# Supplementary material for: A high-density SNP genotyping array for Brassica napus and its ancestral diploid species based on optimised selection of single-locus markers in the allotetraploid genome
Source: PubMed Central journal article supplement (PMC5025514; doi:10.1007/s00122-016-2746-7), 2016-06-30

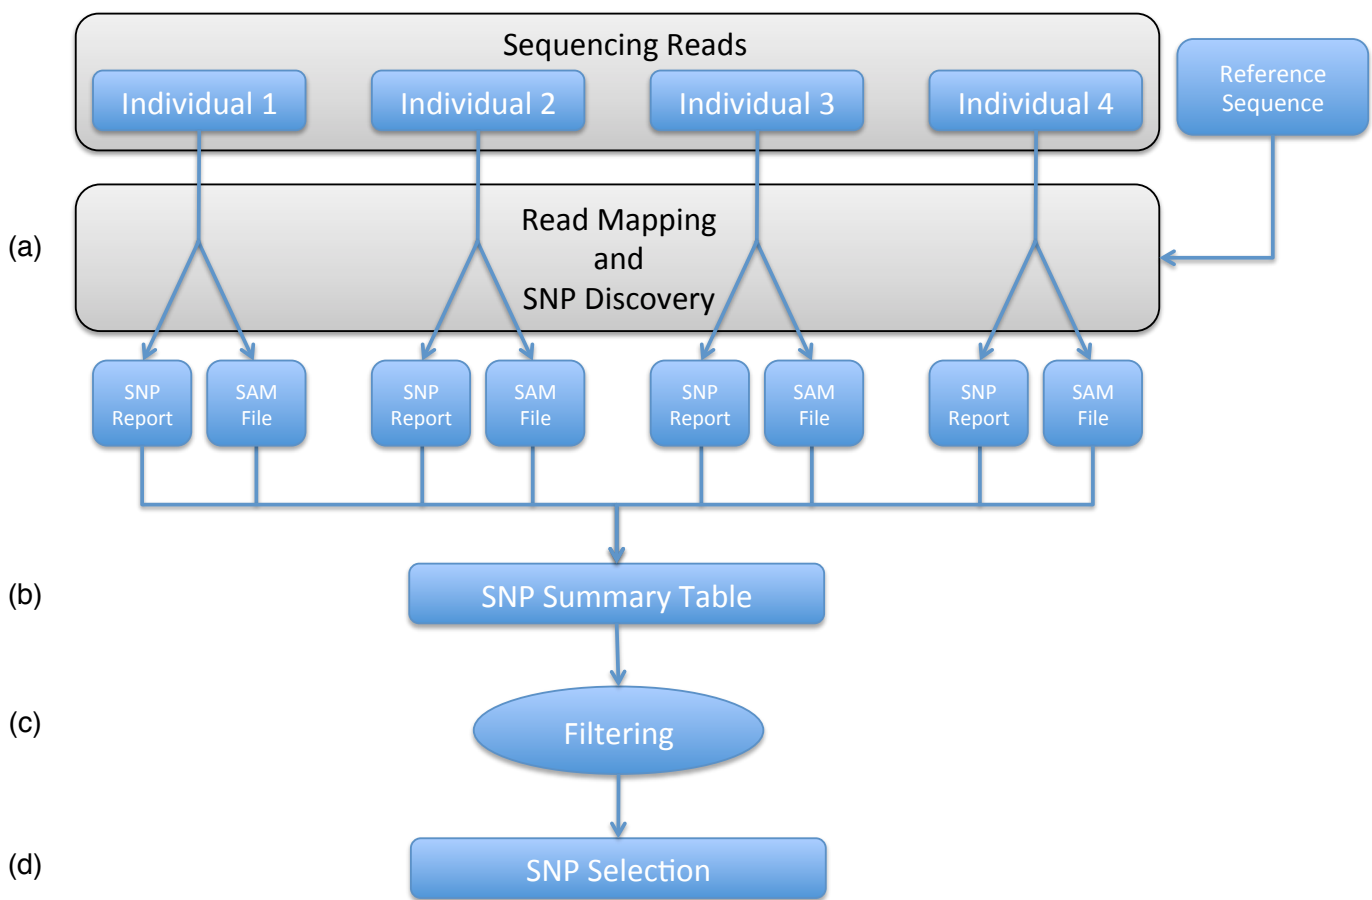

Supplement: 122_2016_2746_MOESM1_ESM.pdf [file 122_2016_2746_MOESM1_ESM.pdf]
