# Supplementary material for: A high-density SNP genotyping array for Brassica napus and its ancestral diploid species based on optimised selection of single-locus markers in the allotetraploid genome
Source: PubMed Central journal article supplement (PMC5025514; doi:10.1007/s00122-016-2746-7), 2016-06-30
Supplement: 122_2016_2746_MOESM2_ESM.pdf [file 122_2016_2746_MOESM2_ESM.pdf]

**Supplementary Table 1: List of genotypes and available sequence data used for SNP discovery**

| <b>Line</b>            | <b>Species</b>    | <b>Platform</b> |
|------------------------|-------------------|-----------------|
| Badger                 | Brassica oleracea | Illumina        |
| Reward                 | Brassica rapa     | Illumina        |
| Candle                 | Brassica rapa     | Illumina        |
| Maleksberger           | Brassica rapa     | Illumina        |
| Gower                  | Brassica oleracea | Illumina        |
| Gower_rnaseq           | Brassica oleracea | Illumina RNASeq |
| Reward_rnaseq          | Brassica rapa     | Illumina RNASeq |
| Maleksberger_rnaseq    | Brassica rapa     | Illumina RNASeq |
| Candle_rnaseq          | Brassica rapa     | Illumina RNASeq |
| Badger_rnaseq          | Brassica oleracea | Illumina RNASeq |
| D102_MAT               | Brassica napus    | Illumina RNASeq |
| D108_MON               | Brassica napus    | Illumina RNASeq |
| D10_BAL                | Brassica napus    | Illumina RNASeq |
| D113_NEWH              | Brassica napus    | Illumina RNASeq |
| D117_NOR               | Brassica napus    | Illumina RNASeq |
| D127_PRI               | Brassica napus    | Illumina RNASeq |
| D128_Q10               | Brassica napus    | Illumina RNASeq |
| D131_Raf               | Brassica napus    | Illumina RNASeq |
| D132_RAGJ              | Brassica napus    | Illumina RNASeq |
| D134_RAPCR             | Brassica napus    | Illumina RNASeq |
| D137_ROCXLIZ           | Brassica napus    | Illumina RNASeq |
| D145_SHEJ              | Brassica napus    | Illumina RNASeq |
| D146_SIBB              | Brassica napus    | Illumina RNASeq |
| D14_Bol                | Brassica oleracea | Illumina RNASeq |
| D170_TIN               | Brassica napus    | Illumina RNASeq |
| D173_TOP               | Brassica napus    | Illumina RNASeq |
| D181_WESD              | Brassica napus    | Illumina RNASeq |
| D182_WILR              | Brassica napus    | Illumina RNASeq |
| D19_BRU                | Brassica napus    | Illumina RNASeq |
| D26_CAPxMOH            | Brassica napus    | Illumina RNASeq |
| D31_CES                | Brassica napus    | Illumina RNASeq |
| D32_CHE_DZA_trimmed_20 | Brassica napus    | Illumina RNASeq |
| D39_COR                | Brassica napus    | Illumina RNASeq |
| D3_ALT                 | Brassica napus    | Illumina RNASeq |
| D41_CUBR               | Brassica napus    | Illumina RNASeq |
| D46_DIP                | Brassica napus    | Illumina RNASeq |
| D4_AMBxCOM             | Brassica napus    | Illumina RNASeq |
| D55_EUR                | Brassica napus    | Illumina RNASeq |
| D56_EVV                | Brassica napus    | Illumina RNASeq |
| D59_FID                | Brassica napus    | Illumina RNASeq |
| D63_GLO                | Brassica napus    | Illumina RNASeq |
| D69_HAN                | Brassica napus    | Illumina RNASeq |
| D6_APE                 | Brassica napus    | Illumina RNASeq |
| D71_HEL                | Brassica napus    | Illumina RNASeq |

|                          |                |                 |
|--------------------------|----------------|-----------------|
| D74_HURxNAV              | Brassica napus | Illumina RNASeq |
| D75_INCxCON              | Brassica napus | Illumina RNASeq |
| D76_JANS                 | Brassica napus | Illumina RNASeq |
| D79_JETN                 | Brassica napus | Illumina RNASeq |
| D7_APExGIN               | Brassica napus | Illumina RNASeq |
| D83_KAR                  | Brassica napus | Illumina RNASeq |
| D85_KRO                  | Brassica napus | Illumina RNASeq |
| D8_AphRR                 | Brassica napus | Illumina RNASeq |
| DH12075                  | Brassica napus | Roche 454       |
| DH12075_chilean          | Brassica napus | Roche 454       |
| DH12075_illumina_chilean | Brassica napus | Illumina        |
| 93-50532_chilean         | Brassica napus | Roche 454       |
| 93-50537_chilean         | Brassica napus | Roche 454       |
| Express                  | Brassica napus | Roche 454       |
| Express_chilean          | Brassica napus | Roche 454       |
| Express_illumina_chilean | Brassica napus | Illumina        |
| Express                  | Brassica napus | Illumina        |
| Express_rnaseq           | Brassica napus | Illumina RNASeq |
| Hamburger                | Brassica napus | Roche 454       |
| Ningyou_chilean          | Brassica napus | Roche 454       |
| Ningyou_illumina         | Brassica napus | Illumina        |
| Ningyou_rnaseq           | Brassica napus | Illumina RNASeq |
| Ningyou                  | Brassica napus | Illumina        |
| PSA12                    | Brassica napus | Roche 454       |
| PSA12_chilean            | Brassica napus | Roche 454       |
| Paroll                   | Brassica napus | Roche 454       |
| Quantum                  | Brassica napus | Roche 454       |
| Rainbow_chilean          | Brassica napus | Roche 454       |
| Surpass                  | Brassica napus | Illumina        |
| Tapidor                  | Brassica napus | Illumina        |
| Tapidor_rnaseq           | Brassica napus | Illumina RNASeq |
| Tapidor_chilean          | Brassica napus | Roche 454       |
| Tapidor_illumina         | Brassica napus | Roche 454       |
| Yudal                    | Brassica napus | Illumina        |
| Topas                    | Brassica napus | Illumina        |
| Polo                     | Brassica napus | Illumina        |
| Glacier                  | Brassica napus | Illumina        |
| Glacier_rnaseq           | Brassica napus | Illumina RNASeq |
| Quinta                   | Brassica napus | Illumina        |
| Quinta_rnaseq            | Brassica napus | Illumina RNASeq |
| Stellar                  | Brassica napus | Illumina        |
| Scoop                    | Brassica napus | Illumina        |
| Samourai                 | Brassica napus | Illumina        |
| Samourai_rnaseq          | Brassica napus | Illumina RNASeq |
| Mendel                   | Brassica napus | Illumina        |
| Mendel_rnaseq            | Brassica napus | Illumina RNASeq |

|               |                |           |
|---------------|----------------|-----------|
| V8            | Brassica napus | Roche 454 |
| V8_chilean    | Brassica napus | Roche 454 |
| YN429_chilean | Brassica napus | Roche 454 |

**Sequenced reads      Unique Mapped Reads   Gb**

|           |           |
|-----------|-----------|
| 93537184  | 83984515  |
| 87149532  | 74804454  |
| 157057996 | 135197219 |
| 159402046 | 137036735 |
| 166874868 | 148539034 |
| 50572178  | 48084783  |
| 53856212  | 50514136  |
| 59102774  | 55559595  |
| 53966062  | 50339970  |
| 84838482  | 80934190  |
| 36158322  | 32721700  |
| 38162349  | 34671780  |
| 29445977  | 27136213  |
| 36110949  | 28521798  |
| 38988726  | 33695055  |
| 39594773  | 31751072  |
| 35776273  | 28014190  |
| 39069961  | 34269642  |
| 39328918  | 35326870  |
| 38813531  | 35290987  |
| 37940783  | 34152978  |
| 38188002  | 34582859  |
| 33705961  | 29248689  |
| 29974230  | 27772249  |
| 38990423  | 35980986  |
| 38492195  | 34387311  |
| 37719204  | 34056466  |
| 34807008  | 29664922  |
| 30955744  | 28830790  |
| 22935657  | 20151056  |
| 28036702  | 26354686  |
| 18052349  | 16504946  |
| 29403131  | 27555540  |
| 29080184  | 27307001  |
| 30309874  | 27307452  |
| 26575511  | 23668740  |
| 28908899  | 26902006  |
| 30060091  | 28271702  |
| 27999290  | 25478403  |
| 30199833  | 27087428  |
| 31220585  | 28178041  |
| 32452527  | 29894517  |
| 32815906  | 30713186  |
| 33117600  | 29716337  |

|           |           |
|-----------|-----------|
| 25438243  | 22797851  |
| 32729048  | 29489839  |
| 30647477  | 26254893  |
| 18441603  | 16720530  |
| 29760647  | 27758030  |
| 38039017  | 33932578  |
| 36534976  | 33895104  |
| 28334337  | 25878110  |
| 887769    | 996364    |
| 1289496   | 996364    |
| 167215494 | 156161565 |
| 742361    | 544211    |
| 717016    | 524730    |
| 636405    | 507686    |
| 827074    | 606370    |
| 184559482 | 175195107 |
| 182678822 | 155549603 |
| 57841114  | 54865304  |
| 404192    | 318272    |
| 803553    | 606835    |
| 533612540 | 495241504 |
| 56524574  | 53553743  |
| 154359284 | 135974829 |
| 866710    | 655021    |
| 826680    | 630083    |
| 286450    | 196676    |
| 251531    | 178647    |
| 742283    | 563478    |
| 190635716 | 168176334 |
| 150206516 | 128941204 |
| 53139260  | 50419189  |
| 778116    | 583084    |
| 523298850 | 445443413 |
| 191318120 | 168845353 |
| 195843394 | 172199886 |
| 190482262 | 167653011 |
| 152810638 | 134241959 |
| 53961478  | 51304667  |
| 146150116 | 128117608 |
| 55783212  | 52587168  |
| 198474328 | 174607069 |
| 185982920 | 164160105 |
| 181394104 | 158282296 |
| 58288548  | 55143555  |
| 160141118 | 137431417 |
| 55600134  | 52584420  |

459158  
711244  
735005

365304  
524728  
540308
