# Supplementary material for: A high-density SNP genotyping array for Brassica napus and its ancestral diploid species based on optimised selection of single-locus markers in the allotetraploid genome
Source: PubMed Central journal article supplement (PMC5025514; doi:10.1007/s00122-016-2746-7), 2016-06-30
Supplement: 122_2016_2746_MOESM3_ESM.pdf [file 122_2016_2746_MOESM3_ESM.pdf]

**Table 2: Scoring metrics for SNP loci at TraitGenetics in *B. napus*, *B. oleracea* and *B. rapa***

| Index | Name             | Scoring                        | napus        |                | oleracea     |                | rapa         |                |
|-------|------------------|--------------------------------|--------------|----------------|--------------|----------------|--------------|----------------|
|       |                  |                                | Call Freq    | GenTrain Score | Call Freq    | GenTrain Score | Call Freq    | GenTrain Score |
| 1     | Bn-A01-p10000230 | A-genome specific (napus-rapa) | 0.9904306    | 0.2665956      | not scorable | not scorable   | 0.9917355    | 0.3447306      |
| 2     | Bn-A01-p1000115  | A-genome specific (napus-rapa) | 0.9473684    | 0.669354       | not scorable | not scorable   | 0.9752066    | 0.6498784      |
| 3     | Bn-A01-p1001022  | A-genome specific (napus-rapa) | 1            | 0.4369346      | not scorable | not scorable   | 0.9917355    | 0.6821402      |
| 4     | Bn-A01-p10013185 | A-genome specific (napus-rapa) | 0.9880383    | 0.3689644      | not scorable | not scorable   | 0.9917355    | 0.6091064      |
| 5     | Bn-A01-p10026020 | A-genome specific (napus-rapa) | 0.9712918    | 0.3369454      | not scorable | not scorable   | 0.9669421    | 0.7870976      |
| 6     | Bn-A01-p10027328 | A-genome specific (napus-rapa) | 0.9617225    | 0.6239452      | not scorable | not scorable   | 0.9504132    | 0.607905       |
| 7     | Bn-A01-p10031169 | A-genome specific (rapa only)  | not scorable | not scorable   | not scorable | not scorable   | 1            | 0.6865193      |
| 8     | Bn-A01-p10036602 | A-genome specific (napus-rapa) | 0.9904306    | 0.7991401      | not scorable | not scorable   | 1            | 0.6476043      |
| 9     | Bn-A01-p100441   | A-genome specific (napus-rapa) | 0.9784689    | 0.8056656      | not scorable | not scorable   | 0.9752066    | 0.7679359      |
| 10    | Bn-A01-p10059043 | genome unspecific (all in)     | 0.9641148    | 0.3950519      | 1            | 0.5893024      | 0.9586777    | 0.8467416      |
| 11    | Bn-A01-p100693   | A-genome specific (napus-rapa) | 0.9760765    | 0.682655       | not scorable | not scorable   | 0.9752066    | 0.7123271      |
| 12    | Bn-A01-p10069493 | A-genome specific (napus-rapa) | 0.9880383    | 0.7955522      | not scorable | not scorable   | 0.9917355    | 0.5615633      |
| 13    | Bn-A01-p10071456 | A-genome specific (napus-rapa) | 0.9712918    | 0.6898434      | not scorable | not scorable   | 0.7107438    | 0.848121       |
| 14    | Bn-A01-p10071903 | A-genome specific (napus-rapa) | 0.9808612    | 0.6955411      | not scorable | not scorable   | 1            | 0.8032902      |
| 15    | Bn-A01-p101021   | A-genome specific (napus-rapa) | 0.9904306    | 0.7510921      | not scorable | not scorable   | 1            | 0.6350701      |
| 16    | Bn-A01-p10105499 | A-genome specific (napus-rapa) | 0.9880383    | 0.5330738      | not scorable | not scorable   | 0.9669421    | 0.7831092      |
| 17    | Bn-A01-p101094   | A-genome specific (napus-rapa) | 0.9880383    | 0.7635614      | not scorable | not scorable   | 0.9917355    | 0.7450218      |
| 18    | Bn-A01-p1012990  | A-genome specific (napus-rapa) | 0.9593301    | 0.3686254      | not scorable | not scorable   | 0.9752066    | 0.6742238      |
| 19    | Bn-A01-p101451   | A-genome specific (napus-rapa) | 0.9784689    | 0.7987067      | not scorable | not scorable   | 0.9669421    | 0.7406716      |
| 20    | Bn-A01-p10166739 | A-genome specific (napus-rapa) | 0.9665072    | 0.8488839      | not scorable | not scorable   | 0.7355372    | 0.8519396      |
| 21    | Bn-A01-p10181972 | A-genome specific (napus-rapa) | 0.9856459    | 0.7297298      | not scorable | not scorable   | 0.9834711    | 0.7876438      |
| 22    | Bn-A01-p101879   | A-genome specific (napus-rapa) | 0.9617225    | 0.7877749      | not scorable | not scorable   | 0.9669421    | 0.7570555      |
| 23    | Bn-A01-p101943   | A-genome specific (napus-rapa) | 0.9688995    | 0.7574532      | not scorable | not scorable   | 0.9834711    | 0.7462464      |
| 24    | Bn-A01-p102158   | A-genome specific (napus-rapa) | 0.9688995    | 0.6769506      | not scorable | not scorable   | 0.9834711    | 0.7080495      |
| 25    | Bn-A01-p102187   | A-genome specific (napus-rapa) | 0.9736842    | 0.763105       | not scorable | not scorable   | 0.9752066    | 0.7424731      |
| 26    | Bn-A01-p102249   | A-genome specific (napus-rapa) | 0.9832536    | 0.6805793      | not scorable | not scorable   | 0.9917355    | 0.7638057      |
| 27    | Bn-A01-p10231780 | A-genome specific (napus-rapa) | 0.9736842    | 0.7622875      | not scorable | not scorable   | 1            | 0.7452666      |
| 28    | Bn-A01-p10234366 | A-genome specific (napus-rapa) | 0.9043062    | 0.3499477      | not scorable | not scorable   | 1            | 0.6643501      |
| 29    | Bn-A01-p10238825 | all not scorable               | not scorable | not scorable   | not scorable | not scorable   | not scorable | not scorable   |
| 30    | Bn-A01-p10242217 | A-genome specific (napus-rapa) | 0.9617225    | 0.793101       | not scorable | not scorable   | 0.9917355    | 0.7951404      |

|    |                  |                                |              |              |              |              |              |              |
|----|------------------|--------------------------------|--------------|--------------|--------------|--------------|--------------|--------------|
| 31 | Bn-A01-p10242298 | A-genome specific (napus-rapa) | 0.8014354    | 0.7506034    | not scorable | not scorable | 0.9834711    | 0.7371384    |
| 32 | Bn-A01-p10246312 | A-genome specific (napus-rapa) | 0.9928229    | 0.7311953    | not scorable | not scorable | 1            | 0.7193801    |
| 33 | Bn-A01-p10249225 | A-genome specific (napus-rapa) | 0.9952153    | 0.3300748    | not scorable | not scorable | 1            | 0.9083468    |
| 34 | Bn-A01-p10250255 | A-genome specific (napus-rapa) | 0.9880383    | 0.7561908    | not scorable | not scorable | 1            | 0.6893185    |
| 35 | Bn-A01-p10251052 | A-genome specific (napus-rapa) | 0.9760765    | 0.7680904    | not scorable | not scorable | 1            | 0.7708634    |
| 36 | Bn-A01-p10257919 | A-genome specific (napus-rapa) | 0.9665072    | 0.5213329    | not scorable | not scorable | 1            | 0.7956077    |
| 37 | Bn-A01-p1026631  | A-genome specific (napus-rapa) | 0.9688995    | 0.4588441    | not scorable | not scorable | 1            | 0.7344612    |
| 38 | Bn-A01-p10268662 | A-genome specific (napus-rapa) | 0.9760765    | 0.3181653    | not scorable | not scorable | 1            | 0.7622542    |
| 39 | Bn-A01-p10278752 | genome unspecific (all in)     | 0.9832536    | 0.4511455    |              | 1 0.7729614  | 1            | 0.8469009    |
| 40 | Bn-A01-p10285074 | A-genome specific (napus-rapa) | 0.9784689    | 0.7776531    | not scorable | not scorable | 1            | 0.8155444    |
| 41 | Bn-A01-p1029558  | A-genome specific (napus-rapa) | 0.9712918    | 0.7703233    | not scorable | not scorable | 0.9917355    | 0.7591832    |
| 42 | Bn-A01-p1029668  | A-genome specific (napus-rapa) | 0.9856459    | 0.8019634    | not scorable | not scorable | 1            | 0.7948786    |
| 43 | Bn-A01-p10297732 | A-genome specific (napus-rapa) | 0.9928229    | 0.4578273    | not scorable | not scorable | 1            | 0.8104565    |
| 44 | Bn-A01-p10299187 | A-genome specific (napus-rapa) | 0.9688995    | 0.7587264    | not scorable | not scorable | 1            | 0.7222773    |
| 45 | Bn-A01-p10340159 | A-genome specific (napus-rapa) | 0.9808612    | 0.6033359    | not scorable | not scorable | 0.9752066    | 0.7038876    |
| 46 | Bn-A01-p10340283 | A-genome specific (rapa only)  | not scorable | not scorable | not scorable | not scorable | 1            | 0.6538376    |
| 47 | Bn-A01-p10340829 | genome unspecific (all in)     | 0.9784689    | 0.4524876    |              | 1 0.6944774  | 1            | 0.8158014    |
| 48 | Bn-A01-p10343401 | A-genome specific (napus-rapa) | 0.9665072    | 0.7711882    | not scorable | not scorable | 0.9917355    | 0.7655298    |
| 49 | Bn-A01-p10344498 | A-genome specific (napus-rapa) | 0.9641148    | 0.7845517    | not scorable | not scorable | 0.9834711    | 0.8655694    |
| 50 | Bn-A01-p10345430 | A-genome specific (napus-rapa) | 0.9928229    | 0.6684332    | not scorable | not scorable | 0.9917355    | 0.7227203    |
| 51 | Bn-A01-p10346546 | A-genome specific (napus-rapa) | 0.9880383    | 0.4187292    | not scorable | not scorable | 0.9752066    | 0.5752468    |
| 52 | Bn-A01-p10354645 | A-genome specific (napus-rapa) | 0.9880383    | 0.5061122    | not scorable | not scorable | 0.9834711    | 0.7026362    |
| 53 | Bn-A01-p10392909 | A-genome specific (rapa only)  | not scorable | not scorable | not scorable | not scorable | 1            | 0.7844879    |
| 54 | Bn-A01-p10398937 | A-genome specific (napus-rapa) | 0.9569378    | 0.6135517    | not scorable | not scorable | 0.9917355    | 0.7251074    |
| 55 | Bn-A01-p10399077 | all not scorable               | not scorable | not scorable | not scorable | not scorable | not scorable | not scorable |
| 56 | Bn-A01-p10406165 | A-genome specific (napus-rapa) | 0.9593301    | 0.2466998    | not scorable | not scorable | 0.9917355    | 0.7093098    |
| 57 | Bn-A01-p10410665 | A-genome specific (napus-rapa) | 0.9808612    | 0.2381571    | not scorable | not scorable | 1            | 0.7641702    |
| 58 | Bn-A01-p10415035 | A-genome specific (rapa only)  | not scorable | not scorable | not scorable | not scorable | 1            | 0.6120533    |
| 59 | Bn-A01-p1041947  | A-genome specific (napus-rapa) | 0.9784689    | 0.784063     | not scorable | not scorable | 1            | 0.7492238    |
| 60 | Bn-A01-p10426647 | A-genome specific (napus-rapa) | 0.9784689    | 0.789389     | not scorable | not scorable | 0.9917355    | 0.7297331    |
| 61 | Bn-A01-p10426714 | A-genome specific (napus-rapa) | 0.9736842    | 0.7676027    | not scorable | not scorable | 0.9917355    | 0.8170549    |
| 62 | Bn-A01-p10427300 | A-genome specific (rapa only)  | not scorable | not scorable | not scorable | not scorable | 1            | 0.7909042    |
| 63 | Bn-A01-p10457944 | A-genome specific (napus-rapa) | 0.9904306    | 0.3923164    | not scorable | not scorable | 1            | 0.8196553    |

|                     |                                   |              |              |              |              |              |              |
|---------------------|-----------------------------------|--------------|--------------|--------------|--------------|--------------|--------------|
| 64 Bn-A01-p1045881  | A-genome specific (napus-rapa)    | 0.9617225    | 0.777612     | not scorable | not scorable | 0.9834711    | 0.7430993    |
| 65 Bn-A01-p10493092 | A-genome specific (rapa only)     | not scorable | not scorable | not scorable | not scorable | 1            | 0.8138223    |
| 66 Bn-A01-p10499882 | genome unspecific (oleracea-rapa) | not scorable | not scorable | 0.8992248    | 0.7567436    | 0.9834711    | 0.7394594    |
| 67 Bn-A01-p10513529 | A-genome specific (napus-rapa)    | 0.9928229    | 0.7872128    | not scorable | not scorable | 0.9834711    | 0.7949384    |
| 68 Bn-A01-p10518110 | A-genome specific (napus-rapa)    | 0.9952153    | 0.6645517    | not scorable | not scorable | 0.9834711    | 0.7841431    |
| 69 Bn-A01-p10523194 | A-genome specific (napus-rapa)    | 0.9952153    | 0.8192077    | not scorable | not scorable | 0.9917355    | 0.7845644    |
| 70 Bn-A01-p10523264 | A-genome specific (napus-rapa)    | 0.9976076    | 0.7840292    | not scorable | not scorable | 1            | 0.7216815    |
| 71 Bn-A01-p10523833 | A-genome specific (napus-rapa)    | 0.9856459    | 0.3752156    | not scorable | not scorable | 0.9834711    | 0.7254374    |
| 72 Bn-A01-p10525172 | A-genome specific (napus-rapa)    | 0.9880383    | 0.7530954    | not scorable | not scorable | 1            | 0.7573287    |
| 73 Bn-A01-p10525357 | napus specific                    | 0.9736842    | 0.3932988    | not scorable | not scorable | not scorable | not scorable |
| 74 Bn-A01-p10525805 | napus specific                    | 0.9138756    | 0.7695048    | not scorable | not scorable | not scorable | not scorable |
| 75 Bn-A01-p10526054 | napus specific                    | 0.9114832    | 0.7585191    | not scorable | not scorable | not scorable | not scorable |
| 76 Bn-A01-p10526561 | A-genome specific (napus-rapa)    | 0.9976076    | 0.7347771    | not scorable | not scorable | 0.9917355    | 0.7274886    |
| 77 Bn-A01-p10543102 | A-genome specific (napus-rapa)    | 0.9904306    | 0.6350611    | not scorable | not scorable | 0.9917355    | 0.7372921    |
| 78 Bn-A01-p10550486 | A-genome specific (napus-rapa)    | 0.9952153    | 0.7756099    | not scorable | not scorable | 1            | 0.8130969    |
| 79 Bn-A01-p10559083 | A-genome specific (napus-rapa)    | 0.9784689    | 0.2816452    | not scorable | not scorable | 0.9834711    | 0.7035483    |
| 80 Bn-A01-p1056386  | A-genome specific (napus-rapa)    | 0.9712918    | 0.5567337    | not scorable | not scorable | 0.9834711    | 0.6834758    |
| 81 Bn-A01-p10590357 | A-genome specific (napus-rapa)    | 0.9880383    | 0.7009175    | not scorable | not scorable | 0.7190083    | 0.750165     |
| 82 Bn-A01-p10611800 | A-genome specific (napus-rapa)    | 0.9880383    | 0.7350952    | not scorable | not scorable | 1            | 0.7683663    |
| 83 Bn-A01-p1062520  | A-genome specific (napus-rapa)    | 0.9808612    | 0.5263378    | not scorable | not scorable | 0.9917355    | 0.8171118    |
| 84 Bn-A01-p10636637 | A-genome specific (napus-rapa)    | 0.9760765    | 0.6933311    | not scorable | not scorable | 0.9752066    | 0.7229741    |
| 85 Bn-A01-p10636994 | A-genome specific (rapa only)     | not scorable | not scorable | not scorable | not scorable | 0.9669421    | 0.7712798    |
| 86 Bn-A01-p10638747 | A-genome specific (rapa only)     | not scorable | not scorable | not scorable | not scorable | 1            | 0.7568499    |
| 87 Bn-A01-p10639421 | A-genome specific (rapa only)     | not scorable | not scorable | not scorable | not scorable | 0.9421487    | 0.789074     |
| 88 Bn-A01-p10640093 | A-genome specific (rapa only)     | not scorable | not scorable | not scorable | not scorable | 0.9421487    | 0.7718278    |
| 89 Bn-A01-p10640881 | A-genome specific (napus-rapa)    | 0.9665072    | 0.3705567    | not scorable | not scorable | 1            | 0.7294249    |
| 90 Bn-A01-p10641656 | A-genome specific (napus-rapa)    | 0.9162679    | 0.4478071    | not scorable | not scorable | 0.9834711    | 0.7104915    |
| 91 Bn-A01-p1067371  | A-genome specific (napus-rapa)    | 0.9617225    | 0.7760444    | not scorable | not scorable | 0.9669421    | 0.8453609    |
| 92 Bn-A01-p10693617 | A-genome specific (napus-rapa)    | 0.9521531    | 0.4207712    | not scorable | not scorable | 1            | 0.5723776    |
| 93 Bn-A01-p10693623 | A-genome specific (napus-rapa)    | 0.9712918    | 0.4451212    | not scorable | not scorable | 1            | 0.8112289    |
| 94 Bn-A01-p10720611 | A-genome specific (napus-rapa)    | 0.9354067    | 0.6733357    | not scorable | not scorable | 0.7190083    | 0.9279843    |
| 95 Bn-A01-p1073387  | A-genome specific (napus-rapa)    | 0.9760765    | 0.3872616    | not scorable | not scorable | 0.9917355    | 0.7375655    |
| 96 Bn-A01-p10740084 | A-genome specific (napus-rapa)    | 0.9569378    | 0.7093448    | not scorable | not scorable | 1            | 0.8074856    |

|                      |                                   |              |              |              |              |              |              |
|----------------------|-----------------------------------|--------------|--------------|--------------|--------------|--------------|--------------|
| 97 Bn-A01-p10786043  | genome unspecific (oleracea-rapa) | not scorable | not scorable | 0.9689922    | 0.3920207    | 1            | 0.9292135    |
| 98 Bn-A01-p108136    | A-genome specific (napus-rapa)    | 0.9952153    | 0.5074401    | not scorable | not scorable | 0.9752066    | 0.7821275    |
| 99 Bn-A01-p108225    | A-genome specific (napus-rapa)    | 0.9760765    | 0.773875     | not scorable | not scorable | 0.9917355    | 0.7596025    |
| 100 Bn-A01-p10835605 | A-genome specific (napus-rapa)    | 0.9880383    | 0.7875881    | not scorable | not scorable | 0.9752066    | 0.7282169    |
| 101 Bn-A01-p10838493 | A-genome specific (napus-rapa)    | 0.9904306    | 0.7826334    | not scorable | not scorable | 0.9917355    | 0.6839622    |
| 102 Bn-A01-p10853026 | A-genome specific (napus-rapa)    | 1            | 0.9172003    | not scorable | not scorable | 0.9834711    | 0.9303316    |
| 103 Bn-A01-p10859527 | A-genome specific (napus-rapa)    | 0.9808612    | 0.7705874    | not scorable | not scorable | 0.9917355    | 0.7856755    |
| 104 Bn-A01-p10876307 | napus specific                    | 1            | 0.2578293    | not scorable | not scorable | not scorable | not scorable |
| 105 Bn-A01-p10889788 | A-genome specific (napus-rapa)    | 0.8827751    | 0.3836298    | not scorable | not scorable | 0.9834711    | 0.7057354    |
| 106 Bn-A01-p1089109  | A-genome specific (napus-rapa)    | 1            | 0.7805272    | not scorable | not scorable | 1            | 0.8653851    |
| 107 Bn-A01-p10916044 | A-genome specific (napus-rapa)    | 0.9904306    | 0.4869438    | not scorable | not scorable | 0.9917355    | 0.6763602    |
| 108 Bn-A01-p1091610  | A-genome specific (napus-rapa)    | 0.9976076    | 0.4233577    | not scorable | not scorable | 0.9917355    | 0.7249529    |
| 109 Bn-A01-p10926129 | A-genome specific (napus-rapa)    | 0.9976076    | 0.4364225    | not scorable | not scorable | 0.9917355    | 0.7858144    |
| 110 Bn-A01-p10933947 | A-genome specific (napus-rapa)    | 0.9760765    | 0.3426332    | not scorable | not scorable | 0.9752066    | 0.6558676    |
| 111 Bn-A01-p10934377 | A-genome specific (napus-rapa)    | 0.9808612    | 0.7126837    | not scorable | not scorable | 1            | 0.7573561    |
| 112 Bn-A01-p10938883 | A-genome specific (napus-rapa)    | 0.9665072    | 0.7735888    | not scorable | not scorable | 1            | 0.7193962    |
| 113 Bn-A01-p10939144 | A-genome specific (napus-rapa)    | 0.9832536    | 0.7809803    | not scorable | not scorable | 0.9917355    | 0.804975     |
| 114 Bn-A01-p10945930 | A-genome specific (napus-rapa)    | 0.9928229    | 0.4515028    | not scorable | not scorable | 1            | 0.8009096    |
| 115 Bn-A01-p1095733  | A-genome specific (napus-rapa)    | 0.9712918    | 0.7122016    | not scorable | not scorable | 0.9917355    | 0.7053235    |
| 116 Bn-A01-p10963536 | A-genome specific (napus-rapa)    | 0.9880383    | 0.7486913    | not scorable | not scorable | 0.9834711    | 0.7680522    |
| 117 Bn-A01-p10991782 | A-genome specific (napus-rapa)    | 0.9832536    | 0.7104169    | not scorable | not scorable | 0.9752066    | 0.7130669    |
| 118 Bn-A01-p11011196 | A-genome specific (napus-rapa)    | 0.9832536    | 0.7513719    | not scorable | not scorable | 0.9834711    | 0.8446312    |
| 119 Bn-A01-p1104187  | A-genome specific (napus-rapa)    | 0.9832536    | 0.7797337    | not scorable | not scorable | 0.9834711    | 0.7974988    |
| 120 Bn-A01-p11052248 | A-genome specific (napus-rapa)    | 0.9856459    | 0.7830637    | not scorable | not scorable | 0.9752066    | 0.6894654    |
| 121 Bn-A01-p11054015 | A-genome specific (napus-rapa)    | 0.9856459    | 0.7572004    | not scorable | not scorable | 0.9669421    | 0.6853675    |
| 122 Bn-A01-p11077627 | A-genome specific (napus-rapa)    | 0.9784689    | 0.7391128    | not scorable | not scorable | 0.9834711    | 0.711687     |
| 123 Bn-A01-p11078406 | A-genome specific (napus-rapa)    | 0.9617225    | 0.7677053    | not scorable | not scorable | 1            | 0.6199373    |
| 124 Bn-A01-p11091663 | A-genome specific (napus-rapa)    | 0.9832536    | 0.4930466    | not scorable | not scorable | 1            | 0.8745553    |
| 125 Bn-A01-p11091816 | A-genome specific (napus-rapa)    | 0.9736842    | 0.4552591    | not scorable | not scorable | 0.9917355    | 0.770445     |
| 126 Bn-A01-p11108443 | A-genome specific (rapa only)     | not scorable | not scorable | not scorable | not scorable | 0.9752066    | 0.7657378    |
| 127 Bn-A01-p11119985 | A-genome specific (rapa only)     | not scorable | not scorable | not scorable | not scorable | 0.9752066    | 0.7788876    |
| 128 Bn-A01-p11120400 | A-genome specific (napus-rapa)    | 0.9928229    | 0.9126557    | not scorable | not scorable | 1            | 0.8144232    |
| 129 Bn-A01-p11120493 | A-genome specific (napus-rapa)    | 0.9832536    | 0.3486197    | not scorable | not scorable | 0.9917355    | 0.7748761    |

|     |                  |                                |              |              |              |              |           |           |
|-----|------------------|--------------------------------|--------------|--------------|--------------|--------------|-----------|-----------|
| 130 | Bn-A01-p11137395 | A-genome specific (napus-rapa) | 0.9832536    | 0.3058263    | not scorable | not scorable | 0.9917355 | 0.7863011 |
| 131 | Bn-A01-p11142752 | A-genome specific (napus-rapa) | 0.9808612    | 0.7719147    | not scorable | not scorable | 1         | 0.7587181 |
| 132 | Bn-A01-p11163785 | A-genome specific (napus-rapa) | 0.9545454    | 0.2719347    | not scorable | not scorable | 0.9917355 | 0.569109  |
| 133 | Bn-A01-p11163980 | A-genome specific (napus-rapa) | 0.9688995    | 0.570121     | not scorable | not scorable | 0.9586777 | 0.6586577 |
| 134 | Bn-A01-p11174997 | A-genome specific (napus-rapa) | 0.9545454    | 0.3162233    | not scorable | not scorable | 0.9586777 | 0.6028904 |
| 135 | Bn-A01-p1119894  | A-genome specific (napus-rapa) | 0.9952153    | 0.2926795    | not scorable | not scorable | 1         | 0.7513643 |
| 136 | Bn-A01-p11206467 | A-genome specific (napus-rapa) | 0.9665072    | 0.3842166    | not scorable | not scorable | 0.9917355 | 0.6783591 |
| 137 | Bn-A01-p11233207 | A-genome specific (napus-rapa) | 0.9928229    | 0.8546239    | not scorable | not scorable | 0.9917355 | 0.7136764 |
| 138 | Bn-A01-p11234159 | A-genome specific (rapa only)  | not scorable | not scorable | not scorable | not scorable | 1         | 0.7829238 |
| 139 | Bn-A01-p11238778 | A-genome specific (napus-rapa) | 0.9712918    | 0.2994429    | not scorable | not scorable | 0.9752066 | 0.3521244 |
| 140 | Bn-A01-p11249993 | A-genome specific (napus-rapa) | 0.9593301    | 0.2973236    | not scorable | not scorable | 0.9917355 | 0.7709839 |
| 141 | Bn-A01-p11253272 | A-genome specific (rapa only)  | not scorable | not scorable | not scorable | not scorable | 0.9834711 | 0.6109979 |
| 142 | Bn-A01-p1125565  | A-genome specific (napus-rapa) | 0.9688995    | 0.7639387    | not scorable | not scorable | 0.9917355 | 0.778431  |
| 143 | Bn-A01-p1126874  | A-genome specific (napus-rapa) | 0.9641148    | 0.7268822    | not scorable | not scorable | 0.9917355 | 0.7429338 |
| 144 | Bn-A01-p11273927 | A-genome specific (rapa only)  | not scorable | not scorable | not scorable | not scorable | 0.9917355 | 0.6625919 |
| 145 | Bn-A01-p11284636 | A-genome specific (napus-rapa) | 0.9928229    | 0.7981051    | not scorable | not scorable | 1         | 0.7081991 |
| 146 | Bn-A01-p11302783 | A-genome specific (rapa only)  | not scorable | not scorable | not scorable | not scorable | 1         | 0.8061329 |
| 147 | Bn-A01-p11306490 | A-genome specific (napus-rapa) | 0.9617225    | 0.3862232    | not scorable | not scorable | 0.9917355 | 0.6777248 |
| 148 | Bn-A01-p11309186 | A-genome specific (rapa only)  | not scorable | not scorable | not scorable | not scorable | 1         | 0.7310278 |
| 149 | Bn-A01-p11324370 | A-genome specific (rapa only)  | not scorable | not scorable | not scorable | not scorable | 1         | 0.6410352 |
| 150 | Bn-A01-p1132885  | A-genome specific (napus-rapa) | 0.9712918    | 0.7654447    | not scorable | not scorable | 0.9917355 | 0.6737197 |
| 151 | Bn-A01-p11330661 | A-genome specific (napus-rapa) | 0.9736842    | 0.3595648    | not scorable | not scorable | 1         | 0.7052383 |
| 152 | Bn-A01-p1133447  | A-genome specific (napus-rapa) | 0.9832536    | 0.7735092    | not scorable | not scorable | 0.9917355 | 0.8131012 |
| 153 | Bn-A01-p11336370 | A-genome specific (rapa only)  | not scorable | not scorable | not scorable | not scorable | 0.9917355 | 0.7437819 |
| 154 | Bn-A01-p11347791 | A-genome specific (napus-rapa) | 1            | 0.8656827    | not scorable | not scorable | 1         | 0.863152  |
| 155 | Bn-A01-p11355643 | A-genome specific (rapa only)  | not scorable | not scorable | not scorable | not scorable | 1         | 0.9514361 |
| 156 | Bn-A01-p11407167 | A-genome specific (napus-rapa) | 0.9904306    | 0.7098235    | not scorable | not scorable | 0.9752066 | 0.7002256 |
| 157 | Bn-A01-p11434769 | A-genome specific (rapa only)  | not scorable | not scorable | not scorable | not scorable | 0.9917355 | 0.8224482 |
| 158 | Bn-A01-p11441851 | A-genome specific (napus-rapa) | 0.9736842    | 0.8038772    | not scorable | not scorable | 0.9917355 | 0.8008587 |
| 159 | Bn-A01-p11444689 | A-genome specific (rapa only)  | not scorable | not scorable | not scorable | not scorable | 1         | 0.6845859 |
| 160 | Bn-A01-p1145674  | A-genome specific (napus-rapa) | 0.9784689    | 0.7559376    | not scorable | not scorable | 1         | 0.7285279 |
| 161 | Bn-A01-p11459295 | A-genome specific (rapa only)  | not scorable | not scorable | not scorable | not scorable | 1         | 0.7279535 |
| 162 | Bn-A01-p11462315 | A-genome specific (rapa only)  | not scorable | not scorable | not scorable | not scorable | 0.9752066 | 0.7117506 |

|     |                  |                                |              |              |              |              |              |              |
|-----|------------------|--------------------------------|--------------|--------------|--------------|--------------|--------------|--------------|
| 163 | Bn-A01-p11469596 | A-genome specific (rapa only)  | not scorable | not scorable | not scorable | not scorable | 0.9834711    | 0.6496505    |
| 164 | Bn-A01-p11469992 | A-genome specific (napus-rapa) | 0.9497608    | 0.4587814    | not scorable | not scorable | 1            | 0.704862     |
| 165 | Bn-A01-p11471489 | genome unspecific (all in)     | 0.9569378    | 0.4844996    | 1            | 0.5508249    | 0.9917355    | 0.7345119    |
| 166 | Bn-A01-p11479565 | A-genome specific (napus-rapa) | 0.9832536    | 0.4146444    | not scorable | not scorable | 0.5123967    | 0.6613363    |
| 167 | Bn-A01-p11480814 | A-genome specific (napus-rapa) | 0.9688995    | 0.5216396    | not scorable | not scorable | 0.9586777    | 0.7981321    |
| 168 | Bn-A01-p11483435 | A-genome specific (napus-rapa) | 1            | 0.7617218    | not scorable | not scorable | 1            | 0.8028744    |
| 169 | Bn-A01-p1148760  | A-genome specific (napus-rapa) | 0.9856459    | 0.3684264    | not scorable | not scorable | 0.9834711    | 0.8941768    |
| 170 | Bn-A01-p11492050 | A-genome specific (napus-rapa) | 0.9688995    | 0.335267     | not scorable | not scorable | 0.9917355    | 0.6780698    |
| 171 | Bn-A01-p1149351  | genome unspecific (all in)     | 0.923445     | 0.5852232    | 0.9534883    | 0.654623     | 1            | 0.8124242    |
| 172 | Bn-A01-p1149698  | genome unspecific (all in)     | 0.9617225    | 0.4704581    | 0.9379845    | 0.6799759    | 0.9752066    | 0.6659241    |
| 173 | Bn-A01-p1150857  | A-genome specific (napus-rapa) | 0.8325359    | 0.7234866    | not scorable | not scorable | 0.9504132    | 0.6767076    |
| 174 | Bn-A01-p1151961  | A-genome specific (napus-rapa) | 1            | 0.5312282    | not scorable | not scorable | 0.9917355    | 0.9019314    |
| 175 | Bn-A01-p1152123  | A-genome specific (napus-rapa) | 0.9880383    | 0.7434763    | not scorable | not scorable | 0.9917355    | 0.720995     |
| 176 | Bn-A01-p1152359  | genome unspecific (all in)     | 0.9712918    | 0.7203477    | 0.9534883    | 0.7175227    | 0.9752066    | 0.5010673    |
| 177 | Bn-A01-p1152369  | A-genome specific (napus-rapa) | 0.9521531    | 0.4297814    | not scorable | not scorable | 1            | 0.7564054    |
| 178 | Bn-A01-p11543126 | A-genome specific (napus-rapa) | 0.9928229    | 0.8502678    | not scorable | not scorable | 0.9669421    | 0.8039905    |
| 179 | Bn-A01-p11543191 | A-genome specific (napus-rapa) | 0.9928229    | 0.7317408    | not scorable | not scorable | 0.9917355    | 0.7064139    |
| 180 | Bn-A01-p11559064 | A-genome specific (rapa only)  | not scorable | not scorable | not scorable | not scorable | 0.9917355    | 0.7162943    |
| 181 | Bn-A01-p11560385 | A-genome specific (napus-rapa) | 1            | 0.6953942    | not scorable | not scorable | 0.9917355    | 0.5080594    |
| 182 | Bn-A01-p1156081  | A-genome specific (napus-rapa) | 0.9449761    | 0.2179753    | not scorable | not scorable | 0.9834711    | 0.6784428    |
| 183 | Bn-A01-p1156979  | A-genome specific (napus-rapa) | 0.8492823    | 0.8454186    | not scorable | not scorable | 0.9752066    | 0.7879395    |
| 184 | Bn-A01-p1158564  | A-genome specific (napus-rapa) | 0.9880383    | 0.7327312    | not scorable | not scorable | 0.9752066    | 0.722595     |
| 185 | Bn-A01-p11613721 | A-genome specific (napus-rapa) | 1            | 0.4893315    | not scorable | not scorable | 1            | 0.4247669    |
| 186 | Bn-A01-p11639506 | A-genome specific (napus-rapa) | 0.9952153    | 0.681012     | not scorable | not scorable | 0.9834711    | 0.8110971    |
| 187 | Bn-A01-p11639917 | A-genome specific (napus-rapa) | 0.937799     | 0.6482093    | not scorable | not scorable | 1            | 0.7930498    |
| 188 | Bn-A01-p11641669 | all not scorable               | not scorable | not scorable | not scorable | not scorable | not scorable | not scorable |
| 189 | Bn-A01-p11642664 | A-genome specific (napus-rapa) | 0.9976076    | 0.3638537    | not scorable | not scorable | 1            | 0.7609156    |
| 190 | Bn-A01-p11642677 | A-genome specific (napus-rapa) | 1            | 0.9175813    | not scorable | not scorable | 1            | 0.8330763    |
| 191 | Bn-A01-p11642772 | A-genome specific (napus-rapa) | 1            | 0.524255     | not scorable | not scorable | 1            | 0.8136061    |
| 192 | Bn-A01-p11642789 | napus specific                 | 1            | 0.3111525    | not scorable | not scorable | not scorable | not scorable |
| 193 | Bn-A01-p11652789 | A-genome specific (napus-rapa) | 0.9976076    | 0.3390766    | not scorable | not scorable | 0.9917355    | 0.7788732    |
| 194 | Bn-A01-p11653461 | A-genome specific (napus-rapa) | 0.9976076    | 0.3562978    | not scorable | not scorable | 0.9834711    | 0.6805549    |
| 195 | Bn-A01-p11702957 | A-genome specific (napus-rapa) | 0.9665072    | 0.7782543    | not scorable | not scorable | 1            | 0.7741857    |

|                      |                                |              |              |              |              |           |           |
|----------------------|--------------------------------|--------------|--------------|--------------|--------------|-----------|-----------|
| 196 Bn-A01-p1170567  | A-genome specific (napus-rapa) | 0.9784689    | 0.308269     | not scorable | not scorable | 0.9834711 | 0.6972505 |
| 197 Bn-A01-p11727190 | A-genome specific (rapa only)  | not scorable | not scorable | not scorable | not scorable | 0.9917355 | 0.83433   |
| 198 Bn-A01-p11741112 | A-genome specific (napus-rapa) | 0.8827751    | 0.7705357    | not scorable | not scorable | 0.5371901 | 0.7974368 |
| 199 Bn-A01-p11744233 | A-genome specific (napus-rapa) | 0.9641148    | 0.2742572    | not scorable | not scorable | 0.9752066 | 0.7549212 |
| 200 Bn-A01-p1175428  | A-genome specific (napus-rapa) | 0.9856459    | 0.2533995    | not scorable | not scorable | 1         | 0.6986491 |
| 201 Bn-A01-p11807124 | A-genome specific (napus-rapa) | 0.9880383    | 0.849119     | not scorable | not scorable | 0.9834711 | 0.7056556 |
| 202 Bn-A01-p11808121 | A-genome specific (napus-rapa) | 0.9856459    | 0.8017023    | not scorable | not scorable | 0.9834711 | 0.7314562 |
| 203 Bn-A01-p11817698 | A-genome specific (napus-rapa) | 0.9880383    | 0.7665815    | not scorable | not scorable | 0.9917355 | 0.8112159 |
| 204 Bn-A01-p11818901 | A-genome specific (napus-rapa) | 0.9832536    | 0.782715     | not scorable | not scorable | 0.9752066 | 0.7018273 |
| 205 Bn-A01-p11825880 | A-genome specific (napus-rapa) | 0.9928229    | 0.8684071    | not scorable | not scorable | 0.9834711 | 0.6657122 |
| 206 Bn-A01-p11830957 | A-genome specific (napus-rapa) | 0.9784689    | 0.483146     | not scorable | not scorable | 0.9834711 | 0.740051  |
| 207 Bn-A01-p1187868  | A-genome specific (napus-rapa) | 0.9736842    | 0.6643248    | not scorable | not scorable | 0.9834711 | 0.7386498 |
| 208 Bn-A01-p1188004  | A-genome specific (napus-rapa) | 0.9784689    | 0.7499646    | not scorable | not scorable | 1         | 0.7097313 |
| 209 Bn-A01-p1188928  | A-genome specific (napus-rapa) | 0.9330143    | 0.6153653    | not scorable | not scorable | 1         | 0.7807196 |
| 210 Bn-A01-p1190844  | A-genome specific (napus-rapa) | 0.8588517    | 0.9205657    | not scorable | not scorable | 1         | 0.7594979 |
| 211 Bn-A01-p1192928  | A-genome specific (napus-rapa) | 0.9617225    | 0.4158099    | not scorable | not scorable | 1         | 0.7139555 |
| 212 Bn-A01-p11933    | A-genome specific (napus-rapa) | 0.9425837    | 0.6843772    | not scorable | not scorable | 0.9917355 | 0.6815898 |
| 213 Bn-A01-p11938379 | A-genome specific (napus-rapa) | 0.9904306    | 0.8265477    | not scorable | not scorable | 0.9834711 | 0.6481165 |
| 214 Bn-A01-p11939834 | A-genome specific (rapa only)  | not scorable | not scorable | not scorable | not scorable | 0.9834711 | 0.9228295 |
| 215 Bn-A01-p1194009  | A-genome specific (napus-rapa) | 0.930622     | 0.5868458    | not scorable | not scorable | 0.9917355 | 0.7976093 |
| 216 Bn-A01-p11947255 | A-genome specific (napus-rapa) | 0.9928229    | 0.7053589    | not scorable | not scorable | 1         | 0.7524902 |
| 217 Bn-A01-p11951605 | A-genome specific (napus-rapa) | 0.9904306    | 0.8588542    | not scorable | not scorable | 0.9917355 | 0.8131865 |
| 218 Bn-A01-p11954334 | A-genome specific (napus-rapa) | 0.9928229    | 0.5757538    | not scorable | not scorable | 0.9338843 | 0.758755  |
| 219 Bn-A01-p11955645 | A-genome specific (napus-rapa) | 0.9928229    | 0.4916941    | not scorable | not scorable | 1         | 0.7414955 |
| 220 Bn-A01-p11965733 | A-genome specific (rapa only)  | not scorable | not scorable | not scorable | not scorable | 0.9421487 | 0.7101336 |
| 221 Bn-A01-p11991521 | A-genome specific (napus-rapa) | 0.9856459    | 0.6375272    | not scorable | not scorable | 1         | 0.8737795 |
| 222 Bn-A01-p11992281 | A-genome specific (napus-rapa) | 0.9665072    | 0.3765419    | not scorable | not scorable | 0.9917355 | 0.7738066 |
| 223 Bn-A01-p11993589 | A-genome specific (napus-rapa) | 0.9952153    | 0.7460844    | not scorable | not scorable | 0.9834711 | 0.6876795 |
| 224 Bn-A01-p11996408 | A-genome specific (napus-rapa) | 0.7966507    | 0.7690449    | not scorable | not scorable | 0.6198347 | 0.8586335 |
| 225 Bn-A01-p11996672 | A-genome specific (rapa only)  | not scorable | not scorable | not scorable | not scorable | 0.6280992 | 0.8808653 |
| 226 Bn-A01-p120225   | A-genome specific (napus-rapa) | 0.9904306    | 0.2652374    | not scorable | not scorable | 0.9917355 | 0.6753637 |
| 227 Bn-A01-p12066369 | genome unspecific (all in)     | 0.9952153    | 0.3208931    | 0.9922481    | 0.5905417    | 1         | 0.8027052 |
| 228 Bn-A01-p12077110 | A-genome specific (napus-rapa) | 0.9904306    | 0.7698391    | not scorable | not scorable | 0.9917355 | 0.8636591 |

|     |                  |                                |           |           |              |              |              |              |           |
|-----|------------------|--------------------------------|-----------|-----------|--------------|--------------|--------------|--------------|-----------|
| 229 | Bn-A01-p12081177 | A-genome specific (napus-rapa) | 0.9952153 | 0.4110411 | not scorable | not scorable |              | 1            | 0.7938477 |
| 230 | Bn-A01-p1208515  | A-genome specific (napus-rapa) | 0.9976076 | 0.4442226 | not scorable | not scorable | 0.9917355    |              | 0.7727268 |
| 231 | Bn-A01-p12098080 | A-genome specific (napus-rapa) | 0.9952153 | 0.420172  | not scorable | not scorable |              | 1            | 0.771117  |
| 232 | Bn-A01-p12136794 | A-genome specific (napus-rapa) | 1         | 0.270754  | not scorable | not scorable |              | 1            | 0.5623716 |
| 233 | Bn-A01-p12136908 | A-genome specific (napus-rapa) | 1         | 0.549558  | not scorable | not scorable |              | 1            | 0.4069836 |
| 234 | Bn-A01-p12138089 | A-genome specific (napus-rapa) | 0.9928229 | 0.632485  | not scorable | not scorable |              | 1            | 0.5373095 |
| 235 | Bn-A01-p12145148 | A-genome specific (napus-rapa) | 0.9952153 | 0.431631  | not scorable | not scorable |              | 1            | 0.8453875 |
| 236 | Bn-A01-p12158810 | A-genome specific (napus-rapa) | 0.9952153 | 0.4761357 | not scorable | not scorable | 0.9917355    |              | 0.6880202 |
| 237 | Bn-A01-p12178646 | A-genome specific (napus-rapa) | 0.9976076 | 0.4218055 | not scorable | not scorable |              | 1            | 0.7138398 |
| 238 | Bn-A01-p12179784 | A-genome specific (napus-rapa) | 0.9904306 | 0.8303608 | not scorable | not scorable |              | 1            | 0.7847885 |
| 239 | Bn-A01-p12192020 | genome unspecific (all in)     | 0.9928229 | 0.6613205 | 0.3178295    | 0.6927192    | 0.9917355    |              | 0.7069837 |
| 240 | Bn-A01-p12206449 | napus specific                 | 0.9856459 | 0.6708309 | not scorable | not scorable | not scorable | not scorable |           |
| 241 | Bn-A01-p1220904  | A-genome specific (napus-rapa) | 1         | 0.6044071 | not scorable | not scorable |              | 1            | 0.7979612 |
| 242 | Bn-A01-p12221698 | A-genome specific (napus-rapa) | 0.9904306 | 0.7802077 | not scorable | not scorable |              | 1            | 0.8099741 |
| 243 | Bn-A01-p12222100 | A-genome specific (napus-rapa) | 0.9904306 | 0.7875617 | not scorable | not scorable | 0.9917355    |              | 0.770835  |
| 244 | Bn-A01-p12222728 | A-genome specific (napus-rapa) | 0.9880383 | 0.7653283 | not scorable | not scorable | 0.9669421    |              | 0.7439612 |
| 245 | Bn-A01-p12222806 | A-genome specific (napus-rapa) | 0.9880383 | 0.8772995 | not scorable | not scorable | 0.9917355    |              | 0.6783558 |
| 246 | Bn-A01-p12224872 | A-genome specific (napus-rapa) | 0.9904306 | 0.8545919 | not scorable | not scorable | 0.9917355    |              | 0.7215734 |
| 247 | Bn-A01-p12233209 | A-genome specific (napus-rapa) | 0.3062201 | 0.7394736 | not scorable | not scorable |              | 1            | 0.7454135 |
| 248 | Bn-A01-p12237534 | A-genome specific (napus-rapa) | 1         | 0.5140246 | not scorable | not scorable |              | 1            | 0.7883869 |
| 249 | Bn-A01-p12257699 | A-genome specific (napus-rapa) | 0.9976076 | 0.404594  | not scorable | not scorable | 0.9834711    |              | 0.8113015 |
| 250 | Bn-A01-p12262504 | A-genome specific (napus-rapa) | 1         | 0.3449225 | not scorable | not scorable | 0.9752066    |              | 0.5642056 |
| 251 | Bn-A01-p1226475  | A-genome specific (napus-rapa) | 0.9641148 | 0.4153487 | not scorable | not scorable |              | 1            | 0.8808117 |
| 252 | Bn-A01-p1227000  | A-genome specific (napus-rapa) | 0.9904306 | 0.7547374 | not scorable | not scorable | 0.9917355    |              | 0.7880889 |
| 253 | Bn-A01-p1227023  | A-genome specific (napus-rapa) | 0.9736842 | 0.7761165 | not scorable | not scorable |              | 1            | 0.8054933 |
| 254 | Bn-A01-p12302708 | A-genome specific (napus-rapa) | 0.9928229 | 0.8611882 | not scorable | not scorable | 0.9917355    |              | 0.7236418 |
| 255 | Bn-A01-p12302861 | A-genome specific (napus-rapa) | 0.923445  | 0.7147273 | not scorable | not scorable | 0.9752066    |              | 0.7385623 |
| 256 | Bn-A01-p12305025 | A-genome specific (napus-rapa) | 0.9904306 | 0.8505798 | not scorable | not scorable |              | 1            | 0.816321  |
| 257 | Bn-A01-p12305828 | A-genome specific (napus-rapa) | 0.9952153 | 0.3198976 | not scorable | not scorable |              | 1            | 0.4710016 |
| 258 | Bn-A01-p12306195 | A-genome specific (napus-rapa) | 0.9880383 | 0.8063994 | not scorable | not scorable |              | 1            | 0.8220317 |
| 259 | Bn-A01-p12308897 | A-genome specific (napus-rapa) | 0.9928229 | 0.7099838 | not scorable | not scorable |              | 1            | 0.6720178 |
| 260 | Bn-A01-p12309767 | A-genome specific (napus-rapa) | 0.9904306 | 0.8443652 | not scorable | not scorable |              | 1            | 0.7676212 |
| 261 | Bn-A01-p12314813 | A-genome specific (napus-rapa) | 0.8899522 | 0.8075957 | not scorable | not scorable | 0.9586777    |              | 0.6058481 |



|     |                  |                                |              |              |              |              |              |              |
|-----|------------------|--------------------------------|--------------|--------------|--------------|--------------|--------------|--------------|
| 262 | Bn-A01-p1232064  | A-genome specific (napus-rapa) | 1            | 0.336769     | not scorable | not scorable | 0.9917355    | 0.7886637    |
| 263 | Bn-A01-p12350104 | A-genome specific (napus-rapa) | 0.9880383    | 0.6635865    | not scorable | not scorable | 1            | 0.6303344    |
| 264 | Bn-A01-p12352518 | A-genome specific (napus-rapa) | 0.9880383    | 0.6720262    | not scorable | not scorable | 1            | 0.6211244    |
| 265 | Bn-A01-p1235334  | A-genome specific (napus-rapa) | 0.9665072    | 0.7371562    | not scorable | not scorable | 1            | 0.744643     |
| 266 | Bn-A01-p1236927  | A-genome specific (napus-rapa) | 0.645933     | 0.9331403    | not scorable | not scorable | 0.9338843    | 0.8867427    |
| 267 | Bn-A01-p12380936 | A-genome specific (napus-rapa) | 0.9880383    | 0.8092616    | not scorable | not scorable | 1            | 0.8592322    |
| 268 | Bn-A01-p12387882 | A-genome specific (napus-rapa) | 0.9880383    | 0.8279986    | not scorable | not scorable | 0.9834711    | 0.8116725    |
| 269 | Bn-A01-p12391243 | A-genome specific (napus-rapa) | 0.9904306    | 0.8344067    | not scorable | not scorable | 1            | 0.7828811    |
| 270 | Bn-A01-p12399796 | A-genome specific (napus-rapa) | 0.9928229    | 0.8191944    | not scorable | not scorable | 1            | 0.8668937    |
| 271 | Bn-A01-p12400477 | A-genome specific (napus-rapa) | 0.9880383    | 0.7945017    | not scorable | not scorable | 0.9917355    | 0.7392782    |
| 272 | Bn-A01-p12427149 | A-genome specific (napus-rapa) | 0.9952153    | 0.5509108    | not scorable | not scorable | 1            | 0.71289      |
| 273 | Bn-A01-p12454306 | A-genome specific (napus-rapa) | 0.9928229    | 0.6266865    | not scorable | not scorable | 1            | 0.6219013    |
| 274 | Bn-A01-p12456089 | A-genome specific (napus-rapa) | 0.9928229    | 0.7882095    | not scorable | not scorable | 0.9917355    | 0.7803518    |
| 275 | Bn-A01-p1247899  | A-genome specific (napus-rapa) | 0.9593301    | 0.7977593    | not scorable | not scorable | 1            | 0.8291255    |
| 276 | Bn-A01-p1248141  | A-genome specific (rapa only)  | not scorable | not scorable | not scorable | not scorable | 0.9834711    | 0.7837986    |
| 277 | Bn-A01-p12484368 | A-genome specific (napus-rapa) | 0.9784689    | 0.583856     | not scorable | not scorable | 0.9834711    | 0.5942021    |
| 278 | Bn-A01-p1249847  | A-genome specific (napus-rapa) | 0.9760765    | 0.7802738    | not scorable | not scorable | 0.9752066    | 0.8324441    |
| 279 | Bn-A01-p1250595  | A-genome specific (napus-rapa) | 0.9019139    | 0.7718884    | not scorable | not scorable | 1            | 0.7470211    |
| 280 | Bn-A01-p12510328 | A-genome specific (napus-rapa) | 0.9808612    | 0.7774609    | not scorable | not scorable | 0.9834711    | 0.7612363    |
| 281 | Bn-A01-p12510566 | A-genome specific (napus-rapa) | 0.9976076    | 0.4475251    | not scorable | not scorable | 1            | 0.7615709    |
| 282 | Bn-A01-p12516944 | A-genome specific (napus-rapa) | 0.9808612    | 0.6722834    | not scorable | not scorable | 0.9669421    | 0.6302709    |
| 283 | Bn-A01-p12522369 | A-genome specific (napus-rapa) | 0.9808612    | 0.7599123    | not scorable | not scorable | 0.9834711    | 0.7753927    |
| 284 | Bn-A01-p1252553  | A-genome specific (rapa only)  | not scorable | not scorable | not scorable | not scorable | 1            | 0.6659275    |
| 285 | Bn-A01-p12533991 | A-genome specific (napus-rapa) | 0.9904306    | 0.7667246    | not scorable | not scorable | 0.9586777    | 0.7200297    |
| 286 | Bn-A01-p12535269 | A-genome specific (napus-rapa) | 0.9976076    | 0.4794829    | not scorable | not scorable | 0.9752066    | 0.7307885    |
| 287 | Bn-A01-p12535612 | A-genome specific (napus-rapa) | 0.9904306    | 0.7829784    | not scorable | not scorable | 0.9834711    | 0.7756329    |
| 288 | Bn-A01-p12539479 | genome unspecific (all in)     | 1            | 0.5445863    | 0.9767442    | 0.678154     | 1            | 0.7936676    |
| 289 | Bn-A01-p12539655 | A-genome specific (napus-rapa) | 0.9928229    | 0.7922541    | not scorable | not scorable | 0.9669421    | 0.7480221    |
| 290 | Bn-A01-p12539953 | napus specific                 | 0.9880383    | 0.5494856    | not scorable | not scorable | not scorable | not scorable |
| 291 | Bn-A01-p12543678 | A-genome specific (napus-rapa) | 1            | 0.47417      | not scorable | not scorable | 0.9834711    | 0.6800156    |
| 292 | Bn-A01-p12544054 | A-genome specific (napus-rapa) | 0.9928229    | 0.7409139    | not scorable | not scorable | 1            | 0.7505876    |
| 293 | Bn-A01-p12550092 | A-genome specific (rapa only)  | not scorable | not scorable | not scorable | not scorable | 0.9752066    | 0.6806947    |
| 294 | Bn-A01-p12560952 | A-genome specific (napus-rapa) | 0.9976076    | 0.4461923    | not scorable | not scorable | 1            | 0.6930565    |

|                      |                                |              |              |              |              |           |           |
|----------------------|--------------------------------|--------------|--------------|--------------|--------------|-----------|-----------|
| 295 Bn-A01-p12577268 | A-genome specific (napus-rapa) | 0.9928229    | 0.8848283    | not scorable | not scorable | 0.9752066 | 0.7341932 |
| 296 Bn-A01-p12580778 | A-genome specific (napus-rapa) | 0.9976076    | 0.5284097    | not scorable | not scorable | 0.9917355 | 0.6902963 |
| 297 Bn-A01-p12591168 | A-genome specific (napus-rapa) | 0.9832536    | 0.8065313    | not scorable | not scorable | 0.6859504 | 0.7888045 |
| 298 Bn-A01-p12593173 | A-genome specific (napus-rapa) | 0.9928229    | 0.7619047    | not scorable | not scorable | 1         | 0.6766812 |
| 299 Bn-A01-p12593802 | A-genome specific (rapa only)  | not scorable | not scorable | not scorable | not scorable | 1         | 0.839635  |
| 300 Bn-A01-p1261017  | A-genome specific (napus-rapa) | 0.9904306    | 0.7708218    | not scorable | not scorable | 0.9917355 | 0.747498  |
| 301 Bn-A01-p12618357 | A-genome specific (napus-rapa) | 0.9976076    | 0.5196093    | not scorable | not scorable | 0.9834711 | 0.6811854 |
| 302 Bn-A01-p12622123 | A-genome specific (napus-rapa) | 0.9736842    | 0.8064575    | not scorable | not scorable | 1         | 0.7525831 |
| 303 Bn-A01-p12625892 | A-genome specific (napus-rapa) | 0.9928229    | 0.7502456    | not scorable | not scorable | 0.9834711 | 0.7789644 |
| 304 Bn-A01-p12653338 | A-genome specific (napus-rapa) | 0.9904306    | 0.4675172    | not scorable | not scorable | 0.9917355 | 0.8427517 |
| 305 Bn-A01-p12665045 | A-genome specific (napus-rapa) | 0.9928229    | 0.7249033    | not scorable | not scorable | 1         | 0.6900909 |
| 306 Bn-A01-p12665250 | A-genome specific (napus-rapa) | 0.9928229    | 0.7594367    | not scorable | not scorable | 0.9752066 | 0.7094528 |
| 307 Bn-A01-p12672899 | A-genome specific (napus-rapa) | 0.9976076    | 0.4629915    | not scorable | not scorable | 1         | 0.6967734 |
| 308 Bn-A01-p12734805 | A-genome specific (napus-rapa) | 0.9928229    | 0.7585934    | not scorable | not scorable | 1         | 0.8947011 |
| 309 Bn-A01-p1275284  | A-genome specific (napus-rapa) | 0.9688995    | 0.7700123    | not scorable | not scorable | 0.9917355 | 0.6936204 |
| 310 Bn-A01-p1276486  | A-genome specific (napus-rapa) | 0.9784689    | 0.7029064    | not scorable | not scorable | 1         | 0.7620607 |
| 311 Bn-A01-p1276504  | A-genome specific (napus-rapa) | 0.9712918    | 0.7991804    | not scorable | not scorable | 0.9917355 | 0.8100437 |
| 312 Bn-A01-p12774270 | A-genome specific (napus-rapa) | 0.9976076    | 0.5231249    | not scorable | not scorable | 0.9917355 | 0.8439682 |
| 313 Bn-A01-p12823550 | A-genome specific (napus-rapa) | 1            | 0.455857     | not scorable | not scorable | 0.9917355 | 0.8354748 |
| 314 Bn-A01-p12926196 | A-genome specific (napus-rapa) | 1            | 0.4634304    | not scorable | not scorable | 0.9917355 | 0.8035609 |
| 315 Bn-A01-p1296503  | A-genome specific (rapa only)  | not scorable | not scorable | not scorable | not scorable | 0.9586777 | 0.3988096 |
| 316 Bn-A01-p1314194  | A-genome specific (napus-rapa) | 0.9880383    | 0.2333066    | not scorable | not scorable | 1         | 0.58727   |
| 317 Bn-A01-p1314440  | A-genome specific (napus-rapa) | 0.9760765    | 0.2707549    | not scorable | not scorable | 0.9752066 | 0.6625077 |
| 318 Bn-A01-p1320368  | A-genome specific (napus-rapa) | 0.8995215    | 0.797123     | not scorable | not scorable | 0.9834711 | 0.67584   |
| 319 Bn-A01-p13239976 | A-genome specific (napus-rapa) | 0.9832536    | 0.7094571    | not scorable | not scorable | 0.9917355 | 0.7518338 |
| 320 Bn-A01-p1324586  | A-genome specific (napus-rapa) | 0.9688995    | 0.7556233    | not scorable | not scorable | 0.9834711 | 0.7181178 |
| 321 Bn-A01-p13622238 | A-genome specific (napus-rapa) | 0.6315789    | 0.6731903    | not scorable | not scorable | 0.9421487 | 0.7406708 |
| 322 Bn-A01-p13709801 | A-genome specific (napus-rapa) | 0.9736842    | 0.7139389    | not scorable | not scorable | 1         | 0.5780196 |
| 323 Bn-A01-p1372430  | A-genome specific (napus-rapa) | 0.9401914    | 0.7634706    | not scorable | not scorable | 0.9752066 | 0.8155184 |
| 324 Bn-A01-p1373104  | A-genome specific (napus-rapa) | 0.9832536    | 0.7966446    | not scorable | not scorable | 0.9917355 | 0.8139654 |
| 325 Bn-A01-p1373239  | A-genome specific (napus-rapa) | 0.9784689    | 0.5574312    | not scorable | not scorable | 0.6280992 | 0.6954632 |
| 326 Bn-A01-p1373827  | A-genome specific (napus-rapa) | 0.9808612    | 0.7701248    | not scorable | not scorable | 0.9917355 | 0.7884952 |
| 327 Bn-A01-p1373838  | A-genome specific (napus-rapa) | 0.9784689    | 0.7812393    | not scorable | not scorable | 0.9917355 | 0.8319343 |

|                      |                                |              |              |              |              |           |           |
|----------------------|--------------------------------|--------------|--------------|--------------|--------------|-----------|-----------|
| 328 Bn-A01-p1373965  | A-genome specific (napus-rapa) | 0.9784689    | 0.71347      | not scorable | not scorable | 0.9669421 | 0.6786404 |
| 329 Bn-A01-p1376589  | A-genome specific (napus-rapa) | 0.9880383    | 0.7608371    | not scorable | not scorable | 0.9917355 | 0.7075    |
| 330 Bn-A01-p13775817 | A-genome specific (napus-rapa) | 0.9904306    | 0.7354486    | not scorable | not scorable | 0.9917355 | 0.7816562 |
| 331 Bn-A01-p137814   | A-genome specific (napus-rapa) | 0.9856459    | 0.6964834    | not scorable | not scorable | 0.9917355 | 0.6833126 |
| 332 Bn-A01-p137869   | A-genome specific (napus-rapa) | 0.9904306    | 0.6550323    | not scorable | not scorable | 1         | 0.6128799 |
| 333 Bn-A01-p13825941 | A-genome specific (napus-rapa) | 0.2464115    | 0.7578292    | not scorable | not scorable | 0.9586777 | 0.7199126 |
| 334 Bn-A01-p13827513 | A-genome specific (napus-rapa) | 0.9952153    | 0.6120517    | not scorable | not scorable | 0.9586777 | 0.7022258 |
| 335 Bn-A01-p13828017 | A-genome specific (napus-rapa) | 0.9808612    | 0.4143094    | not scorable | not scorable | 0.9752066 | 0.5753651 |
| 336 Bn-A01-p13828314 | A-genome specific (napus-rapa) | 0.9736842    | 0.5698635    | not scorable | not scorable | 0.9669421 | 0.8085203 |
| 337 Bn-A01-p1384609  | A-genome specific (napus-rapa) | 0.9880383    | 0.7425978    | not scorable | not scorable | 0.9917355 | 0.9091246 |
| 338 Bn-A01-p1385993  | A-genome specific (napus-rapa) | 0.9497608    | 0.5272615    | not scorable | not scorable | 1         | 0.9140136 |
| 339 Bn-A01-p1387174  | A-genome specific (napus-rapa) | 0.9784689    | 0.417858     | not scorable | not scorable | 1         | 0.7745267 |
| 340 Bn-A01-p138731   | A-genome specific (napus-rapa) | 0.9904306    | 0.6756431    | not scorable | not scorable | 0.9834711 | 0.7377116 |
| 341 Bn-A01-p1387769  | A-genome specific (napus-rapa) | 0.9784689    | 0.753564     | not scorable | not scorable | 0.9752066 | 0.8053254 |
| 342 Bn-A01-p13893020 | A-genome specific (napus-rapa) | 0.9880383    | 0.8205257    | not scorable | not scorable | 1         | 0.8404639 |
| 343 Bn-A01-p14001039 | A-genome specific (napus-rapa) | 1            | 0.4849428    | not scorable | not scorable | 1         | 0.7021827 |
| 344 Bn-A01-p14022855 | A-genome specific (napus-rapa) | 0.9928229    | 0.7837644    | not scorable | not scorable | 0.9834711 | 0.8055862 |
| 345 Bn-A01-p14046733 | A-genome specific (napus-rapa) | 0.9952153    | 0.4037965    | not scorable | not scorable | 0.9752066 | 0.558627  |
| 346 Bn-A01-p14057073 | A-genome specific (rapa only)  | not scorable | not scorable | not scorable | not scorable | 0.9917355 | 0.6622183 |
| 347 Bn-A01-p14071179 | A-genome specific (napus-rapa) | 0.9904306    | 0.7523553    | not scorable | not scorable | 1         | 0.7740541 |
| 348 Bn-A01-p14071237 | A-genome specific (napus-rapa) | 0.9856459    | 0.83043      | not scorable | not scorable | 1         | 0.8182964 |
| 349 Bn-A01-p14074100 | A-genome specific (napus-rapa) | 0.9928229    | 0.7429424    | not scorable | not scorable | 1         | 0.7840061 |
| 350 Bn-A01-p14074268 | A-genome specific (napus-rapa) | 0.9928229    | 0.721787     | not scorable | not scorable | 1         | 0.7295138 |
| 351 Bn-A01-p14074391 | A-genome specific (napus-rapa) | 0.9856459    | 0.7404426    | not scorable | not scorable | 1         | 0.7592629 |
| 352 Bn-A01-p14076641 | A-genome specific (napus-rapa) | 0.9904306    | 0.8262197    | not scorable | not scorable | 1         | 0.8091902 |
| 353 Bn-A01-p14079006 | A-genome specific (napus-rapa) | 0.9880383    | 0.618178     | not scorable | not scorable | 1         | 0.7588036 |
| 354 Bn-A01-p14084579 | A-genome specific (napus-rapa) | 0.9808612    | 0.4481516    | not scorable | not scorable | 1         | 0.7093671 |
| 355 Bn-A01-p14090315 | A-genome specific (napus-rapa) | 0.9880383    | 0.3972804    | not scorable | not scorable | 0.9752066 | 0.5547916 |
| 356 Bn-A01-p1409723  | A-genome specific (napus-rapa) | 0.9928229    | 0.4407693    | not scorable | not scorable | 0.9834711 | 0.6924533 |
| 357 Bn-A01-p14102222 | A-genome specific (napus-rapa) | 0.9832536    | 0.8619328    | not scorable | not scorable | 1         | 0.8167796 |
| 358 Bn-A01-p14104219 | genome unspecific (all in)     | 0.9952153    | 0.7884539    |              | 1 0.7146667  | 0.9834711 | 0.7699351 |
| 359 Bn-A01-p14104241 | A-genome specific (napus-rapa) | 1            | 0.4081207    | not scorable | not scorable | 0.9834711 | 0.4463008 |
| 360 Bn-A01-p14105205 | A-genome specific (napus-rapa) | 1            | 0.8373582    | not scorable | not scorable | 1         | 0.8525043 |

|                      |                                |           |           |              |              |           |           |
|----------------------|--------------------------------|-----------|-----------|--------------|--------------|-----------|-----------|
| 361 Bn-A01-p14106230 | A-genome specific (napus-rapa) | 1         | 0.4224357 | not scorable | not scorable | 0.9917355 | 0.4459139 |
| 362 Bn-A01-p14106856 | A-genome specific (napus-rapa) | 1         | 0.7212236 | not scorable | not scorable | 1         | 0.8079168 |
| 363 Bn-A01-p14128129 | A-genome specific (napus-rapa) | 0.9976076 | 0.4451966 | not scorable | not scorable | 0.9669421 | 0.7046128 |
| 364 Bn-A01-p14134232 | A-genome specific (napus-rapa) | 0.9928229 | 0.7758922 | not scorable | not scorable | 0.9917355 | 0.7049485 |
| 365 Bn-A01-p14138072 | A-genome specific (napus-rapa) | 0.9952153 | 0.5800401 | not scorable | not scorable | 0.9834711 | 0.7863265 |
| 366 Bn-A01-p1414695  | A-genome specific (napus-rapa) | 1         | 0.7173789 | not scorable | not scorable | 1         | 0.7565342 |
| 367 Bn-A01-p14148071 | A-genome specific (napus-rapa) | 0.9928229 | 0.7279299 | not scorable | not scorable | 0.9917355 | 0.6800501 |
| 368 Bn-A01-p14167866 | A-genome specific (napus-rapa) | 0.9880383 | 0.7617337 | not scorable | not scorable | 0.9752066 | 0.7794988 |
| 369 Bn-A01-p14168802 | A-genome specific (napus-rapa) | 0.9904306 | 0.6497484 | not scorable | not scorable | 0.9917355 | 0.7465103 |
| 370 Bn-A01-p14169412 | A-genome specific (napus-rapa) | 0.9784689 | 0.3887236 | not scorable | not scorable | 1         | 0.8047553 |
| 371 Bn-A01-p14181463 | A-genome specific (napus-rapa) | 0.9904306 | 0.7526248 | not scorable | not scorable | 0.9752066 | 0.6868008 |
| 372 Bn-A01-p14181651 | A-genome specific (napus-rapa) | 0.9928229 | 0.762764  | not scorable | not scorable | 0.9917355 | 0.6897457 |
| 373 Bn-A01-p14181829 | A-genome specific (napus-rapa) | 0.9928229 | 0.7675856 | not scorable | not scorable | 0.9917355 | 0.7165584 |
| 374 Bn-A01-p14191393 | A-genome specific (napus-rapa) | 0.9904306 | 0.5792308 | not scorable | not scorable | 0.9917355 | 0.6684284 |
| 375 Bn-A01-p14197545 | A-genome specific (napus-rapa) | 0.9976076 | 0.496622  | not scorable | not scorable | 0.9917355 | 0.777238  |
| 376 Bn-A01-p14200714 | A-genome specific (napus-rapa) | 0.9880383 | 0.7581865 | not scorable | not scorable | 0.9834711 | 0.733355  |
| 377 Bn-A01-p14200787 | A-genome specific (napus-rapa) | 0.9928229 | 0.7033648 | not scorable | not scorable | 0.9834711 | 0.6810399 |
| 378 Bn-A01-p14201581 | A-genome specific (napus-rapa) | 0.9856459 | 0.6761243 | not scorable | not scorable | 1         | 0.6566948 |
| 379 Bn-A01-p14210994 | A-genome specific (napus-rapa) | 0.9928229 | 0.6086816 | not scorable | not scorable | 0.9917355 | 0.679038  |
| 380 Bn-A01-p14223709 | A-genome specific (napus-rapa) | 0.9904306 | 0.605064  | not scorable | not scorable | 0.9917355 | 0.7369236 |
| 381 Bn-A01-p1422384  | genome unspecific (all in)     | 0.9928229 | 0.3068601 |              | 1 0.6902146  | 1         | 0.8004208 |
| 382 Bn-A01-p1423163  | A-genome specific (napus-rapa) | 0.9784689 | 0.4976095 | not scorable | not scorable | 1         | 0.6994658 |
| 383 Bn-A01-p14232473 | A-genome specific (napus-rapa) | 0.9880383 | 0.8046031 | not scorable | not scorable | 0.9834711 | 0.7539325 |
| 384 Bn-A01-p14238948 | A-genome specific (napus-rapa) | 0.9784689 | 0.5621237 | not scorable | not scorable | 0.9917355 | 0.7249692 |
| 385 Bn-A01-p14241215 | A-genome specific (napus-rapa) | 0.9904306 | 0.7441103 | not scorable | not scorable | 0.9834711 | 0.7770978 |
| 386 Bn-A01-p14247718 | A-genome specific (napus-rapa) | 0.9617225 | 0.5910885 | not scorable | not scorable | 0.9834711 | 0.781979  |
| 387 Bn-A01-p14256104 | A-genome specific (napus-rapa) | 0.9952153 | 0.2883646 | not scorable | not scorable | 0.9917355 | 0.7211576 |
| 388 Bn-A01-p14328823 | A-genome specific (napus-rapa) | 1         | 0.5628255 | not scorable | not scorable | 0.9917355 | 0.615298  |
| 389 Bn-A01-p14339825 | A-genome specific (napus-rapa) | 0.9976076 | 0.2813169 | not scorable | not scorable | 0.9917355 | 0.8140109 |
| 390 Bn-A01-p1439621  | A-genome specific (napus-rapa) | 0.9760765 | 0.5267045 | not scorable | not scorable | 0.9834711 | 0.367469  |
| 391 Bn-A01-p1440009  | A-genome specific (napus-rapa) | 0.9808612 | 0.6311568 | not scorable | not scorable | 0.9834711 | 0.7109494 |
| 392 Bn-A01-p14402434 | A-genome specific (napus-rapa) | 0.937799  | 0.2134711 | not scorable | not scorable | 1         | 0.7746665 |
| 393 Bn-A01-p14415386 | A-genome specific (napus-rapa) | 1         | 0.3608276 | not scorable | not scorable | 0.9917355 | 0.677067  |

|                      |                                |              |              |              |              |           |           |
|----------------------|--------------------------------|--------------|--------------|--------------|--------------|-----------|-----------|
| 394 Bn-A01-p14419363 | A-genome specific (napus-rapa) | 0.9928229    | 0.835639     | not scorable | not scorable | 0.9917355 | 0.89465   |
| 395 Bn-A01-p1443389  | A-genome specific (napus-rapa) | 0.9617225    | 0.7277284    | not scorable | not scorable | 0.9917355 | 0.7347819 |
| 396 Bn-A01-p1448811  | A-genome specific (rapa only)  | not scorable | not scorable | not scorable | not scorable | 1         | 0.7545834 |
| 397 Bn-A01-p1449865  | A-genome specific (napus-rapa) | 0.9665072    | 0.6526303    | not scorable | not scorable | 0.9917355 | 0.6696596 |
| 398 Bn-A01-p1453156  | A-genome specific (napus-rapa) | 0.9928229    | 0.820729     | not scorable | not scorable | 0.9917355 | 0.7191458 |
| 399 Bn-A01-p1453560  | A-genome specific (napus-rapa) | 0.8851675    | 0.8316536    | not scorable | not scorable | 0.9421487 | 0.7675593 |
| 400 Bn-A01-p14559770 | A-genome specific (napus-rapa) | 0.7894737    | 0.7637153    | not scorable | not scorable | 0.7190083 | 0.7365817 |
| 401 Bn-A01-p1456256  | A-genome specific (napus-rapa) | 0.9928229    | 0.8287286    | not scorable | not scorable | 0.9834711 | 0.6924742 |
| 402 Bn-A01-p145676   | A-genome specific (napus-rapa) | 0.9880383    | 0.7903903    | not scorable | not scorable | 0.9834711 | 0.7132263 |
| 403 Bn-A01-p14661055 | A-genome specific (napus-rapa) | 1            | 0.8004208    | not scorable | not scorable | 1         | 0.7739488 |
| 404 Bn-A01-p14661148 | A-genome specific (napus-rapa) | 1            | 0.8114662    | not scorable | not scorable | 1         | 0.8004208 |
| 405 Bn-A01-p14666643 | A-genome specific (napus-rapa) | 0.9904306    | 0.4931239    | not scorable | not scorable | 0.9834711 | 0.7937879 |
| 406 Bn-A01-p14687636 | A-genome specific (napus-rapa) | 0.9952153    | 0.5186229    | not scorable | not scorable | 1         | 0.820781  |
| 407 Bn-A01-p146963   | A-genome specific (napus-rapa) | 0.9688995    | 0.7917191    | not scorable | not scorable | 0.9917355 | 0.7564167 |
| 408 Bn-A01-p14704844 | A-genome specific (napus-rapa) | 0.9928229    | 0.4295946    | not scorable | not scorable | 1         | 0.8401869 |
| 409 Bn-A01-p14723306 | A-genome specific (napus-rapa) | 0.9952153    | 0.5226974    | not scorable | not scorable | 1         | 0.7832876 |
| 410 Bn-A01-p14727717 | A-genome specific (napus-rapa) | 0.9880383    | 0.7645015    | not scorable | not scorable | 0.9917355 | 0.7983885 |
| 411 Bn-A01-p1473188  | A-genome specific (napus-rapa) | 1            | 0.5945251    | not scorable | not scorable | 0.9917355 | 0.7232726 |
| 412 Bn-A01-p147360   | A-genome specific (napus-rapa) | 0.9760765    | 0.8084076    | not scorable | not scorable | 1         | 0.6635737 |
| 413 Bn-A01-p1476216  | A-genome specific (napus-rapa) | 0.9712918    | 0.4450222    | not scorable | not scorable | 1         | 0.8051416 |
| 414 Bn-A01-p147990   | A-genome specific (napus-rapa) | 0.9808612    | 0.8084252    | not scorable | not scorable | 1         | 0.7380052 |
| 415 Bn-A01-p14802709 | A-genome specific (napus-rapa) | 0.9856459    | 0.5062508    | not scorable | not scorable | 1         | 0.9175813 |
| 416 Bn-A01-p14859839 | A-genome specific (napus-rapa) | 0.9928229    | 0.7264214    | not scorable | not scorable | 1         | 0.9175813 |
| 417 Bn-A01-p14865565 | A-genome specific (napus-rapa) | 0.9928229    | 0.5397404    | not scorable | not scorable | 1         | 0.9068346 |
| 418 Bn-A01-p14901403 | A-genome specific (napus-rapa) | 0.9904306    | 0.7747275    | not scorable | not scorable | 0.9917355 | 0.7628844 |
| 419 Bn-A01-p14905298 | A-genome specific (napus-rapa) | 0.9808612    | 0.704729     | not scorable | not scorable | 0.9917355 | 0.6850774 |
| 420 Bn-A01-p14906403 | A-genome specific (napus-rapa) | 0.9928229    | 0.6796619    | not scorable | not scorable | 0.9752066 | 0.7699912 |
| 421 Bn-A01-p14906494 | A-genome specific (napus-rapa) | 0.9928229    | 0.7638305    | not scorable | not scorable | 1         | 0.8100366 |
| 422 Bn-A01-p14914475 | A-genome specific (napus-rapa) | 0.9928229    | 0.8088243    | not scorable | not scorable | 1         | 0.7370641 |
| 423 Bn-A01-p14917697 | A-genome specific (napus-rapa) | 0.9928229    | 0.810746     | not scorable | not scorable | 0.9917355 | 0.8215768 |
| 424 Bn-A01-p14934844 | A-genome specific (napus-rapa) | 0.9760765    | 0.8228506    | not scorable | not scorable | 1         | 0.8241322 |
| 425 Bn-A01-p14942681 | A-genome specific (napus-rapa) | 0.9928229    | 0.7083406    | not scorable | not scorable | 0.9834711 | 0.6553146 |
| 426 Bn-A01-p14943499 | A-genome specific (napus-rapa) | 0.9952153    | 0.5254089    | not scorable | not scorable | 0.9834711 | 0.6814213 |

|     |                  |                                |           |           |              |              |           |           |
|-----|------------------|--------------------------------|-----------|-----------|--------------|--------------|-----------|-----------|
| 427 | Bn-A01-p14945302 | A-genome specific (napus-rapa) | 0.9952153 | 0.3859778 | not scorable | not scorable | 0.9917355 | 0.8088143 |
| 428 | Bn-A01-p14947053 | A-genome specific (napus-rapa) | 0.9928229 | 0.7179595 | not scorable | not scorable | 0.9834711 | 0.7865661 |
| 429 | Bn-A01-p14947418 | A-genome specific (napus-rapa) | 0.9952153 | 0.7861242 | not scorable | not scorable | 1         | 0.8765777 |
| 430 | Bn-A01-p14948237 | A-genome specific (napus-rapa) | 0.9928229 | 0.8043585 | not scorable | not scorable | 0.9917355 | 0.7063561 |
| 431 | Bn-A01-p14948379 | A-genome specific (napus-rapa) | 0.9928229 | 0.8044872 | not scorable | not scorable | 0.9917355 | 0.7598522 |
| 432 | Bn-A01-p14948614 | A-genome specific (napus-rapa) | 0.9928229 | 0.7633395 | not scorable | not scorable | 0.9834711 | 0.6639513 |
| 433 | Bn-A01-p14948748 | A-genome specific (napus-rapa) | 0.9928229 | 0.7529407 | not scorable | not scorable | 0.9917355 | 0.6355018 |
| 434 | Bn-A01-p14949030 | A-genome specific (napus-rapa) | 0.9928229 | 0.6473867 | not scorable | not scorable | 0.9834711 | 0.6821839 |
| 435 | Bn-A01-p14949121 | A-genome specific (napus-rapa) | 0.9904306 | 0.6645685 | not scorable | not scorable | 1         | 0.8004208 |
| 436 | Bn-A01-p14949256 | A-genome specific (napus-rapa) | 0.9928229 | 0.7288114 | not scorable | not scorable | 0.9834711 | 0.6886961 |
| 437 | Bn-A01-p14955594 | A-genome specific (napus-rapa) | 0.9928229 | 0.7838486 | not scorable | not scorable | 1         | 0.7819808 |
| 438 | Bn-A01-p14959478 | A-genome specific (napus-rapa) | 0.9928229 | 0.7589554 | not scorable | not scorable | 0.9917355 | 0.7598228 |
| 439 | Bn-A01-p14960233 | A-genome specific (napus-rapa) | 0.9952153 | 0.3823385 | not scorable | not scorable | 0.9917355 | 0.7391033 |
| 440 | Bn-A01-p14965172 | A-genome specific (napus-rapa) | 0.9928229 | 0.3137937 | not scorable | not scorable | 0.9917355 | 0.6380635 |
| 441 | Bn-A01-p14965596 | A-genome specific (napus-rapa) | 0.9976076 | 0.5253988 | not scorable | not scorable | 0.9917355 | 0.6897768 |
| 442 | Bn-A01-p15000034 | genome unspecific (all in)     | 0.9760765 | 0.6658307 | 0.9922481    | 0.6835211    | 0.677686  | 0.8119524 |
| 443 | Bn-A01-p15000468 | A-genome specific (napus-rapa) | 0.9497608 | 0.7372293 | not scorable | not scorable | 0.9917355 | 0.7155222 |
| 444 | Bn-A01-p150028   | A-genome specific (napus-rapa) | 0.9784689 | 0.7550246 | not scorable | not scorable | 1         | 0.6418651 |
| 445 | Bn-A01-p15043967 | genome unspecific (all in)     | 0.9832536 | 0.6693811 |              | 1 0.6971845  | 0.6942149 | 0.7494321 |
| 446 | Bn-A01-p15086787 | A-genome specific (napus-rapa) | 0.9928229 | 0.7409608 | not scorable | not scorable | 0.9752066 | 0.7042561 |
| 447 | Bn-A01-p15087045 | A-genome specific (napus-rapa) | 0.9928229 | 0.3108245 | not scorable | not scorable | 0.9421487 | 0.3693855 |
| 448 | Bn-A01-p15087171 | A-genome specific (napus-rapa) | 0.9928229 | 0.7024454 | not scorable | not scorable | 0.9669421 | 0.6953952 |
| 449 | Bn-A01-p15090383 | A-genome specific (napus-rapa) | 0.9976076 | 0.610445  | not scorable | not scorable | 0.9917355 | 0.7694124 |
| 450 | Bn-A01-p15092778 | A-genome specific (napus-rapa) | 0.9976076 | 0.5632354 | not scorable | not scorable | 0.9917355 | 0.6819887 |
| 451 | Bn-A01-p15095213 | A-genome specific (napus-rapa) | 0.9904306 | 0.7800793 | not scorable | not scorable | 1         | 0.6652268 |
| 452 | Bn-A01-p15095314 | A-genome specific (napus-rapa) | 0.9904306 | 0.6482113 | not scorable | not scorable | 0.9834711 | 0.6881775 |
| 453 | Bn-A01-p15095524 | A-genome specific (napus-rapa) | 0.9928229 | 0.783015  | not scorable | not scorable | 0.9917355 | 0.7791887 |
| 454 | Bn-A01-p15114417 | A-genome specific (napus-rapa) | 0.9760765 | 0.4198054 | not scorable | not scorable | 0.9834711 | 0.5448056 |
| 455 | Bn-A01-p15130843 | A-genome specific (napus-rapa) | 1         | 0.5823976 | not scorable | not scorable | 0.9917355 | 0.6272891 |
| 456 | Bn-A01-p15179106 | A-genome specific (napus-rapa) | 0.9880383 | 0.7790681 | not scorable | not scorable | 1         | 0.7381263 |
| 457 | Bn-A01-p15182302 | A-genome specific (napus-rapa) | 0.9808612 | 0.5141631 | not scorable | not scorable | 0.9752066 | 0.7187808 |
| 458 | Bn-A01-p15193510 | A-genome specific (napus-rapa) | 0.9162679 | 0.7698487 | not scorable | not scorable | 0.9586777 | 0.8133104 |
| 459 | Bn-A01-p15228282 | A-genome specific (napus-rapa) | 0.9928229 | 0.2350904 | not scorable | not scorable | 0.9504132 | 0.2707185 |

|     |                  |                                |              |              |              |              |           |           |
|-----|------------------|--------------------------------|--------------|--------------|--------------|--------------|-----------|-----------|
| 460 | Bn-A01-p15233095 | genome unspecific (all in)     | 0.9952153    | 0.4859448    | 1            | 0.7212361    | 1         | 0.7566166 |
| 461 | Bn-A01-p15295874 | genome unspecific (all in)     | 0.9856459    | 0.694932     | 1            | 0.7193761    | 0.9834711 | 0.7254611 |
| 462 | Bn-A01-p1530160  | A-genome specific (rapa only)  | not scorable | not scorable | not scorable | not scorable | 0.9917355 | 0.8077192 |
| 463 | Bn-A01-p1531829  | A-genome specific (napus-rapa) | 0.9928229    | 0.3034803    | not scorable | not scorable | 0.9834711 | 0.521618  |
| 464 | Bn-A01-p1538603  | A-genome specific (rapa only)  | not scorable | not scorable | not scorable | not scorable | 0.9669421 | 0.7456784 |
| 465 | Bn-A01-p15401259 | A-genome specific (napus-rapa) | 0.9928229    | 0.8076295    | not scorable | not scorable | 0.9917355 | 0.7794766 |
| 466 | Bn-A01-p15402291 | A-genome specific (napus-rapa) | 0.9952153    | 0.4682174    | not scorable | not scorable | 1         | 0.9167765 |
| 467 | Bn-A01-p15407905 | A-genome specific (rapa only)  | not scorable | not scorable | not scorable | not scorable | 0.9752066 | 0.5063943 |
| 468 | Bn-A01-p15408721 | A-genome specific (napus-rapa) | 0.9928229    | 0.6006129    | not scorable | not scorable | 0.9917355 | 0.7109582 |
| 469 | Bn-A01-p15413589 | A-genome specific (napus-rapa) | 0.9928229    | 0.7687166    | not scorable | not scorable | 0.9917355 | 0.7175106 |
| 470 | Bn-A01-p15432406 | A-genome specific (napus-rapa) | 0.9808612    | 0.4111577    | not scorable | not scorable | 1         | 0.7494321 |
| 471 | Bn-A01-p15441407 | A-genome specific (napus-rapa) | 0.9880383    | 0.6540042    | not scorable | not scorable | 0.9834711 | 0.7575629 |
| 472 | Bn-A01-p15446864 | A-genome specific (napus-rapa) | 1            | 0.4980409    | not scorable | not scorable | 0.9834711 | 0.778089  |
| 473 | Bn-A01-p15468033 | A-genome specific (napus-rapa) | 1            | 0.5170386    | not scorable | not scorable | 0.9834711 | 0.7272325 |
| 474 | Bn-A01-p1547232  | A-genome specific (napus-rapa) | 0.9904306    | 0.6331899    | not scorable | not scorable | 0.9669421 | 0.669001  |
| 475 | Bn-A01-p15474986 | A-genome specific (napus-rapa) | 0.9976076    | 0.3677513    | not scorable | not scorable | 0.9669421 | 0.4768252 |
| 476 | Bn-A01-p15475038 | A-genome specific (napus-rapa) | 0.9832536    | 0.7868354    | not scorable | not scorable | 0.6280992 | 0.8079355 |
| 477 | Bn-A01-p15476640 | A-genome specific (napus-rapa) | 0.9928229    | 0.4840779    | not scorable | not scorable | 0.9586777 | 0.6968947 |
| 478 | Bn-A01-p15481986 | A-genome specific (napus-rapa) | 0.9928229    | 0.7137043    | not scorable | not scorable | 0.9669421 | 0.7309846 |
| 479 | Bn-A01-p1548460  | A-genome specific (napus-rapa) | 1            | 0.3601478    | not scorable | not scorable | 0.9917355 | 0.6790785 |
| 480 | Bn-A01-p15487080 | A-genome specific (napus-rapa) | 0.9928229    | 0.7198843    | not scorable | not scorable | 1         | 0.7173789 |
| 481 | Bn-A01-p15489266 | A-genome specific (napus-rapa) | 0.9928229    | 0.7487867    | not scorable | not scorable | 0.9669421 | 0.641044  |
| 482 | Bn-A01-p15494260 | A-genome specific (napus-rapa) | 0.9904306    | 0.6933253    | not scorable | not scorable | 0.9917355 | 0.7529789 |
| 483 | Bn-A01-p15494469 | A-genome specific (napus-rapa) | 0.9928229    | 0.5815339    | not scorable | not scorable | 0.9917355 | 0.7235553 |
| 484 | Bn-A01-p15496639 | A-genome specific (napus-rapa) | 0.9880383    | 0.8594449    | not scorable | not scorable | 0.9917355 | 0.8350746 |
| 485 | Bn-A01-p15496772 | A-genome specific (napus-rapa) | 0.9904306    | 0.7802292    | not scorable | not scorable | 0.9834711 | 0.8083651 |
| 486 | Bn-A01-p15497190 | A-genome specific (napus-rapa) | 0.9880383    | 0.7668061    | not scorable | not scorable | 0.9917355 | 0.6968383 |
| 487 | Bn-A01-p15502589 | A-genome specific (napus-rapa) | 0.9880383    | 0.7110991    | not scorable | not scorable | 0.677686  | 0.8436487 |
| 488 | Bn-A01-p1551223  | A-genome specific (napus-rapa) | 0.9856459    | 0.734421     | not scorable | not scorable | 1         | 0.7074836 |
| 489 | Bn-A01-p1551700  | A-genome specific (napus-rapa) | 0.9928229    | 0.7563044    | not scorable | not scorable | 0.9917355 | 0.7815472 |
| 490 | Bn-A01-p15517260 | genome unspecific (all in)     | 0.9976076    | 0.5997657    | 0.9922481    | 0.6040146    | 1         | 0.896279  |
| 491 | Bn-A01-p15519090 | A-genome specific (napus-rapa) | 1            | 0.3679932    | not scorable | not scorable | 0.9917355 | 0.8227494 |
| 492 | Bn-A01-p1551913  | A-genome specific (napus-rapa) | 0.9880383    | 0.6190057    | not scorable | not scorable | 0.9752066 | 0.7421802 |

|     |                  |                                |              |              |              |              |           |           |
|-----|------------------|--------------------------------|--------------|--------------|--------------|--------------|-----------|-----------|
| 493 | Bn-A01-p1556145  | A-genome specific (napus-rapa) | 0.9952153    | 0.7384948    | not scorable | not scorable | 1         | 0.6906948 |
| 494 | Bn-A01-p15568028 | A-genome specific (napus-rapa) | 0.9952153    | 0.6198791    | not scorable | not scorable | 1         | 0.7352715 |
| 495 | Bn-A01-p15695152 | A-genome specific (napus-rapa) | 0.9904306    | 0.5570671    | not scorable | not scorable | 1         | 0.5452222 |
| 496 | Bn-A01-p1570727  | A-genome specific (rapa only)  | not scorable | not scorable | not scorable | not scorable | 0.9669421 | 0.8201513 |
| 497 | Bn-A01-p1570761  | A-genome specific (napus-rapa) | 0.9928229    | 0.7646217    | not scorable | not scorable | 0.9917355 | 0.8193383 |
| 498 | Bn-A01-p1578682  | A-genome specific (napus-rapa) | 0.9784689    | 0.3511277    | not scorable | not scorable | 1         | 0.7929845 |
| 499 | Bn-A01-p1580970  | A-genome specific (napus-rapa) | 0.9952153    | 0.7842332    | not scorable | not scorable | 0.9917355 | 0.7591249 |
| 500 | Bn-A01-p15865197 | A-genome specific (napus-rapa) | 0.9880383    | 0.683064     | not scorable | not scorable | 1         | 0.7001366 |
| 501 | Bn-A01-p15957543 | A-genome specific (napus-rapa) | 0.9928229    | 0.7657695    | not scorable | not scorable | 1         | 0.7300923 |
| 502 | Bn-A01-p159728   | A-genome specific (rapa only)  | not scorable | not scorable | not scorable | not scorable | 0.7272727 | 0.8154013 |
| 503 | Bn-A01-p16015382 | A-genome specific (napus-rapa) | 0.9976076    | 0.3258899    | not scorable | not scorable | 0.9669421 | 0.8871631 |
| 504 | Bn-A01-p1606312  | A-genome specific (napus-rapa) | 0.9856459    | 0.3759683    | not scorable | not scorable | 0.9917355 | 0.6047406 |
| 505 | Bn-A01-p16079153 | A-genome specific (napus-rapa) | 0.9928229    | 0.5610049    | not scorable | not scorable | 1         | 0.8062817 |
| 506 | Bn-A01-p16079370 | A-genome specific (napus-rapa) | 0.9952153    | 0.2868307    | not scorable | not scorable | 0.9834711 | 0.5488765 |
| 507 | Bn-A01-p16086381 | A-genome specific (napus-rapa) | 0.9928229    | 0.7185038    | not scorable | not scorable | 1         | 0.7241637 |
| 508 | Bn-A01-p16088721 | A-genome specific (napus-rapa) | 0.9114832    | 0.7631961    | not scorable | not scorable | 1         | 0.736501  |
| 509 | Bn-A01-p16093558 | A-genome specific (napus-rapa) | 0.9114832    | 0.7679684    | not scorable | not scorable | 0.9917355 | 0.8115    |
| 510 | Bn-A01-p16093901 | A-genome specific (napus-rapa) | 0.9090909    | 0.8021525    | not scorable | not scorable | 0.9834711 | 0.7747257 |
| 511 | Bn-A01-p16094037 | A-genome specific (napus-rapa) | 0.9114832    | 0.9077126    | not scorable | not scorable | 0.9917355 | 0.7579889 |
| 512 | Bn-A01-p16103425 | A-genome specific (napus-rapa) | 0.9114832    | 0.820013     | not scorable | not scorable | 0.9917355 | 0.7282635 |
| 513 | Bn-A01-p16106314 | A-genome specific (napus-rapa) | 0.9904306    | 0.7283542    | not scorable | not scorable | 0.9834711 | 0.7959835 |
| 514 | Bn-A01-p16106372 | A-genome specific (napus-rapa) | 0.9952153    | 0.4838714    | not scorable | not scorable | 1         | 0.8413136 |
| 515 | Bn-A01-p16111263 | A-genome specific (napus-rapa) | 0.9880383    | 0.6492066    | not scorable | not scorable | 0.9917355 | 0.7464206 |
| 516 | Bn-A01-p16121664 | A-genome specific (napus-rapa) | 0.9856459    | 0.699172     | not scorable | not scorable | 1         | 0.6688023 |
| 517 | Bn-A01-p16122923 | A-genome specific (napus-rapa) | 0.9856459    | 0.7803624    | not scorable | not scorable | 0.9834711 | 0.7789334 |
| 518 | Bn-A01-p16123649 | A-genome specific (napus-rapa) | 0.9880383    | 0.6815299    | not scorable | not scorable | 1         | 0.6397638 |
| 519 | Bn-A01-p161237   | A-genome specific (napus-rapa) | 0.9784689    | 0.4650359    | not scorable | not scorable | 0.9834711 | 0.8589982 |
| 520 | Bn-A01-p16127871 | A-genome specific (napus-rapa) | 0.9784689    | 0.655113     | not scorable | not scorable | 0.9834711 | 0.6328713 |
| 521 | Bn-A01-p16128165 | A-genome specific (napus-rapa) | 0.9880383    | 0.6388603    | not scorable | not scorable | 0.9834711 | 0.7871969 |
| 522 | Bn-A01-p16128458 | A-genome specific (napus-rapa) | 0.9832536    | 0.786655     | not scorable | not scorable | 1         | 0.8214581 |
| 523 | Bn-A01-p16131102 | A-genome specific (rapa only)  | not scorable | not scorable | not scorable | not scorable | 1         | 0.5988446 |
| 524 | Bn-A01-p16134540 | A-genome specific (napus-rapa) | 0.9808612    | 0.7730778    | not scorable | not scorable | 1         | 0.8002763 |
| 525 | Bn-A01-p16134838 | A-genome specific (napus-rapa) | 0.9832536    | 0.6728048    | not scorable | not scorable | 0.9917355 | 0.636606  |



|     |                  |                                |              |              |              |              |           |           |
|-----|------------------|--------------------------------|--------------|--------------|--------------|--------------|-----------|-----------|
| 526 | Bn-A01-p16135094 | A-genome specific (napus-rapa) | 0.9856459    | 0.8113371    | not scorable | not scorable | 0.9917355 | 0.8655304 |
| 527 | Bn-A01-p16135537 | A-genome specific (napus-rapa) | 0.9904306    | 0.8074677    | not scorable | not scorable | 0.9834711 | 0.7440563 |
| 528 | Bn-A01-p16138308 | A-genome specific (napus-rapa) | 0.9856459    | 0.7679947    | not scorable | not scorable | 1         | 0.6009578 |
| 529 | Bn-A01-p16142196 | A-genome specific (napus-rapa) | 0.9880383    | 0.7657752    | not scorable | not scorable | 0.9917355 | 0.786679  |
| 530 | Bn-A01-p16150568 | A-genome specific (napus-rapa) | 0.8971292    | 0.798889     | not scorable | not scorable | 0.9669421 | 0.6695432 |
| 531 | Bn-A01-p16173770 | A-genome specific (napus-rapa) | 0.9880383    | 0.7032694    | not scorable | not scorable | 0.9834711 | 0.6449168 |
| 532 | Bn-A01-p16174042 | A-genome specific (napus-rapa) | 0.9904306    | 0.7043581    | not scorable | not scorable | 0.9834711 | 0.6463727 |
| 533 | Bn-A01-p16175909 | A-genome specific (napus-rapa) | 0.8971292    | 0.7245876    | not scorable | not scorable | 0.9834711 | 0.7453458 |
| 534 | Bn-A01-p16181728 | A-genome specific (napus-rapa) | 0.9976076    | 0.6304978    | not scorable | not scorable | 0.9917355 | 0.7008156 |
| 535 | Bn-A01-p16200217 | A-genome specific (napus-rapa) | 0.9904306    | 0.7541463    | not scorable | not scorable | 0.9834711 | 0.7937998 |
| 536 | Bn-A01-p16217917 | A-genome specific (napus-rapa) | 0.9784689    | 0.7738739    | not scorable | not scorable | 0.9917355 | 0.8072308 |
| 537 | Bn-A01-p16220364 | A-genome specific (rapa only)  | not scorable | not scorable | not scorable | not scorable | 0.9586777 | 0.9140136 |
| 538 | Bn-A01-p16221475 | A-genome specific (napus-rapa) | 0.8995215    | 0.7689804    | not scorable | not scorable | 0.9917355 | 0.7176483 |
| 539 | Bn-A01-p16221732 | A-genome specific (napus-rapa) | 0.8995215    | 0.7762688    | not scorable | not scorable | 0.9917355 | 0.7419144 |
| 540 | Bn-A01-p16222086 | A-genome specific (napus-rapa) | 0.9019139    | 0.7806044    | not scorable | not scorable | 0.9917355 | 0.763863  |
| 541 | Bn-A01-p16222098 | A-genome specific (napus-rapa) | 0.8995215    | 0.7847332    | not scorable | not scorable | 0.9752066 | 0.7576745 |
| 542 | Bn-A01-p16222167 | A-genome specific (napus-rapa) | 0.9019139    | 0.7986882    | not scorable | not scorable | 0.9917355 | 0.8212947 |
| 543 | Bn-A01-p16222479 | A-genome specific (napus-rapa) | 0.8971292    | 0.7570435    | not scorable | not scorable | 0.9917355 | 0.8039848 |
| 544 | Bn-A01-p16223356 | A-genome specific (napus-rapa) | 0.9449761    | 0.5053831    | not scorable | not scorable | 0.9834711 | 0.7781911 |
| 545 | Bn-A01-p16228743 | A-genome specific (rapa only)  | not scorable | not scorable | not scorable | not scorable | 1         | 0.7745675 |
| 546 | Bn-A01-p16229096 | A-genome specific (napus-rapa) | 0.9856459    | 0.5102772    | not scorable | not scorable | 1         | 0.785867  |
| 547 | Bn-A01-p16233062 | A-genome specific (napus-rapa) | 0.9904306    | 0.8196404    | not scorable | not scorable | 0.9917355 | 0.7845725 |
| 548 | Bn-A01-p16253463 | A-genome specific (napus-rapa) | 0.9976076    | 0.4026324    | not scorable | not scorable | 0.9834711 | 0.7639982 |
| 549 | Bn-A01-p16257043 | A-genome specific (napus-rapa) | 0.9856459    | 0.7180244    | not scorable | not scorable | 1         | 0.8146579 |
| 550 | Bn-A01-p16260285 | A-genome specific (napus-rapa) | 0.2416268    | 0.7443817    | not scorable | not scorable | 0.9834711 | 0.6711024 |
| 551 | Bn-A01-p16261297 | A-genome specific (napus-rapa) | 0.2416268    | 0.8141596    | not scorable | not scorable | 0.9834711 | 0.7326172 |
| 552 | Bn-A01-p16262292 | A-genome specific (napus-rapa) | 0.2440191    | 0.3077965    | not scorable | not scorable | 0.9752066 | 0.4696523 |
| 553 | Bn-A01-p16276961 | A-genome specific (napus-rapa) | 0.9904306    | 0.7830012    | not scorable | not scorable | 0.9917355 | 0.8340974 |
| 554 | Bn-A01-p16278008 | A-genome specific (napus-rapa) | 0.9952153    | 0.417592     | not scorable | not scorable | 1         | 0.7161466 |
| 555 | Bn-A01-p16303134 | A-genome specific (napus-rapa) | 0.9976076    | 0.4768853    | not scorable | not scorable | 0.9917355 | 0.7695389 |
| 556 | Bn-A01-p16323375 | A-genome specific (napus-rapa) | 1            | 0.9136801    | not scorable | not scorable | 0.9917355 | 0.9063484 |
| 557 | Bn-A01-p16323503 | A-genome specific (napus-rapa) | 1            | 0.8053868    | not scorable | not scorable | 1         | 0.8936522 |
| 558 | Bn-A01-p16324010 | A-genome specific (napus-rapa) | 1            | 0.4965208    | not scorable | not scorable | 0.9917355 | 0.694369  |

|     |                  |                                |              |              |              |              |              |              |              |
|-----|------------------|--------------------------------|--------------|--------------|--------------|--------------|--------------|--------------|--------------|
| 559 | Bn-A01-p1632686  | A-genome specific (napus-rapa) | 0.9952153    | 0.878007     | not scorable | not scorable |              | 1            | 0.8493479    |
| 560 | Bn-A01-p16331424 | A-genome specific (napus-rapa) | 0.9928229    | 0.6178913    | not scorable | not scorable |              | 1            | 0.5856024    |
| 561 | Bn-A01-p16343556 | A-genome specific (napus-rapa) | 0.9832536    | 0.7422501    | not scorable | not scorable | 0.9834711    |              | 0.7504656    |
| 562 | Bn-A01-p16358989 | A-genome specific (napus-rapa) | 0.9856459    | 0.8287114    | not scorable | not scorable | 0.9834711    |              | 0.7684152    |
| 563 | Bn-A01-p16366870 | A-genome specific (rapa only)  | not scorable | not scorable | not scorable | not scorable | 0.9917355    |              | 0.7117968    |
| 564 | Bn-A01-p1637234  | A-genome specific (napus-rapa) | 0.9976076    | 0.8748439    | not scorable | not scorable |              | 1            | 0.8785267    |
| 565 | Bn-A01-p16374068 | A-genome specific (napus-rapa) | 0.9760765    | 0.7339548    | not scorable | not scorable | 0.9834711    |              | 0.6726437    |
| 566 | Bn-A01-p16380496 | A-genome specific (napus-rapa) | 0.9880383    | 0.6769793    | not scorable | not scorable | 0.9917355    |              | 0.6108499    |
| 567 | Bn-A01-p16389291 | A-genome specific (napus-rapa) | 0.9832536    | 0.780506     | not scorable | not scorable | 0.9834711    |              | 0.7797557    |
| 568 | Bn-A01-p16393582 | A-genome specific (napus-rapa) | 1            | 0.9204846    | not scorable | not scorable |              | 1            | 0.7975187    |
| 569 | Bn-A01-p16393856 | genome unspecific (all in)     | 1            | 0.5319276    |              | 1            | 0.3029858    | 1            | 0.565518     |
| 570 | Bn-A01-p16393939 | A-genome specific (rapa only)  | not scorable | not scorable | not scorable | not scorable |              | 1            | 0.9129078    |
| 571 | Bn-A01-p16394111 | A-genome specific (rapa only)  | not scorable | not scorable | not scorable | not scorable |              | 1            | 0.6716551    |
| 572 | Bn-A01-p16396926 | A-genome specific (napus-rapa) | 0.8995215    | 0.7681311    | not scorable | not scorable | 0.9586777    |              | 0.7467767    |
| 573 | Bn-A01-p1639922  | A-genome specific (napus-rapa) | 0.9784689    | 0.9354553    | not scorable | not scorable |              | 1            | 0.7488236    |
| 574 | Bn-A01-p16403023 | A-genome specific (napus-rapa) | 0.8995215    | 0.800343     | not scorable | not scorable | 0.9752066    |              | 0.7980971    |
| 575 | Bn-A01-p16404320 | A-genome specific (napus-rapa) | 0.8588517    | 0.5856859    | not scorable | not scorable |              | 1            | 0.7935664    |
| 576 | Bn-A01-p1641033  | A-genome specific (napus-rapa) | 0.9976076    | 0.3572757    | not scorable | not scorable |              | 1            | 0.6802424    |
| 577 | Bn-A01-p16418499 | A-genome specific (napus-rapa) | 0.9952153    | 0.3521809    | not scorable | not scorable | 0.9917355    |              | 0.7357308    |
| 578 | Bn-A01-p16432946 | A-genome specific (napus-rapa) | 0.9928229    | 0.4925531    | not scorable | not scorable | 0.9917355    |              | 0.7818975    |
| 579 | Bn-A01-p16436191 | A-genome specific (napus-rapa) | 0.9904306    | 0.4915351    | not scorable | not scorable |              | 1            | 0.7461705    |
| 580 | Bn-A01-p16454615 | A-genome specific (napus-rapa) | 0.9904306    | 0.8129848    | not scorable | not scorable |              | 1            | 0.6821043    |
| 581 | Bn-A01-p16455409 | A-genome specific (napus-rapa) | 0.9928229    | 0.4026206    | not scorable | not scorable | 0.9917355    |              | 0.8313449    |
| 582 | Bn-A01-p16461540 | A-genome specific (napus-rapa) | 0.9904306    | 0.7248526    | not scorable | not scorable |              | 1            | 0.86626      |
| 583 | Bn-A01-p16461639 | A-genome specific (napus-rapa) | 0.9880383    | 0.7522252    | not scorable | not scorable |              | 1            | 0.7946908    |
| 584 | Bn-A01-p16472273 | A-genome specific (napus-rapa) | 1            | 0.2862718    | not scorable | not scorable | 0.9834711    |              | 0.7589861    |
| 585 | Bn-A01-p16474128 | A-genome specific (napus-rapa) | 0.2416268    | 0.7374499    | not scorable | not scorable |              | 1            | 0.716747     |
| 586 | Bn-A01-p16476326 | A-genome specific (napus-rapa) | 1            | 0.3284398    | not scorable | not scorable | 0.9834711    |              | 0.6340655    |
| 587 | Bn-A01-p1647693  | all not scorable               | not scorable | not scorable | not scorable | not scorable | not scorable | not scorable | not scorable |
| 588 | Bn-A01-p16512818 | A-genome specific (napus-rapa) | 1            | 0.4885701    | not scorable | not scorable | 0.9917355    |              | 0.5887577    |
| 589 | Bn-A01-p16529313 | A-genome specific (napus-rapa) | 0.9832536    | 0.7733735    | not scorable | not scorable |              | 1            | 0.7356086    |
| 590 | Bn-A01-p16537769 | A-genome specific (napus-rapa) | 0.9928229    | 0.7152212    | not scorable | not scorable | 0.9917355    |              | 0.750037     |
| 591 | Bn-A01-p16537792 | A-genome specific (napus-rapa) | 0.9880383    | 0.8508732    | not scorable | not scorable | 0.9834711    |              | 0.859604     |

|                      |                                |              |              |              |              |              |              |
|----------------------|--------------------------------|--------------|--------------|--------------|--------------|--------------|--------------|
| 592 Bn-A01-p16537866 | A-genome specific (napus-rapa) | 0.9904306    | 0.8043455    | not scorable | not scorable | 0.9834711    | 0.7957188    |
| 593 Bn-A01-p16538323 | A-genome specific (napus-rapa) | 0.9880383    | 0.7855483    | not scorable | not scorable | 0.9834711    | 0.7307933    |
| 594 Bn-A01-p16538587 | A-genome specific (napus-rapa) | 0.9928229    | 0.7088559    | not scorable | not scorable | 0.9917355    | 0.7447251    |
| 595 Bn-A01-p16539250 | A-genome specific (napus-rapa) | 0.9928229    | 0.7540243    | not scorable | not scorable | 0.7024794    | 0.8012853    |
| 596 Bn-A01-p16557636 | A-genome specific (napus-rapa) | 0.9928229    | 0.7834316    | not scorable | not scorable | 1            | 0.787746     |
| 597 Bn-A01-p16571536 | all not scorable               | not scorable | not scorable | not scorable | not scorable | not scorable | not scorable |
| 598 Bn-A01-p16577721 | A-genome specific (napus-rapa) | 0.9832536    | 0.7134266    | not scorable | not scorable | 0.9917355    | 0.7008683    |
| 599 Bn-A01-p16580971 | A-genome specific (napus-rapa) | 1            | 0.3964088    | not scorable | not scorable | 0.9834711    | 0.6908677    |
| 600 Bn-A01-p16597123 | napus specific                 | 0.9880383    | 0.784229     | not scorable | not scorable | not scorable | not scorable |
| 601 Bn-A01-p16598652 | A-genome specific (napus-rapa) | 0.9928229    | 0.5979915    | not scorable | not scorable | 0.9669421    | 0.6860338    |
| 602 Bn-A01-p1661180  | A-genome specific (napus-rapa) | 0.9880383    | 0.8044863    | not scorable | not scorable | 0.9917355    | 0.7934247    |
| 603 Bn-A01-p16627043 | A-genome specific (napus-rapa) | 0.8995215    | 0.6405609    | not scorable | not scorable | 0.9917355    | 0.6457112    |
| 604 Bn-A01-p16630613 | A-genome specific (napus-rapa) | 0.9928229    | 0.3531196    | not scorable | not scorable | 0.9917355    | 0.7367932    |
| 605 Bn-A01-p16646241 | A-genome specific (napus-rapa) | 0.9760765    | 0.7370559    | not scorable | not scorable | 0.9752066    | 0.7813773    |
| 606 Bn-A01-p16656886 | napus specific                 | 0.9904306    | 0.3866979    | not scorable | not scorable | not scorable | not scorable |
| 607 Bn-A01-p16662544 | A-genome specific (napus-rapa) | 0.9880383    | 0.8032884    | not scorable | not scorable | 0.9752066    | 0.8668666    |
| 608 Bn-A01-p16665014 | A-genome specific (napus-rapa) | 0.9880383    | 0.5387177    | not scorable | not scorable | 0.9917355    | 0.6877334    |
| 609 Bn-A01-p16665036 | A-genome specific (napus-rapa) | 0.9856459    | 0.6043679    | not scorable | not scorable | 1            | 0.6807325    |
| 610 Bn-A01-p1666732  | A-genome specific (napus-rapa) | 0.9880383    | 0.7702525    | not scorable | not scorable | 0.661157     | 0.8177667    |
| 611 Bn-A01-p16669142 | A-genome specific (napus-rapa) | 1            | 0.5099291    | not scorable | not scorable | 0.9834711    | 0.7565833    |
| 612 Bn-A01-p16692819 | A-genome specific (napus-rapa) | 0.9928229    | 0.5488218    | not scorable | not scorable | 0.9834711    | 0.6984584    |
| 613 Bn-A01-p16692959 | A-genome specific (napus-rapa) | 0.9880383    | 0.567459     | not scorable | not scorable | 0.9917355    | 0.5289788    |
| 614 Bn-A01-p16694394 | A-genome specific (napus-rapa) | 0.9904306    | 0.6589631    | not scorable | not scorable | 0.9669421    | 0.7750105    |
| 615 Bn-A01-p16705936 | A-genome specific (napus-rapa) | 0.9976076    | 0.3731414    | not scorable | not scorable | 1            | 0.7746196    |
| 616 Bn-A01-p16711121 | A-genome specific (napus-rapa) | 0.9904306    | 0.8257817    | not scorable | not scorable | 0.9834711    | 0.7851875    |
| 617 Bn-A01-p16715637 | A-genome specific (napus-rapa) | 0.9904306    | 0.5700925    | not scorable | not scorable | 0.9834711    | 0.6775176    |
| 618 Bn-A01-p16717957 | A-genome specific (napus-rapa) | 1            | 0.425095     | not scorable | not scorable | 0.9917355    | 0.7935309    |
| 619 Bn-A01-p16720365 | A-genome specific (napus-rapa) | 0.9928229    | 0.4854914    | not scorable | not scorable | 1            | 0.8328984    |
| 620 Bn-A01-p16730334 | A-genome specific (napus-rapa) | 0.9736842    | 0.6023037    | not scorable | not scorable | 0.9834711    | 0.7142143    |
| 621 Bn-A01-p16749946 | A-genome specific (napus-rapa) | 0.9904306    | 0.5913548    | not scorable | not scorable | 1            | 0.8864269    |
| 622 Bn-A01-p16749951 | A-genome specific (napus-rapa) | 0.9904306    | 0.7618225    | not scorable | not scorable | 1            | 0.71694      |
| 623 Bn-A01-p16770716 | A-genome specific (napus-rapa) | 0.9976076    | 0.61774      | not scorable | not scorable | 0.9586777    | 0.7752942    |
| 624 Bn-A01-p16774157 | A-genome specific (napus-rapa) | 0.9904306    | 0.7051504    | not scorable | not scorable | 0.9917355    | 0.8027504    |

|                      |                                |              |              |              |              |           |           |
|----------------------|--------------------------------|--------------|--------------|--------------|--------------|-----------|-----------|
| 625 Bn-A01-p1678541  | A-genome specific (napus-rapa) | 0.9808612    | 0.817511     | not scorable | not scorable | 0.9917355 | 0.7182372 |
| 626 Bn-A01-p16829363 | A-genome specific (napus-rapa) | 0.9904306    | 0.6778446    | not scorable | not scorable | 1         | 0.7358214 |
| 627 Bn-A01-p1684485  | A-genome specific (napus-rapa) | 0.9928229    | 0.3096772    | not scorable | not scorable | 0.9917355 | 0.7501307 |
| 628 Bn-A01-p16847535 | A-genome specific (napus-rapa) | 0.9904306    | 0.7494892    | not scorable | not scorable | 0.9834711 | 0.6201832 |
| 629 Bn-A01-p16857183 | A-genome specific (rapa only)  | not scorable | not scorable | not scorable | not scorable | 0.9834711 | 0.6362481 |
| 630 Bn-A01-p16857466 | A-genome specific (napus-rapa) | 0.9904306    | 0.812416     | not scorable | not scorable | 1         | 0.7273348 |
| 631 Bn-A01-p16869474 | A-genome specific (napus-rapa) | 0.7894737    | 0.7016385    | not scorable | not scorable | 0.9669421 | 0.6944501 |
| 632 Bn-A01-p16893578 | A-genome specific (napus-rapa) | 0.9976076    | 0.7652619    | not scorable | not scorable | 0.9917355 | 0.6816649 |
| 633 Bn-A01-p16911720 | A-genome specific (napus-rapa) | 0.9904306    | 0.7678972    | not scorable | not scorable | 0.9752066 | 0.8552126 |
| 634 Bn-A01-p16926592 | A-genome specific (napus-rapa) | 0.9808612    | 0.7393218    | not scorable | not scorable | 0.9917355 | 0.7746066 |
| 635 Bn-A01-p16935031 | A-genome specific (napus-rapa) | 0.9832536    | 0.3404019    | not scorable | not scorable | 0.9834711 | 0.7814434 |
| 636 Bn-A01-p16943370 | A-genome specific (napus-rapa) | 0.9880383    | 0.5710623    | not scorable | not scorable | 0.9917355 | 0.7750006 |
| 637 Bn-A01-p16951655 | A-genome specific (napus-rapa) | 0.9784689    | 0.7569799    | not scorable | not scorable | 0.9917355 | 0.8329853 |
| 638 Bn-A01-p16994459 | A-genome specific (napus-rapa) | 0.9880383    | 0.7282444    | not scorable | not scorable | 1         | 0.7173322 |
| 639 Bn-A01-p16997658 | A-genome specific (napus-rapa) | 0.9880383    | 0.5147389    | not scorable | not scorable | 0.9917355 | 0.7850258 |
| 640 Bn-A01-p17015383 | A-genome specific (napus-rapa) | 0.9952153    | 0.6912148    | not scorable | not scorable | 1         | 0.7097523 |
| 641 Bn-A01-p17036109 | A-genome specific (napus-rapa) | 0.9904306    | 0.3477275    | not scorable | not scorable | 0.9834711 | 0.7767258 |
| 642 Bn-A01-p17040457 | A-genome specific (napus-rapa) | 0.9952153    | 0.7442024    | not scorable | not scorable | 1         | 0.8760849 |
| 643 Bn-A01-p17049439 | A-genome specific (napus-rapa) | 0.9880383    | 0.8556809    | not scorable | not scorable | 1         | 0.7719007 |
| 644 Bn-A01-p17050461 | A-genome specific (napus-rapa) | 0.9856459    | 0.6832667    | not scorable | not scorable | 0.9917355 | 0.6741931 |
| 645 Bn-A01-p17050843 | A-genome specific (rapa only)  | not scorable | not scorable | not scorable | not scorable | 1         | 0.8403057 |
| 646 Bn-A01-p17052809 | A-genome specific (rapa only)  | not scorable | not scorable | not scorable | not scorable | 1         | 0.8387069 |
| 647 Bn-A01-p17081120 | A-genome specific (napus-rapa) | 0.9760765    | 0.7639223    | not scorable | not scorable | 0.9917355 | 0.8948524 |
| 648 Bn-A01-p17081703 | A-genome specific (napus-rapa) | 0.9593301    | 0.2894594    | not scorable | not scorable | 1         | 0.7197731 |
| 649 Bn-A01-p17097891 | A-genome specific (napus-rapa) | 0.9952153    | 0.6623596    | not scorable | not scorable | 1         | 0.6990979 |
| 650 Bn-A01-p17104282 | A-genome specific (napus-rapa) | 0.9688995    | 0.6718576    | not scorable | not scorable | 1         | 0.6820723 |
| 651 Bn-A01-p17105194 | A-genome specific (napus-rapa) | 0.9856459    | 0.7155052    | not scorable | not scorable | 1         | 0.6876032 |
| 652 Bn-A01-p17105372 | A-genome specific (napus-rapa) | 0.9784689    | 0.7416512    | not scorable | not scorable | 1         | 0.7899162 |
| 653 Bn-A01-p17105672 | A-genome specific (napus-rapa) | 0.9784689    | 0.7499294    | not scorable | not scorable | 1         | 0.8204867 |
| 654 Bn-A01-p17106985 | A-genome specific (napus-rapa) | 0.9665072    | 0.7396958    | not scorable | not scorable | 0.9917355 | 0.7168478 |
| 655 Bn-A01-p17110860 | A-genome specific (rapa only)  | not scorable | not scorable | not scorable | not scorable | 0.9173554 | 0.7018179 |
| 656 Bn-A01-p17118647 | A-genome specific (napus-rapa) | 0.9736842    | 0.5511296    | not scorable | not scorable | 0.9834711 | 0.7015873 |
| 657 Bn-A01-p17118839 | A-genome specific (napus-rapa) | 0.9784689    | 0.7481247    | not scorable | not scorable | 1         | 0.7686127 |

|                      |                                |              |              |              |              |              |              |
|----------------------|--------------------------------|--------------|--------------|--------------|--------------|--------------|--------------|
| 658 Bn-A01-p17119024 | A-genome specific (napus-rapa) | 0.9641148    | 0.7682443    | not scorable | not scorable | 0.9834711    | 0.8368103    |
| 659 Bn-A01-p17119126 | all not scorable               | not scorable | not scorable | not scorable | not scorable | not scorable | not scorable |
| 660 Bn-A01-p17121291 | A-genome specific (napus-rapa) | 0.9808612    | 0.7791226    | not scorable | not scorable | 0.9834711    | 0.7744188    |
| 661 Bn-A01-p17121775 | A-genome specific (napus-rapa) | 0.9665072    | 0.7750316    | not scorable | not scorable | 1            | 0.8301167    |
| 662 Bn-A01-p17121894 | A-genome specific (napus-rapa) | 0.9856459    | 0.7478482    | not scorable | not scorable | 0.9834711    | 0.8058835    |
| 663 Bn-A01-p17124558 | A-genome specific (napus-rapa) | 0.9784689    | 0.6160161    | not scorable | not scorable | 0.9917355    | 0.6343466    |
| 664 Bn-A01-p17124831 | A-genome specific (napus-rapa) | 0.9928229    | 0.7052152    | not scorable | not scorable | 0.9917355    | 0.7005992    |
| 665 Bn-A01-p17129906 | A-genome specific (napus-rapa) | 0.9760765    | 0.6670837    | not scorable | not scorable | 1            | 0.7983007    |
| 666 Bn-A01-p17136539 | A-genome specific (napus-rapa) | 0.8923445    | 0.6854421    | not scorable | not scorable | 0.9917355    | 0.7781309    |
| 667 Bn-A01-p17137863 | A-genome specific (napus-rapa) | 0.8875598    | 0.6679348    | not scorable | not scorable | 0.9834711    | 0.7010527    |
| 668 Bn-A01-p17150604 | napus specific                 | 0.9808612    | 0.7554874    | not scorable | not scorable | not scorable | not scorable |
| 669 Bn-A01-p17150875 | A-genome specific (napus-rapa) | 0.9904306    | 0.7777652    | not scorable | not scorable | 0.9834711    | 0.7707326    |
| 670 Bn-A01-p17156534 | A-genome specific (napus-rapa) | 0.9688995    | 0.7575676    | not scorable | not scorable | 0.9752066    | 0.704819     |
| 671 Bn-A01-p17157752 | A-genome specific (napus-rapa) | 0.9808612    | 0.7880577    | not scorable | not scorable | 0.9752066    | 0.6911551    |
| 672 Bn-A01-p17159109 | A-genome specific (napus-rapa) | 0.9760765    | 0.7516333    | not scorable | not scorable | 0.9917355    | 0.8127504    |
| 673 Bn-A01-p17160355 | A-genome specific (napus-rapa) | 0.9784689    | 0.7126247    | not scorable | not scorable | 0.9752066    | 0.6938723    |
| 674 Bn-A01-p17165052 | A-genome specific (napus-rapa) | 0.9593301    | 0.7211581    | not scorable | not scorable | 0.9752066    | 0.6923501    |
| 675 Bn-A01-p17165303 | A-genome specific (napus-rapa) | 0.9641148    | 0.7933876    | not scorable | not scorable | 0.9504132    | 0.7812968    |
| 676 Bn-A01-p17174111 | A-genome specific (napus-rapa) | 0.9090909    | 0.7931235    | not scorable | not scorable | 1            | 0.5289788    |
| 677 Bn-A01-p17187327 | A-genome specific (napus-rapa) | 0.9856459    | 0.7135414    | not scorable | not scorable | 0.9917355    | 0.8220242    |
| 678 Bn-A01-p1719658  | A-genome specific (napus-rapa) | 1            | 0.3501566    | not scorable | not scorable | 1            | 0.7568442    |
| 679 Bn-A01-p17216088 | A-genome specific (napus-rapa) | 0.9808612    | 0.6870565    | not scorable | not scorable | 1            | 0.633431     |
| 680 Bn-A01-p17216237 | A-genome specific (napus-rapa) | 0.9832536    | 0.8189083    | not scorable | not scorable | 0.9917355    | 0.7715991    |
| 681 Bn-A01-p17242218 | A-genome specific (napus-rapa) | 0.9976076    | 0.2425291    | not scorable | not scorable | 0.9917355    | 0.7018273    |
| 682 Bn-A01-p17258931 | A-genome specific (napus-rapa) | 0.9856459    | 0.644659     | not scorable | not scorable | 0.9917355    | 0.6937487    |
| 683 Bn-A01-p17271891 | A-genome specific (napus-rapa) | 0.9784689    | 0.7648455    | not scorable | not scorable | 0.9669421    | 0.7456536    |
| 684 Bn-A01-p17278340 | A-genome specific (napus-rapa) | 0.9904306    | 0.738239     | not scorable | not scorable | 1            | 0.7485788    |
| 685 Bn-A01-p17283208 | A-genome specific (napus-rapa) | 0.9928229    | 0.783596     | not scorable | not scorable | 0.9421487    | 0.8526646    |
| 686 Bn-A01-p17294955 | A-genome specific (napus-rapa) | 0.9904306    | 0.7997325    | not scorable | not scorable | 0.9834711    | 0.8220457    |
| 687 Bn-A01-p17295156 | A-genome specific (napus-rapa) | 0.9808612    | 0.7977918    | not scorable | not scorable | 1            | 0.8592536    |
| 688 Bn-A01-p17296147 | A-genome specific (napus-rapa) | 0.9904306    | 0.3554254    | not scorable | not scorable | 0.9834711    | 0.9116107    |
| 689 Bn-A01-p17306980 | A-genome specific (napus-rapa) | 0.9784689    | 0.4418235    | not scorable | not scorable | 0.9752066    | 0.9363571    |
| 690 Bn-A01-p17315519 | A-genome specific (napus-rapa) | 0.9880383    | 0.405986     | not scorable | not scorable | 1            | 0.8662788    |

|                      |                                   |              |              |              |              |           |           |
|----------------------|-----------------------------------|--------------|--------------|--------------|--------------|-----------|-----------|
| 691 Bn-A01-p17326645 | A-genome specific (napus-rapa)    | 0.9904306    | 0.5211549    | not scorable | not scorable | 0.9917355 | 0.7663043 |
| 692 Bn-A01-p17377721 | A-genome specific (napus-rapa)    | 0.9832536    | 0.6599445    | not scorable | not scorable | 1         | 0.7731497 |
| 693 Bn-A01-p17382168 | A-genome specific (napus-rapa)    | 0.9976076    | 0.5330813    | not scorable | not scorable | 0.9834711 | 0.7722343 |
| 694 Bn-A01-p17408107 | A-genome specific (napus-rapa)    | 0.9952153    | 0.6183806    | not scorable | not scorable | 0.9752066 | 0.7215518 |
| 695 Bn-A01-p17428120 | A-genome specific (napus-rapa)    | 0.9928229    | 0.7673422    | not scorable | not scorable | 1         | 0.8026747 |
| 696 Bn-A01-p1742846  | A-genome specific (napus-rapa)    | 0.9952153    | 0.7960058    | not scorable | not scorable | 0.9917355 | 0.879678  |
| 697 Bn-A01-p17432814 | A-genome specific (napus-rapa)    | 0.9712918    | 0.6890628    | not scorable | not scorable | 1         | 0.7437273 |
| 698 Bn-A01-p17434748 | A-genome specific (napus-rapa)    | 0.9928229    | 0.404459     | not scorable | not scorable | 1         | 0.6807756 |
| 699 Bn-A01-p17437603 | A-genome specific (napus-rapa)    | 0.9880383    | 0.801483     | not scorable | not scorable | 1         | 0.8362373 |
| 700 Bn-A01-p17438645 | A-genome specific (napus-rapa)    | 0.9880383    | 0.8329412    | not scorable | not scorable | 1         | 0.7834038 |
| 701 Bn-A01-p17445392 | A-genome specific (napus-rapa)    | 0.9808612    | 0.7143654    | not scorable | not scorable | 0.9917355 | 0.6885723 |
| 702 Bn-A01-p1745099  | A-genome specific (napus-rapa)    | 0.9186603    | 0.389883     | not scorable | not scorable | 1         | 0.7660935 |
| 703 Bn-A01-p1746226  | A-genome specific (napus-rapa)    | 0.9784689    | 0.3277761    | not scorable | not scorable | 1         | 0.8191469 |
| 704 Bn-A01-p17476240 | A-genome specific (napus-rapa)    | 0.9808612    | 0.5461645    | not scorable | not scorable | 0.9917355 | 0.8413854 |
| 705 Bn-A01-p17480096 | A-genome specific (napus-rapa)    | 0.9856459    | 0.7888386    | not scorable | not scorable | 0.9669421 | 0.8617895 |
| 706 Bn-A01-p17481703 | A-genome specific (napus-rapa)    | 0.9832536    | 0.7608973    | not scorable | not scorable | 0.9917355 | 0.7823467 |
| 707 Bn-A01-p17481804 | A-genome specific (napus-rapa)    | 0.9928229    | 0.7337267    | not scorable | not scorable | 0.9669421 | 0.6711696 |
| 708 Bn-A01-p17482037 | A-genome specific (napus-rapa)    | 0.9952153    | 0.6714442    | not scorable | not scorable | 0.9917355 | 0.7055385 |
| 709 Bn-A01-p17483006 | A-genome specific (napus-rapa)    | 0.9880383    | 0.7622485    | not scorable | not scorable | 0.9834711 | 0.701647  |
| 710 Bn-A01-p17492348 | genome unspecific (all in)        | 0.9736842    | 0.4429394    |              | 1 0.6910578  | 1         | 0.7721856 |
| 711 Bn-A01-p17494364 | A-genome specific (napus-rapa)    | 0.9784689    | 0.7601151    | not scorable | not scorable | 0.7024794 | 0.8565337 |
| 712 Bn-A01-p17498057 | A-genome specific (napus-rapa)    | 0.9976076    | 0.7821545    | not scorable | not scorable | 0.9586777 | 0.8342802 |
| 713 Bn-A01-p17506817 | A-genome specific (napus-rapa)    | 0.9928229    | 0.7875162    | not scorable | not scorable | 1         | 0.7955745 |
| 714 Bn-A01-p17518104 | A-genome specific (napus-rapa)    | 0.9928229    | 0.6490927    | not scorable | not scorable | 0.9834711 | 0.5204863 |
| 715 Bn-A01-p17518305 | A-genome specific (napus-rapa)    | 0.9760765    | 0.7707673    | not scorable | not scorable | 1         | 0.7829878 |
| 716 Bn-A01-p17518468 | A-genome specific (napus-rapa)    | 0.9880383    | 0.8095683    | not scorable | not scorable | 0.9752066 | 0.6595996 |
| 717 Bn-A01-p17527782 | A-genome specific (napus-rapa)    | 0.9760765    | 0.7562634    | not scorable | not scorable | 1         | 0.7369925 |
| 718 Bn-A01-p17535899 | genome unspecific (oleracea-rapa) | not scorable | not scorable | 0.9689922    | 0.1840074    | 0.9834711 | 0.6616288 |
| 719 Bn-A01-p17536754 | A-genome specific (napus-rapa)    | 0.9401914    | 0.2811816    | not scorable | not scorable | 0.9669421 | 0.6946872 |
| 720 Bn-A01-p17548021 | A-genome specific (napus-rapa)    | 0.9760765    | 0.4789921    | not scorable | not scorable | 0.9586777 | 0.5041517 |
| 721 Bn-A01-p17548227 | A-genome specific (napus-rapa)    | 0.9760765    | 0.654238     | not scorable | not scorable | 0.9752066 | 0.7411684 |
| 722 Bn-A01-p17549137 | genome unspecific (all in)        | 1            | 0.4609133    |              | 1 0.7753507  | 1         | 0.9087456 |
| 723 Bn-A01-p17550125 | genome unspecific (all in)        | 0.9976076    | 0.431604     | 0.9922481    | 0.6535215    | 0.7107438 | 0.8948976 |

|                      |                                |              |              |              |              |              |              |
|----------------------|--------------------------------|--------------|--------------|--------------|--------------|--------------|--------------|
| 724 Bn-A01-p17550588 | A-genome specific (napus-rapa) | 0.9952153    | 0.5061523    | not scorable | not scorable | 0.9834711    | 0.7631577    |
| 725 Bn-A01-p17552389 | A-genome specific (napus-rapa) | 0.9952153    | 0.5914578    | not scorable | not scorable | 1            | 0.7386726    |
| 726 Bn-A01-p17553462 | A-genome specific (napus-rapa) | 0.9856459    | 0.7288255    | not scorable | not scorable | 0.9834711    | 0.7968372    |
| 727 Bn-A01-p17555906 | A-genome specific (napus-rapa) | 0.9856459    | 0.7726346    | not scorable | not scorable | 0.9669421    | 0.7372245    |
| 728 Bn-A01-p17565834 | A-genome specific (napus-rapa) | 0.9904306    | 0.7580767    | not scorable | not scorable | 0.9834711    | 0.7330833    |
| 729 Bn-A01-p17574483 | A-genome specific (napus-rapa) | 0.9832536    | 0.8022539    | not scorable | not scorable | 0.9917355    | 0.7579209    |
| 730 Bn-A01-p17577426 | A-genome specific (napus-rapa) | 0.9928229    | 0.2949226    | not scorable | not scorable | 0.9834711    | 0.5145421    |
| 731 Bn-A01-p17577903 | napus specific                 | 0.9904306    | 0.4289759    | not scorable | not scorable | not scorable | not scorable |
| 732 Bn-A01-p17578169 | A-genome specific (napus-rapa) | 0.9808612    | 0.2543724    | not scorable | not scorable | 0.9834711    | 0.3464498    |
| 733 Bn-A01-p176052   | A-genome specific (napus-rapa) | 0.9784689    | 0.4352709    | not scorable | not scorable | 1            | 0.9171203    |
| 734 Bn-A01-p17625721 | A-genome specific (napus-rapa) | 0.9712918    | 0.6404186    | not scorable | not scorable | 0.9752066    | 0.7461996    |
| 735 Bn-A01-p17626052 | A-genome specific (napus-rapa) | 0.9688995    | 0.7650398    | not scorable | not scorable | 0.9834711    | 0.6583885    |
| 736 Bn-A01-p17629571 | A-genome specific (napus-rapa) | 0.9641148    | 0.4197555    | not scorable | not scorable | 0.9917355    | 0.8258931    |
| 737 Bn-A01-p17629628 | A-genome specific (napus-rapa) | 0.9856459    | 0.7722364    | not scorable | not scorable | 0.9669421    | 0.7829692    |
| 738 Bn-A01-p17636122 | A-genome specific (rapa only)  | not scorable | not scorable | not scorable | not scorable | 0.9834711    | 0.8589982    |
| 739 Bn-A01-p17649002 | A-genome specific (napus-rapa) | 0.9976076    | 0.7422687    | not scorable | not scorable | 0.9917355    | 0.6844832    |
| 740 Bn-A01-p17677926 | A-genome specific (napus-rapa) | 0.9928229    | 0.306643     | not scorable | not scorable | 0.9752066    | 0.6886397    |
| 741 Bn-A01-p1768443  | A-genome specific (napus-rapa) | 0.9976076    | 0.5107654    | not scorable | not scorable | 1            | 0.7844037    |
| 742 Bn-A01-p17691799 | A-genome specific (napus-rapa) | 0.9808612    | 0.5229204    | not scorable | not scorable | 0.9834711    | 0.6625265    |
| 743 Bn-A01-p17693439 | A-genome specific (napus-rapa) | 0.9904306    | 0.823651     | not scorable | not scorable | 0.9834711    | 0.6941054    |
| 744 Bn-A01-p17696068 | A-genome specific (napus-rapa) | 1            | 0.7668517    | not scorable | not scorable | 1            | 0.8554994    |
| 745 Bn-A01-p17696358 | A-genome specific (napus-rapa) | 0.9880383    | 0.272892     | not scorable | not scorable | 1            | 0.4697423    |
| 746 Bn-A01-p1770291  | A-genome specific (napus-rapa) | 0.9952153    | 0.7055102    | not scorable | not scorable | 1            | 0.7542719    |
| 747 Bn-A01-p1770482  | A-genome specific (napus-rapa) | 0.9928229    | 0.7919643    | not scorable | not scorable | 0.9917355    | 0.7914497    |
| 748 Bn-A01-p17714021 | A-genome specific (napus-rapa) | 0.9856459    | 0.4330999    | not scorable | not scorable | 0.9834711    | 0.7611402    |
| 749 Bn-A01-p17716773 | A-genome specific (napus-rapa) | 0.9904306    | 0.731729     | not scorable | not scorable | 0.9834711    | 0.6709678    |
| 750 Bn-A01-p17717864 | A-genome specific (napus-rapa) | 0.9880383    | 0.752753     | not scorable | not scorable | 0.9752066    | 0.7137238    |
| 751 Bn-A01-p1772621  | A-genome specific (napus-rapa) | 0.9952153    | 0.7768759    | not scorable | not scorable | 0.9917355    | 0.724595     |
| 752 Bn-A01-p17728772 | A-genome specific (napus-rapa) | 0.9928229    | 0.8093067    | not scorable | not scorable | 0.9917355    | 0.6986303    |
| 753 Bn-A01-p17730468 | A-genome specific (napus-rapa) | 0.9928229    | 0.7961984    | not scorable | not scorable | 0.9752066    | 0.8658577    |
| 754 Bn-A01-p1773289  | A-genome specific (napus-rapa) | 0.9952153    | 0.7264529    | not scorable | not scorable | 0.9834711    | 0.7228026    |
| 755 Bn-A01-p17751647 | A-genome specific (napus-rapa) | 1            | 0.7246113    | not scorable | not scorable | 0.9917355    | 0.6953586    |
| 756 Bn-A01-p17755236 | A-genome specific (napus-rapa) | 0.9928229    | 0.5117599    | not scorable | not scorable | 1            | 0.7929777    |

|                      |                                |              |              |              |              |           |           |
|----------------------|--------------------------------|--------------|--------------|--------------|--------------|-----------|-----------|
| 757 Bn-A01-p17769742 | A-genome specific (napus-rapa) | 0.9952153    | 0.7658806    | not scorable | not scorable | 0.9917355 | 0.8323468 |
| 758 Bn-A01-p17771411 | A-genome specific (napus-rapa) | 0.9856459    | 0.7975176    | not scorable | not scorable | 0.9917355 | 0.7378754 |
| 759 Bn-A01-p17783808 | A-genome specific (napus-rapa) | 0.8923445    | 0.7792401    | not scorable | not scorable | 0.8264463 | 0.9501473 |
| 760 Bn-A01-p17783900 | A-genome specific (napus-rapa) | 0.8923445    | 0.7557725    | not scorable | not scorable | 0.8429752 | 0.8259932 |
| 761 Bn-A01-p17787446 | A-genome specific (napus-rapa) | 0.8899522    | 0.7335814    | not scorable | not scorable | 0.6694215 | 0.7373936 |
| 762 Bn-A01-p17806607 | A-genome specific (napus-rapa) | 0.9043062    | 0.7967382    | not scorable | not scorable | 0.677686  | 0.8546116 |
| 763 Bn-A01-p17820874 | A-genome specific (napus-rapa) | 0.9641148    | 0.6722628    | not scorable | not scorable | 0.9834711 | 0.5141634 |
| 764 Bn-A01-p17839637 | A-genome specific (napus-rapa) | 0.9928229    | 0.787922     | not scorable | not scorable | 1         | 0.7804823 |
| 765 Bn-A01-p17845660 | A-genome specific (rapa only)  | not scorable | not scorable | not scorable | not scorable | 0.9586777 | 0.3844747 |
| 766 Bn-A01-p17849675 | A-genome specific (napus-rapa) | 0.9880383    | 0.7981772    | not scorable | not scorable | 0.9834711 | 0.6551153 |
| 767 Bn-A01-p178709   | A-genome specific (napus-rapa) | 0.9760765    | 0.6352564    | not scorable | not scorable | 0.9752066 | 0.649575  |
| 768 Bn-A01-p17881348 | A-genome specific (napus-rapa) | 0.9952153    | 0.73558      | not scorable | not scorable | 0.9917355 | 0.7549964 |
| 769 Bn-A01-p17885385 | A-genome specific (napus-rapa) | 0.9928229    | 0.7649127    | not scorable | not scorable | 0.9834711 | 0.7332052 |
| 770 Bn-A01-p17885812 | A-genome specific (napus-rapa) | 0.9784689    | 0.4682631    | not scorable | not scorable | 1         | 0.8203393 |
| 771 Bn-A01-p17886123 | A-genome specific (napus-rapa) | 0.9952153    | 0.7823653    | not scorable | not scorable | 0.9917355 | 0.8887201 |
| 772 Bn-A01-p17886595 | A-genome specific (napus-rapa) | 0.9904306    | 0.7056537    | not scorable | not scorable | 0.9834711 | 0.7402385 |
| 773 Bn-A01-p17887135 | A-genome specific (napus-rapa) | 0.9904306    | 0.807008     | not scorable | not scorable | 1         | 0.7553928 |
| 774 Bn-A01-p17887214 | A-genome specific (napus-rapa) | 0.9928229    | 0.7506796    | not scorable | not scorable | 1         | 0.7937827 |
| 775 Bn-A01-p17887935 | A-genome specific (napus-rapa) | 0.9880383    | 0.8086185    | not scorable | not scorable | 0.9917355 | 0.8238699 |
| 776 Bn-A01-p17888905 | A-genome specific (napus-rapa) | 0.9952153    | 0.8036841    | not scorable | not scorable | 1         | 0.7830911 |
| 777 Bn-A01-p17892299 | A-genome specific (napus-rapa) | 0.9808612    | 0.7417711    | not scorable | not scorable | 0.9834711 | 0.7635936 |
| 778 Bn-A01-p17899781 | A-genome specific (napus-rapa) | 0.9976076    | 0.6888735    | not scorable | not scorable | 0.9752066 | 0.811487  |
| 779 Bn-A01-p17905950 | A-genome specific (napus-rapa) | 0.9904306    | 0.7740884    | not scorable | not scorable | 0.9834711 | 0.8723322 |
| 780 Bn-A01-p17906322 | A-genome specific (napus-rapa) | 0.9760765    | 0.6116692    | not scorable | not scorable | 0.9834711 | 0.7694179 |
| 781 Bn-A01-p17906399 | A-genome specific (napus-rapa) | 0.9856459    | 0.7592572    | not scorable | not scorable | 0.9834711 | 0.7615721 |
| 782 Bn-A01-p17906765 | A-genome specific (napus-rapa) | 0.9904306    | 0.7874       | not scorable | not scorable | 1         | 0.827272  |
| 783 Bn-A01-p17907059 | A-genome specific (napus-rapa) | 0.9760765    | 0.67416      | not scorable | not scorable | 0.9834711 | 0.7752387 |
| 784 Bn-A01-p17907563 | A-genome specific (napus-rapa) | 0.9832536    | 0.7567583    | not scorable | not scorable | 0.9917355 | 0.812967  |
| 785 Bn-A01-p17910798 | A-genome specific (napus-rapa) | 0.9928229    | 0.6571036    | not scorable | not scorable | 0.9917355 | 0.8096161 |
| 786 Bn-A01-p17911199 | A-genome specific (napus-rapa) | 0.9904306    | 0.4846343    | not scorable | not scorable | 0.9917355 | 0.7983863 |
| 787 Bn-A01-p17911921 | A-genome specific (napus-rapa) | 0.9928229    | 0.3981737    | not scorable | not scorable | 0.9917355 | 0.7845946 |
| 788 Bn-A01-p17916004 | A-genome specific (napus-rapa) | 0.9928229    | 0.790007     | not scorable | not scorable | 1         | 0.7759329 |
| 789 Bn-A01-p17930058 | A-genome specific (napus-rapa) | 0.9808612    | 0.6466267    | not scorable | not scorable | 0.9834711 | 0.8730558 |



|                      |                                |              |              |              |              |              |              |
|----------------------|--------------------------------|--------------|--------------|--------------|--------------|--------------|--------------|
| 790 Bn-A01-p17931128 | A-genome specific (napus-rapa) | 0.9832536    | 0.6534733    | not scorable | not scorable | 1            | 0.7493571    |
| 791 Bn-A01-p17935219 | A-genome specific (napus-rapa) | 0.9880383    | 0.7043811    | not scorable | not scorable | 0.9917355    | 0.7096606    |
| 792 Bn-A01-p1793928  | A-genome specific (napus-rapa) | 0.4330144    | 0.7249883    | not scorable | not scorable | 1            | 0.8639467    |
| 793 Bn-A01-p17941441 | napus specific                 | 0.9162679    | 0.6844801    | not scorable | not scorable | not scorable | not scorable |
| 794 Bn-A01-p17997441 | A-genome specific (napus-rapa) | 0.9832536    | 0.7872486    | not scorable | not scorable | 1            | 0.7409858    |
| 795 Bn-A01-p17998573 | A-genome specific (napus-rapa) | 0.9784689    | 0.7373443    | not scorable | not scorable | 0.6942149    | 0.6990501    |
| 796 Bn-A01-p18006188 | A-genome specific (napus-rapa) | 0.9928229    | 0.8265212    | not scorable | not scorable | 1            | 0.811202     |
| 797 Bn-A01-p18008659 | A-genome specific (napus-rapa) | 0.9904306    | 0.3946294    | not scorable | not scorable | 0.9917355    | 0.7861206    |
| 798 Bn-A01-p18014946 | A-genome specific (napus-rapa) | 0.9928229    | 0.8300089    | not scorable | not scorable | 1            | 0.7501816    |
| 799 Bn-A01-p18015006 | A-genome specific (napus-rapa) | 0.9904306    | 0.6797619    | not scorable | not scorable | 1            | 0.7415134    |
| 800 Bn-A01-p18015162 | A-genome specific (napus-rapa) | 0.9880383    | 0.6277282    | not scorable | not scorable | 1            | 0.6875441    |
| 801 Bn-A01-p18015323 | A-genome specific (napus-rapa) | 0.284689     | 0.7125275    | not scorable | not scorable | 0.9834711    | 0.7640899    |
| 802 Bn-A01-p18019641 | A-genome specific (napus-rapa) | 0.9952153    | 0.6560127    | not scorable | not scorable | 1            | 0.6691702    |
| 803 Bn-A01-p18020258 | A-genome specific (napus-rapa) | 0.9952153    | 0.7839074    | not scorable | not scorable | 1            | 0.7293375    |
| 804 Bn-A01-p18020314 | A-genome specific (napus-rapa) | 0.9904306    | 0.7788019    | not scorable | not scorable | 1            | 0.719255     |
| 805 Bn-A01-p18020503 | A-genome specific (napus-rapa) | 0.9904306    | 0.7913567    | not scorable | not scorable | 1            | 0.6985102    |
| 806 Bn-A01-p18023959 | A-genome specific (napus-rapa) | 0.9832536    | 0.7964001    | not scorable | not scorable | 1            | 0.7600434    |
| 807 Bn-A01-p18025382 | A-genome specific (rapa only)  | not scorable | not scorable | not scorable | not scorable | 1            | 0.8509145    |
| 808 Bn-A01-p18025988 | A-genome specific (napus-rapa) | 0.9808612    | 0.6371223    | not scorable | not scorable | 1            | 0.8545972    |
| 809 Bn-A01-p18027200 | A-genome specific (napus-rapa) | 0.9904306    | 0.811421     | not scorable | not scorable | 1            | 0.6716869    |
| 810 Bn-A01-p18027307 | A-genome specific (napus-rapa) | 0.9928229    | 0.7706072    | not scorable | not scorable | 1            | 0.7900006    |
| 811 Bn-A01-p18027398 | A-genome specific (napus-rapa) | 0.9904306    | 0.7966785    | not scorable | not scorable | 1            | 0.8003525    |
| 812 Bn-A01-p18028380 | A-genome specific (napus-rapa) | 0.9904306    | 0.8077947    | not scorable | not scorable | 0.9917355    | 0.7173789    |
| 813 Bn-A01-p18028483 | A-genome specific (napus-rapa) | 0.9904306    | 0.7106894    | not scorable | not scorable | 1            | 0.7746665    |
| 814 Bn-A01-p18030126 | A-genome specific (napus-rapa) | 0.9952153    | 0.7719436    | not scorable | not scorable | 1            | 0.8747157    |
| 815 Bn-A01-p18032386 | A-genome specific (napus-rapa) | 0.9856459    | 0.781758     | not scorable | not scorable | 0.9917355    | 0.8777807    |
| 816 Bn-A01-p18053077 | A-genome specific (napus-rapa) | 0.9928229    | 0.7944798    | not scorable | not scorable | 1            | 0.7239156    |
| 817 Bn-A01-p18063416 | A-genome specific (napus-rapa) | 0.9976076    | 0.3871094    | not scorable | not scorable | 0.9917355    | 0.8083651    |
| 818 Bn-A01-p18072231 | A-genome specific (napus-rapa) | 0.8157895    | 0.5525681    | not scorable | not scorable | 0.9752066    | 0.7569818    |
| 819 Bn-A01-p18072667 | all not scorable               | not scorable | not scorable | not scorable | not scorable | not scorable | not scorable |
| 820 Bn-A01-p18073544 | A-genome specific (napus-rapa) | 0.9976076    | 0.8440844    | not scorable | not scorable | 1            | 0.7946706    |
| 821 Bn-A01-p18078718 | A-genome specific (napus-rapa) | 0.9832536    | 0.7190431    | not scorable | not scorable | 1            | 0.7069076    |
| 822 Bn-A01-p18084128 | A-genome specific (napus-rapa) | 0.8110048    | 0.7533848    | not scorable | not scorable | 0.9669421    | 0.8233715    |

|                      |                                   |              |              |              |              |           |           |
|----------------------|-----------------------------------|--------------|--------------|--------------|--------------|-----------|-----------|
| 823 Bn-A01-p18091225 | A-genome specific (napus-rapa)    | 0.8253589    | 0.781181     | not scorable | not scorable | 0.9752066 | 0.7819396 |
| 824 Bn-A01-p18091559 | A-genome specific (napus-rapa)    | 0.8277512    | 0.7534589    | not scorable | not scorable | 0.9752066 | 0.7929583 |
| 825 Bn-A01-p18091996 | A-genome specific (napus-rapa)    | 0.8157895    | 0.7131996    | not scorable | not scorable | 0.9669421 | 0.7044402 |
| 826 Bn-A01-p18091997 | A-genome specific (napus-rapa)    | 0.9880383    | 0.6160438    | not scorable | not scorable | 1         | 0.6266667 |
| 827 Bn-A01-p18096974 | A-genome specific (napus-rapa)    | 0.9736842    | 0.7334434    | not scorable | not scorable | 0.9917355 | 0.8129012 |
| 828 Bn-A01-p18100900 | A-genome specific (napus-rapa)    | 0.9832536    | 0.7256022    | not scorable | not scorable | 0.9834711 | 0.8351194 |
| 829 Bn-A01-p18102632 | A-genome specific (napus-rapa)    | 0.9210526    | 0.6826652    | not scorable | not scorable | 0.7024794 | 0.8514571 |
| 830 Bn-A01-p18102711 | A-genome specific (napus-rapa)    | 0.9162679    | 0.734462     | not scorable | not scorable | 0.7107438 | 0.7791697 |
| 831 Bn-A01-p18119989 | A-genome specific (napus-rapa)    | 0.9832536    | 0.7077435    | not scorable | not scorable | 0.9917355 | 0.7442268 |
| 832 Bn-A01-p18121827 | A-genome specific (napus-rapa)    | 0.9880383    | 0.7357628    | not scorable | not scorable | 0.9834711 | 0.8058633 |
| 833 Bn-A01-p18124795 | A-genome specific (napus-rapa)    | 0.9641148    | 0.4797145    | not scorable | not scorable | 0.9834711 | 0.665405  |
| 834 Bn-A01-p18160311 | A-genome specific (napus-rapa)    | 0.9090909    | 0.7251902    | not scorable | not scorable | 0.6859504 | 0.7432426 |
| 835 Bn-A01-p18178802 | A-genome specific (napus-rapa)    | 0.9832536    | 0.7011608    | not scorable | not scorable | 0.9917355 | 0.6487134 |
| 836 Bn-A01-p18182766 | A-genome specific (napus-rapa)    | 0.9904306    | 0.455505     | not scorable | not scorable | 1         | 0.7793339 |
| 837 Bn-A01-p18197352 | A-genome specific (napus-rapa)    | 0.9760765    | 0.5295266    | not scorable | not scorable | 1         | 0.7870198 |
| 838 Bn-A01-p18200921 | A-genome specific (napus-rapa)    | 0.9928229    | 0.8013641    | not scorable | not scorable | 0.9917355 | 0.6954973 |
| 839 Bn-A01-p18205455 | A-genome specific (napus-rapa)    | 0.9832536    | 0.8144378    | not scorable | not scorable | 0.9917355 | 0.7042676 |
| 840 Bn-A01-p18218629 | A-genome specific (napus-rapa)    | 0.8133971    | 0.8604687    | not scorable | not scorable | 0.892562  | 0.7958575 |
| 841 Bn-A01-p18230629 | A-genome specific (napus-rapa)    | 0.9784689    | 0.409407     | not scorable | not scorable | 0.9834711 | 0.7828593 |
| 842 Bn-A01-p1823705  | A-genome specific (napus-rapa)    | 0.9928229    | 0.6776361    | not scorable | not scorable | 0.9834711 | 0.6932496 |
| 843 Bn-A01-p18240444 | genome unspecific (oleracea-rapa) | not scorable | not scorable | 0.8992248    | 0.7777816    | 0.9421487 | 0.8071821 |
| 844 Bn-A01-p18260283 | A-genome specific (napus-rapa)    | 0.9880383    | 0.6948167    | not scorable | not scorable | 0.9917355 | 0.7927071 |
| 845 Bn-A01-p18266537 | A-genome specific (napus-rapa)    | 0.9569378    | 0.7025238    | not scorable | not scorable | 0.9752066 | 0.7452602 |
| 846 Bn-A01-p18285077 | A-genome specific (napus-rapa)    | 0.9976076    | 0.6315592    | not scorable | not scorable | 1         | 0.8335571 |
| 847 Bn-A01-p18306617 | A-genome specific (napus-rapa)    | 0.9760765    | 0.5190143    | not scorable | not scorable | 0.9917355 | 0.7201776 |
| 848 Bn-A01-p1831507  | A-genome specific (napus-rapa)    | 0.8564593    | 0.6942256    | not scorable | not scorable | 0.9917355 | 0.725321  |
| 849 Bn-A01-p18327940 | A-genome specific (napus-rapa)    | 0.9617225    | 0.3242286    | not scorable | not scorable | 1         | 0.7448562 |
| 850 Bn-A01-p18329609 | A-genome specific (napus-rapa)    | 0.9521531    | 0.5385139    | not scorable | not scorable | 0.9834711 | 0.7768234 |
| 851 Bn-A01-p18329689 | A-genome specific (napus-rapa)    | 0.9808612    | 0.794782     | not scorable | not scorable | 0.9917355 | 0.7565959 |
| 852 Bn-A01-p18329796 | A-genome specific (napus-rapa)    | 0.9736842    | 0.7488375    | not scorable | not scorable | 0.9752066 | 0.6893721 |
| 853 Bn-A01-p18330598 | A-genome specific (napus-rapa)    | 0.9856459    | 0.7238232    | not scorable | not scorable | 0.9917355 | 0.7127189 |
| 854 Bn-A01-p18367467 | A-genome specific (napus-rapa)    | 0.9784689    | 0.2853943    | not scorable | not scorable | 0.9917355 | 0.7983629 |
| 855 Bn-A01-p18383994 | A-genome specific (napus-rapa)    | 0.9784689    | 0.3066712    | not scorable | not scorable | 1         | 0.8416427 |

|                      |                                |              |              |              |              |              |              |
|----------------------|--------------------------------|--------------|--------------|--------------|--------------|--------------|--------------|
| 856 Bn-A01-p1838960  | A-genome specific (napus-rapa) | 0.9904306    | 0.4762939    | not scorable | not scorable | 0.9834711    | 0.7456536    |
| 857 Bn-A01-p18391341 | A-genome specific (napus-rapa) | 0.9760765    | 0.5622629    | not scorable | not scorable | 0.9090909    | 0.7507448    |
| 858 Bn-A01-p1842079  | genome unspecific (all in)     | 0.9856459    | 0.585894     | 1            | 0.8213499    | 0.9834711    | 0.8713034    |
| 859 Bn-A01-p1842658  | A-genome specific (napus-rapa) | 0.9952153    | 0.2699037    | not scorable | not scorable | 0.9917355    | 0.7442436    |
| 860 Bn-A01-p18435876 | A-genome specific (napus-rapa) | 0.9760765    | 0.4218654    | not scorable | not scorable | 0.9917355    | 0.6071299    |
| 861 Bn-A01-p18438154 | A-genome specific (rapa only)  | not scorable | not scorable | not scorable | not scorable | 1            | 0.7322186    |
| 862 Bn-A01-p1855903  | A-genome specific (napus-rapa) | 0.9928229    | 0.787994     | not scorable | not scorable | 0.9834711    | 0.7341285    |
| 863 Bn-A01-p1858279  | A-genome specific (napus-rapa) | 0.923445     | 0.6676201    | not scorable | not scorable | 1            | 0.9156699    |
| 864 Bn-A01-p1859204  | genome unspecific (all in)     | 0.9186603    | 0.215144     | 0.9844961    | 0.4183614    | 0.9917355    | 0.8931121    |
| 865 Bn-A01-p18612031 | A-genome specific (napus-rapa) | 0.9880383    | 0.7805707    | not scorable | not scorable | 1            | 0.7260014    |
| 866 Bn-A01-p18635245 | A-genome specific (napus-rapa) | 0.9928229    | 0.656462     | not scorable | not scorable | 0.9917355    | 0.6712978    |
| 867 Bn-A01-p18635275 | A-genome specific (napus-rapa) | 0.9832536    | 0.7189415    | not scorable | not scorable | 1            | 0.6488666    |
| 868 Bn-A01-p18635430 | A-genome specific (napus-rapa) | 0.9976076    | 0.7476389    | not scorable | not scorable | 0.9917355    | 0.8074325    |
| 869 Bn-A01-p18635517 | napus specific                 | 0.9904306    | 0.5992392    | not scorable | not scorable | not scorable | not scorable |
| 870 Bn-A01-p18636804 | A-genome specific (napus-rapa) | 0.9880383    | 0.7262247    | not scorable | not scorable | 0.9917355    | 0.8057707    |
| 871 Bn-A01-p18639615 | A-genome specific (napus-rapa) | 0.9856459    | 0.7036929    | not scorable | not scorable | 0.9834711    | 0.7545809    |
| 872 Bn-A01-p1864705  | A-genome specific (napus-rapa) | 0.9832536    | 0.6450518    | not scorable | not scorable | 1            | 0.8141319    |
| 873 Bn-A01-p18662925 | A-genome specific (napus-rapa) | 0.9856459    | 0.7046435    | not scorable | not scorable | 1            | 0.8694528    |
| 874 Bn-A01-p18672984 | A-genome specific (napus-rapa) | 0.9904306    | 0.8026987    | not scorable | not scorable | 0.9752066    | 0.8181344    |
| 875 Bn-A01-p18673020 | A-genome specific (napus-rapa) | 0.9736842    | 0.5364887    | not scorable | not scorable | 0.9834711    | 0.7820559    |
| 876 Bn-A01-p18676639 | A-genome specific (napus-rapa) | 0.9952153    | 0.6584688    | not scorable | not scorable | 0.9752066    | 0.7819791    |
| 877 Bn-A01-p18691000 | A-genome specific (napus-rapa) | 0.9832536    | 0.7947907    | not scorable | not scorable | 1            | 0.8460613    |
| 878 Bn-A01-p18691142 | A-genome specific (napus-rapa) | 0.9904306    | 0.6689628    | not scorable | not scorable | 1            | 0.8731641    |
| 879 Bn-A01-p18692022 | A-genome specific (napus-rapa) | 0.9880383    | 0.687549     | not scorable | not scorable | 1            | 0.7885991    |
| 880 Bn-A01-p18692229 | A-genome specific (napus-rapa) | 0.9928229    | 0.7333393    | not scorable | not scorable | 0.9917355    | 0.7818957    |
| 881 Bn-A01-p18692686 | A-genome specific (napus-rapa) | 0.9928229    | 0.7528501    | not scorable | not scorable | 0.9752066    | 0.7499897    |
| 882 Bn-A01-p18694130 | A-genome specific (napus-rapa) | 0.9904306    | 0.5919966    | not scorable | not scorable | 1            | 0.9240721    |
| 883 Bn-A01-p18702163 | A-genome specific (napus-rapa) | 0.9928229    | 0.3885471    | not scorable | not scorable | 1            | 0.724835     |
| 884 Bn-A01-p18703183 | A-genome specific (napus-rapa) | 0.9928229    | 0.7347363    | not scorable | not scorable | 0.9752066    | 0.7189662    |
| 885 Bn-A01-p18703922 | A-genome specific (napus-rapa) | 0.9712918    | 0.7245755    | not scorable | not scorable | 0.9834711    | 0.8092477    |
| 886 Bn-A01-p18704205 | A-genome specific (napus-rapa) | 0.9760765    | 0.6896244    | not scorable | not scorable | 0.9669421    | 0.6764028    |
| 887 Bn-A01-p18704834 | A-genome specific (napus-rapa) | 0.9712918    | 0.6059431    | not scorable | not scorable | 0.9669421    | 0.578228     |
| 888 Bn-A01-p18705556 | A-genome specific (napus-rapa) | 1            | 0.6986961    | not scorable | not scorable | 1            | 0.7063369    |

|     |                  |                                |              |              |              |              |              |              |
|-----|------------------|--------------------------------|--------------|--------------|--------------|--------------|--------------|--------------|
| 889 | Bn-A01-p18706337 | A-genome specific (napus-rapa) | 0.9904306    | 0.6432931    | not scorable | not scorable | 1            | 0.7174482    |
| 890 | Bn-A01-p18711867 | A-genome specific (napus-rapa) | 0.9760765    | 0.3873529    | not scorable | not scorable | 0.9752066    | 0.7682264    |
| 891 | Bn-A01-p18714050 | A-genome specific (napus-rapa) | 0.9641148    | 0.3656378    | not scorable | not scorable | 0.9669421    | 0.4078181    |
| 892 | Bn-A01-p18714119 | A-genome specific (napus-rapa) | 0.9760765    | 0.3217244    | not scorable | not scorable | 0.9256198    | 0.4200652    |
| 893 | Bn-A01-p18714182 | A-genome specific (napus-rapa) | 0.9760765    | 0.4828098    | not scorable | not scorable | 1            | 0.2942531    |
| 894 | Bn-A01-p18715909 | napus specific                 | 0.9832536    | 0.7322287    | not scorable | not scorable | not scorable | not scorable |
| 895 | Bn-A01-p18716258 | A-genome specific (rapa only)  | not scorable | not scorable | not scorable | not scorable | 0.9834711    | 0.8782422    |
| 896 | Bn-A01-p18727458 | A-genome specific (napus-rapa) | 0.9928229    | 0.5058958    | not scorable | not scorable | 0.9917355    | 0.7904691    |
| 897 | Bn-A01-p18734383 | A-genome specific (napus-rapa) | 0.9832536    | 0.7749346    | not scorable | not scorable | 1            | 0.9458289    |
| 898 | Bn-A01-p18739675 | A-genome specific (napus-rapa) | 0.9952153    | 0.7848468    | not scorable | not scorable | 0.9917355    | 0.6813199    |
| 899 | Bn-A01-p1879401  | A-genome specific (napus-rapa) | 0.9712918    | 0.7648847    | not scorable | not scorable | 0.9834711    | 0.6770404    |
| 900 | Bn-A01-p1880406  | A-genome specific (napus-rapa) | 0.9593301    | 0.8138466    | not scorable | not scorable | 0.9917355    | 0.7954207    |
| 901 | Bn-A01-p18813615 | A-genome specific (napus-rapa) | 0.9880383    | 0.3614313    | not scorable | not scorable | 0.9917355    | 0.7286923    |
| 902 | Bn-A01-p18813849 | A-genome specific (napus-rapa) | 0.9856459    | 0.2387568    | not scorable | not scorable | 0.9834711    | 0.6608431    |
| 903 | Bn-A01-p18826838 | A-genome specific (napus-rapa) | 0.645933     | 0.8575372    | not scorable | not scorable | 0.9917355    | 0.826878     |
| 904 | Bn-A01-p18826928 | A-genome specific (rapa only)  | not scorable | not scorable | not scorable | not scorable | 0.9834711    | 0.8090869    |
| 905 | Bn-A01-p18827383 | A-genome specific (rapa only)  | not scorable | not scorable | not scorable | not scorable | 0.9917355    | 0.7033091    |
| 906 | Bn-A01-p18828028 | A-genome specific (rapa only)  | not scorable | not scorable | not scorable | not scorable | 0.9917355    | 0.7750772    |
| 907 | Bn-A01-p18828081 | A-genome specific (napus-rapa) | 0.6578947    | 0.6999833    | not scorable | not scorable | 0.9917355    | 0.7311981    |
| 908 | Bn-A01-p18828505 | A-genome specific (napus-rapa) | 0.6435407    | 0.8080457    | not scorable | not scorable | 0.9917355    | 0.6930169    |
| 909 | Bn-A01-p18835025 | A-genome specific (napus-rapa) | 0.9928229    | 0.69782      | not scorable | not scorable | 0.9917355    | 0.6723409    |
| 910 | Bn-A01-p18837660 | A-genome specific (rapa only)  | not scorable | not scorable | not scorable | not scorable | 0.9917355    | 0.8218932    |
| 911 | Bn-A01-p18850969 | A-genome specific (napus-rapa) | 0.9808612    | 0.4367225    | not scorable | not scorable | 0.9917355    | 0.6786802    |
| 912 | Bn-A01-p18866149 | A-genome specific (rapa only)  | not scorable | not scorable | not scorable | not scorable | 0.9752066    | 0.7313379    |
| 913 | Bn-A01-p18870174 | A-genome specific (napus-rapa) | 0.9928229    | 0.6610835    | not scorable | not scorable | 0.9669421    | 0.7008046    |
| 914 | Bn-A01-p18876940 | A-genome specific (napus-rapa) | 0.9784689    | 0.6623287    | not scorable | not scorable | 0.9834711    | 0.7647851    |
| 915 | Bn-A01-p18881723 | A-genome specific (napus-rapa) | 0.9880383    | 0.4945321    | not scorable | not scorable | 0.9669421    | 0.7037584    |
| 916 | Bn-A01-p18882626 | A-genome specific (napus-rapa) | 0.9401914    | 0.6798978    | not scorable | not scorable | 0.9669421    | 0.6893647    |
| 917 | Bn-A01-p18890238 | A-genome specific (napus-rapa) | 0.9736842    | 0.6502059    | not scorable | not scorable | 0.9834711    | 0.7107322    |
| 918 | Bn-A01-p18894627 | A-genome specific (napus-rapa) | 0.9904306    | 0.5921113    | not scorable | not scorable | 0.9752066    | 0.7936412    |
| 919 | Bn-A01-p18896245 | A-genome specific (napus-rapa) | 0.9138756    | 0.7407206    | not scorable | not scorable | 0.9834711    | 0.7608529    |
| 920 | Bn-A01-p1890102  | A-genome specific (napus-rapa) | 0.9784689    | 0.6894891    | not scorable | not scorable | 1            | 0.8045743    |
| 921 | Bn-A01-p18902391 | A-genome specific (napus-rapa) | 0.9976076    | 0.773557     | not scorable | not scorable | 0.9752066    | 0.7193771    |

|     |                  |                                    |              |              |              |              |              |              |
|-----|------------------|------------------------------------|--------------|--------------|--------------|--------------|--------------|--------------|
| 922 | Bn-A01-p18914107 | C-genome specific (napus-oleracea) | 0.9856459    | 0.2657087    | 0.9302326    | 0.2311522    | not scorable | not scorable |
| 923 | Bn-A01-p18914763 | A-genome specific (napus-rapa)     | 1            | 0.9396719    | not scorable | not scorable | 1            | 0.8294522    |
| 924 | Bn-A01-p18917698 | A-genome specific (napus-rapa)     | 0.9928229    | 0.7933979    | not scorable | not scorable | 0.9834711    | 0.7172196    |
| 925 | Bn-A01-p19097875 | A-genome specific (napus-rapa)     | 0.9880383    | 0.5141646    | not scorable | not scorable | 0.9834711    | 0.7519721    |
| 926 | Bn-A01-p19098195 | A-genome specific (napus-rapa)     | 0.9976076    | 0.782424     | not scorable | not scorable | 0.9917355    | 0.7093671    |
| 927 | Bn-A01-p19098776 | A-genome specific (napus-rapa)     | 0.9880383    | 0.7726154    | not scorable | not scorable | 0.9834711    | 0.7545089    |
| 928 | Bn-A01-p19107003 | A-genome specific (napus-rapa)     | 0.9832536    | 0.8005287    | not scorable | not scorable | 0.9834711    | 0.733486     |
| 929 | Bn-A01-p19107198 | A-genome specific (napus-rapa)     | 0.9904306    | 0.7871521    | not scorable | not scorable | 0.9752066    | 0.7154981    |
| 930 | Bn-A01-p19107773 | A-genome specific (napus-rapa)     | 0.9832536    | 0.7488924    | not scorable | not scorable | 0.9504132    | 0.8055305    |
| 931 | Bn-A01-p19108439 | A-genome specific (napus-rapa)     | 0.9904306    | 0.7670153    | not scorable | not scorable | 0.9752066    | 0.6991875    |
| 932 | Bn-A01-p19108743 | A-genome specific (napus-rapa)     | 0.9952153    | 0.7104266    | not scorable | not scorable | 0.9834711    | 0.7913313    |
| 933 | Bn-A01-p19108849 | A-genome specific (napus-rapa)     | 0.9952153    | 0.8007604    | not scorable | not scorable | 0.9917355    | 0.7845291    |
| 934 | Bn-A01-p19110384 | A-genome specific (napus-rapa)     | 0.9880383    | 0.7701765    | not scorable | not scorable | 0.9834711    | 0.7314096    |
| 935 | Bn-A01-p19110508 | A-genome specific (napus-rapa)     | 0.9904306    | 0.7509905    | not scorable | not scorable | 0.9834711    | 0.7531759    |
| 936 | Bn-A01-p19110596 | A-genome specific (rapa only)      | not scorable | not scorable | not scorable | not scorable | 0.9834711    | 0.8929924    |
| 937 | Bn-A01-p19111246 | A-genome specific (napus-rapa)     | 0.9784689    | 0.7507916    | not scorable | not scorable | 0.9834711    | 0.7382591    |
| 938 | Bn-A01-p19111305 | A-genome specific (napus-rapa)     | 0.9880383    | 0.8098382    | not scorable | not scorable | 0.9834711    | 0.8127406    |
| 939 | Bn-A01-p19114969 | A-genome specific (napus-rapa)     | 0.9928229    | 0.8036723    | not scorable | not scorable | 0.9917355    | 0.810369     |
| 940 | Bn-A01-p19115021 | A-genome specific (napus-rapa)     | 0.9880383    | 0.8156418    | not scorable | not scorable | 0.9834711    | 0.8177392    |
| 941 | Bn-A01-p19115242 | A-genome specific (napus-rapa)     | 0.9952153    | 0.7833368    | not scorable | not scorable | 0.9586777    | 0.8200111    |
| 942 | Bn-A01-p19115530 | A-genome specific (napus-rapa)     | 0.9736842    | 0.764879     | not scorable | not scorable | 0.9834711    | 0.7498007    |
| 943 | Bn-A01-p19115872 | A-genome specific (napus-rapa)     | 0.9976076    | 0.8009316    | not scorable | not scorable | 0.9834711    | 0.8135641    |
| 944 | Bn-A01-p19116006 | A-genome specific (napus-rapa)     | 0.9952153    | 0.7864987    | not scorable | not scorable | 0.9834711    | 0.7867858    |
| 945 | Bn-A01-p19116819 | A-genome specific (napus-rapa)     | 0.9904306    | 0.7181495    | not scorable | not scorable | 0.9917355    | 0.7238413    |
| 946 | Bn-A01-p19122048 | A-genome specific (napus-rapa)     | 0.9760765    | 0.7708241    | not scorable | not scorable | 0.9586777    | 0.8079948    |
| 947 | Bn-A01-p19125668 | A-genome specific (napus-rapa)     | 0.9760765    | 0.7078291    | not scorable | not scorable | 0.9586777    | 0.6816537    |
| 948 | Bn-A01-p19132144 | A-genome specific (napus-rapa)     | 0.9880383    | 0.6337997    | not scorable | not scorable | 1            | 0.7944537    |
| 949 | Bn-A01-p19139637 | genome unspecific (all in)         | 0.9760765    | 0.6100909    | 1            | 0.5891986    | 0.9669421    | 0.7987592    |
| 950 | Bn-A01-p19150923 | A-genome specific (napus-rapa)     | 0.9880383    | 0.7907714    | not scorable | not scorable | 0.9917355    | 0.8049241    |
| 951 | Bn-A01-p19153919 | A-genome specific (napus-rapa)     | 0.9808612    | 0.7549415    | not scorable | not scorable | 0.9752066    | 0.7238413    |
| 952 | Bn-A01-p19156177 | A-genome specific (napus-rapa)     | 0.9736842    | 0.7111392    | not scorable | not scorable | 1            | 0.7988512    |
| 953 | Bn-A01-p19158271 | A-genome specific (napus-rapa)     | 0.9928229    | 0.7292264    | not scorable | not scorable | 1            | 0.7299778    |
| 954 | Bn-A01-p19158362 | A-genome specific (napus-rapa)     | 0.9952153    | 0.7194334    | not scorable | not scorable | 1            | 0.7325492    |

|                      |                                |              |              |              |              |           |           |
|----------------------|--------------------------------|--------------|--------------|--------------|--------------|-----------|-----------|
| 955 Bn-A01-p19162993 | A-genome specific (napus-rapa) | 0.9976076    | 0.479274     | not scorable | not scorable | 1         | 0.8552678 |
| 956 Bn-A01-p19163275 | A-genome specific (napus-rapa) | 0.9880383    | 0.5024969    | not scorable | not scorable | 0.9917355 | 0.7194584 |
| 957 Bn-A01-p19170760 | A-genome specific (napus-rapa) | 0.9856459    | 0.5509182    | not scorable | not scorable | 0.9917355 | 0.7876227 |
| 958 Bn-A01-p19174115 | A-genome specific (napus-rapa) | 0.9976076    | 0.7440745    | not scorable | not scorable | 1         | 0.7571859 |
| 959 Bn-A01-p1917414  | A-genome specific (napus-rapa) | 1            | 0.8339194    | not scorable | not scorable | 1         | 0.8020645 |
| 960 Bn-A01-p19185181 | A-genome specific (napus-rapa) | 0.9928229    | 0.7770296    | not scorable | not scorable | 1         | 0.8544614 |
| 961 Bn-A01-p19220693 | A-genome specific (napus-rapa) | 0.9736842    | 0.7194408    | not scorable | not scorable | 1         | 0.7635936 |
| 962 Bn-A01-p19283108 | A-genome specific (napus-rapa) | 0.9976076    | 0.7200807    | not scorable | not scorable | 1         | 0.768926  |
| 963 Bn-A01-p1929982  | A-genome specific (napus-rapa) | 0.9880383    | 0.5810862    | not scorable | not scorable | 1         | 0.6965786 |
| 964 Bn-A01-p1930111  | A-genome specific (napus-rapa) | 1            | 0.5229401    | not scorable | not scorable | 1         | 0.768311  |
| 965 Bn-A01-p19340658 | A-genome specific (napus-rapa) | 0.9952153    | 0.7972027    | not scorable | not scorable | 1         | 0.9414077 |
| 966 Bn-A01-p19355180 | A-genome specific (napus-rapa) | 0.9976076    | 0.3478079    | not scorable | not scorable | 1         | 0.6606453 |
| 967 Bn-A01-p19446599 | A-genome specific (napus-rapa) | 0.9760765    | 0.5129727    | not scorable | not scorable | 1         | 0.8975873 |
| 968 Bn-A01-p19447794 | A-genome specific (napus-rapa) | 0.9856459    | 0.2713615    | not scorable | not scorable | 1         | 0.8273389 |
| 969 Bn-A01-p19449612 | A-genome specific (napus-rapa) | 0.9952153    | 0.8004653    | not scorable | not scorable | 0.9917355 | 0.7587818 |
| 970 Bn-A01-p19498222 | A-genome specific (napus-rapa) | 0.9832536    | 0.3593376    | not scorable | not scorable | 0.9834711 | 0.7025349 |
| 971 Bn-A01-p19512499 | A-genome specific (napus-rapa) | 0.9928229    | 0.4705554    | not scorable | not scorable | 0.9917355 | 0.6777889 |
| 972 Bn-A01-p1951988  | A-genome specific (napus-rapa) | 0.9114832    | 0.5675307    | not scorable | not scorable | 0.9834711 | 0.5431461 |
| 973 Bn-A01-p195253   | A-genome specific (napus-rapa) | 0.9904306    | 0.7094556    | not scorable | not scorable | 1         | 0.7093971 |
| 974 Bn-A01-p19525594 | A-genome specific (napus-rapa) | 0.9832536    | 0.4937035    | not scorable | not scorable | 0.9917355 | 0.6975186 |
| 975 Bn-A01-p19527588 | A-genome specific (napus-rapa) | 0.9928229    | 0.526689     | not scorable | not scorable | 1         | 0.8165209 |
| 976 Bn-A01-p19528388 | A-genome specific (napus-rapa) | 0.9665072    | 0.681171     | not scorable | not scorable | 0.9917355 | 0.6935953 |
| 977 Bn-A01-p19533568 | A-genome specific (napus-rapa) | 0.9856459    | 0.4676928    | not scorable | not scorable | 0.9917355 | 0.6338909 |
| 978 Bn-A01-p19535456 | A-genome specific (rapa only)  | not scorable | not scorable | not scorable | not scorable | 0.7107438 | 0.9041291 |
| 979 Bn-A01-p19540960 | A-genome specific (napus-rapa) | 0.9928229    | 0.5603268    | not scorable | not scorable | 1         | 0.8396539 |
| 980 Bn-A01-p19562202 | A-genome specific (napus-rapa) | 0.9928229    | 0.3951175    | not scorable | not scorable | 1         | 0.8226761 |
| 981 Bn-A01-p19564015 | A-genome specific (napus-rapa) | 0.9928229    | 0.6966766    | not scorable | not scorable | 1         | 0.7777089 |
| 982 Bn-A01-p19567680 | A-genome specific (rapa only)  | not scorable | not scorable | not scorable | not scorable | 1         | 0.785926  |
| 983 Bn-A01-p19577901 | A-genome specific (napus-rapa) | 0.9976076    | 0.5612255    | not scorable | not scorable | 1         | 0.7961764 |
| 984 Bn-A01-p19579243 | A-genome specific (napus-rapa) | 0.9066986    | 0.749384     | not scorable | not scorable | 0.9834711 | 0.7030711 |
| 985 Bn-A01-p19579412 | A-genome specific (napus-rapa) | 0.9880383    | 0.6988412    | not scorable | not scorable | 1         | 0.716031  |
| 986 Bn-A01-p19581862 | A-genome specific (napus-rapa) | 0.9641148    | 0.7853197    | not scorable | not scorable | 0.9834711 | 0.7918388 |
| 987 Bn-A01-p19582940 | A-genome specific (napus-rapa) | 0.9832536    | 0.8202503    | not scorable | not scorable | 0.9917355 | 0.7567395 |

|                       |                                |              |              |              |              |              |              |
|-----------------------|--------------------------------|--------------|--------------|--------------|--------------|--------------|--------------|
| 988 Bn-A01-p19583367  | A-genome specific (napus-rapa) | 0.9880383    | 0.8262744    | not scorable | not scorable | 0.9834711    | 0.747709     |
| 989 Bn-A01-p19583736  | A-genome specific (napus-rapa) | 0.9856459    | 0.5869185    | not scorable | not scorable | 1            | 0.8125831    |
| 990 Bn-A01-p19589837  | A-genome specific (napus-rapa) | 0.9928229    | 0.8125619    | not scorable | not scorable | 0.9834711    | 0.7501816    |
| 991 Bn-A01-p19589921  | A-genome specific (napus-rapa) | 0.9928229    | 0.8076128    | not scorable | not scorable | 1            | 0.7784025    |
| 992 Bn-A01-p19592804  | A-genome specific (napus-rapa) | 0.9784689    | 0.8402614    | not scorable | not scorable | 0.9834711    | 0.7235413    |
| 993 Bn-A01-p19593638  | all not scorable               | not scorable | not scorable | not scorable | not scorable | not scorable | not scorable |
| 994 Bn-A01-p19593702  | napus specific                 | 0.9856459    | 0.6717374    | not scorable | not scorable | not scorable | not scorable |
| 995 Bn-A01-p19594423  | A-genome specific (napus-rapa) | 0.9832536    | 0.801175     | not scorable | not scorable | 0.9917355    | 0.7040766    |
| 996 Bn-A01-p19598162  | napus specific                 | 0.9784689    | 0.301473     | not scorable | not scorable | not scorable | not scorable |
| 997 Bn-A01-p19599270  | A-genome specific (napus-rapa) | 0.9832536    | 0.7222377    | not scorable | not scorable | 0.9586777    | 0.6799036    |
| 998 Bn-A01-p19600244  | A-genome specific (napus-rapa) | 0.9904306    | 0.7374802    | not scorable | not scorable | 0.9338843    | 0.7679144    |
| 999 Bn-A01-p19601137  | A-genome specific (napus-rapa) | 0.9688995    | 0.8285986    | not scorable | not scorable | 1            | 0.8059633    |
| 1000 Bn-A01-p19601542 | A-genome specific (napus-rapa) | 0.9736842    | 0.8026147    | not scorable | not scorable | 0.9752066    | 0.7471011    |
| 1001 Bn-A01-p19602112 | A-genome specific (napus-rapa) | 0.9856459    | 0.7406455    | not scorable | not scorable | 0.9917355    | 0.7089196    |
| 1002 Bn-A01-p19605587 | napus specific                 | 0.9808612    | 0.3241806    | not scorable | not scorable | not scorable | not scorable |
| 1003 Bn-A01-p19607256 | A-genome specific (napus-rapa) | 0.9784689    | 0.6934058    | not scorable | not scorable | 0.9917355    | 0.681553     |
| 1004 Bn-A01-p19617963 | A-genome specific (napus-rapa) | 0.9856459    | 0.757225     | not scorable | not scorable | 0.9917355    | 0.7512794    |
| 1005 Bn-A01-p19623880 | A-genome specific (napus-rapa) | 0.9904306    | 0.7152954    | not scorable | not scorable | 0.9752066    | 0.617974     |
| 1006 Bn-A01-p19623985 | A-genome specific (napus-rapa) | 0.9928229    | 0.7817439    | not scorable | not scorable | 0.9917355    | 0.7299535    |
| 1007 Bn-A01-p19624123 | A-genome specific (napus-rapa) | 0.9880383    | 0.6129854    | not scorable | not scorable | 0.9834711    | 0.5326691    |
| 1008 Bn-A01-p19624216 | A-genome specific (napus-rapa) | 0.9880383    | 0.6622064    | not scorable | not scorable | 0.9834711    | 0.6145394    |
| 1009 Bn-A01-p19633815 | A-genome specific (napus-rapa) | 0.9688995    | 0.7800902    | not scorable | not scorable | 0.9917355    | 0.8343857    |
| 1010 Bn-A01-p19650666 | A-genome specific (napus-rapa) | 0.9521531    | 0.5026596    | not scorable | not scorable | 0.9917355    | 0.8291974    |
| 1011 Bn-A01-p19661033 | A-genome specific (napus-rapa) | 0.9808612    | 0.4546458    | not scorable | not scorable | 0.9834711    | 0.8611981    |
| 1012 Bn-A01-p1966955  | A-genome specific (napus-rapa) | 0.9593301    | 0.4119262    | not scorable | not scorable | 0.9834711    | 0.7863845    |
| 1013 Bn-A01-p19700004 | A-genome specific (napus-rapa) | 0.9760765    | 0.6949056    | not scorable | not scorable | 1            | 0.6908952    |
| 1014 Bn-A01-p19712396 | A-genome specific (napus-rapa) | 1            | 0.9303331    | not scorable | not scorable | 0.9834711    | 0.8649814    |
| 1015 Bn-A01-p19722138 | A-genome specific (napus-rapa) | 0.9545454    | 0.6610944    | not scorable | not scorable | 0.9834711    | 0.752296     |
| 1016 Bn-A01-p19731678 | A-genome specific (napus-rapa) | 0.9760765    | 0.7362979    | not scorable | not scorable | 1            | 0.7518246    |
| 1017 Bn-A01-p1975231  | A-genome specific (napus-rapa) | 0.9952153    | 0.7850443    | not scorable | not scorable | 0.9917355    | 0.8627473    |
| 1018 Bn-A01-p19762477 | A-genome specific (napus-rapa) | 0.9856459    | 0.4133842    | not scorable | not scorable | 1            | 0.7227727    |
| 1019 Bn-A01-p19764240 | A-genome specific (napus-rapa) | 0.9617225    | 0.2927379    | not scorable | not scorable | 1            | 0.7933361    |
| 1020 Bn-A01-p1977270  | A-genome specific (napus-rapa) | 0.9904306    | 0.2892985    | not scorable | not scorable | 0.9834711    | 0.789915     |

|      |                  |                                |              |              |              |              |           |           |
|------|------------------|--------------------------------|--------------|--------------|--------------|--------------|-----------|-----------|
| 1021 | Bn-A01-p1980181  | A-genome specific (napus-rapa) | 0.9856459    | 0.7016599    | not scorable | not scorable | 1         | 0.7900167 |
| 1022 | Bn-A01-p19803988 | A-genome specific (napus-rapa) | 0.9736842    | 0.7715852    | not scorable | not scorable | 0.9586777 | 0.7671582 |
| 1023 | Bn-A01-p19813138 | A-genome specific (napus-rapa) | 0.9521531    | 0.3797322    | not scorable | not scorable | 0.9752066 | 0.7013641 |
| 1024 | Bn-A01-p19840597 | A-genome specific (napus-rapa) | 0.9545454    | 0.6460978    | not scorable | not scorable | 0.9917355 | 0.8694528 |
| 1025 | Bn-A01-p19855343 | A-genome specific (napus-rapa) | 0.4856459    | 0.6923867    | not scorable | not scorable | 1         | 0.7911531 |
| 1026 | Bn-A01-p19858735 | A-genome specific (napus-rapa) | 0.7464115    | 0.7444174    | not scorable | not scorable | 0.9834711 | 0.6552684 |
| 1027 | Bn-A01-p19879925 | A-genome specific (napus-rapa) | 0.9736842    | 0.7194312    | not scorable | not scorable | 1         | 0.9279277 |
| 1028 | Bn-A01-p1990755  | A-genome specific (napus-rapa) | 0.9736842    | 0.5892439    | not scorable | not scorable | 0.9586777 | 0.5243856 |
| 1029 | Bn-A01-p19929280 | A-genome specific (rapa only)  | not scorable | not scorable | not scorable | not scorable | 0.9834711 | 0.7739415 |
| 1030 | Bn-A01-p19931030 | A-genome specific (napus-rapa) | 0.9617225    | 0.7888451    | not scorable | not scorable | 0.9586777 | 0.8517572 |
| 1031 | Bn-A01-p19931596 | A-genome specific (napus-rapa) | 0.9665072    | 0.7345183    | not scorable | not scorable | 0.9834711 | 0.8491015 |
| 1032 | Bn-A01-p1993302  | A-genome specific (napus-rapa) | 0.9808612    | 0.7018445    | not scorable | not scorable | 0.9834711 | 0.7483851 |
| 1033 | Bn-A01-p19946190 | A-genome specific (napus-rapa) | 0.9736842    | 0.7741898    | not scorable | not scorable | 1         | 0.7791921 |
| 1034 | Bn-A01-p19955264 | A-genome specific (napus-rapa) | 0.9928229    | 0.7233712    | not scorable | not scorable | 1         | 0.7401661 |
| 1035 | Bn-A01-p19961176 | A-genome specific (napus-rapa) | 0.9665072    | 0.3320428    | not scorable | not scorable | 0.9917355 | 0.7101301 |
| 1036 | Bn-A01-p19983739 | A-genome specific (napus-rapa) | 0.9976076    | 0.6827177    | not scorable | not scorable | 1         | 0.7195216 |
| 1037 | Bn-A01-p19993388 | A-genome specific (napus-rapa) | 0.9928229    | 0.7497161    | not scorable | not scorable | 0.9504132 | 0.7507055 |
| 1038 | Bn-A01-p2004336  | A-genome specific (napus-rapa) | 0.9856459    | 0.7611501    | not scorable | not scorable | 1         | 0.7961465 |
| 1039 | Bn-A01-p2009581  | A-genome specific (rapa only)  | not scorable | not scorable | not scorable | not scorable | 1         | 0.8530514 |
| 1040 | Bn-A01-p20133687 | A-genome specific (napus-rapa) | 0.9832536    | 0.3317388    | not scorable | not scorable | 0.9669421 | 0.478596  |
| 1041 | Bn-A01-p20139530 | A-genome specific (napus-rapa) | 0.9665072    | 0.6784402    | not scorable | not scorable | 0.9917355 | 0.7801748 |
| 1042 | Bn-A01-p20144346 | A-genome specific (napus-rapa) | 0.9593301    | 0.6712831    | not scorable | not scorable | 0.9834711 | 0.6230401 |
| 1043 | Bn-A01-p20144596 | A-genome specific (rapa only)  | not scorable | not scorable | not scorable | not scorable | 0.9586777 | 0.6346936 |
| 1044 | Bn-A01-p20147405 | A-genome specific (napus-rapa) | 0.9784689    | 0.6703942    | not scorable | not scorable | 0.9834711 | 0.7626469 |
| 1045 | Bn-A01-p20159960 | A-genome specific (napus-rapa) | 0.9641148    | 0.27909      | not scorable | not scorable | 1         | 0.6780497 |
| 1046 | Bn-A01-p20166016 | A-genome specific (napus-rapa) | 0.9593301    | 0.6117621    | not scorable | not scorable | 1         | 0.7541876 |
| 1047 | Bn-A01-p20167230 | A-genome specific (napus-rapa) | 0.9808612    | 0.7496573    | not scorable | not scorable | 0.9586777 | 0.7545766 |
| 1048 | Bn-A01-p20181046 | A-genome specific (napus-rapa) | 0.9856459    | 0.7814912    | not scorable | not scorable | 1         | 0.8112941 |
| 1049 | Bn-A01-p20181346 | A-genome specific (napus-rapa) | 0.9880383    | 0.4082313    | not scorable | not scorable | 0.9834711 | 0.7316437 |
| 1050 | Bn-A01-p20196813 | A-genome specific (napus-rapa) | 0.9928229    | 0.4083154    | not scorable | not scorable | 1         | 0.731406  |
| 1051 | Bn-A01-p20207440 | A-genome specific (napus-rapa) | 0.9904306    | 0.8127222    | not scorable | not scorable | 0.9917355 | 0.6975948 |
| 1052 | Bn-A01-p20211329 | A-genome specific (napus-rapa) | 0.9760765    | 0.4697541    | not scorable | not scorable | 0.9917355 | 0.7364028 |
| 1053 | Bn-A01-p20211387 | A-genome specific (napus-rapa) | 0.9688995    | 0.7742302    | not scorable | not scorable | 1         | 0.7985536 |



|      |                  |                                |              |              |              |              |              |              |
|------|------------------|--------------------------------|--------------|--------------|--------------|--------------|--------------|--------------|
| 1054 | Bn-A01-p20233113 | A-genome specific (napus-rapa) | 0.9712918    | 0.4945846    | not scorable | not scorable | 0.9504132    | 0.6739829    |
| 1055 | Bn-A01-p20240168 | all not scorable               | not scorable | not scorable | not scorable | not scorable | not scorable | not scorable |
| 1056 | Bn-A01-p20240780 | A-genome specific (napus-rapa) | 0.9904306    | 0.4945932    | not scorable | not scorable | 1            | 0.8030509    |
| 1057 | Bn-A01-p20246564 | A-genome specific (napus-rapa) | 0.9736842    | 0.6821868    | not scorable | not scorable | 0.9917355    | 0.7081411    |
| 1058 | Bn-A01-p20246840 | A-genome specific (napus-rapa) | 0.9784689    | 0.7250506    | not scorable | not scorable | 0.9917355    | 0.697707     |
| 1059 | Bn-A01-p20248379 | A-genome specific (napus-rapa) | 0.9712918    | 0.5714301    | not scorable | not scorable | 0.9834711    | 0.6713508    |
| 1060 | Bn-A01-p2025400  | A-genome specific (napus-rapa) | 0.9856459    | 0.7888976    | not scorable | not scorable | 1            | 0.7452201    |
| 1061 | Bn-A01-p20259868 | A-genome specific (napus-rapa) | 0.9808612    | 0.4723499    | not scorable | not scorable | 0.9917355    | 0.7848109    |
| 1062 | Bn-A01-p20282705 | A-genome specific (napus-rapa) | 0.9473684    | 0.4994308    | not scorable | not scorable | 0.9752066    | 0.7833955    |
| 1063 | Bn-A01-p20306930 | A-genome specific (napus-rapa) | 0.4090909    | 0.7258548    | not scorable | not scorable | 0.9752066    | 0.7300994    |
| 1064 | Bn-A01-p20323059 | A-genome specific (napus-rapa) | 0.9736842    | 0.7895429    | not scorable | not scorable | 0.9834711    | 0.8649952    |
| 1065 | Bn-A01-p20393111 | A-genome specific (napus-rapa) | 0.9401914    | 0.4292949    | not scorable | not scorable | 0.9834711    | 0.7033637    |
| 1066 | Bn-A01-p20397807 | A-genome specific (napus-rapa) | 0.9832536    | 0.7810751    | not scorable | not scorable | 0.9917355    | 0.8071022    |
| 1067 | Bn-A01-p20406782 | A-genome specific (napus-rapa) | 0.7583732    | 0.7681702    | not scorable | not scorable | 1            | 0.8911937    |
| 1068 | Bn-A01-p2042209  | A-genome specific (napus-rapa) | 0.9330143    | 0.5054451    | not scorable | not scorable | 0.9090909    | 0.8088876    |
| 1069 | Bn-A01-p20430407 | A-genome specific (napus-rapa) | 0.9736842    | 0.7353063    | not scorable | not scorable | 0.9917355    | 0.7894275    |
| 1070 | Bn-A01-p20431228 | A-genome specific (napus-rapa) | 0.9856459    | 0.3802324    | not scorable | not scorable | 0.9917355    | 0.7413363    |
| 1071 | Bn-A01-p20433111 | A-genome specific (napus-rapa) | 0.8157895    | 0.4689084    | not scorable | not scorable | 0.9917355    | 0.8403395    |
| 1072 | Bn-A01-p20442457 | A-genome specific (napus-rapa) | 0.9736842    | 0.7752901    | not scorable | not scorable | 1            | 0.8271491    |
| 1073 | Bn-A01-p2046061  | A-genome specific (napus-rapa) | 1            | 0.5705255    | not scorable | not scorable | 1            | 0.626141     |
| 1074 | Bn-A01-p20471502 | A-genome specific (napus-rapa) | 0.9880383    | 0.7762998    | not scorable | not scorable | 1            | 0.790405     |
| 1075 | Bn-A01-p20482459 | A-genome specific (napus-rapa) | 0.9880383    | 0.7130696    | not scorable | not scorable | 0.9917355    | 0.7138222    |
| 1076 | Bn-A01-p20483938 | A-genome specific (napus-rapa) | 0.9880383    | 0.8052693    | not scorable | not scorable | 0.9917355    | 0.786477     |
| 1077 | Bn-A01-p20497397 | A-genome specific (rapa only)  | not scorable | not scorable | not scorable | not scorable | 1            | 0.7687935    |
| 1078 | Bn-A01-p2053320  | A-genome specific (napus-rapa) | 0.9736842    | 0.4493733    | not scorable | not scorable | 1            | 0.7832971    |
| 1079 | Bn-A01-p20564016 | A-genome specific (napus-rapa) | 0.9832536    | 0.4856167    | not scorable | not scorable | 0.9917355    | 0.8145845    |
| 1080 | Bn-A01-p2065122  | all not scorable               | not scorable | not scorable | not scorable | not scorable | not scorable | not scorable |
| 1081 | Bn-A01-p206610   | A-genome specific (napus-rapa) | 0.9784689    | 0.7638199    | not scorable | not scorable | 1            | 0.735123     |
| 1082 | Bn-A01-p2067006  | A-genome specific (napus-rapa) | 0.9976076    | 0.252827     | not scorable | not scorable | 1            | 0.7983102    |
| 1083 | Bn-A01-p20679722 | A-genome specific (napus-rapa) | 0.9688995    | 0.2180236    | not scorable | not scorable | 0.9917355    | 0.7754571    |
| 1084 | Bn-A01-p2069218  | A-genome specific (napus-rapa) | 0.9928229    | 0.786928     | not scorable | not scorable | 0.9834711    | 0.792945     |
| 1085 | Bn-A01-p20692707 | A-genome specific (napus-rapa) | 0.8181818    | 0.6316313    | not scorable | not scorable | 1            | 0.7487122    |
| 1086 | Bn-A01-p2069488  | A-genome specific (napus-rapa) | 0.9784689    | 0.784027     | not scorable | not scorable | 0.9917355    | 0.7749951    |

|      |                  |                                |              |              |              |              |              |              |           |
|------|------------------|--------------------------------|--------------|--------------|--------------|--------------|--------------|--------------|-----------|
| 1087 | Bn-A01-p20696971 | A-genome specific (rapa only)  | not scorable | not scorable | not scorable | not scorable | 1            | 0.7800605    |           |
| 1088 | Bn-A01-p207098   | A-genome specific (napus-rapa) | 0.9952153    | 0.656113     | not scorable | not scorable | 1            | 0.6902008    |           |
| 1089 | Bn-A01-p207363   | A-genome specific (napus-rapa) | 0.9808612    | 0.7446876    | not scorable | not scorable | 0.9917355    | 0.888725     |           |
| 1090 | Bn-A01-p20745330 | A-genome specific (napus-rapa) | 0.9808612    | 0.7583753    | not scorable | not scorable | 1            | 0.8036532    |           |
| 1091 | Bn-A01-p20745820 | A-genome specific (napus-rapa) | 0.9641148    | 0.5903901    | not scorable | not scorable | 1            | 0.7613015    |           |
| 1092 | Bn-A01-p20753932 | A-genome specific (napus-rapa) | 0.9808612    | 0.7379682    | not scorable | not scorable | 0.9669421    | 0.7893093    |           |
| 1093 | Bn-A01-p20761933 | A-genome specific (napus-rapa) | 0.9736842    | 0.7071389    | not scorable | not scorable | 1            | 0.7244587    |           |
| 1094 | Bn-A01-p20782963 | A-genome specific (napus-rapa) | 1            | 0.6287634    | not scorable | not scorable | 1            | 0.610312     |           |
| 1095 | Bn-A01-p20783867 | A-genome specific (rapa only)  | not scorable | not scorable | not scorable | not scorable | 0.9917355    | 0.4578595    |           |
| 1096 | Bn-A01-p20784377 | A-genome specific (rapa only)  | not scorable | not scorable | not scorable | not scorable | 1            | 0.7687175    |           |
| 1097 | Bn-A01-p20789828 | A-genome specific (napus-rapa) | 0.9760765    | 0.6742715    | not scorable | not scorable | 0.9834711    | 0.7307041    |           |
| 1098 | Bn-A01-p20805506 | A-genome specific (napus-rapa) | 0.9880383    | 0.773923     | not scorable | not scorable | 0.9917355    | 0.7421681    |           |
| 1099 | Bn-A01-p20805613 | A-genome specific (napus-rapa) | 0.9760765    | 0.818741     | not scorable | not scorable | 1            | 0.6807423    |           |
| 1100 | Bn-A01-p20814699 | A-genome specific (napus-rapa) | 0.9856459    | 0.7737158    | not scorable | not scorable | 1            | 0.714651     |           |
| 1101 | Bn-A01-p20836664 | A-genome specific (napus-rapa) | 0.9832536    | 0.7845371    | not scorable | not scorable | 0.9917355    | 0.7840344    |           |
| 1102 | Bn-A01-p20839901 | A-genome specific (napus-rapa) | 0.9928229    | 0.5653014    | not scorable | not scorable | 0.9917355    | 0.8402824    |           |
| 1103 | Bn-A01-p20843887 | A-genome specific (rapa only)  | not scorable | not scorable | not scorable | not scorable | 0.9586777    | 0.7429884    |           |
| 1104 | Bn-A01-p20866022 | A-genome specific (napus-rapa) | 0.9856459    | 0.738369     | not scorable | not scorable | 0.9917355    | 0.7217659    |           |
| 1105 | Bn-A01-p20866518 | A-genome specific (napus-rapa) | 0.9688995    | 0.7866235    | not scorable | not scorable | 0.9752066    | 0.7656797    |           |
| 1106 | Bn-A01-p20873189 | A-genome specific (rapa only)  | not scorable | not scorable | not scorable | not scorable | 0.9917355    | 0.7168004    |           |
| 1107 | Bn-A01-p20873657 | A-genome specific (napus-rapa) | 1            | 0.3756197    | not scorable | not scorable | 0.9834711    | 0.7238929    |           |
| 1108 | Bn-A01-p20879747 | A-genome specific (rapa only)  | not scorable | not scorable | not scorable | not scorable | 0.9586777    | 0.7172893    |           |
| 1109 | Bn-A01-p20890858 | A-genome specific (napus-rapa) | 0.9760765    | 0.6005332    | not scorable | not scorable | 0.9917355    | 0.5555217    |           |
| 1110 | Bn-A01-p20892080 | A-genome specific (napus-rapa) | 0.9784689    | 0.6818768    | not scorable | not scorable | 0.9917355    | 0.7874163    |           |
| 1111 | Bn-A01-p20892145 | A-genome specific (napus-rapa) | 0.9784689    | 0.7363312    | not scorable | not scorable | 0.9917355    | 0.7930954    |           |
| 1112 | Bn-A01-p20899472 | A-genome specific (napus-rapa) | 0.9976076    | 0.5551814    | not scorable | not scorable | 1            | 0.7886671    |           |
| 1113 | Bn-A01-p20909649 | genome unspecific (all in)     | 0.9688995    | 0.3138359    |              | 1            | 0.7674054    | 1            | 0.8932936 |
| 1114 | Bn-A01-p20909816 | napus specific                 | 0.9880383    | 0.2087191    | not scorable | not scorable | not scorable | not scorable |           |
| 1115 | Bn-A01-p2091322  | A-genome specific (napus-rapa) | 0.9736842    | 0.7806415    | not scorable | not scorable | 0.9752066    | 0.8202122    |           |
| 1116 | Bn-A01-p20924050 | A-genome specific (napus-rapa) | 0.9976076    | 0.4660888    | not scorable | not scorable | 0.9917355    | 0.7327726    |           |
| 1117 | Bn-A01-p20933189 | A-genome specific (napus-rapa) | 0.9665072    | 0.7662805    | not scorable | not scorable | 0.6115702    | 0.778066     |           |
| 1118 | Bn-A01-p2094793  | A-genome specific (napus-rapa) | 0.9712918    | 0.6656118    | not scorable | not scorable | 0.9669421    | 0.7207119    |           |
| 1119 | Bn-A01-p20987149 | A-genome specific (napus-rapa) | 0.9976076    | 0.8346832    | not scorable | not scorable | 0.9917355    | 0.9000877    |           |

|      |                  |                                |           |           |              |              |           |           |
|------|------------------|--------------------------------|-----------|-----------|--------------|--------------|-----------|-----------|
| 1120 | Bn-A01-p20988977 | A-genome specific (napus-rapa) | 0.9928229 | 0.7715532 | not scorable | not scorable | 0.9669421 | 0.7195324 |
| 1121 | Bn-A01-p20990218 | A-genome specific (napus-rapa) | 0.9712918 | 0.7728657 | not scorable | not scorable | 0.9834711 | 0.7967883 |
| 1122 | Bn-A01-p2100996  | A-genome specific (napus-rapa) | 0.9712918 | 0.2475047 | not scorable | not scorable | 1         | 0.6512433 |
| 1123 | Bn-A01-p21018746 | A-genome specific (napus-rapa) | 0.9736842 | 0.4308953 | not scorable | not scorable | 0.6942149 | 0.6457663 |
| 1124 | Bn-A01-p21035670 | A-genome specific (napus-rapa) | 0.9832536 | 0.3988458 | not scorable | not scorable | 1         | 0.727766  |
| 1125 | Bn-A01-p21038677 | A-genome specific (napus-rapa) | 0.9928229 | 0.5019218 | not scorable | not scorable | 1         | 0.7634613 |
| 1126 | Bn-A01-p21075183 | A-genome specific (napus-rapa) | 0.6770335 | 0.7769992 | not scorable | not scorable | 0.6859504 | 0.709143  |
| 1127 | Bn-A01-p21079129 | A-genome specific (napus-rapa) | 0.9880383 | 0.7778019 | not scorable | not scorable | 1         | 0.7988187 |
| 1128 | Bn-A01-p21079348 | A-genome specific (napus-rapa) | 0.9617225 | 0.7981407 | not scorable | not scorable | 0.9917355 | 0.8157659 |
| 1129 | Bn-A01-p21079774 | A-genome specific (napus-rapa) | 0.9856459 | 0.8170367 | not scorable | not scorable | 1         | 0.8276477 |
| 1130 | Bn-A01-p21079909 | A-genome specific (napus-rapa) | 0.9784689 | 0.7816327 | not scorable | not scorable | 0.9917355 | 0.6867492 |
| 1131 | Bn-A01-p21103014 | A-genome specific (napus-rapa) | 0.9641148 | 0.8139529 | not scorable | not scorable | 0.9752066 | 0.7972863 |
| 1132 | Bn-A01-p21106413 | A-genome specific (napus-rapa) | 0.9521531 | 0.7441249 | not scorable | not scorable | 0.9917355 | 0.7250969 |
| 1133 | Bn-A01-p21106687 | A-genome specific (napus-rapa) | 0.9760765 | 0.7919081 | not scorable | not scorable | 1         | 0.777253  |
| 1134 | Bn-A01-p21107496 | A-genome specific (napus-rapa) | 0.9904306 | 0.7069155 | not scorable | not scorable | 1         | 0.7578943 |
| 1135 | Bn-A01-p21108496 | A-genome specific (napus-rapa) | 0.9736842 | 0.6998052 | not scorable | not scorable | 1         | 0.7184181 |
| 1136 | Bn-A01-p2111978  | A-genome specific (napus-rapa) | 0.9904306 | 0.8039233 | not scorable | not scorable | 0.9917355 | 0.6942841 |
| 1137 | Bn-A01-p21135145 | A-genome specific (napus-rapa) | 0.9784689 | 0.7556403 | not scorable | not scorable | 1         | 0.7789075 |
| 1138 | Bn-A01-p21136052 | A-genome specific (napus-rapa) | 0.9784689 | 0.7514102 | not scorable | not scorable | 0.9834711 | 0.6944429 |
| 1139 | Bn-A01-p21141514 | A-genome specific (napus-rapa) | 0.9736842 | 0.7587781 | not scorable | not scorable | 0.9669421 | 0.7307457 |
| 1140 | Bn-A01-p21145008 | A-genome specific (napus-rapa) | 0.9712918 | 0.7802681 | not scorable | not scorable | 1         | 0.8227912 |
| 1141 | Bn-A01-p2114552  | A-genome specific (napus-rapa) | 0.9712918 | 0.69961   | not scorable | not scorable | 0.9752066 | 0.5983737 |
| 1142 | Bn-A01-p2114803  | A-genome specific (napus-rapa) | 0.9784689 | 0.4147435 | not scorable | not scorable | 1         | 0.7219532 |
| 1143 | Bn-A01-p2121224  | A-genome specific (napus-rapa) | 0.7057416 | 0.7774605 | not scorable | not scorable | 1         | 0.7649631 |
| 1144 | Bn-A01-p21219526 | A-genome specific (napus-rapa) | 0.9401914 | 0.5173224 | not scorable | not scorable | 0.9752066 | 0.7057587 |
| 1145 | Bn-A01-p21224647 | A-genome specific (napus-rapa) | 0.9617225 | 0.2291792 | not scorable | not scorable | 0.9917355 | 0.7580727 |
| 1146 | Bn-A01-p21236322 | A-genome specific (napus-rapa) | 0.9736842 | 0.7753983 | not scorable | not scorable | 1         | 0.7901254 |
| 1147 | Bn-A01-p21244027 | A-genome specific (napus-rapa) | 0.9688995 | 0.6903384 | not scorable | not scorable | 1         | 0.8680103 |
| 1148 | Bn-A01-p21277841 | genome unspecific (all in)     | 0.9473684 | 0.2243028 |              | 1 0.3785537  | 0.9834711 | 0.8054857 |
| 1149 | Bn-A01-p21309566 | A-genome specific (napus-rapa) | 0.9832536 | 0.5416542 | not scorable | not scorable | 0.9834711 | 0.7373434 |
| 1150 | Bn-A01-p21329900 | A-genome specific (napus-rapa) | 0.9832536 | 0.4604614 | not scorable | not scorable | 0.9917355 | 0.6681912 |
| 1151 | Bn-A01-p21393260 | A-genome specific (napus-rapa) | 0.9928229 | 0.7849559 | not scorable | not scorable | 0.9669421 | 0.8439177 |
| 1152 | Bn-A01-p21394483 | A-genome specific (napus-rapa) | 0.9808612 | 0.7956669 | not scorable | not scorable | 0.6694215 | 0.91594   |

|                       |                                |              |              |              |              |              |              |
|-----------------------|--------------------------------|--------------|--------------|--------------|--------------|--------------|--------------|
| 1153 Bn-A01-p21430708 | A-genome specific (napus-rapa) | 0.9904306    | 0.4779043    | not scorable | not scorable | 0.9834711    | 0.6926004    |
| 1154 Bn-A01-p21444041 | A-genome specific (napus-rapa) | 0.9043062    | 0.8112793    | not scorable | not scorable | 0.9586777    | 0.7127911    |
| 1155 Bn-A01-p21473161 | A-genome specific (napus-rapa) | 0.9904306    | 0.4372155    | not scorable | not scorable | 1            | 0.6990392    |
| 1156 Bn-A01-p21479969 | A-genome specific (napus-rapa) | 0.9880383    | 0.7194398    | not scorable | not scorable | 1            | 0.8513337    |
| 1157 Bn-A01-p2148059  | A-genome specific (napus-rapa) | 0.9760765    | 0.2688045    | not scorable | not scorable | 0.9917355    | 0.7874246    |
| 1158 Bn-A01-p21484088 | A-genome specific (napus-rapa) | 0.9880383    | 0.7775188    | not scorable | not scorable | 1            | 0.7515343    |
| 1159 Bn-A01-p21484875 | A-genome specific (napus-rapa) | 0.9784689    | 0.8191733    | not scorable | not scorable | 1            | 0.8132238    |
| 1160 Bn-A01-p21499792 | A-genome specific (napus-rapa) | 0.9832536    | 0.7800277    | not scorable | not scorable | 1            | 0.8112231    |
| 1161 Bn-A01-p21500509 | A-genome specific (napus-rapa) | 0.9880383    | 0.7448571    | not scorable | not scorable | 1            | 0.7811202    |
| 1162 Bn-A01-p21500631 | A-genome specific (napus-rapa) | 0.9928229    | 0.7876289    | not scorable | not scorable | 1            | 0.8260823    |
| 1163 Bn-A01-p21512266 | A-genome specific (napus-rapa) | 0.9832536    | 0.7842101    | not scorable | not scorable | 0.9917355    | 0.8314618    |
| 1164 Bn-A01-p21512514 | A-genome specific (napus-rapa) | 0.9904306    | 0.7911364    | not scorable | not scorable | 1            | 0.8747709    |
| 1165 Bn-A01-p21512663 | A-genome specific (napus-rapa) | 0.9904306    | 0.7924657    | not scorable | not scorable | 0.9917355    | 0.7810264    |
| 1166 Bn-A01-p21513096 | A-genome specific (napus-rapa) | 0.9856459    | 0.7510304    | not scorable | not scorable | 1            | 0.7772545    |
| 1167 Bn-A01-p21517353 | A-genome specific (napus-rapa) | 0.9832536    | 0.7208664    | not scorable | not scorable | 0.9834711    | 0.7463361    |
| 1168 Bn-A01-p21519780 | A-genome specific (napus-rapa) | 0.9928229    | 0.4656622    | not scorable | not scorable | 0.9917355    | 0.7230756    |
| 1169 Bn-A01-p21524150 | A-genome specific (napus-rapa) | 0.9832536    | 0.7480121    | not scorable | not scorable | 0.9834711    | 0.7236288    |
| 1170 Bn-A01-p21527187 | napus specific                 | 0.9712918    | 0.7841974    | not scorable | not scorable | not scorable | not scorable |
| 1171 Bn-A01-p21532512 | A-genome specific (napus-rapa) | 0.9808612    | 0.8031058    | not scorable | not scorable | 0.9917355    | 0.7970411    |
| 1172 Bn-A01-p21556957 | A-genome specific (napus-rapa) | 0.9832536    | 0.7433251    | not scorable | not scorable | 1            | 0.8188446    |
| 1173 Bn-A01-p2158511  | A-genome specific (napus-rapa) | 0.9952153    | 0.4783701    | not scorable | not scorable | 0.9917355    | 0.6653698    |
| 1174 Bn-A01-p21605865 | A-genome specific (napus-rapa) | 0.9856459    | 0.7676363    | not scorable | not scorable | 0.9834711    | 0.7487302    |
| 1175 Bn-A01-p21633202 | A-genome specific (napus-rapa) | 0.9832536    | 0.2129229    | not scorable | not scorable | 0.7272727    | 0.726383     |
| 1176 Bn-A01-p21634024 | A-genome specific (rapa only)  | not scorable | not scorable | not scorable | not scorable | 0.9256198    | 0.7160041    |
| 1177 Bn-A01-p21634235 | A-genome specific (napus-rapa) | 0.708134     | 0.6840537    | not scorable | not scorable | 0.9586777    | 0.7728974    |
| 1178 Bn-A01-p21634265 | A-genome specific (napus-rapa) | 0.6961722    | 0.7550347    | not scorable | not scorable | 0.8099173    | 0.8751275    |
| 1179 Bn-A01-p21634646 | A-genome specific (napus-rapa) | 0.9880383    | 0.5856106    | not scorable | not scorable | 0.9586777    | 0.8531295    |
| 1180 Bn-A01-p21635000 | A-genome specific (napus-rapa) | 0.6937799    | 0.6917459    | not scorable | not scorable | 0.9256198    | 0.7972612    |
| 1181 Bn-A01-p21635137 | A-genome specific (napus-rapa) | 0.6937799    | 0.7673885    | not scorable | not scorable | 0.7024794    | 0.8670852    |
| 1182 Bn-A01-p21635270 | A-genome specific (napus-rapa) | 0.7105263    | 0.7512083    | not scorable | not scorable | 0.6859504    | 0.8061119    |
| 1183 Bn-A01-p21636048 | A-genome specific (napus-rapa) | 0.6985646    | 0.7828644    | not scorable | not scorable | 0.8429752    | 0.8760504    |
| 1184 Bn-A01-p21638516 | A-genome specific (napus-rapa) | 0.6937799    | 0.7597344    | not scorable | not scorable | 0.6446281    | 0.7163467    |
| 1185 Bn-A01-p21643354 | A-genome specific (napus-rapa) | 0.9880383    | 0.7520018    | not scorable | not scorable | 1            | 0.8116826    |

|      |                  |                                |              |              |              |              |           |           |
|------|------------------|--------------------------------|--------------|--------------|--------------|--------------|-----------|-----------|
| 1186 | Bn-A01-p21644756 | A-genome specific (napus-rapa) | 0.9904306    | 0.7442039    | not scorable | not scorable | 0.9834711 | 0.7101955 |
| 1187 | Bn-A01-p21651835 | A-genome specific (napus-rapa) | 0.9736842    | 0.4099847    | not scorable | not scorable | 1         | 0.8072308 |
| 1188 | Bn-A01-p21663900 | A-genome specific (napus-rapa) | 0.9712918    | 0.3955137    | not scorable | not scorable | 1         | 0.8140981 |
| 1189 | Bn-A01-p21708353 | A-genome specific (napus-rapa) | 0.9976076    | 0.2944632    | not scorable | not scorable | 0.9504132 | 0.6546811 |
| 1190 | Bn-A01-p21709916 | A-genome specific (napus-rapa) | 0.9904306    | 0.7557947    | not scorable | not scorable | 0.9752066 | 0.7352013 |
| 1191 | Bn-A01-p2171217  | A-genome specific (napus-rapa) | 0.9473684    | 0.7994196    | not scorable | not scorable | 0.9669421 | 0.8333422 |
| 1192 | Bn-A01-p21715162 | A-genome specific (napus-rapa) | 0.9760765    | 0.797234     | not scorable | not scorable | 0.9834711 | 0.7415209 |
| 1193 | Bn-A01-p21724511 | A-genome specific (napus-rapa) | 0.9976076    | 0.2613971    | not scorable | not scorable | 1         | 0.6889215 |
| 1194 | Bn-A01-p21758046 | A-genome specific (napus-rapa) | 0.9808612    | 0.464204     | not scorable | not scorable | 0.9917355 | 0.7292978 |
| 1195 | Bn-A01-p21776016 | A-genome specific (napus-rapa) | 0.9928229    | 0.6982969    | not scorable | not scorable | 0.9917355 | 0.6681895 |
| 1196 | Bn-A01-p21776083 | A-genome specific (napus-rapa) | 0.9928229    | 0.729663     | not scorable | not scorable | 1         | 0.7921427 |
| 1197 | Bn-A01-p21776155 | A-genome specific (napus-rapa) | 0.9688995    | 0.7190909    | not scorable | not scorable | 1         | 0.6886137 |
| 1198 | Bn-A01-p21778610 | A-genome specific (rapa only)  | not scorable | not scorable | not scorable | not scorable | 1         | 0.5856268 |
| 1199 | Bn-A01-p2177864  | A-genome specific (napus-rapa) | 1            | 0.5031275    | not scorable | not scorable | 0.9917355 | 0.830166  |
| 1200 | Bn-A01-p21791128 | A-genome specific (napus-rapa) | 0.9712918    | 0.7671278    | not scorable | not scorable | 0.9834711 | 0.8319019 |
| 1201 | Bn-A01-p21797129 | A-genome specific (napus-rapa) | 0.9976076    | 0.7701522    | not scorable | not scorable | 1         | 0.8672051 |
| 1202 | Bn-A01-p21812098 | A-genome specific (rapa only)  | not scorable | not scorable | not scorable | not scorable | 0.9752066 | 0.7991732 |
| 1203 | Bn-A01-p21846342 | A-genome specific (napus-rapa) | 0.9928229    | 0.2670345    | not scorable | not scorable | 0.9917355 | 0.7077151 |
| 1204 | Bn-A01-p21855770 | A-genome specific (napus-rapa) | 0.9904306    | 0.807543     | not scorable | not scorable | 1         | 0.7378951 |
| 1205 | Bn-A01-p21856899 | A-genome specific (napus-rapa) | 0.9976076    | 0.3288653    | not scorable | not scorable | 1         | 0.6415594 |
| 1206 | Bn-A01-p21860162 | A-genome specific (napus-rapa) | 0.9593301    | 0.8079533    | not scorable | not scorable | 0.9834711 | 0.663301  |
| 1207 | Bn-A01-p21869384 | A-genome specific (napus-rapa) | 0.9760765    | 0.4366409    | not scorable | not scorable | 1         | 0.8095888 |
| 1208 | Bn-A01-p2187099  | A-genome specific (napus-rapa) | 0.9880383    | 0.8440625    | not scorable | not scorable | 0.9917355 | 0.8004754 |
| 1209 | Bn-A01-p2188753  | A-genome specific (napus-rapa) | 0.9976076    | 0.5340092    | not scorable | not scorable | 0.9917355 | 0.7912415 |
| 1210 | Bn-A01-p21902788 | A-genome specific (napus-rapa) | 1            | 0.5133105    | not scorable | not scorable | 1         | 0.8045593 |
| 1211 | Bn-A01-p21923141 | A-genome specific (napus-rapa) | 0.9952153    | 0.2502425    | not scorable | not scorable | 0.9834711 | 0.7663959 |
| 1212 | Bn-A01-p21926431 | A-genome specific (napus-rapa) | 0.9928229    | 0.7073368    | not scorable | not scorable | 0.9834711 | 0.6939745 |
| 1213 | Bn-A01-p21928497 | A-genome specific (napus-rapa) | 0.9928229    | 0.8351394    | not scorable | not scorable | 0.9834711 | 0.7767712 |
| 1214 | Bn-A01-p21928531 | A-genome specific (napus-rapa) | 0.9880383    | 0.7624127    | not scorable | not scorable | 0.9834711 | 0.7694218 |
| 1215 | Bn-A01-p21928927 | A-genome specific (napus-rapa) | 0.9880383    | 0.6347137    | not scorable | not scorable | 0.9834711 | 0.7023777 |
| 1216 | Bn-A01-p21930611 | A-genome specific (napus-rapa) | 0.9832536    | 0.7745256    | not scorable | not scorable | 0.9917355 | 0.7190839 |
| 1217 | Bn-A01-p21930738 | A-genome specific (napus-rapa) | 0.9832536    | 0.8021903    | not scorable | not scorable | 0.9752066 | 0.7594448 |
| 1218 | Bn-A01-p21930931 | A-genome specific (napus-rapa) | 0.9880383    | 0.7272469    | not scorable | not scorable | 0.9752066 | 0.7414829 |

|      |                  |                                |              |              |              |              |              |              |
|------|------------------|--------------------------------|--------------|--------------|--------------|--------------|--------------|--------------|
| 1219 | Bn-A01-p21931228 | A-genome specific (napus-rapa) | 0.9808612    | 0.8153423    | not scorable | not scorable | 1            | 0.7706913    |
| 1220 | Bn-A01-p21931498 | A-genome specific (napus-rapa) | 0.9856459    | 0.7856403    | not scorable | not scorable | 1            | 0.7447198    |
| 1221 | Bn-A01-p21931622 | A-genome specific (napus-rapa) | 0.9856459    | 0.7411048    | not scorable | not scorable | 0.9669421    | 0.7485299    |
| 1222 | Bn-A01-p21931853 | A-genome specific (napus-rapa) | 0.9784689    | 0.7496225    | not scorable | not scorable | 0.9834711    | 0.787676     |
| 1223 | Bn-A01-p21937985 | A-genome specific (napus-rapa) | 0.9784689    | 0.7510415    | not scorable | not scorable | 0.9917355    | 0.7683975    |
| 1224 | Bn-A01-p21938751 | A-genome specific (napus-rapa) | 0.9928229    | 0.492867     | not scorable | not scorable | 0.9752066    | 0.751124     |
| 1225 | Bn-A01-p21960901 | A-genome specific (napus-rapa) | 0.9832536    | 0.7993464    | not scorable | not scorable | 0.9669421    | 0.8676426    |
| 1226 | Bn-A01-p21969405 | A-genome specific (napus-rapa) | 0.9832536    | 0.7057003    | not scorable | not scorable | 1            | 0.6501922    |
| 1227 | Bn-A01-p2197707  | A-genome specific (napus-rapa) | 0.9976076    | 0.7362452    | not scorable | not scorable | 0.9834711    | 0.6864372    |
| 1228 | Bn-A01-p2197976  | A-genome specific (napus-rapa) | 0.9832536    | 0.767311     | not scorable | not scorable | 0.9834711    | 0.7320065    |
| 1229 | Bn-A01-p21980567 | A-genome specific (napus-rapa) | 0.9760765    | 0.413111     | not scorable | not scorable | 0.9834711    | 0.7200872    |
| 1230 | Bn-A01-p21997686 | A-genome specific (napus-rapa) | 0.9712918    | 0.7510949    | not scorable | not scorable | 0.9504132    | 0.6874543    |
| 1231 | Bn-A01-p21998517 | all not scorable               | not scorable | not scorable | not scorable | not scorable | not scorable | not scorable |
| 1232 | Bn-A01-p22014179 | A-genome specific (napus-rapa) | 0.9856459    | 0.3477323    | not scorable | not scorable | 0.9917355    | 0.5846771    |
| 1233 | Bn-A01-p22014707 | napus specific                 | 0.9425837    | 0.2472964    | not scorable | not scorable | not scorable | not scorable |
| 1234 | Bn-A01-p22016353 | A-genome specific (napus-rapa) | 0.9760765    | 0.3455385    | not scorable | not scorable | 0.9834711    | 0.6872441    |
| 1235 | Bn-A01-p22018616 | A-genome specific (napus-rapa) | 0.9904306    | 0.290755     | not scorable | not scorable | 0.9917355    | 0.6475991    |
| 1236 | Bn-A01-p22022023 | A-genome specific (napus-rapa) | 0.9904306    | 0.4735844    | not scorable | not scorable | 1            | 0.6638831    |
| 1237 | Bn-A01-p2202853  | A-genome specific (rapa only)  | not scorable | not scorable | not scorable | not scorable | 0.9669421    | 0.8262289    |
| 1238 | Bn-A01-p22038749 | A-genome specific (napus-rapa) | 0.9880383    | 0.7787855    | not scorable | not scorable | 1            | 0.725246     |
| 1239 | Bn-A01-p22038776 | A-genome specific (napus-rapa) | 0.9856459    | 0.7363254    | not scorable | not scorable | 0.9834711    | 0.6787181    |
| 1240 | Bn-A01-p22051021 | A-genome specific (napus-rapa) | 1            | 0.7891633    | not scorable | not scorable | 1            | 0.840076     |
| 1241 | Bn-A01-p22051502 | A-genome specific (napus-rapa) | 0.9928229    | 0.7686757    | not scorable | not scorable | 1            | 0.7942631    |
| 1242 | Bn-A01-p22051510 | A-genome specific (napus-rapa) | 0.9928229    | 0.7875522    | not scorable | not scorable | 1            | 0.7692299    |
| 1243 | Bn-A01-p220693   | A-genome specific (napus-rapa) | 0.9952153    | 0.2658252    | not scorable | not scorable | 0.9752066    | 0.5328778    |
| 1244 | Bn-A01-p2207452  | A-genome specific (napus-rapa) | 0.9665072    | 0.7822148    | not scorable | not scorable | 0.9834711    | 0.823975     |
| 1245 | Bn-A01-p22085117 | A-genome specific (napus-rapa) | 1            | 0.315121     | not scorable | not scorable | 1            | 0.7842602    |
| 1246 | Bn-A01-p22086244 | A-genome specific (napus-rapa) | 0.9928229    | 0.8241183    | not scorable | not scorable | 1            | 0.7860596    |
| 1247 | Bn-A01-p22087364 | A-genome specific (napus-rapa) | 0.9928229    | 0.7795103    | not scorable | not scorable | 1            | 0.8302346    |
| 1248 | Bn-A01-p22087629 | A-genome specific (napus-rapa) | 0.9928229    | 0.7083049    | not scorable | not scorable | 0.9917355    | 0.7525083    |
| 1249 | Bn-A01-p22156169 | A-genome specific (rapa only)  | not scorable | not scorable | not scorable | not scorable | 0.9917355    | 0.5527267    |
| 1250 | Bn-A01-p22182442 | A-genome specific (napus-rapa) | 0.9976076    | 0.4028099    | not scorable | not scorable | 1            | 0.6480865    |
| 1251 | Bn-A01-p2221110  | A-genome specific (rapa only)  | not scorable | not scorable | not scorable | not scorable | 0.9173554    | 0.8338553    |

|      |                  |                                   |              |              |              |              |              |              |
|------|------------------|-----------------------------------|--------------|--------------|--------------|--------------|--------------|--------------|
| 1252 | Bn-A01-p22257309 | A-genome specific (napus-rapa)    | 0.9928229    | 0.819879     | not scorable | not scorable | 1            | 0.5891774    |
| 1253 | Bn-A01-p22265175 | A-genome specific (napus-rapa)    | 0.9976076    | 0.7633851    | not scorable | not scorable | 1            | 0.834482     |
| 1254 | Bn-A01-p2230371  | A-genome specific (napus-rapa)    | 1            | 0.5383748    | not scorable | not scorable | 1            | 0.844363     |
| 1255 | Bn-A01-p22363809 | A-genome specific (napus-rapa)    | 0.9904306    | 0.4252563    | not scorable | not scorable | 1            | 0.7043824    |
| 1256 | Bn-A01-p2242890  | A-genome specific (napus-rapa)    | 0.9688995    | 0.7682471    | not scorable | not scorable | 0.9917355    | 0.8421025    |
| 1257 | Bn-A01-p2244327  | A-genome specific (napus-rapa)    | 0.9808612    | 0.7545872    | not scorable | not scorable | 1            | 0.723166     |
| 1258 | Bn-A01-p224469   | A-genome specific (rapa only)     | not scorable | not scorable | not scorable | not scorable | 0.9669421    | 0.7711245    |
| 1259 | Bn-A01-p2245780  | A-genome specific (napus-rapa)    | 0.9880383    | 0.3480325    | not scorable | not scorable | 0.9917355    | 0.5946738    |
| 1260 | Bn-A01-p2246317  | A-genome specific (napus-rapa)    | 0.9808612    | 0.8361022    | not scorable | not scorable | 1            | 0.7960499    |
| 1261 | Bn-A01-p2246373  | A-genome specific (napus-rapa)    | 0.9856459    | 0.4741815    | not scorable | not scorable | 0.9917355    | 0.5605972    |
| 1262 | Bn-A01-p2251106  | A-genome specific (napus-rapa)    | 0.9928229    | 0.4362786    | not scorable | not scorable | 1            | 0.7343857    |
| 1263 | Bn-A01-p2254004  | A-genome specific (napus-rapa)    | 0.4473684    | 0.8042827    | not scorable | not scorable | 0.9752066    | 0.8380253    |
| 1264 | Bn-A01-p2254072  | A-genome specific (napus-rapa)    | 0.9736842    | 0.8085449    | not scorable | not scorable | 0.9917355    | 0.7631917    |
| 1265 | Bn-A01-p2254235  | A-genome specific (napus-rapa)    | 0.9688995    | 0.777378     | not scorable | not scorable | 0.9834711    | 0.7544801    |
| 1266 | Bn-A01-p22602330 | napus specific                    | 0.9952153    | 0.8202555    | not scorable | not scorable | not scorable | not scorable |
| 1267 | Bn-A01-p2260859  | A-genome specific (napus-rapa)    | 0.9928229    | 0.3341701    | not scorable | not scorable | 0.9917355    | 0.8187154    |
| 1268 | Bn-A01-p2261903  | A-genome specific (napus-rapa)    | 0.9784689    | 0.7690903    | not scorable | not scorable | 0.9917355    | 0.7629737    |
| 1269 | Bn-A01-p22681496 | A-genome specific (napus-rapa)    | 0.9808612    | 0.7929315    | not scorable | not scorable | 0.9752066    | 0.8622975    |
| 1270 | Bn-A01-p22684301 | A-genome specific (napus-rapa)    | 0.9952153    | 0.4197113    | not scorable | not scorable | 1            | 0.7571332    |
| 1271 | Bn-A01-p22685756 | A-genome specific (napus-rapa)    | 0.9569378    | 0.8135445    | not scorable | not scorable | 1            | 0.811961     |
| 1272 | Bn-A01-p22685858 | A-genome specific (napus-rapa)    | 0.9641148    | 0.4163218    | not scorable | not scorable | 1            | 0.7369736    |
| 1273 | Bn-A01-p22739887 | A-genome specific (napus-rapa)    | 0.9665072    | 0.7374793    | not scorable | not scorable | 0.9504132    | 0.7456605    |
| 1274 | Bn-A01-p22741943 | A-genome specific (napus-rapa)    | 0.9497608    | 0.7704418    | not scorable | not scorable | 0.6942149    | 0.6868446    |
| 1275 | Bn-A01-p22743403 | A-genome specific (napus-rapa)    | 0.9760765    | 0.2887884    | not scorable | not scorable | 0.9669421    | 0.6822459    |
| 1276 | Bn-A01-p22768523 | A-genome specific (napus-rapa)    | 0.9976076    | 0.3621256    | not scorable | not scorable | 1            | 0.8224539    |
| 1277 | Bn-A01-p2277290  | A-genome specific (napus-rapa)    | 0.9976076    | 0.4743615    | not scorable | not scorable | 0.9917355    | 0.7758656    |
| 1278 | Bn-A01-p22777288 | genome unspecific (oleracea-rapa) | not scorable | not scorable |              | 1            | 0.7666422    | 0.6446281    |
| 1279 | Bn-A01-p22841111 | A-genome specific (napus-rapa)    | 0.9856459    | 0.7810175    | not scorable | not scorable | 1            | 0.7337765    |
| 1280 | Bn-A01-p22841314 | A-genome specific (napus-rapa)    | 0.9712918    | 0.2228272    | not scorable | not scorable | 0.9752066    | 0.7119761    |
| 1281 | Bn-A01-p2288902  | A-genome specific (napus-rapa)    | 0.9545454    | 0.4458767    | not scorable | not scorable | 0.9834711    | 0.7043029    |
| 1282 | Bn-A01-p2291940  | A-genome specific (napus-rapa)    | 0.9832536    | 0.7156431    | not scorable | not scorable | 1            | 0.7420965    |
| 1283 | Bn-A01-p2292174  | A-genome specific (napus-rapa)    | 0.9449761    | 0.280975     | not scorable | not scorable | 1            | 0.717533     |
| 1284 | Bn-A01-p22930245 | A-genome specific (napus-rapa)    | 1            | 0.7612559    | not scorable | not scorable | 1            | 0.9205657    |

|      |                  |                                |              |              |              |              |           |           |
|------|------------------|--------------------------------|--------------|--------------|--------------|--------------|-----------|-----------|
| 1285 | Bn-A01-p22937843 | A-genome specific (napus-rapa) | 1            | 0.3052333    | not scorable | not scorable | 1         | 0.7650189 |
| 1286 | Bn-A01-p22948925 | genome unspecific (all in)     | 0.9712918    | 0.5550418    | 0.9844961    | 0.8127997    | 1         | 0.7510429 |
| 1287 | Bn-A01-p22949106 | A-genome specific (napus-rapa) | 0.9784689    | 0.805405     | not scorable | not scorable | 0.9917355 | 0.7019351 |
| 1288 | Bn-A01-p22982065 | A-genome specific (rapa only)  | not scorable | not scorable | not scorable | not scorable | 0.9752066 | 0.5944711 |
| 1289 | Bn-A01-p22983721 | A-genome specific (napus-rapa) | 0.9832536    | 0.4943672    | not scorable | not scorable | 1         | 0.8190554 |
| 1290 | Bn-A01-p22999151 | A-genome specific (napus-rapa) | 0.9760765    | 0.7114803    | not scorable | not scorable | 1         | 0.8264934 |
| 1291 | Bn-A01-p23020726 | A-genome specific (napus-rapa) | 0.9856459    | 0.7519872    | not scorable | not scorable | 1         | 0.8056981 |
| 1292 | Bn-A01-p2303308  | A-genome specific (napus-rapa) | 0.9665072    | 0.7683836    | not scorable | not scorable | 1         | 0.8494412 |
| 1293 | Bn-A01-p2306208  | A-genome specific (napus-rapa) | 0.8516746    | 0.4765505    | not scorable | not scorable | 1         | 0.7074097 |
| 1294 | Bn-A01-p2306938  | A-genome specific (napus-rapa) | 0.9736842    | 0.7333896    | not scorable | not scorable | 0.9917355 | 0.6452415 |
| 1295 | Bn-A01-p2307144  | A-genome specific (napus-rapa) | 0.9856459    | 0.4980933    | not scorable | not scorable | 1         | 0.6990011 |
| 1296 | Bn-A01-p23078554 | A-genome specific (napus-rapa) | 0.9952153    | 0.4007292    | not scorable | not scorable | 0.9917355 | 0.7009389 |
| 1297 | Bn-A01-p23080525 | A-genome specific (napus-rapa) | 0.9976076    | 0.4736131    | not scorable | not scorable | 1         | 0.7248024 |
| 1298 | Bn-A01-p23085796 | A-genome specific (napus-rapa) | 0.9880383    | 0.802633     | not scorable | not scorable | 1         | 0.8084953 |
| 1299 | Bn-A01-p23086253 | A-genome specific (napus-rapa) | 0.9688995    | 0.7590642    | not scorable | not scorable | 0.5454546 | 0.8287867 |
| 1300 | Bn-A01-p23087044 | A-genome specific (napus-rapa) | 0.9617225    | 0.8082688    | not scorable | not scorable | 1         | 0.7904124 |
| 1301 | Bn-A01-p23087707 | A-genome specific (napus-rapa) | 0.9688995    | 0.7960865    | not scorable | not scorable | 0.5041322 | 0.8489662 |
| 1302 | Bn-A01-p2309179  | A-genome specific (napus-rapa) | 0.9904306    | 0.5221317    | not scorable | not scorable | 1         | 0.7740356 |
| 1303 | Bn-A01-p23095567 | A-genome specific (napus-rapa) | 0.9880383    | 0.2759733    | not scorable | not scorable | 0.9917355 | 0.7131069 |
| 1304 | Bn-A01-p23096147 | A-genome specific (napus-rapa) | 0.9904306    | 0.6500086    | not scorable | not scorable | 1         | 0.745021  |
| 1305 | Bn-A01-p23097693 | A-genome specific (napus-rapa) | 0.9928229    | 0.7831156    | not scorable | not scorable | 0.9917355 | 0.7571821 |
| 1306 | Bn-A01-p23103120 | A-genome specific (napus-rapa) | 0.9784689    | 0.8010248    | not scorable | not scorable | 0.9834711 | 0.7368048 |
| 1307 | Bn-A01-p2311015  | A-genome specific (napus-rapa) | 0.9665072    | 0.7765666    | not scorable | not scorable | 0.9834711 | 0.7445812 |
| 1308 | Bn-A01-p23111844 | A-genome specific (napus-rapa) | 0.9904306    | 0.4457023    | not scorable | not scorable | 1         | 0.7477413 |
| 1309 | Bn-A01-p23120368 | A-genome specific (napus-rapa) | 0.9808612    | 0.5690736    | not scorable | not scorable | 0.7107438 | 0.8447563 |
| 1310 | Bn-A01-p23122066 | A-genome specific (napus-rapa) | 1            | 0.6891087    | not scorable | not scorable | 1         | 0.731029  |
| 1311 | Bn-A01-p23169607 | A-genome specific (rapa only)  | not scorable | not scorable | not scorable | not scorable | 0.9917355 | 0.8546581 |
| 1312 | Bn-A01-p23175111 | A-genome specific (napus-rapa) | 0.9952153    | 0.5584118    | not scorable | not scorable | 0.9917355 | 0.8065881 |
| 1313 | Bn-A01-p23181293 | A-genome specific (napus-rapa) | 0.9784689    | 0.7416286    | not scorable | not scorable | 0.5041322 | 0.6868434 |
| 1314 | Bn-A01-p2318972  | A-genome specific (napus-rapa) | 0.9688995    | 0.76538      | not scorable | not scorable | 0.9669421 | 0.7855306 |
| 1315 | Bn-A01-p23191627 | A-genome specific (napus-rapa) | 1            | 0.7749949    | not scorable | not scorable | 0.9917355 | 0.8254227 |
| 1316 | Bn-A01-p23195492 | A-genome specific (napus-rapa) | 0.9928229    | 0.7544676    | not scorable | not scorable | 1         | 0.7185012 |
| 1317 | Bn-A01-p23196022 | A-genome specific (napus-rapa) | 0.9928229    | 0.5930946    | not scorable | not scorable | 0.9917355 | 0.7436028 |



|      |                  |                                   |              |              |              |              |              |              |
|------|------------------|-----------------------------------|--------------|--------------|--------------|--------------|--------------|--------------|
| 1318 | Bn-A01-p2323744  | A-genome specific (napus-rapa)    | 0.9832536    | 0.3705159    | not scorable | not scorable | 0.9917355    | 0.7756329    |
| 1319 | Bn-A01-p23253678 | A-genome specific (napus-rapa)    | 0.9928229    | 0.7209864    | not scorable | not scorable | 0.9834711    | 0.7176437    |
| 1320 | Bn-A01-p23259034 | A-genome specific (napus-rapa)    | 0.9976076    | 0.4824677    | not scorable | not scorable | 1            | 0.6487527    |
| 1321 | Bn-A01-p23259741 | A-genome specific (napus-rapa)    | 0.9928229    | 0.5622385    | not scorable | not scorable | 0.9834711    | 0.5775352    |
| 1322 | Bn-A01-p23279247 | A-genome specific (napus-rapa)    | 0.9976076    | 0.6421199    | not scorable | not scorable | 0.9834711    | 0.653347     |
| 1323 | Bn-A01-p23280094 | A-genome specific (rapa only)     | not scorable | not scorable | not scorable | not scorable | 0.9834711    | 0.800547     |
| 1324 | Bn-A01-p23281709 | genome unspecific (oleracea-rapa) | not scorable | not scorable | 0.8914729    | 0.571296     | 1            | 0.7627373    |
| 1325 | Bn-A01-p23281878 | A-genome specific (napus-rapa)    | 0.9976076    | 0.8442404    | not scorable | not scorable | 1            | 0.7397453    |
| 1326 | Bn-A01-p23282001 | A-genome specific (napus-rapa)    | 0.9976076    | 0.8044995    | not scorable | not scorable | 1            | 0.7788512    |
| 1327 | Bn-A01-p23288238 | A-genome specific (rapa only)     | not scorable | not scorable | not scorable | not scorable | 0.9834711    | 0.7931979    |
| 1328 | Bn-A01-p2329932  | A-genome specific (napus-rapa)    | 0.9712918    | 0.7792413    | not scorable | not scorable | 0.9586777    | 0.3619901    |
| 1329 | Bn-A01-p23303284 | A-genome specific (rapa only)     | not scorable | not scorable | not scorable | not scorable | 0.9917355    | 0.7199739    |
| 1330 | Bn-A01-p23321507 | A-genome specific (napus-rapa)    | 0.9928229    | 0.4771986    | not scorable | not scorable | 1            | 0.8599893    |
| 1331 | Bn-A01-p23321771 | A-genome specific (napus-rapa)    | 0.9832536    | 0.8004524    | not scorable | not scorable | 0.9917355    | 0.7372571    |
| 1332 | Bn-A01-p23322377 | A-genome specific (napus-rapa)    | 0.9856459    | 0.7945657    | not scorable | not scorable | 0.9669421    | 0.6650604    |
| 1333 | Bn-A01-p23322438 | A-genome specific (napus-rapa)    | 0.9928229    | 0.7724172    | not scorable | not scorable | 0.6859504    | 0.8044198    |
| 1334 | Bn-A01-p23330944 | napus specific                    | 0.9641148    | 0.7854073    | not scorable | not scorable | not scorable | not scorable |
| 1335 | Bn-A01-p23370802 | A-genome specific (napus-rapa)    | 0.9090909    | 0.6774311    | not scorable | not scorable | 0.7851239    | 0.9175813    |
| 1336 | Bn-A01-p2340048  | A-genome specific (napus-rapa)    | 0.9736842    | 0.7568356    | not scorable | not scorable | 0.9917355    | 0.7776608    |
| 1337 | Bn-A01-p2340359  | A-genome specific (napus-rapa)    | 0.9688995    | 0.8000708    | not scorable | not scorable | 0.9917355    | 0.8062946    |
| 1338 | Bn-A01-p2341408  | A-genome specific (napus-rapa)    | 0.9688995    | 0.7963336    | not scorable | not scorable | 0.9917355    | 0.82846      |
| 1339 | Bn-A01-p23448661 | A-genome specific (napus-rapa)    | 1            | 0.8051615    | not scorable | not scorable | 1            | 0.7693356    |
| 1340 | Bn-A01-p2345255  | A-genome specific (napus-rapa)    | 0.9904306    | 0.3794476    | not scorable | not scorable | 1            | 0.7177778    |
| 1341 | Bn-A01-p23472380 | A-genome specific (napus-rapa)    | 0.9665072    | 0.7073492    | not scorable | not scorable | 0.7190083    | 0.8644511    |
| 1342 | Bn-A01-p23472646 | A-genome specific (napus-rapa)    | 0.9688995    | 0.780826     | not scorable | not scorable | 0.9752066    | 0.6808475    |
| 1343 | Bn-A01-p23473514 | A-genome specific (napus-rapa)    | 0.9856459    | 0.7871395    | not scorable | not scorable | 1            | 0.7663456    |
| 1344 | Bn-A01-p23477194 | A-genome specific (napus-rapa)    | 0.9784689    | 0.7894045    | not scorable | not scorable | 0.9917355    | 0.680047     |
| 1345 | Bn-A01-p23478530 | A-genome specific (napus-rapa)    | 0.9808612    | 0.7880544    | not scorable | not scorable | 0.5785124    | 0.8392923    |
| 1346 | Bn-A01-p23479473 | A-genome specific (napus-rapa)    | 0.9760765    | 0.4882902    | not scorable | not scorable | 1            | 0.9050438    |
| 1347 | Bn-A01-p23486950 | genome unspecific (oleracea-rapa) | not scorable | not scorable | 0.379845     | 0.4147588    | 0.9586777    | 0.6875448    |
| 1348 | Bn-A01-p234898   | A-genome specific (napus-rapa)    | 0.9545454    | 0.5658053    | not scorable | not scorable | 1            | 0.7364199    |
| 1349 | Bn-A01-p23493920 | genome unspecific (all in)        | 0.9641148    | 0.354924     | 1            | 0.7483889    | 0.5867769    | 0.7977689    |
| 1350 | Bn-A01-p235115   | A-genome specific (napus-rapa)    | 0.9976076    | 0.3274618    | not scorable | not scorable | 0.9834711    | 0.8499259    |

|                       |                                |              |              |              |              |              |              |
|-----------------------|--------------------------------|--------------|--------------|--------------|--------------|--------------|--------------|
| 1351 Bn-A01-p23536634 | A-genome specific (napus-rapa) | 0.7440192    | 0.9175813    | not scorable | not scorable | 1            | 0.8393767    |
| 1352 Bn-A01-p23538267 | A-genome specific (napus-rapa) | 0.9808612    | 0.3049752    | not scorable | not scorable | 0.9917355    | 0.719432     |
| 1353 Bn-A01-p23538856 | A-genome specific (napus-rapa) | 0.9832536    | 0.759492     | not scorable | not scorable | 0.9917355    | 0.8081059    |
| 1354 Bn-A01-p23539305 | A-genome specific (napus-rapa) | 0.9808612    | 0.7853466    | not scorable | not scorable | 0.9917355    | 0.7615933    |
| 1355 Bn-A01-p235484   | A-genome specific (napus-rapa) | 0.9808612    | 0.7788705    | not scorable | not scorable | 0.9504132    | 0.7387811    |
| 1356 Bn-A01-p23560747 | A-genome specific (napus-rapa) | 0.9880383    | 0.4264954    | not scorable | not scorable | 0.9917355    | 0.8612621    |
| 1357 Bn-A01-p23568963 | A-genome specific (napus-rapa) | 0.9569378    | 0.388804     | not scorable | not scorable | 1            | 0.7810875    |
| 1358 Bn-A01-p235781   | A-genome specific (napus-rapa) | 0.9617225    | 0.6839854    | not scorable | not scorable | 0.9752066    | 0.7545217    |
| 1359 Bn-A01-p23582571 | A-genome specific (rapa only)  | not scorable | not scorable | not scorable | not scorable | 1            | 0.7810928    |
| 1360 Bn-A01-p23586266 | A-genome specific (napus-rapa) | 0.9880383    | 0.7936415    | not scorable | not scorable | 0.9917355    | 0.7195811    |
| 1361 Bn-A01-p23600621 | A-genome specific (rapa only)  | not scorable | not scorable | not scorable | not scorable | 1            | 0.7362989    |
| 1362 Bn-A01-p23602361 | A-genome specific (napus-rapa) | 0.9258373    | 0.7903606    | not scorable | not scorable | 0.9917355    | 0.9209533    |
| 1363 Bn-A01-p2360909  | A-genome specific (napus-rapa) | 0.9282297    | 0.2840842    | not scorable | not scorable | 1            | 0.6060079    |
| 1364 Bn-A01-p23613283 | A-genome specific (napus-rapa) | 0.9641148    | 0.3217329    | not scorable | not scorable | 1            | 0.8210919    |
| 1365 Bn-A01-p23614494 | A-genome specific (napus-rapa) | 0.9784689    | 0.7881173    | not scorable | not scorable | 0.9917355    | 0.8503544    |
| 1366 Bn-A01-p23614887 | A-genome specific (napus-rapa) | 0.9856459    | 0.4750561    | not scorable | not scorable | 1            | 0.8401434    |
| 1367 Bn-A01-p23616839 | A-genome specific (napus-rapa) | 0.7200957    | 0.7503549    | not scorable | not scorable | 0.9834711    | 0.8459679    |
| 1368 Bn-A01-p23627526 | A-genome specific (rapa only)  | not scorable | not scorable | not scorable | not scorable | 1            | 0.70992      |
| 1369 Bn-A01-p23634753 | A-genome specific (napus-rapa) | 0.3516746    | 0.6132114    | not scorable | not scorable | 0.9586777    | 0.677716     |
| 1370 Bn-A01-p23638070 | A-genome specific (napus-rapa) | 0.9736842    | 0.3647994    | not scorable | not scorable | 0.9917355    | 0.8165768    |
| 1371 Bn-A01-p23638107 | A-genome specific (napus-rapa) | 0.9832536    | 0.7521313    | not scorable | not scorable | 0.9834711    | 0.699226     |
| 1372 Bn-A01-p23640103 | A-genome specific (napus-rapa) | 0.9832536    | 0.3959498    | not scorable | not scorable | 0.9917355    | 0.75645      |
| 1373 Bn-A01-p23642494 | genome unspecific (all in)     | 0.9952153    | 0.4736132    | 0.9922481    | 0.787617     | 1            | 0.8653798    |
| 1374 Bn-A01-p2365493  | A-genome specific (napus-rapa) | 0.9856459    | 0.7742472    | not scorable | not scorable | 0.9917355    | 0.8267537    |
| 1375 Bn-A01-p2365667  | A-genome specific (napus-rapa) | 0.9928229    | 0.8451989    | not scorable | not scorable | 0.9834711    | 0.7469729    |
| 1376 Bn-A01-p23658023 | A-genome specific (napus-rapa) | 0.9641148    | 0.4300889    | not scorable | not scorable | 1            | 0.7003947    |
| 1377 Bn-A01-p23672301 | A-genome specific (napus-rapa) | 0.9641148    | 0.3488769    | not scorable | not scorable | 1            | 0.5617584    |
| 1378 Bn-A01-p23685466 | napus specific                 | 0.9593301    | 0.6645694    | not scorable | not scorable | not scorable | not scorable |
| 1379 Bn-A01-p23685978 | A-genome specific (napus-rapa) | 1            | 0.5197503    | not scorable | not scorable | 0.9917355    | 0.6741084    |
| 1380 Bn-A01-p23694782 | A-genome specific (napus-rapa) | 0.9641148    | 0.7416436    | not scorable | not scorable | 0.5454546    | 0.7885255    |
| 1381 Bn-A01-p23718726 | A-genome specific (napus-rapa) | 0.9688995    | 0.5472277    | not scorable | not scorable | 0.5289256    | 0.7350129    |
| 1382 Bn-A01-p23719321 | A-genome specific (napus-rapa) | 0.9497608    | 0.6870394    | not scorable | not scorable | 0.9917355    | 0.6643477    |
| 1383 Bn-A01-p23728095 | A-genome specific (napus-rapa) | 0.9497608    | 0.3293611    | not scorable | not scorable | 0.6198347    | 0.6918504    |

|      |                  |                                |              |              |              |              |              |              |
|------|------------------|--------------------------------|--------------|--------------|--------------|--------------|--------------|--------------|
| 1384 | Bn-A01-p23730610 | A-genome specific (napus-rapa) | 0.9904306    | 0.4781381    | not scorable | not scorable | 0.9834711    | 0.7648607    |
| 1385 | Bn-A01-p23736208 | A-genome specific (napus-rapa) | 0.9808612    | 0.5065973    | not scorable | not scorable | 1            | 0.7911221    |
| 1386 | Bn-A01-p23739022 | A-genome specific (napus-rapa) | 0.9641148    | 0.7718753    | not scorable | not scorable | 1            | 0.795207     |
| 1387 | Bn-A01-p23763782 | A-genome specific (napus-rapa) | 0.9952153    | 0.6070205    | not scorable | not scorable | 1            | 0.6270859    |
| 1388 | Bn-A01-p23772904 | A-genome specific (rapa only)  | not scorable | not scorable | not scorable | not scorable | 0.9834711    | 0.6901347    |
| 1389 | Bn-A01-p23785561 | A-genome specific (napus-rapa) | 1            | 0.8298646    | not scorable | not scorable | 1            | 0.7831385    |
| 1390 | Bn-A01-p23809071 | A-genome specific (rapa only)  | not scorable | not scorable | not scorable | not scorable | 0.9834711    | 0.8070274    |
| 1391 | Bn-A01-p23810423 | A-genome specific (rapa only)  | not scorable | not scorable | not scorable | not scorable | 0.9834711    | 0.8393794    |
| 1392 | Bn-A01-p23813837 | A-genome specific (rapa only)  | not scorable | not scorable | not scorable | not scorable | 0.9834711    | 0.6367546    |
| 1393 | Bn-A01-p23815268 | A-genome specific (rapa only)  | not scorable | not scorable | not scorable | not scorable | 0.661157     | 0.7117022    |
| 1394 | Bn-A01-p23819116 | A-genome specific (rapa only)  | not scorable | not scorable | not scorable | not scorable | 0.6694215    | 0.7913548    |
| 1395 | Bn-A01-p23842865 | A-genome specific (napus-rapa) | 0.9952153    | 0.7866972    | not scorable | not scorable | 0.9669421    | 0.753824     |
| 1396 | Bn-A01-p23843030 | napus specific                 | 0.9258373    | 0.3085712    | not scorable | not scorable | not scorable | not scorable |
| 1397 | Bn-A01-p23843222 | A-genome specific (rapa only)  | not scorable | not scorable | not scorable | not scorable | 0.9917355    | 0.7847385    |
| 1398 | Bn-A01-p23859890 | all not scorable               | not scorable | not scorable | not scorable | not scorable | not scorable | not scorable |
| 1399 | Bn-A01-p2387124  | A-genome specific (napus-rapa) | 0.9832536    | 0.8097206    | not scorable | not scorable | 0.9834711    | 0.7495213    |
| 1400 | Bn-A01-p23873720 | A-genome specific (napus-rapa) | 0.930622     | 0.3679378    | not scorable | not scorable | 0.9834711    | 0.7237209    |
| 1401 | Bn-A01-p23876801 | A-genome specific (rapa only)  | not scorable | not scorable | not scorable | not scorable | 0.9917355    | 0.8050253    |
| 1402 | Bn-A01-p23886020 | A-genome specific (rapa only)  | not scorable | not scorable | not scorable | not scorable | 0.9917355    | 0.8253878    |
| 1403 | Bn-A01-p23905191 | A-genome specific (napus-rapa) | 0.9928229    | 0.7011353    | not scorable | not scorable | 1            | 0.7309983    |
| 1404 | Bn-A01-p23935076 | A-genome specific (rapa only)  | not scorable | not scorable | not scorable | not scorable | 1            | 0.7061613    |
| 1405 | Bn-A01-p2393817  | A-genome specific (napus-rapa) | 0.9832536    | 0.4068847    | not scorable | not scorable | 1            | 0.7451702    |
| 1406 | Bn-A01-p23938571 | A-genome specific (rapa only)  | not scorable | not scorable | not scorable | not scorable | 0.9586777    | 0.7761822    |
| 1407 | Bn-A01-p23943508 | A-genome specific (napus-rapa) | 0.9928229    | 0.8453334    | not scorable | not scorable | 0.9917355    | 0.7493598    |
| 1408 | Bn-A01-p23948008 | A-genome specific (rapa only)  | not scorable | not scorable | not scorable | not scorable | 0.9917355    | 0.801908     |
| 1409 | Bn-A01-p23950559 | A-genome specific (napus-rapa) | 0.9880383    | 0.8377019    | not scorable | not scorable | 0.6859504    | 0.7849017    |
| 1410 | Bn-A01-p23961368 | A-genome specific (rapa only)  | not scorable | not scorable | not scorable | not scorable | 1            | 0.784368     |
| 1411 | Bn-A01-p23965220 | A-genome specific (rapa only)  | not scorable | not scorable | not scorable | not scorable | 0.9834711    | 0.8097942    |
| 1412 | Bn-A01-p23966537 | A-genome specific (napus-rapa) | 0.7392344    | 0.8097153    | not scorable | not scorable | 0.9338843    | 0.8991763    |
| 1413 | Bn-A01-p23972100 | A-genome specific (napus-rapa) | 0.9976076    | 0.7458545    | not scorable | not scorable | 0.9834711    | 0.8803958    |
| 1414 | Bn-A01-p24006789 | A-genome specific (napus-rapa) | 0.9904306    | 0.7994248    | not scorable | not scorable | 0.9834711    | 0.7649407    |
| 1415 | Bn-A01-p24020373 | A-genome specific (napus-rapa) | 0.9904306    | 0.7989796    | not scorable | not scorable | 1            | 0.8170915    |
| 1416 | Bn-A01-p24020451 | A-genome specific (napus-rapa) | 0.9808612    | 0.2440005    | not scorable | not scorable | 0.9669421    | 0.3683226    |

|      |                  |                                   |              |              |              |              |           |           |
|------|------------------|-----------------------------------|--------------|--------------|--------------|--------------|-----------|-----------|
| 1417 | Bn-A01-p2403471  | A-genome specific (napus-rapa)    | 0.9808612    | 0.4790445    | not scorable | not scorable | 1         | 0.7357944 |
| 1418 | Bn-A01-p24057724 | A-genome specific (napus-rapa)    | 0.9856459    | 0.3349906    | not scorable | not scorable | 0.8842975 | 0.861779  |
| 1419 | Bn-A01-p24070704 | A-genome specific (napus-rapa)    | 0.9904306    | 0.7627197    | not scorable | not scorable | 0.9917355 | 0.8273427 |
| 1420 | Bn-A01-p24107515 | genome unspecific (all in)        | 0.9928229    | 0.3078613    |              | 1            | 0.656441  | 1         |
| 1421 | Bn-A01-p24145113 | genome unspecific (all in)        | 1            | 0.5753938    | 0.9767442    | 0.1910557    |           | 1         |
| 1422 | Bn-A01-p2421445  | A-genome specific (napus-rapa)    | 0.9856459    | 0.5331212    | not scorable | not scorable | 0.9917355 | 0.767171  |
| 1423 | Bn-A01-p24226107 | A-genome specific (napus-rapa)    | 0.9473684    | 0.841207     | not scorable | not scorable | 0.7603306 | 0.7489003 |
| 1424 | Bn-A01-p24229645 | A-genome specific (napus-rapa)    | 0.9976076    | 0.5136648    | not scorable | not scorable | 1         | 0.7401398 |
| 1425 | Bn-A01-p24308273 | A-genome specific (rapa only)     | not scorable | not scorable | not scorable | not scorable | 1         | 0.8329957 |
| 1426 | Bn-A01-p24308957 | A-genome specific (rapa only)     | not scorable | not scorable | not scorable | not scorable | 0.9917355 | 0.6960069 |
| 1427 | Bn-A01-p24309386 | A-genome specific (rapa only)     | not scorable | not scorable | not scorable | not scorable | 0.9834711 | 0.6971646 |
| 1428 | Bn-A01-p24310993 | A-genome specific (napus-rapa)    | 0.9904306    | 0.6655776    | not scorable | not scorable | 0.9752066 | 0.6095613 |
| 1429 | Bn-A01-p2431503  | A-genome specific (napus-rapa)    | 0.9856459    | 0.5223921    | not scorable | not scorable | 0.9834711 | 0.6830099 |
| 1430 | Bn-A01-p24319792 | A-genome specific (napus-rapa)    | 0.923445     | 0.80387      | not scorable | not scorable | 0.9917355 | 0.7902024 |
| 1431 | Bn-A01-p24320794 | A-genome specific (napus-rapa)    | 0.923445     | 0.8141079    | not scorable | not scorable | 0.9917355 | 0.808334  |
| 1432 | Bn-A01-p24346952 | A-genome specific (napus-rapa)    | 0.9665072    | 0.6221851    | not scorable | not scorable | 1         | 0.8607013 |
| 1433 | Bn-A01-p24360206 | A-genome specific (napus-rapa)    | 0.9736842    | 0.4804409    | not scorable | not scorable | 0.9917355 | 0.7155857 |
| 1434 | Bn-A01-p24369239 | A-genome specific (napus-rapa)    | 0.9497608    | 0.6817468    | not scorable | not scorable | 0.9669421 | 0.8293341 |
| 1435 | Bn-A01-p24369455 | A-genome specific (napus-rapa)    | 0.9784689    | 0.7875039    | not scorable | not scorable | 0.9834711 | 0.7560163 |
| 1436 | Bn-A01-p24372608 | A-genome specific (napus-rapa)    | 0.9880383    | 0.5917053    | not scorable | not scorable | 1         | 0.7882738 |
| 1437 | Bn-A01-p24390991 | A-genome specific (napus-rapa)    | 0.9784689    | 0.2994004    | not scorable | not scorable | 1         | 0.5798491 |
| 1438 | Bn-A01-p24394537 | A-genome specific (napus-rapa)    | 0.9832536    | 0.3120457    | not scorable | not scorable | 0.9917355 | 0.695465  |
| 1439 | Bn-A01-p24395406 | A-genome specific (napus-rapa)    | 0.4976076    | 0.8100576    | not scorable | not scorable | 0.9834711 | 0.777389  |
| 1440 | Bn-A01-p24396906 | A-genome specific (napus-rapa)    | 0.9665072    | 0.7855649    | not scorable | not scorable | 1         | 0.7922278 |
| 1441 | Bn-A01-p24408637 | A-genome specific (napus-rapa)    | 0.9449761    | 0.6741723    | not scorable | not scorable | 0.9752066 | 0.7833724 |
| 1442 | Bn-A01-p24416660 | A-genome specific (napus-rapa)    | 0.9880383    | 0.5369902    | not scorable | not scorable | 0.9917355 | 0.83626   |
| 1443 | Bn-A01-p24425084 | A-genome specific (napus-rapa)    | 0.8373206    | 0.4140776    | not scorable | not scorable | 1         | 0.7186209 |
| 1444 | Bn-A01-p24425211 | A-genome specific (napus-rapa)    | 0.9784689    | 0.1855441    | not scorable | not scorable | 0.9834711 | 0.7880548 |
| 1445 | Bn-A01-p24425829 | A-genome specific (napus-rapa)    | 0.9736842    | 0.2893933    | not scorable | not scorable | 0.9669421 | 0.7113546 |
| 1446 | Bn-A01-p24429653 | genome unspecific (oleracea-rapa) | not scorable | not scorable |              | 1            | 0.362717  | 0.9669421 |
| 1447 | Bn-A01-p24431478 | A-genome specific (napus-rapa)    | 1            | 0.3956327    | not scorable | not scorable | 1         | 0.7721409 |
| 1448 | Bn-A01-p24435452 | A-genome specific (napus-rapa)    | 1            | 0.8135551    | not scorable | not scorable | 1         | 0.7627373 |
| 1449 | Bn-A01-p2445274  | A-genome specific (rapa only)     | not scorable | not scorable | not scorable | not scorable | 0.6033058 | 0.6714416 |

|                       |                                |              |              |              |              |              |              |              |
|-----------------------|--------------------------------|--------------|--------------|--------------|--------------|--------------|--------------|--------------|
| 1450 Bn-A01-p2445468  | A-genome specific (napus-rapa) | 0.9904306    | 0.8275579    | not scorable | not scorable |              | 1            | 0.7245526    |
| 1451 Bn-A01-p2445602  | A-genome specific (napus-rapa) | 0.9904306    | 0.675117     | not scorable | not scorable |              | 1            | 0.7778318    |
| 1452 Bn-A01-p2448162  | A-genome specific (napus-rapa) | 0.9832536    | 0.7567       | not scorable | not scorable | 0.9917355    |              | 0.7476665    |
| 1453 Bn-A01-p24487852 | A-genome specific (napus-rapa) | 0.9712918    | 0.7359673    | not scorable | not scorable | 0.9752066    |              | 0.7595801    |
| 1454 Bn-A01-p24504495 | A-genome specific (napus-rapa) | 0.9856459    | 0.8126721    | not scorable | not scorable |              | 1            | 0.8288649    |
| 1455 Bn-A01-p24504575 | A-genome specific (napus-rapa) | 0.9760765    | 0.7744135    | not scorable | not scorable |              | 1            | 0.8637648    |
| 1456 Bn-A01-p24507466 | A-genome specific (napus-rapa) | 0.9880383    | 0.301901     | not scorable | not scorable | 0.9834711    |              | 0.6863935    |
| 1457 Bn-A01-p24510656 | A-genome specific (napus-rapa) | 0.9880383    | 0.5812946    | not scorable | not scorable |              | 1            | 0.7785823    |
| 1458 Bn-A01-p24520244 | A-genome specific (napus-rapa) | 0.9952153    | 0.2084642    | not scorable | not scorable | 0.9834711    |              | 0.7292882    |
| 1459 Bn-A01-p24525303 | genome unspecific (all in)     | 0.9832536    | 0.268355     | 0.9379845    | 0.2047486    | 0.9917355    |              | 0.4987241    |
| 1460 Bn-A01-p24526982 | A-genome specific (napus-rapa) | 0.9760765    | 0.4268059    | not scorable | not scorable | 0.9917355    |              | 0.7868028    |
| 1461 Bn-A01-p24529391 | A-genome specific (rapa only)  | not scorable | not scorable | not scorable | not scorable |              | 1            | 0.8549314    |
| 1462 Bn-A01-p2453633  | A-genome specific (napus-rapa) | 0.9904306    | 0.7778233    | not scorable | not scorable |              | 1            | 0.8758393    |
| 1463 Bn-A01-p24536432 | A-genome specific (rapa only)  | not scorable | not scorable | not scorable | not scorable | 0.6446281    |              | 0.797288     |
| 1464 Bn-A01-p2453758  | A-genome specific (napus-rapa) | 0.9736842    | 0.721588     | not scorable | not scorable |              | 1            | 0.710425     |
| 1465 Bn-A01-p24541095 | A-genome specific (napus-rapa) | 0.9521531    | 0.7622583    | not scorable | not scorable | 0.9669421    |              | 0.7658485    |
| 1466 Bn-A01-p2455219  | A-genome specific (napus-rapa) | 0.9976076    | 0.5782492    | not scorable | not scorable |              | 1            | 0.5620514    |
| 1467 Bn-A01-p24556230 | A-genome specific (napus-rapa) | 0.9856459    | 0.7371927    | not scorable | not scorable | 0.9917355    |              | 0.7270799    |
| 1468 Bn-A01-p24565084 | A-genome specific (napus-rapa) | 0.9784689    | 0.7746619    | not scorable | not scorable |              | 1            | 0.884536     |
| 1469 Bn-A01-p24565311 | A-genome specific (napus-rapa) | 0.9856459    | 0.7740189    | not scorable | not scorable |              | 1            | 0.8901196    |
| 1470 Bn-A01-p24570589 | all not scorable               | not scorable | not scorable | not scorable | not scorable | not scorable | not scorable | not scorable |
| 1471 Bn-A01-p24575577 | A-genome specific (napus-rapa) |              | 1            | 0.5044385    | not scorable | not scorable | 1            | 0.8423266    |
| 1472 Bn-A01-p24575679 | A-genome specific (napus-rapa) | 0.9808612    | 0.8052014    | not scorable | not scorable |              | 1            | 0.8594825    |
| 1473 Bn-A01-p2457750  | A-genome specific (napus-rapa) | 0.9569378    | 0.3759834    | not scorable | not scorable |              | 1            | 0.7167414    |
| 1474 Bn-A01-p24578644 | A-genome specific (napus-rapa) | 0.9784689    | 0.8072044    | not scorable | not scorable |              | 1            | 0.8659754    |
| 1475 Bn-A01-p2461470  | A-genome specific (rapa only)  | not scorable | not scorable | not scorable | not scorable | 0.892562     |              | 0.7880238    |
| 1476 Bn-A01-p24634303 | A-genome specific (napus-rapa) | 0.9497608    | 0.808457     | not scorable | not scorable |              | 1            | 0.8315895    |
| 1477 Bn-A01-p24635378 | A-genome specific (napus-rapa) | 0.9569378    | 0.7524585    | not scorable | not scorable | 0.9834711    |              | 0.8615099    |
| 1478 Bn-A01-p24636537 | A-genome specific (napus-rapa) | 0.9521531    | 0.4982219    | not scorable | not scorable | 0.9752066    |              | 0.5981658    |
| 1479 Bn-A01-p24646334 | A-genome specific (napus-rapa) | 0.9569378    | 0.7587104    | not scorable | not scorable |              | 1            | 0.8688908    |
| 1480 Bn-A01-p24655110 | A-genome specific (napus-rapa) | 0.9712918    | 0.6192454    | not scorable | not scorable |              | 1            | 0.6744155    |
| 1481 Bn-A01-p24664331 | A-genome specific (napus-rapa) |              | 1            | 0.5751504    | not scorable | not scorable | 0.9834711    | 0.7478836    |
| 1482 Bn-A01-p24696367 | A-genome specific (napus-rapa) | 0.9856459    | 0.7572768    | not scorable | not scorable |              | 1            | 0.7326887    |

|      |                  |                                   |              |              |              |              |              |              |
|------|------------------|-----------------------------------|--------------|--------------|--------------|--------------|--------------|--------------|
| 1483 | Bn-A01-p24697185 | A-genome specific (napus-rapa)    | 0.9593301    | 0.6373955    | not scorable | not scorable | 1            | 0.7636979    |
| 1484 | Bn-A01-p24701885 | A-genome specific (napus-rapa)    | 0.9593301    | 0.7391626    | not scorable | not scorable | 0.9834711    | 0.6563621    |
| 1485 | Bn-A01-p24703150 | A-genome specific (napus-rapa)    | 0.9665072    | 0.7775779    | not scorable | not scorable | 0.9669421    | 0.9010419    |
| 1486 | Bn-A01-p24705790 | A-genome specific (napus-rapa)    | 0.9066986    | 0.7817326    | not scorable | not scorable | 1            | 0.8373652    |
| 1487 | Bn-A01-p24706378 | A-genome specific (napus-rapa)    | 0.9808612    | 0.7276669    | not scorable | not scorable | 1            | 0.7582248    |
| 1488 | Bn-A01-p24707425 | A-genome specific (napus-rapa)    | 0.9665072    | 0.5010982    | not scorable | not scorable | 1            | 0.719188     |
| 1489 | Bn-A01-p24707727 | A-genome specific (napus-rapa)    | 0.9760765    | 0.7108399    | not scorable | not scorable | 1            | 0.7629914    |
| 1490 | Bn-A01-p24720378 | A-genome specific (rapa only)     | not scorable | not scorable | not scorable | not scorable | 0.9834711    | 0.7409135    |
| 1491 | Bn-A01-p24737418 | A-genome specific (rapa only)     | not scorable | not scorable | not scorable | not scorable | 0.7190083    | 0.7509561    |
| 1492 | Bn-A01-p2475676  | A-genome specific (napus-rapa)    | 0.9904306    | 0.8335802    | not scorable | not scorable | 0.9669421    | 0.7403755    |
| 1493 | Bn-A01-p24756888 | A-genome specific (rapa only)     | not scorable | not scorable | not scorable | not scorable | 0.9834711    | 0.7443166    |
| 1494 | Bn-A01-p2478054  | A-genome specific (napus-rapa)    | 0.9880383    | 0.8098974    | not scorable | not scorable | 0.9834711    | 0.7537001    |
| 1495 | Bn-A01-p2478055  | A-genome specific (napus-rapa)    | 0.9904306    | 0.7839454    | not scorable | not scorable | 0.9917355    | 0.8948976    |
| 1496 | Bn-A01-p24811222 | A-genome specific (napus-rapa)    | 0.9832536    | 0.7061973    | not scorable | not scorable | 0.9917355    | 0.7183754    |
| 1497 | Bn-A01-p24812396 | A-genome specific (rapa only)     | not scorable | not scorable | not scorable | not scorable | 1            | 0.7998822    |
| 1498 | Bn-A01-p24813515 | A-genome specific (napus-rapa)    | 0.9114832    | 0.7790854    | not scorable | not scorable | 1            | 0.7214473    |
| 1499 | Bn-A01-p24828081 | A-genome specific (napus-rapa)    | 0.8444976    | 0.6401235    | not scorable | not scorable | 0.9752066    | 0.8474625    |
| 1500 | Bn-A01-p24829245 | A-genome specific (napus-rapa)    | 0.9712918    | 0.7737567    | not scorable | not scorable | 0.9834711    | 0.6725538    |
| 1501 | Bn-A01-p24829988 | A-genome specific (napus-rapa)    | 0.9665072    | 0.7670236    | not scorable | not scorable | 0.9917355    | 0.7559603    |
| 1502 | Bn-A01-p24830111 | A-genome specific (napus-rapa)    | 0.9712918    | 0.7710227    | not scorable | not scorable | 1            | 0.7891905    |
| 1503 | Bn-A01-p24830366 | A-genome specific (napus-rapa)    | 0.9760765    | 0.7959251    | not scorable | not scorable | 0.9917355    | 0.7824134    |
| 1504 | Bn-A01-p24835306 | A-genome specific (napus-rapa)    | 0.9760765    | 0.7540577    | not scorable | not scorable | 0.9917355    | 0.7852557    |
| 1505 | Bn-A01-p24835449 | A-genome specific (napus-rapa)    | 0.9641148    | 0.76271      | not scorable | not scorable | 0.9917355    | 0.7823989    |
| 1506 | Bn-A01-p24839451 | A-genome specific (napus-rapa)    | 0.9712918    | 0.6969022    | not scorable | not scorable | 0.9669421    | 0.6999369    |
| 1507 | Bn-A01-p24839905 | all not scorable                  | not scorable | not scorable | not scorable | not scorable | not scorable | not scorable |
| 1508 | Bn-A01-p24840306 | A-genome specific (napus-rapa)    | 0.9497608    | 0.7121454    | not scorable | not scorable | 0.9917355    | 0.7506587    |
| 1509 | Bn-A01-p24848629 | A-genome specific (napus-rapa)    | 0.9712918    | 0.4086661    | not scorable | not scorable | 0.9669421    | 0.6925956    |
| 1510 | Bn-A01-p24849993 | A-genome specific (napus-rapa)    | 0.9880383    | 0.928963     | not scorable | not scorable | 1            | 0.8751482    |
| 1511 | Bn-A01-p24858036 | A-genome specific (napus-rapa)    | 0.9712918    | 0.3744818    | not scorable | not scorable | 1            | 0.7467463    |
| 1512 | Bn-A01-p24862401 | A-genome specific (napus-rapa)    | 0.9904306    | 0.5692626    | not scorable | not scorable | 1            | 0.8646256    |
| 1513 | Bn-A01-p24880356 | A-genome specific (rapa only)     | not scorable | not scorable | not scorable | not scorable | 0.9752066    | 0.6948057    |
| 1514 | Bn-A01-p24915384 | A-genome specific (napus-rapa)    | 0.9928229    | 0.2656686    | not scorable | not scorable | 0.9917355    | 0.7081516    |
| 1515 | Bn-A01-p2491976  | genome unspecific (oleracea-rapa) | not scorable | not scorable | 0.9689922    | 0.7763976    | 0.9669421    | 0.7203174    |

|      |                  |                                   |              |              |              |              |              |              |              |
|------|------------------|-----------------------------------|--------------|--------------|--------------|--------------|--------------|--------------|--------------|
| 1516 | Bn-A01-p24920662 | A-genome specific (napus-rapa)    | 0.9784689    | 0.7795499    | not scorable | not scorable |              | 1            | 0.7853989    |
| 1517 | Bn-A01-p24921162 | A-genome specific (napus-rapa)    | 0.9880383    | 0.7734184    | not scorable | not scorable | 0.9669421    |              | 0.766748     |
| 1518 | Bn-A01-p24921355 | A-genome specific (napus-rapa)    | 0.9880383    | 0.7848532    | not scorable | not scorable |              | 1            | 0.7023785    |
| 1519 | Bn-A01-p24950985 | A-genome specific (napus-rapa)    | 0.9880383    | 0.6286371    | not scorable | not scorable | 0.9834711    |              | 0.8221104    |
| 1520 | Bn-A01-p24974533 | A-genome specific (rapa only)     | not scorable | not scorable | not scorable | not scorable |              | 1            | 0.7177046    |
| 1521 | Bn-A01-p24976705 | A-genome specific (rapa only)     | not scorable | not scorable | not scorable | not scorable |              | 1            | 0.7681012    |
| 1522 | Bn-A01-p24981413 | A-genome specific (rapa only)     | not scorable | not scorable | not scorable | not scorable |              | 1            | 0.8298145    |
| 1523 | Bn-A01-p25007130 | A-genome specific (rapa only)     | not scorable | not scorable | not scorable | not scorable |              | 1            | 0.7098919    |
| 1524 | Bn-A01-p2501423  | A-genome specific (napus-rapa)    | 0.937799     | 0.7924248    | not scorable | not scorable | 0.9917355    |              | 0.7531719    |
| 1525 | Bn-A01-p25032772 | A-genome specific (napus-rapa)    | 0.8325359    | 0.8315535    | not scorable | not scorable | 0.9669421    |              | 0.7183945    |
| 1526 | Bn-A01-p25040577 | A-genome specific (napus-rapa)    | 0.8181818    | 0.6237687    | not scorable | not scorable | 0.9917355    |              | 0.6249232    |
| 1527 | Bn-A01-p2504370  | A-genome specific (napus-rapa)    | 0.9665072    | 0.5298676    | not scorable | not scorable | 0.9669421    |              | 0.5865411    |
| 1528 | Bn-A01-p25050109 | napus specific                    | 0.7942584    | 0.7649186    | not scorable | not scorable | not scorable | not scorable | not scorable |
| 1529 | Bn-A01-p25061137 | A-genome specific (rapa only)     | not scorable | not scorable | not scorable | not scorable |              | 1            | 0.6876795    |
| 1530 | Bn-A01-p25070443 | A-genome specific (rapa only)     | not scorable | not scorable | not scorable | not scorable |              | 1            | 0.7276598    |
| 1531 | Bn-A01-p25072800 | A-genome specific (napus-rapa)    | 0.8732057    | 0.7136853    | not scorable | not scorable | 0.9834711    |              | 0.663849     |
| 1532 | Bn-A01-p250759   | A-genome specific (napus-rapa)    | 0.8516746    | 0.5970012    | not scorable | not scorable |              | 1            | 0.8675878    |
| 1533 | Bn-A01-p25079412 | A-genome specific (rapa only)     | not scorable | not scorable | not scorable | not scorable |              | 1            | 0.6824101    |
| 1534 | Bn-A01-p25079505 | genome unspecific (oleracea-rapa) | not scorable | not scorable |              | 1            | 0.6769527    | 0.9917355    | 0.7303389    |
| 1535 | Bn-A01-p2509163  | A-genome specific (napus-rapa)    | 0.9904306    | 0.7483288    | not scorable | not scorable |              | 1            | 0.8552703    |
| 1536 | Bn-A01-p25099980 | A-genome specific (rapa only)     | not scorable | not scorable | not scorable | not scorable |              | 1            | 0.8293523    |
| 1537 | Bn-A01-p25100490 | A-genome specific (rapa only)     | not scorable | not scorable | not scorable | not scorable |              | 1            | 0.8545477    |
| 1538 | Bn-A01-p25101023 | all not scorable                  | not scorable | not scorable | not scorable | not scorable | not scorable | not scorable | not scorable |
| 1539 | Bn-A01-p25117730 | A-genome specific (rapa only)     | not scorable | not scorable | not scorable | not scorable | 0.9917355    |              | 0.6995957    |
| 1540 | Bn-A01-p25143334 | A-genome specific (rapa only)     | not scorable | not scorable | not scorable | not scorable | 0.9586777    |              | 0.7124214    |
| 1541 | Bn-A01-p25171870 | A-genome specific (napus-rapa)    | 0.9641148    | 0.673611     | not scorable | not scorable | 0.9669421    |              | 0.5965027    |
| 1542 | Bn-A01-p25175675 | A-genome specific (napus-rapa)    | 0.9904306    | 0.4201587    | not scorable | not scorable | 0.9834711    |              | 0.7826332    |
| 1543 | Bn-A01-p2517658  | A-genome specific (rapa only)     | not scorable | not scorable | not scorable | not scorable | 0.9669421    |              | 0.7787679    |
| 1544 | Bn-A01-p25183707 | A-genome specific (napus-rapa)    | 0.9760765    | 0.4232383    | not scorable | not scorable |              | 1            | 0.6547667    |
| 1545 | Bn-A01-p25196502 | A-genome specific (napus-rapa)    | 0.9880383    | 0.8362558    | not scorable | not scorable |              | 1            | 0.8185435    |
| 1546 | Bn-A01-p25199395 | A-genome specific (napus-rapa)    | 0.9760765    | 0.7669085    | not scorable | not scorable | 0.9917355    |              | 0.8103641    |
| 1547 | Bn-A01-p25200386 | A-genome specific (napus-rapa)    | 0.9880383    | 0.7959126    | not scorable | not scorable |              | 1            | 0.7050563    |
| 1548 | Bn-A01-p25235998 | A-genome specific (napus-rapa)    | 0.9880383    | 0.3322228    | not scorable | not scorable | 0.9669421    |              | 0.774264     |

|      |                  |                                |              |              |              |              |              |              |
|------|------------------|--------------------------------|--------------|--------------|--------------|--------------|--------------|--------------|
| 1549 | Bn-A01-p25255567 | A-genome specific (rapa only)  | not scorable | not scorable | not scorable | not scorable | 1            | 0.6599271    |
| 1550 | Bn-A01-p25258657 | A-genome specific (rapa only)  | not scorable | not scorable | not scorable | not scorable | 0.9256198    | 0.7803772    |
| 1551 | Bn-A01-p25259103 | A-genome specific (rapa only)  | not scorable | not scorable | not scorable | not scorable | 0.9917355    | 0.7087636    |
| 1552 | Bn-A01-p25259292 | A-genome specific (rapa only)  | not scorable | not scorable | not scorable | not scorable | 0.9917355    | 0.7659664    |
| 1553 | Bn-A01-p25260327 | A-genome specific (rapa only)  | not scorable | not scorable | not scorable | not scorable | 1            | 0.8254527    |
| 1554 | Bn-A01-p25260589 | A-genome specific (rapa only)  | not scorable | not scorable | not scorable | not scorable | 1            | 0.7226265    |
| 1555 | Bn-A01-p25260919 | A-genome specific (rapa only)  | not scorable | not scorable | not scorable | not scorable | 0.9834711    | 0.7707136    |
| 1556 | Bn-A01-p25267377 | A-genome specific (napus-rapa) | 0.9736842    | 0.6954525    | not scorable | not scorable | 1            | 0.7010509    |
| 1557 | Bn-A01-p25279161 | A-genome specific (napus-rapa) | 0.6076555    | 0.809734     | not scorable | not scorable | 0.6198347    | 0.7973475    |
| 1558 | Bn-A01-p25311527 | A-genome specific (rapa only)  | not scorable | not scorable | not scorable | not scorable | 1            | 0.7161973    |
| 1559 | Bn-A01-p25326722 | A-genome specific (napus-rapa) | 0.9856459    | 0.6084388    | not scorable | not scorable | 1            | 0.7342008    |
| 1560 | Bn-A01-p25327241 | A-genome specific (napus-rapa) | 1            | 0.8293141    | not scorable | not scorable | 1            | 0.807766     |
| 1561 | Bn-A01-p2533727  | A-genome specific (napus-rapa) | 0.9976076    | 0.4080127    | not scorable | not scorable | 0.9834711    | 0.6731198    |
| 1562 | Bn-A01-p25349875 | A-genome specific (napus-rapa) | 0.9545454    | 0.2165197    | not scorable | not scorable | 0.9421487    | 0.7213356    |
| 1563 | Bn-A01-p25350397 | A-genome specific (napus-rapa) | 0.8971292    | 0.5441456    | not scorable | not scorable | 0.9917355    | 0.8030928    |
| 1564 | Bn-A01-p25351684 | A-genome specific (napus-rapa) | 0.9880383    | 0.784217     | not scorable | not scorable | 1            | 0.6944329    |
| 1565 | Bn-A01-p25352753 | A-genome specific (napus-rapa) | 0.9808612    | 0.7879115    | not scorable | not scorable | 1            | 0.7608553    |
| 1566 | Bn-A01-p25363566 | A-genome specific (napus-rapa) | 0.9784689    | 0.8070248    | not scorable | not scorable | 0.9752066    | 0.6411145    |
| 1567 | Bn-A01-p25364218 | A-genome specific (napus-rapa) | 0.9808612    | 0.568985     | not scorable | not scorable | 1            | 0.6798471    |
| 1568 | Bn-A01-p25377739 | A-genome specific (napus-rapa) | 0.9736842    | 0.6431644    | not scorable | not scorable | 1            | 0.521526     |
| 1569 | Bn-A01-p2538180  | A-genome specific (napus-rapa) | 0.9760765    | 0.5830104    | not scorable | not scorable | 0.9669421    | 0.7880175    |
| 1570 | Bn-A01-p25389497 | all not scorable               | not scorable | not scorable | not scorable | not scorable | not scorable | not scorable |
| 1571 | Bn-A01-p25391997 | A-genome specific (napus-rapa) | 0.9736842    | 0.7723963    | not scorable | not scorable | 0.9752066    | 0.8450002    |
| 1572 | Bn-A01-p25397605 | A-genome specific (napus-rapa) | 0.9976076    | 0.7205103    | not scorable | not scorable | 0.9917355    | 0.7431399    |
| 1573 | Bn-A01-p25405698 | A-genome specific (napus-rapa) | 0.9928229    | 0.289308     | not scorable | not scorable | 0.9834711    | 0.757373     |
| 1574 | Bn-A01-p25428278 | A-genome specific (napus-rapa) | 0.9808612    | 0.7101657    | not scorable | not scorable | 0.9504132    | 0.7796092    |
| 1575 | Bn-A01-p25429100 | A-genome specific (napus-rapa) | 0.9952153    | 0.8599785    | not scorable | not scorable | 0.7107438    | 0.8382545    |
| 1576 | Bn-A01-p25444722 | A-genome specific (rapa only)  | not scorable | not scorable | not scorable | not scorable | 0.9917355    | 0.7594981    |
| 1577 | Bn-A01-p25453874 | A-genome specific (napus-rapa) | 0.9736842    | 0.4813457    | not scorable | not scorable | 1            | 0.6962444    |
| 1578 | Bn-A01-p25462155 | A-genome specific (rapa only)  | not scorable | not scorable | not scorable | not scorable | 1            | 0.8127098    |
| 1579 | Bn-A01-p25470470 | A-genome specific (napus-rapa) | 0.9808612    | 0.7856573    | not scorable | not scorable | 0.9752066    | 0.7677757    |
| 1580 | Bn-A01-p25480187 | A-genome specific (rapa only)  | not scorable | not scorable | not scorable | not scorable | 0.9752066    | 0.7956141    |
| 1581 | Bn-A01-p25480397 | A-genome specific (rapa only)  | not scorable | not scorable | not scorable | not scorable | 0.9834711    | 0.6662053    |



|      |                  |                                |              |              |              |              |           |           |
|------|------------------|--------------------------------|--------------|--------------|--------------|--------------|-----------|-----------|
| 1582 | Bn-A01-p25509783 | A-genome specific (rapa only)  | not scorable | not scorable | not scorable | not scorable | 1         | 0.7019389 |
| 1583 | Bn-A01-p25512934 | A-genome specific (napus-rapa) | 0.9832536    | 0.8282065    | not scorable | not scorable | 0.6115702 | 0.7569256 |
| 1584 | Bn-A01-p25513710 | A-genome specific (napus-rapa) | 0.9928229    | 0.7697304    | not scorable | not scorable | 1         | 0.7597374 |
| 1585 | Bn-A01-p25517197 | A-genome specific (napus-rapa) | 0.9880383    | 0.5899979    | not scorable | not scorable | 0.5619835 | 0.6304076 |
| 1586 | Bn-A01-p25517270 | A-genome specific (rapa only)  | not scorable | not scorable | not scorable | not scorable | 0.9834711 | 0.8219146 |
| 1587 | Bn-A01-p25518745 | A-genome specific (rapa only)  | not scorable | not scorable | not scorable | not scorable | 0.9834711 | 0.8812889 |
| 1588 | Bn-A01-p2553345  | A-genome specific (napus-rapa) | 0.9904306    | 0.8359692    | not scorable | not scorable | 0.9917355 | 0.7963902 |
| 1589 | Bn-A01-p25555508 | A-genome specific (napus-rapa) | 0.8684211    | 0.77848      | not scorable | not scorable | 0.9834711 | 0.8703188 |
| 1590 | Bn-A01-p25561204 | A-genome specific (rapa only)  | not scorable | not scorable | not scorable | not scorable | 0.9834711 | 0.795249  |
| 1591 | Bn-A01-p25562652 | A-genome specific (rapa only)  | not scorable | not scorable | not scorable | not scorable | 0.9752066 | 0.7071002 |
| 1592 | Bn-A01-p25570701 | A-genome specific (rapa only)  | not scorable | not scorable | not scorable | not scorable | 0.9752066 | 0.775996  |
| 1593 | Bn-A01-p25572254 | A-genome specific (rapa only)  | not scorable | not scorable | not scorable | not scorable | 0.9834711 | 0.6962332 |
| 1594 | Bn-A01-p25577348 | A-genome specific (napus-rapa) | 0.8660287    | 0.8042552    | not scorable | not scorable | 0.9669421 | 0.7670889 |
| 1595 | Bn-A01-p25580651 | A-genome specific (rapa only)  | not scorable | not scorable | not scorable | not scorable | 1         | 0.8513826 |
| 1596 | Bn-A01-p25591508 | A-genome specific (rapa only)  | not scorable | not scorable | not scorable | not scorable | 0.9834711 | 0.750864  |
| 1597 | Bn-A01-p2569303  | A-genome specific (napus-rapa) | 0.9880383    | 0.7404099    | not scorable | not scorable | 0.9917355 | 0.7474413 |
| 1598 | Bn-A01-p2574969  | A-genome specific (napus-rapa) | 0.9593301    | 0.4939444    | not scorable | not scorable | 0.9834711 | 0.6824396 |
| 1599 | Bn-A01-p25750911 | A-genome specific (napus-rapa) | 0.9904306    | 0.7645283    | not scorable | not scorable | 1         | 0.7694198 |
| 1600 | Bn-A01-p2575497  | A-genome specific (napus-rapa) | 0.9712918    | 0.6934321    | not scorable | not scorable | 1         | 0.8270477 |
| 1601 | Bn-A01-p2587709  | A-genome specific (napus-rapa) | 0.9593301    | 0.6222298    | not scorable | not scorable | 1         | 0.7796671 |
| 1602 | Bn-A01-p25898606 | A-genome specific (napus-rapa) | 1            | 0.5482896    | not scorable | not scorable | 1         | 0.5871008 |
| 1603 | Bn-A01-p26010353 | A-genome specific (napus-rapa) | 0.9856459    | 0.615495     | not scorable | not scorable | 1         | 0.6975942 |
| 1604 | Bn-A01-p26064479 | A-genome specific (napus-rapa) | 0.9856459    | 0.5602459    | not scorable | not scorable | 0.9917355 | 0.7934078 |
| 1605 | Bn-A01-p2608660  | A-genome specific (napus-rapa) | 0.9904306    | 0.7366656    | not scorable | not scorable | 1         | 0.84435   |
| 1606 | Bn-A01-p2624222  | A-genome specific (napus-rapa) | 0.9688995    | 0.3626452    | not scorable | not scorable | 1         | 0.8290663 |
| 1607 | Bn-A01-p2626270  | A-genome specific (napus-rapa) | 0.9641148    | 0.7752636    | not scorable | not scorable | 1         | 0.6829811 |
| 1608 | Bn-A01-p2634563  | A-genome specific (napus-rapa) | 0.9688995    | 0.2637914    | not scorable | not scorable | 0.9752066 | 0.6170012 |
| 1609 | Bn-A01-p26366791 | A-genome specific (napus-rapa) | 0.9784689    | 0.6954595    | not scorable | not scorable | 0.9834711 | 0.6575026 |
| 1610 | Bn-A01-p26369426 | A-genome specific (napus-rapa) | 0.6650718    | 0.9205657    | not scorable | not scorable | 0.7024794 | 0.8007924 |
| 1611 | Bn-A01-p26369651 | A-genome specific (napus-rapa) | 1            | 0.8093156    | not scorable | not scorable | 0.9834711 | 0.6622275 |
| 1612 | Bn-A01-p2637699  | A-genome specific (napus-rapa) | 0.6650718    | 0.8008664    | not scorable | not scorable | 1         | 0.8570511 |
| 1613 | Bn-A01-p26380200 | A-genome specific (rapa only)  | not scorable | not scorable | not scorable | not scorable | 0.9669421 | 0.740419  |
| 1614 | Bn-A01-p26384777 | A-genome specific (rapa only)  | not scorable | not scorable | not scorable | not scorable | 1         | 0.9077223 |

|      |                  |                                   |              |              |              |              |           |           |
|------|------------------|-----------------------------------|--------------|--------------|--------------|--------------|-----------|-----------|
| 1615 | Bn-A01-p26400154 | A-genome specific (napus-rapa)    | 0.9688995    | 0.6682233    | not scorable | not scorable | 0.9917355 | 0.8313791 |
| 1616 | Bn-A01-p26423587 | A-genome specific (napus-rapa)    | 0.9688995    | 0.7842595    | not scorable | not scorable | 0.9834711 | 0.6842724 |
| 1617 | Bn-A01-p26425810 | A-genome specific (napus-rapa)    | 0.9665072    | 0.7088943    | not scorable | not scorable | 0.6942149 | 0.8734109 |
| 1618 | Bn-A01-p26426004 | A-genome specific (napus-rapa)    | 0.9760765    | 0.5383828    | not scorable | not scorable | 0.9752066 | 0.6775534 |
| 1619 | Bn-A01-p26447438 | A-genome specific (napus-rapa)    | 0.9880383    | 0.7560492    | not scorable | not scorable | 1         | 0.7910574 |
| 1620 | Bn-A01-p26461873 | A-genome specific (rapa only)     | not scorable | not scorable | not scorable | not scorable | 0.9834711 | 0.7643821 |
| 1621 | Bn-A01-p2647221  | A-genome specific (napus-rapa)    | 0.9976076    | 0.4508382    | not scorable | not scorable | 1         | 0.6124635 |
| 1622 | Bn-A01-p26515072 | A-genome specific (rapa only)     | not scorable | not scorable | not scorable | not scorable | 1         | 0.7033863 |
| 1623 | Bn-A01-p26516918 | A-genome specific (rapa only)     | not scorable | not scorable | not scorable | not scorable | 1         | 0.67151   |
| 1624 | Bn-A01-p26518304 | genome unspecific (all in)        | 0.9808612    | 0.3732749    | 0.9844961    | 0.6722978    | 0.9917355 | 0.702432  |
| 1625 | Bn-A01-p26519047 | A-genome specific (napus-rapa)    | 0.9688995    | 0.5022182    | not scorable | not scorable | 1         | 0.7389509 |
| 1626 | Bn-A01-p26541761 | A-genome specific (napus-rapa)    | 0.9832536    | 0.6988035    | not scorable | not scorable | 1         | 0.7355374 |
| 1627 | Bn-A01-p26543758 | A-genome specific (napus-rapa)    | 0.9760765    | 0.9241689    | not scorable | not scorable | 1         | 0.6946182 |
| 1628 | Bn-A01-p26568738 | A-genome specific (rapa only)     | not scorable | not scorable | not scorable | not scorable | 0.9834711 | 0.6525146 |
| 1629 | Bn-A01-p26571596 | A-genome specific (napus-rapa)    | 0.8444976    | 0.8652158    | not scorable | not scorable | 0.6528926 | 0.7360749 |
| 1630 | Bn-A01-p26572331 | A-genome specific (rapa only)     | not scorable | not scorable | not scorable | not scorable | 1         | 0.8116723 |
| 1631 | Bn-A01-p26575652 | genome unspecific (all in)        | 0.9569378    | 0.2610116    |              | 1 0.7531129  | 1         | 0.8193658 |
| 1632 | Bn-A01-p26589959 | A-genome specific (napus-rapa)    | 0.9952153    | 0.5221454    | not scorable | not scorable | 0.9917355 | 0.6602874 |
| 1633 | Bn-A01-p26592021 | genome unspecific (oleracea-rapa) | not scorable | not scorable | 0.6046512    | 0.6249839    | 0.9917355 | 0.609157  |
| 1634 | Bn-A01-p26594603 | A-genome specific (napus-rapa)    | 0.854067     | 0.3610093    | not scorable | not scorable | 0.9917355 | 0.7388162 |
| 1635 | Bn-A01-p26604864 | A-genome specific (napus-rapa)    | 0.9473684    | 0.7415193    | not scorable | not scorable | 0.9669421 | 0.794245  |
| 1636 | Bn-A01-p26614232 | A-genome specific (napus-rapa)    | 0.937799     | 0.7755526    | not scorable | not scorable | 0.6859504 | 0.7463118 |
| 1637 | Bn-A01-p26624315 | A-genome specific (rapa only)     | not scorable | not scorable | not scorable | not scorable | 0.9917355 | 0.8170115 |
| 1638 | Bn-A01-p26627091 | A-genome specific (rapa only)     | not scorable | not scorable | not scorable | not scorable | 1         | 0.6677487 |
| 1639 | Bn-A01-p26658327 | A-genome specific (rapa only)     | not scorable | not scorable | not scorable | not scorable | 1         | 0.873747  |
| 1640 | Bn-A01-p2667471  | A-genome specific (napus-rapa)    | 0.9856459    | 0.723443     | not scorable | not scorable | 0.9752066 | 0.8243435 |
| 1641 | Bn-A01-p2667691  | A-genome specific (napus-rapa)    | 0.9808612    | 0.7911763    | not scorable | not scorable | 0.9834711 | 0.8258467 |
| 1642 | Bn-A01-p2667767  | genome unspecific (all in)        | 0.9736842    | 0.3710898    | 0.9302326    | 0.2758512    | 0.9752066 | 0.721679  |
| 1643 | Bn-A01-p26685015 | A-genome specific (rapa only)     | not scorable | not scorable | not scorable | not scorable | 0.9834711 | 0.7691421 |
| 1644 | Bn-A01-p26685077 | A-genome specific (rapa only)     | not scorable | not scorable | not scorable | not scorable | 0.9752066 | 0.81042   |
| 1645 | Bn-A01-p26688333 | A-genome specific (napus-rapa)    | 0.9808612    | 0.2916954    | not scorable | not scorable | 0.9834711 | 0.7743217 |
| 1646 | Bn-A01-p2668951  | A-genome specific (napus-rapa)    | 0.9808612    | 0.6611878    | not scorable | not scorable | 0.9917355 | 0.8018193 |
| 1647 | Bn-A01-p26713360 | A-genome specific (rapa only)     | not scorable | not scorable | not scorable | not scorable | 0.9917355 | 0.8115249 |

|      |                  |                                   |              |              |              |              |              |              |
|------|------------------|-----------------------------------|--------------|--------------|--------------|--------------|--------------|--------------|
| 1648 | Bn-A01-p26715665 | A-genome specific (rapa only)     | not scorable | not scorable | not scorable | not scorable | 0.9669421    | 0.6890505    |
| 1649 | Bn-A01-p26716060 | A-genome specific (napus-rapa)    | 0.9712918    | 0.3123906    | not scorable | not scorable | 1            | 0.7099588    |
| 1650 | Bn-A01-p26722319 | A-genome specific (napus-rapa)    | 0.9808612    | 0.4783655    | not scorable | not scorable | 0.9917355    | 0.689772     |
| 1651 | Bn-A01-p26759778 | A-genome specific (napus-rapa)    | 0.9521531    | 0.7195595    | not scorable | not scorable | 0.9834711    | 0.6986067    |
| 1652 | Bn-A01-p26760158 | genome unspecific (oleracea-rapa) | not scorable | not scorable |              | 1            | 0.7360497    | 0.9834711    |
| 1653 | Bn-A01-p26767819 | A-genome specific (rapa only)     | not scorable | not scorable | not scorable | not scorable | 0.9834711    | 0.779614     |
| 1654 | Bn-A01-p26829665 | all not scorable                  | not scorable | not scorable | not scorable | not scorable | not scorable | not scorable |
| 1655 | Bn-A01-p26837207 | A-genome specific (napus-rapa)    | 0.9736842    | 0.8089336    | not scorable | not scorable | 0.9917355    | 0.7124652    |
| 1656 | Bn-A01-p26853670 | A-genome specific (rapa only)     | not scorable | not scorable | not scorable | not scorable | 0.9008265    | 0.7397743    |
| 1657 | Bn-A01-p26866541 | A-genome specific (rapa only)     | not scorable | not scorable | not scorable | not scorable | 0.9917355    | 0.7490847    |
| 1658 | Bn-A01-p2688662  | A-genome specific (napus-rapa)    | 0.9928229    | 0.5515639    | not scorable | not scorable | 0.6859504    | 0.7051241    |
| 1659 | Bn-A01-p26910983 | A-genome specific (rapa only)     | not scorable | not scorable | not scorable | not scorable | 1            | 0.7336277    |
| 1660 | Bn-A01-p26914512 | A-genome specific (napus-rapa)    | 0.9545454    | 0.6756006    | not scorable | not scorable | 0.9917355    | 0.5329408    |
| 1661 | Bn-A01-p26914851 | A-genome specific (napus-rapa)    | 0.9497608    | 0.2426034    | not scorable | not scorable | 0.9917355    | 0.6924549    |
| 1662 | Bn-A01-p26921219 | A-genome specific (napus-rapa)    | 0.9832536    | 0.3716201    | not scorable | not scorable | 0.9752066    | 0.5742437    |
| 1663 | Bn-A01-p26921609 | genome unspecific (all in)        | 0.9641148    | 0.4161336    |              | 1            | 0.6501446    | 1            |
| 1664 | Bn-A01-p26940404 | A-genome specific (napus-rapa)    | 0.9760765    | 0.6928773    | not scorable | not scorable | 1            | 0.6974153    |
| 1665 | Bn-A01-p2694323  | A-genome specific (napus-rapa)    | 0.9880383    | 0.4965835    | not scorable | not scorable | 0.9834711    | 0.7093155    |
| 1666 | Bn-A01-p26945726 | A-genome specific (rapa only)     | not scorable | not scorable | not scorable | not scorable | 0.9338843    | 0.7810817    |
| 1667 | Bn-A01-p26946254 | A-genome specific (rapa only)     | not scorable | not scorable | not scorable | not scorable | 0.9752066    | 0.7256585    |
| 1668 | Bn-A01-p26956455 | A-genome specific (napus-rapa)    | 0.9688995    | 0.7827863    | not scorable | not scorable | 1            | 0.8139744    |
| 1669 | Bn-A01-p26965229 | A-genome specific (rapa only)     | not scorable | not scorable | not scorable | not scorable | 0.9669421    | 0.7229632    |
| 1670 | Bn-A01-p26966407 | A-genome specific (napus-rapa)    | 0.9569378    | 0.8092843    | not scorable | not scorable | 0.9917355    | 0.8564767    |
| 1671 | Bn-A01-p26968952 | A-genome specific (napus-rapa)    | 0.9641148    | 0.7950211    | not scorable | not scorable | 0.8016529    | 0.9056543    |
| 1672 | Bn-A01-p26969210 | A-genome specific (napus-rapa)    | 0.9617225    | 0.3783558    | not scorable | not scorable | 1            | 0.7606742    |
| 1673 | Bn-A01-p26973178 | A-genome specific (napus-rapa)    | 0.9593301    | 0.4139059    | not scorable | not scorable | 1            | 0.7689937    |
| 1674 | Bn-A01-p26985090 | A-genome specific (napus-rapa)    | 0.9880383    | 0.2568854    | not scorable | not scorable | 0.9917355    | 0.8004847    |
| 1675 | Bn-A01-p26990131 | A-genome specific (napus-rapa)    | 0.9545454    | 0.7705088    | not scorable | not scorable | 0.9504132    | 0.7806082    |
| 1676 | Bn-A01-p26996900 | A-genome specific (rapa only)     | not scorable | not scorable | not scorable | not scorable | 1            | 0.8263984    |
| 1677 | Bn-A01-p26998962 | A-genome specific (napus-rapa)    | 0.9641148    | 0.7970244    | not scorable | not scorable | 0.9917355    | 0.7937827    |
| 1678 | Bn-A01-p2699907  | A-genome specific (napus-rapa)    | 0.9928229    | 0.5025808    | not scorable | not scorable | 1            | 0.6625305    |
| 1679 | Bn-A01-p27004740 | A-genome specific (napus-rapa)    | 0.9976076    | 0.4138593    | not scorable | not scorable | 0.9834711    | 0.6067383    |
| 1680 | Bn-A01-p27012139 | A-genome specific (rapa only)     | not scorable | not scorable | not scorable | not scorable | 0.9669421    | 0.6144933    |

|      |                  |                                |              |              |              |              |              |              |
|------|------------------|--------------------------------|--------------|--------------|--------------|--------------|--------------|--------------|
| 1681 | Bn-A01-p27017324 | A-genome specific (napus-rapa) | 0.9712918    | 0.7670439    | not scorable | not scorable | 0.9752066    | 0.8035139    |
| 1682 | Bn-A01-p27017651 | A-genome specific (napus-rapa) | 0.7464115    | 0.9348852    | not scorable | not scorable | 0.7107438    | 0.8875333    |
| 1683 | Bn-A01-p27019745 | A-genome specific (napus-rapa) | 0.9401914    | 0.2796735    | not scorable | not scorable | 1            | 0.6578092    |
| 1684 | Bn-A01-p27029107 | A-genome specific (napus-rapa) | 0.9712918    | 0.7035935    | not scorable | not scorable | 0.9917355    | 0.6642047    |
| 1685 | Bn-A01-p27029254 | A-genome specific (napus-rapa) | 0.9760765    | 0.7797901    | not scorable | not scorable | 0.9917355    | 0.7151884    |
| 1686 | Bn-A01-p27037472 | A-genome specific (napus-rapa) | 0.9593301    | 0.7365149    | not scorable | not scorable | 0.9834711    | 0.777812     |
| 1687 | Bn-A01-p27050083 | A-genome specific (napus-rapa) | 0.9808612    | 0.7951952    | not scorable | not scorable | 1            | 0.7197951    |
| 1688 | Bn-A01-p27060364 | A-genome specific (napus-rapa) | 0.9473684    | 0.7583688    | not scorable | not scorable | 0.9834711    | 0.7008753    |
| 1689 | Bn-A01-p27061075 | A-genome specific (napus-rapa) | 0.9617225    | 0.7225438    | not scorable | not scorable | 0.5702479    | 0.6977504    |
| 1690 | Bn-A01-p27079797 | A-genome specific (rapa only)  | not scorable | not scorable | not scorable | not scorable | 0.9834711    | 0.7477164    |
| 1691 | Bn-A01-p27101289 | A-genome specific (napus-rapa) | 1            | 0.4302978    | not scorable | not scorable | 1            | 0.8129535    |
| 1692 | Bn-A01-p27107081 | A-genome specific (napus-rapa) | 0.9856459    | 0.3985004    | not scorable | not scorable | 1            | 0.8831033    |
| 1693 | Bn-A01-p27115455 | A-genome specific (rapa only)  | not scorable | not scorable | not scorable | not scorable | 0.9917355    | 0.7271727    |
| 1694 | Bn-A01-p27117954 | A-genome specific (rapa only)  | not scorable | not scorable | not scorable | not scorable | 0.9917355    | 0.6898228    |
| 1695 | Bn-A01-p27119250 | genome unspecific (all in)     | 0.9856459    | 0.4498782    | 0.9922481    | 0.5605261    | 1            | 0.7542568    |
| 1696 | Bn-A01-p27125649 | A-genome specific (napus-rapa) | 0.9880383    | 0.3834951    | not scorable | not scorable | 0.9917355    | 0.7938709    |
| 1697 | Bn-A01-p2713439  | A-genome specific (napus-rapa) | 0.5598086    | 0.818283     | not scorable | not scorable | 0.9421487    | 0.7534826    |
| 1698 | Bn-A01-p2713528  | A-genome specific (napus-rapa) | 0.9569378    | 0.8000318    | not scorable | not scorable | 0.9917355    | 0.7873488    |
| 1699 | Bn-A01-p2713583  | A-genome specific (napus-rapa) | 0.9832536    | 0.7885799    | not scorable | not scorable | 0.9834711    | 0.7803199    |
| 1700 | Bn-A01-p27147782 | A-genome specific (napus-rapa) | 0.8732057    | 0.3912995    | not scorable | not scorable | 0.9752066    | 0.7209196    |
| 1701 | Bn-A01-p2715156  | A-genome specific (rapa only)  | not scorable | not scorable | not scorable | not scorable | 0.8512397    | 0.8030821    |
| 1702 | Bn-A01-p2718126  | A-genome specific (napus-rapa) | 0.9832536    | 0.8021598    | not scorable | not scorable | 0.9917355    | 0.820279     |
| 1703 | Bn-A01-p27202461 | A-genome specific (rapa only)  | not scorable | not scorable | not scorable | not scorable | 0.9917355    | 0.800547     |
| 1704 | Bn-A01-p27220075 | A-genome specific (rapa only)  | not scorable | not scorable | not scorable | not scorable | 1            | 0.7757145    |
| 1705 | Bn-A01-p27225628 | A-genome specific (napus-rapa) | 0.9976076    | 0.4919578    | not scorable | not scorable | 1            | 0.7707056    |
| 1706 | Bn-A01-p27263558 | A-genome specific (rapa only)  | not scorable | not scorable | not scorable | not scorable | 0.9917355    | 0.7293021    |
| 1707 | Bn-A01-p27272066 | A-genome specific (napus-rapa) | 0.9832536    | 0.2431741    | not scorable | not scorable | 0.9834711    | 0.7385784    |
| 1708 | Bn-A01-p27280214 | all not scorable               | not scorable | not scorable | not scorable | not scorable | not scorable | not scorable |
| 1709 | Bn-A01-p27293125 | A-genome specific (rapa only)  | not scorable | not scorable | not scorable | not scorable | 1            | 0.7710881    |
| 1710 | Bn-A01-p27299339 | A-genome specific (rapa only)  | not scorable | not scorable | not scorable | not scorable | 0.9752066    | 0.686775     |
| 1711 | Bn-A01-p27301264 | A-genome specific (napus-rapa) | 0.9832536    | 0.4795091    | not scorable | not scorable | 0.9669421    | 0.7520791    |
| 1712 | Bn-A01-p27301637 | A-genome specific (rapa only)  | not scorable | not scorable | not scorable | not scorable | 0.9917355    | 0.7782217    |
| 1713 | Bn-A01-p27301980 | A-genome specific (rapa only)  | not scorable | not scorable | not scorable | not scorable | 0.9917355    | 0.7005582    |

|                       |                                   |              |              |              |              |              |              |
|-----------------------|-----------------------------------|--------------|--------------|--------------|--------------|--------------|--------------|
| 1714 Bn-A01-p27302144 | A-genome specific (rapa only)     | not scorable | not scorable | not scorable | not scorable | 0.9669421    | 0.7911367    |
| 1715 Bn-A01-p27318082 | A-genome specific (rapa only)     | not scorable | not scorable | not scorable | not scorable | 0.9834711    | 0.638901     |
| 1716 Bn-A01-p27320515 | A-genome specific (rapa only)     | not scorable | not scorable | not scorable | not scorable | 0.6942149    | 0.8224226    |
| 1717 Bn-A01-p27331467 | A-genome specific (napus-rapa)    | 0.9641148    | 0.6307237    | not scorable | not scorable | 0.7024794    | 0.7799551    |
| 1718 Bn-A01-p27336799 | A-genome specific (rapa only)     | not scorable | not scorable | not scorable | not scorable | 0.9917355    | 0.6770988    |
| 1719 Bn-A01-p27348128 | A-genome specific (napus-rapa)    | 0.9856459    | 0.3866173    | not scorable | not scorable | 1            | 0.8445116    |
| 1720 Bn-A01-p27360503 | A-genome specific (napus-rapa)    | 0.9688995    | 0.3792932    | not scorable | not scorable | 1            | 0.875935     |
| 1721 Bn-A01-p27361855 | A-genome specific (napus-rapa)    | 0.9976076    | 0.555003     | not scorable | not scorable | 0.9834711    | 0.6815073    |
| 1722 Bn-A01-p27381111 | A-genome specific (rapa only)     | not scorable | not scorable | not scorable | not scorable | 0.9917355    | 0.65742      |
| 1723 Bn-A01-p27389703 | A-genome specific (rapa only)     | not scorable | not scorable | not scorable | not scorable | 1            | 0.7646528    |
| 1724 Bn-A01-p27392534 | A-genome specific (napus-rapa)    | 0.9952153    | 0.4685433    | not scorable | not scorable | 0.9834711    | 0.7262161    |
| 1725 Bn-A01-p27417163 | A-genome specific (napus-rapa)    | 1            | 0.4133775    | not scorable | not scorable | 0.9917355    | 0.5353597    |
| 1726 Bn-A01-p27463135 | A-genome specific (napus-rapa)    | 0.9928229    | 0.8263522    | not scorable | not scorable | 1            | 0.7819124    |
| 1727 Bn-A01-p2746862  | A-genome specific (rapa only)     | not scorable | not scorable | not scorable | not scorable | 0.9917355    | 0.7796991    |
| 1728 Bn-A01-p27522299 | genome unspecific (oleracea-rapa) | not scorable | not scorable | 1            | 0.2938209    | 0.9669421    | 0.7448333    |
| 1729 Bn-A01-p27570336 | A-genome specific (rapa only)     | not scorable | not scorable | not scorable | not scorable | 0.9917355    | 0.7193253    |
| 1730 Bn-A01-p27570489 | A-genome specific (rapa only)     | not scorable | not scorable | not scorable | not scorable | 1            | 0.8490494    |
| 1731 Bn-A01-p27573404 | A-genome specific (rapa only)     | not scorable | not scorable | not scorable | not scorable | 1            | 0.7003347    |
| 1732 Bn-A01-p27580681 | A-genome specific (napus-rapa)    | 0.4832536    | 0.6559853    | not scorable | not scorable | 0.6446281    | 0.7950267    |
| 1733 Bn-A01-p27581056 | A-genome specific (napus-rapa)    | 0.492823     | 0.6759167    | not scorable | not scorable | 0.6694215    | 0.8353992    |
| 1734 Bn-A01-p27589456 | A-genome specific (napus-rapa)    | 0.9976076    | 0.4253203    | not scorable | not scorable | 0.9917355    | 0.8792187    |
| 1735 Bn-A01-p27601050 | A-genome specific (rapa only)     | not scorable | not scorable | not scorable | not scorable | 0.9669421    | 0.7694532    |
| 1736 Bn-A01-p27622120 | A-genome specific (rapa only)     | not scorable | not scorable | not scorable | not scorable | 1            | 0.8334464    |
| 1737 Bn-A01-p27622168 | A-genome specific (rapa only)     | not scorable | not scorable | not scorable | not scorable | 1            | 0.7784517    |
| 1738 Bn-A01-p27623686 | A-genome specific (rapa only)     | not scorable | not scorable | not scorable | not scorable | 1            | 0.7635936    |
| 1739 Bn-A01-p27668070 | all not scorable                  | not scorable | not scorable | not scorable | not scorable | not scorable | not scorable |
| 1740 Bn-A01-p27673018 | A-genome specific (rapa only)     | not scorable | not scorable | not scorable | not scorable | 0.9752066    | 0.7682135    |
| 1741 Bn-A01-p276866   | A-genome specific (rapa only)     | not scorable | not scorable | not scorable | not scorable | 0.9917355    | 0.7236418    |
| 1742 Bn-A01-p27722989 | A-genome specific (napus-rapa)    | 0.9497608    | 0.7698267    | not scorable | not scorable | 0.9834711    | 0.6762297    |
| 1743 Bn-A01-p2775635  | A-genome specific (rapa only)     | not scorable | not scorable | not scorable | not scorable | 1            | 0.7546726    |
| 1744 Bn-A01-p27774124 | A-genome specific (napus-rapa)    | 1            | 0.4061617    | not scorable | not scorable | 0.9752066    | 0.7862923    |
| 1745 Bn-A01-p27774386 | A-genome specific (napus-rapa)    | 0.9688995    | 0.7730745    | not scorable | not scorable | 0.7024794    | 0.8366635    |
| 1746 Bn-A01-p27774666 | genome unspecific (all in)        | 0.9760765    | 0.3004295    | 0.9922481    | 0.6603354    | 0.9752066    | 0.6336449    |

|      |                  |                                |              |              |              |              |              |              |              |
|------|------------------|--------------------------------|--------------|--------------|--------------|--------------|--------------|--------------|--------------|
| 1747 | Bn-A01-p27777763 | A-genome specific (napus-rapa) | 0.9665072    | 0.7987347    | not scorable | not scorable |              | 1            | 0.8344165    |
| 1748 | Bn-A01-p27796877 | A-genome specific (napus-rapa) | 0.9880383    | 0.6402216    | not scorable | not scorable |              | 1            | 0.6431798    |
| 1749 | Bn-A01-p27797076 | A-genome specific (napus-rapa) | 0.9808612    | 0.3111543    | not scorable | not scorable | 0.9917355    |              | 0.6791795    |
| 1750 | Bn-A01-p27810962 | A-genome specific (napus-rapa) | 0.9976076    | 0.8167478    | not scorable | not scorable |              | 1            | 0.8240092    |
| 1751 | Bn-A01-p27822000 | A-genome specific (rapa only)  | not scorable | not scorable | not scorable | not scorable |              | 1            | 0.7553414    |
| 1752 | Bn-A01-p27822790 | A-genome specific (napus-rapa) | 1            | 0.6021739    | not scorable | not scorable | 0.9834711    |              | 0.6872332    |
| 1753 | Bn-A01-p27830372 | A-genome specific (rapa only)  | not scorable | not scorable | not scorable | not scorable | 0.9752066    |              | 0.7691837    |
| 1754 | Bn-A01-p27831569 | A-genome specific (rapa only)  | not scorable | not scorable | not scorable | not scorable | 0.9917355    |              | 0.8169929    |
| 1755 | Bn-A01-p27834392 | A-genome specific (rapa only)  | not scorable | not scorable | not scorable | not scorable | 0.9586777    |              | 0.7613422    |
| 1756 | Bn-A01-p27834452 | A-genome specific (rapa only)  | not scorable | not scorable | not scorable | not scorable | 0.9421487    |              | 0.7178444    |
| 1757 | Bn-A01-p2784074  | A-genome specific (napus-rapa) | 0.8755981    | 0.8158981    | not scorable | not scorable | 0.9669421    |              | 0.8508033    |
| 1758 | Bn-A01-p27843242 | A-genome specific (rapa only)  | not scorable | not scorable | not scorable | not scorable |              | 1            | 0.7580888    |
| 1759 | Bn-A01-p27845673 | A-genome specific (rapa only)  | not scorable | not scorable | not scorable | not scorable | 0.9917355    |              | 0.8069113    |
| 1760 | Bn-A01-p27846002 | A-genome specific (rapa only)  | not scorable | not scorable | not scorable | not scorable | 0.9834711    |              | 0.74037      |
| 1761 | Bn-A01-p27846227 | A-genome specific (rapa only)  | not scorable | not scorable | not scorable | not scorable | 0.9752066    |              | 0.7497923    |
| 1762 | Bn-A01-p27846544 | A-genome specific (rapa only)  | not scorable | not scorable | not scorable | not scorable | 0.9917355    |              | 0.8041285    |
| 1763 | Bn-A01-p27854949 | napus specific                 | 0.9641148    | 0.2450865    | not scorable | not scorable | not scorable | not scorable | not scorable |
| 1764 | Bn-A01-p27866419 | A-genome specific (napus-rapa) | 0.8277512    | 0.860509     | not scorable | not scorable | 0.9338843    |              | 0.7838142    |
| 1765 | Bn-A01-p27877194 | A-genome specific (rapa only)  | not scorable | not scorable | not scorable | not scorable | 0.9669421    |              | 0.772181     |
| 1766 | Bn-A01-p27893933 | A-genome specific (rapa only)  | not scorable | not scorable | not scorable | not scorable | 0.9752066    |              | 0.6997312    |
| 1767 | Bn-A01-p27905344 | A-genome specific (napus-rapa) | 0.9904306    | 0.856211     | not scorable | not scorable | 0.9834711    |              | 0.8231663    |
| 1768 | Bn-A01-p27907325 | A-genome specific (napus-rapa) | 0.9641148    | 0.8043339    | not scorable | not scorable | 0.8595041    |              | 0.7993796    |
| 1769 | Bn-A01-p27907422 | A-genome specific (napus-rapa) | 0.9904306    | 0.7374505    | not scorable | not scorable | 0.9834711    |              | 0.738986     |
| 1770 | Bn-A01-p27926074 | A-genome specific (rapa only)  | not scorable | not scorable | not scorable | not scorable | 0.9752066    |              | 0.6954615    |
| 1771 | Bn-A01-p27926195 | A-genome specific (rapa only)  | not scorable | not scorable | not scorable | not scorable | 0.9834711    |              | 0.8130386    |
| 1772 | Bn-A01-p27926396 | A-genome specific (rapa only)  | not scorable | not scorable | not scorable | not scorable | 0.6198347    |              | 0.7201397    |
| 1773 | Bn-A01-p27926574 | A-genome specific (napus-rapa) | 0.9904306    | 0.903313     | not scorable | not scorable |              | 1            | 0.8407481    |
| 1774 | Bn-A01-p27926866 | A-genome specific (rapa only)  | not scorable | not scorable | not scorable | not scorable | 0.9752066    |              | 0.663447     |
| 1775 | Bn-A01-p2792719  | A-genome specific (rapa only)  | not scorable | not scorable | not scorable | not scorable |              | 1            | 0.8306577    |
| 1776 | Bn-A01-p27928188 | A-genome specific (rapa only)  | not scorable | not scorable | not scorable | not scorable | 0.9752066    |              | 0.7983577    |
| 1777 | Bn-A01-p27928239 | A-genome specific (rapa only)  | not scorable | not scorable | not scorable | not scorable | 0.9669421    |              | 0.614388     |
| 1778 | Bn-A01-p27936360 | A-genome specific (napus-rapa) | 1            | 0.9205657    | not scorable | not scorable |              | 1            | 0.8921908    |
| 1779 | Bn-A01-p27937532 | A-genome specific (rapa only)  | not scorable | not scorable | not scorable | not scorable | 0.9834711    |              | 0.7537576    |

|      |                  |                                |              |              |              |              |              |              |
|------|------------------|--------------------------------|--------------|--------------|--------------|--------------|--------------|--------------|
| 1780 | Bn-A01-p27942610 | A-genome specific (rapa only)  | not scorable | not scorable | not scorable | not scorable | 1            | 0.6849987    |
| 1781 | Bn-A01-p27947381 | A-genome specific (rapa only)  | not scorable | not scorable | not scorable | not scorable | 0.9834711    | 0.774467     |
| 1782 | Bn-A01-p27948361 | A-genome specific (rapa only)  | not scorable | not scorable | not scorable | not scorable | 0.9917355    | 0.8010319    |
| 1783 | Bn-A01-p27953178 | A-genome specific (rapa only)  | not scorable | not scorable | not scorable | not scorable | 0.9586777    | 0.6766823    |
| 1784 | Bn-A01-p27953261 | A-genome specific (rapa only)  | not scorable | not scorable | not scorable | not scorable | 0.9917355    | 0.8046464    |
| 1785 | Bn-A01-p27954131 | A-genome specific (rapa only)  | not scorable | not scorable | not scorable | not scorable | 0.9917355    | 0.7908595    |
| 1786 | Bn-A01-p27954294 | A-genome specific (napus-rapa) | 0.9688995    | 0.3112217    | not scorable | not scorable | 0.9917355    | 0.7570941    |
| 1787 | Bn-A01-p27956374 | A-genome specific (rapa only)  | not scorable | not scorable | not scorable | not scorable | 0.6033058    | 0.6817184    |
| 1788 | Bn-A01-p27965742 | A-genome specific (rapa only)  | not scorable | not scorable | not scorable | not scorable | 0.9834711    | 0.6647778    |
| 1789 | Bn-A01-p27968584 | A-genome specific (rapa only)  | not scorable | not scorable | not scorable | not scorable | 0.553719     | 0.6842507    |
| 1790 | Bn-A01-p27988223 | A-genome specific (napus-rapa) | 0.9880383    | 0.3950522    | not scorable | not scorable | 0.677686     | 0.7613192    |
| 1791 | Bn-A01-p27989439 | A-genome specific (rapa only)  | not scorable | not scorable | not scorable | not scorable | 0.9834711    | 0.7130436    |
| 1792 | Bn-A01-p28047872 | A-genome specific (napus-rapa) | 0.9521531    | 0.6571617    | not scorable | not scorable | 0.9256198    | 0.7125588    |
| 1793 | Bn-A01-p28049872 | A-genome specific (napus-rapa) | 1            | 0.6987723    | not scorable | not scorable | 0.9917355    | 0.7735245    |
| 1794 | Bn-A01-p28089456 | genome unspecific (all in)     | 0.9090909    | 0.6534238    | 0.9767442    | 0.7560699    | 1            | 0.7790902    |
| 1795 | Bn-A01-p28102080 | A-genome specific (napus-rapa) | 0.9880383    | 0.7155705    | not scorable | not scorable | 0.9834711    | 0.7733118    |
| 1796 | Bn-A01-p28110393 | A-genome specific (rapa only)  | not scorable | not scorable | not scorable | not scorable | 1            | 0.7004535    |
| 1797 | Bn-A01-p28147757 | A-genome specific (rapa only)  | not scorable | not scorable | not scorable | not scorable | 0.9834711    | 0.7986389    |
| 1798 | Bn-A01-p28161207 | A-genome specific (napus-rapa) | 0.9688995    | 0.4169863    | not scorable | not scorable | 0.9917355    | 0.7851829    |
| 1799 | Bn-A01-p28186318 | napus specific                 | 0.9569378    | 0.5135412    | not scorable | not scorable | not scorable | not scorable |
| 1800 | Bn-A01-p28193774 | A-genome specific (rapa only)  | not scorable | not scorable | not scorable | not scorable | 0.9752066    | 0.6785234    |
| 1801 | Bn-A01-p28205769 | A-genome specific (rapa only)  | not scorable | not scorable | not scorable | not scorable | 0.9917355    | 0.7012425    |
| 1802 | Bn-A01-p28207450 | A-genome specific (napus-rapa) | 0.9449761    | 0.7264074    | not scorable | not scorable | 1            | 0.7755895    |
| 1803 | Bn-A01-p28217427 | A-genome specific (napus-rapa) | 0.9712918    | 0.7347751    | not scorable | not scorable | 0.9669421    | 0.6490854    |
| 1804 | Bn-A01-p28220430 | A-genome specific (napus-rapa) | 0.9856459    | 0.8010601    | not scorable | not scorable | 0.7107438    | 0.7222805    |
| 1805 | Bn-A01-p28222170 | A-genome specific (napus-rapa) | 0.9904306    | 0.7297508    | not scorable | not scorable | 0.6528926    | 0.7096924    |
| 1806 | Bn-A01-p28245023 | A-genome specific (rapa only)  | not scorable | not scorable | not scorable | not scorable | 1            | 0.8746086    |
| 1807 | Bn-A01-p28249918 | A-genome specific (rapa only)  | not scorable | not scorable | not scorable | not scorable | 0.9917355    | 0.8026363    |
| 1808 | Bn-A01-p28250936 | A-genome specific (rapa only)  | not scorable | not scorable | not scorable | not scorable | 0.9834711    | 0.8272757    |
| 1809 | Bn-A01-p2825565  | A-genome specific (napus-rapa) | 0.9760765    | 0.632284     | not scorable | not scorable | 1            | 0.7229235    |
| 1810 | Bn-A01-p28261145 | A-genome specific (napus-rapa) | 0.9880383    | 0.3644576    | not scorable | not scorable | 0.9834711    | 0.7709141    |
| 1811 | Bn-A01-p28278192 | A-genome specific (napus-rapa) | 0.923445     | 0.7091743    | not scorable | not scorable | 0.9917355    | 0.9175813    |
| 1812 | Bn-A01-p28285580 | A-genome specific (rapa only)  | not scorable | not scorable | not scorable | not scorable | 0.9917355    | 0.7753977    |

|      |                  |                                   |              |              |              |              |              |              |
|------|------------------|-----------------------------------|--------------|--------------|--------------|--------------|--------------|--------------|
| 1813 | Bn-A01-p28326025 | A-genome specific (rapa only)     | not scorable | not scorable | not scorable | not scorable | 0.9917355    | 0.6630344    |
| 1814 | Bn-A01-p28333226 | A-genome specific (rapa only)     | not scorable | not scorable | not scorable | not scorable | 1            | 0.7597438    |
| 1815 | Bn-A01-p28336382 | A-genome specific (rapa only)     | not scorable | not scorable | not scorable | not scorable | 0.9917355    | 0.818212     |
| 1816 | Bn-A01-p28336754 | A-genome specific (rapa only)     | not scorable | not scorable | not scorable | not scorable | 0.9917355    | 0.7392313    |
| 1817 | Bn-A01-p28346931 | A-genome specific (rapa only)     | not scorable | not scorable | not scorable | not scorable | 0.9752066    | 0.6803021    |
| 1818 | Bn-A01-p28360889 | A-genome specific (napus-rapa)    | 0.9736842    | 0.592301     | not scorable | not scorable | 0.9917355    | 0.7353469    |
| 1819 | Bn-A01-p28364600 | A-genome specific (rapa only)     | not scorable | not scorable | not scorable | not scorable | 1            | 0.7304878    |
| 1820 | Bn-A01-p2836617  | A-genome specific (napus-rapa)    | 0.9976076    | 0.6349795    | not scorable | not scorable | 1            | 0.840636     |
| 1821 | Bn-A01-p28380414 | A-genome specific (napus-rapa)    | 0.9473684    | 0.7675439    | not scorable | not scorable | 0.9917355    | 0.7852464    |
| 1822 | Bn-A01-p28385501 | napus specific                    | 0.9330143    | 0.3633123    | not scorable | not scorable | not scorable | not scorable |
| 1823 | Bn-A01-p28403438 | all not scorable                  | not scorable | not scorable | not scorable | not scorable | not scorable | not scorable |
| 1824 | Bn-A01-p2841043  | A-genome specific (napus-rapa)    | 0.9856459    | 0.7710929    | not scorable | not scorable | 0.9834711    | 0.8840709    |
| 1825 | Bn-A01-p28426820 | A-genome specific (napus-rapa)    | 0.8875598    | 0.6931239    | not scorable | not scorable | 0.9917355    | 0.7941848    |
| 1826 | Bn-A01-p28447868 | A-genome specific (rapa only)     | not scorable | not scorable | not scorable | not scorable | 1            | 0.8301668    |
| 1827 | Bn-A01-p28462071 | A-genome specific (napus-rapa)    | 0.9784689    | 0.7963622    | not scorable | not scorable | 0.9834711    | 0.7447215    |
| 1828 | Bn-A01-p2846364  | all not scorable                  | not scorable | not scorable | not scorable | not scorable | not scorable | not scorable |
| 1829 | Bn-A01-p2848253  | all not scorable                  | not scorable | not scorable | not scorable | not scorable | not scorable | not scorable |
| 1830 | Bn-A01-p2849034  | napus specific                    | 0.6339713    | 0.6444719    | not scorable | not scorable | not scorable | not scorable |
| 1831 | Bn-A01-p2849540  | all not scorable                  | not scorable | not scorable | not scorable | not scorable | not scorable | not scorable |
| 1832 | Bn-A01-p28497362 | A-genome specific (napus-rapa)    | 0.9641148    | 0.7879814    | not scorable | not scorable | 0.9752066    | 0.7086282    |
| 1833 | Bn-A01-p28497900 | A-genome specific (napus-rapa)    | 0.9928229    | 0.2773077    | not scorable | not scorable | 0.9917355    | 0.7122121    |
| 1834 | Bn-A01-p28500378 | A-genome specific (napus-rapa)    | 0.9354067    | 0.7364721    | not scorable | not scorable | 0.9917355    | 0.9449387    |
| 1835 | Bn-A01-p28502173 | A-genome specific (rapa only)     | not scorable | not scorable | not scorable | not scorable | 1            | 0.8346031    |
| 1836 | Bn-A01-p285120   | genome unspecific (oleracea-rapa) | not scorable | not scorable |              | 1 0.1869946  | 1            | 0.6821967    |
| 1837 | Bn-A01-p28534093 | A-genome specific (rapa only)     | not scorable | not scorable | not scorable | not scorable | 0.9834711    | 0.7950118    |
| 1838 | Bn-A01-p28551714 | A-genome specific (rapa only)     | not scorable | not scorable | not scorable | not scorable | 1            | 0.715218     |
| 1839 | Bn-A01-p28571117 | A-genome specific (rapa only)     | not scorable | not scorable | not scorable | not scorable | 0.6115702    | 0.8330126    |
| 1840 | Bn-A01-p28577026 | A-genome specific (napus-rapa)    | 0.8684211    | 0.8513124    | not scorable | not scorable | 0.9834711    | 0.7906627    |
| 1841 | Bn-A01-p28578023 | A-genome specific (napus-rapa)    | 0.8397129    | 0.7480147    | not scorable | not scorable | 1            | 0.6930552    |
| 1842 | Bn-A01-p28592050 | A-genome specific (rapa only)     | not scorable | not scorable | not scorable | not scorable | 0.9917355    | 0.7818213    |
| 1843 | Bn-A01-p2861502  | A-genome specific (napus-rapa)    | 0.9952153    | 0.729397     | not scorable | not scorable | 0.9834711    | 0.8000473    |
| 1844 | Bn-A01-p2864193  | A-genome specific (napus-rapa)    | 0.9760765    | 0.5908046    | not scorable | not scorable | 1            | 0.7103306    |
| 1845 | Bn-A01-p2867284  | A-genome specific (napus-rapa)    | 0.9736842    | 0.7508223    | not scorable | not scorable | 0.9917355    | 0.6903467    |



|      |                 |                                   |              |              |              |              |              |              |
|------|-----------------|-----------------------------------|--------------|--------------|--------------|--------------|--------------|--------------|
| 1846 | Bn-A01-p2873007 | A-genome specific (napus-rapa)    | 0.9569378    | 0.4239145    | not scorable | not scorable | 0.9834711    | 0.7014819    |
| 1847 | Bn-A01-p2874393 | A-genome specific (napus-rapa)    | 0.8971292    | 0.7987571    | not scorable | not scorable | 0.9834711    | 0.734327     |
| 1848 | Bn-A01-p2882270 | A-genome specific (napus-rapa)    | 0.9688995    | 0.5760276    | not scorable | not scorable | 0.9586777    | 0.8383704    |
| 1849 | Bn-A01-p2884934 | A-genome specific (napus-rapa)    | 0.9521531    | 0.7886327    | not scorable | not scorable | 0.9917355    | 0.7683929    |
| 1850 | Bn-A01-p2891863 | A-genome specific (napus-rapa)    | 0.9760765    | 0.7732499    | not scorable | not scorable | 0.9669421    | 0.7369455    |
| 1851 | Bn-A01-p289703  | A-genome specific (napus-rapa)    | 0.9928229    | 0.7153968    | not scorable | not scorable | 0.9917355    | 0.7434375    |
| 1852 | Bn-A01-p2897071 | A-genome specific (napus-rapa)    | 0.9617225    | 0.3035728    | not scorable | not scorable | 0.9834711    | 0.7097909    |
| 1853 | Bn-A01-p2910608 | A-genome specific (napus-rapa)    | 0.9760765    | 0.7092775    | not scorable | not scorable | 0.9834711    | 0.6939689    |
| 1854 | Bn-A01-p2910752 | A-genome specific (napus-rapa)    | 0.9736842    | 0.8218167    | not scorable | not scorable | 1            | 0.7760538    |
| 1855 | Bn-A01-p2915231 | A-genome specific (napus-rapa)    | 0.9832536    | 0.4145631    | not scorable | not scorable | 1            | 0.8453924    |
| 1856 | Bn-A01-p2915821 | A-genome specific (napus-rapa)    | 0.9449761    | 0.6903124    | not scorable | not scorable | 0.9834711    | 0.8297606    |
| 1857 | Bn-A01-p2928824 | A-genome specific (napus-rapa)    | 0.8253589    | 0.7656881    | not scorable | not scorable | 0.9752066    | 0.7696398    |
| 1858 | Bn-A01-p2934166 | napus specific                    | 0.9521531    | 0.4453172    | not scorable | not scorable | not scorable | not scorable |
| 1859 | Bn-A01-p2956393 | A-genome specific (napus-rapa)    | 0.9976076    | 0.6018646    | not scorable | not scorable | 1            | 0.7904034    |
| 1860 | Bn-A01-p2957869 | A-genome specific (napus-rapa)    | 0.9904306    | 0.7563173    | not scorable | not scorable | 0.9917355    | 0.7935365    |
| 1861 | Bn-A01-p2961857 | A-genome specific (napus-rapa)    | 0.9880383    | 0.7986737    | not scorable | not scorable | 1            | 0.739793     |
| 1862 | Bn-A01-p2990104 | A-genome specific (napus-rapa)    | 0.9665072    | 0.7831562    | not scorable | not scorable | 0.9917355    | 0.7596586    |
| 1863 | Bn-A01-p3000989 | A-genome specific (napus-rapa)    | 0.9856459    | 0.3878766    | not scorable | not scorable | 0.9917355    | 0.8493416    |
| 1864 | Bn-A01-p3005310 | A-genome specific (napus-rapa)    | 0.9186603    | 0.7661651    | not scorable | not scorable | 0.9586777    | 0.8256969    |
| 1865 | Bn-A01-p3005793 | A-genome specific (napus-rapa)    | 0.9976076    | 0.4922641    | not scorable | not scorable | 1            | 0.7715249    |
| 1866 | Bn-A01-p3045214 | A-genome specific (napus-rapa)    | 0.9904306    | 0.7866718    | not scorable | not scorable | 1            | 0.8005987    |
| 1867 | Bn-A01-p3045984 | A-genome specific (napus-rapa)    | 0.9904306    | 0.7010028    | not scorable | not scorable | 1            | 0.7621678    |
| 1868 | Bn-A01-p3050613 | A-genome specific (napus-rapa)    | 0.9808612    | 0.7057841    | not scorable | not scorable | 1            | 0.7628181    |
| 1869 | Bn-A01-p3059596 | A-genome specific (napus-rapa)    | 0.9904306    | 0.565281     | not scorable | not scorable | 0.9669421    | 0.7029747    |
| 1870 | Bn-A01-p3061223 | A-genome specific (napus-rapa)    | 0.9569378    | 0.7845698    | not scorable | not scorable | 0.9669421    | 0.7955427    |
| 1871 | Bn-A01-p3069312 | genome unspecific (oleracea-rapa) | not scorable | not scorable |              | 1            | 0.7580108    | 0.9834711    |
| 1872 | Bn-A01-p3070657 | A-genome specific (napus-rapa)    | 0.9832536    | 0.6830578    | not scorable | not scorable | 0.9834711    | 0.649318     |
| 1873 | Bn-A01-p3076531 | A-genome specific (napus-rapa)    | 0.9712918    | 0.7489499    | not scorable | not scorable | 0.7272727    | 0.820873     |
| 1874 | Bn-A01-p3077309 | A-genome specific (napus-rapa)    | 0.9760765    | 0.2049619    | not scorable | not scorable | 0.9421487    | 0.5487303    |
| 1875 | Bn-A01-p3078457 | A-genome specific (napus-rapa)    | 0.9856459    | 0.5116394    | not scorable | not scorable | 0.9669421    | 0.7157542    |
| 1876 | Bn-A01-p3085248 | A-genome specific (rapa only)     | not scorable | not scorable | not scorable | not scorable | 0.6859504    | 0.8775727    |
| 1877 | Bn-A01-p309524  | A-genome specific (napus-rapa)    | 1            | 0.4592944    | not scorable | not scorable | 0.9917355    | 0.6722058    |
| 1878 | Bn-A01-p3097105 | A-genome specific (napus-rapa)    | 0.9976076    | 0.5499591    | not scorable | not scorable | 1            | 0.7545418    |

|      |                 |                                   |              |              |              |              |           |           |
|------|-----------------|-----------------------------------|--------------|--------------|--------------|--------------|-----------|-----------|
| 1879 | Bn-A01-p3100346 | A-genome specific (napus-rapa)    | 0.9712918    | 0.6972825    | not scorable | not scorable | 0.9834711 | 0.669937  |
| 1880 | Bn-A01-p3105148 | A-genome specific (rapa only)     | not scorable | not scorable | not scorable | not scorable | 0.9917355 | 0.7792274 |
| 1881 | Bn-A01-p3105358 | A-genome specific (rapa only)     | not scorable | not scorable | not scorable | not scorable | 0.9917355 | 0.6894561 |
| 1882 | Bn-A01-p3111607 | A-genome specific (napus-rapa)    | 0.9641148    | 0.8011817    | not scorable | not scorable | 0.9338843 | 0.8770106 |
| 1883 | Bn-A01-p3123580 | A-genome specific (rapa only)     | not scorable | not scorable | not scorable | not scorable | 0.9917355 | 0.7902868 |
| 1884 | Bn-A01-p3134159 | A-genome specific (napus-rapa)    | 0.9712918    | 0.7653059    | not scorable | not scorable | 0.9917355 | 0.8318024 |
| 1885 | Bn-A01-p3136468 | A-genome specific (napus-rapa)    | 0.9760765    | 0.7205639    | not scorable | not scorable | 0.9752066 | 0.7721062 |
| 1886 | Bn-A01-p3137277 | A-genome specific (rapa only)     | not scorable | not scorable | not scorable | not scorable | 0.9834711 | 0.7474329 |
| 1887 | Bn-A01-p314983  | A-genome specific (napus-rapa)    | 0.9904306    | 0.8063725    | not scorable | not scorable | 0.9586777 | 0.6512539 |
| 1888 | Bn-A01-p3152636 | A-genome specific (napus-rapa)    | 0.9952153    | 0.9109368    | not scorable | not scorable | 1         | 0.7812275 |
| 1889 | Bn-A01-p3169855 | A-genome specific (napus-rapa)    | 0.9928229    | 0.7696655    | not scorable | not scorable | 0.9917355 | 0.7947142 |
| 1890 | Bn-A01-p3173607 | A-genome specific (napus-rapa)    | 0.9354067    | 0.7420068    | not scorable | not scorable | 0.9834711 | 0.7570364 |
| 1891 | Bn-A01-p3175614 | A-genome specific (napus-rapa)    | 0.9593301    | 0.7831421    | not scorable | not scorable | 0.9834711 | 0.7247187 |
| 1892 | Bn-A01-p3179210 | genome unspecific (oleracea-rapa) | not scorable | not scorable | 0.9922481    | 0.8127       | 1         | 0.8222544 |
| 1893 | Bn-A01-p3179292 | A-genome specific (napus-rapa)    | 0.9904306    | 0.7726401    | not scorable | not scorable | 0.7272727 | 0.9174899 |
| 1894 | Bn-A01-p3183888 | genome unspecific (all in)        | 0.9473684    | 0.5764778    |              | 1 0.7828524  | 0.9917355 | 0.7103003 |
| 1895 | Bn-A01-p3195980 | A-genome specific (napus-rapa)    | 1            | 0.4310189    | not scorable | not scorable | 0.9917355 | 0.6954912 |
| 1896 | Bn-A01-p3223005 | A-genome specific (rapa only)     | not scorable | not scorable | not scorable | not scorable | 0.9752066 | 0.7779692 |
| 1897 | Bn-A01-p3226309 | A-genome specific (napus-rapa)    | 0.9665072    | 0.6033128    | not scorable | not scorable | 1         | 0.8270521 |
| 1898 | Bn-A01-p3232184 | A-genome specific (napus-rapa)    | 0.9832536    | 0.8032655    | not scorable | not scorable | 0.9834711 | 0.7461516 |
| 1899 | Bn-A01-p3232810 | A-genome specific (rapa only)     | not scorable | not scorable | not scorable | not scorable | 1         | 0.7239926 |
| 1900 | Bn-A01-p3232913 | A-genome specific (rapa only)     | not scorable | not scorable | not scorable | not scorable | 0.9752066 | 0.7343474 |
| 1901 | Bn-A01-p3233247 | A-genome specific (napus-rapa)    | 0.9425837    | 0.4314358    | not scorable | not scorable | 1         | 0.6963357 |
| 1902 | Bn-A01-p3233299 | A-genome specific (napus-rapa)    | 0.9856459    | 0.7198768    | not scorable | not scorable | 0.9834711 | 0.7327123 |
| 1903 | Bn-A01-p3240780 | A-genome specific (napus-rapa)    | 0.9784689    | 0.6421887    | not scorable | not scorable | 0.9917355 | 0.7567704 |
| 1904 | Bn-A01-p324562  | A-genome specific (napus-rapa)    | 1            | 0.6530379    | not scorable | not scorable | 1         | 0.7470765 |
| 1905 | Bn-A01-p3279678 | A-genome specific (napus-rapa)    | 0.8181818    | 0.8100924    | not scorable | not scorable | 0.9752066 | 0.7968768 |
| 1906 | Bn-A01-p3306526 | A-genome specific (napus-rapa)    | 0.9641148    | 0.7555211    | not scorable | not scorable | 0.9834711 | 0.784013  |
| 1907 | Bn-A01-p3307173 | A-genome specific (napus-rapa)    | 0.9832536    | 0.4445606    | not scorable | not scorable | 0.9917355 | 0.6905535 |
| 1908 | Bn-A01-p3323476 | A-genome specific (napus-rapa)    | 0.9904306    | 0.8398063    | not scorable | not scorable | 0.9752066 | 0.6787765 |
| 1909 | Bn-A01-p333856  | A-genome specific (rapa only)     | not scorable | not scorable | not scorable | not scorable | 0.9752066 | 0.6435884 |
| 1910 | Bn-A01-p3378332 | genome unspecific (all in)        | 0.9880383    | 0.7875119    | 0.3643411    | 0.783221     | 1         | 0.6674224 |
| 1911 | Bn-A01-p340954  | A-genome specific (rapa only)     | not scorable | not scorable | not scorable | not scorable | 0.9752066 | 0.618829  |

|      |                 |                                |              |              |              |              |           |           |
|------|-----------------|--------------------------------|--------------|--------------|--------------|--------------|-----------|-----------|
| 1912 | Bn-A01-p344884  | A-genome specific (napus-rapa) | 0.9976076    | 0.3728947    | not scorable | not scorable | 0.661157  | 0.7944186 |
| 1913 | Bn-A01-p345182  | A-genome specific (napus-rapa) | 0.9952153    | 0.496635     | not scorable | not scorable | 1         | 0.6711772 |
| 1914 | Bn-A01-p3487320 | A-genome specific (napus-rapa) | 0.9665072    | 0.6719519    | not scorable | not scorable | 0.9917355 | 0.7242321 |
| 1915 | Bn-A01-p3495476 | A-genome specific (napus-rapa) | 0.9832536    | 0.6147087    | not scorable | not scorable | 1         | 0.7745915 |
| 1916 | Bn-A01-p3567127 | A-genome specific (napus-rapa) | 0.9808612    | 0.8181761    | not scorable | not scorable | 1         | 0.7503445 |
| 1917 | Bn-A01-p3573045 | A-genome specific (napus-rapa) | 0.9880383    | 0.4627736    | not scorable | not scorable | 1         | 0.9205657 |
| 1918 | Bn-A01-p3576068 | A-genome specific (napus-rapa) | 0.9712918    | 0.8186768    | not scorable | not scorable | 0.9752066 | 0.7677296 |
| 1919 | Bn-A01-p3579887 | A-genome specific (napus-rapa) | 0.9760765    | 0.7375665    | not scorable | not scorable | 1         | 0.7242132 |
| 1920 | Bn-A01-p3586744 | A-genome specific (napus-rapa) | 0.9736842    | 0.7886152    | not scorable | not scorable | 0.9917355 | 0.8249918 |
| 1921 | Bn-A01-p3597929 | A-genome specific (napus-rapa) | 0.9856459    | 0.790275     | not scorable | not scorable | 0.9917355 | 0.8355395 |
| 1922 | Bn-A01-p3598097 | A-genome specific (napus-rapa) | 0.9880383    | 0.7476067    | not scorable | not scorable | 0.9917355 | 0.6963976 |
| 1923 | Bn-A01-p3598515 | A-genome specific (napus-rapa) | 0.9856459    | 0.7742741    | not scorable | not scorable | 1         | 0.7201275 |
| 1924 | Bn-A01-p3598533 | A-genome specific (napus-rapa) | 0.9880383    | 0.7938583    | not scorable | not scorable | 1         | 0.7693703 |
| 1925 | Bn-A01-p3599097 | A-genome specific (napus-rapa) | 0.9976076    | 0.4714738    | not scorable | not scorable | 0.9917355 | 0.6789401 |
| 1926 | Bn-A01-p3610530 | A-genome specific (napus-rapa) | 0.9952153    | 0.4284107    | not scorable | not scorable | 1         | 0.7069653 |
| 1927 | Bn-A01-p3619975 | A-genome specific (napus-rapa) | 0.9808612    | 0.8189453    | not scorable | not scorable | 0.9834711 | 0.7821474 |
| 1928 | Bn-A01-p3626821 | A-genome specific (napus-rapa) | 0.9904306    | 0.5621526    | not scorable | not scorable | 0.9917355 | 0.5647066 |
| 1929 | Bn-A01-p3631990 | A-genome specific (napus-rapa) | 0.9976076    | 0.4501518    | not scorable | not scorable | 0.9917355 | 0.7579525 |
| 1930 | Bn-A01-p3640191 | A-genome specific (rapa only)  | not scorable | not scorable | not scorable | not scorable | 0.9917355 | 0.6538121 |
| 1931 | Bn-A01-p3643352 | A-genome specific (napus-rapa) | 0.9808612    | 0.3401394    | not scorable | not scorable | 1         | 0.5272361 |
| 1932 | Bn-A01-p3644770 | A-genome specific (napus-rapa) | 0.9904306    | 0.3707033    | not scorable | not scorable | 0.9917355 | 0.7095698 |
| 1933 | Bn-A01-p3664698 | A-genome specific (napus-rapa) | 0.9976076    | 0.5467758    | not scorable | not scorable | 1         | 0.8300927 |
| 1934 | Bn-A01-p3666241 | A-genome specific (napus-rapa) | 0.9976076    | 0.4607628    | not scorable | not scorable | 0.9917355 | 0.646854  |
| 1935 | Bn-A01-p3703676 | A-genome specific (napus-rapa) | 1            | 0.8579717    | not scorable | not scorable | 1         | 0.8272811 |
| 1936 | Bn-A01-p3707366 | A-genome specific (napus-rapa) | 0.9880383    | 0.3699408    | not scorable | not scorable | 1         | 0.8083752 |
| 1937 | Bn-A01-p3713266 | A-genome specific (napus-rapa) | 0.9808612    | 0.3131576    | not scorable | not scorable | 0.9917355 | 0.6393247 |
| 1938 | Bn-A01-p3737522 | A-genome specific (napus-rapa) | 0.9712918    | 0.6801396    | not scorable | not scorable | 0.9917355 | 0.7063222 |
| 1939 | Bn-A01-p3744726 | A-genome specific (napus-rapa) | 0.9880383    | 0.2810631    | not scorable | not scorable | 0.9669421 | 0.6993529 |
| 1940 | Bn-A01-p3755849 | A-genome specific (napus-rapa) | 0.9760765    | 0.7949107    | not scorable | not scorable | 0.9834711 | 0.7691048 |
| 1941 | Bn-A01-p3758784 | A-genome specific (napus-rapa) | 0.9760765    | 0.8023077    | not scorable | not scorable | 0.9834711 | 0.6898049 |
| 1942 | Bn-A01-p3782356 | A-genome specific (napus-rapa) | 1            | 0.4761784    | not scorable | not scorable | 0.9917355 | 0.734802  |
| 1943 | Bn-A01-p3789302 | A-genome specific (napus-rapa) | 0.9856459    | 0.7144525    | not scorable | not scorable | 1         | 0.7264047 |
| 1944 | Bn-A01-p3791028 | A-genome specific (napus-rapa) | 0.9928229    | 0.6827036    | not scorable | not scorable | 1         | 0.8175309 |

|                      |                                |              |              |              |              |           |           |
|----------------------|--------------------------------|--------------|--------------|--------------|--------------|-----------|-----------|
| 1945 Bn-A01-p3829226 | A-genome specific (rapa only)  | not scorable | not scorable | not scorable | not scorable | 0.9752066 | 0.7902855 |
| 1946 Bn-A01-p3829785 | A-genome specific (napus-rapa) | 0.9569378    | 0.2908964    | not scorable | not scorable | 1         | 0.6784846 |
| 1947 Bn-A01-p3858902 | A-genome specific (napus-rapa) | 0.9904306    | 0.3400923    | not scorable | not scorable | 1         | 0.7006515 |
| 1948 Bn-A01-p3859106 | A-genome specific (napus-rapa) | 0.9904306    | 0.6617844    | not scorable | not scorable | 0.9917355 | 0.6067287 |
| 1949 Bn-A01-p3859610 | A-genome specific (napus-rapa) | 0.9904306    | 0.7908252    | not scorable | not scorable | 0.9834711 | 0.830327  |
| 1950 Bn-A01-p3889035 | A-genome specific (napus-rapa) | 0.9976076    | 0.6098653    | not scorable | not scorable | 0.9917355 | 0.6420069 |
| 1951 Bn-A01-p3892184 | A-genome specific (napus-rapa) | 0.9952153    | 0.5233259    | not scorable | not scorable | 0.9917355 | 0.7596947 |
| 1952 Bn-A01-p3904495 | A-genome specific (napus-rapa) | 0.9880383    | 0.8255144    | not scorable | not scorable | 0.9834711 | 0.7869604 |
| 1953 Bn-A01-p3906965 | A-genome specific (napus-rapa) | 0.9928229    | 0.7953025    | not scorable | not scorable | 0.9834711 | 0.7001463 |
| 1954 Bn-A01-p3935187 | A-genome specific (napus-rapa) | 0.0430622    | 0.7860854    | not scorable | not scorable | 0.6280992 | 0.8128915 |
| 1955 Bn-A01-p3938241 | A-genome specific (napus-rapa) | 0.9952153    | 0.7635738    | not scorable | not scorable | 0.7190083 | 0.8052166 |
| 1956 Bn-A01-p3939508 | A-genome specific (napus-rapa) | 0.9952153    | 0.6447311    | not scorable | not scorable | 0.9917355 | 0.7087289 |
| 1957 Bn-A01-p3948389 | A-genome specific (napus-rapa) | 0.9976076    | 0.3568731    | not scorable | not scorable | 1         | 0.8207335 |
| 1958 Bn-A01-p3984534 | A-genome specific (napus-rapa) | 0.9784689    | 0.6183667    | not scorable | not scorable | 0.9586777 | 0.8106123 |
| 1959 Bn-A01-p3993078 | A-genome specific (napus-rapa) | 0.9976076    | 0.3399651    | not scorable | not scorable | 1         | 0.7353838 |
| 1960 Bn-A01-p4003991 | A-genome specific (napus-rapa) | 0.9617225    | 0.8126613    | not scorable | not scorable | 0.9669421 | 0.6949151 |
| 1961 Bn-A01-p4023655 | A-genome specific (napus-rapa) | 0.9928229    | 0.7605813    | not scorable | not scorable | 1         | 0.7286872 |
| 1962 Bn-A01-p4027402 | A-genome specific (napus-rapa) | 0.9928229    | 0.7933981    | not scorable | not scorable | 0.9834711 | 0.7935458 |
| 1963 Bn-A01-p4041055 | A-genome specific (napus-rapa) | 0.9665072    | 0.7576659    | not scorable | not scorable | 0.9917355 | 0.6273046 |
| 1964 Bn-A01-p4070059 | A-genome specific (napus-rapa) | 0.9688995    | 0.733361     | not scorable | not scorable | 0.9752066 | 0.7774941 |
| 1965 Bn-A01-p4077105 | A-genome specific (napus-rapa) | 0.7416268    | 0.7789842    | not scorable | not scorable | 0.9752066 | 0.6770623 |
| 1966 Bn-A01-p4084366 | A-genome specific (napus-rapa) | 0.9760765    | 0.686331     | not scorable | not scorable | 0.9917355 | 0.6950665 |
| 1967 Bn-A01-p4084739 | A-genome specific (napus-rapa) | 0.9832536    | 0.2971842    | not scorable | not scorable | 0.9917355 | 0.6656501 |
| 1968 Bn-A01-p4087533 | A-genome specific (napus-rapa) | 0.9688995    | 0.793394     | not scorable | not scorable | 1         | 0.777238  |
| 1969 Bn-A01-p4109157 | A-genome specific (napus-rapa) | 0.9976076    | 0.4794883    | not scorable | not scorable | 1         | 0.6742547 |
| 1970 Bn-A01-p4113202 | A-genome specific (napus-rapa) | 0.8923445    | 0.7826226    | not scorable | not scorable | 0.9917355 | 0.7657975 |
| 1971 Bn-A01-p4116110 | A-genome specific (napus-rapa) | 0.9904306    | 0.2814051    | not scorable | not scorable | 0.9917355 | 0.654273  |
| 1972 Bn-A01-p4117153 | A-genome specific (rapa only)  | not scorable | not scorable | not scorable | not scorable | 0.6363636 | 0.8286211 |
| 1973 Bn-A01-p4164843 | A-genome specific (napus-rapa) | 0.9928229    | 0.8209696    | not scorable | not scorable | 1         | 0.7588842 |
| 1974 Bn-A01-p4167795 | A-genome specific (rapa only)  | not scorable | not scorable | not scorable | not scorable | 1         | 0.9272014 |
| 1975 Bn-A01-p4173668 | A-genome specific (napus-rapa) | 0.9784689    | 0.7497423    | not scorable | not scorable | 0.9834711 | 0.6916872 |
| 1976 Bn-A01-p4177941 | A-genome specific (napus-rapa) | 0.9928229    | 0.724332     | not scorable | not scorable | 1         | 0.7427279 |
| 1977 Bn-A01-p4188629 | A-genome specific (napus-rapa) | 0.9808612    | 0.5971491    | not scorable | not scorable | 1         | 0.7580498 |

|                      |                                   |              |              |              |              |           |           |
|----------------------|-----------------------------------|--------------|--------------|--------------|--------------|-----------|-----------|
| 1978 Bn-A01-p4220987 | A-genome specific (napus-rapa)    | 0.6889952    | 0.4224357    | not scorable | not scorable | 1         | 0.9115393 |
| 1979 Bn-A01-p4227703 | A-genome specific (napus-rapa)    | 0.9832536    | 0.5570098    | not scorable | not scorable | 0.9752066 | 0.5284312 |
| 1980 Bn-A01-p4228985 | A-genome specific (napus-rapa)    | 0.9952153    | 0.7630062    | not scorable | not scorable | 1         | 0.6986982 |
| 1981 Bn-A01-p4230829 | A-genome specific (napus-rapa)    | 0.9880383    | 0.5348946    | not scorable | not scorable | 0.9752066 | 0.6185827 |
| 1982 Bn-A01-p4233306 | A-genome specific (napus-rapa)    | 0.9641148    | 0.7929199    | not scorable | not scorable | 1         | 0.6154903 |
| 1983 Bn-A01-p4235273 | A-genome specific (napus-rapa)    | 0.9904306    | 0.4592314    | not scorable | not scorable | 1         | 0.73063   |
| 1984 Bn-A01-p4242269 | A-genome specific (napus-rapa)    | 0.9736842    | 0.5961131    | not scorable | not scorable | 1         | 0.7361456 |
| 1985 Bn-A01-p4246586 | A-genome specific (napus-rapa)    | 0.9760765    | 0.4423441    | not scorable | not scorable | 0.9917355 | 0.7927324 |
| 1986 Bn-A01-p4258195 | A-genome specific (napus-rapa)    | 0.9569378    | 0.3858768    | not scorable | not scorable | 0.9834711 | 0.7729093 |
| 1987 Bn-A01-p4284958 | A-genome specific (napus-rapa)    | 0.9760765    | 0.6106357    | not scorable | not scorable | 1         | 0.6961098 |
| 1988 Bn-A01-p4288869 | A-genome specific (rapa only)     | not scorable | not scorable | not scorable | not scorable | 0.9752066 | 0.8584366 |
| 1989 Bn-A01-p4288938 | A-genome specific (rapa only)     | not scorable | not scorable | not scorable | not scorable | 0.9752066 | 0.6310735 |
| 1990 Bn-A01-p4289535 | A-genome specific (rapa only)     | not scorable | not scorable | not scorable | not scorable | 0.7024794 | 0.7914145 |
| 1991 Bn-A01-p4293847 | A-genome specific (napus-rapa)    | 0.9952153    | 0.5026233    | not scorable | not scorable | 1         | 0.7940474 |
| 1992 Bn-A01-p4293878 | A-genome specific (napus-rapa)    | 0.9688995    | 0.7835191    | not scorable | not scorable | 1         | 0.7495431 |
| 1993 Bn-A01-p4303527 | A-genome specific (napus-rapa)    | 0.9641148    | 0.3598139    | not scorable | not scorable | 0.9752066 | 0.6726535 |
| 1994 Bn-A01-p4310302 | A-genome specific (napus-rapa)    | 0.9976076    | 0.6587597    | not scorable | not scorable | 0.9834711 | 0.7331177 |
| 1995 Bn-A01-p4311134 | A-genome specific (napus-rapa)    | 0.9497608    | 0.7890669    | not scorable | not scorable | 0.9834711 | 0.8010122 |
| 1996 Bn-A01-p4322340 | A-genome specific (napus-rapa)    | 0.8301435    | 0.8004053    | not scorable | not scorable | 0.7272727 | 0.8122094 |
| 1997 Bn-A01-p4325162 | genome unspecific (oleracea-rapa) | not scorable | not scorable | 0.9767442    | 0.3321356    | 1         | 0.7602208 |
| 1998 Bn-A01-p4335144 | A-genome specific (rapa only)     | not scorable | not scorable | not scorable | not scorable | 1         | 0.7234482 |
| 1999 Bn-A01-p4341541 | A-genome specific (napus-rapa)    | 0.9976076    | 0.5103784    | not scorable | not scorable | 0.9834711 | 0.6772383 |
| 2000 Bn-A01-p4353657 | A-genome specific (napus-rapa)    | 0.9928229    | 0.7368858    | not scorable | not scorable | 0.9917355 | 0.7499076 |
| 2001 Bn-A01-p4354753 | A-genome specific (napus-rapa)    | 0.9832536    | 0.7596107    | not scorable | not scorable | 0.9917355 | 0.8092792 |
| 2002 Bn-A01-p436141  | A-genome specific (napus-rapa)    | 0.9808612    | 0.6967064    | not scorable | not scorable | 0.9834711 | 0.7605804 |
| 2003 Bn-A01-p4377760 | A-genome specific (napus-rapa)    | 0.9808612    | 0.6977333    | not scorable | not scorable | 1         | 0.7723418 |
| 2004 Bn-A01-p4378321 | A-genome specific (napus-rapa)    | 0.9808612    | 0.6627697    | not scorable | not scorable | 0.9917355 | 0.876231  |
| 2005 Bn-A01-p4390611 | A-genome specific (napus-rapa)    | 1            | 0.4343343    | not scorable | not scorable | 1         | 0.7546347 |
| 2006 Bn-A01-p4394660 | A-genome specific (napus-rapa)    | 1            | 0.3066774    | not scorable | not scorable | 1         | 0.7326872 |
| 2007 Bn-A01-p4419443 | A-genome specific (napus-rapa)    | 0.9162679    | 0.670675     | not scorable | not scorable | 0.9834711 | 0.6981179 |
| 2008 Bn-A01-p442492  | A-genome specific (napus-rapa)    | 0.9904306    | 0.3415146    | not scorable | not scorable | 1         | 0.7647003 |
| 2009 Bn-A01-p4452779 | A-genome specific (napus-rapa)    | 0.9641148    | 0.668288     | not scorable | not scorable | 0.9504132 | 0.5985798 |
| 2010 Bn-A01-p4499485 | A-genome specific (napus-rapa)    | 0.9808612    | 0.741653     | not scorable | not scorable | 0.9917355 | 0.7932042 |

|      |                 |                                |              |              |              |              |           |           |
|------|-----------------|--------------------------------|--------------|--------------|--------------|--------------|-----------|-----------|
| 2011 | Bn-A01-p4506540 | A-genome specific (napus-rapa) | 0.9808612    | 0.3264243    | not scorable | not scorable | 1         | 0.8013151 |
| 2012 | Bn-A01-p4518460 | A-genome specific (napus-rapa) | 0.9688995    | 0.4225649    | not scorable | not scorable | 0.9917355 | 0.7643929 |
| 2013 | Bn-A01-p4519762 | A-genome specific (napus-rapa) | 0.9856459    | 0.4314763    | not scorable | not scorable | 0.9917355 | 0.6781538 |
| 2014 | Bn-A01-p4549564 | A-genome specific (napus-rapa) | 0.9808612    | 0.7590743    | not scorable | not scorable | 0.9834711 | 0.7560032 |
| 2015 | Bn-A01-p4580719 | A-genome specific (napus-rapa) | 0.8564593    | 0.6595703    | not scorable | not scorable | 1         | 0.8018597 |
| 2016 | Bn-A01-p460072  | A-genome specific (napus-rapa) | 0.9712918    | 0.76019      | not scorable | not scorable | 0.6115702 | 0.691606  |
| 2017 | Bn-A01-p4600975 | A-genome specific (napus-rapa) | 0.9880383    | 0.45643      | not scorable | not scorable | 1         | 0.8114882 |
| 2018 | Bn-A01-p4612881 | A-genome specific (napus-rapa) | 0.9808612    | 0.7932433    | not scorable | not scorable | 1         | 0.7341067 |
| 2019 | Bn-A01-p4635210 | A-genome specific (rapa only)  | not scorable | not scorable | not scorable | not scorable | 0.9917355 | 0.6508822 |
| 2020 | Bn-A01-p4641747 | A-genome specific (napus-rapa) | 0.9856459    | 0.7474229    | not scorable | not scorable | 0.9917355 | 0.8024733 |
| 2021 | Bn-A01-p4641802 | A-genome specific (napus-rapa) | 0.9856459    | 0.7496878    | not scorable | not scorable | 0.9917355 | 0.6713664 |
| 2022 | Bn-A01-p4651746 | A-genome specific (napus-rapa) | 0.9760765    | 0.737113     | not scorable | not scorable | 1         | 0.6510744 |
| 2023 | Bn-A01-p465783  | A-genome specific (rapa only)  | not scorable | not scorable | not scorable | not scorable | 0.9917355 | 0.7984232 |
| 2024 | Bn-A01-p4659972 | A-genome specific (napus-rapa) | 0.9928229    | 0.6505904    | not scorable | not scorable | 0.9752066 | 0.6963493 |
| 2025 | Bn-A01-p467816  | A-genome specific (napus-rapa) | 0.9832536    | 0.7639633    | not scorable | not scorable | 0.9917355 | 0.7160303 |
| 2026 | Bn-A01-p4734188 | A-genome specific (napus-rapa) | 0.9976076    | 0.5797902    | not scorable | not scorable | 0.9917355 | 0.721589  |
| 2027 | Bn-A01-p4736924 | A-genome specific (napus-rapa) | 0.9449761    | 0.9006857    | not scorable | not scorable | 0.9834711 | 0.8178453 |
| 2028 | Bn-A01-p4747874 | A-genome specific (napus-rapa) | 0.9784689    | 0.7041543    | not scorable | not scorable | 0.9752066 | 0.7544323 |
| 2029 | Bn-A01-p4750734 | A-genome specific (napus-rapa) | 0.9736842    | 0.80375      | not scorable | not scorable | 0.9917355 | 0.8354823 |
| 2030 | Bn-A01-p4759559 | A-genome specific (rapa only)  | not scorable | not scorable | not scorable | not scorable | 1         | 0.8309966 |
| 2031 | Bn-A01-p4773772 | A-genome specific (napus-rapa) | 0.9880383    | 0.7483223    | not scorable | not scorable | 0.9917355 | 0.8155614 |
| 2032 | Bn-A01-p4774065 | A-genome specific (napus-rapa) | 0.9904306    | 0.8091096    | not scorable | not scorable | 0.9917355 | 0.7436564 |
| 2033 | Bn-A01-p4785261 | A-genome specific (napus-rapa) | 0.9856459    | 0.7720748    | not scorable | not scorable | 0.9834711 | 0.7886267 |
| 2034 | Bn-A01-p4786653 | A-genome specific (napus-rapa) | 0.9976076    | 0.6571602    | not scorable | not scorable | 1         | 0.7455136 |
| 2035 | Bn-A01-p4786754 | A-genome specific (napus-rapa) | 0.9976076    | 0.7961323    | not scorable | not scorable | 0.9834711 | 0.7601196 |
| 2036 | Bn-A01-p4786787 | A-genome specific (napus-rapa) | 0.9880383    | 0.7768333    | not scorable | not scorable | 0.9834711 | 0.6978854 |
| 2037 | Bn-A01-p4787515 | A-genome specific (napus-rapa) | 0.9928229    | 0.483084     | not scorable | not scorable | 1         | 0.6188304 |
| 2038 | Bn-A01-p4799050 | A-genome specific (napus-rapa) | 0.9904306    | 0.7891912    | not scorable | not scorable | 0.9834711 | 0.7973623 |
| 2039 | Bn-A01-p4800440 | A-genome specific (napus-rapa) | 0.9904306    | 0.2792964    | not scorable | not scorable | 0.9917355 | 0.730725  |
| 2040 | Bn-A01-p4803773 | A-genome specific (napus-rapa) | 0.9832536    | 0.4494584    | not scorable | not scorable | 1         | 0.802505  |
| 2041 | Bn-A01-p4808404 | A-genome specific (napus-rapa) | 0.9736842    | 0.7407727    | not scorable | not scorable | 0.9917355 | 0.7580041 |
| 2042 | Bn-A01-p4812269 | A-genome specific (napus-rapa) | 0.9760765    | 0.5209119    | not scorable | not scorable | 0.9834711 | 0.7646228 |
| 2043 | Bn-A01-p4820187 | A-genome specific (napus-rapa) | 0.9952153    | 0.4907919    | not scorable | not scorable | 0.9917355 | 0.8330544 |

|      |                 |                                   |              |              |              |              |           |           |
|------|-----------------|-----------------------------------|--------------|--------------|--------------|--------------|-----------|-----------|
| 2044 | Bn-A01-p4826685 | A-genome specific (rapa only)     | not scorable | not scorable | not scorable | not scorable | 0.8595041 | 0.832737  |
| 2045 | Bn-A01-p4832074 | A-genome specific (napus-rapa)    | 0.9928229    | 0.7329871    | not scorable | not scorable | 1         | 0.8088252 |
| 2046 | Bn-A01-p4833020 | A-genome specific (napus-rapa)    | 0.9856459    | 0.8222839    | not scorable | not scorable | 0.9917355 | 0.7895895 |
| 2047 | Bn-A01-p483495  | A-genome specific (napus-rapa)    | 1            | 0.3150097    | not scorable | not scorable | 0.9834711 | 0.7635671 |
| 2048 | Bn-A01-p4836338 | A-genome specific (napus-rapa)    | 0.9880383    | 0.7789082    | not scorable | not scorable | 0.9752066 | 0.7507509 |
| 2049 | Bn-A01-p4840973 | A-genome specific (napus-rapa)    | 1            | 0.4826368    | not scorable | not scorable | 1         | 0.7042567 |
| 2050 | Bn-A01-p4869879 | A-genome specific (napus-rapa)    | 0.9593301    | 0.6718714    | not scorable | not scorable | 0.9752066 | 0.8061771 |
| 2051 | Bn-A01-p4874972 | A-genome specific (napus-rapa)    | 0.9449761    | 0.4059836    | not scorable | not scorable | 0.9834711 | 0.7601165 |
| 2052 | Bn-A01-p4877343 | A-genome specific (napus-rapa)    | 0.9736842    | 0.3981194    | not scorable | not scorable | 0.9669421 | 0.7427683 |
| 2053 | Bn-A01-p4883188 | A-genome specific (napus-rapa)    | 0.9880383    | 0.7749712    | not scorable | not scorable | 0.9834711 | 0.7397466 |
| 2054 | Bn-A01-p4908924 | A-genome specific (napus-rapa)    | 0.9784689    | 0.7889029    | not scorable | not scorable | 0.9834711 | 0.7143246 |
| 2055 | Bn-A01-p4909065 | A-genome specific (napus-rapa)    | 0.9856459    | 0.7772519    | not scorable | not scorable | 1         | 0.7478473 |
| 2056 | Bn-A01-p4920622 | A-genome specific (napus-rapa)    | 0.9904306    | 0.3423496    | not scorable | not scorable | 0.9917355 | 0.7863657 |
| 2057 | Bn-A01-p4922557 | A-genome specific (napus-rapa)    | 0.9952153    | 0.4569855    | not scorable | not scorable | 1         | 0.7854537 |
| 2058 | Bn-A01-p4925004 | A-genome specific (napus-rapa)    | 0.9880383    | 0.3037469    | not scorable | not scorable | 0.9917355 | 0.7730688 |
| 2059 | Bn-A01-p4940549 | A-genome specific (napus-rapa)    | 0.9928229    | 0.7686237    | not scorable | not scorable | 1         | 0.7127941 |
| 2060 | Bn-A01-p4947577 | A-genome specific (napus-rapa)    | 0.9880383    | 0.4240515    | not scorable | not scorable | 0.9917355 | 0.6772852 |
| 2061 | Bn-A01-p4948316 | genome unspecific (oleracea-rapa) | not scorable | not scorable |              | 1            | 0.7319669 | 1         |
| 2062 | Bn-A01-p4963297 | A-genome specific (napus-rapa)    | 0.9832536    | 0.6070957    | not scorable | not scorable | 0.9917355 | 0.8610334 |
| 2063 | Bn-A01-p4985329 | A-genome specific (napus-rapa)    | 0.9784689    | 0.8136621    | not scorable | not scorable | 0.9669421 | 0.8289551 |
| 2064 | Bn-A01-p4998346 | A-genome specific (rapa only)     | not scorable | not scorable | not scorable | not scorable | 1         | 0.7691226 |
| 2065 | Bn-A01-p5017444 | A-genome specific (napus-rapa)    | 1            | 0.4861147    | not scorable | not scorable | 1         | 0.8230196 |
| 2066 | Bn-A01-p5017446 | A-genome specific (napus-rapa)    | 1            | 0.4244876    | not scorable | not scorable | 0.9917355 | 0.775295  |
| 2067 | Bn-A01-p5020890 | A-genome specific (napus-rapa)    | 1            | 0.4880226    | not scorable | not scorable | 0.9669421 | 0.8105909 |
| 2068 | Bn-A01-p5057753 | A-genome specific (napus-rapa)    | 0.9904306    | 0.460929     | not scorable | not scorable | 1         | 0.74534   |
| 2069 | Bn-A01-p5069371 | A-genome specific (napus-rapa)    | 0.9904306    | 0.3857467    | not scorable | not scorable | 0.9669421 | 0.5834985 |
| 2070 | Bn-A01-p5070565 | A-genome specific (napus-rapa)    | 0.9880383    | 0.7840532    | not scorable | not scorable | 0.9752066 | 0.7417479 |
| 2071 | Bn-A01-p5070836 | A-genome specific (napus-rapa)    | 0.9904306    | 0.7360534    | not scorable | not scorable | 0.9752066 | 0.6108016 |
| 2072 | Bn-A01-p5071350 | A-genome specific (napus-rapa)    | 0.9928229    | 0.7461768    | not scorable | not scorable | 0.9834711 | 0.7423385 |
| 2073 | Bn-A01-p5071658 | A-genome specific (rapa only)     | not scorable | not scorable | not scorable | not scorable | 0.9917355 | 0.6843054 |
| 2074 | Bn-A01-p5075984 | A-genome specific (napus-rapa)    | 0.9880383    | 0.8043486    | not scorable | not scorable | 0.9752066 | 0.7140822 |
| 2075 | Bn-A01-p5089377 | A-genome specific (napus-rapa)    | 0.9976076    | 0.4774405    | not scorable | not scorable | 1         | 0.7809237 |
| 2076 | Bn-A01-p5101078 | A-genome specific (napus-rapa)    | 0.9928229    | 0.8002905    | not scorable | not scorable | 0.9917355 | 0.7929338 |

|      |                 |                                |              |              |              |              |           |           |
|------|-----------------|--------------------------------|--------------|--------------|--------------|--------------|-----------|-----------|
| 2077 | Bn-A01-p5106042 | A-genome specific (napus-rapa) | 0.9856459    | 0.4505196    | not scorable | not scorable | 0.9917355 | 0.6782633 |
| 2078 | Bn-A01-p511682  | A-genome specific (napus-rapa) | 1            | 0.2659173    | not scorable | not scorable | 0.9834711 | 0.7973625 |
| 2079 | Bn-A01-p515600  | A-genome specific (napus-rapa) | 0.9688995    | 0.4822006    | not scorable | not scorable | 1         | 0.7068847 |
| 2080 | Bn-A01-p5193639 | A-genome specific (napus-rapa) | 0.9976076    | 0.4310189    | not scorable | not scorable | 1         | 0.6963694 |
| 2081 | Bn-A01-p5212238 | A-genome specific (rapa only)  | not scorable | not scorable | not scorable | not scorable | 0.9834711 | 0.7183639 |
| 2082 | Bn-A01-p5215209 | A-genome specific (napus-rapa) | 1            | 0.3623964    | not scorable | not scorable | 1         | 0.7779456 |
| 2083 | Bn-A01-p5238564 | A-genome specific (napus-rapa) | 0.9928229    | 0.8818117    | not scorable | not scorable | 1         | 0.7597861 |
| 2084 | Bn-A01-p5239959 | A-genome specific (napus-rapa) | 0.9976076    | 0.7925668    | not scorable | not scorable | 1         | 0.7448562 |
| 2085 | Bn-A01-p5242967 | A-genome specific (napus-rapa) | 0.9880383    | 0.5644107    | not scorable | not scorable | 1         | 0.671823  |
| 2086 | Bn-A01-p5243029 | A-genome specific (napus-rapa) | 0.9880383    | 0.8224536    | not scorable | not scorable | 0.9917355 | 0.8157201 |
| 2087 | Bn-A01-p5243036 | A-genome specific (napus-rapa) | 0.9832536    | 0.6195478    | not scorable | not scorable | 0.9752066 | 0.6610458 |
| 2088 | Bn-A01-p5243181 | A-genome specific (napus-rapa) | 0.9880383    | 0.7904221    | not scorable | not scorable | 1         | 0.755037  |
| 2089 | Bn-A01-p5245778 | A-genome specific (napus-rapa) | 0.9976076    | 0.6725068    | not scorable | not scorable | 0.9834711 | 0.6601241 |
| 2090 | Bn-A01-p5246582 | A-genome specific (napus-rapa) | 0.9976076    | 0.473164     | not scorable | not scorable | 1         | 0.6867018 |
| 2091 | Bn-A01-p5259856 | A-genome specific (napus-rapa) | 0.9976076    | 0.4592904    | not scorable | not scorable | 1         | 0.7813702 |
| 2092 | Bn-A01-p5265598 | A-genome specific (napus-rapa) | 0.9832536    | 0.778321     | not scorable | not scorable | 0.9917355 | 0.7906627 |
| 2093 | Bn-A01-p5268871 | A-genome specific (napus-rapa) | 0.9976076    | 0.6607196    | not scorable | not scorable | 0.9834711 | 0.7921939 |
| 2094 | Bn-A01-p5269368 | A-genome specific (napus-rapa) | 0.9688995    | 0.421522     | not scorable | not scorable | 1         | 0.6962355 |
| 2095 | Bn-A01-p5284702 | A-genome specific (napus-rapa) | 0.9928229    | 0.7771178    | not scorable | not scorable | 0.9834711 | 0.7523236 |
| 2096 | Bn-A01-p5296564 | A-genome specific (napus-rapa) | 0.9832536    | 0.7891576    | not scorable | not scorable | 0.9917355 | 0.8578618 |
| 2097 | Bn-A01-p5298283 | A-genome specific (napus-rapa) | 0.9856459    | 0.3430477    | not scorable | not scorable | 0.9917355 | 0.7904419 |
| 2098 | Bn-A01-p5318059 | A-genome specific (napus-rapa) | 0.9736842    | 0.7707634    | not scorable | not scorable | 0.9834711 | 0.7396865 |
| 2099 | Bn-A01-p5323726 | A-genome specific (napus-rapa) | 0.9856459    | 0.5614401    | not scorable | not scorable | 0.9834711 | 0.5872219 |
| 2100 | Bn-A01-p5324399 | A-genome specific (napus-rapa) | 0.9856459    | 0.7514811    | not scorable | not scorable | 0.9917355 | 0.6677213 |
| 2101 | Bn-A01-p5324472 | A-genome specific (napus-rapa) | 0.9880383    | 0.7730073    | not scorable | not scorable | 0.9586777 | 0.7589369 |
| 2102 | Bn-A01-p5328220 | A-genome specific (napus-rapa) | 0.9856459    | 0.823927     | not scorable | not scorable | 0.9917355 | 0.8094317 |
| 2103 | Bn-A01-p5328679 | A-genome specific (napus-rapa) | 0.9856459    | 0.8220761    | not scorable | not scorable | 1         | 0.8985579 |
| 2104 | Bn-A01-p5330192 | A-genome specific (napus-rapa) | 0.9808612    | 0.8155247    | not scorable | not scorable | 1         | 0.8294564 |
| 2105 | Bn-A01-p5332773 | A-genome specific (napus-rapa) | 0.9856459    | 0.8290957    | not scorable | not scorable | 0.9917355 | 0.7827479 |
| 2106 | Bn-A01-p5334474 | A-genome specific (napus-rapa) | 0.9856459    | 0.769523     | not scorable | not scorable | 1         | 0.7415857 |
| 2107 | Bn-A01-p5335218 | A-genome specific (napus-rapa) | 0.9832536    | 0.7847264    | not scorable | not scorable | 1         | 0.7409155 |
| 2108 | Bn-A01-p5335323 | A-genome specific (napus-rapa) | 0.9880383    | 0.8104       | not scorable | not scorable | 0.9504132 | 0.7273586 |
| 2109 | Bn-A01-p5335372 | A-genome specific (napus-rapa) | 0.9928229    | 0.4337811    | not scorable | not scorable | 1         | 0.8146218 |



|      |                 |                                   |              |              |              |              |           |           |
|------|-----------------|-----------------------------------|--------------|--------------|--------------|--------------|-----------|-----------|
| 2110 | Bn-A01-p5340953 | A-genome specific (napus-rapa)    | 0.9904306    | 0.5399374    | not scorable | not scorable | 0.9917355 | 0.8212364 |
| 2111 | Bn-A01-p5357589 | A-genome specific (napus-rapa)    | 0.9952153    | 0.5376253    | not scorable | not scorable | 1         | 0.7292859 |
| 2112 | Bn-A01-p5374990 | A-genome specific (napus-rapa)    | 1            | 0.4482889    | not scorable | not scorable | 1         | 0.4893315 |
| 2113 | Bn-A01-p5378430 | A-genome specific (napus-rapa)    | 0.9904306    | 0.7723417    | not scorable | not scorable | 1         | 0.7518216 |
| 2114 | Bn-A01-p5385928 | A-genome specific (napus-rapa)    | 1            | 0.3575064    | not scorable | not scorable | 1         | 0.8192832 |
| 2115 | Bn-A01-p5391551 | A-genome specific (napus-rapa)    | 0.9904306    | 0.7306954    | not scorable | not scorable | 0.9917355 | 0.745652  |
| 2116 | Bn-A01-p5418396 | A-genome specific (napus-rapa)    | 0.9904306    | 0.7510388    | not scorable | not scorable | 0.9917355 | 0.6882154 |
| 2117 | Bn-A01-p5469727 | A-genome specific (napus-rapa)    | 0.9952153    | 0.7539974    | not scorable | not scorable | 0.9834711 | 0.7471559 |
| 2118 | Bn-A01-p5480514 | A-genome specific (napus-rapa)    | 0.9760765    | 0.8059107    | not scorable | not scorable | 0.9917355 | 0.7204049 |
| 2119 | Bn-A01-p5480517 | A-genome specific (napus-rapa)    | 0.9736842    | 0.7777247    | not scorable | not scorable | 1         | 0.6935188 |
| 2120 | Bn-A01-p5481004 | A-genome specific (napus-rapa)    | 0.9880383    | 0.8053382    | not scorable | not scorable | 0.9834711 | 0.7625436 |
| 2121 | Bn-A01-p5485980 | A-genome specific (napus-rapa)    | 0.9856459    | 0.6330682    | not scorable | not scorable | 0.9752066 | 0.656383  |
| 2122 | Bn-A01-p5486104 | A-genome specific (napus-rapa)    | 0.9880383    | 0.6369889    | not scorable | not scorable | 0.9752066 | 0.6756431 |
| 2123 | Bn-A01-p5499353 | A-genome specific (napus-rapa)    | 0.9976076    | 0.3134699    | not scorable | not scorable | 1         | 0.7913718 |
| 2124 | Bn-A01-p5506421 | genome unspecific (oleracea-rapa) | not scorable | not scorable | 0.9147287    | 0.7307861    | 1         | 0.8190892 |
| 2125 | Bn-A01-p5508840 | A-genome specific (napus-rapa)    | 0.9808612    | 0.3190888    | not scorable | not scorable | 0.9752066 | 0.7559415 |
| 2126 | Bn-A01-p5508998 | A-genome specific (napus-rapa)    | 0.9760765    | 0.4693629    | not scorable | not scorable | 0.9421487 | 0.8740647 |
| 2127 | Bn-A01-p5512    | A-genome specific (napus-rapa)    | 0.9497608    | 0.7785608    | not scorable | not scorable | 0.9752066 | 0.759106  |
| 2128 | Bn-A01-p5522403 | A-genome specific (napus-rapa)    | 0.9569378    | 0.4154296    | not scorable | not scorable | 0.9752066 | 0.7721131 |
| 2129 | Bn-A01-p5522870 | A-genome specific (napus-rapa)    | 0.9665072    | 0.7970471    | not scorable | not scorable | 1         | 0.8100895 |
| 2130 | Bn-A01-p5535282 | A-genome specific (rapa only)     | not scorable | not scorable | not scorable | not scorable | 1         | 0.951578  |
| 2131 | Bn-A01-p5536695 | A-genome specific (napus-rapa)    | 0.9641148    | 0.5886007    | not scorable | not scorable | 1         | 0.7606366 |
| 2132 | Bn-A01-p5550226 | A-genome specific (napus-rapa)    | 0.9736842    | 0.7764096    | not scorable | not scorable | 0.9834711 | 0.7165308 |
| 2133 | Bn-A01-p5553918 | A-genome specific (napus-rapa)    | 0.9976076    | 0.2813197    | not scorable | not scorable | 0.9917355 | 0.7434332 |
| 2134 | Bn-A01-p5567077 | A-genome specific (napus-rapa)    | 0.9808612    | 0.7492032    | not scorable | not scorable | 0.9504132 | 0.8040844 |
| 2135 | Bn-A01-p5567840 | A-genome specific (napus-rapa)    | 0.5645933    | 0.7692157    | not scorable | not scorable | 1         | 0.7827143 |
| 2136 | Bn-A01-p5570110 | A-genome specific (napus-rapa)    | 0.9784689    | 0.6138938    | not scorable | not scorable | 0.9917355 | 0.6514556 |
| 2137 | Bn-A01-p5570221 | A-genome specific (napus-rapa)    | 0.9258373    | 0.7212295    | not scorable | not scorable | 0.9917355 | 0.8147714 |
| 2138 | Bn-A01-p5579695 | A-genome specific (napus-rapa)    | 1            | 0.8207097    | not scorable | not scorable | 1         | 0.8207246 |
| 2139 | Bn-A01-p5585071 | A-genome specific (napus-rapa)    | 0.9736842    | 0.4355158    | not scorable | not scorable | 0.9917355 | 0.788171  |
| 2140 | Bn-A01-p5585933 | A-genome specific (napus-rapa)    | 0.6961722    | 0.7830566    | not scorable | not scorable | 0.9504132 | 0.8255201 |
| 2141 | Bn-A01-p5586618 | A-genome specific (napus-rapa)    | 0.9617225    | 0.7954295    | not scorable | not scorable | 0.9752066 | 0.7845778 |
| 2142 | Bn-A01-p5586671 | A-genome specific (napus-rapa)    | 0.9545454    | 0.7930225    | not scorable | not scorable | 0.9834711 | 0.7634333 |

|      |                 |                                   |              |              |              |              |           |           |
|------|-----------------|-----------------------------------|--------------|--------------|--------------|--------------|-----------|-----------|
| 2143 | Bn-A01-p5586854 | A-genome specific (napus-rapa)    | 0.9808612    | 0.7582862    | not scorable | not scorable | 0.9917355 | 0.6768746 |
| 2144 | Bn-A01-p5587840 | A-genome specific (napus-rapa)    | 0.9784689    | 0.7797007    | not scorable | not scorable | 0.9917355 | 0.7020786 |
| 2145 | Bn-A01-p5590998 | A-genome specific (napus-rapa)    | 0.9665072    | 0.7757873    | not scorable | not scorable | 0.9917355 | 0.8386104 |
| 2146 | Bn-A01-p5591950 | A-genome specific (rapa only)     | not scorable | not scorable | not scorable | not scorable | 0.9917355 | 0.6990972 |
| 2147 | Bn-A01-p5593317 | A-genome specific (napus-rapa)    | 0.9186603    | 0.1788501    | not scorable | not scorable | 0.9669421 | 0.8678293 |
| 2148 | Bn-A01-p5593369 | A-genome specific (rapa only)     | not scorable | not scorable | not scorable | not scorable | 0.9917355 | 0.7192603 |
| 2149 | Bn-A01-p5595319 | A-genome specific (napus-rapa)    | 0.9641148    | 0.6990168    | not scorable | not scorable | 1         | 0.8317366 |
| 2150 | Bn-A01-p5599369 | A-genome specific (napus-rapa)    | 0.9808612    | 0.4604861    | not scorable | not scorable | 0.9917355 | 0.74865   |
| 2151 | Bn-A01-p5601232 | A-genome specific (napus-rapa)    | 0.9712918    | 0.7683066    | not scorable | not scorable | 0.9834711 | 0.7597882 |
| 2152 | Bn-A01-p5621392 | A-genome specific (napus-rapa)    | 1            | 0.5693927    | not scorable | not scorable | 0.9669421 | 0.5432907 |
| 2153 | Bn-A01-p5635471 | A-genome specific (napus-rapa)    | 0.9904306    | 0.3406782    | not scorable | not scorable | 0.9917355 | 0.7091282 |
| 2154 | Bn-A01-p5647795 | A-genome specific (napus-rapa)    | 0.9736842    | 0.7877428    | not scorable | not scorable | 0.9834711 | 0.7709503 |
| 2155 | Bn-A01-p5648120 | A-genome specific (napus-rapa)    | 0.9736842    | 0.3239561    | not scorable | not scorable | 0.9917355 | 0.7437051 |
| 2156 | Bn-A01-p5658004 | A-genome specific (napus-rapa)    | 0.9043062    | 0.342047     | not scorable | not scorable | 0.9586777 | 0.4271367 |
| 2157 | Bn-A01-p5659083 | A-genome specific (napus-rapa)    | 0.9593301    | 0.255041     | not scorable | not scorable | 0.9917355 | 0.7796705 |
| 2158 | Bn-A01-p5660238 | A-genome specific (napus-rapa)    | 0.9976076    | 0.265656     | not scorable | not scorable | 0.9752066 | 0.751285  |
| 2159 | Bn-A01-p5661294 | A-genome specific (napus-rapa)    | 0.9880383    | 0.7955012    | not scorable | not scorable | 1         | 0.802054  |
| 2160 | Bn-A01-p5663319 | A-genome specific (napus-rapa)    | 0.9832536    | 0.6906137    | not scorable | not scorable | 1         | 0.7714279 |
| 2161 | Bn-A01-p5665774 | A-genome specific (napus-rapa)    | 0.9856459    | 0.7763845    | not scorable | not scorable | 1         | 0.8286185 |
| 2162 | Bn-A01-p5678678 | A-genome specific (napus-rapa)    | 0.9832536    | 0.7891049    | not scorable | not scorable | 1         | 0.7650721 |
| 2163 | Bn-A01-p5679389 | A-genome specific (napus-rapa)    | 0.9832536    | 0.7918617    | not scorable | not scorable | 1         | 0.7799536 |
| 2164 | Bn-A01-p5680581 | A-genome specific (napus-rapa)    | 0.9856459    | 0.5880549    | not scorable | not scorable | 1         | 0.7164133 |
| 2165 | Bn-A01-p5680730 | A-genome specific (napus-rapa)    | 0.9832536    | 0.6427014    | not scorable | not scorable | 1         | 0.7245708 |
| 2166 | Bn-A01-p5688168 | A-genome specific (napus-rapa)    | 0.9832536    | 0.8187027    | not scorable | not scorable | 0.9752066 | 0.8422864 |
| 2167 | Bn-A01-p5697529 | genome unspecific (oleracea-rapa) | not scorable | not scorable |              | 1            | 0.8311134 | 1         |
| 2168 | Bn-A01-p5697706 | A-genome specific (napus-rapa)    | 0.9569378    | 0.4799112    | not scorable | not scorable | 0.9834711 | 0.7375431 |
| 2169 | Bn-A01-p5699110 | A-genome specific (napus-rapa)    | 0.9832536    | 0.7823582    | not scorable | not scorable | 0.9917355 | 0.8342558 |
| 2170 | Bn-A01-p5711920 | A-genome specific (napus-rapa)    | 0.9952153    | 0.3571143    | not scorable | not scorable | 1         | 0.7794638 |
| 2171 | Bn-A01-p5715141 | A-genome specific (napus-rapa)    | 0.9904306    | 0.7464477    | not scorable | not scorable | 1         | 0.8172321 |
| 2172 | Bn-A01-p5718049 | A-genome specific (napus-rapa)    | 0.9808612    | 0.7441888    | not scorable | not scorable | 1         | 0.8043071 |
| 2173 | Bn-A01-p5730640 | A-genome specific (napus-rapa)    | 0.9808612    | 0.3155487    | not scorable | not scorable | 0.9752066 | 0.5122095 |
| 2174 | Bn-A01-p5731429 | A-genome specific (napus-rapa)    | 0.9401914    | 0.7437899    | not scorable | not scorable | 0.9917355 | 0.7120453 |
| 2175 | Bn-A01-p5731932 | A-genome specific (napus-rapa)    | 0.9832536    | 0.6795269    | not scorable | not scorable | 1         | 0.6095803 |

|                      |                                   |              |              |              |              |              |              |
|----------------------|-----------------------------------|--------------|--------------|--------------|--------------|--------------|--------------|
| 2176 Bn-A01-p5732226 | A-genome specific (napus-rapa)    | 0.9593301    | 0.7638625    | not scorable | not scorable | 0.9834711    | 0.8456624    |
| 2177 Bn-A01-p5737901 | A-genome specific (napus-rapa)    | 0.9856459    | 0.7434707    | not scorable | not scorable | 0.9752066    | 0.7544049    |
| 2178 Bn-A01-p5752342 | A-genome specific (napus-rapa)    | 0.9832536    | 0.7855351    | not scorable | not scorable | 1            | 0.7941739    |
| 2179 Bn-A01-p5762190 | A-genome specific (napus-rapa)    | 0.9425837    | 0.7217531    | not scorable | not scorable | 0.9834711    | 0.7455346    |
| 2180 Bn-A01-p5775331 | A-genome specific (napus-rapa)    | 0.9880383    | 0.8044859    | not scorable | not scorable | 0.9917355    | 0.7391033    |
| 2181 Bn-A01-p5777117 | A-genome specific (napus-rapa)    | 0.9904306    | 0.7685633    | not scorable | not scorable | 1            | 0.7447929    |
| 2182 Bn-A01-p5781261 | A-genome specific (napus-rapa)    | 0.9545454    | 0.6577423    | not scorable | not scorable | 0.9834711    | 0.7491552    |
| 2183 Bn-A01-p5787591 | A-genome specific (napus-rapa)    | 0.9904306    | 0.7816634    | not scorable | not scorable | 1            | 0.7606892    |
| 2184 Bn-A01-p5795016 | A-genome specific (napus-rapa)    | 0.9904306    | 0.7579244    | not scorable | not scorable | 1            | 0.7593027    |
| 2185 Bn-A01-p5796314 | all not scorable                  | not scorable | not scorable | not scorable | not scorable | not scorable | not scorable |
| 2186 Bn-A01-p5796425 | A-genome specific (napus-rapa)    | 0.9425837    | 0.6601626    | not scorable | not scorable | 0.9917355    | 0.6673819    |
| 2187 Bn-A01-p5797296 | napus specific                    | 0.9880383    | 0.3113802    | not scorable | not scorable | not scorable | not scorable |
| 2188 Bn-A01-p5797810 | genome unspecific (oleracea-rapa) | not scorable | not scorable | 0.9069768    | 0.7020756    | 0.9669421    | 0.8012508    |
| 2189 Bn-A01-p5805154 | A-genome specific (napus-rapa)    | 0.9880383    | 0.767651     | not scorable | not scorable | 1            | 0.6725802    |
| 2190 Bn-A01-p5806635 | A-genome specific (napus-rapa)    | 0.9952153    | 0.5076189    | not scorable | not scorable | 0.9917355    | 0.8203074    |
| 2191 Bn-A01-p5808036 | A-genome specific (napus-rapa)    | 0.9665072    | 0.7336619    | not scorable | not scorable | 0.9421487    | 0.8017119    |
| 2192 Bn-A01-p5821651 | A-genome specific (napus-rapa)    | 0.9617225    | 0.4636785    | not scorable | not scorable | 0.9917355    | 0.8140017    |
| 2193 Bn-A01-p5822015 | A-genome specific (napus-rapa)    | 0.9593301    | 0.7860306    | not scorable | not scorable | 0.9669421    | 0.8255906    |
| 2194 Bn-A01-p5835558 | A-genome specific (napus-rapa)    | 0.9856459    | 0.7031496    | not scorable | not scorable | 0.9917355    | 0.7530049    |
| 2195 Bn-A01-p5862558 | A-genome specific (napus-rapa)    | 0.9808612    | 0.8018116    | not scorable | not scorable | 0.9752066    | 0.8050262    |
| 2196 Bn-A01-p5868598 | A-genome specific (napus-rapa)    | 0.9712918    | 0.7711254    | not scorable | not scorable | 0.9586777    | 0.69955      |
| 2197 Bn-A01-p5873504 | A-genome specific (napus-rapa)    | 0.9904306    | 0.7734785    | not scorable | not scorable | 0.9917355    | 0.8293523    |
| 2198 Bn-A01-p5878485 | A-genome specific (napus-rapa)    | 0.9784689    | 0.7783518    | not scorable | not scorable | 0.9834711    | 0.7171305    |
| 2199 Bn-A01-p5886182 | A-genome specific (napus-rapa)    | 1            | 0.4112878    | not scorable | not scorable | 1            | 0.7999297    |
| 2200 Bn-A01-p5899092 | A-genome specific (napus-rapa)    | 0.9138756    | 0.6433278    | not scorable | not scorable | 1            | 0.7680961    |
| 2201 Bn-A01-p5903527 | A-genome specific (napus-rapa)    | 0.9928229    | 0.3913113    | not scorable | not scorable | 0.9834711    | 0.6958624    |
| 2202 Bn-A01-p5917688 | A-genome specific (napus-rapa)    | 0.9832536    | 0.6234019    | not scorable | not scorable | 0.9669421    | 0.6150268    |
| 2203 Bn-A01-p5918340 | A-genome specific (napus-rapa)    | 0.9976076    | 0.7736933    | not scorable | not scorable | 0.9752066    | 0.832279     |
| 2204 Bn-A01-p5921497 | A-genome specific (napus-rapa)    | 0.9832536    | 0.6767806    | not scorable | not scorable | 0.9752066    | 0.7048401    |
| 2205 Bn-A01-p5930704 | A-genome specific (napus-rapa)    | 1            | 0.5172032    | not scorable | not scorable | 0.9752066    | 0.7344397    |
| 2206 Bn-A01-p5943392 | A-genome specific (napus-rapa)    | 0.9952153    | 0.4961517    | not scorable | not scorable | 0.9669421    | 0.6773928    |
| 2207 Bn-A01-p5944398 | A-genome specific (napus-rapa)    | 0.9808612    | 0.826543     | not scorable | not scorable | 0.9917355    | 0.7882035    |
| 2208 Bn-A01-p5949498 | A-genome specific (napus-rapa)    | 0.9952153    | 0.4866338    | not scorable | not scorable | 0.9917355    | 0.8151706    |

|      |                 |                                |              |              |              |              |              |              |
|------|-----------------|--------------------------------|--------------|--------------|--------------|--------------|--------------|--------------|
| 2209 | Bn-A01-p5949582 | A-genome specific (napus-rapa) | 0.9856459    | 0.4707538    | not scorable | not scorable | 0.9917355    | 0.7562752    |
| 2210 | Bn-A01-p5949665 | A-genome specific (napus-rapa) | 0.9856459    | 0.4663477    | not scorable | not scorable | 1            | 0.6962676    |
| 2211 | Bn-A01-p595492  | A-genome specific (rapa only)  | not scorable | not scorable | not scorable | not scorable | 0.9256198    | 0.7305183    |
| 2212 | Bn-A01-p595651  | A-genome specific (napus-rapa) | 0.9760765    | 0.7674024    | not scorable | not scorable | 0.9917355    | 0.7977939    |
| 2213 | Bn-A01-p5959700 | A-genome specific (napus-rapa) | 0.9976076    | 0.4378778    | not scorable | not scorable | 1            | 0.7427151    |
| 2214 | Bn-A01-p597363  | A-genome specific (napus-rapa) | 1            | 0.3204771    | not scorable | not scorable | 1            | 0.7883846    |
| 2215 | Bn-A01-p5973643 | A-genome specific (rapa only)  | not scorable | not scorable | not scorable | not scorable | 0.9752066    | 0.8495506    |
| 2216 | Bn-A01-p5977595 | A-genome specific (rapa only)  | not scorable | not scorable | not scorable | not scorable | 0.9834711    | 0.9175813    |
| 2217 | Bn-A01-p5977820 | A-genome specific (napus-rapa) | 0.9856459    | 0.7262964    | not scorable | not scorable | 0.9752066    | 0.6786442    |
| 2218 | Bn-A01-p598242  | A-genome specific (napus-rapa) | 0.9712918    | 0.5376529    | not scorable | not scorable | 0.9917355    | 0.7963605    |
| 2219 | Bn-A01-p5990203 | A-genome specific (napus-rapa) | 0.9928229    | 0.4151998    | not scorable | not scorable | 1            | 0.6994829    |
| 2220 | Bn-A01-p5994840 | A-genome specific (napus-rapa) | 0.9641148    | 0.7607844    | not scorable | not scorable | 0.9917355    | 0.7378923    |
| 2221 | Bn-A01-p5994980 | A-genome specific (napus-rapa) | 0.9688995    | 0.7006634    | not scorable | not scorable | 0.9917355    | 0.6849162    |
| 2222 | Bn-A01-p599910  | A-genome specific (napus-rapa) | 0.9712918    | 0.731526     | not scorable | not scorable | 0.9752066    | 0.5852711    |
| 2223 | Bn-A01-p6007093 | A-genome specific (napus-rapa) | 0.9832536    | 0.7782392    | not scorable | not scorable | 0.9917355    | 0.8103148    |
| 2224 | Bn-A01-p6035491 | A-genome specific (napus-rapa) | 0.9856459    | 0.758619     | not scorable | not scorable | 0.9834711    | 0.7686905    |
| 2225 | Bn-A01-p6038249 | A-genome specific (napus-rapa) | 0.9832536    | 0.7453348    | not scorable | not scorable | 0.9752066    | 0.801205     |
| 2226 | Bn-A01-p6040667 | A-genome specific (napus-rapa) | 0.9784689    | 0.6878166    | not scorable | not scorable | 0.9669421    | 0.8186894    |
| 2227 | Bn-A01-p6044475 | A-genome specific (napus-rapa) | 0.9904306    | 0.7295846    | not scorable | not scorable | 0.9834711    | 0.7857201    |
| 2228 | Bn-A01-p6053633 | A-genome specific (napus-rapa) | 0.9952153    | 0.7652755    | not scorable | not scorable | 1            | 0.7901177    |
| 2229 | Bn-A01-p6066325 | A-genome specific (napus-rapa) | 1            | 0.5403682    | not scorable | not scorable | 0.9917355    | 0.6978582    |
| 2230 | Bn-A01-p6081978 | A-genome specific (napus-rapa) | 0.9808612    | 0.7582098    | not scorable | not scorable | 0.9917355    | 0.7664619    |
| 2231 | Bn-A01-p6083015 | A-genome specific (napus-rapa) | 1            | 0.1826068    | not scorable | not scorable | 0.9834711    | 0.81692      |
| 2232 | Bn-A01-p6093123 | A-genome specific (napus-rapa) | 0.9832536    | 0.4043821    | not scorable | not scorable | 0.9752066    | 0.6965731    |
| 2233 | Bn-A01-p609857  | A-genome specific (napus-rapa) | 0.9688995    | 0.7655809    | not scorable | not scorable | 1            | 0.7170258    |
| 2234 | Bn-A01-p6111016 | A-genome specific (napus-rapa) | 0.9928229    | 0.5186349    | not scorable | not scorable | 1            | 0.7932262    |
| 2235 | Bn-A01-p611977  | A-genome specific (napus-rapa) | 0.9736842    | 0.7615775    | not scorable | not scorable | 1            | 0.8450921    |
| 2236 | Bn-A01-p6158889 | A-genome specific (napus-rapa) | 0.9904306    | 0.7524049    | not scorable | not scorable | 0.9752066    | 0.6986917    |
| 2237 | Bn-A01-p6168163 | A-genome specific (napus-rapa) | 0.9784689    | 0.7616544    | not scorable | not scorable | 0.9917355    | 0.7859291    |
| 2238 | Bn-A01-p6168191 | all not scorable               | not scorable | not scorable | not scorable | not scorable | not scorable | not scorable |
| 2239 | Bn-A01-p6180257 | A-genome specific (napus-rapa) | 0.9688995    | 0.7374685    | not scorable | not scorable | 0.9917355    | 0.8134049    |
| 2240 | Bn-A01-p6182710 | A-genome specific (napus-rapa) | 0.9928229    | 0.7673516    | not scorable | not scorable | 0.9917355    | 0.7216988    |
| 2241 | Bn-A01-p6188347 | A-genome specific (napus-rapa) | 0.9784689    | 0.7286863    | not scorable | not scorable | 1            | 0.6928239    |

|      |                 |                                |              |              |              |              |           |           |
|------|-----------------|--------------------------------|--------------|--------------|--------------|--------------|-----------|-----------|
| 2242 | Bn-A01-p6199422 | A-genome specific (rapa only)  | not scorable | not scorable | not scorable | not scorable | 0.9834711 | 0.9205657 |
| 2243 | Bn-A01-p6215196 | A-genome specific (napus-rapa) | 1            | 0.3676657    | not scorable | not scorable | 1         | 0.7867026 |
| 2244 | Bn-A01-p6216424 | A-genome specific (napus-rapa) | 1            | 0.304164     | not scorable | not scorable | 0.9917355 | 0.8134012 |
| 2245 | Bn-A01-p6217011 | A-genome specific (napus-rapa) | 0.9904306    | 0.2954578    | not scorable | not scorable | 0.9917355 | 0.7512081 |
| 2246 | Bn-A01-p6220667 | A-genome specific (napus-rapa) | 0.9976076    | 0.5097005    | not scorable | not scorable | 0.9917355 | 0.8104565 |
| 2247 | Bn-A01-p622550  | A-genome specific (napus-rapa) | 0.9904306    | 0.7812953    | not scorable | not scorable | 0.9834711 | 0.8074109 |
| 2248 | Bn-A01-p6232061 | A-genome specific (napus-rapa) | 0.9976076    | 0.472675     | not scorable | not scorable | 0.9669421 | 0.6426827 |
| 2249 | Bn-A01-p623568  | A-genome specific (napus-rapa) | 1            | 0.8177386    | not scorable | not scorable | 1         | 0.8135551 |
| 2250 | Bn-A01-p6239    | A-genome specific (napus-rapa) | 0.9401914    | 0.8139242    | not scorable | not scorable | 0.9834711 | 0.7995675 |
| 2251 | Bn-A01-p6270054 | A-genome specific (napus-rapa) | 0.9928229    | 0.5981111    | not scorable | not scorable | 0.9917355 | 0.6299887 |
| 2252 | Bn-A01-p6271245 | A-genome specific (napus-rapa) | 1            | 0.5554703    | not scorable | not scorable | 0.9834711 | 0.6639184 |
| 2253 | Bn-A01-p6272642 | A-genome specific (napus-rapa) | 0.9904306    | 0.7962251    | not scorable | not scorable | 0.9834711 | 0.8045162 |
| 2254 | Bn-A01-p6274135 | A-genome specific (napus-rapa) | 0.9976076    | 0.7401276    | not scorable | not scorable | 0.9752066 | 0.7640173 |
| 2255 | Bn-A01-p6275784 | A-genome specific (napus-rapa) | 0.9928229    | 0.7751971    | not scorable | not scorable | 0.9917355 | 0.8285038 |
| 2256 | Bn-A01-p6290508 | A-genome specific (rapa only)  | not scorable | not scorable | not scorable | not scorable | 0.9834711 | 0.3114929 |
| 2257 | Bn-A01-p6333810 | A-genome specific (napus-rapa) | 0.9904306    | 0.7003289    | not scorable | not scorable | 1         | 0.7423966 |
| 2258 | Bn-A01-p6333910 | A-genome specific (napus-rapa) | 0.9832536    | 0.7911803    | not scorable | not scorable | 1         | 0.707109  |
| 2259 | Bn-A01-p634701  | A-genome specific (napus-rapa) | 1            | 0.6687379    | not scorable | not scorable | 1         | 0.7590938 |
| 2260 | Bn-A01-p6349933 | A-genome specific (napus-rapa) | 0.9688995    | 0.787617     | not scorable | not scorable | 0.9752066 | 0.8284212 |
| 2261 | Bn-A01-p6369633 | A-genome specific (rapa only)  | not scorable | not scorable | not scorable | not scorable | 0.9421487 | 0.7599422 |
| 2262 | Bn-A01-p637586  | A-genome specific (napus-rapa) | 0.9569378    | 0.3589388    | not scorable | not scorable | 0.9834711 | 0.7750542 |
| 2263 | Bn-A01-p6376105 | A-genome specific (napus-rapa) | 1            | 0.7951425    | not scorable | not scorable | 1         | 0.7650967 |
| 2264 | Bn-A01-p6380934 | A-genome specific (napus-rapa) | 0.9665072    | 0.4092464    | not scorable | not scorable | 0.9752066 | 0.7127312 |
| 2265 | Bn-A01-p6388431 | A-genome specific (napus-rapa) | 0.9832536    | 0.5766192    | not scorable | not scorable | 0.7272727 | 0.7358895 |
| 2266 | Bn-A01-p6390236 | A-genome specific (napus-rapa) | 0.9976076    | 0.5965861    | not scorable | not scorable | 0.7272727 | 0.6775459 |
| 2267 | Bn-A01-p6439605 | A-genome specific (napus-rapa) | 0.9880383    | 0.2116308    | not scorable | not scorable | 1         | 0.7611951 |
| 2268 | Bn-A01-p644410  | A-genome specific (napus-rapa) | 0.9736842    | 0.7594993    | not scorable | not scorable | 1         | 0.7881269 |
| 2269 | Bn-A01-p645951  | A-genome specific (napus-rapa) | 0.6770335    | 0.7597431    | not scorable | not scorable | 0.661157  | 0.7736719 |
| 2270 | Bn-A01-p6478922 | A-genome specific (napus-rapa) | 0.9928229    | 0.2762364    | not scorable | not scorable | 0.9669421 | 0.7037422 |
| 2271 | Bn-A01-p6479735 | A-genome specific (napus-rapa) | 0.9880383    | 0.8213089    | not scorable | not scorable | 0.9669421 | 0.7185031 |
| 2272 | Bn-A01-p648196  | A-genome specific (napus-rapa) | 0.9832536    | 0.782642     | not scorable | not scorable | 1         | 0.7671788 |
| 2273 | Bn-A01-p6482543 | A-genome specific (napus-rapa) | 0.9832536    | 0.7830471    | not scorable | not scorable | 0.9752066 | 0.769574  |
| 2274 | Bn-A01-p6487075 | A-genome specific (napus-rapa) | 0.9952153    | 0.475727     | not scorable | not scorable | 1         | 0.8067995 |

|                      |                                    |              |              |              |              |              |              |
|----------------------|------------------------------------|--------------|--------------|--------------|--------------|--------------|--------------|
| 2275 Bn-A01-p649805  | A-genome specific (napus-rapa)     | 0.9497608    | 0.358359     | not scorable | not scorable | 0.9917355    | 0.7158309    |
| 2276 Bn-A01-p6505754 | A-genome specific (rapa only)      | not scorable | not scorable | not scorable | not scorable | 1            | 0.9158837    |
| 2277 Bn-A01-p6507432 | A-genome specific (napus-rapa)     | 0.9928229    | 0.6174532    | not scorable | not scorable | 0.9917355    | 0.796374     |
| 2278 Bn-A01-p6512377 | C-genome specific (napus-oleracea) | 0.9928229    | 0.7809948    | 0.9844961    | 0.8054167    | not scorable | not scorable |
| 2279 Bn-A01-p6530903 | A-genome specific (napus-rapa)     | 0.9928229    | 0.8076142    | not scorable | not scorable | 0.9917355    | 0.8047049    |
| 2280 Bn-A01-p6538362 | A-genome specific (napus-rapa)     | 1            | 0.4858949    | not scorable | not scorable | 1            | 0.8601731    |
| 2281 Bn-A01-p6546245 | A-genome specific (napus-rapa)     | 0.9832536    | 0.6770661    | not scorable | not scorable | 0.9834711    | 0.7246336    |
| 2282 Bn-A01-p6547052 | A-genome specific (napus-rapa)     | 0.9904306    | 0.7185974    | not scorable | not scorable | 0.9917355    | 0.7078228    |
| 2283 Bn-A01-p6552596 | A-genome specific (napus-rapa)     | 1            | 0.4380204    | not scorable | not scorable | 0.9917355    | 0.5749632    |
| 2284 Bn-A01-p6558843 | A-genome specific (napus-rapa)     | 1            | 0.3575321    | not scorable | not scorable | 0.9917355    | 0.8506843    |
| 2285 Bn-A01-p6560270 | A-genome specific (napus-rapa)     | 0.9904306    | 0.7903701    | not scorable | not scorable | 0.9917355    | 0.7395895    |
| 2286 Bn-A01-p657852  | A-genome specific (napus-rapa)     | 0.9904306    | 0.7476627    | not scorable | not scorable | 1            | 0.8160439    |
| 2287 Bn-A01-p6604419 | A-genome specific (napus-rapa)     | 0.9880383    | 0.4487656    | not scorable | not scorable | 0.9917355    | 0.6779995    |
| 2288 Bn-A01-p6625349 | A-genome specific (napus-rapa)     | 0.9928229    | 0.6404023    | not scorable | not scorable | 0.9834711    | 0.6447065    |
| 2289 Bn-A01-p6628035 | A-genome specific (napus-rapa)     | 0.9712918    | 0.7749171    | not scorable | not scorable | 0.9752066    | 0.690061     |
| 2290 Bn-A01-p663088  | A-genome specific (napus-rapa)     | 0.9760765    | 0.5883609    | not scorable | not scorable | 1            | 0.6916187    |
| 2291 Bn-A01-p6643749 | A-genome specific (napus-rapa)     | 0.9641148    | 0.6942798    | not scorable | not scorable | 1            | 0.835351     |
| 2292 Bn-A01-p6664608 | A-genome specific (napus-rapa)     | 0.9904306    | 0.4035521    | not scorable | not scorable | 1            | 0.7573897    |
| 2293 Bn-A01-p6678914 | A-genome specific (napus-rapa)     | 0.9856459    | 0.5675757    | not scorable | not scorable | 1            | 0.7343488    |
| 2294 Bn-A01-p6679394 | A-genome specific (napus-rapa)     | 0.9641148    | 0.7160898    | not scorable | not scorable | 0.9834711    | 0.7293248    |
| 2295 Bn-A01-p6679669 | genome unspecific (all in)         | 0.9856459    | 0.3020632    | 1            | 0.658442     | 1            | 0.7157381    |
| 2296 Bn-A01-p6687707 | A-genome specific (napus-rapa)     | 0.9928229    | 0.7410733    | not scorable | not scorable | 0.9834711    | 0.7221861    |
| 2297 Bn-A01-p6687839 | A-genome specific (napus-rapa)     | 0.9736842    | 0.8030968    | not scorable | not scorable | 0.9917355    | 0.7910724    |
| 2298 Bn-A01-p6699539 | A-genome specific (napus-rapa)     | 0.9712918    | 0.4604871    | not scorable | not scorable | 1            | 0.8626049    |
| 2299 Bn-A01-p6702060 | A-genome specific (rapa only)      | not scorable | not scorable | not scorable | not scorable | 0.7520661    | 0.8046659    |
| 2300 Bn-A01-p6708539 | A-genome specific (napus-rapa)     | 0.9928229    | 0.778225     | not scorable | not scorable | 0.9752066    | 0.7503335    |
| 2301 Bn-A01-p6713213 | A-genome specific (napus-rapa)     | 0.9760765    | 0.7126238    | not scorable | not scorable | 1            | 0.6824932    |
| 2302 Bn-A01-p6714740 | A-genome specific (napus-rapa)     | 0.9354067    | 0.7851816    | not scorable | not scorable | 0.9834711    | 0.6891667    |
| 2303 Bn-A01-p6715317 | A-genome specific (napus-rapa)     | 0.9808612    | 0.6300939    | not scorable | not scorable | 0.9834711    | 0.6613318    |
| 2304 Bn-A01-p6747706 | A-genome specific (napus-rapa)     | 0.9904306    | 0.770321     | not scorable | not scorable | 0.9917355    | 0.7062156    |
| 2305 Bn-A01-p6773750 | A-genome specific (napus-rapa)     | 0.9784689    | 0.7805338    | not scorable | not scorable | 0.9586777    | 0.7638553    |
| 2306 Bn-A01-p6773949 | A-genome specific (napus-rapa)     | 0.9760765    | 0.7639586    | not scorable | not scorable | 0.9752066    | 0.866415     |
| 2307 Bn-A01-p6774097 | A-genome specific (napus-rapa)     | 1            | 0.4762239    | not scorable | not scorable | 1            | 0.7718182    |

|      |                 |                                |              |              |              |              |              |           |           |
|------|-----------------|--------------------------------|--------------|--------------|--------------|--------------|--------------|-----------|-----------|
| 2308 | Bn-A01-p6774837 | A-genome specific (napus-rapa) | 0.9784689    | 0.7782727    | not scorable | not scorable | 0.9669421    | 0.7567326 |           |
| 2309 | Bn-A01-p6776634 | A-genome specific (napus-rapa) | 0.9449761    | 0.6310245    | not scorable | not scorable | 0.9834711    | 0.7802128 |           |
| 2310 | Bn-A01-p6776950 | A-genome specific (napus-rapa) |              | 1            | 0.4195857    | not scorable | not scorable | 1         | 0.6981117 |
| 2311 | Bn-A01-p678018  | A-genome specific (rapa only)  | not scorable | not scorable | not scorable | not scorable | 1            | 0.8108955 |           |
| 2312 | Bn-A01-p6787691 | A-genome specific (napus-rapa) | 0.9688995    | 0.4664785    | not scorable | not scorable | 1            | 0.7965355 |           |
| 2313 | Bn-A01-p6787930 | A-genome specific (napus-rapa) | 0.9688995    | 0.6154464    | not scorable | not scorable | 1            | 0.7818822 |           |
| 2314 | Bn-A01-p6788044 | A-genome specific (rapa only)  | not scorable | not scorable | not scorable | not scorable | 1            | 0.6968842 |           |
| 2315 | Bn-A01-p6801449 | A-genome specific (napus-rapa) | 0.9401914    | 0.4269576    | not scorable | not scorable | 0.9917355    | 0.8644511 |           |
| 2316 | Bn-A01-p6825673 | A-genome specific (napus-rapa) | 0.9665072    | 0.8130674    | not scorable | not scorable | 0.9834711    | 0.7297969 |           |
| 2317 | Bn-A01-p6826327 | A-genome specific (napus-rapa) | 0.9784689    | 0.6887788    | not scorable | not scorable | 0.9586777    | 0.7197458 |           |
| 2318 | Bn-A01-p6838738 | A-genome specific (napus-rapa) | 0.9832536    | 0.7929561    | not scorable | not scorable | 0.7107438    | 0.7452965 |           |
| 2319 | Bn-A01-p6841235 | A-genome specific (napus-rapa) |              | 1            | 0.5621869    | not scorable | not scorable | 0.9917355 | 0.7724892 |
| 2320 | Bn-A01-p6854917 | A-genome specific (napus-rapa) | 0.9856459    | 0.5191624    | not scorable | not scorable | 0.9917355    | 0.7998236 |           |
| 2321 | Bn-A01-p6863835 | A-genome specific (napus-rapa) | 0.9760765    | 0.494791     | not scorable | not scorable | 0.9752066    | 0.725516  |           |
| 2322 | Bn-A01-p6877281 | A-genome specific (napus-rapa) | 0.9952153    | 0.4794303    | not scorable | not scorable | 1            | 0.7268496 |           |
| 2323 | Bn-A01-p688355  | A-genome specific (napus-rapa) | 0.9688995    | 0.6550958    | not scorable | not scorable | 0.9834711    | 0.658986  |           |
| 2324 | Bn-A01-p6898291 | A-genome specific (napus-rapa) | 0.9880383    | 0.7674453    | not scorable | not scorable | 0.9917355    | 0.849797  |           |
| 2325 | Bn-A01-p6898690 | A-genome specific (napus-rapa) | 0.9736842    | 0.7089965    | not scorable | not scorable | 0.9586777    | 0.740084  |           |
| 2326 | Bn-A01-p6899980 | A-genome specific (rapa only)  | not scorable | not scorable | not scorable | not scorable | 0.7024794    | 0.829312  |           |
| 2327 | Bn-A01-p6900616 | A-genome specific (napus-rapa) | 0.923445     | 0.7537299    | not scorable | not scorable | 0.7024794    | 0.7531074 |           |
| 2328 | Bn-A01-p6907522 | A-genome specific (napus-rapa) | 0.9210526    | 0.7828278    | not scorable | not scorable | 0.7520661    | 0.8056048 |           |
| 2329 | Bn-A01-p6920456 | A-genome specific (napus-rapa) | 0.9904306    | 0.4195472    | not scorable | not scorable | 0.5289256    | 0.7684046 |           |
| 2330 | Bn-A01-p6925167 | A-genome specific (napus-rapa) | 0.9928229    | 0.5100092    | not scorable | not scorable | 0.9752066    | 0.7864066 |           |
| 2331 | Bn-A01-p6925436 | A-genome specific (napus-rapa) | 0.9928229    | 0.2755999    | not scorable | not scorable | 1            | 0.8039197 |           |
| 2332 | Bn-A01-p6950868 | A-genome specific (napus-rapa) | 0.9952153    | 0.3965079    | not scorable | not scorable | 0.9834711    | 0.7228364 |           |
| 2333 | Bn-A01-p6958863 | A-genome specific (napus-rapa) | 0.9904306    | 0.7921842    | not scorable | not scorable | 1            | 0.7584904 |           |
| 2334 | Bn-A01-p6959248 | A-genome specific (napus-rapa) | 0.9832536    | 0.6995357    | not scorable | not scorable | 0.9834711    | 0.6788211 |           |
| 2335 | Bn-A01-p6962542 | A-genome specific (napus-rapa) | 0.9928229    | 0.3783413    | not scorable | not scorable | 0.9917355    | 0.7766539 |           |
| 2336 | Bn-A01-p6965221 | A-genome specific (napus-rapa) | 0.9856459    | 0.7610687    | not scorable | not scorable | 0.9917355    | 0.7300522 |           |
| 2337 | Bn-A01-p6968751 | A-genome specific (napus-rapa) | 0.9856459    | 0.6658638    | not scorable | not scorable | 1            | 0.6847009 |           |
| 2338 | Bn-A01-p6969197 | A-genome specific (napus-rapa) | 0.9904306    | 0.7772461    | not scorable | not scorable | 0.9917355    | 0.7385896 |           |
| 2339 | Bn-A01-p6969284 | A-genome specific (napus-rapa) | 0.9736842    | 0.7234355    | not scorable | not scorable | 0.9917355    | 0.6965255 |           |
| 2340 | Bn-A01-p6969358 | A-genome specific (napus-rapa) | 0.9808612    | 0.739107     | not scorable | not scorable | 0.9834711    | 0.7076883 |           |

|      |                 |                                |              |              |              |              |              |              |
|------|-----------------|--------------------------------|--------------|--------------|--------------|--------------|--------------|--------------|
| 2341 | Bn-A01-p6972779 | A-genome specific (napus-ropa) | 0.9832536    | 0.8286869    | not scorable | not scorable | 0.9834711    | 0.7356253    |
| 2342 | Bn-A01-p6976938 | genome unspecific (all in)     | 0.9832536    | 0.4903604    |              | 1 0.6895438  | 1            | 0.7092124    |
| 2343 | Bn-A01-p6986405 | A-genome specific (napus-ropa) |              | 1 0.3554479  | not scorable | not scorable | 1            | 0.5891774    |
| 2344 | Bn-A01-p7026162 | A-genome specific (napus-ropa) | 0.9952153    | 0.3324807    | not scorable | not scorable | 0.9917355    | 0.7743288    |
| 2345 | Bn-A01-p704525  | A-genome specific (napus-ropa) | 0.9688995    | 0.342135     | not scorable | not scorable | 0.9917355    | 0.7644219    |
| 2346 | Bn-A01-p7068752 | A-genome specific (napus-ropa) | 0.9880383    | 0.7759447    | not scorable | not scorable | 1            | 0.8433055    |
| 2347 | Bn-A01-p7069263 | A-genome specific (napus-ropa) | 0.9904306    | 0.6863875    | not scorable | not scorable | 0.9834711    | 0.7667808    |
| 2348 | Bn-A01-p7086543 | A-genome specific (napus-ropa) | 0.9856459    | 0.8168805    | not scorable | not scorable | 0.9917355    | 0.7059886    |
| 2349 | Bn-A01-p7087000 | A-genome specific (napus-ropa) |              | 1 0.6823635  | not scorable | not scorable | 1            | 0.7235581    |
| 2350 | Bn-A01-p7089762 | A-genome specific (napus-ropa) | 0.3516746    | 0.8145286    | not scorable | not scorable | 0.9917355    | 0.7944399    |
| 2351 | Bn-A01-p7089826 | A-genome specific (ropa only)  | not scorable | not scorable | not scorable | not scorable | 0.9917355    | 0.6463398    |
| 2352 | Bn-A01-p710239  | all not scorable               | not scorable | not scorable | not scorable | not scorable | not scorable | not scorable |
| 2353 | Bn-A01-p71129   | A-genome specific (napus-ropa) | 0.9880383    | 0.3098471    | not scorable | not scorable | 1            | 0.6927842    |
| 2354 | Bn-A01-p7121832 | genome unspecific (all in)     | 0.9784689    | 0.1980119    | 0.9147287    | 0.3581319    | 0.9669421    | 0.752364     |
| 2355 | Bn-A01-p7122036 | A-genome specific (napus-ropa) |              | 1 0.3673542  | not scorable | not scorable | 1            | 0.7641606    |
| 2356 | Bn-A01-p7132729 | A-genome specific (napus-ropa) | 0.9976076    | 0.7540873    | not scorable | not scorable | 0.9917355    | 0.7186126    |
| 2357 | Bn-A01-p713562  | A-genome specific (napus-ropa) | 0.9736842    | 0.4626265    | not scorable | not scorable | 0.9917355    | 0.7072161    |
| 2358 | Bn-A01-p7137897 | A-genome specific (napus-ropa) | 0.9784689    | 0.4893922    | not scorable | not scorable | 0.9917355    | 0.7713531    |
| 2359 | Bn-A01-p7150748 | A-genome specific (napus-ropa) | 0.9665072    | 0.7311332    | not scorable | not scorable | 1            | 0.9398885    |
| 2360 | Bn-A01-p7151096 | A-genome specific (napus-ropa) |              | 1 0.7625467  | not scorable | not scorable | 0.9917355    | 0.7858406    |
| 2361 | Bn-A01-p7160702 | A-genome specific (napus-ropa) | 0.9617225    | 0.6795166    | not scorable | not scorable | 0.9752066    | 0.6693636    |
| 2362 | Bn-A01-p7205595 | A-genome specific (napus-ropa) | 0.9760765    | 0.7124651    | not scorable | not scorable | 1            | 0.8169149    |
| 2363 | Bn-A01-p733483  | A-genome specific (ropa only)  | not scorable | not scorable | not scorable | not scorable | 0.892562     | 0.8194628    |
| 2364 | Bn-A01-p7363480 | A-genome specific (napus-ropa) | 0.9641148    | 0.7205732    | not scorable | not scorable | 1            | 0.6812111    |
| 2365 | Bn-A01-p7367598 | A-genome specific (napus-ropa) |              | 1 0.4494559  | not scorable | not scorable | 0.9834711    | 0.8006749    |
| 2366 | Bn-A01-p7369125 | A-genome specific (napus-ropa) | 0.9928229    | 0.7529274    | not scorable | not scorable | 0.9834711    | 0.718548     |
| 2367 | Bn-A01-p7372570 | A-genome specific (napus-ropa) | 0.6866029    | 0.7958463    | not scorable | not scorable | 0.7272727    | 0.8594449    |
| 2368 | Bn-A01-p7372653 | A-genome specific (napus-ropa) |              | 1 0.7662389  | not scorable | not scorable | 1            | 0.8422474    |
| 2369 | Bn-A01-p7373427 | A-genome specific (napus-ropa) | 0.9832536    | 0.7566932    | not scorable | not scorable | 0.9917355    | 0.6678384    |
| 2370 | Bn-A01-p7374290 | A-genome specific (napus-ropa) | 0.9976076    | 0.3018439    | not scorable | not scorable | 0.9752066    | 0.5473303    |
| 2371 | Bn-A01-p7374589 | A-genome specific (napus-ropa) | 0.9760765    | 0.8052503    | not scorable | not scorable | 0.9834711    | 0.7312777    |
| 2372 | Bn-A01-p737560  | A-genome specific (napus-ropa) | 0.9736842    | 0.8045892    | not scorable | not scorable | 0.9752066    | 0.7409469    |
| 2373 | Bn-A01-p7383179 | A-genome specific (napus-ropa) | 0.6698565    | 0.8109727    | not scorable | not scorable | 0.7438017    | 0.8231242    |



|                      |                                |              |              |              |              |           |           |
|----------------------|--------------------------------|--------------|--------------|--------------|--------------|-----------|-----------|
| 2374 Bn-A01-p7385409 | A-genome specific (napus-rapa) | 0.6961722    | 0.8022107    | not scorable | not scorable | 0.7190083 | 0.8580421 |
| 2375 Bn-A01-p7385725 | A-genome specific (napus-rapa) | 0.9497608    | 0.3903539    | not scorable | not scorable | 0.7438017 | 0.71036   |
| 2376 Bn-A01-p7385797 | A-genome specific (napus-rapa) | 0.9952153    | 0.6736407    | not scorable | not scorable | 0.7272727 | 0.8570039 |
| 2377 Bn-A01-p7386111 | A-genome specific (rapa only)  | not scorable | not scorable | not scorable | not scorable | 0.7355372 | 0.9192614 |
| 2378 Bn-A01-p739098  | A-genome specific (napus-rapa) | 0.9856459    | 0.7232225    | not scorable | not scorable | 1         | 0.7234554 |
| 2379 Bn-A01-p7399827 | A-genome specific (napus-rapa) | 1            | 0.6071301    | not scorable | not scorable | 0.8016529 | 0.7444668 |
| 2380 Bn-A01-p7405147 | A-genome specific (napus-rapa) | 0.9808612    | 0.7481248    | not scorable | not scorable | 0.9834711 | 0.7427847 |
| 2381 Bn-A01-p7405753 | A-genome specific (napus-rapa) | 0.6961722    | 0.7977476    | not scorable | not scorable | 0.7355372 | 0.7548996 |
| 2382 Bn-A01-p7405882 | A-genome specific (napus-rapa) | 0.9066986    | 0.6878061    | not scorable | not scorable | 0.9504132 | 0.6386759 |
| 2383 Bn-A01-p7406041 | A-genome specific (napus-rapa) | 0.6866029    | 0.7968957    | not scorable | not scorable | 0.768595  | 0.8521869 |
| 2384 Bn-A01-p7430242 | A-genome specific (napus-rapa) | 0.9712918    | 0.7152056    | not scorable | not scorable | 1         | 0.7297956 |
| 2385 Bn-A01-p7430311 | A-genome specific (napus-rapa) | 0.9784689    | 0.7761593    | not scorable | not scorable | 0.9917355 | 0.7492446 |
| 2386 Bn-A01-p7440935 | A-genome specific (rapa only)  | not scorable | not scorable | not scorable | not scorable | 0.9834711 | 0.7212331 |
| 2387 Bn-A01-p7452338 | A-genome specific (napus-rapa) | 0.9808612    | 0.5051401    | not scorable | not scorable | 0.9669421 | 0.8339436 |
| 2388 Bn-A01-p7455231 | A-genome specific (napus-rapa) | 0.9880383    | 0.5607159    | not scorable | not scorable | 0.9834711 | 0.8695884 |
| 2389 Bn-A01-p7455852 | A-genome specific (napus-rapa) | 0.9880383    | 0.8828124    | not scorable | not scorable | 1         | 0.7701377 |
| 2390 Bn-A01-p7473265 | A-genome specific (napus-rapa) | 1            | 0.2407155    | not scorable | not scorable | 1         | 0.8040091 |
| 2391 Bn-A01-p7479483 | A-genome specific (napus-rapa) | 0.9952153    | 0.627915     | not scorable | not scorable | 0.9917355 | 0.6491689 |
| 2392 Bn-A01-p7487861 | A-genome specific (napus-rapa) | 0.9880383    | 0.7675837    | not scorable | not scorable | 0.9917355 | 0.7947931 |
| 2393 Bn-A01-p7493373 | A-genome specific (napus-rapa) | 0.9760765    | 0.302868     | not scorable | not scorable | 0.9834711 | 0.6171378 |
| 2394 Bn-A01-p7512557 | A-genome specific (napus-rapa) | 1            | 0.5472876    | not scorable | not scorable | 0.9917355 | 0.8259965 |
| 2395 Bn-A01-p751573  | A-genome specific (napus-rapa) | 0.9784689    | 0.7365752    | not scorable | not scorable | 0.677686  | 0.7394518 |
| 2396 Bn-A01-p7530968 | A-genome specific (napus-rapa) | 0.9928229    | 0.6045443    | not scorable | not scorable | 1         | 0.7420533 |
| 2397 Bn-A01-p7533971 | A-genome specific (napus-rapa) | 0.9880383    | 0.458242     | not scorable | not scorable | 0.9917355 | 0.6422251 |
| 2398 Bn-A01-p7548806 | A-genome specific (rapa only)  | not scorable | not scorable | not scorable | not scorable | 0.9917355 | 0.6982405 |
| 2399 Bn-A01-p7551163 | A-genome specific (napus-rapa) | 0.9880383    | 0.6721168    | not scorable | not scorable | 0.9752066 | 0.6448169 |
| 2400 Bn-A01-p7554673 | A-genome specific (napus-rapa) | 0.9928229    | 0.7458624    | not scorable | not scorable | 1         | 0.6728373 |
| 2401 Bn-A01-p7557422 | A-genome specific (napus-rapa) | 0.6842105    | 0.7584272    | not scorable | not scorable | 1         | 0.7497242 |
| 2402 Bn-A01-p7558012 | A-genome specific (napus-rapa) | 0.9928229    | 0.774186     | not scorable | not scorable | 1         | 0.7174791 |
| 2403 Bn-A01-p7558345 | A-genome specific (napus-rapa) | 0.9856459    | 0.8008437    | not scorable | not scorable | 1         | 0.8039128 |
| 2404 Bn-A01-p7559946 | A-genome specific (napus-rapa) | 0.9832536    | 0.7810608    | not scorable | not scorable | 0.9917355 | 0.8125475 |
| 2405 Bn-A01-p7560785 | A-genome specific (napus-rapa) | 0.9641148    | 0.6054804    | not scorable | not scorable | 0.9917355 | 0.717272  |
| 2406 Bn-A01-p7573871 | A-genome specific (napus-rapa) | 0.9114832    | 0.2995738    | not scorable | not scorable | 1         | 0.7884533 |

|      |                 |                                   |              |              |              |              |              |              |
|------|-----------------|-----------------------------------|--------------|--------------|--------------|--------------|--------------|--------------|
| 2407 | Bn-A01-p7574355 | A-genome specific (napus-rapa)    | 0.9688995    | 0.7985705    | not scorable | not scorable | 0.9917355    | 0.8095371    |
| 2408 | Bn-A01-p7582017 | A-genome specific (napus-rapa)    | 0.9545454    | 0.7742874    | not scorable | not scorable | 1            | 0.812126     |
| 2409 | Bn-A01-p7585849 | A-genome specific (napus-rapa)    | 0.6196172    | 0.6646404    | not scorable | not scorable | 0.9917355    | 0.6248508    |
| 2410 | Bn-A01-p7586821 | A-genome specific (napus-rapa)    | 0.6172249    | 0.8140727    | not scorable | not scorable | 0.9917355    | 0.7355657    |
| 2411 | Bn-A01-p7587840 | A-genome specific (napus-rapa)    | 0.6291866    | 0.6795503    | not scorable | not scorable | 0.9917355    | 0.7298859    |
| 2412 | Bn-A01-p7588413 | A-genome specific (napus-rapa)    | 0.6172249    | 0.8374454    | not scorable | not scorable | 0.9917355    | 0.7436024    |
| 2413 | Bn-A01-p7588937 | A-genome specific (napus-rapa)    | 0.6196172    | 0.665211     | not scorable | not scorable | 0.9669421    | 0.6965741    |
| 2414 | Bn-A01-p7588958 | A-genome specific (napus-rapa)    | 0.6196172    | 0.550025     | not scorable | not scorable | 0.9917355    | 0.7090922    |
| 2415 | Bn-A01-p7593180 | A-genome specific (napus-rapa)    | 0.9593301    | 0.7883755    | not scorable | not scorable | 0.9917355    | 0.697901     |
| 2416 | Bn-A01-p7594170 | A-genome specific (napus-rapa)    | 0.9760765    | 0.3142905    | not scorable | not scorable | 1            | 0.6846697    |
| 2417 | Bn-A01-p7603030 | A-genome specific (napus-rapa)    | 0.9712918    | 0.657733     | not scorable | not scorable | 1            | 0.7022686    |
| 2418 | Bn-A01-p7615707 | A-genome specific (napus-rapa)    | 0.9928229    | 0.7525604    | not scorable | not scorable | 1            | 0.8236455    |
| 2419 | Bn-A01-p7619726 | A-genome specific (napus-rapa)    | 0.9904306    | 0.699182     | not scorable | not scorable | 1            | 0.7219252    |
| 2420 | Bn-A01-p7643514 | A-genome specific (napus-rapa)    | 0.9952153    | 0.459986     | not scorable | not scorable | 0.9669421    | 0.6585762    |
| 2421 | Bn-A01-p7643571 | A-genome specific (napus-rapa)    | 0.9952153    | 0.5340405    | not scorable | not scorable | 0.9917355    | 0.6922877    |
| 2422 | Bn-A01-p7646601 | A-genome specific (napus-rapa)    | 0.8899522    | 0.7886694    | not scorable | not scorable | 0.8347107    | 0.7315326    |
| 2423 | Bn-A01-p7648929 | A-genome specific (napus-rapa)    | 0.9928229    | 0.7824821    | not scorable | not scorable | 0.9752066    | 0.6878925    |
| 2424 | Bn-A01-p7656521 | A-genome specific (napus-rapa)    | 0.9904306    | 0.6184712    | not scorable | not scorable | 1            | 0.7726986    |
| 2425 | Bn-A01-p7667896 | A-genome specific (napus-rapa)    | 0.9928229    | 0.7623014    | not scorable | not scorable | 1            | 0.8065068    |
| 2426 | Bn-A01-p7698558 | A-genome specific (napus-rapa)    | 0.9976076    | 0.3634282    | not scorable | not scorable | 1            | 0.8851715    |
| 2427 | Bn-A01-p7699159 | A-genome specific (napus-rapa)    | 0.9928229    | 0.6679955    | not scorable | not scorable | 1            | 0.6790781    |
| 2428 | Bn-A01-p7702471 | A-genome specific (napus-rapa)    | 0.9928229    | 0.786551     | not scorable | not scorable | 0.9834711    | 0.6382802    |
| 2429 | Bn-A01-p7714470 | A-genome specific (napus-rapa)    | 0.9904306    | 0.7398877    | not scorable | not scorable | 0.9917355    | 0.7031711    |
| 2430 | Bn-A01-p7717618 | genome unspecific (oleracea-rapa) | not scorable | not scorable | 0.9302326    | 0.7176385    | 1            | 0.7546726    |
| 2431 | Bn-A01-p7721497 | A-genome specific (napus-rapa)    | 0.9880383    | 0.5481173    | not scorable | not scorable | 0.9504132    | 0.7639257    |
| 2432 | Bn-A01-p7724859 | genome unspecific (all in)        | 0.9952153    | 0.4273613    |              | 1 0.8923284  | 0.9917355    | 0.8226846    |
| 2433 | Bn-A01-p7745080 | napus specific                    | 0.9641148    | 0.7598489    | not scorable | not scorable | not scorable | not scorable |
| 2434 | Bn-A01-p7768351 | A-genome specific (napus-rapa)    | 0.9904306    | 0.7137059    | not scorable | not scorable | 0.9834711    | 0.7438502    |
| 2435 | Bn-A01-p777123  | A-genome specific (napus-rapa)    | 0.9856459    | 0.4237095    | not scorable | not scorable | 1            | 0.8014378    |
| 2436 | Bn-A01-p7771617 | A-genome specific (napus-rapa)    | 0.9904306    | 0.5054722    | not scorable | not scorable | 0.9669421    | 0.7344456    |
| 2437 | Bn-A01-p7772345 | A-genome specific (napus-rapa)    | 0.9976076    | 0.5243252    | not scorable | not scorable | 0.9917355    | 0.7194836    |
| 2438 | Bn-A01-p778048  | A-genome specific (napus-rapa)    | 0.9760765    | 0.5793232    | not scorable | not scorable | 1            | 0.8928617    |
| 2439 | Bn-A01-p7787153 | A-genome specific (napus-rapa)    | 0.9808612    | 0.3531474    | not scorable | not scorable | 1            | 0.766865     |

|      |                 |                                |              |              |              |              |           |           |
|------|-----------------|--------------------------------|--------------|--------------|--------------|--------------|-----------|-----------|
| 2440 | Bn-A01-p7800839 | A-genome specific (napus-rapa) | 0.9760765    | 0.7722787    | not scorable | not scorable | 0.9917355 | 0.7331263 |
| 2441 | Bn-A01-p7825044 | A-genome specific (napus-rapa) | 0.9736842    | 0.7719089    | not scorable | not scorable | 0.9917355 | 0.7183975 |
| 2442 | Bn-A01-p7827260 | A-genome specific (napus-rapa) | 0.9712918    | 0.2763461    | not scorable | not scorable | 1         | 0.663735  |
| 2443 | Bn-A01-p7831289 | A-genome specific (napus-rapa) | 0.9832536    | 0.2693953    | not scorable | not scorable | 1         | 0.7397969 |
| 2444 | Bn-A01-p7834871 | A-genome specific (napus-rapa) | 0.9545454    | 0.304858     | not scorable | not scorable | 1         | 0.731966  |
| 2445 | Bn-A01-p7850092 | A-genome specific (napus-rapa) | 1            | 0.4901769    | not scorable | not scorable | 1         | 0.7899298 |
| 2446 | Bn-A01-p7852440 | A-genome specific (napus-rapa) | 1            | 0.3275238    | not scorable | not scorable | 0.9917355 | 0.731602  |
| 2447 | Bn-A01-p7861283 | A-genome specific (napus-rapa) | 0.9976076    | 0.7270315    | not scorable | not scorable | 1         | 0.5793777 |
| 2448 | Bn-A01-p7875358 | A-genome specific (napus-rapa) | 1            | 0.3032759    | not scorable | not scorable | 0.9752066 | 0.6764334 |
| 2449 | Bn-A01-p7889385 | A-genome specific (napus-rapa) | 0.9928229    | 0.5966011    | not scorable | not scorable | 1         | 0.6941039 |
| 2450 | Bn-A01-p7890174 | A-genome specific (napus-rapa) | 0.9952153    | 0.543226     | not scorable | not scorable | 0.9834711 | 0.7313213 |
| 2451 | Bn-A01-p7897804 | A-genome specific (napus-rapa) | 0.9952153    | 0.2542506    | not scorable | not scorable | 0.9752066 | 0.6869955 |
| 2452 | Bn-A01-p7897805 | A-genome specific (rapa only)  | not scorable | not scorable | not scorable | not scorable | 0.9669421 | 0.7058876 |
| 2453 | Bn-A01-p7926287 | A-genome specific (napus-rapa) | 0.9904306    | 0.4442226    | not scorable | not scorable | 1         | 0.6871758 |
| 2454 | Bn-A01-p7942548 | A-genome specific (napus-rapa) | 0.9952153    | 0.6533158    | not scorable | not scorable | 1         | 0.7888203 |
| 2455 | Bn-A01-p7953001 | A-genome specific (napus-rapa) | 1            | 0.5438352    | not scorable | not scorable | 0.9917355 | 0.7806042 |
| 2456 | Bn-A01-p796004  | A-genome specific (napus-rapa) | 1            | 0.5622409    | not scorable | not scorable | 1         | 0.9176469 |
| 2457 | Bn-A01-p7961620 | A-genome specific (napus-rapa) | 0.9856459    | 0.6350563    | not scorable | not scorable | 0.9504132 | 0.5597297 |
| 2458 | Bn-A01-p7973418 | genome unspecific (all in)     | 0.9808612    | 0.7144896    |              | 0 0.808931   | 0.9834711 | 0.7087855 |
| 2459 | Bn-A01-p7974551 | A-genome specific (napus-rapa) | 0.9641148    | 0.6452731    | not scorable | not scorable | 0.9834711 | 0.7545086 |
| 2460 | Bn-A01-p797684  | A-genome specific (rapa only)  | not scorable | not scorable | not scorable | not scorable | 1         | 0.7742329 |
| 2461 | Bn-A01-p7979458 | genome unspecific (all in)     | 0.9928229    | 0.564781     |              | 1 0.3299505  | 0.9917355 | 0.7008063 |
| 2462 | Bn-A01-p7982220 | A-genome specific (napus-rapa) | 0.9928229    | 0.7455831    | not scorable | not scorable | 0.9917355 | 0.6441367 |
| 2463 | Bn-A01-p7983241 | A-genome specific (napus-rapa) | 0.9928229    | 0.4124842    | not scorable | not scorable | 1         | 0.8243906 |
| 2464 | Bn-A01-p7987687 | A-genome specific (napus-rapa) | 0.9856459    | 0.8060251    | not scorable | not scorable | 0.9752066 | 0.6797213 |
| 2465 | Bn-A01-p8014995 | A-genome specific (napus-rapa) | 0.9952153    | 0.7170584    | not scorable | not scorable | 0.9752066 | 0.7845222 |
| 2466 | Bn-A01-p8016433 | A-genome specific (napus-rapa) | 1            | 0.232866     | not scorable | not scorable | 0.9834711 | 0.7348057 |
| 2467 | Bn-A01-p8017380 | A-genome specific (napus-rapa) | 0.9952153    | 0.7561173    | not scorable | not scorable | 0.9917355 | 0.692532  |
| 2468 | Bn-A01-p80385   | A-genome specific (napus-rapa) | 0.9617225    | 0.351738     | not scorable | not scorable | 0.9917355 | 0.7612265 |
| 2469 | Bn-A01-p8043776 | A-genome specific (napus-rapa) | 0.9856459    | 0.3712352    | not scorable | not scorable | 0.9834711 | 0.6108911 |
| 2470 | Bn-A01-p8045760 | A-genome specific (napus-rapa) | 0.9760765    | 0.7887551    | not scorable | not scorable | 0.9834711 | 0.7928751 |
| 2471 | Bn-A01-p8046142 | A-genome specific (napus-rapa) | 0.9808612    | 0.6899778    | not scorable | not scorable | 0.9917355 | 0.6347992 |
| 2472 | Bn-A01-p8051029 | A-genome specific (napus-rapa) | 0.9138756    | 0.9405676    | not scorable | not scorable | 0.9586777 | 0.8292131 |

|      |                 |                                |              |              |              |              |           |           |
|------|-----------------|--------------------------------|--------------|--------------|--------------|--------------|-----------|-----------|
| 2473 | Bn-A01-p8051804 | A-genome specific (napus-rapa) | 0.9114832    | 0.7925414    | not scorable | not scorable | 0.9752066 | 0.7722662 |
| 2474 | Bn-A01-p8058255 | A-genome specific (napus-rapa) | 0.9784689    | 0.7729293    | not scorable | not scorable | 1         | 0.745807  |
| 2475 | Bn-A01-p8058475 | A-genome specific (napus-rapa) | 0.9665072    | 0.7575583    | not scorable | not scorable | 1         | 0.7943444 |
| 2476 | Bn-A01-p8063652 | A-genome specific (napus-rapa) | 0.9808612    | 0.8112089    | not scorable | not scorable | 0.9834711 | 0.7694861 |
| 2477 | Bn-A01-p8076080 | A-genome specific (napus-rapa) | 0.9880383    | 0.3597575    | not scorable | not scorable | 0.9669421 | 0.4141327 |
| 2478 | Bn-A01-p8080531 | A-genome specific (napus-rapa) | 1            | 0.5336986    | not scorable | not scorable | 0.9917355 | 0.7904381 |
| 2479 | Bn-A01-p8108178 | A-genome specific (napus-rapa) | 0.9880383    | 0.6630409    | not scorable | not scorable | 1         | 0.6783065 |
| 2480 | Bn-A01-p8111196 | A-genome specific (napus-rapa) | 0.9880383    | 0.8067618    | not scorable | not scorable | 0.9834711 | 0.721589  |
| 2481 | Bn-A01-p8115849 | A-genome specific (napus-rapa) | 0.9880383    | 0.7497345    | not scorable | not scorable | 0.9834711 | 0.7582858 |
| 2482 | Bn-A01-p8116314 | A-genome specific (napus-rapa) | 0.9856459    | 0.4136742    | not scorable | not scorable | 0.9752066 | 0.6267422 |
| 2483 | Bn-A01-p8121877 | A-genome specific (napus-rapa) | 1            | 0.474205     | not scorable | not scorable | 1         | 0.9171228 |
| 2484 | Bn-A01-p8122779 | A-genome specific (napus-rapa) | 0.9928229    | 0.8090187    | not scorable | not scorable | 1         | 0.7367046 |
| 2485 | Bn-A01-p8129876 | A-genome specific (napus-rapa) | 0.9928229    | 0.6896059    | not scorable | not scorable | 1         | 0.7358541 |
| 2486 | Bn-A01-p8150111 | A-genome specific (napus-rapa) | 0.9784689    | 0.1952544    | not scorable | not scorable | 1         | 0.8676265 |
| 2487 | Bn-A01-p8154524 | genome unspecific (all in)     | 0.9928229    | 0.3190248    |              | 1 0.7664712  | 1         | 0.8948976 |
| 2488 | Bn-A01-p816488  | A-genome specific (napus-rapa) | 1            | 0.8060362    | not scorable | not scorable | 1         | 0.8806193 |
| 2489 | Bn-A01-p820317  | A-genome specific (napus-rapa) | 0.9688995    | 0.6036797    | not scorable | not scorable | 1         | 0.662836  |
| 2490 | Bn-A01-p8203740 | A-genome specific (rapa only)  | not scorable | not scorable | not scorable | not scorable | 0.9669421 | 0.7472444 |
| 2491 | Bn-A01-p8204552 | A-genome specific (rapa only)  | not scorable | not scorable | not scorable | not scorable | 0.9752066 | 0.7003862 |
| 2492 | Bn-A01-p8205728 | A-genome specific (rapa only)  | not scorable | not scorable | not scorable | not scorable | 0.9752066 | 0.6931832 |
| 2493 | Bn-A01-p8206136 | A-genome specific (rapa only)  | not scorable | not scorable | not scorable | not scorable | 0.9752066 | 0.6621579 |
| 2494 | Bn-A01-p8206374 | A-genome specific (rapa only)  | not scorable | not scorable | not scorable | not scorable | 0.9752066 | 0.7004539 |
| 2495 | Bn-A01-p8207083 | A-genome specific (rapa only)  | not scorable | not scorable | not scorable | not scorable | 0.9669421 | 0.6886162 |
| 2496 | Bn-A01-p821328  | A-genome specific (napus-rapa) | 0.9688995    | 0.5216793    | not scorable | not scorable | 0.9917355 | 0.7409398 |
| 2497 | Bn-A01-p8221245 | A-genome specific (napus-rapa) | 0.9904306    | 0.8066382    | not scorable | not scorable | 0.9917355 | 0.806761  |
| 2498 | Bn-A01-p8240363 | A-genome specific (napus-rapa) | 0.9928229    | 0.7980362    | not scorable | not scorable | 1         | 0.8143303 |
| 2499 | Bn-A01-p8242690 | A-genome specific (napus-rapa) | 1            | 0.7224955    | not scorable | not scorable | 1         | 0.7035602 |
| 2500 | Bn-A01-p8246641 | A-genome specific (napus-rapa) | 0.9928229    | 0.7678831    | not scorable | not scorable | 1         | 0.8675844 |
| 2501 | Bn-A01-p8263964 | A-genome specific (napus-rapa) | 0.9928229    | 0.7404135    | not scorable | not scorable | 0.9917355 | 0.8341498 |
| 2502 | Bn-A01-p8276793 | A-genome specific (napus-rapa) | 1            | 0.5136053    | not scorable | not scorable | 1         | 0.8451606 |
| 2503 | Bn-A01-p8276922 | A-genome specific (napus-rapa) | 1            | 0.447688     | not scorable | not scorable | 0.9917355 | 0.7292544 |
| 2504 | Bn-A01-p8278925 | A-genome specific (napus-rapa) | 1            | 0.6328043    | not scorable | not scorable | 0.9917355 | 0.7798906 |
| 2505 | Bn-A01-p830221  | A-genome specific (napus-rapa) | 0.9856459    | 0.7956669    | not scorable | not scorable | 1         | 0.745196  |

|      |                 |                                |              |              |              |              |           |           |
|------|-----------------|--------------------------------|--------------|--------------|--------------|--------------|-----------|-----------|
| 2506 | Bn-A01-p8335308 | A-genome specific (napus-rapa) | 0.9976076    | 0.4142104    | not scorable | not scorable | 0.9917355 | 0.7550115 |
| 2507 | Bn-A01-p8353426 | A-genome specific (napus-rapa) | 1            | 0.5826371    | not scorable | not scorable | 0.9917355 | 0.8050923 |
| 2508 | Bn-A01-p8354196 | A-genome specific (napus-rapa) | 1            | 0.476792     | not scorable | not scorable | 1         | 0.730772  |
| 2509 | Bn-A01-p8378967 | A-genome specific (napus-rapa) | 0.9928229    | 0.7276884    | not scorable | not scorable | 1         | 0.8415009 |
| 2510 | Bn-A01-p8402568 | A-genome specific (napus-rapa) | 0.9928229    | 0.8039323    | not scorable | not scorable | 0.9917355 | 0.6903467 |
| 2511 | Bn-A01-p8404588 | A-genome specific (napus-rapa) | 0.9928229    | 0.7046103    | not scorable | not scorable | 0.9752066 | 0.6969791 |
| 2512 | Bn-A01-p8417520 | A-genome specific (napus-rapa) | 0.9928229    | 0.759161     | not scorable | not scorable | 0.9834711 | 0.7092545 |
| 2513 | Bn-A01-p8418102 | A-genome specific (napus-rapa) | 0.9928229    | 0.7589638    | not scorable | not scorable | 1         | 0.74563   |
| 2514 | Bn-A01-p8439363 | A-genome specific (napus-rapa) | 0.9976076    | 0.5437354    | not scorable | not scorable | 0.9669421 | 0.7212059 |
| 2515 | Bn-A01-p8450346 | A-genome specific (napus-rapa) | 0.9736842    | 0.2757879    | not scorable | not scorable | 0.9834711 | 0.8572526 |
| 2516 | Bn-A01-p8451192 | A-genome specific (rapa only)  | not scorable | not scorable | not scorable | not scorable | 0.892562  | 0.9031098 |
| 2517 | Bn-A01-p8452366 | A-genome specific (napus-rapa) | 0.9928229    | 0.6835634    | not scorable | not scorable | 0.9917355 | 0.8382507 |
| 2518 | Bn-A01-p8452493 | A-genome specific (rapa only)  | not scorable | not scorable | not scorable | not scorable | 0.9752066 | 0.6934153 |
| 2519 | Bn-A01-p8452981 | A-genome specific (napus-rapa) | 0.9808612    | 0.7122888    | not scorable | not scorable | 1         | 0.6697664 |
| 2520 | Bn-A01-p8453146 | A-genome specific (napus-rapa) | 0.2009569    | 0.8126745    | not scorable | not scorable | 0.9008265 | 0.7006959 |
| 2521 | Bn-A01-p8470314 | A-genome specific (napus-rapa) | 0.9856459    | 0.399159     | not scorable | not scorable | 0.9917355 | 0.7456675 |
| 2522 | Bn-A01-p849125  | A-genome specific (napus-rapa) | 0.9712918    | 0.7621524    | not scorable | not scorable | 1         | 0.7442658 |
| 2523 | Bn-A01-p8501753 | A-genome specific (napus-rapa) | 0.9928229    | 0.744251     | not scorable | not scorable | 1         | 0.7448832 |
| 2524 | Bn-A01-p8504134 | A-genome specific (napus-rapa) | 0.9976076    | 0.3563309    | not scorable | not scorable | 1         | 0.6914352 |
| 2525 | Bn-A01-p8515129 | A-genome specific (napus-rapa) | 0.9832536    | 0.646772     | not scorable | not scorable | 0.9834711 | 0.705299  |
| 2526 | Bn-A01-p8543512 | A-genome specific (napus-rapa) | 0.9928229    | 0.5613573    | not scorable | not scorable | 0.9586777 | 0.600333  |
| 2527 | Bn-A01-p8564149 | A-genome specific (napus-rapa) | 1            | 0.5112184    | not scorable | not scorable | 1         | 0.6868309 |
| 2528 | Bn-A01-p857771  | A-genome specific (rapa only)  | not scorable | not scorable | not scorable | not scorable | 0.9917355 | 0.8379771 |
| 2529 | Bn-A01-p8593291 | A-genome specific (rapa only)  | not scorable | not scorable | not scorable | not scorable | 0.9834711 | 0.7600462 |
| 2530 | Bn-A01-p8594736 | A-genome specific (rapa only)  | not scorable | not scorable | not scorable | not scorable | 0.9669421 | 0.7750521 |
| 2531 | Bn-A01-p8594955 | A-genome specific (napus-rapa) | 0.9258373    | 0.6900374    | not scorable | not scorable | 0.9586777 | 0.7211653 |
| 2532 | Bn-A01-p8595450 | A-genome specific (napus-rapa) | 0.923445     | 0.754145     | not scorable | not scorable | 0.9586777 | 0.7254611 |
| 2533 | Bn-A01-p8595895 | A-genome specific (napus-rapa) | 0.923445     | 0.8595558    | not scorable | not scorable | 0.9256198 | 0.8174812 |
| 2534 | Bn-A01-p8596463 | A-genome specific (napus-rapa) | 0.9282297    | 0.6795592    | not scorable | not scorable | 0.9338843 | 0.6791383 |
| 2535 | Bn-A01-p8596650 | A-genome specific (napus-rapa) | 0.9138756    | 0.634635     | not scorable | not scorable | 0.9504132 | 0.7755718 |
| 2536 | Bn-A01-p8647625 | A-genome specific (napus-rapa) | 0.9928229    | 0.2701297    | not scorable | not scorable | 0.9752066 | 0.6576771 |
| 2537 | Bn-A01-p866260  | A-genome specific (napus-rapa) | 0.9641148    | 0.7459672    | not scorable | not scorable | 0.9917355 | 0.6692497 |
| 2538 | Bn-A01-p8675601 | A-genome specific (napus-rapa) | 0.9904306    | 0.8351841    | not scorable | not scorable | 0.9917355 | 0.7229037 |

|      |                 |                                |           |           |              |              |           |           |
|------|-----------------|--------------------------------|-----------|-----------|--------------|--------------|-----------|-----------|
| 2539 | Bn-A01-p8675930 | A-genome specific (napus-rapa) | 0.9832536 | 0.4794636 | not scorable | not scorable | 0.9834711 | 0.7567218 |
| 2540 | Bn-A01-p8676024 | A-genome specific (napus-rapa) | 0.9832536 | 0.8228162 | not scorable | not scorable | 0.9917355 | 0.7094581 |
| 2541 | Bn-A01-p8676144 | A-genome specific (napus-rapa) | 0.9784689 | 0.759104  | not scorable | not scorable | 0.9834711 | 0.7854255 |
| 2542 | Bn-A01-p8681309 | A-genome specific (napus-rapa) | 0.9880383 | 0.7955467 | not scorable | not scorable | 0.9834711 | 0.7120237 |
| 2543 | Bn-A01-p8681556 | A-genome specific (napus-rapa) | 0.9904306 | 0.7907762 | not scorable | not scorable | 1         | 0.7470711 |
| 2544 | Bn-A01-p8681757 | A-genome specific (napus-rapa) | 0.9928229 | 0.7421923 | not scorable | not scorable | 0.9917355 | 0.6885744 |
| 2545 | Bn-A01-p8683487 | A-genome specific (napus-rapa) | 1         | 0.3350065 | not scorable | not scorable | 0.9917355 | 0.7198656 |
| 2546 | Bn-A01-p872436  | A-genome specific (napus-rapa) | 0.9808612 | 0.4215149 | not scorable | not scorable | 1         | 0.7339357 |
| 2547 | Bn-A01-p877322  | A-genome specific (napus-rapa) | 0.9808612 | 0.7545708 | not scorable | not scorable | 0.9834711 | 0.6719007 |
| 2548 | Bn-A01-p878256  | A-genome specific (napus-rapa) | 0.9904306 | 0.2900791 | not scorable | not scorable | 1         | 0.8042273 |
| 2549 | Bn-A01-p8782649 | A-genome specific (napus-rapa) | 0.9952153 | 0.4333103 | not scorable | not scorable | 1         | 0.7693055 |
| 2550 | Bn-A01-p8788567 | A-genome specific (napus-rapa) | 0.9976076 | 0.6562223 | not scorable | not scorable | 0.9834711 | 0.6253553 |
| 2551 | Bn-A01-p8795719 | A-genome specific (napus-rapa) | 0.9976076 | 0.511342  | not scorable | not scorable | 1         | 0.7645436 |
| 2552 | Bn-A01-p879755  | A-genome specific (napus-rapa) | 0.9593301 | 0.7835568 | not scorable | not scorable | 0.677686  | 0.7467541 |
| 2553 | Bn-A01-p8805177 | A-genome specific (napus-rapa) | 0.9569378 | 0.7094924 | not scorable | not scorable | 0.9586777 | 0.7014148 |
| 2554 | Bn-A01-p8806524 | A-genome specific (napus-rapa) | 0.9617225 | 0.8632586 | not scorable | not scorable | 0.9669421 | 0.8109026 |
| 2555 | Bn-A01-p8821722 | A-genome specific (napus-rapa) | 0.9641148 | 0.7543002 | not scorable | not scorable | 0.9504132 | 0.6673809 |
| 2556 | Bn-A01-p8836783 | A-genome specific (napus-rapa) | 0.9880383 | 0.6576318 | not scorable | not scorable | 0.9834711 | 0.7938799 |
| 2557 | Bn-A01-p8839183 | A-genome specific (napus-rapa) | 0.9593301 | 0.7752286 | not scorable | not scorable | 0.9586777 | 0.9217552 |
| 2558 | Bn-A01-p8859217 | A-genome specific (napus-rapa) | 0.9521531 | 0.8547055 | not scorable | not scorable | 0.9504132 | 0.7056898 |
| 2559 | Bn-A01-p88608   | A-genome specific (napus-rapa) | 0.9712918 | 0.7518556 | not scorable | not scorable | 0.9834711 | 0.561146  |
| 2560 | Bn-A01-p8874473 | A-genome specific (napus-rapa) | 0.9569378 | 0.7515191 | not scorable | not scorable | 0.9586777 | 0.6925956 |
| 2561 | Bn-A01-p887815  | A-genome specific (napus-rapa) | 0.9736842 | 0.6064315 | not scorable | not scorable | 1         | 0.8186453 |
| 2562 | Bn-A01-p8901327 | A-genome specific (napus-rapa) | 0.9856459 | 0.7420153 | not scorable | not scorable | 0.9752066 | 0.7356703 |
| 2563 | Bn-A01-p8901490 | A-genome specific (napus-rapa) | 0.9928229 | 0.5579286 | not scorable | not scorable | 0.9917355 | 0.7018243 |
| 2564 | Bn-A01-p8914737 | A-genome specific (napus-rapa) | 0.9641148 | 0.7574978 | not scorable | not scorable | 0.9504132 | 0.7086438 |
| 2565 | Bn-A01-p8960719 | A-genome specific (napus-rapa) | 1         | 0.9204677 | not scorable | not scorable | 1         | 0.8850337 |
| 2566 | Bn-A01-p8977767 | A-genome specific (napus-rapa) | 0.8803828 | 0.7757977 | not scorable | not scorable | 1         | 0.8694186 |
| 2567 | Bn-A01-p8982996 | A-genome specific (napus-rapa) | 0.9952153 | 0.3588107 | not scorable | not scorable | 1         | 0.7053689 |
| 2568 | Bn-A01-p89956   | A-genome specific (napus-rapa) | 0.9976076 | 0.5809868 | not scorable | not scorable | 0.9917355 | 0.7549776 |
| 2569 | Bn-A01-p9004629 | A-genome specific (napus-rapa) | 0.9832536 | 0.7539826 | not scorable | not scorable | 0.9834711 | 0.7929008 |
| 2570 | Bn-A01-p9030262 | genome unspecific (all in)     | 0.9904306 | 0.3257509 | 0.9922481    | 0.7548456    | 1         | 0.9072468 |
| 2571 | Bn-A01-p9065564 | A-genome specific (napus-rapa) | 0.9976076 | 0.8793069 | not scorable | not scorable | 1         | 0.8687926 |

|      |                 |                                |              |              |              |              |           |           |
|------|-----------------|--------------------------------|--------------|--------------|--------------|--------------|-----------|-----------|
| 2572 | Bn-A01-p9075803 | A-genome specific (napus-rapa) | 0.9641148    | 0.7687171    | not scorable | not scorable | 0.9834711 | 0.7346492 |
| 2573 | Bn-A01-p9075931 | A-genome specific (napus-rapa) | 0.9641148    | 0.7872018    | not scorable | not scorable | 0.9752066 | 0.8098927 |
| 2574 | Bn-A01-p907721  | genome unspecific (all in)     | 0.9880383    | 0.4234551    | 0.9844961    | 0.79218      | 1         | 0.8237056 |
| 2575 | Bn-A01-p9080359 | A-genome specific (napus-rapa) | 0.9904306    | 0.5151495    | not scorable | not scorable | 0.9917355 | 0.6973079 |
| 2576 | Bn-A01-p9080573 | A-genome specific (napus-rapa) | 0.9832536    | 0.408157     | not scorable | not scorable | 0.9752066 | 0.7570655 |
| 2577 | Bn-A01-p912298  | A-genome specific (napus-rapa) | 0.9665072    | 0.7901939    | not scorable | not scorable | 0.9752066 | 0.802668  |
| 2578 | Bn-A01-p9125819 | A-genome specific (napus-rapa) | 0.9952153    | 0.6438332    | not scorable | not scorable | 0.9917355 | 0.702389  |
| 2579 | Bn-A01-p9129693 | A-genome specific (napus-rapa) | 0.9688995    | 0.7014509    | not scorable | not scorable | 1         | 0.8009096 |
| 2580 | Bn-A01-p9130391 | A-genome specific (napus-rapa) | 0.9736842    | 0.7490004    | not scorable | not scorable | 0.9917355 | 0.7654656 |
| 2581 | Bn-A01-p9138209 | A-genome specific (rapa only)  | not scorable | not scorable | not scorable | not scorable | 0.9421487 | 0.8454501 |
| 2582 | Bn-A01-p9145211 | A-genome specific (napus-rapa) | 0.9641148    | 0.5722004    | not scorable | not scorable | 1         | 0.8004572 |
| 2583 | Bn-A01-p9145630 | A-genome specific (napus-rapa) | 0.9569378    | 0.7104997    | not scorable | not scorable | 0.9834711 | 0.6699126 |
| 2584 | Bn-A01-p9146490 | A-genome specific (napus-rapa) | 0.9808612    | 0.7422884    | not scorable | not scorable | 0.9917355 | 0.6891719 |
| 2585 | Bn-A01-p9147096 | A-genome specific (rapa only)  | not scorable | not scorable | not scorable | not scorable | 0.9834711 | 0.6999326 |
| 2586 | Bn-A01-p9149601 | A-genome specific (napus-rapa) | 0.9808612    | 0.7714487    | not scorable | not scorable | 0.9917355 | 0.708837  |
| 2587 | Bn-A01-p9150695 | A-genome specific (napus-rapa) | 0.9736842    | 0.7677061    | not scorable | not scorable | 0.9834711 | 0.810416  |
| 2588 | Bn-A01-p9155327 | A-genome specific (rapa only)  | not scorable | not scorable | not scorable | not scorable | 0.9834711 | 0.7497222 |
| 2589 | Bn-A01-p916774  | A-genome specific (napus-rapa) | 0.7799043    | 0.8346233    | not scorable | not scorable | 0.9586777 | 0.7504229 |
| 2590 | Bn-A01-p916852  | A-genome specific (napus-rapa) | 0.9569378    | 0.4246368    | not scorable | not scorable | 1         | 0.753805  |
| 2591 | Bn-A01-p9170858 | A-genome specific (napus-rapa) | 0.9928229    | 0.4531369    | not scorable | not scorable | 0.9917355 | 0.6248583 |
| 2592 | Bn-A01-p9176104 | A-genome specific (napus-rapa) | 0.9904306    | 0.3004888    | not scorable | not scorable | 0.9752066 | 0.6629816 |
| 2593 | Bn-A01-p9180340 | A-genome specific (napus-rapa) | 0.9976076    | 0.5139866    | not scorable | not scorable | 0.9917355 | 0.7039695 |
| 2594 | Bn-A01-p9180828 | A-genome specific (napus-rapa) | 0.9904306    | 0.7768031    | not scorable | not scorable | 0.9917355 | 0.7104266 |
| 2595 | Bn-A01-p9203096 | A-genome specific (napus-rapa) | 0.9976076    | 0.5895977    | not scorable | not scorable | 0.9669421 | 0.7215685 |
| 2596 | Bn-A01-p9220977 | A-genome specific (napus-rapa) | 0.9928229    | 0.7969592    | not scorable | not scorable | 0.9669421 | 0.7793942 |
| 2597 | Bn-A01-p9223420 | A-genome specific (napus-rapa) | 0.9880383    | 0.7529009    | not scorable | not scorable | 0.9834711 | 0.830092  |
| 2598 | Bn-A01-p9227229 | A-genome specific (napus-rapa) | 0.9808612    | 0.7488626    | not scorable | not scorable | 0.9752066 | 0.7170734 |
| 2599 | Bn-A01-p923356  | A-genome specific (napus-rapa) | 0.9736842    | 0.4025852    | not scorable | not scorable | 1         | 0.7469699 |
| 2600 | Bn-A01-p9254925 | A-genome specific (napus-rapa) | 0.9880383    | 0.808206     | not scorable | not scorable | 0.9834711 | 0.7040766 |
| 2601 | Bn-A01-p9256011 | A-genome specific (napus-rapa) | 0.9928229    | 0.474391     | not scorable | not scorable | 1         | 0.8234416 |
| 2602 | Bn-A01-p9258144 | A-genome specific (napus-rapa) | 0.9904306    | 0.5806828    | not scorable | not scorable | 1         | 0.7516875 |
| 2603 | Bn-A01-p9259611 | A-genome specific (napus-rapa) | 0.9760765    | 0.6485757    | not scorable | not scorable | 0.9752066 | 0.6364136 |
| 2604 | Bn-A01-p9260073 | A-genome specific (napus-rapa) | 0.9856459    | 0.7871568    | not scorable | not scorable | 0.9917355 | 0.7391517 |

|      |                 |                                   |              |              |              |              |              |              |
|------|-----------------|-----------------------------------|--------------|--------------|--------------|--------------|--------------|--------------|
| 2605 | Bn-A01-p9264081 | A-genome specific (napus-rapa)    | 0.9928229    | 0.7438051    | not scorable | not scorable | 1            | 0.7140734    |
| 2606 | Bn-A01-p9269627 | A-genome specific (napus-rapa)    | 0.9928229    | 0.8345587    | not scorable | not scorable | 1            | 0.7156405    |
| 2607 | Bn-A01-p9303710 | A-genome specific (napus-rapa)    | 0.9952153    | 0.404116     | not scorable | not scorable | 0.9917355    | 0.7147431    |
| 2608 | Bn-A01-p9325719 | A-genome specific (napus-rapa)    | 0.9976076    | 0.6660621    | not scorable | not scorable | 0.9834711    | 0.8911073    |
| 2609 | Bn-A01-p9326695 | A-genome specific (napus-rapa)    | 0.9856459    | 0.8196874    | not scorable | not scorable | 0.9917355    | 0.6952415    |
| 2610 | Bn-A01-p9331463 | A-genome specific (napus-rapa)    | 0.9665072    | 0.5058377    | not scorable | not scorable | 1            | 0.7508058    |
| 2611 | Bn-A01-p9333956 | A-genome specific (napus-rapa)    | 0.715311     | 0.8552695    | not scorable | not scorable | 0.9917355    | 0.789065     |
| 2612 | Bn-A01-p9337252 | A-genome specific (napus-rapa)    | 0.9688995    | 0.7778311    | not scorable | not scorable | 1            | 0.7055126    |
| 2613 | Bn-A01-p933795  | genome unspecific (all in)        | 0.9665072    | 0.2856917    |              | 1 0.7653105  | 0.9834711    | 0.7510444    |
| 2614 | Bn-A01-p9360043 | A-genome specific (napus-rapa)    | 0.9880383    | 0.5856451    | not scorable | not scorable | 0.9917355    | 0.6853399    |
| 2615 | Bn-A01-p936014  | genome unspecific (oleracea-rapa) | not scorable | not scorable | 0.875969     | 0.7430966    | 0.9917355    | 0.8470932    |
| 2616 | Bn-A01-p9360971 | A-genome specific (napus-rapa)    | 0.9928229    | 0.9043303    | not scorable | not scorable | 1            | 0.8273721    |
| 2617 | Bn-A01-p9369257 | A-genome specific (napus-rapa)    | 0.9641148    | 0.8053153    | not scorable | not scorable | 1            | 0.8127       |
| 2618 | Bn-A01-p9371414 | A-genome specific (rapa only)     | not scorable | not scorable | not scorable | not scorable | 1            | 0.8173693    |
| 2619 | Bn-A01-p938887  | A-genome specific (napus-rapa)    | 0.9880383    | 0.4487089    | not scorable | not scorable | 0.9917355    | 0.6863895    |
| 2620 | Bn-A01-p939202  | A-genome specific (napus-rapa)    | 0.9880383    | 0.7098374    | not scorable | not scorable | 0.9752066    | 0.6949719    |
| 2621 | Bn-A01-p9408018 | A-genome specific (napus-rapa)    | 1            | 0.6137596    | not scorable | not scorable | 0.9917355    | 0.6506451    |
| 2622 | Bn-A01-p941792  | A-genome specific (napus-rapa)    | 0.9736842    | 0.3842787    | not scorable | not scorable | 1            | 0.8856928    |
| 2623 | Bn-A01-p9436886 | A-genome specific (rapa only)     | not scorable | not scorable | not scorable | not scorable | 0.6198347    | 0.8336314    |
| 2624 | Bn-A01-p9442471 | A-genome specific (napus-rapa)    | 0.9880383    | 0.8291274    | not scorable | not scorable | 0.9834711    | 0.7246636    |
| 2625 | Bn-A01-p9443863 | A-genome specific (rapa only)     | not scorable | not scorable | not scorable | not scorable | 0.9917355    | 0.7512324    |
| 2626 | Bn-A01-p9445754 | A-genome specific (napus-rapa)    | 0.9928229    | 0.8633167    | not scorable | not scorable | 0.9834711    | 0.7547623    |
| 2627 | Bn-A01-p9469933 | A-genome specific (napus-rapa)    | 0.9976076    | 0.4200247    | not scorable | not scorable | 0.9917355    | 0.7909877    |
| 2628 | Bn-A01-p9476520 | napus specific                    | 0.9449761    | 0.1835868    | not scorable | not scorable | not scorable | not scorable |
| 2629 | Bn-A01-p9499100 | A-genome specific (napus-rapa)    | 0.9497608    | 0.4286865    | not scorable | not scorable | 1            | 0.8834755    |
| 2630 | Bn-A01-p951063  | A-genome specific (napus-rapa)    | 0.9688995    | 0.4920422    | not scorable | not scorable | 1            | 0.8791605    |
| 2631 | Bn-A01-p951341  | A-genome specific (napus-rapa)    | 0.9401914    | 0.2838576    | not scorable | not scorable | 1            | 0.6675612    |
| 2632 | Bn-A01-p9519478 | A-genome specific (napus-rapa)    | 0.9641148    | 0.6942161    | not scorable | not scorable | 0.9917355    | 0.6849335    |
| 2633 | Bn-A01-p9519660 | A-genome specific (napus-rapa)    | 0.9641148    | 0.7019097    | not scorable | not scorable | 0.9917355    | 0.8588858    |
| 2634 | Bn-A01-p9520409 | genome unspecific (all in)        | 0.9784689    | 0.3140631    |              | 1 0.8037983  | 1            | 0.7157279    |
| 2635 | Bn-A01-p9523572 | A-genome specific (napus-rapa)    | 0.9928229    | 0.6623319    | not scorable | not scorable | 1            | 0.6594497    |
| 2636 | Bn-A01-p9551341 | A-genome specific (napus-rapa)    | 0.9808612    | 0.7527544    | not scorable | not scorable | 0.9173554    | 0.70767      |
| 2637 | Bn-A01-p9565360 | A-genome specific (napus-rapa)    | 0.9928229    | 0.8328172    | not scorable | not scorable | 0.9834711    | 0.8324143    |



|      |                 |                                   |              |              |              |              |           |           |
|------|-----------------|-----------------------------------|--------------|--------------|--------------|--------------|-----------|-----------|
| 2638 | Bn-A01-p9565804 | A-genome specific (napus-rapa)    | 1            | 0.4570931    | not scorable | not scorable | 1         | 0.7501816 |
| 2639 | Bn-A01-p9568888 | A-genome specific (napus-rapa)    | 0.9784689    | 0.8387133    | not scorable | not scorable | 1         | 0.76025   |
| 2640 | Bn-A01-p95718   | A-genome specific (napus-rapa)    | 0.9784689    | 0.8050982    | not scorable | not scorable | 0.9834711 | 0.8011191 |
| 2641 | Bn-A01-p9599644 | A-genome specific (rapa only)     | not scorable | not scorable | not scorable | not scorable | 0.9669421 | 0.9064599 |
| 2642 | Bn-A01-p9614730 | A-genome specific (napus-rapa)    | 0.9760765    | 0.7618071    | not scorable | not scorable | 1         | 0.7269471 |
| 2643 | Bn-A01-p9619932 | A-genome specific (napus-rapa)    | 1            | 0.8786843    | not scorable | not scorable | 1         | 0.7780618 |
| 2644 | Bn-A01-p9621623 | A-genome specific (napus-rapa)    | 0.9784689    | 0.7825742    | not scorable | not scorable | 1         | 0.8332121 |
| 2645 | Bn-A01-p968378  | A-genome specific (rapa only)     | not scorable | not scorable | not scorable | not scorable | 0.9917355 | 0.7188525 |
| 2646 | Bn-A01-p968465  | A-genome specific (napus-rapa)    | 0.9760765    | 0.8218916    | not scorable | not scorable | 0.9834711 | 0.7817704 |
| 2647 | Bn-A01-p9699152 | A-genome specific (napus-rapa)    | 0.9784689    | 0.8165813    | not scorable | not scorable | 0.9917355 | 0.8720146 |
| 2648 | Bn-A01-p970103  | A-genome specific (napus-rapa)    | 0.9736842    | 0.7788212    | not scorable | not scorable | 1         | 0.7826774 |
| 2649 | Bn-A01-p9711809 | A-genome specific (napus-rapa)    | 0.9665072    | 0.7503656    | not scorable | not scorable | 0.9917355 | 0.7686307 |
| 2650 | Bn-A01-p9712591 | A-genome specific (napus-rapa)    | 0.8684211    | 0.7848732    | not scorable | not scorable | 1         | 0.8381248 |
| 2651 | Bn-A01-p974934  | A-genome specific (napus-rapa)    | 0.9808612    | 0.7761122    | not scorable | not scorable | 0.9669421 | 0.7349759 |
| 2652 | Bn-A01-p975213  | A-genome specific (napus-rapa)    | 0.7129186    | 0.7942976    | not scorable | not scorable | 0.9917355 | 0.804921  |
| 2653 | Bn-A01-p975640  | A-genome specific (rapa only)     | not scorable | not scorable | not scorable | not scorable | 0.9917355 | 0.7672531 |
| 2654 | Bn-A01-p97663   | A-genome specific (napus-rapa)    | 0.9617225    | 0.7998995    | not scorable | not scorable | 0.9669421 | 0.7627535 |
| 2655 | Bn-A01-p97751   | A-genome specific (rapa only)     | not scorable | not scorable | not scorable | not scorable | 0.9834711 | 0.778963  |
| 2656 | Bn-A01-p977861  | A-genome specific (rapa only)     | not scorable | not scorable | not scorable | not scorable | 0.9752066 | 0.8843359 |
| 2657 | Bn-A01-p978860  | A-genome specific (napus-rapa)    | 0.9784689    | 0.7921835    | not scorable | not scorable | 1         | 0.7054566 |
| 2658 | Bn-A01-p9810552 | genome unspecific (oleracea-rapa) | not scorable | not scorable | 0.9922481    | 0.7761868    | 1         | 0.7562456 |
| 2659 | Bn-A01-p9853365 | A-genome specific (napus-rapa)    | 0.9904306    | 0.5016139    | not scorable | not scorable | 0.9917355 | 0.5414737 |
| 2660 | Bn-A01-p9863114 | A-genome specific (napus-rapa)    | 0.9880383    | 0.3176528    | not scorable | not scorable | 0.9834711 | 0.8269134 |
| 2661 | Bn-A01-p9866468 | A-genome specific (napus-rapa)    | 0.9832536    | 0.7630193    | not scorable | not scorable | 0.9834711 | 0.7889405 |
| 2662 | Bn-A01-p9884449 | A-genome specific (napus-rapa)    | 0.8947368    | 0.8031442    | not scorable | not scorable | 1         | 0.9175813 |
| 2663 | Bn-A01-p9922741 | A-genome specific (napus-rapa)    | 0.9880383    | 0.8095062    | not scorable | not scorable | 1         | 0.7075329 |
| 2664 | Bn-A01-p994722  | A-genome specific (napus-rapa)    | 0.9880383    | 0.649506     | not scorable | not scorable | 0.9917355 | 0.6135442 |
| 2665 | Bn-A01-p9951633 | A-genome specific (napus-rapa)    | 0.9880383    | 0.3974268    | not scorable | not scorable | 0.9669421 | 0.7194839 |
| 2666 | Bn-A01-p9961425 | A-genome specific (napus-rapa)    | 0.9976076    | 0.4783892    | not scorable | not scorable | 1         | 0.6939689 |
| 2667 | Bn-A01-p9961553 | A-genome specific (napus-rapa)    | 0.9952153    | 0.5215012    | not scorable | not scorable | 1         | 0.7492537 |
| 2668 | Bn-A01-p9982115 | A-genome specific (napus-rapa)    | 0.9856459    | 0.353414     | not scorable | not scorable | 0.9917355 | 0.8076326 |
| 2669 | Bn-A01-p9989240 | A-genome specific (napus-rapa)    | 0.9784689    | 0.8365031    | not scorable | not scorable | 0.9834711 | 0.7052579 |
| 2670 | Bn-A01-p9996240 | A-genome specific (napus-rapa)    | 0.9856459    | 0.7447909    | not scorable | not scorable | 0.9834711 | 0.676405  |

|                       |                                |              |              |              |              |           |           |
|-----------------------|--------------------------------|--------------|--------------|--------------|--------------|-----------|-----------|
| 2671 Bn-A01-p9996458  | A-genome specific (napus-rapa) | 0.9904306    | 0.8417633    | not scorable | not scorable | 0.9834711 | 0.6754791 |
| 2672 Bn-A01-p9999485  | A-genome specific (napus-rapa) | 0.930622     | 0.5098737    | not scorable | not scorable | 1         | 0.7076181 |
| 2673 Bn-A02-p10019636 | A-genome specific (napus-rapa) | 0.9832536    | 0.6768479    | not scorable | not scorable | 1         | 0.5130539 |
| 2674 Bn-A02-p10020231 | A-genome specific (napus-rapa) | 0.9712918    | 0.7959       | not scorable | not scorable | 0.9917355 | 0.7730865 |
| 2675 Bn-A02-p10067386 | A-genome specific (napus-rapa) | 0.9760765    | 0.5348075    | not scorable | not scorable | 0.9834711 | 0.7040934 |
| 2676 Bn-A02-p10078171 | A-genome specific (napus-rapa) | 0.9736842    | 0.2962688    | not scorable | not scorable | 0.9917355 | 0.8180001 |
| 2677 Bn-A02-p10092191 | A-genome specific (napus-rapa) | 0.9545454    | 0.3095171    | not scorable | not scorable | 0.9834711 | 0.7040308 |
| 2678 Bn-A02-p10096185 | A-genome specific (napus-rapa) | 0.9784689    | 0.8123909    | not scorable | not scorable | 0.9752066 | 0.718857  |
| 2679 Bn-A02-p10105701 | A-genome specific (napus-rapa) | 0.9712918    | 0.49967      | not scorable | not scorable | 0.9752066 | 0.6521387 |
| 2680 Bn-A02-p10107504 | A-genome specific (napus-rapa) | 0.9808612    | 0.7367874    | not scorable | not scorable | 1         | 0.7105102 |
| 2681 Bn-A02-p10110769 | A-genome specific (napus-rapa) | 0.9736842    | 0.4548682    | not scorable | not scorable | 1         | 0.7229961 |
| 2682 Bn-A02-p10111305 | A-genome specific (napus-rapa) | 0.9880383    | 0.7430297    | not scorable | not scorable | 0.9669421 | 0.7044492 |
| 2683 Bn-A02-p10126530 | A-genome specific (napus-rapa) | 0.9808612    | 0.4145238    | not scorable | not scorable | 0.9917355 | 0.7274572 |
| 2684 Bn-A02-p10129605 | A-genome specific (napus-rapa) | 0.9856459    | 0.7700725    | not scorable | not scorable | 0.9834711 | 0.7212927 |
| 2685 Bn-A02-p10133353 | A-genome specific (napus-rapa) | 0.9976076    | 0.7499518    | not scorable | not scorable | 1         | 0.781088  |
| 2686 Bn-A02-p10138982 | A-genome specific (napus-rapa) | 0.9808612    | 0.3945711    | not scorable | not scorable | 0.9834711 | 0.7971616 |
| 2687 Bn-A02-p10140065 | A-genome specific (rapa only)  | not scorable | not scorable | not scorable | not scorable | 1         | 0.7252899 |
| 2688 Bn-A02-p10153359 | genome unspecific (all in)     | 0.9976076    | 0.2801223    | 0.9767442    | 0.2563767    | 1         | 0.9101796 |
| 2689 Bn-A02-p10156025 | A-genome specific (napus-rapa) | 0.9808612    | 0.8138556    | not scorable | not scorable | 1         | 0.7896795 |
| 2690 Bn-A02-p10176579 | A-genome specific (napus-rapa) | 0.9688995    | 0.8134037    | not scorable | not scorable | 0.9834711 | 0.773312  |
| 2691 Bn-A02-p10176749 | A-genome specific (napus-rapa) | 0.9760765    | 0.7891621    | not scorable | not scorable | 0.9834711 | 0.787383  |
| 2692 Bn-A02-p10181448 | A-genome specific (napus-rapa) | 0.9712918    | 0.380966     | not scorable | not scorable | 0.9752066 | 0.7876717 |
| 2693 Bn-A02-p10184110 | A-genome specific (napus-rapa) | 0.9952153    | 0.2823426    | not scorable | not scorable | 0.9752066 | 0.7566882 |
| 2694 Bn-A02-p10186244 | A-genome specific (napus-rapa) | 0.9641148    | 0.7965204    | not scorable | not scorable | 0.9752066 | 0.7650018 |
| 2695 Bn-A02-p10186594 | A-genome specific (napus-rapa) | 0.9593301    | 0.7766776    | not scorable | not scorable | 0.9917355 | 0.7914191 |
| 2696 Bn-A02-p10193709 | A-genome specific (napus-rapa) | 0.9904306    | 0.5009422    | not scorable | not scorable | 1         | 0.7423257 |
| 2697 Bn-A02-p1020806  | A-genome specific (napus-rapa) | 0.9856459    | 0.8437583    | not scorable | not scorable | 0.5041322 | 0.8503447 |
| 2698 Bn-A02-p10218812 | A-genome specific (napus-rapa) | 0.9928229    | 0.7201415    | not scorable | not scorable | 1         | 0.9007735 |
| 2699 Bn-A02-p10227986 | A-genome specific (napus-rapa) | 0.9904306    | 0.7557117    | not scorable | not scorable | 0.9917355 | 0.753494  |
| 2700 Bn-A02-p10228189 | A-genome specific (napus-rapa) | 1            | 0.4886748    | not scorable | not scorable | 0.9917355 | 0.7458565 |
| 2701 Bn-A02-p10231298 | A-genome specific (napus-rapa) | 0.9641148    | 0.4686856    | not scorable | not scorable | 0.9917355 | 0.7815917 |
| 2702 Bn-A02-p10247756 | A-genome specific (napus-rapa) | 0.9808612    | 0.2493556    | not scorable | not scorable | 0.9834711 | 0.7064714 |
| 2703 Bn-A02-p1025518  | A-genome specific (rapa only)  | not scorable | not scorable | not scorable | not scorable | 0.8595041 | 0.8203158 |

|                       |                                |              |              |              |              |           |           |
|-----------------------|--------------------------------|--------------|--------------|--------------|--------------|-----------|-----------|
| 2704 Bn-A02-p10255955 | A-genome specific (napus-rapa) | 0.9808612    | 0.2803211    | not scorable | not scorable | 0.9917355 | 0.6078122 |
| 2705 Bn-A02-p10259746 | A-genome specific (napus-rapa) | 0.9736842    | 0.3071546    | not scorable | not scorable | 0.9834711 | 0.70717   |
| 2706 Bn-A02-p1027570  | A-genome specific (napus-rapa) | 1            | 0.4916743    | not scorable | not scorable | 0.9669421 | 0.7017869 |
| 2707 Bn-A02-p1028349  | A-genome specific (napus-rapa) | 1            | 0.5580248    | not scorable | not scorable | 0.9586777 | 0.5250807 |
| 2708 Bn-A02-p10289331 | A-genome specific (napus-rapa) | 0.9593301    | 0.7756767    | not scorable | not scorable | 1         | 0.7583615 |
| 2709 Bn-A02-p10323998 | A-genome specific (napus-rapa) | 0.9880383    | 0.6987922    | not scorable | not scorable | 0.9834711 | 0.7097909 |
| 2710 Bn-A02-p10325260 | genome unspecific (all in)     | 0.9880383    | 0.3900229    | 1            | 0.6717914    | 0.9752066 | 0.6823048 |
| 2711 Bn-A02-p10332863 | genome unspecific (all in)     | 0.9880383    | 0.3265109    | 0.6124031    | 0.7499385    | 1         | 0.7759184 |
| 2712 Bn-A02-p10338350 | A-genome specific (rapa only)  | not scorable | not scorable | not scorable | not scorable | 0.9752066 | 0.6816012 |
| 2713 Bn-A02-p10377179 | A-genome specific (napus-rapa) | 0.9952153    | 0.3298168    | not scorable | not scorable | 1         | 0.6632591 |
| 2714 Bn-A02-p10395108 | A-genome specific (napus-rapa) | 0.9832536    | 0.7160507    | not scorable | not scorable | 0.5206612 | 0.6552821 |
| 2715 Bn-A02-p10396907 | A-genome specific (napus-rapa) | 0.9904306    | 0.7796504    | not scorable | not scorable | 0.9917355 | 0.7234836 |
| 2716 Bn-A02-p10404084 | A-genome specific (napus-rapa) | 0.9904306    | 0.6718618    | not scorable | not scorable | 0.9834711 | 0.6729136 |
| 2717 Bn-A02-p10409103 | A-genome specific (napus-rapa) | 0.9904306    | 0.4713656    | not scorable | not scorable | 0.9752066 | 0.8531474 |
| 2718 Bn-A02-p10418131 | A-genome specific (napus-rapa) | 0.9880383    | 0.2555766    | not scorable | not scorable | 0.9917355 | 0.7020359 |
| 2719 Bn-A02-p10444138 | A-genome specific (napus-rapa) | 0.9832536    | 0.764904     | not scorable | not scorable | 0.9917355 | 0.7129886 |
| 2720 Bn-A02-p10452854 | A-genome specific (rapa only)  | not scorable | not scorable | not scorable | not scorable | 0.5041322 | 0.8365592 |
| 2721 Bn-A02-p10477549 | A-genome specific (napus-rapa) | 0.9665072    | 0.7591661    | not scorable | not scorable | 0.9752066 | 0.7014977 |
| 2722 Bn-A02-p10485644 | A-genome specific (napus-rapa) | 0.9904306    | 0.7794305    | not scorable | not scorable | 0.9917355 | 0.7535936 |
| 2723 Bn-A02-p10493685 | genome unspecific (all in)     | 0.9665072    | 0.6924852    | 0.9844961    | 0.7629939    | 0.9834711 | 0.7207382 |
| 2724 Bn-A02-p10507801 | A-genome specific (napus-rapa) | 0.9736842    | 0.7457719    | not scorable | not scorable | 0.9752066 | 0.7184493 |
| 2725 Bn-A02-p10507864 | A-genome specific (napus-rapa) | 0.9736842    | 0.7900165    | not scorable | not scorable | 0.9752066 | 0.7258007 |
| 2726 Bn-A02-p10508075 | A-genome specific (napus-rapa) | 0.9593301    | 0.7859077    | not scorable | not scorable | 0.9917355 | 0.8068569 |
| 2727 Bn-A02-p10510996 | A-genome specific (napus-rapa) | 0.9904306    | 0.7696472    | not scorable | not scorable | 0.9917355 | 0.7112234 |
| 2728 Bn-A02-p10515029 | A-genome specific (napus-rapa) | 0.9665072    | 0.6581645    | not scorable | not scorable | 0.9586777 | 0.6531467 |
| 2729 Bn-A02-p10521287 | A-genome specific (rapa only)  | not scorable | not scorable | not scorable | not scorable | 0.9752066 | 0.832016  |
| 2730 Bn-A02-p10524842 | A-genome specific (napus-rapa) | 0.9808612    | 0.7277724    | not scorable | not scorable | 0.9834711 | 0.6959049 |
| 2731 Bn-A02-p10527075 | A-genome specific (napus-rapa) | 0.9712918    | 0.7875571    | not scorable | not scorable | 0.9834711 | 0.7003807 |
| 2732 Bn-A02-p10528586 | A-genome specific (napus-rapa) | 0.9641148    | 0.7890535    | not scorable | not scorable | 0.9917355 | 0.75708   |
| 2733 Bn-A02-p10530978 | A-genome specific (napus-rapa) | 0.9712918    | 0.7926415    | not scorable | not scorable | 0.9752066 | 0.7487559 |
| 2734 Bn-A02-p10533300 | A-genome specific (napus-rapa) | 0.9688995    | 0.7206933    | not scorable | not scorable | 0.9917355 | 0.7208403 |
| 2735 Bn-A02-p10540052 | A-genome specific (napus-rapa) | 0.9784689    | 0.7893047    | not scorable | not scorable | 0.9917355 | 0.7183622 |
| 2736 Bn-A02-p10540148 | A-genome specific (napus-rapa) | 0.9832536    | 0.7607111    | not scorable | not scorable | 0.9752066 | 0.8009692 |

|      |                  |                                   |              |              |              |              |           |           |
|------|------------------|-----------------------------------|--------------|--------------|--------------|--------------|-----------|-----------|
| 2737 | Bn-A02-p10556758 | A-genome specific (napus-rapa)    | 0.9545454    | 0.6535953    | not scorable | not scorable | 0.9752066 | 0.6365817 |
| 2738 | Bn-A02-p10568947 | A-genome specific (napus-rapa)    | 0.9880383    | 0.3953613    | not scorable | not scorable | 1         | 0.7785489 |
| 2739 | Bn-A02-p10574526 | A-genome specific (napus-rapa)    | 0.9641148    | 0.7928859    | not scorable | not scorable | 0.9421487 | 0.6956645 |
| 2740 | Bn-A02-p10587170 | A-genome specific (napus-rapa)    | 0.9736842    | 0.8007827    | not scorable | not scorable | 0.9917355 | 0.7218029 |
| 2741 | Bn-A02-p10587232 | A-genome specific (napus-rapa)    | 0.9808612    | 0.8027452    | not scorable | not scorable | 0.9917355 | 0.707949  |
| 2742 | Bn-A02-p10587536 | genome unspecific (oleracea-rapa) | not scorable | not scorable |              | 1            | 0.7922735 | 0.9586777 |
| 2743 | Bn-A02-p10591779 | A-genome specific (napus-rapa)    | 0.9976076    | 0.4737935    | not scorable | not scorable | 1         | 0.7207334 |
| 2744 | Bn-A02-p10614602 | A-genome specific (napus-rapa)    | 0.9593301    | 0.7765902    | not scorable | not scorable | 0.9917355 | 0.8198096 |
| 2745 | Bn-A02-p10616871 | A-genome specific (napus-rapa)    | 0.9593301    | 0.6324186    | not scorable | not scorable | 0.9834711 | 0.6896921 |
| 2746 | Bn-A02-p10621504 | A-genome specific (napus-rapa)    | 0.9712918    | 0.8007813    | not scorable | not scorable | 0.9917355 | 0.7963939 |
| 2747 | Bn-A02-p10622338 | A-genome specific (napus-rapa)    | 0.9043062    | 0.7439107    | not scorable | not scorable | 0.9421487 | 0.6466249 |
| 2748 | Bn-A02-p10623838 | A-genome specific (napus-rapa)    | 0.9784689    | 0.8121132    | not scorable | not scorable | 0.9917355 | 0.7430676 |
| 2749 | Bn-A02-p10624373 | A-genome specific (napus-rapa)    | 0.9760765    | 0.6364824    | not scorable | not scorable | 0.9917355 | 0.7832156 |
| 2750 | Bn-A02-p10625720 | A-genome specific (napus-rapa)    | 0.9617225    | 0.6920608    | not scorable | not scorable | 0.9917355 | 0.7600092 |
| 2751 | Bn-A02-p10626782 | A-genome specific (napus-rapa)    | 0.9880383    | 0.6974671    | not scorable | not scorable | 0.9669421 | 0.6698877 |
| 2752 | Bn-A02-p10629886 | A-genome specific (napus-rapa)    | 0.9856459    | 0.7639012    | not scorable | not scorable | 0.9917355 | 0.7615372 |
| 2753 | Bn-A02-p10637202 | A-genome specific (napus-rapa)    | 0.9736842    | 0.8084061    | not scorable | not scorable | 0.9669421 | 0.696144  |
| 2754 | Bn-A02-p10638989 | A-genome specific (napus-rapa)    | 0.9521531    | 0.8145033    | not scorable | not scorable | 0.9834711 | 0.7489321 |
| 2755 | Bn-A02-p10641032 | A-genome specific (rapa only)     | not scorable | not scorable | not scorable | not scorable | 0.8099173 | 0.7194871 |
| 2756 | Bn-A02-p10652585 | A-genome specific (napus-rapa)    | 0.9593301    | 0.4640046    | not scorable | not scorable | 0.9834711 | 0.6824505 |
| 2757 | Bn-A02-p10668400 | A-genome specific (napus-rapa)    | 0.9545454    | 0.6338026    | not scorable | not scorable | 1         | 0.7554175 |
| 2758 | Bn-A02-p10681015 | A-genome specific (napus-rapa)    | 0.9736842    | 0.5088671    | not scorable | not scorable | 0.9669421 | 0.7497477 |
| 2759 | Bn-A02-p1068542  | A-genome specific (napus-rapa)    | 0.9952153    | 0.6929082    | not scorable | not scorable | 0.9586777 | 0.7232896 |
| 2760 | Bn-A02-p10690394 | A-genome specific (napus-rapa)    | 0.9760765    | 0.8052262    | not scorable | not scorable | 0.9752066 | 0.7920424 |
| 2761 | Bn-A02-p10690477 | A-genome specific (napus-rapa)    | 0.9282297    | 0.8134491    | not scorable | not scorable | 0.9586777 | 0.7888144 |
| 2762 | Bn-A02-p10699604 | A-genome specific (napus-rapa)    | 0.6889952    | 0.7059219    | not scorable | not scorable | 0.9586777 | 0.6969976 |
| 2763 | Bn-A02-p10700544 | A-genome specific (napus-rapa)    | 0.9832536    | 0.7736111    | not scorable | not scorable | 0.9917355 | 0.7982529 |
| 2764 | Bn-A02-p10711353 | A-genome specific (napus-rapa)    | 0.9832536    | 0.7857351    | not scorable | not scorable | 0.9917355 | 0.786674  |
| 2765 | Bn-A02-p10711442 | A-genome specific (napus-rapa)    | 0.9904306    | 0.7956988    | not scorable | not scorable | 0.9834711 | 0.7153298 |
| 2766 | Bn-A02-p10711565 | A-genome specific (napus-rapa)    | 0.9760765    | 0.7996149    | not scorable | not scorable | 1         | 0.8851421 |
| 2767 | Bn-A02-p10719296 | A-genome specific (napus-rapa)    | 0.9545454    | 0.6446798    | not scorable | not scorable | 0.9834711 | 0.6717822 |
| 2768 | Bn-A02-p10742809 | A-genome specific (napus-rapa)    | 0.9593301    | 0.516248     | not scorable | not scorable | 0.9421487 | 0.5033373 |
| 2769 | Bn-A02-p10745711 | A-genome specific (napus-rapa)    | 0.9688995    | 0.4523543    | not scorable | not scorable | 1         | 0.8420836 |

|      |                  |                                   |              |              |              |              |              |              |
|------|------------------|-----------------------------------|--------------|--------------|--------------|--------------|--------------|--------------|
| 2770 | Bn-A02-p10746556 | A-genome specific (napus-rapa)    | 0.7464115    | 0.8351284    | not scorable | not scorable | 0.9917355    | 0.8498756    |
| 2771 | Bn-A02-p10753552 | A-genome specific (napus-rapa)    | 0.9832536    | 0.3150043    | not scorable | not scorable | 0.9917355    | 0.6645859    |
| 2772 | Bn-A02-p1075920  | A-genome specific (rapa only)     | not scorable | not scorable | not scorable | not scorable | 0.9917355    | 0.6832442    |
| 2773 | Bn-A02-p10763116 | A-genome specific (napus-rapa)    | 0.9617225    | 0.5694524    | not scorable | not scorable | 0.9917355    | 0.8066405    |
| 2774 | Bn-A02-p10775283 | genome unspecific (all in)        | 0.9832536    | 0.4724845    |              | 1            | 0.8460527    | 1            |
| 2775 | Bn-A02-p10780709 | genome unspecific (oleracea-rapa) | not scorable | not scorable | 0.9844961    | 0.8925639    | 0.9834711    | 0.7848444    |
| 2776 | Bn-A02-p10781906 | A-genome specific (napus-rapa)    | 0.9665072    | 0.7488509    | not scorable | not scorable | 0.9834711    | 0.7508231    |
| 2777 | Bn-A02-p10786230 | A-genome specific (napus-rapa)    | 0.9688995    | 0.6598713    | not scorable | not scorable | 0.9834711    | 0.7079984    |
| 2778 | Bn-A02-p10787104 | A-genome specific (napus-rapa)    | 0.9688995    | 0.8031533    | not scorable | not scorable | 0.9752066    | 0.7152818    |
| 2779 | Bn-A02-p10787380 | A-genome specific (napus-rapa)    | 0.9880383    | 0.814478     | not scorable | not scorable | 0.9917355    | 0.7956197    |
| 2780 | Bn-A02-p10788285 | A-genome specific (napus-rapa)    | 0.9736842    | 0.3972595    | not scorable | not scorable | 1            | 0.7906294    |
| 2781 | Bn-A02-p10790263 | A-genome specific (napus-rapa)    | 0.9736842    | 0.7650067    | not scorable | not scorable | 0.9834711    | 0.7881014    |
| 2782 | Bn-A02-p10793326 | A-genome specific (napus-rapa)    | 0.9688995    | 0.7895914    | not scorable | not scorable | 0.9917355    | 0.6720709    |
| 2783 | Bn-A02-p10796317 | napus specific                    | 0.9641148    | 0.5793405    | not scorable | not scorable | not scorable | not scorable |
| 2784 | Bn-A02-p10796462 | A-genome specific (napus-rapa)    | 0.9832536    | 0.7570568    | not scorable | not scorable | 0.9917355    | 0.7536912    |
| 2785 | Bn-A02-p10806477 | A-genome specific (napus-rapa)    | 0.9736842    | 0.5485599    | not scorable | not scorable | 1            | 0.7544218    |
| 2786 | Bn-A02-p10811918 | A-genome specific (napus-rapa)    | 0.9665072    | 0.590257     | not scorable | not scorable | 0.9917355    | 0.7296093    |
| 2787 | Bn-A02-p10815211 | A-genome specific (napus-rapa)    | 0.9880383    | 0.8048449    | not scorable | not scorable | 0.9917355    | 0.7565199    |
| 2788 | Bn-A02-p10815571 | A-genome specific (napus-rapa)    | 0.9928229    | 0.5668868    | not scorable | not scorable | 0.9752066    | 0.7146045    |
| 2789 | Bn-A02-p10815969 | A-genome specific (napus-rapa)    | 0.9832536    | 0.6772779    | not scorable | not scorable | 1            | 0.8796692    |
| 2790 | Bn-A02-p10818801 | A-genome specific (napus-rapa)    | 0.9928229    | 0.4794307    | not scorable | not scorable | 1            | 0.9175798    |
| 2791 | Bn-A02-p10822102 | A-genome specific (napus-rapa)    | 0.9497608    | 0.5050519    | not scorable | not scorable | 0.9917355    | 0.9175813    |
| 2792 | Bn-A02-p10839131 | A-genome specific (napus-rapa)    | 0.9617225    | 0.7706677    | not scorable | not scorable | 1            | 0.8052031    |
| 2793 | Bn-A02-p10850012 | A-genome specific (napus-rapa)    | 0.9904306    | 0.5145055    | not scorable | not scorable | 1            | 0.6923397    |
| 2794 | Bn-A02-p10850323 | A-genome specific (napus-rapa)    | 0.9952153    | 0.3639618    | not scorable | not scorable | 1            | 0.7544973    |
| 2795 | Bn-A02-p1085455  | A-genome specific (napus-rapa)    | 0.9808612    | 0.8290815    | not scorable | not scorable | 1            | 0.7229961    |
| 2796 | Bn-A02-p10857857 | A-genome specific (napus-rapa)    | 0.9808612    | 0.7506896    | not scorable | not scorable | 0.9752066    | 0.6707141    |
| 2797 | Bn-A02-p10858522 | A-genome specific (rapa only)     | not scorable | not scorable | not scorable | not scorable | 0.9669421    | 0.4402857    |
| 2798 | Bn-A02-p10861090 | A-genome specific (napus-rapa)    | 0.9952153    | 0.7483519    | not scorable | not scorable | 1            | 0.6497253    |
| 2799 | Bn-A02-p10866642 | A-genome specific (napus-rapa)    | 0.9880383    | 0.7501666    | not scorable | not scorable | 0.9834711    | 0.740935     |
| 2800 | Bn-A02-p10869120 | A-genome specific (napus-rapa)    | 0.9880383    | 0.5414088    | not scorable | not scorable | 0.9917355    | 0.7046836    |
| 2801 | Bn-A02-p10879119 | A-genome specific (napus-rapa)    | 0.9162679    | 0.734138     | not scorable | not scorable | 0.9669421    | 0.6380289    |
| 2802 | Bn-A02-p108936   | A-genome specific (napus-rapa)    | 1            | 0.7189614    | not scorable | not scorable | 0.9834711    | 0.6850874    |

|      |                  |                                |              |              |              |              |              |              |
|------|------------------|--------------------------------|--------------|--------------|--------------|--------------|--------------|--------------|
| 2803 | Bn-A02-p10895698 | A-genome specific (napus-rapa) | 0.9856459    | 0.6615065    | not scorable | not scorable | 1            | 0.9175813    |
| 2804 | Bn-A02-p10906851 | A-genome specific (napus-rapa) | 0.9928229    | 0.3369223    | not scorable | not scorable | 1            | 0.7347764    |
| 2805 | Bn-A02-p1091779  | A-genome specific (rapa only)  | not scorable | not scorable | not scorable | not scorable | 0.9834711    | 0.6601198    |
| 2806 | Bn-A02-p1092146  | A-genome specific (napus-rapa) | 0.9928229    | 0.7744465    | not scorable | not scorable | 1            | 0.6967734    |
| 2807 | Bn-A02-p10930249 | A-genome specific (napus-rapa) | 0.9114832    | 0.8129231    | not scorable | not scorable | 0.5289256    | 0.7493338    |
| 2808 | Bn-A02-p10949322 | A-genome specific (napus-rapa) | 0.9880383    | 0.4706188    | not scorable | not scorable | 0.9586777    | 0.6240984    |
| 2809 | Bn-A02-p10956599 | A-genome specific (napus-rapa) | 0.9497608    | 0.7206351    | not scorable | not scorable | 0.5371901    | 0.811419     |
| 2810 | Bn-A02-p10959141 | A-genome specific (napus-rapa) | 0.9952153    | 0.4101261    | not scorable | not scorable | 1            | 0.795513     |
| 2811 | Bn-A02-p1096082  | A-genome specific (napus-rapa) | 0.9928229    | 0.7764494    | not scorable | not scorable | 0.9834711    | 0.7484605    |
| 2812 | Bn-A02-p10983922 | A-genome specific (napus-rapa) | 0.9904306    | 0.2231961    | not scorable | not scorable | 0.9669421    | 0.3928776    |
| 2813 | Bn-A02-p10992266 | A-genome specific (napus-rapa) | 0.8349282    | 0.7761034    | not scorable | not scorable | 0.4876033    | 0.7822044    |
| 2814 | Bn-A02-p10992866 | napus specific                 | 0.9330143    | 0.8007172    | not scorable | not scorable | not scorable | not scorable |
| 2815 | Bn-A02-p10996151 | A-genome specific (napus-rapa) | 0.9808612    | 0.2712472    | not scorable | not scorable | 0.9834711    | 0.6900607    |
| 2816 | Bn-A02-p11014885 | A-genome specific (napus-rapa) | 0.9545454    | 0.5390819    | not scorable | not scorable | 0.9834711    | 0.7383878    |
| 2817 | Bn-A02-p11038401 | A-genome specific (napus-rapa) | 0.9760765    | 0.8103774    | not scorable | not scorable | 0.9752066    | 0.7814685    |
| 2818 | Bn-A02-p11039119 | A-genome specific (napus-rapa) | 0.9880383    | 0.5246774    | not scorable | not scorable | 0.9090909    | 0.5560069    |
| 2819 | Bn-A02-p11041638 | A-genome specific (napus-rapa) | 0.9736842    | 0.439959     | not scorable | not scorable | 0.9917355    | 0.6725169    |
| 2820 | Bn-A02-p11041726 | A-genome specific (napus-rapa) | 0.9928229    | 0.4879316    | not scorable | not scorable | 0.9917355    | 0.7675335    |
| 2821 | Bn-A02-p11053817 | A-genome specific (napus-rapa) | 0.9210526    | 0.7571442    | not scorable | not scorable | 1            | 0.8138818    |
| 2822 | Bn-A02-p11060975 | A-genome specific (napus-rapa) | 0.9928229    | 0.81266      | not scorable | not scorable | 0.9752066    | 0.5140325    |
| 2823 | Bn-A02-p11062457 | A-genome specific (napus-rapa) | 0.9617225    | 0.7984988    | not scorable | not scorable | 1            | 0.7689113    |
| 2824 | Bn-A02-p11068431 | A-genome specific (napus-rapa) | 0.9952153    | 0.5549823    | not scorable | not scorable | 1            | 0.6978682    |
| 2825 | Bn-A02-p11070906 | A-genome specific (napus-rapa) | 0.9880383    | 0.7532225    | not scorable | not scorable | 0.9917355    | 0.7022554    |
| 2826 | Bn-A02-p11073162 | A-genome specific (napus-rapa) | 0.9856459    | 0.7307814    | not scorable | not scorable | 0.9586777    | 0.6609219    |
| 2827 | Bn-A02-p11073326 | A-genome specific (napus-rapa) | 0.9832536    | 0.3749127    | not scorable | not scorable | 0.9917355    | 0.6800783    |
| 2828 | Bn-A02-p11080706 | A-genome specific (napus-rapa) | 0.9856459    | 0.7338021    | not scorable | not scorable | 0.9752066    | 0.7186599    |
| 2829 | Bn-A02-p11086855 | A-genome specific (napus-rapa) | 0.9976076    | 0.5488379    | not scorable | not scorable | 0.9917355    | 0.822943     |
| 2830 | Bn-A02-p11087046 | A-genome specific (napus-rapa) | 0.9952153    | 0.8911709    | not scorable | not scorable | 0.9917355    | 0.9435292    |
| 2831 | Bn-A02-p11087388 | A-genome specific (napus-rapa) | 1            | 0.5896162    | not scorable | not scorable | 0.9834711    | 0.7022027    |
| 2832 | Bn-A02-p11096221 | A-genome specific (napus-rapa) | 0.9880383    | 0.7519594    | not scorable | not scorable | 0.9752066    | 0.8098366    |
| 2833 | Bn-A02-p11153317 | A-genome specific (napus-rapa) | 0.9114832    | 0.3976288    | not scorable | not scorable | 0.9586777    | 0.3803256    |
| 2834 | Bn-A02-p11155686 | A-genome specific (napus-rapa) | 0.9976076    | 0.7610021    | not scorable | not scorable | 0.9752066    | 0.6341022    |
| 2835 | Bn-A02-p11156474 | A-genome specific (napus-rapa) | 0.9928229    | 0.7569256    | not scorable | not scorable | 0.9917355    | 0.7017822    |

|      |                  |                                |              |              |              |              |           |           |
|------|------------------|--------------------------------|--------------|--------------|--------------|--------------|-----------|-----------|
| 2836 | Bn-A02-p11159353 | A-genome specific (napus-rapa) | 0.9952153    | 0.7625158    | not scorable | not scorable | 1         | 0.7760359 |
| 2837 | Bn-A02-p11160726 | A-genome specific (napus-rapa) | 0.9904306    | 0.7619434    | not scorable | not scorable | 0.9504132 | 0.7258481 |
| 2838 | Bn-A02-p11161716 | A-genome specific (napus-rapa) | 0.9976076    | 0.6558157    | not scorable | not scorable | 0.9917355 | 0.7105656 |
| 2839 | Bn-A02-p11170230 | A-genome specific (napus-rapa) | 0.9928229    | 0.4909083    | not scorable | not scorable | 1         | 0.6815073 |
| 2840 | Bn-A02-p11182703 | A-genome specific (napus-rapa) | 0.7535885    | 0.7147064    | not scorable | not scorable | 0.9669421 | 0.6667518 |
| 2841 | Bn-A02-p11187572 | A-genome specific (napus-rapa) | 0.9976076    | 0.814931     | not scorable | not scorable | 1         | 0.8978928 |
| 2842 | Bn-A02-p11192451 | A-genome specific (napus-rapa) | 0.708134     | 0.8059431    | not scorable | not scorable | 0.9256198 | 0.7171036 |
| 2843 | Bn-A02-p11195341 | A-genome specific (napus-rapa) | 0.923445     | 0.7832264    | not scorable | not scorable | 0.9669421 | 0.748989  |
| 2844 | Bn-A02-p11200305 | A-genome specific (napus-rapa) | 0.9808612    | 0.7618113    | not scorable | not scorable | 0.9917355 | 0.7497262 |
| 2845 | Bn-A02-p11209194 | A-genome specific (napus-rapa) | 0.9784689    | 0.497162     | not scorable | not scorable | 0.9917355 | 0.5300997 |
| 2846 | Bn-A02-p11223862 | A-genome specific (napus-rapa) | 0.9808612    | 0.4996364    | not scorable | not scorable | 0.9917355 | 0.7754756 |
| 2847 | Bn-A02-p11227845 | A-genome specific (napus-rapa) | 0.9617225    | 0.5126876    | not scorable | not scorable | 0.9917355 | 0.7600925 |
| 2848 | Bn-A02-p11235969 | A-genome specific (napus-rapa) | 0.7727273    | 0.7533811    | not scorable | not scorable | 0.9669421 | 0.6997408 |
| 2849 | Bn-A02-p11237912 | A-genome specific (napus-rapa) | 0.9641148    | 0.6966767    | not scorable | not scorable | 0.9834711 | 0.6931527 |
| 2850 | Bn-A02-p11238010 | A-genome specific (napus-rapa) | 0.9856459    | 0.66574      | not scorable | not scorable | 0.9752066 | 0.732523  |
| 2851 | Bn-A02-p11238896 | A-genome specific (napus-rapa) | 0.9880383    | 0.7811423    | not scorable | not scorable | 0.9917355 | 0.6957834 |
| 2852 | Bn-A02-p11248280 | A-genome specific (napus-rapa) | 0.9808612    | 0.7456627    | not scorable | not scorable | 0.9669421 | 0.744024  |
| 2853 | Bn-A02-p11248642 | A-genome specific (napus-rapa) | 0.9952153    | 0.845449     | not scorable | not scorable | 1         | 0.704862  |
| 2854 | Bn-A02-p11248742 | A-genome specific (napus-rapa) | 0.9904306    | 0.7550974    | not scorable | not scorable | 0.9834711 | 0.7947085 |
| 2855 | Bn-A02-p11248828 | A-genome specific (napus-rapa) | 0.9832536    | 0.7696138    | not scorable | not scorable | 0.9752066 | 0.7062414 |
| 2856 | Bn-A02-p11259297 | A-genome specific (napus-rapa) | 0.9880383    | 0.7764443    | not scorable | not scorable | 0.9752066 | 0.684204  |
| 2857 | Bn-A02-p11262178 | A-genome specific (napus-rapa) | 0.9641148    | 0.6542574    | not scorable | not scorable | 1         | 0.5850273 |
| 2858 | Bn-A02-p11265573 | A-genome specific (rapa only)  | not scorable | not scorable | not scorable | not scorable | 0.9752066 | 0.7400513 |
| 2859 | Bn-A02-p11278529 | A-genome specific (napus-rapa) | 0.9808612    | 0.3572665    | not scorable | not scorable | 0.9917355 | 0.7376901 |
| 2860 | Bn-A02-p11284285 | A-genome specific (napus-rapa) | 0.9808612    | 0.8224531    | not scorable | not scorable | 1         | 0.7647761 |
| 2861 | Bn-A02-p11284503 | A-genome specific (napus-rapa) | 0.9736842    | 0.7608749    | not scorable | not scorable | 0.9917355 | 0.6876206 |
| 2862 | Bn-A02-p11291606 | A-genome specific (napus-rapa) | 0.9904306    | 0.6919408    | not scorable | not scorable | 0.9917355 | 0.7130901 |
| 2863 | Bn-A02-p11293986 | A-genome specific (napus-rapa) | 0.9904306    | 0.3272583    | not scorable | not scorable | 1         | 0.6816372 |
| 2864 | Bn-A02-p11320789 | A-genome specific (napus-rapa) | 0.9665072    | 0.6465892    | not scorable | not scorable | 0.9752066 | 0.6608645 |
| 2865 | Bn-A02-p11328718 | A-genome specific (napus-rapa) | 0.9832536    | 0.8043924    | not scorable | not scorable | 0.9834711 | 0.7811155 |
| 2866 | Bn-A02-p11342711 | A-genome specific (napus-rapa) | 0.8014354    | 0.6517679    | not scorable | not scorable | 0.5454546 | 0.6414672 |
| 2867 | Bn-A02-p11345557 | A-genome specific (napus-rapa) | 0.9043062    | 0.72053      | not scorable | not scorable | 0.9917355 | 0.697055  |
| 2868 | Bn-A02-p11346389 | A-genome specific (napus-rapa) | 0.9473684    | 0.6544337    | not scorable | not scorable | 1         | 0.6833037 |

|      |                  |                                |              |              |              |              |           |           |
|------|------------------|--------------------------------|--------------|--------------|--------------|--------------|-----------|-----------|
| 2869 | Bn-A02-p1135078  | A-genome specific (napus-ropa) | 0.9928229    | 0.7934042    | not scorable | not scorable | 0.9834711 | 0.7985696 |
| 2870 | Bn-A02-p11355276 | A-genome specific (napus-ropa) | 0.9784689    | 0.2296644    | not scorable | not scorable | 0.9917355 | 0.2892561 |
| 2871 | Bn-A02-p11356944 | A-genome specific (napus-ropa) | 0.8516746    | 0.797935     | not scorable | not scorable | 0.9504132 | 0.7663594 |
| 2872 | Bn-A02-p11365167 | A-genome specific (napus-ropa) | 0.9880383    | 0.863392     | not scorable | not scorable | 0.9917355 | 0.7964792 |
| 2873 | Bn-A02-p11415015 | A-genome specific (napus-ropa) | 0.9904306    | 0.5148746    | not scorable | not scorable | 0.9752066 | 0.7052752 |
| 2874 | Bn-A02-p11439590 | A-genome specific (napus-ropa) | 0.9856459    | 0.8014436    | not scorable | not scorable | 1         | 0.8020115 |
| 2875 | Bn-A02-p11440895 | A-genome specific (napus-ropa) | 0.9712918    | 0.7340946    | not scorable | not scorable | 0.9917355 | 0.667549  |
| 2876 | Bn-A02-p11441711 | A-genome specific (napus-ropa) | 0.9736842    | 0.807888     | not scorable | not scorable | 0.9834711 | 0.7124315 |
| 2877 | Bn-A02-p11449348 | A-genome specific (napus-ropa) | 0.9952153    | 0.7607928    | not scorable | not scorable | 1         | 0.7302788 |
| 2878 | Bn-A02-p11449488 | A-genome specific (napus-ropa) | 0.9808612    | 0.7433488    | not scorable | not scorable | 0.9669421 | 0.6871973 |
| 2879 | Bn-A02-p11450032 | A-genome specific (napus-ropa) | 0.9856459    | 0.7887045    | not scorable | not scorable | 0.9834711 | 0.7806471 |
| 2880 | Bn-A02-p11450463 | A-genome specific (napus-ropa) | 0.9832536    | 0.7445564    | not scorable | not scorable | 0.9752066 | 0.7299915 |
| 2881 | Bn-A02-p11451035 | A-genome specific (napus-ropa) | 0.9784689    | 0.6973041    | not scorable | not scorable | 0.9752066 | 0.6546887 |
| 2882 | Bn-A02-p11451261 | A-genome specific (napus-ropa) | 0.9904306    | 0.7776282    | not scorable | not scorable | 0.9421487 | 0.7071161 |
| 2883 | Bn-A02-p11454010 | A-genome specific (napus-ropa) | 0.9784689    | 0.49856      | not scorable | not scorable | 0.9917355 | 0.7399143 |
| 2884 | Bn-A02-p11454573 | A-genome specific (napus-ropa) | 0.9736842    | 0.8019562    | not scorable | not scorable | 0.9834711 | 0.7659231 |
| 2885 | Bn-A02-p11454658 | A-genome specific (napus-ropa) | 0.9665072    | 0.4799769    | not scorable | not scorable | 0.9834711 | 0.6375329 |
| 2886 | Bn-A02-p11454746 | A-genome specific (napus-ropa) | 0.9976076    | 0.5088444    | not scorable | not scorable | 0.9917355 | 0.7639434 |
| 2887 | Bn-A02-p11455068 | A-genome specific (napus-ropa) | 0.9856459    | 0.8754658    | not scorable | not scorable | 1         | 0.726869  |
| 2888 | Bn-A02-p11455310 | A-genome specific (napus-ropa) | 0.9760765    | 0.7452747    | not scorable | not scorable | 0.9834711 | 0.6808891 |
| 2889 | Bn-A02-p11455369 | A-genome specific (napus-ropa) | 0.9976076    | 0.6914675    | not scorable | not scorable | 1         | 0.7416446 |
| 2890 | Bn-A02-p11455659 | A-genome specific (napus-ropa) | 0.9760765    | 0.7828279    | not scorable | not scorable | 0.9917355 | 0.7620965 |
| 2891 | Bn-A02-p11457727 | A-genome specific (napus-ropa) | 0.9880383    | 0.7685125    | not scorable | not scorable | 0.9834711 | 0.8020721 |
| 2892 | Bn-A02-p11463288 | A-genome specific (napus-ropa) | 0.9593301    | 0.5707067    | not scorable | not scorable | 1         | 0.7846172 |
| 2893 | Bn-A02-p11479169 | A-genome specific (napus-ropa) | 0.9808612    | 0.2665071    | not scorable | not scorable | 1         | 0.728054  |
| 2894 | Bn-A02-p11479678 | A-genome specific (napus-ropa) | 0.9808612    | 0.481438     | not scorable | not scorable | 0.9752066 | 0.6666704 |
| 2895 | Bn-A02-p11492320 | A-genome specific (napus-ropa) | 0.9808612    | 0.8083671    | not scorable | not scorable | 0.9752066 | 0.7859519 |
| 2896 | Bn-A02-p11513420 | A-genome specific (napus-ropa) | 0.9665072    | 0.6642956    | not scorable | not scorable | 0.9917355 | 0.7619538 |
| 2897 | Bn-A02-p11517785 | A-genome specific (napus-ropa) | 0.9808612    | 0.4592679    | not scorable | not scorable | 0.9834711 | 0.7182298 |
| 2898 | Bn-A02-p11521800 | A-genome specific (napus-ropa) | 0.9665072    | 0.7816321    | not scorable | not scorable | 0.9752066 | 0.7947698 |
| 2899 | Bn-A02-p11535570 | A-genome specific (napus-ropa) | 0.9928229    | 0.264915     | not scorable | not scorable | 0.9834711 | 0.7512991 |
| 2900 | Bn-A02-p11550877 | A-genome specific (ropa only)  | not scorable | not scorable | not scorable | not scorable | 1         | 0.7329642 |
| 2901 | Bn-A02-p1155656  | A-genome specific (ropa only)  | not scorable | not scorable | not scorable | not scorable | 0.9917355 | 0.9057445 |



|                       |                                |           |           |              |              |              |              |
|-----------------------|--------------------------------|-----------|-----------|--------------|--------------|--------------|--------------|
| 2902 Bn-A02-p1157373  | genome unspecific (all in)     | 0.923445  | 0.3294582 | 0.9689922    | 0.4151027    | 1            | 0.8004208    |
| 2903 Bn-A02-p11585751 | A-genome specific (napus-rapa) | 0.9162679 | 0.771548  | not scorable | not scorable | 0.9669421    | 0.8051392    |
| 2904 Bn-A02-p11616676 | A-genome specific (napus-rapa) | 0.9832536 | 0.5424441 | not scorable | not scorable | 0.9834711    | 0.7579786    |
| 2905 Bn-A02-p11646535 | A-genome specific (napus-rapa) | 0.9880383 | 0.7761496 | not scorable | not scorable | 1            | 0.8266833    |
| 2906 Bn-A02-p11648522 | A-genome specific (napus-rapa) | 0.9904306 | 0.7490399 | not scorable | not scorable | 1            | 0.7088333    |
| 2907 Bn-A02-p11660867 | A-genome specific (napus-rapa) | 0.9856459 | 0.2779405 | not scorable | not scorable | 1            | 0.7242132    |
| 2908 Bn-A02-p11666688 | A-genome specific (napus-rapa) | 0.9904306 | 0.4843172 | not scorable | not scorable | 1            | 0.8815182    |
| 2909 Bn-A02-p11673455 | napus specific                 | 0.8755981 | 0.8049057 | not scorable | not scorable | not scorable | not scorable |
| 2910 Bn-A02-p11682974 | A-genome specific (napus-rapa) | 0.9880383 | 0.7270359 | not scorable | not scorable | 1            | 0.8275138    |
| 2911 Bn-A02-p11683024 | A-genome specific (napus-rapa) | 0.9928229 | 0.8446832 | not scorable | not scorable | 1            | 0.8287739    |
| 2912 Bn-A02-p11683481 | A-genome specific (napus-rapa) | 0.9952153 | 0.7875241 | not scorable | not scorable | 0.9917355    | 0.7862288    |
| 2913 Bn-A02-p11703005 | A-genome specific (napus-rapa) | 0.9856459 | 0.7646531 | not scorable | not scorable | 1            | 0.7421271    |
| 2914 Bn-A02-p11713324 | A-genome specific (napus-rapa) | 0.9928229 | 0.6708755 | not scorable | not scorable | 0.9752066    | 0.6934128    |
| 2915 Bn-A02-p11713499 | A-genome specific (napus-rapa) | 0.9928229 | 0.3315977 | not scorable | not scorable | 0.9834711    | 0.7698158    |
| 2916 Bn-A02-p11723698 | A-genome specific (napus-rapa) | 0.9976076 | 0.3505815 | not scorable | not scorable | 0.9834711    | 0.7173629    |
| 2917 Bn-A02-p1173704  | A-genome specific (napus-rapa) | 0.9904306 | 0.7684156 | not scorable | not scorable | 0.9669421    | 0.6529559    |
| 2918 Bn-A02-p11737945 | A-genome specific (napus-rapa) | 0.9593301 | 0.7974638 | not scorable | not scorable | 0.9917355    | 0.7521831    |
| 2919 Bn-A02-p11738896 | A-genome specific (napus-rapa) | 0.9665072 | 0.6754242 | not scorable | not scorable | 0.9834711    | 0.7129886    |
| 2920 Bn-A02-p11746891 | A-genome specific (napus-rapa) | 0.9880383 | 0.5269552 | not scorable | not scorable | 0.9834711    | 0.7232494    |
| 2921 Bn-A02-p11748602 | A-genome specific (napus-rapa) | 0.9904306 | 0.7632337 | not scorable | not scorable | 1            | 0.7375398    |
| 2922 Bn-A02-p11750740 | A-genome specific (napus-rapa) | 0.9952153 | 0.4899747 | not scorable | not scorable | 1            | 0.7425883    |
| 2923 Bn-A02-p11759281 | A-genome specific (napus-rapa) | 1         | 0.3314945 | not scorable | not scorable | 1            | 0.7138557    |
| 2924 Bn-A02-p11765114 | A-genome specific (napus-rapa) | 0.9928229 | 0.7497788 | not scorable | not scorable | 0.9834711    | 0.6990585    |
| 2925 Bn-A02-p11772983 | genome unspecific (all in)     | 0.9736842 | 0.7786677 | 0.9302326    | 0.7067049    | 0.9752066    | 0.7286063    |
| 2926 Bn-A02-p11786253 | A-genome specific (napus-rapa) | 0.8516746 | 0.7011642 | not scorable | not scorable | 0.5206612    | 0.7193962    |
| 2927 Bn-A02-p11786572 | A-genome specific (napus-rapa) | 0.8349282 | 0.8233702 | not scorable | not scorable | 0.5206612    | 0.7136915    |
| 2928 Bn-A02-p11789023 | A-genome specific (napus-rapa) | 0.9856459 | 0.7425846 | not scorable | not scorable | 0.9834711    | 0.7670333    |
| 2929 Bn-A02-p11793499 | A-genome specific (napus-rapa) | 0.9856459 | 0.4941938 | not scorable | not scorable | 1            | 0.7909877    |
| 2930 Bn-A02-p11816790 | A-genome specific (napus-rapa) | 0.9880383 | 0.7559376 | not scorable | not scorable | 0.9752066    | 0.7964983    |
| 2931 Bn-A02-p11817742 | A-genome specific (napus-rapa) | 0.9665072 | 0.7764336 | not scorable | not scorable | 0.9834711    | 0.7596439    |
| 2932 Bn-A02-p11829280 | A-genome specific (napus-rapa) | 0.9904306 | 0.7819287 | not scorable | not scorable | 0.9834711    | 0.7220608    |
| 2933 Bn-A02-p11842725 | A-genome specific (napus-rapa) | 0.9928229 | 0.5599157 | not scorable | not scorable | 0.9752066    | 0.705859     |
| 2934 Bn-A02-p11847986 | A-genome specific (napus-rapa) | 0.9736842 | 0.3778673 | not scorable | not scorable | 0.9669421    | 0.6833251    |

|      |                  |                                   |              |              |              |              |              |              |
|------|------------------|-----------------------------------|--------------|--------------|--------------|--------------|--------------|--------------|
| 2935 | Bn-A02-p11849409 | A-genome specific (napus-rapa)    | 0.9928229    | 0.7760916    | not scorable | not scorable | 1            | 0.6869434    |
| 2936 | Bn-A02-p11849571 | A-genome specific (napus-rapa)    | 0.9928229    | 0.7626822    | not scorable | not scorable | 0.9917355    | 0.6886213    |
| 2937 | Bn-A02-p11859430 | A-genome specific (napus-rapa)    | 0.9856459    | 0.4207686    | not scorable | not scorable | 1            | 0.7350504    |
| 2938 | Bn-A02-p11863349 | A-genome specific (napus-rapa)    | 0.9688995    | 0.7503841    | not scorable | not scorable | 0.9834711    | 0.7157601    |
| 2939 | Bn-A02-p11863681 | A-genome specific (napus-rapa)    | 0.9808612    | 0.7406486    | not scorable | not scorable | 0.9504132    | 0.6547279    |
| 2940 | Bn-A02-p11870177 | A-genome specific (napus-rapa)    | 0.9880383    | 0.4452708    | not scorable | not scorable | 0.9752066    | 0.7755873    |
| 2941 | Bn-A02-p1188292  | A-genome specific (rapa only)     | not scorable | not scorable | not scorable | not scorable | 1            | 0.7992046    |
| 2942 | Bn-A02-p11896294 | A-genome specific (napus-rapa)    | 0.9808612    | 0.7787958    | not scorable | not scorable | 0.9917355    | 0.6990761    |
| 2943 | Bn-A02-p11896538 | A-genome specific (napus-rapa)    | 0.9760765    | 0.4258346    | not scorable | not scorable | 0.9917355    | 0.8072101    |
| 2944 | Bn-A02-p11901091 | A-genome specific (rapa only)     | not scorable | not scorable | not scorable | not scorable | 0.9834711    | 0.8028865    |
| 2945 | Bn-A02-p11906704 | A-genome specific (napus-rapa)    | 0.9665072    | 0.762642     | not scorable | not scorable | 0.9917355    | 0.7633223    |
| 2946 | Bn-A02-p11909870 | A-genome specific (napus-rapa)    | 0.9904306    | 0.4768819    | not scorable | not scorable | 1            | 0.7397082    |
| 2947 | Bn-A02-p11918483 | A-genome specific (napus-rapa)    | 1            | 0.4609109    | not scorable | not scorable | 1            | 0.8705826    |
| 2948 | Bn-A02-p11929538 | A-genome specific (napus-rapa)    | 0.9617225    | 0.3704279    | not scorable | not scorable | 0.9504132    | 0.6249714    |
| 2949 | Bn-A02-p11935002 | napus specific                    | 0.6220096    | 0.6733309    | not scorable | not scorable | not scorable | not scorable |
| 2950 | Bn-A02-p11936177 | A-genome specific (napus-rapa)    | 0.9856459    | 0.3989817    | not scorable | not scorable | 0.9504132    | 0.6615893    |
| 2951 | Bn-A02-p11937221 | A-genome specific (napus-rapa)    | 0.9641148    | 0.6867681    | not scorable | not scorable | 0.9752066    | 0.6587664    |
| 2952 | Bn-A02-p11939715 | A-genome specific (napus-rapa)    | 0.9760765    | 0.7611288    | not scorable | not scorable | 0.9504132    | 0.719249     |
| 2953 | Bn-A02-p11939983 | A-genome specific (napus-rapa)    | 0.9473684    | 0.773665     | not scorable | not scorable | 0.9834711    | 0.8140697    |
| 2954 | Bn-A02-p11960741 | A-genome specific (napus-rapa)    | 0.9928229    | 0.6541438    | not scorable | not scorable | 0.9917355    | 0.8216027    |
| 2955 | Bn-A02-p11961581 | A-genome specific (napus-rapa)    | 0.9808612    | 0.4033592    | not scorable | not scorable | 0.9917355    | 0.8282794    |
| 2956 | Bn-A02-p1198     | A-genome specific (napus-rapa)    | 1            | 0.5418917    | not scorable | not scorable | 1            | 0.7599372    |
| 2957 | Bn-A02-p11986866 | genome unspecific (oleracea-rapa) | not scorable | not scorable |              | 1            | 0.8301461    | 1            |
| 2958 | Bn-A02-p11994999 | A-genome specific (napus-rapa)    | 0.9593301    | 0.4591976    | not scorable | not scorable | 1            | 0.7292421    |
| 2959 | Bn-A02-p11995673 | A-genome specific (napus-rapa)    | 0.9856459    | 0.389854     | not scorable | not scorable | 1            | 0.8379921    |
| 2960 | Bn-A02-p11996587 | A-genome specific (napus-rapa)    | 1            | 0.9300349    | not scorable | not scorable | 1            | 0.9248517    |
| 2961 | Bn-A02-p11998345 | A-genome specific (napus-rapa)    | 0.9736842    | 0.8021038    | not scorable | not scorable | 0.9917355    | 0.7332684    |
| 2962 | Bn-A02-p11998540 | A-genome specific (napus-rapa)    | 0.9808612    | 0.7896866    | not scorable | not scorable | 0.9917355    | 0.7973562    |
| 2963 | Bn-A02-p11998921 | A-genome specific (napus-rapa)    | 0.9688995    | 0.760342     | not scorable | not scorable | 0.9752066    | 0.6896471    |
| 2964 | Bn-A02-p12003125 | A-genome specific (napus-rapa)    | 0.9832536    | 0.7981007    | not scorable | not scorable | 0.9834711    | 0.7544396    |
| 2965 | Bn-A02-p12003217 | A-genome specific (napus-rapa)    | 0.4019139    | 0.9498829    | not scorable | not scorable | 0.9586777    | 0.7825954    |
| 2966 | Bn-A02-p12028821 | A-genome specific (napus-rapa)    | 0.8038278    | 0.7886043    | not scorable | not scorable | 1            | 0.8230875    |
| 2967 | Bn-A02-p12044265 | A-genome specific (napus-rapa)    | 0.9928229    | 0.556847     | not scorable | not scorable | 0.9917355    | 0.5414523    |

|      |                  |                                |              |              |              |              |              |              |
|------|------------------|--------------------------------|--------------|--------------|--------------|--------------|--------------|--------------|
| 2968 | Bn-A02-p12061350 | A-genome specific (napus-rapa) | 0.9641148    | 0.7026444    | not scorable | not scorable | 0.9917355    | 0.7122235    |
| 2969 | Bn-A02-p12081581 | A-genome specific (napus-rapa) | 0.9665072    | 0.79785      | not scorable | not scorable | 1            | 0.7521147    |
| 2970 | Bn-A02-p12105374 | A-genome specific (napus-rapa) | 0.9784689    | 0.4860516    | not scorable | not scorable | 1            | 0.8135551    |
| 2971 | Bn-A02-p12106636 | A-genome specific (napus-rapa) | 0.9904306    | 0.2968828    | not scorable | not scorable | 0.9834711    | 0.7397626    |
| 2972 | Bn-A02-p12107746 | A-genome specific (napus-rapa) | 0.9856459    | 0.7380853    | not scorable | not scorable | 0.9917355    | 0.8289013    |
| 2973 | Bn-A02-p12107868 | A-genome specific (napus-rapa) | 0.9808612    | 0.5027643    | not scorable | not scorable | 0.9917355    | 0.8566363    |
| 2974 | Bn-A02-p12145607 | A-genome specific (napus-rapa) | 0.6770335    | 0.7081192    | not scorable | not scorable | 0.9752066    | 0.8176157    |
| 2975 | Bn-A02-p12149042 | A-genome specific (napus-rapa) | 0.9976076    | 0.4936244    | not scorable | not scorable | 1            | 0.7785498    |
| 2976 | Bn-A02-p12150733 | A-genome specific (napus-rapa) | 0.8971292    | 0.7192385    | not scorable | not scorable | 0.9834711    | 0.7370347    |
| 2977 | Bn-A02-p12157799 | A-genome specific (napus-rapa) | 0.9856459    | 0.6507718    | not scorable | not scorable | 1            | 0.7474164    |
| 2978 | Bn-A02-p12164268 | A-genome specific (napus-rapa) | 0.9425837    | 0.720846     | not scorable | not scorable | 0.9834711    | 0.7778099    |
| 2979 | Bn-A02-p12169696 | A-genome specific (napus-rapa) | 0.9832536    | 0.5474809    | not scorable | not scorable | 0.9834711    | 0.7844557    |
| 2980 | Bn-A02-p12169776 | A-genome specific (rapa only)  | not scorable | not scorable | not scorable | not scorable | 0.9917355    | 0.7397237    |
| 2981 | Bn-A02-p12179107 | A-genome specific (napus-rapa) | 0.9952153    | 0.7621909    | not scorable | not scorable | 1            | 0.7417945    |
| 2982 | Bn-A02-p12179579 | A-genome specific (napus-rapa) | 0.9856459    | 0.8037829    | not scorable | not scorable | 0.9917355    | 0.8098742    |
| 2983 | Bn-A02-p12192921 | A-genome specific (napus-rapa) | 0.9976076    | 0.748126     | not scorable | not scorable | 1            | 0.7654577    |
| 2984 | Bn-A02-p12196899 | A-genome specific (rapa only)  | not scorable | not scorable | not scorable | not scorable | 1            | 0.829446     |
| 2985 | Bn-A02-p12198897 | A-genome specific (napus-rapa) | 0.9928229    | 0.4897215    | not scorable | not scorable | 0.9917355    | 0.743686     |
| 2986 | Bn-A02-p1220275  | A-genome specific (napus-rapa) | 0.9880383    | 0.4864532    | not scorable | not scorable | 0.9752066    | 0.7591179    |
| 2987 | Bn-A02-p12219666 | A-genome specific (napus-rapa) | 1            | 0.751255     | not scorable | not scorable | 1            | 0.7271354    |
| 2988 | Bn-A02-p12220436 | A-genome specific (napus-rapa) | 0.9880383    | 0.7704843    | not scorable | not scorable | 0.9834711    | 0.7068547    |
| 2989 | Bn-A02-p12241488 | A-genome specific (rapa only)  | not scorable | not scorable | not scorable | not scorable | 0.9917355    | 0.8034954    |
| 2990 | Bn-A02-p12269431 | A-genome specific (napus-rapa) | 0.9856459    | 0.7404609    | not scorable | not scorable | 0.9752066    | 0.6860862    |
| 2991 | Bn-A02-p12278577 | A-genome specific (napus-rapa) | 0.9976076    | 0.458028     | not scorable | not scorable | 0.9917355    | 0.6696428    |
| 2992 | Bn-A02-p12284078 | A-genome specific (napus-rapa) | 1            | 0.4342639    | not scorable | not scorable | 0.9669421    | 0.6744222    |
| 2993 | Bn-A02-p12284671 | A-genome specific (napus-rapa) | 0.9880383    | 0.5247986    | not scorable | not scorable | 1            | 0.6188555    |
| 2994 | Bn-A02-p12284882 | napus specific                 | 0.9904306    | 0.2994366    | not scorable | not scorable | not scorable | not scorable |
| 2995 | Bn-A02-p12287615 | A-genome specific (napus-rapa) | 0.9760765    | 0.393047     | not scorable | not scorable | 0.9834711    | 0.6791325    |
| 2996 | Bn-A02-p12292026 | A-genome specific (napus-rapa) | 0.9904306    | 0.8245637    | not scorable | not scorable | 0.9917355    | 0.7018297    |
| 2997 | Bn-A02-p12292768 | A-genome specific (napus-rapa) | 0.9880383    | 0.8497826    | not scorable | not scorable | 0.9917355    | 0.7110556    |
| 2998 | Bn-A02-p12293388 | A-genome specific (napus-rapa) | 1            | 0.7727818    | not scorable | not scorable | 0.9834711    | 0.7991754    |
| 2999 | Bn-A02-p12295281 | A-genome specific (napus-rapa) | 0.9784689    | 0.8003728    | not scorable | not scorable | 0.9917355    | 0.8062111    |
| 3000 | Bn-A02-p12295682 | A-genome specific (napus-rapa) | 0.9904306    | 0.7848144    | not scorable | not scorable | 1            | 0.8008788    |

|      |                  |                                |              |              |              |              |              |              |
|------|------------------|--------------------------------|--------------|--------------|--------------|--------------|--------------|--------------|
| 3001 | Bn-A02-p12297473 | A-genome specific (napus-rapa) | 0.9904306    | 0.7904986    | not scorable | not scorable | 0.9917355    | 0.8090288    |
| 3002 | Bn-A02-p12314542 | A-genome specific (napus-rapa) | 0.9808612    | 0.7941186    | not scorable | not scorable | 0.9752066    | 0.7202161    |
| 3003 | Bn-A02-p1232964  | A-genome specific (napus-rapa) | 0.9904306    | 0.765703     | not scorable | not scorable | 0.9917355    | 0.7993867    |
| 3004 | Bn-A02-p12336037 | A-genome specific (napus-rapa) | 0.9593301    | 0.5993348    | not scorable | not scorable | 0.9669421    | 0.6836075    |
| 3005 | Bn-A02-p12342256 | A-genome specific (napus-rapa) | 0.9808612    | 0.8060136    | not scorable | not scorable | 0.5206612    | 0.7377832    |
| 3006 | Bn-A02-p1235480  | A-genome specific (napus-rapa) | 1            | 0.7858552    | not scorable | not scorable | 0.9669421    | 0.7332122    |
| 3007 | Bn-A02-p12363140 | A-genome specific (napus-rapa) | 0.9928229    | 0.7272876    | not scorable | not scorable | 0.9834711    | 0.6330875    |
| 3008 | Bn-A02-p12393535 | A-genome specific (napus-rapa) | 0.9904306    | 0.7753468    | not scorable | not scorable | 0.9917355    | 0.717861     |
| 3009 | Bn-A02-p12393617 | A-genome specific (napus-rapa) | 0.9736842    | 0.6194615    | not scorable | not scorable | 0.9834711    | 0.7509158    |
| 3010 | Bn-A02-p12397326 | A-genome specific (napus-rapa) | 0.9784689    | 0.4361291    | not scorable | not scorable | 0.9256198    | 0.8802001    |
| 3011 | Bn-A02-p12397585 | A-genome specific (napus-rapa) | 0.9641148    | 0.4943984    | not scorable | not scorable | 0.9669421    | 0.8064753    |
| 3012 | Bn-A02-p12415095 | A-genome specific (napus-rapa) | 0.9736842    | 0.559009     | not scorable | not scorable | 0.9917355    | 0.7808155    |
| 3013 | Bn-A02-p12443767 | A-genome specific (napus-rapa) | 0.9808612    | 0.7532993    | not scorable | not scorable | 1            | 0.8028949    |
| 3014 | Bn-A02-p12449263 | A-genome specific (napus-rapa) | 0.9856459    | 0.2742781    | not scorable | not scorable | 0.9917355    | 0.6262633    |
| 3015 | Bn-A02-p12452799 | A-genome specific (napus-rapa) | 0.9928229    | 0.7202903    | not scorable | not scorable | 1            | 0.8318203    |
| 3016 | Bn-A02-p12460628 | A-genome specific (napus-rapa) | 0.9976076    | 0.6967202    | not scorable | not scorable | 0.9752066    | 0.856594     |
| 3017 | Bn-A02-p1250673  | all not scorable               | not scorable | not scorable | not scorable | not scorable | not scorable | not scorable |
| 3018 | Bn-A02-p12508852 | A-genome specific (napus-rapa) | 0.9665072    | 0.8058401    | not scorable | not scorable | 1            | 0.8185257    |
| 3019 | Bn-A02-p12512160 | A-genome specific (napus-rapa) | 0.9880383    | 0.749584     | not scorable | not scorable | 0.9917355    | 0.7018969    |
| 3020 | Bn-A02-p12512328 | A-genome specific (napus-rapa) | 0.9688995    | 0.7579747    | not scorable | not scorable | 1            | 0.8930789    |
| 3021 | Bn-A02-p12512533 | A-genome specific (napus-rapa) | 0.9928229    | 0.5883021    | not scorable | not scorable | 1            | 0.81844      |
| 3022 | Bn-A02-p12514179 | A-genome specific (napus-rapa) | 0.9545454    | 0.7207578    | not scorable | not scorable | 1            | 0.7512512    |
| 3023 | Bn-A02-p12516859 | A-genome specific (napus-rapa) | 0.9784689    | 0.6744137    | not scorable | not scorable | 1            | 0.7575754    |
| 3024 | Bn-A02-p12520861 | A-genome specific (napus-rapa) | 1            | 0.493536     | not scorable | not scorable | 1            | 0.738891     |
| 3025 | Bn-A02-p12521545 | A-genome specific (napus-rapa) | 0.9904306    | 0.3644065    | not scorable | not scorable | 1            | 0.6803178    |
| 3026 | Bn-A02-p12524852 | genome unspecific (all in)     | 0.9760765    | 0.348583     |              | 1 0.882567   | 1            | 0.9272014    |
| 3027 | Bn-A02-p12534375 | napus specific                 | 0.9784689    | 0.4074126    | not scorable | not scorable | not scorable | not scorable |
| 3028 | Bn-A02-p12550795 | A-genome specific (napus-rapa) | 0.9760765    | 0.7516208    | not scorable | not scorable | 0.9752066    | 0.6732684    |
| 3029 | Bn-A02-p12552323 | A-genome specific (napus-rapa) | 0.9760765    | 0.7907307    | not scorable | not scorable | 0.9586777    | 0.7391577    |
| 3030 | Bn-A02-p12554865 | A-genome specific (napus-rapa) | 0.9856459    | 0.6909371    | not scorable | not scorable | 0.9752066    | 0.6912593    |
| 3031 | Bn-A02-p12559982 | A-genome specific (napus-rapa) | 0.6818182    | 0.804282     | not scorable | not scorable | 0.8677686    | 0.9761626    |
| 3032 | Bn-A02-p12581342 | A-genome specific (rapa only)  | not scorable | not scorable | not scorable | not scorable | 0.9752066    | 0.8258571    |
| 3033 | Bn-A02-p12585867 | A-genome specific (napus-rapa) | 1            | 0.9373254    | not scorable | not scorable | 0.9917355    | 0.8933609    |

|      |                  |                                |              |              |              |              |              |              |
|------|------------------|--------------------------------|--------------|--------------|--------------|--------------|--------------|--------------|
| 3034 | Bn-A02-p12585930 | A-genome specific (napus-rapa) | 1            | 0.6154503    | not scorable | not scorable | 0.9752066    | 0.6100948    |
| 3035 | Bn-A02-p12589304 | A-genome specific (napus-rapa) | 0.9688995    | 0.2623686    | not scorable | not scorable | 0.9834711    | 0.7913849    |
| 3036 | Bn-A02-p12595278 | napus specific                 | 0.9928229    | 0.4228345    | not scorable | not scorable | not scorable | not scorable |
| 3037 | Bn-A02-p12597733 | A-genome specific (napus-rapa) | 0.9832536    | 0.773325     | not scorable | not scorable | 0.9586777    | 0.7685441    |
| 3038 | Bn-A02-p1259929  | A-genome specific (napus-rapa) | 0.9784689    | 0.6306293    | not scorable | not scorable | 0.9834711    | 0.7018437    |
| 3039 | Bn-A02-p126006   | A-genome specific (napus-rapa) | 0.9784689    | 0.3625441    | not scorable | not scorable | 0.9917355    | 0.8044072    |
| 3040 | Bn-A02-p12608089 | A-genome specific (napus-rapa) | 0.9832536    | 0.5572177    | not scorable | not scorable | 0.9669421    | 0.7795289    |
| 3041 | Bn-A02-p12627047 | A-genome specific (napus-rapa) | 0.9976076    | 0.7910479    | not scorable | not scorable | 0.9834711    | 0.7728977    |
| 3042 | Bn-A02-p12628141 | A-genome specific (napus-rapa) | 0.9808612    | 0.6876252    | not scorable | not scorable | 1            | 0.7473743    |
| 3043 | Bn-A02-p12632166 | A-genome specific (napus-rapa) | 0.9593301    | 0.7653671    | not scorable | not scorable | 0.9917355    | 0.8112254    |
| 3044 | Bn-A02-p12637974 | A-genome specific (napus-rapa) | 0.9808612    | 0.8006718    | not scorable | not scorable | 1            | 0.8108238    |
| 3045 | Bn-A02-p12642708 | A-genome specific (napus-rapa) | 0.9593301    | 0.6746796    | not scorable | not scorable | 0.9834711    | 0.7056495    |
| 3046 | Bn-A02-p1264906  | A-genome specific (napus-rapa) | 0.9856459    | 0.2903114    | not scorable | not scorable | 0.9834711    | 0.7050172    |
| 3047 | Bn-A02-p1265949  | A-genome specific (napus-rapa) | 0.9736842    | 0.6890687    | not scorable | not scorable | 0.9834711    | 0.7542964    |
| 3048 | Bn-A02-p12666196 | A-genome specific (napus-rapa) | 0.9641148    | 0.6424054    | not scorable | not scorable | 1            | 0.8061697    |
| 3049 | Bn-A02-p12678353 | A-genome specific (napus-rapa) | 1            | 0.4934493    | not scorable | not scorable | 1            | 0.9248387    |
| 3050 | Bn-A02-p12680940 | A-genome specific (napus-rapa) | 0.9712918    | 0.7547821    | not scorable | not scorable | 1            | 0.7326435    |
| 3051 | Bn-A02-p12681201 | A-genome specific (napus-rapa) | 0.9688995    | 0.7319032    | not scorable | not scorable | 1            | 0.5587328    |
| 3052 | Bn-A02-p12681247 | A-genome specific (napus-rapa) | 0.9808612    | 0.3738289    | not scorable | not scorable | 0.5371901    | 0.8077816    |
| 3053 | Bn-A02-p12686417 | A-genome specific (napus-rapa) | 0.9904306    | 0.4061546    | not scorable | not scorable | 0.9917355    | 0.8540307    |
| 3054 | Bn-A02-p12686781 | A-genome specific (napus-rapa) | 0.9904306    | 0.752461     | not scorable | not scorable | 1            | 0.916114     |
| 3055 | Bn-A02-p12688495 | A-genome specific (napus-rapa) | 0.9928229    | 0.5041894    | not scorable | not scorable | 0.9834711    | 0.8124056    |
| 3056 | Bn-A02-p12688906 | A-genome specific (napus-rapa) | 0.9976076    | 0.3862539    | not scorable | not scorable | 0.9834711    | 0.7362109    |
| 3057 | Bn-A02-p12693516 | A-genome specific (napus-rapa) | 1            | 0.3463797    | not scorable | not scorable | 1            | 0.6576501    |
| 3058 | Bn-A02-p12739678 | A-genome specific (napus-rapa) | 0.9832536    | 0.374083     | not scorable | not scorable | 0.9834711    | 0.7574135    |
| 3059 | Bn-A02-p12752915 | A-genome specific (napus-rapa) | 1            | 0.4721927    | not scorable | not scorable | 1            | 0.629589     |
| 3060 | Bn-A02-p12756887 | A-genome specific (napus-rapa) | 0.9976076    | 0.4264193    | not scorable | not scorable | 0.9834711    | 0.7309587    |
| 3061 | Bn-A02-p1276717  | napus specific                 | 0.3014354    | 0.798218     | not scorable | not scorable | not scorable | not scorable |
| 3062 | Bn-A02-p1276995  | napus specific                 | 0.9904306    | 0.8092516    | not scorable | not scorable | not scorable | not scorable |
| 3063 | Bn-A02-p12801838 | A-genome specific (napus-rapa) | 0.9928229    | 0.3043488    | not scorable | not scorable | 1            | 0.6181029    |
| 3064 | Bn-A02-p12809029 | all not scorable               | not scorable | not scorable | not scorable | not scorable | not scorable | not scorable |
| 3065 | Bn-A02-p12810041 | A-genome specific (rapa only)  | not scorable | not scorable | not scorable | not scorable | 0.9834711    | 0.7567164    |
| 3066 | Bn-A02-p12815817 | A-genome specific (napus-rapa) | 0.9736842    | 0.4311776    | not scorable | not scorable | 0.9917355    | 0.6685718    |

|      |                  |                                |              |              |              |              |              |              |
|------|------------------|--------------------------------|--------------|--------------|--------------|--------------|--------------|--------------|
| 3067 | Bn-A02-p12819772 | A-genome specific (napus-rapa) | 0.9760765    | 0.3336272    | not scorable | not scorable | 0.9917355    | 0.7716679    |
| 3068 | Bn-A02-p12821038 | A-genome specific (napus-rapa) | 1            | 0.3549289    | not scorable | not scorable | 0.9917355    | 0.7908466    |
| 3069 | Bn-A02-p12822311 | A-genome specific (napus-rapa) | 0.9688995    | 0.2569763    | not scorable | not scorable | 1            | 0.7157181    |
| 3070 | Bn-A02-p12822315 | A-genome specific (rapa only)  | not scorable | not scorable | not scorable | not scorable | 0.9752066    | 0.8205012    |
| 3071 | Bn-A02-p12848961 | A-genome specific (napus-rapa) | 0.9736842    | 0.6456749    | not scorable | not scorable | 0.9752066    | 0.7791468    |
| 3072 | Bn-A02-p12851818 | A-genome specific (napus-rapa) | 0.9904306    | 0.7944171    | not scorable | not scorable | 0.9917355    | 0.7243189    |
| 3073 | Bn-A02-p1290847  | A-genome specific (napus-rapa) | 0.9425837    | 0.3386586    | not scorable | not scorable | 1            | 0.5631257    |
| 3074 | Bn-A02-p1292023  | A-genome specific (rapa only)  | not scorable | not scorable | not scorable | not scorable | 1            | 0.7729655    |
| 3075 | Bn-A02-p12939509 | napus specific                 | 0.9665072    | 0.4091599    | not scorable | not scorable | not scorable | not scorable |
| 3076 | Bn-A02-p12943042 | A-genome specific (napus-rapa) | 0.9665072    | 0.7594435    | not scorable | not scorable | 0.9669421    | 0.7312071    |
| 3077 | Bn-A02-p12945561 | A-genome specific (napus-rapa) | 0.930622     | 0.4862561    | not scorable | not scorable | 0.9917355    | 0.7703245    |
| 3078 | Bn-A02-p12962845 | A-genome specific (napus-rapa) | 0.8277512    | 0.6209021    | not scorable | not scorable | 0.9917355    | 0.7740173    |
| 3079 | Bn-A02-p12971726 | A-genome specific (napus-rapa) | 0.9856459    | 0.7625436    | not scorable | not scorable | 0.9669421    | 0.8265869    |
| 3080 | Bn-A02-p12972954 | A-genome specific (napus-rapa) | 0.9808612    | 0.7495691    | not scorable | not scorable | 0.9917355    | 0.8686861    |
| 3081 | Bn-A02-p12976547 | A-genome specific (napus-rapa) | 0.9090909    | 0.5285606    | not scorable | not scorable | 1            | 0.7832621    |
| 3082 | Bn-A02-p12986045 | A-genome specific (napus-rapa) | 0.9617225    | 0.3835713    | not scorable | not scorable | 0.9917355    | 0.7294025    |
| 3083 | Bn-A02-p12996998 | A-genome specific (napus-rapa) | 0.9880383    | 0.7194604    | not scorable | not scorable | 0.9669421    | 0.7697719    |
| 3084 | Bn-A02-p12997693 | A-genome specific (napus-rapa) | 0.9856459    | 0.729233     | not scorable | not scorable | 1            | 0.7322882    |
| 3085 | Bn-A02-p12999856 | A-genome specific (napus-rapa) | 0.9928229    | 0.8175188    | not scorable | not scorable | 1            | 0.7091442    |
| 3086 | Bn-A02-p13000494 | A-genome specific (napus-rapa) | 0.9952153    | 0.7763442    | not scorable | not scorable | 1            | 0.7785882    |
| 3087 | Bn-A02-p13016695 | A-genome specific (napus-rapa) | 0.9736842    | 0.302451     | not scorable | not scorable | 0.9421487    | 0.8466056    |
| 3088 | Bn-A02-p13019236 | A-genome specific (napus-rapa) | 0.9856459    | 0.4044824    | not scorable | not scorable | 0.9834711    | 0.6865157    |
| 3089 | Bn-A02-p13067449 | A-genome specific (napus-rapa) | 0.9784689    | 0.7781981    | not scorable | not scorable | 1            | 0.7503625    |
| 3090 | Bn-A02-p13068355 | A-genome specific (napus-rapa) | 0.9736842    | 0.7938458    | not scorable | not scorable | 0.9669421    | 0.7307636    |
| 3091 | Bn-A02-p13091073 | A-genome specific (rapa only)  | not scorable | not scorable | not scorable | not scorable | 1            | 0.7828613    |
| 3092 | Bn-A02-p13118529 | A-genome specific (napus-rapa) | 0.9569378    | 0.2390958    | not scorable | not scorable | 1            | 0.7353324    |
| 3093 | Bn-A02-p13121161 | A-genome specific (napus-rapa) | 0.9497608    | 0.273148     | not scorable | not scorable | 0.9834711    | 0.7903211    |
| 3094 | Bn-A02-p13123802 | A-genome specific (napus-rapa) | 0.9712918    | 0.7986241    | not scorable | not scorable | 0.9834711    | 0.776059     |
| 3095 | Bn-A02-p13124058 | A-genome specific (napus-rapa) | 0.937799     | 0.5927464    | not scorable | not scorable | 0.9834711    | 0.7872227    |
| 3096 | Bn-A02-p13130726 | napus specific                 | 0.9330143    | 0.8038674    | not scorable | not scorable | not scorable | not scorable |
| 3097 | Bn-A02-p13153436 | A-genome specific (napus-rapa) | 1            | 0.4686905    | not scorable | not scorable | 1            | 0.7272668    |
| 3098 | Bn-A02-p13167989 | A-genome specific (napus-rapa) | 0.9712918    | 0.3887221    | not scorable | not scorable | 1            | 0.8348       |
| 3099 | Bn-A02-p1319039  | A-genome specific (napus-rapa) | 1            | 0.6933597    | not scorable | not scorable | 0.9917355    | 0.7070914    |

|      |                  |                                |              |              |              |              |              |              |
|------|------------------|--------------------------------|--------------|--------------|--------------|--------------|--------------|--------------|
| 3100 | Bn-A02-p13195248 | A-genome specific (napus-rapa) | 1            | 0.8101473    | not scorable | not scorable | 1            | 0.7743075    |
| 3101 | Bn-A02-p13197154 | A-genome specific (napus-rapa) | 0.9138756    | 0.7388572    | not scorable | not scorable | 0.9421487    | 0.8354583    |
| 3102 | Bn-A02-p13212386 | A-genome specific (napus-rapa) | 0.9521531    | 0.6497005    | not scorable | not scorable | 0.9917355    | 0.8486647    |
| 3103 | Bn-A02-p1321904  | A-genome specific (napus-rapa) | 0.9976076    | 0.7331814    | not scorable | not scorable | 0.9917355    | 0.6991895    |
| 3104 | Bn-A02-p1324368  | A-genome specific (rapa only)  | not scorable | not scorable | not scorable | not scorable | 1            | 0.8299943    |
| 3105 | Bn-A02-p13252027 | A-genome specific (napus-rapa) | 0.9880383    | 0.8114662    | not scorable | not scorable | 0.9669421    | 0.8135551    |
| 3106 | Bn-A02-p1325213  | A-genome specific (napus-rapa) | 0.9808612    | 0.7558952    | not scorable | not scorable | 1            | 0.8009962    |
| 3107 | Bn-A02-p13252137 | A-genome specific (napus-rapa) | 0.9952153    | 0.5226454    | not scorable | not scorable | 0.9338843    | 0.7734648    |
| 3108 | Bn-A02-p13252354 | all not scorable               | not scorable | not scorable | not scorable | not scorable | not scorable | not scorable |
| 3109 | Bn-A02-p13252652 | all not scorable               | not scorable | not scorable | not scorable | not scorable | not scorable | not scorable |
| 3110 | Bn-A02-p1326013  | A-genome specific (napus-rapa) | 0.9617225    | 0.7765158    | not scorable | not scorable | 0.9917355    | 0.7835029    |
| 3111 | Bn-A02-p1327787  | A-genome specific (napus-rapa) | 0.9760765    | 0.6300305    | not scorable | not scorable | 1            | 0.6114821    |
| 3112 | Bn-A02-p1335862  | A-genome specific (napus-rapa) | 0.9736842    | 0.3646343    | not scorable | not scorable | 1            | 0.8194499    |
| 3113 | Bn-A02-p1337706  | A-genome specific (napus-rapa) | 0.9976076    | 0.781209     | not scorable | not scorable | 0.9834711    | 0.70269      |
| 3114 | Bn-A02-p13382591 | A-genome specific (napus-rapa) | 1            | 0.7914145    | not scorable | not scorable | 1            | 0.7751204    |
| 3115 | Bn-A02-p1341101  | A-genome specific (napus-rapa) | 0.861244     | 0.7869154    | not scorable | not scorable | 0.9173554    | 0.85241      |
| 3116 | Bn-A02-p13411303 | A-genome specific (napus-rapa) | 0.9976076    | 0.7329584    | not scorable | not scorable | 1            | 0.7269387    |
| 3117 | Bn-A02-p1344870  | genome unspecific (all in)     | 0.9880383    | 0.7564654    | 0.9922481    | 0.8008927    | 0.9752066    | 0.7187182    |
| 3118 | Bn-A02-p13498319 | A-genome specific (napus-rapa) | 0.9641148    | 0.5731714    | not scorable | not scorable | 0.9834711    | 0.7220136    |
| 3119 | Bn-A02-p13556392 | genome unspecific (all in)     | 0.9952153    | 0.4762699    | 0.9922481    | 0.8615783    | 1            | 0.7766667    |
| 3120 | Bn-A02-p13556497 | A-genome specific (napus-rapa) | 0.9928229    | 0.5689869    | not scorable | not scorable | 0.9834711    | 0.7158391    |
| 3121 | Bn-A02-p13570742 | A-genome specific (napus-rapa) | 0.9760765    | 0.7889354    | not scorable | not scorable | 1            | 0.8047741    |
| 3122 | Bn-A02-p13572191 | A-genome specific (napus-rapa) | 1            | 0.5138949    | not scorable | not scorable | 1            | 0.7666658    |
| 3123 | Bn-A02-p13593944 | A-genome specific (napus-rapa) | 0.9880383    | 0.8059001    | not scorable | not scorable | 0.9917355    | 0.7374982    |
| 3124 | Bn-A02-p13598238 | A-genome specific (napus-rapa) | 0.9952153    | 0.7114246    | not scorable | not scorable | 0.9669421    | 0.6806829    |
| 3125 | Bn-A02-p13625461 | A-genome specific (napus-rapa) | 0.9904306    | 0.7997314    | not scorable | not scorable | 0.9917355    | 0.7884254    |
| 3126 | Bn-A02-p13626431 | A-genome specific (napus-rapa) | 0.9904306    | 0.800919     | not scorable | not scorable | 1            | 0.8815737    |
| 3127 | Bn-A02-p13627045 | A-genome specific (napus-rapa) | 0.9976076    | 0.3082423    | not scorable | not scorable | 0.9834711    | 0.6562842    |
| 3128 | Bn-A02-p13637436 | A-genome specific (napus-rapa) | 0.9928229    | 0.9285347    | not scorable | not scorable | 0.9917355    | 0.9140795    |
| 3129 | Bn-A02-p13662225 | A-genome specific (napus-rapa) | 0.9928229    | 0.4142511    | not scorable | not scorable | 0.9834711    | 0.7867023    |
| 3130 | Bn-A02-p1370581  | genome unspecific (all in)     | 0.9617225    | 0.3378389    | 1            | 0.8841014    | 1            | 0.7788354    |
| 3131 | Bn-A02-p1372727  | A-genome specific (napus-rapa) | 0.9688995    | 0.6618596    | not scorable | not scorable | 0.9917355    | 0.810988     |
| 3132 | Bn-A02-p13751737 | A-genome specific (napus-rapa) | 0.9952153    | 0.7630872    | not scorable | not scorable | 0.9917355    | 0.7146024    |

|      |                  |                                |              |              |              |              |              |              |
|------|------------------|--------------------------------|--------------|--------------|--------------|--------------|--------------|--------------|
| 3133 | Bn-A02-p13782884 | A-genome specific (napus-rapa) | 0.9928229    | 0.678608     | not scorable | not scorable | 1            | 0.7051241    |
| 3134 | Bn-A02-p13794668 | A-genome specific (napus-rapa) | 0.9976076    | 0.4710896    | not scorable | not scorable | 0.9752066    | 0.7030707    |
| 3135 | Bn-A02-p13798655 | A-genome specific (napus-rapa) | 0.9928229    | 0.7804482    | not scorable | not scorable | 0.9834711    | 0.8088208    |
| 3136 | Bn-A02-p13803383 | A-genome specific (napus-rapa) | 0.9928229    | 0.8160556    | not scorable | not scorable | 0.9917355    | 0.7613291    |
| 3137 | Bn-A02-p13803435 | A-genome specific (napus-rapa) | 0.9904306    | 0.8010759    | not scorable | not scorable | 0.9586777    | 0.6625916    |
| 3138 | Bn-A02-p13822105 | A-genome specific (napus-rapa) | 0.9976076    | 0.589919     | not scorable | not scorable | 0.9834711    | 0.7539659    |
| 3139 | Bn-A02-p13874627 | A-genome specific (napus-rapa) | 1            | 0.6508506    | not scorable | not scorable | 0.9834711    | 0.7062038    |
| 3140 | Bn-A02-p13875459 | A-genome specific (napus-rapa) | 0.9880383    | 0.3205053    | not scorable | not scorable | 1            | 0.7531955    |
| 3141 | Bn-A02-p13951646 | A-genome specific (napus-rapa) | 1            | 0.8778391    | not scorable | not scorable | 1            | 0.905901     |
| 3142 | Bn-A02-p13958436 | A-genome specific (rapa only)  | not scorable | not scorable | not scorable | not scorable | 0.9917355    | 0.7924424    |
| 3143 | Bn-A02-p1396892  | A-genome specific (napus-rapa) | 1            | 0.6305942    | not scorable | not scorable | 1            | 0.7350931    |
| 3144 | Bn-A02-p13972998 | A-genome specific (napus-rapa) | 0.9976076    | 0.2268504    | not scorable | not scorable | 0.9586777    | 0.7717934    |
| 3145 | Bn-A02-p13999424 | A-genome specific (napus-rapa) | 1            | 0.4013976    | not scorable | not scorable | 1            | 0.8388037    |
| 3146 | Bn-A02-p14024462 | A-genome specific (rapa only)  | not scorable | not scorable | not scorable | not scorable | 1            | 0.6423919    |
| 3147 | Bn-A02-p14025825 | A-genome specific (napus-rapa) | 0.9952153    | 0.8215231    | not scorable | not scorable | 0.9917355    | 0.8860154    |
| 3148 | Bn-A02-p14026570 | A-genome specific (napus-rapa) | 0.9952153    | 0.7107612    | not scorable | not scorable | 1            | 0.8211767    |
| 3149 | Bn-A02-p1402685  | A-genome specific (napus-rapa) | 0.9784689    | 0.7155414    | not scorable | not scorable | 0.9917355    | 0.7257178    |
| 3150 | Bn-A02-p14028000 | A-genome specific (napus-rapa) | 0.9928229    | 0.8161988    | not scorable | not scorable | 1            | 0.8306969    |
| 3151 | Bn-A02-p14028770 | A-genome specific (napus-rapa) | 0.9904306    | 0.8026987    | not scorable | not scorable | 0.9917355    | 0.7695999    |
| 3152 | Bn-A02-p14040220 | napus specific                 | 0.9952153    | 0.7734257    | not scorable | not scorable | not scorable | not scorable |
| 3153 | Bn-A02-p14053180 | A-genome specific (rapa only)  | not scorable | not scorable | not scorable | not scorable | 0.9752066    | 0.8068985    |
| 3154 | Bn-A02-p14078497 | A-genome specific (napus-rapa) | 0.9952153    | 0.753142     | not scorable | not scorable | 0.9834711    | 0.7835267    |
| 3155 | Bn-A02-p14103759 | A-genome specific (napus-rapa) | 0.9928229    | 0.7090805    | not scorable | not scorable | 0.9586777    | 0.7887905    |
| 3156 | Bn-A02-p14104250 | A-genome specific (napus-rapa) | 0.9832536    | 0.715404     | not scorable | not scorable | 0.9917355    | 0.7885925    |
| 3157 | Bn-A02-p1411508  | A-genome specific (napus-rapa) | 0.9832536    | 0.7886575    | not scorable | not scorable | 0.9834711    | 0.7385584    |
| 3158 | Bn-A02-p14127042 | A-genome specific (napus-rapa) | 0.9904306    | 0.602768     | not scorable | not scorable | 0.9917355    | 0.7735261    |
| 3159 | Bn-A02-p14130758 | A-genome specific (napus-rapa) | 1            | 0.7834822    | not scorable | not scorable | 0.9834711    | 0.7546473    |
| 3160 | Bn-A02-p14134708 | A-genome specific (rapa only)  | not scorable | not scorable | not scorable | not scorable | 0.9917355    | 0.7866042    |
| 3161 | Bn-A02-p14145586 | A-genome specific (napus-rapa) | 0.9976076    | 0.5545668    | not scorable | not scorable | 1            | 0.78807      |
| 3162 | Bn-A02-p14148076 | A-genome specific (napus-rapa) | 0.9976076    | 0.485128     | not scorable | not scorable | 0.9917355    | 0.7263379    |
| 3163 | Bn-A02-p14151274 | A-genome specific (napus-rapa) | 0.9952153    | 0.7993426    | not scorable | not scorable | 0.9917355    | 0.7700318    |
| 3164 | Bn-A02-p14162326 | A-genome specific (rapa only)  | not scorable | not scorable | not scorable | not scorable | 0.9834711    | 0.7902763    |
| 3165 | Bn-A02-p14167623 | napus specific                 | 0.9162679    | 0.708674     | not scorable | not scorable | not scorable | not scorable |



|      |                  |                                |              |              |              |              |              |              |
|------|------------------|--------------------------------|--------------|--------------|--------------|--------------|--------------|--------------|
| 3166 | Bn-A02-p14170476 | A-genome specific (napus-rapa) | 1            | 0.5086023    | not scorable | not scorable | 1            | 0.7456457    |
| 3167 | Bn-A02-p14174686 | A-genome specific (rapa only)  | not scorable | not scorable | not scorable | not scorable | 0.9917355    | 0.9146796    |
| 3168 | Bn-A02-p14175730 | A-genome specific (napus-rapa) | 0.9952153    | 0.7994079    | not scorable | not scorable | 0.9834711    | 0.7641769    |
| 3169 | Bn-A02-p14177785 | all not scorable               | not scorable | not scorable | not scorable | not scorable | not scorable | not scorable |
| 3170 | Bn-A02-p14178166 | A-genome specific (napus-rapa) | 0.9952153    | 0.7640718    | not scorable | not scorable | 0.9917355    | 0.7337866    |
| 3171 | Bn-A02-p14208801 | A-genome specific (napus-rapa) | 0.9976076    | 0.6125628    | not scorable | not scorable | 0.9752066    | 0.671567     |
| 3172 | Bn-A02-p14215327 | A-genome specific (napus-rapa) | 0.9952153    | 0.7308566    | not scorable | not scorable | 0.9917355    | 0.7086867    |
| 3173 | Bn-A02-p14227678 | A-genome specific (napus-rapa) | 1            | 0.4773371    | not scorable | not scorable | 0.9834711    | 0.7871575    |
| 3174 | Bn-A02-p14229894 | napus specific                 | 0.9928229    | 0.4736191    | not scorable | not scorable | not scorable | not scorable |
| 3175 | Bn-A02-p14232495 | A-genome specific (rapa only)  | not scorable | not scorable | not scorable | not scorable | 0.9834711    | 0.716597     |
| 3176 | Bn-A02-p14287347 | A-genome specific (napus-rapa) | 0.9928229    | 0.5181399    | not scorable | not scorable | 1            | 0.7908058    |
| 3177 | Bn-A02-p14287428 | A-genome specific (napus-rapa) | 1            | 0.3091168    | not scorable | not scorable | 0.9752066    | 0.6256217    |
| 3178 | Bn-A02-p14293315 | A-genome specific (napus-rapa) | 0.9952153    | 0.8029899    | not scorable | not scorable | 0.9917355    | 0.8364806    |
| 3179 | Bn-A02-p14328410 | A-genome specific (napus-rapa) | 0.9856459    | 0.2954222    | not scorable | not scorable | 1            | 0.8746864    |
| 3180 | Bn-A02-p14500945 | all not scorable               | not scorable | not scorable | not scorable | not scorable | not scorable | not scorable |
| 3181 | Bn-A02-p14526876 | A-genome specific (napus-rapa) | 0.9976076    | 0.7718452    | not scorable | not scorable | 0.9504132    | 0.8171834    |
| 3182 | Bn-A02-p14526990 | A-genome specific (napus-rapa) | 0.9976076    | 0.6941428    | not scorable | not scorable | 0.9504132    | 0.8804815    |
| 3183 | Bn-A02-p14527781 | A-genome specific (napus-rapa) | 0.9976076    | 0.739652     | not scorable | not scorable | 0.9504132    | 0.682395     |
| 3184 | Bn-A02-p14529778 | A-genome specific (napus-rapa) | 0.9808612    | 0.3523288    | not scorable | not scorable | 0.9504132    | 0.6567213    |
| 3185 | Bn-A02-p14530693 | A-genome specific (napus-rapa) | 0.9952153    | 0.4602996    | not scorable | not scorable | 0.9586777    | 0.7497717    |
| 3186 | Bn-A02-p14540346 | A-genome specific (napus-rapa) | 0.9976076    | 0.5967311    | not scorable | not scorable | 0.9917355    | 0.8113362    |
| 3187 | Bn-A02-p14564880 | A-genome specific (napus-rapa) | 0.9736842    | 0.7544039    | not scorable | not scorable | 0.9917355    | 0.7916464    |
| 3188 | Bn-A02-p14575017 | A-genome specific (rapa only)  | not scorable | not scorable | not scorable | not scorable | 1            | 0.7892429    |
| 3189 | Bn-A02-p14576479 | A-genome specific (napus-rapa) | 0.9617225    | 0.6179405    | not scorable | not scorable | 0.9834711    | 0.6857461    |
| 3190 | Bn-A02-p14579685 | A-genome specific (napus-rapa) | 0.9712918    | 0.7896586    | not scorable | not scorable | 1            | 0.6303774    |
| 3191 | Bn-A02-p14592602 | napus specific                 | 0.9976076    | 0.4610621    | not scorable | not scorable | not scorable | not scorable |
| 3192 | Bn-A02-p14605944 | A-genome specific (napus-rapa) | 0.9976076    | 0.7861257    | not scorable | not scorable | 0.9834711    | 0.7907084    |
| 3193 | Bn-A02-p14608076 | A-genome specific (napus-rapa) | 0.9617225    | 0.4318213    | not scorable | not scorable | 1            | 0.7371429    |
| 3194 | Bn-A02-p14612382 | A-genome specific (rapa only)  | not scorable | not scorable | not scorable | not scorable | 1            | 0.675705     |
| 3195 | Bn-A02-p14615703 | A-genome specific (napus-rapa) | 0.9976076    | 0.4392627    | not scorable | not scorable | 1            | 0.8022124    |
| 3196 | Bn-A02-p14650284 | A-genome specific (napus-rapa) | 0.9593301    | 0.4010577    | not scorable | not scorable | 1            | 0.8922935    |
| 3197 | Bn-A02-p14653729 | A-genome specific (napus-rapa) | 0.9928229    | 0.4022931    | not scorable | not scorable | 0.9834711    | 0.7064978    |
| 3198 | Bn-A02-p14695760 | A-genome specific (napus-rapa) | 0.9952153    | 0.7374635    | not scorable | not scorable | 1            | 0.7495615    |

|      |                  |                                |              |              |              |              |              |              |
|------|------------------|--------------------------------|--------------|--------------|--------------|--------------|--------------|--------------|
| 3199 | Bn-A02-p14707749 | napus specific                 | 0.9976076    | 0.6386841    | not scorable | not scorable | not scorable | not scorable |
| 3200 | Bn-A02-p14708741 | A-genome specific (rapa only)  | not scorable | not scorable | not scorable | not scorable | 0.9752066    | 0.6924533    |
| 3201 | Bn-A02-p14736669 | A-genome specific (napus-rapa) | 0.9952153    | 0.2526194    | not scorable | not scorable | 0.9752066    | 0.7054088    |
| 3202 | Bn-A02-p14775699 | A-genome specific (napus-rapa) | 0.9928229    | 0.6674984    | not scorable | not scorable | 0.9752066    | 0.6047301    |
| 3203 | Bn-A02-p14781371 | A-genome specific (napus-rapa) | 0.9976076    | 0.776486     | not scorable | not scorable | 0.9917355    | 0.7931407    |
| 3204 | Bn-A02-p1485915  | A-genome specific (napus-rapa) | 0.9904306    | 0.8188727    | not scorable | not scorable | 1            | 0.7730481    |
| 3205 | Bn-A02-p14886507 | A-genome specific (napus-rapa) | 0.9952153    | 0.7729254    | not scorable | not scorable | 0.9917355    | 0.7292245    |
| 3206 | Bn-A02-p14896274 | A-genome specific (napus-rapa) | 0.9976076    | 0.3076343    | not scorable | not scorable | 1            | 0.8496791    |
| 3207 | Bn-A02-p14898010 | A-genome specific (napus-rapa) | 0.9952153    | 0.8113019    | not scorable | not scorable | 1            | 0.773995     |
| 3208 | Bn-A02-p14902806 | A-genome specific (napus-rapa) | 0.9976076    | 0.8330638    | not scorable | not scorable | 0.9752066    | 0.6937109    |
| 3209 | Bn-A02-p14903483 | napus specific                 | 0.9186603    | 0.7637809    | not scorable | not scorable | not scorable | not scorable |
| 3210 | Bn-A02-p14903643 | A-genome specific (napus-rapa) | 1            | 0.4668023    | not scorable | not scorable | 0.9917355    | 0.7659745    |
| 3211 | Bn-A02-p14905419 | A-genome specific (napus-rapa) | 0.9162679    | 0.7156558    | not scorable | not scorable | 0.9669421    | 0.729185     |
| 3212 | Bn-A02-p14925274 | A-genome specific (napus-rapa) | 0.9976076    | 0.5879623    | not scorable | not scorable | 0.9917355    | 0.7749733    |
| 3213 | Bn-A02-p14926973 | A-genome specific (napus-rapa) | 1            | 0.4753223    | not scorable | not scorable | 1            | 0.7666692    |
| 3214 | Bn-A02-p14938768 | A-genome specific (napus-rapa) | 0.7679426    | 0.6964341    | not scorable | not scorable | 0.9752066    | 0.7950392    |
| 3215 | Bn-A02-p14938941 | A-genome specific (napus-rapa) | 0.7727273    | 0.7503761    | not scorable | not scorable | 0.9834711    | 0.8349305    |
| 3216 | Bn-A02-p14939071 | A-genome specific (napus-rapa) | 0.7679426    | 0.7303702    | not scorable | not scorable | 0.9834711    | 0.694302     |
| 3217 | Bn-A02-p14939204 | A-genome specific (napus-rapa) | 0.7679426    | 0.7392656    | not scorable | not scorable | 0.9834711    | 0.6875225    |
| 3218 | Bn-A02-p14939483 | A-genome specific (napus-rapa) | 0.7679426    | 0.7080011    | not scorable | not scorable | 0.9752066    | 0.7187466    |
| 3219 | Bn-A02-p14940026 | A-genome specific (napus-rapa) | 0.7655503    | 0.712921     | not scorable | not scorable | 0.9917355    | 0.7143264    |
| 3220 | Bn-A02-p14940029 | A-genome specific (napus-rapa) | 0.7703349    | 0.7341982    | not scorable | not scorable | 0.9917355    | 0.7132887    |
| 3221 | Bn-A02-p14940149 | A-genome specific (napus-rapa) | 0.7679426    | 0.7375392    | not scorable | not scorable | 0.9834711    | 0.7064788    |
| 3222 | Bn-A02-p14940218 | A-genome specific (napus-rapa) | 0.7703349    | 0.7889026    | not scorable | not scorable | 0.9917355    | 0.7719629    |
| 3223 | Bn-A02-p14941541 | A-genome specific (napus-rapa) | 0.7655503    | 0.7290855    | not scorable | not scorable | 0.9917355    | 0.7591025    |
| 3224 | Bn-A02-p14941595 | genome unspecific (all in)     | 0.784689     | 0.556541     | 0.9689922    | 0.2911764    | 0.9752066    | 0.7178582    |
| 3225 | Bn-A02-p14941620 | A-genome specific (napus-rapa) | 0.7679426    | 0.742449     | not scorable | not scorable | 0.9834711    | 0.7869908    |
| 3226 | Bn-A02-p14942048 | A-genome specific (napus-rapa) | 0.7679426    | 0.6525595    | not scorable | not scorable | 0.9834711    | 0.6345238    |
| 3227 | Bn-A02-p14944551 | A-genome specific (napus-rapa) | 0.9976076    | 0.7801242    | not scorable | not scorable | 0.9917355    | 0.7728239    |
| 3228 | Bn-A02-p14946150 | A-genome specific (napus-rapa) | 0.9952153    | 0.4909858    | not scorable | not scorable | 0.9917355    | 0.7757232    |
| 3229 | Bn-A02-p14956864 | A-genome specific (napus-rapa) | 0.9976076    | 0.7656525    | not scorable | not scorable | 0.9917355    | 0.8042552    |
| 3230 | Bn-A02-p14992706 | A-genome specific (napus-rapa) | 0.9952153    | 0.7701067    | not scorable | not scorable | 0.9917355    | 0.754338     |
| 3231 | Bn-A02-p14992781 | A-genome specific (napus-rapa) | 0.9928229    | 0.6437628    | not scorable | not scorable | 0.9834711    | 0.6896743    |

|      |                  |                                   |              |              |              |              |              |              |
|------|------------------|-----------------------------------|--------------|--------------|--------------|--------------|--------------|--------------|
| 3232 | Bn-A02-p14992802 | A-genome specific (rapa only)     | not scorable | not scorable | not scorable | not scorable | 0.9834711    | 0.7107058    |
| 3233 | Bn-A02-p14996107 | A-genome specific (napus-rapa)    | 0.9832536    | 0.4112699    | not scorable | not scorable | 0.9834711    | 0.7167431    |
| 3234 | Bn-A02-p1506579  | A-genome specific (rapa only)     | not scorable | not scorable | not scorable | not scorable | 1            | 0.7349294    |
| 3235 | Bn-A02-p1517113  | genome unspecific (oleracea-rapa) | not scorable | not scorable |              | 1            | 0.4316438    | 0.9917355    |
| 3236 | Bn-A02-p15184172 | A-genome specific (napus-rapa)    | 0.9808612    | 0.5725501    | not scorable | not scorable | 1            | 0.7195811    |
| 3237 | Bn-A02-p1528341  | A-genome specific (rapa only)     | not scorable | not scorable | not scorable | not scorable | 0.9917355    | 0.8606058    |
| 3238 | Bn-A02-p1530996  | A-genome specific (napus-rapa)    | 0.9976076    | 0.7850553    | not scorable | not scorable | 1            | 0.8521883    |
| 3239 | Bn-A02-p15322404 | A-genome specific (napus-rapa)    | 0.9976076    | 0.8518915    | not scorable | not scorable | 1            | 0.869809     |
| 3240 | Bn-A02-p15323930 | A-genome specific (napus-rapa)    | 0.9856459    | 0.8466671    | not scorable | not scorable | 0.9834711    | 0.7481999    |
| 3241 | Bn-A02-p15323936 | A-genome specific (napus-rapa)    | 0.9976076    | 0.9260141    | not scorable | not scorable | 1            | 0.922092     |
| 3242 | Bn-A02-p15457681 | A-genome specific (napus-rapa)    | 0.9688995    | 0.4769859    | not scorable | not scorable | 0.9586777    | 0.8188943    |
| 3243 | Bn-A02-p1552305  | A-genome specific (napus-rapa)    | 0.9856459    | 0.7942645    | not scorable | not scorable | 1            | 0.8949617    |
| 3244 | Bn-A02-p15569271 | A-genome specific (napus-rapa)    | 0.9856459    | 0.5730578    | not scorable | not scorable | 0.9752066    | 0.6869631    |
| 3245 | Bn-A02-p15628202 | napus specific                    | 0.5598086    | 0.8948976    | not scorable | not scorable | not scorable | not scorable |
| 3246 | Bn-A02-p15637932 | A-genome specific (napus-rapa)    | 0.9928229    | 0.4018365    | not scorable | not scorable | 0.9917355    | 0.6668006    |
| 3247 | Bn-A02-p15693192 | A-genome specific (napus-rapa)    | 0.9952153    | 0.7194458    | not scorable | not scorable | 0.9917355    | 0.7284528    |
| 3248 | Bn-A02-p15717143 | A-genome specific (napus-rapa)    | 0.9976076    | 0.3885508    | not scorable | not scorable | 0.9917355    | 0.8207138    |
| 3249 | Bn-A02-p15745628 | A-genome specific (napus-rapa)    | 0.9832536    | 0.5656829    | not scorable | not scorable | 1            | 0.7645996    |
| 3250 | Bn-A02-p15750257 | A-genome specific (napus-rapa)    | 0.9880383    | 0.4720289    | not scorable | not scorable | 0.9917355    | 0.7631801    |
| 3251 | Bn-A02-p15756475 | A-genome specific (napus-rapa)    | 0.9784689    | 0.6451641    | not scorable | not scorable | 0.9669421    | 0.6379052    |
| 3252 | Bn-A02-p15758928 | A-genome specific (napus-rapa)    | 0.930622     | 0.3192373    | not scorable | not scorable | 0.9669421    | 0.768541     |
| 3253 | Bn-A02-p15760465 | A-genome specific (napus-rapa)    | 0.9449761    | 0.5432864    | not scorable | not scorable | 0.9834711    | 0.7620175    |
| 3254 | Bn-A02-p1576350  | A-genome specific (napus-rapa)    | 0.9832536    | 0.710338     | not scorable | not scorable | 0.9917355    | 0.7532918    |
| 3255 | Bn-A02-p15764198 | A-genome specific (napus-rapa)    | 0.9808612    | 0.8299569    | not scorable | not scorable | 0.9917355    | 0.8014634    |
| 3256 | Bn-A02-p15766649 | A-genome specific (napus-rapa)    | 0.9904306    | 0.4476127    | not scorable | not scorable | 0.9752066    | 0.7028346    |
| 3257 | Bn-A02-p15789088 | A-genome specific (napus-rapa)    | 0.9880383    | 0.369144     | not scorable | not scorable | 0.9917355    | 0.8578107    |
| 3258 | Bn-A02-p15806083 | A-genome specific (rapa only)     | not scorable | not scorable | not scorable | not scorable | 0.5041322    | 0.8272053    |
| 3259 | Bn-A02-p15820017 | A-genome specific (napus-rapa)    | 0.9736842    | 0.2763368    | not scorable | not scorable | 1            | 0.7772811    |
| 3260 | Bn-A02-p15832342 | A-genome specific (napus-rapa)    | 1            | 0.7871383    | not scorable | not scorable | 1            | 0.759752     |
| 3261 | Bn-A02-p15870327 | A-genome specific (napus-rapa)    | 0.9880383    | 0.4586517    | not scorable | not scorable | 0.9834711    | 0.7576363    |
| 3262 | Bn-A02-p15884717 | A-genome specific (napus-rapa)    | 0.9856459    | 0.7434567    | not scorable | not scorable | 0.9834711    | 0.7521971    |
| 3263 | Bn-A02-p15898839 | A-genome specific (napus-rapa)    | 0.9928229    | 0.3479863    | not scorable | not scorable | 1            | 0.7975821    |
| 3264 | Bn-A02-p15912199 | A-genome specific (napus-rapa)    | 0.9880383    | 0.4438224    | not scorable | not scorable | 0.9834711    | 0.8111171    |

|      |                  |                                |              |              |              |              |              |              |
|------|------------------|--------------------------------|--------------|--------------|--------------|--------------|--------------|--------------|
| 3265 | Bn-A02-p15928585 | A-genome specific (napus-rapa) | 0.8421053    | 0.7538716    | not scorable | not scorable | 0.7190083    | 0.7534271    |
| 3266 | Bn-A02-p159653   | A-genome specific (napus-rapa) | 0.9712918    | 0.3828684    | not scorable | not scorable | 1            | 0.7571688    |
| 3267 | Bn-A02-p16058769 | A-genome specific (napus-rapa) | 1            | 0.7785135    | not scorable | not scorable | 1            | 0.7494321    |
| 3268 | Bn-A02-p16083197 | A-genome specific (napus-rapa) | 0.9904306    | 0.3283503    | not scorable | not scorable | 0.9917355    | 0.7055491    |
| 3269 | Bn-A02-p16209439 | A-genome specific (napus-rapa) | 0.9904306    | 0.6745288    | not scorable | not scorable | 1            | 0.6475382    |
| 3270 | Bn-A02-p16220163 | A-genome specific (napus-rapa) | 0.9952153    | 0.7883631    | not scorable | not scorable | 0.9917355    | 0.7088114    |
| 3271 | Bn-A02-p16223740 | A-genome specific (napus-rapa) | 0.8205742    | 0.6892622    | not scorable | not scorable | 0.9917355    | 0.6945941    |
| 3272 | Bn-A02-p16259084 | A-genome specific (napus-rapa) | 0.9952153    | 0.7750432    | not scorable | not scorable | 0.9752066    | 0.7747369    |
| 3273 | Bn-A02-p16259298 | A-genome specific (napus-rapa) | 0.9928229    | 0.2517718    | not scorable | not scorable | 0.9586777    | 0.6845247    |
| 3274 | Bn-A02-p1629448  | A-genome specific (napus-rapa) | 1            | 0.8139551    | not scorable | not scorable | 1            | 0.8534235    |
| 3275 | Bn-A02-p16311535 | A-genome specific (napus-rapa) | 0.9904306    | 0.8190353    | not scorable | not scorable | 1            | 0.9175564    |
| 3276 | Bn-A02-p16339698 | genome unspecific (all in)     | 0.9976076    | 0.7515985    |              | 1 0.60638    | 0.9752066    | 0.6622245    |
| 3277 | Bn-A02-p16428766 | napus specific                 | 0.9736842    | 0.9258286    | not scorable | not scorable | not scorable | not scorable |
| 3278 | Bn-A02-p16486966 | A-genome specific (napus-rapa) | 1            | 0.7914145    | not scorable | not scorable | 1            | 0.7927939    |
| 3279 | Bn-A02-p16520874 | A-genome specific (napus-rapa) | 0.9641148    | 0.6786538    | not scorable | not scorable | 0.5206612    | 0.9088613    |
| 3280 | Bn-A02-p16521871 | A-genome specific (napus-rapa) | 0.9688995    | 0.5906556    | not scorable | not scorable | 0.5206612    | 0.8557174    |
| 3281 | Bn-A02-p16526928 | A-genome specific (napus-rapa) | 0.9976076    | 0.4644936    | not scorable | not scorable | 0.9752066    | 0.5394788    |
| 3282 | Bn-A02-p16528486 | A-genome specific (napus-rapa) | 0.9425837    | 0.5674553    | not scorable | not scorable | 0.553719     | 0.8826532    |
| 3283 | Bn-A02-p16529092 | A-genome specific (napus-rapa) | 0.9760765    | 0.8183839    | not scorable | not scorable | 0.9504132    | 0.8272623    |
| 3284 | Bn-A02-p16571709 | A-genome specific (napus-rapa) | 0.9952153    | 0.8356315    | not scorable | not scorable | 0.9752066    | 0.7506766    |
| 3285 | Bn-A02-p16572757 | A-genome specific (napus-rapa) | 0.9904306    | 0.7791448    | not scorable | not scorable | 1            | 0.759035     |
| 3286 | Bn-A02-p16666866 | A-genome specific (napus-rapa) | 0.9808612    | 0.6835147    | not scorable | not scorable | 0.9917355    | 0.7209759    |
| 3287 | Bn-A02-p1671689  | A-genome specific (napus-rapa) | 0.9593301    | 0.7804402    | not scorable | not scorable | 1            | 0.7844547    |
| 3288 | Bn-A02-p1684625  | A-genome specific (rapa only)  | not scorable | not scorable | not scorable | not scorable | 0.9834711    | 0.7595637    |
| 3289 | Bn-A02-p1687398  | A-genome specific (napus-rapa) | 0.9665072    | 0.7374522    | not scorable | not scorable | 0.9917355    | 0.758269     |
| 3290 | Bn-A02-p1698015  | A-genome specific (napus-rapa) | 0.9569378    | 0.6934527    | not scorable | not scorable | 0.9917355    | 0.7447706    |
| 3291 | Bn-A02-p17012938 | all not scorable               | not scorable | not scorable | not scorable | not scorable | not scorable | not scorable |
| 3292 | Bn-A02-p1705187  | A-genome specific (napus-rapa) | 0.9928229    | 0.4218378    | not scorable | not scorable | 1            | 0.9062111    |
| 3293 | Bn-A02-p1707420  | A-genome specific (napus-rapa) | 0.9832536    | 0.7512879    | not scorable | not scorable | 0.9421487    | 0.8276614    |
| 3294 | Bn-A02-p17112647 | A-genome specific (napus-rapa) | 0.9952153    | 0.8849835    | not scorable | not scorable | 1            | 0.8621171    |
| 3295 | Bn-A02-p17156661 | A-genome specific (napus-rapa) | 0.9904306    | 0.2969875    | not scorable | not scorable | 0.9669421    | 0.7041948    |
| 3296 | Bn-A02-p17189095 | A-genome specific (rapa only)  | not scorable | not scorable | not scorable | not scorable | 0.553719     | 0.8566031    |
| 3297 | Bn-A02-p17189164 | A-genome specific (rapa only)  | not scorable | not scorable | not scorable | not scorable | 0.677686     | 0.8487107    |

|      |                  |                                   |              |              |              |              |              |              |
|------|------------------|-----------------------------------|--------------|--------------|--------------|--------------|--------------|--------------|
| 3298 | Bn-A02-p17224721 | genome unspecific (oleracea-rapa) | not scorable | not scorable | 0.9457364    | 0.303142     | 1            | 0.7320092    |
| 3299 | Bn-A02-p17229398 | genome unspecific (all in)        | 0.9976076    | 0.6051318    | 1            | 0.8194432    | 0.9917355    | 0.8813978    |
| 3300 | Bn-A02-p17333549 | genome unspecific (all in)        | 1            | 0.5355057    | 0.8837209    | 0.6940374    | 1            | 0.9171556    |
| 3301 | Bn-A02-p17381818 | A-genome specific (napus-rapa)    | 0.9856459    | 0.7751049    | not scorable | not scorable | 1            | 0.9175813    |
| 3302 | Bn-A02-p174249   | A-genome specific (napus-rapa)    | 0.9856459    | 0.3675432    | not scorable | not scorable | 1            | 0.6804243    |
| 3303 | Bn-A02-p17532943 | A-genome specific (napus-rapa)    | 0.9330143    | 0.2241565    | not scorable | not scorable | 1            | 0.614313     |
| 3304 | Bn-A02-p175605   | A-genome specific (napus-rapa)    | 0.9856459    | 0.7376103    | not scorable | not scorable | 0.9917355    | 0.727749     |
| 3305 | Bn-A02-p1761218  | A-genome specific (rapa only)     | not scorable | not scorable | not scorable | not scorable | 1            | 0.7419717    |
| 3306 | Bn-A02-p1788566  | A-genome specific (napus-rapa)    | 0.9808612    | 0.7657143    | not scorable | not scorable | 1            | 0.8607456    |
| 3307 | Bn-A02-p17910994 | napus specific                    | 0.9784689    | 0.6188984    | not scorable | not scorable | not scorable | not scorable |
| 3308 | Bn-A02-p17938666 | A-genome specific (napus-rapa)    | 0.9736842    | 0.4440767    | not scorable | not scorable | 0.5289256    | 0.7542993    |
| 3309 | Bn-A02-p179557   | A-genome specific (napus-rapa)    | 0.9736842    | 0.7552561    | not scorable | not scorable | 0.9917355    | 0.7326435    |
| 3310 | Bn-A02-p17996122 | A-genome specific (napus-rapa)    | 0.9952153    | 0.8217659    | not scorable | not scorable | 0.8760331    | 0.8410667    |
| 3311 | Bn-A02-p18076499 | A-genome specific (napus-rapa)    | 0.9952153    | 0.8135217    | not scorable | not scorable | 1            | 0.8000314    |
| 3312 | Bn-A02-p18101171 | A-genome specific (napus-rapa)    | 0.9808612    | 0.6833199    | not scorable | not scorable | 1            | 0.7609816    |
| 3313 | Bn-A02-p182447   | A-genome specific (napus-rapa)    | 1            | 0.78006      | not scorable | not scorable | 1            | 0.7387633    |
| 3314 | Bn-A02-p182618   | A-genome specific (napus-rapa)    | 0.9952153    | 0.7005345    | not scorable | not scorable | 0.9917355    | 0.7436823    |
| 3315 | Bn-A02-p18310675 | A-genome specific (napus-rapa)    | 1            | 0.4247035    | not scorable | not scorable | 0.9917355    | 0.7122792    |
| 3316 | Bn-A02-p183438   | A-genome specific (napus-rapa)    | 0.9856459    | 0.8136101    | not scorable | not scorable | 1            | 0.7503253    |
| 3317 | Bn-A02-p183586   | A-genome specific (napus-rapa)    | 0.9784689    | 0.5067708    | not scorable | not scorable | 0.9917355    | 0.7391412    |
| 3318 | Bn-A02-p183840   | A-genome specific (napus-rapa)    | 1            | 0.811821     | not scorable | not scorable | 0.9917355    | 0.6969276    |
| 3319 | Bn-A02-p18438691 | A-genome specific (napus-rapa)    | 0.9880383    | 0.6433415    | not scorable | not scorable | 1            | 0.7591171    |
| 3320 | Bn-A02-p18571872 | napus specific                    | 0.569378     | 0.7873629    | not scorable | not scorable | not scorable | not scorable |
| 3321 | Bn-A02-p185917   | A-genome specific (napus-rapa)    | 0.8277512    | 0.787751     | not scorable | not scorable | 0.9834711    | 0.8356722    |
| 3322 | Bn-A02-p18599005 | A-genome specific (napus-rapa)    | 1            | 0.3046076    | not scorable | not scorable | 0.9917355    | 0.7935658    |
| 3323 | Bn-A02-p187256   | A-genome specific (napus-rapa)    | 0.8349282    | 0.7739975    | not scorable | not scorable | 0.9338843    | 0.8139877    |
| 3324 | Bn-A02-p188268   | A-genome specific (napus-rapa)    | 0.8397129    | 0.8014279    | not scorable | not scorable | 0.9752066    | 0.82846      |
| 3325 | Bn-A02-p188454   | A-genome specific (napus-rapa)    | 0.8397129    | 0.7736885    | not scorable | not scorable | 0.9834711    | 0.8050065    |
| 3326 | Bn-A02-p1890913  | A-genome specific (rapa only)     | not scorable | not scorable | not scorable | not scorable | 1            | 0.9270482    |
| 3327 | Bn-A02-p18917772 | A-genome specific (napus-rapa)    | 0.9880383    | 0.5712082    | not scorable | not scorable | 0.9834711    | 0.754685     |
| 3328 | Bn-A02-p1894727  | A-genome specific (napus-rapa)    | 0.9976076    | 0.9007395    | not scorable | not scorable | 0.6280992    | 0.9082332    |
| 3329 | Bn-A02-p18949958 | A-genome specific (napus-rapa)    | 0.9880383    | 0.6829301    | not scorable | not scorable | 1            | 0.8575348    |
| 3330 | Bn-A02-p18966918 | genome unspecific (all in)        | 0.9880383    | 0.6974407    | 0.1317829    | 0.7355374    | 1            | 0.7381126    |

|      |                  |                                |              |              |              |              |              |              |
|------|------------------|--------------------------------|--------------|--------------|--------------|--------------|--------------|--------------|
| 3331 | Bn-A02-p18974322 | A-genome specific (napus-rapa) | 0.9856459    | 0.7299376    | not scorable | not scorable | 0.9669421    | 0.7591202    |
| 3332 | Bn-A02-p18979982 | A-genome specific (napus-rapa) | 0.4330144    | 0.7270218    | not scorable | not scorable | 0.5289256    | 0.723753     |
| 3333 | Bn-A02-p18984484 | A-genome specific (rapa only)  | not scorable | not scorable | not scorable | not scorable | 0.9752066    | 0.7668897    |
| 3334 | Bn-A02-p18985754 | A-genome specific (napus-rapa) | 1            | 0.6766622    | not scorable | not scorable | 0.9834711    | 0.7739437    |
| 3335 | Bn-A02-p18989840 | A-genome specific (napus-rapa) | 0.9976076    | 0.3219452    | not scorable | not scorable | 1            | 0.7293474    |
| 3336 | Bn-A02-p18994242 | A-genome specific (rapa only)  | not scorable | not scorable | not scorable | not scorable | 0.9008265    | 0.8783097    |
| 3337 | Bn-A02-p18994312 | A-genome specific (napus-rapa) | 0.9665072    | 0.7423475    | not scorable | not scorable | 1            | 0.792895     |
| 3338 | Bn-A02-p18994472 | A-genome specific (napus-rapa) | 0.9880383    | 0.7758804    | not scorable | not scorable | 1            | 0.8369021    |
| 3339 | Bn-A02-p18998627 | A-genome specific (napus-rapa) | 0.9904306    | 0.7807118    | not scorable | not scorable | 0.9669421    | 0.7903531    |
| 3340 | Bn-A02-p19003944 | A-genome specific (napus-rapa) | 0.9808612    | 0.4376461    | not scorable | not scorable | 0.9917355    | 0.7898582    |
| 3341 | Bn-A02-p19045730 | A-genome specific (napus-rapa) | 0.423445     | 0.7574914    | not scorable | not scorable | 0.9669421    | 0.7010869    |
| 3342 | Bn-A02-p19049506 | A-genome specific (napus-rapa) | 0.9712918    | 0.7938126    | not scorable | not scorable | 1            | 0.7669932    |
| 3343 | Bn-A02-p19049989 | A-genome specific (napus-rapa) | 0.9952153    | 0.338118     | not scorable | not scorable | 1            | 0.7443598    |
| 3344 | Bn-A02-p19052873 | A-genome specific (napus-rapa) | 0.9832536    | 0.675292     | not scorable | not scorable | 0.9752066    | 0.8368086    |
| 3345 | Bn-A02-p19053770 | all not scorable               | not scorable | not scorable | not scorable | not scorable | not scorable | not scorable |
| 3346 | Bn-A02-p19058136 | A-genome specific (rapa only)  | not scorable | not scorable | not scorable | not scorable | 0.9917355    | 0.5807959    |
| 3347 | Bn-A02-p19070958 | A-genome specific (napus-rapa) | 0.9928229    | 0.4264335    | not scorable | not scorable | 0.9834711    | 0.8310072    |
| 3348 | Bn-A02-p19123194 | A-genome specific (rapa only)  | not scorable | not scorable | not scorable | not scorable | 1            | 0.662511     |
| 3349 | Bn-A02-p19125023 | A-genome specific (napus-rapa) | 0.9928229    | 0.6135465    | not scorable | not scorable | 1            | 0.7106043    |
| 3350 | Bn-A02-p19160671 | A-genome specific (rapa only)  | not scorable | not scorable | not scorable | not scorable | 1            | 0.7419274    |
| 3351 | Bn-A02-p19170689 | A-genome specific (napus-rapa) | 0.9784689    | 0.7197862    | not scorable | not scorable | 0.9917355    | 0.754686     |
| 3352 | Bn-A02-p19174964 | A-genome specific (napus-rapa) | 0.9952153    | 0.6125658    | not scorable | not scorable | 0.9752066    | 0.7376505    |
| 3353 | Bn-A02-p19175402 | A-genome specific (napus-rapa) | 0.9832536    | 0.335347     | not scorable | not scorable | 0.9917355    | 0.6871848    |
| 3354 | Bn-A02-p19190669 | A-genome specific (napus-rapa) | 0.708134     | 0.7142869    | not scorable | not scorable | 0.9834711    | 0.7804465    |
| 3355 | Bn-A02-p19201685 | A-genome specific (napus-rapa) | 0.9736842    | 0.6717947    | not scorable | not scorable | 0.9586777    | 0.7534206    |
| 3356 | Bn-A02-p19207431 | A-genome specific (napus-rapa) | 0.9641148    | 0.5406559    | not scorable | not scorable | 1            | 0.674446     |
| 3357 | Bn-A02-p19209964 | A-genome specific (napus-rapa) | 0.9952153    | 0.2666814    | not scorable | not scorable | 1            | 0.8197358    |
| 3358 | Bn-A02-p19212766 | A-genome specific (napus-rapa) | 0.9784689    | 0.6571057    | not scorable | not scorable | 1            | 0.766425     |
| 3359 | Bn-A02-p19218108 | A-genome specific (napus-rapa) | 0.9976076    | 0.3613857    | not scorable | not scorable | 1            | 0.7301149    |
| 3360 | Bn-A02-p19244695 | A-genome specific (napus-rapa) | 0.9904306    | 0.8008955    | not scorable | not scorable | 1            | 0.7503625    |
| 3361 | Bn-A02-p19260818 | A-genome specific (napus-rapa) | 0.9928229    | 0.7832009    | not scorable | not scorable | 0.9917355    | 0.7601098    |
| 3362 | Bn-A02-p19261853 | A-genome specific (napus-rapa) | 0.9976076    | 0.607985     | not scorable | not scorable | 0.9752066    | 0.7628533    |
| 3363 | Bn-A02-p19285211 | A-genome specific (napus-rapa) | 0.9928229    | 0.4477962    | not scorable | not scorable | 1            | 0.7857104    |

|      |                  |                                    |              |              |              |              |              |              |
|------|------------------|------------------------------------|--------------|--------------|--------------|--------------|--------------|--------------|
| 3364 | Bn-A02-p19294461 | A-genome specific (napus-rapa)     | 0.9904306    | 0.7697594    | not scorable | not scorable | 1            | 0.69863      |
| 3365 | Bn-A02-p19299222 | A-genome specific (napus-rapa)     | 0.9784689    | 0.8348282    | not scorable | not scorable | 0.9586777    | 0.8073711    |
| 3366 | Bn-A02-p19299455 | A-genome specific (napus-rapa)     | 0.9856459    | 0.8115287    | not scorable | not scorable | 0.9917355    | 0.7871199    |
| 3367 | Bn-A02-p19316657 | A-genome specific (napus-rapa)     | 0.9928229    | 0.6827853    | not scorable | not scorable | 1            | 0.8138443    |
| 3368 | Bn-A02-p19317643 | A-genome specific (napus-rapa)     | 0.9928229    | 0.4772309    | not scorable | not scorable | 0.9834711    | 0.7266084    |
| 3369 | Bn-A02-p19343485 | A-genome specific (napus-rapa)     | 0.9952153    | 0.827432     | not scorable | not scorable | 1            | 0.8773471    |
| 3370 | Bn-A02-p19348348 | A-genome specific (napus-rapa)     | 0.9880383    | 0.7427712    | not scorable | not scorable | 0.9917355    | 0.74309      |
| 3371 | Bn-A02-p19373757 | A-genome specific (napus-rapa)     | 0.9928229    | 0.7929814    | not scorable | not scorable | 1            | 0.7975748    |
| 3372 | Bn-A02-p19373825 | A-genome specific (napus-rapa)     | 0.9832536    | 0.7524077    | not scorable | not scorable | 0.9917355    | 0.8111154    |
| 3373 | Bn-A02-p19374782 | A-genome specific (napus-rapa)     | 0.9856459    | 0.6161359    | not scorable | not scorable | 0.9917355    | 0.7184696    |
| 3374 | Bn-A02-p19375860 | A-genome specific (napus-rapa)     | 0.9880383    | 0.7419744    | not scorable | not scorable | 0.9834711    | 0.6856686    |
| 3375 | Bn-A02-p19385896 | genome unspecific (all in)         | 0.9880383    | 0.5695209    | 0.9379845    | 0.6722535    | 0.9256198    | 0.644646     |
| 3376 | Bn-A02-p19385986 | A-genome specific (napus-rapa)     | 0.9952153    | 0.6765476    | not scorable | not scorable | 0.9752066    | 0.7185709    |
| 3377 | Bn-A02-p19395795 | A-genome specific (napus-rapa)     | 0.9904306    | 0.7975338    | not scorable | not scorable | 0.9752066    | 0.759536     |
| 3378 | Bn-A02-p19401844 | A-genome specific (napus-rapa)     | 0.9904306    | 0.7386193    | not scorable | not scorable | 0.9834711    | 0.8475552    |
| 3379 | Bn-A02-p19402089 | C-genome specific (napus-oleracea) | 0.9952153    | 0.6208922    | 0.9922481    | 0.7522202    | not scorable | not scorable |
| 3380 | Bn-A02-p19408740 | A-genome specific (rapa only)      | not scorable | not scorable | not scorable | not scorable | 0.9834711    | 0.7160276    |
| 3381 | Bn-A02-p19410459 | A-genome specific (napus-rapa)     | 0.9904306    | 0.6650201    | not scorable | not scorable | 0.9917355    | 0.5514108    |
| 3382 | Bn-A02-p19450017 | A-genome specific (napus-rapa)     | 0.9928229    | 0.556492     | not scorable | not scorable | 0.9834711    | 0.644587     |
| 3383 | Bn-A02-p19450418 | A-genome specific (napus-rapa)     | 1            | 0.3706591    | not scorable | not scorable | 0.9504132    | 0.6996231    |
| 3384 | Bn-A02-p19451380 | A-genome specific (napus-rapa)     | 0.9904306    | 0.7379296    | not scorable | not scorable | 0.9421487    | 0.7155941    |
| 3385 | Bn-A02-p19460299 | napus specific                     | 0.9928229    | 0.5402043    | not scorable | not scorable | not scorable | not scorable |
| 3386 | Bn-A02-p19521910 | genome unspecific (all in)         | 0.9928229    | 0.4065026    | 0.5581396    | 0.5237762    | 1            | 0.730982     |
| 3387 | Bn-A02-p19534217 | A-genome specific (napus-rapa)     | 0.9856459    | 0.743274     | not scorable | not scorable | 0.9586777    | 0.4080552    |
| 3388 | Bn-A02-p19549587 | A-genome specific (napus-rapa)     | 0.9952153    | 0.7742425    | not scorable | not scorable | 1            | 0.8410764    |
| 3389 | Bn-A02-p19566951 | A-genome specific (napus-rapa)     | 0.9784689    | 0.8074201    | not scorable | not scorable | 0.9669421    | 0.707109     |
| 3390 | Bn-A02-p19573867 | A-genome specific (napus-rapa)     | 0.9952153    | 0.7664746    | not scorable | not scorable | 0.9917355    | 0.757426     |
| 3391 | Bn-A02-p19575587 | A-genome specific (napus-rapa)     | 0.9952153    | 0.2564941    | not scorable | not scorable | 0.9917355    | 0.7480944    |
| 3392 | Bn-A02-p19587474 | A-genome specific (napus-rapa)     | 0.9928229    | 0.7116289    | not scorable | not scorable | 0.9917355    | 0.6727926    |
| 3393 | Bn-A02-p19587812 | A-genome specific (napus-rapa)     | 0.9856459    | 0.7730435    | not scorable | not scorable | 1            | 0.6846573    |
| 3394 | Bn-A02-p19589605 | A-genome specific (napus-rapa)     | 0.9354067    | 0.6928881    | not scorable | not scorable | 0.9752066    | 0.6963306    |
| 3395 | Bn-A02-p19602796 | A-genome specific (napus-rapa)     | 0.930622     | 0.6446189    | not scorable | not scorable | 0.9586777    | 0.7259034    |
| 3396 | Bn-A02-p19619823 | A-genome specific (napus-rapa)     | 0.9880383    | 0.439704     | not scorable | not scorable | 0.9917355    | 0.7504635    |

|      |                  |                                |              |              |              |              |           |           |
|------|------------------|--------------------------------|--------------|--------------|--------------|--------------|-----------|-----------|
| 3397 | Bn-A02-p19630208 | A-genome specific (napus-rapa) | 0.9976076    | 0.3444678    | not scorable | not scorable | 1         | 0.7159357 |
| 3398 | Bn-A02-p19645773 | A-genome specific (napus-rapa) | 0.9976076    | 0.408344     | not scorable | not scorable | 0.9834711 | 0.7211741 |
| 3399 | Bn-A02-p19662482 | A-genome specific (napus-rapa) | 0.9952153    | 0.8010619    | not scorable | not scorable | 1         | 0.793086  |
| 3400 | Bn-A02-p19674831 | A-genome specific (napus-rapa) | 0.9928229    | 0.7267082    | not scorable | not scorable | 0.9917355 | 0.6194032 |
| 3401 | Bn-A02-p19682273 | A-genome specific (napus-rapa) | 0.9952153    | 0.7087796    | not scorable | not scorable | 0.9917355 | 0.8172332 |
| 3402 | Bn-A02-p19682984 | A-genome specific (napus-rapa) | 0.9880383    | 0.8256827    | not scorable | not scorable | 0.9917355 | 0.7260362 |
| 3403 | Bn-A02-p19683093 | A-genome specific (napus-rapa) | 0.9856459    | 0.8360622    | not scorable | not scorable | 0.9752066 | 0.6650287 |
| 3404 | Bn-A02-p19702955 | A-genome specific (napus-rapa) | 0.9880383    | 0.5580875    | not scorable | not scorable | 0.9917355 | 0.7339699 |
| 3405 | Bn-A02-p19704677 | A-genome specific (napus-rapa) | 0.9904306    | 0.8179314    | not scorable | not scorable | 1         | 0.6896189 |
| 3406 | Bn-A02-p19709973 | genome unspecific (all in)     | 0.9665072    | 0.3614577    | 0.5658914    | 0.760924     | 1         | 0.9175813 |
| 3407 | Bn-A02-p19717843 | genome unspecific (all in)     | 0.9832536    | 0.2837937    | 0.5968992    | 0.8157162    | 1         | 0.9205657 |
| 3408 | Bn-A02-p19731316 | A-genome specific (rapa only)  | not scorable | not scorable | not scorable | not scorable | 0.9917355 | 0.7562061 |
| 3409 | Bn-A02-p19756499 | A-genome specific (napus-rapa) | 0.9904306    | 0.3150766    | not scorable | not scorable | 1         | 0.8169969 |
| 3410 | Bn-A02-p19872956 | A-genome specific (napus-rapa) | 0.9736842    | 0.7928926    | not scorable | not scorable | 0.9917355 | 0.8035119 |
| 3411 | Bn-A02-p19874478 | A-genome specific (napus-rapa) | 0.9712918    | 0.7010235    | not scorable | not scorable | 0.9834711 | 0.7755477 |
| 3412 | Bn-A02-p19875345 | A-genome specific (napus-rapa) | 0.9641148    | 0.7393757    | not scorable | not scorable | 0.9669421 | 0.4932909 |
| 3413 | Bn-A02-p19886585 | A-genome specific (napus-rapa) | 0.9832536    | 0.8011352    | not scorable | not scorable | 0.9752066 | 0.7887095 |
| 3414 | Bn-A02-p19889192 | A-genome specific (napus-rapa) | 0.9641148    | 0.7445493    | not scorable | not scorable | 0.9917355 | 0.8343771 |
| 3415 | Bn-A02-p19892433 | A-genome specific (napus-rapa) | 0.9712918    | 0.7249332    | not scorable | not scorable | 0.9586777 | 0.7938417 |
| 3416 | Bn-A02-p19892632 | A-genome specific (napus-rapa) | 0.9545454    | 0.7664846    | not scorable | not scorable | 0.9752066 | 0.8041441 |
| 3417 | Bn-A02-p19892839 | A-genome specific (napus-rapa) | 0.9665072    | 0.7512187    | not scorable | not scorable | 0.9834711 | 0.7997946 |
| 3418 | Bn-A02-p19927952 | A-genome specific (napus-rapa) | 0.9904306    | 0.5425022    | not scorable | not scorable | 0.9834711 | 0.8147336 |
| 3419 | Bn-A02-p1997812  | A-genome specific (napus-rapa) | 0.9952153    | 0.755885     | not scorable | not scorable | 1         | 0.7570357 |
| 3420 | Bn-A02-p20055831 | A-genome specific (napus-rapa) | 0.6842105    | 0.7686288    | not scorable | not scorable | 0.7024794 | 0.8239623 |
| 3421 | Bn-A02-p20060311 | A-genome specific (rapa only)  | not scorable | not scorable | not scorable | not scorable | 1         | 0.869534  |
| 3422 | Bn-A02-p20062461 | A-genome specific (napus-rapa) | 1            | 0.5037426    | not scorable | not scorable | 1         | 0.7533351 |
| 3423 | Bn-A02-p20062658 | genome unspecific (all in)     | 0.9952153    | 0.3305332    | 0.8914729    | 0.7284315    | 1         | 0.9123241 |
| 3424 | Bn-A02-p20062733 | genome unspecific (all in)     | 0.8851675    | 0.3023143    | 0.875969     | 0.7023808    | 1         | 0.8004208 |
| 3425 | Bn-A02-p20063202 | A-genome specific (napus-rapa) | 1            | 0.7514131    | not scorable | not scorable | 1         | 0.774545  |
| 3426 | Bn-A02-p20157985 | A-genome specific (napus-rapa) | 0.9760765    | 0.7897193    | not scorable | not scorable | 0.9752066 | 0.7636895 |
| 3427 | Bn-A02-p20158101 | A-genome specific (napus-rapa) | 0.9808612    | 0.7741902    | not scorable | not scorable | 0.9917355 | 0.7398732 |
| 3428 | Bn-A02-p20159139 | A-genome specific (rapa only)  | not scorable | not scorable | not scorable | not scorable | 0.9752066 | 0.7484978 |
| 3429 | Bn-A02-p20166067 | A-genome specific (napus-rapa) | 0.9712918    | 0.4491982    | not scorable | not scorable | 0.9917355 | 0.782876  |



|      |                  |                                |              |              |              |              |              |              |
|------|------------------|--------------------------------|--------------|--------------|--------------|--------------|--------------|--------------|
| 3430 | Bn-A02-p20196208 | A-genome specific (napus-rapa) | 0.9688995    | 0.7952898    | not scorable | not scorable | 0.9752066    | 0.7849531    |
| 3431 | Bn-A02-p201968   | A-genome specific (napus-rapa) | 0.9712918    | 0.5378693    | not scorable | not scorable | 0.9834711    | 0.8129182    |
| 3432 | Bn-A02-p20200723 | A-genome specific (napus-rapa) | 0.9856459    | 0.7912079    | not scorable | not scorable | 0.9834711    | 0.7303801    |
| 3433 | Bn-A02-p20201241 | A-genome specific (napus-rapa) | 0.9665072    | 0.8028215    | not scorable | not scorable | 0.9421487    | 0.7625163    |
| 3434 | Bn-A02-p20203160 | A-genome specific (napus-rapa) | 0.9760765    | 0.7381895    | not scorable | not scorable | 0.9834711    | 0.6785634    |
| 3435 | Bn-A02-p20207870 | A-genome specific (napus-rapa) | 0.9856459    | 0.5584565    | not scorable | not scorable | 0.9917355    | 0.6824547    |
| 3436 | Bn-A02-p202316   | A-genome specific (napus-rapa) | 0.9688995    | 0.5232906    | not scorable | not scorable | 1            | 0.7914523    |
| 3437 | Bn-A02-p20242753 | A-genome specific (napus-rapa) | 0.9976076    | 0.4398999    | not scorable | not scorable | 1            | 0.5503383    |
| 3438 | Bn-A02-p202493   | A-genome specific (napus-rapa) | 0.9856459    | 0.4822587    | not scorable | not scorable | 1            | 0.7453754    |
| 3439 | Bn-A02-p202819   | A-genome specific (napus-rapa) | 0.9665072    | 0.7669547    | not scorable | not scorable | 0.9834711    | 0.7628406    |
| 3440 | Bn-A02-p20363776 | A-genome specific (napus-rapa) | 0.9760765    | 0.7788219    | not scorable | not scorable | 0.9917355    | 0.8338223    |
| 3441 | Bn-A02-p20371730 | A-genome specific (napus-rapa) | 0.9904306    | 0.7706293    | not scorable | not scorable | 0.9917355    | 0.7780712    |
| 3442 | Bn-A02-p20371774 | A-genome specific (napus-rapa) | 1            | 0.4714387    | not scorable | not scorable | 0.9752066    | 0.7148634    |
| 3443 | Bn-A02-p20396880 | A-genome specific (napus-rapa) | 0.9928229    | 0.4084851    | not scorable | not scorable | 1            | 0.7438364    |
| 3444 | Bn-A02-p20398    | A-genome specific (napus-rapa) | 0.9832536    | 0.5807173    | not scorable | not scorable | 0.9917355    | 0.7939435    |
| 3445 | Bn-A02-p20461477 | A-genome specific (napus-rapa) | 0.9952153    | 0.7283329    | not scorable | not scorable | 1            | 0.8100535    |
| 3446 | Bn-A02-p20462487 | A-genome specific (napus-rapa) | 0.9928229    | 0.682543     | not scorable | not scorable | 1            | 0.7235581    |
| 3447 | Bn-A02-p20526431 | A-genome specific (napus-rapa) | 0.9952153    | 0.4436027    | not scorable | not scorable | 1            | 0.8543575    |
| 3448 | Bn-A02-p20536885 | A-genome specific (napus-rapa) | 0.9976076    | 0.8315644    | not scorable | not scorable | 0.9917355    | 0.8129056    |
| 3449 | Bn-A02-p20561132 | A-genome specific (rapa only)  | not scorable | not scorable | not scorable | not scorable | 0.9586777    | 0.5810268    |
| 3450 | Bn-A02-p20568585 | A-genome specific (napus-rapa) | 0.9976076    | 0.7771861    | not scorable | not scorable | 1            | 0.7742361    |
| 3451 | Bn-A02-p20571280 | A-genome specific (napus-rapa) | 0.9976076    | 0.4347409    | not scorable | not scorable | 0.9834711    | 0.7250179    |
| 3452 | Bn-A02-p20580541 | all not scorable               | not scorable | not scorable | not scorable | not scorable | not scorable | not scorable |
| 3453 | Bn-A02-p20634433 | A-genome specific (napus-rapa) | 0.9856459    | 0.7399609    | not scorable | not scorable | 0.9752066    | 0.8000385    |
| 3454 | Bn-A02-p20678898 | A-genome specific (napus-rapa) | 0.9856459    | 0.808339     | not scorable | not scorable | 0.9834711    | 0.813789     |
| 3455 | Bn-A02-p20700463 | A-genome specific (napus-rapa) | 0.9880383    | 0.7585077    | not scorable | not scorable | 0.9917355    | 0.8314418    |
| 3456 | Bn-A02-p20718571 | A-genome specific (napus-rapa) | 0.9952153    | 0.533386     | not scorable | not scorable | 0.9669421    | 0.7482151    |
| 3457 | Bn-A02-p20718651 | A-genome specific (napus-rapa) | 0.9952153    | 0.8433724    | not scorable | not scorable | 0.9834711    | 0.7140613    |
| 3458 | Bn-A02-p20735027 | A-genome specific (napus-rapa) | 1            | 0.6916012    | not scorable | not scorable | 1            | 0.6733703    |
| 3459 | Bn-A02-p20746287 | A-genome specific (rapa only)  | not scorable | not scorable | not scorable | not scorable | 0.9752066    | 0.7791169    |
| 3460 | Bn-A02-p2075762  | A-genome specific (rapa only)  | not scorable | not scorable | not scorable | not scorable | 1            | 0.7238167    |
| 3461 | Bn-A02-p20762322 | A-genome specific (napus-rapa) | 0.9976076    | 0.4611103    | not scorable | not scorable | 0.9917355    | 0.7794813    |
| 3462 | Bn-A02-p20776266 | A-genome specific (napus-rapa) | 0.9856459    | 0.6891719    | not scorable | not scorable | 1            | 0.6668433    |

|      |                  |                                |              |              |              |              |           |              |              |
|------|------------------|--------------------------------|--------------|--------------|--------------|--------------|-----------|--------------|--------------|
| 3463 | Bn-A02-p20832528 | A-genome specific (napus-rapa) | 0.9904306    | 0.4638848    | not scorable | not scorable |           | 1            | 0.7473689    |
| 3464 | Bn-A02-p20845905 | A-genome specific (napus-rapa) | 0.9856459    | 0.7550212    | not scorable | not scorable |           | 0.9917355    | 0.6871008    |
| 3465 | Bn-A02-p20846941 | A-genome specific (rapa only)  | not scorable | not scorable | not scorable | not scorable |           | 0.9917355    | 0.7095971    |
| 3466 | Bn-A02-p20882001 | A-genome specific (napus-rapa) | 0.9928229    | 0.731735     | not scorable | not scorable |           | 0.9834711    | 0.6641613    |
| 3467 | Bn-A02-p20882153 | A-genome specific (napus-rapa) | 0.9928229    | 0.7754462    | not scorable | not scorable |           | 0.9917355    | 0.7567177    |
| 3468 | Bn-A02-p209474   | napus specific                 | 0.9330143    | 0.7922223    | not scorable | not scorable |           | not scorable | not scorable |
| 3469 | Bn-A02-p21009288 | A-genome specific (napus-rapa) | 1            | 0.3163469    | not scorable | not scorable |           | 0.9917355    | 0.7067649    |
| 3470 | Bn-A02-p21023727 | A-genome specific (napus-rapa) | 0.9952153    | 0.3315013    | not scorable | not scorable |           | 0.9834711    | 0.6480788    |
| 3471 | Bn-A02-p21032956 | A-genome specific (napus-rapa) | 0.9736842    | 0.7808708    | not scorable | not scorable |           | 0.5123967    | 0.7518522    |
| 3472 | Bn-A02-p2105937  | A-genome specific (napus-rapa) | 0.9593301    | 0.358872     | not scorable | not scorable |           | 0.8677686    | 0.8040534    |
| 3473 | Bn-A02-p21061002 | A-genome specific (napus-rapa) | 0.9832536    | 0.7263495    | not scorable | not scorable |           | 0.5454546    | 0.7184159    |
| 3474 | Bn-A02-p21062567 | A-genome specific (napus-rapa) | 0.9952153    | 0.8275415    | not scorable | not scorable |           | 1            | 0.7770717    |
| 3475 | Bn-A02-p21062857 | genome unspecific (all in)     | 0.9258373    | 0.399449     |              | 1            | 0.4648754 | 0.9917355    | 0.6189544    |
| 3476 | Bn-A02-p21073755 | A-genome specific (napus-rapa) | 1            | 0.7067085    | not scorable | not scorable |           | 1            | 0.7420408    |
| 3477 | Bn-A02-p21207148 | A-genome specific (napus-rapa) | 0.9928229    | 0.7890028    | not scorable | not scorable |           | 0.9834711    | 0.7668741    |
| 3478 | Bn-A02-p21211198 | A-genome specific (napus-rapa) | 0.9928229    | 0.6645795    | not scorable | not scorable |           | 0.9752066    | 0.6894016    |
| 3479 | Bn-A02-p2121360  | A-genome specific (napus-rapa) | 0.9330143    | 0.6232838    | not scorable | not scorable |           | 0.9752066    | 0.6727062    |
| 3480 | Bn-A02-p2122414  | A-genome specific (napus-rapa) | 0.9545454    | 0.7675133    | not scorable | not scorable |           | 1            | 0.7018533    |
| 3481 | Bn-A02-p2122850  | A-genome specific (napus-rapa) | 0.84689      | 0.685052     | not scorable | not scorable |           | 0.9586777    | 0.7266377    |
| 3482 | Bn-A02-p2124245  | A-genome specific (napus-rapa) | 0.9784689    | 0.7692166    | not scorable | not scorable |           | 1            | 0.7127941    |
| 3483 | Bn-A02-p2124328  | A-genome specific (napus-rapa) | 0.9784689    | 0.7605591    | not scorable | not scorable |           | 0.9834711    | 0.7091021    |
| 3484 | Bn-A02-p2124421  | A-genome specific (napus-rapa) | 0.9832536    | 0.7772292    | not scorable | not scorable |           | 0.9752066    | 0.7871816    |
| 3485 | Bn-A02-p21256748 | A-genome specific (napus-rapa) | 1            | 0.3078872    | not scorable | not scorable |           | 0.9834711    | 0.3533215    |
| 3486 | Bn-A02-p21263855 | A-genome specific (napus-rapa) | 0.9832536    | 0.5715723    | not scorable | not scorable |           | 0.9834711    | 0.8376518    |
| 3487 | Bn-A02-p2128775  | A-genome specific (napus-rapa) | 0.9784689    | 0.7890088    | not scorable | not scorable |           | 1            | 0.7925525    |
| 3488 | Bn-A02-p212959   | genome unspecific (all in)     | 0.9928229    | 0.3280488    | 0.9922481    | 0.7566465    |           | 1            | 0.7546111    |
| 3489 | Bn-A02-p2130611  | A-genome specific (rapa only)  | not scorable | not scorable | not scorable | not scorable |           | 1            | 0.7432612    |
| 3490 | Bn-A02-p2130925  | A-genome specific (rapa only)  | not scorable | not scorable | not scorable | not scorable |           | 1            | 0.7803956    |
| 3491 | Bn-A02-p21322148 | napus specific                 | 0.9665072    | 0.6898457    | not scorable | not scorable |           | not scorable | not scorable |
| 3492 | Bn-A02-p21324539 | A-genome specific (napus-rapa) | 0.9712918    | 0.6929569    | not scorable | not scorable |           | 0.9834711    | 0.7816266    |
| 3493 | Bn-A02-p21325110 | A-genome specific (napus-rapa) | 0.9928229    | 0.5332254    | not scorable | not scorable |           | 1            | 0.6490307    |
| 3494 | Bn-A02-p2134112  | A-genome specific (napus-rapa) | 0.9784689    | 0.7852402    | not scorable | not scorable |           | 1            | 0.8140467    |
| 3495 | Bn-A02-p2135053  | A-genome specific (napus-rapa) | 0.7894737    | 0.7417116    | not scorable | not scorable |           | 0.9256198    | 0.895869     |

|                       |                                   |              |              |              |              |           |           |
|-----------------------|-----------------------------------|--------------|--------------|--------------|--------------|-----------|-----------|
| 3496 Bn-A02-p2136039  | A-genome specific (napus-rapa)    | 0.9712918    | 0.8001956    | not scorable | not scorable | 0.9834711 | 0.8629477 |
| 3497 Bn-A02-p21378450 | A-genome specific (napus-rapa)    | 0.9665072    | 0.7622777    | not scorable | not scorable | 0.9917355 | 0.8349451 |
| 3498 Bn-A02-p21379810 | A-genome specific (napus-rapa)    | 0.9856459    | 0.7353065    | not scorable | not scorable | 1         | 0.8885454 |
| 3499 Bn-A02-p2138408  | A-genome specific (napus-rapa)    | 0.9712918    | 0.7956358    | not scorable | not scorable | 1         | 0.8249322 |
| 3500 Bn-A02-p21409149 | A-genome specific (napus-rapa)    | 0.8827751    | 0.3138179    | not scorable | not scorable | 1         | 0.7023624 |
| 3501 Bn-A02-p21409508 | A-genome specific (napus-rapa)    | 0.9210526    | 0.2678368    | not scorable | not scorable | 0.9917355 | 0.8170711 |
| 3502 Bn-A02-p21410424 | A-genome specific (napus-rapa)    | 0.9473684    | 0.3920943    | not scorable | not scorable | 0.9752066 | 0.6448124 |
| 3503 Bn-A02-p2146210  | A-genome specific (napus-rapa)    | 0.9952153    | 0.7934194    | not scorable | not scorable | 1         | 0.8060201 |
| 3504 Bn-A02-p21467101 | A-genome specific (rapa only)     | not scorable | not scorable | not scorable | not scorable | 1         | 0.7052949 |
| 3505 Bn-A02-p21468    | A-genome specific (napus-rapa)    | 0.9832536    | 0.6331475    | not scorable | not scorable | 1         | 0.6980684 |
| 3506 Bn-A02-p21489620 | A-genome specific (napus-rapa)    | 0.9641148    | 0.7534441    | not scorable | not scorable | 0.9917355 | 0.8208557 |
| 3507 Bn-A02-p21490663 | A-genome specific (napus-rapa)    | 0.9856459    | 0.7722486    | not scorable | not scorable | 0.9917355 | 0.7376631 |
| 3508 Bn-A02-p21491139 | A-genome specific (napus-rapa)    | 0.9880383    | 0.4959746    | not scorable | not scorable | 1         | 0.6642843 |
| 3509 Bn-A02-p21510968 | A-genome specific (napus-rapa)    | 1            | 0.5654504    | not scorable | not scorable | 1         | 0.7322224 |
| 3510 Bn-A02-p21544735 | A-genome specific (napus-rapa)    | 0.9784689    | 0.8002014    | not scorable | not scorable | 0.6942149 | 0.8549622 |
| 3511 Bn-A02-p2154644  | A-genome specific (rapa only)     | not scorable | not scorable | not scorable | not scorable | 1         | 0.7229298 |
| 3512 Bn-A02-p21563911 | A-genome specific (napus-rapa)    | 0.9952153    | 0.8029575    | not scorable | not scorable | 1         | 0.9205657 |
| 3513 Bn-A02-p21570784 | A-genome specific (rapa only)     | not scorable | not scorable | not scorable | not scorable | 1         | 0.6758623 |
| 3514 Bn-A02-p21595382 | A-genome specific (napus-rapa)    | 1            | 0.511056     | not scorable | not scorable | 1         | 0.6431578 |
| 3515 Bn-A02-p21598341 | A-genome specific (napus-rapa)    | 0.9784689    | 0.9095823    | not scorable | not scorable | 1         | 0.7492611 |
| 3516 Bn-A02-p21616494 | A-genome specific (rapa only)     | not scorable | not scorable | not scorable | not scorable | 0.9834711 | 0.7769882 |
| 3517 Bn-A02-p21625125 | A-genome specific (napus-rapa)    | 0.7655503    | 0.5280212    | not scorable | not scorable | 0.9917355 | 0.6256972 |
| 3518 Bn-A02-p21639869 | A-genome specific (napus-rapa)    | 0.9019139    | 0.6518254    | not scorable | not scorable | 0.9669421 | 0.8198121 |
| 3519 Bn-A02-p21648504 | A-genome specific (napus-rapa)    | 1            | 0.379426     | not scorable | not scorable | 1         | 0.6690158 |
| 3520 Bn-A02-p2165239  | A-genome specific (napus-rapa)    | 0.9760765    | 0.7507719    | not scorable | not scorable | 0.9834711 | 0.6987672 |
| 3521 Bn-A02-p21701259 | genome unspecific (oleracea-rapa) | not scorable | not scorable | 0.8837209    | 0.615404     | 1         | 0.8118467 |
| 3522 Bn-A02-p21713756 | genome unspecific (all in)        | 0.9952153    | 0.4614603    | 0.9689922    | 0.9031397    | 1         | 0.9036642 |
| 3523 Bn-A02-p21713818 | genome unspecific (all in)        | 0.9928229    | 0.3574382    | 0.9922481    | 0.8090666    | 1         | 0.8644261 |
| 3524 Bn-A02-p21736387 | A-genome specific (napus-rapa)    | 1            | 0.522947     | not scorable | not scorable | 0.9834711 | 0.8085203 |
| 3525 Bn-A02-p21737275 | A-genome specific (napus-rapa)    | 1            | 0.7206468    | not scorable | not scorable | 0.9752066 | 0.7038418 |
| 3526 Bn-A02-p2182742  | A-genome specific (napus-rapa)    | 0.9880383    | 0.7673079    | not scorable | not scorable | 1         | 0.7020361 |
| 3527 Bn-A02-p21891973 | A-genome specific (napus-rapa)    | 1            | 0.9022347    | not scorable | not scorable | 1         | 0.8549153 |
| 3528 Bn-A02-p21930156 | A-genome specific (napus-rapa)    | 0.9928229    | 0.7939026    | not scorable | not scorable | 0.9917355 | 0.7642924 |

|      |                  |                                   |              |              |              |              |              |              |
|------|------------------|-----------------------------------|--------------|--------------|--------------|--------------|--------------|--------------|
| 3529 | Bn-A02-p22296426 | A-genome specific (napus-rapa)    | 0.9880383    | 0.4016187    | not scorable | not scorable | 0.9917355    | 0.8134547    |
| 3530 | Bn-A02-p22332961 | A-genome specific (napus-rapa)    | 0.9688995    | 0.7772213    | not scorable | not scorable | 0.9834711    | 0.8097115    |
| 3531 | Bn-A02-p22351644 | A-genome specific (napus-rapa)    | 1            | 0.521263     | not scorable | not scorable | 0.9834711    | 0.9244554    |
| 3532 | Bn-A02-p22352518 | A-genome specific (napus-rapa)    | 0.9904306    | 0.6195386    | not scorable | not scorable | 1            | 0.7112254    |
| 3533 | Bn-A02-p22357265 | A-genome specific (napus-rapa)    | 0.9952153    | 0.7974623    | not scorable | not scorable | 1            | 0.7683881    |
| 3534 | Bn-A02-p22365337 | A-genome specific (napus-rapa)    | 0.9808612    | 0.7768333    | not scorable | not scorable | 0.9586777    | 0.7517447    |
| 3535 | Bn-A02-p22371956 | A-genome specific (napus-rapa)    | 0.9952153    | 0.6454414    | not scorable | not scorable | 0.9752066    | 0.7074341    |
| 3536 | Bn-A02-p22375400 | A-genome specific (napus-rapa)    | 0.9760765    | 0.8156456    | not scorable | not scorable | 1            | 0.9175813    |
| 3537 | Bn-A02-p22375887 | A-genome specific (napus-rapa)    | 0.9832536    | 0.8675371    | not scorable | not scorable | 0.9917355    | 0.7958832    |
| 3538 | Bn-A02-p22376180 | all not scorable                  | not scorable | not scorable | not scorable | not scorable | not scorable | not scorable |
| 3539 | Bn-A02-p22383771 | A-genome specific (napus-rapa)    | 0.9712918    | 0.781617     | not scorable | not scorable | 0.9752066    | 0.6862211    |
| 3540 | Bn-A02-p22386317 | A-genome specific (napus-rapa)    | 0.9880383    | 0.2899284    | not scorable | not scorable | 0.9752066    | 0.7603972    |
| 3541 | Bn-A02-p22388092 | A-genome specific (napus-rapa)    | 0.9904306    | 0.7147967    | not scorable | not scorable | 1            | 0.7279547    |
| 3542 | Bn-A02-p22394284 | A-genome specific (napus-rapa)    | 0.9736842    | 0.7772864    | not scorable | not scorable | 0.9917355    | 0.7686312    |
| 3543 | Bn-A02-p22394632 | A-genome specific (napus-rapa)    | 0.9760765    | 0.8140411    | not scorable | not scorable | 0.9917355    | 0.7002051    |
| 3544 | Bn-A02-p22395060 | A-genome specific (napus-rapa)    | 0.9760765    | 0.7007563    | not scorable | not scorable | 0.9834711    | 0.678377     |
| 3545 | Bn-A02-p22398620 | A-genome specific (napus-rapa)    | 0.9832536    | 0.319207     | not scorable | not scorable | 1            | 0.7202674    |
| 3546 | Bn-A02-p22409779 | A-genome specific (napus-rapa)    | 0.9784689    | 0.7726023    | not scorable | not scorable | 0.9834711    | 0.7979118    |
| 3547 | Bn-A02-p22426466 | genome unspecific (oleracea-rapa) | not scorable | not scorable | 0.9689922    | 0.7172679    | 0.9669421    | 0.7040766    |
| 3548 | Bn-A02-p22427387 | A-genome specific (rapa only)     | not scorable | not scorable | not scorable | not scorable | 0.9669421    | 0.6758683    |
| 3549 | Bn-A02-p22429308 | A-genome specific (napus-rapa)    | 0.9760765    | 0.6585421    | not scorable | not scorable | 0.9834711    | 0.6453311    |
| 3550 | Bn-A02-p22429563 | A-genome specific (napus-rapa)    | 0.9880383    | 0.6526489    | not scorable | not scorable | 0.9917355    | 0.7820048    |
| 3551 | Bn-A02-p22429871 | A-genome specific (napus-rapa)    | 0.9856459    | 0.7876871    | not scorable | not scorable | 1            | 0.800707     |
| 3552 | Bn-A02-p22433753 | A-genome specific (napus-rapa)    | 0.9545454    | 0.8027224    | not scorable | not scorable | 0.6280992    | 0.7676806    |
| 3553 | Bn-A02-p22443535 | A-genome specific (napus-rapa)    | 0.9736842    | 0.6848145    | not scorable | not scorable | 1            | 0.6422119    |
| 3554 | Bn-A02-p22460758 | A-genome specific (napus-rapa)    | 0.9928229    | 0.7566096    | not scorable | not scorable | 0.9504132    | 0.7140741    |
| 3555 | Bn-A02-p22478377 | A-genome specific (napus-rapa)    | 0.9976076    | 0.8351101    | not scorable | not scorable | 0.9669421    | 0.7273648    |
| 3556 | Bn-A02-p22479272 | A-genome specific (napus-rapa)    | 0.9976076    | 0.7845125    | not scorable | not scorable | 0.9917355    | 0.7804822    |
| 3557 | Bn-A02-p22485435 | A-genome specific (napus-rapa)    | 0.9928229    | 0.4354958    | not scorable | not scorable | 0.9669421    | 0.7040677    |
| 3558 | Bn-A02-p22485606 | A-genome specific (napus-rapa)    | 0.9856459    | 0.7628941    | not scorable | not scorable | 1            | 0.7635186    |
| 3559 | Bn-A02-p22487030 | A-genome specific (napus-rapa)    | 0.9880383    | 0.6580428    | not scorable | not scorable | 0.9834711    | 0.8791919    |
| 3560 | Bn-A02-p22492507 | A-genome specific (napus-rapa)    | 1            | 0.8593741    | not scorable | not scorable | 0.9917355    | 0.7778147    |
| 3561 | Bn-A02-p22493338 | A-genome specific (napus-rapa)    | 0.9880383    | 0.8755674    | not scorable | not scorable | 0.9834711    | 0.7810593    |

|      |                  |                                |              |              |              |              |              |              |
|------|------------------|--------------------------------|--------------|--------------|--------------|--------------|--------------|--------------|
| 3562 | Bn-A02-p22501359 | A-genome specific (napus-rapa) | 1            | 0.7809012    | not scorable | not scorable | 0.9834711    | 0.7490339    |
| 3563 | Bn-A02-p22507142 | A-genome specific (napus-rapa) | 0.9976076    | 0.4334134    | not scorable | not scorable | 1            | 0.7098995    |
| 3564 | Bn-A02-p22508460 | A-genome specific (napus-rapa) | 0.9952153    | 0.6864519    | not scorable | not scorable | 0.9752066    | 0.7185382    |
| 3565 | Bn-A02-p22508870 | A-genome specific (napus-rapa) | 1            | 0.8053889    | not scorable | not scorable | 0.9917355    | 0.7334594    |
| 3566 | Bn-A02-p22509521 | A-genome specific (rapa only)  | not scorable | not scorable | not scorable | not scorable | 0.5371901    | 0.9242454    |
| 3567 | Bn-A02-p22515745 | A-genome specific (napus-rapa) | 0.9976076    | 0.4849932    | not scorable | not scorable | 0.9834711    | 0.7041288    |
| 3568 | Bn-A02-p22518385 | A-genome specific (napus-rapa) | 1            | 0.8135514    | not scorable | not scorable | 0.9834711    | 0.7203573    |
| 3569 | Bn-A02-p22519689 | all not scorable               | not scorable | not scorable | not scorable | not scorable | not scorable | not scorable |
| 3570 | Bn-A02-p22520110 | A-genome specific (napus-rapa) | 1            | 0.7712844    | not scorable | not scorable | 0.9917355    | 0.7420133    |
| 3571 | Bn-A02-p22520724 | A-genome specific (napus-rapa) | 0.9952153    | 0.6150697    | not scorable | not scorable | 0.9669421    | 0.8071707    |
| 3572 | Bn-A02-p22521362 | A-genome specific (napus-rapa) | 1            | 0.615611     | not scorable | not scorable | 0.9752066    | 0.7252113    |
| 3573 | Bn-A02-p22521802 | A-genome specific (napus-rapa) | 0.9976076    | 0.6711379    | not scorable | not scorable | 0.9917355    | 0.7826753    |
| 3574 | Bn-A02-p22528701 | A-genome specific (napus-rapa) | 1            | 0.7649238    | not scorable | not scorable | 0.9834711    | 0.7305132    |
| 3575 | Bn-A02-p22534152 | A-genome specific (napus-rapa) | 0.9976076    | 0.7978523    | not scorable | not scorable | 0.9586777    | 0.6992367    |
| 3576 | Bn-A02-p22534735 | A-genome specific (napus-rapa) | 0.9928229    | 0.7065177    | not scorable | not scorable | 0.9586777    | 0.7675989    |
| 3577 | Bn-A02-p22543683 | A-genome specific (napus-rapa) | 1            | 0.7523718    | not scorable | not scorable | 0.9752066    | 0.7157784    |
| 3578 | Bn-A02-p22550542 | A-genome specific (napus-rapa) | 1            | 0.763524     | not scorable | not scorable | 0.9917355    | 0.6447003    |
| 3579 | Bn-A02-p22552916 | A-genome specific (napus-rapa) | 1            | 0.5895082    | not scorable | not scorable | 0.9834711    | 0.7469853    |
| 3580 | Bn-A02-p22557981 | A-genome specific (napus-rapa) | 0.9928229    | 0.6069931    | not scorable | not scorable | 0.9834711    | 0.7471687    |
| 3581 | Bn-A02-p22558530 | A-genome specific (napus-rapa) | 1            | 0.8180031    | not scorable | not scorable | 0.9917355    | 0.7753686    |
| 3582 | Bn-A02-p22560577 | A-genome specific (napus-rapa) | 0.9976076    | 0.7836257    | not scorable | not scorable | 0.9752066    | 0.765547     |
| 3583 | Bn-A02-p22563469 | A-genome specific (napus-rapa) | 1            | 0.8127581    | not scorable | not scorable | 0.9752066    | 0.6963291    |
| 3584 | Bn-A02-p22564964 | A-genome specific (napus-rapa) | 1            | 0.7732013    | not scorable | not scorable | 0.9586777    | 0.6477479    |
| 3585 | Bn-A02-p22565755 | A-genome specific (napus-rapa) | 0.9976076    | 0.7792986    | not scorable | not scorable | 0.9917355    | 0.7740891    |
| 3586 | Bn-A02-p22570273 | napus specific                 | 1            | 0.5955835    | not scorable | not scorable | not scorable | not scorable |
| 3587 | Bn-A02-p22571187 | A-genome specific (napus-rapa) | 1            | 0.7799062    | not scorable | not scorable | 1            | 0.6635286    |
| 3588 | Bn-A02-p22571726 | A-genome specific (napus-rapa) | 1            | 0.8218698    | not scorable | not scorable | 0.9834711    | 0.7351703    |
| 3589 | Bn-A02-p22576112 | A-genome specific (napus-rapa) | 1            | 0.7431802    | not scorable | not scorable | 0.9669421    | 0.731402     |
| 3590 | Bn-A02-p22576511 | A-genome specific (napus-rapa) | 1            | 0.7854228    | not scorable | not scorable | 0.9834711    | 0.773126     |
| 3591 | Bn-A02-p22577127 | A-genome specific (napus-rapa) | 0.9976076    | 0.8376964    | not scorable | not scorable | 0.9917355    | 0.7398707    |
| 3592 | Bn-A02-p22581557 | A-genome specific (napus-rapa) | 0.9976076    | 0.7541991    | not scorable | not scorable | 0.9917355    | 0.7806268    |
| 3593 | Bn-A02-p2258714  | A-genome specific (napus-rapa) | 0.9904306    | 0.8655387    | not scorable | not scorable | 1            | 0.7099429    |
| 3594 | Bn-A02-p22590101 | napus specific                 | 1            | 0.6253963    | not scorable | not scorable | not scorable | not scorable |

|      |                  |                                   |              |              |              |              |              |              |
|------|------------------|-----------------------------------|--------------|--------------|--------------|--------------|--------------|--------------|
| 3595 | Bn-A02-p22596234 | A-genome specific (napus-rapa)    | 0.9856459    | 0.77826      | not scorable | not scorable | 0.9917355    | 0.67696      |
| 3596 | Bn-A02-p22596523 | A-genome specific (napus-rapa)    | 0.9976076    | 0.6691222    | not scorable | not scorable | 0.9834711    | 0.6366681    |
| 3597 | Bn-A02-p22597014 | A-genome specific (napus-rapa)    | 0.9952153    | 0.7698966    | not scorable | not scorable | 0.9752066    | 0.688451     |
| 3598 | Bn-A02-p22599833 | A-genome specific (napus-rapa)    | 0.9928229    | 0.8114292    | not scorable | not scorable | 0.9752066    | 0.7526598    |
| 3599 | Bn-A02-p22601555 | A-genome specific (napus-rapa)    | 0.9760765    | 0.7174469    | not scorable | not scorable | 1            | 0.7961111    |
| 3600 | Bn-A02-p22602317 | A-genome specific (napus-rapa)    | 1            | 0.6976327    | not scorable | not scorable | 0.9834711    | 0.7263689    |
| 3601 | Bn-A02-p22637438 | A-genome specific (napus-rapa)    | 0.9880383    | 0.7778311    | not scorable | not scorable | 0.9834711    | 0.6971074    |
| 3602 | Bn-A02-p22637504 | A-genome specific (napus-rapa)    | 1            | 0.6926453    | not scorable | not scorable | 0.9752066    | 0.7289565    |
| 3603 | Bn-A02-p22638512 | A-genome specific (napus-rapa)    | 1            | 0.7764199    | not scorable | not scorable | 0.9752066    | 0.7406246    |
| 3604 | Bn-A02-p22641483 | A-genome specific (napus-rapa)    | 1            | 0.7388332    | not scorable | not scorable | 0.9752066    | 0.700188     |
| 3605 | Bn-A02-p22642101 | A-genome specific (napus-rapa)    | 0.9976076    | 0.7936939    | not scorable | not scorable | 0.9834711    | 0.7386996    |
| 3606 | Bn-A02-p22650896 | A-genome specific (napus-rapa)    | 0.9904306    | 0.7715876    | not scorable | not scorable | 0.9669421    | 0.7585784    |
| 3607 | Bn-A02-p22651355 | A-genome specific (napus-rapa)    | 1            | 0.6935971    | not scorable | not scorable | 0.9834711    | 0.7686504    |
| 3608 | Bn-A02-p22654465 | A-genome specific (napus-rapa)    | 1            | 0.7784702    | not scorable | not scorable | 0.9834711    | 0.7760611    |
| 3609 | Bn-A02-p22670299 | A-genome specific (napus-rapa)    | 1            | 0.7654476    | not scorable | not scorable | 1            | 0.6273827    |
| 3610 | Bn-A02-p22682931 | genome unspecific (all in)        | 1            | 0.2682992    |              | 1 0.3285714  | 0.9834711    | 0.6714574    |
| 3611 | Bn-A02-p22693351 | A-genome specific (napus-rapa)    | 0.9832536    | 0.2681309    | not scorable | not scorable | 1            | 0.8646921    |
| 3612 | Bn-A02-p22697509 | A-genome specific (napus-rapa)    | 0.9880383    | 0.6055601    | not scorable | not scorable | 1            | 0.8815182    |
| 3613 | Bn-A02-p22702484 | A-genome specific (napus-rapa)    | 1            | 0.8077227    | not scorable | not scorable | 0.9752066    | 0.7370024    |
| 3614 | Bn-A02-p22741797 | A-genome specific (napus-rapa)    | 0.9976076    | 0.6988018    | not scorable | not scorable | 1            | 0.8180268    |
| 3615 | Bn-A02-p2274901  | genome unspecific (oleracea-rapa) | not scorable | not scorable |              | 1 0.7594399  | 1            | 0.774431     |
| 3616 | Bn-A02-p22757902 | A-genome specific (napus-rapa)    | 0.9880383    | 0.7844929    | not scorable | not scorable | 0.9752066    | 0.6552019    |
| 3617 | Bn-A02-p2277616  | A-genome specific (napus-rapa)    | 0.9784689    | 0.4426889    | not scorable | not scorable | 0.9917355    | 0.8382434    |
| 3618 | Bn-A02-p22787085 | A-genome specific (napus-rapa)    | 0.9904306    | 0.5408834    | not scorable | not scorable | 0.9752066    | 0.7192839    |
| 3619 | Bn-A02-p22798107 | A-genome specific (napus-rapa)    | 0.9856459    | 0.4326584    | not scorable | not scorable | 0.9669421    | 0.7222261    |
| 3620 | Bn-A02-p22811512 | A-genome specific (napus-rapa)    | 0.9928229    | 0.4735287    | not scorable | not scorable | 0.9917355    | 0.7642992    |
| 3621 | Bn-A02-p22843446 | A-genome specific (napus-rapa)    | 0.9880383    | 0.7982895    | not scorable | not scorable | 0.9917355    | 0.8337346    |
| 3622 | Bn-A02-p22847040 | A-genome specific (napus-rapa)    | 0.9856459    | 0.8084412    | not scorable | not scorable | 0.9669421    | 0.7761505    |
| 3623 | Bn-A02-p22847472 | A-genome specific (napus-rapa)    | 0.9952153    | 0.5778109    | not scorable | not scorable | 0.9752066    | 0.7539784    |
| 3624 | Bn-A02-p22863292 | A-genome specific (rapa only)     | not scorable | not scorable | not scorable | not scorable | 0.5289256    | 0.7726357    |
| 3625 | Bn-A02-p22863757 | napus specific                    | 0.5885168    | 0.6622717    | not scorable | not scorable | not scorable | not scorable |
| 3626 | Bn-A02-p22863981 | A-genome specific (rapa only)     | not scorable | not scorable | not scorable | not scorable | 0.5371901    | 0.7949208    |
| 3627 | Bn-A02-p22872607 | A-genome specific (napus-rapa)    | 0.9736842    | 0.7882505    | not scorable | not scorable | 0.9752066    | 0.8781655    |

|      |                  |                                |              |              |              |              |           |           |
|------|------------------|--------------------------------|--------------|--------------|--------------|--------------|-----------|-----------|
| 3628 | Bn-A02-p22875408 | A-genome specific (napus-rapa) | 0.9665072    | 0.7596585    | not scorable | not scorable | 0.9834711 | 0.8201935 |
| 3629 | Bn-A02-p2287712  | A-genome specific (napus-rapa) | 0.8875598    | 0.5745402    | not scorable | not scorable | 1         | 0.7285279 |
| 3630 | Bn-A02-p2288207  | A-genome specific (napus-rapa) | 0.9688995    | 0.7309657    | not scorable | not scorable | 1         | 0.7236208 |
| 3631 | Bn-A02-p2288216  | A-genome specific (napus-rapa) | 0.9784689    | 0.5747801    | not scorable | not scorable | 0.9917355 | 0.5979134 |
| 3632 | Bn-A02-p22899292 | A-genome specific (napus-rapa) | 0.9665072    | 0.7846684    | not scorable | not scorable | 0.9917355 | 0.8520135 |
| 3633 | Bn-A02-p22899854 | A-genome specific (napus-rapa) | 0.930622     | 0.7088029    | not scorable | not scorable | 0.9917355 | 0.7071448 |
| 3634 | Bn-A02-p22906452 | A-genome specific (napus-rapa) | 0.9688995    | 0.7716946    | not scorable | not scorable | 0.9917355 | 0.6991569 |
| 3635 | Bn-A02-p22906797 | A-genome specific (napus-rapa) | 0.9688995    | 0.7731929    | not scorable | not scorable | 0.9917355 | 0.6942787 |
| 3636 | Bn-A02-p2292871  | A-genome specific (napus-rapa) | 0.9808612    | 0.7769397    | not scorable | not scorable | 1         | 0.8756821 |
| 3637 | Bn-A02-p23092476 | A-genome specific (napus-rapa) | 0.9712918    | 0.2117586    | not scorable | not scorable | 0.9669421 | 0.6954831 |
| 3638 | Bn-A02-p23095572 | A-genome specific (napus-rapa) | 0.9808612    | 0.4715748    | not scorable | not scorable | 1         | 0.8203941 |
| 3639 | Bn-A02-p23098985 | A-genome specific (rapa only)  | not scorable | not scorable | not scorable | not scorable | 0.6280992 | 0.7293175 |
| 3640 | Bn-A02-p23099281 | A-genome specific (napus-rapa) | 0.9354067    | 0.7661719    | not scorable | not scorable | 0.9834711 | 0.801636  |
| 3641 | Bn-A02-p23101889 | A-genome specific (napus-rapa) | 0.9354067    | 0.733131     | not scorable | not scorable | 0.9917355 | 0.7304488 |
| 3642 | Bn-A02-p23108517 | A-genome specific (napus-rapa) | 0.9617225    | 0.2822814    | not scorable | not scorable | 0.9917355 | 0.7038341 |
| 3643 | Bn-A02-p23110903 | A-genome specific (napus-rapa) | 0.9712918    | 0.491399     | not scorable | not scorable | 1         | 0.8131012 |
| 3644 | Bn-A02-p23112746 | A-genome specific (napus-rapa) | 0.9736842    | 0.3258263    | not scorable | not scorable | 0.9917355 | 0.7377492 |
| 3645 | Bn-A02-p23128571 | A-genome specific (napus-rapa) | 0.9712918    | 0.3058508    | not scorable | not scorable | 1         | 0.73063   |
| 3646 | Bn-A02-p23135500 | A-genome specific (napus-rapa) | 0.9449761    | 0.7044726    | not scorable | not scorable | 1         | 0.9470829 |
| 3647 | Bn-A02-p23161914 | A-genome specific (napus-rapa) | 0.9090909    | 0.6420701    | not scorable | not scorable | 0.9834711 | 0.7223239 |
| 3648 | Bn-A02-p23163100 | A-genome specific (napus-rapa) | 0.9330143    | 0.6656118    | not scorable | not scorable | 1         | 0.7713397 |
| 3649 | Bn-A02-p23168213 | A-genome specific (napus-rapa) | 0.9401914    | 0.8384131    | not scorable | not scorable | 1         | 0.8259038 |
| 3650 | Bn-A02-p23237139 | A-genome specific (napus-rapa) | 0.9856459    | 0.7869931    | not scorable | not scorable | 0.9917355 | 0.7693927 |
| 3651 | Bn-A02-p23251431 | A-genome specific (napus-rapa) | 0.9760765    | 0.6727031    | not scorable | not scorable | 0.9834711 | 0.7975906 |
| 3652 | Bn-A02-p23257505 | A-genome specific (rapa only)  | not scorable | not scorable | not scorable | not scorable | 1         | 0.7584332 |
| 3653 | Bn-A02-p23277919 | A-genome specific (rapa only)  | not scorable | not scorable | not scorable | not scorable | 1         | 0.8554686 |
| 3654 | Bn-A02-p23279287 | A-genome specific (napus-rapa) | 0.9832536    | 0.462583     | not scorable | not scorable | 1         | 0.6909724 |
| 3655 | Bn-A02-p23280472 | A-genome specific (napus-rapa) | 0.9880383    | 0.7590026    | not scorable | not scorable | 0.9917355 | 0.7927341 |
| 3656 | Bn-A02-p23280665 | A-genome specific (rapa only)  | not scorable | not scorable | not scorable | not scorable | 1         | 0.7560042 |
| 3657 | Bn-A02-p23280869 | A-genome specific (napus-rapa) | 1            | 0.2597172    | not scorable | not scorable | 0.9834711 | 0.8783981 |
| 3658 | Bn-A02-p23295254 | A-genome specific (napus-rapa) | 0.9497608    | 0.8023953    | not scorable | not scorable | 0.677686  | 0.7945569 |
| 3659 | Bn-A02-p23297690 | A-genome specific (napus-rapa) | 0.8086125    | 0.7823358    | not scorable | not scorable | 0.6198347 | 0.819187  |
| 3660 | Bn-A02-p23297789 | A-genome specific (napus-rapa) | 0.9665072    | 0.250282     | not scorable | not scorable | 1         | 0.7194965 |

|      |                  |                                   |              |              |              |              |              |              |
|------|------------------|-----------------------------------|--------------|--------------|--------------|--------------|--------------|--------------|
| 3661 | Bn-A02-p23309610 | A-genome specific (napus-rapa)    | 0.9904306    | 0.7803795    | not scorable | not scorable | 1            | 0.8100291    |
| 3662 | Bn-A02-p23362842 | A-genome specific (napus-rapa)    | 1            | 0.5559785    | not scorable | not scorable | 1            | 0.8388335    |
| 3663 | Bn-A02-p23408870 | A-genome specific (napus-rapa)    | 0.9928229    | 0.7027501    | not scorable | not scorable | 1            | 0.7159663    |
| 3664 | Bn-A02-p23411852 | A-genome specific (napus-rapa)    | 0.9928229    | 0.8472601    | not scorable | not scorable | 0.9834711    | 0.8058628    |
| 3665 | Bn-A02-p23414384 | A-genome specific (rapa only)     | not scorable | not scorable | not scorable | not scorable | 0.9917355    | 0.812347     |
| 3666 | Bn-A02-p23414610 | A-genome specific (rapa only)     | not scorable | not scorable | not scorable | not scorable | 0.9917355    | 0.9208769    |
| 3667 | Bn-A02-p23414614 | A-genome specific (napus-rapa)    | 0.9928229    | 0.8138618    | not scorable | not scorable | 1            | 0.6801172    |
| 3668 | Bn-A02-p2341934  | A-genome specific (rapa only)     | not scorable | not scorable | not scorable | not scorable | 0.9834711    | 0.7390162    |
| 3669 | Bn-A02-p23423377 | A-genome specific (napus-rapa)    | 0.9928229    | 0.7672445    | not scorable | not scorable | 0.9917355    | 0.7537945    |
| 3670 | Bn-A02-p23425517 | A-genome specific (napus-rapa)    | 0.9928229    | 0.7828693    | not scorable | not scorable | 0.9917355    | 0.8001636    |
| 3671 | Bn-A02-p23428461 | A-genome specific (napus-rapa)    | 0.9952153    | 0.4188091    | not scorable | not scorable | 1            | 0.7133143    |
| 3672 | Bn-A02-p23432823 | A-genome specific (napus-rapa)    | 0.9880383    | 0.7859029    | not scorable | not scorable | 0.9504132    | 0.7570602    |
| 3673 | Bn-A02-p23436829 | A-genome specific (napus-rapa)    | 0.9904306    | 0.7535886    | not scorable | not scorable | 0.9669421    | 0.7323167    |
| 3674 | Bn-A02-p23448271 | A-genome specific (napus-rapa)    | 0.9928229    | 0.4397616    | not scorable | not scorable | 0.9834711    | 0.7345325    |
| 3675 | Bn-A02-p23454935 | C-genome specific (oleracea only) | not scorable | not scorable | 0.9767442    | 0.4313002    | not scorable | not scorable |
| 3676 | Bn-A02-p23456103 | A-genome specific (napus-rapa)    | 0.9928229    | 0.781303     | not scorable | not scorable | 0.9917355    | 0.7226713    |
| 3677 | Bn-A02-p23472944 | A-genome specific (napus-rapa)    | 0.9976076    | 0.3908518    | not scorable | not scorable | 1            | 0.7799541    |
| 3678 | Bn-A02-p23473807 | A-genome specific (napus-rapa)    | 0.9904306    | 0.8068834    | not scorable | not scorable | 0.9917355    | 0.7606095    |
| 3679 | Bn-A02-p23474309 | A-genome specific (napus-rapa)    | 0.9928229    | 0.8063899    | not scorable | not scorable | 1            | 0.7272524    |
| 3680 | Bn-A02-p23477774 | A-genome specific (napus-rapa)    | 0.9976076    | 0.335554     | not scorable | not scorable | 0.9752066    | 0.77592      |
| 3681 | Bn-A02-p23477968 | genome unspecific (all in)        | 0.9928229    | 0.6834925    | 0.9767442    | 0.6711627    | 0.9752066    | 0.7387694    |
| 3682 | Bn-A02-p23479432 | napus specific                    | 0.9976076    | 0.3585258    | not scorable | not scorable | not scorable | not scorable |
| 3683 | Bn-A02-p23482499 | A-genome specific (napus-rapa)    | 0.9904306    | 0.7096521    | not scorable | not scorable | 0.5454546    | 0.8180267    |
| 3684 | Bn-A02-p23486694 | A-genome specific (napus-rapa)    | 0.9904306    | 0.7726752    | not scorable | not scorable | 0.9669421    | 0.7529763    |
| 3685 | Bn-A02-p23488731 | A-genome specific (napus-rapa)    | 1            | 0.4068048    | not scorable | not scorable | 1            | 0.7977145    |
| 3686 | Bn-A02-p23491463 | A-genome specific (napus-rapa)    | 0.9401914    | 0.7705586    | not scorable | not scorable | 0.6446281    | 0.7256376    |
| 3687 | Bn-A02-p23494185 | A-genome specific (napus-rapa)    | 0.9880383    | 0.7259326    | not scorable | not scorable | 0.9834711    | 0.7514516    |
| 3688 | Bn-A02-p23495061 | A-genome specific (napus-rapa)    | 0.9090909    | 0.8014886    | not scorable | not scorable | 0.9256198    | 0.7067049    |
| 3689 | Bn-A02-p23497111 | A-genome specific (napus-rapa)    | 0.9928229    | 0.453399     | not scorable | not scorable | 0.9917355    | 0.7909767    |
| 3690 | Bn-A02-p23509687 | A-genome specific (napus-rapa)    | 0.9928229    | 0.7584389    | not scorable | not scorable | 0.9917355    | 0.8594449    |
| 3691 | Bn-A02-p23509986 | A-genome specific (napus-rapa)    | 0.9904306    | 0.8138064    | not scorable | not scorable | 1            | 0.7759688    |
| 3692 | Bn-A02-p23510178 | A-genome specific (napus-rapa)    | 0.9928229    | 0.7674699    | not scorable | not scorable | 1            | 0.768249     |
| 3693 | Bn-A02-p23523709 | A-genome specific (napus-rapa)    | 0.9928229    | 0.4664733    | not scorable | not scorable | 0.9834711    | 0.7735984    |



|      |                  |                                    |              |              |              |              |              |              |
|------|------------------|------------------------------------|--------------|--------------|--------------|--------------|--------------|--------------|
| 3694 | Bn-A02-p2364069  | A-genome specific (napus-rapa)     | 0.9952153    | 0.8401033    | not scorable | not scorable | 0.9917355    | 0.7232671    |
| 3695 | Bn-A02-p2364479  | A-genome specific (rapa only)      | not scorable | not scorable | not scorable | not scorable | 0.9834711    | 0.7082456    |
| 3696 | Bn-A02-p23668607 | A-genome specific (napus-rapa)     | 0.9784689    | 0.7050626    | not scorable | not scorable | 0.5867769    | 0.7432435    |
| 3697 | Bn-A02-p23669898 | A-genome specific (napus-rapa)     | 0.9928229    | 0.7446899    | not scorable | not scorable | 0.9917355    | 0.8124055    |
| 3698 | Bn-A02-p23685036 | A-genome specific (napus-rapa)     | 0.9545454    | 0.5623235    | not scorable | not scorable | 0.9669421    | 0.7203811    |
| 3699 | Bn-A02-p23686560 | A-genome specific (napus-rapa)     | 0.9449761    | 0.7810077    | not scorable | not scorable | 0.9834711    | 0.824479     |
| 3700 | Bn-A02-p23700858 | A-genome specific (napus-rapa)     | 0.9928229    | 0.7699556    | not scorable | not scorable | 1            | 0.7058686    |
| 3701 | Bn-A02-p23708117 | A-genome specific (napus-rapa)     | 0.9066986    | 0.7721456    | not scorable | not scorable | 0.9834711    | 0.850803     |
| 3702 | Bn-A02-p23708299 | A-genome specific (napus-rapa)     | 0.8971292    | 0.8265429    | not scorable | not scorable | 1            | 0.7654849    |
| 3703 | Bn-A02-p23708516 | A-genome specific (napus-rapa)     | 0.9138756    | 0.7960063    | not scorable | not scorable | 1            | 0.7929248    |
| 3704 | Bn-A02-p23708678 | A-genome specific (napus-rapa)     | 0.9019139    | 0.7473363    | not scorable | not scorable | 0.9752066    | 0.8091279    |
| 3705 | Bn-A02-p23726200 | A-genome specific (napus-rapa)     | 0.8923445    | 0.7673007    | not scorable | not scorable | 0.9917355    | 0.7483892    |
| 3706 | Bn-A02-p23728173 | C-genome specific (napus-oleracea) | 0.9976076    | 0.2992877    |              | 1 0.2808201  | not scorable | not scorable |
| 3707 | Bn-A02-p23729046 | A-genome specific (napus-rapa)     | 0.9162679    | 0.7776386    | not scorable | not scorable | 0.9834711    | 0.7980347    |
| 3708 | Bn-A02-p23730904 | A-genome specific (napus-rapa)     | 0.9688995    | 0.5461779    | not scorable | not scorable | 0.9669421    | 0.7071556    |
| 3709 | Bn-A02-p23743267 | A-genome specific (rapa only)      | not scorable | not scorable | not scorable | not scorable | 1            | 0.7484516    |
| 3710 | Bn-A02-p23757876 | A-genome specific (napus-rapa)     | 0.9904306    | 0.2645536    | not scorable | not scorable | 0.9917355    | 0.7627375    |
| 3711 | Bn-A02-p23788301 | A-genome specific (napus-rapa)     | 0.9258373    | 0.7790092    | not scorable | not scorable | 0.5206612    | 0.7645022    |
| 3712 | Bn-A02-p23792703 | A-genome specific (napus-rapa)     | 0.9808612    | 0.7995489    | not scorable | not scorable | 0.9917355    | 0.7536179    |
| 3713 | Bn-A02-p23819701 | A-genome specific (napus-rapa)     | 0.9665072    | 0.3651035    | not scorable | not scorable | 0.9834711    | 0.7610574    |
| 3714 | Bn-A02-p23819797 | A-genome specific (napus-rapa)     | 0.9688995    | 0.8039054    | not scorable | not scorable | 0.9917355    | 0.7417265    |
| 3715 | Bn-A02-p23824343 | A-genome specific (napus-rapa)     | 0.9473684    | 0.8027064    | not scorable | not scorable | 0.9834711    | 0.7375073    |
| 3716 | Bn-A02-p23826324 | A-genome specific (napus-rapa)     | 0.9688995    | 0.8016993    | not scorable | not scorable | 0.9917355    | 0.7797013    |
| 3717 | Bn-A02-p23831173 | A-genome specific (napus-rapa)     | 0.9665072    | 0.800363     | not scorable | not scorable | 0.9917355    | 0.7404003    |
| 3718 | Bn-A02-p23832547 | A-genome specific (napus-rapa)     | 0.9784689    | 0.2573805    | not scorable | not scorable | 0.9752066    | 0.7778892    |
| 3719 | Bn-A02-p23835683 | A-genome specific (napus-rapa)     | 0.9688995    | 0.8042824    | not scorable | not scorable | 1            | 0.776125     |
| 3720 | Bn-A02-p23836232 | A-genome specific (napus-rapa)     | 0.9856459    | 0.7916022    | not scorable | not scorable | 1            | 0.6906022    |
| 3721 | Bn-A02-p23842103 | A-genome specific (napus-rapa)     | 0.9688995    | 0.5502855    | not scorable | not scorable | 0.9586777    | 0.7913043    |
| 3722 | Bn-A02-p23842763 | A-genome specific (rapa only)      | not scorable | not scorable | not scorable | not scorable | 0.9917355    | 0.7079534    |
| 3723 | Bn-A02-p23856500 | A-genome specific (napus-rapa)     | 0.9736842    | 0.8020059    | not scorable | not scorable | 1            | 0.8033827    |
| 3724 | Bn-A02-p23857384 | A-genome specific (napus-rapa)     | 0.9904306    | 0.7934136    | not scorable | not scorable | 1            | 0.7751837    |
| 3725 | Bn-A02-p23875682 | A-genome specific (napus-rapa)     | 0.9569378    | 0.4061098    | not scorable | not scorable | 0.9917355    | 0.7782946    |
| 3726 | Bn-A02-p23889188 | A-genome specific (napus-rapa)     | 0.9736842    | 0.3557959    | not scorable | not scorable | 1            | 0.6828266    |

|                       |                                |              |              |              |              |           |           |
|-----------------------|--------------------------------|--------------|--------------|--------------|--------------|-----------|-----------|
| 3727 Bn-A02-p2389418  | A-genome specific (rapa only)  | not scorable | not scorable | not scorable | not scorable | 0.9834711 | 0.7429992 |
| 3728 Bn-A02-p23897014 | A-genome specific (napus-rapa) | 0.9856459    | 0.7154508    | not scorable | not scorable | 1         | 0.7913748 |
| 3729 Bn-A02-p23910066 | A-genome specific (napus-rapa) | 0.7942584    | 0.7545238    | not scorable | not scorable | 0.9421487 | 0.819399  |
| 3730 Bn-A02-p23920155 | A-genome specific (napus-rapa) | 0.9928229    | 0.392696     | not scorable | not scorable | 0.9917355 | 0.7806912 |
| 3731 Bn-A02-p23925334 | A-genome specific (napus-rapa) | 0.9880383    | 0.3813853    | not scorable | not scorable | 0.9917355 | 0.6662903 |
| 3732 Bn-A02-p24015556 | A-genome specific (napus-rapa) | 0.937799     | 0.5419008    | not scorable | not scorable | 0.5702479 | 0.9061049 |
| 3733 Bn-A02-p24178094 | A-genome specific (napus-rapa) | 0.9928229    | 0.7320278    | not scorable | not scorable | 0.9752066 | 0.7523103 |
| 3734 Bn-A02-p24216905 | A-genome specific (napus-rapa) | 1            | 0.6643068    | not scorable | not scorable | 1         | 0.7376376 |
| 3735 Bn-A02-p2421888  | A-genome specific (rapa only)  | not scorable | not scorable | not scorable | not scorable | 1         | 0.7537644 |
| 3736 Bn-A02-p24237359 | A-genome specific (napus-rapa) | 1            | 0.5665131    | not scorable | not scorable | 1         | 0.7232355 |
| 3737 Bn-A02-p24268496 | A-genome specific (napus-rapa) | 0.9976076    | 0.5206932    | not scorable | not scorable | 0.9917355 | 0.716031  |
| 3738 Bn-A02-p24269435 | A-genome specific (napus-rapa) | 0.9712918    | 0.7855024    | not scorable | not scorable | 0.9752066 | 0.7267952 |
| 3739 Bn-A02-p24316498 | A-genome specific (napus-rapa) | 0.9904306    | 0.3959908    | not scorable | not scorable | 0.9917355 | 0.6321682 |
| 3740 Bn-A02-p24317870 | A-genome specific (napus-rapa) | 0.9712918    | 0.7354863    | not scorable | not scorable | 1         | 0.6083272 |
| 3741 Bn-A02-p2434462  | A-genome specific (rapa only)  | not scorable | not scorable | not scorable | not scorable | 0.9917355 | 0.7366205 |
| 3742 Bn-A02-p24345550 | A-genome specific (napus-rapa) | 0.9856459    | 0.3550808    | not scorable | not scorable | 0.9917355 | 0.8072528 |
| 3743 Bn-A02-p24345838 | A-genome specific (napus-rapa) | 0.9641148    | 0.6958523    | not scorable | not scorable | 0.9917355 | 0.8327926 |
| 3744 Bn-A02-p24351316 | A-genome specific (napus-rapa) | 0.9688995    | 0.7990696    | not scorable | not scorable | 0.9752066 | 0.749428  |
| 3745 Bn-A02-p24353955 | A-genome specific (napus-rapa) | 0.9736842    | 0.7045437    | not scorable | not scorable | 1         | 0.7591577 |
| 3746 Bn-A02-p24353997 | A-genome specific (napus-rapa) | 0.9665072    | 0.7995799    | not scorable | not scorable | 1         | 0.7117163 |
| 3747 Bn-A02-p24354876 | A-genome specific (napus-rapa) | 0.9688995    | 0.6773205    | not scorable | not scorable | 0.9752066 | 0.6877344 |
| 3748 Bn-A02-p24359370 | A-genome specific (napus-rapa) | 0.9497608    | 0.7032784    | not scorable | not scorable | 0.9917355 | 0.7386569 |
| 3749 Bn-A02-p24366221 | A-genome specific (napus-rapa) | 0.9928229    | 0.7302223    | not scorable | not scorable | 1         | 0.7658132 |
| 3750 Bn-A02-p24378297 | A-genome specific (napus-rapa) | 0.9856459    | 0.5205678    | not scorable | not scorable | 1         | 0.8302463 |
| 3751 Bn-A02-p24386848 | A-genome specific (napus-rapa) | 0.9617225    | 0.7679321    | not scorable | not scorable | 0.9917355 | 0.8334917 |
| 3752 Bn-A02-p24399308 | A-genome specific (napus-rapa) | 0.9617225    | 0.7601669    | not scorable | not scorable | 1         | 0.825245  |
| 3753 Bn-A02-p24401267 | A-genome specific (napus-rapa) | 0.9497608    | 0.7585703    | not scorable | not scorable | 0.5702479 | 0.7939715 |
| 3754 Bn-A02-p24402133 | A-genome specific (napus-rapa) | 0.9808612    | 0.7526482    | not scorable | not scorable | 1         | 0.7709031 |
| 3755 Bn-A02-p24415454 | A-genome specific (napus-rapa) | 0.9808612    | 0.789212     | not scorable | not scorable | 0.9504132 | 0.7628745 |
| 3756 Bn-A02-p24417020 | A-genome specific (napus-rapa) | 0.9952153    | 0.3483326    | not scorable | not scorable | 1         | 0.7442658 |
| 3757 Bn-A02-p2443019  | A-genome specific (napus-rapa) | 0.9760765    | 0.7584864    | not scorable | not scorable | 0.9917355 | 0.8422563 |
| 3758 Bn-A02-p2443275  | A-genome specific (napus-rapa) | 0.9449761    | 0.7744979    | not scorable | not scorable | 0.9752066 | 0.7906436 |
| 3759 Bn-A02-p24438115 | A-genome specific (napus-rapa) | 1            | 0.6174138    | not scorable | not scorable | 0.9752066 | 0.7790318 |

|      |                  |                                   |              |              |              |              |              |              |
|------|------------------|-----------------------------------|--------------|--------------|--------------|--------------|--------------|--------------|
| 3760 | Bn-A02-p24449690 | A-genome specific (napus-rapa)    | 0.9473684    | 0.4058479    | not scorable | not scorable | 0.9669421    | 0.58711      |
| 3761 | Bn-A02-p24462762 | A-genome specific (napus-rapa)    | 0.9760765    | 0.5152972    | not scorable | not scorable | 0.9752066    | 0.5898604    |
| 3762 | Bn-A02-p24477743 | all not scorable                  | not scorable | not scorable | not scorable | not scorable | not scorable | not scorable |
| 3763 | Bn-A02-p24505252 | A-genome specific (napus-rapa)    | 0.9904306    | 0.7258546    | not scorable | not scorable | 0.9917355    | 0.7190342    |
| 3764 | Bn-A02-p24508488 | A-genome specific (napus-rapa)    | 0.9904306    | 0.7945114    | not scorable | not scorable | 0.9917355    | 0.7995239    |
| 3765 | Bn-A02-p2451470  | A-genome specific (napus-rapa)    | 0.9736842    | 0.7273471    | not scorable | not scorable | 0.9834711    | 0.6920629    |
| 3766 | Bn-A02-p24522983 | A-genome specific (napus-rapa)    | 0.9952153    | 0.3993677    | not scorable | not scorable | 1            | 0.7361935    |
| 3767 | Bn-A02-p24532892 | A-genome specific (napus-rapa)    | 0.9688995    | 0.8634405    | not scorable | not scorable | 0.6528926    | 0.8086928    |
| 3768 | Bn-A02-p24533751 | A-genome specific (napus-rapa)    | 0.9066986    | 0.8011951    | not scorable | not scorable | 0.9173554    | 0.8075153    |
| 3769 | Bn-A02-p24543172 | A-genome specific (napus-rapa)    | 0.9880383    | 0.8754367    | not scorable | not scorable | 0.9917355    | 0.7396324    |
| 3770 | Bn-A02-p24548194 | A-genome specific (rapa only)     | not scorable | not scorable | not scorable | not scorable | 0.9917355    | 0.7788241    |
| 3771 | Bn-A02-p24552203 | A-genome specific (napus-rapa)    | 0.9760765    | 0.7576782    | not scorable | not scorable | 1            | 0.8251155    |
| 3772 | Bn-A02-p24552476 | A-genome specific (napus-rapa)    | 0.9928229    | 0.7689822    | not scorable | not scorable | 1            | 0.7931144    |
| 3773 | Bn-A02-p24552542 | A-genome specific (napus-rapa)    | 0.9832536    | 0.7658389    | not scorable | not scorable | 1            | 0.7597877    |
| 3774 | Bn-A02-p24552639 | A-genome specific (napus-rapa)    | 0.9856459    | 0.80213      | not scorable | not scorable | 1            | 0.7398953    |
| 3775 | Bn-A02-p24552721 | napus specific                    | 0.9019139    | 0.9047894    | not scorable | not scorable | not scorable | not scorable |
| 3776 | Bn-A02-p24552840 | A-genome specific (napus-rapa)    | 0.9832536    | 0.8093157    | not scorable | not scorable | 1            | 0.781226     |
| 3777 | Bn-A02-p24552843 | A-genome specific (napus-rapa)    | 0.9880383    | 0.7193589    | not scorable | not scorable | 1            | 0.7668512    |
| 3778 | Bn-A02-p24559792 | A-genome specific (napus-rapa)    | 0.9928229    | 0.7475585    | not scorable | not scorable | 1            | 0.7790264    |
| 3779 | Bn-A02-p24575998 | A-genome specific (napus-rapa)    | 0.9856459    | 0.7743512    | not scorable | not scorable | 1            | 0.7161565    |
| 3780 | Bn-A02-p24577932 | A-genome specific (napus-rapa)    | 0.9904306    | 0.7846226    | not scorable | not scorable | 1            | 0.6941665    |
| 3781 | Bn-A02-p24584058 | A-genome specific (napus-rapa)    | 1            | 0.5375031    | not scorable | not scorable | 1            | 0.8226336    |
| 3782 | Bn-A02-p2466355  | A-genome specific (rapa only)     | not scorable | not scorable | not scorable | not scorable | 0.9834711    | 0.7707361    |
| 3783 | Bn-A02-p24675182 | A-genome specific (napus-rapa)    | 0.9952153    | 0.7475734    | not scorable | not scorable | 0.677686     | 0.6845919    |
| 3784 | Bn-A02-p24687309 | A-genome specific (napus-rapa)    | 0.9832536    | 0.7240523    | not scorable | not scorable | 0.9917355    | 0.8019288    |
| 3785 | Bn-A02-p24688870 | A-genome specific (napus-rapa)    | 0.9976076    | 0.9227535    | not scorable | not scorable | 1            | 0.9172798    |
| 3786 | Bn-A02-p24700081 | A-genome specific (napus-rapa)    | 0.9617225    | 0.3645316    | not scorable | not scorable | 0.9752066    | 0.7151247    |
| 3787 | Bn-A02-p24700485 | A-genome specific (rapa only)     | not scorable | not scorable | not scorable | not scorable | 0.9752066    | 0.7033099    |
| 3788 | Bn-A02-p24700670 | A-genome specific (napus-rapa)    | 0.9688995    | 0.4008781    | not scorable | not scorable | 0.9421487    | 0.7673577    |
| 3789 | Bn-A02-p24700750 | A-genome specific (rapa only)     | not scorable | not scorable | not scorable | not scorable | 0.9338843    | 0.7215623    |
| 3790 | Bn-A02-p24702518 | C-genome specific (oleracea only) | not scorable | not scorable | 0.9922481    | 0.2352519    | not scorable | not scorable |
| 3791 | Bn-A02-p24702986 | A-genome specific (napus-rapa)    | 0.9784689    | 0.4731687    | not scorable | not scorable | 0.9669421    | 0.7972026    |
| 3792 | Bn-A02-p24703050 | A-genome specific (rapa only)     | not scorable | not scorable | not scorable | not scorable | 0.9586777    | 0.7641606    |

|      |                  |                                   |              |              |              |              |              |              |
|------|------------------|-----------------------------------|--------------|--------------|--------------|--------------|--------------|--------------|
| 3793 | Bn-A02-p24706646 | A-genome specific (napus-rapa)    | 0.9808612    | 0.4346285    | not scorable | not scorable | 0.9834711    | 0.6902314    |
| 3794 | Bn-A02-p24708197 | A-genome specific (napus-rapa)    | 0.9832536    | 0.3769797    | not scorable | not scorable | 0.9917355    | 0.6938098    |
| 3795 | Bn-A02-p24718110 | A-genome specific (napus-rapa)    | 0.9856459    | 0.5957897    | not scorable | not scorable | 0.9669421    | 0.654136     |
| 3796 | Bn-A02-p24722684 | A-genome specific (napus-rapa)    | 0.9808612    | 0.8465989    | not scorable | not scorable | 1            | 0.8125221    |
| 3797 | Bn-A02-p24731379 | genome unspecific (all in)        | 0.9545454    | 0.3791173    |              | 1 0.3393075  | 0.9834711    | 0.7734646    |
| 3798 | Bn-A02-p2475208  | A-genome specific (napus-rapa)    | 0.9832536    | 0.7964051    | not scorable | not scorable | 1            | 0.808856     |
| 3799 | Bn-A02-p2480400  | A-genome specific (rapa only)     | not scorable | not scorable | not scorable | not scorable | 0.9917355    | 0.7158222    |
| 3800 | Bn-A02-p24809526 | A-genome specific (napus-rapa)    | 0.9880383    | 0.735046     | not scorable | not scorable | 0.9917355    | 0.6636193    |
| 3801 | Bn-A02-p24810609 | A-genome specific (napus-rapa)    | 0.9904306    | 0.7623301    | not scorable | not scorable | 0.9917355    | 0.7824732    |
| 3802 | Bn-A02-p24827362 | A-genome specific (napus-rapa)    | 0.9856459    | 0.4755225    | not scorable | not scorable | 1            | 0.7868106    |
| 3803 | Bn-A02-p24844291 | A-genome specific (napus-rapa)    | 0.9832536    | 0.5374362    | not scorable | not scorable | 1            | 0.7736591    |
| 3804 | Bn-A02-p24851624 | A-genome specific (napus-rapa)    | 0.9976076    | 0.4736698    | not scorable | not scorable | 1            | 0.7015013    |
| 3805 | Bn-A02-p24878657 | A-genome specific (napus-rapa)    | 0.9952153    | 0.224447     | not scorable | not scorable | 0.9669421    | 0.5929585    |
| 3806 | Bn-A02-p2489530  | A-genome specific (rapa only)     | not scorable | not scorable | not scorable | not scorable | 1            | 0.7618606    |
| 3807 | Bn-A02-p2490293  | A-genome specific (napus-rapa)    | 0.9736842    | 0.5408491    | not scorable | not scorable | 1            | 0.7359998    |
| 3808 | Bn-A02-p24909771 | A-genome specific (napus-rapa)    | 0.9928229    | 0.8024475    | not scorable | not scorable | 0.9834711    | 0.7870135    |
| 3809 | Bn-A02-p24911505 | A-genome specific (napus-rapa)    | 0.9904306    | 0.7679711    | not scorable | not scorable | 0.9504132    | 0.7485819    |
| 3810 | Bn-A02-p24912792 | A-genome specific (napus-rapa)    | 0.9928229    | 0.7205454    | not scorable | not scorable | 1            | 0.7901271    |
| 3811 | Bn-A02-p24914083 | A-genome specific (napus-rapa)    | 1            | 0.7059814    | not scorable | not scorable | 1            | 0.8004208    |
| 3812 | Bn-A02-p24919366 | A-genome specific (rapa only)     | not scorable | not scorable | not scorable | not scorable | 0.6446281    | 0.9446526    |
| 3813 | Bn-A02-p24928201 | A-genome specific (rapa only)     | not scorable | not scorable | not scorable | not scorable | 0.9917355    | 0.7351401    |
| 3814 | Bn-A02-p24928311 | A-genome specific (napus-rapa)    | 0.8708134    | 0.7632811    | not scorable | not scorable | 0.8760331    | 0.7590061    |
| 3815 | Bn-A02-p24945785 | A-genome specific (napus-rapa)    | 0.9784689    | 0.422927     | not scorable | not scorable | 0.9834711    | 0.6968016    |
| 3816 | Bn-A02-p24948938 | A-genome specific (napus-rapa)    | 0.9593301    | 0.820463     | not scorable | not scorable | 1            | 0.7932958    |
| 3817 | Bn-A02-p24967958 | A-genome specific (napus-rapa)    | 1            | 0.4569711    | not scorable | not scorable | 0.9834711    | 0.8208371    |
| 3818 | Bn-A02-p24971607 | A-genome specific (napus-rapa)    | 0.9808612    | 0.5161635    | not scorable | not scorable | 0.9917355    | 0.6083936    |
| 3819 | Bn-A02-p25022333 | all not scorable                  | not scorable | not scorable | not scorable | not scorable | not scorable | not scorable |
| 3820 | Bn-A02-p25022921 | genome unspecific (oleracea-rapa) | not scorable | not scorable | 0.9767442    | 0.5230137    | 0.9834711    | 0.525265     |
| 3821 | Bn-A02-p25027576 | genome unspecific (all in)        | 0.9832536    | 0.3075857    |              | 1 0.8095853  | 1            | 0.8009473    |
| 3822 | Bn-A02-p2502950  | A-genome specific (napus-rapa)    | 0.937799     | 0.5792095    | not scorable | not scorable | 1            | 0.7601622    |
| 3823 | Bn-A02-p25079431 | A-genome specific (napus-rapa)    | 0.9976076    | 0.704473     | not scorable | not scorable | 0.9917355    | 0.7331099    |
| 3824 | Bn-A02-p25081911 | A-genome specific (rapa only)     | not scorable | not scorable | not scorable | not scorable | 1            | 0.827769     |
| 3825 | Bn-A02-p25081916 | A-genome specific (napus-rapa)    | 1            | 0.3411662    | not scorable | not scorable | 0.9834711    | 0.7254934    |

|      |                  |                                   |              |              |              |              |           |           |
|------|------------------|-----------------------------------|--------------|--------------|--------------|--------------|-----------|-----------|
| 3826 | Bn-A02-p2509802  | A-genome specific (napus-rapa)    | 0.9449761    | 0.7629402    | not scorable | not scorable | 0.9834711 | 0.6931663 |
| 3827 | Bn-A02-p25100451 | A-genome specific (napus-rapa)    | 0.9904306    | 0.7879258    | not scorable | not scorable | 1         | 0.7935399 |
| 3828 | Bn-A02-p25105527 | A-genome specific (napus-rapa)    | 1            | 0.4670247    | not scorable | not scorable | 1         | 0.7273133 |
| 3829 | Bn-A02-p25109769 | A-genome specific (napus-rapa)    | 0.9928229    | 0.9235229    | not scorable | not scorable | 1         | 0.7847053 |
| 3830 | Bn-A02-p25118816 | A-genome specific (napus-rapa)    | 0.9904306    | 0.4378158    | not scorable | not scorable | 0.9834711 | 0.4827474 |
| 3831 | Bn-A02-p2511558  | A-genome specific (napus-rapa)    | 0.9928229    | 0.5861614    | not scorable | not scorable | 0.9752066 | 0.677668  |
| 3832 | Bn-A02-p25174583 | genome unspecific (all in)        | 0.9641148    | 0.3216029    | 0.9534883    | 0.7254546    | 0.9917355 | 0.5180019 |
| 3833 | Bn-A02-p25180996 | A-genome specific (napus-rapa)    | 0.9545454    | 0.7543437    | not scorable | not scorable | 0.9917355 | 0.7621441 |
| 3834 | Bn-A02-p25181474 | A-genome specific (napus-rapa)    | 0.9808612    | 0.444824     | not scorable | not scorable | 1         | 0.7543489 |
| 3835 | Bn-A02-p25181726 | genome unspecific (all in)        | 0.9856459    | 0.3598177    |              | 1 0.6156915  | 1         | 0.875934  |
| 3836 | Bn-A02-p25188041 | A-genome specific (napus-rapa)    | 0.9545454    | 0.7840285    | not scorable | not scorable | 0.9752066 | 0.7019362 |
| 3837 | Bn-A02-p25190854 | A-genome specific (napus-rapa)    | 0.9808612    | 0.7632776    | not scorable | not scorable | 0.9834711 | 0.7260795 |
| 3838 | Bn-A02-p25199281 | genome unspecific (oleracea-rapa) | not scorable | not scorable |              | 1 0.751542   | 0.9752066 | 0.657665  |
| 3839 | Bn-A02-p25201372 | A-genome specific (napus-rapa)    | 0.9928229    | 0.6143605    | not scorable | not scorable | 0.9669421 | 0.6023389 |
| 3840 | Bn-A02-p2520421  | A-genome specific (napus-rapa)    | 0.9688995    | 0.6893967    | not scorable | not scorable | 0.9834711 | 0.8861109 |
| 3841 | Bn-A02-p25205468 | A-genome specific (napus-rapa)    | 0.9808612    | 0.3969807    | not scorable | not scorable | 0.9834711 | 0.6045682 |
| 3842 | Bn-A02-p25206495 | A-genome specific (napus-rapa)    | 0.9808612    | 0.4619537    | not scorable | not scorable | 1         | 0.7418953 |
| 3843 | Bn-A02-p25206605 | A-genome specific (napus-rapa)    | 0.9760765    | 0.6348951    | not scorable | not scorable | 0.9834711 | 0.7883735 |
| 3844 | Bn-A02-p25216530 | A-genome specific (napus-rapa)    | 0.9808612    | 0.2618947    | not scorable | not scorable | 0.9834711 | 0.8351889 |
| 3845 | Bn-A02-p25218817 | A-genome specific (napus-rapa)    | 0.9282297    | 0.5755724    | not scorable | not scorable | 0.9752066 | 0.6840392 |
| 3846 | Bn-A02-p25260066 | A-genome specific (napus-rapa)    | 0.9904306    | 0.3791234    | not scorable | not scorable | 1         | 0.7450714 |
| 3847 | Bn-A02-p2527082  | A-genome specific (napus-rapa)    | 0.9784689    | 0.7182524    | not scorable | not scorable | 1         | 0.6417865 |
| 3848 | Bn-A02-p2527735  | A-genome specific (napus-rapa)    | 0.9688995    | 0.7504268    | not scorable | not scorable | 1         | 0.8490733 |
| 3849 | Bn-A02-p25285941 | A-genome specific (rapa only)     | not scorable | not scorable | not scorable | not scorable | 1         | 0.7436799 |
| 3850 | Bn-A02-p25286323 | A-genome specific (rapa only)     | not scorable | not scorable | not scorable | not scorable | 0.5206612 | 0.8930295 |
| 3851 | Bn-A02-p25286373 | A-genome specific (napus-rapa)    | 0.8947368    | 0.3031206    | not scorable | not scorable | 0.5206612 | 0.692642  |
| 3852 | Bn-A02-p25332661 | A-genome specific (rapa only)     | not scorable | not scorable | not scorable | not scorable | 1         | 0.8309836 |
| 3853 | Bn-A02-p25334100 | genome unspecific (all in)        | 0.9856459    | 0.2618202    | 0.9922481    | 0.2440073    | 0.9752066 | 0.466137  |
| 3854 | Bn-A02-p25334266 | A-genome specific (napus-rapa)    | 0.9688995    | 0.7898447    | not scorable | not scorable | 0.9752066 | 0.7802529 |
| 3855 | Bn-A02-p25334271 | A-genome specific (napus-rapa)    | 0.9784689    | 0.8132872    | not scorable | not scorable | 0.9669421 | 0.7840019 |
| 3856 | Bn-A02-p25350701 | A-genome specific (napus-rapa)    | 0.7583732    | 0.6717579    | not scorable | not scorable | 0.9917355 | 0.6839571 |
| 3857 | Bn-A02-p2535232  | A-genome specific (rapa only)     | not scorable | not scorable | not scorable | not scorable | 1         | 0.7257899 |
| 3858 | Bn-A02-p2536779  | A-genome specific (napus-rapa)    | 0.9736842    | 0.7274444    | not scorable | not scorable | 0.9752066 | 0.73816   |

|      |                  |                                |              |              |              |              |              |              |
|------|------------------|--------------------------------|--------------|--------------|--------------|--------------|--------------|--------------|
| 3859 | Bn-A02-p25367886 | A-genome specific (napus-rapa) | 0.9760765    | 0.6727452    | not scorable | not scorable | 1            | 0.6955542    |
| 3860 | Bn-A02-p25375825 | A-genome specific (napus-rapa) | 0.9760765    | 0.651063     | not scorable | not scorable | 1            | 0.7161332    |
| 3861 | Bn-A02-p25389902 | A-genome specific (napus-rapa) | 0.9760765    | 0.7423301    | not scorable | not scorable | 1            | 0.812272     |
| 3862 | Bn-A02-p25400515 | A-genome specific (napus-rapa) | 0.9497608    | 0.7730032    | not scorable | not scorable | 0.9834711    | 0.7955602    |
| 3863 | Bn-A02-p25400591 | A-genome specific (napus-rapa) | 0.9425837    | 0.7311572    | not scorable | not scorable | 0.9917355    | 0.7134288    |
| 3864 | Bn-A02-p25401060 | A-genome specific (rapa only)  | not scorable | not scorable | not scorable | not scorable | 0.9834711    | 0.6469969    |
| 3865 | Bn-A02-p25402286 | A-genome specific (napus-rapa) | 0.9593301    | 0.8104648    | not scorable | not scorable | 0.9917355    | 0.7402028    |
| 3866 | Bn-A02-p25402971 | A-genome specific (napus-rapa) | 0.9712918    | 0.7307721    | not scorable | not scorable | 0.9834711    | 0.8236844    |
| 3867 | Bn-A02-p25413153 | all not scorable               | not scorable | not scorable | not scorable | not scorable | not scorable | not scorable |
| 3868 | Bn-A02-p25419536 | A-genome specific (napus-rapa) | 0.9808612    | 0.3150016    | not scorable | not scorable | 1            | 0.8684912    |
| 3869 | Bn-A02-p2542065  | A-genome specific (napus-rapa) | 0.9665072    | 0.7713618    | not scorable | not scorable | 0.9669421    | 0.7538679    |
| 3870 | Bn-A02-p25429624 | A-genome specific (napus-rapa) | 0.9832536    | 0.4774918    | not scorable | not scorable | 0.9917355    | 0.7816078    |
| 3871 | Bn-A02-p25429837 | A-genome specific (napus-rapa) | 0.9569378    | 0.2545027    | not scorable | not scorable | 0.9917355    | 0.6324435    |
| 3872 | Bn-A02-p25436510 | A-genome specific (napus-rapa) | 0.9832536    | 0.3485574    | not scorable | not scorable | 1            | 0.7474809    |
| 3873 | Bn-A02-p25438684 | A-genome specific (napus-rapa) | 0.9712918    | 0.7670354    | not scorable | not scorable | 0.9917355    | 0.7036653    |
| 3874 | Bn-A02-p2544070  | A-genome specific (napus-rapa) | 0.9808612    | 0.7641829    | not scorable | not scorable | 0.9834711    | 0.6910309    |
| 3875 | Bn-A02-p25445157 | A-genome specific (napus-rapa) | 0.9688995    | 0.2448494    | not scorable | not scorable | 0.9917355    | 0.673512     |
| 3876 | Bn-A02-p25446521 | A-genome specific (napus-rapa) | 0.9760765    | 0.7983402    | not scorable | not scorable | 0.9917355    | 0.7629623    |
| 3877 | Bn-A02-p25448092 | A-genome specific (napus-rapa) | 0.9832536    | 0.7914116    | not scorable | not scorable | 1            | 0.8009782    |
| 3878 | Bn-A02-p25453070 | A-genome specific (napus-rapa) | 0.9832536    | 0.7821937    | not scorable | not scorable | 0.9917355    | 0.7001942    |
| 3879 | Bn-A02-p25453447 | A-genome specific (napus-rapa) | 0.9688995    | 0.7808092    | not scorable | not scorable | 0.9752066    | 0.717015     |
| 3880 | Bn-A02-p25454242 | A-genome specific (napus-rapa) | 0.9712918    | 0.7595798    | not scorable | not scorable | 0.9917355    | 0.7700318    |
| 3881 | Bn-A02-p25454499 | A-genome specific (rapa only)  | not scorable | not scorable | not scorable | not scorable | 0.9917355    | 0.7417291    |
| 3882 | Bn-A02-p25454882 | A-genome specific (napus-rapa) | 0.9712918    | 0.7419256    | not scorable | not scorable | 0.9834711    | 0.7072452    |
| 3883 | Bn-A02-p25456985 | A-genome specific (napus-rapa) | 0.9832536    | 0.649024     | not scorable | not scorable | 0.9834711    | 0.6549544    |
| 3884 | Bn-A02-p25457045 | A-genome specific (napus-rapa) | 0.9736842    | 0.8153956    | not scorable | not scorable | 1            | 0.7757701    |
| 3885 | Bn-A02-p25457843 | A-genome specific (napus-rapa) | 0.9832536    | 0.7692493    | not scorable | not scorable | 0.9834711    | 0.8290427    |
| 3886 | Bn-A02-p25463582 | A-genome specific (napus-rapa) | 0.9736842    | 0.7814487    | not scorable | not scorable | 0.9834711    | 0.7188965    |
| 3887 | Bn-A02-p25465508 | A-genome specific (napus-rapa) | 0.9593301    | 0.8011951    | not scorable | not scorable | 0.9917355    | 0.8009939    |
| 3888 | Bn-A02-p25465589 | A-genome specific (napus-rapa) | 0.9641148    | 0.6783643    | not scorable | not scorable | 0.9752066    | 0.835183     |
| 3889 | Bn-A02-p25477417 | A-genome specific (rapa only)  | not scorable | not scorable | not scorable | not scorable | 1            | 0.8107145    |
| 3890 | Bn-A02-p25479893 | A-genome specific (napus-rapa) | 0.9665072    | 0.7336133    | not scorable | not scorable | 1            | 0.8385277    |
| 3891 | Bn-A02-p25484876 | A-genome specific (napus-rapa) | 0.9736842    | 0.4614016    | not scorable | not scorable | 1            | 0.7779287    |

|      |                  |                                   |              |              |              |              |              |              |
|------|------------------|-----------------------------------|--------------|--------------|--------------|--------------|--------------|--------------|
| 3892 | Bn-A02-p25485627 | A-genome specific (napus-rapa)    | 0.9760765    | 0.6849786    | not scorable | not scorable | 0.9917355    | 0.7877229    |
| 3893 | Bn-A02-p25488435 | A-genome specific (napus-rapa)    | 0.9880383    | 0.4579249    | not scorable | not scorable | 1            | 0.7004995    |
| 3894 | Bn-A02-p2549141  | A-genome specific (napus-rapa)    | 0.9760765    | 0.7501812    | not scorable | not scorable | 0.9917355    | 0.7150395    |
| 3895 | Bn-A02-p25497743 | A-genome specific (napus-rapa)    | 0.9665072    | 0.4827575    | not scorable | not scorable | 0.9752066    | 0.7531053    |
| 3896 | Bn-A02-p2551178  | A-genome specific (napus-rapa)    | 1            | 0.6997946    | not scorable | not scorable | 0.9917355    | 0.7211741    |
| 3897 | Bn-A02-p25530111 | A-genome specific (napus-rapa)    | 0.9688995    | 0.7659855    | not scorable | not scorable | 0.9917355    | 0.8344188    |
| 3898 | Bn-A02-p25530994 | genome unspecific (all in)        | 0.9688995    | 0.3538687    | 0.9767442    | 0.5843842    | 1            | 0.6534097    |
| 3899 | Bn-A02-p25554878 | A-genome specific (napus-rapa)    | 0.9784689    | 0.6235612    | not scorable | not scorable | 0.9256198    | 0.7623515    |
| 3900 | Bn-A02-p25564792 | A-genome specific (napus-rapa)    | 0.9043062    | 0.5261033    | not scorable | not scorable | 0.9834711    | 0.6805814    |
| 3901 | Bn-A02-p25572877 | A-genome specific (napus-rapa)    | 0.9856459    | 0.2909664    | not scorable | not scorable | 0.9917355    | 0.7619383    |
| 3902 | Bn-A02-p2557799  | genome unspecific (oleracea-rapa) | not scorable | not scorable | 0.9922481    | 0.7083627    | 1            | 0.7010074    |
| 3903 | Bn-A02-p25612808 | A-genome specific (napus-rapa)    | 0.9832536    | 0.3084299    | not scorable | not scorable | 1            | 0.7717501    |
| 3904 | Bn-A02-p25615285 | A-genome specific (napus-rapa)    | 0.9617225    | 0.7701499    | not scorable | not scorable | 1            | 0.8086112    |
| 3905 | Bn-A02-p25625124 | A-genome specific (napus-rapa)    | 0.5263158    | 0.7663057    | not scorable | not scorable | 0.6280992    | 0.8006331    |
| 3906 | Bn-A02-p25625846 | A-genome specific (napus-rapa)    | 0.9928229    | 0.5837622    | not scorable | not scorable | 0.6033058    | 0.8064268    |
| 3907 | Bn-A02-p25626500 | A-genome specific (napus-rapa)    | 0.569378     | 0.8204875    | not scorable | not scorable | 0.6033058    | 0.8046752    |
| 3908 | Bn-A02-p25630745 | A-genome specific (napus-rapa)    | 0.5741627    | 0.7672402    | not scorable | not scorable | 0.5950413    | 0.8365013    |
| 3909 | Bn-A02-p25631431 | A-genome specific (napus-rapa)    | 0.5717703    | 0.7990752    | not scorable | not scorable | 0.6198347    | 0.7510429    |
| 3910 | Bn-A02-p25632681 | A-genome specific (napus-rapa)    | 0.5717703    | 0.6927576    | not scorable | not scorable | 0.6528926    | 0.8233868    |
| 3911 | Bn-A02-p25636038 | A-genome specific (napus-rapa)    | 0.5358852    | 0.7991782    | not scorable | not scorable | 0.5702479    | 0.725287     |
| 3912 | Bn-A02-p25636136 | A-genome specific (napus-rapa)    | 0.5550239    | 0.7480863    | not scorable | not scorable | 0.6198347    | 0.750002     |
| 3913 | Bn-A02-p25644999 | all not scorable                  | not scorable | not scorable | not scorable | not scorable | not scorable | not scorable |
| 3914 | Bn-A02-p25652516 | A-genome specific (napus-rapa)    | 0.9665072    | 0.5213373    | not scorable | not scorable | 0.9669421    | 0.6927272    |
| 3915 | Bn-A02-p25655528 | A-genome specific (napus-rapa)    | 0.923445     | 0.4746001    | not scorable | not scorable | 1            | 0.7063446    |
| 3916 | Bn-A02-p25670193 | A-genome specific (napus-rapa)    | 0.9688995    | 0.4428025    | not scorable | not scorable | 0.9834711    | 0.7674047    |
| 3917 | Bn-A02-p25678882 | A-genome specific (napus-rapa)    | 0.9712918    | 0.4364111    | not scorable | not scorable | 1            | 0.712101     |
| 3918 | Bn-A02-p25681480 | A-genome specific (napus-rapa)    | 0.9784689    | 0.7493784    | not scorable | not scorable | 0.9421487    | 0.7899156    |
| 3919 | Bn-A02-p25687470 | A-genome specific (napus-rapa)    | 0.9617225    | 0.1909869    | not scorable | not scorable | 0.9752066    | 0.7376403    |
| 3920 | Bn-A02-p2568989  | A-genome specific (rapa only)     | not scorable | not scorable | not scorable | not scorable | 0.9834711    | 0.5355994    |
| 3921 | Bn-A02-p2572194  | A-genome specific (napus-rapa)    | 0.9976076    | 0.8292307    | not scorable | not scorable | 1            | 0.8640971    |
| 3922 | Bn-A02-p2572625  | A-genome specific (napus-rapa)    | 0.9976076    | 0.7241075    | not scorable | not scorable | 0.9917355    | 0.7682964    |
| 3923 | Bn-A02-p25734367 | A-genome specific (napus-rapa)    | 0.9712918    | 0.4049708    | not scorable | not scorable | 0.9917355    | 0.716334     |
| 3924 | Bn-A02-p25735700 | A-genome specific (napus-rapa)    | 0.9282297    | 0.7727267    | not scorable | not scorable | 0.6528926    | 0.8785214    |

|      |                  |                                   |              |              |              |              |           |           |
|------|------------------|-----------------------------------|--------------|--------------|--------------|--------------|-----------|-----------|
| 3925 | Bn-A02-p25736307 | A-genome specific (napus-rapa)    | 0.5669857    | 0.810605     | not scorable | not scorable | 1         | 0.7757788 |
| 3926 | Bn-A02-p25739024 | A-genome specific (napus-rapa)    | 0.9784689    | 0.3976241    | not scorable | not scorable | 0.9834711 | 0.7549633 |
| 3927 | Bn-A02-p25741878 | A-genome specific (napus-rapa)    | 0.9688995    | 0.3933358    | not scorable | not scorable | 0.9917355 | 0.7895689 |
| 3928 | Bn-A02-p25746504 | A-genome specific (napus-rapa)    | 1            | 0.5243186    | not scorable | not scorable | 1         | 0.7490153 |
| 3929 | Bn-A02-p25747937 | A-genome specific (rapa only)     | not scorable | not scorable | not scorable | not scorable | 1         | 0.883854  |
| 3930 | Bn-A02-p25762081 | A-genome specific (napus-rapa)    | 0.9952153    | 0.2743968    | not scorable | not scorable | 0.9917355 | 0.759901  |
| 3931 | Bn-A02-p25795588 | A-genome specific (napus-rapa)    | 0.9641148    | 0.3011917    | not scorable | not scorable | 1         | 0.6392568 |
| 3932 | Bn-A02-p25814719 | A-genome specific (napus-rapa)    | 0.9712918    | 0.4716518    | not scorable | not scorable | 0.9752066 | 0.763435  |
| 3933 | Bn-A02-p25820450 | A-genome specific (napus-rapa)    | 0.9760765    | 0.7957777    | not scorable | not scorable | 1         | 0.8083437 |
| 3934 | Bn-A02-p25821750 | A-genome specific (napus-rapa)    | 0.9880383    | 0.8817617    | not scorable | not scorable | 1         | 0.792043  |
| 3935 | Bn-A02-p25826690 | A-genome specific (napus-rapa)    | 0.9760765    | 0.7687581    | not scorable | not scorable | 0.9834711 | 0.7344646 |
| 3936 | Bn-A02-p25827208 | A-genome specific (napus-rapa)    | 0.9904306    | 0.7642173    | not scorable | not scorable | 0.9834711 | 0.7254342 |
| 3937 | Bn-A02-p2582999  | A-genome specific (napus-rapa)    | 0.9665072    | 0.6571609    | not scorable | not scorable | 1         | 0.7168393 |
| 3938 | Bn-A02-p25841130 | A-genome specific (napus-rapa)    | 0.930622     | 0.6638005    | not scorable | not scorable | 1         | 0.6396332 |
| 3939 | Bn-A02-p25841252 | A-genome specific (napus-rapa)    | 0.930622     | 0.716061     | not scorable | not scorable | 0.5206612 | 0.7955049 |
| 3940 | Bn-A02-p25841382 | A-genome specific (napus-rapa)    | 0.9497608    | 0.7266648    | not scorable | not scorable | 0.5454546 | 0.6909549 |
| 3941 | Bn-A02-p25841722 | A-genome specific (napus-rapa)    | 0.9449761    | 0.6642765    | not scorable | not scorable | 0.5619835 | 0.6384211 |
| 3942 | Bn-A02-p25842875 | A-genome specific (napus-rapa)    | 0.9808612    | 0.7622928    | not scorable | not scorable | 0.9917355 | 0.7260741 |
| 3943 | Bn-A02-p25844300 | A-genome specific (napus-rapa)    | 0.9665072    | 0.785914     | not scorable | not scorable | 1         | 0.7415183 |
| 3944 | Bn-A02-p25845339 | A-genome specific (napus-rapa)    | 0.9760765    | 0.7935207    | not scorable | not scorable | 0.9752066 | 0.7594121 |
| 3945 | Bn-A02-p25857471 | A-genome specific (napus-rapa)    | 0.9066986    | 0.4629106    | not scorable | not scorable | 0.5123967 | 0.699336  |
| 3946 | Bn-A02-p25864051 | A-genome specific (napus-rapa)    | 0.9641148    | 0.6404436    | not scorable | not scorable | 0.9752066 | 0.8045942 |
| 3947 | Bn-A02-p25864853 | A-genome specific (napus-rapa)    | 0.854067     | 0.7860294    | not scorable | not scorable | 0.6198347 | 0.7113413 |
| 3948 | Bn-A02-p25865360 | A-genome specific (napus-rapa)    | 0.9760765    | 0.5010147    | not scorable | not scorable | 1         | 0.7286872 |
| 3949 | Bn-A02-p25876712 | A-genome specific (napus-rapa)    | 1            | 0.5214758    | not scorable | not scorable | 1         | 0.8333946 |
| 3950 | Bn-A02-p25881031 | A-genome specific (napus-rapa)    | 0.9928229    | 0.7448925    | not scorable | not scorable | 1         | 0.6961026 |
| 3951 | Bn-A02-p25881408 | A-genome specific (napus-rapa)    | 0.9736842    | 0.4496895    | not scorable | not scorable | 0.9917355 | 0.7178582 |
| 3952 | Bn-A02-p25883567 | A-genome specific (napus-rapa)    | 0.9784689    | 0.8083759    | not scorable | not scorable | 0.9917355 | 0.7647892 |
| 3953 | Bn-A02-p25966536 | genome unspecific (oleracea-rapa) | not scorable | not scorable |              | 1            | 0.5178636 | 1         |
| 3954 | Bn-A02-p26013503 | A-genome specific (napus-rapa)    | 0.84689      | 0.7475929    | not scorable | not scorable | 0.9669421 | 0.7360693 |
| 3955 | Bn-A02-p2608125  | A-genome specific (napus-rapa)    | 0.9976076    | 0.7863283    | not scorable | not scorable | 0.9917355 | 0.7411901 |
| 3956 | Bn-A02-p26154897 | A-genome specific (napus-rapa)    | 0.9712918    | 0.6476855    | not scorable | not scorable | 0.9917355 | 0.7736945 |
| 3957 | Bn-A02-p26154951 | A-genome specific (napus-rapa)    | 0.9904306    | 0.7867417    | not scorable | not scorable | 0.9917355 | 0.8218488 |



|      |                  |                                   |              |              |              |              |              |              |           |
|------|------------------|-----------------------------------|--------------|--------------|--------------|--------------|--------------|--------------|-----------|
| 3958 | Bn-A02-p2615923  | A-genome specific (rapa only)     | not scorable | not scorable | not scorable | not scorable | 1            | 0.801878     |           |
| 3959 | Bn-A02-p2617701  | A-genome specific (napus-rapa)    | 0.9808612    | 0.7945674    | not scorable | not scorable | 0.9669421    | 0.8006936    |           |
| 3960 | Bn-A02-p2617781  | A-genome specific (napus-rapa)    | 0.9784689    | 0.7875533    | not scorable | not scorable | 0.9752066    | 0.7834601    |           |
| 3961 | Bn-A02-p26193572 | A-genome specific (napus-rapa)    | 0.8875598    | 0.6917698    | not scorable | not scorable | 0.9752066    | 0.8332381    |           |
| 3962 | Bn-A02-p2620397  | A-genome specific (rapa only)     | not scorable | not scorable | not scorable | not scorable | 1            | 0.5637079    |           |
| 3963 | Bn-A02-p26214379 | A-genome specific (rapa only)     | not scorable | not scorable | not scorable | not scorable | 1            | 0.6990784    |           |
| 3964 | Bn-A02-p2624375  | A-genome specific (napus-rapa)    | 0.9473684    | 0.8466316    | not scorable | not scorable | 0.6528926    | 0.6872752    |           |
| 3965 | Bn-A02-p26304354 | A-genome specific (napus-rapa)    | 0.9808612    | 0.399991     | not scorable | not scorable | 0.9090909    | 0.7015182    |           |
| 3966 | Bn-A02-p26307761 | all not scorable                  | not scorable | not scorable | not scorable | not scorable | not scorable | not scorable |           |
| 3967 | Bn-A02-p26322916 | A-genome specific (napus-rapa)    | 0.9832536    | 0.7588039    | not scorable | not scorable | 0.9834711    | 0.7526912    |           |
| 3968 | Bn-A02-p26335941 | A-genome specific (rapa only)     | not scorable | not scorable | not scorable | not scorable | 0.9917355    | 0.7744511    |           |
| 3969 | Bn-A02-p26345558 | A-genome specific (napus-rapa)    | 0.9641148    | 0.4395147    | not scorable | not scorable | 1            | 0.9277734    |           |
| 3970 | Bn-A02-p26373377 | A-genome specific (rapa only)     | not scorable | not scorable | not scorable | not scorable | 0.9586777    | 0.7892213    |           |
| 3971 | Bn-A02-p2638031  | A-genome specific (napus-rapa)    | 0.9497608    | 0.7690462    | not scorable | not scorable | 0.661157     | 0.7666137    |           |
| 3972 | Bn-A02-p26380384 | A-genome specific (napus-rapa)    | 0.9760765    | 0.30195      | not scorable | not scorable | 0.9917355    | 0.7596891    |           |
| 3973 | Bn-A02-p26398002 | A-genome specific (napus-rapa)    | 0.9832536    | 0.792685     | not scorable | not scorable | 0.9669421    | 0.8037483    |           |
| 3974 | Bn-A02-p26411585 | A-genome specific (napus-rapa)    | 0.9736842    | 0.2365642    | not scorable | not scorable | 0.9504132    | 0.4493165    |           |
| 3975 | Bn-A02-p26412693 | A-genome specific (napus-rapa)    | 0.9641148    | 0.2491794    | not scorable | not scorable | 0.9917355    | 0.6738153    |           |
| 3976 | Bn-A02-p26414199 | genome unspecific (oleracea-rapa) | not scorable | not scorable |              | 1            | 0.8132226    | 1            | 0.9205657 |
| 3977 | Bn-A02-p26419529 | A-genome specific (rapa only)     | not scorable | not scorable | not scorable | not scorable | 0.9917355    | 0.7722063    |           |
| 3978 | Bn-A02-p26421790 | A-genome specific (rapa only)     | not scorable | not scorable | not scorable | not scorable | 1            | 0.7378635    |           |
| 3979 | Bn-A02-p26425347 | A-genome specific (rapa only)     | not scorable | not scorable | not scorable | not scorable | 1            | 0.8065163    |           |
| 3980 | Bn-A02-p2642904  | A-genome specific (napus-rapa)    | 0.9665072    | 0.7193154    | not scorable | not scorable | 1            | 0.7948084    |           |
| 3981 | Bn-A02-p2643078  | A-genome specific (napus-rapa)    | 0.9569378    | 0.8174909    | not scorable | not scorable | 0.9834711    | 0.8277231    |           |
| 3982 | Bn-A02-p26431587 | A-genome specific (rapa only)     | not scorable | not scorable | not scorable | not scorable | 0.9917355    | 0.7846536    |           |
| 3983 | Bn-A02-p26435743 | A-genome specific (rapa only)     | not scorable | not scorable | not scorable | not scorable | 0.9917355    | 0.7133168    |           |
| 3984 | Bn-A02-p26446178 | A-genome specific (rapa only)     | not scorable | not scorable | not scorable | not scorable | 0.9752066    | 0.7688381    |           |
| 3985 | Bn-A02-p2646929  | genome unspecific (oleracea-rapa) | not scorable | not scorable | 0.9844961    | 0.827836     | 0.9917355    | 0.680208     |           |
| 3986 | Bn-A02-p26512828 | A-genome specific (rapa only)     | not scorable | not scorable | not scorable | not scorable | 1            | 0.757892     |           |
| 3987 | Bn-A02-p26512923 | A-genome specific (rapa only)     | not scorable | not scorable | not scorable | not scorable | 0.9834711    | 0.7818587    |           |
| 3988 | Bn-A02-p26514827 | A-genome specific (rapa only)     | not scorable | not scorable | not scorable | not scorable | 0.553719     | 0.9267779    |           |
| 3989 | Bn-A02-p26535192 | A-genome specific (rapa only)     | not scorable | not scorable | not scorable | not scorable | 0.677686     | 0.8058625    |           |
| 3990 | Bn-A02-p26539305 | A-genome specific (rapa only)     | not scorable | not scorable | not scorable | not scorable | 1            | 0.8042592    |           |

|      |                  |                                   |              |              |              |              |              |              |
|------|------------------|-----------------------------------|--------------|--------------|--------------|--------------|--------------|--------------|
| 3991 | Bn-A02-p26547428 | A-genome specific (rapa only)     | not scorable | not scorable | not scorable | not scorable | 1            | 0.7725431    |
| 3992 | Bn-A02-p2654991  | A-genome specific (napus-rapa)    | 0.9545454    | 0.6550132    | not scorable | not scorable | 0.9834711    | 0.7215709    |
| 3993 | Bn-A02-p26554539 | genome unspecific (oleracea-rapa) | not scorable | not scorable | 1            | 0.6706535    | 0.9752066    | 0.6763287    |
| 3994 | Bn-A02-p26564337 | A-genome specific (rapa only)     | not scorable | not scorable | not scorable | not scorable | 0.9917355    | 0.7519459    |
| 3995 | Bn-A02-p26567426 | A-genome specific (rapa only)     | not scorable | not scorable | not scorable | not scorable | 0.9917355    | 0.816599     |
| 3996 | Bn-A02-p26571107 | A-genome specific (rapa only)     | not scorable | not scorable | not scorable | not scorable | 0.9917355    | 0.7906119    |
| 3997 | Bn-A02-p266070   | A-genome specific (napus-rapa)    | 0.9976076    | 0.6167102    | not scorable | not scorable | 0.9421487    | 0.6662418    |
| 3998 | Bn-A02-p266121   | A-genome specific (napus-rapa)    | 0.9904306    | 0.6227802    | not scorable | not scorable | 0.9752066    | 0.6053193    |
| 3999 | Bn-A02-p26620662 | A-genome specific (napus-rapa)    | 0.9832536    | 0.7806922    | not scorable | not scorable | 1            | 0.7642689    |
| 4000 | Bn-A02-p26621160 | A-genome specific (napus-rapa)    | 0.9808612    | 0.7907835    | not scorable | not scorable | 0.9917355    | 0.8348098    |
| 4001 | Bn-A02-p26625153 | A-genome specific (napus-rapa)    | 0.9928229    | 0.5479173    | not scorable | not scorable | 0.9917355    | 0.8063736    |
| 4002 | Bn-A02-p26625696 | A-genome specific (napus-rapa)    | 0.9952153    | 0.4624704    | not scorable | not scorable | 0.9917355    | 0.7242765    |
| 4003 | Bn-A02-p26630032 | A-genome specific (rapa only)     | not scorable | not scorable | not scorable | not scorable | 0.9917355    | 0.7779773    |
| 4004 | Bn-A02-p26640222 | A-genome specific (napus-rapa)    | 0.9688995    | 0.5788972    | not scorable | not scorable | 0.9917355    | 0.619308     |
| 4005 | Bn-A02-p26641996 | A-genome specific (napus-rapa)    | 0.9712918    | 0.7847545    | not scorable | not scorable | 1            | 0.8028569    |
| 4006 | Bn-A02-p26644297 | genome unspecific (oleracea-rapa) | not scorable | not scorable | 1            | 0.7580749    | 0.9834711    | 0.7418215    |
| 4007 | Bn-A02-p26645956 | A-genome specific (napus-rapa)    | 0.9521531    | 0.7631143    | not scorable | not scorable | 1            | 0.5694045    |
| 4008 | Bn-A02-p26646040 | napus specific                    | 0.8803828    | 0.746186     | not scorable | not scorable | not scorable | not scorable |
| 4009 | Bn-A02-p26646436 | A-genome specific (napus-rapa)    | 0.9784689    | 0.7430586    | not scorable | not scorable | 1            | 0.8842213    |
| 4010 | Bn-A02-p26651278 | A-genome specific (napus-rapa)    | 0.9688995    | 0.7659454    | not scorable | not scorable | 1            | 0.8722966    |
| 4011 | Bn-A02-p26653626 | A-genome specific (napus-rapa)    | 0.9593301    | 0.7489499    | not scorable | not scorable | 1            | 0.897248     |
| 4012 | Bn-A02-p26654006 | A-genome specific (napus-rapa)    | 0.9569378    | 0.6947718    | not scorable | not scorable | 1            | 0.8088461    |
| 4013 | Bn-A02-p26656067 | A-genome specific (napus-rapa)    | 0.9665072    | 0.7541266    | not scorable | not scorable | 0.9834711    | 0.8084803    |
| 4014 | Bn-A02-p26656981 | A-genome specific (napus-rapa)    | 0.9880383    | 0.7365009    | not scorable | not scorable | 0.9917355    | 0.6713122    |
| 4015 | Bn-A02-p26658350 | A-genome specific (napus-rapa)    | 0.9904306    | 0.2795922    | not scorable | not scorable | 0.9917355    | 0.7690216    |
| 4016 | Bn-A02-p26665282 | A-genome specific (napus-rapa)    | 0.9784689    | 0.834662     | not scorable | not scorable | 0.9917355    | 0.8041646    |
| 4017 | Bn-A02-p26668289 | A-genome specific (napus-rapa)    | 0.9736842    | 0.4320352    | not scorable | not scorable | 0.9917355    | 0.740729     |
| 4018 | Bn-A02-p26669888 | A-genome specific (napus-rapa)    | 0.9569378    | 0.770789     | not scorable | not scorable | 1            | 0.861191     |
| 4019 | Bn-A02-p26686239 | A-genome specific (napus-rapa)    | 0.9641148    | 0.5426888    | not scorable | not scorable | 1            | 0.6891931    |
| 4020 | Bn-A02-p26689319 | napus specific                    | 0.9473684    | 0.7657803    | not scorable | not scorable | not scorable | not scorable |
| 4021 | Bn-A02-p26710300 | A-genome specific (napus-rapa)    | 0.9856459    | 0.4745325    | not scorable | not scorable | 1            | 0.7859391    |
| 4022 | Bn-A02-p26713316 | A-genome specific (napus-rapa)    | 0.9808612    | 0.5081707    | not scorable | not scorable | 0.9917355    | 0.8199698    |
| 4023 | Bn-A02-p26733511 | A-genome specific (napus-rapa)    | 0.3014354    | 0.8632697    | not scorable | not scorable | 0.6033058    | 0.7495869    |

|      |                  |                                |              |              |              |              |              |              |
|------|------------------|--------------------------------|--------------|--------------|--------------|--------------|--------------|--------------|
| 4024 | Bn-A02-p2673795  | A-genome specific (rapa only)  | not scorable | not scorable | not scorable | not scorable | 0.9917355    | 0.8189792    |
| 4025 | Bn-A02-p26792851 | A-genome specific (napus-rapa) | 0.9880383    | 0.3599333    | not scorable | not scorable | 1            | 0.7368796    |
| 4026 | Bn-A02-p26803902 | A-genome specific (napus-rapa) | 0.9880383    | 0.4413253    | not scorable | not scorable | 0.9834711    | 0.7269258    |
| 4027 | Bn-A02-p26804091 | napus specific                 | 0.9641148    | 0.753601     | not scorable | not scorable | not scorable | not scorable |
| 4028 | Bn-A02-p26816101 | A-genome specific (napus-rapa) | 0.9856459    | 0.620794     | not scorable | not scorable | 1            | 0.8381849    |
| 4029 | Bn-A02-p26816506 | A-genome specific (napus-rapa) | 0.9712918    | 0.7593117    | not scorable | not scorable | 0.9752066    | 0.7046372    |
| 4030 | Bn-A02-p26819130 | A-genome specific (napus-rapa) | 0.9641148    | 0.6796762    | not scorable | not scorable | 0.9669421    | 0.6601005    |
| 4031 | Bn-A02-p26819608 | A-genome specific (napus-rapa) | 0.9736842    | 0.6938714    | not scorable | not scorable | 1            | 0.7155285    |
| 4032 | Bn-A02-p26824239 | A-genome specific (napus-rapa) | 0.9545454    | 0.6782708    | not scorable | not scorable | 0.9752066    | 0.7695445    |
| 4033 | Bn-A02-p26824300 | A-genome specific (napus-rapa) | 0.9760765    | 0.6812587    | not scorable | not scorable | 0.9834711    | 0.7296497    |
| 4034 | Bn-A02-p26824823 | A-genome specific (napus-rapa) | 0.9880383    | 0.5716254    | not scorable | not scorable | 1            | 0.8088076    |
| 4035 | Bn-A02-p26832454 | A-genome specific (napus-rapa) | 0.9665072    | 0.7540839    | not scorable | not scorable | 0.9834711    | 0.6486282    |
| 4036 | Bn-A02-p26845132 | A-genome specific (napus-rapa) | 0.9784689    | 0.3136747    | not scorable | not scorable | 1            | 0.9175813    |
| 4037 | Bn-A02-p26853555 | A-genome specific (napus-rapa) | 0.9784689    | 0.4481732    | not scorable | not scorable | 0.9917355    | 0.7805899    |
| 4038 | Bn-A02-p26854880 | A-genome specific (napus-rapa) | 0.9736842    | 0.7967595    | not scorable | not scorable | 0.9752066    | 0.7930169    |
| 4039 | Bn-A02-p26854933 | A-genome specific (napus-rapa) | 0.9736842    | 0.8090507    | not scorable | not scorable | 1            | 0.8546475    |
| 4040 | Bn-A02-p26857230 | A-genome specific (napus-rapa) | 0.9760765    | 0.5307622    | not scorable | not scorable | 0.9752066    | 0.6929754    |
| 4041 | Bn-A02-p26883269 | A-genome specific (napus-rapa) | 0.9832536    | 0.7466351    | not scorable | not scorable | 1            | 0.7359638    |
| 4042 | Bn-A02-p26887073 | A-genome specific (rapa only)  | not scorable | not scorable | not scorable | not scorable | 1            | 0.7684813    |
| 4043 | Bn-A02-p26890561 | genome unspecific (all in)     | 0.9808612    | 0.4807646    | 0.9379845    | 0.657937     | 1            | 0.7935476    |
| 4044 | Bn-A02-p26892575 | A-genome specific (napus-rapa) | 0.9928229    | 0.7423341    | not scorable | not scorable | 0.9917355    | 0.7790258    |
| 4045 | Bn-A02-p26900937 | A-genome specific (napus-rapa) | 0.9928229    | 0.7546605    | not scorable | not scorable | 0.9669421    | 0.6675804    |
| 4046 | Bn-A02-p26901243 | A-genome specific (napus-rapa) | 0.9736842    | 0.851343     | not scorable | not scorable | 0.9834711    | 0.7954875    |
| 4047 | Bn-A02-p2692116  | A-genome specific (napus-rapa) | 0.9808612    | 0.7156996    | not scorable | not scorable | 1            | 0.6999377    |
| 4048 | Bn-A02-p26921384 | A-genome specific (napus-rapa) | 0.9808612    | 0.7524504    | not scorable | not scorable | 1            | 0.9040579    |
| 4049 | Bn-A02-p26946005 | A-genome specific (napus-rapa) | 0.9760765    | 0.3013268    | not scorable | not scorable | 0.9834711    | 0.5502778    |
| 4050 | Bn-A02-p26947254 | A-genome specific (napus-rapa) | 0.9952153    | 0.7655926    | not scorable | not scorable | 0.9917355    | 0.6948284    |
| 4051 | Bn-A02-p2695870  | A-genome specific (napus-rapa) | 0.9808612    | 0.8047065    | not scorable | not scorable | 0.9752066    | 0.742887     |
| 4052 | Bn-A02-p26975795 | A-genome specific (napus-rapa) | 0.9976076    | 0.9081466    | not scorable | not scorable | 1            | 0.9072468    |
| 4053 | Bn-A02-p2698217  | A-genome specific (napus-rapa) | 0.9952153    | 0.7598017    | not scorable | not scorable | 1            | 0.8049851    |
| 4054 | Bn-A02-p26982864 | A-genome specific (napus-rapa) | 0.9736842    | 0.7551115    | not scorable | not scorable | 1            | 0.7686984    |
| 4055 | Bn-A02-p26986319 | A-genome specific (rapa only)  | not scorable | not scorable | not scorable | not scorable | 0.9917355    | 0.7323602    |
| 4056 | Bn-A02-p26987864 | A-genome specific (napus-rapa) | 0.9904306    | 0.4711652    | not scorable | not scorable | 1            | 0.811287     |

|      |                  |                                |              |              |              |              |           |           |
|------|------------------|--------------------------------|--------------|--------------|--------------|--------------|-----------|-----------|
| 4057 | Bn-A02-p27022909 | A-genome specific (napus-rapa) | 0.9712918    | 0.7675508    | not scorable | not scorable | 1         | 0.8020658 |
| 4058 | Bn-A02-p27024443 | A-genome specific (rapa only)  | not scorable | not scorable | not scorable | not scorable | 0.9917355 | 0.7196941 |
| 4059 | Bn-A02-p27030941 | A-genome specific (rapa only)  | not scorable | not scorable | not scorable | not scorable | 1         | 0.7651234 |
| 4060 | Bn-A02-p27035366 | A-genome specific (rapa only)  | not scorable | not scorable | not scorable | not scorable | 0.9917355 | 0.6993365 |
| 4061 | Bn-A02-p27035425 | A-genome specific (rapa only)  | not scorable | not scorable | not scorable | not scorable | 0.9586777 | 0.693325  |
| 4062 | Bn-A02-p27042108 | A-genome specific (rapa only)  | not scorable | not scorable | not scorable | not scorable | 0.9917355 | 0.6703722 |
| 4063 | Bn-A02-p27043712 | A-genome specific (rapa only)  | not scorable | not scorable | not scorable | not scorable | 0.9669421 | 0.7058506 |
| 4064 | Bn-A02-p27051969 | A-genome specific (rapa only)  | not scorable | not scorable | not scorable | not scorable | 0.5454546 | 0.9033917 |
| 4065 | Bn-A02-p27052532 | A-genome specific (rapa only)  | not scorable | not scorable | not scorable | not scorable | 0.9917355 | 0.7801372 |
| 4066 | Bn-A02-p27052742 | A-genome specific (napus-rapa) | 0.937799     | 0.7954038    | not scorable | not scorable | 0.9917355 | 0.7201011 |
| 4067 | Bn-A02-p27055844 | A-genome specific (napus-rapa) | 0.9976076    | 0.7761796    | not scorable | not scorable | 0.9834711 | 0.7095855 |
| 4068 | Bn-A02-p27055872 | A-genome specific (napus-rapa) | 0.9976076    | 0.6695601    | not scorable | not scorable | 0.9834711 | 0.6932496 |
| 4069 | Bn-A02-p2707979  | A-genome specific (napus-rapa) | 0.8755981    | 0.7478034    | not scorable | not scorable | 0.9669421 | 0.7306691 |
| 4070 | Bn-A02-p2708161  | A-genome specific (napus-rapa) | 0.8851675    | 0.7656389    | not scorable | not scorable | 0.9834711 | 0.6962705 |
| 4071 | Bn-A02-p27109424 | A-genome specific (napus-rapa) | 0.9976076    | 0.7050758    | not scorable | not scorable | 1         | 0.8116624 |
| 4072 | Bn-A02-p27109713 | A-genome specific (napus-rapa) | 0.9880383    | 0.7930319    | not scorable | not scorable | 1         | 0.7193862 |
| 4073 | Bn-A02-p27109858 | A-genome specific (napus-rapa) | 0.9808612    | 0.786954     | not scorable | not scorable | 0.9752066 | 0.667107  |
| 4074 | Bn-A02-p27110006 | A-genome specific (napus-rapa) | 0.9976076    | 0.7360944    | not scorable | not scorable | 0.9917355 | 0.8136193 |
| 4075 | Bn-A02-p27110104 | A-genome specific (rapa only)  | not scorable | not scorable | not scorable | not scorable | 1         | 0.8036969 |
| 4076 | Bn-A02-p27111886 | A-genome specific (napus-rapa) | 0.9904306    | 0.705619     | not scorable | not scorable | 1         | 0.6223736 |
| 4077 | Bn-A02-p27111963 | A-genome specific (napus-rapa) | 0.9856459    | 0.800321     | not scorable | not scorable | 0.9834711 | 0.6771937 |
| 4078 | Bn-A02-p27121126 | A-genome specific (rapa only)  | not scorable | not scorable | not scorable | not scorable | 0.9917355 | 0.758953  |
| 4079 | Bn-A02-p27122935 | A-genome specific (napus-rapa) | 0.9354067    | 0.7579655    | not scorable | not scorable | 0.9586777 | 0.8869727 |
| 4080 | Bn-A02-p27124090 | A-genome specific (napus-rapa) | 0.9928229    | 0.7467044    | not scorable | not scorable | 0.9917355 | 0.7432273 |
| 4081 | Bn-A02-p27125319 | A-genome specific (napus-rapa) | 0.9952153    | 0.7443404    | not scorable | not scorable | 0.9752066 | 0.7277436 |
| 4082 | Bn-A02-p27134251 | A-genome specific (rapa only)  | not scorable | not scorable | not scorable | not scorable | 0.9917355 | 0.8322234 |
| 4083 | Bn-A02-p27144    | A-genome specific (napus-rapa) | 1            | 0.9454014    | not scorable | not scorable | 0.9834711 | 0.9129306 |
| 4084 | Bn-A02-p27149778 | A-genome specific (napus-rapa) | 0.9736842    | 0.6724017    | not scorable | not scorable | 1         | 0.7319797 |
| 4085 | Bn-A02-p27149888 | A-genome specific (napus-rapa) | 0.9832536    | 0.760445     | not scorable | not scorable | 1         | 0.6918393 |
| 4086 | Bn-A02-p27158239 | A-genome specific (napus-rapa) | 1            | 0.4580872    | not scorable | not scorable | 0.9917355 | 0.7487189 |
| 4087 | Bn-A02-p27158781 | A-genome specific (rapa only)  | not scorable | not scorable | not scorable | not scorable | 0.9752066 | 0.7163467 |
| 4088 | Bn-A02-p27171199 | A-genome specific (rapa only)  | not scorable | not scorable | not scorable | not scorable | 0.9834711 | 0.8014399 |
| 4089 | Bn-A02-p27172338 | A-genome specific (napus-rapa) | 0.9330143    | 0.7801768    | not scorable | not scorable | 0.9586777 | 0.7515734 |

|      |                  |                                |              |              |              |              |           |           |
|------|------------------|--------------------------------|--------------|--------------|--------------|--------------|-----------|-----------|
| 4090 | Bn-A02-p27179350 | A-genome specific (napus-rapa) | 0.9688995    | 0.8147829    | not scorable | not scorable | 0.9834711 | 0.6780698 |
| 4091 | Bn-A02-p27180049 | A-genome specific (napus-rapa) | 0.9760765    | 0.7316093    | not scorable | not scorable | 0.9752066 | 0.688991  |
| 4092 | Bn-A02-p2718786  | A-genome specific (rapa only)  | not scorable | not scorable | not scorable | not scorable | 0.9917355 | 0.7767615 |
| 4093 | Bn-A02-p27187948 | A-genome specific (rapa only)  | not scorable | not scorable | not scorable | not scorable | 0.9834711 | 0.7809755 |
| 4094 | Bn-A02-p27203061 | A-genome specific (napus-rapa) | 0.9712918    | 0.8052812    | not scorable | not scorable | 0.9752066 | 0.7218333 |
| 4095 | Bn-A02-p27215745 | A-genome specific (napus-rapa) | 0.9856459    | 0.8049582    | not scorable | not scorable | 1         | 0.9024585 |
| 4096 | Bn-A02-p27220702 | A-genome specific (rapa only)  | not scorable | not scorable | not scorable | not scorable | 0.9752066 | 0.715555  |
| 4097 | Bn-A02-p27226579 | A-genome specific (napus-rapa) | 0.9976076    | 0.8044042    | not scorable | not scorable | 0.9917355 | 0.7104958 |
| 4098 | Bn-A02-p27245861 | A-genome specific (napus-rapa) | 0.9808612    | 0.7580105    | not scorable | not scorable | 0.9917355 | 0.7575112 |
| 4099 | Bn-A02-p27246186 | A-genome specific (rapa only)  | not scorable | not scorable | not scorable | not scorable | 0.9834711 | 0.9168805 |
| 4100 | Bn-A02-p27255197 | A-genome specific (napus-rapa) | 1            | 0.7989994    | not scorable | not scorable | 1         | 0.9175813 |
| 4101 | Bn-A02-p27262588 | A-genome specific (napus-rapa) | 0.9784689    | 0.6537481    | not scorable | not scorable | 0.9834711 | 0.6727278 |
| 4102 | Bn-A02-p2727560  | A-genome specific (napus-rapa) | 0.9760765    | 0.6094089    | not scorable | not scorable | 1         | 0.6658591 |
| 4103 | Bn-A02-p27286923 | A-genome specific (napus-rapa) | 0.9952153    | 0.6910018    | not scorable | not scorable | 0.9752066 | 0.7611907 |
| 4104 | Bn-A02-p27288011 | A-genome specific (napus-rapa) | 0.9976076    | 0.7435452    | not scorable | not scorable | 0.9834711 | 0.7656165 |
| 4105 | Bn-A02-p27288044 | A-genome specific (napus-rapa) | 0.9976076    | 0.790016     | not scorable | not scorable | 0.9917355 | 0.8122747 |
| 4106 | Bn-A02-p27288121 | A-genome specific (napus-rapa) | 0.9976076    | 0.7893304    | not scorable | not scorable | 0.9834711 | 0.7964598 |
| 4107 | Bn-A02-p27303569 | A-genome specific (rapa only)  | not scorable | not scorable | not scorable | not scorable | 0.5041322 | 0.8875917 |
| 4108 | Bn-A02-p27304105 | A-genome specific (napus-rapa) | 0.9952153    | 0.7667795    | not scorable | not scorable | 0.9917355 | 0.8034995 |
| 4109 | Bn-A02-p27321599 | A-genome specific (napus-rapa) | 0.930622     | 0.3027512    | not scorable | not scorable | 1         | 0.7252899 |
| 4110 | Bn-A02-p27327804 | A-genome specific (napus-rapa) | 0.9593301    | 0.4393972    | not scorable | not scorable | 0.9917355 | 0.7394917 |
| 4111 | Bn-A02-p27336483 | A-genome specific (napus-rapa) | 0.9473684    | 0.4737795    | not scorable | not scorable | 0.9752066 | 0.7756771 |
| 4112 | Bn-A02-p27358734 | A-genome specific (napus-rapa) | 0.8708134    | 0.7463854    | not scorable | not scorable | 0.9834711 | 0.7799899 |
| 4113 | Bn-A02-p27360365 | A-genome specific (rapa only)  | not scorable | not scorable | not scorable | not scorable | 0.9917355 | 0.7288406 |
| 4114 | Bn-A02-p2737068  | A-genome specific (rapa only)  | not scorable | not scorable | not scorable | not scorable | 0.5371901 | 0.7728091 |
| 4115 | Bn-A02-p2738923  | A-genome specific (rapa only)  | not scorable | not scorable | not scorable | not scorable | 1         | 0.8204298 |
| 4116 | Bn-A02-p2739888  | A-genome specific (napus-rapa) | 1            | 0.7562031    | not scorable | not scorable | 0.9917355 | 0.8115303 |
| 4117 | Bn-A02-p27399448 | A-genome specific (napus-rapa) | 0.9808612    | 0.780218     | not scorable | not scorable | 0.9917355 | 0.7127644 |
| 4118 | Bn-A02-p27403121 | A-genome specific (napus-rapa) | 0.9976076    | 0.7450931    | not scorable | not scorable | 0.9752066 | 0.7051202 |
| 4119 | Bn-A02-p27405658 | A-genome specific (rapa only)  | not scorable | not scorable | not scorable | not scorable | 1         | 0.7221172 |
| 4120 | Bn-A02-p27408435 | A-genome specific (rapa only)  | not scorable | not scorable | not scorable | not scorable | 0.9917355 | 0.7757141 |
| 4121 | Bn-A02-p27414529 | A-genome specific (rapa only)  | not scorable | not scorable | not scorable | not scorable | 0.9917355 | 0.7387944 |
| 4122 | Bn-A02-p27414794 | A-genome specific (rapa only)  | not scorable | not scorable | not scorable | not scorable | 0.9917355 | 0.7883318 |

|      |                  |                                |              |              |              |              |              |              |
|------|------------------|--------------------------------|--------------|--------------|--------------|--------------|--------------|--------------|
| 4123 | Bn-A02-p27420743 | A-genome specific (rapa only)  | not scorable | not scorable | not scorable | not scorable | 0.9669421    | 0.7712587    |
| 4124 | Bn-A02-p27420799 | A-genome specific (rapa only)  | not scorable | not scorable | not scorable | not scorable | 0.9834711    | 0.698632     |
| 4125 | Bn-A02-p27427939 | A-genome specific (rapa only)  | not scorable | not scorable | not scorable | not scorable | 1            | 0.9039531    |
| 4126 | Bn-A02-p27433275 | A-genome specific (rapa only)  | not scorable | not scorable | not scorable | not scorable | 1            | 0.9175813    |
| 4127 | Bn-A02-p27450764 | A-genome specific (napus-rapa) | 1            | 0.3825184    | not scorable | not scorable | 0.9834711    | 0.5923205    |
| 4128 | Bn-A02-p27490396 | A-genome specific (napus-rapa) | 0.9952153    | 0.3973916    | not scorable | not scorable | 0.9834711    | 0.8189586    |
| 4129 | Bn-A02-p27503846 | A-genome specific (napus-rapa) | 0.9976076    | 0.6860216    | not scorable | not scorable | 1            | 0.8237322    |
| 4130 | Bn-A02-p27504018 | A-genome specific (napus-rapa) | 1            | 0.3064729    | not scorable | not scorable | 0.9917355    | 0.7062199    |
| 4131 | Bn-A02-p27514432 | all not scorable               | not scorable | not scorable | not scorable | not scorable | not scorable | not scorable |
| 4132 | Bn-A02-p27514988 | A-genome specific (napus-rapa) | 0.9952153    | 0.7789278    | not scorable | not scorable | 1            | 0.8208517    |
| 4133 | Bn-A02-p27515530 | A-genome specific (napus-rapa) | 0.9856459    | 0.5207881    | not scorable | not scorable | 1            | 0.7389831    |
| 4134 | Bn-A02-p27525531 | A-genome specific (napus-rapa) | 0.9952153    | 0.7512988    | not scorable | not scorable | 1            | 0.759341     |
| 4135 | Bn-A02-p2753403  | A-genome specific (napus-rapa) | 0.9186603    | 0.5924847    | not scorable | not scorable | 0.9917355    | 0.709433     |
| 4136 | Bn-A02-p2753972  | A-genome specific (napus-rapa) | 0.9832536    | 0.7203191    | not scorable | not scorable | 0.9917355    | 0.8249404    |
| 4137 | Bn-A02-p27565132 | A-genome specific (napus-rapa) | 0.9904306    | 0.6114936    | not scorable | not scorable | 0.9917355    | 0.7840218    |
| 4138 | Bn-A02-p27567204 | A-genome specific (napus-rapa) | 0.9928229    | 0.7207499    | not scorable | not scorable | 0.9917355    | 0.7182376    |
| 4139 | Bn-A02-p27567264 | A-genome specific (napus-rapa) | 1            | 0.4454421    | not scorable | not scorable | 1            | 0.8673873    |
| 4140 | Bn-A02-p27569069 | A-genome specific (napus-rapa) | 0.9928229    | 0.7483461    | not scorable | not scorable | 0.9834711    | 0.8154327    |
| 4141 | Bn-A02-p27613710 | A-genome specific (napus-rapa) | 0.9952153    | 0.4459811    | not scorable | not scorable | 0.9834711    | 0.6928372    |
| 4142 | Bn-A02-p27623430 | A-genome specific (rapa only)  | not scorable | not scorable | not scorable | not scorable | 0.9917355    | 0.7893071    |
| 4143 | Bn-A02-p27625682 | A-genome specific (rapa only)  | not scorable | not scorable | not scorable | not scorable | 0.9917355    | 0.7201275    |
| 4144 | Bn-A02-p27633795 | A-genome specific (rapa only)  | not scorable | not scorable | not scorable | not scorable | 0.5206612    | 0.8931723    |
| 4145 | Bn-A02-p27645672 | A-genome specific (napus-rapa) | 0.9736842    | 0.3794462    | not scorable | not scorable | 0.9917355    | 0.7384122    |
| 4146 | Bn-A02-p27651489 | A-genome specific (rapa only)  | not scorable | not scorable | not scorable | not scorable | 1            | 0.7450505    |
| 4147 | Bn-A02-p27653095 | A-genome specific (rapa only)  | not scorable | not scorable | not scorable | not scorable | 0.9917355    | 0.730344     |
| 4148 | Bn-A02-p27653419 | A-genome specific (rapa only)  | not scorable | not scorable | not scorable | not scorable | 0.9834711    | 0.77314      |
| 4149 | Bn-A02-p276572   | A-genome specific (napus-rapa) | 1            | 0.4936258    | not scorable | not scorable | 0.9834711    | 0.6660089    |
| 4150 | Bn-A02-p27679891 | A-genome specific (rapa only)  | not scorable | not scorable | not scorable | not scorable | 0.9504132    | 0.7439188    |
| 4151 | Bn-A02-p27679897 | A-genome specific (rapa only)  | not scorable | not scorable | not scorable | not scorable | 1            | 0.8615742    |
| 4152 | Bn-A02-p27680472 | A-genome specific (napus-rapa) | 0.9904306    | 0.8541971    | not scorable | not scorable | 1            | 0.8004208    |
| 4153 | Bn-A02-p27682762 | A-genome specific (napus-rapa) | 0.9186603    | 0.3652399    | not scorable | not scorable | 1            | 0.8744652    |
| 4154 | Bn-A02-p27702997 | A-genome specific (rapa only)  | not scorable | not scorable | not scorable | not scorable | 1            | 0.8418922    |
| 4155 | Bn-A02-p27714758 | A-genome specific (rapa only)  | not scorable | not scorable | not scorable | not scorable | 1            | 0.7429466    |

|      |                  |                                   |              |              |              |              |              |   |              |
|------|------------------|-----------------------------------|--------------|--------------|--------------|--------------|--------------|---|--------------|
| 4156 | Bn-A02-p27743910 | A-genome specific (napus-rapa)    | 0.9449761    | 0.3921739    | not scorable | not scorable |              | 1 | 0.6640704    |
| 4157 | Bn-A02-p27749719 | A-genome specific (rapa only)     | not scorable | not scorable | not scorable | not scorable |              | 1 | 0.7236234    |
| 4158 | Bn-A02-p27755843 | A-genome specific (napus-rapa)    | 0.9880383    | 0.6966766    | not scorable | not scorable | 0.9338843    |   | 0.8427827    |
| 4159 | Bn-A02-p2776432  | A-genome specific (napus-rapa)    | 0.9808612    | 0.6893966    | not scorable | not scorable | 0.9752066    |   | 0.7962028    |
| 4160 | Bn-A02-p2776634  | genome unspecific (all in)        | 0.9832536    | 0.4275755    | 0.9844961    | 0.775808     |              | 1 | 0.8376198    |
| 4161 | Bn-A02-p27781100 | A-genome specific (rapa only)     | not scorable | not scorable | not scorable | not scorable |              | 1 | 0.7988073    |
| 4162 | Bn-A02-p27786739 | A-genome specific (napus-rapa)    | 0.9784689    | 0.8302444    | not scorable | not scorable |              | 1 | 0.8284417    |
| 4163 | Bn-A02-p27792444 | A-genome specific (napus-rapa)    | 0.9856459    | 0.7039253    | not scorable | not scorable | 0.9917355    |   | 0.7092206    |
| 4164 | Bn-A02-p27799727 | A-genome specific (rapa only)     | not scorable | not scorable | not scorable | not scorable | 0.9834711    |   | 0.812578     |
| 4165 | Bn-A02-p2782176  | A-genome specific (rapa only)     | not scorable | not scorable | not scorable | not scorable | 0.9752066    |   | 0.7574002    |
| 4166 | Bn-A02-p27831174 | A-genome specific (napus-rapa)    | 0.9856459    | 0.8409862    | not scorable | not scorable |              | 1 | 0.7349294    |
| 4167 | Bn-A02-p27833071 | A-genome specific (rapa only)     | not scorable | not scorable | not scorable | not scorable |              | 1 | 0.7982418    |
| 4168 | Bn-A02-p27834072 | A-genome specific (rapa only)     | not scorable | not scorable | not scorable | not scorable |              | 1 | 0.7453524    |
| 4169 | Bn-A02-p2784335  | A-genome specific (napus-rapa)    | 0.9784689    | 0.6609194    | not scorable | not scorable | 0.9752066    |   | 0.5288004    |
| 4170 | Bn-A02-p27845279 | A-genome specific (rapa only)     | not scorable | not scorable | not scorable | not scorable |              | 1 | 0.765373     |
| 4171 | Bn-A02-p2785185  | napus specific                    | 0.9593301    | 0.7411431    | not scorable | not scorable | not scorable |   | not scorable |
| 4172 | Bn-A02-p2788144  | A-genome specific (rapa only)     | not scorable | not scorable | not scorable | not scorable | 0.9917355    |   | 0.7647673    |
| 4173 | Bn-A02-p2799146  | A-genome specific (napus-rapa)    | 0.9688995    | 0.7581848    | not scorable | not scorable | 0.9917355    |   | 0.9226131    |
| 4174 | Bn-A02-p2800227  | A-genome specific (napus-rapa)    | 0.9952153    | 0.72118      | not scorable | not scorable | 0.9669421    |   | 0.6331613    |
| 4175 | Bn-A02-p2800579  | A-genome specific (napus-rapa)    | 0.8181818    | 0.7795267    | not scorable | not scorable | 0.6033058    |   | 0.8494496    |
| 4176 | Bn-A02-p2800698  | all not scorable                  | not scorable | not scorable | not scorable | not scorable | not scorable |   | not scorable |
| 4177 | Bn-A02-p2817281  | A-genome specific (napus-rapa)    | 0.9784689    | 0.6710376    | not scorable | not scorable | 0.9834711    |   | 0.7629179    |
| 4178 | Bn-A02-p2817294  | A-genome specific (napus-rapa)    | 0.9856459    | 0.7422963    | not scorable | not scorable |              | 1 | 0.7883999    |
| 4179 | Bn-A02-p2818741  | A-genome specific (napus-rapa)    | 0.9736842    | 0.750652     | not scorable | not scorable | 0.9834711    |   | 0.6630738    |
| 4180 | Bn-A02-p284968   | A-genome specific (napus-rapa)    | 0.9952153    | 0.7675233    | not scorable | not scorable | 0.9917355    |   | 0.6820813    |
| 4181 | Bn-A02-p2851231  | A-genome specific (napus-rapa)    | 1            | 0.9235846    | not scorable | not scorable |              | 1 | 0.8193799    |
| 4182 | Bn-A02-p2867545  | A-genome specific (rapa only)     | not scorable | not scorable | not scorable | not scorable | 0.9917355    |   | 0.7483432    |
| 4183 | Bn-A02-p2877222  | A-genome specific (napus-rapa)    | 0.9760765    | 0.763966     | not scorable | not scorable | 0.553719     |   | 0.8948171    |
| 4184 | Bn-A02-p2923889  | A-genome specific (napus-rapa)    | 0.9880383    | 0.7452393    | not scorable | not scorable | 0.9917355    |   | 0.7043781    |
| 4185 | Bn-A02-p2927357  | A-genome specific (napus-rapa)    | 0.4760765    | 0.6279205    | not scorable | not scorable | 0.9917355    |   | 0.6815047    |
| 4186 | Bn-A02-p2931725  | A-genome specific (napus-rapa)    | 0.9904306    | 0.7252479    | not scorable | not scorable | 0.9917355    |   | 0.8230082    |
| 4187 | Bn-A02-p293860   | genome unspecific (oleracea-rapa) | not scorable | not scorable | 0.9922481    | 0.6929381    | 0.9917355    |   | 0.736891     |
| 4188 | Bn-A02-p294984   | A-genome specific (napus-rapa)    | 0.9904306    | 0.3565961    | not scorable | not scorable | 0.9917355    |   | 0.6810721    |

|      |                 |                                |              |              |              |              |              |              |
|------|-----------------|--------------------------------|--------------|--------------|--------------|--------------|--------------|--------------|
| 4189 | Bn-A02-p2962298 | A-genome specific (rapa only)  | not scorable | not scorable | not scorable | not scorable | 0.9917355    | 0.8164601    |
| 4190 | Bn-A02-p298761  | A-genome specific (rapa only)  | not scorable | not scorable | not scorable | not scorable | 1            | 0.809144     |
| 4191 | Bn-A02-p300727  | A-genome specific (napus-rapa) | 0.9712918    | 0.7969199    | not scorable | not scorable | 0.9834711    | 0.8792441    |
| 4192 | Bn-A02-p3011103 | A-genome specific (napus-rapa) | 0.9904306    | 0.7613142    | not scorable | not scorable | 1            | 0.7414308    |
| 4193 | Bn-A02-p302582  | A-genome specific (napus-rapa) | 0.9904306    | 0.7871293    | not scorable | not scorable | 0.9917355    | 0.8073703    |
| 4194 | Bn-A02-p303085  | A-genome specific (napus-rapa) | 0.9808612    | 0.7691188    | not scorable | not scorable | 1            | 0.7979436    |
| 4195 | Bn-A02-p303243  | A-genome specific (napus-rapa) | 0.9904306    | 0.7603363    | not scorable | not scorable | 1            | 0.7996552    |
| 4196 | Bn-A02-p303330  | A-genome specific (napus-rapa) | 0.9832536    | 0.8243567    | not scorable | not scorable | 1            | 0.7496144    |
| 4197 | Bn-A02-p3033620 | A-genome specific (napus-rapa) | 0.9760765    | 0.3926562    | not scorable | not scorable | 0.9834711    | 0.6992005    |
| 4198 | Bn-A02-p303375  | A-genome specific (napus-rapa) | 0.9880383    | 0.8044316    | not scorable | not scorable | 1            | 0.7909131    |
| 4199 | Bn-A02-p303515  | A-genome specific (napus-rapa) | 0.9904306    | 0.7783655    | not scorable | not scorable | 0.9917355    | 0.770577     |
| 4200 | Bn-A02-p3035603 | A-genome specific (napus-rapa) | 0.7200957    | 0.7854255    | not scorable | not scorable | 1            | 0.924587     |
| 4201 | Bn-A02-p304056  | A-genome specific (napus-rapa) | 0.9952153    | 0.4231332    | not scorable | not scorable | 1            | 0.8353633    |
| 4202 | Bn-A02-p305007  | A-genome specific (napus-rapa) | 0.9736842    | 0.6939866    | not scorable | not scorable | 0.9917355    | 0.7499908    |
| 4203 | Bn-A02-p3050150 | A-genome specific (rapa only)  | not scorable | not scorable | not scorable | not scorable | 1            | 0.7978084    |
| 4204 | Bn-A02-p3072415 | A-genome specific (rapa only)  | not scorable | not scorable | not scorable | not scorable | 0.9917355    | 0.7901576    |
| 4205 | Bn-A02-p307342  | A-genome specific (napus-rapa) | 1            | 0.6154287    | not scorable | not scorable | 1            | 0.7980505    |
| 4206 | Bn-A02-p3074016 | A-genome specific (napus-rapa) | 0.9808612    | 0.7776757    | not scorable | not scorable | 1            | 0.7513423    |
| 4207 | Bn-A02-p307657  | A-genome specific (napus-rapa) | 0.9880383    | 0.8106052    | not scorable | not scorable | 0.9917355    | 0.7432435    |
| 4208 | Bn-A02-p3078017 | A-genome specific (napus-rapa) | 1            | 0.9272014    | not scorable | not scorable | 1            | 0.9144938    |
| 4209 | Bn-A02-p3080150 | A-genome specific (napus-rapa) | 0.9856459    | 0.450667     | not scorable | not scorable | 1            | 0.7641606    |
| 4210 | Bn-A02-p308370  | A-genome specific (napus-rapa) | 0.9856459    | 0.8209551    | not scorable | not scorable | 1            | 0.9156529    |
| 4211 | Bn-A02-p3085246 | A-genome specific (rapa only)  | not scorable | not scorable | not scorable | not scorable | 0.9834711    | 0.7977921    |
| 4212 | Bn-A02-p3092363 | all not scorable               | not scorable | not scorable | not scorable | not scorable | not scorable | not scorable |
| 4213 | Bn-A02-p3092949 | all not scorable               | not scorable | not scorable | not scorable | not scorable | not scorable | not scorable |
| 4214 | Bn-A02-p3096890 | A-genome specific (rapa only)  | not scorable | not scorable | not scorable | not scorable | 0.9338843    | 0.7577526    |
| 4215 | Bn-A02-p3121742 | A-genome specific (napus-rapa) | 0.9880383    | 0.7164178    | not scorable | not scorable | 0.9917355    | 0.7737699    |
| 4216 | Bn-A02-p3138043 | A-genome specific (napus-rapa) | 0.9904306    | 0.7673922    | not scorable | not scorable | 0.9917355    | 0.7984076    |
| 4217 | Bn-A02-p3142416 | A-genome specific (rapa only)  | not scorable | not scorable | not scorable | not scorable | 1            | 0.7428162    |
| 4218 | Bn-A02-p3145923 | A-genome specific (napus-rapa) | 0.9976076    | 0.8273849    | not scorable | not scorable | 1            | 0.8248339    |
| 4219 | Bn-A02-p3148346 | A-genome specific (rapa only)  | not scorable | not scorable | not scorable | not scorable | 0.9338843    | 0.7786475    |
| 4220 | Bn-A02-p3150860 | napus specific                 | 0.854067     | 0.6689566    | not scorable | not scorable | not scorable | not scorable |
| 4221 | Bn-A02-p3160461 | A-genome specific (napus-rapa) | 0.9665072    | 0.6257343    | not scorable | not scorable | 0.9917355    | 0.8386027    |



|      |                 |                                |              |              |              |              |           |           |
|------|-----------------|--------------------------------|--------------|--------------|--------------|--------------|-----------|-----------|
| 4222 | Bn-A02-p3167622 | A-genome specific (napus-rapa) | 0.9736842    | 0.855147     | not scorable | not scorable | 0.9834711 | 0.6926764 |
| 4223 | Bn-A02-p3167673 | A-genome specific (rapa only)  | not scorable | not scorable | not scorable | not scorable | 0.9752066 | 0.7908163 |
| 4224 | Bn-A02-p3174    | A-genome specific (napus-rapa) | 0.8755981    | 0.7005323    | not scorable | not scorable | 0.9752066 | 0.7232825 |
| 4225 | Bn-A02-p3175610 | A-genome specific (napus-rapa) | 0.9976076    | 0.8603156    | not scorable | not scorable | 1         | 0.7788567 |
| 4226 | Bn-A02-p3180162 | A-genome specific (napus-rapa) | 0.9880383    | 0.7390934    | not scorable | not scorable | 0.9752066 | 0.7269111 |
| 4227 | Bn-A02-p3181443 | A-genome specific (napus-rapa) | 0.9784689    | 0.7715141    | not scorable | not scorable | 1         | 0.7705671 |
| 4228 | Bn-A02-p3183179 | A-genome specific (rapa only)  | not scorable | not scorable | not scorable | not scorable | 0.9586777 | 0.7391528 |
| 4229 | Bn-A02-p3190650 | A-genome specific (napus-rapa) | 0.9736842    | 0.468041     | not scorable | not scorable | 0.9834711 | 0.6957653 |
| 4230 | Bn-A02-p319267  | A-genome specific (napus-rapa) | 0.9856459    | 0.7585956    | not scorable | not scorable | 1         | 0.8240879 |
| 4231 | Bn-A02-p3207085 | A-genome specific (napus-rapa) | 1            | 0.8127784    | not scorable | not scorable | 1         | 0.8219877 |
| 4232 | Bn-A02-p3208275 | A-genome specific (napus-rapa) | 0.9928229    | 0.8324371    | not scorable | not scorable | 1         | 0.776773  |
| 4233 | Bn-A02-p3214095 | A-genome specific (napus-rapa) | 0.9641148    | 0.7986619    | not scorable | not scorable | 1         | 0.8148509 |
| 4234 | Bn-A02-p3214903 | A-genome specific (napus-rapa) | 0.9880383    | 0.4980189    | not scorable | not scorable | 0.9917355 | 0.8277064 |
| 4235 | Bn-A02-p3221060 | A-genome specific (rapa only)  | not scorable | not scorable | not scorable | not scorable | 0.9917355 | 0.7456936 |
| 4236 | Bn-A02-p3221634 | A-genome specific (napus-rapa) | 0.9928229    | 0.7656881    | not scorable | not scorable | 1         | 0.6442078 |
| 4237 | Bn-A02-p3233816 | A-genome specific (napus-rapa) | 0.9832536    | 0.7968277    | not scorable | not scorable | 0.9834711 | 0.7868679 |
| 4238 | Bn-A02-p325065  | A-genome specific (napus-rapa) | 0.9928229    | 0.8065077    | not scorable | not scorable | 1         | 0.8488413 |
| 4239 | Bn-A02-p325788  | A-genome specific (napus-rapa) | 0.9904306    | 0.7758175    | not scorable | not scorable | 1         | 0.8708174 |
| 4240 | Bn-A02-p3260536 | A-genome specific (napus-rapa) | 0.9880383    | 0.5524712    | not scorable | not scorable | 1         | 0.8296832 |
| 4241 | Bn-A02-p3281338 | A-genome specific (napus-rapa) | 0.9808612    | 0.5225887    | not scorable | not scorable | 0.9752066 | 0.776704  |
| 4242 | Bn-A02-p3281452 | A-genome specific (napus-rapa) | 0.9904306    | 0.7788058    | not scorable | not scorable | 0.9834711 | 0.7505839 |
| 4243 | Bn-A02-p3294682 | A-genome specific (napus-rapa) | 0.2272727    | 0.8130986    | not scorable | not scorable | 0.9586777 | 0.896002  |
| 4244 | Bn-A02-p3295898 | A-genome specific (napus-rapa) | 0.9784689    | 0.8221808    | not scorable | not scorable | 0.9752066 | 0.6195815 |
| 4245 | Bn-A02-p3297592 | A-genome specific (napus-rapa) | 0.9760765    | 0.5186864    | not scorable | not scorable | 0.9917355 | 0.7758402 |
| 4246 | Bn-A02-p3299206 | A-genome specific (napus-rapa) | 0.9904306    | 0.8332821    | not scorable | not scorable | 1         | 0.8194165 |
| 4247 | Bn-A02-p3300731 | A-genome specific (napus-rapa) | 0.9928229    | 0.6305459    | not scorable | not scorable | 0.9669421 | 0.7460604 |
| 4248 | Bn-A02-p3302725 | A-genome specific (napus-rapa) | 0.9952153    | 0.8101256    | not scorable | not scorable | 1         | 0.9272014 |
| 4249 | Bn-A02-p3306076 | A-genome specific (napus-rapa) | 0.9808612    | 0.7137041    | not scorable | not scorable | 1         | 0.7075891 |
| 4250 | Bn-A02-p3344176 | A-genome specific (napus-rapa) | 0.9952153    | 0.7584064    | not scorable | not scorable | 0.9834711 | 0.7916382 |
| 4251 | Bn-A02-p3349026 | A-genome specific (napus-rapa) | 0.9880383    | 0.3954459    | not scorable | not scorable | 1         | 0.7681049 |
| 4252 | Bn-A02-p335197  | A-genome specific (napus-rapa) | 0.9976076    | 0.7851082    | not scorable | not scorable | 1         | 0.8405633 |
| 4253 | Bn-A02-p3352863 | genome unspecific (all in)     | 0.9928229    | 0.640462     | 0.9922481    | 0.5913485    | 1         | 0.7755569 |
| 4254 | Bn-A02-p3354301 | A-genome specific (napus-rapa) | 1            | 0.4468471    | not scorable | not scorable | 1         | 0.7238976 |

|                      |                                   |              |              |              |              |              |              |
|----------------------|-----------------------------------|--------------|--------------|--------------|--------------|--------------|--------------|
| 4255 Bn-A02-p3361391 | A-genome specific (napus-rapa)    | 1            | 0.754914     | not scorable | not scorable | 1            | 0.7748008    |
| 4256 Bn-A02-p337110  | A-genome specific (napus-rapa)    | 0.9856459    | 0.7886564    | not scorable | not scorable | 1            | 0.8232       |
| 4257 Bn-A02-p337457  | A-genome specific (rapa only)     | not scorable | not scorable | not scorable | not scorable | 1            | 0.7973372    |
| 4258 Bn-A02-p3374678 | A-genome specific (napus-rapa)    | 0.9880383    | 0.7693029    | not scorable | not scorable | 1            | 0.7105102    |
| 4259 Bn-A02-p3380510 | A-genome specific (napus-rapa)    | 0.9904306    | 0.516042     | not scorable | not scorable | 0.9834711    | 0.7625436    |
| 4260 Bn-A02-p3398506 | A-genome specific (napus-rapa)    | 0.9976076    | 0.7494109    | not scorable | not scorable | 0.9834711    | 0.7326435    |
| 4261 Bn-A02-p3398710 | A-genome specific (napus-rapa)    | 0.9976076    | 0.5974189    | not scorable | not scorable | 0.9917355    | 0.7036746    |
| 4262 Bn-A02-p3422005 | A-genome specific (rapa only)     | not scorable | not scorable | not scorable | not scorable | 1            | 0.7102833    |
| 4263 Bn-A02-p3423823 | A-genome specific (napus-rapa)    | 1            | 0.8228431    | not scorable | not scorable | 1            | 0.7282277    |
| 4264 Bn-A02-p3427640 | A-genome specific (napus-rapa)    | 0.9952153    | 0.8528981    | not scorable | not scorable | 1            | 0.899518     |
| 4265 Bn-A02-p3430069 | A-genome specific (napus-rapa)    | 1            | 0.7241183    | not scorable | not scorable | 1            | 0.7172196    |
| 4266 Bn-A02-p3446017 | A-genome specific (napus-rapa)    | 0.9976076    | 0.6881834    | not scorable | not scorable | 0.9834711    | 0.7549419    |
| 4267 Bn-A02-p3458391 | napus specific                    | 0.9808612    | 0.2580661    | not scorable | not scorable | not scorable | not scorable |
| 4268 Bn-A02-p3478450 | A-genome specific (napus-rapa)    | 0.9976076    | 0.7733645    | not scorable | not scorable | 0.5454546    | 0.8910362    |
| 4269 Bn-A02-p3488996 | A-genome specific (napus-rapa)    | 1            | 0.8129396    | not scorable | not scorable | 1            | 0.7840965    |
| 4270 Bn-A02-p3489974 | A-genome specific (napus-rapa)    | 0.9832536    | 0.7442302    | not scorable | not scorable | 0.6942149    | 0.6591148    |
| 4271 Bn-A02-p3493190 | A-genome specific (napus-rapa)    | 0.9808612    | 0.2336812    | not scorable | not scorable | 0.9834711    | 0.8945882    |
| 4272 Bn-A02-p3503647 | genome unspecific (oleracea-rapa) | not scorable | not scorable | 0.9689922    | 0.8445874    | 0.9917355    | 0.8168836    |
| 4273 Bn-A02-p3507057 | genome unspecific (all in)        | 0.9043062    | 0.2368324    | 0.9844961    | 0.3313471    | 1            | 0.7367962    |
| 4274 Bn-A02-p3530703 | A-genome specific (napus-rapa)    | 0.9401914    | 0.6041773    | not scorable | not scorable | 0.9669421    | 0.7302511    |
| 4275 Bn-A02-p3534963 | A-genome specific (napus-rapa)    | 0.9928229    | 0.7801194    | not scorable | not scorable | 1            | 0.804667     |
| 4276 Bn-A02-p3535142 | A-genome specific (rapa only)     | not scorable | not scorable | not scorable | not scorable | 1            | 0.8456472    |
| 4277 Bn-A02-p3539297 | A-genome specific (napus-rapa)    | 0.9952153    | 0.6513321    | not scorable | not scorable | 1            | 0.772202     |
| 4278 Bn-A02-p3539377 | A-genome specific (napus-rapa)    | 1            | 0.7857051    | not scorable | not scorable | 1            | 0.8352838    |
| 4279 Bn-A02-p3542024 | A-genome specific (napus-rapa)    | 0.9976076    | 0.825833     | not scorable | not scorable | 0.9834711    | 0.7103617    |
| 4280 Bn-A02-p3543810 | A-genome specific (napus-rapa)    | 0.9928229    | 0.7002599    | not scorable | not scorable | 0.9834711    | 0.786476     |
| 4281 Bn-A02-p3558502 | A-genome specific (napus-rapa)    | 0.9904306    | 0.521555     | not scorable | not scorable | 1            | 0.9175813    |
| 4282 Bn-A02-p3571230 | A-genome specific (napus-rapa)    | 0.9880383    | 0.7158828    | not scorable | not scorable | 0.9917355    | 0.6966808    |
| 4283 Bn-A02-p3597721 | A-genome specific (napus-rapa)    | 0.9330143    | 0.7997871    | not scorable | not scorable | 0.9669421    | 0.6885561    |
| 4284 Bn-A02-p3606635 | A-genome specific (napus-rapa)    | 1            | 0.4585992    | not scorable | not scorable | 0.9752066    | 0.7800079    |
| 4285 Bn-A02-p3607564 | A-genome specific (napus-rapa)    | 0.9976076    | 0.7771602    | not scorable | not scorable | 1            | 0.7457581    |
| 4286 Bn-A02-p3614673 | A-genome specific (napus-rapa)    | 0.9928229    | 0.6678221    | not scorable | not scorable | 0.9752066    | 0.7443328    |
| 4287 Bn-A02-p3627856 | A-genome specific (rapa only)     | not scorable | not scorable | not scorable | not scorable | 1            | 0.8051801    |

|      |                 |                                   |              |              |              |              |              |              |
|------|-----------------|-----------------------------------|--------------|--------------|--------------|--------------|--------------|--------------|
| 4288 | Bn-A02-p3633790 | A-genome specific (napus-rapa)    | 0.9904306    | 0.7093559    | not scorable | not scorable | 0.9917355    | 0.6521871    |
| 4289 | Bn-A02-p3635114 | A-genome specific (napus-rapa)    | 0.9904306    | 0.4526619    | not scorable | not scorable | 1            | 0.7277146    |
| 4290 | Bn-A02-p3640490 | A-genome specific (napus-rapa)    | 1            | 0.7649073    | not scorable | not scorable | 0.9917355    | 0.4554196    |
| 4291 | Bn-A02-p3656969 | A-genome specific (napus-rapa)    | 1            | 0.7190414    | not scorable | not scorable | 1            | 0.7217764    |
| 4292 | Bn-A02-p3658139 | A-genome specific (napus-rapa)    | 1            | 0.7561354    | not scorable | not scorable | 0.9834711    | 0.6945941    |
| 4293 | Bn-A02-p3679028 | A-genome specific (rapa only)     | not scorable | not scorable | not scorable | not scorable | 1            | 0.7210601    |
| 4294 | Bn-A02-p3708263 | A-genome specific (napus-rapa)    | 0.9952153    | 0.8437808    | not scorable | not scorable | 1            | 0.8158038    |
| 4295 | Bn-A02-p3711684 | A-genome specific (napus-rapa)    | 0.9976076    | 0.7873632    | not scorable | not scorable | 0.9752066    | 0.6790326    |
| 4296 | Bn-A02-p3716898 | A-genome specific (napus-rapa)    | 0.9976076    | 0.7628529    | not scorable | not scorable | 0.9752066    | 0.7966264    |
| 4297 | Bn-A02-p3717426 | A-genome specific (napus-rapa)    | 0.9760765    | 0.7119119    | not scorable | not scorable | 1            | 0.8830408    |
| 4298 | Bn-A02-p3718340 | A-genome specific (napus-rapa)    | 0.9928229    | 0.7781079    | not scorable | not scorable | 0.9917355    | 0.7873951    |
| 4299 | Bn-A02-p3728882 | A-genome specific (napus-rapa)    | 0.9976076    | 0.9352732    | not scorable | not scorable | 0.9752066    | 0.6932694    |
| 4300 | Bn-A02-p3730794 | A-genome specific (napus-rapa)    | 0.9976076    | 0.7651848    | not scorable | not scorable | 0.9752066    | 0.5937151    |
| 4301 | Bn-A02-p3735101 | A-genome specific (napus-rapa)    | 0.9928229    | 0.5343648    | not scorable | not scorable | 0.9834711    | 0.6856036    |
| 4302 | Bn-A02-p3742509 | A-genome specific (napus-rapa)    | 1            | 0.7804589    | not scorable | not scorable | 0.9917355    | 0.8533995    |
| 4303 | Bn-A02-p3759462 | A-genome specific (napus-rapa)    | 0.9976076    | 0.8623892    | not scorable | not scorable | 1            | 0.8057495    |
| 4304 | Bn-A02-p3760177 | A-genome specific (napus-rapa)    | 0.9952153    | 0.7505469    | not scorable | not scorable | 0.9917355    | 0.7195768    |
| 4305 | Bn-A02-p3760247 | A-genome specific (napus-rapa)    | 1            | 0.7479872    | not scorable | not scorable | 0.9917355    | 0.6816152    |
| 4306 | Bn-A02-p3774623 | A-genome specific (napus-rapa)    | 1            | 0.5972399    | not scorable | not scorable | 1            | 0.5904108    |
| 4307 | Bn-A02-p3781878 | A-genome specific (napus-rapa)    | 0.9952153    | 0.5107217    | not scorable | not scorable | 1            | 0.7023802    |
| 4308 | Bn-A02-p3792136 | A-genome specific (rapa only)     | not scorable | not scorable | not scorable | not scorable | 1            | 0.7644401    |
| 4309 | Bn-A02-p3796695 | napus specific                    | 0.9976076    | 0.8089832    | not scorable | not scorable | not scorable | not scorable |
| 4310 | Bn-A02-p379918  | A-genome specific (napus-rapa)    | 0.9880383    | 0.6593289    | not scorable | not scorable | 1            | 0.7607631    |
| 4311 | Bn-A02-p3801428 | genome unspecific (oleracea-rapa) | not scorable | not scorable |              | 1            | 0.7420871    | 1            |
| 4312 | Bn-A02-p3803198 | A-genome specific (napus-rapa)    | 0.9904306    | 0.7752225    | not scorable | not scorable | 0.9834711    | 0.8004208    |
| 4313 | Bn-A02-p3803477 | A-genome specific (napus-rapa)    | 0.9976076    | 0.7706614    | not scorable | not scorable | 0.9917355    | 0.9175813    |
| 4314 | Bn-A02-p3807577 | A-genome specific (rapa only)     | not scorable | not scorable | not scorable | not scorable | 0.9752066    | 0.7975124    |
| 4315 | Bn-A02-p3809970 | A-genome specific (rapa only)     | not scorable | not scorable | not scorable | not scorable | 1            | 0.6843715    |
| 4316 | Bn-A02-p3810028 | A-genome specific (rapa only)     | not scorable | not scorable | not scorable | not scorable | 1            | 0.8380908    |
| 4317 | Bn-A02-p3810078 | genome unspecific (oleracea-rapa) | not scorable | not scorable | 0.9844961    | 0.7952663    | 1            | 0.8158219    |
| 4318 | Bn-A02-p3821814 | A-genome specific (rapa only)     | not scorable | not scorable | not scorable | not scorable | 0.9669421    | 0.6861063    |
| 4319 | Bn-A02-p3821944 | A-genome specific (napus-rapa)    | 0.9904306    | 0.6041161    | not scorable | not scorable | 0.9669421    | 0.6444383    |
| 4320 | Bn-A02-p3822985 | A-genome specific (napus-rapa)    | 0.9258373    | 0.7677257    | not scorable | not scorable | 0.9752066    | 0.6591173    |

|                      |                                   |              |              |              |              |              |              |
|----------------------|-----------------------------------|--------------|--------------|--------------|--------------|--------------|--------------|
| 4321 Bn-A02-p3859399 | A-genome specific (napus-rapa)    | 0.9497608    | 0.6619011    | not scorable | not scorable | 1            | 0.8032478    |
| 4322 Bn-A02-p3860483 | A-genome specific (napus-rapa)    | 0.9904306    | 0.7303491    | not scorable | not scorable | 0.9834711    | 0.7451994    |
| 4323 Bn-A02-p38907   | A-genome specific (napus-rapa)    | 0.8301435    | 0.622017     | not scorable | not scorable | 0.9917355    | 0.7852495    |
| 4324 Bn-A02-p3897213 | A-genome specific (napus-rapa)    | 0.9976076    | 0.7561886    | not scorable | not scorable | 0.9917355    | 0.7629454    |
| 4325 Bn-A02-p3897546 | A-genome specific (napus-rapa)    | 0.9976076    | 0.5592635    | not scorable | not scorable | 0.9917355    | 0.6194165    |
| 4326 Bn-A02-p3898766 | A-genome specific (rapa only)     | not scorable | not scorable | not scorable | not scorable | 1            | 0.7308679    |
| 4327 Bn-A02-p3914269 | A-genome specific (napus-rapa)    | 1            | 0.6252947    | not scorable | not scorable | 1            | 0.7368252    |
| 4328 Bn-A02-p3934729 | A-genome specific (napus-rapa)    | 0.9952153    | 0.8670811    | not scorable | not scorable | 1            | 0.6852039    |
| 4329 Bn-A02-p393636  | A-genome specific (napus-rapa)    | 0.9952153    | 0.4601662    | not scorable | not scorable | 0.9917355    | 0.6525966    |
| 4330 Bn-A02-p3950581 | A-genome specific (napus-rapa)    | 0.777512     | 0.7868301    | not scorable | not scorable | 0.9917355    | 0.7088592    |
| 4331 Bn-A02-p3965286 | A-genome specific (rapa only)     | not scorable | not scorable | not scorable | not scorable | 0.9669421    | 0.3925121    |
| 4332 Bn-A02-p39778   | A-genome specific (napus-rapa)    | 0.8516746    | 0.8284452    | not scorable | not scorable | 0.9917355    | 0.6835809    |
| 4333 Bn-A02-p3978921 | A-genome specific (rapa only)     | not scorable | not scorable | not scorable | not scorable | 0.9834711    | 0.563055     |
| 4334 Bn-A02-p39833   | A-genome specific (napus-rapa)    | 0.84689      | 0.8048167    | not scorable | not scorable | 1            | 0.7941261    |
| 4335 Bn-A02-p4035808 | A-genome specific (napus-rapa)    | 0.9904306    | 0.790561     | not scorable | not scorable | 1            | 0.777971     |
| 4336 Bn-A02-p4037028 | A-genome specific (napus-rapa)    | 0.9497608    | 0.7303379    | not scorable | not scorable | 0.9504132    | 0.5240539    |
| 4337 Bn-A02-p4038224 | A-genome specific (napus-rapa)    | 0.9760765    | 0.768791     | not scorable | not scorable | 0.9917355    | 0.5708975    |
| 4338 Bn-A02-p4044933 | A-genome specific (napus-rapa)    | 0.9784689    | 0.4838615    | not scorable | not scorable | 1            | 0.7535345    |
| 4339 Bn-A02-p4045217 | A-genome specific (rapa only)     | not scorable | not scorable | not scorable | not scorable | 1            | 0.7389865    |
| 4340 Bn-A02-p4046982 | all not scorable                  | not scorable | not scorable | not scorable | not scorable | not scorable | not scorable |
| 4341 Bn-A02-p4065755 | genome unspecific (oleracea-rapa) | not scorable | not scorable | 0.9922481    | 0.2403945    | 0.9834711    | 0.7167103    |
| 4342 Bn-A02-p4102727 | A-genome specific (napus-rapa)    | 0.9952153    | 0.3080755    | not scorable | not scorable | 0.9421487    | 0.4265235    |
| 4343 Bn-A02-p4103096 | A-genome specific (rapa only)     | not scorable | not scorable | not scorable | not scorable | 0.9834711    | 0.628665     |
| 4344 Bn-A02-p4103158 | A-genome specific (rapa only)     | not scorable | not scorable | not scorable | not scorable | 0.9917355    | 0.7288734    |
| 4345 Bn-A02-p4103543 | genome unspecific (all in)        | 0.9832536    | 0.3944136    | 0.8604651    | 0.8573309    | 0.9917355    | 0.7623614    |
| 4346 Bn-A02-p4104054 | genome unspecific (all in)        | 0.9856459    | 0.4846509    | 1            | 0.7248943    | 1            | 0.775696     |
| 4347 Bn-A02-p4110181 | A-genome specific (napus-rapa)    | 0.9880383    | 0.7696335    | not scorable | not scorable | 1            | 0.8103651    |
| 4348 Bn-A02-p4110757 | A-genome specific (napus-rapa)    | 0.9952153    | 0.8184463    | not scorable | not scorable | 0.9586777    | 0.8297745    |
| 4349 Bn-A02-p4118946 | A-genome specific (napus-rapa)    | 0.8492823    | 0.7822152    | not scorable | not scorable | 0.9338843    | 0.744895     |
| 4350 Bn-A02-p4151292 | A-genome specific (napus-rapa)    | 1            | 0.8317466    | not scorable | not scorable | 1            | 0.7899064    |
| 4351 Bn-A02-p416231  | A-genome specific (napus-rapa)    | 0.9808612    | 0.4206856    | not scorable | not scorable | 1            | 0.7746207    |
| 4352 Bn-A02-p4174594 | A-genome specific (rapa only)     | not scorable | not scorable | not scorable | not scorable | 1            | 0.8251065    |
| 4353 Bn-A02-p4183553 | A-genome specific (napus-rapa)    | 0.9665072    | 0.7514824    | not scorable | not scorable | 1            | 0.701698     |

|      |                 |                                |              |              |              |              |              |              |
|------|-----------------|--------------------------------|--------------|--------------|--------------|--------------|--------------|--------------|
| 4354 | Bn-A02-p4199792 | A-genome specific (napus-rapa) | 0.9928229    | 0.3374906    | not scorable | not scorable | 0.9752066    | 0.7997442    |
| 4355 | Bn-A02-p4201122 | A-genome specific (napus-rapa) | 0.9856459    | 0.7741914    | not scorable | not scorable | 0.9834711    | 0.7821755    |
| 4356 | Bn-A02-p4210188 | A-genome specific (rapa only)  | not scorable | not scorable | not scorable | not scorable | 0.9752066    | 0.7926081    |
| 4357 | Bn-A02-p4210810 | A-genome specific (napus-rapa) | 0.9880383    | 0.4968298    | not scorable | not scorable | 0.9917355    | 0.7129104    |
| 4358 | Bn-A02-p4220181 | A-genome specific (napus-rapa) | 0.9808612    | 0.5292759    | not scorable | not scorable | 0.9752066    | 0.6516504    |
| 4359 | Bn-A02-p4232093 | napus specific                 | 0.9976076    | 0.5522467    | not scorable | not scorable | not scorable | not scorable |
| 4360 | Bn-A02-p4237047 | genome unspecific (all in)     | 0.9904306    | 0.2906427    | 0.9922481    | 0.3304989    | 0.9834711    | 0.6496409    |
| 4361 | Bn-A02-p4241100 | A-genome specific (napus-rapa) | 0.9904306    | 0.6594497    | not scorable | not scorable | 0.9917355    | 0.6687542    |
| 4362 | Bn-A02-p4243717 | A-genome specific (napus-rapa) | 0.9952153    | 0.7974913    | not scorable | not scorable | 0.9834711    | 0.6770139    |
| 4363 | Bn-A02-p425861  | A-genome specific (napus-rapa) | 0.9856459    | 0.5498161    | not scorable | not scorable | 0.9834711    | 0.7188483    |
| 4364 | Bn-A02-p4259381 | A-genome specific (napus-rapa) | 0.9856459    | 0.781203     | not scorable | not scorable | 0.9917355    | 0.7498073    |
| 4365 | Bn-A02-p4262796 | A-genome specific (napus-rapa) | 0.9784689    | 0.698232     | not scorable | not scorable | 1            | 0.7622395    |
| 4366 | Bn-A02-p4262907 | A-genome specific (napus-rapa) | 0.9904306    | 0.7871943    | not scorable | not scorable | 1            | 0.7046912    |
| 4367 | Bn-A02-p4277649 | A-genome specific (napus-rapa) | 0.9880383    | 0.6826527    | not scorable | not scorable | 0.9917355    | 0.6763458    |
| 4368 | Bn-A02-p4290375 | A-genome specific (napus-rapa) | 0.9832536    | 0.7800839    | not scorable | not scorable | 0.9917355    | 0.8130093    |
| 4369 | Bn-A02-p4291278 | A-genome specific (rapa only)  | not scorable | not scorable | not scorable | not scorable | 0.9669421    | 0.6735589    |
| 4370 | Bn-A02-p4295967 | A-genome specific (napus-rapa) | 0.9976076    | 0.8604002    | not scorable | not scorable | 1            | 0.8306279    |
| 4371 | Bn-A02-p4298976 | A-genome specific (napus-rapa) | 0.9138756    | 0.8424721    | not scorable | not scorable | 0.9917355    | 0.7464924    |
| 4372 | Bn-A02-p4299085 | A-genome specific (napus-rapa) | 0.9138756    | 0.8138258    | not scorable | not scorable | 0.9917355    | 0.7331789    |
| 4373 | Bn-A02-p4299411 | A-genome specific (napus-rapa) | 0.923445     | 0.8410183    | not scorable | not scorable | 1            | 0.7903213    |
| 4374 | Bn-A02-p4306196 | A-genome specific (napus-rapa) | 0.9904306    | 0.6218811    | not scorable | not scorable | 0.9917355    | 0.6430467    |
| 4375 | Bn-A02-p4308819 | A-genome specific (rapa only)  | not scorable | not scorable | not scorable | not scorable | 0.9752066    | 0.9273664    |
| 4376 | Bn-A02-p4343365 | A-genome specific (napus-rapa) | 1            | 0.4463344    | not scorable | not scorable | 0.9917355    | 0.7953724    |
| 4377 | Bn-A02-p4345046 | A-genome specific (napus-rapa) | 0.9736842    | 0.1926384    | not scorable | not scorable | 0.9917355    | 0.6237074    |
| 4378 | Bn-A02-p4345098 | A-genome specific (napus-rapa) | 0.9928229    | 0.3173415    | not scorable | not scorable | 0.9834711    | 0.6631392    |
| 4379 | Bn-A02-p4351893 | genome unspecific (all in)     | 0.9760765    | 0.5212235    | 0.9922481    | 0.7509216    | 1            | 0.8744286    |
| 4380 | Bn-A02-p4352396 | A-genome specific (napus-rapa) | 0.9952153    | 0.778622     | not scorable | not scorable | 1            | 0.7919223    |
| 4381 | Bn-A02-p4374253 | genome unspecific (all in)     | 0.9976076    | 0.3012469    | 0.8992248    | 0.7545024    | 1            | 0.7554235    |
| 4382 | Bn-A02-p441751  | A-genome specific (napus-rapa) | 0.9880383    | 0.2781225    | not scorable | not scorable | 0.9917355    | 0.8054933    |
| 4383 | Bn-A02-p4488937 | A-genome specific (napus-rapa) | 0.9736842    | 0.3653258    | not scorable | not scorable | 0.9834711    | 0.8055197    |
| 4384 | Bn-A02-p4567454 | A-genome specific (rapa only)  | not scorable | not scorable | not scorable | not scorable | 0.9338843    | 0.6885831    |
| 4385 | Bn-A02-p4568023 | A-genome specific (napus-rapa) | 0.9880383    | 0.8814222    | not scorable | not scorable | 0.9917355    | 0.852074     |
| 4386 | Bn-A02-p459981  | A-genome specific (napus-rapa) | 0.9952153    | 0.3350696    | not scorable | not scorable | 0.9834711    | 0.7767122    |

|      |                 |                                   |              |              |              |              |           |           |
|------|-----------------|-----------------------------------|--------------|--------------|--------------|--------------|-----------|-----------|
| 4387 | Bn-A02-p4611221 | genome unspecific (all in)        | 0.9880383    | 0.2152308    | 1            | 0.6156929    | 1         | 0.7914145 |
| 4388 | Bn-A02-p463348  | A-genome specific (napus-rapa)    | 0.9952153    | 0.7979576    | not scorable | not scorable | 0.9917355 | 0.7448519 |
| 4389 | Bn-A02-p4681731 | A-genome specific (rapa only)     | not scorable | not scorable | not scorable | not scorable | 0.9834711 | 0.788332  |
| 4390 | Bn-A02-p4698141 | A-genome specific (napus-rapa)    | 0.9976076    | 0.7886842    | not scorable | not scorable | 0.9752066 | 0.8378487 |
| 4391 | Bn-A02-p4704233 | A-genome specific (rapa only)     | not scorable | not scorable | not scorable | not scorable | 1         | 0.7932316 |
| 4392 | Bn-A02-p4712683 | A-genome specific (napus-rapa)    | 0.9904306    | 0.750589     | not scorable | not scorable | 0.9917355 | 0.7666252 |
| 4393 | Bn-A02-p4716855 | A-genome specific (rapa only)     | not scorable | not scorable | not scorable | not scorable | 0.9917355 | 0.6470522 |
| 4394 | Bn-A02-p4721726 | A-genome specific (napus-rapa)    | 0.5191388    | 0.8085547    | not scorable | not scorable | 0.9669421 | 0.7927424 |
| 4395 | Bn-A02-p4729892 | A-genome specific (rapa only)     | not scorable | not scorable | not scorable | not scorable | 1         | 0.8375739 |
| 4396 | Bn-A02-p4744168 | A-genome specific (rapa only)     | not scorable | not scorable | not scorable | not scorable | 0.9917355 | 0.7469485 |
| 4397 | Bn-A02-p474724  | A-genome specific (napus-rapa)    | 0.9688995    | 0.4096408    | not scorable | not scorable | 0.9421487 | 0.6735286 |
| 4398 | Bn-A02-p4747805 | A-genome specific (rapa only)     | not scorable | not scorable | not scorable | not scorable | 1         | 0.8569115 |
| 4399 | Bn-A02-p476011  | A-genome specific (napus-rapa)    | 0.9928229    | 0.4853908    | not scorable | not scorable | 1         | 0.7022258 |
| 4400 | Bn-A02-p4761483 | A-genome specific (napus-rapa)    | 0.9641148    | 0.6097913    | not scorable | not scorable | 1         | 0.6943445 |
| 4401 | Bn-A02-p4773307 | A-genome specific (napus-rapa)    | 0.9952153    | 0.9294605    | not scorable | not scorable | 0.9834711 | 0.9270522 |
| 4402 | Bn-A02-p4774095 | genome unspecific (all in)        | 0.9282297    | 0.4472634    | 0.9767442    | 0.71777      | 0.9834711 | 0.6755278 |
| 4403 | Bn-A02-p4774099 | genome unspecific (all in)        | 0.9282297    | 0.4093938    | 0.9844961    | 0.4128196    | 0.9338843 | 0.4871291 |
| 4404 | Bn-A02-p4777053 | A-genome specific (napus-rapa)    | 0.8229665    | 0.7404048    | not scorable | not scorable | 0.8760331 | 0.7252899 |
| 4405 | Bn-A02-p4779271 | A-genome specific (rapa only)     | not scorable | not scorable | not scorable | not scorable | 1         | 0.7209949 |
| 4406 | Bn-A02-p4783596 | A-genome specific (napus-rapa)    | 0.9976076    | 0.820315     | not scorable | not scorable | 1         | 0.7955751 |
| 4407 | Bn-A02-p4881323 | A-genome specific (napus-rapa)    | 1            | 0.7337472    | not scorable | not scorable | 0.9834711 | 0.7914415 |
| 4408 | Bn-A02-p488160  | A-genome specific (napus-rapa)    | 0.9904306    | 0.3373286    | not scorable | not scorable | 1         | 0.735561  |
| 4409 | Bn-A02-p490065  | A-genome specific (napus-rapa)    | 0.9665072    | 0.3130467    | not scorable | not scorable | 0.9834711 | 0.6885369 |
| 4410 | Bn-A02-p4913845 | genome unspecific (oleracea-rapa) | not scorable | not scorable | 0.9922481    | 0.2782879    | 0.9752066 | 0.7756873 |
| 4411 | Bn-A02-p4928982 | A-genome specific (napus-rapa)    | 1            | 0.6091886    | not scorable | not scorable | 1         | 0.6921083 |
| 4412 | Bn-A02-p500418  | A-genome specific (napus-rapa)    | 0.9880383    | 0.7193102    | not scorable | not scorable | 0.9669421 | 0.6337368 |
| 4413 | Bn-A02-p501869  | A-genome specific (napus-rapa)    | 0.9880383    | 0.3425539    | not scorable | not scorable | 0.9669421 | 0.7903363 |
| 4414 | Bn-A02-p5040691 | A-genome specific (napus-rapa)    | 0.9593301    | 0.3963282    | not scorable | not scorable | 1         | 0.7677222 |
| 4415 | Bn-A02-p5063790 | A-genome specific (napus-rapa)    | 0.923445     | 0.4887169    | not scorable | not scorable | 1         | 0.5706043 |
| 4416 | Bn-A02-p510727  | A-genome specific (napus-rapa)    | 0.9976076    | 0.7427027    | not scorable | not scorable | 0.9586777 | 0.6744213 |
| 4417 | Bn-A02-p5144074 | A-genome specific (napus-rapa)    | 1            | 0.811515     | not scorable | not scorable | 1         | 0.894883  |
| 4418 | Bn-A02-p5166772 | A-genome specific (rapa only)     | not scorable | not scorable | not scorable | not scorable | 1         | 0.693492  |
| 4419 | Bn-A02-p518958  | A-genome specific (napus-rapa)    | 0.9976076    | 0.7830816    | not scorable | not scorable | 0.9669421 | 0.7571258 |

|      |                 |                                   |              |              |              |              |              |              |
|------|-----------------|-----------------------------------|--------------|--------------|--------------|--------------|--------------|--------------|
| 4420 | Bn-A02-p5201568 | A-genome specific (napus-rapa)    | 0.9473684    | 0.3404023    | not scorable | not scorable | 0.9752066    | 0.7629492    |
| 4421 | Bn-A02-p5242706 | A-genome specific (napus-rapa)    | 0.9521531    | 0.2572013    | not scorable | not scorable | 0.9917355    | 0.6547562    |
| 4422 | Bn-A02-p5271340 | genome unspecific (oleracea-rapa) | not scorable | not scorable | 0.9922481    | 0.4320933    | 0.9834711    | 0.6876038    |
| 4423 | Bn-A02-p5304300 | A-genome specific (rapa only)     | not scorable | not scorable | not scorable | not scorable | 1            | 0.8477979    |
| 4424 | Bn-A02-p5308168 | A-genome specific (rapa only)     | not scorable | not scorable | not scorable | not scorable | 1            | 0.7675935    |
| 4425 | Bn-A02-p5308657 | A-genome specific (rapa only)     | not scorable | not scorable | not scorable | not scorable | 0.9752066    | 0.8052266    |
| 4426 | Bn-A02-p5325556 | A-genome specific (napus-rapa)    | 0.9976076    | 0.896828     | not scorable | not scorable | 1            | 0.9093074    |
| 4427 | Bn-A02-p5326021 | A-genome specific (napus-rapa)    | 0.9784689    | 0.9216133    | not scorable | not scorable | 0.8760331    | 0.9083843    |
| 4428 | Bn-A02-p5326222 | A-genome specific (napus-rapa)    | 0.9904306    | 0.6871462    | not scorable | not scorable | 1            | 0.6674343    |
| 4429 | Bn-A02-p5327209 | napus specific                    | 0.9808612    | 0.6934028    | not scorable | not scorable | not scorable | not scorable |
| 4430 | Bn-A02-p5360273 | A-genome specific (rapa only)     | not scorable | not scorable | not scorable | not scorable | 0.9752066    | 0.6917183    |
| 4431 | Bn-A02-p5394958 | A-genome specific (napus-rapa)    | 0.9832536    | 0.2611039    | not scorable | not scorable | 1            | 0.7401002    |
| 4432 | Bn-A02-p5429003 | A-genome specific (napus-rapa)    | 0.9928229    | 0.619529     | not scorable | not scorable | 0.9917355    | 0.6574569    |
| 4433 | Bn-A02-p5436943 | A-genome specific (napus-rapa)    | 0.9904306    | 0.9396824    | not scorable | not scorable | 1            | 0.9205657    |
| 4434 | Bn-A02-p5439746 | A-genome specific (rapa only)     | not scorable | not scorable | not scorable | not scorable | 0.9917355    | 0.8759143    |
| 4435 | Bn-A02-p5442618 | A-genome specific (rapa only)     | not scorable | not scorable | not scorable | not scorable | 1            | 0.6362951    |
| 4436 | Bn-A02-p545783  | A-genome specific (napus-rapa)    | 0.9976076    | 0.7253315    | not scorable | not scorable | 0.9917355    | 0.7748725    |
| 4437 | Bn-A02-p548469  | A-genome specific (napus-rapa)    | 1            | 0.6908416    | not scorable | not scorable | 0.9917355    | 0.7442268    |
| 4438 | Bn-A02-p5485978 | A-genome specific (napus-rapa)    | 0.9784689    | 0.3173281    | not scorable | not scorable | 1            | 0.854561     |
| 4439 | Bn-A02-p5500107 | A-genome specific (napus-rapa)    | 0.9401914    | 0.5539218    | not scorable | not scorable | 1            | 0.8589143    |
| 4440 | Bn-A02-p5501733 | A-genome specific (napus-rapa)    | 0.9904306    | 0.8083949    | not scorable | not scorable | 1            | 0.8550768    |
| 4441 | Bn-A02-p5507193 | A-genome specific (napus-rapa)    | 0.9904306    | 0.7308789    | not scorable | not scorable | 1            | 0.7412943    |
| 4442 | Bn-A02-p5507530 | A-genome specific (napus-rapa)    | 0.9928229    | 0.7874572    | not scorable | not scorable | 1            | 0.7433375    |
| 4443 | Bn-A02-p551481  | A-genome specific (napus-rapa)    | 1            | 0.8026631    | not scorable | not scorable | 1            | 0.7169277    |
| 4444 | Bn-A02-p5516551 | A-genome specific (napus-rapa)    | 0.9904306    | 0.4253047    | not scorable | not scorable | 0.9834711    | 0.8260332    |
| 4445 | Bn-A02-p5517878 | A-genome specific (napus-rapa)    | 0.6076555    | 0.7627512    | not scorable | not scorable | 0.892562     | 0.788415     |
| 4446 | Bn-A02-p5519388 | A-genome specific (napus-rapa)    | 0.9760765    | 0.7563108    | not scorable | not scorable | 0.9834711    | 0.7393679    |
| 4447 | Bn-A02-p5519417 | A-genome specific (napus-rapa)    | 0.9808612    | 0.7604249    | not scorable | not scorable | 0.9917355    | 0.8382361    |
| 4448 | Bn-A02-p552098  | A-genome specific (rapa only)     | not scorable | not scorable | not scorable | not scorable | 0.9834711    | 0.7012425    |
| 4449 | Bn-A02-p5541204 | A-genome specific (napus-rapa)    | 0.9904306    | 0.7818286    | not scorable | not scorable | 0.9917355    | 0.7302324    |
| 4450 | Bn-A02-p5551332 | A-genome specific (napus-rapa)    | 0.9736842    | 0.8041474    | not scorable | not scorable | 0.9917355    | 0.8230613    |
| 4451 | Bn-A02-p5553077 | A-genome specific (napus-rapa)    | 0.9904306    | 0.8060101    | not scorable | not scorable | 1            | 0.7995954    |
| 4452 | Bn-A02-p5553663 | genome unspecific (oleracea-rapa) | not scorable | not scorable | 0.9767442    | 0.7221775    | 0.9917355    | 0.7603016    |

|      |                 |                                |              |              |              |              |              |              |
|------|-----------------|--------------------------------|--------------|--------------|--------------|--------------|--------------|--------------|
| 4453 | Bn-A02-p5561369 | A-genome specific (rapa only)  | not scorable | not scorable | not scorable | not scorable | 0.9752066    | 0.8170031    |
| 4454 | Bn-A02-p5570144 | A-genome specific (napus-rapa) | 0.9808612    | 0.5246951    | not scorable | not scorable | 1            | 0.7487973    |
| 4455 | Bn-A02-p5571981 | A-genome specific (napus-rapa) | 0.9760765    | 0.7667593    | not scorable | not scorable | 0.9752066    | 0.7836084    |
| 4456 | Bn-A02-p5574727 | A-genome specific (napus-rapa) | 0.9784689    | 0.7808352    | not scorable | not scorable | 0.9834711    | 0.6910924    |
| 4457 | Bn-A02-p557523  | napus specific                 | 0.9066986    | 0.8211706    | not scorable | not scorable | not scorable | not scorable |
| 4458 | Bn-A02-p5582861 | A-genome specific (napus-rapa) | 0.9856459    | 0.7693852    | not scorable | not scorable | 0.9917355    | 0.7902237    |
| 4459 | Bn-A02-p5592678 | A-genome specific (rapa only)  | not scorable | not scorable | not scorable | not scorable | 0.9752066    | 0.7212086    |
| 4460 | Bn-A02-p5601991 | A-genome specific (napus-rapa) | 0.9928229    | 0.7301419    | not scorable | not scorable | 0.9917355    | 0.7443858    |
| 4461 | Bn-A02-p5602271 | A-genome specific (napus-rapa) | 0.9760765    | 0.3972452    | not scorable | not scorable | 1            | 0.7543278    |
| 4462 | Bn-A02-p5604926 | all not scorable               | not scorable | not scorable | not scorable | not scorable | not scorable | not scorable |
| 4463 | Bn-A02-p5612147 | all not scorable               | not scorable | not scorable | not scorable | not scorable | not scorable | not scorable |
| 4464 | Bn-A02-p561309  | A-genome specific (napus-rapa) | 0.9928229    | 0.8494334    | not scorable | not scorable | 0.9834711    | 0.7867317    |
| 4465 | Bn-A02-p5625172 | A-genome specific (rapa only)  | not scorable | not scorable | not scorable | not scorable | 1            | 0.7344813    |
| 4466 | Bn-A02-p562671  | A-genome specific (napus-rapa) | 0.9928229    | 0.685403     | not scorable | not scorable | 0.9834711    | 0.7060453    |
| 4467 | Bn-A02-p5628094 | genome unspecific (all in)     | 0.9808612    | 0.3281028    | 0.9302326    | 0.7890494    | 1            | 0.7906294    |
| 4468 | Bn-A02-p5628473 | A-genome specific (napus-rapa) | 0.9569378    | 0.4606788    | not scorable | not scorable | 0.9917355    | 0.7612749    |
| 4469 | Bn-A02-p5628535 | A-genome specific (rapa only)  | not scorable | not scorable | not scorable | not scorable | 1            | 0.7258791    |
| 4470 | Bn-A02-p5640408 | A-genome specific (napus-rapa) | 0.9856459    | 0.6717374    | not scorable | not scorable | 0.7851239    | 0.8105487    |
| 4471 | Bn-A02-p5644858 | A-genome specific (rapa only)  | not scorable | not scorable | not scorable | not scorable | 0.9421487    | 0.7434226    |
| 4472 | Bn-A02-p5651799 | A-genome specific (rapa only)  | not scorable | not scorable | not scorable | not scorable | 1            | 0.7480727    |
| 4473 | Bn-A02-p5660188 | A-genome specific (napus-rapa) | 0.9952153    | 0.7504759    | not scorable | not scorable | 1            | 0.7823016    |
| 4474 | Bn-A02-p5661524 | A-genome specific (rapa only)  | not scorable | not scorable | not scorable | not scorable | 1            | 0.7491434    |
| 4475 | Bn-A02-p5664842 | A-genome specific (rapa only)  | not scorable | not scorable | not scorable | not scorable | 0.9834711    | 0.7210259    |
| 4476 | Bn-A02-p5666475 | A-genome specific (rapa only)  | not scorable | not scorable | not scorable | not scorable | 0.9256198    | 0.7581453    |
| 4477 | Bn-A02-p5694092 | A-genome specific (rapa only)  | not scorable | not scorable | not scorable | not scorable | 0.9917355    | 0.6366179    |
| 4478 | Bn-A02-p5705619 | A-genome specific (rapa only)  | not scorable | not scorable | not scorable | not scorable | 1            | 0.8282704    |
| 4479 | Bn-A02-p5716304 | A-genome specific (napus-rapa) | 0.8971292    | 0.6756388    | not scorable | not scorable | 0.9586777    | 0.6974347    |
| 4480 | Bn-A02-p5722550 | A-genome specific (rapa only)  | not scorable | not scorable | not scorable | not scorable | 0.9008265    | 0.8617846    |
| 4481 | Bn-A02-p5731499 | genome unspecific (all in)     | 0.9880383    | 0.3241851    | 0.9767442    | 0.7650697    | 0.9917355    | 0.69218      |
| 4482 | Bn-A02-p5743951 | A-genome specific (napus-rapa) | 0.9976076    | 0.7768667    | not scorable | not scorable | 1            | 0.7128059    |
| 4483 | Bn-A02-p576204  | A-genome specific (napus-rapa) | 0.9856459    | 0.5391067    | not scorable | not scorable | 0.9917355    | 0.7723142    |
| 4484 | Bn-A02-p5765840 | A-genome specific (napus-rapa) | 0.9976076    | 0.8604025    | not scorable | not scorable | 1            | 0.8159983    |
| 4485 | Bn-A02-p5772588 | A-genome specific (rapa only)  | not scorable | not scorable | not scorable | not scorable | 1            | 0.8007826    |



|      |                 |                                   |              |              |              |              |           |           |
|------|-----------------|-----------------------------------|--------------|--------------|--------------|--------------|-----------|-----------|
| 4486 | Bn-A02-p5772793 | A-genome specific (napus-rapa)    | 0.9976076    | 0.8481009    | not scorable | not scorable | 1         | 0.8455975 |
| 4487 | Bn-A02-p5773812 | A-genome specific (napus-rapa)    | 0.9760765    | 0.3380639    | not scorable | not scorable | 0.9834711 | 0.6019617 |
| 4488 | Bn-A02-p5774569 | A-genome specific (napus-rapa)    | 0.9736842    | 0.272102     | not scorable | not scorable | 1         | 0.7661864 |
| 4489 | Bn-A02-p5797724 | A-genome specific (rapa only)     | not scorable | not scorable | not scorable | not scorable | 0.9834711 | 0.7996386 |
| 4490 | Bn-A02-p5799113 | A-genome specific (napus-rapa)    | 0.9497608    | 0.7670333    | not scorable | not scorable | 1         | 0.8455574 |
| 4491 | Bn-A02-p5802612 | A-genome specific (napus-rapa)    | 0.9976076    | 0.8196452    | not scorable | not scorable | 0.9669421 | 0.7364082 |
| 4492 | Bn-A02-p5802772 | A-genome specific (napus-rapa)    | 0.9545454    | 0.4164293    | not scorable | not scorable | 0.9752066 | 0.6933086 |
| 4493 | Bn-A02-p5803164 | A-genome specific (napus-rapa)    | 0.9736842    | 0.7416502    | not scorable | not scorable | 0.9917355 | 0.7104843 |
| 4494 | Bn-A02-p5803432 | A-genome specific (rapa only)     | not scorable | not scorable | not scorable | not scorable | 0.6694215 | 0.8562906 |
| 4495 | Bn-A02-p5807792 | genome unspecific (oleracea-rapa) | not scorable | not scorable | 0.9844961    | 0.4755484    | 0.9752066 | 0.8486922 |
| 4496 | Bn-A02-p5812506 | A-genome specific (napus-rapa)    | 0.9952153    | 0.464436     | not scorable | not scorable | 0.9917355 | 0.6618773 |
| 4497 | Bn-A02-p5814583 | A-genome specific (napus-rapa)    | 0.9976076    | 0.9205657    | not scorable | not scorable | 1         | 0.9175813 |
| 4498 | Bn-A02-p5826306 | A-genome specific (rapa only)     | not scorable | not scorable | not scorable | not scorable | 1         | 0.5362331 |
| 4499 | Bn-A02-p5826505 | A-genome specific (napus-rapa)    | 0.9976076    | 0.2186389    | not scorable | not scorable | 0.9834711 | 0.7754879 |
| 4500 | Bn-A02-p5826541 | A-genome specific (napus-rapa)    | 1            | 0.4347724    | not scorable | not scorable | 1         | 0.4843079 |
| 4501 | Bn-A02-p5832870 | A-genome specific (napus-rapa)    | 0.9904306    | 0.5430917    | not scorable | not scorable | 0.9917355 | 0.5658643 |
| 4502 | Bn-A02-p584200  | A-genome specific (napus-rapa)    | 0.9976076    | 0.7156122    | not scorable | not scorable | 1         | 0.7221863 |
| 4503 | Bn-A02-p5859447 | A-genome specific (napus-rapa)    | 0.9856459    | 0.5417457    | not scorable | not scorable | 0.9834711 | 0.7634062 |
| 4504 | Bn-A02-p5866325 | A-genome specific (rapa only)     | not scorable | not scorable | not scorable | not scorable | 0.9917355 | 0.5073043 |
| 4505 | Bn-A02-p5867250 | A-genome specific (napus-rapa)    | 0.8732057    | 0.8548781    | not scorable | not scorable | 0.8181818 | 0.7813128 |
| 4506 | Bn-A02-p588093  | A-genome specific (napus-rapa)    | 0.9976076    | 0.5081543    | not scorable | not scorable | 0.9917355 | 0.7910755 |
| 4507 | Bn-A02-p5882799 | A-genome specific (rapa only)     | not scorable | not scorable | not scorable | not scorable | 1         | 0.7054497 |
| 4508 | Bn-A02-p5907701 | A-genome specific (napus-rapa)    | 0.9952153    | 0.8019977    | not scorable | not scorable | 1         | 0.7940277 |
| 4509 | Bn-A02-p5917045 | A-genome specific (napus-rapa)    | 0.9928229    | 0.3213164    | not scorable | not scorable | 1         | 0.7545345 |
| 4510 | Bn-A02-p5923794 | A-genome specific (rapa only)     | not scorable | not scorable | not scorable | not scorable | 0.9834711 | 0.7477874 |
| 4511 | Bn-A02-p5923878 | A-genome specific (napus-rapa)    | 0.9952153    | 0.7679284    | not scorable | not scorable | 0.9917355 | 0.701698  |
| 4512 | Bn-A02-p5924483 | A-genome specific (rapa only)     | not scorable | not scorable | not scorable | not scorable | 0.9752066 | 0.7249451 |
| 4513 | Bn-A02-p5925648 | A-genome specific (napus-rapa)    | 0.9928229    | 0.7785779    | not scorable | not scorable | 0.9917355 | 0.7698848 |
| 4514 | Bn-A02-p5925715 | A-genome specific (rapa only)     | not scorable | not scorable | not scorable | not scorable | 0.9834711 | 0.7883452 |
| 4515 | Bn-A02-p5925766 | A-genome specific (napus-rapa)    | 0.9976076    | 0.8441619    | not scorable | not scorable | 1         | 0.8305959 |
| 4516 | Bn-A02-p5933593 | A-genome specific (napus-rapa)    | 0.9354067    | 0.547087     | not scorable | not scorable | 0.9834711 | 0.7794496 |
| 4517 | Bn-A02-p5938385 | A-genome specific (napus-rapa)    | 0.9976076    | 0.8689145    | not scorable | not scorable | 1         | 0.8207097 |
| 4518 | Bn-A02-p594109  | A-genome specific (napus-rapa)    | 0.9952153    | 0.8526723    | not scorable | not scorable | 1         | 0.8321144 |

|      |                 |                                |              |              |              |              |           |           |
|------|-----------------|--------------------------------|--------------|--------------|--------------|--------------|-----------|-----------|
| 4519 | Bn-A02-p594700  | A-genome specific (napus-rapa) | 0.9856459    | 0.6705382    | not scorable | not scorable | 0.9917355 | 0.7121257 |
| 4520 | Bn-A02-p5958923 | A-genome specific (rapa only)  | not scorable | not scorable | not scorable | not scorable | 1         | 0.8313413 |
| 4521 | Bn-A02-p5985314 | A-genome specific (napus-rapa) | 0.9880383    | 0.7800914    | not scorable | not scorable | 0.9834711 | 0.7874767 |
| 4522 | Bn-A02-p5985692 | A-genome specific (napus-rapa) | 0.9928229    | 0.7644014    | not scorable | not scorable | 0.9834711 | 0.8584728 |
| 4523 | Bn-A02-p5991465 | A-genome specific (napus-rapa) | 0.9688995    | 0.7176875    | not scorable | not scorable | 1         | 0.7293733 |
| 4524 | Bn-A02-p6039769 | A-genome specific (napus-rapa) | 0.9497608    | 0.6976555    | not scorable | not scorable | 0.9669421 | 0.802623  |
| 4525 | Bn-A02-p6084757 | A-genome specific (napus-rapa) | 0.9856459    | 0.7431587    | not scorable | not scorable | 0.9834711 | 0.6957084 |
| 4526 | Bn-A02-p6097441 | A-genome specific (napus-rapa) | 0.9928229    | 0.6320357    | not scorable | not scorable | 0.9917355 | 0.6976976 |
| 4527 | Bn-A02-p6099790 | A-genome specific (napus-rapa) | 0.9784689    | 0.2118287    | not scorable | not scorable | 1         | 0.8377007 |
| 4528 | Bn-A02-p6100412 | genome unspecific (all in)     | 0.9258373    | 0.2497963    | 0.9922481    | 0.6364007    | 1         | 0.8653501 |
| 4529 | Bn-A02-p6105931 | A-genome specific (napus-rapa) | 1            | 0.7914145    | not scorable | not scorable | 1         | 0.8793069 |
| 4530 | Bn-A02-p6147730 | A-genome specific (napus-rapa) | 0.9808612    | 0.7141695    | not scorable | not scorable | 0.9917355 | 0.6520399 |
| 4531 | Bn-A02-p6147823 | A-genome specific (napus-rapa) | 0.9784689    | 0.6429716    | not scorable | not scorable | 0.9834711 | 0.5949283 |
| 4532 | Bn-A02-p6149358 | A-genome specific (rapa only)  | not scorable | not scorable | not scorable | not scorable | 0.9586777 | 0.6377702 |
| 4533 | Bn-A02-p615312  | A-genome specific (napus-rapa) | 0.9952153    | 0.3213072    | not scorable | not scorable | 0.9917355 | 0.7689164 |
| 4534 | Bn-A02-p6156818 | A-genome specific (napus-rapa) | 0.9808612    | 0.5805482    | not scorable | not scorable | 0.9917355 | 0.7837216 |
| 4535 | Bn-A02-p616247  | A-genome specific (napus-rapa) | 0.9880383    | 0.4667118    | not scorable | not scorable | 1         | 0.794138  |
| 4536 | Bn-A02-p6164030 | A-genome specific (napus-rapa) | 0.9665072    | 0.619513     | not scorable | not scorable | 1         | 0.7757052 |
| 4537 | Bn-A02-p6166043 | A-genome specific (napus-rapa) | 0.9952153    | 0.7389088    | not scorable | not scorable | 0.9752066 | 0.6468085 |
| 4538 | Bn-A02-p6166584 | A-genome specific (napus-rapa) | 0.9114832    | 0.807421     | not scorable | not scorable | 0.9834711 | 0.7459374 |
| 4539 | Bn-A02-p6167491 | A-genome specific (napus-rapa) | 0.9688995    | 0.5337244    | not scorable | not scorable | 0.9752066 | 0.615742  |
| 4540 | Bn-A02-p6171263 | A-genome specific (napus-rapa) | 0.9832536    | 0.3229727    | not scorable | not scorable | 0.9834711 | 0.8367396 |
| 4541 | Bn-A02-p6181965 | A-genome specific (napus-rapa) | 0.9569378    | 0.7621058    | not scorable | not scorable | 0.9834711 | 0.7694786 |
| 4542 | Bn-A02-p6182038 | A-genome specific (napus-rapa) | 0.9641148    | 0.5949909    | not scorable | not scorable | 0.9834711 | 0.7015014 |
| 4543 | Bn-A02-p6182486 | A-genome specific (rapa only)  | not scorable | not scorable | not scorable | not scorable | 1         | 0.8397807 |
| 4544 | Bn-A02-p61866   | A-genome specific (napus-rapa) | 0.9856459    | 0.7465323    | not scorable | not scorable | 0.9917355 | 0.7017055 |
| 4545 | Bn-A02-p6202881 | A-genome specific (napus-rapa) | 0.9880383    | 0.8191638    | not scorable | not scorable | 0.9917355 | 0.7973462 |
| 4546 | Bn-A02-p6203059 | A-genome specific (napus-rapa) | 0.9952153    | 0.7212951    | not scorable | not scorable | 1         | 0.7105698 |
| 4547 | Bn-A02-p6206533 | A-genome specific (napus-rapa) | 0.9545454    | 0.7936383    | not scorable | not scorable | 0.9669421 | 0.7062147 |
| 4548 | Bn-A02-p6206785 | A-genome specific (napus-rapa) | 0.9736842    | 0.7782666    | not scorable | not scorable | 0.9752066 | 0.663608  |
| 4549 | Bn-A02-p6209563 | A-genome specific (napus-rapa) | 0.9856459    | 0.5697475    | not scorable | not scorable | 0.9752066 | 0.6660384 |
| 4550 | Bn-A02-p6233    | A-genome specific (napus-rapa) | 1            | 0.5769446    | not scorable | not scorable | 1         | 0.8098003 |
| 4551 | Bn-A02-p6237474 | A-genome specific (napus-rapa) | 0.9856459    | 0.8074326    | not scorable | not scorable | 0.9917355 | 0.7682201 |

|                      |                                   |              |              |              |              |              |              |
|----------------------|-----------------------------------|--------------|--------------|--------------|--------------|--------------|--------------|
| 4552 Bn-A02-p6244013 | A-genome specific (napus-rapa)    | 0.923445     | 0.6209527    | not scorable | not scorable | 0.9834711    | 0.6713664    |
| 4553 Bn-A02-p624595  | genome unspecific (oleracea-rapa) | not scorable | not scorable | 0.9767442    | 0.2261281    | 1            | 0.9095823    |
| 4554 Bn-A02-p6252196 | A-genome specific (napus-rapa)    | 0.9928229    | 0.299654     | not scorable | not scorable | 1            | 0.6684769    |
| 4555 Bn-A02-p6254332 | A-genome specific (rapa only)     | not scorable | not scorable | not scorable | not scorable | 0.9917355    | 0.6902054    |
| 4556 Bn-A02-p6256499 | A-genome specific (napus-rapa)    | 0.9736842    | 0.7784863    | not scorable | not scorable | 0.9834711    | 0.6970574    |
| 4557 Bn-A02-p6265274 | A-genome specific (napus-rapa)    | 0.9880383    | 0.7995563    | not scorable | not scorable | 0.9752066    | 0.755883     |
| 4558 Bn-A02-p6267188 | A-genome specific (napus-rapa)    | 0.9617225    | 0.8089084    | not scorable | not scorable | 0.7355372    | 0.7669171    |
| 4559 Bn-A02-p6267300 | A-genome specific (napus-rapa)    | 0.9928229    | 0.7435931    | not scorable | not scorable | 1            | 0.7785914    |
| 4560 Bn-A02-p6274305 | A-genome specific (napus-rapa)    | 0.9760765    | 0.7441811    | not scorable | not scorable | 0.9834711    | 0.7594367    |
| 4561 Bn-A02-p6277812 | A-genome specific (napus-rapa)    | 0.9952153    | 0.8073602    | not scorable | not scorable | 0.9917355    | 0.6898733    |
| 4562 Bn-A02-p6280517 | napus specific                    | 0.9952153    | 0.6966712    | not scorable | not scorable | not scorable | not scorable |
| 4563 Bn-A02-p6285260 | A-genome specific (rapa only)     | not scorable | not scorable | not scorable | not scorable | 0.5371901    | 0.7326007    |
| 4564 Bn-A02-p6300284 | A-genome specific (napus-rapa)    | 0.9784689    | 0.7454118    | not scorable | not scorable | 0.9834711    | 0.8496284    |
| 4565 Bn-A02-p6310054 | A-genome specific (napus-rapa)    | 0.9665072    | 0.5060724    | not scorable | not scorable | 0.9834711    | 0.7148749    |
| 4566 Bn-A02-p631297  | A-genome specific (napus-rapa)    | 0.9952153    | 0.749391     | not scorable | not scorable | 0.9669421    | 0.8361734    |
| 4567 Bn-A02-p6315194 | A-genome specific (napus-rapa)    | 0.9808612    | 0.5279381    | not scorable | not scorable | 1            | 0.7138557    |
| 4568 Bn-A02-p6315978 | A-genome specific (napus-rapa)    | 0.9928229    | 0.7804682    | not scorable | not scorable | 1            | 0.7631087    |
| 4569 Bn-A02-p634256  | napus specific                    | 0.9736842    | 0.763501     | not scorable | not scorable | not scorable | not scorable |
| 4570 Bn-A02-p6360867 | A-genome specific (napus-rapa)    | 0.9688995    | 0.3896244    | not scorable | not scorable | 1            | 0.7404224    |
| 4571 Bn-A02-p636428  | A-genome specific (napus-rapa)    | 0.9928229    | 0.371872     | not scorable | not scorable | 1            | 0.5858629    |
| 4572 Bn-A02-p6366262 | A-genome specific (napus-rapa)    | 0.9736842    | 0.3002524    | not scorable | not scorable | 0.9834711    | 0.6362446    |
| 4573 Bn-A02-p6373647 | A-genome specific (rapa only)     | not scorable | not scorable | not scorable | not scorable | 0.9752066    | 0.6891651    |
| 4574 Bn-A02-p6375486 | A-genome specific (rapa only)     | not scorable | not scorable | not scorable | not scorable | 0.9917355    | 0.7289358    |
| 4575 Bn-A02-p6384663 | A-genome specific (napus-rapa)    | 0.9569378    | 0.6048188    | not scorable | not scorable | 0.9834711    | 0.6799752    |
| 4576 Bn-A02-p6390043 | A-genome specific (napus-rapa)    | 0.7894737    | 0.6738291    | not scorable | not scorable | 0.7107438    | 0.8229404    |
| 4577 Bn-A02-p6391751 | A-genome specific (napus-rapa)    | 0.9808612    | 0.7732618    | not scorable | not scorable | 0.9834711    | 0.8046186    |
| 4578 Bn-A02-p6392450 | A-genome specific (napus-rapa)    | 0.9880383    | 0.7118236    | not scorable | not scorable | 1            | 0.7200636    |
| 4579 Bn-A02-p6399820 | A-genome specific (napus-rapa)    | 0.9784689    | 0.3577301    | not scorable | not scorable | 0.9917355    | 0.819568     |
| 4580 Bn-A02-p6439295 | A-genome specific (napus-rapa)    | 0.8732057    | 0.7733414    | not scorable | not scorable | 0.6859504    | 0.7693124    |
| 4581 Bn-A02-p6439449 | A-genome specific (napus-rapa)    | 0.8779904    | 0.8220137    | not scorable | not scorable | 0.7603306    | 0.744128     |
| 4582 Bn-A02-p6440070 | A-genome specific (napus-rapa)    | 0.8755981    | 0.8131681    | not scorable | not scorable | 0.7107438    | 0.7444963    |
| 4583 Bn-A02-p6441318 | A-genome specific (napus-rapa)    | 0.8755981    | 0.8652211    | not scorable | not scorable | 0.7603306    | 0.8172553    |
| 4584 Bn-A02-p6461773 | A-genome specific (napus-rapa)    | 0.9976076    | 0.6988143    | not scorable | not scorable | 1            | 0.8354879    |

|                      |                                |           |           |              |              |           |           |
|----------------------|--------------------------------|-----------|-----------|--------------|--------------|-----------|-----------|
| 4585 Bn-A02-p647024  | A-genome specific (napus-rapa) | 0.9282297 | 0.7713887 | not scorable | not scorable | 0.9586777 | 0.7350385 |
| 4586 Bn-A02-p6473898 | A-genome specific (napus-rapa) | 0.9976076 | 0.7752768 | not scorable | not scorable | 1         | 0.8413565 |
| 4587 Bn-A02-p6474102 | A-genome specific (napus-rapa) | 0.9904306 | 0.5423152 | not scorable | not scorable | 0.9917355 | 0.7640417 |
| 4588 Bn-A02-p6476748 | A-genome specific (napus-rapa) | 0.9736842 | 0.358921  | not scorable | not scorable | 0.9834711 | 0.6330484 |
| 4589 Bn-A02-p647706  | A-genome specific (napus-rapa) | 0.9904306 | 0.4872692 | not scorable | not scorable | 0.9504132 | 0.6511233 |
| 4590 Bn-A02-p6478309 | A-genome specific (napus-rapa) | 0.9928229 | 0.6101801 | not scorable | not scorable | 0.9586777 | 0.6377709 |
| 4591 Bn-A02-p6483805 | A-genome specific (napus-rapa) | 0.9425837 | 0.5696764 | not scorable | not scorable | 0.9917355 | 0.7122976 |
| 4592 Bn-A02-p6500009 | A-genome specific (napus-rapa) | 0.9354067 | 0.2619227 | not scorable | not scorable | 0.9752066 | 0.6501539 |
| 4593 Bn-A02-p65078   | A-genome specific (napus-rapa) | 0.9952153 | 0.6668917 | not scorable | not scorable | 0.9834711 | 0.8454812 |
| 4594 Bn-A02-p6523411 | A-genome specific (napus-rapa) | 0.9784689 | 0.2798371 | not scorable | not scorable | 0.9917355 | 0.7663219 |
| 4595 Bn-A02-p6523609 | genome unspecific (all in)     | 0.9808612 | 0.5341781 |              | 1 0.6987798  | 0.9917355 | 0.63166   |
| 4596 Bn-A02-p652623  | A-genome specific (napus-rapa) | 0.9784689 | 0.3485759 | not scorable | not scorable | 1         | 0.7472227 |
| 4597 Bn-A02-p6555729 | A-genome specific (napus-rapa) | 0.9856459 | 0.3686316 | not scorable | not scorable | 1         | 0.8027746 |
| 4598 Bn-A02-p655765  | A-genome specific (napus-rapa) | 0.9880383 | 0.5550263 | not scorable | not scorable | 0.9917355 | 0.7321919 |
| 4599 Bn-A02-p6564856 | A-genome specific (napus-rapa) | 0.9952153 | 0.6878751 | not scorable | not scorable | 1         | 0.7124805 |
| 4600 Bn-A02-p6564861 | A-genome specific (napus-rapa) | 0.9952153 | 0.8035287 | not scorable | not scorable | 1         | 0.7157857 |
| 4601 Bn-A02-p6570881 | A-genome specific (napus-rapa) | 0.9928229 | 0.7494606 | not scorable | not scorable | 1         | 0.6830564 |
| 4602 Bn-A02-p6576389 | A-genome specific (napus-rapa) | 0.9928229 | 0.4598082 | not scorable | not scorable | 0.5206612 | 0.7139429 |
| 4603 Bn-A02-p6576872 | A-genome specific (napus-rapa) | 0.9784689 | 0.2617305 | not scorable | not scorable | 0.5123967 | 0.7275748 |
| 4604 Bn-A02-p6577065 | A-genome specific (napus-rapa) | 0.8947368 | 0.8137456 | not scorable | not scorable | 0.5041322 | 0.8098675 |
| 4605 Bn-A02-p6578877 | A-genome specific (napus-rapa) | 0.9976076 | 0.8984276 | not scorable | not scorable | 0.9752066 | 0.7803598 |
| 4606 Bn-A02-p6584506 | A-genome specific (napus-rapa) | 0.9952153 | 0.5712456 | not scorable | not scorable | 1         | 0.6940579 |
| 4607 Bn-A02-p6587201 | A-genome specific (napus-rapa) | 0.9928229 | 0.8060136 | not scorable | not scorable | 0.9752066 | 0.7849017 |
| 4608 Bn-A02-p6615821 | A-genome specific (napus-rapa) | 0.9976076 | 0.721914  | not scorable | not scorable | 0.9917355 | 0.7995842 |
| 4609 Bn-A02-p6627382 | A-genome specific (napus-rapa) | 0.9976076 | 0.6875388 | not scorable | not scorable | 1         | 0.7181782 |
| 4610 Bn-A02-p6633    | A-genome specific (napus-rapa) | 0.9856459 | 0.4457311 | not scorable | not scorable | 1         | 0.8392644 |
| 4611 Bn-A02-p6653554 | A-genome specific (napus-rapa) | 0.9856459 | 0.6781244 | not scorable | not scorable | 1         | 0.774173  |
| 4612 Bn-A02-p6658392 | A-genome specific (napus-rapa) | 0.9784689 | 0.7642959 | not scorable | not scorable | 0.9917355 | 0.8067613 |
| 4613 Bn-A02-p6689427 | A-genome specific (napus-rapa) | 0.9784689 | 0.4580777 | not scorable | not scorable | 1         | 0.7765206 |
| 4614 Bn-A02-p6692347 | A-genome specific (napus-rapa) | 0.9904306 | 0.7958043 | not scorable | not scorable | 0.9917355 | 0.7130685 |
| 4615 Bn-A02-p6697045 | A-genome specific (napus-rapa) | 0.9760765 | 0.3930667 | not scorable | not scorable | 1         | 0.7876993 |
| 4616 Bn-A02-p6711579 | A-genome specific (napus-rapa) | 1         | 0.7776538 | not scorable | not scorable | 1         | 0.9272014 |
| 4617 Bn-A02-p6711900 | A-genome specific (napus-rapa) | 0.9880383 | 0.3324243 | not scorable | not scorable | 0.9834711 | 0.777401  |

|      |                 |                                |              |              |              |              |              |              |
|------|-----------------|--------------------------------|--------------|--------------|--------------|--------------|--------------|--------------|
| 4618 | Bn-A02-p6751482 | A-genome specific (napus-rapa) | 0.9952153    | 0.6591077    | not scorable | not scorable | 0.9752066    | 0.6666946    |
| 4619 | Bn-A02-p6751605 | A-genome specific (napus-rapa) | 0.9976076    | 0.7521054    | not scorable | not scorable | 0.9834711    | 0.7640524    |
| 4620 | Bn-A02-p6764001 | A-genome specific (napus-rapa) | 0.9976076    | 0.4450783    | not scorable | not scorable | 0.9917355    | 0.7753879    |
| 4621 | Bn-A02-p6766615 | A-genome specific (napus-rapa) | 0.9952153    | 0.7420125    | not scorable | not scorable | 0.9917355    | 0.68961      |
| 4622 | Bn-A02-p676719  | A-genome specific (napus-rapa) | 0.9904306    | 0.7880341    | not scorable | not scorable | 1            | 0.7855743    |
| 4623 | Bn-A02-p6770000 | A-genome specific (rapa only)  | not scorable | not scorable | not scorable | not scorable | 0.9834711    | 0.7649528    |
| 4624 | Bn-A02-p677501  | A-genome specific (napus-rapa) | 0.9784689    | 0.4593813    | not scorable | not scorable | 1            | 0.7973509    |
| 4625 | Bn-A02-p6794013 | A-genome specific (napus-rapa) | 0.9952153    | 0.3576344    | not scorable | not scorable | 0.9834711    | 0.7456623    |
| 4626 | Bn-A02-p6813    | A-genome specific (napus-rapa) | 1            | 0.8794669    | not scorable | not scorable | 1            | 0.8527914    |
| 4627 | Bn-A02-p6816192 | A-genome specific (napus-rapa) | 0.9952153    | 0.5480705    | not scorable | not scorable | 0.9834711    | 0.793625     |
| 4628 | Bn-A02-p6816262 | A-genome specific (napus-rapa) | 0.9976076    | 0.8376912    | not scorable | not scorable | 0.9669421    | 0.7804608    |
| 4629 | Bn-A02-p6820464 | A-genome specific (rapa only)  | not scorable | not scorable | not scorable | not scorable | 0.9834711    | 0.693504     |
| 4630 | Bn-A02-p6839427 | A-genome specific (napus-rapa) | 0.9856459    | 0.7948368    | not scorable | not scorable | 1            | 0.7325586    |
| 4631 | Bn-A02-p6843407 | A-genome specific (napus-rapa) | 0.9641148    | 0.7362293    | not scorable | not scorable | 0.9917355    | 0.7070044    |
| 4632 | Bn-A02-p6844873 | A-genome specific (napus-rapa) | 0.9832536    | 0.7439936    | not scorable | not scorable | 0.9917355    | 0.6598505    |
| 4633 | Bn-A02-p6844903 | A-genome specific (napus-rapa) | 0.9736842    | 0.7262095    | not scorable | not scorable | 0.9752066    | 0.7188483    |
| 4634 | Bn-A02-p6845049 | A-genome specific (napus-rapa) | 0.9760765    | 0.741873     | not scorable | not scorable | 0.9752066    | 0.6872027    |
| 4635 | Bn-A02-p6845122 | A-genome specific (napus-rapa) | 0.9808612    | 0.6641968    | not scorable | not scorable | 0.9586777    | 0.6685803    |
| 4636 | Bn-A02-p6845953 | A-genome specific (napus-rapa) | 0.9856459    | 0.8436761    | not scorable | not scorable | 0.9834711    | 0.8762286    |
| 4637 | Bn-A02-p6845958 | A-genome specific (napus-rapa) | 0.9808612    | 0.7665581    | not scorable | not scorable | 1            | 0.7521828    |
| 4638 | Bn-A02-p6852756 | A-genome specific (napus-rapa) | 0.9808612    | 0.7790608    | not scorable | not scorable | 0.9752066    | 0.8439336    |
| 4639 | Bn-A02-p6859259 | genome unspecific (all in)     | 0.9904306    | 0.5174167    |              | 1 0.7194259  | 0.9669421    | 0.7409862    |
| 4640 | Bn-A02-p6862619 | napus specific                 | 0.9712918    | 0.1894621    | not scorable | not scorable | not scorable | not scorable |
| 4641 | Bn-A02-p6868939 | A-genome specific (rapa only)  | not scorable | not scorable | not scorable | not scorable | 0.9917355    | 0.7443218    |
| 4642 | Bn-A02-p6871477 | A-genome specific (rapa only)  | not scorable | not scorable | not scorable | not scorable | 1            | 0.7646332    |
| 4643 | Bn-A02-p6898425 | A-genome specific (rapa only)  | not scorable | not scorable | not scorable | not scorable | 0.9917355    | 0.7576258    |
| 4644 | Bn-A02-p6901814 | napus specific                 | 0.9545454    | 0.7065215    | not scorable | not scorable | not scorable | not scorable |
| 4645 | Bn-A02-p6917044 | A-genome specific (napus-rapa) | 0.9856459    | 0.7451756    | not scorable | not scorable | 0.9834711    | 0.7902066    |
| 4646 | Bn-A02-p6930285 | A-genome specific (rapa only)  | not scorable | not scorable | not scorable | not scorable | 1            | 0.7362921    |
| 4647 | Bn-A02-p6995796 | A-genome specific (napus-rapa) | 0.9928229    | 0.6266125    | not scorable | not scorable | 0.9834711    | 0.7795001    |
| 4648 | Bn-A02-p7004091 | A-genome specific (napus-rapa) | 0.9856459    | 0.4681264    | not scorable | not scorable | 0.5123967    | 0.7975696    |
| 4649 | Bn-A02-p7012860 | A-genome specific (napus-rapa) | 0.9856459    | 0.7295506    | not scorable | not scorable | 0.9834711    | 0.6994348    |
| 4650 | Bn-A02-p7014257 | genome unspecific (all in)     | 0.9784689    | 0.2926778    | 0.9922481    | 0.7100427    | 0.9834711    | 0.7134168    |

|      |                 |                                   |              |              |              |              |           |           |
|------|-----------------|-----------------------------------|--------------|--------------|--------------|--------------|-----------|-----------|
| 4651 | Bn-A02-p7029950 | A-genome specific (rapa only)     | not scorable | not scorable | not scorable | not scorable | 0.9586777 | 0.7991558 |
| 4652 | Bn-A02-p7041297 | A-genome specific (napus-rapa)    | 0.9880383    | 0.3653447    | not scorable | not scorable | 1         | 0.7388051 |
| 4653 | Bn-A02-p7043311 | A-genome specific (napus-rapa)    | 0.9784689    | 0.7472472    | not scorable | not scorable | 0.9834711 | 0.7724172 |
| 4654 | Bn-A02-p7043901 | A-genome specific (napus-rapa)    | 0.9928229    | 0.5941372    | not scorable | not scorable | 0.9834711 | 0.6892305 |
| 4655 | Bn-A02-p7056194 | A-genome specific (napus-rapa)    | 0.9856459    | 0.7829198    | not scorable | not scorable | 0.9917355 | 0.7168388 |
| 4656 | Bn-A02-p7057571 | A-genome specific (napus-rapa)    | 0.9928229    | 0.813883     | not scorable | not scorable | 0.9834711 | 0.7023647 |
| 4657 | Bn-A02-p7067463 | A-genome specific (napus-rapa)    | 0.9832536    | 0.6481613    | not scorable | not scorable | 1         | 0.8131424 |
| 4658 | Bn-A02-p709952  | A-genome specific (napus-rapa)    | 0.9976076    | 0.4975208    | not scorable | not scorable | 1         | 0.8378811 |
| 4659 | Bn-A02-p7104549 | A-genome specific (rapa only)     | not scorable | not scorable | not scorable | not scorable | 1         | 0.8418266 |
| 4660 | Bn-A02-p7105435 | A-genome specific (napus-rapa)    | 0.9760765    | 0.2741919    | not scorable | not scorable | 0.9917355 | 0.7189451 |
| 4661 | Bn-A02-p7138093 | A-genome specific (rapa only)     | not scorable | not scorable | not scorable | not scorable | 0.9752066 | 0.8211529 |
| 4662 | Bn-A02-p7138191 | A-genome specific (rapa only)     | not scorable | not scorable | not scorable | not scorable | 0.9917355 | 0.797233  |
| 4663 | Bn-A02-p7139447 | A-genome specific (napus-rapa)    | 0.9952153    | 0.7956669    | not scorable | not scorable | 0.9917355 | 0.7349489 |
| 4664 | Bn-A02-p7147282 | genome unspecific (oleracea-rapa) | not scorable | not scorable |              | 1            | 0.5896284 | 0.9669421 |
| 4665 | Bn-A02-p714791  | A-genome specific (napus-rapa)    | 1            | 0.5002283    | not scorable | not scorable | 0.9917355 | 0.7496533 |
| 4666 | Bn-A02-p7183200 | A-genome specific (napus-rapa)    | 0.9976076    | 0.4379927    | not scorable | not scorable | 1         | 0.8339192 |
| 4667 | Bn-A02-p7207945 | A-genome specific (rapa only)     | not scorable | not scorable | not scorable | not scorable | 0.9917355 | 0.7125625 |
| 4668 | Bn-A02-p7236427 | A-genome specific (napus-rapa)    | 0.4808612    | 0.8332496    | not scorable | not scorable | 0.9834711 | 0.7765396 |
| 4669 | Bn-A02-p7242957 | A-genome specific (rapa only)     | not scorable | not scorable | not scorable | not scorable | 0.9917355 | 0.7567341 |
| 4670 | Bn-A02-p7243236 | A-genome specific (napus-rapa)    | 0.9928229    | 0.7470311    | not scorable | not scorable | 0.9752066 | 0.8084701 |
| 4671 | Bn-A02-p7245587 | A-genome specific (napus-rapa)    | 1            | 0.3631712    | not scorable | not scorable | 0.9917355 | 0.5879409 |
| 4672 | Bn-A02-p7245763 | A-genome specific (napus-rapa)    | 0.9880383    | 0.7696891    | not scorable | not scorable | 1         | 0.6945117 |
| 4673 | Bn-A02-p7250607 | A-genome specific (napus-rapa)    | 0.9114832    | 0.6063761    | not scorable | not scorable | 1         | 0.8160156 |
| 4674 | Bn-A02-p725112  | A-genome specific (napus-rapa)    | 0.9904306    | 0.8017733    | not scorable | not scorable | 0.9917355 | 0.8002675 |
| 4675 | Bn-A02-p7260577 | A-genome specific (napus-rapa)    | 0.9784689    | 0.8253279    | not scorable | not scorable | 0.7438017 | 0.9062533 |
| 4676 | Bn-A02-p7260946 | A-genome specific (napus-rapa)    | 0.9952153    | 0.7700814    | not scorable | not scorable | 0.9834711 | 0.6947733 |
| 4677 | Bn-A02-p7264855 | A-genome specific (napus-rapa)    | 0.9712918    | 0.3267059    | not scorable | not scorable | 1         | 0.8261173 |
| 4678 | Bn-A02-p727584  | A-genome specific (rapa only)     | not scorable | not scorable | not scorable | not scorable | 0.9917355 | 0.6587366 |
| 4679 | Bn-A02-p7278213 | A-genome specific (napus-rapa)    | 0.9832536    | 0.3320951    | not scorable | not scorable | 1         | 0.7145144 |
| 4680 | Bn-A02-p7278330 | A-genome specific (rapa only)     | not scorable | not scorable | not scorable | not scorable | 0.9917355 | 0.8152286 |
| 4681 | Bn-A02-p7279011 | A-genome specific (rapa only)     | not scorable | not scorable | not scorable | not scorable | 0.661157  | 0.876044  |
| 4682 | Bn-A02-p7281627 | A-genome specific (napus-rapa)    | 0.9736842    | 0.5013642    | not scorable | not scorable | 1         | 0.8649814 |
| 4683 | Bn-A02-p7282115 | A-genome specific (napus-rapa)    | 0.9928229    | 0.7853137    | not scorable | not scorable | 1         | 0.8737969 |

|      |                 |                                |              |              |              |              |              |              |
|------|-----------------|--------------------------------|--------------|--------------|--------------|--------------|--------------|--------------|
| 4684 | Bn-A02-p7297184 | A-genome specific (napus-rapa) | 0.9736842    | 0.7731378    | not scorable | not scorable | 0.9008265    | 0.8804122    |
| 4685 | Bn-A02-p7306278 | A-genome specific (rapa only)  | not scorable | not scorable | not scorable | not scorable | 1            | 0.6945083    |
| 4686 | Bn-A02-p7319800 | A-genome specific (napus-rapa) | 0.9808612    | 0.7977852    | not scorable | not scorable | 0.9917355    | 0.7964792    |
| 4687 | Bn-A02-p7324958 | A-genome specific (napus-rapa) | 0.9976076    | 0.3081795    | not scorable | not scorable | 0.9669421    | 0.7791222    |
| 4688 | Bn-A02-p7349063 | A-genome specific (napus-rapa) | 0.9832536    | 0.6922182    | not scorable | not scorable | 1            | 0.7902352    |
| 4689 | Bn-A02-p7350064 | A-genome specific (napus-rapa) | 0.9832536    | 0.8015566    | not scorable | not scorable | 0.9834711    | 0.7667254    |
| 4690 | Bn-A02-p7350199 | A-genome specific (napus-rapa) | 0.9808612    | 0.7851732    | not scorable | not scorable | 0.9917355    | 0.7564395    |
| 4691 | Bn-A02-p7351109 | A-genome specific (napus-rapa) | 0.9354067    | 0.6073132    | not scorable | not scorable | 1            | 0.7789128    |
| 4692 | Bn-A02-p7351619 | A-genome specific (napus-rapa) | 0.9928229    | 0.7625743    | not scorable | not scorable | 0.9834711    | 0.7774591    |
| 4693 | Bn-A02-p7351746 | A-genome specific (napus-rapa) | 0.9832536    | 0.7448601    | not scorable | not scorable | 0.9917355    | 0.7728441    |
| 4694 | Bn-A02-p7361744 | A-genome specific (napus-rapa) | 0.9784689    | 0.726295     | not scorable | not scorable | 1            | 0.8533447    |
| 4695 | Bn-A02-p7363071 | A-genome specific (napus-rapa) | 0.9856459    | 0.7735092    | not scorable | not scorable | 1            | 0.8100545    |
| 4696 | Bn-A02-p7368167 | A-genome specific (rapa only)  | not scorable | not scorable | not scorable | not scorable | 0.9917355    | 0.721895     |
| 4697 | Bn-A02-p7371108 | A-genome specific (napus-rapa) | 0.937799     | 0.6195772    | not scorable | not scorable | 0.9917355    | 0.7371387    |
| 4698 | Bn-A02-p7396082 | A-genome specific (napus-rapa) | 0.9688995    | 0.753009     | not scorable | not scorable | 1            | 0.6973409    |
| 4699 | Bn-A02-p7396400 | A-genome specific (rapa only)  | not scorable | not scorable | not scorable | not scorable | 0.9752066    | 0.699058     |
| 4700 | Bn-A02-p7409699 | A-genome specific (rapa only)  | not scorable | not scorable | not scorable | not scorable | 0.9834711    | 0.4547226    |
| 4701 | Bn-A02-p7439205 | napus specific                 | 0.9186603    | 0.5750291    | not scorable | not scorable | not scorable | not scorable |
| 4702 | Bn-A02-p7453258 | A-genome specific (napus-rapa) | 0.9832536    | 0.398471     | not scorable | not scorable | 0.9917355    | 0.793022     |
| 4703 | Bn-A02-p745468  | A-genome specific (napus-rapa) | 1            | 0.7634817    | not scorable | not scorable | 1            | 0.7167994    |
| 4704 | Bn-A02-p7463965 | A-genome specific (napus-rapa) | 0.9210526    | 0.7899924    | not scorable | not scorable | 0.9586777    | 0.8533713    |
| 4705 | Bn-A02-p7464840 | A-genome specific (napus-rapa) | 0.9521531    | 0.6051677    | not scorable | not scorable | 0.9669421    | 0.7679975    |
| 4706 | Bn-A02-p7464997 | A-genome specific (napus-rapa) | 0.9066986    | 0.6930822    | not scorable | not scorable | 0.9669421    | 0.8337642    |
| 4707 | Bn-A02-p7475028 | A-genome specific (napus-rapa) | 0.5071771    | 0.6843799    | not scorable | not scorable | 0.9669421    | 0.6100981    |
| 4708 | Bn-A02-p7476709 | A-genome specific (napus-rapa) | 0.9880383    | 0.5378415    | not scorable | not scorable | 0.9421487    | 0.7577009    |
| 4709 | Bn-A02-p7482915 | A-genome specific (napus-rapa) | 0.9736842    | 0.8048622    | not scorable | not scorable | 0.9834711    | 0.6957147    |
| 4710 | Bn-A02-p7483107 | A-genome specific (napus-rapa) | 0.9688995    | 0.7878407    | not scorable | not scorable | 1            | 0.7962533    |
| 4711 | Bn-A02-p7483376 | A-genome specific (rapa only)  | not scorable | not scorable | not scorable | not scorable | 0.9917355    | 0.8259604    |
| 4712 | Bn-A02-p7498192 | A-genome specific (napus-rapa) | 0.9832536    | 0.3554854    | not scorable | not scorable | 0.9917355    | 0.7371905    |
| 4713 | Bn-A02-p7510882 | A-genome specific (napus-rapa) | 0.9856459    | 0.6959207    | not scorable | not scorable | 0.9834711    | 0.7712981    |
| 4714 | Bn-A02-p7514338 | A-genome specific (rapa only)  | not scorable | not scorable | not scorable | not scorable | 0.9834711    | 0.7690032    |
| 4715 | Bn-A02-p7516226 | A-genome specific (napus-rapa) | 0.9330143    | 0.6878141    | not scorable | not scorable | 0.9834711    | 0.7514516    |
| 4716 | Bn-A02-p7516732 | A-genome specific (napus-rapa) | 0.9641148    | 0.2267042    | not scorable | not scorable | 0.9917355    | 0.6486743    |

|      |                 |                                   |              |              |              |              |              |              |
|------|-----------------|-----------------------------------|--------------|--------------|--------------|--------------|--------------|--------------|
| 4717 | Bn-A02-p7520783 | A-genome specific (napus-rapa)    | 0.9784689    | 0.2833979    | not scorable | not scorable | 0.9917355    | 0.64094      |
| 4718 | Bn-A02-p7525472 | A-genome specific (rapa only)     | not scorable | not scorable | not scorable | not scorable | 0.9586777    | 0.8314947    |
| 4719 | Bn-A02-p7531907 | A-genome specific (napus-rapa)    | 0.9976076    | 0.5109164    | not scorable | not scorable | 0.9917355    | 0.84812      |
| 4720 | Bn-A02-p7534591 | A-genome specific (rapa only)     | not scorable | not scorable | not scorable | not scorable | 0.9917355    | 0.8015221    |
| 4721 | Bn-A02-p7575736 | A-genome specific (napus-rapa)    | 0.9760765    | 0.7653556    | not scorable | not scorable | 1            | 0.7466948    |
| 4722 | Bn-A02-p7589454 | A-genome specific (rapa only)     | not scorable | not scorable | not scorable | not scorable | 0.9669421    | 0.8385628    |
| 4723 | Bn-A02-p759031  | A-genome specific (napus-rapa)    | 0.9162679    | 0.7249252    | not scorable | not scorable | 0.9421487    | 0.8133634    |
| 4724 | Bn-A02-p7595911 | A-genome specific (napus-rapa)    | 0.9784689    | 0.7827367    | not scorable | not scorable | 1            | 0.7086748    |
| 4725 | Bn-A02-p7597314 | A-genome specific (napus-rapa)    | 0.9880383    | 0.8045736    | not scorable | not scorable | 1            | 0.784313     |
| 4726 | Bn-A02-p761524  | A-genome specific (napus-rapa)    | 0.9904306    | 0.8139089    | not scorable | not scorable | 0.9834711    | 0.7433274    |
| 4727 | Bn-A02-p7647776 | A-genome specific (napus-rapa)    | 1            | 0.520664     | not scorable | not scorable | 1            | 0.8241445    |
| 4728 | Bn-A02-p7675384 | A-genome specific (napus-rapa)    | 0.9904306    | 0.8122706    | not scorable | not scorable | 0.9834711    | 0.7235599    |
| 4729 | Bn-A02-p7675505 | A-genome specific (napus-rapa)    | 0.9928229    | 0.5661506    | not scorable | not scorable | 0.9917355    | 0.8729188    |
| 4730 | Bn-A02-p770821  | A-genome specific (rapa only)     | not scorable | not scorable | not scorable | not scorable | 0.9834711    | 0.6544235    |
| 4731 | Bn-A02-p771019  | A-genome specific (rapa only)     | not scorable | not scorable | not scorable | not scorable | 0.9586777    | 0.5612607    |
| 4732 | Bn-A02-p7712926 | A-genome specific (napus-rapa)    | 0.9401914    | 0.7799253    | not scorable | not scorable | 0.9669421    | 0.7193478    |
| 4733 | Bn-A02-p771313  | A-genome specific (napus-rapa)    | 0.9760765    | 0.5494034    | not scorable | not scorable | 0.9752066    | 0.6921548    |
| 4734 | Bn-A02-p771951  | A-genome specific (napus-rapa)    | 0.9976076    | 0.7461146    | not scorable | not scorable | 1            | 0.6980916    |
| 4735 | Bn-A02-p7736604 | A-genome specific (napus-rapa)    | 0.9832536    | 0.6744211    | not scorable | not scorable | 0.9917355    | 0.7271112    |
| 4736 | Bn-A02-p7738248 | A-genome specific (napus-rapa)    | 0.9760765    | 0.7665671    | not scorable | not scorable | 1            | 0.8824477    |
| 4737 | Bn-A02-p7750368 | A-genome specific (napus-rapa)    | 0.9904306    | 0.5737354    | not scorable | not scorable | 1            | 0.8440034    |
| 4738 | Bn-A02-p7753579 | A-genome specific (napus-rapa)    | 0.9832536    | 0.8317832    | not scorable | not scorable | 1            | 0.6907074    |
| 4739 | Bn-A02-p7756308 | A-genome specific (napus-rapa)    | 0.9425837    | 0.7772068    | not scorable | not scorable | 0.9752066    | 0.9074243    |
| 4740 | Bn-A02-p7775332 | A-genome specific (napus-rapa)    | 0.9760765    | 0.7645133    | not scorable | not scorable | 0.9834711    | 0.7020374    |
| 4741 | Bn-A02-p7784914 | A-genome specific (napus-rapa)    | 0.9952153    | 0.6933859    | not scorable | not scorable | 1            | 0.8234416    |
| 4742 | Bn-A02-p7786183 | A-genome specific (napus-rapa)    | 0.9808612    | 0.7772229    | not scorable | not scorable | 0.9834711    | 0.7531403    |
| 4743 | Bn-A02-p7788379 | A-genome specific (napus-rapa)    | 0.9832536    | 0.3166976    | not scorable | not scorable | 0.9834711    | 0.7241945    |
| 4744 | Bn-A02-p7788840 | A-genome specific (napus-rapa)    | 0.9856459    | 0.7429016    | not scorable | not scorable | 1            | 0.8407756    |
| 4745 | Bn-A02-p7801111 | A-genome specific (napus-rapa)    | 0.9497608    | 0.7901652    | not scorable | not scorable | 1            | 0.8085507    |
| 4746 | Bn-A02-p7804291 | A-genome specific (napus-rapa)    | 0.9401914    | 0.7688072    | not scorable | not scorable | 0.9752066    | 0.7591489    |
| 4747 | Bn-A02-p7812681 | A-genome specific (rapa only)     | not scorable | not scorable | not scorable | not scorable | 1            | 0.7149075    |
| 4748 | Bn-A02-p78265   | A-genome specific (rapa only)     | not scorable | not scorable | not scorable | not scorable | 0.9834711    | 0.8095888    |
| 4749 | Bn-A02-p7831145 | C-genome specific (oleracea only) | not scorable | not scorable | 0.9689922    | 0.4413385    | not scorable | not scorable |



|      |                 |                                |              |              |              |              |              |              |
|------|-----------------|--------------------------------|--------------|--------------|--------------|--------------|--------------|--------------|
| 4750 | Bn-A02-p7840077 | A-genome specific (rapa only)  | not scorable | not scorable | not scorable | not scorable | 0.9834711    | 0.7420868    |
| 4751 | Bn-A02-p7848143 | A-genome specific (napus-rapa) | 0.9904306    | 0.7275792    | not scorable | not scorable | 0.9834711    | 0.7327777    |
| 4752 | Bn-A02-p7853194 | A-genome specific (napus-rapa) | 0.9928229    | 0.7486134    | not scorable | not scorable | 1            | 0.772261     |
| 4753 | Bn-A02-p785930  | all not scorable               | not scorable | not scorable | not scorable | not scorable | not scorable | not scorable |
| 4754 | Bn-A02-p7862412 | A-genome specific (napus-rapa) | 0.9712918    | 0.3328695    | not scorable | not scorable | 0.9834711    | 0.7011391    |
| 4755 | Bn-A02-p7878229 | A-genome specific (rapa only)  | not scorable | not scorable | not scorable | not scorable | 1            | 0.8070189    |
| 4756 | Bn-A02-p7882027 | A-genome specific (napus-rapa) | 0.6100478    | 0.8126702    | not scorable | not scorable | 0.7272727    | 0.6993932    |
| 4757 | Bn-A02-p7885731 | A-genome specific (napus-rapa) | 0.9521531    | 0.7212026    | not scorable | not scorable | 0.9917355    | 0.7851168    |
| 4758 | Bn-A02-p7886882 | napus specific                 | 0.9904306    | 0.7931737    | not scorable | not scorable | not scorable | not scorable |
| 4759 | Bn-A02-p7892272 | A-genome specific (napus-rapa) | 0.9904306    | 0.8000088    | not scorable | not scorable | 0.9917355    | 0.8076818    |
| 4760 | Bn-A02-p7892561 | A-genome specific (napus-rapa) | 0.9880383    | 0.7351797    | not scorable | not scorable | 0.9504132    | 0.7372491    |
| 4761 | Bn-A02-p7893025 | A-genome specific (rapa only)  | not scorable | not scorable | not scorable | not scorable | 0.9917355    | 0.716031     |
| 4762 | Bn-A02-p7893461 | A-genome specific (rapa only)  | not scorable | not scorable | not scorable | not scorable | 1            | 0.7461784    |
| 4763 | Bn-A02-p7893901 | A-genome specific (rapa only)  | not scorable | not scorable | not scorable | not scorable | 1            | 0.7789708    |
| 4764 | Bn-A02-p7894216 | A-genome specific (rapa only)  | not scorable | not scorable | not scorable | not scorable | 0.9917355    | 0.7923428    |
| 4765 | Bn-A02-p7894339 | A-genome specific (rapa only)  | not scorable | not scorable | not scorable | not scorable | 0.9917355    | 0.7945102    |
| 4766 | Bn-A02-p7896923 | A-genome specific (napus-rapa) | 0.9784689    | 0.5332489    | not scorable | not scorable | 0.9917355    | 0.7669969    |
| 4767 | Bn-A02-p7904444 | A-genome specific (napus-rapa) | 0.9832536    | 0.793214     | not scorable | not scorable | 0.9834711    | 0.7326415    |
| 4768 | Bn-A02-p7926823 | A-genome specific (napus-rapa) | 0.9760765    | 0.743062     | not scorable | not scorable | 0.9917355    | 0.7631068    |
| 4769 | Bn-A02-p7935221 | A-genome specific (napus-rapa) | 0.9976076    | 0.3749342    | not scorable | not scorable | 0.9752066    | 0.7526984    |
| 4770 | Bn-A02-p7947982 | A-genome specific (napus-rapa) | 0.9784689    | 0.7641205    | not scorable | not scorable | 0.9752066    | 0.6839395    |
| 4771 | Bn-A02-p7952281 | A-genome specific (napus-rapa) | 0.9928229    | 0.7124779    | not scorable | not scorable | 1            | 0.7197591    |
| 4772 | Bn-A02-p7956983 | A-genome specific (rapa only)  | not scorable | not scorable | not scorable | not scorable | 0.9752066    | 0.7352474    |
| 4773 | Bn-A02-p7958421 | A-genome specific (napus-rapa) | 0.9904306    | 0.4171607    | not scorable | not scorable | 1            | 0.814585     |
| 4774 | Bn-A02-p7970283 | A-genome specific (napus-rapa) | 0.6291866    | 0.7940232    | not scorable | not scorable | 0.7355372    | 0.8040105    |
| 4775 | Bn-A02-p7975165 | A-genome specific (napus-rapa) | 0.9952153    | 0.7289852    | not scorable | not scorable | 0.9834711    | 0.7655351    |
| 4776 | Bn-A02-p7976278 | A-genome specific (napus-rapa) | 0.9856459    | 0.5153814    | not scorable | not scorable | 0.9917355    | 0.664094     |
| 4777 | Bn-A02-p7978230 | A-genome specific (napus-rapa) | 0.9976076    | 0.4148431    | not scorable | not scorable | 0.9917355    | 0.6981266    |
| 4778 | Bn-A02-p799930  | A-genome specific (napus-rapa) | 0.9904306    | 0.6834955    | not scorable | not scorable | 0.9917355    | 0.8329262    |
| 4779 | Bn-A02-p8011131 | A-genome specific (napus-rapa) | 0.9856459    | 0.3153768    | not scorable | not scorable | 1            | 0.6632591    |
| 4780 | Bn-A02-p801257  | napus specific                 | 0.8516746    | 0.7581462    | not scorable | not scorable | not scorable | not scorable |
| 4781 | Bn-A02-p8015745 | A-genome specific (rapa only)  | not scorable | not scorable | not scorable | not scorable | 0.9586777    | 0.718304     |
| 4782 | Bn-A02-p8024157 | A-genome specific (napus-rapa) | 0.9617225    | 0.7603827    | not scorable | not scorable | 0.9752066    | 0.7269179    |

|      |                 |                                |              |              |              |              |              |              |
|------|-----------------|--------------------------------|--------------|--------------|--------------|--------------|--------------|--------------|
| 4783 | Bn-A02-p8024784 | A-genome specific (napus-rapa) | 0.9976076    | 0.9150075    | not scorable | not scorable | 1            | 0.9267293    |
| 4784 | Bn-A02-p8026465 | A-genome specific (napus-rapa) | 0.9952153    | 0.9272014    | not scorable | not scorable | 1            | 0.9205657    |
| 4785 | Bn-A02-p8057234 | A-genome specific (napus-rapa) | 0.9976076    | 0.4670551    | not scorable | not scorable | 0.9834711    | 0.7954453    |
| 4786 | Bn-A02-p806025  | A-genome specific (napus-rapa) | 0.9593301    | 0.8267122    | not scorable | not scorable | 0.9338843    | 0.8624802    |
| 4787 | Bn-A02-p806949  | A-genome specific (napus-rapa) | 0.9976076    | 0.746634     | not scorable | not scorable | 0.9917355    | 0.7883527    |
| 4788 | Bn-A02-p8084362 | A-genome specific (napus-rapa) | 0.9880383    | 0.5006534    | not scorable | not scorable | 1            | 0.77835      |
| 4789 | Bn-A02-p8084605 | A-genome specific (napus-rapa) | 1            | 0.4267537    | not scorable | not scorable | 1            | 0.8605337    |
| 4790 | Bn-A02-p808711  | A-genome specific (napus-rapa) | 0.9952153    | 0.7540577    | not scorable | not scorable | 1            | 0.7609124    |
| 4791 | Bn-A02-p8090196 | A-genome specific (napus-rapa) | 0.9832536    | 0.7745731    | not scorable | not scorable | 0.9752066    | 0.7508547    |
| 4792 | Bn-A02-p809627  | A-genome specific (napus-rapa) | 0.9928229    | 0.7338062    | not scorable | not scorable | 0.9917355    | 0.7338463    |
| 4793 | Bn-A02-p8111245 | A-genome specific (napus-rapa) | 0.9497608    | 0.5355018    | not scorable | not scorable | 0.9834711    | 0.6968412    |
| 4794 | Bn-A02-p8140997 | A-genome specific (napus-rapa) | 0.9808612    | 0.7376928    | not scorable | not scorable | 0.9917355    | 0.814316     |
| 4795 | Bn-A02-p8141909 | A-genome specific (napus-rapa) | 0.9880383    | 0.6842383    | not scorable | not scorable | 0.9834711    | 0.7324694    |
| 4796 | Bn-A02-p8145676 | A-genome specific (napus-rapa) | 0.9808612    | 0.7428272    | not scorable | not scorable | 1            | 0.7580712    |
| 4797 | Bn-A02-p8160522 | A-genome specific (napus-rapa) | 0.9736842    | 0.3464864    | not scorable | not scorable | 1            | 0.8466807    |
| 4798 | Bn-A02-p8169424 | A-genome specific (napus-rapa) | 0.9880383    | 0.691925     | not scorable | not scorable | 0.9669421    | 0.7177985    |
| 4799 | Bn-A02-p8169665 | A-genome specific (napus-rapa) | 0.9736842    | 0.4415961    | not scorable | not scorable | 0.9834711    | 0.8673841    |
| 4800 | Bn-A02-p8176181 | A-genome specific (napus-rapa) | 0.9736842    | 0.5366587    | not scorable | not scorable | 1            | 0.7941383    |
| 4801 | Bn-A02-p8177809 | A-genome specific (napus-rapa) | 0.9976076    | 0.4444549    | not scorable | not scorable | 0.9917355    | 0.7065331    |
| 4802 | Bn-A02-p8179492 | all not scorable               | not scorable | not scorable | not scorable | not scorable | not scorable | not scorable |
| 4803 | Bn-A02-p8190375 | A-genome specific (napus-rapa) | 0.9473684    | 0.7682696    | not scorable | not scorable | 0.9752066    | 0.7602542    |
| 4804 | Bn-A02-p8191099 | A-genome specific (napus-rapa) | 0.9736842    | 0.7887865    | not scorable | not scorable | 0.9586777    | 0.779614     |
| 4805 | Bn-A02-p8199891 | A-genome specific (napus-rapa) | 0.9880383    | 0.8242561    | not scorable | not scorable | 0.9917355    | 0.8053056    |
| 4806 | Bn-A02-p8200381 | A-genome specific (napus-rapa) | 0.9856459    | 0.7659872    | not scorable | not scorable | 0.9421487    | 0.7305777    |
| 4807 | Bn-A02-p8204490 | A-genome specific (napus-rapa) | 0.9880383    | 0.5524054    | not scorable | not scorable | 0.9917355    | 0.7635288    |
| 4808 | Bn-A02-p8208117 | A-genome specific (napus-rapa) | 1            | 0.8191374    | not scorable | not scorable | 1            | 0.7971621    |
| 4809 | Bn-A02-p8215285 | A-genome specific (napus-rapa) | 0.9760765    | 0.8012247    | not scorable | not scorable | 0.9917355    | 0.7342598    |
| 4810 | Bn-A02-p8234333 | A-genome specific (napus-rapa) | 0.9641148    | 0.7151495    | not scorable | not scorable | 0.9669421    | 0.7437899    |
| 4811 | Bn-A02-p8234485 | A-genome specific (napus-rapa) | 0.9449761    | 0.761075     | not scorable | not scorable | 0.9752066    | 0.7008019    |
| 4812 | Bn-A02-p8234978 | A-genome specific (napus-rapa) | 0.9736842    | 0.793328     | not scorable | not scorable | 0.9917355    | 0.6924239    |
| 4813 | Bn-A02-p8235110 | A-genome specific (rapa only)  | not scorable | not scorable | not scorable | not scorable | 0.9834711    | 0.6876985    |
| 4814 | Bn-A02-p823586  | napus specific                 | 0.9258373    | 0.7739003    | not scorable | not scorable | not scorable | not scorable |
| 4815 | Bn-A02-p8243789 | A-genome specific (napus-rapa) | 0.9593301    | 0.5693166    | not scorable | not scorable | 0.9917355    | 0.7230725    |

|      |                 |                                |              |              |              |              |              |              |
|------|-----------------|--------------------------------|--------------|--------------|--------------|--------------|--------------|--------------|
| 4816 | Bn-A02-p8249838 | A-genome specific (rapa only)  | not scorable | not scorable | not scorable | not scorable | 1            | 0.7638761    |
| 4817 | Bn-A02-p8250856 | A-genome specific (napus-rapa) | 0.9928229    | 0.7187208    | not scorable | not scorable | 1            | 0.7286923    |
| 4818 | Bn-A02-p8251258 | A-genome specific (napus-rapa) | 0.9952153    | 0.4134906    | not scorable | not scorable | 0.9917355    | 0.7947058    |
| 4819 | Bn-A02-p8264334 | all not scorable               | not scorable | not scorable | not scorable | not scorable | not scorable | not scorable |
| 4820 | Bn-A02-p8273655 | A-genome specific (rapa only)  | not scorable | not scorable | not scorable | not scorable | 1            | 0.698265     |
| 4821 | Bn-A02-p8277939 | A-genome specific (napus-rapa) | 0.9904306    | 0.4458942    | not scorable | not scorable | 1            | 0.7953373    |
| 4822 | Bn-A02-p8284992 | A-genome specific (napus-rapa) | 0.9784689    | 0.7553542    | not scorable | not scorable | 0.9917355    | 0.7771038    |
| 4823 | Bn-A02-p8285151 | A-genome specific (napus-rapa) | 0.9808612    | 0.7415641    | not scorable | not scorable | 1            | 0.7416434    |
| 4824 | Bn-A02-p8289331 | A-genome specific (napus-rapa) | 0.9952153    | 0.3183582    | not scorable | not scorable | 0.9752066    | 0.7616993    |
| 4825 | Bn-A02-p8294934 | A-genome specific (napus-rapa) | 0.9808612    | 0.7157307    | not scorable | not scorable | 0.5371901    | 0.8269897    |
| 4826 | Bn-A02-p8297807 | A-genome specific (napus-rapa) | 0.9665072    | 0.7890869    | not scorable | not scorable | 1            | 0.7888252    |
| 4827 | Bn-A02-p8313782 | A-genome specific (napus-rapa) | 0.9760765    | 0.4816065    | not scorable | not scorable | 1            | 0.814971     |
| 4828 | Bn-A02-p8323616 | A-genome specific (napus-rapa) | 0.9808612    | 0.8115861    | not scorable | not scorable | 1            | 0.7183553    |
| 4829 | Bn-A02-p8324359 | A-genome specific (napus-rapa) | 0.9760765    | 0.7803825    | not scorable | not scorable | 0.9917355    | 0.6995066    |
| 4830 | Bn-A02-p8335312 | A-genome specific (napus-rapa) | 0.9688995    | 0.7704459    | not scorable | not scorable | 0.9917355    | 0.7934188    |
| 4831 | Bn-A02-p8336294 | A-genome specific (napus-rapa) | 0.9641148    | 0.7805146    | not scorable | not scorable | 0.9752066    | 0.7969964    |
| 4832 | Bn-A02-p8338189 | A-genome specific (napus-rapa) | 0.9760765    | 0.6283789    | not scorable | not scorable | 1            | 0.7533931    |
| 4833 | Bn-A02-p8344540 | A-genome specific (napus-rapa) | 0.9258373    | 0.7418282    | not scorable | not scorable | 0.9917355    | 0.6777365    |
| 4834 | Bn-A02-p8391383 | A-genome specific (napus-rapa) | 0.9832536    | 0.773262     | not scorable | not scorable | 1            | 0.6896096    |
| 4835 | Bn-A02-p8391574 | A-genome specific (napus-rapa) | 0.9808612    | 0.7027655    | not scorable | not scorable | 0.9752066    | 0.7185681    |
| 4836 | Bn-A02-p839171  | A-genome specific (napus-rapa) | 0.9976076    | 0.3595916    | not scorable | not scorable | 0.9752066    | 0.6978591    |
| 4837 | Bn-A02-p8396864 | A-genome specific (napus-rapa) | 0.2105263    | 0.778595     | not scorable | not scorable | 0.9834711    | 0.7934849    |
| 4838 | Bn-A02-p8404663 | A-genome specific (rapa only)  | not scorable | not scorable | not scorable | not scorable | 0.9504132    | 0.7742965    |
| 4839 | Bn-A02-p8412911 | A-genome specific (napus-rapa) | 0.9952153    | 0.6589787    | not scorable | not scorable | 0.9917355    | 0.6743745    |
| 4840 | Bn-A02-p8413531 | A-genome specific (rapa only)  | not scorable | not scorable | not scorable | not scorable | 1            | 0.7965445    |
| 4841 | Bn-A02-p8440451 | napus specific                 | 0.8971292    | 0.7837322    | not scorable | not scorable | not scorable | not scorable |
| 4842 | Bn-A02-p8443355 | A-genome specific (rapa only)  | not scorable | not scorable | not scorable | not scorable | 1            | 0.7207681    |
| 4843 | Bn-A02-p8444558 | A-genome specific (rapa only)  | not scorable | not scorable | not scorable | not scorable | 0.9917355    | 0.7097507    |
| 4844 | Bn-A02-p8453414 | A-genome specific (napus-rapa) | 0.9784689    | 0.7611449    | not scorable | not scorable | 1            | 0.7239645    |
| 4845 | Bn-A02-p8453695 | A-genome specific (napus-rapa) | 0.8947368    | 0.4902489    | not scorable | not scorable | 0.9504132    | 0.3262676    |
| 4846 | Bn-A02-p8466214 | A-genome specific (napus-rapa) | 0.9736842    | 0.797366     | not scorable | not scorable | 0.9834711    | 0.7368887    |
| 4847 | Bn-A02-p8471639 | all not scorable               | not scorable | not scorable | not scorable | not scorable | not scorable | not scorable |
| 4848 | Bn-A02-p8472166 | A-genome specific (napus-rapa) | 0.9736842    | 0.7792907    | not scorable | not scorable | 0.9917355    | 0.7467239    |

|      |                 |                                |              |              |              |              |              |              |
|------|-----------------|--------------------------------|--------------|--------------|--------------|--------------|--------------|--------------|
| 4849 | Bn-A02-p8473119 | A-genome specific (napus-rapa) | 0.9808612    | 0.720535     | not scorable | not scorable | 0.9917355    | 0.7277477    |
| 4850 | Bn-A02-p847638  | A-genome specific (napus-rapa) | 1            | 0.5046297    | not scorable | not scorable | 0.9917355    | 0.6686085    |
| 4851 | Bn-A02-p8481759 | A-genome specific (napus-rapa) | 0.9760765    | 0.7173734    | not scorable | not scorable | 1            | 0.7015526    |
| 4852 | Bn-A02-p848731  | A-genome specific (napus-rapa) | 0.9976076    | 0.7477041    | not scorable | not scorable | 0.9917355    | 0.7712649    |
| 4853 | Bn-A02-p849524  | A-genome specific (napus-rapa) | 0.9904306    | 0.6546049    | not scorable | not scorable | 0.9917355    | 0.7267894    |
| 4854 | Bn-A02-p849709  | A-genome specific (rapa only)  | not scorable | not scorable | not scorable | not scorable | 0.9917355    | 0.8305345    |
| 4855 | Bn-A02-p8501267 | A-genome specific (napus-rapa) | 0.9760765    | 0.7358354    | not scorable | not scorable | 1            | 0.9237478    |
| 4856 | Bn-A02-p8509407 | A-genome specific (napus-rapa) | 0.9665072    | 0.6734825    | not scorable | not scorable | 1            | 0.7550055    |
| 4857 | Bn-A02-p8509694 | A-genome specific (rapa only)  | not scorable | not scorable | not scorable | not scorable | 1            | 0.7099557    |
| 4858 | Bn-A02-p8513186 | A-genome specific (napus-rapa) | 0.9712918    | 0.7282321    | not scorable | not scorable | 0.9834711    | 0.752672     |
| 4859 | Bn-A02-p8517135 | A-genome specific (napus-rapa) | 0.8827751    | 0.7714842    | not scorable | not scorable | 0.8842975    | 0.7534347    |
| 4860 | Bn-A02-p852096  | all not scorable               | not scorable | not scorable | not scorable | not scorable | not scorable | not scorable |
| 4861 | Bn-A02-p8527757 | A-genome specific (napus-rapa) | 0.9952153    | 0.5384931    | not scorable | not scorable | 0.9834711    | 0.6437333    |
| 4862 | Bn-A02-p8530142 | A-genome specific (napus-rapa) | 0.8086125    | 0.7919436    | not scorable | not scorable | 0.9834711    | 0.8904615    |
| 4863 | Bn-A02-p8532901 | A-genome specific (napus-rapa) | 0.9330143    | 0.5372787    | not scorable | not scorable | 0.9752066    | 0.7926612    |
| 4864 | Bn-A02-p8538437 | A-genome specific (napus-rapa) | 0.9856459    | 0.6686826    | not scorable | not scorable | 0.9752066    | 0.7670333    |
| 4865 | Bn-A02-p8541841 | A-genome specific (napus-rapa) | 0.9976076    | 0.3236063    | not scorable | not scorable | 0.9917355    | 0.7523773    |
| 4866 | Bn-A02-p8549373 | A-genome specific (napus-rapa) | 0.9545454    | 0.7367265    | not scorable | not scorable | 1            | 0.8335581    |
| 4867 | Bn-A02-p8549867 | A-genome specific (napus-rapa) | 0.9760765    | 0.7863663    | not scorable | not scorable | 0.9752066    | 0.8164532    |
| 4868 | Bn-A02-p8554870 | A-genome specific (napus-rapa) | 0.9473684    | 0.2962263    | not scorable | not scorable | 0.9834711    | 0.7239497    |
| 4869 | Bn-A02-p8559435 | A-genome specific (napus-rapa) | 0.9043062    | 0.7104662    | not scorable | not scorable | 0.9752066    | 0.8039837    |
| 4870 | Bn-A02-p8560119 | A-genome specific (napus-rapa) | 0.9617225    | 0.8069634    | not scorable | not scorable | 0.9917355    | 0.7794464    |
| 4871 | Bn-A02-p8561027 | A-genome specific (napus-rapa) | 0.9665072    | 0.8011537    | not scorable | not scorable | 0.9752066    | 0.7057483    |
| 4872 | Bn-A02-p8561181 | A-genome specific (napus-rapa) | 0.5789474    | 0.7616862    | not scorable | not scorable | 0.9834711    | 0.824221     |
| 4873 | Bn-A02-p8567245 | A-genome specific (rapa only)  | not scorable | not scorable | not scorable | not scorable | 0.9917355    | 0.6489592    |
| 4874 | Bn-A02-p8570729 | A-genome specific (napus-rapa) | 0.9569378    | 0.7714831    | not scorable | not scorable | 0.9173554    | 0.6793488    |
| 4875 | Bn-A02-p8571485 | A-genome specific (napus-rapa) | 0.9593301    | 0.6382663    | not scorable | not scorable | 0.9917355    | 0.6964638    |
| 4876 | Bn-A02-p8571577 | A-genome specific (napus-rapa) | 0.9617225    | 0.783915     | not scorable | not scorable | 0.9586777    | 0.7203005    |
| 4877 | Bn-A02-p85725   | A-genome specific (napus-rapa) | 0.9808612    | 0.3422756    | not scorable | not scorable | 0.9834711    | 0.7246202    |
| 4878 | Bn-A02-p8575325 | A-genome specific (napus-rapa) | 0.9832536    | 0.7588373    | not scorable | not scorable | 0.9669421    | 0.6796128    |
| 4879 | Bn-A02-p859079  | napus specific                 | 1            | 0.478964     | not scorable | not scorable | not scorable | not scorable |
| 4880 | Bn-A02-p8621264 | A-genome specific (rapa only)  | not scorable | not scorable | not scorable | not scorable | 0.9752066    | 0.7035534    |
| 4881 | Bn-A02-p8624200 | A-genome specific (napus-rapa) | 1            | 0.8475392    | not scorable | not scorable | 1            | 0.8095871    |

|      |                 |                                |              |              |              |              |              |              |
|------|-----------------|--------------------------------|--------------|--------------|--------------|--------------|--------------|--------------|
| 4882 | Bn-A02-p8625851 | A-genome specific (napus-rapa) | 0.9928229    | 0.718559     | not scorable | not scorable | 0.9917355    | 0.7996876    |
| 4883 | Bn-A02-p8633119 | A-genome specific (napus-rapa) | 0.9665072    | 0.698976     | not scorable | not scorable | 0.9834711    | 0.8351535    |
| 4884 | Bn-A02-p8634642 | A-genome specific (napus-rapa) | 0.9904306    | 0.7561342    | not scorable | not scorable | 0.9834711    | 0.7780765    |
| 4885 | Bn-A02-p8637915 | A-genome specific (napus-rapa) | 0.9856459    | 0.7927399    | not scorable | not scorable | 0.9834711    | 0.77153      |
| 4886 | Bn-A02-p8660234 | A-genome specific (napus-rapa) | 0.9569378    | 0.6187571    | not scorable | not scorable | 0.9586777    | 0.5864879    |
| 4887 | Bn-A02-p8660285 | A-genome specific (rapa only)  | not scorable | not scorable | not scorable | not scorable | 0.9586777    | 0.6975725    |
| 4888 | Bn-A02-p8660632 | A-genome specific (napus-rapa) | 0.9832536    | 0.8076782    | not scorable | not scorable | 0.9917355    | 0.7670717    |
| 4889 | Bn-A02-p8663297 | A-genome specific (napus-rapa) | 0.9952153    | 0.6865365    | not scorable | not scorable | 0.9917355    | 0.7680466    |
| 4890 | Bn-A02-p8667676 | A-genome specific (napus-rapa) | 0.9952153    | 0.9033464    | not scorable | not scorable | 1            | 0.8149705    |
| 4891 | Bn-A02-p8676211 | A-genome specific (rapa only)  | not scorable | not scorable | not scorable | not scorable | 0.9834711    | 0.2653292    |
| 4892 | Bn-A02-p8678600 | A-genome specific (napus-rapa) | 0.9617225    | 0.7642558    | not scorable | not scorable | 0.9752066    | 0.817524     |
| 4893 | Bn-A02-p8682290 | A-genome specific (napus-rapa) | 0.9712918    | 0.7554324    | not scorable | not scorable | 1            | 0.7368765    |
| 4894 | Bn-A02-p8688298 | A-genome specific (rapa only)  | not scorable | not scorable | not scorable | not scorable | 1            | 0.7040934    |
| 4895 | Bn-A02-p8702373 | A-genome specific (napus-rapa) | 0.9688995    | 0.7898713    | not scorable | not scorable | 1            | 0.730248     |
| 4896 | Bn-A02-p8703446 | A-genome specific (napus-rapa) | 0.9760765    | 0.5815477    | not scorable | not scorable | 0.9917355    | 0.8475636    |
| 4897 | Bn-A02-p870494  | napus specific                 | 0.9760765    | 0.6542935    | not scorable | not scorable | not scorable | not scorable |
| 4898 | Bn-A02-p8711609 | A-genome specific (napus-rapa) | 0.9856459    | 0.7840903    | not scorable | not scorable | 1            | 0.738374     |
| 4899 | Bn-A02-p8720739 | A-genome specific (rapa only)  | not scorable | not scorable | not scorable | not scorable | 0.9669421    | 0.7304225    |
| 4900 | Bn-A02-p8724443 | A-genome specific (napus-rapa) | 0.9569378    | 0.4934731    | not scorable | not scorable | 0.9752066    | 0.8381849    |
| 4901 | Bn-A02-p8726802 | A-genome specific (napus-rapa) | 0.9688995    | 0.7439119    | not scorable | not scorable | 0.9917355    | 0.7210738    |
| 4902 | Bn-A02-p8732961 | A-genome specific (napus-rapa) | 0.861244     | 0.8682185    | not scorable | not scorable | 0.9834711    | 0.7684597    |
| 4903 | Bn-A02-p8735305 | A-genome specific (napus-rapa) | 0.9712918    | 0.3013057    | not scorable | not scorable | 0.9834711    | 0.6596815    |
| 4904 | Bn-A02-p873656  | A-genome specific (napus-rapa) | 0.9760765    | 0.8196452    | not scorable | not scorable | 1            | 0.734683     |
| 4905 | Bn-A02-p873770  | A-genome specific (napus-rapa) | 0.9904306    | 0.8123478    | not scorable | not scorable | 0.9917355    | 0.8047553    |
| 4906 | Bn-A02-p8747010 | A-genome specific (napus-rapa) | 0.9904306    | 0.5924079    | not scorable | not scorable | 0.9586777    | 0.7683663    |
| 4907 | Bn-A02-p8754935 | A-genome specific (napus-rapa) | 0.9832536    | 0.4749767    | not scorable | not scorable | 0.9752066    | 0.7340579    |
| 4908 | Bn-A02-p8767145 | A-genome specific (napus-rapa) | 0.9760765    | 0.7727231    | not scorable | not scorable | 0.9917355    | 0.7515374    |
| 4909 | Bn-A02-p8777846 | A-genome specific (napus-rapa) | 0.9760765    | 0.7966446    | not scorable | not scorable | 0.9834711    | 0.742353     |
| 4910 | Bn-A02-p8799151 | A-genome specific (napus-rapa) | 0.9736842    | 0.7784495    | not scorable | not scorable | 1            | 0.876192     |
| 4911 | Bn-A02-p8802671 | A-genome specific (napus-rapa) | 0.9688995    | 0.7899616    | not scorable | not scorable | 1            | 0.8378905    |
| 4912 | Bn-A02-p8804225 | A-genome specific (napus-rapa) | 0.9856459    | 0.3960864    | not scorable | not scorable | 1            | 0.842582     |
| 4913 | Bn-A02-p8827347 | A-genome specific (napus-rapa) | 0.9832536    | 0.382514     | not scorable | not scorable | 0.9917355    | 0.7884539    |
| 4914 | Bn-A02-p8833760 | A-genome specific (napus-rapa) | 0.9760765    | 0.6850253    | not scorable | not scorable | 0.9917355    | 0.8032025    |

|      |                 |                                |              |              |              |              |           |           |
|------|-----------------|--------------------------------|--------------|--------------|--------------|--------------|-----------|-----------|
| 4915 | Bn-A02-p8834915 | A-genome specific (napus-rapa) | 0.9904306    | 0.7288857    | not scorable | not scorable | 1         | 0.7250962 |
| 4916 | Bn-A02-p8836098 | A-genome specific (napus-rapa) | 0.9856459    | 0.8020059    | not scorable | not scorable | 1         | 0.7586786 |
| 4917 | Bn-A02-p8849037 | A-genome specific (napus-rapa) | 0.9665072    | 0.2983027    | not scorable | not scorable | 1         | 0.6409478 |
| 4918 | Bn-A02-p8865764 | A-genome specific (napus-rapa) | 0.9856459    | 0.7690871    | not scorable | not scorable | 1         | 0.787617  |
| 4919 | Bn-A02-p8865968 | A-genome specific (rapa only)  | not scorable | not scorable | not scorable | not scorable | 0.9917355 | 0.7017485 |
| 4920 | Bn-A02-p8867093 | A-genome specific (rapa only)  | not scorable | not scorable | not scorable | not scorable | 0.9917355 | 0.7152845 |
| 4921 | Bn-A02-p8867507 | A-genome specific (napus-rapa) | 0.9712918    | 0.7863376    | not scorable | not scorable | 0.9752066 | 0.6603634 |
| 4922 | Bn-A02-p8867662 | A-genome specific (napus-rapa) | 0.9593301    | 0.7845464    | not scorable | not scorable | 1         | 0.7205973 |
| 4923 | Bn-A02-p8872271 | A-genome specific (napus-rapa) | 0.9856459    | 0.8036887    | not scorable | not scorable | 1         | 0.7485667 |
| 4924 | Bn-A02-p8873630 | A-genome specific (napus-rapa) | 0.9760765    | 0.6572811    | not scorable | not scorable | 1         | 0.720804  |
| 4925 | Bn-A02-p8873864 | A-genome specific (napus-rapa) | 0.9712918    | 0.7957613    | not scorable | not scorable | 1         | 0.7436157 |
| 4926 | Bn-A02-p8873993 | A-genome specific (napus-rapa) | 0.9736842    | 0.7118471    | not scorable | not scorable | 0.9834711 | 0.6862456 |
| 4927 | Bn-A02-p8874016 | A-genome specific (napus-rapa) | 0.9808612    | 0.7950137    | not scorable | not scorable | 0.9917355 | 0.6646068 |
| 4928 | Bn-A02-p8874086 | A-genome specific (napus-rapa) | 0.9736842    | 0.7226784    | not scorable | not scorable | 1         | 0.6919687 |
| 4929 | Bn-A02-p8874299 | A-genome specific (napus-rapa) | 0.9736842    | 0.79494      | not scorable | not scorable | 0.9917355 | 0.8521953 |
| 4930 | Bn-A02-p8874380 | A-genome specific (napus-rapa) | 0.9712918    | 0.7818184    | not scorable | not scorable | 0.9917355 | 0.7235523 |
| 4931 | Bn-A02-p8876332 | A-genome specific (rapa only)  | not scorable | not scorable | not scorable | not scorable | 1         | 0.6843128 |
| 4932 | Bn-A02-p8877059 | genome unspecific (all in)     | 0.9712918    | 0.706939     | 0            | 0.8113948    | 0.9504132 | 0.8172697 |
| 4933 | Bn-A02-p8877587 | A-genome specific (napus-rapa) | 0.9593301    | 0.8076585    | not scorable | not scorable | 0.9917355 | 0.7701694 |
| 4934 | Bn-A02-p8877788 | A-genome specific (napus-rapa) | 0.9688995    | 0.7278332    | not scorable | not scorable | 1         | 0.7987592 |
| 4935 | Bn-A02-p8878326 | A-genome specific (napus-rapa) | 0.8899522    | 0.7969353    | not scorable | not scorable | 0.9834711 | 0.6872807 |
| 4936 | Bn-A02-p8880230 | A-genome specific (napus-rapa) | 0.9736842    | 0.7921325    | not scorable | not scorable | 0.9752066 | 0.6945366 |
| 4937 | Bn-A02-p8880464 | A-genome specific (napus-rapa) | 0.9617225    | 0.7861856    | not scorable | not scorable | 0.9752066 | 0.72905   |
| 4938 | Bn-A02-p8881070 | A-genome specific (napus-rapa) | 0.9330143    | 0.764646     | not scorable | not scorable | 0.9917355 | 0.6877344 |
| 4939 | Bn-A02-p8881251 | A-genome specific (napus-rapa) | 0.9665072    | 0.7859368    | not scorable | not scorable | 0.9669421 | 0.6697457 |
| 4940 | Bn-A02-p8883792 | A-genome specific (napus-rapa) | 0.9665072    | 0.8145517    | not scorable | not scorable | 1         | 0.7010351 |
| 4941 | Bn-A02-p8884242 | A-genome specific (napus-rapa) | 0.9545454    | 0.8238764    | not scorable | not scorable | 0.9917355 | 0.7827922 |
| 4942 | Bn-A02-p8884712 | A-genome specific (napus-rapa) | 0.9784689    | 0.7232582    | not scorable | not scorable | 0.9917355 | 0.6940895 |
| 4943 | Bn-A02-p8885004 | A-genome specific (napus-rapa) | 0.9497608    | 0.3307886    | not scorable | not scorable | 0.9917355 | 0.7487202 |
| 4944 | Bn-A02-p8885082 | A-genome specific (rapa only)  | not scorable | not scorable | not scorable | not scorable | 0.9834711 | 0.7810735 |
| 4945 | Bn-A02-p8885209 | A-genome specific (napus-rapa) | 0.9593301    | 0.6352014    | not scorable | not scorable | 0.9917355 | 0.781507  |
| 4946 | Bn-A02-p8885908 | A-genome specific (napus-rapa) | 0.9665072    | 0.7939116    | not scorable | not scorable | 0.9834711 | 0.6617929 |
| 4947 | Bn-A02-p8886238 | A-genome specific (napus-rapa) | 0.9736842    | 0.7833209    | not scorable | not scorable | 0.9917355 | 0.6785312 |

|      |                 |                                    |              |              |              |              |              |              |
|------|-----------------|------------------------------------|--------------|--------------|--------------|--------------|--------------|--------------|
| 4948 | Bn-A02-p8891703 | A-genome specific (napus-rapa)     | 0.9736842    | 0.6968184    | not scorable | not scorable | 0.9669421    | 0.6883987    |
| 4949 | Bn-A02-p8893045 | all not scorable                   | not scorable | not scorable | not scorable | not scorable | not scorable | not scorable |
| 4950 | Bn-A02-p8893096 | A-genome specific (rapa only)      | not scorable | not scorable | not scorable | not scorable | 0.9669421    | 0.6837302    |
| 4951 | Bn-A02-p8895388 | A-genome specific (napus-rapa)     | 0.9760765    | 0.8127044    | not scorable | not scorable | 0.9917355    | 0.7527145    |
| 4952 | Bn-A02-p8899305 | A-genome specific (napus-rapa)     | 0.9330143    | 0.4404597    | not scorable | not scorable | 0.9917355    | 0.647458     |
| 4953 | Bn-A02-p8912747 | A-genome specific (napus-rapa)     | 0.9665072    | 0.7831338    | not scorable | not scorable | 0.9917355    | 0.7793103    |
| 4954 | Bn-A02-p8915005 | A-genome specific (napus-rapa)     | 0.9736842    | 0.59136      | not scorable | not scorable | 1            | 0.8237346    |
| 4955 | Bn-A02-p8924447 | A-genome specific (napus-rapa)     | 0.9688995    | 0.7810876    | not scorable | not scorable | 0.9917355    | 0.7595123    |
| 4956 | Bn-A02-p8925092 | A-genome specific (napus-rapa)     | 0.9617225    | 0.3177333    | not scorable | not scorable | 1            | 0.8572899    |
| 4957 | Bn-A02-p892640  | A-genome specific (napus-rapa)     | 1            | 0.6572978    | not scorable | not scorable | 1            | 0.8333569    |
| 4958 | Bn-A02-p8934314 | A-genome specific (napus-rapa)     | 0.9760765    | 0.2788229    | not scorable | not scorable | 0.9917355    | 0.7001159    |
| 4959 | Bn-A02-p8934537 | A-genome specific (napus-rapa)     | 0.9712918    | 0.6562421    | not scorable | not scorable | 1            | 0.7762496    |
| 4960 | Bn-A02-p8937580 | A-genome specific (napus-rapa)     | 0.9976076    | 0.8694758    | not scorable | not scorable | 0.9752066    | 0.7626801    |
| 4961 | Bn-A02-p8949465 | A-genome specific (napus-rapa)     | 0.9736842    | 0.4009407    | not scorable | not scorable | 0.9834711    | 0.7783774    |
| 4962 | Bn-A02-p8950348 | A-genome specific (napus-rapa)     | 0.9928229    | 0.6693106    | not scorable | not scorable | 0.9834711    | 0.6793928    |
| 4963 | Bn-A02-p8954851 | A-genome specific (napus-rapa)     | 0.9688995    | 0.777397     | not scorable | not scorable | 0.9917355    | 0.7377263    |
| 4964 | Bn-A02-p8955992 | A-genome specific (napus-rapa)     | 0.9593301    | 0.7447118    | not scorable | not scorable | 0.9917355    | 0.7058651    |
| 4965 | Bn-A02-p8967830 | C-genome specific (napus-oleracea) | 0.9210526    | 0.7796193    | 0.6589147    | 0.8494952    | not scorable | not scorable |
| 4966 | Bn-A02-p8999771 | A-genome specific (napus-rapa)     | 0.9856459    | 0.7328517    | not scorable | not scorable | 0.9917355    | 0.6987185    |
| 4967 | Bn-A02-p9000565 | A-genome specific (napus-rapa)     | 0.9832536    | 0.7067785    | not scorable | not scorable | 0.9669421    | 0.6719358    |
| 4968 | Bn-A02-p9000921 | A-genome specific (napus-rapa)     | 0.9928229    | 0.6272995    | not scorable | not scorable | 0.9752066    | 0.6600125    |
| 4969 | Bn-A02-p9000998 | A-genome specific (napus-rapa)     | 0.9952153    | 0.7395847    | not scorable | not scorable | 1            | 0.7134259    |
| 4970 | Bn-A02-p9006677 | A-genome specific (napus-rapa)     | 0.9712918    | 0.3774639    | not scorable | not scorable | 1            | 0.9205657    |
| 4971 | Bn-A02-p9022920 | A-genome specific (napus-rapa)     | 0.9736842    | 0.4857047    | not scorable | not scorable | 0.9834711    | 0.9272014    |
| 4972 | Bn-A02-p9051321 | A-genome specific (napus-rapa)     | 1            | 0.9175768    | not scorable | not scorable | 1            | 0.8840809    |
| 4973 | Bn-A02-p9064726 | A-genome specific (napus-rapa)     | 1            | 0.7090018    | not scorable | not scorable | 0.9917355    | 0.8523772    |
| 4974 | Bn-A02-p9071076 | A-genome specific (rapa only)      | not scorable | not scorable | not scorable | not scorable | 0.9834711    | 0.6841179    |
| 4975 | Bn-A02-p9080423 | A-genome specific (napus-rapa)     | 0.9928229    | 0.695892     | not scorable | not scorable | 1            | 0.8126447    |
| 4976 | Bn-A02-p9108719 | napus specific                     | 0.9688995    | 0.3636605    | not scorable | not scorable | not scorable | not scorable |
| 4977 | Bn-A02-p9135710 | A-genome specific (napus-rapa)     | 0.9521531    | 0.7869809    | not scorable | not scorable | 0.9586777    | 0.7641803    |
| 4978 | Bn-A02-p9140734 | A-genome specific (napus-rapa)     | 0.9784689    | 0.3136055    | not scorable | not scorable | 0.9586777    | 0.6647474    |
| 4979 | Bn-A02-p9143216 | A-genome specific (rapa only)      | not scorable | not scorable | not scorable | not scorable | 0.9917355    | 0.5247383    |
| 4980 | Bn-A02-p9148801 | A-genome specific (napus-rapa)     | 0.9880383    | 0.4756634    | not scorable | not scorable | 0.9586777    | 0.6771753    |

|      |                 |                                   |              |              |              |              |              |              |
|------|-----------------|-----------------------------------|--------------|--------------|--------------|--------------|--------------|--------------|
| 4981 | Bn-A02-p9160227 | A-genome specific (napus-rapa)    | 0.9808612    | 0.2608811    | not scorable | not scorable | 0.9752066    | 0.7255831    |
| 4982 | Bn-A02-p9161498 | A-genome specific (napus-rapa)    | 0.8660287    | 0.7773438    | not scorable | not scorable | 0.9834711    | 0.7711986    |
| 4983 | Bn-A02-p918384  | A-genome specific (napus-rapa)    | 0.9976076    | 0.7655144    | not scorable | not scorable | 0.9752066    | 0.7845314    |
| 4984 | Bn-A02-p9183872 | A-genome specific (napus-rapa)    | 0.9760765    | 0.4758004    | not scorable | not scorable | 0.9669421    | 0.8517894    |
| 4985 | Bn-A02-p9187768 | A-genome specific (napus-rapa)    | 0.9928229    | 0.5838235    | not scorable | not scorable | 1            | 0.8343691    |
| 4986 | Bn-A02-p9195997 | genome unspecific (all in)        | 0.9712918    | 0.2334578    | 0.9689922    | 0.6652421    | 0.9917355    | 0.5713479    |
| 4987 | Bn-A02-p9206062 | genome unspecific (oleracea-rapa) | not scorable | not scorable | 0.8139535    | 0.6963674    | 1            | 0.7494321    |
| 4988 | Bn-A02-p9206254 | A-genome specific (napus-rapa)    | 0.9976076    | 0.5156251    | not scorable | not scorable | 1            | 0.786476     |
| 4989 | Bn-A02-p9206548 | A-genome specific (napus-rapa)    | 0.9928229    | 0.5255143    | not scorable | not scorable | 1            | 0.7397041    |
| 4990 | Bn-A02-p9223722 | A-genome specific (napus-rapa)    | 0.9784689    | 0.7596304    | not scorable | not scorable | 0.9917355    | 0.7886162    |
| 4991 | Bn-A02-p9224016 | A-genome specific (napus-rapa)    | 0.9832536    | 0.7509986    | not scorable | not scorable | 0.9917355    | 0.7002389    |
| 4992 | Bn-A02-p9225798 | A-genome specific (napus-rapa)    | 0.9808612    | 0.2610306    | not scorable | not scorable | 0.9917355    | 0.5986961    |
| 4993 | Bn-A02-p9229113 | A-genome specific (napus-rapa)    | 0.9688995    | 0.7302253    | not scorable | not scorable | 1            | 0.7854271    |
| 4994 | Bn-A02-p9231115 | A-genome specific (napus-rapa)    | 0.9712918    | 0.5493301    | not scorable | not scorable | 0.9917355    | 0.7077852    |
| 4995 | Bn-A02-p9239879 | A-genome specific (napus-rapa)    | 0.9593301    | 0.7846327    | not scorable | not scorable | 0.9752066    | 0.693035     |
| 4996 | Bn-A02-p9240182 | A-genome specific (napus-rapa)    | 0.9736842    | 0.7751217    | not scorable | not scorable | 0.9834711    | 0.9338203    |
| 4997 | Bn-A02-p9242308 | A-genome specific (napus-rapa)    | 0.9856459    | 0.7768582    | not scorable | not scorable | 0.9834711    | 0.7938426    |
| 4998 | Bn-A02-p9246552 | A-genome specific (napus-rapa)    | 0.9736842    | 0.5621161    | not scorable | not scorable | 0.9586777    | 0.6450936    |
| 4999 | Bn-A02-p925207  | napus specific                    | 0.9330143    | 0.8118936    | not scorable | not scorable | not scorable | not scorable |
| 5000 | Bn-A02-p9254995 | A-genome specific (napus-rapa)    | 0.9665072    | 0.2997098    | not scorable | not scorable | 0.9917355    | 0.7039331    |
| 5001 | Bn-A02-p9255686 | A-genome specific (napus-rapa)    | 0.9712918    | 0.737632     | not scorable | not scorable | 0.9917355    | 0.8072408    |
| 5002 | Bn-A02-p9256040 | A-genome specific (napus-rapa)    | 0.9760765    | 0.7672445    | not scorable | not scorable | 1            | 0.7542315    |
| 5003 | Bn-A02-p9258117 | A-genome specific (napus-rapa)    | 0.9712918    | 0.7800077    | not scorable | not scorable | 0.9834711    | 0.7725549    |
| 5004 | Bn-A02-p9259325 | A-genome specific (napus-rapa)    | 0.9712918    | 0.7439548    | not scorable | not scorable | 0.9504132    | 0.6833032    |
| 5005 | Bn-A02-p9265512 | A-genome specific (napus-rapa)    | 0.9066986    | 0.5795457    | not scorable | not scorable | 0.9917355    | 0.7580718    |
| 5006 | Bn-A02-p9274719 | genome unspecific (all in)        | 0.9976076    | 0.542537     | 1            | 0.8225538    | 1            | 0.7224851    |
| 5007 | Bn-A02-p9281731 | napus specific                    | 0.9066986    | 0.6560249    | not scorable | not scorable | not scorable | not scorable |
| 5008 | Bn-A02-p9308233 | A-genome specific (napus-rapa)    | 0.6315789    | 0.7479566    | not scorable | not scorable | 0.9586777    | 0.6988206    |
| 5009 | Bn-A02-p9319210 | A-genome specific (rapa only)     | not scorable | not scorable | not scorable | not scorable | 0.9504132    | 0.5468885    |
| 5010 | Bn-A02-p9322468 | A-genome specific (rapa only)     | not scorable | not scorable | not scorable | not scorable | 0.9421487    | 0.9106142    |
| 5011 | Bn-A02-p9339288 | napus specific                    | 0.9043062    | 0.7675657    | not scorable | not scorable | not scorable | not scorable |
| 5012 | Bn-A02-p9339514 | A-genome specific (napus-rapa)    | 0.9832536    | 0.6492009    | not scorable | not scorable | 0.9917355    | 0.6525173    |
| 5013 | Bn-A02-p9340002 | A-genome specific (napus-rapa)    | 0.9928229    | 0.7730449    | not scorable | not scorable | 0.9752066    | 0.8154225    |



|      |                 |                                |              |              |              |              |              |              |
|------|-----------------|--------------------------------|--------------|--------------|--------------|--------------|--------------|--------------|
| 5014 | Bn-A02-p9341487 | A-genome specific (napus-rapa) | 0.9952153    | 0.8653359    | not scorable | not scorable | 1            | 0.8242752    |
| 5015 | Bn-A02-p9346140 | A-genome specific (napus-rapa) | 0.9856459    | 0.5455258    | not scorable | not scorable | 0.9917355    | 0.7884895    |
| 5016 | Bn-A02-p9351376 | A-genome specific (rapa only)  | not scorable | not scorable | not scorable | not scorable | 1            | 0.7450076    |
| 5017 | Bn-A02-p9353942 | A-genome specific (napus-rapa) | 0.9880383    | 0.2247259    | not scorable | not scorable | 0.9669421    | 0.6955034    |
| 5018 | Bn-A02-p9361967 | A-genome specific (napus-rapa) | 0.923445     | 0.744975     | not scorable | not scorable | 0.9834711    | 0.7014447    |
| 5019 | Bn-A02-p9371363 | A-genome specific (napus-rapa) | 0.9856459    | 0.7793347    | not scorable | not scorable | 0.9917355    | 0.7990386    |
| 5020 | Bn-A02-p9371633 | A-genome specific (napus-rapa) | 0.9880383    | 0.7021627    | not scorable | not scorable | 0.9917355    | 0.6871121    |
| 5021 | Bn-A02-p9371841 | A-genome specific (napus-rapa) | 0.9904306    | 0.7379723    | not scorable | not scorable | 0.9834711    | 0.7526949    |
| 5022 | Bn-A02-p9371930 | A-genome specific (napus-rapa) | 0.9617225    | 0.7309755    | not scorable | not scorable | 1            | 0.7721822    |
| 5023 | Bn-A02-p9371948 | A-genome specific (napus-rapa) | 0.9593301    | 0.6600273    | not scorable | not scorable | 0.9834711    | 0.7073705    |
| 5024 | Bn-A02-p9396655 | napus specific                 | 0.7129186    | 0.7936415    | not scorable | not scorable | not scorable | not scorable |
| 5025 | Bn-A02-p9408651 | A-genome specific (napus-rapa) | 0.9832536    | 0.3293611    | not scorable | not scorable | 1            | 0.6871157    |
| 5026 | Bn-A02-p9409799 | A-genome specific (napus-rapa) | 0.9712918    | 0.7992056    | not scorable | not scorable | 0.9917355    | 0.6805574    |
| 5027 | Bn-A02-p9415380 | A-genome specific (napus-rapa) | 0.9928229    | 0.2596824    | not scorable | not scorable | 1            | 0.6770098    |
| 5028 | Bn-A02-p9415636 | A-genome specific (napus-rapa) | 0.9736842    | 0.3919061    | not scorable | not scorable | 0.9752066    | 0.6684452    |
| 5029 | Bn-A02-p9415901 | A-genome specific (napus-rapa) | 0.9808612    | 0.3232072    | not scorable | not scorable | 0.9834711    | 0.7325208    |
| 5030 | Bn-A02-p9416095 | A-genome specific (napus-rapa) | 0.9832536    | 0.7488766    | not scorable | not scorable | 1            | 0.7041416    |
| 5031 | Bn-A02-p9420837 | A-genome specific (napus-rapa) | 0.9976076    | 0.7760484    | not scorable | not scorable | 1            | 0.801774     |
| 5032 | Bn-A02-p9422112 | A-genome specific (napus-rapa) | 0.9760765    | 0.3308937    | not scorable | not scorable | 1            | 0.6877309    |
| 5033 | Bn-A02-p9425125 | A-genome specific (napus-rapa) | 0.9832536    | 0.7117971    | not scorable | not scorable | 0.9917355    | 0.6986142    |
| 5034 | Bn-A02-p9434869 | A-genome specific (napus-rapa) | 0.9808612    | 0.5108179    | not scorable | not scorable | 0.9917355    | 0.7067189    |
| 5035 | Bn-A02-p9464293 | A-genome specific (napus-rapa) | 0.6794258    | 0.945904     | not scorable | not scorable | 0.9917355    | 0.8876017    |
| 5036 | Bn-A02-p9465668 | A-genome specific (napus-rapa) | 0.9784689    | 0.7924582    | not scorable | not scorable | 1            | 0.8008413    |
| 5037 | Bn-A02-p9480465 | A-genome specific (napus-rapa) | 1            | 0.4593177    | not scorable | not scorable | 0.9834711    | 0.6881039    |
| 5038 | Bn-A02-p9497598 | A-genome specific (napus-rapa) | 0.8779904    | 0.7278972    | not scorable | not scorable | 0.9421487    | 0.6449527    |
| 5039 | Bn-A02-p9505646 | A-genome specific (napus-rapa) | 0.9736842    | 0.7756432    | not scorable | not scorable | 0.9834711    | 0.82829      |
| 5040 | Bn-A02-p9506103 | A-genome specific (napus-rapa) | 0.9784689    | 0.7672995    | not scorable | not scorable | 0.9834711    | 0.8257592    |
| 5041 | Bn-A02-p9513250 | A-genome specific (napus-rapa) | 0.9641148    | 0.681105     | not scorable | not scorable | 0.9917355    | 0.7670318    |
| 5042 | Bn-A02-p9519366 | A-genome specific (rapa only)  | not scorable | not scorable | not scorable | not scorable | 0.9917355    | 0.7981747    |
| 5043 | Bn-A02-p9526960 | A-genome specific (napus-rapa) | 0.9976076    | 0.6011081    | not scorable | not scorable | 0.9834711    | 0.7315794    |
| 5044 | Bn-A02-p9558338 | A-genome specific (napus-rapa) | 0.9856459    | 0.733752     | not scorable | not scorable | 0.9752066    | 0.7167961    |
| 5045 | Bn-A02-p9558523 | A-genome specific (napus-rapa) | 0.5430622    | 0.7401857    | not scorable | not scorable | 0.9834711    | 0.8094644    |
| 5046 | Bn-A02-p9559304 | A-genome specific (napus-rapa) | 0.9904306    | 0.6920804    | not scorable | not scorable | 1            | 0.8064953    |

|      |                 |                                |           |           |              |              |              |              |
|------|-----------------|--------------------------------|-----------|-----------|--------------|--------------|--------------|--------------|
| 5047 | Bn-A02-p9560736 | A-genome specific (napus-rapa) | 0.9856459 | 0.5930505 | not scorable | not scorable | 0.9834711    | 0.8103212    |
| 5048 | Bn-A02-p9566560 | A-genome specific (napus-rapa) | 0.9880383 | 0.3657166 | not scorable | not scorable | 0.9917355    | 0.8537922    |
| 5049 | Bn-A02-p9599263 | A-genome specific (napus-rapa) | 0.9162679 | 0.6811639 | not scorable | not scorable | 0.9256198    | 0.7497954    |
| 5050 | Bn-A02-p9607043 | A-genome specific (napus-rapa) | 0.9688995 | 0.7822963 | not scorable | not scorable | 0.9752066    | 0.7917066    |
| 5051 | Bn-A02-p9607756 | A-genome specific (napus-rapa) | 0.9282297 | 0.2962231 | not scorable | not scorable | 0.9917355    | 0.8077894    |
| 5052 | Bn-A02-p9608319 | A-genome specific (napus-rapa) | 0.9665072 | 0.7714535 | not scorable | not scorable | 1            | 0.6758727    |
| 5053 | Bn-A02-p9608730 | napus specific                 | 0.9401914 | 0.6664383 | not scorable | not scorable | not scorable | not scorable |
| 5054 | Bn-A02-p9610453 | A-genome specific (napus-rapa) | 0.9641148 | 0.8031533 | not scorable | not scorable | 0.9917355    | 0.7072586    |
| 5055 | Bn-A02-p9622161 | A-genome specific (napus-rapa) | 0.9617225 | 0.7823756 | not scorable | not scorable | 0.9917355    | 0.7343901    |
| 5056 | Bn-A02-p9625502 | A-genome specific (napus-rapa) | 0.9665072 | 0.4461489 | not scorable | not scorable | 1            | 0.7937247    |
| 5057 | Bn-A02-p9635795 | A-genome specific (napus-rapa) | 0.8205742 | 0.6419194 | not scorable | not scorable | 0.9669421    | 0.7361779    |
| 5058 | Bn-A02-p9635953 | A-genome specific (napus-rapa) | 0.8181818 | 0.7770723 | not scorable | not scorable | 0.9752066    | 0.7846726    |
| 5059 | Bn-A02-p9636219 | A-genome specific (napus-rapa) | 0.9808612 | 0.7702147 | not scorable | not scorable | 0.9917355    | 0.8343857    |
| 5060 | Bn-A02-p9640434 | A-genome specific (napus-rapa) | 0.9712918 | 0.3644251 | not scorable | not scorable | 0.9669421    | 0.7664369    |
| 5061 | Bn-A02-p9643734 | A-genome specific (napus-rapa) | 0.9856459 | 0.2134844 | not scorable | not scorable | 0.9834711    | 0.8139505    |
| 5062 | Bn-A02-p9646068 | A-genome specific (napus-rapa) | 0.9928229 | 0.5001884 | not scorable | not scorable | 0.9917355    | 0.7465184    |
| 5063 | Bn-A02-p9648484 | A-genome specific (napus-rapa) | 0.9880383 | 0.456204  | not scorable | not scorable | 0.9917355    | 0.7378272    |
| 5064 | Bn-A02-p9664226 | A-genome specific (napus-rapa) | 0.9736842 | 0.3049676 | not scorable | not scorable | 0.9834711    | 0.7570844    |
| 5065 | Bn-A02-p9684927 | A-genome specific (napus-rapa) | 0.9497608 | 0.5149683 | not scorable | not scorable | 0.9669421    | 0.6981347    |
| 5066 | Bn-A02-p9703128 | A-genome specific (napus-rapa) | 0.9569378 | 0.6929321 | not scorable | not scorable | 0.9834711    | 0.6924984    |
| 5067 | Bn-A02-p9706613 | A-genome specific (napus-rapa) | 0.9593301 | 0.2768548 | not scorable | not scorable | 1            | 0.6496807    |
| 5068 | Bn-A02-p9707309 | A-genome specific (napus-rapa) | 0.9497608 | 0.5908216 | not scorable | not scorable | 0.9917355    | 0.604704     |
| 5069 | Bn-A02-p9719196 | A-genome specific (napus-rapa) | 0.930622  | 0.2214538 | not scorable | not scorable | 0.9834711    | 0.7352247    |
| 5070 | Bn-A02-p9722276 | A-genome specific (napus-rapa) | 0.9760765 | 0.3235612 | not scorable | not scorable | 1            | 0.8764072    |
| 5071 | Bn-A02-p9726742 | A-genome specific (napus-rapa) | 0.9832536 | 0.7788599 | not scorable | not scorable | 1            | 0.8189065    |
| 5072 | Bn-A02-p972896  | A-genome specific (napus-rapa) | 0.9114832 | 0.7506474 | not scorable | not scorable | 0.9752066    | 0.7043232    |
| 5073 | Bn-A02-p9740120 | genome unspecific (all in)     | 0.9976076 | 0.471016  | 0.9689922    | 0.814975     | 1            | 0.8815182    |
| 5074 | Bn-A02-p975209  | A-genome specific (napus-rapa) | 0.9688995 | 0.351389  | not scorable | not scorable | 0.9752066    | 0.6246641    |
| 5075 | Bn-A02-p9778318 | A-genome specific (napus-rapa) | 0.9760765 | 0.7124499 | not scorable | not scorable | 1            | 0.9272014    |
| 5076 | Bn-A02-p978741  | A-genome specific (napus-rapa) | 0.9976076 | 0.7207088 | not scorable | not scorable | 0.9917355    | 0.6466544    |
| 5077 | Bn-A02-p980390  | A-genome specific (napus-rapa) | 0.9928229 | 0.7120554 | not scorable | not scorable | 0.9917355    | 0.7619979    |
| 5078 | Bn-A02-p9829719 | A-genome specific (napus-rapa) | 0.930622  | 0.6622922 | not scorable | not scorable | 1            | 0.7909383    |
| 5079 | Bn-A02-p9846691 | A-genome specific (napus-rapa) | 0.9856459 | 0.3124525 | not scorable | not scorable | 0.9917355    | 0.6956154    |

|      |                  |                                   |              |              |              |              |              |              |
|------|------------------|-----------------------------------|--------------|--------------|--------------|--------------|--------------|--------------|
| 5080 | Bn-A02-p9846899  | A-genome specific (napus-rapa)    | 0.9976076    | 0.5643549    | not scorable | not scorable | 0.9752066    | 0.7678604    |
| 5081 | Bn-A02-p985366   | A-genome specific (napus-rapa)    | 0.9928229    | 0.5698414    | not scorable | not scorable | 0.9917355    | 0.6743953    |
| 5082 | Bn-A02-p9885351  | A-genome specific (napus-rapa)    | 0.9665072    | 0.7918265    | not scorable | not scorable | 0.9834711    | 0.7267699    |
| 5083 | Bn-A02-p9886564  | A-genome specific (napus-rapa)    | 0.9832536    | 0.2930706    | not scorable | not scorable | 0.9752066    | 0.7100459    |
| 5084 | Bn-A02-p9888208  | A-genome specific (napus-rapa)    | 0.9856459    | 0.2426255    | not scorable | not scorable | 1            | 0.7156282    |
| 5085 | Bn-A02-p9891733  | A-genome specific (napus-rapa)    | 0.9066986    | 0.7524282    | not scorable | not scorable | 0.9669421    | 0.7861187    |
| 5086 | Bn-A02-p9927808  | A-genome specific (napus-rapa)    | 0.930622     | 0.7163373    | not scorable | not scorable | 0.9669421    | 0.8277952    |
| 5087 | Bn-A02-p9959992  | A-genome specific (napus-rapa)    | 0.9928229    | 0.7713007    | not scorable | not scorable | 0.9834711    | 0.7899249    |
| 5088 | Bn-A02-p9961743  | napus specific                    | 0.9832536    | 0.7417537    | not scorable | not scorable | not scorable | not scorable |
| 5089 | Bn-A02-p9970625  | A-genome specific (napus-rapa)    | 0.9880383    | 0.367826     | not scorable | not scorable | 0.9917355    | 0.7483729    |
| 5090 | Bn-A02-p9970848  | A-genome specific (napus-rapa)    | 0.9808612    | 0.2768814    | not scorable | not scorable | 0.9917355    | 0.7713221    |
| 5091 | Bn-A02-p9973775  | A-genome specific (rapa only)     | not scorable | not scorable | not scorable | not scorable | 0.9834711    | 0.8004208    |
| 5092 | Bn-A02-p9973927  | A-genome specific (napus-rapa)    | 0.9282297    | 0.2411183    | not scorable | not scorable | 0.9834711    | 0.7349294    |
| 5093 | Bn-A02-p99883    | A-genome specific (napus-rapa)    | 1            | 0.6802951    | not scorable | not scorable | 1            | 0.6503867    |
| 5094 | Bn-A02-p9990613  | A-genome specific (napus-rapa)    | 0.9760765    | 0.2269715    | not scorable | not scorable | 1            | 0.7566578    |
| 5095 | Bn-A02-p9993945  | A-genome specific (napus-rapa)    | 0.9641148    | 0.2989485    | not scorable | not scorable | 1            | 0.7528283    |
| 5096 | Bn-A02-p9996703  | A-genome specific (napus-rapa)    | 0.9760765    | 0.7730789    | not scorable | not scorable | 0.9752066    | 0.7927519    |
| 5097 | Bn-A02-p9997237  | napus specific                    | 0.9856459    | 0.2436382    | not scorable | not scorable | not scorable | not scorable |
| 5098 | Bn-A03-p10002791 | A-genome specific (napus-rapa)    | 0.9904306    | 0.4369407    | not scorable | not scorable | 1            | 0.7494321    |
| 5099 | Bn-A03-p10008905 | A-genome specific (napus-rapa)    | 0.9688995    | 0.4513174    | not scorable | not scorable | 0.9834711    | 0.7129212    |
| 5100 | Bn-A03-p10010569 | A-genome specific (napus-rapa)    | 0.9952153    | 0.7856001    | not scorable | not scorable | 0.9834711    | 0.8028401    |
| 5101 | Bn-A03-p10011955 | A-genome specific (napus-rapa)    | 0.9880383    | 0.6975461    | not scorable | not scorable | 0.9917355    | 0.8015306    |
| 5102 | Bn-A03-p10023639 | A-genome specific (napus-rapa)    | 0.9760765    | 0.709915     | not scorable | not scorable | 1            | 0.7380836    |
| 5103 | Bn-A03-p10027020 | A-genome specific (napus-rapa)    | 0.9760765    | 0.532495     | not scorable | not scorable | 0.9752066    | 0.6972185    |
| 5104 | Bn-A03-p10045527 | genome unspecific (all in)        | 0.9904306    | 0.305382     | 0.9844961    | 0.5803345    | 1            | 0.9316995    |
| 5105 | Bn-A03-p10047160 | A-genome specific (napus-rapa)    | 0.9928229    | 0.8468072    | not scorable | not scorable | 1            | 0.7791812    |
| 5106 | Bn-A03-p10047998 | A-genome specific (napus-rapa)    | 0.9952153    | 0.5821193    | not scorable | not scorable | 1            | 0.7071238    |
| 5107 | Bn-A03-p1004918  | A-genome specific (rapa only)     | not scorable | not scorable | not scorable | not scorable | 0.9752066    | 0.6627242    |
| 5108 | Bn-A03-p10062838 | A-genome specific (napus-rapa)    | 0.9952153    | 0.2569478    | not scorable | not scorable | 0.9752066    | 0.4449755    |
| 5109 | Bn-A03-p10076616 | napus specific                    | 1            | 0.2863811    | not scorable | not scorable | not scorable | not scorable |
| 5110 | Bn-A03-p10081359 | genome unspecific (oleracea-rapa) | not scorable | not scorable | 0.9922481    | 0.8276236    | 0.9752066    | 0.7019902    |
| 5111 | Bn-A03-p1008445  | A-genome specific (napus-rapa)    | 0.937799     | 0.8034447    | not scorable | not scorable | 0.9752066    | 0.7608739    |
| 5112 | Bn-A03-p10084501 | genome unspecific (all in)        | 0.9928229    | 0.5920501    | 0.9922481    | 0.7134535    | 1            | 0.6859793    |

|      |                   |                                |              |              |              |              |              |           |           |
|------|-------------------|--------------------------------|--------------|--------------|--------------|--------------|--------------|-----------|-----------|
| 5113 | Bn-A03-p10086496  | A-genome specific (napus-rapa) | 0.9928229    | 0.8305932    | not scorable | not scorable |              | 1         | 0.7515859 |
| 5114 | Bn-A03-p10087723  | A-genome specific (rapa only)  | not scorable | not scorable | not scorable | not scorable |              | 1         | 0.6799615 |
| 5115 | Bn-A03-p10092390  | A-genome specific (napus-rapa) | 0.9880383    | 0.3959139    | not scorable | not scorable |              | 1         | 0.851064  |
| 5116 | Bn-A03-p10092885  | genome unspecific (all in)     | 0.9952153    | 0.5089732    |              | 1            | 0.5726631    | 1         | 0.7075    |
| 5117 | Bn-A03-p101110586 | A-genome specific (napus-rapa) | 0.9976076    | 0.7987271    | not scorable | not scorable | 0.9917355    |           | 0.7786188 |
| 5118 | Bn-A03-p10113984  | A-genome specific (napus-rapa) | 0.3564593    | 0.7933518    | not scorable | not scorable | 0.9256198    |           | 0.8246439 |
| 5119 | Bn-A03-p10117543  | A-genome specific (napus-rapa) | 0.9617225    | 0.8963926    | not scorable | not scorable | 0.9834711    |           | 0.6658646 |
| 5120 | Bn-A03-p10129836  | A-genome specific (napus-rapa) | 0.9425837    | 0.4671274    | not scorable | not scorable | 0.9917355    |           | 0.6048279 |
| 5121 | Bn-A03-p10130816  | A-genome specific (napus-rapa) |              | 1            | 0.5209166    | not scorable | not scorable | 0.9917355 | 0.7870192 |
| 5122 | Bn-A03-p1013445   | A-genome specific (rapa only)  | not scorable | not scorable | not scorable | not scorable |              | 1         | 0.8134261 |
| 5123 | Bn-A03-p10218040  | genome unspecific (all in)     | 0.9904306    | 0.3423601    | 0.9689922    | 0.4026267    |              | 1         | 0.8692989 |
| 5124 | Bn-A03-p10248162  | A-genome specific (napus-rapa) | 0.9665072    | 0.5798329    | not scorable | not scorable | 0.9834711    |           | 0.7586334 |
| 5125 | Bn-A03-p10273355  | A-genome specific (napus-rapa) | 0.9712918    | 0.5473375    | not scorable | not scorable |              | 1         | 0.9175813 |
| 5126 | Bn-A03-p10285809  | A-genome specific (napus-rapa) | 0.9856459    | 0.7585521    | not scorable | not scorable | 0.9917355    |           | 0.7438421 |
| 5127 | Bn-A03-p10288202  | A-genome specific (napus-rapa) | 0.9712918    | 0.5421591    | not scorable | not scorable |              | 1         | 0.7639437 |
| 5128 | Bn-A03-p10293071  | A-genome specific (napus-rapa) | 0.9760765    | 0.796537     | not scorable | not scorable |              | 1         | 0.7257573 |
| 5129 | Bn-A03-p10296969  | A-genome specific (napus-rapa) | 0.9712918    | 0.3834068    | not scorable | not scorable | 0.9917355    |           | 0.7526135 |
| 5130 | Bn-A03-p10313368  | A-genome specific (napus-rapa) | 0.9976076    | 0.7105801    | not scorable | not scorable |              | 1         | 0.8095524 |
| 5131 | Bn-A03-p10321263  | A-genome specific (napus-rapa) | 0.9952153    | 0.3379588    | not scorable | not scorable |              | 1         | 0.7663543 |
| 5132 | Bn-A03-p10321416  | A-genome specific (napus-rapa) | 0.9976076    | 0.6965511    | not scorable | not scorable | 0.9834711    |           | 0.6862957 |
| 5133 | Bn-A03-p10342088  | A-genome specific (napus-rapa) | 0.9473684    | 0.4222451    | not scorable | not scorable | 0.8429752    |           | 0.7829915 |
| 5134 | Bn-A03-p10350207  | A-genome specific (rapa only)  | not scorable | not scorable | not scorable | not scorable |              | 1         | 0.7801202 |
| 5135 | Bn-A03-p10355167  | A-genome specific (napus-rapa) | 0.9856459    | 0.6615505    | not scorable | not scorable |              | 1         | 0.7108301 |
| 5136 | Bn-A03-p10376862  | A-genome specific (napus-rapa) | 0.9712918    | 0.3064386    | not scorable | not scorable | 0.9669421    |           | 0.650941  |
| 5137 | Bn-A03-p10388827  | A-genome specific (napus-rapa) | 0.9952153    | 0.4445018    | not scorable | not scorable | 0.9669421    |           | 0.6687172 |
| 5138 | Bn-A03-p10393461  | A-genome specific (napus-rapa) | 0.9952153    | 0.5799794    | not scorable | not scorable | 0.9834711    |           | 0.6805213 |
| 5139 | Bn-A03-p10400341  | A-genome specific (napus-rapa) | 0.9952153    | 0.6966792    | not scorable | not scorable | 0.9917355    |           | 0.4865592 |
| 5140 | Bn-A03-p10402639  | A-genome specific (napus-rapa) | 0.9976076    | 0.7570226    | not scorable | not scorable | 0.9917355    |           | 0.6226847 |
| 5141 | Bn-A03-p10414176  | A-genome specific (napus-rapa) | 0.8660287    | 0.5933778    | not scorable | not scorable |              | 1         | 0.9475539 |
| 5142 | Bn-A03-p10445051  | A-genome specific (napus-rapa) | 0.9976076    | 0.4600951    | not scorable | not scorable |              | 1         | 0.7455676 |
| 5143 | Bn-A03-p10448318  | A-genome specific (napus-rapa) | 0.9952153    | 0.7364935    | not scorable | not scorable | 0.9917355    |           | 0.7078092 |
| 5144 | Bn-A03-p10449972  | A-genome specific (napus-rapa) | 0.9928229    | 0.5898635    | not scorable | not scorable | 0.9421487    |           | 0.571029  |
| 5145 | Bn-A03-p10458923  | A-genome specific (napus-rapa) | 0.9856459    | 0.7496867    | not scorable | not scorable | 0.9834711    |           | 0.6795592 |

|      |                  |                                |              |              |              |              |              |              |
|------|------------------|--------------------------------|--------------|--------------|--------------|--------------|--------------|--------------|
| 5146 | Bn-A03-p10464551 | A-genome specific (napus-rapa) | 0.9952153    | 0.4340621    | not scorable | not scorable | 0.9917355    | 0.7509199    |
| 5147 | Bn-A03-p10466633 | A-genome specific (napus-rapa) | 0.9952153    | 0.6763363    | not scorable | not scorable | 1            | 0.6536661    |
| 5148 | Bn-A03-p1046864  | A-genome specific (napus-rapa) | 0.9569378    | 0.6579955    | not scorable | not scorable | 1            | 0.8833086    |
| 5149 | Bn-A03-p10482765 | A-genome specific (napus-rapa) | 0.9952153    | 0.7696385    | not scorable | not scorable | 0.9917355    | 0.77306      |
| 5150 | Bn-A03-p10487754 | A-genome specific (napus-rapa) | 0.9856459    | 0.5900955    | not scorable | not scorable | 1            | 0.7101598    |
| 5151 | Bn-A03-p1050437  | A-genome specific (napus-rapa) | 0.9114832    | 0.6664365    | not scorable | not scorable | 0.9834711    | 0.6996428    |
| 5152 | Bn-A03-p1050893  | A-genome specific (napus-rapa) | 0.9043062    | 0.7562289    | not scorable | not scorable | 1            | 0.7581046    |
| 5153 | Bn-A03-p10517056 | A-genome specific (napus-rapa) | 0.9712918    | 0.8157431    | not scorable | not scorable | 0.9834711    | 0.7420409    |
| 5154 | Bn-A03-p10517505 | A-genome specific (rapa only)  | not scorable | not scorable | not scorable | not scorable | 0.9834711    | 0.7477279    |
| 5155 | Bn-A03-p1051774  | A-genome specific (rapa only)  | not scorable | not scorable | not scorable | not scorable | 1            | 0.7390981    |
| 5156 | Bn-A03-p10533775 | A-genome specific (napus-rapa) | 0.9856459    | 0.775816     | not scorable | not scorable | 0.9917355    | 0.6888669    |
| 5157 | Bn-A03-p10547280 | A-genome specific (napus-rapa) | 0.9688995    | 0.4582045    | not scorable | not scorable | 0.9669421    | 0.530384     |
| 5158 | Bn-A03-p10562274 | A-genome specific (napus-rapa) | 0.9282297    | 0.3036279    | not scorable | not scorable | 1            | 0.636762     |
| 5159 | Bn-A03-p10565738 | A-genome specific (napus-rapa) | 0.9856459    | 0.6583429    | not scorable | not scorable | 1            | 0.7071266    |
| 5160 | Bn-A03-p10566503 | A-genome specific (napus-rapa) | 0.9760765    | 0.680471     | not scorable | not scorable | 1            | 0.7485616    |
| 5161 | Bn-A03-p10573912 | A-genome specific (napus-rapa) | 0.9928229    | 0.3987852    | not scorable | not scorable | 1            | 0.8336737    |
| 5162 | Bn-A03-p10583411 | A-genome specific (napus-rapa) | 0.8732057    | 0.7733875    | not scorable | not scorable | 0.9834711    | 0.9057256    |
| 5163 | Bn-A03-p10584028 | A-genome specific (napus-rapa) | 0.9258373    | 0.7291861    | not scorable | not scorable | 1            | 0.8424219    |
| 5164 | Bn-A03-p10587547 | A-genome specific (napus-rapa) | 0.9521531    | 0.7806543    | not scorable | not scorable | 1            | 0.6817682    |
| 5165 | Bn-A03-p10600103 | A-genome specific (napus-rapa) | 0.9641148    | 0.2724372    | not scorable | not scorable | 1            | 0.7498477    |
| 5166 | Bn-A03-p10600567 | napus specific                 | 0.9210526    | 0.6899465    | not scorable | not scorable | not scorable | not scorable |
| 5167 | Bn-A03-p10607288 | A-genome specific (napus-rapa) | 0.9593301    | 0.6844414    | not scorable | not scorable | 1            | 0.7240503    |
| 5168 | Bn-A03-p10608519 | A-genome specific (napus-rapa) | 0.7296651    | 0.7067349    | not scorable | not scorable | 1            | 0.7428197    |
| 5169 | Bn-A03-p10617866 | A-genome specific (napus-rapa) | 0.9832536    | 0.7344964    | not scorable | not scorable | 1            | 0.7591079    |
| 5170 | Bn-A03-p10623167 | A-genome specific (napus-rapa) | 0.5598086    | 0.7900027    | not scorable | not scorable | 1            | 0.7642848    |
| 5171 | Bn-A03-p10640254 | A-genome specific (napus-rapa) | 0.9904306    | 0.7523452    | not scorable | not scorable | 0.9917355    | 0.7294865    |
| 5172 | Bn-A03-p10640643 | A-genome specific (napus-rapa) | 0.9665072    | 0.7525132    | not scorable | not scorable | 0.9834711    | 0.7146232    |
| 5173 | Bn-A03-p10641561 | napus specific                 | 0.5454546    | 0.9183553    | not scorable | not scorable | not scorable | not scorable |
| 5174 | Bn-A03-p10641836 | A-genome specific (napus-rapa) | 0.9712918    | 0.7117614    | not scorable | not scorable | 1            | 0.7591307    |
| 5175 | Bn-A03-p10649410 | A-genome specific (napus-rapa) | 0.9976076    | 0.4964367    | not scorable | not scorable | 0.9669421    | 0.7111429    |
| 5176 | Bn-A03-p1065055  | A-genome specific (napus-rapa) | 0.9832536    | 0.4295581    | not scorable | not scorable | 1            | 0.8234133    |
| 5177 | Bn-A03-p10651420 | A-genome specific (napus-rapa) | 0.9569378    | 0.726617     | not scorable | not scorable | 1            | 0.8007333    |
| 5178 | Bn-A03-p10664726 | A-genome specific (napus-rapa) | 0.9258373    | 0.4499105    | not scorable | not scorable | 0.9834711    | 0.8144349    |

|      |                  |                                |           |           |              |              |              |              |
|------|------------------|--------------------------------|-----------|-----------|--------------|--------------|--------------|--------------|
| 5179 | Bn-A03-p1067313  | A-genome specific (napus-rapa) | 0.9282297 | 0.7697099 | not scorable | not scorable | 0.9917355    | 0.8741567    |
| 5180 | Bn-A03-p10676505 | A-genome specific (napus-rapa) | 0.9760765 | 0.5602989 | not scorable | not scorable | 0.9917355    | 0.8051141    |
| 5181 | Bn-A03-p10680539 | A-genome specific (napus-rapa) | 0.9808612 | 0.7273422 | not scorable | not scorable | 1            | 0.8264885    |
| 5182 | Bn-A03-p1068165  | A-genome specific (napus-rapa) | 0.9186603 | 0.7748325 | not scorable | not scorable | 1            | 0.8023399    |
| 5183 | Bn-A03-p10682159 | A-genome specific (napus-rapa) | 0.9808612 | 0.7240335 | not scorable | not scorable | 0.9917355    | 0.7898132    |
| 5184 | Bn-A03-p10683528 | napus specific                 | 0.5287082 | 0.8634806 | not scorable | not scorable | not scorable | not scorable |
| 5185 | Bn-A03-p10692514 | A-genome specific (napus-rapa) | 0.9736842 | 0.6444696 | not scorable | not scorable | 1            | 0.7060363    |
| 5186 | Bn-A03-p10703085 | A-genome specific (napus-rapa) | 0.9928229 | 0.772752  | not scorable | not scorable | 0.9917355    | 0.7545361    |
| 5187 | Bn-A03-p1070680  | A-genome specific (napus-rapa) | 0.9808612 | 0.5434826 | not scorable | not scorable | 1            | 0.7004576    |
| 5188 | Bn-A03-p10714724 | napus specific                 | 0.937799  | 0.7147045 | not scorable | not scorable | not scorable | not scorable |
| 5189 | Bn-A03-p10723392 | A-genome specific (napus-rapa) | 0.7822967 | 0.7702524 | not scorable | not scorable | 0.9752066    | 0.8523399    |
| 5190 | Bn-A03-p10723484 | A-genome specific (napus-rapa) | 0.7751196 | 0.7760659 | not scorable | not scorable | 0.9917355    | 0.8407545    |
| 5191 | Bn-A03-p10732934 | A-genome specific (napus-rapa) | 0.9354067 | 0.7264069 | not scorable | not scorable | 0.9834711    | 0.6598726    |
| 5192 | Bn-A03-p10749391 | A-genome specific (napus-rapa) | 0.9688995 | 0.3528845 | not scorable | not scorable | 0.9834711    | 0.6596674    |
| 5193 | Bn-A03-p10757525 | A-genome specific (napus-rapa) | 0.9760765 | 0.7875881 | not scorable | not scorable | 1            | 0.7383026    |
| 5194 | Bn-A03-p1075837  | A-genome specific (napus-rapa) | 0.9521531 | 0.5350001 | not scorable | not scorable | 1            | 0.51849      |
| 5195 | Bn-A03-p10758970 | A-genome specific (napus-rapa) | 0.9617225 | 0.808253  | not scorable | not scorable | 1            | 0.8542958    |
| 5196 | Bn-A03-p10761386 | A-genome specific (napus-rapa) | 0.9952153 | 0.5001145 | not scorable | not scorable | 1            | 0.694041     |
| 5197 | Bn-A03-p10761460 | A-genome specific (napus-rapa) | 0.9904306 | 0.5271561 | not scorable | not scorable | 0.9504132    | 0.5644894    |
| 5198 | Bn-A03-p10773321 | A-genome specific (napus-rapa) | 0.9904306 | 0.450622  | not scorable | not scorable | 1            | 0.6759783    |
| 5199 | Bn-A03-p10773339 | A-genome specific (napus-rapa) | 0.9976076 | 0.7701179 | not scorable | not scorable | 0.9917355    | 0.7748146    |
| 5200 | Bn-A03-p10794513 | napus specific                 | 0.9425837 | 0.4827262 | not scorable | not scorable | not scorable | not scorable |
| 5201 | Bn-A03-p10794985 | A-genome specific (napus-rapa) | 0.9808612 | 0.7518843 | not scorable | not scorable | 0.9834711    | 0.7504583    |
| 5202 | Bn-A03-p10797405 | A-genome specific (napus-rapa) | 0.9784689 | 0.5351871 | not scorable | not scorable | 0.9917355    | 0.5099606    |
| 5203 | Bn-A03-p10802728 | A-genome specific (napus-rapa) | 0.9976076 | 0.466033  | not scorable | not scorable | 0.9834711    | 0.7786132    |
| 5204 | Bn-A03-p10803927 | A-genome specific (napus-rapa) | 0.9856459 | 0.399814  | not scorable | not scorable | 0.9917355    | 0.7481225    |
| 5205 | Bn-A03-p10814591 | A-genome specific (napus-rapa) | 0.9928229 | 0.7702935 | not scorable | not scorable | 1            | 0.8013009    |
| 5206 | Bn-A03-p10819432 | A-genome specific (napus-rapa) | 0.9928229 | 0.742265  | not scorable | not scorable | 1            | 0.7286986    |
| 5207 | Bn-A03-p10823720 | A-genome specific (napus-rapa) | 0.9856459 | 0.5328443 | not scorable | not scorable | 1            | 0.7636456    |
| 5208 | Bn-A03-p10830360 | A-genome specific (napus-rapa) | 0.9641148 | 0.7510456 | not scorable | not scorable | 0.9917355    | 0.7301316    |
| 5209 | Bn-A03-p10833240 | A-genome specific (napus-rapa) | 0.9928229 | 0.8954517 | not scorable | not scorable | 0.9917355    | 0.7212858    |
| 5210 | Bn-A03-p1084819  | A-genome specific (napus-rapa) | 0.9210526 | 0.7678473 | not scorable | not scorable | 1            | 0.8743911    |
| 5211 | Bn-A03-p10853616 | A-genome specific (napus-rapa) | 0.9856459 | 0.7324257 | not scorable | not scorable | 0.9834711    | 0.6658531    |

|      |                  |                                   |              |              |              |              |           |           |
|------|------------------|-----------------------------------|--------------|--------------|--------------|--------------|-----------|-----------|
| 5212 | Bn-A03-p10855422 | A-genome specific (napus-rapa)    | 1            | 0.7208948    | not scorable | not scorable | 1         | 0.6957343 |
| 5213 | Bn-A03-p10862251 | A-genome specific (napus-rapa)    | 0.9928229    | 0.8510907    | not scorable | not scorable | 1         | 0.6960684 |
| 5214 | Bn-A03-p10873434 | A-genome specific (napus-rapa)    | 0.9808612    | 0.7538314    | not scorable | not scorable | 0.8264463 | 0.7195574 |
| 5215 | Bn-A03-p10883930 | genome unspecific (all in)        | 0.9976076    | 0.361945     | 0.9767442    | 0.3745004    | 1         | 0.7578155 |
| 5216 | Bn-A03-p10889554 | A-genome specific (napus-rapa)    | 0.2583732    | 0.8736487    | not scorable | not scorable | 0.9917355 | 0.8269143 |
| 5217 | Bn-A03-p10897572 | A-genome specific (napus-rapa)    | 0.9952153    | 0.7888409    | not scorable | not scorable | 1         | 0.7595835 |
| 5218 | Bn-A03-p10898289 | A-genome specific (napus-rapa)    | 0.9976076    | 0.8274082    | not scorable | not scorable | 0.9834711 | 0.7513597 |
| 5219 | Bn-A03-p1089875  | A-genome specific (napus-rapa)    | 0.9282297    | 0.7706058    | not scorable | not scorable | 1         | 0.8045731 |
| 5220 | Bn-A03-p10900301 | A-genome specific (napus-rapa)    | 0.9976076    | 0.5491616    | not scorable | not scorable | 0.9752066 | 0.7895783 |
| 5221 | Bn-A03-p10900813 | A-genome specific (napus-rapa)    | 0.9928229    | 0.7789853    | not scorable | not scorable | 0.9834711 | 0.8842712 |
| 5222 | Bn-A03-p10907793 | A-genome specific (napus-rapa)    | 0.9928229    | 0.8101681    | not scorable | not scorable | 0.9752066 | 0.7146232 |
| 5223 | Bn-A03-p10912453 | A-genome specific (napus-rapa)    | 0.9904306    | 0.7070758    | not scorable | not scorable | 1         | 0.7987826 |
| 5224 | Bn-A03-p10912815 | A-genome specific (napus-rapa)    | 0.9976076    | 0.4802548    | not scorable | not scorable | 1         | 0.7937169 |
| 5225 | Bn-A03-p10928669 | A-genome specific (napus-rapa)    | 0.9904306    | 0.5314842    | not scorable | not scorable | 0.9917355 | 0.8049473 |
| 5226 | Bn-A03-p10928990 | A-genome specific (napus-rapa)    | 0.9162679    | 0.8207017    | not scorable | not scorable | 1         | 0.7711915 |
| 5227 | Bn-A03-p10930541 | A-genome specific (napus-rapa)    | 0.9928229    | 0.5416912    | not scorable | not scorable | 0.9834711 | 0.72797   |
| 5228 | Bn-A03-p10947710 | genome unspecific (oleracea-rapa) | not scorable | not scorable | 0.8372093    | 0.84755      | 0.9834711 | 0.8124357 |
| 5229 | Bn-A03-p10952575 | A-genome specific (napus-rapa)    | 0.9952153    | 0.4075186    | not scorable | not scorable | 1         | 0.8410593 |
| 5230 | Bn-A03-p10958194 | A-genome specific (napus-rapa)    | 1            | 0.727371     | not scorable | not scorable | 1         | 0.7362441 |
| 5231 | Bn-A03-p10959387 | A-genome specific (napus-rapa)    | 0.9976076    | 0.7027575    | not scorable | not scorable | 1         | 0.8062757 |
| 5232 | Bn-A03-p10959439 | A-genome specific (napus-rapa)    | 0.9928229    | 0.7249324    | not scorable | not scorable | 1         | 0.7989482 |
| 5233 | Bn-A03-p10962307 | A-genome specific (napus-rapa)    | 0.9760765    | 0.7153134    | not scorable | not scorable | 0.8264463 | 0.8269348 |
| 5234 | Bn-A03-p10962645 | A-genome specific (napus-rapa)    | 0.9712918    | 0.8104526    | not scorable | not scorable | 0.8264463 | 0.8379447 |
| 5235 | Bn-A03-p10962969 | A-genome specific (napus-rapa)    | 0.9641148    | 0.7838488    | not scorable | not scorable | 0.8099173 | 0.750002  |
| 5236 | Bn-A03-p10963046 | A-genome specific (rapa only)     | not scorable | not scorable | not scorable | not scorable | 0.8347107 | 0.7599619 |
| 5237 | Bn-A03-p10964394 | A-genome specific (napus-rapa)    | 0.9712918    | 0.8041307    | not scorable | not scorable | 0.8016529 | 0.7759728 |
| 5238 | Bn-A03-p10964511 | A-genome specific (napus-rapa)    | 0.9832536    | 0.8158737    | not scorable | not scorable | 0.9586777 | 0.752816  |
| 5239 | Bn-A03-p10964682 | A-genome specific (napus-rapa)    | 0.9688995    | 0.7365783    | not scorable | not scorable | 0.8512397 | 0.7401044 |
| 5240 | Bn-A03-p10967268 | A-genome specific (napus-rapa)    | 0.9904306    | 0.3666797    | not scorable | not scorable | 0.8181818 | 0.7268057 |
| 5241 | Bn-A03-p10969109 | A-genome specific (napus-rapa)    | 0.9952153    | 0.5169186    | not scorable | not scorable | 1         | 0.7779718 |
| 5242 | Bn-A03-p1098531  | A-genome specific (napus-rapa)    | 1            | 0.858917     | not scorable | not scorable | 1         | 0.7516536 |
| 5243 | Bn-A03-p10993904 | A-genome specific (napus-rapa)    | 0.9856459    | 0.7525268    | not scorable | not scorable | 1         | 0.9078432 |
| 5244 | Bn-A03-p11027825 | A-genome specific (napus-rapa)    | 1            | 0.7040766    | not scorable | not scorable | 1         | 0.8796402 |

|      |                  |                                    |              |              |              |              |              |              |
|------|------------------|------------------------------------|--------------|--------------|--------------|--------------|--------------|--------------|
| 5245 | Bn-A03-p11051970 | napus specific                     | 0.7416268    | 0.7625728    | not scorable | not scorable | not scorable | not scorable |
| 5246 | Bn-A03-p11053758 | A-genome specific (napus-rapa)     | 0.9784689    | 0.7210378    | not scorable | not scorable | 0.9917355    | 0.7042054    |
| 5247 | Bn-A03-p11053857 | A-genome specific (napus-rapa)     | 0.9712918    | 0.7358117    | not scorable | not scorable | 1            | 0.6926724    |
| 5248 | Bn-A03-p11065674 | A-genome specific (napus-rapa)     | 0.9928229    | 0.5306202    | not scorable | not scorable | 1            | 0.7296067    |
| 5249 | Bn-A03-p11070576 | A-genome specific (napus-rapa)     | 0.9904306    | 0.6397136    | not scorable | not scorable | 0.9834711    | 0.6687723    |
| 5250 | Bn-A03-p11070958 | A-genome specific (napus-rapa)     | 1            | 0.7929812    | not scorable | not scorable | 1            | 0.7708455    |
| 5251 | Bn-A03-p11071010 | A-genome specific (napus-rapa)     | 0.9952153    | 0.8150311    | not scorable | not scorable | 1            | 0.8585363    |
| 5252 | Bn-A03-p11071320 | A-genome specific (napus-rapa)     | 0.9952153    | 0.8373995    | not scorable | not scorable | 1            | 0.7776622    |
| 5253 | Bn-A03-p11071640 | A-genome specific (napus-rapa)     | 1            | 0.8568761    | not scorable | not scorable | 1            | 0.758513     |
| 5254 | Bn-A03-p11086751 | A-genome specific (napus-rapa)     | 0.9832536    | 0.6624835    | not scorable | not scorable | 0.9586777    | 0.5446155    |
| 5255 | Bn-A03-p11087692 | A-genome specific (napus-rapa)     | 0.9904306    | 0.7798703    | not scorable | not scorable | 1            | 0.794051     |
| 5256 | Bn-A03-p11122273 | C-genome specific (napus-oleracea) | 0.9186603    | 0.3395446    | 0.9379845    | 0.3942117    | not scorable | not scorable |
| 5257 | Bn-A03-p11133743 | A-genome specific (napus-rapa)     | 0.9976076    | 0.7565389    | not scorable | not scorable | 0.9834711    | 0.6928803    |
| 5258 | Bn-A03-p11138137 | A-genome specific (napus-rapa)     | 0.9808612    | 0.3407292    | not scorable | not scorable | 0.9917355    | 0.7248131    |
| 5259 | Bn-A03-p11143696 | A-genome specific (napus-rapa)     | 0.2942584    | 0.8642073    | not scorable | not scorable | 0.9917355    | 0.7833296    |
| 5260 | Bn-A03-p11156293 | A-genome specific (napus-rapa)     | 0.9904306    | 0.5983151    | not scorable | not scorable | 0.9917355    | 0.7647294    |
| 5261 | Bn-A03-p11171067 | A-genome specific (napus-rapa)     | 0.9904306    | 0.7249979    | not scorable | not scorable | 0.9917355    | 0.690599     |
| 5262 | Bn-A03-p11177892 | A-genome specific (napus-rapa)     | 0.9952153    | 0.4820233    | not scorable | not scorable | 1            | 0.7097556    |
| 5263 | Bn-A03-p11188500 | A-genome specific (napus-rapa)     | 0.8181818    | 0.856598     | not scorable | not scorable | 0.8842975    | 0.9022073    |
| 5264 | Bn-A03-p11191805 | A-genome specific (napus-rapa)     | 0.9856459    | 0.590327     | not scorable | not scorable | 0.9586777    | 0.7615929    |
| 5265 | Bn-A03-p11202719 | A-genome specific (napus-rapa)     | 1            | 0.2742017    | not scorable | not scorable | 0.9834711    | 0.7079362    |
| 5266 | Bn-A03-p11217606 | A-genome specific (rapa only)      | not scorable | not scorable | not scorable | not scorable | 1            | 0.7558123    |
| 5267 | Bn-A03-p11218468 | A-genome specific (napus-rapa)     | 0.9952153    | 0.3259405    | not scorable | not scorable | 0.9917355    | 0.2867653    |
| 5268 | Bn-A03-p11227755 | A-genome specific (napus-rapa)     | 0.9952153    | 0.7815886    | not scorable | not scorable | 1            | 0.7548996    |
| 5269 | Bn-A03-p11232586 | A-genome specific (napus-rapa)     | 0.9904306    | 0.635788     | not scorable | not scorable | 0.9917355    | 0.7681777    |
| 5270 | Bn-A03-p11247615 | A-genome specific (napus-rapa)     | 0.9904306    | 0.8046045    | not scorable | not scorable | 0.9917355    | 0.7090014    |
| 5271 | Bn-A03-p11256138 | A-genome specific (napus-rapa)     | 0.9976076    | 0.8029923    | not scorable | not scorable | 0.9917355    | 0.8379771    |
| 5272 | Bn-A03-p11256392 | A-genome specific (napus-rapa)     | 0.9928229    | 0.8011888    | not scorable | not scorable | 0.9917355    | 0.8272159    |
| 5273 | Bn-A03-p11256664 | A-genome specific (napus-rapa)     | 0.9976076    | 0.787027     | not scorable | not scorable | 0.9917355    | 0.7674003    |
| 5274 | Bn-A03-p11257708 | A-genome specific (napus-rapa)     | 0.9856459    | 0.7697231    | not scorable | not scorable | 0.9917355    | 0.7650257    |
| 5275 | Bn-A03-p11294370 | A-genome specific (napus-rapa)     | 0.9952153    | 0.5161114    | not scorable | not scorable | 0.9917355    | 0.7534155    |
| 5276 | Bn-A03-p11294858 | A-genome specific (napus-rapa)     | 0.9928229    | 0.473326     | not scorable | not scorable | 1            | 0.7826302    |
| 5277 | Bn-A03-p11319722 | A-genome specific (napus-rapa)     | 0.9976076    | 0.7894596    | not scorable | not scorable | 1            | 0.8113519    |



|      |                  |                                |              |              |              |              |              |              |
|------|------------------|--------------------------------|--------------|--------------|--------------|--------------|--------------|--------------|
| 5278 | Bn-A03-p11319901 | A-genome specific (napus-rapa) | 0.9856459    | 0.8079349    | not scorable | not scorable | 1            | 0.7369935    |
| 5279 | Bn-A03-p11325897 | A-genome specific (napus-rapa) | 0.9162679    | 0.778622     | not scorable | not scorable | 1            | 0.8317298    |
| 5280 | Bn-A03-p11345845 | A-genome specific (napus-rapa) | 0.9952153    | 0.7709465    | not scorable | not scorable | 0.9008265    | 0.8522056    |
| 5281 | Bn-A03-p11347564 | A-genome specific (rapa only)  | not scorable | not scorable | not scorable | not scorable | 0.9338843    | 0.8261573    |
| 5282 | Bn-A03-p11356180 | A-genome specific (napus-rapa) | 0.9784689    | 0.7586975    | not scorable | not scorable | 1            | 0.8818015    |
| 5283 | Bn-A03-p11364656 | napus specific                 | 0.9856459    | 0.8942379    | not scorable | not scorable | not scorable | not scorable |
| 5284 | Bn-A03-p11381125 | A-genome specific (napus-rapa) | 0.9880383    | 0.7882114    | not scorable | not scorable | 0.9834711    | 0.6976214    |
| 5285 | Bn-A03-p11383138 | A-genome specific (napus-rapa) | 0.9617225    | 0.452123     | not scorable | not scorable | 0.9917355    | 0.7168742    |
| 5286 | Bn-A03-p11391930 | A-genome specific (napus-rapa) | 0.9784689    | 0.7674896    | not scorable | not scorable | 0.9917355    | 0.7167431    |
| 5287 | Bn-A03-p11392385 | A-genome specific (rapa only)  | not scorable | not scorable | not scorable | not scorable | 0.9917355    | 0.7067898    |
| 5288 | Bn-A03-p11399915 | A-genome specific (napus-rapa) | 0.9952153    | 0.7555442    | not scorable | not scorable | 0.9834711    | 0.7980237    |
| 5289 | Bn-A03-p11402714 | A-genome specific (napus-rapa) | 0.9976076    | 0.5265287    | not scorable | not scorable | 1            | 0.6362857    |
| 5290 | Bn-A03-p11418849 | A-genome specific (napus-rapa) | 0.9952153    | 0.342601     | not scorable | not scorable | 1            | 0.7736256    |
| 5291 | Bn-A03-p11421511 | A-genome specific (napus-rapa) | 0.9976076    | 0.8522483    | not scorable | not scorable | 0.9669421    | 0.7761122    |
| 5292 | Bn-A03-p11423310 | A-genome specific (napus-rapa) | 0.9880383    | 0.6718942    | not scorable | not scorable | 0.9834711    | 0.7916752    |
| 5293 | Bn-A03-p11429520 | A-genome specific (napus-rapa) | 1            | 0.5276634    | not scorable | not scorable | 0.9752066    | 0.717873     |
| 5294 | Bn-A03-p11444081 | A-genome specific (napus-rapa) | 1            | 0.7654977    | not scorable | not scorable | 1            | 0.7557611    |
| 5295 | Bn-A03-p11444389 | A-genome specific (napus-rapa) | 1            | 0.3525551    | not scorable | not scorable | 0.9917355    | 0.7121141    |
| 5296 | Bn-A03-p11456115 | A-genome specific (napus-rapa) | 0.9856459    | 0.7553195    | not scorable | not scorable | 1            | 0.7741286    |
| 5297 | Bn-A03-p11468741 | A-genome specific (napus-rapa) | 0.9760765    | 0.3434114    | not scorable | not scorable | 0.9917355    | 0.7976286    |
| 5298 | Bn-A03-p11499523 | A-genome specific (napus-rapa) | 0.9904306    | 0.510186     | not scorable | not scorable | 1            | 0.9493449    |
| 5299 | Bn-A03-p11505658 | A-genome specific (napus-rapa) | 0.9952153    | 0.5080623    | not scorable | not scorable | 0.9917355    | 0.7239868    |
| 5300 | Bn-A03-p11515810 | A-genome specific (napus-rapa) | 0.9904306    | 0.769222     | not scorable | not scorable | 1            | 0.8403501    |
| 5301 | Bn-A03-p11517597 | A-genome specific (napus-rapa) | 0.9832536    | 0.7974146    | not scorable | not scorable | 0.9917355    | 0.7821614    |
| 5302 | Bn-A03-p11519012 | A-genome specific (napus-rapa) | 0.9928229    | 0.8161196    | not scorable | not scorable | 1            | 0.6907297    |
| 5303 | Bn-A03-p11519264 | A-genome specific (napus-rapa) | 0.9976076    | 0.7696153    | not scorable | not scorable | 0.9917355    | 0.7411231    |
| 5304 | Bn-A03-p11520156 | A-genome specific (napus-rapa) | 0.9904306    | 0.5554656    | not scorable | not scorable | 1            | 0.7920699    |
| 5305 | Bn-A03-p11534030 | A-genome specific (napus-rapa) | 0.9736842    | 0.5493516    | not scorable | not scorable | 0.9586777    | 0.8408164    |
| 5306 | Bn-A03-p11544253 | A-genome specific (napus-rapa) | 0.9856459    | 0.5519262    | not scorable | not scorable | 1            | 0.7959908    |
| 5307 | Bn-A03-p11546520 | A-genome specific (napus-rapa) | 0.9832536    | 0.7670555    | not scorable | not scorable | 0.9834711    | 0.7487155    |
| 5308 | Bn-A03-p11549018 | A-genome specific (napus-rapa) | 0.9904306    | 0.7890614    | not scorable | not scorable | 0.9834711    | 0.7610225    |
| 5309 | Bn-A03-p11549288 | A-genome specific (napus-rapa) | 0.9760765    | 0.758216     | not scorable | not scorable | 0.9752066    | 0.7888584    |
| 5310 | Bn-A03-p11572347 | A-genome specific (napus-rapa) | 0.9760765    | 0.7478341    | not scorable | not scorable | 1            | 0.7103665    |

|      |                  |                                |              |              |              |              |              |              |
|------|------------------|--------------------------------|--------------|--------------|--------------|--------------|--------------|--------------|
| 5311 | Bn-A03-p11578563 | A-genome specific (napus-rapa) | 0.9952153    | 0.4625314    | not scorable | not scorable | 0.9752066    | 0.5359061    |
| 5312 | Bn-A03-p11583086 | A-genome specific (napus-rapa) | 0.9856459    | 0.6954622    | not scorable | not scorable | 0.9917355    | 0.756093     |
| 5313 | Bn-A03-p11590315 | A-genome specific (napus-rapa) | 0.8995215    | 0.7078218    | not scorable | not scorable | 0.8595041    | 0.7018247    |
| 5314 | Bn-A03-p11605644 | A-genome specific (napus-rapa) | 0.9856459    | 0.2481291    | not scorable | not scorable | 0.9834711    | 0.8187895    |
| 5315 | Bn-A03-p11613167 | A-genome specific (napus-rapa) | 0.9928229    | 0.3266001    | not scorable | not scorable | 1            | 0.7098928    |
| 5316 | Bn-A03-p11613865 | A-genome specific (napus-rapa) | 0.8755981    | 0.7328466    | not scorable | not scorable | 1            | 0.7868593    |
| 5317 | Bn-A03-p11617534 | A-genome specific (napus-rapa) | 0.9952153    | 0.7821622    | not scorable | not scorable | 1            | 0.7471316    |
| 5318 | Bn-A03-p11618241 | A-genome specific (napus-rapa) | 1            | 0.73057      | not scorable | not scorable | 1            | 0.8249638    |
| 5319 | Bn-A03-p11621375 | A-genome specific (napus-rapa) | 0.9808612    | 0.3059969    | not scorable | not scorable | 1            | 0.6820162    |
| 5320 | Bn-A03-p11623083 | A-genome specific (napus-rapa) | 0.9928229    | 0.4268504    | not scorable | not scorable | 0.892562     | 0.7944839    |
| 5321 | Bn-A03-p11624578 | A-genome specific (napus-rapa) | 0.9090909    | 0.803053     | not scorable | not scorable | 0.892562     | 0.9165112    |
| 5322 | Bn-A03-p11626015 | A-genome specific (napus-rapa) | 0.9952153    | 0.7538181    | not scorable | not scorable | 1            | 0.7991292    |
| 5323 | Bn-A03-p11626279 | A-genome specific (napus-rapa) | 0.9904306    | 0.5367107    | not scorable | not scorable | 0.9917355    | 0.7539644    |
| 5324 | Bn-A03-p11633959 | napus specific                 | 0.9210526    | 0.7694378    | not scorable | not scorable | not scorable | not scorable |
| 5325 | Bn-A03-p11640168 | genome unspecific (all in)     | 0.9832536    | 0.6016328    |              | 1 0.7989718  | 0.9917355    | 0.7286076    |
| 5326 | Bn-A03-p11646564 | all not scorable               | not scorable | not scorable | not scorable | not scorable | not scorable | not scorable |
| 5327 | Bn-A03-p11655161 | A-genome specific (napus-rapa) | 0.9545454    | 0.564651     | not scorable | not scorable | 1            | 0.6705018    |
| 5328 | Bn-A03-p11655433 | A-genome specific (napus-rapa) | 0.9832536    | 0.7781782    | not scorable | not scorable | 0.9834711    | 0.8498148    |
| 5329 | Bn-A03-p11655749 | A-genome specific (napus-rapa) | 0.9952153    | 0.7113739    | not scorable | not scorable | 1            | 0.7526731    |
| 5330 | Bn-A03-p11656333 | A-genome specific (napus-rapa) | 0.9401914    | 0.8599369    | not scorable | not scorable | 0.9752066    | 0.8130879    |
| 5331 | Bn-A03-p11683045 | A-genome specific (napus-rapa) | 0.9880383    | 0.3834499    | not scorable | not scorable | 1            | 0.7995946    |
| 5332 | Bn-A03-p11684352 | A-genome specific (napus-rapa) | 0.923445     | 0.8009381    | not scorable | not scorable | 0.9834711    | 0.7981747    |
| 5333 | Bn-A03-p11687251 | A-genome specific (napus-rapa) | 0.9186603    | 0.7300445    | not scorable | not scorable | 1            | 0.7006202    |
| 5334 | Bn-A03-p11704125 | A-genome specific (napus-rapa) | 0.9976076    | 0.7270659    | not scorable | not scorable | 0.9834711    | 0.661199     |
| 5335 | Bn-A03-p11704711 | A-genome specific (napus-rapa) | 0.9784689    | 0.3660067    | not scorable | not scorable | 0.9669421    | 0.6936245    |
| 5336 | Bn-A03-p11708366 | A-genome specific (rapa only)  | not scorable | not scorable | not scorable | not scorable | 0.9752066    | 0.652494     |
| 5337 | Bn-A03-p11739768 | A-genome specific (napus-rapa) | 0.9904306    | 0.506255     | not scorable | not scorable | 1            | 0.8180857    |
| 5338 | Bn-A03-p11744082 | A-genome specific (napus-rapa) | 0.9928229    | 0.6664226    | not scorable | not scorable | 0.9834711    | 0.7653599    |
| 5339 | Bn-A03-p11751694 | A-genome specific (napus-rapa) | 0.9856459    | 0.518812     | not scorable | not scorable | 0.9834711    | 0.7396557    |
| 5340 | Bn-A03-p11765203 | all not scorable               | not scorable | not scorable | not scorable | not scorable | not scorable | not scorable |
| 5341 | Bn-A03-p11771139 | A-genome specific (napus-rapa) | 0.9976076    | 0.3892892    | not scorable | not scorable | 0.9669421    | 0.9483778    |
| 5342 | Bn-A03-p11772387 | genome unspecific (all in)     | 0.9904306    | 0.2941328    | 0.9767442    | 0.5585905    | 1            | 0.7641606    |
| 5343 | Bn-A03-p11785159 | A-genome specific (napus-rapa) | 0.9928229    | 0.6886181    | not scorable | not scorable | 1            | 0.6813985    |

|                       |                                   |              |              |              |              |              |              |
|-----------------------|-----------------------------------|--------------|--------------|--------------|--------------|--------------|--------------|
| 5344 Bn-A03-p11792328 | A-genome specific (napus-rapa)    | 1            | 0.3266852    | not scorable | not scorable | 0.9586777    | 0.7307112    |
| 5345 Bn-A03-p11798309 | A-genome specific (napus-rapa)    | 0.9832536    | 0.4521256    | not scorable | not scorable | 0.9752066    | 0.7513744    |
| 5346 Bn-A03-p11822847 | all not scorable                  | not scorable | not scorable | not scorable | not scorable | not scorable | not scorable |
| 5347 Bn-A03-p11831815 | A-genome specific (napus-rapa)    | 0.9856459    | 0.2458735    | not scorable | not scorable | 1            | 0.6995863    |
| 5348 Bn-A03-p11883572 | A-genome specific (napus-rapa)    | 1            | 0.8484479    | not scorable | not scorable | 0.9917355    | 0.7096455    |
| 5349 Bn-A03-p1194072  | A-genome specific (rapa only)     | not scorable | not scorable | not scorable | not scorable | 0.9917355    | 0.707278     |
| 5350 Bn-A03-p1195712  | genome unspecific (oleracea-rapa) | not scorable | not scorable | 0.8062016    | 0.846328     | 0.9917355    | 0.798512     |
| 5351 Bn-A03-p12008511 | A-genome specific (napus-rapa)    | 0.9904306    | 0.4370525    | not scorable | not scorable | 0.9752066    | 0.7146838    |
| 5352 Bn-A03-p12026    | A-genome specific (napus-rapa)    | 0.8421053    | 0.7745283    | not scorable | not scorable | 0.9834711    | 0.6785688    |
| 5353 Bn-A03-p12065947 | A-genome specific (napus-rapa)    | 0.9808612    | 0.7540565    | not scorable | not scorable | 0.9834711    | 0.7485709    |
| 5354 Bn-A03-p12076661 | A-genome specific (napus-rapa)    | 0.9952153    | 0.3229261    | not scorable | not scorable | 0.9917355    | 0.8114336    |
| 5355 Bn-A03-p1218291  | A-genome specific (napus-rapa)    | 0.9282297    | 0.7873467    | not scorable | not scorable | 0.9834711    | 0.8236184    |
| 5356 Bn-A03-p12186958 | A-genome specific (napus-rapa)    | 0.9952153    | 0.7441103    | not scorable | not scorable | 1            | 0.8246635    |
| 5357 Bn-A03-p12201775 | A-genome specific (napus-rapa)    | 0.9856459    | 0.5317661    | not scorable | not scorable | 0.9752066    | 0.6073731    |
| 5358 Bn-A03-p12213267 | A-genome specific (napus-rapa)    | 0.9880383    | 0.764293     | not scorable | not scorable | 0.9834711    | 0.7754347    |
| 5359 Bn-A03-p12219523 | A-genome specific (napus-rapa)    | 0.9952153    | 0.3804826    | not scorable | not scorable | 1            | 0.7836584    |
| 5360 Bn-A03-p12250401 | A-genome specific (napus-rapa)    | 0.9928229    | 0.7676533    | not scorable | not scorable | 0.9917355    | 0.8905174    |
| 5361 Bn-A03-p12279241 | A-genome specific (napus-rapa)    | 1            | 0.7835542    | not scorable | not scorable | 1            | 0.8904615    |
| 5362 Bn-A03-p12279706 | A-genome specific (napus-rapa)    | 0.9880383    | 0.7328691    | not scorable | not scorable | 1            | 0.8294268    |
| 5363 Bn-A03-p12286718 | A-genome specific (napus-rapa)    | 0.9976076    | 0.7198862    | not scorable | not scorable | 0.9917355    | 0.6772168    |
| 5364 Bn-A03-p12287907 | A-genome specific (napus-rapa)    | 0.9976076    | 0.806498     | not scorable | not scorable | 1            | 0.8131604    |
| 5365 Bn-A03-p12287911 | A-genome specific (napus-rapa)    | 0.9880383    | 0.7397896    | not scorable | not scorable | 1            | 0.6906343    |
| 5366 Bn-A03-p12296442 | A-genome specific (napus-rapa)    | 1            | 0.614265     | not scorable | not scorable | 0.9834711    | 0.5578845    |
| 5367 Bn-A03-p12296651 | A-genome specific (napus-rapa)    | 0.9904306    | 0.24645      | not scorable | not scorable | 1            | 0.7601145    |
| 5368 Bn-A03-p12302996 | A-genome specific (napus-rapa)    | 0.9808612    | 0.7689352    | not scorable | not scorable | 0.9917355    | 0.7222427    |
| 5369 Bn-A03-p12308046 | A-genome specific (napus-rapa)    | 0.9880383    | 0.6991484    | not scorable | not scorable | 0.9917355    | 0.7072919    |
| 5370 Bn-A03-p12308158 | A-genome specific (napus-rapa)    | 0.9952153    | 0.8054594    | not scorable | not scorable | 0.9834711    | 0.8439984    |
| 5371 Bn-A03-p12308276 | A-genome specific (napus-rapa)    | 0.9904306    | 0.8167464    | not scorable | not scorable | 0.9917355    | 0.6840516    |
| 5372 Bn-A03-p12308684 | A-genome specific (napus-rapa)    | 0.9976076    | 0.7417129    | not scorable | not scorable | 1            | 0.7710169    |
| 5373 Bn-A03-p12308737 | A-genome specific (napus-rapa)    | 0.9952153    | 0.6595648    | not scorable | not scorable | 1            | 0.6380289    |
| 5374 Bn-A03-p12309478 | A-genome specific (napus-rapa)    | 0.9043062    | 0.7343063    | not scorable | not scorable | 1            | 0.7661504    |
| 5375 Bn-A03-p12311830 | A-genome specific (napus-rapa)    | 0.9665072    | 0.7749124    | not scorable | not scorable | 1            | 0.7145388    |
| 5376 Bn-A03-p12313036 | A-genome specific (napus-rapa)    | 1            | 0.7020041    | not scorable | not scorable | 0.9917355    | 0.7266544    |

|                       |                                   |              |              |              |              |              |              |
|-----------------------|-----------------------------------|--------------|--------------|--------------|--------------|--------------|--------------|
| 5377 Bn-A03-p12313330 | A-genome specific (napus-rapa)    | 1            | 0.7153094    | not scorable | not scorable | 1            | 0.7312977    |
| 5378 Bn-A03-p12319647 | A-genome specific (napus-rapa)    | 0.9880383    | 0.5280263    | not scorable | not scorable | 1            | 0.7356917    |
| 5379 Bn-A03-p12322277 | A-genome specific (napus-rapa)    | 0.9880383    | 0.8434859    | not scorable | not scorable | 0.9917355    | 0.7931738    |
| 5380 Bn-A03-p12331321 | A-genome specific (napus-rapa)    | 0.9521531    | 0.6258197    | not scorable | not scorable | 0.9173554    | 0.630042     |
| 5381 Bn-A03-p12331460 | A-genome specific (napus-rapa)    | 0.9521531    | 0.697512     | not scorable | not scorable | 0.9752066    | 0.7733748    |
| 5382 Bn-A03-p12331575 | A-genome specific (napus-rapa)    | 0.9090909    | 0.7676178    | not scorable | not scorable | 0.9834711    | 0.7290828    |
| 5383 Bn-A03-p12332552 | A-genome specific (napus-rapa)    | 0.9019139    | 0.7542918    | not scorable | not scorable | 0.9917355    | 0.6788916    |
| 5384 Bn-A03-p12342812 | A-genome specific (napus-rapa)    | 0.9784689    | 0.7981699    | not scorable | not scorable | 0.9669421    | 0.7868872    |
| 5385 Bn-A03-p12343742 | A-genome specific (napus-rapa)    | 0.9952153    | 0.3964042    | not scorable | not scorable | 0.9669421    | 0.7839566    |
| 5386 Bn-A03-p12353218 | A-genome specific (napus-rapa)    | 0.9904306    | 0.6915604    | not scorable | not scorable | 0.9917355    | 0.6715325    |
| 5387 Bn-A03-p12353370 | A-genome specific (napus-rapa)    | 0.9832536    | 0.4654876    | not scorable | not scorable | 0.9917355    | 0.8285162    |
| 5388 Bn-A03-p12359936 | A-genome specific (napus-rapa)    | 0.9904306    | 0.6844398    | not scorable | not scorable | 1            | 0.6976528    |
| 5389 Bn-A03-p1238329  | A-genome specific (napus-rapa)    | 0.9210526    | 0.6514074    | not scorable | not scorable | 0.9917355    | 0.660017     |
| 5390 Bn-A03-p12393626 | A-genome specific (napus-rapa)    | 0.9808612    | 0.3891913    | not scorable | not scorable | 1            | 0.8050153    |
| 5391 Bn-A03-p12393711 | A-genome specific (napus-rapa)    | 0.9832536    | 0.7893108    | not scorable | not scorable | 0.9917355    | 0.7345523    |
| 5392 Bn-A03-p12402349 | genome unspecific (oleracea-rapa) | not scorable | not scorable | 0.9922481    | 0.6164997    | 0.9917355    | 0.7526404    |
| 5393 Bn-A03-p12411362 | A-genome specific (napus-rapa)    | 0.9832536    | 0.3419674    | not scorable | not scorable | 0.9834711    | 0.7833       |
| 5394 Bn-A03-p12426461 | A-genome specific (napus-rapa)    | 0.9760765    | 0.4430735    | not scorable | not scorable | 0.9834711    | 0.8299392    |
| 5395 Bn-A03-p12429205 | A-genome specific (napus-rapa)    | 0.9928229    | 0.7123672    | not scorable | not scorable | 1            | 0.7436125    |
| 5396 Bn-A03-p12431376 | A-genome specific (napus-rapa)    | 0.9928229    | 0.5014616    | not scorable | not scorable | 1            | 0.9175813    |
| 5397 Bn-A03-p12439824 | A-genome specific (napus-rapa)    | 1            | 0.5507981    | not scorable | not scorable | 0.9917355    | 0.5755402    |
| 5398 Bn-A03-p12444739 | A-genome specific (napus-rapa)    | 0.9904306    | 0.7940341    | not scorable | not scorable | 1            | 0.9175813    |
| 5399 Bn-A03-p12453877 | A-genome specific (napus-rapa)    | 0.9760765    | 0.4141209    | not scorable | not scorable | 1            | 0.8250605    |
| 5400 Bn-A03-p12457385 | A-genome specific (napus-rapa)    | 0.9904306    | 0.8196128    | not scorable | not scorable | 0.9834711    | 0.7022214    |
| 5401 Bn-A03-p12457751 | A-genome specific (napus-rapa)    | 0.9976076    | 0.6652936    | not scorable | not scorable | 0.9917355    | 0.7541751    |
| 5402 Bn-A03-p12471513 | A-genome specific (napus-rapa)    | 0.9808612    | 0.7662895    | not scorable | not scorable | 0.9504132    | 0.8564795    |
| 5403 Bn-A03-p12477334 | A-genome specific (napus-rapa)    | 0.9736842    | 0.6007537    | not scorable | not scorable | 1            | 0.8140023    |
| 5404 Bn-A03-p12482349 | A-genome specific (napus-rapa)    | 0.9808612    | 0.530714     | not scorable | not scorable | 0.9669421    | 0.7761641    |
| 5405 Bn-A03-p12511746 | A-genome specific (napus-rapa)    | 0.9856459    | 0.4961472    | not scorable | not scorable | 0.9917355    | 0.709359     |
| 5406 Bn-A03-p12512134 | A-genome specific (napus-rapa)    | 0.9760765    | 0.6887558    | not scorable | not scorable | 0.9752066    | 0.6475088    |
| 5407 Bn-A03-p12518314 | napus specific                    | 0.9880383    | 0.7215762    | not scorable | not scorable | not scorable | not scorable |
| 5408 Bn-A03-p12532686 | A-genome specific (napus-rapa)    | 0.9856459    | 0.2383776    | not scorable | not scorable | 0.9917355    | 0.7848483    |
| 5409 Bn-A03-p12541037 | A-genome specific (napus-rapa)    | 0.9712918    | 0.2832885    | not scorable | not scorable | 0.9752066    | 0.7017043    |

|      |                  |                                   |              |              |              |              |           |           |
|------|------------------|-----------------------------------|--------------|--------------|--------------|--------------|-----------|-----------|
| 5410 | Bn-A03-p12541207 | A-genome specific (napus-rapa)    | 0.9832536    | 0.5727046    | not scorable | not scorable | 0.9917355 | 0.7235581 |
| 5411 | Bn-A03-p12541337 | A-genome specific (napus-rapa)    | 0.9904306    | 0.493327     | not scorable | not scorable | 1         | 0.7702418 |
| 5412 | Bn-A03-p1254871  | A-genome specific (rapa only)     | not scorable | not scorable | not scorable | not scorable | 1         | 0.7720746 |
| 5413 | Bn-A03-p12622050 | A-genome specific (napus-rapa)    | 0.9856459    | 0.7873049    | not scorable | not scorable | 0.9586777 | 0.8310348 |
| 5414 | Bn-A03-p12623286 | A-genome specific (napus-rapa)    | 0.9736842    | 0.7667772    | not scorable | not scorable | 0.9669421 | 0.7985176 |
| 5415 | Bn-A03-p12628781 | A-genome specific (napus-rapa)    | 0.9808612    | 0.6317586    | not scorable | not scorable | 0.9917355 | 0.7436985 |
| 5416 | Bn-A03-p12631124 | genome unspecific (oleracea-rapa) | not scorable | not scorable | 0.9844961    | 0.7691123    | 0.9917355 | 0.7360191 |
| 5417 | Bn-A03-p12638944 | A-genome specific (napus-rapa)    | 0.9784689    | 0.6388492    | not scorable | not scorable | 0.9917355 | 0.8265692 |
| 5418 | Bn-A03-p12639200 | A-genome specific (napus-rapa)    | 0.9856459    | 0.7831169    | not scorable | not scorable | 1         | 0.6787928 |
| 5419 | Bn-A03-p12639319 | A-genome specific (napus-rapa)    | 0.9904306    | 0.7773882    | not scorable | not scorable | 1         | 0.8138083 |
| 5420 | Bn-A03-p12737336 | genome unspecific (all in)        | 0.9760765    | 0.6574421    | 0.744186     | 0.7042676    | 1         | 0.7723419 |
| 5421 | Bn-A03-p12783093 | A-genome specific (napus-rapa)    | 0.9976076    | 0.7700087    | not scorable | not scorable | 1         | 0.7941356 |
| 5422 | Bn-A03-p12784925 | A-genome specific (napus-rapa)    | 0.9976076    | 0.7800601    | not scorable | not scorable | 1         | 0.7423106 |
| 5423 | Bn-A03-p12820905 | A-genome specific (napus-rapa)    | 0.9760765    | 0.7878451    | not scorable | not scorable | 0.9669421 | 0.7505035 |
| 5424 | Bn-A03-p12826949 | A-genome specific (napus-rapa)    | 0.9760765    | 0.4618206    | not scorable | not scorable | 0.9752066 | 0.8013898 |
| 5425 | Bn-A03-p12859516 | A-genome specific (napus-rapa)    | 0.9760765    | 0.2996366    | not scorable | not scorable | 0.9834711 | 0.8416808 |
| 5426 | Bn-A03-p12863264 | A-genome specific (napus-rapa)    | 1            | 0.8406045    | not scorable | not scorable | 0.9752066 | 0.7046431 |
| 5427 | Bn-A03-p12863642 | A-genome specific (napus-rapa)    | 0.9976076    | 0.7384824    | not scorable | not scorable | 1         | 0.703868  |
| 5428 | Bn-A03-p12863684 | A-genome specific (napus-rapa)    | 0.9976076    | 0.6936817    | not scorable | not scorable | 0.9834711 | 0.6851025 |
| 5429 | Bn-A03-p12869911 | A-genome specific (napus-rapa)    | 0.9952153    | 0.796129     | not scorable | not scorable | 0.9917355 | 0.7869104 |
| 5430 | Bn-A03-p12903591 | A-genome specific (napus-rapa)    | 0.9904306    | 0.7986871    | not scorable | not scorable | 0.9834711 | 0.7465758 |
| 5431 | Bn-A03-p12932399 | A-genome specific (napus-rapa)    | 0.9928229    | 0.7815844    | not scorable | not scorable | 1         | 0.7678177 |
| 5432 | Bn-A03-p12932760 | A-genome specific (rapa only)     | not scorable | not scorable | not scorable | not scorable | 1         | 0.8147472 |
| 5433 | Bn-A03-p12933099 | A-genome specific (napus-rapa)    | 0.9976076    | 0.8017709    | not scorable | not scorable | 1         | 0.7613931 |
| 5434 | Bn-A03-p12935447 | A-genome specific (napus-rapa)    | 0.9880383    | 0.7791921    | not scorable | not scorable | 0.9917355 | 0.7463617 |
| 5435 | Bn-A03-p12941404 | A-genome specific (napus-rapa)    | 0.9832536    | 0.7646145    | not scorable | not scorable | 1         | 0.7931048 |
| 5436 | Bn-A03-p12945091 | A-genome specific (napus-rapa)    | 1            | 0.7832142    | not scorable | not scorable | 1         | 0.8687926 |
| 5437 | Bn-A03-p12973462 | A-genome specific (napus-rapa)    | 0.9976076    | 0.8429547    | not scorable | not scorable | 0.9669421 | 0.6962659 |
| 5438 | Bn-A03-p1297873  | A-genome specific (rapa only)     | not scorable | not scorable | not scorable | not scorable | 0.9834711 | 0.8588021 |
| 5439 | Bn-A03-p12981348 | A-genome specific (napus-rapa)    | 0.9712918    | 0.5782443    | not scorable | not scorable | 0.9917355 | 0.9387571 |
| 5440 | Bn-A03-p12990610 | A-genome specific (napus-rapa)    | 0.9976076    | 0.7942174    | not scorable | not scorable | 1         | 0.7194485 |
| 5441 | Bn-A03-p12993600 | A-genome specific (napus-rapa)    | 0.9808612    | 0.7555156    | not scorable | not scorable | 0.9917355 | 0.751028  |
| 5442 | Bn-A03-p12994885 | A-genome specific (napus-rapa)    | 0.9641148    | 0.5852197    | not scorable | not scorable | 1         | 0.6510744 |

|      |                  |                                   |              |              |              |              |           |           |
|------|------------------|-----------------------------------|--------------|--------------|--------------|--------------|-----------|-----------|
| 5443 | Bn-A03-p13016324 | A-genome specific (napus-rapa)    | 0.6339713    | 0.8027261    | not scorable | not scorable | 0.8595041 | 0.7470858 |
| 5444 | Bn-A03-p13017512 | A-genome specific (napus-rapa)    | 0.9617225    | 0.4284885    | not scorable | not scorable | 0.9917355 | 0.6560733 |
| 5445 | Bn-A03-p13017704 | A-genome specific (napus-rapa)    | 0.9712918    | 0.7600284    | not scorable | not scorable | 0.9917355 | 0.7455516 |
| 5446 | Bn-A03-p13018172 | genome unspecific (oleracea-rapa) | not scorable | not scorable | 0.9689922    | 0.2966666    | 0.9834711 | 0.6869229 |
| 5447 | Bn-A03-p13032037 | A-genome specific (napus-rapa)    | 0.9832536    | 0.7658719    | not scorable | not scorable | 0.9917355 | 0.7422404 |
| 5448 | Bn-A03-p13032092 | A-genome specific (napus-rapa)    | 0.9904306    | 0.6968184    | not scorable | not scorable | 0.9917355 | 0.7993341 |
| 5449 | Bn-A03-p13037975 | A-genome specific (napus-rapa)    | 0.9760765    | 0.7079893    | not scorable | not scorable | 1         | 0.8891756 |
| 5450 | Bn-A03-p13039000 | A-genome specific (napus-rapa)    | 0.9880383    | 0.7549368    | not scorable | not scorable | 0.9917355 | 0.7707877 |
| 5451 | Bn-A03-p13039285 | A-genome specific (napus-rapa)    | 0.9952153    | 0.8191442    | not scorable | not scorable | 0.9917355 | 0.8052118 |
| 5452 | Bn-A03-p13043164 | A-genome specific (napus-rapa)    | 0.9401914    | 0.5375264    | not scorable | not scorable | 0.9834711 | 0.626734  |
| 5453 | Bn-A03-p13044950 | A-genome specific (napus-rapa)    | 0.777512     | 0.8106512    | not scorable | not scorable | 1         | 0.9269007 |
| 5454 | Bn-A03-p13050570 | A-genome specific (rapa only)     | not scorable | not scorable | not scorable | not scorable | 0.9834711 | 0.7451766 |
| 5455 | Bn-A03-p13058729 | A-genome specific (napus-rapa)    | 0.9617225    | 0.4325492    | not scorable | not scorable | 0.8595041 | 0.7930796 |
| 5456 | Bn-A03-p13061709 | A-genome specific (napus-rapa)    | 0.9784689    | 0.5482695    | not scorable | not scorable | 0.9834711 | 0.6541692 |
| 5457 | Bn-A03-p1308820  | A-genome specific (napus-rapa)    | 0.9138756    | 0.737713     | not scorable | not scorable | 0.9917355 | 0.7170929 |
| 5458 | Bn-A03-p13094043 | A-genome specific (napus-rapa)    | 0.9138756    | 0.7610633    | not scorable | not scorable | 0.8842975 | 0.8087493 |
| 5459 | Bn-A03-p13099476 | A-genome specific (napus-rapa)    | 0.9952153    | 0.8050456    | not scorable | not scorable | 1         | 0.8257377 |
| 5460 | Bn-A03-p13104283 | A-genome specific (napus-rapa)    | 0.9928229    | 0.7234445    | not scorable | not scorable | 1         | 0.6676938 |
| 5461 | Bn-A03-p13107268 | A-genome specific (napus-rapa)    | 0.9976076    | 0.6178387    | not scorable | not scorable | 0.9834711 | 0.8067495 |
| 5462 | Bn-A03-p13109267 | A-genome specific (napus-rapa)    | 0.9976076    | 0.7923573    | not scorable | not scorable | 0.9834711 | 0.7238204 |
| 5463 | Bn-A03-p13131453 | A-genome specific (napus-rapa)    | 0.9665072    | 0.7766892    | not scorable | not scorable | 1         | 0.7681646 |
| 5464 | Bn-A03-p13145923 | A-genome specific (napus-rapa)    | 0.9665072    | 0.320095     | not scorable | not scorable | 0.9421487 | 0.543936  |
| 5465 | Bn-A03-p13160528 | A-genome specific (napus-rapa)    | 0.9880383    | 0.5374056    | not scorable | not scorable | 0.9917355 | 0.7803829 |
| 5466 | Bn-A03-p13169138 | A-genome specific (napus-rapa)    | 0.9712918    | 0.7496251    | not scorable | not scorable | 1         | 0.798901  |
| 5467 | Bn-A03-p13169346 | A-genome specific (napus-rapa)    | 0.9904306    | 0.7261339    | not scorable | not scorable | 0.9834711 | 0.7545496 |
| 5468 | Bn-A03-p13177232 | A-genome specific (napus-rapa)    | 0.8205742    | 0.797794     | not scorable | not scorable | 0.9669421 | 0.6495573 |
| 5469 | Bn-A03-p13189171 | A-genome specific (napus-rapa)    | 0.9641148    | 0.3557096    | not scorable | not scorable | 1         | 0.7248943 |
| 5470 | Bn-A03-p13216785 | genome unspecific (oleracea-rapa) | not scorable | not scorable |              | 1 0.5129972  | 1         | 0.7146787 |
| 5471 | Bn-A03-p13218451 | A-genome specific (napus-rapa)    | 0.8397129    | 0.8176482    | not scorable | not scorable | 0.9586777 | 0.7561886 |
| 5472 | Bn-A03-p13219815 | A-genome specific (napus-rapa)    | 0.8492823    | 0.7979313    | not scorable | not scorable | 0.9669421 | 0.7862451 |
| 5473 | Bn-A03-p13221584 | A-genome specific (napus-rapa)    | 0.8373206    | 0.7272601    | not scorable | not scorable | 0.9834711 | 0.6307871 |
| 5474 | Bn-A03-p13223204 | A-genome specific (napus-rapa)    | 0.8325359    | 0.8085008    | not scorable | not scorable | 0.9669421 | 0.7589105 |
| 5475 | Bn-A03-p13236840 | A-genome specific (napus-rapa)    | 0.9880383    | 0.7197053    | not scorable | not scorable | 0.9917355 | 0.6955878 |

|      |                  |                                   |              |              |              |              |           |           |           |
|------|------------------|-----------------------------------|--------------|--------------|--------------|--------------|-----------|-----------|-----------|
| 5476 | Bn-A03-p13253155 | A-genome specific (napus-rapa)    | 0.9736842    | 0.4488608    | not scorable | not scorable |           | 1         | 0.7229308 |
| 5477 | Bn-A03-p13254564 | A-genome specific (napus-rapa)    | 0.9712918    | 0.4297775    | not scorable | not scorable | 0.9752066 |           | 0.8038705 |
| 5478 | Bn-A03-p13266036 | A-genome specific (napus-rapa)    | 0.9688995    | 0.7279103    | not scorable | not scorable | 0.9834711 |           | 0.9090296 |
| 5479 | Bn-A03-p13286574 | A-genome specific (napus-rapa)    | 0.9976076    | 0.8166432    | not scorable | not scorable | 0.9917355 |           | 0.7436472 |
| 5480 | Bn-A03-p13287670 | A-genome specific (napus-rapa)    | 0.9856459    | 0.7370334    | not scorable | not scorable | 0.9834711 |           | 0.7315952 |
| 5481 | Bn-A03-p13288429 | A-genome specific (napus-rapa)    | 0.9880383    | 0.7271395    | not scorable | not scorable |           | 1         | 0.7617276 |
| 5482 | Bn-A03-p13291935 | A-genome specific (napus-rapa)    | 0.9473684    | 0.7384024    | not scorable | not scorable | 0.8595041 |           | 0.7880812 |
| 5483 | Bn-A03-p13298734 | A-genome specific (napus-rapa)    | 0.9856459    | 0.6595703    | not scorable | not scorable | 0.9917355 |           | 0.7043232 |
| 5484 | Bn-A03-p13302773 | A-genome specific (rapa only)     | not scorable | not scorable | not scorable | not scorable |           | 1         | 0.7432435 |
| 5485 | Bn-A03-p13302882 | genome unspecific (all in)        | 0.576555     | 0.8793352    |              | 0            | 0.7813661 | 0.9504132 | 0.8552643 |
| 5486 | Bn-A03-p13306819 | A-genome specific (napus-rapa)    | 0.9880383    | 0.3131319    | not scorable | not scorable | 0.9834711 |           | 0.7816145 |
| 5487 | Bn-A03-p13324647 | A-genome specific (napus-rapa)    | 0.7655503    | 0.8495582    | not scorable | not scorable |           | 1         | 0.8019731 |
| 5488 | Bn-A03-p13325522 | A-genome specific (napus-rapa)    | 0.7631579    | 0.8007662    | not scorable | not scorable |           | 1         | 0.8154832 |
| 5489 | Bn-A03-p13335275 | A-genome specific (napus-rapa)    | 0.9832536    | 0.5067183    | not scorable | not scorable | 0.9752066 |           | 0.7409006 |
| 5490 | Bn-A03-p13335946 | A-genome specific (napus-rapa)    | 0.9928229    | 0.4231012    | not scorable | not scorable | 0.9917355 |           | 0.6920217 |
| 5491 | Bn-A03-p13365712 | A-genome specific (napus-rapa)    | 0.9521531    | 0.4719522    | not scorable | not scorable | 0.9834711 |           | 0.6980245 |
| 5492 | Bn-A03-p13421039 | A-genome specific (napus-rapa)    | 0.9736842    | 0.7898866    | not scorable | not scorable | 0.9586777 |           | 0.8185682 |
| 5493 | Bn-A03-p13440035 | A-genome specific (napus-rapa)    | 0.9569378    | 0.5555617    | not scorable | not scorable | 0.9752066 |           | 0.7261897 |
| 5494 | Bn-A03-p13451851 | A-genome specific (napus-rapa)    | 0.9856459    | 0.7665362    | not scorable | not scorable | 0.9917355 |           | 0.720566  |
| 5495 | Bn-A03-p13465062 | A-genome specific (napus-rapa)    | 0.9856459    | 0.6989835    | not scorable | not scorable | 0.9504132 |           | 0.5669611 |
| 5496 | Bn-A03-p13469770 | A-genome specific (rapa only)     | not scorable | not scorable | not scorable | not scorable |           | 1         | 0.7871423 |
| 5497 | Bn-A03-p13492986 | genome unspecific (oleracea-rapa) | not scorable | not scorable | 0.9224806    | 0.2585334    | 0.9917355 |           | 0.8324326 |
| 5498 | Bn-A03-p13502336 | A-genome specific (napus-rapa)    | 0.9784689    | 0.5150532    | not scorable | not scorable |           | 1         | 0.7712471 |
| 5499 | Bn-A03-p13502830 | A-genome specific (napus-rapa)    | 0.9832536    | 0.3917311    | not scorable | not scorable |           | 1         | 0.7432263 |
| 5500 | Bn-A03-p135145   | genome unspecific (oleracea-rapa) | not scorable | not scorable | 0.9612403    | 0.2493363    | 0.9752066 |           | 0.633635  |
| 5501 | Bn-A03-p13514947 | A-genome specific (napus-rapa)    | 0.9688995    | 0.2851632    | not scorable | not scorable | 0.9917355 |           | 0.6936299 |
| 5502 | Bn-A03-p13523343 | A-genome specific (napus-rapa)    | 0.9928229    | 0.2722597    | not scorable | not scorable | 0.9834711 |           | 0.6532474 |
| 5503 | Bn-A03-p1352996  | A-genome specific (napus-rapa)    | 0.9258373    | 0.7539104    | not scorable | not scorable |           | 1         | 0.779401  |
| 5504 | Bn-A03-p1353309  | A-genome specific (napus-rapa)    | 0.9760765    | 0.6323574    | not scorable | not scorable |           | 1         | 0.7502307 |
| 5505 | Bn-A03-p13533904 | A-genome specific (napus-rapa)    | 0.9976076    | 0.8043466    | not scorable | not scorable | 0.9917355 |           | 0.7397541 |
| 5506 | Bn-A03-p1354206  | A-genome specific (napus-rapa)    | 0.8205742    | 0.7939495    | not scorable | not scorable | 0.9752066 |           | 0.8259369 |
| 5507 | Bn-A03-p1354375  | A-genome specific (napus-rapa)    | 0.9258373    | 0.7201173    | not scorable | not scorable |           | 1         | 0.7776101 |
| 5508 | Bn-A03-p13545223 | A-genome specific (napus-rapa)    | 0.9856459    | 0.7475673    | not scorable | not scorable |           | 1         | 0.7341583 |

|      |                  |                                   |              |              |              |              |           |           |
|------|------------------|-----------------------------------|--------------|--------------|--------------|--------------|-----------|-----------|
| 5509 | Bn-A03-p13546174 | A-genome specific (rapa only)     | not scorable | not scorable | not scorable | not scorable | 0.9256198 | 0.7897152 |
| 5510 | Bn-A03-p13567559 | A-genome specific (napus-rapa)    | 0.9521531    | 0.7850012    | not scorable | not scorable | 0.9834711 | 0.6556188 |
| 5511 | Bn-A03-p13572495 | A-genome specific (napus-rapa)    | 0.9904306    | 0.7550953    | not scorable | not scorable | 0.9834711 | 0.7901838 |
| 5512 | Bn-A03-p13585261 | A-genome specific (napus-rapa)    | 0.9904306    | 0.6324359    | not scorable | not scorable | 1         | 0.6591645 |
| 5513 | Bn-A03-p13605344 | A-genome specific (napus-rapa)    | 0.8205742    | 0.7957346    | not scorable | not scorable | 0.9669421 | 0.8044536 |
| 5514 | Bn-A03-p13610858 | A-genome specific (napus-rapa)    | 0.9856459    | 0.3683416    | not scorable | not scorable | 0.9917355 | 0.7316198 |
| 5515 | Bn-A03-p13616280 | A-genome specific (napus-rapa)    | 0.9712918    | 0.3851596    | not scorable | not scorable | 0.9834711 | 0.6910375 |
| 5516 | Bn-A03-p13624310 | A-genome specific (napus-rapa)    | 0.9880383    | 0.7689049    | not scorable | not scorable | 1         | 0.7942903 |
| 5517 | Bn-A03-p13630048 | A-genome specific (napus-rapa)    | 0.708134     | 0.8208213    | not scorable | not scorable | 1         | 0.6942151 |
| 5518 | Bn-A03-p13640859 | A-genome specific (napus-rapa)    | 0.9521531    | 0.3585845    | not scorable | not scorable | 0.9917355 | 0.7248549 |
| 5519 | Bn-A03-p13653603 | A-genome specific (napus-rapa)    | 0.6961722    | 0.6386769    | not scorable | not scorable | 0.9917355 | 0.7124016 |
| 5520 | Bn-A03-p13658460 | A-genome specific (napus-rapa)    | 0.9760765    | 0.3058629    | not scorable | not scorable | 0.9834711 | 0.7036489 |
| 5521 | Bn-A03-p13664500 | A-genome specific (napus-rapa)    | 0.9904306    | 0.7809391    | not scorable | not scorable | 1         | 0.8004379 |
| 5522 | Bn-A03-p13664657 | A-genome specific (napus-rapa)    | 0.9856459    | 0.7614344    | not scorable | not scorable | 1         | 0.8096587 |
| 5523 | Bn-A03-p13678735 | A-genome specific (napus-rapa)    | 0.9904306    | 0.2356496    | not scorable | not scorable | 0.9669421 | 0.7648913 |
| 5524 | Bn-A03-p13679854 | A-genome specific (napus-rapa)    | 0.9808612    | 0.3194575    | not scorable | not scorable | 0.9752066 | 0.7138126 |
| 5525 | Bn-A03-p1373885  | A-genome specific (rapa only)     | not scorable | not scorable | not scorable | not scorable | 0.9917355 | 0.8151305 |
| 5526 | Bn-A03-p13746713 | A-genome specific (napus-rapa)    | 0.9904306    | 0.7644034    | not scorable | not scorable | 0.9834711 | 0.7075557 |
| 5527 | Bn-A03-p13747074 | A-genome specific (napus-rapa)    | 0.9569378    | 0.6721485    | not scorable | not scorable | 0.9669421 | 0.6966495 |
| 5528 | Bn-A03-p13755726 | A-genome specific (napus-rapa)    | 0.9904306    | 0.8009173    | not scorable | not scorable | 0.9256198 | 0.6906074 |
| 5529 | Bn-A03-p13758392 | A-genome specific (napus-rapa)    | 0.9904306    | 0.8019578    | not scorable | not scorable | 0.9421487 | 0.6907854 |
| 5530 | Bn-A03-p13773583 | A-genome specific (napus-rapa)    | 0.9904306    | 0.7904152    | not scorable | not scorable | 0.8595041 | 0.7094761 |
| 5531 | Bn-A03-p13777203 | genome unspecific (all in)        | 0.9880383    | 0.4100632    | 0.9224806    | 0.5359281    | 0.9834711 | 0.7040216 |
| 5532 | Bn-A03-p13778786 | A-genome specific (napus-rapa)    | 0.9880383    | 0.4727136    | not scorable | not scorable | 0.9917355 | 0.7680721 |
| 5533 | Bn-A03-p13783263 | A-genome specific (napus-rapa)    | 0.9808612    | 0.4066428    | not scorable | not scorable | 0.9917355 | 0.7238167 |
| 5534 | Bn-A03-p13802162 | A-genome specific (napus-rapa)    | 0.9808612    | 0.7617787    | not scorable | not scorable | 0.9752066 | 0.6973376 |
| 5535 | Bn-A03-p13810458 | A-genome specific (napus-rapa)    | 1            | 0.7586714    | not scorable | not scorable | 0.8347107 | 0.890564  |
| 5536 | Bn-A03-p13814543 | A-genome specific (napus-rapa)    | 0.9832536    | 0.3215439    | not scorable | not scorable | 0.8264463 | 0.9209731 |
| 5537 | Bn-A03-p13815665 | A-genome specific (napus-rapa)    | 1            | 0.2961185    | not scorable | not scorable | 0.9917355 | 0.5903504 |
| 5538 | Bn-A03-p13853558 | A-genome specific (napus-rapa)    | 0.9880383    | 0.7477842    | not scorable | not scorable | 0.9669421 | 0.7439271 |
| 5539 | Bn-A03-p13859927 | genome unspecific (oleracea-rapa) | not scorable | not scorable | 0.9922481    | 0.7938771    | 0.9752066 | 0.8544804 |
| 5540 | Bn-A03-p13861679 | A-genome specific (napus-rapa)    | 0.5813397    | 0.6621116    | not scorable | not scorable | 0.9917355 | 0.767139  |
| 5541 | Bn-A03-p13861749 | A-genome specific (napus-rapa)    | 1            | 0.8086978    | not scorable | not scorable | 1         | 0.7721077 |



|      |                  |                                |           |           |              |              |           |           |
|------|------------------|--------------------------------|-----------|-----------|--------------|--------------|-----------|-----------|
| 5542 | Bn-A03-p13863828 | A-genome specific (napus-rapa) | 0.930622  | 0.2622168 | not scorable | not scorable | 0.9917355 | 0.7585171 |
| 5543 | Bn-A03-p13883754 | A-genome specific (napus-rapa) | 0.9808612 | 0.7763981 | not scorable | not scorable | 0.9752066 | 0.7595723 |
| 5544 | Bn-A03-p13906492 | A-genome specific (napus-rapa) | 0.9880383 | 0.4191443 | not scorable | not scorable | 0.9917355 | 0.7659603 |
| 5545 | Bn-A03-p13908787 | A-genome specific (napus-rapa) | 0.9928229 | 0.4923468 | not scorable | not scorable | 0.9917355 | 0.7575203 |
| 5546 | Bn-A03-p13912476 | A-genome specific (napus-rapa) | 0.9641148 | 0.7107902 | not scorable | not scorable | 1         | 0.74534   |
| 5547 | Bn-A03-p13922223 | A-genome specific (napus-rapa) | 0.9641148 | 0.623268  | not scorable | not scorable | 1         | 0.7375211 |
| 5548 | Bn-A03-p13922405 | A-genome specific (napus-rapa) | 0.9880383 | 0.7825214 | not scorable | not scorable | 0.9834711 | 0.7619595 |
| 5549 | Bn-A03-p13925731 | A-genome specific (napus-rapa) | 0.9976076 | 0.6870852 | not scorable | not scorable | 1         | 0.6231178 |
| 5550 | Bn-A03-p13943992 | A-genome specific (napus-rapa) | 0.9880383 | 0.7358934 | not scorable | not scorable | 1         | 0.7277293 |
| 5551 | Bn-A03-p13968921 | A-genome specific (napus-rapa) | 0.9880383 | 0.3160003 | not scorable | not scorable | 0.9917355 | 0.7945459 |
| 5552 | Bn-A03-p13970114 | A-genome specific (napus-rapa) | 0.9880383 | 0.8090085 | not scorable | not scorable | 1         | 0.7802013 |
| 5553 | Bn-A03-p13970168 | A-genome specific (napus-rapa) | 0.9952153 | 0.8578107 | not scorable | not scorable | 1         | 0.9037206 |
| 5554 | Bn-A03-p13974725 | A-genome specific (napus-rapa) | 0.9736842 | 0.7978377 | not scorable | not scorable | 0.9917355 | 0.8080547 |
| 5555 | Bn-A03-p13975945 | A-genome specific (napus-rapa) | 0.9952153 | 0.6803098 | not scorable | not scorable | 1         | 0.7234979 |
| 5556 | Bn-A03-p13977740 | A-genome specific (napus-rapa) | 0.9760765 | 0.6493017 | not scorable | not scorable | 0.8842975 | 0.7062998 |
| 5557 | Bn-A03-p13987679 | A-genome specific (napus-rapa) | 0.9880383 | 0.6738646 | not scorable | not scorable | 0.9917355 | 0.8088477 |
| 5558 | Bn-A03-p13996014 | A-genome specific (napus-rapa) | 0.9976076 | 0.6778447 | not scorable | not scorable | 0.9669421 | 0.6658475 |
| 5559 | Bn-A03-p14003701 | A-genome specific (napus-rapa) | 1         | 0.8339772 | not scorable | not scorable | 1         | 0.8444647 |
| 5560 | Bn-A03-p14009871 | A-genome specific (napus-rapa) | 0.9880383 | 0.6976369 | not scorable | not scorable | 0.9917355 | 0.7022238 |
| 5561 | Bn-A03-p14015779 | A-genome specific (napus-rapa) | 0.9832536 | 0.4871463 | not scorable | not scorable | 0.9834711 | 0.7179611 |
| 5562 | Bn-A03-p14023392 | A-genome specific (napus-rapa) | 0.9928229 | 0.7555622 | not scorable | not scorable | 0.9917355 | 0.7395499 |
| 5563 | Bn-A03-p14024778 | A-genome specific (napus-rapa) | 0.569378  | 0.6711851 | not scorable | not scorable | 0.9752066 | 0.7475929 |
| 5564 | Bn-A03-p14026999 | A-genome specific (napus-rapa) | 0.9114832 | 0.7844557 | not scorable | not scorable | 0.9834711 | 0.8433641 |
| 5565 | Bn-A03-p14031468 | A-genome specific (napus-rapa) | 0.9066986 | 0.7507783 | not scorable | not scorable | 0.9834711 | 0.826178  |
| 5566 | Bn-A03-p14034228 | A-genome specific (napus-rapa) | 0.9736842 | 0.5849665 | not scorable | not scorable | 0.9917355 | 0.7298668 |
| 5567 | Bn-A03-p14037892 | A-genome specific (napus-rapa) | 0.9856459 | 0.6491271 | not scorable | not scorable | 0.9669421 | 0.7144052 |
| 5568 | Bn-A03-p14041361 | A-genome specific (napus-rapa) | 0.9545454 | 0.8000417 | not scorable | not scorable | 1         | 0.8258333 |
| 5569 | Bn-A03-p14041931 | A-genome specific (napus-rapa) | 0.9545454 | 0.410037  | not scorable | not scorable | 0.9917355 | 0.6684541 |
| 5570 | Bn-A03-p14092692 | A-genome specific (napus-rapa) | 0.9688995 | 0.4871914 | not scorable | not scorable | 0.9917355 | 0.8051483 |
| 5571 | Bn-A03-p14095948 | A-genome specific (napus-rapa) | 0.9880383 | 0.724889  | not scorable | not scorable | 0.9834711 | 0.7857534 |
| 5572 | Bn-A03-p14112910 | A-genome specific (napus-rapa) | 0.9497608 | 0.7906131 | not scorable | not scorable | 0.9917355 | 0.6849222 |
| 5573 | Bn-A03-p14113489 | A-genome specific (napus-rapa) | 0.9688995 | 0.8285137 | not scorable | not scorable | 0.9917355 | 0.7255349 |
| 5574 | Bn-A03-p14121492 | A-genome specific (napus-rapa) | 0.9928229 | 0.5724918 | not scorable | not scorable | 1         | 0.7507635 |

|                       |                                |              |              |              |              |              |              |
|-----------------------|--------------------------------|--------------|--------------|--------------|--------------|--------------|--------------|
| 5575 Bn-A03-p14127649 | A-genome specific (napus-rapa) | 0.9952153    | 0.622758     | not scorable | not scorable | 0.9752066    | 0.5975209    |
| 5576 Bn-A03-p14128333 | A-genome specific (napus-rapa) | 0.9880383    | 0.3287923    | not scorable | not scorable | 1            | 0.7134259    |
| 5577 Bn-A03-p14153283 | A-genome specific (napus-rapa) | 0.9976076    | 0.8687427    | not scorable | not scorable | 1            | 0.9517783    |
| 5578 Bn-A03-p14153306 | A-genome specific (napus-rapa) | 0.9976076    | 0.8035696    | not scorable | not scorable | 0.9834711    | 0.6600227    |
| 5579 Bn-A03-p14153376 | A-genome specific (napus-rapa) | 0.8373206    | 0.7136337    | not scorable | not scorable | 0.9752066    | 0.7867898    |
| 5580 Bn-A03-p14154555 | A-genome specific (napus-rapa) | 0.9952153    | 0.7690284    | not scorable | not scorable | 0.9752066    | 0.7331636    |
| 5581 Bn-A03-p14154912 | A-genome specific (napus-rapa) | 0.9976076    | 0.8985654    | not scorable | not scorable | 0.9834711    | 0.7598843    |
| 5582 Bn-A03-p14155274 | A-genome specific (napus-rapa) | 1            | 0.8123643    | not scorable | not scorable | 0.9917355    | 0.7361144    |
| 5583 Bn-A03-p141681   | A-genome specific (napus-rapa) | 0.9880383    | 0.5229543    | not scorable | not scorable | 0.9669421    | 0.6846697    |
| 5584 Bn-A03-p14175904 | A-genome specific (napus-rapa) | 0.9760765    | 0.7793086    | not scorable | not scorable | 1            | 0.8220586    |
| 5585 Bn-A03-p14176469 | A-genome specific (napus-rapa) | 0.9952153    | 0.749972     | not scorable | not scorable | 0.9669421    | 0.7744361    |
| 5586 Bn-A03-p14196859 | A-genome specific (napus-rapa) | 0.9880383    | 0.7472756    | not scorable | not scorable | 0.9834711    | 0.6724088    |
| 5587 Bn-A03-p14197151 | A-genome specific (napus-rapa) | 0.9928229    | 0.7728011    | not scorable | not scorable | 1            | 0.738019     |
| 5588 Bn-A03-p14201146 | A-genome specific (napus-rapa) | 0.9114832    | 0.8100545    | not scorable | not scorable | 1            | 0.895025     |
| 5589 Bn-A03-p14209971 | A-genome specific (napus-rapa) | 0.9665072    | 0.7987092    | not scorable | not scorable | 0.9834711    | 0.8942698    |
| 5590 Bn-A03-p14212196 | A-genome specific (rapa only)  | not scorable | not scorable | not scorable | not scorable | 1            | 0.8220702    |
| 5591 Bn-A03-p14251137 | A-genome specific (napus-rapa) | 0.9952153    | 0.7820045    | not scorable | not scorable | 1            | 0.7419274    |
| 5592 Bn-A03-p14261914 | A-genome specific (napus-rapa) | 0.9784689    | 0.7012179    | not scorable | not scorable | 1            | 0.6996191    |
| 5593 Bn-A03-p14262103 | A-genome specific (napus-rapa) | 0.9856459    | 0.3898825    | not scorable | not scorable | 1            | 0.707387     |
| 5594 Bn-A03-p14273821 | A-genome specific (napus-rapa) | 0.9665072    | 0.69795      | not scorable | not scorable | 1            | 0.7108782    |
| 5595 Bn-A03-p14276328 | A-genome specific (napus-rapa) | 0.9784689    | 0.4558971    | not scorable | not scorable | 1            | 0.7252982    |
| 5596 Bn-A03-p14282460 | A-genome specific (napus-rapa) | 0.9880383    | 0.7106097    | not scorable | not scorable | 0.9834711    | 0.6710642    |
| 5597 Bn-A03-p14286873 | A-genome specific (napus-rapa) | 0.9569378    | 0.310583     | not scorable | not scorable | 0.9834711    | 0.7155547    |
| 5598 Bn-A03-p14290741 | A-genome specific (napus-rapa) | 0.9760765    | 0.7024059    | not scorable | not scorable | 0.8842975    | 0.722693     |
| 5599 Bn-A03-p14291952 | genome unspecific (all in)     | 0.9688995    | 0.3534776    | 0.9767442    | 0.7120925    | 0.9834711    | 0.7110288    |
| 5600 Bn-A03-p14295089 | A-genome specific (napus-rapa) | 0.9952153    | 0.3625909    | not scorable | not scorable | 1            | 0.8107109    |
| 5601 Bn-A03-p14295396 | A-genome specific (napus-rapa) | 0.9856459    | 0.6979052    | not scorable | not scorable | 0.9917355    | 0.7312261    |
| 5602 Bn-A03-p14306440 | A-genome specific (napus-rapa) | 0.9712918    | 0.5816492    | not scorable | not scorable | 0.9917355    | 0.6859793    |
| 5603 Bn-A03-p14309803 | A-genome specific (napus-rapa) | 0.9880383    | 0.7647578    | not scorable | not scorable | 0.9752066    | 0.7296809    |
| 5604 Bn-A03-p14310386 | A-genome specific (napus-rapa) | 0.9952153    | 0.7946287    | not scorable | not scorable | 0.9917355    | 0.7160908    |
| 5605 Bn-A03-p14310805 | A-genome specific (napus-rapa) | 0.8779904    | 0.8153975    | not scorable | not scorable | 0.9834711    | 0.6939947    |
| 5606 Bn-A03-p14330609 | A-genome specific (napus-rapa) | 0.9928229    | 0.3079938    | not scorable | not scorable | 0.9834711    | 0.6302835    |
| 5607 Bn-A03-p14353080 | napus specific                 | 0.8851675    | 0.6714671    | not scorable | not scorable | not scorable | not scorable |

|      |                  |                                |              |              |              |              |              |              |
|------|------------------|--------------------------------|--------------|--------------|--------------|--------------|--------------|--------------|
| 5608 | Bn-A03-p14355646 | A-genome specific (napus-rapa) | 0.9904306    | 0.7248414    | not scorable | not scorable | 0.9752066    | 0.6567682    |
| 5609 | Bn-A03-p1435886  | A-genome specific (napus-rapa) | 0.9162679    | 0.6739193    | not scorable | not scorable | 1            | 0.676922     |
| 5610 | Bn-A03-p14363525 | all not scorable               | not scorable | not scorable | not scorable | not scorable | not scorable | not scorable |
| 5611 | Bn-A03-p14369287 | A-genome specific (napus-rapa) | 0.9928229    | 0.717856     | not scorable | not scorable | 0.9752066    | 0.8358058    |
| 5612 | Bn-A03-p14385006 | A-genome specific (napus-rapa) | 0.9976076    | 0.7217564    | not scorable | not scorable | 1            | 0.6676899    |
| 5613 | Bn-A03-p14387177 | A-genome specific (napus-rapa) | 0.9784689    | 0.4337255    | not scorable | not scorable | 1            | 0.8219444    |
| 5614 | Bn-A03-p14398744 | A-genome specific (napus-rapa) | 0.9832536    | 0.3954021    | not scorable | not scorable | 1            | 0.7322186    |
| 5615 | Bn-A03-p14399972 | A-genome specific (napus-rapa) | 0.9952153    | 0.6774447    | not scorable | not scorable | 0.9917355    | 0.6786544    |
| 5616 | Bn-A03-p14400020 | A-genome specific (napus-rapa) | 0.9832536    | 0.8121197    | not scorable | not scorable | 0.9834711    | 0.725991     |
| 5617 | Bn-A03-p14402509 | A-genome specific (napus-rapa) | 0.9832536    | 0.3938435    | not scorable | not scorable | 1            | 0.6781039    |
| 5618 | Bn-A03-p14413451 | genome unspecific (all in)     | 0.8684211    | 0.582573     | 0.9844961    | 0.280252     | 1            | 0.7966102    |
| 5619 | Bn-A03-p14418556 | A-genome specific (napus-rapa) | 0.9569378    | 0.3492815    | not scorable | not scorable | 1            | 0.7088731    |
| 5620 | Bn-A03-p14418650 | A-genome specific (napus-rapa) | 0.9952153    | 0.4613407    | not scorable | not scorable | 1            | 0.8180235    |
| 5621 | Bn-A03-p14423477 | A-genome specific (napus-rapa) | 0.9784689    | 0.7276827    | not scorable | not scorable | 0.9917355    | 0.8317313    |
| 5622 | Bn-A03-p14434665 | A-genome specific (napus-rapa) | 0.9952153    | 0.8050964    | not scorable | not scorable | 0.9834711    | 0.8200701    |
| 5623 | Bn-A03-p14447238 | A-genome specific (napus-rapa) | 0.9880383    | 0.7488167    | not scorable | not scorable | 1            | 0.8136883    |
| 5624 | Bn-A03-p14458139 | A-genome specific (napus-rapa) | 0.9856459    | 0.622539     | not scorable | not scorable | 1            | 0.8436139    |
| 5625 | Bn-A03-p14461008 | A-genome specific (napus-rapa) | 0.9952153    | 0.574797     | not scorable | not scorable | 0.9834711    | 0.7148626    |
| 5626 | Bn-A03-p14462148 | A-genome specific (napus-rapa) | 0.9952153    | 0.8337399    | not scorable | not scorable | 1            | 0.8752148    |
| 5627 | Bn-A03-p14462570 | A-genome specific (napus-rapa) | 1            | 0.6659186    | not scorable | not scorable | 1            | 0.6420932    |
| 5628 | Bn-A03-p14472406 | A-genome specific (napus-rapa) | 1            | 0.7481881    | not scorable | not scorable | 0.8760331    | 0.7151247    |
| 5629 | Bn-A03-p14473184 | napus specific                 | 1            | 0.5623639    | not scorable | not scorable | not scorable | not scorable |
| 5630 | Bn-A03-p14473296 | A-genome specific (napus-rapa) | 0.9760765    | 0.6871446    | not scorable | not scorable | 0.9917355    | 0.6352119    |
| 5631 | Bn-A03-p14474478 | A-genome specific (napus-rapa) | 0.9617225    | 0.7667105    | not scorable | not scorable | 1            | 0.8335571    |
| 5632 | Bn-A03-p14511431 | A-genome specific (napus-rapa) | 0.9904306    | 0.774935     | not scorable | not scorable | 1            | 0.72925      |
| 5633 | Bn-A03-p14552086 | A-genome specific (napus-rapa) | 0.9928229    | 0.5263312    | not scorable | not scorable | 1            | 0.7709211    |
| 5634 | Bn-A03-p14557663 | A-genome specific (napus-rapa) | 0.9808612    | 0.5876682    | not scorable | not scorable | 0.9917355    | 0.7431487    |
| 5635 | Bn-A03-p14577690 | A-genome specific (napus-rapa) | 0.9688995    | 0.3514619    | not scorable | not scorable | 0.9834711    | 0.6644379    |
| 5636 | Bn-A03-p14583041 | A-genome specific (napus-rapa) | 0.9880383    | 0.8107138    | not scorable | not scorable | 1            | 0.8385125    |
| 5637 | Bn-A03-p14585799 | A-genome specific (napus-rapa) | 0.9928229    | 0.7772273    | not scorable | not scorable | 0.9917355    | 0.796831     |
| 5638 | Bn-A03-p14586392 | A-genome specific (napus-rapa) | 0.9832536    | 0.4746354    | not scorable | not scorable | 0.9917355    | 0.8356195    |
| 5639 | Bn-A03-p14598476 | A-genome specific (napus-rapa) | 0.9617225    | 0.2552498    | not scorable | not scorable | 1            | 0.7032276    |
| 5640 | Bn-A03-p14611641 | A-genome specific (napus-rapa) | 0.9904306    | 0.7164478    | not scorable | not scorable | 1            | 0.7243329    |

|                       |                                   |              |              |              |              |              |              |
|-----------------------|-----------------------------------|--------------|--------------|--------------|--------------|--------------|--------------|
| 5641 Bn-A03-p1461633  | A-genome specific (napus-rapa)    | 0.9354067    | 0.7939495    | not scorable | not scorable | 1            | 0.7344691    |
| 5642 Bn-A03-p1466010  | A-genome specific (rapa only)     | not scorable | not scorable | not scorable | not scorable | 0.9834711    | 0.5258038    |
| 5643 Bn-A03-p14684924 | A-genome specific (rapa only)     | not scorable | not scorable | not scorable | not scorable | 0.9669421    | 0.7001394    |
| 5644 Bn-A03-p14685500 | A-genome specific (napus-rapa)    | 0.8779904    | 0.7309419    | not scorable | not scorable | 0.7768595    | 0.7855022    |
| 5645 Bn-A03-p14692579 | A-genome specific (napus-rapa)    | 0.8923445    | 0.9450443    | not scorable | not scorable | 0.9834711    | 0.9309483    |
| 5646 Bn-A03-p14710981 | A-genome specific (napus-rapa)    | 0.9952153    | 0.7886893    | not scorable | not scorable | 1            | 0.8135551    |
| 5647 Bn-A03-p14735831 | A-genome specific (napus-rapa)    | 0.9904306    | 0.7048963    | not scorable | not scorable | 0.9917355    | 0.6952731    |
| 5648 Bn-A03-p14736161 | A-genome specific (napus-rapa)    | 0.9784689    | 0.424578     | not scorable | not scorable | 0.9752066    | 0.8142088    |
| 5649 Bn-A03-p14742926 | A-genome specific (napus-rapa)    | 0.7559808    | 0.7870395    | not scorable | not scorable | 0.9752066    | 0.7637817    |
| 5650 Bn-A03-p14747263 | A-genome specific (napus-rapa)    | 0.9904306    | 0.7483796    | not scorable | not scorable | 1            | 0.8131497    |
| 5651 Bn-A03-p1475495  | A-genome specific (rapa only)     | not scorable | not scorable | not scorable | not scorable | 0.9834711    | 0.7726238    |
| 5652 Bn-A03-p14758285 | genome unspecific (all in)        | 0.9784689    | 0.2935005    |              | 1 0.3217177  | 0.9752066    | 0.6095991    |
| 5653 Bn-A03-p14759764 | A-genome specific (napus-rapa)    | 0.9928229    | 0.7803418    | not scorable | not scorable | 1            | 0.6893014    |
| 5654 Bn-A03-p14760518 | A-genome specific (rapa only)     | not scorable | not scorable | not scorable | not scorable | 0.8347107    | 0.9272014    |
| 5655 Bn-A03-p14784764 | A-genome specific (napus-rapa)    | 0.9856459    | 0.3099771    | not scorable | not scorable | 0.9669421    | 0.8127       |
| 5656 Bn-A03-p14792548 | A-genome specific (rapa only)     | not scorable | not scorable | not scorable | not scorable | 1            | 0.7491972    |
| 5657 Bn-A03-p14803521 | A-genome specific (rapa only)     | not scorable | not scorable | not scorable | not scorable | 0.8016529    | 0.8910999    |
| 5658 Bn-A03-p14811204 | A-genome specific (napus-rapa)    | 0.9401914    | 0.2399881    | not scorable | not scorable | 1            | 0.7603807    |
| 5659 Bn-A03-p14811653 | A-genome specific (napus-rapa)    | 0.9593301    | 0.5079381    | not scorable | not scorable | 1            | 0.7259326    |
| 5660 Bn-A03-p14816541 | genome unspecific (oleracea-rapa) | not scorable | not scorable |              | 1 0.837801   | 0.9917355    | 0.7517515    |
| 5661 Bn-A03-p14839497 | A-genome specific (napus-rapa)    | 0.9808612    | 0.4461769    | not scorable | not scorable | 0.9917355    | 0.6580603    |
| 5662 Bn-A03-p14839583 | A-genome specific (napus-rapa)    | 0.9928229    | 0.8175452    | not scorable | not scorable | 0.9917355    | 0.718304     |
| 5663 Bn-A03-p14848117 | genome unspecific (all in)        | 0.9784689    | 0.3038665    | 0.9922481    | 0.7093671    | 0.9834711    | 0.7567326    |
| 5664 Bn-A03-p14852785 | A-genome specific (napus-rapa)    | 0.9904306    | 0.6757932    | not scorable | not scorable | 0.9917355    | 0.6839479    |
| 5665 Bn-A03-p14870270 | A-genome specific (napus-rapa)    | 0.9760765    | 0.649468     | not scorable | not scorable | 1            | 0.662836     |
| 5666 Bn-A03-p14870763 | A-genome specific (rapa only)     | not scorable | not scorable | not scorable | not scorable | 0.9834711    | 0.8213806    |
| 5667 Bn-A03-p14871005 | napus specific                    | 0.8205742    | 0.8221628    | not scorable | not scorable | not scorable | not scorable |
| 5668 Bn-A03-p1488306  | A-genome specific (napus-rapa)    | 0.9210526    | 0.4899762    | not scorable | not scorable | 0.9917355    | 0.8117021    |
| 5669 Bn-A03-p14885241 | A-genome specific (napus-rapa)    | 0.9952153    | 0.7662086    | not scorable | not scorable | 0.9917355    | 0.7178061    |
| 5670 Bn-A03-p14888403 | A-genome specific (napus-rapa)    | 0.9880383    | 0.2803631    | not scorable | not scorable | 0.9834711    | 0.7696       |
| 5671 Bn-A03-p14903814 | A-genome specific (napus-rapa)    | 0.9952153    | 0.3717571    | not scorable | not scorable | 0.9917355    | 0.7831675    |
| 5672 Bn-A03-p14927037 | A-genome specific (napus-rapa)    | 0.9880383    | 0.4381097    | not scorable | not scorable | 1            | 0.7634497    |
| 5673 Bn-A03-p14949812 | A-genome specific (napus-rapa)    | 1            | 0.7996386    | not scorable | not scorable | 1            | 0.8187039    |

|                       |                                |              |              |              |              |              |              |
|-----------------------|--------------------------------|--------------|--------------|--------------|--------------|--------------|--------------|
| 5674 Bn-A03-p14962288 | A-genome specific (napus-rapa) | 0.9473684    | 0.7845681    | not scorable | not scorable | 0.8016529    | 0.6963878    |
| 5675 Bn-A03-p14968153 | A-genome specific (napus-rapa) | 0.9712918    | 0.5191349    | not scorable | not scorable | 0.9752066    | 0.6832536    |
| 5676 Bn-A03-p15002477 | A-genome specific (napus-rapa) | 0.9712918    | 0.6804684    | not scorable | not scorable | 0.9917355    | 0.7264439    |
| 5677 Bn-A03-p15004059 | A-genome specific (napus-rapa) | 0.9760765    | 0.7517055    | not scorable | not scorable | 0.9917355    | 0.7765962    |
| 5678 Bn-A03-p15015706 | A-genome specific (napus-rapa) | 0.9976076    | 0.8209934    | not scorable | not scorable | 0.9752066    | 0.7204394    |
| 5679 Bn-A03-p1503462  | genome unspecific (all in)     | 0.9928229    | 0.4794303    | 1            | 0.7639066    | 0.9669421    | 0.7233297    |
| 5680 Bn-A03-p15038774 | A-genome specific (napus-rapa) | 0.9712918    | 0.7477467    | not scorable | not scorable | 0.9917355    | 0.7957059    |
| 5681 Bn-A03-p15044158 | A-genome specific (napus-rapa) | 0.9880383    | 0.4475853    | not scorable | not scorable | 0.9917355    | 0.5921194    |
| 5682 Bn-A03-p1506511  | A-genome specific (napus-rapa) | 0.854067     | 0.9129604    | not scorable | not scorable | 0.9834711    | 0.9275912    |
| 5683 Bn-A03-p15070818 | A-genome specific (napus-rapa) | 0.2703349    | 0.8790218    | not scorable | not scorable | 0.8181818    | 0.8604698    |
| 5684 Bn-A03-p15077006 | A-genome specific (napus-rapa) | 0.9904306    | 0.7561331    | not scorable | not scorable | 1            | 0.7214014    |
| 5685 Bn-A03-p1507769  | A-genome specific (napus-rapa) | 0.9258373    | 0.7666782    | not scorable | not scorable | 0.9752066    | 0.745841     |
| 5686 Bn-A03-p15102212 | A-genome specific (napus-rapa) | 0.9665072    | 0.3867507    | not scorable | not scorable | 1            | 0.7221172    |
| 5687 Bn-A03-p15103575 | A-genome specific (napus-rapa) | 0.9880383    | 0.2589812    | not scorable | not scorable | 0.9752066    | 0.7408481    |
| 5688 Bn-A03-p15107284 | all not scorable               | not scorable | not scorable | not scorable | not scorable | not scorable | not scorable |
| 5689 Bn-A03-p15120410 | A-genome specific (napus-rapa) | 0.9641148    | 0.8001947    | not scorable | not scorable | 0.8595041    | 0.6801624    |
| 5690 Bn-A03-p15139190 | A-genome specific (napus-rapa) | 0.777512     | 0.7662652    | not scorable | not scorable | 0.9586777    | 0.7215816    |
| 5691 Bn-A03-p15139484 | A-genome specific (napus-rapa) | 1            | 0.5433649    | not scorable | not scorable | 0.9917355    | 0.8404831    |
| 5692 Bn-A03-p15141821 | A-genome specific (napus-rapa) | 0.9712918    | 0.7536452    | not scorable | not scorable | 0.8429752    | 0.6504474    |
| 5693 Bn-A03-p1514927  | A-genome specific (napus-rapa) | 0.9282297    | 0.5494355    | not scorable | not scorable | 0.9917355    | 0.8025808    |
| 5694 Bn-A03-p15149454 | A-genome specific (napus-rapa) | 0.9736842    | 0.5544051    | not scorable | not scorable | 1            | 0.8154362    |
| 5695 Bn-A03-p15156393 | A-genome specific (napus-rapa) | 0.8995215    | 0.7620121    | not scorable | not scorable | 0.9917355    | 0.6760501    |
| 5696 Bn-A03-p15174986 | A-genome specific (napus-rapa) | 0.777512     | 0.7827256    | not scorable | not scorable | 1            | 0.8398426    |
| 5697 Bn-A03-p15184379 | A-genome specific (napus-rapa) | 0.9760765    | 0.5470327    | not scorable | not scorable | 0.9834711    | 0.7353612    |
| 5698 Bn-A03-p15200901 | A-genome specific (napus-rapa) | 0.9832536    | 0.6751266    | not scorable | not scorable | 1            | 0.7009098    |
| 5699 Bn-A03-p15201279 | A-genome specific (napus-rapa) | 0.9856459    | 0.3372405    | not scorable | not scorable | 0.9917355    | 0.807839     |
| 5700 Bn-A03-p15207594 | A-genome specific (napus-rapa) | 0.9856459    | 0.328628     | not scorable | not scorable | 0.9834711    | 0.572859     |
| 5701 Bn-A03-p15229988 | A-genome specific (napus-rapa) | 0.9641148    | 0.6857461    | not scorable | not scorable | 0.9669421    | 0.7181081    |
| 5702 Bn-A03-p15233860 | A-genome specific (napus-rapa) | 0.9090909    | 0.736141     | not scorable | not scorable | 0.7933884    | 0.723796     |
| 5703 Bn-A03-p15237693 | A-genome specific (napus-rapa) | 0.9904306    | 0.7515081    | not scorable | not scorable | 0.9917355    | 0.7944423    |
| 5704 Bn-A03-p15240794 | A-genome specific (napus-rapa) | 0.9856459    | 0.6728234    | not scorable | not scorable | 1            | 0.7037767    |
| 5705 Bn-A03-p15240992 | A-genome specific (napus-rapa) | 1            | 0.4536684    | not scorable | not scorable | 0.9834711    | 0.6094438    |
| 5706 Bn-A03-p15245600 | A-genome specific (napus-rapa) | 0.9282297    | 0.7623614    | not scorable | not scorable | 0.9669421    | 0.8710286    |

|                       |                                |           |           |              |              |           |           |
|-----------------------|--------------------------------|-----------|-----------|--------------|--------------|-----------|-----------|
| 5707 Bn-A03-p15265791 | A-genome specific (napus-rapa) | 0.9593301 | 0.5790476 | not scorable | not scorable | 1         | 0.8182366 |
| 5708 Bn-A03-p15266403 | A-genome specific (napus-rapa) | 0.9976076 | 0.8013346 | not scorable | not scorable | 0.9917355 | 0.730126  |
| 5709 Bn-A03-p15300653 | A-genome specific (napus-rapa) | 0.9952153 | 0.7078519 | not scorable | not scorable | 1         | 0.7750097 |
| 5710 Bn-A03-p1532114  | A-genome specific (napus-rapa) | 0.9928229 | 0.5590882 | not scorable | not scorable | 0.9834711 | 0.642509  |
| 5711 Bn-A03-p15326805 | A-genome specific (napus-rapa) | 1         | 0.5069947 | not scorable | not scorable | 0.9834711 | 0.6907421 |
| 5712 Bn-A03-p15327817 | A-genome specific (napus-rapa) | 0.9976076 | 0.6554469 | not scorable | not scorable | 0.9917355 | 0.7374666 |
| 5713 Bn-A03-p15327921 | A-genome specific (napus-rapa) | 0.9976076 | 0.7899165 | not scorable | not scorable | 1         | 0.7012504 |
| 5714 Bn-A03-p15337088 | A-genome specific (napus-rapa) | 0.9760765 | 0.2826414 | not scorable | not scorable | 0.9752066 | 0.7571762 |
| 5715 Bn-A03-p15346153 | A-genome specific (napus-rapa) | 0.9952153 | 0.7068107 | not scorable | not scorable | 0.9917355 | 0.8496006 |
| 5716 Bn-A03-p15347967 | A-genome specific (napus-rapa) | 0.9976076 | 0.7004927 | not scorable | not scorable | 0.9917355 | 0.6930565 |
| 5717 Bn-A03-p15349925 | genome unspecific (all in)     | 0.9880383 | 0.5159891 | 0.4573644    | 0.7350179    | 0.9917355 | 0.740214  |
| 5718 Bn-A03-p15351982 | A-genome specific (napus-rapa) | 0.9832536 | 0.8041285 | not scorable | not scorable | 1         | 0.7890749 |
| 5719 Bn-A03-p15359867 | A-genome specific (napus-rapa) | 0.9904306 | 0.6512235 | not scorable | not scorable | 1         | 0.7450662 |
| 5720 Bn-A03-p15363919 | A-genome specific (napus-rapa) | 0.9808612 | 0.4389783 | not scorable | not scorable | 1         | 0.7643426 |
| 5721 Bn-A03-p15365259 | A-genome specific (napus-rapa) | 0.9952153 | 0.7956763 | not scorable | not scorable | 0.9834711 | 0.6946486 |
| 5722 Bn-A03-p15368328 | A-genome specific (napus-rapa) | 0.9952153 | 0.5564671 | not scorable | not scorable | 0.9834711 | 0.5495553 |
| 5723 Bn-A03-p1538555  | A-genome specific (napus-rapa) | 0.9114832 | 0.6784859 | not scorable | not scorable | 0.9917355 | 0.7462659 |
| 5724 Bn-A03-p15397187 | A-genome specific (napus-rapa) | 0.9832536 | 0.6791142 | not scorable | not scorable | 0.9834711 | 0.8034778 |
| 5725 Bn-A03-p15404736 | A-genome specific (napus-rapa) | 0.9904306 | 0.7703875 | not scorable | not scorable | 0.9834711 | 0.7902734 |
| 5726 Bn-A03-p15405498 | A-genome specific (napus-rapa) | 0.9473684 | 0.7249722 | not scorable | not scorable | 0.9752066 | 0.736288  |
| 5727 Bn-A03-p15406047 | A-genome specific (napus-rapa) | 0.9928229 | 0.6817471 | not scorable | not scorable | 1         | 0.8276423 |
| 5728 Bn-A03-p15416728 | A-genome specific (napus-rapa) | 0.9880383 | 0.6631147 | not scorable | not scorable | 1         | 0.698265  |
| 5729 Bn-A03-p15417676 | genome unspecific (all in)     | 0.9976076 | 0.4700363 |              | 1 0.238809   | 1         | 0.7320092 |
| 5730 Bn-A03-p15424536 | A-genome specific (napus-rapa) | 0.937799  | 0.8125674 | not scorable | not scorable | 0.9834711 | 0.7829943 |
| 5731 Bn-A03-p15435114 | A-genome specific (napus-rapa) | 0.9928229 | 0.339014  | not scorable | not scorable | 0.9752066 | 0.6457492 |
| 5732 Bn-A03-p15435174 | A-genome specific (napus-rapa) | 0.9904306 | 0.4871615 | not scorable | not scorable | 0.9834711 | 0.6360325 |
| 5733 Bn-A03-p15435442 | A-genome specific (napus-rapa) | 1         | 0.7472403 | not scorable | not scorable | 0.9917355 | 0.656527  |
| 5734 Bn-A03-p15481319 | A-genome specific (napus-rapa) | 0.9665072 | 0.4600129 | not scorable | not scorable | 0.9917355 | 0.7272258 |
| 5735 Bn-A03-p15481682 | A-genome specific (napus-rapa) | 0.9976076 | 0.7355552 | not scorable | not scorable | 1         | 0.7620569 |
| 5736 Bn-A03-p15496608 | A-genome specific (napus-rapa) | 0.9880383 | 0.5596464 | not scorable | not scorable | 1         | 0.7371384 |
| 5737 Bn-A03-p15496962 | A-genome specific (napus-rapa) | 0.9952153 | 0.7085512 | not scorable | not scorable | 1         | 0.7451537 |
| 5738 Bn-A03-p15499288 | A-genome specific (napus-rapa) | 0.9952153 | 0.7748116 | not scorable | not scorable | 0.9917355 | 0.809986  |
| 5739 Bn-A03-p15546590 | A-genome specific (napus-rapa) | 1         | 0.8077878 | not scorable | not scorable | 0.9917355 | 0.823669  |

|      |                  |                                   |              |              |              |              |              |              |
|------|------------------|-----------------------------------|--------------|--------------|--------------|--------------|--------------|--------------|
| 5740 | Bn-A03-p15548506 | A-genome specific (napus-rapa)    | 0.9928229    | 0.7761807    | not scorable | not scorable | 0.9917355    | 0.7633445    |
| 5741 | Bn-A03-p15548953 | A-genome specific (napus-rapa)    | 0.9976076    | 0.5442027    | not scorable | not scorable | 1            | 0.7333017    |
| 5742 | Bn-A03-p15559809 | A-genome specific (napus-rapa)    | 0.9784689    | 0.7781263    | not scorable | not scorable | 0.9834711    | 0.6999873    |
| 5743 | Bn-A03-p15576074 | A-genome specific (napus-rapa)    | 0.923445     | 0.6568506    | not scorable | not scorable | 0.9917355    | 0.7013826    |
| 5744 | Bn-A03-p15577849 | A-genome specific (napus-rapa)    | 0.9976076    | 0.7831069    | not scorable | not scorable | 0.9752066    | 0.7673208    |
| 5745 | Bn-A03-p15593483 | A-genome specific (napus-rapa)    | 1            | 0.5617753    | not scorable | not scorable | 0.9917355    | 0.7782555    |
| 5746 | Bn-A03-p1559742  | A-genome specific (napus-rapa)    | 0.9186603    | 0.7672096    | not scorable | not scorable | 0.7024794    | 0.9079534    |
| 5747 | Bn-A03-p15605355 | A-genome specific (napus-rapa)    | 1            | 0.5572206    | not scorable | not scorable | 1            | 0.7730535    |
| 5748 | Bn-A03-p15615278 | A-genome specific (napus-rapa)    | 0.9808612    | 0.4956777    | not scorable | not scorable | 1            | 0.7427022    |
| 5749 | Bn-A03-p1562119  | A-genome specific (napus-rapa)    | 0.9162679    | 0.777845     | not scorable | not scorable | 0.6280992    | 0.8443323    |
| 5750 | Bn-A03-p15622267 | A-genome specific (napus-rapa)    | 0.9808612    | 0.8511497    | not scorable | not scorable | 1            | 0.8241596    |
| 5751 | Bn-A03-p15624030 | A-genome specific (napus-rapa)    | 0.9880383    | 0.707849     | not scorable | not scorable | 1            | 0.7393419    |
| 5752 | Bn-A03-p15624379 | A-genome specific (napus-rapa)    | 0.9952153    | 0.7125828    | not scorable | not scorable | 0.9917355    | 0.6714318    |
| 5753 | Bn-A03-p15627698 | A-genome specific (napus-rapa)    | 0.9736842    | 0.7754917    | not scorable | not scorable | 1            | 0.7903121    |
| 5754 | Bn-A03-p15634432 | A-genome specific (napus-rapa)    | 0.9569378    | 0.3715838    | not scorable | not scorable | 0.9917355    | 0.7342305    |
| 5755 | Bn-A03-p1563613  | A-genome specific (napus-rapa)    | 0.9186603    | 0.8060953    | not scorable | not scorable | 0.6859504    | 0.8912069    |
| 5756 | Bn-A03-p15675871 | A-genome specific (napus-rapa)    | 0.9880383    | 0.5198693    | not scorable | not scorable | 0.9834711    | 0.653852     |
| 5757 | Bn-A03-p15689225 | A-genome specific (napus-rapa)    | 1            | 0.5081469    | not scorable | not scorable | 1            | 0.6305527    |
| 5758 | Bn-A03-p15702943 | A-genome specific (napus-rapa)    | 0.9904306    | 0.6146862    | not scorable | not scorable | 0.9917355    | 0.9281533    |
| 5759 | Bn-A03-p15704793 | A-genome specific (napus-rapa)    | 0.9760765    | 0.3832133    | not scorable | not scorable | 0.9917355    | 0.6943207    |
| 5760 | Bn-A03-p15704830 | A-genome specific (napus-rapa)    | 0.9641148    | 0.5219854    | not scorable | not scorable | 1            | 0.7103293    |
| 5761 | Bn-A03-p15705021 | C-genome specific (oleracea only) | not scorable | not scorable | 0.9922481    | 0.3368704    | not scorable | not scorable |
| 5762 | Bn-A03-p15708192 | A-genome specific (napus-rapa)    | 0.9928229    | 0.7072939    | not scorable | not scorable | 1            | 0.6718319    |
| 5763 | Bn-A03-p15708289 | A-genome specific (napus-rapa)    | 1            | 0.849976     | not scorable | not scorable | 0.9834711    | 0.7447924    |
| 5764 | Bn-A03-p15725925 | A-genome specific (napus-rapa)    | 0.9784689    | 0.7446344    | not scorable | not scorable | 0.9917355    | 0.7825384    |
| 5765 | Bn-A03-p15732    | A-genome specific (napus-rapa)    | 0.8229665    | 0.8143427    | not scorable | not scorable | 0.9834711    | 0.8273963    |
| 5766 | Bn-A03-p15739646 | A-genome specific (napus-rapa)    | 0.9880383    | 0.7851327    | not scorable | not scorable | 0.9669421    | 0.7509246    |
| 5767 | Bn-A03-p15744983 | A-genome specific (napus-rapa)    | 0.9856459    | 0.7238212    | not scorable | not scorable | 0.9917355    | 0.6929718    |
| 5768 | Bn-A03-p15748819 | A-genome specific (napus-rapa)    | 0.9976076    | 0.8017119    | not scorable | not scorable | 0.9917355    | 0.7475286    |
| 5769 | Bn-A03-p15749083 | A-genome specific (napus-rapa)    | 0.9904306    | 0.7736924    | not scorable | not scorable | 1            | 0.7984229    |
| 5770 | Bn-A03-p15766386 | A-genome specific (napus-rapa)    | 1            | 0.5856662    | not scorable | not scorable | 0.9917355    | 0.7227655    |
| 5771 | Bn-A03-p15768536 | A-genome specific (napus-rapa)    | 0.9832536    | 0.256184     | not scorable | not scorable | 0.9669421    | 0.5986605    |
| 5772 | Bn-A03-p1577561  | A-genome specific (rapa only)     | not scorable | not scorable | not scorable | not scorable | 0.9917355    | 0.6334302    |

|                       |                                |              |              |              |              |           |           |
|-----------------------|--------------------------------|--------------|--------------|--------------|--------------|-----------|-----------|
| 5773 Bn-A03-p15776521 | A-genome specific (napus-rapa) | 0.9976076    | 0.551823     | not scorable | not scorable | 0.9504132 | 0.53808   |
| 5774 Bn-A03-p15776756 | A-genome specific (napus-rapa) | 0.9760765    | 0.6135227    | not scorable | not scorable | 0.9917355 | 0.7062946 |
| 5775 Bn-A03-p15801208 | A-genome specific (napus-rapa) | 0.9330143    | 0.6865979    | not scorable | not scorable | 0.8264463 | 0.7518073 |
| 5776 Bn-A03-p15811901 | A-genome specific (napus-rapa) | 0.9976076    | 0.4115214    | not scorable | not scorable | 1         | 0.6955462 |
| 5777 Bn-A03-p15815965 | A-genome specific (napus-rapa) | 0.9665072    | 0.3551319    | not scorable | not scorable | 0.9586777 | 0.7047315 |
| 5778 Bn-A03-p15818896 | A-genome specific (napus-rapa) | 0.9928229    | 0.4340068    | not scorable | not scorable | 1         | 0.7021772 |
| 5779 Bn-A03-p15824796 | A-genome specific (napus-rapa) | 0.9808612    | 0.7744122    | not scorable | not scorable | 1         | 0.7825404 |
| 5780 Bn-A03-p15827113 | A-genome specific (napus-rapa) | 0.9832536    | 0.7078003    | not scorable | not scorable | 0.9917355 | 0.8336643 |
| 5781 Bn-A03-p15828397 | A-genome specific (napus-rapa) | 0.9832536    | 0.7639653    | not scorable | not scorable | 0.9917355 | 0.743686  |
| 5782 Bn-A03-p15852439 | A-genome specific (napus-rapa) | 0.9808612    | 0.2874022    | not scorable | not scorable | 0.9752066 | 0.7401809 |
| 5783 Bn-A03-p15853765 | A-genome specific (napus-rapa) | 0.9784689    | 0.4476235    | not scorable | not scorable | 0.9917355 | 0.8188219 |
| 5784 Bn-A03-p15871284 | A-genome specific (napus-rapa) | 0.9665072    | 0.4337922    | not scorable | not scorable | 1         | 0.7136886 |
| 5785 Bn-A03-p15875404 | A-genome specific (napus-rapa) | 0.9688995    | 0.8308064    | not scorable | not scorable | 0.9834711 | 0.7567569 |
| 5786 Bn-A03-p1588735  | A-genome specific (rapa only)  | not scorable | not scorable | not scorable | not scorable | 0.9834711 | 0.685509  |
| 5787 Bn-A03-p15892296 | A-genome specific (napus-rapa) | 0.84689      | 0.8783022    | not scorable | not scorable | 0.9586777 | 0.8064034 |
| 5788 Bn-A03-p15893952 | A-genome specific (napus-rapa) | 0.9976076    | 0.7574086    | not scorable | not scorable | 1         | 0.6928743 |
| 5789 Bn-A03-p15894013 | A-genome specific (napus-rapa) | 0.9856459    | 0.7843164    | not scorable | not scorable | 0.9917355 | 0.756395  |
| 5790 Bn-A03-p15900189 | A-genome specific (napus-rapa) | 0.9952153    | 0.7789081    | not scorable | not scorable | 0.9917355 | 0.7818949 |
| 5791 Bn-A03-p15906810 | A-genome specific (napus-rapa) | 0.9952153    | 0.7712682    | not scorable | not scorable | 0.9917355 | 0.6829743 |
| 5792 Bn-A03-p15916054 | A-genome specific (napus-rapa) | 0.9784689    | 0.7678409    | not scorable | not scorable | 0.9917355 | 0.8149601 |
| 5793 Bn-A03-p15916258 | A-genome specific (napus-rapa) | 0.9784689    | 0.7608996    | not scorable | not scorable | 0.9917355 | 0.7556771 |
| 5794 Bn-A03-p15923626 | A-genome specific (napus-rapa) | 0.9856459    | 0.3586591    | not scorable | not scorable | 1         | 0.8740078 |
| 5795 Bn-A03-p15936354 | A-genome specific (napus-rapa) | 0.8732057    | 0.8808252    | not scorable | not scorable | 0.9834711 | 0.7776138 |
| 5796 Bn-A03-p15954297 | A-genome specific (napus-rapa) | 0.9832536    | 0.4021505    | not scorable | not scorable | 0.9917355 | 0.7595155 |
| 5797 Bn-A03-p15957657 | A-genome specific (napus-rapa) | 0.9928229    | 0.7754202    | not scorable | not scorable | 1         | 0.7142359 |
| 5798 Bn-A03-p15958035 | A-genome specific (napus-rapa) | 0.9856459    | 0.4773967    | not scorable | not scorable | 1         | 0.7742409 |
| 5799 Bn-A03-p15960001 | A-genome specific (napus-rapa) | 0.9904306    | 0.789126     | not scorable | not scorable | 1         | 0.7167431 |
| 5800 Bn-A03-p15960376 | A-genome specific (napus-rapa) | 0.9760765    | 0.6953256    | not scorable | not scorable | 0.9752066 | 0.7994384 |
| 5801 Bn-A03-p1596091  | A-genome specific (napus-rapa) | 0.923445     | 0.7765236    | not scorable | not scorable | 0.9917355 | 0.7429354 |
| 5802 Bn-A03-p15968189 | A-genome specific (napus-rapa) | 0.8851675    | 0.7968677    | not scorable | not scorable | 0.9256198 | 0.7547897 |
| 5803 Bn-A03-p15973005 | A-genome specific (napus-rapa) | 0.9736842    | 0.6498584    | not scorable | not scorable | 0.9752066 | 0.8266627 |
| 5804 Bn-A03-p15974991 | A-genome specific (napus-rapa) | 0.9784689    | 0.8270382    | not scorable | not scorable | 0.9917355 | 0.5909037 |
| 5805 Bn-A03-p15979252 | A-genome specific (napus-rapa) | 0.8444976    | 0.6860555    | not scorable | not scorable | 0.9752066 | 0.6890675 |



|                       |                                |              |              |              |              |              |              |
|-----------------------|--------------------------------|--------------|--------------|--------------|--------------|--------------|--------------|
| 5806 Bn-A03-p15983019 | A-genome specific (napus-rapa) | 0.9952153    | 0.7497607    | not scorable | not scorable | 0.9752066    | 0.7629418    |
| 5807 Bn-A03-p16000194 | genome unspecific (all in)     | 1            | 0.3238211    | 0.9844961    | 0.3306791    | 1            | 0.7888938    |
| 5808 Bn-A03-p16017186 | A-genome specific (napus-rapa) | 0.9904306    | 0.8434092    | not scorable | not scorable | 1            | 0.8069542    |
| 5809 Bn-A03-p16038553 | A-genome specific (napus-rapa) | 0.9569378    | 0.8636244    | not scorable | not scorable | 1            | 0.8210682    |
| 5810 Bn-A03-p16051661 | A-genome specific (napus-rapa) | 1            | 0.6308175    | not scorable | not scorable | 0.9917355    | 0.7086748    |
| 5811 Bn-A03-p16055930 | all not scorable               | not scorable | not scorable | not scorable | not scorable | not scorable | not scorable |
| 5812 Bn-A03-p16056039 | napus specific                 | 0.9856459    | 0.5439663    | not scorable | not scorable | not scorable | not scorable |
| 5813 Bn-A03-p16056249 | A-genome specific (napus-rapa) | 0.9665072    | 0.3264222    | not scorable | not scorable | 0.9917355    | 0.6957013    |
| 5814 Bn-A03-p16056460 | A-genome specific (napus-rapa) | 0.9880383    | 0.3676674    | not scorable | not scorable | 0.9917355    | 0.7115262    |
| 5815 Bn-A03-p16056621 | A-genome specific (napus-rapa) | 0.9904306    | 0.4629203    | not scorable | not scorable | 1            | 0.6119907    |
| 5816 Bn-A03-p16070543 | A-genome specific (napus-rapa) | 0.9928229    | 0.6828198    | not scorable | not scorable | 0.9917355    | 0.6958005    |
| 5817 Bn-A03-p16079386 | A-genome specific (napus-rapa) | 0.9904306    | 0.7370976    | not scorable | not scorable | 0.9917355    | 0.7973625    |
| 5818 Bn-A03-p16081434 | A-genome specific (napus-rapa) | 0.9760765    | 0.7037004    | not scorable | not scorable | 0.9834711    | 0.8008798    |
| 5819 Bn-A03-p16084302 | A-genome specific (napus-rapa) | 0.9976076    | 0.8506913    | not scorable | not scorable | 0.9917355    | 0.8015116    |
| 5820 Bn-A03-p16098207 | A-genome specific (napus-rapa) | 0.9712918    | 0.7022911    | not scorable | not scorable | 1            | 0.8795602    |
| 5821 Bn-A03-p16103891 | A-genome specific (napus-rapa) | 0.9832536    | 0.7711818    | not scorable | not scorable | 1            | 0.7465637    |
| 5822 Bn-A03-p16123758 | A-genome specific (napus-rapa) | 0.9904306    | 0.6619513    | not scorable | not scorable | 1            | 0.7235709    |
| 5823 Bn-A03-p16126013 | genome unspecific (all in)     | 0.9712918    | 0.4219336    | 1            | 0.7823842    | 0.9834711    | 0.7285361    |
| 5824 Bn-A03-p16134415 | A-genome specific (napus-rapa) | 0.9832536    | 0.4449373    | not scorable | not scorable | 0.9834711    | 0.7294535    |
| 5825 Bn-A03-p16158248 | A-genome specific (napus-rapa) | 0.9688995    | 0.5906062    | not scorable | not scorable | 0.8429752    | 0.5966659    |
| 5826 Bn-A03-p16162908 | A-genome specific (napus-rapa) | 1            | 0.736278     | not scorable | not scorable | 1            | 0.9084849    |
| 5827 Bn-A03-p16167780 | all not scorable               | not scorable | not scorable | not scorable | not scorable | not scorable | not scorable |
| 5828 Bn-A03-p16170389 | A-genome specific (rapa only)  | not scorable | not scorable | not scorable | not scorable | 0.7355372    | 0.5411618    |
| 5829 Bn-A03-p16185537 | A-genome specific (napus-rapa) | 0.9832536    | 0.7412998    | not scorable | not scorable | 1            | 0.7161438    |
| 5830 Bn-A03-p16190643 | A-genome specific (napus-rapa) | 0.9928229    | 0.7603837    | not scorable | not scorable | 1            | 0.8494194    |
| 5831 Bn-A03-p16211692 | A-genome specific (napus-rapa) | 0.9880383    | 0.8083097    | not scorable | not scorable | 1            | 0.7690955    |
| 5832 Bn-A03-p162225   | A-genome specific (napus-rapa) | 0.9473684    | 0.3193581    | not scorable | not scorable | 0.9917355    | 0.6868628    |
| 5833 Bn-A03-p16229294 | A-genome specific (napus-rapa) | 0.9545454    | 0.3971421    | not scorable | not scorable | 0.9917355    | 0.6895267    |
| 5834 Bn-A03-p16262184 | A-genome specific (napus-rapa) | 0.9976076    | 0.387283     | not scorable | not scorable | 0.9917355    | 0.7795519    |
| 5835 Bn-A03-p16269745 | napus specific                 | 0.9760765    | 0.7556658    | not scorable | not scorable | not scorable | not scorable |
| 5836 Bn-A03-p16275650 | A-genome specific (napus-rapa) | 0.9928229    | 0.668286     | not scorable | not scorable | 1            | 0.6983143    |
| 5837 Bn-A03-p16278251 | A-genome specific (napus-rapa) | 0.9904306    | 0.7760227    | not scorable | not scorable | 0.9917355    | 0.782773     |
| 5838 Bn-A03-p16284595 | A-genome specific (napus-rapa) | 0.9856459    | 0.7047896    | not scorable | not scorable | 0.9917355    | 0.7207536    |

|      |                  |                                   |              |              |              |              |              |              |
|------|------------------|-----------------------------------|--------------|--------------|--------------|--------------|--------------|--------------|
| 5839 | Bn-A03-p16289300 | all not scorable                  | not scorable | not scorable | not scorable | not scorable | not scorable | not scorable |
| 5840 | Bn-A03-p16301988 | A-genome specific (napus-rapa)    | 0.9593301    | 0.3784592    | not scorable | not scorable | 0.9917355    | 0.7722343    |
| 5841 | Bn-A03-p16303181 | A-genome specific (napus-rapa)    | 0.9856459    | 0.3492493    | not scorable | not scorable | 1            | 0.7279542    |
| 5842 | Bn-A03-p16303780 | A-genome specific (napus-rapa)    | 0.9808612    | 0.7920244    | not scorable | not scorable | 0.9834711    | 0.8327581    |
| 5843 | Bn-A03-p16309    | A-genome specific (rapa only)     | not scorable | not scorable | not scorable | not scorable | 0.9504132    | 0.6329616    |
| 5844 | Bn-A03-p16342771 | A-genome specific (napus-rapa)    | 0.9904306    | 0.5533428    | not scorable | not scorable | 0.7851239    | 0.6732634    |
| 5845 | Bn-A03-p16355867 | A-genome specific (napus-rapa)    | 0.9856459    | 0.6793572    | not scorable | not scorable | 0.9917355    | 0.6867253    |
| 5846 | Bn-A03-p16371467 | A-genome specific (napus-rapa)    | 0.9976076    | 0.8243888    | not scorable | not scorable | 0.9752066    | 0.7924223    |
| 5847 | Bn-A03-p16378233 | A-genome specific (napus-rapa)    | 0.9832536    | 0.4709962    | not scorable | not scorable | 1            | 0.7808928    |
| 5848 | Bn-A03-p16379045 | A-genome specific (napus-rapa)    | 0.9760765    | 0.7439343    | not scorable | not scorable | 0.9421487    | 0.6569786    |
| 5849 | Bn-A03-p16380304 | A-genome specific (napus-rapa)    | 0.9832536    | 0.6913049    | not scorable | not scorable | 0.9917355    | 0.5697977    |
| 5850 | Bn-A03-p1638326  | A-genome specific (rapa only)     | not scorable | not scorable | not scorable | not scorable | 1            | 0.6537102    |
| 5851 | Bn-A03-p1639446  | genome unspecific (oleracea-rapa) | not scorable | not scorable | 0.9844961    | 0.6593229    | 0.9834711    | 0.6956896    |
| 5852 | Bn-A03-p16404390 | A-genome specific (napus-rapa)    | 0.9976076    | 0.7140145    | not scorable | not scorable | 1            | 0.681006     |
| 5853 | Bn-A03-p16404538 | A-genome specific (napus-rapa)    | 0.9832536    | 0.5336586    | not scorable | not scorable | 0.9752066    | 0.7792552    |
| 5854 | Bn-A03-p16404871 | all not scorable                  | not scorable | not scorable | not scorable | not scorable | not scorable | not scorable |
| 5855 | Bn-A03-p16405269 | A-genome specific (napus-rapa)    | 0.9976076    | 0.8308399    | not scorable | not scorable | 1            | 0.7016065    |
| 5856 | Bn-A03-p16409353 | A-genome specific (napus-rapa)    | 0.9904306    | 0.7417583    | not scorable | not scorable | 0.9917355    | 0.7726752    |
| 5857 | Bn-A03-p16416948 | A-genome specific (napus-rapa)    | 0.9976076    | 0.7819876    | not scorable | not scorable | 1            | 0.788431     |
| 5858 | Bn-A03-p16422604 | A-genome specific (napus-rapa)    | 0.9784689    | 0.4000248    | not scorable | not scorable | 0.9834711    | 0.6955087    |
| 5859 | Bn-A03-p16423239 | A-genome specific (napus-rapa)    | 0.9832536    | 0.7007966    | not scorable | not scorable | 0.8016529    | 0.7622204    |
| 5860 | Bn-A03-p16431100 | A-genome specific (napus-rapa)    | 0.9736842    | 0.7618128    | not scorable | not scorable | 0.9917355    | 0.7124017    |
| 5861 | Bn-A03-p16437979 | A-genome specific (napus-rapa)    | 0.9641148    | 0.7509831    | not scorable | not scorable | 0.7851239    | 0.8866258    |
| 5862 | Bn-A03-p16444510 | napus specific                    | 0.9976076    | 0.7917167    | not scorable | not scorable | not scorable | not scorable |
| 5863 | Bn-A03-p16454331 | A-genome specific (napus-rapa)    | 1            | 0.7989338    | not scorable | not scorable | 0.9834711    | 0.7336798    |
| 5864 | Bn-A03-p16481995 | A-genome specific (napus-rapa)    | 1            | 0.6652509    | not scorable | not scorable | 0.9917355    | 0.7063071    |
| 5865 | Bn-A03-p16482731 | A-genome specific (napus-rapa)    | 1            | 0.5187945    | not scorable | not scorable | 0.9917355    | 0.7232355    |
| 5866 | Bn-A03-p16501946 | A-genome specific (napus-rapa)    | 0.9760765    | 0.7124595    | not scorable | not scorable | 0.9752066    | 0.8068278    |
| 5867 | Bn-A03-p1652490  | A-genome specific (rapa only)     | not scorable | not scorable | not scorable | not scorable | 0.9834711    | 0.6770979    |
| 5868 | Bn-A03-p16530135 | A-genome specific (napus-rapa)    | 1            | 0.553915     | not scorable | not scorable | 1            | 0.6927592    |
| 5869 | Bn-A03-p16565487 | A-genome specific (napus-rapa)    | 0.9808612    | 0.281171     | not scorable | not scorable | 0.9752066    | 0.6554057    |
| 5870 | Bn-A03-p16607714 | A-genome specific (napus-rapa)    | 0.9784689    | 0.4582933    | not scorable | not scorable | 0.9917355    | 0.7042211    |
| 5871 | Bn-A03-p16610235 | A-genome specific (rapa only)     | not scorable | not scorable | not scorable | not scorable | 0.9834711    | 0.6933311    |



|                       |                                   |              |              |              |              |              |              |
|-----------------------|-----------------------------------|--------------|--------------|--------------|--------------|--------------|--------------|
| 5905 Bn-A03-p17182494 | A-genome specific (napus-rapa)    | 0.9976076    | 0.7876688    | not scorable | not scorable | 0.9752066    | 0.6970707    |
| 5906 Bn-A03-p17183616 | A-genome specific (napus-rapa)    | 1            | 0.7053196    | not scorable | not scorable | 1            | 0.8135551    |
| 5907 Bn-A03-p17184441 | A-genome specific (napus-rapa)    | 0.9976076    | 0.7322975    | not scorable | not scorable | 0.9917355    | 0.6272221    |
| 5908 Bn-A03-p17190733 | A-genome specific (rapa only)     | not scorable | not scorable | not scorable | not scorable | 0.9917355    | 0.8646078    |
| 5909 Bn-A03-p17194139 | A-genome specific (napus-rapa)    | 1            | 0.4959221    | not scorable | not scorable | 1            | 0.808534     |
| 5910 Bn-A03-p1719791  | A-genome specific (napus-rapa)    | 0.2583732    | 0.8442286    | not scorable | not scorable | 0.9669421    | 0.8843412    |
| 5911 Bn-A03-p17207547 | napus specific                    | 0.715311     | 0.7953328    | not scorable | not scorable | not scorable | not scorable |
| 5912 Bn-A03-p17213825 | A-genome specific (napus-rapa)    | 0.9760765    | 0.4408043    | not scorable | not scorable | 0.9917355    | 0.6703242    |
| 5913 Bn-A03-p17217528 | A-genome specific (napus-rapa)    | 0.9760765    | 0.3073706    | not scorable | not scorable | 0.9917355    | 0.6981302    |
| 5914 Bn-A03-p17281617 | A-genome specific (napus-rapa)    | 0.9880383    | 0.7505705    | not scorable | not scorable | 1            | 0.7419678    |
| 5915 Bn-A03-p17334423 | napus specific                    | 0.9162679    | 0.33171      | not scorable | not scorable | not scorable | not scorable |
| 5916 Bn-A03-p17336041 | A-genome specific (napus-rapa)    | 1            | 0.3784633    | not scorable | not scorable | 0.9421487    | 0.7608163    |
| 5917 Bn-A03-p1741556  | A-genome specific (rapa only)     | not scorable | not scorable | not scorable | not scorable | 0.7272727    | 0.7320971    |
| 5918 Bn-A03-p17532322 | A-genome specific (napus-rapa)    | 0.9880383    | 0.7174388    | not scorable | not scorable | 1            | 0.8136467    |
| 5919 Bn-A03-p1755651  | A-genome specific (napus-rapa)    | 0.9521531    | 0.4247928    | not scorable | not scorable | 0.9834711    | 0.7561532    |
| 5920 Bn-A03-p17588    | genome unspecific (oleracea-rapa) | not scorable | not scorable | 0.8062016    | 0.7828159    | 0.9917355    | 0.8317524    |
| 5921 Bn-A03-p1762980  | A-genome specific (napus-rapa)    | 0.9593301    | 0.5796103    | not scorable | not scorable | 0.9917355    | 0.5846988    |
| 5922 Bn-A03-p1777701  | A-genome specific (napus-rapa)    | 0.9976076    | 0.8637566    | not scorable | not scorable | 0.9834711    | 0.8122839    |
| 5923 Bn-A03-p17782292 | A-genome specific (napus-rapa)    | 0.9880383    | 0.3478327    | not scorable | not scorable | 0.9834711    | 0.7519507    |
| 5924 Bn-A03-p17790084 | A-genome specific (napus-rapa)    | 0.9928229    | 0.4302098    | not scorable | not scorable | 0.9669421    | 0.6913705    |
| 5925 Bn-A03-p17921239 | A-genome specific (napus-rapa)    | 1            | 0.7980775    | not scorable | not scorable | 0.9917355    | 0.81765      |
| 5926 Bn-A03-p17926123 | A-genome specific (napus-rapa)    | 0.9952153    | 0.7382676    | not scorable | not scorable | 1            | 0.6610279    |
| 5927 Bn-A03-p17985410 | A-genome specific (napus-rapa)    | 0.9976076    | 0.7107227    | not scorable | not scorable | 0.9752066    | 0.6485186    |
| 5928 Bn-A03-p17986611 | A-genome specific (napus-rapa)    | 0.9928229    | 0.8617132    | not scorable | not scorable | 1            | 0.7781072    |
| 5929 Bn-A03-p18014273 | A-genome specific (napus-rapa)    | 0.9760765    | 0.3950177    | not scorable | not scorable | 0.9504132    | 0.5878692    |
| 5930 Bn-A03-p18019822 | A-genome specific (napus-rapa)    | 0.9808612    | 0.5332072    | not scorable | not scorable | 1            | 0.552564     |
| 5931 Bn-A03-p18025565 | A-genome specific (napus-rapa)    | 0.9904306    | 0.8491425    | not scorable | not scorable | 0.9917355    | 0.6834776    |
| 5932 Bn-A03-p18025753 | A-genome specific (napus-rapa)    | 0.9425837    | 0.4191322    | not scorable | not scorable | 0.9669421    | 0.7563342    |
| 5933 Bn-A03-p1805828  | A-genome specific (rapa only)     | not scorable | not scorable | not scorable | not scorable | 0.9834711    | 0.7012051    |
| 5934 Bn-A03-p18120938 | A-genome specific (napus-rapa)    | 0.9976076    | 0.3656736    | not scorable | not scorable | 0.9917355    | 0.8146527    |
| 5935 Bn-A03-p1813564  | A-genome specific (napus-rapa)    | 0.9593301    | 0.2842583    | not scorable | not scorable | 1            | 0.6849828    |
| 5936 Bn-A03-p1817556  | A-genome specific (napus-rapa)    | 0.9354067    | 0.3027873    | not scorable | not scorable | 0.9917355    | 0.4166303    |
| 5937 Bn-A03-p18183550 | A-genome specific (napus-rapa)    | 1            | 0.5612964    | not scorable | not scorable | 1            | 0.7235482    |

|      |                  |                                |              |              |              |              |              |              |
|------|------------------|--------------------------------|--------------|--------------|--------------|--------------|--------------|--------------|
| 5938 | Bn-A03-p18198495 | A-genome specific (napus-rapa) | 1            | 0.3341349    | not scorable | not scorable | 0.9917355    | 0.9078106    |
| 5939 | Bn-A03-p18208425 | A-genome specific (napus-rapa) | 0.9976076    | 0.3448997    | not scorable | not scorable | 1            | 0.792897     |
| 5940 | Bn-A03-p1831525  | A-genome specific (rapa only)  | not scorable | not scorable | not scorable | not scorable | 0.9834711    | 0.7714021    |
| 5941 | Bn-A03-p18376493 | A-genome specific (napus-rapa) | 0.9904306    | 0.3937381    | not scorable | not scorable | 0.9752066    | 0.6526463    |
| 5942 | Bn-A03-p18383780 | A-genome specific (rapa only)  | not scorable | not scorable | not scorable | not scorable | 0.9338843    | 0.3575154    |
| 5943 | Bn-A03-p1839932  | A-genome specific (rapa only)  | not scorable | not scorable | not scorable | not scorable | 0.9917355    | 0.8015463    |
| 5944 | Bn-A03-p18405869 | A-genome specific (napus-rapa) | 0.9808612    | 0.8277916    | not scorable | not scorable | 0.8264463    | 0.821041     |
| 5945 | Bn-A03-p18414643 | A-genome specific (napus-rapa) | 0.9904306    | 0.3270931    | not scorable | not scorable | 0.9834711    | 0.6325362    |
| 5946 | Bn-A03-p18451316 | A-genome specific (napus-rapa) | 0.9952153    | 0.6760358    | not scorable | not scorable | 1            | 0.7252899    |
| 5947 | Bn-A03-p18455020 | A-genome specific (napus-rapa) | 0.9952153    | 0.7941719    | not scorable | not scorable | 0.9917355    | 0.7985208    |
| 5948 | Bn-A03-p18455932 | A-genome specific (napus-rapa) | 0.9952153    | 0.7440118    | not scorable | not scorable | 0.9834711    | 0.7045221    |
| 5949 | Bn-A03-p18461597 | A-genome specific (napus-rapa) | 0.9856459    | 0.7949721    | not scorable | not scorable | 0.8264463    | 0.7094161    |
| 5950 | Bn-A03-p18461778 | A-genome specific (napus-rapa) | 0.9880383    | 0.7892097    | not scorable | not scorable | 0.8429752    | 0.7491046    |
| 5951 | Bn-A03-p18462261 | A-genome specific (napus-rapa) | 0.9856459    | 0.6079261    | not scorable | not scorable | 0.8429752    | 0.7533877    |
| 5952 | Bn-A03-p18468633 | A-genome specific (napus-rapa) | 0.9832536    | 0.5413554    | not scorable | not scorable | 0.8347107    | 0.7911589    |
| 5953 | Bn-A03-p18471820 | A-genome specific (napus-rapa) | 0.9880383    | 0.7169248    | not scorable | not scorable | 1            | 0.6558676    |
| 5954 | Bn-A03-p18570046 | A-genome specific (napus-rapa) | 0.9976076    | 0.6385927    | not scorable | not scorable | 0.9752066    | 0.8265762    |
| 5955 | Bn-A03-p18570852 | A-genome specific (napus-rapa) | 0.9976076    | 0.3695284    | not scorable | not scorable | 0.9834711    | 0.7976577    |
| 5956 | Bn-A03-p18571065 | genome unspecific (all in)     | 0.9976076    | 0.3102164    |              | 1 0.2856168  | 1            | 0.7679       |
| 5957 | Bn-A03-p18579721 | A-genome specific (napus-rapa) | 0.9952153    | 0.3568533    | not scorable | not scorable | 1            | 0.7355271    |
| 5958 | Bn-A03-p18592597 | A-genome specific (napus-rapa) | 0.9904306    | 0.4536687    | not scorable | not scorable | 1            | 0.7497537    |
| 5959 | Bn-A03-p18593371 | A-genome specific (napus-rapa) | 0.9904306    | 0.7123775    | not scorable | not scorable | 0.9752066    | 0.6515277    |
| 5960 | Bn-A03-p18593905 | A-genome specific (napus-rapa) | 0.9976076    | 0.3994464    | not scorable | not scorable | 1            | 0.687777     |
| 5961 | Bn-A03-p18594273 | A-genome specific (napus-rapa) | 0.9617225    | 0.3510044    | not scorable | not scorable | 0.9834711    | 0.7642049    |
| 5962 | Bn-A03-p18595122 | napus specific                 | 0.9808612    | 0.2614416    | not scorable | not scorable | not scorable | not scorable |
| 5963 | Bn-A03-p18602597 | A-genome specific (napus-rapa) | 0.9880383    | 0.5841707    | not scorable | not scorable | 0.9917355    | 0.57105      |
| 5964 | Bn-A03-p18606297 | A-genome specific (napus-rapa) | 1            | 0.6599659    | not scorable | not scorable | 0.9752066    | 0.6776835    |
| 5965 | Bn-A03-p18618117 | A-genome specific (napus-rapa) | 0.9832536    | 0.7178324    | not scorable | not scorable | 0.9669421    | 0.6909164    |
| 5966 | Bn-A03-p18618990 | A-genome specific (napus-rapa) | 0.9856459    | 0.7230592    | not scorable | not scorable | 0.9752066    | 0.6512918    |
| 5967 | Bn-A03-p18622329 | A-genome specific (napus-rapa) | 0.9736842    | 0.5718836    | not scorable | not scorable | 0.9256198    | 0.8697541    |
| 5968 | Bn-A03-p18638146 | A-genome specific (napus-rapa) | 0.9904306    | 0.8092182    | not scorable | not scorable | 1            | 0.8199876    |
| 5969 | Bn-A03-p18668408 | A-genome specific (napus-rapa) | 1            | 0.7975907    | not scorable | not scorable | 1            | 0.8815182    |
| 5970 | Bn-A03-p18682521 | A-genome specific (napus-rapa) | 0.9976076    | 0.7871521    | not scorable | not scorable | 0.9834711    | 0.7701083    |

|                       |                                |              |              |              |              |              |              |
|-----------------------|--------------------------------|--------------|--------------|--------------|--------------|--------------|--------------|
| 5971 Bn-A03-p1869248  | genome unspecific (all in)     | 0.930622     | 0.5747726    | 1            | 0.7672392    | 0.9752066    | 0.7502021    |
| 5972 Bn-A03-p18692928 | A-genome specific (napus-rapa) | 0.9832536    | 0.5211822    | not scorable | not scorable | 1            | 0.8331708    |
| 5973 Bn-A03-p187017   | A-genome specific (napus-rapa) | 0.9928229    | 0.5452315    | not scorable | not scorable | 1            | 0.7820035    |
| 5974 Bn-A03-p18706654 | A-genome specific (napus-rapa) | 0.9736842    | 0.2380497    | not scorable | not scorable | 0.9752066    | 0.713761     |
| 5975 Bn-A03-p1871012  | A-genome specific (rapa only)  | not scorable | not scorable | not scorable | not scorable | 0.9834711    | 0.7617037    |
| 5976 Bn-A03-p18737967 | A-genome specific (napus-rapa) | 0.9784689    | 0.543836     | not scorable | not scorable | 0.9917355    | 0.7147654    |
| 5977 Bn-A03-p18744023 | napus specific                 | 0.9832536    | 0.7971055    | not scorable | not scorable | not scorable | not scorable |
| 5978 Bn-A03-p18744159 | A-genome specific (napus-rapa) | 0.9832536    | 0.7175259    | not scorable | not scorable | 0.9752066    | 0.6860651    |
| 5979 Bn-A03-p18745119 | A-genome specific (napus-rapa) | 1            | 0.8296717    | not scorable | not scorable | 0.9917355    | 0.7232494    |
| 5980 Bn-A03-p18746523 | A-genome specific (napus-rapa) | 0.9808612    | 0.6861332    | not scorable | not scorable | 0.9834711    | 0.8949589    |
| 5981 Bn-A03-p18746612 | A-genome specific (napus-rapa) | 0.9976076    | 0.7717363    | not scorable | not scorable | 0.9669421    | 0.8834158    |
| 5982 Bn-A03-p18746881 | A-genome specific (napus-rapa) | 0.9904306    | 0.8288935    | not scorable | not scorable | 0.9752066    | 0.7490746    |
| 5983 Bn-A03-p18747847 | all not scorable               | not scorable | not scorable | not scorable | not scorable | not scorable | not scorable |
| 5984 Bn-A03-p18749943 | A-genome specific (napus-rapa) | 0.9856459    | 0.8402233    | not scorable | not scorable | 0.9834711    | 0.6724489    |
| 5985 Bn-A03-p18749952 | A-genome specific (napus-rapa) | 0.9904306    | 0.8196344    | not scorable | not scorable | 0.9917355    | 0.6710151    |
| 5986 Bn-A03-p18750371 | A-genome specific (napus-rapa) | 0.9928229    | 0.7971272    | not scorable | not scorable | 0.9917355    | 0.6904303    |
| 5987 Bn-A03-p18752710 | A-genome specific (napus-rapa) | 0.9880383    | 0.7547866    | not scorable | not scorable | 0.9917355    | 0.7020488    |
| 5988 Bn-A03-p18753036 | napus specific                 | 0.9808612    | 0.830726     | not scorable | not scorable | not scorable | not scorable |
| 5989 Bn-A03-p18762440 | A-genome specific (napus-rapa) | 0.9784689    | 0.5197375    | not scorable | not scorable | 0.9834711    | 0.6920379    |
| 5990 Bn-A03-p18762453 | A-genome specific (napus-rapa) | 0.9856459    | 0.7083723    | not scorable | not scorable | 0.9834711    | 0.7400401    |
| 5991 Bn-A03-p18762984 | A-genome specific (napus-rapa) | 0.9976076    | 0.7644388    | not scorable | not scorable | 0.9917355    | 0.6809168    |
| 5992 Bn-A03-p18764384 | A-genome specific (napus-rapa) | 0.8660287    | 0.7793524    | not scorable | not scorable | 1            | 0.9302652    |
| 5993 Bn-A03-p18765971 | A-genome specific (napus-rapa) | 0.9688995    | 0.6821235    | not scorable | not scorable | 0.9504132    | 0.6991098    |
| 5994 Bn-A03-p18766028 | A-genome specific (napus-rapa) | 0.9138756    | 0.6455745    | not scorable | not scorable | 0.9917355    | 0.6800793    |
| 5995 Bn-A03-p18768321 | A-genome specific (napus-rapa) | 0.9880383    | 0.7971544    | not scorable | not scorable | 0.9834711    | 0.777375     |
| 5996 Bn-A03-p18770617 | A-genome specific (napus-rapa) | 0.9904306    | 0.7659637    | not scorable | not scorable | 0.9917355    | 0.7930048    |
| 5997 Bn-A03-p18770982 | A-genome specific (napus-rapa) | 0.9952153    | 0.7832958    | not scorable | not scorable | 0.9917355    | 0.7998117    |
| 5998 Bn-A03-p18775919 | A-genome specific (napus-rapa) | 0.9880383    | 0.7789081    | not scorable | not scorable | 1            | 0.7112501    |
| 5999 Bn-A03-p18776071 | A-genome specific (napus-rapa) | 0.9952153    | 0.6397488    | not scorable | not scorable | 0.9834711    | 0.6499786    |
| 6000 Bn-A03-p18782352 | A-genome specific (napus-rapa) | 0.9880383    | 0.7566057    | not scorable | not scorable | 0.9917355    | 0.786381     |
| 6001 Bn-A03-p18782416 | A-genome specific (napus-rapa) | 0.9856459    | 0.7578342    | not scorable | not scorable | 1            | 0.7136897    |
| 6002 Bn-A03-p18788929 | napus specific                 | 0.5430622    | 0.7588344    | not scorable | not scorable | not scorable | not scorable |
| 6003 Bn-A03-p187972   | A-genome specific (rapa only)  | not scorable | not scorable | not scorable | not scorable | 1            | 0.6663824    |

|                       |                                    |              |              |              |              |              |              |
|-----------------------|------------------------------------|--------------|--------------|--------------|--------------|--------------|--------------|
| 6004 Bn-A03-p18803630 | all not scorable                   | not scorable | not scorable | not scorable | not scorable | not scorable | not scorable |
| 6005 Bn-A03-p18807150 | A-genome specific (napus-rapa)     | 0.9856459    | 0.5484413    | not scorable | not scorable | 0.9917355    | 0.7697235    |
| 6006 Bn-A03-p18810251 | A-genome specific (napus-rapa)     | 0.9976076    | 0.7507116    | not scorable | not scorable | 0.9917355    | 0.6961094    |
| 6007 Bn-A03-p18811487 | A-genome specific (napus-rapa)     | 0.9832536    | 0.7511508    | not scorable | not scorable | 1            | 0.9180558    |
| 6008 Bn-A03-p18816507 | A-genome specific (napus-rapa)     | 0.9976076    | 0.4373566    | not scorable | not scorable | 0.9917355    | 0.8063063    |
| 6009 Bn-A03-p18818925 | A-genome specific (napus-rapa)     | 1            | 0.8117172    | not scorable | not scorable | 1            | 0.8175144    |
| 6010 Bn-A03-p18819844 | A-genome specific (napus-rapa)     | 0.9952153    | 0.8220329    | not scorable | not scorable | 0.9834711    | 0.7070054    |
| 6011 Bn-A03-p18820592 | A-genome specific (napus-rapa)     | 0.9904306    | 0.7495844    | not scorable | not scorable | 0.9917355    | 0.7989676    |
| 6012 Bn-A03-p18824580 | A-genome specific (napus-rapa)     | 0.3708134    | 0.9408662    | not scorable | not scorable | 0.9338843    | 0.8345996    |
| 6013 Bn-A03-p18826478 | A-genome specific (napus-rapa)     | 0.9593301    | 0.3471732    | not scorable | not scorable | 0.9917355    | 0.7415839    |
| 6014 Bn-A03-p18828645 | A-genome specific (napus-rapa)     | 0.9856459    | 0.793972     | not scorable | not scorable | 0.9917355    | 0.7868921    |
| 6015 Bn-A03-p18830716 | A-genome specific (napus-rapa)     | 0.8923445    | 0.7831449    | not scorable | not scorable | 0.9917355    | 0.8752664    |
| 6016 Bn-A03-p18834464 | A-genome specific (napus-rapa)     | 0.9904306    | 0.7841095    | not scorable | not scorable | 0.9917355    | 0.8675472    |
| 6017 Bn-A03-p18836509 | A-genome specific (napus-rapa)     | 0.9784689    | 0.3861595    | not scorable | not scorable | 1            | 0.7495229    |
| 6018 Bn-A03-p18846268 | A-genome specific (napus-rapa)     | 0.9760765    | 0.7756373    | not scorable | not scorable | 1            | 0.8475112    |
| 6019 Bn-A03-p18848732 | A-genome specific (napus-rapa)     | 0.9641148    | 0.5980548    | not scorable | not scorable | 0.9917355    | 0.6926912    |
| 6020 Bn-A03-p18855689 | A-genome specific (napus-rapa)     | 0.9832536    | 0.7642395    | not scorable | not scorable | 0.9834711    | 0.8278041    |
| 6021 Bn-A03-p18859928 | A-genome specific (napus-rapa)     | 0.9904306    | 0.8042495    | not scorable | not scorable | 1            | 0.7779072    |
| 6022 Bn-A03-p18873704 | A-genome specific (napus-rapa)     | 0.9784689    | 0.4155857    | not scorable | not scorable | 0.9834711    | 0.7445134    |
| 6023 Bn-A03-p18883097 | napus specific                     | 0.9688995    | 0.4081837    | not scorable | not scorable | not scorable | not scorable |
| 6024 Bn-A03-p18883151 | C-genome specific (napus-oleracea) | 0.9114832    | 0.2868923    | 0.255814     | 0.6635755    | not scorable | not scorable |
| 6025 Bn-A03-p18886205 | napus specific                     | 0.937799     | 0.7247446    | not scorable | not scorable | not scorable | not scorable |
| 6026 Bn-A03-p18899251 | napus specific                     | 0.9186603    | 0.7587651    | not scorable | not scorable | not scorable | not scorable |
| 6027 Bn-A03-p18899284 | napus specific                     | 0.9114832    | 0.7655693    | not scorable | not scorable | not scorable | not scorable |
| 6028 Bn-A03-p1894119  | A-genome specific (napus-rapa)     | 0.9688995    | 0.5487162    | not scorable | not scorable | 1            | 0.7267181    |
| 6029 Bn-A03-p1899032  | A-genome specific (napus-rapa)     | 0.9090909    | 0.7472325    | not scorable | not scorable | 0.9586777    | 0.8200139    |
| 6030 Bn-A03-p19045801 | A-genome specific (napus-rapa)     | 0.9856459    | 0.7685573    | not scorable | not scorable | 1            | 0.8039527    |
| 6031 Bn-A03-p19046345 | all not scorable                   | not scorable | not scorable | not scorable | not scorable | not scorable | not scorable |
| 6032 Bn-A03-p19047537 | A-genome specific (napus-rapa)     | 0.9880383    | 0.7155481    | not scorable | not scorable | 0.9834711    | 0.8207924    |
| 6033 Bn-A03-p1904916  | A-genome specific (napus-rapa)     | 0.937799     | 0.6480187    | not scorable | not scorable | 0.9917355    | 0.7586453    |
| 6034 Bn-A03-p19065774 | A-genome specific (napus-rapa)     | 0.9880383    | 0.7673887    | not scorable | not scorable | 1            | 0.7415125    |
| 6035 Bn-A03-p19066579 | A-genome specific (napus-rapa)     | 0.9808612    | 0.7505156    | not scorable | not scorable | 1            | 0.6989763    |
| 6036 Bn-A03-p19068030 | A-genome specific (napus-rapa)     | 0.9808612    | 0.3741009    | not scorable | not scorable | 0.9917355    | 0.7393765    |

|      |                  |                                |              |              |              |              |           |           |
|------|------------------|--------------------------------|--------------|--------------|--------------|--------------|-----------|-----------|
| 6037 | Bn-A03-p19071304 | A-genome specific (napus-rapa) | 0.9712918    | 0.7512957    | not scorable | not scorable | 0.9834711 | 0.8303624 |
| 6038 | Bn-A03-p19071572 | A-genome specific (napus-rapa) | 0.9880383    | 0.5213324    | not scorable | not scorable | 0.9917355 | 0.8137031 |
| 6039 | Bn-A03-p19078721 | A-genome specific (napus-rapa) | 0.7966507    | 0.8299983    | not scorable | not scorable | 0.9669421 | 0.706614  |
| 6040 | Bn-A03-p19091667 | A-genome specific (napus-rapa) | 0.9712918    | 0.2540083    | not scorable | not scorable | 1         | 0.7089314 |
| 6041 | Bn-A03-p19094554 | A-genome specific (napus-rapa) | 1            | 0.8618054    | not scorable | not scorable | 0.9669421 | 0.7783759 |
| 6042 | Bn-A03-p19129006 | A-genome specific (napus-rapa) | 0.9856459    | 0.3986091    | not scorable | not scorable | 0.9917355 | 0.8830506 |
| 6043 | Bn-A03-p19132431 | A-genome specific (napus-rapa) | 0.9856459    | 0.7832031    | not scorable | not scorable | 1         | 0.7867216 |
| 6044 | Bn-A03-p19147644 | A-genome specific (napus-rapa) | 0.9928229    | 0.4278602    | not scorable | not scorable | 1         | 0.7789389 |
| 6045 | Bn-A03-p19160298 | A-genome specific (napus-rapa) | 0.9665072    | 0.5445761    | not scorable | not scorable | 0.9834711 | 0.7719007 |
| 6046 | Bn-A03-p19166062 | A-genome specific (napus-rapa) | 0.9712918    | 0.2878649    | not scorable | not scorable | 0.9834711 | 0.6715563 |
| 6047 | Bn-A03-p1918536  | A-genome specific (rapa only)  | not scorable | not scorable | not scorable | not scorable | 0.9834711 | 0.7190452 |
| 6048 | Bn-A03-p19189483 | A-genome specific (napus-rapa) | 0.9880383    | 0.7662436    | not scorable | not scorable | 0.9834711 | 0.7904102 |
| 6049 | Bn-A03-p19191616 | A-genome specific (rapa only)  | not scorable | not scorable | not scorable | not scorable | 0.9752066 | 0.6877309 |
| 6050 | Bn-A03-p19198939 | A-genome specific (napus-rapa) | 0.9688995    | 0.773173     | not scorable | not scorable | 1         | 0.7875286 |
| 6051 | Bn-A03-p19202899 | A-genome specific (napus-rapa) | 0.9545454    | 0.7675167    | not scorable | not scorable | 0.9669421 | 0.7168917 |
| 6052 | Bn-A03-p19203494 | A-genome specific (napus-rapa) | 0.9688995    | 0.7651234    | not scorable | not scorable | 0.9834711 | 0.786392  |
| 6053 | Bn-A03-p19204483 | A-genome specific (napus-rapa) | 0.9593301    | 0.6393643    | not scorable | not scorable | 0.9752066 | 0.6758332 |
| 6054 | Bn-A03-p19210113 | A-genome specific (napus-rapa) | 0.9856459    | 0.721864     | not scorable | not scorable | 1         | 0.7183708 |
| 6055 | Bn-A03-p1922712  | A-genome specific (napus-rapa) | 0.9712918    | 0.7695417    | not scorable | not scorable | 0.9917355 | 0.8058044 |
| 6056 | Bn-A03-p1923025  | A-genome specific (napus-rapa) | 0.9617225    | 0.7801909    | not scorable | not scorable | 0.9504132 | 0.8158876 |
| 6057 | Bn-A03-p19243266 | A-genome specific (napus-rapa) | 0.9808612    | 0.7757382    | not scorable | not scorable | 0.9917355 | 0.7791938 |
| 6058 | Bn-A03-p19252196 | A-genome specific (napus-rapa) | 0.9880383    | 0.7599619    | not scorable | not scorable | 1         | 0.7002952 |
| 6059 | Bn-A03-p19254792 | A-genome specific (napus-rapa) | 0.9569378    | 0.6242054    | not scorable | not scorable | 0.9917355 | 0.7129078 |
| 6060 | Bn-A03-p1926809  | A-genome specific (napus-rapa) | 0.9688995    | 0.7979753    | not scorable | not scorable | 0.9669421 | 0.7753451 |
| 6061 | Bn-A03-p19274997 | A-genome specific (napus-rapa) | 0.9688995    | 0.7692891    | not scorable | not scorable | 1         | 0.8848283 |
| 6062 | Bn-A03-p19323656 | A-genome specific (napus-rapa) | 0.9808612    | 0.4017629    | not scorable | not scorable | 0.9752066 | 0.7390499 |
| 6063 | Bn-A03-p19333794 | A-genome specific (napus-rapa) | 0.9688995    | 0.5613789    | not scorable | not scorable | 0.9917355 | 0.7972284 |
| 6064 | Bn-A03-p19344007 | A-genome specific (napus-rapa) | 0.9712918    | 0.5003403    | not scorable | not scorable | 0.9917355 | 0.8099015 |
| 6065 | Bn-A03-p19359327 | A-genome specific (napus-rapa) | 0.8732057    | 0.9311934    | not scorable | not scorable | 0.7272727 | 0.7467983 |
| 6066 | Bn-A03-p19366010 | A-genome specific (napus-rapa) | 0.9952153    | 0.8100545    | not scorable | not scorable | 1         | 0.7133861 |
| 6067 | Bn-A03-p19375820 | A-genome specific (napus-rapa) | 0.9186603    | 0.7617968    | not scorable | not scorable | 0.9752066 | 0.7376153 |
| 6068 | Bn-A03-p19380485 | A-genome specific (napus-rapa) | 1            | 0.661095     | not scorable | not scorable | 0.9669421 | 0.6145211 |
| 6069 | Bn-A03-p19380801 | A-genome specific (napus-rapa) | 0.9976076    | 0.7438509    | not scorable | not scorable | 0.9752066 | 0.8119538 |



|      |                  |                                |              |              |              |              |           |           |
|------|------------------|--------------------------------|--------------|--------------|--------------|--------------|-----------|-----------|
| 6070 | Bn-A03-p19389076 | A-genome specific (napus-rapa) | 0.9808612    | 0.7064304    | not scorable | not scorable | 0.9834711 | 0.7078112 |
| 6071 | Bn-A03-p19408999 | A-genome specific (napus-rapa) | 0.9760765    | 0.4452616    | not scorable | not scorable | 1         | 0.6651956 |
| 6072 | Bn-A03-p19438796 | A-genome specific (napus-rapa) | 0.9904306    | 0.7384716    | not scorable | not scorable | 0.9917355 | 0.7086143 |
| 6073 | Bn-A03-p19441544 | A-genome specific (napus-rapa) | 0.9832536    | 0.6752714    | not scorable | not scorable | 1         | 0.6582553 |
| 6074 | Bn-A03-p19441620 | A-genome specific (napus-rapa) | 0.9808612    | 0.7604288    | not scorable | not scorable | 0.9834711 | 0.7663515 |
| 6075 | Bn-A03-p19442945 | A-genome specific (napus-rapa) | 0.9952153    | 0.357811     | not scorable | not scorable | 1         | 0.7830779 |
| 6076 | Bn-A03-p19462036 | A-genome specific (napus-rapa) | 0.9569378    | 0.7339234    | not scorable | not scorable | 0.9917355 | 0.699551  |
| 6077 | Bn-A03-p19475069 | A-genome specific (napus-rapa) | 0.9688995    | 0.458533     | not scorable | not scorable | 1         | 0.8934759 |
| 6078 | Bn-A03-p19501529 | A-genome specific (napus-rapa) | 0.3133971    | 0.84958      | not scorable | not scorable | 0.7272727 | 0.8663617 |
| 6079 | Bn-A03-p19510486 | A-genome specific (napus-rapa) | 0.9952153    | 0.8361156    | not scorable | not scorable | 0.9917355 | 0.7753705 |
| 6080 | Bn-A03-p19512402 | A-genome specific (napus-rapa) | 0.8947368    | 0.5866775    | not scorable | not scorable | 0.9917355 | 0.6844546 |
| 6081 | Bn-A03-p1951453  | A-genome specific (rapa only)  | not scorable | not scorable | not scorable | not scorable | 0.9669421 | 0.6780698 |
| 6082 | Bn-A03-p19519674 | A-genome specific (napus-rapa) | 0.9880383    | 0.7584445    | not scorable | not scorable | 1         | 0.700622  |
| 6083 | Bn-A03-p19526788 | A-genome specific (napus-rapa) | 0.9784689    | 0.720786     | not scorable | not scorable | 0.9834711 | 0.6623063 |
| 6084 | Bn-A03-p19527199 | A-genome specific (napus-rapa) | 0.9952153    | 0.7564561    | not scorable | not scorable | 1         | 0.6980743 |
| 6085 | Bn-A03-p19536775 | A-genome specific (napus-rapa) | 0.9808612    | 0.8098843    | not scorable | not scorable | 0.9917355 | 0.7459868 |
| 6086 | Bn-A03-p19542946 | A-genome specific (napus-rapa) | 1            | 0.5076848    | not scorable | not scorable | 0.9834711 | 0.7060285 |
| 6087 | Bn-A03-p1954639  | A-genome specific (napus-rapa) | 0.9521531    | 0.5947318    | not scorable | not scorable | 1         | 0.7578901 |
| 6088 | Bn-A03-p19559007 | A-genome specific (napus-rapa) | 0.9904306    | 0.7568452    | not scorable | not scorable | 0.9917355 | 0.6700526 |
| 6089 | Bn-A03-p19560497 | A-genome specific (napus-rapa) | 0.9880383    | 0.7574773    | not scorable | not scorable | 0.9834711 | 0.735888  |
| 6090 | Bn-A03-p19560700 | A-genome specific (napus-rapa) | 0.9760765    | 0.7615058    | not scorable | not scorable | 0.9752066 | 0.7110013 |
| 6091 | Bn-A03-p19564317 | A-genome specific (napus-rapa) | 0.9712918    | 0.7082992    | not scorable | not scorable | 0.9752066 | 0.6261423 |
| 6092 | Bn-A03-p19564333 | A-genome specific (napus-rapa) | 0.9162679    | 0.8328186    | not scorable | not scorable | 0.9834711 | 0.7613197 |
| 6093 | Bn-A03-p19573902 | A-genome specific (napus-rapa) | 0.9808612    | 0.3522361    | not scorable | not scorable | 1         | 0.7227835 |
| 6094 | Bn-A03-p19582066 | A-genome specific (napus-rapa) | 0.9808612    | 0.3615849    | not scorable | not scorable | 1         | 0.8213951 |
| 6095 | Bn-A03-p1959964  | A-genome specific (napus-rapa) | 0.9665072    | 0.6872754    | not scorable | not scorable | 0.9834711 | 0.6392025 |
| 6096 | Bn-A03-p1960313  | A-genome specific (napus-rapa) | 0.9593301    | 0.6660919    | not scorable | not scorable | 0.9834711 | 0.773732  |
| 6097 | Bn-A03-p1960694  | A-genome specific (napus-rapa) | 0.9712918    | 0.6596957    | not scorable | not scorable | 0.9917355 | 0.688472  |
| 6098 | Bn-A03-p196636   | A-genome specific (napus-rapa) | 0.6818182    | 0.7556645    | not scorable | not scorable | 0.9834711 | 0.707594  |
| 6099 | Bn-A03-p19727558 | A-genome specific (napus-rapa) | 0.9976076    | 0.9304118    | not scorable | not scorable | 0.9834711 | 0.7890996 |
| 6100 | Bn-A03-p19740654 | A-genome specific (rapa only)  | not scorable | not scorable | not scorable | not scorable | 0.9917355 | 0.6764538 |
| 6101 | Bn-A03-p19751864 | A-genome specific (napus-rapa) | 0.9162679    | 0.8084127    | not scorable | not scorable | 0.9504132 | 0.7249707 |
| 6102 | Bn-A03-p19752316 | A-genome specific (napus-rapa) | 0.9401914    | 0.8548384    | not scorable | not scorable | 0.9090909 | 0.9171779 |

|      |                  |                                |           |           |              |              |              |              |
|------|------------------|--------------------------------|-----------|-----------|--------------|--------------|--------------|--------------|
| 6103 | Bn-A03-p19753364 | A-genome specific (napus-rapa) | 1         | 0.7808523 | not scorable | not scorable | 0.9917355    | 0.8134644    |
| 6104 | Bn-A03-p19753436 | A-genome specific (napus-rapa) | 1         | 0.6794679 | not scorable | not scorable | 1            | 0.7252899    |
| 6105 | Bn-A03-p19753470 | A-genome specific (napus-rapa) | 1         | 0.4541752 | not scorable | not scorable | 0.9669421    | 0.5258642    |
| 6106 | Bn-A03-p19766214 | napus specific                 | 0.9928229 | 0.3283196 | not scorable | not scorable | not scorable | not scorable |
| 6107 | Bn-A03-p19768447 | A-genome specific (napus-rapa) | 1         | 0.5056018 | not scorable | not scorable | 0.9669421    | 0.793625     |
| 6108 | Bn-A03-p19769998 | A-genome specific (napus-rapa) | 1         | 0.7992011 | not scorable | not scorable | 1            | 0.8048838    |
| 6109 | Bn-A03-p19772056 | A-genome specific (napus-rapa) | 0.9928229 | 0.6309823 | not scorable | not scorable | 0.9917355    | 0.7635841    |
| 6110 | Bn-A03-p19776651 | A-genome specific (napus-rapa) | 0.9976076 | 0.9655425 | not scorable | not scorable | 1            | 0.7930965    |
| 6111 | Bn-A03-p19793770 | A-genome specific (napus-rapa) | 0.930622  | 0.8751893 | not scorable | not scorable | 0.9917355    | 0.7627573    |
| 6112 | Bn-A03-p19796541 | A-genome specific (napus-rapa) | 0.9258373 | 0.8203386 | not scorable | not scorable | 0.9834711    | 0.7526286    |
| 6113 | Bn-A03-p19798208 | A-genome specific (napus-rapa) | 0.9976076 | 0.5190509 | not scorable | not scorable | 0.9669421    | 0.6662316    |
| 6114 | Bn-A03-p19805933 | A-genome specific (napus-rapa) | 1         | 0.309222  | not scorable | not scorable | 0.9834711    | 0.7181162    |
| 6115 | Bn-A03-p19806018 | A-genome specific (napus-rapa) | 1         | 0.3695414 | not scorable | not scorable | 0.9834711    | 0.7312811    |
| 6116 | Bn-A03-p19819975 | A-genome specific (napus-rapa) | 1         | 0.5634728 | not scorable | not scorable | 1            | 0.6937931    |
| 6117 | Bn-A03-p19832980 | A-genome specific (napus-rapa) | 1         | 0.7917327 | not scorable | not scorable | 0.9917355    | 0.8020663    |
| 6118 | Bn-A03-p19844661 | A-genome specific (napus-rapa) | 0.9330143 | 0.8104562 | not scorable | not scorable | 0.7933884    | 0.7802427    |
| 6119 | Bn-A03-p19850198 | A-genome specific (napus-rapa) | 0.9976076 | 0.4634023 | not scorable | not scorable | 1            | 0.7905928    |
| 6120 | Bn-A03-p19851089 | A-genome specific (napus-rapa) | 0.9354067 | 0.7529355 | not scorable | not scorable | 0.8016529    | 0.7763917    |
| 6121 | Bn-A03-p19868485 | A-genome specific (napus-rapa) | 0.9952153 | 0.4001562 | not scorable | not scorable | 0.9834711    | 0.7286804    |
| 6122 | Bn-A03-p19874058 | A-genome specific (napus-rapa) | 0.9928229 | 0.7663468 | not scorable | not scorable | 0.9917355    | 0.691284     |
| 6123 | Bn-A03-p19880918 | A-genome specific (napus-rapa) | 1         | 0.5895585 | not scorable | not scorable | 0.9834711    | 0.6455349    |
| 6124 | Bn-A03-p198822   | A-genome specific (napus-rapa) | 0.6818182 | 0.7771927 | not scorable | not scorable | 0.9917355    | 0.7162221    |
| 6125 | Bn-A03-p19896843 | napus specific                 | 0.7464115 | 0.7341067 | not scorable | not scorable | not scorable | not scorable |
| 6126 | Bn-A03-p19897251 | A-genome specific (napus-rapa) | 1         | 0.2993476 | not scorable | not scorable | 0.9834711    | 0.7047676    |
| 6127 | Bn-A03-p19902796 | A-genome specific (napus-rapa) | 0.9832536 | 0.3626459 | not scorable | not scorable | 0.9917355    | 0.6950014    |
| 6128 | Bn-A03-p1990974  | genome unspecific (all in)     | 0.9832536 | 0.3297311 |              | 1 0.7970625  | 0.9917355    | 0.7411686    |
| 6129 | Bn-A03-p19916449 | A-genome specific (napus-rapa) | 0.9976076 | 0.307027  | not scorable | not scorable | 0.9752066    | 0.5567098    |
| 6130 | Bn-A03-p19925593 | A-genome specific (napus-rapa) | 0.9856459 | 0.7799436 | not scorable | not scorable | 0.9917355    | 0.7674381    |
| 6131 | Bn-A03-p19928269 | A-genome specific (napus-rapa) | 0.9928229 | 0.7676277 | not scorable | not scorable | 1            | 0.8436524    |
| 6132 | Bn-A03-p19935973 | A-genome specific (napus-rapa) | 0.9808612 | 0.7727245 | not scorable | not scorable | 1            | 0.7786573    |
| 6133 | Bn-A03-p19942172 | A-genome specific (napus-rapa) | 0.9904306 | 0.7741914 | not scorable | not scorable | 0.9752066    | 0.7838417    |
| 6134 | Bn-A03-p19951011 | A-genome specific (napus-rapa) | 0.9258373 | 0.2531542 | not scorable | not scorable | 1            | 0.7607262    |
| 6135 | Bn-A03-p19953514 | A-genome specific (napus-rapa) | 0.7416268 | 0.7429729 | not scorable | not scorable | 0.9752066    | 0.7107991    |

|      |                  |                                |              |              |              |              |              |              |
|------|------------------|--------------------------------|--------------|--------------|--------------|--------------|--------------|--------------|
| 6136 | Bn-A03-p19956358 | napus specific                 | 1            | 0.3323511    | not scorable | not scorable | not scorable | not scorable |
| 6137 | Bn-A03-p19973423 | A-genome specific (napus-rapa) | 0.9856459    | 0.4428411    | not scorable | not scorable | 0.9752066    | 0.6967553    |
| 6138 | Bn-A03-p19974784 | A-genome specific (napus-rapa) | 0.9928229    | 0.7574182    | not scorable | not scorable | 0.9917355    | 0.7372297    |
| 6139 | Bn-A03-p19975539 | A-genome specific (napus-rapa) | 0.9736842    | 0.2830442    | not scorable | not scorable | 0.9917355    | 0.6927454    |
| 6140 | Bn-A03-p20000930 | A-genome specific (napus-rapa) | 0.9593301    | 0.6181672    | not scorable | not scorable | 0.9669421    | 0.6513372    |
| 6141 | Bn-A03-p20005216 | A-genome specific (napus-rapa) | 0.9712918    | 0.5260543    | not scorable | not scorable | 0.9917355    | 0.7219275    |
| 6142 | Bn-A03-p20007146 | A-genome specific (napus-rapa) | 0.9688995    | 0.3568729    | not scorable | not scorable | 1            | 0.5964255    |
| 6143 | Bn-A03-p20008868 | A-genome specific (napus-rapa) | 1            | 0.5485577    | not scorable | not scorable | 0.9752066    | 0.7209976    |
| 6144 | Bn-A03-p20025367 | A-genome specific (napus-rapa) | 1            | 0.7649662    | not scorable | not scorable | 1            | 0.8493798    |
| 6145 | Bn-A03-p20033408 | A-genome specific (napus-rapa) | 1            | 0.8576522    | not scorable | not scorable | 1            | 0.8211405    |
| 6146 | Bn-A03-p2003715  | A-genome specific (napus-rapa) | 0.9808612    | 0.8376459    | not scorable | not scorable | 0.9917355    | 0.779722     |
| 6147 | Bn-A03-p20044499 | A-genome specific (rapa only)  | not scorable | not scorable | not scorable | not scorable | 0.9917355    | 0.7282605    |
| 6148 | Bn-A03-p2004585  | A-genome specific (napus-rapa) | 0.9976076    | 0.3985095    | not scorable | not scorable | 0.9917355    | 0.7541243    |
| 6149 | Bn-A03-p2005352  | A-genome specific (rapa only)  | not scorable | not scorable | not scorable | not scorable | 0.9917355    | 0.7801163    |
| 6150 | Bn-A03-p20079160 | A-genome specific (rapa only)  | not scorable | not scorable | not scorable | not scorable | 0.9338843    | 0.7564192    |
| 6151 | Bn-A03-p20079452 | A-genome specific (napus-rapa) | 0.9952153    | 0.6825824    | not scorable | not scorable | 0.9669421    | 0.7240042    |
| 6152 | Bn-A03-p20080800 | A-genome specific (napus-rapa) | 0.9976076    | 0.740008     | not scorable | not scorable | 0.9917355    | 0.6594836    |
| 6153 | Bn-A03-p20086767 | A-genome specific (napus-rapa) | 0.9497608    | 0.2990162    | not scorable | not scorable | 0.9834711    | 0.6448386    |
| 6154 | Bn-A03-p20100490 | A-genome specific (napus-rapa) | 0.9760765    | 0.4651143    | not scorable | not scorable | 1            | 0.6391391    |
| 6155 | Bn-A03-p201146   | A-genome specific (rapa only)  | not scorable | not scorable | not scorable | not scorable | 1            | 0.9272014    |
| 6156 | Bn-A03-p20114910 | A-genome specific (napus-rapa) | 0.9736842    | 0.4287883    | not scorable | not scorable | 0.9834711    | 0.7848179    |
| 6157 | Bn-A03-p20122616 | A-genome specific (napus-rapa) | 0.9832536    | 0.3489036    | not scorable | not scorable | 0.9834711    | 0.7483006    |
| 6158 | Bn-A03-p20125361 | napus specific                 | 0.8397129    | 0.8807803    | not scorable | not scorable | not scorable | not scorable |
| 6159 | Bn-A03-p20145024 | A-genome specific (napus-rapa) | 0.9808612    | 0.3058938    | not scorable | not scorable | 0.9834711    | 0.7309557    |
| 6160 | Bn-A03-p20150479 | A-genome specific (napus-rapa) | 0.9641148    | 0.7557421    | not scorable | not scorable | 0.9504132    | 0.7576761    |
| 6161 | Bn-A03-p20151244 | A-genome specific (napus-rapa) | 0.9712918    | 0.7182727    | not scorable | not scorable | 1            | 0.727949     |
| 6162 | Bn-A03-p20158806 | A-genome specific (napus-rapa) | 0.9808612    | 0.3911626    | not scorable | not scorable | 1            | 0.7656837    |
| 6163 | Bn-A03-p20164751 | A-genome specific (napus-rapa) | 0.9928229    | 0.4320413    | not scorable | not scorable | 1            | 0.7047713    |
| 6164 | Bn-A03-p20180463 | A-genome specific (napus-rapa) | 0.9760765    | 0.2332338    | not scorable | not scorable | 1            | 0.7379075    |
| 6165 | Bn-A03-p2018577  | A-genome specific (rapa only)  | not scorable | not scorable | not scorable | not scorable | 1            | 0.7163702    |
| 6166 | Bn-A03-p20186336 | A-genome specific (rapa only)  | not scorable | not scorable | not scorable | not scorable | 1            | 0.7977625    |
| 6167 | Bn-A03-p20213689 | A-genome specific (napus-rapa) | 0.9712918    | 0.5965237    | not scorable | not scorable | 0.9834711    | 0.6457031    |
| 6168 | Bn-A03-p20216550 | A-genome specific (napus-rapa) | 0.9617225    | 0.4678882    | not scorable | not scorable | 1            | 0.7347732    |

|      |                  |                                |              |              |              |              |              |              |
|------|------------------|--------------------------------|--------------|--------------|--------------|--------------|--------------|--------------|
| 6169 | Bn-A03-p20221017 | napus specific                 | 0.9282297    | 0.7110363    | not scorable | not scorable | not scorable | not scorable |
| 6170 | Bn-A03-p20225335 | A-genome specific (napus-rapa) | 0.9952153    | 0.3243728    | not scorable | not scorable | 1            | 0.6370981    |
| 6171 | Bn-A03-p20237681 | A-genome specific (napus-rapa) | 0.9617225    | 0.2422656    | not scorable | not scorable | 0.9834711    | 0.9131089    |
| 6172 | Bn-A03-p20262635 | A-genome specific (rapa only)  | not scorable | not scorable | not scorable | not scorable | 0.7933884    | 0.7073662    |
| 6173 | Bn-A03-p20269025 | A-genome specific (napus-rapa) | 1            | 0.3923702    | not scorable | not scorable | 1            | 0.7286923    |
| 6174 | Bn-A03-p20286113 | A-genome specific (napus-rapa) | 0.9952153    | 0.8009252    | not scorable | not scorable | 0.9834711    | 0.7892681    |
| 6175 | Bn-A03-p203000   | A-genome specific (napus-rapa) | 0.9258373    | 0.7603936    | not scorable | not scorable | 1            | 0.7193484    |
| 6176 | Bn-A03-p2030676  | A-genome specific (napus-rapa) | 0.9976076    | 0.5457158    | not scorable | not scorable | 1            | 0.6476653    |
| 6177 | Bn-A03-p20318892 | A-genome specific (napus-rapa) | 0.9760765    | 0.7576782    | not scorable | not scorable | 0.9421487    | 0.7993273    |
| 6178 | Bn-A03-p20319347 | A-genome specific (napus-rapa) | 0.9784689    | 0.7931784    | not scorable | not scorable | 0.9752066    | 0.7586836    |
| 6179 | Bn-A03-p20324951 | A-genome specific (napus-rapa) | 1            | 0.8534212    | not scorable | not scorable | 1            | 0.7934078    |
| 6180 | Bn-A03-p20350690 | A-genome specific (napus-rapa) | 0.9952153    | 0.8337978    | not scorable | not scorable | 1            | 0.7898603    |
| 6181 | Bn-A03-p20358050 | A-genome specific (napus-rapa) | 0.9688995    | 0.5710906    | not scorable | not scorable | 0.9669421    | 0.8567631    |
| 6182 | Bn-A03-p20361721 | A-genome specific (napus-rapa) | 0.9066986    | 0.7137193    | not scorable | not scorable | 0.9752066    | 0.6831111    |
| 6183 | Bn-A03-p20369417 | A-genome specific (napus-rapa) | 0.9904306    | 0.4587319    | not scorable | not scorable | 1            | 0.8337883    |
| 6184 | Bn-A03-p20369521 | A-genome specific (napus-rapa) | 0.9832536    | 0.7970738    | not scorable | not scorable | 0.9917355    | 0.6586018    |
| 6185 | Bn-A03-p20375108 | genome unspecific (all in)     | 0.9665072    | 0.4841399    | 0.9767442    | 0.8174405    | 1            | 0.9095823    |
| 6186 | Bn-A03-p20375514 | A-genome specific (napus-rapa) | 0.9473684    | 0.5790371    | not scorable | not scorable | 1            | 0.8815182    |
| 6187 | Bn-A03-p20383979 | A-genome specific (napus-rapa) | 0.9952153    | 0.8178393    | not scorable | not scorable | 0.9917355    | 0.806816     |
| 6188 | Bn-A03-p20395531 | A-genome specific (napus-rapa) | 1            | 0.7107133    | not scorable | not scorable | 0.9917355    | 0.6751812    |
| 6189 | Bn-A03-p20395584 | A-genome specific (napus-rapa) | 0.9976076    | 0.6955988    | not scorable | not scorable | 1            | 0.7698651    |
| 6190 | Bn-A03-p20398340 | A-genome specific (napus-rapa) | 0.9688995    | 0.7482507    | not scorable | not scorable | 0.9752066    | 0.6013519    |
| 6191 | Bn-A03-p20398711 | A-genome specific (napus-rapa) | 0.9760765    | 0.7532679    | not scorable | not scorable | 0.9752066    | 0.7983918    |
| 6192 | Bn-A03-p20409233 | A-genome specific (napus-rapa) | 0.9736842    | 0.3795091    | not scorable | not scorable | 1            | 0.8593605    |
| 6193 | Bn-A03-p20413103 | A-genome specific (napus-rapa) | 0.9952153    | 0.7079429    | not scorable | not scorable | 1            | 0.7304603    |
| 6194 | Bn-A03-p20417630 | A-genome specific (napus-rapa) | 0.9928229    | 0.5051054    | not scorable | not scorable | 0.8181818    | 0.7801041    |
| 6195 | Bn-A03-p20424880 | A-genome specific (napus-rapa) | 0.9928229    | 0.7996594    | not scorable | not scorable | 0.9834711    | 0.692294     |
| 6196 | Bn-A03-p20427554 | A-genome specific (napus-rapa) | 0.9904306    | 0.8604092    | not scorable | not scorable | 0.9669421    | 0.7713128    |
| 6197 | Bn-A03-p20429794 | A-genome specific (napus-rapa) | 0.9952153    | 0.713192     | not scorable | not scorable | 0.9917355    | 0.6902151    |
| 6198 | Bn-A03-p20442807 | A-genome specific (rapa only)  | not scorable | not scorable | not scorable | not scorable | 0.9752066    | 0.6444087    |
| 6199 | Bn-A03-p20477726 | A-genome specific (napus-rapa) | 1            | 0.3432764    | not scorable | not scorable | 0.9834711    | 0.8211704    |
| 6200 | Bn-A03-p20495253 | A-genome specific (napus-rapa) | 0.9976076    | 0.864391     | not scorable | not scorable | 0.9752066    | 0.7017789    |
| 6201 | Bn-A03-p20495700 | A-genome specific (napus-rapa) | 0.9928229    | 0.7726158    | not scorable | not scorable | 0.9917355    | 0.745065     |

|      |                  |                                |              |              |              |              |              |              |
|------|------------------|--------------------------------|--------------|--------------|--------------|--------------|--------------|--------------|
| 6202 | Bn-A03-p20514460 | napus specific                 | 0.9593301    | 0.3554783    | not scorable | not scorable | not scorable | not scorable |
| 6203 | Bn-A03-p20518761 | A-genome specific (napus-rapa) | 0.9497608    | 0.5317938    | not scorable | not scorable | 0.9586777    | 0.7241183    |
| 6204 | Bn-A03-p20523474 | A-genome specific (rapa only)  | not scorable | not scorable | not scorable | not scorable | 0.9586777    | 0.5277287    |
| 6205 | Bn-A03-p20523585 | A-genome specific (napus-rapa) | 0.9880383    | 0.7465385    | not scorable | not scorable | 0.9834711    | 0.6238458    |
| 6206 | Bn-A03-p20524035 | genome unspecific (all in)     | 0.9760765    | 0.2529562    | 0.9767442    | 0.3153403    | 1            | 0.8114529    |
| 6207 | Bn-A03-p20525474 | A-genome specific (napus-rapa) | 0.9617225    | 0.7032795    | not scorable | not scorable | 0.9834711    | 0.6479452    |
| 6208 | Bn-A03-p20525591 | A-genome specific (napus-rapa) | 0.9856459    | 0.7816616    | not scorable | not scorable | 0.9834711    | 0.823826     |
| 6209 | Bn-A03-p2054412  | A-genome specific (napus-rapa) | 0.9712918    | 0.7530861    | not scorable | not scorable | 0.9752066    | 0.7312261    |
| 6210 | Bn-A03-p20550791 | A-genome specific (rapa only)  | not scorable | not scorable | not scorable | not scorable | 0.9752066    | 0.7471964    |
| 6211 | Bn-A03-p20551216 | A-genome specific (napus-rapa) | 0.9976076    | 0.8236186    | not scorable | not scorable | 0.9752066    | 0.7600628    |
| 6212 | Bn-A03-p2055179  | A-genome specific (rapa only)  | not scorable | not scorable | not scorable | not scorable | 0.9834711    | 0.7889516    |
| 6213 | Bn-A03-p20560569 | A-genome specific (napus-rapa) | 0.9736842    | 0.463465     | not scorable | not scorable | 0.9586777    | 0.6049393    |
| 6214 | Bn-A03-p20568764 | A-genome specific (napus-rapa) | 0.9784689    | 0.733285     | not scorable | not scorable | 1            | 0.7304791    |
| 6215 | Bn-A03-p20584351 | genome unspecific (all in)     | 0.9712918    | 0.4877732    |              | 1            | 0.7966806    | 0.9917355    |
| 6216 | Bn-A03-p20604949 | A-genome specific (napus-rapa) | 0.9712918    | 0.4202984    | not scorable | not scorable | 0.9917355    | 0.7782079    |
| 6217 | Bn-A03-p20609910 | A-genome specific (napus-rapa) | 0.9736842    | 0.6487846    | not scorable | not scorable | 1            | 0.7701765    |
| 6218 | Bn-A03-p20627333 | A-genome specific (napus-rapa) | 0.9952153    | 0.6966182    | not scorable | not scorable | 0.9752066    | 0.6630704    |
| 6219 | Bn-A03-p20656717 | A-genome specific (napus-rapa) | 0.9593301    | 0.4956236    | not scorable | not scorable | 1            | 0.7757955    |
| 6220 | Bn-A03-p20662048 | A-genome specific (napus-rapa) | 0.9784689    | 0.7987103    | not scorable | not scorable | 0.9834711    | 0.7269177    |
| 6221 | Bn-A03-p20664670 | A-genome specific (napus-rapa) | 0.9784689    | 0.4998975    | not scorable | not scorable | 0.9834711    | 0.7746316    |
| 6222 | Bn-A03-p20670561 | A-genome specific (napus-rapa) | 0.9856459    | 0.6916338    | not scorable | not scorable | 0.9752066    | 0.6891034    |
| 6223 | Bn-A03-p20673486 | A-genome specific (napus-rapa) | 0.9808612    | 0.315338     | not scorable | not scorable | 0.9586777    | 0.7195854    |
| 6224 | Bn-A03-p20678223 | A-genome specific (napus-rapa) | 0.9808612    | 0.7631621    | not scorable | not scorable | 0.9917355    | 0.8921801    |
| 6225 | Bn-A03-p20678571 | A-genome specific (napus-rapa) | 0.9784689    | 0.7527214    | not scorable | not scorable | 0.9834711    | 0.8366571    |
| 6226 | Bn-A03-p20691359 | A-genome specific (napus-rapa) | 0.9641148    | 0.5129788    | not scorable | not scorable | 1            | 0.7880695    |
| 6227 | Bn-A03-p20693752 | A-genome specific (napus-rapa) | 0.9760765    | 0.4608092    | not scorable | not scorable | 1            | 0.8342676    |
| 6228 | Bn-A03-p20701991 | A-genome specific (napus-rapa) | 0.9928229    | 0.7775438    | not scorable | not scorable | 0.9917355    | 0.7711118    |
| 6229 | Bn-A03-p20702469 | A-genome specific (napus-rapa) | 1            | 0.692532     | not scorable | not scorable | 1            | 0.7396948    |
| 6230 | Bn-A03-p2071494  | A-genome specific (napus-rapa) | 1            | 0.4960324    | not scorable | not scorable | 0.9917355    | 0.729495     |
| 6231 | Bn-A03-p20727133 | A-genome specific (napus-rapa) | 0.9928229    | 0.3749401    | not scorable | not scorable | 0.9752066    | 0.7807903    |
| 6232 | Bn-A03-p20730830 | A-genome specific (napus-rapa) | 0.9856459    | 0.7553341    | not scorable | not scorable | 1            | 0.9175813    |
| 6233 | Bn-A03-p2073180  | A-genome specific (napus-rapa) | 1            | 0.4905245    | not scorable | not scorable | 1            | 0.7664936    |
| 6234 | Bn-A03-p20736965 | A-genome specific (napus-rapa) | 0.9736842    | 0.5409086    | not scorable | not scorable | 1            | 0.7523996    |

|                       |                                   |              |              |              |              |              |              |
|-----------------------|-----------------------------------|--------------|--------------|--------------|--------------|--------------|--------------|
| 6235 Bn-A03-p2074890  | A-genome specific (napus-rapa)    | 0.9688995    | 0.7589542    | not scorable | not scorable | 0.9834711    | 0.7769175    |
| 6236 Bn-A03-p20749815 | A-genome specific (napus-rapa)    | 0.9808612    | 0.3823527    | not scorable | not scorable | 1            | 0.8296082    |
| 6237 Bn-A03-p20762376 | A-genome specific (napus-rapa)    | 0.9784689    | 0.463612     | not scorable | not scorable | 1            | 0.9205657    |
| 6238 Bn-A03-p207748   | genome unspecific (oleracea-rapa) | not scorable | not scorable | 0.8914729    | 0.7466597    | 1            | 0.7914145    |
| 6239 Bn-A03-p20786060 | A-genome specific (napus-rapa)    | 0.9425837    | 0.7526995    | not scorable | not scorable | 0.9338843    | 0.7819484    |
| 6240 Bn-A03-p20848887 | all not scorable                  | not scorable | not scorable | not scorable | not scorable | not scorable | not scorable |
| 6241 Bn-A03-p20909567 | A-genome specific (napus-rapa)    | 0.9545454    | 0.3245638    | not scorable | not scorable | 0.9834711    | 0.8221763    |
| 6242 Bn-A03-p20937268 | A-genome specific (napus-rapa)    | 0.9928229    | 0.2755845    | not scorable | not scorable | 0.9669421    | 0.7514905    |
| 6243 Bn-A03-p20983297 | A-genome specific (napus-rapa)    | 0.9928229    | 0.7758434    | not scorable | not scorable | 1            | 0.8474829    |
| 6244 Bn-A03-p20983398 | A-genome specific (napus-rapa)    | 0.9952153    | 0.3939326    | not scorable | not scorable | 1            | 0.682759     |
| 6245 Bn-A03-p2100226  | A-genome specific (rapa only)     | not scorable | not scorable | not scorable | not scorable | 0.9834711    | 0.8539659    |
| 6246 Bn-A03-p21075664 | A-genome specific (napus-rapa)    | 0.9880383    | 0.4918177    | not scorable | not scorable | 0.9917355    | 0.776694     |
| 6247 Bn-A03-p21076805 | A-genome specific (napus-rapa)    | 1            | 0.4126867    | not scorable | not scorable | 0.9834711    | 0.5815508    |
| 6248 Bn-A03-p21155851 | A-genome specific (napus-rapa)    | 1            | 0.7876927    | not scorable | not scorable | 1            | 0.9175813    |
| 6249 Bn-A03-p21199018 | genome unspecific (oleracea-rapa) | not scorable | not scorable |              | 1            | 0.7179766    | 1            |
| 6250 Bn-A03-p21205471 | A-genome specific (napus-rapa)    | 0.9952153    | 0.4264135    | not scorable | not scorable | 0.9917355    | 0.7357489    |
| 6251 Bn-A03-p21210189 | A-genome specific (napus-rapa)    | 1            | 0.3241173    | not scorable | not scorable | 1            | 0.7559249    |
| 6252 Bn-A03-p21225846 | A-genome specific (napus-rapa)    | 0.9043062    | 0.6870103    | not scorable | not scorable | 0.9669421    | 0.7285719    |
| 6253 Bn-A03-p21226758 | A-genome specific (rapa only)     | not scorable | not scorable | not scorable | not scorable | 0.9917355    | 0.7117158    |
| 6254 Bn-A03-p21234281 | A-genome specific (napus-rapa)    | 0.9832536    | 0.7910416    | not scorable | not scorable | 1            | 0.7515329    |
| 6255 Bn-A03-p21237671 | A-genome specific (napus-rapa)    | 0.9856459    | 0.6612093    | not scorable | not scorable | 1            | 0.7770717    |
| 6256 Bn-A03-p21238466 | A-genome specific (napus-rapa)    | 0.9904306    | 0.6936077    | not scorable | not scorable | 1            | 0.7235095    |
| 6257 Bn-A03-p21241827 | A-genome specific (napus-rapa)    | 1            | 0.7662671    | not scorable | not scorable | 1            | 0.8519569    |
| 6258 Bn-A03-p21252366 | A-genome specific (napus-rapa)    | 0.9928229    | 0.554938     | not scorable | not scorable | 1            | 0.761601     |
| 6259 Bn-A03-p21259337 | A-genome specific (napus-rapa)    | 1            | 0.7414662    | not scorable | not scorable | 1            | 0.9089059    |
| 6260 Bn-A03-p21271941 | A-genome specific (napus-rapa)    | 0.9784689    | 0.488311     | not scorable | not scorable | 1            | 0.7644803    |
| 6261 Bn-A03-p21283570 | A-genome specific (napus-rapa)    | 0.9569378    | 0.5407825    | not scorable | not scorable | 0.9917355    | 0.7183611    |
| 6262 Bn-A03-p21284312 | A-genome specific (napus-rapa)    | 0.9712918    | 0.8437614    | not scorable | not scorable | 0.9669421    | 0.8666806    |
| 6263 Bn-A03-p21292773 | A-genome specific (napus-rapa)    | 0.9880383    | 0.6843174    | not scorable | not scorable | 0.9917355    | 0.6850431    |
| 6264 Bn-A03-p21294836 | A-genome specific (napus-rapa)    | 1            | 0.5138816    | not scorable | not scorable | 1            | 0.5861297    |
| 6265 Bn-A03-p21298611 | A-genome specific (napus-rapa)    | 0.9832536    | 0.8315659    | not scorable | not scorable | 0.9917355    | 0.8625424    |
| 6266 Bn-A03-p2130281  | A-genome specific (napus-rapa)    | 0.9593301    | 0.7817718    | not scorable | not scorable | 0.9752066    | 0.7514432    |
| 6267 Bn-A03-p21329715 | A-genome specific (napus-rapa)    | 0.9808612    | 0.7225955    | not scorable | not scorable | 0.9834711    | 0.7309238    |

|      |                  |                                |              |              |              |              |              |              |
|------|------------------|--------------------------------|--------------|--------------|--------------|--------------|--------------|--------------|
| 6268 | Bn-A03-p21344477 | A-genome specific (napus-rapa) | 0.9593301    | 0.440294     | not scorable | not scorable | 0.9834711    | 0.6951214    |
| 6269 | Bn-A03-p21353686 | A-genome specific (napus-rapa) | 0.9593301    | 0.3525266    | not scorable | not scorable | 1            | 0.6925776    |
| 6270 | Bn-A03-p21357849 | A-genome specific (napus-rapa) | 0.9617225    | 0.550795     | not scorable | not scorable | 0.9917355    | 0.8347137    |
| 6271 | Bn-A03-p21375969 | A-genome specific (napus-rapa) | 0.9952153    | 0.3572702    | not scorable | not scorable | 1            | 0.7455035    |
| 6272 | Bn-A03-p21377430 | A-genome specific (napus-rapa) | 0.9641148    | 0.4677371    | not scorable | not scorable | 0.9917355    | 0.700554     |
| 6273 | Bn-A03-p2140542  | A-genome specific (napus-rapa) | 1            | 0.5125045    | not scorable | not scorable | 0.9917355    | 0.7812234    |
| 6274 | Bn-A03-p21414316 | A-genome specific (napus-rapa) | 0.9162679    | 0.3614666    | not scorable | not scorable | 0.9586777    | 0.598104     |
| 6275 | Bn-A03-p21422696 | A-genome specific (napus-rapa) | 0.9856459    | 0.7600757    | not scorable | not scorable | 0.9752066    | 0.7248582    |
| 6276 | Bn-A03-p21428952 | A-genome specific (napus-rapa) | 0.9928229    | 0.81681      | not scorable | not scorable | 0.9917355    | 0.9498444    |
| 6277 | Bn-A03-p21436299 | A-genome specific (napus-rapa) | 0.9928229    | 0.7816932    | not scorable | not scorable | 0.9834711    | 0.8611281    |
| 6278 | Bn-A03-p21478889 | A-genome specific (napus-rapa) | 0.9784689    | 0.8303384    | not scorable | not scorable | 0.9917355    | 0.85388      |
| 6279 | Bn-A03-p21487106 | A-genome specific (napus-rapa) | 0.9832536    | 0.453779     | not scorable | not scorable | 0.9173554    | 0.7763742    |
| 6280 | Bn-A03-p21503102 | napus specific                 | 0.7296651    | 0.7117328    | not scorable | not scorable | not scorable | not scorable |
| 6281 | Bn-A03-p21504871 | A-genome specific (napus-rapa) | 0.9808612    | 0.5327719    | not scorable | not scorable | 1            | 0.8582115    |
| 6282 | Bn-A03-p21505363 | A-genome specific (napus-rapa) | 0.9880383    | 0.7802736    | not scorable | not scorable | 1            | 0.8357486    |
| 6283 | Bn-A03-p21505431 | A-genome specific (napus-rapa) | 0.9880383    | 0.7864668    | not scorable | not scorable | 1            | 0.7983146    |
| 6284 | Bn-A03-p21505440 | A-genome specific (napus-rapa) | 0.9880383    | 0.7941719    | not scorable | not scorable | 1            | 0.8338675    |
| 6285 | Bn-A03-p21505530 | A-genome specific (napus-rapa) | 0.9665072    | 0.7511067    | not scorable | not scorable | 0.9504132    | 0.8098857    |
| 6286 | Bn-A03-p21507834 | A-genome specific (napus-rapa) | 0.9593301    | 0.5762652    | not scorable | not scorable | 0.9917355    | 0.5834825    |
| 6287 | Bn-A03-p21507915 | A-genome specific (napus-rapa) | 0.9665072    | 0.2600136    | not scorable | not scorable | 0.9834711    | 0.6805131    |
| 6288 | Bn-A03-p21508594 | A-genome specific (napus-rapa) | 0.9736842    | 0.3599712    | not scorable | not scorable | 1            | 0.7124087    |
| 6289 | Bn-A03-p21536745 | A-genome specific (napus-rapa) | 0.9928229    | 0.7666442    | not scorable | not scorable | 0.9504132    | 0.687184     |
| 6290 | Bn-A03-p21540310 | A-genome specific (napus-rapa) | 0.9928229    | 0.7675065    | not scorable | not scorable | 0.9917355    | 0.766727     |
| 6291 | Bn-A03-p21570061 | A-genome specific (napus-rapa) | 0.9712918    | 0.7844723    | not scorable | not scorable | 1            | 0.7872455    |
| 6292 | Bn-A03-p2159699  | A-genome specific (rapa only)  | not scorable | not scorable | not scorable | not scorable | 0.9669421    | 0.7171257    |
| 6293 | Bn-A03-p21614714 | A-genome specific (napus-rapa) | 0.9736842    | 0.5486966    | not scorable | not scorable | 0.9917355    | 0.7602798    |
| 6294 | Bn-A03-p21615990 | A-genome specific (napus-rapa) | 0.9904306    | 0.7830507    | not scorable | not scorable | 0.9834711    | 0.8167623    |
| 6295 | Bn-A03-p21619999 | A-genome specific (napus-rapa) | 0.9880383    | 0.7981629    | not scorable | not scorable | 0.9917355    | 0.7762188    |
| 6296 | Bn-A03-p21632587 | A-genome specific (napus-rapa) | 0.9832536    | 0.6657807    | not scorable | not scorable | 0.9917355    | 0.6694291    |
| 6297 | Bn-A03-p21660490 | A-genome specific (napus-rapa) | 0.9904306    | 0.746069     | not scorable | not scorable | 0.9917355    | 0.7537252    |
| 6298 | Bn-A03-p21666750 | A-genome specific (napus-rapa) | 0.9784689    | 0.278403     | not scorable | not scorable | 0.9834711    | 0.7569873    |
| 6299 | Bn-A03-p21666983 | A-genome specific (napus-rapa) | 0.9952153    | 0.7979863    | not scorable | not scorable | 1            | 0.7778046    |
| 6300 | Bn-A03-p21669774 | A-genome specific (napus-rapa) | 0.9856459    | 0.8075654    | not scorable | not scorable | 1            | 0.8208194    |

|      |                  |                                |              |              |              |              |              |              |
|------|------------------|--------------------------------|--------------|--------------|--------------|--------------|--------------|--------------|
| 6301 | Bn-A03-p21675680 | A-genome specific (rapa only)  | not scorable | not scorable | not scorable | not scorable | 0.9256198    | 0.8312004    |
| 6302 | Bn-A03-p21676845 | A-genome specific (napus-rapa) | 0.9928229    | 0.5182927    | not scorable | not scorable | 0.9917355    | 0.6493702    |
| 6303 | Bn-A03-p21685480 | A-genome specific (napus-rapa) | 0.9880383    | 0.3029352    | not scorable | not scorable | 1            | 0.6600704    |
| 6304 | Bn-A03-p2171944  | A-genome specific (napus-rapa) | 0.9784689    | 0.77803      | not scorable | not scorable | 0.9834711    | 0.746554     |
| 6305 | Bn-A03-p21744993 | A-genome specific (napus-rapa) | 0.9832536    | 0.4591534    | not scorable | not scorable | 0.9917355    | 0.7415015    |
| 6306 | Bn-A03-p21750559 | A-genome specific (napus-rapa) | 0.9976076    | 0.8096412    | not scorable | not scorable | 0.9834711    | 0.7321907    |
| 6307 | Bn-A03-p21750922 | A-genome specific (napus-rapa) | 0.9210526    | 0.7551218    | not scorable | not scorable | 0.9752066    | 0.7293375    |
| 6308 | Bn-A03-p21752115 | napus specific                 | 0.9808612    | 0.9014213    | not scorable | not scorable | not scorable | not scorable |
| 6309 | Bn-A03-p21752426 | A-genome specific (napus-rapa) | 0.9976076    | 0.8703268    | not scorable | not scorable | 0.9834711    | 0.704466     |
| 6310 | Bn-A03-p21770898 | A-genome specific (rapa only)  | not scorable | not scorable | not scorable | not scorable | 0.9338843    | 0.6870328    |
| 6311 | Bn-A03-p21771317 | A-genome specific (napus-rapa) | 0.9904306    | 0.798027     | not scorable | not scorable | 1            | 0.7296703    |
| 6312 | Bn-A03-p21782249 | napus specific                 | 0.9784689    | 0.7019429    | not scorable | not scorable | not scorable | not scorable |
| 6313 | Bn-A03-p21783015 | A-genome specific (napus-rapa) | 0.9880383    | 0.5116287    | not scorable | not scorable | 1            | 0.7630137    |
| 6314 | Bn-A03-p21786943 | A-genome specific (napus-rapa) | 0.9330143    | 0.6289027    | not scorable | not scorable | 0.9586777    | 0.6245322    |
| 6315 | Bn-A03-p21787407 | A-genome specific (napus-rapa) | 0.9354067    | 0.7796378    | not scorable | not scorable | 1            | 0.7356615    |
| 6316 | Bn-A03-p21787813 | napus specific                 | 0.7296651    | 0.7939495    | not scorable | not scorable | not scorable | not scorable |
| 6317 | Bn-A03-p21798303 | A-genome specific (napus-rapa) | 1            | 0.8077108    | not scorable | not scorable | 1            | 0.7887701    |
| 6318 | Bn-A03-p21813117 | A-genome specific (napus-rapa) | 0.9952153    | 0.7582909    | not scorable | not scorable | 0.9586777    | 0.6755568    |
| 6319 | Bn-A03-p21820847 | A-genome specific (napus-rapa) | 0.9928229    | 0.7874824    | not scorable | not scorable | 0.9917355    | 0.8086653    |
| 6320 | Bn-A03-p21830330 | A-genome specific (napus-rapa) | 0.9186603    | 0.7358611    | not scorable | not scorable | 0.9834711    | 0.7947387    |
| 6321 | Bn-A03-p21832912 | A-genome specific (napus-rapa) | 0.9808612    | 0.3596093    | not scorable | not scorable | 0.9917355    | 0.8580785    |
| 6322 | Bn-A03-p21839200 | A-genome specific (napus-rapa) | 0.9569378    | 0.8154865    | not scorable | not scorable | 0.9504132    | 0.8594111    |
| 6323 | Bn-A03-p21841965 | A-genome specific (napus-rapa) | 0.9641148    | 0.5846424    | not scorable | not scorable | 0.9917355    | 0.719255     |
| 6324 | Bn-A03-p21846413 | A-genome specific (napus-rapa) | 0.9808612    | 0.6768082    | not scorable | not scorable | 0.9586777    | 0.8098153    |
| 6325 | Bn-A03-p21860400 | A-genome specific (napus-rapa) | 0.9688995    | 0.4328285    | not scorable | not scorable | 1            | 0.766824     |
| 6326 | Bn-A03-p21862988 | A-genome specific (napus-rapa) | 0.9904306    | 0.8426129    | not scorable | not scorable | 1            | 0.8855926    |
| 6327 | Bn-A03-p21864294 | A-genome specific (napus-rapa) | 0.9976076    | 0.2862117    | not scorable | not scorable | 0.9834711    | 0.5994023    |
| 6328 | Bn-A03-p21904842 | napus specific                 | 0.9641148    | 0.4594987    | not scorable | not scorable | not scorable | not scorable |
| 6329 | Bn-A03-p2190638  | A-genome specific (napus-rapa) | 0.9712918    | 0.7831275    | not scorable | not scorable | 0.9917355    | 0.6898537    |
| 6330 | Bn-A03-p21907151 | A-genome specific (napus-rapa) | 0.9976076    | 0.8289795    | not scorable | not scorable | 0.9917355    | 0.7300616    |
| 6331 | Bn-A03-p21909917 | A-genome specific (napus-rapa) | 0.9928229    | 0.6287314    | not scorable | not scorable | 1            | 0.6946223    |
| 6332 | Bn-A03-p21921653 | A-genome specific (napus-rapa) | 0.9856459    | 0.312009     | not scorable | not scorable | 1            | 0.696214     |
| 6333 | Bn-A03-p21927724 | A-genome specific (napus-rapa) | 0.9712918    | 0.6462619    | not scorable | not scorable | 0.9917355    | 0.7466308    |



|      |                  |                                    |              |              |              |              |              |              |
|------|------------------|------------------------------------|--------------|--------------|--------------|--------------|--------------|--------------|
| 6334 | Bn-A03-p21937030 | A-genome specific (napus-rapa)     | 0.9856459    | 0.7508786    | not scorable | not scorable | 0.8181818    | 0.7356452    |
| 6335 | Bn-A03-p21941473 | A-genome specific (napus-rapa)     | 0.9832536    | 0.3764886    | not scorable | not scorable | 0.9917355    | 0.7344292    |
| 6336 | Bn-A03-p21942870 | A-genome specific (napus-rapa)     | 0.9784689    | 0.2997       | not scorable | not scorable | 0.9834711    | 0.79971      |
| 6337 | Bn-A03-p21945987 | A-genome specific (napus-rapa)     | 0.9736842    | 0.6612054    | not scorable | not scorable | 0.9669421    | 0.6070964    |
| 6338 | Bn-A03-p21964085 | A-genome specific (napus-rapa)     | 0.5861244    | 0.9261189    | not scorable | not scorable | 0.9834711    | 0.7562438    |
| 6339 | Bn-A03-p21967946 | A-genome specific (napus-rapa)     | 0.9832536    | 0.4185989    | not scorable | not scorable | 0.9834711    | 0.7193655    |
| 6340 | Bn-A03-p21979477 | C-genome specific (napus-oleracea) | 0.9856459    | 0.2599811    |              | 1 0.7659699  | not scorable | not scorable |
| 6341 | Bn-A03-p21980336 | A-genome specific (napus-rapa)     |              | 1 0.3883741  | not scorable | not scorable | 0.9834711    | 0.5898842    |
| 6342 | Bn-A03-p22002284 | A-genome specific (rapa only)      | not scorable | not scorable | not scorable | not scorable | 0.9586777    | 0.6683499    |
| 6343 | Bn-A03-p22003165 | A-genome specific (napus-rapa)     | 0.9952153    | 0.8550834    | not scorable | not scorable | 0.9917355    | 0.7354049    |
| 6344 | Bn-A03-p22012070 | A-genome specific (napus-rapa)     | 0.9976076    | 0.8217029    | not scorable | not scorable | 0.9917355    | 0.7982837    |
| 6345 | Bn-A03-p22014622 | A-genome specific (napus-rapa)     | 0.9545454    | 0.3774506    | not scorable | not scorable | 1            | 0.8461323    |
| 6346 | Bn-A03-p22028778 | A-genome specific (napus-rapa)     | 0.9736842    | 0.3741097    | not scorable | not scorable | 1            | 0.6725635    |
| 6347 | Bn-A03-p2203942  | A-genome specific (napus-rapa)     | 0.9665072    | 0.7790984    | not scorable | not scorable | 0.9752066    | 0.7439688    |
| 6348 | Bn-A03-p2206256  | genome unspecific (all in)         | 0.8923445    | 0.2756155    | 0.9922481    | 0.823165     | 1            | 0.7204181    |
| 6349 | Bn-A03-p22065637 | A-genome specific (napus-rapa)     | 0.9904306    | 0.3656313    | not scorable | not scorable | 1            | 0.7087905    |
| 6350 | Bn-A03-p22072036 | A-genome specific (napus-rapa)     | 0.9641148    | 0.3077792    | not scorable | not scorable | 0.9917355    | 0.6161923    |
| 6351 | Bn-A03-p22088201 | A-genome specific (napus-rapa)     | 0.9856459    | 0.6445189    | not scorable | not scorable | 0.9917355    | 0.6962284    |
| 6352 | Bn-A03-p22090414 | A-genome specific (napus-rapa)     | 0.9856459    | 0.5518949    | not scorable | not scorable | 0.9752066    | 0.8125991    |
| 6353 | Bn-A03-p22098429 | A-genome specific (napus-rapa)     | 0.9832536    | 0.5766641    | not scorable | not scorable | 0.9917355    | 0.6877048    |
| 6354 | Bn-A03-p22102124 | A-genome specific (napus-rapa)     | 0.9665072    | 0.2893229    | not scorable | not scorable | 0.9917355    | 0.6015636    |
| 6355 | Bn-A03-p22112518 | genome unspecific (oleracea-rapa)  | not scorable | not scorable | 0.9922481    | 0.7189572    | 1            | 0.7703759    |
| 6356 | Bn-A03-p221207   | A-genome specific (napus-rapa)     | 0.8732057    | 0.7716154    | not scorable | not scorable | 0.9752066    | 0.8568738    |
| 6357 | Bn-A03-p22121980 | A-genome specific (napus-rapa)     | 0.9928229    | 0.3504651    | not scorable | not scorable | 0.9917355    | 0.8087388    |
| 6358 | Bn-A03-p22125583 | napus specific                     | 0.8660287    | 0.6723101    | not scorable | not scorable | not scorable | not scorable |
| 6359 | Bn-A03-p22132164 | A-genome specific (napus-rapa)     | 0.9808612    | 0.5093468    | not scorable | not scorable | 0.9834711    | 0.7250662    |
| 6360 | Bn-A03-p22132555 | A-genome specific (napus-rapa)     | 0.9832536    | 0.7400139    | not scorable | not scorable | 0.9669421    | 0.6942552    |
| 6361 | Bn-A03-p22132662 | A-genome specific (napus-rapa)     | 0.9952153    | 0.7128378    | not scorable | not scorable | 0.9752066    | 0.770838     |
| 6362 | Bn-A03-p22138059 | A-genome specific (napus-rapa)     | 0.9880383    | 0.7652116    | not scorable | not scorable | 1            | 0.890921     |
| 6363 | Bn-A03-p22145945 | A-genome specific (napus-rapa)     | 0.9688995    | 0.7254025    | not scorable | not scorable | 0.9917355    | 0.7200636    |
| 6364 | Bn-A03-p22149000 | A-genome specific (napus-rapa)     | 0.9928229    | 0.7903253    | not scorable | not scorable | 0.9917355    | 0.7348881    |
| 6365 | Bn-A03-p22164764 | A-genome specific (napus-rapa)     | 0.9760765    | 0.7393739    | not scorable | not scorable | 1            | 0.8570282    |
| 6366 | Bn-A03-p22183905 | A-genome specific (napus-rapa)     | 0.9880383    | 0.4522366    | not scorable | not scorable | 1            | 0.8679707    |

|      |                  |                                |              |              |              |              |           |           |
|------|------------------|--------------------------------|--------------|--------------|--------------|--------------|-----------|-----------|
| 6367 | Bn-A03-p22227279 | A-genome specific (napus-rapa) | 0.9258373    | 0.6984127    | not scorable | not scorable | 0.7768595 | 0.8460121 |
| 6368 | Bn-A03-p22237846 | A-genome specific (napus-rapa) | 0.9856459    | 0.7959632    | not scorable | not scorable | 0.9917355 | 0.8647583 |
| 6369 | Bn-A03-p22238801 | A-genome specific (napus-rapa) | 0.9712918    | 0.5692192    | not scorable | not scorable | 0.9917355 | 0.5410329 |
| 6370 | Bn-A03-p22272850 | A-genome specific (napus-rapa) | 0.9401914    | 0.7211033    | not scorable | not scorable | 1         | 0.7770748 |
| 6371 | Bn-A03-p22285105 | A-genome specific (napus-rapa) | 0.9784689    | 0.2984741    | not scorable | not scorable | 1         | 0.71514   |
| 6372 | Bn-A03-p2228813  | A-genome specific (napus-rapa) | 0.9976076    | 0.4629818    | not scorable | not scorable | 0.9752066 | 0.7875568 |
| 6373 | Bn-A03-p22299476 | A-genome specific (napus-rapa) | 0.9856459    | 0.7830136    | not scorable | not scorable | 0.9752066 | 0.7665268 |
| 6374 | Bn-A03-p22300372 | A-genome specific (napus-rapa) | 0.9712918    | 0.3406335    | not scorable | not scorable | 0.9421487 | 0.4362547 |
| 6375 | Bn-A03-p2230320  | A-genome specific (napus-rapa) | 0.9712918    | 0.7822981    | not scorable | not scorable | 1         | 0.7291278 |
| 6376 | Bn-A03-p22304555 | A-genome specific (napus-rapa) | 0.9569378    | 0.2915057    | not scorable | not scorable | 0.9834711 | 0.6862457 |
| 6377 | Bn-A03-p22306212 | A-genome specific (napus-rapa) | 0.9688995    | 0.7806745    | not scorable | not scorable | 0.9834711 | 0.8223407 |
| 6378 | Bn-A03-p22306743 | A-genome specific (napus-rapa) | 0.9545454    | 0.3764042    | not scorable | not scorable | 0.8181818 | 0.7849016 |
| 6379 | Bn-A03-p22313737 | A-genome specific (napus-rapa) | 0.9760765    | 0.3153366    | not scorable | not scorable | 0.9669421 | 0.664616  |
| 6380 | Bn-A03-p22323976 | A-genome specific (napus-rapa) | 0.9497608    | 0.5754092    | not scorable | not scorable | 1         | 0.6722468 |
| 6381 | Bn-A03-p22339476 | A-genome specific (napus-rapa) | 0.9880383    | 0.8506054    | not scorable | not scorable | 1         | 0.6805297 |
| 6382 | Bn-A03-p22339742 | A-genome specific (rapa only)  | not scorable | not scorable | not scorable | not scorable | 0.9917355 | 0.9417582 |
| 6383 | Bn-A03-p22349705 | A-genome specific (napus-rapa) | 0.9832536    | 0.7702117    | not scorable | not scorable | 0.9752066 | 0.6805447 |
| 6384 | Bn-A03-p22369823 | A-genome specific (napus-rapa) | 0.9976076    | 0.5268403    | not scorable | not scorable | 0.9917355 | 0.6614335 |
| 6385 | Bn-A03-p22378361 | A-genome specific (napus-rapa) | 0.9952153    | 0.7479324    | not scorable | not scorable | 0.9834711 | 0.7447708 |
| 6386 | Bn-A03-p22382259 | A-genome specific (napus-rapa) | 1            | 0.312561     | not scorable | not scorable | 1         | 0.7297021 |
| 6387 | Bn-A03-p22382828 | A-genome specific (napus-rapa) | 0.9808612    | 0.5064759    | not scorable | not scorable | 0.9917355 | 0.7372329 |
| 6388 | Bn-A03-p22385937 | A-genome specific (napus-rapa) | 1            | 0.7724019    | not scorable | not scorable | 1         | 0.8146399 |
| 6389 | Bn-A03-p22398141 | A-genome specific (napus-rapa) | 0.9832536    | 0.3562434    | not scorable | not scorable | 0.9917355 | 0.6048486 |
| 6390 | Bn-A03-p22465067 | A-genome specific (napus-rapa) | 0.9952153    | 0.8265594    | not scorable | not scorable | 0.9834711 | 0.8111263 |
| 6391 | Bn-A03-p22465690 | A-genome specific (napus-rapa) | 0.9976076    | 0.7660604    | not scorable | not scorable | 0.9834711 | 0.7135148 |
| 6392 | Bn-A03-p22465764 | A-genome specific (napus-rapa) | 0.9976076    | 0.8998451    | not scorable | not scorable | 0.9917355 | 0.7577426 |
| 6393 | Bn-A03-p22506637 | A-genome specific (napus-rapa) | 1            | 0.5249521    | not scorable | not scorable | 1         | 0.7714251 |
| 6394 | Bn-A03-p22556722 | A-genome specific (napus-rapa) | 0.9928229    | 0.4870737    | not scorable | not scorable | 0.9586777 | 0.7637552 |
| 6395 | Bn-A03-p22574983 | A-genome specific (napus-rapa) | 0.9832536    | 0.7662134    | not scorable | not scorable | 1         | 0.9272014 |
| 6396 | Bn-A03-p22582234 | A-genome specific (napus-rapa) | 0.8971292    | 0.7180863    | not scorable | not scorable | 0.9504132 | 0.7508155 |
| 6397 | Bn-A03-p22582673 | A-genome specific (napus-rapa) | 0.9114832    | 0.6783901    | not scorable | not scorable | 0.9504132 | 0.6794808 |
| 6398 | Bn-A03-p22582862 | A-genome specific (napus-rapa) | 0.9066986    | 0.6511111    | not scorable | not scorable | 0.9256198 | 0.6436167 |
| 6399 | Bn-A03-p22588041 | A-genome specific (napus-rapa) | 1            | 0.5016941    | not scorable | not scorable | 1         | 0.8085111 |

|      |                  |                                |              |              |              |              |              |              |
|------|------------------|--------------------------------|--------------|--------------|--------------|--------------|--------------|--------------|
| 6400 | Bn-A03-p22590442 | A-genome specific (napus-rapa) | 0.9808612    | 0.7705176    | not scorable | not scorable | 0.9917355    | 0.7310675    |
| 6401 | Bn-A03-p22595213 | A-genome specific (napus-rapa) | 0.9760765    | 0.484121     | not scorable | not scorable | 0.9917355    | 0.8936757    |
| 6402 | Bn-A03-p22610222 | A-genome specific (napus-rapa) | 0.9760765    | 0.4829943    | not scorable | not scorable | 1            | 0.7629493    |
| 6403 | Bn-A03-p22614031 | genome unspecific (all in)     | 0.9904306    | 0.1914603    | 0.9379845    | 0.4726573    | 0.9752066    | 0.8008627    |
| 6404 | Bn-A03-p22619997 | A-genome specific (napus-rapa) | 0.9832536    | 0.7418314    | not scorable | not scorable | 0.9917355    | 0.7648365    |
| 6405 | Bn-A03-p2262214  | A-genome specific (rapa only)  | not scorable | not scorable | not scorable | not scorable | 0.9917355    | 0.8358978    |
| 6406 | Bn-A03-p22626240 | A-genome specific (napus-rapa) | 0.9784689    | 0.526287     | not scorable | not scorable | 0.9917355    | 0.7633111    |
| 6407 | Bn-A03-p22627731 | A-genome specific (napus-rapa) | 0.9784689    | 0.7889062    | not scorable | not scorable | 0.9669421    | 0.7729505    |
| 6408 | Bn-A03-p22628435 | A-genome specific (rapa only)  | not scorable | not scorable | not scorable | not scorable | 0.9917355    | 0.7364721    |
| 6409 | Bn-A03-p22630782 | A-genome specific (napus-rapa) | 1            | 0.7750576    | not scorable | not scorable | 0.9917355    | 0.691558     |
| 6410 | Bn-A03-p22633445 | A-genome specific (napus-rapa) | 0.9880383    | 0.8077011    | not scorable | not scorable | 1            | 0.8203164    |
| 6411 | Bn-A03-p22635426 | A-genome specific (napus-rapa) | 0.9832536    | 0.7417774    | not scorable | not scorable | 1            | 0.730357     |
| 6412 | Bn-A03-p22643433 | A-genome specific (napus-rapa) | 0.9808612    | 0.6783279    | not scorable | not scorable | 0.9917355    | 0.7479311    |
| 6413 | Bn-A03-p22651625 | A-genome specific (napus-rapa) | 0.9856459    | 0.7490229    | not scorable | not scorable | 1            | 0.8018248    |
| 6414 | Bn-A03-p22655575 | A-genome specific (napus-rapa) | 0.9856459    | 0.4820206    | not scorable | not scorable | 1            | 0.7932408    |
| 6415 | Bn-A03-p22679507 | A-genome specific (napus-rapa) | 0.9856459    | 0.7042384    | not scorable | not scorable | 0.9917355    | 0.7677697    |
| 6416 | Bn-A03-p22708175 | A-genome specific (napus-rapa) | 1            | 0.7671781    | not scorable | not scorable | 1            | 0.8653011    |
| 6417 | Bn-A03-p2271873  | A-genome specific (napus-rapa) | 0.9521531    | 0.7987809    | not scorable | not scorable | 0.9752066    | 0.8401836    |
| 6418 | Bn-A03-p22729    | A-genome specific (rapa only)  | not scorable | not scorable | not scorable | not scorable | 0.9834711    | 0.775111     |
| 6419 | Bn-A03-p22730208 | A-genome specific (rapa only)  | not scorable | not scorable | not scorable | not scorable | 0.9752066    | 0.6834903    |
| 6420 | Bn-A03-p22737711 | A-genome specific (rapa only)  | not scorable | not scorable | not scorable | not scorable | 0.7438017    | 0.7618164    |
| 6421 | Bn-A03-p22739253 | A-genome specific (napus-rapa) | 0.9760765    | 0.4007961    | not scorable | not scorable | 1            | 0.776496     |
| 6422 | Bn-A03-p22739529 | A-genome specific (napus-rapa) | 0.9569378    | 0.7661553    | not scorable | not scorable | 1            | 0.8345648    |
| 6423 | Bn-A03-p22744766 | A-genome specific (napus-rapa) | 0.9760765    | 0.6737286    | not scorable | not scorable | 1            | 0.7686638    |
| 6424 | Bn-A03-p22750972 | A-genome specific (napus-rapa) | 0.9521531    | 0.7643581    | not scorable | not scorable | 0.7603306    | 0.8103977    |
| 6425 | Bn-A03-p22752812 | A-genome specific (napus-rapa) | 0.9449761    | 0.7050996    | not scorable | not scorable | 0.7603306    | 0.7855605    |
| 6426 | Bn-A03-p22752871 | A-genome specific (napus-rapa) | 0.9497608    | 0.7584514    | not scorable | not scorable | 0.7438017    | 0.8229498    |
| 6427 | Bn-A03-p22776355 | A-genome specific (rapa only)  | not scorable | not scorable | not scorable | not scorable | 0.9669421    | 0.7323347    |
| 6428 | Bn-A03-p22779259 | A-genome specific (napus-rapa) | 0.5478469    | 0.8765852    | not scorable | not scorable | 0.6859504    | 0.9724753    |
| 6429 | Bn-A03-p22816593 | napus specific                 | 0.6746411    | 0.802617     | not scorable | not scorable | not scorable | not scorable |
| 6430 | Bn-A03-p22816713 | napus specific                 | 0.6722488    | 0.8211461    | not scorable | not scorable | not scorable | not scorable |
| 6431 | Bn-A03-p22816724 | napus specific                 | 0.6889952    | 0.8005238    | not scorable | not scorable | not scorable | not scorable |
| 6432 | Bn-A03-p22816854 | napus specific                 | 0.6698565    | 0.8395578    | not scorable | not scorable | not scorable | not scorable |

|                       |                                |              |              |              |              |              |              |
|-----------------------|--------------------------------|--------------|--------------|--------------|--------------|--------------|--------------|
| 6433 Bn-A03-p22818464 | A-genome specific (napus-rapa) | 0.9856459    | 0.3015084    | not scorable | not scorable | 0.9917355    | 0.6741338    |
| 6434 Bn-A03-p22820800 | napus specific                 | 0.8899522    | 0.853515     | not scorable | not scorable | not scorable | not scorable |
| 6435 Bn-A03-p22820867 | napus specific                 | 0.6674641    | 0.7510757    | not scorable | not scorable | not scorable | not scorable |
| 6436 Bn-A03-p22820943 | A-genome specific (napus-rapa) | 0.9856459    | 0.7614925    | not scorable | not scorable | 1            | 0.7721574    |
| 6437 Bn-A03-p22820996 | A-genome specific (napus-rapa) | 0.9617225    | 0.7828537    | not scorable | not scorable | 1            | 0.7771863    |
| 6438 Bn-A03-p22821346 | A-genome specific (napus-rapa) | 0.9976076    | 0.8176157    | not scorable | not scorable | 1            | 0.7497553    |
| 6439 Bn-A03-p22838495 | A-genome specific (napus-rapa) | 0.9617225    | 0.7881553    | not scorable | not scorable | 0.9752066    | 0.6544216    |
| 6440 Bn-A03-p22841929 | A-genome specific (napus-rapa) | 0.9880383    | 0.3395004    | not scorable | not scorable | 0.9834711    | 0.7111582    |
| 6441 Bn-A03-p22858823 | A-genome specific (napus-rapa) | 0.9712918    | 0.7052743    | not scorable | not scorable | 0.9917355    | 0.8040303    |
| 6442 Bn-A03-p22882585 | A-genome specific (napus-rapa) | 0.9928229    | 0.2344454    | not scorable | not scorable | 0.9834711    | 0.7321667    |
| 6443 Bn-A03-p22886478 | all not scorable               | not scorable | not scorable | not scorable | not scorable | not scorable | not scorable |
| 6444 Bn-A03-p2297079  | A-genome specific (rapa only)  | not scorable | not scorable | not scorable | not scorable | 0.9834711    | 0.7613336    |
| 6445 Bn-A03-p2297145  | A-genome specific (napus-rapa) | 0.9641148    | 0.9209452    | not scorable | not scorable | 0.9917355    | 0.8415254    |
| 6446 Bn-A03-p22974798 | A-genome specific (napus-rapa) | 1            | 0.320936     | not scorable | not scorable | 1            | 0.8078685    |
| 6447 Bn-A03-p22975377 | A-genome specific (napus-rapa) | 0.9976076    | 0.5475405    | not scorable | not scorable | 0.9917355    | 0.7485106    |
| 6448 Bn-A03-p22976259 | A-genome specific (napus-rapa) | 0.9976076    | 0.3943763    | not scorable | not scorable | 1            | 0.669937     |
| 6449 Bn-A03-p22976648 | A-genome specific (napus-rapa) | 0.9952153    | 0.5405343    | not scorable | not scorable | 0.9669421    | 0.6221597    |
| 6450 Bn-A03-p23017354 | A-genome specific (napus-rapa) | 0.9880383    | 0.5785322    | not scorable | not scorable | 0.9917355    | 0.7817844    |
| 6451 Bn-A03-p23020431 | A-genome specific (napus-rapa) | 0.9832536    | 0.724619     | not scorable | not scorable | 0.9669421    | 0.6784481    |
| 6452 Bn-A03-p23023607 | A-genome specific (napus-rapa) | 0.9736842    | 0.7666983    | not scorable | not scorable | 0.9834711    | 0.7978314    |
| 6453 Bn-A03-p23023930 | A-genome specific (napus-rapa) | 0.9712918    | 0.7535623    | not scorable | not scorable | 0.9669421    | 0.7688043    |
| 6454 Bn-A03-p23025381 | A-genome specific (napus-rapa) | 0.9880383    | 0.7719436    | not scorable | not scorable | 0.9917355    | 0.8847975    |
| 6455 Bn-A03-p23026734 | A-genome specific (napus-rapa) | 1            | 0.800547     | not scorable | not scorable | 1            | 0.8473544    |
| 6456 Bn-A03-p23027465 | A-genome specific (napus-rapa) | 0.9760765    | 0.6976238    | not scorable | not scorable | 1            | 0.7935653    |
| 6457 Bn-A03-p23036027 | A-genome specific (napus-rapa) | 0.9401914    | 0.7485551    | not scorable | not scorable | 0.9338843    | 0.8121871    |
| 6458 Bn-A03-p23039421 | A-genome specific (napus-rapa) | 1            | 0.3329871    | not scorable | not scorable | 0.9834711    | 0.7977852    |
| 6459 Bn-A03-p23041622 | A-genome specific (napus-rapa) | 0.9784689    | 0.7204294    | not scorable | not scorable | 1            | 0.7425357    |
| 6460 Bn-A03-p23041853 | A-genome specific (napus-rapa) | 0.9952153    | 0.8764942    | not scorable | not scorable | 1            | 0.7588842    |
| 6461 Bn-A03-p23043608 | A-genome specific (napus-rapa) | 0.9904306    | 0.7924223    | not scorable | not scorable | 0.9586777    | 0.6823445    |
| 6462 Bn-A03-p23046592 | A-genome specific (napus-rapa) | 0.9832536    | 0.7762009    | not scorable | not scorable | 0.9917355    | 0.8176394    |
| 6463 Bn-A03-p23047749 | A-genome specific (napus-rapa) | 0.8971292    | 0.7130809    | not scorable | not scorable | 0.768595     | 0.7108089    |
| 6464 Bn-A03-p23061800 | all not scorable               | not scorable | not scorable | not scorable | not scorable | not scorable | not scorable |
| 6465 Bn-A03-p23065216 | A-genome specific (napus-rapa) | 0.9808612    | 0.7353194    | not scorable | not scorable | 0.9917355    | 0.7850741    |

|                       |                                |           |                        |              |           |   |           |
|-----------------------|--------------------------------|-----------|------------------------|--------------|-----------|---|-----------|
| 6466 Bn-A03-p23065321 | A-genome specific (napus-rapa) | 0.9712918 | 0.617568 not scorable  | not scorable |           | 1 | 0.7352853 |
| 6467 Bn-A03-p23077236 | A-genome specific (napus-rapa) | 0.9210526 | 0.7277477 not scorable | not scorable | 0.9752066 |   | 0.7167404 |
| 6468 Bn-A03-p23080487 | A-genome specific (napus-rapa) | 1         | 0.3167184 not scorable | not scorable | 0.9752066 |   | 0.5542271 |
| 6469 Bn-A03-p23086442 | A-genome specific (napus-rapa) | 0.9138756 | 0.9256723 not scorable | not scorable | 0.9586777 |   | 0.8661759 |
| 6470 Bn-A03-p23088716 | A-genome specific (napus-rapa) | 0.9880383 | 0.44187 not scorable   | not scorable | 0.9669421 |   | 0.7827646 |
| 6471 Bn-A03-p2311607  | A-genome specific (napus-rapa) | 0.9688995 | 0.7115034 not scorable | not scorable | 0.9834711 |   | 0.7372549 |
| 6472 Bn-A03-p23123050 | A-genome specific (napus-rapa) | 0.9976076 | 0.8142844 not scorable | not scorable | 0.9917355 |   | 0.789754  |
| 6473 Bn-A03-p23123128 | A-genome specific (napus-rapa) | 1         | 0.6563773 not scorable | not scorable | 0.9504132 |   | 0.7063643 |
| 6474 Bn-A03-p23127658 | A-genome specific (napus-rapa) | 1         | 0.5585528 not scorable | not scorable | 0.9669421 |   | 0.7749835 |
| 6475 Bn-A03-p23129458 | A-genome specific (napus-rapa) | 0.9952153 | 0.3596164 not scorable | not scorable | 0.9917355 |   | 0.7739381 |
| 6476 Bn-A03-p23130971 | A-genome specific (napus-rapa) | 1         | 0.7101598 not scorable | not scorable |           | 1 | 0.7175964 |
| 6477 Bn-A03-p2313208  | A-genome specific (napus-rapa) | 0.9808612 | 0.7570496 not scorable | not scorable | 0.9917355 |   | 0.8090098 |
| 6478 Bn-A03-p23143134 | A-genome specific (napus-rapa) | 0.9928229 | 0.3708405 not scorable | not scorable | 0.9917355 |   | 0.7936793 |
| 6479 Bn-A03-p23156409 | A-genome specific (napus-rapa) | 0.6411483 | 0.8340276 not scorable | not scorable | 0.9834711 |   | 0.7055126 |
| 6480 Bn-A03-p23156512 | A-genome specific (napus-rapa) | 0.4210526 | 0.7452894 not scorable | not scorable |           | 1 | 0.8429463 |
| 6481 Bn-A03-p23157775 | A-genome specific (napus-rapa) | 0.708134  | 0.8274667 not scorable | not scorable | 0.9917355 |   | 0.8321756 |
| 6482 Bn-A03-p23159350 | A-genome specific (napus-rapa) | 0.638756  | 0.8650714 not scorable | not scorable |           | 1 | 0.729888  |
| 6483 Bn-A03-p23160671 | A-genome specific (napus-rapa) | 0.5956938 | 0.807777 not scorable  | not scorable | 0.9834711 |   | 0.7017589 |
| 6484 Bn-A03-p23170401 | A-genome specific (napus-rapa) | 0.9808612 | 0.5152809 not scorable | not scorable | 0.9834711 |   | 0.6950313 |
| 6485 Bn-A03-p23181984 | A-genome specific (napus-rapa) | 0.9138756 | 0.4811173 not scorable | not scorable | 0.9834711 |   | 0.7956775 |
| 6486 Bn-A03-p23185327 | A-genome specific (napus-rapa) | 0.9832536 | 0.49613 not scorable   | not scorable | 0.9752066 |   | 0.7635037 |
| 6487 Bn-A03-p23193342 | A-genome specific (napus-rapa) | 0.9784689 | 0.4584962 not scorable | not scorable | 0.9752066 |   | 0.7820773 |
| 6488 Bn-A03-p23205791 | A-genome specific (napus-rapa) | 0.9688995 | 0.3860783 not scorable | not scorable | 0.9834711 |   | 0.7063694 |
| 6489 Bn-A03-p23218296 | A-genome specific (napus-rapa) | 0.9688995 | 0.7719693 not scorable | not scorable | 0.9917355 |   | 0.8484495 |
| 6490 Bn-A03-p23222657 | A-genome specific (napus-rapa) | 0.8923445 | 0.1901414 not scorable | not scorable |           | 1 | 0.4904395 |
| 6491 Bn-A03-p23240923 | A-genome specific (napus-rapa) | 0.9712918 | 0.7868927 not scorable | not scorable | 0.9834711 |   | 0.7699184 |
| 6492 Bn-A03-p23243420 | A-genome specific (napus-rapa) | 0.9760765 | 0.2870198 not scorable | not scorable | 0.9834711 |   | 0.7446321 |
| 6493 Bn-A03-p23253636 | A-genome specific (napus-rapa) | 0.9904306 | 0.7741188 not scorable | not scorable | 0.9917355 |   | 0.7942212 |
| 6494 Bn-A03-p23286977 | A-genome specific (napus-rapa) | 0.9760765 | 0.2697973 not scorable | not scorable | 0.9752066 |   | 0.6906274 |
| 6495 Bn-A03-p23303062 | A-genome specific (napus-rapa) | 0.9832536 | 0.4553734 not scorable | not scorable |           | 1 | 0.7970527 |
| 6496 Bn-A03-p23318910 | A-genome specific (napus-rapa) | 0.9784689 | 0.5078291 not scorable | not scorable | 0.9917355 |   | 0.7793401 |
| 6497 Bn-A03-p23319135 | A-genome specific (napus-rapa) | 0.9856459 | 0.5727573 not scorable | not scorable | 0.9669421 |   | 0.8178099 |
| 6498 Bn-A03-p23396260 | A-genome specific (napus-rapa) | 0.9952153 | 0.8014634 not scorable | not scorable | 0.9917355 |   | 0.8243392 |

|      |                  |                                |              |              |              |              |              |              |
|------|------------------|--------------------------------|--------------|--------------|--------------|--------------|--------------|--------------|
| 6499 | Bn-A03-p23414886 | A-genome specific (napus-rapa) | 0.8014354    | 0.6830094    | not scorable | not scorable | 0.9834711    | 0.6186244    |
| 6500 | Bn-A03-p23426911 | A-genome specific (napus-rapa) | 0.9952153    | 0.7079076    | not scorable | not scorable | 0.9917355    | 0.861829     |
| 6501 | Bn-A03-p2342965  | A-genome specific (rapa only)  | not scorable | not scorable | not scorable | not scorable | 1            | 0.7916567    |
| 6502 | Bn-A03-p23432067 | A-genome specific (napus-rapa) | 1            | 0.4448519    | not scorable | not scorable | 0.9917355    | 0.8136197    |
| 6503 | Bn-A03-p2344066  | A-genome specific (napus-rapa) | 0.9880383    | 0.5083225    | not scorable | not scorable | 0.9669421    | 0.5845135    |
| 6504 | Bn-A03-p23454434 | all not scorable               | not scorable | not scorable | not scorable | not scorable | not scorable | not scorable |
| 6505 | Bn-A03-p23485055 | A-genome specific (napus-rapa) | 0.9976076    | 0.7848318    | not scorable | not scorable | 0.9752066    | 0.7951664    |
| 6506 | Bn-A03-p23485435 | A-genome specific (napus-rapa) | 0.9880383    | 0.7667989    | not scorable | not scorable | 0.9834711    | 0.7025059    |
| 6507 | Bn-A03-p23503118 | A-genome specific (napus-rapa) | 0.9712918    | 0.687502     | not scorable | not scorable | 1            | 0.7912294    |
| 6508 | Bn-A03-p235039   | A-genome specific (napus-rapa) | 0.9090909    | 0.6865657    | not scorable | not scorable | 0.9834711    | 0.698902     |
| 6509 | Bn-A03-p23522509 | A-genome specific (napus-rapa) | 0.9784689    | 0.7817625    | not scorable | not scorable | 0.9834711    | 0.6656432    |
| 6510 | Bn-A03-p23526338 | A-genome specific (napus-rapa) | 0.9952153    | 0.7768538    | not scorable | not scorable | 0.9917355    | 0.7952038    |
| 6511 | Bn-A03-p23526756 | A-genome specific (napus-rapa) | 0.9784689    | 0.8050382    | not scorable | not scorable | 0.9834711    | 0.8056173    |
| 6512 | Bn-A03-p23526967 | A-genome specific (napus-rapa) | 0.9832536    | 0.8074094    | not scorable | not scorable | 1            | 0.83028      |
| 6513 | Bn-A03-p23528989 | A-genome specific (rapa only)  | not scorable | not scorable | not scorable | not scorable | 0.9834711    | 0.8103784    |
| 6514 | Bn-A03-p23529225 | A-genome specific (napus-rapa) | 0.9808612    | 0.7732179    | not scorable | not scorable | 0.9917355    | 0.7836375    |
| 6515 | Bn-A03-p23550322 | genome unspecific (all in)     | 0.9856459    | 0.5230834    | 0.8139535    | 0.8171942    | 0.9917355    | 0.7851355    |
| 6516 | Bn-A03-p23552464 | A-genome specific (napus-rapa) | 0.9976076    | 0.7062023    | not scorable | not scorable | 0.9834711    | 0.7684326    |
| 6517 | Bn-A03-p23552601 | A-genome specific (napus-rapa) | 0.9928229    | 0.7582803    | not scorable | not scorable | 0.9917355    | 0.6838505    |
| 6518 | Bn-A03-p23562008 | A-genome specific (napus-rapa) | 0.8875598    | 0.4303952    | not scorable | not scorable | 0.9669421    | 0.6852541    |
| 6519 | Bn-A03-p23596892 | A-genome specific (napus-rapa) | 0.9904306    | 0.7674566    | not scorable | not scorable | 0.9752066    | 0.7786945    |
| 6520 | Bn-A03-p23599149 | A-genome specific (napus-rapa) | 0.9976076    | 0.2558829    | not scorable | not scorable | 0.9752066    | 0.7329832    |
| 6521 | Bn-A03-p23607037 | A-genome specific (napus-rapa) | 0.9976076    | 0.6927492    | not scorable | not scorable | 0.9834711    | 0.6976467    |
| 6522 | Bn-A03-p23608564 | A-genome specific (napus-rapa) | 0.9928229    | 0.2944959    | not scorable | not scorable | 0.9834711    | 0.7143667    |
| 6523 | Bn-A03-p23609377 | A-genome specific (napus-rapa) | 1            | 0.686775     | not scorable | not scorable | 0.9834711    | 0.6767924    |
| 6524 | Bn-A03-p23609934 | A-genome specific (napus-rapa) | 0.9928229    | 0.7692418    | not scorable | not scorable | 0.9752066    | 0.7848398    |
| 6525 | Bn-A03-p23621455 | A-genome specific (napus-rapa) | 0.9856459    | 0.3991474    | not scorable | not scorable | 1            | 0.9205657    |
| 6526 | Bn-A03-p23634723 | A-genome specific (rapa only)  | not scorable | not scorable | not scorable | not scorable | 0.9421487    | 0.8028761    |
| 6527 | Bn-A03-p23635020 | A-genome specific (rapa only)  | not scorable | not scorable | not scorable | not scorable | 0.6280992    | 0.7289358    |
| 6528 | Bn-A03-p23663605 | A-genome specific (napus-rapa) | 0.9808612    | 0.7938348    | not scorable | not scorable | 0.9917355    | 0.7267323    |
| 6529 | Bn-A03-p2366510  | A-genome specific (napus-rapa) | 0.9712918    | 0.8248184    | not scorable | not scorable | 0.9834711    | 0.771007     |
| 6530 | Bn-A03-p23666221 | A-genome specific (rapa only)  | not scorable | not scorable | not scorable | not scorable | 0.9917355    | 0.7269418    |
| 6531 | Bn-A03-p23672735 | A-genome specific (napus-rapa) | 0.9665072    | 0.7687989    | not scorable | not scorable | 0.9834711    | 0.7417922    |

|      |                  |                                |              |              |              |              |              |              |
|------|------------------|--------------------------------|--------------|--------------|--------------|--------------|--------------|--------------|
| 6532 | Bn-A03-p23674889 | A-genome specific (napus-rapa) | 0.9952153    | 0.7836125    | not scorable | not scorable | 0.9917355    | 0.7136915    |
| 6533 | Bn-A03-p23685798 | A-genome specific (napus-rapa) | 0.9354067    | 0.3446471    | not scorable | not scorable | 1            | 0.8241557    |
| 6534 | Bn-A03-p23696737 | A-genome specific (napus-rapa) | 0.9784689    | 0.3153011    | not scorable | not scorable | 0.9917355    | 0.7806168    |
| 6535 | Bn-A03-p23704255 | A-genome specific (napus-rapa) | 0.9760765    | 0.510873     | not scorable | not scorable | 0.892562     | 0.7778919    |
| 6536 | Bn-A03-p23708487 | A-genome specific (napus-rapa) | 0.9521531    | 0.7509792    | not scorable | not scorable | 0.9752066    | 0.7140445    |
| 6537 | Bn-A03-p23711362 | A-genome specific (napus-rapa) | 0.9928229    | 0.7698783    | not scorable | not scorable | 0.9669421    | 0.7892889    |
| 6538 | Bn-A03-p23715660 | A-genome specific (napus-rapa) | 0.9904306    | 0.7702344    | not scorable | not scorable | 0.9917355    | 0.8182154    |
| 6539 | Bn-A03-p23719771 | A-genome specific (napus-rapa) | 0.9617225    | 0.6481889    | not scorable | not scorable | 0.9917355    | 0.6578873    |
| 6540 | Bn-A03-p23735715 | A-genome specific (napus-rapa) | 0.9808612    | 0.4543206    | not scorable | not scorable | 0.9917355    | 0.7749013    |
| 6541 | Bn-A03-p23736096 | A-genome specific (napus-rapa) | 0.9976076    | 0.2980876    | not scorable | not scorable | 0.9752066    | 0.6123064    |
| 6542 | Bn-A03-p23736392 | A-genome specific (rapa only)  | not scorable | not scorable | not scorable | not scorable | 0.9834711    | 0.7204025    |
| 6543 | Bn-A03-p23760564 | A-genome specific (napus-rapa) | 0.9976076    | 0.7670866    | not scorable | not scorable | 0.9917355    | 0.6642581    |
| 6544 | Bn-A03-p23798235 | A-genome specific (napus-rapa) | 0.9904306    | 0.7717593    | not scorable | not scorable | 1            | 0.8047553    |
| 6545 | Bn-A03-p23799968 | A-genome specific (napus-rapa) | 0.9976076    | 0.7730271    | not scorable | not scorable | 0.9752066    | 0.6944774    |
| 6546 | Bn-A03-p23801324 | napus specific                 | 0.9162679    | 0.7821022    | not scorable | not scorable | not scorable | not scorable |
| 6547 | Bn-A03-p23809317 | A-genome specific (napus-rapa) | 0.9808612    | 0.7160119    | not scorable | not scorable | 0.9752066    | 0.8231553    |
| 6548 | Bn-A03-p23809595 | A-genome specific (napus-rapa) | 0.9928229    | 0.7088347    | not scorable | not scorable | 0.9834711    | 0.7513597    |
| 6549 | Bn-A03-p23810014 | A-genome specific (napus-rapa) | 0.9904306    | 0.7962388    | not scorable | not scorable | 0.9586777    | 0.7829553    |
| 6550 | Bn-A03-p23822093 | A-genome specific (napus-rapa) | 0.9736842    | 0.7625387    | not scorable | not scorable | 0.9421487    | 0.758621     |
| 6551 | Bn-A03-p23853396 | A-genome specific (rapa only)  | not scorable | not scorable | not scorable | not scorable | 0.9669421    | 0.8302457    |
| 6552 | Bn-A03-p23860825 | A-genome specific (napus-rapa) | 0.9976076    | 0.7748017    | not scorable | not scorable | 1            | 0.6352153    |
| 6553 | Bn-A03-p23861481 | A-genome specific (napus-rapa) | 0.9856459    | 0.7044101    | not scorable | not scorable | 0.9834711    | 0.6949393    |
| 6554 | Bn-A03-p23862018 | A-genome specific (napus-rapa) | 0.9952153    | 0.8029972    | not scorable | not scorable | 0.9834711    | 0.7045221    |
| 6555 | Bn-A03-p23862683 | A-genome specific (napus-rapa) | 0.9976076    | 0.774298     | not scorable | not scorable | 0.9834711    | 0.7822146    |
| 6556 | Bn-A03-p23868030 | A-genome specific (napus-rapa) | 1            | 0.7935309    | not scorable | not scorable | 0.9752066    | 0.7918096    |
| 6557 | Bn-A03-p23887373 | A-genome specific (napus-rapa) | 0.9736842    | 0.7892883    | not scorable | not scorable | 0.9917355    | 0.6838019    |
| 6558 | Bn-A03-p23890040 | A-genome specific (napus-rapa) | 0.9928229    | 0.7708631    | not scorable | not scorable | 0.9752066    | 0.6660798    |
| 6559 | Bn-A03-p23899    | A-genome specific (napus-rapa) | 0.9258373    | 0.7694713    | not scorable | not scorable | 1            | 0.7778862    |
| 6560 | Bn-A03-p23917701 | A-genome specific (napus-rapa) | 0.9832536    | 0.3891894    | not scorable | not scorable | 1            | 0.7697716    |
| 6561 | Bn-A03-p23921932 | A-genome specific (napus-rapa) | 0.9856459    | 0.7860337    | not scorable | not scorable | 0.9834711    | 0.6995802    |
| 6562 | Bn-A03-p23973475 | napus specific                 | 0.9258373    | 0.8941005    | not scorable | not scorable | not scorable | not scorable |
| 6563 | Bn-A03-p23980725 | A-genome specific (napus-rapa) | 0.9760765    | 0.3097561    | not scorable | not scorable | 1            | 0.7412145    |
| 6564 | Bn-A03-p23980912 | A-genome specific (napus-rapa) | 0.9784689    | 0.7603488    | not scorable | not scorable | 0.9917355    | 0.9142475    |

|                       |                                |              |              |              |              |              |              |
|-----------------------|--------------------------------|--------------|--------------|--------------|--------------|--------------|--------------|
| 6565 Bn-A03-p23984129 | A-genome specific (napus-rapa) | 0.7703349    | 0.7418365    | not scorable | not scorable | 0.9834711    | 0.8413941    |
| 6566 Bn-A03-p23992075 | A-genome specific (napus-rapa) | 0.9880383    | 0.7651425    | not scorable | not scorable | 1            | 0.7070044    |
| 6567 Bn-A03-p23996628 | A-genome specific (napus-rapa) | 0.930622     | 0.8504254    | not scorable | not scorable | 0.7768595    | 0.8496944    |
| 6568 Bn-A03-p24002443 | A-genome specific (napus-rapa) | 0.9473684    | 0.7575043    | not scorable | not scorable | 0.9917355    | 0.9112235    |
| 6569 Bn-A03-p24016551 | A-genome specific (napus-rapa) | 0.9665072    | 0.6842436    | not scorable | not scorable | 1            | 0.7372954    |
| 6570 Bn-A03-p24017311 | A-genome specific (napus-rapa) | 0.854067     | 0.3563369    | not scorable | not scorable | 0.9834711    | 0.7376646    |
| 6571 Bn-A03-p24017859 | A-genome specific (napus-rapa) | 0.9976076    | 0.5676636    | not scorable | not scorable | 1            | 0.7955081    |
| 6572 Bn-A03-p24017924 | A-genome specific (napus-rapa) | 1            | 0.7091545    | not scorable | not scorable | 1            | 0.8235429    |
| 6573 Bn-A03-p24022648 | A-genome specific (napus-rapa) | 0.9928229    | 0.5055766    | not scorable | not scorable | 0.9834711    | 0.7996072    |
| 6574 Bn-A03-p2402265  | A-genome specific (rapa only)  | not scorable | not scorable | not scorable | not scorable | 0.9834711    | 0.7335652    |
| 6575 Bn-A03-p24032564 | A-genome specific (napus-rapa) | 0.9784689    | 0.7691477    | not scorable | not scorable | 1            | 0.7067118    |
| 6576 Bn-A03-p24046319 | A-genome specific (rapa only)  | not scorable | not scorable | not scorable | not scorable | 1            | 0.8054308    |
| 6577 Bn-A03-p24046452 | A-genome specific (napus-rapa) | 0.9808612    | 0.7913827    | not scorable | not scorable | 1            | 0.7256375    |
| 6578 Bn-A03-p24048132 | A-genome specific (napus-rapa) | 0.9904306    | 0.7527011    | not scorable | not scorable | 1            | 0.7570085    |
| 6579 Bn-A03-p2405726  | A-genome specific (rapa only)  | not scorable | not scorable | not scorable | not scorable | 0.9917355    | 0.7453861    |
| 6580 Bn-A03-p24059470 | A-genome specific (rapa only)  | not scorable | not scorable | not scorable | not scorable | 1            | 0.7277196    |
| 6581 Bn-A03-p24090020 | A-genome specific (napus-rapa) | 0.9832536    | 0.3460981    | not scorable | not scorable | 1            | 0.7371384    |
| 6582 Bn-A03-p24092986 | A-genome specific (napus-rapa) | 0.9832536    | 0.6357081    | not scorable | not scorable | 0.9917355    | 0.7225231    |
| 6583 Bn-A03-p24104930 | A-genome specific (napus-rapa) | 1            | 0.7418646    | not scorable | not scorable | 1            | 0.7510702    |
| 6584 Bn-A03-p24117554 | A-genome specific (napus-rapa) | 0.9952153    | 0.4200491    | not scorable | not scorable | 0.9917355    | 0.7217508    |
| 6585 Bn-A03-p2412263  | A-genome specific (napus-rapa) | 0.9569378    | 0.5755259    | not scorable | not scorable | 1            | 0.775237     |
| 6586 Bn-A03-p24124318 | napus specific                 | 0.8971292    | 0.7795846    | not scorable | not scorable | not scorable | not scorable |
| 6587 Bn-A03-p24134454 | napus specific                 | 0.9952153    | 0.317534     | not scorable | not scorable | not scorable | not scorable |
| 6588 Bn-A03-p24154359 | A-genome specific (napus-rapa) | 0.9066986    | 0.7960536    | not scorable | not scorable | 0.9669421    | 0.7218816    |
| 6589 Bn-A03-p24169327 | napus specific                 | 0.9258373    | 0.5291593    | not scorable | not scorable | not scorable | not scorable |
| 6590 Bn-A03-p24175395 | A-genome specific (rapa only)  | not scorable | not scorable | not scorable | not scorable | 1            | 0.6969588    |
| 6591 Bn-A03-p24176332 | A-genome specific (napus-rapa) | 0.9736842    | 0.7735883    | not scorable | not scorable | 0.9917355    | 0.7736937    |
| 6592 Bn-A03-p24179750 | A-genome specific (napus-rapa) | 0.9952153    | 0.7563667    | not scorable | not scorable | 0.9917355    | 0.7743954    |
| 6593 Bn-A03-p24181488 | A-genome specific (napus-rapa) | 0.9928229    | 0.7708838    | not scorable | not scorable | 0.9834711    | 0.798441     |
| 6594 Bn-A03-p24181569 | A-genome specific (napus-rapa) | 0.9976076    | 0.7749998    | not scorable | not scorable | 1            | 0.7880737    |
| 6595 Bn-A03-p24218520 | A-genome specific (rapa only)  | not scorable | not scorable | not scorable | not scorable | 0.9752066    | 0.7232825    |
| 6596 Bn-A03-p2423548  | A-genome specific (rapa only)  | not scorable | not scorable | not scorable | not scorable | 0.9586777    | 0.6759076    |
| 6597 Bn-A03-p24249333 | A-genome specific (napus-rapa) | 0.8995215    | 0.7744742    | not scorable | not scorable | 0.9834711    | 0.7492133    |



|      |                  |                                |              |              |              |              |           |           |
|------|------------------|--------------------------------|--------------|--------------|--------------|--------------|-----------|-----------|
| 6598 | Bn-A03-p24255868 | A-genome specific (napus-rapa) | 0.9880383    | 0.7224682    | not scorable | not scorable | 1         | 0.7622278 |
| 6599 | Bn-A03-p2427713  | A-genome specific (napus-rapa) | 0.708134     | 0.6424924    | not scorable | not scorable | 0.9586777 | 0.6638596 |
| 6600 | Bn-A03-p24294571 | A-genome specific (napus-rapa) | 0.9976076    | 0.5479292    | not scorable | not scorable | 1         | 0.7316726 |
| 6601 | Bn-A03-p24298999 | A-genome specific (napus-rapa) | 0.923445     | 0.6835436    | not scorable | not scorable | 0.9834711 | 0.7401499 |
| 6602 | Bn-A03-p2431404  | A-genome specific (napus-rapa) | 0.9736842    | 0.2814147    | not scorable | not scorable | 1         | 0.7296267 |
| 6603 | Bn-A03-p24345237 | A-genome specific (napus-rapa) | 0.9545454    | 0.706633     | not scorable | not scorable | 0.8099173 | 0.7231381 |
| 6604 | Bn-A03-p24349898 | A-genome specific (napus-rapa) | 0.9808612    | 0.4174549    | not scorable | not scorable | 1         | 0.787483  |
| 6605 | Bn-A03-p24355827 | A-genome specific (napus-rapa) | 0.9569378    | 0.5907879    | not scorable | not scorable | 0.9834711 | 0.7473179 |
| 6606 | Bn-A03-p24355878 | A-genome specific (napus-rapa) | 0.9736842    | 0.5505385    | not scorable | not scorable | 0.9752066 | 0.6328842 |
| 6607 | Bn-A03-p24363260 | A-genome specific (napus-rapa) | 0.9952153    | 0.7580212    | not scorable | not scorable | 0.9752066 | 0.7676342 |
| 6608 | Bn-A03-p24363811 | A-genome specific (napus-rapa) | 0.9808612    | 0.7302264    | not scorable | not scorable | 0.9834711 | 0.762     |
| 6609 | Bn-A03-p24365383 | A-genome specific (napus-rapa) | 0.9665072    | 0.5213048    | not scorable | not scorable | 0.9917355 | 0.524058  |
| 6610 | Bn-A03-p24392068 | A-genome specific (napus-rapa) | 0.9976076    | 0.7611596    | not scorable | not scorable | 0.9834711 | 0.7716715 |
| 6611 | Bn-A03-p24394796 | A-genome specific (napus-rapa) | 0.9808612    | 0.7212237    | not scorable | not scorable | 0.9834711 | 0.7574471 |
| 6612 | Bn-A03-p24395668 | A-genome specific (napus-rapa) | 0.9928229    | 0.7437569    | not scorable | not scorable | 0.9834711 | 0.6757309 |
| 6613 | Bn-A03-p24396004 | A-genome specific (napus-rapa) | 0.9880383    | 0.7388577    | not scorable | not scorable | 0.9834711 | 0.6558907 |
| 6614 | Bn-A03-p24397912 | A-genome specific (napus-rapa) | 0.9880383    | 0.7995637    | not scorable | not scorable | 0.9586777 | 0.7421635 |
| 6615 | Bn-A03-p24397916 | A-genome specific (napus-rapa) | 0.9952153    | 0.7781911    | not scorable | not scorable | 0.9917355 | 0.777849  |
| 6616 | Bn-A03-p24398419 | A-genome specific (napus-rapa) | 0.9880383    | 0.7853137    | not scorable | not scorable | 0.9669421 | 0.7497286 |
| 6617 | Bn-A03-p24400338 | A-genome specific (napus-rapa) | 0.9928229    | 0.7855397    | not scorable | not scorable | 0.9917355 | 0.7177429 |
| 6618 | Bn-A03-p24405388 | A-genome specific (rapa only)  | not scorable | not scorable | not scorable | not scorable | 0.9834711 | 0.8320355 |
| 6619 | Bn-A03-p24410521 | A-genome specific (napus-rapa) | 0.9856459    | 0.7664156    | not scorable | not scorable | 0.9917355 | 0.7606129 |
| 6620 | Bn-A03-p24411222 | A-genome specific (napus-rapa) | 0.9832536    | 0.8042824    | not scorable | not scorable | 0.9834711 | 0.7851459 |
| 6621 | Bn-A03-p24415246 | A-genome specific (napus-rapa) | 0.9952153    | 0.7788144    | not scorable | not scorable | 0.9917355 | 0.6986021 |
| 6622 | Bn-A03-p24417118 | A-genome specific (napus-rapa) | 0.930622     | 0.7650862    | not scorable | not scorable | 0.9917355 | 0.6678255 |
| 6623 | Bn-A03-p24419229 | A-genome specific (napus-rapa) | 0.9880383    | 0.7954323    | not scorable | not scorable | 0.9752066 | 0.7792856 |
| 6624 | Bn-A03-p24420093 | A-genome specific (napus-rapa) | 0.9928229    | 0.7789081    | not scorable | not scorable | 0.9917355 | 0.8614453 |
| 6625 | Bn-A03-p24420842 | A-genome specific (napus-rapa) | 0.9808612    | 0.7540386    | not scorable | not scorable | 0.9917355 | 0.7871201 |
| 6626 | Bn-A03-p24422801 | A-genome specific (napus-rapa) | 0.9856459    | 0.7401875    | not scorable | not scorable | 1         | 0.7411011 |
| 6627 | Bn-A03-p24423536 | A-genome specific (napus-rapa) | 0.9904306    | 0.8110406    | not scorable | not scorable | 0.9917355 | 0.7948937 |
| 6628 | Bn-A03-p24423762 | A-genome specific (napus-rapa) | 0.9952153    | 0.6865418    | not scorable | not scorable | 0.9917355 | 0.6487774 |
| 6629 | Bn-A03-p24423797 | A-genome specific (napus-rapa) | 0.9904306    | 0.7778602    | not scorable | not scorable | 0.9834711 | 0.6776635 |
| 6630 | Bn-A03-p24424174 | A-genome specific (napus-rapa) | 0.9928229    | 0.8183743    | not scorable | not scorable | 0.9834711 | 0.7110603 |

|      |                  |                                |              |              |              |              |              |              |
|------|------------------|--------------------------------|--------------|--------------|--------------|--------------|--------------|--------------|
| 6631 | Bn-A03-p24424231 | A-genome specific (napus-rapa) | 0.9784689    | 0.779777     | not scorable | not scorable | 0.9752066    | 0.7162258    |
| 6632 | Bn-A03-p24424286 | A-genome specific (napus-rapa) | 0.9880383    | 0.7768571    | not scorable | not scorable | 0.9917355    | 0.73553      |
| 6633 | Bn-A03-p24424807 | A-genome specific (napus-rapa) | 0.9784689    | 0.7244657    | not scorable | not scorable | 0.9917355    | 0.7418869    |
| 6634 | Bn-A03-p24426088 | A-genome specific (napus-rapa) | 0.9904306    | 0.7729529    | not scorable | not scorable | 1            | 0.7531262    |
| 6635 | Bn-A03-p24445966 | napus specific                 | 0.3995215    | 0.8148175    | not scorable | not scorable | not scorable | not scorable |
| 6636 | Bn-A03-p24482649 | A-genome specific (napus-rapa) | 0.9952153    | 0.7767802    | not scorable | not scorable | 1            | 0.7414125    |
| 6637 | Bn-A03-p24486881 | A-genome specific (napus-rapa) | 0.9976076    | 0.7680234    | not scorable | not scorable | 0.9834711    | 0.7595137    |
| 6638 | Bn-A03-p2449290  | A-genome specific (napus-rapa) | 1            | 0.4754882    | not scorable | not scorable | 1            | 0.7494448    |
| 6639 | Bn-A03-p24494026 | A-genome specific (napus-rapa) | 0.8444976    | 0.8110638    | not scorable | not scorable | 0.9752066    | 0.787383     |
| 6640 | Bn-A03-p24494224 | A-genome specific (napus-rapa) | 0.9282297    | 0.8322148    | not scorable | not scorable | 0.9669421    | 0.7381436    |
| 6641 | Bn-A03-p24497262 | A-genome specific (napus-rapa) | 0.9952153    | 0.744936     | not scorable | not scorable | 0.9421487    | 0.7786604    |
| 6642 | Bn-A03-p24512946 | A-genome specific (napus-rapa) | 0.9019139    | 0.8957767    | not scorable | not scorable | 1            | 0.8114341    |
| 6643 | Bn-A03-p24526574 | A-genome specific (napus-rapa) | 0.9952153    | 0.5153062    | not scorable | not scorable | 0.9752066    | 0.7604197    |
| 6644 | Bn-A03-p24527313 | A-genome specific (napus-rapa) | 1            | 0.6452897    | not scorable | not scorable | 0.9917355    | 0.5981495    |
| 6645 | Bn-A03-p24537588 | A-genome specific (napus-rapa) | 0.9330143    | 0.7836428    | not scorable | not scorable | 0.7851239    | 0.7209138    |
| 6646 | Bn-A03-p2453901  | A-genome specific (rapa only)  | not scorable | not scorable | not scorable | not scorable | 1            | 0.8448456    |
| 6647 | Bn-A03-p24544179 | A-genome specific (napus-rapa) | 0.9736842    | 0.327416     | not scorable | not scorable | 1            | 0.7278167    |
| 6648 | Bn-A03-p24565421 | A-genome specific (napus-rapa) | 1            | 0.3343455    | not scorable | not scorable | 1            | 0.7956936    |
| 6649 | Bn-A03-p24576670 | A-genome specific (napus-rapa) | 0.9473684    | 0.6447119    | not scorable | not scorable | 0.9834711    | 0.7154917    |
| 6650 | Bn-A03-p2457869  | A-genome specific (napus-rapa) | 0.9665072    | 0.7285771    | not scorable | not scorable | 0.9834711    | 0.6776835    |
| 6651 | Bn-A03-p2457934  | A-genome specific (napus-rapa) | 0.9665072    | 0.8408797    | not scorable | not scorable | 0.9917355    | 0.7355909    |
| 6652 | Bn-A03-p24581655 | A-genome specific (napus-rapa) | 0.9593301    | 0.6387448    | not scorable | not scorable | 0.9917355    | 0.7010389    |
| 6653 | Bn-A03-p24588576 | A-genome specific (rapa only)  | not scorable | not scorable | not scorable | not scorable | 0.9917355    | 0.7109206    |
| 6654 | Bn-A03-p24596982 | A-genome specific (rapa only)  | not scorable | not scorable | not scorable | not scorable | 0.9752066    | 0.799085     |
| 6655 | Bn-A03-p2460475  | A-genome specific (napus-rapa) | 0.9641148    | 0.7700267    | not scorable | not scorable | 1            | 0.7969586    |
| 6656 | Bn-A03-p24606883 | A-genome specific (napus-rapa) | 0.8684211    | 0.9407511    | not scorable | not scorable | 0.9669421    | 0.7466294    |
| 6657 | Bn-A03-p24612593 | A-genome specific (napus-rapa) | 1            | 0.924385     | not scorable | not scorable | 1            | 0.8794277    |
| 6658 | Bn-A03-p24613172 | A-genome specific (napus-rapa) | 0.9904306    | 0.7253217    | not scorable | not scorable | 1            | 0.7584611    |
| 6659 | Bn-A03-p24626484 | A-genome specific (napus-rapa) | 0.8708134    | 0.9285722    | not scorable | not scorable | 0.9752066    | 0.7708727    |
| 6660 | Bn-A03-p24627047 | A-genome specific (napus-rapa) | 0.9760765    | 0.5440142    | not scorable | not scorable | 1            | 0.9264424    |
| 6661 | Bn-A03-p24650359 | A-genome specific (napus-rapa) | 0.9569378    | 0.4088935    | not scorable | not scorable | 0.9917355    | 0.8189151    |
| 6662 | Bn-A03-p24669270 | A-genome specific (napus-rapa) | 0.8755981    | 0.9019492    | not scorable | not scorable | 0.9752066    | 0.8634915    |
| 6663 | Bn-A03-p24688180 | A-genome specific (napus-rapa) | 0.9832536    | 0.8504308    | not scorable | not scorable | 0.9834711    | 0.8867637    |

|      |                  |                                   |              |              |              |              |              |              |
|------|------------------|-----------------------------------|--------------|--------------|--------------|--------------|--------------|--------------|
| 6664 | Bn-A03-p2468983  | genome unspecific (oleracea-rapa) | not scorable | not scorable | 0.8914729    | 0.1443294    | 0.9752066    | 0.5309913    |
| 6665 | Bn-A03-p24690789 | A-genome specific (napus-rapa)    | 0.5669857    | 0.9238845    | not scorable | not scorable | 1            | 0.8151029    |
| 6666 | Bn-A03-p2469223  | A-genome specific (napus-rapa)    | 0.9928229    | 0.4302405    | not scorable | not scorable | 0.9834711    | 0.8057071    |
| 6667 | Bn-A03-p24704126 | A-genome specific (napus-rapa)    | 0.8205742    | 0.8293523    | not scorable | not scorable | 1            | 0.7634205    |
| 6668 | Bn-A03-p24710055 | A-genome specific (napus-rapa)    | 0.9976076    | 0.7177405    | not scorable | not scorable | 1            | 0.7012724    |
| 6669 | Bn-A03-p24739525 | A-genome specific (napus-rapa)    | 0.9928229    | 0.7478398    | not scorable | not scorable | 0.9917355    | 0.7245228    |
| 6670 | Bn-A03-p24745951 | A-genome specific (napus-rapa)    | 0.9928229    | 0.7689065    | not scorable | not scorable | 0.9917355    | 0.8573797    |
| 6671 | Bn-A03-p24746007 | A-genome specific (napus-rapa)    | 0.9904306    | 0.7518393    | not scorable | not scorable | 0.9917355    | 0.8664003    |
| 6672 | Bn-A03-p24748004 | A-genome specific (napus-rapa)    | 0.9712918    | 0.2494912    | not scorable | not scorable | 0.9917355    | 0.6805801    |
| 6673 | Bn-A03-p24753667 | A-genome specific (napus-rapa)    | 0.9760765    | 0.8025423    | not scorable | not scorable | 0.9917355    | 0.7638793    |
| 6674 | Bn-A03-p24753829 | A-genome specific (napus-rapa)    | 0.9760765    | 0.7258437    | not scorable | not scorable | 0.9917355    | 0.7317423    |
| 6675 | Bn-A03-p24763656 | A-genome specific (rapa only)     | not scorable | not scorable | not scorable | not scorable | 0.9586777    | 0.8156029    |
| 6676 | Bn-A03-p24773584 | A-genome specific (napus-rapa)    | 0.9976076    | 0.5180653    | not scorable | not scorable | 0.9917355    | 0.7889594    |
| 6677 | Bn-A03-p24780067 | napus specific                    | 0.9904306    | 0.7459771    | not scorable | not scorable | not scorable | not scorable |
| 6678 | Bn-A03-p2479213  | napus specific                    | 0.9449761    | 0.7499059    | not scorable | not scorable | not scorable | not scorable |
| 6679 | Bn-A03-p24800655 | A-genome specific (napus-rapa)    | 1            | 0.5467187    | not scorable | not scorable | 0.9917355    | 0.7207055    |
| 6680 | Bn-A03-p24805476 | A-genome specific (napus-rapa)    | 0.9856459    | 0.5785417    | not scorable | not scorable | 0.9917355    | 0.6551772    |
| 6681 | Bn-A03-p24809290 | A-genome specific (napus-rapa)    | 0.9856459    | 0.7662671    | not scorable | not scorable | 0.9917355    | 0.7481571    |
| 6682 | Bn-A03-p24811187 | A-genome specific (napus-rapa)    | 0.9976076    | 0.855454     | not scorable | not scorable | 0.9752066    | 0.7945815    |
| 6683 | Bn-A03-p24823015 | A-genome specific (napus-rapa)    | 0.9952153    | 0.7882114    | not scorable | not scorable | 0.9917355    | 0.7172629    |
| 6684 | Bn-A03-p24824357 | A-genome specific (napus-rapa)    | 0.9641148    | 0.801886     | not scorable | not scorable | 0.9008265    | 0.8868099    |
| 6685 | Bn-A03-p24827646 | genome unspecific (all in)        | 0.9904306    | 0.5232289    | 0.9689922    | 0.8129192    | 1            | 0.7073078    |
| 6686 | Bn-A03-p24829281 | A-genome specific (napus-rapa)    | 0.9688995    | 0.3696975    | not scorable | not scorable | 0.9834711    | 0.709146     |
| 6687 | Bn-A03-p2483644  | A-genome specific (napus-rapa)    | 0.9784689    | 0.5844431    | not scorable | not scorable | 0.9669421    | 0.6319522    |
| 6688 | Bn-A03-p24842021 | A-genome specific (napus-rapa)    | 1            | 0.7692734    | not scorable | not scorable | 1            | 0.7140905    |
| 6689 | Bn-A03-p24864494 | A-genome specific (napus-rapa)    | 0.3110048    | 0.7871903    | not scorable | not scorable | 0.9008265    | 0.7816744    |
| 6690 | Bn-A03-p24896477 | A-genome specific (napus-rapa)    | 0.9138756    | 0.8411083    | not scorable | not scorable | 0.9752066    | 0.8180065    |
| 6691 | Bn-A03-p24896531 | A-genome specific (napus-rapa)    | 0.9162679    | 0.7905918    | not scorable | not scorable | 0.9834711    | 0.7903524    |
| 6692 | Bn-A03-p24896769 | A-genome specific (napus-rapa)    | 0.9090909    | 0.7748513    | not scorable | not scorable | 0.9669421    | 0.7399241    |
| 6693 | Bn-A03-p24896884 | A-genome specific (napus-rapa)    | 0.9162679    | 0.8371346    | not scorable | not scorable | 0.9669421    | 0.8107114    |
| 6694 | Bn-A03-p24897111 | A-genome specific (napus-rapa)    | 0.9162679    | 0.7743694    | not scorable | not scorable | 0.9669421    | 0.7331177    |
| 6695 | Bn-A03-p24897118 | A-genome specific (napus-rapa)    | 0.9138756    | 0.7929528    | not scorable | not scorable | 0.9669421    | 0.7012326    |
| 6696 | Bn-A03-p24897286 | A-genome specific (napus-rapa)    | 0.9162679    | 0.8032023    | not scorable | not scorable | 0.9834711    | 0.8049498    |

|                       |                                |              |              |              |              |           |           |
|-----------------------|--------------------------------|--------------|--------------|--------------|--------------|-----------|-----------|
| 6697 Bn-A03-p24900647 | A-genome specific (napus-rapa) | 0.9162679    | 0.7930267    | not scorable | not scorable | 0.9752066 | 0.7520571 |
| 6698 Bn-A03-p24902152 | A-genome specific (napus-rapa) | 0.9162679    | 0.8104087    | not scorable | not scorable | 0.9752066 | 0.7386913 |
| 6699 Bn-A03-p24902631 | A-genome specific (napus-rapa) | 0.9162679    | 0.7193407    | not scorable | not scorable | 0.9834711 | 0.7033099 |
| 6700 Bn-A03-p24906226 | A-genome specific (napus-rapa) | 0.9928229    | 0.4535144    | not scorable | not scorable | 1         | 0.789242  |
| 6701 Bn-A03-p2491346  | A-genome specific (rapa only)  | not scorable | not scorable | not scorable | not scorable | 0.9917355 | 0.6706721 |
| 6702 Bn-A03-p24920415 | A-genome specific (napus-rapa) | 1            | 0.419773     | not scorable | not scorable | 0.9917355 | 0.7479537 |
| 6703 Bn-A03-p24928989 | A-genome specific (napus-rapa) | 0.9952153    | 0.6587282    | not scorable | not scorable | 0.9917355 | 0.7071024 |
| 6704 Bn-A03-p2493541  | A-genome specific (napus-rapa) | 0.9688995    | 0.6543214    | not scorable | not scorable | 1         | 0.7432543 |
| 6705 Bn-A03-p24965131 | A-genome specific (napus-rapa) | 1            | 0.5820072    | not scorable | not scorable | 0.9917355 | 0.6805493 |
| 6706 Bn-A03-p24971161 | A-genome specific (napus-rapa) | 1            | 0.7123237    | not scorable | not scorable | 0.9917355 | 0.7226265 |
| 6707 Bn-A03-p24971360 | A-genome specific (napus-rapa) | 0.9760765    | 0.7650027    | not scorable | not scorable | 0.9917355 | 0.8602692 |
| 6708 Bn-A03-p24985700 | A-genome specific (napus-rapa) | 0.9952153    | 0.7498276    | not scorable | not scorable | 0.9834711 | 0.7640035 |
| 6709 Bn-A03-p24986472 | A-genome specific (napus-rapa) | 0.9976076    | 0.8994301    | not scorable | not scorable | 0.9917355 | 0.775649  |
| 6710 Bn-A03-p24990059 | A-genome specific (napus-rapa) | 0.9736842    | 0.3895088    | not scorable | not scorable | 0.9834711 | 0.6775794 |
| 6711 Bn-A03-p24998976 | A-genome specific (napus-rapa) | 0.9808612    | 0.6447199    | not scorable | not scorable | 0.9917355 | 0.690023  |
| 6712 Bn-A03-p24999716 | A-genome specific (napus-rapa) | 0.4808612    | 0.779134     | not scorable | not scorable | 0.7851239 | 0.7942743 |
| 6713 Bn-A03-p25008908 | A-genome specific (napus-rapa) | 0.9497608    | 0.714157     | not scorable | not scorable | 0.9917355 | 0.6735455 |
| 6714 Bn-A03-p25009736 | A-genome specific (napus-rapa) | 0.9976076    | 0.8183227    | not scorable | not scorable | 0.9917355 | 0.7711441 |
| 6715 Bn-A03-p25009919 | A-genome specific (napus-rapa) | 0.9976076    | 0.7632269    | not scorable | not scorable | 0.9752066 | 0.7353338 |
| 6716 Bn-A03-p25009925 | A-genome specific (napus-rapa) | 0.9904306    | 0.7889529    | not scorable | not scorable | 0.9917355 | 0.7823338 |
| 6717 Bn-A03-p25024647 | A-genome specific (napus-rapa) | 0.9880383    | 0.7658893    | not scorable | not scorable | 0.9917355 | 0.7651227 |
| 6718 Bn-A03-p25024749 | A-genome specific (napus-rapa) | 0.9760765    | 0.6174672    | not scorable | not scorable | 0.9917355 | 0.7014967 |
| 6719 Bn-A03-p25024928 | A-genome specific (napus-rapa) | 0.9928229    | 0.7730804    | not scorable | not scorable | 0.9917355 | 0.7447109 |
| 6720 Bn-A03-p25025360 | A-genome specific (napus-rapa) | 0.9904306    | 0.7985497    | not scorable | not scorable | 0.9834711 | 0.78022   |
| 6721 Bn-A03-p25032014 | A-genome specific (napus-rapa) | 0.4760765    | 0.7160954    | not scorable | not scorable | 0.8181818 | 0.6777143 |
| 6722 Bn-A03-p25033468 | A-genome specific (napus-rapa) | 0.4688995    | 0.8519772    | not scorable | not scorable | 0.8677686 | 0.7776775 |
| 6723 Bn-A03-p25037423 | A-genome specific (napus-rapa) | 0.9186603    | 0.6794637    | not scorable | not scorable | 0.9834711 | 0.8246735 |
| 6724 Bn-A03-p25043466 | A-genome specific (napus-rapa) | 0.9545454    | 0.5195987    | not scorable | not scorable | 0.9917355 | 0.706578  |
| 6725 Bn-A03-p25046120 | A-genome specific (napus-rapa) | 0.9330143    | 0.5248874    | not scorable | not scorable | 0.9917355 | 0.8076674 |
| 6726 Bn-A03-p25047750 | A-genome specific (napus-rapa) | 0.9832536    | 0.3872924    | not scorable | not scorable | 0.9917355 | 0.7050795 |
| 6727 Bn-A03-p25055647 | A-genome specific (napus-rapa) | 0.9856459    | 0.3799444    | not scorable | not scorable | 1         | 0.7277759 |
| 6728 Bn-A03-p25071259 | A-genome specific (napus-rapa) | 0.9952153    | 0.8408425    | not scorable | not scorable | 0.9834711 | 0.7655048 |
| 6729 Bn-A03-p25073363 | A-genome specific (napus-rapa) | 1            | 0.7562859    | not scorable | not scorable | 0.9917355 | 0.7041311 |

|                       |                                |           |           |              |              |           |           |
|-----------------------|--------------------------------|-----------|-----------|--------------|--------------|-----------|-----------|
| 6730 Bn-A03-p25082044 | A-genome specific (napus-rapa) | 0.9976076 | 0.5740218 | not scorable | not scorable | 0.9917355 | 0.7705    |
| 6731 Bn-A03-p25111028 | A-genome specific (napus-rapa) | 0.9928229 | 0.4311489 | not scorable | not scorable | 1         | 0.7081072 |
| 6732 Bn-A03-p25111171 | A-genome specific (napus-rapa) | 1         | 0.7293203 | not scorable | not scorable | 0.9834711 | 0.8019294 |
| 6733 Bn-A03-p2511868  | A-genome specific (napus-rapa) | 1         | 0.7071137 | not scorable | not scorable | 1         | 0.7193207 |
| 6734 Bn-A03-p25119771 | A-genome specific (napus-rapa) | 0.9976076 | 0.408127  | not scorable | not scorable | 1         | 0.7791945 |
| 6735 Bn-A03-p2520008  | A-genome specific (napus-rapa) | 0.9641148 | 0.5266188 | not scorable | not scorable | 0.9917355 | 0.7052752 |
| 6736 Bn-A03-p2521128  | A-genome specific (napus-rapa) | 0.9545454 | 0.7649608 | not scorable | not scorable | 1         | 0.7406269 |
| 6737 Bn-A03-p25265364 | A-genome specific (napus-rapa) | 0.9473684 | 0.3411439 | not scorable | not scorable | 0.9669421 | 0.489955  |
| 6738 Bn-A03-p25296332 | A-genome specific (napus-rapa) | 0.9976076 | 0.4726601 | not scorable | not scorable | 1         | 0.8176416 |
| 6739 Bn-A03-p25314490 | A-genome specific (napus-rapa) | 0.9688995 | 0.7207966 | not scorable | not scorable | 0.9504132 | 0.619914  |
| 6740 Bn-A03-p25314570 | A-genome specific (napus-rapa) | 0.9497608 | 0.6824952 | not scorable | not scorable | 0.9834711 | 0.812075  |
| 6741 Bn-A03-p2532699  | A-genome specific (napus-rapa) | 0.9928229 | 0.4587076 | not scorable | not scorable | 1         | 0.6748204 |
| 6742 Bn-A03-p25330901 | A-genome specific (napus-rapa) | 0.9952153 | 0.7343946 | not scorable | not scorable | 0.9834711 | 0.8567975 |
| 6743 Bn-A03-p25337594 | A-genome specific (napus-rapa) | 0.9976076 | 0.7948563 | not scorable | not scorable | 1         | 0.7743765 |
| 6744 Bn-A03-p25342507 | A-genome specific (napus-rapa) | 0.9904306 | 0.3955503 | not scorable | not scorable | 0.9834711 | 0.7077503 |
| 6745 Bn-A03-p25343812 | A-genome specific (napus-rapa) | 0.9952153 | 0.8380256 | not scorable | not scorable | 0.9834711 | 0.8076818 |
| 6746 Bn-A03-p25361950 | A-genome specific (napus-rapa) | 0.9880383 | 0.5241575 | not scorable | not scorable | 1         | 0.8598664 |
| 6747 Bn-A03-p25362364 | A-genome specific (napus-rapa) | 0.9952153 | 0.5350069 | not scorable | not scorable | 0.9834711 | 0.7898923 |
| 6748 Bn-A03-p25365003 | A-genome specific (napus-rapa) | 0.9952153 | 0.8402349 | not scorable | not scorable | 1         | 0.752243  |
| 6749 Bn-A03-p25393494 | A-genome specific (napus-rapa) | 0.9736842 | 0.7469046 | not scorable | not scorable | 0.9669421 | 0.860481  |
| 6750 Bn-A03-p25402301 | A-genome specific (napus-rapa) | 0.9784689 | 0.7053856 | not scorable | not scorable | 1         | 0.747857  |
| 6751 Bn-A03-p25402717 | A-genome specific (napus-rapa) | 0.9856459 | 0.7672871 | not scorable | not scorable | 0.9752066 | 0.7252939 |
| 6752 Bn-A03-p25403786 | A-genome specific (napus-rapa) | 0.9521531 | 0.2843831 | not scorable | not scorable | 0.9669421 | 0.7203365 |
| 6753 Bn-A03-p25408779 | A-genome specific (napus-rapa) | 0.9712918 | 0.6047825 | not scorable | not scorable | 1         | 0.769795  |
| 6754 Bn-A03-p25423612 | A-genome specific (napus-rapa) | 0.9928229 | 0.7919471 | not scorable | not scorable | 1         | 0.9298731 |
| 6755 Bn-A03-p25437069 | A-genome specific (napus-rapa) | 0.9976076 | 0.8890684 | not scorable | not scorable | 1         | 0.9454979 |
| 6756 Bn-A03-p25471848 | A-genome specific (napus-rapa) | 1         | 0.3907432 | not scorable | not scorable | 0.9917355 | 0.8217604 |
| 6757 Bn-A03-p25473832 | A-genome specific (napus-rapa) | 1         | 0.451246  | not scorable | not scorable | 1         | 0.8447355 |
| 6758 Bn-A03-p25474850 | A-genome specific (napus-rapa) | 0.9832536 | 0.6371432 | not scorable | not scorable | 0.9917355 | 0.6303114 |
| 6759 Bn-A03-p2548187  | A-genome specific (napus-rapa) | 0.9665072 | 0.539252  | not scorable | not scorable | 1         | 0.7037888 |
| 6760 Bn-A03-p25489551 | A-genome specific (napus-rapa) | 0.9880383 | 0.8479936 | not scorable | not scorable | 0.9917355 | 0.7167284 |
| 6761 Bn-A03-p25494539 | A-genome specific (napus-rapa) | 0.9784689 | 0.7259338 | not scorable | not scorable | 0.9834711 | 0.7865135 |
| 6762 Bn-A03-p25511978 | A-genome specific (napus-rapa) | 0.9952153 | 0.8457839 | not scorable | not scorable | 0.9834711 | 0.7027249 |

|                       |                                |              |              |              |              |           |           |
|-----------------------|--------------------------------|--------------|--------------|--------------|--------------|-----------|-----------|
| 6763 Bn-A03-p25521989 | A-genome specific (napus-rapa) | 0.9808612    | 0.574041     | not scorable | not scorable | 0.9834711 | 0.6542021 |
| 6764 Bn-A03-p25525612 | A-genome specific (napus-rapa) | 0.9928229    | 0.4244581    | not scorable | not scorable | 0.9834711 | 0.5805591 |
| 6765 Bn-A03-p25555423 | A-genome specific (napus-rapa) | 0.9928229    | 0.8022624    | not scorable | not scorable | 0.9834711 | 0.8207097 |
| 6766 Bn-A03-p2557607  | A-genome specific (rapa only)  | not scorable | not scorable | not scorable | not scorable | 0.9834711 | 0.7793936 |
| 6767 Bn-A03-p25582691 | A-genome specific (napus-rapa) | 0.9928229    | 0.3984939    | not scorable | not scorable | 1         | 0.825563  |
| 6768 Bn-A03-p25584526 | A-genome specific (napus-rapa) | 0.9904306    | 0.7711689    | not scorable | not scorable | 1         | 0.840514  |
| 6769 Bn-A03-p25591818 | A-genome specific (napus-rapa) | 0.9952153    | 0.7376582    | not scorable | not scorable | 0.9917355 | 0.7359099 |
| 6770 Bn-A03-p25599340 | A-genome specific (napus-rapa) | 0.9928229    | 0.881541     | not scorable | not scorable | 0.9834711 | 0.7774724 |
| 6771 Bn-A03-p25604179 | A-genome specific (rapa only)  | not scorable | not scorable | not scorable | not scorable | 0.9834711 | 0.7855322 |
| 6772 Bn-A03-p25606900 | A-genome specific (napus-rapa) | 0.9976076    | 0.3176388    | not scorable | not scorable | 0.9917355 | 0.6795604 |
| 6773 Bn-A03-p25608893 | A-genome specific (napus-rapa) | 0.9976076    | 0.8006701    | not scorable | not scorable | 1         | 0.828581  |
| 6774 Bn-A03-p25614406 | A-genome specific (napus-rapa) | 0.9449761    | 0.8415254    | not scorable | not scorable | 0.9504132 | 0.868379  |
| 6775 Bn-A03-p25625732 | A-genome specific (rapa only)  | not scorable | not scorable | not scorable | not scorable | 0.9917355 | 0.7766615 |
| 6776 Bn-A03-p25629067 | A-genome specific (napus-rapa) | 0.9976076    | 0.680786     | not scorable | not scorable | 0.9834711 | 0.7774729 |
| 6777 Bn-A03-p25631316 | A-genome specific (napus-rapa) | 0.9880383    | 0.7775806    | not scorable | not scorable | 0.9917355 | 0.7925289 |
| 6778 Bn-A03-p25636300 | A-genome specific (napus-rapa) | 0.9904306    | 0.601392     | not scorable | not scorable | 0.9669421 | 0.6347953 |
| 6779 Bn-A03-p25637279 | A-genome specific (napus-rapa) | 0.9784689    | 0.7510444    | not scorable | not scorable | 1         | 0.7365086 |
| 6780 Bn-A03-p25640844 | A-genome specific (napus-rapa) | 0.9904306    | 0.7188381    | not scorable | not scorable | 0.9834711 | 0.7224126 |
| 6781 Bn-A03-p25668597 | A-genome specific (napus-rapa) | 1            | 0.5108613    | not scorable | not scorable | 0.9834711 | 0.6673809 |
| 6782 Bn-A03-p25671744 | A-genome specific (napus-rapa) | 0.9832536    | 0.3228954    | not scorable | not scorable | 0.9669421 | 0.5717062 |
| 6783 Bn-A03-p25679775 | A-genome specific (napus-rapa) | 0.9641148    | 0.7193376    | not scorable | not scorable | 0.7603306 | 0.8694186 |
| 6784 Bn-A03-p25681343 | A-genome specific (napus-rapa) | 1            | 0.3304496    | not scorable | not scorable | 1         | 0.8078775 |
| 6785 Bn-A03-p25683964 | A-genome specific (rapa only)  | not scorable | not scorable | not scorable | not scorable | 0.8760331 | 0.7884539 |
| 6786 Bn-A03-p25695855 | A-genome specific (napus-rapa) | 0.9856459    | 0.394556     | not scorable | not scorable | 1         | 0.7804914 |
| 6787 Bn-A03-p25704793 | A-genome specific (napus-rapa) | 0.9904306    | 0.3877018    | not scorable | not scorable | 0.9834711 | 0.583651  |
| 6788 Bn-A03-p25708944 | A-genome specific (napus-rapa) | 0.9665072    | 0.820559     | not scorable | not scorable | 1         | 0.8369554 |
| 6789 Bn-A03-p25715049 | A-genome specific (napus-rapa) | 0.9210526    | 0.8697508    | not scorable | not scorable | 0.9917355 | 0.8575163 |
| 6790 Bn-A03-p25718518 | A-genome specific (napus-rapa) | 0.9904306    | 0.3670449    | not scorable | not scorable | 1         | 0.7320683 |
| 6791 Bn-A03-p25718716 | A-genome specific (napus-rapa) | 0.9976076    | 0.7384736    | not scorable | not scorable | 1         | 0.8295    |
| 6792 Bn-A03-p25729227 | A-genome specific (napus-rapa) | 0.9976076    | 0.8185547    | not scorable | not scorable | 1         | 0.7339805 |
| 6793 Bn-A03-p25729305 | A-genome specific (napus-rapa) | 0.9976076    | 0.8402116    | not scorable | not scorable | 0.9917355 | 0.7584571 |
| 6794 Bn-A03-p25734907 | A-genome specific (napus-rapa) | 0.9976076    | 0.76619      | not scorable | not scorable | 1         | 0.8157343 |
| 6795 Bn-A03-p25751759 | A-genome specific (napus-rapa) | 0.9952153    | 0.7675278    | not scorable | not scorable | 0.9834711 | 0.7505261 |

|                       |                                   |              |              |              |              |              |              |
|-----------------------|-----------------------------------|--------------|--------------|--------------|--------------|--------------|--------------|
| 6796 Bn-A03-p25756310 | A-genome specific (napus-rapa)    | 0.9928229    | 0.743876     | not scorable | not scorable | 0.9834711    | 0.8010354    |
| 6797 Bn-A03-p25765687 | A-genome specific (rapa only)     | not scorable | not scorable | not scorable | not scorable | 0.9752066    | 0.7443224    |
| 6798 Bn-A03-p25774773 | A-genome specific (napus-rapa)    | 0.9856459    | 0.5365525    | not scorable | not scorable | 0.9834711    | 0.6948738    |
| 6799 Bn-A03-p25774827 | C-genome specific (oleracea only) | not scorable | not scorable | 0.9844961    | 0.7793023    | not scorable | not scorable |
| 6800 Bn-A03-p25779411 | genome unspecific (oleracea-rapa) | not scorable | not scorable | 0.7209302    | 0.6888492    | 0.9834711    | 0.6966167    |
| 6801 Bn-A03-p25785875 | A-genome specific (napus-rapa)    | 0.9952153    | 0.4903269    | not scorable | not scorable | 0.9752066    | 0.6751118    |
| 6802 Bn-A03-p2579866  | napus specific                    | 0.9521531    | 0.7848895    | not scorable | not scorable | not scorable | not scorable |
| 6803 Bn-A03-p25801783 | A-genome specific (napus-rapa)    | 0.9665072    | 0.6965187    | not scorable | not scorable | 0.9917355    | 0.6834372    |
| 6804 Bn-A03-p25805632 | A-genome specific (napus-rapa)    | 0.9425837    | 0.8701583    | not scorable | not scorable | 0.9834711    | 0.7873433    |
| 6805 Bn-A03-p25810585 | A-genome specific (napus-rapa)    | 1            | 0.7812222    | not scorable | not scorable | 0.9917355    | 0.7063597    |
| 6806 Bn-A03-p25819955 | A-genome specific (napus-rapa)    | 0.9928229    | 0.3887921    | not scorable | not scorable | 0.9834711    | 0.818069     |
| 6807 Bn-A03-p25825392 | A-genome specific (napus-rapa)    | 0.9904306    | 0.7841604    | not scorable | not scorable | 1            | 0.8017315    |
| 6808 Bn-A03-p25826578 | A-genome specific (napus-rapa)    | 0.9880383    | 0.7935843    | not scorable | not scorable | 0.9752066    | 0.6838543    |
| 6809 Bn-A03-p25827210 | A-genome specific (napus-rapa)    | 0.9880383    | 0.7471937    | not scorable | not scorable | 0.9752066    | 0.6832657    |
| 6810 Bn-A03-p25827833 | A-genome specific (napus-rapa)    | 1            | 0.7345186    | not scorable | not scorable | 1            | 0.6406283    |
| 6811 Bn-A03-p25828479 | napus specific                    | 0.708134     | 0.8215497    | not scorable | not scorable | not scorable | not scorable |
| 6812 Bn-A03-p25839360 | napus specific                    | 0.9593301    | 0.428109     | not scorable | not scorable | not scorable | not scorable |
| 6813 Bn-A03-p25841013 | A-genome specific (rapa only)     | not scorable | not scorable | not scorable | not scorable | 0.9917355    | 0.3333955    |
| 6814 Bn-A03-p25841615 | A-genome specific (napus-rapa)    | 0.9904306    | 0.3985109    | not scorable | not scorable | 0.9834711    | 0.8428062    |
| 6815 Bn-A03-p25843937 | A-genome specific (napus-rapa)    | 0.9904306    | 0.7541863    | not scorable | not scorable | 0.9917355    | 0.776098     |
| 6816 Bn-A03-p25849429 | A-genome specific (napus-rapa)    | 0.9856459    | 0.5017938    | not scorable | not scorable | 0.9917355    | 0.580787     |
| 6817 Bn-A03-p25849463 | A-genome specific (napus-rapa)    | 0.9808612    | 0.8131489    | not scorable | not scorable | 0.9834711    | 0.7338386    |
| 6818 Bn-A03-p25850146 | genome unspecific (all in)        | 0.9856459    | 0.4132021    | 0.9612403    | 0.5904712    | 0.9834711    | 0.7476213    |
| 6819 Bn-A03-p25851789 | A-genome specific (napus-rapa)    | 0.9521531    | 0.6022698    | not scorable | not scorable | 0.9917355    | 0.7232682    |
| 6820 Bn-A03-p25858075 | A-genome specific (rapa only)     | not scorable | not scorable | not scorable | not scorable | 0.9834711    | 0.4864223    |
| 6821 Bn-A03-p25868537 | A-genome specific (napus-rapa)    | 0.9904306    | 0.7868593    | not scorable | not scorable | 1            | 0.6773683    |
| 6822 Bn-A03-p25879876 | A-genome specific (napus-rapa)    | 0.9808612    | 0.7370031    | not scorable | not scorable | 0.9834711    | 0.7203544    |
| 6823 Bn-A03-p25885330 | napus specific                    | 0.9856459    | 0.8587439    | not scorable | not scorable | not scorable | not scorable |
| 6824 Bn-A03-p2589077  | A-genome specific (rapa only)     | not scorable | not scorable | not scorable | not scorable | 0.9917355    | 0.7975518    |
| 6825 Bn-A03-p25949532 | napus specific                    | 0.9665072    | 0.5365107    | not scorable | not scorable | not scorable | not scorable |
| 6826 Bn-A03-p25949676 | A-genome specific (napus-rapa)    | 0.9880383    | 0.5965263    | not scorable | not scorable | 0.9834711    | 0.6803482    |
| 6827 Bn-A03-p25951191 | A-genome specific (napus-rapa)    | 0.9784689    | 0.699569     | not scorable | not scorable | 0.9338843    | 0.6602532    |
| 6828 Bn-A03-p25952725 | A-genome specific (napus-rapa)    | 0.9952153    | 0.7196659    | not scorable | not scorable | 1            | 0.731602     |

|      |                  |                                   |              |              |              |              |              |              |
|------|------------------|-----------------------------------|--------------|--------------|--------------|--------------|--------------|--------------|
| 6829 | Bn-A03-p25957465 | A-genome specific (napus-rapa)    | 0.9904306    | 0.3994641    | not scorable | not scorable | 1            | 0.8100411    |
| 6830 | Bn-A03-p2596410  | A-genome specific (napus-rapa)    | 0.9043062    | 0.8245699    | not scorable | not scorable | 0.9917355    | 0.7741908    |
| 6831 | Bn-A03-p25993601 | A-genome specific (napus-rapa)    | 0.9736842    | 0.7725473    | not scorable | not scorable | 0.9669421    | 0.7286393    |
| 6832 | Bn-A03-p26001258 | A-genome specific (napus-rapa)    | 0.9736842    | 0.7355054    | not scorable | not scorable | 0.9586777    | 0.7007593    |
| 6833 | Bn-A03-p26004171 | A-genome specific (napus-rapa)    | 0.9904306    | 0.6480551    | not scorable | not scorable | 0.9917355    | 0.7915948    |
| 6834 | Bn-A03-p26013651 | A-genome specific (napus-rapa)    | 0.9856459    | 0.3118527    | not scorable | not scorable | 1            | 0.7047822    |
| 6835 | Bn-A03-p26014745 | A-genome specific (napus-rapa)    | 0.9952153    | 0.7933949    | not scorable | not scorable | 1            | 0.7126471    |
| 6836 | Bn-A03-p26021585 | A-genome specific (napus-rapa)    | 0.9545454    | 0.5247356    | not scorable | not scorable | 0.9834711    | 0.6472479    |
| 6837 | Bn-A03-p26055806 | A-genome specific (napus-rapa)    | 0.9712918    | 0.741665     | not scorable | not scorable | 1            | 0.793758     |
| 6838 | Bn-A03-p2606192  | A-genome specific (napus-rapa)    | 0.4162679    | 0.729663     | not scorable | not scorable | 0.7851239    | 0.7589241    |
| 6839 | Bn-A03-p26066930 | A-genome specific (napus-rapa)    | 0.9904306    | 0.7704231    | not scorable | not scorable | 1            | 0.8491004    |
| 6840 | Bn-A03-p26071059 | A-genome specific (napus-rapa)    | 0.9928229    | 0.7766228    | not scorable | not scorable | 0.9834711    | 0.7586592    |
| 6841 | Bn-A03-p26071126 | A-genome specific (napus-rapa)    | 0.9952153    | 0.8086145    | not scorable | not scorable | 0.9917355    | 0.7759608    |
| 6842 | Bn-A03-p26075478 | A-genome specific (napus-rapa)    | 0.9736842    | 0.670863     | not scorable | not scorable | 0.9917355    | 0.7247779    |
| 6843 | Bn-A03-p26075535 | A-genome specific (napus-rapa)    | 0.9665072    | 0.4842155    | not scorable | not scorable | 0.9834711    | 0.7629414    |
| 6844 | Bn-A03-p26079114 | A-genome specific (napus-rapa)    | 0.9832536    | 0.5846496    | not scorable | not scorable | 1            | 0.7045545    |
| 6845 | Bn-A03-p26081548 | A-genome specific (napus-rapa)    | 0.9880383    | 0.5393499    | not scorable | not scorable | 1            | 0.7757495    |
| 6846 | Bn-A03-p26090388 | A-genome specific (napus-rapa)    | 0.9952153    | 0.4719716    | not scorable | not scorable | 1            | 0.837967     |
| 6847 | Bn-A03-p26100548 | A-genome specific (rapa only)     | not scorable | not scorable | not scorable | not scorable | 1            | 0.8522928    |
| 6848 | Bn-A03-p26100814 | A-genome specific (napus-rapa)    | 0.9808612    | 0.6988091    | not scorable | not scorable | 0.9834711    | 0.7615478    |
| 6849 | Bn-A03-p26116027 | A-genome specific (napus-rapa)    | 0.9904306    | 0.3484017    | not scorable | not scorable | 0.9834711    | 0.7468299    |
| 6850 | Bn-A03-p26117920 | A-genome specific (napus-rapa)    | 0.9976076    | 0.8454746    | not scorable | not scorable | 0.9917355    | 0.7616268    |
| 6851 | Bn-A03-p26119193 | A-genome specific (napus-rapa)    | 0.9784689    | 0.7946625    | not scorable | not scorable | 0.9917355    | 0.7900776    |
| 6852 | Bn-A03-p26121502 | A-genome specific (napus-rapa)    | 0.9904306    | 0.734126     | not scorable | not scorable | 1            | 0.8095435    |
| 6853 | Bn-A03-p26131473 | A-genome specific (napus-rapa)    | 1            | 0.7161857    | not scorable | not scorable | 1            | 0.6707532    |
| 6854 | Bn-A03-p26132481 | A-genome specific (napus-rapa)    | 0.9928229    | 0.8183736    | not scorable | not scorable | 1            | 0.7053532    |
| 6855 | Bn-A03-p26133142 | A-genome specific (napus-rapa)    | 0.9952153    | 0.6921923    | not scorable | not scorable | 0.9917355    | 0.6241058    |
| 6856 | Bn-A03-p26133346 | A-genome specific (napus-rapa)    | 0.9928229    | 0.3146702    | not scorable | not scorable | 0.9586777    | 0.8039298    |
| 6857 | Bn-A03-p26148876 | all not scorable                  | not scorable | not scorable | not scorable | not scorable | not scorable | not scorable |
| 6858 | Bn-A03-p2616068  | genome unspecific (oleracea-rapa) | not scorable | not scorable | 1            | 0.2758499    | 1            | 0.6459131    |
| 6859 | Bn-A03-p26167847 | genome unspecific (all in)        | 0.9712918    | 0.2595774    | 0.9844961    | 0.2700552    | 0.9917355    | 0.7070636    |
| 6860 | Bn-A03-p26167992 | A-genome specific (napus-rapa)    | 1            | 0.4293925    | not scorable | not scorable | 0.9504132    | 0.5407359    |
| 6861 | Bn-A03-p26168881 | A-genome specific (napus-rapa)    | 0.9952153    | 0.4548941    | not scorable | not scorable | 0.9669421    | 0.5443752    |



|      |                  |                                |              |              |              |              |              |              |
|------|------------------|--------------------------------|--------------|--------------|--------------|--------------|--------------|--------------|
| 6862 | Bn-A03-p26195875 | A-genome specific (napus-rapa) | 0.9856459    | 0.8025534    | not scorable | not scorable | 0.9752066    | 0.6937616    |
| 6863 | Bn-A03-p26197815 | A-genome specific (napus-rapa) | 0.9928229    | 0.6836517    | not scorable | not scorable | 0.9669421    | 0.6768839    |
| 6864 | Bn-A03-p26202244 | A-genome specific (napus-rapa) | 0.9808612    | 0.7560939    | not scorable | not scorable | 0.9834711    | 0.7826273    |
| 6865 | Bn-A03-p2621677  | A-genome specific (napus-rapa) | 0.9258373    | 0.4502969    | not scorable | not scorable | 0.9834711    | 0.7815526    |
| 6866 | Bn-A03-p26216950 | A-genome specific (napus-rapa) | 0.7799043    | 0.9031515    | not scorable | not scorable | 0.9917355    | 0.7515881    |
| 6867 | Bn-A03-p26232681 | A-genome specific (napus-rapa) | 1            | 0.4373125    | not scorable | not scorable | 1            | 0.5383495    |
| 6868 | Bn-A03-p26248671 | A-genome specific (napus-rapa) | 0.9545454    | 0.4741703    | not scorable | not scorable | 0.9752066    | 0.6797703    |
| 6869 | Bn-A03-p26264242 | A-genome specific (napus-rapa) | 0.9880383    | 0.5044744    | not scorable | not scorable | 0.9752066    | 0.7670268    |
| 6870 | Bn-A03-p26272560 | napus specific                 | 0.9497608    | 0.203819     | not scorable | not scorable | not scorable | not scorable |
| 6871 | Bn-A03-p26275444 | A-genome specific (napus-rapa) | 0.7009569    | 0.8216316    | not scorable | not scorable | 0.7355372    | 0.793963     |
| 6872 | Bn-A03-p2627552  | A-genome specific (napus-rapa) | 0.9665072    | 0.803582     | not scorable | not scorable | 1            | 0.9175813    |
| 6873 | Bn-A03-p26275615 | A-genome specific (napus-rapa) | 0.6937799    | 0.7685632    | not scorable | not scorable | 0.7520661    | 0.7452087    |
| 6874 | Bn-A03-p26276349 | A-genome specific (napus-rapa) | 0.9425837    | 0.4405088    | not scorable | not scorable | 0.9917355    | 0.6655075    |
| 6875 | Bn-A03-p262793   | A-genome specific (rapa only)  | not scorable | not scorable | not scorable | not scorable | 0.9917355    | 0.7908501    |
| 6876 | Bn-A03-p26284129 | A-genome specific (napus-rapa) | 0.9928229    | 0.7244878    | not scorable | not scorable | 0.9669421    | 0.6572834    |
| 6877 | Bn-A03-p26284449 | A-genome specific (napus-rapa) | 1            | 0.6214259    | not scorable | not scorable | 0.9917355    | 0.7626569    |
| 6878 | Bn-A03-p26284882 | A-genome specific (napus-rapa) | 0.9928229    | 0.7061277    | not scorable | not scorable | 1            | 0.7426893    |
| 6879 | Bn-A03-p26286301 | A-genome specific (napus-rapa) | 0.9856459    | 0.7270816    | not scorable | not scorable | 0.9834711    | 0.6942053    |
| 6880 | Bn-A03-p26288769 | A-genome specific (napus-rapa) | 0.9665072    | 0.7068239    | not scorable | not scorable | 0.9917355    | 0.7297269    |
| 6881 | Bn-A03-p26309336 | A-genome specific (napus-rapa) | 0.9569378    | 0.4783708    | not scorable | not scorable | 0.9917355    | 0.7556286    |
| 6882 | Bn-A03-p26309550 | A-genome specific (napus-rapa) | 0.9856459    | 0.7664756    | not scorable | not scorable | 0.9834711    | 0.7348804    |
| 6883 | Bn-A03-p26310351 | A-genome specific (napus-rapa) | 0.9665072    | 0.6987505    | not scorable | not scorable | 0.9917355    | 0.8069491    |
| 6884 | Bn-A03-p26311193 | A-genome specific (napus-rapa) | 0.9904306    | 0.7821362    | not scorable | not scorable | 1            | 0.8052432    |
| 6885 | Bn-A03-p26319168 | napus specific                 | 0.8205742    | 0.7010623    | not scorable | not scorable | not scorable | not scorable |
| 6886 | Bn-A03-p26359851 | A-genome specific (napus-rapa) | 0.9928229    | 0.4600107    | not scorable | not scorable | 0.9917355    | 0.8041645    |
| 6887 | Bn-A03-p2638510  | A-genome specific (rapa only)  | not scorable | not scorable | not scorable | not scorable | 0.9917355    | 0.6927592    |
| 6888 | Bn-A03-p26405367 | napus specific                 | 0.9162679    | 0.7248186    | not scorable | not scorable | not scorable | not scorable |
| 6889 | Bn-A03-p26406372 | A-genome specific (napus-rapa) | 0.9641148    | 0.6426784    | not scorable | not scorable | 0.9917355    | 0.6273827    |
| 6890 | Bn-A03-p2643134  | A-genome specific (napus-rapa) | 0.9425837    | 0.362263     | not scorable | not scorable | 0.9752066    | 0.6994933    |
| 6891 | Bn-A03-p26433672 | A-genome specific (napus-rapa) | 0.7105263    | 0.7559118    | not scorable | not scorable | 0.9752066    | 0.7808021    |
| 6892 | Bn-A03-p26433849 | A-genome specific (napus-rapa) | 0.9952153    | 0.7687855    | not scorable | not scorable | 1            | 0.8133682    |
| 6893 | Bn-A03-p26433912 | A-genome specific (napus-rapa) | 0.9928229    | 0.6766505    | not scorable | not scorable | 1            | 0.6741807    |
| 6894 | Bn-A03-p26433948 | A-genome specific (napus-rapa) | 0.9880383    | 0.7566537    | not scorable | not scorable | 1            | 0.813203     |

|                       |                                   |              |              |              |              |           |           |
|-----------------------|-----------------------------------|--------------|--------------|--------------|--------------|-----------|-----------|
| 6895 Bn-A03-p26437565 | A-genome specific (napus-rapa)    | 0.9880383    | 0.758953     | not scorable | not scorable | 0.9834711 | 0.8212726 |
| 6896 Bn-A03-p26437680 | A-genome specific (napus-rapa)    | 0.9952153    | 0.7290215    | not scorable | not scorable | 0.9917355 | 0.7624756 |
| 6897 Bn-A03-p26437883 | A-genome specific (napus-rapa)    | 1            | 0.777526     | not scorable | not scorable | 0.9669421 | 0.775204  |
| 6898 Bn-A03-p26439962 | genome unspecific (oleracea-rapa) | not scorable | not scorable |              | 1            | 0.726634  | 0.9917355 |
| 6899 Bn-A03-p26444464 | A-genome specific (napus-rapa)    | 0.9401914    | 0.6385937    | not scorable | not scorable | 1         | 0.6798831 |
| 6900 Bn-A03-p26444945 | A-genome specific (napus-rapa)    | 0.9928229    | 0.7162951    | not scorable | not scorable | 0.5041322 | 0.7600735 |
| 6901 Bn-A03-p26445028 | A-genome specific (napus-rapa)    | 0.9856459    | 0.7649498    | not scorable | not scorable | 1         | 0.7528773 |
| 6902 Bn-A03-p2645391  | A-genome specific (napus-rapa)    | 0.9545454    | 0.7080087    | not scorable | not scorable | 0.9834711 | 0.6686319 |
| 6903 Bn-A03-p26477533 | A-genome specific (napus-rapa)    | 0.9617225    | 0.7520068    | not scorable | not scorable | 0.9669421 | 0.784013  |
| 6904 Bn-A03-p26478842 | A-genome specific (napus-rapa)    | 0.9784689    | 0.6849964    | not scorable | not scorable | 0.9586777 | 0.7096214 |
| 6905 Bn-A03-p26506472 | genome unspecific (all in)        | 0.9808612    | 0.4113053    |              | 1            | 0.806362  | 1         |
| 6906 Bn-A03-p26510093 | A-genome specific (napus-rapa)    | 1            | 0.803435     | not scorable | not scorable | 1         | 0.729994  |
| 6907 Bn-A03-p26528958 | A-genome specific (napus-rapa)    | 0.9808612    | 0.732834     | not scorable | not scorable | 0.9834711 | 0.7480645 |
| 6908 Bn-A03-p26546744 | genome unspecific (all in)        | 0.9641148    | 0.3827632    |              | 1            | 0.6900312 | 1         |
| 6909 Bn-A03-p26560194 | A-genome specific (napus-rapa)    | 0.9856459    | 0.7960782    | not scorable | not scorable | 1         | 0.7778792 |
| 6910 Bn-A03-p26567111 | A-genome specific (napus-rapa)    | 1            | 0.3512424    | not scorable | not scorable | 1         | 0.6504184 |
| 6911 Bn-A03-p26567993 | A-genome specific (napus-rapa)    | 0.9641148    | 0.2559953    | not scorable | not scorable | 0.9917355 | 0.6866909 |
| 6912 Bn-A03-p26571083 | A-genome specific (napus-rapa)    | 0.9832536    | 0.6627277    | not scorable | not scorable | 0.9586777 | 0.632782  |
| 6913 Bn-A03-p26572622 | A-genome specific (napus-rapa)    | 0.9784689    | 0.7811325    | not scorable | not scorable | 0.9917355 | 0.8067438 |
| 6914 Bn-A03-p26577952 | genome unspecific (oleracea-rapa) | not scorable | not scorable | 0.9922481    | 0.8580986    | 0.9917355 | 0.7089232 |
| 6915 Bn-A03-p26603077 | A-genome specific (napus-rapa)    | 0.9928229    | 0.6825198    | not scorable | not scorable | 0.9917355 | 0.6211556 |
| 6916 Bn-A03-p26604097 | A-genome specific (napus-rapa)    | 0.9976076    | 0.7801243    | not scorable | not scorable | 1         | 0.800683  |
| 6917 Bn-A03-p26604578 | A-genome specific (napus-rapa)    | 0.9880383    | 0.3092309    | not scorable | not scorable | 0.9504132 | 0.5986605 |
| 6918 Bn-A03-p26607921 | A-genome specific (napus-rapa)    | 0.9976076    | 0.7745147    | not scorable | not scorable | 0.9917355 | 0.6981117 |
| 6919 Bn-A03-p2662675  | A-genome specific (napus-rapa)    | 0.9904306    | 0.7263095    | not scorable | not scorable | 0.9917355 | 0.7857051 |
| 6920 Bn-A03-p2665731  | A-genome specific (napus-rapa)    | 0.8947368    | 0.6912753    | not scorable | not scorable | 0.9834711 | 0.6499636 |
| 6921 Bn-A03-p2666271  | A-genome specific (napus-rapa)    | 0.9425837    | 0.70749      | not scorable | not scorable | 1         | 0.7315536 |
| 6922 Bn-A03-p2667726  | A-genome specific (napus-rapa)    | 0.8923445    | 0.8550065    | not scorable | not scorable | 1         | 0.7467236 |
| 6923 Bn-A03-p2668128  | A-genome specific (napus-rapa)    | 0.9617225    | 0.7612469    | not scorable | not scorable | 1         | 0.8079165 |
| 6924 Bn-A03-p26740723 | A-genome specific (napus-rapa)    | 0.9904306    | 0.7091329    | not scorable | not scorable | 1         | 0.8927264 |
| 6925 Bn-A03-p26742006 | A-genome specific (napus-rapa)    | 0.9976076    | 0.8672755    | not scorable | not scorable | 1         | 0.8087255 |
| 6926 Bn-A03-p26756701 | A-genome specific (rapa only)     | not scorable | not scorable | not scorable | not scorable | 0.5206612 | 0.8783935 |
| 6927 Bn-A03-p26763577 | A-genome specific (napus-rapa)    | 0.9784689    | 0.7593756    | not scorable | not scorable | 0.9752066 | 0.7473724 |

|      |                  |                                |              |              |              |              |           |           |
|------|------------------|--------------------------------|--------------|--------------|--------------|--------------|-----------|-----------|
| 6928 | Bn-A03-p26764606 | A-genome specific (napus-rapa) | 0.9856459    | 0.5562426    | not scorable | not scorable | 0.9917355 | 0.5541473 |
| 6929 | Bn-A03-p26771482 | A-genome specific (napus-rapa) | 0.9832536    | 0.8376549    | not scorable | not scorable | 0.9834711 | 0.8001143 |
| 6930 | Bn-A03-p26775994 | A-genome specific (napus-rapa) | 0.9832536    | 0.8415766    | not scorable | not scorable | 0.9504132 | 0.7123927 |
| 6931 | Bn-A03-p26786549 | A-genome specific (napus-rapa) | 0.9832536    | 0.7385593    | not scorable | not scorable | 0.9834711 | 0.7538136 |
| 6932 | Bn-A03-p26788875 | A-genome specific (napus-rapa) | 0.9808612    | 0.8791263    | not scorable | not scorable | 0.9752066 | 0.7437811 |
| 6933 | Bn-A03-p26789755 | A-genome specific (napus-rapa) | 0.9808612    | 0.8416991    | not scorable | not scorable | 0.9752066 | 0.8084202 |
| 6934 | Bn-A03-p26798652 | A-genome specific (napus-rapa) | 0.9856459    | 0.6861849    | not scorable | not scorable | 0.9834711 | 0.7165272 |
| 6935 | Bn-A03-p26800384 | A-genome specific (napus-rapa) | 0.9784689    | 0.7653916    | not scorable | not scorable | 0.9834711 | 0.8016018 |
| 6936 | Bn-A03-p26803262 | A-genome specific (napus-rapa) | 0.9976076    | 0.482747     | not scorable | not scorable | 1         | 0.5601621 |
| 6937 | Bn-A03-p26809706 | A-genome specific (napus-rapa) | 0.9688995    | 0.4604504    | not scorable | not scorable | 0.9834711 | 0.7731143 |
| 6938 | Bn-A03-p26810924 | A-genome specific (napus-rapa) | 1            | 0.855454     | not scorable | not scorable | 1         | 0.8131094 |
| 6939 | Bn-A03-p26811025 | A-genome specific (napus-rapa) | 0.9593301    | 0.8007044    | not scorable | not scorable | 0.9421487 | 0.7196259 |
| 6940 | Bn-A03-p26811385 | A-genome specific (rapa only)  | not scorable | not scorable | not scorable | not scorable | 0.9669421 | 0.7715239 |
| 6941 | Bn-A03-p26815896 | A-genome specific (napus-rapa) | 0.9856459    | 0.6578658    | not scorable | not scorable | 0.9669421 | 0.6235002 |
| 6942 | Bn-A03-p26822285 | A-genome specific (napus-rapa) | 0.9832536    | 0.7411423    | not scorable | not scorable | 0.9669421 | 0.7708023 |
| 6943 | Bn-A03-p26822384 | A-genome specific (napus-rapa) | 0.9928229    | 0.7723818    | not scorable | not scorable | 0.9669421 | 0.7589203 |
| 6944 | Bn-A03-p26824343 | A-genome specific (napus-rapa) | 0.9832536    | 0.8012585    | not scorable | not scorable | 0.9669421 | 0.7365518 |
| 6945 | Bn-A03-p26833555 | A-genome specific (napus-rapa) | 0.9880383    | 0.7408515    | not scorable | not scorable | 1         | 0.7145385 |
| 6946 | Bn-A03-p26833841 | A-genome specific (napus-rapa) | 0.9808612    | 0.5010561    | not scorable | not scorable | 1         | 0.7752328 |
| 6947 | Bn-A03-p2683534  | A-genome specific (napus-rapa) | 0.9282297    | 0.6759418    | not scorable | not scorable | 0.9917355 | 0.8159829 |
| 6948 | Bn-A03-p26839758 | A-genome specific (napus-rapa) | 0.9952153    | 0.6641985    | not scorable | not scorable | 1         | 0.7106516 |
| 6949 | Bn-A03-p26840269 | A-genome specific (napus-rapa) | 0.9952153    | 0.5319017    | not scorable | not scorable | 1         | 0.7183553 |
| 6950 | Bn-A03-p26848326 | A-genome specific (napus-rapa) | 1            | 0.4762031    | not scorable | not scorable | 0.9917355 | 0.4571813 |
| 6951 | Bn-A03-p26852795 | A-genome specific (napus-rapa) | 1            | 0.5265277    | not scorable | not scorable | 0.9917355 | 0.6783493 |
| 6952 | Bn-A03-p2691383  | A-genome specific (napus-rapa) | 0.9521531    | 0.3539826    | not scorable | not scorable | 1         | 0.598024  |
| 6953 | Bn-A03-p26931199 | A-genome specific (napus-rapa) | 0.9784689    | 0.5114753    | not scorable | not scorable | 1         | 0.7746196 |
| 6954 | Bn-A03-p2695311  | A-genome specific (napus-rapa) | 0.9425837    | 0.761053     | not scorable | not scorable | 1         | 0.7035822 |
| 6955 | Bn-A03-p27002187 | A-genome specific (napus-rapa) | 0.9019139    | 0.7281234    | not scorable | not scorable | 0.9917355 | 0.7836207 |
| 6956 | Bn-A03-p27006222 | A-genome specific (napus-rapa) | 0.9712918    | 0.8117684    | not scorable | not scorable | 1         | 0.7509883 |
| 6957 | Bn-A03-p27008420 | A-genome specific (napus-rapa) | 0.9880383    | 0.7626038    | not scorable | not scorable | 0.9917355 | 0.7926454 |
| 6958 | Bn-A03-p27028300 | A-genome specific (rapa only)  | not scorable | not scorable | not scorable | not scorable | 1         | 0.8147027 |
| 6959 | Bn-A03-p27033682 | A-genome specific (rapa only)  | not scorable | not scorable | not scorable | not scorable | 0.9834711 | 0.8754691 |
| 6960 | Bn-A03-p2704795  | A-genome specific (napus-rapa) | 0.9688995    | 0.4099247    | not scorable | not scorable | 1         | 0.6896008 |

|                       |                                |              |              |              |              |           |           |
|-----------------------|--------------------------------|--------------|--------------|--------------|--------------|-----------|-----------|
| 6961 Bn-A03-p27066000 | A-genome specific (napus-rapa) | 0.9712918    | 0.3901446    | not scorable | not scorable | 1         | 0.7529513 |
| 6962 Bn-A03-p27070872 | A-genome specific (napus-rapa) | 0.9736842    | 0.300966     | not scorable | not scorable | 1         | 0.7216338 |
| 6963 Bn-A03-p27101177 | A-genome specific (napus-rapa) | 0.9665072    | 0.7722501    | not scorable | not scorable | 0.9586777 | 0.7041734 |
| 6964 Bn-A03-p27104733 | A-genome specific (napus-rapa) | 0.9808612    | 0.3841944    | not scorable | not scorable | 0.9834711 | 0.703747  |
| 6965 Bn-A03-p27111541 | A-genome specific (napus-rapa) | 0.9760765    | 0.7797049    | not scorable | not scorable | 0.9504132 | 0.7288821 |
| 6966 Bn-A03-p27112789 | A-genome specific (napus-rapa) | 0.9856459    | 0.783897     | not scorable | not scorable | 0.9504132 | 0.6896096 |
| 6967 Bn-A03-p2714251  | A-genome specific (napus-rapa) | 0.9641148    | 0.5954776    | not scorable | not scorable | 0.9917355 | 0.7058203 |
| 6968 Bn-A03-p27146568 | A-genome specific (napus-rapa) | 1            | 0.6099746    | not scorable | not scorable | 0.9834711 | 0.77184   |
| 6969 Bn-A03-p27156983 | A-genome specific (napus-rapa) | 1            | 0.3399675    | not scorable | not scorable | 1         | 0.6766819 |
| 6970 Bn-A03-p27164178 | A-genome specific (napus-rapa) | 0.9856459    | 0.8822398    | not scorable | not scorable | 0.9752066 | 0.7472021 |
| 6971 Bn-A03-p27168311 | A-genome specific (napus-rapa) | 0.9904306    | 0.8216213    | not scorable | not scorable | 0.9917355 | 0.7742347 |
| 6972 Bn-A03-p27171824 | A-genome specific (napus-rapa) | 0.9976076    | 0.8129576    | not scorable | not scorable | 1         | 0.7395731 |
| 6973 Bn-A03-p27172113 | A-genome specific (napus-rapa) | 0.9976076    | 0.8040757    | not scorable | not scorable | 0.9834711 | 0.8489268 |
| 6974 Bn-A03-p27172168 | A-genome specific (napus-rapa) | 0.9976076    | 0.8094168    | not scorable | not scorable | 0.9752066 | 0.84435   |
| 6975 Bn-A03-p27179255 | A-genome specific (napus-rapa) | 0.9904306    | 0.7480031    | not scorable | not scorable | 1         | 0.7746897 |
| 6976 Bn-A03-p27179357 | A-genome specific (napus-rapa) | 1            | 0.6772203    | not scorable | not scorable | 1         | 0.8044871 |
| 6977 Bn-A03-p27181751 | A-genome specific (napus-rapa) | 0.9928229    | 0.7431011    | not scorable | not scorable | 0.9752066 | 0.696816  |
| 6978 Bn-A03-p27182289 | A-genome specific (napus-rapa) | 0.9976076    | 0.8771244    | not scorable | not scorable | 0.9917355 | 0.7292225 |
| 6979 Bn-A03-p27192830 | A-genome specific (napus-rapa) | 0.9976076    | 0.7931052    | not scorable | not scorable | 0.9834711 | 0.8129033 |
| 6980 Bn-A03-p27193587 | A-genome specific (napus-rapa) | 1            | 0.6785228    | not scorable | not scorable | 1         | 0.7089376 |
| 6981 Bn-A03-p2719384  | A-genome specific (napus-rapa) | 0.8803828    | 0.8367904    | not scorable | not scorable | 0.9338843 | 0.8638873 |
| 6982 Bn-A03-p27218655 | A-genome specific (napus-rapa) | 0.9952153    | 0.8216213    | not scorable | not scorable | 0.9752066 | 0.7980337 |
| 6983 Bn-A03-p27253035 | A-genome specific (napus-rapa) | 0.9928229    | 0.4479863    | not scorable | not scorable | 1         | 0.6967041 |
| 6984 Bn-A03-p27253678 | A-genome specific (napus-rapa) | 1            | 0.8352608    | not scorable | not scorable | 1         | 0.864952  |
| 6985 Bn-A03-p27255790 | A-genome specific (napus-rapa) | 0.9976076    | 0.8169866    | not scorable | not scorable | 1         | 0.8463818 |
| 6986 Bn-A03-p27256355 | A-genome specific (napus-rapa) | 0.9904306    | 0.8182196    | not scorable | not scorable | 0.9917355 | 0.8277613 |
| 6987 Bn-A03-p27257933 | A-genome specific (napus-rapa) | 0.9880383    | 0.773239     | not scorable | not scorable | 0.9834711 | 0.8280368 |
| 6988 Bn-A03-p27269401 | A-genome specific (napus-rapa) | 0.9952153    | 0.8198647    | not scorable | not scorable | 0.9917355 | 0.7685498 |
| 6989 Bn-A03-p2727877  | A-genome specific (napus-rapa) | 0.9449761    | 0.6629925    | not scorable | not scorable | 0.9834711 | 0.772486  |
| 6990 Bn-A03-p27288521 | A-genome specific (napus-rapa) | 0.9880383    | 0.7762017    | not scorable | not scorable | 0.9834711 | 0.860003  |
| 6991 Bn-A03-p27289437 | A-genome specific (napus-rapa) | 1            | 0.7533017    | not scorable | not scorable | 0.9917355 | 0.7171793 |
| 6992 Bn-A03-p27298810 | A-genome specific (rapa only)  | not scorable | not scorable | not scorable | not scorable | 0.9917355 | 0.7906627 |
| 6993 Bn-A03-p27304692 | A-genome specific (napus-rapa) | 0.9880383    | 0.3042431    | not scorable | not scorable | 0.9917355 | 0.7136481 |



|      |                  |                                |              |              |              |              |              |              |
|------|------------------|--------------------------------|--------------|--------------|--------------|--------------|--------------|--------------|
| 7027 | Bn-A03-p27398341 | all not scorable               | not scorable | not scorable | not scorable | not scorable | not scorable | not scorable |
| 7028 | Bn-A03-p27398352 | A-genome specific (napus-rapa) | 0.9784689    | 0.8037688    | not scorable | not scorable | 0.9752066    | 0.6944774    |
| 7029 | Bn-A03-p27398935 | A-genome specific (rapa only)  | not scorable | not scorable | not scorable | not scorable | 0.7438017    | 0.7740446    |
| 7030 | Bn-A03-p27399719 | A-genome specific (napus-rapa) | 0.9784689    | 0.8117824    | not scorable | not scorable | 0.9834711    | 0.7524701    |
| 7031 | Bn-A03-p27406806 | A-genome specific (rapa only)  | not scorable | not scorable | not scorable | not scorable | 0.9917355    | 0.7665129    |
| 7032 | Bn-A03-p27416815 | A-genome specific (napus-rapa) | 0.9952153    | 0.7858635    | not scorable | not scorable | 0.9834711    | 0.6959602    |
| 7033 | Bn-A03-p27419226 | napus specific                 | 0.9856459    | 0.879243     | not scorable | not scorable | not scorable | not scorable |
| 7034 | Bn-A03-p27419285 | A-genome specific (napus-rapa) | 0.9904306    | 0.8373511    | not scorable | not scorable | 0.9917355    | 0.7180871    |
| 7035 | Bn-A03-p27420794 | A-genome specific (napus-rapa) | 0.9904306    | 0.8535629    | not scorable | not scorable | 0.9752066    | 0.762654     |
| 7036 | Bn-A03-p27423379 | A-genome specific (napus-rapa) | 0.9832536    | 0.456253     | not scorable | not scorable | 0.9917355    | 0.6995439    |
| 7037 | Bn-A03-p27438081 | A-genome specific (napus-rapa) | 0.9832536    | 0.7741535    | not scorable | not scorable | 0.9834711    | 0.7906648    |
| 7038 | Bn-A03-p27445819 | A-genome specific (napus-rapa) | 0.9258373    | 0.1661237    | not scorable | not scorable | 1            | 0.6724718    |
| 7039 | Bn-A03-p27454930 | A-genome specific (napus-rapa) | 0.9808612    | 0.578975     | not scorable | not scorable | 0.9917355    | 0.7476752    |
| 7040 | Bn-A03-p27455156 | A-genome specific (napus-rapa) | 0.9928229    | 0.6616126    | not scorable | not scorable | 1            | 0.6643892    |
| 7041 | Bn-A03-p27484868 | genome unspecific (all in)     | 0.9736842    | 0.6293373    |              | 1 0.7732232  | 0.9834711    | 0.7902876    |
| 7042 | Bn-A03-p2748923  | A-genome specific (rapa only)  | not scorable | not scorable | not scorable | not scorable | 1            | 0.7392583    |
| 7043 | Bn-A03-p27489686 | A-genome specific (napus-rapa) | 0.9808612    | 0.4531082    | not scorable | not scorable | 0.9917355    | 0.8039277    |
| 7044 | Bn-A03-p27516492 | A-genome specific (napus-rapa) | 1            | 0.7875707    | not scorable | not scorable | 1            | 0.9271749    |
| 7045 | Bn-A03-p27541115 | A-genome specific (napus-rapa) | 0.9976076    | 0.7814572    | not scorable | not scorable | 1            | 0.726869     |
| 7046 | Bn-A03-p27546971 | A-genome specific (napus-rapa) | 0.9880383    | 0.714899     | not scorable | not scorable | 1            | 0.7799388    |
| 7047 | Bn-A03-p27547270 | A-genome specific (napus-rapa) | 0.9952153    | 0.7309559    | not scorable | not scorable | 1            | 0.9173692    |
| 7048 | Bn-A03-p27564692 | A-genome specific (napus-rapa) | 0.9760765    | 0.7877326    | not scorable | not scorable | 1            | 0.7145227    |
| 7049 | Bn-A03-p27568225 | A-genome specific (napus-rapa) | 0.9449761    | 0.5741157    | not scorable | not scorable | 0.9917355    | 0.7939925    |
| 7050 | Bn-A03-p27568580 | A-genome specific (napus-rapa) | 0.9832536    | 0.628589     | not scorable | not scorable | 1            | 0.8144061    |
| 7051 | Bn-A03-p27581773 | A-genome specific (napus-rapa) | 0.9569378    | 0.4641013    | not scorable | not scorable | 0.9669421    | 0.7949653    |
| 7052 | Bn-A03-p27582705 | A-genome specific (napus-rapa) | 0.9832536    | 0.7572169    | not scorable | not scorable | 0.9917355    | 0.6910838    |
| 7053 | Bn-A03-p27596068 | A-genome specific (napus-rapa) | 0.9880383    | 0.30397      | not scorable | not scorable | 1            | 0.789576     |
| 7054 | Bn-A03-p27600547 | A-genome specific (napus-rapa) | 0.9904306    | 0.6697934    | not scorable | not scorable | 0.9669421    | 0.5540885    |
| 7055 | Bn-A03-p27607709 | A-genome specific (napus-rapa) | 0.9688995    | 0.6382255    | not scorable | not scorable | 0.9917355    | 0.8056468    |
| 7056 | Bn-A03-p27612791 | A-genome specific (napus-rapa) | 0.9712918    | 0.6236287    | not scorable | not scorable | 1            | 0.8460862    |
| 7057 | Bn-A03-p27616297 | A-genome specific (napus-rapa) | 0.9688995    | 0.7382997    | not scorable | not scorable | 0.7272727    | 0.7197168    |
| 7058 | Bn-A03-p27629415 | A-genome specific (napus-rapa) | 0.9808612    | 0.4580355    | not scorable | not scorable | 0.9917355    | 0.7441819    |
| 7059 | Bn-A03-p27650553 | A-genome specific (napus-rapa) | 0.9688995    | 0.4572642    | not scorable | not scorable | 1            | 0.8387879    |

|      |                  |                                   |              |              |              |              |           |           |           |
|------|------------------|-----------------------------------|--------------|--------------|--------------|--------------|-----------|-----------|-----------|
| 7060 | Bn-A03-p27662317 | A-genome specific (napus-rapa)    | 0.9856459    | 0.7706242    | not scorable | not scorable |           | 1         | 0.8382767 |
| 7061 | Bn-A03-p27663888 | A-genome specific (napus-rapa)    | 0.9880383    | 0.7389907    | not scorable | not scorable |           | 0.9917355 | 0.7358662 |
| 7062 | Bn-A03-p27665971 | genome unspecific (oleracea-rapa) | not scorable | not scorable |              | 1            | 0.7703836 | 0.9917355 | 0.7536673 |
| 7063 | Bn-A03-p27683723 | A-genome specific (napus-rapa)    | 0.9928229    | 0.7747034    | not scorable | not scorable |           | 0.9834711 | 0.7669605 |
| 7064 | Bn-A03-p27683903 | A-genome specific (napus-rapa)    | 0.9832536    | 0.702018     | not scorable | not scorable |           | 0.9834711 | 0.790482  |
| 7065 | Bn-A03-p27685078 | A-genome specific (napus-rapa)    | 0.9712918    | 0.3405987    | not scorable | not scorable |           | 0.9834711 | 0.7834053 |
| 7066 | Bn-A03-p27686257 | A-genome specific (napus-rapa)    | 0.9904306    | 0.7805742    | not scorable | not scorable |           | 0.9917355 | 0.7190969 |
| 7067 | Bn-A03-p27686487 | A-genome specific (napus-rapa)    | 0.9808612    | 0.8038026    | not scorable | not scorable |           | 0.9752066 | 0.8142092 |
| 7068 | Bn-A03-p27686879 | A-genome specific (napus-rapa)    | 0.7703349    | 0.8045428    | not scorable | not scorable |           | 0.5371901 | 0.7640303 |
| 7069 | Bn-A03-p27712521 | A-genome specific (napus-rapa)    | 0.9712918    | 0.7771339    | not scorable | not scorable |           | 0.7272727 | 0.7481439 |
| 7070 | Bn-A03-p27713307 | A-genome specific (napus-rapa)    | 0.9641148    | 0.7741648    | not scorable | not scorable |           | 0.7190083 | 0.8094397 |
| 7071 | Bn-A03-p27713975 | A-genome specific (napus-rapa)    | 0.9449761    | 0.7795983    | not scorable | not scorable |           | 0.7107438 | 0.8662751 |
| 7072 | Bn-A03-p27715593 | A-genome specific (napus-rapa)    | 0.937799     | 0.7570992    | not scorable | not scorable |           | 0.7107438 | 0.7473218 |
| 7073 | Bn-A03-p27719757 | A-genome specific (napus-rapa)    | 0.9497608    | 0.4115874    | not scorable | not scorable |           | 1         | 0.7045447 |
| 7074 | Bn-A03-p27720045 | A-genome specific (napus-rapa)    | 0.9354067    | 0.4395901    | not scorable | not scorable |           | 1         | 0.7248667 |
| 7075 | Bn-A03-p27741110 | A-genome specific (napus-rapa)    | 0.9784689    | 0.7681945    | not scorable | not scorable |           | 0.9917355 | 0.7829702 |
| 7076 | Bn-A03-p27742950 | A-genome specific (napus-rapa)    | 0.9832536    | 0.4788291    | not scorable | not scorable |           | 0.9669421 | 0.6681253 |
| 7077 | Bn-A03-p27746955 | genome unspecific (all in)        | 0.9976076    | 0.264052     |              | 1            | 0.7269822 | 1         | 0.5029543 |
| 7078 | Bn-A03-p27747178 | A-genome specific (napus-rapa)    | 0.9665072    | 0.2357372    | not scorable | not scorable |           | 0.9917355 | 0.705092  |
| 7079 | Bn-A03-p27747229 | A-genome specific (rapa only)     | not scorable | not scorable | not scorable | not scorable |           | 0.9917355 | 0.6978273 |
| 7080 | Bn-A03-p27752076 | A-genome specific (napus-rapa)    | 0.9736842    | 0.7674094    | not scorable | not scorable |           | 1         | 0.8192819 |
| 7081 | Bn-A03-p27752857 | A-genome specific (napus-rapa)    | 0.9880383    | 0.7731963    | not scorable | not scorable |           | 0.9834711 | 0.7553476 |
| 7082 | Bn-A03-p27791357 | A-genome specific (napus-rapa)    | 0.9952153    | 0.8201092    | not scorable | not scorable |           | 0.9834711 | 0.7225638 |
| 7083 | Bn-A03-p27791437 | A-genome specific (napus-rapa)    | 0.9832536    | 0.7800751    | not scorable | not scorable |           | 0.9917355 | 0.785115  |
| 7084 | Bn-A03-p27793125 | A-genome specific (napus-rapa)    | 0.9736842    | 0.7266456    | not scorable | not scorable |           | 0.9917355 | 0.6913665 |
| 7085 | Bn-A03-p27794041 | A-genome specific (napus-rapa)    | 0.9736842    | 0.6427104    | not scorable | not scorable |           | 0.9834711 | 0.6237078 |
| 7086 | Bn-A03-p27794263 | A-genome specific (napus-rapa)    | 0.9760765    | 0.7191436    | not scorable | not scorable |           | 0.9917355 | 0.6929486 |
| 7087 | Bn-A03-p27794657 | A-genome specific (napus-rapa)    | 0.9760765    | 0.6543214    | not scorable | not scorable |           | 0.9752066 | 0.6233765 |
| 7088 | Bn-A03-p27794772 | A-genome specific (napus-rapa)    | 0.9856459    | 0.7770101    | not scorable | not scorable |           | 0.9834711 | 0.807207  |
| 7089 | Bn-A03-p27794775 | A-genome specific (napus-rapa)    | 0.9880383    | 0.7636347    | not scorable | not scorable |           | 0.9834711 | 0.7354633 |
| 7090 | Bn-A03-p27794848 | A-genome specific (napus-rapa)    | 0.9808612    | 0.798434     | not scorable | not scorable |           | 0.9917355 | 0.8053529 |
| 7091 | Bn-A03-p27796940 | A-genome specific (napus-rapa)    | 0.9904306    | 0.8143449    | not scorable | not scorable |           | 0.9669421 | 0.7759143 |
| 7092 | Bn-A03-p27805759 | A-genome specific (napus-rapa)    | 0.9856459    | 0.775235     | not scorable | not scorable |           | 1         | 0.79044   |

|      |                  |                                   |              |              |              |              |              |              |
|------|------------------|-----------------------------------|--------------|--------------|--------------|--------------|--------------|--------------|
| 7093 | Bn-A03-p27824257 | A-genome specific (napus-rapa)    | 0.9928229    | 0.8047447    | not scorable | not scorable | 0.9917355    | 0.8195639    |
| 7094 | Bn-A03-p27825739 | A-genome specific (napus-rapa)    | 0.9904306    | 0.7155367    | not scorable | not scorable | 0.9917355    | 0.6461827    |
| 7095 | Bn-A03-p27828889 | A-genome specific (napus-rapa)    | 0.9832536    | 0.7180378    | not scorable | not scorable | 0.9834711    | 0.787192     |
| 7096 | Bn-A03-p27838177 | A-genome specific (napus-rapa)    | 0.9808612    | 0.3786797    | not scorable | not scorable | 1            | 0.9205657    |
| 7097 | Bn-A03-p27840169 | A-genome specific (napus-rapa)    | 0.9880383    | 0.7728361    | not scorable | not scorable | 1            | 0.7521731    |
| 7098 | Bn-A03-p27841728 | A-genome specific (napus-rapa)    | 0.9904306    | 0.7306871    | not scorable | not scorable | 0.9834711    | 0.7014851    |
| 7099 | Bn-A03-p27853312 | A-genome specific (napus-rapa)    | 0.9736842    | 0.4202016    | not scorable | not scorable | 0.9917355    | 0.6752047    |
| 7100 | Bn-A03-p27866782 | A-genome specific (napus-rapa)    | 0.9904306    | 0.8099139    | not scorable | not scorable | 0.9917355    | 0.7336286    |
| 7101 | Bn-A03-p2789113  | A-genome specific (rapa only)     | not scorable | not scorable | not scorable | not scorable | 1            | 0.7624819    |
| 7102 | Bn-A03-p27906760 | A-genome specific (napus-rapa)    | 0.9545454    | 0.2278894    | not scorable | not scorable | 0.9834711    | 0.5567296    |
| 7103 | Bn-A03-p27917455 | A-genome specific (napus-rapa)    | 0.9760765    | 0.3924345    | not scorable | not scorable | 1            | 0.824479     |
| 7104 | Bn-A03-p27927967 | A-genome specific (napus-rapa)    | 0.9760765    | 0.7458301    | not scorable | not scorable | 0.9917355    | 0.7811404    |
| 7105 | Bn-A03-p27928232 | A-genome specific (napus-rapa)    | 0.6842105    | 0.920714     | not scorable | not scorable | 0.9834711    | 0.9154006    |
| 7106 | Bn-A03-p2793288  | A-genome specific (napus-rapa)    | 0.9976076    | 0.5323982    | not scorable | not scorable | 0.9421487    | 0.7830532    |
| 7107 | Bn-A03-p27951283 | A-genome specific (napus-rapa)    | 0.9473684    | 0.4916507    | not scorable | not scorable | 1            | 0.6493279    |
| 7108 | Bn-A03-p27951979 | A-genome specific (napus-rapa)    | 0.9856459    | 0.7780089    | not scorable | not scorable | 1            | 0.7522417    |
| 7109 | Bn-A03-p27972408 | genome unspecific (oleracea-rapa) | not scorable | not scorable |              | 1            | 0.7275194    | 0.9917355    |
| 7110 | Bn-A03-p27972738 | A-genome specific (napus-rapa)    | 0.9856459    | 0.729419     | not scorable | not scorable | 0.9917355    | 0.6577612    |
| 7111 | Bn-A03-p28036367 | A-genome specific (napus-rapa)    | 0.9928229    | 0.7737016    | not scorable | not scorable | 1            | 0.8143556    |
| 7112 | Bn-A03-p28039749 | A-genome specific (napus-rapa)    | 0.9856459    | 0.7531274    | not scorable | not scorable | 1            | 0.8229404    |
| 7113 | Bn-A03-p28043216 | A-genome specific (napus-rapa)    | 0.9856459    | 0.7254896    | not scorable | not scorable | 0.9586777    | 0.6057239    |
| 7114 | Bn-A03-p28046101 | A-genome specific (napus-rapa)    | 0.9736842    | 0.4523977    | not scorable | not scorable | 0.9917355    | 0.7401661    |
| 7115 | Bn-A03-p28091909 | A-genome specific (napus-rapa)    | 0.9665072    | 0.7601923    | not scorable | not scorable | 0.9834711    | 0.799817     |
| 7116 | Bn-A03-p28097052 | A-genome specific (napus-rapa)    | 0.9712918    | 0.4672724    | not scorable | not scorable | 1            | 0.7211741    |
| 7117 | Bn-A03-p28109103 | A-genome specific (napus-rapa)    | 0.9712918    | 0.7290346    | not scorable | not scorable | 0.9917355    | 0.6604959    |
| 7118 | Bn-A03-p28117836 | A-genome specific (napus-rapa)    | 0.9880383    | 0.5744061    | not scorable | not scorable | 1            | 0.7413988    |
| 7119 | Bn-A03-p28126287 | napus specific                    | 0.9832536    | 0.7181222    | not scorable | not scorable | not scorable | not scorable |
| 7120 | Bn-A03-p28127216 | A-genome specific (napus-rapa)    | 0.9736842    | 0.6039369    | not scorable | not scorable | 1            | 0.4958567    |
| 7121 | Bn-A03-p28153736 | A-genome specific (napus-rapa)    | 0.9808612    | 0.4470077    | not scorable | not scorable | 0.9834711    | 0.6936432    |
| 7122 | Bn-A03-p28153797 | A-genome specific (napus-rapa)    | 0.9712918    | 0.6438315    | not scorable | not scorable | 1            | 0.6877341    |
| 7123 | Bn-A03-p28154053 | A-genome specific (napus-rapa)    | 0.9736842    | 0.3183069    | not scorable | not scorable | 0.9752066    | 0.5865586    |
| 7124 | Bn-A03-p28154830 | A-genome specific (napus-rapa)    | 0.9952153    | 0.7955617    | not scorable | not scorable | 0.9917355    | 0.7168419    |
| 7125 | Bn-A03-p28154970 | A-genome specific (napus-rapa)    | 0.3875598    | 0.8578239    | not scorable | not scorable | 0.5289256    | 0.8158457    |



|      |                  |                                |              |              |              |              |              |              |
|------|------------------|--------------------------------|--------------|--------------|--------------|--------------|--------------|--------------|
| 7126 | Bn-A03-p28155412 | A-genome specific (napus-rapa) | 0.9928229    | 0.7692649    | not scorable | not scorable | 1            | 0.8310312    |
| 7127 | Bn-A03-p28184972 | A-genome specific (napus-rapa) | 0.9832536    | 0.3112537    | not scorable | not scorable | 1            | 0.6751164    |
| 7128 | Bn-A03-p28202050 | A-genome specific (napus-rapa) | 0.9545454    | 0.6056274    | not scorable | not scorable | 1            | 0.7861024    |
| 7129 | Bn-A03-p28207594 | A-genome specific (napus-rapa) | 0.9688995    | 0.2742949    | not scorable | not scorable | 0.9504132    | 0.7785954    |
| 7130 | Bn-A03-p28221433 | A-genome specific (napus-rapa) | 0.9976076    | 0.5621893    | not scorable | not scorable | 1            | 0.7208881    |
| 7131 | Bn-A03-p28222096 | A-genome specific (napus-rapa) | 1            | 0.675622     | not scorable | not scorable | 0.9834711    | 0.7502331    |
| 7132 | Bn-A03-p28227026 | A-genome specific (napus-rapa) | 0.9784689    | 0.6979976    | not scorable | not scorable | 1            | 0.6960055    |
| 7133 | Bn-A03-p28229360 | A-genome specific (napus-rapa) | 0.9688995    | 0.7755161    | not scorable | not scorable | 0.9504132    | 0.7281106    |
| 7134 | Bn-A03-p28232863 | A-genome specific (napus-rapa) | 0.9952153    | 0.7112629    | not scorable | not scorable | 0.9917355    | 0.7435111    |
| 7135 | Bn-A03-p28233201 | A-genome specific (napus-rapa) | 0.9760765    | 0.7051514    | not scorable | not scorable | 1            | 0.7223274    |
| 7136 | Bn-A03-p28233701 | A-genome specific (napus-rapa) | 0.9856459    | 0.7429647    | not scorable | not scorable | 1            | 0.7946225    |
| 7137 | Bn-A03-p28234166 | A-genome specific (napus-rapa) | 0.9808612    | 0.7539203    | not scorable | not scorable | 1            | 0.7873787    |
| 7138 | Bn-A03-p28234586 | A-genome specific (napus-rapa) | 0.9952153    | 0.8321174    | not scorable | not scorable | 0.9917355    | 0.7326576    |
| 7139 | Bn-A03-p28242905 | A-genome specific (napus-rapa) | 1            | 0.8031629    | not scorable | not scorable | 1            | 0.7498396    |
| 7140 | Bn-A03-p28243306 | A-genome specific (napus-rapa) | 0.9856459    | 0.8576143    | not scorable | not scorable | 1            | 0.807159     |
| 7141 | Bn-A03-p28256169 | A-genome specific (napus-rapa) | 0.9712918    | 0.6829509    | not scorable | not scorable | 0.9917355    | 0.795688     |
| 7142 | Bn-A03-p28265602 | genome unspecific (all in)     | 0.9521531    | 0.1937395    | 0.9379845    | 0.3726288    | 1            | 0.7591531    |
| 7143 | Bn-A03-p28276873 | all not scorable               | not scorable | not scorable | not scorable | not scorable | not scorable | not scorable |
| 7144 | Bn-A03-p28279796 | A-genome specific (napus-rapa) | 0.9904306    | 0.7203869    | not scorable | not scorable | 1            | 0.7195519    |
| 7145 | Bn-A03-p28297407 | A-genome specific (napus-rapa) | 0.9976076    | 0.4653637    | not scorable | not scorable | 1            | 0.7974627    |
| 7146 | Bn-A03-p28302949 | A-genome specific (napus-rapa) | 0.9976076    | 0.6006212    | not scorable | not scorable | 0.9917355    | 0.7615933    |
| 7147 | Bn-A03-p2834684  | A-genome specific (napus-rapa) | 0.9856459    | 0.5045836    | not scorable | not scorable | 1            | 0.7593281    |
| 7148 | Bn-A03-p28360281 | A-genome specific (napus-rapa) | 1            | 0.7635936    | not scorable | not scorable | 1            | 0.8135551    |
| 7149 | Bn-A03-p28389539 | A-genome specific (napus-rapa) | 0.9904306    | 0.3998596    | not scorable | not scorable | 1            | 0.753969     |
| 7150 | Bn-A03-p2843108  | A-genome specific (napus-rapa) | 0.9545454    | 0.7818289    | not scorable | not scorable | 0.9917355    | 0.811019     |
| 7151 | Bn-A03-p28464995 | A-genome specific (napus-rapa) | 0.9760765    | 0.7325476    | not scorable | not scorable | 0.9917355    | 0.7201521    |
| 7152 | Bn-A03-p28468317 | A-genome specific (napus-rapa) | 1            | 0.7063881    | not scorable | not scorable | 1            | 0.7802441    |
| 7153 | Bn-A03-p28469194 | A-genome specific (napus-rapa) | 0.9449761    | 0.3289601    | not scorable | not scorable | 0.9834711    | 0.6889063    |
| 7154 | Bn-A03-p28491294 | A-genome specific (napus-rapa) | 0.9401914    | 0.796029     | not scorable | not scorable | 0.9669421    | 0.786539     |
| 7155 | Bn-A03-p28491779 | A-genome specific (rapa only)  | not scorable | not scorable | not scorable | not scorable | 1            | 0.77314      |
| 7156 | Bn-A03-p28498617 | A-genome specific (napus-rapa) | 0.9856459    | 0.7755794    | not scorable | not scorable | 1            | 0.9205657    |
| 7157 | Bn-A03-p28498755 | A-genome specific (napus-rapa) | 0.9856459    | 0.7543649    | not scorable | not scorable | 0.9917355    | 0.6885571    |
| 7158 | Bn-A03-p28499049 | A-genome specific (napus-rapa) | 0.9665072    | 0.4431145    | not scorable | not scorable | 1            | 0.6770748    |

|      |                  |                                |              |              |              |              |              |              |
|------|------------------|--------------------------------|--------------|--------------|--------------|--------------|--------------|--------------|
| 7159 | Bn-A03-p28499141 | A-genome specific (napus-rapa) | 0.9856459    | 0.7413908    | not scorable | not scorable | 0.9834711    | 0.8041093    |
| 7160 | Bn-A03-p28535638 | A-genome specific (napus-rapa) | 0.9593301    | 0.6671326    | not scorable | not scorable | 0.9834711    | 0.7626065    |
| 7161 | Bn-A03-p28541411 | A-genome specific (napus-rapa) | 0.9712918    | 0.5021151    | not scorable | not scorable | 0.9917355    | 0.7114221    |
| 7162 | Bn-A03-p28551517 | A-genome specific (rapa only)  | not scorable | not scorable | not scorable | not scorable | 0.9917355    | 0.7847934    |
| 7163 | Bn-A03-p28551626 | A-genome specific (napus-rapa) | 0.9976076    | 0.7840836    | not scorable | not scorable | 0.9834711    | 0.7838938    |
| 7164 | Bn-A03-p28551775 | A-genome specific (napus-rapa) | 0.9617225    | 0.7759422    | not scorable | not scorable | 0.9917355    | 0.8073231    |
| 7165 | Bn-A03-p28560125 | A-genome specific (napus-rapa) | 0.9736842    | 0.6304501    | not scorable | not scorable | 0.9917355    | 0.731862     |
| 7166 | Bn-A03-p28560659 | A-genome specific (napus-rapa) | 0.9784689    | 0.2696207    | not scorable | not scorable | 0.9917355    | 0.6887593    |
| 7167 | Bn-A03-p2856933  | A-genome specific (rapa only)  | not scorable | not scorable | not scorable | not scorable | 0.9834711    | 0.7855918    |
| 7168 | Bn-A03-p28570053 | A-genome specific (napus-rapa) | 0.8803828    | 0.8177989    | not scorable | not scorable | 0.7024794    | 0.7618618    |
| 7169 | Bn-A03-p28583587 | A-genome specific (napus-rapa) | 0.9880383    | 0.5598829    | not scorable | not scorable | 0.9752066    | 0.5884658    |
| 7170 | Bn-A03-p28583685 | A-genome specific (napus-rapa) | 0.9904306    | 0.881644     | not scorable | not scorable | 0.9669421    | 0.7512952    |
| 7171 | Bn-A03-p28588701 | A-genome specific (napus-rapa) | 0.9832536    | 0.5333548    | not scorable | not scorable | 0.9752066    | 0.7008672    |
| 7172 | Bn-A03-p2858882  | A-genome specific (napus-rapa) | 0.9641148    | 0.6424435    | not scorable | not scorable | 0.9669421    | 0.622668     |
| 7173 | Bn-A03-p2858972  | A-genome specific (rapa only)  | not scorable | not scorable | not scorable | not scorable | 0.9834711    | 0.7391571    |
| 7174 | Bn-A03-p28590688 | genome unspecific (all in)     | 0.9665072    | 0.4761234    |              | 1 0.798078   | 0.9752066    | 0.7135509    |
| 7175 | Bn-A03-p28590746 | A-genome specific (napus-rapa) | 0.9880383    | 0.6407571    | not scorable | not scorable | 0.9917355    | 0.6884       |
| 7176 | Bn-A03-p28594732 | A-genome specific (napus-rapa) | 0.9808612    | 0.7382373    | not scorable | not scorable | 0.9917355    | 0.8298221    |
| 7177 | Bn-A03-p2860489  | A-genome specific (napus-rapa) | 0.9617225    | 0.7056313    | not scorable | not scorable | 0.9917355    | 0.760975     |
| 7178 | Bn-A03-p28616355 | A-genome specific (napus-rapa) | 0.9976076    | 0.4192386    | not scorable | not scorable | 0.9917355    | 0.8256459    |
| 7179 | Bn-A03-p2862687  | A-genome specific (napus-rapa) | 0.9641148    | 0.7049245    | not scorable | not scorable | 0.9834711    | 0.7526577    |
| 7180 | Bn-A03-p28698732 | napus specific                 | 0.9832536    | 0.5525395    | not scorable | not scorable | not scorable | not scorable |
| 7181 | Bn-A03-p2872671  | A-genome specific (napus-rapa) | 0.9593301    | 0.5435914    | not scorable | not scorable | 0.9834711    | 0.7172602    |
| 7182 | Bn-A03-p2879773  | A-genome specific (napus-rapa) | 0.9928229    | 0.5626425    | not scorable | not scorable | 0.9917355    | 0.6738516    |
| 7183 | Bn-A03-p28808705 | A-genome specific (napus-rapa) | 0.9928229    | 0.7681407    | not scorable | not scorable | 0.9917355    | 0.8123032    |
| 7184 | Bn-A03-p28840414 | A-genome specific (napus-rapa) | 0.9449761    | 0.4473711    | not scorable | not scorable | 1            | 0.7677687    |
| 7185 | Bn-A03-p28843588 | A-genome specific (napus-rapa) | 0.9688995    | 0.7426613    | not scorable | not scorable | 1            | 0.7543925    |
| 7186 | Bn-A03-p28847903 | A-genome specific (napus-rapa) | 0.9856459    | 0.7596955    | not scorable | not scorable | 1            | 0.7531066    |
| 7187 | Bn-A03-p28851691 | A-genome specific (napus-rapa) | 0.9019139    | 0.938517     | not scorable | not scorable | 0.9917355    | 0.8441256    |
| 7188 | Bn-A03-p288544   | A-genome specific (rapa only)  | not scorable | not scorable | not scorable | not scorable | 1            | 0.9205657    |
| 7189 | Bn-A03-p28873781 | all not scorable               | not scorable | not scorable | not scorable | not scorable | not scorable | not scorable |
| 7190 | Bn-A03-p28877626 | A-genome specific (napus-rapa) | 0.9904306    | 0.7554089    | not scorable | not scorable | 1            | 0.7023286    |
| 7191 | Bn-A03-p28877719 | A-genome specific (napus-rapa) | 0.9880383    | 0.7517628    | not scorable | not scorable | 0.9917355    | 0.7848888    |

|      |                  |                                |              |              |              |              |           |           |
|------|------------------|--------------------------------|--------------|--------------|--------------|--------------|-----------|-----------|
| 7192 | Bn-A03-p28878501 | A-genome specific (napus-rapa) | 0.9712918    | 0.5849917    | not scorable | not scorable | 0.9917355 | 0.7145746 |
| 7193 | Bn-A03-p28878698 | A-genome specific (napus-rapa) | 0.9904306    | 0.6747506    | not scorable | not scorable | 1         | 0.7523732 |
| 7194 | Bn-A03-p28878703 | A-genome specific (napus-rapa) | 0.9784689    | 0.7422957    | not scorable | not scorable | 0.9917355 | 0.7390368 |
| 7195 | Bn-A03-p28879610 | A-genome specific (napus-rapa) | 0.9784689    | 0.6709555    | not scorable | not scorable | 0.9917355 | 0.7249307 |
| 7196 | Bn-A03-p28882585 | A-genome specific (napus-rapa) | 0.9760765    | 0.7693222    | not scorable | not scorable | 0.9752066 | 0.7361351 |
| 7197 | Bn-A03-p28883986 | A-genome specific (napus-rapa) | 0.9712918    | 0.5098153    | not scorable | not scorable | 0.9752066 | 0.6310138 |
| 7198 | Bn-A03-p28910384 | A-genome specific (napus-rapa) | 0.3253588    | 0.7872123    | not scorable | not scorable | 0.9834711 | 0.8387734 |
| 7199 | Bn-A03-p28910430 | A-genome specific (napus-rapa) | 0.9688995    | 0.7772505    | not scorable | not scorable | 1         | 0.7144622 |
| 7200 | Bn-A03-p2891056  | A-genome specific (napus-rapa) | 0.9641148    | 0.4711859    | not scorable | not scorable | 0.9917355 | 0.7393948 |
| 7201 | Bn-A03-p2891934  | A-genome specific (napus-rapa) | 0.9545454    | 0.6779337    | not scorable | not scorable | 1         | 0.7698004 |
| 7202 | Bn-A03-p28924123 | A-genome specific (napus-rapa) | 0.9856459    | 0.6041095    | not scorable | not scorable | 1         | 0.7401604 |
| 7203 | Bn-A03-p28926445 | A-genome specific (napus-rapa) | 0.9521531    | 0.4186138    | not scorable | not scorable | 1         | 0.7233305 |
| 7204 | Bn-A03-p28928570 | A-genome specific (napus-rapa) | 0.9952153    | 0.702576     | not scorable | not scorable | 0.9834711 | 0.7183622 |
| 7205 | Bn-A03-p28948799 | A-genome specific (napus-rapa) | 0.9952153    | 0.7663476    | not scorable | not scorable | 0.9917355 | 0.7386804 |
| 7206 | Bn-A03-p28963072 | A-genome specific (napus-rapa) | 0.9832536    | 0.4001698    | not scorable | not scorable | 0.9834711 | 0.5891729 |
| 7207 | Bn-A03-p2897610  | A-genome specific (napus-rapa) | 0.9688995    | 0.7648936    | not scorable | not scorable | 0.9586777 | 0.7667674 |
| 7208 | Bn-A03-p28977058 | A-genome specific (napus-rapa) | 0.9569378    | 0.456908     | not scorable | not scorable | 1         | 0.7709086 |
| 7209 | Bn-A03-p2898043  | A-genome specific (napus-rapa) | 1            | 0.5426577    | not scorable | not scorable | 1         | 0.7591149 |
| 7210 | Bn-A03-p28981296 | A-genome specific (napus-rapa) | 0.9904306    | 0.7907872    | not scorable | not scorable | 0.9752066 | 0.793385  |
| 7211 | Bn-A03-p28982546 | A-genome specific (napus-rapa) | 0.9952153    | 0.7591814    | not scorable | not scorable | 0.9917355 | 0.7118359 |
| 7212 | Bn-A03-p28995612 | genome unspecific (all in)     | 0.9928229    | 0.349898     | 0.9922481    | 0.5993966    | 1         | 0.5918231 |
| 7213 | Bn-A03-p28996082 | A-genome specific (rapa only)  | not scorable | not scorable | not scorable | not scorable | 0.9917355 | 0.5829232 |
| 7214 | Bn-A03-p29002618 | A-genome specific (napus-rapa) | 0.9808612    | 0.6950197    | not scorable | not scorable | 0.9917355 | 0.7956129 |
| 7215 | Bn-A03-p29005979 | A-genome specific (napus-rapa) | 0.9856459    | 0.7662292    | not scorable | not scorable | 0.9917355 | 0.7204551 |
| 7216 | Bn-A03-p29007606 | A-genome specific (rapa only)  | not scorable | not scorable | not scorable | not scorable | 1         | 0.7286919 |
| 7217 | Bn-A03-p29009401 | A-genome specific (napus-rapa) | 0.9808612    | 0.740739     | not scorable | not scorable | 1         | 0.7667289 |
| 7218 | Bn-A03-p29046284 | A-genome specific (napus-rapa) | 0.9904306    | 0.7638041    | not scorable | not scorable | 1         | 0.7869431 |
| 7219 | Bn-A03-p29050002 | A-genome specific (napus-rapa) | 0.9043062    | 0.5878133    | not scorable | not scorable | 1         | 0.7753394 |
| 7220 | Bn-A03-p29053385 | A-genome specific (napus-rapa) | 0.9880383    | 0.7665234    | not scorable | not scorable | 0.9917355 | 0.7308035 |
| 7221 | Bn-A03-p29060027 | A-genome specific (napus-rapa) | 0.9904306    | 0.7771861    | not scorable | not scorable | 0.9917355 | 0.9081098 |
| 7222 | Bn-A03-p29060253 | A-genome specific (napus-rapa) | 0.9952153    | 0.784619     | not scorable | not scorable | 1         | 0.8428769 |
| 7223 | Bn-A03-p29065314 | A-genome specific (napus-rapa) | 0.8588517    | 0.8049759    | not scorable | not scorable | 0.9917355 | 0.7866986 |
| 7224 | Bn-A03-p29066510 | A-genome specific (napus-rapa) | 0.9688995    | 0.7361217    | not scorable | not scorable | 0.9834711 | 0.7800515 |

|                       |                                |           |           |              |              |              |              |           |
|-----------------------|--------------------------------|-----------|-----------|--------------|--------------|--------------|--------------|-----------|
| 7225 Bn-A03-p29067657 | A-genome specific (napus-rapa) | 0.8588517 | 0.7468092 | not scorable | not scorable | 0.9752066    | 0.7072048    |           |
| 7226 Bn-A03-p29068059 | A-genome specific (napus-rapa) | 0.8373206 | 0.6029469 | not scorable | not scorable | 0.9917355    | 0.7781275    |           |
| 7227 Bn-A03-p29068198 | A-genome specific (napus-rapa) | 0.8636364 | 0.8974518 | not scorable | not scorable | 0.9917355    | 0.7600738    |           |
| 7228 Bn-A03-p29075333 | A-genome specific (napus-rapa) | 0.861244  | 0.7693104 | not scorable | not scorable | 0.9917355    | 0.694396     |           |
| 7229 Bn-A03-p29081614 | A-genome specific (napus-rapa) | 0.9904306 | 0.7786232 | not scorable | not scorable | 1            | 0.7739069    |           |
| 7230 Bn-A03-p29097772 | A-genome specific (napus-rapa) | 0.861244  | 0.8097457 | not scorable | not scorable | 0.9917355    | 0.8154153    |           |
| 7231 Bn-A03-p29102865 | A-genome specific (napus-rapa) | 0.8301435 | 0.7673451 | not scorable | not scorable | 0.9090909    | 0.7372139    |           |
| 7232 Bn-A03-p29118954 | A-genome specific (napus-rapa) | 0.9904306 | 0.7539196 | not scorable | not scorable | 0.9917355    | 0.8142101    |           |
| 7233 Bn-A03-p2914046  | A-genome specific (napus-rapa) | 0.9832536 | 0.5664155 | not scorable | not scorable | 0.8677686    | 0.7586442    |           |
| 7234 Bn-A03-p2917477  | A-genome specific (napus-rapa) | 0.9928229 | 0.7969561 | not scorable | not scorable | 0.8264463    | 0.7934078    |           |
| 7235 Bn-A03-p29198982 | A-genome specific (napus-rapa) | 0.9688995 | 0.7120817 | not scorable | not scorable | 1            | 0.7580948    |           |
| 7236 Bn-A03-p29212835 | A-genome specific (napus-rapa) | 0.9593301 | 0.6416954 | not scorable | not scorable | 0.9669421    | 0.7852247    |           |
| 7237 Bn-A03-p29216506 | A-genome specific (napus-rapa) | 0.9784689 | 0.4670393 | not scorable | not scorable | 1            | 0.7512187    |           |
| 7238 Bn-A03-p29216612 | A-genome specific (napus-rapa) | 0.9784689 | 0.7371357 | not scorable | not scorable | 0.9669421    | 0.8144518    |           |
| 7239 Bn-A03-p29234677 | A-genome specific (napus-rapa) | 0.9904306 | 0.528591  | not scorable | not scorable | 0.9504132    | 0.8324642    |           |
| 7240 Bn-A03-p29264946 | A-genome specific (napus-rapa) | 0.9593301 | 0.6186846 | not scorable | not scorable | 1            | 0.7170045    |           |
| 7241 Bn-A03-p29269385 | A-genome specific (napus-rapa) | 0.9449761 | 0.4979934 | not scorable | not scorable | 1            | 0.8365017    |           |
| 7242 Bn-A03-p29271424 | A-genome specific (napus-rapa) | 0.9880383 | 0.7818581 | not scorable | not scorable | 0.9917355    | 0.7457815    |           |
| 7243 Bn-A03-p29271737 | A-genome specific (napus-rapa) | 0.9617225 | 0.7689042 | not scorable | not scorable | 1            | 0.9272014    |           |
| 7244 Bn-A03-p29274532 | A-genome specific (napus-rapa) | 0.9808612 | 0.7666342 | not scorable | not scorable | 1            | 0.8287388    |           |
| 7245 Bn-A03-p29279909 | A-genome specific (napus-rapa) | 0.9736842 | 0.7692649 | not scorable | not scorable | 1            | 0.9095823    |           |
| 7246 Bn-A03-p2929711  | A-genome specific (napus-rapa) | 0.2631579 | 0.7658883 | not scorable | not scorable | 0.768595     | 0.8123304    |           |
| 7247 Bn-A03-p29326525 | A-genome specific (napus-rapa) | 0.9880383 | 0.8137729 | not scorable | not scorable | 0.9917355    | 0.895059     |           |
| 7248 Bn-A03-p29335920 | A-genome specific (napus-rapa) | 0.9808612 | 0.4391937 | not scorable | not scorable | 1            | 0.8766605    |           |
| 7249 Bn-A03-p29338454 | A-genome specific (napus-rapa) | 0.9784689 | 0.7294619 | not scorable | not scorable | 1            | 0.7597827    |           |
| 7250 Bn-A03-p29342929 | A-genome specific (napus-rapa) | 0.9665072 | 0.3763268 | not scorable | not scorable | 1            | 0.6945017    |           |
| 7251 Bn-A03-p29346125 | A-genome specific (napus-rapa) | 0.9856459 | 0.5306969 | not scorable | not scorable | 0.9917355    | 0.8363402    |           |
| 7252 Bn-A03-p29347368 | A-genome specific (napus-rapa) | 0.9569378 | 0.6044278 | not scorable | not scorable | 0.9917355    | 0.7525958    |           |
| 7253 Bn-A03-p29364596 | A-genome specific (napus-rapa) | 0.9712918 | 0.5721333 | not scorable | not scorable | 0.9752066    | 0.6476204    |           |
| 7254 Bn-A03-p29367826 | napus specific                 | 0.9760765 | 0.7366489 | not scorable | not scorable | not scorable | not scorable |           |
| 7255 Bn-A03-p29390022 | genome unspecific (all in)     | 0.9808612 | 0.7658425 |              | 0            | 0.6805282    | 1            | 0.7795187 |
| 7256 Bn-A03-p29391849 | A-genome specific (napus-rapa) | 0.9736842 | 0.7217233 | not scorable | not scorable | 0.6942149    | 0.8036858    |           |
| 7257 Bn-A03-p2946358  | A-genome specific (napus-rapa) | 1         | 0.6211592 | not scorable | not scorable | 1            | 0.7760504    |           |

|                       |                                |              |              |              |              |              |              |
|-----------------------|--------------------------------|--------------|--------------|--------------|--------------|--------------|--------------|
| 7258 Bn-A03-p2948394  | A-genome specific (napus-rapa) | 0.9354067    | 0.6339281    | not scorable | not scorable | 0.8181818    | 0.7120833    |
| 7259 Bn-A03-p2948695  | A-genome specific (napus-rapa) | 0.9497608    | 0.6818768    | not scorable | not scorable | 0.8347107    | 0.8127915    |
| 7260 Bn-A03-p29564970 | A-genome specific (napus-rapa) | 0.9808612    | 0.6863119    | not scorable | not scorable | 0.9917355    | 0.7128249    |
| 7261 Bn-A03-p29565087 | A-genome specific (napus-rapa) | 0.9856459    | 0.7531183    | not scorable | not scorable | 0.9917355    | 0.7522025    |
| 7262 Bn-A03-p29566168 | A-genome specific (napus-rapa) | 0.9880383    | 0.560161     | not scorable | not scorable | 1            | 0.6432272    |
| 7263 Bn-A03-p29571938 | napus specific                 | 0.9880383    | 0.8135673    | not scorable | not scorable | not scorable | not scorable |
| 7264 Bn-A03-p29573204 | A-genome specific (napus-rapa) | 0.9904306    | 0.8737755    | not scorable | not scorable | 1            | 0.6888322    |
| 7265 Bn-A03-p29583640 | A-genome specific (napus-rapa) | 0.9952153    | 0.8547808    | not scorable | not scorable | 0.9917355    | 0.8151352    |
| 7266 Bn-A03-p29587388 | A-genome specific (napus-rapa) | 0.9688995    | 0.6370021    | not scorable | not scorable | 0.9834711    | 0.6661862    |
| 7267 Bn-A03-p29587945 | A-genome specific (napus-rapa) | 0.9593301    | 0.7906181    | not scorable | not scorable | 0.5206612    | 0.7181526    |
| 7268 Bn-A03-p29590349 | A-genome specific (napus-rapa) | 0.9904306    | 0.764203     | not scorable | not scorable | 0.9917355    | 0.7196062    |
| 7269 Bn-A03-p29593434 | A-genome specific (napus-rapa) | 0.9880383    | 0.6907109    | not scorable | not scorable | 0.9917355    | 0.656527     |
| 7270 Bn-A03-p29595276 | A-genome specific (napus-rapa) | 0.9856459    | 0.7840836    | not scorable | not scorable | 0.9834711    | 0.793843     |
| 7271 Bn-A03-p29598801 | A-genome specific (napus-rapa) | 0.9665072    | 0.5468537    | not scorable | not scorable | 0.9834711    | 0.6829081    |
| 7272 Bn-A03-p29606245 | A-genome specific (napus-rapa) | 0.9641148    | 0.8147309    | not scorable | not scorable | 0.9834711    | 0.7197455    |
| 7273 Bn-A03-p29614729 | A-genome specific (napus-rapa) | 0.9808612    | 0.7880369    | not scorable | not scorable | 1            | 0.6931245    |
| 7274 Bn-A03-p29629982 | A-genome specific (napus-rapa) | 0.9928229    | 0.7660485    | not scorable | not scorable | 0.9834711    | 0.7627978    |
| 7275 Bn-A03-p29632526 | A-genome specific (napus-rapa) | 0.9593301    | 0.4500183    | not scorable | not scorable | 1            | 0.7244065    |
| 7276 Bn-A03-p29656801 | A-genome specific (napus-rapa) | 0.8803828    | 0.7446745    | not scorable | not scorable | 0.9917355    | 0.787953     |
| 7277 Bn-A03-p29661431 | A-genome specific (napus-rapa) | 0.9928229    | 0.8393649    | not scorable | not scorable | 1            | 0.9029373    |
| 7278 Bn-A03-p29711192 | A-genome specific (napus-rapa) | 1            | 0.5213755    | not scorable | not scorable | 0.9917355    | 0.8864086    |
| 7279 Bn-A03-p29764052 | A-genome specific (napus-rapa) | 0.9928229    | 0.806209     | not scorable | not scorable | 1            | 0.8287753    |
| 7280 Bn-A03-p2976496  | A-genome specific (rapa only)  | not scorable | not scorable | not scorable | not scorable | 1            | 0.6941791    |
| 7281 Bn-A03-p29776900 | A-genome specific (napus-rapa) | 0.937799     | 0.819433     | not scorable | not scorable | 1            | 0.8694528    |
| 7282 Bn-A03-p29780293 | A-genome specific (napus-rapa) | 0.9354067    | 0.714115     | not scorable | not scorable | 0.9752066    | 0.7938456    |
| 7283 Bn-A03-p29781065 | A-genome specific (napus-rapa) | 0.9162679    | 0.7127428    | not scorable | not scorable | 0.9752066    | 0.7694935    |
| 7284 Bn-A03-p29784941 | A-genome specific (napus-rapa) | 0.9712918    | 0.7793172    | not scorable | not scorable | 0.9752066    | 0.9070715    |
| 7285 Bn-A03-p2978588  | A-genome specific (napus-rapa) | 0.9784689    | 0.5245405    | not scorable | not scorable | 0.9917355    | 0.697923     |
| 7286 Bn-A03-p29790183 | A-genome specific (napus-rapa) | 0.9617225    | 0.405933     | not scorable | not scorable | 0.9586777    | 0.8412624    |
| 7287 Bn-A03-p29802913 | A-genome specific (napus-rapa) | 0.9497608    | 0.7634909    | not scorable | not scorable | 0.9917355    | 0.6825903    |
| 7288 Bn-A03-p29803241 | A-genome specific (napus-rapa) | 0.9282297    | 0.6450936    | not scorable | not scorable | 0.9917355    | 0.7445741    |
| 7289 Bn-A03-p29803351 | A-genome specific (napus-rapa) | 0.9497608    | 0.7874149    | not scorable | not scorable | 0.9917355    | 0.7890589    |
| 7290 Bn-A03-p29805598 | A-genome specific (napus-rapa) | 0.9425837    | 0.7708021    | not scorable | not scorable | 0.9917355    | 0.762583     |

|                       |                                |              |              |              |              |              |              |
|-----------------------|--------------------------------|--------------|--------------|--------------|--------------|--------------|--------------|
| 7291 Bn-A03-p29806105 | A-genome specific (napus-rapa) | 0.9449761    | 0.7796823    | not scorable | not scorable | 0.9917355    | 0.8487194    |
| 7292 Bn-A03-p29816785 | A-genome specific (napus-rapa) | 0.9354067    | 0.7750766    | not scorable | not scorable | 0.9586777    | 0.8437102    |
| 7293 Bn-A03-p29823747 | A-genome specific (napus-rapa) | 0.9473684    | 0.7535161    | not scorable | not scorable | 0.9752066    | 0.9039531    |
| 7294 Bn-A03-p298309   | A-genome specific (napus-rapa) | 0.9952153    | 0.5088559    | not scorable | not scorable | 1            | 0.7739488    |
| 7295 Bn-A03-p29834625 | A-genome specific (napus-rapa) | 0.9952153    | 0.7632703    | not scorable | not scorable | 0.9917355    | 0.7582729    |
| 7296 Bn-A03-p29840518 | A-genome specific (napus-rapa) | 0.9904306    | 0.3875247    | not scorable | not scorable | 0.9917355    | 0.7152185    |
| 7297 Bn-A03-p29849117 | A-genome specific (napus-rapa) | 0.9976076    | 0.7762936    | not scorable | not scorable | 1            | 0.7775881    |
| 7298 Bn-A03-p29849191 | A-genome specific (napus-rapa) | 0.9952153    | 0.6915416    | not scorable | not scorable | 0.9917355    | 0.6492524    |
| 7299 Bn-A03-p29855378 | A-genome specific (napus-rapa) | 0.9784689    | 0.3719263    | not scorable | not scorable | 1            | 0.8920393    |
| 7300 Bn-A03-p29866453 | genome unspecific (all in)     | 0.9952153    | 0.5086149    | 0.6744186    | 0.7118279    | 1            | 0.7200772    |
| 7301 Bn-A03-p29868254 | A-genome specific (napus-rapa) | 0.9497608    | 0.7709776    | not scorable | not scorable | 0.9752066    | 0.7413903    |
| 7302 Bn-A03-p29873919 | A-genome specific (napus-rapa) | 0.9808612    | 0.6785958    | not scorable | not scorable | 1            | 0.6963812    |
| 7303 Bn-A03-p29874052 | A-genome specific (napus-rapa) | 0.9952153    | 0.6786919    | not scorable | not scorable | 1            | 0.6943514    |
| 7304 Bn-A03-p29883989 | A-genome specific (napus-rapa) | 0.930622     | 0.7600673    | not scorable | not scorable | 0.9586777    | 0.8555742    |
| 7305 Bn-A03-p29896540 | A-genome specific (napus-rapa) | 0.9928229    | 0.3182597    | not scorable | not scorable | 0.9917355    | 0.8210978    |
| 7306 Bn-A03-p29899721 | A-genome specific (napus-rapa) | 0.9330143    | 0.7211718    | not scorable | not scorable | 0.9752066    | 0.8053306    |
| 7307 Bn-A03-p29900824 | A-genome specific (rapa only)  | not scorable | not scorable | not scorable | not scorable | 1            | 0.9175813    |
| 7308 Bn-A03-p29926117 | A-genome specific (napus-rapa) | 0.937799     | 0.7676384    | not scorable | not scorable | 0.9917355    | 0.8501012    |
| 7309 Bn-A03-p29938    | A-genome specific (rapa only)  | not scorable | not scorable | not scorable | not scorable | 0.9669421    | 0.7304058    |
| 7310 Bn-A03-p29956906 | A-genome specific (napus-rapa) | 0.930622     | 0.718242     | not scorable | not scorable | 0.9752066    | 0.7918587    |
| 7311 Bn-A03-p29964330 | A-genome specific (rapa only)  | not scorable | not scorable | not scorable | not scorable | 1            | 0.8807709    |
| 7312 Bn-A03-p2997270  | A-genome specific (napus-rapa) | 0.9904306    | 0.4739395    | not scorable | not scorable | 0.9834711    | 0.7568986    |
| 7313 Bn-A03-p29998247 | A-genome specific (napus-rapa) | 1            | 0.9241819    | not scorable | not scorable | 1            | 0.8492144    |
| 7314 Bn-A03-p29999738 | A-genome specific (napus-rapa) | 0.9976076    | 0.8537236    | not scorable | not scorable | 1            | 0.7801048    |
| 7315 Bn-A03-p3001467  | napus specific                 | 0.9521531    | 0.9018       | not scorable | not scorable | not scorable | not scorable |
| 7316 Bn-A03-p30029704 | A-genome specific (napus-rapa) | 0.9976076    | 0.7954653    | not scorable | not scorable | 0.9917355    | 0.7469117    |
| 7317 Bn-A03-p30052524 | A-genome specific (napus-rapa) | 0.9976076    | 0.3725545    | not scorable | not scorable | 1            | 0.6586422    |
| 7318 Bn-A03-p30057461 | genome unspecific (all in)     | 0.9832536    | 0.4776487    | 0.9844961    | 0.1838472    | 1            | 0.6222353    |
| 7319 Bn-A03-p30170124 | A-genome specific (napus-rapa) | 0.9856459    | 0.7641972    | not scorable | not scorable | 1            | 0.7595674    |
| 7320 Bn-A03-p30183760 | A-genome specific (napus-rapa) | 0.9665072    | 0.3902398    | not scorable | not scorable | 0.9669421    | 0.4814632    |
| 7321 Bn-A03-p30183937 | A-genome specific (napus-rapa) | 0.9712918    | 0.43295      | not scorable | not scorable | 0.9917355    | 0.8316599    |
| 7322 Bn-A03-p30243799 | A-genome specific (napus-rapa) | 0.9904306    | 0.2951837    | not scorable | not scorable | 0.9834711    | 0.7766962    |
| 7323 Bn-A03-p30291719 | A-genome specific (napus-rapa) | 1            | 0.7966691    | not scorable | not scorable | 0.9917355    | 0.711896     |

|                       |                                   |              |              |              |              |              |              |
|-----------------------|-----------------------------------|--------------|--------------|--------------|--------------|--------------|--------------|
| 7324 Bn-A03-p30351345 | A-genome specific (napus-rapa)    | 1            | 0.566712     | not scorable | not scorable | 1            | 0.8532568    |
| 7325 Bn-A03-p30358487 | genome unspecific (all in)        | 0.9449761    | 0.3163812    | 0.8604651    | 0.7119734    | 0.9917355    | 0.8004208    |
| 7326 Bn-A03-p3036102  | A-genome specific (napus-rapa)    | 0.9497608    | 0.3268545    | not scorable | not scorable | 0.9586777    | 0.7098031    |
| 7327 Bn-A03-p3036446  | A-genome specific (rapa only)     | not scorable | not scorable | not scorable | not scorable | 0.9752066    | 0.6340719    |
| 7328 Bn-A03-p3052882  | A-genome specific (napus-rapa)    | 1            | 0.5801196    | not scorable | not scorable | 0.9917355    | 0.627337     |
| 7329 Bn-A03-p3053702  | A-genome specific (napus-rapa)    | 1            | 0.6781774    | not scorable | not scorable | 1            | 0.6593966    |
| 7330 Bn-A03-p30564852 | A-genome specific (napus-rapa)    | 0.9928229    | 0.7367018    | not scorable | not scorable | 1            | 0.7524662    |
| 7331 Bn-A03-p30658785 | A-genome specific (napus-rapa)    | 0.9976076    | 0.7743611    | not scorable | not scorable | 0.9917355    | 0.8109788    |
| 7332 Bn-A03-p30663365 | A-genome specific (napus-rapa)    | 0.9928229    | 0.8114098    | not scorable | not scorable | 0.9917355    | 0.7867317    |
| 7333 Bn-A03-p30667694 | A-genome specific (napus-rapa)    | 0.9880383    | 0.6799687    | not scorable | not scorable | 0.9752066    | 0.7446882    |
| 7334 Bn-A03-p306814   | A-genome specific (rapa only)     | not scorable | not scorable | not scorable | not scorable | 1            | 0.9171866    |
| 7335 Bn-A03-p30693412 | A-genome specific (napus-rapa)    | 0.9904306    | 0.3624463    | not scorable | not scorable | 1            | 0.785064     |
| 7336 Bn-A03-p3073797  | napus specific                    | 0.9976076    | 0.771359     | not scorable | not scorable | not scorable | not scorable |
| 7337 Bn-A03-p3074927  | napus specific                    | 0.9952153    | 0.9073427    | not scorable | not scorable | not scorable | not scorable |
| 7338 Bn-A03-p3075427  | A-genome specific (napus-rapa)    | 0.9976076    | 0.9041845    | not scorable | not scorable | 0.9917355    | 0.7842876    |
| 7339 Bn-A03-p30831188 | A-genome specific (napus-rapa)    | 0.9856459    | 0.7755584    | not scorable | not scorable | 0.9090909    | 0.7897342    |
| 7340 Bn-A03-p3084593  | napus specific                    | 0.9808612    | 0.8051857    | not scorable | not scorable | not scorable | not scorable |
| 7341 Bn-A03-p3084866  | napus specific                    | 0.9952153    | 0.8515416    | not scorable | not scorable | not scorable | not scorable |
| 7342 Bn-A03-p30852922 | A-genome specific (napus-rapa)    | 0.9976076    | 0.7506766    | not scorable | not scorable | 0.9338843    | 0.8085203    |
| 7343 Bn-A03-p30873818 | A-genome specific (rapa only)     | not scorable | not scorable | not scorable | not scorable | 1            | 0.9110658    |
| 7344 Bn-A03-p30873956 | genome unspecific (oleracea-rapa) | not scorable | not scorable | 0.9767442    | 0.7185478    | 1            | 0.8933567    |
| 7345 Bn-A03-p30874086 | A-genome specific (napus-rapa)    | 0.9760765    | 0.7056215    | not scorable | not scorable | 0.9834711    | 0.697804     |
| 7346 Bn-A03-p30876909 | A-genome specific (napus-rapa)    | 0.9928229    | 0.7840836    | not scorable | not scorable | 0.9917355    | 0.812594     |
| 7347 Bn-A03-p30879004 | A-genome specific (napus-rapa)    | 0.9641148    | 0.7896242    | not scorable | not scorable | 0.9586777    | 0.6705306    |
| 7348 Bn-A03-p30879164 | A-genome specific (napus-rapa)    | 0.9832536    | 0.4556359    | not scorable | not scorable | 0.9752066    | 0.705884     |
| 7349 Bn-A03-p30888263 | A-genome specific (napus-rapa)    | 0.9928229    | 0.698755     | not scorable | not scorable | 0.9834711    | 0.6865193    |
| 7350 Bn-A03-p30897153 | A-genome specific (napus-rapa)    | 0.9808612    | 0.3836831    | not scorable | not scorable | 0.9752066    | 0.6731411    |
| 7351 Bn-A03-p30905429 | A-genome specific (napus-rapa)    | 0.9832536    | 0.7667378    | not scorable | not scorable | 0.9917355    | 0.7327078    |
| 7352 Bn-A03-p30906755 | A-genome specific (napus-rapa)    | 0.9784689    | 0.7487896    | not scorable | not scorable | 0.9917355    | 0.781985     |
| 7353 Bn-A03-p3091011  | napus specific                    | 0.9928229    | 0.6404029    | not scorable | not scorable | not scorable | not scorable |
| 7354 Bn-A03-p30910234 | A-genome specific (napus-rapa)    | 0.9712918    | 0.7465215    | not scorable | not scorable | 0.9917355    | 0.7014378    |
| 7355 Bn-A03-p30920789 | A-genome specific (napus-rapa)    | 0.9880383    | 0.3679796    | not scorable | not scorable | 0.9917355    | 0.7866022    |
| 7356 Bn-A03-p30925102 | A-genome specific (napus-rapa)    | 0.9976076    | 0.7399983    | not scorable | not scorable | 0.9917355    | 0.8017028    |

|      |                  |                                |              |              |              |              |              |              |
|------|------------------|--------------------------------|--------------|--------------|--------------|--------------|--------------|--------------|
| 7357 | Bn-A03-p30951542 | A-genome specific (napus-rapa) | 0.9760765    | 0.7741535    | not scorable | not scorable | 1            | 0.8129897    |
| 7358 | Bn-A03-p30974143 | A-genome specific (napus-rapa) | 1            | 0.7006917    | not scorable | not scorable | 1            | 0.6676938    |
| 7359 | Bn-A03-p30974251 | A-genome specific (napus-rapa) | 1            | 0.8894587    | not scorable | not scorable | 1            | 0.7419274    |
| 7360 | Bn-A03-p3097703  | napus specific                 | 0.9952153    | 0.7768877    | not scorable | not scorable | not scorable | not scorable |
| 7361 | Bn-A03-p3098147  | A-genome specific (napus-rapa) | 1            | 0.4308606    | not scorable | not scorable | 0.9504132    | 0.5643108    |
| 7362 | Bn-A03-p3098813  | napus specific                 | 0.9952153    | 0.8062941    | not scorable | not scorable | not scorable | not scorable |
| 7363 | Bn-A03-p3099901  | napus specific                 | 0.9880383    | 0.6711724    | not scorable | not scorable | not scorable | not scorable |
| 7364 | Bn-A03-p31030338 | A-genome specific (napus-rapa) | 0.9641148    | 0.3674453    | not scorable | not scorable | 0.9834711    | 0.7863241    |
| 7365 | Bn-A03-p31049094 | A-genome specific (napus-rapa) | 0.9736842    | 0.2855645    | not scorable | not scorable | 1            | 0.7216815    |
| 7366 | Bn-A03-p31076742 | napus specific                 | 0.9856459    | 0.4421882    | not scorable | not scorable | not scorable | not scorable |
| 7367 | Bn-A03-p31076904 | A-genome specific (napus-rapa) | 0.9808612    | 0.7619962    | not scorable | not scorable | 0.9834711    | 0.8556731    |
| 7368 | Bn-A03-p31077034 | A-genome specific (napus-rapa) | 0.9760765    | 0.7832189    | not scorable | not scorable | 0.9917355    | 0.7354562    |
| 7369 | Bn-A03-p31078490 | A-genome specific (napus-rapa) | 1            | 0.7827932    | not scorable | not scorable | 1            | 0.8105487    |
| 7370 | Bn-A03-p31088060 | A-genome specific (napus-rapa) | 0.9784689    | 0.7735092    | not scorable | not scorable | 1            | 0.8232071    |
| 7371 | Bn-A03-p31088264 | A-genome specific (napus-rapa) | 0.9928229    | 0.7695096    | not scorable | not scorable | 0.9917355    | 0.7313921    |
| 7372 | Bn-A03-p31091148 | A-genome specific (napus-rapa) | 0.8564593    | 0.8360246    | not scorable | not scorable | 1            | 0.7165963    |
| 7373 | Bn-A03-p31093169 | A-genome specific (napus-rapa) | 1            | 0.3026855    | not scorable | not scorable | 1            | 0.7884539    |
| 7374 | Bn-A03-p31095221 | A-genome specific (napus-rapa) | 0.9832536    | 0.7706004    | not scorable | not scorable | 1            | 0.7888339    |
| 7375 | Bn-A03-p31113968 | A-genome specific (napus-rapa) | 0.9904306    | 0.8733141    | not scorable | not scorable | 1            | 0.6243924    |
| 7376 | Bn-A03-p31147953 | A-genome specific (napus-rapa) | 0.9688995    | 0.7692309    | not scorable | not scorable | 0.8099173    | 0.8662917    |
| 7377 | Bn-A03-p3115732  | all not scorable               | not scorable | not scorable | not scorable | not scorable | not scorable | not scorable |
| 7378 | Bn-A03-p31160337 | A-genome specific (napus-rapa) | 0.9617225    | 0.4683604    | not scorable | not scorable | 0.7603306    | 0.7156561    |
| 7379 | Bn-A03-p3116829  | napus specific                 | 0.9593301    | 0.7793429    | not scorable | not scorable | not scorable | not scorable |
| 7380 | Bn-A03-p31179815 | A-genome specific (napus-rapa) | 0.9760765    | 0.3598176    | not scorable | not scorable | 0.9917355    | 0.7653556    |
| 7381 | Bn-A03-p31212393 | A-genome specific (napus-rapa) | 0.9928229    | 0.6963856    | not scorable | not scorable | 0.9917355    | 0.6557474    |
| 7382 | Bn-A03-p31242297 | A-genome specific (napus-rapa) | 0.9904306    | 0.8045593    | not scorable | not scorable | 0.6859504    | 0.8378905    |
| 7383 | Bn-A03-p31242854 | A-genome specific (rapa only)  | not scorable | not scorable | not scorable | not scorable | 0.6446281    | 0.8210481    |
| 7384 | Bn-A03-p31246266 | A-genome specific (rapa only)  | not scorable | not scorable | not scorable | not scorable | 0.6528926    | 0.6682963    |
| 7385 | Bn-A03-p312762   | A-genome specific (napus-rapa) | 0.9354067    | 0.7956669    | not scorable | not scorable | 0.9917355    | 0.8317735    |
| 7386 | Bn-A03-p3131450  | napus specific                 | 0.9712918    | 0.4333505    | not scorable | not scorable | not scorable | not scorable |
| 7387 | Bn-A03-p31327366 | A-genome specific (napus-rapa) | 0.9425837    | 0.5657234    | not scorable | not scorable | 1            | 0.8640254    |
| 7388 | Bn-A03-p31535298 | A-genome specific (napus-rapa) | 0.9617225    | 0.3001902    | not scorable | not scorable | 1            | 0.8422567    |
| 7389 | Bn-A03-p31540985 | A-genome specific (napus-rapa) | 0.9976076    | 0.7813376    | not scorable | not scorable | 0.9834711    | 0.7424419    |



|      |                  |                                |              |              |              |              |              |              |
|------|------------------|--------------------------------|--------------|--------------|--------------|--------------|--------------|--------------|
| 7390 | Bn-A03-p31546901 | A-genome specific (napus-rapa) | 1            | 0.8642864    | not scorable | not scorable | 1            | 0.8965881    |
| 7391 | Bn-A03-p3156872  | A-genome specific (napus-rapa) | 0.9952153    | 0.3808227    | not scorable | not scorable | 0.9917355    | 0.6865885    |
| 7392 | Bn-A03-p31579593 | A-genome specific (napus-rapa) | 1            | 0.8496538    | not scorable | not scorable | 1            | 0.7964512    |
| 7393 | Bn-A03-p31651142 | A-genome specific (rapa only)  | not scorable | not scorable | not scorable | not scorable | 0.9834711    | 0.5385464    |
| 7394 | Bn-A03-p31654131 | napus specific                 | 0.9665072    | 0.2757368    | not scorable | not scorable | not scorable | not scorable |
| 7395 | Bn-A03-p3189093  | A-genome specific (napus-rapa) | 0.9832536    | 0.7849496    | not scorable | not scorable | 1            | 0.7705146    |
| 7396 | Bn-A03-p3189333  | A-genome specific (napus-rapa) | 0.9952153    | 0.7471203    | not scorable | not scorable | 1            | 0.7294715    |
| 7397 | Bn-A03-p319304   | A-genome specific (rapa only)  | not scorable | not scorable | not scorable | not scorable | 0.9917355    | 0.5783283    |
| 7398 | Bn-A03-p3219484  | A-genome specific (napus-rapa) | 0.937799     | 0.4705165    | not scorable | not scorable | 0.9834711    | 0.6797649    |
| 7399 | Bn-A03-p3272346  | A-genome specific (napus-rapa) | 0.9736842    | 0.8213861    | not scorable | not scorable | 0.9834711    | 0.8431111    |
| 7400 | Bn-A03-p3273629  | A-genome specific (rapa only)  | not scorable | not scorable | not scorable | not scorable | 1            | 0.7030702    |
| 7401 | Bn-A03-p3319357  | A-genome specific (napus-rapa) | 0.9976076    | 0.8361261    | not scorable | not scorable | 0.9917355    | 0.8397495    |
| 7402 | Bn-A03-p334010   | A-genome specific (rapa only)  | not scorable | not scorable | not scorable | not scorable | 0.9917355    | 0.7829539    |
| 7403 | Bn-A03-p3381122  | A-genome specific (napus-rapa) | 0.9856459    | 0.3129415    | not scorable | not scorable | 1            | 0.9084126    |
| 7404 | Bn-A03-p3392103  | A-genome specific (napus-rapa) | 0.9928229    | 0.8190565    | not scorable | not scorable | 0.9752066    | 0.8681164    |
| 7405 | Bn-A03-p3476060  | A-genome specific (rapa only)  | not scorable | not scorable | not scorable | not scorable | 0.8760331    | 0.7789106    |
| 7406 | Bn-A03-p3476410  | A-genome specific (napus-rapa) | 0.9952153    | 0.8346981    | not scorable | not scorable | 0.8429752    | 0.7211741    |
| 7407 | Bn-A03-p3489437  | A-genome specific (rapa only)  | not scorable | not scorable | not scorable | not scorable | 0.9917355    | 0.6864532    |
| 7408 | Bn-A03-p3492107  | A-genome specific (rapa only)  | not scorable | not scorable | not scorable | not scorable | 1            | 0.7386974    |
| 7409 | Bn-A03-p3507222  | A-genome specific (rapa only)  | not scorable | not scorable | not scorable | not scorable | 1            | 0.6878806    |
| 7410 | Bn-A03-p3517306  | A-genome specific (napus-rapa) | 1            | 0.8207132    | not scorable | not scorable | 0.9834711    | 0.8173782    |
| 7411 | Bn-A03-p3544165  | A-genome specific (rapa only)  | not scorable | not scorable | not scorable | not scorable | 1            | 0.7022559    |
| 7412 | Bn-A03-p3544245  | A-genome specific (napus-rapa) | 0.9976076    | 0.790868     | not scorable | not scorable | 0.9752066    | 0.7849029    |
| 7413 | Bn-A03-p3561270  | A-genome specific (napus-rapa) | 1            | 0.9261386    | not scorable | not scorable | 1            | 0.9174846    |
| 7414 | Bn-A03-p3571622  | genome unspecific (all in)     | 0.8229665    | 0.7497075    | 0.4031008    | 0.8061886    | 0.9917355    | 0.9159064    |
| 7415 | Bn-A03-p3571859  | A-genome specific (rapa only)  | not scorable | not scorable | not scorable | not scorable | 0.9752066    | 0.5783415    |
| 7416 | Bn-A03-p360880   | A-genome specific (napus-rapa) | 0.923445     | 0.8077155    | not scorable | not scorable | 0.9917355    | 0.8367031    |
| 7417 | Bn-A03-p3674265  | A-genome specific (napus-rapa) | 0.9976076    | 0.8055902    | not scorable | not scorable | 1            | 0.8065564    |
| 7418 | Bn-A03-p3692048  | A-genome specific (napus-rapa) | 0.9593301    | 0.6570483    | not scorable | not scorable | 0.9669421    | 0.6710246    |
| 7419 | Bn-A03-p3698620  | A-genome specific (napus-rapa) | 0.9832536    | 0.7668395    | not scorable | not scorable | 0.9917355    | 0.7277821    |
| 7420 | Bn-A03-p373134   | A-genome specific (napus-rapa) | 0.9043062    | 0.7963603    | not scorable | not scorable | 0.9586777    | 0.7559701    |
| 7421 | Bn-A03-p373153   | A-genome specific (napus-rapa) | 0.8397129    | 0.8162653    | not scorable | not scorable | 0.9586777    | 0.8350886    |
| 7422 | Bn-A03-p3795299  | A-genome specific (napus-rapa) | 0.9832536    | 0.7647683    | not scorable | not scorable | 0.9752066    | 0.7420568    |

|      |                 |                                |              |              |              |              |              |              |
|------|-----------------|--------------------------------|--------------|--------------|--------------|--------------|--------------|--------------|
| 7423 | Bn-A03-p3795523 | A-genome specific (napus-rapa) | 0.9928229    | 0.8317405    | not scorable | not scorable | 0.9917355    | 0.798208     |
| 7424 | Bn-A03-p3796394 | all not scorable               | not scorable | not scorable | not scorable | not scorable | not scorable | not scorable |
| 7425 | Bn-A03-p3796557 | A-genome specific (napus-rapa) | 0.9928229    | 0.8178231    | not scorable | not scorable | 1            | 0.8090347    |
| 7426 | Bn-A03-p3796624 | A-genome specific (napus-rapa) | 0.9952153    | 0.7192219    | not scorable | not scorable | 0.9834711    | 0.7131919    |
| 7427 | Bn-A03-p3799804 | A-genome specific (napus-rapa) | 0.9928229    | 0.7384247    | not scorable | not scorable | 1            | 0.8085203    |
| 7428 | Bn-A03-p3801626 | napus specific                 | 0.8875598    | 0.7811927    | not scorable | not scorable | not scorable | not scorable |
| 7429 | Bn-A03-p3808441 | A-genome specific (napus-rapa) | 0.9928229    | 0.793898     | not scorable | not scorable | 0.9917355    | 0.8062909    |
| 7430 | Bn-A03-p3819549 | A-genome specific (napus-rapa) | 0.9976076    | 0.4191545    | not scorable | not scorable | 1            | 0.7973999    |
| 7431 | Bn-A03-p3823071 | A-genome specific (napus-rapa) | 0.9497608    | 0.4489898    | not scorable | not scorable | 0.9917355    | 0.8061205    |
| 7432 | Bn-A03-p3839084 | A-genome specific (rapa only)  | not scorable | not scorable | not scorable | not scorable | 0.8099173    | 0.9174042    |
| 7433 | Bn-A03-p3851195 | A-genome specific (napus-rapa) | 0.9952153    | 0.825492     | not scorable | not scorable | 1            | 0.7423896    |
| 7434 | Bn-A03-p3857752 | A-genome specific (napus-rapa) | 0.9928229    | 0.4850564    | not scorable | not scorable | 0.9917355    | 0.699442     |
| 7435 | Bn-A03-p3861991 | A-genome specific (napus-rapa) | 0.9928229    | 0.8351377    | not scorable | not scorable | 1            | 0.8656023    |
| 7436 | Bn-A03-p3862302 | A-genome specific (napus-rapa) | 0.9976076    | 0.86612      | not scorable | not scorable | 1            | 0.9185661    |
| 7437 | Bn-A03-p3862406 | A-genome specific (rapa only)  | not scorable | not scorable | not scorable | not scorable | 0.9917355    | 0.72885      |
| 7438 | Bn-A03-p3862928 | A-genome specific (napus-rapa) | 0.9760765    | 0.7193097    | not scorable | not scorable | 0.8264463    | 0.6743186    |
| 7439 | Bn-A03-p386542  | napus specific                 | 0.9976076    | 0.309222     | not scorable | not scorable | not scorable | not scorable |
| 7440 | Bn-A03-p3877500 | A-genome specific (napus-rapa) | 0.9665072    | 0.7332357    | not scorable | not scorable | 0.9586777    | 0.7405977    |
| 7441 | Bn-A03-p3877572 | A-genome specific (rapa only)  | not scorable | not scorable | not scorable | not scorable | 1            | 0.7663021    |
| 7442 | Bn-A03-p3951623 | A-genome specific (napus-rapa) | 0.9904306    | 0.7584762    | not scorable | not scorable | 0.9917355    | 0.7614423    |
| 7443 | Bn-A03-p3951816 | A-genome specific (napus-rapa) | 0.9904306    | 0.5718336    | not scorable | not scorable | 0.9917355    | 0.7045814    |
| 7444 | Bn-A03-p3969037 | A-genome specific (napus-rapa) | 0.9976076    | 0.9178608    | not scorable | not scorable | 0.9917355    | 0.7826211    |
| 7445 | Bn-A03-p3969278 | A-genome specific (napus-rapa) | 0.9976076    | 0.4478361    | not scorable | not scorable | 0.9752066    | 0.7365075    |
| 7446 | Bn-A03-p3984795 | all not scorable               | not scorable | not scorable | not scorable | not scorable | not scorable | not scorable |
| 7447 | Bn-A03-p3994857 | A-genome specific (napus-rapa) | 1            | 0.833072     | not scorable | not scorable | 1            | 0.8848283    |
| 7448 | Bn-A03-p4008078 | napus specific                 | 0.9473684    | 0.6965044    | not scorable | not scorable | not scorable | not scorable |
| 7449 | Bn-A03-p403559  | A-genome specific (napus-rapa) | 0.9330143    | 0.7870512    | not scorable | not scorable | 1            | 0.8571517    |
| 7450 | Bn-A03-p4036118 | A-genome specific (rapa only)  | not scorable | not scorable | not scorable | not scorable | 0.9586777    | 0.8122351    |
| 7451 | Bn-A03-p4036196 | A-genome specific (napus-rapa) | 0.9832536    | 0.7309472    | not scorable | not scorable | 0.9917355    | 0.7294192    |
| 7452 | Bn-A03-p4050929 | napus specific                 | 0.6650718    | 0.6892128    | not scorable | not scorable | not scorable | not scorable |
| 7453 | Bn-A03-p4092312 | A-genome specific (rapa only)  | not scorable | not scorable | not scorable | not scorable | 1            | 0.7807286    |
| 7454 | Bn-A03-p4096019 | A-genome specific (napus-rapa) | 0.9712918    | 0.7570184    | not scorable | not scorable | 0.9752066    | 0.779534     |
| 7455 | Bn-A03-p4100027 | A-genome specific (rapa only)  | not scorable | not scorable | not scorable | not scorable | 0.9669421    | 0.6978019    |

|                      |                                   |              |              |              |              |              |              |
|----------------------|-----------------------------------|--------------|--------------|--------------|--------------|--------------|--------------|
| 7456 Bn-A03-p4116886 | A-genome specific (napus-rapa)    | 0.9880383    | 0.7458222    | not scorable | not scorable | 0.9752066    | 0.7983682    |
| 7457 Bn-A03-p4118881 | A-genome specific (rapa only)     | not scorable | not scorable | not scorable | not scorable | 0.9752066    | 0.7186745    |
| 7458 Bn-A03-p4123164 | A-genome specific (napus-rapa)    | 0.9354067    | 0.7384563    | not scorable | not scorable | 0.9917355    | 0.7338673    |
| 7459 Bn-A03-p4123209 | A-genome specific (napus-rapa)    | 0.9856459    | 0.7800994    | not scorable | not scorable | 0.9752066    | 0.7938052    |
| 7460 Bn-A03-p4130585 | A-genome specific (rapa only)     | not scorable | not scorable | not scorable | not scorable | 0.9917355    | 0.8010893    |
| 7461 Bn-A03-p4138735 | A-genome specific (napus-rapa)    | 0.9832536    | 0.5220073    | not scorable | not scorable | 0.9834711    | 0.751825     |
| 7462 Bn-A03-p4153697 | A-genome specific (rapa only)     | not scorable | not scorable | not scorable | not scorable | 0.9752066    | 0.8081412    |
| 7463 Bn-A03-p4167644 | A-genome specific (napus-rapa)    | 0.9593301    | 0.7695863    | not scorable | not scorable | 0.9834711    | 0.7611853    |
| 7464 Bn-A03-p4177118 | A-genome specific (napus-rapa)    | 0.9784689    | 0.3540428    | not scorable | not scorable | 0.9917355    | 0.4965771    |
| 7465 Bn-A03-p4180932 | genome unspecific (oleracea-rapa) | not scorable | not scorable |              | 1 0.8619709  | 1            | 0.8527403    |
| 7466 Bn-A03-p4183056 | A-genome specific (rapa only)     | not scorable | not scorable | not scorable | not scorable | 1            | 0.7018657    |
| 7467 Bn-A03-p419250  | A-genome specific (napus-rapa)    | 0.9952153    | 0.4492301    | not scorable | not scorable | 1            | 0.8602356    |
| 7468 Bn-A03-p4193022 | napus specific                    | 0.9593301    | 0.7873563    | not scorable | not scorable | not scorable | not scorable |
| 7469 Bn-A03-p4196989 | A-genome specific (napus-rapa)    | 0.9784689    | 0.7868638    | not scorable | not scorable | 0.9917355    | 0.8168967    |
| 7470 Bn-A03-p4202242 | A-genome specific (rapa only)     | not scorable | not scorable | not scorable | not scorable | 0.9752066    | 0.5849507    |
| 7471 Bn-A03-p4205159 | A-genome specific (napus-rapa)    | 0.9856459    | 0.7409237    | not scorable | not scorable | 0.9752066    | 0.7354854    |
| 7472 Bn-A03-p420642  | A-genome specific (napus-rapa)    | 0.9928229    | 0.4941792    | not scorable | not scorable | 1            | 0.8597022    |
| 7473 Bn-A03-p4211072 | A-genome specific (napus-rapa)    | 0.9760765    | 0.7550015    | not scorable | not scorable | 0.9834711    | 0.6907074    |
| 7474 Bn-A03-p4215720 | A-genome specific (rapa only)     | not scorable | not scorable | not scorable | not scorable | 0.9504132    | 0.6121618    |
| 7475 Bn-A03-p4216444 | A-genome specific (napus-rapa)    | 0.9425837    | 0.5429848    | not scorable | not scorable | 0.9917355    | 0.7278751    |
| 7476 Bn-A03-p4232493 | A-genome specific (napus-rapa)    | 0.8684211    | 0.7604216    | not scorable | not scorable | 0.9752066    | 0.723519     |
| 7477 Bn-A03-p4235658 | A-genome specific (napus-rapa)    | 0.9090909    | 0.4272245    | not scorable | not scorable | 0.9834711    | 0.6468084    |
| 7478 Bn-A03-p4244641 | A-genome specific (napus-rapa)    | 1            | 0.7506877    | not scorable | not scorable | 0.9917355    | 0.7521315    |
| 7479 Bn-A03-p4256940 | genome unspecific (oleracea-rapa) | not scorable | not scorable | 0.9922481    | 0.7301472    | 1            | 0.7355853    |
| 7480 Bn-A03-p4279693 | A-genome specific (napus-rapa)    | 0.9736842    | 0.7255251    | not scorable | not scorable | 0.9834711    | 0.6686319    |
| 7481 Bn-A03-p4279836 | A-genome specific (rapa only)     | not scorable | not scorable | not scorable | not scorable | 0.9917355    | 0.6698927    |
| 7482 Bn-A03-p4292459 | A-genome specific (napus-rapa)    | 0.9976076    | 0.7845509    | not scorable | not scorable | 1            | 0.6975146    |
| 7483 Bn-A03-p4295145 | A-genome specific (rapa only)     | not scorable | not scorable | not scorable | not scorable | 0.8181818    | 0.7584581    |
| 7484 Bn-A03-p4309562 | A-genome specific (napus-rapa)    | 0.9976076    | 0.8131651    | not scorable | not scorable | 0.9834711    | 0.7924426    |
| 7485 Bn-A03-p4335536 | A-genome specific (napus-rapa)    | 0.9186603    | 0.5150786    | not scorable | not scorable | 0.9834711    | 0.7622114    |
| 7486 Bn-A03-p4339301 | A-genome specific (napus-rapa)    | 0.9952153    | 0.3713767    | not scorable | not scorable | 0.9586777    | 0.5536273    |
| 7487 Bn-A03-p4342338 | A-genome specific (napus-rapa)    | 0.9856459    | 0.7673541    | not scorable | not scorable | 0.9917355    | 0.7554075    |
| 7488 Bn-A03-p4348997 | napus specific                    | 0.9665072    | 0.7706622    | not scorable | not scorable | not scorable | not scorable |

|      |                 |                                |              |              |              |              |              |              |
|------|-----------------|--------------------------------|--------------|--------------|--------------|--------------|--------------|--------------|
| 7489 | Bn-A03-p4352837 | A-genome specific (napus-rapa) | 0.9736842    | 0.782464     | not scorable | not scorable | 0.9917355    | 0.7207875    |
| 7490 | Bn-A03-p4378124 | A-genome specific (rapa only)  | not scorable | not scorable | not scorable | not scorable | 0.9917355    | 0.7696424    |
| 7491 | Bn-A03-p4382093 | A-genome specific (napus-rapa) | 0.9736842    | 0.8152851    | not scorable | not scorable | 1            | 0.7655828    |
| 7492 | Bn-A03-p4387230 | A-genome specific (napus-rapa) | 0.9976076    | 0.7720975    | not scorable | not scorable | 0.9834711    | 0.7136315    |
| 7493 | Bn-A03-p4399285 | A-genome specific (napus-rapa) | 0.9617225    | 0.8134522    | not scorable | not scorable | 0.8347107    | 0.7443467    |
| 7494 | Bn-A03-p4407987 | A-genome specific (napus-rapa) | 0.9784689    | 0.7005998    | not scorable | not scorable | 0.9917355    | 0.8963528    |
| 7495 | Bn-A03-p4408006 | A-genome specific (napus-rapa) | 0.9712918    | 0.6952382    | not scorable | not scorable | 0.9834711    | 0.722072     |
| 7496 | Bn-A03-p4408895 | A-genome specific (napus-rapa) | 0.9880383    | 0.7228676    | not scorable | not scorable | 1            | 0.7608284    |
| 7497 | Bn-A03-p4409606 | A-genome specific (napus-rapa) | 0.9952153    | 0.7896671    | not scorable | not scorable | 1            | 0.7605999    |
| 7498 | Bn-A03-p4409970 | A-genome specific (rapa only)  | not scorable | not scorable | not scorable | not scorable | 0.9917355    | 0.6062437    |
| 7499 | Bn-A03-p4416817 | A-genome specific (napus-rapa) | 0.9497608    | 0.3722148    | not scorable | not scorable | 1            | 0.7361338    |
| 7500 | Bn-A03-p4423212 | A-genome specific (napus-rapa) | 0.9808612    | 0.7590605    | not scorable | not scorable | 0.9917355    | 0.8290427    |
| 7501 | Bn-A03-p4423604 | A-genome specific (napus-rapa) | 0.9952153    | 0.7677105    | not scorable | not scorable | 0.9834711    | 0.8054933    |
| 7502 | Bn-A03-p4425566 | A-genome specific (napus-rapa) | 0.9904306    | 0.6061164    | not scorable | not scorable | 0.9834711    | 0.7758104    |
| 7503 | Bn-A03-p4425819 | A-genome specific (napus-rapa) | 0.9952153    | 0.7762482    | not scorable | not scorable | 0.9917355    | 0.7679095    |
| 7504 | Bn-A03-p4437907 | A-genome specific (napus-rapa) | 0.9928229    | 0.612386     | not scorable | not scorable | 0.9917355    | 0.7161686    |
| 7505 | Bn-A03-p4473205 | A-genome specific (napus-rapa) | 0.9904306    | 0.4387455    | not scorable | not scorable | 0.9834711    | 0.733959     |
| 7506 | Bn-A03-p4488639 | A-genome specific (napus-rapa) | 0.9497608    | 0.7110998    | not scorable | not scorable | 1            | 0.8264596    |
| 7507 | Bn-A03-p4498766 | A-genome specific (napus-rapa) | 0.8660287    | 0.7371564    | not scorable | not scorable | 0.8677686    | 0.7121256    |
| 7508 | Bn-A03-p4507718 | A-genome specific (napus-rapa) | 0.9760765    | 0.7723679    | not scorable | not scorable | 0.9834711    | 0.6824206    |
| 7509 | Bn-A03-p4509102 | A-genome specific (napus-rapa) | 0.9856459    | 0.7400692    | not scorable | not scorable | 1            | 0.8190148    |
| 7510 | Bn-A03-p4548924 | A-genome specific (napus-rapa) | 0.9880383    | 0.72348      | not scorable | not scorable | 0.9917355    | 0.7426291    |
| 7511 | Bn-A03-p4549344 | A-genome specific (rapa only)  | not scorable | not scorable | not scorable | not scorable | 1            | 0.7140883    |
| 7512 | Bn-A03-p4550270 | A-genome specific (rapa only)  | not scorable | not scorable | not scorable | not scorable | 0.9917355    | 0.7593805    |
| 7513 | Bn-A03-p4560576 | A-genome specific (rapa only)  | not scorable | not scorable | not scorable | not scorable | 1            | 0.6621513    |
| 7514 | Bn-A03-p4567578 | A-genome specific (napus-rapa) | 0.9043062    | 0.4334243    | not scorable | not scorable | 0.9917355    | 0.6896756    |
| 7515 | Bn-A03-p4572110 | A-genome specific (napus-rapa) | 0.9808612    | 0.4066466    | not scorable | not scorable | 0.9917355    | 0.716942     |
| 7516 | Bn-A03-p4575317 | napus specific                 | 0.8349282    | 0.6528487    | not scorable | not scorable | not scorable | not scorable |
| 7517 | Bn-A03-p4590174 | A-genome specific (napus-rapa) | 0.9712918    | 0.7019057    | not scorable | not scorable | 1            | 0.7443007    |
| 7518 | Bn-A03-p4593298 | A-genome specific (rapa only)  | not scorable | not scorable | not scorable | not scorable | 0.9917355    | 0.7635609    |
| 7519 | Bn-A03-p4593331 | A-genome specific (rapa only)  | not scorable | not scorable | not scorable | not scorable | 0.9834711    | 0.7097092    |
| 7520 | Bn-A03-p4594763 | A-genome specific (napus-rapa) | 0.9952153    | 0.4865949    | not scorable | not scorable | 0.9834711    | 0.630109     |
| 7521 | Bn-A03-p4605838 | A-genome specific (rapa only)  | not scorable | not scorable | not scorable | not scorable | 0.9834711    | 0.7916752    |

|      |                 |                                   |              |              |              |              |           |           |
|------|-----------------|-----------------------------------|--------------|--------------|--------------|--------------|-----------|-----------|
| 7522 | Bn-A03-p4606213 | A-genome specific (rapa only)     | not scorable | not scorable | not scorable | not scorable | 0.9669421 | 0.795204  |
| 7523 | Bn-A03-p4607120 | A-genome specific (napus-rapa)    | 0.9760765    | 0.6457719    | not scorable | not scorable | 0.9586777 | 0.6408432 |
| 7524 | Bn-A03-p4607947 | A-genome specific (napus-rapa)    | 0.8181818    | 0.915972     | not scorable | not scorable | 0.9752066 | 0.9098665 |
| 7525 | Bn-A03-p4620459 | A-genome specific (napus-rapa)    | 0.9832536    | 0.7515733    | not scorable | not scorable | 1         | 0.7921442 |
| 7526 | Bn-A03-p4638893 | A-genome specific (rapa only)     | not scorable | not scorable | not scorable | not scorable | 0.9917355 | 0.7505503 |
| 7527 | Bn-A03-p4659068 | A-genome specific (napus-rapa)    | 0.9497608    | 0.6456177    | not scorable | not scorable | 0.9917355 | 0.7774001 |
| 7528 | Bn-A03-p4673503 | A-genome specific (napus-rapa)    | 0.9449761    | 0.5026833    | not scorable | not scorable | 0.9834711 | 0.5808347 |
| 7529 | Bn-A03-p4673508 | A-genome specific (napus-rapa)    | 0.9952153    | 0.8007945    | not scorable | not scorable | 0.9834711 | 0.6946002 |
| 7530 | Bn-A03-p4682207 | A-genome specific (napus-rapa)    | 0.9832536    | 0.2984687    | not scorable | not scorable | 0.9834711 | 0.5423722 |
| 7531 | Bn-A03-p471570  | A-genome specific (napus-rapa)    | 0.9569378    | 0.5187739    | not scorable | not scorable | 1         | 0.7045401 |
| 7532 | Bn-A03-p4753001 | A-genome specific (rapa only)     | not scorable | not scorable | not scorable | not scorable | 1         | 0.7775756 |
| 7533 | Bn-A03-p4769653 | A-genome specific (napus-rapa)    | 0.9928229    | 0.8140981    | not scorable | not scorable | 0.9752066 | 0.7942212 |
| 7534 | Bn-A03-p4783485 | A-genome specific (napus-rapa)    | 0.9904306    | 0.7794448    | not scorable | not scorable | 1         | 0.6291124 |
| 7535 | Bn-A03-p478702  | A-genome specific (napus-rapa)    | 0.930622     | 0.7558073    | not scorable | not scorable | 0.9917355 | 0.7653976 |
| 7536 | Bn-A03-p4798485 | A-genome specific (rapa only)     | not scorable | not scorable | not scorable | not scorable | 1         | 0.699198  |
| 7537 | Bn-A03-p4799142 | A-genome specific (napus-rapa)    | 0.9952153    | 0.5554939    | not scorable | not scorable | 0.9917355 | 0.7076653 |
| 7538 | Bn-A03-p4809473 | A-genome specific (rapa only)     | not scorable | not scorable | not scorable | not scorable | 0.9917355 | 0.8551057 |
| 7539 | Bn-A03-p4827846 | A-genome specific (napus-rapa)    | 0.9760765    | 0.7097555    | not scorable | not scorable | 1         | 0.8002217 |
| 7540 | Bn-A03-p4829139 | A-genome specific (rapa only)     | not scorable | not scorable | not scorable | not scorable | 1         | 0.8395246 |
| 7541 | Bn-A03-p4861136 | A-genome specific (napus-rapa)    | 0.9760765    | 0.3054993    | not scorable | not scorable | 0.9752066 | 0.7061461 |
| 7542 | Bn-A03-p4871103 | A-genome specific (napus-rapa)    | 0.9952153    | 0.7390259    | not scorable | not scorable | 1         | 0.7673323 |
| 7543 | Bn-A03-p487666  | A-genome specific (rapa only)     | not scorable | not scorable | not scorable | not scorable | 0.9834711 | 0.8213049 |
| 7544 | Bn-A03-p4879812 | A-genome specific (napus-rapa)    | 0.9641148    | 0.7393047    | not scorable | not scorable | 0.9669421 | 0.6856222 |
| 7545 | Bn-A03-p4881229 | A-genome specific (rapa only)     | not scorable | not scorable | not scorable | not scorable | 0.9834711 | 0.7830136 |
| 7546 | Bn-A03-p49020   | A-genome specific (rapa only)     | not scorable | not scorable | not scorable | not scorable | 0.9834711 | 0.7723494 |
| 7547 | Bn-A03-p4909233 | A-genome specific (napus-rapa)    | 0.9832536    | 0.75986      | not scorable | not scorable | 0.9752066 | 0.7603261 |
| 7548 | Bn-A03-p4909313 | A-genome specific (rapa only)     | not scorable | not scorable | not scorable | not scorable | 0.9834711 | 0.7297021 |
| 7549 | Bn-A03-p4909522 | A-genome specific (rapa only)     | not scorable | not scorable | not scorable | not scorable | 0.9586777 | 0.7460187 |
| 7550 | Bn-A03-p4916224 | A-genome specific (napus-rapa)    | 0.6124402    | 0.8795152    | not scorable | not scorable | 0.9752066 | 0.7748017 |
| 7551 | Bn-A03-p4934887 | A-genome specific (rapa only)     | not scorable | not scorable | not scorable | not scorable | 0.9752066 | 0.8006725 |
| 7552 | Bn-A03-p493766  | A-genome specific (napus-rapa)    | 0.9210526    | 0.4904248    | not scorable | not scorable | 1         | 0.8513054 |
| 7553 | Bn-A03-p494427  | genome unspecific (oleracea-rapa) | not scorable | not scorable | 0.9844961    | 0.40434      | 1         | 0.7401911 |
| 7554 | Bn-A03-p4944913 | A-genome specific (napus-rapa)    | 0.9952153    | 0.7145084    | not scorable | not scorable | 0.9752066 | 0.7206949 |

|                      |                                |              |              |              |              |              |              |
|----------------------|--------------------------------|--------------|--------------|--------------|--------------|--------------|--------------|
| 7555 Bn-A03-p498320  | A-genome specific (napus-rapa) | 0.8636364    | 0.7401044    | not scorable | not scorable | 1            | 0.8134705    |
| 7556 Bn-A03-p4989769 | A-genome specific (napus-rapa) | 0.7344497    | 0.8284623    | not scorable | not scorable | 0.9834711    | 0.8940818    |
| 7557 Bn-A03-p4992039 | A-genome specific (rapa only)  | not scorable | not scorable | not scorable | not scorable | 0.9752066    | 0.7506456    |
| 7558 Bn-A03-p4997351 | A-genome specific (rapa only)  | not scorable | not scorable | not scorable | not scorable | 0.9669421    | 0.6049495    |
| 7559 Bn-A03-p4999662 | A-genome specific (rapa only)  | not scorable | not scorable | not scorable | not scorable | 0.9917355    | 0.6903507    |
| 7560 Bn-A03-p5006544 | A-genome specific (rapa only)  | not scorable | not scorable | not scorable | not scorable | 1            | 0.7349294    |
| 7561 Bn-A03-p5023169 | napus specific                 | 0.7631579    | 0.7465882    | not scorable | not scorable | not scorable | not scorable |
| 7562 Bn-A03-p5025156 | A-genome specific (napus-rapa) | 0.9688995    | 0.5639485    | not scorable | not scorable | 0.9834711    | 0.6179368    |
| 7563 Bn-A03-p5038403 | A-genome specific (napus-rapa) | 0.6339713    | 0.9158995    | not scorable | not scorable | 0.8595041    | 0.8201163    |
| 7564 Bn-A03-p5039235 | A-genome specific (napus-rapa) | 0.9784689    | 0.4879007    | not scorable | not scorable | 1            | 0.9110646    |
| 7565 Bn-A03-p5039586 | A-genome specific (napus-rapa) | 0.9641148    | 0.7705398    | not scorable | not scorable | 1            | 0.7923465    |
| 7566 Bn-A03-p5042719 | A-genome specific (napus-rapa) | 0.9449761    | 0.4365304    | not scorable | not scorable | 1            | 0.7129645    |
| 7567 Bn-A03-p5045095 | A-genome specific (napus-rapa) | 0.9330143    | 0.3949938    | not scorable | not scorable | 0.9834711    | 0.6846312    |
| 7568 Bn-A03-p5052289 | A-genome specific (napus-rapa) | 0.7535885    | 0.8195979    | not scorable | not scorable | 0.9669421    | 0.8135254    |
| 7569 Bn-A03-p5067556 | A-genome specific (napus-rapa) | 0.923445     | 0.4162782    | not scorable | not scorable | 0.9917355    | 0.6957626    |
| 7570 Bn-A03-p5072729 | A-genome specific (napus-rapa) | 1            | 0.4789127    | not scorable | not scorable | 0.9917355    | 0.6915346    |
| 7571 Bn-A03-p5078310 | A-genome specific (napus-rapa) | 0.9856459    | 0.8392569    | not scorable | not scorable | 1            | 0.7351667    |
| 7572 Bn-A03-p5083198 | A-genome specific (napus-rapa) | 0.9832536    | 0.8282107    | not scorable | not scorable | 0.8760331    | 0.8126996    |
| 7573 Bn-A03-p5083386 | A-genome specific (napus-rapa) | 0.9832536    | 0.7605443    | not scorable | not scorable | 0.8760331    | 0.8306364    |
| 7574 Bn-A03-p5083430 | A-genome specific (napus-rapa) | 0.9832536    | 0.745198     | not scorable | not scorable | 0.892562     | 0.7880469    |
| 7575 Bn-A03-p5111446 | A-genome specific (napus-rapa) | 1            | 0.3496064    | not scorable | not scorable | 0.9752066    | 0.6835081    |
| 7576 Bn-A03-p5115321 | A-genome specific (napus-rapa) | 0.9665072    | 0.4286527    | not scorable | not scorable | 0.9834711    | 0.8201146    |
| 7577 Bn-A03-p5131282 | A-genome specific (napus-rapa) | 0.9832536    | 0.7473509    | not scorable | not scorable | 0.9752066    | 0.6861427    |
| 7578 Bn-A03-p5131371 | A-genome specific (napus-rapa) | 0.9784689    | 0.6954108    | not scorable | not scorable | 0.9917355    | 0.7205139    |
| 7579 Bn-A03-p5133977 | A-genome specific (napus-rapa) | 0.9066986    | 0.5278134    | not scorable | not scorable | 0.9834711    | 0.8154917    |
| 7580 Bn-A03-p5135902 | A-genome specific (napus-rapa) | 0.9593301    | 0.2716399    | not scorable | not scorable | 0.9917355    | 0.7132878    |
| 7581 Bn-A03-p5140330 | A-genome specific (rapa only)  | not scorable | not scorable | not scorable | not scorable | 0.9834711    | 0.8352724    |
| 7582 Bn-A03-p5140947 | A-genome specific (napus-rapa) | 0.9832536    | 0.7468907    | not scorable | not scorable | 0.9917355    | 0.8015907    |
| 7583 Bn-A03-p5144171 | A-genome specific (napus-rapa) | 0.9856459    | 0.8331536    | not scorable | not scorable | 1            | 0.7692884    |
| 7584 Bn-A03-p5153735 | A-genome specific (napus-rapa) | 0.9808612    | 0.3676153    | not scorable | not scorable | 0.9752066    | 0.6608645    |
| 7585 Bn-A03-p5159930 | A-genome specific (napus-rapa) | 0.9832536    | 0.3291049    | not scorable | not scorable | 0.9421487    | 0.4762597    |
| 7586 Bn-A03-p5160088 | A-genome specific (napus-rapa) | 0.9856459    | 0.8008282    | not scorable | not scorable | 0.9917355    | 0.7239057    |
| 7587 Bn-A03-p5163056 | A-genome specific (napus-rapa) | 0.9760765    | 0.4545608    | not scorable | not scorable | 0.9917355    | 0.7009826    |

|      |                 |                                |              |              |              |              |              |              |
|------|-----------------|--------------------------------|--------------|--------------|--------------|--------------|--------------|--------------|
| 7588 | Bn-A03-p5170706 | napus specific                 | 0.9832536    | 0.7802194    | not scorable | not scorable | not scorable | not scorable |
| 7589 | Bn-A03-p5177830 | A-genome specific (napus-rapa) | 0.9904306    | 0.4417276    | not scorable | not scorable | 0.9834711    | 0.787963     |
| 7590 | Bn-A03-p5180655 | A-genome specific (napus-rapa) | 0.9832536    | 0.6906459    | not scorable | not scorable | 0.9834711    | 0.7566171    |
| 7591 | Bn-A03-p5182850 | genome unspecific (all in)     | 1            | 0.2989883    | 0.9922481    | 0.7417857    | 0.9834711    | 0.677817     |
| 7592 | Bn-A03-p5222291 | A-genome specific (napus-rapa) | 0.9904306    | 0.4853771    | not scorable | not scorable | 1            | 0.6948672    |
| 7593 | Bn-A03-p5227700 | A-genome specific (napus-rapa) | 0.9425837    | 0.7589675    | not scorable | not scorable | 0.9917355    | 0.8446013    |
| 7594 | Bn-A03-p5230726 | A-genome specific (napus-rapa) | 0.9545454    | 0.5746073    | not scorable | not scorable | 1            | 0.6942185    |
| 7595 | Bn-A03-p5263828 | A-genome specific (napus-rapa) | 0.9880383    | 0.3956468    | not scorable | not scorable | 1            | 0.7234806    |
| 7596 | Bn-A03-p5268272 | A-genome specific (napus-rapa) | 0.9976076    | 0.5160456    | not scorable | not scorable | 0.9834711    | 0.8202378    |
| 7597 | Bn-A03-p5273046 | A-genome specific (rapa only)  | not scorable | not scorable | not scorable | not scorable | 0.9752066    | 0.797078     |
| 7598 | Bn-A03-p528276  | A-genome specific (napus-rapa) | 0.9162679    | 0.7452217    | not scorable | not scorable | 0.9917355    | 0.8402592    |
| 7599 | Bn-A03-p532166  | A-genome specific (napus-rapa) | 0.7272727    | 0.7899777    | not scorable | not scorable | 0.9917355    | 0.7971246    |
| 7600 | Bn-A03-p5333699 | A-genome specific (napus-rapa) | 0.9952153    | 0.8347282    | not scorable | not scorable | 0.9834711    | 0.7905619    |
| 7601 | Bn-A03-p5341139 | A-genome specific (napus-rapa) | 0.9928229    | 0.7916658    | not scorable | not scorable | 0.9669421    | 0.7027308    |
| 7602 | Bn-A03-p5357737 | genome unspecific (all in)     | 0.6124402    | 0.7744598    | 1            | 0.8297678    | 0.9917355    | 0.655319     |
| 7603 | Bn-A03-p5360744 | A-genome specific (rapa only)  | not scorable | not scorable | not scorable | not scorable | 0.9752066    | 0.7681804    |
| 7604 | Bn-A03-p5374417 | A-genome specific (napus-rapa) | 0.9976076    | 0.814248     | not scorable | not scorable | 1            | 0.6559938    |
| 7605 | Bn-A03-p537905  | A-genome specific (napus-rapa) | 0.8971292    | 0.7208124    | not scorable | not scorable | 1            | 0.778098     |
| 7606 | Bn-A03-p5380857 | A-genome specific (napus-rapa) | 0.9928229    | 0.8735576    | not scorable | not scorable | 0.9917355    | 0.8310575    |
| 7607 | Bn-A03-p5408678 | A-genome specific (napus-rapa) | 0.9904306    | 0.3527291    | not scorable | not scorable | 1            | 0.7370149    |
| 7608 | Bn-A03-p5414946 | A-genome specific (napus-rapa) | 0.9880383    | 0.785073     | not scorable | not scorable | 1            | 0.7032702    |
| 7609 | Bn-A03-p5423318 | A-genome specific (rapa only)  | not scorable | not scorable | not scorable | not scorable | 1            | 0.6382402    |
| 7610 | Bn-A03-p5434265 | napus specific                 | 0.9617225    | 0.9395323    | not scorable | not scorable | not scorable | not scorable |
| 7611 | Bn-A03-p5439400 | A-genome specific (napus-rapa) | 1            | 0.8231412    | not scorable | not scorable | 0.9917355    | 0.7209238    |
| 7612 | Bn-A03-p5454100 | napus specific                 | 0.9904306    | 0.4696753    | not scorable | not scorable | not scorable | not scorable |
| 7613 | Bn-A03-p5455069 | A-genome specific (napus-rapa) | 0.9952153    | 0.7235022    | not scorable | not scorable | 1            | 0.6482639    |
| 7614 | Bn-A03-p5462418 | A-genome specific (napus-rapa) | 0.9784689    | 0.6060026    | not scorable | not scorable | 1            | 0.7626569    |
| 7615 | Bn-A03-p5467712 | A-genome specific (napus-rapa) | 0.9928229    | 0.7519439    | not scorable | not scorable | 0.9752066    | 0.8078017    |
| 7616 | Bn-A03-p5468447 | A-genome specific (napus-rapa) | 0.9928229    | 0.6672873    | not scorable | not scorable | 1            | 0.6238344    |
| 7617 | Bn-A03-p5471743 | genome unspecific (all in)     | 0.9760765    | 0.6652225    | 0.9457364    | 0.7108734    | 0.9752066    | 0.8212636    |
| 7618 | Bn-A03-p5502308 | A-genome specific (napus-rapa) | 0.9952153    | 0.7460867    | not scorable | not scorable | 1            | 0.7245347    |
| 7619 | Bn-A03-p5503857 | A-genome specific (napus-rapa) | 0.9832536    | 0.7147524    | not scorable | not scorable | 0.8512397    | 0.7197788    |
| 7620 | Bn-A03-p5523239 | A-genome specific (napus-rapa) | 0.9952153    | 0.7797544    | not scorable | not scorable | 0.9586777    | 0.6684033    |

|      |                 |                                   |              |              |              |              |              |              |
|------|-----------------|-----------------------------------|--------------|--------------|--------------|--------------|--------------|--------------|
| 7621 | Bn-A03-p5523813 | A-genome specific (napus-rapa)    | 0.9952153    | 0.6902739    | not scorable | not scorable | 1            | 0.6626507    |
| 7622 | Bn-A03-p5523943 | A-genome specific (napus-rapa)    | 0.9952153    | 0.7863435    | not scorable | not scorable | 0.9752066    | 0.6979521    |
| 7623 | Bn-A03-p5532043 | A-genome specific (napus-rapa)    | 0.9976076    | 0.6598164    | not scorable | not scorable | 0.9669421    | 0.6211019    |
| 7624 | Bn-A03-p5548413 | A-genome specific (rapa only)     | not scorable | not scorable | not scorable | not scorable | 1            | 0.7026088    |
| 7625 | Bn-A03-p5551018 | A-genome specific (napus-rapa)    | 0.9712918    | 0.7843596    | not scorable | not scorable | 0.9752066    | 0.7562535    |
| 7626 | Bn-A03-p5563280 | A-genome specific (rapa only)     | not scorable | not scorable | not scorable | not scorable | 1            | 0.7262031    |
| 7627 | Bn-A03-p5564849 | A-genome specific (napus-rapa)    | 0.9880383    | 0.7540259    | not scorable | not scorable | 0.9834711    | 0.790215     |
| 7628 | Bn-A03-p5578777 | A-genome specific (napus-rapa)    | 0.9928229    | 0.4088874    | not scorable | not scorable | 1            | 0.651049     |
| 7629 | Bn-A03-p5597551 | A-genome specific (napus-rapa)    | 0.9856459    | 0.5018368    | not scorable | not scorable | 0.9917355    | 0.6488491    |
| 7630 | Bn-A03-p560769  | A-genome specific (napus-rapa)    | 0.9138756    | 0.7024938    | not scorable | not scorable | 1            | 0.784973     |
| 7631 | Bn-A03-p5608927 | napus specific                    | 0.9808612    | 0.7422436    | not scorable | not scorable | not scorable | not scorable |
| 7632 | Bn-A03-p560941  | A-genome specific (napus-rapa)    | 0.9330143    | 0.7251384    | not scorable | not scorable | 1            | 0.7420298    |
| 7633 | Bn-A03-p5611940 | A-genome specific (napus-rapa)    | 0.9808612    | 0.3990846    | not scorable | not scorable | 0.9504132    | 0.7212554    |
| 7634 | Bn-A03-p5612769 | napus specific                    | 0.9928229    | 0.7015483    | not scorable | not scorable | not scorable | not scorable |
| 7635 | Bn-A03-p5613665 | napus specific                    | 0.9808612    | 0.7945741    | not scorable | not scorable | not scorable | not scorable |
| 7636 | Bn-A03-p5614097 | all not scorable                  | not scorable | not scorable | not scorable | not scorable | not scorable | not scorable |
| 7637 | Bn-A03-p5626575 | A-genome specific (napus-rapa)    | 0.9784689    | 0.6800024    | not scorable | not scorable | 0.9917355    | 0.7092251    |
| 7638 | Bn-A03-p5626694 | A-genome specific (napus-rapa)    | 1            | 0.5089189    | not scorable | not scorable | 1            | 0.753419     |
| 7639 | Bn-A03-p5627074 | A-genome specific (napus-rapa)    | 0.9904306    | 0.7714169    | not scorable | not scorable | 0.9917355    | 0.7448741    |
| 7640 | Bn-A03-p5627585 | A-genome specific (napus-rapa)    | 1            | 0.7101301    | not scorable | not scorable | 1            | 0.7770717    |
| 7641 | Bn-A03-p563787  | A-genome specific (napus-rapa)    | 0.9641148    | 0.4873606    | not scorable | not scorable | 0.9669421    | 0.7325926    |
| 7642 | Bn-A03-p5643775 | A-genome specific (napus-rapa)    | 0.9832536    | 0.7604436    | not scorable | not scorable | 0.9917355    | 0.7450931    |
| 7643 | Bn-A03-p5649178 | A-genome specific (napus-rapa)    | 0.9952153    | 0.2716594    | not scorable | not scorable | 0.9834711    | 0.7157406    |
| 7644 | Bn-A03-p565187  | A-genome specific (napus-rapa)    | 0.9545454    | 0.4646529    | not scorable | not scorable | 0.9752066    | 0.7442171    |
| 7645 | Bn-A03-p565363  | genome unspecific (oleracea-rapa) | not scorable | not scorable |              | 1            | 0.7804757    | 1            |
| 7646 | Bn-A03-p5654220 | A-genome specific (rapa only)     | not scorable | not scorable | not scorable | not scorable | 0.9752066    | 0.6857201    |
| 7647 | Bn-A03-p565637  | A-genome specific (rapa only)     | not scorable | not scorable | not scorable | not scorable | 0.9917355    | 0.6213671    |
| 7648 | Bn-A03-p5669661 | napus specific                    | 0.9641148    | 0.8873985    | not scorable | not scorable | not scorable | not scorable |
| 7649 | Bn-A03-p5682911 | A-genome specific (napus-rapa)    | 1            | 0.4009607    | not scorable | not scorable | 1            | 0.7407764    |
| 7650 | Bn-A03-p5694401 | A-genome specific (napus-rapa)    | 0.9712918    | 0.6057469    | not scorable | not scorable | 1            | 0.7001542    |
| 7651 | Bn-A03-p5696470 | A-genome specific (rapa only)     | not scorable | not scorable | not scorable | not scorable | 1            | 0.8180838    |
| 7652 | Bn-A03-p5711554 | A-genome specific (napus-rapa)    | 0.9928229    | 0.7332344    | not scorable | not scorable | 1            | 0.7167833    |
| 7653 | Bn-A03-p5711923 | A-genome specific (napus-rapa)    | 0.9712918    | 0.7394128    | not scorable | not scorable | 0.9834711    | 0.7323701    |



|                      |                                |              |              |              |              |           |           |
|----------------------|--------------------------------|--------------|--------------|--------------|--------------|-----------|-----------|
| 7654 Bn-A03-p5713023 | A-genome specific (napus-rapa) | 0.9688995    | 0.7675729    | not scorable | not scorable | 0.9752066 | 0.7785958 |
| 7655 Bn-A03-p5721171 | A-genome specific (napus-rapa) | 0.9952153    | 0.7383321    | not scorable | not scorable | 0.9834711 | 0.6850379 |
| 7656 Bn-A03-p5721231 | A-genome specific (napus-rapa) | 0.9928229    | 0.7257864    | not scorable | not scorable | 0.9834711 | 0.7240035 |
| 7657 Bn-A03-p5721443 | A-genome specific (napus-rapa) | 0.9928229    | 0.6802424    | not scorable | not scorable | 0.9752066 | 0.657653  |
| 7658 Bn-A03-p5721617 | A-genome specific (napus-rapa) | 0.9928229    | 0.7017218    | not scorable | not scorable | 0.9917355 | 0.6438657 |
| 7659 Bn-A03-p5722009 | A-genome specific (napus-rapa) | 0.9808612    | 0.8182721    | not scorable | not scorable | 0.9173554 | 0.8394191 |
| 7660 Bn-A03-p5722579 | A-genome specific (napus-rapa) | 0.6578947    | 0.8087062    | not scorable | not scorable | 0.9173554 | 0.7569847 |
| 7661 Bn-A03-p5741340 | A-genome specific (napus-rapa) | 0.9808612    | 0.6766212    | not scorable | not scorable | 0.9917355 | 0.6753191 |
| 7662 Bn-A03-p5741875 | A-genome specific (napus-rapa) | 0.9593301    | 0.6407257    | not scorable | not scorable | 1         | 0.7332143 |
| 7663 Bn-A03-p5742880 | A-genome specific (napus-rapa) | 0.9808612    | 0.7775691    | not scorable | not scorable | 0.9834711 | 0.7497889 |
| 7664 Bn-A03-p5742916 | A-genome specific (napus-rapa) | 0.9736842    | 0.8094077    | not scorable | not scorable | 0.9834711 | 0.773612  |
| 7665 Bn-A03-p5743020 | A-genome specific (napus-rapa) | 0.6291866    | 0.8918571    | not scorable | not scorable | 0.9504132 | 0.8022243 |
| 7666 Bn-A03-p5744242 | A-genome specific (napus-rapa) | 0.9808612    | 0.7668223    | not scorable | not scorable | 0.9586777 | 0.7821004 |
| 7667 Bn-A03-p5744750 | A-genome specific (napus-rapa) | 0.9832536    | 0.6882675    | not scorable | not scorable | 1         | 0.7082319 |
| 7668 Bn-A03-p5745392 | A-genome specific (napus-rapa) | 0.9808612    | 0.7589923    | not scorable | not scorable | 1         | 0.8049096 |
| 7669 Bn-A03-p5745449 | A-genome specific (napus-rapa) | 0.9808612    | 0.7711915    | not scorable | not scorable | 1         | 0.8199109 |
| 7670 Bn-A03-p5746114 | A-genome specific (napus-rapa) | 0.937799     | 0.712346     | not scorable | not scorable | 0.9917355 | 0.6518111 |
| 7671 Bn-A03-p5748366 | A-genome specific (napus-rapa) | 0.9593301    | 0.7932428    | not scorable | not scorable | 1         | 0.8184522 |
| 7672 Bn-A03-p5748775 | A-genome specific (napus-rapa) | 0.9688995    | 0.7906005    | not scorable | not scorable | 1         | 0.8387375 |
| 7673 Bn-A03-p5748884 | A-genome specific (napus-rapa) | 0.9425837    | 0.7400977    | not scorable | not scorable | 0.9669421 | 0.7659114 |
| 7674 Bn-A03-p5749121 | A-genome specific (napus-rapa) | 0.937799     | 0.6597643    | not scorable | not scorable | 1         | 0.8096516 |
| 7675 Bn-A03-p5749213 | A-genome specific (napus-rapa) | 0.9593301    | 0.7252596    | not scorable | not scorable | 0.9834711 | 0.7200157 |
| 7676 Bn-A03-p5749663 | A-genome specific (napus-rapa) | 0.9808612    | 0.7740886    | not scorable | not scorable | 1         | 0.7736467 |
| 7677 Bn-A03-p5749832 | A-genome specific (napus-rapa) | 0.9258373    | 0.8235879    | not scorable | not scorable | 0.9834711 | 0.8677401 |
| 7678 Bn-A03-p5750321 | A-genome specific (napus-rapa) | 0.9760765    | 0.7092806    | not scorable | not scorable | 1         | 0.7177447 |
| 7679 Bn-A03-p5751160 | A-genome specific (napus-rapa) | 0.9401914    | 0.722494     | not scorable | not scorable | 0.9752066 | 0.789126  |
| 7680 Bn-A03-p5751992 | A-genome specific (napus-rapa) | 0.9641148    | 0.7591591    | not scorable | not scorable | 0.9834711 | 0.707387  |
| 7681 Bn-A03-p5752052 | genome unspecific (all in)     | 0.9449761    | 0.7822777    |              | 0            | 0.6957793 | 0.9834711 |
| 7682 Bn-A03-p5752371 | A-genome specific (rapa only)  | not scorable | not scorable | not scorable | not scorable | 0.9669421 | 0.754569  |
| 7683 Bn-A03-p5762915 | A-genome specific (rapa only)  | not scorable | not scorable | not scorable | not scorable | 0.9834711 | 0.7183402 |
| 7684 Bn-A03-p5770833 | A-genome specific (napus-rapa) | 0.9449761    | 0.4158233    | not scorable | not scorable | 0.9669421 | 0.7087587 |
| 7685 Bn-A03-p5784532 | A-genome specific (napus-rapa) | 0.9641148    | 0.7948966    | not scorable | not scorable | 0.9586777 | 0.751454  |
| 7686 Bn-A03-p5796033 | A-genome specific (napus-rapa) | 0.9641148    | 0.4620031    | not scorable | not scorable | 1         | 0.7253703 |

|      |                 |                                   |              |              |              |              |              |              |
|------|-----------------|-----------------------------------|--------------|--------------|--------------|--------------|--------------|--------------|
| 7687 | Bn-A03-p5800566 | genome unspecific (all in)        | 0.9880383    | 0.477366     | 1            | 0.4860544    | 1            | 0.7252899    |
| 7688 | Bn-A03-p5809786 | A-genome specific (napus-rapa)    | 0.9688995    | 0.5077896    | not scorable | not scorable | 0.9834711    | 0.7426553    |
| 7689 | Bn-A03-p5809860 | A-genome specific (napus-rapa)    | 0.9808612    | 0.7963656    | not scorable | not scorable | 0.9752066    | 0.7490408    |
| 7690 | Bn-A03-p5814447 | A-genome specific (napus-rapa)    | 0.9880383    | 0.756735     | not scorable | not scorable | 0.9917355    | 0.7081367    |
| 7691 | Bn-A03-p5866896 | genome unspecific (oleracea-rapa) | not scorable | not scorable | 1            | 0.6823338    | 1            | 0.6421195    |
| 7692 | Bn-A03-p5892557 | A-genome specific (rapa only)     | not scorable | not scorable | not scorable | not scorable | 1            | 0.7009104    |
| 7693 | Bn-A03-p5893002 | A-genome specific (napus-rapa)    | 0.9736842    | 0.9006504    | not scorable | not scorable | 0.9917355    | 0.7643259    |
| 7694 | Bn-A03-p5903435 | A-genome specific (napus-rapa)    | 0.9928229    | 0.5589588    | not scorable | not scorable | 1            | 0.6952415    |
| 7695 | Bn-A03-p5912430 | A-genome specific (rapa only)     | not scorable | not scorable | not scorable | not scorable | 0.9752066    | 0.792782     |
| 7696 | Bn-A03-p5952923 | A-genome specific (rapa only)     | not scorable | not scorable | not scorable | not scorable | 0.9752066    | 0.6297615    |
| 7697 | Bn-A03-p5956851 | A-genome specific (napus-rapa)    | 0.9928229    | 0.7068547    | not scorable | not scorable | 0.9752066    | 0.7471516    |
| 7698 | Bn-A03-p5956934 | A-genome specific (napus-rapa)    | 0.9832536    | 0.7215312    | not scorable | not scorable | 1            | 0.7494771    |
| 7699 | Bn-A03-p5984123 | A-genome specific (napus-rapa)    | 0.923445     | 0.5989958    | not scorable | not scorable | 1            | 0.7783204    |
| 7700 | Bn-A03-p6036521 | A-genome specific (napus-rapa)    | 0.9712918    | 0.8171275    | not scorable | not scorable | 0.9752066    | 0.7714523    |
| 7701 | Bn-A03-p6039029 | A-genome specific (napus-rapa)    | 0.9952153    | 0.7918741    | not scorable | not scorable | 1            | 0.7293366    |
| 7702 | Bn-A03-p6057369 | A-genome specific (napus-rapa)    | 1            | 0.6707018    | not scorable | not scorable | 0.9917355    | 0.8286775    |
| 7703 | Bn-A03-p6126012 | A-genome specific (napus-rapa)    | 1            | 0.3284041    | not scorable | not scorable | 1            | 0.5708936    |
| 7704 | Bn-A03-p6132626 | A-genome specific (rapa only)     | not scorable | not scorable | not scorable | not scorable | 1            | 0.87866      |
| 7705 | Bn-A03-p6136484 | A-genome specific (napus-rapa)    | 0.9928229    | 0.5015988    | not scorable | not scorable | 1            | 0.709865     |
| 7706 | Bn-A03-p6138644 | A-genome specific (rapa only)     | not scorable | not scorable | not scorable | not scorable | 0.9834711    | 0.7308469    |
| 7707 | Bn-A03-p6149485 | A-genome specific (napus-rapa)    | 0.9784689    | 0.729452     | not scorable | not scorable | 0.9917355    | 0.749133     |
| 7708 | Bn-A03-p6157864 | A-genome specific (napus-rapa)    | 0.9736842    | 0.6212168    | not scorable | not scorable | 1            | 0.7885433    |
| 7709 | Bn-A03-p6158211 | A-genome specific (napus-rapa)    | 0.9784689    | 0.3321478    | not scorable | not scorable | 1            | 0.7712401    |
| 7710 | Bn-A03-p6182289 | A-genome specific (rapa only)     | not scorable | not scorable | not scorable | not scorable | 1            | 0.7442658    |
| 7711 | Bn-A03-p6204498 | napus specific                    | 1            | 0.5770498    | not scorable | not scorable | not scorable | not scorable |
| 7712 | Bn-A03-p6224340 | A-genome specific (rapa only)     | not scorable | not scorable | not scorable | not scorable | 0.9752066    | 0.8199376    |
| 7713 | Bn-A03-p6228570 | A-genome specific (napus-rapa)    | 0.9928229    | 0.8592411    | not scorable | not scorable | 0.9586777    | 0.7800742    |
| 7714 | Bn-A03-p623390  | A-genome specific (napus-rapa)    | 0.9808612    | 0.2333404    | not scorable | not scorable | 1            | 0.7466799    |
| 7715 | Bn-A03-p6265064 | A-genome specific (napus-rapa)    | 1            | 0.5446512    | not scorable | not scorable | 0.9917355    | 0.5692675    |
| 7716 | Bn-A03-p6274828 | A-genome specific (napus-rapa)    | 0.9832536    | 0.7945466    | not scorable | not scorable | 0.9173554    | 0.7593935    |
| 7717 | Bn-A03-p6276385 | A-genome specific (napus-rapa)    | 0.9952153    | 0.784013     | not scorable | not scorable | 1            | 0.8848283    |
| 7718 | Bn-A03-p6286363 | A-genome specific (napus-rapa)    | 0.9856459    | 0.7597181    | not scorable | not scorable | 1            | 0.7036739    |
| 7719 | Bn-A03-p6288173 | A-genome specific (napus-rapa)    | 0.9712918    | 0.7191334    | not scorable | not scorable | 0.9917355    | 0.7273776    |

|      |                 |                                   |              |              |              |              |              |              |
|------|-----------------|-----------------------------------|--------------|--------------|--------------|--------------|--------------|--------------|
| 7720 | Bn-A03-p6299523 | A-genome specific (napus-rapa)    | 0.9904306    | 0.5775436    | not scorable | not scorable | 1            | 0.7618905    |
| 7721 | Bn-A03-p630979  | A-genome specific (napus-rapa)    | 0.930622     | 0.7795375    | not scorable | not scorable | 0.9834711    | 0.7428126    |
| 7722 | Bn-A03-p6317002 | A-genome specific (napus-rapa)    | 0.9617225    | 0.3640856    | not scorable | not scorable | 0.9917355    | 0.7899418    |
| 7723 | Bn-A03-p6319963 | A-genome specific (napus-rapa)    | 0.9928229    | 0.7754805    | not scorable | not scorable | 1            | 0.6523157    |
| 7724 | Bn-A03-p6324760 | A-genome specific (napus-rapa)    | 1            | 0.6786327    | not scorable | not scorable | 1            | 0.7920848    |
| 7725 | Bn-A03-p6332797 | A-genome specific (napus-rapa)    | 0.937799     | 0.6997382    | not scorable | not scorable | 1            | 0.6406797    |
| 7726 | Bn-A03-p6335597 | A-genome specific (napus-rapa)    | 0.9976076    | 0.7587337    | not scorable | not scorable | 0.9917355    | 0.7591255    |
| 7727 | Bn-A03-p6338496 | A-genome specific (napus-rapa)    | 0.9569378    | 0.6025947    | not scorable | not scorable | 1            | 0.7654959    |
| 7728 | Bn-A03-p6354338 | A-genome specific (napus-rapa)    | 0.9569378    | 0.3636395    | not scorable | not scorable | 1            | 0.7516617    |
| 7729 | Bn-A03-p6358993 | A-genome specific (rapa only)     | not scorable | not scorable | not scorable | not scorable | 1            | 0.8786294    |
| 7730 | Bn-A03-p6384649 | A-genome specific (rapa only)     | not scorable | not scorable | not scorable | not scorable | 0.9834711    | 0.5907344    |
| 7731 | Bn-A03-p6385958 | A-genome specific (napus-rapa)    | 0.9736842    | 0.7536376    | not scorable | not scorable | 0.9917355    | 0.6859278    |
| 7732 | Bn-A03-p6387774 | A-genome specific (rapa only)     | not scorable | not scorable | not scorable | not scorable | 1            | 0.7683919    |
| 7733 | Bn-A03-p6388604 | A-genome specific (napus-rapa)    | 0.9952153    | 0.8128043    | not scorable | not scorable | 1            | 0.7224071    |
| 7734 | Bn-A03-p6404659 | genome unspecific (oleracea-rapa) | not scorable | not scorable | 0.9302326    | 0.5090902    | 0.9917355    | 0.6582912    |
| 7735 | Bn-A03-p6404903 | A-genome specific (napus-rapa)    | 0.9808612    | 0.7040495    | not scorable | not scorable | 0.9917355    | 0.7700132    |
| 7736 | Bn-A03-p6408156 | A-genome specific (rapa only)     | not scorable | not scorable | not scorable | not scorable | 0.8264463    | 0.8384824    |
| 7737 | Bn-A03-p641927  | A-genome specific (rapa only)     | not scorable | not scorable | not scorable | not scorable | 0.9834711    | 0.7197356    |
| 7738 | Bn-A03-p6420355 | A-genome specific (napus-rapa)    | 0.9784689    | 0.8237109    | not scorable | not scorable | 1            | 0.7403933    |
| 7739 | Bn-A03-p6423049 | A-genome specific (napus-rapa)    | 0.9856459    | 0.8040795    | not scorable | not scorable | 0.9917355    | 0.7844661    |
| 7740 | Bn-A03-p6423198 | A-genome specific (napus-rapa)    | 0.9832536    | 0.6089762    | not scorable | not scorable | 0.9752066    | 0.6009976    |
| 7741 | Bn-A03-p6423795 | A-genome specific (napus-rapa)    | 0.9832536    | 0.8189678    | not scorable | not scorable | 0.9586777    | 0.7880545    |
| 7742 | Bn-A03-p6424980 | napus specific                    | 0.9712918    | 0.4553261    | not scorable | not scorable | not scorable | not scorable |
| 7743 | Bn-A03-p6425315 | A-genome specific (napus-rapa)    | 0.9952153    | 0.8751906    | not scorable | not scorable | 1            | 0.8272818    |
| 7744 | Bn-A03-p6425858 | A-genome specific (napus-rapa)    | 0.9688995    | 0.7051423    | not scorable | not scorable | 0.9752066    | 0.7280242    |
| 7745 | Bn-A03-p6427905 | A-genome specific (rapa only)     | not scorable | not scorable | not scorable | not scorable | 1            | 0.6877584    |
| 7746 | Bn-A03-p6428220 | A-genome specific (napus-rapa)    | 0.9928229    | 0.7895075    | not scorable | not scorable | 1            | 0.785244     |
| 7747 | Bn-A03-p6439432 | A-genome specific (napus-rapa)    | 0.9880383    | 0.4580778    | not scorable | not scorable | 0.9586777    | 0.697583     |
| 7748 | Bn-A03-p6456584 | A-genome specific (napus-rapa)    | 0.9760765    | 0.3310408    | not scorable | not scorable | 0.9752066    | 0.6821544    |
| 7749 | Bn-A03-p6484137 | A-genome specific (napus-rapa)    | 0.9736842    | 0.3664588    | not scorable | not scorable | 0.9752066    | 0.6856814    |
| 7750 | Bn-A03-p6498305 | A-genome specific (rapa only)     | not scorable | not scorable | not scorable | not scorable | 1            | 0.6585189    |
| 7751 | Bn-A03-p6502463 | A-genome specific (napus-rapa)    | 0.9808612    | 0.6337031    | not scorable | not scorable | 1            | 0.7765067    |
| 7752 | Bn-A03-p6514858 | A-genome specific (rapa only)     | not scorable | not scorable | not scorable | not scorable | 0.9834711    | 0.7720999    |

|                      |                                |              |              |              |              |              |              |
|----------------------|--------------------------------|--------------|--------------|--------------|--------------|--------------|--------------|
| 7753 Bn-A03-p6522454 | A-genome specific (napus-rapa) | 0.9808612    | 0.6806252    | not scorable | not scorable | 0.9834711    | 0.6385329    |
| 7754 Bn-A03-p6528914 | A-genome specific (napus-rapa) | 1            | 0.3859816    | not scorable | not scorable | 0.9917355    | 0.7362677    |
| 7755 Bn-A03-p654363  | A-genome specific (rapa only)  | not scorable | not scorable | not scorable | not scorable | 0.9917355    | 0.6888669    |
| 7756 Bn-A03-p6556647 | A-genome specific (napus-rapa) | 0.9521531    | 0.280574     | not scorable | not scorable | 1            | 0.7634516    |
| 7757 Bn-A03-p657593  | A-genome specific (napus-rapa) | 0.8660287    | 0.8035964    | not scorable | not scorable | 0.6859504    | 0.7414052    |
| 7758 Bn-A03-p6576575 | A-genome specific (napus-rapa) | 0.9784689    | 0.7915924    | not scorable | not scorable | 0.9917355    | 0.8152432    |
| 7759 Bn-A03-p6577213 | A-genome specific (napus-rapa) | 0.9832536    | 0.8422651    | not scorable | not scorable | 1            | 0.7615284    |
| 7760 Bn-A03-p6578752 | A-genome specific (napus-rapa) | 0.9952153    | 0.8335571    | not scorable | not scorable | 1            | 0.8946469    |
| 7761 Bn-A03-p6583208 | A-genome specific (napus-rapa) | 0.9928229    | 0.8190148    | not scorable | not scorable | 1            | 0.8687926    |
| 7762 Bn-A03-p6585645 | A-genome specific (napus-rapa) | 0.9784689    | 0.8056495    | not scorable | not scorable | 1            | 0.7335952    |
| 7763 Bn-A03-p6586436 | A-genome specific (napus-rapa) | 0.9760765    | 0.7923179    | not scorable | not scorable | 1            | 0.8529477    |
| 7764 Bn-A03-p6590051 | A-genome specific (napus-rapa) | 0.9760765    | 0.8023167    | not scorable | not scorable | 1            | 0.7660844    |
| 7765 Bn-A03-p6591745 | genome unspecific (all in)     | 0.9808612    | 0.7587294    | 1            | 0.7190649    | 1            | 0.6741855    |
| 7766 Bn-A03-p6602787 | A-genome specific (rapa only)  | not scorable | not scorable | not scorable | not scorable | 1            | 0.6745787    |
| 7767 Bn-A03-p6602851 | A-genome specific (napus-rapa) | 0.9832536    | 0.5261881    | not scorable | not scorable | 0.9917355    | 0.7614741    |
| 7768 Bn-A03-p6636780 | A-genome specific (napus-rapa) | 0.9832536    | 0.8496484    | not scorable | not scorable | 0.9917355    | 0.7395672    |
| 7769 Bn-A03-p6646094 | A-genome specific (napus-rapa) | 0.9976076    | 0.532305     | not scorable | not scorable | 1            | 0.7602962    |
| 7770 Bn-A03-p6668218 | napus specific                 | 0.9904306    | 0.4715981    | not scorable | not scorable | not scorable | not scorable |
| 7771 Bn-A03-p6668259 | A-genome specific (napus-rapa) | 0.9784689    | 0.2491457    | not scorable | not scorable | 0.9917355    | 0.7262536    |
| 7772 Bn-A03-p6672024 | A-genome specific (napus-rapa) | 0.9928229    | 0.7527573    | not scorable | not scorable | 1            | 0.7811348    |
| 7773 Bn-A03-p6677819 | A-genome specific (napus-rapa) | 0.9832536    | 0.7128766    | not scorable | not scorable | 0.9917355    | 0.6868538    |
| 7774 Bn-A03-p6681953 | A-genome specific (napus-rapa) | 0.9784689    | 0.7798386    | not scorable | not scorable | 0.9834711    | 0.6523717    |
| 7775 Bn-A03-p6706586 | A-genome specific (rapa only)  | not scorable | not scorable | not scorable | not scorable | 1            | 0.9188636    |
| 7776 Bn-A03-p6708217 | A-genome specific (napus-rapa) | 0.9760765    | 0.5172084    | not scorable | not scorable | 0.9917355    | 0.6682555    |
| 7777 Bn-A03-p6708475 | A-genome specific (rapa only)  | not scorable | not scorable | not scorable | not scorable | 0.9917355    | 0.7638845    |
| 7778 Bn-A03-p6710409 | A-genome specific (napus-rapa) | 0.9808612    | 0.7290791    | not scorable | not scorable | 0.9834711    | 0.704776     |
| 7779 Bn-A03-p6710651 | A-genome specific (napus-rapa) | 0.9760765    | 0.8184522    | not scorable | not scorable | 0.9834711    | 0.7412955    |
| 7780 Bn-A03-p671279  | A-genome specific (napus-rapa) | 0.9880383    | 0.4935156    | not scorable | not scorable | 0.9917355    | 0.7924836    |
| 7781 Bn-A03-p6717546 | A-genome specific (rapa only)  | not scorable | not scorable | not scorable | not scorable | 0.9917355    | 0.6960269    |
| 7782 Bn-A03-p6717785 | A-genome specific (napus-rapa) | 0.9952153    | 0.66571      | not scorable | not scorable | 0.9917355    | 0.7103029    |
| 7783 Bn-A03-p6744274 | A-genome specific (napus-rapa) | 0.9856459    | 0.8007197    | not scorable | not scorable | 1            | 0.8153307    |
| 7784 Bn-A03-p6744344 | A-genome specific (napus-rapa) | 0.9784689    | 0.8188414    | not scorable | not scorable | 1            | 0.8334719    |
| 7785 Bn-A03-p6760051 | A-genome specific (napus-rapa) | 0.9928229    | 0.74318      | not scorable | not scorable | 0.9752066    | 0.7032975    |

|      |                 |                                |              |              |              |              |              |              |
|------|-----------------|--------------------------------|--------------|--------------|--------------|--------------|--------------|--------------|
| 7786 | Bn-A03-p6765024 | A-genome specific (napus-rapa) | 0.9904306    | 0.6783697    | not scorable | not scorable | 0.9917355    | 0.6882072    |
| 7787 | Bn-A03-p6771876 | A-genome specific (napus-rapa) | 0.9928229    | 0.6878965    | not scorable | not scorable | 0.9834711    | 0.6901347    |
| 7788 | Bn-A03-p6772326 | A-genome specific (napus-rapa) | 0.9808612    | 0.7773609    | not scorable | not scorable | 1            | 0.8035665    |
| 7789 | Bn-A03-p6781156 | A-genome specific (napus-rapa) | 0.9832536    | 0.7223697    | not scorable | not scorable | 1            | 0.7799522    |
| 7790 | Bn-A03-p6782910 | A-genome specific (rapa only)  | not scorable | not scorable | not scorable | not scorable | 0.9752066    | 0.5520744    |
| 7791 | Bn-A03-p6782961 | A-genome specific (rapa only)  | not scorable | not scorable | not scorable | not scorable | 0.9917355    | 0.8328607    |
| 7792 | Bn-A03-p6783685 | A-genome specific (napus-rapa) | 0.9521531    | 0.5803976    | not scorable | not scorable | 0.9752066    | 0.7419853    |
| 7793 | Bn-A03-p6789784 | A-genome specific (napus-rapa) | 0.9952153    | 0.2798916    | not scorable | not scorable | 1            | 0.6751118    |
| 7794 | Bn-A03-p6791851 | A-genome specific (napus-rapa) | 0.9808612    | 0.7624815    | not scorable | not scorable | 0.9834711    | 0.7057595    |
| 7795 | Bn-A03-p6804536 | A-genome specific (napus-rapa) | 0.9808612    | 0.794342     | not scorable | not scorable | 0.9917355    | 0.8217803    |
| 7796 | Bn-A03-p6804857 | A-genome specific (napus-rapa) | 0.9641148    | 0.8086624    | not scorable | not scorable | 1            | 0.7912036    |
| 7797 | Bn-A03-p6807075 | A-genome specific (napus-rapa) | 0.9856459    | 0.715036     | not scorable | not scorable | 0.9256198    | 0.8330972    |
| 7798 | Bn-A03-p6834343 | A-genome specific (napus-rapa) | 1            | 0.3140541    | not scorable | not scorable | 1            | 0.742772     |
| 7799 | Bn-A03-p6845546 | A-genome specific (rapa only)  | not scorable | not scorable | not scorable | not scorable | 0.9504132    | 0.6257551    |
| 7800 | Bn-A03-p6849607 | A-genome specific (napus-rapa) | 0.9617225    | 0.4570783    | not scorable | not scorable | 0.9917355    | 0.8129342    |
| 7801 | Bn-A03-p6888670 | napus specific                 | 0.9066986    | 0.8362017    | not scorable | not scorable | not scorable | not scorable |
| 7802 | Bn-A03-p6895946 | all not scorable               | not scorable | not scorable | not scorable | not scorable | not scorable | not scorable |
| 7803 | Bn-A03-p6897034 | A-genome specific (rapa only)  | not scorable | not scorable | not scorable | not scorable | 0.9834711    | 0.7672023    |
| 7804 | Bn-A03-p6898220 | A-genome specific (napus-rapa) | 0.9928229    | 0.8671735    | not scorable | not scorable | 1            | 0.8630779    |
| 7805 | Bn-A03-p6907743 | A-genome specific (napus-rapa) | 0.9880383    | 0.6319141    | not scorable | not scorable | 0.9917355    | 0.7497693    |
| 7806 | Bn-A03-p6909237 | A-genome specific (napus-rapa) | 0.9593301    | 0.6266375    | not scorable | not scorable | 0.9834711    | 0.8052031    |
| 7807 | Bn-A03-p6910492 | A-genome specific (rapa only)  | not scorable | not scorable | not scorable | not scorable | 1            | 0.7955713    |
| 7808 | Bn-A03-p6919500 | A-genome specific (napus-rapa) | 1            | 0.3282791    | not scorable | not scorable | 1            | 0.8660193    |
| 7809 | Bn-A03-p6934438 | A-genome specific (napus-rapa) | 0.9856459    | 0.6963912    | not scorable | not scorable | 0.9917355    | 0.7082966    |
| 7810 | Bn-A03-p6934751 | A-genome specific (rapa only)  | not scorable | not scorable | not scorable | not scorable | 1            | 0.7009504    |
| 7811 | Bn-A03-p6937615 | A-genome specific (rapa only)  | not scorable | not scorable | not scorable | not scorable | 0.9752066    | 0.7622582    |
| 7812 | Bn-A03-p6967307 | A-genome specific (napus-rapa) | 1            | 0.3870788    | not scorable | not scorable | 0.9834711    | 0.9253247    |
| 7813 | Bn-A03-p6984742 | A-genome specific (napus-rapa) | 0.9808612    | 0.2919358    | not scorable | not scorable | 0.9834711    | 0.7307633    |
| 7814 | Bn-A03-p6994294 | A-genome specific (napus-rapa) | 0.9904306    | 0.343385     | not scorable | not scorable | 0.9834711    | 0.6234235    |
| 7815 | Bn-A03-p7007376 | A-genome specific (napus-rapa) | 0.9808612    | 0.8265488    | not scorable | not scorable | 0.9256198    | 0.8753491    |
| 7816 | Bn-A03-p7007377 | A-genome specific (napus-rapa) | 0.9808612    | 0.8358084    | not scorable | not scorable | 0.9090909    | 0.8002372    |
| 7817 | Bn-A03-p7011698 | A-genome specific (rapa only)  | not scorable | not scorable | not scorable | not scorable | 0.9917355    | 0.692975     |
| 7818 | Bn-A03-p7011746 | A-genome specific (napus-rapa) | 1            | 0.555096     | not scorable | not scorable | 1            | 0.5013781    |

|      |                 |                                   |              |              |              |              |              |              |
|------|-----------------|-----------------------------------|--------------|--------------|--------------|--------------|--------------|--------------|
| 7819 | Bn-A03-p7012232 | C-genome specific (oleracea only) | not scorable | not scorable | 0.9767442    | 0.2309433    | not scorable | not scorable |
| 7820 | Bn-A03-p7015536 | A-genome specific (napus-rapa)    | 0.9928229    | 0.3272834    | not scorable | not scorable | 1            | 0.8231977    |
| 7821 | Bn-A03-p7049396 | A-genome specific (napus-rapa)    | 0.1650718    | 0.7937773    | not scorable | not scorable | 1            | 0.861973     |
| 7822 | Bn-A03-p7054553 | A-genome specific (napus-rapa)    | 0.9952153    | 0.414262     | not scorable | not scorable | 1            | 0.7273511    |
| 7823 | Bn-A03-p7058001 | A-genome specific (napus-rapa)    | 0.9952153    | 0.7145224    | not scorable | not scorable | 1            | 0.6893721    |
| 7824 | Bn-A03-p7067563 | A-genome specific (napus-rapa)    | 0.9952153    | 0.345826     | not scorable | not scorable | 0.9834711    | 0.6995296    |
| 7825 | Bn-A03-p7074078 | A-genome specific (rapa only)     | not scorable | not scorable | not scorable | not scorable | 0.9917355    | 0.7504783    |
| 7826 | Bn-A03-p7075595 | A-genome specific (napus-rapa)    | 0.9976076    | 0.5182511    | not scorable | not scorable | 1            | 0.6876625    |
| 7827 | Bn-A03-p7079712 | genome unspecific (all in)        | 0.9856459    | 0.5330578    | 0.9922481    | 0.6257297    | 0.9752066    | 0.632522     |
| 7828 | Bn-A03-p7085943 | A-genome specific (napus-rapa)    | 0.9928229    | 0.7964124    | not scorable | not scorable | 1            | 0.7073128    |
| 7829 | Bn-A03-p708787  | A-genome specific (napus-rapa)    | 0.9066986    | 0.826536     | not scorable | not scorable | 1            | 0.741662     |
| 7830 | Bn-A03-p7088375 | A-genome specific (napus-rapa)    | 0.9473684    | 0.6002557    | not scorable | not scorable | 1            | 0.8142083    |
| 7831 | Bn-A03-p709005  | A-genome specific (napus-rapa)    | 0.9186603    | 0.7810993    | not scorable | not scorable | 0.9338843    | 0.8616534    |
| 7832 | Bn-A03-p7090745 | A-genome specific (rapa only)     | not scorable | not scorable | not scorable | not scorable | 0.9917355    | 0.7459779    |
| 7833 | Bn-A03-p709332  | A-genome specific (rapa only)     | not scorable | not scorable | not scorable | not scorable | 0.9834711    | 0.7633051    |
| 7834 | Bn-A03-p7094698 | A-genome specific (napus-rapa)    | 0.9928229    | 0.8692414    | not scorable | not scorable | 1            | 0.7700555    |
| 7835 | Bn-A03-p7110332 | A-genome specific (napus-rapa)    | 0.9856459    | 0.8862039    | not scorable | not scorable | 0.9834711    | 0.8053902    |
| 7836 | Bn-A03-p711408  | A-genome specific (rapa only)     | not scorable | not scorable | not scorable | not scorable | 1            | 0.6884168    |
| 7837 | Bn-A03-p712308  | A-genome specific (napus-rapa)    | 1            | 0.8479601    | not scorable | not scorable | 1            | 0.7142797    |
| 7838 | Bn-A03-p7157714 | A-genome specific (napus-rapa)    | 0.9904306    | 0.474685     | not scorable | not scorable | 0.9834711    | 0.8012645    |
| 7839 | Bn-A03-p7157782 | A-genome specific (napus-rapa)    | 0.9928229    | 0.4641683    | not scorable | not scorable | 1            | 0.6855757    |
| 7840 | Bn-A03-p7159916 | A-genome specific (napus-rapa)    | 0.923445     | 0.4012836    | not scorable | not scorable | 1            | 0.7281422    |
| 7841 | Bn-A03-p7167442 | A-genome specific (napus-rapa)    | 0.9688995    | 0.7769015    | not scorable | not scorable | 1            | 0.7721235    |
| 7842 | Bn-A03-p7177161 | A-genome specific (rapa only)     | not scorable | not scorable | not scorable | not scorable | 0.9752066    | 0.7400542    |
| 7843 | Bn-A03-p7177504 | A-genome specific (napus-rapa)    | 0.9904306    | 0.7107428    | not scorable | not scorable | 0.9834711    | 0.7164374    |
| 7844 | Bn-A03-p7177776 | A-genome specific (napus-rapa)    | 0.9928229    | 0.7667168    | not scorable | not scorable | 1            | 0.8241898    |
| 7845 | Bn-A03-p7178551 | A-genome specific (napus-rapa)    | 0.9736842    | 0.4197768    | not scorable | not scorable | 0.9834711    | 0.5970958    |
| 7846 | Bn-A03-p7178650 | A-genome specific (napus-rapa)    | 0.9880383    | 0.7814372    | not scorable | not scorable | 0.9917355    | 0.7935368    |
| 7847 | Bn-A03-p7178917 | A-genome specific (napus-rapa)    | 0.9952153    | 0.6905993    | not scorable | not scorable | 0.9917355    | 0.6450099    |
| 7848 | Bn-A03-p7180288 | A-genome specific (napus-rapa)    | 0.9354067    | 0.6637082    | not scorable | not scorable | 0.9586777    | 0.6264626    |
| 7849 | Bn-A03-p7186958 | A-genome specific (napus-rapa)    | 0.9258373    | 0.8471591    | not scorable | not scorable | 0.9752066    | 0.7062156    |
| 7850 | Bn-A03-p7187473 | napus specific                    | 0.930622     | 0.4184518    | not scorable | not scorable | not scorable | not scorable |
| 7851 | Bn-A03-p7218582 | A-genome specific (napus-rapa)    | 0.9210526    | 0.5867325    | not scorable | not scorable | 1            | 0.8618941    |

|                      |                                |              |              |              |              |           |           |
|----------------------|--------------------------------|--------------|--------------|--------------|--------------|-----------|-----------|
| 7852 Bn-A03-p7224854 | A-genome specific (napus-rapa) | 0.9449761    | 0.309217     | not scorable | not scorable | 0.9256198 | 0.5548381 |
| 7853 Bn-A03-p7228211 | A-genome specific (napus-rapa) | 0.9760765    | 0.7348103    | not scorable | not scorable | 0.9917355 | 0.8001279 |
| 7854 Bn-A03-p7228783 | A-genome specific (napus-rapa) | 0.9928229    | 0.8081543    | not scorable | not scorable | 1         | 0.6297082 |
| 7855 Bn-A03-p7234862 | A-genome specific (napus-rapa) | 0.9904306    | 0.7955063    | not scorable | not scorable | 0.9834711 | 0.8025838 |
| 7856 Bn-A03-p7234988 | A-genome specific (napus-rapa) | 0.9928229    | 0.2749851    | not scorable | not scorable | 0.9834711 | 0.6965818 |
| 7857 Bn-A03-p7235826 | A-genome specific (napus-rapa) | 0.9952153    | 0.7408643    | not scorable | not scorable | 1         | 0.7441986 |
| 7858 Bn-A03-p7236103 | A-genome specific (napus-rapa) | 0.9736842    | 0.7096326    | not scorable | not scorable | 0.9917355 | 0.7369606 |
| 7859 Bn-A03-p7239205 | A-genome specific (napus-rapa) | 0.9904306    | 0.8235979    | not scorable | not scorable | 0.9917355 | 0.7279946 |
| 7860 Bn-A03-p7239260 | A-genome specific (napus-rapa) | 0.9856459    | 0.8112721    | not scorable | not scorable | 0.9917355 | 0.719924  |
| 7861 Bn-A03-p7248970 | A-genome specific (napus-rapa) | 0.9904306    | 0.7920889    | not scorable | not scorable | 0.9586777 | 0.7223118 |
| 7862 Bn-A03-p7253298 | A-genome specific (napus-rapa) | 0.9904306    | 0.3306782    | not scorable | not scorable | 0.9834711 | 0.7065586 |
| 7863 Bn-A03-p726812  | A-genome specific (napus-rapa) | 0.9880383    | 0.3461441    | not scorable | not scorable | 1         | 0.5755651 |
| 7864 Bn-A03-p7281096 | A-genome specific (napus-rapa) | 0.9473684    | 0.4519103    | not scorable | not scorable | 0.9917355 | 0.8257833 |
| 7865 Bn-A03-p7284090 | A-genome specific (napus-rapa) | 0.9904306    | 0.7283169    | not scorable | not scorable | 1         | 0.7275584 |
| 7866 Bn-A03-p72933   | A-genome specific (rapa only)  | not scorable | not scorable | not scorable | not scorable | 0.9834711 | 0.6942123 |
| 7867 Bn-A03-p7295912 | A-genome specific (rapa only)  | not scorable | not scorable | not scorable | not scorable | 0.9917355 | 0.6802698 |
| 7868 Bn-A03-p731558  | A-genome specific (napus-rapa) | 0.8660287    | 0.3825243    | not scorable | not scorable | 0.9917355 | 0.7076031 |
| 7869 Bn-A03-p7319235 | A-genome specific (napus-rapa) | 0.9210526    | 0.5451888    | not scorable | not scorable | 0.9917355 | 0.7155814 |
| 7870 Bn-A03-p7326202 | A-genome specific (napus-rapa) | 0.9952153    | 0.6600214    | not scorable | not scorable | 0.9834711 | 0.6684946 |
| 7871 Bn-A03-p7331109 | A-genome specific (napus-rapa) | 0.9880383    | 0.7623122    | not scorable | not scorable | 0.9917355 | 0.7248695 |
| 7872 Bn-A03-p7331517 | A-genome specific (napus-rapa) | 0.9665072    | 0.5396728    | not scorable | not scorable | 0.9917355 | 0.7341067 |
| 7873 Bn-A03-p7356882 | A-genome specific (napus-rapa) | 0.9712918    | 0.9313904    | not scorable | not scorable | 0.9917355 | 0.7929051 |
| 7874 Bn-A03-p7357257 | A-genome specific (napus-rapa) | 0.638756     | 0.9248657    | not scorable | not scorable | 0.9669421 | 0.7596024 |
| 7875 Bn-A03-p7366616 | A-genome specific (napus-rapa) | 0.9976076    | 0.3706979    | not scorable | not scorable | 1         | 0.7443042 |
| 7876 Bn-A03-p7366783 | A-genome specific (napus-rapa) | 0.9712918    | 0.7896255    | not scorable | not scorable | 0.9834711 | 0.7296342 |
| 7877 Bn-A03-p7378514 | A-genome specific (napus-rapa) | 0.9593301    | 0.4882496    | not scorable | not scorable | 0.9834711 | 0.5874348 |
| 7878 Bn-A03-p7382887 | A-genome specific (napus-rapa) | 0.9521531    | 0.7130471    | not scorable | not scorable | 0.9834711 | 0.7210281 |
| 7879 Bn-A03-p7411648 | A-genome specific (napus-rapa) | 0.861244     | 0.7363209    | not scorable | not scorable | 0.9421487 | 0.7981498 |
| 7880 Bn-A03-p7420835 | A-genome specific (napus-rapa) | 0.6913875    | 0.7361311    | not scorable | not scorable | 0.9917355 | 0.6960069 |
| 7881 Bn-A03-p7421178 | A-genome specific (napus-rapa) | 0.6913875    | 0.8177536    | not scorable | not scorable | 1         | 0.7663583 |
| 7882 Bn-A03-p7428803 | genome unspecific (all in)     | 0.9904306    | 0.3207513    | 0.8992248    | 0.2607104    | 1         | 0.7111256 |
| 7883 Bn-A03-p7434488 | A-genome specific (napus-rapa) | 0.9736842    | 0.7590962    | not scorable | not scorable | 0.9917355 | 0.7470349 |
| 7884 Bn-A03-p7434950 | A-genome specific (napus-rapa) | 0.9593301    | 0.7741464    | not scorable | not scorable | 0.9752066 | 0.770776  |

|                      |                                |              |              |              |              |              |              |
|----------------------|--------------------------------|--------------|--------------|--------------|--------------|--------------|--------------|
| 7885 Bn-A03-p7442744 | A-genome specific (rapa only)  | not scorable | not scorable | not scorable | not scorable | 0.9917355    | 0.8087432    |
| 7886 Bn-A03-p7445206 | A-genome specific (napus-rapa) | 0.9688995    | 0.538993     | not scorable | not scorable | 1            | 0.7421709    |
| 7887 Bn-A03-p7458972 | A-genome specific (napus-rapa) | 0.9808612    | 0.2663221    | not scorable | not scorable | 0.9834711    | 0.8142844    |
| 7888 Bn-A03-p7460244 | napus specific                 | 0.8971292    | 0.7798976    | not scorable | not scorable | not scorable | not scorable |
| 7889 Bn-A03-p7467515 | A-genome specific (napus-rapa) | 0.9593301    | 0.4718303    | not scorable | not scorable | 1            | 0.7751601    |
| 7890 Bn-A03-p7478438 | napus specific                 | 0.9688995    | 0.8177654    | not scorable | not scorable | not scorable | not scorable |
| 7891 Bn-A03-p7480105 | napus specific                 | 0.9617225    | 0.7940962    | not scorable | not scorable | not scorable | not scorable |
| 7892 Bn-A03-p7482812 | A-genome specific (napus-rapa) | 0.9569378    | 0.3202595    | not scorable | not scorable | 0.9917355    | 0.6474978    |
| 7893 Bn-A03-p7485450 | A-genome specific (rapa only)  | not scorable | not scorable | not scorable | not scorable | 1            | 0.6459444    |
| 7894 Bn-A03-p7491211 | napus specific                 | 0.9880383    | 0.7397998    | not scorable | not scorable | not scorable | not scorable |
| 7895 Bn-A03-p7493664 | A-genome specific (napus-rapa) | 0.9688995    | 0.7613888    | not scorable | not scorable | 0.9669421    | 0.7379045    |
| 7896 Bn-A03-p7500107 | A-genome specific (napus-rapa) | 0.9569378    | 0.4783834    | not scorable | not scorable | 0.9917355    | 0.7180824    |
| 7897 Bn-A03-p7501352 | A-genome specific (napus-rapa) | 0.9880383    | 0.8642383    | not scorable | not scorable | 0.9917355    | 0.7869141    |
| 7898 Bn-A03-p7505194 | A-genome specific (napus-rapa) | 0.4736842    | 0.7601249    | not scorable | not scorable | 0.9669421    | 0.7676057    |
| 7899 Bn-A03-p7506855 | A-genome specific (napus-rapa) | 0.9904306    | 0.5208967    | not scorable | not scorable | 0.9752066    | 0.809961     |
| 7900 Bn-A03-p7514571 | A-genome specific (napus-rapa) | 0.9497608    | 0.7155401    | not scorable | not scorable | 0.9586777    | 0.7044402    |
| 7901 Bn-A03-p7514678 | A-genome specific (napus-rapa) | 0.9904306    | 0.796658     | not scorable | not scorable | 1            | 0.8149011    |
| 7902 Bn-A03-p7514862 | A-genome specific (napus-rapa) | 0.9856459    | 0.6718059    | not scorable | not scorable | 1            | 0.8182911    |
| 7903 Bn-A03-p7521958 | A-genome specific (napus-rapa) | 0.9066986    | 0.6398383    | not scorable | not scorable | 0.9008265    | 0.6616946    |
| 7904 Bn-A03-p7528981 | A-genome specific (napus-rapa) | 0.9976076    | 0.5059961    | not scorable | not scorable | 1            | 0.6929526    |
| 7905 Bn-A03-p7532415 | A-genome specific (napus-rapa) | 0.9976076    | 0.448343     | not scorable | not scorable | 0.9752066    | 0.6053073    |
| 7906 Bn-A03-p7543362 | genome unspecific (all in)     | 0.9808612    | 0.341412     |              | 1 0.6602734  | 0.9834711    | 0.6805757    |
| 7907 Bn-A03-p755100  | A-genome specific (rapa only)  | not scorable | not scorable | not scorable | not scorable | 1            | 0.9002686    |
| 7908 Bn-A03-p7551518 | A-genome specific (napus-rapa) | 0.9784689    | 0.3172227    | not scorable | not scorable | 1            | 0.6937545    |
| 7909 Bn-A03-p7555264 | A-genome specific (napus-rapa) | 0.9856459    | 0.8141341    | not scorable | not scorable | 0.9917355    | 0.7917782    |
| 7910 Bn-A03-p7571364 | A-genome specific (napus-rapa) | 0.9832536    | 0.7520587    | not scorable | not scorable | 1            | 0.8258477    |
| 7911 Bn-A03-p7572109 | A-genome specific (napus-rapa) | 0.9880383    | 0.7813368    | not scorable | not scorable | 0.9752066    | 0.7855919    |
| 7912 Bn-A03-p7572128 | A-genome specific (napus-rapa) | 0.9521531    | 0.7166634    | not scorable | not scorable | 0.9256198    | 0.6872754    |
| 7913 Bn-A03-p7575620 | A-genome specific (napus-rapa) | 0.9952153    | 0.3622191    | not scorable | not scorable | 0.9834711    | 0.686775     |
| 7914 Bn-A03-p757592  | A-genome specific (napus-rapa) | 0.6196172    | 0.7273234    | not scorable | not scorable | 0.9586777    | 0.7081448    |
| 7915 Bn-A03-p7581383 | A-genome specific (napus-rapa) | 0.9258373    | 0.7431417    | not scorable | not scorable | 0.892562     | 0.7974854    |
| 7916 Bn-A03-p7582235 | A-genome specific (napus-rapa) | 0.9712918    | 0.7577997    | not scorable | not scorable | 0.9917355    | 0.7223673    |
| 7917 Bn-A03-p7583703 | A-genome specific (napus-rapa) | 0.9784689    | 0.331875     | not scorable | not scorable | 1            | 0.7438364    |



|      |                 |                                   |              |              |              |              |              |              |
|------|-----------------|-----------------------------------|--------------|--------------|--------------|--------------|--------------|--------------|
| 7918 | Bn-A03-p7588123 | A-genome specific (napus-rapa)    | 0.9688995    | 0.7998334    | not scorable | not scorable | 0.9586777    | 0.7161086    |
| 7919 | Bn-A03-p7595626 | A-genome specific (napus-rapa)    | 0.9880383    | 0.3507471    | not scorable | not scorable | 0.9752066    | 0.7036184    |
| 7920 | Bn-A03-p7597598 | A-genome specific (napus-rapa)    | 0.9473684    | 0.774967     | not scorable | not scorable | 0.9834711    | 0.8072164    |
| 7921 | Bn-A03-p7613494 | A-genome specific (napus-rapa)    | 0.7870814    | 0.7882515    | not scorable | not scorable | 0.8842975    | 0.8468915    |
| 7922 | Bn-A03-p7614596 | A-genome specific (napus-rapa)    | 0.9832536    | 0.7469115    | not scorable | not scorable | 1            | 0.7945759    |
| 7923 | Bn-A03-p7618555 | A-genome specific (napus-rapa)    | 0.9856459    | 0.7852318    | not scorable | not scorable | 0.9752066    | 0.6915144    |
| 7924 | Bn-A03-p7627590 | A-genome specific (napus-rapa)    | 0.9880383    | 0.4902492    | not scorable | not scorable | 1            | 0.7462053    |
| 7925 | Bn-A03-p7628749 | A-genome specific (napus-rapa)    | 0.9808612    | 0.3179613    | not scorable | not scorable | 1            | 0.7790431    |
| 7926 | Bn-A03-p7628905 | A-genome specific (napus-rapa)    | 0.9545454    | 0.6884062    | not scorable | not scorable | 1            | 0.7683609    |
| 7927 | Bn-A03-p7629219 | A-genome specific (napus-rapa)    | 0.9066986    | 0.6685717    | not scorable | not scorable | 0.9669421    | 0.7053821    |
| 7928 | Bn-A03-p7630376 | A-genome specific (napus-rapa)    | 0.930622     | 0.5820872    | not scorable | not scorable | 0.9834711    | 0.7606472    |
| 7929 | Bn-A03-p7630628 | A-genome specific (napus-rapa)    | 0.9784689    | 0.4727942    | not scorable | not scorable | 0.9917355    | 0.6558676    |
| 7930 | Bn-A03-p7631083 | A-genome specific (napus-rapa)    | 0.9736842    | 0.7604119    | not scorable | not scorable | 0.8760331    | 0.7134827    |
| 7931 | Bn-A03-p7631177 | A-genome specific (napus-rapa)    | 0.9952153    | 0.5393506    | not scorable | not scorable | 1            | 0.8293539    |
| 7932 | Bn-A03-p7641673 | A-genome specific (napus-rapa)    | 0.9712918    | 0.7624017    | not scorable | not scorable | 0.9917355    | 0.8140582    |
| 7933 | Bn-A03-p7642519 | A-genome specific (napus-rapa)    | 0.9641148    | 0.7805383    | not scorable | not scorable | 1            | 0.7829676    |
| 7934 | Bn-A03-p7642692 | A-genome specific (napus-rapa)    | 0.9688995    | 0.7818435    | not scorable | not scorable | 0.9752066    | 0.7955495    |
| 7935 | Bn-A03-p764274  | genome unspecific (oleracea-rapa) | not scorable | not scorable | 0.8217054    | 0.3564879    | 1            | 0.7281514    |
| 7936 | Bn-A03-p7643795 | genome unspecific (all in)        | 0.9641148    | 0.554243     | 1            | 0.5639431    | 1            | 0.730028     |
| 7937 | Bn-A03-p765077  | A-genome specific (napus-rapa)    | 0.9162679    | 0.8465989    | not scorable | not scorable | 1            | 0.8448888    |
| 7938 | Bn-A03-p7652326 | A-genome specific (napus-rapa)    | 0.9808612    | 0.8162246    | not scorable | not scorable | 0.9917355    | 0.746737     |
| 7939 | Bn-A03-p766322  | A-genome specific (napus-rapa)    | 0.8947368    | 0.7363375    | not scorable | not scorable | 0.9834711    | 0.6976467    |
| 7940 | Bn-A03-p7672403 | A-genome specific (napus-rapa)    | 0.9784689    | 0.7421128    | not scorable | not scorable | 0.9752066    | 0.8550293    |
| 7941 | Bn-A03-p7675340 | genome unspecific (all in)        | 0.9688995    | 0.2801807    | 1            | 0.333893     | 0.9917355    | 0.6773373    |
| 7942 | Bn-A03-p7678159 | A-genome specific (napus-rapa)    | 0.9617225    | 0.3958095    | not scorable | not scorable | 0.9256198    | 0.7303997    |
| 7943 | Bn-A03-p7685279 | A-genome specific (napus-rapa)    | 0.9928229    | 0.2687158    | not scorable | not scorable | 0.9917355    | 0.6681796    |
| 7944 | Bn-A03-p7688578 | A-genome specific (napus-rapa)    | 0.9090909    | 0.4068252    | not scorable | not scorable | 0.9917355    | 0.7214007    |
| 7945 | Bn-A03-p7692467 | all not scorable                  | not scorable | not scorable | not scorable | not scorable | not scorable | not scorable |
| 7946 | Bn-A03-p77099   | genome unspecific (oleracea-rapa) | not scorable | not scorable | 1            | 0.7718685    | 0.9917355    | 0.7827933    |
| 7947 | Bn-A03-p7738300 | A-genome specific (napus-rapa)    | 0.9784689    | 0.7533256    | not scorable | not scorable | 0.9834711    | 0.6728689    |
| 7948 | Bn-A03-p7757095 | A-genome specific (rapa only)     | not scorable | not scorable | not scorable | not scorable | 0.9752066    | 0.6170102    |
| 7949 | Bn-A03-p7760102 | A-genome specific (napus-rapa)    | 0.9832536    | 0.8584554    | not scorable | not scorable | 0.9669421    | 0.8288376    |
| 7950 | Bn-A03-p7761061 | A-genome specific (rapa only)     | not scorable | not scorable | not scorable | not scorable | 0.9752066    | 0.6404971    |



|      |                 |                                |              |              |              |              |              |              |
|------|-----------------|--------------------------------|--------------|--------------|--------------|--------------|--------------|--------------|
| 7984 | Bn-A03-p7961581 | A-genome specific (napus-rapa) | 0.9976076    | 0.423016     | not scorable | not scorable | 1            | 0.746624     |
| 7985 | Bn-A03-p7963101 | A-genome specific (rapa only)  | not scorable | not scorable | not scorable | not scorable | 0.9586777    | 0.6969824    |
| 7986 | Bn-A03-p7964361 | A-genome specific (napus-rapa) | 0.9856459    | 0.8757187    | not scorable | not scorable | 0.9834711    | 0.7637922    |
| 7987 | Bn-A03-p7964519 | A-genome specific (napus-rapa) | 0.9928229    | 0.9042242    | not scorable | not scorable | 0.9917355    | 0.7245597    |
| 7988 | Bn-A03-p7964789 | A-genome specific (napus-rapa) | 0.9904306    | 0.8629914    | not scorable | not scorable | 0.9917355    | 0.7236944    |
| 7989 | Bn-A03-p7965237 | A-genome specific (napus-rapa) | 0.9880383    | 0.6358898    | not scorable | not scorable | 0.9752066    | 0.7363251    |
| 7990 | Bn-A03-p7966805 | A-genome specific (napus-rapa) | 0.9904306    | 0.727407     | not scorable | not scorable | 0.9917355    | 0.7719597    |
| 7991 | Bn-A03-p7969685 | A-genome specific (napus-rapa) | 0.9928229    | 0.7756539    | not scorable | not scorable | 0.9834711    | 0.7815326    |
| 7992 | Bn-A03-p7974602 | A-genome specific (napus-rapa) | 0.9473684    | 0.5788326    | not scorable | not scorable | 0.9917355    | 0.7771342    |
| 7993 | Bn-A03-p7983071 | A-genome specific (rapa only)  | not scorable | not scorable | not scorable | not scorable | 1            | 0.8145293    |
| 7994 | Bn-A03-p7985158 | A-genome specific (rapa only)  | not scorable | not scorable | not scorable | not scorable | 1            | 0.6209045    |
| 7995 | Bn-A03-p7988522 | A-genome specific (napus-rapa) | 0.9617225    | 0.812738     | not scorable | not scorable | 0.9586777    | 0.7288146    |
| 7996 | Bn-A03-p7988667 | A-genome specific (napus-rapa) | 0.9449761    | 0.8378785    | not scorable | not scorable | 0.9752066    | 0.7220598    |
| 7997 | Bn-A03-p7988820 | A-genome specific (napus-rapa) | 0.9593301    | 0.8512008    | not scorable | not scorable | 0.9834711    | 0.6926226    |
| 7998 | Bn-A03-p8008867 | A-genome specific (napus-rapa) | 0.9928229    | 0.8100467    | not scorable | not scorable | 1            | 0.722063     |
| 7999 | Bn-A03-p8022406 | A-genome specific (napus-rapa) | 0.9928229    | 0.8666855    | not scorable | not scorable | 1            | 0.7135404    |
| 8000 | Bn-A03-p8032849 | A-genome specific (napus-rapa) | 0.9688995    | 0.7248591    | not scorable | not scorable | 0.9752066    | 0.7370734    |
| 8001 | Bn-A03-p8033095 | A-genome specific (napus-rapa) | 0.9521531    | 0.7423527    | not scorable | not scorable | 0.9917355    | 0.8050555    |
| 8002 | Bn-A03-p8038504 | A-genome specific (rapa only)  | not scorable | not scorable | not scorable | not scorable | 0.9752066    | 0.7011166    |
| 8003 | Bn-A03-p8039401 | A-genome specific (napus-rapa) | 0.9880383    | 0.4662207    | not scorable | not scorable | 1            | 0.6702687    |
| 8004 | Bn-A03-p8043620 | A-genome specific (napus-rapa) | 0.9928229    | 0.6037242    | not scorable | not scorable | 1            | 0.7454115    |
| 8005 | Bn-A03-p8043983 | A-genome specific (napus-rapa) | 0.9545454    | 0.5438173    | not scorable | not scorable | 0.9917355    | 0.7818972    |
| 8006 | Bn-A03-p8059035 | A-genome specific (napus-rapa) | 0.9832536    | 0.6072763    | not scorable | not scorable | 1            | 0.8532906    |
| 8007 | Bn-A03-p8070883 | napus specific                 | 0.9976076    | 0.3785277    | not scorable | not scorable | not scorable | not scorable |
| 8008 | Bn-A03-p8075228 | A-genome specific (rapa only)  | not scorable | not scorable | not scorable | not scorable | 0.9752066    | 0.7116282    |
| 8009 | Bn-A03-p8080680 | A-genome specific (napus-rapa) | 1            | 0.8165222    | not scorable | not scorable | 1            | 0.9272014    |
| 8010 | Bn-A03-p8083083 | A-genome specific (rapa only)  | not scorable | not scorable | not scorable | not scorable | 0.9173554    | 0.8953075    |
| 8011 | Bn-A03-p8084586 | A-genome specific (rapa only)  | not scorable | not scorable | not scorable | not scorable | 0.9504132    | 0.7922245    |
| 8012 | Bn-A03-p8095796 | A-genome specific (napus-rapa) | 0.8923445    | 0.630339     | not scorable | not scorable | 0.9917355    | 0.6721433    |
| 8013 | Bn-A03-p8103457 | A-genome specific (napus-rapa) | 0.9688995    | 0.860061     | not scorable | not scorable | 0.9917355    | 0.6951423    |
| 8014 | Bn-A03-p8109045 | A-genome specific (napus-rapa) | 0.9976076    | 0.5465681    | not scorable | not scorable | 1            | 0.7277114    |
| 8015 | Bn-A03-p8112016 | napus specific                 | 0.9066986    | 0.7465459    | not scorable | not scorable | not scorable | not scorable |
| 8016 | Bn-A03-p8122222 | A-genome specific (napus-rapa) | 0.9904306    | 0.6508276    | not scorable | not scorable | 0.9752066    | 0.6908095    |

|      |                 |                                |              |              |              |              |              |              |           |
|------|-----------------|--------------------------------|--------------|--------------|--------------|--------------|--------------|--------------|-----------|
| 8017 | Bn-A03-p8133096 | A-genome specific (napus-rapa) | 0.9593301    | 0.7272726    | not scorable | not scorable |              | 1            | 0.7253703 |
| 8018 | Bn-A03-p8148926 | A-genome specific (rapa only)  | not scorable | not scorable | not scorable | not scorable |              | 1            | 0.6952136 |
| 8019 | Bn-A03-p8152842 | A-genome specific (napus-rapa) | 0.9808612    | 0.562276     | not scorable | not scorable | 0.9834711    |              | 0.7199671 |
| 8020 | Bn-A03-p8158265 | genome unspecific (all in)     | 0.9808612    | 0.3333014    | 0.9844961    | 0.628476     |              | 1            | 0.6688465 |
| 8021 | Bn-A03-p8169179 | A-genome specific (napus-rapa) | 0.9736842    | 0.4531946    | not scorable | not scorable |              | 1            | 0.7482402 |
| 8022 | Bn-A03-p8170734 | A-genome specific (napus-rapa) | 0.9832536    | 0.8113705    | not scorable | not scorable | 0.9917355    |              | 0.781993  |
| 8023 | Bn-A03-p8171211 | A-genome specific (napus-rapa) | 0.9832536    | 0.6838223    | not scorable | not scorable | 0.9917355    |              | 0.6747683 |
| 8024 | Bn-A03-p8171248 | A-genome specific (napus-rapa) | 0.930622     | 0.6925251    | not scorable | not scorable |              | 1            | 0.7072228 |
| 8025 | Bn-A03-p8177644 | A-genome specific (napus-rapa) | 0.9665072    | 0.6665681    | not scorable | not scorable | 0.9834711    |              | 0.7905504 |
| 8026 | Bn-A03-p8177695 | A-genome specific (rapa only)  | not scorable | not scorable | not scorable | not scorable |              | 1            | 0.839259  |
| 8027 | Bn-A03-p8181125 | A-genome specific (napus-rapa) | 0.9880383    | 0.8252659    | not scorable | not scorable |              | 1            | 0.8376619 |
| 8028 | Bn-A03-p8181187 | A-genome specific (napus-rapa) | 0.9880383    | 0.8416769    | not scorable | not scorable |              | 1            | 0.7709971 |
| 8029 | Bn-A03-p8181778 | A-genome specific (napus-rapa) | 0.9880383    | 0.9206545    | not scorable | not scorable |              | 1            | 0.8655627 |
| 8030 | Bn-A03-p8190847 | A-genome specific (napus-rapa) | 0.9593301    | 0.5388932    | not scorable | not scorable |              | 1            | 0.781415  |
| 8031 | Bn-A03-p8204479 | napus specific                 | 0.9665072    | 0.3874211    | not scorable | not scorable | not scorable | not scorable |           |
| 8032 | Bn-A03-p8206961 | A-genome specific (napus-rapa) | 0.9832536    | 0.7390412    | not scorable | not scorable | 0.9834711    |              | 0.7284867 |
| 8033 | Bn-A03-p8217276 | A-genome specific (napus-rapa) | 0.9497608    | 0.8225138    | not scorable | not scorable | 0.9338843    |              | 0.7087269 |
| 8034 | Bn-A03-p8217358 | A-genome specific (napus-rapa) | 0.9593301    | 0.7060575    | not scorable | not scorable | 0.9421487    |              | 0.7454649 |
| 8035 | Bn-A03-p8218946 | A-genome specific (napus-rapa) | 0.9808612    | 0.4847307    | not scorable | not scorable | 0.9834711    |              | 0.6894066 |
| 8036 | Bn-A03-p8260551 | genome unspecific (all in)     | 0.9904306    | 0.5266603    | 0.8139535    | 0.8230354    | 0.9917355    |              | 0.7760841 |
| 8037 | Bn-A03-p8279849 | A-genome specific (napus-rapa) | 0.9928229    | 0.2759137    | not scorable | not scorable | 0.9669421    |              | 0.5983175 |
| 8038 | Bn-A03-p8282545 | A-genome specific (napus-rapa) | 0.9760765    | 0.6716564    | not scorable | not scorable | 0.9669421    |              | 0.7433973 |
| 8039 | Bn-A03-p8285385 | A-genome specific (napus-rapa) | 0.9736842    | 0.3082609    | not scorable | not scorable | 0.9917355    |              | 0.6946752 |
| 8040 | Bn-A03-p8288895 | A-genome specific (napus-rapa) | 0.9760765    | 0.3961723    | not scorable | not scorable | 0.9752066    |              | 0.7154225 |
| 8041 | Bn-A03-p8298067 | A-genome specific (napus-rapa) | 0.9904306    | 0.5942143    | not scorable | not scorable | 0.9917355    |              | 0.819873  |
| 8042 | Bn-A03-p8298336 | A-genome specific (napus-rapa) | 0.9856459    | 0.8289244    | not scorable | not scorable | 0.9834711    |              | 0.7844557 |
| 8043 | Bn-A03-p830116  | A-genome specific (napus-rapa) | 0.9114832    | 0.7808228    | not scorable | not scorable | 0.9752066    |              | 0.8012742 |
| 8044 | Bn-A03-p830487  | A-genome specific (napus-rapa) | 0.9665072    | 0.7296516    | not scorable | not scorable | 0.9917355    |              | 0.8125748 |
| 8045 | Bn-A03-p8308938 | A-genome specific (napus-rapa) | 0.9880383    | 0.8061008    | not scorable | not scorable |              | 1            | 0.8952507 |
| 8046 | Bn-A03-p8314005 | A-genome specific (napus-rapa) | 0.9928229    | 0.7073323    | not scorable | not scorable |              | 1            | 0.8135551 |
| 8047 | Bn-A03-p831433  | A-genome specific (napus-rapa) | 0.9736842    | 0.3172887    | not scorable | not scorable |              | 1            | 0.7266697 |
| 8048 | Bn-A03-p832473  | A-genome specific (napus-rapa) | 0.930622     | 0.7404763    | not scorable | not scorable | 0.9834711    |              | 0.7968811 |
| 8049 | Bn-A03-p8329291 | A-genome specific (napus-rapa) | 1            | 0.288366     | not scorable | not scorable |              | 1            | 0.7538685 |

|      |                 |                                |              |              |              |              |           |           |
|------|-----------------|--------------------------------|--------------|--------------|--------------|--------------|-----------|-----------|
| 8050 | Bn-A03-p8333536 | A-genome specific (napus-rapa) | 0.8851675    | 0.8173244    | not scorable | not scorable | 0.9917355 | 0.8176495 |
| 8051 | Bn-A03-p8337135 | A-genome specific (napus-rapa) | 0.9569378    | 0.7496994    | not scorable | not scorable | 0.9917355 | 0.7231776 |
| 8052 | Bn-A03-p8337378 | A-genome specific (napus-rapa) | 1            | 0.2480136    | not scorable | not scorable | 0.9917355 | 0.8207901 |
| 8053 | Bn-A03-p834379  | A-genome specific (napus-rapa) | 0.8947368    | 0.7469566    | not scorable | not scorable | 1         | 0.8073053 |
| 8054 | Bn-A03-p8347370 | A-genome specific (napus-rapa) | 1            | 0.6323521    | not scorable | not scorable | 0.9834711 | 0.8290746 |
| 8055 | Bn-A03-p835162  | A-genome specific (napus-rapa) | 0.9090909    | 0.8144715    | not scorable | not scorable | 0.9834711 | 0.7926462 |
| 8056 | Bn-A03-p8359092 | genome unspecific (all in)     | 0.9832536    | 0.4480899    | 0.9922481    | 0.7010086    | 1         | 0.6915832 |
| 8057 | Bn-A03-p835987  | A-genome specific (rapa only)  | not scorable | not scorable | not scorable | not scorable | 0.9917355 | 0.7512562 |
| 8058 | Bn-A03-p8360894 | A-genome specific (napus-rapa) | 0.7703349    | 0.7254874    | not scorable | not scorable | 1         | 0.6452205 |
| 8059 | Bn-A03-p836873  | A-genome specific (napus-rapa) | 0.9330143    | 0.7468809    | not scorable | not scorable | 1         | 0.750535  |
| 8060 | Bn-A03-p8372559 | A-genome specific (rapa only)  | not scorable | not scorable | not scorable | not scorable | 1         | 0.6499091 |
| 8061 | Bn-A03-p8380550 | A-genome specific (napus-rapa) | 0.9210526    | 0.7673404    | not scorable | not scorable | 0.9586777 | 0.634596  |
| 8062 | Bn-A03-p8381012 | A-genome specific (napus-rapa) | 0.9569378    | 0.8029826    | not scorable | not scorable | 1         | 0.8129317 |
| 8063 | Bn-A03-p8394184 | A-genome specific (napus-rapa) | 0.9880383    | 0.8539055    | not scorable | not scorable | 0.9917355 | 0.8112677 |
| 8064 | Bn-A03-p8395621 | A-genome specific (napus-rapa) | 0.9760765    | 0.7593513    | not scorable | not scorable | 1         | 0.7997159 |
| 8065 | Bn-A03-p8396525 | A-genome specific (napus-rapa) | 0.9425837    | 0.503436     | not scorable | not scorable | 0.9834711 | 0.6872858 |
| 8066 | Bn-A03-p8398790 | A-genome specific (napus-rapa) | 0.9880383    | 0.8186218    | not scorable | not scorable | 1         | 0.7011481 |
| 8067 | Bn-A03-p8403705 | A-genome specific (rapa only)  | not scorable | not scorable | not scorable | not scorable | 0.9669421 | 0.7536424 |
| 8068 | Bn-A03-p8406930 | A-genome specific (napus-rapa) | 0.9282297    | 0.8363864    | not scorable | not scorable | 0.9834711 | 0.7729632 |
| 8069 | Bn-A03-p8407999 | A-genome specific (napus-rapa) | 0.9856459    | 0.7204257    | not scorable | not scorable | 0.9752066 | 0.7485912 |
| 8070 | Bn-A03-p8408815 | A-genome specific (napus-rapa) | 0.9760765    | 0.4676016    | not scorable | not scorable | 0.9586777 | 0.5687731 |
| 8071 | Bn-A03-p8420805 | A-genome specific (napus-rapa) | 0.7177033    | 0.7934078    | not scorable | not scorable | 0.9917355 | 0.9205657 |
| 8072 | Bn-A03-p8439865 | A-genome specific (napus-rapa) | 0.9952153    | 0.862923     | not scorable | not scorable | 0.9917355 | 0.7611737 |
| 8073 | Bn-A03-p8454293 | A-genome specific (rapa only)  | not scorable | not scorable | not scorable | not scorable | 0.9917355 | 0.7845222 |
| 8074 | Bn-A03-p8467104 | A-genome specific (napus-rapa) | 0.9904306    | 0.6917644    | not scorable | not scorable | 0.9917355 | 0.6659946 |
| 8075 | Bn-A03-p8475614 | genome unspecific (all in)     | 0.9545454    | 0.3609864    | 0.9844961    | 0.8061702    | 1         | 0.8762643 |
| 8076 | Bn-A03-p8479803 | genome unspecific (all in)     | 0.9928229    | 0.3155419    | 1            | 0.762161     | 1         | 0.9095522 |
| 8077 | Bn-A03-p8480669 | A-genome specific (napus-rapa) | 0.923445     | 0.4297373    | not scorable | not scorable | 0.9834711 | 0.6956323 |
| 8078 | Bn-A03-p8483706 | A-genome specific (napus-rapa) | 0.9880383    | 0.8093553    | not scorable | not scorable | 0.9834711 | 0.7568502 |
| 8079 | Bn-A03-p8497543 | A-genome specific (napus-rapa) | 0.9856459    | 0.7652116    | not scorable | not scorable | 0.9917355 | 0.6539943 |
| 8080 | Bn-A03-p8554739 | A-genome specific (napus-rapa) | 0.9736842    | 0.7544846    | not scorable | not scorable | 0.9917355 | 0.7149889 |
| 8081 | Bn-A03-p8559617 | A-genome specific (napus-rapa) | 0.9473684    | 0.7055877    | not scorable | not scorable | 0.9917355 | 0.6857461 |
| 8082 | Bn-A03-p8559794 | A-genome specific (napus-rapa) | 0.9808612    | 0.4732807    | not scorable | not scorable | 1         | 0.6763545 |

|      |                 |                                |              |              |              |              |              |              |
|------|-----------------|--------------------------------|--------------|--------------|--------------|--------------|--------------|--------------|
| 8083 | Bn-A03-p8585196 | A-genome specific (rapa only)  | not scorable | not scorable | not scorable | not scorable | 0.9834711    | 0.765916     |
| 8084 | Bn-A03-p858910  | A-genome specific (napus-rapa) | 0.9976076    | 0.8514487    | not scorable | not scorable | 1            | 0.8497714    |
| 8085 | Bn-A03-p8620584 | A-genome specific (napus-rapa) | 0.9832536    | 0.4373923    | not scorable | not scorable | 1            | 0.9005054    |
| 8086 | Bn-A03-p8629992 | A-genome specific (rapa only)  | not scorable | not scorable | not scorable | not scorable | 1            | 0.8289879    |
| 8087 | Bn-A03-p8631833 | A-genome specific (napus-rapa) | 0.9880383    | 0.8025541    | not scorable | not scorable | 0.9917355    | 0.6806947    |
| 8088 | Bn-A03-p8632710 | A-genome specific (rapa only)  | not scorable | not scorable | not scorable | not scorable | 0.9338843    | 0.9205657    |
| 8089 | Bn-A03-p8637914 | A-genome specific (napus-rapa) | 0.9665072    | 0.7387698    | not scorable | not scorable | 0.9752066    | 0.7786468    |
| 8090 | Bn-A03-p8638217 | A-genome specific (napus-rapa) | 0.9736842    | 0.7155128    | not scorable | not scorable | 0.9917355    | 0.7819756    |
| 8091 | Bn-A03-p8642052 | A-genome specific (rapa only)  | not scorable | not scorable | not scorable | not scorable | 0.9752066    | 0.7835432    |
| 8092 | Bn-A03-p8645654 | A-genome specific (napus-rapa) | 0.9545454    | 0.6775714    | not scorable | not scorable | 0.9834711    | 0.7561993    |
| 8093 | Bn-A03-p8654614 | A-genome specific (napus-rapa) | 0.9736842    | 0.5815858    | not scorable | not scorable | 0.9752066    | 0.761075     |
| 8094 | Bn-A03-p8663803 | A-genome specific (napus-rapa) | 0.9880383    | 0.8783022    | not scorable | not scorable | 0.9917355    | 0.8349034    |
| 8095 | Bn-A03-p8665794 | A-genome specific (napus-rapa) | 0.9808612    | 0.8101007    | not scorable | not scorable | 0.9917355    | 0.6446292    |
| 8096 | Bn-A03-p8671468 | A-genome specific (napus-rapa) | 0.9976076    | 0.4231066    | not scorable | not scorable | 0.9752066    | 0.7455958    |
| 8097 | Bn-A03-p8671697 | A-genome specific (napus-rapa) | 0.9808612    | 0.5885524    | not scorable | not scorable | 0.9834711    | 0.7932267    |
| 8098 | Bn-A03-p8681690 | A-genome specific (napus-rapa) | 0.9760765    | 0.369589     | not scorable | not scorable | 0.9917355    | 0.7109153    |
| 8099 | Bn-A03-p8733974 | genome unspecific (all in)     | 0.9712918    | 0.2463539    | 0.9922481    | 0.6779475    | 0.9917355    | 0.6373128    |
| 8100 | Bn-A03-p8735039 | A-genome specific (napus-rapa) | 0.9880383    | 0.4804429    | not scorable | not scorable | 0.9586777    | 0.6910145    |
| 8101 | Bn-A03-p8741978 | A-genome specific (napus-rapa) | 0.9832536    | 0.7843004    | not scorable | not scorable | 0.9834711    | 0.7230071    |
| 8102 | Bn-A03-p8741996 | A-genome specific (napus-rapa) | 0.9952153    | 0.5569785    | not scorable | not scorable | 0.9834711    | 0.7475901    |
| 8103 | Bn-A03-p8745839 | genome unspecific (all in)     | 0.9425837    | 0.4220534    | 0.9612403    | 0.7897397    | 0.9090909    | 0.8268548    |
| 8104 | Bn-A03-p8756590 | A-genome specific (napus-rapa) | 0.9880383    | 0.911702     | not scorable | not scorable | 0.9917355    | 0.7954699    |
| 8105 | Bn-A03-p8764251 | A-genome specific (napus-rapa) | 0.9856459    | 0.781794     | not scorable | not scorable | 0.9834711    | 0.8124008    |
| 8106 | Bn-A03-p8764481 | A-genome specific (napus-rapa) | 0.9880383    | 0.8000137    | not scorable | not scorable | 0.9752066    | 0.7511868    |
| 8107 | Bn-A03-p8769576 | A-genome specific (napus-rapa) | 0.9808612    | 0.7925531    | not scorable | not scorable | 0.9752066    | 0.7328518    |
| 8108 | Bn-A03-p8802360 | A-genome specific (napus-rapa) | 0.9880383    | 0.830029     | not scorable | not scorable | 0.9834711    | 0.7302321    |
| 8109 | Bn-A03-p8805441 | A-genome specific (napus-rapa) | 0.9928229    | 0.7682233    | not scorable | not scorable | 0.9917355    | 0.7076876    |
| 8110 | Bn-A03-p8812807 | A-genome specific (napus-rapa) | 0.9928229    | 0.7059764    | not scorable | not scorable | 0.9669421    | 0.6588802    |
| 8111 | Bn-A03-p8822734 | A-genome specific (napus-rapa) | 0.9545454    | 0.5315421    | not scorable | not scorable | 1            | 0.802894     |
| 8112 | Bn-A03-p8823042 | all not scorable               | not scorable | not scorable | not scorable | not scorable | not scorable | not scorable |
| 8113 | Bn-A03-p8833016 | A-genome specific (napus-rapa) | 0.9856459    | 0.7759858    | not scorable | not scorable | 0.9834711    | 0.6910642    |
| 8114 | Bn-A03-p8836751 | A-genome specific (napus-rapa) | 0.937799     | 0.3300055    | not scorable | not scorable | 0.9752066    | 0.7521774    |
| 8115 | Bn-A03-p8842546 | A-genome specific (napus-rapa) | 0.9976076    | 0.4330713    | not scorable | not scorable | 1            | 0.794439     |

|      |                 |                                |              |              |              |              |              |              |              |           |
|------|-----------------|--------------------------------|--------------|--------------|--------------|--------------|--------------|--------------|--------------|-----------|
| 8116 | Bn-A03-p8850004 | A-genome specific (napus-rapa) | 0.930622     | 0.6505194    | not scorable | not scorable |              | 1            | 0.8976545    |           |
| 8117 | Bn-A03-p8850377 | A-genome specific (napus-rapa) | 0.9904306    | 0.8256539    | not scorable | not scorable |              | 1            | 0.8529564    |           |
| 8118 | Bn-A03-p8851043 | A-genome specific (napus-rapa) | 0.9258373    | 0.5602669    | not scorable | not scorable | 0.9504132    |              | 0.7088173    |           |
| 8119 | Bn-A03-p8851142 | A-genome specific (napus-rapa) | 0.9856459    | 0.7756077    | not scorable | not scorable | 0.9917355    |              | 0.7463047    |           |
| 8120 | Bn-A03-p8860638 | A-genome specific (napus-rapa) | 0.9712918    | 0.7110343    | not scorable | not scorable | 0.9834711    |              | 0.7140822    |           |
| 8121 | Bn-A03-p8861495 | A-genome specific (rapa only)  | not scorable | not scorable | not scorable | not scorable | 0.9834711    |              | 0.8360152    |           |
| 8122 | Bn-A03-p8881377 | A-genome specific (napus-rapa) | 0.9808612    | 0.6276909    | not scorable | not scorable | 0.9669421    |              | 0.7762519    |           |
| 8123 | Bn-A03-p8881585 | A-genome specific (napus-rapa) | 0.9856459    | 0.7473072    | not scorable | not scorable | 0.9834711    |              | 0.7268212    |           |
| 8124 | Bn-A03-p8883782 | A-genome specific (napus-rapa) | 0.9928229    | 0.8087612    | not scorable | not scorable | 0.9917355    |              | 0.839403     |           |
| 8125 | Bn-A03-p8883841 | A-genome specific (rapa only)  | not scorable | not scorable | not scorable | not scorable | 0.9752066    |              | 0.7288934    |           |
| 8126 | Bn-A03-p8897362 | A-genome specific (napus-rapa) | 0.9736842    | 0.725117     | not scorable | not scorable | 0.9917355    |              | 0.7080775    |           |
| 8127 | Bn-A03-p8906751 | A-genome specific (napus-rapa) | 0.9880383    | 0.7912863    | not scorable | not scorable | 0.9917355    |              | 0.7019222    |           |
| 8128 | Bn-A03-p8915240 | A-genome specific (napus-rapa) | 0.9904306    | 0.7710129    | not scorable | not scorable | 0.9917355    |              | 0.761231     |           |
| 8129 | Bn-A03-p8924852 | A-genome specific (napus-rapa) | 0.9712918    | 0.5209178    | not scorable | not scorable | 0.9669421    |              | 0.7831932    |           |
| 8130 | Bn-A03-p8952053 | A-genome specific (napus-rapa) | 0.9760765    | 0.3549931    | not scorable | not scorable | 0.9752066    |              | 0.7886239    |           |
| 8131 | Bn-A03-p8956355 | A-genome specific (napus-rapa) | 0.9832536    | 0.8501896    | not scorable | not scorable | 0.9669421    |              | 0.7751827    |           |
| 8132 | Bn-A03-p8957734 | A-genome specific (napus-rapa) | 0.9497608    | 0.7021428    | not scorable | not scorable |              | 1            | 0.756869     |           |
| 8133 | Bn-A03-p8960332 | A-genome specific (napus-rapa) | 0.9856459    | 0.5009062    | not scorable | not scorable | 0.9917355    |              | 0.753154     |           |
| 8134 | Bn-A03-p8973137 | A-genome specific (napus-rapa) | 0.9928229    | 0.4283671    | not scorable | not scorable |              | 1            | 0.6861063    |           |
| 8135 | Bn-A03-p8978761 | napus specific                 | 0.9545454    | 0.9373336    | not scorable | not scorable | not scorable | not scorable | not scorable |           |
| 8136 | Bn-A03-p898067  | A-genome specific (napus-rapa) | 0.9952153    | 0.5487018    | not scorable | not scorable | 0.9669421    |              | 0.7880925    |           |
| 8137 | Bn-A03-p8983947 | A-genome specific (napus-rapa) |              | 1            | 0.6971599    | not scorable | not scorable |              | 1            | 0.6006638 |
| 8138 | Bn-A03-p8987098 | A-genome specific (rapa only)  | not scorable | not scorable | not scorable | not scorable | 0.9834711    |              | 0.7425229    |           |
| 8139 | Bn-A03-p8987269 | A-genome specific (napus-rapa) | 0.7942584    | 0.9177062    | not scorable | not scorable | 0.9256198    |              | 0.8233967    |           |
| 8140 | Bn-A03-p8987820 | A-genome specific (rapa only)  | not scorable | not scorable | not scorable | not scorable | 0.9338843    |              | 0.9172689    |           |
| 8141 | Bn-A03-p9011801 | A-genome specific (rapa only)  | not scorable | not scorable | not scorable | not scorable | 0.9917355    |              | 0.7833462    |           |
| 8142 | Bn-A03-p9011966 | A-genome specific (napus-rapa) | 0.9473684    | 0.8213773    | not scorable | not scorable | 0.9917355    |              | 0.7067118    |           |
| 8143 | Bn-A03-p9020167 | A-genome specific (napus-rapa) | 0.9665072    | 0.8092616    | not scorable | not scorable | 0.9917355    |              | 0.7681311    |           |
| 8144 | Bn-A03-p9020291 | A-genome specific (napus-rapa) | 0.9736842    | 0.7745702    | not scorable | not scorable |              | 1            | 0.7303197    |           |
| 8145 | Bn-A03-p90436   | A-genome specific (napus-rapa) | 0.923445     | 0.7357419    | not scorable | not scorable | 0.9917355    |              | 0.7506878    |           |
| 8146 | Bn-A03-p9047380 | A-genome specific (napus-rapa) | 0.9545454    | 0.8764279    | not scorable | not scorable | 0.9256198    |              | 0.7893785    |           |
| 8147 | Bn-A03-p9093699 | A-genome specific (napus-rapa) | 0.9928229    | 0.7951738    | not scorable | not scorable | 0.9752066    |              | 0.695935     |           |
| 8148 | Bn-A03-p9098576 | A-genome specific (napus-rapa) | 0.6818182    | 0.8076818    | not scorable | not scorable | 0.9504132    |              | 0.9272014    |           |

|      |                 |                                |              |              |              |              |              |              |
|------|-----------------|--------------------------------|--------------|--------------|--------------|--------------|--------------|--------------|
| 8149 | Bn-A03-p9098773 | A-genome specific (napus-rapa) | 0.9784689    | 0.5690199    | not scorable | not scorable | 0.9917355    | 0.7165427    |
| 8150 | Bn-A03-p9100699 | A-genome specific (rapa only)  | not scorable | not scorable | not scorable | not scorable | 0.9917355    | 0.7610134    |
| 8151 | Bn-A03-p9115020 | A-genome specific (napus-rapa) | 0.9760765    | 0.7626681    | not scorable | not scorable | 1            | 0.8720064    |
| 8152 | Bn-A03-p912314  | A-genome specific (napus-rapa) | 0.9354067    | 0.7941422    | not scorable | not scorable | 0.9834711    | 0.8197823    |
| 8153 | Bn-A03-p9123542 | A-genome specific (napus-rapa) | 0.9617225    | 0.6339982    | not scorable | not scorable | 0.9834711    | 0.7958812    |
| 8154 | Bn-A03-p9124799 | A-genome specific (napus-rapa) | 0.9880383    | 0.7759107    | not scorable | not scorable | 0.9834711    | 0.8263959    |
| 8155 | Bn-A03-p9129107 | A-genome specific (napus-rapa) | 0.9641148    | 0.4291966    | not scorable | not scorable | 0.9586777    | 0.6976671    |
| 8156 | Bn-A03-p9143356 | A-genome specific (napus-rapa) | 0.9832536    | 0.8076818    | not scorable | not scorable | 0.9917355    | 0.7954005    |
| 8157 | Bn-A03-p9148822 | A-genome specific (napus-rapa) | 0.9593301    | 0.4197842    | not scorable | not scorable | 0.9917355    | 0.7096302    |
| 8158 | Bn-A03-p9170934 | A-genome specific (napus-rapa) | 1            | 0.4784003    | not scorable | not scorable | 0.9669421    | 0.7862108    |
| 8159 | Bn-A03-p9179284 | napus specific                 | 0.9952153    | 0.6522878    | not scorable | not scorable | not scorable | not scorable |
| 8160 | Bn-A03-p9179896 | A-genome specific (napus-rapa) | 0.9808612    | 0.3712496    | not scorable | not scorable | 1            | 0.7416984    |
| 8161 | Bn-A03-p9186605 | A-genome specific (napus-rapa) | 0.9880383    | 0.8187077    | not scorable | not scorable | 1            | 0.8566714    |
| 8162 | Bn-A03-p9191787 | A-genome specific (napus-rapa) | 0.9904306    | 0.3934736    | not scorable | not scorable | 0.9834711    | 0.6987166    |
| 8163 | Bn-A03-p9203389 | A-genome specific (napus-rapa) | 0.5023924    | 0.9074499    | not scorable | not scorable | 0.9752066    | 0.809663     |
| 8164 | Bn-A03-p9203536 | A-genome specific (napus-rapa) | 0.5          | 0.8673111    | not scorable | not scorable | 0.9917355    | 0.8327085    |
| 8165 | Bn-A03-p9203834 | A-genome specific (napus-rapa) | 0.5023924    | 0.8927962    | not scorable | not scorable | 0.9917355    | 0.7881667    |
| 8166 | Bn-A03-p9203992 | A-genome specific (napus-rapa) | 0.5          | 0.7895767    | not scorable | not scorable | 0.9586777    | 0.726112     |
| 8167 | Bn-A03-p9203999 | A-genome specific (napus-rapa) | 0.5023924    | 0.8285478    | not scorable | not scorable | 0.9834711    | 0.7294878    |
| 8168 | Bn-A03-p9208735 | A-genome specific (napus-rapa) | 0.9832536    | 0.7881516    | not scorable | not scorable | 0.9917355    | 0.8189138    |
| 8169 | Bn-A03-p9233645 | A-genome specific (napus-rapa) | 0.8181818    | 0.7980588    | not scorable | not scorable | 0.8512397    | 0.9045029    |
| 8170 | Bn-A03-p9243701 | A-genome specific (napus-rapa) | 0.9736842    | 0.5357692    | not scorable | not scorable | 0.9752066    | 0.8135148    |
| 8171 | Bn-A03-p9244195 | A-genome specific (napus-rapa) | 0.9545454    | 0.4738123    | not scorable | not scorable | 0.9917355    | 0.7388391    |
| 8172 | Bn-A03-p9245937 | A-genome specific (napus-rapa) | 0.9928229    | 0.5050273    | not scorable | not scorable | 1            | 0.7377167    |
| 8173 | Bn-A03-p9246222 | A-genome specific (napus-rapa) | 0.9784689    | 0.8299648    | not scorable | not scorable | 1            | 0.8685864    |
| 8174 | Bn-A03-p924676  | A-genome specific (napus-rapa) | 0.937799     | 0.82362      | not scorable | not scorable | 1            | 0.7849017    |
| 8175 | Bn-A03-p9247666 | A-genome specific (napus-rapa) | 0.9808612    | 0.8251132    | not scorable | not scorable | 1            | 0.8045345    |
| 8176 | Bn-A03-p9247798 | A-genome specific (napus-rapa) | 0.9760765    | 0.8211127    | not scorable | not scorable | 0.9834711    | 0.7969552    |
| 8177 | Bn-A03-p924780  | A-genome specific (napus-rapa) | 0.9258373    | 0.7988252    | not scorable | not scorable | 0.9917355    | 0.7193992    |
| 8178 | Bn-A03-p9250832 | genome unspecific (all in)     | 0.9641148    | 0.6307454    | 0.9767442    | 0.2193727    | 0.9669421    | 0.6678938    |
| 8179 | Bn-A03-p9255139 | A-genome specific (napus-rapa) | 0.9880383    | 0.7556924    | not scorable | not scorable | 1            | 0.7673302    |
| 8180 | Bn-A03-p9265554 | A-genome specific (napus-rapa) | 0.9904306    | 0.5388063    | not scorable | not scorable | 1            | 0.8319378    |
| 8181 | Bn-A03-p9266328 | A-genome specific (napus-rapa) | 0.9856459    | 0.8347671    | not scorable | not scorable | 0.9917355    | 0.7165243    |



|      |                 |                                |              |              |              |              |           |           |
|------|-----------------|--------------------------------|--------------|--------------|--------------|--------------|-----------|-----------|
| 8182 | Bn-A03-p927517  | A-genome specific (rapa only)  | not scorable | not scorable | not scorable | not scorable | 1         | 0.5875754 |
| 8183 | Bn-A03-p928009  | A-genome specific (napus-rapa) | 0.9210526    | 0.7507027    | not scorable | not scorable | 0.9834711 | 0.7298775 |
| 8184 | Bn-A03-p928274  | A-genome specific (napus-rapa) | 0.9186603    | 0.7185768    | not scorable | not scorable | 0.9917355 | 0.8020242 |
| 8185 | Bn-A03-p9300575 | A-genome specific (napus-rapa) | 0.9808612    | 0.4227254    | not scorable | not scorable | 0.9917355 | 0.724448  |
| 8186 | Bn-A03-p9301541 | A-genome specific (napus-rapa) | 0.9617225    | 0.651466     | not scorable | not scorable | 1         | 0.7045599 |
| 8187 | Bn-A03-p9303850 | A-genome specific (napus-rapa) | 0.4162679    | 0.9453188    | not scorable | not scorable | 0.9586777 | 0.7642528 |
| 8188 | Bn-A03-p9304563 | A-genome specific (napus-rapa) | 0.9784689    | 0.771987     | not scorable | not scorable | 0.9834711 | 0.7881145 |
| 8189 | Bn-A03-p9304885 | genome unspecific (all in)     | 0.9784689    | 0.219511     | 0.9922481    | 0.6636861    | 1         | 0.768774  |
| 8190 | Bn-A03-p9324653 | A-genome specific (napus-rapa) | 1            | 0.4331245    | not scorable | not scorable | 1         | 0.7229989 |
| 8191 | Bn-A03-p9328470 | A-genome specific (napus-rapa) | 0.9976076    | 0.2860115    | not scorable | not scorable | 0.9917355 | 0.6501398 |
| 8192 | Bn-A03-p9338698 | A-genome specific (napus-rapa) | 0.9904306    | 0.8710861    | not scorable | not scorable | 1         | 0.7626578 |
| 8193 | Bn-A03-p9343295 | A-genome specific (napus-rapa) | 0.9904306    | 0.7682336    | not scorable | not scorable | 0.9834711 | 0.6707665 |
| 8194 | Bn-A03-p9343716 | A-genome specific (napus-rapa) | 0.9976076    | 0.4753319    | not scorable | not scorable | 0.9917355 | 0.7652662 |
| 8195 | Bn-A03-p9357075 | A-genome specific (napus-rapa) | 0.9976076    | 0.5371368    | not scorable | not scorable | 1         | 0.7124085 |
| 8196 | Bn-A03-p9361280 | A-genome specific (napus-rapa) | 0.9880383    | 0.8418941    | not scorable | not scorable | 0.9586777 | 0.7349766 |
| 8197 | Bn-A03-p9382281 | A-genome specific (napus-rapa) | 0.9928229    | 0.8051531    | not scorable | not scorable | 0.9917355 | 0.9476676 |
| 8198 | Bn-A03-p9383602 | genome unspecific (all in)     | 1            | 0.4999238    | 0.9922481    | 0.3170122    | 1         | 0.4357498 |
| 8199 | Bn-A03-p9429437 | A-genome specific (napus-rapa) | 0.9928229    | 0.8178275    | not scorable | not scorable | 0.9834711 | 0.7696753 |
| 8200 | Bn-A03-p943531  | A-genome specific (napus-rapa) | 0.3325359    | 0.8559471    | not scorable | not scorable | 0.9834711 | 0.7129991 |
| 8201 | Bn-A03-p9439354 | A-genome specific (napus-rapa) | 0.9928229    | 0.5440177    | not scorable | not scorable | 1         | 0.7325223 |
| 8202 | Bn-A03-p9439893 | A-genome specific (napus-rapa) | 0.9880383    | 0.6743492    | not scorable | not scorable | 0.9752066 | 0.6523845 |
| 8203 | Bn-A03-p9448206 | A-genome specific (napus-rapa) | 0.9928229    | 0.6158956    | not scorable | not scorable | 0.9917355 | 0.5663684 |
| 8204 | Bn-A03-p9449316 | A-genome specific (napus-rapa) | 0.9904306    | 0.4329319    | not scorable | not scorable | 0.9917355 | 0.7178582 |
| 8205 | Bn-A03-p9468025 | A-genome specific (napus-rapa) | 0.9808612    | 0.8243108    | not scorable | not scorable | 0.9834711 | 0.8135014 |
| 8206 | Bn-A03-p9476053 | A-genome specific (napus-rapa) | 1            | 0.4381896    | not scorable | not scorable | 0.9752066 | 0.785815  |
| 8207 | Bn-A03-p9480203 | A-genome specific (napus-rapa) | 0.9808612    | 0.7954422    | not scorable | not scorable | 1         | 0.7580955 |
| 8208 | Bn-A03-p9485365 | A-genome specific (napus-rapa) | 0.9856459    | 0.504979     | not scorable | not scorable | 0.9917355 | 0.719432  |
| 8209 | Bn-A03-p9488435 | A-genome specific (napus-rapa) | 0.9712918    | 0.7200912    | not scorable | not scorable | 0.9917355 | 0.7169514 |
| 8210 | Bn-A03-p9497697 | A-genome specific (napus-rapa) | 0.9928229    | 0.8077534    | not scorable | not scorable | 1         | 0.7906294 |
| 8211 | Bn-A03-p9497821 | A-genome specific (napus-rapa) | 0.9808612    | 0.7028803    | not scorable | not scorable | 0.9917355 | 0.7636057 |
| 8212 | Bn-A03-p950999  | A-genome specific (napus-rapa) | 0.937799     | 0.6629262    | not scorable | not scorable | 1         | 0.7252899 |
| 8213 | Bn-A03-p951365  | A-genome specific (napus-rapa) | 0.9258373    | 0.7399897    | not scorable | not scorable | 1         | 0.694619  |
| 8214 | Bn-A03-p952091  | A-genome specific (napus-rapa) | 0.9282297    | 0.7751124    | not scorable | not scorable | 1         | 0.7791197 |

|                      |                                |           |           |              |              |           |           |
|----------------------|--------------------------------|-----------|-----------|--------------|--------------|-----------|-----------|
| 8215 Bn-A03-p9522072 | A-genome specific (napus-rapa) | 0.9976076 | 0.5446739 | not scorable | not scorable | 0.9917355 | 0.787383  |
| 8216 Bn-A03-p9525820 | A-genome specific (napus-rapa) | 0.9784689 | 0.5567996 | not scorable | not scorable | 1         | 0.8379921 |
| 8217 Bn-A03-p9537155 | A-genome specific (napus-rapa) | 0.9665072 | 0.7811695 | not scorable | not scorable | 0.9669421 | 0.7156999 |
| 8218 Bn-A03-p9537618 | A-genome specific (napus-rapa) | 0.9904306 | 0.8132609 | not scorable | not scorable | 0.9917355 | 0.73758   |
| 8219 Bn-A03-p955176  | A-genome specific (napus-rapa) | 0.923445  | 0.8029299 | not scorable | not scorable | 0.9917355 | 0.7592824 |
| 8220 Bn-A03-p9564515 | genome unspecific (all in)     | 0.8851675 | 0.6878916 | 0.875969     | 0.6828715    | 0.9917355 | 0.8827738 |
| 8221 Bn-A03-p9567767 | A-genome specific (napus-rapa) | 0.9832536 | 0.4896149 | not scorable | not scorable | 0.9669421 | 0.5896956 |
| 8222 Bn-A03-p9601581 | A-genome specific (napus-rapa) | 0.9760765 | 0.8438662 | not scorable | not scorable | 0.9752066 | 0.7880756 |
| 8223 Bn-A03-p9602074 | A-genome specific (napus-rapa) | 0.9736842 | 0.85719   | not scorable | not scorable | 0.9338843 | 0.7268355 |
| 8224 Bn-A03-p9605319 | A-genome specific (napus-rapa) | 0.9880383 | 0.7125748 | not scorable | not scorable | 0.9917355 | 0.6493331 |
| 8225 Bn-A03-p9613933 | A-genome specific (napus-rapa) | 1         | 0.5445434 | not scorable | not scorable | 0.9669421 | 0.5570701 |
| 8226 Bn-A03-p9615126 | A-genome specific (napus-rapa) | 0.9593301 | 0.207033  | not scorable | not scorable | 0.9834711 | 0.7785882 |
| 8227 Bn-A03-p9618630 | A-genome specific (napus-rapa) | 0.9904306 | 0.7337993 | not scorable | not scorable | 1         | 0.7019977 |
| 8228 Bn-A03-p9626063 | A-genome specific (napus-rapa) | 0.9330143 | 0.4540745 | not scorable | not scorable | 1         | 0.716634  |
| 8229 Bn-A03-p9627365 | A-genome specific (napus-rapa) | 0.9880383 | 0.8284228 | not scorable | not scorable | 0.9834711 | 0.8236209 |
| 8230 Bn-A03-p9637487 | A-genome specific (napus-rapa) | 0.9856459 | 0.773469  | not scorable | not scorable | 0.9752066 | 0.7566584 |
| 8231 Bn-A03-p9638708 | A-genome specific (napus-rapa) | 0.9784689 | 0.7591976 | not scorable | not scorable | 1         | 0.7067255 |
| 8232 Bn-A03-p9638726 | A-genome specific (napus-rapa) | 0.9784689 | 0.6730143 | not scorable | not scorable | 1         | 0.6701939 |
| 8233 Bn-A03-p9641671 | A-genome specific (napus-rapa) | 0.9665072 | 0.7145602 | not scorable | not scorable | 0.9834711 | 0.8776289 |
| 8234 Bn-A03-p9651526 | A-genome specific (napus-rapa) | 0.9617225 | 0.5007778 | not scorable | not scorable | 1         | 0.7901848 |
| 8235 Bn-A03-p9657864 | A-genome specific (napus-rapa) | 0.9880383 | 0.3346985 | not scorable | not scorable | 1         | 0.8214939 |
| 8236 Bn-A03-p9660869 | A-genome specific (napus-rapa) | 0.9904306 | 0.822892  | not scorable | not scorable | 0.9917355 | 0.7876235 |
| 8237 Bn-A03-p9677969 | A-genome specific (napus-rapa) | 0.9832536 | 0.7930467 | not scorable | not scorable | 0.9917355 | 0.7781708 |
| 8238 Bn-A03-p9678981 | A-genome specific (napus-rapa) | 0.9904306 | 0.5264527 | not scorable | not scorable | 0.9752066 | 0.856342  |
| 8239 Bn-A03-p9680882 | A-genome specific (napus-rapa) | 0.9832536 | 0.7821287 | not scorable | not scorable | 0.9669421 | 0.8207156 |
| 8240 Bn-A03-p9705481 | A-genome specific (napus-rapa) | 0.9856459 | 0.3125615 | not scorable | not scorable | 0.9917355 | 0.7238167 |
| 8241 Bn-A03-p9706640 | A-genome specific (napus-rapa) | 0.9976076 | 0.5269832 | not scorable | not scorable | 1         | 0.6799201 |
| 8242 Bn-A03-p9734588 | A-genome specific (napus-rapa) | 0.9880383 | 0.75969   | not scorable | not scorable | 0.9834711 | 0.7822676 |
| 8243 Bn-A03-p9747710 | A-genome specific (napus-rapa) | 0.9904306 | 0.8018699 | not scorable | not scorable | 0.9917355 | 0.7112521 |
| 8244 Bn-A03-p9747824 | A-genome specific (napus-rapa) | 0.9856459 | 0.7656601 | not scorable | not scorable | 1         | 0.7134107 |
| 8245 Bn-A03-p974894  | A-genome specific (napus-rapa) | 0.9019139 | 0.5746238 | not scorable | not scorable | 0.9917355 | 0.6071299 |
| 8246 Bn-A03-p9751621 | A-genome specific (napus-rapa) | 0.9904306 | 0.7924676 | not scorable | not scorable | 0.9917355 | 0.7797557 |
| 8247 Bn-A03-p9758514 | A-genome specific (napus-rapa) | 0.9832536 | 0.813787  | not scorable | not scorable | 0.9752066 | 0.7772134 |

|      |                 |                                   |              |              |              |              |              |              |
|------|-----------------|-----------------------------------|--------------|--------------|--------------|--------------|--------------|--------------|
| 8248 | Bn-A03-p9764680 | A-genome specific (napus-rapa)    | 0.9904306    | 0.3219271    | not scorable | not scorable | 1            | 0.6783624    |
| 8249 | Bn-A03-p9765420 | A-genome specific (napus-rapa)    | 0.9928229    | 0.8496934    | not scorable | not scorable | 0.9917355    | 0.824485     |
| 8250 | Bn-A03-p9765623 | A-genome specific (napus-rapa)    | 0.9928229    | 0.7278595    | not scorable | not scorable | 0.9752066    | 0.858018     |
| 8251 | Bn-A03-p9818699 | A-genome specific (napus-rapa)    | 0.9928229    | 0.7417248    | not scorable | not scorable | 0.9752066    | 0.708764     |
| 8252 | Bn-A03-p9819365 | A-genome specific (napus-rapa)    | 0.9832536    | 0.8683464    | not scorable | not scorable | 0.9917355    | 0.7144147    |
| 8253 | Bn-A03-p9819389 | A-genome specific (napus-rapa)    | 0.9952153    | 0.7879774    | not scorable | not scorable | 0.9834711    | 0.7665128    |
| 8254 | Bn-A03-p9823618 | A-genome specific (napus-rapa)    | 0.9976076    | 0.422529     | not scorable | not scorable | 0.9834711    | 0.7146232    |
| 8255 | Bn-A03-p9825032 | A-genome specific (napus-rapa)    | 1            | 0.3567328    | not scorable | not scorable | 1            | 0.7154919    |
| 8256 | Bn-A03-p9833648 | A-genome specific (napus-rapa)    | 0.9808612    | 0.7212242    | not scorable | not scorable | 0.9834711    | 0.8197204    |
| 8257 | Bn-A03-p9836757 | A-genome specific (napus-rapa)    | 0.9856459    | 0.7402512    | not scorable | not scorable | 0.9834711    | 0.703786     |
| 8258 | Bn-A03-p9839212 | A-genome specific (napus-rapa)    | 0.9976076    | 0.4739356    | not scorable | not scorable | 1            | 0.8268818    |
| 8259 | Bn-A03-p9847680 | A-genome specific (napus-rapa)    | 0.9904306    | 0.4366435    | not scorable | not scorable | 0.9917355    | 0.8222803    |
| 8260 | Bn-A03-p9856465 | A-genome specific (napus-rapa)    | 0.9760765    | 0.8058246    | not scorable | not scorable | 0.9917355    | 0.8192184    |
| 8261 | Bn-A03-p9856923 | A-genome specific (napus-rapa)    | 0.9952153    | 0.7556314    | not scorable | not scorable | 1            | 0.7578101    |
| 8262 | Bn-A03-p9863138 | A-genome specific (napus-rapa)    | 0.9712918    | 0.7400446    | not scorable | not scorable | 0.9917355    | 0.6763602    |
| 8263 | Bn-A03-p9863553 | A-genome specific (napus-rapa)    | 0.9808612    | 0.8178373    | not scorable | not scorable | 0.9834711    | 0.819433     |
| 8264 | Bn-A03-p9863600 | A-genome specific (napus-rapa)    | 0.9784689    | 0.7930661    | not scorable | not scorable | 0.9917355    | 0.8327429    |
| 8265 | Bn-A03-p9869156 | A-genome specific (napus-rapa)    | 0.9832536    | 0.7287478    | not scorable | not scorable | 0.9917355    | 0.7020041    |
| 8266 | Bn-A03-p9869182 | genome unspecific (oleracea-rapa) | not scorable | not scorable |              | 1            | 0.74485      | 0.9917355    |
| 8267 | Bn-A03-p9873327 | A-genome specific (napus-rapa)    | 0.9760765    | 0.7071537    | not scorable | not scorable | 0.9917355    | 0.6880409    |
| 8268 | Bn-A03-p9873384 | A-genome specific (napus-rapa)    | 0.9497608    | 0.7196521    | not scorable | not scorable | 1            | 0.7514223    |
| 8269 | Bn-A03-p9876378 | napus specific                    | 0.9641148    | 0.3372435    | not scorable | not scorable | not scorable | not scorable |
| 8270 | Bn-A03-p9883544 | A-genome specific (napus-rapa)    | 1            | 0.5696082    | not scorable | not scorable | 0.9917355    | 0.8124406    |
| 8271 | Bn-A03-p9899417 | A-genome specific (napus-rapa)    | 0.9904306    | 0.5360056    | not scorable | not scorable | 0.9917355    | 0.6932496    |
| 8272 | Bn-A03-p991949  | A-genome specific (napus-rapa)    | 0.937799     | 0.7882087    | not scorable | not scorable | 0.9917355    | 0.6646572    |
| 8273 | Bn-A03-p9920847 | A-genome specific (napus-rapa)    | 0.9856459    | 0.7390603    | not scorable | not scorable | 0.9917355    | 0.7579179    |
| 8274 | Bn-A03-p9921379 | A-genome specific (napus-rapa)    | 0.9736842    | 0.7923144    | not scorable | not scorable | 1            | 0.72553      |
| 8275 | Bn-A03-p9921928 | A-genome specific (napus-rapa)    | 0.9808612    | 0.7132422    | not scorable | not scorable | 0.9669421    | 0.8813163    |
| 8276 | Bn-A03-p9924047 | A-genome specific (napus-rapa)    | 0.9665072    | 0.8160322    | not scorable | not scorable | 1            | 0.834636     |
| 8277 | Bn-A03-p9925289 | A-genome specific (napus-rapa)    | 0.9784689    | 0.7936907    | not scorable | not scorable | 0.8429752    | 0.8380996    |
| 8278 | Bn-A03-p9925550 | A-genome specific (napus-rapa)    | 0.9784689    | 0.7453971    | not scorable | not scorable | 0.9917355    | 0.7933823    |
| 8279 | Bn-A03-p9926783 | A-genome specific (napus-rapa)    | 0.9928229    | 0.7663506    | not scorable | not scorable | 0.9917355    | 0.841835     |
| 8280 | Bn-A03-p9939018 | A-genome specific (napus-rapa)    | 0.9736842    | 0.7517345    | not scorable | not scorable | 0.9669421    | 0.759119     |

|                       |                                |           |           |              |              |           |           |
|-----------------------|--------------------------------|-----------|-----------|--------------|--------------|-----------|-----------|
| 8281 Bn-A03-p9966625  | A-genome specific (napus-rapa) | 1         | 0.4490254 | not scorable | not scorable | 1         | 0.8289795 |
| 8282 Bn-A03-p9969989  | A-genome specific (napus-rapa) | 0.9952153 | 0.6578659 | not scorable | not scorable | 1         | 0.7479122 |
| 8283 Bn-A04-p1001237  | A-genome specific (napus-rapa) | 0.9952153 | 0.8207692 | not scorable | not scorable | 1         | 0.7500455 |
| 8284 Bn-A04-p10016854 | A-genome specific (napus-rapa) | 0.9976076 | 0.8386101 | not scorable | not scorable | 1         | 0.813361  |
| 8285 Bn-A04-p10043859 | A-genome specific (napus-rapa) | 0.9952153 | 0.7882869 | not scorable | not scorable | 0.9917355 | 0.7368809 |
| 8286 Bn-A04-p10049865 | A-genome specific (napus-rapa) | 0.9928229 | 0.843116  | not scorable | not scorable | 1         | 0.8045247 |
| 8287 Bn-A04-p10049966 | A-genome specific (napus-rapa) | 0.9952153 | 0.8420658 | not scorable | not scorable | 0.9752066 | 0.7369736 |
| 8288 Bn-A04-p10054968 | A-genome specific (napus-rapa) | 0.9976076 | 0.843972  | not scorable | not scorable | 1         | 0.7769243 |
| 8289 Bn-A04-p10056980 | A-genome specific (napus-rapa) | 0.9976076 | 0.8318204 | not scorable | not scorable | 1         | 0.8339064 |
| 8290 Bn-A04-p10058358 | A-genome specific (napus-rapa) | 0.9976076 | 0.8516029 | not scorable | not scorable | 1         | 0.724456  |
| 8291 Bn-A04-p10059165 | A-genome specific (napus-rapa) | 0.9976076 | 0.8318616 | not scorable | not scorable | 0.9917355 | 0.7225745 |
| 8292 Bn-A04-p10069116 | A-genome specific (napus-rapa) | 0.9952153 | 0.7280481 | not scorable | not scorable | 0.9752066 | 0.7994025 |
| 8293 Bn-A04-p10071085 | A-genome specific (napus-rapa) | 0.9952153 | 0.8072441 | not scorable | not scorable | 0.9917355 | 0.7467128 |
| 8294 Bn-A04-p1007534  | A-genome specific (napus-rapa) | 1         | 0.8366807 | not scorable | not scorable | 0.9669421 | 0.7097182 |
| 8295 Bn-A04-p10085135 | A-genome specific (napus-rapa) | 0.9952153 | 0.8560814 | not scorable | not scorable | 0.9917355 | 0.8062136 |
| 8296 Bn-A04-p10085844 | A-genome specific (napus-rapa) | 0.9928229 | 0.6696359 | not scorable | not scorable | 0.9834711 | 0.7779803 |
| 8297 Bn-A04-p10087754 | A-genome specific (napus-rapa) | 0.9976076 | 0.8179201 | not scorable | not scorable | 0.9917355 | 0.7036551 |
| 8298 Bn-A04-p10088142 | A-genome specific (napus-rapa) | 0.9976076 | 0.7769604 | not scorable | not scorable | 1         | 0.7135277 |
| 8299 Bn-A04-p10088385 | A-genome specific (napus-rapa) | 0.9952153 | 0.7859275 | not scorable | not scorable | 0.9834711 | 0.8122377 |
| 8300 Bn-A04-p10088445 | A-genome specific (napus-rapa) | 0.9976076 | 0.7772551 | not scorable | not scorable | 0.9917355 | 0.7788066 |
| 8301 Bn-A04-p10088570 | A-genome specific (napus-rapa) | 0.9976076 | 0.6487384 | not scorable | not scorable | 0.9834711 | 0.6547102 |
| 8302 Bn-A04-p10089027 | A-genome specific (napus-rapa) | 0.9928229 | 0.8231288 | not scorable | not scorable | 0.9834711 | 0.6673149 |
| 8303 Bn-A04-p10089238 | A-genome specific (napus-rapa) | 0.9976076 | 0.8389751 | not scorable | not scorable | 0.9917355 | 0.7967852 |
| 8304 Bn-A04-p10089301 | A-genome specific (napus-rapa) | 0.9904306 | 0.7732738 | not scorable | not scorable | 0.9917355 | 0.7759476 |
| 8305 Bn-A04-p10089384 | A-genome specific (napus-rapa) | 0.9976076 | 0.6814407 | not scorable | not scorable | 0.9917355 | 0.7043613 |
| 8306 Bn-A04-p10089680 | A-genome specific (napus-rapa) | 0.9976076 | 0.8483146 | not scorable | not scorable | 0.9917355 | 0.8021637 |
| 8307 Bn-A04-p10089715 | A-genome specific (napus-rapa) | 0.9976076 | 0.568394  | not scorable | not scorable | 1         | 0.7419648 |
| 8308 Bn-A04-p10090470 | A-genome specific (napus-rapa) | 0.9976076 | 0.7574509 | not scorable | not scorable | 1         | 0.5943417 |
| 8309 Bn-A04-p10093618 | A-genome specific (napus-rapa) | 0.9952153 | 0.8437599 | not scorable | not scorable | 0.9917355 | 0.6536983 |
| 8310 Bn-A04-p10094831 | A-genome specific (napus-rapa) | 0.9976076 | 0.7979577 | not scorable | not scorable | 1         | 0.7247049 |
| 8311 Bn-A04-p10099096 | A-genome specific (napus-rapa) | 0.9976076 | 0.4986041 | not scorable | not scorable | 0.9917355 | 0.7146772 |
| 8312 Bn-A04-p1009976  | A-genome specific (napus-rapa) | 0.9976076 | 0.8549963 | not scorable | not scorable | 1         | 0.8335614 |
| 8313 Bn-A04-p10101293 | A-genome specific (napus-rapa) | 0.9976076 | 0.8632371 | not scorable | not scorable | 0.9917355 | 0.7997406 |

|      |                  |                                   |              |              |              |              |              |              |
|------|------------------|-----------------------------------|--------------|--------------|--------------|--------------|--------------|--------------|
| 8314 | Bn-A04-p10103888 | A-genome specific (napus-rapa)    | 0.9952153    | 0.8219081    | not scorable | not scorable | 0.9834711    | 0.7100585    |
| 8315 | Bn-A04-p10104666 | A-genome specific (napus-rapa)    | 0.9976076    | 0.8416846    | not scorable | not scorable | 0.9917355    | 0.7556812    |
| 8316 | Bn-A04-p10108610 | A-genome specific (napus-rapa)    | 0.9976076    | 0.7929857    | not scorable | not scorable | 0.9917355    | 0.8036009    |
| 8317 | Bn-A04-p10113831 | A-genome specific (napus-rapa)    | 0.9976076    | 0.7879074    | not scorable | not scorable | 0.9917355    | 0.7410045    |
| 8318 | Bn-A04-p10113969 | A-genome specific (napus-rapa)    | 0.9976076    | 0.7823327    | not scorable | not scorable | 0.9917355    | 0.765747     |
| 8319 | Bn-A04-p10129538 | A-genome specific (napus-rapa)    | 0.9808612    | 0.8399643    | not scorable | not scorable | 0.6528926    | 0.7571167    |
| 8320 | Bn-A04-p10154400 | A-genome specific (napus-rapa)    | 1            | 0.5451833    | not scorable | not scorable | 1            | 0.6887994    |
| 8321 | Bn-A04-p10155907 | A-genome specific (napus-rapa)    | 0.9976076    | 0.7024054    | not scorable | not scorable | 1            | 0.6694872    |
| 8322 | Bn-A04-p10176387 | A-genome specific (napus-rapa)    | 0.9928229    | 0.8513263    | not scorable | not scorable | 0.9834711    | 0.9176717    |
| 8323 | Bn-A04-p10182453 | A-genome specific (napus-rapa)    | 0.9976076    | 0.8641753    | not scorable | not scorable | 0.9834711    | 0.7448161    |
| 8324 | Bn-A04-p1018807  | A-genome specific (napus-rapa)    | 0.9952153    | 0.8483796    | not scorable | not scorable | 0.9834711    | 0.7734122    |
| 8325 | Bn-A04-p10188827 | A-genome specific (napus-rapa)    | 0.9976076    | 0.8437311    | not scorable | not scorable | 1            | 0.6903697    |
| 8326 | Bn-A04-p10196289 | A-genome specific (napus-rapa)    | 0.9952153    | 0.3453643    | not scorable | not scorable | 1            | 0.6625491    |
| 8327 | Bn-A04-p1021879  | A-genome specific (napus-rapa)    | 0.9832536    | 0.6289667    | not scorable | not scorable | 0.9669421    | 0.7084547    |
| 8328 | Bn-A04-p10250633 | A-genome specific (napus-rapa)    | 0.9976076    | 0.8435445    | not scorable | not scorable | 0.9917355    | 0.6931905    |
| 8329 | Bn-A04-p10261874 | A-genome specific (napus-rapa)    | 1            | 0.4218935    | not scorable | not scorable | 0.9752066    | 0.679301     |
| 8330 | Bn-A04-p10286035 | A-genome specific (rapa only)     | not scorable | not scorable | not scorable | not scorable | 0.9173554    | 0.6801589    |
| 8331 | Bn-A04-p10288476 | napus specific                    | 0.8779904    | 0.5105038    | not scorable | not scorable | not scorable | not scorable |
| 8332 | Bn-A04-p1032336  | A-genome specific (napus-rapa)    | 0.9976076    | 0.8285049    | not scorable | not scorable | 1            | 0.6066822    |
| 8333 | Bn-A04-p1036308  | A-genome specific (napus-rapa)    | 0.9904306    | 0.316713     | not scorable | not scorable | 0.9917355    | 0.8012068    |
| 8334 | Bn-A04-p10372116 | A-genome specific (napus-rapa)    | 0.9928229    | 0.8525689    | not scorable | not scorable | 0.9917355    | 0.7980971    |
| 8335 | Bn-A04-p10383434 | A-genome specific (napus-rapa)    | 0.9641148    | 0.3800404    | not scorable | not scorable | 0.9917355    | 0.7010307    |
| 8336 | Bn-A04-p10387804 | A-genome specific (napus-rapa)    | 0.9736842    | 0.85525      | not scorable | not scorable | 1            | 0.6937472    |
| 8337 | Bn-A04-p10393460 | A-genome specific (napus-rapa)    | 0.9665072    | 0.8327757    | not scorable | not scorable | 0.9752066    | 0.7197168    |
| 8338 | Bn-A04-p1040916  | genome unspecific (oleracea-rapa) | not scorable | not scorable | 0.9844961    | 0.2614505    | 0.9917355    | 0.6735559    |
| 8339 | Bn-A04-p1042273  | A-genome specific (napus-rapa)    | 0.9832536    | 0.7321724    | not scorable | not scorable | 0.9669421    | 0.6387057    |
| 8340 | Bn-A04-p1043111  | A-genome specific (napus-rapa)    | 0.9856459    | 0.7037452    | not scorable | not scorable | 1            | 0.786476     |
| 8341 | Bn-A04-p10434805 | A-genome specific (napus-rapa)    | 1            | 0.466299     | not scorable | not scorable | 0.9752066    | 0.7657341    |
| 8342 | Bn-A04-p10458946 | A-genome specific (napus-rapa)    | 0.9665072    | 0.7514317    | not scorable | not scorable | 0.9586777    | 0.7845129    |
| 8343 | Bn-A04-p10464942 | napus specific                    | 0.9976076    | 0.7759518    | not scorable | not scorable | not scorable | not scorable |
| 8344 | Bn-A04-p1048288  | A-genome specific (napus-rapa)    | 1            | 0.8376964    | not scorable | not scorable | 0.9752066    | 0.7805875    |
| 8345 | Bn-A04-p10490223 | A-genome specific (napus-rapa)    | 0.9928229    | 0.7575678    | not scorable | not scorable | 0.9752066    | 0.7975682    |
| 8346 | Bn-A04-p10490380 | A-genome specific (napus-rapa)    | 0.9473684    | 0.7800913    | not scorable | not scorable | 1            | 0.8081351    |

|      |                  |                                   |              |              |              |              |              |              |
|------|------------------|-----------------------------------|--------------|--------------|--------------|--------------|--------------|--------------|
| 8347 | Bn-A04-p10494765 | A-genome specific (napus-rapa)    | 0.9521531    | 0.7182139    | not scorable | not scorable | 0.9917355    | 0.724129     |
| 8348 | Bn-A04-p10502015 | A-genome specific (napus-rapa)    | 0.9784689    | 0.7156128    | not scorable | not scorable | 1            | 0.6882113    |
| 8349 | Bn-A04-p10503082 | A-genome specific (napus-rapa)    | 0.9904306    | 0.7761877    | not scorable | not scorable | 0.9504132    | 0.679795     |
| 8350 | Bn-A04-p10515374 | A-genome specific (napus-rapa)    | 0.9736842    | 0.7316802    | not scorable | not scorable | 1            | 0.7532828    |
| 8351 | Bn-A04-p10541268 | A-genome specific (napus-rapa)    | 0.9784689    | 0.6421807    | not scorable | not scorable | 0.9917355    | 0.7863185    |
| 8352 | Bn-A04-p10555408 | A-genome specific (napus-rapa)    | 0.9545454    | 0.4772646    | not scorable | not scorable | 0.9669421    | 0.6877676    |
| 8353 | Bn-A04-p10559481 | A-genome specific (napus-rapa)    | 0.9880383    | 0.7976924    | not scorable | not scorable | 0.9669421    | 0.6385577    |
| 8354 | Bn-A04-p10560896 | A-genome specific (napus-rapa)    | 0.9904306    | 0.7484185    | not scorable | not scorable | 0.9752066    | 0.6769026    |
| 8355 | Bn-A04-p10566018 | A-genome specific (napus-rapa)    | 0.9928229    | 0.5253142    | not scorable | not scorable | 1            | 0.7069696    |
| 8356 | Bn-A04-p10592914 | all not scorable                  | not scorable | not scorable | not scorable | not scorable | not scorable | not scorable |
| 8357 | Bn-A04-p10600455 | A-genome specific (napus-rapa)    | 0.9569378    | 0.5473564    | not scorable | not scorable | 0.9917355    | 0.8063386    |
| 8358 | Bn-A04-p10602815 | genome unspecific (oleracea-rapa) | not scorable | not scorable | 0.9844961    | 0.6821816    | 0.9752066    | 0.6242504    |
| 8359 | Bn-A04-p10608772 | A-genome specific (napus-rapa)    | 0.9617225    | 0.7889425    | not scorable | not scorable | 1            | 0.64634      |
| 8360 | Bn-A04-p1062119  | A-genome specific (napus-rapa)    | 1            | 0.8512694    | not scorable | not scorable | 0.9917355    | 0.7979999    |
| 8361 | Bn-A04-p10628643 | A-genome specific (napus-rapa)    | 0.7966507    | 0.8336589    | not scorable | not scorable | 0.9834711    | 0.6700917    |
| 8362 | Bn-A04-p10628977 | A-genome specific (napus-rapa)    | 0.9808612    | 0.7951728    | not scorable | not scorable | 1            | 0.7051874    |
| 8363 | Bn-A04-p10630934 | A-genome specific (napus-rapa)    | 0.9880383    | 0.762882     | not scorable | not scorable | 0.9834711    | 0.7000063    |
| 8364 | Bn-A04-p10649540 | A-genome specific (napus-rapa)    | 0.9641148    | 0.7857676    | not scorable | not scorable | 0.9917355    | 0.7255757    |
| 8365 | Bn-A04-p1065480  | A-genome specific (napus-rapa)    | 1            | 0.359257     | not scorable | not scorable | 1            | 0.7893053    |
| 8366 | Bn-A04-p10661890 | A-genome specific (napus-rapa)    | 0.9593301    | 0.6469404    | not scorable | not scorable | 1            | 0.7895319    |
| 8367 | Bn-A04-p10661931 | A-genome specific (napus-rapa)    | 0.9904306    | 0.7546182    | not scorable | not scorable | 0.9917355    | 0.7384813    |
| 8368 | Bn-A04-p10662404 | A-genome specific (napus-rapa)    | 0.9665072    | 0.7383147    | not scorable | not scorable | 0.9834711    | 0.6824803    |
| 8369 | Bn-A04-p10671164 | A-genome specific (napus-rapa)    | 0.9880383    | 0.688552     | not scorable | not scorable | 0.9752066    | 0.6951733    |
| 8370 | Bn-A04-p10671721 | A-genome specific (napus-rapa)    | 0.9688995    | 0.8310868    | not scorable | not scorable | 1            | 0.708733     |
| 8371 | Bn-A04-p10680523 | A-genome specific (napus-rapa)    | 0.9545454    | 0.8276861    | not scorable | not scorable | 0.9752066    | 0.81874      |
| 8372 | Bn-A04-p10688504 | A-genome specific (napus-rapa)    | 0.9688995    | 0.424396     | not scorable | not scorable | 0.9752066    | 0.7267343    |
| 8373 | Bn-A04-p1070815  | A-genome specific (napus-rapa)    | 0.9760765    | 0.8646542    | not scorable | not scorable | 0.9752066    | 0.781979     |
| 8374 | Bn-A04-p10718521 | A-genome specific (napus-rapa)    | 0.9952153    | 0.7794726    | not scorable | not scorable | 1            | 0.6799201    |
| 8375 | Bn-A04-p10719274 | A-genome specific (napus-rapa)    | 0.9880383    | 0.7935993    | not scorable | not scorable | 0.9834711    | 0.7245079    |
| 8376 | Bn-A04-p10719331 | A-genome specific (napus-rapa)    | 0.9952153    | 0.8056173    | not scorable | not scorable | 0.9917355    | 0.666648     |
| 8377 | Bn-A04-p10744003 | A-genome specific (napus-rapa)    | 0.9928229    | 0.838342     | not scorable | not scorable | 0.9669421    | 0.7194893    |
| 8378 | Bn-A04-p10748559 | A-genome specific (napus-rapa)    | 0.9808612    | 0.8149921    | not scorable | not scorable | 0.9834711    | 0.6947346    |
| 8379 | Bn-A04-p10759605 | A-genome specific (napus-rapa)    | 0.9808612    | 0.8049639    | not scorable | not scorable | 0.9834711    | 0.7862172    |

|      |                  |                                   |              |              |              |              |           |           |
|------|------------------|-----------------------------------|--------------|--------------|--------------|--------------|-----------|-----------|
| 8380 | Bn-A04-p10759783 | A-genome specific (napus-rapa)    | 0.9904306    | 0.7786547    | not scorable | not scorable | 0.9834711 | 0.7103407 |
| 8381 | Bn-A04-p10760138 | A-genome specific (napus-rapa)    | 0.9712918    | 0.858559     | not scorable | not scorable | 0.9917355 | 0.7498785 |
| 8382 | Bn-A04-p10760352 | A-genome specific (napus-rapa)    | 0.9760765    | 0.7394434    | not scorable | not scorable | 0.9834711 | 0.7699208 |
| 8383 | Bn-A04-p10760790 | A-genome specific (napus-rapa)    | 0.9808612    | 0.2792164    | not scorable | not scorable | 0.9917355 | 0.8339955 |
| 8384 | Bn-A04-p10769811 | A-genome specific (napus-rapa)    | 0.9856459    | 0.8510734    | not scorable | not scorable | 0.5371901 | 0.8237607 |
| 8385 | Bn-A04-p10774641 | A-genome specific (napus-rapa)    | 0.9880383    | 0.6498886    | not scorable | not scorable | 0.9917355 | 0.7958391 |
| 8386 | Bn-A04-p1077522  | A-genome specific (napus-rapa)    | 0.9928229    | 0.9211312    | not scorable | not scorable | 0.9917355 | 0.799288  |
| 8387 | Bn-A04-p10786704 | A-genome specific (napus-rapa)    | 0.9976076    | 0.8363218    | not scorable | not scorable | 0.9917355 | 0.7370206 |
| 8388 | Bn-A04-p10792201 | A-genome specific (napus-rapa)    | 0.9928229    | 0.756969     | not scorable | not scorable | 0.9917355 | 0.7524305 |
| 8389 | Bn-A04-p10808508 | A-genome specific (napus-rapa)    | 0.9952153    | 0.9055482    | not scorable | not scorable | 1         | 0.7676948 |
| 8390 | Bn-A04-p10808805 | A-genome specific (napus-rapa)    | 0.9952153    | 0.3410371    | not scorable | not scorable | 1         | 0.8109607 |
| 8391 | Bn-A04-p10809637 | A-genome specific (napus-rapa)    | 0.9904306    | 0.4565796    | not scorable | not scorable | 0.9917355 | 0.6924493 |
| 8392 | Bn-A04-p10833713 | A-genome specific (napus-rapa)    | 0.9952153    | 0.7133706    | not scorable | not scorable | 1         | 0.7409858 |
| 8393 | Bn-A04-p10841936 | A-genome specific (napus-rapa)    | 0.9593301    | 0.3679833    | not scorable | not scorable | 1         | 0.7481895 |
| 8394 | Bn-A04-p10852032 | A-genome specific (napus-rapa)    | 0.9712918    | 0.4671388    | not scorable | not scorable | 1         | 0.7719324 |
| 8395 | Bn-A04-p10861826 | A-genome specific (napus-rapa)    | 0.9784689    | 0.8145068    | not scorable | not scorable | 0.9834711 | 0.7358518 |
| 8396 | Bn-A04-p10867512 | genome unspecific (all in)        | 0.9736842    | 0.352234     |              | 1 0.7783606  | 0.9917355 | 0.8028898 |
| 8397 | Bn-A04-p10870734 | A-genome specific (napus-rapa)    | 0.9665072    | 0.7660088    | not scorable | not scorable | 1         | 0.8021563 |
| 8398 | Bn-A04-p10871341 | A-genome specific (napus-rapa)    | 0.9904306    | 0.5109445    | not scorable | not scorable | 1         | 0.3467439 |
| 8399 | Bn-A04-p10871494 | A-genome specific (napus-rapa)    | 0.9808612    | 0.8157527    | not scorable | not scorable | 0.9917355 | 0.8313978 |
| 8400 | Bn-A04-p10872405 | A-genome specific (napus-rapa)    | 0.9928229    | 0.7619505    | not scorable | not scorable | 0.9917355 | 0.6816216 |
| 8401 | Bn-A04-p10881502 | A-genome specific (napus-rapa)    | 0.9784689    | 0.8564889    | not scorable | not scorable | 1         | 0.7427967 |
| 8402 | Bn-A04-p10902724 | A-genome specific (napus-rapa)    | 0.9688995    | 0.4296813    | not scorable | not scorable | 1         | 0.7094886 |
| 8403 | Bn-A04-p10903353 | genome unspecific (oleracea-rapa) | not scorable | not scorable | 0.9767442    | 0.7446627    | 1         | 0.8085706 |
| 8404 | Bn-A04-p10912425 | A-genome specific (napus-rapa)    | 0.5311005    | 0.7969366    | not scorable | not scorable | 0.9752066 | 0.7349294 |
| 8405 | Bn-A04-p10914108 | A-genome specific (napus-rapa)    | 0.9784689    | 0.8111229    | not scorable | not scorable | 0.9917355 | 0.8102296 |
| 8406 | Bn-A04-p1091727  | A-genome specific (napus-rapa)    | 0.9617225    | 0.7933137    | not scorable | not scorable | 0.9917355 | 0.8004746 |
| 8407 | Bn-A04-p10975832 | A-genome specific (napus-rapa)    | 0.9976076    | 0.5447663    | not scorable | not scorable | 0.9917355 | 0.7871124 |
| 8408 | Bn-A04-p10976023 | A-genome specific (rapa only)     | not scorable | not scorable | not scorable | not scorable | 0.9917355 | 0.6558319 |
| 8409 | Bn-A04-p10980342 | A-genome specific (napus-rapa)    | 0.9952153    | 0.8843005    | not scorable | not scorable | 0.9917355 | 0.8661726 |
| 8410 | Bn-A04-p10983805 | A-genome specific (napus-rapa)    | 0.9976076    | 0.8190384    | not scorable | not scorable | 0.9917355 | 0.831573  |
| 8411 | Bn-A04-p11015443 | A-genome specific (napus-rapa)    | 0.9928229    | 0.3293518    | not scorable | not scorable | 1         | 0.7668723 |
| 8412 | Bn-A04-p11017537 | A-genome specific (napus-rapa)    | 0.9784689    | 0.7119262    | not scorable | not scorable | 1         | 0.8115246 |

|      |                  |                                |              |              |              |              |              |              |
|------|------------------|--------------------------------|--------------|--------------|--------------|--------------|--------------|--------------|
| 8413 | Bn-A04-p11018682 | A-genome specific (napus-rapa) | 0.9760765    | 0.7434618    | not scorable | not scorable | 0.9917355    | 0.6633283    |
| 8414 | Bn-A04-p11020444 | A-genome specific (napus-rapa) | 0.9832536    | 0.6799475    | not scorable | not scorable | 0.9917355    | 0.6218448    |
| 8415 | Bn-A04-p11026664 | A-genome specific (napus-rapa) | 0.9976076    | 0.6752296    | not scorable | not scorable | 0.9834711    | 0.7336089    |
| 8416 | Bn-A04-p1104385  | A-genome specific (napus-rapa) | 0.9952153    | 0.8376332    | not scorable | not scorable | 0.9752066    | 0.7301727    |
| 8417 | Bn-A04-p11058870 | A-genome specific (napus-rapa) | 0.3014354    | 0.826343     | not scorable | not scorable | 0.6528926    | 0.7627692    |
| 8418 | Bn-A04-p11119216 | A-genome specific (napus-rapa) | 0.9593301    | 0.8023747    | not scorable | not scorable | 0.9669421    | 0.5952334    |
| 8419 | Bn-A04-p11119582 | A-genome specific (napus-rapa) | 0.9665072    | 0.3541713    | not scorable | not scorable | 0.9917355    | 0.6930982    |
| 8420 | Bn-A04-p11164883 | A-genome specific (napus-rapa) | 0.8516746    | 0.798871     | not scorable | not scorable | 0.9917355    | 0.7897629    |
| 8421 | Bn-A04-p11191754 | A-genome specific (napus-rapa) | 0.9688995    | 0.7349456    | not scorable | not scorable | 1            | 0.7518212    |
| 8422 | Bn-A04-p11192862 | A-genome specific (napus-rapa) | 0.9856459    | 0.7489851    | not scorable | not scorable | 0.9917355    | 0.6202541    |
| 8423 | Bn-A04-p11197346 | A-genome specific (napus-rapa) | 0.9760765    | 0.7901875    | not scorable | not scorable | 0.9834711    | 0.7315583    |
| 8424 | Bn-A04-p11197707 | A-genome specific (napus-rapa) | 0.9856459    | 0.7327107    | not scorable | not scorable | 0.9834711    | 0.6689033    |
| 8425 | Bn-A04-p11203305 | A-genome specific (napus-rapa) | 0.9904306    | 0.4841329    | not scorable | not scorable | 0.9917355    | 0.7806171    |
| 8426 | Bn-A04-p11209663 | A-genome specific (napus-rapa) | 0.9832536    | 0.4417794    | not scorable | not scorable | 0.9917355    | 0.846046     |
| 8427 | Bn-A04-p11209773 | A-genome specific (napus-rapa) | 0.9952153    | 0.403861     | not scorable | not scorable | 1            | 0.8113095    |
| 8428 | Bn-A04-p11209827 | A-genome specific (napus-rapa) | 0.9832536    | 0.348819     | not scorable | not scorable | 1            | 0.7906191    |
| 8429 | Bn-A04-p11213108 | A-genome specific (napus-rapa) | 0.9784689    | 0.7754679    | not scorable | not scorable | 1            | 0.8296761    |
| 8430 | Bn-A04-p11243983 | A-genome specific (napus-rapa) | 0.9976076    | 0.6729593    | not scorable | not scorable | 0.9669421    | 0.6608245    |
| 8431 | Bn-A04-p11243994 | A-genome specific (napus-rapa) | 0.9976076    | 0.7634824    | not scorable | not scorable | 1            | 0.780166     |
| 8432 | Bn-A04-p11244643 | A-genome specific (napus-rapa) | 1            | 0.6319475    | not scorable | not scorable | 0.9917355    | 0.7229488    |
| 8433 | Bn-A04-p11244673 | A-genome specific (napus-rapa) | 0.9952153    | 0.4235312    | not scorable | not scorable | 0.9834711    | 0.6734545    |
| 8434 | Bn-A04-p11245906 | A-genome specific (napus-rapa) | 1            | 0.6183447    | not scorable | not scorable | 1            | 0.6291033    |
| 8435 | Bn-A04-p11247206 | A-genome specific (napus-rapa) | 0.9593301    | 0.8027782    | not scorable | not scorable | 0.5702479    | 0.8055053    |
| 8436 | Bn-A04-p11250035 | A-genome specific (napus-rapa) | 0.9665072    | 0.7782564    | not scorable | not scorable | 0.6033058    | 0.7751748    |
| 8437 | Bn-A04-p11250141 | A-genome specific (napus-rapa) | 0.9665072    | 0.7988107    | not scorable | not scorable | 0.5702479    | 0.8357344    |
| 8438 | Bn-A04-p11256083 | all not scorable               | not scorable | not scorable | not scorable | not scorable | not scorable | not scorable |
| 8439 | Bn-A04-p11274255 | A-genome specific (napus-rapa) | 0.9856459    | 0.6918575    | not scorable | not scorable | 0.9834711    | 0.7057195    |
| 8440 | Bn-A04-p11291596 | A-genome specific (napus-rapa) | 0.9545454    | 0.5077589    | not scorable | not scorable | 0.6033058    | 0.7397362    |
| 8441 | Bn-A04-p11293892 | A-genome specific (napus-rapa) | 0.9665072    | 0.4283896    | not scorable | not scorable | 1            | 0.7810965    |
| 8442 | Bn-A04-p11319703 | A-genome specific (napus-rapa) | 0.3779904    | 0.8715475    | not scorable | not scorable | 0.9669421    | 0.837379     |
| 8443 | Bn-A04-p11320045 | A-genome specific (napus-rapa) | 0.361244     | 0.8987191    | not scorable | not scorable | 0.9669421    | 0.8408843    |
| 8444 | Bn-A04-p11325008 | A-genome specific (napus-rapa) | 0.9760765    | 0.2713946    | not scorable | not scorable | 1            | 0.7620342    |
| 8445 | Bn-A04-p11329756 | A-genome specific (napus-rapa) | 0.9712918    | 0.6339489    | not scorable | not scorable | 0.9917355    | 0.5242216    |



|      |                  |                                |              |              |              |              |           |           |
|------|------------------|--------------------------------|--------------|--------------|--------------|--------------|-----------|-----------|
| 8446 | Bn-A04-p11352544 | A-genome specific (napus-rapa) | 0.9330143    | 0.4189594    | not scorable | not scorable | 0.9917355 | 0.7152346 |
| 8447 | Bn-A04-p11359006 | A-genome specific (napus-rapa) | 0.9976076    | 0.8961288    | not scorable | not scorable | 0.9917355 | 0.7383954 |
| 8448 | Bn-A04-p113641   | A-genome specific (napus-rapa) | 0.9880383    | 0.8019829    | not scorable | not scorable | 0.9917355 | 0.764704  |
| 8449 | Bn-A04-p11364790 | A-genome specific (napus-rapa) | 0.9856459    | 0.799143     | not scorable | not scorable | 1         | 0.8154098 |
| 8450 | Bn-A04-p11376488 | A-genome specific (napus-rapa) | 0.9904306    | 0.5416701    | not scorable | not scorable | 0.9834711 | 0.4465471 |
| 8451 | Bn-A04-p11377702 | A-genome specific (napus-rapa) | 0.9976076    | 0.8929359    | not scorable | not scorable | 0.9586777 | 0.7357397 |
| 8452 | Bn-A04-p11377775 | A-genome specific (napus-rapa) | 0.9976076    | 0.7869737    | not scorable | not scorable | 1         | 0.7448992 |
| 8453 | Bn-A04-p11386737 | A-genome specific (napus-rapa) | 0.9976076    | 0.7497301    | not scorable | not scorable | 1         | 0.7224936 |
| 8454 | Bn-A04-p11402649 | A-genome specific (napus-rapa) | 0.9976076    | 0.8229404    | not scorable | not scorable | 0.9834711 | 0.8387681 |
| 8455 | Bn-A04-p11413704 | A-genome specific (napus-rapa) | 0.9976076    | 0.6421454    | not scorable | not scorable | 0.9917355 | 0.7937956 |
| 8456 | Bn-A04-p11420466 | A-genome specific (napus-rapa) | 0.9808612    | 0.7545582    | not scorable | not scorable | 0.9834711 | 0.8153421 |
| 8457 | Bn-A04-p11425304 | A-genome specific (napus-rapa) | 0.9832536    | 0.7470962    | not scorable | not scorable | 0.9834711 | 0.7572152 |
| 8458 | Bn-A04-p11428085 | A-genome specific (napus-rapa) | 0.9712918    | 0.3755125    | not scorable | not scorable | 1         | 0.7598017 |
| 8459 | Bn-A04-p11437131 | A-genome specific (rapa only)  | not scorable | not scorable | not scorable | not scorable | 0.7190083 | 0.6616288 |
| 8460 | Bn-A04-p11449464 | A-genome specific (napus-rapa) | 0.9880383    | 0.5621551    | not scorable | not scorable | 1         | 0.7828462 |
| 8461 | Bn-A04-p1145007  | A-genome specific (napus-rapa) | 0.9880383    | 0.7787584    | not scorable | not scorable | 0.9917355 | 0.7894613 |
| 8462 | Bn-A04-p11450339 | A-genome specific (napus-rapa) | 0.9856459    | 0.4106717    | not scorable | not scorable | 1         | 0.6537138 |
| 8463 | Bn-A04-p11452549 | A-genome specific (napus-rapa) | 0.9832536    | 0.8007146    | not scorable | not scorable | 0.6280992 | 0.8014024 |
| 8464 | Bn-A04-p11453319 | A-genome specific (napus-rapa) | 0.9760765    | 0.7636005    | not scorable | not scorable | 0.9752066 | 0.7483381 |
| 8465 | Bn-A04-p11463316 | A-genome specific (napus-rapa) | 0.9832536    | 0.8077514    | not scorable | not scorable | 0.9917355 | 0.7443219 |
| 8466 | Bn-A04-p11465588 | A-genome specific (napus-rapa) | 0.9760765    | 0.8033053    | not scorable | not scorable | 0.9834711 | 0.7806956 |
| 8467 | Bn-A04-p11503303 | A-genome specific (napus-rapa) | 0.9569378    | 0.4752349    | not scorable | not scorable | 0.9917355 | 0.6312414 |
| 8468 | Bn-A04-p11509775 | A-genome specific (napus-rapa) | 0.9928229    | 0.7518989    | not scorable | not scorable | 1         | 0.8014507 |
| 8469 | Bn-A04-p11510797 | A-genome specific (napus-rapa) | 0.9928229    | 0.8274636    | not scorable | not scorable | 0.9917355 | 0.7951212 |
| 8470 | Bn-A04-p11512379 | A-genome specific (napus-rapa) | 0.9808612    | 0.3933196    | not scorable | not scorable | 1         | 0.7762159 |
| 8471 | Bn-A04-p11513352 | A-genome specific (napus-rapa) | 0.9976076    | 0.5019376    | not scorable | not scorable | 1         | 0.7811896 |
| 8472 | Bn-A04-p1156390  | A-genome specific (napus-rapa) | 0.9976076    | 0.8349912    | not scorable | not scorable | 1         | 0.9175813 |
| 8473 | Bn-A04-p11585127 | A-genome specific (napus-rapa) | 0.8971292    | 0.359635     | not scorable | not scorable | 0.9834711 | 0.6958169 |
| 8474 | Bn-A04-p11586565 | A-genome specific (rapa only)  | not scorable | not scorable | not scorable | not scorable | 1         | 0.8225167 |
| 8475 | Bn-A04-p11588227 | A-genome specific (napus-rapa) | 1            | 0.3847252    | not scorable | not scorable | 1         | 0.8885585 |
| 8476 | Bn-A04-p11595428 | A-genome specific (napus-rapa) | 0.9880383    | 0.3101252    | not scorable | not scorable | 0.9834711 | 0.6206599 |
| 8477 | Bn-A04-p1159662  | A-genome specific (napus-rapa) | 0.9976076    | 0.4716674    | not scorable | not scorable | 1         | 0.7302722 |
| 8478 | Bn-A04-p1159924  | A-genome specific (napus-rapa) | 1            | 0.8780655    | not scorable | not scorable | 0.9834711 | 0.716031  |

|      |                  |                                   |              |              |              |              |              |              |
|------|------------------|-----------------------------------|--------------|--------------|--------------|--------------|--------------|--------------|
| 8479 | Bn-A04-p1161563  | A-genome specific (napus-rapa)    | 1            | 0.5672154    | not scorable | not scorable | 0.9834711    | 0.7119878    |
| 8480 | Bn-A04-p11633209 | A-genome specific (napus-rapa)    | 0.9976076    | 0.8097162    | not scorable | not scorable | 0.9834711    | 0.7852401    |
| 8481 | Bn-A04-p11633439 | napus specific                    | 0.9856459    | 0.8110777    | not scorable | not scorable | not scorable | not scorable |
| 8482 | Bn-A04-p11693521 | A-genome specific (napus-rapa)    | 0.9545454    | 0.545512     | not scorable | not scorable | 0.9917355    | 0.6889182    |
| 8483 | Bn-A04-p11734372 | A-genome specific (napus-rapa)    | 0.9976076    | 0.8854356    | not scorable | not scorable | 0.9752066    | 0.7678203    |
| 8484 | Bn-A04-p1176453  | A-genome specific (napus-rapa)    | 0.9952153    | 0.842691     | not scorable | not scorable | 0.9834711    | 0.6823388    |
| 8485 | Bn-A04-p11765380 | A-genome specific (napus-rapa)    | 0.9880383    | 0.3325762    | not scorable | not scorable | 0.9917355    | 0.7874572    |
| 8486 | Bn-A04-p11791366 | A-genome specific (napus-rapa)    | 0.9593301    | 0.7645989    | not scorable | not scorable | 0.9917355    | 0.8616549    |
| 8487 | Bn-A04-p11794986 | A-genome specific (napus-rapa)    | 0.9856459    | 0.3557006    | not scorable | not scorable | 1            | 0.7020434    |
| 8488 | Bn-A04-p11795779 | A-genome specific (napus-rapa)    | 0.9952153    | 0.8616337    | not scorable | not scorable | 0.9917355    | 0.7747407    |
| 8489 | Bn-A04-p11802638 | A-genome specific (napus-rapa)    | 0.9521531    | 0.5070018    | not scorable | not scorable | 1            | 0.7100585    |
| 8490 | Bn-A04-p11810574 | A-genome specific (napus-rapa)    | 0.9976076    | 0.6263047    | not scorable | not scorable | 0.9917355    | 0.6756958    |
| 8491 | Bn-A04-p11818064 | A-genome specific (napus-rapa)    | 0.9880383    | 0.8015811    | not scorable | not scorable | 0.9917355    | 0.7505407    |
| 8492 | Bn-A04-p11818085 | A-genome specific (napus-rapa)    | 0.9880383    | 0.8031575    | not scorable | not scorable | 0.9669421    | 0.8119537    |
| 8493 | Bn-A04-p11865854 | A-genome specific (napus-rapa)    | 0.9976076    | 0.6386148    | not scorable | not scorable | 0.9917355    | 0.7938323    |
| 8494 | Bn-A04-p1187598  | genome unspecific (oleracea-rapa) | not scorable | not scorable | 0.9689922    | 0.31451      | 0.9752066    | 0.820682     |
| 8495 | Bn-A04-p11888044 | A-genome specific (napus-rapa)    | 0.9952153    | 0.8239522    | not scorable | not scorable | 1            | 0.8415254    |
| 8496 | Bn-A04-p11890416 | A-genome specific (napus-rapa)    | 0.9952153    | 0.7846714    | not scorable | not scorable | 0.9586777    | 0.6934159    |
| 8497 | Bn-A04-p11896581 | A-genome specific (napus-rapa)    | 0.9641148    | 0.7131069    | not scorable | not scorable | 0.9834711    | 0.6972656    |
| 8498 | Bn-A04-p11896696 | A-genome specific (napus-rapa)    | 0.9521531    | 0.5982027    | not scorable | not scorable | 0.9834711    | 0.666065     |
| 8499 | Bn-A04-p11897079 | A-genome specific (napus-rapa)    | 0.9928229    | 0.836853     | not scorable | not scorable | 1            | 0.8194156    |
| 8500 | Bn-A04-p11900571 | A-genome specific (napus-rapa)    | 0.7894737    | 0.7905681    | not scorable | not scorable | 0.9752066    | 0.7072074    |
| 8501 | Bn-A04-p11902113 | A-genome specific (napus-rapa)    | 0.784689     | 0.8736613    | not scorable | not scorable | 0.9917355    | 0.749165     |
| 8502 | Bn-A04-p11907565 | A-genome specific (napus-rapa)    | 0.9712918    | 0.8030925    | not scorable | not scorable | 0.9917355    | 0.7898548    |
| 8503 | Bn-A04-p11922910 | A-genome specific (napus-rapa)    | 0.9856459    | 0.6438789    | not scorable | not scorable | 0.9504132    | 0.8122483    |
| 8504 | Bn-A04-p11923310 | A-genome specific (napus-rapa)    | 0.9497608    | 0.2436112    | not scorable | not scorable | 0.9917355    | 0.5414732    |
| 8505 | Bn-A04-p11923511 | genome unspecific (all in)        | 0.9736842    | 0.6563888    | 0.6899225    | 0.1654596    | 0.9917355    | 0.6818378    |
| 8506 | Bn-A04-p11924219 | A-genome specific (napus-rapa)    | 0.9665072    | 0.5526964    | not scorable | not scorable | 0.9752066    | 0.6458265    |
| 8507 | Bn-A04-p11957518 | A-genome specific (napus-rapa)    | 0.9808612    | 0.7100198    | not scorable | not scorable | 0.9917355    | 0.7365537    |
| 8508 | Bn-A04-p11958047 | A-genome specific (napus-rapa)    | 0.9856459    | 0.7228459    | not scorable | not scorable | 0.9752066    | 0.7192405    |
| 8509 | Bn-A04-p11961175 | A-genome specific (napus-rapa)    | 0.9760765    | 0.6170105    | not scorable | not scorable | 1            | 0.6869503    |
| 8510 | Bn-A04-p11988057 | A-genome specific (napus-rapa)    | 0.9641148    | 0.8002757    | not scorable | not scorable | 0.9917355    | 0.8090409    |
| 8511 | Bn-A04-p12010066 | A-genome specific (napus-rapa)    | 0.9856459    | 0.7861364    | not scorable | not scorable | 0.9917355    | 0.7332153    |

|      |                  |                                |              |              |              |              |              |              |
|------|------------------|--------------------------------|--------------|--------------|--------------|--------------|--------------|--------------|
| 8512 | Bn-A04-p12011281 | A-genome specific (napus-rapa) | 0.9688995    | 0.2105072    | not scorable | not scorable | 0.9669421    | 0.8100608    |
| 8513 | Bn-A04-p12037515 | A-genome specific (napus-rapa) | 0.6435407    | 0.7702129    | not scorable | not scorable | 0.9669421    | 0.7403468    |
| 8514 | Bn-A04-p12051277 | A-genome specific (napus-rapa) | 0.9784689    | 0.5457255    | not scorable | not scorable | 0.9917355    | 0.7975391    |
| 8515 | Bn-A04-p12084855 | A-genome specific (napus-rapa) | 0.9665072    | 0.6273301    | not scorable | not scorable | 1            | 0.8591565    |
| 8516 | Bn-A04-p12087644 | A-genome specific (napus-rapa) | 0.9712918    | 0.4148239    | not scorable | not scorable | 1            | 0.8135551    |
| 8517 | Bn-A04-p12112148 | A-genome specific (napus-rapa) | 0.9856459    | 0.7860578    | not scorable | not scorable | 0.9917355    | 0.7683342    |
| 8518 | Bn-A04-p12112787 | A-genome specific (napus-rapa) | 0.9760765    | 0.8157622    | not scorable | not scorable | 1            | 0.6999747    |
| 8519 | Bn-A04-p12119805 | A-genome specific (napus-rapa) | 0.9784689    | 0.8352177    | not scorable | not scorable | 1            | 0.9616575    |
| 8520 | Bn-A04-p1212589  | A-genome specific (napus-rapa) | 1            | 0.8316116    | not scorable | not scorable | 0.9917355    | 0.7770296    |
| 8521 | Bn-A04-p1213196  | A-genome specific (napus-rapa) | 1            | 0.7703892    | not scorable | not scorable | 1            | 0.652612     |
| 8522 | Bn-A04-p12151317 | A-genome specific (napus-rapa) | 0.9736842    | 0.7835966    | not scorable | not scorable | 0.9669421    | 0.7586418    |
| 8523 | Bn-A04-p1215863  | A-genome specific (rapa only)  | not scorable | not scorable | not scorable | not scorable | 1            | 0.6379946    |
| 8524 | Bn-A04-p12159795 | A-genome specific (napus-rapa) | 0.6076555    | 0.7812938    | not scorable | not scorable | 0.9752066    | 0.851019     |
| 8525 | Bn-A04-p12163578 | A-genome specific (rapa only)  | not scorable | not scorable | not scorable | not scorable | 0.9834711    | 0.7744899    |
| 8526 | Bn-A04-p12163967 | genome unspecific (all in)     | 0.9521531    | 0.4200505    | 0.9922481    | 0.7514443    | 1            | 0.6995161    |
| 8527 | Bn-A04-p12170206 | A-genome specific (rapa only)  | not scorable | not scorable | not scorable | not scorable | 0.9752066    | 0.686855     |
| 8528 | Bn-A04-p12204775 | A-genome specific (napus-rapa) | 0.9856459    | 0.7040867    | not scorable | not scorable | 0.9752066    | 0.6316977    |
| 8529 | Bn-A04-p12205378 | A-genome specific (napus-rapa) | 0.9832536    | 0.5396996    | not scorable | not scorable | 1            | 0.7597284    |
| 8530 | Bn-A04-p12210199 | A-genome specific (napus-rapa) | 0.9617225    | 0.6493184    | not scorable | not scorable | 1            | 0.7635127    |
| 8531 | Bn-A04-p12211993 | A-genome specific (napus-rapa) | 0.9736842    | 0.4197427    | not scorable | not scorable | 0.9834711    | 0.8088477    |
| 8532 | Bn-A04-p122280   | A-genome specific (napus-rapa) | 0.9808612    | 0.8018345    | not scorable | not scorable | 1            | 0.8522458    |
| 8533 | Bn-A04-p12236240 | A-genome specific (napus-rapa) | 0.9808612    | 0.6702024    | not scorable | not scorable | 0.9752066    | 0.6860204    |
| 8534 | Bn-A04-p12243311 | A-genome specific (napus-rapa) | 1            | 0.7572199    | not scorable | not scorable | 0.9834711    | 0.7137662    |
| 8535 | Bn-A04-p12251256 | A-genome specific (napus-rapa) | 0.9808612    | 0.7875952    | not scorable | not scorable | 0.9586777    | 0.732173     |
| 8536 | Bn-A04-p12256481 | A-genome specific (napus-rapa) | 0.9760765    | 0.7809999    | not scorable | not scorable | 0.9834711    | 0.6754586    |
| 8537 | Bn-A04-p12256574 | A-genome specific (napus-rapa) | 0.9856459    | 0.7477446    | not scorable | not scorable | 0.9917355    | 0.6901799    |
| 8538 | Bn-A04-p12256636 | A-genome specific (napus-rapa) | 0.9808612    | 0.7094451    | not scorable | not scorable | 0.9917355    | 0.7629602    |
| 8539 | Bn-A04-p12256681 | A-genome specific (napus-rapa) | 0.9808612    | 0.8087395    | not scorable | not scorable | 0.9586777    | 0.6695005    |
| 8540 | Bn-A04-p12259499 | A-genome specific (napus-rapa) | 0.9976076    | 0.6996875    | not scorable | not scorable | 0.9586777    | 0.6530643    |
| 8541 | Bn-A04-p12263920 | A-genome specific (rapa only)  | not scorable | not scorable | not scorable | not scorable | 0.9669421    | 0.5374677    |
| 8542 | Bn-A04-p12283561 | A-genome specific (napus-rapa) | 0.9880383    | 0.7673404    | not scorable | not scorable | 1            | 0.8345054    |
| 8543 | Bn-A04-p12286484 | A-genome specific (napus-rapa) | 1            | 0.8517051    | not scorable | not scorable | 0.9917355    | 0.7330995    |
| 8544 | Bn-A04-p12288635 | napus specific                 | 0.9736842    | 0.7843238    | not scorable | not scorable | not scorable | not scorable |



|      |                  |                                |              |              |              |              |              |              |
|------|------------------|--------------------------------|--------------|--------------|--------------|--------------|--------------|--------------|
| 8578 | Bn-A04-p12572376 | A-genome specific (napus-rapa) | 0.9976076    | 0.8813428    | not scorable | not scorable | 0.9917355    | 0.7133514    |
| 8579 | Bn-A04-p12572577 | A-genome specific (napus-rapa) | 0.9904306    | 0.7700216    | not scorable | not scorable | 0.9586777    | 0.7588212    |
| 8580 | Bn-A04-p12575050 | A-genome specific (napus-rapa) | 1            | 0.84174      | not scorable | not scorable | 0.9586777    | 0.6798798    |
| 8581 | Bn-A04-p12575115 | A-genome specific (napus-rapa) | 0.9904306    | 0.4145241    | not scorable | not scorable | 1            | 0.7552096    |
| 8582 | Bn-A04-p12578822 | A-genome specific (napus-rapa) | 0.9928229    | 0.348518     | not scorable | not scorable | 0.9834711    | 0.8048924    |
| 8583 | Bn-A04-p12580768 | A-genome specific (napus-rapa) | 1            | 0.887202     | not scorable | not scorable | 0.9917355    | 0.8017709    |
| 8584 | Bn-A04-p12584051 | A-genome specific (rapa only)  | not scorable | not scorable | not scorable | not scorable | 0.9586777    | 0.7690871    |
| 8585 | Bn-A04-p12586651 | A-genome specific (napus-rapa) | 0.9138756    | 0.782023     | not scorable | not scorable | 0.5371901    | 0.8636483    |
| 8586 | Bn-A04-p12599627 | napus specific                 | 0.9593301    | 0.201881     | not scorable | not scorable | not scorable | not scorable |
| 8587 | Bn-A04-p12599843 | A-genome specific (napus-rapa) | 0.9808612    | 0.4784869    | not scorable | not scorable | 0.9669421    | 0.6997253    |
| 8588 | Bn-A04-p12600635 | A-genome specific (napus-rapa) | 0.9880383    | 0.3595544    | not scorable | not scorable | 1            | 0.6998697    |
| 8589 | Bn-A04-p12631523 | A-genome specific (napus-rapa) | 0.9712918    | 0.4057275    | not scorable | not scorable | 0.9917355    | 0.2845516    |
| 8590 | Bn-A04-p12634330 | A-genome specific (napus-rapa) | 0.9904306    | 0.7383524    | not scorable | not scorable | 0.9834711    | 0.684243     |
| 8591 | Bn-A04-p12634856 | A-genome specific (napus-rapa) | 0.9928229    | 0.7878991    | not scorable | not scorable | 0.9752066    | 0.7330651    |
| 8592 | Bn-A04-p12635106 | A-genome specific (napus-rapa) | 0.9952153    | 0.7771924    | not scorable | not scorable | 0.9917355    | 0.6822492    |
| 8593 | Bn-A04-p12635986 | A-genome specific (napus-rapa) | 0.9976076    | 0.7705176    | not scorable | not scorable | 1            | 0.7445042    |
| 8594 | Bn-A04-p12639105 | A-genome specific (napus-rapa) | 0.9808612    | 0.6479716    | not scorable | not scorable | 0.9917355    | 0.7485714    |
| 8595 | Bn-A04-p12651819 | A-genome specific (napus-rapa) | 0.9617225    | 0.4140143    | not scorable | not scorable | 1            | 0.6902404    |
| 8596 | Bn-A04-p12655669 | A-genome specific (napus-rapa) | 1            | 0.5282421    | not scorable | not scorable | 0.9917355    | 0.7970411    |
| 8597 | Bn-A04-p12659254 | A-genome specific (napus-rapa) | 0.9856459    | 0.7964299    | not scorable | not scorable | 0.9834711    | 0.8356597    |
| 8598 | Bn-A04-p12659402 | A-genome specific (napus-rapa) | 0.9784689    | 0.7081259    | not scorable | not scorable | 0.9752066    | 0.7742743    |
| 8599 | Bn-A04-p12670129 | A-genome specific (napus-rapa) | 1            | 0.5453542    | not scorable | not scorable | 0.9834711    | 0.7792304    |
| 8600 | Bn-A04-p12671369 | genome unspecific (all in)     | 0.9712918    | 0.3244569    | 0.9767442    | 0.7909235    | 0.9917355    | 0.8045309    |
| 8601 | Bn-A04-p12675088 | A-genome specific (napus-rapa) | 0.9976076    | 0.7527285    | not scorable | not scorable | 0.9917355    | 0.7881291    |
| 8602 | Bn-A04-p12677961 | A-genome specific (napus-rapa) | 0.5885168    | 0.6016579    | not scorable | not scorable | 0.9090909    | 0.4309601    |
| 8603 | Bn-A04-p12680156 | A-genome specific (napus-rapa) | 0.9904306    | 0.7572992    | not scorable | not scorable | 1            | 0.7216191    |
| 8604 | Bn-A04-p12687510 | A-genome specific (napus-rapa) | 0.9880383    | 0.3896342    | not scorable | not scorable | 1            | 0.7158871    |
| 8605 | Bn-A04-p12690759 | A-genome specific (napus-rapa) | 0.9856459    | 0.8504075    | not scorable | not scorable | 1            | 0.6923243    |
| 8606 | Bn-A04-p12691245 | A-genome specific (napus-rapa) | 0.9736842    | 0.870918     | not scorable | not scorable | 0.9834711    | 0.6862206    |
| 8607 | Bn-A04-p12712772 | A-genome specific (napus-rapa) | 0.9928229    | 0.7840798    | not scorable | not scorable | 0.9917355    | 0.7836695    |
| 8608 | Bn-A04-p12715859 | A-genome specific (napus-rapa) | 0.9904306    | 0.661178     | not scorable | not scorable | 0.9917355    | 0.7749835    |
| 8609 | Bn-A04-p12717815 | all not scorable               | not scorable | not scorable | not scorable | not scorable | not scorable | not scorable |
| 8610 | Bn-A04-p12719682 | A-genome specific (napus-rapa) | 0.9928229    | 0.7902774    | not scorable | not scorable | 0.9917355    | 0.7896356    |

|      |                  |                                   |              |              |              |              |              |              |
|------|------------------|-----------------------------------|--------------|--------------|--------------|--------------|--------------|--------------|
| 8611 | Bn-A04-p12724637 | A-genome specific (napus-rapa)    | 0.9880383    | 0.8367066    | not scorable | not scorable | 1            | 0.8039333    |
| 8612 | Bn-A04-p12725596 | A-genome specific (napus-rapa)    | 0.9880383    | 0.5598685    | not scorable | not scorable | 0.9834711    | 0.7019476    |
| 8613 | Bn-A04-p12726067 | A-genome specific (napus-rapa)    | 0.9976076    | 0.7111446    | not scorable | not scorable | 0.9834711    | 0.6448683    |
| 8614 | Bn-A04-p12726676 | A-genome specific (napus-rapa)    | 1            | 0.5776842    | not scorable | not scorable | 1            | 0.7357392    |
| 8615 | Bn-A04-p12728362 | A-genome specific (napus-rapa)    | 0.9904306    | 0.8155922    | not scorable | not scorable | 0.9917355    | 0.8109586    |
| 8616 | Bn-A04-p12734346 | A-genome specific (napus-rapa)    | 0.9904306    | 0.8220102    | not scorable | not scorable | 0.9917355    | 0.8147585    |
| 8617 | Bn-A04-p12735594 | A-genome specific (napus-rapa)    | 1            | 0.534942     | not scorable | not scorable | 0.9834711    | 0.7131827    |
| 8618 | Bn-A04-p1274596  | A-genome specific (napus-rapa)    | 0.9832536    | 0.8256963    | not scorable | not scorable | 0.5785124    | 0.8367513    |
| 8619 | Bn-A04-p12749707 | A-genome specific (napus-rapa)    | 1            | 0.4388056    | not scorable | not scorable | 0.9834711    | 0.6762528    |
| 8620 | Bn-A04-p12751774 | genome unspecific (all in)        | 0.9904306    | 0.4347689    | 0.9922481    | 0.7704939    | 0.6363636    | 0.7284935    |
| 8621 | Bn-A04-p12756666 | A-genome specific (napus-rapa)    | 0.9880383    | 0.7085101    | not scorable | not scorable | 0.9917355    | 0.7306235    |
| 8622 | Bn-A04-p12759219 | napus specific                    | 0.9665072    | 0.9007835    | not scorable | not scorable | not scorable | not scorable |
| 8623 | Bn-A04-p12759499 | genome unspecific (oleracea-rapa) | not scorable | not scorable | 0.9457364    | 0.749599     | 0.9917355    | 0.7714852    |
| 8624 | Bn-A04-p1276308  | A-genome specific (napus-rapa)    | 0.9904306    | 0.7677081    | not scorable | not scorable | 0.9917355    | 0.7819209    |
| 8625 | Bn-A04-p12764046 | A-genome specific (napus-rapa)    | 0.9808612    | 0.7533298    | not scorable | not scorable | 0.9256198    | 0.8407952    |
| 8626 | Bn-A04-p12769407 | A-genome specific (napus-rapa)    | 0.9880383    | 0.8697634    | not scorable | not scorable | 0.9586777    | 0.7432804    |
| 8627 | Bn-A04-p12772506 | A-genome specific (napus-rapa)    | 0.05263158   | 0.8013936    | not scorable | not scorable | 0.9917355    | 0.7865393    |
| 8628 | Bn-A04-p12782652 | A-genome specific (rapa only)     | not scorable | not scorable | not scorable | not scorable | 0.9917355    | 0.7775161    |
| 8629 | Bn-A04-p12793333 | A-genome specific (napus-rapa)    | 0.9928229    | 0.7679189    | not scorable | not scorable | 0.9917355    | 0.8519257    |
| 8630 | Bn-A04-p12793456 | A-genome specific (napus-rapa)    | 0.9904306    | 0.3446214    | not scorable | not scorable | 0.9752066    | 0.6652234    |
| 8631 | Bn-A04-p12793487 | A-genome specific (napus-rapa)    | 0.9880383    | 0.6725469    | not scorable | not scorable | 1            | 0.7793756    |
| 8632 | Bn-A04-p1279752  | A-genome specific (rapa only)     | not scorable | not scorable | not scorable | not scorable | 0.9917355    | 0.7881186    |
| 8633 | Bn-A04-p12798976 | A-genome specific (napus-rapa)    | 0.9904306    | 0.8269345    | not scorable | not scorable | 1            | 0.665654     |
| 8634 | Bn-A04-p12802914 | A-genome specific (napus-rapa)    | 0.9784689    | 0.3349117    | not scorable | not scorable | 0.9752066    | 0.7696701    |
| 8635 | Bn-A04-p12818353 | A-genome specific (napus-rapa)    | 0.9736842    | 0.7500497    | not scorable | not scorable | 1            | 0.7554216    |
| 8636 | Bn-A04-p12818639 | A-genome specific (napus-rapa)    | 0.9832536    | 0.7678173    | not scorable | not scorable | 0.9917355    | 0.6911854    |
| 8637 | Bn-A04-p12819355 | A-genome specific (napus-rapa)    | 0.9832536    | 0.8111658    | not scorable | not scorable | 0.9917355    | 0.7915535    |
| 8638 | Bn-A04-p12820145 | napus specific                    | 0.8875598    | 0.6984441    | not scorable | not scorable | not scorable | not scorable |
| 8639 | Bn-A04-p12822929 | A-genome specific (napus-rapa)    | 0.9760765    | 0.8296344    | not scorable | not scorable | 0.9834711    | 0.6924461    |
| 8640 | Bn-A04-p12824172 | A-genome specific (napus-rapa)    | 0.9688995    | 0.746143     | not scorable | not scorable | 0.9917355    | 0.7352476    |
| 8641 | Bn-A04-p1282528  | A-genome specific (napus-rapa)    | 1            | 0.3911941    | not scorable | not scorable | 0.9752066    | 0.7070133    |
| 8642 | Bn-A04-p12825295 | A-genome specific (napus-rapa)    | 0.9736842    | 0.7659827    | not scorable | not scorable | 1            | 0.7064683    |
| 8643 | Bn-A04-p12826986 | A-genome specific (napus-rapa)    | 0.9808612    | 0.8069044    | not scorable | not scorable | 0.9834711    | 0.7321525    |



|      |                  |                                |              |              |              |              |           |           |
|------|------------------|--------------------------------|--------------|--------------|--------------|--------------|-----------|-----------|
| 8677 | Bn-A04-p13059166 | A-genome specific (napus-rapa) | 0.9497608    | 0.740001     | not scorable | not scorable | 1         | 0.8356096 |
| 8678 | Bn-A04-p13059485 | A-genome specific (napus-rapa) | 0.9928229    | 0.7723844    | not scorable | not scorable | 0.9917355 | 0.8338223 |
| 8679 | Bn-A04-p13061139 | A-genome specific (napus-rapa) | 0.9952153    | 0.7673975    | not scorable | not scorable | 1         | 0.7832446 |
| 8680 | Bn-A04-p13062081 | A-genome specific (napus-rapa) | 0.9617225    | 0.6712302    | not scorable | not scorable | 0.9586777 | 0.7570057 |
| 8681 | Bn-A04-p13063145 | A-genome specific (napus-rapa) | 0.9880383    | 0.7554143    | not scorable | not scorable | 0.9917355 | 0.6814371 |
| 8682 | Bn-A04-p13068545 | A-genome specific (napus-rapa) | 0.9569378    | 0.6437039    | not scorable | not scorable | 0.9834711 | 0.8295368 |
| 8683 | Bn-A04-p13069741 | A-genome specific (napus-rapa) | 0.9760765    | 0.4607904    | not scorable | not scorable | 1         | 0.7015526 |
| 8684 | Bn-A04-p13078078 | A-genome specific (napus-rapa) | 0.9425837    | 0.5950263    | not scorable | not scorable | 1         | 0.8085203 |
| 8685 | Bn-A04-p13091624 | A-genome specific (napus-rapa) | 0.9760765    | 0.6470073    | not scorable | not scorable | 0.9917355 | 0.5802294 |
| 8686 | Bn-A04-p13096878 | A-genome specific (napus-rapa) | 0.9928229    | 0.7962025    | not scorable | not scorable | 0.9834711 | 0.7447971 |
| 8687 | Bn-A04-p13107522 | A-genome specific (napus-rapa) | 0.9928229    | 0.5788236    | not scorable | not scorable | 0.9834711 | 0.7612342 |
| 8688 | Bn-A04-p13112913 | A-genome specific (napus-rapa) | 0.9928229    | 0.6347869    | not scorable | not scorable | 0.9917355 | 0.7952991 |
| 8689 | Bn-A04-p1311487  | A-genome specific (napus-rapa) | 0.9952153    | 0.6997204    | not scorable | not scorable | 0.9917355 | 0.6630068 |
| 8690 | Bn-A04-p1311567  | A-genome specific (napus-rapa) | 0.9928229    | 0.7247425    | not scorable | not scorable | 1         | 0.6756914 |
| 8691 | Bn-A04-p13116453 | genome unspecific (all in)     | 0.8732057    | 0.5862358    |              | 1 0.8160813  | 0.9917355 | 0.6668433 |
| 8692 | Bn-A04-p13118144 | A-genome specific (napus-rapa) | 0.9976076    | 0.7129986    | not scorable | not scorable | 1         | 0.6874943 |
| 8693 | Bn-A04-p13119516 | genome unspecific (all in)     | 0.9952153    | 0.5772075    | 0.8372093    | 0.8750586    | 0.9917355 | 0.7052052 |
| 8694 | Bn-A04-p13122589 | A-genome specific (napus-rapa) | 0.9784689    | 0.7765417    | not scorable | not scorable | 0.9917355 | 0.824479  |
| 8695 | Bn-A04-p13125820 | A-genome specific (napus-rapa) | 0.9832536    | 0.7866411    | not scorable | not scorable | 1         | 0.8492312 |
| 8696 | Bn-A04-p13128840 | A-genome specific (napus-rapa) | 0.9473684    | 0.6920022    | not scorable | not scorable | 0.9917355 | 0.6851635 |
| 8697 | Bn-A04-p13129093 | A-genome specific (napus-rapa) | 0.9760765    | 0.4086539    | not scorable | not scorable | 0.9917355 | 0.7748213 |
| 8698 | Bn-A04-p13129306 | A-genome specific (napus-rapa) | 0.9808612    | 0.7822734    | not scorable | not scorable | 0.9834711 | 0.7596551 |
| 8699 | Bn-A04-p13129601 | A-genome specific (napus-rapa) | 0.9880383    | 0.7583378    | not scorable | not scorable | 0.9917355 | 0.8260867 |
| 8700 | Bn-A04-p13129741 | A-genome specific (napus-rapa) | 0.9832536    | 0.8099283    | not scorable | not scorable | 0.9917355 | 0.7835218 |
| 8701 | Bn-A04-p13140266 | A-genome specific (napus-rapa) | 0.9425837    | 0.5901919    | not scorable | not scorable | 1         | 0.7931106 |
| 8702 | Bn-A04-p13145539 | A-genome specific (napus-rapa) | 0.9688995    | 0.5638658    | not scorable | not scorable | 0.9834711 | 0.715457  |
| 8703 | Bn-A04-p13173919 | A-genome specific (napus-rapa) | 0.9832536    | 0.8129992    | not scorable | not scorable | 0.9917355 | 0.7114246 |
| 8704 | Bn-A04-p1317446  | genome unspecific (all in)     | 0.9808612    | 0.4493911    | 0.9612403    | 0.484121     | 0.9834711 | 0.7016078 |
| 8705 | Bn-A04-p1318613  | A-genome specific (napus-rapa) | 0.9952153    | 0.7837514    | not scorable | not scorable | 0.9834711 | 0.7764203 |
| 8706 | Bn-A04-p13196638 | A-genome specific (rapa only)  | not scorable | not scorable | not scorable | not scorable | 0.9752066 | 0.6712735 |
| 8707 | Bn-A04-p13206432 | A-genome specific (napus-rapa) | 0.9569378    | 0.5369815    | not scorable | not scorable | 0.9834711 | 0.707193  |
| 8708 | Bn-A04-p13207715 | A-genome specific (napus-rapa) | 0.9928229    | 0.3652149    | not scorable | not scorable | 1         | 0.55558   |
| 8709 | Bn-A04-p13208442 | A-genome specific (napus-rapa) | 0.9210526    | 0.3328519    | not scorable | not scorable | 0.9421487 | 0.6106737 |



|                       |                                |           |                        |              |           |           |
|-----------------------|--------------------------------|-----------|------------------------|--------------|-----------|-----------|
| 8710 Bn-A04-p13215929 | A-genome specific (napus-rapa) | 0.9856459 | 0.7888114 not scorable | not scorable | 0.9917355 | 0.7608863 |
| 8711 Bn-A04-p13216114 | A-genome specific (napus-rapa) | 0.9832536 | 0.7922563 not scorable | not scorable | 0.9917355 | 0.7896386 |
| 8712 Bn-A04-p1322758  | A-genome specific (napus-rapa) | 0.9976076 | 0.7649282 not scorable | not scorable | 0.9586777 | 0.6355415 |
| 8713 Bn-A04-p13235708 | A-genome specific (napus-rapa) | 0.9856459 | 0.8409498 not scorable | not scorable | 0.9669421 | 0.782364  |
| 8714 Bn-A04-p1323611  | A-genome specific (napus-rapa) | 0.9784689 | 0.933138 not scorable  | not scorable | 0.9917355 | 0.6883734 |
| 8715 Bn-A04-p13241959 | A-genome specific (napus-rapa) | 0.9425837 | 0.2512828 not scorable | not scorable | 0.9917355 | 0.6633003 |
| 8716 Bn-A04-p1324549  | A-genome specific (napus-rapa) | 0.9497608 | 0.8019532 not scorable | not scorable | 0.9586777 | 0.6592495 |
| 8717 Bn-A04-p13245778 | A-genome specific (napus-rapa) | 0.9473684 | 0.5452483 not scorable | not scorable | 0.9669421 | 0.6492565 |
| 8718 Bn-A04-p13246454 | A-genome specific (napus-rapa) | 0.9760765 | 0.5265793 not scorable | not scorable | 0.9917355 | 0.7909213 |
| 8719 Bn-A04-p13247108 | A-genome specific (napus-rapa) | 0.9210526 | 0.8356755 not scorable | not scorable | 0.9834711 | 0.817649  |
| 8720 Bn-A04-p13249011 | A-genome specific (napus-rapa) | 0.9784689 | 0.7507092 not scorable | not scorable | 1         | 0.7756329 |
| 8721 Bn-A04-p13269135 | A-genome specific (napus-rapa) | 0.9808612 | 0.7297376 not scorable | not scorable | 1         | 0.4341539 |
| 8722 Bn-A04-p13286494 | A-genome specific (napus-rapa) | 0.9952153 | 0.7799457 not scorable | not scorable | 0.9752066 | 0.8097162 |
| 8723 Bn-A04-p1329352  | A-genome specific (napus-rapa) | 0.9976076 | 0.8132388 not scorable | not scorable | 0.6033058 | 0.6661707 |
| 8724 Bn-A04-p13293545 | A-genome specific (napus-rapa) | 0.9569378 | 0.577386 not scorable  | not scorable | 1         | 0.7725486 |
| 8725 Bn-A04-p13293640 | A-genome specific (napus-rapa) | 0.9688995 | 0.6529618 not scorable | not scorable | 1         | 0.7933806 |
| 8726 Bn-A04-p13294322 | A-genome specific (napus-rapa) | 0.9760765 | 0.7063718 not scorable | not scorable | 0.6280992 | 0.6914117 |
| 8727 Bn-A04-p1329438  | A-genome specific (napus-rapa) | 0.9976076 | 0.5550905 not scorable | not scorable | 0.6198347 | 0.6314523 |
| 8728 Bn-A04-p13302511 | A-genome specific (napus-rapa) | 0.9928229 | 0.78348 not scorable   | not scorable | 1         | 0.7660799 |
| 8729 Bn-A04-p1330321  | A-genome specific (napus-rapa) | 0.9832536 | 0.6773221 not scorable | not scorable | 0.9834711 | 0.7964904 |
| 8730 Bn-A04-p13306369 | A-genome specific (napus-rapa) | 0.9688995 | 0.7725218 not scorable | not scorable | 0.9917355 | 0.7251441 |
| 8731 Bn-A04-p13330392 | A-genome specific (napus-rapa) | 0.9138756 | 0.534896 not scorable  | not scorable | 0.6446281 | 0.8413619 |
| 8732 Bn-A04-p13336924 | A-genome specific (napus-rapa) | 0.9760765 | 0.7862427 not scorable | not scorable | 1         | 0.8537028 |
| 8733 Bn-A04-p13368998 | A-genome specific (napus-rapa) | 0.9952153 | 0.7176596 not scorable | not scorable | 0.9834711 | 0.7003902 |
| 8734 Bn-A04-p13370433 | A-genome specific (napus-rapa) | 0.9784689 | 0.7979206 not scorable | not scorable | 1         | 0.7933572 |
| 8735 Bn-A04-p13372886 | A-genome specific (napus-rapa) | 0.9832536 | 0.7647925 not scorable | not scorable | 1         | 0.7714852 |
| 8736 Bn-A04-p13384606 | A-genome specific (napus-rapa) | 0.9760765 | 0.740822 not scorable  | not scorable | 1         | 0.7381898 |
| 8737 Bn-A04-p13389366 | A-genome specific (napus-rapa) | 0.9832536 | 0.7011939 not scorable | not scorable | 0.9752066 | 0.6765223 |
| 8738 Bn-A04-p13389622 | A-genome specific (napus-rapa) | 0.9880383 | 0.7084573 not scorable | not scorable | 1         | 0.7139006 |
| 8739 Bn-A04-p13389743 | A-genome specific (napus-rapa) | 0.9856459 | 0.7794688 not scorable | not scorable | 1         | 0.791757  |
| 8740 Bn-A04-p13389784 | A-genome specific (napus-rapa) | 0.9928229 | 0.7883298 not scorable | not scorable | 0.9917355 | 0.8145373 |
| 8741 Bn-A04-p13390838 | A-genome specific (napus-rapa) | 0.9665072 | 0.7692496 not scorable | not scorable | 1         | 0.8222939 |
| 8742 Bn-A04-p13394479 | A-genome specific (napus-rapa) | 0.9880383 | 0.6972967 not scorable | not scorable | 0.9917355 | 0.7416757 |



|                       |                                |           |           |              |              |           |           |
|-----------------------|--------------------------------|-----------|-----------|--------------|--------------|-----------|-----------|
| 8776 Bn-A04-p13541465 | A-genome specific (napus-rapa) | 1         | 0.7668424 | not scorable | not scorable | 0.9834711 | 0.7095779 |
| 8777 Bn-A04-p13552122 | A-genome specific (napus-rapa) | 1         | 0.4140143 | not scorable | not scorable | 0.9917355 | 0.6581989 |
| 8778 Bn-A04-p1355502  | A-genome specific (napus-rapa) | 1         | 0.7587216 | not scorable | not scorable | 0.9752066 | 0.6418401 |
| 8779 Bn-A04-p1356122  | A-genome specific (napus-rapa) | 0.9760765 | 0.6029772 | not scorable | not scorable | 0.9669421 | 0.6607398 |
| 8780 Bn-A04-p13562332 | A-genome specific (napus-rapa) | 1         | 0.3485843 | not scorable | not scorable | 0.9752066 | 0.7939828 |
| 8781 Bn-A04-p13572341 | A-genome specific (napus-rapa) | 0.9760765 | 0.7850365 | not scorable | not scorable | 0.7272727 | 0.828771  |
| 8782 Bn-A04-p13578411 | A-genome specific (napus-rapa) | 0.9976076 | 0.4900584 | not scorable | not scorable | 0.9917355 | 0.8312033 |
| 8783 Bn-A04-p13583325 | A-genome specific (napus-rapa) | 0.9784689 | 0.6803538 | not scorable | not scorable | 0.9834711 | 0.7169108 |
| 8784 Bn-A04-p13589498 | A-genome specific (napus-rapa) | 0.9976076 | 0.3747656 | not scorable | not scorable | 0.9834711 | 0.6746309 |
| 8785 Bn-A04-p13600415 | A-genome specific (napus-rapa) | 1         | 0.320516  | not scorable | not scorable | 0.9917355 | 0.5273464 |
| 8786 Bn-A04-p13615482 | A-genome specific (napus-rapa) | 1         | 0.6960961 | not scorable | not scorable | 1         | 0.812517  |
| 8787 Bn-A04-p13645293 | A-genome specific (napus-rapa) | 0.9641148 | 0.411984  | not scorable | not scorable | 0.9917355 | 0.3943763 |
| 8788 Bn-A04-p13655958 | A-genome specific (napus-rapa) | 0.9952153 | 0.787613  | not scorable | not scorable | 1         | 0.7034411 |
| 8789 Bn-A04-p13659690 | A-genome specific (napus-rapa) | 0.9952153 | 0.8111996 | not scorable | not scorable | 1         | 0.7787471 |
| 8790 Bn-A04-p13665489 | A-genome specific (napus-rapa) | 0.9665072 | 0.4916672 | not scorable | not scorable | 0.9917355 | 0.7540017 |
| 8791 Bn-A04-p13670045 | A-genome specific (napus-rapa) | 0.9952153 | 0.4756983 | not scorable | not scorable | 0.9917355 | 0.7915851 |
| 8792 Bn-A04-p13685561 | A-genome specific (napus-rapa) | 0.9808612 | 0.7610233 | not scorable | not scorable | 1         | 0.8138438 |
| 8793 Bn-A04-p13689816 | A-genome specific (napus-rapa) | 0.9760765 | 0.8012473 | not scorable | not scorable | 0.9834711 | 0.9360203 |
| 8794 Bn-A04-p13705410 | A-genome specific (napus-rapa) | 0.9784689 | 0.450924  | not scorable | not scorable | 1         | 0.7932116 |
| 8795 Bn-A04-p13705548 | A-genome specific (napus-rapa) | 0.9784689 | 0.6924239 | not scorable | not scorable | 0.9834711 | 0.5871264 |
| 8796 Bn-A04-p13705636 | A-genome specific (napus-rapa) | 0.9952153 | 0.7597603 | not scorable | not scorable | 1         | 0.7812651 |
| 8797 Bn-A04-p13705760 | A-genome specific (napus-rapa) | 0.9976076 | 0.7714643 | not scorable | not scorable | 0.9834711 | 0.7710491 |
| 8798 Bn-A04-p13711282 | A-genome specific (napus-rapa) | 0.9832536 | 0.7933822 | not scorable | not scorable | 0.9917355 | 0.8299816 |
| 8799 Bn-A04-p13726056 | genome unspecific (all in)     | 0.937799  | 0.4401062 | 0.9767442    | 0.7996681    | 0.9917355 | 0.7209969 |
| 8800 Bn-A04-p13738279 | A-genome specific (napus-rapa) | 0.9880383 | 0.8017275 | not scorable | not scorable | 0.9834711 | 0.8184816 |
| 8801 Bn-A04-p13761897 | A-genome specific (napus-rapa) | 0.8229665 | 0.762412  | not scorable | not scorable | 0.9834711 | 0.808535  |
| 8802 Bn-A04-p13767868 | A-genome specific (napus-rapa) | 0.8277512 | 0.8096746 | not scorable | not scorable | 0.9834711 | 0.8228822 |
| 8803 Bn-A04-p1377226  | A-genome specific (napus-rapa) | 0.9976076 | 0.5630221 | not scorable | not scorable | 0.9917355 | 0.7894242 |
| 8804 Bn-A04-p13856134 | A-genome specific (napus-rapa) | 1         | 0.5565655 | not scorable | not scorable | 0.9752066 | 0.5433732 |
| 8805 Bn-A04-p13859935 | A-genome specific (napus-rapa) | 1         | 0.7825954 | not scorable | not scorable | 1         | 0.7584673 |
| 8806 Bn-A04-p13866861 | A-genome specific (napus-rapa) | 0.9210526 | 0.8000322 | not scorable | not scorable | 0.9917355 | 0.914403  |
| 8807 Bn-A04-p13899576 | A-genome specific (napus-rapa) | 0.9976076 | 0.4361346 | not scorable | not scorable | 1         | 0.8263542 |
| 8808 Bn-A04-p13900963 | A-genome specific (napus-rapa) | 0.9976076 | 0.8466083 | not scorable | not scorable | 0.9752066 | 0.6504048 |

|      |                  |                                |              |              |              |              |              |              |
|------|------------------|--------------------------------|--------------|--------------|--------------|--------------|--------------|--------------|
| 8809 | Bn-A04-p13901008 | A-genome specific (napus-rapa) | 0.9976076    | 0.8965474    | not scorable | not scorable | 0.9752066    | 0.7032007    |
| 8810 | Bn-A04-p1390449  | A-genome specific (napus-rapa) | 0.9952153    | 0.5500242    | not scorable | not scorable | 1            | 0.6708648    |
| 8811 | Bn-A04-p13910168 | A-genome specific (napus-rapa) | 1            | 0.8595471    | not scorable | not scorable | 1            | 0.6798391    |
| 8812 | Bn-A04-p13910822 | A-genome specific (rapa only)  | not scorable | not scorable | not scorable | not scorable | 0.9752066    | 0.741864     |
| 8813 | Bn-A04-p13927295 | A-genome specific (rapa only)  | not scorable | not scorable | not scorable | not scorable | 0.9669421    | 0.8095517    |
| 8814 | Bn-A04-p13930713 | A-genome specific (rapa only)  | not scorable | not scorable | not scorable | not scorable | 0.9917355    | 0.6521096    |
| 8815 | Bn-A04-p13992889 | A-genome specific (napus-rapa) | 0.9952153    | 0.3358991    | not scorable | not scorable | 0.9917355    | 0.7116842    |
| 8816 | Bn-A04-p13993666 | A-genome specific (napus-rapa) | 1            | 0.8533637    | not scorable | not scorable | 0.9917355    | 0.7772585    |
| 8817 | Bn-A04-p13993683 | A-genome specific (napus-rapa) | 1            | 0.8535424    | not scorable | not scorable | 0.9917355    | 0.7222244    |
| 8818 | Bn-A04-p13995098 | napus specific                 | 1            | 0.757318     | not scorable | not scorable | not scorable | not scorable |
| 8819 | Bn-A04-p14008077 | A-genome specific (napus-rapa) | 1            | 0.7271194    | not scorable | not scorable | 1            | 0.8213393    |
| 8820 | Bn-A04-p14018867 | A-genome specific (napus-rapa) | 1            | 0.9373063    | not scorable | not scorable | 1            | 0.7610074    |
| 8821 | Bn-A04-p14020738 | A-genome specific (napus-rapa) | 1            | 0.8047376    | not scorable | not scorable | 1            | 0.6965014    |
| 8822 | Bn-A04-p14020855 | napus specific                 | 0.9880383    | 0.9122071    | not scorable | not scorable | not scorable | not scorable |
| 8823 | Bn-A04-p14023419 | A-genome specific (napus-rapa) | 0.9976076    | 0.8546386    | not scorable | not scorable | 0.661157     | 0.7589057    |
| 8824 | Bn-A04-p14026143 | A-genome specific (napus-rapa) | 1            | 0.6673465    | not scorable | not scorable | 0.9834711    | 0.662568     |
| 8825 | Bn-A04-p14060096 | A-genome specific (napus-rapa) | 1            | 0.7592424    | not scorable | not scorable | 1            | 0.7705707    |
| 8826 | Bn-A04-p14092385 | genome unspecific (all in)     | 0.9928229    | 0.3395887    | 0.9922481    | 0.83543      | 1            | 0.8948976    |
| 8827 | Bn-A04-p14156506 | A-genome specific (napus-rapa) | 0.9808612    | 0.7853199    | not scorable | not scorable | 0.9669421    | 0.8099291    |
| 8828 | Bn-A04-p14159293 | A-genome specific (napus-rapa) | 0.9832536    | 0.5484189    | not scorable | not scorable | 1            | 0.7437668    |
| 8829 | Bn-A04-p14159494 | A-genome specific (rapa only)  | not scorable | not scorable | not scorable | not scorable | 0.9752066    | 0.7406795    |
| 8830 | Bn-A04-p14159558 | A-genome specific (napus-rapa) | 0.9736842    | 0.5130865    | not scorable | not scorable | 0.9834711    | 0.6786793    |
| 8831 | Bn-A04-p1416287  | A-genome specific (napus-rapa) | 0.9856459    | 0.6835722    | not scorable | not scorable | 1            | 0.7125415    |
| 8832 | Bn-A04-p1417481  | A-genome specific (napus-rapa) | 0.9952153    | 0.4594841    | not scorable | not scorable | 1            | 0.7728057    |
| 8833 | Bn-A04-p14226310 | A-genome specific (napus-rapa) | 1            | 0.7012544    | not scorable | not scorable | 0.9834711    | 0.7769274    |
| 8834 | Bn-A04-p14255771 | A-genome specific (napus-rapa) | 1            | 0.6149848    | not scorable | not scorable | 0.9669421    | 0.4718842    |
| 8835 | Bn-A04-p14271109 | A-genome specific (rapa only)  | not scorable | not scorable | not scorable | not scorable | 0.6528926    | 0.6085756    |
| 8836 | Bn-A04-p14271110 | A-genome specific (napus-rapa) | 1            | 0.7752897    | not scorable | not scorable | 0.9917355    | 0.7002603    |
| 8837 | Bn-A04-p14271161 | A-genome specific (napus-rapa) | 0.9928229    | 0.7585056    | not scorable | not scorable | 0.9752066    | 0.7125888    |
| 8838 | Bn-A04-p14289058 | A-genome specific (napus-rapa) | 1            | 0.8327709    | not scorable | not scorable | 1            | 0.6784759    |
| 8839 | Bn-A04-p1429850  | A-genome specific (napus-rapa) | 0.9976076    | 0.7378104    | not scorable | not scorable | 0.6033058    | 0.8033731    |
| 8840 | Bn-A04-p14312019 | A-genome specific (napus-rapa) | 1            | 0.84258      | not scorable | not scorable | 1            | 0.7755565    |
| 8841 | Bn-A04-p14315336 | A-genome specific (napus-rapa) | 0.9856459    | 0.4180059    | not scorable | not scorable | 0.9917355    | 0.7846863    |

|      |                  |                                   |              |              |              |              |              |              |
|------|------------------|-----------------------------------|--------------|--------------|--------------|--------------|--------------|--------------|
| 8842 | Bn-A04-p14332759 | A-genome specific (napus-rapa)    | 0.9521531    | 0.4363637    | not scorable | not scorable | 0.9752066    | 0.6968851    |
| 8843 | Bn-A04-p14333001 | A-genome specific (napus-rapa)    | 0.9784689    | 0.341587     | not scorable | not scorable | 1            | 0.7111393    |
| 8844 | Bn-A04-p14353463 | A-genome specific (napus-rapa)    | 1            | 0.3971906    | not scorable | not scorable | 0.9917355    | 0.6136271    |
| 8845 | Bn-A04-p14357191 | A-genome specific (napus-rapa)    | 0.9904306    | 0.7903373    | not scorable | not scorable | 0.9834711    | 0.752178     |
| 8846 | Bn-A04-p14357445 | A-genome specific (napus-rapa)    | 0.9880383    | 0.3883097    | not scorable | not scorable | 0.9917355    | 0.6916431    |
| 8847 | Bn-A04-p14360385 | A-genome specific (napus-rapa)    | 0.9808612    | 0.776        | not scorable | not scorable | 0.9834711    | 0.7325151    |
| 8848 | Bn-A04-p14360799 | A-genome specific (napus-rapa)    | 0.9617225    | 0.4874062    | not scorable | not scorable | 1            | 0.8318096    |
| 8849 | Bn-A04-p14365868 | A-genome specific (napus-rapa)    | 0.9880383    | 0.8163774    | not scorable | not scorable | 0.9752066    | 0.7795016    |
| 8850 | Bn-A04-p14380140 | A-genome specific (napus-rapa)    | 0.9784689    | 0.7819045    | not scorable | not scorable | 1            | 0.8394032    |
| 8851 | Bn-A04-p14397957 | A-genome specific (napus-rapa)    | 0.9736842    | 0.6998108    | not scorable | not scorable | 0.9669421    | 0.6785831    |
| 8852 | Bn-A04-p14398335 | A-genome specific (napus-rapa)    | 0.9856459    | 0.8058596    | not scorable | not scorable | 0.9752066    | 0.8375925    |
| 8853 | Bn-A04-p14410667 | A-genome specific (napus-rapa)    | 0.9832536    | 0.7819387    | not scorable | not scorable | 1            | 0.7518701    |
| 8854 | Bn-A04-p14478925 | A-genome specific (napus-rapa)    | 0.9832536    | 0.7692937    | not scorable | not scorable | 0.9917355    | 0.6623275    |
| 8855 | Bn-A04-p14479867 | A-genome specific (napus-rapa)    | 0.9976076    | 0.46312      | not scorable | not scorable | 0.9834711    | 0.6397657    |
| 8856 | Bn-A04-p14483727 | A-genome specific (napus-rapa)    | 0.9952153    | 0.8228639    | not scorable | not scorable | 0.9834711    | 0.7672791    |
| 8857 | Bn-A04-p1451594  | A-genome specific (napus-rapa)    | 0.9880383    | 0.8188927    | not scorable | not scorable | 0.6694215    | 0.7177484    |
| 8858 | Bn-A04-p14528871 | A-genome specific (napus-rapa)    | 0.9665072    | 0.5166218    | not scorable | not scorable | 0.9917355    | 0.849865     |
| 8859 | Bn-A04-p14532353 | A-genome specific (napus-rapa)    | 0.9449761    | 0.66468      | not scorable | not scorable | 1            | 0.8815182    |
| 8860 | Bn-A04-p1454434  | A-genome specific (napus-rapa)    | 1            | 0.8628727    | not scorable | not scorable | 1            | 0.7907986    |
| 8861 | Bn-A04-p14559897 | A-genome specific (napus-rapa)    | 0.9952153    | 0.3454482    | not scorable | not scorable | 0.9834711    | 0.7780501    |
| 8862 | Bn-A04-p14563007 | A-genome specific (napus-rapa)    | 0.5526316    | 0.921045     | not scorable | not scorable | 0.661157     | 0.9240721    |
| 8863 | Bn-A04-p14565138 | A-genome specific (napus-rapa)    | 0.9928229    | 0.7123283    | not scorable | not scorable | 0.9504132    | 0.6689837    |
| 8864 | Bn-A04-p14565883 | A-genome specific (napus-rapa)    | 0.9856459    | 0.8046634    | not scorable | not scorable | 0.9834711    | 0.8255138    |
| 8865 | Bn-A04-p14572391 | A-genome specific (napus-rapa)    | 1            | 0.5506166    | not scorable | not scorable | 0.9834711    | 0.822262     |
| 8866 | Bn-A04-p14582431 | genome unspecific (oleracea-rapa) | not scorable | not scorable |              | 1            | 0.6185355    | 1            |
| 8867 | Bn-A04-p14582584 | A-genome specific (napus-rapa)    | 0.9832536    | 0.5569968    | not scorable | not scorable | 0.9669421    | 0.6119093    |
| 8868 | Bn-A04-p14586235 | A-genome specific (napus-rapa)    | 0.9473684    | 0.5395532    | not scorable | not scorable | 1            | 0.6168636    |
| 8869 | Bn-A04-p14588183 | A-genome specific (napus-rapa)    | 0.9832536    | 0.2461415    | not scorable | not scorable | 1            | 0.4406723    |
| 8870 | Bn-A04-p14622218 | napus specific                    | 0.9545454    | 0.7289078    | not scorable | not scorable | not scorable | not scorable |
| 8871 | Bn-A04-p14630533 | A-genome specific (napus-rapa)    | 0.9210526    | 0.2241433    | not scorable | not scorable | 0.9669421    | 0.6798057    |
| 8872 | Bn-A04-p14630759 | genome unspecific (oleracea-rapa) | not scorable | not scorable | 0.620155     | 0.6463355    | 0.9586777    | 0.8118961    |
| 8873 | Bn-A04-p14631343 | A-genome specific (napus-rapa)    | 1            | 0.7741535    | not scorable | not scorable | 0.9834711    | 0.9175813    |
| 8874 | Bn-A04-p14631586 | A-genome specific (napus-rapa)    | 0.937799     | 0.7899167    | not scorable | not scorable | 0.9669421    | 0.8393922    |

|      |                  |                                |              |              |              |              |              |              |
|------|------------------|--------------------------------|--------------|--------------|--------------|--------------|--------------|--------------|
| 8875 | Bn-A04-p14640007 | napus specific                 | 0.9736842    | 0.2430935    | not scorable | not scorable | not scorable | not scorable |
| 8876 | Bn-A04-p14642152 | A-genome specific (napus-rapa) | 0.9928229    | 0.2688541    | not scorable | not scorable | 1            | 0.6886604    |
| 8877 | Bn-A04-p1465207  | A-genome specific (napus-rapa) | 0.9617225    | 0.7372109    | not scorable | not scorable | 0.5619835    | 0.6746701    |
| 8878 | Bn-A04-p14652223 | A-genome specific (napus-rapa) | 0.9856459    | 0.7517949    | not scorable | not scorable | 1            | 0.7839529    |
| 8879 | Bn-A04-p14661285 | A-genome specific (napus-rapa) | 0.9880383    | 0.442535     | not scorable | not scorable | 1            | 0.7219486    |
| 8880 | Bn-A04-p14662924 | A-genome specific (napus-rapa) | 0.9880383    | 0.5894179    | not scorable | not scorable | 0.9834711    | 0.9287174    |
| 8881 | Bn-A04-p14670237 | A-genome specific (napus-rapa) | 0.9856459    | 0.8007197    | not scorable | not scorable | 0.9834711    | 0.7178417    |
| 8882 | Bn-A04-p14670992 | A-genome specific (napus-rapa) | 0.9665072    | 0.5149094    | not scorable | not scorable | 0.9752066    | 0.6248713    |
| 8883 | Bn-A04-p14673783 | A-genome specific (napus-rapa) | 0.9952153    | 0.7928311    | not scorable | not scorable | 0.9752066    | 0.793625     |
| 8884 | Bn-A04-p14687930 | A-genome specific (napus-rapa) | 0.9952153    | 0.8053312    | not scorable | not scorable | 0.9586777    | 0.7706864    |
| 8885 | Bn-A04-p1470844  | A-genome specific (napus-rapa) | 0.9952153    | 0.8176733    | not scorable | not scorable | 0.9669421    | 0.7707459    |
| 8886 | Bn-A04-p1471607  | A-genome specific (napus-rapa) | 1            | 0.6979212    | not scorable | not scorable | 0.9917355    | 0.7699408    |
| 8887 | Bn-A04-p1471982  | A-genome specific (napus-rapa) | 0.9952153    | 0.79048      | not scorable | not scorable | 1            | 0.684007     |
| 8888 | Bn-A04-p1472416  | A-genome specific (napus-rapa) | 0.9928229    | 0.674539     | not scorable | not scorable | 0.9586777    | 0.5636415    |
| 8889 | Bn-A04-p1472739  | A-genome specific (napus-rapa) | 0.9665072    | 0.3088323    | not scorable | not scorable | 0.9834711    | 0.6878969    |
| 8890 | Bn-A04-p14742779 | A-genome specific (napus-rapa) | 0.9784689    | 0.7279728    | not scorable | not scorable | 0.9917355    | 0.7575227    |
| 8891 | Bn-A04-p14756001 | A-genome specific (napus-rapa) | 0.9760765    | 0.7832031    | not scorable | not scorable | 0.9752066    | 0.808744     |
| 8892 | Bn-A04-p14756394 | A-genome specific (napus-rapa) | 0.9832536    | 0.7193728    | not scorable | not scorable | 0.9752066    | 0.7475697    |
| 8893 | Bn-A04-p14777980 | A-genome specific (napus-rapa) | 0.9976076    | 0.8765668    | not scorable | not scorable | 0.9834711    | 0.6999747    |
| 8894 | Bn-A04-p14778146 | A-genome specific (napus-rapa) | 0.9976076    | 0.8469702    | not scorable | not scorable | 0.9917355    | 0.7347717    |
| 8895 | Bn-A04-p1479491  | A-genome specific (rapa only)  | not scorable | not scorable | not scorable | not scorable | 0.9752066    | 0.7138944    |
| 8896 | Bn-A04-p1480226  | A-genome specific (napus-rapa) | 1            | 0.6448796    | not scorable | not scorable | 1            | 0.8164276    |
| 8897 | Bn-A04-p14807002 | A-genome specific (napus-rapa) | 0.9928229    | 0.5445462    | not scorable | not scorable | 0.9421487    | 0.7312317    |
| 8898 | Bn-A04-p14807150 | A-genome specific (napus-rapa) | 0.9856459    | 0.5047338    | not scorable | not scorable | 0.9586777    | 0.8268245    |
| 8899 | Bn-A04-p14807561 | A-genome specific (napus-rapa) | 0.9976076    | 0.3733341    | not scorable | not scorable | 1            | 0.7529748    |
| 8900 | Bn-A04-p14808819 | A-genome specific (napus-rapa) | 0.9784689    | 0.5201086    | not scorable | not scorable | 1            | 0.8602008    |
| 8901 | Bn-A04-p1481110  | A-genome specific (napus-rapa) | 1            | 0.8596519    | not scorable | not scorable | 0.9834711    | 0.7064376    |
| 8902 | Bn-A04-p14815251 | A-genome specific (napus-rapa) | 0.9976076    | 0.4453147    | not scorable | not scorable | 0.9917355    | 0.7308435    |
| 8903 | Bn-A04-p14822521 | A-genome specific (napus-rapa) | 0.9928229    | 0.5396577    | not scorable | not scorable | 0.9752066    | 0.6183447    |
| 8904 | Bn-A04-p14826595 | A-genome specific (napus-rapa) | 0.9258373    | 0.7816034    | not scorable | not scorable | 0.9752066    | 0.7277337    |
| 8905 | Bn-A04-p14829686 | A-genome specific (rapa only)  | not scorable | not scorable | not scorable | not scorable | 1            | 0.6342785    |
| 8906 | Bn-A04-p14867427 | A-genome specific (napus-rapa) | 0.8181818    | 0.8924959    | not scorable | not scorable | 1            | 0.9205657    |
| 8907 | Bn-A04-p14877869 | A-genome specific (napus-rapa) | 0.9784689    | 0.4724688    | not scorable | not scorable | 0.9834711    | 0.7466301    |

|      |                  |                                |              |              |              |              |              |              |
|------|------------------|--------------------------------|--------------|--------------|--------------|--------------|--------------|--------------|
| 8908 | Bn-A04-p14893870 | A-genome specific (napus-rapa) | 0.9928229    | 0.8062928    | not scorable | not scorable | 0.9917355    | 0.8303288    |
| 8909 | Bn-A04-p1490485  | A-genome specific (napus-rapa) | 0.9736842    | 0.357735     | not scorable | not scorable | 1            | 0.7070534    |
| 8910 | Bn-A04-p14908542 | A-genome specific (napus-rapa) | 0.9928229    | 0.8123332    | not scorable | not scorable | 0.9669421    | 0.7541844    |
| 8911 | Bn-A04-p14917114 | A-genome specific (napus-rapa) | 0.9736842    | 0.7611674    | not scorable | not scorable | 0.9917355    | 0.8119168    |
| 8912 | Bn-A04-p14922562 | A-genome specific (napus-rapa) | 0.9736842    | 0.2890656    | not scorable | not scorable | 0.9917355    | 0.5810626    |
| 8913 | Bn-A04-p14923168 | A-genome specific (napus-rapa) | 0.9641148    | 0.4672006    | not scorable | not scorable | 0.9917355    | 0.7964969    |
| 8914 | Bn-A04-p14944336 | A-genome specific (napus-rapa) | 0.9928229    | 0.7148775    | not scorable | not scorable | 0.9834711    | 0.6753877    |
| 8915 | Bn-A04-p14944421 | A-genome specific (napus-rapa) | 0.9952153    | 0.7682916    | not scorable | not scorable | 0.9917355    | 0.7734752    |
| 8916 | Bn-A04-p14954537 | A-genome specific (napus-rapa) | 0.9904306    | 0.7682233    | not scorable | not scorable | 0.9669421    | 0.7555351    |
| 8917 | Bn-A04-p14961814 | A-genome specific (napus-rapa) | 0.9832536    | 0.7764475    | not scorable | not scorable | 0.9917355    | 0.8490673    |
| 8918 | Bn-A04-p14965926 | A-genome specific (napus-rapa) | 0.9856459    | 0.7438592    | not scorable | not scorable | 1            | 0.700806     |
| 8919 | Bn-A04-p14972825 | A-genome specific (napus-rapa) | 0.9928229    | 0.8437278    | not scorable | not scorable | 0.9752066    | 0.7766623    |
| 8920 | Bn-A04-p149787   | genome unspecific (all in)     | 0.9784689    | 0.303927     | 0.9922481    | 0.6747913    | 1            | 0.7914145    |
| 8921 | Bn-A04-p14986920 | A-genome specific (napus-rapa) | 0.9760765    | 0.4248636    | not scorable | not scorable | 0.9917355    | 0.7250165    |
| 8922 | Bn-A04-p14987934 | A-genome specific (napus-rapa) | 0.9832536    | 0.6600332    | not scorable | not scorable | 0.9917355    | 0.6890939    |
| 8923 | Bn-A04-p14988304 | A-genome specific (napus-rapa) | 0.9736842    | 0.3083933    | not scorable | not scorable | 1            | 0.7751698    |
| 8924 | Bn-A04-p14999714 | A-genome specific (napus-rapa) | 0.9880383    | 0.7560533    | not scorable | not scorable | 0.9917355    | 0.7688572    |
| 8925 | Bn-A04-p14999768 | all not scorable               | not scorable | not scorable | not scorable | not scorable | not scorable | not scorable |
| 8926 | Bn-A04-p15001710 | A-genome specific (napus-rapa) | 0.9641148    | 0.6927934    | not scorable | not scorable | 1            | 0.6857525    |
| 8927 | Bn-A04-p15007146 | A-genome specific (napus-rapa) | 0.937799     | 0.7691654    | not scorable | not scorable | 0.9834711    | 0.6955795    |
| 8928 | Bn-A04-p15009639 | A-genome specific (napus-rapa) | 0.9641148    | 0.6388344    | not scorable | not scorable | 0.9834711    | 0.746902     |
| 8929 | Bn-A04-p15011193 | A-genome specific (napus-rapa) | 0.9856459    | 0.4417515    | not scorable | not scorable | 1            | 0.8323125    |
| 8930 | Bn-A04-p15030355 | A-genome specific (napus-rapa) | 0.9688995    | 0.5768256    | not scorable | not scorable | 1            | 0.7208149    |
| 8931 | Bn-A04-p15030899 | A-genome specific (rapa only)  | not scorable | not scorable | not scorable | not scorable | 0.9917355    | 0.7297885    |
| 8932 | Bn-A04-p15030963 | A-genome specific (napus-rapa) | 0.9617225    | 0.3941147    | not scorable | not scorable | 0.9917355    | 0.7351688    |
| 8933 | Bn-A04-p15041769 | A-genome specific (napus-rapa) | 0.9688995    | 0.7473382    | not scorable | not scorable | 0.9834711    | 0.6657705    |
| 8934 | Bn-A04-p15048204 | A-genome specific (napus-rapa) | 0.9593301    | 0.4951431    | not scorable | not scorable | 0.9834711    | 0.813601     |
| 8935 | Bn-A04-p15066563 | A-genome specific (rapa only)  | not scorable | not scorable | not scorable | not scorable | 0.9669421    | 0.635949     |
| 8936 | Bn-A04-p15070651 | A-genome specific (rapa only)  | not scorable | not scorable | not scorable | not scorable | 0.9917355    | 0.7690042    |
| 8937 | Bn-A04-p15108913 | A-genome specific (napus-rapa) | 0.9425837    | 0.3975478    | not scorable | not scorable | 0.9669421    | 0.6982431    |
| 8938 | Bn-A04-p15122412 | all not scorable               | not scorable | not scorable | not scorable | not scorable | not scorable | not scorable |
| 8939 | Bn-A04-p15134578 | all not scorable               | not scorable | not scorable | not scorable | not scorable | not scorable | not scorable |
| 8940 | Bn-A04-p15150564 | A-genome specific (napus-rapa) | 0.9832536    | 0.2521837    | not scorable | not scorable | 0.9917355    | 0.6601775    |

|      |                  |                                |              |              |              |              |           |           |
|------|------------------|--------------------------------|--------------|--------------|--------------|--------------|-----------|-----------|
| 8941 | Bn-A04-p15152016 | A-genome specific (napus-rapa) | 0.8636364    | 0.3612198    | not scorable | not scorable | 0.9834711 | 0.6596007 |
| 8942 | Bn-A04-p15164920 | A-genome specific (rapa only)  | not scorable | not scorable | not scorable | not scorable | 0.9669421 | 0.8009343 |
| 8943 | Bn-A04-p15168889 | A-genome specific (napus-rapa) | 0.9976076    | 0.4718766    | not scorable | not scorable | 1         | 0.8063467 |
| 8944 | Bn-A04-p15184744 | A-genome specific (rapa only)  | not scorable | not scorable | not scorable | not scorable | 0.9834711 | 0.7594317 |
| 8945 | Bn-A04-p15190648 | A-genome specific (rapa only)  | not scorable | not scorable | not scorable | not scorable | 0.9917355 | 0.7941428 |
| 8946 | Bn-A04-p15195920 | A-genome specific (rapa only)  | not scorable | not scorable | not scorable | not scorable | 0.9917355 | 0.8040481 |
| 8947 | Bn-A04-p15207252 | A-genome specific (rapa only)  | not scorable | not scorable | not scorable | not scorable | 0.9917355 | 0.7280351 |
| 8948 | Bn-A04-p15244369 | A-genome specific (napus-rapa) | 0.9976076    | 0.3748531    | not scorable | not scorable | 0.9917355 | 0.7797454 |
| 8949 | Bn-A04-p15287200 | A-genome specific (napus-rapa) | 0.9976076    | 0.8265352    | not scorable | not scorable | 0.9917355 | 0.7858993 |
| 8950 | Bn-A04-p15296217 | A-genome specific (napus-rapa) | 0.9808612    | 0.6057025    | not scorable | not scorable | 1         | 0.9050301 |
| 8951 | Bn-A04-p15298740 | A-genome specific (napus-rapa) | 0.9976076    | 0.8805987    | not scorable | not scorable | 0.9752066 | 0.7331897 |
| 8952 | Bn-A04-p15310116 | A-genome specific (napus-rapa) | 1            | 0.579002     | not scorable | not scorable | 0.9917355 | 0.864643  |
| 8953 | Bn-A04-p15312437 | A-genome specific (napus-rapa) | 0.361244     | 0.8274619    | not scorable | not scorable | 0.8760331 | 0.7963597 |
| 8954 | Bn-A04-p15315594 | A-genome specific (napus-rapa) | 0.9880383    | 0.4213975    | not scorable | not scorable | 1         | 0.7005973 |
| 8955 | Bn-A04-p15341169 | A-genome specific (rapa only)  | not scorable | not scorable | not scorable | not scorable | 1         | 0.8318462 |
| 8956 | Bn-A04-p15341244 | A-genome specific (rapa only)  | not scorable | not scorable | not scorable | not scorable | 0.9752066 | 0.7745593 |
| 8957 | Bn-A04-p15367046 | A-genome specific (napus-rapa) | 0.9593301    | 0.4754821    | not scorable | not scorable | 1         | 0.828523  |
| 8958 | Bn-A04-p15377693 | A-genome specific (rapa only)  | not scorable | not scorable | not scorable | not scorable | 1         | 0.7806923 |
| 8959 | Bn-A04-p15378781 | A-genome specific (rapa only)  | not scorable | not scorable | not scorable | not scorable | 1         | 0.7553833 |
| 8960 | Bn-A04-p15399118 | genome unspecific (all in)     | 0.9688995    | 0.4317366    | 0.9922481    | 0.2693038    | 0.9917355 | 0.6900888 |
| 8961 | Bn-A04-p15404568 | A-genome specific (napus-rapa) | 0.9736842    | 0.7705973    | not scorable | not scorable | 0.9917355 | 0.7175075 |
| 8962 | Bn-A04-p15409836 | A-genome specific (napus-rapa) | 0.9952153    | 0.8255778    | not scorable | not scorable | 1         | 0.8592454 |
| 8963 | Bn-A04-p15411699 | A-genome specific (napus-rapa) | 0.9880383    | 0.7481518    | not scorable | not scorable | 0.9752066 | 0.7824817 |
| 8964 | Bn-A04-p15413213 | A-genome specific (napus-rapa) | 0.9545454    | 0.6505222    | not scorable | not scorable | 1         | 0.8042552 |
| 8965 | Bn-A04-p15414343 | A-genome specific (napus-rapa) | 0.9617225    | 0.7986905    | not scorable | not scorable | 0.9917355 | 0.7818269 |
| 8966 | Bn-A04-p15420126 | A-genome specific (napus-rapa) | 0.9617225    | 0.2420422    | not scorable | not scorable | 0.9421487 | 0.4464254 |
| 8967 | Bn-A04-p15429891 | A-genome specific (napus-rapa) | 0.9808612    | 0.3387024    | not scorable | not scorable | 1         | 0.7824845 |
| 8968 | Bn-A04-p15436139 | A-genome specific (napus-rapa) | 0.9928229    | 0.4957927    | not scorable | not scorable | 0.9917355 | 0.8073221 |
| 8969 | Bn-A04-p15441336 | A-genome specific (napus-rapa) | 0.9928229    | 0.8675869    | not scorable | not scorable | 0.9752066 | 0.7738849 |
| 8970 | Bn-A04-p15456188 | A-genome specific (napus-rapa) | 0.9928229    | 0.3531757    | not scorable | not scorable | 0.9834711 | 0.7432657 |
| 8971 | Bn-A04-p15466343 | A-genome specific (napus-rapa) | 0.9928229    | 0.3888402    | not scorable | not scorable | 0.9752066 | 0.7849017 |
| 8972 | Bn-A04-p15471964 | A-genome specific (napus-rapa) | 0.9904306    | 0.553331     | not scorable | not scorable | 0.9917355 | 0.7183611 |
| 8973 | Bn-A04-p15475759 | A-genome specific (napus-rapa) | 0.9928229    | 0.8503884    | not scorable | not scorable | 1         | 0.6720875 |



|                       |                                   |              |              |              |              |           |           |
|-----------------------|-----------------------------------|--------------|--------------|--------------|--------------|-----------|-----------|
| 8974 Bn-A04-p15485629 | A-genome specific (napus-rapa)    | 0.9832536    | 0.4889628    | not scorable | not scorable | 0.9834711 | 0.7197552 |
| 8975 Bn-A04-p15492182 | A-genome specific (napus-rapa)    | 0.9569378    | 0.8238503    | not scorable | not scorable | 0.9917355 | 0.8284803 |
| 8976 Bn-A04-p15498393 | A-genome specific (napus-rapa)    | 0.9832536    | 0.4516468    | not scorable | not scorable | 0.9917355 | 0.7465746 |
| 8977 Bn-A04-p15500804 | A-genome specific (napus-rapa)    | 0.9808612    | 0.8274619    | not scorable | not scorable | 0.6115702 | 0.8291611 |
| 8978 Bn-A04-p15514869 | A-genome specific (napus-rapa)    | 0.9665072    | 0.7837225    | not scorable | not scorable | 0.9586777 | 0.8555552 |
| 8979 Bn-A04-p15519877 | A-genome specific (napus-rapa)    | 0.9760765    | 0.5630146    | not scorable | not scorable | 0.9834711 | 0.7425946 |
| 8980 Bn-A04-p15530059 | A-genome specific (napus-rapa)    | 0.9712918    | 0.4097189    | not scorable | not scorable | 0.9669421 | 0.7251468 |
| 8981 Bn-A04-p15530609 | A-genome specific (napus-rapa)    | 0.9282297    | 0.6327026    | not scorable | not scorable | 0.9834711 | 0.7189613 |
| 8982 Bn-A04-p15530625 | A-genome specific (napus-rapa)    | 0.9712918    | 0.7573868    | not scorable | not scorable | 1         | 0.7488809 |
| 8983 Bn-A04-p15534626 | A-genome specific (napus-rapa)    | 0.9952153    | 0.8694858    | not scorable | not scorable | 0.9834711 | 0.7954171 |
| 8984 Bn-A04-p15534921 | A-genome specific (rapa only)     | not scorable | not scorable | not scorable | not scorable | 0.9669421 | 0.9249945 |
| 8985 Bn-A04-p15535011 | A-genome specific (napus-rapa)    | 0.9952153    | 0.8011312    | not scorable | not scorable | 0.9917355 | 0.6266003 |
| 8986 Bn-A04-p15555443 | A-genome specific (napus-rapa)    | 0.9832536    | 0.4954794    | not scorable | not scorable | 0.9834711 | 0.7202361 |
| 8987 Bn-A04-p15556246 | A-genome specific (napus-rapa)    | 0.9904306    | 0.4349702    | not scorable | not scorable | 0.9834711 | 0.7843896 |
| 8988 Bn-A04-p15559138 | genome unspecific (oleracea-rapa) | not scorable | not scorable | 0.9302326    | 0.7215804    | 0.9586777 | 0.7506922 |
| 8989 Bn-A04-p15597988 | A-genome specific (napus-rapa)    | 0.9784689    | 0.7855307    | not scorable | not scorable | 0.9917355 | 0.7710512 |
| 8990 Bn-A04-p15600337 | A-genome specific (napus-rapa)    | 0.9688995    | 0.7857604    | not scorable | not scorable | 0.9917355 | 0.7370362 |
| 8991 Bn-A04-p15617379 | A-genome specific (napus-rapa)    | 0.9928229    | 0.4393173    | not scorable | not scorable | 0.9834711 | 0.7063597 |
| 8992 Bn-A04-p15619897 | A-genome specific (napus-rapa)    | 0.9856459    | 0.8061854    | not scorable | not scorable | 0.9834711 | 0.7880082 |
| 8993 Bn-A04-p15630537 | A-genome specific (napus-rapa)    | 1            | 0.7776763    | not scorable | not scorable | 1         | 0.7739488 |
| 8994 Bn-A04-p15631388 | A-genome specific (napus-rapa)    | 0.9856459    | 0.7892735    | not scorable | not scorable | 0.9504132 | 0.7711592 |
| 8995 Bn-A04-p15643031 | A-genome specific (napus-rapa)    | 0.9856459    | 0.3994646    | not scorable | not scorable | 0.9586777 | 0.7832878 |
| 8996 Bn-A04-p15655213 | A-genome specific (napus-rapa)    | 0.9784689    | 0.7783051    | not scorable | not scorable | 0.9917355 | 0.6700102 |
| 8997 Bn-A04-p15658143 | A-genome specific (rapa only)     | not scorable | not scorable | not scorable | not scorable | 0.9917355 | 0.7228674 |
| 8998 Bn-A04-p15661972 | A-genome specific (napus-rapa)    | 0.9952153    | 0.8268484    | not scorable | not scorable | 0.9917355 | 0.7969698 |
| 8999 Bn-A04-p15662133 | A-genome specific (rapa only)     | not scorable | not scorable | not scorable | not scorable | 1         | 0.7560207 |
| 9000 Bn-A04-p15670183 | A-genome specific (napus-rapa)    | 0.9928229    | 0.8028214    | not scorable | not scorable | 1         | 0.8575141 |
| 9001 Bn-A04-p15670197 | genome unspecific (all in)        | 0.9904306    | 0.598814     | 0.8372093    | 0.772759     | 0.9834711 | 0.836568  |
| 9002 Bn-A04-p15701924 | A-genome specific (rapa only)     | not scorable | not scorable | not scorable | not scorable | 0.6694215 | 0.7527181 |
| 9003 Bn-A04-p15707649 | A-genome specific (napus-rapa)    | 0.9952153    | 0.8562291    | not scorable | not scorable | 1         | 0.7934078 |
| 9004 Bn-A04-p15710186 | A-genome specific (napus-rapa)    | 0.9952153    | 0.7781971    | not scorable | not scorable | 0.9834711 | 0.752719  |
| 9005 Bn-A04-p15713429 | A-genome specific (napus-rapa)    | 0.9856459    | 0.780229     | not scorable | not scorable | 0.9917355 | 0.7755706 |
| 9006 Bn-A04-p15727549 | A-genome specific (napus-rapa)    | 0.9856459    | 0.3169387    | not scorable | not scorable | 0.9834711 | 0.6191358 |

|      |                  |                                |              |              |              |              |              |              |
|------|------------------|--------------------------------|--------------|--------------|--------------|--------------|--------------|--------------|
| 9007 | Bn-A04-p15731996 | A-genome specific (rapa only)  | not scorable | not scorable | not scorable | not scorable | 0.9917355    | 0.7219242    |
| 9008 | Bn-A04-p15742373 | A-genome specific (napus-rapa) | 0.9856459    | 0.3684909    | not scorable | not scorable | 0.9917355    | 0.7239241    |
| 9009 | Bn-A04-p15745275 | A-genome specific (napus-rapa) | 0.9880383    | 0.4952703    | not scorable | not scorable | 0.9834711    | 0.8191153    |
| 9010 | Bn-A04-p1576564  | A-genome specific (napus-rapa) | 0.9976076    | 0.4568068    | not scorable | not scorable | 1            | 0.6691948    |
| 9011 | Bn-A04-p15835310 | napus specific                 | 0.9665072    | 0.7248076    | not scorable | not scorable | not scorable | not scorable |
| 9012 | Bn-A04-p15840589 | A-genome specific (rapa only)  | not scorable | not scorable | not scorable | not scorable | 0.9752066    | 0.7052125    |
| 9013 | Bn-A04-p1585447  | A-genome specific (napus-rapa) | 0.9880383    | 0.8136523    | not scorable | not scorable | 1            | 0.7555221    |
| 9014 | Bn-A04-p15870508 | A-genome specific (napus-rapa) | 0.9808612    | 0.5506707    | not scorable | not scorable | 1            | 0.8276071    |
| 9015 | Bn-A04-p15877051 | A-genome specific (napus-rapa) | 0.4186603    | 0.8247074    | not scorable | not scorable | 0.9834711    | 0.8079519    |
| 9016 | Bn-A04-p15885427 | A-genome specific (napus-rapa) | 0.9617225    | 0.3203213    | not scorable | not scorable | 0.9917355    | 0.7625296    |
| 9017 | Bn-A04-p1589006  | A-genome specific (napus-rapa) | 0.9952153    | 0.7933808    | not scorable | not scorable | 1            | 0.7830779    |
| 9018 | Bn-A04-p15893499 | A-genome specific (napus-rapa) | 0.937799     | 0.2057027    | not scorable | not scorable | 1            | 0.7680414    |
| 9019 | Bn-A04-p15895339 | A-genome specific (napus-rapa) | 0.7105263    | 0.8232837    | not scorable | not scorable | 0.9752066    | 0.7590252    |
| 9020 | Bn-A04-p15895510 | A-genome specific (napus-rapa) | 0.9856459    | 0.4960383    | not scorable | not scorable | 0.9917355    | 0.7418856    |
| 9021 | Bn-A04-p15895735 | A-genome specific (napus-rapa) | 0.6818182    | 0.6693903    | not scorable | not scorable | 0.9586777    | 0.6479997    |
| 9022 | Bn-A04-p1590169  | A-genome specific (napus-rapa) | 0.9952153    | 0.8418182    | not scorable | not scorable | 0.9834711    | 0.7519378    |
| 9023 | Bn-A04-p1590669  | A-genome specific (napus-rapa) | 0.9784689    | 0.6616009    | not scorable | not scorable | 0.6446281    | 0.7480513    |
| 9024 | Bn-A04-p15906747 | A-genome specific (napus-rapa) | 0.9832536    | 0.3805396    | not scorable | not scorable | 0.9834711    | 0.7332237    |
| 9025 | Bn-A04-p1590931  | A-genome specific (napus-rapa) | 0.8157895    | 0.8177654    | not scorable | not scorable | 0.6033058    | 0.734874     |
| 9026 | Bn-A04-p15933265 | A-genome specific (napus-rapa) | 1            | 0.7226316    | not scorable | not scorable | 1            | 0.8209013    |
| 9027 | Bn-A04-p15939956 | A-genome specific (napus-rapa) | 0.9880383    | 0.4430558    | not scorable | not scorable | 0.9917355    | 0.8343889    |
| 9028 | Bn-A04-p15942668 | A-genome specific (rapa only)  | not scorable | not scorable | not scorable | not scorable | 0.9834711    | 0.797233     |
| 9029 | Bn-A04-p15951138 | A-genome specific (napus-rapa) | 0.9976076    | 0.2739176    | not scorable | not scorable | 0.9669421    | 0.631776     |
| 9030 | Bn-A04-p15953263 | A-genome specific (rapa only)  | not scorable | not scorable | not scorable | not scorable | 0.9504132    | 0.6552808    |
| 9031 | Bn-A04-p15970355 | A-genome specific (napus-rapa) | 0.9330143    | 0.2541671    | not scorable | not scorable | 0.9917355    | 0.6497782    |
| 9032 | Bn-A04-p16000929 | A-genome specific (napus-rapa) | 0.9880383    | 0.5212955    | not scorable | not scorable | 0.9834711    | 0.798773     |
| 9033 | Bn-A04-p16014198 | A-genome specific (napus-rapa) | 1            | 0.7110427    | not scorable | not scorable | 1            | 0.7394592    |
| 9034 | Bn-A04-p16022528 | A-genome specific (rapa only)  | not scorable | not scorable | not scorable | not scorable | 0.9752066    | 0.751667     |
| 9035 | Bn-A04-p16025591 | A-genome specific (napus-rapa) | 0.9952153    | 0.5243186    | not scorable | not scorable | 1            | 0.6766161    |
| 9036 | Bn-A04-p16056186 | A-genome specific (napus-rapa) | 0.9976076    | 0.3251873    | not scorable | not scorable | 0.9586777    | 0.6609219    |
| 9037 | Bn-A04-p16074808 | A-genome specific (rapa only)  | not scorable | not scorable | not scorable | not scorable | 0.9917355    | 0.7956432    |
| 9038 | Bn-A04-p16090875 | A-genome specific (napus-rapa) | 0.9784689    | 0.4039671    | not scorable | not scorable | 0.9834711    | 0.6929324    |
| 9039 | Bn-A04-p16104213 | A-genome specific (napus-rapa) | 0.9784689    | 0.7652541    | not scorable | not scorable | 0.9834711    | 0.8186907    |

|      |                  |                                   |              |              |              |              |           |           |
|------|------------------|-----------------------------------|--------------|--------------|--------------|--------------|-----------|-----------|
| 9040 | Bn-A04-p16104616 | A-genome specific (napus-rapa)    | 0.9760765    | 0.7912861    | not scorable | not scorable | 0.9752066 | 0.7970411 |
| 9041 | Bn-A04-p16107844 | A-genome specific (rapa only)     | not scorable | not scorable | not scorable | not scorable | 1         | 0.8207097 |
| 9042 | Bn-A04-p16109558 | genome unspecific (all in)        | 0.9904306    | 0.3151409    | 0.9689922    | 0.4156069    | 1         | 0.7622204 |
| 9043 | Bn-A04-p16119082 | genome unspecific (oleracea-rapa) | not scorable | not scorable | 0.9922481    | 0.7060951    | 1         | 0.9180714 |
| 9044 | Bn-A04-p16120092 | genome unspecific (oleracea-rapa) | not scorable | not scorable | 0.9922481    | 0.6392727    | 0.9917355 | 0.7252899 |
| 9045 | Bn-A04-p16123695 | A-genome specific (napus-rapa)    | 0.9808612    | 0.4287671    | not scorable | not scorable | 1         | 0.8092792 |
| 9046 | Bn-A04-p16131108 | A-genome specific (napus-rapa)    | 0.9330143    | 0.7396515    | not scorable | not scorable | 0.9752066 | 0.6020277 |
| 9047 | Bn-A04-p16137916 | A-genome specific (napus-rapa)    | 0.9808612    | 0.297788     | not scorable | not scorable | 1         | 0.7251201 |
| 9048 | Bn-A04-p16143324 | A-genome specific (napus-rapa)    | 1            | 0.8105522    | not scorable | not scorable | 1         | 0.8867181 |
| 9049 | Bn-A04-p16155604 | A-genome specific (napus-rapa)    | 0.9928229    | 0.452481     | not scorable | not scorable | 0.9917355 | 0.7555377 |
| 9050 | Bn-A04-p16156157 | A-genome specific (napus-rapa)    | 0.9688995    | 0.7905537    | not scorable | not scorable | 0.6363636 | 0.7196677 |
| 9051 | Bn-A04-p16157904 | A-genome specific (napus-rapa)    | 0.9904306    | 0.3286742    | not scorable | not scorable | 0.9752066 | 0.7865062 |
| 9052 | Bn-A04-p16166839 | A-genome specific (napus-rapa)    | 0.9545454    | 0.5754302    | not scorable | not scorable | 0.9338843 | 0.8087256 |
| 9053 | Bn-A04-p16224941 | A-genome specific (napus-rapa)    | 0.9928229    | 0.5272621    | not scorable | not scorable | 1         | 0.7376546 |
| 9054 | Bn-A04-p1623151  | A-genome specific (napus-rapa)    | 0.9904306    | 0.5945843    | not scorable | not scorable | 1         | 0.7526131 |
| 9055 | Bn-A04-p16233024 | A-genome specific (napus-rapa)    | 0.9784689    | 0.7560669    | not scorable | not scorable | 0.9752066 | 0.7822965 |
| 9056 | Bn-A04-p16233377 | A-genome specific (napus-rapa)    | 0.9832536    | 0.7673827    | not scorable | not scorable | 0.9834711 | 0.810416  |
| 9057 | Bn-A04-p16237245 | A-genome specific (napus-rapa)    | 1            | 0.4094593    | not scorable | not scorable | 0.9421487 | 0.7714387 |
| 9058 | Bn-A04-p16259439 | A-genome specific (napus-rapa)    | 0.9904306    | 0.7317196    | not scorable | not scorable | 1         | 0.7738628 |
| 9059 | Bn-A04-p16264494 | A-genome specific (napus-rapa)    | 0.9449761    | 0.8168051    | not scorable | not scorable | 0.9752066 | 0.6923664 |
| 9060 | Bn-A04-p16268792 | A-genome specific (napus-rapa)    | 0.9928229    | 0.7988904    | not scorable | not scorable | 0.9834711 | 0.8011487 |
| 9061 | Bn-A04-p16275472 | A-genome specific (napus-rapa)    | 0.9952153    | 0.7683555    | not scorable | not scorable | 0.9752066 | 0.7473217 |
| 9062 | Bn-A04-p16275979 | A-genome specific (napus-rapa)    | 0.9760765    | 0.6940623    | not scorable | not scorable | 0.9752066 | 0.7150274 |
| 9063 | Bn-A04-p16276156 | A-genome specific (napus-rapa)    | 0.9665072    | 0.6689013    | not scorable | not scorable | 0.9834711 | 0.6570787 |
| 9064 | Bn-A04-p16276464 | A-genome specific (napus-rapa)    | 0.9928229    | 0.6911103    | not scorable | not scorable | 0.9917355 | 0.8652223 |
| 9065 | Bn-A04-p16277340 | A-genome specific (napus-rapa)    | 0.9760765    | 0.7334817    | not scorable | not scorable | 0.9752066 | 0.7988884 |
| 9066 | Bn-A04-p16280279 | A-genome specific (napus-rapa)    | 0.9641148    | 0.7654166    | not scorable | not scorable | 0.9917355 | 0.8184033 |
| 9067 | Bn-A04-p16282039 | A-genome specific (napus-rapa)    | 0.9736842    | 0.8036469    | not scorable | not scorable | 0.9834711 | 0.8424072 |
| 9068 | Bn-A04-p16283972 | A-genome specific (napus-rapa)    | 0.9545454    | 0.4788777    | not scorable | not scorable | 0.9752066 | 0.6095938 |
| 9069 | Bn-A04-p16287850 | A-genome specific (napus-rapa)    | 0.9712918    | 0.5572191    | not scorable | not scorable | 1         | 0.7736467 |
| 9070 | Bn-A04-p16288681 | A-genome specific (napus-rapa)    | 0.9688995    | 0.8059821    | not scorable | not scorable | 0.9834711 | 0.797058  |
| 9071 | Bn-A04-p16303678 | A-genome specific (napus-rapa)    | 0.9784689    | 0.7592261    | not scorable | not scorable | 0.9834711 | 0.7900144 |
| 9072 | Bn-A04-p16303728 | A-genome specific (napus-rapa)    | 0.9712918    | 0.4969774    | not scorable | not scorable | 0.9834711 | 0.6983337 |

|      |                  |                                |              |              |              |              |              |              |
|------|------------------|--------------------------------|--------------|--------------|--------------|--------------|--------------|--------------|
| 9073 | Bn-A04-p16313477 | A-genome specific (napus-rapa) | 0.9904306    | 0.4821763    | not scorable | not scorable | 1            | 0.803342     |
| 9074 | Bn-A04-p16320671 | A-genome specific (napus-rapa) | 0.9808612    | 0.3562808    | not scorable | not scorable | 0.9917355    | 0.6095246    |
| 9075 | Bn-A04-p1633159  | A-genome specific (napus-rapa) | 1            | 0.7986       | not scorable | not scorable | 1            | 0.9105069    |
| 9076 | Bn-A04-p16336301 | A-genome specific (napus-rapa) | 0.9808612    | 0.7883286    | not scorable | not scorable | 1            | 0.7205747    |
| 9077 | Bn-A04-p16337105 | all not scorable               | not scorable | not scorable | not scorable | not scorable | not scorable | not scorable |
| 9078 | Bn-A04-p16365226 | A-genome specific (napus-rapa) | 0.9641148    | 0.7618787    | not scorable | not scorable | 0.9917355    | 0.7544466    |
| 9079 | Bn-A04-p16368407 | A-genome specific (napus-rapa) | 0.9617225    | 0.5301584    | not scorable | not scorable | 0.9834711    | 0.8044382    |
| 9080 | Bn-A04-p16368852 | A-genome specific (napus-rapa) | 0.9736842    | 0.5225792    | not scorable | not scorable | 0.9834711    | 0.7175061    |
| 9081 | Bn-A04-p16382491 | A-genome specific (rapa only)  | not scorable | not scorable | not scorable | not scorable | 0.9834711    | 0.7189265    |
| 9082 | Bn-A04-p16394755 | A-genome specific (napus-rapa) | 0.9760765    | 0.5281989    | not scorable | not scorable | 0.9752066    | 0.7523744    |
| 9083 | Bn-A04-p16403131 | A-genome specific (napus-rapa) | 0.9808612    | 0.4637301    | not scorable | not scorable | 0.9752066    | 0.6675128    |
| 9084 | Bn-A04-p1640389  | A-genome specific (napus-rapa) | 0.791866     | 0.8334967    | not scorable | not scorable | 0.6280992    | 0.7151299    |
| 9085 | Bn-A04-p16405335 | A-genome specific (napus-rapa) | 0.9497608    | 0.3173717    | not scorable | not scorable | 0.9917355    | 0.6665735    |
| 9086 | Bn-A04-p16416104 | A-genome specific (napus-rapa) | 0.9736842    | 0.6532468    | not scorable | not scorable | 0.9834711    | 0.778954     |
| 9087 | Bn-A04-p16427350 | A-genome specific (napus-rapa) | 0.9736842    | 0.5670363    | not scorable | not scorable | 0.9917355    | 0.7875672    |
| 9088 | Bn-A04-p16431550 | all not scorable               | not scorable | not scorable | not scorable | not scorable | not scorable | not scorable |
| 9089 | Bn-A04-p16445225 | A-genome specific (napus-rapa) | 0.9928229    | 0.9192502    | not scorable | not scorable | 0.9917355    | 0.8060234    |
| 9090 | Bn-A04-p16445602 | A-genome specific (napus-rapa) | 0.9904306    | 0.7662759    | not scorable | not scorable | 0.9752066    | 0.7135587    |
| 9091 | Bn-A04-p16445675 | A-genome specific (napus-rapa) | 0.9904306    | 0.7884324    | not scorable | not scorable | 0.9917355    | 0.8376818    |
| 9092 | Bn-A04-p16446976 | A-genome specific (napus-rapa) | 0.7320574    | 0.8136343    | not scorable | not scorable | 0.5867769    | 0.89616      |
| 9093 | Bn-A04-p16447217 | A-genome specific (napus-rapa) | 0.9952153    | 0.8872474    | not scorable | not scorable | 0.9834711    | 0.8513421    |
| 9094 | Bn-A04-p16451992 | A-genome specific (napus-rapa) | 0.9880383    | 0.716279     | not scorable | not scorable | 1            | 0.6619216    |
| 9095 | Bn-A04-p16452098 | A-genome specific (napus-rapa) | 0.9880383    | 0.8007171    | not scorable | not scorable | 0.9917355    | 0.7386625    |
| 9096 | Bn-A04-p16459969 | A-genome specific (napus-rapa) | 0.9712918    | 0.7880909    | not scorable | not scorable | 0.9917355    | 0.7237646    |
| 9097 | Bn-A04-p16477853 | A-genome specific (napus-rapa) | 0.9617225    | 0.5674626    | not scorable | not scorable | 0.9917355    | 0.7901692    |
| 9098 | Bn-A04-p16479236 | A-genome specific (napus-rapa) | 0.9856459    | 0.2797354    | not scorable | not scorable | 1            | 0.6886033    |
| 9099 | Bn-A04-p16486340 | A-genome specific (napus-rapa) | 0.8325359    | 0.7807469    | not scorable | not scorable | 1            | 0.9175813    |
| 9100 | Bn-A04-p16503326 | A-genome specific (napus-rapa) | 0.9688995    | 0.5961856    | not scorable | not scorable | 0.9917355    | 0.7653733    |
| 9101 | Bn-A04-p16506148 | A-genome specific (napus-rapa) | 0.9976076    | 0.4075226    | not scorable | not scorable | 1            | 0.8048211    |
| 9102 | Bn-A04-p16508914 | A-genome specific (napus-rapa) | 1            | 0.413096     | not scorable | not scorable | 0.9917355    | 0.6873556    |
| 9103 | Bn-A04-p16514488 | A-genome specific (napus-rapa) | 0.9952153    | 0.8754031    | not scorable | not scorable | 0.9834711    | 0.7123968    |
| 9104 | Bn-A04-p16517396 | A-genome specific (napus-rapa) | 0.9976076    | 0.449349     | not scorable | not scorable | 0.9917355    | 0.711579     |
| 9105 | Bn-A04-p16523010 | A-genome specific (napus-rapa) | 0.9952153    | 0.7148441    | not scorable | not scorable | 1            | 0.7342599    |

|      |                  |                                |           |           |              |              |           |           |
|------|------------------|--------------------------------|-----------|-----------|--------------|--------------|-----------|-----------|
| 9106 | Bn-A04-p16523116 | A-genome specific (napus-rapa) | 0.9617225 | 0.7593277 | not scorable | not scorable | 1         | 0.8359115 |
| 9107 | Bn-A04-p16528010 | A-genome specific (napus-rapa) | 0.9808612 | 0.8005027 | not scorable | not scorable | 1         | 0.7201062 |
| 9108 | Bn-A04-p16528107 | A-genome specific (napus-rapa) | 0.9904306 | 0.7767451 | not scorable | not scorable | 0.9917355 | 0.8306848 |
| 9109 | Bn-A04-p16540340 | A-genome specific (napus-rapa) | 0.9736842 | 0.4869212 | not scorable | not scorable | 1         | 0.7682258 |
| 9110 | Bn-A04-p16545584 | A-genome specific (napus-rapa) | 0.9928229 | 0.538789  | not scorable | not scorable | 1         | 0.7712092 |
| 9111 | Bn-A04-p16552002 | A-genome specific (napus-rapa) | 0.9712918 | 0.8806614 | not scorable | not scorable | 1         | 0.8550907 |
| 9112 | Bn-A04-p16553214 | A-genome specific (napus-rapa) | 0.9832536 | 0.7728311 | not scorable | not scorable | 0.9834711 | 0.7551324 |
| 9113 | Bn-A04-p16553276 | A-genome specific (napus-rapa) | 0.9880383 | 0.7522739 | not scorable | not scorable | 0.9917355 | 0.7815723 |
| 9114 | Bn-A04-p1655416  | A-genome specific (napus-rapa) | 1         | 0.7894776 | not scorable | not scorable | 0.9669421 | 0.6749547 |
| 9115 | Bn-A04-p16555982 | A-genome specific (napus-rapa) | 0.9760765 | 0.8012777 | not scorable | not scorable | 0.9917355 | 0.8385908 |
| 9116 | Bn-A04-p16556868 | A-genome specific (napus-rapa) | 0.9904306 | 0.8083851 | not scorable | not scorable | 0.9917355 | 0.7289358 |
| 9117 | Bn-A04-p16558888 | A-genome specific (napus-rapa) | 0.9473684 | 0.5247774 | not scorable | not scorable | 0.9834711 | 0.6983034 |
| 9118 | Bn-A04-p16563543 | A-genome specific (napus-rapa) | 0.9641148 | 0.7335649 | not scorable | not scorable | 1         | 0.7911353 |
| 9119 | Bn-A04-p16565696 | A-genome specific (napus-rapa) | 0.9904306 | 0.8416278 | not scorable | not scorable | 0.9834711 | 0.7948382 |
| 9120 | Bn-A04-p16579551 | A-genome specific (napus-rapa) | 0.9569378 | 0.7153713 | not scorable | not scorable | 0.9421487 | 0.7440684 |
| 9121 | Bn-A04-p16584084 | A-genome specific (napus-rapa) | 0.9688995 | 0.3080729 | not scorable | not scorable | 0.9917355 | 0.6665162 |
| 9122 | Bn-A04-p16595064 | A-genome specific (napus-rapa) | 0.9856459 | 0.7171603 | not scorable | not scorable | 1         | 0.8497944 |
| 9123 | Bn-A04-p16598514 | A-genome specific (napus-rapa) | 0.9808612 | 0.587745  | not scorable | not scorable | 0.9834711 | 0.7915269 |
| 9124 | Bn-A04-p16605277 | A-genome specific (napus-rapa) | 0.9688995 | 0.4714673 | not scorable | not scorable | 1         | 0.7218091 |
| 9125 | Bn-A04-p16607433 | A-genome specific (napus-rapa) | 0.9832536 | 0.2925589 | not scorable | not scorable | 0.9917355 | 0.7480614 |
| 9126 | Bn-A04-p16608584 | A-genome specific (napus-rapa) | 0.9856459 | 0.7705176 | not scorable | not scorable | 0.9917355 | 0.8201232 |
| 9127 | Bn-A04-p16621448 | A-genome specific (napus-rapa) | 1         | 0.5528759 | not scorable | not scorable | 1         | 0.621411  |
| 9128 | Bn-A04-p16627363 | genome unspecific (all in)     | 0.9832536 | 0.4278835 |              | 1 0.3121269  | 0.9917355 | 0.749171  |
| 9129 | Bn-A04-p16651306 | A-genome specific (napus-rapa) | 0.9928229 | 0.8096758 | not scorable | not scorable | 0.9834711 | 0.7765445 |
| 9130 | Bn-A04-p16663552 | A-genome specific (napus-rapa) | 0.9832536 | 0.8161658 | not scorable | not scorable | 1         | 0.7831389 |
| 9131 | Bn-A04-p16677612 | A-genome specific (napus-rapa) | 0.9976076 | 0.7330693 | not scorable | not scorable | 0.9834711 | 0.8070533 |
| 9132 | Bn-A04-p16678843 | A-genome specific (napus-rapa) | 0.9976076 | 0.7804426 | not scorable | not scorable | 0.9917355 | 0.850601  |
| 9133 | Bn-A04-p16684288 | A-genome specific (napus-rapa) | 0.9976076 | 0.2560492 | not scorable | not scorable | 0.9669421 | 0.6476616 |
| 9134 | Bn-A04-p16711900 | A-genome specific (napus-rapa) | 0.9976076 | 0.713241  | not scorable | not scorable | 0.9917355 | 0.6702768 |
| 9135 | Bn-A04-p16719721 | A-genome specific (napus-rapa) | 0.9976076 | 0.3065865 | not scorable | not scorable | 0.9752066 | 0.5069157 |
| 9136 | Bn-A04-p16719955 | A-genome specific (napus-rapa) | 1         | 0.5058821 | not scorable | not scorable | 0.9917355 | 0.6931867 |
| 9137 | Bn-A04-p16743976 | A-genome specific (napus-rapa) | 0.9712918 | 0.8717489 | not scorable | not scorable | 1         | 0.7639438 |
| 9138 | Bn-A04-p16744035 | A-genome specific (napus-rapa) | 0.9665072 | 0.8291883 | not scorable | not scorable | 1         | 0.6761023 |

|      |                  |                                |              |              |              |              |           |           |
|------|------------------|--------------------------------|--------------|--------------|--------------|--------------|-----------|-----------|
| 9139 | Bn-A04-p16745356 | A-genome specific (napus-rapa) | 0.9712918    | 0.8297076    | not scorable | not scorable | 0.9917355 | 0.8291255 |
| 9140 | Bn-A04-p1674763  | A-genome specific (napus-rapa) | 0.9832536    | 0.4698481    | not scorable | not scorable | 1         | 0.7439995 |
| 9141 | Bn-A04-p16748162 | A-genome specific (napus-rapa) | 0.9712918    | 0.7756525    | not scorable | not scorable | 1         | 0.8368417 |
| 9142 | Bn-A04-p16751677 | A-genome specific (napus-rapa) | 0.9904306    | 0.8125824    | not scorable | not scorable | 0.9752066 | 0.6576722 |
| 9143 | Bn-A04-p16791082 | A-genome specific (napus-rapa) | 0.9952153    | 0.8318138    | not scorable | not scorable | 0.9917355 | 0.8784877 |
| 9144 | Bn-A04-p16798852 | A-genome specific (napus-rapa) | 0.9952153    | 0.7555044    | not scorable | not scorable | 0.9917355 | 0.5861406 |
| 9145 | Bn-A04-p1680506  | A-genome specific (napus-rapa) | 1            | 0.7418743    | not scorable | not scorable | 1         | 0.6688542 |
| 9146 | Bn-A04-p1680518  | A-genome specific (rapa only)  | not scorable | not scorable | not scorable | not scorable | 0.9917355 | 0.8215771 |
| 9147 | Bn-A04-p16805391 | A-genome specific (napus-rapa) | 0.9904306    | 0.383598     | not scorable | not scorable | 1         | 0.7349452 |
| 9148 | Bn-A04-p1680673  | A-genome specific (napus-rapa) | 0.9449761    | 0.7928798    | not scorable | not scorable | 1         | 0.739696  |
| 9149 | Bn-A04-p16819445 | A-genome specific (napus-rapa) | 0.9880383    | 0.7820782    | not scorable | not scorable | 0.9917355 | 0.8184493 |
| 9150 | Bn-A04-p16821442 | A-genome specific (napus-rapa) | 0.9952153    | 0.7034137    | not scorable | not scorable | 0.9752066 | 0.6568198 |
| 9151 | Bn-A04-p16830389 | genome unspecific (all in)     | 0.9880383    | 0.4994667    |              | 1 0.7293031  | 0.9834711 | 0.6510171 |
| 9152 | Bn-A04-p1683090  | A-genome specific (napus-rapa) | 1            | 0.826373     | not scorable | not scorable | 1         | 0.8841101 |
| 9153 | Bn-A04-p16832545 | genome unspecific (all in)     | 1            | 0.5132703    | 0.9379845    | 0.6009685    | 1         | 0.738565  |
| 9154 | Bn-A04-p16841462 | A-genome specific (napus-rapa) | 0.9952153    | 0.5057462    | not scorable | not scorable | 0.9834711 | 0.7964279 |
| 9155 | Bn-A04-p1684695  | A-genome specific (napus-rapa) | 1            | 0.7648603    | not scorable | not scorable | 0.9752066 | 0.6854421 |
| 9156 | Bn-A04-p16892915 | A-genome specific (napus-rapa) | 0.9425837    | 0.8199479    | not scorable | not scorable | 0.9669421 | 0.8552856 |
| 9157 | Bn-A04-p16919648 | A-genome specific (napus-rapa) | 0.9928229    | 0.5252975    | not scorable | not scorable | 0.6528926 | 0.8841216 |
| 9158 | Bn-A04-p16919672 | genome unspecific (all in)     | 1            | 0.7410883    |              | 1 0.7624856  | 0.9834711 | 0.6756677 |
| 9159 | Bn-A04-p16946306 | A-genome specific (napus-rapa) | 1            | 0.8148901    | not scorable | not scorable | 0.9834711 | 0.7867321 |
| 9160 | Bn-A04-p16980928 | A-genome specific (napus-rapa) | 0.9952153    | 0.3370576    | not scorable | not scorable | 0.9752066 | 0.6836994 |
| 9161 | Bn-A04-p16998111 | A-genome specific (napus-rapa) | 0.9976076    | 0.8370125    | not scorable | not scorable | 1         | 0.6827254 |
| 9162 | Bn-A04-p17003395 | A-genome specific (napus-rapa) | 0.9952153    | 0.5619785    | not scorable | not scorable | 0.9834711 | 0.7775808 |
| 9163 | Bn-A04-p17019529 | A-genome specific (napus-rapa) | 1            | 0.323826     | not scorable | not scorable | 1         | 0.8194088 |
| 9164 | Bn-A04-p17044228 | A-genome specific (napus-rapa) | 0.9952153    | 0.7619458    | not scorable | not scorable | 1         | 0.7170051 |
| 9165 | Bn-A04-p17045348 | A-genome specific (napus-rapa) | 0.9952153    | 0.7594439    | not scorable | not scorable | 0.9834711 | 0.7740433 |
| 9166 | Bn-A04-p17046250 | A-genome specific (napus-rapa) | 0.9976076    | 0.8112252    | not scorable | not scorable | 0.9752066 | 0.6964207 |
| 9167 | Bn-A04-p17047140 | A-genome specific (rapa only)  | not scorable | not scorable | not scorable | not scorable | 0.9917355 | 0.8332147 |
| 9168 | Bn-A04-p17052071 | A-genome specific (napus-rapa) | 0.9976076    | 0.8790981    | not scorable | not scorable | 0.9917355 | 0.8068503 |
| 9169 | Bn-A04-p17058367 | A-genome specific (napus-rapa) | 0.9976076    | 0.3719747    | not scorable | not scorable | 1         | 0.8425243 |
| 9170 | Bn-A04-p17105440 | A-genome specific (napus-rapa) | 1            | 0.427574     | not scorable | not scorable | 0.9752066 | 0.7082671 |
| 9171 | Bn-A04-p17106064 | A-genome specific (napus-rapa) | 0.9976076    | 0.6892042    | not scorable | not scorable | 0.9752066 | 0.7431537 |

|                       |                                   |              |              |              |              |              |              |
|-----------------------|-----------------------------------|--------------|--------------|--------------|--------------|--------------|--------------|
| 9172 Bn-A04-p17107045 | A-genome specific (napus-rapa)    | 0.9952153    | 0.3327017    | not scorable | not scorable | 1            | 0.8207603    |
| 9173 Bn-A04-p17125513 | A-genome specific (napus-rapa)    | 1            | 0.5922579    | not scorable | not scorable | 1            | 0.7522939    |
| 9174 Bn-A04-p17142570 | A-genome specific (napus-rapa)    | 0.9976076    | 0.7493378    | not scorable | not scorable | 1            | 0.6986762    |
| 9175 Bn-A04-p17155901 | A-genome specific (napus-rapa)    | 0.9976076    | 0.8105419    | not scorable | not scorable | 1            | 0.7950195    |
| 9176 Bn-A04-p17157304 | A-genome specific (napus-rapa)    | 0.9952153    | 0.8371145    | not scorable | not scorable | 1            | 0.7828301    |
| 9177 Bn-A04-p17170974 | A-genome specific (napus-rapa)    | 0.9473684    | 0.4424879    | not scorable | not scorable | 0.9752066    | 0.6896485    |
| 9178 Bn-A04-p17171349 | A-genome specific (napus-rapa)    | 0.9952153    | 0.871802     | not scorable | not scorable | 0.9917355    | 0.7684325    |
| 9179 Bn-A04-p17172246 | A-genome specific (napus-rapa)    | 1            | 0.8263673    | not scorable | not scorable | 0.9834711    | 0.769586     |
| 9180 Bn-A04-p17174846 | A-genome specific (napus-rapa)    | 0.9928229    | 0.9002177    | not scorable | not scorable | 0.9752066    | 0.8416573    |
| 9181 Bn-A04-p17179870 | A-genome specific (napus-rapa)    | 0.9976076    | 0.3356032    | not scorable | not scorable | 1            | 0.732608     |
| 9182 Bn-A04-p1718231  | A-genome specific (napus-rapa)    | 1            | 0.7037888    | not scorable | not scorable | 0.9917355    | 0.6583381    |
| 9183 Bn-A04-p1718248  | A-genome specific (napus-rapa)    | 0.9952153    | 0.7812059    | not scorable | not scorable | 0.9834711    | 0.6742517    |
| 9184 Bn-A04-p17212731 | A-genome specific (napus-rapa)    | 0.9952153    | 0.6740559    | not scorable | not scorable | 0.9752066    | 0.6938457    |
| 9185 Bn-A04-p17217840 | all not scorable                  | not scorable | not scorable | not scorable | not scorable | not scorable | not scorable |
| 9186 Bn-A04-p17219361 | napus specific                    | 0.9808612    | 0.771708     | not scorable | not scorable | not scorable | not scorable |
| 9187 Bn-A04-p17219743 | all not scorable                  | not scorable | not scorable | not scorable | not scorable | not scorable | not scorable |
| 9188 Bn-A04-p17220068 | napus specific                    | 0.9880383    | 0.7727132    | not scorable | not scorable | not scorable | not scorable |
| 9189 Bn-A04-p17221332 | napus specific                    | 0.9856459    | 0.7123217    | not scorable | not scorable | not scorable | not scorable |
| 9190 Bn-A04-p1722346  | A-genome specific (napus-rapa)    | 0.9880383    | 0.8090347    | not scorable | not scorable | 0.7520661    | 0.8127477    |
| 9191 Bn-A04-p17223885 | A-genome specific (napus-rapa)    | 0.9808612    | 0.7372922    | not scorable | not scorable | 0.9586777    | 0.7661338    |
| 9192 Bn-A04-p17231009 | A-genome specific (napus-rapa)    | 0.9880383    | 0.7914444    | not scorable | not scorable | 0.9752066    | 0.763038     |
| 9193 Bn-A04-p17238605 | A-genome specific (napus-rapa)    | 0.9856459    | 0.71657      | not scorable | not scorable | 0.9834711    | 0.7793567    |
| 9194 Bn-A04-p17239071 | A-genome specific (napus-rapa)    | 0.9856459    | 0.7552015    | not scorable | not scorable | 1            | 0.80383      |
| 9195 Bn-A04-p17239509 | A-genome specific (napus-rapa)    | 0.9736842    | 0.787952     | not scorable | not scorable | 0.9752066    | 0.7964415    |
| 9196 Bn-A04-p17273076 | genome unspecific (oleracea-rapa) | not scorable | not scorable | 0.9922481    | 0.4757029    | 0.9917355    | 0.5461337    |
| 9197 Bn-A04-p17277010 | genome unspecific (all in)        | 0.9784689    | 0.2859913    | 1            | 0.7475697    | 0.9917355    | 0.8004208    |
| 9198 Bn-A04-p17278229 | genome unspecific (all in)        | 0.9784689    | 0.5420578    | 0.9767442    | 0.7440732    | 0.9917355    | 0.6701708    |
| 9199 Bn-A04-p17281577 | A-genome specific (napus-rapa)    | 0.9736842    | 0.8332546    | not scorable | not scorable | 1            | 0.8114095    |
| 9200 Bn-A04-p17295665 | genome unspecific (all in)        | 0.9569378    | 0.6091447    | 0.9767442    | 0.726351     | 0.9917355    | 0.6534202    |
| 9201 Bn-A04-p17300068 | A-genome specific (napus-rapa)    | 0.9760765    | 0.3884032    | not scorable | not scorable | 0.9917355    | 0.6596727    |
| 9202 Bn-A04-p17312041 | A-genome specific (napus-rapa)    | 1            | 0.5309883    | not scorable | not scorable | 0.9917355    | 0.7332304    |
| 9203 Bn-A04-p17320026 | A-genome specific (napus-rapa)    | 0.9976076    | 0.4501354    | not scorable | not scorable | 1            | 0.7955703    |
| 9204 Bn-A04-p17322241 | A-genome specific (napus-rapa)    | 0.9976076    | 0.7763656    | not scorable | not scorable | 0.9834711    | 0.6931029    |

|      |                  |                                   |              |              |              |              |              |              |
|------|------------------|-----------------------------------|--------------|--------------|--------------|--------------|--------------|--------------|
| 9205 | Bn-A04-p17331915 | A-genome specific (napus-rapa)    | 0.9617225    | 0.4042864    | not scorable | not scorable | 0.9834711    | 0.6394106    |
| 9206 | Bn-A04-p17358519 | A-genome specific (napus-rapa)    | 0.9712918    | 0.4889482    | not scorable | not scorable | 1            | 0.8001173    |
| 9207 | Bn-A04-p17372718 | genome unspecific (oleracea-rapa) | not scorable | not scorable |              | 1            | 0.7715026    | 0.9834711    |
| 9208 | Bn-A04-p17381118 | A-genome specific (napus-rapa)    | 0.9760765    | 0.8141175    | not scorable | not scorable | 0.9752066    | 0.7339138    |
| 9209 | Bn-A04-p17383739 | A-genome specific (napus-rapa)    | 0.9665072    | 0.3048913    | not scorable | not scorable | 1            | 0.7664859    |
| 9210 | Bn-A04-p1738861  | A-genome specific (rapa only)     | not scorable | not scorable | not scorable | not scorable | 0.9834711    | 0.6850112    |
| 9211 | Bn-A04-p17391232 | A-genome specific (napus-rapa)    | 0.9880383    | 0.4808972    | not scorable | not scorable | 0.9917355    | 0.782317     |
| 9212 | Bn-A04-p17391802 | napus specific                    | 0.9808612    | 0.4710767    | not scorable | not scorable | not scorable | not scorable |
| 9213 | Bn-A04-p17394552 | genome unspecific (all in)        | 0.9354067    | 0.3282011    | 0.9612403    | 0.5709252    | 0.9834711    | 0.6888669    |
| 9214 | Bn-A04-p17394736 | A-genome specific (napus-rapa)    | 0.9665072    | 0.3871326    | not scorable | not scorable | 1            | 0.7610028    |
| 9215 | Bn-A04-p17401632 | A-genome specific (napus-rapa)    | 0.9808612    | 0.766139     | not scorable | not scorable | 0.9917355    | 0.7552312    |
| 9216 | Bn-A04-p17412823 | A-genome specific (napus-rapa)    | 0.9617225    | 0.3924695    | not scorable | not scorable | 1            | 0.6986724    |
| 9217 | Bn-A04-p17416243 | A-genome specific (napus-rapa)    | 0.9856459    | 0.7190037    | not scorable | not scorable | 1            | 0.7188333    |
| 9218 | Bn-A04-p17417142 | A-genome specific (napus-rapa)    | 0.9808612    | 0.3384117    | not scorable | not scorable | 1            | 0.835825     |
| 9219 | Bn-A04-p17422800 | A-genome specific (napus-rapa)    | 0.9856459    | 0.7849482    | not scorable | not scorable | 0.9752066    | 0.7973136    |
| 9220 | Bn-A04-p17425190 | A-genome specific (napus-rapa)    | 0.9784689    | 0.6943787    | not scorable | not scorable | 0.9834711    | 0.7054963    |
| 9221 | Bn-A04-p17439839 | A-genome specific (napus-rapa)    | 0.9928229    | 0.7619459    | not scorable | not scorable | 1            | 0.8105936    |
| 9222 | Bn-A04-p1745832  | A-genome specific (napus-rapa)    | 0.9449761    | 0.7983341    | not scorable | not scorable | 0.9752066    | 0.7761122    |
| 9223 | Bn-A04-p17475728 | genome unspecific (all in)        | 0.9928229    | 0.3846953    | 0.9922481    | 0.8508529    | 1            | 0.8056206    |
| 9224 | Bn-A04-p17487757 | A-genome specific (napus-rapa)    | 0.9856459    | 0.4817092    | not scorable | not scorable | 0.9669421    | 0.7563528    |
| 9225 | Bn-A04-p17489063 | all not scorable                  | not scorable | not scorable | not scorable | not scorable | not scorable | not scorable |
| 9226 | Bn-A04-p17490425 | A-genome specific (napus-rapa)    | 0.9880383    | 0.7604005    | not scorable | not scorable | 0.9917355    | 0.814182     |
| 9227 | Bn-A04-p17496899 | A-genome specific (napus-rapa)    | 0.9976076    | 0.8837978    | not scorable | not scorable | 1            | 0.8458923    |
| 9228 | Bn-A04-p17530621 | genome unspecific (all in)        | 0.9736842    | 0.568487     |              | 1            | 0.614495     | 1            |
| 9229 | Bn-A04-p17535104 | A-genome specific (napus-rapa)    | 0.9904306    | 0.7880712    | not scorable | not scorable | 0.6528926    | 0.7216272    |
| 9230 | Bn-A04-p17541500 | genome unspecific (all in)        | 0.9808612    | 0.2776755    | 0.9922481    | 0.6945408    | 0.9669421    | 0.6465729    |
| 9231 | Bn-A04-p17541623 | A-genome specific (napus-rapa)    | 0.9784689    | 0.5757022    | not scorable | not scorable | 0.9834711    | 0.7612407    |
| 9232 | Bn-A04-p17550209 | A-genome specific (napus-rapa)    | 0.9736842    | 0.4063496    | not scorable | not scorable | 0.9834711    | 0.80571      |
| 9233 | Bn-A04-p1756591  | napus specific                    | 0.9354067    | 0.3709655    | not scorable | not scorable | not scorable | not scorable |
| 9234 | Bn-A04-p17574162 | A-genome specific (napus-rapa)    | 0.9784689    | 0.7623603    | not scorable | not scorable | 0.9917355    | 0.8143303    |
| 9235 | Bn-A04-p17576444 | A-genome specific (napus-rapa)    | 0.9880383    | 0.7487143    | not scorable | not scorable | 1            | 0.7794484    |
| 9236 | Bn-A04-p17577700 | A-genome specific (napus-rapa)    | 0.9760765    | 0.3619131    | not scorable | not scorable | 1            | 0.6498604    |
| 9237 | Bn-A04-p17578444 | A-genome specific (napus-rapa)    | 0.9425837    | 0.7892169    | not scorable | not scorable | 0.9834711    | 0.6851476    |



|      |                  |                                   |              |              |              |              |           |           |
|------|------------------|-----------------------------------|--------------|--------------|--------------|--------------|-----------|-----------|
| 9238 | Bn-A04-p17580804 | A-genome specific (napus-rapa)    | 0.9808612    | 0.6691713    | not scorable | not scorable | 0.9917355 | 0.6957108 |
| 9239 | Bn-A04-p1758570  | A-genome specific (napus-rapa)    | 0.9617225    | 0.5611995    | not scorable | not scorable | 0.9917355 | 0.8268179 |
| 9240 | Bn-A04-p1759257  | A-genome specific (napus-rapa)    | 0.9784689    | 0.7690881    | not scorable | not scorable | 0.9917355 | 0.7682269 |
| 9241 | Bn-A04-p17613869 | A-genome specific (napus-rapa)    | 0.9736842    | 0.7083262    | not scorable | not scorable | 0.9917355 | 0.824894  |
| 9242 | Bn-A04-p17614504 | A-genome specific (napus-rapa)    | 0.930622     | 0.7508956    | not scorable | not scorable | 1         | 0.7457941 |
| 9243 | Bn-A04-p17615088 | A-genome specific (napus-rapa)    | 0.9210526    | 0.7526013    | not scorable | not scorable | 1         | 0.8698636 |
| 9244 | Bn-A04-p17623914 | A-genome specific (napus-rapa)    | 0.9473684    | 0.4055259    | not scorable | not scorable | 0.9834711 | 0.6934316 |
| 9245 | Bn-A04-p17624469 | genome unspecific (oleracea-rapa) | not scorable | not scorable | 0.9379845    | 0.3292428    | 0.9917355 | 0.3654249 |
| 9246 | Bn-A04-p17624526 | A-genome specific (rapa only)     | not scorable | not scorable | not scorable | not scorable | 0.9917355 | 0.7047639 |
| 9247 | Bn-A04-p17632009 | A-genome specific (napus-rapa)    | 0.9856459    | 0.7922968    | not scorable | not scorable | 0.9917355 | 0.8095888 |
| 9248 | Bn-A04-p17634469 | A-genome specific (napus-rapa)    | 0.9593301    | 0.4022683    | not scorable | not scorable | 0.9917355 | 0.7894939 |
| 9249 | Bn-A04-p1764916  | A-genome specific (napus-rapa)    | 0.9808612    | 0.7904852    | not scorable | not scorable | 0.9834711 | 0.7043457 |
| 9250 | Bn-A04-p1765163  | A-genome specific (napus-rapa)    | 0.9808612    | 0.7940629    | not scorable | not scorable | 0.9834711 | 0.6877309 |
| 9251 | Bn-A04-p17658206 | A-genome specific (napus-rapa)    | 0.7679426    | 0.7688709    | not scorable | not scorable | 0.9586777 | 0.8058131 |
| 9252 | Bn-A04-p17685210 | A-genome specific (rapa only)     | not scorable | not scorable | not scorable | not scorable | 1         | 0.7533008 |
| 9253 | Bn-A04-p17686228 | A-genome specific (napus-rapa)    | 0.9808612    | 0.8109291    | not scorable | not scorable | 0.9752066 | 0.7732124 |
| 9254 | Bn-A04-p17689002 | A-genome specific (napus-rapa)    | 0.9856459    | 0.7096539    | not scorable | not scorable | 0.9834711 | 0.7649984 |
| 9255 | Bn-A04-p17689324 | A-genome specific (napus-rapa)    | 1            | 0.7371257    | not scorable | not scorable | 1         | 0.8234757 |
| 9256 | Bn-A04-p17692138 | A-genome specific (napus-rapa)    | 0.9784689    | 0.6827103    | not scorable | not scorable | 1         | 0.6984116 |
| 9257 | Bn-A04-p17698780 | A-genome specific (napus-rapa)    | 0.9928229    | 0.809095     | not scorable | not scorable | 0.9917355 | 0.7481785 |
| 9258 | Bn-A04-p17704458 | A-genome specific (napus-rapa)    | 0.9712918    | 0.5686407    | not scorable | not scorable | 1         | 0.8023478 |
| 9259 | Bn-A04-p17706333 | A-genome specific (napus-rapa)    | 0.937799     | 0.7629701    | not scorable | not scorable | 0.9669421 | 0.7973309 |
| 9260 | Bn-A04-p17712184 | A-genome specific (napus-rapa)    | 0.9832536    | 0.7548684    | not scorable | not scorable | 0.9917355 | 0.8186453 |
| 9261 | Bn-A04-p1773333  | A-genome specific (napus-rapa)    | 0.9928229    | 0.7347106    | not scorable | not scorable | 1         | 0.713299  |
| 9262 | Bn-A04-p17736387 | A-genome specific (napus-rapa)    | 0.9641148    | 0.3719573    | not scorable | not scorable | 0.9752066 | 0.5446155 |
| 9263 | Bn-A04-p17736770 | A-genome specific (napus-rapa)    | 0.9880383    | 0.7763885    | not scorable | not scorable | 0.9834711 | 0.6605806 |
| 9264 | Bn-A04-p17738097 | A-genome specific (napus-rapa)    | 0.9976076    | 0.7940474    | not scorable | not scorable | 0.9917355 | 0.7818289 |
| 9265 | Bn-A04-p1774031  | A-genome specific (napus-rapa)    | 0.9784689    | 0.7893559    | not scorable | not scorable | 0.9834711 | 0.7624306 |
| 9266 | Bn-A04-p17740663 | genome unspecific (all in)        | 0.9425837    | 0.4804407    | 0.9767442    | 0.6810263    | 0.9504132 | 0.6841583 |
| 9267 | Bn-A04-p17742799 | A-genome specific (napus-rapa)    | 0.9473684    | 0.4634572    | not scorable | not scorable | 0.9586777 | 0.676002  |
| 9268 | Bn-A04-p1774926  | A-genome specific (napus-rapa)    | 0.9904306    | 0.7742343    | not scorable | not scorable | 1         | 0.7556958 |
| 9269 | Bn-A04-p1775155  | A-genome specific (napus-rapa)    | 0.9856459    | 0.5195107    | not scorable | not scorable | 0.9917355 | 0.8368692 |
| 9270 | Bn-A04-p17756059 | A-genome specific (napus-rapa)    | 0.9856459    | 0.7263153    | not scorable | not scorable | 0.9917355 | 0.6229188 |

|      |                  |                                   |              |              |              |              |              |              |
|------|------------------|-----------------------------------|--------------|--------------|--------------|--------------|--------------|--------------|
| 9271 | Bn-A04-p17760280 | napus specific                    | 0.9593301    | 0.4725342    | not scorable | not scorable | not scorable | not scorable |
| 9272 | Bn-A04-p17760869 | A-genome specific (napus-rapa)    | 0.9808612    | 0.3724486    | not scorable | not scorable | 0.9917355    | 0.7871463    |
| 9273 | Bn-A04-p17766173 | genome unspecific (all in)        | 0.9856459    | 0.7261904    |              | 1            | 0.574428     | 0.9586777    |
| 9274 | Bn-A04-p17768404 | A-genome specific (napus-rapa)    | 0.9712918    | 0.5458004    | not scorable | not scorable | 1            | 0.8344214    |
| 9275 | Bn-A04-p17770281 | A-genome specific (napus-rapa)    | 0.9976076    | 0.8183022    | not scorable | not scorable | 1            | 0.8543575    |
| 9276 | Bn-A04-p1777948  | A-genome specific (napus-rapa)    | 1            | 0.8730361    | not scorable | not scorable | 1            | 0.9199983    |
| 9277 | Bn-A04-p17790228 | A-genome specific (napus-rapa)    | 0.9880383    | 0.3945232    | not scorable | not scorable | 0.9917355    | 0.7689141    |
| 9278 | Bn-A04-p1780149  | A-genome specific (napus-rapa)    | 0.9593301    | 0.3534143    | not scorable | not scorable | 0.9834711    | 0.7713329    |
| 9279 | Bn-A04-p17811740 | A-genome specific (napus-rapa)    | 0.9473684    | 0.6990018    | not scorable | not scorable | 1            | 0.7195191    |
| 9280 | Bn-A04-p17814849 | A-genome specific (napus-rapa)    | 0.791866     | 0.8416464    | not scorable | not scorable | 0.9917355    | 0.7414146    |
| 9281 | Bn-A04-p17816796 | A-genome specific (napus-rapa)    | 0.9665072    | 0.6559324    | not scorable | not scorable | 0.9917355    | 0.5829142    |
| 9282 | Bn-A04-p17816969 | genome unspecific (all in)        | 0.9665072    | 0.5660895    | 0.9844961    | 0.8552722    | 0.9752066    | 0.7807314    |
| 9283 | Bn-A04-p17820683 | A-genome specific (napus-rapa)    | 1            | 0.6150594    | not scorable | not scorable | 1            | 0.8569579    |
| 9284 | Bn-A04-p17832455 | genome unspecific (oleracea-rapa) | not scorable | not scorable |              | 1            | 0.8178433    | 0.9917355    |
| 9285 | Bn-A04-p1783485  | A-genome specific (napus-rapa)    | 0.9832536    | 0.3124115    | not scorable | not scorable | 0.9834711    | 0.7559544    |
| 9286 | Bn-A04-p17845366 | A-genome specific (napus-rapa)    | 1            | 0.5164079    | not scorable | not scorable | 1            | 0.7068847    |
| 9287 | Bn-A04-p17858149 | A-genome specific (napus-rapa)    | 0.9665072    | 0.7801339    | not scorable | not scorable | 0.9834711    | 0.7179871    |
| 9288 | Bn-A04-p17864572 | A-genome specific (napus-rapa)    | 0.9784689    | 0.7750976    | not scorable | not scorable | 0.9917355    | 0.7724181    |
| 9289 | Bn-A04-p17864879 | A-genome specific (napus-rapa)    | 0.9760765    | 0.8020527    | not scorable | not scorable | 0.9752066    | 0.6438812    |
| 9290 | Bn-A04-p17870056 | A-genome specific (napus-rapa)    | 0.8899522    | 0.8125927    | not scorable | not scorable | 0.661157     | 0.8444123    |
| 9291 | Bn-A04-p17871505 | A-genome specific (napus-rapa)    | 0.9760765    | 0.7973577    | not scorable | not scorable | 0.9917355    | 0.8243164    |
| 9292 | Bn-A04-p17885659 | A-genome specific (rapa only)     | not scorable | not scorable | not scorable | not scorable | 0.9917355    | 0.7211996    |
| 9293 | Bn-A04-p17896333 | genome unspecific (all in)        | 0.9808612    | 0.3373762    | 0.9922481    | 0.7062766    | 1            | 0.7586259    |
| 9294 | Bn-A04-p17910578 | A-genome specific (napus-rapa)    | 1            | 0.6171024    | not scorable | not scorable | 1            | 0.6066825    |
| 9295 | Bn-A04-p17934648 | A-genome specific (napus-rapa)    | 0.9856459    | 0.7921286    | not scorable | not scorable | 0.9917355    | 0.7168507    |
| 9296 | Bn-A04-p17940697 | A-genome specific (napus-rapa)    | 0.9808612    | 0.782281     | not scorable | not scorable | 0.9917355    | 0.796643     |
| 9297 | Bn-A04-p17940767 | A-genome specific (napus-rapa)    | 0.9712918    | 0.551406     | not scorable | not scorable | 0.9917355    | 0.7232706    |
| 9298 | Bn-A04-p17968847 | A-genome specific (napus-rapa)    | 0.9904306    | 0.73083      | not scorable | not scorable | 0.9834711    | 0.6117924    |
| 9299 | Bn-A04-p17969838 | A-genome specific (napus-rapa)    | 0.9712918    | 0.6820135    | not scorable | not scorable | 0.9917355    | 0.6840917    |
| 9300 | Bn-A04-p17976746 | A-genome specific (napus-rapa)    | 0.9688995    | 0.591197     | not scorable | not scorable | 0.9834711    | 0.6313891    |
| 9301 | Bn-A04-p18003170 | A-genome specific (napus-rapa)    | 0.9808612    | 0.763015     | not scorable | not scorable | 1            | 0.6622107    |
| 9302 | Bn-A04-p18003813 | A-genome specific (napus-rapa)    | 0.9569378    | 0.8846033    | not scorable | not scorable | 0.553719     | 0.7853353    |
| 9303 | Bn-A04-p18007716 | napus specific                    | 0.7344497    | 0.7232249    | not scorable | not scorable | not scorable | not scorable |

|                       |                                   |              |              |              |              |           |           |
|-----------------------|-----------------------------------|--------------|--------------|--------------|--------------|-----------|-----------|
| 9304 Bn-A04-p18009131 | A-genome specific (napus-rapa)    | 0.9641148    | 0.7968261    | not scorable | not scorable | 0.5950413 | 0.8320854 |
| 9305 Bn-A04-p18012102 | A-genome specific (napus-rapa)    | 0.9784689    | 0.6004086    | not scorable | not scorable | 0.9917355 | 0.7839343 |
| 9306 Bn-A04-p18013923 | A-genome specific (napus-rapa)    | 0.9784689    | 0.7722824    | not scorable | not scorable | 0.9917355 | 0.7659952 |
| 9307 Bn-A04-p18015189 | A-genome specific (napus-rapa)    | 0.9736842    | 0.7822166    | not scorable | not scorable | 1         | 0.8471489 |
| 9308 Bn-A04-p18027570 | A-genome specific (napus-rapa)    | 0.9760765    | 0.7871521    | not scorable | not scorable | 1         | 0.7737237 |
| 9309 Bn-A04-p18031439 | A-genome specific (napus-rapa)    | 1            | 0.5329401    | not scorable | not scorable | 0.9834711 | 0.663646  |
| 9310 Bn-A04-p18038306 | A-genome specific (napus-rapa)    | 0.9736842    | 0.6891751    | not scorable | not scorable | 0.9752066 | 0.7156014 |
| 9311 Bn-A04-p18047327 | A-genome specific (napus-rapa)    | 0.9784689    | 0.2376818    | not scorable | not scorable | 1         | 0.749177  |
| 9312 Bn-A04-p18047606 | A-genome specific (napus-rapa)    | 0.9210526    | 0.3096215    | not scorable | not scorable | 0.9917355 | 0.7592556 |
| 9313 Bn-A04-p18055770 | genome unspecific (all in)        | 0.9186603    | 0.4081582    | 0.9922481    | 0.7631772    | 0.9586777 | 0.7923121 |
| 9314 Bn-A04-p18062365 | A-genome specific (napus-rapa)    | 0.9832536    | 0.8513764    | not scorable | not scorable | 0.9421487 | 0.6639891 |
| 9315 Bn-A04-p18065518 | A-genome specific (rapa only)     | not scorable | not scorable | not scorable | not scorable | 1         | 0.7697366 |
| 9316 Bn-A04-p18065896 | A-genome specific (napus-rapa)    | 0.9688995    | 0.7668924    | not scorable | not scorable | 0.9917355 | 0.6893607 |
| 9317 Bn-A04-p18071582 | A-genome specific (rapa only)     | not scorable | not scorable | not scorable | not scorable | 0.5950413 | 0.9034117 |
| 9318 Bn-A04-p18071791 | A-genome specific (napus-rapa)    | 0.9784689    | 0.7740461    | not scorable | not scorable | 0.5867769 | 0.8148199 |
| 9319 Bn-A04-p18075680 | genome unspecific (all in)        | 0.9736842    | 0.8108997    | 0.6589147    | 0.7548283    | 1         | 0.8223149 |
| 9320 Bn-A04-p18081163 | A-genome specific (napus-rapa)    | 0.9760765    | 0.7579353    | not scorable | not scorable | 0.9834711 | 0.7779294 |
| 9321 Bn-A04-p18083568 | A-genome specific (napus-rapa)    | 0.9976076    | 0.3565235    | not scorable | not scorable | 0.9752066 | 0.6521329 |
| 9322 Bn-A04-p18085734 | A-genome specific (napus-rapa)    | 0.9593301    | 0.8723353    | not scorable | not scorable | 0.9669421 | 0.7333806 |
| 9323 Bn-A04-p18086224 | A-genome specific (napus-rapa)    | 0.9736842    | 0.7558789    | not scorable | not scorable | 1         | 0.7853137 |
| 9324 Bn-A04-p18087342 | A-genome specific (napus-rapa)    | 0.9186603    | 0.7205167    | not scorable | not scorable | 0.9586777 | 0.6936534 |
| 9325 Bn-A04-p18087738 | A-genome specific (napus-rapa)    | 0.9904306    | 0.7436739    | not scorable | not scorable | 0.9917355 | 0.7851833 |
| 9326 Bn-A04-p18089854 | A-genome specific (napus-rapa)    | 0.9784689    | 0.7827268    | not scorable | not scorable | 0.9752066 | 0.8230858 |
| 9327 Bn-A04-p18090397 | A-genome specific (napus-rapa)    | 0.9856459    | 0.7235605    | not scorable | not scorable | 0.9752066 | 0.6923385 |
| 9328 Bn-A04-p18097103 | genome unspecific (oleracea-rapa) | not scorable | not scorable | 0.9069768    | 0.3917983    | 0.9834711 | 0.7128335 |
| 9329 Bn-A04-p18097421 | A-genome specific (napus-rapa)    | 1            | 0.4144393    | not scorable | not scorable | 1         | 0.7452957 |
| 9330 Bn-A04-p18112711 | A-genome specific (napus-rapa)    | 0.9832536    | 0.784529     | not scorable | not scorable | 0.9917355 | 0.7907945 |
| 9331 Bn-A04-p18124053 | A-genome specific (napus-rapa)    | 0.9712918    | 0.4249277    | not scorable | not scorable | 0.9917355 | 0.8154249 |
| 9332 Bn-A04-p18125528 | A-genome specific (napus-rapa)    | 0.9617225    | 0.7216362    | not scorable | not scorable | 1         | 0.7539133 |
| 9333 Bn-A04-p18125679 | A-genome specific (napus-rapa)    | 0.9784689    | 0.7003452    | not scorable | not scorable | 0.9752066 | 0.6569011 |
| 9334 Bn-A04-p18129552 | A-genome specific (napus-rapa)    | 0.9856459    | 0.6119404    | not scorable | not scorable | 0.9834711 | 0.8353892 |
| 9335 Bn-A04-p18136301 | A-genome specific (napus-rapa)    | 0.9665072    | 0.5278142    | not scorable | not scorable | 1         | 0.8233715 |
| 9336 Bn-A04-p18152854 | A-genome specific (napus-rapa)    | 0.9928229    | 0.7483749    | not scorable | not scorable | 0.9917355 | 0.8131679 |

|                       |                                |              |              |              |              |              |              |
|-----------------------|--------------------------------|--------------|--------------|--------------|--------------|--------------|--------------|
| 9337 Bn-A04-p1815404  | A-genome specific (napus-rapa) | 0.9521531    | 0.4739307    | not scorable | not scorable | 0.9917355    | 0.7547195    |
| 9338 Bn-A04-p18156458 | A-genome specific (napus-rapa) | 0.9712918    | 0.8481968    | not scorable | not scorable | 0.9752066    | 0.7234749    |
| 9339 Bn-A04-p18167535 | A-genome specific (napus-rapa) | 0.9952153    | 0.3223836    | not scorable | not scorable | 0.9917355    | 0.6869836    |
| 9340 Bn-A04-p18167614 | A-genome specific (napus-rapa) | 0.9784689    | 0.5104159    | not scorable | not scorable | 0.9917355    | 0.7796663    |
| 9341 Bn-A04-p18168733 | A-genome specific (napus-rapa) | 0.8851675    | 0.7785262    | not scorable | not scorable | 1            | 0.8611665    |
| 9342 Bn-A04-p18178609 | A-genome specific (napus-rapa) | 0.9736842    | 0.8045176    | not scorable | not scorable | 1            | 0.9002636    |
| 9343 Bn-A04-p18180777 | A-genome specific (napus-rapa) | 0.9641148    | 0.5545123    | not scorable | not scorable | 0.661157     | 0.6913545    |
| 9344 Bn-A04-p1824456  | A-genome specific (napus-rapa) | 0.9928229    | 0.7039209    | not scorable | not scorable | 0.9917355    | 0.7353681    |
| 9345 Bn-A04-p18252317 | A-genome specific (rapa only)  | not scorable | not scorable | not scorable | not scorable | 1            | 0.7553875    |
| 9346 Bn-A04-p18256793 | A-genome specific (napus-rapa) | 0.8397129    | 0.6416445    | not scorable | not scorable | 0.9586777    | 0.6417928    |
| 9347 Bn-A04-p1827230  | A-genome specific (napus-rapa) | 0.9976076    | 0.7858793    | not scorable | not scorable | 0.9917355    | 0.8146861    |
| 9348 Bn-A04-p18273048 | A-genome specific (napus-rapa) | 0.8971292    | 0.5324244    | not scorable | not scorable | 1            | 0.853812     |
| 9349 Bn-A04-p1829219  | A-genome specific (rapa only)  | not scorable | not scorable | not scorable | not scorable | 0.9834711    | 0.7268962    |
| 9350 Bn-A04-p18354325 | A-genome specific (napus-rapa) | 0.9832536    | 0.7207896    | not scorable | not scorable | 0.9917355    | 0.7356425    |
| 9351 Bn-A04-p18358463 | A-genome specific (napus-rapa) | 1            | 0.5419363    | not scorable | not scorable | 1            | 0.6022679    |
| 9352 Bn-A04-p1837535  | napus specific                 | 0.5143541    | 0.7901528    | not scorable | not scorable | not scorable | not scorable |
| 9353 Bn-A04-p18377757 | A-genome specific (napus-rapa) | 0.9760765    | 0.376796     | not scorable | not scorable | 0.9917355    | 0.7922279    |
| 9354 Bn-A04-p18390795 | A-genome specific (napus-rapa) | 0.9808612    | 0.8326987    | not scorable | not scorable | 0.9917355    | 0.7538387    |
| 9355 Bn-A04-p18409410 | A-genome specific (napus-rapa) | 0.9808612    | 0.6210484    | not scorable | not scorable | 0.9917355    | 0.7567343    |
| 9356 Bn-A04-p18417786 | A-genome specific (napus-rapa) | 0.9760765    | 0.7386652    | not scorable | not scorable | 1            | 0.7134618    |
| 9357 Bn-A04-p18429573 | A-genome specific (napus-rapa) | 0.9784689    | 0.7627969    | not scorable | not scorable | 0.9752066    | 0.7619901    |
| 9358 Bn-A04-p18455291 | A-genome specific (napus-rapa) | 0.9976076    | 0.7742743    | not scorable | not scorable | 1            | 0.8543575    |
| 9359 Bn-A04-p18457550 | A-genome specific (napus-rapa) | 0.9736842    | 0.7270214    | not scorable | not scorable | 1            | 0.7860953    |
| 9360 Bn-A04-p18458146 | A-genome specific (napus-rapa) | 0.9856459    | 0.62256      | not scorable | not scorable | 0.9752066    | 0.7660415    |
| 9361 Bn-A04-p18467235 | A-genome specific (napus-rapa) | 0.9784689    | 0.8484657    | not scorable | not scorable | 1            | 0.8019052    |
| 9362 Bn-A04-p18471424 | A-genome specific (napus-rapa) | 0.9832536    | 0.5735394    | not scorable | not scorable | 1            | 0.7524127    |
| 9363 Bn-A04-p18472857 | A-genome specific (napus-rapa) | 0.7511961    | 0.8125546    | not scorable | not scorable | 0.9421487    | 0.840508     |
| 9364 Bn-A04-p18487715 | A-genome specific (napus-rapa) | 0.9856459    | 0.6005326    | not scorable | not scorable | 0.9917355    | 0.7544709    |
| 9365 Bn-A04-p18499666 | A-genome specific (napus-rapa) | 0.9665072    | 0.7675864    | not scorable | not scorable | 0.9834711    | 0.8289795    |
| 9366 Bn-A04-p18502854 | A-genome specific (napus-rapa) | 0.9712918    | 0.7453173    | not scorable | not scorable | 0.9834711    | 0.7962135    |
| 9367 Bn-A04-p18515323 | A-genome specific (rapa only)  | not scorable | not scorable | not scorable | not scorable | 1            | 0.8304235    |
| 9368 Bn-A04-p18522691 | A-genome specific (napus-rapa) | 0.9665072    | 0.5274078    | not scorable | not scorable | 0.9752066    | 0.7389593    |
| 9369 Bn-A04-p18530009 | A-genome specific (napus-rapa) | 0.9808612    | 0.7832899    | not scorable | not scorable | 1            | 0.7686359    |

|                       |                                |              |              |              |              |           |           |
|-----------------------|--------------------------------|--------------|--------------|--------------|--------------|-----------|-----------|
| 9370 Bn-A04-p1854718  | A-genome specific (napus-rapa) | 0.9688995    | 0.6981506    | not scorable | not scorable | 0.9669421 | 0.6981179 |
| 9371 Bn-A04-p18552075 | A-genome specific (rapa only)  | not scorable | not scorable | not scorable | not scorable | 0.9917355 | 0.8478519 |
| 9372 Bn-A04-p18562244 | A-genome specific (napus-rapa) | 0.9736842    | 0.6083112    | not scorable | not scorable | 0.9752066 | 0.6437557 |
| 9373 Bn-A04-p18572841 | A-genome specific (napus-rapa) | 0.9856459    | 0.3579233    | not scorable | not scorable | 0.9669421 | 0.5806885 |
| 9374 Bn-A04-p18573606 | A-genome specific (napus-rapa) | 0.9617225    | 0.7783461    | not scorable | not scorable | 0.9834711 | 0.7747121 |
| 9375 Bn-A04-p18577466 | A-genome specific (napus-rapa) | 0.9712918    | 0.4843069    | not scorable | not scorable | 1         | 0.8039973 |
| 9376 Bn-A04-p1858140  | A-genome specific (napus-rapa) | 0.9473684    | 0.8093418    | not scorable | not scorable | 0.6115702 | 0.8021932 |
| 9377 Bn-A04-p18585603 | A-genome specific (napus-rapa) | 0.9808612    | 0.7196856    | not scorable | not scorable | 0.9834711 | 0.6702854 |
| 9378 Bn-A04-p18595858 | A-genome specific (napus-rapa) | 0.9784689    | 0.2949174    | not scorable | not scorable | 0.9834711 | 0.787617  |
| 9379 Bn-A04-p18606660 | A-genome specific (napus-rapa) | 0.9880383    | 0.5421918    | not scorable | not scorable | 1         | 0.8031628 |
| 9380 Bn-A04-p18613344 | A-genome specific (napus-rapa) | 0.9856459    | 0.3524694    | not scorable | not scorable | 1         | 0.7698085 |
| 9381 Bn-A04-p18617343 | A-genome specific (napus-rapa) | 0.9928229    | 0.791268     | not scorable | not scorable | 0.9917355 | 0.8367441 |
| 9382 Bn-A04-p18620226 | A-genome specific (napus-rapa) | 0.9880383    | 0.3630414    | not scorable | not scorable | 0.9917355 | 0.7168025 |
| 9383 Bn-A04-p18621492 | genome unspecific (all in)     | 0.9617225    | 0.5757912    | 0.9844961    | 0.6875192    | 0.9917355 | 0.827274  |
| 9384 Bn-A04-p18639840 | A-genome specific (napus-rapa) | 1            | 0.370384     | not scorable | not scorable | 0.9834711 | 0.6649366 |
| 9385 Bn-A04-p18639922 | A-genome specific (rapa only)  | not scorable | not scorable | not scorable | not scorable | 1         | 0.7288427 |
| 9386 Bn-A04-p1865434  | A-genome specific (napus-rapa) | 0.9976076    | 0.5109836    | not scorable | not scorable | 0.9752066 | 0.8020285 |
| 9387 Bn-A04-p18673015 | A-genome specific (napus-rapa) | 1            | 0.4650257    | not scorable | not scorable | 1         | 0.9172017 |
| 9388 Bn-A04-p1867423  | A-genome specific (napus-rapa) | 0.9952153    | 0.9065347    | not scorable | not scorable | 0.9917355 | 0.7515473 |
| 9389 Bn-A04-p18693211 | A-genome specific (napus-rapa) | 0.9976076    | 0.637215     | not scorable | not scorable | 0.9917355 | 0.7354065 |
| 9390 Bn-A04-p18694989 | A-genome specific (napus-rapa) | 0.9976076    | 0.7163467    | not scorable | not scorable | 1         | 0.7299266 |
| 9391 Bn-A04-p1869508  | A-genome specific (napus-rapa) | 0.9928229    | 0.5185612    | not scorable | not scorable | 0.9752066 | 0.6888708 |
| 9392 Bn-A04-p18702920 | A-genome specific (rapa only)  | not scorable | not scorable | not scorable | not scorable | 1         | 0.7448068 |
| 9393 Bn-A04-p18731541 | A-genome specific (napus-rapa) | 1            | 0.5030417    | not scorable | not scorable | 0.9917355 | 0.6422077 |
| 9394 Bn-A04-p18763435 | A-genome specific (napus-rapa) | 0.9928229    | 0.5907952    | not scorable | not scorable | 0.9834711 | 0.7735179 |
| 9395 Bn-A04-p18789871 | A-genome specific (rapa only)  | not scorable | not scorable | not scorable | not scorable | 1         | 0.7948923 |
| 9396 Bn-A04-p1880654  | A-genome specific (napus-rapa) | 0.9976076    | 0.740625     | not scorable | not scorable | 0.9834711 | 0.7037346 |
| 9397 Bn-A04-p18806834 | A-genome specific (napus-rapa) | 1            | 0.6974877    | not scorable | not scorable | 0.9752066 | 0.6947444 |
| 9398 Bn-A04-p1882240  | A-genome specific (napus-rapa) | 0.9880383    | 0.7585191    | not scorable | not scorable | 0.9669421 | 0.8018925 |
| 9399 Bn-A04-p18867216 | A-genome specific (napus-rapa) | 0.9952153    | 0.7146183    | not scorable | not scorable | 1         | 0.7739488 |
| 9400 Bn-A04-p18913495 | A-genome specific (napus-rapa) | 0.9832536    | 0.6570467    | not scorable | not scorable | 0.9834711 | 0.589     |
| 9401 Bn-A04-p18918997 | genome unspecific (all in)     | 0.8971292    | 0.3304026    | 0.9922481    | 0.5211179    | 1         | 0.5440472 |
| 9402 Bn-A04-p1893968  | A-genome specific (napus-rapa) | 0.7535885    | 0.8571028    | not scorable | not scorable | 0.9752066 | 0.7513897 |

|      |                  |                                |           |           |              |              |              |              |              |
|------|------------------|--------------------------------|-----------|-----------|--------------|--------------|--------------|--------------|--------------|
| 9403 | Bn-A04-p18943386 | A-genome specific (napus-rapa) | 0.9976076 | 0.7341207 | not scorable | not scorable |              | 1            | 0.7034611    |
| 9404 | Bn-A04-p18946513 | A-genome specific (napus-rapa) | 1         | 0.7550989 | not scorable | not scorable |              | 1            | 0.7739488    |
| 9405 | Bn-A04-p1895018  | A-genome specific (napus-rapa) | 0.7416268 | 0.8385868 | not scorable | not scorable | 0.9917355    |              | 0.7028005    |
| 9406 | Bn-A04-p18960154 | A-genome specific (napus-rapa) | 0.9952153 | 0.5318099 | not scorable | not scorable |              | 1            | 0.6826699    |
| 9407 | Bn-A04-p18961456 | A-genome specific (napus-rapa) | 0.9856459 | 0.6222124 | not scorable | not scorable | 0.9917355    |              | 0.7530153    |
| 9408 | Bn-A04-p18961945 | genome unspecific (all in)     | 0.9282297 | 0.472239  | 0.9922481    | 0.791706     |              | 1            | 0.9175813    |
| 9409 | Bn-A04-p18961947 | A-genome specific (napus-rapa) | 0.9545454 | 0.4880107 | not scorable | not scorable |              | 1            | 0.8751518    |
| 9410 | Bn-A04-p18962305 | A-genome specific (napus-rapa) | 0.8875598 | 0.4742662 | not scorable | not scorable |              | 1            | 0.9045871    |
| 9411 | Bn-A04-p18962378 | A-genome specific (napus-rapa) | 0.9712918 | 0.5074472 | not scorable | not scorable |              | 1            | 0.9174577    |
| 9412 | Bn-A04-p18962442 | A-genome specific (napus-rapa) | 0.9736842 | 0.4072584 | not scorable | not scorable |              | 1            | 0.9062158    |
| 9413 | Bn-A04-p1897541  | A-genome specific (napus-rapa) | 0.7440192 | 0.7304007 | not scorable | not scorable |              | 1            | 0.7156159    |
| 9414 | Bn-A04-p1900422  | A-genome specific (napus-rapa) | 0.3492823 | 0.7240215 | not scorable | not scorable | 0.9834711    |              | 0.7506039    |
| 9415 | Bn-A04-p1913537  | A-genome specific (napus-rapa) | 0.6770335 | 0.6039565 | not scorable | not scorable | 0.9917355    |              | 0.6560127    |
| 9416 | Bn-A04-p1927138  | A-genome specific (napus-rapa) | 0.7464115 | 0.8825182 | not scorable | not scorable | 0.9834711    |              | 0.6488328    |
| 9417 | Bn-A04-p1927832  | A-genome specific (napus-rapa) | 0.7655503 | 0.8910024 | not scorable | not scorable | 0.9917355    |              | 0.9169714    |
| 9418 | Bn-A04-p1928290  | A-genome specific (napus-rapa) | 0.7488039 | 0.6184193 | not scorable | not scorable | 0.9834711    |              | 0.7381606    |
| 9419 | Bn-A04-p1931502  | A-genome specific (napus-rapa) | 0.9808612 | 0.7575074 | not scorable | not scorable | 0.9669421    |              | 0.7980855    |
| 9420 | Bn-A04-p1932300  | A-genome specific (napus-rapa) | 0.7559808 | 0.7339693 | not scorable | not scorable | 0.9834711    |              | 0.7159997    |
| 9421 | Bn-A04-p1932352  | A-genome specific (napus-rapa) | 0.7535885 | 0.7055543 | not scorable | not scorable | 0.9917355    |              | 0.7359238    |
| 9422 | Bn-A04-p1935147  | A-genome specific (napus-rapa) | 0.7511961 | 0.7771561 | not scorable | not scorable | 0.9917355    |              | 0.7374033    |
| 9423 | Bn-A04-p1938332  | A-genome specific (napus-rapa) | 0.9856459 | 0.5309194 | not scorable | not scorable | 0.9917355    |              | 0.7033768    |
| 9424 | Bn-A04-p1941188  | A-genome specific (napus-rapa) | 0.7535885 | 0.8031276 | not scorable | not scorable | 0.9917355    |              | 0.6655442    |
| 9425 | Bn-A04-p1943749  | A-genome specific (napus-rapa) | 0.7583732 | 0.648775  | not scorable | not scorable | 0.9917355    |              | 0.8508542    |
| 9426 | Bn-A04-p1948034  | A-genome specific (napus-rapa) | 0.7511961 | 0.77904   | not scorable | not scorable | 0.9917355    |              | 0.8282349    |
| 9427 | Bn-A04-p1950544  | A-genome specific (napus-rapa) | 0.9976076 | 0.8626078 | not scorable | not scorable |              | 1            | 0.8090609    |
| 9428 | Bn-A04-p1962888  | A-genome specific (napus-rapa) | 0.9952153 | 0.284406  | not scorable | not scorable | 0.9669421    |              | 0.7412119    |
| 9429 | Bn-A04-p1971842  | A-genome specific (napus-rapa) | 0.9760765 | 0.7932827 | not scorable | not scorable | 0.9752066    |              | 0.8103147    |
| 9430 | Bn-A04-p1976999  | napus specific                 | 0.7416268 | 0.8063838 | not scorable | not scorable | not scorable | not scorable | not scorable |
| 9431 | Bn-A04-p1978703  | A-genome specific (napus-rapa) | 0.9736842 | 0.3083358 | not scorable | not scorable |              | 1            | 0.8046467    |
| 9432 | Bn-A04-p1979834  | A-genome specific (napus-rapa) | 0.9760765 | 0.7673513 | not scorable | not scorable | 0.9834711    |              | 0.7859978    |
| 9433 | Bn-A04-p1983164  | A-genome specific (napus-rapa) | 1         | 0.7278885 | not scorable | not scorable | 0.9917355    |              | 0.6793128    |
| 9434 | Bn-A04-p1991843  | A-genome specific (napus-rapa) | 0.9569378 | 0.2886991 | not scorable | not scorable | 0.9834711    |              | 0.7372728    |
| 9435 | Bn-A04-p1993598  | A-genome specific (napus-rapa) | 0.9976076 | 0.7717809 | not scorable | not scorable | 0.9834711    |              | 0.7365086    |

|                      |                                |           |           |              |              |              |              |
|----------------------|--------------------------------|-----------|-----------|--------------|--------------|--------------|--------------|
| 9436 Bn-A04-p2000268 | A-genome specific (napus-rapa) | 0.9593301 | 0.535801  | not scorable | not scorable | 1            | 0.68033      |
| 9437 Bn-A04-p2009476 | A-genome specific (napus-rapa) | 0.9928229 | 0.7619805 | not scorable | not scorable | 0.9586777    | 0.7405311    |
| 9438 Bn-A04-p2010971 | A-genome specific (napus-rapa) | 0.9401914 | 0.6525037 | not scorable | not scorable | 1            | 0.811681     |
| 9439 Bn-A04-p2029030 | napus specific                 | 0.5717703 | 0.9137297 | not scorable | not scorable | not scorable | not scorable |
| 9440 Bn-A04-p2037077 | A-genome specific (napus-rapa) | 1         | 0.8327038 | not scorable | not scorable | 0.9917355    | 0.7358753    |
| 9441 Bn-A04-p2048587 | A-genome specific (napus-rapa) | 0.9354067 | 0.326625  | not scorable | not scorable | 0.9917355    | 0.6839201    |
| 9442 Bn-A04-p2094469 | A-genome specific (napus-rapa) | 0.9425837 | 0.4467099 | not scorable | not scorable | 0.9917355    | 0.7089894    |
| 9443 Bn-A04-p2094818 | A-genome specific (napus-rapa) | 0.9856459 | 0.7519183 | not scorable | not scorable | 0.9834711    | 0.7932144    |
| 9444 Bn-A04-p2104072 | A-genome specific (napus-rapa) | 0.9617225 | 0.7662662 | not scorable | not scorable | 1            | 0.7771659    |
| 9445 Bn-A04-p2111647 | A-genome specific (napus-rapa) | 0.9904306 | 0.7343224 | not scorable | not scorable | 1            | 0.7697691    |
| 9446 Bn-A04-p2122324 | A-genome specific (napus-rapa) | 1         | 0.3789478 | not scorable | not scorable | 0.9752066    | 0.5582925    |
| 9447 Bn-A04-p2124879 | napus specific                 | 0.2057416 | 0.8477142 | not scorable | not scorable | not scorable | not scorable |
| 9448 Bn-A04-p2126232 | A-genome specific (napus-rapa) | 0.9976076 | 0.776185  | not scorable | not scorable | 0.9834711    | 0.8142525    |
| 9449 Bn-A04-p2126294 | A-genome specific (napus-rapa) | 0.9688995 | 0.4974627 | not scorable | not scorable | 0.6198347    | 0.7825954    |
| 9450 Bn-A04-p2135204 | A-genome specific (napus-rapa) | 0.9976076 | 0.4804099 | not scorable | not scorable | 1            | 0.772817     |
| 9451 Bn-A04-p2137317 | A-genome specific (napus-rapa) | 1         | 0.8344694 | not scorable | not scorable | 0.9917355    | 0.7394388    |
| 9452 Bn-A04-p2146459 | A-genome specific (napus-rapa) | 0.9952153 | 0.7319627 | not scorable | not scorable | 0.9834711    | 0.6985237    |
| 9453 Bn-A04-p2149134 | A-genome specific (napus-rapa) | 0.9545454 | 0.4646099 | not scorable | not scorable | 1            | 0.9157093    |
| 9454 Bn-A04-p2149214 | A-genome specific (napus-rapa) | 0.9904306 | 0.3017809 | not scorable | not scorable | 0.9834711    | 0.676232     |
| 9455 Bn-A04-p2151567 | A-genome specific (napus-rapa) | 0.9952153 | 0.8203091 | not scorable | not scorable | 1            | 0.7278452    |
| 9456 Bn-A04-p2152171 | A-genome specific (napus-rapa) | 0.9593301 | 0.7641389 | not scorable | not scorable | 0.9917355    | 0.6832229    |
| 9457 Bn-A04-p2152528 | A-genome specific (napus-rapa) | 0.9928229 | 0.7917723 | not scorable | not scorable | 0.9917355    | 0.8159432    |
| 9458 Bn-A04-p2178146 | napus specific                 | 0.9114832 | 0.7122878 | not scorable | not scorable | not scorable | not scorable |
| 9459 Bn-A04-p2191612 | A-genome specific (napus-rapa) | 0.9904306 | 0.6390353 | not scorable | not scorable | 0.9834711    | 0.5627925    |
| 9460 Bn-A04-p2192192 | A-genome specific (napus-rapa) | 0.9904306 | 0.674539  | not scorable | not scorable | 0.6528926    | 0.7080037    |
| 9461 Bn-A04-p2200043 | A-genome specific (napus-rapa) | 0.9856459 | 0.7563377 | not scorable | not scorable | 1            | 0.7087176    |
| 9462 Bn-A04-p2213805 | A-genome specific (napus-rapa) | 0.9904306 | 0.4540154 | not scorable | not scorable | 0.9834711    | 0.817902     |
| 9463 Bn-A04-p2215376 | A-genome specific (napus-rapa) | 1         | 0.4623215 | not scorable | not scorable | 0.9669421    | 0.3027811    |
| 9464 Bn-A04-p2215559 | A-genome specific (napus-rapa) | 0.9449761 | 0.2626651 | not scorable | not scorable | 0.9669421    | 0.619914     |
| 9465 Bn-A04-p2218115 | A-genome specific (napus-rapa) | 1         | 0.8164203 | not scorable | not scorable | 0.9917355    | 0.7112229    |
| 9466 Bn-A04-p2222852 | A-genome specific (napus-rapa) | 0.9976076 | 0.4066476 | not scorable | not scorable | 0.9917355    | 0.8223843    |
| 9467 Bn-A04-p223001  | A-genome specific (napus-rapa) | 1         | 0.8904615 | not scorable | not scorable | 0.9917355    | 0.753701     |
| 9468 Bn-A04-p225323  | A-genome specific (napus-rapa) | 1         | 0.5888935 | not scorable | not scorable | 0.9917355    | 0.8241305    |

|      |                 |                                |              |              |              |              |           |           |
|------|-----------------|--------------------------------|--------------|--------------|--------------|--------------|-----------|-----------|
| 9469 | Bn-A04-p2270213 | A-genome specific (napus-rapa) | 0.9952153    | 0.7807232    | not scorable | not scorable | 0.9917355 | 0.9039531 |
| 9470 | Bn-A04-p2282199 | A-genome specific (napus-rapa) | 0.9928229    | 0.4734727    | not scorable | not scorable | 0.9834711 | 0.7976328 |
| 9471 | Bn-A04-p2288114 | A-genome specific (rapa only)  | not scorable | not scorable | not scorable | not scorable | 0.9917355 | 0.7814125 |
| 9472 | Bn-A04-p2309625 | A-genome specific (napus-rapa) | 0.9617225    | 0.1878528    | not scorable | not scorable | 0.9504132 | 0.272849  |
| 9473 | Bn-A04-p2325988 | A-genome specific (napus-rapa) | 0.9952153    | 0.7790074    | not scorable | not scorable | 0.9834711 | 0.8140697 |
| 9474 | Bn-A04-p2330084 | A-genome specific (napus-rapa) | 0.937799     | 0.6990896    | not scorable | not scorable | 0.9834711 | 0.6775374 |
| 9475 | Bn-A04-p2334920 | A-genome specific (rapa only)  | not scorable | not scorable | not scorable | not scorable | 0.9834711 | 0.7767055 |
| 9476 | Bn-A04-p233588  | A-genome specific (napus-rapa) | 0.9904306    | 0.6691502    | not scorable | not scorable | 0.9917355 | 0.6715612 |
| 9477 | Bn-A04-p2342131 | A-genome specific (napus-rapa) | 0.9880383    | 0.6735913    | not scorable | not scorable | 0.9834711 | 0.6240643 |
| 9478 | Bn-A04-p234664  | A-genome specific (napus-rapa) | 0.9952153    | 0.6436669    | not scorable | not scorable | 1         | 0.8587458 |
| 9479 | Bn-A04-p2353879 | A-genome specific (napus-rapa) | 0.9521531    | 0.412494     | not scorable | not scorable | 0.9752066 | 0.6599309 |
| 9480 | Bn-A04-p2367374 | A-genome specific (napus-rapa) | 0.9736842    | 0.7731407    | not scorable | not scorable | 0.6859504 | 0.8719174 |
| 9481 | Bn-A04-p2401413 | A-genome specific (napus-rapa) | 0.9545454    | 0.635132     | not scorable | not scorable | 0.9669421 | 0.7034123 |
| 9482 | Bn-A04-p2411039 | A-genome specific (napus-rapa) | 0.937799     | 0.8439403    | not scorable | not scorable | 0.9586777 | 0.9173898 |
| 9483 | Bn-A04-p2415169 | A-genome specific (rapa only)  | not scorable | not scorable | not scorable | not scorable | 1         | 0.7306921 |
| 9484 | Bn-A04-p2429853 | A-genome specific (napus-rapa) | 1            | 0.6686773    | not scorable | not scorable | 0.9752066 | 0.7752491 |
| 9485 | Bn-A04-p2434674 | A-genome specific (napus-rapa) | 1            | 0.8997231    | not scorable | not scorable | 0.9834711 | 0.7657718 |
| 9486 | Bn-A04-p24368   | A-genome specific (napus-rapa) | 1            | 0.8297507    | not scorable | not scorable | 0.9917355 | 0.7447408 |
| 9487 | Bn-A04-p2439163 | A-genome specific (napus-rapa) | 0.9976076    | 0.826654     | not scorable | not scorable | 0.9917355 | 0.7295072 |
| 9488 | Bn-A04-p24411   | A-genome specific (napus-rapa) | 0.9976076    | 0.6727062    | not scorable | not scorable | 0.9917355 | 0.5694439 |
| 9489 | Bn-A04-p2448580 | A-genome specific (napus-rapa) | 1            | 0.8427519    | not scorable | not scorable | 1         | 0.7790077 |
| 9490 | Bn-A04-p2456200 | A-genome specific (rapa only)  | not scorable | not scorable | not scorable | not scorable | 0.9917355 | 0.7168925 |
| 9491 | Bn-A04-p2475793 | A-genome specific (napus-rapa) | 1            | 0.7676928    | not scorable | not scorable | 1         | 0.8343173 |
| 9492 | Bn-A04-p248884  | A-genome specific (napus-rapa) | 0.9952153    | 0.4766282    | not scorable | not scorable | 1         | 0.7383217 |
| 9493 | Bn-A04-p2498254 | A-genome specific (napus-rapa) | 0.9880383    | 0.7251781    | not scorable | not scorable | 0.9834711 | 0.6546672 |
| 9494 | Bn-A04-p251383  | A-genome specific (napus-rapa) | 0.9928229    | 0.8272741    | not scorable | not scorable | 1         | 0.8727394 |
| 9495 | Bn-A04-p2537756 | A-genome specific (napus-rapa) | 0.9856459    | 0.5380934    | not scorable | not scorable | 0.9669421 | 0.7627054 |
| 9496 | Bn-A04-p2542000 | A-genome specific (napus-rapa) | 1            | 0.8663135    | not scorable | not scorable | 0.9917355 | 0.7016385 |
| 9497 | Bn-A04-p2552293 | A-genome specific (napus-rapa) | 1            | 0.7317032    | not scorable | not scorable | 1         | 0.7771295 |
| 9498 | Bn-A04-p2562005 | A-genome specific (napus-rapa) | 1            | 0.8335621    | not scorable | not scorable | 1         | 0.7860581 |
| 9499 | Bn-A04-p2566546 | A-genome specific (napus-rapa) | 0.9952153    | 0.3018834    | not scorable | not scorable | 0.9752066 | 0.8288633 |
| 9500 | Bn-A04-p2568394 | A-genome specific (napus-rapa) | 0.9976076    | 0.4785771    | not scorable | not scorable | 0.9834711 | 0.7898469 |
| 9501 | Bn-A04-p2592215 | A-genome specific (napus-rapa) | 1            | 0.8281221    | not scorable | not scorable | 1         | 0.8552262 |



|      |                 |                                    |              |              |              |              |              |              |
|------|-----------------|------------------------------------|--------------|--------------|--------------|--------------|--------------|--------------|
| 9502 | Bn-A04-p2593658 | genome unspecific (all in)         | 0.9880383    | 0.7125414    | 0.6899225    | 0.7805941    | 0.9421487    | 0.6749262    |
| 9503 | Bn-A04-p2603671 | A-genome specific (napus-rapa)     | 1            | 0.8167262    | not scorable | not scorable | 1            | 0.7819862    |
| 9504 | Bn-A04-p2611718 | A-genome specific (napus-rapa)     | 1            | 0.8350718    | not scorable | not scorable | 0.9752066    | 0.695935     |
| 9505 | Bn-A04-p261340  | A-genome specific (napus-rapa)     | 0.9617225    | 0.8275406    | not scorable | not scorable | 0.9669421    | 0.7846559    |
| 9506 | Bn-A04-p2616582 | A-genome specific (napus-rapa)     | 1            | 0.8485806    | not scorable | not scorable | 0.6363636    | 0.8613519    |
| 9507 | Bn-A04-p2623116 | A-genome specific (rapa only)      | not scorable | not scorable | not scorable | not scorable | 0.9917355    | 0.7823381    |
| 9508 | Bn-A04-p262404  | A-genome specific (napus-rapa)     | 0.9904306    | 0.5352684    | not scorable | not scorable | 0.9917355    | 0.7330095    |
| 9509 | Bn-A04-p2648823 | A-genome specific (napus-rapa)     | 1            | 0.8381849    | not scorable | not scorable | 0.9752066    | 0.7106797    |
| 9510 | Bn-A04-p2650427 | C-genome specific (napus-oleracea) | 0.9880383    | 0.2994321    | 0.9922481    | 0.2138192    | not scorable | not scorable |
| 9511 | Bn-A04-p2651171 | A-genome specific (napus-rapa)     | 1            | 0.7638833    | not scorable | not scorable | 0.9917355    | 0.7585063    |
| 9512 | Bn-A04-p2657695 | A-genome specific (napus-rapa)     | 0.9952153    | 0.8520935    | not scorable | not scorable | 0.9834711    | 0.7134477    |
| 9513 | Bn-A04-p2658023 | A-genome specific (napus-rapa)     | 0.9856459    | 0.8402416    | not scorable | not scorable | 0.9752066    | 0.7553384    |
| 9514 | Bn-A04-p2660465 | A-genome specific (napus-rapa)     | 0.8755981    | 0.615896     | not scorable | not scorable | 0.9669421    | 0.7305559    |
| 9515 | Bn-A04-p2662208 | A-genome specific (napus-rapa)     | 0.9928229    | 0.7814817    | not scorable | not scorable | 1            | 0.7206949    |
| 9516 | Bn-A04-p2664124 | A-genome specific (napus-rapa)     | 0.9904306    | 0.8719767    | not scorable | not scorable | 0.9752066    | 0.7276515    |
| 9517 | Bn-A04-p2665421 | A-genome specific (napus-rapa)     | 0.9521531    | 0.3646606    | not scorable | not scorable | 0.9256198    | 0.6543438    |
| 9518 | Bn-A04-p2666754 | A-genome specific (napus-rapa)     | 0.9832536    | 0.9051176    | not scorable | not scorable | 0.9834711    | 0.7071137    |
| 9519 | Bn-A04-p2668053 | A-genome specific (napus-rapa)     | 0.9952153    | 0.3278828    | not scorable | not scorable | 0.9752066    | 0.7391689    |
| 9520 | Bn-A04-p2669971 | A-genome specific (napus-rapa)     | 0.9928229    | 0.7138222    | not scorable | not scorable | 0.9917355    | 0.7119705    |
| 9521 | Bn-A04-p2670078 | A-genome specific (napus-rapa)     | 0.9808612    | 0.5696267    | not scorable | not scorable | 0.9917355    | 0.5836712    |
| 9522 | Bn-A04-p2670318 | A-genome specific (napus-rapa)     | 0.8779904    | 0.4526289    | not scorable | not scorable | 0.9834711    | 0.6826093    |
| 9523 | Bn-A04-p2671273 | A-genome specific (napus-rapa)     | 0.9832536    | 0.8560692    | not scorable | not scorable | 0.9834711    | 0.7603245    |
| 9524 | Bn-A04-p267294  | A-genome specific (napus-rapa)     | 0.9928229    | 0.7613875    | not scorable | not scorable | 1            | 0.8187364    |
| 9525 | Bn-A04-p2680732 | A-genome specific (napus-rapa)     | 0.9952153    | 0.6863958    | not scorable | not scorable | 1            | 0.764473     |
| 9526 | Bn-A04-p2689124 | A-genome specific (napus-rapa)     | 0.9952153    | 0.7902796    | not scorable | not scorable | 0.9834711    | 0.7597603    |
| 9527 | Bn-A04-p2692131 | A-genome specific (napus-rapa)     | 0.9904306    | 0.8663232    | not scorable | not scorable | 1            | 0.8325943    |
| 9528 | Bn-A04-p2713517 | A-genome specific (napus-rapa)     | 0.9952153    | 0.7981277    | not scorable | not scorable | 0.9669421    | 0.8200515    |
| 9529 | Bn-A04-p2713564 | A-genome specific (napus-rapa)     | 0.9880383    | 0.4474392    | not scorable | not scorable | 0.9752066    | 0.7984909    |
| 9530 | Bn-A04-p2723787 | A-genome specific (napus-rapa)     | 1            | 0.7664241    | not scorable | not scorable | 0.9917355    | 0.8182597    |
| 9531 | Bn-A04-p2730690 | A-genome specific (napus-rapa)     | 0.8636364    | 0.6293261    | not scorable | not scorable | 0.9752066    | 0.5933949    |
| 9532 | Bn-A04-p2748876 | A-genome specific (rapa only)      | not scorable | not scorable | not scorable | not scorable | 0.9090909    | 0.7965723    |
| 9533 | Bn-A04-p2750401 | A-genome specific (napus-rapa)     | 0.9880383    | 0.7679557    | not scorable | not scorable | 0.9669421    | 0.7664316    |
| 9534 | Bn-A04-p2751097 | A-genome specific (napus-rapa)     | 0.9952153    | 0.816592     | not scorable | not scorable | 0.9834711    | 0.7876455    |

|                      |                                |              |              |              |              |              |              |
|----------------------|--------------------------------|--------------|--------------|--------------|--------------|--------------|--------------|
| 9535 Bn-A04-p2753796 | A-genome specific (napus-rapa) | 0.9880383    | 0.7799343    | not scorable | not scorable | 0.9834711    | 0.6818096    |
| 9536 Bn-A04-p2753824 | A-genome specific (napus-rapa) | 0.9928229    | 0.7277877    | not scorable | not scorable | 0.9834711    | 0.7291099    |
| 9537 Bn-A04-p2760477 | A-genome specific (napus-rapa) | 0.5717703    | 0.8434469    | not scorable | not scorable | 1            | 0.7900175    |
| 9538 Bn-A04-p2761067 | A-genome specific (napus-rapa) | 0.5717703    | 0.8090534    | not scorable | not scorable | 0.9752066    | 0.7447679    |
| 9539 Bn-A04-p2762891 | A-genome specific (napus-rapa) | 0.5717703    | 0.8499875    | not scorable | not scorable | 0.9917355    | 0.7929817    |
| 9540 Bn-A04-p2763423 | A-genome specific (napus-rapa) | 0.569378     | 0.7674242    | not scorable | not scorable | 0.9834711    | 0.7189919    |
| 9541 Bn-A04-p2765547 | A-genome specific (napus-rapa) | 1            | 0.7539171    | not scorable | not scorable | 0.9917355    | 0.7561262    |
| 9542 Bn-A04-p2780974 | A-genome specific (napus-rapa) | 0.9928229    | 0.8703667    | not scorable | not scorable | 0.9834711    | 0.7900752    |
| 9543 Bn-A04-p2781853 | napus specific                 | 0.9928229    | 0.8312163    | not scorable | not scorable | not scorable | not scorable |
| 9544 Bn-A04-p2782258 | A-genome specific (napus-rapa) | 0.9784689    | 0.859454     | not scorable | not scorable | 0.9917355    | 0.6891034    |
| 9545 Bn-A04-p2783207 | A-genome specific (napus-rapa) | 0.9952153    | 0.8717191    | not scorable | not scorable | 1            | 0.6725802    |
| 9546 Bn-A04-p2789250 | A-genome specific (napus-rapa) | 1            | 0.8908999    | not scorable | not scorable | 1            | 0.6723114    |
| 9547 Bn-A04-p2793807 | A-genome specific (napus-rapa) | 0.9712918    | 0.6131735    | not scorable | not scorable | 0.9917355    | 0.6984304    |
| 9548 Bn-A04-p2802411 | A-genome specific (napus-rapa) | 0.9856459    | 0.5570931    | not scorable | not scorable | 0.9669421    | 0.741774     |
| 9549 Bn-A04-p2807465 | A-genome specific (napus-rapa) | 1            | 0.4821323    | not scorable | not scorable | 0.9669421    | 0.6388381    |
| 9550 Bn-A04-p2817722 | A-genome specific (napus-rapa) | 0.9808612    | 0.8714933    | not scorable | not scorable | 0.9834711    | 0.7397835    |
| 9551 Bn-A04-p2818095 | A-genome specific (napus-rapa) | 0.9784689    | 0.3937797    | not scorable | not scorable | 1            | 0.6995043    |
| 9552 Bn-A04-p2823217 | A-genome specific (rapa only)  | not scorable | not scorable | not scorable | not scorable | 0.9917355    | 0.6949153    |
| 9553 Bn-A04-p2825294 | A-genome specific (napus-rapa) | 0.9928229    | 0.4378979    | not scorable | not scorable | 0.9917355    | 0.8275031    |
| 9554 Bn-A04-p2825362 | A-genome specific (napus-rapa) | 0.9976076    | 0.8656128    | not scorable | not scorable | 0.9917355    | 0.7592086    |
| 9555 Bn-A04-p2833736 | A-genome specific (napus-rapa) | 0.9784689    | 0.4374253    | not scorable | not scorable | 0.9834711    | 0.6926391    |
| 9556 Bn-A04-p2841305 | A-genome specific (napus-rapa) | 0.9545454    | 0.5106031    | not scorable | not scorable | 0.9917355    | 0.7826812    |
| 9557 Bn-A04-p2841433 | A-genome specific (rapa only)  | not scorable | not scorable | not scorable | not scorable | 0.9752066    | 0.7049065    |
| 9558 Bn-A04-p2843802 | A-genome specific (napus-rapa) | 0.9904306    | 0.7318231    | not scorable | not scorable | 0.9752066    | 0.7436404    |
| 9559 Bn-A04-p2845855 | A-genome specific (napus-rapa) | 0.9952153    | 0.7758907    | not scorable | not scorable | 0.9834711    | 0.7620555    |
| 9560 Bn-A04-p2847914 | A-genome specific (napus-rapa) | 0.9832536    | 0.8247396    | not scorable | not scorable | 0.9834711    | 0.7043232    |
| 9561 Bn-A04-p2881354 | A-genome specific (napus-rapa) | 0.9808612    | 0.7598998    | not scorable | not scorable | 0.9917355    | 0.811658     |
| 9562 Bn-A04-p288906  | A-genome specific (napus-rapa) | 0.9976076    | 0.8664871    | not scorable | not scorable | 0.9917355    | 0.790215     |
| 9563 Bn-A04-p2889239 | A-genome specific (napus-rapa) | 0.9880383    | 0.7880844    | not scorable | not scorable | 0.9917355    | 0.7702582    |
| 9564 Bn-A04-p2892557 | A-genome specific (napus-rapa) | 0.9904306    | 0.7414456    | not scorable | not scorable | 0.9752066    | 0.6576321    |
| 9565 Bn-A04-p2892722 | A-genome specific (napus-rapa) | 0.9928229    | 0.7429333    | not scorable | not scorable | 0.9917355    | 0.7875235    |
| 9566 Bn-A04-p2892985 | A-genome specific (napus-rapa) | 0.9976076    | 0.8004358    | not scorable | not scorable | 1            | 0.5972179    |
| 9567 Bn-A04-p2893053 | A-genome specific (napus-rapa) | 1            | 0.7760101    | not scorable | not scorable | 0.9834711    | 0.7528777    |

|                      |                                |           |           |              |              |              |              |
|----------------------|--------------------------------|-----------|-----------|--------------|--------------|--------------|--------------|
| 9568 Bn-A04-p289974  | A-genome specific (napus-rapa) | 0.9114832 | 0.8632445 | not scorable | not scorable | 0.9752066    | 0.8131607    |
| 9569 Bn-A04-p2903530 | A-genome specific (napus-rapa) | 0.9688995 | 0.6445517 | not scorable | not scorable | 0.9834711    | 0.6959602    |
| 9570 Bn-A04-p2906681 | A-genome specific (napus-rapa) | 0.9880383 | 0.5479018 | not scorable | not scorable | 0.6859504    | 0.6176571    |
| 9571 Bn-A04-p2909242 | A-genome specific (napus-rapa) | 0.9904306 | 0.5744396 | not scorable | not scorable | 0.6198347    | 0.7985611    |
| 9572 Bn-A04-p2913939 | A-genome specific (napus-rapa) | 0.9832536 | 0.7473009 | not scorable | not scorable | 0.9917355    | 0.7100779    |
| 9573 Bn-A04-p2914409 | A-genome specific (napus-rapa) | 0.9976076 | 0.7739198 | not scorable | not scorable | 0.9917355    | 0.7785292    |
| 9574 Bn-A04-p2921313 | A-genome specific (napus-rapa) | 0.9976076 | 0.7598693 | not scorable | not scorable | 0.9834711    | 0.7208499    |
| 9575 Bn-A04-p2921682 | A-genome specific (napus-rapa) | 0.9808612 | 0.7717234 | not scorable | not scorable | 1            | 0.7523933    |
| 9576 Bn-A04-p2921832 | A-genome specific (napus-rapa) | 0.9808612 | 0.7628785 | not scorable | not scorable | 1            | 0.7415655    |
| 9577 Bn-A04-p2923396 | A-genome specific (napus-rapa) | 0.9928229 | 0.773458  | not scorable | not scorable | 0.9834711    | 0.7745193    |
| 9578 Bn-A04-p2925273 | A-genome specific (napus-rapa) | 0.9904306 | 0.7640589 | not scorable | not scorable | 1            | 0.7040766    |
| 9579 Bn-A04-p2932086 | A-genome specific (napus-rapa) | 0.9784689 | 0.7483853 | not scorable | not scorable | 0.9834711    | 0.7067118    |
| 9580 Bn-A04-p2933140 | A-genome specific (napus-rapa) | 0.9904306 | 0.7628951 | not scorable | not scorable | 0.9834711    | 0.7882631    |
| 9581 Bn-A04-p2941201 | genome unspecific (all in)     | 0.9952153 | 0.5264153 |              | 1 0.7475585  | 1            | 0.6308588    |
| 9582 Bn-A04-p2944723 | A-genome specific (napus-rapa) | 0.9952153 | 0.7635173 | not scorable | not scorable | 1            | 0.8256688    |
| 9583 Bn-A04-p2947993 | A-genome specific (napus-rapa) | 0.9904306 | 0.8388332 | not scorable | not scorable | 0.9917355    | 0.7684254    |
| 9584 Bn-A04-p2948936 | A-genome specific (napus-rapa) | 0.9928229 | 0.8439397 | not scorable | not scorable | 0.9752066    | 0.7488836    |
| 9585 Bn-A04-p2949084 | A-genome specific (napus-rapa) | 0.9784689 | 0.7794812 | not scorable | not scorable | 0.9917355    | 0.6824558    |
| 9586 Bn-A04-p2949339 | A-genome specific (napus-rapa) | 0.9832536 | 0.771849  | not scorable | not scorable | 0.9834711    | 0.7362629    |
| 9587 Bn-A04-p2954791 | A-genome specific (napus-rapa) | 0.9760765 | 0.32821   | not scorable | not scorable | 0.9834711    | 0.7735373    |
| 9588 Bn-A04-p2954824 | A-genome specific (napus-rapa) | 0.9617225 | 0.5287805 | not scorable | not scorable | 0.9669421    | 0.7611408    |
| 9589 Bn-A04-p2957928 | napus specific                 | 1         | 0.7919362 | not scorable | not scorable | not scorable | not scorable |
| 9590 Bn-A04-p2957984 | A-genome specific (napus-rapa) | 0.9952153 | 0.7972959 | not scorable | not scorable | 0.9834711    | 0.4753979    |
| 9591 Bn-A04-p2960723 | A-genome specific (napus-rapa) | 0.9880383 | 0.6027597 | not scorable | not scorable | 0.9752066    | 0.6625611    |
| 9592 Bn-A04-p2963387 | A-genome specific (napus-rapa) | 0.9569378 | 0.3881554 | not scorable | not scorable | 0.9834711    | 0.7738208    |
| 9593 Bn-A04-p2969081 | A-genome specific (napus-rapa) | 0.9904306 | 0.5233365 | not scorable | not scorable | 0.9669421    | 0.4605447    |
| 9594 Bn-A04-p2983187 | napus specific                 | 0.9521531 | 0.4215306 | not scorable | not scorable | not scorable | not scorable |
| 9595 Bn-A04-p2999394 | A-genome specific (napus-rapa) | 0.9736842 | 0.7565537 | not scorable | not scorable | 1            | 0.9397733    |
| 9596 Bn-A04-p3002670 | A-genome specific (napus-rapa) | 0.9808612 | 0.3134426 | not scorable | not scorable | 0.9752066    | 0.595712     |
| 9597 Bn-A04-p3004068 | A-genome specific (napus-rapa) | 0.9808612 | 0.3576762 | not scorable | not scorable | 1            | 0.777019     |
| 9598 Bn-A04-p3016121 | A-genome specific (napus-rapa) | 0.9665072 | 0.4919949 | not scorable | not scorable | 1            | 0.7907543    |
| 9599 Bn-A04-p3021710 | A-genome specific (napus-rapa) | 0.9952153 | 0.8231564 | not scorable | not scorable | 0.9834711    | 0.7821741    |
| 9600 Bn-A04-p3022681 | A-genome specific (napus-rapa) | 0.9904306 | 0.5689077 | not scorable | not scorable | 1            | 0.6983941    |

|      |                 |                                |              |              |              |              |              |              |
|------|-----------------|--------------------------------|--------------|--------------|--------------|--------------|--------------|--------------|
| 9601 | Bn-A04-p3095652 | A-genome specific (napus-rapa) | 0.9808612    | 0.7372097    | not scorable | not scorable | 0.9917355    | 0.7457149    |
| 9602 | Bn-A04-p3116993 | A-genome specific (rapa only)  | not scorable | not scorable | not scorable | not scorable | 0.9917355    | 0.8159167    |
| 9603 | Bn-A04-p3118075 | A-genome specific (napus-rapa) | 1            | 0.7953196    | not scorable | not scorable | 1            | 0.8409084    |
| 9604 | Bn-A04-p312324  | A-genome specific (napus-rapa) | 0.9952153    | 0.842741     | not scorable | not scorable | 0.9917355    | 0.8422567    |
| 9605 | Bn-A04-p3126855 | A-genome specific (napus-rapa) | 0.9712918    | 0.4353352    | not scorable | not scorable | 0.9834711    | 0.8293211    |
| 9606 | Bn-A04-p3128038 | A-genome specific (napus-rapa) | 0.9569378    | 0.6284894    | not scorable | not scorable | 0.9834711    | 0.6509814    |
| 9607 | Bn-A04-p313091  | A-genome specific (napus-rapa) | 0.9952153    | 0.810208     | not scorable | not scorable | 0.9917355    | 0.7386276    |
| 9608 | Bn-A04-p313410  | A-genome specific (napus-rapa) | 0.9976076    | 0.7754975    | not scorable | not scorable | 0.9917355    | 0.8053572    |
| 9609 | Bn-A04-p3135512 | A-genome specific (napus-rapa) | 0.9641148    | 0.5115613    | not scorable | not scorable | 0.9917355    | 0.8104939    |
| 9610 | Bn-A04-p3135978 | A-genome specific (napus-rapa) | 0.9784689    | 0.6924659    | not scorable | not scorable | 0.9834711    | 0.6947585    |
| 9611 | Bn-A04-p3138111 | A-genome specific (napus-rapa) | 0.9688995    | 0.6079832    | not scorable | not scorable | 0.9917355    | 0.8030513    |
| 9612 | Bn-A04-p3138462 | A-genome specific (napus-rapa) | 0.9856459    | 0.7549686    | not scorable | not scorable | 0.9917355    | 0.7850422    |
| 9613 | Bn-A04-p313935  | A-genome specific (napus-rapa) | 1            | 0.7925267    | not scorable | not scorable | 1            | 0.6683086    |
| 9614 | Bn-A04-p3140726 | A-genome specific (napus-rapa) | 0.9856459    | 0.7561897    | not scorable | not scorable | 1            | 0.7110297    |
| 9615 | Bn-A04-p314440  | A-genome specific (napus-rapa) | 1            | 0.767509     | not scorable | not scorable | 0.9669421    | 0.7318206    |
| 9616 | Bn-A04-p3144839 | A-genome specific (napus-rapa) | 0.9497608    | 0.3521485    | not scorable | not scorable | 0.9917355    | 0.7202103    |
| 9617 | Bn-A04-p314536  | A-genome specific (napus-rapa) | 0.9928229    | 0.6678345    | not scorable | not scorable | 1            | 0.5823967    |
| 9618 | Bn-A04-p314872  | A-genome specific (napus-rapa) | 0.9952153    | 0.6921808    | not scorable | not scorable | 0.9669421    | 0.4962315    |
| 9619 | Bn-A04-p3152494 | A-genome specific (napus-rapa) | 0.9712918    | 0.4383987    | not scorable | not scorable | 0.9917355    | 0.7212923    |
| 9620 | Bn-A04-p3152554 | A-genome specific (napus-rapa) | 0.9617225    | 0.6366324    | not scorable | not scorable | 0.9917355    | 0.7431666    |
| 9621 | Bn-A04-p3172854 | A-genome specific (napus-rapa) | 0.9976076    | 0.7145781    | not scorable | not scorable | 1            | 0.7717832    |
| 9622 | Bn-A04-p3181336 | A-genome specific (napus-rapa) | 0.9976076    | 0.3238432    | not scorable | not scorable | 1            | 0.7481608    |
| 9623 | Bn-A04-p3182956 | A-genome specific (napus-rapa) | 0.9090909    | 0.7343262    | not scorable | not scorable | 0.9752066    | 0.7482621    |
| 9624 | Bn-A04-p3190463 | A-genome specific (napus-rapa) | 0.8349282    | 0.7240528    | not scorable | not scorable | 0.9834711    | 0.6891936    |
| 9625 | Bn-A04-p320972  | A-genome specific (napus-rapa) | 0.9976076    | 0.3709218    | not scorable | not scorable | 1            | 0.7819138    |
| 9626 | Bn-A04-p3219148 | A-genome specific (napus-rapa) | 0.9497608    | 0.8237522    | not scorable | not scorable | 0.9834711    | 0.8183623    |
| 9627 | Bn-A04-p3220424 | napus specific                 | 1            | 0.2904207    | not scorable | not scorable | not scorable | not scorable |
| 9628 | Bn-A04-p3220819 | A-genome specific (napus-rapa) | 1            | 0.7237918    | not scorable | not scorable | 1            | 0.7890415    |
| 9629 | Bn-A04-p3225119 | A-genome specific (napus-rapa) | 0.9665072    | 0.3322402    | not scorable | not scorable | 0.9834711    | 0.5679683    |
| 9630 | Bn-A04-p322820  | A-genome specific (napus-rapa) | 0.9617225    | 0.3106201    | not scorable | not scorable | 0.9834711    | 0.7809242    |
| 9631 | Bn-A04-p3229572 | A-genome specific (napus-rapa) | 0.9928229    | 0.5491607    | not scorable | not scorable | 0.8429752    | 0.6602194    |
| 9632 | Bn-A04-p3235336 | A-genome specific (napus-rapa) | 0.9569378    | 0.4326471    | not scorable | not scorable | 0.9917355    | 0.6624446    |
| 9633 | Bn-A04-p324144  | A-genome specific (napus-rapa) | 1            | 0.8535089    | not scorable | not scorable | 0.9917355    | 0.8142882    |

|                      |                                   |              |              |              |              |           |           |
|----------------------|-----------------------------------|--------------|--------------|--------------|--------------|-----------|-----------|
| 9634 Bn-A04-p325019  | A-genome specific (napus-rapa)    | 0.9856459    | 0.8690729    | not scorable | not scorable | 1         | 0.689499  |
| 9635 Bn-A04-p3254177 | A-genome specific (napus-rapa)    | 0.9856459    | 0.2469944    | not scorable | not scorable | 0.553719  | 0.5592213 |
| 9636 Bn-A04-p3255140 | A-genome specific (napus-rapa)    | 0.8779904    | 0.7130182    | not scorable | not scorable | 0.5619835 | 0.762321  |
| 9637 Bn-A04-p3255172 | A-genome specific (napus-rapa)    | 0.8373206    | 0.4981945    | not scorable | not scorable | 0.5371901 | 0.6907253 |
| 9638 Bn-A04-p326007  | A-genome specific (napus-rapa)    | 0.9952153    | 0.8205206    | not scorable | not scorable | 0.9917355 | 0.792846  |
| 9639 Bn-A04-p3262432 | A-genome specific (napus-rapa)    | 0.9808612    | 0.7822923    | not scorable | not scorable | 0.9917355 | 0.7973625 |
| 9640 Bn-A04-p3263085 | A-genome specific (napus-rapa)    | 0.9808612    | 0.5163279    | not scorable | not scorable | 1         | 0.6415797 |
| 9641 Bn-A04-p3267803 | A-genome specific (napus-rapa)    | 0.9760765    | 0.8148065    | not scorable | not scorable | 1         | 0.8561852 |
| 9642 Bn-A04-p3272740 | genome unspecific (all in)        | 0.9880383    | 0.7129759    | 1            | 0.6543147    | 0.9834711 | 0.7067428 |
| 9643 Bn-A04-p3273187 | A-genome specific (napus-rapa)    | 1            | 0.7283937    | not scorable | not scorable | 0.9917355 | 0.746606  |
| 9644 Bn-A04-p3274507 | A-genome specific (napus-rapa)    | 1            | 0.5940585    | not scorable | not scorable | 0.9917355 | 0.7608721 |
| 9645 Bn-A04-p3283282 | A-genome specific (napus-rapa)    | 0.9880383    | 0.2793228    | not scorable | not scorable | 0.9917355 | 0.7658658 |
| 9646 Bn-A04-p3294004 | A-genome specific (napus-rapa)    | 1            | 0.6732786    | not scorable | not scorable | 0.9752066 | 0.7480511 |
| 9647 Bn-A04-p3297115 | A-genome specific (napus-rapa)    | 0.9952153    | 0.4511201    | not scorable | not scorable | 1         | 0.7978051 |
| 9648 Bn-A04-p3298487 | A-genome specific (napus-rapa)    | 0.9952153    | 0.5420992    | not scorable | not scorable | 1         | 0.7656361 |
| 9649 Bn-A04-p330341  | A-genome specific (napus-rapa)    | 0.9880383    | 0.266967     | not scorable | not scorable | 1         | 0.7114117 |
| 9650 Bn-A04-p3306253 | genome unspecific (oleracea-rapa) | not scorable | not scorable | 0.9379845    | 0.4681461    | 0.9421487 | 0.7813604 |
| 9651 Bn-A04-p3308299 | A-genome specific (rapa only)     | not scorable | not scorable | not scorable | not scorable | 0.5867769 | 0.8340232 |
| 9652 Bn-A04-p3331930 | A-genome specific (napus-rapa)    | 0.9880383    | 0.7167162    | not scorable | not scorable | 1         | 0.6032355 |
| 9653 Bn-A04-p3331969 | A-genome specific (napus-rapa)    | 0.9904306    | 0.4958424    | not scorable | not scorable | 0.9834711 | 0.8074395 |
| 9654 Bn-A04-p3332039 | A-genome specific (napus-rapa)    | 0.9736842    | 0.7028045    | not scorable | not scorable | 0.9669421 | 0.698546  |
| 9655 Bn-A04-p3332042 | A-genome specific (napus-rapa)    | 0.9832536    | 0.8346835    | not scorable | not scorable | 0.9917355 | 0.8272724 |
| 9656 Bn-A04-p3345530 | A-genome specific (napus-rapa)    | 0.9665072    | 0.2968284    | not scorable | not scorable | 1         | 0.6649233 |
| 9657 Bn-A04-p3351067 | A-genome specific (napus-rapa)    | 0.9880383    | 0.8082699    | not scorable | not scorable | 0.9834711 | 0.7952991 |
| 9658 Bn-A04-p3351150 | A-genome specific (napus-rapa)    | 0.9736842    | 0.7455055    | not scorable | not scorable | 0.9752066 | 0.7599207 |
| 9659 Bn-A04-p3357098 | A-genome specific (napus-rapa)    | 0.9688995    | 0.4591659    | not scorable | not scorable | 0.9917355 | 0.7944338 |
| 9660 Bn-A04-p3357519 | A-genome specific (napus-rapa)    | 1            | 0.9166866    | not scorable | not scorable | 1         | 0.8343857 |
| 9661 Bn-A04-p3357700 | A-genome specific (napus-rapa)    | 0.9760765    | 0.8923251    | not scorable | not scorable | 1         | 0.7752552 |
| 9662 Bn-A04-p3358441 | A-genome specific (rapa only)     | not scorable | not scorable | not scorable | not scorable | 0.5123967 | 0.8018306 |
| 9663 Bn-A04-p3363190 | A-genome specific (napus-rapa)    | 1            | 0.8345768    | not scorable | not scorable | 0.9917355 | 0.6878995 |
| 9664 Bn-A04-p3379410 | A-genome specific (napus-rapa)    | 0.9760765    | 0.8111658    | not scorable | not scorable | 0.9752066 | 0.8474989 |
| 9665 Bn-A04-p3390331 | A-genome specific (napus-rapa)    | 0.9497608    | 0.4796315    | not scorable | not scorable | 0.9834711 | 0.7371351 |
| 9666 Bn-A04-p3395103 | A-genome specific (napus-rapa)    | 0.9784689    | 0.7286358    | not scorable | not scorable | 0.9752066 | 0.6794516 |

|                      |                                |              |              |              |              |              |              |
|----------------------|--------------------------------|--------------|--------------|--------------|--------------|--------------|--------------|
| 9667 Bn-A04-p3413548 | A-genome specific (napus-rapa) | 0.9808612    | 0.8150966    | not scorable | not scorable | 0.9834711    | 0.700367     |
| 9668 Bn-A04-p3414140 | A-genome specific (napus-rapa) | 0.9641148    | 0.7400357    | not scorable | not scorable | 1            | 0.6520115    |
| 9669 Bn-A04-p3414232 | A-genome specific (napus-rapa) | 0.9952153    | 0.7394629    | not scorable | not scorable | 0.9917355    | 0.6892272    |
| 9670 Bn-A04-p3414449 | A-genome specific (napus-rapa) | 0.9784689    | 0.8362392    | not scorable | not scorable | 0.9917355    | 0.7336606    |
| 9671 Bn-A04-p3420532 | A-genome specific (napus-rapa) | 0.9832536    | 0.7832367    | not scorable | not scorable | 1            | 0.7412711    |
| 9672 Bn-A04-p3421117 | A-genome specific (napus-rapa) | 0.9760765    | 0.7056122    | not scorable | not scorable | 1            | 0.6796372    |
| 9673 Bn-A04-p3448682 | A-genome specific (napus-rapa) | 1            | 0.843249     | not scorable | not scorable | 1            | 0.7359045    |
| 9674 Bn-A04-p3449764 | A-genome specific (napus-rapa) | 0.9976076    | 0.9182991    | not scorable | not scorable | 1            | 0.8533314    |
| 9675 Bn-A04-p3457753 | A-genome specific (napus-rapa) | 0.9401914    | 0.7852687    | not scorable | not scorable | 0.9917355    | 0.7562483    |
| 9676 Bn-A04-p3462758 | A-genome specific (napus-rapa) | 0.9832536    | 0.5873974    | not scorable | not scorable | 0.9917355    | 0.7719791    |
| 9677 Bn-A04-p3463785 | A-genome specific (napus-rapa) | 0.9928229    | 0.5595241    | not scorable | not scorable | 0.9917355    | 0.599916     |
| 9678 Bn-A04-p3471699 | A-genome specific (napus-rapa) | 0.9856459    | 0.791226     | not scorable | not scorable | 0.9586777    | 0.6553779    |
| 9679 Bn-A04-p3473990 | A-genome specific (napus-rapa) | 0.9856459    | 0.7897729    | not scorable | not scorable | 0.9752066    | 0.7045884    |
| 9680 Bn-A04-p3483694 | A-genome specific (napus-rapa) | 1            | 0.8070485    | not scorable | not scorable | 0.9834711    | 0.8291102    |
| 9681 Bn-A04-p3483780 | A-genome specific (napus-rapa) | 0.9832536    | 0.6768233    | not scorable | not scorable | 0.9834711    | 0.7027584    |
| 9682 Bn-A04-p3485611 | A-genome specific (napus-rapa) | 0.9976076    | 0.821795     | not scorable | not scorable | 0.9834711    | 0.7286923    |
| 9683 Bn-A04-p3509049 | napus specific                 | 0.8397129    | 0.6622617    | not scorable | not scorable | not scorable | not scorable |
| 9684 Bn-A04-p3528213 | A-genome specific (napus-rapa) | 0.9569378    | 0.3505399    | not scorable | not scorable | 0.9752066    | 0.688382     |
| 9685 Bn-A04-p3540163 | A-genome specific (napus-rapa) | 0.9976076    | 0.7931589    | not scorable | not scorable | 0.5785124    | 0.870795     |
| 9686 Bn-A04-p354688  | A-genome specific (napus-rapa) | 0.9808612    | 0.8486626    | not scorable | not scorable | 0.6198347    | 0.8127691    |
| 9687 Bn-A04-p3551969 | A-genome specific (napus-rapa) | 0.9880383    | 0.7521334    | not scorable | not scorable | 1            | 0.7590011    |
| 9688 Bn-A04-p3563096 | A-genome specific (napus-rapa) | 0.9904306    | 0.7159402    | not scorable | not scorable | 0.9917355    | 0.708402     |
| 9689 Bn-A04-p356570  | A-genome specific (napus-rapa) | 0.9784689    | 0.9011632    | not scorable | not scorable | 0.9752066    | 0.7546584    |
| 9690 Bn-A04-p3571259 | A-genome specific (napus-rapa) | 0.9449761    | 0.6791484    | not scorable | not scorable | 0.9669421    | 0.6931794    |
| 9691 Bn-A04-p3572717 | A-genome specific (napus-rapa) | 0.9497608    | 0.7308953    | not scorable | not scorable | 0.9752066    | 0.6905558    |
| 9692 Bn-A04-p357272  | A-genome specific (napus-rapa) | 0.9952153    | 0.7421556    | not scorable | not scorable | 0.9586777    | 0.7707107    |
| 9693 Bn-A04-p3572777 | A-genome specific (napus-rapa) | 0.9808612    | 0.7235262    | not scorable | not scorable | 0.9917355    | 0.7708753    |
| 9694 Bn-A04-p3573078 | A-genome specific (rapa only)  | not scorable | not scorable | not scorable | not scorable | 0.9834711    | 0.6871217    |
| 9695 Bn-A04-p3583216 | A-genome specific (napus-rapa) | 0.9354067    | 0.6651208    | not scorable | not scorable | 0.9917355    | 0.7590817    |
| 9696 Bn-A04-p3589494 | A-genome specific (napus-rapa) | 0.9976076    | 0.3944502    | not scorable | not scorable | 1            | 0.690158     |
| 9697 Bn-A04-p3602299 | A-genome specific (napus-rapa) | 0.9665072    | 0.7454916    | not scorable | not scorable | 0.9834711    | 0.7091731    |
| 9698 Bn-A04-p3615799 | napus specific                 | 1            | 0.5498412    | not scorable | not scorable | not scorable | not scorable |
| 9699 Bn-A04-p3618090 | napus specific                 | 0.9952153    | 0.5200757    | not scorable | not scorable | not scorable | not scorable |

|                      |                                |              |              |              |              |              |              |
|----------------------|--------------------------------|--------------|--------------|--------------|--------------|--------------|--------------|
| 9700 Bn-A04-p3628682 | A-genome specific (napus-rapa) | 0.9593301    | 0.6987593    | not scorable | not scorable | 1            | 0.8096865    |
| 9701 Bn-A04-p3630793 | A-genome specific (napus-rapa) | 0.9928229    | 0.5142915    | not scorable | not scorable | 1            | 0.7006238    |
| 9702 Bn-A04-p3631563 | A-genome specific (napus-rapa) | 0.9736842    | 0.7348714    | not scorable | not scorable | 0.9917355    | 0.6737842    |
| 9703 Bn-A04-p3632226 | A-genome specific (napus-rapa) | 0.9880383    | 0.7441453    | not scorable | not scorable | 0.9917355    | 0.6383561    |
| 9704 Bn-A04-p3632611 | A-genome specific (napus-rapa) | 0.9952153    | 0.7638794    | not scorable | not scorable | 1            | 0.7177677    |
| 9705 Bn-A04-p3651589 | A-genome specific (napus-rapa) | 0.9521531    | 0.3363951    | not scorable | not scorable | 0.9834711    | 0.7252181    |
| 9706 Bn-A04-p3668627 | A-genome specific (napus-rapa) | 0.9784689    | 0.8279315    | not scorable | not scorable | 1            | 0.8445701    |
| 9707 Bn-A04-p3690435 | A-genome specific (napus-rapa) | 0.9832536    | 0.5158319    | not scorable | not scorable | 0.9917355    | 0.7831922    |
| 9708 Bn-A04-p3695547 | A-genome specific (napus-rapa) | 0.4688995    | 0.8840098    | not scorable | not scorable | 0.9256198    | 0.79131      |
| 9709 Bn-A04-p3702357 | A-genome specific (napus-rapa) | 0.9760765    | 0.6328984    | not scorable | not scorable | 0.9917355    | 0.8569925    |
| 9710 Bn-A04-p3702896 | A-genome specific (napus-rapa) | 0.9760765    | 0.2963188    | not scorable | not scorable | 0.9669421    | 0.6159005    |
| 9711 Bn-A04-p370297  | A-genome specific (napus-rapa) | 0.9928229    | 0.7338368    | not scorable | not scorable | 0.9586777    | 0.6154082    |
| 9712 Bn-A04-p3719381 | A-genome specific (napus-rapa) | 0.9928229    | 0.7935023    | not scorable | not scorable | 1            | 0.8458138    |
| 9713 Bn-A04-p3721587 | A-genome specific (napus-rapa) | 1            | 0.8098124    | not scorable | not scorable | 0.9834711    | 0.7324129    |
| 9714 Bn-A04-p3724573 | A-genome specific (napus-rapa) | 1            | 0.4763272    | not scorable | not scorable | 1            | 0.8012655    |
| 9715 Bn-A04-p3743549 | A-genome specific (napus-rapa) | 0.9928229    | 0.7134449    | not scorable | not scorable | 0.9752066    | 0.6592058    |
| 9716 Bn-A04-p3750975 | A-genome specific (napus-rapa) | 0.9808612    | 0.5248904    | not scorable | not scorable | 1            | 0.8206075    |
| 9717 Bn-A04-p375224  | A-genome specific (napus-rapa) | 0.9880383    | 0.8160862    | not scorable | not scorable | 0.9586777    | 0.7933186    |
| 9718 Bn-A04-p375518  | A-genome specific (napus-rapa) | 0.9952153    | 0.8331373    | not scorable | not scorable | 0.9834711    | 0.8238301    |
| 9719 Bn-A04-p3757486 | A-genome specific (napus-rapa) | 0.9928229    | 0.6882309    | not scorable | not scorable | 0.9834711    | 0.7053689    |
| 9720 Bn-A04-p3761523 | A-genome specific (napus-rapa) | 0.9952153    | 0.8013068    | not scorable | not scorable | 0.9834711    | 0.8510177    |
| 9721 Bn-A04-p3820381 | A-genome specific (napus-rapa) | 0.9856459    | 0.73953      | not scorable | not scorable | 0.9917355    | 0.7098398    |
| 9722 Bn-A04-p3851969 | A-genome specific (napus-rapa) | 0.7703349    | 0.8607996    | not scorable | not scorable | 0.9917355    | 0.7917648    |
| 9723 Bn-A04-p3852124 | napus specific                 | 0.7631579    | 0.9124498    | not scorable | not scorable | not scorable | not scorable |
| 9724 Bn-A04-p3853621 | napus specific                 | 0.7679426    | 0.7272235    | not scorable | not scorable | not scorable | not scorable |
| 9725 Bn-A04-p3875034 | A-genome specific (napus-rapa) | 0.9808612    | 0.7815894    | not scorable | not scorable | 0.9917355    | 0.6289822    |
| 9726 Bn-A04-p3915978 | napus specific                 | 1            | 0.5584974    | not scorable | not scorable | not scorable | not scorable |
| 9727 Bn-A04-p3923982 | A-genome specific (rapa only)  | not scorable | not scorable | not scorable | not scorable | 0.5950413    | 0.7240272    |
| 9728 Bn-A04-p3933714 | A-genome specific (napus-rapa) | 0.9904306    | 0.7633109    | not scorable | not scorable | 1            | 0.6769987    |
| 9729 Bn-A04-p3934671 | A-genome specific (napus-rapa) | 0.9808612    | 0.7172512    | not scorable | not scorable | 0.9917355    | 0.6734592    |
| 9730 Bn-A04-p397523  | A-genome specific (napus-rapa) | 0.9952153    | 0.6883276    | not scorable | not scorable | 0.9917355    | 0.6598009    |
| 9731 Bn-A04-p398807  | A-genome specific (napus-rapa) | 0.9976076    | 0.5090746    | not scorable | not scorable | 1            | 0.707249     |
| 9732 Bn-A04-p3990611 | A-genome specific (napus-rapa) | 0.9856459    | 0.7086554    | not scorable | not scorable | 1            | 0.7245188    |

|                      |                                   |              |              |              |              |              |              |
|----------------------|-----------------------------------|--------------|--------------|--------------|--------------|--------------|--------------|
| 9733 Bn-A04-p3990828 | A-genome specific (napus-rapa)    | 0.9856459    | 0.7751051    | not scorable | not scorable | 1            | 0.7197421    |
| 9734 Bn-A04-p3991261 | A-genome specific (napus-rapa)    | 0.9880383    | 0.7758925    | not scorable | not scorable | 1            | 0.8293419    |
| 9735 Bn-A04-p4002585 | A-genome specific (napus-rapa)    | 0.9688995    | 0.7339039    | not scorable | not scorable | 1            | 0.5660856    |
| 9736 Bn-A04-p4034426 | A-genome specific (napus-rapa)    | 0.9928229    | 0.8028546    | not scorable | not scorable | 0.9834711    | 0.8058633    |
| 9737 Bn-A04-p4035141 | A-genome specific (rapa only)     | not scorable | not scorable | not scorable | not scorable | 0.9917355    | 0.7770618    |
| 9738 Bn-A04-p404042  | all not scorable                  | not scorable | not scorable | not scorable | not scorable | not scorable | not scorable |
| 9739 Bn-A04-p405060  | A-genome specific (napus-rapa)    | 0.9880383    | 0.6296661    | not scorable | not scorable | 0.9752066    | 0.578559     |
| 9740 Bn-A04-p4056517 | A-genome specific (napus-rapa)    | 1            | 0.8227402    | not scorable | not scorable | 0.9834711    | 0.7267053    |
| 9741 Bn-A04-p4060806 | A-genome specific (napus-rapa)    | 0.9880383    | 0.7782921    | not scorable | not scorable | 0.9752066    | 0.764575     |
| 9742 Bn-A04-p4074166 | A-genome specific (napus-rapa)    | 0.9976076    | 0.223732     | not scorable | not scorable | 1            | 0.528818     |
| 9743 Bn-A04-p4074703 | A-genome specific (napus-rapa)    | 0.9617225    | 0.5453034    | not scorable | not scorable | 1            | 0.8668658    |
| 9744 Bn-A04-p4082416 | A-genome specific (rapa only)     | not scorable | not scorable | not scorable | not scorable | 0.9834711    | 0.6448815    |
| 9745 Bn-A04-p4087475 | A-genome specific (rapa only)     | not scorable | not scorable | not scorable | not scorable | 0.9090909    | 0.4266796    |
| 9746 Bn-A04-p4090389 | A-genome specific (napus-rapa)    | 0.9976076    | 0.447558     | not scorable | not scorable | 0.9834711    | 0.7945956    |
| 9747 Bn-A04-p4097272 | A-genome specific (napus-rapa)    | 0.9808612    | 0.7983378    | not scorable | not scorable | 0.9586777    | 0.7204002    |
| 9748 Bn-A04-p4099958 | A-genome specific (napus-rapa)    | 0.9880383    | 0.7956931    | not scorable | not scorable | 1            | 0.7757955    |
| 9749 Bn-A04-p4101266 | A-genome specific (napus-rapa)    | 0.9665072    | 0.7125781    | not scorable | not scorable | 0.9752066    | 0.6319184    |
| 9750 Bn-A04-p4101473 | A-genome specific (napus-rapa)    | 0.9784689    | 0.3777509    | not scorable | not scorable | 0.9834711    | 0.7278553    |
| 9751 Bn-A04-p4102094 | A-genome specific (napus-rapa)    | 0.9784689    | 0.7552872    | not scorable | not scorable | 0.9752066    | 0.6973829    |
| 9752 Bn-A04-p4107072 | A-genome specific (napus-rapa)    | 0.9808612    | 0.7831545    | not scorable | not scorable | 0.9834711    | 0.7410726    |
| 9753 Bn-A04-p4112460 | A-genome specific (napus-rapa)    | 0.9856459    | 0.7972761    | not scorable | not scorable | 1            | 0.7807541    |
| 9754 Bn-A04-p4117100 | A-genome specific (napus-rapa)    | 0.9808612    | 0.7453884    | not scorable | not scorable | 1            | 0.6795201    |
| 9755 Bn-A04-p4121578 | A-genome specific (napus-rapa)    | 0.9976076    | 0.7499337    | not scorable | not scorable | 1            | 0.6930039    |
| 9756 Bn-A04-p4124082 | A-genome specific (napus-rapa)    | 0.9736842    | 0.6360599    | not scorable | not scorable | 0.9669421    | 0.5565655    |
| 9757 Bn-A04-p4124240 | napus specific                    | 0.9641148    | 0.5240147    | not scorable | not scorable | not scorable | not scorable |
| 9758 Bn-A04-p4131451 | A-genome specific (napus-rapa)    | 0.9760765    | 0.772599     | not scorable | not scorable | 0.9917355    | 0.7774039    |
| 9759 Bn-A04-p4150340 | napus specific                    | 0.9688995    | 0.2382677    | not scorable | not scorable | not scorable | not scorable |
| 9760 Bn-A04-p4152511 | A-genome specific (napus-rapa)    | 0.9497608    | 0.4941343    | not scorable | not scorable | 0.9917355    | 0.7016693    |
| 9761 Bn-A04-p4169131 | A-genome specific (napus-rapa)    | 0.9593301    | 0.4229332    | not scorable | not scorable | 0.9834711    | 0.7743751    |
| 9762 Bn-A04-p4179724 | genome unspecific (oleracea-rapa) | not scorable | not scorable | 0.9689922    | 0.1459306    | 0.9586777    | 0.7096977    |
| 9763 Bn-A04-p4179915 | A-genome specific (napus-rapa)    | 0.9545454    | 0.512719     | not scorable | not scorable | 0.9917355    | 0.6160439    |
| 9764 Bn-A04-p4200354 | A-genome specific (napus-rapa)    | 0.9976076    | 0.7976544    | not scorable | not scorable | 0.9834711    | 0.6958786    |
| 9765 Bn-A04-p4203564 | A-genome specific (napus-rapa)    | 0.9808612    | 0.7739424    | not scorable | not scorable | 0.9752066    | 0.7022622    |



|                      |                                   |              |              |              |              |           |           |
|----------------------|-----------------------------------|--------------|--------------|--------------|--------------|-----------|-----------|
| 9766 Bn-A04-p4204119 | A-genome specific (napus-rapa)    | 0.9808612    | 0.7932532    | not scorable | not scorable | 0.9834711 | 0.7639515 |
| 9767 Bn-A04-p4204775 | A-genome specific (napus-rapa)    | 0.9258373    | 0.554356     | not scorable | not scorable | 0.9752066 | 0.6448771 |
| 9768 Bn-A04-p4207198 | A-genome specific (napus-rapa)    | 0.9904306    | 0.7523361    | not scorable | not scorable | 0.9834711 | 0.7191718 |
| 9769 Bn-A04-p4210431 | A-genome specific (napus-rapa)    | 1            | 0.759294     | not scorable | not scorable | 0.9917355 | 0.730921  |
| 9770 Bn-A04-p4217227 | A-genome specific (napus-rapa)    | 0.9928229    | 0.319452     | not scorable | not scorable | 1         | 0.6219663 |
| 9771 Bn-A04-p4221603 | A-genome specific (napus-rapa)    | 0.9784689    | 0.7481617    | not scorable | not scorable | 1         | 0.742234  |
| 9772 Bn-A04-p4222491 | A-genome specific (napus-rapa)    | 1            | 0.4819123    | not scorable | not scorable | 1         | 0.7065566 |
| 9773 Bn-A04-p4223859 | A-genome specific (napus-rapa)    | 0.9736842    | 0.4806241    | not scorable | not scorable | 0.9917355 | 0.7880316 |
| 9774 Bn-A04-p4224646 | A-genome specific (napus-rapa)    | 0.562201     | 0.8135828    | not scorable | not scorable | 0.9752066 | 0.7918426 |
| 9775 Bn-A04-p4224705 | A-genome specific (napus-rapa)    | 0.562201     | 0.8414686    | not scorable | not scorable | 0.9917355 | 0.7345473 |
| 9776 Bn-A04-p4244824 | A-genome specific (napus-rapa)    | 1            | 0.4458955    | not scorable | not scorable | 0.9834711 | 0.4173105 |
| 9777 Bn-A04-p4249132 | A-genome specific (napus-rapa)    | 1            | 0.6055367    | not scorable | not scorable | 0.9834711 | 0.6871157 |
| 9778 Bn-A04-p4254366 | A-genome specific (napus-rapa)    | 1            | 0.5333191    | not scorable | not scorable | 0.9669421 | 0.7209556 |
| 9779 Bn-A04-p4265054 | A-genome specific (napus-rapa)    | 1            | 0.3207493    | not scorable | not scorable | 1         | 0.7530859 |
| 9780 Bn-A04-p4265606 | A-genome specific (napus-rapa)    | 0.9928229    | 0.3418558    | not scorable | not scorable | 0.9752066 | 0.7594211 |
| 9781 Bn-A04-p4276334 | A-genome specific (napus-rapa)    | 0.9593301    | 0.3814976    | not scorable | not scorable | 0.9917355 | 0.7816851 |
| 9782 Bn-A04-p4286343 | A-genome specific (napus-rapa)    | 0.9976076    | 0.797215     | not scorable | not scorable | 0.9917355 | 0.7879608 |
| 9783 Bn-A04-p4294569 | A-genome specific (napus-rapa)    | 1            | 0.8437496    | not scorable | not scorable | 1         | 0.9039531 |
| 9784 Bn-A04-p4307559 | A-genome specific (napus-rapa)    | 0.9856459    | 0.6352119    | not scorable | not scorable | 0.9917355 | 0.5085835 |
| 9785 Bn-A04-p4319736 | genome unspecific (oleracea-rapa) | not scorable | not scorable | 0.9922481    | 0.3165402    | 0.9586777 | 0.5628939 |
| 9786 Bn-A04-p4325390 | A-genome specific (napus-rapa)    | 0.9593301    | 0.5915003    | not scorable | not scorable | 1         | 0.7061199 |
| 9787 Bn-A04-p4330419 | A-genome specific (napus-rapa)    | 0.9952153    | 0.4140308    | not scorable | not scorable | 1         | 0.6995957 |
| 9788 Bn-A04-p4332836 | A-genome specific (napus-rapa)    | 1            | 0.8024035    | not scorable | not scorable | 1         | 0.7674087 |
| 9789 Bn-A04-p4346492 | A-genome specific (napus-rapa)    | 1            | 0.8925295    | not scorable | not scorable | 0.9834711 | 0.8139626 |
| 9790 Bn-A04-p4349715 | A-genome specific (napus-rapa)    | 0.9976076    | 0.7705802    | not scorable | not scorable | 1         | 0.7417137 |
| 9791 Bn-A04-p4350372 | A-genome specific (napus-rapa)    | 1            | 0.846877     | not scorable | not scorable | 0.9669421 | 0.772532  |
| 9792 Bn-A04-p4350555 | A-genome specific (napus-rapa)    | 0.9976076    | 0.8569781    | not scorable | not scorable | 0.9834711 | 0.70071   |
| 9793 Bn-A04-p4382202 | A-genome specific (napus-rapa)    | 1            | 0.8587587    | not scorable | not scorable | 0.9834711 | 0.809307  |
| 9794 Bn-A04-p4392113 | A-genome specific (napus-rapa)    | 0.9880383    | 0.8623146    | not scorable | not scorable | 0.9917355 | 0.7862728 |
| 9795 Bn-A04-p4409348 | A-genome specific (napus-rapa)    | 0.9952153    | 0.5518695    | not scorable | not scorable | 1         | 0.6903692 |
| 9796 Bn-A04-p4409463 | A-genome specific (napus-rapa)    | 1            | 0.8665085    | not scorable | not scorable | 1         | 0.7267236 |
| 9797 Bn-A04-p4409752 | A-genome specific (napus-rapa)    | 1            | 0.8512385    | not scorable | not scorable | 0.9834711 | 0.7056103 |
| 9798 Bn-A04-p4410113 | A-genome specific (napus-rapa)    | 1            | 0.8684896    | not scorable | not scorable | 0.9834711 | 0.7185551 |

|      |                 |                                |              |              |              |              |              |              |
|------|-----------------|--------------------------------|--------------|--------------|--------------|--------------|--------------|--------------|
| 9799 | Bn-A04-p4410144 | A-genome specific (napus-rapa) | 0.9976076    | 0.7749025    | not scorable | not scorable | 0.9752066    | 0.7003623    |
| 9800 | Bn-A04-p4410196 | A-genome specific (napus-rapa) | 0.9856459    | 0.8900737    | not scorable | not scorable | 0.9917355    | 0.6597216    |
| 9801 | Bn-A04-p4418670 | A-genome specific (napus-rapa) | 1            | 0.7807335    | not scorable | not scorable | 1            | 0.6909857    |
| 9802 | Bn-A04-p4418715 | A-genome specific (napus-rapa) | 0.9976076    | 0.4672951    | not scorable | not scorable | 0.9917355    | 0.6015807    |
| 9803 | Bn-A04-p4529360 | A-genome specific (napus-rapa) | 0.9976076    | 0.7739609    | not scorable | not scorable | 0.9504132    | 0.618674     |
| 9804 | Bn-A04-p4531566 | napus specific                 | 0.6578947    | 0.7762067    | not scorable | not scorable | not scorable | not scorable |
| 9805 | Bn-A04-p4532802 | all not scorable               | not scorable | not scorable | not scorable | not scorable | not scorable | not scorable |
| 9806 | Bn-A04-p4544600 | A-genome specific (napus-rapa) | 0.8325359    | 0.7813753    | not scorable | not scorable | 1            | 0.7518713    |
| 9807 | Bn-A04-p455869  | A-genome specific (napus-rapa) | 1            | 0.7916754    | not scorable | not scorable | 0.9752066    | 0.7002707    |
| 9808 | Bn-A04-p459395  | A-genome specific (rapa only)  | not scorable | not scorable | not scorable | not scorable | 0.7438017    | 0.7764386    |
| 9809 | Bn-A04-p4598738 | A-genome specific (napus-rapa) | 0.9354067    | 0.4549383    | not scorable | not scorable | 0.9834711    | 0.8527662    |
| 9810 | Bn-A04-p4598943 | A-genome specific (napus-rapa) | 0.9760765    | 0.4621509    | not scorable | not scorable | 0.9834711    | 0.7865753    |
| 9811 | Bn-A04-p4599093 | A-genome specific (napus-rapa) | 0.9162679    | 0.3712881    | not scorable | not scorable | 0.9834711    | 0.7127799    |
| 9812 | Bn-A04-p4599664 | A-genome specific (napus-rapa) | 0.9425837    | 0.3275432    | not scorable | not scorable | 0.9834711    | 0.7140323    |
| 9813 | Bn-A04-p4599814 | A-genome specific (napus-rapa) | 0.9401914    | 0.3193439    | not scorable | not scorable | 0.9752066    | 0.7096587    |
| 9814 | Bn-A04-p4599916 | A-genome specific (rapa only)  | not scorable | not scorable | not scorable | not scorable | 0.9917355    | 0.6891796    |
| 9815 | Bn-A04-p4599988 | A-genome specific (napus-rapa) | 0.9354067    | 0.3619776    | not scorable | not scorable | 0.9586777    | 0.7845204    |
| 9816 | Bn-A04-p4600223 | A-genome specific (napus-rapa) | 0.937799     | 0.737289     | not scorable | not scorable | 0.9752066    | 0.7395847    |
| 9817 | Bn-A04-p4601980 | A-genome specific (napus-rapa) | 0.923445     | 0.5134644    | not scorable | not scorable | 0.9917355    | 0.7442976    |
| 9818 | Bn-A04-p4602694 | A-genome specific (napus-rapa) | 0.9186603    | 0.5689141    | not scorable | not scorable | 0.9586777    | 0.7948715    |
| 9819 | Bn-A04-p461679  | napus specific                 | 0.9186603    | 0.4716844    | not scorable | not scorable | not scorable | not scorable |
| 9820 | Bn-A04-p462219  | A-genome specific (rapa only)  | not scorable | not scorable | not scorable | not scorable | 0.768595     | 0.9197958    |
| 9821 | Bn-A04-p462966  | A-genome specific (napus-rapa) | 0.9545454    | 0.2508653    | not scorable | not scorable | 0.6859504    | 0.7453435    |
| 9822 | Bn-A04-p463864  | A-genome specific (napus-rapa) | 1            | 0.9018453    | not scorable | not scorable | 1            | 0.707625     |
| 9823 | Bn-A04-p4693254 | A-genome specific (napus-rapa) | 0.9952153    | 0.9151071    | not scorable | not scorable | 0.9917355    | 0.7107084    |
| 9824 | Bn-A04-p4717909 | A-genome specific (napus-rapa) | 1            | 0.7645525    | not scorable | not scorable | 1            | 0.8839908    |
| 9825 | Bn-A04-p4730302 | A-genome specific (napus-rapa) | 0.9569378    | 0.9091653    | not scorable | not scorable | 0.9752066    | 0.7941489    |
| 9826 | Bn-A04-p4736023 | A-genome specific (napus-rapa) | 0.9976076    | 0.8694049    | not scorable | not scorable | 0.9834711    | 0.7844154    |
| 9827 | Bn-A04-p4742377 | A-genome specific (napus-rapa) | 0.9808612    | 0.8521061    | not scorable | not scorable | 0.9586777    | 0.738763     |
| 9828 | Bn-A04-p4742432 | A-genome specific (napus-rapa) | 0.9808612    | 0.7986385    | not scorable | not scorable | 0.9752066    | 0.828782     |
| 9829 | Bn-A04-p4823556 | A-genome specific (napus-rapa) | 0.9952153    | 0.753897     | not scorable | not scorable | 0.9917355    | 0.7912108    |
| 9830 | Bn-A04-p4825669 | A-genome specific (napus-rapa) | 0.9760765    | 0.8084666    | not scorable | not scorable | 0.9752066    | 0.7542337    |
| 9831 | Bn-A04-p4834943 | A-genome specific (napus-rapa) | 0.9880383    | 0.7192727    | not scorable | not scorable | 0.9752066    | 0.7370261    |

|      |                 |                                   |              |              |              |              |              |              |
|------|-----------------|-----------------------------------|--------------|--------------|--------------|--------------|--------------|--------------|
| 9832 | Bn-A04-p4835096 | A-genome specific (napus-rapa)    | 0.9856459    | 0.7839423    | not scorable | not scorable | 0.9917355    | 0.6749162    |
| 9833 | Bn-A04-p4835244 | A-genome specific (napus-rapa)    | 0.9880383    | 0.7847956    | not scorable | not scorable | 0.9586777    | 0.7749012    |
| 9834 | Bn-A04-p4835883 | A-genome specific (napus-rapa)    | 0.9904306    | 0.7957003    | not scorable | not scorable | 0.9834711    | 0.6796759    |
| 9835 | Bn-A04-p4836499 | A-genome specific (napus-rapa)    | 0.9952153    | 0.8154332    | not scorable | not scorable | 0.9917355    | 0.8035693    |
| 9836 | Bn-A04-p4848743 | A-genome specific (napus-rapa)    | 0.9952153    | 0.8003404    | not scorable | not scorable | 0.9586777    | 0.8317357    |
| 9837 | Bn-A04-p4864900 | A-genome specific (napus-rapa)    | 0.9976076    | 0.8397645    | not scorable | not scorable | 0.9917355    | 0.751178     |
| 9838 | Bn-A04-p4866786 | A-genome specific (napus-rapa)    | 0.9976076    | 0.8346374    | not scorable | not scorable | 0.9917355    | 0.7236252    |
| 9839 | Bn-A04-p4872836 | A-genome specific (napus-rapa)    | 0.9832536    | 0.7690726    | not scorable | not scorable | 0.9421487    | 0.8739601    |
| 9840 | Bn-A04-p4874261 | A-genome specific (napus-rapa)    | 1            | 0.8284246    | not scorable | not scorable | 0.9917355    | 0.8004699    |
| 9841 | Bn-A04-p4874840 | A-genome specific (napus-rapa)    | 0.9832536    | 0.7904475    | not scorable | not scorable | 0.9504132    | 0.7446173    |
| 9842 | Bn-A04-p487513  | A-genome specific (napus-rapa)    | 1            | 0.891062     | not scorable | not scorable | 0.9752066    | 0.7600093    |
| 9843 | Bn-A04-p4879262 | A-genome specific (napus-rapa)    | 0.9952153    | 0.8054369    | not scorable | not scorable | 0.9917355    | 0.7226719    |
| 9844 | Bn-A04-p4880759 | A-genome specific (napus-rapa)    | 0.9904306    | 0.5864121    | not scorable | not scorable | 1            | 0.7323372    |
| 9845 | Bn-A04-p4881168 | A-genome specific (napus-rapa)    | 0.9952153    | 0.860281     | not scorable | not scorable | 1            | 0.8010378    |
| 9846 | Bn-A04-p4881807 | A-genome specific (napus-rapa)    | 0.9832536    | 0.6726725    | not scorable | not scorable | 0.9917355    | 0.76532      |
| 9847 | Bn-A04-p4891169 | A-genome specific (napus-rapa)    | 0.8660287    | 0.5657546    | not scorable | not scorable | 0.6280992    | 0.7008231    |
| 9848 | Bn-A04-p4897489 | A-genome specific (napus-rapa)    | 0.9784689    | 0.7685058    | not scorable | not scorable | 0.6694215    | 0.6766605    |
| 9849 | Bn-A04-p4909402 | A-genome specific (napus-rapa)    | 0.9880383    | 0.7551913    | not scorable | not scorable | 0.6363636    | 0.6933745    |
| 9850 | Bn-A04-p490967  | A-genome specific (rapa only)     | not scorable | not scorable | not scorable | not scorable | 0.9834711    | 0.7521201    |
| 9851 | Bn-A04-p4910033 | A-genome specific (napus-rapa)    | 0.9928229    | 0.7786417    | not scorable | not scorable | 0.6363636    | 0.6378961    |
| 9852 | Bn-A04-p4932716 | A-genome specific (napus-rapa)    | 0.9688995    | 0.5220121    | not scorable | not scorable | 0.9669421    | 0.5437787    |
| 9853 | Bn-A04-p4976932 | A-genome specific (napus-rapa)    | 0.9856459    | 0.6974087    | not scorable | not scorable | 0.9752066    | 0.6940176    |
| 9854 | Bn-A04-p4977488 | A-genome specific (napus-rapa)    | 1            | 0.9048023    | not scorable | not scorable | 1            | 0.6956778    |
| 9855 | Bn-A04-p4978478 | A-genome specific (napus-rapa)    | 0.9976076    | 0.9353137    | not scorable | not scorable | 0.9834711    | 0.7379379    |
| 9856 | Bn-A04-p4978492 | A-genome specific (napus-rapa)    | 0.9976076    | 0.7940474    | not scorable | not scorable | 0.9917355    | 0.7178526    |
| 9857 | Bn-A04-p4978780 | A-genome specific (napus-rapa)    | 0.9976076    | 0.7619479    | not scorable | not scorable | 0.9917355    | 0.7284321    |
| 9858 | Bn-A04-p5133653 | A-genome specific (napus-rapa)    | 0.9952153    | 0.7939724    | not scorable | not scorable | 0.9834711    | 0.736361     |
| 9859 | Bn-A04-p5137321 | genome unspecific (all in)        | 0.9832536    | 0.4653326    | 1            | 0.834457     | 0.9917355    | 0.7587286    |
| 9860 | Bn-A04-p5183306 | A-genome specific (napus-rapa)    | 0.9784689    | 0.7701285    | not scorable | not scorable | 0.9752066    | 0.7219929    |
| 9861 | Bn-A04-p5223849 | C-genome specific (oleracea only) | not scorable | not scorable | 0.8527132    | 0.5250189    | not scorable | not scorable |
| 9862 | Bn-A04-p5270881 | A-genome specific (napus-rapa)    | 0.9593301    | 0.4592729    | not scorable | not scorable | 0.9834711    | 0.691402     |
| 9863 | Bn-A04-p5273199 | A-genome specific (napus-rapa)    | 0.9784689    | 0.3468392    | not scorable | not scorable | 0.9917355    | 0.7274802    |
| 9864 | Bn-A04-p534430  | A-genome specific (napus-rapa)    | 0.9904306    | 0.805127     | not scorable | not scorable | 0.6115702    | 0.7714831    |

|                      |                                |              |              |              |              |              |              |
|----------------------|--------------------------------|--------------|--------------|--------------|--------------|--------------|--------------|
| 9865 Bn-A04-p534845  | A-genome specific (napus-rapa) | 1            | 0.8235574    | not scorable | not scorable | 1            | 0.7033026    |
| 9866 Bn-A04-p5378408 | A-genome specific (napus-rapa) | 0.9952153    | 0.574847     | not scorable | not scorable | 1            | 0.8342283    |
| 9867 Bn-A04-p538802  | A-genome specific (rapa only)  | not scorable | not scorable | not scorable | not scorable | 0.9669421    | 0.7396516    |
| 9868 Bn-A04-p5398352 | A-genome specific (napus-rapa) | 0.9880383    | 0.6685718    | not scorable | not scorable | 0.9834711    | 0.6575862    |
| 9869 Bn-A04-p541336  | A-genome specific (napus-rapa) | 0.9928229    | 0.8598717    | not scorable | not scorable | 0.8181818    | 0.7086295    |
| 9870 Bn-A04-p5501342 | all not scorable               | not scorable | not scorable | not scorable | not scorable | not scorable | not scorable |
| 9871 Bn-A04-p5501870 | A-genome specific (rapa only)  | not scorable | not scorable | not scorable | not scorable | 1            | 0.5171568    |
| 9872 Bn-A04-p5553976 | A-genome specific (rapa only)  | not scorable | not scorable | not scorable | not scorable | 1            | 0.6753637    |
| 9873 Bn-A04-p5554444 | A-genome specific (napus-rapa) | 0.9928229    | 0.5301726    | not scorable | not scorable | 1            | 0.678672     |
| 9874 Bn-A04-p556991  | A-genome specific (napus-rapa) | 1            | 0.8675472    | not scorable | not scorable | 0.9752066    | 0.773154     |
| 9875 Bn-A04-p557097  | A-genome specific (napus-rapa) | 0.9976076    | 0.7265286    | not scorable | not scorable | 0.9917355    | 0.7062421    |
| 9876 Bn-A04-p5576673 | A-genome specific (napus-rapa) | 0.9880383    | 0.5809089    | not scorable | not scorable | 1            | 0.8722882    |
| 9877 Bn-A04-p560622  | A-genome specific (napus-rapa) | 0.8875598    | 0.7777887    | not scorable | not scorable | 0.5867769    | 0.7101301    |
| 9878 Bn-A04-p5646833 | A-genome specific (napus-rapa) | 1            | 0.5817558    | not scorable | not scorable | 1            | 0.7970801    |
| 9879 Bn-A04-p570250  | napus specific                 | 0.937799     | 0.7836981    | not scorable | not scorable | not scorable | not scorable |
| 9880 Bn-A04-p5715780 | A-genome specific (napus-rapa) | 0.9904306    | 0.8154697    | not scorable | not scorable | 0.9917355    | 0.7531332    |
| 9881 Bn-A04-p5788908 | A-genome specific (napus-rapa) | 0.9976076    | 0.3163436    | not scorable | not scorable | 0.9917355    | 0.6137172    |
| 9882 Bn-A04-p5809264 | A-genome specific (napus-rapa) | 0.9952153    | 0.8477324    | not scorable | not scorable | 1            | 0.8330486    |
| 9883 Bn-A04-p581704  | A-genome specific (napus-rapa) | 0.9760765    | 0.7221511    | not scorable | not scorable | 0.9917355    | 0.7125766    |
| 9884 Bn-A04-p582626  | A-genome specific (napus-rapa) | 0.8779904    | 0.8360122    | not scorable | not scorable | 0.9917355    | 0.7359703    |
| 9885 Bn-A04-p5827901 | A-genome specific (napus-rapa) | 0.9976076    | 0.5218312    | not scorable | not scorable | 1            | 0.6871443    |
| 9886 Bn-A04-p582979  | A-genome specific (napus-rapa) | 0.8875598    | 0.809747     | not scorable | not scorable | 0.9752066    | 0.7321706    |
| 9887 Bn-A04-p583036  | A-genome specific (napus-rapa) | 0.8851675    | 0.8938024    | not scorable | not scorable | 0.9917355    | 0.7962971    |
| 9888 Bn-A04-p583242  | A-genome specific (napus-rapa) | 0.8827751    | 0.85905      | not scorable | not scorable | 1            | 0.812957     |
| 9889 Bn-A04-p583254  | A-genome specific (napus-rapa) | 0.861244     | 0.7743843    | not scorable | not scorable | 0.5950413    | 0.7277901    |
| 9890 Bn-A04-p583798  | A-genome specific (rapa only)  | not scorable | not scorable | not scorable | not scorable | 0.5702479    | 0.7915887    |
| 9891 Bn-A04-p5843077 | A-genome specific (rapa only)  | not scorable | not scorable | not scorable | not scorable | 0.9917355    | 0.8474121    |
| 9892 Bn-A04-p5852413 | A-genome specific (napus-rapa) | 0.9952153    | 0.8030596    | not scorable | not scorable | 1            | 0.7313014    |
| 9893 Bn-A04-p5853514 | A-genome specific (napus-rapa) | 0.9976076    | 0.7908846    | not scorable | not scorable | 1            | 0.720183     |
| 9894 Bn-A04-p5872564 | A-genome specific (napus-rapa) | 0.9880383    | 0.7862628    | not scorable | not scorable | 0.9834711    | 0.728904     |
| 9895 Bn-A04-p5873190 | A-genome specific (napus-rapa) | 0.9760765    | 0.8440688    | not scorable | not scorable | 0.9752066    | 0.7359368    |
| 9896 Bn-A04-p5880992 | A-genome specific (napus-rapa) | 0.9736842    | 0.9294937    | not scorable | not scorable | 1            | 0.7593716    |
| 9897 Bn-A04-p5885917 | A-genome specific (napus-rapa) | 1            | 0.8018859    | not scorable | not scorable | 0.5454546    | 0.9061333    |

|                      |                                |              |              |              |              |           |           |
|----------------------|--------------------------------|--------------|--------------|--------------|--------------|-----------|-----------|
| 9898 Bn-A04-p5919648 | A-genome specific (napus-rapa) | 0.9712918    | 0.8805773    | not scorable | not scorable | 0.9421487 | 0.7700459 |
| 9899 Bn-A04-p5938125 | A-genome specific (napus-rapa) | 0.9952153    | 0.4340712    | not scorable | not scorable | 1         | 0.9039531 |
| 9900 Bn-A04-p5938245 | A-genome specific (napus-rapa) | 0.9856459    | 0.6724878    | not scorable | not scorable | 0.9917355 | 0.8404178 |
| 9901 Bn-A04-p5959753 | A-genome specific (napus-rapa) | 0.9832536    | 0.7346559    | not scorable | not scorable | 0.9917355 | 0.8154227 |
| 9902 Bn-A04-p5964175 | A-genome specific (napus-rapa) | 1            | 0.9181998    | not scorable | not scorable | 1         | 0.7282632 |
| 9903 Bn-A04-p5965590 | A-genome specific (napus-rapa) | 0.9808612    | 0.6542808    | not scorable | not scorable | 1         | 0.6985441 |
| 9904 Bn-A04-p5967828 | A-genome specific (napus-rapa) | 0.9856459    | 0.6762845    | not scorable | not scorable | 1         | 0.66468   |
| 9905 Bn-A04-p5971620 | A-genome specific (napus-rapa) | 0.9952153    | 0.5202371    | not scorable | not scorable | 0.9917355 | 0.8227199 |
| 9906 Bn-A04-p597296  | A-genome specific (napus-rapa) | 0.9976076    | 0.841257     | not scorable | not scorable | 0.9834711 | 0.7501634 |
| 9907 Bn-A04-p5973348 | A-genome specific (napus-rapa) | 0.9928229    | 0.7223004    | not scorable | not scorable | 0.9834711 | 0.8211411 |
| 9908 Bn-A04-p5973919 | A-genome specific (napus-rapa) | 1            | 0.9148182    | not scorable | not scorable | 0.9834711 | 0.7691472 |
| 9909 Bn-A04-p5974195 | A-genome specific (napus-rapa) | 0.9880383    | 0.6380497    | not scorable | not scorable | 1         | 0.8177654 |
| 9910 Bn-A04-p5979118 | A-genome specific (napus-rapa) | 0.9928229    | 0.8629093    | not scorable | not scorable | 0.9917355 | 0.8601335 |
| 9911 Bn-A04-p5982123 | A-genome specific (napus-rapa) | 0.9736842    | 0.725991     | not scorable | not scorable | 0.9917355 | 0.6329935 |
| 9912 Bn-A04-p5983577 | A-genome specific (napus-rapa) | 1            | 0.8800282    | not scorable | not scorable | 1         | 0.7221214 |
| 9913 Bn-A04-p5985513 | A-genome specific (napus-rapa) | 1            | 0.4845143    | not scorable | not scorable | 1         | 0.7050616 |
| 9914 Bn-A04-p5987463 | A-genome specific (napus-rapa) | 0.9473684    | 0.9255054    | not scorable | not scorable | 0.9752066 | 0.718918  |
| 9915 Bn-A04-p599845  | A-genome specific (napus-rapa) | 0.9976076    | 0.8630112    | not scorable | not scorable | 0.9834711 | 0.8095143 |
| 9916 Bn-A04-p5999405 | A-genome specific (napus-rapa) | 0.9641148    | 0.527492     | not scorable | not scorable | 0.9834711 | 0.7505626 |
| 9917 Bn-A04-p600223  | A-genome specific (napus-rapa) | 1            | 0.8772717    | not scorable | not scorable | 0.9917355 | 0.7897659 |
| 9918 Bn-A04-p6004690 | A-genome specific (napus-rapa) | 0.9354067    | 0.7739547    | not scorable | not scorable | 0.9917355 | 0.6727043 |
| 9919 Bn-A04-p6008358 | A-genome specific (rapa only)  | not scorable | not scorable | not scorable | not scorable | 0.9669421 | 0.7934078 |
| 9920 Bn-A04-p6008778 | A-genome specific (napus-rapa) | 0.930622     | 0.8857938    | not scorable | not scorable | 0.9256198 | 0.8506994 |
| 9921 Bn-A04-p6017218 | A-genome specific (napus-rapa) | 0.937799     | 0.5871725    | not scorable | not scorable | 0.9834711 | 0.5966064 |
| 9922 Bn-A04-p6017599 | A-genome specific (napus-rapa) | 0.9617225    | 0.3882974    | not scorable | not scorable | 1         | 0.5586416 |
| 9923 Bn-A04-p6023914 | A-genome specific (napus-rapa) | 0.9976076    | 0.7645338    | not scorable | not scorable | 0.9917355 | 0.7552441 |
| 9924 Bn-A04-p6027878 | A-genome specific (napus-rapa) | 0.9641148    | 0.6985116    | not scorable | not scorable | 0.9752066 | 0.7447017 |
| 9925 Bn-A04-p6028097 | A-genome specific (napus-rapa) | 0.9904306    | 0.7908722    | not scorable | not scorable | 0.9752066 | 0.7105474 |
| 9926 Bn-A04-p6028334 | A-genome specific (napus-rapa) | 0.9928229    | 0.7789082    | not scorable | not scorable | 0.9752066 | 0.797245  |
| 9927 Bn-A04-p6029797 | A-genome specific (napus-rapa) | 0.9425837    | 0.7922821    | not scorable | not scorable | 0.9586777 | 0.6776279 |
| 9928 Bn-A04-p6030108 | A-genome specific (rapa only)  | not scorable | not scorable | not scorable | not scorable | 0.5950413 | 0.9354743 |
| 9929 Bn-A04-p6042013 | A-genome specific (rapa only)  | not scorable | not scorable | not scorable | not scorable | 0.9917355 | 0.7639738 |
| 9930 Bn-A04-p6047600 | A-genome specific (napus-rapa) | 0.9784689    | 0.7461309    | not scorable | not scorable | 0.9917355 | 0.7409972 |

|                      |                                |              |              |              |              |           |           |
|----------------------|--------------------------------|--------------|--------------|--------------|--------------|-----------|-----------|
| 9931 Bn-A04-p6050616 | A-genome specific (napus-rapa) | 0.9617225    | 0.4251138    | not scorable | not scorable | 0.9256198 | 0.7061945 |
| 9932 Bn-A04-p6052986 | A-genome specific (rapa only)  | not scorable | not scorable | not scorable | not scorable | 0.9586777 | 0.6597604 |
| 9933 Bn-A04-p6053997 | A-genome specific (napus-rapa) | 0.9832536    | 0.7716251    | not scorable | not scorable | 0.9917355 | 0.783999  |
| 9934 Bn-A04-p6063409 | A-genome specific (napus-rapa) | 0.930622     | 0.279572     | not scorable | not scorable | 0.6198347 | 0.8845037 |
| 9935 Bn-A04-p6100884 | A-genome specific (napus-rapa) | 0.9665072    | 0.8093098    | not scorable | not scorable | 0.9917355 | 0.8799968 |
| 9936 Bn-A04-p6165743 | A-genome specific (napus-rapa) | 0.9928229    | 0.8573222    | not scorable | not scorable | 1         | 0.7556916 |
| 9937 Bn-A04-p619001  | A-genome specific (napus-rapa) | 1            | 0.8582115    | not scorable | not scorable | 0.9669421 | 0.6748194 |
| 9938 Bn-A04-p6228211 | A-genome specific (napus-rapa) | 0.9641148    | 0.3793482    | not scorable | not scorable | 1         | 0.7545423 |
| 9939 Bn-A04-p6240855 | A-genome specific (napus-rapa) | 0.9641148    | 0.2621892    | not scorable | not scorable | 0.9834711 | 0.7025011 |
| 9940 Bn-A04-p6255997 | A-genome specific (napus-rapa) | 0.9784689    | 0.8076194    | not scorable | not scorable | 1         | 0.7960291 |
| 9941 Bn-A04-p6263702 | A-genome specific (napus-rapa) | 0.5119617    | 0.908464     | not scorable | not scorable | 0.9917355 | 0.6863167 |
| 9942 Bn-A04-p6264043 | A-genome specific (napus-rapa) | 0.9856459    | 0.6856831    | not scorable | not scorable | 1         | 0.9001486 |
| 9943 Bn-A04-p6277634 | A-genome specific (napus-rapa) | 0.9760765    | 0.4505779    | not scorable | not scorable | 1         | 0.7981288 |
| 9944 Bn-A04-p6284377 | A-genome specific (rapa only)  | not scorable | not scorable | not scorable | not scorable | 1         | 0.7773446 |
| 9945 Bn-A04-p6296526 | A-genome specific (napus-rapa) | 0.9712918    | 0.8283322    | not scorable | not scorable | 0.9917355 | 0.7898396 |
| 9946 Bn-A04-p6319430 | A-genome specific (napus-rapa) | 0.9976076    | 0.6159064    | not scorable | not scorable | 0.9917355 | 0.7505349 |
| 9947 Bn-A04-p6340854 | A-genome specific (napus-rapa) | 0.9736842    | 0.7706004    | not scorable | not scorable | 0.9834711 | 0.6992329 |
| 9948 Bn-A04-p6341516 | A-genome specific (napus-rapa) | 0.9617225    | 0.3808186    | not scorable | not scorable | 1         | 0.7891354 |
| 9949 Bn-A04-p6376472 | A-genome specific (napus-rapa) | 0.9545454    | 0.8802879    | not scorable | not scorable | 0.9752066 | 0.7973285 |
| 9950 Bn-A04-p637683  | A-genome specific (napus-rapa) | 0.9856459    | 0.8774217    | not scorable | not scorable | 0.9752066 | 0.7078871 |
| 9951 Bn-A04-p6389136 | A-genome specific (napus-rapa) | 0.9641148    | 0.5246497    | not scorable | not scorable | 0.9834711 | 0.7341309 |
| 9952 Bn-A04-p6395765 | A-genome specific (napus-rapa) | 0.5669857    | 0.8266092    | not scorable | not scorable | 0.9586777 | 0.7618849 |
| 9953 Bn-A04-p6402808 | A-genome specific (napus-rapa) | 0.5669857    | 0.7382709    | not scorable | not scorable | 0.9834711 | 0.7158242 |
| 9954 Bn-A04-p641998  | A-genome specific (napus-rapa) | 0.9976076    | 0.8628868    | not scorable | not scorable | 1         | 0.7774823 |
| 9955 Bn-A04-p6422450 | A-genome specific (napus-rapa) | 0.9784689    | 0.9128547    | not scorable | not scorable | 0.9917355 | 0.765166  |
| 9956 Bn-A04-p6428686 | A-genome specific (napus-rapa) | 0.9832536    | 0.4368686    | not scorable | not scorable | 0.9669421 | 0.7796715 |
| 9957 Bn-A04-p643876  | A-genome specific (napus-rapa) | 1            | 0.7253414    | not scorable | not scorable | 0.9834711 | 0.6911283 |
| 9958 Bn-A04-p6445083 | A-genome specific (rapa only)  | not scorable | not scorable | not scorable | not scorable | 1         | 0.7547234 |
| 9959 Bn-A04-p6448172 | A-genome specific (napus-rapa) | 0.9736842    | 0.9136612    | not scorable | not scorable | 0.9669421 | 0.7958726 |
| 9960 Bn-A04-p6453979 | A-genome specific (napus-rapa) | 0.9832536    | 0.8232718    | not scorable | not scorable | 0.9752066 | 0.6871821 |
| 9961 Bn-A04-p6454976 | A-genome specific (napus-rapa) | 0.9449761    | 0.8999277    | not scorable | not scorable | 0.9752066 | 0.7872966 |
| 9962 Bn-A04-p6455109 | A-genome specific (napus-rapa) | 0.9784689    | 0.8771845    | not scorable | not scorable | 0.9917355 | 0.7903211 |
| 9963 Bn-A04-p6456456 | A-genome specific (napus-rapa) | 0.9784689    | 0.8515025    | not scorable | not scorable | 0.9917355 | 0.6986197 |

|      |                 |                                |              |              |              |              |              |              |
|------|-----------------|--------------------------------|--------------|--------------|--------------|--------------|--------------|--------------|
| 9964 | Bn-A04-p645702  | A-genome specific (napus-rapa) | 1            | 0.8248156    | not scorable | not scorable | 0.9834711    | 0.7886414    |
| 9965 | Bn-A04-p646064  | A-genome specific (napus-rapa) | 1            | 0.7401044    | not scorable | not scorable | 1            | 0.8004208    |
| 9966 | Bn-A04-p646105  | all not scorable               | not scorable | not scorable | not scorable | not scorable | not scorable | not scorable |
| 9967 | Bn-A04-p6463878 | A-genome specific (napus-rapa) | 0.9952153    | 0.7676194    | not scorable | not scorable | 0.9917355    | 0.7106016    |
| 9968 | Bn-A04-p6465442 | A-genome specific (napus-rapa) | 0.9832536    | 0.7657553    | not scorable | not scorable | 0.9834711    | 0.8112298    |
| 9969 | Bn-A04-p648152  | A-genome specific (napus-rapa) | 1            | 0.7870384    | not scorable | not scorable | 1            | 0.7712533    |
| 9970 | Bn-A04-p6486540 | napus specific                 | 0.5598086    | 0.9152238    | not scorable | not scorable | not scorable | not scorable |
| 9971 | Bn-A04-p6487804 | A-genome specific (napus-rapa) | 0.7607656    | 0.7515029    | not scorable | not scorable | 0.9917355    | 0.7588108    |
| 9972 | Bn-A04-p652225  | A-genome specific (rapa only)  | not scorable | not scorable | not scorable | not scorable | 0.9752066    | 0.8545262    |
| 9973 | Bn-A04-p6533593 | A-genome specific (napus-rapa) | 0.9928229    | 0.762158     | not scorable | not scorable | 1            | 0.7287537    |
| 9974 | Bn-A04-p6550369 | A-genome specific (napus-rapa) | 0.9784689    | 0.7639387    | not scorable | not scorable | 1            | 0.7247278    |
| 9975 | Bn-A04-p6550757 | A-genome specific (napus-rapa) | 0.861244     | 0.8748199    | not scorable | not scorable | 0.9917355    | 0.7452475    |
| 9976 | Bn-A04-p6555913 | A-genome specific (napus-rapa) | 0.9832536    | 0.7496696    | not scorable | not scorable | 0.9834711    | 0.799786     |
| 9977 | Bn-A04-p6556405 | A-genome specific (napus-rapa) | 0.9593301    | 0.5875356    | not scorable | not scorable | 0.9834711    | 0.8334903    |
| 9978 | Bn-A04-p6563107 | A-genome specific (rapa only)  | not scorable | not scorable | not scorable | not scorable | 1            | 0.7279266    |
| 9979 | Bn-A04-p6563200 | A-genome specific (napus-rapa) | 0.9904306    | 0.3387341    | not scorable | not scorable | 0.9834711    | 0.829729     |
| 9980 | Bn-A04-p6588935 | A-genome specific (napus-rapa) | 0.9904306    | 0.7315736    | not scorable | not scorable | 0.9834711    | 0.7602701    |
| 9981 | Bn-A04-p6632126 | A-genome specific (napus-rapa) | 0.9856459    | 0.5697042    | not scorable | not scorable | 1            | 0.8135915    |
| 9982 | Bn-A04-p6637458 | A-genome specific (napus-rapa) | 0.9760765    | 0.7329367    | not scorable | not scorable | 1            | 0.7349604    |
| 9983 | Bn-A04-p6640990 | A-genome specific (napus-rapa) | 0.9688995    | 0.4465581    | not scorable | not scorable | 1            | 0.8411725    |
| 9984 | Bn-A04-p6646210 | all not scorable               | not scorable | not scorable | not scorable | not scorable | not scorable | not scorable |
| 9985 | Bn-A04-p664994  | A-genome specific (napus-rapa) | 0.9760765    | 0.3959174    | not scorable | not scorable | 0.9586777    | 0.7460113    |
| 9986 | Bn-A04-p6653508 | A-genome specific (napus-rapa) | 0.9712918    | 0.794568     | not scorable | not scorable | 0.9834711    | 0.7155414    |
| 9987 | Bn-A04-p6657342 | A-genome specific (napus-rapa) | 0.9832536    | 0.3898592    | not scorable | not scorable | 0.9752066    | 0.7938295    |
| 9988 | Bn-A04-p665754  | genome unspecific (all in)     | 0.9880383    | 0.4300866    | 0.9922481    | 0.4884036    | 0.9834711    | 0.5358047    |
| 9989 | Bn-A04-p665932  | A-genome specific (napus-rapa) | 0.9952153    | 0.3966294    | not scorable | not scorable | 0.9586777    | 0.467429     |
| 9990 | Bn-A04-p665967  | A-genome specific (rapa only)  | not scorable | not scorable | not scorable | not scorable | 0.9752066    | 0.4856958    |
| 9991 | Bn-A04-p6673120 | A-genome specific (napus-rapa) | 0.6028708    | 0.5820294    | not scorable | not scorable | 0.9917355    | 0.7252836    |
| 9992 | Bn-A04-p6678797 | A-genome specific (napus-rapa) | 0.8588517    | 0.395766     | not scorable | not scorable | 0.9917355    | 0.7362986    |
| 9993 | Bn-A04-p6679263 | A-genome specific (rapa only)  | not scorable | not scorable | not scorable | not scorable | 0.9504132    | 0.478887     |
| 9994 | Bn-A04-p6679568 | A-genome specific (napus-rapa) | 0.9784689    | 0.290753     | not scorable | not scorable | 1            | 0.6113716    |
| 9995 | Bn-A04-p6682658 | A-genome specific (napus-rapa) | 0.9425837    | 0.8142837    | not scorable | not scorable | 0.9752066    | 0.803691     |
| 9996 | Bn-A04-p6682728 | A-genome specific (napus-rapa) | 0.9497608    | 0.8800325    | not scorable | not scorable | 1            | 0.8622939    |

|                       |                                |              |              |              |              |              |              |
|-----------------------|--------------------------------|--------------|--------------|--------------|--------------|--------------|--------------|
| 9997 Bn-A04-p6683009  | A-genome specific (napus-rapa) | 0.9760765    | 0.9023381    | not scorable | not scorable | 0.9917355    | 0.8341916    |
| 9998 Bn-A04-p668378   | A-genome specific (napus-rapa) | 1            | 0.4709941    | not scorable | not scorable | 0.9834711    | 0.7793339    |
| 9999 Bn-A04-p6684054  | A-genome specific (napus-rapa) | 0.9521531    | 0.9124076    | not scorable | not scorable | 1            | 0.749783     |
| ##### Bn-A04-p6685027 | A-genome specific (napus-rapa) | 0.9665072    | 0.9114733    | not scorable | not scorable | 1            | 0.8524694    |
| ##### Bn-A04-p6685062 | A-genome specific (napus-rapa) | 0.9832536    | 0.8274801    | not scorable | not scorable | 1            | 0.8213645    |
| ##### Bn-A04-p6685294 | A-genome specific (napus-rapa) | 0.9784689    | 0.7606586    | not scorable | not scorable | 0.9917355    | 0.6078041    |
| ##### Bn-A04-p6685371 | A-genome specific (napus-rapa) | 0.9784689    | 0.8236449    | not scorable | not scorable | 1            | 0.753652     |
| ##### Bn-A04-p669182  | A-genome specific (napus-rapa) | 0.9880383    | 0.5731716    | not scorable | not scorable | 0.9834711    | 0.6663988    |
| ##### Bn-A04-p6697580 | A-genome specific (napus-rapa) | 0.9856459    | 0.8477979    | not scorable | not scorable | 1            | 0.765373     |
| ##### Bn-A04-p6718464 | A-genome specific (napus-rapa) | 0.7942584    | 0.8897412    | not scorable | not scorable | 0.9834711    | 0.8290797    |
| ##### Bn-A04-p6719949 | A-genome specific (napus-rapa) | 0.9976076    | 0.8471035    | not scorable | not scorable | 0.9669421    | 0.7914112    |
| ##### Bn-A04-p6747807 | A-genome specific (napus-rapa) | 0.9760765    | 0.8199897    | not scorable | not scorable | 0.9669421    | 0.9464173    |
| ##### Bn-A04-p6748822 | A-genome specific (napus-rapa) | 0.9760765    | 0.4440337    | not scorable | not scorable | 0.9752066    | 0.7378531    |
| ##### Bn-A04-p6749073 | A-genome specific (napus-rapa) | 0.9832536    | 0.8735242    | not scorable | not scorable | 0.9669421    | 0.8702711    |
| ##### Bn-A04-p6749114 | A-genome specific (napus-rapa) | 0.9856459    | 0.8695291    | not scorable | not scorable | 0.9669421    | 0.9212252    |
| ##### Bn-A04-p6749322 | A-genome specific (napus-rapa) | 0.9712918    | 0.9001594    | not scorable | not scorable | 0.9504132    | 0.7788189    |
| ##### Bn-A04-p6752299 | A-genome specific (napus-rapa) | 0.9808612    | 0.748781     | not scorable | not scorable | 0.9421487    | 0.7760171    |
| ##### Bn-A04-p6752979 | A-genome specific (napus-rapa) | 0.9641148    | 0.7401796    | not scorable | not scorable | 0.9669421    | 0.8045593    |
| ##### Bn-A04-p6760294 | A-genome specific (napus-rapa) | 0.9832536    | 0.8392224    | not scorable | not scorable | 0.9669421    | 0.868216     |
| ##### Bn-A04-p6764233 | A-genome specific (napus-rapa) | 0.9808612    | 0.7111743    | not scorable | not scorable | 0.9752066    | 0.8058044    |
| ##### Bn-A04-p6765045 | genome unspecific (all in)     | 0.9784689    | 0.672936     | 0.9147287    | 0.5974009    | 0.9834711    | 0.6931816    |
| ##### Bn-A04-p6771264 | napus specific                 | 0.9736842    | 0.735633     | not scorable | not scorable | not scorable | not scorable |
| ##### Bn-A04-p6773984 | A-genome specific (napus-rapa) | 0.9856459    | 0.6987329    | not scorable | not scorable | 0.9669421    | 0.8133746    |
| ##### Bn-A04-p6775008 | A-genome specific (napus-rapa) | 0.9688995    | 0.6521707    | not scorable | not scorable | 0.9586777    | 0.7985248    |
| ##### Bn-A04-p6776597 | A-genome specific (napus-rapa) | 0.9784689    | 0.7792198    | not scorable | not scorable | 0.9586777    | 0.7552744    |
| ##### Bn-A04-p6776786 | A-genome specific (napus-rapa) | 0.9928229    | 0.7324047    | not scorable | not scorable | 0.9752066    | 0.8397954    |
| ##### Bn-A04-p6778593 | A-genome specific (napus-rapa) | 0.8947368    | 0.8122345    | not scorable | not scorable | 0.9669421    | 0.8290346    |
| ##### Bn-A04-p6780163 | A-genome specific (napus-rapa) | 0.9904306    | 0.4469636    | not scorable | not scorable | 0.9752066    | 0.9033059    |
| ##### Bn-A04-p6783717 | A-genome specific (napus-rapa) | 0.9880383    | 0.8150943    | not scorable | not scorable | 0.9834711    | 0.8595492    |
| ##### Bn-A04-p6790373 | A-genome specific (napus-rapa) | 0.9952153    | 0.5695329    | not scorable | not scorable | 0.9917355    | 0.6775374    |
| ##### Bn-A04-p6929056 | A-genome specific (napus-rapa) | 0.9976076    | 0.7278077    | not scorable | not scorable | 0.9752066    | 0.6922396    |
| ##### Bn-A04-p6953674 | A-genome specific (napus-rapa) | 1            | 0.7804081    | not scorable | not scorable | 1            | 0.7641612    |
| ##### Bn-A04-p6958157 | A-genome specific (rapa only)  | not scorable | not scorable | not scorable | not scorable | 0.5950413    | 0.9175813    |



|                      |                                |              |              |              |              |              |              |
|----------------------|--------------------------------|--------------|--------------|--------------|--------------|--------------|--------------|
| #### Bn-A04-p6966154 | A-genome specific (napus-rapa) | 0.9976076    | 0.8965958    | not scorable | not scorable | 0.9917355    | 0.7112095    |
| #### Bn-A04-p6966782 | A-genome specific (napus-rapa) | 1            | 0.856232     | not scorable | not scorable | 1            | 0.9227971    |
| #### Bn-A04-p6968899 | A-genome specific (napus-rapa) | 1            | 0.9118298    | not scorable | not scorable | 1            | 0.9175813    |
| #### Bn-A04-p6973605 | A-genome specific (napus-rapa) | 0.9928229    | 0.7844111    | not scorable | not scorable | 1            | 0.9398479    |
| #### Bn-A04-p6973712 | A-genome specific (napus-rapa) | 0.9976076    | 0.9009352    | not scorable | not scorable | 1            | 0.9468859    |
| #### Bn-A04-p6974206 | A-genome specific (napus-rapa) | 1            | 0.8796032    | not scorable | not scorable | 1            | 0.9142227    |
| #### Bn-A04-p6975646 | A-genome specific (napus-rapa) | 0.9952153    | 0.8429987    | not scorable | not scorable | 1            | 0.9175813    |
| #### Bn-A04-p6978108 | A-genome specific (napus-rapa) | 0.9976076    | 0.7583425    | not scorable | not scorable | 1            | 0.9360299    |
| #### Bn-A04-p6978163 | A-genome specific (napus-rapa) | 1            | 0.8218337    | not scorable | not scorable | 1            | 0.9178212    |
| #### Bn-A04-p6979129 | A-genome specific (napus-rapa) | 1            | 0.90432      | not scorable | not scorable | 1            | 0.9419204    |
| #### Bn-A04-p6980459 | A-genome specific (napus-rapa) | 0.9952153    | 0.8312419    | not scorable | not scorable | 1            | 0.9076689    |
| #### Bn-A04-p7003715 | A-genome specific (napus-rapa) | 1            | 0.483662     | not scorable | not scorable | 0.9917355    | 0.6387082    |
| #### Bn-A04-p7026999 | A-genome specific (rapa only)  | not scorable | not scorable | not scorable | not scorable | 1            | 0.8815182    |
| #### Bn-A04-p7027225 | A-genome specific (rapa only)  | not scorable | not scorable | not scorable | not scorable | 0.6280992    | 0.7904024    |
| #### Bn-A04-p7027307 | all not scorable               | not scorable | not scorable | not scorable | not scorable | not scorable | not scorable |
| #### Bn-A04-p7044446 | A-genome specific (napus-rapa) | 0.9808612    | 0.4780554    | not scorable | not scorable | 0.9834711    | 0.7182308    |
| #### Bn-A04-p7066181 | A-genome specific (napus-rapa) | 0.9736842    | 0.6650302    | not scorable | not scorable | 0.9834711    | 0.7178236    |
| #### Bn-A04-p7066595 | A-genome specific (napus-rapa) | 0.9736842    | 0.5823061    | not scorable | not scorable | 1            | 0.7966691    |
| #### Bn-A04-p7068079 | A-genome specific (napus-rapa) | 0.9832536    | 0.5404111    | not scorable | not scorable | 0.9834711    | 0.6997826    |
| #### Bn-A04-p7077586 | A-genome specific (napus-rapa) | 0.9976076    | 0.4038846    | not scorable | not scorable | 1            | 0.9125418    |
| #### Bn-A04-p7088336 | A-genome specific (napus-rapa) | 0.9784689    | 0.4733645    | not scorable | not scorable | 0.9834711    | 0.8500586    |
| #### Bn-A04-p7090997 | A-genome specific (napus-rapa) | 0.9760765    | 0.7503874    | not scorable | not scorable | 0.9917355    | 0.7580069    |
| #### Bn-A04-p7093491 | A-genome specific (napus-rapa) | 0.9976076    | 0.3170142    | not scorable | not scorable | 0.9834711    | 0.5131946    |
| #### Bn-A04-p7107858 | A-genome specific (napus-rapa) | 0.9832536    | 0.7716262    | not scorable | not scorable | 0.9834711    | 0.73132      |
| #### Bn-A04-p7109346 | A-genome specific (napus-rapa) | 0.9904306    | 0.7769073    | not scorable | not scorable | 0.9834711    | 0.6910355    |
| #### Bn-A04-p7109625 | A-genome specific (napus-rapa) | 0.9736842    | 0.7926259    | not scorable | not scorable | 0.9917355    | 0.7642915    |
| #### Bn-A04-p7112803 | A-genome specific (napus-rapa) | 0.9952153    | 0.7362097    | not scorable | not scorable | 0.9669421    | 0.703155     |
| #### Bn-A04-p7113045 | A-genome specific (napus-rapa) | 0.9712918    | 0.7333022    | not scorable | not scorable | 0.9504132    | 0.5492328    |
| #### Bn-A04-p7113156 | A-genome specific (napus-rapa) | 0.9928229    | 0.7662893    | not scorable | not scorable | 1            | 0.6766212    |
| #### Bn-A04-p7113281 | genome unspecific (all in)     | 0.9952153    | 0.8078924    |              | 0 0.6140522  | 1            | 0.6776279    |
| #### Bn-A04-p7113498 | A-genome specific (napus-rapa) | 0.9880383    | 0.7760915    | not scorable | not scorable | 0.9834711    | 0.8062617    |
| #### Bn-A04-p7113584 | genome unspecific (all in)     | 0.9928229    | 0.913235     |              | 0 0.7204491  | 0.9834711    | 0.6879769    |
| #### Bn-A04-p7133952 | A-genome specific (napus-rapa) | 0.9784689    | 0.7311476    | not scorable | not scorable | 0.9834711    | 0.7128029    |

|                      |                                |              |              |              |              |           |           |
|----------------------|--------------------------------|--------------|--------------|--------------|--------------|-----------|-----------|
| #### Bn-A04-p7134022 | A-genome specific (napus-rapa) | 0.9928229    | 0.7762072    | not scorable | not scorable | 0.9917355 | 0.6683936 |
| #### Bn-A04-p7139140 | A-genome specific (napus-rapa) | 0.9904306    | 0.7271534    | not scorable | not scorable | 0.9834711 | 0.7426725 |
| #### Bn-A04-p7141171 | A-genome specific (napus-rapa) | 0.9736842    | 0.6285266    | not scorable | not scorable | 0.9917355 | 0.7130669 |
| #### Bn-A04-p7142597 | A-genome specific (napus-rapa) | 0.9928229    | 0.77657      | not scorable | not scorable | 0.9834711 | 0.7744859 |
| #### Bn-A04-p7143891 | A-genome specific (napus-rapa) | 0.9928229    | 0.7668345    | not scorable | not scorable | 0.9834711 | 0.8073388 |
| #### Bn-A04-p7149396 | A-genome specific (napus-rapa) | 0.9593301    | 0.5597114    | not scorable | not scorable | 0.9834711 | 0.7088029 |
| #### Bn-A04-p7150064 | A-genome specific (napus-rapa) | 0.9808612    | 0.7186714    | not scorable | not scorable | 0.9917355 | 0.7096214 |
| #### Bn-A04-p7150104 | A-genome specific (napus-rapa) | 0.9856459    | 0.7084139    | not scorable | not scorable | 0.9917355 | 0.697928  |
| #### Bn-A04-p7150329 | A-genome specific (napus-rapa) | 0.9641148    | 0.6301583    | not scorable | not scorable | 0.9752066 | 0.6678376 |
| #### Bn-A04-p7157859 | A-genome specific (napus-rapa) | 0.9856459    | 0.7396079    | not scorable | not scorable | 0.9834711 | 0.6882576 |
| #### Bn-A04-p7161326 | A-genome specific (napus-rapa) | 1            | 0.7861754    | not scorable | not scorable | 1         | 0.8002234 |
| #### Bn-A04-p7162690 | A-genome specific (napus-rapa) | 0.9880383    | 0.7415367    | not scorable | not scorable | 1         | 0.8204935 |
| #### Bn-A04-p716889  | A-genome specific (napus-rapa) | 0.9976076    | 0.4554918    | not scorable | not scorable | 0.9834711 | 0.8365848 |
| #### Bn-A04-p7212436 | A-genome specific (napus-rapa) | 0.9952153    | 0.3994882    | not scorable | not scorable | 0.6694215 | 0.6970574 |
| #### Bn-A04-p7233978 | A-genome specific (napus-rapa) | 0.9952153    | 0.8007117    | not scorable | not scorable | 0.9917355 | 0.8081447 |
| #### Bn-A04-p7251871 | A-genome specific (napus-rapa) | 0.9976076    | 0.8749103    | not scorable | not scorable | 0.9834711 | 0.7945439 |
| #### Bn-A04-p726356  | A-genome specific (napus-rapa) | 0.9952153    | 0.3590641    | not scorable | not scorable | 1         | 0.9175813 |
| #### Bn-A04-p7275318 | genome unspecific (all in)     | 1            | 0.615882     | 0.9379845    | 0.2732761    | 0.9917355 | 0.6927312 |
| #### Bn-A04-p7297317 | A-genome specific (napus-rapa) | 1            | 0.6054923    | not scorable | not scorable | 1         | 0.7485933 |
| #### Bn-A04-p7322000 | A-genome specific (napus-rapa) | 0.9976076    | 0.3754301    | not scorable | not scorable | 0.9917355 | 0.6986197 |
| #### Bn-A04-p7322497 | A-genome specific (napus-rapa) | 1            | 0.5437943    | not scorable | not scorable | 1         | 0.7594932 |
| #### Bn-A04-p7323275 | A-genome specific (napus-rapa) | 0.9976076    | 0.4262182    | not scorable | not scorable | 1         | 0.8431817 |
| #### Bn-A04-p7349115 | A-genome specific (napus-rapa) | 0.9019139    | 0.7640037    | not scorable | not scorable | 1         | 0.7499316 |
| #### Bn-A04-p7349794 | A-genome specific (napus-rapa) | 0.9258373    | 0.7609718    | not scorable | not scorable | 1         | 0.8468006 |
| #### Bn-A04-p7350870 | A-genome specific (napus-rapa) | 0.9282297    | 0.8474121    | not scorable | not scorable | 0.9917355 | 0.7377093 |
| #### Bn-A04-p7373248 | A-genome specific (napus-rapa) | 0.9808612    | 0.5564902    | not scorable | not scorable | 1         | 0.6803967 |
| #### Bn-A04-p7389149 | A-genome specific (napus-rapa) | 1            | 0.5958052    | not scorable | not scorable | 1         | 0.7106146 |
| #### Bn-A04-p7407657 | A-genome specific (napus-rapa) | 0.9880383    | 0.6392852    | not scorable | not scorable | 1         | 0.8143092 |
| #### Bn-A04-p7410699 | A-genome specific (napus-rapa) | 0.9976076    | 0.9321206    | not scorable | not scorable | 0.9834711 | 0.7415906 |
| #### Bn-A04-p741528  | A-genome specific (napus-rapa) | 0.9832536    | 0.5304719    | not scorable | not scorable | 0.9917355 | 0.770471  |
| #### Bn-A04-p7422354 | A-genome specific (napus-rapa) | 0.9832536    | 0.8444116    | not scorable | not scorable | 0.9834711 | 0.7772185 |
| #### Bn-A04-p7425311 | A-genome specific (rapa only)  | not scorable | not scorable | not scorable | not scorable | 0.9669421 | 0.8804176 |
| #### Bn-A04-p7425359 | A-genome specific (napus-rapa) | 0.9832536    | 0.825327     | not scorable | not scorable | 0.9834711 | 0.7959595 |

|                      |                                |              |              |              |              |              |              |
|----------------------|--------------------------------|--------------|--------------|--------------|--------------|--------------|--------------|
| #### Bn-A04-p7425697 | A-genome specific (napus-rapa) | 0.9760765    | 0.8060524    | not scorable | not scorable | 0.9917355    | 0.8162266    |
| #### Bn-A04-p7426527 | napus specific                 | 0.9976076    | 0.8104141    | not scorable | not scorable | not scorable | not scorable |
| #### Bn-A04-p7431245 | A-genome specific (napus-rapa) | 0.9952153    | 0.9080831    | not scorable | not scorable | 0.9834711    | 0.7900194    |
| #### Bn-A04-p7431816 | A-genome specific (napus-rapa) | 0.9928229    | 0.8423564    | not scorable | not scorable | 0.9834711    | 0.7790921    |
| #### Bn-A04-p7441018 | A-genome specific (napus-rapa) | 0.9952153    | 0.7113469    | not scorable | not scorable | 1            | 0.7389982    |
| #### Bn-A04-p7441659 | A-genome specific (napus-rapa) | 0.9904306    | 0.7866982    | not scorable | not scorable | 0.9917355    | 0.5471747    |
| #### Bn-A04-p7442353 | A-genome specific (napus-rapa) | 0.9952153    | 0.7438589    | not scorable | not scorable | 0.9917355    | 0.673363     |
| #### Bn-A04-p7442886 | A-genome specific (napus-rapa) | 1            | 0.8512269    | not scorable | not scorable | 0.9917355    | 0.756297     |
| #### Bn-A04-p7443395 | A-genome specific (napus-rapa) | 0.9928229    | 0.8648512    | not scorable | not scorable | 0.9669421    | 0.7866274    |
| #### Bn-A04-p7446849 | napus specific                 | 1            | 0.4349402    | not scorable | not scorable | not scorable | not scorable |
| #### Bn-A04-p745024  | A-genome specific (napus-rapa) | 0.9497608    | 0.2553417    | not scorable | not scorable | 0.9917355    | 0.6930565    |
| #### Bn-A04-p7450678 | genome unspecific (all in)     | 0.8923445    | 0.6293741    | 0.9534883    | 0.6267408    | 0.9834711    | 0.6918287    |
| #### Bn-A04-p7471870 | A-genome specific (napus-rapa) | 0.9952153    | 0.8356263    | not scorable | not scorable | 1            | 0.7661656    |
| #### Bn-A04-p7474589 | A-genome specific (napus-rapa) | 0.9760765    | 0.4599922    | not scorable | not scorable | 1            | 0.7508737    |
| #### Bn-A04-p7482491 | A-genome specific (napus-rapa) | 0.9784689    | 0.7952471    | not scorable | not scorable | 0.6198347    | 0.8367791    |
| #### Bn-A04-p7488675 | A-genome specific (napus-rapa) | 0.9952153    | 0.8127908    | not scorable | not scorable | 0.9917355    | 0.769349     |
| #### Bn-A04-p7490390 | A-genome specific (napus-rapa) | 1            | 0.8391998    | not scorable | not scorable | 0.5123967    | 0.8836357    |
| #### Bn-A04-p7493966 | A-genome specific (napus-rapa) | 1            | 0.8408002    | not scorable | not scorable | 1            | 0.7511113    |
| #### Bn-A04-p7500685 | napus specific                 | 0.9019139    | 0.8028878    | not scorable | not scorable | not scorable | not scorable |
| #### Bn-A04-p7503042 | A-genome specific (napus-rapa) | 1            | 0.8872287    | not scorable | not scorable | 0.9917355    | 0.7947276    |
| #### Bn-A04-p7519541 | A-genome specific (napus-rapa) | 0.9617225    | 0.6296679    | not scorable | not scorable | 0.9338843    | 0.7685955    |
| #### Bn-A04-p7520330 | A-genome specific (napus-rapa) | 1            | 0.7809185    | not scorable | not scorable | 0.9834711    | 0.6799062    |
| #### Bn-A04-p7540834 | napus specific                 | 0.9688995    | 0.5406189    | not scorable | not scorable | not scorable | not scorable |
| #### Bn-A04-p7541325 | A-genome specific (napus-rapa) | 0.9712918    | 0.772532     | not scorable | not scorable | 0.6198347    | 0.7827822    |
| #### Bn-A04-p7541762 | A-genome specific (napus-rapa) | 0.9952153    | 0.8833086    | not scorable | not scorable | 0.6446281    | 0.7848005    |
| #### Bn-A04-p7542594 | A-genome specific (napus-rapa) | 0.9928229    | 0.8664813    | not scorable | not scorable | 0.677686     | 0.7717489    |
| #### Bn-A04-p7556327 | all not scorable               | not scorable | not scorable | not scorable | not scorable | not scorable | not scorable |
| #### Bn-A04-p757668  | A-genome specific (napus-rapa) | 0.9952153    | 0.8052458    | not scorable | not scorable | 0.9586777    | 0.7402171    |
| #### Bn-A04-p7582986 | A-genome specific (napus-rapa) | 1            | 0.8571876    | not scorable | not scorable | 0.9586777    | 0.7517944    |
| #### Bn-A04-p7584788 | napus specific                 | 0.2368421    | 0.8033082    | not scorable | not scorable | not scorable | not scorable |
| #### Bn-A04-p7586476 | A-genome specific (rapa only)  | not scorable | not scorable | not scorable | not scorable | 0.9834711    | 0.6431442    |
| #### Bn-A04-p7588820 | all not scorable               | not scorable | not scorable | not scorable | not scorable | not scorable | not scorable |
| #### Bn-A04-p7596556 | A-genome specific (napus-rapa) | 0.9784689    | 0.8916296    | not scorable | not scorable | 1            | 0.8252487    |

|                      |                                |              |              |              |              |              |              |
|----------------------|--------------------------------|--------------|--------------|--------------|--------------|--------------|--------------|
| #### Bn-A04-p7598934 | A-genome specific (napus-rapa) | 0.9904306    | 0.8089281    | not scorable | not scorable | 0.9917355    | 0.7541262    |
| #### Bn-A04-p7601638 | A-genome specific (napus-rapa) | 0.9928229    | 0.7956967    | not scorable | not scorable | 0.9834711    | 0.7693331    |
| #### Bn-A04-p7601731 | A-genome specific (napus-rapa) | 0.9928229    | 0.8182912    | not scorable | not scorable | 0.9917355    | 0.8088477    |
| #### Bn-A04-p761383  | A-genome specific (napus-rapa) | 0.9928229    | 0.5236396    | not scorable | not scorable | 0.9586777    | 0.756209     |
| #### Bn-A04-p7616574 | A-genome specific (napus-rapa) | 0.9808612    | 0.8833086    | not scorable | not scorable | 0.9834711    | 0.7585436    |
| #### Bn-A04-p7617794 | A-genome specific (napus-rapa) | 0.9808612    | 0.8166683    | not scorable | not scorable | 1            | 0.6721445    |
| #### Bn-A04-p7625503 | A-genome specific (napus-rapa) | 0.9952153    | 0.7114244    | not scorable | not scorable | 1            | 0.6936299    |
| #### Bn-A04-p7629926 | A-genome specific (rapa only)  | not scorable | not scorable | not scorable | not scorable | 0.7024794    | 0.9029506    |
| #### Bn-A04-p7635112 | genome unspecific (all in)     | 0.9617225    | 0.3983181    |              | 1 0.7484283  | 0.9669421    | 0.6149928    |
| #### Bn-A04-p7643584 | all not scorable               | not scorable | not scorable | not scorable | not scorable | not scorable | not scorable |
| #### Bn-A04-p7656041 | A-genome specific (napus-rapa) | 1            | 0.7630587    | not scorable | not scorable | 1            | 0.6186112    |
| #### Bn-A04-p7666812 | A-genome specific (napus-rapa) | 0.9904306    | 0.8209378    | not scorable | not scorable | 0.9917355    | 0.7360542    |
| #### Bn-A04-p7666981 | A-genome specific (napus-rapa) | 0.9928229    | 0.8113848    | not scorable | not scorable | 0.9917355    | 0.7937239    |
| #### Bn-A04-p7670170 | A-genome specific (napus-rapa) | 0.9736842    | 0.9388269    | not scorable | not scorable | 0.9834711    | 0.7650318    |
| #### Bn-A04-p7670852 | A-genome specific (napus-rapa) | 1            | 0.8646756    | not scorable | not scorable | 0.9917355    | 0.6895545    |
| #### Bn-A04-p7671731 | A-genome specific (napus-rapa) | 0.9856459    | 0.816581     | not scorable | not scorable | 0.9917355    | 0.7079362    |
| #### Bn-A04-p7672240 | A-genome specific (napus-rapa) | 0.9952153    | 0.8096704    | not scorable | not scorable | 1            | 0.7383842    |
| #### Bn-A04-p7680446 | A-genome specific (napus-rapa) | 0.9976076    | 0.798659     | not scorable | not scorable | 0.9752066    | 0.8343484    |
| #### Bn-A04-p7681107 | A-genome specific (napus-rapa) | 0.9832536    | 0.8143232    | not scorable | not scorable | 0.9917355    | 0.7496772    |
| #### Bn-A04-p7681563 | A-genome specific (napus-rapa) | 1            | 0.6009593    | not scorable | not scorable | 1            | 0.6637822    |
| #### Bn-A04-p7681694 | A-genome specific (napus-rapa) | 0.9880383    | 0.8084921    | not scorable | not scorable | 1            | 0.8562489    |
| #### Bn-A04-p7683677 | A-genome specific (napus-rapa) | 0.9880383    | 0.8064625    | not scorable | not scorable | 0.9917355    | 0.7640833    |
| #### Bn-A04-p7684111 | A-genome specific (napus-rapa) | 1            | 0.7867724    | not scorable | not scorable | 1            | 0.8476073    |
| #### Bn-A04-p7685115 | A-genome specific (napus-rapa) | 0.9952153    | 0.8163102    | not scorable | not scorable | 1            | 0.7567353    |
| #### Bn-A04-p7694288 | A-genome specific (napus-rapa) | 0.9665072    | 0.3307825    | not scorable | not scorable | 1            | 0.7779458    |
| #### Bn-A04-p7760488 | A-genome specific (napus-rapa) | 0.9832536    | 0.7927777    | not scorable | not scorable | 0.9917355    | 0.7451807    |
| #### Bn-A04-p7760541 | A-genome specific (napus-rapa) | 0.9856459    | 0.7810854    | not scorable | not scorable | 0.9752066    | 0.7268405    |
| #### Bn-A04-p7769990 | A-genome specific (napus-rapa) | 0.9904306    | 0.4741548    | not scorable | not scorable | 0.9834711    | 0.764693     |
| #### Bn-A04-p7770904 | A-genome specific (napus-rapa) | 0.9952153    | 0.8132417    | not scorable | not scorable | 0.9834711    | 0.734351     |
| #### Bn-A04-p7776319 | A-genome specific (napus-rapa) | 0.9856459    | 0.3826382    | not scorable | not scorable | 0.9752066    | 0.856419     |
| #### Bn-A04-p7790919 | A-genome specific (rapa only)  | not scorable | not scorable | not scorable | not scorable | 0.9586777    | 0.9175813    |
| #### Bn-A04-p7791214 | A-genome specific (napus-rapa) | 0.9904306    | 0.4645264    | not scorable | not scorable | 0.9834711    | 0.7904528    |
| #### Bn-A04-p7797300 | A-genome specific (napus-rapa) | 0.9832536    | 0.5335478    | not scorable | not scorable | 0.9669421    | 0.8519897    |

|                      |                                |              |              |              |              |              |              |
|----------------------|--------------------------------|--------------|--------------|--------------|--------------|--------------|--------------|
| #### Bn-A04-p7808804 | A-genome specific (napus-rapa) | 0.9545454    | 0.8310137    | not scorable | not scorable | 0.9917355    | 0.690971     |
| #### Bn-A04-p7813672 | A-genome specific (napus-rapa) | 0.9904306    | 0.827877     | not scorable | not scorable | 0.9917355    | 0.8060883    |
| #### Bn-A04-p7818700 | A-genome specific (rapa only)  | not scorable | not scorable | not scorable | not scorable | 0.9917355    | 0.8526634    |
| #### Bn-A04-p7819391 | A-genome specific (rapa only)  | not scorable | not scorable | not scorable | not scorable | 0.9669421    | 0.8297783    |
| #### Bn-A04-p7819525 | A-genome specific (napus-rapa) | 0.9952153    | 0.8313876    | not scorable | not scorable | 0.9917355    | 0.7712851    |
| #### Bn-A04-p7822519 | A-genome specific (napus-rapa) | 0.9976076    | 0.8454219    | not scorable | not scorable | 0.9917355    | 0.7753746    |
| #### Bn-A04-p7822585 | A-genome specific (napus-rapa) | 0.9928229    | 0.8603637    | not scorable | not scorable | 1            | 0.8282386    |
| #### Bn-A04-p783339  | A-genome specific (napus-rapa) | 1            | 0.5803968    | not scorable | not scorable | 0.9752066    | 0.6993493    |
| #### Bn-A04-p784708  | A-genome specific (napus-rapa) | 1            | 0.8884304    | not scorable | not scorable | 0.9834711    | 0.8181403    |
| #### Bn-A04-p784894  | all not scorable               | not scorable | not scorable | not scorable | not scorable | not scorable | not scorable |
| #### Bn-A04-p785628  | A-genome specific (napus-rapa) | 0.9976076    | 0.6728179    | not scorable | not scorable | 0.9834711    | 0.7597919    |
| #### Bn-A04-p7857679 | A-genome specific (napus-rapa) | 0.9760765    | 0.4480949    | not scorable | not scorable | 0.9834711    | 0.7050518    |
| #### Bn-A04-p7857722 | genome unspecific (all in)     | 0.9880383    | 0.5405815    | 0.9767442    | 0.69373      | 0.6363636    | 0.8505408    |
| #### Bn-A04-p7858224 | A-genome specific (napus-rapa) | 1            | 0.5880607    | not scorable | not scorable | 0.5950413    | 0.7930255    |
| #### Bn-A04-p786588  | A-genome specific (napus-rapa) | 0.9114832    | 0.7920969    | not scorable | not scorable | 1            | 0.5647836    |
| #### Bn-A04-p7870001 | A-genome specific (napus-rapa) | 0.9856459    | 0.4580181    | not scorable | not scorable | 0.9917355    | 0.7963138    |
| #### Bn-A04-p7883120 | A-genome specific (napus-rapa) | 0.9760765    | 0.3672342    | not scorable | not scorable | 0.9917355    | 0.7438364    |
| #### Bn-A04-p7886817 | A-genome specific (napus-rapa) | 0.9856459    | 0.7639872    | not scorable | not scorable | 1            | 0.8101128    |
| #### Bn-A04-p7887561 | A-genome specific (napus-rapa) | 0.9856459    | 0.8009068    | not scorable | not scorable | 1            | 0.7210601    |
| #### Bn-A04-p7888986 | A-genome specific (napus-rapa) | 0.9904306    | 0.7392183    | not scorable | not scorable | 1            | 0.767114     |
| #### Bn-A04-p7889763 | A-genome specific (napus-rapa) | 0.9784689    | 0.4434755    | not scorable | not scorable | 1            | 0.8539606    |
| #### Bn-A04-p7897465 | A-genome specific (napus-rapa) | 0.9808612    | 0.8277351    | not scorable | not scorable | 1            | 0.7973625    |
| #### Bn-A04-p7914869 | A-genome specific (napus-rapa) | 0.9976076    | 0.5364723    | not scorable | not scorable | 1            | 0.7501513    |
| #### Bn-A04-p792399  | A-genome specific (napus-rapa) | 0.9976076    | 0.8968745    | not scorable | not scorable | 1            | 0.8145378    |
| #### Bn-A04-p7930087 | A-genome specific (napus-rapa) | 0.9928229    | 0.7955263    | not scorable | not scorable | 0.9917355    | 0.7151299    |
| #### Bn-A04-p7931854 | A-genome specific (napus-rapa) | 0.9904306    | 0.8425085    | not scorable | not scorable | 0.9752066    | 0.7417024    |
| #### Bn-A04-p7933628 | A-genome specific (napus-rapa) | 0.9976076    | 0.4957593    | not scorable | not scorable | 0.9917355    | 0.7868304    |
| #### Bn-A04-p7955059 | A-genome specific (napus-rapa) | 0.9593301    | 0.7531537    | not scorable | not scorable | 0.5785124    | 0.789211     |
| #### Bn-A04-p7965197 | A-genome specific (napus-rapa) | 0.9928229    | 0.6470641    | not scorable | not scorable | 0.9917355    | 0.8068677    |
| #### Bn-A04-p7984004 | A-genome specific (napus-rapa) | 0.9856459    | 0.5271731    | not scorable | not scorable | 0.9917355    | 0.7830393    |
| #### Bn-A04-p7990037 | A-genome specific (rapa only)  | not scorable | not scorable | not scorable | not scorable | 0.9338843    | 0.929083     |
| #### Bn-A04-p7990273 | A-genome specific (napus-rapa) | 0.9976076    | 0.8231098    | not scorable | not scorable | 0.9834711    | 0.6911854    |
| #### Bn-A04-p8004085 | A-genome specific (napus-rapa) | 0.9976076    | 0.5162324    | not scorable | not scorable | 1            | 0.7170125    |

|                      |                                |              |              |              |              |              |              |
|----------------------|--------------------------------|--------------|--------------|--------------|--------------|--------------|--------------|
| #### Bn-A04-p8009543 | A-genome specific (napus-rapa) | 0.9976076    | 0.8133294    | not scorable | not scorable | 0.9834711    | 0.81576      |
| #### Bn-A04-p8017096 | A-genome specific (napus-rapa) | 0.9712918    | 0.9213765    | not scorable | not scorable | 0.6363636    | 0.8572638    |
| #### Bn-A04-p803315  | A-genome specific (napus-rapa) | 1            | 0.7587425    | not scorable | not scorable | 0.9752066    | 0.6693327    |
| #### Bn-A04-p808824  | A-genome specific (napus-rapa) | 0.9736842    | 0.7504764    | not scorable | not scorable | 0.9752066    | 0.519604     |
| #### Bn-A04-p808834  | A-genome specific (napus-rapa) | 0.9832536    | 0.8006344    | not scorable | not scorable | 0.9917355    | 0.7503625    |
| #### Bn-A04-p809984  | A-genome specific (napus-rapa) | 0.9880383    | 0.8694727    | not scorable | not scorable | 0.9834711    | 0.7809902    |
| #### Bn-A04-p810039  | A-genome specific (napus-rapa) | 0.9354067    | 0.8546536    | not scorable | not scorable | 0.9917355    | 0.675675     |
| #### Bn-A04-p810166  | A-genome specific (napus-rapa) | 0.9832536    | 0.8693039    | not scorable | not scorable | 0.9917355    | 0.8493357    |
| #### Bn-A04-p810935  | A-genome specific (napus-rapa) | 0.9976076    | 0.8362382    | not scorable | not scorable | 1            | 0.8187394    |
| #### Bn-A04-p8114074 | A-genome specific (napus-rapa) | 0.9808612    | 0.2343308    | not scorable | not scorable | 0.6528926    | 0.7713266    |
| #### Bn-A04-p8114079 | A-genome specific (napus-rapa) | 0.9401914    | 0.4925568    | not scorable | not scorable | 0.6033058    | 0.8028675    |
| #### Bn-A04-p8116942 | A-genome specific (napus-rapa) | 0.9904306    | 0.6797017    | not scorable | not scorable | 0.9917355    | 0.7038804    |
| #### Bn-A04-p8117244 | A-genome specific (napus-rapa) | 0.9617225    | 0.7128887    | not scorable | not scorable | 0.9834711    | 0.8165557    |
| #### Bn-A04-p813173  | A-genome specific (napus-rapa) | 0.9976076    | 0.7707787    | not scorable | not scorable | 1            | 0.6409599    |
| #### Bn-A04-p814033  | A-genome specific (napus-rapa) | 1            | 0.8171469    | not scorable | not scorable | 0.6446281    | 0.7564514    |
| #### Bn-A04-p8178053 | genome unspecific (all in)     | 0.9976076    | 0.574803     | 1            | 0.8519285    | 1            | 0.8996406    |
| #### Bn-A04-p8178997 | A-genome specific (napus-rapa) | 1            | 0.5061432    | not scorable | not scorable | 1            | 0.8107701    |
| #### Bn-A04-p8186888 | A-genome specific (napus-rapa) | 0.9784689    | 0.7789908    | not scorable | not scorable | 0.9752066    | 0.7129104    |
| #### Bn-A04-p8208799 | A-genome specific (napus-rapa) | 0.9952153    | 0.8867826    | not scorable | not scorable | 1            | 0.8063325    |
| #### Bn-A04-p8285381 | A-genome specific (rapa only)  | not scorable | not scorable | not scorable | not scorable | 0.9256198    | 0.8678751    |
| #### Bn-A04-p8287776 | A-genome specific (napus-rapa) | 0.9952153    | 0.8853577    | not scorable | not scorable | 0.9917355    | 0.8115923    |
| #### Bn-A04-p8287906 | A-genome specific (napus-rapa) | 0.9928229    | 0.8595376    | not scorable | not scorable | 1            | 0.6956896    |
| #### Bn-A04-p8292499 | A-genome specific (napus-rapa) | 0.9688995    | 0.7806461    | not scorable | not scorable | 0.9669421    | 0.7773674    |
| #### Bn-A04-p8299391 | A-genome specific (napus-rapa) | 0.9880383    | 0.3366669    | not scorable | not scorable | 0.9917355    | 0.7313297    |
| #### Bn-A04-p8310242 | A-genome specific (napus-rapa) | 0.9904306    | 0.4868661    | not scorable | not scorable | 1            | 0.7559428    |
| #### Bn-A04-p8310328 | A-genome specific (napus-rapa) | 0.9976076    | 0.7898337    | not scorable | not scorable | 0.9669421    | 0.6809998    |
| #### Bn-A04-p831099  | napus specific                 | 1            | 0.4989774    | not scorable | not scorable | not scorable | not scorable |
| #### Bn-A04-p8312347 | A-genome specific (napus-rapa) | 0.9832536    | 0.5547321    | not scorable | not scorable | 0.9917355    | 0.7683265    |
| #### Bn-A04-p8328216 | A-genome specific (napus-rapa) | 0.9928229    | 0.5286749    | not scorable | not scorable | 0.9834711    | 0.7913663    |
| #### Bn-A04-p8329549 | A-genome specific (napus-rapa) | 0.9856459    | 0.5460216    | not scorable | not scorable | 0.9669421    | 0.69318      |
| #### Bn-A04-p8344866 | A-genome specific (napus-rapa) | 0.9904306    | 0.8069627    | not scorable | not scorable | 0.9752066    | 0.680862     |
| #### Bn-A04-p8345666 | A-genome specific (napus-rapa) | 0.9976076    | 0.905706     | not scorable | not scorable | 0.9917355    | 0.7739204    |
| #### Bn-A04-p8348145 | A-genome specific (napus-rapa) | 1            | 0.8899168    | not scorable | not scorable | 0.9834711    | 0.7438365    |

|                      |                                |              |              |              |              |              |              |
|----------------------|--------------------------------|--------------|--------------|--------------|--------------|--------------|--------------|
| #### Bn-A04-p8348750 | A-genome specific (napus-rapa) | 0.9832536    | 0.2045122    | not scorable | not scorable | 1            | 0.7878866    |
| #### Bn-A04-p8348806 | A-genome specific (napus-rapa) | 1            | 0.536495     | not scorable | not scorable | 0.9834711    | 0.6691662    |
| #### Bn-A04-p8403728 | napus specific                 | 0.9808612    | 0.5115303    | not scorable | not scorable | not scorable | not scorable |
| #### Bn-A04-p8407945 | A-genome specific (napus-rapa) | 0.9760765    | 0.3598927    | not scorable | not scorable | 0.9834711    | 0.7133861    |
| #### Bn-A04-p8441932 | A-genome specific (napus-rapa) | 0.9760765    | 0.6885573    | not scorable | not scorable | 1            | 0.7590942    |
| #### Bn-A04-p8473768 | A-genome specific (napus-rapa) | 0.9808612    | 0.4162657    | not scorable | not scorable | 1            | 0.7688319    |
| #### Bn-A04-p8481222 | A-genome specific (napus-rapa) | 0.9784689    | 0.8817683    | not scorable | not scorable | 0.9834711    | 0.7993042    |
| #### Bn-A04-p8555881 | all not scorable               | not scorable | not scorable | not scorable | not scorable | not scorable | not scorable |
| #### Bn-A04-p8559580 | A-genome specific (napus-rapa) | 0.9928229    | 0.3533401    | not scorable | not scorable | 0.9586777    | 0.6995912    |
| #### Bn-A04-p8564072 | A-genome specific (napus-rapa) | 0.9976076    | 0.5773626    | not scorable | not scorable | 0.9917355    | 0.7942156    |
| #### Bn-A04-p8575908 | A-genome specific (napus-rapa) | 1            | 0.7663167    | not scorable | not scorable | 0.9752066    | 0.696036     |
| #### Bn-A04-p8575962 | A-genome specific (napus-rapa) | 1            | 0.7807058    | not scorable | not scorable | 0.9834711    | 0.6868559    |
| #### Bn-A04-p8587019 | A-genome specific (napus-rapa) | 0.9641148    | 0.831047     | not scorable | not scorable | 0.9917355    | 0.7955283    |
| #### Bn-A04-p8595035 | A-genome specific (napus-rapa) | 1            | 0.2690754    | not scorable | not scorable | 0.9917355    | 0.6896948    |
| #### Bn-A04-p860212  | A-genome specific (napus-rapa) | 0.9976076    | 0.555096     | not scorable | not scorable | 0.9917355    | 0.6489385    |
| #### Bn-A04-p8609799 | A-genome specific (napus-rapa) | 0.9784689    | 0.5611215    | not scorable | not scorable | 1            | 0.7035398    |
| #### Bn-A04-p8612311 | A-genome specific (napus-rapa) | 0.2559808    | 0.9407187    | not scorable | not scorable | 0.9586777    | 0.7994237    |
| #### Bn-A04-p8615093 | A-genome specific (rapa only)  | not scorable | not scorable | not scorable | not scorable | 0.892562     | 0.9095823    |
| #### Bn-A04-p865058  | A-genome specific (napus-rapa) | 1            | 0.8923261    | not scorable | not scorable | 0.9669421    | 0.7993027    |
| #### Bn-A04-p8686116 | A-genome specific (napus-rapa) | 1            | 0.9146931    | not scorable | not scorable | 0.9669421    | 0.7992495    |
| #### Bn-A04-p8686934 | genome unspecific (all in)     | 0.9904306    | 0.395905     | 0.9922481    | 0.8177934    | 0.9834711    | 0.8256018    |
| #### Bn-A04-p869491  | A-genome specific (napus-rapa) | 1            | 0.7871816    | not scorable | not scorable | 0.9834711    | 0.7781474    |
| #### Bn-A04-p8700128 | A-genome specific (napus-rapa) | 0.9952153    | 0.7936482    | not scorable | not scorable | 0.9504132    | 0.8224537    |
| #### Bn-A04-p870365  | A-genome specific (napus-rapa) | 0.9976076    | 0.7287188    | not scorable | not scorable | 0.9917355    | 0.6644652    |
| #### Bn-A04-p8705840 | A-genome specific (napus-rapa) | 0.9976076    | 0.7673804    | not scorable | not scorable | 0.9917355    | 0.7613204    |
| #### Bn-A04-p8706392 | A-genome specific (napus-rapa) | 0.9880383    | 0.7701946    | not scorable | not scorable | 0.9917355    | 0.663013     |
| #### Bn-A04-p8709391 | A-genome specific (napus-rapa) | 0.9880383    | 0.7593687    | not scorable | not scorable | 1            | 0.7322744    |
| #### Bn-A04-p8713733 | A-genome specific (napus-rapa) | 0.9880383    | 0.7646733    | not scorable | not scorable | 1            | 0.6876985    |
| #### Bn-A04-p8718115 | A-genome specific (napus-rapa) | 0.9760765    | 0.3915617    | not scorable | not scorable | 1            | 0.6986263    |
| #### Bn-A04-p8729788 | A-genome specific (napus-rapa) | 0.9641148    | 0.5679501    | not scorable | not scorable | 0.9834711    | 0.7908595    |
| #### Bn-A04-p874008  | A-genome specific (napus-rapa) | 0.9952153    | 0.6224654    | not scorable | not scorable | 0.9834711    | 0.6537809    |
| #### Bn-A04-p8761898 | A-genome specific (napus-rapa) | 0.9473684    | 0.3352092    | not scorable | not scorable | 0.9917355    | 0.7340437    |
| #### Bn-A04-p8773241 | A-genome specific (napus-rapa) | 0.9928229    | 0.8324577    | not scorable | not scorable | 0.9917355    | 0.74115      |

|                      |                                |              |              |              |              |           |           |
|----------------------|--------------------------------|--------------|--------------|--------------|--------------|-----------|-----------|
| #### Bn-A04-p8773286 | A-genome specific (napus-rapa) | 0.9904306    | 0.7273647    | not scorable | not scorable | 0.9834711 | 0.7478666 |
| #### Bn-A04-p8782104 | A-genome specific (napus-rapa) | 0.9712918    | 0.4582036    | not scorable | not scorable | 0.9917355 | 0.8176341 |
| #### Bn-A04-p8786765 | A-genome specific (napus-rapa) | 1            | 0.8400073    | not scorable | not scorable | 0.9834711 | 0.9195408 |
| #### Bn-A04-p8788445 | A-genome specific (napus-rapa) | 0.9760765    | 0.3741866    | not scorable | not scorable | 0.9834711 | 0.8543459 |
| #### Bn-A04-p8790105 | A-genome specific (napus-rapa) | 0.9952153    | 0.7656885    | not scorable | not scorable | 1         | 0.6902189 |
| #### Bn-A04-p8790433 | A-genome specific (napus-rapa) | 0.9808612    | 0.5290859    | not scorable | not scorable | 1         | 0.8198267 |
| #### Bn-A04-p8796688 | A-genome specific (napus-rapa) | 0.9736842    | 0.720816     | not scorable | not scorable | 1         | 0.6164368 |
| #### Bn-A04-p8796706 | A-genome specific (napus-rapa) | 0.9904306    | 0.7732147    | not scorable | not scorable | 1         | 0.7306563 |
| #### Bn-A04-p8803630 | A-genome specific (napus-rapa) | 0.9976076    | 0.778626     | not scorable | not scorable | 0.9917355 | 0.7335028 |
| #### Bn-A04-p8807708 | A-genome specific (napus-rapa) | 0.9784689    | 0.7814562    | not scorable | not scorable | 1         | 0.7346032 |
| #### Bn-A04-p8811740 | A-genome specific (napus-rapa) | 0.9712918    | 0.3259647    | not scorable | not scorable | 1         | 0.8570947 |
| #### Bn-A04-p8813038 | A-genome specific (napus-rapa) | 0.9928229    | 0.7203408    | not scorable | not scorable | 0.9752066 | 0.6865944 |
| #### Bn-A04-p8817223 | A-genome specific (rapa only)  | not scorable | not scorable | not scorable | not scorable | 0.9834711 | 0.9117482 |
| #### Bn-A04-p8817780 | A-genome specific (napus-rapa) | 0.9880383    | 0.4556274    | not scorable | not scorable | 1         | 0.83672   |
| #### Bn-A04-p8824695 | A-genome specific (napus-rapa) | 0.9952153    | 0.8014634    | not scorable | not scorable | 0.9917355 | 0.7514749 |
| #### Bn-A04-p8828395 | A-genome specific (napus-rapa) | 0.9832536    | 0.2826765    | not scorable | not scorable | 1         | 0.7246916 |
| #### Bn-A04-p8828462 | A-genome specific (napus-rapa) | 0.9688995    | 0.6805991    | not scorable | not scorable | 1         | 0.7441957 |
| #### Bn-A04-p8830454 | A-genome specific (napus-rapa) | 1            | 0.8825166    | not scorable | not scorable | 0.9917355 | 0.7235581 |
| #### Bn-A04-p8834077 | A-genome specific (napus-rapa) | 1            | 0.8000051    | not scorable | not scorable | 0.9917355 | 0.793542  |
| #### Bn-A04-p8834259 | A-genome specific (napus-rapa) | 0.9784689    | 0.7352648    | not scorable | not scorable | 0.9917355 | 0.758696  |
| #### Bn-A04-p8840146 | A-genome specific (napus-rapa) | 0.9688995    | 0.5638545    | not scorable | not scorable | 1         | 0.7625474 |
| #### Bn-A04-p8847485 | A-genome specific (napus-rapa) | 0.9665072    | 0.7959204    | not scorable | not scorable | 1         | 0.8684258 |
| #### Bn-A04-p8850036 | A-genome specific (napus-rapa) | 0.9784689    | 0.4603537    | not scorable | not scorable | 0.9917355 | 0.699442  |
| #### Bn-A04-p8865894 | A-genome specific (napus-rapa) | 1            | 0.8604447    | not scorable | not scorable | 0.9917355 | 0.7062998 |
| #### Bn-A04-p887081  | A-genome specific (napus-rapa) | 0.9880383    | 0.5241237    | not scorable | not scorable | 0.9834711 | 0.768783  |
| #### Bn-A04-p8888969 | A-genome specific (rapa only)  | not scorable | not scorable | not scorable | not scorable | 0.9752066 | 0.723342  |
| #### Bn-A04-p8889253 | A-genome specific (napus-rapa) | 1            | 0.6881747    | not scorable | not scorable | 0.9917355 | 0.6993302 |
| #### Bn-A04-p8892416 | A-genome specific (napus-rapa) | 0.9952153    | 0.4842038    | not scorable | not scorable | 0.9834711 | 0.665067  |
| #### Bn-A04-p8906594 | A-genome specific (napus-rapa) | 1            | 0.8323046    | not scorable | not scorable | 1         | 0.7239684 |
| #### Bn-A04-p8974361 | A-genome specific (rapa only)  | not scorable | not scorable | not scorable | not scorable | 1         | 0.917867  |
| #### Bn-A04-p9024009 | A-genome specific (napus-rapa) | 1            | 0.7517868    | not scorable | not scorable | 0.9917355 | 0.7625978 |
| #### Bn-A04-p9086923 | A-genome specific (napus-rapa) | 1            | 0.6299996    | not scorable | not scorable | 1         | 0.7966477 |
| #### Bn-A04-p9088043 | A-genome specific (napus-rapa) | 0.9976076    | 0.887599     | not scorable | not scorable | 1         | 0.7919511 |



|                      |                                |              |              |              |              |              |              |
|----------------------|--------------------------------|--------------|--------------|--------------|--------------|--------------|--------------|
| #### Bn-A04-p9088760 | A-genome specific (napus-rapa) | 0.9976076    | 0.785426     | not scorable | not scorable | 1            | 0.7002039    |
| #### Bn-A04-p9097344 | A-genome specific (napus-rapa) | 1            | 0.3353213    | not scorable | not scorable | 0.9917355    | 0.6841851    |
| #### Bn-A04-p9098709 | A-genome specific (napus-rapa) | 1            | 0.7168217    | not scorable | not scorable | 1            | 0.7854597    |
| #### Bn-A04-p9099209 | A-genome specific (napus-rapa) | 1            | 0.6073417    | not scorable | not scorable | 1            | 0.6622245    |
| #### Bn-A04-p9107147 | A-genome specific (napus-rapa) | 0.9521531    | 0.3930911    | not scorable | not scorable | 0.9752066    | 0.8016405    |
| #### Bn-A04-p9114826 | A-genome specific (napus-rapa) | 0.9617225    | 0.2688745    | not scorable | not scorable | 0.9917355    | 0.771207     |
| #### Bn-A04-p9119079 | A-genome specific (napus-rapa) | 0.9521531    | 0.9521978    | not scorable | not scorable | 0.9917355    | 0.7039872    |
| #### Bn-A04-p9119142 | A-genome specific (napus-rapa) | 0.9856459    | 0.6387358    | not scorable | not scorable | 0.9834711    | 0.628647     |
| #### Bn-A04-p9119675 | A-genome specific (napus-rapa) | 1            | 0.8142598    | not scorable | not scorable | 1            | 0.7210986    |
| #### Bn-A04-p9119867 | A-genome specific (napus-rapa) | 0.9856459    | 0.7847597    | not scorable | not scorable | 0.9917355    | 0.8202969    |
| #### Bn-A04-p9174273 | A-genome specific (napus-rapa) | 0.9880383    | 0.6059897    | not scorable | not scorable | 0.9917355    | 0.653261     |
| #### Bn-A04-p922828  | A-genome specific (napus-rapa) | 1            | 0.7974275    | not scorable | not scorable | 0.9917355    | 0.7160897    |
| #### Bn-A04-p9231842 | A-genome specific (rapa only)  | not scorable | not scorable | not scorable | not scorable | 0.9917355    | 0.6512775    |
| #### Bn-A04-p9232024 | A-genome specific (napus-rapa) | 0.9832536    | 0.3077331    | not scorable | not scorable | 0.9917355    | 0.7868775    |
| #### Bn-A04-p9232365 | A-genome specific (rapa only)  | not scorable | not scorable | not scorable | not scorable | 1            | 0.4968174    |
| #### Bn-A04-p9232828 | A-genome specific (napus-rapa) | 1            | 0.6882874    | not scorable | not scorable | 1            | 0.8207097    |
| #### Bn-A04-p9245980 | A-genome specific (napus-rapa) | 1            | 0.5795714    | not scorable | not scorable | 1            | 0.5987751    |
| #### Bn-A04-p926916  | A-genome specific (napus-rapa) | 0.9904306    | 0.3209788    | not scorable | not scorable | 1            | 0.8268133    |
| #### Bn-A04-p928350  | A-genome specific (napus-rapa) | 0.9904306    | 0.7980775    | not scorable | not scorable | 0.9834711    | 0.7754667    |
| #### Bn-A04-p9296314 | A-genome specific (napus-rapa) | 0.9904306    | 0.8298323    | not scorable | not scorable | 0.9917355    | 0.8050555    |
| #### Bn-A04-p9296465 | A-genome specific (napus-rapa) | 0.9736842    | 0.2799123    | not scorable | not scorable | 0.9834711    | 0.793625     |
| #### Bn-A04-p9309213 | A-genome specific (napus-rapa) | 0.9521531    | 0.905031     | not scorable | not scorable | 1            | 0.9183635    |
| #### Bn-A04-p9317798 | A-genome specific (napus-rapa) | 0.9952153    | 0.694189     | not scorable | not scorable | 0.9917355    | 0.7417953    |
| #### Bn-A04-p9322160 | A-genome specific (napus-rapa) | 0.9856459    | 0.7892161    | not scorable | not scorable | 0.9752066    | 0.8019537    |
| #### Bn-A04-p932865  | A-genome specific (napus-rapa) | 0.9952153    | 0.5507236    | not scorable | not scorable | 1            | 0.7952886    |
| #### Bn-A04-p9331682 | A-genome specific (napus-rapa) | 0.9138756    | 0.7715955    | not scorable | not scorable | 0.8512397    | 0.8207097    |
| #### Bn-A04-p9337637 | A-genome specific (rapa only)  | not scorable | not scorable | not scorable | not scorable | 0.9421487    | 0.6834289    |
| #### Bn-A04-p9339599 | A-genome specific (napus-rapa) | 0.8636364    | 0.8010102    | not scorable | not scorable | 0.8677686    | 0.7371542    |
| #### Bn-A04-p9340809 | all not scorable               | not scorable | not scorable | not scorable | not scorable | not scorable | not scorable |
| #### Bn-A04-p934150  | A-genome specific (napus-rapa) | 0.9952153    | 0.5777289    | not scorable | not scorable | 0.9917355    | 0.6809824    |
| #### Bn-A04-p9345530 | A-genome specific (napus-rapa) | 0.9952153    | 0.8150251    | not scorable | not scorable | 0.9917355    | 0.6937414    |
| #### Bn-A04-p9355248 | A-genome specific (napus-rapa) | 1            | 0.841675     | not scorable | not scorable | 0.9917355    | 0.8758779    |
| #### Bn-A04-p9363550 | A-genome specific (napus-rapa) | 0.9904306    | 0.3691185    | not scorable | not scorable | 0.9917355    | 0.7145512    |

|                      |                                |              |              |              |              |              |              |
|----------------------|--------------------------------|--------------|--------------|--------------|--------------|--------------|--------------|
| #### Bn-A04-p9379937 | A-genome specific (napus-rapa) | 0.9138756    | 0.3482456    | not scorable | not scorable | 1            | 0.7705146    |
| #### Bn-A04-p9392577 | A-genome specific (napus-rapa) | 0.9641148    | 0.53807      | not scorable | not scorable | 0.9917355    | 0.7897233    |
| #### Bn-A04-p9400393 | A-genome specific (napus-rapa) | 0.9665072    | 0.5128107    | not scorable | not scorable | 0.9917355    | 0.7880455    |
| #### Bn-A04-p9422027 | A-genome specific (napus-rapa) | 0.9808612    | 0.7664756    | not scorable | not scorable | 0.9834711    | 0.7977133    |
| #### Bn-A04-p9426523 | napus specific                 | 0.9808612    | 0.7615884    | not scorable | not scorable | not scorable | not scorable |
| #### Bn-A04-p9450472 | all not scorable               | not scorable | not scorable | not scorable | not scorable | not scorable | not scorable |
| #### Bn-A04-p9484747 | A-genome specific (napus-rapa) | 0.9904306    | 0.5516437    | not scorable | not scorable | 0.9752066    | 0.6492524    |
| #### Bn-A04-p9505012 | A-genome specific (rapa only)  | not scorable | not scorable | not scorable | not scorable | 0.9752066    | 0.6284665    |
| #### Bn-A04-p9508676 | A-genome specific (napus-rapa) | 0.9976076    | 0.6537102    | not scorable | not scorable | 0.9917355    | 0.5897086    |
| #### Bn-A04-p9509486 | A-genome specific (napus-rapa) | 0.9880383    | 0.7921632    | not scorable | not scorable | 1            | 0.7992977    |
| #### Bn-A04-p9510223 | A-genome specific (napus-rapa) | 0.9832536    | 0.7733799    | not scorable | not scorable | 0.9834711    | 0.6951471    |
| #### Bn-A04-p9510750 | A-genome specific (napus-rapa) | 0.9904306    | 0.7236553    | not scorable | not scorable | 0.9669421    | 0.7728162    |
| #### Bn-A04-p9510764 | A-genome specific (napus-rapa) | 0.9928229    | 0.692579     | not scorable | not scorable | 0.9752066    | 0.6869572    |
| #### Bn-A04-p9511386 | A-genome specific (napus-rapa) | 0.9856459    | 0.7634513    | not scorable | not scorable | 0.9834711    | 0.7638118    |
| #### Bn-A04-p9522781 | A-genome specific (rapa only)  | not scorable | not scorable | not scorable | not scorable | 0.9586777    | 0.6194744    |
| #### Bn-A04-p9524800 | A-genome specific (napus-rapa) | 0.6602871    | 0.8614707    | not scorable | not scorable | 0.9917355    | 0.8302645    |
| #### Bn-A04-p9532027 | A-genome specific (napus-rapa) | 0.9976076    | 0.4450374    | not scorable | not scorable | 0.9834711    | 0.8185435    |
| #### Bn-A04-p9532255 | A-genome specific (napus-rapa) | 0.9976076    | 0.8423527    | not scorable | not scorable | 1            | 0.7097299    |
| #### Bn-A04-p9543062 | A-genome specific (napus-rapa) | 0.9952153    | 0.7187647    | not scorable | not scorable | 1            | 0.7462972    |
| #### Bn-A04-p9543969 | A-genome specific (napus-rapa) | 1            | 0.6057992    | not scorable | not scorable | 1            | 0.8353348    |
| #### Bn-A04-p9566708 | A-genome specific (napus-rapa) | 0.9952153    | 0.6662956    | not scorable | not scorable | 1            | 0.8047553    |
| #### Bn-A04-p9582109 | A-genome specific (napus-rapa) | 1            | 0.8624684    | not scorable | not scorable | 1            | 0.8448273    |
| #### Bn-A04-p9606190 | A-genome specific (napus-rapa) | 0.9976076    | 0.6862993    | not scorable | not scorable | 1            | 0.6469069    |
| #### Bn-A04-p9623505 | A-genome specific (napus-rapa) | 0.9928229    | 0.7551577    | not scorable | not scorable | 0.9834711    | 0.6819919    |
| #### Bn-A04-p9623913 | A-genome specific (napus-rapa) | 0.9760765    | 0.6052546    | not scorable | not scorable | 1            | 0.63592      |
| #### Bn-A04-p9632786 | A-genome specific (napus-rapa) | 0.9497608    | 0.7873529    | not scorable | not scorable | 0.6115702    | 0.8656352    |
| #### Bn-A04-p9639648 | A-genome specific (napus-rapa) | 1            | 0.61053      | not scorable | not scorable | 1            | 0.7871554    |
| #### Bn-A04-p9658559 | A-genome specific (napus-rapa) | 0.9784689    | 0.658468     | not scorable | not scorable | 0.9917355    | 0.6753122    |
| #### Bn-A04-p9670525 | A-genome specific (napus-rapa) | 0.9760765    | 0.7996546    | not scorable | not scorable | 0.9834711    | 0.8391967    |
| #### Bn-A04-p9673337 | A-genome specific (napus-rapa) | 0.6626794    | 0.8388265    | not scorable | not scorable | 0.9338843    | 0.811949     |
| #### Bn-A04-p9675790 | A-genome specific (napus-rapa) | 0.9593301    | 0.4168999    | not scorable | not scorable | 0.9834711    | 0.7084561    |
| #### Bn-A04-p9716870 | A-genome specific (napus-rapa) | 1            | 0.5442087    | not scorable | not scorable | 0.9917355    | 0.7000874    |
| #### Bn-A04-p9746407 | A-genome specific (napus-rapa) | 1            | 0.5834023    | not scorable | not scorable | 0.9834711    | 0.6432823    |

|                      |                                |              |              |              |              |           |           |
|----------------------|--------------------------------|--------------|--------------|--------------|--------------|-----------|-----------|
| #### Bn-A04-p9802131 | A-genome specific (napus-rapa) | 0.9952153    | 0.537937     | not scorable | not scorable | 1         | 0.7337655 |
| #### Bn-A04-p9808875 | A-genome specific (napus-rapa) | 0.9545454    | 0.4453346    | not scorable | not scorable | 0.9917355 | 0.721589  |
| #### Bn-A04-p980952  | A-genome specific (napus-rapa) | 0.9928229    | 0.8485228    | not scorable | not scorable | 0.9917355 | 0.7222196 |
| #### Bn-A04-p9811506 | A-genome specific (napus-rapa) | 0.930622     | 0.3106559    | not scorable | not scorable | 0.9834711 | 0.8163984 |
| #### Bn-A04-p9814236 | A-genome specific (napus-rapa) | 0.9593301    | 0.3300521    | not scorable | not scorable | 0.9917355 | 0.7012927 |
| #### Bn-A04-p9814284 | A-genome specific (napus-rapa) | 0.9760765    | 0.5995137    | not scorable | not scorable | 1         | 0.6529687 |
| #### Bn-A04-p9815052 | A-genome specific (napus-rapa) | 0.9665072    | 0.3830069    | not scorable | not scorable | 0.9917355 | 0.6686319 |
| #### Bn-A04-p9819724 | A-genome specific (napus-rapa) | 1            | 0.3170858    | not scorable | not scorable | 0.9834711 | 0.7652212 |
| #### Bn-A04-p9819885 | A-genome specific (napus-rapa) | 0.9856459    | 0.7640828    | not scorable | not scorable | 1         | 0.8040874 |
| #### Bn-A04-p982068  | A-genome specific (napus-rapa) | 0.9952153    | 0.8071095    | not scorable | not scorable | 0.9669421 | 0.726182  |
| #### Bn-A04-p9830766 | A-genome specific (rapa only)  | not scorable | not scorable | not scorable | not scorable | 0.9917355 | 0.7269744 |
| #### Bn-A04-p9841094 | A-genome specific (napus-rapa) | 0.9736842    | 0.6381893    | not scorable | not scorable | 1         | 0.6701869 |
| #### Bn-A04-p9844020 | A-genome specific (napus-rapa) | 0.9952153    | 0.4953309    | not scorable | not scorable | 0.9586777 | 0.7701138 |
| #### Bn-A04-p9847875 | A-genome specific (napus-rapa) | 0.9904306    | 0.5638334    | not scorable | not scorable | 0.9669421 | 0.5768443 |
| #### Bn-A04-p9848849 | A-genome specific (napus-rapa) | 1            | 0.7803863    | not scorable | not scorable | 0.9834711 | 0.7040766 |
| #### Bn-A04-p9861037 | A-genome specific (napus-rapa) | 0.9928229    | 0.7915911    | not scorable | not scorable | 1         | 0.6864107 |
| #### Bn-A04-p9863329 | A-genome specific (napus-rapa) | 0.9904306    | 0.8071716    | not scorable | not scorable | 0.9917355 | 0.663902  |
| #### Bn-A04-p9864811 | A-genome specific (napus-rapa) | 0.9952153    | 0.8489355    | not scorable | not scorable | 0.9917355 | 0.6606812 |
| #### Bn-A04-p9864983 | A-genome specific (napus-rapa) | 0.9904306    | 0.8392501    | not scorable | not scorable | 0.9834711 | 0.7136915 |
| #### Bn-A04-p9865629 | A-genome specific (napus-rapa) | 1            | 0.7732459    | not scorable | not scorable | 0.9834711 | 0.6956896 |
| #### Bn-A04-p9865712 | A-genome specific (napus-rapa) | 0.9976076    | 0.8476278    | not scorable | not scorable | 0.9917355 | 0.6753443 |
| #### Bn-A04-p9866201 | A-genome specific (napus-rapa) | 0.9976076    | 0.8249698    | not scorable | not scorable | 1         | 0.7983621 |
| #### Bn-A04-p9868258 | A-genome specific (napus-rapa) | 0.9952153    | 0.7446294    | not scorable | not scorable | 0.9586777 | 0.7967765 |
| #### Bn-A04-p9870167 | A-genome specific (napus-rapa) | 0.9952153    | 0.7990296    | not scorable | not scorable | 0.9917355 | 0.6813985 |
| #### Bn-A04-p9870879 | A-genome specific (napus-rapa) | 0.9688995    | 0.7680029    | not scorable | not scorable | 1         | 0.8077747 |
| #### Bn-A04-p9878192 | A-genome specific (napus-rapa) | 0.9497608    | 0.8386382    | not scorable | not scorable | 0.9669421 | 0.6833032 |
| #### Bn-A04-p9878444 | A-genome specific (napus-rapa) | 0.9976076    | 0.8070768    | not scorable | not scorable | 0.9917355 | 0.8059325 |
| #### Bn-A04-p9879436 | A-genome specific (napus-rapa) | 1            | 0.5113595    | not scorable | not scorable | 1         | 0.7163417 |
| #### Bn-A04-p9920827 | A-genome specific (napus-rapa) | 0.9952153    | 0.8515794    | not scorable | not scorable | 0.9752066 | 0.7506722 |
| #### Bn-A04-p9920873 | A-genome specific (napus-rapa) | 0.9976076    | 0.9483694    | not scorable | not scorable | 0.9917355 | 0.7679619 |
| #### Bn-A04-p9921876 | A-genome specific (napus-rapa) | 1            | 0.505382     | not scorable | not scorable | 1         | 0.681392  |
| #### Bn-A04-p9930371 | A-genome specific (napus-rapa) | 0.9976076    | 0.4993044    | not scorable | not scorable | 1         | 0.8109526 |
| #### Bn-A04-p9932606 | A-genome specific (napus-rapa) | 0.9952153    | 0.8101181    | not scorable | not scorable | 1         | 0.8076404 |

|                       |                                |              |              |              |              |              |              |
|-----------------------|--------------------------------|--------------|--------------|--------------|--------------|--------------|--------------|
| #### Bn-A04-p9983165  | A-genome specific (napus-rapa) | 0.9976076    | 0.8907107    | not scorable | not scorable | 1            | 0.8255098    |
| #### Bn-A04-p9991606  | A-genome specific (napus-rapa) | 0.9952153    | 0.8370666    | not scorable | not scorable | 0.9917355    | 0.8026443    |
| #### Bn-A05-p10009197 | A-genome specific (napus-rapa) | 0.9784689    | 0.8228517    | not scorable | not scorable | 0.6528926    | 0.7877723    |
| #### Bn-A05-p10009485 | A-genome specific (napus-rapa) | 0.9880383    | 0.8407717    | not scorable | not scorable | 0.9917355    | 0.7830843    |
| #### Bn-A05-p1006754  | A-genome specific (napus-rapa) | 0.9808612    | 0.3251211    | not scorable | not scorable | 0.9834711    | 0.6717662    |
| #### Bn-A05-p10101040 | A-genome specific (napus-rapa) | 0.9952153    | 0.8525339    | not scorable | not scorable | 0.9752066    | 0.7983692    |
| #### Bn-A05-p10103295 | A-genome specific (napus-rapa) | 0.9928229    | 0.7692301    | not scorable | not scorable | 1            | 0.732154     |
| #### Bn-A05-p10171248 | A-genome specific (napus-rapa) | 0.9856459    | 0.780487     | not scorable | not scorable | 0.9834711    | 0.6768451    |
| #### Bn-A05-p10179640 | A-genome specific (napus-rapa) | 0.9904306    | 0.7738579    | not scorable | not scorable | 0.9917355    | 0.7902774    |
| #### Bn-A05-p10181096 | A-genome specific (napus-rapa) | 0.9928229    | 0.7908362    | not scorable | not scorable | 0.9752066    | 0.7849041    |
| #### Bn-A05-p10214000 | A-genome specific (napus-rapa) | 0.9832536    | 0.8311532    | not scorable | not scorable | 1            | 0.8541407    |
| #### Bn-A05-p10214398 | A-genome specific (napus-rapa) | 0.9976076    | 0.7280865    | not scorable | not scorable | 0.9917355    | 0.7061196    |
| #### Bn-A05-p10241814 | A-genome specific (rapa only)  | not scorable | not scorable | not scorable | not scorable | 0.9834711    | 0.8350291    |
| #### Bn-A05-p10264427 | A-genome specific (napus-rapa) | 0.9952153    | 0.7572432    | not scorable | not scorable | 0.9834711    | 0.8491581    |
| #### Bn-A05-p10264494 | A-genome specific (napus-rapa) | 0.9880383    | 0.7961781    | not scorable | not scorable | 0.9917355    | 0.7816985    |
| #### Bn-A05-p10267278 | A-genome specific (napus-rapa) | 0.7009569    | 0.6446386    | not scorable | not scorable | 0.9917355    | 0.8514802    |
| #### Bn-A05-p10269046 | A-genome specific (napus-rapa) | 0.9880383    | 0.7053419    | not scorable | not scorable | 1            | 0.7045303    |
| #### Bn-A05-p10278245 | A-genome specific (napus-rapa) | 0.9904306    | 0.817386     | not scorable | not scorable | 1            | 0.7319714    |
| #### Bn-A05-p10281337 | A-genome specific (napus-rapa) | 0.9880383    | 0.8695367    | not scorable | not scorable | 0.9834711    | 0.6860555    |
| #### Bn-A05-p10292778 | napus specific                 | 0.9114832    | 0.5879735    | not scorable | not scorable | not scorable | not scorable |
| #### Bn-A05-p10296509 | A-genome specific (rapa only)  | not scorable | not scorable | not scorable | not scorable | 0.9917355    | 0.7259103    |
| #### Bn-A05-p1030058  | A-genome specific (napus-rapa) | 0.9760765    | 0.4672996    | not scorable | not scorable | 0.9917355    | 0.719144     |
| #### Bn-A05-p10305352 | A-genome specific (napus-rapa) | 1            | 0.3156064    | not scorable | not scorable | 0.9917355    | 0.7129645    |
| #### Bn-A05-p10320143 | A-genome specific (napus-rapa) | 0.9928229    | 0.4388309    | not scorable | not scorable | 0.9917355    | 0.7289489    |
| #### Bn-A05-p10320501 | A-genome specific (napus-rapa) | 0.9808612    | 0.479975     | not scorable | not scorable | 0.9752066    | 0.7753587    |
| #### Bn-A05-p10321304 | A-genome specific (napus-rapa) | 0.9976076    | 0.9311632    | not scorable | not scorable | 1            | 0.9531466    |
| #### Bn-A05-p10321580 | A-genome specific (napus-rapa) | 0.9736842    | 0.8081185    | not scorable | not scorable | 0.9586777    | 0.7983829    |
| #### Bn-A05-p10331539 | A-genome specific (rapa only)  | not scorable | not scorable | not scorable | not scorable | 0.9917355    | 0.5493351    |
| #### Bn-A05-p10349551 | A-genome specific (napus-rapa) | 0.9832536    | 0.8400269    | not scorable | not scorable | 1            | 0.7355271    |
| #### Bn-A05-p1035167  | A-genome specific (napus-rapa) | 0.9904306    | 0.3684653    | not scorable | not scorable | 0.9917355    | 0.8001444    |
| #### Bn-A05-p10357316 | A-genome specific (napus-rapa) | 0.9904306    | 0.8200872    | not scorable | not scorable | 0.9917355    | 0.8041285    |
| #### Bn-A05-p10364013 | A-genome specific (napus-rapa) | 0.9904306    | 0.7999232    | not scorable | not scorable | 1            | 0.8028173    |
| #### Bn-A05-p10365857 | A-genome specific (napus-rapa) | 0.9976076    | 0.6964929    | not scorable | not scorable | 1            | 0.7362399    |

|                       |                                |              |              |              |              |              |              |
|-----------------------|--------------------------------|--------------|--------------|--------------|--------------|--------------|--------------|
| #### Bn-A05-p10367279 | A-genome specific (napus-rapa) | 0.9856459    | 0.6697623    | not scorable | not scorable | 0.9917355    | 0.7017483    |
| #### Bn-A05-p10368686 | A-genome specific (napus-rapa) | 0.9904306    | 0.6932496    | not scorable | not scorable | 0.9834711    | 0.6866765    |
| #### Bn-A05-p103817   | A-genome specific (napus-rapa) | 0.9617225    | 0.5990162    | not scorable | not scorable | 0.9917355    | 0.6673574    |
| #### Bn-A05-p10403917 | napus specific                 | 0.9784689    | 0.6967798    | not scorable | not scorable | not scorable | not scorable |
| #### Bn-A05-p10413113 | A-genome specific (napus-rapa) | 0.9880383    | 0.7812539    | not scorable | not scorable | 0.9917355    | 0.7152185    |
| #### Bn-A05-p10413574 | A-genome specific (napus-rapa) | 0.9736842    | 0.7236876    | not scorable | not scorable | 0.9834711    | 0.7653875    |
| #### Bn-A05-p10423564 | A-genome specific (napus-rapa) | 0.9856459    | 0.4268348    | not scorable | not scorable | 0.9917355    | 0.5865664    |
| #### Bn-A05-p10425198 | A-genome specific (napus-rapa) | 1            | 0.3380069    | not scorable | not scorable | 1            | 0.9205657    |
| #### Bn-A05-p10426347 | A-genome specific (napus-rapa) | 0.9736842    | 0.8450391    | not scorable | not scorable | 0.7107438    | 0.8306848    |
| #### Bn-A05-p10426618 | A-genome specific (napus-rapa) | 1            | 0.5947348    | not scorable | not scorable | 1            | 0.653881     |
| #### Bn-A05-p10437937 | A-genome specific (napus-rapa) | 0.9760765    | 0.8395281    | not scorable | not scorable | 0.9256198    | 0.7150277    |
| #### Bn-A05-p10452570 | A-genome specific (napus-rapa) | 0.9904306    | 0.3781323    | not scorable | not scorable | 1            | 0.7421775    |
| #### Bn-A05-p10622526 | A-genome specific (napus-rapa) | 0.9832536    | 0.6384492    | not scorable | not scorable | 1            | 0.6074274    |
| #### Bn-A05-p10624916 | A-genome specific (napus-rapa) | 0.9808612    | 0.7680653    | not scorable | not scorable | 0.9917355    | 0.8149812    |
| #### Bn-A05-p10625034 | A-genome specific (napus-rapa) | 0.6746411    | 0.9512877    | not scorable | not scorable | 0.9917355    | 0.7820156    |
| #### Bn-A05-p10625215 | A-genome specific (rapa only)  | not scorable | not scorable | not scorable | not scorable | 1            | 0.8542037    |
| #### Bn-A05-p10625236 | A-genome specific (napus-rapa) | 0.9952153    | 0.7870179    | not scorable | not scorable | 1            | 0.9269587    |
| #### Bn-A05-p10665044 | A-genome specific (napus-rapa) | 0.9880383    | 0.5658607    | not scorable | not scorable | 0.9834711    | 0.7108423    |
| #### Bn-A05-p10694572 | A-genome specific (napus-rapa) | 1            | 0.4907801    | not scorable | not scorable | 1            | 0.7849252    |
| #### Bn-A05-p10697862 | A-genome specific (napus-rapa) | 0.9856459    | 0.399174     | not scorable | not scorable | 0.9669421    | 0.6212759    |
| #### Bn-A05-p1071371  | A-genome specific (napus-rapa) | 0.9688995    | 0.6816048    | not scorable | not scorable | 0.9917355    | 0.7867506    |
| #### Bn-A05-p10719967 | A-genome specific (napus-rapa) | 1            | 0.6594534    | not scorable | not scorable | 1            | 0.7279152    |
| #### Bn-A05-p10734565 | A-genome specific (napus-rapa) | 0.9808612    | 0.4804975    | not scorable | not scorable | 0.9752066    | 0.4132078    |
| #### Bn-A05-p1074864  | A-genome specific (napus-rapa) | 0.9665072    | 0.6936206    | not scorable | not scorable | 0.9917355    | 0.732167     |
| #### Bn-A05-p10752346 | A-genome specific (napus-rapa) | 0.9665072    | 0.3609956    | not scorable | not scorable | 0.9917355    | 0.7215093    |
| #### Bn-A05-p10760570 | A-genome specific (napus-rapa) | 0.9976076    | 0.4728328    | not scorable | not scorable | 0.9917355    | 0.7976328    |
| #### Bn-A05-p10778859 | A-genome specific (napus-rapa) | 0.9880383    | 0.4745528    | not scorable | not scorable | 0.9834711    | 0.7800552    |
| #### Bn-A05-p10780480 | A-genome specific (napus-rapa) | 0.9928229    | 0.8679422    | not scorable | not scorable | 0.9834711    | 0.6146014    |
| #### Bn-A05-p10783057 | A-genome specific (napus-rapa) | 0.9904306    | 0.7144561    | not scorable | not scorable | 0.9586777    | 0.6455203    |
| #### Bn-A05-p10798961 | A-genome specific (napus-rapa) | 0.9784689    | 0.8021863    | not scorable | not scorable | 0.9917355    | 0.8384817    |
| #### Bn-A05-p10804278 | A-genome specific (napus-rapa) | 0.9736842    | 0.7732871    | not scorable | not scorable | 0.9917355    | 0.7815014    |
| #### Bn-A05-p10820194 | A-genome specific (napus-rapa) | 0.9928229    | 0.5564591    | not scorable | not scorable | 1            | 0.891554     |
| #### Bn-A05-p10840480 | napus specific                 | 0.9425837    | 0.2722276    | not scorable | not scorable | not scorable | not scorable |

|                       |                                |              |              |              |              |           |           |
|-----------------------|--------------------------------|--------------|--------------|--------------|--------------|-----------|-----------|
| #### Bn-A05-p1084980  | A-genome specific (napus-rapa) | 0.9545454    | 0.5764614    | not scorable | not scorable | 0.9752066 | 0.7083077 |
| #### Bn-A05-p108510   | A-genome specific (napus-rapa) | 0.9784689    | 0.3971686    | not scorable | not scorable | 0.9834711 | 0.7645464 |
| #### Bn-A05-p10868044 | A-genome specific (napus-rapa) | 0.9928229    | 0.311801     | not scorable | not scorable | 1         | 0.8200477 |
| #### Bn-A05-p10922835 | A-genome specific (napus-rapa) | 0.9832536    | 0.3018378    | not scorable | not scorable | 1         | 0.8350435 |
| #### Bn-A05-p10924105 | A-genome specific (napus-rapa) | 0.9856459    | 0.6882429    | not scorable | not scorable | 1         | 0.6341765 |
| #### Bn-A05-p10930228 | A-genome specific (napus-rapa) | 1            | 0.7345608    | not scorable | not scorable | 1         | 0.7991373 |
| #### Bn-A05-p10939686 | A-genome specific (napus-rapa) | 0.9928229    | 0.6961426    | not scorable | not scorable | 0.9917355 | 0.606396  |
| #### Bn-A05-p10939740 | A-genome specific (napus-rapa) | 0.9832536    | 0.4492921    | not scorable | not scorable | 1         | 0.6784759 |
| #### Bn-A05-p10940401 | A-genome specific (napus-rapa) | 0.9904306    | 0.802958     | not scorable | not scorable | 1         | 0.8546536 |
| #### Bn-A05-p10945933 | A-genome specific (napus-rapa) | 1            | 0.9503593    | not scorable | not scorable | 1         | 0.9475388 |
| #### Bn-A05-p10946327 | A-genome specific (napus-rapa) | 1            | 0.9309       | not scorable | not scorable | 1         | 0.9035182 |
| #### Bn-A05-p10947783 | A-genome specific (napus-rapa) | 0.9760765    | 0.4956893    | not scorable | not scorable | 1         | 0.8736501 |
| #### Bn-A05-p10948934 | A-genome specific (napus-rapa) | 0.9736842    | 0.6442204    | not scorable | not scorable | 0.9917355 | 0.750405  |
| #### Bn-A05-p10951155 | A-genome specific (rapa only)  | not scorable | not scorable | not scorable | not scorable | 0.9917355 | 0.7947016 |
| #### Bn-A05-p10951975 | A-genome specific (napus-rapa) | 1            | 0.7698122    | not scorable | not scorable | 1         | 0.8252758 |
| #### Bn-A05-p10964994 | A-genome specific (napus-rapa) | 0.9808612    | 0.7640045    | not scorable | not scorable | 0.9917355 | 0.7376109 |
| #### Bn-A05-p10966950 | A-genome specific (napus-rapa) | 0.9808612    | 0.6866301    | not scorable | not scorable | 1         | 0.753532  |
| #### Bn-A05-p1096935  | A-genome specific (napus-rapa) | 0.9904306    | 0.7216619    | not scorable | not scorable | 0.9834711 | 0.8318064 |
| #### Bn-A05-p1097088  | A-genome specific (napus-rapa) | 0.9736842    | 0.3094587    | not scorable | not scorable | 0.9917355 | 0.7943903 |
| #### Bn-A05-p10981427 | A-genome specific (napus-rapa) | 0.9856459    | 0.7471141    | not scorable | not scorable | 1         | 0.7975445 |
| #### Bn-A05-p109998   | A-genome specific (napus-rapa) | 0.9712918    | 0.6913311    | not scorable | not scorable | 0.9834711 | 0.7008945 |
| #### Bn-A05-p10999977 | A-genome specific (napus-rapa) | 0.9928229    | 0.7575833    | not scorable | not scorable | 0.9917355 | 0.7174992 |
| #### Bn-A05-p11000036 | A-genome specific (napus-rapa) | 0.9784689    | 0.8012666    | not scorable | not scorable | 1         | 0.8584123 |
| #### Bn-A05-p11000261 | A-genome specific (napus-rapa) | 0.9688995    | 0.3418545    | not scorable | not scorable | 1         | 0.6735432 |
| #### Bn-A05-p11012409 | A-genome specific (napus-rapa) | 0.9952153    | 0.8030952    | not scorable | not scorable | 0.9834711 | 0.772213  |
| #### Bn-A05-p11013933 | A-genome specific (napus-rapa) | 0.9808612    | 0.6185138    | not scorable | not scorable | 1         | 0.7846502 |
| #### Bn-A05-p11013981 | A-genome specific (napus-rapa) | 1            | 0.3953399    | not scorable | not scorable | 0.9917355 | 0.7565321 |
| #### Bn-A05-p11044537 | A-genome specific (napus-rapa) | 0.9952153    | 0.4340661    | not scorable | not scorable | 1         | 0.7935139 |
| #### Bn-A05-p11048761 | A-genome specific (napus-rapa) | 1            | 0.3613172    | not scorable | not scorable | 0.9917355 | 0.7520851 |
| #### Bn-A05-p11056573 | A-genome specific (napus-rapa) | 0.9976076    | 0.5238574    | not scorable | not scorable | 1         | 0.6719183 |
| #### Bn-A05-p11057820 | A-genome specific (rapa only)  | not scorable | not scorable | not scorable | not scorable | 0.9834711 | 0.781804  |
| #### Bn-A05-p11068866 | A-genome specific (napus-rapa) | 0.9928229    | 0.6895443    | not scorable | not scorable | 0.9917355 | 0.872438  |
| #### Bn-A05-p1107888  | A-genome specific (napus-rapa) | 0.9760765    | 0.8050262    | not scorable | not scorable | 0.6033058 | 0.8641129 |

|                       |                                |           |           |              |              |           |           |
|-----------------------|--------------------------------|-----------|-----------|--------------|--------------|-----------|-----------|
| #### Bn-A05-p11084469 | A-genome specific (napus-rapa) | 0.9880383 | 0.4779801 | not scorable | not scorable | 0.9834711 | 0.8632979 |
| #### Bn-A05-p11088814 | A-genome specific (napus-rapa) | 0.9832536 | 0.3985411 | not scorable | not scorable | 1         | 0.8302616 |
| #### Bn-A05-p11120195 | A-genome specific (napus-rapa) | 0.9712918 | 0.7769009 | not scorable | not scorable | 0.9338843 | 0.7469814 |
| #### Bn-A05-p11120274 | A-genome specific (napus-rapa) | 0.9784689 | 0.3511234 | not scorable | not scorable | 0.9834711 | 0.7205312 |
| #### Bn-A05-p11143078 | A-genome specific (napus-rapa) | 0.9808612 | 0.7403288 | not scorable | not scorable | 0.7933884 | 0.6244924 |
| #### Bn-A05-p11146315 | A-genome specific (napus-rapa) | 0.9832536 | 0.317552  | not scorable | not scorable | 0.9917355 | 0.8853623 |
| #### Bn-A05-p11146571 | A-genome specific (napus-rapa) | 0.9808612 | 0.6606387 | not scorable | not scorable | 1         | 0.7135057 |
| #### Bn-A05-p11151246 | A-genome specific (napus-rapa) | 0.9904306 | 0.7100585 | not scorable | not scorable | 1         | 0.7573233 |
| #### Bn-A05-p11164954 | A-genome specific (napus-rapa) | 1         | 0.5560554 | not scorable | not scorable | 0.9834711 | 0.7011353 |
| #### Bn-A05-p11168272 | A-genome specific (napus-rapa) | 0.8660287 | 0.4882196 | not scorable | not scorable | 0.9917355 | 0.723166  |
| #### Bn-A05-p11168423 | A-genome specific (napus-rapa) | 0.8875598 | 0.4474941 | not scorable | not scorable | 0.9338843 | 0.8526633 |
| #### Bn-A05-p11225095 | A-genome specific (napus-rapa) | 1         | 0.9247398 | not scorable | not scorable | 1         | 0.7898901 |
| #### Bn-A05-p11226462 | A-genome specific (napus-rapa) | 0.9904306 | 0.7625824 | not scorable | not scorable | 1         | 0.8448205 |
| #### Bn-A05-p11254494 | A-genome specific (napus-rapa) | 0.9976076 | 0.7568642 | not scorable | not scorable | 0.9752066 | 0.8331724 |
| #### Bn-A05-p11255103 | A-genome specific (napus-rapa) | 0.9976076 | 0.803587  | not scorable | not scorable | 0.9586777 | 0.6572919 |
| #### Bn-A05-p11279325 | A-genome specific (napus-rapa) | 0.9736842 | 0.8526029 | not scorable | not scorable | 1         | 0.8344012 |
| #### Bn-A05-p11279669 | A-genome specific (napus-rapa) | 0.9856459 | 0.4569578 | not scorable | not scorable | 1         | 0.711734  |
| #### Bn-A05-p11283530 | A-genome specific (napus-rapa) | 0.9928229 | 0.6571167 | not scorable | not scorable | 1         | 0.8664528 |
| #### Bn-A05-p11297100 | A-genome specific (napus-rapa) | 0.9832536 | 0.4468037 | not scorable | not scorable | 0.9917355 | 0.6539873 |
| #### Bn-A05-p1134104  | A-genome specific (napus-rapa) | 0.9832536 | 0.660798  | not scorable | not scorable | 0.9586777 | 0.8077363 |
| #### Bn-A05-p11372809 | A-genome specific (napus-rapa) | 0.9784689 | 0.7797241 | not scorable | not scorable | 0.9504132 | 0.7548708 |
| #### Bn-A05-p11377111 | A-genome specific (napus-rapa) | 1         | 0.7323557 | not scorable | not scorable | 0.9834711 | 0.8058489 |
| #### Bn-A05-p11384651 | A-genome specific (napus-rapa) | 1         | 0.5799218 | not scorable | not scorable | 0.9834711 | 0.640321  |
| #### Bn-A05-p11426194 | A-genome specific (napus-rapa) | 0.9808612 | 0.7528992 | not scorable | not scorable | 1         | 0.8240975 |
| #### Bn-A05-p11429310 | A-genome specific (napus-rapa) | 1         | 0.7844516 | not scorable | not scorable | 1         | 0.8275546 |
| #### Bn-A05-p114598   | A-genome specific (napus-rapa) | 0.9138756 | 0.630439  | not scorable | not scorable | 0.9752066 | 0.6763995 |
| #### Bn-A05-p11514604 | A-genome specific (napus-rapa) | 1         | 0.5801526 | not scorable | not scorable | 1         | 0.8532773 |
| #### Bn-A05-p11562034 | A-genome specific (napus-rapa) | 1         | 0.7536629 | not scorable | not scorable | 0.9917355 | 0.7237091 |
| #### Bn-A05-p11593933 | A-genome specific (napus-rapa) | 0.9976076 | 0.3307559 | not scorable | not scorable | 1         | 0.6350003 |
| #### Bn-A05-p11606554 | A-genome specific (napus-rapa) | 0.9952153 | 0.7309262 | not scorable | not scorable | 1         | 0.7408684 |
| #### Bn-A05-p11607344 | A-genome specific (napus-rapa) | 0.9808612 | 0.6591588 | not scorable | not scorable | 0.9669421 | 0.7114879 |
| #### Bn-A05-p11626174 | A-genome specific (napus-rapa) | 0.784689  | 0.6752737 | not scorable | not scorable | 0.9834711 | 0.8358579 |
| #### Bn-A05-p11686214 | A-genome specific (napus-rapa) | 1         | 0.8200702 | not scorable | not scorable | 0.9917355 | 0.7604609 |

|                       |                                |              |              |              |              |              |              |
|-----------------------|--------------------------------|--------------|--------------|--------------|--------------|--------------|--------------|
| #### Bn-A05-p11687380 | A-genome specific (napus-rapa) | 0.9808612    | 0.2602273    | not scorable | not scorable | 1            | 0.7562124    |
| #### Bn-A05-p11689852 | A-genome specific (napus-rapa) | 0.9976076    | 0.512587     | not scorable | not scorable | 1            | 0.7315711    |
| #### Bn-A05-p11690317 | A-genome specific (napus-rapa) | 1            | 0.4908344    | not scorable | not scorable | 0.9917355    | 0.7906306    |
| #### Bn-A05-p11702049 | A-genome specific (napus-rapa) | 0.9210526    | 0.4428999    | not scorable | not scorable | 1            | 0.7025673    |
| #### Bn-A05-p11735505 | A-genome specific (napus-rapa) | 0.9952153    | 0.2897251    | not scorable | not scorable | 0.9917355    | 0.6549749    |
| #### Bn-A05-p11736698 | A-genome specific (napus-rapa) | 0.9832536    | 0.3752197    | not scorable | not scorable | 1            | 0.7154679    |
| #### Bn-A05-p11737404 | A-genome specific (napus-rapa) | 0.9712918    | 0.6717739    | not scorable | not scorable | 0.9917355    | 0.8337364    |
| #### Bn-A05-p11738337 | A-genome specific (napus-rapa) | 0.9258373    | 0.4318279    | not scorable | not scorable | 0.9834711    | 0.6354367    |
| #### Bn-A05-p11740536 | A-genome specific (napus-rapa) | 0.9449761    | 0.2184676    | not scorable | not scorable | 1            | 0.6928614    |
| #### Bn-A05-p11751401 | A-genome specific (napus-rapa) | 0.9832536    | 0.279249     | not scorable | not scorable | 1            | 0.8018968    |
| #### Bn-A05-p11767399 | A-genome specific (napus-rapa) | 1            | 0.6436768    | not scorable | not scorable | 1            | 0.5904204    |
| #### Bn-A05-p11776888 | A-genome specific (napus-rapa) | 0.3636364    | 0.7117825    | not scorable | not scorable | 0.9504132    | 0.7958187    |
| #### Bn-A05-p11781784 | all not scorable               | not scorable | not scorable | not scorable | not scorable | not scorable | not scorable |
| #### Bn-A05-p11785796 | A-genome specific (napus-rapa) | 0.9832536    | 0.5086489    | not scorable | not scorable | 0.9917355    | 0.7321043    |
| #### Bn-A05-p11786537 | A-genome specific (napus-rapa) | 0.9712918    | 0.6408622    | not scorable | not scorable | 0.9834711    | 0.6683499    |
| #### Bn-A05-p11812178 | A-genome specific (napus-rapa) | 0.9904306    | 0.3612525    | not scorable | not scorable | 0.9917355    | 0.6519752    |
| #### Bn-A05-p11812265 | A-genome specific (napus-rapa) | 0.9880383    | 0.5173039    | not scorable | not scorable | 0.9834711    | 0.8749894    |
| #### Bn-A05-p11818095 | A-genome specific (napus-rapa) | 0.9880383    | 0.3236778    | not scorable | not scorable | 1            | 0.643315     |
| #### Bn-A05-p11840240 | A-genome specific (napus-rapa) | 0.9856459    | 0.3569155    | not scorable | not scorable | 1            | 0.604719     |
| #### Bn-A05-p11856345 | A-genome specific (napus-rapa) | 0.9784689    | 0.2876118    | not scorable | not scorable | 1            | 0.7033995    |
| #### Bn-A05-p11910270 | A-genome specific (napus-rapa) | 0.5717703    | 0.6970498    | not scorable | not scorable | 0.9917355    | 0.782876     |
| #### Bn-A05-p11926097 | A-genome specific (napus-rapa) | 0.9832536    | 0.3781281    | not scorable | not scorable | 1            | 0.8733965    |
| #### Bn-A05-p1192706  | A-genome specific (napus-rapa) | 0.8803828    | 0.6934756    | not scorable | not scorable | 0.9917355    | 0.8071598    |
| #### Bn-A05-p11927100 | A-genome specific (napus-rapa) | 0.9665072    | 0.7542313    | not scorable | not scorable | 0.9917355    | 0.668591     |
| #### Bn-A05-p11927159 | A-genome specific (napus-rapa) | 0.9904306    | 0.7146924    | not scorable | not scorable | 1            | 0.7375373    |
| #### Bn-A05-p11927165 | A-genome specific (napus-rapa) | 0.9952153    | 0.6632242    | not scorable | not scorable | 1            | 0.5584884    |
| #### Bn-A05-p11942356 | A-genome specific (napus-rapa) | 0.9736842    | 0.4197618    | not scorable | not scorable | 0.9917355    | 0.6936432    |
| #### Bn-A05-p11961924 | A-genome specific (napus-rapa) | 0.8014354    | 0.6956896    | not scorable | not scorable | 0.9917355    | 0.8062737    |
| #### Bn-A05-p11966222 | A-genome specific (napus-rapa) | 1            | 0.4630724    | not scorable | not scorable | 1            | 0.8092235    |
| #### Bn-A05-p1196947  | A-genome specific (napus-rapa) | 0.9904306    | 0.4780737    | not scorable | not scorable | 1            | 0.7318985    |
| #### Bn-A05-p11975840 | A-genome specific (napus-rapa) | 0.9808612    | 0.2445872    | not scorable | not scorable | 0.9917355    | 0.7094512    |
| #### Bn-A05-p11990369 | all not scorable               | not scorable | not scorable | not scorable | not scorable | not scorable | not scorable |
| #### Bn-A05-p12002033 | A-genome specific (napus-rapa) | 0.9904306    | 0.79955      | not scorable | not scorable | 1            | 0.7749903    |



|                       |                                |              |              |              |              |           |           |
|-----------------------|--------------------------------|--------------|--------------|--------------|--------------|-----------|-----------|
| #### Bn-A05-p12018989 | A-genome specific (napus-rapa) | 0.930622     | 0.7136176    | not scorable | not scorable | 0.9669421 | 0.6731555 |
| #### Bn-A05-p12019087 | A-genome specific (napus-rapa) | 0.9928229    | 0.7387426    | not scorable | not scorable | 1         | 0.7598882 |
| #### Bn-A05-p12019708 | A-genome specific (napus-rapa) | 0.9282297    | 0.6132887    | not scorable | not scorable | 0.9917355 | 0.6137882 |
| #### Bn-A05-p12021730 | A-genome specific (napus-rapa) | 0.9712918    | 0.5945939    | not scorable | not scorable | 1         | 0.783363  |
| #### Bn-A05-p12021976 | A-genome specific (napus-rapa) | 0.9330143    | 0.727056     | not scorable | not scorable | 0.9917355 | 0.6938709 |
| #### Bn-A05-p12022144 | A-genome specific (rapa only)  | not scorable | not scorable | not scorable | not scorable | 1         | 0.6642559 |
| #### Bn-A05-p12022540 | A-genome specific (napus-rapa) | 0.9832536    | 0.5735331    | not scorable | not scorable | 1         | 0.7856574 |
| #### Bn-A05-p12024011 | A-genome specific (rapa only)  | not scorable | not scorable | not scorable | not scorable | 0.9752066 | 0.6680171 |
| #### Bn-A05-p12026117 | A-genome specific (napus-rapa) | 0.9856459    | 0.7323353    | not scorable | not scorable | 0.9834711 | 0.7741836 |
| #### Bn-A05-p12032938 | A-genome specific (napus-rapa) | 0.9808612    | 0.4830529    | not scorable | not scorable | 0.9752066 | 0.5800495 |
| #### Bn-A05-p12046650 | A-genome specific (napus-rapa) | 0.9880383    | 0.7948073    | not scorable | not scorable | 0.9834711 | 0.8256641 |
| #### Bn-A05-p1204987  | A-genome specific (napus-rapa) | 0.9521531    | 0.5445216    | not scorable | not scorable | 0.9917355 | 0.8132794 |
| #### Bn-A05-p12052571 | A-genome specific (napus-rapa) | 0.9760765    | 0.647494     | not scorable | not scorable | 1         | 0.7699569 |
| #### Bn-A05-p12056452 | A-genome specific (napus-rapa) | 0.9832536    | 0.3264702    | not scorable | not scorable | 1         | 0.7706463 |
| #### Bn-A05-p12059250 | A-genome specific (napus-rapa) | 0.9880383    | 0.4038003    | not scorable | not scorable | 0.9504132 | 0.3437998 |
| #### Bn-A05-p12067093 | A-genome specific (napus-rapa) | 0.9784689    | 0.6427388    | not scorable | not scorable | 1         | 0.6878925 |
| #### Bn-A05-p12069010 | A-genome specific (napus-rapa) | 0.9880383    | 0.3897271    | not scorable | not scorable | 0.9917355 | 0.7048109 |
| #### Bn-A05-p12102885 | A-genome specific (napus-rapa) | 0.9808612    | 0.6965085    | not scorable | not scorable | 0.9917355 | 0.8101091 |
| #### Bn-A05-p12103432 | A-genome specific (napus-rapa) | 0.9856459    | 0.7847863    | not scorable | not scorable | 1         | 0.7180848 |
| #### Bn-A05-p12104940 | A-genome specific (napus-rapa) | 0.9928229    | 0.7226744    | not scorable | not scorable | 1         | 0.7067276 |
| #### Bn-A05-p12105780 | A-genome specific (napus-rapa) | 0.9880383    | 0.7468796    | not scorable | not scorable | 1         | 0.8738732 |
| #### Bn-A05-p12115583 | A-genome specific (napus-rapa) | 0.9928229    | 0.7238235    | not scorable | not scorable | 1         | 0.7776101 |
| #### Bn-A05-p12119364 | A-genome specific (napus-rapa) | 0.9641148    | 0.7349157    | not scorable | not scorable | 0.9917355 | 0.7893811 |
| #### Bn-A05-p12120855 | A-genome specific (napus-rapa) | 0.9904306    | 0.4658964    | not scorable | not scorable | 1         | 0.6680119 |
| #### Bn-A05-p12131090 | genome unspecific (all in)     | 0.9976076    | 0.5546744    |              | 1 0.8611138  | 1         | 0.8567975 |
| #### Bn-A05-p1214053  | A-genome specific (napus-rapa) | 0.9665072    | 0.5312838    | not scorable | not scorable | 0.9834711 | 0.7992573 |
| #### Bn-A05-p12141401 | A-genome specific (napus-rapa) | 0.7583732    | 0.6458821    | not scorable | not scorable | 0.9917355 | 0.9205657 |
| #### Bn-A05-p12158169 | A-genome specific (napus-rapa) | 0.9832536    | 0.3755104    | not scorable | not scorable | 0.9834711 | 0.6338977 |
| #### Bn-A05-p1216828  | A-genome specific (napus-rapa) | 0.9545454    | 0.3080547    | not scorable | not scorable | 0.9834711 | 0.6533034 |
| #### Bn-A05-p12170375 | A-genome specific (napus-rapa) | 0.9952153    | 0.8476576    | not scorable | not scorable | 1         | 0.7412776 |
| #### Bn-A05-p12193915 | A-genome specific (napus-rapa) | 0.9904306    | 0.6844695    | not scorable | not scorable | 0.9834711 | 0.7229283 |
| #### Bn-A05-p12199879 | A-genome specific (napus-rapa) | 0.9808612    | 0.7940825    | not scorable | not scorable | 0.9917355 | 0.7894837 |
| #### Bn-A05-p1220485  | A-genome specific (napus-rapa) | 0.9952153    | 0.7324972    | not scorable | not scorable | 0.9917355 | 0.7131635 |

|                       |                                |              |              |              |              |           |           |
|-----------------------|--------------------------------|--------------|--------------|--------------|--------------|-----------|-----------|
| #### Bn-A05-p12205591 | A-genome specific (napus-rapa) | 0.9928229    | 0.8675802    | not scorable | not scorable | 0.9917355 | 0.7907953 |
| #### Bn-A05-p12207497 | A-genome specific (napus-rapa) | 0.9904306    | 0.7710915    | not scorable | not scorable | 0.9917355 | 0.7886205 |
| #### Bn-A05-p12208604 | A-genome specific (rapa only)  | not scorable | not scorable | not scorable | not scorable | 0.9917355 | 0.6806947 |
| #### Bn-A05-p12208728 | A-genome specific (napus-rapa) | 0.9808612    | 0.6977511    | not scorable | not scorable | 0.9917355 | 0.6158109 |
| #### Bn-A05-p12208840 | A-genome specific (napus-rapa) | 0.9880383    | 0.8236844    | not scorable | not scorable | 0.9917355 | 0.7944437 |
| #### Bn-A05-p12209129 | A-genome specific (napus-rapa) | 0.9976076    | 0.7228634    | not scorable | not scorable | 0.9917355 | 0.7724233 |
| #### Bn-A05-p12209466 | A-genome specific (napus-rapa) | 0.9880383    | 0.7562965    | not scorable | not scorable | 0.9917355 | 0.6949515 |
| #### Bn-A05-p12216620 | A-genome specific (napus-rapa) | 0.9808612    | 0.4155895    | not scorable | not scorable | 0.9752066 | 0.4500768 |
| #### Bn-A05-p12246566 | A-genome specific (napus-rapa) | 0.9928229    | 0.2806034    | not scorable | not scorable | 0.9834711 | 0.7626072 |
| #### Bn-A05-p12248987 | A-genome specific (napus-rapa) | 0.9593301    | 0.6909347    | not scorable | not scorable | 0.9834711 | 0.7086985 |
| #### Bn-A05-p12298408 | A-genome specific (napus-rapa) | 0.937799     | 0.8502172    | not scorable | not scorable | 0.9752066 | 0.8394201 |
| #### Bn-A05-p12321766 | A-genome specific (napus-rapa) | 0.9904306    | 0.2832311    | not scorable | not scorable | 1         | 0.8411826 |
| #### Bn-A05-p12362411 | A-genome specific (napus-rapa) | 0.9928229    | 0.4449223    | not scorable | not scorable | 1         | 0.7785457 |
| #### Bn-A05-p1237296  | A-genome specific (napus-rapa) | 0.9736842    | 0.4250365    | not scorable | not scorable | 0.9917355 | 0.625229  |
| #### Bn-A05-p12378382 | A-genome specific (napus-rapa) | 0.9808612    | 0.7729486    | not scorable | not scorable | 0.9586777 | 0.7323682 |
| #### Bn-A05-p12395933 | A-genome specific (napus-rapa) | 0.9928229    | 0.4513147    | not scorable | not scorable | 0.9917355 | 0.8177226 |
| #### Bn-A05-p12408504 | A-genome specific (napus-rapa) | 0.9976076    | 0.3931613    | not scorable | not scorable | 1         | 0.7534895 |
| #### Bn-A05-p12418607 | A-genome specific (napus-rapa) | 0.9617225    | 0.458407     | not scorable | not scorable | 0.9752066 | 0.8636117 |
| #### Bn-A05-p12418761 | A-genome specific (napus-rapa) | 0.9880383    | 0.8026497    | not scorable | not scorable | 0.9917355 | 0.7104266 |
| #### Bn-A05-p12418828 | A-genome specific (napus-rapa) | 0.9880383    | 0.9092134    | not scorable | not scorable | 0.9834711 | 0.7526832 |
| #### Bn-A05-p12436060 | A-genome specific (napus-rapa) | 0.9832536    | 0.6399797    | not scorable | not scorable | 1         | 0.7494859 |
| #### Bn-A05-p12447042 | A-genome specific (napus-rapa) | 0.9952153    | 0.4593855    | not scorable | not scorable | 1         | 0.6949418 |
| #### Bn-A05-p12447170 | A-genome specific (napus-rapa) | 0.9904306    | 0.3445522    | not scorable | not scorable | 1         | 0.7308116 |
| #### Bn-A05-p12450816 | A-genome specific (napus-rapa) | 0.9976076    | 0.8048355    | not scorable | not scorable | 1         | 0.7709633 |
| #### Bn-A05-p12453362 | A-genome specific (napus-rapa) | 0.9856459    | 0.7879313    | not scorable | not scorable | 0.9669421 | 0.6849987 |
| #### Bn-A05-p12457036 | A-genome specific (napus-rapa) | 0.9856459    | 0.3241183    | not scorable | not scorable | 1         | 0.7911202 |
| #### Bn-A05-p12457173 | A-genome specific (napus-rapa) | 0.9880383    | 0.3713906    | not scorable | not scorable | 1         | 0.702443  |
| #### Bn-A05-p12457670 | A-genome specific (napus-rapa) | 0.9880383    | 0.2918586    | not scorable | not scorable | 0.9834711 | 0.6968593 |
| #### Bn-A05-p12489885 | A-genome specific (rapa only)  | not scorable | not scorable | not scorable | not scorable | 0.9752066 | 0.7083436 |
| #### Bn-A05-p12493072 | A-genome specific (napus-rapa) | 0.9736842    | 0.8115861    | not scorable | not scorable | 0.9917355 | 0.7029465 |
| #### Bn-A05-p12497800 | A-genome specific (napus-rapa) | 0.8660287    | 0.6470056    | not scorable | not scorable | 0.9834711 | 0.6358404 |
| #### Bn-A05-p12507206 | A-genome specific (napus-rapa) | 0.9928229    | 0.3180775    | not scorable | not scorable | 0.9917355 | 0.7851636 |
| #### Bn-A05-p12511706 | A-genome specific (napus-rapa) | 0.9880383    | 0.3850041    | not scorable | not scorable | 0.9917355 | 0.6697007 |

|                       |                                |              |              |              |              |           |           |
|-----------------------|--------------------------------|--------------|--------------|--------------|--------------|-----------|-----------|
| #### Bn-A05-p12519886 | A-genome specific (rapa only)  | not scorable | not scorable | not scorable | not scorable | 0.9917355 | 0.7288145 |
| #### Bn-A05-p12529959 | A-genome specific (napus-rapa) | 1            | 0.7611011    | not scorable | not scorable | 1         | 0.9158497 |
| #### Bn-A05-p1254185  | A-genome specific (napus-rapa) | 0.9928229    | 0.7687845    | not scorable | not scorable | 0.9834711 | 0.7160311 |
| #### Bn-A05-p12546760 | A-genome specific (napus-rapa) | 0.9665072    | 0.7981407    | not scorable | not scorable | 1         | 0.6761603 |
| #### Bn-A05-p12553495 | A-genome specific (napus-rapa) | 0.9832536    | 0.6272883    | not scorable | not scorable | 1         | 0.7849402 |
| #### Bn-A05-p12553851 | A-genome specific (napus-rapa) | 0.9904306    | 0.7633795    | not scorable | not scorable | 0.9834711 | 0.6744097 |
| #### Bn-A05-p12554299 | A-genome specific (napus-rapa) | 0.9808612    | 0.7774656    | not scorable | not scorable | 1         | 0.7397594 |
| #### Bn-A05-p12573416 | A-genome specific (napus-rapa) | 0.9880383    | 0.3838162    | not scorable | not scorable | 0.9834711 | 0.7412516 |
| #### Bn-A05-p12592066 | A-genome specific (napus-rapa) | 0.9976076    | 0.5060132    | not scorable | not scorable | 1         | 0.811729  |
| #### Bn-A05-p12597194 | A-genome specific (napus-rapa) | 0.9880383    | 0.5311761    | not scorable | not scorable | 0.9752066 | 0.7964972 |
| #### Bn-A05-p12597426 | A-genome specific (napus-rapa) | 0.9736842    | 0.8158063    | not scorable | not scorable | 0.9834711 | 0.7834632 |
| #### Bn-A05-p1259869  | A-genome specific (napus-rapa) | 0.9808612    | 0.7864878    | not scorable | not scorable | 1         | 0.8198699 |
| #### Bn-A05-p1260228  | A-genome specific (napus-rapa) | 0.9856459    | 0.799269     | not scorable | not scorable | 1         | 0.8647583 |
| #### Bn-A05-p1260305  | A-genome specific (napus-rapa) | 0.9880383    | 0.6872016    | not scorable | not scorable | 0.9917355 | 0.7127189 |
| #### Bn-A05-p1260565  | A-genome specific (napus-rapa) | 0.9617225    | 0.7873439    | not scorable | not scorable | 0.9752066 | 0.7040371 |
| #### Bn-A05-p12608926 | A-genome specific (napus-rapa) | 0.9928229    | 0.4431527    | not scorable | not scorable | 1         | 0.7110881 |
| #### Bn-A05-p12643056 | A-genome specific (napus-rapa) | 0.9880383    | 0.4527169    | not scorable | not scorable | 1         | 0.7007595 |
| #### Bn-A05-p1267683  | A-genome specific (napus-rapa) | 0.9808612    | 0.4915771    | not scorable | not scorable | 1         | 0.8508493 |
| #### Bn-A05-p12684736 | A-genome specific (napus-rapa) | 0.9928229    | 0.3137266    | not scorable | not scorable | 0.9917355 | 0.8041816 |
| #### Bn-A05-p12734993 | A-genome specific (napus-rapa) | 0.9856459    | 0.5767543    | not scorable | not scorable | 0.9917355 | 0.8002324 |
| #### Bn-A05-p1279304  | A-genome specific (napus-rapa) | 0.9712918    | 0.2987345    | not scorable | not scorable | 0.9917355 | 0.7284475 |
| #### Bn-A05-p1281138  | A-genome specific (napus-rapa) | 0.6602871    | 0.9126741    | not scorable | not scorable | 0.9090909 | 0.9032104 |
| #### Bn-A05-p12821101 | A-genome specific (napus-rapa) | 0.9904306    | 0.5412003    | not scorable | not scorable | 0.9917355 | 0.6170105 |
| #### Bn-A05-p12821172 | A-genome specific (napus-rapa) | 0.9808612    | 0.680163     | not scorable | not scorable | 0.9834711 | 0.6844396 |
| #### Bn-A05-p12838668 | A-genome specific (rapa only)  | not scorable | not scorable | not scorable | not scorable | 1         | 0.6241857 |
| #### Bn-A05-p12845300 | A-genome specific (napus-rapa) | 0.9904306    | 0.4443542    | not scorable | not scorable | 1         | 0.7444597 |
| #### Bn-A05-p12867516 | A-genome specific (napus-rapa) | 0.9904306    | 0.6560721    | not scorable | not scorable | 0.9834711 | 0.6922773 |
| #### Bn-A05-p12868006 | A-genome specific (napus-rapa) | 0.9808612    | 0.8216829    | not scorable | not scorable | 1         | 0.6916436 |
| #### Bn-A05-p12878356 | A-genome specific (napus-rapa) | 0.9832536    | 0.6306806    | not scorable | not scorable | 0.9834711 | 0.8142368 |
| #### Bn-A05-p12888273 | A-genome specific (napus-rapa) | 0.9832536    | 0.7663379    | not scorable | not scorable | 1         | 0.7354251 |
| #### Bn-A05-p12888422 | A-genome specific (napus-rapa) | 0.9736842    | 0.7228274    | not scorable | not scorable | 1         | 0.7129829 |
| #### Bn-A05-p12889434 | A-genome specific (napus-rapa) | 0.9952153    | 0.457323     | not scorable | not scorable | 0.9917355 | 0.6840535 |
| #### Bn-A05-p12890298 | A-genome specific (napus-rapa) | 0.9880383    | 0.7477623    | not scorable | not scorable | 1         | 0.7751675 |

|                       |                                |              |              |              |              |              |              |
|-----------------------|--------------------------------|--------------|--------------|--------------|--------------|--------------|--------------|
| #### Bn-A05-p12890362 | A-genome specific (napus-rapa) | 0.9808612    | 0.6319359    | not scorable | not scorable | 0.9669421    | 0.690979     |
| #### Bn-A05-p12891251 | A-genome specific (napus-rapa) | 1            | 0.5344025    | not scorable | not scorable | 0.9834711    | 0.8115477    |
| #### Bn-A05-p12891987 | A-genome specific (napus-rapa) | 0.9880383    | 0.8566455    | not scorable | not scorable | 1            | 0.9080831    |
| #### Bn-A05-p12895483 | A-genome specific (napus-rapa) | 0.9904306    | 0.669691     | not scorable | not scorable | 0.9917355    | 0.7172675    |
| #### Bn-A05-p12911399 | A-genome specific (napus-rapa) | 0.9736842    | 0.6437307    | not scorable | not scorable | 0.9834711    | 0.6914029    |
| #### Bn-A05-p12930251 | A-genome specific (napus-rapa) | 0.354067     | 0.7725613    | not scorable | not scorable | 0.9834711    | 0.9175813    |
| #### Bn-A05-p12952248 | A-genome specific (napus-rapa) | 0.9952153    | 0.6756845    | not scorable | not scorable | 1            | 0.7287537    |
| #### Bn-A05-p1299570  | A-genome specific (rapa only)  | not scorable | not scorable | not scorable | not scorable | 0.9834711    | 0.7113431    |
| #### Bn-A05-p13000538 | A-genome specific (napus-rapa) | 0.3851674    | 0.7832317    | not scorable | not scorable | 0.9752066    | 0.7999963    |
| #### Bn-A05-p13013349 | A-genome specific (napus-rapa) | 0.3803828    | 0.7069109    | not scorable | not scorable | 0.9669421    | 0.7808555    |
| #### Bn-A05-p1308471  | A-genome specific (napus-rapa) | 0.9808612    | 0.685629     | not scorable | not scorable | 0.9752066    | 0.6307886    |
| #### Bn-A05-p13094470 | A-genome specific (rapa only)  | not scorable | not scorable | not scorable | not scorable | 0.9917355    | 0.675553     |
| #### Bn-A05-p13098758 | A-genome specific (napus-rapa) | 0.9808612    | 0.794416     | not scorable | not scorable | 1            | 0.7727491    |
| #### Bn-A05-p1310329  | A-genome specific (napus-rapa) | 0.9186603    | 0.7898545    | not scorable | not scorable | 0.9917355    | 0.6103619    |
| #### Bn-A05-p1311652  | A-genome specific (napus-rapa) | 0.9904306    | 0.4460801    | not scorable | not scorable | 1            | 0.8329018    |
| #### Bn-A05-p13119450 | A-genome specific (napus-rapa) | 0.9712918    | 0.7932056    | not scorable | not scorable | 0.9917355    | 0.7230601    |
| #### Bn-A05-p13126937 | A-genome specific (napus-rapa) | 0.9832536    | 0.3106436    | not scorable | not scorable | 0.9917355    | 0.7105414    |
| #### Bn-A05-p13165406 | napus specific                 | 0.9665072    | 0.5090244    | not scorable | not scorable | not scorable | not scorable |
| #### Bn-A05-p13168139 | A-genome specific (napus-rapa) | 0.9880383    | 0.7873908    | not scorable | not scorable | 1            | 0.8366613    |
| #### Bn-A05-p13175224 | A-genome specific (napus-rapa) | 0.9760765    | 0.6961217    | not scorable | not scorable | 1            | 0.76025      |
| #### Bn-A05-p13178934 | A-genome specific (napus-rapa) | 0.9808612    | 0.8046561    | not scorable | not scorable | 1            | 0.8252965    |
| #### Bn-A05-p13178955 | A-genome specific (napus-rapa) | 0.9856459    | 0.7747124    | not scorable | not scorable | 0.9917355    | 0.8701311    |
| #### Bn-A05-p13179258 | A-genome specific (napus-rapa) | 0.9736842    | 0.7925007    | not scorable | not scorable | 0.9917355    | 0.7546523    |
| #### Bn-A05-p13184792 | A-genome specific (napus-rapa) | 0.9952153    | 0.4030424    | not scorable | not scorable | 1            | 0.8898563    |
| #### Bn-A05-p13187401 | A-genome specific (napus-rapa) | 0.9904306    | 0.7997032    | not scorable | not scorable | 1            | 0.8224833    |
| #### Bn-A05-p13190945 | A-genome specific (napus-rapa) | 0.9856459    | 0.2190625    | not scorable | not scorable | 0.9917355    | 0.7122391    |
| #### Bn-A05-p13191000 | A-genome specific (napus-rapa) | 0.9641148    | 0.7673834    | not scorable | not scorable | 0.9917355    | 0.830798     |
| #### Bn-A05-p13224690 | A-genome specific (napus-rapa) | 0.9928229    | 0.5053673    | not scorable | not scorable | 1            | 0.8457354    |
| #### Bn-A05-p13227178 | A-genome specific (napus-rapa) | 0.9952153    | 0.501025     | not scorable | not scorable | 0.9834711    | 0.837082     |
| #### Bn-A05-p13282990 | A-genome specific (napus-rapa) | 0.9952153    | 0.7747018    | not scorable | not scorable | 1            | 0.7926157    |
| #### Bn-A05-p13301511 | A-genome specific (napus-rapa) | 0.3971292    | 0.8172142    | not scorable | not scorable | 1            | 0.7864866    |
| #### Bn-A05-p1335771  | A-genome specific (napus-rapa) | 0.9880383    | 0.3658217    | not scorable | not scorable | 1            | 0.8123307    |
| #### Bn-A05-p13372155 | A-genome specific (napus-rapa) | 0.3995215    | 0.7192481    | not scorable | not scorable | 0.9834711    | 0.776039     |

|                       |                                   |              |              |              |              |           |              |
|-----------------------|-----------------------------------|--------------|--------------|--------------|--------------|-----------|--------------|
| #### Bn-A05-p13453538 | A-genome specific (napus-rapa)    | 0.9904306    | 0.496338     | not scorable | not scorable | 0.9834711 | 0.6998889    |
| #### Bn-A05-p13460617 | A-genome specific (napus-rapa)    | 0.9976076    | 0.490584     | not scorable | not scorable | 0.9834711 | 0.895432     |
| #### Bn-A05-p1347246  | A-genome specific (napus-rapa)    | 0.9617225    | 0.7890999    | not scorable | not scorable | 0.9586777 | 0.8063037    |
| #### Bn-A05-p13482596 | A-genome specific (napus-rapa)    | 0.9904306    | 0.7835218    | not scorable | not scorable | 1         | 0.8207101    |
| #### Bn-A05-p13483874 | A-genome specific (napus-rapa)    | 0.9832536    | 0.7677003    | not scorable | not scorable | 0.9669421 | 0.7230237    |
| #### Bn-A05-p13483931 | A-genome specific (napus-rapa)    | 0.9856459    | 0.8002555    | not scorable | not scorable | 0.9752066 | 0.7280045    |
| #### Bn-A05-p13488514 | A-genome specific (napus-rapa)    | 0.9784689    | 0.8188689    | not scorable | not scorable | 0.9917355 | 0.8433141    |
| #### Bn-A05-p13488725 | A-genome specific (napus-rapa)    | 0.9904306    | 0.8027456    | not scorable | not scorable | 0.9917355 | 0.7335148    |
| #### Bn-A05-p13489002 | A-genome specific (napus-rapa)    | 0.9880383    | 0.8091476    | not scorable | not scorable | 0.9917355 | 0.7338857    |
| #### Bn-A05-p13493260 | A-genome specific (napus-rapa)    | 0.9856459    | 0.8161368    | not scorable | not scorable | 1         | 0.7481321    |
| #### Bn-A05-p13493392 | A-genome specific (napus-rapa)    | 0.9832536    | 0.7362406    | not scorable | not scorable | 1         | 0.8094467    |
| #### Bn-A05-p13493704 | A-genome specific (napus-rapa)    | 0.9832536    | 0.7749788    | not scorable | not scorable | 0.9834711 | 0.8763453    |
| #### Bn-A05-p13493781 | A-genome specific (napus-rapa)    | 0.9832536    | 0.7189589    | not scorable | not scorable | 1         | 0.8160059    |
| #### Bn-A05-p13493836 | A-genome specific (napus-rapa)    | 0.9856459    | 0.7921391    | not scorable | not scorable | 1         | 0.891156     |
| #### Bn-A05-p13494389 | A-genome specific (napus-rapa)    | 0.9928229    | 0.6618043    | not scorable | not scorable | 0.9834711 | 0.731228     |
| #### Bn-A05-p13494414 | A-genome specific (napus-rapa)    | 0.9904306    | 0.7100684    | not scorable | not scorable | 0.9917355 | 0.7601068    |
| #### Bn-A05-p1349520  | A-genome specific (napus-rapa)    | 0.9760765    | 0.7388194    | not scorable | not scorable | 0.9752066 | 0.8102825    |
| #### Bn-A05-p13504387 | A-genome specific (napus-rapa)    | 0.9928229    | 0.4699766    | not scorable | not scorable | 1         | 0.8465989    |
| #### Bn-A05-p1350976  | A-genome specific (napus-rapa)    | 0.9712918    | 0.7458147    | not scorable | not scorable | 1         | 0.8200578    |
| #### Bn-A05-p13514214 | A-genome specific (napus-rapa)    | 0.9952153    | 0.4063192    | not scorable | not scorable | 0.9834711 | 0.7681223    |
| #### Bn-A05-p13526183 | A-genome specific (napus-rapa)    | 0.9832536    | 0.7413812    | not scorable | not scorable | 0.9834711 | 0.7767414    |
| #### Bn-A05-p13528032 | A-genome specific (napus-rapa)    | 0.861244     | 0.7728866    | not scorable | not scorable | 0.9834711 | 0.7235278    |
| #### Bn-A05-p1353104  | C-genome specific (oleracea only) | not scorable | not scorable |              | 1            | 0.7331931 | not scorable |
| #### Bn-A05-p13532974 | A-genome specific (napus-rapa)    | 0.9856459    | 0.7951331    | not scorable | not scorable | 0.9917355 | 0.683278     |
| #### Bn-A05-p13533202 | A-genome specific (napus-rapa)    | 0.9617225    | 0.7897811    | not scorable | not scorable | 0.9834711 | 0.7711689    |
| #### Bn-A05-p13533449 | A-genome specific (napus-rapa)    | 0.9880383    | 0.7867874    | not scorable | not scorable | 0.9752066 | 0.7913948    |
| #### Bn-A05-p13541711 | A-genome specific (napus-rapa)    | 0.9880383    | 0.6913       | not scorable | not scorable | 1         | 0.7446905    |
| #### Bn-A05-p13552586 | A-genome specific (napus-rapa)    | 0.9904306    | 0.8032731    | not scorable | not scorable | 0.9834711 | 0.8620332    |
| #### Bn-A05-p13553481 | A-genome specific (napus-rapa)    | 0.9425837    | 0.7166058    | not scorable | not scorable | 1         | 0.7578908    |
| #### Bn-A05-p13553743 | A-genome specific (napus-rapa)    | 0.9976076    | 0.7855683    | not scorable | not scorable | 1         | 0.7515587    |
| #### Bn-A05-p13554854 | A-genome specific (napus-rapa)    | 0.9760765    | 0.6102501    | not scorable | not scorable | 0.9834711 | 0.74719      |
| #### Bn-A05-p1356378  | A-genome specific (napus-rapa)    | 0.9545454    | 0.4927146    | not scorable | not scorable | 1         | 0.7227259    |
| #### Bn-A05-p13565564 | A-genome specific (napus-rapa)    | 0.9928229    | 0.8003382    | not scorable | not scorable | 1         | 0.7951249    |

|                       |                                |              |              |              |              |           |           |
|-----------------------|--------------------------------|--------------|--------------|--------------|--------------|-----------|-----------|
| #### Bn-A05-p1368115  | A-genome specific (napus-rapa) | 0.9617225    | 0.7514594    | not scorable | not scorable | 1         | 0.8613519 |
| #### Bn-A05-p13687507 | A-genome specific (napus-rapa) | 0.9904306    | 0.4794829    | not scorable | not scorable | 0.9917355 | 0.7135841 |
| #### Bn-A05-p13688426 | A-genome specific (napus-rapa) | 0.9904306    | 0.7326518    | not scorable | not scorable | 0.9586777 | 0.662137  |
| #### Bn-A05-p13688982 | A-genome specific (napus-rapa) | 0.9904306    | 0.3676944    | not scorable | not scorable | 0.9917355 | 0.7063069 |
| #### Bn-A05-p13690413 | A-genome specific (napus-rapa) | 0.9928229    | 0.272142     | not scorable | not scorable | 0.9917355 | 0.699124  |
| #### Bn-A05-p1372057  | A-genome specific (napus-rapa) | 0.9425837    | 0.4685318    | not scorable | not scorable | 1         | 0.6533017 |
| #### Bn-A05-p137314   | A-genome specific (napus-rapa) | 0.6937799    | 0.7736022    | not scorable | not scorable | 0.9917355 | 0.7314861 |
| #### Bn-A05-p13751450 | A-genome specific (napus-rapa) | 0.9856459    | 0.8160366    | not scorable | not scorable | 1         | 0.8079789 |
| #### Bn-A05-p13760191 | A-genome specific (napus-rapa) | 0.9617225    | 0.41025      | not scorable | not scorable | 0.9917355 | 0.7282501 |
| #### Bn-A05-p13760281 | A-genome specific (napus-rapa) | 0.8564593    | 0.8104867    | not scorable | not scorable | 0.9917355 | 0.8700463 |
| #### Bn-A05-p13766174 | A-genome specific (napus-rapa) | 0.9832536    | 0.8136856    | not scorable | not scorable | 0.9834711 | 0.7176499 |
| #### Bn-A05-p13774122 | A-genome specific (napus-rapa) | 0.9808612    | 0.5089132    | not scorable | not scorable | 1         | 0.1978836 |
| #### Bn-A05-p13774324 | A-genome specific (napus-rapa) | 0.7870814    | 0.839577     | not scorable | not scorable | 0.9917355 | 0.7914145 |
| #### Bn-A05-p13778123 | A-genome specific (napus-rapa) | 0.8708134    | 0.678169     | not scorable | not scorable | 0.9834711 | 0.8529011 |
| #### Bn-A05-p13778371 | A-genome specific (napus-rapa) | 0.8755981    | 0.7763469    | not scorable | not scorable | 1         | 0.8425163 |
| #### Bn-A05-p13778538 | A-genome specific (napus-rapa) | 0.8803828    | 0.6764037    | not scorable | not scorable | 0.9752066 | 0.8451946 |
| #### Bn-A05-p13809267 | A-genome specific (napus-rapa) | 0.9760765    | 0.5502014    | not scorable | not scorable | 0.9834711 | 0.6976266 |
| #### Bn-A05-p13811322 | A-genome specific (napus-rapa) | 0.9880383    | 0.6552807    | not scorable | not scorable | 0.9834711 | 0.7940351 |
| #### Bn-A05-p13811525 | A-genome specific (napus-rapa) | 0.9712918    | 0.7712513    | not scorable | not scorable | 0.9834711 | 0.8404107 |
| #### Bn-A05-p13813146 | A-genome specific (napus-rapa) | 0.9952153    | 0.3812588    | not scorable | not scorable | 1         | 0.7364012 |
| #### Bn-A05-p13816756 | A-genome specific (napus-rapa) | 0.9784689    | 0.7378824    | not scorable | not scorable | 0.9917355 | 0.6621579 |
| #### Bn-A05-p13816826 | A-genome specific (napus-rapa) | 0.9832536    | 0.7385879    | not scorable | not scorable | 0.9834711 | 0.7130393 |
| #### Bn-A05-p13816842 | A-genome specific (napus-rapa) | 0.9832536    | 0.6734825    | not scorable | not scorable | 1         | 0.6872042 |
| #### Bn-A05-p13817153 | A-genome specific (napus-rapa) | 0.9808612    | 0.7846883    | not scorable | not scorable | 1         | 0.7473196 |
| #### Bn-A05-p13817451 | A-genome specific (napus-rapa) | 0.9928229    | 0.7258217    | not scorable | not scorable | 0.9834711 | 0.6874065 |
| #### Bn-A05-p13822414 | A-genome specific (napus-rapa) | 0.9832536    | 0.6532624    | not scorable | not scorable | 1         | 0.7766234 |
| #### Bn-A05-p13822616 | A-genome specific (napus-rapa) | 0.9904306    | 0.8201162    | not scorable | not scorable | 0.9917355 | 0.8231684 |
| #### Bn-A05-p13823408 | A-genome specific (napus-rapa) | 0.9976076    | 0.7245713    | not scorable | not scorable | 0.9752066 | 0.6923596 |
| #### Bn-A05-p13825402 | A-genome specific (napus-rapa) | 0.9784689    | 0.8118443    | not scorable | not scorable | 0.9917355 | 0.653144  |
| #### Bn-A05-p13826013 | A-genome specific (napus-rapa) | 0.9832536    | 0.5139144    | not scorable | not scorable | 1         | 0.7233354 |
| #### Bn-A05-p13834175 | A-genome specific (napus-rapa) | 1            | 0.5192636    | not scorable | not scorable | 0.9834711 | 0.7326576 |
| #### Bn-A05-p13834240 | A-genome specific (rapa only)  | not scorable | not scorable | not scorable | not scorable | 0.9917355 | 0.8351378 |
| #### Bn-A05-p1384000  | A-genome specific (napus-rapa) | 0.9688995    | 0.6978064    | not scorable | not scorable | 0.9834711 | 0.7716873 |

|                       |                                |           |           |              |              |           |           |
|-----------------------|--------------------------------|-----------|-----------|--------------|--------------|-----------|-----------|
| #### Bn-A05-p13844605 | A-genome specific (napus-rapa) | 1         | 0.5999731 | not scorable | not scorable | 1         | 0.6028796 |
| #### Bn-A05-p13845255 | A-genome specific (napus-rapa) | 0.9928229 | 0.6469375 | not scorable | not scorable | 0.9752066 | 0.7577213 |
| #### Bn-A05-p1384677  | A-genome specific (napus-rapa) | 0.9808612 | 0.7675519 | not scorable | not scorable | 0.9917355 | 0.7773376 |
| #### Bn-A05-p1385188  | A-genome specific (napus-rapa) | 0.9808612 | 0.7623653 | not scorable | not scorable | 0.9834711 | 0.715282  |
| #### Bn-A05-p13852930 | A-genome specific (napus-rapa) | 0.9856459 | 0.7852725 | not scorable | not scorable | 1         | 0.7941309 |
| #### Bn-A05-p13853329 | A-genome specific (napus-rapa) | 0.8732057 | 0.8379179 | not scorable | not scorable | 0.9917355 | 0.7798659 |
| #### Bn-A05-p13856683 | A-genome specific (napus-rapa) | 0.9760765 | 0.3584197 | not scorable | not scorable | 0.9752066 | 0.493851  |
| #### Bn-A05-p13863624 | A-genome specific (napus-rapa) | 0.9880383 | 0.7436077 | not scorable | not scorable | 1         | 0.7346509 |
| #### Bn-A05-p13863673 | A-genome specific (napus-rapa) | 0.9952153 | 0.6098399 | not scorable | not scorable | 0.9917355 | 0.7088531 |
| #### Bn-A05-p13863975 | A-genome specific (napus-rapa) | 0.9928229 | 0.4700585 | not scorable | not scorable | 1         | 0.6507345 |
| #### Bn-A05-p13864064 | A-genome specific (napus-rapa) | 0.9736842 | 0.6167814 | not scorable | not scorable | 1         | 0.8678269 |
| #### Bn-A05-p13864133 | A-genome specific (napus-rapa) | 0.9808612 | 0.6631585 | not scorable | not scorable | 0.9917355 | 0.6643708 |
| #### Bn-A05-p13864467 | A-genome specific (napus-rapa) | 0.9856459 | 0.768726  | not scorable | not scorable | 0.9917355 | 0.8722557 |
| #### Bn-A05-p13869168 | A-genome specific (napus-rapa) | 0.9952153 | 0.6563772 | not scorable | not scorable | 1         | 0.799539  |
| #### Bn-A05-p13876782 | A-genome specific (napus-rapa) | 0.9904306 | 0.6782483 | not scorable | not scorable | 1         | 0.78584   |
| #### Bn-A05-p13880377 | A-genome specific (napus-rapa) | 0.9952153 | 0.7413821 | not scorable | not scorable | 1         | 0.8029795 |
| #### Bn-A05-p13882697 | A-genome specific (napus-rapa) | 0.9880383 | 0.3930521 | not scorable | not scorable | 1         | 0.8673864 |
| #### Bn-A05-p13883109 | A-genome specific (napus-rapa) | 0.9425837 | 0.356817  | not scorable | not scorable | 1         | 0.7221759 |
| #### Bn-A05-p13886960 | A-genome specific (napus-rapa) | 0.9808612 | 0.8075964 | not scorable | not scorable | 0.9834711 | 0.74742   |
| #### Bn-A05-p13891848 | A-genome specific (napus-rapa) | 0.9880383 | 0.7937678 | not scorable | not scorable | 0.9917355 | 0.7512119 |
| #### Bn-A05-p13895100 | A-genome specific (napus-rapa) | 0.9928229 | 0.6979634 | not scorable | not scorable | 1         | 0.7765287 |
| #### Bn-A05-p13895153 | A-genome specific (napus-rapa) | 0.9832536 | 0.8050931 | not scorable | not scorable | 0.9834711 | 0.8698773 |
| #### Bn-A05-p13896924 | A-genome specific (napus-rapa) | 0.9928229 | 0.7534214 | not scorable | not scorable | 1         | 0.8116738 |
| #### Bn-A05-p13897888 | A-genome specific (napus-rapa) | 0.9976076 | 0.7385688 | not scorable | not scorable | 0.9917355 | 0.7780793 |
| #### Bn-A05-p13900766 | A-genome specific (napus-rapa) | 0.9928229 | 0.7996481 | not scorable | not scorable | 1         | 0.7500615 |
| #### Bn-A05-p13907424 | A-genome specific (napus-rapa) | 0.9832536 | 0.1752356 | not scorable | not scorable | 0.9669421 | 0.7884697 |
| #### Bn-A05-p13908499 | A-genome specific (napus-rapa) | 0.9952153 | 0.3651779 | not scorable | not scorable | 1         | 0.5023226 |
| #### Bn-A05-p13931810 | A-genome specific (napus-rapa) | 0.9928229 | 0.4967313 | not scorable | not scorable | 0.9834711 | 0.7134245 |
| #### Bn-A05-p13948854 | A-genome specific (napus-rapa) | 0.9952153 | 0.7995563 | not scorable | not scorable | 0.9917355 | 0.7551011 |
| #### Bn-A05-p1396162  | A-genome specific (napus-rapa) | 0.9043062 | 0.7500815 | not scorable | not scorable | 0.5867769 | 0.9166433 |
| #### Bn-A05-p13962356 | A-genome specific (napus-rapa) | 0.9688995 | 0.8108222 | not scorable | not scorable | 1         | 0.7492601 |
| #### Bn-A05-p13963172 | A-genome specific (napus-rapa) | 0.6650718 | 0.8151597 | not scorable | not scorable | 1         | 0.8207138 |
| #### Bn-A05-p13965323 | A-genome specific (napus-rapa) | 0.9952153 | 0.771007  | not scorable | not scorable | 1         | 0.9271286 |

|                       |                                |              |              |              |              |              |              |
|-----------------------|--------------------------------|--------------|--------------|--------------|--------------|--------------|--------------|
| #### Bn-A05-p1396567  | A-genome specific (napus-rapa) | 0.8971292    | 0.7661606    | not scorable | not scorable | 0.5454546    | 0.7890839    |
| #### Bn-A05-p13968337 | A-genome specific (napus-rapa) | 0.9856459    | 0.7526824    | not scorable | not scorable | 1            | 0.8129922    |
| #### Bn-A05-p13969222 | A-genome specific (napus-rapa) | 0.9569378    | 0.7754179    | not scorable | not scorable | 1            | 0.8217288    |
| #### Bn-A05-p1396959  | all not scorable               | not scorable | not scorable | not scorable | not scorable | not scorable | not scorable |
| #### Bn-A05-p13973628 | A-genome specific (napus-rapa) | 0.9928229    | 0.516964     | not scorable | not scorable | 0.9917355    | 0.7507907    |
| #### Bn-A05-p13975657 | A-genome specific (napus-rapa) | 0.9784689    | 0.2027846    | not scorable | not scorable | 0.9834711    | 0.7254837    |
| #### Bn-A05-p14021272 | A-genome specific (napus-rapa) | 0.9880383    | 0.7540577    | not scorable | not scorable | 0.9917355    | 0.815152     |
| #### Bn-A05-p14029097 | A-genome specific (napus-rapa) | 0.9784689    | 0.7808251    | not scorable | not scorable | 0.9917355    | 0.7537515    |
| #### Bn-A05-p14029214 | all not scorable               | not scorable | not scorable | not scorable | not scorable | not scorable | not scorable |
| #### Bn-A05-p14040257 | A-genome specific (napus-rapa) | 0.9736842    | 0.4005092    | not scorable | not scorable | 0.9669421    | 0.4212311    |
| #### Bn-A05-p14040907 | A-genome specific (napus-rapa) | 0.9808612    | 0.4296155    | not scorable | not scorable | 0.9752066    | 0.6714398    |
| #### Bn-A05-p14042687 | A-genome specific (napus-rapa) | 0.9712918    | 0.5099954    | not scorable | not scorable | 0.9834711    | 0.7495871    |
| #### Bn-A05-p140798   | A-genome specific (napus-rapa) | 0.9258373    | 0.6342245    | not scorable | not scorable | 0.9917355    | 0.6893881    |
| #### Bn-A05-p14104827 | A-genome specific (napus-rapa) | 1            | 0.8021232    | not scorable | not scorable | 1            | 0.8361113    |
| #### Bn-A05-p14106384 | A-genome specific (napus-rapa) | 1            | 0.4595138    | not scorable | not scorable | 1            | 0.8090124    |
| #### Bn-A05-p14121401 | A-genome specific (napus-rapa) | 0.7822967    | 0.7564514    | not scorable | not scorable | 0.9917355    | 0.5940767    |
| #### Bn-A05-p14131155 | A-genome specific (napus-rapa) | 0.9832536    | 0.7562683    | not scorable | not scorable | 1            | 0.7514383    |
| #### Bn-A05-p14144406 | A-genome specific (napus-rapa) | 0.7894737    | 0.7740884    | not scorable | not scorable | 1            | 0.8120064    |
| #### Bn-A05-p14146305 | A-genome specific (napus-rapa) | 0.9904306    | 0.7616547    | not scorable | not scorable | 1            | 0.7247769    |
| #### Bn-A05-p14175152 | napus specific                 | 0.9808612    | 0.3778795    | not scorable | not scorable | not scorable | not scorable |
| #### Bn-A05-p14198626 | A-genome specific (napus-rapa) | 1            | 0.8170009    | not scorable | not scorable | 0.9834711    | 0.8392849    |
| #### Bn-A05-p14202849 | A-genome specific (napus-rapa) | 1            | 0.3898809    | not scorable | not scorable | 1            | 0.717967     |
| #### Bn-A05-p14205845 | A-genome specific (napus-rapa) | 0.9832536    | 0.715423     | not scorable | not scorable | 0.9917355    | 0.7272967    |
| #### Bn-A05-p14206065 | A-genome specific (napus-rapa) | 0.9832536    | 0.7855651    | not scorable | not scorable | 0.9834711    | 0.7542132    |
| #### Bn-A05-p14206169 | A-genome specific (napus-rapa) | 0.9976076    | 0.9034107    | not scorable | not scorable | 1            | 0.8346071    |
| #### Bn-A05-p14206731 | A-genome specific (napus-rapa) | 0.9976076    | 0.7868271    | not scorable | not scorable | 1            | 0.7494321    |
| #### Bn-A05-p14207371 | A-genome specific (napus-rapa) | 0.9976076    | 0.8384841    | not scorable | not scorable | 1            | 0.8369067    |
| #### Bn-A05-p14207788 | A-genome specific (napus-rapa) | 0.9976076    | 0.9237373    | not scorable | not scorable | 1            | 0.8667399    |
| #### Bn-A05-p14208091 | A-genome specific (napus-rapa) | 0.9976076    | 0.7819678    | not scorable | not scorable | 1            | 0.7622204    |
| #### Bn-A05-p14208624 | A-genome specific (napus-rapa) | 0.9976076    | 0.8506218    | not scorable | not scorable | 1            | 0.8117813    |
| #### Bn-A05-p14208906 | A-genome specific (napus-rapa) | 0.9856459    | 0.7174041    | not scorable | not scorable | 0.9917355    | 0.6997458    |
| #### Bn-A05-p14213049 | A-genome specific (napus-rapa) | 0.9856459    | 0.4249578    | not scorable | not scorable | 0.9917355    | 0.6465485    |
| #### Bn-A05-p14253804 | napus specific                 | 0.9856459    | 0.919146     | not scorable | not scorable | not scorable | not scorable |



|                       |                                |              |              |              |              |              |              |
|-----------------------|--------------------------------|--------------|--------------|--------------|--------------|--------------|--------------|
| #### Bn-A05-p14255879 | napus specific                 | 0.9928229    | 0.8932253    | not scorable | not scorable | not scorable | not scorable |
| #### Bn-A05-p14256951 | A-genome specific (napus-rapa) | 0.9832536    | 0.6772866    | not scorable | not scorable | 1            | 0.6926029    |
| #### Bn-A05-p14285804 | A-genome specific (rapa only)  | not scorable | not scorable | not scorable | not scorable | 0.9752066    | 0.8013329    |
| #### Bn-A05-p14285873 | A-genome specific (rapa only)  | not scorable | not scorable | not scorable | not scorable | 0.9834711    | 0.8469042    |
| #### Bn-A05-p14313107 | A-genome specific (napus-rapa) | 0.9928229    | 0.4286734    | not scorable | not scorable | 1            | 0.6025474    |
| #### Bn-A05-p14325043 | A-genome specific (napus-rapa) | 1            | 0.60592      | not scorable | not scorable | 0.9917355    | 0.735331     |
| #### Bn-A05-p14332800 | A-genome specific (napus-rapa) | 1            | 0.506248     | not scorable | not scorable | 0.9917355    | 0.7971937    |
| #### Bn-A05-p14336877 | A-genome specific (napus-rapa) | 0.9856459    | 0.7438463    | not scorable | not scorable | 0.9917355    | 0.7396191    |
| #### Bn-A05-p14338060 | A-genome specific (napus-rapa) | 0.9928229    | 0.7387361    | not scorable | not scorable | 0.9834711    | 0.7587919    |
| #### Bn-A05-p14347292 | A-genome specific (napus-rapa) | 0.9808612    | 0.414051     | not scorable | not scorable | 0.9834711    | 0.7776639    |
| #### Bn-A05-p14347603 | A-genome specific (napus-rapa) | 0.9808612    | 0.8123105    | not scorable | not scorable | 0.9917355    | 0.8151368    |
| #### Bn-A05-p14347674 | A-genome specific (napus-rapa) | 0.9904306    | 0.731306     | not scorable | not scorable | 0.9834711    | 0.7675073    |
| #### Bn-A05-p1434959  | A-genome specific (napus-rapa) | 0.9904306    | 0.4842895    | not scorable | not scorable | 0.9834711    | 0.7519047    |
| #### Bn-A05-p14355487 | A-genome specific (rapa only)  | not scorable | not scorable | not scorable | not scorable | 1            | 0.7443701    |
| #### Bn-A05-p143572   | A-genome specific (napus-rapa) | 0.9688995    | 0.784629     | not scorable | not scorable | 0.9752066    | 0.7121841    |
| #### Bn-A05-p1436011  | A-genome specific (napus-rapa) | 0.9904306    | 0.5177342    | not scorable | not scorable | 0.9834711    | 0.7729131    |
| #### Bn-A05-p14364345 | A-genome specific (napus-rapa) | 0.9784689    | 0.3349369    | not scorable | not scorable | 0.9917355    | 0.7784424    |
| #### Bn-A05-p14364568 | all not scorable               | not scorable | not scorable | not scorable | not scorable | not scorable | not scorable |
| #### Bn-A05-p14372759 | A-genome specific (napus-rapa) | 0.9784689    | 0.3221039    | not scorable | not scorable | 1            | 0.7074004    |
| #### Bn-A05-p14374199 | A-genome specific (napus-rapa) | 0.9808612    | 0.814245     | not scorable | not scorable | 1            | 0.6876312    |
| #### Bn-A05-p14374632 | A-genome specific (napus-rapa) | 0.9808612    | 0.7934174    | not scorable | not scorable | 1            | 0.7716556    |
| #### Bn-A05-p14380049 | A-genome specific (napus-rapa) | 0.9880383    | 0.3719637    | not scorable | not scorable | 1            | 0.7265942    |
| #### Bn-A05-p14394157 | A-genome specific (napus-rapa) | 0.9808612    | 0.6792425    | not scorable | not scorable | 0.9752066    | 0.5497229    |
| #### Bn-A05-p14394895 | A-genome specific (napus-rapa) | 0.9928229    | 0.7681825    | not scorable | not scorable | 0.9834711    | 0.5876268    |
| #### Bn-A05-p14402155 | A-genome specific (napus-rapa) | 0.9736842    | 0.8202082    | not scorable | not scorable | 1            | 0.7421642    |
| #### Bn-A05-p14426042 | A-genome specific (napus-rapa) | 0.9952153    | 0.4348619    | not scorable | not scorable | 0.9669421    | 0.5778209    |
| #### Bn-A05-p14426121 | A-genome specific (napus-rapa) | 0.9856459    | 0.784063     | not scorable | not scorable | 1            | 0.7790133    |
| #### Bn-A05-p14435461 | A-genome specific (napus-rapa) | 0.9856459    | 0.8269274    | not scorable | not scorable | 0.9917355    | 0.7587654    |
| #### Bn-A05-p14443915 | A-genome specific (napus-rapa) | 0.9904306    | 0.3103996    | not scorable | not scorable | 0.9586777    | 0.6236752    |
| #### Bn-A05-p14444179 | A-genome specific (napus-rapa) | 0.9904306    | 0.2955016    | not scorable | not scorable | 0.9586777    | 0.6518297    |
| #### Bn-A05-p14447476 | A-genome specific (napus-rapa) | 0.9928229    | 0.5022085    | not scorable | not scorable | 0.9834711    | 0.6915604    |
| #### Bn-A05-p14464244 | A-genome specific (napus-rapa) | 0.9928229    | 0.4584039    | not scorable | not scorable | 0.9917355    | 0.7704409    |
| #### Bn-A05-p14464476 | A-genome specific (napus-rapa) | 0.9928229    | 0.3744709    | not scorable | not scorable | 1            | 0.7681217    |

|                       |                                |              |              |              |              |           |           |
|-----------------------|--------------------------------|--------------|--------------|--------------|--------------|-----------|-----------|
| #### Bn-A05-p14477462 | A-genome specific (napus-rapa) | 0.9832536    | 0.4693806    | not scorable | not scorable | 1         | 0.6758462 |
| #### Bn-A05-p14480752 | A-genome specific (napus-rapa) | 0.9425837    | 0.7793456    | not scorable | not scorable | 0.9586777 | 0.8289343 |
| #### Bn-A05-p14482654 | A-genome specific (napus-rapa) | 0.9832536    | 0.5779714    | not scorable | not scorable | 0.9917355 | 0.4764111 |
| #### Bn-A05-p14482858 | A-genome specific (napus-rapa) | 0.9880383    | 0.7399379    | not scorable | not scorable | 0.9917355 | 0.863204  |
| #### Bn-A05-p14483099 | A-genome specific (napus-rapa) | 0.8349282    | 0.7658073    | not scorable | not scorable | 0.9586777 | 0.8031629 |
| #### Bn-A05-p14483962 | A-genome specific (napus-rapa) | 0.9736842    | 0.7380367    | not scorable | not scorable | 0.9752066 | 0.6580356 |
| #### Bn-A05-p14496771 | A-genome specific (napus-rapa) | 0.8373206    | 0.7288017    | not scorable | not scorable | 0.9752066 | 0.7277868 |
| #### Bn-A05-p14505946 | A-genome specific (napus-rapa) | 0.9976076    | 0.7708385    | not scorable | not scorable | 0.9834711 | 0.7193513 |
| #### Bn-A05-p14516105 | A-genome specific (napus-rapa) | 0.9784689    | 0.7091001    | not scorable | not scorable | 0.9917355 | 0.750927  |
| #### Bn-A05-p1451750  | A-genome specific (napus-rapa) | 1            | 0.5406895    | not scorable | not scorable | 1         | 0.7658601 |
| #### Bn-A05-p14521315 | A-genome specific (napus-rapa) | 0.9832536    | 0.318531     | not scorable | not scorable | 1         | 0.6997939 |
| #### Bn-A05-p14525918 | A-genome specific (napus-rapa) | 0.8421053    | 0.8169802    | not scorable | not scorable | 0.9834711 | 0.7190273 |
| #### Bn-A05-p14529716 | A-genome specific (napus-rapa) | 0.9904306    | 0.542789     | not scorable | not scorable | 0.9917355 | 0.7279447 |
| #### Bn-A05-p14532593 | A-genome specific (rapa only)  | not scorable | not scorable | not scorable | not scorable | 0.9669421 | 0.8086067 |
| #### Bn-A05-p14533489 | A-genome specific (napus-rapa) | 0.8373206    | 0.758665     | not scorable | not scorable | 0.9669421 | 0.7592772 |
| #### Bn-A05-p14537104 | A-genome specific (napus-rapa) | 0.9976076    | 0.6153359    | not scorable | not scorable | 0.9834711 | 0.689976  |
| #### Bn-A05-p14546189 | A-genome specific (napus-rapa) | 0.9617225    | 0.2713633    | not scorable | not scorable | 0.9834711 | 0.7709047 |
| #### Bn-A05-p14547107 | A-genome specific (napus-rapa) | 0.8373206    | 0.7661392    | not scorable | not scorable | 0.9752066 | 0.6386008 |
| #### Bn-A05-p14555358 | A-genome specific (napus-rapa) | 0.8397129    | 0.8024165    | not scorable | not scorable | 0.9752066 | 0.7788349 |
| #### Bn-A05-p14557992 | A-genome specific (napus-rapa) | 0.8397129    | 0.8255709    | not scorable | not scorable | 0.9752066 | 0.7840218 |
| #### Bn-A05-p14558091 | A-genome specific (napus-rapa) | 0.8373206    | 0.5990408    | not scorable | not scorable | 0.9834711 | 0.5514354 |
| #### Bn-A05-p14558121 | A-genome specific (rapa only)  | not scorable | not scorable | not scorable | not scorable | 0.9752066 | 0.7268059 |
| #### Bn-A05-p1457058  | A-genome specific (napus-rapa) | 0.9832536    | 0.7419155    | not scorable | not scorable | 0.9917355 | 0.854089  |
| #### Bn-A05-p14579391 | A-genome specific (napus-rapa) | 0.9880383    | 0.7644255    | not scorable | not scorable | 1         | 0.8538787 |
| #### Bn-A05-p14580151 | A-genome specific (napus-rapa) | 0.9904306    | 0.3185287    | not scorable | not scorable | 1         | 0.8449438 |
| #### Bn-A05-p14588431 | A-genome specific (napus-rapa) | 0.9928229    | 0.8693936    | not scorable | not scorable | 0.9090909 | 0.706449  |
| #### Bn-A05-p14591985 | A-genome specific (napus-rapa) | 0.8564593    | 0.7890928    | not scorable | not scorable | 0.6198347 | 0.6992605 |
| #### Bn-A05-p14592407 | A-genome specific (napus-rapa) | 0.9928229    | 0.7781494    | not scorable | not scorable | 1         | 0.7518246 |
| #### Bn-A05-p14599830 | A-genome specific (napus-rapa) | 0.9904306    | 0.7608089    | not scorable | not scorable | 0.9752066 | 0.7815613 |
| #### Bn-A05-p14600386 | A-genome specific (napus-rapa) | 0.9952153    | 0.5137135    | not scorable | not scorable | 1         | 0.8320046 |
| #### Bn-A05-p14602709 | A-genome specific (napus-rapa) | 0.9856459    | 0.7673253    | not scorable | not scorable | 0.9834711 | 0.787383  |
| #### Bn-A05-p14602869 | A-genome specific (napus-rapa) | 0.9880383    | 0.7483007    | not scorable | not scorable | 0.9917355 | 0.7345109 |
| #### Bn-A05-p14603280 | A-genome specific (napus-rapa) | 0.9976076    | 0.8350514    | not scorable | not scorable | 1         | 0.7561697 |

|                       |                                |              |              |              |              |           |           |
|-----------------------|--------------------------------|--------------|--------------|--------------|--------------|-----------|-----------|
| #### Bn-A05-p14612446 | A-genome specific (napus-rapa) | 0.9880383    | 0.5248339    | not scorable | not scorable | 0.9917355 | 0.7501578 |
| #### Bn-A05-p14620205 | A-genome specific (rapa only)  | not scorable | not scorable | not scorable | not scorable | 0.9752066 | 0.9095823 |
| #### Bn-A05-p14624727 | A-genome specific (napus-rapa) | 0.9688995    | 0.6074086    | not scorable | not scorable | 0.9669421 | 0.5866516 |
| #### Bn-A05-p14624784 | A-genome specific (napus-rapa) | 0.9856459    | 0.7651913    | not scorable | not scorable | 0.6115702 | 0.7332695 |
| #### Bn-A05-p1462945  | A-genome specific (napus-rapa) | 0.9760765    | 0.4114179    | not scorable | not scorable | 0.9917355 | 0.7029889 |
| #### Bn-A05-p14636717 | A-genome specific (napus-rapa) | 0.9497608    | 0.6557966    | not scorable | not scorable | 0.9669421 | 0.7349476 |
| #### Bn-A05-p14662656 | A-genome specific (napus-rapa) | 0.9928229    | 0.3799554    | not scorable | not scorable | 0.9917355 | 0.6579516 |
| #### Bn-A05-p14663154 | A-genome specific (napus-rapa) | 0.9976076    | 0.7225737    | not scorable | not scorable | 0.7107438 | 0.7009459 |
| #### Bn-A05-p14673407 | A-genome specific (napus-rapa) | 0.9784689    | 0.4298753    | not scorable | not scorable | 0.9917355 | 0.8042552 |
| #### Bn-A05-p14709014 | A-genome specific (napus-rapa) | 0.9688995    | 0.8146971    | not scorable | not scorable | 1         | 0.8318565 |
| #### Bn-A05-p14709370 | A-genome specific (napus-rapa) | 0.9880383    | 0.720078     | not scorable | not scorable | 0.9834711 | 0.7056816 |
| #### Bn-A05-p14712935 | A-genome specific (napus-rapa) | 0.9784689    | 0.8067452    | not scorable | not scorable | 1         | 0.8397262 |
| #### Bn-A05-p14715097 | A-genome specific (napus-rapa) | 0.9712918    | 0.6511468    | not scorable | not scorable | 1         | 0.8587967 |
| #### Bn-A05-p14723523 | A-genome specific (napus-rapa) | 0.9712918    | 0.5362268    | not scorable | not scorable | 0.9917355 | 0.6893369 |
| #### Bn-A05-p14726545 | A-genome specific (napus-rapa) | 0.9880383    | 0.347479     | not scorable | not scorable | 0.9917355 | 0.7839159 |
| #### Bn-A05-p14726690 | A-genome specific (napus-rapa) | 0.9760765    | 0.7617753    | not scorable | not scorable | 0.9917355 | 0.7839109 |
| #### Bn-A05-p1473472  | A-genome specific (rapa only)  | not scorable | not scorable | not scorable | not scorable | 1         | 0.7366139 |
| #### Bn-A05-p14734937 | A-genome specific (napus-rapa) | 0.9784689    | 0.7810981    | not scorable | not scorable | 0.9917355 | 0.8014634 |
| #### Bn-A05-p14739008 | A-genome specific (napus-rapa) | 0.9138756    | 0.6958975    | not scorable | not scorable | 0.9834711 | 0.711966  |
| #### Bn-A05-p14739080 | A-genome specific (napus-rapa) | 0.9832536    | 0.6573217    | not scorable | not scorable | 1         | 0.5689861 |
| #### Bn-A05-p14740992 | A-genome specific (napus-rapa) | 0.9665072    | 0.8022601    | not scorable | not scorable | 1         | 0.8177823 |
| #### Bn-A05-p14742715 | A-genome specific (napus-rapa) | 0.9904306    | 0.6834508    | not scorable | not scorable | 0.9917355 | 0.8206556 |
| #### Bn-A05-p14743027 | A-genome specific (napus-rapa) | 0.9856459    | 0.794562     | not scorable | not scorable | 0.9917355 | 0.7314629 |
| #### Bn-A05-p14747774 | A-genome specific (napus-rapa) | 0.9784689    | 0.7959195    | not scorable | not scorable | 1         | 0.7810712 |
| #### Bn-A05-p1475369  | A-genome specific (napus-rapa) | 0.9545454    | 0.2426655    | not scorable | not scorable | 1         | 0.6989659 |
| #### Bn-A05-p14755242 | A-genome specific (napus-rapa) | 0.9808612    | 0.4162999    | not scorable | not scorable | 0.9834711 | 0.7997415 |
| #### Bn-A05-p14764932 | A-genome specific (napus-rapa) | 0.7200957    | 0.8674166    | not scorable | not scorable | 0.5785124 | 0.7819356 |
| #### Bn-A05-p14786195 | A-genome specific (napus-rapa) | 0.9736842    | 0.5182476    | not scorable | not scorable | 1         | 0.7645805 |
| #### Bn-A05-p14787361 | A-genome specific (napus-rapa) | 0.9808612    | 0.795471     | not scorable | not scorable | 0.9917355 | 0.7428662 |
| #### Bn-A05-p1479325  | A-genome specific (napus-rapa) | 0.9784689    | 0.3422905    | not scorable | not scorable | 0.9917355 | 0.7766304 |
| #### Bn-A05-p14801451 | A-genome specific (napus-rapa) | 0.9784689    | 0.7164723    | not scorable | not scorable | 0.6446281 | 0.7567889 |
| #### Bn-A05-p14813049 | A-genome specific (napus-rapa) | 0.9569378    | 0.7689926    | not scorable | not scorable | 0.9752066 | 0.5455063 |
| #### Bn-A05-p14813106 | A-genome specific (napus-rapa) | 0.9593301    | 0.8010921    | not scorable | not scorable | 0.9834711 | 0.662568  |

|                       |                                |              |              |              |              |              |              |
|-----------------------|--------------------------------|--------------|--------------|--------------|--------------|--------------|--------------|
| #### Bn-A05-p14821280 | A-genome specific (napus-rapa) | 0.9784689    | 0.7403466    | not scorable | not scorable | 1            | 0.6082642    |
| #### Bn-A05-p14821998 | A-genome specific (napus-rapa) | 0.9593301    | 0.7614154    | not scorable | not scorable | 0.9917355    | 0.695935     |
| #### Bn-A05-p14830384 | A-genome specific (napus-rapa) | 0.9736842    | 0.682444     | not scorable | not scorable | 0.9917355    | 0.6359735    |
| #### Bn-A05-p14840113 | A-genome specific (napus-rapa) | 0.9760765    | 0.4991404    | not scorable | not scorable | 0.9917355    | 0.7922906    |
| #### Bn-A05-p14844746 | A-genome specific (napus-rapa) | 0.9808612    | 0.4812004    | not scorable | not scorable | 0.9917355    | 0.7631871    |
| #### Bn-A05-p14882151 | A-genome specific (napus-rapa) | 0.9856459    | 0.7831926    | not scorable | not scorable | 0.9917355    | 0.7953966    |
| #### Bn-A05-p14890882 | A-genome specific (napus-rapa) | 0.6052632    | 0.910757     | not scorable | not scorable | 0.9917355    | 0.8575654    |
| #### Bn-A05-p14899711 | A-genome specific (napus-rapa) | 1            | 0.5515773    | not scorable | not scorable | 0.9834711    | 0.6927553    |
| #### Bn-A05-p14906734 | A-genome specific (napus-rapa) | 0.9904306    | 0.7836866    | not scorable | not scorable | 1            | 0.7636451    |
| #### Bn-A05-p1492327  | napus specific                 | 1            | 0.2782149    | not scorable | not scorable | not scorable | not scorable |
| #### Bn-A05-p14951722 | A-genome specific (napus-rapa) | 0.9784689    | 0.5346705    | not scorable | not scorable | 1            | 0.7943577    |
| #### Bn-A05-p14959506 | A-genome specific (napus-rapa) | 0.854067     | 0.7845822    | not scorable | not scorable | 1            | 0.8514328    |
| #### Bn-A05-p14960328 | A-genome specific (napus-rapa) | 0.8732057    | 0.7913759    | not scorable | not scorable | 0.9917355    | 0.8220202    |
| #### Bn-A05-p1496037  | A-genome specific (napus-rapa) | 0.9784689    | 0.4256454    | not scorable | not scorable | 0.9917355    | 0.6649013    |
| #### Bn-A05-p14991084 | A-genome specific (rapa only)  | not scorable | not scorable | not scorable | not scorable | 1            | 0.7439071    |
| #### Bn-A05-p1499192  | A-genome specific (napus-rapa) | 0.9856459    | 0.3200792    | not scorable | not scorable | 1            | 0.6739376    |
| #### Bn-A05-p15004033 | A-genome specific (napus-rapa) | 0.9880383    | 0.5505275    | not scorable | not scorable | 1            | 0.6769819    |
| #### Bn-A05-p15013585 | A-genome specific (napus-rapa) | 0.9976076    | 0.4027723    | not scorable | not scorable | 0.9917355    | 0.8552632    |
| #### Bn-A05-p15015962 | A-genome specific (napus-rapa) | 0.9808612    | 0.621562     | not scorable | not scorable | 1            | 0.7016079    |
| #### Bn-A05-p15016066 | A-genome specific (napus-rapa) | 0.9688995    | 0.5459198    | not scorable | not scorable | 0.9917355    | 0.6292179    |
| #### Bn-A05-p15035058 | A-genome specific (napus-rapa) | 0.9593301    | 0.7695797    | not scorable | not scorable | 0.5867769    | 0.8307579    |
| #### Bn-A05-p15082396 | A-genome specific (napus-rapa) | 0.9880383    | 0.7367738    | not scorable | not scorable | 1            | 0.6410413    |
| #### Bn-A05-p15086331 | A-genome specific (napus-rapa) | 0.9760765    | 0.6199493    | not scorable | not scorable | 1            | 0.7077931    |
| #### Bn-A05-p15099108 | A-genome specific (napus-rapa) | 0.9928229    | 0.7848312    | not scorable | not scorable | 1            | 0.6463428    |
| #### Bn-A05-p15103134 | A-genome specific (napus-rapa) | 0.9736842    | 0.7672597    | not scorable | not scorable | 0.9917355    | 0.7165173    |
| #### Bn-A05-p15107406 | A-genome specific (napus-rapa) | 0.9688995    | 0.7677789    | not scorable | not scorable | 0.9752066    | 0.8237666    |
| #### Bn-A05-p15108699 | all not scorable               | not scorable | not scorable | not scorable | not scorable | not scorable | not scorable |
| #### Bn-A05-p15113044 | A-genome specific (napus-rapa) | 0.9832536    | 0.7744453    | not scorable | not scorable | 0.9917355    | 0.7128341    |
| #### Bn-A05-p15113541 | A-genome specific (napus-rapa) | 0.9736842    | 0.7806722    | not scorable | not scorable | 1            | 0.6716575    |
| #### Bn-A05-p15113570 | A-genome specific (napus-rapa) | 0.9760765    | 0.7931147    | not scorable | not scorable | 1            | 0.7076277    |
| #### Bn-A05-p15113653 | A-genome specific (napus-rapa) | 0.9736842    | 0.6775535    | not scorable | not scorable | 0.9586777    | 0.70492      |
| #### Bn-A05-p15115420 | A-genome specific (napus-rapa) | 0.9569378    | 0.7764308    | not scorable | not scorable | 0.9917355    | 0.7767562    |
| #### Bn-A05-p15116155 | A-genome specific (napus-rapa) | 0.9712918    | 0.7779978    | not scorable | not scorable | 0.9917355    | 0.7329232    |

|                       |                                |              |              |              |              |              |              |
|-----------------------|--------------------------------|--------------|--------------|--------------|--------------|--------------|--------------|
| #### Bn-A05-p15116220 | A-genome specific (napus-rapa) | 0.9904306    | 0.4398892    | not scorable | not scorable | 0.9834711    | 0.7153529    |
| #### Bn-A05-p15126127 | A-genome specific (napus-rapa) | 0.9808612    | 0.5139937    | not scorable | not scorable | 0.9586777    | 0.6475566    |
| #### Bn-A05-p15136372 | napus specific                 | 1            | 0.9205657    | not scorable | not scorable | not scorable | not scorable |
| #### Bn-A05-p15157665 | A-genome specific (napus-rapa) | 0.9808612    | 0.7897446    | not scorable | not scorable | 0.9917355    | 0.7877035    |
| #### Bn-A05-p15160819 | napus specific                 | 0.3468899    | 0.7877973    | not scorable | not scorable | not scorable | not scorable |
| #### Bn-A05-p15169260 | A-genome specific (rapa only)  | not scorable | not scorable | not scorable | not scorable | 1            | 0.797058     |
| #### Bn-A05-p15169361 | A-genome specific (napus-rapa) | 0.9665072    | 0.7839491    | not scorable | not scorable | 0.9917355    | 0.7369743    |
| #### Bn-A05-p15187671 | A-genome specific (napus-rapa) | 0.9856459    | 0.5736871    | not scorable | not scorable | 0.9917355    | 0.7453722    |
| #### Bn-A05-p15218436 | A-genome specific (napus-rapa) | 0.9641148    | 0.787951     | not scorable | not scorable | 1            | 0.8012621    |
| #### Bn-A05-p15224458 | A-genome specific (napus-rapa) | 1            | 0.633243     | not scorable | not scorable | 1            | 0.646846     |
| #### Bn-A05-p15227777 | A-genome specific (napus-rapa) | 0.9784689    | 0.6610716    | not scorable | not scorable | 0.9917355    | 0.7694553    |
| #### Bn-A05-p15232488 | A-genome specific (napus-rapa) | 0.8779904    | 0.7285617    | not scorable | not scorable | 0.9834711    | 0.7112391    |
| #### Bn-A05-p15236669 | napus specific                 | 0.9641148    | 0.6989807    | not scorable | not scorable | not scorable | not scorable |
| #### Bn-A05-p15250834 | A-genome specific (napus-rapa) | 0.9665072    | 0.3429927    | not scorable | not scorable | 0.9917355    | 0.7360603    |
| #### Bn-A05-p15281306 | A-genome specific (napus-rapa) | 0.9784689    | 0.5877738    | not scorable | not scorable | 0.9834711    | 0.7516944    |
| #### Bn-A05-p15281766 | A-genome specific (napus-rapa) | 0.9904306    | 0.7733926    | not scorable | not scorable | 0.9834711    | 0.8325318    |
| #### Bn-A05-p15282156 | genome unspecific (all in)     | 0.9952153    | 0.6063809    | 0.4341085    | 0.7980374    | 0.9917355    | 0.6948407    |
| #### Bn-A05-p15290524 | A-genome specific (napus-rapa) | 0.9808612    | 0.6668944    | not scorable | not scorable | 0.9917355    | 0.7845024    |
| #### Bn-A05-p15297460 | A-genome specific (napus-rapa) | 0.9832536    | 0.7291475    | not scorable | not scorable | 1            | 0.754338     |
| #### Bn-A05-p15320768 | A-genome specific (napus-rapa) | 0.9832536    | 0.3868776    | not scorable | not scorable | 0.9917355    | 0.919155     |
| #### Bn-A05-p15322236 | A-genome specific (napus-rapa) | 0.9545454    | 0.7000575    | not scorable | not scorable | 0.6033058    | 0.8050629    |
| #### Bn-A05-p15343768 | A-genome specific (napus-rapa) | 0.9688995    | 0.7579447    | not scorable | not scorable | 0.9917355    | 0.8942854    |
| #### Bn-A05-p15351341 | A-genome specific (napus-rapa) | 0.9736842    | 0.780077     | not scorable | not scorable | 0.9917355    | 0.8272399    |
| #### Bn-A05-p15369031 | A-genome specific (napus-rapa) | 0.9760765    | 0.4481802    | not scorable | not scorable | 0.9834711    | 0.746865     |
| #### Bn-A05-p15374255 | A-genome specific (napus-rapa) | 0.9688995    | 0.7440934    | not scorable | not scorable | 1            | 0.7804538    |
| #### Bn-A05-p15375132 | A-genome specific (napus-rapa) | 0.9784689    | 0.6917923    | not scorable | not scorable | 0.9752066    | 0.7001899    |
| #### Bn-A05-p15383133 | A-genome specific (napus-rapa) | 1            | 0.5476851    | not scorable | not scorable | 1            | 0.6591572    |
| #### Bn-A05-p15383563 | A-genome specific (napus-rapa) | 0.9880383    | 0.7710983    | not scorable | not scorable | 1            | 0.7433065    |
| #### Bn-A05-p15385848 | A-genome specific (napus-rapa) | 1            | 0.7314773    | not scorable | not scorable | 1            | 0.8115661    |
| #### Bn-A05-p15387386 | A-genome specific (napus-rapa) | 0.9904306    | 0.7090982    | not scorable | not scorable | 1            | 0.7925208    |
| #### Bn-A05-p15397425 | A-genome specific (napus-rapa) | 0.8110048    | 0.7347764    | not scorable | not scorable | 0.9752066    | 0.6457372    |
| #### Bn-A05-p15426487 | A-genome specific (napus-rapa) | 0.9521531    | 0.796814     | not scorable | not scorable | 0.9256198    | 0.8752542    |
| #### Bn-A05-p15443959 | genome unspecific (all in)     | 0.9952153    | 0.4008607    |              | 1 0.8458923  | 0.9917355    | 0.8191499    |

|                       |                                |              |              |              |              |              |              |
|-----------------------|--------------------------------|--------------|--------------|--------------|--------------|--------------|--------------|
| #### Bn-A05-p15445826 | A-genome specific (napus-rapa) | 0.9784689    | 0.7543095    | not scorable | not scorable | 1            | 0.7583339    |
| #### Bn-A05-p15446452 | A-genome specific (napus-rapa) | 0.9928229    | 0.6822941    | not scorable | not scorable | 0.9917355    | 0.5668756    |
| #### Bn-A05-p15446585 | A-genome specific (napus-rapa) | 0.9832536    | 0.6377189    | not scorable | not scorable | 0.9834711    | 0.6136621    |
| #### Bn-A05-p15446739 | A-genome specific (napus-rapa) | 0.9976076    | 0.7183458    | not scorable | not scorable | 0.9917355    | 0.6591359    |
| #### Bn-A05-p15447107 | A-genome specific (napus-rapa) | 0.9928229    | 0.7100793    | not scorable | not scorable | 0.9834711    | 0.6509095    |
| #### Bn-A05-p15447772 | A-genome specific (napus-rapa) | 0.9880383    | 0.7853509    | not scorable | not scorable | 0.9917355    | 0.7651446    |
| #### Bn-A05-p15459231 | A-genome specific (napus-rapa) | 0.9808612    | 0.6417672    | not scorable | not scorable | 1            | 0.6665895    |
| #### Bn-A05-p15459604 | A-genome specific (napus-rapa) | 0.9928229    | 0.758574     | not scorable | not scorable | 0.9917355    | 0.8425643    |
| #### Bn-A05-p15459993 | A-genome specific (napus-rapa) | 0.9880383    | 0.7832555    | not scorable | not scorable | 1            | 0.8146937    |
| #### Bn-A05-p15460116 | A-genome specific (napus-rapa) | 0.9928229    | 0.7840836    | not scorable | not scorable | 0.9917355    | 0.8362582    |
| #### Bn-A05-p15460178 | A-genome specific (napus-rapa) | 0.9880383    | 0.7007706    | not scorable | not scorable | 0.9834711    | 0.6738854    |
| #### Bn-A05-p15460626 | A-genome specific (napus-rapa) | 0.9856459    | 0.4954044    | not scorable | not scorable | 0.9504132    | 0.3861498    |
| #### Bn-A05-p15460677 | A-genome specific (napus-rapa) | 0.9760765    | 0.5765041    | not scorable | not scorable | 0.9752066    | 0.4807346    |
| #### Bn-A05-p15461137 | A-genome specific (napus-rapa) | 0.9808612    | 0.7967417    | not scorable | not scorable | 0.9917355    | 0.7943989    |
| #### Bn-A05-p15463933 | A-genome specific (napus-rapa) | 0.9928229    | 0.8284883    | not scorable | not scorable | 1            | 0.8665701    |
| #### Bn-A05-p15464720 | A-genome specific (napus-rapa) | 0.9856459    | 0.7598712    | not scorable | not scorable | 0.9834711    | 0.7615276    |
| #### Bn-A05-p15465648 | napus specific                 | 0.8181818    | 0.7671464    | not scorable | not scorable | not scorable | not scorable |
| #### Bn-A05-p15466228 | A-genome specific (napus-rapa) | 0.9808612    | 0.5147618    | not scorable | not scorable | 0.9917355    | 0.8581793    |
| #### Bn-A05-p15472992 | A-genome specific (napus-rapa) | 0.9832536    | 0.5021293    | not scorable | not scorable | 1            | 0.8222046    |
| #### Bn-A05-p15475096 | A-genome specific (napus-rapa) | 1            | 0.6625175    | not scorable | not scorable | 0.9752066    | 0.7573017    |
| #### Bn-A05-p15478674 | A-genome specific (napus-rapa) | 0.9832536    | 0.7978693    | not scorable | not scorable | 0.9834711    | 0.7508439    |
| #### Bn-A05-p15478769 | A-genome specific (napus-rapa) | 0.9760765    | 0.4896141    | not scorable | not scorable | 0.9917355    | 0.7891018    |
| #### Bn-A05-p15491528 | A-genome specific (napus-rapa) | 0.9880383    | 0.5245419    | not scorable | not scorable | 1            | 0.7526832    |
| #### Bn-A05-p15510479 | A-genome specific (napus-rapa) | 0.9736842    | 0.7057055    | not scorable | not scorable | 1            | 0.815388     |
| #### Bn-A05-p15511775 | A-genome specific (napus-rapa) | 0.9928229    | 0.8198833    | not scorable | not scorable | 1            | 0.844681     |
| #### Bn-A05-p15521397 | A-genome specific (napus-rapa) | 0.9760765    | 0.8144602    | not scorable | not scorable | 1            | 0.9095823    |
| #### Bn-A05-p15532294 | A-genome specific (napus-rapa) | 0.9952153    | 0.7700274    | not scorable | not scorable | 1            | 0.7461237    |
| #### Bn-A05-p1554943  | A-genome specific (napus-rapa) | 0.9832536    | 0.7725419    | not scorable | not scorable | 0.9917355    | 0.7532787    |
| #### Bn-A05-p15551715 | A-genome specific (napus-rapa) | 0.9760765    | 0.2803045    | not scorable | not scorable | 0.9834711    | 0.750066     |
| #### Bn-A05-p1561518  | A-genome specific (rapa only)  | not scorable | not scorable | not scorable | not scorable | 1            | 0.8855544    |
| #### Bn-A05-p1566005  | A-genome specific (rapa only)  | not scorable | not scorable | not scorable | not scorable | 1            | 0.8566455    |
| #### Bn-A05-p15663987 | A-genome specific (napus-rapa) | 1            | 0.8448036    | not scorable | not scorable | 1            | 0.7673309    |
| #### Bn-A05-p15670035 | A-genome specific (napus-rapa) | 0.9952153    | 0.7650651    | not scorable | not scorable | 0.9917355    | 0.8241062    |

|                       |                                |              |              |              |              |           |           |
|-----------------------|--------------------------------|--------------|--------------|--------------|--------------|-----------|-----------|
| #### Bn-A05-p15676718 | A-genome specific (napus-rapa) | 1            | 0.616855     | not scorable | not scorable | 0.9834711 | 0.8207097 |
| #### Bn-A05-p15679327 | A-genome specific (napus-rapa) | 0.9904306    | 0.7569318    | not scorable | not scorable | 0.9917355 | 0.8894345 |
| #### Bn-A05-p15702744 | A-genome specific (napus-rapa) | 1            | 0.9138703    | not scorable | not scorable | 1         | 0.7590037 |
| #### Bn-A05-p1578074  | A-genome specific (napus-rapa) | 0.9880383    | 0.8222545    | not scorable | not scorable | 0.9917355 | 0.7236798 |
| #### Bn-A05-p15780983 | A-genome specific (napus-rapa) | 0.9976076    | 0.5722775    | not scorable | not scorable | 0.9752066 | 0.6745558 |
| #### Bn-A05-p15789974 | A-genome specific (napus-rapa) | 1            | 0.7099044    | not scorable | not scorable | 0.9834711 | 0.7584304 |
| #### Bn-A05-p1579155  | A-genome specific (napus-rapa) | 0.9880383    | 0.7970954    | not scorable | not scorable | 1         | 0.827274  |
| #### Bn-A05-p1579208  | A-genome specific (napus-rapa) | 0.9904306    | 0.7943621    | not scorable | not scorable | 1         | 0.7182841 |
| #### Bn-A05-p15797839 | A-genome specific (napus-rapa) | 1            | 0.7414995    | not scorable | not scorable | 1         | 0.7989914 |
| #### Bn-A05-p15802321 | A-genome specific (napus-rapa) | 1            | 0.7275501    | not scorable | not scorable | 0.9917355 | 0.7508512 |
| #### Bn-A05-p1580246  | A-genome specific (napus-rapa) | 0.9856459    | 0.4330649    | not scorable | not scorable | 1         | 0.567142  |
| #### Bn-A05-p15805806 | A-genome specific (napus-rapa) | 1            | 0.7254026    | not scorable | not scorable | 1         | 0.7254937 |
| #### Bn-A05-p15805908 | A-genome specific (napus-rapa) | 0.9976076    | 0.7906715    | not scorable | not scorable | 0.9752066 | 0.7895731 |
| #### Bn-A05-p15808942 | A-genome specific (napus-rapa) | 0.9952153    | 0.7964587    | not scorable | not scorable | 0.9917355 | 0.7472867 |
| #### Bn-A05-p15812933 | A-genome specific (napus-rapa) | 1            | 0.5405614    | not scorable | not scorable | 0.9834711 | 0.736235  |
| #### Bn-A05-p15859690 | A-genome specific (napus-rapa) | 1            | 0.5161004    | not scorable | not scorable | 0.9834711 | 0.1651634 |
| #### Bn-A05-p15867343 | A-genome specific (napus-rapa) | 0.9760765    | 0.4371895    | not scorable | not scorable | 0.9917355 | 0.755999  |
| #### Bn-A05-p15868478 | A-genome specific (napus-rapa) | 0.9641148    | 0.5863327    | not scorable | not scorable | 0.9752066 | 0.7075087 |
| #### Bn-A05-p15894915 | A-genome specific (napus-rapa) | 0.9808612    | 0.4722785    | not scorable | not scorable | 1         | 0.8414277 |
| #### Bn-A05-p15905187 | A-genome specific (napus-rapa) | 0.9856459    | 0.7799413    | not scorable | not scorable | 0.9834711 | 0.7659622 |
| #### Bn-A05-p15906659 | A-genome specific (napus-rapa) | 0.9832536    | 0.3729982    | not scorable | not scorable | 0.9752066 | 0.5912985 |
| #### Bn-A05-p15938967 | A-genome specific (rapa only)  | not scorable | not scorable | not scorable | not scorable | 0.9752066 | 0.7252899 |
| #### Bn-A05-p15940232 | A-genome specific (napus-rapa) | 0.9617225    | 0.7653453    | not scorable | not scorable | 0.9917355 | 0.841803  |
| #### Bn-A05-p15948690 | A-genome specific (napus-rapa) | 0.9641148    | 0.2776361    | not scorable | not scorable | 1         | 0.6763525 |
| #### Bn-A05-p16026452 | A-genome specific (napus-rapa) | 0.9856459    | 0.5221619    | not scorable | not scorable | 0.9917355 | 0.7448257 |
| #### Bn-A05-p16030815 | A-genome specific (napus-rapa) | 0.9832536    | 0.6568515    | not scorable | not scorable | 0.9834711 | 0.6936035 |
| #### Bn-A05-p16039471 | A-genome specific (napus-rapa) | 0.9856459    | 0.4687572    | not scorable | not scorable | 1         | 0.5967325 |
| #### Bn-A05-p16051992 | A-genome specific (napus-rapa) | 0.9952153    | 0.4489051    | not scorable | not scorable | 0.5702479 | 0.7993333 |
| #### Bn-A05-p16054367 | A-genome specific (napus-rapa) | 0.9832536    | 0.2861169    | not scorable | not scorable | 0.9917355 | 0.7242475 |
| #### Bn-A05-p16092993 | A-genome specific (napus-rapa) | 0.9832536    | 0.7552835    | not scorable | not scorable | 0.9752066 | 0.7811423 |
| #### Bn-A05-p16098564 | A-genome specific (napus-rapa) | 0.9712918    | 0.4569332    | not scorable | not scorable | 0.9834711 | 0.6892272 |
| #### Bn-A05-p16099943 | A-genome specific (napus-rapa) | 0.9784689    | 0.5994108    | not scorable | not scorable | 0.9752066 | 0.5960335 |
| #### Bn-A05-p16099945 | A-genome specific (napus-rapa) | 0.9880383    | 0.6694568    | not scorable | not scorable | 0.9504132 | 0.6247362 |

|                       |                                |              |              |              |              |           |           |
|-----------------------|--------------------------------|--------------|--------------|--------------|--------------|-----------|-----------|
| #### Bn-A05-p16106702 | A-genome specific (napus-ropa) | 0.9808612    | 0.7536811    | not scorable | not scorable | 0.9752066 | 0.7725515 |
| #### Bn-A05-p16106977 | A-genome specific (napus-ropa) | 0.9856459    | 0.7788095    | not scorable | not scorable | 0.9834711 | 0.7843596 |
| #### Bn-A05-p16109920 | A-genome specific (napus-ropa) | 0.9760765    | 0.7084873    | not scorable | not scorable | 0.9586777 | 0.7022573 |
| #### Bn-A05-p16167725 | A-genome specific (napus-ropa) | 0.9665072    | 0.4833287    | not scorable | not scorable | 0.9421487 | 0.5372674 |
| #### Bn-A05-p16183886 | A-genome specific (napus-ropa) | 0.9712918    | 0.1909826    | not scorable | not scorable | 0.9834711 | 0.7687289 |
| #### Bn-A05-p16186321 | A-genome specific (napus-ropa) | 0.9712918    | 0.7193025    | not scorable | not scorable | 0.9917355 | 0.752258  |
| #### Bn-A05-p16195531 | A-genome specific (napus-ropa) | 0.9712918    | 0.3349337    | not scorable | not scorable | 0.9917355 | 0.7427092 |
| #### Bn-A05-p16196113 | A-genome specific (napus-ropa) | 0.9760765    | 0.3908678    | not scorable | not scorable | 0.9834711 | 0.7953966 |
| #### Bn-A05-p16209763 | A-genome specific (napus-ropa) | 0.9808612    | 0.7459595    | not scorable | not scorable | 1         | 0.8141569 |
| #### Bn-A05-p16224115 | A-genome specific (napus-ropa) | 0.9832536    | 0.7737777    | not scorable | not scorable | 1         | 0.7656431 |
| #### Bn-A05-p16224273 | A-genome specific (napus-ropa) | 0.9784689    | 0.6120229    | not scorable | not scorable | 0.9669421 | 0.682959  |
| #### Bn-A05-p16225090 | A-genome specific (napus-ropa) | 0.9832536    | 0.7134193    | not scorable | not scorable | 0.9669421 | 0.6872365 |
| #### Bn-A05-p16230123 | A-genome specific (napus-ropa) | 0.9880383    | 0.6459444    | not scorable | not scorable | 0.9917355 | 0.6649489 |
| #### Bn-A05-p16234543 | A-genome specific (napus-ropa) | 0.9856459    | 0.6698401    | not scorable | not scorable | 0.9917355 | 0.8235812 |
| #### Bn-A05-p16240970 | A-genome specific (napus-ropa) | 0.9760765    | 0.7849498    | not scorable | not scorable | 0.9834711 | 0.7071137 |
| #### Bn-A05-p16244846 | A-genome specific (napus-ropa) | 0.9784689    | 0.4673198    | not scorable | not scorable | 0.9752066 | 0.5983363 |
| #### Bn-A05-p16245038 | A-genome specific (napus-ropa) | 0.9808612    | 0.7848592    | not scorable | not scorable | 0.9834711 | 0.7905645 |
| #### Bn-A05-p16260356 | A-genome specific (napus-ropa) | 0.9593301    | 0.4803911    | not scorable | not scorable | 1         | 0.7976328 |
| #### Bn-A05-p16260894 | A-genome specific (napus-ropa) | 0.9760765    | 0.773262     | not scorable | not scorable | 0.9917355 | 0.7936016 |
| #### Bn-A05-p16272686 | A-genome specific (napus-ropa) | 0.9976076    | 0.4462278    | not scorable | not scorable | 0.9917355 | 0.7161742 |
| #### Bn-A05-p16274076 | A-genome specific (napus-ropa) | 1            | 0.8394041    | not scorable | not scorable | 0.9834711 | 0.7511635 |
| #### Bn-A05-p1630204  | A-genome specific (napus-ropa) | 1            | 0.3513969    | not scorable | not scorable | 1         | 0.7705783 |
| #### Bn-A05-p16305594 | A-genome specific (napus-ropa) | 1            | 0.5788181    | not scorable | not scorable | 1         | 0.5959508 |
| #### Bn-A05-p16338133 | A-genome specific (napus-ropa) | 1            | 0.8122911    | not scorable | not scorable | 0.9338843 | 0.7600561 |
| #### Bn-A05-p16359545 | A-genome specific (napus-ropa) | 1            | 0.4620944    | not scorable | not scorable | 0.9834711 | 0.7584956 |
| #### Bn-A05-p16392699 | A-genome specific (napus-ropa) | 0.9904306    | 0.504046     | not scorable | not scorable | 0.9834711 | 0.8498172 |
| #### Bn-A05-p16406388 | A-genome specific (napus-ropa) | 1            | 0.7764187    | not scorable | not scorable | 0.9834711 | 0.8940311 |
| #### Bn-A05-p16422457 | A-genome specific (napus-ropa) | 0.9976076    | 0.5096543    | not scorable | not scorable | 1         | 0.6684838 |
| #### Bn-A05-p16460167 | A-genome specific (napus-ropa) | 0.9976076    | 0.7073627    | not scorable | not scorable | 0.9752066 | 0.7077425 |
| #### Bn-A05-p16468152 | A-genome specific (ropa only)  | not scorable | not scorable | not scorable | not scorable | 0.6363636 | 0.8308049 |
| #### Bn-A05-p16471616 | A-genome specific (napus-ropa) | 0.9952153    | 0.5745972    | not scorable | not scorable | 0.9834711 | 0.7855946 |
| #### Bn-A05-p16477848 | A-genome specific (napus-ropa) | 0.9952153    | 0.8168548    | not scorable | not scorable | 0.6363636 | 0.7369214 |
| #### Bn-A05-p16489462 | A-genome specific (napus-ropa) | 0.9665072    | 0.6599779    | not scorable | not scorable | 0.9917355 | 0.88727   |



|                       |                                |              |              |              |              |              |              |
|-----------------------|--------------------------------|--------------|--------------|--------------|--------------|--------------|--------------|
| #### Bn-A05-p16490679 | A-genome specific (napus-rapa) | 0.9856459    | 0.7090759    | not scorable | not scorable | 1            | 0.7238823    |
| #### Bn-A05-p16506888 | A-genome specific (napus-rapa) | 0.9880383    | 0.5703408    | not scorable | not scorable | 0.9752066    | 0.6959504    |
| #### Bn-A05-p16507044 | A-genome specific (napus-rapa) | 0.9904306    | 0.7790682    | not scorable | not scorable | 1            | 0.6710737    |
| #### Bn-A05-p16507306 | A-genome specific (napus-rapa) | 0.9952153    | 0.7963493    | not scorable | not scorable | 0.9669421    | 0.7681305    |
| #### Bn-A05-p16509283 | A-genome specific (napus-rapa) | 0.9952153    | 0.5517134    | not scorable | not scorable | 1            | 0.7711137    |
| #### Bn-A05-p16538605 | A-genome specific (napus-rapa) | 0.9880383    | 0.3249863    | not scorable | not scorable | 0.9669421    | 0.4571435    |
| #### Bn-A05-p16544454 | A-genome specific (napus-rapa) | 1            | 0.6414527    | not scorable | not scorable | 0.9834711    | 0.7508258    |
| #### Bn-A05-p16545436 | A-genome specific (napus-rapa) | 0.9952153    | 0.8058719    | not scorable | not scorable | 0.9669421    | 0.7720716    |
| #### Bn-A05-p16546416 | A-genome specific (napus-rapa) | 0.9976076    | 0.7037584    | not scorable | not scorable | 0.9917355    | 0.7293484    |
| #### Bn-A05-p16553141 | A-genome specific (napus-rapa) | 0.9928229    | 0.7601622    | not scorable | not scorable | 0.9917355    | 0.7748176    |
| #### Bn-A05-p16561237 | A-genome specific (napus-rapa) | 0.9880383    | 0.3928767    | not scorable | not scorable | 0.9917355    | 0.7400256    |
| #### Bn-A05-p16581289 | A-genome specific (napus-rapa) | 0.9928229    | 0.6671382    | not scorable | not scorable | 0.9752066    | 0.7299423    |
| #### Bn-A05-p16588569 | A-genome specific (napus-rapa) | 0.9832536    | 0.793039     | not scorable | not scorable | 0.9834711    | 0.7318531    |
| #### Bn-A05-p16590105 | A-genome specific (napus-rapa) | 0.9976076    | 0.5835805    | not scorable | not scorable | 1            | 0.830209     |
| #### Bn-A05-p16625783 | A-genome specific (napus-rapa) | 0.9976076    | 0.5292512    | not scorable | not scorable | 0.9917355    | 0.6822277    |
| #### Bn-A05-p16637476 | A-genome specific (napus-rapa) | 0.9976076    | 0.4658909    | not scorable | not scorable | 0.9834711    | 0.863726     |
| #### Bn-A05-p16648406 | A-genome specific (rapa only)  | not scorable | not scorable | not scorable | not scorable | 0.9834711    | 0.7949702    |
| #### Bn-A05-p16651858 | A-genome specific (napus-rapa) | 0.9904306    | 0.6212329    | not scorable | not scorable | 0.9504132    | 0.7778232    |
| #### Bn-A05-p16652401 | A-genome specific (napus-rapa) | 0.9952153    | 0.7843031    | not scorable | not scorable | 0.9752066    | 0.5959725    |
| #### Bn-A05-p16664411 | A-genome specific (rapa only)  | not scorable | not scorable | not scorable | not scorable | 0.9752066    | 0.5841213    |
| #### Bn-A05-p16671522 | A-genome specific (napus-rapa) | 0.9904306    | 0.8205975    | not scorable | not scorable | 0.9917355    | 0.8478391    |
| #### Bn-A05-p1671823  | A-genome specific (napus-rapa) | 1            | 0.8179615    | not scorable | not scorable | 1            | 0.7789278    |
| #### Bn-A05-p16735186 | A-genome specific (napus-rapa) | 0.9976076    | 0.7844908    | not scorable | not scorable | 0.9256198    | 0.8222046    |
| #### Bn-A05-p16738292 | A-genome specific (napus-rapa) | 0.9856459    | 0.5365632    | not scorable | not scorable | 1            | 0.7554443    |
| #### Bn-A05-p16738871 | A-genome specific (napus-rapa) | 0.9856459    | 0.7097429    | not scorable | not scorable | 1            | 0.7977925    |
| #### Bn-A05-p16747703 | A-genome specific (napus-rapa) | 0.9736842    | 0.2536981    | not scorable | not scorable | 1            | 0.7399379    |
| #### Bn-A05-p16747797 | A-genome specific (napus-rapa) | 0.9784689    | 0.7949107    | not scorable | not scorable | 0.9917355    | 0.7079124    |
| #### Bn-A05-p16754780 | A-genome specific (napus-rapa) | 0.9760765    | 0.7943084    | not scorable | not scorable | 0.9917355    | 0.7343701    |
| #### Bn-A05-p16755625 | A-genome specific (napus-rapa) | 0.9712918    | 0.5163674    | not scorable | not scorable | 0.9421487    | 0.7700818    |
| #### Bn-A05-p1676024  | A-genome specific (napus-rapa) | 0.9880383    | 0.8057048    | not scorable | not scorable | 0.6694215    | 0.85427      |
| #### Bn-A05-p16775295 | all not scorable               | not scorable | not scorable | not scorable | not scorable | not scorable | not scorable |
| #### Bn-A05-p16789633 | A-genome specific (napus-rapa) | 0.9808612    | 0.688322     | not scorable | not scorable | 0.9917355    | 0.694905     |
| #### Bn-A05-p16789808 | A-genome specific (napus-rapa) | 0.9784689    | 0.7539029    | not scorable | not scorable | 0.9834711    | 0.7533532    |

|                       |                                   |              |              |              |              |           |           |
|-----------------------|-----------------------------------|--------------|--------------|--------------|--------------|-----------|-----------|
| #### Bn-A05-p1679589  | A-genome specific (napus-rapa)    | 0.9976076    | 0.5277396    | not scorable | not scorable | 0.9752066 | 0.8038052 |
| #### Bn-A05-p16801582 | genome unspecific (oleracea-rapa) | not scorable | not scorable | 0.7829458    | 0.7604458    | 1         | 0.9244093 |
| #### Bn-A05-p16811156 | A-genome specific (napus-rapa)    | 0.9688995    | 0.4077357    | not scorable | not scorable | 1         | 0.8722049 |
| #### Bn-A05-p16833526 | A-genome specific (napus-rapa)    | 0.9856459    | 0.7660205    | not scorable | not scorable | 1         | 0.9157199 |
| #### Bn-A05-p16834136 | A-genome specific (napus-rapa)    | 0.9617225    | 0.3424505    | not scorable | not scorable | 1         | 0.8064858 |
| #### Bn-A05-p16835570 | A-genome specific (napus-rapa)    | 0.9784689    | 0.7846854    | not scorable | not scorable | 0.9917355 | 0.8325015 |
| #### Bn-A05-p16836518 | A-genome specific (napus-rapa)    | 0.9808612    | 0.7881526    | not scorable | not scorable | 1         | 0.6742994 |
| #### Bn-A05-p16842656 | A-genome specific (napus-rapa)    | 0.9712918    | 0.5759544    | not scorable | not scorable | 0.9917355 | 0.7929825 |
| #### Bn-A05-p16844203 | A-genome specific (napus-rapa)    | 0.9401914    | 0.3952431    | not scorable | not scorable | 0.9917355 | 0.6075105 |
| #### Bn-A05-p16844504 | A-genome specific (napus-rapa)    | 0.9784689    | 0.7800228    | not scorable | not scorable | 0.9917355 | 0.7452869 |
| #### Bn-A05-p16846880 | A-genome specific (napus-rapa)    | 0.9856459    | 0.7552933    | not scorable | not scorable | 0.9752066 | 0.8392952 |
| #### Bn-A05-p16848755 | A-genome specific (napus-rapa)    | 0.9808612    | 0.6118512    | not scorable | not scorable | 1         | 0.801263  |
| #### Bn-A05-p16862109 | A-genome specific (napus-rapa)    | 0.9760765    | 0.5934374    | not scorable | not scorable | 1         | 0.9175813 |
| #### Bn-A05-p16863502 | A-genome specific (napus-rapa)    | 0.576555     | 0.8212944    | not scorable | not scorable | 0.6280992 | 0.7867437 |
| #### Bn-A05-p16867347 | A-genome specific (napus-rapa)    | 0.9688995    | 0.7496771    | not scorable | not scorable | 1         | 0.7554558 |
| #### Bn-A05-p16892759 | A-genome specific (napus-rapa)    | 0.9904306    | 0.7620708    | not scorable | not scorable | 0.9834711 | 0.6522584 |
| #### Bn-A05-p1689277  | A-genome specific (napus-rapa)    | 0.9497608    | 0.7717922    | not scorable | not scorable | 0.9752066 | 0.7805854 |
| #### Bn-A05-p16897600 | A-genome specific (napus-rapa)    | 0.937799     | 0.7428461    | not scorable | not scorable | 0.5702479 | 0.6744905 |
| #### Bn-A05-p16898305 | A-genome specific (napus-rapa)    | 1            | 0.7450127    | not scorable | not scorable | 0.9752066 | 0.8274895 |
| #### Bn-A05-p16900864 | A-genome specific (napus-rapa)    | 0.9760765    | 0.7494133    | not scorable | not scorable | 1         | 0.7868506 |
| #### Bn-A05-p1690598  | A-genome specific (napus-rapa)    | 0.9976076    | 0.6642578    | not scorable | not scorable | 0.9917355 | 0.6813819 |
| #### Bn-A05-p16909798 | A-genome specific (napus-rapa)    | 0.9784689    | 0.6453311    | not scorable | not scorable | 0.9504132 | 0.5804911 |
| #### Bn-A05-p16909956 | genome unspecific (all in)        | 0.9952153    | 0.2493585    | 0.9457364    | 0.2621864    | 1         | 0.76249   |
| #### Bn-A05-p1692254  | A-genome specific (napus-rapa)    | 0.9736842    | 0.7878061    | not scorable | not scorable | 0.9834711 | 0.7818343 |
| #### Bn-A05-p1692692  | A-genome specific (napus-rapa)    | 0.9856459    | 0.7880577    | not scorable | not scorable | 0.9752066 | 0.7233731 |
| #### Bn-A05-p1693000  | A-genome specific (napus-rapa)    | 0.9760765    | 0.8224052    | not scorable | not scorable | 1         | 0.794052  |
| #### Bn-A05-p1693196  | A-genome specific (napus-rapa)    | 0.9808612    | 0.6897439    | not scorable | not scorable | 0.9752066 | 0.7935562 |
| #### Bn-A05-p16935999 | A-genome specific (napus-rapa)    | 0.9928229    | 0.7149521    | not scorable | not scorable | 0.9834711 | 0.7774039 |
| #### Bn-A05-p16938263 | A-genome specific (napus-rapa)    | 0.9904306    | 0.5446244    | not scorable | not scorable | 1         | 0.9055923 |
| #### Bn-A05-p16942305 | A-genome specific (rapa only)     | not scorable | not scorable | not scorable | not scorable | 0.9917355 | 0.895419  |
| #### Bn-A05-p16953641 | A-genome specific (napus-rapa)    | 0.5358852    | 0.7500644    | not scorable | not scorable | 0.9917355 | 0.7161742 |
| #### Bn-A05-p1695394  | A-genome specific (napus-rapa)    | 0.9784689    | 0.7629402    | not scorable | not scorable | 0.9917355 | 0.750471  |
| #### Bn-A05-p1695552  | A-genome specific (napus-rapa)    | 0.9880383    | 0.7842772    | not scorable | not scorable | 1         | 0.7796711 |

|                       |                                |           |           |              |              |              |              |
|-----------------------|--------------------------------|-----------|-----------|--------------|--------------|--------------|--------------|
| #### Bn-A05-p1696330  | A-genome specific (napus-rapa) | 0.9832536 | 0.7748728 | not scorable | not scorable | 1            | 0.7703344    |
| #### Bn-A05-p1696411  | A-genome specific (napus-rapa) | 0.9736842 | 0.7862639 | not scorable | not scorable | 1            | 0.7787101    |
| #### Bn-A05-p1696613  | A-genome specific (napus-rapa) | 0.9760765 | 0.7705297 | not scorable | not scorable | 1            | 0.7559938    |
| #### Bn-A05-p1697018  | A-genome specific (napus-rapa) | 0.9880383 | 0.7715172 | not scorable | not scorable | 0.9917355    | 0.7758816    |
| #### Bn-A05-p1697401  | A-genome specific (napus-rapa) | 1         | 0.5611373 | not scorable | not scorable | 0.9917355    | 0.7371728    |
| #### Bn-A05-p1701030  | A-genome specific (napus-rapa) | 0.8349282 | 0.7862386 | not scorable | not scorable | 0.6280992    | 0.7525893    |
| #### Bn-A05-p17093469 | A-genome specific (napus-rapa) | 1         | 0.6037034 | not scorable | not scorable | 1            | 0.7603049    |
| #### Bn-A05-p17108506 | genome unspecific (all in)     | 0.9976076 | 0.4627327 | 0.9922481    | 0.7803835    | 0.9917355    | 0.6951741    |
| #### Bn-A05-p17202622 | A-genome specific (napus-rapa) | 0.9952153 | 0.7829521 | not scorable | not scorable | 1            | 0.9205657    |
| #### Bn-A05-p17203695 | A-genome specific (napus-rapa) | 1         | 0.5051728 | not scorable | not scorable | 1            | 0.7245421    |
| #### Bn-A05-p17215153 | A-genome specific (napus-rapa) | 1         | 0.6774176 | not scorable | not scorable | 0.9917355    | 0.7125033    |
| #### Bn-A05-p17241091 | A-genome specific (napus-rapa) | 0.9856459 | 0.5002236 | not scorable | not scorable | 1            | 0.7279716    |
| #### Bn-A05-p17243214 | A-genome specific (napus-rapa) | 0.9928229 | 0.8194101 | not scorable | not scorable | 1            | 0.7231084    |
| #### Bn-A05-p17262653 | A-genome specific (napus-rapa) | 0.9880383 | 0.326676  | not scorable | not scorable | 1            | 0.7319344    |
| #### Bn-A05-p17292224 | A-genome specific (napus-rapa) | 0.9832536 | 0.5085568 | not scorable | not scorable | 0.9917355    | 0.5967978    |
| #### Bn-A05-p17330707 | napus specific                 | 0.9617225 | 0.6767837 | not scorable | not scorable | not scorable | not scorable |
| #### Bn-A05-p17366544 | A-genome specific (napus-rapa) | 0.2990431 | 0.4987206 | not scorable | not scorable | 0.9256198    | 0.8912995    |
| #### Bn-A05-p17368155 | A-genome specific (napus-rapa) | 0.9928229 | 0.7637491 | not scorable | not scorable | 0.9917355    | 0.7006459    |
| #### Bn-A05-p17392998 | A-genome specific (napus-rapa) | 0.9904306 | 0.8037758 | not scorable | not scorable | 0.9917355    | 0.8049123    |
| #### Bn-A05-p17399423 | A-genome specific (napus-rapa) | 0.9712918 | 0.6582587 | not scorable | not scorable | 1            | 0.8056542    |
| #### Bn-A05-p17402697 | A-genome specific (napus-rapa) | 0.9736842 | 0.4541373 | not scorable | not scorable | 1            | 0.7795539    |
| #### Bn-A05-p17417422 | A-genome specific (napus-rapa) | 0.9736842 | 0.3474081 | not scorable | not scorable | 1            | 0.8360887    |
| #### Bn-A05-p17419591 | A-genome specific (napus-rapa) | 0.8397129 | 0.7464461 | not scorable | not scorable | 0.9752066    | 0.715128     |
| #### Bn-A05-p17420484 | A-genome specific (napus-rapa) | 0.9880383 | 0.5239101 | not scorable | not scorable | 0.9834711    | 0.7253301    |
| #### Bn-A05-p17420613 | A-genome specific (napus-rapa) | 0.9832536 | 0.73572   | not scorable | not scorable | 1            | 0.7278512    |
| #### Bn-A05-p17442162 | A-genome specific (napus-rapa) | 0.9952153 | 0.792631  | not scorable | not scorable | 0.8099173    | 0.9174066    |
| #### Bn-A05-p1744534  | A-genome specific (napus-rapa) | 0.9617225 | 0.7774826 | not scorable | not scorable | 0.9669421    | 0.7252018    |
| #### Bn-A05-p17445937 | A-genome specific (napus-rapa) | 1         | 0.5558235 | not scorable | not scorable | 0.9752066    | 0.8257785    |
| #### Bn-A05-p17482579 | A-genome specific (napus-rapa) | 1         | 0.4511294 | not scorable | not scorable | 1            | 0.7933664    |
| #### Bn-A05-p17511337 | A-genome specific (napus-rapa) | 0.9880383 | 0.8150228 | not scorable | not scorable | 1            | 0.8239708    |
| #### Bn-A05-p17514353 | A-genome specific (napus-rapa) | 0.9976076 | 0.8090102 | not scorable | not scorable | 0.9834711    | 0.7426201    |
| #### Bn-A05-p17542638 | A-genome specific (napus-rapa) | 1         | 0.4473538 | not scorable | not scorable | 1            | 0.7482538    |
| #### Bn-A05-p17544675 | A-genome specific (napus-rapa) | 1         | 0.6870948 | not scorable | not scorable | 0.9834711    | 0.6459777    |

|                       |                                   |              |              |              |              |              |              |
|-----------------------|-----------------------------------|--------------|--------------|--------------|--------------|--------------|--------------|
| #### Bn-A05-p17564038 | A-genome specific (napus-rapa)    | 0.9904306    | 0.6127589    | not scorable | not scorable | 0.9752066    | 0.7137067    |
| #### Bn-A05-p17566846 | A-genome specific (napus-rapa)    | 0.9952153    | 0.3123011    | not scorable | not scorable | 0.9917355    | 0.6951149    |
| #### Bn-A05-p17567179 | A-genome specific (napus-rapa)    | 0.9808612    | 0.5152463    | not scorable | not scorable | 0.9917355    | 0.8127797    |
| #### Bn-A05-p17568606 | A-genome specific (napus-rapa)    | 0.9928229    | 0.7597451    | not scorable | not scorable | 1            | 0.7856432    |
| #### Bn-A05-p17587730 | genome unspecific (oleracea-rapa) | not scorable | not scorable | 0.9844961    | 0.7984183    | 1            | 0.6624619    |
| #### Bn-A05-p1761473  | A-genome specific (napus-rapa)    | 0.9712918    | 0.7745822    | not scorable | not scorable | 0.9917355    | 0.7014567    |
| #### Bn-A05-p17614751 | A-genome specific (napus-rapa)    | 0.9952153    | 0.6897087    | not scorable | not scorable | 1            | 0.6641342    |
| #### Bn-A05-p17615064 | A-genome specific (napus-rapa)    | 0.9976076    | 0.5212131    | not scorable | not scorable | 1            | 0.8379771    |
| #### Bn-A05-p17616044 | A-genome specific (napus-rapa)    | 0.9976076    | 0.8161885    | not scorable | not scorable | 1            | 0.9222978    |
| #### Bn-A05-p17616132 | A-genome specific (napus-rapa)    | 0.9904306    | 0.7743224    | not scorable | not scorable | 0.9917355    | 0.740004     |
| #### Bn-A05-p17617527 | A-genome specific (napus-rapa)    | 1            | 0.4264731    | not scorable | not scorable | 1            | 0.8815182    |
| #### Bn-A05-p17617724 | A-genome specific (napus-rapa)    | 1            | 0.7299884    | not scorable | not scorable | 0.9917355    | 0.766555     |
| #### Bn-A05-p1762229  | A-genome specific (napus-rapa)    | 0.9688995    | 0.6995797    | not scorable | not scorable | 0.6528926    | 0.7378951    |
| #### Bn-A05-p17624348 | A-genome specific (napus-rapa)    | 0.9952153    | 0.8596416    | not scorable | not scorable | 1            | 0.9235974    |
| #### Bn-A05-p17625934 | A-genome specific (napus-rapa)    | 0.9952153    | 0.8139869    | not scorable | not scorable | 1            | 0.902242     |
| #### Bn-A05-p17625943 | A-genome specific (napus-rapa)    | 0.9976076    | 0.8286158    | not scorable | not scorable | 0.9917355    | 0.9022775    |
| #### Bn-A05-p1764530  | A-genome specific (napus-rapa)    | 0.9856459    | 0.4993658    | not scorable | not scorable | 0.9917355    | 0.4631481    |
| #### Bn-A05-p1765880  | A-genome specific (napus-rapa)    | 0.9665072    | 0.664854     | not scorable | not scorable | 0.9834711    | 0.642917     |
| #### Bn-A05-p1766223  | A-genome specific (napus-rapa)    | 0.9425837    | 0.7807313    | not scorable | not scorable | 0.9669421    | 0.7673622    |
| #### Bn-A05-p17675829 | A-genome specific (napus-rapa)    | 1            | 0.4401192    | not scorable | not scorable | 0.9917355    | 0.7295379    |
| #### Bn-A05-p17708970 | A-genome specific (napus-rapa)    | 1            | 0.3174834    | not scorable | not scorable | 0.9669421    | 0.7841673    |
| #### Bn-A05-p17739455 | A-genome specific (napus-rapa)    | 1            | 0.7352515    | not scorable | not scorable | 0.9917355    | 0.7067034    |
| #### Bn-A05-p17750022 | A-genome specific (napus-rapa)    | 0.9976076    | 0.7796417    | not scorable | not scorable | 0.9834711    | 0.8053109    |
| #### Bn-A05-p1775540  | A-genome specific (napus-rapa)    | 0.9856459    | 0.5699703    | not scorable | not scorable | 0.9834711    | 0.7337215    |
| #### Bn-A05-p17758084 | A-genome specific (napus-rapa)    | 1            | 0.26791      | not scorable | not scorable | 0.9834711    | 0.531085     |
| #### Bn-A05-p17761769 | A-genome specific (napus-rapa)    | 0.9976076    | 0.7003805    | not scorable | not scorable | 0.9917355    | 0.8154237    |
| #### Bn-A05-p17770256 | A-genome specific (napus-rapa)    | 0.9928229    | 0.7709633    | not scorable | not scorable | 0.9834711    | 0.6791053    |
| #### Bn-A05-p17774694 | A-genome specific (napus-rapa)    | 0.9880383    | 0.5366027    | not scorable | not scorable | 0.9917355    | 0.6648225    |
| #### Bn-A05-p17799506 | A-genome specific (napus-rapa)    | 1            | 0.4596072    | not scorable | not scorable | 0.9917355    | 0.7995193    |
| #### Bn-A05-p17822322 | A-genome specific (napus-rapa)    | 0.9904306    | 0.2578293    | not scorable | not scorable | 1            | 0.4994062    |
| #### Bn-A05-p17830597 | A-genome specific (napus-rapa)    | 0.9952153    | 0.7972015    | not scorable | not scorable | 0.9917355    | 0.7214636    |
| #### Bn-A05-p17835705 | napus specific                    | 0.9712918    | 0.5217221    | not scorable | not scorable | not scorable | not scorable |
| #### Bn-A05-p17880874 | A-genome specific (napus-rapa)    | 0.9952153    | 0.7459006    | not scorable | not scorable | 0.9834711    | 0.6697192    |

|                       |                                   |              |              |              |              |           |           |
|-----------------------|-----------------------------------|--------------|--------------|--------------|--------------|-----------|-----------|
| #### Bn-A05-p17894045 | A-genome specific (napus-rapa)    | 1            | 0.2957292    | not scorable | not scorable | 1         | 0.7984077 |
| #### Bn-A05-p17895197 | A-genome specific (napus-rapa)    | 0.9928229    | 0.7835103    | not scorable | not scorable | 1         | 0.8408566 |
| #### Bn-A05-p17913760 | A-genome specific (napus-rapa)    | 0.9976076    | 0.4657085    | not scorable | not scorable | 1         | 0.7769049 |
| #### Bn-A05-p17928363 | A-genome specific (rapa only)     | not scorable | not scorable | not scorable | not scorable | 0.9669421 | 0.6306389 |
| #### Bn-A05-p17931505 | A-genome specific (napus-rapa)    | 0.9617225    | 0.7360166    | not scorable | not scorable | 0.9586777 | 0.6121697 |
| #### Bn-A05-p1806574  | A-genome specific (napus-rapa)    | 0.9760765    | 0.784379     | not scorable | not scorable | 0.9834711 | 0.6773961 |
| #### Bn-A05-p18066693 | A-genome specific (napus-rapa)    | 1            | 0.8848283    | not scorable | not scorable | 1         | 0.8687926 |
| #### Bn-A05-p18088421 | A-genome specific (napus-rapa)    | 0.9976076    | 0.334849     | not scorable | not scorable | 0.9917355 | 0.7883866 |
| #### Bn-A05-p18101769 | A-genome specific (napus-rapa)    | 0.9688995    | 0.7995363    | not scorable | not scorable | 1         | 0.7945122 |
| #### Bn-A05-p18109527 | A-genome specific (napus-rapa)    | 0.9832536    | 0.7878743    | not scorable | not scorable | 1         | 0.8055421 |
| #### Bn-A05-p18109536 | A-genome specific (napus-rapa)    | 0.9880383    | 0.7339863    | not scorable | not scorable | 0.9917355 | 0.758664  |
| #### Bn-A05-p18112139 | A-genome specific (napus-rapa)    | 0.9880383    | 0.7971956    | not scorable | not scorable | 0.9917355 | 0.7398812 |
| #### Bn-A05-p18118640 | A-genome specific (napus-rapa)    | 0.9401914    | 0.4276387    | not scorable | not scorable | 0.9917355 | 0.7683113 |
| #### Bn-A05-p18125663 | A-genome specific (napus-rapa)    | 0.9712918    | 0.7962593    | not scorable | not scorable | 0.9752066 | 0.8088316 |
| #### Bn-A05-p18135244 | A-genome specific (napus-rapa)    | 0.9043062    | 0.7670919    | not scorable | not scorable | 0.5785124 | 0.6815456 |
| #### Bn-A05-p18137410 | A-genome specific (napus-rapa)    | 0.9736842    | 0.837493     | not scorable | not scorable | 0.9669421 | 0.7091826 |
| #### Bn-A05-p18139526 | A-genome specific (napus-rapa)    | 0.9569378    | 0.704061     | not scorable | not scorable | 0.6694215 | 0.6691558 |
| #### Bn-A05-p18147040 | A-genome specific (napus-rapa)    | 0.9928229    | 0.6531543    | not scorable | not scorable | 0.6528926 | 0.7110949 |
| #### Bn-A05-p18161591 | A-genome specific (napus-rapa)    | 0.9449761    | 0.7081791    | not scorable | not scorable | 0.9834711 | 0.7166088 |
| #### Bn-A05-p1818846  | A-genome specific (napus-rapa)    | 0.9880383    | 0.524544     | not scorable | not scorable | 0.9917355 | 0.7604629 |
| #### Bn-A05-p18191062 | A-genome specific (napus-rapa)    | 0.9736842    | 0.5829559    | not scorable | not scorable | 1         | 0.8098131 |
| #### Bn-A05-p18196942 | A-genome specific (napus-rapa)    | 0.9856459    | 0.2930158    | not scorable | not scorable | 0.9917355 | 0.6575781 |
| #### Bn-A05-p18214148 | A-genome specific (napus-rapa)    | 0.9880383    | 0.7865417    | not scorable | not scorable | 0.9834711 | 0.6974153 |
| #### Bn-A05-p18223406 | A-genome specific (napus-rapa)    | 0.9688995    | 0.4363306    | not scorable | not scorable | 0.9917355 | 0.6892233 |
| #### Bn-A05-p18229790 | A-genome specific (napus-rapa)    | 0.9904306    | 0.6918726    | not scorable | not scorable | 0.9669421 | 0.7156951 |
| #### Bn-A05-p182664   | A-genome specific (napus-rapa)    | 0.9258373    | 0.3784495    | not scorable | not scorable | 0.9917355 | 0.6883869 |
| #### Bn-A05-p18306160 | A-genome specific (napus-rapa)    | 0.9904306    | 0.5774844    | not scorable | not scorable | 0.9917355 | 0.7680172 |
| #### Bn-A05-p18309576 | A-genome specific (napus-rapa)    | 0.9569378    | 0.5543652    | not scorable | not scorable | 0.9917355 | 0.7454807 |
| #### Bn-A05-p18310658 | A-genome specific (napus-rapa)    | 0.9736842    | 0.4239044    | not scorable | not scorable | 0.9834711 | 0.7794924 |
| #### Bn-A05-p18310838 | A-genome specific (napus-rapa)    | 0.9641148    | 0.7562679    | not scorable | not scorable | 1         | 0.7997552 |
| #### Bn-A05-p18349076 | genome unspecific (oleracea-rapa) | not scorable | not scorable | 0.9534883    | 0.2591399    | 0.7272727 | 0.5172655 |
| #### Bn-A05-p18376815 | genome unspecific (oleracea-rapa) | not scorable | not scorable | 1            | 0.8176717    | 1         | 0.9280821 |
| #### Bn-A05-p18391243 | A-genome specific (napus-rapa)    | 0.9832536    | 0.3704997    | not scorable | not scorable | 1         | 0.6827843 |

|                       |                                |              |              |              |              |           |           |
|-----------------------|--------------------------------|--------------|--------------|--------------|--------------|-----------|-----------|
| #### Bn-A05-p18391581 | A-genome specific (napus-rapa) | 0.9688995    | 0.8121782    | not scorable | not scorable | 1         | 0.8106832 |
| #### Bn-A05-p18452462 | A-genome specific (napus-rapa) | 0.9904306    | 0.5025557    | not scorable | not scorable | 1         | 0.9057909 |
| #### Bn-A05-p18452563 | A-genome specific (napus-rapa) | 0.9808612    | 0.2969941    | not scorable | not scorable | 1         | 0.7571141 |
| #### Bn-A05-p18453140 | A-genome specific (napus-rapa) | 0.9760765    | 0.3244177    | not scorable | not scorable | 0.9834711 | 0.6703537 |
| #### Bn-A05-p18458181 | A-genome specific (napus-rapa) | 0.9760765    | 0.28783      | not scorable | not scorable | 0.9917355 | 0.6964967 |
| #### Bn-A05-p18475836 | A-genome specific (napus-rapa) | 0.9856459    | 0.4475583    | not scorable | not scorable | 0.9834711 | 0.8390219 |
| #### Bn-A05-p18480152 | A-genome specific (napus-rapa) | 0.9712918    | 0.2669426    | not scorable | not scorable | 0.9834711 | 0.7198011 |
| #### Bn-A05-p18490530 | A-genome specific (napus-rapa) | 0.9688995    | 0.7209903    | not scorable | not scorable | 0.9834711 | 0.8227723 |
| #### Bn-A05-p18496803 | A-genome specific (napus-rapa) | 0.9856459    | 0.3156546    | not scorable | not scorable | 0.9917355 | 0.7618081 |
| #### Bn-A05-p18505935 | A-genome specific (napus-rapa) | 0.9760765    | 0.7335835    | not scorable | not scorable | 1         | 0.711411  |
| #### Bn-A05-p18528112 | A-genome specific (napus-rapa) | 0.9856459    | 0.3836942    | not scorable | not scorable | 1         | 0.7009844 |
| #### Bn-A05-p18543237 | A-genome specific (napus-rapa) | 0.9736842    | 0.6104291    | not scorable | not scorable | 0.9917355 | 0.5937957 |
| #### Bn-A05-p18543933 | A-genome specific (napus-rapa) | 0.9784689    | 0.7968438    | not scorable | not scorable | 0.9669421 | 0.751047  |
| #### Bn-A05-p1854510  | A-genome specific (napus-rapa) | 0.9665072    | 0.8455062    | not scorable | not scorable | 1         | 0.7174947 |
| #### Bn-A05-p18547040 | A-genome specific (napus-rapa) | 0.9952153    | 0.4680369    | not scorable | not scorable | 1         | 0.7574129 |
| #### Bn-A05-p1857946  | A-genome specific (napus-rapa) | 0.9952153    | 0.7790803    | not scorable | not scorable | 0.9834711 | 0.7758102 |
| #### Bn-A05-p18590326 | A-genome specific (napus-rapa) | 0.9832536    | 0.5050199    | not scorable | not scorable | 0.9917355 | 0.7871014 |
| #### Bn-A05-p18598001 | A-genome specific (napus-rapa) | 0.9665072    | 0.2669114    | not scorable | not scorable | 0.9917355 | 0.7021827 |
| #### Bn-A05-p18615644 | A-genome specific (napus-rapa) | 0.9832536    | 0.7493223    | not scorable | not scorable | 1         | 0.6383966 |
| #### Bn-A05-p18616260 | A-genome specific (napus-rapa) | 0.9760765    | 0.7105904    | not scorable | not scorable | 1         | 0.9036612 |
| #### Bn-A05-p18627784 | A-genome specific (napus-rapa) | 0.9976076    | 0.237393     | not scorable | not scorable | 0.9834711 | 0.2942947 |
| #### Bn-A05-p18637087 | A-genome specific (napus-rapa) | 0.9928229    | 0.6785161    | not scorable | not scorable | 1         | 0.6441295 |
| #### Bn-A05-p18642842 | A-genome specific (napus-rapa) | 0.8684211    | 0.8694867    | not scorable | not scorable | 0.9586777 | 0.8305073 |
| #### Bn-A05-p18643459 | A-genome specific (rapa only)  | not scorable | not scorable | not scorable | not scorable | 0.9752066 | 0.7495101 |
| #### Bn-A05-p18682729 | A-genome specific (napus-rapa) | 0.9736842    | 0.7901246    | not scorable | not scorable | 0.6363636 | 0.7793339 |
| #### Bn-A05-p18683201 | A-genome specific (rapa only)  | not scorable | not scorable | not scorable | not scorable | 0.661157  | 0.8288758 |
| #### Bn-A05-p18687031 | A-genome specific (napus-rapa) | 0.9641148    | 0.8402984    | not scorable | not scorable | 0.9917355 | 0.8087777 |
| #### Bn-A05-p18689306 | A-genome specific (napus-rapa) | 0.9880383    | 0.3364558    | not scorable | not scorable | 0.9917355 | 0.8159032 |
| #### Bn-A05-p18704009 | A-genome specific (napus-rapa) | 0.9952153    | 0.7843069    | not scorable | not scorable | 1         | 0.7341428 |
| #### Bn-A05-p18704064 | A-genome specific (napus-rapa) | 0.9832536    | 0.6833819    | not scorable | not scorable | 0.9917355 | 0.6273827 |
| #### Bn-A05-p18704349 | A-genome specific (napus-rapa) | 0.9904306    | 0.7359627    | not scorable | not scorable | 1         | 0.7461109 |
| #### Bn-A05-p18730286 | A-genome specific (napus-rapa) | 0.9928229    | 0.4749652    | not scorable | not scorable | 1         | 0.8024037 |
| #### Bn-A05-p18744312 | A-genome specific (napus-rapa) | 0.9928229    | 0.7930564    | not scorable | not scorable | 0.9917355 | 0.6972361 |

|                       |                                |              |              |              |              |           |           |
|-----------------------|--------------------------------|--------------|--------------|--------------|--------------|-----------|-----------|
| #### Bn-A05-p18744372 | A-genome specific (napus-rapa) | 0.9976076    | 0.8387947    | not scorable | not scorable | 0.9834711 | 0.7821184 |
| #### Bn-A05-p18753257 | A-genome specific (napus-rapa) | 0.9856459    | 0.7386575    | not scorable | not scorable | 0.9834711 | 0.6705433 |
| #### Bn-A05-p18759144 | A-genome specific (napus-rapa) | 0.9880383    | 0.5555689    | not scorable | not scorable | 1         | 0.8431962 |
| #### Bn-A05-p18761878 | A-genome specific (napus-rapa) | 0.9784689    | 0.712483     | not scorable | not scorable | 0.9917355 | 0.6847045 |
| #### Bn-A05-p18768801 | A-genome specific (napus-rapa) | 0.9880383    | 0.7929792    | not scorable | not scorable | 0.9917355 | 0.7793105 |
| #### Bn-A05-p18770393 | A-genome specific (rapa only)  | not scorable | not scorable | not scorable | not scorable | 0.9669421 | 0.4998976 |
| #### Bn-A05-p18773930 | A-genome specific (rapa only)  | not scorable | not scorable | not scorable | not scorable | 0.9834711 | 0.7098026 |
| #### Bn-A05-p18793322 | A-genome specific (napus-rapa) | 0.9856459    | 0.4054185    | not scorable | not scorable | 1         | 0.823873  |
| #### Bn-A05-p18807426 | A-genome specific (napus-rapa) | 0.9760765    | 0.8084629    | not scorable | not scorable | 0.9917355 | 0.8016225 |
| #### Bn-A05-p18819337 | A-genome specific (napus-rapa) | 0.9784689    | 0.7621922    | not scorable | not scorable | 1         | 0.8214605 |
| #### Bn-A05-p18819519 | A-genome specific (napus-rapa) | 0.9712918    | 0.6016858    | not scorable | not scorable | 0.9917355 | 0.6027501 |
| #### Bn-A05-p18819673 | A-genome specific (napus-rapa) | 0.9736842    | 0.6826335    | not scorable | not scorable | 0.9752066 | 0.653946  |
| #### Bn-A05-p18820057 | A-genome specific (napus-rapa) | 0.9808612    | 0.6931797    | not scorable | not scorable | 1         | 0.7088397 |
| #### Bn-A05-p18820492 | A-genome specific (napus-rapa) | 0.9808612    | 0.7802718    | not scorable | not scorable | 1         | 0.7440118 |
| #### Bn-A05-p18828578 | A-genome specific (napus-rapa) | 0.937799     | 0.6682511    | not scorable | not scorable | 0.9669421 | 0.683764  |
| #### Bn-A05-p18828589 | A-genome specific (napus-rapa) | 0.9665072    | 0.5048072    | not scorable | not scorable | 0.9834711 | 0.5205449 |
| #### Bn-A05-p18905070 | A-genome specific (napus-rapa) | 0.9880383    | 0.5100516    | not scorable | not scorable | 1         | 0.7456774 |
| #### Bn-A05-p18922154 | A-genome specific (napus-rapa) | 0.1650718    | 0.8128185    | not scorable | not scorable | 0.9917355 | 0.6545202 |
| #### Bn-A05-p1893613  | A-genome specific (rapa only)  | not scorable | not scorable | not scorable | not scorable | 0.9917355 | 0.775069  |
| #### Bn-A05-p18958059 | A-genome specific (napus-rapa) | 0.9856459    | 0.4368172    | not scorable | not scorable | 0.9834711 | 0.7022696 |
| #### Bn-A05-p18958083 | A-genome specific (napus-rapa) | 0.9880383    | 0.6894801    | not scorable | not scorable | 0.9917355 | 0.6084838 |
| #### Bn-A05-p1898273  | A-genome specific (napus-rapa) | 0.9617225    | 0.816856     | not scorable | not scorable | 1         | 0.839677  |
| #### Bn-A05-p19001293 | A-genome specific (napus-rapa) | 0.9856459    | 0.6972432    | not scorable | not scorable | 1         | 0.8030552 |
| #### Bn-A05-p19017469 | A-genome specific (rapa only)  | not scorable | not scorable | not scorable | not scorable | 0.8842975 | 0.5867121 |
| #### Bn-A05-p19029505 | A-genome specific (napus-rapa) | 0.9880383    | 0.8400073    | not scorable | not scorable | 0.9752066 | 0.781377  |
| #### Bn-A05-p19031269 | A-genome specific (napus-rapa) | 0.9665072    | 0.7906581    | not scorable | not scorable | 0.6115702 | 0.7822942 |
| #### Bn-A05-p19032247 | A-genome specific (napus-rapa) | 0.9904306    | 0.4876139    | not scorable | not scorable | 1         | 0.6950285 |
| #### Bn-A05-p19041695 | A-genome specific (napus-rapa) | 0.9928229    | 0.3772976    | not scorable | not scorable | 0.9834711 | 0.7942212 |
| #### Bn-A05-p19048941 | A-genome specific (napus-rapa) | 0.9736842    | 0.4222291    | not scorable | not scorable | 0.9917355 | 0.7461041 |
| #### Bn-A05-p19064234 | A-genome specific (napus-rapa) | 0.9832536    | 0.3355565    | not scorable | not scorable | 1         | 0.8202433 |
| #### Bn-A05-p19067421 | A-genome specific (napus-rapa) | 1            | 0.8146383    | not scorable | not scorable | 1         | 0.839835  |
| #### Bn-A05-p19070214 | A-genome specific (napus-rapa) | 0.9880383    | 0.8027963    | not scorable | not scorable | 0.9917355 | 0.8378819 |
| #### Bn-A05-p19070284 | A-genome specific (napus-rapa) | 0.9856459    | 0.7942677    | not scorable | not scorable | 0.9834711 | 0.8151299 |

|                       |                                |              |              |              |              |           |           |
|-----------------------|--------------------------------|--------------|--------------|--------------|--------------|-----------|-----------|
| #### Bn-A05-p19071118 | A-genome specific (rapa only)  | not scorable | not scorable | not scorable | not scorable | 1         | 0.8089101 |
| #### Bn-A05-p19096242 | A-genome specific (napus-rapa) | 0.9904306    | 0.7253518    | not scorable | not scorable | 0.9834711 | 0.7074528 |
| #### Bn-A05-p19105275 | A-genome specific (napus-rapa) | 0.9904306    | 0.7743271    | not scorable | not scorable | 0.9917355 | 0.8093156 |
| #### Bn-A05-p19105857 | A-genome specific (napus-rapa) | 0.9904306    | 0.7165952    | not scorable | not scorable | 0.9917355 | 0.6813741 |
| #### Bn-A05-p19116891 | genome unspecific (all in)     | 0.9952153    | 0.7018828    | 0.5271318    | 0.8990383    | 0.9917355 | 0.8093607 |
| #### Bn-A05-p19128595 | A-genome specific (napus-rapa) | 0.9784689    | 0.7674341    | not scorable | not scorable | 0.9917355 | 0.7785748 |
| #### Bn-A05-p19130774 | A-genome specific (napus-rapa) | 0.9665072    | 0.8104416    | not scorable | not scorable | 0.9752066 | 0.731097  |
| #### Bn-A05-p19178139 | A-genome specific (napus-rapa) | 0.9928229    | 0.7858185    | not scorable | not scorable | 1         | 0.7645862 |
| #### Bn-A05-p19186596 | A-genome specific (napus-rapa) | 0.9880383    | 0.3609344    | not scorable | not scorable | 1         | 0.7827481 |
| #### Bn-A05-p19187149 | A-genome specific (napus-rapa) | 1            | 0.9137889    | not scorable | not scorable | 1         | 0.8031005 |
| #### Bn-A05-p1919060  | A-genome specific (napus-rapa) | 0.9952153    | 0.8255541    | not scorable | not scorable | 0.9917355 | 0.7356588 |
| #### Bn-A05-p19195181 | A-genome specific (napus-rapa) | 0.9832536    | 0.7276098    | not scorable | not scorable | 0.9834711 | 0.746573  |
| #### Bn-A05-p19207735 | A-genome specific (napus-rapa) | 0.9856459    | 0.7369217    | not scorable | not scorable | 1         | 0.8877785 |
| #### Bn-A05-p19209866 | A-genome specific (napus-rapa) | 0.9808612    | 0.2709426    | not scorable | not scorable | 0.9669421 | 0.7014334 |
| #### Bn-A05-p19224833 | A-genome specific (napus-rapa) | 0.9880383    | 0.3494681    | not scorable | not scorable | 0.9834711 | 0.54172   |
| #### Bn-A05-p19238078 | A-genome specific (napus-rapa) | 0.9976076    | 0.7904353    | not scorable | not scorable | 1         | 0.7989678 |
| #### Bn-A05-p19238134 | A-genome specific (napus-rapa) | 0.9952153    | 0.7720228    | not scorable | not scorable | 0.9834711 | 0.7047588 |
| #### Bn-A05-p19238534 | A-genome specific (napus-rapa) | 0.9736842    | 0.4631932    | not scorable | not scorable | 0.9917355 | 0.8773267 |
| #### Bn-A05-p19242100 | A-genome specific (napus-rapa) | 0.9880383    | 0.8190317    | not scorable | not scorable | 0.9917355 | 0.751514  |
| #### Bn-A05-p19242397 | A-genome specific (napus-rapa) | 0.9856459    | 0.7980725    | not scorable | not scorable | 0.9752066 | 0.7860961 |
| #### Bn-A05-p19246371 | A-genome specific (napus-rapa) | 0.9832536    | 0.6741466    | not scorable | not scorable | 0.9421487 | 0.6237388 |
| #### Bn-A05-p19250569 | A-genome specific (napus-rapa) | 0.9880383    | 0.7601599    | not scorable | not scorable | 0.9669421 | 0.7229794 |
| #### Bn-A05-p19251131 | A-genome specific (napus-rapa) | 0.9904306    | 0.8021458    | not scorable | not scorable | 0.9586777 | 0.8041587 |
| #### Bn-A05-p19267100 | A-genome specific (napus-rapa) | 0.9832536    | 0.7817973    | not scorable | not scorable | 0.9752066 | 0.7792676 |
| #### Bn-A05-p19267153 | A-genome specific (napus-rapa) | 0.9880383    | 0.7503397    | not scorable | not scorable | 0.9917355 | 0.7667828 |
| #### Bn-A05-p19267475 | A-genome specific (napus-rapa) | 0.9904306    | 0.4392189    | not scorable | not scorable | 1         | 0.788645  |
| #### Bn-A05-p19268141 | A-genome specific (napus-rapa) | 0.9736842    | 0.7103897    | not scorable | not scorable | 1         | 0.6443118 |
| #### Bn-A05-p19278249 | A-genome specific (napus-rapa) | 0.9736842    | 0.5218727    | not scorable | not scorable | 1         | 0.7544576 |
| #### Bn-A05-p19278438 | A-genome specific (napus-rapa) | 0.9760765    | 0.7480281    | not scorable | not scorable | 0.9834711 | 0.7629552 |
| #### Bn-A05-p19359433 | A-genome specific (napus-rapa) | 0.9832536    | 0.7811325    | not scorable | not scorable | 0.9834711 | 0.8282984 |
| #### Bn-A05-p19359443 | A-genome specific (napus-rapa) | 0.9880383    | 0.7932043    | not scorable | not scorable | 0.9834711 | 0.7902157 |
| #### Bn-A05-p19362820 | A-genome specific (napus-rapa) | 0.9904306    | 0.3887517    | not scorable | not scorable | 0.9917355 | 0.7937153 |
| #### Bn-A05-p1942242  | A-genome specific (napus-rapa) | 0.9928229    | 0.7065078    | not scorable | not scorable | 0.9917355 | 0.8143404 |



|                       |                                   |              |              |              |              |           |           |                     |
|-----------------------|-----------------------------------|--------------|--------------|--------------|--------------|-----------|-----------|---------------------|
| #### Bn-A05-p19425901 | A-genome specific (napus-rapa)    | 0.9952153    | 0.7571525    | not scorable | not scorable |           | 1         | 0.7581795           |
| #### Bn-A05-p1943093  | A-genome specific (napus-rapa)    | 0.9928229    | 0.468921     | not scorable | not scorable | 0.9917355 |           | 0.8022016           |
| #### Bn-A05-p19436126 | A-genome specific (napus-rapa)    | 0.9832536    | 0.8082582    | not scorable | not scorable | 0.9917355 |           | 0.8727548           |
| #### Bn-A05-p19445367 | A-genome specific (napus-rapa)    | 0.9760765    | 0.7043135    | not scorable | not scorable | 0.9669421 |           | 0.7168652           |
| #### Bn-A05-p19448529 | A-genome specific (napus-rapa)    | 0.9808612    | 0.8131216    | not scorable | not scorable | 0.9834711 |           | 0.7119912           |
| #### Bn-A05-p19473882 | genome unspecific (oleracea-rapa) | not scorable | not scorable |              |              | 1         | 0.6678175 | 1 0.6811868         |
| #### Bn-A05-p19514459 | A-genome specific (napus-rapa)    | 0.9712918    | 0.603533     | not scorable | not scorable | 0.9834711 |           | 0.8118221           |
| #### Bn-A05-p19530568 | A-genome specific (napus-rapa)    | 0.9952153    | 0.7137901    | not scorable | not scorable | 0.9917355 |           | 0.8636814           |
| #### Bn-A05-p19532660 | A-genome specific (napus-rapa)    | 0.9952153    | 0.7368143    | not scorable | not scorable |           | 1         | 0.713484            |
| #### Bn-A05-p19539167 | A-genome specific (napus-rapa)    | 0.9880383    | 0.7475441    | not scorable | not scorable | 0.9834711 |           | 0.6041471           |
| #### Bn-A05-p19539235 | A-genome specific (napus-rapa)    | 0.9904306    | 0.7932793    | not scorable | not scorable | 0.9752066 |           | 0.7947152           |
| #### Bn-A05-p19539677 | A-genome specific (rapa only)     | not scorable | not scorable | not scorable | not scorable | 0.9338843 |           | 0.9086833           |
| #### Bn-A05-p19547378 | A-genome specific (napus-rapa)    | 0.9856459    | 0.3961389    | not scorable | not scorable | 0.6363636 |           | 0.7372702           |
| #### Bn-A05-p19550645 | A-genome specific (napus-rapa)    | 0.9641148    | 0.5505758    | not scorable | not scorable |           | 1         | 0.6817572           |
| #### Bn-A05-p19554281 | A-genome specific (napus-rapa)    | 0.9928229    | 0.8087645    | not scorable | not scorable | 0.9917355 |           | 0.8203865           |
| #### Bn-A05-p19571798 | A-genome specific (napus-rapa)    | 0.9928229    | 0.7838237    | not scorable | not scorable | 0.9917355 |           | 0.8076818           |
| #### Bn-A05-p19575123 | A-genome specific (napus-rapa)    | 0.9808612    | 0.408687     | not scorable | not scorable | 0.9917355 |           | 0.7882144           |
| #### Bn-A05-p19583714 | A-genome specific (napus-rapa)    | 0.9904306    | 0.7711592    | not scorable | not scorable | 0.9834711 |           | 0.7552525           |
| #### Bn-A05-p19599390 | A-genome specific (napus-rapa)    | 0.9641148    | 0.6753418    | not scorable | not scorable |           | 1         | 0.6834372           |
| #### Bn-A05-p19599809 | A-genome specific (napus-rapa)    | 0.9904306    | 0.7909828    | not scorable | not scorable | 0.9917355 |           | 0.8582645           |
| #### Bn-A05-p19612275 | A-genome specific (napus-rapa)    | 0.9880383    | 0.294282     | not scorable | not scorable |           | 1         | 0.736665            |
| #### Bn-A05-p19622826 | A-genome specific (napus-rapa)    | 0.9736842    | 0.4491403    | not scorable | not scorable |           | 1         | 0.7850553           |
| #### Bn-A05-p19623018 | A-genome specific (napus-rapa)    | 0.9856459    | 0.775817     | not scorable | not scorable | 0.9752066 |           | 0.7384774           |
| #### Bn-A05-p19650213 | A-genome specific (napus-rapa)    |              | 1 0.7801627  | not scorable | not scorable | 0.9834711 |           | 0.8294867           |
| #### Bn-A05-p19650278 | A-genome specific (napus-rapa)    | 0.9904306    | 0.7563848    | not scorable | not scorable | 0.9752066 |           | 0.7030701           |
| #### Bn-A05-p19650965 | A-genome specific (napus-rapa)    | 0.9976076    | 0.8002308    | not scorable | not scorable | 0.9752066 |           | 0.7565655           |
| #### Bn-A05-p19653084 | A-genome specific (napus-rapa)    | 0.9904306    | 0.7296695    | not scorable | not scorable | 0.9917355 |           | 0.6920334           |
| #### Bn-A05-p19660820 | A-genome specific (napus-rapa)    | 0.9880383    | 0.7889743    | not scorable | not scorable | 0.9834711 |           | 0.6860847           |
| #### Bn-A05-p19666434 | A-genome specific (napus-rapa)    | 0.9880383    | 0.7207434    | not scorable | not scorable | 0.9917355 |           | 0.8140488           |
| #### Bn-A05-p19668317 | A-genome specific (napus-rapa)    | 0.9904306    | 0.7663769    | not scorable | not scorable | 0.9917355 |           | 0.7738497           |
| #### Bn-A05-p19668632 | A-genome specific (napus-rapa)    | 0.9880383    | 0.8202624    | not scorable | not scorable |           | 1         | 0.798358            |
| #### Bn-A05-p19728614 | A-genome specific (napus-rapa)    | 0.9688995    | 0.7175491    | not scorable | not scorable | 0.9917355 |           | 0.5924731           |
| #### Bn-A05-p19730291 | genome unspecific (oleracea-rapa) | not scorable | not scorable |              |              | 1         | 0.5098581 | 0.9917355 0.7524529 |

|                       |                                |              |              |              |              |              |              |
|-----------------------|--------------------------------|--------------|--------------|--------------|--------------|--------------|--------------|
| #### Bn-A05-p1974178  | A-genome specific (napus-rapa) | 0.9856459    | 0.49788      | not scorable | not scorable | 0.6446281    | 0.8392317    |
| #### Bn-A05-p19745674 | napus specific                 | 0.9162679    | 0.770963     | not scorable | not scorable | not scorable | not scorable |
| #### Bn-A05-p1975785  | A-genome specific (napus-rapa) | 0.9976076    | 0.7140692    | not scorable | not scorable | 0.9834711    | 0.7319134    |
| #### Bn-A05-p19777231 | A-genome specific (napus-rapa) | 0.9808612    | 0.6733628    | not scorable | not scorable | 1            | 0.7389225    |
| #### Bn-A05-p19777547 | A-genome specific (napus-rapa) | 0.9856459    | 0.6516067    | not scorable | not scorable | 1            | 0.8216771    |
| #### Bn-A05-p1978957  | A-genome specific (napus-rapa) | 0.9928229    | 0.8288244    | not scorable | not scorable | 0.9917355    | 0.7230591    |
| #### Bn-A05-p19802577 | A-genome specific (napus-rapa) | 0.9904306    | 0.6090744    | not scorable | not scorable | 0.9917355    | 0.7235928    |
| #### Bn-A05-p19806333 | A-genome specific (napus-rapa) | 0.9832536    | 0.692484     | not scorable | not scorable | 0.9917355    | 0.6951473    |
| #### Bn-A05-p1981647  | A-genome specific (napus-rapa) | 0.9665072    | 0.6750557    | not scorable | not scorable | 0.9421487    | 0.7101196    |
| #### Bn-A05-p19846575 | A-genome specific (rapa only)  | not scorable | not scorable | not scorable | not scorable | 1            | 0.7876082    |
| #### Bn-A05-p19857351 | A-genome specific (napus-rapa) | 0.9545454    | 0.4825408    | not scorable | not scorable | 0.9834711    | 0.5126354    |
| #### Bn-A05-p19857532 | A-genome specific (napus-rapa) | 1            | 0.9293141    | not scorable | not scorable | 1            | 0.9272014    |
| #### Bn-A05-p19873242 | A-genome specific (napus-rapa) | 0.9904306    | 0.5724945    | not scorable | not scorable | 1            | 0.7133751    |
| #### Bn-A05-p19886554 | A-genome specific (napus-rapa) | 0.9808612    | 0.7535625    | not scorable | not scorable | 0.9752066    | 0.7823407    |
| #### Bn-A05-p19887308 | A-genome specific (napus-rapa) | 0.9952153    | 0.5443494    | not scorable | not scorable | 1            | 0.7948728    |
| #### Bn-A05-p19897379 | A-genome specific (napus-rapa) | 0.9880383    | 0.7325768    | not scorable | not scorable | 0.9917355    | 0.7469649    |
| #### Bn-A05-p19909249 | A-genome specific (napus-rapa) | 0.9808612    | 0.4889305    | not scorable | not scorable | 1            | 0.7802272    |
| #### Bn-A05-p19919111 | A-genome specific (napus-rapa) | 0.9736842    | 0.7657433    | not scorable | not scorable | 0.9834711    | 0.7334405    |
| #### Bn-A05-p19919179 | A-genome specific (napus-rapa) | 0.9760765    | 0.8020984    | not scorable | not scorable | 0.9752066    | 0.7395979    |
| #### Bn-A05-p19930910 | A-genome specific (napus-rapa) | 0.9976076    | 0.7693241    | not scorable | not scorable | 0.9752066    | 0.7839488    |
| #### Bn-A05-p19943528 | genome unspecific (all in)     | 0.9712918    | 0.318673     | 0.9844961    | 0.693344     | 1            | 0.8547045    |
| #### Bn-A05-p19946413 | A-genome specific (napus-rapa) | 0.9712918    | 0.4089649    | not scorable | not scorable | 1            | 0.7831712    |
| #### Bn-A05-p19967151 | A-genome specific (napus-rapa) | 0.9856459    | 0.2613275    | not scorable | not scorable | 0.9917355    | 0.8088612    |
| #### Bn-A05-p19973413 | A-genome specific (napus-rapa) | 0.9593301    | 0.2435013    | not scorable | not scorable | 0.9917355    | 0.7411395    |
| #### Bn-A05-p19978706 | A-genome specific (napus-rapa) | 0.9521531    | 0.7928636    | not scorable | not scorable | 1            | 0.7841166    |
| #### Bn-A05-p19990020 | A-genome specific (napus-rapa) | 0.9760765    | 0.496685     | not scorable | not scorable | 0.9834711    | 0.7898074    |
| #### Bn-A05-p19990560 | A-genome specific (rapa only)  | not scorable | not scorable | not scorable | not scorable | 1            | 0.790464     |
| #### Bn-A05-p20009925 | A-genome specific (napus-rapa) | 0.9928229    | 0.7848729    | not scorable | not scorable | 0.9752066    | 0.7938465    |
| #### Bn-A05-p20019130 | A-genome specific (napus-rapa) | 0.9712918    | 0.7967959    | not scorable | not scorable | 0.9917355    | 0.8150891    |
| #### Bn-A05-p20020286 | A-genome specific (napus-rapa) | 0.9952153    | 0.6312669    | not scorable | not scorable | 1            | 0.8691807    |
| #### Bn-A05-p200254   | A-genome specific (napus-rapa) | 0.9928229    | 0.7902161    | not scorable | not scorable | 0.9917355    | 0.7328228    |
| #### Bn-A05-p20074144 | A-genome specific (napus-rapa) | 1            | 0.8135734    | not scorable | not scorable | 1            | 0.7493539    |
| #### Bn-A05-p20075053 | A-genome specific (napus-rapa) | 0.9784689    | 0.7830873    | not scorable | not scorable | 1            | 0.7151078    |

|                       |                                   |              |              |              |              |           |           |
|-----------------------|-----------------------------------|--------------|--------------|--------------|--------------|-----------|-----------|
| #### Bn-A05-p20100234 | A-genome specific (napus-rapa)    | 0.9665072    | 0.3752645    | not scorable | not scorable | 0.9917355 | 0.73515   |
| #### Bn-A05-p20105944 | A-genome specific (napus-rapa)    | 0.9904306    | 0.8153329    | not scorable | not scorable | 1         | 0.7803828 |
| #### Bn-A05-p20109948 | A-genome specific (napus-rapa)    | 0.9856459    | 0.6754115    | not scorable | not scorable | 0.9752066 | 0.7042676 |
| #### Bn-A05-p20113630 | A-genome specific (napus-rapa)    | 0.9784689    | 0.5466524    | not scorable | not scorable | 1         | 0.9174437 |
| #### Bn-A05-p20124425 | A-genome specific (napus-rapa)    | 0.9952153    | 0.7914414    | not scorable | not scorable | 1         | 0.819771  |
| #### Bn-A05-p20125478 | A-genome specific (napus-rapa)    | 0.9832536    | 0.7983338    | not scorable | not scorable | 1         | 0.9272014 |
| #### Bn-A05-p20125982 | A-genome specific (napus-rapa)    | 0.9688995    | 0.7763443    | not scorable | not scorable | 0.9669421 | 0.7509598 |
| #### Bn-A05-p20126071 | A-genome specific (napus-rapa)    | 0.9736842    | 0.7990362    | not scorable | not scorable | 1         | 0.8321881 |
| #### Bn-A05-p20127293 | A-genome specific (napus-rapa)    | 0.8444976    | 0.8520336    | not scorable | not scorable | 0.9917355 | 0.8467577 |
| #### Bn-A05-p20127547 | A-genome specific (napus-rapa)    | 0.9880383    | 0.7509729    | not scorable | not scorable | 1         | 0.8546867 |
| #### Bn-A05-p20128796 | A-genome specific (napus-rapa)    | 0.9904306    | 0.7946774    | not scorable | not scorable | 1         | 0.7485278 |
| #### Bn-A05-p20129266 | A-genome specific (napus-rapa)    | 0.9760765    | 0.7836324    | not scorable | not scorable | 0.9834711 | 0.7888456 |
| #### Bn-A05-p20138451 | A-genome specific (napus-rapa)    | 0.9904306    | 0.8086479    | not scorable | not scorable | 1         | 0.7256749 |
| #### Bn-A05-p20139872 | A-genome specific (napus-rapa)    | 0.9880383    | 0.7532134    | not scorable | not scorable | 0.9752066 | 0.6368245 |
| #### Bn-A05-p20141883 | A-genome specific (napus-rapa)    | 0.9928229    | 0.5119429    | not scorable | not scorable | 1         | 0.4670898 |
| #### Bn-A05-p20142804 | A-genome specific (napus-rapa)    | 0.9760765    | 0.3626936    | not scorable | not scorable | 0.9917355 | 0.665702  |
| #### Bn-A05-p20161210 | genome unspecific (all in)        | 0.9545454    | 0.435711     | 0.9612403    | 0.2465464    | 0.9669421 | 0.7331205 |
| #### Bn-A05-p20163118 | A-genome specific (napus-rapa)    | 0.9712918    | 0.7182986    | not scorable | not scorable | 0.9752066 | 0.6363951 |
| #### Bn-A05-p20167176 | A-genome specific (napus-rapa)    | 0.9880383    | 0.8047754    | not scorable | not scorable | 0.9752066 | 0.7708302 |
| #### Bn-A05-p20168806 | A-genome specific (napus-rapa)    | 0.9856459    | 0.4766909    | not scorable | not scorable | 1         | 0.6893203 |
| #### Bn-A05-p20168909 | A-genome specific (napus-rapa)    | 0.9593301    | 0.4621453    | not scorable | not scorable | 0.9917355 | 0.5466226 |
| #### Bn-A05-p20174313 | genome unspecific (oleracea-rapa) | not scorable | not scorable |              | 1            | 0.6476261 | 0.9834711 |
| #### Bn-A05-p20178007 | A-genome specific (napus-rapa)    | 0.9736842    | 0.7182854    | not scorable | not scorable | 0.9752066 | 0.7030895 |
| #### Bn-A05-p20179255 | A-genome specific (rapa only)     | not scorable | not scorable | not scorable | not scorable | 0.9834711 | 0.6770346 |
| #### Bn-A05-p20232989 | A-genome specific (napus-rapa)    | 0.9808612    | 0.6763161    | not scorable | not scorable | 1         | 0.6912112 |
| #### Bn-A05-p2024975  | A-genome specific (napus-rapa)    | 0.9880383    | 0.6235477    | not scorable | not scorable | 0.9669421 | 0.7517704 |
| #### Bn-A05-p20254809 | A-genome specific (napus-rapa)    | 0.9880383    | 0.7832338    | not scorable | not scorable | 0.9917355 | 0.7335973 |
| #### Bn-A05-p20283717 | A-genome specific (napus-rapa)    | 0.9688995    | 0.7979661    | not scorable | not scorable | 0.6033058 | 0.8163134 |
| #### Bn-A05-p20283817 | A-genome specific (napus-rapa)    | 0.9688995    | 0.7293816    | not scorable | not scorable | 0.9504132 | 0.5072837 |
| #### Bn-A05-p20290091 | A-genome specific (napus-rapa)    | 0.9593301    | 0.5055331    | not scorable | not scorable | 1         | 0.8800009 |
| #### Bn-A05-p20292751 | genome unspecific (oleracea-rapa) | not scorable | not scorable | 0.9689922    | 0.1657277    | 0.9917355 | 0.267318  |
| #### Bn-A05-p20296253 | A-genome specific (napus-rapa)    | 0.9904306    | 0.5022858    | not scorable | not scorable | 1         | 0.8149554 |
| #### Bn-A05-p20300638 | A-genome specific (napus-rapa)    | 0.930622     | 0.8085203    | not scorable | not scorable | 1         | 0.8135064 |

|                       |                                |           |           |              |              |           |           |
|-----------------------|--------------------------------|-----------|-----------|--------------|--------------|-----------|-----------|
| #### Bn-A05-p20302128 | A-genome specific (napus-rapa) | 0.9760765 | 0.6715361 | not scorable | not scorable | 1         | 0.648831  |
| #### Bn-A05-p2030789  | A-genome specific (napus-rapa) | 0.9784689 | 0.3704401 | not scorable | not scorable | 0.9752066 | 0.7370691 |
| #### Bn-A05-p20314128 | A-genome specific (napus-rapa) | 0.9952153 | 0.8022643 | not scorable | not scorable | 1         | 0.7174681 |
| #### Bn-A05-p20316923 | A-genome specific (napus-rapa) | 0.9832536 | 0.3256988 | not scorable | not scorable | 1         | 0.7699323 |
| #### Bn-A05-p20319622 | A-genome specific (napus-rapa) | 0.9665072 | 0.7280776 | not scorable | not scorable | 0.9752066 | 0.7875085 |
| #### Bn-A05-p20328249 | A-genome specific (napus-rapa) | 0.9665072 | 0.4088381 | not scorable | not scorable | 0.9752066 | 0.6655978 |
| #### Bn-A05-p20328443 | A-genome specific (napus-rapa) | 0.9856459 | 0.4476026 | not scorable | not scorable | 0.9917355 | 0.6830243 |
| #### Bn-A05-p20337405 | A-genome specific (napus-rapa) | 0.9976076 | 0.5321876 | not scorable | not scorable | 1         | 0.7530559 |
| #### Bn-A05-p20354606 | A-genome specific (napus-rapa) | 0.9928229 | 0.4471853 | not scorable | not scorable | 0.9752066 | 0.7229759 |
| #### Bn-A05-p20359381 | A-genome specific (napus-rapa) | 0.9760765 | 0.819029  | not scorable | not scorable | 1         | 0.8759238 |
| #### Bn-A05-p20359553 | A-genome specific (napus-rapa) | 0.9880383 | 0.8108431 | not scorable | not scorable | 1         | 0.7006989 |
| #### Bn-A05-p20365953 | A-genome specific (napus-rapa) | 0.9856459 | 0.4544694 | not scorable | not scorable | 0.9752066 | 0.6775002 |
| #### Bn-A05-p20372600 | A-genome specific (napus-rapa) | 1         | 0.5826588 | not scorable | not scorable | 1         | 0.6202648 |
| #### Bn-A05-p20375812 | A-genome specific (napus-rapa) | 0.9832536 | 0.4208603 | not scorable | not scorable | 1         | 0.8089778 |
| #### Bn-A05-p20377770 | A-genome specific (napus-rapa) | 0.9880383 | 0.7193465 | not scorable | not scorable | 1         | 0.7157628 |
| #### Bn-A05-p20379970 | A-genome specific (napus-rapa) | 0.8827751 | 0.6723114 | not scorable | not scorable | 0.6033058 | 0.8003798 |
| #### Bn-A05-p20380629 | A-genome specific (napus-rapa) | 0.8708134 | 0.797788  | not scorable | not scorable | 0.6033058 | 0.8167256 |
| #### Bn-A05-p20386700 | A-genome specific (napus-rapa) | 0.9952153 | 0.3097196 | not scorable | not scorable | 0.9917355 | 0.7365292 |
| #### Bn-A05-p20390129 | A-genome specific (napus-rapa) | 0.9928229 | 0.7852919 | not scorable | not scorable | 0.9752066 | 0.7857522 |
| #### Bn-A05-p20394162 | genome unspecific (all in)     | 0.9665072 | 0.4083105 | 0.9844961    | 0.2497406    | 0.9752066 | 0.7805901 |
| #### Bn-A05-p2039690  | A-genome specific (napus-rapa) | 0.9904306 | 0.8505738 | not scorable | not scorable | 0.9834711 | 0.8360972 |
| #### Bn-A05-p20399452 | A-genome specific (napus-rapa) | 0.9593301 | 0.5287408 | not scorable | not scorable | 0.9752066 | 0.6864699 |
| #### Bn-A05-p20404099 | A-genome specific (napus-rapa) | 0.9928229 | 0.6677064 | not scorable | not scorable | 1         | 0.7645778 |
| #### Bn-A05-p20422081 | A-genome specific (napus-rapa) | 0.9952153 | 0.4992225 | not scorable | not scorable | 1         | 0.6608376 |
| #### Bn-A05-p20425452 | A-genome specific (napus-rapa) | 0.9880383 | 0.3434804 | not scorable | not scorable | 0.9834711 | 0.7118058 |
| #### Bn-A05-p20425648 | A-genome specific (napus-rapa) | 0.9760765 | 0.3273316 | not scorable | not scorable | 1         | 0.6400863 |
| #### Bn-A05-p20429403 | A-genome specific (napus-rapa) | 0.9952153 | 0.8572267 | not scorable | not scorable | 1         | 0.8349755 |
| #### Bn-A05-p20443393 | A-genome specific (napus-rapa) | 1         | 0.431834  | not scorable | not scorable | 1         | 0.6674994 |
| #### Bn-A05-p20449058 | A-genome specific (napus-rapa) | 0.9784689 | 0.4197202 | not scorable | not scorable | 1         | 0.671567  |
| #### Bn-A05-p20458590 | A-genome specific (napus-rapa) | 0.9904306 | 0.7864174 | not scorable | not scorable | 1         | 0.7807422 |
| #### Bn-A05-p20461416 | A-genome specific (napus-rapa) | 0.9760765 | 0.6551969 | not scorable | not scorable | 0.9752066 | 0.8027548 |
| #### Bn-A05-p20461727 | A-genome specific (napus-rapa) | 0.9712918 | 0.7965148 | not scorable | not scorable | 0.9917355 | 0.7794971 |
| #### Bn-A05-p20467809 | A-genome specific (napus-rapa) | 0.9665072 | 0.7856001 | not scorable | not scorable | 1         | 0.7120411 |

|                       |                                |              |              |              |              |              |              |
|-----------------------|--------------------------------|--------------|--------------|--------------|--------------|--------------|--------------|
| #### Bn-A05-p20478486 | A-genome specific (rapa only)  | not scorable | not scorable | not scorable | not scorable | 1            | 0.7882326    |
| #### Bn-A05-p20479068 | A-genome specific (rapa only)  | not scorable | not scorable | not scorable | not scorable | 1            | 0.7473264    |
| #### Bn-A05-p20485998 | A-genome specific (napus-rapa) | 0.9904306    | 0.7871493    | not scorable | not scorable | 0.9752066    | 0.7532809    |
| #### Bn-A05-p20487983 | A-genome specific (napus-rapa) | 0.9832536    | 0.814613     | not scorable | not scorable | 0.9834711    | 0.6874883    |
| #### Bn-A05-p20492525 | A-genome specific (napus-rapa) | 0.9976076    | 0.5457357    | not scorable | not scorable | 1            | 0.6541435    |
| #### Bn-A05-p20503767 | A-genome specific (napus-rapa) | 1            | 0.7752416    | not scorable | not scorable | 1            | 0.7422752    |
| #### Bn-A05-p20534431 | A-genome specific (napus-rapa) | 0.9856459    | 0.7770748    | not scorable | not scorable | 0.9834711    | 0.8340049    |
| #### Bn-A05-p20541690 | A-genome specific (napus-rapa) | 1            | 0.9205657    | not scorable | not scorable | 1            | 0.9175813    |
| #### Bn-A05-p20541987 | A-genome specific (napus-rapa) | 0.9904306    | 0.7663167    | not scorable | not scorable | 1            | 0.8494952    |
| #### Bn-A05-p20549826 | A-genome specific (napus-rapa) | 0.4282297    | 0.6536983    | not scorable | not scorable | 0.9917355    | 0.6212941    |
| #### Bn-A05-p20550694 | A-genome specific (napus-rapa) | 0.9952153    | 0.72338      | not scorable | not scorable | 1            | 0.6951995    |
| #### Bn-A05-p20554567 | genome unspecific (all in)     | 0.9952153    | 0.7852837    | 0            | 0.8007098    | 0.9752066    | 0.7708607    |
| #### Bn-A05-p20555996 | A-genome specific (napus-rapa) | 0.9952153    | 0.7231936    | not scorable | not scorable | 0.9917355    | 0.6714237    |
| #### Bn-A05-p20563653 | A-genome specific (napus-rapa) | 0.9952153    | 0.4542452    | not scorable | not scorable | 0.9917355    | 0.7747972    |
| #### Bn-A05-p20564729 | A-genome specific (napus-rapa) | 0.9665072    | 0.3319836    | not scorable | not scorable | 0.9917355    | 0.7465069    |
| #### Bn-A05-p20591895 | A-genome specific (napus-rapa) | 0.9760765    | 0.5500098    | not scorable | not scorable | 1            | 0.7904748    |
| #### Bn-A05-p20591964 | A-genome specific (napus-rapa) | 0.9617225    | 0.7880247    | not scorable | not scorable | 0.6033058    | 0.7417902    |
| #### Bn-A05-p20594196 | A-genome specific (napus-rapa) | 0.9784689    | 0.5079296    | not scorable | not scorable | 1            | 0.7770717    |
| #### Bn-A05-p20597839 | A-genome specific (napus-rapa) | 0.9928229    | 0.4501688    | not scorable | not scorable | 0.9752066    | 0.7544127    |
| #### Bn-A05-p20601139 | A-genome specific (napus-rapa) | 0.9856459    | 0.775849     | not scorable | not scorable | 1            | 0.8259001    |
| #### Bn-A05-p20623573 | A-genome specific (napus-rapa) | 0.9952153    | 0.7981007    | not scorable | not scorable | 1            | 0.7360603    |
| #### Bn-A05-p20626818 | A-genome specific (napus-rapa) | 1            | 0.7727537    | not scorable | not scorable | 1            | 0.7619172    |
| #### Bn-A05-p2062917  | A-genome specific (napus-rapa) | 0.9808612    | 0.7832018    | not scorable | not scorable | 0.9917355    | 0.709864     |
| #### Bn-A05-p20632153 | A-genome specific (napus-rapa) | 1            | 0.7782727    | not scorable | not scorable | 1            | 0.7137816    |
| #### Bn-A05-p20673293 | A-genome specific (napus-rapa) | 1            | 0.7602968    | not scorable | not scorable | 1            | 0.7257791    |
| #### Bn-A05-p20676409 | napus specific                 | 0.9665072    | 0.8126962    | not scorable | not scorable | not scorable | not scorable |
| #### Bn-A05-p2067722  | A-genome specific (napus-rapa) | 0.9928229    | 0.7870454    | not scorable | not scorable | 0.9834711    | 0.7444382    |
| #### Bn-A05-p20681871 | A-genome specific (napus-rapa) | 1            | 0.7554034    | not scorable | not scorable | 1            | 0.8508033    |
| #### Bn-A05-p20690058 | A-genome specific (napus-rapa) | 1            | 0.7746114    | not scorable | not scorable | 0.9917355    | 0.7405595    |
| #### Bn-A05-p20692714 | A-genome specific (napus-rapa) | 0.9976076    | 0.654015     | not scorable | not scorable | 1            | 0.7819035    |
| #### Bn-A05-p20697145 | A-genome specific (napus-rapa) | 0.9952153    | 0.7117223    | not scorable | not scorable | 1            | 0.7247998    |
| #### Bn-A05-p20697410 | A-genome specific (napus-rapa) | 1            | 0.7353347    | not scorable | not scorable | 0.9917355    | 0.8288288    |
| #### Bn-A05-p20697473 | A-genome specific (napus-rapa) | 0.9976076    | 0.7759578    | not scorable | not scorable | 1            | 0.7882201    |

|                       |                                |              |              |              |              |           |           |
|-----------------------|--------------------------------|--------------|--------------|--------------|--------------|-----------|-----------|
| #### Bn-A05-p20697824 | A-genome specific (napus-rapa) | 1            | 0.7232289    | not scorable | not scorable | 0.9917355 | 0.8047732 |
| #### Bn-A05-p20697908 | A-genome specific (napus-rapa) | 0.9928229    | 0.7377468    | not scorable | not scorable | 1         | 0.8051713 |
| #### Bn-A05-p20698928 | A-genome specific (rapa only)  | not scorable | not scorable | not scorable | not scorable | 1         | 0.6957591 |
| #### Bn-A05-p20699671 | A-genome specific (napus-rapa) | 0.9976076    | 0.7901343    | not scorable | not scorable | 1         | 0.7452181 |
| #### Bn-A05-p20705675 | A-genome specific (rapa only)  | not scorable | not scorable | not scorable | not scorable | 1         | 0.7860979 |
| #### Bn-A05-p20712388 | A-genome specific (napus-rapa) | 0.9808612    | 0.5235363    | not scorable | not scorable | 1         | 0.7863717 |
| #### Bn-A05-p20714207 | A-genome specific (napus-rapa) | 1            | 0.5625229    | not scorable | not scorable | 0.9917355 | 0.7708303 |
| #### Bn-A05-p20714302 | A-genome specific (napus-rapa) | 0.9976076    | 0.3776084    | not scorable | not scorable | 0.9917355 | 0.7072175 |
| #### Bn-A05-p20714581 | A-genome specific (napus-rapa) | 1            | 0.8025625    | not scorable | not scorable | 0.9834711 | 0.7581809 |
| #### Bn-A05-p20716500 | A-genome specific (napus-rapa) | 0.9976076    | 0.6833518    | not scorable | not scorable | 1         | 0.8132641 |
| #### Bn-A05-p20718776 | A-genome specific (napus-rapa) | 0.9976076    | 0.7629884    | not scorable | not scorable | 1         | 0.7851137 |
| #### Bn-A05-p20719343 | A-genome specific (napus-rapa) | 0.9808612    | 0.7337445    | not scorable | not scorable | 0.9338843 | 0.909426  |
| #### Bn-A05-p20728232 | A-genome specific (napus-rapa) | 0.9473684    | 0.6045958    | not scorable | not scorable | 1         | 0.7402759 |
| #### Bn-A05-p20728284 | A-genome specific (rapa only)  | not scorable | not scorable | not scorable | not scorable | 0.9669421 | 0.8469902 |
| #### Bn-A05-p20734549 | A-genome specific (rapa only)  | not scorable | not scorable | not scorable | not scorable | 0.9834711 | 0.7496812 |
| #### Bn-A05-p20747913 | A-genome specific (napus-rapa) | 0.9856459    | 0.7515344    | not scorable | not scorable | 0.6033058 | 0.7955049 |
| #### Bn-A05-p20790867 | A-genome specific (napus-rapa) | 0.9928229    | 0.7206525    | not scorable | not scorable | 1         | 0.7059751 |
| #### Bn-A05-p20791306 | A-genome specific (napus-rapa) | 0.9976076    | 0.7794048    | not scorable | not scorable | 1         | 0.6834136 |
| #### Bn-A05-p20794306 | A-genome specific (napus-rapa) | 1            | 0.8687871    | not scorable | not scorable | 1         | 0.8653011 |
| #### Bn-A05-p20808964 | A-genome specific (rapa only)  | not scorable | not scorable | not scorable | not scorable | 0.9834711 | 0.7332327 |
| #### Bn-A05-p20809217 | A-genome specific (rapa only)  | not scorable | not scorable | not scorable | not scorable | 0.9834711 | 0.7161915 |
| #### Bn-A05-p20809327 | A-genome specific (rapa only)  | not scorable | not scorable | not scorable | not scorable | 0.9834711 | 0.8123746 |
| #### Bn-A05-p20811510 | A-genome specific (rapa only)  | not scorable | not scorable | not scorable | not scorable | 0.9917355 | 0.7600672 |
| #### Bn-A05-p20818194 | A-genome specific (rapa only)  | not scorable | not scorable | not scorable | not scorable | 0.9586777 | 0.7629373 |
| #### Bn-A05-p20818989 | A-genome specific (napus-rapa) | 1            | 0.7705563    | not scorable | not scorable | 1         | 0.9022536 |
| #### Bn-A05-p20824936 | A-genome specific (napus-rapa) | 0.9856459    | 0.7600218    | not scorable | not scorable | 0.9752066 | 0.6711195 |
| #### Bn-A05-p20825280 | A-genome specific (napus-rapa) | 0.9521531    | 0.7395855    | not scorable | not scorable | 0.9752066 | 0.6695426 |
| #### Bn-A05-p20825449 | A-genome specific (rapa only)  | not scorable | not scorable | not scorable | not scorable | 0.9834711 | 0.7079834 |
| #### Bn-A05-p20828693 | A-genome specific (napus-rapa) | 1            | 0.7702438    | not scorable | not scorable | 0.9834711 | 0.6761604 |
| #### Bn-A05-p20839044 | A-genome specific (napus-rapa) | 0.9928229    | 0.7961762    | not scorable | not scorable | 0.9752066 | 0.7195259 |
| #### Bn-A05-p20843453 | A-genome specific (rapa only)  | not scorable | not scorable | not scorable | not scorable | 1         | 0.7066184 |
| #### Bn-A05-p20844496 | A-genome specific (napus-rapa) | 1            | 0.7192586    | not scorable | not scorable | 0.9917355 | 0.7224618 |
| #### Bn-A05-p20844938 | A-genome specific (rapa only)  | not scorable | not scorable | not scorable | not scorable | 0.9917355 | 0.7266377 |

|                       |                                |              |              |              |              |           |           |
|-----------------------|--------------------------------|--------------|--------------|--------------|--------------|-----------|-----------|
| #### Bn-A05-p20852240 | A-genome specific (napus-rapa) | 0.9449761    | 0.6600185    | not scorable | not scorable | 0.9669421 | 0.7666233 |
| #### Bn-A05-p20888695 | A-genome specific (rapa only)  | not scorable | not scorable | not scorable | not scorable | 1         | 0.8130783 |
| #### Bn-A05-p20894465 | A-genome specific (rapa only)  | not scorable | not scorable | not scorable | not scorable | 0.8595041 | 0.8137174 |
| #### Bn-A05-p20903214 | A-genome specific (rapa only)  | not scorable | not scorable | not scorable | not scorable | 1         | 0.836808  |
| #### Bn-A05-p20903608 | A-genome specific (napus-rapa) | 0.9952153    | 0.3238211    | not scorable | not scorable | 1         | 0.7622204 |
| #### Bn-A05-p2091308  | A-genome specific (napus-rapa) | 0.9976076    | 0.7697294    | not scorable | not scorable | 0.9834711 | 0.8054408 |
| #### Bn-A05-p20940971 | A-genome specific (napus-rapa) | 0.9856459    | 0.4615396    | not scorable | not scorable | 0.6115702 | 0.719925  |
| #### Bn-A05-p20955184 | A-genome specific (napus-rapa) | 0.9808612    | 0.5152993    | not scorable | not scorable | 0.9834711 | 0.8527468 |
| #### Bn-A05-p20972649 | A-genome specific (napus-rapa) | 0.9856459    | 0.8033336    | not scorable | not scorable | 1         | 0.7487295 |
| #### Bn-A05-p20974054 | A-genome specific (napus-rapa) | 0.9808612    | 0.664434     | not scorable | not scorable | 0.9917355 | 0.6520352 |
| #### Bn-A05-p20998848 | A-genome specific (rapa only)  | not scorable | not scorable | not scorable | not scorable | 1         | 0.8364183 |
| #### Bn-A05-p21000008 | A-genome specific (napus-rapa) | 0.9904306    | 0.7671291    | not scorable | not scorable | 0.9669421 | 0.7257819 |
| #### Bn-A05-p21000614 | A-genome specific (napus-rapa) | 0.9880383    | 0.7912342    | not scorable | not scorable | 1         | 0.8335571 |
| #### Bn-A05-p21006621 | A-genome specific (rapa only)  | not scorable | not scorable | not scorable | not scorable | 0.9834711 | 0.7047226 |
| #### Bn-A05-p2102634  | A-genome specific (napus-rapa) | 0.9952153    | 0.3961241    | not scorable | not scorable | 1         | 0.6062281 |
| #### Bn-A05-p21028051 | A-genome specific (napus-rapa) | 0.9904306    | 0.795072     | not scorable | not scorable | 0.9917355 | 0.8064644 |
| #### Bn-A05-p21029850 | A-genome specific (napus-rapa) | 0.9952153    | 0.8328664    | not scorable | not scorable | 1         | 0.8227471 |
| #### Bn-A05-p21029910 | A-genome specific (napus-rapa) | 0.9952153    | 0.808516     | not scorable | not scorable | 0.6033058 | 0.752282  |
| #### Bn-A05-p21036828 | A-genome specific (napus-rapa) | 0.9832536    | 0.5192206    | not scorable | not scorable | 0.9834711 | 0.7137486 |
| #### Bn-A05-p21037865 | A-genome specific (napus-rapa) | 0.9736842    | 0.8352256    | not scorable | not scorable | 0.9834711 | 0.7685616 |
| #### Bn-A05-p21047802 | A-genome specific (napus-rapa) | 0.9952153    | 0.7495071    | not scorable | not scorable | 0.9834711 | 0.7348757 |
| #### Bn-A05-p21052552 | A-genome specific (napus-rapa) | 1            | 0.5293095    | not scorable | not scorable | 0.9917355 | 0.7350201 |
| #### Bn-A05-p21054101 | A-genome specific (napus-rapa) | 0.9832536    | 0.7928503    | not scorable | not scorable | 1         | 0.8416532 |
| #### Bn-A05-p21056938 | A-genome specific (napus-rapa) | 0.9976076    | 0.8414966    | not scorable | not scorable | 1         | 0.8032891 |
| #### Bn-A05-p21057936 | A-genome specific (napus-rapa) | 0.9976076    | 0.410116     | not scorable | not scorable | 0.9752066 | 0.621749  |
| #### Bn-A05-p21058156 | A-genome specific (napus-rapa) | 0.9928229    | 0.7922674    | not scorable | not scorable | 0.9917355 | 0.8185    |
| #### Bn-A05-p21058435 | A-genome specific (napus-rapa) | 0.9928229    | 0.8365861    | not scorable | not scorable | 0.9834711 | 0.8371058 |
| #### Bn-A05-p21064254 | A-genome specific (rapa only)  | not scorable | not scorable | not scorable | not scorable | 1         | 0.6823571 |
| #### Bn-A05-p21065087 | A-genome specific (napus-rapa) | 0.9019139    | 0.7869024    | not scorable | not scorable | 0.9752066 | 0.7942155 |
| #### Bn-A05-p2106680  | A-genome specific (napus-rapa) | 0.9976076    | 0.7434528    | not scorable | not scorable | 0.9917355 | 0.7792991 |
| #### Bn-A05-p21070302 | A-genome specific (napus-rapa) | 0.9976076    | 0.702597     | not scorable | not scorable | 0.9752066 | 0.6549986 |
| #### Bn-A05-p21070991 | A-genome specific (napus-rapa) | 1            | 0.6763301    | not scorable | not scorable | 1         | 0.7727653 |
| #### Bn-A05-p2107808  | A-genome specific (napus-rapa) | 0.9976076    | 0.7726344    | not scorable | not scorable | 0.9834711 | 0.7135004 |

|                       |                                |              |              |              |              |           |           |
|-----------------------|--------------------------------|--------------|--------------|--------------|--------------|-----------|-----------|
| #### Bn-A05-p21081145 | A-genome specific (napus-rapa) | 0.9186603    | 0.8262522    | not scorable | not scorable | 0.9752066 | 0.8215418 |
| #### Bn-A05-p2108713  | A-genome specific (napus-rapa) | 0.9904306    | 0.669964     | not scorable | not scorable | 0.9834711 | 0.6704814 |
| #### Bn-A05-p21093954 | A-genome specific (napus-rapa) | 0.9832536    | 0.4445618    | not scorable | not scorable | 0.9834711 | 0.6530712 |
| #### Bn-A05-p2109546  | A-genome specific (napus-rapa) | 0.9976076    | 0.7664476    | not scorable | not scorable | 0.9917355 | 0.7320964 |
| #### Bn-A05-p2110255  | A-genome specific (napus-rapa) | 0.9976076    | 0.6807659    | not scorable | not scorable | 1         | 0.7216478 |
| #### Bn-A05-p2110344  | A-genome specific (napus-rapa) | 0.9976076    | 0.6357534    | not scorable | not scorable | 0.9917355 | 0.6743599 |
| #### Bn-A05-p21106566 | A-genome specific (napus-rapa) | 0.9784689    | 0.5225418    | not scorable | not scorable | 0.9917355 | 0.8646462 |
| #### Bn-A05-p21107181 | A-genome specific (napus-rapa) | 0.9665072    | 0.2894852    | not scorable | not scorable | 1         | 0.7045832 |
| #### Bn-A05-p2111165  | A-genome specific (napus-rapa) | 0.9880383    | 0.5099034    | not scorable | not scorable | 1         | 0.7208876 |
| #### Bn-A05-p21163226 | A-genome specific (napus-rapa) | 1            | 0.7776649    | not scorable | not scorable | 1         | 0.7909042 |
| #### Bn-A05-p21176831 | A-genome specific (napus-rapa) | 0.9784689    | 0.7205074    | not scorable | not scorable | 1         | 0.716603  |
| #### Bn-A05-p21182276 | A-genome specific (napus-rapa) | 0.9760765    | 0.4191424    | not scorable | not scorable | 0.9917355 | 0.7322522 |
| #### Bn-A05-p21188442 | A-genome specific (napus-rapa) | 0.9880383    | 0.4976288    | not scorable | not scorable | 0.9917355 | 0.7365086 |
| #### Bn-A05-p21193491 | A-genome specific (napus-rapa) | 0.9928229    | 0.7595256    | not scorable | not scorable | 1         | 0.8420879 |
| #### Bn-A05-p21201908 | A-genome specific (napus-rapa) | 0.9904306    | 0.6795592    | not scorable | not scorable | 0.9917355 | 0.6544748 |
| #### Bn-A05-p21201956 | A-genome specific (napus-rapa) | 0.9928229    | 0.706045     | not scorable | not scorable | 1         | 0.6532649 |
| #### Bn-A05-p21208394 | A-genome specific (napus-rapa) | 1            | 0.7773431    | not scorable | not scorable | 0.9752066 | 0.7551941 |
| #### Bn-A05-p21210078 | A-genome specific (napus-rapa) | 0.9880383    | 0.332107     | not scorable | not scorable | 0.9752066 | 0.6795902 |
| #### Bn-A05-p21221296 | A-genome specific (napus-rapa) | 0.9856459    | 0.7859538    | not scorable | not scorable | 0.9834711 | 0.7522865 |
| #### Bn-A05-p21233666 | A-genome specific (napus-rapa) | 0.9976076    | 0.3983047    | not scorable | not scorable | 0.9834711 | 0.5923949 |
| #### Bn-A05-p21240761 | A-genome specific (napus-rapa) | 1            | 0.8096263    | not scorable | not scorable | 0.9834711 | 0.7924066 |
| #### Bn-A05-p21243931 | A-genome specific (napus-rapa) | 0.9928229    | 0.7775173    | not scorable | not scorable | 0.9834711 | 0.7910011 |
| #### Bn-A05-p21248382 | A-genome specific (napus-rapa) | 1            | 0.7730108    | not scorable | not scorable | 0.9834711 | 0.856598  |
| #### Bn-A05-p21248720 | A-genome specific (napus-rapa) | 0.9832536    | 0.7494116    | not scorable | not scorable | 0.9834711 | 0.8046125 |
| #### Bn-A05-p21267598 | A-genome specific (napus-rapa) | 0.9832536    | 0.3948153    | not scorable | not scorable | 0.9834711 | 0.7206949 |
| #### Bn-A05-p21299910 | A-genome specific (napus-rapa) | 0.9928229    | 0.7539886    | not scorable | not scorable | 0.9752066 | 0.7752903 |
| #### Bn-A05-p21313618 | A-genome specific (napus-rapa) | 1            | 0.7451401    | not scorable | not scorable | 0.9586777 | 0.7349232 |
| #### Bn-A05-p21319243 | A-genome specific (napus-rapa) | 0.9952153    | 0.5112509    | not scorable | not scorable | 0.9917355 | 0.6711031 |
| #### Bn-A05-p21325400 | A-genome specific (napus-rapa) | 0.9928229    | 0.7900273    | not scorable | not scorable | 1         | 0.9175813 |
| #### Bn-A05-p21326091 | A-genome specific (napus-rapa) | 1            | 0.6878671    | not scorable | not scorable | 0.9917355 | 0.7766346 |
| #### Bn-A05-p21326775 | A-genome specific (napus-rapa) | 0.9928229    | 0.5187322    | not scorable | not scorable | 1         | 0.8521883 |
| #### Bn-A05-p21345579 | A-genome specific (rapa only)  | not scorable | not scorable | not scorable | not scorable | 0.9917355 | 0.8713833 |
| #### Bn-A05-p21347821 | A-genome specific (napus-rapa) | 0.9856459    | 0.7239614    | not scorable | not scorable | 0.9834711 | 0.7814583 |



|                       |                                   |              |              |              |              |              |              |
|-----------------------|-----------------------------------|--------------|--------------|--------------|--------------|--------------|--------------|
| #### Bn-A05-p21370435 | A-genome specific (napus-rapa)    | 0.9688995    | 0.3178908    | not scorable | not scorable | 0.9917355    | 0.7465438    |
| #### Bn-A05-p21370618 | A-genome specific (napus-rapa)    | 0.9832536    | 0.7726155    | not scorable | not scorable | 0.9752066    | 0.6337259    |
| #### Bn-A05-p21375513 | napus specific                    | 0.9138756    | 0.2569491    | not scorable | not scorable | not scorable | not scorable |
| #### Bn-A05-p21375514 | napus specific                    | 0.9330143    | 0.3076274    | not scorable | not scorable | not scorable | not scorable |
| #### Bn-A05-p21377682 | genome unspecific (all in)        | 0.9832536    | 0.4470023    |              | 1 0.8345801  | 0.9917355    | 0.6790586    |
| #### Bn-A05-p21381782 | A-genome specific (napus-rapa)    | 0.9282297    | 0.7677541    | not scorable | not scorable | 0.9917355    | 0.7657691    |
| #### Bn-A05-p2138342  | A-genome specific (napus-rapa)    | 1            | 0.7135787    | not scorable | not scorable | 1            | 0.7726238    |
| #### Bn-A05-p21384657 | A-genome specific (napus-rapa)    | 0.9760765    | 0.2509238    | not scorable | not scorable | 0.9752066    | 0.798973     |
| #### Bn-A05-p21385524 | A-genome specific (napus-rapa)    | 0.9856459    | 0.5043669    | not scorable | not scorable | 1            | 0.8116566    |
| #### Bn-A05-p2139529  | A-genome specific (rapa only)     | not scorable | not scorable | not scorable | not scorable | 0.9917355    | 0.5694224    |
| #### Bn-A05-p2142102  | A-genome specific (napus-rapa)    | 0.9856459    | 0.7580984    | not scorable | not scorable | 0.9752066    | 0.8223481    |
| #### Bn-A05-p2143241  | A-genome specific (napus-rapa)    | 0.437799     | 0.6308175    | not scorable | not scorable | 0.9421487    | 0.5064331    |
| #### Bn-A05-p2143292  | A-genome specific (rapa only)     | not scorable | not scorable | not scorable | not scorable | 0.9421487    | 0.7769517    |
| #### Bn-A05-p21463902 | genome unspecific (oleracea-rapa) | not scorable | not scorable |              | 1 0.6000344  | 1            | 0.5187793    |
| #### Bn-A05-p21470614 | A-genome specific (napus-rapa)    | 0.9976076    | 0.742601     | not scorable | not scorable | 0.9917355    | 0.7722381    |
| #### Bn-A05-p21480994 | A-genome specific (napus-rapa)    | 0.9928229    | 0.4171317    | not scorable | not scorable | 0.9917355    | 0.7164915    |
| #### Bn-A05-p21484113 | A-genome specific (napus-rapa)    | 0.9976076    | 0.7598017    | not scorable | not scorable | 1            | 0.836735     |
| #### Bn-A05-p21491115 | A-genome specific (napus-rapa)    | 0.9904306    | 0.5458049    | not scorable | not scorable | 1            | 0.7316357    |
| #### Bn-A05-p21493851 | A-genome specific (napus-rapa)    | 0.9808612    | 0.7372672    | not scorable | not scorable | 0.5619835    | 0.7653882    |
| #### Bn-A05-p2151202  | A-genome specific (napus-rapa)    | 0.9976076    | 0.7449302    | not scorable | not scorable | 1            | 0.7936785    |
| #### Bn-A05-p21532839 | A-genome specific (napus-rapa)    | 0.9856459    | 0.5268254    | not scorable | not scorable | 0.9917355    | 0.7915397    |
| #### Bn-A05-p21538700 | A-genome specific (napus-rapa)    | 0.9952153    | 0.7670899    | not scorable | not scorable | 0.9834711    | 0.7445341    |
| #### Bn-A05-p2155466  | A-genome specific (napus-rapa)    | 0.9976076    | 0.4434382    | not scorable | not scorable | 1            | 0.8148221    |
| #### Bn-A05-p21579642 | A-genome specific (napus-rapa)    | 0.9976076    | 0.4027491    | not scorable | not scorable | 1            | 0.7701805    |
| #### Bn-A05-p21587317 | A-genome specific (napus-rapa)    | 0.9976076    | 0.7936804    | not scorable | not scorable | 0.9669421    | 0.7507553    |
| #### Bn-A05-p21600657 | A-genome specific (napus-rapa)    | 1            | 0.6807379    | not scorable | not scorable | 0.9752066    | 0.7791275    |
| #### Bn-A05-p21600954 | A-genome specific (napus-rapa)    | 0.9976076    | 0.4951656    | not scorable | not scorable | 0.9917355    | 0.8177617    |
| #### Bn-A05-p21631586 | A-genome specific (napus-rapa)    | 1            | 0.6203411    | not scorable | not scorable | 0.9917355    | 0.7126814    |
| #### Bn-A05-p21633055 | A-genome specific (napus-rapa)    | 0.8803828    | 0.5077754    | not scorable | not scorable | 0.9834711    | 0.7425181    |
| #### Bn-A05-p21638427 | A-genome specific (napus-rapa)    | 0.9928229    | 0.7092291    | not scorable | not scorable | 0.9834711    | 0.8488882    |
| #### Bn-A05-p21641604 | A-genome specific (napus-rapa)    | 0.9928229    | 0.774497     | not scorable | not scorable | 1            | 0.7822919    |
| #### Bn-A05-p21641616 | A-genome specific (napus-rapa)    | 0.9976076    | 0.519976     | not scorable | not scorable | 0.9917355    | 0.6418307    |
| #### Bn-A05-p21646684 | A-genome specific (napus-rapa)    | 0.9162679    | 0.7904294    | not scorable | not scorable | 0.9752066    | 0.7793182    |

|                       |                                   |              |              |              |              |              |              |
|-----------------------|-----------------------------------|--------------|--------------|--------------|--------------|--------------|--------------|
| #### Bn-A05-p21658509 | A-genome specific (rapa only)     | not scorable | not scorable | not scorable | not scorable | 0.9421487    | 0.7769966    |
| #### Bn-A05-p21660030 | A-genome specific (napus-rapa)    | 0.9760765    | 0.8042824    | not scorable | not scorable | 0.9586777    | 0.6996052    |
| #### Bn-A05-p21660088 | A-genome specific (napus-rapa)    | 0.9880383    | 0.7108365    | not scorable | not scorable | 0.9917355    | 0.7411529    |
| #### Bn-A05-p21661113 | A-genome specific (napus-rapa)    | 0.9928229    | 0.7525829    | not scorable | not scorable | 0.9917355    | 0.6838576    |
| #### Bn-A05-p2166681  | A-genome specific (rapa only)     | not scorable | not scorable | not scorable | not scorable | 0.9917355    | 0.7819025    |
| #### Bn-A05-p21668872 | A-genome specific (napus-rapa)    | 1            | 0.4041414    | not scorable | not scorable | 0.9834711    | 0.7819542    |
| #### Bn-A05-p2167188  | A-genome specific (napus-rapa)    | 0.9976076    | 0.7683138    | not scorable | not scorable | 0.9917355    | 0.7997399    |
| #### Bn-A05-p2167269  | A-genome specific (napus-rapa)    | 0.930622     | 0.8306848    | not scorable | not scorable | 0.9752066    | 0.846468     |
| #### Bn-A05-p2167540  | A-genome specific (napus-rapa)    | 0.9976076    | 0.7877693    | not scorable | not scorable | 0.9834711    | 0.8136072    |
| #### Bn-A05-p21698558 | A-genome specific (napus-rapa)    | 1            | 0.49882      | not scorable | not scorable | 0.9834711    | 0.7208527    |
| #### Bn-A05-p21699314 | A-genome specific (napus-rapa)    | 0.9904306    | 0.7705401    | not scorable | not scorable | 0.9917355    | 0.7775611    |
| #### Bn-A05-p2172320  | A-genome specific (napus-rapa)    | 1            | 0.5257344    | not scorable | not scorable | 0.9752066    | 0.7061011    |
| #### Bn-A05-p21806633 | A-genome specific (napus-rapa)    | 0.9952153    | 0.69458      | not scorable | not scorable | 0.9834711    | 0.734471     |
| #### Bn-A05-p21806801 | A-genome specific (napus-rapa)    | 0.9952153    | 0.5898287    | not scorable | not scorable | 1            | 0.7937827    |
| #### Bn-A05-p21809718 | A-genome specific (napus-rapa)    | 0.9976076    | 0.8536648    | not scorable | not scorable | 0.9834711    | 0.7489479    |
| #### Bn-A05-p21814557 | A-genome specific (napus-rapa)    | 1            | 0.5700043    | not scorable | not scorable | 1            | 0.7504022    |
| #### Bn-A05-p21848003 | A-genome specific (rapa only)     | not scorable | not scorable | not scorable | not scorable | 0.9752066    | 0.7820434    |
| #### Bn-A05-p21852014 | A-genome specific (napus-rapa)    | 0.9976076    | 0.7914261    | not scorable | not scorable | 1            | 0.7369435    |
| #### Bn-A05-p21852563 | A-genome specific (napus-rapa)    | 0.9928229    | 0.8486146    | not scorable | not scorable | 0.9834711    | 0.6912694    |
| #### Bn-A05-p21853739 | napus specific                    | 0.9688995    | 0.7908984    | not scorable | not scorable | not scorable | not scorable |
| #### Bn-A05-p21865451 | A-genome specific (napus-rapa)    | 1            | 0.4477971    | not scorable | not scorable | 0.9917355    | 0.7345971    |
| #### Bn-A05-p21886422 | A-genome specific (napus-rapa)    | 0.8947368    | 0.537281     | not scorable | not scorable | 0.9917355    | 0.7030191    |
| #### Bn-A05-p21887311 | A-genome specific (napus-rapa)    | 0.9904306    | 0.4551728    | not scorable | not scorable | 0.9834711    | 0.7781072    |
| #### Bn-A05-p21889289 | A-genome specific (napus-rapa)    | 0.9808612    | 0.6830326    | not scorable | not scorable | 0.9834711    | 0.7096455    |
| #### Bn-A05-p21915455 | genome unspecific (oleracea-rapa) | not scorable | not scorable | 0.9922481    | 0.3139133    | 0.9421487    | 0.6590759    |
| #### Bn-A05-p21930978 | A-genome specific (napus-rapa)    | 1            | 0.620148     | not scorable | not scorable | 0.9586777    | 0.7267897    |
| #### Bn-A05-p21973951 | A-genome specific (napus-rapa)    | 0.8995215    | 0.7815474    | not scorable | not scorable | 0.7768595    | 0.7941189    |
| #### Bn-A05-p22015412 | A-genome specific (napus-rapa)    | 0.9976076    | 0.1640322    | not scorable | not scorable | 0.9834711    | 0.6303926    |
| #### Bn-A05-p22021177 | A-genome specific (napus-rapa)    | 1            | 0.6568402    | not scorable | not scorable | 0.9752066    | 0.7416866    |
| #### Bn-A05-p22027389 | A-genome specific (napus-rapa)    | 0.9976076    | 0.4874499    | not scorable | not scorable | 0.9669421    | 0.6166462    |
| #### Bn-A05-p22028401 | A-genome specific (napus-rapa)    | 1            | 0.8104924    | not scorable | not scorable | 0.6033058    | 0.8254998    |
| #### Bn-A05-p22060825 | A-genome specific (napus-rapa)    | 1            | 0.7892071    | not scorable | not scorable | 1            | 0.8137309    |
| #### Bn-A05-p2208960  | A-genome specific (napus-rapa)    | 0.9952153    | 0.873731     | not scorable | not scorable | 0.9504132    | 0.7929228    |

|                       |                                |              |              |              |              |           |           |
|-----------------------|--------------------------------|--------------|--------------|--------------|--------------|-----------|-----------|
| #### Bn-A05-p22089650 | A-genome specific (napus-rapa) | 0.9665072    | 0.7888787    | not scorable | not scorable | 0.9834711 | 0.7721342 |
| #### Bn-A05-p22101592 | A-genome specific (napus-rapa) | 0.8971292    | 0.7844431    | not scorable | not scorable | 0.9752066 | 0.7825384 |
| #### Bn-A05-p22111286 | A-genome specific (napus-rapa) | 0.9784689    | 0.234571     | not scorable | not scorable | 0.9752066 | 0.5864163 |
| #### Bn-A05-p22111345 | A-genome specific (rapa only)  | not scorable | not scorable | not scorable | not scorable | 0.9586777 | 0.5490675 |
| #### Bn-A05-p22114137 | A-genome specific (rapa only)  | not scorable | not scorable | not scorable | not scorable | 0.9586777 | 0.7816538 |
| #### Bn-A05-p22117809 | A-genome specific (rapa only)  | not scorable | not scorable | not scorable | not scorable | 0.9586777 | 0.6645556 |
| #### Bn-A05-p221189   | A-genome specific (napus-rapa) | 0.5454546    | 0.862361     | not scorable | not scorable | 0.9669421 | 0.7192402 |
| #### Bn-A05-p22132297 | A-genome specific (napus-rapa) | 0.9712918    | 0.4790277    | not scorable | not scorable | 0.9834711 | 0.8276204 |
| #### Bn-A05-p22135265 | genome unspecific (all in)     | 0.9784689    | 0.8138227    | 0            | 0.4607987    | 0.9917355 | 0.8274808 |
| #### Bn-A05-p22141046 | A-genome specific (napus-rapa) | 0.9808612    | 0.5483452    | not scorable | not scorable | 0.9917355 | 0.6880242 |
| #### Bn-A05-p22142609 | A-genome specific (rapa only)  | not scorable | not scorable | not scorable | not scorable | 0.9917355 | 0.6666172 |
| #### Bn-A05-p22145624 | A-genome specific (rapa only)  | not scorable | not scorable | not scorable | not scorable | 0.9834711 | 0.7035027 |
| #### Bn-A05-p22152482 | A-genome specific (napus-rapa) | 0.9904306    | 0.3749974    | not scorable | not scorable | 0.9752066 | 0.8042552 |
| #### Bn-A05-p22153383 | A-genome specific (rapa only)  | not scorable | not scorable | not scorable | not scorable | 0.9669421 | 0.8040302 |
| #### Bn-A05-p22159613 | A-genome specific (napus-rapa) | 0.9880383    | 0.7251481    | not scorable | not scorable | 0.9917355 | 0.7521194 |
| #### Bn-A05-p22169560 | A-genome specific (rapa only)  | not scorable | not scorable | not scorable | not scorable | 0.9917355 | 0.621645  |
| #### Bn-A05-p22182628 | A-genome specific (napus-rapa) | 0.9856459    | 0.7051139    | not scorable | not scorable | 0.9917355 | 0.5906218 |
| #### Bn-A05-p22218776 | A-genome specific (napus-rapa) | 0.9928229    | 0.7933466    | not scorable | not scorable | 1         | 0.7415362 |
| #### Bn-A05-p22221563 | A-genome specific (napus-rapa) | 0.9760765    | 0.7929196    | not scorable | not scorable | 1         | 0.7795539 |
| #### Bn-A05-p22224811 | A-genome specific (napus-rapa) | 1            | 0.7413105    | not scorable | not scorable | 1         | 0.8088477 |
| #### Bn-A05-p22249401 | A-genome specific (napus-rapa) | 0.9784689    | 0.5096595    | not scorable | not scorable | 1         | 0.7789563 |
| #### Bn-A05-p22265537 | A-genome specific (napus-rapa) | 0.9808612    | 0.7759255    | not scorable | not scorable | 0.9834711 | 0.7848645 |
| #### Bn-A05-p22266340 | A-genome specific (napus-rapa) | 0.9617225    | 0.6425937    | not scorable | not scorable | 0.9917355 | 0.6752724 |
| #### Bn-A05-p22266933 | A-genome specific (napus-rapa) | 0.9497608    | 0.7471942    | not scorable | not scorable | 0.9338843 | 0.7040766 |
| #### Bn-A05-p22269511 | A-genome specific (napus-rapa) | 0.9258373    | 0.8017946    | not scorable | not scorable | 1         | 0.7862009 |
| #### Bn-A05-p2227024  | A-genome specific (napus-rapa) | 0.9904306    | 0.7797565    | not scorable | not scorable | 0.9917355 | 0.8057628 |
| #### Bn-A05-p22276626 | A-genome specific (napus-rapa) | 0.9808612    | 0.2848408    | not scorable | not scorable | 1         | 0.710373  |
| #### Bn-A05-p22282750 | A-genome specific (napus-rapa) | 0.9904306    | 0.8126651    | not scorable | not scorable | 0.9917355 | 0.8914528 |
| #### Bn-A05-p22282814 | A-genome specific (napus-rapa) | 0.9019139    | 0.7565764    | not scorable | not scorable | 0.9917355 | 0.7396141 |
| #### Bn-A05-p22284501 | A-genome specific (napus-rapa) | 0.9880383    | 0.7566727    | not scorable | not scorable | 0.9917355 | 0.7012435 |
| #### Bn-A05-p22298146 | A-genome specific (napus-rapa) | 0.9545454    | 0.1958308    | not scorable | not scorable | 1         | 0.5715545 |
| #### Bn-A05-p22299077 | A-genome specific (rapa only)  | not scorable | not scorable | not scorable | not scorable | 0.9752066 | 0.4721518 |
| #### Bn-A05-p22299214 | A-genome specific (rapa only)  | not scorable | not scorable | not scorable | not scorable | 0.9834711 | 0.6176679 |

|                       |                                |              |              |              |              |              |              |
|-----------------------|--------------------------------|--------------|--------------|--------------|--------------|--------------|--------------|
| #### Bn-A05-p22310050 | A-genome specific (rapa only)  | not scorable | not scorable | not scorable | not scorable | 0.9917355    | 0.7187123    |
| #### Bn-A05-p22318660 | A-genome specific (napus-rapa) | 0.9880383    | 0.8013927    | not scorable | not scorable | 0.6033058    | 0.8004208    |
| #### Bn-A05-p22320477 | all not scorable               | not scorable | not scorable | not scorable | not scorable | not scorable | not scorable |
| #### Bn-A05-p22324761 | A-genome specific (napus-rapa) | 0.9736842    | 0.3963413    | not scorable | not scorable | 0.9752066    | 0.6690314    |
| #### Bn-A05-p2233637  | A-genome specific (napus-rapa) | 0.9928229    | 0.8317678    | not scorable | not scorable | 0.9917355    | 0.7916046    |
| #### Bn-A05-p2233700  | A-genome specific (napus-rapa) | 0.9880383    | 0.7833233    | not scorable | not scorable | 0.9834711    | 0.7703477    |
| #### Bn-A05-p2234082  | A-genome specific (napus-rapa) | 0.9928229    | 0.7385961    | not scorable | not scorable | 0.9917355    | 0.6878072    |
| #### Bn-A05-p22350368 | A-genome specific (rapa only)  | not scorable | not scorable | not scorable | not scorable | 0.8842975    | 0.83925      |
| #### Bn-A05-p22351135 | A-genome specific (napus-rapa) | 0.9808612    | 0.8755383    | not scorable | not scorable | 0.9504132    | 0.7221171    |
| #### Bn-A05-p22392750 | A-genome specific (rapa only)  | not scorable | not scorable | not scorable | not scorable | 0.6115702    | 0.7724408    |
| #### Bn-A05-p22406985 | A-genome specific (rapa only)  | not scorable | not scorable | not scorable | not scorable | 1            | 0.7708783    |
| #### Bn-A05-p22427412 | A-genome specific (napus-rapa) | 0.9952153    | 0.3635646    | not scorable | not scorable | 0.9917355    | 0.6710666    |
| #### Bn-A05-p22452120 | all not scorable               | not scorable | not scorable | not scorable | not scorable | not scorable | not scorable |
| #### Bn-A05-p22454211 | A-genome specific (napus-rapa) | 0.9569378    | 0.7320339    | not scorable | not scorable | 0.9586777    | 0.7344668    |
| #### Bn-A05-p22454557 | A-genome specific (napus-rapa) | 0.9832536    | 0.7811071    | not scorable | not scorable | 0.9752066    | 0.7615733    |
| #### Bn-A05-p22459438 | A-genome specific (napus-rapa) | 0.9784689    | 0.8313856    | not scorable | not scorable | 0.9586777    | 0.7304482    |
| #### Bn-A05-p2246038  | A-genome specific (napus-rapa) | 0.9928229    | 0.7849702    | not scorable | not scorable | 0.9917355    | 0.7576417    |
| #### Bn-A05-p22463256 | A-genome specific (napus-rapa) | 0.9425837    | 0.5035987    | not scorable | not scorable | 0.9834711    | 0.5577688    |
| #### Bn-A05-p22476414 | A-genome specific (napus-rapa) | 0.9928229    | 0.5296592    | not scorable | not scorable | 0.9752066    | 0.7995027    |
| #### Bn-A05-p22478538 | A-genome specific (napus-rapa) | 0.9952153    | 0.4276024    | not scorable | not scorable | 0.9752066    | 0.6946626    |
| #### Bn-A05-p22480535 | A-genome specific (napus-rapa) | 0.9976076    | 0.4092898    | not scorable | not scorable | 0.9669421    | 0.77586      |
| #### Bn-A05-p22488454 | A-genome specific (napus-rapa) | 0.9952153    | 0.5340592    | not scorable | not scorable | 1            | 0.7580737    |
| #### Bn-A05-p22498838 | A-genome specific (napus-rapa) | 1            | 0.6679631    | not scorable | not scorable | 0.9752066    | 0.6324893    |
| #### Bn-A05-p22506006 | A-genome specific (napus-rapa) | 1            | 0.5484684    | not scorable | not scorable | 0.6363636    | 0.7906653    |
| #### Bn-A05-p22511813 | A-genome specific (napus-rapa) | 0.9952153    | 0.7485923    | not scorable | not scorable | 0.6280992    | 0.7735133    |
| #### Bn-A05-p22513075 | A-genome specific (napus-rapa) | 0.9952153    | 0.6842329    | not scorable | not scorable | 0.6033058    | 0.7607438    |
| #### Bn-A05-p22519751 | A-genome specific (napus-rapa) | 0.9952153    | 0.2751799    | not scorable | not scorable | 0.9917355    | 0.8236753    |
| #### Bn-A05-p22519836 | A-genome specific (napus-rapa) | 0.9832536    | 0.7055925    | not scorable | not scorable | 1            | 0.772859     |
| #### Bn-A05-p2254100  | A-genome specific (napus-rapa) | 0.9976076    | 0.7945387    | not scorable | not scorable | 1            | 0.7825052    |
| #### Bn-A05-p22553631 | napus specific                 | 0.9976076    | 0.4702678    | not scorable | not scorable | not scorable | not scorable |
| #### Bn-A05-p22563719 | A-genome specific (napus-rapa) | 0.9856459    | 0.6494826    | not scorable | not scorable | 0.9421487    | 0.7428306    |
| #### Bn-A05-p22585118 | A-genome specific (napus-rapa) | 0.9976076    | 0.814613     | not scorable | not scorable | 0.9917355    | 0.7457741    |
| #### Bn-A05-p22589874 | A-genome specific (napus-rapa) | 0.9617225    | 0.6215775    | not scorable | not scorable | 0.9669421    | 0.6610469    |

|                       |                                |              |              |              |              |              |              |
|-----------------------|--------------------------------|--------------|--------------|--------------|--------------|--------------|--------------|
| #### Bn-A05-p22591072 | A-genome specific (napus-rapa) | 0.9904306    | 0.8847374    | not scorable | not scorable | 0.9834711    | 0.8422496    |
| #### Bn-A05-p22591626 | A-genome specific (napus-rapa) | 1            | 0.7675446    | not scorable | not scorable | 1            | 0.7635067    |
| #### Bn-A05-p22599241 | A-genome specific (napus-rapa) | 0.9952153    | 0.2845806    | not scorable | not scorable | 0.9917355    | 0.774188     |
| #### Bn-A05-p22613926 | A-genome specific (napus-rapa) | 0.9880383    | 0.76738      | not scorable | not scorable | 0.9917355    | 0.8168433    |
| #### Bn-A05-p2261738  | A-genome specific (napus-rapa) | 0.9976076    | 0.7402956    | not scorable | not scorable | 1            | 0.8306921    |
| #### Bn-A05-p22622143 | A-genome specific (rapa only)  | not scorable | not scorable | not scorable | not scorable | 1            | 0.6048745    |
| #### Bn-A05-p2262914  | A-genome specific (napus-rapa) | 0.9976076    | 0.3671518    | not scorable | not scorable | 0.9917355    | 0.7397051    |
| #### Bn-A05-p22636722 | A-genome specific (napus-rapa) | 0.9976076    | 0.430973     | not scorable | not scorable | 0.9917355    | 0.8232467    |
| #### Bn-A05-p22650582 | A-genome specific (napus-rapa) | 0.9928229    | 0.8681046    | not scorable | not scorable | 0.9834711    | 0.802765     |
| #### Bn-A05-p22651145 | A-genome specific (napus-rapa) | 0.9904306    | 0.2977657    | not scorable | not scorable | 0.9504132    | 0.6113445    |
| #### Bn-A05-p22653151 | A-genome specific (napus-rapa) | 0.9952153    | 0.7313808    | not scorable | not scorable | 0.9752066    | 0.7022651    |
| #### Bn-A05-p22657528 | A-genome specific (napus-rapa) | 0.9449761    | 0.7330033    | not scorable | not scorable | 0.9421487    | 0.6958111    |
| #### Bn-A05-p22658512 | A-genome specific (napus-rapa) | 0.9928229    | 0.7995687    | not scorable | not scorable | 0.9917355    | 0.8458923    |
| #### Bn-A05-p22660561 | all not scorable               | not scorable | not scorable | not scorable | not scorable | not scorable | not scorable |
| #### Bn-A05-p22669409 | napus specific                 | 0.9904306    | 0.5690113    | not scorable | not scorable | not scorable | not scorable |
| #### Bn-A05-p22677701 | A-genome specific (napus-rapa) | 0.9928229    | 0.661962     | not scorable | not scorable | 0.9752066    | 0.8399903    |
| #### Bn-A05-p22677829 | A-genome specific (napus-rapa) | 0.9952153    | 0.8165326    | not scorable | not scorable | 0.9917355    | 0.7954273    |
| #### Bn-A05-p22677937 | A-genome specific (napus-rapa) | 0.9976076    | 0.8343228    | not scorable | not scorable | 0.9752066    | 0.7478139    |
| #### Bn-A05-p22682587 | A-genome specific (napus-rapa) | 0.9976076    | 0.6520808    | not scorable | not scorable | 0.9917355    | 0.6212825    |
| #### Bn-A05-p22682639 | A-genome specific (napus-rapa) | 0.9952153    | 0.5789832    | not scorable | not scorable | 1            | 0.7407741    |
| #### Bn-A05-p22689848 | A-genome specific (napus-rapa) | 0.9952153    | 0.6445189    | not scorable | not scorable | 0.9834711    | 0.7312164    |
| #### Bn-A05-p22691469 | A-genome specific (napus-rapa) | 0.9928229    | 0.7812486    | not scorable | not scorable | 0.9917355    | 0.79443      |
| #### Bn-A05-p22706491 | A-genome specific (napus-rapa) | 0.9545454    | 0.6963454    | not scorable | not scorable | 0.9917355    | 0.7546661    |
| #### Bn-A05-p22712783 | A-genome specific (napus-rapa) | 0.9904306    | 0.2508829    | not scorable | not scorable | 1            | 0.7040576    |
| #### Bn-A05-p2272518  | A-genome specific (napus-rapa) | 0.9976076    | 0.7209546    | not scorable | not scorable | 1            | 0.7030711    |
| #### Bn-A05-p22727640 | A-genome specific (napus-rapa) | 0.9976076    | 0.7258548    | not scorable | not scorable | 1            | 0.7015526    |
| #### Bn-A05-p2273196  | A-genome specific (napus-rapa) | 0.9928229    | 0.8041633    | not scorable | not scorable | 0.9834711    | 0.8163401    |
| #### Bn-A05-p2274301  | A-genome specific (napus-rapa) | 1            | 0.3344539    | not scorable | not scorable | 0.9834711    | 0.7692136    |
| #### Bn-A05-p22766713 | A-genome specific (napus-rapa) | 0.9904306    | 0.7295586    | not scorable | not scorable | 1            | 0.6895437    |
| #### Bn-A05-p22766965 | A-genome specific (napus-rapa) | 0.9904306    | 0.8455086    | not scorable | not scorable | 0.9752066    | 0.7396585    |
| #### Bn-A05-p22767027 | A-genome specific (napus-rapa) | 0.9856459    | 0.8483468    | not scorable | not scorable | 0.9834711    | 0.8161229    |
| #### Bn-A05-p22767106 | A-genome specific (napus-rapa) | 0.9952153    | 0.7881978    | not scorable | not scorable | 0.9917355    | 0.828397     |
| #### Bn-A05-p22771419 | A-genome specific (napus-rapa) | 0.9904306    | 0.5750239    | not scorable | not scorable | 0.9669421    | 0.7233328    |

|                       |                                |           |           |              |              |           |           |
|-----------------------|--------------------------------|-----------|-----------|--------------|--------------|-----------|-----------|
| #### Bn-A05-p22780601 | A-genome specific (napus-rapa) | 0.9258373 | 0.7603143 | not scorable | not scorable | 0.661157  | 0.8731608 |
| #### Bn-A05-p22780670 | A-genome specific (napus-rapa) | 0.9665072 | 0.7261226 | not scorable | not scorable | 0.661157  | 0.7764697 |
| #### Bn-A05-p22786339 | A-genome specific (napus-rapa) | 0.9976076 | 0.8509513 | not scorable | not scorable | 0.9669421 | 0.6952189 |
| #### Bn-A05-p22789344 | A-genome specific (napus-rapa) | 0.5550239 | 0.7057846 | not scorable | not scorable | 0.9421487 | 0.6796387 |
| #### Bn-A05-p22789711 | A-genome specific (napus-rapa) | 0.9760765 | 0.8125226 | not scorable | not scorable | 0.9752066 | 0.8158158 |
| #### Bn-A05-p22789974 | A-genome specific (napus-rapa) | 0.9784689 | 0.7555637 | not scorable | not scorable | 0.9669421 | 0.6943771 |
| #### Bn-A05-p22797664 | A-genome specific (napus-rapa) | 0.9856459 | 0.7540249 | not scorable | not scorable | 0.9917355 | 0.7634553 |
| #### Bn-A05-p22804927 | A-genome specific (napus-rapa) | 0.9880383 | 0.5109917 | not scorable | not scorable | 1         | 0.814081  |
| #### Bn-A05-p2280549  | A-genome specific (napus-rapa) | 0.9976076 | 0.6281154 | not scorable | not scorable | 0.9752066 | 0.7679021 |
| #### Bn-A05-p22812957 | A-genome specific (napus-rapa) | 1         | 0.6609219 | not scorable | not scorable | 1         | 0.7739488 |
| #### Bn-A05-p22813120 | A-genome specific (napus-rapa) | 0.9952153 | 0.9438366 | not scorable | not scorable | 1         | 0.8604133 |
| #### Bn-A05-p22813805 | genome unspecific (all in)     | 0.9856459 | 0.4101639 |              | 1 0.7905083  | 0.9752066 | 0.6975757 |
| #### Bn-A05-p22826924 | A-genome specific (napus-rapa) | 0.9928229 | 0.7387625 | not scorable | not scorable | 0.9752066 | 0.6997511 |
| #### Bn-A05-p22853415 | A-genome specific (napus-rapa) | 0.9473684 | 0.3411839 | not scorable | not scorable | 0.9752066 | 0.6384286 |
| #### Bn-A05-p228555   | A-genome specific (napus-rapa) | 0.9808612 | 0.815669  | not scorable | not scorable | 0.9834711 | 0.7364951 |
| #### Bn-A05-p2285903  | genome unspecific (all in)     | 0.9952153 | 0.3339771 |              | 1 0.8260807  | 1         | 0.8848283 |
| #### Bn-A05-p22863641 | A-genome specific (napus-rapa) | 0.9904306 | 0.395654  | not scorable | not scorable | 0.9917355 | 0.6621847 |
| #### Bn-A05-p22868682 | A-genome specific (napus-rapa) | 0.9904306 | 0.7768592 | not scorable | not scorable | 0.9834711 | 0.7630409 |
| #### Bn-A05-p22868951 | A-genome specific (napus-rapa) | 0.9856459 | 0.7994657 | not scorable | not scorable | 0.9834711 | 0.8311573 |
| #### Bn-A05-p22874045 | genome unspecific (all in)     | 1         | 0.7428617 | 0.8449612    | 0.6617243    | 0.9834711 | 0.6947252 |
| #### Bn-A05-p2287815  | A-genome specific (napus-rapa) | 0.9976076 | 0.8395217 | not scorable | not scorable | 0.9834711 | 0.6707829 |
| #### Bn-A05-p22889788 | A-genome specific (napus-rapa) | 0.9569378 | 0.4011386 | not scorable | not scorable | 0.9917355 | 0.7368926 |
| #### Bn-A05-p22899595 | A-genome specific (napus-rapa) | 0.9856459 | 0.7586249 | not scorable | not scorable | 0.9917355 | 0.8500487 |
| #### Bn-A05-p22911906 | A-genome specific (napus-rapa) | 0.9521531 | 0.7017894 | not scorable | not scorable | 0.9917355 | 0.7193606 |
| #### Bn-A05-p22912544 | A-genome specific (napus-rapa) | 0.9641148 | 0.3944719 | not scorable | not scorable | 1         | 0.6956896 |
| #### Bn-A05-p22913147 | A-genome specific (napus-rapa) | 0.9976076 | 0.8058243 | not scorable | not scorable | 1         | 0.702931  |
| #### Bn-A05-p22913571 | A-genome specific (napus-rapa) | 1         | 0.7675736 | not scorable | not scorable | 1         | 0.9048258 |
| #### Bn-A05-p22913874 | A-genome specific (napus-rapa) | 0.9952153 | 0.7786604 | not scorable | not scorable | 1         | 0.7453237 |
| #### Bn-A05-p22915357 | A-genome specific (napus-rapa) | 0.9928229 | 0.3714773 | not scorable | not scorable | 1         | 0.8114662 |
| #### Bn-A05-p22917436 | A-genome specific (napus-rapa) | 0.9952153 | 0.8394711 | not scorable | not scorable | 1         | 0.8325576 |
| #### Bn-A05-p22920228 | A-genome specific (napus-rapa) | 1         | 0.7847597 | not scorable | not scorable | 1         | 0.7760417 |
| #### Bn-A05-p22934224 | A-genome specific (napus-rapa) | 0.9760765 | 0.3045922 | not scorable | not scorable | 1         | 0.7180079 |
| #### Bn-A05-p2293577  | A-genome specific (napus-rapa) | 0.4425837 | 0.7886499 | not scorable | not scorable | 1         | 0.7649547 |

|                       |                                |              |              |              |              |              |              |
|-----------------------|--------------------------------|--------------|--------------|--------------|--------------|--------------|--------------|
| #### Bn-A05-p22938228 | A-genome specific (napus-rapa) | 0.9617225    | 0.5224178    | not scorable | not scorable | 0.9917355    | 0.6127103    |
| #### Bn-A05-p22943215 | A-genome specific (napus-rapa) | 0.9880383    | 0.7238548    | not scorable | not scorable | 0.9834711    | 0.7074269    |
| #### Bn-A05-p22946715 | napus specific                 | 0.5263158    | 0.8659872    | not scorable | not scorable | not scorable | not scorable |
| #### Bn-A05-p22946858 | A-genome specific (napus-rapa) | 0.9760765    | 0.6395214    | not scorable | not scorable | 0.9834711    | 0.7772235    |
| #### Bn-A05-p22948751 | A-genome specific (napus-rapa) | 0.9354067    | 0.2743224    | not scorable | not scorable | 0.9834711    | 0.7820827    |
| #### Bn-A05-p2296307  | A-genome specific (napus-rapa) | 0.9928229    | 0.7033357    | not scorable | not scorable | 0.9917355    | 0.6460242    |
| #### Bn-A05-p22969236 | A-genome specific (napus-rapa) | 1            | 0.6644443    | not scorable | not scorable | 1            | 0.6461107    |
| #### Bn-A05-p22969550 | A-genome specific (napus-rapa) | 0.9688995    | 0.7875746    | not scorable | not scorable | 1            | 0.7857482    |
| #### Bn-A05-p22973324 | A-genome specific (napus-rapa) | 0.9712918    | 0.7805417    | not scorable | not scorable | 0.9917355    | 0.7270243    |
| #### Bn-A05-p2297395  | A-genome specific (napus-rapa) | 0.9928229    | 0.6505721    | not scorable | not scorable | 1            | 0.6231968    |
| #### Bn-A05-p22976431 | A-genome specific (napus-rapa) | 0.9952153    | 0.7606364    | not scorable | not scorable | 1            | 0.7793296    |
| #### Bn-A05-p22977061 | A-genome specific (napus-rapa) | 1            | 0.4247281    | not scorable | not scorable | 1            | 0.8217116    |
| #### Bn-A05-p22981266 | A-genome specific (napus-rapa) | 0.9688995    | 0.4603234    | not scorable | not scorable | 1            | 0.7869714    |
| #### Bn-A05-p2299167  | A-genome specific (napus-rapa) | 0.9904306    | 0.7875724    | not scorable | not scorable | 1            | 0.705898     |
| #### Bn-A05-p2299442  | A-genome specific (napus-rapa) | 0.9736842    | 0.8443511    | not scorable | not scorable | 0.9008265    | 0.8126721    |
| #### Bn-A05-p2300076  | A-genome specific (napus-rapa) | 0.9952153    | 0.7731925    | not scorable | not scorable | 0.9917355    | 0.7896207    |
| #### Bn-A05-p2301167  | A-genome specific (napus-rapa) | 1            | 0.6628417    | not scorable | not scorable | 1            | 0.6214259    |
| #### Bn-A05-p23019620 | A-genome specific (napus-rapa) | 0.9880383    | 0.7247303    | not scorable | not scorable | 0.9752066    | 0.6808112    |
| #### Bn-A05-p23020463 | A-genome specific (rapa only)  | not scorable | not scorable | not scorable | not scorable | 0.5041322    | 0.8869507    |
| #### Bn-A05-p23020834 | A-genome specific (napus-rapa) | 0.9952153    | 0.7800123    | not scorable | not scorable | 0.9834711    | 0.7115383    |
| #### Bn-A05-p23027881 | A-genome specific (napus-rapa) | 0.9521531    | 0.3005885    | not scorable | not scorable | 1            | 0.6528514    |
| #### Bn-A05-p23030143 | A-genome specific (napus-rapa) | 0.9952153    | 0.4945874    | not scorable | not scorable | 1            | 0.8193437    |
| #### Bn-A05-p2303112  | A-genome specific (napus-rapa) | 0.9928229    | 0.6062984    | not scorable | not scorable | 1            | 0.6444352    |
| #### Bn-A05-p23032803 | A-genome specific (napus-rapa) | 0.9904306    | 0.7808572    | not scorable | not scorable | 0.9917355    | 0.8220969    |
| #### Bn-A05-p23044521 | A-genome specific (napus-rapa) | 0.9952153    | 0.8038412    | not scorable | not scorable | 0.9834711    | 0.7540687    |
| #### Bn-A05-p23079485 | A-genome specific (napus-rapa) | 1            | 0.4628164    | not scorable | not scorable | 0.9752066    | 0.7464112    |
| #### Bn-A05-p23081875 | A-genome specific (napus-rapa) | 0.9832536    | 0.3126375    | not scorable | not scorable | 0.9917355    | 0.7382128    |
| #### Bn-A05-p23102053 | genome unspecific (all in)     | 1            | 0.3415891    | 0.9224806    | 0.4624231    | 1            | 0.930966     |
| #### Bn-A05-p23126108 | A-genome specific (napus-rapa) | 0.9856459    | 0.6845897    | not scorable | not scorable | 0.6280992    | 0.7347293    |
| #### Bn-A05-p23140205 | A-genome specific (napus-rapa) | 0.9976076    | 0.6502038    | not scorable | not scorable | 0.9917355    | 0.6519747    |
| #### Bn-A05-p23141080 | A-genome specific (napus-rapa) | 0.9832536    | 0.6419073    | not scorable | not scorable | 0.9752066    | 0.6830118    |
| #### Bn-A05-p23143046 | A-genome specific (napus-rapa) | 0.9904306    | 0.8207465    | not scorable | not scorable | 0.9752066    | 0.742853     |
| #### Bn-A05-p23145678 | A-genome specific (rapa only)  | not scorable | not scorable | not scorable | not scorable | 1            | 0.8073645    |

|                       |                                   |              |              |              |              |              |              |
|-----------------------|-----------------------------------|--------------|--------------|--------------|--------------|--------------|--------------|
| #### Bn-A05-p23146882 | A-genome specific (napus-rapa)    | 0.9976076    | 0.5902624    | not scorable | not scorable | 0.9834711    | 0.5176431    |
| #### Bn-A05-p23154172 | A-genome specific (napus-rapa)    | 0.9928229    | 0.5456713    | not scorable | not scorable | 1            | 0.6392193    |
| #### Bn-A05-p23159292 | genome unspecific (all in)        | 0.9688995    | 0.4220355    |              | 1 0.7186732  | 0.9917355    | 0.8205839    |
| #### Bn-A05-p23165568 | A-genome specific (napus-rapa)    | 0.9832536    | 0.7834677    | not scorable | not scorable | 1            | 0.828151     |
| #### Bn-A05-p23166612 | A-genome specific (napus-rapa)    | 0.9928229    | 0.7672309    | not scorable | not scorable | 0.9917355    | 0.6131639    |
| #### Bn-A05-p23166708 | A-genome specific (napus-rapa)    | 0.9928229    | 0.7877322    | not scorable | not scorable | 1            | 0.7255321    |
| #### Bn-A05-p23167201 | A-genome specific (napus-rapa)    | 0.8803828    | 0.8186991    | not scorable | not scorable | 0.8512397    | 0.7911698    |
| #### Bn-A05-p23172786 | A-genome specific (napus-rapa)    | 0.9736842    | 0.2467696    | not scorable | not scorable | 0.9669421    | 0.6358763    |
| #### Bn-A05-p23179980 | A-genome specific (napus-rapa)    | 0.9665072    | 0.7030742    | not scorable | not scorable | 0.9752066    | 0.6195934    |
| #### Bn-A05-p23188259 | A-genome specific (napus-rapa)    | 0.9976076    | 0.7992148    | not scorable | not scorable | 0.9917355    | 0.771064     |
| #### Bn-A05-p23188406 | A-genome specific (napus-rapa)    | 0.9952153    | 0.5092274    | not scorable | not scorable | 1            | 0.5618805    |
| #### Bn-A05-p23196656 | A-genome specific (napus-rapa)    | 0.9928229    | 0.7156864    | not scorable | not scorable | 1            | 0.6975278    |
| #### Bn-A05-p23207708 | A-genome specific (rapa only)     | not scorable | not scorable | not scorable | not scorable | 1            | 0.803066     |
| #### Bn-A05-p23253826 | A-genome specific (napus-rapa)    | 0.9354067    | 0.744895     | not scorable | not scorable | 0.9669421    | 0.7433818    |
| #### Bn-A05-p23276053 | A-genome specific (napus-rapa)    | 0.9330143    | 0.7757209    | not scorable | not scorable | 0.9917355    | 0.7499852    |
| #### Bn-A05-p23285926 | A-genome specific (napus-rapa)    | 0.9856459    | 0.3318587    | not scorable | not scorable | 1            | 0.6409353    |
| #### Bn-A05-p23288913 | napus specific                    | 0.784689     | 0.6076639    | not scorable | not scorable | not scorable | not scorable |
| #### Bn-A05-p23290863 | A-genome specific (napus-rapa)    | 0.9784689    | 0.7835447    | not scorable | not scorable | 0.9752066    | 0.785302     |
| #### Bn-A05-p2329965  | genome unspecific (oleracea-rapa) | not scorable | not scorable | 0.9922481    | 0.3731116    | 0.8760331    | 0.9412735    |
| #### Bn-A05-p23314738 | A-genome specific (napus-rapa)    | 0.9712918    | 0.2453709    | not scorable | not scorable | 1            | 0.684404     |
| #### Bn-A05-p23318038 | A-genome specific (napus-rapa)    | 1            | 0.7833564    | not scorable | not scorable | 1            | 0.9196517    |
| #### Bn-A05-p23340419 | A-genome specific (napus-rapa)    | 0.9832536    | 0.7927031    | not scorable | not scorable | 1            | 0.8421641    |
| #### Bn-A05-p23358283 | A-genome specific (napus-rapa)    | 0.9688995    | 0.5917117    | not scorable | not scorable | 0.5950413    | 0.5466749    |
| #### Bn-A05-p23372051 | A-genome specific (napus-rapa)    | 0.9952153    | 0.7640694    | not scorable | not scorable | 1            | 0.7845569    |
| #### Bn-A05-p2337684  | A-genome specific (napus-rapa)    | 0.9904306    | 0.8493359    | not scorable | not scorable | 0.9917355    | 0.7586541    |
| #### Bn-A05-p23377419 | A-genome specific (napus-rapa)    | 0.9952153    | 0.3796244    | not scorable | not scorable | 0.9917355    | 0.8441574    |
| #### Bn-A05-p23397606 | A-genome specific (napus-rapa)    | 0.9904306    | 0.8007011    | not scorable | not scorable | 0.9834711    | 0.766562     |
| #### Bn-A05-p23405117 | A-genome specific (napus-rapa)    | 0.9856459    | 0.7413768    | not scorable | not scorable | 0.9834711    | 0.6588489    |
| #### Bn-A05-p2340565  | A-genome specific (napus-rapa)    | 0.423445     | 0.8328705    | not scorable | not scorable | 0.9752066    | 0.7977849    |
| #### Bn-A05-p23415646 | A-genome specific (napus-rapa)    | 0.9976076    | 0.336408     | not scorable | not scorable | 0.9917355    | 0.7945306    |
| #### Bn-A05-p23424482 | A-genome specific (rapa only)     | not scorable | not scorable | not scorable | not scorable | 1            | 0.7444375    |
| #### Bn-A05-p23433947 | A-genome specific (napus-rapa)    | 0.9904306    | 0.3968226    | not scorable | not scorable | 1            | 0.8180188    |
| #### Bn-A05-p23445454 | A-genome specific (napus-rapa)    | 0.9952153    | 0.372411     | not scorable | not scorable | 1            | 0.7431428    |



|                       |                                |              |              |              |              |              |              |
|-----------------------|--------------------------------|--------------|--------------|--------------|--------------|--------------|--------------|
| #### Bn-A05-p2345233  | A-genome specific (napus-rapa) | 0.6722488    | 0.6780389    | not scorable | not scorable | 0.9917355    | 0.7961171    |
| #### Bn-A05-p2345489  | A-genome specific (napus-rapa) | 0.9976076    | 0.3395363    | not scorable | not scorable | 0.9917355    | 0.6822758    |
| #### Bn-A05-p23465599 | A-genome specific (rapa only)  | not scorable | not scorable | not scorable | not scorable | 0.9917355    | 0.831443     |
| #### Bn-A05-p23466337 | A-genome specific (rapa only)  | not scorable | not scorable | not scorable | not scorable | 1            | 0.2763056    |
| #### Bn-A05-p23478913 | A-genome specific (napus-rapa) | 0.9760765    | 0.7508786    | not scorable | not scorable | 1            | 0.7716454    |
| #### Bn-A05-p23488683 | A-genome specific (napus-rapa) | 0.9617225    | 0.8047315    | not scorable | not scorable | 0.9917355    | 0.6813025    |
| #### Bn-A05-p23498540 | A-genome specific (napus-rapa) | 0.9880383    | 0.7994444    | not scorable | not scorable | 1            | 0.8852836    |
| #### Bn-A05-p2350131  | A-genome specific (napus-rapa) | 0.9712918    | 0.7374497    | not scorable | not scorable | 0.9917355    | 0.7220762    |
| #### Bn-A05-p23502993 | A-genome specific (napus-rapa) | 0.9856459    | 0.7766336    | not scorable | not scorable | 1            | 0.8236775    |
| #### Bn-A05-p23512396 | A-genome specific (napus-rapa) | 0.9736842    | 0.7557615    | not scorable | not scorable | 0.6033058    | 0.7420741    |
| #### Bn-A05-p23512931 | napus specific                 | 0.9856459    | 0.7598492    | not scorable | not scorable | not scorable | not scorable |
| #### Bn-A05-p2351545  | A-genome specific (napus-rapa) | 0.9976076    | 0.2861604    | not scorable | not scorable | 1            | 0.7926196    |
| #### Bn-A05-p23529753 | A-genome specific (napus-rapa) | 0.9736842    | 0.7686282    | not scorable | not scorable | 1            | 0.7840353    |
| #### Bn-A05-p23529824 | A-genome specific (napus-rapa) | 0.9784689    | 0.6313235    | not scorable | not scorable | 0.9752066    | 0.7448338    |
| #### Bn-A05-p23529883 | A-genome specific (napus-rapa) | 0.9808612    | 0.788775     | not scorable | not scorable | 1            | 0.6647314    |
| #### Bn-A05-p23530018 | A-genome specific (napus-rapa) | 0.9880383    | 0.7887045    | not scorable | not scorable | 0.9752066    | 0.7810897    |
| #### Bn-A05-p23530095 | A-genome specific (napus-rapa) | 0.9808612    | 0.7996424    | not scorable | not scorable | 1            | 0.7034416    |
| #### Bn-A05-p23531991 | A-genome specific (napus-rapa) | 0.9784689    | 0.8067618    | not scorable | not scorable | 0.9917355    | 0.7172812    |
| #### Bn-A05-p23532126 | A-genome specific (napus-rapa) | 0.9808612    | 0.7725722    | not scorable | not scorable | 0.9917355    | 0.7330098    |
| #### Bn-A05-p23532489 | A-genome specific (napus-rapa) | 0.9928229    | 0.7669217    | not scorable | not scorable | 1            | 0.8007853    |
| #### Bn-A05-p23533696 | all not scorable               | not scorable | not scorable | not scorable | not scorable | not scorable | not scorable |
| #### Bn-A05-p2353656  | A-genome specific (napus-rapa) | 0.9928229    | 0.8010672    | not scorable | not scorable | 0.9917355    | 0.6917989    |
| #### Bn-A05-p23543751 | A-genome specific (napus-rapa) | 0.9832536    | 0.7781438    | not scorable | not scorable | 0.9834711    | 0.7185529    |
| #### Bn-A05-p23547791 | A-genome specific (napus-rapa) | 0.9928229    | 0.3867505    | not scorable | not scorable | 0.9834711    | 0.7957595    |
| #### Bn-A05-p23553029 | A-genome specific (napus-rapa) | 0.9856459    | 0.7925563    | not scorable | not scorable | 0.9917355    | 0.7326556    |
| #### Bn-A05-p23562940 | A-genome specific (napus-rapa) | 0.9928229    | 0.7135322    | not scorable | not scorable | 1            | 0.9063296    |
| #### Bn-A05-p23587018 | A-genome specific (napus-rapa) | 0.9617225    | 0.6405453    | not scorable | not scorable | 1            | 0.7185994    |
| #### Bn-A05-p23587547 | A-genome specific (napus-rapa) | 0.9736842    | 0.7510253    | not scorable | not scorable | 0.9917355    | 0.7714632    |
| #### Bn-A05-p23588992 | A-genome specific (napus-rapa) | 0.9665072    | 0.6657295    | not scorable | not scorable | 0.9917355    | 0.6366118    |
| #### Bn-A05-p23593836 | A-genome specific (napus-rapa) | 0.9832536    | 0.7880369    | not scorable | not scorable | 1            | 0.8499617    |
| #### Bn-A05-p23598510 | A-genome specific (napus-rapa) | 0.3923445    | 0.6619669    | not scorable | not scorable | 0.6033058    | 0.6373359    |
| #### Bn-A05-p23607588 | A-genome specific (napus-rapa) | 0.9880383    | 0.5126613    | not scorable | not scorable | 1            | 0.7859963    |
| #### Bn-A05-p2367876  | A-genome specific (napus-rapa) | 0.9688995    | 0.5550761    | not scorable | not scorable | 0.9834711    | 0.6929861    |

|                       |                                |              |              |              |              |              |              |
|-----------------------|--------------------------------|--------------|--------------|--------------|--------------|--------------|--------------|
| #### Bn-A05-p23680925 | A-genome specific (napus-rapa) | 0.8803828    | 0.7859167    | not scorable | not scorable | 0.8512397    | 0.822635     |
| #### Bn-A05-p23691939 | A-genome specific (napus-rapa) | 0.9832536    | 0.3169344    | not scorable | not scorable | 0.9917355    | 0.7562806    |
| #### Bn-A05-p23692249 | A-genome specific (napus-rapa) | 0.9665072    | 0.7746539    | not scorable | not scorable | 0.9834711    | 0.8272757    |
| #### Bn-A05-p23693572 | A-genome specific (napus-rapa) | 0.9736842    | 0.4139259    | not scorable | not scorable | 0.9917355    | 0.7164802    |
| #### Bn-A05-p23699894 | A-genome specific (napus-rapa) | 0.9641148    | 0.6927411    | not scorable | not scorable | 1            | 0.8170996    |
| #### Bn-A05-p23701898 | A-genome specific (rapa only)  | not scorable | not scorable | not scorable | not scorable | 0.9917355    | 0.545823     |
| #### Bn-A05-p23702049 | A-genome specific (napus-rapa) | 0.9617225    | 0.7894464    | not scorable | not scorable | 1            | 0.8014603    |
| #### Bn-A05-p23702275 | A-genome specific (rapa only)  | not scorable | not scorable | not scorable | not scorable | 1            | 0.7854686    |
| #### Bn-A05-p23703740 | A-genome specific (napus-rapa) | 0.9641148    | 0.803811     | not scorable | not scorable | 1            | 0.817339     |
| #### Bn-A05-p23704743 | A-genome specific (napus-rapa) | 0.9808612    | 0.9268792    | not scorable | not scorable | 0.5950413    | 0.9458012    |
| #### Bn-A05-p23717457 | A-genome specific (rapa only)  | not scorable | not scorable | not scorable | not scorable | 0.9834711    | 0.6571057    |
| #### Bn-A05-p23718363 | A-genome specific (napus-rapa) | 0.9808612    | 0.784701     | not scorable | not scorable | 0.9917355    | 0.7905719    |
| #### Bn-A05-p23726137 | A-genome specific (rapa only)  | not scorable | not scorable | not scorable | not scorable | 0.9834711    | 0.8130754    |
| #### Bn-A05-p23745136 | A-genome specific (rapa only)  | not scorable | not scorable | not scorable | not scorable | 0.9834711    | 0.7343995    |
| #### Bn-A05-p2376801  | A-genome specific (napus-rapa) | 0.9904306    | 0.815001     | not scorable | not scorable | 0.9752066    | 0.7108423    |
| #### Bn-A05-p23776343 | A-genome specific (napus-rapa) | 0.9736842    | 0.7018662    | not scorable | not scorable | 1            | 0.7682801    |
| #### Bn-A05-p23776869 | A-genome specific (napus-rapa) | 0.9784689    | 0.738869     | not scorable | not scorable | 0.9917355    | 0.8472357    |
| #### Bn-A05-p23782123 | A-genome specific (napus-rapa) | 0.9712918    | 0.8232322    | not scorable | not scorable | 0.5785124    | 0.8589618    |
| #### Bn-A05-p23782304 | A-genome specific (napus-rapa) | 0.9760765    | 0.7808185    | not scorable | not scorable | 0.9752066    | 0.7006547    |
| #### Bn-A05-p23790987 | A-genome specific (rapa only)  | not scorable | not scorable | not scorable | not scorable | 1            | 0.9029719    |
| #### Bn-A05-p23791467 | A-genome specific (napus-rapa) | 0.9784689    | 0.7675696    | not scorable | not scorable | 1            | 0.7962339    |
| #### Bn-A05-p23802326 | A-genome specific (napus-rapa) | 0.9736842    | 0.4184909    | not scorable | not scorable | 0.9752066    | 0.5859402    |
| #### Bn-A05-p23838032 | A-genome specific (napus-rapa) | 0.9736842    | 0.3907262    | not scorable | not scorable | 1            | 0.8177654    |
| #### Bn-A05-p23844016 | A-genome specific (napus-rapa) | 0.9210526    | 0.7035195    | not scorable | not scorable | 1            | 0.6986886    |
| #### Bn-A05-p23844225 | A-genome specific (napus-rapa) | 0.8971292    | 0.5920736    | not scorable | not scorable | 0.9834711    | 0.7840218    |
| #### Bn-A05-p23848037 | A-genome specific (napus-rapa) | 0.9665072    | 0.3917488    | not scorable | not scorable | 0.9586777    | 0.696164     |
| #### Bn-A05-p23855991 | A-genome specific (napus-rapa) | 0.9593301    | 0.7654794    | not scorable | not scorable | 0.9669421    | 0.7048714    |
| #### Bn-A05-p23873413 | A-genome specific (napus-rapa) | 0.9473684    | 0.7606381    | not scorable | not scorable | 1            | 0.8063037    |
| #### Bn-A05-p23876386 | A-genome specific (napus-rapa) | 0.9545454    | 0.7733989    | not scorable | not scorable | 0.9752066    | 0.769637     |
| #### Bn-A05-p23893594 | napus specific                 | 0.9401914    | 0.7760084    | not scorable | not scorable | not scorable | not scorable |
| #### Bn-A05-p23899052 | A-genome specific (rapa only)  | not scorable | not scorable | not scorable | not scorable | 1            | 0.7556387    |
| #### Bn-A05-p23899654 | A-genome specific (rapa only)  | not scorable | not scorable | not scorable | not scorable | 1            | 0.8132989    |
| #### Bn-A05-p23906880 | A-genome specific (rapa only)  | not scorable | not scorable | not scorable | not scorable | 1            | 0.9095823    |

|                       |                                |              |              |              |              |              |              |
|-----------------------|--------------------------------|--------------|--------------|--------------|--------------|--------------|--------------|
| #### Bn-A05-p23909209 | A-genome specific (rapa only)  | not scorable | not scorable | not scorable | not scorable | 0.9917355    | 0.712705     |
| #### Bn-A05-p23928643 | A-genome specific (napus-rapa) | 0.9641148    | 0.7736719    | not scorable | not scorable | 0.9834711    | 0.7780471    |
| #### Bn-A05-p2393098  | A-genome specific (napus-rapa) | 0.9904306    | 0.7314749    | not scorable | not scorable | 1            | 0.8280163    |
| #### Bn-A05-p2394919  | A-genome specific (napus-rapa) | 0.9401914    | 0.7789187    | not scorable | not scorable | 0.9834711    | 0.6658624    |
| #### Bn-A05-p2416806  | A-genome specific (napus-rapa) | 0.9736842    | 0.3280345    | not scorable | not scorable | 1            | 0.7681864    |
| #### Bn-A05-p2422387  | A-genome specific (napus-rapa) | 0.9952153    | 0.5480961    | not scorable | not scorable | 1            | 0.7003313    |
| #### Bn-A05-p2423005  | A-genome specific (napus-rapa) | 0.9904306    | 0.7817843    | not scorable | not scorable | 0.9834711    | 0.7939165    |
| #### Bn-A05-p2431338  | A-genome specific (napus-rapa) | 0.9952153    | 0.7717138    | not scorable | not scorable | 1            | 0.7717351    |
| #### Bn-A05-p2434176  | napus specific                 | 0.9808612    | 0.5088442    | not scorable | not scorable | not scorable | not scorable |
| #### Bn-A05-p244051   | A-genome specific (napus-rapa) | 0.9928229    | 0.3492232    | not scorable | not scorable | 0.9917355    | 0.7717753    |
| #### Bn-A05-p2440512  | A-genome specific (napus-rapa) | 0.9856459    | 0.4270251    | not scorable | not scorable | 0.9917355    | 0.7947931    |
| #### Bn-A05-p2460244  | A-genome specific (napus-rapa) | 0.9736842    | 0.565502     | not scorable | not scorable | 0.9917355    | 0.8196729    |
| #### Bn-A05-p2469338  | A-genome specific (napus-rapa) | 0.9473684    | 0.5384806    | not scorable | not scorable | 1            | 0.6877302    |
| #### Bn-A05-p2472050  | A-genome specific (napus-rapa) | 0.9760765    | 0.6752376    | not scorable | not scorable | 1            | 0.7236546    |
| #### Bn-A05-p2472584  | genome unspecific (all in)     | 1            | 0.8257477    | 0.6046512    | 0.7736955    | 0.9752066    | 0.7309579    |
| #### Bn-A05-p2488952  | A-genome specific (napus-rapa) | 0.9712918    | 0.52394      | not scorable | not scorable | 1            | 0.8483881    |
| #### Bn-A05-p2489101  | A-genome specific (napus-rapa) | 0.9808612    | 0.44293      | not scorable | not scorable | 0.9752066    | 0.7494167    |
| #### Bn-A05-p2492451  | A-genome specific (napus-rapa) | 0.9760765    | 0.4935141    | not scorable | not scorable | 0.9834711    | 0.8013238    |
| #### Bn-A05-p249420   | A-genome specific (napus-rapa) | 0.9712918    | 0.7924633    | not scorable | not scorable | 0.6859504    | 0.750376     |
| #### Bn-A05-p2494204  | A-genome specific (napus-rapa) | 1            | 0.4434827    | not scorable | not scorable | 0.9669421    | 0.2788869    |
| #### Bn-A05-p2495066  | A-genome specific (napus-rapa) | 0.9784689    | 0.6106819    | not scorable | not scorable | 1            | 0.8035387    |
| #### Bn-A05-p2495419  | A-genome specific (napus-rapa) | 0.8708134    | 0.3498313    | not scorable | not scorable | 1            | 0.7010313    |
| #### Bn-A05-p2495697  | A-genome specific (napus-rapa) | 0.9928229    | 0.56278      | not scorable | not scorable | 1            | 0.7709854    |
| #### Bn-A05-p2497466  | A-genome specific (napus-rapa) | 0.9976076    | 0.4663571    | not scorable | not scorable | 0.9917355    | 0.6722499    |
| #### Bn-A05-p2501988  | A-genome specific (napus-rapa) | 0.9641148    | 0.8103759    | not scorable | not scorable | 0.9834711    | 0.7328052    |
| #### Bn-A05-p2523070  | A-genome specific (napus-rapa) | 0.9976076    | 0.7947698    | not scorable | not scorable | 1            | 0.7488022    |
| #### Bn-A05-p2523179  | A-genome specific (napus-rapa) | 0.4473684    | 0.7680776    | not scorable | not scorable | 0.9586777    | 0.8233419    |
| #### Bn-A05-p2525969  | A-genome specific (rapa only)  | not scorable | not scorable | not scorable | not scorable | 0.9917355    | 0.7322124    |
| #### Bn-A05-p2534219  | A-genome specific (napus-rapa) | 1            | 0.4512076    | not scorable | not scorable | 0.9834711    | 0.7872394    |
| #### Bn-A05-p253584   | A-genome specific (napus-rapa) | 0.9760765    | 0.4557344    | not scorable | not scorable | 0.9917355    | 0.7305357    |
| #### Bn-A05-p25416    | A-genome specific (napus-rapa) | 0.9904306    | 0.8229336    | not scorable | not scorable | 0.7190083    | 0.8270081    |
| #### Bn-A05-p25420    | A-genome specific (napus-rapa) | 0.9928229    | 0.8146019    | not scorable | not scorable | 0.9917355    | 0.7793977    |
| #### Bn-A05-p2555885  | A-genome specific (rapa only)  | not scorable | not scorable | not scorable | not scorable | 1            | 0.6865501    |

|                      |                                   |              |              |              |              |              |              |           |
|----------------------|-----------------------------------|--------------|--------------|--------------|--------------|--------------|--------------|-----------|
| #### Bn-A05-p2563320 | A-genome specific (napus-rapa)    | 0.9856459    | 0.7190225    | not scorable | not scorable |              | 1            | 0.7169521 |
| #### Bn-A05-p2565185 | A-genome specific (napus-rapa)    | 0.9904306    | 0.5145594    | not scorable | not scorable |              | 1            | 0.7155109 |
| #### Bn-A05-p2565586 | A-genome specific (napus-rapa)    | 0.9856459    | 0.8437333    | not scorable | not scorable | 0.9834711    |              | 0.763512  |
| #### Bn-A05-p2565706 | A-genome specific (napus-rapa)    | 0.9880383    | 0.6537374    | not scorable | not scorable | 0.9752066    |              | 0.663453  |
| #### Bn-A05-p2565761 | A-genome specific (napus-rapa)    | 0.9928229    | 0.7516063    | not scorable | not scorable | 0.9917355    |              | 0.7809256 |
| #### Bn-A05-p2582423 | A-genome specific (napus-rapa)    | 0.9856459    | 0.565093     | not scorable | not scorable | 0.9917355    |              | 0.5022524 |
| #### Bn-A05-p2592847 | genome unspecific (all in)        | 0.9880383    | 0.6977961    |              | 1            | 0.7624332    | 1            | 0.685295  |
| #### Bn-A05-p2600118 | A-genome specific (napus-rapa)    | 0.9712918    | 0.7719892    | not scorable | not scorable | 0.9752066    |              | 0.7950472 |
| #### Bn-A05-p2604531 | genome unspecific (all in)        | 0.9712918    | 0.5858039    |              | 1            | 0.7002443    |              | 0.9752066 |
| #### Bn-A05-p2604957 | A-genome specific (napus-rapa)    | 0.3444976    | 0.7906983    | not scorable | not scorable | 0.9752066    |              | 0.7057136 |
| #### Bn-A05-p2606660 | A-genome specific (napus-rapa)    | 0.9736842    | 0.478859     | not scorable | not scorable | 0.9752066    |              | 0.7283066 |
| #### Bn-A05-p2610006 | A-genome specific (napus-rapa)    | 0.9425837    | 0.8004273    | not scorable | not scorable | 0.9669421    |              | 0.7442045 |
| #### Bn-A05-p262934  | C-genome specific (oleracea only) | not scorable | not scorable | 0.9457364    | 0.3201617    | not scorable | not scorable |           |
| #### Bn-A05-p2641800 | A-genome specific (napus-rapa)    | 0.9976076    | 0.7511835    | not scorable | not scorable |              | 1            | 0.9080027 |
| #### Bn-A05-p2645307 | A-genome specific (napus-rapa)    | 0.9808612    | 0.4063636    | not scorable | not scorable |              | 1            | 0.7661255 |
| #### Bn-A05-p2645365 | A-genome specific (napus-rapa)    | 0.8923445    | 0.7715023    | not scorable | not scorable |              | 1            | 0.7687295 |
| #### Bn-A05-p2648679 | genome unspecific (all in)        | 0.9904306    | 0.5575504    |              | 1            | 0.744995     | 0.9669421    | 0.5783864 |
| #### Bn-A05-p2653139 | A-genome specific (napus-rapa)    | 0.9856459    | 0.4438694    | not scorable | not scorable | 0.9917355    |              | 0.6693183 |
| #### Bn-A05-p2656042 | A-genome specific (napus-rapa)    | 0.9760765    | 0.4989264    | not scorable | not scorable |              | 1            | 0.7007509 |
| #### Bn-A05-p2671921 | A-genome specific (napus-rapa)    | 0.9976076    | 0.519507     | not scorable | not scorable | 0.6528926    |              | 0.723908  |
| #### Bn-A05-p267915  | A-genome specific (napus-rapa)    | 0.9904306    | 0.4218368    | not scorable | not scorable |              | 1            | 0.7966787 |
| #### Bn-A05-p2688101 | A-genome specific (napus-rapa)    | 0.9952153    | 0.3774758    | not scorable | not scorable | 0.5950413    |              | 0.7855997 |
| #### Bn-A05-p2711007 | A-genome specific (napus-rapa)    | 0.9952153    | 0.7755628    | not scorable | not scorable | 0.9917355    |              | 0.7754411 |
| #### Bn-A05-p271108  | A-genome specific (napus-rapa)    | 0.9808612    | 0.2950563    | not scorable | not scorable |              | 1            | 0.9272014 |
| #### Bn-A05-p2711208 | A-genome specific (napus-rapa)    | 0.9928229    | 0.3813375    | not scorable | not scorable | 0.9917355    |              | 0.6469216 |
| #### Bn-A05-p2718015 | A-genome specific (napus-rapa)    | 0.9904306    | 0.5096283    | not scorable | not scorable | 0.9834711    |              | 0.7924049 |
| #### Bn-A05-p2726301 | A-genome specific (napus-rapa)    | 0.9904306    | 0.7670671    | not scorable | not scorable | 0.9834711    |              | 0.7541008 |
| #### Bn-A05-p2732409 | A-genome specific (napus-rapa)    | 0.9856459    | 0.2966138    | not scorable | not scorable | 0.9586777    |              | 0.8117022 |
| #### Bn-A05-p2735134 | A-genome specific (napus-rapa)    | 0.9832536    | 0.8026188    | not scorable | not scorable | 0.9586777    |              | 0.8083189 |
| #### Bn-A05-p2746921 | A-genome specific (napus-rapa)    | 0.9808612    | 0.7475392    | not scorable | not scorable |              | 1            | 0.6875693 |
| #### Bn-A05-p2751864 | A-genome specific (napus-rapa)    |              | 1            | 0.4297657    | not scorable | not scorable | 1            | 0.8919886 |
| #### Bn-A05-p2765988 | A-genome specific (napus-rapa)    | 0.9952153    | 0.483954     | not scorable | not scorable |              | 1            | 0.7542082 |
| #### Bn-A05-p2773820 | A-genome specific (napus-rapa)    | 0.9952153    | 0.3757491    | not scorable | not scorable |              | 1            | 0.7467764 |

|                      |                                   |              |              |              |              |           |           |
|----------------------|-----------------------------------|--------------|--------------|--------------|--------------|-----------|-----------|
| #### Bn-A05-p2777110 | A-genome specific (napus-rapa)    | 0.9114832    | 0.7869422    | not scorable | not scorable | 0.9917355 | 0.707423  |
| #### Bn-A05-p2777824 | A-genome specific (napus-rapa)    | 0.9808612    | 0.7813799    | not scorable | not scorable | 1         | 0.8672201 |
| #### Bn-A05-p2777912 | A-genome specific (napus-rapa)    | 0.9784689    | 0.7961776    | not scorable | not scorable | 1         | 0.7482163 |
| #### Bn-A05-p2778040 | A-genome specific (napus-rapa)    | 0.9784689    | 0.7809176    | not scorable | not scorable | 0.9917355 | 0.7817007 |
| #### Bn-A05-p2778230 | A-genome specific (napus-rapa)    | 0.9712918    | 0.7976192    | not scorable | not scorable | 0.9917355 | 0.8100824 |
| #### Bn-A05-p2778577 | A-genome specific (napus-rapa)    | 0.9641148    | 0.7918816    | not scorable | not scorable | 0.9917355 | 0.7955325 |
| #### Bn-A05-p2778679 | A-genome specific (napus-rapa)    | 0.9880383    | 0.7723442    | not scorable | not scorable | 1         | 0.7768531 |
| #### Bn-A05-p2778737 | A-genome specific (napus-rapa)    | 0.9880383    | 0.7880577    | not scorable | not scorable | 1         | 0.836551  |
| #### Bn-A05-p2779142 | A-genome specific (napus-rapa)    | 0.9808612    | 0.3813139    | not scorable | not scorable | 1         | 0.766578  |
| #### Bn-A05-p2791353 | A-genome specific (napus-rapa)    | 0.5909091    | 0.773262     | not scorable | not scorable | 0.9917355 | 0.7376583 |
| #### Bn-A05-p2794364 | A-genome specific (napus-rapa)    | 0.9904306    | 0.5126869    | not scorable | not scorable | 1         | 0.7613098 |
| #### Bn-A05-p2804703 | A-genome specific (napus-rapa)    | 0.9976076    | 0.7785249    | not scorable | not scorable | 0.9917355 | 0.7353749 |
| #### Bn-A05-p280800  | A-genome specific (napus-rapa)    | 0.9856459    | 0.6939957    | not scorable | not scorable | 0.9752066 | 0.7133701 |
| #### Bn-A05-p2830103 | A-genome specific (napus-rapa)    | 0.9617225    | 0.30877      | not scorable | not scorable | 1         | 0.6827766 |
| #### Bn-A05-p2839985 | A-genome specific (napus-rapa)    | 0.6698565    | 0.6712462    | not scorable | not scorable | 0.9917355 | 0.8961731 |
| #### Bn-A05-p2840537 | A-genome specific (napus-rapa)    | 0.9952153    | 0.7569368    | not scorable | not scorable | 0.9917355 | 0.7831008 |
| #### Bn-A05-p2840734 | A-genome specific (napus-rapa)    | 0.9976076    | 0.7781259    | not scorable | not scorable | 1         | 0.7880946 |
| #### Bn-A05-p2841024 | A-genome specific (napus-rapa)    | 0.9976076    | 0.6610551    | not scorable | not scorable | 0.9917355 | 0.7817025 |
| #### Bn-A05-p2843347 | A-genome specific (napus-rapa)    | 0.9904306    | 0.7686352    | not scorable | not scorable | 1         | 0.86847   |
| #### Bn-A05-p2844059 | A-genome specific (napus-rapa)    | 0.9808612    | 0.7885288    | not scorable | not scorable | 0.9917355 | 0.7894838 |
| #### Bn-A05-p2849284 | A-genome specific (napus-rapa)    | 1            | 0.5752714    | not scorable | not scorable | 1         | 0.8260863 |
| #### Bn-A05-p2852544 | A-genome specific (napus-rapa)    | 0.9832536    | 0.2833515    | not scorable | not scorable | 0.9834711 | 0.6638611 |
| #### Bn-A05-p2860757 | A-genome specific (napus-rapa)    | 0.9952153    | 0.7616597    | not scorable | not scorable | 0.9917355 | 0.8343795 |
| #### Bn-A05-p2863301 | A-genome specific (napus-rapa)    | 0.9952153    | 0.7006729    | not scorable | not scorable | 0.9752066 | 0.6844829 |
| #### Bn-A05-p2863674 | A-genome specific (napus-rapa)    | 0.9952153    | 0.6066533    | not scorable | not scorable | 0.9834711 | 0.702307  |
| #### Bn-A05-p2864686 | A-genome specific (napus-rapa)    | 0.9952153    | 0.7876695    | not scorable | not scorable | 0.9917355 | 0.7941719 |
| #### Bn-A05-p2865380 | A-genome specific (napus-rapa)    | 0.9952153    | 0.7966254    | not scorable | not scorable | 0.9917355 | 0.8502555 |
| #### Bn-A05-p2865634 | A-genome specific (napus-rapa)    | 0.9952153    | 0.8073664    | not scorable | not scorable | 0.9669421 | 0.7225314 |
| #### Bn-A05-p2865716 | A-genome specific (napus-rapa)    | 0.9952153    | 0.801136     | not scorable | not scorable | 0.9752066 | 0.6728813 |
| #### Bn-A05-p2868976 | A-genome specific (napus-rapa)    | 0.9952153    | 0.6688196    | not scorable | not scorable | 1         | 0.7449527 |
| #### Bn-A05-p2898061 | genome unspecific (oleracea-rapa) | not scorable | not scorable | 1            | 0.6624733    | 0.9917355 | 0.6877553 |
| #### Bn-A05-p2924872 | A-genome specific (napus-rapa)    | 0.6722488    | 0.789874     | not scorable | not scorable | 0.9917355 | 0.7774907 |
| #### Bn-A05-p2925195 | A-genome specific (napus-rapa)    | 0.9736842    | 0.784622     | not scorable | not scorable | 0.9752066 | 0.7869414 |

|                      |                                   |              |              |              |              |              |              |
|----------------------|-----------------------------------|--------------|--------------|--------------|--------------|--------------|--------------|
| #### Bn-A05-p2929698 | A-genome specific (napus-rapa)    | 0.9856459    | 0.4213647    | not scorable | not scorable | 1            | 0.7545244    |
| #### Bn-A05-p2937826 | A-genome specific (napus-rapa)    | 0.9904306    | 0.5692319    | not scorable | not scorable | 0.9917355    | 0.7883516    |
| #### Bn-A05-p2937829 | A-genome specific (rapa only)     | not scorable | not scorable | not scorable | not scorable | 0.9834711    | 0.5733733    |
| #### Bn-A05-p2940969 | A-genome specific (rapa only)     | not scorable | not scorable | not scorable | not scorable | 1            | 0.8106322    |
| #### Bn-A05-p2984656 | all not scorable                  | not scorable | not scorable | not scorable | not scorable | not scorable | not scorable |
| #### Bn-A05-p3002824 | A-genome specific (napus-rapa)    | 0.9808612    | 0.348067     | not scorable | not scorable | 0.6363636    | 0.7793971    |
| #### Bn-A05-p3005109 | A-genome specific (napus-rapa)    | 0.9545454    | 0.3150868    | not scorable | not scorable | 0.9917355    | 0.7581408    |
| #### Bn-A05-p3019980 | A-genome specific (napus-rapa)    | 0.9832536    | 0.7760325    | not scorable | not scorable | 0.9917355    | 0.7758887    |
| #### Bn-A05-p3021668 | A-genome specific (napus-rapa)    | 0.9688995    | 0.6707211    | not scorable | not scorable | 0.9752066    | 0.6478857    |
| #### Bn-A05-p3042172 | A-genome specific (napus-rapa)    | 0.9952153    | 0.8578289    | not scorable | not scorable | 1            | 0.8437781    |
| #### Bn-A05-p3042173 | A-genome specific (napus-rapa)    | 0.9880383    | 0.8248671    | not scorable | not scorable | 0.9834711    | 0.7889662    |
| #### Bn-A05-p3043365 | A-genome specific (napus-rapa)    | 0.9880383    | 0.4755261    | not scorable | not scorable | 1            | 0.7684873    |
| #### Bn-A05-p3045689 | A-genome specific (napus-rapa)    | 0.9114832    | 0.7995032    | not scorable | not scorable | 0.9752066    | 0.8235878    |
| #### Bn-A05-p3053025 | A-genome specific (napus-rapa)    | 0.9976076    | 0.7745945    | not scorable | not scorable | 1            | 0.7242321    |
| #### Bn-A05-p3053859 | A-genome specific (napus-rapa)    | 0.9976076    | 0.7594656    | not scorable | not scorable | 1            | 0.8076131    |
| #### Bn-A05-p3061052 | A-genome specific (napus-rapa)    | 0.9976076    | 0.6755899    | not scorable | not scorable | 0.9834711    | 0.6472185    |
| #### Bn-A05-p3068418 | A-genome specific (napus-rapa)    | 0.3277512    | 0.8248016    | not scorable | not scorable | 0.9504132    | 0.8525023    |
| #### Bn-A05-p3071868 | A-genome specific (napus-rapa)    | 0.9832536    | 0.3722265    | not scorable | not scorable | 1            | 0.8076818    |
| #### Bn-A05-p3099878 | A-genome specific (napus-rapa)    | 0.9832536    | 0.5896843    | not scorable | not scorable | 0.9917355    | 0.634932     |
| #### Bn-A05-p3112401 | A-genome specific (napus-rapa)    | 0.9976076    | 0.781545     | not scorable | not scorable | 0.9917355    | 0.7799048    |
| #### Bn-A05-p3117520 | A-genome specific (napus-rapa)    | 0.9952153    | 0.3388641    | not scorable | not scorable | 1            | 0.8052797    |
| #### Bn-A05-p3129492 | A-genome specific (napus-rapa)    | 0.9856459    | 0.8004558    | not scorable | not scorable | 0.9669421    | 0.687094     |
| #### Bn-A05-p3130062 | A-genome specific (napus-rapa)    | 0.9712918    | 0.6795881    | not scorable | not scorable | 0.9834711    | 0.7245228    |
| #### Bn-A05-p3135130 | A-genome specific (napus-rapa)    | 0.9760765    | 0.3800686    | not scorable | not scorable | 1            | 0.677421     |
| #### Bn-A05-p3135213 | A-genome specific (napus-rapa)    | 0.9832536    | 0.4945431    | not scorable | not scorable | 0.9917355    | 0.7302743    |
| #### Bn-A05-p3163568 | A-genome specific (napus-rapa)    | 0.9808612    | 0.3816141    | not scorable | not scorable | 0.9917355    | 0.6674753    |
| #### Bn-A05-p3166433 | genome unspecific (oleracea-rapa) | not scorable | not scorable |              | 1            | 0.799049     | 1            |
| #### Bn-A05-p3188172 | A-genome specific (napus-rapa)    | 0.9712918    | 0.6477227    | not scorable | not scorable | 0.9917355    | 0.650798     |
| #### Bn-A05-p3188714 | A-genome specific (napus-rapa)    | 1            | 0.3946687    | not scorable | not scorable | 0.9917355    | 0.7742113    |
| #### Bn-A05-p3191390 | A-genome specific (napus-rapa)    | 0.9928229    | 0.7226068    | not scorable | not scorable | 0.9917355    | 0.6829407    |
| #### Bn-A05-p3198955 | genome unspecific (all in)        | 0.9928229    | 0.4597722    | 0.9922481    | 0.7310675    | 1            | 0.6704807    |
| #### Bn-A05-p3242299 | A-genome specific (napus-rapa)    | 0.9976076    | 0.8227099    | not scorable | not scorable | 0.9917355    | 0.6832201    |
| #### Bn-A05-p3246311 | A-genome specific (napus-rapa)    | 0.9832536    | 0.2901366    | not scorable | not scorable | 0.9834711    | 0.7514731    |

|                      |                                |              |              |              |              |           |           |
|----------------------|--------------------------------|--------------|--------------|--------------|--------------|-----------|-----------|
| #### Bn-A05-p3248878 | A-genome specific (napus-rapa) | 0.9688995    | 0.6249004    | not scorable | not scorable | 0.5950413 | 0.7615864 |
| #### Bn-A05-p3251117 | A-genome specific (napus-rapa) | 0.7535885    | 0.9007937    | not scorable | not scorable | 0.9752066 | 0.818193  |
| #### Bn-A05-p3258566 | A-genome specific (napus-rapa) | 0.9928229    | 0.312549     | not scorable | not scorable | 0.9917355 | 0.8290188 |
| #### Bn-A05-p3264129 | A-genome specific (napus-rapa) | 0.9593301    | 0.3437693    | not scorable | not scorable | 0.9669421 | 0.7990826 |
| #### Bn-A05-p3275289 | A-genome specific (napus-rapa) | 0.9880383    | 0.4555812    | not scorable | not scorable | 1         | 0.8571696 |
| #### Bn-A05-p3278023 | A-genome specific (napus-rapa) | 0.9928229    | 0.8041607    | not scorable | not scorable | 0.9917355 | 0.7828347 |
| #### Bn-A05-p3278514 | A-genome specific (napus-rapa) | 0.9856459    | 0.8233534    | not scorable | not scorable | 1         | 0.8343857 |
| #### Bn-A05-p3280592 | A-genome specific (napus-rapa) | 0.9688995    | 0.7906918    | not scorable | not scorable | 0.6115702 | 0.7991788 |
| #### Bn-A05-p3282089 | A-genome specific (napus-rapa) | 0.9976076    | 0.4091158    | not scorable | not scorable | 1         | 0.8008999 |
| #### Bn-A05-p3300112 | A-genome specific (napus-rapa) | 0.9808612    | 0.7861837    | not scorable | not scorable | 0.9834711 | 0.7737466 |
| #### Bn-A05-p3307736 | A-genome specific (napus-rapa) | 0.9641148    | 0.8097274    | not scorable | not scorable | 0.6528926 | 0.7116662 |
| #### Bn-A05-p3311786 | A-genome specific (napus-rapa) | 0.9880383    | 0.4359278    | not scorable | not scorable | 0.9752066 | 0.6907184 |
| #### Bn-A05-p3311869 | A-genome specific (napus-rapa) | 0.9856459    | 0.8272244    | not scorable | not scorable | 0.9834711 | 0.7842609 |
| #### Bn-A05-p3312679 | A-genome specific (napus-rapa) | 1            | 0.4742499    | not scorable | not scorable | 1         | 0.7168373 |
| #### Bn-A05-p3312786 | A-genome specific (napus-rapa) | 1            | 0.7202613    | not scorable | not scorable | 1         | 0.7010086 |
| #### Bn-A05-p3320783 | A-genome specific (napus-rapa) | 0.9904306    | 0.5543631    | not scorable | not scorable | 0.9917355 | 0.7051241 |
| #### Bn-A05-p3322798 | A-genome specific (rapa only)  | not scorable | not scorable | not scorable | not scorable | 0.8347107 | 0.9316226 |
| #### Bn-A05-p3323878 | A-genome specific (rapa only)  | not scorable | not scorable | not scorable | not scorable | 0.9917355 | 0.8438382 |
| #### Bn-A05-p3330640 | A-genome specific (napus-rapa) | 0.9593301    | 0.6288496    | not scorable | not scorable | 1         | 0.7682366 |
| #### Bn-A05-p3361741 | A-genome specific (napus-rapa) | 0.9832536    | 0.4568853    | not scorable | not scorable | 0.6198347 | 0.8152189 |
| #### Bn-A05-p3369681 | A-genome specific (rapa only)  | not scorable | not scorable | not scorable | not scorable | 0.9586777 | 0.7008532 |
| #### Bn-A05-p3394311 | A-genome specific (napus-rapa) | 0.9712918    | 0.7691963    | not scorable | not scorable | 0.9669421 | 0.7264202 |
| #### Bn-A05-p3401393 | A-genome specific (napus-rapa) | 0.9976076    | 0.8011637    | not scorable | not scorable | 0.9834711 | 0.7955781 |
| #### Bn-A05-p3406573 | A-genome specific (napus-rapa) | 0.9952153    | 0.6795959    | not scorable | not scorable | 0.9834711 | 0.7937259 |
| #### Bn-A05-p3414540 | A-genome specific (napus-rapa) | 0.9952153    | 0.7213245    | not scorable | not scorable | 0.9834711 | 0.8229404 |
| #### Bn-A05-p3421628 | A-genome specific (napus-rapa) | 0.5956938    | 0.6998192    | not scorable | not scorable | 0.9917355 | 0.6752687 |
| #### Bn-A05-p342596  | A-genome specific (napus-rapa) | 0.9832536    | 0.3299021    | not scorable | not scorable | 0.9834711 | 0.8031581 |
| #### Bn-A05-p3427883 | A-genome specific (napus-rapa) | 0.9928229    | 0.7586371    | not scorable | not scorable | 1         | 0.7024336 |
| #### Bn-A05-p3427993 | A-genome specific (napus-rapa) | 0.9425837    | 0.791457     | not scorable | not scorable | 0.6528926 | 0.7577688 |
| #### Bn-A05-p3428986 | A-genome specific (rapa only)  | not scorable | not scorable | not scorable | not scorable | 0.9917355 | 0.6743433 |
| #### Bn-A05-p3429612 | A-genome specific (napus-rapa) | 0.9641148    | 0.2792437    | not scorable | not scorable | 1         | 0.7342988 |
| #### Bn-A05-p3450929 | A-genome specific (rapa only)  | not scorable | not scorable | not scorable | not scorable | 0.9669421 | 0.7679964 |
| #### Bn-A05-p3454754 | A-genome specific (napus-rapa) | 0.9688995    | 0.7995518    | not scorable | not scorable | 0.9917355 | 0.7878326 |

|                      |                                |              |              |              |              |              |              |
|----------------------|--------------------------------|--------------|--------------|--------------|--------------|--------------|--------------|
| #### Bn-A05-p3456024 | A-genome specific (napus-rapa) | 0.9808612    | 0.8060433    | not scorable | not scorable | 1            | 0.7407264    |
| #### Bn-A05-p3456661 | A-genome specific (napus-rapa) | 0.9856459    | 0.783475     | not scorable | not scorable | 0.9834711    | 0.774552     |
| #### Bn-A05-p3467036 | A-genome specific (napus-rapa) | 0.9808612    | 0.593524     | not scorable | not scorable | 0.9834711    | 0.7202281    |
| #### Bn-A05-p3467060 | A-genome specific (napus-rapa) | 0.9712918    | 0.8095763    | not scorable | not scorable | 0.9752066    | 0.8306469    |
| #### Bn-A05-p3467688 | A-genome specific (napus-rapa) | 0.9090909    | 0.7945712    | not scorable | not scorable | 0.9338843    | 0.6951165    |
| #### Bn-A05-p3468129 | A-genome specific (napus-rapa) | 0.9138756    | 0.7987754    | not scorable | not scorable | 0.9752066    | 0.7906311    |
| #### Bn-A05-p3468204 | A-genome specific (napus-rapa) | 0.9066986    | 0.8287258    | not scorable | not scorable | 0.9669421    | 0.8233879    |
| #### Bn-A05-p346822  | A-genome specific (napus-rapa) | 0.9665072    | 0.4170791    | not scorable | not scorable | 0.9917355    | 0.7077696    |
| #### Bn-A05-p3469996 | A-genome specific (napus-rapa) | 0.8995215    | 0.8013204    | not scorable | not scorable | 0.9586777    | 0.8112935    |
| #### Bn-A05-p347486  | A-genome specific (rapa only)  | not scorable | not scorable | not scorable | not scorable | 0.9917355    | 0.829697     |
| #### Bn-A05-p3481481 | A-genome specific (napus-rapa) | 0.9808612    | 0.3751002    | not scorable | not scorable | 1            | 0.7393478    |
| #### Bn-A05-p3481611 | A-genome specific (napus-rapa) | 0.9928229    | 0.8035924    | not scorable | not scorable | 1            | 0.7939289    |
| #### Bn-A05-p3482813 | A-genome specific (napus-rapa) | 0.9808612    | 0.3690387    | not scorable | not scorable | 1            | 0.7700332    |
| #### Bn-A05-p3494729 | A-genome specific (rapa only)  | not scorable | not scorable | not scorable | not scorable | 0.9834711    | 0.7099763    |
| #### Bn-A05-p3507831 | A-genome specific (napus-rapa) | 0.9928229    | 0.8087324    | not scorable | not scorable | 1            | 0.7054136    |
| #### Bn-A05-p3516602 | A-genome specific (napus-rapa) | 0.9880383    | 0.8096855    | not scorable | not scorable | 0.9834711    | 0.7566053    |
| #### Bn-A05-p3518253 | A-genome specific (napus-rapa) | 0.9736842    | 0.5480176    | not scorable | not scorable | 0.9917355    | 0.4206098    |
| #### Bn-A05-p3548736 | A-genome specific (napus-rapa) | 0.9856459    | 0.4976004    | not scorable | not scorable | 0.9752066    | 0.5202888    |
| #### Bn-A05-p3550203 | A-genome specific (napus-rapa) | 0.9952153    | 0.3889967    | not scorable | not scorable | 1            | 0.8449665    |
| #### Bn-A05-p355200  | A-genome specific (napus-rapa) | 0.9832536    | 0.3992393    | not scorable | not scorable | 0.9752066    | 0.6934315    |
| #### Bn-A05-p3557797 | A-genome specific (napus-rapa) | 0.9784689    | 0.8101119    | not scorable | not scorable | 0.9834711    | 0.760955     |
| #### Bn-A05-p3598362 | A-genome specific (napus-rapa) | 0.9952153    | 0.7524389    | not scorable | not scorable | 0.9834711    | 0.7724001    |
| #### Bn-A05-p3598758 | A-genome specific (napus-rapa) | 0.9976076    | 0.7286766    | not scorable | not scorable | 1            | 0.7217363    |
| #### Bn-A05-p3599315 | A-genome specific (napus-rapa) | 0.9952153    | 0.8402058    | not scorable | not scorable | 1            | 0.6955948    |
| #### Bn-A05-p3605605 | A-genome specific (napus-rapa) | 0.9976076    | 0.8023859    | not scorable | not scorable | 0.9834711    | 0.7601281    |
| #### Bn-A05-p3610111 | A-genome specific (napus-rapa) | 0.9976076    | 0.8049498    | not scorable | not scorable | 0.9752066    | 0.7664462    |
| #### Bn-A05-p3611878 | A-genome specific (napus-rapa) | 0.9952153    | 0.5530657    | not scorable | not scorable | 0.9917355    | 0.7026774    |
| #### Bn-A05-p3617320 | A-genome specific (napus-rapa) | 0.9976076    | 0.4559218    | not scorable | not scorable | 0.9917355    | 0.728605     |
| #### Bn-A05-p3618356 | A-genome specific (napus-rapa) | 0.7320574    | 0.9072468    | not scorable | not scorable | 0.6446281    | 0.8190282    |
| #### Bn-A05-p3629424 | A-genome specific (rapa only)  | not scorable | not scorable | not scorable | not scorable | 0.9504132    | 0.7536385    |
| #### Bn-A05-p363138  | napus specific                 | 0.9497608    | 0.5625359    | not scorable | not scorable | not scorable | not scorable |
| #### Bn-A05-p3649985 | A-genome specific (napus-rapa) | 0.9928229    | 0.8952301    | not scorable | not scorable | 1            | 0.7891211    |
| #### Bn-A05-p3650066 | A-genome specific (napus-rapa) | 0.9904306    | 0.8428977    | not scorable | not scorable | 0.9669421    | 0.7653947    |



|                      |                                |              |              |              |              |              |              |
|----------------------|--------------------------------|--------------|--------------|--------------|--------------|--------------|--------------|
| #### Bn-A05-p3659292 | A-genome specific (napus-rapa) | 0.9952153    | 0.6293502    | not scorable | not scorable | 0.9586777    | 0.7737158    |
| #### Bn-A05-p3659796 | A-genome specific (napus-rapa) | 0.9976076    | 0.267253     | not scorable | not scorable | 0.9669421    | 0.6955644    |
| #### Bn-A05-p3670158 | A-genome specific (napus-rapa) | 0.9928229    | 0.4979096    | not scorable | not scorable | 1            | 0.8379771    |
| #### Bn-A05-p3681637 | A-genome specific (napus-rapa) | 0.8373206    | 0.3705647    | not scorable | not scorable | 0.9752066    | 0.7852494    |
| #### Bn-A05-p3684668 | A-genome specific (napus-rapa) | 0.9952153    | 0.7469894    | not scorable | not scorable | 1            | 0.865162     |
| #### Bn-A05-p3703643 | A-genome specific (napus-rapa) | 0.9808612    | 0.4320617    | not scorable | not scorable | 1            | 0.8021294    |
| #### Bn-A05-p3719423 | A-genome specific (rapa only)  | not scorable | not scorable | not scorable | not scorable | 0.9917355    | 0.7630112    |
| #### Bn-A05-p3754543 | A-genome specific (napus-rapa) | 0.930622     | 0.6769214    | not scorable | not scorable | 0.7024794    | 0.7991043    |
| #### Bn-A05-p3759320 | A-genome specific (napus-rapa) | 0.9617225    | 0.7117105    | not scorable | not scorable | 0.9834711    | 0.6990387    |
| #### Bn-A05-p377542  | A-genome specific (napus-rapa) | 0.9760765    | 0.5942039    | not scorable | not scorable | 0.9586777    | 0.5984696    |
| #### Bn-A05-p3781544 | A-genome specific (napus-rapa) | 0.9976076    | 0.486738     | not scorable | not scorable | 0.9917355    | 0.7536452    |
| #### Bn-A05-p3796206 | genome unspecific (all in)     | 0.9904306    | 0.5314343    | 0.5348837    | 0.7262002    | 0.9256198    | 0.7739488    |
| #### Bn-A05-p3808836 | A-genome specific (napus-rapa) | 0.9976076    | 0.9127215    | not scorable | not scorable | 1            | 0.8167268    |
| #### Bn-A05-p3812776 | A-genome specific (napus-rapa) | 0.9976076    | 0.9175813    | not scorable | not scorable | 0.9834711    | 0.8135673    |
| #### Bn-A05-p3833073 | A-genome specific (rapa only)  | not scorable | not scorable | not scorable | not scorable | 0.9752066    | 0.7199836    |
| #### Bn-A05-p3833308 | genome unspecific (all in)     | 0.9019139    | 0.3787898    | 0.9767442    | 0.7471843    | 1            | 0.821539     |
| #### Bn-A05-p3834445 | A-genome specific (napus-rapa) | 0.9880383    | 0.8052018    | not scorable | not scorable | 0.9917355    | 0.7686269    |
| #### Bn-A05-p3834639 | A-genome specific (napus-rapa) | 0.3110048    | 0.7667319    | not scorable | not scorable | 0.9834711    | 0.7949042    |
| #### Bn-A05-p3846005 | A-genome specific (napus-rapa) | 0.9904306    | 0.7634487    | not scorable | not scorable | 1            | 0.7718545    |
| #### Bn-A05-p3847996 | A-genome specific (rapa only)  | not scorable | not scorable | not scorable | not scorable | 0.9917355    | 0.6813985    |
| #### Bn-A05-p3871998 | A-genome specific (napus-rapa) | 1            | 0.5071949    | not scorable | not scorable | 0.9752066    | 0.8024748    |
| #### Bn-A05-p3882826 | A-genome specific (rapa only)  | not scorable | not scorable | not scorable | not scorable | 0.9917355    | 0.7749658    |
| #### Bn-A05-p389230  | A-genome specific (napus-rapa) | 0.9665072    | 0.5343968    | not scorable | not scorable | 0.9504132    | 0.5389776    |
| #### Bn-A05-p3901565 | A-genome specific (napus-rapa) | 0.9928229    | 0.3769887    | not scorable | not scorable | 1            | 0.7594963    |
| #### Bn-A05-p3919804 | all not scorable               | not scorable | not scorable | not scorable | not scorable | not scorable | not scorable |
| #### Bn-A05-p3920198 | all not scorable               | not scorable | not scorable | not scorable | not scorable | not scorable | not scorable |
| #### Bn-A05-p392053  | A-genome specific (napus-rapa) | 0.9880383    | 0.7695165    | not scorable | not scorable | 0.9917355    | 0.7808229    |
| #### Bn-A05-p3923692 | A-genome specific (napus-rapa) | 0.9617225    | 0.4427902    | not scorable | not scorable | 0.9834711    | 0.5364295    |
| #### Bn-A05-p3923814 | A-genome specific (napus-rapa) | 0.9736842    | 0.8666215    | not scorable | not scorable | 1            | 0.8828484    |
| #### Bn-A05-p3939102 | A-genome specific (napus-rapa) | 0.9880383    | 0.8403008    | not scorable | not scorable | 1            | 0.7807861    |
| #### Bn-A05-p3953066 | A-genome specific (napus-rapa) | 0.8708134    | 0.779858     | not scorable | not scorable | 0.9752066    | 0.8354011    |
| #### Bn-A05-p3963790 | A-genome specific (napus-rapa) | 0.6674641    | 0.8312193    | not scorable | not scorable | 0.9504132    | 0.7220723    |
| #### Bn-A05-p3966848 | A-genome specific (napus-rapa) | 0.9856459    | 0.5215058    | not scorable | not scorable | 0.9834711    | 0.6832324    |

|                      |                                |              |              |              |              |           |           |
|----------------------|--------------------------------|--------------|--------------|--------------|--------------|-----------|-----------|
| #### Bn-A05-p3988218 | A-genome specific (napus-rapa) | 0.9904306    | 0.7421105    | not scorable | not scorable | 1         | 0.6914105 |
| #### Bn-A05-p3988279 | A-genome specific (napus-rapa) | 0.9880383    | 0.8032272    | not scorable | not scorable | 0.9917355 | 0.7999281 |
| #### Bn-A05-p3988958 | A-genome specific (napus-rapa) | 0.9880383    | 0.3325582    | not scorable | not scorable | 0.9917355 | 0.8205577 |
| #### Bn-A05-p3989555 | A-genome specific (napus-rapa) | 0.9904306    | 0.7155205    | not scorable | not scorable | 1         | 0.6075637 |
| #### Bn-A05-p4006770 | A-genome specific (napus-rapa) | 1            | 0.5134318    | not scorable | not scorable | 1         | 0.8006559 |
| #### Bn-A05-p4016172 | A-genome specific (rapa only)  | not scorable | not scorable | not scorable | not scorable | 0.9917355 | 0.6800712 |
| #### Bn-A05-p4017270 | A-genome specific (napus-rapa) | 0.9976076    | 0.7677189    | not scorable | not scorable | 0.6363636 | 0.6948223 |
| #### Bn-A05-p4022440 | A-genome specific (rapa only)  | not scorable | not scorable | not scorable | not scorable | 0.9834711 | 0.6967734 |
| #### Bn-A05-p4023464 | A-genome specific (napus-rapa) | 0.7009569    | 0.6209862    | not scorable | not scorable | 0.9917355 | 0.606728  |
| #### Bn-A05-p4036806 | A-genome specific (napus-rapa) | 0.9952153    | 0.7323389    | not scorable | not scorable | 1         | 0.6970947 |
| #### Bn-A05-p4043474 | A-genome specific (napus-rapa) | 0.9712918    | 0.5272076    | not scorable | not scorable | 1         | 0.6288794 |
| #### Bn-A05-p4046605 | A-genome specific (napus-rapa) | 0.9904306    | 0.7003254    | not scorable | not scorable | 1         | 0.7105125 |
| #### Bn-A05-p4053502 | A-genome specific (napus-rapa) | 0.9784689    | 0.7397651    | not scorable | not scorable | 0.9917355 | 0.7471753 |
| #### Bn-A05-p4054823 | A-genome specific (napus-rapa) | 0.9880383    | 0.4770927    | not scorable | not scorable | 0.9917355 | 0.7372529 |
| #### Bn-A05-p4055656 | A-genome specific (napus-rapa) | 0.9904306    | 0.2386352    | not scorable | not scorable | 0.9669421 | 0.6087569 |
| #### Bn-A05-p4055839 | A-genome specific (napus-rapa) | 0.9856459    | 0.5861222    | not scorable | not scorable | 1         | 0.7399741 |
| #### Bn-A05-p4059534 | A-genome specific (napus-rapa) | 0.9808612    | 0.792668     | not scorable | not scorable | 1         | 0.804073  |
| #### Bn-A05-p4061730 | A-genome specific (napus-rapa) | 0.9880383    | 0.7330705    | not scorable | not scorable | 0.9834711 | 0.8051432 |
| #### Bn-A05-p4061978 | A-genome specific (napus-rapa) | 0.9880383    | 0.8112355    | not scorable | not scorable | 0.9917355 | 0.8439929 |
| #### Bn-A05-p4062134 | A-genome specific (napus-rapa) | 0.9976076    | 0.7699234    | not scorable | not scorable | 1         | 0.9153172 |
| #### Bn-A05-p4068277 | A-genome specific (napus-rapa) | 0.9880383    | 0.7676619    | not scorable | not scorable | 0.9917355 | 0.6670371 |
| #### Bn-A05-p4069460 | A-genome specific (napus-rapa) | 0.9736842    | 0.3033395    | not scorable | not scorable | 0.9917355 | 0.8202339 |
| #### Bn-A05-p4073230 | A-genome specific (napus-rapa) | 0.9952153    | 0.3732508    | not scorable | not scorable | 1         | 0.7611668 |
| #### Bn-A05-p4073997 | A-genome specific (napus-rapa) | 0.9904306    | 0.7797557    | not scorable | not scorable | 1         | 0.709715  |
| #### Bn-A05-p4078496 | A-genome specific (napus-rapa) | 0.9976076    | 0.437979     | not scorable | not scorable | 1         | 0.8624078 |
| #### Bn-A05-p4080798 | A-genome specific (napus-rapa) | 0.9952153    | 0.7415245    | not scorable | not scorable | 1         | 0.6769364 |
| #### Bn-A05-p4085121 | A-genome specific (napus-rapa) | 0.937799     | 0.7691876    | not scorable | not scorable | 0.6115702 | 0.778749  |
| #### Bn-A05-p4086144 | A-genome specific (napus-rapa) | 0.9880383    | 0.7337471    | not scorable | not scorable | 0.9752066 | 0.836688  |
| #### Bn-A05-p4093306 | A-genome specific (napus-rapa) | 0.9904306    | 0.4645639    | not scorable | not scorable | 0.9917355 | 0.7702807 |
| #### Bn-A05-p4102906 | A-genome specific (napus-rapa) | 0.9952153    | 0.7668298    | not scorable | not scorable | 1         | 0.6828028 |
| #### Bn-A05-p4104070 | A-genome specific (napus-rapa) | 0.9928229    | 0.2909306    | not scorable | not scorable | 0.9669421 | 0.5938171 |
| #### Bn-A05-p4108818 | A-genome specific (napus-rapa) | 0.9832536    | 0.6139143    | not scorable | not scorable | 0.9917355 | 0.7667087 |
| #### Bn-A05-p4110015 | A-genome specific (napus-rapa) | 1            | 0.3718556    | not scorable | not scorable | 0.9917355 | 0.7370849 |

|                      |                                   |              |              |              |              |           |           |
|----------------------|-----------------------------------|--------------|--------------|--------------|--------------|-----------|-----------|
| #### Bn-A05-p4121158 | A-genome specific (napus-rapa)    | 0.930622     | 0.6926226    | not scorable | not scorable | 0.9834711 | 0.6969336 |
| #### Bn-A05-p4176921 | genome unspecific (all in)        | 0.9856459    | 0.4738692    | 0.9922481    | 0.5829095    | 1         | 0.7935928 |
| #### Bn-A05-p4196214 | A-genome specific (napus-rapa)    | 0.9976076    | 0.8038533    | not scorable | not scorable | 0.677686  | 0.7847714 |
| #### Bn-A05-p4197697 | A-genome specific (napus-rapa)    | 0.9784689    | 0.8213857    | not scorable | not scorable | 1         | 0.8833862 |
| #### Bn-A05-p4212213 | A-genome specific (napus-rapa)    | 0.9856459    | 0.3297706    | not scorable | not scorable | 1         | 0.7602192 |
| #### Bn-A05-p4230422 | A-genome specific (napus-rapa)    | 1            | 0.437949     | not scorable | not scorable | 1         | 0.8893603 |
| #### Bn-A05-p4290068 | A-genome specific (napus-rapa)    | 0.5095694    | 0.8442473    | not scorable | not scorable | 0.9090909 | 0.9208351 |
| #### Bn-A05-p4304172 | genome unspecific (all in)        | 0.9928229    | 0.7313564    | 0.9689922    | 0.6964487    | 0.9421487 | 0.8085063 |
| #### Bn-A05-p4307316 | genome unspecific (oleracea-rapa) | not scorable | not scorable | 0.9069768    | 0.761631     | 1         | 0.9207501 |
| #### Bn-A05-p4316642 | A-genome specific (napus-rapa)    | 0.9904306    | 0.485852     | not scorable | not scorable | 0.9752066 | 0.7756222 |
| #### Bn-A05-p4316943 | A-genome specific (napus-rapa)    | 0.9521531    | 0.8025826    | not scorable | not scorable | 0.9917355 | 0.8208314 |
| #### Bn-A05-p4333409 | A-genome specific (napus-rapa)    | 0.9928229    | 0.8091696    | not scorable | not scorable | 1         | 0.7468417 |
| #### Bn-A05-p4336667 | A-genome specific (napus-rapa)    | 0.9856459    | 0.7581415    | not scorable | not scorable | 1         | 0.7645065 |
| #### Bn-A05-p4353454 | A-genome specific (napus-rapa)    | 0.9856459    | 0.7578623    | not scorable | not scorable | 1         | 0.7559701 |
| #### Bn-A05-p4354442 | A-genome specific (napus-rapa)    | 0.9832536    | 0.5834324    | not scorable | not scorable | 0.9917355 | 0.6909901 |
| #### Bn-A05-p4355047 | A-genome specific (napus-rapa)    | 0.9832536    | 0.5654079    | not scorable | not scorable | 1         | 0.7252899 |
| #### Bn-A05-p4373694 | A-genome specific (napus-rapa)    | 0.9928229    | 0.8360434    | not scorable | not scorable | 0.9917355 | 0.7197514 |
| #### Bn-A05-p4376029 | A-genome specific (napus-rapa)    | 0.9019139    | 0.7736164    | not scorable | not scorable | 0.9917355 | 0.677412  |
| #### Bn-A05-p4398134 | A-genome specific (napus-rapa)    | 0.9952153    | 0.8033118    | not scorable | not scorable | 1         | 0.811842  |
| #### Bn-A05-p4399949 | A-genome specific (napus-rapa)    | 0.9928229    | 0.3202833    | not scorable | not scorable | 1         | 0.7686591 |
| #### Bn-A05-p4418703 | A-genome specific (napus-rapa)    | 1            | 0.3292082    | not scorable | not scorable | 1         | 0.7318229 |
| #### Bn-A05-p4422786 | A-genome specific (napus-rapa)    | 1            | 0.6984933    | not scorable | not scorable | 0.9917355 | 0.6806584 |
| #### Bn-A05-p44690   | A-genome specific (napus-rapa)    | 1            | 0.9208159    | not scorable | not scorable | 1         | 0.9175813 |
| #### Bn-A05-p449086  | A-genome specific (napus-rapa)    | 0.9904306    | 0.5557899    | not scorable | not scorable | 1         | 0.7975834 |
| #### Bn-A05-p4498290 | A-genome specific (napus-rapa)    | 0.9808612    | 0.2800896    | not scorable | not scorable | 1         | 0.8185809 |
| #### Bn-A05-p4498398 | A-genome specific (napus-rapa)    | 0.9210526    | 0.8246281    | not scorable | not scorable | 0.5950413 | 0.8055689 |
| #### Bn-A05-p4516526 | A-genome specific (napus-rapa)    | 0.9928229    | 0.5057297    | not scorable | not scorable | 1         | 0.751707  |
| #### Bn-A05-p4516748 | A-genome specific (rapa only)     | not scorable | not scorable | not scorable | not scorable | 0.5950413 | 0.8095464 |
| #### Bn-A05-p4520844 | A-genome specific (napus-rapa)    | 0.9880383    | 0.2398178    | not scorable | not scorable | 0.9917355 | 0.6121123 |
| #### Bn-A05-p4524286 | A-genome specific (napus-rapa)    | 0.9808612    | 0.5798689    | not scorable | not scorable | 1         | 0.7902774 |
| #### Bn-A05-p4525705 | A-genome specific (napus-rapa)    | 0.9665072    | 0.8010295    | not scorable | not scorable | 0.9338843 | 0.7183189 |
| #### Bn-A05-p452939  | genome unspecific (oleracea-rapa) | not scorable | not scorable | 0.9534883    | 0.745786     | 1         | 0.7650468 |
| #### Bn-A05-p4542257 | A-genome specific (napus-rapa)    | 0.9976076    | 0.4687764    | not scorable | not scorable | 0.9917355 | 0.8074523 |

|                      |                                    |              |              |              |              |              |              |
|----------------------|------------------------------------|--------------|--------------|--------------|--------------|--------------|--------------|
| #### Bn-A05-p4549959 | A-genome specific (napus-rapa)     | 1            | 0.7016702    | not scorable | not scorable | 0.9834711    | 0.7275646    |
| #### Bn-A05-p4550465 | A-genome specific (napus-rapa)     | 0.9808612    | 0.7742141    | not scorable | not scorable | 0.9752066    | 0.6939689    |
| #### Bn-A05-p4569670 | A-genome specific (napus-rapa)     | 0.9808612    | 0.7412094    | not scorable | not scorable | 0.9834711    | 0.6824313    |
| #### Bn-A05-p458357  | C-genome specific (napus-oleracea) | 0.9258373    | 0.7462918    | 0.9922481    | 0.8526646    | not scorable | not scorable |
| #### Bn-A05-p4590055 | A-genome specific (napus-rapa)     | 0.9904306    | 0.8067362    | not scorable | not scorable | 0.9917355    | 0.8186828    |
| #### Bn-A05-p4590326 | A-genome specific (napus-rapa)     | 0.9880383    | 0.6497977    | not scorable | not scorable | 0.9752066    | 0.7595804    |
| #### Bn-A05-p4593001 | A-genome specific (napus-rapa)     | 0.9856459    | 0.4793262    | not scorable | not scorable | 0.9834711    | 0.5802915    |
| #### Bn-A05-p4612911 | A-genome specific (napus-rapa)     | 0.9880383    | 0.4905775    | not scorable | not scorable | 1            | 0.7434353    |
| #### Bn-A05-p4616151 | A-genome specific (napus-rapa)     | 0.9904306    | 0.588962     | not scorable | not scorable | 0.9917355    | 0.8148105    |
| #### Bn-A05-p461633  | A-genome specific (napus-rapa)     | 0.9665072    | 0.4848723    | not scorable | not scorable | 1            | 0.8906373    |
| #### Bn-A05-p4618158 | A-genome specific (napus-rapa)     | 1            | 0.7632905    | not scorable | not scorable | 0.9834711    | 0.7271518    |
| #### Bn-A05-p4619303 | A-genome specific (napus-rapa)     | 0.9976076    | 0.52302      | not scorable | not scorable | 0.9834711    | 0.8037351    |
| #### Bn-A05-p4621087 | A-genome specific (napus-rapa)     | 1            | 0.7420156    | not scorable | not scorable | 0.9917355    | 0.7805594    |
| #### Bn-A05-p4621949 | A-genome specific (napus-rapa)     | 0.9928229    | 0.7732162    | not scorable | not scorable | 1            | 0.712615     |
| #### Bn-A05-p4625019 | A-genome specific (napus-rapa)     | 0.9784689    | 0.5050447    | not scorable | not scorable | 1            | 0.6948495    |
| #### Bn-A05-p4632407 | A-genome specific (napus-rapa)     | 0.9760765    | 0.7745882    | not scorable | not scorable | 0.9421487    | 0.8486249    |
| #### Bn-A05-p4644984 | A-genome specific (napus-rapa)     | 0.9952153    | 0.3719256    | not scorable | not scorable | 1            | 0.5629493    |
| #### Bn-A05-p4653714 | A-genome specific (rapa only)      | not scorable | not scorable | not scorable | not scorable | 0.9752066    | 0.5860605    |
| #### Bn-A05-p4655845 | A-genome specific (napus-rapa)     | 1            | 0.6904525    | not scorable | not scorable | 1            | 0.8528472    |
| #### Bn-A05-p4665099 | A-genome specific (napus-rapa)     | 1            | 0.7936761    | not scorable | not scorable | 1            | 0.7228909    |
| #### Bn-A05-p4679663 | A-genome specific (napus-rapa)     | 0.9976076    | 0.5178118    | not scorable | not scorable | 1            | 0.7543517    |
| #### Bn-A05-p468551  | A-genome specific (napus-rapa)     | 0.9617225    | 0.4698649    | not scorable | not scorable | 0.9917355    | 0.7805789    |
| #### Bn-A05-p4696360 | A-genome specific (napus-rapa)     | 0.9928229    | 0.7912977    | not scorable | not scorable | 0.6528926    | 0.8410159    |
| #### Bn-A05-p4715599 | genome unspecific (all in)         | 0.9976076    | 0.3098338    | 0.9922481    | 0.8547986    | 0.9917355    | 0.7894143    |
| #### Bn-A05-p4717725 | A-genome specific (napus-rapa)     | 0.9976076    | 0.8287444    | not scorable | not scorable | 0.9917355    | 0.7754467    |
| #### Bn-A05-p4717815 | A-genome specific (napus-rapa)     | 0.9904306    | 0.7311299    | not scorable | not scorable | 0.9752066    | 0.7903441    |
| #### Bn-A05-p472271  | genome unspecific (all in)         | 0.9760765    | 0.7046981    | 0.4806201    | 0.8073233    | 1            | 0.6445189    |
| #### Bn-A05-p4728882 | A-genome specific (napus-rapa)     | 1            | 0.7759413    | not scorable | not scorable | 0.9834711    | 0.7240552    |
| #### Bn-A05-p4729566 | A-genome specific (napus-rapa)     | 0.9832536    | 0.6323283    | not scorable | not scorable | 0.9834711    | 0.7224679    |
| #### Bn-A05-p4732914 | A-genome specific (napus-rapa)     | 1            | 0.7892722    | not scorable | not scorable | 0.9917355    | 0.7886006    |
| #### Bn-A05-p4736340 | A-genome specific (napus-rapa)     | 0.9952153    | 0.8242797    | not scorable | not scorable | 0.9917355    | 0.743686     |
| #### Bn-A05-p4737634 | A-genome specific (rapa only)      | not scorable | not scorable | not scorable | not scorable | 0.9752066    | 0.7674559    |
| #### Bn-A05-p474257  | A-genome specific (napus-rapa)     | 0.9832536    | 0.6842052    | not scorable | not scorable | 0.9917355    | 0.8155786    |

|                      |                                   |              |              |              |              |           |           |
|----------------------|-----------------------------------|--------------|--------------|--------------|--------------|-----------|-----------|
| #### Bn-A05-p4749718 | A-genome specific (napus-rapa)    | 0.9904306    | 0.5278285    | not scorable | not scorable | 0.9917355 | 0.7486592 |
| #### Bn-A05-p4762044 | A-genome specific (napus-rapa)    | 0.9976076    | 0.5199819    | not scorable | not scorable | 0.9834711 | 0.818361  |
| #### Bn-A05-p4772468 | A-genome specific (napus-rapa)    | 1            | 0.7239965    | not scorable | not scorable | 0.9834711 | 0.8150748 |
| #### Bn-A05-p4792988 | A-genome specific (napus-rapa)    | 0.9976076    | 0.6683721    | not scorable | not scorable | 1         | 0.7639329 |
| #### Bn-A05-p4793033 | A-genome specific (napus-rapa)    | 1            | 0.7405659    | not scorable | not scorable | 0.9834711 | 0.7751213 |
| #### Bn-A05-p4794141 | A-genome specific (napus-rapa)    | 0.9904306    | 0.3112699    | not scorable | not scorable | 0.9917355 | 0.8205397 |
| #### Bn-A05-p4820365 | A-genome specific (napus-rapa)    | 1            | 0.7049519    | not scorable | not scorable | 1         | 0.6951041 |
| #### Bn-A05-p482473  | A-genome specific (napus-rapa)    | 0.9952153    | 0.5469098    | not scorable | not scorable | 0.9917355 | 0.8302022 |
| #### Bn-A05-p484591  | A-genome specific (napus-rapa)    | 0.9784689    | 0.3902336    | not scorable | not scorable | 1         | 0.6366912 |
| #### Bn-A05-p4871527 | A-genome specific (napus-rapa)    | 0.9736842    | 0.8832948    | not scorable | not scorable | 1         | 0.7727718 |
| #### Bn-A05-p4904405 | A-genome specific (napus-rapa)    | 0.9832536    | 0.9174066    | not scorable | not scorable | 0.9834711 | 0.7671781 |
| #### Bn-A05-p4915516 | A-genome specific (napus-rapa)    | 0.9904306    | 0.8395197    | not scorable | not scorable | 0.6280992 | 0.8327757 |
| #### Bn-A05-p4919899 | A-genome specific (napus-rapa)    | 0.9545454    | 0.783209     | not scorable | not scorable | 0.9917355 | 0.8098593 |
| #### Bn-A05-p4924856 | A-genome specific (napus-rapa)    | 1            | 0.7765347    | not scorable | not scorable | 1         | 0.7007138 |
| #### Bn-A05-p4937055 | A-genome specific (napus-rapa)    | 0.9904306    | 0.7788116    | not scorable | not scorable | 0.9834711 | 0.7730682 |
| #### Bn-A05-p4940676 | A-genome specific (napus-rapa)    | 0.9928229    | 0.7967482    | not scorable | not scorable | 1         | 0.8110461 |
| #### Bn-A05-p4940713 | A-genome specific (napus-rapa)    | 0.9928229    | 0.8025123    | not scorable | not scorable | 0.9917355 | 0.830782  |
| #### Bn-A05-p4940779 | A-genome specific (napus-rapa)    | 0.9976076    | 0.7690636    | not scorable | not scorable | 1         | 0.8061883 |
| #### Bn-A05-p4941234 | A-genome specific (napus-rapa)    | 0.9952153    | 0.7803927    | not scorable | not scorable | 1         | 0.8291568 |
| #### Bn-A05-p4959282 | A-genome specific (napus-rapa)    | 1            | 0.7265302    | not scorable | not scorable | 0.9752066 | 0.8177654 |
| #### Bn-A05-p4961402 | A-genome specific (napus-rapa)    | 0.9928229    | 0.2369486    | not scorable | not scorable | 0.9752066 | 0.6553057 |
| #### Bn-A05-p4973912 | A-genome specific (napus-rapa)    | 0.9784689    | 0.7456518    | not scorable | not scorable | 0.6363636 | 0.6720281 |
| #### Bn-A05-p4984837 | A-genome specific (napus-rapa)    | 0.9904306    | 0.3096625    | not scorable | not scorable | 0.9834711 | 0.7409236 |
| #### Bn-A05-p5001194 | A-genome specific (rapa only)     | not scorable | not scorable | not scorable | not scorable | 0.6694215 | 0.5974919 |
| #### Bn-A05-p5002988 | A-genome specific (napus-rapa)    | 0.9904306    | 0.838789     | not scorable | not scorable | 1         | 0.787343  |
| #### Bn-A05-p5004187 | A-genome specific (napus-rapa)    | 0.9688995    | 0.5026452    | not scorable | not scorable | 1         | 0.7988282 |
| #### Bn-A05-p5020058 | A-genome specific (napus-rapa)    | 0.9856459    | 0.5424193    | not scorable | not scorable | 1         | 0.7243367 |
| #### Bn-A05-p5026139 | A-genome specific (napus-rapa)    | 0.9904306    | 0.2649752    | not scorable | not scorable | 1         | 0.6340655 |
| #### Bn-A05-p5037839 | A-genome specific (napus-rapa)    | 0.9976076    | 0.7643007    | not scorable | not scorable | 0.9752066 | 0.7481176 |
| #### Bn-A05-p5038148 | A-genome specific (napus-rapa)    | 0.9880383    | 0.8075311    | not scorable | not scorable | 0.9917355 | 0.730388  |
| #### Bn-A05-p5041159 | A-genome specific (napus-rapa)    | 0.9904306    | 0.825842     | not scorable | not scorable | 0.9917355 | 0.677913  |
| #### Bn-A05-p5043499 | genome unspecific (oleracea-rapa) | not scorable | not scorable | 1            | 0.7170734    | 1         | 0.7574295 |
| #### Bn-A05-p5057096 | A-genome specific (napus-rapa)    | 0.9952153    | 0.7060942    | not scorable | not scorable | 0.9834711 | 0.7596684 |

|                      |                                |              |              |              |              |           |           |
|----------------------|--------------------------------|--------------|--------------|--------------|--------------|-----------|-----------|
| #### Bn-A05-p5057141 | A-genome specific (napus-rapa) | 0.9712918    | 0.468114     | not scorable | not scorable | 0.9917355 | 0.7499781 |
| #### Bn-A05-p5058143 | A-genome specific (napus-rapa) | 0.9928229    | 0.5408046    | not scorable | not scorable | 0.9752066 | 0.5831441 |
| #### Bn-A05-p5093548 | A-genome specific (napus-rapa) | 0.9641148    | 0.7200636    | not scorable | not scorable | 0.6115702 | 0.8191477 |
| #### Bn-A05-p5100352 | A-genome specific (napus-rapa) | 0.9712918    | 0.238547     | not scorable | not scorable | 0.9752066 | 0.7892913 |
| #### Bn-A05-p5102120 | A-genome specific (napus-rapa) | 0.9976076    | 0.6686502    | not scorable | not scorable | 1         | 0.8821031 |
| #### Bn-A05-p5102147 | A-genome specific (napus-rapa) | 0.9928229    | 0.3779608    | not scorable | not scorable | 1         | 0.6987064 |
| #### Bn-A05-p5104821 | A-genome specific (napus-rapa) | 0.9880383    | 0.6548197    | not scorable | not scorable | 0.9917355 | 0.703967  |
| #### Bn-A05-p5133417 | A-genome specific (napus-rapa) | 0.9952153    | 0.4179525    | not scorable | not scorable | 1         | 0.8437105 |
| #### Bn-A05-p5135426 | A-genome specific (napus-rapa) | 0.9880383    | 0.5508231    | not scorable | not scorable | 0.9917355 | 0.7604856 |
| #### Bn-A05-p518923  | A-genome specific (rapa only)  | not scorable | not scorable | not scorable | not scorable | 0.9834711 | 0.7748172 |
| #### Bn-A05-p5251613 | A-genome specific (napus-rapa) | 0.9760765    | 0.2796916    | not scorable | not scorable | 0.9834711 | 0.7649689 |
| #### Bn-A05-p5252542 | A-genome specific (napus-rapa) | 0.9856459    | 0.8303989    | not scorable | not scorable | 0.9834711 | 0.8090895 |
| #### Bn-A05-p5264904 | A-genome specific (napus-rapa) | 0.9928229    | 0.7877973    | not scorable | not scorable | 1         | 0.8613048 |
| #### Bn-A05-p5279229 | A-genome specific (napus-rapa) | 0.9856459    | 0.5830094    | not scorable | not scorable | 1         | 0.8385333 |
| #### Bn-A05-p5280016 | A-genome specific (napus-rapa) | 0.9736842    | 0.5574831    | not scorable | not scorable | 0.9669421 | 0.675553  |
| #### Bn-A05-p5281478 | A-genome specific (napus-rapa) | 0.9880383    | 0.6975561    | not scorable | not scorable | 0.9917355 | 0.723166  |
| #### Bn-A05-p5283304 | A-genome specific (napus-rapa) | 0.9880383    | 0.4820598    | not scorable | not scorable | 0.9586777 | 0.6301776 |
| #### Bn-A05-p529716  | A-genome specific (napus-rapa) | 0.9760765    | 0.8003569    | not scorable | not scorable | 1         | 0.8788541 |
| #### Bn-A05-p5328959 | A-genome specific (napus-rapa) | 0.9856459    | 0.4628373    | not scorable | not scorable | 1         | 0.7696513 |
| #### Bn-A05-p5337620 | A-genome specific (napus-rapa) | 0.9976076    | 0.2854094    | not scorable | not scorable | 0.9752066 | 0.6233408 |
| #### Bn-A05-p5344859 | A-genome specific (napus-rapa) | 0.9976076    | 0.8063635    | not scorable | not scorable | 0.9834711 | 0.7331893 |
| #### Bn-A05-p5349944 | A-genome specific (napus-rapa) | 0.9928229    | 0.7114276    | not scorable | not scorable | 0.9917355 | 0.8096758 |
| #### Bn-A05-p5350567 | A-genome specific (napus-rapa) | 0.9880383    | 0.8110018    | not scorable | not scorable | 0.9917355 | 0.7957904 |
| #### Bn-A05-p5350892 | A-genome specific (napus-rapa) | 0.9736842    | 0.7889077    | not scorable | not scorable | 0.9834711 | 0.8015345 |
| #### Bn-A05-p5372015 | A-genome specific (napus-rapa) | 1            | 0.7798709    | not scorable | not scorable | 0.9504132 | 0.7789019 |
| #### Bn-A05-p5374000 | A-genome specific (napus-rapa) | 0.9952153    | 0.7103273    | not scorable | not scorable | 0.9917355 | 0.6717374 |
| #### Bn-A05-p5391937 | A-genome specific (napus-rapa) | 1            | 0.8083164    | not scorable | not scorable | 0.9834711 | 0.7355098 |
| #### Bn-A05-p541565  | A-genome specific (napus-rapa) | 0.9784689    | 0.5517754    | not scorable | not scorable | 0.9669421 | 0.6874883 |
| #### Bn-A05-p5437257 | A-genome specific (napus-rapa) | 0.9832536    | 0.3715005    | not scorable | not scorable | 0.9834711 | 0.7342843 |
| #### Bn-A05-p5445252 | A-genome specific (napus-rapa) | 0.9904306    | 0.7646507    | not scorable | not scorable | 1         | 0.708764  |
| #### Bn-A05-p5446122 | A-genome specific (napus-rapa) | 0.9976076    | 0.7831202    | not scorable | not scorable | 1         | 0.706614  |
| #### Bn-A05-p5457877 | A-genome specific (napus-rapa) | 0.9976076    | 0.8569642    | not scorable | not scorable | 0.9917355 | 0.7591975 |
| #### Bn-A05-p547582  | A-genome specific (napus-rapa) | 0.9688995    | 0.6681643    | not scorable | not scorable | 0.9834711 | 0.7019902 |

|                      |                                |              |              |              |              |           |           |
|----------------------|--------------------------------|--------------|--------------|--------------|--------------|-----------|-----------|
| #### Bn-A05-p5475992 | A-genome specific (napus-rapa) | 0.9952153    | 0.8615543    | not scorable | not scorable | 0.9917355 | 0.728601  |
| #### Bn-A05-p5483612 | A-genome specific (napus-rapa) | 0.9952153    | 0.5158451    | not scorable | not scorable | 1         | 0.6144376 |
| #### Bn-A05-p5492491 | A-genome specific (napus-rapa) | 1            | 0.8458923    | not scorable | not scorable | 0.9917355 | 0.8011296 |
| #### Bn-A05-p550807  | genome unspecific (all in)     | 0.9545454    | 0.771167     | 0.8914729    | 0.7189392    | 0.9669421 | 0.7022595 |
| #### Bn-A05-p5519729 | A-genome specific (napus-rapa) | 0.9928229    | 0.7635285    | not scorable | not scorable | 0.9917355 | 0.717526  |
| #### Bn-A05-p5521242 | A-genome specific (napus-rapa) | 0.9952153    | 0.4846175    | not scorable | not scorable | 0.9834711 | 0.6666117 |
| #### Bn-A05-p5522210 | genome unspecific (all in)     | 0.9976076    | 0.5576342    | 0.9767442    | 0.7742203    | 0.9834711 | 0.702941  |
| #### Bn-A05-p5533987 | A-genome specific (napus-rapa) | 0.9976076    | 0.7485694    | not scorable | not scorable | 1         | 0.8855474 |
| #### Bn-A05-p5535142 | A-genome specific (napus-rapa) | 0.9760765    | 0.8099664    | not scorable | not scorable | 0.9669421 | 0.6966965 |
| #### Bn-A05-p5537385 | A-genome specific (napus-rapa) | 0.9784689    | 0.7407898    | not scorable | not scorable | 0.9421487 | 0.7778892 |
| #### Bn-A05-p5537609 | A-genome specific (napus-rapa) | 0.9928229    | 0.822769     | not scorable | not scorable | 1         | 0.7726629 |
| #### Bn-A05-p5537751 | A-genome specific (napus-rapa) | 1            | 0.6489761    | not scorable | not scorable | 0.9917355 | 0.633616  |
| #### Bn-A05-p5541232 | A-genome specific (napus-rapa) | 0.9904306    | 0.7009401    | not scorable | not scorable | 0.9834711 | 0.6236969 |
| #### Bn-A05-p5542434 | A-genome specific (napus-rapa) | 0.9928229    | 0.4665029    | not scorable | not scorable | 0.9917355 | 0.7219897 |
| #### Bn-A05-p5552246 | A-genome specific (napus-rapa) | 0.9928229    | 0.4445888    | not scorable | not scorable | 0.9917355 | 0.6707439 |
| #### Bn-A05-p556585  | A-genome specific (rapa only)  | not scorable | not scorable | not scorable | not scorable | 0.9834711 | 0.6689662 |
| #### Bn-A05-p5565945 | A-genome specific (napus-rapa) | 0.9928229    | 0.2367571    | not scorable | not scorable | 0.9917355 | 0.6732364 |
| #### Bn-A05-p5566193 | A-genome specific (napus-rapa) | 0.9784689    | 0.7650709    | not scorable | not scorable | 0.9669421 | 0.7854449 |
| #### Bn-A05-p5575695 | A-genome specific (napus-rapa) | 0.9904306    | 0.7988507    | not scorable | not scorable | 1         | 0.7444711 |
| #### Bn-A05-p5586839 | A-genome specific (napus-rapa) | 0.9904306    | 0.7729803    | not scorable | not scorable | 0.9752066 | 0.797488  |
| #### Bn-A05-p5588271 | A-genome specific (napus-rapa) | 0.9784689    | 0.8021218    | not scorable | not scorable | 0.9752066 | 0.7177495 |
| #### Bn-A05-p5595403 | A-genome specific (napus-rapa) | 0.9856459    | 0.7961553    | not scorable | not scorable | 0.9586777 | 0.7053341 |
| #### Bn-A05-p5595578 | A-genome specific (napus-rapa) | 0.9928229    | 0.8138397    | not scorable | not scorable | 0.9834711 | 0.7627122 |
| #### Bn-A05-p559597  | A-genome specific (napus-rapa) | 0.9832536    | 0.7928916    | not scorable | not scorable | 0.9752066 | 0.6760932 |
| #### Bn-A05-p5614651 | A-genome specific (napus-rapa) | 0.9856459    | 0.6714244    | not scorable | not scorable | 1         | 0.6574759 |
| #### Bn-A05-p5615444 | A-genome specific (napus-rapa) | 1            | 0.9306033    | not scorable | not scorable | 1         | 0.9090905 |
| #### Bn-A05-p5627413 | A-genome specific (napus-rapa) | 0.9856459    | 0.7817304    | not scorable | not scorable | 1         | 0.8684785 |
| #### Bn-A05-p5644210 | A-genome specific (napus-rapa) | 1            | 0.7643037    | not scorable | not scorable | 0.9752066 | 0.738128  |
| #### Bn-A05-p5645000 | A-genome specific (napus-rapa) | 1            | 0.7764401    | not scorable | not scorable | 0.9752066 | 0.7834842 |
| #### Bn-A05-p5647262 | A-genome specific (rapa only)  | not scorable | not scorable | not scorable | not scorable | 0.9917355 | 0.5493351 |
| #### Bn-A05-p565719  | A-genome specific (napus-rapa) | 0.9641148    | 0.7366168    | not scorable | not scorable | 0.9586777 | 0.6894202 |
| #### Bn-A05-p5657708 | A-genome specific (napus-rapa) | 0.9952153    | 0.7353714    | not scorable | not scorable | 1         | 0.7009387 |
| #### Bn-A05-p5661136 | A-genome specific (napus-rapa) | 0.9904306    | 0.3982007    | not scorable | not scorable | 1         | 0.8160369 |

|                      |                                |              |              |              |              |              |              |
|----------------------|--------------------------------|--------------|--------------|--------------|--------------|--------------|--------------|
| #### Bn-A05-p5662601 | A-genome specific (napus-rapa) | 0.9880383    | 0.7063412    | not scorable | not scorable | 0.9917355    | 0.8761218    |
| #### Bn-A05-p5664658 | A-genome specific (napus-rapa) | 0.9928229    | 0.7242243    | not scorable | not scorable | 1            | 0.7129104    |
| #### Bn-A05-p5670181 | A-genome specific (napus-rapa) | 0.9976076    | 0.816709     | not scorable | not scorable | 0.9917355    | 0.7355717    |
| #### Bn-A05-p5684860 | A-genome specific (napus-rapa) | 0.9928229    | 0.6914271    | not scorable | not scorable | 1            | 0.7698848    |
| #### Bn-A05-p5687833 | A-genome specific (napus-rapa) | 0.9665072    | 0.7874331    | not scorable | not scorable | 0.9256198    | 0.6338614    |
| #### Bn-A05-p5689705 | A-genome specific (napus-rapa) | 0.9856459    | 0.7425504    | not scorable | not scorable | 1            | 0.6509471    |
| #### Bn-A05-p5691374 | A-genome specific (napus-rapa) | 0.9856459    | 0.7868741    | not scorable | not scorable | 0.9834711    | 0.7357318    |
| #### Bn-A05-p5693743 | A-genome specific (napus-rapa) | 0.9880383    | 0.8607521    | not scorable | not scorable | 0.9669421    | 0.6499743    |
| #### Bn-A05-p5700216 | A-genome specific (napus-rapa) | 0.9928229    | 0.8958366    | not scorable | not scorable | 0.9834711    | 0.7554693    |
| #### Bn-A05-p5700891 | A-genome specific (napus-rapa) | 0.9880383    | 0.778435     | not scorable | not scorable | 0.9917355    | 0.8445532    |
| #### Bn-A05-p5714702 | A-genome specific (napus-rapa) | 0.9736842    | 0.651947     | not scorable | not scorable | 1            | 0.7468688    |
| #### Bn-A05-p5714756 | A-genome specific (napus-rapa) | 0.9784689    | 0.7674046    | not scorable | not scorable | 0.9917355    | 0.8524482    |
| #### Bn-A05-p5714836 | A-genome specific (napus-rapa) | 0.9760765    | 0.8463846    | not scorable | not scorable | 0.9834711    | 0.7745014    |
| #### Bn-A05-p5715403 | A-genome specific (napus-rapa) | 0.9856459    | 0.2988797    | not scorable | not scorable | 0.9669421    | 0.6477179    |
| #### Bn-A05-p575873  | A-genome specific (napus-rapa) | 0.9736842    | 0.3295884    | not scorable | not scorable | 0.9834711    | 0.7255786    |
| #### Bn-A05-p5764156 | A-genome specific (rapa only)  | not scorable | not scorable | not scorable | not scorable | 0.9917355    | 0.7034169    |
| #### Bn-A05-p5770114 | A-genome specific (napus-rapa) | 0.9976076    | 0.810151     | not scorable | not scorable | 0.9917355    | 0.8233715    |
| #### Bn-A05-p5778158 | A-genome specific (napus-rapa) | 0.9976076    | 0.4741229    | not scorable | not scorable | 0.9752066    | 0.6184489    |
| #### Bn-A05-p5790313 | napus specific                 | 0.9665072    | 0.3541712    | not scorable | not scorable | not scorable | not scorable |
| #### Bn-A05-p5796678 | napus specific                 | 0.9784689    | 0.8015411    | not scorable | not scorable | not scorable | not scorable |
| #### Bn-A05-p579882  | A-genome specific (napus-rapa) | 0.9808612    | 0.6367021    | not scorable | not scorable | 0.9917355    | 0.7132058    |
| #### Bn-A05-p5805445 | A-genome specific (napus-rapa) | 0.9856459    | 0.4234855    | not scorable | not scorable | 1            | 0.8073739    |
| #### Bn-A05-p5808654 | A-genome specific (napus-rapa) | 0.9832536    | 0.725927     | not scorable | not scorable | 1            | 0.8137786    |
| #### Bn-A05-p5808895 | A-genome specific (napus-rapa) | 0.9856459    | 0.4120608    | not scorable | not scorable | 0.9917355    | 0.7860762    |
| #### Bn-A05-p5809043 | A-genome specific (rapa only)  | not scorable | not scorable | not scorable | not scorable | 1            | 0.8237792    |
| #### Bn-A05-p5812537 | A-genome specific (napus-rapa) | 0.9928229    | 0.7550341    | not scorable | not scorable | 1            | 0.7392774    |
| #### Bn-A05-p5817231 | A-genome specific (napus-rapa) | 0.9641148    | 0.6717362    | not scorable | not scorable | 0.9586777    | 0.5416139    |
| #### Bn-A05-p5831673 | A-genome specific (napus-rapa) | 0.9952153    | 0.4942217    | not scorable | not scorable | 0.9917355    | 0.7745402    |
| #### Bn-A05-p5838524 | A-genome specific (napus-rapa) | 0.9976076    | 0.7330959    | not scorable | not scorable | 1            | 0.8100908    |
| #### Bn-A05-p5839222 | A-genome specific (napus-rapa) | 0.9928229    | 0.7168773    | not scorable | not scorable | 0.9917355    | 0.8095312    |
| #### Bn-A05-p5839438 | A-genome specific (napus-rapa) | 1            | 0.7484082    | not scorable | not scorable | 0.9917355    | 0.7910023    |
| #### Bn-A05-p583972  | A-genome specific (napus-rapa) | 0.9712918    | 0.3655559    | not scorable | not scorable | 0.9752066    | 0.6930552    |
| #### Bn-A05-p5842980 | A-genome specific (napus-rapa) | 0.9904306    | 0.4735969    | not scorable | not scorable | 0.9917355    | 0.7523423    |



|                      |                                |              |              |              |              |              |              |
|----------------------|--------------------------------|--------------|--------------|--------------|--------------|--------------|--------------|
| #### Bn-A05-p5865143 | A-genome specific (napus-rapa) | 0.9976076    | 0.658154     | not scorable | not scorable | 0.9917355    | 0.7902774    |
| #### Bn-A05-p5878329 | A-genome specific (napus-rapa) | 0.9880383    | 0.4424873    | not scorable | not scorable | 0.9834711    | 0.8033706    |
| #### Bn-A05-p589658  | A-genome specific (napus-rapa) | 0.9736842    | 0.6748786    | not scorable | not scorable | 1            | 0.7139092    |
| #### Bn-A05-p5897513 | A-genome specific (napus-rapa) | 0.9952153    | 0.7781377    | not scorable | not scorable | 1            | 0.6956896    |
| #### Bn-A05-p58992   | A-genome specific (napus-rapa) | 0.9904306    | 0.818263     | not scorable | not scorable | 1            | 0.7877918    |
| #### Bn-A05-p59055   | A-genome specific (napus-rapa) | 0.9880383    | 0.7297782    | not scorable | not scorable | 1            | 0.6853239    |
| #### Bn-A05-p59178   | A-genome specific (napus-rapa) | 0.9736842    | 0.3222489    | not scorable | not scorable | 1            | 0.719448     |
| #### Bn-A05-p5924319 | A-genome specific (napus-rapa) | 1            | 0.7488141    | not scorable | not scorable | 1            | 0.6902477    |
| #### Bn-A05-p5926631 | genome unspecific (all in)     | 0.9784689    | 0.3078931    | 0.7286822    | 0.7272372    | 1            | 0.7402923    |
| #### Bn-A05-p5936565 | A-genome specific (rapa only)  | not scorable | not scorable | not scorable | not scorable | 1            | 0.7669629    |
| #### Bn-A05-p5970916 | A-genome specific (napus-rapa) | 0.854067     | 0.7392447    | not scorable | not scorable | 0.6280992    | 0.7339198    |
| #### Bn-A05-p5973528 | A-genome specific (napus-rapa) | 0.9904306    | 0.5513769    | not scorable | not scorable | 0.9834711    | 0.736039     |
| #### Bn-A05-p5973876 | A-genome specific (napus-rapa) | 0.9904306    | 0.7882492    | not scorable | not scorable | 1            | 0.7899277    |
| #### Bn-A05-p5992612 | A-genome specific (napus-rapa) | 0.9760765    | 0.51521      | not scorable | not scorable | 0.9917355    | 0.6953899    |
| #### Bn-A05-p600196  | A-genome specific (napus-rapa) | 0.9808612    | 0.3326063    | not scorable | not scorable | 1            | 0.7902759    |
| #### Bn-A05-p6004356 | A-genome specific (napus-rapa) | 0.9665072    | 0.341258     | not scorable | not scorable | 0.9917355    | 0.7070044    |
| #### Bn-A05-p6020205 | A-genome specific (napus-rapa) | 0.9880383    | 0.7503774    | not scorable | not scorable | 0.9917355    | 0.6761893    |
| #### Bn-A05-p6021593 | A-genome specific (napus-rapa) | 0.9976076    | 0.3164911    | not scorable | not scorable | 1            | 0.7774823    |
| #### Bn-A05-p6055523 | A-genome specific (napus-rapa) | 0.9928229    | 0.70705      | not scorable | not scorable | 0.9834711    | 0.6101249    |
| #### Bn-A05-p6061277 | napus specific                 | 0.9856459    | 0.483722     | not scorable | not scorable | not scorable | not scorable |
| #### Bn-A05-p6063715 | A-genome specific (napus-rapa) | 0.9976076    | 0.5391663    | not scorable | not scorable | 0.9834711    | 0.8120726    |
| #### Bn-A05-p6074427 | A-genome specific (rapa only)  | not scorable | not scorable | not scorable | not scorable | 1            | 0.7314882    |
| #### Bn-A05-p61233   | A-genome specific (napus-rapa) | 0.9521531    | 0.7106193    | not scorable | not scorable | 0.9504132    | 0.7574944    |
| #### Bn-A05-p6154871 | A-genome specific (napus-rapa) | 0.9928229    | 0.4898474    | not scorable | not scorable | 0.9917355    | 0.5449288    |
| #### Bn-A05-p6155799 | A-genome specific (napus-rapa) | 0.9856459    | 0.6689135    | not scorable | not scorable | 1            | 0.7917845    |
| #### Bn-A05-p6155901 | A-genome specific (napus-rapa) | 0.9808612    | 0.6382338    | not scorable | not scorable | 0.9834711    | 0.7955763    |
| #### Bn-A05-p6176943 | A-genome specific (napus-rapa) | 0.9928229    | 0.7721756    | not scorable | not scorable | 1            | 0.6539372    |
| #### Bn-A05-p619336  | A-genome specific (napus-rapa) | 0.9665072    | 0.3372836    | not scorable | not scorable | 0.9917355    | 0.6179622    |
| #### Bn-A05-p621136  | A-genome specific (napus-rapa) | 0.9904306    | 0.7074847    | not scorable | not scorable | 1            | 0.6573179    |
| #### Bn-A05-p6236807 | A-genome specific (napus-rapa) | 0.9928229    | 0.4197509    | not scorable | not scorable | 0.9834711    | 0.9175813    |
| #### Bn-A05-p6261796 | A-genome specific (napus-rapa) | 0.9976076    | 0.8113485    | not scorable | not scorable | 0.9752066    | 0.7763813    |
| #### Bn-A05-p6269991 | A-genome specific (napus-rapa) | 0.9832536    | 0.6596448    | not scorable | not scorable | 1            | 0.6761098    |
| #### Bn-A05-p6271443 | A-genome specific (napus-rapa) | 0.9952153    | 0.7837559    | not scorable | not scorable | 0.9834711    | 0.797317     |

|                      |                                   |              |              |              |              |              |              |
|----------------------|-----------------------------------|--------------|--------------|--------------|--------------|--------------|--------------|
| #### Bn-A05-p6284593 | A-genome specific (napus-rapa)    | 0.9928229    | 0.7729984    | not scorable | not scorable | 0.9834711    | 0.7511476    |
| #### Bn-A05-p6288330 | A-genome specific (napus-rapa)    | 0.9928229    | 0.362331     | not scorable | not scorable | 1            | 0.7744332    |
| #### Bn-A05-p6308471 | A-genome specific (napus-rapa)    | 0.9880383    | 0.8012438    | not scorable | not scorable | 0.9917355    | 0.759675     |
| #### Bn-A05-p6308543 | A-genome specific (napus-rapa)    | 0.9832536    | 0.6832628    | not scorable | not scorable | 1            | 0.5699365    |
| #### Bn-A05-p6335652 | A-genome specific (napus-rapa)    | 0.9784689    | 0.5997311    | not scorable | not scorable | 1            | 0.8701721    |
| #### Bn-A05-p6337412 | A-genome specific (napus-rapa)    | 0.9904306    | 0.354295     | not scorable | not scorable | 1            | 0.7327957    |
| #### Bn-A05-p6402777 | A-genome specific (napus-rapa)    | 1            | 0.8042387    | not scorable | not scorable | 0.9917355    | 0.7725101    |
| #### Bn-A05-p6404424 | A-genome specific (napus-rapa)    | 0.9880383    | 0.7127104    | not scorable | not scorable | 0.9917355    | 0.7763684    |
| #### Bn-A05-p6404595 | A-genome specific (napus-rapa)    | 0.9832536    | 0.7065465    | not scorable | not scorable | 0.9834711    | 0.7517272    |
| #### Bn-A05-p6404775 | C-genome specific (oleracea only) | not scorable | not scorable | 0.9844961    | 0.1861193    | not scorable | not scorable |
| #### Bn-A05-p6405021 | A-genome specific (napus-rapa)    | 0.9712918    | 0.5235622    | not scorable | not scorable | 0.9834711    | 0.7377089    |
| #### Bn-A05-p6405095 | genome unspecific (all in)        | 0.9784689    | 0.4445553    | 1            | 0.6951364    | 0.9917355    | 0.7945669    |
| #### Bn-A05-p6405336 | A-genome specific (napus-rapa)    | 0.9736842    | 0.4605604    | not scorable | not scorable | 0.9834711    | 0.7322435    |
| #### Bn-A05-p6405415 | A-genome specific (napus-rapa)    | 0.9928229    | 0.8201808    | not scorable | not scorable | 0.9834711    | 0.8042438    |
| #### Bn-A05-p6412530 | A-genome specific (napus-rapa)    | 0.9880383    | 0.7917836    | not scorable | not scorable | 0.9834711    | 0.7608896    |
| #### Bn-A05-p6415983 | A-genome specific (napus-rapa)    | 0.9832536    | 0.8092616    | not scorable | not scorable | 0.9752066    | 0.8296482    |
| #### Bn-A05-p6416604 | A-genome specific (napus-rapa)    | 0.9760765    | 0.8030288    | not scorable | not scorable | 1            | 0.735843     |
| #### Bn-A05-p6423355 | A-genome specific (napus-rapa)    | 0.9760765    | 0.6865757    | not scorable | not scorable | 1            | 0.8159418    |
| #### Bn-A05-p6423710 | A-genome specific (napus-rapa)    | 0.9880383    | 0.401017     | not scorable | not scorable | 0.9586777    | 0.830142     |
| #### Bn-A05-p6438367 | A-genome specific (rapa only)     | not scorable | not scorable | not scorable | not scorable | 0.9586777    | 0.7089773    |
| #### Bn-A05-p6441813 | A-genome specific (napus-rapa)    | 0.9856459    | 0.5071548    | not scorable | not scorable | 0.9834711    | 0.6701323    |
| #### Bn-A05-p6457465 | genome unspecific (all in)        | 0.9784689    | 0.2835187    | 1            | 0.76615      | 0.9917355    | 0.793777     |
| #### Bn-A05-p6473296 | A-genome specific (napus-rapa)    | 0.9904306    | 0.4176446    | not scorable | not scorable | 0.9917355    | 0.5762315    |
| #### Bn-A05-p6479603 | A-genome specific (napus-rapa)    | 1            | 0.9205657    | not scorable | not scorable | 1            | 0.9173338    |
| #### Bn-A05-p6480168 | A-genome specific (napus-rapa)    | 0.9880383    | 0.4652334    | not scorable | not scorable | 0.9834711    | 0.7362641    |
| #### Bn-A05-p6480907 | A-genome specific (napus-rapa)    | 0.9904306    | 0.4886409    | not scorable | not scorable | 0.9917355    | 0.7112398    |
| #### Bn-A05-p6480981 | A-genome specific (napus-rapa)    | 0.9904306    | 0.7865103    | not scorable | not scorable | 0.9752066    | 0.7438797    |
| #### Bn-A05-p6494313 | A-genome specific (napus-rapa)    | 0.9880383    | 0.6675031    | not scorable | not scorable | 1            | 0.7673253    |
| #### Bn-A05-p652475  | genome unspecific (all in)        | 0.9928229    | 0.3437648    | 1            | 0.7685573    | 0.9917355    | 0.81151      |
| #### Bn-A05-p6534544 | A-genome specific (napus-rapa)    | 0.9856459    | 0.3679169    | not scorable | not scorable | 1            | 0.7788004    |
| #### Bn-A05-p6535233 | genome unspecific (oleracea-rapa) | not scorable | not scorable | 1            | 0.7331263    | 0.9917355    | 0.6652145    |
| #### Bn-A05-p653606  | A-genome specific (napus-rapa)    | 0.7272727    | 0.7907175    | not scorable | not scorable | 0.9752066    | 0.7811267    |
| #### Bn-A05-p6539730 | A-genome specific (napus-rapa)    | 0.9952153    | 0.7789644    | not scorable | not scorable | 1            | 0.7342378    |

|                      |                                |              |              |              |              |           |           |
|----------------------|--------------------------------|--------------|--------------|--------------|--------------|-----------|-----------|
| #### Bn-A05-p6541429 | A-genome specific (napus-rapa) | 0.9952153    | 0.76833      | not scorable | not scorable | 0.9917355 | 0.7223668 |
| #### Bn-A05-p6542040 | A-genome specific (napus-rapa) | 0.9808612    | 0.4455372    | not scorable | not scorable | 0.9917355 | 0.7590788 |
| #### Bn-A05-p6558171 | A-genome specific (napus-rapa) | 0.9832536    | 0.748695     | not scorable | not scorable | 0.9669421 | 0.7808446 |
| #### Bn-A05-p6562415 | A-genome specific (napus-rapa) | 0.9880383    | 0.5455779    | not scorable | not scorable | 0.9917355 | 0.7167006 |
| #### Bn-A05-p6571327 | A-genome specific (napus-rapa) | 0.9856459    | 0.6603037    | not scorable | not scorable | 0.9834711 | 0.6700168 |
| #### Bn-A05-p6571330 | A-genome specific (napus-rapa) | 0.9904306    | 0.5890545    | not scorable | not scorable | 0.9917355 | 0.7995171 |
| #### Bn-A05-p6654285 | A-genome specific (napus-rapa) | 0.9856459    | 0.5031602    | not scorable | not scorable | 0.9752066 | 0.6066801 |
| #### Bn-A05-p6654419 | A-genome specific (napus-rapa) | 0.9952153    | 0.7783493    | not scorable | not scorable | 0.9834711 | 0.7856833 |
| #### Bn-A05-p6672638 | A-genome specific (napus-rapa) | 0.923445     | 0.7494321    | not scorable | not scorable | 0.9421487 | 0.7349294 |
| #### Bn-A05-p6674758 | A-genome specific (napus-rapa) | 0.9880383    | 0.3938569    | not scorable | not scorable | 0.9917355 | 0.689648  |
| #### Bn-A05-p6682796 | A-genome specific (napus-rapa) | 0.9904306    | 0.3358619    | not scorable | not scorable | 0.9917355 | 0.7964735 |
| #### Bn-A05-p6688695 | A-genome specific (napus-rapa) | 0.9904306    | 0.798718     | not scorable | not scorable | 1         | 0.8744026 |
| #### Bn-A05-p671910  | A-genome specific (napus-rapa) | 0.9832536    | 0.7492642    | not scorable | not scorable | 1         | 0.6425663 |
| #### Bn-A05-p673050  | A-genome specific (napus-rapa) | 0.9593301    | 0.3352894    | not scorable | not scorable | 1         | 0.6982101 |
| #### Bn-A05-p6739093 | A-genome specific (napus-rapa) | 0.9712918    | 0.7812341    | not scorable | not scorable | 0.9917355 | 0.6749376 |
| #### Bn-A05-p6739341 | A-genome specific (napus-rapa) | 0.9760765    | 0.7811968    | not scorable | not scorable | 1         | 0.7540129 |
| #### Bn-A05-p6748150 | A-genome specific (napus-rapa) | 0.9928229    | 0.7119003    | not scorable | not scorable | 0.9834711 | 0.7113937 |
| #### Bn-A05-p6750239 | A-genome specific (napus-rapa) | 0.9856459    | 0.7743136    | not scorable | not scorable | 0.9834711 | 0.7660106 |
| #### Bn-A05-p6750458 | A-genome specific (napus-rapa) | 0.9952153    | 0.7878842    | not scorable | not scorable | 1         | 0.8332047 |
| #### Bn-A05-p6751337 | A-genome specific (napus-rapa) | 0.9832536    | 0.7228219    | not scorable | not scorable | 1         | 0.8525218 |
| #### Bn-A05-p6751841 | A-genome specific (napus-rapa) | 0.9952153    | 0.7654794    | not scorable | not scorable | 0.9917355 | 0.8147027 |
| #### Bn-A05-p6757087 | A-genome specific (napus-rapa) | 1            | 0.8115413    | not scorable | not scorable | 0.9917355 | 0.7245347 |
| #### Bn-A05-p6774249 | A-genome specific (rapa only)  | not scorable | not scorable | not scorable | not scorable | 0.9917355 | 0.7874564 |
| #### Bn-A05-p6775737 | A-genome specific (napus-rapa) | 0.9760765    | 0.4190556    | not scorable | not scorable | 1         | 0.8003169 |
| #### Bn-A05-p677619  | A-genome specific (napus-rapa) | 0.9425837    | 0.2504087    | not scorable | not scorable | 0.9834711 | 0.5762169 |
| #### Bn-A05-p6776954 | A-genome specific (napus-rapa) | 0.9832536    | 0.7631521    | not scorable | not scorable | 1         | 0.8597855 |
| #### Bn-A05-p6786862 | A-genome specific (napus-rapa) | 0.9952153    | 0.7771927    | not scorable | not scorable | 1         | 0.8543575 |
| #### Bn-A05-p6787164 | A-genome specific (napus-rapa) | 0.9928229    | 0.7936219    | not scorable | not scorable | 0.9917355 | 0.8396341 |
| #### Bn-A05-p679803  | A-genome specific (napus-rapa) | 0.9665072    | 0.7858111    | not scorable | not scorable | 0.9752066 | 0.7689065 |
| #### Bn-A05-p6822861 | A-genome specific (rapa only)  | not scorable | not scorable | not scorable | not scorable | 0.9669421 | 0.6809804 |
| #### Bn-A05-p6845189 | A-genome specific (napus-rapa) | 0.9928229    | 0.8092186    | not scorable | not scorable | 0.9752066 | 0.6964218 |
| #### Bn-A05-p6867531 | A-genome specific (napus-rapa) | 0.9952153    | 0.4438299    | not scorable | not scorable | 1         | 0.7098165 |
| #### Bn-A05-p686912  | A-genome specific (napus-rapa) | 0.9808612    | 0.7913456    | not scorable | not scorable | 0.9834711 | 0.7977321 |

|                      |                                |           |           |              |              |           |           |
|----------------------|--------------------------------|-----------|-----------|--------------|--------------|-----------|-----------|
| #### Bn-A05-p6877058 | A-genome specific (napus-rapa) | 0.9904306 | 0.7863536 | not scorable | not scorable | 0.9917355 | 0.7464744 |
| #### Bn-A05-p687790  | A-genome specific (napus-rapa) | 0.9808612 | 0.7371425 | not scorable | not scorable | 0.9834711 | 0.6832592 |
| #### Bn-A05-p6878538 | A-genome specific (napus-rapa) | 1         | 0.5065711 | not scorable | not scorable | 0.9834711 | 0.6652026 |
| #### Bn-A05-p6882852 | A-genome specific (napus-rapa) | 0.9952153 | 0.6977416 | not scorable | not scorable | 1         | 0.889635  |
| #### Bn-A05-p6897871 | A-genome specific (napus-rapa) | 0.9952153 | 0.860123  | not scorable | not scorable | 0.9834711 | 0.774188  |
| #### Bn-A05-p6898696 | A-genome specific (napus-rapa) | 0.9641148 | 0.4964765 | not scorable | not scorable | 0.9586777 | 0.6817704 |
| #### Bn-A05-p6910402 | A-genome specific (napus-rapa) | 0.9880383 | 0.2418688 | not scorable | not scorable | 0.6694215 | 0.7165339 |
| #### Bn-A05-p6918694 | A-genome specific (napus-rapa) | 0.923445  | 0.3251061 | not scorable | not scorable | 0.9917355 | 0.7513396 |
| #### Bn-A05-p6951707 | A-genome specific (napus-rapa) | 1         | 0.7001775 | not scorable | not scorable | 1         | 0.7677348 |
| #### Bn-A05-p6955996 | A-genome specific (napus-rapa) | 1         | 0.8125369 | not scorable | not scorable | 0.9669421 | 0.8028789 |
| #### Bn-A05-p6957948 | A-genome specific (napus-rapa) | 0.9712918 | 0.7864401 | not scorable | not scorable | 0.5206612 | 0.8739935 |
| #### Bn-A05-p6975353 | A-genome specific (napus-rapa) | 1         | 0.7178167 | not scorable | not scorable | 1         | 0.8937193 |
| #### Bn-A05-p6984362 | A-genome specific (napus-rapa) | 0.9569378 | 0.7622342 | not scorable | not scorable | 0.9504132 | 0.6845619 |
| #### Bn-A05-p6995896 | A-genome specific (napus-rapa) | 0.9928229 | 0.7861632 | not scorable | not scorable | 0.9917355 | 0.8054572 |
| #### Bn-A05-p7011916 | A-genome specific (napus-rapa) | 0.9688995 | 0.7046986 | not scorable | not scorable | 0.5785124 | 0.8553948 |
| #### Bn-A05-p701389  | A-genome specific (napus-rapa) | 0.9856459 | 0.7813323 | not scorable | not scorable | 0.9917355 | 0.8049595 |
| #### Bn-A05-p7031053 | A-genome specific (napus-rapa) | 0.9688995 | 0.4107797 | not scorable | not scorable | 1         | 0.8007129 |
| #### Bn-A05-p7032286 | A-genome specific (napus-rapa) | 0.9904306 | 0.7985684 | not scorable | not scorable | 0.9752066 | 0.8097327 |
| #### Bn-A05-p7038463 | A-genome specific (napus-rapa) | 0.9808612 | 0.5140685 | not scorable | not scorable | 0.9917355 | 0.7096664 |
| #### Bn-A05-p7048173 | A-genome specific (napus-rapa) | 0.9856459 | 0.3608137 | not scorable | not scorable | 0.9834711 | 0.6892272 |
| #### Bn-A05-p7052463 | A-genome specific (napus-rapa) | 0.9976076 | 0.7554284 | not scorable | not scorable | 0.9834711 | 0.8345281 |
| #### Bn-A05-p7059671 | A-genome specific (napus-rapa) | 0.9904306 | 0.7112923 | not scorable | not scorable | 0.9834711 | 0.6944501 |
| #### Bn-A05-p7062575 | A-genome specific (napus-rapa) | 0.9784689 | 0.4274725 | not scorable | not scorable | 1         | 0.6696357 |
| #### Bn-A05-p7062784 | A-genome specific (napus-rapa) | 0.9665072 | 0.4845349 | not scorable | not scorable | 1         | 0.8218998 |
| #### Bn-A05-p7076442 | A-genome specific (napus-rapa) | 0.6315789 | 0.7961786 | not scorable | not scorable | 0.9090909 | 0.6639194 |
| #### Bn-A05-p7098949 | A-genome specific (napus-rapa) | 0.9904306 | 0.7432833 | not scorable | not scorable | 0.9834711 | 0.6282696 |
| #### Bn-A05-p7105221 | A-genome specific (napus-rapa) | 0.9736842 | 0.3574639 | not scorable | not scorable | 0.9917355 | 0.7593442 |
| #### Bn-A05-p7119719 | A-genome specific (napus-rapa) | 0.9952153 | 0.818427  | not scorable | not scorable | 1         | 0.8623074 |
| #### Bn-A05-p7125379 | A-genome specific (napus-rapa) | 0.5574163 | 0.7426743 | not scorable | not scorable | 0.9008265 | 0.7273611 |
| #### Bn-A05-p7137614 | A-genome specific (napus-rapa) | 0.9617225 | 0.6670837 | not scorable | not scorable | 0.9338843 | 0.6717063 |
| #### Bn-A05-p7140511 | A-genome specific (napus-rapa) | 0.9880383 | 0.7890329 | not scorable | not scorable | 0.9834711 | 0.8410932 |
| #### Bn-A05-p7141123 | A-genome specific (napus-rapa) | 0.9976076 | 0.7797557 | not scorable | not scorable | 0.9917355 | 0.7808607 |
| #### Bn-A05-p7154689 | A-genome specific (napus-rapa) | 0.9832536 | 0.4025866 | not scorable | not scorable | 0.9917355 | 0.6866934 |

|                      |                                |              |              |              |              |              |              |
|----------------------|--------------------------------|--------------|--------------|--------------|--------------|--------------|--------------|
| #### Bn-A05-p717416  | A-genome specific (rapa only)  | not scorable | not scorable | not scorable | not scorable | 0.6859504    | 0.9097302    |
| #### Bn-A05-p7187425 | A-genome specific (napus-rapa) | 0.9617225    | 0.6996811    | not scorable | not scorable | 1            | 0.691284     |
| #### Bn-A05-p7222795 | A-genome specific (napus-rapa) | 0.9928229    | 0.6545577    | not scorable | not scorable | 1            | 0.8059039    |
| #### Bn-A05-p7224750 | A-genome specific (napus-rapa) | 0.9928229    | 0.7752569    | not scorable | not scorable | 0.9752066    | 0.7360302    |
| #### Bn-A05-p7227877 | A-genome specific (napus-rapa) | 0.9665072    | 0.7973682    | not scorable | not scorable | 0.9504132    | 0.7823923    |
| #### Bn-A05-p7231369 | A-genome specific (napus-rapa) | 0.9856459    | 0.8006775    | not scorable | not scorable | 1            | 0.7777886    |
| #### Bn-A05-p7246705 | A-genome specific (napus-rapa) | 0.9976076    | 0.5808491    | not scorable | not scorable | 1            | 0.7277791    |
| #### Bn-A05-p7255746 | A-genome specific (napus-rapa) | 0.9808612    | 0.7642801    | not scorable | not scorable | 0.9834711    | 0.7437173    |
| #### Bn-A05-p726481  | A-genome specific (napus-rapa) | 0.9090909    | 0.7348965    | not scorable | not scorable | 0.9917355    | 0.7584748    |
| #### Bn-A05-p7346478 | A-genome specific (napus-rapa) | 0.9952153    | 0.8106422    | not scorable | not scorable | 0.9917355    | 0.6970574    |
| #### Bn-A05-p7352554 | A-genome specific (rapa only)  | not scorable | not scorable | not scorable | not scorable | 0.9752066    | 0.7456172    |
| #### Bn-A05-p7370869 | A-genome specific (napus-rapa) | 0.9832536    | 0.6645064    | not scorable | not scorable | 0.6033058    | 0.8857612    |
| #### Bn-A05-p7434500 | genome unspecific (all in)     | 0.5550239    | 0.8215581    | 0.8217054    | 0.6141299    | 0.9008265    | 0.6870269    |
| #### Bn-A05-p7472918 | A-genome specific (rapa only)  | not scorable | not scorable | not scorable | not scorable | 0.9586777    | 0.8517691    |
| #### Bn-A05-p7491426 | A-genome specific (rapa only)  | not scorable | not scorable | not scorable | not scorable | 0.9917355    | 0.7581525    |
| #### Bn-A05-p7496554 | A-genome specific (napus-rapa) | 0.9832536    | 0.5635771    | not scorable | not scorable | 1            | 0.6221592    |
| #### Bn-A05-p7552614 | A-genome specific (napus-rapa) | 0.9736842    | 0.5914077    | not scorable | not scorable | 1            | 0.8004208    |
| #### Bn-A05-p7558647 | A-genome specific (napus-rapa) | 0.9904306    | 0.4010132    | not scorable | not scorable | 1            | 0.7788401    |
| #### Bn-A05-p757624  | A-genome specific (napus-rapa) | 0.9760765    | 0.3231009    | not scorable | not scorable | 0.9834711    | 0.8269936    |
| #### Bn-A05-p7589125 | A-genome specific (napus-rapa) | 0.9569378    | 0.3449278    | not scorable | not scorable | 0.9834711    | 0.4481883    |
| #### Bn-A05-p7589257 | A-genome specific (napus-rapa) | 0.9784689    | 0.2155385    | not scorable | not scorable | 0.9917355    | 0.3538447    |
| #### Bn-A05-p7591501 | A-genome specific (napus-rapa) | 0.9641148    | 0.6202886    | not scorable | not scorable | 0.661157     | 0.9102081    |
| #### Bn-A05-p761283  | A-genome specific (napus-rapa) | 0.9521531    | 0.536536     | not scorable | not scorable | 0.9917355    | 0.7889036    |
| #### Bn-A05-p7613069 | A-genome specific (napus-rapa) | 0.9976076    | 0.6039445    | not scorable | not scorable | 1            | 0.9151567    |
| #### Bn-A05-p761376  | A-genome specific (napus-rapa) | 0.9952153    | 0.555096     | not scorable | not scorable | 1            | 0.5966557    |
| #### Bn-A05-p7618158 | all not scorable               | not scorable | not scorable | not scorable | not scorable | not scorable | not scorable |
| #### Bn-A05-p7632429 | A-genome specific (napus-rapa) | 1            | 0.9071735    | not scorable | not scorable | 1            | 0.8693638    |
| #### Bn-A05-p76428   | A-genome specific (napus-rapa) | 0.9760765    | 0.3828594    | not scorable | not scorable | 1            | 0.8137967    |
| #### Bn-A05-p7651411 | A-genome specific (napus-rapa) | 1            | 0.7639561    | not scorable | not scorable | 1            | 0.9205657    |
| #### Bn-A05-p7662456 | napus specific                 | 0.9665072    | 0.8282643    | not scorable | not scorable | not scorable | not scorable |
| #### Bn-A05-p7705565 | A-genome specific (napus-rapa) | 0.9904306    | 0.8111199    | not scorable | not scorable | 0.9917355    | 0.7608135    |
| #### Bn-A05-p771943  | A-genome specific (napus-rapa) | 0.9952153    | 0.8498164    | not scorable | not scorable | 0.9917355    | 0.8465595    |
| #### Bn-A05-p772777  | A-genome specific (rapa only)  | not scorable | not scorable | not scorable | not scorable | 0.9752066    | 0.7847687    |

|                      |                                |              |              |              |              |           |           |
|----------------------|--------------------------------|--------------|--------------|--------------|--------------|-----------|-----------|
| #### Bn-A05-p7729367 | A-genome specific (napus-rapa) | 0.9832536    | 0.825826     | not scorable | not scorable | 0.9917355 | 0.7442175 |
| #### Bn-A05-p7741244 | A-genome specific (napus-rapa) | 0.9688995    | 0.4069836    | not scorable | not scorable | 0.9917355 | 0.6509188 |
| #### Bn-A05-p7778186 | A-genome specific (napus-rapa) | 0.9904306    | 0.319869     | not scorable | not scorable | 0.9917355 | 0.8269624 |
| #### Bn-A05-p7781811 | A-genome specific (napus-rapa) | 0.9832536    | 0.3384133    | not scorable | not scorable | 0.9834711 | 0.5950561 |
| #### Bn-A05-p7783330 | A-genome specific (napus-rapa) | 0.9928229    | 0.8666626    | not scorable | not scorable | 1         | 0.7518041 |
| #### Bn-A05-p7791550 | A-genome specific (napus-rapa) | 0.9712918    | 0.7620973    | not scorable | not scorable | 0.5785124 | 0.7717942 |
| #### Bn-A05-p779415  | A-genome specific (napus-rapa) | 0.9904306    | 0.8512001    | not scorable | not scorable | 1         | 0.6652964 |
| #### Bn-A05-p780844  | A-genome specific (napus-rapa) | 0.9760765    | 0.5280765    | not scorable | not scorable | 1         | 0.8463393 |
| #### Bn-A05-p7809870 | A-genome specific (napus-rapa) | 0.9569378    | 0.3162602    | not scorable | not scorable | 0.9917355 | 0.7057541 |
| #### Bn-A05-p7811409 | A-genome specific (napus-rapa) | 0.9712918    | 0.2466919    | not scorable | not scorable | 1         | 0.7010397 |
| #### Bn-A05-p7826230 | A-genome specific (napus-rapa) | 0.9832536    | 0.7678627    | not scorable | not scorable | 1         | 0.7553875 |
| #### Bn-A05-p7840300 | A-genome specific (napus-rapa) | 0.9904306    | 0.7061687    | not scorable | not scorable | 0.9752066 | 0.7135404 |
| #### Bn-A05-p7841073 | A-genome specific (napus-rapa) | 1            | 0.926601     | not scorable | not scorable | 1         | 0.9173834 |
| #### Bn-A05-p784331  | A-genome specific (napus-rapa) | 0.9808612    | 0.3813459    | not scorable | not scorable | 0.9917355 | 0.7277915 |
| #### Bn-A05-p7844876 | A-genome specific (napus-rapa) | 0.9856459    | 0.7311944    | not scorable | not scorable | 0.9752066 | 0.7440302 |
| #### Bn-A05-p7855766 | A-genome specific (napus-rapa) | 0.9832536    | 0.7026118    | not scorable | not scorable | 0.9917355 | 0.7245739 |
| #### Bn-A05-p7873080 | A-genome specific (napus-rapa) | 0.9904306    | 0.662837     | not scorable | not scorable | 0.9834711 | 0.752169  |
| #### Bn-A05-p7874994 | A-genome specific (napus-rapa) | 0.9736842    | 0.7936383    | not scorable | not scorable | 0.9834711 | 0.725942  |
| #### Bn-A05-p7901866 | A-genome specific (napus-rapa) | 0.9760765    | 0.2627688    | not scorable | not scorable | 1         | 0.7021827 |
| #### Bn-A05-p7903619 | A-genome specific (napus-rapa) | 0.9952153    | 0.7732146    | not scorable | not scorable | 0.9917355 | 0.7774354 |
| #### Bn-A05-p7911054 | A-genome specific (napus-rapa) | 0.9808612    | 0.5386556    | not scorable | not scorable | 0.9917355 | 0.7679034 |
| #### Bn-A05-p7926510 | A-genome specific (napus-rapa) | 0.9904306    | 0.3013154    | not scorable | not scorable | 0.9834711 | 0.7210625 |
| #### Bn-A05-p794760  | A-genome specific (napus-rapa) | 0.9282297    | 0.4796498    | not scorable | not scorable | 0.9834711 | 0.7398528 |
| #### Bn-A05-p800515  | A-genome specific (napus-rapa) | 0.9688995    | 0.7052349    | not scorable | not scorable | 1         | 0.7156722 |
| #### Bn-A05-p800549  | A-genome specific (napus-rapa) | 0.9425837    | 0.7872672    | not scorable | not scorable | 0.9586777 | 0.8605999 |
| #### Bn-A05-p802111  | A-genome specific (napus-rapa) | 0.9832536    | 0.659824     | not scorable | not scorable | 1         | 0.7136589 |
| #### Bn-A05-p8120795 | A-genome specific (napus-rapa) | 0.9712918    | 0.2666841    | not scorable | not scorable | 0.9834711 | 0.800547  |
| #### Bn-A05-p8120997 | A-genome specific (napus-rapa) | 0.9856459    | 0.8104685    | not scorable | not scorable | 1         | 0.8360305 |
| #### Bn-A05-p8135828 | A-genome specific (napus-rapa) | 1            | 0.7504071    | not scorable | not scorable | 0.9917355 | 0.7691384 |
| #### Bn-A05-p81414   | A-genome specific (rapa only)  | not scorable | not scorable | not scorable | not scorable | 1         | 0.7895902 |
| #### Bn-A05-p815322  | A-genome specific (napus-rapa) | 0.9832536    | 0.734825     | not scorable | not scorable | 0.9917355 | 0.7046005 |
| #### Bn-A05-p8165715 | A-genome specific (rapa only)  | not scorable | not scorable | not scorable | not scorable | 0.9504132 | 0.3731641 |
| #### Bn-A05-p816963  | A-genome specific (napus-rapa) | 0.9880383    | 0.8028721    | not scorable | not scorable | 1         | 0.8057212 |

|                      |                                |              |              |              |              |              |              |
|----------------------|--------------------------------|--------------|--------------|--------------|--------------|--------------|--------------|
| #### Bn-A05-p817036  | A-genome specific (napus-rapa) | 0.9832536    | 0.7344827    | not scorable | not scorable | 0.9834711    | 0.7613885    |
| #### Bn-A05-p8202536 | A-genome specific (napus-rapa) | 0.9904306    | 0.7349455    | not scorable | not scorable | 1            | 0.8134261    |
| #### Bn-A05-p8206349 | A-genome specific (napus-rapa) | 1            | 0.6923679    | not scorable | not scorable | 1            | 0.7855819    |
| #### Bn-A05-p8210067 | A-genome specific (napus-rapa) | 0.9952153    | 0.3349418    | not scorable | not scorable | 0.9752066    | 0.6781526    |
| #### Bn-A05-p822087  | genome unspecific (all in)     | 0.9473684    | 0.2233801    |              | 1 0.7563062  | 1            | 0.9137406    |
| #### Bn-A05-p8222879 | A-genome specific (napus-rapa) | 1            | 0.6085679    | not scorable | not scorable | 0.9917355    | 0.7677385    |
| #### Bn-A05-p822597  | A-genome specific (napus-rapa) | 0.9641148    | 0.4175113    | not scorable | not scorable | 0.9917355    | 0.7879268    |
| #### Bn-A05-p8245454 | A-genome specific (napus-rapa) | 1            | 0.3775623    | not scorable | not scorable | 1            | 0.6073804    |
| #### Bn-A05-p825088  | A-genome specific (rapa only)  | not scorable | not scorable | not scorable | not scorable | 1            | 0.924392     |
| #### Bn-A05-p825915  | A-genome specific (napus-rapa) | 0.9952153    | 0.8042147    | not scorable | not scorable | 1            | 0.9061772    |
| #### Bn-A05-p8261872 | A-genome specific (napus-rapa) | 0.9976076    | 0.7794029    | not scorable | not scorable | 0.9917355    | 0.884536     |
| #### Bn-A05-p8290002 | A-genome specific (napus-rapa) | 1            | 0.3553061    | not scorable | not scorable | 1            | 0.7439139    |
| #### Bn-A05-p8297352 | A-genome specific (napus-rapa) | 0.9976076    | 0.4869464    | not scorable | not scorable | 1            | 0.7212299    |
| #### Bn-A05-p8297563 | genome unspecific (all in)     | 1            | 0.6663287    |              | 1 0.6209557  | 1            | 0.6675953    |
| #### Bn-A05-p8318433 | A-genome specific (napus-rapa) | 1            | 0.58222      | not scorable | not scorable | 1            | 0.8300765    |
| #### Bn-A05-p8320167 | A-genome specific (napus-rapa) | 1            | 0.943249     | not scorable | not scorable | 1            | 0.9012891    |
| #### Bn-A05-p8322435 | A-genome specific (napus-rapa) | 0.9784689    | 0.5673671    | not scorable | not scorable | 0.9834711    | 0.735953     |
| #### Bn-A05-p8327216 | genome unspecific (all in)     | 0.9952153    | 0.4449646    | 0.9922481    | 0.6970797    | 0.9917355    | 0.8098354    |
| #### Bn-A05-p8329506 | A-genome specific (napus-rapa) | 1            | 0.770074     | not scorable | not scorable | 1            | 0.8127157    |
| #### Bn-A05-p837013  | A-genome specific (napus-rapa) | 0.9976076    | 0.3746752    | not scorable | not scorable | 1            | 0.852886     |
| #### Bn-A05-p8376865 | A-genome specific (napus-rapa) | 0.9952153    | 0.491284     | not scorable | not scorable | 0.9917355    | 0.9180959    |
| #### Bn-A05-p849712  | A-genome specific (napus-rapa) | 0.9952153    | 0.5020889    | not scorable | not scorable | 0.9917355    | 0.5856405    |
| #### Bn-A05-p8511229 | A-genome specific (napus-rapa) | 1            | 0.7343102    | not scorable | not scorable | 1            | 0.8530596    |
| #### Bn-A05-p8522584 | A-genome specific (napus-rapa) | 1            | 0.7594639    | not scorable | not scorable | 0.9834711    | 0.8858985    |
| #### Bn-A05-p853364  | A-genome specific (napus-rapa) | 0.9952153    | 0.6690196    | not scorable | not scorable | 1            | 0.8918399    |
| #### Bn-A05-p8542569 | genome unspecific (all in)     | 0.9904306    | 0.4445888    | 0.9844961    | 0.8429019    | 1            | 0.8822209    |
| #### Bn-A05-p8786891 | A-genome specific (napus-rapa) | 0.8564593    | 0.9051473    | not scorable | not scorable | 0.8842975    | 0.8142846    |
| #### Bn-A05-p8798628 | genome unspecific (all in)     | 0.9114832    | 0.3214868    |              | 1 0.5915157  | 1            | 0.7647092    |
| #### Bn-A05-p8844881 | A-genome specific (rapa only)  | not scorable | not scorable | not scorable | not scorable | 1            | 0.8510558    |
| #### Bn-A05-p8851115 | A-genome specific (napus-rapa) | 0.9928229    | 0.6987026    | not scorable | not scorable | 1            | 0.8521883    |
| #### Bn-A05-p8855134 | A-genome specific (napus-rapa) | 0.9976076    | 0.6784146    | not scorable | not scorable | 0.9090909    | 0.786476     |
| #### Bn-A05-p8865637 | all not scorable               | not scorable | not scorable | not scorable | not scorable | not scorable | not scorable |
| #### Bn-A05-p8892295 | A-genome specific (napus-rapa) | 0.9952153    | 0.8944422    | not scorable | not scorable | 0.9917355    | 0.7449288    |





|                      |                                |              |              |              |              |              |              |
|----------------------|--------------------------------|--------------|--------------|--------------|--------------|--------------|--------------|
| #### Bn-A05-p926361  | A-genome specific (napus-rapa) | 0.9808612    | 0.2743495    | not scorable | not scorable | 0.9752066    | 0.8189422    |
| #### Bn-A05-p9266289 | A-genome specific (rapa only)  | not scorable | not scorable | not scorable | not scorable | 0.9669421    | 0.6853701    |
| #### Bn-A05-p9277011 | A-genome specific (napus-rapa) | 0.3755981    | 0.6125389    | not scorable | not scorable | 0.9917355    | 0.6557037    |
| #### Bn-A05-p9286929 | A-genome specific (napus-rapa) | 0.9354067    | 0.4749032    | not scorable | not scorable | 0.9669421    | 0.9022794    |
| #### Bn-A05-p9319851 | A-genome specific (napus-rapa) | 0.9952153    | 0.4492071    | not scorable | not scorable | 1            | 0.6073198    |
| #### Bn-A05-p933536  | A-genome specific (napus-rapa) | 0.9904306    | 0.5653206    | not scorable | not scorable | 1            | 0.7613786    |
| #### Bn-A05-p934600  | A-genome specific (rapa only)  | not scorable | not scorable | not scorable | not scorable | 1            | 0.7629318    |
| #### Bn-A05-p9347113 | A-genome specific (napus-rapa) | 0.9880383    | 0.4592353    | not scorable | not scorable | 1            | 0.6379285    |
| #### Bn-A05-p9364170 | A-genome specific (napus-rapa) | 0.9904306    | 0.7530767    | not scorable | not scorable | 0.9917355    | 0.6750506    |
| #### Bn-A05-p9370169 | A-genome specific (rapa only)  | not scorable | not scorable | not scorable | not scorable | 1            | 0.6003873    |
| #### Bn-A05-p9376879 | A-genome specific (napus-rapa) | 0.9952153    | 0.4925472    | not scorable | not scorable | 0.9834711    | 0.7426457    |
| #### Bn-A05-p9384270 | A-genome specific (napus-rapa) | 0.9928229    | 0.7864153    | not scorable | not scorable | 0.6528926    | 0.8190794    |
| #### Bn-A05-p9385617 | A-genome specific (napus-rapa) | 0.9952153    | 0.7065486    | not scorable | not scorable | 0.6694215    | 0.7205435    |
| #### Bn-A05-p9389251 | A-genome specific (napus-rapa) | 0.9952153    | 0.6154464    | not scorable | not scorable | 0.9834711    | 0.7714587    |
| #### Bn-A05-p9408634 | A-genome specific (napus-rapa) | 1            | 0.4476099    | not scorable | not scorable | 1            | 0.556193     |
| #### Bn-A05-p9409136 | A-genome specific (napus-rapa) | 0.9976076    | 0.3470266    | not scorable | not scorable | 0.9834711    | 0.7718474    |
| #### Bn-A05-p9431593 | A-genome specific (napus-rapa) | 0.9904306    | 0.7957033    | not scorable | not scorable | 0.9752066    | 0.7723736    |
| #### Bn-A05-p9451391 | A-genome specific (napus-rapa) | 0.9976076    | 0.5411686    | not scorable | not scorable | 1            | 0.7594934    |
| #### Bn-A05-p9455372 | A-genome specific (napus-rapa) | 0.9976076    | 0.7777707    | not scorable | not scorable | 1            | 0.5720658    |
| #### Bn-A05-p9472646 | A-genome specific (napus-rapa) | 1            | 0.8632373    | not scorable | not scorable | 0.9834711    | 0.7086816    |
| #### Bn-A05-p9472820 | A-genome specific (napus-rapa) | 1            | 0.6876233    | not scorable | not scorable | 1            | 0.7733137    |
| #### Bn-A05-p9495579 | A-genome specific (napus-rapa) | 0.9952153    | 0.3299994    | not scorable | not scorable | 1            | 0.6966471    |
| #### Bn-A05-p9502471 | napus specific                 | 0.9976076    | 0.5445434    | not scorable | not scorable | not scorable | not scorable |
| #### Bn-A05-p9502893 | A-genome specific (napus-rapa) | 1            | 0.4083284    | not scorable | not scorable | 1            | 0.8368209    |
| #### Bn-A05-p95346   | A-genome specific (napus-rapa) | 0.9856459    | 0.7401052    | not scorable | not scorable | 0.9752066    | 0.7575313    |
| #### Bn-A05-p9555189 | A-genome specific (napus-rapa) | 0.9976076    | 0.560594     | not scorable | not scorable | 0.6942149    | 0.8049531    |
| #### Bn-A05-p956298  | A-genome specific (napus-rapa) | 0.9952153    | 0.8398163    | not scorable | not scorable | 0.9917355    | 0.8670748    |
| #### Bn-A05-p958740  | A-genome specific (napus-rapa) | 0.9904306    | 0.8351308    | not scorable | not scorable | 0.9917355    | 0.7492925    |
| #### Bn-A05-p9602710 | A-genome specific (napus-rapa) | 0.7727273    | 0.7511754    | not scorable | not scorable | 0.9090909    | 0.8086715    |
| #### Bn-A05-p9602897 | A-genome specific (napus-rapa) | 0.7870814    | 0.8015583    | not scorable | not scorable | 0.9421487    | 0.7753088    |
| #### Bn-A05-p9623131 | A-genome specific (napus-rapa) | 0.9904306    | 0.3430033    | not scorable | not scorable | 0.9586777    | 0.6792218    |
| #### Bn-A05-p9638089 | A-genome specific (napus-rapa) | 0.9952153    | 0.5364432    | not scorable | not scorable | 0.9917355    | 0.7654104    |
| #### Bn-A05-p9638802 | A-genome specific (napus-rapa) | 0.9904306    | 0.810706     | not scorable | not scorable | 0.9834711    | 0.8138697    |

|                       |                                |              |              |              |              |              |              |
|-----------------------|--------------------------------|--------------|--------------|--------------|--------------|--------------|--------------|
| #### Bn-A05-p9646716  | A-genome specific (napus-rapa) | 0.9569378    | 0.2214656    | not scorable | not scorable | 0.9917355    | 0.8886898    |
| #### Bn-A05-p9660152  | A-genome specific (napus-rapa) | 0.9880383    | 0.797058     | not scorable | not scorable | 1            | 0.8008999    |
| #### Bn-A05-p966483   | A-genome specific (napus-rapa) | 0.9928229    | 0.4168855    | not scorable | not scorable | 0.9917355    | 0.7482154    |
| #### Bn-A05-p9668222  | genome unspecific (all in)     | 0.9928229    | 0.3821594    |              | 1 0.7867702  | 0.9834711    | 0.7542949    |
| #### Bn-A05-p967131   | A-genome specific (napus-rapa) | 0.9449761    | 0.7762658    | not scorable | not scorable | 0.9421487    | 0.8261644    |
| #### Bn-A05-p967575   | A-genome specific (napus-rapa) | 0.9114832    | 0.5136297    | not scorable | not scorable | 0.9338843    | 0.7119064    |
| #### Bn-A05-p970816   | A-genome specific (napus-rapa) | 0.9162679    | 0.7677682    | not scorable | not scorable | 0.5950413    | 0.7938615    |
| #### Bn-A05-p9758517  | A-genome specific (napus-rapa) | 0.9928229    | 0.7618899    | not scorable | not scorable | 0.9834711    | 0.8077748    |
| #### Bn-A05-p9765872  | A-genome specific (napus-rapa) | 0.9928229    | 0.6955811    | not scorable | not scorable | 0.9917355    | 0.8765541    |
| #### Bn-A05-p9766332  | A-genome specific (napus-rapa) | 0.9856459    | 0.7742776    | not scorable | not scorable | 1            | 0.6941759    |
| #### Bn-A05-p9766628  | A-genome specific (napus-rapa) | 0.9904306    | 0.8496368    | not scorable | not scorable | 0.9917355    | 0.6659892    |
| #### Bn-A05-p9773183  | A-genome specific (napus-rapa) | 0.9832536    | 0.6154975    | not scorable | not scorable | 1            | 0.7981734    |
| #### Bn-A05-p9777066  | napus specific                 | 0.9688995    | 0.6134226    | not scorable | not scorable | not scorable | not scorable |
| #### Bn-A05-p9777250  | A-genome specific (napus-rapa) | 0.9736842    | 0.2522809    | not scorable | not scorable | 1            | 0.7657952    |
| #### Bn-A05-p983618   | A-genome specific (rapa only)  | not scorable | not scorable | not scorable | not scorable | 1            | 0.8203638    |
| #### Bn-A05-p9849049  | A-genome specific (napus-rapa) | 0.9856459    | 0.4875813    | not scorable | not scorable | 0.9834711    | 0.8220464    |
| #### Bn-A05-p9849822  | A-genome specific (napus-rapa) | 0.9904306    | 0.3899673    | not scorable | not scorable | 1            | 0.7915296    |
| #### Bn-A05-p9849941  | A-genome specific (napus-rapa) | 0.9832536    | 0.3376244    | not scorable | not scorable | 1            | 0.70673      |
| #### Bn-A05-p9860991  | A-genome specific (napus-rapa) | 1            | 0.4797985    | not scorable | not scorable | 1            | 0.4693085    |
| #### Bn-A05-p9877872  | A-genome specific (napus-rapa) | 0.9976076    | 0.8531508    | not scorable | not scorable | 1            | 0.6580876    |
| #### Bn-A05-p9890807  | A-genome specific (napus-rapa) | 0.9904306    | 0.7820143    | not scorable | not scorable | 0.9917355    | 0.8573067    |
| #### Bn-A05-p9900987  | A-genome specific (napus-rapa) | 0.9928229    | 0.810416     | not scorable | not scorable | 0.9917355    | 0.8289263    |
| #### Bn-A05-p9937099  | A-genome specific (napus-rapa) | 1            | 0.4370553    | not scorable | not scorable | 1            | 0.8004208    |
| #### Bn-A05-p996188   | A-genome specific (rapa only)  | not scorable | not scorable | not scorable | not scorable | 0.9917355    | 0.7383497    |
| #### Bn-A06-p10005161 | A-genome specific (rapa only)  | not scorable | not scorable | not scorable | not scorable | 0.9917355    | 0.757585     |
| #### Bn-A06-p10018992 | A-genome specific (napus-rapa) | 0.9928229    | 0.6779389    | not scorable | not scorable | 0.5867769    | 0.7382953    |
| #### Bn-A06-p10019580 | A-genome specific (napus-rapa) | 0.9904306    | 0.7286653    | not scorable | not scorable | 0.5206612    | 0.7047048    |
| #### Bn-A06-p10021272 | A-genome specific (napus-rapa) | 0.9904306    | 0.7362314    | not scorable | not scorable | 0.5123967    | 0.7969393    |
| #### Bn-A06-p10021339 | A-genome specific (napus-rapa) | 0.9856459    | 0.819232     | not scorable | not scorable | 0.5785124    | 0.7559571    |
| #### Bn-A06-p10021393 | A-genome specific (napus-rapa) | 0.9832536    | 0.8574103    | not scorable | not scorable | 0.5123967    | 0.8414418    |
| #### Bn-A06-p10022213 | A-genome specific (napus-rapa) | 0.9808612    | 0.8076153    | not scorable | not scorable | 0.5206612    | 0.8362778    |
| #### Bn-A06-p10022347 | A-genome specific (napus-rapa) | 0.9688995    | 0.750725     | not scorable | not scorable | 0.5123967    | 0.7304225    |
| #### Bn-A06-p10022751 | A-genome specific (napus-rapa) | 0.9688995    | 0.7433733    | not scorable | not scorable | 0.5123967    | 0.7365086    |

|                       |                                |           |                        |              |           |           |
|-----------------------|--------------------------------|-----------|------------------------|--------------|-----------|-----------|
| #### Bn-A06-p10023556 | A-genome specific (napus-rapa) | 0.9952153 | 0.8005991 not scorable | not scorable | 0.6033058 | 0.8322143 |
| #### Bn-A06-p10031447 | A-genome specific (napus-rapa) | 0.9928229 | 0.7324781 not scorable | not scorable | 0.5123967 | 0.8258424 |
| #### Bn-A06-p10031660 | A-genome specific (napus-rapa) | 0.9880383 | 0.7948594 not scorable | not scorable | 0.6115702 | 0.7985566 |
| #### Bn-A06-p10032901 | A-genome specific (napus-rapa) | 0.9976076 | 0.8525339 not scorable | not scorable | 0.8760331 | 0.9109087 |
| #### Bn-A06-p10033398 | A-genome specific (napus-rapa) | 0.9928229 | 0.7041888 not scorable | not scorable | 0.5206612 | 0.8174314 |
| #### Bn-A06-p10033718 | A-genome specific (napus-rapa) | 0.9976076 | 0.7230359 not scorable | not scorable | 0.5950413 | 0.7559296 |
| #### Bn-A06-p10033903 | A-genome specific (napus-rapa) | 0.9880383 | 0.7998355 not scorable | not scorable | 0.5206612 | 0.7571789 |
| #### Bn-A06-p10040506 | A-genome specific (napus-rapa) | 0.9641148 | 0.7815504 not scorable | not scorable | 0.9834711 | 0.6905599 |
| #### Bn-A06-p10046575 | A-genome specific (napus-rapa) | 0.9928229 | 0.4476666 not scorable | not scorable | 0.9834711 | 0.6486661 |
| #### Bn-A06-p10046691 | A-genome specific (napus-rapa) | 0.9880383 | 0.4370077 not scorable | not scorable | 0.9752066 | 0.5682449 |
| #### Bn-A06-p10053057 | A-genome specific (napus-rapa) | 0.9784689 | 0.7132966 not scorable | not scorable | 0.9917355 | 0.720109  |
| #### Bn-A06-p10053801 | A-genome specific (napus-rapa) | 0.9832536 | 0.5524017 not scorable | not scorable | 0.9917355 | 0.7330312 |
| #### Bn-A06-p10064955 | A-genome specific (napus-rapa) | 0.9856459 | 0.7514418 not scorable | not scorable | 1         | 0.7635981 |
| #### Bn-A06-p10068703 | A-genome specific (napus-rapa) | 0.9904306 | 0.7648885 not scorable | not scorable | 1         | 0.707705  |
| #### Bn-A06-p10069150 | A-genome specific (napus-rapa) | 0.9904306 | 0.7644212 not scorable | not scorable | 1         | 0.7453828 |
| #### Bn-A06-p10085385 | A-genome specific (napus-rapa) | 0.9904306 | 0.724895 not scorable  | not scorable | 1         | 0.7030152 |
| #### Bn-A06-p10085689 | A-genome specific (napus-rapa) | 0.9880383 | 0.8199857 not scorable | not scorable | 0.9669421 | 0.8285653 |
| #### Bn-A06-p10086667 | A-genome specific (napus-rapa) | 0.9904306 | 0.6935779 not scorable | not scorable | 0.9504132 | 0.6436834 |
| #### Bn-A06-p10124135 | A-genome specific (napus-rapa) | 0.9712918 | 0.4147213 not scorable | not scorable | 0.9834711 | 0.6309807 |
| #### Bn-A06-p10129250 | A-genome specific (napus-rapa) | 0.9976076 | 0.7594367 not scorable | not scorable | 0.9917355 | 0.8421437 |
| #### Bn-A06-p10135140 | A-genome specific (napus-rapa) | 0.9928229 | 0.4291705 not scorable | not scorable | 0.9917355 | 0.6676522 |
| #### Bn-A06-p10146008 | A-genome specific (napus-rapa) | 0.9904306 | 0.7528565 not scorable | not scorable | 1         | 0.7192583 |
| #### Bn-A06-p1015217  | A-genome specific (napus-rapa) | 0.9784689 | 0.7015271 not scorable | not scorable | 0.9752066 | 0.678677  |
| #### Bn-A06-p1016417  | A-genome specific (napus-rapa) | 0.9928229 | 0.7824732 not scorable | not scorable | 1         | 0.8485919 |
| #### Bn-A06-p10169231 | A-genome specific (napus-rapa) | 1         | 0.6946233 not scorable | not scorable | 0.9917355 | 0.9083077 |
| #### Bn-A06-p10182944 | A-genome specific (napus-rapa) | 0.9832536 | 0.3672982 not scorable | not scorable | 0.9834711 | 0.6685633 |
| #### Bn-A06-p10200920 | A-genome specific (napus-rapa) | 0.9928229 | 0.7788835 not scorable | not scorable | 1         | 0.782432  |
| #### Bn-A06-p10202557 | A-genome specific (napus-rapa) | 0.9880383 | 0.8108371 not scorable | not scorable | 0.9917355 | 0.8001542 |
| #### Bn-A06-p10210368 | A-genome specific (napus-rapa) | 0.9952153 | 0.8249696 not scorable | not scorable | 1         | 0.9293141 |
| #### Bn-A06-p10238741 | A-genome specific (napus-rapa) | 0.9928229 | 0.8214073 not scorable | not scorable | 0.9586777 | 0.6514975 |
| #### Bn-A06-p10238985 | A-genome specific (napus-rapa) | 0.9880383 | 0.5791875 not scorable | not scorable | 0.9752066 | 0.7777372 |
| #### Bn-A06-p10240329 | A-genome specific (napus-rapa) | 0.9976076 | 0.676163 not scorable  | not scorable | 0.9669421 | 0.6577469 |
| #### Bn-A06-p10251899 | A-genome specific (napus-rapa) | 0.9856459 | 0.5322762 not scorable | not scorable | 1         | 0.7553007 |

|                       |                                |              |              |              |              |              |              |
|-----------------------|--------------------------------|--------------|--------------|--------------|--------------|--------------|--------------|
| #### Bn-A06-p10296909 | A-genome specific (napus-rapa) | 0.9928229    | 0.7292485    | not scorable | not scorable | 0.9834711    | 0.7573762    |
| #### Bn-A06-p10297153 | A-genome specific (napus-rapa) | 0.9880383    | 0.7499089    | not scorable | not scorable | 0.9917355    | 0.7056975    |
| #### Bn-A06-p10300664 | A-genome specific (napus-rapa) | 0.9832536    | 0.6908392    | not scorable | not scorable | 0.9917355    | 0.7566491    |
| #### Bn-A06-p10308910 | napus specific                 | 0.9641148    | 0.3299563    | not scorable | not scorable | not scorable | not scorable |
| #### Bn-A06-p10320803 | A-genome specific (rapa only)  | not scorable | not scorable | not scorable | not scorable | 0.9834711    | 0.7655988    |
| #### Bn-A06-p10327909 | A-genome specific (napus-rapa) | 0.9808612    | 0.5509072    | not scorable | not scorable | 0.9752066    | 0.6856446    |
| #### Bn-A06-p10330066 | A-genome specific (napus-rapa) | 0.9880383    | 0.7426164    | not scorable | not scorable | 0.9834711    | 0.8008162    |
| #### Bn-A06-p10349427 | A-genome specific (napus-rapa) | 0.9832536    | 0.7123818    | not scorable | not scorable | 1            | 0.7020658    |
| #### Bn-A06-p10351604 | A-genome specific (napus-rapa) | 0.9712918    | 0.7811277    | not scorable | not scorable | 0.9834711    | 0.6856064    |
| #### Bn-A06-p10377145 | all not scorable               | not scorable | not scorable | not scorable | not scorable | not scorable | not scorable |
| #### Bn-A06-p10391346 | A-genome specific (napus-rapa) | 0.9784689    | 0.3586276    | not scorable | not scorable | 0.9834711    | 0.8245668    |
| #### Bn-A06-p10400171 | A-genome specific (napus-rapa) | 1            | 0.7325938    | not scorable | not scorable | 1            | 0.7134259    |
| #### Bn-A06-p10401376 | A-genome specific (rapa only)  | not scorable | not scorable | not scorable | not scorable | 1            | 0.9095776    |
| #### Bn-A06-p10403901 | A-genome specific (napus-rapa) | 0.9473684    | 0.648475     | not scorable | not scorable | 0.9834711    | 0.6145394    |
| #### Bn-A06-p10416354 | A-genome specific (napus-rapa) | 1            | 0.7480313    | not scorable | not scorable | 1            | 0.8307312    |
| #### Bn-A06-p10442596 | A-genome specific (napus-rapa) | 0.9928229    | 0.7814094    | not scorable | not scorable | 0.9917355    | 0.7386752    |
| #### Bn-A06-p10443399 | A-genome specific (napus-rapa) | 0.9832536    | 0.7932527    | not scorable | not scorable | 0.9917355    | 0.7828946    |
| #### Bn-A06-p10452758 | A-genome specific (rapa only)  | not scorable | not scorable | not scorable | not scorable | 1            | 0.6569073    |
| #### Bn-A06-p10453182 | A-genome specific (napus-rapa) | 0.9952153    | 0.6733881    | not scorable | not scorable | 0.9917355    | 0.7825242    |
| #### Bn-A06-p10457871 | napus specific                 | 0.9856459    | 0.3273372    | not scorable | not scorable | not scorable | not scorable |
| #### Bn-A06-p10470779 | A-genome specific (rapa only)  | not scorable | not scorable | not scorable | not scorable | 0.9917355    | 0.9058921    |
| #### Bn-A06-p10480404 | A-genome specific (napus-rapa) | 0.9856459    | 0.5408666    | not scorable | not scorable | 0.5206612    | 0.7030397    |
| #### Bn-A06-p10499003 | A-genome specific (napus-rapa) | 0.9976076    | 0.4347561    | not scorable | not scorable | 0.9917355    | 0.5654813    |
| #### Bn-A06-p1054104  | A-genome specific (napus-rapa) | 0.9976076    | 0.4959051    | not scorable | not scorable | 0.9834711    | 0.7066976    |
| #### Bn-A06-p10574739 | A-genome specific (napus-rapa) | 0.9808612    | 0.7851234    | not scorable | not scorable | 0.9586777    | 0.7553866    |
| #### Bn-A06-p10577973 | A-genome specific (napus-rapa) | 0.9904306    | 0.809202     | not scorable | not scorable | 1            | 0.8948976    |
| #### Bn-A06-p10578969 | A-genome specific (napus-rapa) | 0.9856459    | 0.7670246    | not scorable | not scorable | 0.9834711    | 0.822782     |
| #### Bn-A06-p10579615 | A-genome specific (napus-rapa) | 0.9712918    | 0.4500825    | not scorable | not scorable | 0.9834711    | 0.7369534    |
| #### Bn-A06-p10588412 | A-genome specific (rapa only)  | not scorable | not scorable | not scorable | not scorable | 0.9834711    | 0.8020135    |
| #### Bn-A06-p10594170 | A-genome specific (napus-rapa) | 0.9712918    | 0.3262079    | not scorable | not scorable | 1            | 0.7672472    |
| #### Bn-A06-p10606807 | A-genome specific (napus-rapa) | 0.9928229    | 0.7777972    | not scorable | not scorable | 1            | 0.8270501    |
| #### Bn-A06-p10609574 | A-genome specific (napus-rapa) | 0.9928229    | 0.7547899    | not scorable | not scorable | 0.9917355    | 0.7159379    |
| #### Bn-A06-p10609641 | genome unspecific (all in)     | 0.9976076    | 0.3285409    | 0.9844961    | 0.8113595    | 1            | 0.8697782    |

|                       |                                |              |              |              |              |           |           |
|-----------------------|--------------------------------|--------------|--------------|--------------|--------------|-----------|-----------|
| #### Bn-A06-p10642761 | A-genome specific (napus-rapa) | 0.9617225    | 0.3745417    | not scorable | not scorable | 0.9917355 | 0.7121279 |
| #### Bn-A06-p1071392  | A-genome specific (napus-rapa) | 0.9928229    | 0.3871962    | not scorable | not scorable | 1         | 0.7996386 |
| #### Bn-A06-p10781335 | A-genome specific (napus-rapa) | 0.9784689    | 0.503312     | not scorable | not scorable | 1         | 0.8028117 |
| #### Bn-A06-p10795156 | A-genome specific (napus-rapa) | 0.9904306    | 0.4693213    | not scorable | not scorable | 1         | 0.9115109 |
| #### Bn-A06-p10818634 | A-genome specific (napus-rapa) | 0.8277512    | 0.5849885    | not scorable | not scorable | 0.9917355 | 0.6691458 |
| #### Bn-A06-p1082496  | A-genome specific (napus-rapa) | 1            | 0.7985817    | not scorable | not scorable | 0.9917355 | 0.7981288 |
| #### Bn-A06-p1082655  | A-genome specific (napus-rapa) | 0.9904306    | 0.7600288    | not scorable | not scorable | 0.9669421 | 0.7481756 |
| #### Bn-A06-p10832056 | A-genome specific (napus-rapa) | 0.8899522    | 0.7787101    | not scorable | not scorable | 1         | 0.7529556 |
| #### Bn-A06-p10833219 | A-genome specific (napus-rapa) | 0.9976076    | 0.4945572    | not scorable | not scorable | 1         | 0.7979036 |
| #### Bn-A06-p10836353 | A-genome specific (napus-rapa) | 0.9904306    | 0.3777954    | not scorable | not scorable | 0.9917355 | 0.7131884 |
| #### Bn-A06-p1083892  | A-genome specific (napus-rapa) | 1            | 0.786446     | not scorable | not scorable | 0.9834711 | 0.7670099 |
| #### Bn-A06-p10854312 | A-genome specific (napus-rapa) | 0.9904306    | 0.5327448    | not scorable | not scorable | 0.9917355 | 0.7038196 |
| #### Bn-A06-p10859915 | A-genome specific (napus-rapa) | 0.9760765    | 0.7411894    | not scorable | not scorable | 1         | 0.7187554 |
| #### Bn-A06-p10863673 | A-genome specific (napus-rapa) | 0.9856459    | 0.8190123    | not scorable | not scorable | 0.9917355 | 0.7454397 |
| #### Bn-A06-p10873048 | A-genome specific (napus-rapa) | 0.9880383    | 0.605126     | not scorable | not scorable | 0.9669421 | 0.6793934 |
| #### Bn-A06-p1094608  | A-genome specific (rapa only)  | not scorable | not scorable | not scorable | not scorable | 0.9669421 | 0.7048389 |
| #### Bn-A06-p1099469  | A-genome specific (napus-rapa) | 1            | 0.6853533    | not scorable | not scorable | 1         | 0.6726277 |
| #### Bn-A06-p1099939  | A-genome specific (napus-rapa) | 0.9976076    | 0.6649001    | not scorable | not scorable | 0.9917355 | 0.7140136 |
| #### Bn-A06-p11021085 | A-genome specific (napus-rapa) | 0.9856459    | 0.636482     | not scorable | not scorable | 1         | 0.7642207 |
| #### Bn-A06-p11024576 | A-genome specific (napus-rapa) | 0.9066986    | 0.4887941    | not scorable | not scorable | 1         | 0.6886236 |
| #### Bn-A06-p11025660 | A-genome specific (napus-rapa) | 0.9354067    | 0.3770125    | not scorable | not scorable | 0.9834711 | 0.7245347 |
| #### Bn-A06-p1106605  | A-genome specific (napus-rapa) | 0.9976076    | 0.6071167    | not scorable | not scorable | 0.9834711 | 0.710424  |
| #### Bn-A06-p1115978  | A-genome specific (napus-rapa) | 1            | 0.9158275    | not scorable | not scorable | 1         | 0.9181228 |
| #### Bn-A06-p11165324 | A-genome specific (napus-rapa) | 0.9760765    | 0.685284     | not scorable | not scorable | 0.9917355 | 0.702776  |
| #### Bn-A06-p11165375 | A-genome specific (napus-rapa) | 0.9784689    | 0.7657825    | not scorable | not scorable | 1         | 0.7510055 |
| #### Bn-A06-p1116784  | A-genome specific (napus-rapa) | 0.9952153    | 0.7222624    | not scorable | not scorable | 0.9917355 | 0.7158061 |
| #### Bn-A06-p1116867  | A-genome specific (napus-rapa) | 1            | 0.8828264    | not scorable | not scorable | 1         | 0.8378905 |
| #### Bn-A06-p1116930  | A-genome specific (napus-rapa) | 1            | 0.755897     | not scorable | not scorable | 1         | 0.8307881 |
| #### Bn-A06-p1119681  | A-genome specific (napus-rapa) | 0.9976076    | 0.7638442    | not scorable | not scorable | 0.9834711 | 0.8110157 |
| #### Bn-A06-p1119751  | A-genome specific (napus-rapa) | 1            | 0.4877147    | not scorable | not scorable | 0.9917355 | 0.7989585 |
| #### Bn-A06-p1120102  | A-genome specific (napus-rapa) | 1            | 0.7950849    | not scorable | not scorable | 0.9917355 | 0.715754  |
| #### Bn-A06-p1120107  | A-genome specific (napus-rapa) | 1            | 0.7730531    | not scorable | not scorable | 0.9917355 | 0.6995957 |
| #### Bn-A06-p11231528 | A-genome specific (napus-rapa) | 0.9736842    | 0.4788904    | not scorable | not scorable | 1         | 0.7419868 |

|                       |                                |              |              |              |              |              |              |
|-----------------------|--------------------------------|--------------|--------------|--------------|--------------|--------------|--------------|
| #### Bn-A06-p112339   | A-genome specific (napus-rapa) | 0.9952153    | 0.564059     | not scorable | not scorable | 1            | 0.6142499    |
| #### Bn-A06-p11239689 | A-genome specific (napus-rapa) | 0.9736842    | 0.228742     | not scorable | not scorable | 0.9917355    | 0.8115126    |
| #### Bn-A06-p11291712 | A-genome specific (napus-rapa) | 0.9784689    | 0.7900804    | not scorable | not scorable | 0.7603306    | 0.8059192    |
| #### Bn-A06-p11297663 | A-genome specific (napus-rapa) | 0.9904306    | 0.6288998    | not scorable | not scorable | 0.7603306    | 0.7540566    |
| #### Bn-A06-p11301532 | A-genome specific (napus-rapa) | 0.9569378    | 0.7663103    | not scorable | not scorable | 1            | 0.8850875    |
| #### Bn-A06-p11343875 | A-genome specific (napus-rapa) | 0.9665072    | 0.7698197    | not scorable | not scorable | 1            | 0.7954777    |
| #### Bn-A06-p11344945 | A-genome specific (napus-rapa) | 0.9736842    | 0.6059076    | not scorable | not scorable | 1            | 0.8593845    |
| #### Bn-A06-p11356047 | A-genome specific (napus-rapa) | 0.9832536    | 0.6646058    | not scorable | not scorable | 1            | 0.640595     |
| #### Bn-A06-p11356414 | A-genome specific (napus-rapa) | 0.9832536    | 0.7946937    | not scorable | not scorable | 1            | 0.7201476    |
| #### Bn-A06-p11356524 | A-genome specific (napus-rapa) | 0.9976076    | 0.8008898    | not scorable | not scorable | 0.9917355    | 0.8333257    |
| #### Bn-A06-p1135789  | A-genome specific (napus-rapa) | 0.9928229    | 0.6717916    | not scorable | not scorable | 0.9834711    | 0.6808389    |
| #### Bn-A06-p11362290 | A-genome specific (napus-rapa) | 0.9617225    | 0.3690567    | not scorable | not scorable | 1            | 0.7087374    |
| #### Bn-A06-p11366920 | A-genome specific (napus-rapa) | 1            | 0.7647003    | not scorable | not scorable | 1            | 0.9175813    |
| #### Bn-A06-p11368090 | A-genome specific (napus-rapa) | 0.8516746    | 0.8155918    | not scorable | not scorable | 0.6694215    | 0.7241411    |
| #### Bn-A06-p11380334 | A-genome specific (rapa only)  | not scorable | not scorable | not scorable | not scorable | 0.9752066    | 0.576641     |
| #### Bn-A06-p11380775 | A-genome specific (rapa only)  | not scorable | not scorable | not scorable | not scorable | 0.7520661    | 0.5657402    |
| #### Bn-A06-p11381026 | A-genome specific (napus-rapa) | 1            | 0.7043434    | not scorable | not scorable | 1            | 0.7367962    |
| #### Bn-A06-p113900   | A-genome specific (napus-rapa) | 0.9880383    | 0.2549745    | not scorable | not scorable | 0.9752066    | 0.6413375    |
| #### Bn-A06-p11415584 | A-genome specific (napus-rapa) | 0.9784689    | 0.723091     | not scorable | not scorable | 1            | 0.797233     |
| #### Bn-A06-p1142557  | A-genome specific (napus-rapa) | 0.9066986    | 0.7789338    | not scorable | not scorable | 0.9917355    | 0.7524039    |
| #### Bn-A06-p11432316 | A-genome specific (napus-rapa) | 0.9784689    | 0.4630884    | not scorable | not scorable | 0.9504132    | 0.5443395    |
| #### Bn-A06-p11455914 | A-genome specific (napus-rapa) | 1            | 0.7155162    | not scorable | not scorable | 0.9834711    | 0.8049601    |
| #### Bn-A06-p114634   | A-genome specific (napus-rapa) | 0.9976076    | 0.4366549    | not scorable | not scorable | 0.6942149    | 0.8367572    |
| #### Bn-A06-p1149034  | A-genome specific (napus-rapa) | 1            | 0.7789344    | not scorable | not scorable | 0.6942149    | 0.8005329    |
| #### Bn-A06-p11500765 | A-genome specific (napus-rapa) | 0.9856459    | 0.5563209    | not scorable | not scorable | 1            | 0.7320092    |
| #### Bn-A06-p1154840  | A-genome specific (napus-rapa) | 0.9952153    | 0.5568834    | not scorable | not scorable | 0.9917355    | 0.7325417    |
| #### Bn-A06-p115737   | A-genome specific (rapa only)  | not scorable | not scorable | not scorable | not scorable | 0.6694215    | 0.8624666    |
| #### Bn-A06-p11588495 | A-genome specific (napus-rapa) | 1            | 0.3320274    | not scorable | not scorable | 0.9834711    | 0.6929848    |
| #### Bn-A06-p115948   | A-genome specific (napus-rapa) | 0.9880383    | 0.7896861    | not scorable | not scorable | 1            | 0.7521878    |
| #### Bn-A06-p1160984  | A-genome specific (napus-rapa) | 1            | 0.471817     | not scorable | not scorable | 0.9917355    | 0.7668743    |
| #### Bn-A06-p1168447  | napus specific                 | 1            | 0.4249248    | not scorable | not scorable | not scorable | not scorable |
| #### Bn-A06-p11704401 | A-genome specific (napus-rapa) | 0.9856459    | 0.7748103    | not scorable | not scorable | 0.9834711    | 0.8326044    |
| #### Bn-A06-p11708819 | napus specific                 | 0.9808612    | 0.8019677    | not scorable | not scorable | not scorable | not scorable |

|                       |                                   |              |              |              |              |              |              |           |
|-----------------------|-----------------------------------|--------------|--------------|--------------|--------------|--------------|--------------|-----------|
| #### Bn-A06-p1173126  | A-genome specific (napus-rapa)    | 0.9928229    | 0.8591606    | not scorable | not scorable | 0.9752066    | 0.7483622    |           |
| #### Bn-A06-p1176062  | A-genome specific (napus-rapa)    | 0.9952153    | 0.3308119    | not scorable | not scorable | 0.9917355    | 0.6588989    |           |
| #### Bn-A06-p11776560 | A-genome specific (napus-rapa)    |              | 1            | 0.635902     | not scorable | not scorable | 1            | 0.7739488 |
| #### Bn-A06-p11808857 | A-genome specific (rapa only)     | not scorable | not scorable | not scorable | not scorable | 0.9834711    | 0.6502585    |           |
| #### Bn-A06-p11819912 | A-genome specific (napus-rapa)    | 0.9784689    | 0.4961949    | not scorable | not scorable | 0.9834711    | 0.8148219    |           |
| #### Bn-A06-p11819954 | A-genome specific (napus-rapa)    | 0.9832536    | 0.3038135    | not scorable | not scorable | 0.9917355    | 0.7737194    |           |
| #### Bn-A06-p11840908 | A-genome specific (napus-rapa)    | 0.9976076    | 0.7613404    | not scorable | not scorable | 0.9917355    | 0.720181     |           |
| #### Bn-A06-p1184282  | A-genome specific (napus-rapa)    | 0.9976076    | 0.6958141    | not scorable | not scorable | 0.9917355    | 0.8346409    |           |
| #### Bn-A06-p11848553 | A-genome specific (napus-rapa)    | 0.9976076    | 0.7671664    | not scorable | not scorable |              | 1            | 0.737825  |
| #### Bn-A06-p11848767 | A-genome specific (napus-rapa)    | 0.9736842    | 0.6856481    | not scorable | not scorable | 0.9917355    | 0.8164111    |           |
| #### Bn-A06-p11848770 | A-genome specific (napus-rapa)    | 0.9784689    | 0.6121548    | not scorable | not scorable | 0.9917355    | 0.7745563    |           |
| #### Bn-A06-p1185371  | A-genome specific (napus-rapa)    | 0.9976076    | 0.4150164    | not scorable | not scorable | 0.9834711    | 0.7433071    |           |
| #### Bn-A06-p1187915  | C-genome specific (oleracea only) | not scorable | not scorable | 0.9922481    | 0.6929926    | not scorable | not scorable |           |
| #### Bn-A06-p11919396 | A-genome specific (napus-rapa)    | 0.9952153    | 0.3445336    | not scorable | not scorable | 0.9752066    | 0.8395817    |           |
| #### Bn-A06-p11995250 | A-genome specific (napus-rapa)    |              | 1            | 0.5789745    | not scorable | not scorable | 1            | 0.5976474 |
| #### Bn-A06-p12030020 | A-genome specific (napus-rapa)    |              | 1            | 0.7614368    | not scorable | not scorable | 1            | 0.7591512 |
| #### Bn-A06-p12078648 | A-genome specific (napus-rapa)    | 0.8660287    | 0.7197168    | not scorable | not scorable | 0.7520661    | 0.7286038    |           |
| #### Bn-A06-p12093192 | A-genome specific (napus-rapa)    | 0.9880383    | 0.7244185    | not scorable | not scorable | 0.9917355    | 0.8740839    |           |
| #### Bn-A06-p12135104 | A-genome specific (napus-rapa)    | 0.9976076    | 0.6648868    | not scorable | not scorable | 0.9834711    | 0.6603483    |           |
| #### Bn-A06-p12142438 | A-genome specific (rapa only)     | not scorable | not scorable | not scorable | not scorable |              | 1            | 0.7533373 |
| #### Bn-A06-p121547   | A-genome specific (napus-rapa)    | 0.9928229    | 0.7853238    | not scorable | not scorable | 0.9917355    | 0.7681255    |           |
| #### Bn-A06-p1217543  | A-genome specific (napus-rapa)    | 0.9593301    | 0.7509734    | not scorable | not scorable | 0.661157     | 0.8204749    |           |
| #### Bn-A06-p12202203 | A-genome specific (napus-rapa)    | 0.9952153    | 0.3539796    | not scorable | not scorable | 0.9834711    | 0.7232896    |           |
| #### Bn-A06-p12203381 | A-genome specific (napus-rapa)    | 0.9880383    | 0.721136     | not scorable | not scorable | 0.9834711    | 0.7471445    |           |
| #### Bn-A06-p12205865 | A-genome specific (napus-rapa)    | 0.9976076    | 0.7670361    | not scorable | not scorable | 0.9917355    | 0.8164662    |           |
| #### Bn-A06-p12213032 | A-genome specific (napus-rapa)    | 0.9760765    | 0.768383     | not scorable | not scorable | 0.9917355    | 0.7115262    |           |
| #### Bn-A06-p1225010  | genome unspecific (oleracea-rapa) | not scorable | not scorable | 0.9689922    | 0.7457433    | 0.7603306    | 0.8906642    |           |
| #### Bn-A06-p1232267  | A-genome specific (napus-rapa)    | 0.9976076    | 0.7996382    | not scorable | not scorable |              | 1            | 0.8012844 |
| #### Bn-A06-p12337022 | A-genome specific (napus-rapa)    | 0.9880383    | 0.7888277    | not scorable | not scorable | 0.9834711    | 0.7812226    |           |
| #### Bn-A06-p12337596 | A-genome specific (napus-rapa)    | 0.9952153    | 0.6485423    | not scorable | not scorable | 0.9834711    | 0.6113846    |           |
| #### Bn-A06-p12337598 | A-genome specific (napus-rapa)    | 0.9904306    | 0.5710512    | not scorable | not scorable | 0.9834711    | 0.6976759    |           |
| #### Bn-A06-p12346760 | A-genome specific (napus-rapa)    | 0.9760765    | 0.6087637    | not scorable | not scorable | 0.9669421    | 0.6330386    |           |
| #### Bn-A06-p12348915 | A-genome specific (napus-rapa)    | 0.9928229    | 0.7845942    | not scorable | not scorable | 0.9917355    | 0.8134061    |           |

|                       |                                |              |              |              |              |              |              |
|-----------------------|--------------------------------|--------------|--------------|--------------|--------------|--------------|--------------|
| #### Bn-A06-p12354309 | A-genome specific (napus-rapa) | 0.9832536    | 0.7853431    | not scorable | not scorable | 0.9752066    | 0.8267855    |
| #### Bn-A06-p12354524 | napus specific                 | 0.9880383    | 0.6749924    | not scorable | not scorable | not scorable | not scorable |
| #### Bn-A06-p12354582 | A-genome specific (napus-rapa) | 0.9952153    | 0.6736845    | not scorable | not scorable | 0.9669421    | 0.6859751    |
| #### Bn-A06-p12355438 | A-genome specific (napus-rapa) | 0.9928229    | 0.7872537    | not scorable | not scorable | 0.9752066    | 0.7600623    |
| #### Bn-A06-p12355762 | A-genome specific (napus-rapa) | 0.9928229    | 0.7610742    | not scorable | not scorable | 0.9752066    | 0.7340579    |
| #### Bn-A06-p12356277 | A-genome specific (napus-rapa) | 0.9952153    | 0.8009423    | not scorable | not scorable | 0.9752066    | 0.8157302    |
| #### Bn-A06-p12356525 | A-genome specific (napus-rapa) | 0.9832536    | 0.7396562    | not scorable | not scorable | 0.9752066    | 0.5668947    |
| #### Bn-A06-p12356708 | A-genome specific (rapa only)  | not scorable | not scorable | not scorable | not scorable | 0.9669421    | 0.7616207    |
| #### Bn-A06-p12357497 | A-genome specific (napus-rapa) | 0.9904306    | 0.4722738    | not scorable | not scorable | 0.9834711    | 0.5847653    |
| #### Bn-A06-p12358748 | A-genome specific (napus-rapa) | 0.9832536    | 0.7894202    | not scorable | not scorable | 0.9834711    | 0.8285961    |
| #### Bn-A06-p12362853 | A-genome specific (napus-rapa) | 0.9856459    | 0.7481425    | not scorable | not scorable | 0.9834711    | 0.7500029    |
| #### Bn-A06-p12363034 | A-genome specific (napus-rapa) | 0.9928229    | 0.7937927    | not scorable | not scorable | 0.9669421    | 0.7936831    |
| #### Bn-A06-p12364597 | A-genome specific (napus-rapa) | 0.9928229    | 0.7800971    | not scorable | not scorable | 0.5289256    | 0.7043585    |
| #### Bn-A06-p12364605 | A-genome specific (rapa only)  | not scorable | not scorable | not scorable | not scorable | 0.892562     | 0.8862464    |
| #### Bn-A06-p12376674 | A-genome specific (napus-rapa) | 0.9784689    | 0.6522495    | not scorable | not scorable | 0.9834711    | 0.6686524    |
| #### Bn-A06-p12402009 | A-genome specific (napus-rapa) | 0.9928229    | 0.6910045    | not scorable | not scorable | 0.9752066    | 0.6983269    |
| #### Bn-A06-p12404563 | A-genome specific (napus-rapa) | 0.9904306    | 0.7921799    | not scorable | not scorable | 0.9917355    | 0.7654617    |
| #### Bn-A06-p12404570 | A-genome specific (napus-rapa) | 0.9952153    | 0.7330528    | not scorable | not scorable | 1            | 0.7640449    |
| #### Bn-A06-p12404848 | A-genome specific (napus-rapa) | 0.9928229    | 0.6942918    | not scorable | not scorable | 1            | 0.8085203    |
| #### Bn-A06-p12436092 | A-genome specific (napus-rapa) | 0.9904306    | 0.7813781    | not scorable | not scorable | 0.9917355    | 0.7952865    |
| #### Bn-A06-p12438791 | A-genome specific (napus-rapa) | 0.9880383    | 0.7947542    | not scorable | not scorable | 1            | 0.917563     |
| #### Bn-A06-p12441450 | A-genome specific (napus-rapa) | 0.9928229    | 0.7917563    | not scorable | not scorable | 0.9834711    | 0.7991471    |
| #### Bn-A06-p12451649 | A-genome specific (napus-rapa) | 0.9832536    | 0.8325339    | not scorable | not scorable | 1            | 0.8167799    |
| #### Bn-A06-p12464905 | A-genome specific (napus-rapa) | 0.9832536    | 0.4510816    | not scorable | not scorable | 1            | 0.7309964    |
| #### Bn-A06-p12517420 | A-genome specific (napus-rapa) | 0.9928229    | 0.4458174    | not scorable | not scorable | 0.9669421    | 0.6896096    |
| #### Bn-A06-p12534357 | A-genome specific (napus-rapa) | 0.9976076    | 0.4955723    | not scorable | not scorable | 0.9917355    | 0.784013     |
| #### Bn-A06-p12609046 | A-genome specific (napus-rapa) | 0.9928229    | 0.393588     | not scorable | not scorable | 0.9917355    | 0.8045535    |
| #### Bn-A06-p12627660 | A-genome specific (napus-rapa) | 0.9904306    | 0.3191718    | not scorable | not scorable | 1            | 0.7560848    |
| #### Bn-A06-p12632207 | A-genome specific (napus-rapa) | 0.9808612    | 0.7236586    | not scorable | not scorable | 1            | 0.8049245    |
| #### Bn-A06-p12634012 | A-genome specific (napus-rapa) | 0.9976076    | 0.7308255    | not scorable | not scorable | 1            | 0.7152911    |
| #### Bn-A06-p12634097 | A-genome specific (napus-rapa) | 0.9952153    | 0.6698314    | not scorable | not scorable | 1            | 0.6212335    |
| #### Bn-A06-p12641317 | A-genome specific (napus-rapa) | 0.9880383    | 0.8220268    | not scorable | not scorable | 0.9752066    | 0.7623531    |
| #### Bn-A06-p12641905 | A-genome specific (napus-rapa) | 0.9952153    | 0.6881461    | not scorable | not scorable | 0.9917355    | 0.7351651    |



|                       |                                |              |              |              |              |           |           |
|-----------------------|--------------------------------|--------------|--------------|--------------|--------------|-----------|-----------|
| #### Bn-A06-p12645785 | A-genome specific (napus-rapa) | 0.9976076    | 0.6919374    | not scorable | not scorable | 0.9917355 | 0.6662588 |
| #### Bn-A06-p12658161 | A-genome specific (napus-rapa) | 0.9808612    | 0.7381235    | not scorable | not scorable | 0.9752066 | 0.6265146 |
| #### Bn-A06-p12696157 | A-genome specific (napus-rapa) | 0.9928229    | 0.6007544    | not scorable | not scorable | 0.9917355 | 0.7030661 |
| #### Bn-A06-p12718659 | A-genome specific (napus-rapa) | 0.9976076    | 0.4325381    | not scorable | not scorable | 0.9917355 | 0.8123731 |
| #### Bn-A06-p12732487 | A-genome specific (napus-rapa) | 0.9904306    | 0.4290624    | not scorable | not scorable | 0.9917355 | 0.8056887 |
| #### Bn-A06-p12734894 | A-genome specific (napus-rapa) | 1            | 0.7226511    | not scorable | not scorable | 0.9669421 | 0.7358505 |
| #### Bn-A06-p12748821 | A-genome specific (napus-rapa) | 0.9952153    | 0.7680824    | not scorable | not scorable | 0.9834711 | 0.7971296 |
| #### Bn-A06-p12768136 | A-genome specific (napus-rapa) | 0.9832536    | 0.8058218    | not scorable | not scorable | 0.9834711 | 0.773975  |
| #### Bn-A06-p12775306 | A-genome specific (napus-rapa) | 0.9952153    | 0.7606934    | not scorable | not scorable | 0.9834711 | 0.7206949 |
| #### Bn-A06-p12775616 | A-genome specific (napus-rapa) | 0.9904306    | 0.8324084    | not scorable | not scorable | 0.9752066 | 0.7026841 |
| #### Bn-A06-p12775665 | A-genome specific (napus-rapa) | 0.9856459    | 0.7219978    | not scorable | not scorable | 0.9669421 | 0.6444806 |
| #### Bn-A06-p12775802 | A-genome specific (napus-rapa) | 0.9904306    | 0.8007179    | not scorable | not scorable | 1         | 0.8327143 |
| #### Bn-A06-p1278419  | A-genome specific (napus-rapa) | 0.9952153    | 0.7274017    | not scorable | not scorable | 1         | 0.747323  |
| #### Bn-A06-p12824031 | A-genome specific (napus-rapa) | 1            | 0.7356847    | not scorable | not scorable | 1         | 0.5940111 |
| #### Bn-A06-p12843916 | A-genome specific (napus-rapa) | 0.9880383    | 0.8008307    | not scorable | not scorable | 0.9834711 | 0.7688105 |
| #### Bn-A06-p12846574 | A-genome specific (napus-rapa) | 0.9856459    | 0.6324841    | not scorable | not scorable | 0.9834711 | 0.7516447 |
| #### Bn-A06-p12868864 | A-genome specific (napus-rapa) | 0.9952153    | 0.789197     | not scorable | not scorable | 0.9917355 | 0.7647055 |
| #### Bn-A06-p12876501 | A-genome specific (napus-rapa) | 0.9928229    | 0.7802979    | not scorable | not scorable | 0.9917355 | 0.7614141 |
| #### Bn-A06-p12880298 | A-genome specific (napus-rapa) | 0.9808612    | 0.719653     | not scorable | not scorable | 0.9834711 | 0.6878283 |
| #### Bn-A06-p12884492 | A-genome specific (napus-rapa) | 0.9808612    | 0.6015235    | not scorable | not scorable | 0.9834711 | 0.6671287 |
| #### Bn-A06-p12884843 | A-genome specific (napus-rapa) | 1            | 0.9095823    | not scorable | not scorable | 1         | 0.9175813 |
| #### Bn-A06-p12886443 | A-genome specific (napus-rapa) | 0.9952153    | 0.5282201    | not scorable | not scorable | 1         | 0.7472173 |
| #### Bn-A06-p12886553 | A-genome specific (napus-rapa) | 0.9952153    | 0.5751531    | not scorable | not scorable | 0.9834711 | 0.7613427 |
| #### Bn-A06-p12896905 | A-genome specific (napus-rapa) | 0.9904306    | 0.7935735    | not scorable | not scorable | 0.9669421 | 0.7731049 |
| #### Bn-A06-p12911577 | A-genome specific (napus-rapa) | 0.9832536    | 0.4476945    | not scorable | not scorable | 0.9834711 | 0.7709775 |
| #### Bn-A06-p1291667  | A-genome specific (napus-rapa) | 0.9976076    | 0.762328     | not scorable | not scorable | 1         | 0.8223467 |
| #### Bn-A06-p1292241  | A-genome specific (napus-rapa) | 0.9904306    | 0.7520941    | not scorable | not scorable | 1         | 0.7025625 |
| #### Bn-A06-p12980841 | A-genome specific (rapa only)  | not scorable | not scorable | not scorable | not scorable | 0.8429752 | 0.7915418 |
| #### Bn-A06-p12986192 | A-genome specific (napus-rapa) | 0.9904306    | 0.5063318    | not scorable | not scorable | 0.9917355 | 0.7220628 |
| #### Bn-A06-p12995133 | A-genome specific (napus-rapa) | 0.9928229    | 0.6492539    | not scorable | not scorable | 0.9752066 | 0.6909733 |
| #### Bn-A06-p13007607 | A-genome specific (napus-rapa) | 0.9928229    | 0.6879587    | not scorable | not scorable | 0.9917355 | 0.7241918 |
| #### Bn-A06-p13008545 | A-genome specific (napus-rapa) | 0.9952153    | 0.7714634    | not scorable | not scorable | 0.9917355 | 0.7231992 |
| #### Bn-A06-p13009409 | A-genome specific (napus-rapa) | 0.9880383    | 0.8101414    | not scorable | not scorable | 0.9917355 | 0.714877  |

|                       |                                |              |              |              |              |              |              |
|-----------------------|--------------------------------|--------------|--------------|--------------|--------------|--------------|--------------|
| #### Bn-A06-p13021244 | A-genome specific (napus-rapa) | 0.9736842    | 0.7813579    | not scorable | not scorable | 0.9669421    | 0.7623345    |
| #### Bn-A06-p13105867 | A-genome specific (napus-rapa) | 0.9736842    | 0.7197819    | not scorable | not scorable | 0.7768595    | 0.7024059    |
| #### Bn-A06-p13112819 | A-genome specific (napus-rapa) | 0.9880383    | 0.3857996    | not scorable | not scorable | 0.7520661    | 0.666582     |
| #### Bn-A06-p1312619  | A-genome specific (napus-rapa) | 1            | 0.5414092    | not scorable | not scorable | 0.9834711    | 0.7589697    |
| #### Bn-A06-p13126839 | A-genome specific (napus-rapa) | 0.9808612    | 0.8130695    | not scorable | not scorable | 0.7438017    | 0.6740149    |
| #### Bn-A06-p13144922 | A-genome specific (napus-rapa) | 0.9545454    | 0.7878996    | not scorable | not scorable | 0.768595     | 0.8879762    |
| #### Bn-A06-p13147955 | A-genome specific (napus-rapa) | 0.9688995    | 0.6904839    | not scorable | not scorable | 0.7438017    | 0.687968     |
| #### Bn-A06-p13159551 | A-genome specific (napus-rapa) | 0.9952153    | 0.8062796    | not scorable | not scorable | 0.9917355    | 0.7947181    |
| #### Bn-A06-p13162770 | A-genome specific (napus-rapa) | 0.9928229    | 0.5188691    | not scorable | not scorable | 0.9917355    | 0.7664203    |
| #### Bn-A06-p13190352 | A-genome specific (napus-rapa) | 0.9904306    | 0.4019636    | not scorable | not scorable | 1            | 0.8484885    |
| #### Bn-A06-p13194586 | A-genome specific (napus-rapa) | 0.9832536    | 0.7319274    | not scorable | not scorable | 0.9917355    | 0.6923604    |
| #### Bn-A06-p13204772 | A-genome specific (napus-rapa) | 0.9976076    | 0.8050264    | not scorable | not scorable | 1            | 0.8013928    |
| #### Bn-A06-p1322724  | A-genome specific (napus-rapa) | 0.9784689    | 0.4109783    | not scorable | not scorable | 0.6694215    | 0.7427732    |
| #### Bn-A06-p13230875 | A-genome specific (napus-rapa) | 0.9904306    | 0.5164688    | not scorable | not scorable | 1            | 0.7067118    |
| #### Bn-A06-p13230989 | A-genome specific (napus-rapa) | 0.9928229    | 0.4350449    | not scorable | not scorable | 0.9834711    | 0.7657516    |
| #### Bn-A06-p1330567  | A-genome specific (napus-rapa) | 0.9808612    | 0.407299     | not scorable | not scorable | 0.9834711    | 0.7576386    |
| #### Bn-A06-p1345642  | A-genome specific (napus-rapa) | 0.9808612    | 0.4551361    | not scorable | not scorable | 0.7272727    | 0.8089982    |
| #### Bn-A06-p1348404  | A-genome specific (napus-rapa) | 0.9904306    | 0.7759456    | not scorable | not scorable | 0.9834711    | 0.7209508    |
| #### Bn-A06-p1350786  | A-genome specific (napus-rapa) | 0.9928229    | 0.7708716    | not scorable | not scorable | 1            | 0.8219877    |
| #### Bn-A06-p13583056 | all not scorable               | not scorable | not scorable | not scorable | not scorable | not scorable | not scorable |
| #### Bn-A06-p1358955  | A-genome specific (napus-rapa) | 0.9952153    | 0.795873     | not scorable | not scorable | 0.9752066    | 0.7155437    |
| #### Bn-A06-p13610210 | A-genome specific (napus-rapa) | 0.9856459    | 0.3489999    | not scorable | not scorable | 1            | 0.8168827    |
| #### Bn-A06-p1366713  | A-genome specific (napus-rapa) | 0.9808612    | 0.3811374    | not scorable | not scorable | 0.9917355    | 0.7749607    |
| #### Bn-A06-p13726921 | A-genome specific (napus-rapa) | 0.9712918    | 0.5642921    | not scorable | not scorable | 1            | 0.8330827    |
| #### Bn-A06-p13728321 | A-genome specific (napus-rapa) | 0.9904306    | 0.262479     | not scorable | not scorable | 0.9752066    | 0.7024423    |
| #### Bn-A06-p1373016  | A-genome specific (rapa only)  | not scorable | not scorable | not scorable | not scorable | 0.9917355    | 0.694411     |
| #### Bn-A06-p13732668 | A-genome specific (napus-rapa) | 0.9784689    | 0.7261752    | not scorable | not scorable | 0.9917355    | 0.6924533    |
| #### Bn-A06-p137614   | A-genome specific (napus-rapa) | 0.9952153    | 0.803583     | not scorable | not scorable | 0.9917355    | 0.721624     |
| #### Bn-A06-p13787740 | A-genome specific (napus-rapa) | 1            | 0.554594     | not scorable | not scorable | 0.9917355    | 0.8443128    |
| #### Bn-A06-p1378913  | A-genome specific (napus-rapa) | 0.9976076    | 0.7010535    | not scorable | not scorable | 1            | 0.7808867    |
| #### Bn-A06-p13825200 | A-genome specific (napus-rapa) | 0.9928229    | 0.6931776    | not scorable | not scorable | 1            | 0.6199228    |
| #### Bn-A06-p1383275  | A-genome specific (napus-rapa) | 0.9784689    | 0.789272     | not scorable | not scorable | 1            | 0.8033431    |
| #### Bn-A06-p13850939 | napus specific                 | 0.937799     | 0.267318     | not scorable | not scorable | not scorable | not scorable |

|                       |                                |              |              |              |              |           |           |
|-----------------------|--------------------------------|--------------|--------------|--------------|--------------|-----------|-----------|
| #### Bn-A06-p13859891 | A-genome specific (napus-rapa) | 0.9641148    | 0.8077102    | not scorable | not scorable | 1         | 0.760376  |
| #### Bn-A06-p1386474  | A-genome specific (rapa only)  | not scorable | not scorable | not scorable | not scorable | 0.677686  | 0.9175554 |
| #### Bn-A06-p13870364 | A-genome specific (napus-rapa) | 0.9832536    | 0.4489942    | not scorable | not scorable | 0.9834711 | 0.6769026 |
| #### Bn-A06-p13872191 | A-genome specific (napus-rapa) | 0.9880383    | 0.6999618    | not scorable | not scorable | 0.9917355 | 0.7003243 |
| #### Bn-A06-p139033   | A-genome specific (napus-rapa) | 1            | 0.6192982    | not scorable | not scorable | 0.9917355 | 0.8436432 |
| #### Bn-A06-p13910548 | A-genome specific (napus-rapa) | 0.9904306    | 0.6967127    | not scorable | not scorable | 0.9834711 | 0.5734083 |
| #### Bn-A06-p13913895 | A-genome specific (napus-rapa) | 0.9736842    | 0.8101604    | not scorable | not scorable | 1         | 0.7693269 |
| #### Bn-A06-p13958812 | A-genome specific (napus-rapa) | 0.9258373    | 0.6859965    | not scorable | not scorable | 0.9338843 | 0.6680776 |
| #### Bn-A06-p1403969  | A-genome specific (napus-rapa) | 1            | 0.374563     | not scorable | not scorable | 0.9834711 | 0.7782195 |
| #### Bn-A06-p1404859  | A-genome specific (napus-rapa) | 0.9712918    | 0.7188787    | not scorable | not scorable | 0.5619835 | 0.7851781 |
| #### Bn-A06-p1408273  | A-genome specific (napus-rapa) | 0.9784689    | 0.4574404    | not scorable | not scorable | 1         | 0.6308318 |
| #### Bn-A06-p14121814 | A-genome specific (napus-rapa) | 0.9641148    | 0.7722188    | not scorable | not scorable | 0.9917355 | 0.7432481 |
| #### Bn-A06-p14163715 | A-genome specific (napus-rapa) | 0.9808612    | 0.1966075    | not scorable | not scorable | 1         | 0.9515939 |
| #### Bn-A06-p14179943 | A-genome specific (napus-rapa) | 0.9736842    | 0.794936     | not scorable | not scorable | 1         | 0.927162  |
| #### Bn-A06-p14189236 | A-genome specific (napus-rapa) | 0.9856459    | 0.523357     | not scorable | not scorable | 0.9834711 | 0.7366242 |
| #### Bn-A06-p14192915 | A-genome specific (napus-rapa) | 0.9904306    | 0.2542224    | not scorable | not scorable | 0.9917355 | 0.8117295 |
| #### Bn-A06-p14193381 | A-genome specific (napus-rapa) | 0.8875598    | 0.7948895    | not scorable | not scorable | 0.9834711 | 0.753765  |
| #### Bn-A06-p14198240 | A-genome specific (napus-rapa) | 0.9856459    | 0.4615354    | not scorable | not scorable | 1         | 0.7118057 |
| #### Bn-A06-p14207547 | A-genome specific (napus-rapa) | 0.9688995    | 0.8198035    | not scorable | not scorable | 0.9834711 | 0.7526106 |
| #### Bn-A06-p14212186 | A-genome specific (napus-rapa) | 0.9569378    | 0.6843207    | not scorable | not scorable | 0.9752066 | 0.7321373 |
| #### Bn-A06-p14214930 | A-genome specific (napus-rapa) | 0.9545454    | 0.8288864    | not scorable | not scorable | 0.9669421 | 0.8011191 |
| #### Bn-A06-p14232702 | A-genome specific (napus-rapa) | 0.5334928    | 0.6206563    | not scorable | not scorable | 0.9669421 | 0.6445115 |
| #### Bn-A06-p14232703 | A-genome specific (napus-rapa) | 0.5550239    | 0.7066329    | not scorable | not scorable | 0.9586777 | 0.8436641 |
| #### Bn-A06-p14241294 | A-genome specific (napus-rapa) | 0.9760765    | 0.775151     | not scorable | not scorable | 0.9752066 | 0.7459099 |
| #### Bn-A06-p14266102 | A-genome specific (napus-rapa) | 1            | 0.4791672    | not scorable | not scorable | 0.9669421 | 0.7612398 |
| #### Bn-A06-p14269763 | A-genome specific (napus-rapa) | 0.9832536    | 0.3308119    | not scorable | not scorable | 0.9917355 | 0.7608328 |
| #### Bn-A06-p1427206  | A-genome specific (napus-rapa) | 0.9736842    | 0.7954577    | not scorable | not scorable | 0.9834711 | 0.8214294 |
| #### Bn-A06-p14281185 | A-genome specific (napus-rapa) | 0.9832536    | 0.6103412    | not scorable | not scorable | 1         | 0.7816716 |
| #### Bn-A06-p14285203 | A-genome specific (napus-rapa) | 0.9497608    | 0.7474042    | not scorable | not scorable | 0.9504132 | 0.6851076 |
| #### Bn-A06-p14300543 | A-genome specific (napus-rapa) | 0.9952153    | 0.5159616    | not scorable | not scorable | 0.9917355 | 0.7302115 |
| #### Bn-A06-p14300642 | A-genome specific (napus-rapa) | 0.9784689    | 0.4495222    | not scorable | not scorable | 1         | 0.8116663 |
| #### Bn-A06-p14300919 | A-genome specific (napus-rapa) | 0.9545454    | 0.8661194    | not scorable | not scorable | 1         | 0.7707667 |
| #### Bn-A06-p14316307 | A-genome specific (napus-rapa) | 0.9880383    | 0.7206984    | not scorable | not scorable | 0.9421487 | 0.707125  |

|                       |                                |              |              |              |              |              |              |
|-----------------------|--------------------------------|--------------|--------------|--------------|--------------|--------------|--------------|
| #### Bn-A06-p1432446  | A-genome specific (napus-rapa) | 0.9736842    | 0.8108827    | not scorable | not scorable | 0.9917355    | 0.8008413    |
| #### Bn-A06-p14327501 | A-genome specific (napus-rapa) | 0.9976076    | 0.528057     | not scorable | not scorable | 1            | 0.8363531    |
| #### Bn-A06-p1433021  | A-genome specific (napus-rapa) | 0.9880383    | 0.7491498    | not scorable | not scorable | 1            | 0.6983862    |
| #### Bn-A06-p14369166 | A-genome specific (napus-rapa) | 0.9880383    | 0.4778179    | not scorable | not scorable | 0.9917355    | 0.8464755    |
| #### Bn-A06-p14373935 | A-genome specific (napus-rapa) | 0.9880383    | 0.565223     | not scorable | not scorable | 0.9917355    | 0.7490245    |
| #### Bn-A06-p14375425 | A-genome specific (napus-rapa) | 0.9904306    | 0.5628347    | not scorable | not scorable | 0.9834711    | 0.7631255    |
| #### Bn-A06-p14375498 | A-genome specific (napus-rapa) | 0.9832536    | 0.7791786    | not scorable | not scorable | 0.9917355    | 0.8019738    |
| #### Bn-A06-p14389679 | A-genome specific (napus-rapa) | 0.9928229    | 0.5136651    | not scorable | not scorable | 0.9917355    | 0.8639689    |
| #### Bn-A06-p14391905 | A-genome specific (napus-rapa) | 0.9760765    | 0.6822259    | not scorable | not scorable | 0.9752066    | 0.7820169    |
| #### Bn-A06-p14399524 | A-genome specific (napus-rapa) | 0.9354067    | 0.7612922    | not scorable | not scorable | 0.9586777    | 0.796928     |
| #### Bn-A06-p14399853 | all not scorable               | not scorable | not scorable | not scorable | not scorable | not scorable | not scorable |
| #### Bn-A06-p14402043 | napus specific                 | 0.9712918    | 0.793607     | not scorable | not scorable | not scorable | not scorable |
| #### Bn-A06-p14417437 | A-genome specific (napus-rapa) | 0.9856459    | 0.5853306    | not scorable | not scorable | 0.9917355    | 0.6968291    |
| #### Bn-A06-p14428186 | A-genome specific (napus-rapa) | 0.9856459    | 0.4585965    | not scorable | not scorable | 0.9917355    | 0.8191147    |
| #### Bn-A06-p14428293 | A-genome specific (napus-rapa) | 0.9928229    | 0.4666623    | not scorable | not scorable | 0.9917355    | 0.6929011    |
| #### Bn-A06-p1443684  | A-genome specific (napus-rapa) | 0.9784689    | 0.2595223    | not scorable | not scorable | 0.9834711    | 0.7009473    |
| #### Bn-A06-p14439178 | A-genome specific (napus-rapa) | 0.9880383    | 0.4974527    | not scorable | not scorable | 0.9917355    | 0.7384785    |
| #### Bn-A06-p14439400 | A-genome specific (napus-rapa) | 1            | 0.5125557    | not scorable | not scorable | 0.9752066    | 0.6440314    |
| #### Bn-A06-p14441081 | A-genome specific (napus-rapa) | 1            | 0.4584518    | not scorable | not scorable | 0.9752066    | 0.6872303    |
| #### Bn-A06-p14457099 | A-genome specific (napus-rapa) | 0.9712918    | 0.4667186    | not scorable | not scorable | 1            | 0.7087782    |
| #### Bn-A06-p14469354 | A-genome specific (napus-rapa) | 0.9904306    | 0.7506744    | not scorable | not scorable | 0.7603306    | 0.6354762    |
| #### Bn-A06-p14474461 | A-genome specific (napus-rapa) | 0.9880383    | 0.6214383    | not scorable | not scorable | 0.9752066    | 0.7686826    |
| #### Bn-A06-p14495889 | A-genome specific (napus-rapa) | 0.9976076    | 0.7886099    | not scorable | not scorable | 0.9834711    | 0.6886729    |
| #### Bn-A06-p1450741  | A-genome specific (napus-rapa) | 0.9688995    | 0.6489722    | not scorable | not scorable | 0.9586777    | 0.6716062    |
| #### Bn-A06-p14510328 | A-genome specific (napus-rapa) | 0.9952153    | 0.7417997    | not scorable | not scorable | 0.9917355    | 0.7113537    |
| #### Bn-A06-p14527757 | A-genome specific (napus-rapa) | 1            | 0.4847424    | not scorable | not scorable | 0.9669421    | 0.761632     |
| #### Bn-A06-p14546946 | A-genome specific (napus-rapa) | 0.9976076    | 0.750188     | not scorable | not scorable | 0.9834711    | 0.7955766    |
| #### Bn-A06-p1455751  | A-genome specific (napus-rapa) | 0.9880383    | 0.7682316    | not scorable | not scorable | 0.6942149    | 0.7208323    |
| #### Bn-A06-p1455781  | A-genome specific (napus-rapa) | 0.9928229    | 0.7793891    | not scorable | not scorable | 0.7190083    | 0.8176259    |
| #### Bn-A06-p1456521  | A-genome specific (napus-rapa) | 0.9665072    | 0.5936332    | not scorable | not scorable | 0.7024794    | 0.7474849    |
| #### Bn-A06-p1457087  | A-genome specific (napus-rapa) | 1            | 0.829748     | not scorable | not scorable | 0.9917355    | 0.748491     |
| #### Bn-A06-p1457383  | A-genome specific (napus-rapa) | 0.9976076    | 0.7574754    | not scorable | not scorable | 0.9917355    | 0.6861063    |
| #### Bn-A06-p14576278 | genome unspecific (all in)     | 1            | 0.4846798    |              | 1            | 0.7319725    | 0.9917355    |

|                       |                                |              |              |              |              |              |              |
|-----------------------|--------------------------------|--------------|--------------|--------------|--------------|--------------|--------------|
| #### Bn-A06-p14578177 | A-genome specific (napus-rapa) | 1            | 0.3348734    | not scorable | not scorable | 0.9917355    | 0.4843373    |
| #### Bn-A06-p14578303 | A-genome specific (napus-rapa) | 1            | 0.615422     | not scorable | not scorable | 0.9834711    | 0.8031524    |
| #### Bn-A06-p14588321 | A-genome specific (napus-rapa) | 0.9976076    | 0.7487138    | not scorable | not scorable | 1            | 0.8079238    |
| #### Bn-A06-p14594965 | A-genome specific (napus-rapa) | 1            | 0.6171259    | not scorable | not scorable | 0.9752066    | 0.5931935    |
| #### Bn-A06-p14595126 | A-genome specific (napus-rapa) | 1            | 0.49661      | not scorable | not scorable | 1            | 0.7254171    |
| #### Bn-A06-p1460039  | A-genome specific (napus-rapa) | 0.9904306    | 0.7678543    | not scorable | not scorable | 0.9421487    | 0.6831894    |
| #### Bn-A06-p14616522 | A-genome specific (napus-rapa) | 0.9832536    | 0.781324     | not scorable | not scorable | 1            | 0.9272779    |
| #### Bn-A06-p14621640 | A-genome specific (napus-rapa) | 0.937799     | 0.4416581    | not scorable | not scorable | 0.7024794    | 0.7744794    |
| #### Bn-A06-p14664213 | A-genome specific (napus-rapa) | 0.9880383    | 0.4156978    | not scorable | not scorable | 1            | 0.7884539    |
| #### Bn-A06-p14676716 | A-genome specific (napus-rapa) | 1            | 0.3219499    | not scorable | not scorable | 0.9917355    | 0.7753065    |
| #### Bn-A06-p14690714 | A-genome specific (rapa only)  | not scorable | not scorable | not scorable | not scorable | 1            | 0.3583842    |
| #### Bn-A06-p14737621 | A-genome specific (rapa only)  | not scorable | not scorable | not scorable | not scorable | 1            | 0.8684879    |
| #### Bn-A06-p14773179 | A-genome specific (napus-rapa) | 1            | 0.5459703    | not scorable | not scorable | 1            | 0.609028     |
| #### Bn-A06-p14809503 | A-genome specific (napus-rapa) | 1            | 0.76289      | not scorable | not scorable | 0.9917355    | 0.8565431    |
| #### Bn-A06-p1481362  | A-genome specific (napus-rapa) | 0.9497608    | 0.7063059    | not scorable | not scorable | 0.9917355    | 0.7575313    |
| #### Bn-A06-p14813811 | A-genome specific (napus-rapa) | 0.9904306    | 0.7976006    | not scorable | not scorable | 0.9917355    | 0.8136404    |
| #### Bn-A06-p14816143 | A-genome specific (napus-rapa) | 0.9784689    | 0.4046156    | not scorable | not scorable | 1            | 0.7656946    |
| #### Bn-A06-p14819465 | A-genome specific (napus-rapa) | 1            | 0.5601844    | not scorable | not scorable | 0.9917355    | 0.8521241    |
| #### Bn-A06-p14829925 | A-genome specific (napus-rapa) | 0.9712918    | 0.7619435    | not scorable | not scorable | 1            | 0.670136     |
| #### Bn-A06-p14834424 | A-genome specific (napus-rapa) | 0.9880383    | 0.3575363    | not scorable | not scorable | 1            | 0.807014     |
| #### Bn-A06-p14836066 | A-genome specific (napus-rapa) | 0.9832536    | 0.8210949    | not scorable | not scorable | 0.9834711    | 0.6963905    |
| #### Bn-A06-p14836486 | A-genome specific (napus-rapa) | 0.9904306    | 0.7869103    | not scorable | not scorable | 1            | 0.8004529    |
| #### Bn-A06-p14843109 | A-genome specific (napus-rapa) | 0.9952153    | 0.2688068    | not scorable | not scorable | 0.9421487    | 0.2317262    |
| #### Bn-A06-p14848662 | A-genome specific (napus-rapa) | 0.9856459    | 0.6390084    | not scorable | not scorable | 0.9917355    | 0.7926773    |
| #### Bn-A06-p14850300 | A-genome specific (rapa only)  | not scorable | not scorable | not scorable | not scorable | 0.9834711    | 0.5709409    |
| #### Bn-A06-p14852091 | A-genome specific (napus-rapa) | 0.9904306    | 0.7832155    | not scorable | not scorable | 0.9834711    | 0.7396818    |
| #### Bn-A06-p14852157 | A-genome specific (napus-rapa) | 0.9904306    | 0.8196893    | not scorable | not scorable | 0.9752066    | 0.7534373    |
| #### Bn-A06-p1485525  | A-genome specific (napus-rapa) | 0.9976076    | 0.7547109    | not scorable | not scorable | 0.9834711    | 0.6994703    |
| #### Bn-A06-p14864165 | A-genome specific (napus-rapa) | 0.8899522    | 0.7619857    | not scorable | not scorable | 0.9917355    | 0.8059069    |
| #### Bn-A06-p14878721 | A-genome specific (napus-rapa) | 0.9736842    | 0.5197877    | not scorable | not scorable | 1            | 0.7458668    |
| #### Bn-A06-p14880259 | napus specific                 | 0.9952153    | 0.7151111    | not scorable | not scorable | not scorable | not scorable |
| #### Bn-A06-p14880848 | A-genome specific (napus-rapa) | 0.9880383    | 0.3200532    | not scorable | not scorable | 0.9917355    | 0.7114244    |
| #### Bn-A06-p1490969  | A-genome specific (napus-rapa) | 0.9688995    | 0.358557     | not scorable | not scorable | 0.9917355    | 0.7364417    |

|                       |                                |              |              |              |              |           |           |
|-----------------------|--------------------------------|--------------|--------------|--------------|--------------|-----------|-----------|
| #### Bn-A06-p149145   | A-genome specific (napus-rapa) | 0.9928229    | 0.7958696    | not scorable | not scorable | 0.9917355 | 0.8283616 |
| #### Bn-A06-p15006796 | A-genome specific (napus-rapa) | 0.9856459    | 0.6006454    | not scorable | not scorable | 1         | 0.7940072 |
| #### Bn-A06-p15013369 | genome unspecific (all in)     | 0.9880383    | 0.2372204    | 0.9922481    | 0.7339854    | 1         | 0.6831905 |
| #### Bn-A06-p15037349 | A-genome specific (napus-rapa) | 0.9569378    | 0.7693295    | not scorable | not scorable | 0.9752066 | 0.6333217 |
| #### Bn-A06-p15048    | A-genome specific (napus-rapa) | 0.9856459    | 0.7220254    | not scorable | not scorable | 1         | 0.7382159 |
| #### Bn-A06-p15059166 | A-genome specific (napus-rapa) | 0.9880383    | 0.8142627    | not scorable | not scorable | 0.9834711 | 0.7445339 |
| #### Bn-A06-p15065078 | A-genome specific (napus-rapa) | 0.9856459    | 0.3943763    | not scorable | not scorable | 0.9917355 | 0.8096535 |
| #### Bn-A06-p1507197  | A-genome specific (napus-rapa) | 1            | 0.5790953    | not scorable | not scorable | 0.9834711 | 0.836962  |
| #### Bn-A06-p15101156 | A-genome specific (napus-rapa) | 0.9688995    | 0.7929416    | not scorable | not scorable | 0.9917355 | 0.7893556 |
| #### Bn-A06-p15112901 | A-genome specific (rapa only)  | not scorable | not scorable | not scorable | not scorable | 0.9338843 | 0.7468821 |
| #### Bn-A06-p1517263  | A-genome specific (rapa only)  | not scorable | not scorable | not scorable | not scorable | 0.9834711 | 0.7371452 |
| #### Bn-A06-p15210596 | A-genome specific (napus-rapa) | 0.937799     | 0.6820722    | not scorable | not scorable | 0.9586777 | 0.7456779 |
| #### Bn-A06-p15258692 | A-genome specific (napus-rapa) | 0.9736842    | 0.2958046    | not scorable | not scorable | 1         | 0.7357686 |
| #### Bn-A06-p15262271 | A-genome specific (napus-rapa) | 0.9952153    | 0.5158182    | not scorable | not scorable | 1         | 0.8354266 |
| #### Bn-A06-p15285770 | A-genome specific (napus-rapa) | 0.9880383    | 0.6718265    | not scorable | not scorable | 0.9669421 | 0.5730987 |
| #### Bn-A06-p15294160 | A-genome specific (napus-rapa) | 0.9760765    | 0.80081      | not scorable | not scorable | 0.9917355 | 0.714762  |
| #### Bn-A06-p1530126  | A-genome specific (napus-rapa) | 1            | 0.4529341    | not scorable | not scorable | 0.9586777 | 0.6754574 |
| #### Bn-A06-p15339222 | A-genome specific (napus-rapa) | 0.9808612    | 0.8271491    | not scorable | not scorable | 1         | 0.7333737 |
| #### Bn-A06-p15358902 | A-genome specific (napus-rapa) | 0.9808612    | 0.429766     | not scorable | not scorable | 0.9917355 | 0.7305586 |
| #### Bn-A06-p15360859 | A-genome specific (napus-rapa) | 0.9784689    | 0.7622387    | not scorable | not scorable | 0.9917355 | 0.7271897 |
| #### Bn-A06-p15375170 | A-genome specific (napus-rapa) | 0.9736842    | 0.2998629    | not scorable | not scorable | 0.9917355 | 0.6485454 |
| #### Bn-A06-p15375395 | A-genome specific (napus-rapa) | 0.9736842    | 0.4435343    | not scorable | not scorable | 0.9834711 | 0.7720932 |
| #### Bn-A06-p15406244 | A-genome specific (rapa only)  | not scorable | not scorable | not scorable | not scorable | 0.8595041 | 0.9053316 |
| #### Bn-A06-p15415078 | A-genome specific (napus-rapa) | 0.9808612    | 0.3517488    | not scorable | not scorable | 0.9917355 | 0.7408474 |
| #### Bn-A06-p15420581 | A-genome specific (napus-rapa) | 0.9832536    | 0.3873282    | not scorable | not scorable | 0.9917355 | 0.8055603 |
| #### Bn-A06-p15421020 | A-genome specific (napus-rapa) | 0.9856459    | 0.7718892    | not scorable | not scorable | 0.9669421 | 0.6940722 |
| #### Bn-A06-p15432171 | A-genome specific (napus-rapa) | 0.9258373    | 0.593458     | not scorable | not scorable | 1         | 0.8702592 |
| #### Bn-A06-p15434445 | A-genome specific (napus-rapa) | 0.9569378    | 0.7686326    | not scorable | not scorable | 1         | 0.8094236 |
| #### Bn-A06-p15470965 | A-genome specific (napus-rapa) | 0.9928229    | 0.4960161    | not scorable | not scorable | 0.9752066 | 0.772032  |
| #### Bn-A06-p15489475 | A-genome specific (napus-rapa) | 0.9856459    | 0.7997606    | not scorable | not scorable | 0.9917355 | 0.7937827 |
| #### Bn-A06-p15513288 | A-genome specific (napus-rapa) | 1            | 0.5107986    | not scorable | not scorable | 0.9917355 | 0.7956564 |
| #### Bn-A06-p15515345 | A-genome specific (napus-rapa) | 0.9904306    | 0.717018     | not scorable | not scorable | 0.9834711 | 0.7648371 |
| #### Bn-A06-p15581849 | A-genome specific (napus-rapa) | 0.9832536    | 0.7060107    | not scorable | not scorable | 0.9917355 | 0.7491596 |

|                       |                                |              |              |              |              |           |           |
|-----------------------|--------------------------------|--------------|--------------|--------------|--------------|-----------|-----------|
| #### Bn-A06-p15582577 | A-genome specific (napus-rapa) | 0.9976076    | 0.5034127    | not scorable | not scorable | 0.9834711 | 0.816063  |
| #### Bn-A06-p15582617 | A-genome specific (napus-rapa) | 0.9712918    | 0.3404703    | not scorable | not scorable | 0.9917355 | 0.6603951 |
| #### Bn-A06-p15584456 | A-genome specific (napus-rapa) | 0.9760765    | 0.7817284    | not scorable | not scorable | 0.9834711 | 0.773729  |
| #### Bn-A06-p15632434 | A-genome specific (napus-rapa) | 0.9904306    | 0.7903177    | not scorable | not scorable | 0.9917355 | 0.8145425 |
| #### Bn-A06-p15649917 | A-genome specific (napus-rapa) | 0.9784689    | 0.3170709    | not scorable | not scorable | 0.9669421 | 0.703772  |
| #### Bn-A06-p15661345 | A-genome specific (napus-rapa) | 0.9952153    | 0.7876096    | not scorable | not scorable | 0.9917355 | 0.8083969 |
| #### Bn-A06-p15662331 | A-genome specific (napus-rapa) | 0.9736842    | 0.7936228    | not scorable | not scorable | 0.661157  | 0.8287914 |
| #### Bn-A06-p15691701 | A-genome specific (napus-rapa) | 0.9976076    | 0.5604097    | not scorable | not scorable | 1         | 0.8177654 |
| #### Bn-A06-p15700525 | A-genome specific (napus-rapa) | 0.9952153    | 0.6883085    | not scorable | not scorable | 1         | 0.8086844 |
| #### Bn-A06-p15701094 | A-genome specific (napus-rapa) | 0.9856459    | 0.7505224    | not scorable | not scorable | 0.9917355 | 0.7508853 |
| #### Bn-A06-p15703535 | A-genome specific (napus-rapa) | 0.9832536    | 0.6276017    | not scorable | not scorable | 0.661157  | 0.8214749 |
| #### Bn-A06-p15709579 | genome unspecific (all in)     | 0.9976076    | 0.4452079    |              | 1 0.8207103  | 1         | 0.8145207 |
| #### Bn-A06-p15712062 | A-genome specific (napus-rapa) | 0.9904306    | 0.7748302    | not scorable | not scorable | 0.9752066 | 0.8260106 |
| #### Bn-A06-p15743629 | A-genome specific (napus-rapa) | 0.9521531    | 0.7693118    | not scorable | not scorable | 0.9669421 | 0.6781133 |
| #### Bn-A06-p15748291 | A-genome specific (napus-rapa) | 0.9569378    | 0.6590814    | not scorable | not scorable | 0.9752066 | 0.7451802 |
| #### Bn-A06-p15749428 | A-genome specific (napus-rapa) | 1            | 0.8336033    | not scorable | not scorable | 0.9917355 | 0.7204518 |
| #### Bn-A06-p15760165 | A-genome specific (napus-rapa) | 0.9976076    | 0.3684029    | not scorable | not scorable | 0.9834711 | 0.7030522 |
| #### Bn-A06-p15775625 | A-genome specific (napus-rapa) | 0.9976076    | 0.7858106    | not scorable | not scorable | 1         | 0.7236875 |
| #### Bn-A06-p15778397 | A-genome specific (napus-rapa) | 0.9832536    | 0.3476014    | not scorable | not scorable | 0.9586777 | 0.8333383 |
| #### Bn-A06-p15791244 | A-genome specific (napus-rapa) | 0.9760765    | 0.6102226    | not scorable | not scorable | 0.9752066 | 0.7762588 |
| #### Bn-A06-p15801373 | A-genome specific (napus-rapa) | 0.9976076    | 0.7673511    | not scorable | not scorable | 0.9917355 | 0.7884806 |
| #### Bn-A06-p15893014 | A-genome specific (napus-rapa) | 0.9904306    | 0.6443722    | not scorable | not scorable | 0.9834711 | 0.5724069 |
| #### Bn-A06-p15893221 | A-genome specific (napus-rapa) | 0.9784689    | 0.2740359    | not scorable | not scorable | 0.9752066 | 0.5878999 |
| #### Bn-A06-p15894458 | A-genome specific (rapa only)  | not scorable | not scorable | not scorable | not scorable | 0.9917355 | 0.7480733 |
| #### Bn-A06-p15894910 | A-genome specific (napus-rapa) | 0.9760765    | 0.3472844    | not scorable | not scorable | 1         | 0.7538385 |
| #### Bn-A06-p15913910 | A-genome specific (rapa only)  | not scorable | not scorable | not scorable | not scorable | 0.9834711 | 0.7553031 |
| #### Bn-A06-p15921988 | A-genome specific (napus-rapa) | 0.9880383    | 0.4079188    | not scorable | not scorable | 0.9669421 | 0.5445014 |
| #### Bn-A06-p15922683 | A-genome specific (napus-rapa) | 0.9808612    | 0.3923483    | not scorable | not scorable | 0.9752066 | 0.7946898 |
| #### Bn-A06-p15966650 | A-genome specific (napus-rapa) | 0.9976076    | 0.6893014    | not scorable | not scorable | 0.9834711 | 0.8566131 |
| #### Bn-A06-p15967529 | A-genome specific (napus-rapa) | 1            | 0.7865977    | not scorable | not scorable | 0.9669421 | 0.760443  |
| #### Bn-A06-p15967682 | A-genome specific (napus-rapa) | 1            | 0.7933219    | not scorable | not scorable | 0.9834711 | 0.7036652 |
| #### Bn-A06-p15988623 | A-genome specific (napus-rapa) | 1            | 0.5609792    | not scorable | not scorable | 0.9917355 | 0.7907662 |
| #### Bn-A06-p15990313 | A-genome specific (napus-rapa) | 1            | 0.4885826    | not scorable | not scorable | 0.9917355 | 0.8057448 |

|                       |                                |              |              |              |              |              |              |
|-----------------------|--------------------------------|--------------|--------------|--------------|--------------|--------------|--------------|
| #### Bn-A06-p16000523 | A-genome specific (rapa only)  | not scorable | not scorable | not scorable | not scorable | 0.9917355    | 0.7772956    |
| #### Bn-A06-p16009894 | A-genome specific (napus-rapa) | 0.9976076    | 0.7800343    | not scorable | not scorable | 0.9669421    | 0.6932905    |
| #### Bn-A06-p16013571 | A-genome specific (napus-rapa) | 0.9617225    | 0.6288615    | not scorable | not scorable | 0.9669421    | 0.6809539    |
| #### Bn-A06-p16013796 | A-genome specific (napus-rapa) | 0.9665072    | 0.5355712    | not scorable | not scorable | 0.9917355    | 0.6742523    |
| #### Bn-A06-p16014870 | A-genome specific (napus-rapa) | 0.9880383    | 0.6577537    | not scorable | not scorable | 0.9752066    | 0.6265906    |
| #### Bn-A06-p16014941 | A-genome specific (napus-rapa) | 0.9904306    | 0.6792614    | not scorable | not scorable | 0.9669421    | 0.67022      |
| #### Bn-A06-p16015026 | A-genome specific (napus-rapa) | 0.9952153    | 0.7109914    | not scorable | not scorable | 0.9752066    | 0.7356135    |
| #### Bn-A06-p16015727 | A-genome specific (napus-rapa) | 0.9952153    | 0.677512     | not scorable | not scorable | 0.9917355    | 0.6759912    |
| #### Bn-A06-p16015795 | A-genome specific (napus-rapa) | 0.6052632    | 0.8337684    | not scorable | not scorable | 0.7024794    | 0.7821928    |
| #### Bn-A06-p16016634 | A-genome specific (napus-rapa) | 0.9928229    | 0.7771403    | not scorable | not scorable | 0.9917355    | 0.7905771    |
| #### Bn-A06-p16025514 | A-genome specific (napus-rapa) | 0.9880383    | 0.6876359    | not scorable | not scorable | 0.9669421    | 0.6951582    |
| #### Bn-A06-p16030994 | A-genome specific (napus-rapa) | 0.9784689    | 0.676307     | not scorable | not scorable | 1            | 0.6805803    |
| #### Bn-A06-p16032028 | A-genome specific (napus-rapa) | 0.9760765    | 0.7824032    | not scorable | not scorable | 0.9669421    | 0.7094271    |
| #### Bn-A06-p16042593 | napus specific                 | 0.9641148    | 0.9371856    | not scorable | not scorable | not scorable | not scorable |
| #### Bn-A06-p16064239 | A-genome specific (napus-rapa) | 0.9497608    | 0.3711144    | not scorable | not scorable | 0.9917355    | 0.5681765    |
| #### Bn-A06-p16071214 | A-genome specific (napus-rapa) | 0.9928229    | 0.704638     | not scorable | not scorable | 0.9669421    | 0.6239372    |
| #### Bn-A06-p16102726 | A-genome specific (napus-rapa) | 0.9497608    | 0.6016836    | not scorable | not scorable | 0.9917355    | 0.7688866    |
| #### Bn-A06-p16106230 | A-genome specific (napus-rapa) | 1            | 0.6587121    | not scorable | not scorable | 1            | 0.6720757    |
| #### Bn-A06-p1612900  | A-genome specific (rapa only)  | not scorable | not scorable | not scorable | not scorable | 0.9669421    | 0.9243378    |
| #### Bn-A06-p16131586 | A-genome specific (napus-rapa) | 1            | 0.8006784    | not scorable | not scorable | 0.9917355    | 0.7430053    |
| #### Bn-A06-p16133328 | napus specific                 | 0.9593301    | 0.6090599    | not scorable | not scorable | not scorable | not scorable |
| #### Bn-A06-p16134293 | A-genome specific (rapa only)  | not scorable | not scorable | not scorable | not scorable | 0.9752066    | 0.6779389    |
| #### Bn-A06-p16148736 | A-genome specific (napus-rapa) | 0.9904306    | 0.8042262    | not scorable | not scorable | 0.9834711    | 0.7899241    |
| #### Bn-A06-p16149093 | A-genome specific (napus-rapa) | 1            | 0.8135551    | not scorable | not scorable | 1            | 0.8135551    |
| #### Bn-A06-p16150365 | A-genome specific (napus-rapa) | 0.9976076    | 0.7549687    | not scorable | not scorable | 0.9834711    | 0.7075345    |
| #### Bn-A06-p16150919 | A-genome specific (napus-rapa) | 1            | 0.5551252    | not scorable | not scorable | 1            | 0.8004208    |
| #### Bn-A06-p1615726  | A-genome specific (napus-rapa) | 0.9641148    | 0.5137805    | not scorable | not scorable | 1            | 0.6597274    |
| #### Bn-A06-p16166965 | A-genome specific (napus-rapa) | 0.9976076    | 0.5130699    | not scorable | not scorable | 1            | 0.7427495    |
| #### Bn-A06-p16168931 | A-genome specific (napus-rapa) | 1            | 0.7884359    | not scorable | not scorable | 1            | 0.7696534    |
| #### Bn-A06-p16169045 | A-genome specific (napus-rapa) | 0.9976076    | 0.8268663    | not scorable | not scorable | 0.9917355    | 0.763027     |
| #### Bn-A06-p16169367 | A-genome specific (napus-rapa) | 0.9880383    | 0.8011565    | not scorable | not scorable | 1            | 0.7046239    |
| #### Bn-A06-p16169669 | A-genome specific (napus-rapa) | 0.9952153    | 0.7653556    | not scorable | not scorable | 0.9752066    | 0.7169248    |
| #### Bn-A06-p16170755 | A-genome specific (napus-rapa) | 1            | 0.814613     | not scorable | not scorable | 0.9917355    | 0.7633869    |



|                       |                                |              |              |              |              |           |           |
|-----------------------|--------------------------------|--------------|--------------|--------------|--------------|-----------|-----------|
| #### Bn-A06-p16170813 | A-genome specific (napus-rapa) | 0.9976076    | 0.753828     | not scorable | not scorable | 0.9917355 | 0.7560859 |
| #### Bn-A06-p16173797 | A-genome specific (napus-rapa) | 0.9904306    | 0.704466     | not scorable | not scorable | 0.9834711 | 0.7245347 |
| #### Bn-A06-p16181242 | A-genome specific (napus-rapa) | 0.9832536    | 0.8068777    | not scorable | not scorable | 0.9669421 | 0.7793317 |
| #### Bn-A06-p16188512 | A-genome specific (napus-rapa) | 0.9976076    | 0.7323664    | not scorable | not scorable | 1         | 0.765983  |
| #### Bn-A06-p16237929 | A-genome specific (napus-rapa) | 0.9569378    | 0.7659086    | not scorable | not scorable | 0.9917355 | 0.7412319 |
| #### Bn-A06-p16256906 | A-genome specific (napus-rapa) | 0.9976076    | 0.330162     | not scorable | not scorable | 0.9917355 | 0.6969356 |
| #### Bn-A06-p1626020  | A-genome specific (napus-rapa) | 1            | 0.55515      | not scorable | not scorable | 1         | 0.7680972 |
| #### Bn-A06-p16262957 | A-genome specific (napus-rapa) | 0.8636364    | 0.7787807    | not scorable | not scorable | 0.6363636 | 0.8215211 |
| #### Bn-A06-p16283909 | A-genome specific (napus-rapa) | 0.9952153    | 0.7987685    | not scorable | not scorable | 0.5785124 | 0.8146011 |
| #### Bn-A06-p16284324 | A-genome specific (napus-rapa) | 0.9976076    | 0.747008     | not scorable | not scorable | 1         | 0.6671334 |
| #### Bn-A06-p16284610 | A-genome specific (napus-rapa) | 0.9880383    | 0.517243     | not scorable | not scorable | 1         | 0.7889764 |
| #### Bn-A06-p16303805 | A-genome specific (napus-rapa) | 0.9952153    | 0.6358169    | not scorable | not scorable | 0.9504132 | 0.6003107 |
| #### Bn-A06-p16303860 | A-genome specific (napus-rapa) | 0.9976076    | 0.7820808    | not scorable | not scorable | 0.9917355 | 0.7216529 |
| #### Bn-A06-p16308544 | A-genome specific (napus-rapa) | 0.9976076    | 0.7764606    | not scorable | not scorable | 0.9669421 | 0.7460765 |
| #### Bn-A06-p16314064 | genome unspecific (all in)     | 0.9665072    | 0.3968066    |              | 1 0.4700956  | 0.9917355 | 0.8301404 |
| #### Bn-A06-p16325882 | A-genome specific (rapa only)  | not scorable | not scorable | not scorable | not scorable | 0.9917355 | 0.7901847 |
| #### Bn-A06-p16325934 | A-genome specific (napus-rapa) | 0.9856459    | 0.7585959    | not scorable | not scorable | 1         | 0.6648738 |
| #### Bn-A06-p16330377 | A-genome specific (napus-rapa) | 0.9832536    | 0.5988952    | not scorable | not scorable | 0.9917355 | 0.8228956 |
| #### Bn-A06-p163388   | A-genome specific (napus-rapa) | 0.9760765    | 0.5409738    | not scorable | not scorable | 0.9504132 | 0.7393414 |
| #### Bn-A06-p16342269 | A-genome specific (rapa only)  | not scorable | not scorable | not scorable | not scorable | 0.9917355 | 0.8254753 |
| #### Bn-A06-p16362555 | A-genome specific (napus-rapa) | 0.9880383    | 0.7954009    | not scorable | not scorable | 0.9834711 | 0.773917  |
| #### Bn-A06-p1636449  | A-genome specific (napus-rapa) | 0.9928229    | 0.31699      | not scorable | not scorable | 0.9917355 | 0.7357985 |
| #### Bn-A06-p16381299 | A-genome specific (napus-rapa) | 0.9928229    | 0.6663723    | not scorable | not scorable | 1         | 0.6890678 |
| #### Bn-A06-p16386782 | A-genome specific (napus-rapa) | 0.9760765    | 0.7775438    | not scorable | not scorable | 0.9917355 | 0.816465  |
| #### Bn-A06-p16386992 | A-genome specific (napus-rapa) | 0.9712918    | 0.7840853    | not scorable | not scorable | 0.9834711 | 0.8200318 |
| #### Bn-A06-p16406113 | A-genome specific (napus-rapa) | 0.9904306    | 0.4294029    | not scorable | not scorable | 0.9669421 | 0.6740993 |
| #### Bn-A06-p16449642 | A-genome specific (napus-rapa) | 0.9808612    | 0.7830929    | not scorable | not scorable | 0.9752066 | 0.777311  |
| #### Bn-A06-p16460575 | A-genome specific (napus-rapa) | 0.9760765    | 0.7564679    | not scorable | not scorable | 0.9504132 | 0.6583517 |
| #### Bn-A06-p16461885 | A-genome specific (napus-rapa) | 0.9808612    | 0.7222949    | not scorable | not scorable | 0.9752066 | 0.6781062 |
| #### Bn-A06-p1650453  | A-genome specific (napus-rapa) | 0.9856459    | 0.7559413    | not scorable | not scorable | 0.9917355 | 0.6762386 |
| #### Bn-A06-p1650457  | A-genome specific (napus-rapa) | 0.9856459    | 0.7668051    | not scorable | not scorable | 0.9834711 | 0.7953139 |
| #### Bn-A06-p1650529  | A-genome specific (napus-rapa) | 0.9880383    | 0.9154827    | not scorable | not scorable | 0.9834711 | 0.7774786 |
| #### Bn-A06-p1650786  | A-genome specific (napus-rapa) | 0.9952153    | 0.5077711    | not scorable | not scorable | 0.9752066 | 0.7738416 |

|                       |                                |           |                        |              |              |              |
|-----------------------|--------------------------------|-----------|------------------------|--------------|--------------|--------------|
| #### Bn-A06-p1652088  | A-genome specific (napus-rapa) | 0.9976076 | 0.7861372 not scorable | not scorable | 0.9834711    | 0.7285472    |
| #### Bn-A06-p16553412 | A-genome specific (napus-rapa) | 0.9808612 | 0.4776695 not scorable | not scorable | 0.9834711    | 0.6487134    |
| #### Bn-A06-p16553640 | A-genome specific (napus-rapa) | 0.9832536 | 0.5152501 not scorable | not scorable | 0.9917355    | 0.6998188    |
| #### Bn-A06-p16554297 | A-genome specific (napus-rapa) | 0.9904306 | 0.7926969 not scorable | not scorable | 0.9917355    | 0.8641534    |
| #### Bn-A06-p1658095  | napus specific                 | 0.9043062 | 0.54857 not scorable   | not scorable | not scorable | not scorable |
| #### Bn-A06-p16588120 | A-genome specific (napus-rapa) | 0.9808612 | 0.6799524 not scorable | not scorable | 0.9917355    | 0.7794802    |
| #### Bn-A06-p16588154 | napus specific                 | 0.9641148 | 0.5498086 not scorable | not scorable | not scorable | not scorable |
| #### Bn-A06-p16613538 | A-genome specific (napus-rapa) | 0.9736842 | 0.6770887 not scorable | not scorable | 0.9752066    | 0.6712872    |
| #### Bn-A06-p1661477  | A-genome specific (napus-rapa) | 0.9090909 | 0.7082462 not scorable | not scorable | 0.9669421    | 0.6202248    |
| #### Bn-A06-p16620858 | A-genome specific (napus-rapa) | 0.9641148 | 0.2463419 not scorable | not scorable | 0.9834711    | 0.7017635    |
| #### Bn-A06-p16620984 | A-genome specific (napus-rapa) | 0.9856459 | 0.3237579 not scorable | not scorable | 0.9917355    | 0.8110601    |
| #### Bn-A06-p16621639 | A-genome specific (napus-rapa) | 0.9832536 | 0.7819065 not scorable | not scorable | 0.9917355    | 0.8509741    |
| #### Bn-A06-p16624574 | A-genome specific (napus-rapa) | 0.9856459 | 0.6861864 not scorable | not scorable | 0.9917355    | 0.6345529    |
| #### Bn-A06-p16629547 | A-genome specific (napus-rapa) | 0.9641148 | 0.3549107 not scorable | not scorable | 0.9834711    | 0.7820685    |
| #### Bn-A06-p16645035 | A-genome specific (napus-rapa) | 0.9928229 | 0.7582259 not scorable | not scorable | 0.9917355    | 0.8235909    |
| #### Bn-A06-p16645140 | A-genome specific (napus-rapa) | 0.9904306 | 0.5151128 not scorable | not scorable | 0.9917355    | 0.8375668    |
| #### Bn-A06-p16656745 | genome unspecific (all in)     | 0.9856459 | 0.5116102              | 1 0.7760428  | 0.9917355    | 0.7242395    |
| #### Bn-A06-p16657894 | A-genome specific (napus-rapa) | 0.9904306 | 0.7989181 not scorable | not scorable | 1            | 0.7299228    |
| #### Bn-A06-p16660065 | A-genome specific (napus-rapa) | 0.9736842 | 0.3040999 not scorable | not scorable | 0.9917355    | 0.7493256    |
| #### Bn-A06-p16678748 | A-genome specific (napus-rapa) | 0.9808612 | 0.7866086 not scorable | not scorable | 1            | 0.7994226    |
| #### Bn-A06-p16682224 | A-genome specific (napus-rapa) | 0.9928229 | 0.5212793 not scorable | not scorable | 1            | 0.6942437    |
| #### Bn-A06-p16689717 | A-genome specific (napus-rapa) | 0.9832536 | 0.5150467 not scorable | not scorable | 0.9917355    | 0.7581329    |
| #### Bn-A06-p16701773 | A-genome specific (napus-rapa) | 1         | 0.7024977 not scorable | not scorable | 0.9834711    | 0.6945397    |
| #### Bn-A06-p16702471 | A-genome specific (napus-rapa) | 0.9832536 | 0.5317633 not scorable | not scorable | 1            | 0.6962484    |
| #### Bn-A06-p16703929 | A-genome specific (napus-rapa) | 0.9904306 | 0.3986781 not scorable | not scorable | 0.9917355    | 0.6901155    |
| #### Bn-A06-p16718752 | genome unspecific (all in)     | 0.9928229 | 0.5125078              | 1 0.7557063  | 0.6859504    | 0.7031403    |
| #### Bn-A06-p16728885 | A-genome specific (napus-rapa) | 0.9976076 | 0.3571929 not scorable | not scorable | 0.9917355    | 0.7053624    |
| #### Bn-A06-p167382   | A-genome specific (napus-rapa) | 0.9904306 | 0.4215459 not scorable | not scorable | 1            | 0.7788153    |
| #### Bn-A06-p16829292 | A-genome specific (napus-rapa) | 0.9832536 | 0.446236 not scorable  | not scorable | 1            | 0.8893794    |
| #### Bn-A06-p16840167 | A-genome specific (napus-rapa) | 0.9952153 | 0.792918 not scorable  | not scorable | 0.9917355    | 0.7687623    |
| #### Bn-A06-p16847178 | A-genome specific (napus-rapa) | 1         | 0.7320092 not scorable | not scorable | 1            | 0.7462659    |
| #### Bn-A06-p16847229 | A-genome specific (napus-rapa) | 1         | 0.49915 not scorable   | not scorable | 0.9752066    | 0.6682746    |
| #### Bn-A06-p1685018  | A-genome specific (napus-rapa) | 0.9856459 | 0.3285702 not scorable | not scorable | 0.9586777    | 0.825318     |

|                       |                                |              |              |              |              |           |           |
|-----------------------|--------------------------------|--------------|--------------|--------------|--------------|-----------|-----------|
| #### Bn-A06-p1685192  | A-genome specific (napus-rapa) | 0.9808612    | 0.5958149    | not scorable | not scorable | 0.9586777 | 0.646979  |
| #### Bn-A06-p16875263 | A-genome specific (rapa only)  | not scorable | not scorable | not scorable | not scorable | 0.9917355 | 0.7264067 |
| #### Bn-A06-p16933880 | A-genome specific (napus-rapa) | 0.9952153    | 0.5219405    | not scorable | not scorable | 0.9586777 | 0.7769821 |
| #### Bn-A06-p16985788 | A-genome specific (napus-rapa) | 0.9928229    | 0.529933     | not scorable | not scorable | 1         | 0.716581  |
| #### Bn-A06-p16992951 | A-genome specific (napus-rapa) | 0.9952153    | 0.7767684    | not scorable | not scorable | 0.9917355 | 0.6991709 |
| #### Bn-A06-p16993923 | A-genome specific (napus-rapa) | 0.9904306    | 0.7562174    | not scorable | not scorable | 0.9917355 | 0.7593259 |
| #### Bn-A06-p16994210 | A-genome specific (napus-rapa) | 0.9904306    | 0.3625469    | not scorable | not scorable | 0.9752066 | 0.798762  |
| #### Bn-A06-p17003685 | A-genome specific (napus-rapa) | 0.9832536    | 0.460525     | not scorable | not scorable | 0.9917355 | 0.8311084 |
| #### Bn-A06-p17006799 | A-genome specific (napus-rapa) | 0.9856459    | 0.7520738    | not scorable | not scorable | 1         | 0.7738914 |
| #### Bn-A06-p17007775 | A-genome specific (napus-rapa) | 0.9760765    | 0.7357221    | not scorable | not scorable | 0.9669421 | 0.752656  |
| #### Bn-A06-p17010360 | A-genome specific (napus-rapa) | 0.9784689    | 0.3767497    | not scorable | not scorable | 0.9917355 | 0.6951944 |
| #### Bn-A06-p17011382 | genome unspecific (all in)     | 0.9808612    | 0.4401713    |              | 1 0.7603709  | 1         | 0.6763377 |
| #### Bn-A06-p17021956 | A-genome specific (napus-rapa) | 0.9952153    | 0.7969892    | not scorable | not scorable | 1         | 0.780094  |
| #### Bn-A06-p17023559 | A-genome specific (rapa only)  | not scorable | not scorable | not scorable | not scorable | 0.7024794 | 0.7414954 |
| #### Bn-A06-p17024179 | A-genome specific (napus-rapa) | 0.9832536    | 0.6867579    | not scorable | not scorable | 0.9669421 | 0.6915157 |
| #### Bn-A06-p17026294 | A-genome specific (napus-rapa) | 0.9784689    | 0.7406293    | not scorable | not scorable | 0.9752066 | 0.7910517 |
| #### Bn-A06-p17026843 | A-genome specific (rapa only)  | not scorable | not scorable | not scorable | not scorable | 0.9752066 | 0.6244431 |
| #### Bn-A06-p17032583 | A-genome specific (napus-rapa) | 0.9808612    | 0.5624855    | not scorable | not scorable | 0.9917355 | 0.7642815 |
| #### Bn-A06-p17033313 | A-genome specific (napus-rapa) | 0.9712918    | 0.6890773    | not scorable | not scorable | 0.9752066 | 0.6871214 |
| #### Bn-A06-p17037739 | genome unspecific (all in)     | 0.9856459    | 0.4811082    |              | 1 0.7871097  | 1         | 0.7534428 |
| #### Bn-A06-p17037912 | A-genome specific (napus-rapa) | 0.9928229    | 0.4022129    | not scorable | not scorable | 0.9338843 | 0.6658676 |
| #### Bn-A06-p17042021 | A-genome specific (napus-rapa) | 0.9856459    | 0.8023536    | not scorable | not scorable | 0.9834711 | 0.7903157 |
| #### Bn-A06-p17042110 | A-genome specific (napus-rapa) | 0.9736842    | 0.6325307    | not scorable | not scorable | 0.9752066 | 0.7849693 |
| #### Bn-A06-p17049401 | A-genome specific (napus-rapa) | 0.9856459    | 0.8054748    | not scorable | not scorable | 1         | 0.8035294 |
| #### Bn-A06-p17058018 | A-genome specific (napus-rapa) | 0.9880383    | 0.7957971    | not scorable | not scorable | 0.5123967 | 0.7096606 |
| #### Bn-A06-p17058537 | A-genome specific (napus-rapa) | 0.9736842    | 0.7213836    | not scorable | not scorable | 0.5206612 | 0.721753  |
| #### Bn-A06-p17059130 | A-genome specific (napus-rapa) | 0.9952153    | 0.7962995    | not scorable | not scorable | 0.7107438 | 0.7779452 |
| #### Bn-A06-p17059461 | A-genome specific (napus-rapa) | 0.9856459    | 0.690636     | not scorable | not scorable | 0.5041322 | 0.6995872 |
| #### Bn-A06-p17065808 | A-genome specific (napus-rapa) | 0.9880383    | 0.8042824    | not scorable | not scorable | 0.6033058 | 0.8586174 |
| #### Bn-A06-p17093738 | A-genome specific (napus-rapa) | 0.9928229    | 0.3475238    | not scorable | not scorable | 0.9669421 | 0.786568  |
| #### Bn-A06-p17097734 | A-genome specific (napus-rapa) | 0.9808612    | 0.7112521    | not scorable | not scorable | 1         | 0.6937376 |
| #### Bn-A06-p17099451 | A-genome specific (napus-rapa) | 0.9832536    | 0.5752718    | not scorable | not scorable | 0.9586777 | 0.6450936 |
| #### Bn-A06-p17109583 | A-genome specific (napus-rapa) | 0.9952153    | 0.8038881    | not scorable | not scorable | 0.9752066 | 0.8189644 |

|                       |                                |              |              |              |              |              |              |
|-----------------------|--------------------------------|--------------|--------------|--------------|--------------|--------------|--------------|
| #### Bn-A06-p17112322 | A-genome specific (napus-rapa) | 1            | 0.8022394    | not scorable | not scorable | 0.9917355    | 0.7528518    |
| #### Bn-A06-p17114458 | A-genome specific (napus-rapa) | 0.9976076    | 0.798973     | not scorable | not scorable | 0.553719     | 0.8408964    |
| #### Bn-A06-p17143376 | A-genome specific (napus-rapa) | 0.2607656    | 0.8343296    | not scorable | not scorable | 1            | 0.8485305    |
| #### Bn-A06-p17156091 | A-genome specific (rapa only)  | not scorable | not scorable | not scorable | not scorable | 1            | 0.5747117    |
| #### Bn-A06-p17173552 | A-genome specific (napus-rapa) | 0.9856459    | 0.5047378    | not scorable | not scorable | 1            | 0.8323764    |
| #### Bn-A06-p17175388 | A-genome specific (napus-rapa) | 0.9904306    | 0.2982488    | not scorable | not scorable | 0.9834711    | 0.6719483    |
| #### Bn-A06-p17176086 | A-genome specific (napus-rapa) | 1            | 0.6347812    | not scorable | not scorable | 0.9917355    | 0.662836     |
| #### Bn-A06-p17190074 | all not scorable               | not scorable | not scorable | not scorable | not scorable | not scorable | not scorable |
| #### Bn-A06-p17208027 | A-genome specific (napus-rapa) | 0.9880383    | 0.7099763    | not scorable | not scorable | 0.5454546    | 0.6944501    |
| #### Bn-A06-p172171   | A-genome specific (napus-rapa) | 0.9665072    | 0.7879169    | not scorable | not scorable | 0.9586777    | 0.6744213    |
| #### Bn-A06-p17220153 | A-genome specific (napus-rapa) | 0.9856459    | 0.5504892    | not scorable | not scorable | 0.5702479    | 0.7181352    |
| #### Bn-A06-p1722627  | A-genome specific (napus-rapa) | 0.9736842    | 0.8077073    | not scorable | not scorable | 0.9090909    | 0.7627784    |
| #### Bn-A06-p17226648 | A-genome specific (napus-rapa) | 0.9952153    | 0.7989584    | not scorable | not scorable | 1            | 0.7504681    |
| #### Bn-A06-p17242102 | A-genome specific (napus-rapa) | 0.8971292    | 0.5605977    | not scorable | not scorable | 0.8842975    | 0.7884649    |
| #### Bn-A06-p17242631 | all not scorable               | not scorable | not scorable | not scorable | not scorable | not scorable | not scorable |
| #### Bn-A06-p17260160 | A-genome specific (napus-rapa) | 0.9904306    | 0.503556     | not scorable | not scorable | 1            | 0.7922361    |
| #### Bn-A06-p17260573 | A-genome specific (napus-rapa) | 0.9808612    | 0.67841      | not scorable | not scorable | 0.9917355    | 0.8996682    |
| #### Bn-A06-p17262265 | A-genome specific (napus-rapa) | 0.9736842    | 0.8249155    | not scorable | not scorable | 0.9917355    | 0.9212999    |
| #### Bn-A06-p17267787 | A-genome specific (napus-rapa) | 0.9952153    | 0.7721497    | not scorable | not scorable | 0.9752066    | 0.7419204    |
| #### Bn-A06-p172731   | A-genome specific (napus-rapa) | 0.9712918    | 0.7757637    | not scorable | not scorable | 1            | 0.6995161    |
| #### Bn-A06-p17289947 | A-genome specific (napus-rapa) | 0.9928229    | 0.3172973    | not scorable | not scorable | 1            | 0.8516589    |
| #### Bn-A06-p17291868 | A-genome specific (napus-rapa) | 0.9976076    | 0.84392      | not scorable | not scorable | 1            | 0.7142364    |
| #### Bn-A06-p17301456 | A-genome specific (napus-rapa) | 0.9856459    | 0.3124814    | not scorable | not scorable | 1            | 0.7600912    |
| #### Bn-A06-p17313345 | A-genome specific (napus-rapa) | 0.9928229    | 0.3456605    | not scorable | not scorable | 0.9917355    | 0.7812183    |
| #### Bn-A06-p17321987 | A-genome specific (napus-rapa) | 0.9880383    | 0.768483     | not scorable | not scorable | 0.9586777    | 0.6961991    |
| #### Bn-A06-p17331074 | A-genome specific (napus-rapa) | 0.9904306    | 0.4482886    | not scorable | not scorable | 1            | 0.7863377    |
| #### Bn-A06-p17332795 | A-genome specific (napus-rapa) | 0.9928229    | 0.5705034    | not scorable | not scorable | 0.9669421    | 0.6275762    |
| #### Bn-A06-p17337842 | A-genome specific (napus-rapa) | 0.9880383    | 0.3627049    | not scorable | not scorable | 0.9917355    | 0.7805368    |
| #### Bn-A06-p17346654 | A-genome specific (napus-rapa) | 0.9736842    | 0.7343631    | not scorable | not scorable | 1            | 0.8137556    |
| #### Bn-A06-p17375407 | A-genome specific (napus-rapa) | 0.9832536    | 0.3481195    | not scorable | not scorable | 1            | 0.7624283    |
| #### Bn-A06-p17375882 | A-genome specific (napus-rapa) | 0.9856459    | 0.7378044    | not scorable | not scorable | 1            | 0.6036078    |
| #### Bn-A06-p17411706 | A-genome specific (napus-rapa) | 0.9856459    | 0.7880903    | not scorable | not scorable | 0.9834711    | 0.6892179    |
| #### Bn-A06-p17415359 | A-genome specific (napus-rapa) | 0.9856459    | 0.361008     | not scorable | not scorable | 0.9917355    | 0.7954502    |

|                       |                                |              |              |              |              |           |           |
|-----------------------|--------------------------------|--------------|--------------|--------------|--------------|-----------|-----------|
| #### Bn-A06-p17430491 | genome unspecific (all in)     | 0.9425837    | 0.563417     | 0.9457364    | 0.3960749    | 0.9917355 | 0.8026219 |
| #### Bn-A06-p1743446  | A-genome specific (napus-rapa) | 0.9784689    | 0.7319359    | not scorable | not scorable | 0.9834711 | 0.6432585 |
| #### Bn-A06-p17452087 | A-genome specific (napus-rapa) | 0.9832536    | 0.512971     | not scorable | not scorable | 1         | 0.7739488 |
| #### Bn-A06-p17455962 | A-genome specific (napus-rapa) | 0.9784689    | 0.4775787    | not scorable | not scorable | 1         | 0.8461192 |
| #### Bn-A06-p17548258 | genome unspecific (all in)     | 0.9760765    | 0.5652488    | 1            | 0.7617062    | 0.9917355 | 0.6502439 |
| #### Bn-A06-p17548894 | A-genome specific (napus-rapa) | 0.9856459    | 0.4155801    | not scorable | not scorable | 0.9917355 | 0.740381  |
| #### Bn-A06-p17549347 | A-genome specific (napus-rapa) | 0.9665072    | 0.4055918    | not scorable | not scorable | 0.9917355 | 0.7726756 |
| #### Bn-A06-p17549603 | A-genome specific (napus-rapa) | 0.9880383    | 0.6795291    | not scorable | not scorable | 0.9752066 | 0.5866033 |
| #### Bn-A06-p17566259 | A-genome specific (napus-rapa) | 0.9904306    | 0.5719148    | not scorable | not scorable | 1         | 0.6909539 |
| #### Bn-A06-p17659127 | A-genome specific (napus-rapa) | 0.9880383    | 0.532942     | not scorable | not scorable | 0.9834711 | 0.8177654 |
| #### Bn-A06-p17671185 | A-genome specific (napus-rapa) | 0.9856459    | 0.4119997    | not scorable | not scorable | 0.9917355 | 0.7792268 |
| #### Bn-A06-p17681092 | A-genome specific (napus-rapa) | 0.9712918    | 0.7553742    | not scorable | not scorable | 0.9917355 | 0.7386914 |
| #### Bn-A06-p1768254  | A-genome specific (napus-rapa) | 0.9880383    | 0.7857155    | not scorable | not scorable | 0.9752066 | 0.7275296 |
| #### Bn-A06-p17684443 | A-genome specific (napus-rapa) | 0.9760765    | 0.3713014    | not scorable | not scorable | 0.9752066 | 0.4561963 |
| #### Bn-A06-p17689034 | A-genome specific (napus-rapa) | 0.6842105    | 0.8082798    | not scorable | not scorable | 0.9834711 | 0.773594  |
| #### Bn-A06-p1768918  | A-genome specific (napus-rapa) | 0.9856459    | 0.7711685    | not scorable | not scorable | 0.9752066 | 0.6552749 |
| #### Bn-A06-p17689415 | A-genome specific (napus-rapa) | 0.9688995    | 0.6225581    | not scorable | not scorable | 0.9917355 | 0.6219917 |
| #### Bn-A06-p17697154 | A-genome specific (napus-rapa) | 0.9808612    | 0.6385843    | not scorable | not scorable | 0.9834711 | 0.7781585 |
| #### Bn-A06-p17699971 | A-genome specific (napus-rapa) | 0.9569378    | 0.6913501    | not scorable | not scorable | 0.9834711 | 0.707481  |
| #### Bn-A06-p17710201 | A-genome specific (rapa only)  | not scorable | not scorable | not scorable | not scorable | 0.9834711 | 0.7905051 |
| #### Bn-A06-p17721678 | A-genome specific (rapa only)  | not scorable | not scorable | not scorable | not scorable | 0.9917355 | 0.7419018 |
| #### Bn-A06-p17729064 | A-genome specific (napus-rapa) | 0.9928229    | 0.3015568    | not scorable | not scorable | 0.9917355 | 0.7997445 |
| #### Bn-A06-p17734402 | A-genome specific (napus-rapa) | 0.9832536    | 0.4417477    | not scorable | not scorable | 0.9917355 | 0.7591076 |
| #### Bn-A06-p17734904 | A-genome specific (napus-rapa) | 0.9880383    | 0.802748     | not scorable | not scorable | 0.9917355 | 0.7012135 |
| #### Bn-A06-p17737199 | A-genome specific (rapa only)  | not scorable | not scorable | not scorable | not scorable | 1         | 0.6701952 |
| #### Bn-A06-p17741868 | A-genome specific (napus-rapa) | 0.9880383    | 0.439115     | not scorable | not scorable | 0.9669421 | 0.6402496 |
| #### Bn-A06-p17741952 | A-genome specific (rapa only)  | not scorable | not scorable | not scorable | not scorable | 1         | 0.7051603 |
| #### Bn-A06-p17744170 | A-genome specific (napus-rapa) | 0.9832536    | 0.3935951    | not scorable | not scorable | 0.6363636 | 0.7317601 |
| #### Bn-A06-p17755205 | A-genome specific (napus-rapa) | 0.9928229    | 0.7709687    | not scorable | not scorable | 0.9834711 | 0.7878355 |
| #### Bn-A06-p1776668  | A-genome specific (napus-rapa) | 1            | 0.7696667    | not scorable | not scorable | 1         | 0.6435617 |
| #### Bn-A06-p1777127  | A-genome specific (napus-rapa) | 0.9736842    | 0.3885179    | not scorable | not scorable | 1         | 0.8521883 |
| #### Bn-A06-p17778079 | A-genome specific (napus-rapa) | 0.9904306    | 0.2647348    | not scorable | not scorable | 0.9669421 | 0.6308004 |
| #### Bn-A06-p17778210 | A-genome specific (napus-rapa) | 0.9832536    | 0.4448838    | not scorable | not scorable | 0.9917355 | 0.6289672 |

|                       |                                |              |              |              |              |              |              |
|-----------------------|--------------------------------|--------------|--------------|--------------|--------------|--------------|--------------|
| #### Bn-A06-p17785331 | A-genome specific (napus-rapa) | 0.9736842    | 0.322933     | not scorable | not scorable | 1            | 0.7231945    |
| #### Bn-A06-p17790290 | A-genome specific (napus-rapa) | 0.9688995    | 0.7703403    | not scorable | not scorable | 0.9586777    | 0.7634347    |
| #### Bn-A06-p17791496 | A-genome specific (napus-rapa) | 0.9832536    | 0.6984524    | not scorable | not scorable | 1            | 0.6247691    |
| #### Bn-A06-p17791746 | A-genome specific (napus-rapa) | 0.9952153    | 0.7437948    | not scorable | not scorable | 0.9669421    | 0.701064     |
| #### Bn-A06-p17823115 | A-genome specific (napus-rapa) | 0.9808612    | 0.4195192    | not scorable | not scorable | 1            | 0.7265286    |
| #### Bn-A06-p17831661 | A-genome specific (napus-rapa) | 0.9784689    | 0.4501364    | not scorable | not scorable | 1            | 0.7012355    |
| #### Bn-A06-p17863217 | all not scorable               | not scorable | not scorable | not scorable | not scorable | not scorable | not scorable |
| #### Bn-A06-p17887060 | A-genome specific (napus-rapa) | 0.9808612    | 0.4103791    | not scorable | not scorable | 1            | 0.6673359    |
| #### Bn-A06-p17888567 | A-genome specific (rapa only)  | not scorable | not scorable | not scorable | not scorable | 0.9504132    | 0.5677139    |
| #### Bn-A06-p17889311 | A-genome specific (napus-rapa) | 0.9832536    | 0.6970931    | not scorable | not scorable | 1            | 0.5998946    |
| #### Bn-A06-p17908957 | A-genome specific (napus-rapa) | 0.9760765    | 0.8095837    | not scorable | not scorable | 0.9338843    | 0.6954914    |
| #### Bn-A06-p17920968 | A-genome specific (napus-rapa) | 0.9928229    | 0.7936275    | not scorable | not scorable | 0.9834711    | 0.798132     |
| #### Bn-A06-p17929532 | A-genome specific (napus-rapa) | 0.9808612    | 0.590741     | not scorable | not scorable | 1            | 0.7815756    |
| #### Bn-A06-p17932959 | A-genome specific (napus-rapa) | 0.9904306    | 0.2223562    | not scorable | not scorable | 0.9917355    | 0.686147     |
| #### Bn-A06-p1793586  | A-genome specific (napus-rapa) | 0.9832536    | 0.7515153    | not scorable | not scorable | 0.9917355    | 0.7395804    |
| #### Bn-A06-p17938497 | A-genome specific (napus-rapa) | 0.9952153    | 0.4317956    | not scorable | not scorable | 0.9834711    | 0.5992818    |
| #### Bn-A06-p17939632 | A-genome specific (napus-rapa) | 0.9904306    | 0.8265953    | not scorable | not scorable | 1            | 0.7846893    |
| #### Bn-A06-p17956497 | A-genome specific (rapa only)  | not scorable | not scorable | not scorable | not scorable | 0.553719     | 0.6768451    |
| #### Bn-A06-p17959919 | A-genome specific (napus-rapa) | 0.9952153    | 0.8089006    | not scorable | not scorable | 1            | 0.7364206    |
| #### Bn-A06-p17967505 | A-genome specific (napus-rapa) | 0.9880383    | 0.6937433    | not scorable | not scorable | 0.9504132    | 0.6940042    |
| #### Bn-A06-p18000403 | A-genome specific (napus-rapa) | 0.9928229    | 0.6857706    | not scorable | not scorable | 0.9917355    | 0.7401475    |
| #### Bn-A06-p18000461 | A-genome specific (napus-rapa) | 0.9904306    | 0.6971313    | not scorable | not scorable | 0.9917355    | 0.6829788    |
| #### Bn-A06-p1800467  | A-genome specific (napus-rapa) | 0.7583732    | 0.8040736    | not scorable | not scorable | 0.9173554    | 0.9136915    |
| #### Bn-A06-p18006686 | A-genome specific (napus-rapa) | 0.9928229    | 0.7132073    | not scorable | not scorable | 1            | 0.8655702    |
| #### Bn-A06-p18009980 | A-genome specific (napus-rapa) | 1            | 0.5291753    | not scorable | not scorable | 0.5867769    | 0.8085375    |
| #### Bn-A06-p1802123  | A-genome specific (napus-rapa) | 0.9784689    | 0.2939378    | not scorable | not scorable | 1            | 0.8249864    |
| #### Bn-A06-p18022188 | A-genome specific (napus-rapa) | 1            | 0.6656172    | not scorable | not scorable | 0.9834711    | 0.8335571    |
| #### Bn-A06-p18025751 | A-genome specific (napus-rapa) | 0.9952153    | 0.4189116    | not scorable | not scorable | 0.9917355    | 0.710943     |
| #### Bn-A06-p18028791 | A-genome specific (napus-rapa) | 1            | 0.8005349    | not scorable | not scorable | 0.9917355    | 0.767074     |
| #### Bn-A06-p18028879 | A-genome specific (napus-rapa) | 0.8947368    | 0.7823271    | not scorable | not scorable | 0.9917355    | 0.7979024    |
| #### Bn-A06-p18028921 | A-genome specific (napus-rapa) | 0.9928229    | 0.7547078    | not scorable | not scorable | 0.9834711    | 0.6995164    |
| #### Bn-A06-p18029021 | A-genome specific (napus-rapa) | 0.9952153    | 0.7767658    | not scorable | not scorable | 0.9834711    | 0.7417904    |
| #### Bn-A06-p18029621 | A-genome specific (napus-rapa) | 1            | 0.735266     | not scorable | not scorable | 1            | 0.7454732    |

|                       |                                |              |              |              |              |              |              |
|-----------------------|--------------------------------|--------------|--------------|--------------|--------------|--------------|--------------|
| #### Bn-A06-p18033006 | A-genome specific (napus-rapa) | 1            | 0.7479001    | not scorable | not scorable | 0.9669421    | 0.6729136    |
| #### Bn-A06-p18040363 | A-genome specific (napus-rapa) | 0.9760765    | 0.7976784    | not scorable | not scorable | 0.9917355    | 0.7086518    |
| #### Bn-A06-p18040423 | A-genome specific (napus-rapa) | 0.9736842    | 0.5453208    | not scorable | not scorable | 0.9834711    | 0.6132494    |
| #### Bn-A06-p18058671 | A-genome specific (napus-rapa) | 0.9856459    | 0.7411953    | not scorable | not scorable | 1            | 0.7832034    |
| #### Bn-A06-p18059278 | A-genome specific (napus-rapa) | 1            | 0.5448344    | not scorable | not scorable | 1            | 0.9091015    |
| #### Bn-A06-p18059565 | A-genome specific (napus-rapa) | 0.9784689    | 0.7013718    | not scorable | not scorable | 0.9834711    | 0.6290873    |
| #### Bn-A06-p18059678 | A-genome specific (napus-rapa) | 0.9904306    | 0.7027781    | not scorable | not scorable | 0.9917355    | 0.7504464    |
| #### Bn-A06-p18065846 | A-genome specific (napus-rapa) | 0.9952153    | 0.5112348    | not scorable | not scorable | 0.9917355    | 0.7126986    |
| #### Bn-A06-p18089377 | A-genome specific (napus-rapa) | 0.9593301    | 0.2185774    | not scorable | not scorable | 0.9834711    | 0.2757821    |
| #### Bn-A06-p18102164 | A-genome specific (napus-rapa) | 0.9641148    | 0.7922965    | not scorable | not scorable | 0.9917355    | 0.7876217    |
| #### Bn-A06-p18113924 | A-genome specific (napus-rapa) | 0.9832536    | 0.4810372    | not scorable | not scorable | 0.9752066    | 0.7857338    |
| #### Bn-A06-p18115817 | A-genome specific (napus-rapa) | 0.9593301    | 0.2858504    | not scorable | not scorable | 0.9917355    | 0.7444384    |
| #### Bn-A06-p18120189 | A-genome specific (rapa only)  | not scorable | not scorable | not scorable | not scorable | 0.9917355    | 0.7702867    |
| #### Bn-A06-p18120195 | all not scorable               | not scorable | not scorable | not scorable | not scorable | not scorable | not scorable |
| #### Bn-A06-p18127830 | A-genome specific (napus-rapa) | 0.9784689    | 0.8067102    | not scorable | not scorable | 0.9834711    | 0.704466     |
| #### Bn-A06-p18129979 | A-genome specific (napus-rapa) | 0.9832536    | 0.7194813    | not scorable | not scorable | 0.9917355    | 0.7175804    |
| #### Bn-A06-p18131525 | A-genome specific (napus-rapa) | 0.9712918    | 0.3714509    | not scorable | not scorable | 0.9752066    | 0.7763614    |
| #### Bn-A06-p18136235 | A-genome specific (napus-rapa) | 0.9952153    | 0.7511073    | not scorable | not scorable | 0.9752066    | 0.7548258    |
| #### Bn-A06-p18141167 | A-genome specific (napus-rapa) | 0.9904306    | 0.5778937    | not scorable | not scorable | 0.9834711    | 0.8293068    |
| #### Bn-A06-p18144127 | A-genome specific (napus-rapa) | 0.9928229    | 0.6971865    | not scorable | not scorable | 0.9917355    | 0.6716666    |
| #### Bn-A06-p18152497 | A-genome specific (napus-rapa) | 0.9808612    | 0.7709536    | not scorable | not scorable | 0.9917355    | 0.7789357    |
| #### Bn-A06-p18182395 | A-genome specific (napus-rapa) | 0.9784689    | 0.6777947    | not scorable | not scorable | 0.9917355    | 0.6914294    |
| #### Bn-A06-p18188412 | A-genome specific (napus-rapa) | 0.9904306    | 0.7851401    | not scorable | not scorable | 0.9917355    | 0.7144638    |
| #### Bn-A06-p18188496 | A-genome specific (napus-rapa) | 0.9808612    | 0.4653105    | not scorable | not scorable | 0.9917355    | 0.7367048    |
| #### Bn-A06-p18207917 | A-genome specific (napus-rapa) | 0.9569378    | 0.6837332    | not scorable | not scorable | 1            | 0.6655804    |
| #### Bn-A06-p18219362 | A-genome specific (napus-rapa) | 0.9928229    | 0.8538665    | not scorable | not scorable | 1            | 0.7775072    |
| #### Bn-A06-p18220327 | A-genome specific (napus-rapa) | 0.9186603    | 0.7954096    | not scorable | not scorable | 0.9917355    | 0.7642493    |
| #### Bn-A06-p18232202 | A-genome specific (rapa only)  | not scorable | not scorable | not scorable | not scorable | 0.9917355    | 0.7481443    |
| #### Bn-A06-p18235310 | A-genome specific (napus-rapa) | 0.9952153    | 0.8165818    | not scorable | not scorable | 1            | 0.7548383    |
| #### Bn-A06-p18237512 | A-genome specific (napus-rapa) | 1            | 0.6636746    | not scorable | not scorable | 0.9917355    | 0.7586554    |
| #### Bn-A06-p18246821 | A-genome specific (napus-rapa) | 0.9665072    | 0.7635297    | not scorable | not scorable | 0.5950413    | 0.7949292    |
| #### Bn-A06-p18247490 | A-genome specific (napus-rapa) | 0.8301435    | 0.7802194    | not scorable | not scorable | 0.5950413    | 0.7618685    |
| #### Bn-A06-p18248917 | A-genome specific (napus-rapa) | 0.8588517    | 0.8104475    | not scorable | not scorable | 1            | 0.7480721    |

|                       |                                   |              |              |              |              |           |   |           |
|-----------------------|-----------------------------------|--------------|--------------|--------------|--------------|-----------|---|-----------|
| #### Bn-A06-p18249054 | A-genome specific (napus-rapa)    | 0.854067     | 0.8036721    | not scorable | not scorable |           | 1 | 0.7709448 |
| #### Bn-A06-p18252711 | A-genome specific (napus-rapa)    | 0.9832536    | 0.6904163    | not scorable | not scorable |           | 1 | 0.6919689 |
| #### Bn-A06-p18254877 | A-genome specific (napus-rapa)    | 0.9688995    | 0.3515235    | not scorable | not scorable | 0.9834711 |   | 0.6896096 |
| #### Bn-A06-p18260387 | A-genome specific (napus-rapa)    | 0.9760765    | 0.4884132    | not scorable | not scorable |           | 1 | 0.7605261 |
| #### Bn-A06-p18277724 | A-genome specific (napus-rapa)    | 0.9928229    | 0.5829328    | not scorable | not scorable | 0.9752066 |   | 0.7854813 |
| #### Bn-A06-p18277802 | A-genome specific (napus-rapa)    | 1            | 0.402841     | not scorable | not scorable | 0.9752066 |   | 0.7809825 |
| #### Bn-A06-p1834863  | A-genome specific (napus-rapa)    | 1            | 0.8042074    | not scorable | not scorable |           | 1 | 0.9030796 |
| #### Bn-A06-p18364834 | A-genome specific (napus-rapa)    | 0.9880383    | 0.7417517    | not scorable | not scorable | 0.9834711 |   | 0.9059584 |
| #### Bn-A06-p18369013 | A-genome specific (napus-rapa)    | 0.9880383    | 0.7482964    | not scorable | not scorable | 0.9834711 |   | 0.8088477 |
| #### Bn-A06-p18380196 | A-genome specific (napus-rapa)    | 0.9808612    | 0.3050797    | not scorable | not scorable | 0.9586777 |   | 0.6481637 |
| #### Bn-A06-p183811   | A-genome specific (napus-rapa)    | 0.9736842    | 0.6255818    | not scorable | not scorable | 0.9917355 |   | 0.7556905 |
| #### Bn-A06-p18388041 | A-genome specific (napus-rapa)    | 0.9808612    | 0.8331169    | not scorable | not scorable | 0.9834711 |   | 0.7431734 |
| #### Bn-A06-p18388778 | genome unspecific (all in)        | 0.9856459    | 0.4047633    |              | 1 0.7316474  | 0.9834711 |   | 0.7585323 |
| #### Bn-A06-p18390889 | A-genome specific (napus-rapa)    | 0.9928229    | 0.7790163    | not scorable | not scorable | 0.9917355 |   | 0.7113248 |
| #### Bn-A06-p18392463 | A-genome specific (napus-rapa)    | 0.9497608    | 0.5927677    | not scorable | not scorable | 0.9834711 |   | 0.7830848 |
| #### Bn-A06-p18394892 | A-genome specific (napus-rapa)    | 0.9880383    | 0.6755649    | not scorable | not scorable |           | 1 | 0.6707243 |
| #### Bn-A06-p18397592 | A-genome specific (napus-rapa)    | 0.9880383    | 0.7038523    | not scorable | not scorable |           | 1 | 0.7522502 |
| #### Bn-A06-p18402713 | A-genome specific (napus-rapa)    | 0.9976076    | 0.7136945    | not scorable | not scorable | 0.9834711 |   | 0.6747848 |
| #### Bn-A06-p18403451 | A-genome specific (rapa only)     | not scorable | not scorable | not scorable | not scorable |           | 1 | 0.7463304 |
| #### Bn-A06-p18408257 | A-genome specific (napus-rapa)    | 0.9688995    | 0.3018214    | not scorable | not scorable |           | 1 | 0.8030666 |
| #### Bn-A06-p18430792 | A-genome specific (napus-rapa)    | 0.9832536    | 0.451726     | not scorable | not scorable |           | 1 | 0.7669737 |
| #### Bn-A06-p18432812 | A-genome specific (napus-rapa)    | 0.9976076    | 0.7306182    | not scorable | not scorable |           | 1 | 0.7612836 |
| #### Bn-A06-p18438509 | A-genome specific (napus-rapa)    | 0.9928229    | 0.7553815    | not scorable | not scorable | 0.9834711 |   | 0.7977165 |
| #### Bn-A06-p18445250 | A-genome specific (napus-rapa)    | 0.9880383    | 0.5409557    | not scorable | not scorable | 0.9917355 |   | 0.7779592 |
| #### Bn-A06-p18454864 | A-genome specific (rapa only)     | not scorable | not scorable | not scorable | not scorable | 0.9421487 |   | 0.7863449 |
| #### Bn-A06-p18455125 | A-genome specific (napus-rapa)    | 0.9688995    | 0.4016844    | not scorable | not scorable | 0.9752066 |   | 0.7910416 |
| #### Bn-A06-p18500429 | genome unspecific (oleracea-rapa) | not scorable | not scorable | 0.9689922    | 0.7061687    | 0.9834711 |   | 0.6676789 |
| #### Bn-A06-p18500596 | A-genome specific (napus-rapa)    | 0.9641148    | 0.7976274    | not scorable | not scorable |           | 1 | 0.7395962 |
| #### Bn-A06-p18500625 | A-genome specific (napus-rapa)    | 0.9665072    | 0.3479977    | not scorable | not scorable | 0.9917355 |   | 0.8005264 |
| #### Bn-A06-p18502274 | A-genome specific (napus-rapa)    | 0.9880383    | 0.5381089    | not scorable | not scorable |           | 1 | 0.7865542 |
| #### Bn-A06-p18502399 | A-genome specific (napus-rapa)    | 0.9641148    | 0.2976414    | not scorable | not scorable |           | 1 | 0.7135133 |
| #### Bn-A06-p18563686 | A-genome specific (rapa only)     | not scorable | not scorable | not scorable | not scorable | 0.9917355 |   | 0.791281  |
| #### Bn-A06-p18573338 | A-genome specific (napus-rapa)    | 0.937799     | 0.2840751    | not scorable | not scorable | 0.9586777 |   | 0.6813247 |



|                       |                                |           |           |              |              |              |              |
|-----------------------|--------------------------------|-----------|-----------|--------------|--------------|--------------|--------------|
| #### Bn-A06-p18600460 | A-genome specific (napus-rapa) | 0.9641148 | 0.7609589 | not scorable | not scorable | 0.9917355    | 0.8145428    |
| #### Bn-A06-p18614110 | A-genome specific (napus-rapa) | 0.9784689 | 0.2891992 | not scorable | not scorable | 0.661157     | 0.7808442    |
| #### Bn-A06-p18624741 | A-genome specific (napus-rapa) | 0.9641148 | 0.5369933 | not scorable | not scorable | 0.9834711    | 0.6638477    |
| #### Bn-A06-p18634396 | A-genome specific (napus-rapa) | 0.9688995 | 0.6871526 | not scorable | not scorable | 0.9917355    | 0.7785769    |
| #### Bn-A06-p18642085 | A-genome specific (napus-rapa) | 0.9545454 | 0.3282853 | not scorable | not scorable | 1            | 0.6650838    |
| #### Bn-A06-p18659358 | A-genome specific (napus-rapa) | 0.9832536 | 0.6857125 | not scorable | not scorable | 0.9917355    | 0.7968631    |
| #### Bn-A06-p18692755 | A-genome specific (napus-rapa) | 0.9832536 | 0.827432  | not scorable | not scorable | 0.9834711    | 0.7762491    |
| #### Bn-A06-p18706102 | A-genome specific (napus-rapa) | 0.9593301 | 0.5417364 | not scorable | not scorable | 0.9917355    | 0.8378816    |
| #### Bn-A06-p18709596 | napus specific                 | 0.9330143 | 0.6786534 | not scorable | not scorable | not scorable | not scorable |
| #### Bn-A06-p18717323 | A-genome specific (napus-rapa) | 0.9688995 | 0.3430781 | not scorable | not scorable | 0.9669421    | 0.5963017    |
| #### Bn-A06-p18718829 | A-genome specific (napus-rapa) | 0.9904306 | 0.7736471 | not scorable | not scorable | 1            | 0.7951118    |
| #### Bn-A06-p1872484  | A-genome specific (napus-rapa) | 0.9976076 | 0.6745178 | not scorable | not scorable | 0.9917355    | 0.7322186    |
| #### Bn-A06-p1872597  | A-genome specific (napus-rapa) | 0.9880383 | 0.7718801 | not scorable | not scorable | 0.9752066    | 0.7277194    |
| #### Bn-A06-p18729660 | A-genome specific (napus-rapa) | 0.9904306 | 0.7808825 | not scorable | not scorable | 1            | 0.7803028    |
| #### Bn-A06-p18740524 | A-genome specific (napus-rapa) | 0.9760765 | 0.7806745 | not scorable | not scorable | 0.9752066    | 0.7940474    |
| #### Bn-A06-p1874196  | A-genome specific (napus-rapa) | 0.9712918 | 0.7013798 | not scorable | not scorable | 0.9752066    | 0.9095823    |
| #### Bn-A06-p18742389 | A-genome specific (napus-rapa) | 0.9641148 | 0.4342854 | not scorable | not scorable | 0.9917355    | 0.7907822    |
| #### Bn-A06-p18754657 | A-genome specific (napus-rapa) | 0.9736842 | 0.5027965 | not scorable | not scorable | 0.9917355    | 0.7390832    |
| #### Bn-A06-p18755269 | A-genome specific (napus-rapa) | 0.7511961 | 0.9464626 | not scorable | not scorable | 0.9586777    | 0.7572669    |
| #### Bn-A06-p18755859 | A-genome specific (napus-rapa) | 0.9569378 | 0.2758512 | not scorable | not scorable | 1            | 0.6995457    |
| #### Bn-A06-p18757339 | A-genome specific (napus-rapa) | 0.8995215 | 0.7634357 | not scorable | not scorable | 0.9834711    | 0.7145087    |
| #### Bn-A06-p1875896  | A-genome specific (napus-rapa) | 0.9545454 | 0.6697966 | not scorable | not scorable | 0.9504132    | 0.6776387    |
| #### Bn-A06-p18776948 | genome unspecific (all in)     | 0.9665072 | 0.4297526 |              | 1 0.7470369  | 1            | 0.720088     |
| #### Bn-A06-p18777001 | A-genome specific (napus-rapa) | 0.9808612 | 0.5051112 | not scorable | not scorable | 1            | 0.6640143    |
| #### Bn-A06-p18783    | A-genome specific (napus-rapa) | 0.9832536 | 0.7305045 | not scorable | not scorable | 0.9917355    | 0.8166034    |
| #### Bn-A06-p18785908 | A-genome specific (napus-rapa) | 0.9688995 | 0.6844227 | not scorable | not scorable | 0.9917355    | 0.7598116    |
| #### Bn-A06-p18794208 | A-genome specific (napus-rapa) | 0.9712918 | 0.4739237 | not scorable | not scorable | 1            | 0.706701     |
| #### Bn-A06-p18807305 | A-genome specific (napus-rapa) | 0.9976076 | 0.7208838 | not scorable | not scorable | 1            | 0.7802867    |
| #### Bn-A06-p18813274 | A-genome specific (napus-rapa) | 0.9904306 | 0.597259  | not scorable | not scorable | 0.9834711    | 0.7830454    |
| #### Bn-A06-p18867395 | A-genome specific (napus-rapa) | 0.9904306 | 0.2604821 | not scorable | not scorable | 1            | 0.8331373    |
| #### Bn-A06-p18872147 | A-genome specific (napus-rapa) | 0.9856459 | 0.5564669 | not scorable | not scorable | 1            | 0.8458794    |
| #### Bn-A06-p18880950 | napus specific                 | 0.9665072 | 0.6845963 | not scorable | not scorable | not scorable | not scorable |
| #### Bn-A06-p18882138 | A-genome specific (napus-rapa) | 0.9665072 | 0.6305875 | not scorable | not scorable | 0.8677686    | 0.7244219    |

|                       |                                |              |              |              |              |              |              |
|-----------------------|--------------------------------|--------------|--------------|--------------|--------------|--------------|--------------|
| #### Bn-A06-p18885366 | A-genome specific (napus-rapa) | 0.9976076    | 0.7373943    | not scorable | not scorable | 1            | 0.6552948    |
| #### Bn-A06-p18898902 | A-genome specific (napus-rapa) | 0.9832536    | 0.7536705    | not scorable | not scorable | 0.5123967    | 0.7731714    |
| #### Bn-A06-p1892397  | A-genome specific (napus-rapa) | 0.9856459    | 0.3637568    | not scorable | not scorable | 1            | 0.7276234    |
| #### Bn-A06-p1892464  | A-genome specific (napus-rapa) | 0.9760765    | 0.6482869    | not scorable | not scorable | 0.9917355    | 0.8592248    |
| #### Bn-A06-p18998806 | A-genome specific (napus-rapa) | 0.9712918    | 0.6988216    | not scorable | not scorable | 1            | 0.8206883    |
| #### Bn-A06-p19021973 | A-genome specific (napus-rapa) | 0.9808612    | 0.7568182    | not scorable | not scorable | 1            | 0.7855273    |
| #### Bn-A06-p1903170  | A-genome specific (napus-rapa) | 1            | 0.7419457    | not scorable | not scorable | 1            | 0.9263889    |
| #### Bn-A06-p1903532  | A-genome specific (napus-rapa) | 1            | 0.7786627    | not scorable | not scorable | 0.9752066    | 0.6854145    |
| #### Bn-A06-p1908583  | A-genome specific (rapa only)  | not scorable | not scorable | not scorable | not scorable | 1            | 0.910212     |
| #### Bn-A06-p1908707  | A-genome specific (napus-rapa) | 0.9880383    | 0.6865292    | not scorable | not scorable | 0.9752066    | 0.7061555    |
| #### Bn-A06-p19089918 | A-genome specific (rapa only)  | not scorable | not scorable | not scorable | not scorable | 0.9338843    | 0.8505956    |
| #### Bn-A06-p1909050  | A-genome specific (napus-rapa) | 0.9904306    | 0.6917045    | not scorable | not scorable | 1            | 0.7598165    |
| #### Bn-A06-p19102612 | A-genome specific (napus-rapa) | 0.9808612    | 0.5070884    | not scorable | not scorable | 0.9256198    | 0.833535     |
| #### Bn-A06-p19102725 | A-genome specific (napus-rapa) | 0.9641148    | 0.3065965    | not scorable | not scorable | 0.9256198    | 0.7462659    |
| #### Bn-A06-p19130048 | A-genome specific (napus-rapa) | 0.9760765    | 0.7634797    | not scorable | not scorable | 0.892562     | 0.8042249    |
| #### Bn-A06-p19151996 | A-genome specific (napus-rapa) | 0.9784689    | 0.7629507    | not scorable | not scorable | 0.9752066    | 0.880185     |
| #### Bn-A06-p19153385 | A-genome specific (napus-rapa) | 0.9904306    | 0.7486759    | not scorable | not scorable | 0.9834711    | 0.7997234    |
| #### Bn-A06-p19153719 | A-genome specific (napus-rapa) | 1            | 0.8666431    | not scorable | not scorable | 1            | 0.8159295    |
| #### Bn-A06-p19163919 | A-genome specific (napus-rapa) | 0.9545454    | 0.4285963    | not scorable | not scorable | 0.9917355    | 0.6850684    |
| #### Bn-A06-p19184868 | A-genome specific (napus-rapa) | 0.7799043    | 0.9095823    | not scorable | not scorable | 0.8181818    | 0.8635932    |
| #### Bn-A06-p19185585 | A-genome specific (napus-rapa) | 0.9665072    | 0.5660708    | not scorable | not scorable | 0.9917355    | 0.6770072    |
| #### Bn-A06-p19197269 | A-genome specific (napus-rapa) | 0.9952153    | 0.6872579    | not scorable | not scorable | 0.9917355    | 0.686269     |
| #### Bn-A06-p19226794 | A-genome specific (napus-rapa) | 0.9736842    | 0.6155817    | not scorable | not scorable | 1            | 0.739498     |
| #### Bn-A06-p19245025 | A-genome specific (napus-rapa) | 0.9952153    | 0.3904046    | not scorable | not scorable | 0.9752066    | 0.6919105    |
| #### Bn-A06-p19256933 | A-genome specific (napus-rapa) | 0.9928229    | 0.2712645    | not scorable | not scorable | 0.9669421    | 0.7908595    |
| #### Bn-A06-p1925858  | A-genome specific (napus-rapa) | 0.9952153    | 0.7962403    | not scorable | not scorable | 1            | 0.7966691    |
| #### Bn-A06-p19263581 | A-genome specific (napus-rapa) | 0.9928229    | 0.3951331    | not scorable | not scorable | 0.9834711    | 0.8033799    |
| #### Bn-A06-p19265815 | A-genome specific (napus-rapa) | 0.9832536    | 0.7166491    | not scorable | not scorable | 0.9917355    | 0.7570407    |
| #### Bn-A06-p19291105 | all not scorable               | not scorable | not scorable | not scorable | not scorable | not scorable | not scorable |
| #### Bn-A06-p19292104 | A-genome specific (napus-rapa) | 0.9665072    | 0.2111718    | not scorable | not scorable | 0.9917355    | 0.8716812    |
| #### Bn-A06-p19296157 | A-genome specific (napus-rapa) | 0.8636364    | 0.661546     | not scorable | not scorable | 0.9752066    | 0.8646256    |
| #### Bn-A06-p19329736 | A-genome specific (napus-rapa) | 0.9784689    | 0.3716876    | not scorable | not scorable | 0.9834711    | 0.7747613    |
| #### Bn-A06-p19333055 | A-genome specific (napus-rapa) | 0.9832536    | 0.5692393    | not scorable | not scorable | 0.9917355    | 0.6990505    |

|                       |                                |              |              |              |              |              |              |
|-----------------------|--------------------------------|--------------|--------------|--------------|--------------|--------------|--------------|
| #### Bn-A06-p19333117 | A-genome specific (napus-rapa) | 0.9952153    | 0.7677808    | not scorable | not scorable | 0.9917355    | 0.7531571    |
| #### Bn-A06-p19333349 | A-genome specific (napus-rapa) | 0.9928229    | 0.7283338    | not scorable | not scorable | 0.9917355    | 0.6896072    |
| #### Bn-A06-p19392651 | A-genome specific (napus-rapa) | 0.9880383    | 0.2369612    | not scorable | not scorable | 0.9834711    | 0.7475029    |
| #### Bn-A06-p19395565 | A-genome specific (napus-rapa) | 0.9784689    | 0.7348083    | not scorable | not scorable | 0.9834711    | 0.8011216    |
| #### Bn-A06-p19395890 | A-genome specific (napus-rapa) | 0.9832536    | 0.6002275    | not scorable | not scorable | 1            | 0.7635154    |
| #### Bn-A06-p19396032 | A-genome specific (napus-rapa) | 0.9880383    | 0.3507533    | not scorable | not scorable | 1            | 0.777316     |
| #### Bn-A06-p19404012 | A-genome specific (napus-rapa) | 0.9928229    | 0.7857079    | not scorable | not scorable | 0.9917355    | 0.7871282    |
| #### Bn-A06-p19405765 | A-genome specific (napus-rapa) | 0.9976076    | 0.7626438    | not scorable | not scorable | 0.9917355    | 0.788398     |
| #### Bn-A06-p19411124 | A-genome specific (napus-rapa) | 0.9641148    | 0.6208773    | not scorable | not scorable | 1            | 0.6846505    |
| #### Bn-A06-p19416292 | A-genome specific (napus-rapa) | 0.9904306    | 0.5356665    | not scorable | not scorable | 0.9834711    | 0.7291237    |
| #### Bn-A06-p19418423 | A-genome specific (napus-rapa) | 0.9784689    | 0.6066359    | not scorable | not scorable | 0.9917355    | 0.7041054    |
| #### Bn-A06-p19419215 | A-genome specific (napus-rapa) | 0.5143541    | 0.7938844    | not scorable | not scorable | 0.9917355    | 0.7992279    |
| #### Bn-A06-p19434905 | A-genome specific (napus-rapa) | 0.9856459    | 0.7373469    | not scorable | not scorable | 1            | 0.8686684    |
| #### Bn-A06-p19437625 | napus specific                 | 0.791866     | 0.7642791    | not scorable | not scorable | not scorable | not scorable |
| #### Bn-A06-p1947247  | A-genome specific (napus-rapa) | 1            | 0.4923992    | not scorable | not scorable | 0.9752066    | 0.6928769    |
| #### Bn-A06-p19485623 | A-genome specific (napus-rapa) | 0.9952153    | 0.8226718    | not scorable | not scorable | 0.9669421    | 0.7041288    |
| #### Bn-A06-p19489870 | A-genome specific (rapa only)  | not scorable | not scorable | not scorable | not scorable | 0.9834711    | 0.5871974    |
| #### Bn-A06-p19501594 | A-genome specific (napus-rapa) | 0.9688995    | 0.3466427    | not scorable | not scorable | 0.9752066    | 0.7825384    |
| #### Bn-A06-p19502324 | A-genome specific (napus-rapa) | 0.9808612    | 0.38028      | not scorable | not scorable | 1            | 0.7106495    |
| #### Bn-A06-p19508949 | A-genome specific (napus-rapa) | 0.5526316    | 0.7532428    | not scorable | not scorable | 0.9504132    | 0.7439496    |
| #### Bn-A06-p19533298 | A-genome specific (napus-rapa) | 0.9473684    | 0.5469618    | not scorable | not scorable | 0.768595     | 0.7816594    |
| #### Bn-A06-p195449   | A-genome specific (napus-rapa) | 0.9545454    | 0.6520118    | not scorable | not scorable | 0.9917355    | 0.6448559    |
| #### Bn-A06-p19549093 | A-genome specific (napus-rapa) | 0.9760765    | 0.4753434    | not scorable | not scorable | 0.9917355    | 0.7659851    |
| #### Bn-A06-p19549571 | A-genome specific (napus-rapa) | 0.9832536    | 0.6123109    | not scorable | not scorable | 0.9917355    | 0.6501432    |
| #### Bn-A06-p19555116 | A-genome specific (napus-rapa) | 0.9904306    | 0.7935762    | not scorable | not scorable | 0.9669421    | 0.8104015    |
| #### Bn-A06-p19562187 | A-genome specific (napus-rapa) | 0.930622     | 0.542289     | not scorable | not scorable | 0.9752066    | 0.6067291    |
| #### Bn-A06-p19574863 | A-genome specific (napus-rapa) | 0.9976076    | 0.3686921    | not scorable | not scorable | 0.9917355    | 0.8230137    |
| #### Bn-A06-p19579765 | napus specific                 | 0.9760765    | 0.5616598    | not scorable | not scorable | not scorable | not scorable |
| #### Bn-A06-p19593266 | A-genome specific (napus-rapa) | 0.9760765    | 0.799538     | not scorable | not scorable | 1            | 0.7148065    |
| #### Bn-A06-p19598035 | A-genome specific (napus-rapa) | 0.5861244    | 0.7935341    | not scorable | not scorable | 0.9669421    | 0.6908799    |
| #### Bn-A06-p19602022 | A-genome specific (napus-rapa) | 0.5813397    | 0.6475175    | not scorable | not scorable | 1            | 0.7443811    |
| #### Bn-A06-p1961013  | A-genome specific (napus-rapa) | 1            | 0.2919384    | not scorable | not scorable | 1            | 0.7532086    |
| #### Bn-A06-p19623637 | A-genome specific (rapa only)  | not scorable | not scorable | not scorable | not scorable | 1            | 0.9114538    |

|                       |                                |              |              |              |              |           |           |
|-----------------------|--------------------------------|--------------|--------------|--------------|--------------|-----------|-----------|
| #### Bn-A06-p19635380 | A-genome specific (napus-rapa) | 0.9952153    | 0.8093771    | not scorable | not scorable | 1         | 0.7707854 |
| #### Bn-A06-p19646183 | A-genome specific (napus-rapa) | 0.9665072    | 0.2970377    | not scorable | not scorable | 0.9917355 | 0.7255021 |
| #### Bn-A06-p19647126 | A-genome specific (napus-rapa) | 0.9856459    | 0.8109831    | not scorable | not scorable | 0.9917355 | 0.5964394 |
| #### Bn-A06-p19647330 | A-genome specific (napus-rapa) | 0.7057416    | 0.8754691    | not scorable | not scorable | 0.9669421 | 0.8135107 |
| #### Bn-A06-p19647388 | A-genome specific (napus-rapa) | 0.9808612    | 0.7452978    | not scorable | not scorable | 0.9834711 | 0.7078381 |
| #### Bn-A06-p19647543 | A-genome specific (napus-rapa) | 0.9880383    | 0.7867172    | not scorable | not scorable | 0.9917355 | 0.7397462 |
| #### Bn-A06-p19648186 | A-genome specific (napus-rapa) | 0.9282297    | 0.7251095    | not scorable | not scorable | 0.9586777 | 0.7819775 |
| #### Bn-A06-p19648433 | A-genome specific (napus-rapa) | 0.9760765    | 0.3899417    | not scorable | not scorable | 0.9834711 | 0.7818428 |
| #### Bn-A06-p19656363 | A-genome specific (napus-rapa) | 0.9904306    | 0.7738494    | not scorable | not scorable | 0.9917355 | 0.8034204 |
| #### Bn-A06-p19658177 | A-genome specific (napus-rapa) | 0.9928229    | 0.7246714    | not scorable | not scorable | 1         | 0.7091008 |
| #### Bn-A06-p19680250 | A-genome specific (napus-rapa) | 0.9928229    | 0.5603641    | not scorable | not scorable | 1         | 0.8166372 |
| #### Bn-A06-p19715332 | A-genome specific (napus-rapa) | 0.9976076    | 0.3093178    | not scorable | not scorable | 1         | 0.7042676 |
| #### Bn-A06-p1973105  | A-genome specific (napus-rapa) | 1            | 0.7099991    | not scorable | not scorable | 1         | 0.7999869 |
| #### Bn-A06-p19739501 | A-genome specific (napus-rapa) | 0.9784689    | 0.267318     | not scorable | not scorable | 1         | 0.7444403 |
| #### Bn-A06-p19747056 | A-genome specific (napus-rapa) | 0.9617225    | 0.8198293    | not scorable | not scorable | 0.9669421 | 0.8216213 |
| #### Bn-A06-p19757422 | A-genome specific (napus-rapa) | 0.9952153    | 0.5804777    | not scorable | not scorable | 1         | 0.6221481 |
| #### Bn-A06-p19759161 | A-genome specific (napus-rapa) | 0.9952153    | 0.7744001    | not scorable | not scorable | 0.9917355 | 0.791353  |
| #### Bn-A06-p197604   | A-genome specific (napus-rapa) | 0.9617225    | 0.7286828    | not scorable | not scorable | 0.9669421 | 0.652746  |
| #### Bn-A06-p19788556 | A-genome specific (napus-rapa) | 0.9928229    | 0.2895405    | not scorable | not scorable | 1         | 0.6805297 |
| #### Bn-A06-p19792160 | A-genome specific (napus-rapa) | 1            | 0.7944196    | not scorable | not scorable | 1         | 0.9046174 |
| #### Bn-A06-p19794728 | A-genome specific (napus-rapa) | 1            | 0.5867994    | not scorable | not scorable | 1         | 0.6163771 |
| #### Bn-A06-p19804872 | A-genome specific (napus-rapa) | 0.9497608    | 0.6324359    | not scorable | not scorable | 0.9917355 | 0.6952382 |
| #### Bn-A06-p19833393 | A-genome specific (napus-rapa) | 0.9665072    | 0.8179824    | not scorable | not scorable | 0.9669421 | 0.8325562 |
| #### Bn-A06-p19838015 | A-genome specific (napus-rapa) | 1            | 0.8456079    | not scorable | not scorable | 1         | 0.889194  |
| #### Bn-A06-p19885379 | A-genome specific (napus-rapa) | 0.9880383    | 0.2160652    | not scorable | not scorable | 1         | 0.9094265 |
| #### Bn-A06-p19943194 | A-genome specific (napus-rapa) | 0.9880383    | 0.7726677    | not scorable | not scorable | 0.9834711 | 0.7007644 |
| #### Bn-A06-p19968113 | genome unspecific (all in)     | 1            | 0.214835     | 0.8914729    | 0.4755139    | 1         | 0.7227655 |
| #### Bn-A06-p19971717 | genome unspecific (all in)     | 0.9928229    | 0.2560492    | 0.8837209    | 0.2400374    | 0.9834711 | 0.6386963 |
| #### Bn-A06-p19972403 | A-genome specific (napus-rapa) | 1            | 0.7532282    | not scorable | not scorable | 1         | 0.7703719 |
| #### Bn-A06-p19976368 | A-genome specific (napus-rapa) | 1            | 0.6320699    | not scorable | not scorable | 1         | 0.6328461 |
| #### Bn-A06-p20177226 | A-genome specific (napus-rapa) | 0.9976076    | 0.6426485    | not scorable | not scorable | 1         | 0.6510744 |
| #### Bn-A06-p20177791 | A-genome specific (rapa only)  | not scorable | not scorable | not scorable | not scorable | 1         | 0.4874006 |
| #### Bn-A06-p20211283 | A-genome specific (napus-rapa) | 0.9904306    | 0.8044565    | not scorable | not scorable | 0.9834711 | 0.8354682 |

|                       |                                |              |              |              |              |              |              |
|-----------------------|--------------------------------|--------------|--------------|--------------|--------------|--------------|--------------|
| #### Bn-A06-p20320209 | A-genome specific (napus-rapa) | 0.9114832    | 0.4749121    | not scorable | not scorable | 0.9752066    | 0.6775332    |
| #### Bn-A06-p20320258 | A-genome specific (napus-rapa) | 0.9880383    | 0.838596     | not scorable | not scorable | 0.9917355    | 0.7657278    |
| #### Bn-A06-p20476713 | A-genome specific (napus-rapa) | 0.9832536    | 0.7395071    | not scorable | not scorable | 0.9917355    | 0.8139145    |
| #### Bn-A06-p20494935 | A-genome specific (napus-rapa) | 0.9880383    | 0.2550202    | not scorable | not scorable | 1            | 0.6864058    |
| #### Bn-A06-p20495127 | A-genome specific (napus-rapa) | 0.7655503    | 0.820134     | not scorable | not scorable | 0.9173554    | 0.9492106    |
| #### Bn-A06-p205050   | A-genome specific (napus-rapa) | 0.9832536    | 0.463542     | not scorable | not scorable | 0.9669421    | 0.5689569    |
| #### Bn-A06-p2060583  | A-genome specific (napus-rapa) | 1            | 0.426027     | not scorable | not scorable | 1            | 0.8063016    |
| #### Bn-A06-p20633479 | A-genome specific (rapa only)  | not scorable | not scorable | not scorable | not scorable | 0.9917355    | 0.7450555    |
| #### Bn-A06-p2065936  | A-genome specific (napus-rapa) | 0.9952153    | 0.823295     | not scorable | not scorable | 1            | 0.8528919    |
| #### Bn-A06-p20696441 | A-genome specific (napus-rapa) | 0.9976076    | 0.3493758    | not scorable | not scorable | 1            | 0.6870549    |
| #### Bn-A06-p20696691 | all not scorable               | not scorable | not scorable | not scorable | not scorable | not scorable | not scorable |
| #### Bn-A06-p2077171  | A-genome specific (napus-rapa) | 0.9976076    | 0.3118794    | not scorable | not scorable | 0.9917355    | 0.7576765    |
| #### Bn-A06-p20877321 | genome unspecific (all in)     | 0.9688995    | 0.3527241    | 0.9844961    | 0.6829675    | 1            | 0.7376376    |
| #### Bn-A06-p20877670 | A-genome specific (napus-rapa) | 0.854067     | 0.3210518    | not scorable | not scorable | 1            | 0.7295224    |
| #### Bn-A06-p20998201 | A-genome specific (napus-rapa) | 0.9952153    | 0.7805338    | not scorable | not scorable | 0.8512397    | 0.7625126    |
| #### Bn-A06-p21031038 | A-genome specific (napus-rapa) | 1            | 0.6018038    | not scorable | not scorable | 1            | 0.6547505    |
| #### Bn-A06-p21041632 | A-genome specific (napus-rapa) | 0.9880383    | 0.7722193    | not scorable | not scorable | 0.9669421    | 0.7685857    |
| #### Bn-A06-p21045315 | A-genome specific (napus-rapa) | 0.9617225    | 0.3913358    | not scorable | not scorable | 0.9752066    | 0.8068424    |
| #### Bn-A06-p21060490 | A-genome specific (napus-rapa) | 0.9904306    | 0.7800975    | not scorable | not scorable | 0.9834711    | 0.6915432    |
| #### Bn-A06-p21062265 | A-genome specific (napus-rapa) | 0.9138756    | 0.7305983    | not scorable | not scorable | 0.677686     | 0.8075364    |
| #### Bn-A06-p21062492 | A-genome specific (napus-rapa) | 0.9162679    | 0.7780567    | not scorable | not scorable | 0.8099173    | 0.7831137    |
| #### Bn-A06-p21064129 | A-genome specific (napus-rapa) | 0.9976076    | 0.792733     | not scorable | not scorable | 0.9834711    | 0.8247338    |
| #### Bn-A06-p21064168 | A-genome specific (napus-rapa) | 0.9736842    | 0.3436185    | not scorable | not scorable | 0.9752066    | 0.8276739    |
| #### Bn-A06-p21064290 | A-genome specific (napus-rapa) | 0.9832536    | 0.3008423    | not scorable | not scorable | 0.9834711    | 0.5878294    |
| #### Bn-A06-p21064341 | A-genome specific (napus-rapa) | 0.9521531    | 0.3781022    | not scorable | not scorable | 0.9752066    | 0.5444675    |
| #### Bn-A06-p21065019 | A-genome specific (napus-rapa) | 0.9856459    | 0.6881166    | not scorable | not scorable | 0.9752066    | 0.7473243    |
| #### Bn-A06-p21069394 | A-genome specific (napus-rapa) | 0.9856459    | 0.7876945    | not scorable | not scorable | 0.9834711    | 0.8385129    |
| #### Bn-A06-p2107176  | A-genome specific (rapa only)  | not scorable | not scorable | not scorable | not scorable | 0.9917355    | 0.7065499    |
| #### Bn-A06-p21072392 | A-genome specific (napus-rapa) | 0.9952153    | 0.741163     | not scorable | not scorable | 0.9917355    | 0.7936143    |
| #### Bn-A06-p2107610  | A-genome specific (napus-rapa) | 0.9665072    | 0.7955374    | not scorable | not scorable | 0.9834711    | 0.9113625    |
| #### Bn-A06-p21080778 | A-genome specific (napus-rapa) | 0.9832536    | 0.7810466    | not scorable | not scorable | 0.9834711    | 0.8216213    |
| #### Bn-A06-p21080915 | A-genome specific (napus-rapa) | 0.9712918    | 0.7817146    | not scorable | not scorable | 0.9917355    | 0.7558359    |
| #### Bn-A06-p21083249 | napus specific                 | 0.9784689    | 0.8006104    | not scorable | not scorable | not scorable | not scorable |

|                       |                                |              |              |              |              |              |              |
|-----------------------|--------------------------------|--------------|--------------|--------------|--------------|--------------|--------------|
| #### Bn-A06-p21083748 | napus specific                 | 0.9665072    | 0.7507926    | not scorable | not scorable | not scorable | not scorable |
| #### Bn-A06-p21085532 | A-genome specific (napus-rapa) | 0.9832536    | 0.7947452    | not scorable | not scorable | 1            | 0.8486626    |
| #### Bn-A06-p21086685 | A-genome specific (napus-rapa) | 0.9808612    | 0.7707045    | not scorable | not scorable | 1            | 0.6794615    |
| #### Bn-A06-p21098677 | genome unspecific (all in)     | 0.9928229    | 0.4802193    |              | 1 0.8082134  | 0.9917355    | 0.7124265    |
| #### Bn-A06-p21101957 | A-genome specific (napus-rapa) | 0.9904306    | 0.4021807    | not scorable | not scorable | 0.9834711    | 0.5794188    |
| #### Bn-A06-p21105437 | A-genome specific (napus-rapa) | 0.9641148    | 0.5281621    | not scorable | not scorable | 0.9917355    | 0.7740345    |
| #### Bn-A06-p21116438 | A-genome specific (napus-rapa) | 0.9856459    | 0.8132126    | not scorable | not scorable | 0.9669421    | 0.7040084    |
| #### Bn-A06-p21126329 | A-genome specific (napus-rapa) | 0.9808612    | 0.7639666    | not scorable | not scorable | 0.9834711    | 0.733636     |
| #### Bn-A06-p21127138 | A-genome specific (napus-rapa) | 0.9760765    | 0.7619255    | not scorable | not scorable | 0.9917355    | 0.8098002    |
| #### Bn-A06-p21127779 | A-genome specific (napus-rapa) | 0.9760765    | 0.4622948    | not scorable | not scorable | 0.9834711    | 0.6284818    |
| #### Bn-A06-p21127805 | A-genome specific (napus-rapa) | 0.9952153    | 0.7430481    | not scorable | not scorable | 0.9917355    | 0.7973977    |
| #### Bn-A06-p21127973 | A-genome specific (napus-rapa) | 0.9712918    | 0.7516951    | not scorable | not scorable | 0.9834711    | 0.8013431    |
| #### Bn-A06-p21132765 | A-genome specific (napus-rapa) | 0.9760765    | 0.7968733    | not scorable | not scorable | 1            | 0.7179279    |
| #### Bn-A06-p21134315 | A-genome specific (napus-rapa) | 0.9928229    | 0.7663901    | not scorable | not scorable | 1            | 0.8023173    |
| #### Bn-A06-p21136673 | A-genome specific (napus-rapa) | 0.9880383    | 0.7977899    | not scorable | not scorable | 1            | 0.8099538    |
| #### Bn-A06-p21150459 | A-genome specific (napus-rapa) | 0.9712918    | 0.3790761    | not scorable | not scorable | 1            | 0.7156364    |
| #### Bn-A06-p21150622 | A-genome specific (napus-rapa) | 0.9904306    | 0.7484589    | not scorable | not scorable | 0.9752066    | 0.7023996    |
| #### Bn-A06-p21155152 | all not scorable               | not scorable | not scorable | not scorable | not scorable | not scorable | not scorable |
| #### Bn-A06-p21162770 | A-genome specific (napus-rapa) | 0.9904306    | 0.7533696    | not scorable | not scorable | 1            | 0.6932312    |
| #### Bn-A06-p21163037 | A-genome specific (napus-rapa) | 0.9808612    | 0.3869669    | not scorable | not scorable | 1            | 0.6315923    |
| #### Bn-A06-p21163950 | A-genome specific (napus-rapa) | 0.9880383    | 0.4834919    | not scorable | not scorable | 1            | 0.7583529    |
| #### Bn-A06-p21163993 | A-genome specific (napus-rapa) | 0.9928229    | 0.4787954    | not scorable | not scorable | 1            | 0.7304303    |
| #### Bn-A06-p21164043 | A-genome specific (rapa only)  | not scorable | not scorable | not scorable | not scorable | 0.9917355    | 0.6820268    |
| #### Bn-A06-p21164284 | A-genome specific (napus-rapa) | 0.9545454    | 0.696143     | not scorable | not scorable | 1            | 0.7007295    |
| #### Bn-A06-p21164289 | A-genome specific (napus-rapa) | 0.9976076    | 0.5394581    | not scorable | not scorable | 1            | 0.8105727    |
| #### Bn-A06-p21183207 | genome unspecific (all in)     | 0.9904306    | 0.2590947    | 0.9457364    | 0.6975202    | 0.9834711    | 0.6526677    |
| #### Bn-A06-p21187999 | A-genome specific (napus-rapa) | 0.9808612    | 0.7304664    | not scorable | not scorable | 0.9338843    | 0.6561165    |
| #### Bn-A06-p21191463 | A-genome specific (napus-rapa) | 0.9784689    | 0.5909143    | not scorable | not scorable | 1            | 0.6099425    |
| #### Bn-A06-p21194827 | A-genome specific (napus-rapa) | 1            | 0.4028627    | not scorable | not scorable | 0.9917355    | 0.6728882    |
| #### Bn-A06-p21195115 | A-genome specific (napus-rapa) | 0.9760765    | 0.3960669    | not scorable | not scorable | 0.9586777    | 0.7251166    |
| #### Bn-A06-p21196739 | A-genome specific (napus-rapa) | 0.9688995    | 0.579423     | not scorable | not scorable | 0.9917355    | 0.6800721    |
| #### Bn-A06-p21221869 | napus specific                 | 0.9880383    | 0.8122085    | not scorable | not scorable | not scorable | not scorable |
| #### Bn-A06-p21224575 | A-genome specific (napus-rapa) | 0.9832536    | 0.418537     | not scorable | not scorable | 1            | 0.8168764    |

|                       |                                |              |              |              |              |              |              |
|-----------------------|--------------------------------|--------------|--------------|--------------|--------------|--------------|--------------|
| #### Bn-A06-p21238199 | A-genome specific (rapa only)  | not scorable | not scorable | not scorable | not scorable | 1            | 0.8864327    |
| #### Bn-A06-p21247593 | A-genome specific (napus-rapa) | 0.9784689    | 0.4038316    | not scorable | not scorable | 1            | 0.8135532    |
| #### Bn-A06-p21252883 | A-genome specific (napus-rapa) | 0.9856459    | 0.7312089    | not scorable | not scorable | 0.9834711    | 0.6703395    |
| #### Bn-A06-p21260739 | A-genome specific (napus-rapa) | 0.9904306    | 0.4597152    | not scorable | not scorable | 0.9917355    | 0.7289231    |
| #### Bn-A06-p21262030 | A-genome specific (napus-rapa) | 0.9688995    | 0.6277261    | not scorable | not scorable | 1            | 0.7770801    |
| #### Bn-A06-p21268699 | A-genome specific (rapa only)  | not scorable | not scorable | not scorable | not scorable | 1            | 0.909694     |
| #### Bn-A06-p21268967 | A-genome specific (napus-rapa) | 0.9928229    | 0.5820765    | not scorable | not scorable | 1            | 0.5676258    |
| #### Bn-A06-p21269830 | A-genome specific (napus-rapa) | 0.9832536    | 0.6500201    | not scorable | not scorable | 0.9586777    | 0.5729207    |
| #### Bn-A06-p21270132 | A-genome specific (napus-rapa) | 0.9760765    | 0.7749662    | not scorable | not scorable | 1            | 0.687643     |
| #### Bn-A06-p21273211 | A-genome specific (napus-rapa) | 0.9760765    | 0.5881068    | not scorable | not scorable | 1            | 0.6182877    |
| #### Bn-A06-p21277332 | A-genome specific (napus-rapa) | 0.9641148    | 0.2695112    | not scorable | not scorable | 0.9917355    | 0.8023721    |
| #### Bn-A06-p21278243 | A-genome specific (napus-rapa) | 0.9856459    | 0.8019257    | not scorable | not scorable | 0.9834711    | 0.7363553    |
| #### Bn-A06-p21280471 | A-genome specific (napus-rapa) | 0.9928229    | 0.4752955    | not scorable | not scorable | 0.9917355    | 0.7998558    |
| #### Bn-A06-p21280942 | A-genome specific (napus-rapa) | 0.9856459    | 0.7534977    | not scorable | not scorable | 1            | 0.6936527    |
| #### Bn-A06-p21281098 | napus specific                 | 0.937799     | 0.8020887    | not scorable | not scorable | not scorable | not scorable |
| #### Bn-A06-p21293821 | A-genome specific (napus-rapa) | 0.9712918    | 0.4404388    | not scorable | not scorable | 0.9917355    | 0.6881834    |
| #### Bn-A06-p21301745 | A-genome specific (napus-rapa) | 0.9904306    | 0.5374666    | not scorable | not scorable | 0.9917355    | 0.7843279    |
| #### Bn-A06-p21302070 | A-genome specific (rapa only)  | not scorable | not scorable | not scorable | not scorable | 0.9586777    | 0.4320623    |
| #### Bn-A06-p21308348 | A-genome specific (napus-rapa) | 0.9928229    | 0.7287587    | not scorable | not scorable | 1            | 0.6985735    |
| #### Bn-A06-p21310030 | A-genome specific (napus-rapa) | 0.9976076    | 0.5123106    | not scorable | not scorable | 0.9917355    | 0.7769424    |
| #### Bn-A06-p21311925 | A-genome specific (napus-rapa) | 0.9952153    | 0.6906182    | not scorable | not scorable | 0.9586777    | 0.6699104    |
| #### Bn-A06-p21315016 | A-genome specific (napus-rapa) | 0.9019139    | 0.7067087    | not scorable | not scorable | 0.9504132    | 0.7169248    |
| #### Bn-A06-p21318925 | A-genome specific (napus-rapa) | 0.9593301    | 0.2656312    | not scorable | not scorable | 0.9752066    | 0.68916      |
| #### Bn-A06-p21321797 | A-genome specific (napus-rapa) | 0.9090909    | 0.7376631    | not scorable | not scorable | 0.9834711    | 0.7627113    |
| #### Bn-A06-p21324859 | A-genome specific (napus-rapa) | 0.9593301    | 0.7680596    | not scorable | not scorable | 0.6033058    | 0.7181293    |
| #### Bn-A06-p21349507 | A-genome specific (napus-rapa) | 0.9856459    | 0.7901061    | not scorable | not scorable | 0.9752066    | 0.7320295    |
| #### Bn-A06-p21415201 | A-genome specific (napus-rapa) | 0.9928229    | 0.6966767    | not scorable | not scorable | 0.9834711    | 0.6733619    |
| #### Bn-A06-p21422671 | A-genome specific (napus-rapa) | 0.9952153    | 0.6725802    | not scorable | not scorable | 0.9917355    | 0.6740808    |
| #### Bn-A06-p21426650 | A-genome specific (napus-rapa) | 0.9952153    | 0.792155     | not scorable | not scorable | 0.9834711    | 0.7730765    |
| #### Bn-A06-p21438687 | genome unspecific (all in)     | 0.9832536    | 0.4680392    | 0.9147287    | 0.6182296    | 0.9917355    | 0.7874941    |
| #### Bn-A06-p21445218 | A-genome specific (napus-rapa) | 0.9856459    | 0.7633827    | not scorable | not scorable | 0.9917355    | 0.7934758    |
| #### Bn-A06-p21445439 | A-genome specific (napus-rapa) | 0.9856459    | 0.4987118    | not scorable | not scorable | 1            | 0.7729406    |
| #### Bn-A06-p21462006 | A-genome specific (napus-rapa) | 0.9688995    | 0.324174     | not scorable | not scorable | 0.9917355    | 0.4536872    |

|                       |                                |              |              |              |              |              |              |
|-----------------------|--------------------------------|--------------|--------------|--------------|--------------|--------------|--------------|
| #### Bn-A06-p21463076 | napus specific                 | 0.5980861    | 0.8178911    | not scorable | not scorable | not scorable | not scorable |
| #### Bn-A06-p21471436 | A-genome specific (napus-rapa) | 0.9473684    | 0.4310223    | not scorable | not scorable | 1            | 0.8084679    |
| #### Bn-A06-p21472562 | A-genome specific (napus-rapa) | 1            | 0.8393996    | not scorable | not scorable | 0.9917355    | 0.7509659    |
| #### Bn-A06-p21475556 | A-genome specific (napus-rapa) | 0.9617225    | 0.3431004    | not scorable | not scorable | 1            | 0.7255074    |
| #### Bn-A06-p21478202 | A-genome specific (rapa only)  | not scorable | not scorable | not scorable | not scorable | 1            | 0.7644343    |
| #### Bn-A06-p21490506 | A-genome specific (napus-rapa) | 0.9784689    | 0.3950372    | not scorable | not scorable | 0.9917355    | 0.7418157    |
| #### Bn-A06-p21491454 | A-genome specific (napus-rapa) | 0.9712918    | 0.2717429    | not scorable | not scorable | 0.6280992    | 0.7318531    |
| #### Bn-A06-p21501350 | A-genome specific (napus-rapa) | 0.9952153    | 0.4694072    | not scorable | not scorable | 1            | 0.884657     |
| #### Bn-A06-p21509934 | A-genome specific (napus-rapa) | 0.9593301    | 0.5669113    | not scorable | not scorable | 0.9834711    | 0.6662092    |
| #### Bn-A06-p21525576 | A-genome specific (napus-rapa) | 0.9952153    | 0.4283035    | not scorable | not scorable | 0.9917355    | 0.7857097    |
| #### Bn-A06-p21550710 | A-genome specific (napus-rapa) | 0.9928229    | 0.3748721    | not scorable | not scorable | 0.9834711    | 0.6868999    |
| #### Bn-A06-p21572310 | A-genome specific (rapa only)  | not scorable | not scorable | not scorable | not scorable | 0.9917355    | 0.622836     |
| #### Bn-A06-p21573640 | A-genome specific (rapa only)  | not scorable | not scorable | not scorable | not scorable | 0.9834711    | 0.8135204    |
| #### Bn-A06-p21574157 | A-genome specific (napus-rapa) | 0.9952153    | 0.7383929    | not scorable | not scorable | 0.9917355    | 0.7830412    |
| #### Bn-A06-p21589512 | A-genome specific (rapa only)  | not scorable | not scorable | not scorable | not scorable | 0.9917355    | 0.8008413    |
| #### Bn-A06-p21591920 | A-genome specific (napus-rapa) | 0.9736842    | 0.7603014    | not scorable | not scorable | 1            | 0.8674148    |
| #### Bn-A06-p21597170 | A-genome specific (napus-rapa) | 0.9784689    | 0.6898045    | not scorable | not scorable | 0.9669421    | 0.8284779    |
| #### Bn-A06-p21600894 | A-genome specific (napus-rapa) | 0.9832536    | 0.7313558    | not scorable | not scorable | 0.9834711    | 0.6441015    |
| #### Bn-A06-p21602381 | A-genome specific (napus-rapa) | 0.9832536    | 0.3559659    | not scorable | not scorable | 1            | 0.8798255    |
| #### Bn-A06-p21613020 | A-genome specific (napus-rapa) | 0.9688995    | 0.3778238    | not scorable | not scorable | 0.9834711    | 0.8436733    |
| #### Bn-A06-p21650617 | A-genome specific (napus-rapa) | 0.9856459    | 0.5190089    | not scorable | not scorable | 0.9917355    | 0.7120868    |
| #### Bn-A06-p2165351  | A-genome specific (napus-rapa) | 1            | 0.3942173    | not scorable | not scorable | 0.9917355    | 0.6840373    |
| #### Bn-A06-p21653611 | A-genome specific (napus-rapa) | 0.9641148    | 0.478348     | not scorable | not scorable | 0.9917355    | 0.8211638    |
| #### Bn-A06-p21663690 | A-genome specific (napus-rapa) | 0.9976076    | 0.398362     | not scorable | not scorable | 0.9917355    | 0.7274289    |
| #### Bn-A06-p21677028 | A-genome specific (napus-rapa) | 1            | 0.4955086    | not scorable | not scorable | 1            | 0.7612059    |
| #### Bn-A06-p2168634  | A-genome specific (rapa only)  | not scorable | not scorable | not scorable | not scorable | 1            | 0.7134245    |
| #### Bn-A06-p21796008 | A-genome specific (napus-rapa) | 0.9904306    | 0.8114603    | not scorable | not scorable | 1            | 0.7301449    |
| #### Bn-A06-p21797963 | A-genome specific (napus-rapa) | 0.9904306    | 0.7853025    | not scorable | not scorable | 1            | 0.8101285    |
| #### Bn-A06-p21800812 | A-genome specific (napus-rapa) | 0.9856459    | 0.7225661    | not scorable | not scorable | 1            | 0.6692769    |
| #### Bn-A06-p21800927 | A-genome specific (napus-rapa) | 0.9928229    | 0.7095326    | not scorable | not scorable | 0.9752066    | 0.6678817    |
| #### Bn-A06-p21801638 | A-genome specific (napus-rapa) | 1            | 0.7741914    | not scorable | not scorable | 0.9834711    | 0.8351377    |
| #### Bn-A06-p21804318 | A-genome specific (napus-rapa) | 0.9880383    | 0.7569664    | not scorable | not scorable | 0.9917355    | 0.7463443    |
| #### Bn-A06-p21822204 | A-genome specific (napus-rapa) | 1            | 0.273265     | not scorable | not scorable | 1            | 0.6851047    |



|                       |                                |              |              |              |              |           |           |
|-----------------------|--------------------------------|--------------|--------------|--------------|--------------|-----------|-----------|
| #### Bn-A06-p21825957 | A-genome specific (napus-rapa) | 0.9617225    | 0.8006789    | not scorable | not scorable | 0.6033058 | 0.7864977 |
| #### Bn-A06-p21826106 | A-genome specific (rapa only)  | not scorable | not scorable | not scorable | not scorable | 0.5867769 | 0.8710383 |
| #### Bn-A06-p21826609 | A-genome specific (napus-rapa) | 0.9760765    | 0.8092616    | not scorable | not scorable | 0.9917355 | 0.6939957 |
| #### Bn-A06-p21826671 | A-genome specific (napus-rapa) | 0.9880383    | 0.7019902    | not scorable | not scorable | 1         | 0.7799422 |
| #### Bn-A06-p21826830 | A-genome specific (napus-rapa) | 0.9593301    | 0.5281987    | not scorable | not scorable | 0.9752066 | 0.7150626 |
| #### Bn-A06-p21826979 | A-genome specific (napus-rapa) | 0.9928229    | 0.7980903    | not scorable | not scorable | 0.9917355 | 0.796352  |
| #### Bn-A06-p21827359 | A-genome specific (napus-rapa) | 0.9832536    | 0.7992296    | not scorable | not scorable | 0.9752066 | 0.7880515 |
| #### Bn-A06-p21829647 | A-genome specific (napus-rapa) | 0.9784689    | 0.811658     | not scorable | not scorable | 1         | 0.7956669 |
| #### Bn-A06-p21846491 | A-genome specific (napus-rapa) | 0.6818182    | 0.7068456    | not scorable | not scorable | 0.6115702 | 0.6572533 |
| #### Bn-A06-p21848747 | A-genome specific (napus-rapa) | 0.9760765    | 0.6256702    | not scorable | not scorable | 0.9834711 | 0.7188126 |
| #### Bn-A06-p2185099  | A-genome specific (napus-rapa) | 0.9688995    | 0.8690061    | not scorable | not scorable | 0.9834711 | 0.8737018 |
| #### Bn-A06-p21852261 | A-genome specific (napus-rapa) | 0.9521531    | 0.5807966    | not scorable | not scorable | 0.9917355 | 0.8016173 |
| #### Bn-A06-p21884761 | A-genome specific (napus-rapa) | 0.9880383    | 0.7742633    | not scorable | not scorable | 0.6528926 | 0.7730228 |
| #### Bn-A06-p21888532 | A-genome specific (napus-rapa) | 0.9688995    | 0.4897531    | not scorable | not scorable | 1         | 0.8784661 |
| #### Bn-A06-p21896359 | A-genome specific (napus-rapa) | 0.9760765    | 0.7328776    | not scorable | not scorable | 0.9834711 | 0.7238802 |
| #### Bn-A06-p21896871 | A-genome specific (napus-rapa) | 0.9808612    | 0.7584976    | not scorable | not scorable | 0.9917355 | 0.8238913 |
| #### Bn-A06-p21899421 | A-genome specific (napus-rapa) | 0.9952153    | 0.8050625    | not scorable | not scorable | 1         | 0.9052851 |
| #### Bn-A06-p21902421 | A-genome specific (napus-rapa) | 0.9832536    | 0.7868257    | not scorable | not scorable | 1         | 0.6549867 |
| #### Bn-A06-p21902773 | A-genome specific (napus-rapa) | 0.9784689    | 0.8052423    | not scorable | not scorable | 0.9834711 | 0.8192739 |
| #### Bn-A06-p21903683 | A-genome specific (napus-rapa) | 0.9736842    | 0.7849514    | not scorable | not scorable | 1         | 0.7729177 |
| #### Bn-A06-p21904019 | A-genome specific (napus-rapa) | 0.9880383    | 0.8071038    | not scorable | not scorable | 1         | 0.9146456 |
| #### Bn-A06-p21904162 | A-genome specific (napus-rapa) | 0.9784689    | 0.6918477    | not scorable | not scorable | 0.9917355 | 0.7465235 |
| #### Bn-A06-p21917612 | A-genome specific (napus-rapa) | 0.9736842    | 0.5197405    | not scorable | not scorable | 0.5206612 | 0.8392041 |
| #### Bn-A06-p21926982 | A-genome specific (napus-rapa) | 0.9856459    | 0.6646758    | not scorable | not scorable | 0.9586777 | 0.6346143 |
| #### Bn-A06-p21930942 | A-genome specific (napus-rapa) | 0.9880383    | 0.3698871    | not scorable | not scorable | 1         | 0.6919689 |
| #### Bn-A06-p21933122 | A-genome specific (napus-rapa) | 1            | 0.5750912    | not scorable | not scorable | 0.9834711 | 0.8046679 |
| #### Bn-A06-p21933776 | A-genome specific (napus-rapa) | 0.9952153    | 0.4777787    | not scorable | not scorable | 0.9834711 | 0.7492527 |
| #### Bn-A06-p21933808 | A-genome specific (napus-rapa) | 1            | 0.7969946    | not scorable | not scorable | 0.9834711 | 0.7749467 |
| #### Bn-A06-p21933870 | A-genome specific (napus-rapa) | 1            | 0.7083493    | not scorable | not scorable | 1         | 0.7488707 |
| #### Bn-A06-p21953510 | A-genome specific (napus-rapa) | 1            | 0.8114662    | not scorable | not scorable | 1         | 0.7474564 |
| #### Bn-A06-p21954315 | A-genome specific (napus-rapa) | 1            | 0.6515502    | not scorable | not scorable | 0.9917355 | 0.7105888 |
| #### Bn-A06-p21955208 | A-genome specific (napus-rapa) | 1            | 0.6990795    | not scorable | not scorable | 0.9917355 | 0.6994056 |
| #### Bn-A06-p21980483 | A-genome specific (rapa only)  | not scorable | not scorable | not scorable | not scorable | 1         | 0.6824719 |

|                       |                                |              |              |              |              |              |              |           |
|-----------------------|--------------------------------|--------------|--------------|--------------|--------------|--------------|--------------|-----------|
| #### Bn-A06-p21980699 | A-genome specific (napus-rapa) | 0.9976076    | 0.3897233    | not scorable | not scorable |              | 1            | 0.7500832 |
| #### Bn-A06-p21983885 | A-genome specific (napus-rapa) | 0.9904306    | 0.4978341    | not scorable | not scorable | 0.9834711    |              | 0.8298522 |
| #### Bn-A06-p21986550 | A-genome specific (napus-rapa) | 0.9736842    | 0.7752701    | not scorable | not scorable | 0.9917355    |              | 0.6833972 |
| #### Bn-A06-p21992536 | A-genome specific (napus-rapa) | 1            | 0.790081     | not scorable | not scorable | 0.9834711    |              | 0.7885493 |
| #### Bn-A06-p21993050 | A-genome specific (napus-rapa) | 0.930622     | 0.7128178    | not scorable | not scorable |              | 1            | 0.7453101 |
| #### Bn-A06-p22001193 | A-genome specific (napus-rapa) | 0.9760765    | 0.3092453    | not scorable | not scorable | 0.9917355    |              | 0.7098652 |
| #### Bn-A06-p22051862 | A-genome specific (napus-rapa) | 0.9760765    | 0.4227062    | not scorable | not scorable | 0.9917355    |              | 0.7087814 |
| #### Bn-A06-p22054532 | A-genome specific (napus-rapa) | 0.6363636    | 0.8905491    | not scorable | not scorable | 0.9917355    |              | 0.8583596 |
| #### Bn-A06-p22056809 | genome unspecific (all in)     | 0.9880383    | 0.2565279    |              | 1            | 0.2193336    | 1            | 0.6940234 |
| #### Bn-A06-p22063657 | A-genome specific (rapa only)  | not scorable | not scorable | not scorable | not scorable |              | 1            | 0.7440118 |
| #### Bn-A06-p22074841 | genome unspecific (all in)     | 0.9330143    | 0.2777138    | 0.9844961    | 0.6106088    | 0.9752066    |              | 0.5598418 |
| #### Bn-A06-p22077748 | A-genome specific (napus-rapa) | 0.9880383    | 0.7323995    | not scorable | not scorable | 0.9669421    |              | 0.839055  |
| #### Bn-A06-p22088550 | A-genome specific (napus-rapa) | 0.9880383    | 0.5401381    | not scorable | not scorable | 0.9834711    |              | 0.7096933 |
| #### Bn-A06-p22096615 | A-genome specific (napus-rapa) | 0.9904306    | 0.3694408    | not scorable | not scorable | 0.9917355    |              | 0.6150306 |
| #### Bn-A06-p22105035 | napus specific                 | 0.9880383    | 0.2993841    | not scorable | not scorable | not scorable | not scorable |           |
| #### Bn-A06-p22121666 | A-genome specific (napus-rapa) | 0.9976076    | 0.2598789    | not scorable | not scorable |              | 1            | 0.7094886 |
| #### Bn-A06-p22160452 | A-genome specific (napus-rapa) | 0.9880383    | 0.6269611    | not scorable | not scorable | 0.9917355    |              | 0.8496951 |
| #### Bn-A06-p22163702 | A-genome specific (napus-rapa) | 0.9832536    | 0.2684243    | not scorable | not scorable | 0.9917355    |              | 0.7886636 |
| #### Bn-A06-p22173832 | A-genome specific (napus-rapa) | 0.9976076    | 0.3968476    | not scorable | not scorable |              | 1            | 0.826859  |
| #### Bn-A06-p2217578  | A-genome specific (napus-rapa) | 0.9928229    | 0.4004328    | not scorable | not scorable |              | 1            | 0.7175488 |
| #### Bn-A06-p2218956  | A-genome specific (napus-rapa) | 0.9832536    | 0.584325     | not scorable | not scorable |              | 1            | 0.6789079 |
| #### Bn-A06-p22209347 | A-genome specific (napus-rapa) | 0.9593301    | 0.5568881    | not scorable | not scorable | 0.9917355    |              | 0.7910571 |
| #### Bn-A06-p2222872  | A-genome specific (rapa only)  | not scorable | not scorable | not scorable | not scorable |              | 1            | 0.7884539 |
| #### Bn-A06-p22231737 | A-genome specific (napus-rapa) | 0.9784689    | 0.7005237    | not scorable | not scorable | 0.9669421    |              | 0.8223557 |
| #### Bn-A06-p22262511 | A-genome specific (napus-rapa) | 0.9784689    | 0.7894836    | not scorable | not scorable | 0.9834711    |              | 0.7995051 |
| #### Bn-A06-p22267850 | A-genome specific (napus-rapa) | 1            | 0.9272014    | not scorable | not scorable | 0.9917355    |              | 0.9272014 |
| #### Bn-A06-p22268128 | A-genome specific (napus-rapa) | 0.9856459    | 0.3041212    | not scorable | not scorable | 0.9752066    |              | 0.7819726 |
| #### Bn-A06-p22271048 | A-genome specific (napus-rapa) | 0.9760765    | 0.2987354    | not scorable | not scorable | 0.9917355    |              | 0.6917776 |
| #### Bn-A06-p22278059 | A-genome specific (napus-rapa) | 0.9880383    | 0.6133742    | not scorable | not scorable | 0.9917355    |              | 0.7196835 |
| #### Bn-A06-p22278468 | A-genome specific (napus-rapa) | 0.9880383    | 0.5345018    | not scorable | not scorable | 0.9752066    |              | 0.7094762 |
| #### Bn-A06-p22279513 | A-genome specific (napus-rapa) | 0.9976076    | 0.6832656    | not scorable | not scorable | 0.9917355    |              | 0.6990988 |
| #### Bn-A06-p22324968 | A-genome specific (napus-rapa) | 0.9712918    | 0.758703     | not scorable | not scorable | 0.9669421    |              | 0.7949031 |
| #### Bn-A06-p22326059 | A-genome specific (napus-rapa) | 0.9832536    | 0.7157491    | not scorable | not scorable | 0.9917355    |              | 0.7217886 |

|                       |                                |           |           |              |              |           |           |
|-----------------------|--------------------------------|-----------|-----------|--------------|--------------|-----------|-----------|
| #### Bn-A06-p22329026 | A-genome specific (napus-rapa) | 0.9928229 | 0.502389  | not scorable | not scorable | 0.9834711 | 0.8122377 |
| #### Bn-A06-p22329819 | A-genome specific (napus-rapa) | 0.9904306 | 0.5097431 | not scorable | not scorable | 1         | 0.7515808 |
| #### Bn-A06-p22330861 | A-genome specific (napus-rapa) | 1         | 0.8279113 | not scorable | not scorable | 1         | 0.8049911 |
| #### Bn-A06-p22331680 | A-genome specific (napus-rapa) | 0.9976076 | 0.4326962 | not scorable | not scorable | 1         | 0.7173514 |
| #### Bn-A06-p2234696  | A-genome specific (napus-rapa) | 0.8851675 | 0.7869537 | not scorable | not scorable | 0.9256198 | 0.7732797 |
| #### Bn-A06-p2234718  | A-genome specific (napus-rapa) | 0.9569378 | 0.825357  | not scorable | not scorable | 0.9256198 | 0.7523549 |
| #### Bn-A06-p22383556 | A-genome specific (napus-rapa) | 0.9832536 | 0.5125602 | not scorable | not scorable | 1         | 0.7850402 |
| #### Bn-A06-p22383722 | A-genome specific (napus-rapa) | 0.9330143 | 0.5844208 | not scorable | not scorable | 0.9752066 | 0.6731301 |
| #### Bn-A06-p22391357 | genome unspecific (all in)     | 0.9808612 | 0.3056332 |              | 1 0.656002   | 1         | 0.8376571 |
| #### Bn-A06-p22397061 | A-genome specific (napus-rapa) | 1         | 0.6626829 | not scorable | not scorable | 0.9917355 | 0.6592323 |
| #### Bn-A06-p22503987 | A-genome specific (napus-rapa) | 0.9784689 | 0.551122  | not scorable | not scorable | 0.9917355 | 0.7753481 |
| #### Bn-A06-p22505664 | A-genome specific (napus-rapa) | 0.9712918 | 0.523587  | not scorable | not scorable | 0.9917355 | 0.7711571 |
| #### Bn-A06-p22505810 | genome unspecific (all in)     | 0.9904306 | 0.4963154 |              | 1 0.8481144  | 0.9834711 | 0.8218268 |
| #### Bn-A06-p2251910  | A-genome specific (napus-rapa) | 0.9665072 | 0.599645  | not scorable | not scorable | 0.661157  | 0.6186296 |
| #### Bn-A06-p2252815  | A-genome specific (napus-rapa) | 0.9952153 | 0.3311453 | not scorable | not scorable | 0.9834711 | 0.7325816 |
| #### Bn-A06-p22554741 | A-genome specific (napus-rapa) | 1         | 0.8304602 | not scorable | not scorable | 1         | 0.9175813 |
| #### Bn-A06-p22555168 | A-genome specific (napus-rapa) | 0.9712918 | 0.5948875 | not scorable | not scorable | 1         | 0.6999635 |
| #### Bn-A06-p22557239 | A-genome specific (napus-rapa) | 0.9736842 | 0.3231167 | not scorable | not scorable | 0.9834711 | 0.7087324 |
| #### Bn-A06-p22559895 | A-genome specific (napus-rapa) | 0.9904306 | 0.6226589 | not scorable | not scorable | 0.9917355 | 0.6322215 |
| #### Bn-A06-p22577587 | A-genome specific (napus-rapa) | 0.9880383 | 0.7462591 | not scorable | not scorable | 0.9917355 | 0.7569162 |
| #### Bn-A06-p22582397 | A-genome specific (napus-rapa) | 0.9473684 | 0.5405324 | not scorable | not scorable | 0.9834711 | 0.6675481 |
| #### Bn-A06-p22588868 | A-genome specific (napus-rapa) | 0.9856459 | 0.7789547 | not scorable | not scorable | 0.9917355 | 0.7228335 |
| #### Bn-A06-p22589709 | A-genome specific (napus-rapa) | 0.9856459 | 0.7664944 | not scorable | not scorable | 0.9834711 | 0.7443291 |
| #### Bn-A06-p22594488 | A-genome specific (napus-rapa) | 0.9545454 | 0.5016845 | not scorable | not scorable | 0.9752066 | 0.7725552 |
| #### Bn-A06-p22595032 | A-genome specific (napus-rapa) | 0.7679426 | 0.7808175 | not scorable | not scorable | 0.6033058 | 0.6472887 |
| #### Bn-A06-p22597668 | A-genome specific (napus-rapa) | 0.9688995 | 0.5357071 | not scorable | not scorable | 0.9917355 | 0.8633536 |
| #### Bn-A06-p22601511 | A-genome specific (napus-rapa) | 0.9760765 | 0.4287783 | not scorable | not scorable | 0.9834711 | 0.7651327 |
| #### Bn-A06-p22601589 | A-genome specific (napus-rapa) | 0.9904306 | 0.7768082 | not scorable | not scorable | 0.9669421 | 0.7140841 |
| #### Bn-A06-p22605217 | A-genome specific (napus-rapa) | 0.9665072 | 0.6326937 | not scorable | not scorable | 0.9917355 | 0.6842645 |
| #### Bn-A06-p22608192 | A-genome specific (napus-rapa) | 0.9856459 | 0.6730262 | not scorable | not scorable | 0.9834711 | 0.6658371 |
| #### Bn-A06-p22644580 | A-genome specific (napus-rapa) | 0.9545454 | 0.8165238 | not scorable | not scorable | 0.9669421 | 0.8731697 |
| #### Bn-A06-p22647955 | A-genome specific (napus-rapa) | 0.9904306 | 0.2856245 | not scorable | not scorable | 1         | 0.8211561 |
| #### Bn-A06-p2268393  | A-genome specific (napus-rapa) | 0.9617225 | 0.7060627 | not scorable | not scorable | 0.9917355 | 0.7069958 |

|                       |                                |              |              |              |              |              |              |
|-----------------------|--------------------------------|--------------|--------------|--------------|--------------|--------------|--------------|
| #### Bn-A06-p22691250 | A-genome specific (napus-rapa) | 1            | 0.752691     | not scorable | not scorable | 1            | 0.9205657    |
| #### Bn-A06-p22709184 | genome unspecific (all in)     | 0.9784689    | 0.7797378    | 0.8682171    | 0.7570032    | 1            | 0.8409123    |
| #### Bn-A06-p22709872 | A-genome specific (napus-rapa) | 1            | 0.3960792    | not scorable | not scorable | 0.9669421    | 0.7446026    |
| #### Bn-A06-p2274318  | A-genome specific (napus-rapa) | 0.9904306    | 0.3607583    | not scorable | not scorable | 0.6942149    | 0.8568431    |
| #### Bn-A06-p2275754  | napus specific                 | 0.5095694    | 0.777229     | not scorable | not scorable | not scorable | not scorable |
| #### Bn-A06-p22773574 | A-genome specific (napus-rapa) | 0.9976076    | 0.4123129    | not scorable | not scorable | 0.9752066    | 0.7645047    |
| #### Bn-A06-p22773576 | A-genome specific (napus-rapa) | 0.9976076    | 0.5770319    | not scorable | not scorable | 0.9834711    | 0.6940374    |
| #### Bn-A06-p22781886 | A-genome specific (napus-rapa) | 0.9066986    | 0.5583483    | not scorable | not scorable | 0.6198347    | 0.6921057    |
| #### Bn-A06-p22782335 | A-genome specific (napus-rapa) | 0.9641148    | 0.8132621    | not scorable | not scorable | 0.6115702    | 0.7008032    |
| #### Bn-A06-p22784485 | A-genome specific (napus-rapa) | 0.6746411    | 0.714874     | not scorable | not scorable | 0.892562     | 0.6823767    |
| #### Bn-A06-p22786948 | A-genome specific (napus-rapa) | 0.9760765    | 0.7822806    | not scorable | not scorable | 0.6198347    | 0.7517534    |
| #### Bn-A06-p22788890 | A-genome specific (napus-rapa) | 0.9425837    | 0.7118186    | not scorable | not scorable | 0.9834711    | 0.6942552    |
| #### Bn-A06-p22796718 | genome unspecific (all in)     | 0.9760765    | 0.4126065    | 1            | 0.7355843    | 0.9834711    | 0.6716518    |
| #### Bn-A06-p22806976 | A-genome specific (napus-rapa) | 0.9976076    | 0.7120022    | not scorable | not scorable | 1            | 0.6683499    |
| #### Bn-A06-p22808095 | A-genome specific (napus-rapa) | 0.9760765    | 0.3261864    | not scorable | not scorable | 1            | 0.4626161    |
| #### Bn-A06-p22809449 | A-genome specific (napus-rapa) | 0.9545454    | 0.6369309    | not scorable | not scorable | 0.9834711    | 0.77964      |
| #### Bn-A06-p22816078 | A-genome specific (napus-rapa) | 0.9497608    | 0.5518503    | not scorable | not scorable | 0.9917355    | 0.8373659    |
| #### Bn-A06-p22835281 | A-genome specific (rapa only)  | not scorable | not scorable | not scorable | not scorable | 0.9917355    | 0.7165428    |
| #### Bn-A06-p22847296 | A-genome specific (napus-rapa) | 0.9712918    | 0.374049     | not scorable | not scorable | 0.9834711    | 0.6694064    |
| #### Bn-A06-p22882207 | A-genome specific (napus-rapa) | 0.9904306    | 0.7592138    | not scorable | not scorable | 0.9917355    | 0.6023511    |
| #### Bn-A06-p22894392 | A-genome specific (rapa only)  | not scorable | not scorable | not scorable | not scorable | 0.9752066    | 0.6975516    |
| #### Bn-A06-p22910339 | A-genome specific (napus-rapa) | 0.9808612    | 0.4182937    | not scorable | not scorable | 0.9917355    | 0.6240761    |
| #### Bn-A06-p22913862 | A-genome specific (napus-rapa) | 0.9784689    | 0.7338065    | not scorable | not scorable | 0.9834711    | 0.6828651    |
| #### Bn-A06-p22914032 | A-genome specific (napus-rapa) | 0.9832536    | 0.7012511    | not scorable | not scorable | 0.9834711    | 0.6990761    |
| #### Bn-A06-p22914117 | A-genome specific (napus-rapa) | 0.9856459    | 0.6923657    | not scorable | not scorable | 0.9586777    | 0.7093671    |
| #### Bn-A06-p22917369 | A-genome specific (napus-rapa) | 0.9641148    | 0.7616261    | not scorable | not scorable | 0.9834711    | 0.7901378    |
| #### Bn-A06-p22921908 | A-genome specific (napus-rapa) | 0.9832536    | 0.6794688    | not scorable | not scorable | 0.9917355    | 0.8013307    |
| #### Bn-A06-p22922325 | A-genome specific (napus-rapa) | 0.9880383    | 0.7759107    | not scorable | not scorable | 1            | 0.9240721    |
| #### Bn-A06-p2292578  | A-genome specific (napus-rapa) | 0.9401914    | 0.3481184    | not scorable | not scorable | 1            | 0.6500306    |
| #### Bn-A06-p2293069  | A-genome specific (napus-rapa) | 0.9760765    | 0.8195679    | not scorable | not scorable | 1            | 0.8012809    |
| #### Bn-A06-p22938934 | A-genome specific (napus-rapa) | 0.9688995    | 0.2358641    | not scorable | not scorable | 0.9752066    | 0.569261     |
| #### Bn-A06-p22947499 | A-genome specific (napus-rapa) | 0.9617225    | 0.6171902    | not scorable | not scorable | 0.9917355    | 0.8018759    |
| #### Bn-A06-p2300342  | A-genome specific (napus-rapa) | 0.9497608    | 0.7454369    | not scorable | not scorable | 0.9917355    | 0.8177654    |

|                       |                                |              |              |              |              |           |           |
|-----------------------|--------------------------------|--------------|--------------|--------------|--------------|-----------|-----------|
| #### Bn-A06-p2303914  | A-genome specific (napus-rapa) | 0.9545454    | 0.7636623    | not scorable | not scorable | 0.9586777 | 0.7777188 |
| #### Bn-A06-p23041811 | A-genome specific (napus-rapa) | 0.9976076    | 0.7219982    | not scorable | not scorable | 0.9917355 | 0.6904709 |
| #### Bn-A06-p23042397 | A-genome specific (napus-rapa) | 1            | 0.6746852    | not scorable | not scorable | 0.9917355 | 0.7225248 |
| #### Bn-A06-p23042849 | A-genome specific (napus-rapa) | 0.9976076    | 0.801504     | not scorable | not scorable | 0.9917355 | 0.8148065 |
| #### Bn-A06-p23043135 | A-genome specific (napus-rapa) | 0.9976076    | 0.8109214    | not scorable | not scorable | 0.9834711 | 0.7837855 |
| #### Bn-A06-p2304435  | A-genome specific (napus-rapa) | 0.9976076    | 0.2655419    | not scorable | not scorable | 0.9834711 | 0.7964625 |
| #### Bn-A06-p2305844  | A-genome specific (napus-rapa) | 0.9784689    | 0.3823975    | not scorable | not scorable | 0.9586777 | 0.7348355 |
| #### Bn-A06-p2306499  | A-genome specific (napus-rapa) | 1            | 0.4666708    | not scorable | not scorable | 0.9834711 | 0.8250861 |
| #### Bn-A06-p2307291  | A-genome specific (napus-rapa) | 0.9497608    | 0.8188066    | not scorable | not scorable | 0.9834711 | 0.8577474 |
| #### Bn-A06-p2316252  | A-genome specific (napus-rapa) | 0.9473684    | 0.3444099    | not scorable | not scorable | 1         | 0.7808376 |
| #### Bn-A06-p23216260 | A-genome specific (napus-rapa) | 0.9808612    | 0.8264181    | not scorable | not scorable | 0.9917355 | 0.7162943 |
| #### Bn-A06-p23218510 | A-genome specific (napus-rapa) | 0.9617225    | 0.7825961    | not scorable | not scorable | 1         | 0.7543278 |
| #### Bn-A06-p23219303 | A-genome specific (napus-rapa) | 0.9784689    | 0.8080567    | not scorable | not scorable | 1         | 0.8103186 |
| #### Bn-A06-p23219336 | A-genome specific (napus-rapa) | 0.9593301    | 0.4510284    | not scorable | not scorable | 1         | 0.7410041 |
| #### Bn-A06-p23219420 | A-genome specific (napus-rapa) | 0.9904306    | 0.8240921    | not scorable | not scorable | 1         | 0.7606184 |
| #### Bn-A06-p23226757 | A-genome specific (napus-rapa) | 0.9952153    | 0.7345465    | not scorable | not scorable | 1         | 0.7063227 |
| #### Bn-A06-p23226981 | A-genome specific (napus-rapa) | 0.9617225    | 0.7228265    | not scorable | not scorable | 1         | 0.8525698 |
| #### Bn-A06-p23227091 | A-genome specific (napus-rapa) | 0.9784689    | 0.769268     | not scorable | not scorable | 1         | 0.7736149 |
| #### Bn-A06-p23229650 | A-genome specific (napus-rapa) | 0.9665072    | 0.4458218    | not scorable | not scorable | 0.9834711 | 0.794191  |
| #### Bn-A06-p23250542 | A-genome specific (napus-rapa) | 0.9952153    | 0.8103112    | not scorable | not scorable | 1         | 0.6782417 |
| #### Bn-A06-p23258948 | A-genome specific (rapa only)  | not scorable | not scorable | not scorable | not scorable | 1         | 0.7307554 |
| #### Bn-A06-p23259546 | A-genome specific (napus-rapa) | 0.9880383    | 0.7547672    | not scorable | not scorable | 0.9917355 | 0.7317971 |
| #### Bn-A06-p23268021 | A-genome specific (napus-rapa) | 0.9688995    | 0.6622695    | not scorable | not scorable | 0.9834711 | 0.8006958 |
| #### Bn-A06-p23295405 | A-genome specific (napus-rapa) | 0.9784689    | 0.7934908    | not scorable | not scorable | 0.9917355 | 0.8321213 |
| #### Bn-A06-p23341715 | A-genome specific (napus-rapa) | 0.9641148    | 0.7969531    | not scorable | not scorable | 0.9586777 | 0.7736661 |
| #### Bn-A06-p23347767 | A-genome specific (napus-rapa) | 0.9904306    | 0.6970072    | not scorable | not scorable | 0.9917355 | 0.6929789 |
| #### Bn-A06-p23350246 | A-genome specific (napus-rapa) | 0.9928229    | 0.8128534    | not scorable | not scorable | 0.9917355 | 0.8135626 |
| #### Bn-A06-p23406582 | A-genome specific (napus-rapa) | 1            | 0.9205657    | not scorable | not scorable | 1         | 0.916608  |
| #### Bn-A06-p2341154  | A-genome specific (napus-rapa) | 0.9832536    | 0.8126062    | not scorable | not scorable | 0.9752066 | 0.6947213 |
| #### Bn-A06-p23442751 | A-genome specific (napus-rapa) | 0.9952153    | 0.4427902    | not scorable | not scorable | 1         | 0.8085203 |
| #### Bn-A06-p2345966  | A-genome specific (napus-rapa) | 0.9832536    | 0.7527182    | not scorable | not scorable | 1         | 0.8422567 |
| #### Bn-A06-p23468803 | A-genome specific (napus-rapa) | 0.9952153    | 0.7937553    | not scorable | not scorable | 1         | 0.7396594 |
| #### Bn-A06-p2347754  | A-genome specific (napus-rapa) | 0.9688995    | 0.7010462    | not scorable | not scorable | 1         | 0.6793889 |

|                       |                                   |              |              |              |              |           |           |
|-----------------------|-----------------------------------|--------------|--------------|--------------|--------------|-----------|-----------|
| #### Bn-A06-p2348428  | A-genome specific (napus-rapa)    | 0.9784689    | 0.4037814    | not scorable | not scorable | 0.9917355 | 0.7903694 |
| #### Bn-A06-p23542209 | A-genome specific (napus-rapa)    | 0.9976076    | 0.8102468    | not scorable | not scorable | 0.9834711 | 0.8047117 |
| #### Bn-A06-p2357647  | A-genome specific (napus-rapa)    | 0.9688995    | 0.7521178    | not scorable | not scorable | 1         | 0.8024052 |
| #### Bn-A06-p23585772 | A-genome specific (napus-rapa)    | 0.9760765    | 0.3811812    | not scorable | not scorable | 0.9752066 | 0.7761122 |
| #### Bn-A06-p23586019 | A-genome specific (napus-rapa)    | 1            | 0.5353746    | not scorable | not scorable | 0.9834711 | 0.5762067 |
| #### Bn-A06-p23590868 | A-genome specific (napus-rapa)    | 0.9904306    | 0.347268     | not scorable | not scorable | 1         | 0.7052888 |
| #### Bn-A06-p23591616 | A-genome specific (napus-rapa)    | 0.9760765    | 0.7132003    | not scorable | not scorable | 0.9917355 | 0.6967156 |
| #### Bn-A06-p23595655 | A-genome specific (napus-rapa)    | 0.9904306    | 0.802133     | not scorable | not scorable | 1         | 0.8153849 |
| #### Bn-A06-p23612730 | A-genome specific (napus-rapa)    | 0.9808612    | 0.7639281    | not scorable | not scorable | 1         | 0.8521708 |
| #### Bn-A06-p23621651 | A-genome specific (napus-rapa)    | 0.9712918    | 0.670655     | not scorable | not scorable | 0.9917355 | 0.7763514 |
| #### Bn-A06-p23625426 | A-genome specific (napus-rapa)    | 0.9330143    | 0.8034906    | not scorable | not scorable | 0.6115702 | 0.803229  |
| #### Bn-A06-p23657129 | A-genome specific (napus-rapa)    | 0.9784689    | 0.3808871    | not scorable | not scorable | 1         | 0.7354022 |
| #### Bn-A06-p2365869  | A-genome specific (napus-rapa)    | 0.9952153    | 0.7711585    | not scorable | not scorable | 0.9917355 | 0.8517414 |
| #### Bn-A06-p23660656 | A-genome specific (napus-rapa)    | 0.9712918    | 0.7373261    | not scorable | not scorable | 1         | 0.8592515 |
| #### Bn-A06-p23661679 | genome unspecific (oleracea-rapa) | not scorable | not scorable | 1            | 0.699091     | 0.9917355 | 0.7998371 |
| #### Bn-A06-p23665384 | A-genome specific (napus-rapa)    | 0.9832536    | 0.3532295    | not scorable | not scorable | 0.6363636 | 0.8310879 |
| #### Bn-A06-p23665564 | A-genome specific (napus-rapa)    | 0.6483254    | 0.7533282    | not scorable | not scorable | 0.6694215 | 0.6998192 |
| #### Bn-A06-p23666378 | A-genome specific (napus-rapa)    | 0.6507177    | 0.8610106    | not scorable | not scorable | 0.6694215 | 0.8162478 |
| #### Bn-A06-p23674542 | A-genome specific (napus-rapa)    | 0.9856459    | 0.7621419    | not scorable | not scorable | 1         | 0.7255844 |
| #### Bn-A06-p23677178 | A-genome specific (napus-rapa)    | 0.9904306    | 0.7481931    | not scorable | not scorable | 1         | 0.6611145 |
| #### Bn-A06-p23677200 | A-genome specific (napus-rapa)    | 0.9928229    | 0.7532716    | not scorable | not scorable | 1         | 0.7818686 |
| #### Bn-A06-p23681386 | A-genome specific (napus-rapa)    | 0.9880383    | 0.7157691    | not scorable | not scorable | 1         | 0.6885931 |
| #### Bn-A06-p23684217 | A-genome specific (napus-rapa)    | 0.9784689    | 0.7621069    | not scorable | not scorable | 1         | 0.8291757 |
| #### Bn-A06-p23684770 | A-genome specific (napus-rapa)    | 0.9928229    | 0.7599296    | not scorable | not scorable | 1         | 0.8186069 |
| #### Bn-A06-p23687609 | A-genome specific (napus-rapa)    | 0.9952153    | 0.7531577    | not scorable | not scorable | 1         | 0.7956324 |
| #### Bn-A06-p23688372 | A-genome specific (napus-rapa)    | 0.9856459    | 0.7620777    | not scorable | not scorable | 1         | 0.7502258 |
| #### Bn-A06-p23695500 | A-genome specific (napus-rapa)    | 0.9760765    | 0.6462757    | not scorable | not scorable | 1         | 0.7836249 |
| #### Bn-A06-p23695665 | A-genome specific (napus-rapa)    | 0.9856459    | 0.7559047    | not scorable | not scorable | 1         | 0.8235264 |
| #### Bn-A06-p23697182 | A-genome specific (napus-rapa)    | 0.9760765    | 0.7507638    | not scorable | not scorable | 1         | 0.7582187 |
| #### Bn-A06-p23697605 | A-genome specific (napus-rapa)    | 0.9760765    | 0.7593462    | not scorable | not scorable | 1         | 0.6761311 |
| #### Bn-A06-p23699003 | A-genome specific (napus-rapa)    | 0.9928229    | 0.7846684    | not scorable | not scorable | 0.9834711 | 0.7774679 |
| #### Bn-A06-p23699420 | A-genome specific (napus-rapa)    | 0.9736842    | 0.6880916    | not scorable | not scorable | 0.9917355 | 0.7672326 |
| #### Bn-A06-p23706979 | A-genome specific (rapa only)     | not scorable | not scorable | not scorable | not scorable | 0.9834711 | 0.7644212 |

|                       |                                |              |              |              |              |              |              |           |
|-----------------------|--------------------------------|--------------|--------------|--------------|--------------|--------------|--------------|-----------|
| #### Bn-A06-p23710466 | A-genome specific (napus-rapa) | 0.9473684    | 0.6795021    | not scorable | not scorable | 0.9917355    | 0.7520569    |           |
| #### Bn-A06-p23710506 | A-genome specific (napus-rapa) | 0.9952153    | 0.7464174    | not scorable | not scorable | 1            | 0.8086776    |           |
| #### Bn-A06-p23741737 | A-genome specific (napus-rapa) | 0.9569378    | 0.6973283    | not scorable | not scorable | 0.9917355    | 0.659147     |           |
| #### Bn-A06-p23744370 | A-genome specific (napus-rapa) | 0.03827751   | 0.7145514    | not scorable | not scorable | 0.9834711    | 0.6968536    |           |
| #### Bn-A06-p23746948 | A-genome specific (napus-rapa) | 0.9952153    | 0.7534229    | not scorable | not scorable | 1            | 0.9240721    |           |
| #### Bn-A06-p23748804 | A-genome specific (napus-rapa) | 0.9712918    | 0.5657801    | not scorable | not scorable | 0.9669421    | 0.7882775    |           |
| #### Bn-A06-p23750653 | A-genome specific (napus-rapa) | 0.9521531    | 0.7523856    | not scorable | not scorable | 1            | 0.7608893    |           |
| #### Bn-A06-p23759352 | A-genome specific (napus-rapa) | 0.9593301    | 0.6766212    | not scorable | not scorable | 0.9834711    | 0.9507774    |           |
| #### Bn-A06-p23768610 | A-genome specific (napus-rapa) | 0.9832536    | 0.3197401    | not scorable | not scorable | 1            | 0.7320846    |           |
| #### Bn-A06-p23776151 | A-genome specific (napus-rapa) | 0.9880383    | 0.6614456    | not scorable | not scorable | 0.9917355    | 0.8288725    |           |
| #### Bn-A06-p23795599 | A-genome specific (napus-rapa) | 1            | 0.7491307    | not scorable | not scorable | 0.9752066    | 0.8230965    |           |
| #### Bn-A06-p23795763 | A-genome specific (napus-rapa) | 0.9904306    | 0.8271506    | not scorable | not scorable | 0.9917355    | 0.8023478    |           |
| #### Bn-A06-p23796020 | A-genome specific (napus-rapa) | 0.9904306    | 0.8661372    | not scorable | not scorable | 0.9917355    | 0.7957217    |           |
| #### Bn-A06-p23806343 | A-genome specific (napus-rapa) | 0.9808612    | 0.4950114    | not scorable | not scorable | 0.9752066    | 0.5297749    |           |
| #### Bn-A06-p23852270 | A-genome specific (napus-rapa) | 0.6842105    | 0.7750737    | not scorable | not scorable | 0.9504132    | 0.8161226    |           |
| #### Bn-A06-p23857345 | A-genome specific (napus-rapa) | 0.9665072    | 0.4038264    | not scorable | not scorable | 0.9917355    | 0.7704021    |           |
| #### Bn-A06-p23865356 | A-genome specific (napus-rapa) | 0.9928229    | 0.6824156    | not scorable | not scorable | 0.9834711    | 0.7200165    |           |
| #### Bn-A06-p23873505 | A-genome specific (napus-rapa) | 0.6842105    | 0.8214992    | not scorable | not scorable | 0.9586777    | 0.8233764    |           |
| #### Bn-A06-p23892315 | A-genome specific (napus-rapa) | 0.9904306    | 0.7632224    | not scorable | not scorable | 1            | 0.7323081    |           |
| #### Bn-A06-p23892404 | A-genome specific (napus-rapa) | 0.9856459    | 0.7643707    | not scorable | not scorable | 0.9834711    | 0.7304637    |           |
| #### Bn-A06-p2390609  | A-genome specific (napus-rapa) | 0.9928229    | 0.7813344    | not scorable | not scorable | 0.9917355    | 0.8547498    |           |
| #### Bn-A06-p23944667 | A-genome specific (napus-rapa) | 0.9952153    | 0.7527133    | not scorable | not scorable | 1            | 0.7457933    |           |
| #### Bn-A06-p23968879 | A-genome specific (napus-rapa) | 0.9880383    | 0.7399921    | not scorable | not scorable | 0.9834711    | 0.6907133    |           |
| #### Bn-A06-p23972440 | A-genome specific (napus-rapa) | 0.9569378    | 0.4123479    | not scorable | not scorable | 0.9917355    | 0.7838849    |           |
| #### Bn-A06-p23983648 | A-genome specific (napus-rapa) | 0.9784689    | 0.4675966    | not scorable | not scorable | 1            | 0.7320513    |           |
| #### Bn-A06-p23988702 | A-genome specific (napus-rapa) | 0.9904306    | 0.4737935    | not scorable | not scorable | 1            | 0.8008183    |           |
| #### Bn-A06-p24000840 | A-genome specific (napus-rapa) | 0.4952153    | 0.7729893    | not scorable | not scorable | 0.8842975    | 0.6698728    |           |
| #### Bn-A06-p24005581 | A-genome specific (napus-rapa) | 0.9952153    | 0.510698     | not scorable | not scorable | 0.9752066    | 0.7795855    |           |
| #### Bn-A06-p24006085 | A-genome specific (rapa only)  | not scorable | not scorable | not scorable | not scorable | 0.9917355    | 0.6944862    |           |
| #### Bn-A06-p24017545 | all not scorable               | not scorable | not scorable | not scorable | not scorable | not scorable | not scorable |           |
| #### Bn-A06-p24032427 | A-genome specific (napus-rapa) | 0.9712918    | 0.6964451    | not scorable | not scorable | 0.9834711    | 0.7926037    |           |
| #### Bn-A06-p24040939 | A-genome specific (napus-rapa) | 0.9712918    | 0.7136787    | not scorable | not scorable | 0.9752066    | 0.7167431    |           |
| #### Bn-A06-p24041870 | genome unspecific (all in)     | 0.9952153    | 0.7806701    |              | 0            | 0.8419402    | 1            | 0.8067898 |

|                       |                                    |              |              |              |              |              |              |
|-----------------------|------------------------------------|--------------|--------------|--------------|--------------|--------------|--------------|
| #### Bn-A06-p24043170 | A-genome specific (napus-rapa)     | 0.9760765    | 0.4213769    | not scorable | not scorable | 0.9917355    | 0.7879115    |
| #### Bn-A06-p24045825 | A-genome specific (napus-rapa)     | 0.9832536    | 0.7527015    | not scorable | not scorable | 1            | 0.8020123    |
| #### Bn-A06-p24046488 | A-genome specific (napus-rapa)     | 0.9784689    | 0.3761618    | not scorable | not scorable | 0.9917355    | 0.4908206    |
| #### Bn-A06-p2405022  | C-genome specific (napus-oleracea) | 0.9760765    | 0.7020916    | 0.9534883    | 0.7829805    | not scorable | not scorable |
| #### Bn-A06-p24068524 | genome unspecific (all in)         | 0.9784689    | 0.3539623    | 0.9844961    | 0.6033046    | 0.9834711    | 0.7407122    |
| #### Bn-A06-p24070714 | A-genome specific (napus-rapa)     | 0.9856459    | 0.7956859    | not scorable | not scorable | 0.9834711    | 0.7117031    |
| #### Bn-A06-p2407080  | A-genome specific (napus-rapa)     | 0.9832536    | 0.7327422    | not scorable | not scorable | 0.9917355    | 0.7528263    |
| #### Bn-A06-p24075375 | A-genome specific (napus-rapa)     | 0.854067     | 0.7805812    | not scorable | not scorable | 0.9834711    | 0.847411     |
| #### Bn-A06-p24076443 | A-genome specific (napus-rapa)     | 0.9736842    | 0.7658553    | not scorable | not scorable | 0.9834711    | 0.7631356    |
| #### Bn-A06-p24099288 | A-genome specific (napus-rapa)     | 0.9736842    | 0.6623705    | not scorable | not scorable | 0.9834711    | 0.7282557    |
| #### Bn-A06-p2412998  | A-genome specific (napus-rapa)     | 0.9904306    | 0.4997921    | not scorable | not scorable | 0.9917355    | 0.793184     |
| #### Bn-A06-p24132842 | A-genome specific (napus-rapa)     | 0.9952153    | 0.6984201    | not scorable | not scorable | 0.9917355    | 0.6863167    |
| #### Bn-A06-p24132956 | A-genome specific (napus-rapa)     | 0.9521531    | 0.4897759    | not scorable | not scorable | 0.9917355    | 0.7314074    |
| #### Bn-A06-p2413971  | A-genome specific (napus-rapa)     | 0.9880383    | 0.8155088    | not scorable | not scorable | 0.9834711    | 0.7966136    |
| #### Bn-A06-p24142937 | A-genome specific (napus-rapa)     | 0.9880383    | 0.7705176    | not scorable | not scorable | 0.9917355    | 0.7434394    |
| #### Bn-A06-p24145208 | A-genome specific (napus-rapa)     | 0.9832536    | 0.7220418    | not scorable | not scorable | 1            | 0.7846798    |
| #### Bn-A06-p24147820 | A-genome specific (napus-rapa)     | 0.9880383    | 0.7578976    | not scorable | not scorable | 0.9917355    | 0.7214114    |
| #### Bn-A06-p24152122 | A-genome specific (napus-rapa)     | 0.9736842    | 0.3817016    | not scorable | not scorable | 1            | 0.7841223    |
| #### Bn-A06-p24156940 | A-genome specific (napus-rapa)     | 0.9880383    | 0.7725638    | not scorable | not scorable | 1            | 0.7387109    |
| #### Bn-A06-p24156988 | A-genome specific (napus-rapa)     | 0.9904306    | 0.7732701    | not scorable | not scorable | 0.9917355    | 0.8162115    |
| #### Bn-A06-p24167592 | genome unspecific (all in)         | 0.9832536    | 0.5228553    | 0.9922481    | 0.7142245    | 0.9504132    | 0.6530532    |
| #### Bn-A06-p24168470 | A-genome specific (napus-rapa)     | 0.9569378    | 0.2581909    | not scorable | not scorable | 1            | 0.6989014    |
| #### Bn-A06-p24170361 | A-genome specific (napus-rapa)     | 0.9856459    | 0.8041015    | not scorable | not scorable | 0.9917355    | 0.7425246    |
| #### Bn-A06-p24178982 | A-genome specific (napus-rapa)     | 0.9784689    | 0.7979935    | not scorable | not scorable | 0.9752066    | 0.7627319    |
| #### Bn-A06-p24204030 | A-genome specific (napus-rapa)     | 0.9712918    | 0.7567242    | not scorable | not scorable | 1            | 0.7827548    |
| #### Bn-A06-p24206019 | A-genome specific (napus-rapa)     | 0.9760765    | 0.6906354    | not scorable | not scorable | 1            | 0.6784909    |
| #### Bn-A06-p24206556 | A-genome specific (napus-rapa)     | 0.9904306    | 0.7811074    | not scorable | not scorable | 1            | 0.7806654    |
| #### Bn-A06-p24207308 | genome unspecific (all in)         | 0.9808612    | 0.7700121    |              | 1            | 0.7066216    | 1            |
| #### Bn-A06-p24210014 | A-genome specific (napus-rapa)     | 0.9760765    | 0.7853403    | not scorable | not scorable | 0.9752066    | 0.8409306    |
| #### Bn-A06-p24218304 | A-genome specific (rapa only)      | not scorable | not scorable | not scorable | not scorable | 1            | 0.68419      |
| #### Bn-A06-p24220121 | A-genome specific (napus-rapa)     | 0.9712918    | 0.7681912    | not scorable | not scorable | 0.9917355    | 0.8310581    |
| #### Bn-A06-p24222064 | A-genome specific (napus-rapa)     | 0.9736842    | 0.4229615    | not scorable | not scorable | 0.9917355    | 0.7052028    |
| #### Bn-A06-p24236385 | A-genome specific (napus-rapa)     | 0.9928229    | 0.7824283    | not scorable | not scorable | 1            | 0.7816136    |



|                       |                                |           |           |              |              |              |              |
|-----------------------|--------------------------------|-----------|-----------|--------------|--------------|--------------|--------------|
| #### Bn-A06-p24237899 | A-genome specific (napus-rapa) | 0.9856459 | 0.5273543 | not scorable | not scorable | 0.9917355    | 0.7447951    |
| #### Bn-A06-p24240603 | A-genome specific (napus-rapa) | 0.9688995 | 0.3621333 | not scorable | not scorable | 0.9917355    | 0.6660392    |
| #### Bn-A06-p24245615 | napus specific                 | 0.9186603 | 0.6723401 | not scorable | not scorable | not scorable | not scorable |
| #### Bn-A06-p24257262 | A-genome specific (napus-rapa) | 0.9808612 | 0.4894132 | not scorable | not scorable | 0.9917355    | 0.7019793    |
| #### Bn-A06-p24267492 | A-genome specific (napus-rapa) | 0.9856459 | 0.4328229 | not scorable | not scorable | 1            | 0.7916889    |
| #### Bn-A06-p24267499 | A-genome specific (napus-rapa) | 0.9832536 | 0.7580826 | not scorable | not scorable | 0.9834711    | 0.7597477    |
| #### Bn-A06-p24267745 | A-genome specific (napus-rapa) | 0.9784689 | 0.7363952 | not scorable | not scorable | 0.9917355    | 0.7601219    |
| #### Bn-A06-p24270718 | A-genome specific (napus-rapa) | 0.9736842 | 0.5481899 | not scorable | not scorable | 0.9834711    | 0.6788129    |
| #### Bn-A06-p24274213 | A-genome specific (napus-rapa) | 0.9904306 | 0.8064559 | not scorable | not scorable | 0.9917355    | 0.8053553    |
| #### Bn-A06-p24278510 | A-genome specific (napus-rapa) | 0.9952153 | 0.7204055 | not scorable | not scorable | 0.9752066    | 0.7096606    |
| #### Bn-A06-p24284014 | A-genome specific (napus-rapa) | 0.9784689 | 0.4552818 | not scorable | not scorable | 0.9917355    | 0.7352065    |
| #### Bn-A06-p24286025 | A-genome specific (napus-rapa) | 0.9808612 | 0.7074205 | not scorable | not scorable | 1            | 0.8006257    |
| #### Bn-A06-p24297216 | A-genome specific (napus-rapa) | 0.9904306 | 0.8008186 | not scorable | not scorable | 1            | 0.6877922    |
| #### Bn-A06-p24307250 | A-genome specific (napus-rapa) | 0.9880383 | 0.4293169 | not scorable | not scorable | 0.9834711    | 0.7258022    |
| #### Bn-A06-p24319329 | A-genome specific (napus-rapa) | 0.84689   | 0.5147618 | not scorable | not scorable | 0.9917355    | 0.5765904    |
| #### Bn-A06-p24327317 | A-genome specific (napus-rapa) | 0.9928229 | 0.4083067 | not scorable | not scorable | 0.9752066    | 0.6493217    |
| #### Bn-A06-p24334015 | A-genome specific (napus-rapa) | 0.9832536 | 0.4737988 | not scorable | not scorable | 0.9917355    | 0.75764      |
| #### Bn-A06-p24340685 | A-genome specific (napus-rapa) | 0.9784689 | 0.4739423 | not scorable | not scorable | 0.6446281    | 0.8013015    |
| #### Bn-A06-p24340830 | A-genome specific (napus-rapa) | 0.9760765 | 0.4280463 | not scorable | not scorable | 0.9834711    | 0.760085     |
| #### Bn-A06-p2434155  | genome unspecific (all in)     | 1         | 0.3416681 | 0.9922481    | 0.8132935    | 1            | 0.8687926    |
| #### Bn-A06-p24370009 | A-genome specific (napus-rapa) | 0.9736842 | 0.7653058 | not scorable | not scorable | 0.6694215    | 0.8104508    |
| #### Bn-A06-p24371980 | A-genome specific (napus-rapa) | 0.9784689 | 0.5481317 | not scorable | not scorable | 0.9917355    | 0.6101058    |
| #### Bn-A06-p2437284  | A-genome specific (napus-rapa) | 0.9976076 | 0.8089186 | not scorable | not scorable | 1            | 0.7078187    |
| #### Bn-A06-p24386467 | A-genome specific (napus-rapa) | 0.9665072 | 0.5693668 | not scorable | not scorable | 0.9917355    | 0.5415506    |
| #### Bn-A06-p24395608 | A-genome specific (napus-rapa) | 0.9856459 | 0.7508473 | not scorable | not scorable | 1            | 0.7220084    |
| #### Bn-A06-p24401543 | A-genome specific (napus-rapa) | 0.9808612 | 0.7789615 | not scorable | not scorable | 0.9834711    | 0.7596446    |
| #### Bn-A06-p24404374 | A-genome specific (napus-rapa) | 0.9330143 | 0.764757  | not scorable | not scorable | 0.9669421    | 0.7354829    |
| #### Bn-A06-p24404996 | A-genome specific (napus-rapa) | 0.9641148 | 0.7880833 | not scorable | not scorable | 0.9834711    | 0.8022919    |
| #### Bn-A06-p24405065 | A-genome specific (napus-rapa) | 0.9736842 | 0.7199325 | not scorable | not scorable | 0.9917355    | 0.7341916    |
| #### Bn-A06-p24407165 | A-genome specific (napus-rapa) | 0.9641148 | 0.7386729 | not scorable | not scorable | 0.9917355    | 0.750797     |
| #### Bn-A06-p24407535 | A-genome specific (napus-rapa) | 0.9665072 | 0.7890869 | not scorable | not scorable | 0.9917355    | 0.812771     |
| #### Bn-A06-p24407609 | A-genome specific (napus-rapa) | 0.9665072 | 0.7799134 | not scorable | not scorable | 0.9917355    | 0.780642     |
| #### Bn-A06-p24410007 | A-genome specific (napus-rapa) | 0.9880383 | 0.8015509 | not scorable | not scorable | 1            | 0.7470555    |

|                       |                                |              |              |              |              |           |           |
|-----------------------|--------------------------------|--------------|--------------|--------------|--------------|-----------|-----------|
| #### Bn-A06-p24428073 | A-genome specific (napus-rapa) | 0.9760765    | 0.3326877    | not scorable | not scorable | 0.9834711 | 0.7390581 |
| #### Bn-A06-p24430448 | A-genome specific (napus-rapa) | 0.9784689    | 0.79985      | not scorable | not scorable | 0.9917355 | 0.8186901 |
| #### Bn-A06-p24430453 | A-genome specific (napus-rapa) | 0.9880383    | 0.7830415    | not scorable | not scorable | 1         | 0.7520554 |
| #### Bn-A06-p24431577 | A-genome specific (napus-rapa) | 0.9736842    | 0.7798895    | not scorable | not scorable | 0.9834711 | 0.7840755 |
| #### Bn-A06-p24432451 | A-genome specific (napus-rapa) | 0.9593301    | 0.7778897    | not scorable | not scorable | 0.9917355 | 0.7769164 |
| #### Bn-A06-p24432909 | A-genome specific (napus-rapa) | 0.9712918    | 0.7921971    | not scorable | not scorable | 0.9917355 | 0.6570231 |
| #### Bn-A06-p24433131 | A-genome specific (napus-rapa) | 0.9712918    | 0.8167499    | not scorable | not scorable | 0.9834711 | 0.787383  |
| #### Bn-A06-p24441882 | A-genome specific (napus-rapa) | 0.9832536    | 0.3056305    | not scorable | not scorable | 0.9917355 | 0.6923874 |
| #### Bn-A06-p24453423 | A-genome specific (napus-rapa) | 0.9784689    | 0.2533611    | not scorable | not scorable | 0.9504132 | 0.7467681 |
| #### Bn-A06-p24465494 | A-genome specific (napus-rapa) | 0.9521531    | 0.3466715    | not scorable | not scorable | 1         | 0.6000783 |
| #### Bn-A06-p24466136 | A-genome specific (napus-rapa) | 0.9880383    | 0.7866471    | not scorable | not scorable | 0.9834711 | 0.7743333 |
| #### Bn-A06-p24467652 | A-genome specific (napus-rapa) | 0.9928229    | 0.7882712    | not scorable | not scorable | 1         | 0.7133151 |
| #### Bn-A06-p24496051 | A-genome specific (napus-rapa) | 0.9712918    | 0.5640677    | not scorable | not scorable | 1         | 0.8402684 |
| #### Bn-A06-p24501315 | A-genome specific (napus-rapa) | 0.9617225    | 0.7895656    | not scorable | not scorable | 0.9917355 | 0.7548246 |
| #### Bn-A06-p24501540 | A-genome specific (rapa only)  | not scorable | not scorable | not scorable | not scorable | 1         | 0.8342927 |
| #### Bn-A06-p24503033 | A-genome specific (napus-rapa) | 0.9688995    | 0.6983396    | not scorable | not scorable | 0.9834711 | 0.6839688 |
| #### Bn-A06-p24508464 | A-genome specific (napus-rapa) | 0.9521531    | 0.7558073    | not scorable | not scorable | 1         | 0.8318305 |
| #### Bn-A06-p24536499 | A-genome specific (napus-rapa) | 0.9928229    | 0.7754807    | not scorable | not scorable | 1         | 0.7281514 |
| #### Bn-A06-p24544753 | A-genome specific (napus-rapa) | 0.9593301    | 0.7455648    | not scorable | not scorable | 1         | 0.787078  |
| #### Bn-A06-p24551529 | A-genome specific (napus-rapa) | 0.9712918    | 0.7455115    | not scorable | not scorable | 0.9917355 | 0.7871619 |
| #### Bn-A06-p24557108 | A-genome specific (napus-rapa) | 0.9354067    | 0.6098844    | not scorable | not scorable | 0.9834711 | 0.7855092 |
| #### Bn-A06-p24557193 | A-genome specific (napus-rapa) | 0.9784689    | 0.5869064    | not scorable | not scorable | 0.9834711 | 0.7452355 |
| #### Bn-A06-p24567939 | A-genome specific (napus-rapa) | 0.9880383    | 0.7400342    | not scorable | not scorable | 0.9917355 | 0.8879275 |
| #### Bn-A06-p24570179 | A-genome specific (napus-rapa) | 0.8062201    | 0.8208902    | not scorable | not scorable | 0.9669421 | 0.7985221 |
| #### Bn-A06-p24579442 | A-genome specific (napus-rapa) | 0.9880383    | 0.8181059    | not scorable | not scorable | 0.9834711 | 0.6504189 |
| #### Bn-A06-p24580393 | A-genome specific (napus-rapa) | 0.9784689    | 0.7815068    | not scorable | not scorable | 0.9834711 | 0.7639838 |
| #### Bn-A06-p24588298 | A-genome specific (napus-rapa) | 0.9904306    | 0.4381678    | not scorable | not scorable | 0.9917355 | 0.8442788 |
| #### Bn-A06-p24599972 | A-genome specific (napus-rapa) | 0.9712918    | 0.6896733    | not scorable | not scorable | 0.9917355 | 0.7287537 |
| #### Bn-A06-p24600019 | A-genome specific (napus-rapa) | 0.9688995    | 0.3473459    | not scorable | not scorable | 0.9752066 | 0.7272967 |
| #### Bn-A06-p24600140 | A-genome specific (napus-rapa) | 0.9832536    | 0.7006138    | not scorable | not scorable | 0.9917355 | 0.7544801 |
| #### Bn-A06-p24602106 | A-genome specific (napus-rapa) | 0.9856459    | 0.7926656    | not scorable | not scorable | 1         | 0.6689139 |
| #### Bn-A06-p24602719 | A-genome specific (napus-rapa) | 0.9736842    | 0.6859457    | not scorable | not scorable | 1         | 0.6887476 |
| #### Bn-A06-p24607556 | A-genome specific (napus-rapa) | 0.9832536    | 0.7538398    | not scorable | not scorable | 0.9586777 | 0.7552096 |

|                       |                                |              |                        |              |              |           |           |
|-----------------------|--------------------------------|--------------|------------------------|--------------|--------------|-----------|-----------|
| #### Bn-A06-p24618096 | genome unspecific (all in)     | 0.9760765    | 0.2591633              | 1            | 0.7966581    | 0.9917355 | 0.7994234 |
| #### Bn-A06-p24678077 | A-genome specific (napus-rapa) | 0.9976076    | 0.4567027 not scorable | not scorable | not scorable | 0.9917355 | 0.7807196 |
| #### Bn-A06-p24695860 | A-genome specific (napus-rapa) | 0.9736842    | 0.5209771 not scorable | not scorable | not scorable | 0.9834711 | 0.7853186 |
| #### Bn-A06-p24705718 | A-genome specific (napus-rapa) | 0.9138756    | 0.6859515 not scorable | not scorable | not scorable | 0.6528926 | 0.7639838 |
| #### Bn-A06-p24709822 | A-genome specific (napus-rapa) | 0.9832536    | 0.7480705 not scorable | not scorable | not scorable | 0.9917355 | 0.8594416 |
| #### Bn-A06-p24713872 | A-genome specific (napus-rapa) | 0.9832536    | 0.7750278 not scorable | not scorable | not scorable | 0.9834711 | 0.7489637 |
| #### Bn-A06-p24717767 | A-genome specific (napus-rapa) | 0.9617225    | 0.6845276 not scorable | not scorable | not scorable | 0.9917355 | 0.7134931 |
| #### Bn-A06-p24726203 | genome unspecific (all in)     | 0.9665072    | 0.3857822              | 1            | 0.7529412    | 1         | 0.8348742 |
| #### Bn-A06-p24730935 | A-genome specific (napus-rapa) | 1            | 0.2653577 not scorable | not scorable | not scorable | 1         | 0.7743655 |
| #### Bn-A06-p24744523 | A-genome specific (napus-rapa) | 0.9617225    | 0.6452928 not scorable | not scorable | not scorable | 1         | 0.864459  |
| #### Bn-A06-p24746974 | A-genome specific (napus-rapa) | 0.9712918    | 0.7664129 not scorable | not scorable | not scorable | 0.9834711 | 0.7446961 |
| #### Bn-A06-p24814906 | A-genome specific (napus-rapa) | 0.9856459    | 0.7167431 not scorable | not scorable | not scorable | 0.9917355 | 0.6860588 |
| #### Bn-A06-p24822573 | A-genome specific (rapa only)  | not scorable | not scorable           | not scorable | not scorable | 0.9917355 | 0.7269214 |
| #### Bn-A06-p24825884 | A-genome specific (napus-rapa) | 0.9688995    | 0.6836185 not scorable | not scorable | not scorable | 0.9834711 | 0.7297958 |
| #### Bn-A06-p24827051 | A-genome specific (napus-rapa) | 0.9952153    | 0.4814776 not scorable | not scorable | not scorable | 1         | 0.8845848 |
| #### Bn-A06-p24827783 | A-genome specific (napus-rapa) | 0.9688995    | 0.7907486 not scorable | not scorable | not scorable | 0.9834711 | 0.7466914 |
| #### Bn-A06-p24831071 | A-genome specific (napus-rapa) | 0.9784689    | 0.7108649 not scorable | not scorable | not scorable | 0.9917355 | 0.7639838 |
| #### Bn-A06-p24834963 | A-genome specific (napus-rapa) | 0.9497608    | 0.3862358 not scorable | not scorable | not scorable | 0.9917355 | 0.7012126 |
| #### Bn-A06-p24836495 | A-genome specific (napus-rapa) | 0.9880383    | 0.2657792 not scorable | not scorable | not scorable | 0.9917355 | 0.711806  |
| #### Bn-A06-p24849468 | A-genome specific (napus-rapa) | 0.9641148    | 0.4645701 not scorable | not scorable | not scorable | 0.9586777 | 0.7832031 |
| #### Bn-A06-p24886436 | A-genome specific (napus-rapa) | 0.9665072    | 0.3117276 not scorable | not scorable | not scorable | 0.9917355 | 0.6566592 |
| #### Bn-A06-p24890908 | A-genome specific (napus-rapa) | 0.9856459    | 0.2800292 not scorable | not scorable | not scorable | 1         | 0.7078133 |
| #### Bn-A06-p24913140 | A-genome specific (napus-rapa) | 0.9880383    | 0.306381 not scorable  | not scorable | not scorable | 0.9917355 | 0.7672659 |
| #### Bn-A06-p24922072 | A-genome specific (napus-rapa) | 0.9784689    | 0.7435666 not scorable | not scorable | not scorable | 0.9917355 | 0.7087088 |
| #### Bn-A06-p24929938 | A-genome specific (napus-rapa) | 1            | 0.7454508 not scorable | not scorable | not scorable | 1         | 0.7914145 |
| #### Bn-A06-p24934604 | A-genome specific (napus-rapa) | 0.9928229    | 0.8169877 not scorable | not scorable | not scorable | 1         | 0.7292976 |
| #### Bn-A06-p24939059 | A-genome specific (napus-rapa) | 0.9784689    | 0.2558593 not scorable | not scorable | not scorable | 1         | 0.6663646 |
| #### Bn-A06-p24973824 | A-genome specific (napus-rapa) | 0.9904306    | 0.7362843 not scorable | not scorable | not scorable | 0.9752066 | 0.7337518 |
| #### Bn-A06-p24976434 | A-genome specific (napus-rapa) | 0.854067     | 0.4508709 not scorable | not scorable | not scorable | 0.9917355 | 0.6025972 |
| #### Bn-A06-p2514723  | A-genome specific (napus-rapa) | 1            | 0.4976095 not scorable | not scorable | not scorable | 0.9834711 | 0.8001024 |
| #### Bn-A06-p2521454  | A-genome specific (napus-rapa) | 0.9904306    | 0.8022602 not scorable | not scorable | not scorable | 0.9917355 | 0.7088029 |
| #### Bn-A06-p2521668  | A-genome specific (napus-rapa) | 0.9760765    | 0.5481434 not scorable | not scorable | not scorable | 0.9917355 | 0.6438779 |
| #### Bn-A06-p2525037  | A-genome specific (napus-rapa) | 0.9784689    | 0.6386495 not scorable | not scorable | not scorable | 1         | 0.8550336 |

|                       |                                   |              |              |              |              |              |              |
|-----------------------|-----------------------------------|--------------|--------------|--------------|--------------|--------------|--------------|
| #### Bn-A06-p2526552  | A-genome specific (napus-rapa)    | 0.9904306    | 0.7495234    | not scorable | not scorable | 1            | 0.687061     |
| #### Bn-A06-p25329425 | A-genome specific (napus-rapa)    | 0.9688995    | 0.6205255    | not scorable | not scorable | 1            | 0.6815433    |
| #### Bn-A06-p25343454 | A-genome specific (napus-rapa)    | 0.9880383    | 0.510487     | not scorable | not scorable | 0.9917355    | 0.5930505    |
| #### Bn-A06-p25345586 | A-genome specific (napus-rapa)    | 0.9904306    | 0.7550738    | not scorable | not scorable | 0.9834711    | 0.7642198    |
| #### Bn-A06-p25349874 | A-genome specific (napus-rapa)    | 0.9832536    | 0.5222439    | not scorable | not scorable | 1            | 0.7933608    |
| #### Bn-A06-p25349932 | A-genome specific (napus-rapa)    | 0.9904306    | 0.7673638    | not scorable | not scorable | 1            | 0.7240891    |
| #### Bn-A06-p25350033 | A-genome specific (napus-rapa)    | 0.9904306    | 0.7208919    | not scorable | not scorable | 1            | 0.744217     |
| #### Bn-A06-p25351980 | A-genome specific (napus-rapa)    | 0.9904306    | 0.380904     | not scorable | not scorable | 0.9917355    | 0.7104467    |
| #### Bn-A06-p25369364 | napus specific                    | 0.9282297    | 0.7210104    | not scorable | not scorable | not scorable | not scorable |
| #### Bn-A06-p25369668 | A-genome specific (napus-rapa)    | 0.9162679    | 0.6763486    | not scorable | not scorable | 1            | 0.7601068    |
| #### Bn-A06-p25369719 | genome unspecific (oleracea-rapa) | not scorable | not scorable | 0.9534883    | 0.5544293    | 1            | 0.6704551    |
| #### Bn-A06-p25377321 | A-genome specific (napus-rapa)    | 0.9880383    | 0.6151441    | not scorable | not scorable | 1            | 0.7501194    |
| #### Bn-A06-p25409852 | A-genome specific (napus-rapa)    | 0.9928229    | 0.8395917    | not scorable | not scorable | 1            | 0.8310137    |
| #### Bn-A06-p2542722  | A-genome specific (napus-rapa)    | 0.9425837    | 0.4989112    | not scorable | not scorable | 0.9752066    | 0.7490253    |
| #### Bn-A06-p25471463 | A-genome specific (napus-rapa)    | 0.9665072    | 0.6680034    | not scorable | not scorable | 1            | 0.9440146    |
| #### Bn-A06-p2563025  | A-genome specific (napus-rapa)    | 1            | 0.3093325    | not scorable | not scorable | 0.9752066    | 0.5248225    |
| #### Bn-A06-p2570378  | A-genome specific (napus-rapa)    | 1            | 0.8544095    | not scorable | not scorable | 0.9917355    | 0.8176654    |
| #### Bn-A06-p25786733 | A-genome specific (napus-rapa)    | 0.9928229    | 0.65985      | not scorable | not scorable | 0.9834711    | 0.8000291    |
| #### Bn-A06-p2582613  | A-genome specific (napus-rapa)    | 0.9880383    | 0.7736222    | not scorable | not scorable | 0.9917355    | 0.7283458    |
| #### Bn-A06-p25840740 | A-genome specific (napus-rapa)    | 0.9928229    | 0.6616498    | not scorable | not scorable | 0.9752066    | 0.6269112    |
| #### Bn-A06-p2586825  | A-genome specific (napus-rapa)    | 1            | 0.7256602    | not scorable | not scorable | 1            | 0.8493412    |
| #### Bn-A06-p25878721 | A-genome specific (napus-rapa)    | 0.9736842    | 0.7482065    | not scorable | not scorable | 1            | 0.7666197    |
| #### Bn-A06-p2599060  | A-genome specific (napus-rapa)    | 1            | 0.7305337    | not scorable | not scorable | 0.9917355    | 0.8108302    |
| #### Bn-A06-p2599150  | A-genome specific (napus-rapa)    | 0.9928229    | 0.3280707    | not scorable | not scorable | 0.9834711    | 0.7538703    |
| #### Bn-A06-p26011034 | A-genome specific (napus-rapa)    | 0.9928229    | 0.7848144    | not scorable | not scorable | 1            | 0.9205657    |
| #### Bn-A06-p26023391 | A-genome specific (napus-rapa)    | 0.9952153    | 0.3582511    | not scorable | not scorable | 1            | 0.8164408    |
| #### Bn-A06-p26039465 | A-genome specific (rapa only)     | not scorable | not scorable | not scorable | not scorable | 0.9917355    | 0.8211779    |
| #### Bn-A06-p26043562 | A-genome specific (rapa only)     | not scorable | not scorable | not scorable | not scorable | 0.9504132    | 0.9148563    |
| #### Bn-A06-p26045429 | A-genome specific (napus-rapa)    | 0.9186603    | 0.6999741    | not scorable | not scorable | 0.9669421    | 0.7690442    |
| #### Bn-A06-p26058372 | A-genome specific (napus-rapa)    | 0.9928229    | 0.7098094    | not scorable | not scorable | 0.9917355    | 0.8199377    |
| #### Bn-A06-p26058643 | A-genome specific (napus-rapa)    | 1            | 0.3594028    | not scorable | not scorable | 0.9834711    | 0.7087224    |
| #### Bn-A06-p26066533 | A-genome specific (napus-rapa)    | 0.9904306    | 0.8260399    | not scorable | not scorable | 1            | 0.7085158    |
| #### Bn-A06-p26080915 | A-genome specific (napus-rapa)    | 0.9976076    | 0.3068143    | not scorable | not scorable | 1            | 0.7655848    |

|                       |                                |              |              |              |              |              |              |
|-----------------------|--------------------------------|--------------|--------------|--------------|--------------|--------------|--------------|
| #### Bn-A06-p26081617 | A-genome specific (napus-rapa) | 0.9066986    | 0.5803629    | not scorable | not scorable | 0.9917355    | 0.7391866    |
| #### Bn-A06-p26083498 | A-genome specific (napus-rapa) | 0.9736842    | 0.7286274    | not scorable | not scorable | 0.9669421    | 0.7217246    |
| #### Bn-A06-p26096667 | A-genome specific (napus-rapa) | 0.9952153    | 0.4549983    | not scorable | not scorable | 1            | 0.793473     |
| #### Bn-A06-p26096963 | A-genome specific (napus-rapa) | 0.9210526    | 0.5800685    | not scorable | not scorable | 1            | 0.8004208    |
| #### Bn-A06-p26097037 | A-genome specific (rapa only)  | not scorable | not scorable | not scorable | not scorable | 1            | 0.718655     |
| #### Bn-A06-p26100486 | A-genome specific (napus-rapa) | 0.9832536    | 0.7337466    | not scorable | not scorable | 1            | 0.7263482    |
| #### Bn-A06-p26100652 | A-genome specific (napus-rapa) | 0.9760765    | 0.7908077    | not scorable | not scorable | 0.9752066    | 0.6948265    |
| #### Bn-A06-p26100738 | A-genome specific (napus-rapa) | 0.9784689    | 0.7998211    | not scorable | not scorable | 1            | 0.7971106    |
| #### Bn-A06-p26100812 | A-genome specific (napus-rapa) | 0.9808612    | 0.7648637    | not scorable | not scorable | 0.9669421    | 0.7623633    |
| #### Bn-A06-p26101019 | A-genome specific (napus-rapa) | 0.9665072    | 0.8398883    | not scorable | not scorable | 0.9834711    | 0.7398025    |
| #### Bn-A06-p26101080 | A-genome specific (napus-rapa) | 0.9832536    | 0.7959415    | not scorable | not scorable | 1            | 0.755209     |
| #### Bn-A06-p26101272 | A-genome specific (napus-rapa) | 0.9928229    | 0.7701377    | not scorable | not scorable | 1            | 0.8317302    |
| #### Bn-A06-p26108669 | A-genome specific (napus-rapa) | 0.9880383    | 0.4125436    | not scorable | not scorable | 0.9834711    | 0.7857311    |
| #### Bn-A06-p26113448 | A-genome specific (napus-rapa) | 0.9808612    | 0.4965005    | not scorable | not scorable | 0.9834711    | 0.726025     |
| #### Bn-A06-p26125430 | all not scorable               | not scorable | not scorable | not scorable | not scorable | not scorable | not scorable |
| #### Bn-A06-p26135022 | A-genome specific (napus-rapa) | 0.9904306    | 0.7597941    | not scorable | not scorable | 0.9917355    | 0.765302     |
| #### Bn-A06-p26135038 | A-genome specific (napus-rapa) | 0.9976076    | 0.6387275    | not scorable | not scorable | 1            | 0.7229707    |
| #### Bn-A06-p26135283 | A-genome specific (napus-rapa) | 0.9976076    | 0.5679134    | not scorable | not scorable | 0.9917355    | 0.7516038    |
| #### Bn-A06-p26135324 | A-genome specific (napus-rapa) | 0.9904306    | 0.7888578    | not scorable | not scorable | 0.9917355    | 0.7930112    |
| #### Bn-A06-p26139717 | A-genome specific (napus-rapa) | 0.9928229    | 0.8989305    | not scorable | not scorable | 1            | 0.7387427    |
| #### Bn-A06-p26144134 | A-genome specific (napus-rapa) | 0.9904306    | 0.2579812    | not scorable | not scorable | 1            | 0.8019215    |
| #### Bn-A06-p26144417 | A-genome specific (napus-rapa) | 1            | 0.4028936    | not scorable | not scorable | 0.9917355    | 0.7406995    |
| #### Bn-A06-p26144731 | A-genome specific (napus-rapa) | 1            | 0.5251905    | not scorable | not scorable | 1            | 0.7412815    |
| #### Bn-A06-p26152237 | A-genome specific (napus-rapa) | 0.9976076    | 0.5874063    | not scorable | not scorable | 0.9834711    | 0.80871      |
| #### Bn-A06-p26154413 | A-genome specific (napus-rapa) | 0.9928229    | 0.4960452    | not scorable | not scorable | 0.9917355    | 0.7505927    |
| #### Bn-A06-p26155068 | A-genome specific (napus-rapa) | 1            | 0.3792681    | not scorable | not scorable | 0.9834711    | 0.8087606    |
| #### Bn-A06-p26159702 | A-genome specific (napus-rapa) | 0.9928229    | 0.7461846    | not scorable | not scorable | 0.9917355    | 0.7253973    |
| #### Bn-A06-p2617079  | A-genome specific (napus-rapa) | 0.9832536    | 0.4598214    | not scorable | not scorable | 1            | 0.7614174    |
| #### Bn-A06-p26173206 | A-genome specific (napus-rapa) | 0.9928229    | 0.6977573    | not scorable | not scorable | 0.9917355    | 0.7015341    |
| #### Bn-A06-p26186229 | A-genome specific (napus-rapa) | 1            | 0.4045323    | not scorable | not scorable | 0.9834711    | 0.6657921    |
| #### Bn-A06-p2619089  | A-genome specific (napus-rapa) | 0.9808612    | 0.7997314    | not scorable | not scorable | 0.9917355    | 0.778774     |
| #### Bn-A06-p26212942 | A-genome specific (napus-rapa) | 1            | 0.3093872    | not scorable | not scorable | 1            | 0.7720919    |
| #### Bn-A06-p26213014 | A-genome specific (napus-rapa) | 0.9952153    | 0.6634726    | not scorable | not scorable | 0.9917355    | 0.8367406    |

|                       |                                |              |              |              |              |              |              |
|-----------------------|--------------------------------|--------------|--------------|--------------|--------------|--------------|--------------|
| #### Bn-A06-p26213205 | A-genome specific (rapa only)  | not scorable | not scorable | not scorable | not scorable | 1            | 0.8854492    |
| #### Bn-A06-p26213281 | A-genome specific (napus-rapa) | 1            | 0.8546153    | not scorable | not scorable | 1            | 0.8591195    |
| #### Bn-A06-p26219274 | A-genome specific (napus-rapa) | 1            | 0.5504327    | not scorable | not scorable | 0.9669421    | 0.7221036    |
| #### Bn-A06-p26219617 | A-genome specific (napus-rapa) | 1            | 0.2113188    | not scorable | not scorable | 0.9752066    | 0.6817759    |
| #### Bn-A06-p26222718 | A-genome specific (napus-rapa) | 0.9928229    | 0.6971142    | not scorable | not scorable | 1            | 0.8416879    |
| #### Bn-A06-p26248182 | A-genome specific (napus-rapa) | 0.9904306    | 0.3770535    | not scorable | not scorable | 1            | 0.6527258    |
| #### Bn-A06-p2630468  | A-genome specific (napus-rapa) | 0.9569378    | 0.4105567    | not scorable | not scorable | 0.9752066    | 0.5139383    |
| #### Bn-A06-p2633224  | A-genome specific (napus-rapa) | 0.9856459    | 0.6777666    | not scorable | not scorable | 0.9917355    | 0.6745058    |
| #### Bn-A06-p2633764  | A-genome specific (napus-rapa) | 1            | 0.8219877    | not scorable | not scorable | 0.9917355    | 0.7344885    |
| #### Bn-A06-p2643305  | A-genome specific (napus-rapa) | 0.9976076    | 0.7391319    | not scorable | not scorable | 0.9834711    | 0.8159941    |
| #### Bn-A06-p2643564  | A-genome specific (napus-rapa) | 0.9976076    | 0.7878247    | not scorable | not scorable | 0.9917355    | 0.8604648    |
| #### Bn-A06-p2646572  | genome unspecific (all in)     | 0.9760765    | 0.4263291    | 0.9922481    | 0.7997813    | 0.9752066    | 0.7435926    |
| #### Bn-A06-p2650442  | A-genome specific (napus-rapa) | 0.9952153    | 0.2991098    | not scorable | not scorable | 1            | 0.80042      |
| #### Bn-A06-p2651708  | A-genome specific (napus-rapa) | 1            | 0.4664699    | not scorable | not scorable | 1            | 0.7686933    |
| #### Bn-A06-p2676314  | A-genome specific (napus-rapa) | 0.9976076    | 0.7671963    | not scorable | not scorable | 1            | 0.8017633    |
| #### Bn-A06-p2676798  | A-genome specific (napus-rapa) | 0.9880383    | 0.7244194    | not scorable | not scorable | 1            | 0.8423881    |
| #### Bn-A06-p267765   | A-genome specific (napus-rapa) | 0.9736842    | 0.7295835    | not scorable | not scorable | 0.9586777    | 0.6883175    |
| #### Bn-A06-p2682929  | A-genome specific (napus-rapa) | 0.9784689    | 0.8340902    | not scorable | not scorable | 0.9917355    | 0.7977284    |
| #### Bn-A06-p2698067  | A-genome specific (napus-rapa) | 0.9904306    | 0.3971766    | not scorable | not scorable | 0.9917355    | 0.7439876    |
| #### Bn-A06-p2709177  | A-genome specific (napus-rapa) | 0.9880383    | 0.8196452    | not scorable | not scorable | 0.9917355    | 0.7301987    |
| #### Bn-A06-p2714610  | A-genome specific (napus-rapa) | 0.9952153    | 0.4159195    | not scorable | not scorable | 0.9752066    | 0.6235566    |
| #### Bn-A06-p2717967  | A-genome specific (napus-rapa) | 0.9952153    | 0.7396959    | not scorable | not scorable | 0.9752066    | 0.6811808    |
| #### Bn-A06-p2718852  | napus specific                 | 0.9928229    | 0.7476975    | not scorable | not scorable | not scorable | not scorable |
| #### Bn-A06-p2729577  | A-genome specific (napus-rapa) | 0.9832536    | 0.7801434    | not scorable | not scorable | 1            | 0.9240721    |
| #### Bn-A06-p2732731  | napus specific                 | 0.8708134    | 0.4792121    | not scorable | not scorable | not scorable | not scorable |
| #### Bn-A06-p2743076  | A-genome specific (napus-rapa) | 1            | 0.7513835    | not scorable | not scorable | 1            | 0.7904987    |
| #### Bn-A06-p2748311  | A-genome specific (napus-rapa) | 0.9856459    | 0.4707588    | not scorable | not scorable | 1            | 0.8538328    |
| #### Bn-A06-p2756247  | A-genome specific (napus-rapa) | 0.9856459    | 0.8038998    | not scorable | not scorable | 1            | 0.7843317    |
| #### Bn-A06-p2756792  | A-genome specific (napus-rapa) | 0.9952153    | 0.709574     | not scorable | not scorable | 1            | 0.824177     |
| #### Bn-A06-p2758495  | A-genome specific (napus-rapa) | 0.9928229    | 0.7379979    | not scorable | not scorable | 0.9834711    | 0.7079761    |
| #### Bn-A06-p275949   | A-genome specific (napus-rapa) | 0.9952153    | 0.7801319    | not scorable | not scorable | 0.9752066    | 0.795041     |
| #### Bn-A06-p2778072  | A-genome specific (napus-rapa) | 1            | 0.7493146    | not scorable | not scorable | 0.9834711    | 0.7316881    |
| #### Bn-A06-p2778829  | A-genome specific (napus-rapa) | 1            | 0.7201904    | not scorable | not scorable | 0.9917355    | 0.7147341    |

|                      |                                |              |              |              |              |              |              |
|----------------------|--------------------------------|--------------|--------------|--------------|--------------|--------------|--------------|
| #### Bn-A06-p2778837 | A-genome specific (napus-rapa) | 1            | 0.7323093    | not scorable | not scorable | 0.9834711    | 0.6661494    |
| #### Bn-A06-p2779243 | A-genome specific (napus-rapa) | 0.9401914    | 0.6891719    | not scorable | not scorable | 1            | 0.7272689    |
| #### Bn-A06-p2788585 | A-genome specific (napus-rapa) | 0.9976076    | 0.4946675    | not scorable | not scorable | 0.9586777    | 0.5837711    |
| #### Bn-A06-p279045  | A-genome specific (napus-rapa) | 0.9928229    | 0.768324     | not scorable | not scorable | 0.9752066    | 0.8154362    |
| #### Bn-A06-p2793899 | A-genome specific (rapa only)  | not scorable | not scorable | not scorable | not scorable | 0.9834711    | 0.7969111    |
| #### Bn-A06-p2801792 | A-genome specific (napus-rapa) | 1            | 0.7973794    | not scorable | not scorable | 0.9834711    | 0.7773519    |
| #### Bn-A06-p280351  | A-genome specific (napus-rapa) | 0.9712918    | 0.7863003    | not scorable | not scorable | 0.9669421    | 0.6761603    |
| #### Bn-A06-p2807759 | A-genome specific (napus-rapa) | 0.9880383    | 0.3079911    | not scorable | not scorable | 0.9917355    | 0.7513038    |
| #### Bn-A06-p281559  | napus specific                 | 0.9784689    | 0.7342743    | not scorable | not scorable | not scorable | not scorable |
| #### Bn-A06-p281874  | napus specific                 | 0.9928229    | 0.7197951    | not scorable | not scorable | not scorable | not scorable |
| #### Bn-A06-p2823066 | A-genome specific (napus-rapa) | 0.9832536    | 0.8049476    | not scorable | not scorable | 0.9752066    | 0.8157909    |
| #### Bn-A06-p2824500 | A-genome specific (napus-rapa) | 0.9952153    | 0.3446837    | not scorable | not scorable | 0.9752066    | 0.6788507    |
| #### Bn-A06-p2826315 | A-genome specific (napus-rapa) | 0.9832536    | 0.3900352    | not scorable | not scorable | 0.9917355    | 0.6984608    |
| #### Bn-A06-p2826630 | A-genome specific (napus-rapa) | 0.9760765    | 0.7750993    | not scorable | not scorable | 0.9834711    | 0.8224351    |
| #### Bn-A06-p282853  | A-genome specific (napus-rapa) | 0.9784689    | 0.8276066    | not scorable | not scorable | 0.9752066    | 0.8023524    |
| #### Bn-A06-p283425  | A-genome specific (napus-rapa) | 0.9736842    | 0.7740304    | not scorable | not scorable | 0.9752066    | 0.7923967    |
| #### Bn-A06-p283640  | A-genome specific (napus-rapa) | 0.9808612    | 0.8207017    | not scorable | not scorable | 0.9834711    | 0.798973     |
| #### Bn-A06-p2842757 | A-genome specific (napus-rapa) | 1            | 0.906397     | not scorable | not scorable | 1            | 0.7478409    |
| #### Bn-A06-p284408  | A-genome specific (napus-rapa) | 0.9808612    | 0.7189634    | not scorable | not scorable | 0.9669421    | 0.6664119    |
| #### Bn-A06-p2851834 | A-genome specific (napus-rapa) | 0.9712918    | 0.3397568    | not scorable | not scorable | 1            | 0.7406615    |
| #### Bn-A06-p285515  | A-genome specific (napus-rapa) | 0.9784689    | 0.5718048    | not scorable | not scorable | 0.9586777    | 0.5392188    |
| #### Bn-A06-p2870413 | A-genome specific (napus-rapa) | 0.9976076    | 0.7675655    | not scorable | not scorable | 0.9834711    | 0.7513582    |
| #### Bn-A06-p287053  | A-genome specific (napus-rapa) | 0.9976076    | 0.656612     | not scorable | not scorable | 0.9917355    | 0.6803098    |
| #### Bn-A06-p2874216 | A-genome specific (napus-rapa) | 0.9952153    | 0.4939228    | not scorable | not scorable | 0.9752066    | 0.6945729    |
| #### Bn-A06-p2883231 | A-genome specific (napus-rapa) | 1            | 0.5738116    | not scorable | not scorable | 1            | 0.7783666    |
| #### Bn-A06-p2883297 | A-genome specific (napus-rapa) | 0.9952153    | 0.5738513    | not scorable | not scorable | 1            | 0.8072396    |
| #### Bn-A06-p288377  | A-genome specific (napus-rapa) | 0.9976076    | 0.7877859    | not scorable | not scorable | 0.9834711    | 0.8098057    |
| #### Bn-A06-p2890703 | A-genome specific (napus-rapa) | 0.9569378    | 0.7758219    | not scorable | not scorable | 1            | 0.7549031    |
| #### Bn-A06-p2891175 | A-genome specific (napus-rapa) | 0.930622     | 0.3316183    | not scorable | not scorable | 0.9752066    | 0.7637617    |
| #### Bn-A06-p2891290 | A-genome specific (napus-rapa) | 0.9760765    | 0.7907544    | not scorable | not scorable | 0.9752066    | 0.7541506    |
| #### Bn-A06-p289876  | A-genome specific (napus-rapa) | 0.9928229    | 0.7316931    | not scorable | not scorable | 0.9834711    | 0.7330132    |
| #### Bn-A06-p2901305 | A-genome specific (napus-rapa) | 0.9976076    | 0.8035473    | not scorable | not scorable | 1            | 0.8148115    |
| #### Bn-A06-p2903017 | A-genome specific (napus-rapa) | 0.9808612    | 0.342283     | not scorable | not scorable | 0.9834711    | 0.736963     |

|                      |                                    |              |              |              |              |              |              |
|----------------------|------------------------------------|--------------|--------------|--------------|--------------|--------------|--------------|
| #### Bn-A06-p290355  | A-genome specific (napus-rapa)     | 0.9904306    | 0.7652098    | not scorable | not scorable | 1            | 0.9000877    |
| #### Bn-A06-p2917807 | A-genome specific (napus-rapa)     | 1            | 0.7558554    | not scorable | not scorable | 0.9917355    | 0.7723379    |
| #### Bn-A06-p291943  | A-genome specific (rapa only)      | not scorable | not scorable | not scorable | not scorable | 0.9752066    | 0.9240721    |
| #### Bn-A06-p2929852 | A-genome specific (napus-rapa)     | 0.9928229    | 0.484681     | not scorable | not scorable | 0.9917355    | 0.8510869    |
| #### Bn-A06-p2930156 | A-genome specific (napus-rapa)     | 1            | 0.7862228    | not scorable | not scorable | 0.9917355    | 0.6847303    |
| #### Bn-A06-p2936438 | A-genome specific (napus-rapa)     | 0.9976076    | 0.8259058    | not scorable | not scorable | 1            | 0.7069986    |
| #### Bn-A06-p2938450 | A-genome specific (napus-rapa)     | 0.9952153    | 0.5574459    | not scorable | not scorable | 1            | 0.665437     |
| #### Bn-A06-p2938890 | A-genome specific (napus-rapa)     | 1            | 0.4474623    | not scorable | not scorable | 0.9917355    | 0.5986149    |
| #### Bn-A06-p2940743 | A-genome specific (napus-rapa)     | 0.9928229    | 0.8692706    | not scorable | not scorable | 0.9669421    | 0.8513851    |
| #### Bn-A06-p2949562 | A-genome specific (napus-rapa)     | 1            | 0.7113797    | not scorable | not scorable | 0.9834711    | 0.778075     |
| #### Bn-A06-p2949781 | A-genome specific (napus-rapa)     | 0.9904306    | 0.7333906    | not scorable | not scorable | 0.9917355    | 0.7172619    |
| #### Bn-A06-p2949858 | A-genome specific (napus-rapa)     | 0.9904306    | 0.7633107    | not scorable | not scorable | 0.9834711    | 0.7848645    |
| #### Bn-A06-p2954752 | A-genome specific (napus-rapa)     | 1            | 0.7452237    | not scorable | not scorable | 0.9917355    | 0.8338599    |
| #### Bn-A06-p2956891 | A-genome specific (napus-rapa)     | 0.9760765    | 0.7527828    | not scorable | not scorable | 1            | 0.790238     |
| #### Bn-A06-p2958095 | A-genome specific (napus-rapa)     | 0.9856459    | 0.6854145    | not scorable | not scorable | 0.9917355    | 0.7545387    |
| #### Bn-A06-p2966556 | A-genome specific (napus-rapa)     | 0.9976076    | 0.7583834    | not scorable | not scorable | 0.9917355    | 0.8008767    |
| #### Bn-A06-p2973074 | A-genome specific (napus-rapa)     | 1            | 0.7459583    | not scorable | not scorable | 0.9834711    | 0.794817     |
| #### Bn-A06-p2981395 | A-genome specific (napus-rapa)     | 0.9808612    | 0.3988191    | not scorable | not scorable | 1            | 0.831035     |
| #### Bn-A06-p2984184 | C-genome specific (napus-oleracea) | 0.9354067    | 0.7395762    | 0.6434109    | 0.7932946    | not scorable | not scorable |
| #### Bn-A06-p2987202 | A-genome specific (napus-rapa)     | 0.9760765    | 0.3288996    | not scorable | not scorable | 0.9917355    | 0.8349713    |
| #### Bn-A06-p2993800 | A-genome specific (napus-rapa)     | 0.9952153    | 0.4602275    | not scorable | not scorable | 1            | 0.769322     |
| #### Bn-A06-p2995114 | A-genome specific (napus-rapa)     | 0.9904306    | 0.7910628    | not scorable | not scorable | 0.9834711    | 0.7829219    |
| #### Bn-A06-p3005047 | A-genome specific (napus-rapa)     | 0.9880383    | 0.7917076    | not scorable | not scorable | 1            | 0.7100134    |
| #### Bn-A06-p3005981 | A-genome specific (napus-rapa)     | 0.9856459    | 0.8065036    | not scorable | not scorable | 0.9752066    | 0.6874833    |
| #### Bn-A06-p3009854 | A-genome specific (napus-rapa)     | 0.9928229    | 0.8143823    | not scorable | not scorable | 0.9834711    | 0.703272     |
| #### Bn-A06-p3010221 | A-genome specific (napus-rapa)     | 1            | 0.7319198    | not scorable | not scorable | 1            | 0.8135551    |
| #### Bn-A06-p3012876 | A-genome specific (napus-rapa)     | 0.9712918    | 0.7590306    | not scorable | not scorable | 0.9834711    | 0.6615953    |
| #### Bn-A06-p3013547 | A-genome specific (napus-rapa)     | 0.9952153    | 0.8121059    | not scorable | not scorable | 0.9752066    | 0.7888305    |
| #### Bn-A06-p301366  | A-genome specific (napus-rapa)     | 0.8803828    | 0.782281     | not scorable | not scorable | 0.9504132    | 0.8149335    |
| #### Bn-A06-p3016186 | A-genome specific (napus-rapa)     | 0.9928229    | 0.4099914    | not scorable | not scorable | 0.9917355    | 0.5507392    |
| #### Bn-A06-p3016356 | A-genome specific (napus-rapa)     | 0.9952153    | 0.7692254    | not scorable | not scorable | 1            | 0.8018759    |
| #### Bn-A06-p3031327 | A-genome specific (napus-rapa)     | 0.9976076    | 0.3836949    | not scorable | not scorable | 1            | 0.6577333    |
| #### Bn-A06-p3049884 | A-genome specific (napus-rapa)     | 1            | 0.3315896    | not scorable | not scorable | 0.9586777    | 0.6171182    |



|                      |                                |              |              |              |              |              |              |
|----------------------|--------------------------------|--------------|--------------|--------------|--------------|--------------|--------------|
| #### Bn-A06-p3050205 | A-genome specific (napus-rapa) | 0.9880383    | 0.4294781    | not scorable | not scorable | 0.9834711    | 0.6586065    |
| #### Bn-A06-p3050747 | A-genome specific (napus-rapa) | 0.9856459    | 0.7795768    | not scorable | not scorable | 0.9752066    | 0.7536905    |
| #### Bn-A06-p3051257 | A-genome specific (napus-rapa) | 0.9976076    | 0.7466363    | not scorable | not scorable | 0.9917355    | 0.6989515    |
| #### Bn-A06-p3051799 | A-genome specific (napus-rapa) | 1            | 0.7037053    | not scorable | not scorable | 1            | 0.5768476    |
| #### Bn-A06-p3051928 | A-genome specific (napus-rapa) | 0.9952153    | 0.6313193    | not scorable | not scorable | 0.9752066    | 0.6814733    |
| #### Bn-A06-p3065773 | all not scorable               | not scorable | not scorable | not scorable | not scorable | not scorable | not scorable |
| #### Bn-A06-p3066038 | A-genome specific (napus-rapa) | 0.9952153    | 0.7079026    | not scorable | not scorable | 0.9834711    | 0.6623591    |
| #### Bn-A06-p3066372 | A-genome specific (napus-rapa) | 1            | 0.652509     | not scorable | not scorable | 0.9834711    | 0.8452606    |
| #### Bn-A06-p3072724 | A-genome specific (napus-rapa) | 0.9880383    | 0.4416096    | not scorable | not scorable | 0.9917355    | 0.7365789    |
| #### Bn-A06-p307436  | A-genome specific (napus-rapa) | 0.9856459    | 0.7164564    | not scorable | not scorable | 0.9917355    | 0.7097896    |
| #### Bn-A06-p3088460 | A-genome specific (napus-rapa) | 0.9976076    | 0.2651271    | not scorable | not scorable | 0.9917355    | 0.7920059    |
| #### Bn-A06-p3090078 | A-genome specific (napus-rapa) | 0.9401914    | 0.4144637    | not scorable | not scorable | 0.9752066    | 0.7156762    |
| #### Bn-A06-p3093741 | A-genome specific (napus-rapa) | 0.9808612    | 0.818186     | not scorable | not scorable | 0.9752066    | 0.8298243    |
| #### Bn-A06-p3096813 | A-genome specific (napus-rapa) | 0.9952153    | 0.7457037    | not scorable | not scorable | 0.9834711    | 0.8010721    |
| #### Bn-A06-p3105589 | A-genome specific (napus-rapa) | 1            | 0.8185498    | not scorable | not scorable | 0.9834711    | 0.7883303    |
| #### Bn-A06-p3114818 | A-genome specific (napus-rapa) | 0.9952153    | 0.7581507    | not scorable | not scorable | 1            | 0.9167013    |
| #### Bn-A06-p3115038 | A-genome specific (napus-rapa) | 1            | 0.7262398    | not scorable | not scorable | 1            | 0.7135793    |
| #### Bn-A06-p3118627 | A-genome specific (napus-rapa) | 0.9904306    | 0.7378588    | not scorable | not scorable | 0.9917355    | 0.8054758    |
| #### Bn-A06-p3125473 | A-genome specific (napus-rapa) | 0.9808612    | 0.2748263    | not scorable | not scorable | 0.9834711    | 0.6985419    |
| #### Bn-A06-p3132058 | A-genome specific (napus-rapa) | 0.9928229    | 0.8254164    | not scorable | not scorable | 1            | 0.6545114    |
| #### Bn-A06-p3132860 | A-genome specific (napus-rapa) | 1            | 0.7885466    | not scorable | not scorable | 0.9917355    | 0.6686315    |
| #### Bn-A06-p313319  | A-genome specific (napus-rapa) | 0.9880383    | 0.8273999    | not scorable | not scorable | 1            | 0.8079896    |
| #### Bn-A06-p313835  | A-genome specific (napus-rapa) | 0.9760765    | 0.5284073    | not scorable | not scorable | 0.9917355    | 0.6830483    |
| #### Bn-A06-p3146367 | A-genome specific (napus-rapa) | 0.9976076    | 0.754553     | not scorable | not scorable | 0.9834711    | 0.687094     |
| #### Bn-A06-p3146720 | A-genome specific (napus-rapa) | 0.9832536    | 0.7451017    | not scorable | not scorable | 1            | 0.6875853    |
| #### Bn-A06-p3167411 | A-genome specific (napus-rapa) | 0.9641148    | 0.7144848    | not scorable | not scorable | 0.9586777    | 0.7266851    |
| #### Bn-A06-p3177392 | A-genome specific (rapa only)  | not scorable | not scorable | not scorable | not scorable | 0.9421487    | 0.8840718    |
| #### Bn-A06-p3177472 | A-genome specific (napus-rapa) | 0.9832536    | 0.7909437    | not scorable | not scorable | 1            | 0.7848222    |
| #### Bn-A06-p3177570 | A-genome specific (napus-rapa) | 1            | 0.7857878    | not scorable | not scorable | 1            | 0.6843576    |
| #### Bn-A06-p318331  | A-genome specific (napus-rapa) | 0.9569378    | 0.7647647    | not scorable | not scorable | 0.9834711    | 0.7724217    |
| #### Bn-A06-p3184395 | A-genome specific (napus-rapa) | 0.9928229    | 0.8162605    | not scorable | not scorable | 0.6694215    | 0.8242667    |
| #### Bn-A06-p3188819 | A-genome specific (napus-rapa) | 0.9856459    | 0.7951933    | not scorable | not scorable | 0.9834711    | 0.7849894    |
| #### Bn-A06-p3189490 | A-genome specific (napus-rapa) | 0.9808612    | 0.362575     | not scorable | not scorable | 0.9752066    | 0.6472974    |

|                      |                                |              |              |              |              |              |              |
|----------------------|--------------------------------|--------------|--------------|--------------|--------------|--------------|--------------|
| #### Bn-A06-p3202098 | A-genome specific (napus-rapa) | 0.9856459    | 0.7787027    | not scorable | not scorable | 0.9917355    | 0.8130777    |
| #### Bn-A06-p3202615 | A-genome specific (napus-rapa) | 0.9665072    | 0.8001187    | not scorable | not scorable | 0.9834711    | 0.7483226    |
| #### Bn-A06-p3206017 | A-genome specific (napus-rapa) | 1            | 0.4045249    | not scorable | not scorable | 0.9669421    | 0.7563871    |
| #### Bn-A06-p3207623 | A-genome specific (napus-rapa) | 0.9904306    | 0.7489994    | not scorable | not scorable | 1            | 0.7921959    |
| #### Bn-A06-p3210791 | A-genome specific (napus-rapa) | 0.9832536    | 0.5105319    | not scorable | not scorable | 0.9834711    | 0.7414125    |
| #### Bn-A06-p3226693 | A-genome specific (napus-rapa) | 0.9808612    | 0.3313046    | not scorable | not scorable | 0.9917355    | 0.569905     |
| #### Bn-A06-p3227752 | A-genome specific (napus-rapa) | 0.9784689    | 0.7716161    | not scorable | not scorable | 0.9834711    | 0.8028246    |
| #### Bn-A06-p3230963 | A-genome specific (rapa only)  | not scorable | not scorable | not scorable | not scorable | 0.6280992    | 0.750198     |
| #### Bn-A06-p3239087 | A-genome specific (napus-rapa) | 0.9688995    | 0.7803575    | not scorable | not scorable | 0.5454546    | 0.7683636    |
| #### Bn-A06-p3255819 | A-genome specific (napus-rapa) | 1            | 0.7917964    | not scorable | not scorable | 0.9917355    | 0.7324688    |
| #### Bn-A06-p3256782 | A-genome specific (napus-rapa) | 0.9976076    | 0.6814371    | not scorable | not scorable | 0.9917355    | 0.7604615    |
| #### Bn-A06-p3257163 | A-genome specific (napus-rapa) | 0.9952153    | 0.6921464    | not scorable | not scorable | 0.9669421    | 0.6786869    |
| #### Bn-A06-p3269320 | A-genome specific (napus-rapa) | 1            | 0.767672     | not scorable | not scorable | 0.9669421    | 0.738236     |
| #### Bn-A06-p3278682 | A-genome specific (napus-rapa) | 0.9976076    | 0.236427     | not scorable | not scorable | 0.9669421    | 0.6958703    |
| #### Bn-A06-p3287018 | A-genome specific (napus-rapa) | 0.2799043    | 0.7809828    | not scorable | not scorable | 0.5867769    | 0.8664527    |
| #### Bn-A06-p3291936 | A-genome specific (napus-rapa) | 0.9952153    | 0.8012258    | not scorable | not scorable | 0.9917355    | 0.8321635    |
| #### Bn-A06-p329217  | A-genome specific (napus-rapa) | 0.854067     | 0.8471783    | not scorable | not scorable | 0.7768595    | 0.804925     |
| #### Bn-A06-p3295431 | A-genome specific (napus-rapa) | 0.8253589    | 0.8056777    | not scorable | not scorable | 0.6280992    | 0.7766134    |
| #### Bn-A06-p3302657 | napus specific                 | 0.6483254    | 0.6622101    | not scorable | not scorable | not scorable | not scorable |
| #### Bn-A06-p330826  | A-genome specific (rapa only)  | not scorable | not scorable | not scorable | not scorable | 0.9917355    | 0.6509212    |
| #### Bn-A06-p3308398 | A-genome specific (napus-rapa) | 0.9784689    | 0.7618369    | not scorable | not scorable | 0.9834711    | 0.8192011    |
| #### Bn-A06-p3316040 | A-genome specific (napus-rapa) | 0.6435407    | 0.7964104    | not scorable | not scorable | 0.9586777    | 0.8642471    |
| #### Bn-A06-p3316207 | A-genome specific (napus-rapa) | 0.6172249    | 0.8259059    | not scorable | not scorable | 0.9504132    | 0.8083546    |
| #### Bn-A06-p3318611 | A-genome specific (napus-rapa) | 0.9569378    | 0.3075124    | not scorable | not scorable | 0.9834711    | 0.5873021    |
| #### Bn-A06-p3325502 | A-genome specific (napus-rapa) | 0.9808612    | 0.4534445    | not scorable | not scorable | 0.9917355    | 0.8392493    |
| #### Bn-A06-p3325566 | A-genome specific (napus-rapa) | 0.9784689    | 0.365392     | not scorable | not scorable | 1            | 0.8142724    |
| #### Bn-A06-p3329211 | genome unspecific (all in)     | 1            | 0.4123001    | 0.9922481    | 0.8130574    | 0.9917355    | 0.7504174    |
| #### Bn-A06-p3339435 | A-genome specific (napus-rapa) | 0.7894737    | 0.7842003    | not scorable | not scorable | 0.5867769    | 0.7863934    |
| #### Bn-A06-p3353405 | A-genome specific (napus-rapa) | 0.9880383    | 0.5777375    | not scorable | not scorable | 0.9669421    | 0.6478892    |
| #### Bn-A06-p3354754 | A-genome specific (napus-rapa) | 1            | 0.5356272    | not scorable | not scorable | 0.9917355    | 0.6374834    |
| #### Bn-A06-p3361377 | A-genome specific (napus-rapa) | 1            | 0.7199516    | not scorable | not scorable | 0.9917355    | 0.7898132    |
| #### Bn-A06-p3363188 | A-genome specific (napus-rapa) | 0.9976076    | 0.7909075    | not scorable | not scorable | 0.9917355    | 0.8109992    |
| #### Bn-A06-p3370349 | napus specific                 | 1            | 0.7875881    | not scorable | not scorable | not scorable | not scorable |

|                      |                                |           |                        |              |              |              |
|----------------------|--------------------------------|-----------|------------------------|--------------|--------------|--------------|
| #### Bn-A06-p337583  | A-genome specific (napus-rapa) | 0.9928229 | 0.5137511 not scorable | not scorable | 0.9834711    | 0.8084265    |
| #### Bn-A06-p3380495 | A-genome specific (napus-rapa) | 1         | 0.4767966 not scorable | not scorable | 1            | 0.7926856    |
| #### Bn-A06-p3399869 | A-genome specific (napus-rapa) | 1         | 0.7901269 not scorable | not scorable | 1            | 0.8305473    |
| #### Bn-A06-p3399973 | A-genome specific (napus-rapa) | 1         | 0.4330519 not scorable | not scorable | 1            | 0.7271869    |
| #### Bn-A06-p3405779 | A-genome specific (napus-rapa) | 0.9904306 | 0.7569005 not scorable | not scorable | 0.9917355    | 0.7494027    |
| #### Bn-A06-p3406041 | napus specific                 | 0.9114832 | 0.7724089 not scorable | not scorable | not scorable | not scorable |
| #### Bn-A06-p3414128 | A-genome specific (napus-rapa) | 0.9760765 | 0.786456 not scorable  | not scorable | 1            | 0.8815182    |
| #### Bn-A06-p3416803 | A-genome specific (napus-rapa) | 0.9760765 | 0.7997735 not scorable | not scorable | 1            | 0.9175546    |
| #### Bn-A06-p3428214 | A-genome specific (napus-rapa) | 0.9497608 | 0.6506487 not scorable | not scorable | 1            | 0.9166579    |
| #### Bn-A06-p3434498 | A-genome specific (napus-rapa) | 1         | 0.7593729 not scorable | not scorable | 0.9834711    | 0.7928383    |
| #### Bn-A06-p3435985 | A-genome specific (napus-rapa) | 1         | 0.7950717 not scorable | not scorable | 0.9917355    | 0.8089182    |
| #### Bn-A06-p3437409 | A-genome specific (napus-rapa) | 1         | 0.7910791 not scorable | not scorable | 1            | 0.7959436    |
| #### Bn-A06-p3442742 | A-genome specific (napus-rapa) | 0.9976076 | 0.6638182 not scorable | not scorable | 0.9917355    | 0.7746989    |
| #### Bn-A06-p3444868 | A-genome specific (napus-rapa) | 1         | 0.7430891 not scorable | not scorable | 1            | 0.7752895    |
| #### Bn-A06-p3446956 | A-genome specific (napus-rapa) | 0.9976076 | 0.8196024 not scorable | not scorable | 0.9834711    | 0.8043666    |
| #### Bn-A06-p3447648 | A-genome specific (napus-rapa) | 1         | 0.3446561 not scorable | not scorable | 0.9752066    | 0.7043564    |
| #### Bn-A06-p3452904 | A-genome specific (napus-rapa) | 0.9952153 | 0.5932927 not scorable | not scorable | 1            | 0.8554157    |
| #### Bn-A06-p3468374 | A-genome specific (napus-rapa) | 0.9976076 | 0.330204 not scorable  | not scorable | 0.9917355    | 0.7680559    |
| #### Bn-A06-p3483249 | A-genome specific (napus-rapa) | 0.9904306 | 0.4560266 not scorable | not scorable | 1            | 0.6645095    |
| #### Bn-A06-p3483382 | A-genome specific (napus-rapa) | 0.9952153 | 0.6318588 not scorable | not scorable | 1            | 0.7433437    |
| #### Bn-A06-p3491241 | A-genome specific (napus-rapa) | 1         | 0.5570792 not scorable | not scorable | 0.9917355    | 0.7972407    |
| #### Bn-A06-p3492295 | A-genome specific (napus-rapa) | 0.9976076 | 0.8249155 not scorable | not scorable | 1            | 0.7901596    |
| #### Bn-A06-p3496759 | A-genome specific (napus-rapa) | 0.9832536 | 0.4046704 not scorable | not scorable | 0.9752066    | 0.8110504    |
| #### Bn-A06-p3528559 | A-genome specific (napus-rapa) | 0.9928229 | 0.805824 not scorable  | not scorable | 0.9669421    | 0.7906119    |
| #### Bn-A06-p3528628 | A-genome specific (napus-rapa) | 0.9928229 | 0.8011081 not scorable | not scorable | 0.9917355    | 0.8001914    |
| #### Bn-A06-p3532353 | A-genome specific (napus-rapa) | 0.9976076 | 0.612304 not scorable  | not scorable | 0.9834711    | 0.7486777    |
| #### Bn-A06-p3561531 | A-genome specific (napus-rapa) | 0.9736842 | 0.3531477 not scorable | not scorable | 0.9917355    | 0.8107828    |
| #### Bn-A06-p3567180 | A-genome specific (napus-rapa) | 0.9736842 | 0.3782267 not scorable | not scorable | 1            | 0.8402112    |
| #### Bn-A06-p3584489 | A-genome specific (napus-rapa) | 0.9928229 | 0.7946991 not scorable | not scorable | 0.9917355    | 0.7869681    |
| #### Bn-A06-p3586728 | A-genome specific (napus-rapa) | 0.9952153 | 0.4734154 not scorable | not scorable | 0.9917355    | 0.8257994    |
| #### Bn-A06-p3587032 | A-genome specific (napus-rapa) | 0.9688995 | 0.5210065 not scorable | not scorable | 0.9917355    | 0.8151843    |
| #### Bn-A06-p3611806 | A-genome specific (napus-rapa) | 0.9688995 | 0.3628463 not scorable | not scorable | 0.9917355    | 0.7920029    |
| #### Bn-A06-p3612397 | A-genome specific (napus-rapa) | 0.9952153 | 0.5554092 not scorable | not scorable | 1            | 0.7446254    |

|                      |                                |              |              |              |              |              |              |
|----------------------|--------------------------------|--------------|--------------|--------------|--------------|--------------|--------------|
| #### Bn-A06-p362402  | A-genome specific (napus-rapa) | 0.8995215    | 0.7225267    | not scorable | not scorable | 0.9256198    | 0.6647897    |
| #### Bn-A06-p3625328 | A-genome specific (napus-rapa) | 1            | 0.5151601    | not scorable | not scorable | 0.9917355    | 0.6486297    |
| #### Bn-A06-p3628159 | A-genome specific (napus-rapa) | 0.9856459    | 0.3633574    | not scorable | not scorable | 0.9834711    | 0.7781549    |
| #### Bn-A06-p364061  | A-genome specific (napus-rapa) | 0.9808612    | 0.3734849    | not scorable | not scorable | 0.9752066    | 0.6935074    |
| #### Bn-A06-p3651074 | A-genome specific (napus-rapa) | 0.9856459    | 0.208482     | not scorable | not scorable | 1            | 0.8759552    |
| #### Bn-A06-p3651473 | A-genome specific (napus-rapa) | 1            | 0.4211016    | not scorable | not scorable | 0.9752066    | 0.644226     |
| #### Bn-A06-p3660997 | all not scorable               | not scorable | not scorable | not scorable | not scorable | not scorable | not scorable |
| #### Bn-A06-p3661134 | A-genome specific (rapa only)  | not scorable | not scorable | not scorable | not scorable | 0.9834711    | 0.7224717    |
| #### Bn-A06-p3661342 | A-genome specific (napus-rapa) | 0.9904306    | 0.5007264    | not scorable | not scorable | 1            | 0.7139118    |
| #### Bn-A06-p3667300 | A-genome specific (napus-rapa) | 0.9186603    | 0.7192096    | not scorable | not scorable | 0.9834711    | 0.8566722    |
| #### Bn-A06-p3677526 | all not scorable               | not scorable | not scorable | not scorable | not scorable | not scorable | not scorable |
| #### Bn-A06-p3691343 | A-genome specific (napus-rapa) | 0.9760765    | 0.5634008    | not scorable | not scorable | 0.9834711    | 0.6454048    |
| #### Bn-A06-p369746  | A-genome specific (napus-rapa) | 0.9808612    | 0.7961401    | not scorable | not scorable | 0.9834711    | 0.6452215    |
| #### Bn-A06-p3703307 | A-genome specific (napus-rapa) | 0.9928229    | 0.8039243    | not scorable | not scorable | 1            | 0.7846264    |
| #### Bn-A06-p370376  | A-genome specific (napus-rapa) | 0.9880383    | 0.8162041    | not scorable | not scorable | 0.9752066    | 0.7103748    |
| #### Bn-A06-p3708256 | napus specific                 | 0.9760765    | 0.3182925    | not scorable | not scorable | not scorable | not scorable |
| #### Bn-A06-p3712646 | A-genome specific (napus-rapa) | 0.9928229    | 0.7763527    | not scorable | not scorable | 0.9834711    | 0.8438915    |
| #### Bn-A06-p3723340 | A-genome specific (napus-rapa) | 0.9856459    | 0.4624       | not scorable | not scorable | 0.9834711    | 0.7717051    |
| #### Bn-A06-p3731147 | A-genome specific (napus-rapa) | 1            | 0.4929586    | not scorable | not scorable | 0.9752066    | 0.6718804    |
| #### Bn-A06-p3759020 | A-genome specific (rapa only)  | not scorable | not scorable | not scorable | not scorable | 0.9834711    | 0.7475555    |
| #### Bn-A06-p3805018 | A-genome specific (napus-rapa) | 0.9760765    | 0.6074849    | not scorable | not scorable | 0.9834711    | 0.6971861    |
| #### Bn-A06-p3809199 | A-genome specific (napus-rapa) | 0.9928229    | 0.3584149    | not scorable | not scorable | 0.9669421    | 0.7658163    |
| #### Bn-A06-p3818421 | A-genome specific (napus-rapa) | 0.9688995    | 0.5978594    | not scorable | not scorable | 0.9834711    | 0.7911736    |
| #### Bn-A06-p3818484 | A-genome specific (napus-rapa) | 0.9856459    | 0.7941719    | not scorable | not scorable | 0.9752066    | 0.7634313    |
| #### Bn-A06-p3825492 | A-genome specific (napus-rapa) | 0.9880383    | 0.3300152    | not scorable | not scorable | 0.9834711    | 0.7109948    |
| #### Bn-A06-p3834324 | A-genome specific (napus-rapa) | 0.9928229    | 0.7175583    | not scorable | not scorable | 0.9586777    | 0.6053187    |
| #### Bn-A06-p3837553 | A-genome specific (napus-rapa) | 0.9952153    | 0.7421918    | not scorable | not scorable | 0.9917355    | 0.7627959    |
| #### Bn-A06-p3839293 | A-genome specific (napus-rapa) | 1            | 0.7392813    | not scorable | not scorable | 1            | 0.7817926    |
| #### Bn-A06-p3867353 | A-genome specific (napus-rapa) | 0.9952153    | 0.8319956    | not scorable | not scorable | 0.9917355    | 0.7829617    |
| #### Bn-A06-p3871984 | A-genome specific (napus-rapa) | 1            | 0.2822185    | not scorable | not scorable | 0.9917355    | 0.6697611    |
| #### Bn-A06-p3900404 | A-genome specific (napus-rapa) | 0.9665072    | 0.7540386    | not scorable | not scorable | 1            | 0.689375     |
| #### Bn-A06-p3913280 | A-genome specific (napus-rapa) | 1            | 0.4300812    | not scorable | not scorable | 0.9752066    | 0.7790034    |
| #### Bn-A06-p3928714 | napus specific                 | 1            | 0.6880783    | not scorable | not scorable | not scorable | not scorable |

|                      |                                |           |           |              |              |           |           |
|----------------------|--------------------------------|-----------|-----------|--------------|--------------|-----------|-----------|
| #### Bn-A06-p393328  | A-genome specific (napus-rapa) | 0.9952153 | 0.4704306 | not scorable | not scorable | 0.9669421 | 0.739553  |
| #### Bn-A06-p3934890 | A-genome specific (napus-rapa) | 1         | 0.364909  | not scorable | not scorable | 0.9917355 | 0.7999551 |
| #### Bn-A06-p3953661 | A-genome specific (napus-rapa) | 0.9784689 | 0.453999  | not scorable | not scorable | 0.9752066 | 0.6063034 |
| #### Bn-A06-p3970972 | A-genome specific (napus-rapa) | 0.9760765 | 0.7247944 | not scorable | not scorable | 0.9752066 | 0.7942811 |
| #### Bn-A06-p3976759 | A-genome specific (napus-rapa) | 0.9760765 | 0.3466649 | not scorable | not scorable | 0.9917355 | 0.619302  |
| #### Bn-A06-p3986320 | A-genome specific (napus-rapa) | 0.9712918 | 0.4777187 | not scorable | not scorable | 1         | 0.8550683 |
| #### Bn-A06-p3987067 | A-genome specific (napus-rapa) | 0.9832536 | 0.7481972 | not scorable | not scorable | 1         | 0.8682142 |
| #### Bn-A06-p3988352 | A-genome specific (napus-rapa) | 1         | 0.7234792 | not scorable | not scorable | 0.9917355 | 0.6059493 |
| #### Bn-A06-p3992289 | A-genome specific (napus-rapa) | 0.9401914 | 0.7020786 | not scorable | not scorable | 0.6528926 | 0.9175813 |
| #### Bn-A06-p3997307 | A-genome specific (napus-rapa) | 0.9976076 | 0.7959026 | not scorable | not scorable | 0.9834711 | 0.7512732 |
| #### Bn-A06-p3998593 | A-genome specific (napus-rapa) | 0.9880383 | 0.7518017 | not scorable | not scorable | 0.9834711 | 0.8202201 |
| #### Bn-A06-p3999986 | A-genome specific (napus-rapa) | 0.9593301 | 0.525153  | not scorable | not scorable | 1         | 0.6080307 |
| #### Bn-A06-p4001378 | A-genome specific (napus-rapa) | 0.9952153 | 0.4284897 | not scorable | not scorable | 1         | 0.6729115 |
| #### Bn-A06-p4013010 | A-genome specific (napus-rapa) | 0.9904306 | 0.7668226 | not scorable | not scorable | 0.9917355 | 0.7997132 |
| #### Bn-A06-p4016422 | A-genome specific (napus-rapa) | 0.9952153 | 0.7554193 | not scorable | not scorable | 0.9917355 | 0.7938406 |
| #### Bn-A06-p4017460 | A-genome specific (napus-rapa) | 0.9641148 | 0.3343937 | not scorable | not scorable | 0.9834711 | 0.7864506 |
| #### Bn-A06-p4019827 | A-genome specific (napus-rapa) | 0.9712918 | 0.320877  | not scorable | not scorable | 0.9917355 | 0.8135881 |
| #### Bn-A06-p4021930 | A-genome specific (napus-rapa) | 0.9856459 | 0.8020997 | not scorable | not scorable | 0.9917355 | 0.7156382 |
| #### Bn-A06-p4025613 | A-genome specific (napus-rapa) | 0.9856459 | 0.7910369 | not scorable | not scorable | 0.9834711 | 0.7602957 |
| #### Bn-A06-p4026453 | A-genome specific (napus-rapa) | 0.9760765 | 0.7606373 | not scorable | not scorable | 0.9917355 | 0.7810404 |
| #### Bn-A06-p4027051 | A-genome specific (napus-rapa) | 0.9593301 | 0.6036029 | not scorable | not scorable | 0.9669421 | 0.6795421 |
| #### Bn-A06-p4039206 | A-genome specific (napus-rapa) | 0.9665072 | 0.3037911 | not scorable | not scorable | 0.9752066 | 0.6381266 |
| #### Bn-A06-p4040976 | A-genome specific (napus-rapa) | 0.9784689 | 0.2679523 | not scorable | not scorable | 1         | 0.7535797 |
| #### Bn-A06-p4056446 | A-genome specific (napus-rapa) | 0.9832536 | 0.778047  | not scorable | not scorable | 0.9917355 | 0.8372037 |
| #### Bn-A06-p4060202 | A-genome specific (napus-rapa) | 0.9760765 | 0.4180308 | not scorable | not scorable | 0.9834711 | 0.6559128 |
| #### Bn-A06-p4060310 | A-genome specific (napus-rapa) | 0.9784689 | 0.6316126 | not scorable | not scorable | 0.9834711 | 0.782944  |
| #### Bn-A06-p4072818 | A-genome specific (napus-rapa) | 0.9880383 | 0.7808565 | not scorable | not scorable | 0.9669421 | 0.6943995 |
| #### Bn-A06-p4098532 | A-genome specific (napus-rapa) | 0.9760765 | 0.6398569 | not scorable | not scorable | 1         | 0.7612875 |
| #### Bn-A06-p4098800 | A-genome specific (napus-rapa) | 0.9904306 | 0.6194757 | not scorable | not scorable | 1         | 0.7282501 |
| #### Bn-A06-p410058  | A-genome specific (napus-rapa) | 0.9904306 | 0.263812  | not scorable | not scorable | 0.5950413 | 0.7616834 |
| #### Bn-A06-p4179318 | A-genome specific (napus-rapa) | 0.9880383 | 0.7737371 | not scorable | not scorable | 0.9917355 | 0.7894714 |
| #### Bn-A06-p4195181 | A-genome specific (napus-rapa) | 1         | 0.8993629 | not scorable | not scorable | 0.9917355 | 0.9094582 |
| #### Bn-A06-p4196008 | A-genome specific (napus-rapa) | 0.9808612 | 0.7532066 | not scorable | not scorable | 1         | 0.8918202 |

|                      |                                |           |           |              |              |              |              |
|----------------------|--------------------------------|-----------|-----------|--------------|--------------|--------------|--------------|
| #### Bn-A06-p4211266 | A-genome specific (napus-rapa) | 0.9688995 | 0.678075  | not scorable | not scorable | 1            | 0.7003915    |
| #### Bn-A06-p4218801 | A-genome specific (napus-rapa) | 0.8397129 | 0.7446243 | not scorable | not scorable | 0.9917355    | 0.7552251    |
| #### Bn-A06-p4229919 | A-genome specific (napus-rapa) | 0.9904306 | 0.4308419 | not scorable | not scorable | 1            | 0.7749302    |
| #### Bn-A06-p428400  | A-genome specific (napus-rapa) | 0.9736842 | 0.7619545 | not scorable | not scorable | 1            | 0.8912938    |
| #### Bn-A06-p4315934 | napus specific                 | 0.6602871 | 0.6819515 | not scorable | not scorable | not scorable | not scorable |
| #### Bn-A06-p4316905 | A-genome specific (napus-rapa) | 0.9856459 | 0.8143935 | not scorable | not scorable | 1            | 0.7507112    |
| #### Bn-A06-p4317300 | A-genome specific (napus-rapa) | 1         | 0.7278983 | not scorable | not scorable | 0.9752066    | 0.7086738    |
| #### Bn-A06-p4331202 | A-genome specific (napus-rapa) | 0.9856459 | 0.7995563 | not scorable | not scorable | 0.9917355    | 0.7252168    |
| #### Bn-A06-p4332149 | A-genome specific (napus-rapa) | 0.9760765 | 0.4390059 | not scorable | not scorable | 0.9834711    | 0.8016818    |
| #### Bn-A06-p4332223 | A-genome specific (napus-rapa) | 0.9856459 | 0.7832235 | not scorable | not scorable | 1            | 0.6778251    |
| #### Bn-A06-p4333047 | A-genome specific (napus-rapa) | 0.8995215 | 0.7921216 | not scorable | not scorable | 0.5702479    | 0.6769026    |
| #### Bn-A06-p4333144 | A-genome specific (napus-rapa) | 0.784689  | 0.7612076 | not scorable | not scorable | 0.9752066    | 0.840328     |
| #### Bn-A06-p4333227 | A-genome specific (napus-rapa) | 0.9856459 | 0.7591707 | not scorable | not scorable | 0.9834711    | 0.7567682    |
| #### Bn-A06-p4337931 | A-genome specific (napus-rapa) | 0.9784689 | 0.7216286 | not scorable | not scorable | 0.9917355    | 0.7515649    |
| #### Bn-A06-p4340434 | A-genome specific (napus-rapa) | 0.9043062 | 0.7452542 | not scorable | not scorable | 0.553719     | 0.6765379    |
| #### Bn-A06-p4340819 | A-genome specific (napus-rapa) | 0.9019139 | 0.7606668 | not scorable | not scorable | 0.6198347    | 0.6843472    |
| #### Bn-A06-p4361865 | A-genome specific (napus-rapa) | 0.9880383 | 0.7789082 | not scorable | not scorable | 0.9834711    | 0.8416675    |
| #### Bn-A06-p4362245 | A-genome specific (napus-rapa) | 0.9976076 | 0.3097715 | not scorable | not scorable | 1            | 0.6568727    |
| #### Bn-A06-p4362386 | A-genome specific (napus-rapa) | 1         | 0.2916716 | not scorable | not scorable | 0.9834711    | 0.5582227    |
| #### Bn-A06-p4362700 | A-genome specific (napus-rapa) | 0.9928229 | 0.7061266 | not scorable | not scorable | 1            | 0.734123     |
| #### Bn-A06-p4365836 | A-genome specific (napus-rapa) | 0.9210526 | 0.3047065 | not scorable | not scorable | 0.9917355    | 0.712837     |
| #### Bn-A06-p4365949 | A-genome specific (napus-rapa) | 0.9760765 | 0.2506799 | not scorable | not scorable | 0.9586777    | 0.5808154    |
| #### Bn-A06-p4371627 | A-genome specific (napus-rapa) | 0.9808612 | 0.6922006 | not scorable | not scorable | 0.9834711    | 0.7800862    |
| #### Bn-A06-p4409355 | A-genome specific (napus-rapa) | 0.9880383 | 0.4178815 | not scorable | not scorable | 1            | 0.7985421    |
| #### Bn-A06-p4410177 | A-genome specific (napus-rapa) | 0.9736842 | 0.5992252 | not scorable | not scorable | 0.9917355    | 0.6104478    |
| #### Bn-A06-p4418231 | A-genome specific (napus-rapa) | 0.9880383 | 0.707617  | not scorable | not scorable | 0.9917355    | 0.6525763    |
| #### Bn-A06-p4419571 | A-genome specific (napus-rapa) | 0.9784689 | 0.5592513 | not scorable | not scorable | 0.9586777    | 0.759639     |
| #### Bn-A06-p4420263 | A-genome specific (napus-rapa) | 0.9928229 | 0.7793623 | not scorable | not scorable | 1            | 0.6406884    |
| #### Bn-A06-p4421214 | A-genome specific (napus-rapa) | 0.9832536 | 0.4924951 | not scorable | not scorable | 0.9752066    | 0.7904896    |
| #### Bn-A06-p4428703 | A-genome specific (napus-rapa) | 0.9712918 | 0.7682348 | not scorable | not scorable | 0.9917355    | 0.704819     |
| #### Bn-A06-p4435926 | A-genome specific (napus-rapa) | 0.9641148 | 0.3334932 | not scorable | not scorable | 0.9834711    | 0.7094157    |
| #### Bn-A06-p4436168 | A-genome specific (napus-rapa) | 0.9952153 | 0.7524182 | not scorable | not scorable | 1            | 0.7004576    |
| #### Bn-A06-p4437120 | A-genome specific (napus-rapa) | 0.9904306 | 0.7750767 | not scorable | not scorable | 1            | 0.7569137    |

|                      |                                |              |              |              |              |              |              |
|----------------------|--------------------------------|--------------|--------------|--------------|--------------|--------------|--------------|
| #### Bn-A06-p4452778 | A-genome specific (napus-rapa) | 0.9760765    | 0.4778323    | not scorable | not scorable | 0.9834711    | 0.5756618    |
| #### Bn-A06-p4461241 | A-genome specific (napus-rapa) | 0.9808612    | 0.7889364    | not scorable | not scorable | 1            | 0.8423122    |
| #### Bn-A06-p4466057 | all not scorable               | not scorable | not scorable | not scorable | not scorable | not scorable | not scorable |
| #### Bn-A06-p4508774 | A-genome specific (napus-rapa) | 0.9856459    | 0.4707777    | not scorable | not scorable | 1            | 0.9154155    |
| #### Bn-A06-p4509926 | A-genome specific (rapa only)  | not scorable | not scorable | not scorable | not scorable | 0.9752066    | 0.9062178    |
| #### Bn-A06-p4517457 | A-genome specific (napus-rapa) | 0.9665072    | 0.7768134    | not scorable | not scorable | 0.9917355    | 0.745486     |
| #### Bn-A06-p4558209 | A-genome specific (napus-rapa) | 0.9928229    | 0.4368514    | not scorable | not scorable | 0.9669421    | 0.7709749    |
| #### Bn-A06-p4597746 | A-genome specific (napus-rapa) | 0.9928229    | 0.7794246    | not scorable | not scorable | 1            | 0.84488      |
| #### Bn-A06-p4619013 | A-genome specific (napus-rapa) | 0.9760765    | 0.4090758    | not scorable | not scorable | 0.9917355    | 0.6874133    |
| #### Bn-A06-p4623401 | A-genome specific (napus-rapa) | 0.9880383    | 0.7607247    | not scorable | not scorable | 0.9834711    | 0.7822542    |
| #### Bn-A06-p4703366 | A-genome specific (napus-rapa) | 0.9736842    | 0.6889068    | not scorable | not scorable | 0.9917355    | 0.6578664    |
| #### Bn-A06-p4729500 | A-genome specific (napus-rapa) | 0.9569378    | 0.5523856    | not scorable | not scorable | 0.9917355    | 0.8349156    |
| #### Bn-A06-p4731996 | A-genome specific (napus-rapa) | 0.7870814    | 0.7575244    | not scorable | not scorable | 0.9834711    | 0.7636389    |
| #### Bn-A06-p4837796 | A-genome specific (rapa only)  | not scorable | not scorable | not scorable | not scorable | 0.9917355    | 0.7333669    |
| #### Bn-A06-p4838544 | A-genome specific (napus-rapa) | 0.9880383    | 0.7420257    | not scorable | not scorable | 0.9752066    | 0.7592574    |
| #### Bn-A06-p4844167 | A-genome specific (napus-rapa) | 0.9736842    | 0.8158969    | not scorable | not scorable | 1            | 0.8208792    |
| #### Bn-A06-p4874556 | A-genome specific (napus-rapa) | 0.9856459    | 0.7972259    | not scorable | not scorable | 0.9752066    | 0.782245     |
| #### Bn-A06-p4881785 | A-genome specific (napus-rapa) | 1            | 0.6423515    | not scorable | not scorable | 1            | 0.6912151    |
| #### Bn-A06-p4896084 | A-genome specific (napus-rapa) | 0.9521531    | 0.8121677    | not scorable | not scorable | 0.6033058    | 0.8943655    |
| #### Bn-A06-p4901091 | A-genome specific (napus-rapa) | 0.9186603    | 0.775032     | not scorable | not scorable | 0.9752066    | 0.7186431    |
| #### Bn-A06-p4901457 | A-genome specific (napus-rapa) | 0.8947368    | 0.8157951    | not scorable | not scorable | 0.9504132    | 0.6494765    |
| #### Bn-A06-p4927344 | A-genome specific (napus-rapa) | 0.9760765    | 0.3249969    | not scorable | not scorable | 0.9834711    | 0.7254934    |
| #### Bn-A06-p49287   | napus specific                 | 0.9904306    | 0.7124816    | not scorable | not scorable | not scorable | not scorable |
| #### Bn-A06-p4929018 | A-genome specific (napus-rapa) | 0.9401914    | 0.4423695    | not scorable | not scorable | 0.9752066    | 0.7905645    |
| #### Bn-A06-p4933932 | A-genome specific (napus-rapa) | 0.9880383    | 0.7564929    | not scorable | not scorable | 1            | 0.8662829    |
| #### Bn-A06-p49438   | napus specific                 | 0.9736842    | 0.5542111    | not scorable | not scorable | not scorable | not scorable |
| #### Bn-A06-p4976377 | A-genome specific (napus-rapa) | 0.8779904    | 0.6549259    | not scorable | not scorable | 0.9917355    | 0.6751723    |
| #### Bn-A06-p5020498 | A-genome specific (napus-rapa) | 0.9952153    | 0.7895814    | not scorable | not scorable | 1            | 0.8145315    |
| #### Bn-A06-p5020605 | A-genome specific (napus-rapa) | 0.9856459    | 0.311483     | not scorable | not scorable | 0.9669421    | 0.7203286    |
| #### Bn-A06-p5020675 | A-genome specific (napus-rapa) | 0.9880383    | 0.7445997    | not scorable | not scorable | 1            | 0.8481613    |
| #### Bn-A06-p50386   | napus specific                 | 0.9832536    | 0.7701079    | not scorable | not scorable | not scorable | not scorable |
| #### Bn-A06-p5040441 | A-genome specific (napus-rapa) | 0.9784689    | 0.7895907    | not scorable | not scorable | 1            | 0.648029     |
| #### Bn-A06-p5047871 | A-genome specific (napus-rapa) | 0.9928229    | 0.3980387    | not scorable | not scorable | 1            | 0.7209747    |

|                      |                                |              |              |              |              |           |           |
|----------------------|--------------------------------|--------------|--------------|--------------|--------------|-----------|-----------|
| #### Bn-A06-p5053748 | A-genome specific (napus-rapa) | 0.9928229    | 0.7813157    | not scorable | not scorable | 0.9917355 | 0.7890258 |
| #### Bn-A06-p506366  | A-genome specific (napus-rapa) | 0.8062201    | 0.8817921    | not scorable | not scorable | 1         | 0.7788738 |
| #### Bn-A06-p5077968 | A-genome specific (rapa only)  | not scorable | not scorable | not scorable | not scorable | 0.9504132 | 0.6804008 |
| #### Bn-A06-p5091252 | A-genome specific (napus-rapa) | 0.9641148    | 0.3566382    | not scorable | not scorable | 1         | 0.765574  |
| #### Bn-A06-p5094790 | A-genome specific (napus-rapa) | 0.9904306    | 0.7779871    | not scorable | not scorable | 0.9834711 | 0.8385081 |
| #### Bn-A06-p5103824 | A-genome specific (napus-rapa) | 0.9688995    | 0.7114758    | not scorable | not scorable | 1         | 0.6910558 |
| #### Bn-A06-p5114238 | A-genome specific (napus-rapa) | 0.9784689    | 0.3608175    | not scorable | not scorable | 0.9752066 | 0.5602247 |
| #### Bn-A06-p5114770 | A-genome specific (napus-rapa) | 0.9043062    | 0.6766579    | not scorable | not scorable | 0.9752066 | 0.7133502 |
| #### Bn-A06-p5130670 | A-genome specific (napus-rapa) | 0.9569378    | 0.5069199    | not scorable | not scorable | 0.9917355 | 0.7651305 |
| #### Bn-A06-p5147575 | A-genome specific (napus-rapa) | 0.9832536    | 0.4830559    | not scorable | not scorable | 0.9917355 | 0.7809055 |
| #### Bn-A06-p5151254 | A-genome specific (napus-rapa) | 0.9928229    | 0.7783281    | not scorable | not scorable | 1         | 0.779168  |
| #### Bn-A06-p5151337 | A-genome specific (napus-rapa) | 0.9856459    | 0.5545317    | not scorable | not scorable | 0.9917355 | 0.7159153 |
| #### Bn-A06-p5179267 | A-genome specific (napus-rapa) | 0.9832536    | 0.3432046    | not scorable | not scorable | 0.9917355 | 0.7846431 |
| #### Bn-A06-p5182164 | A-genome specific (napus-rapa) | 0.9760765    | 0.7623614    | not scorable | not scorable | 0.9917355 | 0.6214764 |
| #### Bn-A06-p5182253 | A-genome specific (napus-rapa) | 0.9784689    | 0.7504745    | not scorable | not scorable | 1         | 0.7374942 |
| #### Bn-A06-p5182315 | A-genome specific (napus-rapa) | 0.9736842    | 0.7928563    | not scorable | not scorable | 0.9917355 | 0.7174947 |
| #### Bn-A06-p5183425 | A-genome specific (napus-rapa) | 0.9928229    | 0.747763     | not scorable | not scorable | 0.9917355 | 0.8007044 |
| #### Bn-A06-p5184830 | A-genome specific (napus-rapa) | 0.9952153    | 0.7561083    | not scorable | not scorable | 0.9834711 | 0.7445864 |
| #### Bn-A06-p5187939 | A-genome specific (napus-rapa) | 0.9856459    | 0.7719108    | not scorable | not scorable | 0.9917355 | 0.8113057 |
| #### Bn-A06-p5188207 | A-genome specific (napus-rapa) | 0.9856459    | 0.787071     | not scorable | not scorable | 0.9917355 | 0.7889054 |
| #### Bn-A06-p5188627 | A-genome specific (napus-rapa) | 0.9665072    | 0.574296     | not scorable | not scorable | 0.9834711 | 0.5456266 |
| #### Bn-A06-p5190285 | A-genome specific (rapa only)  | not scorable | not scorable | not scorable | not scorable | 1         | 0.6298696 |
| #### Bn-A06-p5190418 | A-genome specific (rapa only)  | not scorable | not scorable | not scorable | not scorable | 0.9752066 | 0.6886467 |
| #### Bn-A06-p5190514 | A-genome specific (rapa only)  | not scorable | not scorable | not scorable | not scorable | 0.9917355 | 0.7054226 |
| #### Bn-A06-p5192434 | A-genome specific (napus-rapa) | 0.9832536    | 0.7936383    | not scorable | not scorable | 0.9834711 | 0.774188  |
| #### Bn-A06-p5197572 | A-genome specific (napus-rapa) | 0.9784689    | 0.7627431    | not scorable | not scorable | 0.9917355 | 0.7869879 |
| #### Bn-A06-p5197898 | A-genome specific (napus-rapa) | 0.9760765    | 0.7780508    | not scorable | not scorable | 1         | 0.7453712 |
| #### Bn-A06-p5201102 | A-genome specific (napus-rapa) | 0.9928229    | 0.3471432    | not scorable | not scorable | 0.9917355 | 0.769951  |
| #### Bn-A06-p5217195 | A-genome specific (napus-rapa) | 0.9712918    | 0.5308471    | not scorable | not scorable | 1         | 0.794974  |
| #### Bn-A06-p5226816 | A-genome specific (napus-rapa) | 0.9688995    | 0.6275808    | not scorable | not scorable | 0.9917355 | 0.6855088 |
| #### Bn-A06-p5227178 | A-genome specific (napus-rapa) | 0.9784689    | 0.7358917    | not scorable | not scorable | 0.9834711 | 0.7170555 |
| #### Bn-A06-p5227365 | A-genome specific (napus-rapa) | 0.9856459    | 0.7240264    | not scorable | not scorable | 0.9917355 | 0.7200636 |
| #### Bn-A06-p5232462 | A-genome specific (napus-rapa) | 0.9808612    | 0.6758243    | not scorable | not scorable | 0.9917355 | 0.7172196 |



|                      |                                |              |              |              |              |           |           |
|----------------------|--------------------------------|--------------|--------------|--------------|--------------|-----------|-----------|
| #### Bn-A06-p5232488 | A-genome specific (napus-rapa) | 0.9856459    | 0.6570908    | not scorable | not scorable | 0.9834711 | 0.7058906 |
| #### Bn-A06-p5232937 | A-genome specific (napus-rapa) | 0.9832536    | 0.6746269    | not scorable | not scorable | 0.9834711 | 0.7310367 |
| #### Bn-A06-p5233115 | A-genome specific (napus-rapa) | 0.9856459    | 0.7300066    | not scorable | not scorable | 0.9669421 | 0.7219447 |
| #### Bn-A06-p5233226 | A-genome specific (napus-rapa) | 0.9928229    | 0.7496697    | not scorable | not scorable | 0.9917355 | 0.7555073 |
| #### Bn-A06-p5235813 | A-genome specific (napus-rapa) | 0.9856459    | 0.7586971    | not scorable | not scorable | 0.9834711 | 0.7884734 |
| #### Bn-A06-p5235889 | A-genome specific (napus-rapa) | 0.9856459    | 0.7773178    | not scorable | not scorable | 0.9834711 | 0.7868083 |
| #### Bn-A06-p5236016 | A-genome specific (napus-rapa) | 0.9808612    | 0.7860653    | not scorable | not scorable | 1         | 0.878257  |
| #### Bn-A06-p5236102 | A-genome specific (napus-rapa) | 0.9904306    | 0.7437516    | not scorable | not scorable | 0.9834711 | 0.7160677 |
| #### Bn-A06-p5236283 | A-genome specific (napus-rapa) | 0.9880383    | 0.7541274    | not scorable | not scorable | 0.9917355 | 0.7534823 |
| #### Bn-A06-p5236645 | A-genome specific (napus-rapa) | 0.9808612    | 0.5422934    | not scorable | not scorable | 0.9917355 | 0.8282238 |
| #### Bn-A06-p5246637 | A-genome specific (rapa only)  | not scorable | not scorable | not scorable | not scorable | 0.9917355 | 0.8192415 |
| #### Bn-A06-p5260549 | A-genome specific (napus-rapa) | 0.9808612    | 0.3537495    | not scorable | not scorable | 1         | 0.7878213 |
| #### Bn-A06-p5274160 | A-genome specific (napus-rapa) | 0.9832536    | 0.6610661    | not scorable | not scorable | 1         | 0.5574672 |
| #### Bn-A06-p5275416 | A-genome specific (rapa only)  | not scorable | not scorable | not scorable | not scorable | 0.553719  | 0.8046426 |
| #### Bn-A06-p5275803 | A-genome specific (napus-rapa) | 0.9760765    | 0.7638571    | not scorable | not scorable | 0.9917355 | 0.8168549 |
| #### Bn-A06-p5276150 | A-genome specific (napus-rapa) | 0.9808612    | 0.7408746    | not scorable | not scorable | 0.9834711 | 0.7891298 |
| #### Bn-A06-p5276251 | A-genome specific (napus-rapa) | 0.9760765    | 0.7040401    | not scorable | not scorable | 0.9917355 | 0.7083914 |
| #### Bn-A06-p5276641 | A-genome specific (napus-rapa) | 0.9856459    | 0.7339445    | not scorable | not scorable | 0.9917355 | 0.6986303 |
| #### Bn-A06-p5276713 | A-genome specific (napus-rapa) | 0.9808612    | 0.626475     | not scorable | not scorable | 0.9669421 | 0.5579931 |
| #### Bn-A06-p5276751 | A-genome specific (napus-rapa) | 0.9904306    | 0.7108434    | not scorable | not scorable | 0.9834711 | 0.7229997 |
| #### Bn-A06-p5277548 | A-genome specific (napus-rapa) | 0.9904306    | 0.7823472    | not scorable | not scorable | 1         | 0.7481564 |
| #### Bn-A06-p5278752 | A-genome specific (napus-rapa) | 0.9880383    | 0.7793317    | not scorable | not scorable | 0.9834711 | 0.7266651 |
| #### Bn-A06-p5279490 | A-genome specific (napus-rapa) | 0.9856459    | 0.7156757    | not scorable | not scorable | 0.9917355 | 0.7201172 |
| #### Bn-A06-p5280041 | A-genome specific (napus-rapa) | 0.9712918    | 0.7185276    | not scorable | not scorable | 0.9834711 | 0.6893438 |
| #### Bn-A06-p5280225 | A-genome specific (napus-rapa) | 0.9712918    | 0.6073774    | not scorable | not scorable | 0.9917355 | 0.5690406 |
| #### Bn-A06-p5284260 | A-genome specific (napus-rapa) | 0.9832536    | 0.6713755    | not scorable | not scorable | 0.9834711 | 0.8318305 |
| #### Bn-A06-p5285976 | A-genome specific (napus-rapa) | 0.9760765    | 0.6840172    | not scorable | not scorable | 0.9917355 | 0.7153134 |
| #### Bn-A06-p5299890 | A-genome specific (napus-rapa) | 0.9688995    | 0.2442499    | not scorable | not scorable | 0.6033058 | 0.7246003 |
| #### Bn-A06-p5300943 | A-genome specific (rapa only)  | not scorable | not scorable | not scorable | not scorable | 0.9917355 | 0.7549197 |
| #### Bn-A06-p5301714 | A-genome specific (napus-rapa) | 0.9760765    | 0.7852103    | not scorable | not scorable | 0.9586777 | 0.7835553 |
| #### Bn-A06-p5305727 | A-genome specific (napus-rapa) | 0.9760765    | 0.782874     | not scorable | not scorable | 1         | 0.8101183 |
| #### Bn-A06-p5305781 | A-genome specific (napus-rapa) | 0.9928229    | 0.8006167    | not scorable | not scorable | 1         | 0.7903211 |
| #### Bn-A06-p5306445 | A-genome specific (napus-rapa) | 0.9784689    | 0.677368     | not scorable | not scorable | 0.9834711 | 0.7116496 |

|                      |                                |              |              |              |              |              |              |
|----------------------|--------------------------------|--------------|--------------|--------------|--------------|--------------|--------------|
| #### Bn-A06-p5310499 | A-genome specific (napus-rapa) | 0.9928229    | 0.8139647    | not scorable | not scorable | 0.9669421    | 0.7933717    |
| #### Bn-A06-p5310521 | A-genome specific (napus-rapa) | 0.9856459    | 0.788574     | not scorable | not scorable | 0.9586777    | 0.7577538    |
| #### Bn-A06-p5310579 | A-genome specific (napus-rapa) | 0.9832536    | 0.7929791    | not scorable | not scorable | 0.9669421    | 0.7238618    |
| #### Bn-A06-p5311852 | A-genome specific (napus-rapa) | 0.9688995    | 0.6744235    | not scorable | not scorable | 0.9669421    | 0.7328676    |
| #### Bn-A06-p5314603 | A-genome specific (napus-rapa) | 0.9760765    | 0.7834277    | not scorable | not scorable | 1            | 0.7330021    |
| #### Bn-A06-p5315085 | A-genome specific (napus-rapa) | 0.9856459    | 0.7773328    | not scorable | not scorable | 1            | 0.7633339    |
| #### Bn-A06-p5315140 | A-genome specific (napus-rapa) | 0.9760765    | 0.665778     | not scorable | not scorable | 0.9669421    | 0.6804513    |
| #### Bn-A06-p5320572 | A-genome specific (napus-rapa) | 0.9832536    | 0.6714153    | not scorable | not scorable | 0.9917355    | 0.6533853    |
| #### Bn-A06-p5321651 | A-genome specific (napus-rapa) | 0.9952153    | 0.3630171    | not scorable | not scorable | 0.9917355    | 0.6815509    |
| #### Bn-A06-p5325547 | A-genome specific (napus-rapa) | 0.9712918    | 0.7630296    | not scorable | not scorable | 0.9834711    | 0.7480104    |
| #### Bn-A06-p5331686 | all not scorable               | not scorable | not scorable | not scorable | not scorable | not scorable | not scorable |
| #### Bn-A06-p5333246 | A-genome specific (napus-rapa) | 0.9856459    | 0.6714153    | not scorable | not scorable | 0.9834711    | 0.7045974    |
| #### Bn-A06-p5333348 | A-genome specific (napus-rapa) | 0.9760765    | 0.5519631    | not scorable | not scorable | 0.9752066    | 0.6561409    |
| #### Bn-A06-p5335605 | A-genome specific (napus-rapa) | 0.9665072    | 0.6698004    | not scorable | not scorable | 0.9752066    | 0.7513966    |
| #### Bn-A06-p5339433 | A-genome specific (napus-rapa) | 0.9832536    | 0.708905     | not scorable | not scorable | 1            | 0.6875546    |
| #### Bn-A06-p5340584 | A-genome specific (napus-rapa) | 0.9808612    | 0.3071604    | not scorable | not scorable | 0.9834711    | 0.7097926    |
| #### Bn-A06-p5344950 | A-genome specific (napus-rapa) | 0.9952153    | 0.5155717    | not scorable | not scorable | 0.9917355    | 0.6320549    |
| #### Bn-A06-p5345401 | A-genome specific (napus-rapa) | 0.9904306    | 0.7396421    | not scorable | not scorable | 1            | 0.7677622    |
| #### Bn-A06-p5346654 | A-genome specific (napus-rapa) | 0.9760765    | 0.4618848    | not scorable | not scorable | 0.9834711    | 0.7989571    |
| #### Bn-A06-p5346849 | A-genome specific (napus-rapa) | 0.9736842    | 0.7323399    | not scorable | not scorable | 0.9917355    | 0.8092807    |
| #### Bn-A06-p53517   | napus specific                 | 0.9856459    | 0.7369973    | not scorable | not scorable | not scorable | not scorable |
| #### Bn-A06-p5372653 | A-genome specific (napus-rapa) | 0.9665072    | 0.8078989    | not scorable | not scorable | 0.9504132    | 0.7801714    |
| #### Bn-A06-p5384725 | A-genome specific (napus-rapa) | 0.9808612    | 0.6426238    | not scorable | not scorable | 0.9917355    | 0.8063737    |
| #### Bn-A06-p5386579 | A-genome specific (napus-rapa) | 0.9784689    | 0.8138018    | not scorable | not scorable | 0.9669421    | 0.7601424    |
| #### Bn-A06-p5389758 | A-genome specific (napus-rapa) | 0.9641148    | 0.3694029    | not scorable | not scorable | 0.9917355    | 0.804377     |
| #### Bn-A06-p5390277 | A-genome specific (napus-rapa) | 0.9808612    | 0.7250764    | not scorable | not scorable | 0.9504132    | 0.7124087    |
| #### Bn-A06-p5393231 | A-genome specific (napus-rapa) | 0.9665072    | 0.565684     | not scorable | not scorable | 0.9752066    | 0.7812384    |
| #### Bn-A06-p5427889 | A-genome specific (napus-rapa) | 0.9736842    | 0.7983542    | not scorable | not scorable | 0.9752066    | 0.7577651    |
| #### Bn-A06-p543411  | A-genome specific (napus-rapa) | 0.9186603    | 0.7609383    | not scorable | not scorable | 0.9421487    | 0.6502959    |
| #### Bn-A06-p5436800 | A-genome specific (napus-rapa) | 0.9784689    | 0.5815776    | not scorable | not scorable | 0.9834711    | 0.7561668    |
| #### Bn-A06-p5438131 | A-genome specific (napus-rapa) | 0.9928229    | 0.7044265    | not scorable | not scorable | 1            | 0.7671019    |
| #### Bn-A06-p5441991 | A-genome specific (napus-rapa) | 0.9856459    | 0.3541784    | not scorable | not scorable | 1            | 0.8748588    |
| #### Bn-A06-p54687   | napus specific                 | 0.9712918    | 0.7010231    | not scorable | not scorable | not scorable | not scorable |

|                      |                                |              |              |              |              |              |              |
|----------------------|--------------------------------|--------------|--------------|--------------|--------------|--------------|--------------|
| #### Bn-A06-p55225   | napus specific                 | 0.9736842    | 0.7352313    | not scorable | not scorable | not scorable | not scorable |
| #### Bn-A06-p5535537 | A-genome specific (napus-rapa) | 0.9928229    | 0.7865396    | not scorable | not scorable | 1            | 0.7668408    |
| #### Bn-A06-p5540327 | A-genome specific (napus-rapa) | 0.9880383    | 0.7661971    | not scorable | not scorable | 0.9917355    | 0.7044402    |
| #### Bn-A06-p5546411 | A-genome specific (napus-rapa) | 0.291866     | 0.7376167    | not scorable | not scorable | 0.9504132    | 0.7007855    |
| #### Bn-A06-p556859  | A-genome specific (napus-rapa) | 0.9186603    | 0.7177663    | not scorable | not scorable | 0.9834711    | 0.7856927    |
| #### Bn-A06-p557358  | A-genome specific (napus-rapa) | 1            | 0.4402171    | not scorable | not scorable | 0.9834711    | 0.7043457    |
| #### Bn-A06-p557754  | A-genome specific (napus-rapa) | 1            | 0.6982906    | not scorable | not scorable | 0.9834711    | 0.7111467    |
| #### Bn-A06-p5577934 | A-genome specific (napus-rapa) | 0.9688995    | 0.4146676    | not scorable | not scorable | 1            | 0.704372     |
| #### Bn-A06-p558792  | A-genome specific (napus-rapa) | 1            | 0.7892064    | not scorable | not scorable | 0.9834711    | 0.7860712    |
| #### Bn-A06-p558853  | A-genome specific (napus-rapa) | 1            | 0.7934239    | not scorable | not scorable | 0.9917355    | 0.7884638    |
| #### Bn-A06-p559060  | A-genome specific (napus-rapa) | 1            | 0.7321733    | not scorable | not scorable | 0.9752066    | 0.7922378    |
| #### Bn-A06-p5593050 | A-genome specific (napus-rapa) | 1            | 0.7761238    | not scorable | not scorable | 0.9917355    | 0.7441496    |
| #### Bn-A06-p559417  | A-genome specific (napus-rapa) | 0.9976076    | 0.6988571    | not scorable | not scorable | 0.9917355    | 0.768494     |
| #### Bn-A06-p5600636 | A-genome specific (napus-rapa) | 0.9952153    | 0.7576929    | not scorable | not scorable | 0.9752066    | 0.7096564    |
| #### Bn-A06-p5604858 | A-genome specific (napus-rapa) | 0.9952153    | 0.7562709    | not scorable | not scorable | 0.9752066    | 0.6840566    |
| #### Bn-A06-p5616164 | A-genome specific (napus-rapa) | 0.9952153    | 0.7712396    | not scorable | not scorable | 0.9669421    | 0.7376125    |
| #### Bn-A06-p5618302 | A-genome specific (napus-rapa) | 0.9808612    | 0.762643     | not scorable | not scorable | 0.9917355    | 0.6929061    |
| #### Bn-A06-p5641863 | A-genome specific (napus-rapa) | 0.9976076    | 0.8732565    | not scorable | not scorable | 1            | 0.7851261    |
| #### Bn-A06-p5669960 | A-genome specific (napus-rapa) | 0.9952153    | 0.7930985    | not scorable | not scorable | 0.9834711    | 0.6860991    |
| #### Bn-A06-p568101  | A-genome specific (napus-rapa) | 1            | 0.7925012    | not scorable | not scorable | 1            | 0.7669629    |
| #### Bn-A06-p5690066 | A-genome specific (napus-rapa) | 0.9712918    | 0.4606819    | not scorable | not scorable | 0.9917355    | 0.592959     |
| #### Bn-A06-p5693735 | A-genome specific (napus-rapa) | 0.9856459    | 0.4815084    | not scorable | not scorable | 0.9917355    | 0.5109566    |
| #### Bn-A06-p569582  | A-genome specific (napus-rapa) | 0.9976076    | 0.4660817    | not scorable | not scorable | 0.9256198    | 0.723671     |
| #### Bn-A06-p5739682 | A-genome specific (napus-rapa) | 0.9928229    | 0.7576851    | not scorable | not scorable | 0.9834711    | 0.8192005    |
| #### Bn-A06-p5741557 | A-genome specific (napus-rapa) | 0.9736842    | 0.7559947    | not scorable | not scorable | 1            | 0.7336461    |
| #### Bn-A06-p5747694 | A-genome specific (napus-rapa) | 0.9904306    | 0.3743708    | not scorable | not scorable | 0.9834711    | 0.5009422    |
| #### Bn-A06-p5758576 | A-genome specific (napus-rapa) | 0.9736842    | 0.5737105    | not scorable | not scorable | 0.9917355    | 0.822475     |
| #### Bn-A06-p5761019 | A-genome specific (rapa only)  | not scorable | not scorable | not scorable | not scorable | 0.9917355    | 0.6177276    |
| #### Bn-A06-p5761097 | A-genome specific (rapa only)  | not scorable | not scorable | not scorable | not scorable | 0.9917355    | 0.7502389    |
| #### Bn-A06-p5762475 | A-genome specific (rapa only)  | not scorable | not scorable | not scorable | not scorable | 0.9834711    | 0.8860479    |
| #### Bn-A06-p5762802 | A-genome specific (rapa only)  | not scorable | not scorable | not scorable | not scorable | 0.9834711    | 0.7025824    |
| #### Bn-A06-p5767097 | A-genome specific (napus-rapa) | 0.9736842    | 0.5174576    | not scorable | not scorable | 0.6446281    | 0.8004208    |
| #### Bn-A06-p576740  | A-genome specific (napus-rapa) | 0.9952153    | 0.5699016    | not scorable | not scorable | 0.9834711    | 0.6324359    |

|                      |                                |              |              |              |              |              |              |
|----------------------|--------------------------------|--------------|--------------|--------------|--------------|--------------|--------------|
| #### Bn-A06-p5780982 | A-genome specific (napus-rapa) | 0.9617225    | 0.406638     | not scorable | not scorable | 1            | 0.7210048    |
| #### Bn-A06-p5785209 | genome unspecific (all in)     | 0.9952153    | 0.4223553    | 0.9844961    | 0.7470106    | 1            | 0.9296917    |
| #### Bn-A06-p5824546 | genome unspecific (all in)     | 0.9856459    | 0.4737935    | 0.9767442    | 0.7955338    | 1            | 0.744592     |
| #### Bn-A06-p5826493 | A-genome specific (napus-rapa) | 0.9545454    | 0.2952847    | not scorable | not scorable | 0.9917355    | 0.4860004    |
| #### Bn-A06-p5830298 | A-genome specific (napus-rapa) | 0.9760765    | 0.6993999    | not scorable | not scorable | 0.9917355    | 0.6530237    |
| #### Bn-A06-p5844403 | A-genome specific (napus-rapa) | 0.9593301    | 0.6908904    | not scorable | not scorable | 0.9917355    | 0.6405323    |
| #### Bn-A06-p5845542 | A-genome specific (napus-rapa) | 0.9401914    | 0.6579297    | not scorable | not scorable | 0.9338843    | 0.7097669    |
| #### Bn-A06-p5868273 | A-genome specific (napus-rapa) | 0.930622     | 0.7713985    | not scorable | not scorable | 0.9752066    | 0.7832798    |
| #### Bn-A06-p5878990 | A-genome specific (napus-rapa) | 0.9688995    | 0.3248464    | not scorable | not scorable | 1            | 0.8148032    |
| #### Bn-A06-p5880980 | A-genome specific (napus-rapa) | 0.9784689    | 0.7831392    | not scorable | not scorable | 1            | 0.8277056    |
| #### Bn-A06-p5888779 | A-genome specific (napus-rapa) | 0.9808612    | 0.3979507    | not scorable | not scorable | 0.9752066    | 0.6102396    |
| #### Bn-A06-p5904190 | A-genome specific (napus-rapa) | 0.9832536    | 0.7512016    | not scorable | not scorable | 0.9917355    | 0.7682027    |
| #### Bn-A06-p5907449 | A-genome specific (napus-rapa) | 0.9808612    | 0.4130938    | not scorable | not scorable | 1            | 0.8789551    |
| #### Bn-A06-p590960  | A-genome specific (rapa only)  | not scorable | not scorable | not scorable | not scorable | 0.9917355    | 0.6844553    |
| #### Bn-A06-p5922951 | A-genome specific (napus-rapa) | 1            | 0.5229515    | not scorable | not scorable | 0.9752066    | 0.6236859    |
| #### Bn-A06-p5930501 | A-genome specific (napus-rapa) | 0.9784689    | 0.6539907    | not scorable | not scorable | 0.9917355    | 0.7351463    |
| #### Bn-A06-p5931022 | napus specific                 | 0.9976076    | 0.3122063    | not scorable | not scorable | not scorable | not scorable |
| #### Bn-A06-p5931130 | A-genome specific (napus-rapa) | 1            | 0.4800005    | not scorable | not scorable | 1            | 0.8948976    |
| #### Bn-A06-p5944090 | genome unspecific (all in)     | 0.9688995    | 0.2782986    | 0.9922481    | 0.7870858    | 1            | 0.9011973    |
| #### Bn-A06-p5945068 | A-genome specific (napus-rapa) | 0.9760765    | 0.8692114    | not scorable | not scorable | 0.9834711    | 0.7341237    |
| #### Bn-A06-p5945471 | A-genome specific (napus-rapa) | 0.9904306    | 0.3961873    | not scorable | not scorable | 0.9917355    | 0.6466915    |
| #### Bn-A06-p5947781 | A-genome specific (napus-rapa) | 0.9832536    | 0.8149714    | not scorable | not scorable | 0.9504132    | 0.70705      |
| #### Bn-A06-p5956274 | A-genome specific (napus-rapa) | 1            | 0.5097922    | not scorable | not scorable | 0.9752066    | 0.5609335    |
| #### Bn-A06-p5957378 | A-genome specific (napus-rapa) | 0.9880383    | 0.5062362    | not scorable | not scorable | 0.9586777    | 0.6291359    |
| #### Bn-A06-p5967477 | A-genome specific (napus-rapa) | 1            | 0.4657585    | not scorable | not scorable | 0.9834711    | 0.7172154    |
| #### Bn-A06-p5969087 | A-genome specific (napus-rapa) | 0.9976076    | 0.7841092    | not scorable | not scorable | 1            | 0.7581305    |
| #### Bn-A06-p5969789 | A-genome specific (napus-rapa) | 0.9784689    | 0.750425     | not scorable | not scorable | 1            | 0.7645847    |
| #### Bn-A06-p5973569 | A-genome specific (napus-rapa) | 0.9808612    | 0.7505003    | not scorable | not scorable | 0.9917355    | 0.7582625    |
| #### Bn-A06-p5974383 | A-genome specific (napus-rapa) | 0.9856459    | 0.7600523    | not scorable | not scorable | 0.9752066    | 0.6804018    |
| #### Bn-A06-p5974957 | A-genome specific (napus-rapa) | 0.9856459    | 0.7059729    | not scorable | not scorable | 0.9090909    | 0.5758928    |
| #### Bn-A06-p5976042 | A-genome specific (napus-rapa) | 0.9952153    | 0.7365265    | not scorable | not scorable | 1            | 0.6973079    |
| #### Bn-A06-p5978510 | A-genome specific (napus-rapa) | 0.9952153    | 0.7842848    | not scorable | not scorable | 0.9917355    | 0.7681945    |
| #### Bn-A06-p5978667 | A-genome specific (napus-rapa) | 0.9952153    | 0.785089     | not scorable | not scorable | 0.9917355    | 0.8120193    |

|                      |                                   |              |              |              |              |              |              |
|----------------------|-----------------------------------|--------------|--------------|--------------|--------------|--------------|--------------|
| #### Bn-A06-p5979198 | A-genome specific (napus-rapa)    | 0.9976076    | 0.7419809    | not scorable | not scorable | 0.9917355    | 0.6907074    |
| #### Bn-A06-p5979527 | A-genome specific (napus-rapa)    | 0.9928229    | 0.7947458    | not scorable | not scorable | 1            | 0.7496759    |
| #### Bn-A06-p5981335 | A-genome specific (napus-rapa)    | 0.9736842    | 0.8316504    | not scorable | not scorable | 0.9917355    | 0.7941428    |
| #### Bn-A06-p5981608 | A-genome specific (napus-rapa)    | 0.9904306    | 0.7215169    | not scorable | not scorable | 1            | 0.7557154    |
| #### Bn-A06-p5982453 | A-genome specific (napus-rapa)    | 0.9976076    | 0.8218698    | not scorable | not scorable | 0.9752066    | 0.7280167    |
| #### Bn-A06-p5983201 | A-genome specific (napus-rapa)    | 0.9976076    | 0.7721464    | not scorable | not scorable | 0.9834711    | 0.7201601    |
| #### Bn-A06-p5984910 | A-genome specific (napus-rapa)    | 0.9880383    | 0.7656       | not scorable | not scorable | 0.9917355    | 0.7831272    |
| #### Bn-A06-p5990338 | A-genome specific (napus-rapa)    | 0.9952153    | 0.7879373    | not scorable | not scorable | 0.9917355    | 0.7216598    |
| #### Bn-A06-p5991117 | A-genome specific (napus-rapa)    | 0.9976076    | 0.7960818    | not scorable | not scorable | 0.9917355    | 0.7623414    |
| #### Bn-A06-p5991309 | A-genome specific (napus-rapa)    | 0.3181818    | 0.9260107    | not scorable | not scorable | 0.7272727    | 0.7032385    |
| #### Bn-A06-p5993672 | A-genome specific (napus-rapa)    | 0.9856459    | 0.7661971    | not scorable | not scorable | 1            | 0.8050792    |
| #### Bn-A06-p5995778 | A-genome specific (napus-rapa)    | 0.9976076    | 0.7988936    | not scorable | not scorable | 0.9834711    | 0.727699     |
| #### Bn-A06-p5996847 | A-genome specific (napus-rapa)    | 1            | 0.3789628    | not scorable | not scorable | 0.9917355    | 0.701719     |
| #### Bn-A06-p600029  | A-genome specific (napus-rapa)    | 0.9904306    | 0.5034268    | not scorable | not scorable | 1            | 0.7677389    |
| #### Bn-A06-p6006425 | A-genome specific (napus-rapa)    | 0.9856459    | 0.7547319    | not scorable | not scorable | 1            | 0.821562     |
| #### Bn-A06-p6009064 | A-genome specific (napus-rapa)    | 0.9880383    | 0.3913939    | not scorable | not scorable | 1            | 0.8631146    |
| #### Bn-A06-p6023926 | A-genome specific (napus-rapa)    | 0.9688995    | 0.476907     | not scorable | not scorable | 1            | 0.7059768    |
| #### Bn-A06-p6047002 | A-genome specific (napus-rapa)    | 0.9952153    | 0.7611164    | not scorable | not scorable | 1            | 0.7599033    |
| #### Bn-A06-p6056844 | A-genome specific (napus-rapa)    | 0.9952153    | 0.7508293    | not scorable | not scorable | 1            | 0.7148255    |
| #### Bn-A06-p6056922 | genome unspecific (oleracea-rapa) | not scorable | not scorable | 0.9379845    | 0.7854525    | 1            | 0.9061927    |
| #### Bn-A06-p6057865 | A-genome specific (rapa only)     | not scorable | not scorable | not scorable | not scorable | 1            | 0.7053981    |
| #### Bn-A06-p6059527 | A-genome specific (rapa only)     | not scorable | not scorable | not scorable | not scorable | 1            | 0.7941999    |
| #### Bn-A06-p6066073 | A-genome specific (napus-rapa)    | 1            | 0.7233227    | not scorable | not scorable | 0.9834711    | 0.7407472    |
| #### Bn-A06-p608554  | A-genome specific (napus-rapa)    | 1            | 0.7320442    | not scorable | not scorable | 1            | 0.7894081    |
| #### Bn-A06-p608570  | A-genome specific (napus-rapa)    | 0.9976076    | 0.4915549    | not scorable | not scorable | 0.9917355    | 0.6647856    |
| #### Bn-A06-p6091453 | A-genome specific (napus-rapa)    | 0.9904306    | 0.4178697    | not scorable | not scorable | 0.9917355    | 0.3905617    |
| #### Bn-A06-p6103844 | A-genome specific (napus-rapa)    | 0.9760765    | 0.7871298    | not scorable | not scorable | 0.9917355    | 0.7900169    |
| #### Bn-A06-p6103921 | A-genome specific (napus-rapa)    | 0.9425837    | 0.654011     | not scorable | not scorable | 1            | 0.8217046    |
| #### Bn-A06-p611589  | A-genome specific (napus-rapa)    | 0.9880383    | 0.7886502    | not scorable | not scorable | 0.7024794    | 0.8298551    |
| #### Bn-A06-p6118760 | napus specific                    | 0.9688995    | 0.7958411    | not scorable | not scorable | not scorable | not scorable |
| #### Bn-A06-p6129072 | A-genome specific (napus-rapa)    | 0.9712918    | 0.5643058    | not scorable | not scorable | 0.9834711    | 0.7682188    |
| #### Bn-A06-p613789  | A-genome specific (napus-rapa)    | 0.9976076    | 0.762118     | not scorable | not scorable | 0.9752066    | 0.7210138    |
| #### Bn-A06-p6154470 | A-genome specific (napus-rapa)    | 0.9880383    | 0.6831949    | not scorable | not scorable | 1            | 0.7522274    |

|                      |                                   |              |              |              |              |           |           |
|----------------------|-----------------------------------|--------------|--------------|--------------|--------------|-----------|-----------|
| #### Bn-A06-p6182046 | A-genome specific (napus-rapa)    | 0.9880383    | 0.7779685    | not scorable | not scorable | 0.9669421 | 0.8377154 |
| #### Bn-A06-p6182593 | A-genome specific (napus-rapa)    | 0.9856459    | 0.3265416    | not scorable | not scorable | 0.9752066 | 0.6488135 |
| #### Bn-A06-p6183859 | A-genome specific (napus-rapa)    | 0.9784689    | 0.7842842    | not scorable | not scorable | 0.9917355 | 0.7806359 |
| #### Bn-A06-p6184455 | A-genome specific (napus-rapa)    | 0.9928229    | 0.760348     | not scorable | not scorable | 1         | 0.8493857 |
| #### Bn-A06-p6195732 | A-genome specific (napus-rapa)    | 0.9856459    | 0.7698897    | not scorable | not scorable | 0.9917355 | 0.6988343 |
| #### Bn-A06-p6196005 | A-genome specific (napus-rapa)    | 0.9784689    | 0.472027     | not scorable | not scorable | 1         | 0.6990497 |
| #### Bn-A06-p6198128 | A-genome specific (napus-rapa)    | 0.9497608    | 0.5014913    | not scorable | not scorable | 1         | 0.6153943 |
| #### Bn-A06-p6204652 | A-genome specific (napus-rapa)    | 0.9736842    | 0.3045044    | not scorable | not scorable | 0.9917355 | 0.6997603 |
| #### Bn-A06-p621506  | A-genome specific (napus-rapa)    | 0.9976076    | 0.7558604    | not scorable | not scorable | 0.6446281 | 0.7877622 |
| #### Bn-A06-p621695  | A-genome specific (napus-rapa)    | 0.9952153    | 0.6625258    | not scorable | not scorable | 0.9504132 | 0.5655084 |
| #### Bn-A06-p6270772 | genome unspecific (oleracea-rapa) | not scorable | not scorable |              | 1            | 0.8129888 | 1         |
| #### Bn-A06-p6308667 | A-genome specific (napus-rapa)    | 0.9904306    | 0.7599258    | not scorable | not scorable | 0.9834711 | 0.730818  |
| #### Bn-A06-p6311231 | A-genome specific (napus-rapa)    | 0.9760765    | 0.8109809    | not scorable | not scorable | 0.9669421 | 0.8269873 |
| #### Bn-A06-p6311289 | A-genome specific (napus-rapa)    | 0.9641148    | 0.7947679    | not scorable | not scorable | 1         | 0.7326914 |
| #### Bn-A06-p6319212 | A-genome specific (napus-rapa)    | 0.9952153    | 0.7786338    | not scorable | not scorable | 0.9752066 | 0.7582548 |
| #### Bn-A06-p6341389 | A-genome specific (napus-rapa)    | 0.9784689    | 0.5063395    | not scorable | not scorable | 1         | 0.7283378 |
| #### Bn-A06-p6343931 | A-genome specific (napus-rapa)    | 0.9808612    | 0.4047375    | not scorable | not scorable | 1         | 0.7661327 |
| #### Bn-A06-p6356463 | A-genome specific (napus-rapa)    | 0.9856459    | 0.7225096    | not scorable | not scorable | 1         | 0.8822489 |
| #### Bn-A06-p6358974 | A-genome specific (napus-rapa)    | 0.9976076    | 0.8092304    | not scorable | not scorable | 0.9917355 | 0.761192  |
| #### Bn-A06-p6359207 | A-genome specific (napus-rapa)    | 0.9976076    | 0.4899659    | not scorable | not scorable | 0.9917355 | 0.8208444 |
| #### Bn-A06-p6363956 | A-genome specific (napus-rapa)    | 0.9976076    | 0.4633728    | not scorable | not scorable | 1         | 0.6762052 |
| #### Bn-A06-p6382773 | A-genome specific (napus-rapa)    | 0.9952153    | 0.4152324    | not scorable | not scorable | 1         | 0.737516  |
| #### Bn-A06-p6388760 | A-genome specific (napus-rapa)    | 1            | 0.4942485    | not scorable | not scorable | 0.9917355 | 0.7948223 |
| #### Bn-A06-p6389318 | A-genome specific (napus-rapa)    | 0.9952153    | 0.6024925    | not scorable | not scorable | 1         | 0.8061239 |
| #### Bn-A06-p6403382 | A-genome specific (napus-rapa)    | 0.9928229    | 0.7347358    | not scorable | not scorable | 0.9917355 | 0.7656774 |
| #### Bn-A06-p6408922 | A-genome specific (napus-rapa)    | 0.9952153    | 0.3531356    | not scorable | not scorable | 0.9834711 | 0.7704284 |
| #### Bn-A06-p6432467 | A-genome specific (napus-rapa)    | 0.9952153    | 0.5003566    | not scorable | not scorable | 1         | 0.7955878 |
| #### Bn-A06-p6437068 | A-genome specific (napus-rapa)    | 0.9832536    | 0.399261     | not scorable | not scorable | 0.9917355 | 0.7243382 |
| #### Bn-A06-p6439396 | A-genome specific (napus-rapa)    | 0.9832536    | 0.3099335    | not scorable | not scorable | 1         | 0.6890446 |
| #### Bn-A06-p6446571 | A-genome specific (napus-rapa)    | 0.9641148    | 0.611495     | not scorable | not scorable | 0.9917355 | 0.8394179 |
| #### Bn-A06-p6450368 | A-genome specific (napus-rapa)    | 0.9688995    | 0.7009493    | not scorable | not scorable | 0.6446281 | 0.7287599 |
| #### Bn-A06-p6451055 | A-genome specific (napus-rapa)    | 0.9641148    | 0.7547342    | not scorable | not scorable | 1         | 0.8887678 |
| #### Bn-A06-p6452160 | A-genome specific (napus-rapa)    | 0.9856459    | 0.7677237    | not scorable | not scorable | 0.9834711 | 0.7912524 |

|                      |                                   |              |              |              |              |              |              |
|----------------------|-----------------------------------|--------------|--------------|--------------|--------------|--------------|--------------|
| #### Bn-A06-p6457529 | A-genome specific (napus-rapa)    | 0.937799     | 0.530444     | not scorable | not scorable | 0.9917355    | 0.7460197    |
| #### Bn-A06-p6458266 | A-genome specific (napus-rapa)    | 0.9665072    | 0.7971069    | not scorable | not scorable | 0.9917355    | 0.8011175    |
| #### Bn-A06-p6464476 | A-genome specific (napus-rapa)    | 0.9784689    | 0.6064239    | not scorable | not scorable | 0.9917355    | 0.763024     |
| #### Bn-A06-p6477943 | A-genome specific (napus-rapa)    | 0.8755981    | 0.8158063    | not scorable | not scorable | 0.7107438    | 0.867814     |
| #### Bn-A06-p6482307 | A-genome specific (napus-rapa)    | 1            | 0.7972872    | not scorable | not scorable | 1            | 0.7397814    |
| #### Bn-A06-p6483553 | A-genome specific (napus-rapa)    | 1            | 0.4103365    | not scorable | not scorable | 0.9834711    | 0.7660024    |
| #### Bn-A06-p6486764 | A-genome specific (napus-rapa)    | 0.9904306    | 0.8074076    | not scorable | not scorable | 0.9669421    | 0.6438724    |
| #### Bn-A06-p649348  | A-genome specific (napus-rapa)    | 1            | 0.4160587    | not scorable | not scorable | 0.9917355    | 0.769861     |
| #### Bn-A06-p650072  | A-genome specific (napus-rapa)    | 0.9976076    | 0.3278603    | not scorable | not scorable | 0.9669421    | 0.69033      |
| #### Bn-A06-p650790  | A-genome specific (napus-rapa)    | 0.8995215    | 0.8979133    | not scorable | not scorable | 0.6033058    | 0.8023093    |
| #### Bn-A06-p6508162 | A-genome specific (napus-rapa)    | 0.9904306    | 0.8472037    | not scorable | not scorable | 0.9917355    | 0.768091     |
| #### Bn-A06-p6517823 | A-genome specific (napus-rapa)    | 0.9784689    | 0.5097362    | not scorable | not scorable | 0.9917355    | 0.7761122    |
| #### Bn-A06-p6520301 | A-genome specific (napus-rapa)    | 0.9832536    | 0.7391729    | not scorable | not scorable | 0.9834711    | 0.7762352    |
| #### Bn-A06-p6532740 | A-genome specific (napus-rapa)    | 0.9593301    | 0.5509505    | not scorable | not scorable | 0.9834711    | 0.715356     |
| #### Bn-A06-p6555456 | A-genome specific (napus-rapa)    | 0.9617225    | 0.7198097    | not scorable | not scorable | 0.9917355    | 0.6471123    |
| #### Bn-A06-p6563295 | A-genome specific (napus-rapa)    | 0.9928229    | 0.7873191    | not scorable | not scorable | 1            | 0.7711321    |
| #### Bn-A06-p6569468 | A-genome specific (napus-rapa)    | 0.8995215    | 0.4999183    | not scorable | not scorable | 1            | 0.71921      |
| #### Bn-A06-p6573582 | A-genome specific (napus-rapa)    | 0.9736842    | 0.7273241    | not scorable | not scorable | 0.9917355    | 0.7127259    |
| #### Bn-A06-p6576675 | C-genome specific (oleracea only) | not scorable | not scorable | 0.9069768    | 0.5712118    | not scorable | not scorable |
| #### Bn-A06-p6588828 | A-genome specific (napus-rapa)    | 0.9760765    | 0.2326052    | not scorable | not scorable | 0.9752066    | 0.6808381    |
| #### Bn-A06-p6591354 | A-genome specific (napus-rapa)    | 0.9976076    | 0.6237146    | not scorable | not scorable | 1            | 0.7652044    |
| #### Bn-A06-p659391  | A-genome specific (rapa only)     | not scorable | not scorable | not scorable | not scorable | 0.5123967    | 0.8085203    |
| #### Bn-A06-p6617274 | A-genome specific (napus-rapa)    | 0.9617225    | 0.1858325    | not scorable | not scorable | 0.9752066    | 0.7448782    |
| #### Bn-A06-p6622319 | A-genome specific (napus-rapa)    | 0.9880383    | 0.4050444    | not scorable | not scorable | 0.9917355    | 0.651529     |
| #### Bn-A06-p6624071 | A-genome specific (napus-rapa)    | 0.9760765    | 0.7569918    | not scorable | not scorable | 1            | 0.8336849    |
| #### Bn-A06-p6624464 | A-genome specific (napus-rapa)    | 0.9688995    | 0.756471     | not scorable | not scorable | 1            | 0.8153838    |
| #### Bn-A06-p6636202 | A-genome specific (napus-rapa)    | 0.9808612    | 0.7499111    | not scorable | not scorable | 1            | 0.6671976    |
| #### Bn-A06-p6646249 | A-genome specific (napus-rapa)    | 0.9808612    | 0.4597253    | not scorable | not scorable | 0.9834711    | 0.6968184    |
| #### Bn-A06-p6647323 | A-genome specific (napus-rapa)    | 0.9832536    | 0.7211424    | not scorable | not scorable | 1            | 0.6593912    |
| #### Bn-A06-p6655047 | A-genome specific (napus-rapa)    | 0.923445     | 0.2742781    | not scorable | not scorable | 1            | 0.7440504    |
| #### Bn-A06-p6661719 | A-genome specific (napus-rapa)    | 0.9880383    | 0.4100068    | not scorable | not scorable | 0.9752066    | 0.7231218    |
| #### Bn-A06-p6679810 | A-genome specific (napus-rapa)    | 0.9928229    | 0.3423735    | not scorable | not scorable | 0.9834711    | 0.7708862    |
| #### Bn-A06-p6689858 | A-genome specific (napus-rapa)    | 0.9856459    | 0.5507295    | not scorable | not scorable | 0.9917355    | 0.6494147    |

|                      |                                   |              |              |              |              |              |              |
|----------------------|-----------------------------------|--------------|--------------|--------------|--------------|--------------|--------------|
| #### Bn-A06-p6691628 | A-genome specific (napus-rapa)    | 0.9928229    | 0.5960228    | not scorable | not scorable | 0.9669421    | 0.6523674    |
| #### Bn-A06-p6692851 | A-genome specific (napus-rapa)    | 0.9976076    | 0.7731913    | not scorable | not scorable | 1            | 0.8100411    |
| #### Bn-A06-p6699971 | A-genome specific (napus-rapa)    | 1            | 0.3899464    | not scorable | not scorable | 0.9834711    | 0.760515     |
| #### Bn-A06-p6705911 | A-genome specific (napus-rapa)    | 0.9904306    | 0.5443408    | not scorable | not scorable | 0.9669421    | 0.686548     |
| #### Bn-A06-p6706067 | A-genome specific (napus-rapa)    | 0.9904306    | 0.6936429    | not scorable | not scorable | 1            | 0.8658792    |
| #### Bn-A06-p6723804 | A-genome specific (napus-rapa)    | 0.9760765    | 0.3787074    | not scorable | not scorable | 1            | 0.8563822    |
| #### Bn-A06-p6744737 | A-genome specific (napus-rapa)    | 0.930622     | 0.3661322    | not scorable | not scorable | 0.9834711    | 0.7643107    |
| #### Bn-A06-p6747460 | A-genome specific (napus-rapa)    | 0.9928229    | 0.4905555    | not scorable | not scorable | 1            | 0.8285838    |
| #### Bn-A06-p6761232 | A-genome specific (napus-rapa)    | 1            | 0.7688384    | not scorable | not scorable | 1            | 0.7031696    |
| #### Bn-A06-p6761241 | A-genome specific (napus-rapa)    | 1            | 0.7623785    | not scorable | not scorable | 0.9917355    | 0.7417586    |
| #### Bn-A06-p6761331 | A-genome specific (napus-rapa)    | 0.9976076    | 0.8717046    | not scorable | not scorable | 0.9917355    | 0.741683     |
| #### Bn-A06-p6779990 | A-genome specific (napus-rapa)    | 1            | 0.7555217    | not scorable | not scorable | 0.9917355    | 0.7288567    |
| #### Bn-A06-p6780446 | A-genome specific (napus-rapa)    | 1            | 0.8559127    | not scorable | not scorable | 0.9917355    | 0.8159127    |
| #### Bn-A06-p6780542 | A-genome specific (napus-rapa)    | 0.9976076    | 0.7490253    | not scorable | not scorable | 0.9917355    | 0.7200625    |
| #### Bn-A06-p6782162 | A-genome specific (napus-rapa)    | 0.9952153    | 0.7005886    | not scorable | not scorable | 0.9669421    | 0.6422952    |
| #### Bn-A06-p6782980 | A-genome specific (napus-rapa)    | 1            | 0.7763158    | not scorable | not scorable | 0.9834711    | 0.730305     |
| #### Bn-A06-p6798408 | A-genome specific (napus-rapa)    | 0.9976076    | 0.7545397    | not scorable | not scorable | 1            | 0.9225804    |
| #### Bn-A06-p6822469 | C-genome specific (oleracea only) | not scorable | not scorable | 0.8294573    | 0.573199     | not scorable | not scorable |
| #### Bn-A06-p6843211 | A-genome specific (rapa only)     | not scorable | not scorable | not scorable | not scorable | 0.9917355    | 0.717833     |
| #### Bn-A06-p6843711 | A-genome specific (rapa only)     | not scorable | not scorable | not scorable | not scorable | 1            | 0.719756     |
| #### Bn-A06-p6843808 | A-genome specific (rapa only)     | not scorable | not scorable | not scorable | not scorable | 1            | 0.7554229    |
| #### Bn-A06-p6844127 | A-genome specific (napus-rapa)    | 0.9952153    | 0.7668832    | not scorable | not scorable | 0.9917355    | 0.8403527    |
| #### Bn-A06-p6847261 | A-genome specific (rapa only)     | not scorable | not scorable | not scorable | not scorable | 1            | 0.5964268    |
| #### Bn-A06-p6847367 | A-genome specific (napus-rapa)    | 1            | 0.6757838    | not scorable | not scorable | 1            | 0.7560381    |
| #### Bn-A06-p6864079 | A-genome specific (napus-rapa)    | 0.9928229    | 0.7445343    | not scorable | not scorable | 0.9586777    | 0.7720857    |
| #### Bn-A06-p6875144 | A-genome specific (napus-rapa)    | 0.9904306    | 0.474942     | not scorable | not scorable | 0.9917355    | 0.4877522    |
| #### Bn-A06-p6878792 | A-genome specific (napus-rapa)    | 1            | 0.7706237    | not scorable | not scorable | 0.9834711    | 0.7221346    |
| #### Bn-A06-p6879017 | A-genome specific (napus-rapa)    | 1            | 0.5397351    | not scorable | not scorable | 0.9917355    | 0.73031      |
| #### Bn-A06-p6895399 | A-genome specific (napus-rapa)    | 0.9928229    | 0.8224781    | not scorable | not scorable | 0.9917355    | 0.7403314    |
| #### Bn-A06-p690460  | A-genome specific (napus-rapa)    | 0.9976076    | 0.2776039    | not scorable | not scorable | 0.9834711    | 0.8103353    |
| #### Bn-A06-p6913483 | A-genome specific (napus-rapa)    | 0.9784689    | 0.3164852    | not scorable | not scorable | 0.9669421    | 0.7057664    |
| #### Bn-A06-p6919765 | A-genome specific (napus-rapa)    | 1            | 0.8895347    | not scorable | not scorable | 1            | 0.8218274    |
| #### Bn-A06-p6920925 | A-genome specific (napus-rapa)    | 0.9712918    | 0.5086393    | not scorable | not scorable | 0.9834711    | 0.5516126    |



|                      |                                |           |           |              |              |              |              |
|----------------------|--------------------------------|-----------|-----------|--------------|--------------|--------------|--------------|
| #### Bn-A06-p69515   | A-genome specific (napus-rapa) | 0.9928229 | 0.6927842 | not scorable | not scorable | 0.9669421    | 0.6333901    |
| #### Bn-A06-p6951503 | A-genome specific (napus-rapa) | 0.9114832 | 0.5333913 | not scorable | not scorable | 1            | 0.7790899    |
| #### Bn-A06-p6955437 | A-genome specific (napus-rapa) | 0.9688995 | 0.8123244 | not scorable | not scorable | 1            | 0.8485491    |
| #### Bn-A06-p6959460 | A-genome specific (napus-rapa) | 0.9784689 | 0.5298209 | not scorable | not scorable | 0.9834711    | 0.7944611    |
| #### Bn-A06-p6961069 | A-genome specific (napus-rapa) | 0.9880383 | 0.7657303 | not scorable | not scorable | 0.9917355    | 0.7169905    |
| #### Bn-A06-p6966525 | A-genome specific (napus-rapa) | 0.9928229 | 0.5451661 | not scorable | not scorable | 0.9834711    | 0.662588     |
| #### Bn-A06-p6970539 | A-genome specific (napus-rapa) | 0.9880383 | 0.689528  | not scorable | not scorable | 0.9834711    | 0.701288     |
| #### Bn-A06-p6971737 | A-genome specific (napus-rapa) | 0.9808612 | 0.7975129 | not scorable | not scorable | 0.9752066    | 0.7387477    |
| #### Bn-A06-p6971900 | A-genome specific (napus-rapa) | 0.9784689 | 0.8000461 | not scorable | not scorable | 1            | 0.7466218    |
| #### Bn-A06-p6972345 | A-genome specific (napus-rapa) | 0.9665072 | 0.7959522 | not scorable | not scorable | 0.9834711    | 0.7541701    |
| #### Bn-A06-p6980159 | A-genome specific (napus-rapa) | 0.9665072 | 0.7769876 | not scorable | not scorable | 0.9917355    | 0.7092396    |
| #### Bn-A06-p6985717 | A-genome specific (napus-rapa) | 0.9449761 | 0.3830291 | not scorable | not scorable | 1            | 0.7688225    |
| #### Bn-A06-p6990496 | A-genome specific (napus-rapa) | 0.9641148 | 0.6142724 | not scorable | not scorable | 0.9917355    | 0.8278894    |
| #### Bn-A06-p6993862 | A-genome specific (napus-rapa) | 0.9880383 | 0.7703957 | not scorable | not scorable | 0.9917355    | 0.8334357    |
| #### Bn-A06-p6995492 | A-genome specific (napus-rapa) | 0.9904306 | 0.7156909 | not scorable | not scorable | 1            | 0.7051389    |
| #### Bn-A06-p7003598 | A-genome specific (napus-rapa) | 0.9904306 | 0.6888322 | not scorable | not scorable | 0.9917355    | 0.7708539    |
| #### Bn-A06-p7023598 | A-genome specific (napus-rapa) | 0.9832536 | 0.7307225 | not scorable | not scorable | 0.9917355    | 0.7088073    |
| #### Bn-A06-p7023804 | A-genome specific (napus-rapa) | 0.9712918 | 0.6009524 | not scorable | not scorable | 0.9917355    | 0.8345705    |
| #### Bn-A06-p7023818 | A-genome specific (napus-rapa) | 0.9904306 | 0.8030359 | not scorable | not scorable | 0.9834711    | 0.6677091    |
| #### Bn-A06-p7023924 | A-genome specific (napus-rapa) | 0.9712918 | 0.6266131 | not scorable | not scorable | 0.9834711    | 0.7344818    |
| #### Bn-A06-p7083415 | A-genome specific (napus-rapa) | 0.9688995 | 0.3256362 | not scorable | not scorable | 0.9834711    | 0.7030141    |
| #### Bn-A06-p709547  | A-genome specific (napus-rapa) | 0.9976076 | 0.5445961 | not scorable | not scorable | 0.9917355    | 0.665489     |
| #### Bn-A06-p7107840 | A-genome specific (napus-rapa) | 0.9952153 | 0.6595548 | not scorable | not scorable | 0.9917355    | 0.6927378    |
| #### Bn-A06-p7119339 | genome unspecific (all in)     | 0.9210526 | 0.5168476 | 0.9922481    | 0.8171462    | 0.9752066    | 0.841727     |
| #### Bn-A06-p7134425 | A-genome specific (napus-rapa) | 1         | 0.4667993 | not scorable | not scorable | 0.9917355    | 0.7265257    |
| #### Bn-A06-p7179419 | napus specific                 | 0.9641148 | 0.8008282 | not scorable | not scorable | not scorable | not scorable |
| #### Bn-A06-p7187455 | A-genome specific (napus-rapa) | 1         | 0.6663148 | not scorable | not scorable | 1            | 0.7928565    |
| #### Bn-A06-p7230364 | A-genome specific (napus-rapa) | 1         | 0.5924323 | not scorable | not scorable | 0.9917355    | 0.6576771    |
| #### Bn-A06-p72383   | A-genome specific (napus-rapa) | 0.9952153 | 0.7318512 | not scorable | not scorable | 0.9834711    | 0.7359613    |
| #### Bn-A06-p7247810 | A-genome specific (napus-rapa) | 0.9880383 | 0.8065313 | not scorable | not scorable | 0.9834711    | 0.7318531    |
| #### Bn-A06-p7266200 | A-genome specific (napus-rapa) | 1         | 0.5160676 | not scorable | not scorable | 0.9917355    | 0.770107     |
| #### Bn-A06-p7279909 | A-genome specific (napus-rapa) | 0.9856459 | 0.7852174 | not scorable | not scorable | 0.9834711    | 0.829973     |
| #### Bn-A06-p72878   | A-genome specific (napus-rapa) | 0.9976076 | 0.7959938 | not scorable | not scorable | 1            | 0.7702622    |

|                      |                                   |              |              |              |              |              |              |
|----------------------|-----------------------------------|--------------|--------------|--------------|--------------|--------------|--------------|
| #### Bn-A06-p7288881 | A-genome specific (napus-rapa)    | 0.9808612    | 0.5694845    | not scorable | not scorable | 1            | 0.7191743    |
| #### Bn-A06-p7289388 | A-genome specific (napus-rapa)    | 0.9952153    | 0.7544927    | not scorable | not scorable | 0.9834711    | 0.7558541    |
| #### Bn-A06-p7290511 | A-genome specific (napus-rapa)    | 0.9832536    | 0.6769214    | not scorable | not scorable | 0.9752066    | 0.7110556    |
| #### Bn-A06-p7290893 | A-genome specific (napus-rapa)    | 0.9904306    | 0.7800575    | not scorable | not scorable | 1            | 0.9013507    |
| #### Bn-A06-p7290973 | A-genome specific (napus-rapa)    | 0.9880383    | 0.7388068    | not scorable | not scorable | 1            | 0.8806835    |
| #### Bn-A06-p7302651 | A-genome specific (napus-rapa)    | 0.9856459    | 0.6518633    | not scorable | not scorable | 0.9917355    | 0.7370692    |
| #### Bn-A06-p7305466 | A-genome specific (napus-rapa)    | 1            | 0.7887977    | not scorable | not scorable | 1            | 0.9175813    |
| #### Bn-A06-p7313589 | A-genome specific (napus-rapa)    | 0.9521531    | 0.6955901    | not scorable | not scorable | 1            | 0.7827178    |
| #### Bn-A06-p7314403 | A-genome specific (napus-rapa)    | 0.9832536    | 0.2784271    | not scorable | not scorable | 0.9917355    | 0.7298442    |
| #### Bn-A06-p7355866 | A-genome specific (napus-rapa)    | 0.9928229    | 0.4130386    | not scorable | not scorable | 0.9834711    | 0.6913202    |
| #### Bn-A06-p7384367 | A-genome specific (napus-rapa)    | 1            | 0.2742781    | not scorable | not scorable | 0.9917355    | 0.8007227    |
| #### Bn-A06-p73924   | A-genome specific (napus-rapa)    | 0.9904306    | 0.7784266    | not scorable | not scorable | 1            | 0.813257     |
| #### Bn-A06-p7393806 | genome unspecific (oleracea-rapa) | not scorable | not scorable | 0.9767442    | 0.7789006    | 1            | 0.7357756    |
| #### Bn-A06-p7420466 | A-genome specific (napus-rapa)    | 0.9856459    | 0.4606941    | not scorable | not scorable | 0.9917355    | 0.7205918    |
| #### Bn-A06-p7432516 | A-genome specific (napus-rapa)    | 1            | 0.7556244    | not scorable | not scorable | 1            | 0.8495528    |
| #### Bn-A06-p7437586 | A-genome specific (napus-rapa)    | 0.9976076    | 0.76359      | not scorable | not scorable | 0.9917355    | 0.7937827    |
| #### Bn-A06-p7439750 | A-genome specific (napus-rapa)    | 1            | 0.6108853    | not scorable | not scorable | 1            | 0.790215     |
| #### Bn-A06-p7444483 | A-genome specific (napus-rapa)    | 0.9880383    | 0.5714203    | not scorable | not scorable | 0.9669421    | 0.788344     |
| #### Bn-A06-p7459428 | A-genome specific (napus-rapa)    | 0.9641148    | 0.5421022    | not scorable | not scorable | 0.9834711    | 0.6905569    |
| #### Bn-A06-p7459843 | A-genome specific (napus-rapa)    | 0.9880383    | 0.7258099    | not scorable | not scorable | 0.9917355    | 0.7449826    |
| #### Bn-A06-p7460077 | A-genome specific (napus-rapa)    | 0.9856459    | 0.4821236    | not scorable | not scorable | 0.9834711    | 0.6922915    |
| #### Bn-A06-p7499751 | A-genome specific (napus-rapa)    | 0.9904306    | 0.6668456    | not scorable | not scorable | 1            | 0.7168652    |
| #### Bn-A06-p7501594 | A-genome specific (napus-rapa)    | 0.9904306    | 0.2877264    | not scorable | not scorable | 0.9752066    | 0.7640041    |
| #### Bn-A06-p7515700 | A-genome specific (napus-rapa)    | 0.9880383    | 0.2750899    | not scorable | not scorable | 0.5454546    | 0.6706491    |
| #### Bn-A06-p7553160 | A-genome specific (napus-rapa)    | 0.9784689    | 0.6978909    | not scorable | not scorable | 1            | 0.8100545    |
| #### Bn-A06-p7556709 | napus specific                    | 0.9976076    | 0.9233105    | not scorable | not scorable | not scorable | not scorable |
| #### Bn-A06-p7560098 | A-genome specific (napus-rapa)    | 0.9856459    | 0.5865835    | not scorable | not scorable | 0.9834711    | 0.7149706    |
| #### Bn-A06-p7566996 | A-genome specific (napus-rapa)    | 0.9808612    | 0.6410471    | not scorable | not scorable | 0.9752066    | 0.7474023    |
| #### Bn-A06-p7583628 | A-genome specific (napus-rapa)    | 0.9928229    | 0.7458418    | not scorable | not scorable | 0.9834711    | 0.7350121    |
| #### Bn-A06-p7584691 | A-genome specific (napus-rapa)    | 0.9832536    | 0.7503873    | not scorable | not scorable | 0.9834711    | 0.7790666    |
| #### Bn-A06-p7589883 | A-genome specific (napus-rapa)    | 0.9832536    | 0.4908467    | not scorable | not scorable | 1            | 0.8029585    |
| #### Bn-A06-p7616430 | A-genome specific (napus-rapa)    | 0.9760765    | 0.7759902    | not scorable | not scorable | 0.9917355    | 0.7807665    |
| #### Bn-A06-p7624783 | A-genome specific (napus-rapa)    | 0.9760765    | 0.7618725    | not scorable | not scorable | 1            | 0.7178468    |

|                      |                                |              |              |              |              |           |           |
|----------------------|--------------------------------|--------------|--------------|--------------|--------------|-----------|-----------|
| #### Bn-A06-p7626450 | A-genome specific (rapa only)  | not scorable | not scorable | not scorable | not scorable | 1         | 0.8244513 |
| #### Bn-A06-p7632651 | A-genome specific (napus-rapa) | 0.9832536    | 0.2783262    | not scorable | not scorable | 0.9917355 | 0.7002864 |
| #### Bn-A06-p7636623 | A-genome specific (napus-rapa) | 0.9760765    | 0.5699222    | not scorable | not scorable | 0.9917355 | 0.7579936 |
| #### Bn-A06-p7636729 | A-genome specific (napus-rapa) | 0.9856459    | 0.685194     | not scorable | not scorable | 1         | 0.6974515 |
| #### Bn-A06-p7641474 | A-genome specific (napus-rapa) | 0.9856459    | 0.605241     | not scorable | not scorable | 0.9917355 | 0.7387353 |
| #### Bn-A06-p7653199 | A-genome specific (rapa only)  | not scorable | not scorable | not scorable | not scorable | 0.9917355 | 0.6796434 |
| #### Bn-A06-p7657281 | A-genome specific (napus-rapa) | 0.9952153    | 0.7475385    | not scorable | not scorable | 0.9917355 | 0.8537922 |
| #### Bn-A06-p7658535 | A-genome specific (napus-rapa) | 0.9832536    | 0.689563     | not scorable | not scorable | 1         | 0.9288069 |
| #### Bn-A06-p7665759 | A-genome specific (napus-rapa) | 0.9832536    | 0.5291513    | not scorable | not scorable | 0.9917355 | 0.7340617 |
| #### Bn-A06-p7670615 | A-genome specific (napus-rapa) | 0.9880383    | 0.7481787    | not scorable | not scorable | 1         | 0.8520585 |
| #### Bn-A06-p7670696 | A-genome specific (napus-rapa) | 0.9856459    | 0.7393058    | not scorable | not scorable | 0.9917355 | 0.7177194 |
| #### Bn-A06-p7701069 | A-genome specific (napus-rapa) | 0.9928229    | 0.4459396    | not scorable | not scorable | 0.9917355 | 0.8329642 |
| #### Bn-A06-p7703242 | A-genome specific (napus-rapa) | 0.9976076    | 0.6942626    | not scorable | not scorable | 0.9752066 | 0.6181659 |
| #### Bn-A06-p7707699 | A-genome specific (napus-rapa) | 0.9784689    | 0.7506766    | not scorable | not scorable | 0.9586777 | 0.62341   |
| #### Bn-A06-p7726350 | A-genome specific (napus-rapa) | 0.9856459    | 0.3686921    | not scorable | not scorable | 0.9917355 | 0.6928262 |
| #### Bn-A06-p7771695 | A-genome specific (napus-rapa) | 1            | 0.4528087    | not scorable | not scorable | 1         | 0.7281643 |
| #### Bn-A06-p781674  | A-genome specific (napus-rapa) | 0.9784689    | 0.7261688    | not scorable | not scorable | 0.9917355 | 0.7341337 |
| #### Bn-A06-p7857624 | A-genome specific (napus-rapa) | 0.9976076    | 0.6043352    | not scorable | not scorable | 0.9834711 | 0.5806887 |
| #### Bn-A06-p7927622 | A-genome specific (napus-rapa) | 0.9976076    | 0.8591483    | not scorable | not scorable | 0.9917355 | 0.7979692 |
| #### Bn-A06-p7927767 | A-genome specific (napus-rapa) | 0.9928229    | 0.6218389    | not scorable | not scorable | 0.9917355 | 0.636774  |
| #### Bn-A06-p7928380 | A-genome specific (napus-rapa) | 0.9952153    | 0.7224781    | not scorable | not scorable | 0.9917355 | 0.6963905 |
| #### Bn-A06-p7931177 | A-genome specific (napus-rapa) | 0.9952153    | 0.8006565    | not scorable | not scorable | 0.9834711 | 0.8400385 |
| #### Bn-A06-p7949147 | A-genome specific (napus-rapa) | 0.9976076    | 0.64635      | not scorable | not scorable | 1         | 0.6251695 |
| #### Bn-A06-p7959476 | A-genome specific (napus-rapa) | 0.9952153    | 0.6038088    | not scorable | not scorable | 0.9917355 | 0.7815634 |
| #### Bn-A06-p7962905 | A-genome specific (napus-rapa) | 1            | 0.7824205    | not scorable | not scorable | 1         | 0.7591364 |
| #### Bn-A06-p7965038 | A-genome specific (napus-rapa) | 1            | 0.8303661    | not scorable | not scorable | 1         | 0.7371922 |
| #### Bn-A06-p7965415 | A-genome specific (napus-rapa) | 0.9952153    | 0.6319914    | not scorable | not scorable | 0.9752066 | 0.7306941 |
| #### Bn-A06-p7973826 | A-genome specific (napus-rapa) | 0.9976076    | 0.7360837    | not scorable | not scorable | 1         | 0.7910354 |
| #### Bn-A06-p7974986 | A-genome specific (napus-rapa) | 0.9952153    | 0.8261133    | not scorable | not scorable | 1         | 0.700118  |
| #### Bn-A06-p798821  | A-genome specific (napus-rapa) | 0.9880383    | 0.5344437    | not scorable | not scorable | 1         | 0.756673  |
| #### Bn-A06-p7993829 | A-genome specific (napus-rapa) | 0.9856459    | 0.4986058    | not scorable | not scorable | 0.9917355 | 0.718823  |
| #### Bn-A06-p8006619 | A-genome specific (napus-rapa) | 0.9928229    | 0.5059268    | not scorable | not scorable | 0.9917355 | 0.8476244 |
| #### Bn-A06-p8010125 | A-genome specific (napus-rapa) | 1            | 0.7453048    | not scorable | not scorable | 1         | 0.78628   |

|                      |                                |              |              |              |              |              |              |
|----------------------|--------------------------------|--------------|--------------|--------------|--------------|--------------|--------------|
| #### Bn-A06-p8010345 | A-genome specific (napus-rapa) | 0.9976076    | 0.7271531    | not scorable | not scorable | 0.9917355    | 0.7498688    |
| #### Bn-A06-p8021875 | A-genome specific (napus-rapa) | 1            | 0.8627425    | not scorable | not scorable | 1            | 0.7346438    |
| #### Bn-A06-p8022058 | A-genome specific (napus-rapa) | 0.9952153    | 0.7125445    | not scorable | not scorable | 1            | 0.7725891    |
| #### Bn-A06-p8033701 | A-genome specific (napus-rapa) | 1            | 0.4554698    | not scorable | not scorable | 1            | 0.7555723    |
| #### Bn-A06-p8042439 | A-genome specific (napus-rapa) | 0.9952153    | 0.5206185    | not scorable | not scorable | 1            | 0.5801746    |
| #### Bn-A06-p8042901 | A-genome specific (napus-rapa) | 0.9928229    | 0.3715546    | not scorable | not scorable | 0.9917355    | 0.7631211    |
| #### Bn-A06-p8043214 | A-genome specific (napus-rapa) | 0.9952153    | 0.7848541    | not scorable | not scorable | 0.9917355    | 0.7508301    |
| #### Bn-A06-p8047893 | A-genome specific (rapa only)  | not scorable | not scorable | not scorable | not scorable | 1            | 0.7770287    |
| #### Bn-A06-p8080390 | A-genome specific (napus-rapa) | 0.9928229    | 0.3687741    | not scorable | not scorable | 0.9834711    | 0.7739986    |
| #### Bn-A06-p8080666 | napus specific                 | 0.9928229    | 0.8253247    | not scorable | not scorable | not scorable | not scorable |
| #### Bn-A06-p8090520 | A-genome specific (napus-rapa) | 1            | 0.4287416    | not scorable | not scorable | 1            | 0.8079966    |
| #### Bn-A06-p8104956 | A-genome specific (napus-rapa) | 0.923445     | 0.8021875    | not scorable | not scorable | 1            | 0.7429392    |
| #### Bn-A06-p8109713 | A-genome specific (napus-rapa) | 1            | 0.420775     | not scorable | not scorable | 0.9834711    | 0.7134138    |
| #### Bn-A06-p8123266 | A-genome specific (napus-rapa) | 1            | 0.5668162    | not scorable | not scorable | 0.9834711    | 0.7489746    |
| #### Bn-A06-p8180116 | all not scorable               | not scorable | not scorable | not scorable | not scorable | not scorable | not scorable |
| #### Bn-A06-p8199618 | A-genome specific (napus-rapa) | 1            | 0.7869915    | not scorable | not scorable | 0.9834711    | 0.7123824    |
| #### Bn-A06-p8200169 | napus specific                 | 0.9832536    | 0.3136196    | not scorable | not scorable | not scorable | not scorable |
| #### Bn-A06-p8201495 | A-genome specific (napus-rapa) | 0.9952153    | 0.7663024    | not scorable | not scorable | 0.9834711    | 0.6848013    |
| #### Bn-A06-p8201581 | A-genome specific (napus-rapa) | 0.9688995    | 0.3584872    | not scorable | not scorable | 1            | 0.6821865    |
| #### Bn-A06-p8221017 | A-genome specific (rapa only)  | not scorable | not scorable | not scorable | not scorable | 0.9834711    | 0.6096008    |
| #### Bn-A06-p8230834 | A-genome specific (napus-rapa) | 0.9952153    | 0.487226     | not scorable | not scorable | 1            | 0.8310654    |
| #### Bn-A06-p8252024 | A-genome specific (napus-rapa) | 0.9832536    | 0.5355949    | not scorable | not scorable | 1            | 0.6997741    |
| #### Bn-A06-p8253130 | A-genome specific (napus-rapa) | 1            | 0.6031866    | not scorable | not scorable | 0.9917355    | 0.7462972    |
| #### Bn-A06-p825900  | A-genome specific (napus-rapa) | 0.9904306    | 0.6397247    | not scorable | not scorable | 0.9834711    | 0.7326356    |
| #### Bn-A06-p8263325 | A-genome specific (napus-rapa) | 0.9976076    | 0.8788835    | not scorable | not scorable | 0.9752066    | 0.7745171    |
| #### Bn-A06-p8277116 | A-genome specific (napus-rapa) | 1            | 0.7974426    | not scorable | not scorable | 0.9834711    | 0.7551317    |
| #### Bn-A06-p8356542 | A-genome specific (napus-rapa) | 1            | 0.363855     | not scorable | not scorable | 0.9834711    | 0.654634     |
| #### Bn-A06-p836912  | A-genome specific (napus-rapa) | 0.9904306    | 0.391557     | not scorable | not scorable | 0.9917355    | 0.7546939    |
| #### Bn-A06-p8402978 | A-genome specific (napus-rapa) | 0.9904306    | 0.773268     | not scorable | not scorable | 0.9917355    | 0.8280516    |
| #### Bn-A06-p8416265 | A-genome specific (napus-rapa) | 0.9952153    | 0.6399888    | not scorable | not scorable | 0.9669421    | 0.7490661    |
| #### Bn-A06-p8426071 | A-genome specific (napus-rapa) | 0.9880383    | 0.6530814    | not scorable | not scorable | 0.9338843    | 0.6599204    |
| #### Bn-A06-p8430642 | A-genome specific (napus-rapa) | 0.8923445    | 0.739759     | not scorable | not scorable | 0.7933884    | 0.7444415    |
| #### Bn-A06-p8434088 | A-genome specific (napus-rapa) | 0.9856459    | 0.3958735    | not scorable | not scorable | 0.9917355    | 0.7582384    |

|                      |                                |              |              |              |              |              |              |
|----------------------|--------------------------------|--------------|--------------|--------------|--------------|--------------|--------------|
| #### Bn-A06-p8446816 | A-genome specific (napus-rapa) | 0.9904306    | 0.8187988    | not scorable | not scorable | 0.9917355    | 0.7036288    |
| #### Bn-A06-p846095  | A-genome specific (napus-rapa) | 0.9904306    | 0.7046363    | not scorable | not scorable | 0.9917355    | 0.7630534    |
| #### Bn-A06-p8472457 | A-genome specific (napus-rapa) | 0.9856459    | 0.5090325    | not scorable | not scorable | 0.9917355    | 0.8206638    |
| #### Bn-A06-p8475485 | A-genome specific (napus-rapa) | 0.9856459    | 0.7425955    | not scorable | not scorable | 0.9504132    | 0.4298494    |
| #### Bn-A06-p8491315 | all not scorable               | not scorable | not scorable | not scorable | not scorable | not scorable | not scorable |
| #### Bn-A06-p8527596 | A-genome specific (napus-rapa) | 0.9880383    | 0.7412711    | not scorable | not scorable | 1            | 0.9095699    |
| #### Bn-A06-p8536023 | A-genome specific (napus-rapa) | 0.9952153    | 0.444591     | not scorable | not scorable | 0.9917355    | 0.7939944    |
| #### Bn-A06-p853722  | A-genome specific (napus-rapa) | 0.9976076    | 0.5120677    | not scorable | not scorable | 1            | 0.6654295    |
| #### Bn-A06-p853974  | A-genome specific (napus-rapa) | 1            | 0.8793069    | not scorable | not scorable | 1            | 0.8552241    |
| #### Bn-A06-p8539863 | A-genome specific (rapa only)  | not scorable | not scorable | not scorable | not scorable | 0.9917355    | 0.7202918    |
| #### Bn-A06-p8545758 | A-genome specific (napus-rapa) | 0.9210526    | 0.5521348    | not scorable | not scorable | 0.7024794    | 0.8477408    |
| #### Bn-A06-p8546149 | A-genome specific (napus-rapa) | 0.9808612    | 0.8225061    | not scorable | not scorable | 0.9834711    | 0.7867528    |
| #### Bn-A06-p8546698 | A-genome specific (napus-rapa) | 0.9952153    | 0.7134678    | not scorable | not scorable | 0.9917355    | 0.7558222    |
| #### Bn-A06-p8573607 | A-genome specific (napus-rapa) | 1            | 0.8135551    | not scorable | not scorable | 0.9917355    | 0.7033637    |
| #### Bn-A06-p8581295 | A-genome specific (napus-rapa) | 1            | 0.8893709    | not scorable | not scorable | 1            | 0.6814563    |
| #### Bn-A06-p8593423 | A-genome specific (napus-rapa) | 0.9952153    | 0.8815182    | not scorable | not scorable | 0.9917355    | 0.7998192    |
| #### Bn-A06-p8600040 | A-genome specific (napus-rapa) | 0.9952153    | 0.9053548    | not scorable | not scorable | 1            | 0.8277064    |
| #### Bn-A06-p8601048 | A-genome specific (napus-rapa) | 0.9832536    | 0.7700768    | not scorable | not scorable | 0.9504132    | 0.6790906    |
| #### Bn-A06-p8601089 | A-genome specific (napus-rapa) | 0.9880383    | 0.7961024    | not scorable | not scorable | 0.9834711    | 0.8002591    |
| #### Bn-A06-p860631  | A-genome specific (napus-rapa) | 0.9952153    | 0.296467     | not scorable | not scorable | 1            | 0.7193777    |
| #### Bn-A06-p8614872 | A-genome specific (napus-rapa) | 0.9952153    | 0.7033637    | not scorable | not scorable | 0.9834711    | 0.6675972    |
| #### Bn-A06-p8615815 | A-genome specific (napus-rapa) | 1            | 0.4474145    | not scorable | not scorable | 0.9834711    | 0.7547536    |
| #### Bn-A06-p8633786 | A-genome specific (napus-rapa) | 1            | 0.4518997    | not scorable | not scorable | 0.9917355    | 0.7741535    |
| #### Bn-A06-p8634166 | A-genome specific (napus-rapa) | 0.9928229    | 0.5175565    | not scorable | not scorable | 0.9917355    | 0.367715     |
| #### Bn-A06-p8634648 | A-genome specific (napus-rapa) | 1            | 0.6869938    | not scorable | not scorable | 1            | 0.7032407    |
| #### Bn-A06-p8643665 | all not scorable               | not scorable | not scorable | not scorable | not scorable | not scorable | not scorable |
| #### Bn-A06-p8697187 | A-genome specific (napus-rapa) | 0.9904306    | 0.6852317    | not scorable | not scorable | 1            | 0.6134477    |
| #### Bn-A06-p8697193 | A-genome specific (napus-rapa) | 0.9904306    | 0.7807755    | not scorable | not scorable | 1            | 0.7139078    |
| #### Bn-A06-p8732612 | A-genome specific (napus-rapa) | 0.9952153    | 0.4394026    | not scorable | not scorable | 1            | 0.745912     |
| #### Bn-A06-p87536   | A-genome specific (napus-rapa) | 0.9976076    | 0.8133361    | not scorable | not scorable | 0.9834711    | 0.7622249    |
| #### Bn-A06-p8766088 | A-genome specific (napus-rapa) | 0.9641148    | 0.7963916    | not scorable | not scorable | 0.7851239    | 0.787094     |
| #### Bn-A06-p8784719 | A-genome specific (napus-rapa) | 0.7559808    | 0.7532881    | not scorable | not scorable | 0.7520661    | 0.7198685    |
| #### Bn-A06-p8791868 | genome unspecific (all in)     | 0.9928229    | 0.2613828    | 0.9844961    | 0.6190215    | 1            | 0.8600073    |

|                      |                                |              |              |              |              |              |              |
|----------------------|--------------------------------|--------------|--------------|--------------|--------------|--------------|--------------|
| #### Bn-A06-p8792429 | A-genome specific (napus-rapa) | 0.9832536    | 0.2087944    | not scorable | not scorable | 0.9421487    | 0.35186      |
| #### Bn-A06-p8792843 | A-genome specific (napus-rapa) | 0.8827751    | 0.5730997    | not scorable | not scorable | 0.9917355    | 0.7439774    |
| #### Bn-A06-p8809314 | A-genome specific (napus-rapa) | 0.9808612    | 0.4158321    | not scorable | not scorable | 0.9917355    | 0.6967734    |
| #### Bn-A06-p8810900 | napus specific                 | 0.9880383    | 0.3871987    | not scorable | not scorable | not scorable | not scorable |
| #### Bn-A06-p8811363 | A-genome specific (napus-rapa) | 0.9641148    | 0.6252196    | not scorable | not scorable | 0.9834711    | 0.7451351    |
| #### Bn-A06-p8825744 | all not scorable               | not scorable | not scorable | not scorable | not scorable | not scorable | not scorable |
| #### Bn-A06-p8833793 | A-genome specific (napus-rapa) | 0.9641148    | 0.7367855    | not scorable | not scorable | 1            | 0.7748716    |
| #### Bn-A06-p8834741 | A-genome specific (napus-rapa) | 0.9976076    | 0.7617482    | not scorable | not scorable | 1            | 0.7561574    |
| #### Bn-A06-p8837251 | A-genome specific (napus-rapa) | 0.9952153    | 0.7679784    | not scorable | not scorable | 0.9917355    | 0.7365656    |
| #### Bn-A06-p8837290 | A-genome specific (napus-rapa) | 0.9904306    | 0.4105275    | not scorable | not scorable | 0.9917355    | 0.6865597    |
| #### Bn-A06-p8842980 | A-genome specific (napus-rapa) | 1            | 0.8154504    | not scorable | not scorable | 0.9917355    | 0.9073917    |
| #### Bn-A06-p8854250 | napus specific                 | 0.9760765    | 0.6625077    | not scorable | not scorable | not scorable | not scorable |
| #### Bn-A06-p8864234 | A-genome specific (napus-rapa) | 1            | 0.7239239    | not scorable | not scorable | 1            | 0.8250008    |
| #### Bn-A06-p8871997 | A-genome specific (napus-rapa) | 0.9976076    | 0.7125587    | not scorable | not scorable | 0.9752066    | 0.7403259    |
| #### Bn-A06-p8907559 | A-genome specific (napus-rapa) | 0.8014354    | 0.6522732    | not scorable | not scorable | 0.9669421    | 0.599072     |
| #### Bn-A06-p89131   | A-genome specific (napus-rapa) | 0.9976076    | 0.3594906    | not scorable | not scorable | 1            | 0.6619558    |
| #### Bn-A06-p8923160 | A-genome specific (napus-rapa) | 1            | 0.6661148    | not scorable | not scorable | 0.9917355    | 0.8136466    |
| #### Bn-A06-p8948420 | A-genome specific (napus-rapa) | 0.9952153    | 0.8345175    | not scorable | not scorable | 0.9752066    | 0.7490964    |
| #### Bn-A06-p8953809 | A-genome specific (napus-rapa) | 0.9976076    | 0.7193652    | not scorable | not scorable | 0.9586777    | 0.6688356    |
| #### Bn-A06-p8968750 | A-genome specific (napus-rapa) | 0.9976076    | 0.4763359    | not scorable | not scorable | 0.9834711    | 0.6559247    |
| #### Bn-A06-p8972533 | A-genome specific (napus-rapa) | 0.9976076    | 0.7473825    | not scorable | not scorable | 0.9834711    | 0.7482209    |
| #### Bn-A06-p8987272 | A-genome specific (napus-rapa) | 0.9784689    | 0.7249341    | not scorable | not scorable | 1            | 0.7784596    |
| #### Bn-A06-p8987370 | A-genome specific (napus-rapa) | 0.9856459    | 0.7370433    | not scorable | not scorable | 1            | 0.7164072    |
| #### Bn-A06-p8988728 | A-genome specific (napus-rapa) | 0.9808612    | 0.365689     | not scorable | not scorable | 1            | 0.7103773    |
| #### Bn-A06-p8988945 | A-genome specific (napus-rapa) | 0.9904306    | 0.7618107    | not scorable | not scorable | 0.9917355    | 0.7622277    |
| #### Bn-A06-p8992364 | A-genome specific (napus-rapa) | 0.9736842    | 0.6813199    | not scorable | not scorable | 0.9834711    | 0.7027664    |
| #### Bn-A06-p899811  | A-genome specific (napus-rapa) | 1            | 0.7295138    | not scorable | not scorable | 0.9917355    | 0.7446984    |
| #### Bn-A06-p8998572 | A-genome specific (napus-rapa) | 0.9688995    | 0.7229267    | not scorable | not scorable | 0.9917355    | 0.6339609    |
| #### Bn-A06-p9009861 | A-genome specific (napus-rapa) | 0.9856459    | 0.7236698    | not scorable | not scorable | 1            | 0.8218431    |
| #### Bn-A06-p9010952 | A-genome specific (napus-rapa) | 0.9832536    | 0.7337865    | not scorable | not scorable | 1            | 0.7160262    |
| #### Bn-A06-p9013844 | A-genome specific (napus-rapa) | 0.9976076    | 0.7866828    | not scorable | not scorable | 0.9834711    | 0.7216479    |
| #### Bn-A06-p9020967 | all not scorable               | not scorable | not scorable | not scorable | not scorable | not scorable | not scorable |
| #### Bn-A06-p9032267 | A-genome specific (napus-rapa) | 0.9497608    | 0.4514261    | not scorable | not scorable | 0.6859504    | 0.8461362    |

|                      |                                |           |           |              |              |           |           |
|----------------------|--------------------------------|-----------|-----------|--------------|--------------|-----------|-----------|
| #### Bn-A06-p9064537 | A-genome specific (napus-rapa) | 0.9904306 | 0.7542888 | not scorable | not scorable | 1         | 0.7680644 |
| #### Bn-A06-p9065249 | A-genome specific (napus-rapa) | 0.9688995 | 0.506672  | not scorable | not scorable | 1         | 0.7462992 |
| #### Bn-A06-p9074653 | A-genome specific (napus-rapa) | 0.9904306 | 0.3152916 | not scorable | not scorable | 0.9834711 | 0.6787446 |
| #### Bn-A06-p9076011 | A-genome specific (napus-rapa) | 0.9880383 | 0.8102883 | not scorable | not scorable | 0.9917355 | 0.7971225 |
| #### Bn-A06-p908271  | A-genome specific (napus-rapa) | 0.9952153 | 0.4764628 | not scorable | not scorable | 0.9752066 | 0.7328739 |
| #### Bn-A06-p9087487 | A-genome specific (napus-rapa) | 0.9808612 | 0.4073864 | not scorable | not scorable | 1         | 0.7763577 |
| #### Bn-A06-p9090817 | A-genome specific (napus-rapa) | 0.8014354 | 0.6809666 | not scorable | not scorable | 1         | 0.8929767 |
| #### Bn-A06-p9094415 | A-genome specific (napus-rapa) | 0.9880383 | 0.8081571 | not scorable | not scorable | 1         | 0.7588082 |
| #### Bn-A06-p9094772 | A-genome specific (napus-rapa) | 0.9617225 | 0.3190996 | not scorable | not scorable | 0.9917355 | 0.8091982 |
| #### Bn-A06-p9119114 | A-genome specific (napus-rapa) | 0.9665072 | 0.7686179 | not scorable | not scorable | 0.5289256 | 0.6385074 |
| #### Bn-A06-p9127880 | A-genome specific (napus-rapa) | 0.9928229 | 0.4615399 | not scorable | not scorable | 0.9504132 | 0.6811894 |
| #### Bn-A06-p9128417 | A-genome specific (napus-rapa) | 0.9880383 | 0.7574418 | not scorable | not scorable | 1         | 0.8113266 |
| #### Bn-A06-p9132494 | A-genome specific (napus-rapa) | 0.9665072 | 0.7705088 | not scorable | not scorable | 0.9917355 | 0.7819465 |
| #### Bn-A06-p9135772 | A-genome specific (napus-rapa) | 0.9808612 | 0.4681594 | not scorable | not scorable | 1         | 0.6431347 |
| #### Bn-A06-p918871  | A-genome specific (napus-rapa) | 1         | 0.7368786 | not scorable | not scorable | 1         | 0.7716759 |
| #### Bn-A06-p9248676 | A-genome specific (napus-rapa) | 0.9976076 | 0.7847756 | not scorable | not scorable | 1         | 0.9516757 |
| #### Bn-A06-p9250298 | A-genome specific (napus-rapa) | 1         | 0.7340311 | not scorable | not scorable | 1         | 0.8782954 |
| #### Bn-A06-p9287101 | A-genome specific (napus-rapa) | 0.9736842 | 0.7885996 | not scorable | not scorable | 0.9504132 | 0.8847322 |
| #### Bn-A06-p9289355 | A-genome specific (napus-rapa) | 0.9784689 | 0.649493  | not scorable | not scorable | 1         | 0.6938407 |
| #### Bn-A06-p9291582 | A-genome specific (napus-rapa) | 0.9808612 | 0.7468674 | not scorable | not scorable | 0.9917355 | 0.732893  |
| #### Bn-A06-p9292257 | A-genome specific (napus-rapa) | 0.9593301 | 0.64912   | not scorable | not scorable | 0.9752066 | 0.7567658 |
| #### Bn-A06-p9299877 | A-genome specific (napus-rapa) | 0.9904306 | 0.4258188 | not scorable | not scorable | 0.9752066 | 0.785064  |
| #### Bn-A06-p9371495 | A-genome specific (napus-rapa) | 0.9880383 | 0.4789647 | not scorable | not scorable | 1         | 0.7742398 |
| #### Bn-A06-p9376280 | A-genome specific (napus-rapa) | 0.9784689 | 0.4910668 | not scorable | not scorable | 1         | 0.742775  |
| #### Bn-A06-p9384998 | A-genome specific (napus-rapa) | 0.9952153 | 0.781423  | not scorable | not scorable | 1         | 0.6921729 |
| #### Bn-A06-p938677  | A-genome specific (napus-rapa) | 0.9976076 | 0.8948976 | not scorable | not scorable | 1         | 0.8687926 |
| #### Bn-A06-p9390167 | A-genome specific (napus-rapa) | 0.9856459 | 0.4404992 | not scorable | not scorable | 1         | 0.8825033 |
| #### Bn-A06-p9399854 | A-genome specific (napus-rapa) | 0.9856459 | 0.4068403 | not scorable | not scorable | 0.9917355 | 0.7239849 |
| #### Bn-A06-p9424836 | A-genome specific (napus-rapa) | 0.9808612 | 0.7048404 | not scorable | not scorable | 0.9752066 | 0.6775082 |
| #### Bn-A06-p9452981 | A-genome specific (napus-rapa) | 0.9784689 | 0.5772781 | not scorable | not scorable | 0.9834711 | 0.7906691 |
| #### Bn-A06-p945992  | A-genome specific (napus-rapa) | 1         | 0.7970591 | not scorable | not scorable | 0.9834711 | 0.7666498 |
| #### Bn-A06-p9465709 | A-genome specific (napus-rapa) | 0.9928229 | 0.5728965 | not scorable | not scorable | 0.9917355 | 0.6893093 |
| #### Bn-A06-p9475900 | A-genome specific (napus-rapa) | 0.9736842 | 0.7721094 | not scorable | not scorable | 0.9586777 | 0.584188  |

|                       |                                |              |              |              |              |              |              |
|-----------------------|--------------------------------|--------------|--------------|--------------|--------------|--------------|--------------|
| #### Bn-A06-p947740   | A-genome specific (napus-rapa) | 1            | 0.3453358    | not scorable | not scorable | 0.9752066    | 0.7699369    |
| #### Bn-A06-p9491200  | all not scorable               | not scorable | not scorable | not scorable | not scorable | not scorable | not scorable |
| #### Bn-A06-p9495829  | A-genome specific (napus-rapa) | 0.9976076    | 0.6509411    | not scorable | not scorable | 0.9752066    | 0.6330572    |
| #### Bn-A06-p9517147  | A-genome specific (napus-rapa) | 0.9928229    | 0.449397     | not scorable | not scorable | 0.9834711    | 0.7916672    |
| #### Bn-A06-p9562200  | A-genome specific (napus-rapa) | 0.9832536    | 0.8147897    | not scorable | not scorable | 0.9917355    | 0.7436233    |
| #### Bn-A06-p9593892  | A-genome specific (napus-rapa) | 0.9856459    | 0.7074167    | not scorable | not scorable | 1            | 0.7910751    |
| #### Bn-A06-p9630478  | A-genome specific (napus-rapa) | 1            | 0.5381303    | not scorable | not scorable | 1            | 0.9079718    |
| #### Bn-A06-p9665402  | A-genome specific (napus-rapa) | 1            | 0.7562175    | not scorable | not scorable | 1            | 0.7472873    |
| #### Bn-A06-p9684583  | napus specific                 | 0.9712918    | 0.6036651    | not scorable | not scorable | not scorable | not scorable |
| #### Bn-A06-p9721031  | A-genome specific (napus-rapa) | 1            | 0.4773201    | not scorable | not scorable | 1            | 0.8275167    |
| #### Bn-A06-p9722046  | A-genome specific (napus-rapa) | 1            | 0.4034955    | not scorable | not scorable | 1            | 0.7427956    |
| #### Bn-A06-p9753017  | A-genome specific (napus-rapa) | 0.9952153    | 0.4330621    | not scorable | not scorable | 0.9669421    | 0.7061977    |
| #### Bn-A06-p9936409  | A-genome specific (napus-rapa) | 0.9904306    | 0.7887537    | not scorable | not scorable | 0.9917355    | 0.7260514    |
| #### Bn-A06-p9940067  | A-genome specific (rapa only)  | not scorable | not scorable | not scorable | not scorable | 0.9917355    | 0.7692299    |
| #### Bn-A06-p9957408  | A-genome specific (napus-rapa) | 1            | 0.7673033    | not scorable | not scorable | 1            | 0.8992497    |
| #### Bn-A06-p999044   | A-genome specific (napus-rapa) | 0.9928229    | 0.5446894    | not scorable | not scorable | 0.9917355    | 0.7466469    |
| #### Bn-A07-p1000144  | napus specific                 | 0.9832536    | 0.7030742    | not scorable | not scorable | not scorable | not scorable |
| #### Bn-A07-p10003378 | A-genome specific (napus-rapa) | 0.9832536    | 0.4400946    | not scorable | not scorable | 0.9917355    | 0.8232507    |
| #### Bn-A07-p10004245 | A-genome specific (napus-rapa) | 0.9760765    | 0.3828363    | not scorable | not scorable | 0.9669421    | 0.7377849    |
| #### Bn-A07-p10010327 | A-genome specific (napus-rapa) | 1            | 0.5107161    | not scorable | not scorable | 1            | 0.7234927    |
| #### Bn-A07-p10022226 | A-genome specific (napus-rapa) | 0.9760765    | 0.8086737    | not scorable | not scorable | 0.9917355    | 0.7942771    |
| #### Bn-A07-p10033055 | A-genome specific (napus-rapa) | 0.9904306    | 0.5051163    | not scorable | not scorable | 1            | 0.7639591    |
| #### Bn-A07-p10037462 | A-genome specific (napus-rapa) | 0.9904306    | 0.3257784    | not scorable | not scorable | 0.9834711    | 0.7300316    |
| #### Bn-A07-p10092606 | A-genome specific (napus-rapa) | 0.9497608    | 0.5947958    | not scorable | not scorable | 1            | 0.8307117    |
| #### Bn-A07-p10099786 | A-genome specific (napus-rapa) | 0.9904306    | 0.5394347    | not scorable | not scorable | 0.9752066    | 0.7044645    |
| #### Bn-A07-p10100811 | A-genome specific (napus-rapa) | 0.9114832    | 0.6712766    | not scorable | not scorable | 0.9917355    | 0.7162023    |
| #### Bn-A07-p10101125 | napus specific                 | 0.8349282    | 0.7906627    | not scorable | not scorable | not scorable | not scorable |
| #### Bn-A07-p10128190 | A-genome specific (napus-rapa) | 0.9856459    | 0.4316159    | not scorable | not scorable | 1            | 0.8387704    |
| #### Bn-A07-p10144240 | A-genome specific (napus-rapa) | 0.9928229    | 0.4051692    | not scorable | not scorable | 0.9834711    | 0.8237943    |
| #### Bn-A07-p10169211 | A-genome specific (napus-rapa) | 0.9760765    | 0.6500944    | not scorable | not scorable | 1            | 0.7214502    |
| #### Bn-A07-p10181071 | napus specific                 | 0.9545454    | 0.3373226    | not scorable | not scorable | not scorable | not scorable |
| #### Bn-A07-p10188190 | A-genome specific (napus-rapa) | 0.8373206    | 0.2574344    | not scorable | not scorable | 0.9834711    | 0.8004208    |
| #### Bn-A07-p10194155 | A-genome specific (napus-rapa) | 0.9569378    | 0.773538     | not scorable | not scorable | 0.9917355    | 0.7087009    |



|                       |                                |           |           |              |              |              |              |
|-----------------------|--------------------------------|-----------|-----------|--------------|--------------|--------------|--------------|
| #### Bn-A07-p10195276 | A-genome specific (napus-rapa) | 0.9712918 | 0.8080677 | not scorable | not scorable | 0.9834711    | 0.7203173    |
| #### Bn-A07-p10200584 | A-genome specific (napus-rapa) | 0.9545454 | 0.7729049 | not scorable | not scorable | 0.9834711    | 0.7953927    |
| #### Bn-A07-p10204148 | napus specific                 | 0.8588517 | 0.8594629 | not scorable | not scorable | not scorable | not scorable |
| #### Bn-A07-p10204886 | A-genome specific (napus-rapa) | 0.9808612 | 0.7716988 | not scorable | not scorable | 0.9586777    | 0.7504917    |
| #### Bn-A07-p10207855 | A-genome specific (napus-rapa) | 1         | 0.797652  | not scorable | not scorable | 0.9917355    | 0.7321578    |
| #### Bn-A07-p10209077 | A-genome specific (napus-rapa) | 0.9976076 | 0.5259802 | not scorable | not scorable | 0.9917355    | 0.7337689    |
| #### Bn-A07-p10209154 | A-genome specific (napus-rapa) | 0.9880383 | 0.6168417 | not scorable | not scorable | 0.9752066    | 0.6473148    |
| #### Bn-A07-p10220287 | A-genome specific (napus-rapa) | 0.9617225 | 0.5396581 | not scorable | not scorable | 1            | 0.7205356    |
| #### Bn-A07-p10230704 | A-genome specific (napus-rapa) | 0.9090909 | 0.8450912 | not scorable | not scorable | 0.9834711    | 0.7082725    |
| #### Bn-A07-p10233337 | A-genome specific (napus-rapa) | 0.9904306 | 0.258117  | not scorable | not scorable | 0.9917355    | 0.6828811    |
| #### Bn-A07-p10236271 | genome unspecific (all in)     | 0.9688995 | 0.5956163 | 0.5813953    | 0.9610805    | 1            | 0.7952315    |
| #### Bn-A07-p10236552 | A-genome specific (napus-rapa) | 0.9880383 | 0.7825021 | not scorable | not scorable | 1            | 0.8054393    |
| #### Bn-A07-p10238917 | A-genome specific (napus-rapa) | 0.9832536 | 0.660195  | not scorable | not scorable | 0.9917355    | 0.6470035    |
| #### Bn-A07-p10253702 | A-genome specific (napus-rapa) | 0.9641148 | 0.8101985 | not scorable | not scorable | 1            | 0.7259361    |
| #### Bn-A07-p1026571  | A-genome specific (napus-rapa) | 0.9784689 | 0.8312935 | not scorable | not scorable | 0.9834711    | 0.7588103    |
| #### Bn-A07-p10281077 | A-genome specific (napus-rapa) | 0.9928229 | 0.3822278 | not scorable | not scorable | 1            | 0.8137217    |
| #### Bn-A07-p10282316 | A-genome specific (napus-rapa) | 0.9760765 | 0.4621585 | not scorable | not scorable | 0.9917355    | 0.7133769    |
| #### Bn-A07-p10282792 | A-genome specific (napus-rapa) | 0.9808612 | 0.472201  | not scorable | not scorable | 0.9917355    | 0.7516536    |
| #### Bn-A07-p10284031 | A-genome specific (napus-rapa) | 0.9928229 | 0.6170481 | not scorable | not scorable | 1            | 0.6856734    |
| #### Bn-A07-p10285778 | A-genome specific (napus-rapa) | 0.9904306 | 0.7788686 | not scorable | not scorable | 1            | 0.6951423    |
| #### Bn-A07-p10289778 | A-genome specific (napus-rapa) | 0.9760765 | 0.5783228 | not scorable | not scorable | 0.9752066    | 0.7828077    |
| #### Bn-A07-p10291035 | A-genome specific (napus-rapa) | 0.9880383 | 0.7499277 | not scorable | not scorable | 0.9752066    | 0.6592327    |
| #### Bn-A07-p10297311 | A-genome specific (napus-rapa) | 0.9928229 | 0.806744  | not scorable | not scorable | 0.9917355    | 0.7024059    |
| #### Bn-A07-p10299745 | A-genome specific (napus-rapa) | 1         | 0.7414557 | not scorable | not scorable | 0.9834711    | 0.7570167    |
| #### Bn-A07-p10337326 | A-genome specific (napus-rapa) | 0.9760765 | 0.6538827 | not scorable | not scorable | 1            | 0.8372683    |
| #### Bn-A07-p10340211 | A-genome specific (napus-rapa) | 0.9928229 | 0.7633532 | not scorable | not scorable | 0.9917355    | 0.7580311    |
| #### Bn-A07-p10347794 | A-genome specific (napus-rapa) | 0.9736842 | 0.8116788 | not scorable | not scorable | 0.9917355    | 0.7942811    |
| #### Bn-A07-p10357533 | A-genome specific (napus-rapa) | 0.9665072 | 0.7845142 | not scorable | not scorable | 0.9834711    | 0.8029232    |
| #### Bn-A07-p10357605 | A-genome specific (napus-rapa) | 0.9712918 | 0.8000658 | not scorable | not scorable | 0.9917355    | 0.7191126    |
| #### Bn-A07-p10357942 | A-genome specific (napus-rapa) | 0.9784689 | 0.5425604 | not scorable | not scorable | 0.9917355    | 0.800302     |
| #### Bn-A07-p10367676 | A-genome specific (napus-rapa) | 0.9641148 | 0.6911914 | not scorable | not scorable | 0.9586777    | 0.6523784    |
| #### Bn-A07-p10368959 | A-genome specific (napus-rapa) | 0.9617225 | 0.7580469 | not scorable | not scorable | 1            | 0.8238428    |
| #### Bn-A07-p10370541 | A-genome specific (napus-rapa) | 0.9784689 | 0.7503309 | not scorable | not scorable | 0.9752066    | 0.6444455    |

|                       |                                   |              |              |              |              |              |              |           |
|-----------------------|-----------------------------------|--------------|--------------|--------------|--------------|--------------|--------------|-----------|
| #### Bn-A07-p10379059 | genome unspecific (oleracea-rapa) | not scorable | not scorable |              | 1            | 0.7631939    | 1            | 0.8015686 |
| #### Bn-A07-p10382757 | A-genome specific (napus-rapa)    | 0.9760765    | 0.8478801    | not scorable | not scorable | 0.9834711    | 0.6951214    |           |
| #### Bn-A07-p10388044 | A-genome specific (napus-rapa)    | 0.9066986    | 0.7685952    | not scorable | not scorable | 0.9917355    | 0.7223058    |           |
| #### Bn-A07-p10398999 | A-genome specific (napus-rapa)    | 0.9593301    | 0.6591529    | not scorable | not scorable | 1            | 0.8348718    |           |
| #### Bn-A07-p10399235 | A-genome specific (napus-rapa)    | 0.9832536    | 0.5935611    | not scorable | not scorable | 1            | 0.7924162    |           |
| #### Bn-A07-p10400825 | A-genome specific (napus-rapa)    | 0.9736842    | 0.5856664    | not scorable | not scorable | 1            | 0.7331572    |           |
| #### Bn-A07-p10401133 | A-genome specific (napus-rapa)    | 0.9880383    | 0.2920131    | not scorable | not scorable | 0.9917355    | 0.7248387    |           |
| #### Bn-A07-p1040165  | napus specific                    | 0.9617225    | 0.2330097    | not scorable | not scorable | not scorable | not scorable |           |
| #### Bn-A07-p10409623 | A-genome specific (napus-rapa)    | 0.9736842    | 0.7755846    | not scorable | not scorable | 0.9917355    | 0.7713895    |           |
| #### Bn-A07-p10414624 | A-genome specific (napus-rapa)    | 0.9760765    | 0.5992252    | not scorable | not scorable | 1            | 0.6584523    |           |
| #### Bn-A07-p1041609  | napus specific                    | 0.9425837    | 0.4814549    | not scorable | not scorable | not scorable | not scorable |           |
| #### Bn-A07-p10418835 | A-genome specific (napus-rapa)    | 0.9904306    | 0.7786703    | not scorable | not scorable | 0.9834711    | 0.6165605    |           |
| #### Bn-A07-p10421977 | all not scorable                  | not scorable | not scorable | not scorable | not scorable | not scorable | not scorable |           |
| #### Bn-A07-p10430301 | A-genome specific (napus-rapa)    | 0.9952153    | 0.8393157    | not scorable | not scorable | 1            | 0.7574543    |           |
| #### Bn-A07-p10437749 | A-genome specific (napus-rapa)    | 0.9952153    | 0.786519     | not scorable | not scorable | 0.9917355    | 0.7226665    |           |
| #### Bn-A07-p10437970 | A-genome specific (rapa only)     | not scorable | not scorable | not scorable | not scorable | 1            | 0.8235375    |           |
| #### Bn-A07-p10451411 | A-genome specific (napus-rapa)    | 0.9880383    | 0.4591164    | not scorable | not scorable | 0.9917355    | 0.666443     |           |
| #### Bn-A07-p10455192 | A-genome specific (napus-rapa)    | 0.9976076    | 0.467607     | not scorable | not scorable | 0.9917355    | 0.7266362    |           |
| #### Bn-A07-p10466052 | napus specific                    | 0.8564593    | 0.5604491    | not scorable | not scorable | not scorable | not scorable |           |
| #### Bn-A07-p10468928 | genome unspecific (all in)        | 0.9569378    | 0.1840665    | 0.8449612    | 0.2580729    | 1            | 0.9175813    |           |
| #### Bn-A07-p10471024 | napus specific                    | 0.9928229    | 0.3386299    | not scorable | not scorable | not scorable | not scorable |           |
| #### Bn-A07-p10473511 | all not scorable                  | not scorable | not scorable | not scorable | not scorable | not scorable | not scorable |           |
| #### Bn-A07-p10483339 | A-genome specific (napus-rapa)    | 0.9880383    | 0.3982324    | not scorable | not scorable | 0.9917355    | 0.6891719    |           |
| #### Bn-A07-p10486045 | A-genome specific (napus-rapa)    | 0.9928229    | 0.7949625    | not scorable | not scorable | 0.9917355    | 0.7632396    |           |
| #### Bn-A07-p10494571 | genome unspecific (all in)        | 0.9952153    | 0.702469     |              | 1            | 0.6852042    | 1            | 0.7929599 |
| #### Bn-A07-p10501097 | A-genome specific (napus-rapa)    | 0.9976076    | 0.7775482    | not scorable | not scorable | 1            | 0.8534384    |           |
| #### Bn-A07-p10501168 | A-genome specific (napus-rapa)    | 0.9976076    | 0.8273862    | not scorable | not scorable | 1            | 0.805071     |           |
| #### Bn-A07-p10532652 | A-genome specific (napus-rapa)    | 0.9497608    | 0.5310034    | not scorable | not scorable | 1            | 0.7437766    |           |
| #### Bn-A07-p10554944 | A-genome specific (napus-rapa)    | 0.9880383    | 0.7576961    | not scorable | not scorable | 0.9917355    | 0.8582797    |           |
| #### Bn-A07-p10557165 | A-genome specific (napus-rapa)    | 0.9712918    | 0.6584936    | not scorable | not scorable | 1            | 0.6718407    |           |
| #### Bn-A07-p10557557 | A-genome specific (napus-rapa)    | 0.9665072    | 0.7672371    | not scorable | not scorable | 0.9752066    | 0.7709971    |           |
| #### Bn-A07-p10557559 | A-genome specific (napus-rapa)    | 0.9904306    | 0.7776352    | not scorable | not scorable | 0.9752066    | 0.7267705    |           |
| #### Bn-A07-p10568144 | A-genome specific (napus-rapa)    | 0.9952153    | 0.7360916    | not scorable | not scorable | 1            | 0.7307907    |           |

|                       |                                |              |              |              |              |           |           |
|-----------------------|--------------------------------|--------------|--------------|--------------|--------------|-----------|-----------|
| #### Bn-A07-p10573729 | A-genome specific (napus-rapa) | 0.9976076    | 0.7612108    | not scorable | not scorable | 0.9917355 | 0.7604988 |
| #### Bn-A07-p10573931 | A-genome specific (napus-rapa) | 1            | 0.7512472    | not scorable | not scorable | 0.9752066 | 0.8229404 |
| #### Bn-A07-p10584018 | A-genome specific (napus-rapa) | 1            | 0.7644813    | not scorable | not scorable | 0.9917355 | 0.8124008 |
| #### Bn-A07-p10635069 | A-genome specific (napus-rapa) | 0.9784689    | 0.7863923    | not scorable | not scorable | 1         | 0.8147714 |
| #### Bn-A07-p10635266 | A-genome specific (rapa only)  | not scorable | not scorable | not scorable | not scorable | 1         | 0.8525137 |
| #### Bn-A07-p10650508 | A-genome specific (rapa only)  | not scorable | not scorable | not scorable | not scorable | 1         | 0.8071225 |
| #### Bn-A07-p10651899 | A-genome specific (napus-rapa) | 0.9712918    | 0.4629203    | not scorable | not scorable | 1         | 0.678006  |
| #### Bn-A07-p10652292 | A-genome specific (napus-rapa) | 0.9760765    | 0.5951942    | not scorable | not scorable | 1         | 0.7308967 |
| #### Bn-A07-p10652962 | A-genome specific (napus-rapa) | 0.9712918    | 0.7394649    | not scorable | not scorable | 1         | 0.7670928 |
| #### Bn-A07-p10653042 | A-genome specific (napus-rapa) | 0.9856459    | 0.7711002    | not scorable | not scorable | 1         | 0.7826723 |
| #### Bn-A07-p10667459 | A-genome specific (napus-rapa) | 1            | 0.7499742    | not scorable | not scorable | 1         | 0.9164452 |
| #### Bn-A07-p10672691 | A-genome specific (napus-rapa) | 0.9808612    | 0.4602965    | not scorable | not scorable | 1         | 0.7898963 |
| #### Bn-A07-p10673477 | A-genome specific (napus-rapa) | 1            | 0.4884165    | not scorable | not scorable | 1         | 0.7398688 |
| #### Bn-A07-p10673700 | A-genome specific (napus-rapa) | 0.9832536    | 0.4432534    | not scorable | not scorable | 0.9917355 | 0.6491978 |
| #### Bn-A07-p10675102 | A-genome specific (napus-rapa) | 0.9952153    | 0.5503539    | not scorable | not scorable | 1         | 0.7529491 |
| #### Bn-A07-p10725832 | A-genome specific (napus-rapa) | 0.9976076    | 0.7371951    | not scorable | not scorable | 1         | 0.6616417 |
| #### Bn-A07-p10729654 | A-genome specific (napus-rapa) | 0.9808612    | 0.6824238    | not scorable | not scorable | 0.9504132 | 0.700309  |
| #### Bn-A07-p10733528 | A-genome specific (napus-rapa) | 0.9904306    | 0.3415661    | not scorable | not scorable | 0.9917355 | 0.6960582 |
| #### Bn-A07-p10750190 | A-genome specific (napus-rapa) | 1            | 0.6800549    | not scorable | not scorable | 0.9586777 | 0.4128169 |
| #### Bn-A07-p10755129 | A-genome specific (napus-rapa) | 0.9665072    | 0.2944556    | not scorable | not scorable | 0.9917355 | 0.5621815 |
| #### Bn-A07-p10775694 | A-genome specific (napus-rapa) | 0.9928229    | 0.7447246    | not scorable | not scorable | 1         | 0.7961426 |
| #### Bn-A07-p10780571 | A-genome specific (napus-rapa) | 0.9928229    | 0.6896733    | not scorable | not scorable | 0.9834711 | 0.7162943 |
| #### Bn-A07-p107832   | A-genome specific (napus-rapa) | 0.9904306    | 0.3962642    | not scorable | not scorable | 0.9917355 | 0.8218104 |
| #### Bn-A07-p10798522 | A-genome specific (napus-rapa) | 0.930622     | 0.6700338    | not scorable | not scorable | 0.9586777 | 0.7089143 |
| #### Bn-A07-p10800383 | A-genome specific (napus-rapa) | 0.9904306    | 0.7655084    | not scorable | not scorable | 0.9917355 | 0.774724  |
| #### Bn-A07-p108234   | A-genome specific (napus-rapa) | 1            | 0.7853755    | not scorable | not scorable | 0.9917355 | 0.7949628 |
| #### Bn-A07-p10837849 | A-genome specific (rapa only)  | not scorable | not scorable | not scorable | not scorable | 0.9752066 | 0.7768493 |
| #### Bn-A07-p10847704 | A-genome specific (napus-rapa) | 0.9712918    | 0.8063903    | not scorable | not scorable | 0.9917355 | 0.7981964 |
| #### Bn-A07-p10848104 | A-genome specific (napus-rapa) | 0.6052632    | 0.6865183    | not scorable | not scorable | 0.9834711 | 0.7031137 |
| #### Bn-A07-p10848190 | A-genome specific (napus-rapa) | 0.9784689    | 0.7008322    | not scorable | not scorable | 0.9834711 | 0.7048426 |
| #### Bn-A07-p10849053 | A-genome specific (napus-rapa) | 0.9760765    | 0.708321     | not scorable | not scorable | 0.9834711 | 0.7736596 |
| #### Bn-A07-p10869578 | A-genome specific (napus-rapa) | 0.562201     | 0.7997735    | not scorable | not scorable | 0.9834711 | 0.814801  |
| #### Bn-A07-p10870115 | A-genome specific (napus-rapa) | 1            | 0.9208044    | not scorable | not scorable | 1         | 0.8978186 |

|                       |                                |              |              |              |              |              |              |
|-----------------------|--------------------------------|--------------|--------------|--------------|--------------|--------------|--------------|
| #### Bn-A07-p10873126 | A-genome specific (napus-rapa) | 0.9784689    | 0.5448334    | not scorable | not scorable | 0.9834711    | 0.7409858    |
| #### Bn-A07-p10877038 | A-genome specific (napus-rapa) | 0.9880383    | 0.7506806    | not scorable | not scorable | 1            | 0.8049501    |
| #### Bn-A07-p10890061 | A-genome specific (napus-rapa) | 1            | 0.4770124    | not scorable | not scorable | 0.9586777    | 0.7014868    |
| #### Bn-A07-p10891272 | genome unspecific (all in)     | 1            | 0.5567055    |              | 1 0.7654063  | 0.9917355    | 0.6773645    |
| #### Bn-A07-p1093997  | A-genome specific (napus-rapa) | 0.9736842    | 0.5252432    | not scorable | not scorable | 0.9917355    | 0.7626766    |
| #### Bn-A07-p10949782 | A-genome specific (napus-rapa) | 0.9808612    | 0.5058544    | not scorable | not scorable | 0.9917355    | 0.7698805    |
| #### Bn-A07-p10963555 | A-genome specific (napus-rapa) | 0.9952153    | 0.4539658    | not scorable | not scorable | 0.9834711    | 0.8323747    |
| #### Bn-A07-p10965607 | A-genome specific (rapa only)  | not scorable | not scorable | not scorable | not scorable | 0.9834711    | 0.8429616    |
| #### Bn-A07-p10968184 | A-genome specific (napus-rapa) | 0.9808612    | 0.7849903    | not scorable | not scorable | 0.9917355    | 0.7369128    |
| #### Bn-A07-p1096829  | A-genome specific (rapa only)  | not scorable | not scorable | not scorable | not scorable | 0.9834711    | 0.7030499    |
| #### Bn-A07-p10971791 | A-genome specific (napus-rapa) | 0.9641148    | 0.6331977    | not scorable | not scorable | 0.9834711    | 0.7440135    |
| #### Bn-A07-p10972081 | A-genome specific (napus-rapa) | 0.9808612    | 0.7609509    | not scorable | not scorable | 0.9917355    | 0.7186314    |
| #### Bn-A07-p10975419 | A-genome specific (napus-rapa) | 0.9880383    | 0.6857982    | not scorable | not scorable | 0.9917355    | 0.7098279    |
| #### Bn-A07-p10979187 | A-genome specific (rapa only)  | not scorable | not scorable | not scorable | not scorable | 0.9752066    | 0.6598055    |
| #### Bn-A07-p1098196  | A-genome specific (napus-rapa) | 0.9904306    | 0.7476866    | not scorable | not scorable | 0.9669421    | 0.6324692    |
| #### Bn-A07-p10995462 | A-genome specific (napus-rapa) | 0.9712918    | 0.6738448    | not scorable | not scorable | 1            | 0.7513626    |
| #### Bn-A07-p11006909 | A-genome specific (napus-rapa) | 0.9760765    | 0.6948578    | not scorable | not scorable | 0.9917355    | 0.7196551    |
| #### Bn-A07-p11008123 | A-genome specific (napus-rapa) | 0.9856459    | 0.7729712    | not scorable | not scorable | 0.9917355    | 0.7685572    |
| #### Bn-A07-p11009397 | A-genome specific (napus-rapa) | 0.9856459    | 0.622758     | not scorable | not scorable | 0.9917355    | 0.7836204    |
| #### Bn-A07-p11010528 | A-genome specific (napus-rapa) | 0.9856459    | 0.7295862    | not scorable | not scorable | 1            | 0.7964234    |
| #### Bn-A07-p11012468 | napus specific                 | 0.9401914    | 0.7831746    | not scorable | not scorable | not scorable | not scorable |
| #### Bn-A07-p11021668 | A-genome specific (napus-rapa) | 0.9736842    | 0.5443615    | not scorable | not scorable | 0.9917355    | 0.5483939    |
| #### Bn-A07-p11041528 | all not scorable               | not scorable | not scorable | not scorable | not scorable | not scorable | not scorable |
| #### Bn-A07-p11044717 | A-genome specific (napus-rapa) | 1            | 0.5671775    | not scorable | not scorable | 0.9917355    | 0.5757526    |
| #### Bn-A07-p11058228 | A-genome specific (napus-rapa) | 1            | 0.7465288    | not scorable | not scorable | 0.9752066    | 0.7932081    |
| #### Bn-A07-p11059156 | A-genome specific (napus-rapa) | 0.9856459    | 0.7056352    | not scorable | not scorable | 0.9752066    | 0.6971419    |
| #### Bn-A07-p11059209 | A-genome specific (napus-rapa) | 0.9928229    | 0.6570191    | not scorable | not scorable | 0.9586777    | 0.6946883    |
| #### Bn-A07-p11066210 | napus specific                 | 0.9784689    | 0.8148835    | not scorable | not scorable | not scorable | not scorable |
| #### Bn-A07-p11068231 | A-genome specific (napus-rapa) | 0.9784689    | 0.7889493    | not scorable | not scorable | 0.9504132    | 0.7079926    |
| #### Bn-A07-p11068735 | A-genome specific (napus-rapa) | 0.9856459    | 0.6950145    | not scorable | not scorable | 1            | 0.6448434    |
| #### Bn-A07-p11072052 | A-genome specific (napus-rapa) | 0.9832536    | 0.701015     | not scorable | not scorable | 0.9917355    | 0.6962059    |
| #### Bn-A07-p11074548 | A-genome specific (napus-rapa) | 0.9928229    | 0.7161855    | not scorable | not scorable | 1            | 0.7448035    |
| #### Bn-A07-p11076587 | A-genome specific (napus-rapa) | 0.9904306    | 0.7068847    | not scorable | not scorable | 0.9834711    | 0.6753877    |

|                       |                                |              |              |              |              |           |           |
|-----------------------|--------------------------------|--------------|--------------|--------------|--------------|-----------|-----------|
| #### Bn-A07-p11086654 | A-genome specific (napus-rapa) | 0.9856459    | 0.352665     | not scorable | not scorable | 1         | 0.8547642 |
| #### Bn-A07-p11103061 | A-genome specific (napus-rapa) | 0.9856459    | 0.4178697    | not scorable | not scorable | 1         | 0.8075965 |
| #### Bn-A07-p11114150 | A-genome specific (napus-rapa) | 0.9880383    | 0.7973692    | not scorable | not scorable | 1         | 0.8025329 |
| #### Bn-A07-p11119130 | A-genome specific (napus-rapa) | 0.9354067    | 0.8152761    | not scorable | not scorable | 0.9586777 | 0.7667541 |
| #### Bn-A07-p11138100 | A-genome specific (napus-rapa) | 0.9760765    | 0.6807477    | not scorable | not scorable | 0.9917355 | 0.7417953 |
| #### Bn-A07-p11147817 | A-genome specific (napus-rapa) | 0.9808612    | 0.6824558    | not scorable | not scorable | 0.9504132 | 0.7884257 |
| #### Bn-A07-p11152131 | A-genome specific (napus-rapa) | 0.9976076    | 0.4500624    | not scorable | not scorable | 1         | 0.7205924 |
| #### Bn-A07-p11156840 | A-genome specific (napus-rapa) | 0.9952153    | 0.8026365    | not scorable | not scorable | 1         | 0.7324888 |
| #### Bn-A07-p11159936 | A-genome specific (napus-rapa) | 0.9904306    | 0.4984267    | not scorable | not scorable | 1         | 0.7316684 |
| #### Bn-A07-p11162333 | A-genome specific (napus-rapa) | 0.9904306    | 0.4134068    | not scorable | not scorable | 0.9752066 | 0.7871816 |
| #### Bn-A07-p11163415 | A-genome specific (napus-rapa) | 0.9784689    | 0.7927259    | not scorable | not scorable | 1         | 0.7602476 |
| #### Bn-A07-p11163481 | A-genome specific (napus-rapa) | 0.9952153    | 0.6627811    | not scorable | not scorable | 0.9917355 | 0.7672359 |
| #### Bn-A07-p11171407 | A-genome specific (napus-rapa) | 0.9928229    | 0.3255305    | not scorable | not scorable | 1         | 0.7945399 |
| #### Bn-A07-p11175937 | A-genome specific (napus-rapa) | 0.9952153    | 0.6919971    | not scorable | not scorable | 0.9917355 | 0.7187513 |
| #### Bn-A07-p11176924 | A-genome specific (napus-rapa) | 0.9976076    | 0.7585436    | not scorable | not scorable | 0.9752066 | 0.7903211 |
| #### Bn-A07-p11178077 | A-genome specific (napus-rapa) | 0.9928229    | 0.7068735    | not scorable | not scorable | 0.9834711 | 0.7211244 |
| #### Bn-A07-p11178807 | A-genome specific (napus-rapa) | 0.9808612    | 0.3856633    | not scorable | not scorable | 0.9917355 | 0.7084965 |
| #### Bn-A07-p11185122 | A-genome specific (napus-rapa) | 0.9832536    | 0.8373539    | not scorable | not scorable | 1         | 0.7937264 |
| #### Bn-A07-p11186861 | A-genome specific (napus-rapa) | 0.9784689    | 0.7730157    | not scorable | not scorable | 0.9917355 | 0.7568033 |
| #### Bn-A07-p1118872  | A-genome specific (napus-rapa) | 0.9856459    | 0.6734306    | not scorable | not scorable | 0.9752066 | 0.6768839 |
| #### Bn-A07-p11191424 | A-genome specific (napus-rapa) | 0.9856459    | 0.3751154    | not scorable | not scorable | 0.9834711 | 0.7905279 |
| #### Bn-A07-p11191776 | A-genome specific (napus-rapa) | 0.9928229    | 0.8129226    | not scorable | not scorable | 1         | 0.8210896 |
| #### Bn-A07-p11194871 | A-genome specific (rapa only)  | not scorable | not scorable | not scorable | not scorable | 0.9008265 | 0.7494555 |
| #### Bn-A07-p11196478 | A-genome specific (napus-rapa) | 1            | 0.703671     | not scorable | not scorable | 1         | 0.8362207 |
| #### Bn-A07-p11196510 | A-genome specific (napus-rapa) | 0.9928229    | 0.5206124    | not scorable | not scorable | 0.9917355 | 0.73608   |
| #### Bn-A07-p11200338 | A-genome specific (napus-rapa) | 0.9354067    | 0.8066093    | not scorable | not scorable | 0.9256198 | 0.7013716 |
| #### Bn-A07-p11200772 | A-genome specific (napus-rapa) | 0.9330143    | 0.824899     | not scorable | not scorable | 0.9256198 | 0.9205657 |
| #### Bn-A07-p11204177 | A-genome specific (napus-rapa) | 0.9976076    | 0.5019693    | not scorable | not scorable | 1         | 0.8137091 |
| #### Bn-A07-p11208979 | A-genome specific (napus-rapa) | 0.9784689    | 0.4731764    | not scorable | not scorable | 1         | 0.8105087 |
| #### Bn-A07-p11225243 | A-genome specific (napus-rapa) | 1            | 0.475026     | not scorable | not scorable | 0.9917355 | 0.8231918 |
| #### Bn-A07-p11235392 | A-genome specific (napus-rapa) | 0.9904306    | 0.4037323    | not scorable | not scorable | 1         | 0.8363475 |
| #### Bn-A07-p11245975 | A-genome specific (napus-rapa) | 1            | 0.3806572    | not scorable | not scorable | 1         | 0.8681762 |
| #### Bn-A07-p11248281 | A-genome specific (napus-rapa) | 1            | 0.7825576    | not scorable | not scorable | 0.9917355 | 0.7952257 |

|                       |                                |              |              |              |              |              |              |
|-----------------------|--------------------------------|--------------|--------------|--------------|--------------|--------------|--------------|
| #### Bn-A07-p11248893 | A-genome specific (napus-rapa) | 0.9856459    | 0.7140768    | not scorable | not scorable | 1            | 0.7676759    |
| #### Bn-A07-p11249547 | A-genome specific (napus-rapa) | 0.9473684    | 0.4635427    | not scorable | not scorable | 0.9090909    | 0.9272014    |
| #### Bn-A07-p11255851 | genome unspecific (all in)     | 0.9928229    | 0.6400208    | 0.8449612    | 0.7155414    | 1            | 0.6250408    |
| #### Bn-A07-p11264644 | A-genome specific (napus-rapa) | 0.9976076    | 0.8151305    | not scorable | not scorable | 0.9834711    | 0.8187077    |
| #### Bn-A07-p11270373 | A-genome specific (napus-rapa) | 0.9808612    | 0.4469605    | not scorable | not scorable | 1            | 0.8294823    |
| #### Bn-A07-p11276443 | A-genome specific (napus-rapa) | 0.9832536    | 0.7355148    | not scorable | not scorable | 0.9834711    | 0.7159255    |
| #### Bn-A07-p11284412 | A-genome specific (napus-rapa) | 0.9808612    | 0.6788282    | not scorable | not scorable | 1            | 0.947082     |
| #### Bn-A07-p11286252 | A-genome specific (napus-rapa) | 1            | 0.7287802    | not scorable | not scorable | 1            | 0.7897604    |
| #### Bn-A07-p11287521 | A-genome specific (napus-rapa) | 0.9808612    | 0.5282848    | not scorable | not scorable | 1            | 0.7537469    |
| #### Bn-A07-p11300051 | A-genome specific (napus-rapa) | 1            | 0.5490705    | not scorable | not scorable | 0.9752066    | 0.658904     |
| #### Bn-A07-p11304368 | A-genome specific (napus-rapa) | 0.9976076    | 0.5176003    | not scorable | not scorable | 0.9917355    | 0.8518212    |
| #### Bn-A07-p11305778 | A-genome specific (rapa only)  | not scorable | not scorable | not scorable | not scorable | 1            | 0.7432928    |
| #### Bn-A07-p11314565 | A-genome specific (rapa only)  | not scorable | not scorable | not scorable | not scorable | 0.8677686    | 0.9104364    |
| #### Bn-A07-p11317561 | A-genome specific (napus-rapa) | 0.9952153    | 0.394738     | not scorable | not scorable | 1            | 0.838333     |
| #### Bn-A07-p11320753 | A-genome specific (napus-rapa) | 0.9976076    | 0.460287     | not scorable | not scorable | 1            | 0.8123857    |
| #### Bn-A07-p11323366 | A-genome specific (napus-rapa) | 1            | 0.6134528    | not scorable | not scorable | 1            | 0.8671007    |
| #### Bn-A07-p11324360 | A-genome specific (napus-rapa) | 0.9784689    | 0.4917847    | not scorable | not scorable | 0.9917355    | 0.7750199    |
| #### Bn-A07-p11328250 | A-genome specific (napus-rapa) | 0.9688995    | 0.7106051    | not scorable | not scorable | 0.9586777    | 0.739611     |
| #### Bn-A07-p11330018 | napus specific                 | 0.7177033    | 0.5237986    | not scorable | not scorable | not scorable | not scorable |
| #### Bn-A07-p11331372 | A-genome specific (napus-rapa) | 0.9904306    | 0.7627087    | not scorable | not scorable | 1            | 0.7733137    |
| #### Bn-A07-p11333494 | A-genome specific (rapa only)  | not scorable | not scorable | not scorable | not scorable | 0.9338843    | 0.36776      |
| #### Bn-A07-p1135440  | A-genome specific (napus-rapa) | 0.9760765    | 0.7889228    | not scorable | not scorable | 0.9917355    | 0.8299278    |
| #### Bn-A07-p11390804 | A-genome specific (napus-rapa) | 0.9688995    | 0.3470787    | not scorable | not scorable | 0.9834711    | 0.4471804    |
| #### Bn-A07-p11403525 | A-genome specific (napus-rapa) | 0.9832536    | 0.3776537    | not scorable | not scorable | 0.9834711    | 0.6478575    |
| #### Bn-A07-p1145134  | A-genome specific (napus-rapa) | 1            | 0.560406     | not scorable | not scorable | 1            | 0.8891203    |
| #### Bn-A07-p11457443 | A-genome specific (napus-rapa) | 0.9784689    | 0.489755     | not scorable | not scorable | 0.9834711    | 0.7683235    |
| #### Bn-A07-p11463160 | A-genome specific (napus-rapa) | 1            | 0.8983011    | not scorable | not scorable | 1            | 0.8646998    |
| #### Bn-A07-p11472553 | A-genome specific (napus-rapa) | 0.9904306    | 0.6311445    | not scorable | not scorable | 0.9917355    | 0.8096973    |
| #### Bn-A07-p11472623 | A-genome specific (napus-rapa) | 0.9952153    | 0.5653169    | not scorable | not scorable | 1            | 0.6509008    |
| #### Bn-A07-p11477634 | A-genome specific (napus-rapa) | 1            | 0.7327133    | not scorable | not scorable | 0.9752066    | 0.726149     |
| #### Bn-A07-p11492877 | A-genome specific (napus-rapa) | 0.9928229    | 0.6910558    | not scorable | not scorable | 0.9752066    | 0.8166724    |
| #### Bn-A07-p11512981 | A-genome specific (napus-rapa) | 0.9760765    | 0.4937847    | not scorable | not scorable | 1            | 0.6987211    |
| #### Bn-A07-p11542386 | A-genome specific (napus-rapa) | 0.9856459    | 0.356396     | not scorable | not scorable | 1            | 0.8000963    |

|                       |                                |              |              |              |              |              |              |              |
|-----------------------|--------------------------------|--------------|--------------|--------------|--------------|--------------|--------------|--------------|
| #### Bn-A07-p11542638 | A-genome specific (napus-rapa) | 0.9928229    | 0.3417943    | not scorable | not scorable |              | 1            | 0.5909606    |
| #### Bn-A07-p11570097 | A-genome specific (napus-rapa) | 0.9497608    | 0.3356135    | not scorable | not scorable |              | 1            | 0.6921451    |
| #### Bn-A07-p11572985 | A-genome specific (napus-rapa) | 0.9832536    | 0.6645685    | not scorable | not scorable | 0.9834711    |              | 0.7754731    |
| #### Bn-A07-p1158936  | A-genome specific (napus-rapa) | 0.9904306    | 0.5109473    | not scorable | not scorable | 0.9834711    |              | 0.6964207    |
| #### Bn-A07-p11593493 | napus specific                 | 0.8492823    | 0.8410827    | not scorable | not scorable | not scorable | not scorable | not scorable |
| #### Bn-A07-p11599915 | A-genome specific (rapa only)  | not scorable | not scorable | not scorable | not scorable | 0.9834711    |              | 0.6427754    |
| #### Bn-A07-p11603894 | A-genome specific (napus-rapa) | 0.9784689    | 0.7832409    | not scorable | not scorable | 0.9752066    |              | 0.8041537    |
| #### Bn-A07-p11611255 | A-genome specific (napus-rapa) | 0.9784689    | 0.736331     | not scorable | not scorable | 0.9917355    |              | 0.7110854    |
| #### Bn-A07-p11616820 | A-genome specific (napus-rapa) | 0.9665072    | 0.5716928    | not scorable | not scorable | 0.9917355    |              | 0.7937853    |
| #### Bn-A07-p11627477 | A-genome specific (napus-rapa) | 0.9712918    | 0.7504371    | not scorable | not scorable | 0.9834711    |              | 0.8125817    |
| #### Bn-A07-p11629852 | A-genome specific (napus-rapa) | 0.9760765    | 0.7326599    | not scorable | not scorable |              | 1            | 0.7073662    |
| #### Bn-A07-p11631422 | A-genome specific (napus-rapa) | 0.9856459    | 0.7778918    | not scorable | not scorable | 0.9917355    |              | 0.7736907    |
| #### Bn-A07-p11631477 | A-genome specific (napus-rapa) | 0.9832536    | 0.7923458    | not scorable | not scorable | 0.9917355    |              | 0.7898962    |
| #### Bn-A07-p11636619 | A-genome specific (napus-rapa) | 0.9665072    | 0.4456201    | not scorable | not scorable |              | 1            | 0.7212796    |
| #### Bn-A07-p116371   | A-genome specific (napus-rapa) | 0.9976076    | 0.6727328    | not scorable | not scorable | 0.9917355    |              | 0.8286237    |
| #### Bn-A07-p11641657 | A-genome specific (napus-rapa) | 0.9808612    | 0.7707008    | not scorable | not scorable | 0.9752066    |              | 0.7702872    |
| #### Bn-A07-p1164871  | A-genome specific (napus-rapa) | 0.9928229    | 0.763126     | not scorable | not scorable | 0.9752066    |              | 0.7159097    |
| #### Bn-A07-p11660810 | A-genome specific (napus-rapa) | 0.9808612    | 0.6555538    | not scorable | not scorable | 0.9669421    |              | 0.8379921    |
| #### Bn-A07-p11668787 | A-genome specific (napus-rapa) | 0.9760765    | 0.6060649    | not scorable | not scorable |              | 1            | 0.9366658    |
| #### Bn-A07-p11698185 | A-genome specific (napus-rapa) | 0.9665072    | 0.2801139    | not scorable | not scorable | 0.9917355    |              | 0.7654511    |
| #### Bn-A07-p11715576 | A-genome specific (napus-rapa) | 0.9976076    | 0.3399727    | not scorable | not scorable | 0.9669421    |              | 0.6695048    |
| #### Bn-A07-p11724009 | A-genome specific (napus-rapa) | 0.9736842    | 0.7636845    | not scorable | not scorable |              | 1            | 0.8318138    |
| #### Bn-A07-p11727700 | A-genome specific (napus-rapa) | 0.9808612    | 0.7455173    | not scorable | not scorable | 0.9917355    |              | 0.7124529    |
| #### Bn-A07-p11750002 | A-genome specific (napus-rapa) | 0.9712918    | 0.1660349    | not scorable | not scorable |              | 1            | 0.5930461    |
| #### Bn-A07-p11764922 | A-genome specific (napus-rapa) | 0.9736842    | 0.2522908    | not scorable | not scorable | 0.9917355    |              | 0.7980828    |
| #### Bn-A07-p11765027 | A-genome specific (napus-rapa) | 0.9808612    | 0.5425139    | not scorable | not scorable |              | 1            | 0.6610464    |
| #### Bn-A07-p11765232 | A-genome specific (napus-rapa) | 0.9832536    | 0.6623936    | not scorable | not scorable |              | 1            | 0.920646     |
| #### Bn-A07-p1177830  | A-genome specific (napus-rapa) | 0.9976076    | 0.5239711    | not scorable | not scorable | 0.9917355    |              | 0.6745558    |
| #### Bn-A07-p11799578 | A-genome specific (rapa only)  | not scorable | not scorable | not scorable | not scorable |              | 1            | 0.71188      |
| #### Bn-A07-p11811971 | A-genome specific (napus-rapa) | 0.9856459    | 0.7289358    | not scorable | not scorable |              | 1            | 0.7569355    |
| #### Bn-A07-p11813549 | A-genome specific (napus-rapa) | 0.9688995    | 0.5347922    | not scorable | not scorable | 0.9834711    |              | 0.6692492    |
| #### Bn-A07-p11815679 | A-genome specific (napus-rapa) | 0.9569378    | 0.7212123    | not scorable | not scorable | 0.9917355    |              | 0.8779707    |
| #### Bn-A07-p11815770 | A-genome specific (rapa only)  | not scorable | not scorable | not scorable | not scorable |              | 1            | 0.7525774    |





|                       |                                |              |              |              |              |           |           |
|-----------------------|--------------------------------|--------------|--------------|--------------|--------------|-----------|-----------|
| #### Bn-A07-p12003491 | A-genome specific (napus-rapa) | 0.9641148    | 0.3014578    | not scorable | not scorable | 0.9917355 | 0.7480668 |
| #### Bn-A07-p12017702 | A-genome specific (napus-rapa) | 0.9784689    | 0.2323632    | not scorable | not scorable | 0.9917355 | 0.7154787 |
| #### Bn-A07-p12018948 | A-genome specific (napus-rapa) | 0.9736842    | 0.5442274    | not scorable | not scorable | 0.9752066 | 0.7283754 |
| #### Bn-A07-p12050100 | A-genome specific (napus-rapa) | 0.9880383    | 0.7443627    | not scorable | not scorable | 0.9917355 | 0.7155242 |
| #### Bn-A07-p12066704 | A-genome specific (napus-rapa) | 0.9832536    | 0.2701474    | not scorable | not scorable | 0.9338843 | 0.6801757 |
| #### Bn-A07-p12075838 | A-genome specific (napus-rapa) | 0.9736842    | 0.7068174    | not scorable | not scorable | 1         | 0.6523818 |
| #### Bn-A07-p12079803 | A-genome specific (napus-rapa) | 0.9784689    | 0.7888748    | not scorable | not scorable | 0.9752066 | 0.7669782 |
| #### Bn-A07-p12084613 | A-genome specific (napus-rapa) | 0.9856459    | 0.7940917    | not scorable | not scorable | 0.9752066 | 0.7891736 |
| #### Bn-A07-p12086167 | A-genome specific (napus-rapa) | 0.9808612    | 0.6961997    | not scorable | not scorable | 1         | 0.8133749 |
| #### Bn-A07-p12094894 | A-genome specific (napus-rapa) | 0.9808612    | 0.3507657    | not scorable | not scorable | 0.9917355 | 0.7209759 |
| #### Bn-A07-p12102140 | A-genome specific (napus-rapa) | 0.9760765    | 0.7131355    | not scorable | not scorable | 1         | 0.7355803 |
| #### Bn-A07-p1210412  | A-genome specific (napus-rapa) | 0.7727273    | 0.8150182    | not scorable | not scorable | 0.9669421 | 0.6740745 |
| #### Bn-A07-p12104177 | A-genome specific (napus-rapa) | 0.9641148    | 0.3354231    | not scorable | not scorable | 0.9917355 | 0.810066  |
| #### Bn-A07-p1210439  | A-genome specific (napus-rapa) | 0.7727273    | 0.7861245    | not scorable | not scorable | 0.9834711 | 0.7902492 |
| #### Bn-A07-p12113648 | A-genome specific (napus-rapa) | 0.9976076    | 0.698198     | not scorable | not scorable | 0.9917355 | 0.8973759 |
| #### Bn-A07-p12115911 | A-genome specific (napus-rapa) | 0.9928229    | 0.778009     | not scorable | not scorable | 0.9917355 | 0.8711474 |
| #### Bn-A07-p12123202 | A-genome specific (napus-rapa) | 0.8397129    | 0.7481655    | not scorable | not scorable | 0.9256198 | 0.7767231 |
| #### Bn-A07-p12131198 | A-genome specific (rapa only)  | not scorable | not scorable | not scorable | not scorable | 1         | 0.7928097 |
| #### Bn-A07-p12171217 | A-genome specific (napus-rapa) | 0.9736842    | 0.7195044    | not scorable | not scorable | 0.6280992 | 0.6573667 |
| #### Bn-A07-p1217535  | A-genome specific (napus-rapa) | 0.9808612    | 0.8211907    | not scorable | not scorable | 0.9834711 | 0.7946861 |
| #### Bn-A07-p1217876  | A-genome specific (napus-rapa) | 0.9784689    | 0.3785897    | not scorable | not scorable | 0.9917355 | 0.7683072 |
| #### Bn-A07-p12193031 | A-genome specific (napus-rapa) | 0.9952153    | 0.7914777    | not scorable | not scorable | 0.9917355 | 0.7414985 |
| #### Bn-A07-p1227140  | A-genome specific (napus-rapa) | 0.9688995    | 0.6595982    | not scorable | not scorable | 0.9917355 | 0.7228409 |
| #### Bn-A07-p1228602  | A-genome specific (napus-rapa) | 0.9832536    | 0.6807027    | not scorable | not scorable | 0.9917355 | 0.7855193 |
| #### Bn-A07-p12297809 | A-genome specific (napus-rapa) | 0.9712918    | 0.5609196    | not scorable | not scorable | 1         | 0.6907759 |
| #### Bn-A07-p12318667 | A-genome specific (napus-rapa) | 0.9880383    | 0.4144607    | not scorable | not scorable | 0.9917355 | 0.8109033 |
| #### Bn-A07-p12328863 | A-genome specific (napus-rapa) | 1            | 0.527168     | not scorable | not scorable | 0.9917355 | 0.6776739 |
| #### Bn-A07-p12333270 | A-genome specific (napus-rapa) | 1            | 0.2385113    | not scorable | not scorable | 1         | 0.6294335 |
| #### Bn-A07-p12337353 | A-genome specific (napus-rapa) | 0.9784689    | 0.7640231    | not scorable | not scorable | 1         | 0.7764772 |
| #### Bn-A07-p12345399 | A-genome specific (napus-rapa) | 0.9712918    | 0.7186795    | not scorable | not scorable | 0.9917355 | 0.7496437 |
| #### Bn-A07-p12345729 | A-genome specific (napus-rapa) | 0.9880383    | 0.6960353    | not scorable | not scorable | 0.9752066 | 0.7354022 |
| #### Bn-A07-p12348360 | A-genome specific (napus-rapa) | 0.9808612    | 0.499355     | not scorable | not scorable | 0.9917355 | 0.7245347 |
| #### Bn-A07-p12362172 | A-genome specific (napus-rapa) | 0.8779904    | 0.7730877    | not scorable | not scorable | 0.9834711 | 0.7794608 |

|                       |                                |              |              |              |              |           |           |
|-----------------------|--------------------------------|--------------|--------------|--------------|--------------|-----------|-----------|
| #### Bn-A07-p12363575 | A-genome specific (napus-rapa) | 1            | 0.4115954    | not scorable | not scorable | 0.9917355 | 0.7558599 |
| #### Bn-A07-p12376191 | A-genome specific (napus-rapa) | 0.9784689    | 0.6609242    | not scorable | not scorable | 0.9917355 | 0.8079545 |
| #### Bn-A07-p12385490 | genome unspecific (all in)     | 0.9760765    | 0.4874134    |              | 1 0.7965588  | 1         | 0.8143303 |
| #### Bn-A07-p12397651 | A-genome specific (napus-rapa) | 0.9904306    | 0.4363815    | not scorable | not scorable | 1         | 0.9020252 |
| #### Bn-A07-p12400157 | A-genome specific (napus-rapa) | 0.9904306    | 0.7248002    | not scorable | not scorable | 0.9834711 | 0.7243353 |
| #### Bn-A07-p12412116 | A-genome specific (napus-rapa) | 0.9641148    | 0.4828659    | not scorable | not scorable | 0.9752066 | 0.649497  |
| #### Bn-A07-p12415736 | A-genome specific (napus-rapa) | 0.9114832    | 0.6545722    | not scorable | not scorable | 0.9669421 | 0.6712071 |
| #### Bn-A07-p12415996 | A-genome specific (napus-rapa) | 0.9066986    | 0.7747554    | not scorable | not scorable | 0.9834711 | 0.7422948 |
| #### Bn-A07-p12418491 | A-genome specific (napus-rapa) | 0.8923445    | 0.8099102    | not scorable | not scorable | 0.9834711 | 0.7670542 |
| #### Bn-A07-p12418633 | A-genome specific (napus-rapa) | 0.9019139    | 0.7094668    | not scorable | not scorable | 0.9752066 | 0.7259436 |
| #### Bn-A07-p12419468 | A-genome specific (napus-rapa) | 0.8923445    | 0.8011044    | not scorable | not scorable | 0.9834711 | 0.8223446 |
| #### Bn-A07-p12421128 | A-genome specific (napus-rapa) | 0.8851675    | 0.7927148    | not scorable | not scorable | 0.9917355 | 0.6393242 |
| #### Bn-A07-p12421327 | A-genome specific (napus-rapa) | 0.9090909    | 0.7850637    | not scorable | not scorable | 0.9752066 | 0.7632015 |
| #### Bn-A07-p12423315 | A-genome specific (napus-rapa) | 0.8875598    | 0.7927179    | not scorable | not scorable | 0.9669421 | 0.7242259 |
| #### Bn-A07-p12423454 | A-genome specific (napus-rapa) | 0.8708134    | 0.7527162    | not scorable | not scorable | 0.9917355 | 0.7628176 |
| #### Bn-A07-p12423544 | A-genome specific (napus-rapa) | 0.9043062    | 0.7086951    | not scorable | not scorable | 0.9834711 | 0.7245917 |
| #### Bn-A07-p12424387 | A-genome specific (napus-rapa) | 0.9114832    | 0.7788516    | not scorable | not scorable | 0.9917355 | 0.8360775 |
| #### Bn-A07-p12424510 | A-genome specific (napus-rapa) | 0.9138756    | 0.7819862    | not scorable | not scorable | 0.9752066 | 0.7339477 |
| #### Bn-A07-p12424938 | A-genome specific (napus-rapa) | 0.9856459    | 0.7901833    | not scorable | not scorable | 0.9834711 | 0.7835338 |
| #### Bn-A07-p12425115 | A-genome specific (napus-rapa) | 0.9114832    | 0.717974     | not scorable | not scorable | 0.9669421 | 0.7376891 |
| #### Bn-A07-p12425319 | A-genome specific (napus-rapa) | 0.9043062    | 0.7639613    | not scorable | not scorable | 0.9917355 | 0.8113129 |
| #### Bn-A07-p12425566 | A-genome specific (napus-rapa) | 0.9114832    | 0.7492524    | not scorable | not scorable | 0.9917355 | 0.7167961 |
| #### Bn-A07-p12426500 | A-genome specific (rapa only)  | not scorable | not scorable | not scorable | not scorable | 0.9586777 | 0.7334232 |
| #### Bn-A07-p12426652 | A-genome specific (napus-rapa) | 0.8995215    | 0.7422042    | not scorable | not scorable | 0.9917355 | 0.7205924 |
| #### Bn-A07-p12426907 | A-genome specific (napus-rapa) | 0.9043062    | 0.7288055    | not scorable | not scorable | 0.9834711 | 0.704466  |
| #### Bn-A07-p12429159 | A-genome specific (napus-rapa) | 0.9019139    | 0.7842823    | not scorable | not scorable | 0.9834711 | 0.7780893 |
| #### Bn-A07-p12430820 | A-genome specific (napus-rapa) | 0.8899522    | 0.7767872    | not scorable | not scorable | 0.9669421 | 0.6619408 |
| #### Bn-A07-p12430965 | A-genome specific (napus-rapa) | 0.9880383    | 0.7610266    | not scorable | not scorable | 0.9834711 | 0.7764123 |
| #### Bn-A07-p12432622 | A-genome specific (napus-rapa) | 0.9952153    | 0.7806745    | not scorable | not scorable | 1         | 0.7392381 |
| #### Bn-A07-p12432678 | A-genome specific (napus-rapa) | 0.9712918    | 0.7469718    | not scorable | not scorable | 0.9834711 | 0.6721469 |
| #### Bn-A07-p12432832 | A-genome specific (napus-rapa) | 0.9904306    | 0.6410927    | not scorable | not scorable | 0.9917355 | 0.6561934 |
| #### Bn-A07-p12433131 | A-genome specific (napus-rapa) | 0.9928229    | 0.7868638    | not scorable | not scorable | 1         | 0.7047889 |
| #### Bn-A07-p12443929 | A-genome specific (napus-rapa) | 0.9976076    | 0.8175281    | not scorable | not scorable | 1         | 0.7993165 |

|                       |                                   |              |              |              |              |              |              |
|-----------------------|-----------------------------------|--------------|--------------|--------------|--------------|--------------|--------------|
| #### Bn-A07-p12470367 | genome unspecific (oleracea-rapa) | not scorable | not scorable | 0.9612403    | 0.3608211    | 0.9752066    | 0.6414432    |
| #### Bn-A07-p12486479 | A-genome specific (napus-rapa)    | 0.9880383    | 0.7340211    | not scorable | not scorable | 0.9834711    | 0.6995957    |
| #### Bn-A07-p12487549 | A-genome specific (napus-rapa)    | 0.9856459    | 0.7538295    | not scorable | not scorable | 1            | 0.8101206    |
| #### Bn-A07-p12487688 | A-genome specific (napus-rapa)    | 0.9856459    | 0.7174926    | not scorable | not scorable | 1            | 0.7199915    |
| #### Bn-A07-p12487765 | A-genome specific (napus-rapa)    | 0.9784689    | 0.7544709    | not scorable | not scorable | 0.9917355    | 0.7965066    |
| #### Bn-A07-p12495414 | A-genome specific (napus-rapa)    | 0.9808612    | 0.7309325    | not scorable | not scorable | 0.9752066    | 0.7440118    |
| #### Bn-A07-p12496653 | A-genome specific (napus-rapa)    | 0.9904306    | 0.7775143    | not scorable | not scorable | 1            | 0.8806894    |
| #### Bn-A07-p12502804 | A-genome specific (napus-rapa)    | 0.9856459    | 0.3893309    | not scorable | not scorable | 1            | 0.7155477    |
| #### Bn-A07-p12504230 | all not scorable                  | not scorable | not scorable | not scorable | not scorable | not scorable | not scorable |
| #### Bn-A07-p1254564  | A-genome specific (napus-rapa)    | 0.9736842    | 0.4707423    | not scorable | not scorable | 1            | 0.7727035    |
| #### Bn-A07-p12546889 | A-genome specific (napus-rapa)    | 0.9928229    | 0.746845     | not scorable | not scorable | 0.9917355    | 0.7632224    |
| #### Bn-A07-p12547012 | A-genome specific (napus-rapa)    | 0.9784689    | 0.6006427    | not scorable | not scorable | 0.9752066    | 0.6582699    |
| #### Bn-A07-p12547288 | A-genome specific (napus-rapa)    | 0.9880383    | 0.2158381    | not scorable | not scorable | 0.9752066    | 0.5586224    |
| #### Bn-A07-p1255437  | A-genome specific (napus-rapa)    | 0.9760765    | 0.4091728    | not scorable | not scorable | 0.9586777    | 0.7895206    |
| #### Bn-A07-p12554962 | A-genome specific (napus-rapa)    | 0.9928229    | 0.4691772    | not scorable | not scorable | 0.9917355    | 0.726207     |
| #### Bn-A07-p12567541 | A-genome specific (napus-rapa)    | 1            | 0.9139944    | not scorable | not scorable | 1            | 0.913263     |
| #### Bn-A07-p12576869 | A-genome specific (napus-rapa)    | 0.791866     | 0.7567632    | not scorable | not scorable | 1            | 0.8921926    |
| #### Bn-A07-p12578940 | A-genome specific (napus-rapa)    | 0.8110048    | 0.6927177    | not scorable | not scorable | 1            | 0.7051434    |
| #### Bn-A07-p12583860 | A-genome specific (napus-rapa)    | 0.9784689    | 0.463714     | not scorable | not scorable | 0.9752066    | 0.7274786    |
| #### Bn-A07-p12589168 | A-genome specific (napus-rapa)    | 0.9832536    | 0.5078464    | not scorable | not scorable | 1            | 0.8836019    |
| #### Bn-A07-p12593239 | A-genome specific (napus-rapa)    | 0.9928229    | 0.7381953    | not scorable | not scorable | 1            | 0.7422542    |
| #### Bn-A07-p12594658 | A-genome specific (napus-rapa)    | 1            | 0.734484     | not scorable | not scorable | 0.9917355    | 0.7045814    |
| #### Bn-A07-p12602102 | A-genome specific (napus-rapa)    | 0.9952153    | 0.7397894    | not scorable | not scorable | 0.9752066    | 0.7319198    |
| #### Bn-A07-p12605125 | A-genome specific (napus-rapa)    | 0.9904306    | 0.7523403    | not scorable | not scorable | 1            | 0.757929     |
| #### Bn-A07-p12609078 | A-genome specific (napus-rapa)    | 1            | 0.9205657    | not scorable | not scorable | 1            | 0.8770766    |
| #### Bn-A07-p12609202 | A-genome specific (napus-rapa)    | 0.9976076    | 0.8349866    | not scorable | not scorable | 0.9917355    | 0.7306036    |
| #### Bn-A07-p12617108 | A-genome specific (napus-rapa)    | 0.9760765    | 0.4300781    | not scorable | not scorable | 1            | 0.6214048    |
| #### Bn-A07-p12617827 | A-genome specific (napus-rapa)    | 0.8779904    | 0.7675409    | not scorable | not scorable | 0.9917355    | 0.7225548    |
| #### Bn-A07-p12622860 | A-genome specific (napus-rapa)    | 0.8492823    | 0.6570944    | not scorable | not scorable | 0.9834711    | 0.7053497    |
| #### Bn-A07-p12631921 | A-genome specific (napus-rapa)    | 0.9712918    | 0.3751167    | not scorable | not scorable | 0.9917355    | 0.8365129    |
| #### Bn-A07-p12679842 | A-genome specific (rapa only)     | not scorable | not scorable | not scorable | not scorable | 0.9917355    | 0.6168858    |
| #### Bn-A07-p12685266 | A-genome specific (napus-rapa)    | 0.8684211    | 0.7312281    | not scorable | not scorable | 0.9752066    | 0.7402468    |
| #### Bn-A07-p12688545 | A-genome specific (napus-rapa)    | 0.9736842    | 0.676439     | not scorable | not scorable | 0.9917355    | 0.6888363    |

|                       |                                   |              |              |              |              |              |   |              |
|-----------------------|-----------------------------------|--------------|--------------|--------------|--------------|--------------|---|--------------|
| #### Bn-A07-p12693030 | A-genome specific (napus-rapa)    | 0.9473684    | 0.3269863    | not scorable | not scorable |              | 1 | 0.7729371    |
| #### Bn-A07-p12705404 | A-genome specific (napus-rapa)    | 0.9880383    | 0.7467628    | not scorable | not scorable | 0.9834711    |   | 0.6598001    |
| #### Bn-A07-p12708718 | A-genome specific (napus-rapa)    | 0.9736842    | 0.3066641    | not scorable | not scorable | 0.9834711    |   | 0.5053799    |
| #### Bn-A07-p12710571 | A-genome specific (napus-rapa)    | 0.9928229    | 0.6286297    | not scorable | not scorable |              | 1 | 0.695251     |
| #### Bn-A07-p12716261 | all not scorable                  | not scorable | not scorable | not scorable | not scorable | not scorable |   | not scorable |
| #### Bn-A07-p12732142 | A-genome specific (napus-rapa)    | 0.9760765    | 0.6503958    | not scorable | not scorable | 0.8099173    |   | 0.6296344    |
| #### Bn-A07-p12734895 | A-genome specific (napus-rapa)    | 0.9904306    | 0.7262111    | not scorable | not scorable | 0.9834711    |   | 0.7043       |
| #### Bn-A07-p12749234 | A-genome specific (napus-rapa)    | 0.9856459    | 0.6923664    | not scorable | not scorable | 0.8016529    |   | 0.7566987    |
| #### Bn-A07-p12749531 | A-genome specific (napus-rapa)    | 0.7894737    | 0.7180856    | not scorable | not scorable | 0.7933884    |   | 0.7775161    |
| #### Bn-A07-p12751218 | A-genome specific (napus-rapa)    | 0.9665072    | 0.7915581    | not scorable | not scorable | 0.9917355    |   | 0.8448267    |
| #### Bn-A07-p12754144 | all not scorable                  | not scorable | not scorable | not scorable | not scorable | not scorable |   | not scorable |
| #### Bn-A07-p12757009 | A-genome specific (napus-rapa)    | 0.9904306    | 0.5816963    | not scorable | not scorable |              | 1 | 0.7277994    |
| #### Bn-A07-p12787260 | A-genome specific (napus-rapa)    | 0.9832536    | 0.2685401    | not scorable | not scorable |              | 1 | 0.8460085    |
| #### Bn-A07-p12811691 | A-genome specific (napus-rapa)    | 0.9880383    | 0.5081102    | not scorable | not scorable | 0.9917355    |   | 0.6964369    |
| #### Bn-A07-p12827973 | A-genome specific (rapa only)     | not scorable | not scorable | not scorable | not scorable | 0.9752066    |   | 0.7204108    |
| #### Bn-A07-p12828848 | A-genome specific (napus-rapa)    | 0.9712918    | 0.4946394    | not scorable | not scorable | 0.9752066    |   | 0.808934     |
| #### Bn-A07-p12830017 | A-genome specific (rapa only)     | not scorable | not scorable | not scorable | not scorable | 0.9917355    |   | 0.739592     |
| #### Bn-A07-p12833066 | A-genome specific (napus-rapa)    | 0.9736842    | 0.7101812    | not scorable | not scorable | 0.9917355    |   | 0.8063367    |
| #### Bn-A07-p12833434 | A-genome specific (napus-rapa)    | 0.9712918    | 0.8015219    | not scorable | not scorable | 0.9834711    |   | 0.8095103    |
| #### Bn-A07-p12833496 | A-genome specific (napus-rapa)    | 0.9808612    | 0.7781911    | not scorable | not scorable | 0.9834711    |   | 0.7911709    |
| #### Bn-A07-p12840368 | A-genome specific (napus-rapa)    | 0.9688995    | 0.7108116    | not scorable | not scorable | 0.9834711    |   | 0.7375425    |
| #### Bn-A07-p12841026 | genome unspecific (oleracea-rapa) | not scorable | not scorable |              | 1            | 0.7923368    |   | 1 0.8492818  |
| #### Bn-A07-p12869509 | A-genome specific (napus-rapa)    | 0.9808612    | 0.7747089    | not scorable | not scorable | 0.9669421    |   | 0.7070216    |
| #### Bn-A07-p12874349 | napus specific                    | 0.9641148    | 0.6344632    | not scorable | not scorable | not scorable |   | not scorable |
| #### Bn-A07-p12876226 | A-genome specific (napus-rapa)    | 0.9114832    | 0.3835113    | not scorable | not scorable | 0.8264463    |   | 0.779471     |
| #### Bn-A07-p12878986 | A-genome specific (napus-rapa)    | 0.9617225    | 0.4237542    | not scorable | not scorable | 0.9669421    |   | 0.7499493    |
| #### Bn-A07-p12884814 | A-genome specific (napus-rapa)    | 0.9712918    | 0.8042824    | not scorable | not scorable | 0.9917355    |   | 0.8222046    |
| #### Bn-A07-p12904129 | A-genome specific (rapa only)     | not scorable | not scorable | not scorable | not scorable | 0.9834711    |   | 0.7106205    |
| #### Bn-A07-p12918175 | A-genome specific (napus-rapa)    | 0.9712918    | 0.4001257    | not scorable | not scorable | 0.9917355    |   | 0.6193036    |
| #### Bn-A07-p12921727 | A-genome specific (napus-rapa)    | 0.9904306    | 0.8104898    | not scorable | not scorable | 0.9752066    |   | 0.7282655    |
| #### Bn-A07-p12922061 | A-genome specific (rapa only)     | not scorable | not scorable | not scorable | not scorable | 0.9917355    |   | 0.670429     |
| #### Bn-A07-p12926496 | A-genome specific (napus-rapa)    | 0.9784689    | 0.7978278    | not scorable | not scorable | 0.9917355    |   | 0.8195595    |
| #### Bn-A07-p1292866  | A-genome specific (napus-rapa)    | 0.9617225    | 0.7627851    | not scorable | not scorable | 0.9917355    |   | 0.7987562    |

|                       |                                    |              |              |              |              |              |              |
|-----------------------|------------------------------------|--------------|--------------|--------------|--------------|--------------|--------------|
| #### Bn-A07-p1293366  | genome unspecific (all in)         | 1            | 0.5319708    | 1            | 0.6889469    | 1            | 0.7770717    |
| #### Bn-A07-p12935086 | genome unspecific (all in)         | 0.9952153    | 0.4720629    | 1            | 0.7603008    | 0.9834711    | 0.7929108    |
| #### Bn-A07-p12935190 | genome unspecific (oleracea-rapa)  | not scorable | not scorable | 0.9844961    | 0.7583297    | 0.7355372    | 0.7514408    |
| #### Bn-A07-p1294264  | A-genome specific (napus-rapa)     | 0.9904306    | 0.7780989    | not scorable | not scorable | 0.9917355    | 0.8042552    |
| #### Bn-A07-p12947587 | napus specific                     | 0.9976076    | 0.7340783    | not scorable | not scorable | not scorable | not scorable |
| #### Bn-A07-p12963622 | C-genome specific (napus-oleracea) | 0.9641148    | 0.4724292    | 0.8914729    | 0.5445379    | not scorable | not scorable |
| #### Bn-A07-p12969280 | napus specific                     | 0.9760765    | 0.365844     | not scorable | not scorable | not scorable | not scorable |
| #### Bn-A07-p12992945 | A-genome specific (napus-rapa)     | 0.9856459    | 0.4971574    | not scorable | not scorable | 0.9917355    | 0.8058264    |
| #### Bn-A07-p1300457  | napus specific                     | 0.9521531    | 0.7735319    | not scorable | not scorable | not scorable | not scorable |
| #### Bn-A07-p13005198 | A-genome specific (napus-rapa)     | 0.9856459    | 0.7871357    | not scorable | not scorable | 1            | 0.8267965    |
| #### Bn-A07-p13007323 | A-genome specific (napus-rapa)     | 0.9665072    | 0.693108     | not scorable | not scorable | 1            | 0.699442     |
| #### Bn-A07-p13009858 | A-genome specific (napus-rapa)     | 0.9904306    | 0.6785457    | not scorable | not scorable | 0.9752066    | 0.6259825    |
| #### Bn-A07-p1301127  | genome unspecific (all in)         | 0.9688995    | 0.3034353    | 1            | 0.5900869    | 0.9917355    | 0.6618353    |
| #### Bn-A07-p1301402  | A-genome specific (napus-rapa)     | 0.9904306    | 0.7302015    | not scorable | not scorable | 0.9669421    | 0.7911916    |
| #### Bn-A07-p13017844 | A-genome specific (napus-rapa)     | 0.9880383    | 0.6140189    | not scorable | not scorable | 1            | 0.6938334    |
| #### Bn-A07-p1303513  | A-genome specific (napus-rapa)     | 0.9784689    | 0.6738493    | not scorable | not scorable | 0.9917355    | 0.6921418    |
| #### Bn-A07-p1303705  | A-genome specific (napus-rapa)     | 0.9784689    | 0.7794729    | not scorable | not scorable | 0.9834711    | 0.7466434    |
| #### Bn-A07-p13037426 | A-genome specific (napus-rapa)     | 0.9880383    | 0.5567363    | not scorable | not scorable | 0.9917355    | 0.7339104    |
| #### Bn-A07-p1306286  | napus specific                     | 0.9641148    | 0.7537711    | not scorable | not scorable | not scorable | not scorable |
| #### Bn-A07-p13072595 | A-genome specific (napus-rapa)     | 1            | 0.7666325    | not scorable | not scorable | 1            | 0.7015764    |
| #### Bn-A07-p13090054 | A-genome specific (napus-rapa)     | 0.9736842    | 0.7824497    | not scorable | not scorable | 0.9917355    | 0.6920685    |
| #### Bn-A07-p13096286 | A-genome specific (napus-rapa)     | 0.9760765    | 0.7802982    | not scorable | not scorable | 1            | 0.6667266    |
| #### Bn-A07-p13097588 | A-genome specific (napus-rapa)     | 1            | 0.9212185    | not scorable | not scorable | 1            | 0.8912995    |
| #### Bn-A07-p13097844 | A-genome specific (napus-rapa)     | 0.9688995    | 0.7610126    | not scorable | not scorable | 0.9917355    | 0.8055334    |
| #### Bn-A07-p13099081 | A-genome specific (napus-rapa)     | 0.9641148    | 0.7713459    | not scorable | not scorable | 0.9917355    | 0.77314      |
| #### Bn-A07-p13101489 | A-genome specific (napus-rapa)     | 0.9641148    | 0.7147065    | not scorable | not scorable | 1            | 0.7226961    |
| #### Bn-A07-p13102686 | A-genome specific (napus-rapa)     | 0.9760765    | 0.6800535    | not scorable | not scorable | 0.9917355    | 0.7244381    |
| #### Bn-A07-p13103201 | A-genome specific (napus-rapa)     | 0.9760765    | 0.6648085    | not scorable | not scorable | 0.9917355    | 0.64099      |
| #### Bn-A07-p13110243 | A-genome specific (napus-rapa)     | 0.9688995    | 0.6733023    | not scorable | not scorable | 0.8264463    | 0.7765832    |
| #### Bn-A07-p13122160 | A-genome specific (napus-rapa)     | 0.9665072    | 0.3624942    | not scorable | not scorable | 0.9917355    | 0.8013213    |
| #### Bn-A07-p13124922 | A-genome specific (napus-rapa)     | 0.9712918    | 0.2385983    | not scorable | not scorable | 0.9834711    | 0.6488409    |
| #### Bn-A07-p13125509 | A-genome specific (rapa only)      | not scorable | not scorable | not scorable | not scorable | 1            | 0.6051793    |
| #### Bn-A07-p13128413 | genome unspecific (all in)         | 0.9688995    | 0.3793393    | 0.9922481    | 0.8368091    | 0.8264463    | 0.9151685    |

|                       |                                |           |           |              |              |              |              |
|-----------------------|--------------------------------|-----------|-----------|--------------|--------------|--------------|--------------|
| #### Bn-A07-p13133496 | A-genome specific (napus-rapa) | 0.8349282 | 0.7473723 | not scorable | not scorable | 0.9834711    | 0.6964849    |
| #### Bn-A07-p13137182 | A-genome specific (napus-rapa) | 0.9856459 | 0.7892981 | not scorable | not scorable | 0.9917355    | 0.7197168    |
| #### Bn-A07-p13138010 | A-genome specific (napus-rapa) | 0.9832536 | 0.793732  | not scorable | not scorable | 1            | 0.5945849    |
| #### Bn-A07-p13138082 | A-genome specific (napus-rapa) | 0.9808612 | 0.8080389 | not scorable | not scorable | 0.9917355    | 0.7027858    |
| #### Bn-A07-p13138310 | A-genome specific (napus-rapa) | 0.9784689 | 0.6852701 | not scorable | not scorable | 0.9834711    | 0.6544216    |
| #### Bn-A07-p13141694 | A-genome specific (napus-rapa) | 0.9928229 | 0.8798974 | not scorable | not scorable | 0.9752066    | 0.7724882    |
| #### Bn-A07-p13147502 | A-genome specific (napus-rapa) | 0.9952153 | 0.8082874 | not scorable | not scorable | 1            | 0.8117164    |
| #### Bn-A07-p13147568 | A-genome specific (napus-rapa) | 0.9784689 | 0.7319767 | not scorable | not scorable | 0.9917355    | 0.6960391    |
| #### Bn-A07-p13148032 | A-genome specific (napus-rapa) | 0.9760765 | 0.7847272 | not scorable | not scorable | 1            | 0.8520315    |
| #### Bn-A07-p13154645 | A-genome specific (napus-rapa) | 0.9952153 | 0.5867337 | not scorable | not scorable | 1            | 0.7355924    |
| #### Bn-A07-p13156984 | A-genome specific (napus-rapa) | 0.9976076 | 0.8047093 | not scorable | not scorable | 1            | 0.7949262    |
| #### Bn-A07-p13161975 | A-genome specific (napus-rapa) | 0.9976076 | 0.4289127 | not scorable | not scorable | 1            | 0.7500055    |
| #### Bn-A07-p13162255 | A-genome specific (napus-rapa) | 0.9952153 | 0.5161802 | not scorable | not scorable | 1            | 0.8163809    |
| #### Bn-A07-p13162516 | A-genome specific (napus-rapa) | 0.9952153 | 0.5153009 | not scorable | not scorable | 1            | 0.7454807    |
| #### Bn-A07-p13164874 | napus specific                 | 0.9928229 | 0.8968774 | not scorable | not scorable | not scorable | not scorable |
| #### Bn-A07-p13167740 | A-genome specific (napus-rapa) | 0.9904306 | 0.8639413 | not scorable | not scorable | 0.9917355    | 0.7118106    |
| #### Bn-A07-p13167844 | A-genome specific (napus-rapa) | 1         | 0.8906603 | not scorable | not scorable | 0.9917355    | 0.75914      |
| #### Bn-A07-p13171850 | A-genome specific (napus-rapa) | 0.9928229 | 0.7392671 | not scorable | not scorable | 1            | 0.812377     |
| #### Bn-A07-p13172047 | A-genome specific (napus-rapa) | 0.9928229 | 0.6489987 | not scorable | not scorable | 1            | 0.7165536    |
| #### Bn-A07-p13184664 | A-genome specific (napus-rapa) | 0.9521531 | 0.5041376 | not scorable | not scorable | 1            | 0.7364459    |
| #### Bn-A07-p13186090 | A-genome specific (napus-rapa) | 0.9832536 | 0.4876596 | not scorable | not scorable | 0.9917355    | 0.6621693    |
| #### Bn-A07-p13187658 | A-genome specific (napus-rapa) | 1         | 0.8044676 | not scorable | not scorable | 0.9917355    | 0.7844694    |
| #### Bn-A07-p13188334 | A-genome specific (napus-rapa) | 0.9952153 | 0.7508068 | not scorable | not scorable | 1            | 0.7123908    |
| #### Bn-A07-p13192299 | A-genome specific (napus-rapa) | 0.9976076 | 0.8598651 | not scorable | not scorable | 0.9752066    | 0.7264322    |
| #### Bn-A07-p13202840 | A-genome specific (napus-rapa) | 1         | 0.7583812 | not scorable | not scorable | 0.9834711    | 0.7973853    |
| #### Bn-A07-p132150   | A-genome specific (napus-rapa) | 1         | 0.7475586 | not scorable | not scorable | 0.9917355    | 0.6970033    |
| #### Bn-A07-p13231557 | A-genome specific (napus-rapa) | 1         | 0.8292734 | not scorable | not scorable | 1            | 0.7891282    |
| #### Bn-A07-p1323822  | A-genome specific (napus-rapa) | 0.9928229 | 0.672076  | not scorable | not scorable | 0.9917355    | 0.6954373    |
| #### Bn-A07-p1324687  | A-genome specific (napus-rapa) | 0.9928229 | 0.5626308 | not scorable | not scorable | 0.9090909    | 0.5694977    |
| #### Bn-A07-p13247613 | A-genome specific (napus-rapa) | 0.9952153 | 0.3938185 | not scorable | not scorable | 0.9834711    | 0.7448434    |
| #### Bn-A07-p13259825 | A-genome specific (napus-rapa) | 0.9712918 | 0.6784558 | not scorable | not scorable | 0.9917355    | 0.7641606    |
| #### Bn-A07-p13260561 | A-genome specific (napus-rapa) | 0.9976076 | 0.5393254 | not scorable | not scorable | 0.9669421    | 0.7886432    |
| #### Bn-A07-p13273073 | A-genome specific (napus-rapa) | 0.9976076 | 0.4925472 | not scorable | not scorable | 0.9917355    | 0.5674871    |

|                       |                                |              |              |              |              |              |              |
|-----------------------|--------------------------------|--------------|--------------|--------------|--------------|--------------|--------------|
| #### Bn-A07-p1327427  | A-genome specific (napus-rapa) | 0.9808612    | 0.8042824    | not scorable | not scorable | 0.9917355    | 0.8358084    |
| #### Bn-A07-p13278392 | A-genome specific (napus-rapa) | 0.9928229    | 0.7447036    | not scorable | not scorable | 0.9917355    | 0.7673666    |
| #### Bn-A07-p13283299 | A-genome specific (napus-rapa) | 0.9976076    | 0.8423448    | not scorable | not scorable | 1            | 0.7526934    |
| #### Bn-A07-p13292902 | A-genome specific (napus-rapa) | 0.9976076    | 0.7856794    | not scorable | not scorable | 0.9917355    | 0.7148337    |
| #### Bn-A07-p13305000 | A-genome specific (napus-rapa) | 1            | 0.3556729    | not scorable | not scorable | 0.9834711    | 0.7893023    |
| #### Bn-A07-p13320094 | A-genome specific (napus-rapa) | 1            | 0.7647728    | not scorable | not scorable | 0.9917355    | 0.7910609    |
| #### Bn-A07-p13320647 | A-genome specific (napus-rapa) | 1            | 0.7028853    | not scorable | not scorable | 1            | 0.7641606    |
| #### Bn-A07-p13323913 | A-genome specific (napus-rapa) | 0.9808612    | 0.7288978    | not scorable | not scorable | 0.9834711    | 0.6909083    |
| #### Bn-A07-p13324733 | A-genome specific (napus-rapa) | 0.9904306    | 0.6986755    | not scorable | not scorable | 0.9834711    | 0.6334242    |
| #### Bn-A07-p13334430 | A-genome specific (napus-rapa) | 0.9712918    | 0.4046127    | not scorable | not scorable | 0.9917355    | 0.668996     |
| #### Bn-A07-p13341778 | A-genome specific (napus-rapa) | 1            | 0.8948976    | not scorable | not scorable | 1            | 0.7088631    |
| #### Bn-A07-p13347715 | A-genome specific (rapa only)  | not scorable | not scorable | not scorable | not scorable | 1            | 0.8170684    |
| #### Bn-A07-p13350234 | A-genome specific (napus-rapa) | 0.9928229    | 0.4852844    | not scorable | not scorable | 1            | 0.7422366    |
| #### Bn-A07-p13358954 | A-genome specific (napus-rapa) | 0.9736842    | 0.2458407    | not scorable | not scorable | 1            | 0.5747411    |
| #### Bn-A07-p13359413 | A-genome specific (napus-rapa) | 0.9712918    | 0.8037723    | not scorable | not scorable | 0.9917355    | 0.8164366    |
| #### Bn-A07-p1336276  | A-genome specific (napus-rapa) | 0.6674641    | 0.5617567    | not scorable | not scorable | 0.9834711    | 0.8013431    |
| #### Bn-A07-p13382993 | A-genome specific (napus-rapa) | 0.9688995    | 0.3334683    | not scorable | not scorable | 1            | 0.694096     |
| #### Bn-A07-p13388181 | A-genome specific (napus-rapa) | 0.9904306    | 0.7677696    | not scorable | not scorable | 0.9834711    | 0.7871185    |
| #### Bn-A07-p13391170 | A-genome specific (napus-rapa) | 0.9736842    | 0.3337447    | not scorable | not scorable | 0.9917355    | 0.8119705    |
| #### Bn-A07-p13391724 | A-genome specific (napus-rapa) | 0.9976076    | 0.7097875    | not scorable | not scorable | 1            | 0.7482834    |
| #### Bn-A07-p13407262 | all not scorable               | not scorable | not scorable | not scorable | not scorable | not scorable | not scorable |
| #### Bn-A07-p1341355  | A-genome specific (napus-rapa) | 0.9808612    | 0.6695833    | not scorable | not scorable | 0.9917355    | 0.7526509    |
| #### Bn-A07-p1341614  | A-genome specific (napus-rapa) | 0.9688995    | 0.708383     | not scorable | not scorable | 0.9917355    | 0.822969     |
| #### Bn-A07-p1341729  | A-genome specific (napus-rapa) | 0.9904306    | 0.7780897    | not scorable | not scorable | 0.9917355    | 0.770315     |
| #### Bn-A07-p13425409 | A-genome specific (napus-rapa) | 0.9928229    | 0.7978256    | not scorable | not scorable | 0.9834711    | 0.8321198    |
| #### Bn-A07-p1345521  | A-genome specific (napus-rapa) | 0.7966507    | 0.7701765    | not scorable | not scorable | 1            | 0.6083708    |
| #### Bn-A07-p1346125  | A-genome specific (rapa only)  | not scorable | not scorable | not scorable | not scorable | 0.9752066    | 0.6833796    |
| #### Bn-A07-p13481981 | A-genome specific (napus-rapa) | 1            | 0.8350135    | not scorable | not scorable | 1            | 0.8135551    |
| #### Bn-A07-p13482160 | A-genome specific (napus-rapa) | 1            | 0.7688043    | not scorable | not scorable | 1            | 0.6720574    |
| #### Bn-A07-p13485321 | A-genome specific (napus-rapa) | 0.9976076    | 0.7922144    | not scorable | not scorable | 1            | 0.7437366    |
| #### Bn-A07-p13485413 | A-genome specific (napus-rapa) | 1            | 0.7678645    | not scorable | not scorable | 0.9834711    | 0.6974381    |
| #### Bn-A07-p13485722 | A-genome specific (napus-rapa) | 0.9904306    | 0.6474664    | not scorable | not scorable | 0.9834711    | 0.8005624    |
| #### Bn-A07-p13488332 | A-genome specific (napus-rapa) | 0.9904306    | 0.8207394    | not scorable | not scorable | 0.9834711    | 0.6908549    |

|                       |                                |           |           |              |              |              |              |
|-----------------------|--------------------------------|-----------|-----------|--------------|--------------|--------------|--------------|
| #### Bn-A07-p13488433 | A-genome specific (napus-rapa) | 0.9952153 | 0.7482722 | not scorable | not scorable | 0.9917355    | 0.6785043    |
| #### Bn-A07-p1349482  | A-genome specific (napus-rapa) | 0.7990431 | 0.7646959 | not scorable | not scorable | 0.9669421    | 0.7814007    |
| #### Bn-A07-p13497516 | napus specific                 | 0.9330143 | 0.9349343 | not scorable | not scorable | not scorable | not scorable |
| #### Bn-A07-p13497654 | napus specific                 | 0.9330143 | 0.8977635 | not scorable | not scorable | not scorable | not scorable |
| #### Bn-A07-p13498071 | napus specific                 | 0.9354067 | 0.7864085 | not scorable | not scorable | not scorable | not scorable |
| #### Bn-A07-p13499840 | napus specific                 | 0.9210526 | 0.758444  | not scorable | not scorable | not scorable | not scorable |
| #### Bn-A07-p13500775 | napus specific                 | 0.930622  | 0.7666212 | not scorable | not scorable | not scorable | not scorable |
| #### Bn-A07-p13512124 | genome unspecific (all in)     | 0.9928229 | 0.3263976 |              | 1 0.730921   | 0.9752066    | 0.7079055    |
| #### Bn-A07-p13513308 | A-genome specific (napus-rapa) | 0.9880383 | 0.7522659 | not scorable | not scorable | 0.9834711    | 0.7509992    |
| #### Bn-A07-p13513850 | genome unspecific (all in)     | 0.9712918 | 0.6348324 | 0.8992248    | 0.6418804    | 0.9917355    | 0.7078627    |
| #### Bn-A07-p13516497 | A-genome specific (napus-rapa) | 0.2177033 | 0.6622728 | not scorable | not scorable | 0.8677686    | 0.7857668    |
| #### Bn-A07-p13521038 | A-genome specific (napus-rapa) | 1         | 0.7174963 | not scorable | not scorable | 1            | 0.8090134    |
| #### Bn-A07-p13537021 | A-genome specific (napus-rapa) | 0.9880383 | 0.6253872 | not scorable | not scorable | 0.9669421    | 0.594051     |
| #### Bn-A07-p13543954 | A-genome specific (napus-rapa) | 0.9856459 | 0.7159928 | not scorable | not scorable | 0.9917355    | 0.7746869    |
| #### Bn-A07-p13587753 | A-genome specific (napus-rapa) | 0.9976076 | 0.7704381 | not scorable | not scorable | 1            | 0.7642481    |
| #### Bn-A07-p13589740 | A-genome specific (napus-rapa) | 0.9617225 | 0.7772036 | not scorable | not scorable | 0.8016529    | 0.8347916    |
| #### Bn-A07-p13599579 | A-genome specific (napus-rapa) | 0.9880383 | 0.7979388 | not scorable | not scorable | 0.9917355    | 0.8007416    |
| #### Bn-A07-p13605650 | A-genome specific (napus-rapa) | 0.9952153 | 0.588084  | not scorable | not scorable | 0.9834711    | 0.5827414    |
| #### Bn-A07-p13605726 | A-genome specific (napus-rapa) | 0.9952153 | 0.5808881 | not scorable | not scorable | 0.9752066    | 0.5341222    |
| #### Bn-A07-p13613809 | A-genome specific (napus-rapa) | 0.9760765 | 0.449318  | not scorable | not scorable | 1            | 0.7610953    |
| #### Bn-A07-p13613886 | A-genome specific (napus-rapa) | 0.9856459 | 0.5549481 | not scorable | not scorable | 1            | 0.4997939    |
| #### Bn-A07-p13615643 | A-genome specific (napus-rapa) | 0.9832536 | 0.321131  | not scorable | not scorable | 1            | 0.777503     |
| #### Bn-A07-p13639374 | A-genome specific (napus-rapa) | 0.9808612 | 0.4433459 | not scorable | not scorable | 0.9586777    | 0.5788916    |
| #### Bn-A07-p13650653 | A-genome specific (napus-rapa) | 1         | 0.5004385 | not scorable | not scorable | 1            | 0.8387362    |
| #### Bn-A07-p13653958 | A-genome specific (napus-rapa) | 0.9952153 | 0.6270104 | not scorable | not scorable | 0.9917355    | 0.7878926    |
| #### Bn-A07-p13654191 | A-genome specific (napus-rapa) | 0.9808612 | 0.7474135 | not scorable | not scorable | 0.9669421    | 0.6883833    |
| #### Bn-A07-p13657646 | A-genome specific (napus-rapa) | 0.4736842 | 0.7847975 | not scorable | not scorable | 0.9669421    | 0.8021356    |
| #### Bn-A07-p13659939 | A-genome specific (napus-rapa) | 0.9617225 | 0.6415942 | not scorable | not scorable | 1            | 0.7703295    |
| #### Bn-A07-p13662635 | A-genome specific (napus-rapa) | 0.9928229 | 0.7773857 | not scorable | not scorable | 1            | 0.7588955    |
| #### Bn-A07-p13665031 | A-genome specific (napus-rapa) | 1         | 0.4055145 | not scorable | not scorable | 0.9917355    | 0.7796507    |
| #### Bn-A07-p13679221 | A-genome specific (napus-rapa) | 0.9928229 | 0.5641541 | not scorable | not scorable | 0.9917355    | 0.8008398    |
| #### Bn-A07-p13693377 | A-genome specific (napus-rapa) | 0.9593301 | 0.5432894 | not scorable | not scorable | 1            | 0.8034273    |
| #### Bn-A07-p13705188 | A-genome specific (napus-rapa) | 0.9976076 | 0.4449693 | not scorable | not scorable | 1            | 0.782243     |





|                       |                                   |              |              |              |              |              |              |
|-----------------------|-----------------------------------|--------------|--------------|--------------|--------------|--------------|--------------|
| #### Bn-A07-p13947936 | A-genome specific (napus-rapa)    | 0.9162679    | 0.4843542    | not scorable | not scorable | 0.9917355    | 0.802957     |
| #### Bn-A07-p13947955 | A-genome specific (napus-rapa)    | 0.9617225    | 0.7605419    | not scorable | not scorable | 0.9752066    | 0.6979369    |
| #### Bn-A07-p13957160 | napus specific                    | 0.9545454    | 0.788916     | not scorable | not scorable | not scorable | not scorable |
| #### Bn-A07-p13957625 | napus specific                    | 0.9593301    | 0.7442295    | not scorable | not scorable | not scorable | not scorable |
| #### Bn-A07-p13963849 | A-genome specific (napus-rapa)    | 0.9736842    | 0.2971108    | not scorable | not scorable | 0.9669421    | 0.7627161    |
| #### Bn-A07-p13964923 | napus specific                    | 0.9114832    | 0.8008282    | not scorable | not scorable | not scorable | not scorable |
| #### Bn-A07-p13969888 | A-genome specific (napus-rapa)    | 0.7966507    | 0.7303327    | not scorable | not scorable | 0.9834711    | 0.8228635    |
| #### Bn-A07-p13971525 | napus specific                    | 0.9569378    | 0.7129219    | not scorable | not scorable | not scorable | not scorable |
| #### Bn-A07-p1400148  | A-genome specific (napus-rapa)    | 0.9808612    | 0.3011402    | not scorable | not scorable | 1            | 0.6358051    |
| #### Bn-A07-p14002586 | A-genome specific (napus-rapa)    | 0.9976076    | 0.7865099    | not scorable | not scorable | 0.9834711    | 0.7538134    |
| #### Bn-A07-p14002656 | A-genome specific (napus-rapa)    | 0.9808612    | 0.4614859    | not scorable | not scorable | 0.9917355    | 0.7887913    |
| #### Bn-A07-p14005263 | A-genome specific (napus-rapa)    | 0.9712918    | 0.7832866    | not scorable | not scorable | 0.9752066    | 0.7977526    |
| #### Bn-A07-p14016405 | A-genome specific (napus-rapa)    | 0.9736842    | 0.4214176    | not scorable | not scorable | 0.9917355    | 0.7794024    |
| #### Bn-A07-p14024559 | A-genome specific (napus-rapa)    | 1            | 0.4746027    | not scorable | not scorable | 0.9917355    | 0.7743959    |
| #### Bn-A07-p14024677 | A-genome specific (napus-rapa)    | 0.9641148    | 0.6451685    | not scorable | not scorable | 1            | 0.7427787    |
| #### Bn-A07-p14024930 | A-genome specific (napus-rapa)    | 0.9904306    | 0.3892752    | not scorable | not scorable | 0.9586777    | 0.643296     |
| #### Bn-A07-p14026612 | A-genome specific (napus-rapa)    | 0.9736842    | 0.6101846    | not scorable | not scorable | 0.9917355    | 0.6774345    |
| #### Bn-A07-p14029820 | A-genome specific (napus-rapa)    | 0.9880383    | 0.6931905    | not scorable | not scorable | 1            | 0.7094899    |
| #### Bn-A07-p14034468 | A-genome specific (napus-rapa)    | 0.9904306    | 0.8065699    | not scorable | not scorable | 0.9834711    | 0.7771393    |
| #### Bn-A07-p14045156 | genome unspecific (oleracea-rapa) | not scorable | not scorable | 0.9844961    | 0.8129542    | 1            | 0.7649122    |
| #### Bn-A07-p14046607 | A-genome specific (napus-rapa)    | 0.9928229    | 0.5582135    | not scorable | not scorable | 0.9834711    | 0.6316202    |
| #### Bn-A07-p14059112 | A-genome specific (napus-rapa)    | 0.9928229    | 0.4356181    | not scorable | not scorable | 0.9752066    | 0.702454     |
| #### Bn-A07-p14062366 | A-genome specific (napus-rapa)    | 0.9593301    | 0.6086066    | not scorable | not scorable | 1            | 0.7373857    |
| #### Bn-A07-p14065231 | napus specific                    | 0.6411483    | 0.8039201    | not scorable | not scorable | not scorable | not scorable |
| #### Bn-A07-p14071930 | A-genome specific (napus-rapa)    | 0.9952153    | 0.4014032    | not scorable | not scorable | 1            | 0.6479927    |
| #### Bn-A07-p14092905 | A-genome specific (napus-rapa)    | 0.9976076    | 0.6881672    | not scorable | not scorable | 0.9917355    | 0.7592067    |
| #### Bn-A07-p14103536 | A-genome specific (napus-rapa)    | 0.9832536    | 0.3321051    | not scorable | not scorable | 1            | 0.6812021    |
| #### Bn-A07-p14110753 | A-genome specific (napus-rapa)    | 0.9688995    | 0.6549555    | not scorable | not scorable | 0.9917355    | 0.6930624    |
| #### Bn-A07-p14116283 | A-genome specific (napus-rapa)    | 0.9904306    | 0.4974352    | not scorable | not scorable | 0.8595041    | 0.7681279    |
| #### Bn-A07-p14116798 | A-genome specific (napus-rapa)    | 0.9665072    | 0.7703139    | not scorable | not scorable | 0.9917355    | 0.800547     |
| #### Bn-A07-p14121891 | A-genome specific (napus-rapa)    | 0.9760765    | 0.6918058    | not scorable | not scorable | 1            | 0.854561     |
| #### Bn-A07-p14124058 | A-genome specific (napus-rapa)    | 0.9760765    | 0.4514513    | not scorable | not scorable | 0.9834711    | 0.6110302    |
| #### Bn-A07-p14129550 | A-genome specific (napus-rapa)    | 0.9928229    | 0.7088199    | not scorable | not scorable | 1            | 0.8570995    |

|                       |                                |              |              |              |              |              |              |
|-----------------------|--------------------------------|--------------|--------------|--------------|--------------|--------------|--------------|
| #### Bn-A07-p14129566 | A-genome specific (napus-rapa) | 0.9593301    | 0.732999     | not scorable | not scorable | 0.9917355    | 0.7494091    |
| #### Bn-A07-p14134237 | A-genome specific (napus-rapa) | 0.9832536    | 0.7148095    | not scorable | not scorable | 0.9834711    | 0.7021861    |
| #### Bn-A07-p14140428 | A-genome specific (napus-rapa) | 0.9880383    | 0.730259     | not scorable | not scorable | 0.9917355    | 0.7995618    |
| #### Bn-A07-p14142383 | A-genome specific (napus-rapa) | 0.9856459    | 0.6801473    | not scorable | not scorable | 0.9917355    | 0.745059     |
| #### Bn-A07-p14143419 | A-genome specific (napus-rapa) | 0.9832536    | 0.7703037    | not scorable | not scorable | 0.9669421    | 0.7760002    |
| #### Bn-A07-p14143422 | A-genome specific (napus-rapa) | 0.9880383    | 0.7343195    | not scorable | not scorable | 0.9586777    | 0.8043562    |
| #### Bn-A07-p14144205 | A-genome specific (napus-rapa) | 0.9928229    | 0.6900505    | not scorable | not scorable | 1            | 0.743666     |
| #### Bn-A07-p14146406 | A-genome specific (napus-rapa) | 1            | 0.4233972    | not scorable | not scorable | 0.9917355    | 0.902238     |
| #### Bn-A07-p14150380 | A-genome specific (napus-rapa) | 0.9880383    | 0.4131571    | not scorable | not scorable | 1            | 0.7871124    |
| #### Bn-A07-p1415413  | A-genome specific (napus-rapa) | 0.9473684    | 0.3280699    | not scorable | not scorable | 0.9752066    | 0.7093671    |
| #### Bn-A07-p14162450 | A-genome specific (napus-rapa) | 1            | 0.4000926    | not scorable | not scorable | 1            | 0.6722943    |
| #### Bn-A07-p14162566 | A-genome specific (napus-rapa) | 0.9521531    | 0.7512755    | not scorable | not scorable | 0.9669421    | 0.744148     |
| #### Bn-A07-p14162622 | A-genome specific (napus-rapa) | 0.9665072    | 0.7385492    | not scorable | not scorable | 1            | 0.8453379    |
| #### Bn-A07-p14164068 | A-genome specific (napus-rapa) | 0.9856459    | 0.7824778    | not scorable | not scorable | 1            | 0.8425688    |
| #### Bn-A07-p1416980  | A-genome specific (napus-rapa) | 0.7679426    | 0.6504216    | not scorable | not scorable | 0.9752066    | 0.6796869    |
| #### Bn-A07-p14184802 | A-genome specific (napus-rapa) | 1            | 0.2887456    | not scorable | not scorable | 1            | 0.745892     |
| #### Bn-A07-p14185108 | A-genome specific (napus-rapa) | 0.9760765    | 0.6258205    | not scorable | not scorable | 0.9917355    | 0.5910345    |
| #### Bn-A07-p14193108 | A-genome specific (rapa only)  | not scorable | not scorable | not scorable | not scorable | 0.9752066    | 0.8071719    |
| #### Bn-A07-p14199690 | A-genome specific (napus-rapa) | 0.9952153    | 0.4780829    | not scorable | not scorable | 0.9834711    | 0.6144826    |
| #### Bn-A07-p14202755 | A-genome specific (napus-rapa) | 0.8803828    | 0.6651222    | not scorable | not scorable | 1            | 0.7788273    |
| #### Bn-A07-p14213371 | A-genome specific (napus-rapa) | 0.9832536    | 0.5011801    | not scorable | not scorable | 0.9917355    | 0.800464     |
| #### Bn-A07-p14225102 | A-genome specific (napus-rapa) | 0.9712918    | 0.8166201    | not scorable | not scorable | 0.9917355    | 0.6635625    |
| #### Bn-A07-p14225642 | A-genome specific (napus-rapa) | 0.9808612    | 0.2433617    | not scorable | not scorable | 0.9834711    | 0.6994061    |
| #### Bn-A07-p14231567 | A-genome specific (napus-rapa) | 0.9760765    | 0.7548693    | not scorable | not scorable | 0.9917355    | 0.8840817    |
| #### Bn-A07-p14241936 | A-genome specific (napus-rapa) | 0.9665072    | 0.2593146    | not scorable | not scorable | 0.9669421    | 0.6776102    |
| #### Bn-A07-p14263288 | all not scorable               | not scorable | not scorable | not scorable | not scorable | not scorable | not scorable |
| #### Bn-A07-p14273852 | A-genome specific (napus-rapa) | 0.9569378    | 0.3754578    | not scorable | not scorable | 0.9834711    | 0.6905293    |
| #### Bn-A07-p14287940 | A-genome specific (napus-rapa) | 0.9760765    | 0.7633903    | not scorable | not scorable | 1            | 0.7406391    |
| #### Bn-A07-p14288125 | A-genome specific (napus-rapa) | 0.9880383    | 0.7573293    | not scorable | not scorable | 0.9917355    | 0.8001507    |
| #### Bn-A07-p14297369 | A-genome specific (napus-rapa) | 0.9784689    | 0.3040973    | not scorable | not scorable | 0.9917355    | 0.7973608    |
| #### Bn-A07-p14306631 | A-genome specific (napus-rapa) | 0.9928229    | 0.3524475    | not scorable | not scorable | 0.9669421    | 0.678725     |
| #### Bn-A07-p14325380 | A-genome specific (napus-rapa) | 0.9784689    | 0.7256783    | not scorable | not scorable | 0.9917355    | 0.7229245    |
| #### Bn-A07-p14328365 | A-genome specific (napus-rapa) | 1            | 0.7831812    | not scorable | not scorable | 1            | 0.7910324    |

|                       |                                |              |              |              |              |              |              |
|-----------------------|--------------------------------|--------------|--------------|--------------|--------------|--------------|--------------|
| #### Bn-A07-p14329191 | A-genome specific (napus-rapa) | 0.9856459    | 0.6653774    | not scorable | not scorable | 0.9834711    | 0.7349139    |
| #### Bn-A07-p14333680 | A-genome specific (napus-rapa) | 1            | 0.803124     | not scorable | not scorable | 0.9917355    | 0.792949     |
| #### Bn-A07-p14340252 | A-genome specific (napus-rapa) | 1            | 0.7668386    | not scorable | not scorable | 0.9834711    | 0.6896698    |
| #### Bn-A07-p1437386  | genome unspecific (all in)     | 0.9760765    | 0.569074     | 0.8992248    | 0.5316597    | 1            | 0.6574711    |
| #### Bn-A07-p1437777  | A-genome specific (napus-rapa) | 0.7870814    | 0.8030111    | not scorable | not scorable | 0.9834711    | 0.8391827    |
| #### Bn-A07-p14382008 | A-genome specific (napus-rapa) | 0.9593301    | 0.2273288    | not scorable | not scorable | 0.9917355    | 0.5867245    |
| #### Bn-A07-p14390667 | A-genome specific (napus-rapa) | 0.9760765    | 0.7954291    | not scorable | not scorable | 0.9834711    | 0.850488     |
| #### Bn-A07-p1443503  | A-genome specific (napus-rapa) | 0.9856459    | 0.4762557    | not scorable | not scorable | 0.9917355    | 0.7883722    |
| #### Bn-A07-p14437313 | A-genome specific (napus-rapa) | 0.9832536    | 0.5677043    | not scorable | not scorable | 1            | 0.7969241    |
| #### Bn-A07-p1443824  | A-genome specific (rapa only)  | not scorable | not scorable | not scorable | not scorable | 0.9669421    | 0.8320708    |
| #### Bn-A07-p144486   | A-genome specific (napus-rapa) | 0.9952153    | 0.2244546    | not scorable | not scorable | 1            | 0.7759652    |
| #### Bn-A07-p14450900 | A-genome specific (napus-rapa) | 0.9425837    | 0.5791746    | not scorable | not scorable | 1            | 0.8514671    |
| #### Bn-A07-p14453848 | A-genome specific (napus-rapa) | 0.9880383    | 0.77339      | not scorable | not scorable | 1            | 0.7427015    |
| #### Bn-A07-p14462032 | A-genome specific (napus-rapa) | 0.9832536    | 0.4139376    | not scorable | not scorable | 0.9834711    | 0.8381401    |
| #### Bn-A07-p14462380 | A-genome specific (napus-rapa) | 0.9712918    | 0.7576793    | not scorable | not scorable | 0.9504132    | 0.670449     |
| #### Bn-A07-p14472064 | A-genome specific (napus-rapa) | 0.9952153    | 0.7417505    | not scorable | not scorable | 1            | 0.7746196    |
| #### Bn-A07-p14500760 | A-genome specific (napus-rapa) | 0.9952153    | 0.5296996    | not scorable | not scorable | 1            | 0.7815622    |
| #### Bn-A07-p1450730  | A-genome specific (napus-rapa) | 0.9952153    | 0.7298775    | not scorable | not scorable | 0.9834711    | 0.6596991    |
| #### Bn-A07-p1450961  | A-genome specific (napus-rapa) | 0.9856459    | 0.7788978    | not scorable | not scorable | 0.9917355    | 0.7645989    |
| #### Bn-A07-p14511986 | A-genome specific (napus-rapa) | 0.9832536    | 0.3155481    | not scorable | not scorable | 1            | 0.7804806    |
| #### Bn-A07-p1451303  | A-genome specific (napus-rapa) | 0.9952153    | 0.7618959    | not scorable | not scorable | 0.9917355    | 0.6889078    |
| #### Bn-A07-p1451559  | A-genome specific (napus-rapa) | 1            | 0.8806365    | not scorable | not scorable | 1            | 0.8828776    |
| #### Bn-A07-p1452210  | A-genome specific (napus-rapa) | 0.9880383    | 0.8344494    | not scorable | not scorable | 0.9669421    | 0.6792347    |
| #### Bn-A07-p14523096 | A-genome specific (napus-rapa) | 0.9904306    | 0.7574182    | not scorable | not scorable | 1            | 0.7844259    |
| #### Bn-A07-p14523713 | genome unspecific (all in)     | 0.9928229    | 0.2803114    |              | 1 0.7345493  | 1            | 0.7868677    |
| #### Bn-A07-p14525404 | A-genome specific (napus-rapa) | 0.9952153    | 0.7905719    | not scorable | not scorable | 1            | 0.7338981    |
| #### Bn-A07-p145272   | A-genome specific (napus-rapa) | 0.9976076    | 0.5715458    | not scorable | not scorable | 1            | 0.7795858    |
| #### Bn-A07-p14533453 | A-genome specific (napus-rapa) | 0.9976076    | 0.8633162    | not scorable | not scorable | 0.9834711    | 0.7769585    |
| #### Bn-A07-p14540334 | napus specific                 | 0.1698565    | 0.7883484    | not scorable | not scorable | not scorable | not scorable |
| #### Bn-A07-p14562613 | A-genome specific (napus-rapa) | 0.9976076    | 0.7726223    | not scorable | not scorable | 1            | 0.6843851    |
| #### Bn-A07-p14566670 | A-genome specific (napus-rapa) | 0.9712918    | 0.766862     | not scorable | not scorable | 0.9752066    | 0.7126753    |
| #### Bn-A07-p14575140 | A-genome specific (rapa only)  | not scorable | not scorable | not scorable | not scorable | 0.9834711    | 0.8127       |
| #### Bn-A07-p14585610 | A-genome specific (rapa only)  | not scorable | not scorable | not scorable | not scorable | 1            | 0.6784759    |

|                       |                                |              |              |              |              |           |           |
|-----------------------|--------------------------------|--------------|--------------|--------------|--------------|-----------|-----------|
| #### Bn-A07-p14594344 | A-genome specific (napus-rapa) | 0.9856459    | 0.5082999    | not scorable | not scorable | 0.9834711 | 0.633431  |
| #### Bn-A07-p14594716 | A-genome specific (napus-rapa) | 0.9784689    | 0.304021     | not scorable | not scorable | 0.9917355 | 0.7593755 |
| #### Bn-A07-p14596285 | A-genome specific (napus-rapa) | 0.9808612    | 0.5759865    | not scorable | not scorable | 0.9917355 | 0.6811977 |
| #### Bn-A07-p14598430 | A-genome specific (napus-rapa) | 0.9880383    | 0.5338764    | not scorable | not scorable | 1         | 0.7266862 |
| #### Bn-A07-p14606994 | A-genome specific (napus-rapa) | 0.9928229    | 0.4305515    | not scorable | not scorable | 1         | 0.8562704 |
| #### Bn-A07-p14611227 | A-genome specific (rapa only)  | not scorable | not scorable | not scorable | not scorable | 0.9917355 | 0.906214  |
| #### Bn-A07-p14622638 | A-genome specific (napus-rapa) | 0.9760765    | 0.3136952    | not scorable | not scorable | 0.9917355 | 0.6399112 |
| #### Bn-A07-p14623449 | A-genome specific (napus-rapa) | 0.9880383    | 0.7632316    | not scorable | not scorable | 1         | 0.7520659 |
| #### Bn-A07-p14627135 | A-genome specific (napus-rapa) | 0.9760765    | 0.681159     | not scorable | not scorable | 0.9834711 | 0.6848078 |
| #### Bn-A07-p14628930 | A-genome specific (napus-rapa) | 0.9641148    | 0.7293566    | not scorable | not scorable | 0.9586777 | 0.8188707 |
| #### Bn-A07-p14635438 | A-genome specific (napus-rapa) | 0.9832536    | 0.7332581    | not scorable | not scorable | 1         | 0.7903847 |
| #### Bn-A07-p14635732 | A-genome specific (napus-rapa) | 0.9736842    | 0.7872848    | not scorable | not scorable | 1         | 0.7368767 |
| #### Bn-A07-p14635854 | A-genome specific (napus-rapa) | 0.9952153    | 0.5890206    | not scorable | not scorable | 1         | 0.8947105 |
| #### Bn-A07-p14636039 | A-genome specific (napus-rapa) | 0.9880383    | 0.7928069    | not scorable | not scorable | 1         | 0.8093362 |
| #### Bn-A07-p14645683 | A-genome specific (napus-rapa) | 0.9928229    | 0.3045867    | not scorable | not scorable | 0.9917355 | 0.5220988 |
| #### Bn-A07-p14646080 | A-genome specific (napus-rapa) | 0.9904306    | 0.7721179    | not scorable | not scorable | 0.9917355 | 0.7805039 |
| #### Bn-A07-p14649790 | A-genome specific (napus-rapa) | 0.9976076    | 0.5137092    | not scorable | not scorable | 1         | 0.7683291 |
| #### Bn-A07-p14655552 | A-genome specific (napus-rapa) | 1            | 0.7845619    | not scorable | not scorable | 0.9917355 | 0.7037994 |
| #### Bn-A07-p14664544 | A-genome specific (napus-rapa) | 1            | 0.6346807    | not scorable | not scorable | 0.9834711 | 0.6675921 |
| #### Bn-A07-p14665161 | A-genome specific (napus-rapa) | 0.9832536    | 0.7179519    | not scorable | not scorable | 0.9917355 | 0.8005071 |
| #### Bn-A07-p14666868 | A-genome specific (napus-rapa) | 1            | 0.9124702    | not scorable | not scorable | 1         | 0.9039531 |
| #### Bn-A07-p14682292 | A-genome specific (napus-rapa) | 0.9258373    | 0.7830434    | not scorable | not scorable | 1         | 0.6761603 |
| #### Bn-A07-p14705901 | A-genome specific (napus-rapa) | 1            | 0.5441789    | not scorable | not scorable | 1         | 0.7881012 |
| #### Bn-A07-p14735920 | A-genome specific (napus-rapa) | 0.9545454    | 0.4721562    | not scorable | not scorable | 0.9752066 | 0.8521351 |
| #### Bn-A07-p14736696 | A-genome specific (napus-rapa) | 0.923445     | 0.2596146    | not scorable | not scorable | 0.9669421 | 0.8227944 |
| #### Bn-A07-p14757084 | A-genome specific (napus-rapa) | 0.9760765    | 0.6942573    | not scorable | not scorable | 0.9917355 | 0.625508  |
| #### Bn-A07-p14759734 | A-genome specific (napus-rapa) | 0.9928229    | 0.7705991    | not scorable | not scorable | 0.9917355 | 0.6664438 |
| #### Bn-A07-p14759792 | A-genome specific (napus-rapa) | 0.9880383    | 0.6857519    | not scorable | not scorable | 1         | 0.5588933 |
| #### Bn-A07-p14759961 | A-genome specific (napus-rapa) | 0.9952153    | 0.6983235    | not scorable | not scorable | 0.9834711 | 0.7346288 |
| #### Bn-A07-p14759962 | A-genome specific (napus-rapa) | 0.9952153    | 0.731523     | not scorable | not scorable | 0.9917355 | 0.7298661 |
| #### Bn-A07-p14760232 | A-genome specific (napus-rapa) | 0.9712918    | 0.4176649    | not scorable | not scorable | 0.9917355 | 0.7840218 |
| #### Bn-A07-p14765022 | A-genome specific (rapa only)  | not scorable | not scorable | not scorable | not scorable | 0.9752066 | 0.7641606 |
| #### Bn-A07-p14766907 | A-genome specific (napus-rapa) | 0.9856459    | 0.6398475    | not scorable | not scorable | 0.9834711 | 0.6226773 |

|                       |                                   |              |              |              |              |              |              |
|-----------------------|-----------------------------------|--------------|--------------|--------------|--------------|--------------|--------------|
| #### Bn-A07-p14768265 | A-genome specific (napus-rapa)    | 0.9904306    | 0.7373837    | not scorable | not scorable | 1            | 0.8011912    |
| #### Bn-A07-p14770619 | napus specific                    | 0.9138756    | 0.7917683    | not scorable | not scorable | not scorable | not scorable |
| #### Bn-A07-p14780968 | A-genome specific (napus-rapa)    | 1            | 0.2765364    | not scorable | not scorable | 1            | 0.7116791    |
| #### Bn-A07-p14784989 | napus specific                    | 0.9282297    | 0.7907133    | not scorable | not scorable | not scorable | not scorable |
| #### Bn-A07-p14792267 | A-genome specific (napus-rapa)    | 0.9856459    | 0.4039963    | not scorable | not scorable | 0.9834711    | 0.7648869    |
| #### Bn-A07-p14792772 | A-genome specific (napus-rapa)    | 0.9856459    | 0.3154786    | not scorable | not scorable | 0.9834711    | 0.7548164    |
| #### Bn-A07-p14798978 | A-genome specific (napus-rapa)    | 1            | 0.7005862    | not scorable | not scorable | 1            | 0.7071137    |
| #### Bn-A07-p14804953 | A-genome specific (napus-rapa)    | 0.9832536    | 0.4151338    | not scorable | not scorable | 0.9917355    | 0.7966691    |
| #### Bn-A07-p14809393 | A-genome specific (napus-rapa)    | 0.9928229    | 0.683883     | not scorable | not scorable | 0.9917355    | 0.7537761    |
| #### Bn-A07-p14812317 | A-genome specific (napus-rapa)    | 0.9736842    | 0.6583871    | not scorable | not scorable | 1            | 0.7252982    |
| #### Bn-A07-p14814393 | A-genome specific (napus-rapa)    | 0.9904306    | 0.7641363    | not scorable | not scorable | 1            | 0.7442623    |
| #### Bn-A07-p14820942 | A-genome specific (napus-rapa)    | 0.9784689    | 0.6401411    | not scorable | not scorable | 0.9834711    | 0.7001864    |
| #### Bn-A07-p14823470 | A-genome specific (napus-rapa)    | 0.8947368    | 0.6315891    | not scorable | not scorable | 0.9669421    | 0.6161923    |
| #### Bn-A07-p14823761 | A-genome specific (napus-rapa)    | 0.9760765    | 0.5359061    | not scorable | not scorable | 0.9752066    | 0.699442     |
| #### Bn-A07-p14824091 | A-genome specific (napus-rapa)    | 0.9952153    | 0.5998236    | not scorable | not scorable | 1            | 0.8932276    |
| #### Bn-A07-p1482858  | A-genome specific (napus-rapa)    | 0.9832536    | 0.6438053    | not scorable | not scorable | 0.9834711    | 0.7667028    |
| #### Bn-A07-p14836793 | A-genome specific (napus-rapa)    | 0.9832536    | 0.4055677    | not scorable | not scorable | 1            | 0.7252982    |
| #### Bn-A07-p14863875 | A-genome specific (napus-rapa)    | 0.9688995    | 0.6883005    | not scorable | not scorable | 0.9834711    | 0.70071      |
| #### Bn-A07-p14865976 | A-genome specific (napus-rapa)    | 0.9976076    | 0.4659023    | not scorable | not scorable | 1            | 0.7641606    |
| #### Bn-A07-p14868938 | A-genome specific (napus-rapa)    | 1            | 0.4296518    | not scorable | not scorable | 1            | 0.8004208    |
| #### Bn-A07-p14869066 | A-genome specific (napus-rapa)    | 0.9784689    | 0.6512843    | not scorable | not scorable | 0.9917355    | 0.8277114    |
| #### Bn-A07-p14870055 | A-genome specific (napus-rapa)    | 0.9976076    | 0.3983214    | not scorable | not scorable | 0.9917355    | 0.630005     |
| #### Bn-A07-p14895551 | A-genome specific (napus-rapa)    | 0.9880383    | 0.3512052    | not scorable | not scorable | 0.9752066    | 0.7467555    |
| #### Bn-A07-p14895675 | A-genome specific (napus-rapa)    | 0.9736842    | 0.7883037    | not scorable | not scorable | 0.9752066    | 0.7631981    |
| #### Bn-A07-p14920018 | A-genome specific (napus-rapa)    | 1            | 0.4793944    | not scorable | not scorable | 1            | 0.9230191    |
| #### Bn-A07-p14922137 | A-genome specific (napus-rapa)    | 0.9832536    | 0.3884326    | not scorable | not scorable | 1            | 0.6628931    |
| #### Bn-A07-p14934271 | A-genome specific (napus-rapa)    | 0.9760765    | 0.5544602    | not scorable | not scorable | 0.9834711    | 0.6145394    |
| #### Bn-A07-p14958606 | A-genome specific (napus-rapa)    | 0.9282297    | 0.482924     | not scorable | not scorable | 0.9752066    | 0.7869276    |
| #### Bn-A07-p14966705 | A-genome specific (napus-rapa)    | 0.9928229    | 0.7485973    | not scorable | not scorable | 0.9834711    | 0.7839168    |
| #### Bn-A07-p14969298 | A-genome specific (rapa only)     | not scorable | not scorable | not scorable | not scorable | 0.9669421    | 0.6641968    |
| #### Bn-A07-p14970273 | A-genome specific (napus-rapa)    | 0.9952153    | 0.3056709    | not scorable | not scorable | 0.9834711    | 0.6346949    |
| #### Bn-A07-p14975152 | genome unspecific (oleracea-rapa) | not scorable | not scorable | 0.9844961    | 0.6035082    | 1            | 0.6622245    |
| #### Bn-A07-p15006983 | A-genome specific (napus-rapa)    | 0.9688995    | 0.2436754    | not scorable | not scorable | 0.9586777    | 0.5852491    |

|                       |                                |              |              |              |              |              |              |
|-----------------------|--------------------------------|--------------|--------------|--------------|--------------|--------------|--------------|
| #### Bn-A07-p15007983 | A-genome specific (napus-rapa) | 0.9784689    | 0.7525488    | not scorable | not scorable | 0.9834711    | 0.8042086    |
| #### Bn-A07-p1501022  | A-genome specific (napus-rapa) | 0.9856459    | 0.4096751    | not scorable | not scorable | 0.9917355    | 0.7592011    |
| #### Bn-A07-p15015434 | A-genome specific (napus-rapa) | 0.9617225    | 0.4957456    | not scorable | not scorable | 0.9917355    | 0.8260799    |
| #### Bn-A07-p15025202 | A-genome specific (napus-rapa) | 0.9736842    | 0.5335197    | not scorable | not scorable | 0.9917355    | 0.7405595    |
| #### Bn-A07-p1502636  | A-genome specific (napus-rapa) | 1            | 0.7245023    | not scorable | not scorable | 0.9752066    | 0.7085831    |
| #### Bn-A07-p15033167 | A-genome specific (rapa only)  | not scorable | not scorable | not scorable | not scorable | 0.9752066    | 0.8359349    |
| #### Bn-A07-p15033648 | A-genome specific (napus-rapa) | 0.9856459    | 0.7518367    | not scorable | not scorable | 1            | 0.7239645    |
| #### Bn-A07-p15035369 | A-genome specific (rapa only)  | not scorable | not scorable | not scorable | not scorable | 0.9917355    | 0.813166     |
| #### Bn-A07-p15043209 | A-genome specific (napus-rapa) | 1            | 0.8948976    | not scorable | not scorable | 1            | 0.9053562    |
| #### Bn-A07-p15050270 | A-genome specific (rapa only)  | not scorable | not scorable | not scorable | not scorable | 0.9917355    | 0.7035602    |
| #### Bn-A07-p15054860 | napus specific                 | 0.9330143    | 0.2717432    | not scorable | not scorable | not scorable | not scorable |
| #### Bn-A07-p15055528 | A-genome specific (napus-rapa) | 0.9736842    | 0.3455824    | not scorable | not scorable | 1            | 0.725894     |
| #### Bn-A07-p15059054 | A-genome specific (napus-rapa) | 0.9784689    | 0.4464643    | not scorable | not scorable | 1            | 0.7569209    |
| #### Bn-A07-p15064528 | A-genome specific (napus-rapa) | 0.9784689    | 0.5894945    | not scorable | not scorable | 1            | 0.7191191    |
| #### Bn-A07-p15093743 | A-genome specific (rapa only)  | not scorable | not scorable | not scorable | not scorable | 0.9586777    | 0.6655074    |
| #### Bn-A07-p15101433 | A-genome specific (napus-rapa) | 0.9976076    | 0.5717747    | not scorable | not scorable | 0.9752066    | 0.7257703    |
| #### Bn-A07-p15107656 | A-genome specific (napus-rapa) | 0.9784689    | 0.7716068    | not scorable | not scorable | 0.9917355    | 0.7654804    |
| #### Bn-A07-p15120097 | A-genome specific (napus-rapa) | 0.9808612    | 0.2966446    | not scorable | not scorable | 0.9917355    | 0.8045757    |
| #### Bn-A07-p15129531 | A-genome specific (napus-rapa) | 0.9354067    | 0.5802674    | not scorable | not scorable | 1            | 0.7991562    |
| #### Bn-A07-p1514419  | A-genome specific (napus-rapa) | 0.9976076    | 0.7705127    | not scorable | not scorable | 0.9917355    | 0.7490919    |
| #### Bn-A07-p15148050 | A-genome specific (napus-rapa) | 0.9665072    | 0.6646489    | not scorable | not scorable | 0.9834711    | 0.8177346    |
| #### Bn-A07-p15162548 | A-genome specific (napus-rapa) | 0.9641148    | 0.2109456    | not scorable | not scorable | 0.9669421    | 0.6527089    |
| #### Bn-A07-p15162767 | A-genome specific (napus-rapa) | 0.9952153    | 0.763948     | not scorable | not scorable | 1            | 0.7048497    |
| #### Bn-A07-p15162837 | A-genome specific (napus-rapa) | 0.9569378    | 0.5127349    | not scorable | not scorable | 0.9834711    | 0.6948582    |
| #### Bn-A07-p15165145 | A-genome specific (napus-rapa) | 0.9808612    | 0.4233115    | not scorable | not scorable | 1            | 0.6526904    |
| #### Bn-A07-p1516782  | A-genome specific (napus-rapa) | 0.9665072    | 0.2360471    | not scorable | not scorable | 1            | 0.536552     |
| #### Bn-A07-p15175027 | A-genome specific (napus-rapa) | 0.9928229    | 0.7245107    | not scorable | not scorable | 1            | 0.6727062    |
| #### Bn-A07-p15175141 | genome unspecific (all in)     | 0.9736842    | 0.3293955    |              | 1 0.3528507  | 0.9917355    | 0.6945256    |
| #### Bn-A07-p15183066 | A-genome specific (napus-rapa) | 0.9712918    | 0.2476286    | not scorable | not scorable | 0.9917355    | 0.7302164    |
| #### Bn-A07-p15220175 | A-genome specific (napus-rapa) | 0.9688995    | 0.5279351    | not scorable | not scorable | 0.9752066    | 0.6985925    |
| #### Bn-A07-p15220891 | A-genome specific (rapa only)  | not scorable | not scorable | not scorable | not scorable | 0.9917355    | 0.7698198    |
| #### Bn-A07-p15233647 | A-genome specific (napus-rapa) | 0.9952153    | 0.7956612    | not scorable | not scorable | 0.9834711    | 0.7704991    |
| #### Bn-A07-p15236422 | A-genome specific (napus-rapa) | 0.9808612    | 0.7328293    | not scorable | not scorable | 0.9752066    | 0.7367349    |

|                       |                                |              |              |              |              |           |           |
|-----------------------|--------------------------------|--------------|--------------|--------------|--------------|-----------|-----------|
| #### Bn-A07-p15239170 | A-genome specific (napus-rapa) | 0.9784689    | 0.2558253    | not scorable | not scorable | 0.9917355 | 0.6965739 |
| #### Bn-A07-p15241878 | A-genome specific (napus-rapa) | 0.9736842    | 0.7718869    | not scorable | not scorable | 0.9834711 | 0.7619823 |
| #### Bn-A07-p15242562 | A-genome specific (napus-rapa) | 0.9928229    | 0.7164661    | not scorable | not scorable | 0.9917355 | 0.7640912 |
| #### Bn-A07-p15245952 | A-genome specific (napus-rapa) | 0.9832536    | 0.3606412    | not scorable | not scorable | 1         | 0.7414369 |
| #### Bn-A07-p15247793 | A-genome specific (napus-rapa) | 0.9760765    | 0.7756644    | not scorable | not scorable | 0.9917355 | 0.7818354 |
| #### Bn-A07-p15248927 | A-genome specific (napus-rapa) | 0.9736842    | 0.6842874    | not scorable | not scorable | 1         | 0.6474598 |
| #### Bn-A07-p15262851 | A-genome specific (rapa only)  | not scorable | not scorable | not scorable | not scorable | 0.9669421 | 0.7320092 |
| #### Bn-A07-p15273529 | A-genome specific (napus-rapa) | 0.9641148    | 0.7671971    | not scorable | not scorable | 0.9421487 | 0.7155139 |
| #### Bn-A07-p15276966 | A-genome specific (napus-rapa) | 0.9808612    | 0.6338096    | not scorable | not scorable | 1         | 0.8900577 |
| #### Bn-A07-p15287374 | A-genome specific (rapa only)  | not scorable | not scorable | not scorable | not scorable | 1         | 0.7915887 |
| #### Bn-A07-p15298239 | A-genome specific (napus-rapa) | 0.9904306    | 0.7628843    | not scorable | not scorable | 1         | 0.7630472 |
| #### Bn-A07-p15298338 | A-genome specific (napus-rapa) | 0.9641148    | 0.7137091    | not scorable | not scorable | 1         | 0.8422567 |
| #### Bn-A07-p15299046 | A-genome specific (napus-rapa) | 0.9952153    | 0.7797605    | not scorable | not scorable | 1         | 0.8702264 |
| #### Bn-A07-p15300466 | A-genome specific (napus-rapa) | 1            | 0.9142767    | not scorable | not scorable | 1         | 0.8605385 |
| #### Bn-A07-p15303340 | A-genome specific (napus-rapa) | 0.9043062    | 0.3230954    | not scorable | not scorable | 1         | 0.8541355 |
| #### Bn-A07-p15309387 | A-genome specific (napus-rapa) | 0.9736842    | 0.334108     | not scorable | not scorable | 1         | 0.8627764 |
| #### Bn-A07-p15310281 | A-genome specific (napus-rapa) | 0.9904306    | 0.7579578    | not scorable | not scorable | 1         | 0.8680603 |
| #### Bn-A07-p15321076 | A-genome specific (napus-rapa) | 0.9856459    | 0.3515829    | not scorable | not scorable | 0.9917355 | 0.7388945 |
| #### Bn-A07-p15331892 | A-genome specific (napus-rapa) | 0.9665072    | 0.4600204    | not scorable | not scorable | 1         | 0.7540531 |
| #### Bn-A07-p15332201 | A-genome specific (rapa only)  | not scorable | not scorable | not scorable | not scorable | 0.9917355 | 0.8146837 |
| #### Bn-A07-p15352802 | A-genome specific (napus-rapa) | 0.9952153    | 0.6054521    | not scorable | not scorable | 1         | 0.6364112 |
| #### Bn-A07-p15354488 | A-genome specific (napus-rapa) | 0.9617225    | 0.4650338    | not scorable | not scorable | 0.9669421 | 0.6422274 |
| #### Bn-A07-p15357890 | A-genome specific (napus-rapa) | 1            | 0.655866     | not scorable | not scorable | 0.9669421 | 0.7738409 |
| #### Bn-A07-p15359622 | A-genome specific (napus-rapa) | 0.9019139    | 0.7770688    | not scorable | not scorable | 0.8842975 | 0.8446944 |
| #### Bn-A07-p15364409 | A-genome specific (rapa only)  | not scorable | not scorable | not scorable | not scorable | 0.9669421 | 0.932537  |
| #### Bn-A07-p15366978 | A-genome specific (napus-rapa) | 0.9186603    | 0.2968901    | not scorable | not scorable | 1         | 0.5588962 |
| #### Bn-A07-p15369326 | A-genome specific (napus-rapa) | 0.9976076    | 0.7933427    | not scorable | not scorable | 1         | 0.7930135 |
| #### Bn-A07-p15372787 | A-genome specific (napus-rapa) | 0.9688995    | 0.8256924    | not scorable | not scorable | 0.9669421 | 0.7894178 |
| #### Bn-A07-p15373643 | A-genome specific (napus-rapa) | 0.9904306    | 0.7547323    | not scorable | not scorable | 1         | 0.8030287 |
| #### Bn-A07-p15373724 | A-genome specific (napus-rapa) | 0.9665072    | 0.490793     | not scorable | not scorable | 0.9834711 | 0.8554723 |
| #### Bn-A07-p1537589  | A-genome specific (napus-rapa) | 0.9952153    | 0.7020211    | not scorable | not scorable | 0.9752066 | 0.5701833 |
| #### Bn-A07-p1537814  | A-genome specific (napus-rapa) | 0.9856459    | 0.6873378    | not scorable | not scorable | 1         | 0.7567614 |
| #### Bn-A07-p15381285 | A-genome specific (rapa only)  | not scorable | not scorable | not scorable | not scorable | 0.9504132 | 0.7828085 |



|                       |                                |              |              |              |              |           |           |
|-----------------------|--------------------------------|--------------|--------------|--------------|--------------|-----------|-----------|
| #### Bn-A07-p15404895 | A-genome specific (napus-rapa) | 1            | 0.4657947    | not scorable | not scorable | 1         | 0.6517718 |
| #### Bn-A07-p15405942 | A-genome specific (napus-rapa) | 0.9617225    | 0.2916466    | not scorable | not scorable | 1         | 0.8008677 |
| #### Bn-A07-p15410837 | A-genome specific (rapa only)  | not scorable | not scorable | not scorable | not scorable | 0.9834711 | 0.6729168 |
| #### Bn-A07-p15411766 | A-genome specific (napus-rapa) | 0.9425837    | 0.3748012    | not scorable | not scorable | 0.9917355 | 0.7869677 |
| #### Bn-A07-p15412126 | A-genome specific (napus-rapa) | 1            | 0.8310657    | not scorable | not scorable | 1         | 0.7945709 |
| #### Bn-A07-p15415388 | A-genome specific (napus-rapa) | 0.9760765    | 0.2770578    | not scorable | not scorable | 0.9917355 | 0.6980743 |
| #### Bn-A07-p15415913 | A-genome specific (napus-rapa) | 0.9760765    | 0.7056484    | not scorable | not scorable | 1         | 0.8188357 |
| #### Bn-A07-p15417895 | A-genome specific (napus-rapa) | 0.9832536    | 0.5212996    | not scorable | not scorable | 1         | 0.7647607 |
| #### Bn-A07-p15425959 | A-genome specific (napus-rapa) | 0.9282297    | 0.5448453    | not scorable | not scorable | 1         | 0.8327926 |
| #### Bn-A07-p15426090 | genome unspecific (all in)     | 0.9952153    | 0.7835542    |              | 0 0.6237516  | 1         | 0.7848645 |
| #### Bn-A07-p15428458 | A-genome specific (napus-rapa) | 0.9952153    | 0.7682528    | not scorable | not scorable | 0.9917355 | 0.7642082 |
| #### Bn-A07-p154378   | A-genome specific (napus-rapa) | 1            | 0.7670231    | not scorable | not scorable | 0.9752066 | 0.7350053 |
| #### Bn-A07-p15441391 | A-genome specific (napus-rapa) | 0.9545454    | 0.5138577    | not scorable | not scorable | 0.9917355 | 0.7467563 |
| #### Bn-A07-p15442723 | A-genome specific (napus-rapa) | 0.9928229    | 0.7167162    | not scorable | not scorable | 0.9834711 | 0.7098398 |
| #### Bn-A07-p15444203 | A-genome specific (napus-rapa) | 0.9856459    | 0.7159262    | not scorable | not scorable | 0.9917355 | 0.7661279 |
| #### Bn-A07-p15447440 | A-genome specific (napus-rapa) | 0.9976076    | 0.7732593    | not scorable | not scorable | 0.9669421 | 0.7368116 |
| #### Bn-A07-p15453076 | A-genome specific (napus-rapa) | 0.9617225    | 0.8245221    | not scorable | not scorable | 0.9421487 | 0.8207097 |
| #### Bn-A07-p15459314 | A-genome specific (napus-rapa) | 0.9904306    | 0.6742548    | not scorable | not scorable | 1         | 0.7662795 |
| #### Bn-A07-p15464739 | A-genome specific (napus-rapa) | 0.9832536    | 0.7037512    | not scorable | not scorable | 0.9917355 | 0.7574637 |
| #### Bn-A07-p15468982 | A-genome specific (napus-rapa) | 0.9952153    | 0.7941996    | not scorable | not scorable | 0.9586777 | 0.7840836 |
| #### Bn-A07-p15470119 | A-genome specific (napus-rapa) | 0.9760765    | 0.5932581    | not scorable | not scorable | 0.9917355 | 0.8030589 |
| #### Bn-A07-p15470208 | A-genome specific (napus-rapa) | 0.9832536    | 0.6480594    | not scorable | not scorable | 0.9917355 | 0.7717387 |
| #### Bn-A07-p15470833 | A-genome specific (napus-rapa) | 0.9856459    | 0.7682251    | not scorable | not scorable | 0.9834711 | 0.7803772 |
| #### Bn-A07-p15471161 | A-genome specific (napus-rapa) | 0.9928229    | 0.7713287    | not scorable | not scorable | 0.9669421 | 0.7670901 |
| #### Bn-A07-p15505090 | A-genome specific (napus-rapa) | 0.9928229    | 0.7475845    | not scorable | not scorable | 0.9917355 | 0.7142854 |
| #### Bn-A07-p15524114 | A-genome specific (napus-rapa) | 1            | 0.7801672    | not scorable | not scorable | 1         | 0.801263  |
| #### Bn-A07-p15537891 | A-genome specific (napus-rapa) | 0.9210526    | 0.749524     | not scorable | not scorable | 0.9917355 | 0.8147027 |
| #### Bn-A07-p15545260 | A-genome specific (napus-rapa) | 0.9784689    | 0.3645826    | not scorable | not scorable | 0.9752066 | 0.7783659 |
| #### Bn-A07-p15546893 | A-genome specific (napus-rapa) | 0.9760765    | 0.5968395    | not scorable | not scorable | 0.9917355 | 0.7234864 |
| #### Bn-A07-p15549943 | A-genome specific (napus-rapa) | 0.9952153    | 0.5893421    | not scorable | not scorable | 1         | 0.8355293 |
| #### Bn-A07-p15557239 | A-genome specific (rapa only)  | not scorable | not scorable | not scorable | not scorable | 0.9834711 | 0.7860538 |
| #### Bn-A07-p1557675  | A-genome specific (napus-rapa) | 0.9904306    | 0.7849017    | not scorable | not scorable | 0.9834711 | 0.7645261 |
| #### Bn-A07-p15578269 | A-genome specific (napus-rapa) | 0.9880383    | 0.7942088    | not scorable | not scorable | 0.9834711 | 0.6850055 |

|                       |                                |              |              |              |              |           |           |
|-----------------------|--------------------------------|--------------|--------------|--------------|--------------|-----------|-----------|
| #### Bn-A07-p15587759 | A-genome specific (napus-rapa) | 0.9736842    | 0.7312182    | not scorable | not scorable | 0.9834711 | 0.6789641 |
| #### Bn-A07-p15587835 | A-genome specific (rapa only)  | not scorable | not scorable | not scorable | not scorable | 0.9256198 | 0.684466  |
| #### Bn-A07-p15588492 | A-genome specific (napus-rapa) | 0.9928229    | 0.7741535    | not scorable | not scorable | 0.9834711 | 0.6852756 |
| #### Bn-A07-p15588706 | A-genome specific (rapa only)  | not scorable | not scorable | not scorable | not scorable | 0.9586777 | 0.9174647 |
| #### Bn-A07-p15588927 | A-genome specific (napus-rapa) | 0.9736842    | 0.6752986    | not scorable | not scorable | 0.9752066 | 0.7210169 |
| #### Bn-A07-p15589001 | A-genome specific (napus-rapa) | 0.9976076    | 0.7186876    | not scorable | not scorable | 0.9752066 | 0.7652796 |
| #### Bn-A07-p15591535 | A-genome specific (napus-rapa) | 0.9832536    | 0.7417826    | not scorable | not scorable | 0.9917355 | 0.7536411 |
| #### Bn-A07-p15591699 | A-genome specific (napus-rapa) | 0.9880383    | 0.7702393    | not scorable | not scorable | 0.9752066 | 0.766496  |
| #### Bn-A07-p15606996 | A-genome specific (napus-rapa) | 0.9832536    | 0.3080048    | not scorable | not scorable | 0.9834711 | 0.7991601 |
| #### Bn-A07-p15612140 | A-genome specific (napus-rapa) | 0.9832536    | 0.7340063    | not scorable | not scorable | 0.9586777 | 0.7541841 |
| #### Bn-A07-p15622870 | A-genome specific (napus-rapa) | 0.9617225    | 0.5924758    | not scorable | not scorable | 0.9917355 | 0.7503557 |
| #### Bn-A07-p15632054 | A-genome specific (napus-rapa) | 1            | 0.6508883    | not scorable | not scorable | 0.9917355 | 0.7309402 |
| #### Bn-A07-p1564369  | A-genome specific (napus-rapa) | 0.9760765    | 0.2882995    | not scorable | not scorable | 0.9752066 | 0.6632598 |
| #### Bn-A07-p15644181 | A-genome specific (rapa only)  | not scorable | not scorable | not scorable | not scorable | 0.9834711 | 0.8457088 |
| #### Bn-A07-p15648620 | A-genome specific (napus-rapa) | 0.9425837    | 0.3188301    | not scorable | not scorable | 0.9917355 | 0.6011688 |
| #### Bn-A07-p15650680 | A-genome specific (napus-rapa) | 0.9832536    | 0.7460368    | not scorable | not scorable | 0.9504132 | 0.7877576 |
| #### Bn-A07-p15652974 | A-genome specific (napus-rapa) | 0.9712918    | 0.4076833    | not scorable | not scorable | 0.9752066 | 0.7114071 |
| #### Bn-A07-p15669200 | A-genome specific (napus-rapa) | 0.9808612    | 0.6865193    | not scorable | not scorable | 0.9917355 | 0.6860374 |
| #### Bn-A07-p15671084 | A-genome specific (napus-rapa) | 0.9832536    | 0.7993128    | not scorable | not scorable | 1         | 0.839143  |
| #### Bn-A07-p15674502 | A-genome specific (napus-rapa) | 0.9832536    | 0.8092616    | not scorable | not scorable | 0.9917355 | 0.7475697 |
| #### Bn-A07-p15675658 | A-genome specific (rapa only)  | not scorable | not scorable | not scorable | not scorable | 0.9669421 | 0.6527231 |
| #### Bn-A07-p15675717 | A-genome specific (rapa only)  | not scorable | not scorable | not scorable | not scorable | 0.9669421 | 0.6834372 |
| #### Bn-A07-p15687112 | A-genome specific (napus-rapa) | 0.9808612    | 0.7517428    | not scorable | not scorable | 1         | 0.757545  |
| #### Bn-A07-p15690501 | A-genome specific (napus-rapa) | 0.9952153    | 0.7769248    | not scorable | not scorable | 0.9917355 | 0.7603068 |
| #### Bn-A07-p15691004 | A-genome specific (napus-rapa) | 0.9856459    | 0.6363006    | not scorable | not scorable | 0.9917355 | 0.8191361 |
| #### Bn-A07-p15691716 | A-genome specific (napus-rapa) | 0.9976076    | 0.8180522    | not scorable | not scorable | 0.9834711 | 0.8151352 |
| #### Bn-A07-p15695422 | A-genome specific (napus-rapa) | 0.9760765    | 0.730402     | not scorable | not scorable | 0.9834711 | 0.762489  |
| #### Bn-A07-p15698133 | A-genome specific (napus-rapa) | 0.9856459    | 0.4283247    | not scorable | not scorable | 1         | 0.8458389 |
| #### Bn-A07-p15709440 | A-genome specific (napus-rapa) | 0.9688995    | 0.7627316    | not scorable | not scorable | 0.9917355 | 0.6877309 |
| #### Bn-A07-p15719490 | A-genome specific (napus-rapa) | 0.9856459    | 0.2614995    | not scorable | not scorable | 0.9669421 | 0.7445597 |
| #### Bn-A07-p15728800 | A-genome specific (napus-rapa) | 0.9784689    | 0.3565881    | not scorable | not scorable | 1         | 0.7614557 |
| #### Bn-A07-p15729378 | A-genome specific (napus-rapa) | 0.9545454    | 0.5217233    | not scorable | not scorable | 1         | 0.7719439 |
| #### Bn-A07-p15738506 | A-genome specific (napus-rapa) | 0.9952153    | 0.6393565    | not scorable | not scorable | 0.9834711 | 0.6955104 |

|                       |                                |              |              |              |              |              |              |
|-----------------------|--------------------------------|--------------|--------------|--------------|--------------|--------------|--------------|
| #### Bn-A07-p15756045 | A-genome specific (napus-rapa) | 0.9808612    | 0.7545052    | not scorable | not scorable | 0.9586777    | 0.7043457    |
| #### Bn-A07-p15757524 | A-genome specific (rapa only)  | not scorable | not scorable | not scorable | not scorable | 1            | 0.8670539    |
| #### Bn-A07-p15758978 | napus specific                 | 0.9473684    | 0.661764     | not scorable | not scorable | not scorable | not scorable |
| #### Bn-A07-p15760227 | A-genome specific (napus-rapa) | 0.9904306    | 0.7461041    | not scorable | not scorable | 1            | 0.707205     |
| #### Bn-A07-p15762423 | napus specific                 | 0.9473684    | 0.7760702    | not scorable | not scorable | not scorable | not scorable |
| #### Bn-A07-p15768026 | A-genome specific (napus-rapa) | 0.9832536    | 0.3928044    | not scorable | not scorable | 1            | 0.9050736    |
| #### Bn-A07-p15771342 | A-genome specific (napus-rapa) | 0.9880383    | 0.7682251    | not scorable | not scorable | 1            | 0.8117013    |
| #### Bn-A07-p15773212 | A-genome specific (napus-rapa) | 0.9856459    | 0.7686486    | not scorable | not scorable | 1            | 0.7910319    |
| #### Bn-A07-p15787164 | A-genome specific (napus-rapa) | 0.9736842    | 0.6674984    | not scorable | not scorable | 0.9834711    | 0.7732102    |
| #### Bn-A07-p15791885 | A-genome specific (napus-rapa) | 1            | 0.5019269    | not scorable | not scorable | 0.9834711    | 0.7379211    |
| #### Bn-A07-p15797527 | A-genome specific (napus-rapa) | 0.9904306    | 0.7384555    | not scorable | not scorable | 0.9834711    | 0.7455266    |
| #### Bn-A07-p15797607 | A-genome specific (napus-rapa) | 1            | 0.5565277    | not scorable | not scorable | 0.9917355    | 0.6686674    |
| #### Bn-A07-p15801291 | A-genome specific (napus-rapa) | 0.9282297    | 0.6979954    | not scorable | not scorable | 0.9669421    | 0.5604542    |
| #### Bn-A07-p15802174 | A-genome specific (rapa only)  | not scorable | not scorable | not scorable | not scorable | 0.9917355    | 0.6885462    |
| #### Bn-A07-p15802229 | napus specific                 | 0.930622     | 0.740293     | not scorable | not scorable | not scorable | not scorable |
| #### Bn-A07-p15803011 | A-genome specific (napus-rapa) | 0.9856459    | 0.7398379    | not scorable | not scorable | 0.9917355    | 0.7016168    |
| #### Bn-A07-p15809590 | napus specific                 | 0.9976076    | 0.6908305    | not scorable | not scorable | not scorable | not scorable |
| #### Bn-A07-p15812852 | A-genome specific (napus-rapa) | 0.9856459    | 0.4492835    | not scorable | not scorable | 0.9917355    | 0.7254095    |
| #### Bn-A07-p15814161 | A-genome specific (napus-rapa) | 0.9712918    | 0.7870365    | not scorable | not scorable | 1            | 0.8443965    |
| #### Bn-A07-p15816246 | A-genome specific (napus-rapa) | 0.9449761    | 0.8153787    | not scorable | not scorable | 0.9917355    | 0.8037564    |
| #### Bn-A07-p15821030 | A-genome specific (napus-rapa) | 0.9760765    | 0.3411916    | not scorable | not scorable | 1            | 0.7968439    |
| #### Bn-A07-p15829114 | napus specific                 | 0.9880383    | 0.7810093    | not scorable | not scorable | not scorable | not scorable |
| #### Bn-A07-p15829285 | A-genome specific (napus-rapa) | 0.9880383    | 0.7234462    | not scorable | not scorable | 0.9917355    | 0.6965234    |
| #### Bn-A07-p15831043 | A-genome specific (napus-rapa) | 0.9736842    | 0.2625858    | not scorable | not scorable | 0.9752066    | 0.5912648    |
| #### Bn-A07-p15833211 | A-genome specific (napus-rapa) | 0.9808612    | 0.4119164    | not scorable | not scorable | 1            | 0.7241886    |
| #### Bn-A07-p15856545 | A-genome specific (napus-rapa) | 0.9808612    | 0.7001746    | not scorable | not scorable | 0.9917355    | 0.7027293    |
| #### Bn-A07-p15856978 | A-genome specific (napus-rapa) | 0.9856459    | 0.406995     | not scorable | not scorable | 0.9917355    | 0.7503964    |
| #### Bn-A07-p15871261 | A-genome specific (napus-rapa) | 0.9760765    | 0.6864801    | not scorable | not scorable | 0.9917355    | 0.6765488    |
| #### Bn-A07-p15872578 | A-genome specific (napus-rapa) | 0.9784689    | 0.7482501    | not scorable | not scorable | 1            | 0.7694004    |
| #### Bn-A07-p15881760 | A-genome specific (napus-rapa) | 0.9736842    | 0.5771589    | not scorable | not scorable | 0.9917355    | 0.6648524    |
| #### Bn-A07-p15885711 | A-genome specific (napus-rapa) | 0.9904306    | 0.7735094    | not scorable | not scorable | 0.9586777    | 0.6870355    |
| #### Bn-A07-p158888   | A-genome specific (napus-rapa) | 0.9354067    | 0.7136621    | not scorable | not scorable | 1            | 0.8004208    |
| #### Bn-A07-p15901533 | A-genome specific (napus-rapa) | 0.9952153    | 0.7248196    | not scorable | not scorable | 0.9834711    | 0.6806595    |

|                       |                                |           |           |              |              |              |              |
|-----------------------|--------------------------------|-----------|-----------|--------------|--------------|--------------|--------------|
| #### Bn-A07-p15903009 | A-genome specific (napus-rapa) | 1         | 0.920565  | not scorable | not scorable | 1            | 0.7141417    |
| #### Bn-A07-p15905994 | A-genome specific (napus-rapa) | 0.9904306 | 0.7675519 | not scorable | not scorable | 0.8429752    | 0.8058429    |
| #### Bn-A07-p15913063 | A-genome specific (napus-rapa) | 0.9856459 | 0.3009032 | not scorable | not scorable | 1            | 0.6938925    |
| #### Bn-A07-p15921259 | A-genome specific (napus-rapa) | 0.9688995 | 0.6209654 | not scorable | not scorable | 0.9752066    | 0.7461242    |
| #### Bn-A07-p15931750 | A-genome specific (napus-rapa) | 0.9784689 | 0.4307372 | not scorable | not scorable | 0.9834711    | 0.5710646    |
| #### Bn-A07-p15938534 | A-genome specific (napus-rapa) | 0.9473684 | 0.5236858 | not scorable | not scorable | 0.9834711    | 0.6700305    |
| #### Bn-A07-p15948472 | A-genome specific (napus-rapa) | 0.9880383 | 0.7723844 | not scorable | not scorable | 0.9752066    | 0.7657063    |
| #### Bn-A07-p15949460 | A-genome specific (napus-rapa) | 0.9856459 | 0.752614  | not scorable | not scorable | 0.9834711    | 0.7730933    |
| #### Bn-A07-p1595411  | A-genome specific (napus-rapa) | 0.9928229 | 0.530286  | not scorable | not scorable | 0.9752066    | 0.7450142    |
| #### Bn-A07-p15957061 | A-genome specific (napus-rapa) | 0.9880383 | 0.7208016 | not scorable | not scorable | 0.9586777    | 0.7469651    |
| #### Bn-A07-p15986673 | A-genome specific (napus-rapa) | 0.9952153 | 0.7414747 | not scorable | not scorable | 0.9752066    | 0.6877219    |
| #### Bn-A07-p15996043 | A-genome specific (napus-rapa) | 0.9641148 | 0.2362475 | not scorable | not scorable | 0.9917355    | 0.7738467    |
| #### Bn-A07-p16005587 | A-genome specific (napus-rapa) | 0.9856459 | 0.6769276 | not scorable | not scorable | 0.9752066    | 0.7346057    |
| #### Bn-A07-p16009799 | A-genome specific (napus-rapa) | 0.9712918 | 0.6527494 | not scorable | not scorable | 0.9917355    | 0.6874868    |
| #### Bn-A07-p16013075 | A-genome specific (napus-rapa) | 0.9904306 | 0.6850154 | not scorable | not scorable | 0.9834711    | 0.6598566    |
| #### Bn-A07-p16015935 | A-genome specific (napus-rapa) | 0.9736842 | 0.6640536 | not scorable | not scorable | 0.9917355    | 0.7236227    |
| #### Bn-A07-p16020955 | A-genome specific (napus-rapa) | 0.9617225 | 0.7187486 | not scorable | not scorable | 1            | 0.8293141    |
| #### Bn-A07-p16021617 | A-genome specific (napus-rapa) | 0.9354067 | 0.4965068 | not scorable | not scorable | 1            | 0.8063037    |
| #### Bn-A07-p16025294 | A-genome specific (napus-rapa) | 0.9880383 | 0.6795661 | not scorable | not scorable | 0.9834711    | 0.7492969    |
| #### Bn-A07-p16027866 | A-genome specific (napus-rapa) | 0.9784689 | 0.7051066 | not scorable | not scorable | 0.9586777    | 0.7378951    |
| #### Bn-A07-p1602850  | A-genome specific (napus-rapa) | 0.9976076 | 0.8415623 | not scorable | not scorable | 0.9752066    | 0.7860783    |
| #### Bn-A07-p16028782 | napus specific                 | 0.8205742 | 0.5255247 | not scorable | not scorable | not scorable | not scorable |
| #### Bn-A07-p16030550 | A-genome specific (napus-rapa) | 0.9760765 | 0.482951  | not scorable | not scorable | 0.9917355    | 0.7934941    |
| #### Bn-A07-p16036626 | A-genome specific (napus-rapa) | 0.9976076 | 0.7569916 | not scorable | not scorable | 1            | 0.8042552    |
| #### Bn-A07-p16039345 | A-genome specific (napus-rapa) | 0.9808612 | 0.7377653 | not scorable | not scorable | 1            | 0.7028428    |
| #### Bn-A07-p16045526 | A-genome specific (napus-rapa) | 0.9976076 | 0.7820841 | not scorable | not scorable | 0.9917355    | 0.6823445    |
| #### Bn-A07-p16045865 | A-genome specific (napus-rapa) | 0.9210526 | 0.5566991 | not scorable | not scorable | 0.9917355    | 0.6663396    |
| #### Bn-A07-p16047469 | A-genome specific (napus-rapa) | 0.9808612 | 0.6254412 | not scorable | not scorable | 0.9752066    | 0.732367     |
| #### Bn-A07-p16049291 | A-genome specific (napus-rapa) | 0.9784689 | 0.7569116 | not scorable | not scorable | 0.9917355    | 0.7288207    |
| #### Bn-A07-p16049688 | A-genome specific (napus-rapa) | 0.9904306 | 0.6878566 | not scorable | not scorable | 0.9917355    | 0.7932819    |
| #### Bn-A07-p16050076 | A-genome specific (napus-rapa) | 0.9593301 | 0.6737532 | not scorable | not scorable | 0.9917355    | 0.780268     |
| #### Bn-A07-p16050430 | A-genome specific (napus-rapa) | 0.9712918 | 0.6660778 | not scorable | not scorable | 0.9834711    | 0.704283     |
| #### Bn-A07-p160648   | genome unspecific (all in)     | 1         | 0.2837676 | 0.9767442    | 0.7190519    | 1            | 0.7941949    |

|                       |                                |              |              |              |              |           |           |
|-----------------------|--------------------------------|--------------|--------------|--------------|--------------|-----------|-----------|
| #### Bn-A07-p16070816 | A-genome specific (rapa only)  | not scorable | not scorable | not scorable | not scorable | 0.8181818 | 0.6919881 |
| #### Bn-A07-p16074768 | A-genome specific (napus-rapa) | 0.9904306    | 0.751667     | not scorable | not scorable | 0.9834711 | 0.7768422 |
| #### Bn-A07-p16079602 | A-genome specific (napus-rapa) | 0.9856459    | 0.7763346    | not scorable | not scorable | 0.9752066 | 0.7789128 |
| #### Bn-A07-p16089710 | A-genome specific (napus-rapa) | 0.9856459    | 0.5501162    | not scorable | not scorable | 0.9586777 | 0.6904057 |
| #### Bn-A07-p16090031 | A-genome specific (napus-rapa) | 0.9688995    | 0.6822557    | not scorable | not scorable | 0.9834711 | 0.6909303 |
| #### Bn-A07-p16095589 | A-genome specific (napus-rapa) | 0.937799     | 0.7929874    | not scorable | not scorable | 0.7933884 | 0.8081803 |
| #### Bn-A07-p16099690 | A-genome specific (napus-rapa) | 0.9521531    | 0.6992128    | not scorable | not scorable | 0.8181818 | 0.6663209 |
| #### Bn-A07-p16100507 | A-genome specific (napus-rapa) | 0.9880383    | 0.3964249    | not scorable | not scorable | 0.8429752 | 0.7774039 |
| #### Bn-A07-p16101102 | A-genome specific (napus-rapa) | 0.9880383    | 0.2299682    | not scorable | not scorable | 0.8347107 | 0.7626666 |
| #### Bn-A07-p16139853 | A-genome specific (rapa only)  | not scorable | not scorable | not scorable | not scorable | 0.9834711 | 0.7659512 |
| #### Bn-A07-p16146576 | A-genome specific (napus-rapa) | 0.6172249    | 0.8604017    | not scorable | not scorable | 0.9834711 | 0.7032164 |
| #### Bn-A07-p16146639 | A-genome specific (napus-rapa) | 0.5837321    | 0.6950168    | not scorable | not scorable | 0.9504132 | 0.6791844 |
| #### Bn-A07-p16157761 | A-genome specific (napus-rapa) | 1            | 0.4486357    | not scorable | not scorable | 1         | 0.8135889 |
| #### Bn-A07-p16167393 | A-genome specific (napus-rapa) | 0.9617225    | 0.4246303    | not scorable | not scorable | 0.9752066 | 0.6894804 |
| #### Bn-A07-p16167837 | A-genome specific (napus-rapa) | 0.9904306    | 0.7598017    | not scorable | not scorable | 0.9917355 | 0.8056937 |
| #### Bn-A07-p16183869 | A-genome specific (napus-rapa) | 0.9473684    | 0.7499103    | not scorable | not scorable | 1         | 0.8118345 |
| #### Bn-A07-p1619354  | A-genome specific (rapa only)  | not scorable | not scorable | not scorable | not scorable | 1         | 0.8507066 |
| #### Bn-A07-p1625292  | A-genome specific (napus-rapa) | 0.9784689    | 0.6372459    | not scorable | not scorable | 0.9917355 | 0.7719644 |
| #### Bn-A07-p16260678 | A-genome specific (napus-rapa) | 0.9976076    | 0.796096     | not scorable | not scorable | 1         | 0.7427574 |
| #### Bn-A07-p16261412 | A-genome specific (napus-rapa) | 0.9952153    | 0.7665601    | not scorable | not scorable | 0.9917355 | 0.804979  |
| #### Bn-A07-p16371184 | A-genome specific (napus-rapa) | 0.9832536    | 0.3498497    | not scorable | not scorable | 0.8264463 | 0.6877309 |
| #### Bn-A07-p16379135 | A-genome specific (napus-rapa) | 0.9808612    | 0.6981177    | not scorable | not scorable | 0.9669421 | 0.6459993 |
| #### Bn-A07-p16383705 | A-genome specific (napus-rapa) | 0.9880383    | 0.7040824    | not scorable | not scorable | 0.9917355 | 0.562908  |
| #### Bn-A07-p16383888 | A-genome specific (napus-rapa) | 0.9760765    | 0.7037584    | not scorable | not scorable | 0.9834711 | 0.6978582 |
| #### Bn-A07-p16395444 | A-genome specific (napus-rapa) | 0.9521531    | 0.738964     | not scorable | not scorable | 1         | 0.7577286 |
| #### Bn-A07-p16399898 | A-genome specific (napus-rapa) | 0.9784689    | 0.7557939    | not scorable | not scorable | 0.9834711 | 0.7595909 |
| #### Bn-A07-p16404722 | A-genome specific (napus-rapa) | 0.9952153    | 0.4279335    | not scorable | not scorable | 1         | 0.7990795 |
| #### Bn-A07-p16406072 | A-genome specific (napus-rapa) | 0.9832536    | 0.4739273    | not scorable | not scorable | 1         | 0.8544583 |
| #### Bn-A07-p16408097 | A-genome specific (napus-rapa) | 0.9976076    | 0.7153943    | not scorable | not scorable | 0.9917355 | 0.7981288 |
| #### Bn-A07-p16423207 | A-genome specific (napus-rapa) | 0.9880383    | 0.8176222    | not scorable | not scorable | 0.9917355 | 0.6817479 |
| #### Bn-A07-p16449661 | A-genome specific (napus-rapa) | 0.9760765    | 0.5469011    | not scorable | not scorable | 1         | 0.5844277 |
| #### Bn-A07-p16449988 | A-genome specific (napus-rapa) | 0.9425837    | 0.5330495    | not scorable | not scorable | 0.9752066 | 0.7084091 |
| #### Bn-A07-p16461287 | A-genome specific (napus-rapa) | 0.9784689    | 0.7625436    | not scorable | not scorable | 0.9917355 | 0.8144091 |

|                       |                                |              |              |              |              |              |              |
|-----------------------|--------------------------------|--------------|--------------|--------------|--------------|--------------|--------------|
| #### Bn-A07-p16468333 | A-genome specific (napus-rapa) | 0.9712918    | 0.75884      | not scorable | not scorable | 0.9834711    | 0.8112192    |
| #### Bn-A07-p16469173 | A-genome specific (napus-rapa) | 0.9617225    | 0.5070856    | not scorable | not scorable | 1            | 0.8004208    |
| #### Bn-A07-p16491329 | A-genome specific (napus-rapa) | 0.9832536    | 0.4968509    | not scorable | not scorable | 1            | 0.7552096    |
| #### Bn-A07-p16519850 | A-genome specific (napus-rapa) | 0.9856459    | 0.7256327    | not scorable | not scorable | 0.9917355    | 0.6805803    |
| #### Bn-A07-p16527225 | A-genome specific (napus-rapa) | 0.9401914    | 0.7440203    | not scorable | not scorable | 0.9917355    | 0.8477763    |
| #### Bn-A07-p16553147 | napus specific                 | 0.9497608    | 0.6214087    | not scorable | not scorable | not scorable | not scorable |
| #### Bn-A07-p16557893 | A-genome specific (napus-rapa) | 0.9784689    | 0.7385802    | not scorable | not scorable | 0.9669421    | 0.7536144    |
| #### Bn-A07-p16559043 | all not scorable               | not scorable | not scorable | not scorable | not scorable | not scorable | not scorable |
| #### Bn-A07-p16566633 | A-genome specific (rapa only)  | not scorable | not scorable | not scorable | not scorable | 1            | 0.7378615    |
| #### Bn-A07-p16567234 | A-genome specific (napus-rapa) | 0.9952153    | 0.6846656    | not scorable | not scorable | 1            | 0.7078252    |
| #### Bn-A07-p16569143 | A-genome specific (napus-rapa) | 0.9856459    | 0.489023     | not scorable | not scorable | 1            | 0.8597855    |
| #### Bn-A07-p16574221 | A-genome specific (napus-rapa) | 0.9688995    | 0.677208     | not scorable | not scorable | 0.9917355    | 0.730628     |
| #### Bn-A07-p1657613  | A-genome specific (napus-rapa) | 0.9904306    | 0.6794532    | not scorable | not scorable | 1            | 0.6798128    |
| #### Bn-A07-p1657975  | A-genome specific (napus-rapa) | 0.9976076    | 0.8975762    | not scorable | not scorable | 0.9834711    | 0.8101106    |
| #### Bn-A07-p1658007  | A-genome specific (napus-rapa) | 0.9928229    | 0.8001569    | not scorable | not scorable | 0.9917355    | 0.8408501    |
| #### Bn-A07-p1658486  | A-genome specific (napus-rapa) | 1            | 0.7794066    | not scorable | not scorable | 1            | 0.837742     |
| #### Bn-A07-p16595704 | A-genome specific (napus-rapa) | 0.9617225    | 0.5540444    | not scorable | not scorable | 0.9338843    | 0.5839058    |
| #### Bn-A07-p16632905 | A-genome specific (napus-rapa) | 0.9688995    | 0.4147067    | not scorable | not scorable | 1            | 0.7950409    |
| #### Bn-A07-p16636474 | A-genome specific (napus-rapa) | 0.9760765    | 0.3205491    | not scorable | not scorable | 1            | 0.8106892    |
| #### Bn-A07-p16636687 | A-genome specific (rapa only)  | not scorable | not scorable | not scorable | not scorable | 1            | 0.7760289    |
| #### Bn-A07-p16646442 | A-genome specific (napus-rapa) | 0.9354067    | 0.7491826    | not scorable | not scorable | 0.9669421    | 0.8440377    |
| #### Bn-A07-p16659232 | A-genome specific (napus-rapa) | 0.9521531    | 0.8846847    | not scorable | not scorable | 0.9752066    | 0.8487774    |
| #### Bn-A07-p16659396 | A-genome specific (napus-rapa) | 0.9760765    | 0.3989674    | not scorable | not scorable | 0.9752066    | 0.7716914    |
| #### Bn-A07-p16668740 | A-genome specific (napus-rapa) | 0.9808612    | 0.7221889    | not scorable | not scorable | 0.9917355    | 0.710157     |
| #### Bn-A07-p16677886 | A-genome specific (napus-rapa) | 0.9617225    | 0.4821232    | not scorable | not scorable | 1            | 0.8116488    |
| #### Bn-A07-p16680070 | A-genome specific (napus-rapa) | 0.9593301    | 0.7326348    | not scorable | not scorable | 0.9917355    | 0.7840412    |
| #### Bn-A07-p16683460 | A-genome specific (napus-rapa) | 0.9641148    | 0.2886513    | not scorable | not scorable | 0.9917355    | 0.7226449    |
| #### Bn-A07-p16687846 | A-genome specific (napus-rapa) | 0.9904306    | 0.7472932    | not scorable | not scorable | 1            | 0.8551714    |
| #### Bn-A07-p16694176 | all not scorable               | not scorable | not scorable | not scorable | not scorable | not scorable | not scorable |
| #### Bn-A07-p16695430 | A-genome specific (rapa only)  | not scorable | not scorable | not scorable | not scorable | 0.9917355    | 0.720566     |
| #### Bn-A07-p16697491 | A-genome specific (napus-rapa) | 0.9928229    | 0.4564088    | not scorable | not scorable | 1            | 0.686775     |
| #### Bn-A07-p16709303 | A-genome specific (rapa only)  | not scorable | not scorable | not scorable | not scorable | 0.9917355    | 0.4691747    |
| #### Bn-A07-p16716464 | A-genome specific (napus-rapa) | 0.9760765    | 0.7333587    | not scorable | not scorable | 1            | 0.807466     |

|                       |                                   |              |              |              |              |           |           |
|-----------------------|-----------------------------------|--------------|--------------|--------------|--------------|-----------|-----------|
| #### Bn-A07-p16717729 | A-genome specific (napus-rapa)    | 0.9832536    | 0.3604094    | not scorable | not scorable | 1         | 0.8592556 |
| #### Bn-A07-p16721483 | genome unspecific (oleracea-rapa) | not scorable | not scorable | 1            | 0.4357345    | 0.9752066 | 0.5464679 |
| #### Bn-A07-p16722346 | A-genome specific (napus-rapa)    | 0.9641148    | 0.7410656    | not scorable | not scorable | 0.9834711 | 0.764039  |
| #### Bn-A07-p16722383 | A-genome specific (napus-rapa)    | 0.9832536    | 0.5684911    | not scorable | not scorable | 1         | 0.8092792 |
| #### Bn-A07-p16722623 | A-genome specific (napus-rapa)    | 0.9856459    | 0.7269559    | not scorable | not scorable | 0.9917355 | 0.6886004 |
| #### Bn-A07-p16724761 | A-genome specific (rapa only)     | not scorable | not scorable | not scorable | not scorable | 0.7603306 | 0.9085643 |
| #### Bn-A07-p16724882 | A-genome specific (napus-rapa)    | 0.9641148    | 0.7014366    | not scorable | not scorable | 0.9917355 | 0.7837912 |
| #### Bn-A07-p16726568 | A-genome specific (napus-rapa)    | 0.9904306    | 0.7063985    | not scorable | not scorable | 0.9421487 | 0.769032  |
| #### Bn-A07-p16727616 | A-genome specific (napus-rapa)    | 0.9688995    | 0.7173442    | not scorable | not scorable | 0.9504132 | 0.6943743 |
| #### Bn-A07-p16729007 | A-genome specific (napus-rapa)    | 0.9784689    | 0.6467304    | not scorable | not scorable | 0.9917355 | 0.7720095 |
| #### Bn-A07-p16729187 | A-genome specific (napus-rapa)    | 0.9760765    | 0.7595175    | not scorable | not scorable | 1         | 0.8125101 |
| #### Bn-A07-p16729233 | A-genome specific (napus-rapa)    | 0.9712918    | 0.644232     | not scorable | not scorable | 0.9834711 | 0.7797557 |
| #### Bn-A07-p16729439 | A-genome specific (napus-rapa)    | 0.9856459    | 0.7520552    | not scorable | not scorable | 0.9834711 | 0.8004113 |
| #### Bn-A07-p16729644 | A-genome specific (napus-rapa)    | 0.9736842    | 0.7580295    | not scorable | not scorable | 0.9917355 | 0.7525385 |
| #### Bn-A07-p16745833 | A-genome specific (napus-rapa)    | 0.9473684    | 0.4273952    | not scorable | not scorable | 0.9917355 | 0.7754279 |
| #### Bn-A07-p16749101 | A-genome specific (napus-rapa)    | 0.5143541    | 0.7420694    | not scorable | not scorable | 0.9834711 | 0.7314983 |
| #### Bn-A07-p16755801 | A-genome specific (napus-rapa)    | 0.9736842    | 0.6806384    | not scorable | not scorable | 0.9834711 | 0.6694487 |
| #### Bn-A07-p16756509 | A-genome specific (napus-rapa)    | 0.9928229    | 0.6339489    | not scorable | not scorable | 0.9917355 | 0.7235394 |
| #### Bn-A07-p16760771 | A-genome specific (napus-rapa)    | 0.9736842    | 0.7215044    | not scorable | not scorable | 1         | 0.8851795 |
| #### Bn-A07-p167614   | A-genome specific (napus-rapa)    | 0.9880383    | 0.848816     | not scorable | not scorable | 1         | 0.7814276 |
| #### Bn-A07-p16765596 | A-genome specific (napus-rapa)    | 0.9593301    | 0.3703931    | not scorable | not scorable | 0.9752066 | 0.7534926 |
| #### Bn-A07-p16792991 | A-genome specific (napus-rapa)    | 0.9617225    | 0.2650235    | not scorable | not scorable | 0.9669421 | 0.7906995 |
| #### Bn-A07-p16793852 | A-genome specific (napus-rapa)    | 0.9880383    | 0.7755504    | not scorable | not scorable | 1         | 0.8792318 |
| #### Bn-A07-p1680649  | A-genome specific (napus-rapa)    | 0.9808612    | 0.667916     | not scorable | not scorable | 0.9834711 | 0.7470132 |
| #### Bn-A07-p16806829 | A-genome specific (napus-rapa)    | 0.9976076    | 0.6592032    | not scorable | not scorable | 1         | 0.6107295 |
| #### Bn-A07-p1681059  | A-genome specific (napus-rapa)    | 0.9736842    | 0.7449377    | not scorable | not scorable | 0.9917355 | 0.7323765 |
| #### Bn-A07-p16831414 | A-genome specific (napus-rapa)    | 0.9880383    | 0.752        | not scorable | not scorable | 1         | 0.7414878 |
| #### Bn-A07-p16833174 | A-genome specific (napus-rapa)    | 0.9688995    | 0.2972549    | not scorable | not scorable | 1         | 0.5557343 |
| #### Bn-A07-p16846624 | A-genome specific (rapa only)     | not scorable | not scorable | not scorable | not scorable | 0.9917355 | 0.6907074 |
| #### Bn-A07-p16871286 | A-genome specific (napus-rapa)    | 0.9856459    | 0.7083856    | not scorable | not scorable | 1         | 0.7489746 |
| #### Bn-A07-p16871349 | A-genome specific (napus-rapa)    | 0.8636364    | 0.7003563    | not scorable | not scorable | 0.9834711 | 0.7365382 |
| #### Bn-A07-p16872148 | A-genome specific (napus-rapa)    | 0.9856459    | 0.3082952    | not scorable | not scorable | 0.9917355 | 0.7510419 |
| #### Bn-A07-p1689072  | A-genome specific (napus-rapa)    | 0.9808612    | 0.7377049    | not scorable | not scorable | 0.9669421 | 0.7992574 |

|                       |                                |              |              |              |              |              |              |
|-----------------------|--------------------------------|--------------|--------------|--------------|--------------|--------------|--------------|
| #### Bn-A07-p16895848 | A-genome specific (rapa only)  | not scorable | not scorable | not scorable | not scorable | 0.9917355    | 0.7038769    |
| #### Bn-A07-p16896370 | A-genome specific (napus-rapa) | 0.9856459    | 0.7639281    | not scorable | not scorable | 0.9917355    | 0.7102633    |
| #### Bn-A07-p16898207 | A-genome specific (napus-rapa) | 0.8923445    | 0.4243813    | not scorable | not scorable | 0.9834711    | 0.7981288    |
| #### Bn-A07-p16904376 | all not scorable               | not scorable | not scorable | not scorable | not scorable | not scorable | not scorable |
| #### Bn-A07-p16909798 | A-genome specific (napus-rapa) | 0.9856459    | 0.7681362    | not scorable | not scorable | 0.9834711    | 0.8432186    |
| #### Bn-A07-p16912963 | napus specific                 | 0.9760765    | 0.8134885    | not scorable | not scorable | not scorable | not scorable |
| #### Bn-A07-p16919795 | A-genome specific (napus-rapa) | 1            | 0.9258044    | not scorable | not scorable | 1            | 0.8985185    |
| #### Bn-A07-p16919955 | A-genome specific (rapa only)  | not scorable | not scorable | not scorable | not scorable | 1            | 0.7719916    |
| #### Bn-A07-p16923741 | A-genome specific (napus-rapa) | 0.9641148    | 0.478244     | not scorable | not scorable | 0.9834711    | 0.6805814    |
| #### Bn-A07-p16923977 | A-genome specific (napus-rapa) | 0.9760765    | 0.7563541    | not scorable | not scorable | 0.9338843    | 0.6630885    |
| #### Bn-A07-p16924814 | A-genome specific (napus-rapa) | 0.9952153    | 0.3501211    | not scorable | not scorable | 1            | 0.8383566    |
| #### Bn-A07-p16925201 | A-genome specific (napus-rapa) | 1            | 0.8948974    | not scorable | not scorable | 0.9669421    | 0.7878911    |
| #### Bn-A07-p16931589 | A-genome specific (napus-rapa) | 0.9760765    | 0.7493752    | not scorable | not scorable | 0.9917355    | 0.8694764    |
| #### Bn-A07-p16934084 | A-genome specific (napus-rapa) | 0.9473684    | 0.53385      | not scorable | not scorable | 0.9752066    | 0.6454716    |
| #### Bn-A07-p16936529 | genome unspecific (all in)     | 0.9880383    | 0.365892     | 1            | 0.8196729    | 0.9917355    | 0.7754838    |
| #### Bn-A07-p16939399 | A-genome specific (napus-rapa) | 0.9952153    | 0.7242079    | not scorable | not scorable | 0.9917355    | 0.7305189    |
| #### Bn-A07-p16946173 | A-genome specific (napus-rapa) | 1            | 0.3449632    | not scorable | not scorable | 0.9917355    | 0.6816227    |
| #### Bn-A07-p16965943 | A-genome specific (napus-rapa) | 0.9928229    | 0.5788292    | not scorable | not scorable | 0.9752066    | 0.8123925    |
| #### Bn-A07-p16967567 | A-genome specific (napus-rapa) | 0.9880383    | 0.7465259    | not scorable | not scorable | 0.8512397    | 0.7372947    |
| #### Bn-A07-p16970000 | A-genome specific (napus-rapa) | 1            | 0.7616116    | not scorable | not scorable | 0.9834711    | 0.670435     |
| #### Bn-A07-p16987468 | A-genome specific (rapa only)  | not scorable | not scorable | not scorable | not scorable | 0.9917355    | 0.5588518    |
| #### Bn-A07-p16996070 | A-genome specific (napus-rapa) | 0.9641148    | 0.3854687    | not scorable | not scorable | 0.9752066    | 0.69511      |
| #### Bn-A07-p17001912 | napus specific                 | 0.9880383    | 0.5609028    | not scorable | not scorable | not scorable | not scorable |
| #### Bn-A07-p1701712  | A-genome specific (napus-rapa) | 0.9497608    | 0.2553725    | not scorable | not scorable | 0.9834711    | 0.7899514    |
| #### Bn-A07-p17017277 | A-genome specific (napus-rapa) | 0.9880383    | 0.4902638    | not scorable | not scorable | 1            | 0.8301398    |
| #### Bn-A07-p17026003 | A-genome specific (napus-rapa) | 0.9688995    | 0.5622048    | not scorable | not scorable | 0.9917355    | 0.814494     |
| #### Bn-A07-p17026027 | napus specific                 | 0.9545454    | 0.7511902    | not scorable | not scorable | not scorable | not scorable |
| #### Bn-A07-p17026444 | A-genome specific (napus-rapa) | 0.9952153    | 0.7631976    | not scorable | not scorable | 1            | 0.8421814    |
| #### Bn-A07-p17047263 | A-genome specific (napus-rapa) | 0.9904306    | 0.8081644    | not scorable | not scorable | 0.9917355    | 0.7531626    |
| #### Bn-A07-p17053061 | A-genome specific (napus-rapa) | 1            | 0.7244906    | not scorable | not scorable | 1            | 0.8191277    |
| #### Bn-A07-p17068106 | A-genome specific (napus-rapa) | 0.9736842    | 0.7717927    | not scorable | not scorable | 0.9917355    | 0.7321798    |
| #### Bn-A07-p17074195 | A-genome specific (napus-rapa) | 0.7200957    | 0.7480225    | not scorable | not scorable | 0.9917355    | 0.8185435    |
| #### Bn-A07-p17080877 | A-genome specific (napus-rapa) | 0.9856459    | 0.7458948    | not scorable | not scorable | 0.9917355    | 0.745759     |



|                       |                                |              |              |              |              |              |              |
|-----------------------|--------------------------------|--------------|--------------|--------------|--------------|--------------|--------------|
| #### Bn-A07-p17085728 | A-genome specific (napus-rapa) | 1            | 0.3487176    | not scorable | not scorable | 0.9917355    | 0.6888812    |
| #### Bn-A07-p17087544 | A-genome specific (napus-rapa) | 0.9880383    | 0.437995     | not scorable | not scorable | 1            | 0.8007209    |
| #### Bn-A07-p17100649 | A-genome specific (napus-rapa) | 0.9880383    | 0.3088542    | not scorable | not scorable | 0.9834711    | 0.6643004    |
| #### Bn-A07-p17104148 | A-genome specific (napus-rapa) | 0.9856459    | 0.37734      | not scorable | not scorable | 0.9834711    | 0.7393003    |
| #### Bn-A07-p17123712 | A-genome specific (napus-rapa) | 1            | 0.651136     | not scorable | not scorable | 0.9834711    | 0.5526043    |
| #### Bn-A07-p17142058 | A-genome specific (rapa only)  | not scorable | not scorable | not scorable | not scorable | 0.9504132    | 0.793892     |
| #### Bn-A07-p17148373 | A-genome specific (napus-rapa) | 0.9880383    | 0.7342879    | not scorable | not scorable | 1            | 0.7624813    |
| #### Bn-A07-p17153938 | A-genome specific (napus-rapa) | 0.9641148    | 0.659851     | not scorable | not scorable | 0.9917355    | 0.6723275    |
| #### Bn-A07-p17157365 | A-genome specific (napus-rapa) | 0.9736842    | 0.6789793    | not scorable | not scorable | 1            | 0.8277953    |
| #### Bn-A07-p17160294 | A-genome specific (napus-rapa) | 0.9593301    | 0.3948161    | not scorable | not scorable | 1            | 0.7977497    |
| #### Bn-A07-p17168790 | A-genome specific (napus-rapa) | 0.9832536    | 0.5045497    | not scorable | not scorable | 1            | 0.7071902    |
| #### Bn-A07-p17177279 | A-genome specific (napus-rapa) | 1            | 0.3643708    | not scorable | not scorable | 1            | 0.7105214    |
| #### Bn-A07-p1717993  | A-genome specific (napus-rapa) | 0.9808612    | 0.5179722    | not scorable | not scorable | 0.9917355    | 0.6680113    |
| #### Bn-A07-p17186393 | A-genome specific (napus-rapa) | 0.9569378    | 0.555425     | not scorable | not scorable | 1            | 0.6693982    |
| #### Bn-A07-p17197152 | A-genome specific (napus-rapa) | 0.9880383    | 0.6901195    | not scorable | not scorable | 0.9834711    | 0.7930343    |
| #### Bn-A07-p17212130 | A-genome specific (napus-rapa) | 0.9952153    | 0.7192653    | not scorable | not scorable | 0.9917355    | 0.844732     |
| #### Bn-A07-p17212502 | A-genome specific (napus-rapa) | 0.9952153    | 0.8117613    | not scorable | not scorable | 0.9752066    | 0.8393178    |
| #### Bn-A07-p17214494 | A-genome specific (napus-rapa) | 0.9856459    | 0.790947     | not scorable | not scorable | 0.9917355    | 0.8633527    |
| #### Bn-A07-p17225853 | A-genome specific (napus-rapa) | 0.9976076    | 0.7604328    | not scorable | not scorable | 0.9917355    | 0.6866978    |
| #### Bn-A07-p1725633  | A-genome specific (rapa only)  | not scorable | not scorable | not scorable | not scorable | 0.9834711    | 0.699396     |
| #### Bn-A07-p17260356 | A-genome specific (napus-rapa) | 0.9976076    | 0.7873914    | not scorable | not scorable | 0.9586777    | 0.7458819    |
| #### Bn-A07-p1729364  | A-genome specific (napus-rapa) | 0.9736842    | 0.7428306    | not scorable | not scorable | 0.9752066    | 0.7282729    |
| #### Bn-A07-p17298132 | napus specific                 | 0.9976076    | 0.2822894    | not scorable | not scorable | not scorable | not scorable |
| #### Bn-A07-p17312272 | A-genome specific (napus-rapa) | 0.9952153    | 0.7310045    | not scorable | not scorable | 0.8512397    | 0.720566     |
| #### Bn-A07-p17326181 | A-genome specific (napus-rapa) | 0.9952153    | 0.7270528    | not scorable | not scorable | 1            | 0.7530149    |
| #### Bn-A07-p17339463 | A-genome specific (napus-rapa) | 0.9880383    | 0.5545549    | not scorable | not scorable | 0.9669421    | 0.679265     |
| #### Bn-A07-p1734331  | A-genome specific (napus-rapa) | 1            | 0.3987229    | not scorable | not scorable | 1            | 0.7285747    |
| #### Bn-A07-p17353806 | genome unspecific (all in)     | 0.9952153    | 0.4315       | 0.9844961    | 0.7838361    | 1            | 0.7304887    |
| #### Bn-A07-p17382019 | A-genome specific (napus-rapa) | 0.9617225    | 0.371526     | not scorable | not scorable | 0.9834711    | 0.9175813    |
| #### Bn-A07-p17382630 | A-genome specific (napus-rapa) | 0.9808612    | 0.7771786    | not scorable | not scorable | 0.9917355    | 0.7770737    |
| #### Bn-A07-p17388536 | A-genome specific (napus-rapa) | 0.9880383    | 0.7458287    | not scorable | not scorable | 1            | 0.9176645    |
| #### Bn-A07-p17388825 | A-genome specific (napus-rapa) | 0.9904306    | 0.6528006    | not scorable | not scorable | 0.9834711    | 0.7011406    |
| #### Bn-A07-p17400106 | A-genome specific (napus-rapa) | 0.9928229    | 0.3725201    | not scorable | not scorable | 1            | 0.7999729    |

|                       |                                |              |              |              |              |              |              |
|-----------------------|--------------------------------|--------------|--------------|--------------|--------------|--------------|--------------|
| #### Bn-A07-p17404116 | A-genome specific (napus-rapa) | 0.9952153    | 0.7415897    | not scorable | not scorable | 1            | 0.9178407    |
| #### Bn-A07-p17409328 | A-genome specific (napus-rapa) | 0.9880383    | 0.703569     | not scorable | not scorable | 0.9834711    | 0.7381257    |
| #### Bn-A07-p17411297 | A-genome specific (rapa only)  | not scorable | not scorable | not scorable | not scorable | 1            | 0.7170715    |
| #### Bn-A07-p17411599 | A-genome specific (napus-rapa) | 0.9736842    | 0.7592161    | not scorable | not scorable | 0.9752066    | 0.7220509    |
| #### Bn-A07-p17412755 | A-genome specific (napus-rapa) | 0.9856459    | 0.5819077    | not scorable | not scorable | 0.9917355    | 0.7523193    |
| #### Bn-A07-p17418824 | A-genome specific (napus-rapa) | 0.9928229    | 0.6078453    | not scorable | not scorable | 0.9917355    | 0.8000259    |
| #### Bn-A07-p17419179 | A-genome specific (napus-rapa) | 0.9928229    | 0.7531646    | not scorable | not scorable | 0.9834711    | 0.808067     |
| #### Bn-A07-p17421675 | A-genome specific (napus-rapa) | 0.9880383    | 0.5511089    | not scorable | not scorable | 0.9752066    | 0.5532253    |
| #### Bn-A07-p17434468 | A-genome specific (napus-rapa) | 0.9808612    | 0.6561989    | not scorable | not scorable | 0.9917355    | 0.7488312    |
| #### Bn-A07-p17435418 | A-genome specific (napus-rapa) | 0.9976076    | 0.6703581    | not scorable | not scorable | 1            | 0.653285     |
| #### Bn-A07-p17439730 | A-genome specific (napus-rapa) | 0.9904306    | 0.5051355    | not scorable | not scorable | 0.9834711    | 0.6973619    |
| #### Bn-A07-p17440585 | A-genome specific (napus-rapa) | 0.9617225    | 0.5570933    | not scorable | not scorable | 0.9834711    | 0.7241183    |
| #### Bn-A07-p17448936 | A-genome specific (napus-rapa) | 0.9952153    | 0.7636442    | not scorable | not scorable | 1            | 0.7732786    |
| #### Bn-A07-p17450697 | napus specific                 | 0.9952153    | 0.8134838    | not scorable | not scorable | not scorable | not scorable |
| #### Bn-A07-p17465762 | A-genome specific (napus-rapa) | 0.9832536    | 0.7035347    | not scorable | not scorable | 0.9917355    | 0.6905375    |
| #### Bn-A07-p17470966 | A-genome specific (napus-rapa) | 0.9808612    | 0.3874707    | not scorable | not scorable | 1            | 0.7126126    |
| #### Bn-A07-p17477080 | A-genome specific (napus-rapa) | 0.9688995    | 0.3393956    | not scorable | not scorable | 0.9834711    | 0.7032797    |
| #### Bn-A07-p17483655 | A-genome specific (napus-rapa) | 0.5526316    | 0.876838     | not scorable | not scorable | 0.9338843    | 0.8084772    |
| #### Bn-A07-p17484397 | A-genome specific (napus-rapa) | 0.9928229    | 0.739416     | not scorable | not scorable | 0.9917355    | 0.6340035    |
| #### Bn-A07-p17488337 | A-genome specific (napus-rapa) | 0.9784689    | 0.7414614    | not scorable | not scorable | 0.9669421    | 0.765447     |
| #### Bn-A07-p17488591 | A-genome specific (napus-rapa) | 0.9832536    | 0.7524039    | not scorable | not scorable | 0.9586777    | 0.7193334    |
| #### Bn-A07-p17497283 | A-genome specific (rapa only)  | not scorable | not scorable | not scorable | not scorable | 0.9834711    | 0.7865868    |
| #### Bn-A07-p17513051 | A-genome specific (rapa only)  | not scorable | not scorable | not scorable | not scorable | 0.9834711    | 0.7996722    |
| #### Bn-A07-p17520539 | A-genome specific (napus-rapa) | 1            | 0.5753938    | not scorable | not scorable | 1            | 0.6616629    |
| #### Bn-A07-p17523277 | A-genome specific (rapa only)  | not scorable | not scorable | not scorable | not scorable | 0.9008265    | 0.8026692    |
| #### Bn-A07-p17581698 | A-genome specific (napus-rapa) | 1            | 0.7702091    | not scorable | not scorable | 1            | 0.7514439    |
| #### Bn-A07-p17583998 | A-genome specific (napus-rapa) | 1            | 0.8207097    | not scorable | not scorable | 1            | 0.8135551    |
| #### Bn-A07-p17587315 | napus specific                 | 0.9736842    | 0.6208385    | not scorable | not scorable | not scorable | not scorable |
| #### Bn-A07-p17588031 | A-genome specific (napus-rapa) | 0.937799     | 0.3483655    | not scorable | not scorable | 0.9917355    | 0.7311835    |
| #### Bn-A07-p17593690 | A-genome specific (napus-rapa) | 0.9449761    | 0.6903276    | not scorable | not scorable | 0.9752066    | 0.6734115    |
| #### Bn-A07-p17593695 | A-genome specific (napus-rapa) | 0.9186603    | 0.6440774    | not scorable | not scorable | 0.9669421    | 0.5647334    |
| #### Bn-A07-p17598687 | A-genome specific (napus-rapa) | 0.8923445    | 0.3717648    | not scorable | not scorable | 1            | 0.8372842    |
| #### Bn-A07-p17605668 | A-genome specific (napus-rapa) | 0.9760765    | 0.3680961    | not scorable | not scorable | 1            | 0.7164134    |

|                       |                                   |              |              |              |              |              |              |
|-----------------------|-----------------------------------|--------------|--------------|--------------|--------------|--------------|--------------|
| #### Bn-A07-p17606005 | A-genome specific (napus-rapa)    | 0.9928229    | 0.7076628    | not scorable | not scorable | 0.8595041    | 0.8133528    |
| #### Bn-A07-p17606752 | A-genome specific (napus-rapa)    | 0.9688995    | 0.6470262    | not scorable | not scorable | 0.8842975    | 0.7769179    |
| #### Bn-A07-p17607958 | A-genome specific (napus-rapa)    | 0.9952153    | 0.7791837    | not scorable | not scorable | 0.9917355    | 0.7372382    |
| #### Bn-A07-p17628920 | A-genome specific (rapa only)     | not scorable | not scorable | not scorable | not scorable | 1            | 0.7775202    |
| #### Bn-A07-p17636141 | A-genome specific (napus-rapa)    | 1            | 0.8366179    | not scorable | not scorable | 1            | 0.8409751    |
| #### Bn-A07-p17639842 | genome unspecific (all in)        | 0.9856459    | 0.4514261    | 1            | 0.8182692    | 1            | 0.7831476    |
| #### Bn-A07-p17647906 | A-genome specific (rapa only)     | not scorable | not scorable | not scorable | not scorable | 0.9834711    | 0.7700588    |
| #### Bn-A07-p17661422 | A-genome specific (napus-rapa)    | 1            | 0.5324681    | not scorable | not scorable | 1            | 0.4693085    |
| #### Bn-A07-p17679589 | A-genome specific (napus-rapa)    | 0.9976076    | 0.8011909    | not scorable | not scorable | 0.9752066    | 0.7206483    |
| #### Bn-A07-p17802877 | A-genome specific (rapa only)     | not scorable | not scorable | not scorable | not scorable | 1            | 0.8981678    |
| #### Bn-A07-p17804261 | A-genome specific (napus-rapa)    | 0.9832536    | 0.6722892    | not scorable | not scorable | 0.9504132    | 0.6562993    |
| #### Bn-A07-p17804272 | A-genome specific (napus-rapa)    | 0.9856459    | 0.7421178    | not scorable | not scorable | 0.9669421    | 0.6895375    |
| #### Bn-A07-p17810756 | A-genome specific (rapa only)     | not scorable | not scorable | not scorable | not scorable | 0.9752066    | 0.642257     |
| #### Bn-A07-p17814268 | A-genome specific (rapa only)     | not scorable | not scorable | not scorable | not scorable | 1            | 0.8685705    |
| #### Bn-A07-p17823544 | A-genome specific (napus-rapa)    | 0.9928229    | 0.6590215    | not scorable | not scorable | 0.9752066    | 0.6798267    |
| #### Bn-A07-p17827124 | genome unspecific (all in)        | 1            | 0.3455803    | 0.9922481    | 0.303959     | 0.9917355    | 0.7432941    |
| #### Bn-A07-p17839833 | A-genome specific (napus-rapa)    | 0.9641148    | 0.6849679    | not scorable | not scorable | 1            | 0.6841838    |
| #### Bn-A07-p178437   | A-genome specific (napus-rapa)    | 0.9856459    | 0.4382904    | not scorable | not scorable | 1            | 0.7638682    |
| #### Bn-A07-p17846018 | A-genome specific (napus-rapa)    | 0.9641148    | 0.579578     | not scorable | not scorable | 0.9917355    | 0.765558     |
| #### Bn-A07-p17846299 | A-genome specific (napus-rapa)    | 0.9856459    | 0.3734584    | not scorable | not scorable | 1            | 0.7859007    |
| #### Bn-A07-p17860745 | A-genome specific (napus-rapa)    | 0.9832536    | 0.4811443    | not scorable | not scorable | 1            | 0.8129001    |
| #### Bn-A07-p17869552 | A-genome specific (napus-rapa)    | 0.9856459    | 0.7974974    | not scorable | not scorable | 0.9834711    | 0.8207097    |
| #### Bn-A07-p17930992 | A-genome specific (napus-rapa)    | 0.9688995    | 0.4491993    | not scorable | not scorable | 1            | 0.7921491    |
| #### Bn-A07-p17959118 | A-genome specific (napus-rapa)    | 0.9808612    | 0.780405     | not scorable | not scorable | 0.9917355    | 0.7867873    |
| #### Bn-A07-p1800556  | A-genome specific (napus-rapa)    | 0.8899522    | 0.6219534    | not scorable | not scorable | 0.9256198    | 0.813565     |
| #### Bn-A07-p18020732 | napus specific                    | 0.9186603    | 0.5882598    | not scorable | not scorable | not scorable | not scorable |
| #### Bn-A07-p18021746 | A-genome specific (napus-rapa)    | 0.9952153    | 0.7558401    | not scorable | not scorable | 1            | 0.7818989    |
| #### Bn-A07-p18028449 | napus specific                    | 0.9952153    | 0.6744488    | not scorable | not scorable | not scorable | not scorable |
| #### Bn-A07-p18028951 | A-genome specific (napus-rapa)    | 0.9545454    | 0.6373191    | not scorable | not scorable | 1            | 0.9332608    |
| #### Bn-A07-p18029053 | napus specific                    | 0.9760765    | 0.7398118    | not scorable | not scorable | not scorable | not scorable |
| #### Bn-A07-p18035698 | genome unspecific (oleracea-rapa) | not scorable | not scorable | 0.9844961    | 0.6562764    | 0.9752066    | 0.676384     |
| #### Bn-A07-p18041441 | A-genome specific (napus-rapa)    | 0.9784689    | 0.5296074    | not scorable | not scorable | 1            | 0.7883672    |
| #### Bn-A07-p18048293 | A-genome specific (napus-rapa)    | 0.9904306    | 0.5911066    | not scorable | not scorable | 0.9917355    | 0.7190772    |

|                       |                                |              |              |              |              |              |              |
|-----------------------|--------------------------------|--------------|--------------|--------------|--------------|--------------|--------------|
| #### Bn-A07-p18049440 | A-genome specific (napus-rapa) | 0.9617225    | 0.5182487    | not scorable | not scorable | 1            | 0.7270018    |
| #### Bn-A07-p18074241 | A-genome specific (napus-rapa) | 1            | 0.3931819    | not scorable | not scorable | 1            | 0.790886     |
| #### Bn-A07-p18074585 | A-genome specific (rapa only)  | not scorable | not scorable | not scorable | not scorable | 1            | 0.6770065    |
| #### Bn-A07-p18076313 | A-genome specific (napus-rapa) | 0.9904306    | 0.7587552    | not scorable | not scorable | 0.9917355    | 0.806761     |
| #### Bn-A07-p18076429 | A-genome specific (napus-rapa) | 0.9665072    | 0.728481     | not scorable | not scorable | 0.9917355    | 0.770409     |
| #### Bn-A07-p18084198 | napus specific                 | 0.9617225    | 0.7775868    | not scorable | not scorable | not scorable | not scorable |
| #### Bn-A07-p18088151 | A-genome specific (napus-rapa) | 1            | 0.5411173    | not scorable | not scorable | 0.9834711    | 0.7718732    |
| #### Bn-A07-p1809446  | A-genome specific (napus-rapa) | 0.9856459    | 0.4406309    | not scorable | not scorable | 0.9669421    | 0.6310849    |
| #### Bn-A07-p18095670 | A-genome specific (napus-rapa) | 1            | 0.5403449    | not scorable | not scorable | 0.9917355    | 0.7327892    |
| #### Bn-A07-p1809594  | A-genome specific (napus-rapa) | 0.9976076    | 0.7690014    | not scorable | not scorable | 0.9917355    | 0.7524056    |
| #### Bn-A07-p18103464 | A-genome specific (napus-rapa) | 1            | 0.6314275    | not scorable | not scorable | 0.9834711    | 0.6538309    |
| #### Bn-A07-p18103505 | A-genome specific (napus-rapa) | 0.9880383    | 0.7035524    | not scorable | not scorable | 0.9834711    | 0.7383621    |
| #### Bn-A07-p1810459  | A-genome specific (napus-rapa) | 1            | 0.6979295    | not scorable | not scorable | 0.9834711    | 0.7778372    |
| #### Bn-A07-p18104828 | A-genome specific (napus-rapa) | 0.9856459    | 0.702439     | not scorable | not scorable | 1            | 0.7914145    |
| #### Bn-A07-p18106007 | A-genome specific (napus-rapa) | 1            | 0.7414912    | not scorable | not scorable | 0.9917355    | 0.8627988    |
| #### Bn-A07-p18106626 | A-genome specific (napus-rapa) | 0.9904306    | 0.3071079    | not scorable | not scorable | 0.9834711    | 0.789221     |
| #### Bn-A07-p18106750 | A-genome specific (napus-rapa) | 0.9952153    | 0.8079977    | not scorable | not scorable | 1            | 0.7071902    |
| #### Bn-A07-p18115061 | A-genome specific (napus-rapa) | 1            | 0.7933922    | not scorable | not scorable | 1            | 0.9095823    |
| #### Bn-A07-p18115747 | A-genome specific (napus-rapa) | 0.9976076    | 0.7576202    | not scorable | not scorable | 1            | 0.6953018    |
| #### Bn-A07-p18121365 | A-genome specific (napus-rapa) | 0.9976076    | 0.8078945    | not scorable | not scorable | 0.9917355    | 0.7765831    |
| #### Bn-A07-p18134446 | A-genome specific (napus-rapa) | 0.9928229    | 0.6426919    | not scorable | not scorable | 0.9834711    | 0.6913865    |
| #### Bn-A07-p18151107 | A-genome specific (napus-rapa) | 0.9976076    | 0.743366     | not scorable | not scorable | 1            | 0.7881469    |
| #### Bn-A07-p18157564 | A-genome specific (napus-rapa) | 1            | 0.5756649    | not scorable | not scorable | 0.9917355    | 0.7408797    |
| #### Bn-A07-p18167424 | A-genome specific (napus-rapa) | 0.9976076    | 0.2281735    | not scorable | not scorable | 1            | 0.6460914    |
| #### Bn-A07-p1817516  | A-genome specific (napus-rapa) | 0.9928229    | 0.8132827    | not scorable | not scorable | 1            | 0.7489131    |
| #### Bn-A07-p18187317 | A-genome specific (napus-rapa) | 0.9976076    | 0.3330207    | not scorable | not scorable | 1            | 0.7018587    |
| #### Bn-A07-p18196996 | A-genome specific (napus-rapa) | 0.9760765    | 0.7103146    | not scorable | not scorable | 1            | 0.7390317    |
| #### Bn-A07-p18197951 | A-genome specific (napus-rapa) | 0.3349282    | 0.8765885    | not scorable | not scorable | 0.8595041    | 0.805556     |
| #### Bn-A07-p18201301 | A-genome specific (napus-rapa) | 0.9497608    | 0.5874556    | not scorable | not scorable | 0.9917355    | 0.7232735    |
| #### Bn-A07-p18204966 | A-genome specific (napus-rapa) | 0.9928229    | 0.7894096    | not scorable | not scorable | 0.9834711    | 0.7531861    |
| #### Bn-A07-p18208846 | A-genome specific (napus-rapa) | 1            | 0.7554678    | not scorable | not scorable | 0.9917355    | 0.7042567    |
| #### Bn-A07-p18210547 | A-genome specific (rapa only)  | not scorable | not scorable | not scorable | not scorable | 1            | 0.7466573    |
| #### Bn-A07-p18216943 | A-genome specific (napus-rapa) | 1            | 0.7694677    | not scorable | not scorable | 1            | 0.7494321    |

|                       |                                   |              |              |              |              |              |              |
|-----------------------|-----------------------------------|--------------|--------------|--------------|--------------|--------------|--------------|
| #### Bn-A07-p18223256 | A-genome specific (napus-rapa)    | 0.9928229    | 0.7931954    | not scorable | not scorable | 1            | 0.8108167    |
| #### Bn-A07-p18226326 | A-genome specific (napus-rapa)    | 0.9928229    | 0.8260473    | not scorable | not scorable | 0.9586777    | 0.8111903    |
| #### Bn-A07-p18227328 | A-genome specific (napus-rapa)    | 0.9976076    | 0.8334827    | not scorable | not scorable | 0.9917355    | 0.8585076    |
| #### Bn-A07-p1822755  | A-genome specific (napus-rapa)    | 0.9976076    | 0.4633537    | not scorable | not scorable | 0.9834711    | 0.7134245    |
| #### Bn-A07-p18230931 | A-genome specific (napus-rapa)    | 0.9736842    | 0.7020812    | not scorable | not scorable | 0.9917355    | 0.821159     |
| #### Bn-A07-p18231736 | A-genome specific (rapa only)     | not scorable | not scorable | not scorable | not scorable | 1            | 0.70513      |
| #### Bn-A07-p18233390 | A-genome specific (napus-rapa)    | 1            | 0.5687568    | not scorable | not scorable | 1            | 0.7305205    |
| #### Bn-A07-p18262143 | A-genome specific (napus-rapa)    | 0.9856459    | 0.6691655    | not scorable | not scorable | 0.9834711    | 0.711337     |
| #### Bn-A07-p18265668 | genome unspecific (all in)        | 0.9904306    | 0.3349769    | 1            | 0.7171388    | 0.9917355    | 0.7245917    |
| #### Bn-A07-p18265772 | A-genome specific (napus-rapa)    | 1            | 0.7591583    | not scorable | not scorable | 1            | 0.6589029    |
| #### Bn-A07-p18274656 | A-genome specific (napus-rapa)    | 0.9904306    | 0.7315812    | not scorable | not scorable | 0.9752066    | 0.6329297    |
| #### Bn-A07-p18282597 | A-genome specific (napus-rapa)    | 1            | 0.9086228    | not scorable | not scorable | 1            | 0.8195446    |
| #### Bn-A07-p18282722 | A-genome specific (napus-rapa)    | 1            | 0.8824214    | not scorable | not scorable | 0.9917355    | 0.7961242    |
| #### Bn-A07-p18308378 | A-genome specific (napus-rapa)    | 0.9976076    | 0.5490265    | not scorable | not scorable | 0.9917355    | 0.5866622    |
| #### Bn-A07-p18319586 | A-genome specific (napus-rapa)    | 0.9976076    | 0.7108098    | not scorable | not scorable | 1            | 0.8212658    |
| #### Bn-A07-p1832580  | A-genome specific (napus-rapa)    | 0.9952153    | 0.4090666    | not scorable | not scorable | 0.9834711    | 0.7767055    |
| #### Bn-A07-p18326762 | A-genome specific (napus-rapa)    | 0.9976076    | 0.6461156    | not scorable | not scorable | 0.9917355    | 0.6831908    |
| #### Bn-A07-p18338860 | napus specific                    | 0.9258373    | 0.9205657    | not scorable | not scorable | not scorable | not scorable |
| #### Bn-A07-p18346973 | A-genome specific (napus-rapa)    | 0.9784689    | 0.760303     | not scorable | not scorable | 0.9917355    | 0.7235792    |
| #### Bn-A07-p1835232  | A-genome specific (napus-rapa)    | 0.9856459    | 0.7396765    | not scorable | not scorable | 0.9834711    | 0.7155414    |
| #### Bn-A07-p184221   | A-genome specific (napus-rapa)    | 0.9593301    | 0.6413701    | not scorable | not scorable | 0.9917355    | 0.6746162    |
| #### Bn-A07-p18451074 | A-genome specific (napus-rapa)    | 1            | 0.6716062    | not scorable | not scorable | 1            | 0.9175813    |
| #### Bn-A07-p1845182  | A-genome specific (napus-rapa)    | 0.9952153    | 0.8518244    | not scorable | not scorable | 0.9917355    | 0.8142498    |
| #### Bn-A07-p1857408  | A-genome specific (napus-rapa)    | 1            | 0.6261628    | not scorable | not scorable | 1            | 0.6564732    |
| #### Bn-A07-p1861823  | A-genome specific (napus-rapa)    | 0.8803828    | 0.2005018    | not scorable | not scorable | 0.9669421    | 0.6963184    |
| #### Bn-A07-p1862015  | A-genome specific (napus-rapa)    | 0.9186603    | 0.4498592    | not scorable | not scorable | 0.9586777    | 0.2677796    |
| #### Bn-A07-p186971   | A-genome specific (napus-rapa)    | 0.9928229    | 0.8106061    | not scorable | not scorable | 0.9834711    | 0.8035615    |
| #### Bn-A07-p187342   | A-genome specific (napus-rapa)    | 0.9880383    | 0.7561478    | not scorable | not scorable | 0.9752066    | 0.7368896    |
| #### Bn-A07-p18745105 | A-genome specific (napus-rapa)    | 1            | 0.8181556    | not scorable | not scorable | 1            | 0.8556182    |
| #### Bn-A07-p187880   | A-genome specific (napus-rapa)    | 0.9928229    | 0.789126     | not scorable | not scorable | 0.9752066    | 0.8173649    |
| #### Bn-A07-p18812613 | genome unspecific (oleracea-rapa) | not scorable | not scorable | 0.9922481    | 0.8051205    | 0.9917355    | 0.8309556    |
| #### Bn-A07-p18822708 | A-genome specific (napus-rapa)    | 0.9808612    | 0.5586076    | not scorable | not scorable | 1            | 0.6998239    |
| #### Bn-A07-p18832178 | A-genome specific (napus-rapa)    | 0.9688995    | 0.6096598    | not scorable | not scorable | 1            | 0.6643412    |

|                       |                                |              |              |              |              |           |           |
|-----------------------|--------------------------------|--------------|--------------|--------------|--------------|-----------|-----------|
| #### Bn-A07-p188720   | A-genome specific (napus-rapa) | 0.9904306    | 0.8071685    | not scorable | not scorable | 0.9917355 | 0.7691094 |
| #### Bn-A07-p188774   | A-genome specific (napus-rapa) | 0.9904306    | 0.3981617    | not scorable | not scorable | 1         | 0.7272967 |
| #### Bn-A07-p1889752  | A-genome specific (rapa only)  | not scorable | not scorable | not scorable | not scorable | 0.9586777 | 0.397024  |
| #### Bn-A07-p18903215 | A-genome specific (napus-rapa) | 1            | 0.6447094    | not scorable | not scorable | 0.9669421 | 0.7443017 |
| #### Bn-A07-p189086   | A-genome specific (napus-rapa) | 0.9808612    | 0.3927713    | not scorable | not scorable | 1         | 0.6771552 |
| #### Bn-A07-p18914294 | A-genome specific (napus-rapa) | 0.9880383    | 0.7482555    | not scorable | not scorable | 1         | 0.7165323 |
| #### Bn-A07-p18919960 | A-genome specific (napus-rapa) | 0.9282297    | 0.6589787    | not scorable | not scorable | 1         | 0.7138681 |
| #### Bn-A07-p18922121 | A-genome specific (napus-rapa) | 0.9952153    | 0.7860081    | not scorable | not scorable | 0.9834711 | 0.7624525 |
| #### Bn-A07-p18935257 | A-genome specific (napus-rapa) | 0.9665072    | 0.3108633    | not scorable | not scorable | 1         | 0.8008413 |
| #### Bn-A07-p18947073 | A-genome specific (napus-rapa) | 0.9712918    | 0.3270929    | not scorable | not scorable | 0.9917355 | 0.6855561 |
| #### Bn-A07-p18954998 | A-genome specific (napus-rapa) | 0.9760765    | 0.7789383    | not scorable | not scorable | 0.9917355 | 0.7764921 |
| #### Bn-A07-p18955989 | A-genome specific (napus-rapa) | 0.9497608    | 0.5711296    | not scorable | not scorable | 0.9917355 | 0.73527   |
| #### Bn-A07-p18956207 | A-genome specific (napus-rapa) | 0.9808612    | 0.6217577    | not scorable | not scorable | 1         | 0.8302672 |
| #### Bn-A07-p18957162 | A-genome specific (napus-rapa) | 0.9856459    | 0.3496196    | not scorable | not scorable | 1         | 0.8045188 |
| #### Bn-A07-p18968214 | A-genome specific (napus-rapa) | 1            | 0.6451743    | not scorable | not scorable | 0.9917355 | 0.5256066 |
| #### Bn-A07-p18971657 | A-genome specific (napus-rapa) | 0.8779904    | 0.9205657    | not scorable | not scorable | 1         | 0.9175813 |
| #### Bn-A07-p18973385 | A-genome specific (napus-rapa) | 0.930622     | 0.4449184    | not scorable | not scorable | 0.9917355 | 0.7080025 |
| #### Bn-A07-p18983802 | A-genome specific (napus-rapa) | 0.9569378    | 0.658838     | not scorable | not scorable | 0.9917355 | 0.6619674 |
| #### Bn-A07-p18985169 | A-genome specific (napus-rapa) | 0.9641148    | 0.2731416    | not scorable | not scorable | 1         | 0.8420913 |
| #### Bn-A07-p18990899 | A-genome specific (napus-rapa) | 0.9880383    | 0.761962     | not scorable | not scorable | 1         | 0.8189049 |
| #### Bn-A07-p18993118 | A-genome specific (rapa only)  | not scorable | not scorable | not scorable | not scorable | 0.9834711 | 0.917673  |
| #### Bn-A07-p19001556 | A-genome specific (napus-rapa) | 0.9665072    | 0.6032373    | not scorable | not scorable | 1         | 0.5881607 |
| #### Bn-A07-p19001778 | A-genome specific (napus-rapa) | 0.9641148    | 0.2481157    | not scorable | not scorable | 0.9917355 | 0.7947701 |
| #### Bn-A07-p19009397 | A-genome specific (napus-rapa) | 0.9904306    | 0.7869651    | not scorable | not scorable | 1         | 0.8434563 |
| #### Bn-A07-p19028597 | A-genome specific (napus-rapa) | 0.9904306    | 0.8020086    | not scorable | not scorable | 0.9834711 | 0.7759204 |
| #### Bn-A07-p19028743 | A-genome specific (napus-rapa) | 0.9497608    | 0.5150786    | not scorable | not scorable | 1         | 0.7421356 |
| #### Bn-A07-p19037677 | A-genome specific (napus-rapa) | 0.9736842    | 0.387482     | not scorable | not scorable | 1         | 0.7619855 |
| #### Bn-A07-p19066968 | A-genome specific (napus-rapa) | 0.9808612    | 0.7516662    | not scorable | not scorable | 0.9917355 | 0.7057509 |
| #### Bn-A07-p19090612 | A-genome specific (napus-rapa) | 0.9449761    | 0.4287487    | not scorable | not scorable | 0.9917355 | 0.7440017 |
| #### Bn-A07-p19093712 | A-genome specific (napus-rapa) | 0.9665072    | 0.4383603    | not scorable | not scorable | 1         | 0.7729416 |
| #### Bn-A07-p19102772 | A-genome specific (napus-rapa) | 0.9736842    | 0.8775468    | not scorable | not scorable | 0.9917355 | 0.7898132 |
| #### Bn-A07-p19109981 | A-genome specific (napus-rapa) | 0.9976076    | 0.772145     | not scorable | not scorable | 1         | 0.9313495 |
| #### Bn-A07-p19110333 | A-genome specific (napus-rapa) | 0.9928229    | 0.7134145    | not scorable | not scorable | 1         | 0.9510354 |

|                       |                                |              |              |              |              |              |              |
|-----------------------|--------------------------------|--------------|--------------|--------------|--------------|--------------|--------------|
| #### Bn-A07-p19110971 | A-genome specific (napus-rapa) | 0.9904306    | 0.7129844    | not scorable | not scorable | 1            | 0.737486     |
| #### Bn-A07-p19111807 | A-genome specific (napus-rapa) | 0.9593301    | 0.7391247    | not scorable | not scorable | 1            | 0.9516799    |
| #### Bn-A07-p19113444 | A-genome specific (napus-rapa) | 1            | 0.6103159    | not scorable | not scorable | 0.9834711    | 0.6183447    |
| #### Bn-A07-p19118066 | A-genome specific (napus-rapa) | 0.9832536    | 0.7469136    | not scorable | not scorable | 1            | 0.8318305    |
| #### Bn-A07-p19129406 | napus specific                 | 0.9832536    | 0.6475111    | not scorable | not scorable | not scorable | not scorable |
| #### Bn-A07-p19142808 | A-genome specific (rapa only)  | not scorable | not scorable | not scorable | not scorable | 1            | 0.7205011    |
| #### Bn-A07-p19145175 | A-genome specific (napus-rapa) | 0.9760765    | 0.7496117    | not scorable | not scorable | 0.9917355    | 0.7721701    |
| #### Bn-A07-p19150984 | A-genome specific (napus-rapa) | 0.9880383    | 0.7828851    | not scorable | not scorable | 0.9917355    | 0.7702268    |
| #### Bn-A07-p19151274 | A-genome specific (napus-rapa) | 0.9976076    | 0.7597081    | not scorable | not scorable | 0.9834711    | 0.7778496    |
| #### Bn-A07-p19163856 | A-genome specific (napus-rapa) | 0.9473684    | 0.6198893    | not scorable | not scorable | 1            | 0.7259524    |
| #### Bn-A07-p19166676 | A-genome specific (napus-rapa) | 0.9880383    | 0.7592667    | not scorable | not scorable | 0.9752066    | 0.7088304    |
| #### Bn-A07-p19175358 | all not scorable               | not scorable | not scorable | not scorable | not scorable | not scorable | not scorable |
| #### Bn-A07-p19176340 | A-genome specific (napus-rapa) | 0.9665072    | 0.4728822    | not scorable | not scorable | 1            | 0.7576207    |
| #### Bn-A07-p19186300 | genome unspecific (all in)     | 0.9856459    | 0.4424712    | 0.9767442    | 0.6900374    | 1            | 0.7957538    |
| #### Bn-A07-p19190510 | A-genome specific (napus-rapa) | 0.9808612    | 0.6292762    | not scorable | not scorable | 0.9752066    | 0.6851948    |
| #### Bn-A07-p19192373 | A-genome specific (napus-rapa) | 0.9712918    | 0.7432038    | not scorable | not scorable | 0.9504132    | 0.7582155    |
| #### Bn-A07-p19260238 | A-genome specific (rapa only)  | not scorable | not scorable | not scorable | not scorable | 0.9834711    | 0.6914791    |
| #### Bn-A07-p19260331 | A-genome specific (rapa only)  | not scorable | not scorable | not scorable | not scorable | 0.9752066    | 0.6659849    |
| #### Bn-A07-p19311663 | A-genome specific (napus-rapa) | 0.9856459    | 0.5319552    | not scorable | not scorable | 0.9669421    | 0.7129046    |
| #### Bn-A07-p19352007 | A-genome specific (napus-rapa) | 0.9832536    | 0.7101939    | not scorable | not scorable | 1            | 0.7173966    |
| #### Bn-A07-p19409951 | A-genome specific (napus-rapa) | 0.9856459    | 0.5296659    | not scorable | not scorable | 0.9752066    | 0.6558732    |
| #### Bn-A07-p19423792 | A-genome specific (rapa only)  | not scorable | not scorable | not scorable | not scorable | 0.9504132    | 0.3743577    |
| #### Bn-A07-p19458370 | A-genome specific (napus-rapa) | 0.9808612    | 0.6218026    | not scorable | not scorable | 0.9752066    | 0.7516804    |
| #### Bn-A07-p19486760 | A-genome specific (rapa only)  | not scorable | not scorable | not scorable | not scorable | 0.9504132    | 0.7847995    |
| #### Bn-A07-p19487659 | A-genome specific (napus-rapa) | 0.9952153    | 0.7460652    | not scorable | not scorable | 1            | 0.7981111    |
| #### Bn-A07-p19512603 | A-genome specific (napus-rapa) | 0.9928229    | 0.7259634    | not scorable | not scorable | 0.9917355    | 0.8084642    |
| #### Bn-A07-p19512916 | A-genome specific (napus-rapa) | 0.9473684    | 0.6553548    | not scorable | not scorable | 0.9669421    | 0.6461447    |
| #### Bn-A07-p19515708 | A-genome specific (napus-rapa) | 0.9712918    | 0.2963482    | not scorable | not scorable | 1            | 0.7422807    |
| #### Bn-A07-p19563230 | A-genome specific (napus-rapa) | 0.9545454    | 0.6324154    | not scorable | not scorable | 0.9834711    | 0.5956376    |
| #### Bn-A07-p19622207 | A-genome specific (napus-rapa) | 0.9952153    | 0.3004586    | not scorable | not scorable | 0.9421487    | 0.454258     |
| #### Bn-A07-p19622647 | all not scorable               | not scorable | not scorable | not scorable | not scorable | not scorable | not scorable |
| #### Bn-A07-p1962566  | A-genome specific (napus-rapa) | 1            | 0.420367     | not scorable | not scorable | 0.9669421    | 0.5378139    |
| #### Bn-A07-p1963551  | A-genome specific (napus-rapa) | 1            | 0.8195596    | not scorable | not scorable | 1            | 0.711467     |

|                       |                                |              |              |              |              |              |              |
|-----------------------|--------------------------------|--------------|--------------|--------------|--------------|--------------|--------------|
| #### Bn-A07-p1963945  | napus specific                 | 1            | 0.6071444    | not scorable | not scorable | not scorable | not scorable |
| #### Bn-A07-p1963962  | A-genome specific (napus-rapa) | 1            | 0.5999731    | not scorable | not scorable | 1            | 0.5932571    |
| #### Bn-A07-p1964708  | A-genome specific (napus-rapa) | 1            | 0.5385311    | not scorable | not scorable | 0.9421487    | 0.4743924    |
| #### Bn-A07-p1965600  | A-genome specific (rapa only)  | not scorable | not scorable | not scorable | not scorable | 0.9504132    | 0.4873364    |
| #### Bn-A07-p19795126 | A-genome specific (napus-rapa) | 0.9952153    | 0.7066934    | not scorable | not scorable | 0.9917355    | 0.8042552    |
| #### Bn-A07-p19824864 | A-genome specific (rapa only)  | not scorable | not scorable | not scorable | not scorable | 1            | 0.7037174    |
| #### Bn-A07-p19825063 | A-genome specific (napus-rapa) | 0.9928229    | 0.8828596    | not scorable | not scorable | 0.9917355    | 0.8440234    |
| #### Bn-A07-p19865918 | A-genome specific (napus-rapa) | 0.9928229    | 0.7154162    | not scorable | not scorable | 0.9834711    | 0.7975728    |
| #### Bn-A07-p19865996 | A-genome specific (napus-rapa) | 0.9952153    | 0.7746639    | not scorable | not scorable | 0.9752066    | 0.7910917    |
| #### Bn-A07-p19871923 | A-genome specific (napus-rapa) | 0.9952153    | 0.765498     | not scorable | not scorable | 0.7851239    | 0.7876974    |
| #### Bn-A07-p19880756 | A-genome specific (napus-rapa) | 0.9904306    | 0.5052565    | not scorable | not scorable | 0.9917355    | 0.827045     |
| #### Bn-A07-p19880968 | A-genome specific (napus-rapa) | 0.9856459    | 0.6689516    | not scorable | not scorable | 1            | 0.8185227    |
| #### Bn-A07-p19900592 | A-genome specific (napus-rapa) | 0.9593301    | 0.5867041    | not scorable | not scorable | 1            | 0.6311116    |
| #### Bn-A07-p19901175 | A-genome specific (napus-rapa) | 0.9784689    | 0.5806909    | not scorable | not scorable | 1            | 0.8320497    |
| #### Bn-A07-p19912379 | A-genome specific (napus-rapa) | 0.9880383    | 0.5092608    | not scorable | not scorable | 0.9917355    | 0.7329017    |
| #### Bn-A07-p19915062 | A-genome specific (napus-rapa) | 0.9952153    | 0.7886956    | not scorable | not scorable | 0.9752066    | 0.625879     |
| #### Bn-A07-p19924753 | A-genome specific (napus-rapa) | 0.9832536    | 0.7617614    | not scorable | not scorable | 0.9752066    | 0.8024677    |
| #### Bn-A07-p19941998 | A-genome specific (rapa only)  | not scorable | not scorable | not scorable | not scorable | 0.9917355    | 0.8190759    |
| #### Bn-A07-p199473   | A-genome specific (napus-rapa) | 1            | 0.6396389    | not scorable | not scorable | 0.9834711    | 0.7645635    |
| #### Bn-A07-p19957202 | A-genome specific (napus-rapa) | 0.9928229    | 0.4408567    | not scorable | not scorable | 1            | 0.699688     |
| #### Bn-A07-p199589   | A-genome specific (napus-rapa) | 0.9928229    | 0.7947004    | not scorable | not scorable | 1            | 0.8828245    |
| #### Bn-A07-p19961825 | napus specific                 | 0.9688995    | 0.6575926    | not scorable | not scorable | not scorable | not scorable |
| #### Bn-A07-p19965401 | A-genome specific (napus-rapa) | 0.9856459    | 0.4139613    | not scorable | not scorable | 1            | 0.7984475    |
| #### Bn-A07-p19967695 | A-genome specific (napus-rapa) | 1            | 0.4354188    | not scorable | not scorable | 1            | 0.7858153    |
| #### Bn-A07-p19975808 | A-genome specific (napus-rapa) | 0.9808612    | 0.7352703    | not scorable | not scorable | 1            | 0.7843276    |
| #### Bn-A07-p19977445 | A-genome specific (napus-rapa) | 0.9928229    | 0.4227974    | not scorable | not scorable | 0.9917355    | 0.8140548    |
| #### Bn-A07-p19984971 | A-genome specific (napus-rapa) | 0.9880383    | 0.7657458    | not scorable | not scorable | 1            | 0.8508033    |
| #### Bn-A07-p19987483 | A-genome specific (napus-rapa) | 0.9976076    | 0.4109717    | not scorable | not scorable | 1            | 0.6763602    |
| #### Bn-A07-p19987485 | A-genome specific (rapa only)  | not scorable | not scorable | not scorable | not scorable | 1            | 0.7376899    |
| #### Bn-A07-p19995985 | A-genome specific (napus-rapa) | 0.9808612    | 0.7338902    | not scorable | not scorable | 0.9834711    | 0.8050808    |
| #### Bn-A07-p19999651 | A-genome specific (napus-rapa) | 0.9665072    | 0.2239777    | not scorable | not scorable | 0.9834711    | 0.6231655    |
| #### Bn-A07-p20000340 | A-genome specific (napus-rapa) | 0.9808612    | 0.3338975    | not scorable | not scorable | 0.9752066    | 0.6861908    |
| #### Bn-A07-p20003438 | A-genome specific (napus-rapa) | 0.9736842    | 0.3091106    | not scorable | not scorable | 0.9834711    | 0.6732364    |



|                       |                                |              |              |              |              |              |              |
|-----------------------|--------------------------------|--------------|--------------|--------------|--------------|--------------|--------------|
| #### Bn-A07-p20005724 | A-genome specific (napus-rapa) | 0.9736842    | 0.741945     | not scorable | not scorable | 0.9834711    | 0.7119471    |
| #### Bn-A07-p20006245 | A-genome specific (napus-rapa) | 0.9808612    | 0.7349845    | not scorable | not scorable | 0.9834711    | 0.6198636    |
| #### Bn-A07-p20029449 | A-genome specific (napus-rapa) | 0.9688995    | 0.3346437    | not scorable | not scorable | 0.9917355    | 0.6650417    |
| #### Bn-A07-p20044413 | A-genome specific (napus-rapa) | 0.9665072    | 0.6223785    | not scorable | not scorable | 1            | 0.7040147    |
| #### Bn-A07-p20090726 | A-genome specific (napus-rapa) | 0.9736842    | 0.4793808    | not scorable | not scorable | 1            | 0.7399867    |
| #### Bn-A07-p20135392 | A-genome specific (napus-rapa) | 0.9688995    | 0.5628486    | not scorable | not scorable | 0.9752066    | 0.6953201    |
| #### Bn-A07-p20143003 | A-genome specific (rapa only)  | not scorable | not scorable | not scorable | not scorable | 0.9917355    | 0.6276965    |
| #### Bn-A07-p20143131 | A-genome specific (rapa only)  | not scorable | not scorable | not scorable | not scorable | 0.9669421    | 0.6176097    |
| #### Bn-A07-p20144687 | A-genome specific (napus-rapa) | 0.9832536    | 0.1900503    | not scorable | not scorable | 0.9834711    | 0.7413996    |
| #### Bn-A07-p20190653 | A-genome specific (napus-rapa) | 0.9569378    | 0.6454188    | not scorable | not scorable | 1            | 0.6634322    |
| #### Bn-A07-p20192092 | A-genome specific (napus-rapa) | 0.9497608    | 0.4862247    | not scorable | not scorable | 1            | 0.7182569    |
| #### Bn-A07-p20193221 | A-genome specific (rapa only)  | not scorable | not scorable | not scorable | not scorable | 1            | 0.7374429    |
| #### Bn-A07-p20209068 | A-genome specific (napus-rapa) | 0.9497608    | 0.4110088    | not scorable | not scorable | 1            | 0.8474661    |
| #### Bn-A07-p20221692 | A-genome specific (napus-rapa) | 0.9952153    | 0.443985     | not scorable | not scorable | 1            | 0.6445675    |
| #### Bn-A07-p20230189 | genome unspecific (all in)     | 0.9784689    | 0.4918386    |              | 1 0.7999257  | 0.9834711    | 0.6766359    |
| #### Bn-A07-p20231605 | A-genome specific (napus-rapa) | 0.9952153    | 0.402342     | not scorable | not scorable | 0.9834711    | 0.6877309    |
| #### Bn-A07-p20248654 | A-genome specific (napus-rapa) | 0.9928229    | 0.7683705    | not scorable | not scorable | 1            | 0.6859066    |
| #### Bn-A07-p20248822 | A-genome specific (napus-rapa) | 0.9880383    | 0.6546007    | not scorable | not scorable | 0.9834711    | 0.4889628    |
| #### Bn-A07-p20251365 | A-genome specific (napus-rapa) | 0.9832536    | 0.3054434    | not scorable | not scorable | 0.9917355    | 0.6816022    |
| #### Bn-A07-p20369599 | napus specific                 | 0.9976076    | 0.5072653    | not scorable | not scorable | not scorable | not scorable |
| #### Bn-A07-p20467347 | A-genome specific (napus-rapa) | 0.9880383    | 0.3344961    | not scorable | not scorable | 0.9917355    | 0.7825954    |
| #### Bn-A07-p20469674 | A-genome specific (napus-rapa) | 1            | 0.7802292    | not scorable | not scorable | 1            | 0.9175124    |
| #### Bn-A07-p20471091 | A-genome specific (rapa only)  | not scorable | not scorable | not scorable | not scorable | 1            | 0.7410534    |
| #### Bn-A07-p20471143 | A-genome specific (rapa only)  | not scorable | not scorable | not scorable | not scorable | 1            | 0.8593067    |
| #### Bn-A07-p20477027 | A-genome specific (napus-rapa) | 1            | 0.9074544    | not scorable | not scorable | 1            | 0.9039475    |
| #### Bn-A07-p20481682 | A-genome specific (napus-rapa) | 0.930622     | 0.7326745    | not scorable | not scorable | 0.9669421    | 0.8181944    |
| #### Bn-A07-p20485039 | A-genome specific (napus-rapa) | 0.9928229    | 0.7677682    | not scorable | not scorable | 1            | 0.911518     |
| #### Bn-A07-p20511320 | napus specific                 | 0.9760765    | 0.7456849    | not scorable | not scorable | not scorable | not scorable |
| #### Bn-A07-p20527962 | A-genome specific (napus-rapa) | 0.9928229    | 0.7398226    | not scorable | not scorable | 1            | 0.9205657    |
| #### Bn-A07-p20554194 | A-genome specific (napus-rapa) | 0.9760765    | 0.6802674    | not scorable | not scorable | 0.9917355    | 0.7325231    |
| #### Bn-A07-p20558164 | A-genome specific (napus-rapa) | 0.9904306    | 0.7589368    | not scorable | not scorable | 0.9917355    | 0.7031287    |
| #### Bn-A07-p20561173 | A-genome specific (rapa only)  | not scorable | not scorable | not scorable | not scorable | 1            | 0.9110866    |
| #### Bn-A07-p20565057 | A-genome specific (napus-rapa) | 0.9808612    | 0.7609653    | not scorable | not scorable | 0.9917355    | 0.8103272    |

|                       |                                   |              |              |              |              |              |              |
|-----------------------|-----------------------------------|--------------|--------------|--------------|--------------|--------------|--------------|
| #### Bn-A07-p20565684 | A-genome specific (napus-rapa)    | 0.923445     | 0.6848113    | not scorable | not scorable | 0.9669421    | 0.6350489    |
| #### Bn-A07-p20571625 | A-genome specific (napus-rapa)    | 0.9856459    | 0.5434133    | not scorable | not scorable | 1            | 0.8078372    |
| #### Bn-A07-p20580512 | A-genome specific (napus-rapa)    | 0.9712918    | 0.561448     | not scorable | not scorable | 0.9917355    | 0.7978364    |
| #### Bn-A07-p20589714 | A-genome specific (napus-rapa)    | 0.9808612    | 0.7559544    | not scorable | not scorable | 0.9752066    | 0.8375158    |
| #### Bn-A07-p20611621 | A-genome specific (napus-rapa)    | 0.9856459    | 0.4188164    | not scorable | not scorable | 1            | 0.7027582    |
| #### Bn-A07-p20646388 | A-genome specific (napus-rapa)    | 0.9784689    | 0.3934106    | not scorable | not scorable | 0.9834711    | 0.8045917    |
| #### Bn-A07-p20649978 | A-genome specific (napus-rapa)    | 0.9904306    | 0.6977356    | not scorable | not scorable | 0.9834711    | 0.7016025    |
| #### Bn-A07-p20658738 | genome unspecific (all in)        | 0.9258373    | 0.3591206    |              | 1 0.7355374  | 0.9917355    | 0.7498602    |
| #### Bn-A07-p20661885 | A-genome specific (napus-rapa)    | 0.9138756    | 0.4894429    | not scorable | not scorable | 1            | 0.6300952    |
| #### Bn-A07-p20662200 | napus specific                    | 0.9521531    | 0.3132434    | not scorable | not scorable | not scorable | not scorable |
| #### Bn-A07-p20671112 | A-genome specific (napus-rapa)    | 0.9688995    | 0.7009647    | not scorable | not scorable | 1            | 0.8284472    |
| #### Bn-A07-p20675049 | A-genome specific (rapa only)     | not scorable | not scorable | not scorable | not scorable | 1            | 0.8848283    |
| #### Bn-A07-p20684260 | A-genome specific (napus-rapa)    | 0.937799     | 0.5018501    | not scorable | not scorable | 0.9834711    | 0.7703621    |
| #### Bn-A07-p20688218 | A-genome specific (napus-rapa)    | 0.9497608    | 0.6722915    | not scorable | not scorable | 0.9834711    | 0.6772359    |
| #### Bn-A07-p20688341 | A-genome specific (napus-rapa)    | 0.9521531    | 0.6822557    | not scorable | not scorable | 0.9752066    | 0.7165316    |
| #### Bn-A07-p20700508 | A-genome specific (rapa only)     | not scorable | not scorable | not scorable | not scorable | 1            | 0.732564     |
| #### Bn-A07-p20732884 | A-genome specific (napus-rapa)    | 0.9928229    | 0.6182069    | not scorable | not scorable | 0.9752066    | 0.6662207    |
| #### Bn-A07-p20771568 | A-genome specific (napus-rapa)    | 0.9784689    | 0.7639561    | not scorable | not scorable | 0.9669421    | 0.8609685    |
| #### Bn-A07-p20786814 | A-genome specific (rapa only)     | not scorable | not scorable | not scorable | not scorable | 1            | 0.7037315    |
| #### Bn-A07-p20797755 | A-genome specific (rapa only)     | not scorable | not scorable | not scorable | not scorable | 0.9752066    | 0.8411239    |
| #### Bn-A07-p20801106 | A-genome specific (napus-rapa)    | 0.9856459    | 0.7243295    | not scorable | not scorable | 0.9834711    | 0.7213833    |
| #### Bn-A07-p20801255 | A-genome specific (napus-rapa)    | 0.9904306    | 0.7532462    | not scorable | not scorable | 0.9917355    | 0.7209599    |
| #### Bn-A07-p20801487 | A-genome specific (napus-rapa)    | 0.9880383    | 0.7882496    | not scorable | not scorable | 0.9917355    | 0.6991098    |
| #### Bn-A07-p20801586 | A-genome specific (napus-rapa)    | 0.9808612    | 0.7658557    | not scorable | not scorable | 0.9917355    | 0.6900817    |
| #### Bn-A07-p20801762 | A-genome specific (napus-rapa)    | 0.9880383    | 0.7653792    | not scorable | not scorable | 0.9669421    | 0.7672694    |
| #### Bn-A07-p20871163 | A-genome specific (rapa only)     | not scorable | not scorable | not scorable | not scorable | 0.9834711    | 0.7113371    |
| #### Bn-A07-p20887568 | A-genome specific (napus-rapa)    | 0.9641148    | 0.2131527    | not scorable | not scorable | 0.9917355    | 0.7510436    |
| #### Bn-A07-p20894218 | A-genome specific (napus-rapa)    | 0.9832536    | 0.3628633    | not scorable | not scorable | 0.9752066    | 0.7582585    |
| #### Bn-A07-p20935217 | genome unspecific (oleracea-rapa) | not scorable | not scorable | 0.9922481    | 0.7810794    | 0.9917355    | 0.8896858    |
| #### Bn-A07-p20941237 | A-genome specific (rapa only)     | not scorable | not scorable | not scorable | not scorable | 1            | 0.7900486    |
| #### Bn-A07-p20941338 | genome unspecific (all in)        | 0.9904306    | 0.347369     | 0.8527132    | 0.687094     | 1            | 0.8184586    |
| #### Bn-A07-p20950895 | A-genome specific (napus-rapa)    | 0.9114832    | 0.4692609    | not scorable | not scorable | 0.9338843    | 0.8329918    |
| #### Bn-A07-p20951340 | A-genome specific (rapa only)     | not scorable | not scorable | not scorable | not scorable | 0.9338843    | 0.9188006    |

|                       |                                |              |              |              |              |              |              |
|-----------------------|--------------------------------|--------------|--------------|--------------|--------------|--------------|--------------|
| #### Bn-A07-p20952117 | A-genome specific (napus-rapa) | 0.9138756    | 0.321234     | not scorable | not scorable | 0.9256198    | 0.8508408    |
| #### Bn-A07-p20981410 | napus specific                 | 0.9760765    | 0.2872332    | not scorable | not scorable | not scorable | not scorable |
| #### Bn-A07-p20986876 | A-genome specific (napus-rapa) | 0.9904306    | 0.6533968    | not scorable | not scorable | 0.9834711    | 0.6885229    |
| #### Bn-A07-p20999615 | genome unspecific (all in)     | 0.9856459    | 0.4603156    | 0.9612403    | 0.2253591    | 0.9917355    | 0.7663566    |
| #### Bn-A07-p21006643 | A-genome specific (napus-rapa) | 0.9856459    | 0.6265801    | not scorable | not scorable | 0.9752066    | 0.6898387    |
| #### Bn-A07-p21019499 | A-genome specific (napus-rapa) | 0.9593301    | 0.4243947    | not scorable | not scorable | 0.9504132    | 0.5655563    |
| #### Bn-A07-p21078249 | genome unspecific (all in)     | 0.9665072    | 0.5223343    | 0.9844961    | 0.800716     | 0.9834711    | 0.685969     |
| #### Bn-A07-p21095697 | A-genome specific (napus-rapa) | 0.9784689    | 0.8331373    | not scorable | not scorable | 0.9338843    | 0.7377238    |
| #### Bn-A07-p21096350 | A-genome specific (napus-rapa) | 0.9952153    | 0.7987868    | not scorable | not scorable | 0.9834711    | 0.7740234    |
| #### Bn-A07-p21096706 | A-genome specific (napus-rapa) | 0.9760765    | 0.661786     | not scorable | not scorable | 0.9834711    | 0.6484454    |
| #### Bn-A07-p21160078 | A-genome specific (napus-rapa) | 0.9880383    | 0.6776252    | not scorable | not scorable | 0.9669421    | 0.6457947    |
| #### Bn-A07-p21173491 | A-genome specific (napus-rapa) | 0.9880383    | 0.7752174    | not scorable | not scorable | 1            | 0.7836397    |
| #### Bn-A07-p21173896 | A-genome specific (rapa only)  | not scorable | not scorable | not scorable | not scorable | 0.9752066    | 0.5462677    |
| #### Bn-A07-p211902   | A-genome specific (napus-rapa) | 0.9808612    | 0.517144     | not scorable | not scorable | 0.9917355    | 0.689319     |
| #### Bn-A07-p21191683 | A-genome specific (napus-rapa) | 0.9904306    | 0.7620051    | not scorable | not scorable | 0.9669421    | 0.7105041    |
| #### Bn-A07-p21193584 | A-genome specific (napus-rapa) | 0.9665072    | 0.7671917    | not scorable | not scorable | 0.9834711    | 0.7589615    |
| #### Bn-A07-p21195382 | A-genome specific (rapa only)  | not scorable | not scorable | not scorable | not scorable | 1            | 0.8131141    |
| #### Bn-A07-p212488   | A-genome specific (napus-rapa) | 0.9952153    | 0.3638859    | not scorable | not scorable | 1            | 0.6904103    |
| #### Bn-A07-p21261518 | A-genome specific (napus-rapa) | 0.9880383    | 0.75352      | not scorable | not scorable | 0.9917355    | 0.6043605    |
| #### Bn-A07-p21271213 | A-genome specific (napus-rapa) | 0.9880383    | 0.3633013    | not scorable | not scorable | 0.9917355    | 0.7570559    |
| #### Bn-A07-p21280027 | A-genome specific (napus-rapa) | 0.9617225    | 0.4701084    | not scorable | not scorable | 0.9752066    | 0.6908906    |
| #### Bn-A07-p21321699 | A-genome specific (napus-rapa) | 0.9425837    | 0.4515293    | not scorable | not scorable | 0.9752066    | 0.6848043    |
| #### Bn-A07-p21328168 | A-genome specific (napus-rapa) | 0.9784689    | 0.6659122    | not scorable | not scorable | 1            | 0.8675917    |
| #### Bn-A07-p21332273 | A-genome specific (napus-rapa) | 0.8277512    | 0.7275959    | not scorable | not scorable | 0.9834711    | 0.7058119    |
| #### Bn-A07-p21337094 | A-genome specific (napus-rapa) | 0.9665072    | 0.4729094    | not scorable | not scorable | 0.9504132    | 0.7071772    |
| #### Bn-A07-p21343543 | genome unspecific (all in)     | 0.9617225    | 0.344519     | 1            | 0.5906748    | 0.9752066    | 0.7976679    |
| #### Bn-A07-p21344843 | A-genome specific (napus-rapa) | 0.9521531    | 0.3977696    | not scorable | not scorable | 0.9834711    | 0.7667683    |
| #### Bn-A07-p21347324 | A-genome specific (napus-rapa) | 0.9712918    | 0.6834819    | not scorable | not scorable | 0.9917355    | 0.768579     |
| #### Bn-A07-p21354084 | A-genome specific (napus-rapa) | 0.9545454    | 0.5485378    | not scorable | not scorable | 1            | 0.7779236    |
| #### Bn-A07-p21365616 | A-genome specific (napus-rapa) | 0.9593301    | 0.7471952    | not scorable | not scorable | 1            | 0.8115935    |
| #### Bn-A07-p21366096 | A-genome specific (rapa only)  | not scorable | not scorable | not scorable | not scorable | 0.9834711    | 0.9296983    |
| #### Bn-A07-p21366215 | A-genome specific (napus-rapa) | 0.9784689    | 0.5383915    | not scorable | not scorable | 1            | 0.9209853    |
| #### Bn-A07-p21371577 | A-genome specific (napus-rapa) | 0.9545454    | 0.6794291    | not scorable | not scorable | 1            | 0.9205583    |

|                       |                                |              |              |              |              |              |              |
|-----------------------|--------------------------------|--------------|--------------|--------------|--------------|--------------|--------------|
| #### Bn-A07-p21377298 | A-genome specific (napus-rapa) | 0.9688995    | 0.7794305    | not scorable | not scorable | 1            | 0.8026343    |
| #### Bn-A07-p21395576 | A-genome specific (napus-rapa) | 0.9712918    | 0.4589286    | not scorable | not scorable | 0.9752066    | 0.6859578    |
| #### Bn-A07-p21400508 | A-genome specific (rapa only)  | not scorable | not scorable | not scorable | not scorable | 0.9917355    | 0.5936909    |
| #### Bn-A07-p21404492 | A-genome specific (napus-rapa) | 0.9449761    | 0.6415247    | not scorable | not scorable | 0.9917355    | 0.8815304    |
| #### Bn-A07-p21406280 | napus specific                 | 0.8803828    | 0.7468709    | not scorable | not scorable | not scorable | not scorable |
| #### Bn-A07-p21410292 | A-genome specific (napus-rapa) | 0.9665072    | 0.7345407    | not scorable | not scorable | 1            | 0.6780161    |
| #### Bn-A07-p21413042 | A-genome specific (napus-rapa) | 0.9688995    | 0.4426736    | not scorable | not scorable | 0.9917355    | 0.7589539    |
| #### Bn-A07-p21430149 | A-genome specific (napus-rapa) | 0.9593301    | 0.7996587    | not scorable | not scorable | 0.9917355    | 0.7821968    |
| #### Bn-A07-p21434917 | all not scorable               | not scorable | not scorable | not scorable | not scorable | not scorable | not scorable |
| #### Bn-A07-p21449796 | A-genome specific (napus-rapa) | 0.9736842    | 0.763494     | not scorable | not scorable | 0.9834711    | 0.8114138    |
| #### Bn-A07-p21463060 | A-genome specific (napus-rapa) | 0.9760765    | 0.7527182    | not scorable | not scorable | 0.9669421    | 0.7703955    |
| #### Bn-A07-p21475300 | A-genome specific (napus-rapa) | 0.9593301    | 0.5972971    | not scorable | not scorable | 0.9834711    | 0.789574     |
| #### Bn-A07-p21476982 | A-genome specific (napus-rapa) | 0.9784689    | 0.505632     | not scorable | not scorable | 0.9834711    | 0.6045423    |
| #### Bn-A07-p21478337 | A-genome specific (napus-rapa) | 0.9617225    | 0.2069464    | not scorable | not scorable | 1            | 0.6783065    |
| #### Bn-A07-p21496070 | A-genome specific (napus-rapa) | 0.9880383    | 0.7460952    | not scorable | not scorable | 0.9834711    | 0.7333285    |
| #### Bn-A07-p21546078 | A-genome specific (napus-rapa) | 0.6555024    | 0.5225304    | not scorable | not scorable | 0.9834711    | 0.6360394    |
| #### Bn-A07-p21555527 | A-genome specific (napus-rapa) | 0.9808612    | 0.7705505    | not scorable | not scorable | 0.9917355    | 0.7068456    |
| #### Bn-A07-p21567127 | A-genome specific (napus-rapa) | 0.9976076    | 0.9130839    | not scorable | not scorable | 0.5206612    | 0.7277256    |
| #### Bn-A07-p21568086 | A-genome specific (napus-rapa) | 0.8708134    | 0.8979602    | not scorable | not scorable | 0.5041322    | 0.8830847    |
| #### Bn-A07-p21569289 | A-genome specific (napus-rapa) | 0.9832536    | 0.7390621    | not scorable | not scorable | 0.9834711    | 0.7876306    |
| #### Bn-A07-p21573107 | A-genome specific (napus-rapa) | 0.9856459    | 0.7541033    | not scorable | not scorable | 1            | 0.8285044    |
| #### Bn-A07-p21577164 | A-genome specific (napus-rapa) | 0.9832536    | 0.6640979    | not scorable | not scorable | 0.9752066    | 0.6636251    |
| #### Bn-A07-p21586613 | A-genome specific (napus-rapa) | 0.9880383    | 0.7445254    | not scorable | not scorable | 1            | 0.8811764    |
| #### Bn-A07-p21587819 | A-genome specific (napus-rapa) | 0.9808612    | 0.4562761    | not scorable | not scorable | 0.9917355    | 0.7573153    |
| #### Bn-A07-p21600829 | genome unspecific (all in)     | 0.9784689    | 0.3133292    |              | 1            | 0.834657     | 1            |
| #### Bn-A07-p21601293 | A-genome specific (napus-rapa) | 0.9832536    | 0.7567808    | not scorable | not scorable | 0.9917355    | 0.8186142    |
| #### Bn-A07-p21601441 | A-genome specific (napus-rapa) | 0.9880383    | 0.7553871    | not scorable | not scorable | 0.9834711    | 0.8241416    |
| #### Bn-A07-p21601511 | A-genome specific (napus-rapa) | 0.9808612    | 0.7755355    | not scorable | not scorable | 0.9752066    | 0.7295582    |
| #### Bn-A07-p216152   | A-genome specific (napus-rapa) | 0.9904306    | 0.7544396    | not scorable | not scorable | 1            | 0.851736     |
| #### Bn-A07-p21631043 | A-genome specific (napus-rapa) | 0.8229665    | 0.7742872    | not scorable | not scorable | 0.553719     | 0.8474196    |
| #### Bn-A07-p21635264 | A-genome specific (napus-rapa) | 0.9832536    | 0.7184706    | not scorable | not scorable | 0.9917355    | 0.7479876    |
| #### Bn-A07-p21636048 | A-genome specific (napus-rapa) | 0.9832536    | 0.7626663    | not scorable | not scorable | 0.9917355    | 0.8295642    |
| #### Bn-A07-p21637923 | A-genome specific (napus-rapa) | 0.9880383    | 0.6107299    | not scorable | not scorable | 0.9917355    | 0.6803632    |

|                       |                                |              |              |              |              |           |           |
|-----------------------|--------------------------------|--------------|--------------|--------------|--------------|-----------|-----------|
| #### Bn-A07-p21643815 | A-genome specific (napus-rapa) | 0.9593301    | 0.3040355    | not scorable | not scorable | 0.9917355 | 0.6931131 |
| #### Bn-A07-p21668460 | A-genome specific (napus-rapa) | 0.9617225    | 0.6649348    | not scorable | not scorable | 0.9917355 | 0.7726668 |
| #### Bn-A07-p21678440 | A-genome specific (napus-rapa) | 0.9712918    | 0.5678497    | not scorable | not scorable | 1         | 0.6299749 |
| #### Bn-A07-p21679566 | A-genome specific (napus-rapa) | 0.9856459    | 0.7819484    | not scorable | not scorable | 1         | 0.9095264 |
| #### Bn-A07-p21680952 | genome unspecific (all in)     | 0.9880383    | 0.5550886    | 0.9844961    | 0.7840905    | 1         | 0.7754081 |
| #### Bn-A07-p21681332 | A-genome specific (napus-rapa) | 0.9617225    | 0.4508462    | not scorable | not scorable | 1         | 0.6807024 |
| #### Bn-A07-p21681736 | A-genome specific (napus-rapa) | 0.9784689    | 0.7874824    | not scorable | not scorable | 0.9917355 | 0.793487  |
| #### Bn-A07-p21699999 | A-genome specific (napus-rapa) | 0.9688995    | 0.7464494    | not scorable | not scorable | 0.9917355 | 0.8154362 |
| #### Bn-A07-p21707007 | A-genome specific (napus-rapa) | 0.9736842    | 0.720126     | not scorable | not scorable | 1         | 0.9095823 |
| #### Bn-A07-p21710786 | A-genome specific (napus-rapa) | 0.9617225    | 0.6560035    | not scorable | not scorable | 1         | 0.7665027 |
| #### Bn-A07-p21790459 | A-genome specific (napus-rapa) | 0.9808612    | 0.5726648    | not scorable | not scorable | 1         | 0.8360483 |
| #### Bn-A07-p21792030 | A-genome specific (rapa only)  | not scorable | not scorable | not scorable | not scorable | 0.9752066 | 0.7260771 |
| #### Bn-A07-p21803967 | A-genome specific (napus-rapa) | 0.9832536    | 0.7629088    | not scorable | not scorable | 0.9917355 | 0.8314    |
| #### Bn-A07-p21808739 | A-genome specific (napus-rapa) | 0.9354067    | 0.442243     | not scorable | not scorable | 0.9752066 | 0.711843  |
| #### Bn-A07-p21820686 | A-genome specific (napus-rapa) | 0.9976076    | 0.8635875    | not scorable | not scorable | 1         | 0.9205657 |
| #### Bn-A07-p21835729 | genome unspecific (all in)     | 0.9976076    | 0.3240971    |              | 1 0.8474649  | 1         | 0.8792493 |
| #### Bn-A07-p21837742 | A-genome specific (napus-rapa) | 0.9928229    | 0.4364312    | not scorable | not scorable | 0.9917355 | 0.6937655 |
| #### Bn-A07-p21844673 | A-genome specific (napus-rapa) | 0.9904306    | 0.663279     | not scorable | not scorable | 1         | 0.7864345 |
| #### Bn-A07-p21847025 | A-genome specific (napus-rapa) | 0.9880383    | 0.6718884    | not scorable | not scorable | 0.9752066 | 0.7193065 |
| #### Bn-A07-p21852154 | A-genome specific (napus-rapa) | 0.9904306    | 0.6750001    | not scorable | not scorable | 0.9834711 | 0.653488  |
| #### Bn-A07-p21871055 | A-genome specific (napus-rapa) | 0.9952153    | 0.7722904    | not scorable | not scorable | 1         | 0.8015166 |
| #### Bn-A07-p21875901 | A-genome specific (napus-rapa) | 0.9688995    | 0.4287218    | not scorable | not scorable | 1         | 0.6901717 |
| #### Bn-A07-p21895875 | A-genome specific (napus-rapa) | 0.9641148    | 0.7282839    | not scorable | not scorable | 1         | 0.7127941 |
| #### Bn-A07-p21902068 | A-genome specific (napus-rapa) | 0.9760765    | 0.7558069    | not scorable | not scorable | 1         | 0.7258548 |
| #### Bn-A07-p21907519 | A-genome specific (napus-rapa) | 0.9784689    | 0.7021337    | not scorable | not scorable | 1         | 0.7104915 |
| #### Bn-A07-p21916201 | A-genome specific (napus-rapa) | 0.9832536    | 0.7782876    | not scorable | not scorable | 1         | 0.8602352 |
| #### Bn-A07-p21918901 | A-genome specific (napus-rapa) | 0.9880383    | 0.5238672    | not scorable | not scorable | 1         | 0.718065  |
| #### Bn-A07-p21942650 | A-genome specific (napus-rapa) | 0.9090909    | 0.6793095    | not scorable | not scorable | 0.9586777 | 0.8606011 |
| #### Bn-A07-p21959231 | A-genome specific (napus-rapa) | 0.9425837    | 0.3281905    | not scorable | not scorable | 0.9917355 | 0.7470984 |
| #### Bn-A07-p21961987 | A-genome specific (napus-rapa) | 0.9856459    | 0.4312473    | not scorable | not scorable | 1         | 0.8002427 |
| #### Bn-A07-p21962752 | A-genome specific (napus-rapa) | 0.9736842    | 0.4053176    | not scorable | not scorable | 0.9917355 | 0.7541677 |
| #### Bn-A07-p21964088 | A-genome specific (napus-rapa) | 0.9976076    | 0.701515     | not scorable | not scorable | 1         | 0.6249426 |
| #### Bn-A07-p21965076 | A-genome specific (napus-rapa) | 0.9880383    | 0.7142259    | not scorable | not scorable | 0.9834711 | 0.7500725 |

|                       |                                   |              |              |              |              |           |           |
|-----------------------|-----------------------------------|--------------|--------------|--------------|--------------|-----------|-----------|
| #### Bn-A07-p21970228 | A-genome specific (napus-rapa)    | 0.9832536    | 0.7164202    | not scorable | not scorable | 0.9917355 | 0.7254828 |
| #### Bn-A07-p21979205 | A-genome specific (rapa only)     | not scorable | not scorable | not scorable | not scorable | 0.9173554 | 0.8543575 |
| #### Bn-A07-p21983885 | A-genome specific (napus-rapa)    | 0.9665072    | 0.2743535    | not scorable | not scorable | 0.9752066 | 0.7218699 |
| #### Bn-A07-p21993375 | A-genome specific (napus-rapa)    | 0.9904306    | 0.7579234    | not scorable | not scorable | 1         | 0.7152516 |
| #### Bn-A07-p21994050 | A-genome specific (napus-rapa)    | 0.9784689    | 0.7894673    | not scorable | not scorable | 1         | 0.7518142 |
| #### Bn-A07-p21995054 | A-genome specific (napus-rapa)    | 0.9832536    | 0.3413216    | not scorable | not scorable | 1         | 0.7178742 |
| #### Bn-A07-p22005058 | A-genome specific (napus-rapa)    | 0.9856459    | 0.6762651    | not scorable | not scorable | 0.9752066 | 0.3961468 |
| #### Bn-A07-p22005392 | A-genome specific (napus-rapa)    | 0.9784689    | 0.7485322    | not scorable | not scorable | 0.9917355 | 0.7765377 |
| #### Bn-A07-p22010671 | A-genome specific (napus-rapa)    | 0.9593301    | 0.3847515    | not scorable | not scorable | 0.9917355 | 0.6753571 |
| #### Bn-A07-p22019732 | A-genome specific (napus-rapa)    | 0.5239235    | 0.747862     | not scorable | not scorable | 0.9752066 | 0.7281108 |
| #### Bn-A07-p22034462 | A-genome specific (napus-rapa)    | 0.9497608    | 0.5105762    | not scorable | not scorable | 0.9917355 | 0.8154061 |
| #### Bn-A07-p22050904 | A-genome specific (napus-rapa)    | 0.9617225    | 0.6102267    | not scorable | not scorable | 0.9917355 | 0.7756222 |
| #### Bn-A07-p22064576 | A-genome specific (napus-rapa)    | 1            | 0.7770717    | not scorable | not scorable | 1         | 0.7740083 |
| #### Bn-A07-p22077654 | A-genome specific (napus-rapa)    | 0.9641148    | 0.6815748    | not scorable | not scorable | 0.9752066 | 0.7070191 |
| #### Bn-A07-p22092610 | A-genome specific (napus-rapa)    | 1            | 0.7914145    | not scorable | not scorable | 1         | 0.786476  |
| #### Bn-A07-p22092775 | A-genome specific (napus-rapa)    | 1            | 0.8114662    | not scorable | not scorable | 1         | 0.8004208 |
| #### Bn-A07-p22095943 | genome unspecific (oleracea-rapa) | not scorable | not scorable | 0.9379845    | 0.8102211    | 0.9917355 | 0.7206749 |
| #### Bn-A07-p22096180 | A-genome specific (napus-rapa)    | 0.9832536    | 0.6831505    | not scorable | not scorable | 0.9917355 | 0.7923662 |
| #### Bn-A07-p22096241 | A-genome specific (napus-rapa)    | 0.9401914    | 0.6291502    | not scorable | not scorable | 1         | 0.78922   |
| #### Bn-A07-p22103902 | A-genome specific (rapa only)     | not scorable | not scorable | not scorable | not scorable | 0.9834711 | 0.8260164 |
| #### Bn-A07-p22119502 | A-genome specific (napus-rapa)    | 0.9856459    | 0.7953114    | not scorable | not scorable | 1         | 0.6115729 |
| #### Bn-A07-p22121193 | A-genome specific (napus-rapa)    | 0.9736842    | 0.6693944    | not scorable | not scorable | 0.9834711 | 0.6214067 |
| #### Bn-A07-p22121263 | A-genome specific (napus-rapa)    | 0.9688995    | 0.6916984    | not scorable | not scorable | 0.9917355 | 0.7853405 |
| #### Bn-A07-p22136602 | A-genome specific (napus-rapa)    | 0.9952153    | 0.4077142    | not scorable | not scorable | 0.9834711 | 0.8445418 |
| #### Bn-A07-p22139480 | A-genome specific (napus-rapa)    | 0.9904306    | 0.5917044    | not scorable | not scorable | 0.9917355 | 0.6692029 |
| #### Bn-A07-p22140320 | A-genome specific (napus-rapa)    | 0.9808612    | 0.2854565    | not scorable | not scorable | 0.9917355 | 0.6664288 |
| #### Bn-A07-p22156609 | A-genome specific (napus-rapa)    | 0.9976076    | 0.4098212    | not scorable | not scorable | 1         | 0.8418379 |
| #### Bn-A07-p22168947 | genome unspecific (all in)        | 0.9665072    | 0.2511424    | 0.8914729    | 0.378437     | 0.9834711 | 0.5193916 |
| #### Bn-A07-p22169573 | A-genome specific (napus-rapa)    | 0.9880383    | 0.7578718    | not scorable | not scorable | 1         | 0.7299495 |
| #### Bn-A07-p22176569 | A-genome specific (napus-rapa)    | 0.9832536    | 0.6740595    | not scorable | not scorable | 0.9752066 | 0.7107075 |
| #### Bn-A07-p22182943 | A-genome specific (napus-rapa)    | 0.9832536    | 0.7572746    | not scorable | not scorable | 0.9917355 | 0.733086  |
| #### Bn-A07-p22198393 | A-genome specific (napus-rapa)    | 0.9641148    | 0.5380762    | not scorable | not scorable | 0.9834711 | 0.7207526 |
| #### Bn-A07-p22209952 | A-genome specific (napus-rapa)    | 0.9210526    | 0.6780497    | not scorable | not scorable | 0.9834711 | 0.7125625 |

|                       |                                |              |              |              |              |              |              |
|-----------------------|--------------------------------|--------------|--------------|--------------|--------------|--------------|--------------|
| #### Bn-A07-p22221286 | all not scorable               | not scorable | not scorable | not scorable | not scorable | not scorable | not scorable |
| #### Bn-A07-p22231852 | A-genome specific (napus-rapa) | 0.9665072    | 0.3196594    | not scorable | not scorable | 1            | 0.7321379    |
| #### Bn-A07-p22237999 | A-genome specific (napus-rapa) | 0.9880383    | 0.7670971    | not scorable | not scorable | 1            | 0.8009715    |
| #### Bn-A07-p22238668 | A-genome specific (napus-rapa) | 0.9904306    | 0.7736504    | not scorable | not scorable | 0.9669421    | 0.7574182    |
| #### Bn-A07-p22250567 | A-genome specific (napus-rapa) | 0.9832536    | 0.4030491    | not scorable | not scorable | 0.9917355    | 0.7803369    |
| #### Bn-A07-p22251229 | A-genome specific (napus-rapa) | 0.9832536    | 0.7816188    | not scorable | not scorable | 1            | 0.7838673    |
| #### Bn-A07-p22251906 | A-genome specific (napus-rapa) | 0.9952153    | 0.4554843    | not scorable | not scorable | 1            | 0.9272014    |
| #### Bn-A07-p22253687 | A-genome specific (napus-rapa) | 0.9784689    | 0.670087     | not scorable | not scorable | 0.9917355    | 0.7064139    |
| #### Bn-A07-p22282923 | A-genome specific (napus-rapa) | 0.9569378    | 0.2761979    | not scorable | not scorable | 0.9917355    | 0.6699732    |
| #### Bn-A07-p22302158 | A-genome specific (napus-rapa) | 0.9545454    | 0.4632691    | not scorable | not scorable | 0.9834711    | 0.7683383    |
| #### Bn-A07-p22306994 | A-genome specific (napus-rapa) | 0.9736842    | 0.417443     | not scorable | not scorable | 1            | 0.8195413    |
| #### Bn-A07-p22307021 | A-genome specific (napus-rapa) | 0.9665072    | 0.6681322    | not scorable | not scorable | 0.9917355    | 0.6982965    |
| #### Bn-A07-p22308030 | A-genome specific (napus-rapa) | 0.9904306    | 0.3130418    | not scorable | not scorable | 1            | 0.6627463    |
| #### Bn-A07-p22309060 | A-genome specific (napus-rapa) | 0.9736842    | 0.6961082    | not scorable | not scorable | 0.9917355    | 0.7753534    |
| #### Bn-A07-p22309183 | A-genome specific (napus-rapa) | 0.9760765    | 0.7016396    | not scorable | not scorable | 0.9752066    | 0.7782443    |
| #### Bn-A07-p22310107 | A-genome specific (napus-rapa) | 0.9497608    | 0.6048554    | not scorable | not scorable | 0.9834711    | 0.7435136    |
| #### Bn-A07-p22329359 | A-genome specific (napus-rapa) | 0.9808612    | 0.7005649    | not scorable | not scorable | 0.9917355    | 0.7596639    |
| #### Bn-A07-p22362597 | A-genome specific (napus-rapa) | 0.9952153    | 0.8193178    | not scorable | not scorable | 0.9669421    | 0.6987447    |
| #### Bn-A07-p22382675 | A-genome specific (napus-rapa) | 0.9952153    | 0.7385498    | not scorable | not scorable | 1            | 0.6436302    |
| #### Bn-A07-p22398500 | A-genome specific (napus-rapa) | 0.9928229    | 0.7654794    | not scorable | not scorable | 0.9752066    | 0.7336226    |
| #### Bn-A07-p22399700 | A-genome specific (napus-rapa) | 0.9258373    | 0.3556807    | not scorable | not scorable | 0.9917355    | 0.6969851    |
| #### Bn-A07-p22412915 | A-genome specific (napus-rapa) | 0.9976076    | 0.2758512    | not scorable | not scorable | 1            | 0.6159286    |
| #### Bn-A07-p22440144 | A-genome specific (napus-rapa) | 0.9952153    | 0.8054216    | not scorable | not scorable | 0.9917355    | 0.7762206    |
| #### Bn-A07-p22474782 | A-genome specific (napus-rapa) | 0.9593301    | 0.6060603    | not scorable | not scorable | 0.9917355    | 0.621129     |
| #### Bn-A07-p22476046 | A-genome specific (rapa only)  | not scorable | not scorable | not scorable | not scorable | 1            | 0.4446907    |
| #### Bn-A07-p22484069 | A-genome specific (napus-rapa) | 0.9425837    | 0.6000946    | not scorable | not scorable | 1            | 0.798117     |
| #### Bn-A07-p22488507 | A-genome specific (napus-rapa) | 0.9617225    | 0.7043067    | not scorable | not scorable | 1            | 0.7104164    |
| #### Bn-A07-p22493972 | A-genome specific (napus-rapa) | 0.9162679    | 0.6888318    | not scorable | not scorable | 0.9752066    | 0.6923664    |
| #### Bn-A07-p22510199 | A-genome specific (napus-rapa) | 0.9449761    | 0.7139757    | not scorable | not scorable | 1            | 0.7736899    |
| #### Bn-A07-p22510892 | A-genome specific (napus-rapa) | 0.9688995    | 0.7718015    | not scorable | not scorable | 1            | 0.8001314    |
| #### Bn-A07-p22513026 | A-genome specific (napus-rapa) | 0.9712918    | 0.386804     | not scorable | not scorable | 1            | 0.7380495    |
| #### Bn-A07-p22525803 | A-genome specific (napus-rapa) | 0.9114832    | 0.7314263    | not scorable | not scorable | 0.9421487    | 0.7737612    |
| #### Bn-A07-p22542288 | A-genome specific (napus-rapa) | 0.9688995    | 0.7232099    | not scorable | not scorable | 1            | 0.639402     |

|                       |                                |              |              |              |              |              |              |
|-----------------------|--------------------------------|--------------|--------------|--------------|--------------|--------------|--------------|
| #### Bn-A07-p22575730 | A-genome specific (napus-rapa) | 0.8947368    | 0.5933014    | not scorable | not scorable | 1            | 0.7139627    |
| #### Bn-A07-p22586713 | A-genome specific (napus-rapa) | 0.923445     | 0.7248178    | not scorable | not scorable | 1            | 0.6364436    |
| #### Bn-A07-p2264217  | A-genome specific (napus-rapa) | 0.9808612    | 0.5942496    | not scorable | not scorable | 0.9917355    | 0.5698469    |
| #### Bn-A07-p2278898  | A-genome specific (napus-rapa) | 1            | 0.585574     | not scorable | not scorable | 1            | 0.591656     |
| #### Bn-A07-p2412726  | A-genome specific (napus-rapa) | 1            | 0.7757556    | not scorable | not scorable | 1            | 0.9175813    |
| #### Bn-A07-p241997   | napus specific                 | 0.9904306    | 0.9423992    | not scorable | not scorable | not scorable | not scorable |
| #### Bn-A07-p2425818  | A-genome specific (napus-rapa) | 0.9976076    | 0.6216711    | not scorable | not scorable | 1            | 0.8463342    |
| #### Bn-A07-p244051   | A-genome specific (napus-rapa) | 0.9952153    | 0.7123525    | not scorable | not scorable | 1            | 0.7566339    |
| #### Bn-A07-p2518346  | A-genome specific (napus-rapa) | 1            | 0.7064425    | not scorable | not scorable | 1            | 0.7868947    |
| #### Bn-A07-p2524777  | A-genome specific (napus-rapa) | 0.9904306    | 0.7828414    | not scorable | not scorable | 1            | 0.8521241    |
| #### Bn-A07-p255987   | A-genome specific (napus-rapa) | 0.9712918    | 0.7722221    | not scorable | not scorable | 0.9834711    | 0.8117102    |
| #### Bn-A07-p2575548  | A-genome specific (napus-rapa) | 1            | 0.8115381    | not scorable | not scorable | 1            | 0.8859531    |
| #### Bn-A07-p2578858  | A-genome specific (napus-rapa) | 0.9856459    | 0.6926233    | not scorable | not scorable | 1            | 0.7572791    |
| #### Bn-A07-p267110   | A-genome specific (napus-rapa) | 1            | 0.7812242    | not scorable | not scorable | 1            | 0.8233362    |
| #### Bn-A07-p2698690  | A-genome specific (napus-rapa) | 1            | 0.7505547    | not scorable | not scorable | 1            | 0.7624819    |
| #### Bn-A07-p275485   | A-genome specific (napus-rapa) | 0.9832536    | 0.6922378    | not scorable | not scorable | 0.9834711    | 0.6978582    |
| #### Bn-A07-p276584   | A-genome specific (napus-rapa) | 0.9784689    | 0.6575022    | not scorable | not scorable | 0.9917355    | 0.6807766    |
| #### Bn-A07-p278353   | A-genome specific (napus-rapa) | 1            | 0.4059602    | not scorable | not scorable | 0.9917355    | 0.6665836    |
| #### Bn-A07-p286291   | A-genome specific (napus-rapa) | 0.9665072    | 0.3502665    | not scorable | not scorable | 1            | 0.8736063    |
| #### Bn-A07-p286993   | A-genome specific (rapa only)  | not scorable | not scorable | not scorable | not scorable | 1            | 0.7036764    |
| #### Bn-A07-p2899520  | A-genome specific (napus-rapa) | 0.9712918    | 0.7134119    | not scorable | not scorable | 0.9752066    | 0.7304121    |
| #### Bn-A07-p2946329  | A-genome specific (napus-rapa) | 0.9808612    | 0.6766431    | not scorable | not scorable | 1            | 0.8002851    |
| #### Bn-A07-p2976209  | A-genome specific (napus-rapa) | 0.9832536    | 0.4417141    | not scorable | not scorable | 1            | 0.7354166    |
| #### Bn-A07-p2980414  | A-genome specific (napus-rapa) | 0.9904306    | 0.3933516    | not scorable | not scorable | 0.9834711    | 0.6957653    |
| #### Bn-A07-p2990276  | A-genome specific (napus-rapa) | 0.9688995    | 0.2574337    | not scorable | not scorable | 0.9917355    | 0.7053238    |
| #### Bn-A07-p2990468  | all not scorable               | not scorable | not scorable | not scorable | not scorable | not scorable | not scorable |
| #### Bn-A07-p2992350  | napus specific                 | 1            | 0.6550182    | not scorable | not scorable | not scorable | not scorable |
| #### Bn-A07-p2992985  | A-genome specific (napus-rapa) | 0.9832536    | 0.7171397    | not scorable | not scorable | 0.9917355    | 0.703477     |
| #### Bn-A07-p2993312  | A-genome specific (napus-rapa) | 0.9856459    | 0.7875522    | not scorable | not scorable | 0.9917355    | 0.8020977    |
| #### Bn-A07-p2996741  | A-genome specific (napus-rapa) | 0.9712918    | 0.4544322    | not scorable | not scorable | 0.9834711    | 0.7596962    |
| #### Bn-A07-p3013745  | A-genome specific (napus-rapa) | 0.9856459    | 0.7180489    | not scorable | not scorable | 1            | 0.7256573    |
| #### Bn-A07-p3027332  | A-genome specific (napus-rapa) | 0.9760765    | 0.5415608    | not scorable | not scorable | 0.9669421    | 0.7219511    |
| #### Bn-A07-p3027449  | A-genome specific (rapa only)  | not scorable | not scorable | not scorable | not scorable | 0.9669421    | 0.7800838    |



|                      |                                |              |              |              |              |              |              |
|----------------------|--------------------------------|--------------|--------------|--------------|--------------|--------------|--------------|
| #### Bn-A07-p3028363 | A-genome specific (napus-rapa) | 0.9210526    | 0.7013053    | not scorable | not scorable | 0.9669421    | 0.6552286    |
| #### Bn-A07-p3028546 | A-genome specific (napus-rapa) | 0.9282297    | 0.7570927    | not scorable | not scorable | 0.9586777    | 0.7224012    |
| #### Bn-A07-p3041012 | A-genome specific (napus-rapa) | 0.9856459    | 0.7272806    | not scorable | not scorable | 0.9752066    | 0.682718     |
| #### Bn-A07-p3081602 | A-genome specific (napus-rapa) | 0.9832536    | 0.5267929    | not scorable | not scorable | 0.9834711    | 0.7690961    |
| #### Bn-A07-p3093306 | A-genome specific (napus-rapa) | 0.9760765    | 0.7506622    | not scorable | not scorable | 0.9917355    | 0.7617765    |
| #### Bn-A07-p3102715 | A-genome specific (rapa only)  | not scorable | not scorable | not scorable | not scorable | 0.9504132    | 0.7473506    |
| #### Bn-A07-p312340  | A-genome specific (napus-rapa) | 1            | 0.3245094    | not scorable | not scorable | 1            | 0.7840437    |
| #### Bn-A07-p3132316 | A-genome specific (napus-rapa) | 0.9712918    | 0.2914669    | not scorable | not scorable | 0.9917355    | 0.5974815    |
| #### Bn-A07-p3147129 | A-genome specific (napus-rapa) | 1            | 0.682571     | not scorable | not scorable | 1            | 0.6090008    |
| #### Bn-A07-p315799  | A-genome specific (napus-rapa) | 0.9952153    | 0.4867631    | not scorable | not scorable | 1            | 0.7392124    |
| #### Bn-A07-p3161639 | A-genome specific (napus-rapa) | 0.9688995    | 0.3804339    | not scorable | not scorable | 0.7851239    | 0.7551939    |
| #### Bn-A07-p3163343 | A-genome specific (napus-rapa) | 0.9736842    | 0.8841951    | not scorable | not scorable | 0.768595     | 0.8126205    |
| #### Bn-A07-p3163701 | A-genome specific (napus-rapa) | 0.9952153    | 0.7693725    | not scorable | not scorable | 0.6859504    | 0.7739426    |
| #### Bn-A07-p3164912 | A-genome specific (napus-rapa) | 0.9760765    | 0.5825462    | not scorable | not scorable | 0.6280992    | 0.5596644    |
| #### Bn-A07-p3164991 | A-genome specific (napus-rapa) | 0.9928229    | 0.779254     | not scorable | not scorable | 0.6033058    | 0.7400008    |
| #### Bn-A07-p3167464 | A-genome specific (napus-rapa) | 1            | 0.5577523    | not scorable | not scorable | 1            | 0.6140003    |
| #### Bn-A07-p3183864 | A-genome specific (napus-rapa) | 0.9976076    | 0.5713065    | not scorable | not scorable | 1            | 0.5652714    |
| #### Bn-A07-p3193611 | A-genome specific (napus-rapa) | 1            | 0.8075789    | not scorable | not scorable | 0.6198347    | 0.9003543    |
| #### Bn-A07-p3202245 | A-genome specific (napus-rapa) | 0.9569378    | 0.5867622    | not scorable | not scorable | 0.9669421    | 0.7939121    |
| #### Bn-A07-p3208245 | A-genome specific (rapa only)  | not scorable | not scorable | not scorable | not scorable | 0.9752066    | 0.8100573    |
| #### Bn-A07-p3216267 | A-genome specific (napus-rapa) | 0.9736842    | 0.6003866    | not scorable | not scorable | 0.9669421    | 0.7276592    |
| #### Bn-A07-p3252073 | A-genome specific (napus-rapa) | 0.8038278    | 0.7067946    | not scorable | not scorable | 0.9834711    | 0.6860519    |
| #### Bn-A07-p3262688 | A-genome specific (napus-rapa) | 0.9976076    | 0.8621484    | not scorable | not scorable | 0.9834711    | 0.6769094    |
| #### Bn-A07-p3262752 | A-genome specific (napus-rapa) | 0.8492823    | 0.6873153    | not scorable | not scorable | 0.9834711    | 0.5651022    |
| #### Bn-A07-p3262864 | A-genome specific (napus-rapa) | 0.7822967    | 0.7449669    | not scorable | not scorable | 0.9834711    | 0.7588418    |
| #### Bn-A07-p3275876 | A-genome specific (napus-rapa) | 0.9976076    | 0.6891744    | not scorable | not scorable | 0.9917355    | 0.7992671    |
| #### Bn-A07-p3287486 | A-genome specific (napus-rapa) | 0.937799     | 0.4452239    | not scorable | not scorable | 0.9917355    | 0.7578623    |
| #### Bn-A07-p3309722 | A-genome specific (napus-rapa) | 0.9976076    | 0.342327     | not scorable | not scorable | 0.9834711    | 0.8147373    |
| #### Bn-A07-p3323989 | A-genome specific (napus-rapa) | 0.9808612    | 0.6941576    | not scorable | not scorable | 0.5206612    | 0.8258033    |
| #### Bn-A07-p3467400 | napus specific                 | 0.9856459    | 0.2225052    | not scorable | not scorable | not scorable | not scorable |
| #### Bn-A07-p3474919 | A-genome specific (napus-rapa) | 0.9736842    | 0.3889764    | not scorable | not scorable | 0.9834711    | 0.7403204    |
| #### Bn-A07-p3481474 | A-genome specific (napus-rapa) | 0.9784689    | 0.7131926    | not scorable | not scorable | 1            | 0.7119247    |
| #### Bn-A07-p3482570 | A-genome specific (napus-rapa) | 0.9904306    | 0.4150393    | not scorable | not scorable | 1            | 0.7601067    |

|                      |                                |              |              |              |              |              |              |
|----------------------|--------------------------------|--------------|--------------|--------------|--------------|--------------|--------------|
| #### Bn-A07-p3482967 | A-genome specific (napus-rapa) | 0.9832536    | 0.6354327    | not scorable | not scorable | 0.9917355    | 0.6708147    |
| #### Bn-A07-p3486022 | A-genome specific (napus-rapa) | 0.9736842    | 0.5179177    | not scorable | not scorable | 1            | 0.7003256    |
| #### Bn-A07-p3489365 | A-genome specific (napus-rapa) | 0.9712918    | 0.3387747    | not scorable | not scorable | 1            | 0.7773995    |
| #### Bn-A07-p3509187 | A-genome specific (napus-rapa) | 0.9832536    | 0.7410488    | not scorable | not scorable | 0.9752066    | 0.7386363    |
| #### Bn-A07-p3517211 | A-genome specific (napus-rapa) | 1            | 0.5248017    | not scorable | not scorable | 1            | 0.7467914    |
| #### Bn-A07-p3523290 | A-genome specific (napus-rapa) | 0.9856459    | 0.7710344    | not scorable | not scorable | 0.9752066    | 0.9030978    |
| #### Bn-A07-p3538601 | A-genome specific (napus-rapa) | 0.9928229    | 0.7772213    | not scorable | not scorable | 1            | 0.8284803    |
| #### Bn-A07-p3566269 | A-genome specific (napus-rapa) | 0.9856459    | 0.7658477    | not scorable | not scorable | 0.9917355    | 0.8058527    |
| #### Bn-A07-p3568361 | genome unspecific (all in)     | 0.9665072    | 0.301214     | 0.9922481    | 0.6355774    | 0.9834711    | 0.661047     |
| #### Bn-A07-p3569093 | A-genome specific (napus-rapa) | 0.9880383    | 0.7365383    | not scorable | not scorable | 0.9834711    | 0.6435031    |
| #### Bn-A07-p3569250 | A-genome specific (napus-rapa) | 0.9832536    | 0.7983209    | not scorable | not scorable | 0.9917355    | 0.7903211    |
| #### Bn-A07-p3571306 | A-genome specific (napus-rapa) | 0.9880383    | 0.6773211    | not scorable | not scorable | 0.9834711    | 0.6260363    |
| #### Bn-A07-p3576219 | A-genome specific (napus-rapa) | 0.9808612    | 0.2475849    | not scorable | not scorable | 0.9917355    | 0.7758032    |
| #### Bn-A07-p3583161 | A-genome specific (napus-rapa) | 0.9832536    | 0.7452729    | not scorable | not scorable | 0.9834711    | 0.6729705    |
| #### Bn-A07-p3584348 | A-genome specific (napus-rapa) | 0.9712918    | 0.6028918    | not scorable | not scorable | 0.9586777    | 0.6602069    |
| #### Bn-A07-p3594657 | A-genome specific (napus-rapa) | 0.9904306    | 0.7544396    | not scorable | not scorable | 0.9917355    | 0.7704359    |
| #### Bn-A07-p3595423 | A-genome specific (napus-rapa) | 0.9856459    | 0.469351     | not scorable | not scorable | 1            | 0.6734886    |
| #### Bn-A07-p3595474 | all not scorable               | not scorable | not scorable | not scorable | not scorable | not scorable | not scorable |
| #### Bn-A07-p3596286 | A-genome specific (napus-rapa) | 0.9904306    | 0.7647003    | not scorable | not scorable | 0.9834711    | 0.8018759    |
| #### Bn-A07-p3599603 | A-genome specific (napus-rapa) | 0.9760765    | 0.6890572    | not scorable | not scorable | 0.9752066    | 0.7294325    |
| #### Bn-A07-p3601318 | A-genome specific (napus-rapa) | 0.9904306    | 0.7638108    | not scorable | not scorable | 1            | 0.841363     |
| #### Bn-A07-p3609912 | A-genome specific (napus-rapa) | 0.9928229    | 0.7616785    | not scorable | not scorable | 0.9917355    | 0.8600513    |
| #### Bn-A07-p3618045 | A-genome specific (napus-rapa) | 0.8014354    | 0.5526859    | not scorable | not scorable | 0.9834711    | 0.6189788    |
| #### Bn-A07-p3637130 | A-genome specific (rapa only)  | not scorable | not scorable | not scorable | not scorable | 0.9917355    | 0.8265594    |
| #### Bn-A07-p3646853 | A-genome specific (napus-rapa) | 0.9904306    | 0.6442823    | not scorable | not scorable | 1            | 0.8670343    |
| #### Bn-A07-p3648246 | A-genome specific (napus-rapa) | 0.9569378    | 0.598257     | not scorable | not scorable | 0.9917355    | 0.7601424    |
| #### Bn-A07-p3649647 | A-genome specific (rapa only)  | not scorable | not scorable | not scorable | not scorable | 0.7438017    | 0.6812755    |
| #### Bn-A07-p3659345 | A-genome specific (napus-rapa) | 0.9856459    | 0.7678801    | not scorable | not scorable | 0.9917355    | 0.7526037    |
| #### Bn-A07-p367569  | all not scorable               | not scorable | not scorable | not scorable | not scorable | not scorable | not scorable |
| #### Bn-A07-p3707777 | A-genome specific (napus-rapa) | 0.5526316    | 0.6620666    | not scorable | not scorable | 0.9917355    | 0.7201321    |
| #### Bn-A07-p3717215 | A-genome specific (napus-rapa) | 0.9904306    | 0.7111362    | not scorable | not scorable | 0.9917355    | 0.7106114    |
| #### Bn-A07-p3718401 | A-genome specific (napus-rapa) | 0.9904306    | 0.7519585    | not scorable | not scorable | 1            | 0.8439959    |
| #### Bn-A07-p3728535 | A-genome specific (napus-rapa) | 0.9784689    | 0.5200574    | not scorable | not scorable | 0.9917355    | 0.7790762    |

|                      |                                |              |              |              |              |              |              |
|----------------------|--------------------------------|--------------|--------------|--------------|--------------|--------------|--------------|
| #### Bn-A07-p3729992 | A-genome specific (napus-rapa) | 0.9784689    | 0.2478919    | not scorable | not scorable | 1            | 0.7464796    |
| #### Bn-A07-p3746131 | A-genome specific (napus-rapa) | 0.9712918    | 0.7917902    | not scorable | not scorable | 0.9834711    | 0.7304521    |
| #### Bn-A07-p3747912 | A-genome specific (napus-rapa) | 0.9880383    | 0.1999441    | not scorable | not scorable | 1            | 0.748773     |
| #### Bn-A07-p3749471 | A-genome specific (napus-rapa) | 0.9880383    | 0.7771861    | not scorable | not scorable | 1            | 0.7826293    |
| #### Bn-A07-p3769807 | A-genome specific (rapa only)  | not scorable | not scorable | not scorable | not scorable | 0.9256198    | 0.6777635    |
| #### Bn-A07-p3771785 | A-genome specific (napus-rapa) | 0.9712918    | 0.6879442    | not scorable | not scorable | 1            | 0.6587718    |
| #### Bn-A07-p3771821 | A-genome specific (napus-rapa) | 0.9760765    | 0.578936     | not scorable | not scorable | 1            | 0.6672147    |
| #### Bn-A07-p3773635 | A-genome specific (napus-rapa) | 0.9808612    | 0.6860632    | not scorable | not scorable | 1            | 0.7752984    |
| #### Bn-A07-p3793386 | A-genome specific (napus-rapa) | 0.9880383    | 0.7402222    | not scorable | not scorable | 1            | 0.8933524    |
| #### Bn-A07-p3796068 | A-genome specific (napus-rapa) | 0.9856459    | 0.2906915    | not scorable | not scorable | 0.9752066    | 0.5591931    |
| #### Bn-A07-p3796474 | A-genome specific (napus-rapa) | 0.9808612    | 0.4424503    | not scorable | not scorable | 0.9917355    | 0.7904992    |
| #### Bn-A07-p3796859 | A-genome specific (napus-rapa) | 0.923445     | 0.3673092    | not scorable | not scorable | 1            | 0.8082213    |
| #### Bn-A07-p3803780 | A-genome specific (napus-rapa) | 0.9880383    | 0.7858371    | not scorable | not scorable | 0.9917355    | 0.7709869    |
| #### Bn-A07-p3811586 | A-genome specific (napus-rapa) | 0.9808612    | 0.7427846    | not scorable | not scorable | 1            | 0.7709503    |
| #### Bn-A07-p3826249 | A-genome specific (napus-rapa) | 0.9665072    | 0.7467235    | not scorable | not scorable | 0.9917355    | 0.8301552    |
| #### Bn-A07-p3856921 | A-genome specific (napus-rapa) | 1            | 0.9439843    | not scorable | not scorable | 0.9917355    | 0.9175813    |
| #### Bn-A07-p3862192 | napus specific                 | 0.9354067    | 0.5196366    | not scorable | not scorable | not scorable | not scorable |
| #### Bn-A07-p3899866 | A-genome specific (napus-rapa) | 1            | 0.7008032    | not scorable | not scorable | 0.9834711    | 0.7173989    |
| #### Bn-A07-p3900934 | A-genome specific (napus-rapa) | 0.9688995    | 0.4880325    | not scorable | not scorable | 0.9669421    | 0.7154807    |
| #### Bn-A07-p3915443 | A-genome specific (napus-rapa) | 0.9856459    | 0.4983954    | not scorable | not scorable | 1            | 0.8540419    |
| #### Bn-A07-p3916567 | A-genome specific (napus-rapa) | 0.9808612    | 0.2949341    | not scorable | not scorable | 0.9669421    | 0.7846386    |
| #### Bn-A07-p3918449 | A-genome specific (napus-rapa) | 0.9808612    | 0.4615353    | not scorable | not scorable | 1            | 0.7443379    |
| #### Bn-A07-p3921656 | A-genome specific (napus-rapa) | 0.9904306    | 0.8028744    | not scorable | not scorable | 0.9917355    | 0.6931905    |
| #### Bn-A07-p3929927 | A-genome specific (napus-rapa) | 0.9736842    | 0.7904991    | not scorable | not scorable | 1            | 0.7697172    |
| #### Bn-A07-p3930035 | A-genome specific (napus-rapa) | 0.9258373    | 0.7421215    | not scorable | not scorable | 0.9669421    | 0.7236132    |
| #### Bn-A07-p3930092 | A-genome specific (napus-rapa) | 0.9832536    | 0.7323964    | not scorable | not scorable | 0.9752066    | 0.7920139    |
| #### Bn-A07-p3931338 | A-genome specific (napus-rapa) | 0.9784689    | 0.7974152    | not scorable | not scorable | 1            | 0.7668962    |
| #### Bn-A07-p3934301 | A-genome specific (napus-rapa) | 0.9904306    | 0.745674     | not scorable | not scorable | 1            | 0.7368615    |
| #### Bn-A07-p3957667 | A-genome specific (napus-rapa) | 0.9928229    | 0.7585323    | not scorable | not scorable | 1            | 0.7886445    |
| #### Bn-A07-p3960247 | A-genome specific (napus-rapa) | 0.9928229    | 0.4625965    | not scorable | not scorable | 0.9669421    | 0.6715128    |
| #### Bn-A07-p3975589 | A-genome specific (napus-rapa) | 0.9593301    | 0.81193      | not scorable | not scorable | 1            | 0.7931477    |
| #### Bn-A07-p3976201 | A-genome specific (napus-rapa) | 0.9880383    | 0.3841072    | not scorable | not scorable | 0.9834711    | 0.752924     |
| #### Bn-A07-p3978709 | A-genome specific (napus-rapa) | 0.9856459    | 0.7444049    | not scorable | not scorable | 1            | 0.8191662    |

|                      |                                |              |              |              |              |           |           |
|----------------------|--------------------------------|--------------|--------------|--------------|--------------|-----------|-----------|
| #### Bn-A07-p3994854 | A-genome specific (napus-rapa) | 0.9736842    | 0.3558009    | not scorable | not scorable | 0.9917355 | 0.853172  |
| #### Bn-A07-p3995605 | A-genome specific (napus-rapa) | 0.9569378    | 0.2151389    | not scorable | not scorable | 0.9917355 | 0.661757  |
| #### Bn-A07-p4013256 | A-genome specific (napus-rapa) | 0.9665072    | 0.6344802    | not scorable | not scorable | 0.9917355 | 0.70705   |
| #### Bn-A07-p4050120 | A-genome specific (napus-rapa) | 0.9784689    | 0.304805     | not scorable | not scorable | 1         | 0.7332441 |
| #### Bn-A07-p4050475 | A-genome specific (napus-rapa) | 0.9736842    | 0.647286     | not scorable | not scorable | 1         | 0.7212505 |
| #### Bn-A07-p4050743 | A-genome specific (napus-rapa) | 0.9808612    | 0.670255     | not scorable | not scorable | 0.9917355 | 0.6554593 |
| #### Bn-A07-p4095559 | A-genome specific (napus-rapa) | 0.9688995    | 0.7481362    | not scorable | not scorable | 1         | 0.7387041 |
| #### Bn-A07-p4097388 | A-genome specific (napus-rapa) | 0.9856459    | 0.7886209    | not scorable | not scorable | 0.9917355 | 0.7389347 |
| #### Bn-A07-p4097690 | A-genome specific (napus-rapa) | 0.9880383    | 0.2972632    | not scorable | not scorable | 0.9917355 | 0.7553883 |
| #### Bn-A07-p4109343 | A-genome specific (napus-rapa) | 0.9832536    | 0.6691211    | not scorable | not scorable | 0.9504132 | 0.6592212 |
| #### Bn-A07-p4109459 | A-genome specific (napus-rapa) | 0.9856459    | 0.7549233    | not scorable | not scorable | 0.9834711 | 0.7477644 |
| #### Bn-A07-p4110292 | A-genome specific (napus-rapa) | 0.9952153    | 0.5970599    | not scorable | not scorable | 0.9917355 | 0.6801139 |
| #### Bn-A07-p4129734 | A-genome specific (napus-rapa) | 0.9904306    | 0.7853453    | not scorable | not scorable | 1         | 0.7602639 |
| #### Bn-A07-p4130487 | A-genome specific (napus-rapa) | 0.9856459    | 0.6518128    | not scorable | not scorable | 0.9834711 | 0.7402868 |
| #### Bn-A07-p4141499 | A-genome specific (napus-rapa) | 0.9760765    | 0.8152512    | not scorable | not scorable | 1         | 0.6589149 |
| #### Bn-A07-p4142320 | A-genome specific (napus-rapa) | 0.9832536    | 0.7941316    | not scorable | not scorable | 1         | 0.6823445 |
| #### Bn-A07-p4148934 | A-genome specific (napus-rapa) | 0.9976076    | 0.7774221    | not scorable | not scorable | 1         | 0.9038252 |
| #### Bn-A07-p4151821 | A-genome specific (napus-rapa) | 0.9856459    | 0.7235324    | not scorable | not scorable | 0.9834711 | 0.6325114 |
| #### Bn-A07-p4154271 | A-genome specific (napus-rapa) | 0.9832536    | 0.5755907    | not scorable | not scorable | 0.9752066 | 0.5531771 |
| #### Bn-A07-p4155337 | A-genome specific (napus-rapa) | 0.9832536    | 0.6811854    | not scorable | not scorable | 0.9669421 | 0.6083915 |
| #### Bn-A07-p4158079 | A-genome specific (napus-rapa) | 0.9976076    | 0.7680219    | not scorable | not scorable | 0.9752066 | 0.8032113 |
| #### Bn-A07-p4161480 | A-genome specific (napus-rapa) | 0.9928229    | 0.7814752    | not scorable | not scorable | 0.9752066 | 0.7783366 |
| #### Bn-A07-p4162513 | A-genome specific (napus-rapa) | 0.9832536    | 0.7843373    | not scorable | not scorable | 1         | 0.7918019 |
| #### Bn-A07-p4164663 | A-genome specific (rapa only)  | not scorable | not scorable | not scorable | not scorable | 0.9752066 | 0.7259578 |
| #### Bn-A07-p4173116 | A-genome specific (napus-rapa) | 0.9832536    | 0.3484448    | not scorable | not scorable | 1         | 0.6767038 |
| #### Bn-A07-p4173583 | A-genome specific (napus-rapa) | 0.9904306    | 0.8039683    | not scorable | not scorable | 0.9834711 | 0.8963842 |
| #### Bn-A07-p4191541 | A-genome specific (napus-rapa) | 0.9808612    | 0.774093     | not scorable | not scorable | 1         | 0.794711  |
| #### Bn-A07-p4191546 | A-genome specific (napus-rapa) | 0.9952153    | 0.5590435    | not scorable | not scorable | 1         | 0.8229897 |
| #### Bn-A07-p4191832 | A-genome specific (napus-rapa) | 0.9880383    | 0.4412918    | not scorable | not scorable | 0.9917355 | 0.824482  |
| #### Bn-A07-p4204511 | A-genome specific (napus-rapa) | 0.9856459    | 0.5727064    | not scorable | not scorable | 0.9669421 | 0.4364943 |
| #### Bn-A07-p4204647 | A-genome specific (napus-rapa) | 0.9808612    | 0.7928472    | not scorable | not scorable | 0.9917355 | 0.819315  |
| #### Bn-A07-p4208528 | A-genome specific (napus-rapa) | 0.9856459    | 0.381386     | not scorable | not scorable | 0.9917355 | 0.7104666 |
| #### Bn-A07-p4210761 | A-genome specific (napus-rapa) | 0.9760765    | 0.3363607    | not scorable | not scorable | 0.9834711 | 0.7701266 |

|                      |                                |              |              |              |              |              |              |
|----------------------|--------------------------------|--------------|--------------|--------------|--------------|--------------|--------------|
| #### Bn-A07-p4289732 | A-genome specific (napus-rapa) | 1            | 0.7035392    | not scorable | not scorable | 1            | 0.7378303    |
| #### Bn-A07-p4297035 | A-genome specific (napus-rapa) | 0.562201     | 0.5748053    | not scorable | not scorable | 0.9669421    | 0.6506535    |
| #### Bn-A07-p430181  | A-genome specific (napus-rapa) | 0.9162679    | 0.757265     | not scorable | not scorable | 0.9669421    | 0.8318305    |
| #### Bn-A07-p4305077 | A-genome specific (napus-rapa) | 1            | 0.7914591    | not scorable | not scorable | 0.9752066    | 0.7566797    |
| #### Bn-A07-p4305761 | A-genome specific (napus-rapa) | 0.9760765    | 0.8013408    | not scorable | not scorable | 0.9834711    | 0.6604571    |
| #### Bn-A07-p4305829 | A-genome specific (napus-rapa) | 0.9784689    | 0.8015673    | not scorable | not scorable | 0.9917355    | 0.8018919    |
| #### Bn-A07-p4307671 | A-genome specific (napus-rapa) | 0.9617225    | 0.7947607    | not scorable | not scorable | 1            | 0.7955434    |
| #### Bn-A07-p4309577 | A-genome specific (napus-rapa) | 0.9832536    | 0.7558774    | not scorable | not scorable | 1            | 0.6784772    |
| #### Bn-A07-p4324841 | A-genome specific (napus-rapa) | 1            | 0.7655461    | not scorable | not scorable | 1            | 0.7715929    |
| #### Bn-A07-p4364075 | A-genome specific (napus-rapa) | 0.9545454    | 0.7432815    | not scorable | not scorable | 0.9834711    | 0.9478856    |
| #### Bn-A07-p4376685 | A-genome specific (napus-rapa) | 1            | 0.7635345    | not scorable | not scorable | 1            | 0.820487     |
| #### Bn-A07-p4380688 | napus specific                 | 0.9976076    | 0.2986472    | not scorable | not scorable | not scorable | not scorable |
| #### Bn-A07-p4387388 | A-genome specific (napus-rapa) | 1            | 0.59045      | not scorable | not scorable | 1            | 0.8583759    |
| #### Bn-A07-p4414432 | A-genome specific (napus-rapa) | 0.9808612    | 0.6954873    | not scorable | not scorable | 1            | 0.644686     |
| #### Bn-A07-p4477010 | A-genome specific (napus-rapa) | 0.9449761    | 0.6868649    | not scorable | not scorable | 0.9504132    | 0.7999857    |
| #### Bn-A07-p4480260 | A-genome specific (napus-rapa) | 0.9784689    | 0.2700753    | not scorable | not scorable | 1            | 0.8137834    |
| #### Bn-A07-p4483935 | genome unspecific (all in)     | 0.9808612    | 0.3204559    | 1            | 0.65516      | 0.9669421    | 0.6782347    |
| #### Bn-A07-p4520449 | genome unspecific (all in)     | 0.9354067    | 0.3708532    | 0.9534883    | 0.7736661    | 0.9917355    | 0.8322974    |
| #### Bn-A07-p4522519 | napus specific                 | 0.9641148    | 0.8151538    | not scorable | not scorable | not scorable | not scorable |
| #### Bn-A07-p4522573 | napus specific                 | 0.9569378    | 0.6935323    | not scorable | not scorable | not scorable | not scorable |
| #### Bn-A07-p4535707 | napus specific                 | 0.9617225    | 0.6903524    | not scorable | not scorable | not scorable | not scorable |
| #### Bn-A07-p4536488 | A-genome specific (napus-rapa) | 0.9784689    | 0.3758472    | not scorable | not scorable | 0.9917355    | 0.6126752    |
| #### Bn-A07-p4536608 | napus specific                 | 0.9760765    | 0.7731771    | not scorable | not scorable | not scorable | not scorable |
| #### Bn-A07-p4539144 | napus specific                 | 0.9712918    | 0.6931905    | not scorable | not scorable | not scorable | not scorable |
| #### Bn-A07-p4554373 | A-genome specific (napus-rapa) | 0.9832536    | 0.7783545    | not scorable | not scorable | 1            | 0.8194408    |
| #### Bn-A07-p4566975 | all not scorable               | not scorable | not scorable | not scorable | not scorable | not scorable | not scorable |
| #### Bn-A07-p4568148 | A-genome specific (napus-rapa) | 0.9904306    | 0.784961     | not scorable | not scorable | 1            | 0.7141603    |
| #### Bn-A07-p4578845 | A-genome specific (napus-rapa) | 0.9760765    | 0.773173     | not scorable | not scorable | 1            | 0.7096633    |
| #### Bn-A07-p4582463 | all not scorable               | not scorable | not scorable | not scorable | not scorable | not scorable | not scorable |
| #### Bn-A07-p4587108 | all not scorable               | not scorable | not scorable | not scorable | not scorable | not scorable | not scorable |
| #### Bn-A07-p4607332 | genome unspecific (all in)     | 0.9856459    | 0.2844493    | 0.9922481    | 0.8533781    | 0.9752066    | 0.8700725    |
| #### Bn-A07-p4624421 | A-genome specific (napus-rapa) | 0.9784689    | 0.6220239    | not scorable | not scorable | 1            | 0.7097909    |
| #### Bn-A07-p4639103 | napus specific                 | 1            | 0.4839354    | not scorable | not scorable | not scorable | not scorable |

|                      |                                |           |           |              |              |              |              |
|----------------------|--------------------------------|-----------|-----------|--------------|--------------|--------------|--------------|
| #### Bn-A07-p4644371 | A-genome specific (napus-rapa) | 0.9832536 | 0.7992938 | not scorable | not scorable | 1            | 0.7690871    |
| #### Bn-A07-p4656578 | A-genome specific (napus-rapa) | 0.9808612 | 0.3629946 | not scorable | not scorable | 0.9834711    | 0.7379161    |
| #### Bn-A07-p4657440 | A-genome specific (napus-rapa) | 0.9928229 | 0.7723844 | not scorable | not scorable | 0.9917355    | 0.8154362    |
| #### Bn-A07-p4672563 | A-genome specific (napus-rapa) | 0.9880383 | 0.2158297 | not scorable | not scorable | 1            | 0.7373488    |
| #### Bn-A07-p4678510 | napus specific                 | 0.9784689 | 0.7427211 | not scorable | not scorable | not scorable | not scorable |
| #### Bn-A07-p4684890 | A-genome specific (napus-rapa) | 0.9760765 | 0.3608551 | not scorable | not scorable | 1            | 0.9175813    |
| #### Bn-A07-p4687740 | A-genome specific (napus-rapa) | 0.9808612 | 0.7425246 | not scorable | not scorable | 1            | 0.8147714    |
| #### Bn-A07-p4691624 | A-genome specific (napus-rapa) | 1         | 0.5519999 | not scorable | not scorable | 1            | 0.8948976    |
| #### Bn-A07-p4693647 | A-genome specific (napus-rapa) | 0.9712918 | 0.2875687 | not scorable | not scorable | 0.9834711    | 0.733496     |
| #### Bn-A07-p4704042 | A-genome specific (napus-rapa) | 0.9808612 | 0.2735735 | not scorable | not scorable | 1            | 0.7044029    |
| #### Bn-A07-p4708781 | A-genome specific (napus-rapa) | 0.9808612 | 0.27839   | not scorable | not scorable | 0.9834711    | 0.7192168    |
| #### Bn-A07-p4709589 | A-genome specific (napus-rapa) | 0.9856459 | 0.7515153 | not scorable | not scorable | 0.5206612    | 0.7108648    |
| #### Bn-A07-p4745849 | A-genome specific (napus-rapa) | 0.9904306 | 0.7491408 | not scorable | not scorable | 0.5206612    | 0.797861     |
| #### Bn-A07-p475640  | A-genome specific (napus-rapa) | 0.6507177 | 0.7622404 | not scorable | not scorable | 0.9669421    | 0.7517037    |
| #### Bn-A07-p4777275 | napus specific                 | 0.9665072 | 0.813967  | not scorable | not scorable | not scorable | not scorable |
| #### Bn-A07-p4802709 | A-genome specific (napus-rapa) | 0.9617225 | 0.738792  | not scorable | not scorable | 0.9752066    | 0.6669867    |
| #### Bn-A07-p4815239 | A-genome specific (napus-rapa) | 0.9808612 | 0.7935097 | not scorable | not scorable | 0.9834711    | 0.7392147    |
| #### Bn-A07-p4815910 | A-genome specific (napus-rapa) | 0.9952153 | 0.4458336 | not scorable | not scorable | 0.9917355    | 0.6940501    |
| #### Bn-A07-p4817318 | A-genome specific (napus-rapa) | 0.9904306 | 0.6108341 | not scorable | not scorable | 0.9752066    | 0.7795539    |
| #### Bn-A07-p4825210 | A-genome specific (napus-rapa) | 0.9186603 | 0.4005998 | not scorable | not scorable | 0.9834711    | 0.7484888    |
| #### Bn-A07-p483451  | A-genome specific (napus-rapa) | 0.6291866 | 0.7494817 | not scorable | not scorable | 0.9917355    | 0.782064     |
| #### Bn-A07-p483535  | A-genome specific (napus-rapa) | 0.65311   | 0.6615495 | not scorable | not scorable | 0.9917355    | 0.6813806    |
| #### Bn-A07-p483541  | A-genome specific (napus-rapa) | 0.638756  | 0.7262353 | not scorable | not scorable | 0.9917355    | 0.8445919    |
| #### Bn-A07-p4838826 | A-genome specific (napus-rapa) | 0.9928229 | 0.2844231 | not scorable | not scorable | 0.9752066    | 0.5854669    |
| #### Bn-A07-p4851746 | A-genome specific (napus-rapa) | 0.84689   | 0.9440307 | not scorable | not scorable | 0.9752066    | 0.7336501    |
| #### Bn-A07-p4898790 | A-genome specific (napus-rapa) | 0.9856459 | 0.781221  | not scorable | not scorable | 0.9917355    | 0.7875866    |
| #### Bn-A07-p4910739 | A-genome specific (napus-rapa) | 0.9928229 | 0.7619962 | not scorable | not scorable | 0.9834711    | 0.7243788    |
| #### Bn-A07-p4911450 | A-genome specific (napus-rapa) | 0.9808612 | 0.5962475 | not scorable | not scorable | 0.9917355    | 0.7103308    |
| #### Bn-A07-p4912091 | A-genome specific (napus-rapa) | 0.9904306 | 0.7900335 | not scorable | not scorable | 0.9917355    | 0.7842948    |
| #### Bn-A07-p4912587 | A-genome specific (napus-rapa) | 0.9952153 | 0.6871117 | not scorable | not scorable | 0.9834711    | 0.6813372    |
| #### Bn-A07-p4912709 | A-genome specific (napus-rapa) | 0.9832536 | 0.6360901 | not scorable | not scorable | 0.9834711    | 0.5639426    |
| #### Bn-A07-p4914608 | A-genome specific (napus-rapa) | 0.9904306 | 0.7621495 | not scorable | not scorable | 0.9917355    | 0.7814276    |
| #### Bn-A07-p4914940 | A-genome specific (napus-rapa) | 0.9880383 | 0.7182474 | not scorable | not scorable | 0.9917355    | 0.7176418    |

|                      |                                |              |              |              |              |           |           |
|----------------------|--------------------------------|--------------|--------------|--------------|--------------|-----------|-----------|
| #### Bn-A07-p4916203 | A-genome specific (napus-rapa) | 0.9904306    | 0.7730554    | not scorable | not scorable | 1         | 0.8092088 |
| #### Bn-A07-p4916911 | A-genome specific (napus-rapa) | 0.9832536    | 0.7691694    | not scorable | not scorable | 0.9752066 | 0.6807478 |
| #### Bn-A07-p4916995 | A-genome specific (napus-rapa) | 0.9784689    | 0.7804096    | not scorable | not scorable | 0.9834711 | 0.7253047 |
| #### Bn-A07-p4923764 | A-genome specific (napus-rapa) | 0.9904306    | 0.738864     | not scorable | not scorable | 0.9669421 | 0.7018794 |
| #### Bn-A07-p4923886 | A-genome specific (napus-rapa) | 0.9904306    | 0.6355867    | not scorable | not scorable | 1         | 0.6463238 |
| #### Bn-A07-p4926294 | A-genome specific (napus-rapa) | 0.9880383    | 0.7483031    | not scorable | not scorable | 0.9752066 | 0.6672967 |
| #### Bn-A07-p4934236 | A-genome specific (napus-rapa) | 0.9928229    | 0.7547159    | not scorable | not scorable | 0.9917355 | 0.7130669 |
| #### Bn-A07-p4937244 | A-genome specific (napus-rapa) | 0.9808612    | 0.671458     | not scorable | not scorable | 1         | 0.7992422 |
| #### Bn-A07-p4941605 | A-genome specific (napus-rapa) | 0.9688995    | 0.7553821    | not scorable | not scorable | 1         | 0.913542  |
| #### Bn-A07-p4947273 | A-genome specific (napus-rapa) | 0.9832536    | 0.7682251    | not scorable | not scorable | 0.9834711 | 0.9175813 |
| #### Bn-A07-p4954667 | A-genome specific (rapa only)  | not scorable | not scorable | not scorable | not scorable | 0.9752066 | 0.6053866 |
| #### Bn-A07-p4958794 | A-genome specific (napus-rapa) | 0.9904306    | 0.8015093    | not scorable | not scorable | 1         | 0.913416  |
| #### Bn-A07-p4958868 | A-genome specific (napus-rapa) | 0.9904306    | 0.7611715    | not scorable | not scorable | 0.9917355 | 0.7762857 |
| #### Bn-A07-p4959975 | A-genome specific (napus-rapa) | 0.9712918    | 0.7450467    | not scorable | not scorable | 1         | 0.7763787 |
| #### Bn-A07-p4968765 | A-genome specific (napus-rapa) | 0.9832536    | 0.5836449    | not scorable | not scorable | 0.9917355 | 0.8158252 |
| #### Bn-A07-p4976992 | A-genome specific (napus-rapa) | 0.9688995    | 0.7494958    | not scorable | not scorable | 0.9917355 | 0.865634  |
| #### Bn-A07-p4997213 | A-genome specific (napus-rapa) | 0.9688995    | 0.4179689    | not scorable | not scorable | 0.9834711 | 0.6413519 |
| #### Bn-A07-p5003344 | A-genome specific (napus-rapa) | 0.9808612    | 0.7046803    | not scorable | not scorable | 1         | 0.8035526 |
| #### Bn-A07-p5008797 | A-genome specific (napus-rapa) | 0.9425837    | 0.4761514    | not scorable | not scorable | 1         | 0.9272014 |
| #### Bn-A07-p5016523 | A-genome specific (napus-rapa) | 0.9736842    | 0.6790922    | not scorable | not scorable | 1         | 0.6885478 |
| #### Bn-A07-p5020495 | A-genome specific (napus-rapa) | 0.9784689    | 0.7129127    | not scorable | not scorable | 0.9917355 | 0.8102182 |
| #### Bn-A07-p5030137 | A-genome specific (napus-rapa) | 0.9928229    | 0.7602988    | not scorable | not scorable | 0.9752066 | 0.6837733 |
| #### Bn-A07-p5039631 | A-genome specific (napus-rapa) | 0.9736842    | 0.6777764    | not scorable | not scorable | 1         | 0.7322153 |
| #### Bn-A07-p5050160 | A-genome specific (napus-rapa) | 0.9712918    | 0.4685074    | not scorable | not scorable | 0.9917355 | 0.5970345 |
| #### Bn-A07-p5054596 | A-genome specific (napus-rapa) | 0.9904306    | 0.5154238    | not scorable | not scorable | 1         | 0.7157456 |
| #### Bn-A07-p5072420 | A-genome specific (napus-rapa) | 0.9784689    | 0.3559117    | not scorable | not scorable | 0.9917355 | 0.7396088 |
| #### Bn-A07-p5092272 | A-genome specific (napus-rapa) | 0.9736842    | 0.4633952    | not scorable | not scorable | 1         | 0.7963433 |
| #### Bn-A07-p5095657 | A-genome specific (napus-rapa) | 0.9760765    | 0.7537186    | not scorable | not scorable | 0.9917355 | 0.7771561 |
| #### Bn-A07-p5098897 | A-genome specific (napus-rapa) | 0.9904306    | 0.82247      | not scorable | not scorable | 0.9917355 | 0.828885  |
| #### Bn-A07-p5100047 | A-genome specific (napus-rapa) | 1            | 0.5236588    | not scorable | not scorable | 1         | 0.8016225 |
| #### Bn-A07-p5106046 | A-genome specific (napus-rapa) | 0.9880383    | 0.7569925    | not scorable | not scorable | 1         | 0.8001637 |
| #### Bn-A07-p5110099 | A-genome specific (napus-rapa) | 0.9688995    | 0.8326202    | not scorable | not scorable | 0.9917355 | 0.6922492 |
| #### Bn-A07-p5110555 | A-genome specific (napus-rapa) | 0.9928229    | 0.8218186    | not scorable | not scorable | 0.9917355 | 0.7888523 |

|                      |                                |           |           |              |              |              |              |
|----------------------|--------------------------------|-----------|-----------|--------------|--------------|--------------|--------------|
| #### Bn-A07-p5111659 | A-genome specific (napus-rapa) | 0.9928229 | 0.5083035 | not scorable | not scorable | 0.9917355    | 0.7871816    |
| #### Bn-A07-p5112113 | A-genome specific (napus-rapa) | 0.9880383 | 0.7496422 | not scorable | not scorable | 0.9917355    | 0.7513775    |
| #### Bn-A07-p5114487 | A-genome specific (napus-rapa) | 0.9808612 | 0.7477766 | not scorable | not scorable | 0.9669421    | 0.6918189    |
| #### Bn-A07-p5114831 | A-genome specific (napus-rapa) | 0.9736842 | 0.675262  | not scorable | not scorable | 0.9586777    | 0.740324     |
| #### Bn-A07-p5114926 | A-genome specific (napus-rapa) | 0.9665072 | 0.7917605 | not scorable | not scorable | 0.9917355    | 0.7313967    |
| #### Bn-A07-p5115445 | A-genome specific (napus-rapa) | 0.9712918 | 0.694464  | not scorable | not scorable | 0.9752066    | 0.6994233    |
| #### Bn-A07-p5115563 | A-genome specific (napus-rapa) | 0.9688995 | 0.6785634 | not scorable | not scorable | 0.9504132    | 0.6931572    |
| #### Bn-A07-p5118743 | A-genome specific (napus-rapa) | 0.9952153 | 0.7635381 | not scorable | not scorable | 0.9917355    | 0.7622406    |
| #### Bn-A07-p5119149 | A-genome specific (napus-rapa) | 0.9880383 | 0.7014657 | not scorable | not scorable | 0.9917355    | 0.7290791    |
| #### Bn-A07-p5121735 | napus specific                 | 0.777512  | 0.7931026 | not scorable | not scorable | not scorable | not scorable |
| #### Bn-A07-p5126106 | A-genome specific (napus-rapa) | 0.9593301 | 0.502991  | not scorable | not scorable | 0.9834711    | 0.7050846    |
| #### Bn-A07-p5145011 | A-genome specific (napus-rapa) | 0.9736842 | 0.2935948 | not scorable | not scorable | 0.9917355    | 0.8381315    |
| #### Bn-A07-p5145409 | A-genome specific (napus-rapa) | 0.9784689 | 0.3081788 | not scorable | not scorable | 1            | 0.7120063    |
| #### Bn-A07-p5150157 | napus specific                 | 0.5933014 | 0.7069345 | not scorable | not scorable | not scorable | not scorable |
| #### Bn-A07-p5192258 | A-genome specific (napus-rapa) | 0.9784689 | 0.7458622 | not scorable | not scorable | 1            | 0.7981362    |
| #### Bn-A07-p5203115 | A-genome specific (napus-rapa) | 0.9760765 | 0.3450873 | not scorable | not scorable | 0.9917355    | 0.8146074    |
| #### Bn-A07-p5211320 | A-genome specific (napus-rapa) | 1         | 0.4761397 | not scorable | not scorable | 0.9917355    | 0.7266335    |
| #### Bn-A07-p5228632 | A-genome specific (napus-rapa) | 0.9856459 | 0.7270372 | not scorable | not scorable | 0.9917355    | 0.8013967    |
| #### Bn-A07-p5229070 | A-genome specific (napus-rapa) | 0.9928229 | 0.7600711 | not scorable | not scorable | 1            | 0.7693515    |
| #### Bn-A07-p5234114 | A-genome specific (napus-rapa) | 0.9880383 | 0.7309852 | not scorable | not scorable | 0.9752066    | 0.710746     |
| #### Bn-A07-p5243525 | A-genome specific (napus-rapa) | 0.9760765 | 0.3208712 | not scorable | not scorable | 0.9834711    | 0.8480576    |
| #### Bn-A07-p5251710 | A-genome specific (napus-rapa) | 0.9832536 | 0.6935971 | not scorable | not scorable | 0.9917355    | 0.7360545    |
| #### Bn-A07-p5255311 | A-genome specific (napus-rapa) | 0.9952153 | 0.7475585 | not scorable | not scorable | 0.9752066    | 0.7502316    |
| #### Bn-A07-p5255375 | A-genome specific (napus-rapa) | 0.9665072 | 0.2738982 | not scorable | not scorable | 1            | 0.7861174    |
| #### Bn-A07-p5256311 | A-genome specific (napus-rapa) | 0.9784689 | 0.5976096 | not scorable | not scorable | 0.9917355    | 0.8428203    |
| #### Bn-A07-p5259951 | A-genome specific (napus-rapa) | 0.9138756 | 0.3822809 | not scorable | not scorable | 1            | 0.9432787    |
| #### Bn-A07-p5270463 | A-genome specific (napus-rapa) | 0.9808612 | 0.4288599 | not scorable | not scorable | 1            | 0.7591782    |
| #### Bn-A07-p5272310 | A-genome specific (napus-rapa) | 0.9952153 | 0.6784521 | not scorable | not scorable | 0.9752066    | 0.8127453    |
| #### Bn-A07-p5288286 | A-genome specific (napus-rapa) | 0.9952153 | 0.2685089 | not scorable | not scorable | 0.9834711    | 0.9175813    |
| #### Bn-A07-p5291077 | napus specific                 | 0.9688995 | 0.6764134 | not scorable | not scorable | not scorable | not scorable |
| #### Bn-A07-p5293804 | A-genome specific (napus-rapa) | 0.9784689 | 0.6838948 | not scorable | not scorable | 1            | 0.9095029    |
| #### Bn-A07-p5295300 | A-genome specific (napus-rapa) | 0.9760765 | 0.3453617 | not scorable | not scorable | 1            | 0.9026341    |
| #### Bn-A07-p5304766 | A-genome specific (napus-rapa) | 0.9880383 | 0.732664  | not scorable | not scorable | 1            | 0.8335911    |



|                      |                                |              |              |              |              |              |              |
|----------------------|--------------------------------|--------------|--------------|--------------|--------------|--------------|--------------|
| #### Bn-A07-p5306358 | A-genome specific (napus-rapa) | 0.9904306    | 0.7518371    | not scorable | not scorable | 0.9917355    | 0.7545731    |
| #### Bn-A07-p5307627 | A-genome specific (napus-rapa) | 0.9712918    | 0.7334163    | not scorable | not scorable | 0.9917355    | 0.7922363    |
| #### Bn-A07-p5310522 | A-genome specific (napus-rapa) | 0.9904306    | 0.402541     | not scorable | not scorable | 1            | 0.6776749    |
| #### Bn-A07-p5322075 | A-genome specific (napus-rapa) | 0.9880383    | 0.5444473    | not scorable | not scorable | 1            | 0.6901165    |
| #### Bn-A07-p5325817 | A-genome specific (napus-rapa) | 0.9784689    | 0.6721444    | not scorable | not scorable | 1            | 0.8262686    |
| #### Bn-A07-p5325897 | A-genome specific (napus-rapa) | 0.9880383    | 0.7223082    | not scorable | not scorable | 0.9834711    | 0.7008032    |
| #### Bn-A07-p5326470 | A-genome specific (napus-rapa) | 1            | 0.7784076    | not scorable | not scorable | 1            | 0.9486229    |
| #### Bn-A07-p5330694 | A-genome specific (napus-rapa) | 0.9736842    | 0.5195265    | not scorable | not scorable | 1            | 0.7289264    |
| #### Bn-A07-p5335780 | all not scorable               | not scorable | not scorable | not scorable | not scorable | not scorable | not scorable |
| #### Bn-A07-p5340927 | A-genome specific (napus-rapa) | 0.9688995    | 0.8140628    | not scorable | not scorable | 0.9917355    | 0.8426985    |
| #### Bn-A07-p5361286 | A-genome specific (napus-rapa) | 0.9593301    | 0.660873     | not scorable | not scorable | 1            | 0.8932506    |
| #### Bn-A07-p5365136 | A-genome specific (napus-rapa) | 0.9856459    | 0.2986616    | not scorable | not scorable | 0.9917355    | 0.7347796    |
| #### Bn-A07-p5366717 | A-genome specific (napus-rapa) | 0.9952153    | 0.4176493    | not scorable | not scorable | 1            | 0.8005196    |
| #### Bn-A07-p5367379 | A-genome specific (napus-rapa) | 1            | 0.7442765    | not scorable | not scorable | 1            | 0.8041503    |
| #### Bn-A07-p5367982 | A-genome specific (napus-rapa) | 0.9880383    | 0.7106059    | not scorable | not scorable | 0.9669421    | 0.7712594    |
| #### Bn-A07-p5370119 | A-genome specific (napus-rapa) | 1            | 0.667924     | not scorable | not scorable | 0.9834711    | 0.7194198    |
| #### Bn-A07-p53742   | A-genome specific (napus-rapa) | 1            | 0.9081361    | not scorable | not scorable | 1            | 0.9027861    |
| #### Bn-A07-p5385190 | A-genome specific (rapa only)  | not scorable | not scorable | not scorable | not scorable | 1            | 0.6979383    |
| #### Bn-A07-p5398751 | A-genome specific (rapa only)  | not scorable | not scorable | not scorable | not scorable | 0.9834711    | 0.78095      |
| #### Bn-A07-p5398913 | A-genome specific (napus-rapa) | 0.9832536    | 0.7618266    | not scorable | not scorable | 0.9834711    | 0.679038     |
| #### Bn-A07-p5400056 | A-genome specific (napus-rapa) | 0.9784689    | 0.7550347    | not scorable | not scorable | 1            | 0.757506     |
| #### Bn-A07-p5400130 | A-genome specific (napus-rapa) | 0.9904306    | 0.7701377    | not scorable | not scorable | 0.9917355    | 0.7626158    |
| #### Bn-A07-p5400202 | A-genome specific (napus-rapa) | 0.9808612    | 0.7655126    | not scorable | not scorable | 1            | 0.6640414    |
| #### Bn-A07-p5401960 | A-genome specific (napus-rapa) | 0.9880383    | 0.7989509    | not scorable | not scorable | 1            | 0.7276645    |
| #### Bn-A07-p5402372 | A-genome specific (napus-rapa) | 0.9856459    | 0.7670333    | not scorable | not scorable | 0.9834711    | 0.74414      |
| #### Bn-A07-p5402451 | A-genome specific (napus-rapa) | 0.9856459    | 0.7460479    | not scorable | not scorable | 1            | 0.7920885    |
| #### Bn-A07-p5402605 | A-genome specific (napus-rapa) | 0.9856459    | 0.7673319    | not scorable | not scorable | 0.9917355    | 0.6908203    |
| #### Bn-A07-p5402835 | A-genome specific (napus-rapa) | 0.9976076    | 0.7671074    | not scorable | not scorable | 1            | 0.7864887    |
| #### Bn-A07-p5403065 | A-genome specific (napus-rapa) | 0.9856459    | 0.695999     | not scorable | not scorable | 0.9834711    | 0.6774554    |
| #### Bn-A07-p5407029 | A-genome specific (napus-rapa) | 0.9856459    | 0.6312414    | not scorable | not scorable | 1            | 0.6336848    |
| #### Bn-A07-p5407143 | A-genome specific (napus-rapa) | 0.9832536    | 0.7657267    | not scorable | not scorable | 0.9917355    | 0.7400358    |
| #### Bn-A07-p5407683 | A-genome specific (napus-rapa) | 1            | 0.750957     | not scorable | not scorable | 1            | 0.7913541    |
| #### Bn-A07-p5408025 | A-genome specific (napus-rapa) | 0.9641148    | 0.5509209    | not scorable | not scorable | 0.9834711    | 0.6815924    |

|                      |                                |              |              |              |              |              |              |
|----------------------|--------------------------------|--------------|--------------|--------------|--------------|--------------|--------------|
| #### Bn-A07-p5412930 | A-genome specific (napus-rapa) | 0.9976076    | 0.7436271    | not scorable | not scorable | 0.9917355    | 0.6930249    |
| #### Bn-A07-p5413164 | genome unspecific (all in)     | 0.9617225    | 0.5674223    | 0.9844961    | 0.6171474    | 0.9917355    | 0.6898537    |
| #### Bn-A07-p541617  | napus specific                 | 1            | 0.5445434    | not scorable | not scorable | not scorable | not scorable |
| #### Bn-A07-p5419348 | A-genome specific (napus-rapa) | 0.9832536    | 0.5252298    | not scorable | not scorable | 1            | 0.863578     |
| #### Bn-A07-p5419648 | A-genome specific (napus-rapa) | 0.9880383    | 0.3531231    | not scorable | not scorable | 1            | 0.7058657    |
| #### Bn-A07-p5419833 | A-genome specific (napus-rapa) | 0.9760765    | 0.7344667    | not scorable | not scorable | 0.9917355    | 0.7874591    |
| #### Bn-A07-p5427886 | genome unspecific (all in)     | 0.9760765    | 0.7084959    | 0            | 0.7349061    | 0.9669421    | 0.7946579    |
| #### Bn-A07-p5428283 | A-genome specific (napus-rapa) | 0.9904306    | 0.4411124    | not scorable | not scorable | 0.9917355    | 0.7762437    |
| #### Bn-A07-p5431144 | A-genome specific (napus-rapa) | 0.9545454    | 0.8042853    | not scorable | not scorable | 0.9834711    | 0.6872754    |
| #### Bn-A07-p5436630 | A-genome specific (napus-rapa) | 0.9928229    | 0.5675892    | not scorable | not scorable | 1            | 0.8047117    |
| #### Bn-A07-p5438049 | A-genome specific (rapa only)  | not scorable | not scorable | not scorable | not scorable | 1            | 0.8019984    |
| #### Bn-A07-p5438333 | A-genome specific (napus-rapa) | 0.9904306    | 0.6895214    | not scorable | not scorable | 1            | 0.7689235    |
| #### Bn-A07-p5447322 | A-genome specific (napus-rapa) | 0.9521531    | 0.6677057    | not scorable | not scorable | 1            | 0.7892095    |
| #### Bn-A07-p5448813 | genome unspecific (all in)     | 0.9856459    | 0.7273097    | 0            | 0.7890843    | 1            | 0.9175813    |
| #### Bn-A07-p5449174 | A-genome specific (napus-rapa) | 0.9904306    | 0.7013757    | not scorable | not scorable | 0.9917355    | 0.7165428    |
| #### Bn-A07-p5455024 | A-genome specific (napus-rapa) | 0.9904306    | 0.7581413    | not scorable | not scorable | 0.9834711    | 0.7778711    |
| #### Bn-A07-p5472218 | all not scorable               | not scorable | not scorable | not scorable | not scorable | not scorable | not scorable |
| #### Bn-A07-p5472963 | A-genome specific (napus-rapa) | 0.9832536    | 0.5112751    | not scorable | not scorable | 0.9917355    | 0.7234501    |
| #### Bn-A07-p5482599 | A-genome specific (napus-rapa) | 0.9856459    | 0.7429484    | not scorable | not scorable | 1            | 0.7055039    |
| #### Bn-A07-p5500390 | A-genome specific (napus-rapa) | 0.9904306    | 0.7455807    | not scorable | not scorable | 0.9917355    | 0.7104915    |
| #### Bn-A07-p5500448 | A-genome specific (napus-rapa) | 0.9904306    | 0.6973405    | not scorable | not scorable | 1            | 0.6995199    |
| #### Bn-A07-p5516068 | A-genome specific (napus-rapa) | 0.9832536    | 0.6778281    | not scorable | not scorable | 0.9834711    | 0.5965319    |
| #### Bn-A07-p5517100 | A-genome specific (napus-rapa) | 0.9952153    | 0.7789381    | not scorable | not scorable | 1            | 0.7901312    |
| #### Bn-A07-p5517642 | A-genome specific (napus-rapa) | 0.6315789    | 0.7566977    | not scorable | not scorable | 0.5041322    | 0.774669     |
| #### Bn-A07-p5518221 | genome unspecific (all in)     | 0.9880383    | 0.7170504    | 0            | 0.6711252    | 1            | 0.7362967    |
| #### Bn-A07-p5518604 | A-genome specific (napus-rapa) | 0.9832536    | 0.7553502    | not scorable | not scorable | 0.9917355    | 0.711918     |
| #### Bn-A07-p5519194 | A-genome specific (napus-rapa) | 0.9928229    | 0.6770583    | not scorable | not scorable | 1            | 0.6765344    |
| #### Bn-A07-p5519356 | A-genome specific (napus-rapa) | 0.6291866    | 0.7195066    | not scorable | not scorable | 0.5123967    | 0.8029889    |
| #### Bn-A07-p5519439 | A-genome specific (napus-rapa) | 0.9904306    | 0.7602654    | not scorable | not scorable | 1            | 0.7656104    |
| #### Bn-A07-p5519719 | napus specific                 | 0.6483254    | 0.8963987    | not scorable | not scorable | not scorable | not scorable |
| #### Bn-A07-p5539902 | A-genome specific (napus-rapa) | 0.9641148    | 0.5035851    | not scorable | not scorable | 1            | 0.8244301    |
| #### Bn-A07-p5555349 | A-genome specific (napus-rapa) | 0.9784689    | 0.675037     | not scorable | not scorable | 0.9669421    | 0.6592264    |
| #### Bn-A07-p5556527 | genome unspecific (all in)     | 0.5095694    | 0.8128297    | 0            | 0.666779     | 0.9917355    | 0.7287537    |

|                      |                                |              |              |              |              |           |           |
|----------------------|--------------------------------|--------------|--------------|--------------|--------------|-----------|-----------|
| #### Bn-A07-p5557211 | A-genome specific (napus-rapa) | 0.9736842    | 0.7297283    | not scorable | not scorable | 0.9669421 | 0.7188483 |
| #### Bn-A07-p5568504 | A-genome specific (napus-rapa) | 0.9712918    | 0.6810381    | not scorable | not scorable | 0.9834711 | 0.7940319 |
| #### Bn-A07-p5572683 | A-genome specific (napus-rapa) | 0.9952153    | 0.8020127    | not scorable | not scorable | 1         | 0.8230966 |
| #### Bn-A07-p5574316 | A-genome specific (napus-rapa) | 0.9952153    | 0.7695195    | not scorable | not scorable | 0.9917355 | 0.8005677 |
| #### Bn-A07-p5578410 | A-genome specific (napus-rapa) | 0.9880383    | 0.4392076    | not scorable | not scorable | 0.8595041 | 0.9212868 |
| #### Bn-A07-p5591930 | A-genome specific (napus-rapa) | 0.9904306    | 0.5210303    | not scorable | not scorable | 1         | 0.8188316 |
| #### Bn-A07-p5609094 | A-genome specific (napus-rapa) | 1            | 0.786476     | not scorable | not scorable | 1         | 0.7884539 |
| #### Bn-A07-p5609159 | A-genome specific (napus-rapa) | 1            | 0.6366912    | not scorable | not scorable | 1         | 0.7494321 |
| #### Bn-A07-p5612740 | A-genome specific (napus-rapa) | 0.9976076    | 0.7840292    | not scorable | not scorable | 0.9834711 | 0.8813269 |
| #### Bn-A07-p5618903 | A-genome specific (napus-rapa) | 0.9952153    | 0.7172827    | not scorable | not scorable | 0.9752066 | 0.698423  |
| #### Bn-A07-p5619095 | A-genome specific (napus-rapa) | 0.9976076    | 0.70043      | not scorable | not scorable | 0.9834711 | 0.6589943 |
| #### Bn-A07-p5619285 | A-genome specific (napus-rapa) | 0.9880383    | 0.4577333    | not scorable | not scorable | 0.9752066 | 0.6623716 |
| #### Bn-A07-p5620067 | A-genome specific (napus-rapa) | 0.9784689    | 0.4672907    | not scorable | not scorable | 0.9669421 | 0.8653011 |
| #### Bn-A07-p5633352 | A-genome specific (rapa only)  | not scorable | not scorable | not scorable | not scorable | 0.9752066 | 0.6514682 |
| #### Bn-A07-p5648697 | A-genome specific (napus-rapa) | 0.9808612    | 0.5224995    | not scorable | not scorable | 0.9917355 | 0.8029414 |
| #### Bn-A07-p5660270 | A-genome specific (napus-rapa) | 0.9952153    | 0.4164238    | not scorable | not scorable | 0.9917355 | 0.7478058 |
| #### Bn-A07-p5670936 | A-genome specific (napus-rapa) | 0.9880383    | 0.2791666    | not scorable | not scorable | 0.9917355 | 0.6452597 |
| #### Bn-A07-p5684410 | A-genome specific (napus-rapa) | 0.9784689    | 0.2582723    | not scorable | not scorable | 0.9917355 | 0.8025967 |
| #### Bn-A07-p5703663 | A-genome specific (napus-rapa) | 0.9880383    | 0.2981645    | not scorable | not scorable | 0.9834711 | 0.7509122 |
| #### Bn-A07-p5709944 | A-genome specific (napus-rapa) | 0.9880383    | 0.7576001    | not scorable | not scorable | 1         | 0.8190148 |
| #### Bn-A07-p5710530 | A-genome specific (napus-rapa) | 1            | 0.7697824    | not scorable | not scorable | 0.9917355 | 0.7623743 |
| #### Bn-A07-p5710766 | A-genome specific (napus-rapa) | 1            | 0.9205657    | not scorable | not scorable | 0.9834711 | 0.8062928 |
| #### Bn-A07-p5712114 | A-genome specific (rapa only)  | not scorable | not scorable | not scorable | not scorable | 0.9834711 | 0.7373222 |
| #### Bn-A07-p5713057 | A-genome specific (napus-rapa) | 0.9856459    | 0.7868577    | not scorable | not scorable | 0.9752066 | 0.7659114 |
| #### Bn-A07-p5733051 | A-genome specific (rapa only)  | not scorable | not scorable | not scorable | not scorable | 0.7107438 | 0.9079733 |
| #### Bn-A07-p5735606 | A-genome specific (napus-rapa) | 0.9976076    | 0.6152922    | not scorable | not scorable | 1         | 0.7694445 |
| #### Bn-A07-p5737895 | A-genome specific (napus-rapa) | 0.9186603    | 0.8064796    | not scorable | not scorable | 0.6446281 | 0.7954482 |
| #### Bn-A07-p5737991 | A-genome specific (napus-rapa) | 0.9066986    | 0.7584333    | not scorable | not scorable | 0.6446281 | 0.6803152 |
| #### Bn-A07-p5738023 | A-genome specific (napus-rapa) | 0.9162679    | 0.7068456    | not scorable | not scorable | 0.6446281 | 0.8495278 |
| #### Bn-A07-p5757189 | A-genome specific (napus-rapa) | 0.9856459    | 0.3445354    | not scorable | not scorable | 1         | 0.6977397 |
| #### Bn-A07-p5758215 | A-genome specific (napus-rapa) | 0.9952153    | 0.2178207    | not scorable | not scorable | 0.9917355 | 0.7471272 |
| #### Bn-A07-p5766826 | A-genome specific (napus-rapa) | 0.9760765    | 0.7658712    | not scorable | not scorable | 0.9834711 | 0.8244484 |
| #### Bn-A07-p5768726 | A-genome specific (napus-rapa) | 1            | 0.4703517    | not scorable | not scorable | 1         | 0.624246  |

|                      |                                |              |              |              |              |           |           |
|----------------------|--------------------------------|--------------|--------------|--------------|--------------|-----------|-----------|
| #### Bn-A07-p5769927 | A-genome specific (napus-rapa) | 0.9928229    | 0.7563403    | not scorable | not scorable | 0.9917355 | 0.8523329 |
| #### Bn-A07-p5773404 | A-genome specific (napus-rapa) | 0.9856459    | 0.4759735    | not scorable | not scorable | 0.9834711 | 0.7124024 |
| #### Bn-A07-p5786966 | A-genome specific (napus-rapa) | 0.9928229    | 0.7371878    | not scorable | not scorable | 1         | 0.7420367 |
| #### Bn-A07-p5787070 | A-genome specific (napus-rapa) | 0.9856459    | 0.6958405    | not scorable | not scorable | 1         | 0.6754138 |
| #### Bn-A07-p5790807 | A-genome specific (napus-rapa) | 0.9904306    | 0.7493256    | not scorable | not scorable | 1         | 0.7931674 |
| #### Bn-A07-p5793420 | A-genome specific (napus-rapa) | 0.9784689    | 0.6931905    | not scorable | not scorable | 0.9834711 | 0.7470349 |
| #### Bn-A07-p5794504 | A-genome specific (napus-rapa) | 0.9760765    | 0.5460246    | not scorable | not scorable | 0.9752066 | 0.6862457 |
| #### Bn-A07-p580965  | A-genome specific (rapa only)  | not scorable | not scorable | not scorable | not scorable | 0.9256198 | 0.811663  |
| #### Bn-A07-p5810641 | A-genome specific (napus-rapa) | 0.9880383    | 0.5590627    | not scorable | not scorable | 0.9586777 | 0.8012829 |
| #### Bn-A07-p5812342 | A-genome specific (napus-rapa) | 0.4832536    | 0.4865204    | not scorable | not scorable | 0.9669421 | 0.7966956 |
| #### Bn-A07-p5812470 | A-genome specific (napus-rapa) | 0.9760765    | 0.7547019    | not scorable | not scorable | 0.9834711 | 0.8573184 |
| #### Bn-A07-p5813326 | A-genome specific (napus-rapa) | 0.9641148    | 0.5826447    | not scorable | not scorable | 0.9752066 | 0.7398314 |
| #### Bn-A07-p5824940 | A-genome specific (napus-rapa) | 0.9688995    | 0.5257562    | not scorable | not scorable | 1         | 0.7705172 |
| #### Bn-A07-p5826334 | A-genome specific (napus-rapa) | 0.9976076    | 0.7317922    | not scorable | not scorable | 0.9586777 | 0.7152489 |
| #### Bn-A07-p5834691 | A-genome specific (napus-rapa) | 0.9665072    | 0.5715535    | not scorable | not scorable | 0.9752066 | 0.7292399 |
| #### Bn-A07-p5835036 | A-genome specific (napus-rapa) | 0.9736842    | 0.7527007    | not scorable | not scorable | 0.9917355 | 0.7206296 |
| #### Bn-A07-p5835842 | A-genome specific (napus-rapa) | 0.9952153    | 0.8769534    | not scorable | not scorable | 0.9917355 | 0.7693939 |
| #### Bn-A07-p5837375 | A-genome specific (napus-rapa) | 0.9856459    | 0.4085102    | not scorable | not scorable | 0.9586777 | 0.6711104 |
| #### Bn-A07-p5849947 | A-genome specific (napus-rapa) | 0.9976076    | 0.7209125    | not scorable | not scorable | 0.9752066 | 0.7345001 |
| #### Bn-A07-p5853302 | A-genome specific (napus-rapa) | 0.9832536    | 0.3453704    | not scorable | not scorable | 1         | 0.8910459 |
| #### Bn-A07-p5859070 | A-genome specific (napus-rapa) | 0.9832536    | 0.7112256    | not scorable | not scorable | 1         | 0.8776355 |
| #### Bn-A07-p5871275 | A-genome specific (napus-rapa) | 0.9880383    | 0.7840218    | not scorable | not scorable | 0.9917355 | 0.6935368 |
| #### Bn-A07-p5872166 | A-genome specific (napus-rapa) | 1            | 0.7381086    | not scorable | not scorable | 1         | 0.7522166 |
| #### Bn-A07-p5877587 | A-genome specific (napus-rapa) | 0.9880383    | 0.7369194    | not scorable | not scorable | 0.9834711 | 0.7140962 |
| #### Bn-A07-p5882920 | A-genome specific (napus-rapa) | 0.9712918    | 0.3701031    | not scorable | not scorable | 0.9504132 | 0.8187734 |
| #### Bn-A07-p5895170 | A-genome specific (rapa only)  | not scorable | not scorable | not scorable | not scorable | 0.9834711 | 0.6536983 |
| #### Bn-A07-p5905223 | A-genome specific (napus-rapa) | 0.9736842    | 0.7170456    | not scorable | not scorable | 1         | 0.8680809 |
| #### Bn-A07-p5983825 | A-genome specific (napus-rapa) | 0.9808612    | 0.2397586    | not scorable | not scorable | 0.9917355 | 0.8260295 |
| #### Bn-A07-p5995415 | A-genome specific (napus-rapa) | 0.9760765    | 0.67304      | not scorable | not scorable | 1         | 0.6852541 |
| #### Bn-A07-p6008398 | A-genome specific (napus-rapa) | 0.9593301    | 0.3600884    | not scorable | not scorable | 0.9421487 | 0.6724226 |
| #### Bn-A07-p6012565 | A-genome specific (napus-rapa) | 1            | 0.7002994    | not scorable | not scorable | 0.9752066 | 0.6888322 |
| #### Bn-A07-p6044939 | A-genome specific (napus-rapa) | 0.9736842    | 0.7532181    | not scorable | not scorable | 0.9338843 | 0.7781634 |
| #### Bn-A07-p6055505 | A-genome specific (napus-rapa) | 0.9832536    | 0.7394012    | not scorable | not scorable | 1         | 0.7120815 |

|                      |                                |              |              |              |              |           |           |
|----------------------|--------------------------------|--------------|--------------|--------------|--------------|-----------|-----------|
| #### Bn-A07-p6068523 | A-genome specific (napus-rapa) | 0.9760765    | 0.7199011    | not scorable | not scorable | 0.9917355 | 0.7012504 |
| #### Bn-A07-p6068639 | A-genome specific (napus-rapa) | 1            | 0.5679476    | not scorable | not scorable | 1         | 0.5867994 |
| #### Bn-A07-p6071787 | A-genome specific (rapa only)  | not scorable | not scorable | not scorable | not scorable | 0.9669421 | 0.9139337 |
| #### Bn-A07-p607926  | A-genome specific (napus-rapa) | 0.9904306    | 0.7254964    | not scorable | not scorable | 0.9917355 | 0.7715966 |
| #### Bn-A07-p6135654 | A-genome specific (napus-rapa) | 0.9114832    | 0.7564197    | not scorable | not scorable | 0.9917355 | 0.6753601 |
| #### Bn-A07-p6197889 | A-genome specific (napus-rapa) | 0.8181818    | 0.7689186    | not scorable | not scorable | 0.9338843 | 0.8353337 |
| #### Bn-A07-p6206232 | A-genome specific (napus-rapa) | 0.9712918    | 0.4217281    | not scorable | not scorable | 0.9752066 | 0.6564524 |
| #### Bn-A07-p6207835 | A-genome specific (napus-rapa) | 1            | 0.8686666    | not scorable | not scorable | 0.9917355 | 0.7594072 |
| #### Bn-A07-p6210782 | A-genome specific (napus-rapa) | 0.923445     | 0.6952236    | not scorable | not scorable | 0.9917355 | 0.9278786 |
| #### Bn-A07-p6215131 | A-genome specific (napus-rapa) | 0.6555024    | 0.7956841    | not scorable | not scorable | 0.5041322 | 0.8020979 |
| #### Bn-A07-p6217329 | A-genome specific (napus-rapa) | 0.6602871    | 0.8272592    | not scorable | not scorable | 0.5867769 | 0.772137  |
| #### Bn-A07-p6217365 | A-genome specific (napus-rapa) | 0.65311      | 0.7892979    | not scorable | not scorable | 0.5041322 | 0.7786395 |
| #### Bn-A07-p6238777 | A-genome specific (napus-rapa) | 0.9976076    | 0.643791     | not scorable | not scorable | 1         | 0.6127563 |
| #### Bn-A07-p6244683 | A-genome specific (napus-rapa) | 0.9856459    | 0.7790219    | not scorable | not scorable | 0.9917355 | 0.8177392 |
| #### Bn-A07-p6259787 | A-genome specific (napus-rapa) | 1            | 0.5084221    | not scorable | not scorable | 1         | 0.7955856 |
| #### Bn-A07-p6262438 | A-genome specific (napus-rapa) | 0.9617225    | 0.3110872    | not scorable | not scorable | 0.9669421 | 0.7548783 |
| #### Bn-A07-p6276115 | A-genome specific (napus-rapa) | 1            | 0.4250858    | not scorable | not scorable | 0.9917355 | 0.7691845 |
| #### Bn-A07-p6281546 | A-genome specific (rapa only)  | not scorable | not scorable | not scorable | not scorable | 0.9669421 | 0.8510231 |
| #### Bn-A07-p6282717 | A-genome specific (napus-rapa) | 0.9928229    | 0.4664735    | not scorable | not scorable | 1         | 0.66965   |
| #### Bn-A07-p6283126 | A-genome specific (napus-rapa) | 1            | 0.6917621    | not scorable | not scorable | 1         | 0.6937376 |
| #### Bn-A07-p6297941 | A-genome specific (napus-rapa) | 1            | 0.7614491    | not scorable | not scorable | 0.9834711 | 0.7942212 |
| #### Bn-A07-p6305750 | A-genome specific (napus-rapa) | 1            | 0.7897046    | not scorable | not scorable | 1         | 0.7954277 |
| #### Bn-A07-p6307545 | A-genome specific (napus-rapa) | 1            | 0.7287834    | not scorable | not scorable | 0.9752066 | 0.7443507 |
| #### Bn-A07-p6309969 | A-genome specific (napus-rapa) | 0.9952153    | 0.4459641    | not scorable | not scorable | 1         | 0.7838112 |
| #### Bn-A07-p6327847 | A-genome specific (napus-rapa) | 0.1196172    | 0.6657114    | not scorable | not scorable | 0.9504132 | 0.6625265 |
| #### Bn-A07-p6346472 | A-genome specific (napus-rapa) | 0.9665072    | 0.5419688    | not scorable | not scorable | 0.9917355 | 0.7409058 |
| #### Bn-A07-p6366999 | A-genome specific (napus-rapa) | 1            | 0.7670555    | not scorable | not scorable | 1         | 0.8083978 |
| #### Bn-A07-p6369122 | A-genome specific (napus-rapa) | 0.9904306    | 0.6494776    | not scorable | not scorable | 0.9917355 | 0.7726612 |
| #### Bn-A07-p6372584 | A-genome specific (napus-rapa) | 0.9976076    | 0.6685416    | not scorable | not scorable | 0.9669421 | 0.7173789 |
| #### Bn-A07-p6373884 | A-genome specific (napus-rapa) | 1            | 0.7706276    | not scorable | not scorable | 1         | 0.6976811 |
| #### Bn-A07-p6382641 | A-genome specific (napus-rapa) | 0.9904306    | 0.7730469    | not scorable | not scorable | 1         | 0.7365242 |
| #### Bn-A07-p6410362 | A-genome specific (napus-rapa) | 0.9856459    | 0.4642168    | not scorable | not scorable | 0.9917355 | 0.6759569 |
| #### Bn-A07-p642484  | A-genome specific (napus-rapa) | 1            | 0.7536408    | not scorable | not scorable | 1         | 0.6756812 |

|                      |                                |              |              |              |              |              |              |
|----------------------|--------------------------------|--------------|--------------|--------------|--------------|--------------|--------------|
| #### Bn-A07-p6428365 | A-genome specific (napus-rapa) | 0.9880383    | 0.7864437    | not scorable | not scorable | 1            | 0.7461354    |
| #### Bn-A07-p6432326 | napus specific                 | 0.8660287    | 0.825235     | not scorable | not scorable | not scorable | not scorable |
| #### Bn-A07-p6432331 | A-genome specific (napus-rapa) | 0.9904306    | 0.8166432    | not scorable | not scorable | 0.9917355    | 0.7841055    |
| #### Bn-A07-p6437343 | A-genome specific (napus-rapa) | 1            | 0.7164202    | not scorable | not scorable | 1            | 0.7348652    |
| #### Bn-A07-p6439944 | A-genome specific (napus-rapa) | 1            | 0.5170605    | not scorable | not scorable | 0.9669421    | 0.6296619    |
| #### Bn-A07-p6443432 | A-genome specific (napus-rapa) | 0.9904306    | 0.7800824    | not scorable | not scorable | 0.9917355    | 0.7245144    |
| #### Bn-A07-p6444067 | A-genome specific (napus-rapa) | 1            | 0.7663659    | not scorable | not scorable | 0.9669421    | 0.73672      |
| #### Bn-A07-p6444420 | A-genome specific (napus-rapa) | 1            | 0.7721503    | not scorable | not scorable | 0.9752066    | 0.7831344    |
| #### Bn-A07-p6445012 | A-genome specific (napus-rapa) | 1            | 0.7429819    | not scorable | not scorable | 0.9752066    | 0.8013064    |
| #### Bn-A07-p645188  | A-genome specific (napus-rapa) | 0.9880383    | 0.7440192    | not scorable | not scorable | 0.9669421    | 0.6701869    |
| #### Bn-A07-p6460270 | A-genome specific (napus-rapa) | 0.9976076    | 0.7569018    | not scorable | not scorable | 0.9917355    | 0.8178496    |
| #### Bn-A07-p6494007 | A-genome specific (napus-rapa) | 1            | 0.4121918    | not scorable | not scorable | 0.9917355    | 0.751524     |
| #### Bn-A07-p6501207 | A-genome specific (napus-rapa) | 0.9952153    | 0.4395377    | not scorable | not scorable | 0.9834711    | 0.6781096    |
| #### Bn-A07-p6509651 | A-genome specific (napus-rapa) | 1            | 0.719991     | not scorable | not scorable | 0.9917355    | 0.7549794    |
| #### Bn-A07-p6516437 | A-genome specific (rapa only)  | not scorable | not scorable | not scorable | not scorable | 1            | 0.6718444    |
| #### Bn-A07-p6518480 | A-genome specific (rapa only)  | not scorable | not scorable | not scorable | not scorable | 1            | 0.6964929    |
| #### Bn-A07-p6523973 | A-genome specific (napus-rapa) | 0.9976076    | 0.6431062    | not scorable | not scorable | 0.9917355    | 0.660585     |
| #### Bn-A07-p6524220 | A-genome specific (napus-rapa) | 0.9976076    | 0.6125168    | not scorable | not scorable | 1            | 0.7171995    |
| #### Bn-A07-p653283  | A-genome specific (napus-rapa) | 0.9880383    | 0.4589728    | not scorable | not scorable | 1            | 0.9175586    |
| #### Bn-A07-p6534557 | napus specific                 | 0.9880383    | 0.4727087    | not scorable | not scorable | not scorable | not scorable |
| #### Bn-A07-p6541352 | A-genome specific (napus-rapa) | 0.9832536    | 0.7401643    | not scorable | not scorable | 0.9917355    | 0.7945749    |
| #### Bn-A07-p6542254 | A-genome specific (napus-rapa) | 1            | 0.6684301    | not scorable | not scorable | 0.9752066    | 0.7286508    |
| #### Bn-A07-p6542812 | A-genome specific (napus-rapa) | 0.9976076    | 0.579214     | not scorable | not scorable | 0.9834711    | 0.5265849    |
| #### Bn-A07-p6544334 | A-genome specific (napus-rapa) | 0.9976076    | 0.7519077    | not scorable | not scorable | 1            | 0.6090527    |
| #### Bn-A07-p6544677 | A-genome specific (napus-rapa) | 0.9952153    | 0.3884211    | not scorable | not scorable | 0.9917355    | 0.842319     |
| #### Bn-A07-p6552161 | A-genome specific (napus-rapa) | 0.9928229    | 0.6270239    | not scorable | not scorable | 0.9917355    | 0.7098623    |
| #### Bn-A07-p6552431 | A-genome specific (napus-rapa) | 0.9928229    | 0.7565013    | not scorable | not scorable | 1            | 0.7290749    |
| #### Bn-A07-p6553171 | A-genome specific (napus-rapa) | 0.9952153    | 0.7603302    | not scorable | not scorable | 0.9669421    | 0.7950054    |
| #### Bn-A07-p6553231 | A-genome specific (napus-rapa) | 0.9952153    | 0.3217087    | not scorable | not scorable | 0.9669421    | 0.7384727    |
| #### Bn-A07-p6553314 | A-genome specific (napus-rapa) | 0.9952153    | 0.4012085    | not scorable | not scorable | 0.9834711    | 0.8109173    |
| #### Bn-A07-p6553663 | A-genome specific (napus-rapa) | 0.9856459    | 0.7860348    | not scorable | not scorable | 1            | 0.8276197    |
| #### Bn-A07-p6553774 | A-genome specific (napus-rapa) | 0.9760765    | 0.8155743    | not scorable | not scorable | 1            | 0.8040842    |
| #### Bn-A07-p6554430 | A-genome specific (napus-rapa) | 0.9760765    | 0.7988002    | not scorable | not scorable | 0.9752066    | 0.8121392    |

|                      |                                |              |              |              |              |              |              |
|----------------------|--------------------------------|--------------|--------------|--------------|--------------|--------------|--------------|
| #### Bn-A07-p6554767 | A-genome specific (napus-rapa) | 0.9928229    | 0.8364989    | not scorable | not scorable | 0.9917355    | 0.8618242    |
| #### Bn-A07-p6556246 | A-genome specific (napus-rapa) | 0.9904306    | 0.7534295    | not scorable | not scorable | 1            | 0.7794003    |
| #### Bn-A07-p6564252 | A-genome specific (rapa only)  | not scorable | not scorable | not scorable | not scorable | 0.9752066    | 0.6314116    |
| #### Bn-A07-p6564338 | A-genome specific (napus-rapa) | 0.9952153    | 0.4898146    | not scorable | not scorable | 0.9586777    | 0.693994     |
| #### Bn-A07-p6565672 | A-genome specific (rapa only)  | not scorable | not scorable | not scorable | not scorable | 0.9752066    | 0.6732364    |
| #### Bn-A07-p6574022 | A-genome specific (napus-rapa) | 0.9952153    | 0.7782886    | not scorable | not scorable | 0.9917355    | 0.6857954    |
| #### Bn-A07-p6575320 | A-genome specific (napus-rapa) | 0.9952153    | 0.3018541    | not scorable | not scorable | 1            | 0.6867536    |
| #### Bn-A07-p6576078 | A-genome specific (napus-rapa) | 1            | 0.7043457    | not scorable | not scorable | 0.9917355    | 0.7286076    |
| #### Bn-A07-p6576457 | A-genome specific (napus-rapa) | 0.9928229    | 0.7915857    | not scorable | not scorable | 1            | 0.7811222    |
| #### Bn-A07-p6576689 | A-genome specific (napus-rapa) | 0.9928229    | 0.7740869    | not scorable | not scorable | 0.9917355    | 0.7626158    |
| #### Bn-A07-p6582792 | all not scorable               | not scorable | not scorable | not scorable | not scorable | not scorable | not scorable |
| #### Bn-A07-p6606249 | A-genome specific (napus-rapa) | 1            | 0.6179052    | not scorable | not scorable | 0.9338843    | 0.5651805    |
| #### Bn-A07-p6606278 | A-genome specific (napus-rapa) | 1            | 0.8214979    | not scorable | not scorable | 0.9834711    | 0.7515849    |
| #### Bn-A07-p663772  | A-genome specific (rapa only)  | not scorable | not scorable | not scorable | not scorable | 0.9917355    | 0.863353     |
| #### Bn-A07-p6641473 | A-genome specific (napus-rapa) | 1            | 0.5213783    | not scorable | not scorable | 1            | 0.7133168    |
| #### Bn-A07-p6644825 | A-genome specific (napus-rapa) | 0.9976076    | 0.5980806    | not scorable | not scorable | 0.9917355    | 0.6735409    |
| #### Bn-A07-p6647096 | A-genome specific (napus-rapa) | 0.9976076    | 0.5327539    | not scorable | not scorable | 0.9834711    | 0.8227624    |
| #### Bn-A07-p665003  | A-genome specific (napus-rapa) | 0.9952153    | 0.4132217    | not scorable | not scorable | 0.9917355    | 0.7428916    |
| #### Bn-A07-p6657878 | A-genome specific (napus-rapa) | 1            | 0.7237005    | not scorable | not scorable | 0.9834711    | 0.7248679    |
| #### Bn-A07-p6660717 | A-genome specific (napus-rapa) | 0.9784689    | 0.32096      | not scorable | not scorable | 0.9917355    | 0.6762705    |
| #### Bn-A07-p6711753 | A-genome specific (napus-rapa) | 0.9928229    | 0.4817403    | not scorable | not scorable | 1            | 0.7679636    |
| #### Bn-A07-p6716678 | A-genome specific (napus-rapa) | 0.9928229    | 0.4351786    | not scorable | not scorable | 0.9752066    | 0.6684301    |
| #### Bn-A07-p6719583 | A-genome specific (napus-rapa) | 0.9976076    | 0.6687784    | not scorable | not scorable | 1            | 0.6858726    |
| #### Bn-A07-p6721704 | A-genome specific (rapa only)  | not scorable | not scorable | not scorable | not scorable | 1            | 0.9509854    |
| #### Bn-A07-p6722244 | A-genome specific (napus-rapa) | 0.9282297    | 0.1887326    | not scorable | not scorable | 1            | 0.7590662    |
| #### Bn-A07-p6723305 | A-genome specific (napus-rapa) | 1            | 0.7483549    | not scorable | not scorable | 1            | 0.7566696    |
| #### Bn-A07-p672743  | napus specific                 | 0.9521531    | 0.7941908    | not scorable | not scorable | not scorable | not scorable |
| #### Bn-A07-p6735264 | A-genome specific (napus-rapa) | 0.9880383    | 0.7927096    | not scorable | not scorable | 0.9917355    | 0.7924565    |
| #### Bn-A07-p6757359 | A-genome specific (napus-rapa) | 0.9928229    | 0.8931581    | not scorable | not scorable | 1            | 0.825471     |
| #### Bn-A07-p6759128 | A-genome specific (napus-rapa) | 1            | 0.5342532    | not scorable | not scorable | 0.9917355    | 0.7333425    |
| #### Bn-A07-p6763846 | A-genome specific (napus-rapa) | 1            | 0.7860268    | not scorable | not scorable | 1            | 0.7325248    |
| #### Bn-A07-p6765464 | A-genome specific (napus-rapa) | 1            | 0.7061411    | not scorable | not scorable | 1            | 0.6798205    |
| #### Bn-A07-p6824682 | A-genome specific (napus-rapa) | 0.9856459    | 0.6998799    | not scorable | not scorable | 1            | 0.7213343    |

|                      |                                |              |              |              |              |              |              |
|----------------------|--------------------------------|--------------|--------------|--------------|--------------|--------------|--------------|
| #### Bn-A07-p6839228 | A-genome specific (napus-rapa) | 0.9856459    | 0.3555546    | not scorable | not scorable | 0.9917355    | 0.774165     |
| #### Bn-A07-p6841662 | A-genome specific (napus-rapa) | 0.9736842    | 0.3004625    | not scorable | not scorable | 0.9834711    | 0.6906294    |
| #### Bn-A07-p6850383 | A-genome specific (napus-rapa) | 0.9856459    | 0.7631521    | not scorable | not scorable | 1            | 0.7737985    |
| #### Bn-A07-p6878338 | A-genome specific (napus-rapa) | 0.9808612    | 0.6818768    | not scorable | not scorable | 0.9834711    | 0.6831111    |
| #### Bn-A07-p6885690 | A-genome specific (napus-rapa) | 0.9832536    | 0.3685436    | not scorable | not scorable | 0.9917355    | 0.5438873    |
| #### Bn-A07-p6892291 | all not scorable               | not scorable | not scorable | not scorable | not scorable | not scorable | not scorable |
| #### Bn-A07-p6894028 | A-genome specific (napus-rapa) | 0.9928229    | 0.2043351    | not scorable | not scorable | 0.9917355    | 0.7327892    |
| #### Bn-A07-p689831  | A-genome specific (rapa only)  | not scorable | not scorable | not scorable | not scorable | 0.9834711    | 0.8804131    |
| #### Bn-A07-p6898363 | A-genome specific (napus-rapa) | 0.9976076    | 0.8823042    | not scorable | not scorable | 0.9917355    | 0.808892     |
| #### Bn-A07-p689898  | A-genome specific (napus-rapa) | 0.9832536    | 0.6375728    | not scorable | not scorable | 1            | 0.7494321    |
| #### Bn-A07-p6903948 | A-genome specific (napus-rapa) | 1            | 0.8238725    | not scorable | not scorable | 0.9917355    | 0.7786081    |
| #### Bn-A07-p6906296 | A-genome specific (napus-rapa) | 0.9138756    | 0.6989805    | not scorable | not scorable | 0.9752066    | 0.7535031    |
| #### Bn-A07-p6909620 | A-genome specific (napus-rapa) | 0.9976076    | 0.623775     | not scorable | not scorable | 1            | 0.7289976    |
| #### Bn-A07-p6926020 | A-genome specific (napus-rapa) | 0.9880383    | 0.3768823    | not scorable | not scorable | 1            | 0.6599972    |
| #### Bn-A07-p6929108 | A-genome specific (rapa only)  | not scorable | not scorable | not scorable | not scorable | 0.9586777    | 0.2349599    |
| #### Bn-A07-p6942882 | A-genome specific (napus-rapa) | 0.9545454    | 0.5061343    | not scorable | not scorable | 0.9752066    | 0.6568243    |
| #### Bn-A07-p6943725 | A-genome specific (napus-rapa) | 0.9856459    | 0.4180532    | not scorable | not scorable | 0.9917355    | 0.7287543    |
| #### Bn-A07-p6944436 | A-genome specific (napus-rapa) | 0.9904306    | 0.4044555    | not scorable | not scorable | 0.5041322    | 0.8647511    |
| #### Bn-A07-p6947953 | A-genome specific (napus-rapa) | 0.9808612    | 0.7263216    | not scorable | not scorable | 0.9834711    | 0.8109224    |
| #### Bn-A07-p6952910 | A-genome specific (napus-rapa) | 0.9904306    | 0.7683934    | not scorable | not scorable | 0.9917355    | 0.7872428    |
| #### Bn-A07-p6976405 | A-genome specific (napus-rapa) | 0.9976076    | 0.5913532    | not scorable | not scorable | 1            | 0.4434424    |
| #### Bn-A07-p6981435 | A-genome specific (napus-rapa) | 0.9880383    | 0.5147269    | not scorable | not scorable | 0.9669421    | 0.6814238    |
| #### Bn-A07-p6988823 | A-genome specific (napus-rapa) | 0.9952153    | 0.3631728    | not scorable | not scorable | 0.9917355    | 0.677063     |
| #### Bn-A07-p7009935 | A-genome specific (napus-rapa) | 0.9976076    | 0.7534161    | not scorable | not scorable | 1            | 0.8543929    |
| #### Bn-A07-p7027400 | A-genome specific (napus-rapa) | 0.9952153    | 0.2819322    | not scorable | not scorable | 0.9834711    | 0.7526379    |
| #### Bn-A07-p7035715 | all not scorable               | not scorable | not scorable | not scorable | not scorable | not scorable | not scorable |
| #### Bn-A07-p7039686 | A-genome specific (napus-rapa) | 0.9880383    | 0.7732241    | not scorable | not scorable | 0.9917355    | 0.7283451    |
| #### Bn-A07-p7040554 | A-genome specific (napus-rapa) | 0.9832536    | 0.522319     | not scorable | not scorable | 0.9834711    | 0.8260456    |
| #### Bn-A07-p7055420 | A-genome specific (napus-rapa) | 0.9880383    | 0.7687475    | not scorable | not scorable | 0.9834711    | 0.7721684    |
| #### Bn-A07-p7069624 | A-genome specific (napus-rapa) | 0.9832536    | 0.7703922    | not scorable | not scorable | 0.9917355    | 0.7430605    |
| #### Bn-A07-p7078464 | A-genome specific (napus-rapa) | 0.9856459    | 0.706829     | not scorable | not scorable | 0.9917355    | 0.6391407    |
| #### Bn-A07-p7079099 | A-genome specific (napus-rapa) | 0.9952153    | 0.8205392    | not scorable | not scorable | 0.9917355    | 0.7848226    |
| #### Bn-A07-p7082333 | napus specific                 | 0.9856459    | 0.7920217    | not scorable | not scorable | not scorable | not scorable |



|                      |                                |              |              |              |              |              |              |
|----------------------|--------------------------------|--------------|--------------|--------------|--------------|--------------|--------------|
| #### Bn-A07-p7088617 | napus specific                 | 0.9976076    | 0.8154113    | not scorable | not scorable | not scorable | not scorable |
| #### Bn-A07-p7092988 | A-genome specific (napus-rapa) | 0.9976076    | 0.7960269    | not scorable | not scorable | 1            | 0.7553402    |
| #### Bn-A07-p7099002 | A-genome specific (napus-rapa) | 1            | 0.7947989    | not scorable | not scorable | 1            | 0.8103295    |
| #### Bn-A07-p7108284 | A-genome specific (napus-rapa) | 0.9425837    | 0.6428878    | not scorable | not scorable | 1            | 0.7564933    |
| #### Bn-A07-p7110257 | A-genome specific (napus-rapa) | 0.9976076    | 0.7994927    | not scorable | not scorable | 0.9917355    | 0.7643204    |
| #### Bn-A07-p7117228 | A-genome specific (napus-rapa) | 1            | 0.75145      | not scorable | not scorable | 1            | 0.7267334    |
| #### Bn-A07-p7117229 | A-genome specific (napus-rapa) | 0.9928229    | 0.7443823    | not scorable | not scorable | 1            | 0.7744349    |
| #### Bn-A07-p7118584 | A-genome specific (napus-rapa) | 0.9808612    | 0.405568     | not scorable | not scorable | 1            | 0.6181417    |
| #### Bn-A07-p7119962 | A-genome specific (napus-rapa) | 1            | 0.3773187    | not scorable | not scorable | 1            | 0.7092981    |
| #### Bn-A07-p7124154 | A-genome specific (napus-rapa) | 1            | 0.6775566    | not scorable | not scorable | 0.9752066    | 0.6082818    |
| #### Bn-A07-p7139702 | A-genome specific (napus-rapa) | 0.9928229    | 0.7673161    | not scorable | not scorable | 0.9834711    | 0.7321292    |
| #### Bn-A07-p7141211 | A-genome specific (napus-rapa) | 0.9880383    | 0.7327537    | not scorable | not scorable | 1            | 0.7218502    |
| #### Bn-A07-p7141625 | A-genome specific (napus-rapa) | 0.9904306    | 0.7993085    | not scorable | not scorable | 1            | 0.7664784    |
| #### Bn-A07-p7141806 | A-genome specific (napus-rapa) | 0.9880383    | 0.6868632    | not scorable | not scorable | 1            | 0.7046686    |
| #### Bn-A07-p7146249 | A-genome specific (napus-rapa) | 0.9832536    | 0.7459899    | not scorable | not scorable | 1            | 0.684576     |
| #### Bn-A07-p7180352 | A-genome specific (napus-rapa) | 0.9593301    | 0.6839622    | not scorable | not scorable | 0.9917355    | 0.697893     |
| #### Bn-A07-p7184457 | A-genome specific (rapa only)  | not scorable | not scorable | not scorable | not scorable | 0.9917355    | 0.7507567    |
| #### Bn-A07-p7185841 | A-genome specific (napus-rapa) | 0.9904306    | 0.7929356    | not scorable | not scorable | 0.9917355    | 0.772787     |
| #### Bn-A07-p7191306 | A-genome specific (napus-rapa) | 0.9928229    | 0.7426459    | not scorable | not scorable | 1            | 0.7588012    |
| #### Bn-A07-p7194218 | napus specific                 | 0.9090909    | 0.7714372    | not scorable | not scorable | not scorable | not scorable |
| #### Bn-A07-p7196025 | A-genome specific (napus-rapa) | 0.9760765    | 0.5733715    | not scorable | not scorable | 1            | 0.6721111    |
| #### Bn-A07-p7196197 | A-genome specific (napus-rapa) | 0.9665072    | 0.7086109    | not scorable | not scorable | 1            | 0.7871642    |
| #### Bn-A07-p7197488 | A-genome specific (napus-rapa) | 0.9808612    | 0.4235877    | not scorable | not scorable | 1            | 0.8413878    |
| #### Bn-A07-p7197588 | A-genome specific (napus-rapa) | 0.9928229    | 0.6521896    | not scorable | not scorable | 1            | 0.6947654    |
| #### Bn-A07-p7198236 | A-genome specific (napus-rapa) | 1            | 0.7342826    | not scorable | not scorable | 0.9834711    | 0.8089625    |
| #### Bn-A07-p7200963 | A-genome specific (napus-rapa) | 1            | 0.7385716    | not scorable | not scorable | 0.9917355    | 0.702491     |
| #### Bn-A07-p7211602 | A-genome specific (napus-rapa) | 0.9354067    | 0.5412516    | not scorable | not scorable | 0.9834711    | 0.6543225    |
| #### Bn-A07-p7215862 | A-genome specific (napus-rapa) | 0.9928229    | 0.7931176    | not scorable | not scorable | 1            | 0.7492513    |
| #### Bn-A07-p7220544 | A-genome specific (napus-rapa) | 0.9904306    | 0.6944501    | not scorable | not scorable | 0.9834711    | 0.6222736    |
| #### Bn-A07-p7230543 | A-genome specific (napus-rapa) | 0.9928229    | 0.8031502    | not scorable | not scorable | 1            | 0.7528743    |
| #### Bn-A07-p7232691 | A-genome specific (napus-rapa) | 1            | 0.4893315    | not scorable | not scorable | 1            | 0.7928802    |
| #### Bn-A07-p7234071 | A-genome specific (napus-rapa) | 0.9952153    | 0.7520637    | not scorable | not scorable | 1            | 0.8500032    |
| #### Bn-A07-p7237742 | A-genome specific (napus-rapa) | 0.9880383    | 0.7340872    | not scorable | not scorable | 1            | 0.78558      |

|                      |                                |           |           |              |              |           |           |
|----------------------|--------------------------------|-----------|-----------|--------------|--------------|-----------|-----------|
| #### Bn-A07-p7244763 | A-genome specific (napus-rapa) | 0.9904306 | 0.8051605 | not scorable | not scorable | 1         | 0.8054979 |
| #### Bn-A07-p7245610 | A-genome specific (napus-rapa) | 1         | 0.8106573 | not scorable | not scorable | 0.9917355 | 0.8002694 |
| #### Bn-A07-p7245971 | A-genome specific (napus-rapa) | 0.9856459 | 0.8153098 | not scorable | not scorable | 0.9752066 | 0.7892239 |
| #### Bn-A07-p7246175 | A-genome specific (napus-rapa) | 0.9856459 | 0.7635473 | not scorable | not scorable | 0.9917355 | 0.7216291 |
| #### Bn-A07-p7246452 | A-genome specific (napus-rapa) | 0.9856459 | 0.736221  | not scorable | not scorable | 1         | 0.7631415 |
| #### Bn-A07-p7252813 | A-genome specific (napus-rapa) | 0.9928229 | 0.7956669 | not scorable | not scorable | 0.9834711 | 0.7921113 |
| #### Bn-A07-p7255937 | A-genome specific (napus-rapa) | 0.9976076 | 0.6914294 | not scorable | not scorable | 0.9834711 | 0.7427402 |
| #### Bn-A07-p7261357 | A-genome specific (napus-rapa) | 0.9976076 | 0.3807347 | not scorable | not scorable | 0.9917355 | 0.7395775 |
| #### Bn-A07-p7261508 | A-genome specific (napus-rapa) | 0.9880383 | 0.7837215 | not scorable | not scorable | 0.9752066 | 0.779911  |
| #### Bn-A07-p7268294 | A-genome specific (napus-rapa) | 1         | 0.4753315 | not scorable | not scorable | 0.9917355 | 0.7956147 |
| #### Bn-A07-p7270443 | A-genome specific (napus-rapa) | 0.9976076 | 0.6800712 | not scorable | not scorable | 1         | 0.5635626 |
| #### Bn-A07-p7276136 | A-genome specific (napus-rapa) | 0.9976076 | 0.7269068 | not scorable | not scorable | 0.9917355 | 0.6980985 |
| #### Bn-A07-p7282445 | A-genome specific (napus-rapa) | 0.9952153 | 0.7011868 | not scorable | not scorable | 0.9752066 | 0.7891087 |
| #### Bn-A07-p7287398 | A-genome specific (napus-rapa) | 1         | 0.4950074 | not scorable | not scorable | 0.9917355 | 0.8122555 |
| #### Bn-A07-p7297758 | A-genome specific (napus-rapa) | 0.9784689 | 0.4119856 | not scorable | not scorable | 0.9834711 | 0.7268105 |
| #### Bn-A07-p7298176 | A-genome specific (napus-rapa) | 0.9904306 | 0.7062998 | not scorable | not scorable | 1         | 0.7069583 |
| #### Bn-A07-p7298603 | A-genome specific (napus-rapa) | 0.9784689 | 0.6441833 | not scorable | not scorable | 0.9917355 | 0.7482954 |
| #### Bn-A07-p7302034 | A-genome specific (napus-rapa) | 0.9976076 | 0.8353443 | not scorable | not scorable | 0.9834711 | 0.7926778 |
| #### Bn-A07-p7309287 | A-genome specific (napus-rapa) | 0.9976076 | 0.7979582 | not scorable | not scorable | 1         | 0.7783385 |
| #### Bn-A07-p7310644 | A-genome specific (napus-rapa) | 1         | 0.7433239 | not scorable | not scorable | 1         | 0.7099209 |
| #### Bn-A07-p7311296 | A-genome specific (napus-rapa) | 0.9784689 | 0.3352176 | not scorable | not scorable | 1         | 0.6209885 |
| #### Bn-A07-p7312075 | A-genome specific (napus-rapa) | 0.9856459 | 0.4931988 | not scorable | not scorable | 0.9834711 | 0.66632   |
| #### Bn-A07-p73440   | A-genome specific (napus-rapa) | 0.9856459 | 0.2998041 | not scorable | not scorable | 1         | 0.6350696 |
| #### Bn-A07-p7352643 | A-genome specific (napus-rapa) | 0.9784689 | 0.7930903 | not scorable | not scorable | 1         | 0.7667421 |
| #### Bn-A07-p7362180 | A-genome specific (napus-rapa) | 0.9880383 | 0.7685757 | not scorable | not scorable | 1         | 0.8174005 |
| #### Bn-A07-p7367247 | A-genome specific (napus-rapa) | 1         | 0.7301182 | not scorable | not scorable | 0.9917355 | 0.7735369 |
| #### Bn-A07-p7372586 | A-genome specific (napus-rapa) | 0.9114832 | 0.2511047 | not scorable | not scorable | 1         | 0.6773906 |
| #### Bn-A07-p7374912 | A-genome specific (napus-rapa) | 0.6842105 | 0.7040147 | not scorable | not scorable | 0.9917355 | 0.6791692 |
| #### Bn-A07-p7380906 | A-genome specific (napus-rapa) | 0.9976076 | 0.5568056 | not scorable | not scorable | 1         | 0.833285  |
| #### Bn-A07-p7390413 | A-genome specific (napus-rapa) | 0.9784689 | 0.8057694 | not scorable | not scorable | 1         | 0.7134006 |
| #### Bn-A07-p7391449 | A-genome specific (napus-rapa) | 0.9904306 | 0.3919844 | not scorable | not scorable | 0.9917355 | 0.7171317 |
| #### Bn-A07-p7392394 | A-genome specific (napus-rapa) | 0.9712918 | 0.1909564 | not scorable | not scorable | 0.9504132 | 0.6557374 |
| #### Bn-A07-p7392454 | A-genome specific (napus-rapa) | 0.9808612 | 0.4266824 | not scorable | not scorable | 1         | 0.7347149 |

|                      |                                |              |              |              |              |              |              |
|----------------------|--------------------------------|--------------|--------------|--------------|--------------|--------------|--------------|
| #### Bn-A07-p7392457 | A-genome specific (napus-ropa) | 0.9784689    | 0.4448315    | not scorable | not scorable | 0.9917355    | 0.6727278    |
| #### Bn-A07-p7392753 | A-genome specific (napus-ropa) | 1            | 0.4204186    | not scorable | not scorable | 1            | 0.8409224    |
| #### Bn-A07-p7392879 | A-genome specific (napus-ropa) | 0.9712918    | 0.7079879    | not scorable | not scorable | 1            | 0.5816504    |
| #### Bn-A07-p7393007 | A-genome specific (napus-ropa) | 0.9904306    | 0.3285449    | not scorable | not scorable | 1            | 0.7967283    |
| #### Bn-A07-p7395038 | A-genome specific (napus-ropa) | 0.9856459    | 0.3440904    | not scorable | not scorable | 1            | 0.6674064    |
| #### Bn-A07-p7398602 | A-genome specific (napus-ropa) | 0.9688995    | 0.7072002    | not scorable | not scorable | 0.9834711    | 0.7101301    |
| #### Bn-A07-p7400268 | A-genome specific (napus-ropa) | 0.9880383    | 0.4874507    | not scorable | not scorable | 1            | 0.7569069    |
| #### Bn-A07-p7400432 | A-genome specific (napus-ropa) | 0.9736842    | 0.7205765    | not scorable | not scorable | 0.9834711    | 0.6776519    |
| #### Bn-A07-p74011   | A-genome specific (napus-ropa) | 0.9904306    | 0.7413039    | not scorable | not scorable | 0.9834711    | 0.7579213    |
| #### Bn-A07-p7401420 | napus specific                 | 0.9473684    | 0.7901329    | not scorable | not scorable | not scorable | not scorable |
| #### Bn-A07-p7433228 | A-genome specific (napus-ropa) | 0.9952153    | 0.3268393    | not scorable | not scorable | 0.9917355    | 0.6388749    |
| #### Bn-A07-p7433707 | A-genome specific (napus-ropa) | 0.9712918    | 0.6369382    | not scorable | not scorable | 1            | 0.7658607    |
| #### Bn-A07-p7434126 | A-genome specific (napus-ropa) | 0.9856459    | 0.8623174    | not scorable | not scorable | 1            | 0.7880116    |
| #### Bn-A07-p7436573 | A-genome specific (napus-ropa) | 0.9928229    | 0.8042414    | not scorable | not scorable | 0.9834711    | 0.6867126    |
| #### Bn-A07-p7445858 | A-genome specific (napus-ropa) | 0.9952153    | 0.3550261    | not scorable | not scorable | 1            | 0.7696095    |
| #### Bn-A07-p7454447 | A-genome specific (napus-ropa) | 0.9760765    | 0.5218465    | not scorable | not scorable | 0.9917355    | 0.7740983    |
| #### Bn-A07-p7499400 | A-genome specific (napus-ropa) | 0.9952153    | 0.4885655    | not scorable | not scorable | 1            | 0.7112473    |
| #### Bn-A07-p7509139 | A-genome specific (napus-ropa) | 0.9665072    | 0.7257811    | not scorable | not scorable | 0.9752066    | 0.6706542    |
| #### Bn-A07-p7512738 | A-genome specific (napus-ropa) | 0.9138756    | 0.8279648    | not scorable | not scorable | 0.5289256    | 0.8736907    |
| #### Bn-A07-p7519375 | A-genome specific (napus-ropa) | 0.9952153    | 0.789668     | not scorable | not scorable | 0.9917355    | 0.7842187    |
| #### Bn-A07-p7528011 | A-genome specific (napus-ropa) | 1            | 0.5409861    | not scorable | not scorable | 0.9834711    | 0.6964937    |
| #### Bn-A07-p7528095 | A-genome specific (ropa only)  | not scorable | not scorable | not scorable | not scorable | 0.9834711    | 0.6460914    |
| #### Bn-A07-p7542335 | genome unspecific (all in)     | 0.9617225    | 0.4230007    |              | 1 0.6809896  | 1            | 0.6327448    |
| #### Bn-A07-p7551371 | A-genome specific (napus-ropa) | 0.9114832    | 0.679038     | not scorable | not scorable | 1            | 0.7534155    |
| #### Bn-A07-p7556616 | A-genome specific (napus-ropa) | 0.9880383    | 0.7075732    | not scorable | not scorable | 0.9752066    | 0.7355374    |
| #### Bn-A07-p7562328 | A-genome specific (napus-ropa) | 0.9976076    | 0.7726141    | not scorable | not scorable | 0.9917355    | 0.7609131    |
| #### Bn-A07-p7578604 | A-genome specific (napus-ropa) | 0.9952153    | 0.69717      | not scorable | not scorable | 0.9752066    | 0.6352119    |
| #### Bn-A07-p7583086 | A-genome specific (napus-ropa) | 1            | 0.7804598    | not scorable | not scorable | 1            | 0.8392215    |
| #### Bn-A07-p7584364 | A-genome specific (napus-ropa) | 0.9856459    | 0.3279772    | not scorable | not scorable | 1            | 0.7125246    |
| #### Bn-A07-p7603379 | A-genome specific (napus-ropa) | 0.9976076    | 0.6174699    | not scorable | not scorable | 0.9917355    | 0.7364953    |
| #### Bn-A07-p7603440 | A-genome specific (napus-ropa) | 0.9976076    | 0.8160059    | not scorable | not scorable | 0.9834711    | 0.7817469    |
| #### Bn-A07-p7605204 | A-genome specific (napus-ropa) | 1            | 0.7980093    | not scorable | not scorable | 1            | 0.829837     |
| #### Bn-A07-p7605498 | A-genome specific (napus-ropa) | 1            | 0.7563152    | not scorable | not scorable | 0.9752066    | 0.740636     |

|                      |                                   |              |              |              |              |              |              |
|----------------------|-----------------------------------|--------------|--------------|--------------|--------------|--------------|--------------|
| #### Bn-A07-p7605606 | A-genome specific (napus-rapa)    | 0.9976076    | 0.7811325    | not scorable | not scorable | 0.9917355    | 0.8239623    |
| #### Bn-A07-p7606040 | A-genome specific (napus-rapa)    | 0.9952153    | 0.811906     | not scorable | not scorable | 0.9752066    | 0.8010777    |
| #### Bn-A07-p7606228 | A-genome specific (napus-rapa)    | 0.9976076    | 0.7356381    | not scorable | not scorable | 1            | 0.7751763    |
| #### Bn-A07-p7606261 | A-genome specific (napus-rapa)    | 1            | 0.7608274    | not scorable | not scorable | 0.9917355    | 0.7798091    |
| #### Bn-A07-p7606760 | A-genome specific (napus-rapa)    | 0.9354067    | 0.7485522    | not scorable | not scorable | 0.9752066    | 0.7290791    |
| #### Bn-A07-p7607101 | A-genome specific (napus-rapa)    | 0.9952153    | 0.784429     | not scorable | not scorable | 0.9834711    | 0.6576346    |
| #### Bn-A07-p7607188 | napus specific                    | 1            | 0.7472792    | not scorable | not scorable | not scorable | not scorable |
| #### Bn-A07-p7608035 | A-genome specific (napus-rapa)    | 1            | 0.7162778    | not scorable | not scorable | 1            | 0.6989548    |
| #### Bn-A07-p7610810 | A-genome specific (napus-rapa)    | 0.9976076    | 0.7477267    | not scorable | not scorable | 0.9917355    | 0.72447      |
| #### Bn-A07-p7611089 | C-genome specific (oleracea only) | not scorable | not scorable | 0.7751938    | 0.9208632    | not scorable | not scorable |
| #### Bn-A07-p7621496 | A-genome specific (napus-rapa)    | 0.9976076    | 0.408647     | not scorable | not scorable | 0.9917355    | 0.7641326    |
| #### Bn-A07-p7635152 | A-genome specific (napus-rapa)    | 0.9952153    | 0.4778761    | not scorable | not scorable | 0.9917355    | 0.8217797    |
| #### Bn-A07-p7637265 | A-genome specific (napus-rapa)    | 1            | 0.6208177    | not scorable | not scorable | 0.9834711    | 0.6600248    |
| #### Bn-A07-p7637621 | A-genome specific (napus-rapa)    | 0.9952153    | 0.7034018    | not scorable | not scorable | 0.9834711    | 0.6753805    |
| #### Bn-A07-p7640474 | A-genome specific (napus-rapa)    | 0.9449761    | 0.5219465    | not scorable | not scorable | 0.9917355    | 0.6149917    |
| #### Bn-A07-p7664147 | A-genome specific (napus-rapa)    | 0.937799     | 0.7868975    | not scorable | not scorable | 0.9752066    | 0.8618229    |
| #### Bn-A07-p7673966 | A-genome specific (napus-rapa)    | 0.9521531    | 0.7840467    | not scorable | not scorable | 0.9834711    | 0.7193478    |
| #### Bn-A07-p7676201 | A-genome specific (napus-rapa)    | 0.9928229    | 0.772799     | not scorable | not scorable | 0.9834711    | 0.7504022    |
| #### Bn-A07-p7677536 | A-genome specific (napus-rapa)    | 0.9976076    | 0.7502468    | not scorable | not scorable | 0.9917355    | 0.8172804    |
| #### Bn-A07-p7677609 | A-genome specific (napus-rapa)    | 1            | 0.5249274    | not scorable | not scorable | 0.9917355    | 0.7616055    |
| #### Bn-A07-p7678236 | A-genome specific (napus-rapa)    | 0.9976076    | 0.6422142    | not scorable | not scorable | 0.9917355    | 0.7318105    |
| #### Bn-A07-p7678421 | A-genome specific (napus-rapa)    | 0.9928229    | 0.8346152    | not scorable | not scorable | 0.9917355    | 0.7780612    |
| #### Bn-A07-p7678712 | A-genome specific (napus-rapa)    | 0.9976076    | 0.4907796    | not scorable | not scorable | 1            | 0.854162     |
| #### Bn-A07-p7679469 | A-genome specific (napus-rapa)    | 0.9952153    | 0.7935156    | not scorable | not scorable | 1            | 0.8518089    |
| #### Bn-A07-p7685214 | A-genome specific (napus-rapa)    | 0.9904306    | 0.7680797    | not scorable | not scorable | 0.9917355    | 0.8696381    |
| #### Bn-A07-p7686074 | A-genome specific (napus-rapa)    | 0.9952153    | 0.8530773    | not scorable | not scorable | 0.9917355    | 0.720786     |
| #### Bn-A07-p7702326 | A-genome specific (rapa only)     | not scorable | not scorable | not scorable | not scorable | 0.9834711    | 0.673916     |
| #### Bn-A07-p7713308 | all not scorable                  | not scorable | not scorable | not scorable | not scorable | not scorable | not scorable |
| #### Bn-A07-p7717365 | A-genome specific (napus-rapa)    | 0.9880383    | 0.3106781    | not scorable | not scorable | 1            | 0.6042206    |
| #### Bn-A07-p7723038 | A-genome specific (napus-rapa)    | 1            | 0.7859371    | not scorable | not scorable | 1            | 0.6758326    |
| #### Bn-A07-p7725873 | A-genome specific (napus-rapa)    | 0.9976076    | 0.7663505    | not scorable | not scorable | 1            | 0.788143     |
| #### Bn-A07-p7738577 | A-genome specific (napus-rapa)    | 0.9952153    | 0.7339716    | not scorable | not scorable | 0.9917355    | 0.7995466    |
| #### Bn-A07-p7740173 | A-genome specific (napus-rapa)    | 0.9976076    | 0.7765799    | not scorable | not scorable | 0.9834711    | 0.8385738    |

|                      |                                |              |              |              |              |              |              |
|----------------------|--------------------------------|--------------|--------------|--------------|--------------|--------------|--------------|
| #### Bn-A07-p7773921 | A-genome specific (napus-rapa) | 1            | 0.6774858    | not scorable | not scorable | 0.9834711    | 0.7701184    |
| #### Bn-A07-p7793608 | A-genome specific (napus-rapa) | 1            | 0.6963519    | not scorable | not scorable | 0.9917355    | 0.8052689    |
| #### Bn-A07-p7794741 | A-genome specific (napus-rapa) | 0.9976076    | 0.5833805    | not scorable | not scorable | 0.9834711    | 0.8056173    |
| #### Bn-A07-p7796025 | A-genome specific (napus-rapa) | 0.9928229    | 0.6537671    | not scorable | not scorable | 0.9752066    | 0.6822558    |
| #### Bn-A07-p7814470 | A-genome specific (napus-rapa) | 0.9808612    | 0.3645739    | not scorable | not scorable | 0.9917355    | 0.7644097    |
| #### Bn-A07-p786330  | A-genome specific (napus-rapa) | 0.9760765    | 0.4933835    | not scorable | not scorable | 0.9669421    | 0.7532428    |
| #### Bn-A07-p7872194 | A-genome specific (napus-rapa) | 0.9688995    | 0.7051241    | not scorable | not scorable | 0.8760331    | 0.7442623    |
| #### Bn-A07-p7931519 | A-genome specific (rapa only)  | not scorable | not scorable | not scorable | not scorable | 0.9917355    | 0.7088311    |
| #### Bn-A07-p8037081 | A-genome specific (napus-rapa) | 0.9976076    | 0.4691428    | not scorable | not scorable | 0.9834711    | 0.7768452    |
| #### Bn-A07-p8046121 | A-genome specific (napus-rapa) | 0.9856459    | 0.3085852    | not scorable | not scorable | 1            | 0.8331141    |
| #### Bn-A07-p8067557 | A-genome specific (napus-rapa) | 0.854067     | 0.7292772    | not scorable | not scorable | 0.9834711    | 0.7505965    |
| #### Bn-A07-p8084624 | A-genome specific (napus-rapa) | 0.9976076    | 0.4980889    | not scorable | not scorable | 1            | 0.6958488    |
| #### Bn-A07-p8096658 | A-genome specific (napus-rapa) | 0.9952153    | 0.3453355    | not scorable | not scorable | 0.9917355    | 0.6023356    |
| #### Bn-A07-p8122640 | A-genome specific (napus-rapa) | 1            | 0.5606948    | not scorable | not scorable | 0.9669421    | 0.5482288    |
| #### Bn-A07-p8128951 | A-genome specific (napus-rapa) | 0.9928229    | 0.6471297    | not scorable | not scorable | 0.9917355    | 0.5275036    |
| #### Bn-A07-p8131907 | A-genome specific (napus-rapa) | 0.9904306    | 0.7313026    | not scorable | not scorable | 1            | 0.6956789    |
| #### Bn-A07-p8134950 | A-genome specific (napus-rapa) | 0.9928229    | 0.7534107    | not scorable | not scorable | 0.9834711    | 0.6915547    |
| #### Bn-A07-p8138266 | A-genome specific (napus-rapa) | 0.9976076    | 0.7632224    | not scorable | not scorable | 0.9917355    | 0.8219339    |
| #### Bn-A07-p8143924 | A-genome specific (napus-rapa) | 0.9856459    | 0.702923     | not scorable | not scorable | 0.9752066    | 0.7359313    |
| #### Bn-A07-p8162493 | A-genome specific (napus-rapa) | 0.9904306    | 0.7309338    | not scorable | not scorable | 1            | 0.8315895    |
| #### Bn-A07-p8167856 | all not scorable               | not scorable | not scorable | not scorable | not scorable | not scorable | not scorable |
| #### Bn-A07-p8175756 | all not scorable               | not scorable | not scorable | not scorable | not scorable | not scorable | not scorable |
| #### Bn-A07-p8178839 | A-genome specific (napus-rapa) | 1            | 0.6868759    | not scorable | not scorable | 1            | 0.7190828    |
| #### Bn-A07-p8181654 | A-genome specific (napus-rapa) | 0.9976076    | 0.7894549    | not scorable | not scorable | 0.9834711    | 0.7840403    |
| #### Bn-A07-p8183365 | A-genome specific (napus-rapa) | 0.9904306    | 0.37441      | not scorable | not scorable | 1            | 0.6992955    |
| #### Bn-A07-p8184393 | A-genome specific (napus-rapa) | 0.9784689    | 0.4290331    | not scorable | not scorable | 0.9917355    | 0.6644134    |
| #### Bn-A07-p8185226 | A-genome specific (napus-rapa) | 0.9784689    | 0.6974465    | not scorable | not scorable | 0.9917355    | 0.6748194    |
| #### Bn-A07-p8186475 | A-genome specific (napus-rapa) | 0.9952153    | 0.7296873    | not scorable | not scorable | 0.9752066    | 0.6588258    |
| #### Bn-A07-p8186509 | A-genome specific (napus-rapa) | 0.9760765    | 0.6849681    | not scorable | not scorable | 0.9834711    | 0.7726473    |
| #### Bn-A07-p8194806 | A-genome specific (napus-rapa) | 0.6196172    | 0.663439     | not scorable | not scorable | 0.9834711    | 0.7797557    |
| #### Bn-A07-p8197265 | A-genome specific (napus-rapa) | 0.5980861    | 0.725399     | not scorable | not scorable | 0.9669421    | 0.8092792    |
| #### Bn-A07-p8207791 | A-genome specific (napus-rapa) | 0.9712918    | 0.6466421    | not scorable | not scorable | 0.9834711    | 0.6959974    |
| #### Bn-A07-p8224070 | A-genome specific (napus-rapa) | 0.9880383    | 0.4124547    | not scorable | not scorable | 1            | 0.851525     |

|                      |                                |              |              |              |              |              |              |
|----------------------|--------------------------------|--------------|--------------|--------------|--------------|--------------|--------------|
| #### Bn-A07-p8224100 | A-genome specific (napus-rapa) | 0.9880383    | 0.6939855    | not scorable | not scorable | 1            | 0.8571616    |
| #### Bn-A07-p8224244 | A-genome specific (napus-rapa) | 0.9856459    | 0.732254     | not scorable | not scorable | 0.9834711    | 0.8352333    |
| #### Bn-A07-p8227408 | A-genome specific (napus-rapa) | 0.9928229    | 0.7102238    | not scorable | not scorable | 1            | 0.7943974    |
| #### Bn-A07-p8227698 | A-genome specific (napus-rapa) | 0.9856459    | 0.7578697    | not scorable | not scorable | 0.9834711    | 0.763186     |
| #### Bn-A07-p8231877 | A-genome specific (napus-rapa) | 0.9880383    | 0.7734851    | not scorable | not scorable | 1            | 0.8300784    |
| #### Bn-A07-p8232184 | A-genome specific (napus-rapa) | 0.9904306    | 0.6815495    | not scorable | not scorable | 1            | 0.8620779    |
| #### Bn-A07-p8243053 | A-genome specific (napus-rapa) | 1            | 0.3795716    | not scorable | not scorable | 1            | 0.6717175    |
| #### Bn-A07-p8250951 | A-genome specific (rapa only)  | not scorable | not scorable | not scorable | not scorable | 0.9917355    | 0.7268883    |
| #### Bn-A07-p8252992 | napus specific                 | 1            | 0.7795539    | not scorable | not scorable | not scorable | not scorable |
| #### Bn-A07-p8258521 | A-genome specific (napus-rapa) | 0.9760765    | 0.4109099    | not scorable | not scorable | 0.9669421    | 0.7472831    |
| #### Bn-A07-p8259212 | A-genome specific (napus-rapa) | 0.9880383    | 0.2980693    | not scorable | not scorable | 0.9917355    | 0.8236395    |
| #### Bn-A07-p8259218 | A-genome specific (napus-rapa) | 0.9856459    | 0.3470836    | not scorable | not scorable | 0.9834711    | 0.7043873    |
| #### Bn-A07-p8262039 | A-genome specific (napus-rapa) | 1            | 0.6634204    | not scorable | not scorable | 1            | 0.9272014    |
| #### Bn-A07-p8265574 | A-genome specific (napus-rapa) | 1            | 0.5179188    | not scorable | not scorable | 1            | 0.7637509    |
| #### Bn-A07-p828139  | A-genome specific (napus-rapa) | 0.9736842    | 0.3705792    | not scorable | not scorable | 0.9834711    | 0.7488255    |
| #### Bn-A07-p829095  | A-genome specific (napus-rapa) | 0.9880383    | 0.7524168    | not scorable | not scorable | 0.9669421    | 0.7964061    |
| #### Bn-A07-p831443  | A-genome specific (napus-rapa) | 1            | 0.6591966    | not scorable | not scorable | 0.9669421    | 0.6230929    |
| #### Bn-A07-p8314613 | napus specific                 | 0.9784689    | 0.3476188    | not scorable | not scorable | not scorable | not scorable |
| #### Bn-A07-p8318791 | A-genome specific (napus-rapa) | 1            | 0.5488153    | not scorable | not scorable | 1            | 0.8485395    |
| #### Bn-A07-p8323309 | A-genome specific (napus-rapa) | 0.9952153    | 0.7799469    | not scorable | not scorable | 0.9834711    | 0.6802147    |
| #### Bn-A07-p8324017 | A-genome specific (napus-rapa) | 0.9952153    | 0.5334949    | not scorable | not scorable | 0.9752066    | 0.6566032    |
| #### Bn-A07-p8334245 | A-genome specific (napus-rapa) | 1            | 0.4854707    | not scorable | not scorable | 1            | 0.7868911    |
| #### Bn-A07-p8348770 | A-genome specific (napus-rapa) | 0.9928229    | 0.7597958    | not scorable | not scorable | 0.9752066    | 0.7607381    |
| #### Bn-A07-p8359729 | A-genome specific (napus-rapa) | 0.9832536    | 0.6517158    | not scorable | not scorable | 1            | 0.705974     |
| #### Bn-A07-p8403118 | A-genome specific (napus-rapa) | 0.9976076    | 0.4615781    | not scorable | not scorable | 1            | 0.9076871    |
| #### Bn-A07-p8434029 | A-genome specific (napus-rapa) | 1            | 0.8008704    | not scorable | not scorable | 1            | 0.7107503    |
| #### Bn-A07-p8450971 | A-genome specific (napus-rapa) | 0.9928229    | 0.4696021    | not scorable | not scorable | 0.9917355    | 0.6862206    |
| #### Bn-A07-p8451913 | A-genome specific (napus-rapa) | 0.9856459    | 0.3922705    | not scorable | not scorable | 0.9834711    | 0.7879019    |
| #### Bn-A07-p8498337 | A-genome specific (napus-rapa) | 0.9808612    | 0.6861983    | not scorable | not scorable | 1            | 0.768829     |
| #### Bn-A07-p8516100 | A-genome specific (napus-rapa) | 1            | 0.827697     | not scorable | not scorable | 0.9917355    | 0.8429772    |
| #### Bn-A07-p8516667 | A-genome specific (napus-rapa) | 0.9784689    | 0.7693667    | not scorable | not scorable | 0.9752066    | 0.854867     |
| #### Bn-A07-p8520077 | A-genome specific (napus-rapa) | 0.9952153    | 0.7104974    | not scorable | not scorable | 0.9834711    | 0.7417953    |
| #### Bn-A07-p8523568 | A-genome specific (napus-rapa) | 0.9952153    | 0.6962937    | not scorable | not scorable | 0.9752066    | 0.7028264    |

|                      |                                |              |              |              |              |              |              |
|----------------------|--------------------------------|--------------|--------------|--------------|--------------|--------------|--------------|
| #### Bn-A07-p8526430 | A-genome specific (napus-rapa) | 0.9976076    | 0.732299     | not scorable | not scorable | 0.9586777    | 0.648176     |
| #### Bn-A07-p8530938 | A-genome specific (napus-rapa) | 0.9856459    | 0.3818837    | not scorable | not scorable | 0.9917355    | 0.7653427    |
| #### Bn-A07-p8531068 | A-genome specific (napus-rapa) | 0.9952153    | 0.5332239    | not scorable | not scorable | 0.9834711    | 0.809007     |
| #### Bn-A07-p8541452 | all not scorable               | not scorable | not scorable | not scorable | not scorable | not scorable | not scorable |
| #### Bn-A07-p8545569 | A-genome specific (rapa only)  | not scorable | not scorable | not scorable | not scorable | 0.9917355    | 0.8611879    |
| #### Bn-A07-p8558330 | A-genome specific (rapa only)  | not scorable | not scorable | not scorable | not scorable | 0.9834711    | 0.6787103    |
| #### Bn-A07-p8560948 | A-genome specific (napus-rapa) | 0.9617225    | 0.6012166    | not scorable | not scorable | 0.9669421    | 0.7327716    |
| #### Bn-A07-p8566493 | A-genome specific (napus-rapa) | 0.9928229    | 0.2876741    | not scorable | not scorable | 0.9917355    | 0.7956328    |
| #### Bn-A07-p8567824 | A-genome specific (napus-rapa) | 0.9808612    | 0.6765708    | not scorable | not scorable | 0.9834711    | 0.7159054    |
| #### Bn-A07-p8571463 | A-genome specific (napus-rapa) | 0.9808612    | 0.4799431    | not scorable | not scorable | 0.9917355    | 0.7277157    |
| #### Bn-A07-p8572785 | A-genome specific (napus-rapa) | 0.9688995    | 0.5380995    | not scorable | not scorable | 0.9917355    | 0.7836176    |
| #### Bn-A07-p8584939 | A-genome specific (napus-rapa) | 0.9952153    | 0.7973794    | not scorable | not scorable | 0.9917355    | 0.7609811    |
| #### Bn-A07-p8593730 | A-genome specific (napus-rapa) | 0.9832536    | 0.6904473    | not scorable | not scorable | 0.9917355    | 0.7853351    |
| #### Bn-A07-p8594245 | A-genome specific (napus-rapa) | 0.9976076    | 0.7197134    | not scorable | not scorable | 0.9752066    | 0.7455861    |
| #### Bn-A07-p8598343 | A-genome specific (napus-rapa) | 0.9832536    | 0.7216655    | not scorable | not scorable | 0.9917355    | 0.7779179    |
| #### Bn-A07-p8610828 | A-genome specific (napus-rapa) | 1            | 0.6259273    | not scorable | not scorable | 1            | 0.711467     |
| #### Bn-A07-p8612122 | A-genome specific (napus-rapa) | 0.9832536    | 0.7890869    | not scorable | not scorable | 0.9917355    | 0.8081789    |
| #### Bn-A07-p8615521 | A-genome specific (napus-rapa) | 0.9808612    | 0.7160742    | not scorable | not scorable | 0.9917355    | 0.8289657    |
| #### Bn-A07-p8615961 | A-genome specific (napus-rapa) | 0.9928229    | 0.4544316    | not scorable | not scorable | 0.9834711    | 0.614674     |
| #### Bn-A07-p8616202 | A-genome specific (napus-rapa) | 0.9712918    | 0.6592801    | not scorable | not scorable | 1            | 0.7015526    |
| #### Bn-A07-p8617055 | A-genome specific (napus-rapa) | 0.8971292    | 0.7343244    | not scorable | not scorable | 0.9917355    | 0.7464172    |
| #### Bn-A07-p8617442 | A-genome specific (napus-rapa) | 0.9808612    | 0.6157054    | not scorable | not scorable | 1            | 0.6722114    |
| #### Bn-A07-p8618114 | A-genome specific (napus-rapa) | 0.9904306    | 0.6627621    | not scorable | not scorable | 1            | 0.7364028    |
| #### Bn-A07-p8619654 | A-genome specific (napus-rapa) | 0.9712918    | 0.5780987    | not scorable | not scorable | 0.9917355    | 0.5876023    |
| #### Bn-A07-p8632859 | A-genome specific (napus-rapa) | 0.5478469    | 0.7707297    | not scorable | not scorable | 0.9669421    | 0.7376987    |
| #### Bn-A07-p8655988 | A-genome specific (napus-rapa) | 1            | 0.7488803    | not scorable | not scorable | 1            | 0.8154747    |
| #### Bn-A07-p8656682 | A-genome specific (napus-rapa) | 1            | 0.9081932    | not scorable | not scorable | 1            | 0.8259079    |
| #### Bn-A07-p8668003 | A-genome specific (napus-rapa) | 0.9808612    | 0.6617288    | not scorable | not scorable | 1            | 0.7458947    |
| #### Bn-A07-p8668714 | A-genome specific (napus-rapa) | 0.9880383    | 0.7552519    | not scorable | not scorable | 1            | 0.7135926    |
| #### Bn-A07-p8669833 | A-genome specific (napus-rapa) | 1            | 0.7740884    | not scorable | not scorable | 1            | 0.7734946    |
| #### Bn-A07-p8670132 | A-genome specific (napus-rapa) | 0.9952153    | 0.7874       | not scorable | not scorable | 1            | 0.7723573    |
| #### Bn-A07-p8674321 | A-genome specific (napus-rapa) | 0.9928229    | 0.7788571    | not scorable | not scorable | 1            | 0.7867599    |
| #### Bn-A07-p8674940 | A-genome specific (napus-rapa) | 0.9904306    | 0.8203914    | not scorable | not scorable | 0.9834711    | 0.7364442    |

|                      |                                   |              |              |              |              |              |              |
|----------------------|-----------------------------------|--------------|--------------|--------------|--------------|--------------|--------------|
| #### Bn-A07-p8675164 | A-genome specific (napus-rapa)    | 0.9856459    | 0.774294     | not scorable | not scorable | 1            | 0.8136196    |
| #### Bn-A07-p8675574 | genome unspecific (oleracea-rapa) | not scorable | not scorable |              | 1            | 0.6671167    | 0.9586777    |
| #### Bn-A07-p8696690 | A-genome specific (napus-rapa)    | 0.9904306    | 0.5705259    | not scorable | not scorable | 1            | 0.8659705    |
| #### Bn-A07-p8698580 | A-genome specific (napus-rapa)    | 1            | 0.8483725    | not scorable | not scorable | 0.9917355    | 0.720601     |
| #### Bn-A07-p8699677 | A-genome specific (napus-rapa)    | 0.9952153    | 0.8237977    | not scorable | not scorable | 0.9917355    | 0.7001833    |
| #### Bn-A07-p8701644 | A-genome specific (napus-rapa)    | 0.9928229    | 0.7346919    | not scorable | not scorable | 0.9834711    | 0.7235581    |
| #### Bn-A07-p8718607 | A-genome specific (napus-rapa)    | 0.9904306    | 0.7563297    | not scorable | not scorable | 0.9917355    | 0.841388     |
| #### Bn-A07-p8721197 | napus specific                    | 0.9832536    | 0.7517152    | not scorable | not scorable | not scorable | not scorable |
| #### Bn-A07-p8724769 | A-genome specific (napus-rapa)    | 0.9880383    | 0.6969807    | not scorable | not scorable | 1            | 0.7556512    |
| #### Bn-A07-p8745024 | A-genome specific (napus-rapa)    | 0.9952153    | 0.7764338    | not scorable | not scorable | 0.9834711    | 0.831589     |
| #### Bn-A07-p8748832 | A-genome specific (napus-rapa)    | 0.9952153    | 0.8584828    | not scorable | not scorable | 1            | 0.7348759    |
| #### Bn-A07-p8752561 | A-genome specific (napus-rapa)    | 0.9952153    | 0.65075      | not scorable | not scorable | 0.9834711    | 0.6108186    |
| #### Bn-A07-p8752606 | A-genome specific (napus-rapa)    | 1            | 0.7673059    | not scorable | not scorable | 0.9917355    | 0.7031026    |
| #### Bn-A07-p8755253 | A-genome specific (napus-rapa)    | 1            | 0.4010545    | not scorable | not scorable | 1            | 0.8957461    |
| #### Bn-A07-p8758900 | A-genome specific (rapa only)     | not scorable | not scorable | not scorable | not scorable | 0.9752066    | 0.5431924    |
| #### Bn-A07-p8773140 | A-genome specific (napus-rapa)    | 0.9808612    | 0.4161473    | not scorable | not scorable | 0.9917355    | 0.784721     |
| #### Bn-A07-p8773216 | A-genome specific (napus-rapa)    | 0.9712918    | 0.2449959    | not scorable | not scorable | 0.9669421    | 0.6397387    |
| #### Bn-A07-p8775069 | A-genome specific (napus-rapa)    | 0.9808612    | 0.715247     | not scorable | not scorable | 1            | 0.8409179    |
| #### Bn-A07-p8790021 | A-genome specific (napus-rapa)    | 0.9784689    | 0.7223244    | not scorable | not scorable | 0.9752066    | 0.6461144    |
| #### Bn-A07-p8796823 | A-genome specific (napus-rapa)    | 0.9928229    | 0.7770717    | not scorable | not scorable | 0.9917355    | 0.7641606    |
| #### Bn-A07-p8824653 | A-genome specific (napus-rapa)    | 1            | 0.7915289    | not scorable | not scorable | 0.9917355    | 0.771039     |
| #### Bn-A07-p884435  | A-genome specific (napus-rapa)    | 0.9736842    | 0.3904709    | not scorable | not scorable | 1            | 0.6781068    |
| #### Bn-A07-p8850191 | A-genome specific (rapa only)     | not scorable | not scorable | not scorable | not scorable | 0.9917355    | 0.8315895    |
| #### Bn-A07-p8851644 | A-genome specific (napus-rapa)    | 1            | 0.6860681    | not scorable | not scorable | 0.9752066    | 0.7097241    |
| #### Bn-A07-p885219  | A-genome specific (napus-rapa)    | 0.9976076    | 0.5967206    | not scorable | not scorable | 1            | 0.7026957    |
| #### Bn-A07-p8852716 | A-genome specific (napus-rapa)    | 0.9904306    | 0.466993     | not scorable | not scorable | 1            | 0.759657     |
| #### Bn-A07-p8854569 | A-genome specific (napus-rapa)    | 0.9928229    | 0.5591668    | not scorable | not scorable | 0.9834711    | 0.6811292    |
| #### Bn-A07-p8857433 | A-genome specific (napus-rapa)    | 0.9880383    | 0.7704878    | not scorable | not scorable | 0.9669421    | 0.7750351    |
| #### Bn-A07-p8888056 | A-genome specific (napus-rapa)    | 1            | 0.5679454    | not scorable | not scorable | 1            | 0.568415     |
| #### Bn-A07-p8895419 | A-genome specific (napus-rapa)    | 0.9856459    | 0.263101     | not scorable | not scorable | 1            | 0.7417101    |
| #### Bn-A07-p8896391 | A-genome specific (napus-rapa)    | 0.9760765    | 0.52349      | not scorable | not scorable | 1            | 0.7840805    |
| #### Bn-A07-p8898443 | A-genome specific (napus-rapa)    | 0.9832536    | 0.5478979    | not scorable | not scorable | 0.9669421    | 0.7671839    |
| #### Bn-A07-p8903901 | A-genome specific (napus-rapa)    | 0.9928229    | 0.675226     | not scorable | not scorable | 0.9669421    | 0.7211759    |



|                      |                                |              |              |              |              |              |              |
|----------------------|--------------------------------|--------------|--------------|--------------|--------------|--------------|--------------|
| #### Bn-A07-p8911104 | A-genome specific (napus-rapa) | 0.9928229    | 0.7716177    | not scorable | not scorable | 1            | 0.7658106    |
| #### Bn-A07-p8929154 | A-genome specific (napus-rapa) | 0.9736842    | 0.8047956    | not scorable | not scorable | 0.9917355    | 0.7615063    |
| #### Bn-A07-p8932587 | A-genome specific (napus-rapa) | 0.9928229    | 0.7468417    | not scorable | not scorable | 1            | 0.7597999    |
| #### Bn-A07-p8935344 | A-genome specific (napus-rapa) | 1            | 0.7682296    | not scorable | not scorable | 1            | 0.849083     |
| #### Bn-A07-p8941260 | A-genome specific (napus-rapa) | 0.9856459    | 0.6306252    | not scorable | not scorable | 0.9834711    | 0.6298547    |
| #### Bn-A07-p8947431 | A-genome specific (napus-rapa) | 0.9856459    | 0.3191113    | not scorable | not scorable | 0.9917355    | 0.810079     |
| #### Bn-A07-p8959937 | A-genome specific (napus-rapa) | 0.9904306    | 0.7789082    | not scorable | not scorable | 0.9752066    | 0.8031681    |
| #### Bn-A07-p8962304 | A-genome specific (napus-rapa) | 0.9808612    | 0.7336312    | not scorable | not scorable | 0.9421487    | 0.6797916    |
| #### Bn-A07-p8967890 | A-genome specific (napus-rapa) | 0.9928229    | 0.499644     | not scorable | not scorable | 0.9834711    | 0.8099607    |
| #### Bn-A07-p897139  | A-genome specific (napus-rapa) | 0.9019139    | 0.7753151    | not scorable | not scorable | 1            | 0.6553555    |
| #### Bn-A07-p897472  | A-genome specific (rapa only)  | not scorable | not scorable | not scorable | not scorable | 0.9834711    | 0.7561479    |
| #### Bn-A07-p8977017 | A-genome specific (napus-rapa) | 1            | 0.757467     | not scorable | not scorable | 1            | 0.6251919    |
| #### Bn-A07-p8977490 | A-genome specific (napus-rapa) | 0.9856459    | 0.7495441    | not scorable | not scorable | 0.9917355    | 0.707959     |
| #### Bn-A07-p8980166 | A-genome specific (napus-rapa) | 0.9832536    | 0.3358858    | not scorable | not scorable | 0.9917355    | 0.7391828    |
| #### Bn-A07-p8989988 | A-genome specific (napus-rapa) | 0.9880383    | 0.5175602    | not scorable | not scorable | 0.9917355    | 0.7300016    |
| #### Bn-A07-p8997726 | A-genome specific (napus-rapa) | 0.9952153    | 0.748731     | not scorable | not scorable | 0.9917355    | 0.6990761    |
| #### Bn-A07-p9010472 | A-genome specific (napus-rapa) | 0.9784689    | 0.6526681    | not scorable | not scorable | 0.9834711    | 0.7533894    |
| #### Bn-A07-p9014912 | A-genome specific (napus-rapa) | 1            | 0.5313779    | not scorable | not scorable | 0.9834711    | 0.7404085    |
| #### Bn-A07-p9020570 | A-genome specific (napus-rapa) | 0.9808612    | 0.7139099    | not scorable | not scorable | 1            | 0.7408746    |
| #### Bn-A07-p902415  | A-genome specific (rapa only)  | not scorable | not scorable | not scorable | not scorable | 0.9917355    | 0.8592173    |
| #### Bn-A07-p9031421 | napus specific                 | 0.9904306    | 0.3970624    | not scorable | not scorable | not scorable | not scorable |
| #### Bn-A07-p9034194 | A-genome specific (napus-rapa) | 1            | 0.4737966    | not scorable | not scorable | 1            | 0.8114665    |
| #### Bn-A07-p9041783 | A-genome specific (napus-rapa) | 0.9928229    | 0.7903338    | not scorable | not scorable | 0.9752066    | 0.7053905    |
| #### Bn-A07-p9043136 | A-genome specific (napus-rapa) | 0.9952153    | 0.6438332    | not scorable | not scorable | 0.9504132    | 0.6446916    |
| #### Bn-A07-p9044585 | A-genome specific (napus-rapa) | 0.3253588    | 0.7479973    | not scorable | not scorable | 0.5123967    | 0.849865     |
| #### Bn-A07-p9046330 | A-genome specific (napus-rapa) | 0.9928229    | 0.7947385    | not scorable | not scorable | 1            | 0.8531089    |
| #### Bn-A07-p9060619 | A-genome specific (napus-rapa) | 1            | 0.9072374    | not scorable | not scorable | 1            | 0.8904845    |
| #### Bn-A07-p9071682 | A-genome specific (napus-rapa) | 0.9856459    | 0.4917042    | not scorable | not scorable | 0.9752066    | 0.7720309    |
| #### Bn-A07-p9079474 | A-genome specific (napus-rapa) | 0.9928229    | 0.7295709    | not scorable | not scorable | 1            | 0.7084058    |
| #### Bn-A07-p9086600 | napus specific                 | 0.923445     | 0.7274819    | not scorable | not scorable | not scorable | not scorable |
| #### Bn-A07-p9089710 | A-genome specific (napus-rapa) | 0.9808612    | 0.2835433    | not scorable | not scorable | 0.9834711    | 0.6193108    |
| #### Bn-A07-p9091839 | A-genome specific (napus-rapa) | 0.9952153    | 0.4313378    | not scorable | not scorable | 0.9834711    | 0.7047347    |
| #### Bn-A07-p9095204 | A-genome specific (napus-rapa) | 0.9688995    | 0.5479667    | not scorable | not scorable | 0.9834711    | 0.7408778    |

|                      |                                |              |              |              |              |              |              |
|----------------------|--------------------------------|--------------|--------------|--------------|--------------|--------------|--------------|
| #### Bn-A07-p9095357 | all not scorable               | not scorable | not scorable | not scorable | not scorable | not scorable | not scorable |
| #### Bn-A07-p9095557 | A-genome specific (napus-rapa) | 0.8205742    | 0.8745275    | not scorable | not scorable | 0.9917355    | 0.8894848    |
| #### Bn-A07-p9097136 | A-genome specific (napus-rapa) | 0.2751196    | 0.8869561    | not scorable | not scorable | 0.7438017    | 0.8175203    |
| #### Bn-A07-p9111745 | A-genome specific (napus-rapa) | 0.9976076    | 0.8068302    | not scorable | not scorable | 1            | 0.8848092    |
| #### Bn-A07-p9115370 | A-genome specific (napus-rapa) | 1            | 0.4685715    | not scorable | not scorable | 0.9917355    | 0.7378951    |
| #### Bn-A07-p9117042 | genome unspecific (all in)     | 1            | 0.326854     | 0.9767442    | 0.6657467    | 1            | 0.739476     |
| #### Bn-A07-p9120043 | all not scorable               | not scorable | not scorable | not scorable | not scorable | not scorable | not scorable |
| #### Bn-A07-p9155350 | A-genome specific (napus-rapa) | 0.9952153    | 0.7198775    | not scorable | not scorable | 0.9752066    | 0.8016551    |
| #### Bn-A07-p9180716 | A-genome specific (rapa only)  | not scorable | not scorable | not scorable | not scorable | 1            | 0.8173341    |
| #### Bn-A07-p9180953 | A-genome specific (rapa only)  | not scorable | not scorable | not scorable | not scorable | 0.9834711    | 0.7440007    |
| #### Bn-A07-p9208032 | A-genome specific (napus-rapa) | 1            | 0.7510902    | not scorable | not scorable | 0.9917355    | 0.7436457    |
| #### Bn-A07-p9216783 | napus specific                 | 0.4832536    | 0.7614018    | not scorable | not scorable | not scorable | not scorable |
| #### Bn-A07-p923902  | A-genome specific (napus-rapa) | 0.9928229    | 0.8522313    | not scorable | not scorable | 0.9752066    | 0.6978582    |
| #### Bn-A07-p9272000 | A-genome specific (napus-rapa) | 1            | 0.6578236    | not scorable | not scorable | 0.9917355    | 0.7550377    |
| #### Bn-A07-p9283373 | A-genome specific (napus-rapa) | 1            | 0.3722208    | not scorable | not scorable | 0.9917355    | 0.8227258    |
| #### Bn-A07-p9293372 | A-genome specific (napus-rapa) | 1            | 0.3364611    | not scorable | not scorable | 1            | 0.6193029    |
| #### Bn-A07-p930068  | A-genome specific (napus-rapa) | 0.9712918    | 0.4692393    | not scorable | not scorable | 0.9752066    | 0.7631446    |
| #### Bn-A07-p9309081 | A-genome specific (rapa only)  | not scorable | not scorable | not scorable | not scorable | 1            | 0.8216863    |
| #### Bn-A07-p9320476 | A-genome specific (napus-rapa) | 0.9976076    | 0.7761643    | not scorable | not scorable | 0.9834711    | 0.796764     |
| #### Bn-A07-p9321347 | A-genome specific (napus-rapa) | 0.9976076    | 0.7789335    | not scorable | not scorable | 1            | 0.5472338    |
| #### Bn-A07-p9324529 | A-genome specific (napus-rapa) | 0.9976076    | 0.7739226    | not scorable | not scorable | 1            | 0.7555689    |
| #### Bn-A07-p9336662 | A-genome specific (napus-rapa) | 0.9976076    | 0.639589     | not scorable | not scorable | 1            | 0.9201241    |
| #### Bn-A07-p9339366 | A-genome specific (napus-rapa) | 0.9976076    | 0.7022284    | not scorable | not scorable | 0.9834711    | 0.793555     |
| #### Bn-A07-p9344001 | A-genome specific (napus-rapa) | 0.9976076    | 0.7688704    | not scorable | not scorable | 1            | 0.8699468    |
| #### Bn-A07-p9347254 | A-genome specific (napus-rapa) | 1            | 0.7499008    | not scorable | not scorable | 0.9917355    | 0.8251951    |
| #### Bn-A07-p9384306 | A-genome specific (rapa only)  | not scorable | not scorable | not scorable | not scorable | 0.9917355    | 0.7201344    |
| #### Bn-A07-p9402974 | A-genome specific (napus-rapa) | 0.9928229    | 0.6920028    | not scorable | not scorable | 1            | 0.6728991    |
| #### Bn-A07-p9429348 | A-genome specific (napus-rapa) | 0.9976076    | 0.3413901    | not scorable | not scorable | 0.9917355    | 0.723415     |
| #### Bn-A07-p9441022 | A-genome specific (napus-rapa) | 0.9928229    | 0.3311839    | not scorable | not scorable | 0.9917355    | 0.7284595    |
| #### Bn-A07-p9441402 | A-genome specific (napus-rapa) | 0.9880383    | 0.2674601    | not scorable | not scorable | 0.9917355    | 0.8099609    |
| #### Bn-A07-p9441979 | A-genome specific (napus-rapa) | 0.9976076    | 0.7455277    | not scorable | not scorable | 1            | 0.8015532    |
| #### Bn-A07-p9450863 | A-genome specific (napus-rapa) | 0.9976076    | 0.376281     | not scorable | not scorable | 0.9917355    | 0.5642593    |
| #### Bn-A07-p9451917 | A-genome specific (napus-rapa) | 0.9904306    | 0.3241324    | not scorable | not scorable | 0.9917355    | 0.8140225    |

|                      |                                |              |              |              |              |              |              |
|----------------------|--------------------------------|--------------|--------------|--------------|--------------|--------------|--------------|
| #### Bn-A07-p9462417 | A-genome specific (napus-rapa) | 0.9952153    | 0.2987557    | not scorable | not scorable | 1            | 0.7637661    |
| #### Bn-A07-p9468382 | A-genome specific (napus-rapa) | 0.9928229    | 0.7123718    | not scorable | not scorable | 0.9917355    | 0.7323885    |
| #### Bn-A07-p9468670 | A-genome specific (napus-rapa) | 0.9928229    | 0.5297843    | not scorable | not scorable | 0.9586777    | 0.7432132    |
| #### Bn-A07-p9480985 | A-genome specific (napus-rapa) | 0.9904306    | 0.7671267    | not scorable | not scorable | 1            | 0.8948976    |
| #### Bn-A07-p9481452 | A-genome specific (napus-rapa) | 0.9976076    | 0.7016861    | not scorable | not scorable | 0.9917355    | 0.7352082    |
| #### Bn-A07-p9485484 | A-genome specific (napus-rapa) | 0.9880383    | 0.7105041    | not scorable | not scorable | 1            | 0.8581351    |
| #### Bn-A07-p9486032 | A-genome specific (napus-rapa) | 0.9880383    | 0.371041     | not scorable | not scorable | 0.9752066    | 0.6642492    |
| #### Bn-A07-p9493282 | A-genome specific (napus-rapa) | 0.9976076    | 0.8125824    | not scorable | not scorable | 0.9917355    | 0.7896624    |
| #### Bn-A07-p9494829 | A-genome specific (napus-rapa) | 0.9976076    | 0.2453595    | not scorable | not scorable | 0.9752066    | 0.7818591    |
| #### Bn-A07-p9509100 | A-genome specific (napus-rapa) | 1            | 0.8312103    | not scorable | not scorable | 0.9752066    | 0.7929054    |
| #### Bn-A07-p9512042 | A-genome specific (napus-rapa) | 1            | 0.5584346    | not scorable | not scorable | 1            | 0.8095316    |
| #### Bn-A07-p9512256 | A-genome specific (napus-rapa) | 0.9832536    | 0.761203     | not scorable | not scorable | 0.9917355    | 0.8446452    |
| #### Bn-A07-p9516564 | A-genome specific (napus-rapa) | 0.9665072    | 0.2625739    | not scorable | not scorable | 1            | 0.6390162    |
| #### Bn-A07-p9521819 | A-genome specific (napus-rapa) | 0.9952153    | 0.7751901    | not scorable | not scorable | 0.9586777    | 0.7581319    |
| #### Bn-A07-p9523515 | A-genome specific (rapa only)  | not scorable | not scorable | not scorable | not scorable | 0.9752066    | 0.6091911    |
| #### Bn-A07-p9525348 | A-genome specific (napus-rapa) | 0.8205742    | 0.3862655    | not scorable | not scorable | 1            | 0.8013199    |
| #### Bn-A07-p9530382 | A-genome specific (napus-rapa) | 0.9665072    | 0.784013     | not scorable | not scorable | 0.9834711    | 0.8140981    |
| #### Bn-A07-p9535820 | all not scorable               | not scorable | not scorable | not scorable | not scorable | not scorable | not scorable |
| #### Bn-A07-p955599  | genome unspecific (all in)     | 0.9736842    | 0.3071772    |              | 1 0.8671686  | 0.9917355    | 0.7906627    |
| #### Bn-A07-p9564494 | A-genome specific (napus-rapa) | 0.9784689    | 0.761748     | not scorable | not scorable | 1            | 0.7333302    |
| #### Bn-A07-p9565657 | A-genome specific (napus-rapa) | 0.9976076    | 0.7349532    | not scorable | not scorable | 1            | 0.79237      |
| #### Bn-A07-p9579307 | A-genome specific (napus-rapa) | 0.9784689    | 0.7591402    | not scorable | not scorable | 1            | 0.7215713    |
| #### Bn-A07-p9583355 | A-genome specific (napus-rapa) | 0.9736842    | 0.8059028    | not scorable | not scorable | 0.9834711    | 0.7736149    |
| #### Bn-A07-p9583457 | A-genome specific (napus-rapa) | 0.9521531    | 0.6560591    | not scorable | not scorable | 1            | 0.784013     |
| #### Bn-A07-p959523  | A-genome specific (napus-rapa) | 0.9808612    | 0.7455561    | not scorable | not scorable | 1            | 0.781228     |
| #### Bn-A07-p9597037 | A-genome specific (napus-rapa) | 0.9976076    | 0.7579653    | not scorable | not scorable | 0.9917355    | 0.8628264    |
| #### Bn-A07-p9611857 | A-genome specific (napus-rapa) | 0.9976076    | 0.6438332    | not scorable | not scorable | 1            | 0.6442073    |
| #### Bn-A07-p9617534 | A-genome specific (napus-rapa) | 0.9928229    | 0.3657037    | not scorable | not scorable | 0.9834711    | 0.7400436    |
| #### Bn-A07-p963064  | A-genome specific (napus-rapa) | 0.9832536    | 0.3866387    | not scorable | not scorable | 0.9917355    | 0.7421098    |
| #### Bn-A07-p9632473 | A-genome specific (napus-rapa) | 0.9880383    | 0.7322787    | not scorable | not scorable | 1            | 0.9175813    |
| #### Bn-A07-p9637867 | A-genome specific (napus-rapa) | 0.2870813    | 0.6857607    | not scorable | not scorable | 0.9752066    | 0.7286205    |
| #### Bn-A07-p9639704 | A-genome specific (napus-rapa) | 0.9928229    | 0.7905498    | not scorable | not scorable | 1            | 0.7536858    |
| #### Bn-A07-p9641332 | A-genome specific (napus-rapa) | 0.9832536    | 0.3813039    | not scorable | not scorable | 0.9917355    | 0.7143052    |

|                      |                                |           |           |              |              |              |              |
|----------------------|--------------------------------|-----------|-----------|--------------|--------------|--------------|--------------|
| #### Bn-A07-p9661444 | A-genome specific (napus-rapa) | 0.9808612 | 0.6453538 | not scorable | not scorable | 0.9917355    | 0.7531171    |
| #### Bn-A07-p9663232 | A-genome specific (napus-rapa) | 0.9856459 | 0.7699805 | not scorable | not scorable | 0.9752066    | 0.7299294    |
| #### Bn-A07-p9670298 | A-genome specific (napus-rapa) | 1         | 0.674959  | not scorable | not scorable | 0.9917355    | 0.6307672    |
| #### Bn-A07-p9684829 | A-genome specific (napus-rapa) | 0.9976076 | 0.7101685 | not scorable | not scorable | 1            | 0.7982089    |
| #### Bn-A07-p9689917 | A-genome specific (napus-rapa) | 0.9904306 | 0.6525668 | not scorable | not scorable | 0.9421487    | 0.6967867    |
| #### Bn-A07-p9690172 | A-genome specific (napus-rapa) | 0.9928229 | 0.8017182 | not scorable | not scorable | 0.9834711    | 0.747691     |
| #### Bn-A07-p9690345 | A-genome specific (napus-rapa) | 0.9976076 | 0.6971617 | not scorable | not scorable | 0.9504132    | 0.6132845    |
| #### Bn-A07-p9696670 | A-genome specific (napus-rapa) | 0.9976076 | 0.5934504 | not scorable | not scorable | 0.9752066    | 0.7141311    |
| #### Bn-A07-p9708357 | A-genome specific (napus-rapa) | 1         | 0.6878925 | not scorable | not scorable | 0.9752066    | 0.6838279    |
| #### Bn-A07-p9724274 | napus specific                 | 0.9736842 | 0.2755277 | not scorable | not scorable | not scorable | not scorable |
| #### Bn-A07-p9760391 | A-genome specific (napus-rapa) | 1         | 0.8124413 | not scorable | not scorable | 1            | 0.8666354    |
| #### Bn-A07-p9764930 | A-genome specific (napus-rapa) | 0.9976076 | 0.5468593 | not scorable | not scorable | 1            | 0.7043532    |
| #### Bn-A07-p9791002 | A-genome specific (napus-rapa) | 0.9928229 | 0.776884  | not scorable | not scorable | 1            | 0.7023629    |
| #### Bn-A07-p9824132 | A-genome specific (napus-rapa) | 0.9114832 | 0.4521229 | not scorable | not scorable | 0.9834711    | 0.8085203    |
| #### Bn-A07-p9831545 | A-genome specific (napus-rapa) | 0.9712918 | 0.5362125 | not scorable | not scorable | 0.9917355    | 0.732996     |
| #### Bn-A07-p9841369 | A-genome specific (napus-rapa) | 0.9808612 | 0.3163782 | not scorable | not scorable | 0.9917355    | 0.8140109    |
| #### Bn-A07-p9843341 | A-genome specific (napus-rapa) | 0.9617225 | 0.7972904 | not scorable | not scorable | 0.9917355    | 0.8687372    |
| #### Bn-A07-p9849702 | A-genome specific (napus-rapa) | 0.9569378 | 0.2437492 | not scorable | not scorable | 0.9917355    | 0.6889843    |
| #### Bn-A07-p9867804 | A-genome specific (napus-rapa) | 0.9808612 | 0.4762262 | not scorable | not scorable | 0.9917355    | 0.8928791    |
| #### Bn-A07-p9897363 | A-genome specific (napus-rapa) | 0.9856459 | 0.7522361 | not scorable | not scorable | 0.9834711    | 0.7313561    |
| #### Bn-A07-p9901034 | A-genome specific (napus-rapa) | 0.9904306 | 0.7098883 | not scorable | not scorable | 0.9917355    | 0.6743611    |
| #### Bn-A07-p9903750 | A-genome specific (napus-rapa) | 0.9545454 | 0.5729435 | not scorable | not scorable | 0.9917355    | 0.6224325    |
| #### Bn-A07-p9908315 | A-genome specific (napus-rapa) | 0.9856459 | 0.7518138 | not scorable | not scorable | 0.9917355    | 0.6988756    |
| #### Bn-A07-p9912557 | A-genome specific (napus-rapa) | 0.9736842 | 0.5385216 | not scorable | not scorable | 0.9917355    | 0.8226855    |
| #### Bn-A07-p9912637 | A-genome specific (napus-rapa) | 0.9736842 | 0.7915223 | not scorable | not scorable | 1            | 0.7842478    |
| #### Bn-A07-p9915554 | A-genome specific (napus-rapa) | 0.3062201 | 0.9232488 | not scorable | not scorable | 1            | 0.709832     |
| #### Bn-A07-p9916502 | A-genome specific (napus-rapa) | 0.9952153 | 0.7846289 | not scorable | not scorable | 1            | 0.7714426    |
| #### Bn-A07-p9916647 | A-genome specific (napus-rapa) | 0.9688995 | 0.6744709 | not scorable | not scorable | 1            | 0.7580142    |
| #### Bn-A07-p9921856 | A-genome specific (napus-rapa) | 0.9856459 | 0.7243696 | not scorable | not scorable | 0.9669421    | 0.6625042    |
| #### Bn-A07-p9923514 | A-genome specific (napus-rapa) | 1         | 0.7253697 | not scorable | not scorable | 0.9669421    | 0.6949268    |
| #### Bn-A07-p9924604 | A-genome specific (napus-rapa) | 0.9976076 | 0.7932076 | not scorable | not scorable | 0.9834711    | 0.7194358    |
| #### Bn-A07-p9924929 | A-genome specific (napus-rapa) | 0.9976076 | 0.8547434 | not scorable | not scorable | 0.9834711    | 0.6850885    |
| #### Bn-A07-p9945186 | A-genome specific (napus-rapa) | 0.9760765 | 0.6916533 | not scorable | not scorable | 1            | 0.8079667    |

|                       |                                |              |              |              |              |              |              |
|-----------------------|--------------------------------|--------------|--------------|--------------|--------------|--------------|--------------|
| #### Bn-A07-p9975543  | A-genome specific (napus-rapa) | 1            | 0.7870334    | not scorable | not scorable | 0.9917355    | 0.8005624    |
| #### Bn-A07-p9985625  | A-genome specific (rapa only)  | not scorable | not scorable | not scorable | not scorable | 0.9834711    | 0.7175844    |
| #### Bn-A07-p9987682  | A-genome specific (napus-rapa) | 0.784689     | 0.8233496    | not scorable | not scorable | 0.9834711    | 0.7907417    |
| #### Bn-A07-p9988423  | A-genome specific (napus-rapa) | 0.9976076    | 0.801968     | not scorable | not scorable | 0.9917355    | 0.8260675    |
| #### Bn-A08-p1002560  | A-genome specific (rapa only)  | not scorable | not scorable | not scorable | not scorable | 0.9834711    | 0.6670027    |
| #### Bn-A08-p10026421 | A-genome specific (napus-rapa) | 0.9904306    | 0.8052839    | not scorable | not scorable | 1            | 0.7037426    |
| #### Bn-A08-p10031059 | A-genome specific (napus-rapa) | 0.9784689    | 0.7577333    | not scorable | not scorable | 0.9752066    | 0.6759071    |
| #### Bn-A08-p10067927 | A-genome specific (napus-rapa) | 0.9832536    | 0.4761647    | not scorable | not scorable | 0.9834711    | 0.6405718    |
| #### Bn-A08-p10068904 | A-genome specific (napus-rapa) | 0.9904306    | 0.4261496    | not scorable | not scorable | 0.9834711    | 0.7941574    |
| #### Bn-A08-p10071208 | A-genome specific (napus-rapa) | 0.9808612    | 0.7468922    | not scorable | not scorable | 0.9752066    | 0.7173675    |
| #### Bn-A08-p1007687  | A-genome specific (napus-rapa) | 0.9808612    | 0.4879352    | not scorable | not scorable | 1            | 0.7293445    |
| #### Bn-A08-p10098062 | A-genome specific (rapa only)  | not scorable | not scorable | not scorable | not scorable | 0.9834711    | 0.7903103    |
| #### Bn-A08-p10101802 | A-genome specific (napus-rapa) | 0.9784689    | 0.5470796    | not scorable | not scorable | 0.9917355    | 0.8109252    |
| #### Bn-A08-p1010548  | A-genome specific (napus-rapa) | 0.9976076    | 0.7332202    | not scorable | not scorable | 0.9752066    | 0.749107     |
| #### Bn-A08-p10106723 | A-genome specific (napus-rapa) | 1            | 0.4508796    | not scorable | not scorable | 0.9917355    | 0.7973076    |
| #### Bn-A08-p10115835 | A-genome specific (napus-rapa) | 0.9784689    | 0.3040577    | not scorable | not scorable | 1            | 0.6800265    |
| #### Bn-A08-p10118532 | A-genome specific (rapa only)  | not scorable | not scorable | not scorable | not scorable | 1            | 0.9161223    |
| #### Bn-A08-p10123561 | A-genome specific (napus-rapa) | 0.9856459    | 0.6720108    | not scorable | not scorable | 0.9834711    | 0.557959     |
| #### Bn-A08-p10128352 | napus specific                 | 0.9904306    | 0.3400466    | not scorable | not scorable | not scorable | not scorable |
| #### Bn-A08-p10128687 | A-genome specific (napus-rapa) | 0.9952153    | 0.796545     | not scorable | not scorable | 0.9834711    | 0.8061238    |
| #### Bn-A08-p10128760 | A-genome specific (napus-rapa) | 0.9832536    | 0.6487062    | not scorable | not scorable | 0.9834711    | 0.7445595    |
| #### Bn-A08-p10136371 | A-genome specific (napus-rapa) | 0.9856459    | 0.711336     | not scorable | not scorable | 0.9917355    | 0.7262671    |
| #### Bn-A08-p10147092 | A-genome specific (napus-rapa) | 0.861244     | 0.7582545    | not scorable | not scorable | 0.9752066    | 0.7747087    |
| #### Bn-A08-p10180719 | A-genome specific (napus-rapa) | 0.9712918    | 0.732154     | not scorable | not scorable | 0.9917355    | 0.634621     |
| #### Bn-A08-p10190275 | A-genome specific (napus-rapa) | 0.9593301    | 0.4949367    | not scorable | not scorable | 0.7520661    | 0.7170517    |
| #### Bn-A08-p10214814 | A-genome specific (napus-rapa) | 0.9832536    | 0.546644     | not scorable | not scorable | 1            | 0.7417893    |
| #### Bn-A08-p10215334 | A-genome specific (napus-rapa) | 1            | 0.800707     | not scorable | not scorable | 0.9917355    | 0.7786884    |
| #### Bn-A08-p10215623 | A-genome specific (napus-rapa) | 0.9760765    | 0.6528447    | not scorable | not scorable | 1            | 0.7544819    |
| #### Bn-A08-p10222411 | A-genome specific (napus-rapa) | 0.9760765    | 0.7750569    | not scorable | not scorable | 1            | 0.9226547    |
| #### Bn-A08-p1022454  | A-genome specific (napus-rapa) | 0.9832536    | 0.7825176    | not scorable | not scorable | 0.9917355    | 0.8260247    |
| #### Bn-A08-p10270998 | A-genome specific (napus-rapa) | 1            | 0.7887306    | not scorable | not scorable | 1            | 0.8115405    |
| #### Bn-A08-p10281337 | A-genome specific (napus-rapa) | 0.9904306    | 0.561831     | not scorable | not scorable | 0.9834711    | 0.8010609    |
| #### Bn-A08-p10329356 | A-genome specific (napus-rapa) | 1            | 0.5858366    | not scorable | not scorable | 0.9752066    | 0.779241     |

|                       |                                   |              |              |              |              |              |              |              |
|-----------------------|-----------------------------------|--------------|--------------|--------------|--------------|--------------|--------------|--------------|
| #### Bn-A08-p10329729 | A-genome specific (napus-rapa)    | 0.9880383    | 0.7636263    | not scorable | not scorable |              | 1            | 0.7834679    |
| #### Bn-A08-p10394354 | A-genome specific (napus-rapa)    | 1            | 0.5331738    | not scorable | not scorable |              | 1            | 0.7085029    |
| #### Bn-A08-p10429774 | A-genome specific (napus-rapa)    | 0.9521531    | 0.729991     | not scorable | not scorable | 0.7107438    |              | 0.7181565    |
| #### Bn-A08-p10439396 | A-genome specific (napus-rapa)    | 0.9641148    | 0.2717086    | not scorable | not scorable | 0.9752066    |              | 0.244861     |
| #### Bn-A08-p10440699 | A-genome specific (napus-rapa)    | 0.9760765    | 0.7616395    | not scorable | not scorable | 0.9834711    |              | 0.5581389    |
| #### Bn-A08-p10443959 | A-genome specific (napus-rapa)    | 0.9712918    | 0.6238635    | not scorable | not scorable |              | 1            | 0.7150714    |
| #### Bn-A08-p10452462 | A-genome specific (napus-rapa)    | 0.8038278    | 0.7683607    | not scorable | not scorable | 0.7107438    |              | 0.7701226    |
| #### Bn-A08-p10472777 | A-genome specific (napus-rapa)    | 0.9880383    | 0.7718668    | not scorable | not scorable | 0.9834711    |              | 0.6657122    |
| #### Bn-A08-p10473245 | A-genome specific (napus-rapa)    | 0.9760765    | 0.7449526    | not scorable | not scorable |              | 1            | 0.8413236    |
| #### Bn-A08-p10480848 | A-genome specific (rapa only)     | not scorable | not scorable | not scorable | not scorable | 0.9917355    |              | 0.7892701    |
| #### Bn-A08-p1048096  | A-genome specific (napus-rapa)    | 0.9784689    | 0.4884391    | not scorable | not scorable | 0.9752066    |              | 0.7414618    |
| #### Bn-A08-p1049012  | A-genome specific (napus-rapa)    | 0.9760765    | 0.7405838    | not scorable | not scorable | 0.9834711    |              | 0.7648726    |
| #### Bn-A08-p10494058 | A-genome specific (napus-rapa)    | 0.9952153    | 0.7494794    | not scorable | not scorable |              | 1            | 0.9175813    |
| #### Bn-A08-p10509442 | A-genome specific (napus-rapa)    | 0.9736842    | 0.2705589    | not scorable | not scorable |              | 1            | 0.6444352    |
| #### Bn-A08-p10528898 | A-genome specific (napus-rapa)    | 0.9904306    | 0.7662719    | not scorable | not scorable |              | 1            | 0.7491354    |
| #### Bn-A08-p10581818 | napus specific                    | 0.9497608    | 0.7831024    | not scorable | not scorable | not scorable | not scorable | not scorable |
| #### Bn-A08-p10593605 | A-genome specific (napus-rapa)    | 0.9712918    | 0.7421917    | not scorable | not scorable | 0.9917355    |              | 0.7793339    |
| #### Bn-A08-p1059680  | A-genome specific (napus-rapa)    | 0.9784689    | 0.7528217    | not scorable | not scorable |              | 1            | 0.7941217    |
| #### Bn-A08-p1059858  | A-genome specific (napus-rapa)    | 0.9665072    | 0.6680726    | not scorable | not scorable |              | 1            | 0.759572     |
| #### Bn-A08-p1059966  | genome unspecific (all in)        | 0.9497608    | 0.4181533    | 0.8837209    | 0.8020945    | 0.9917355    |              | 0.7438096    |
| #### Bn-A08-p10608550 | A-genome specific (napus-rapa)    | 0.9090909    | 0.5364677    | not scorable | not scorable | 0.9917355    |              | 0.7209599    |
| #### Bn-A08-p10615012 | genome unspecific (all in)        | 0.9688995    | 0.3075653    |              | 1 0.613456   | 0.9834711    |              | 0.5547507    |
| #### Bn-A08-p10626905 | A-genome specific (napus-rapa)    | 0.9712918    | 0.6906182    | not scorable | not scorable | 0.9917355    |              | 0.7405311    |
| #### Bn-A08-p10663544 | A-genome specific (napus-rapa)    | 0.9665072    | 0.4912593    | not scorable | not scorable | 0.9917355    |              | 0.6908766    |
| #### Bn-A08-p1068698  | A-genome specific (napus-rapa)    | 0.9832536    | 0.401504     | not scorable | not scorable | 0.9917355    |              | 0.7979365    |
| #### Bn-A08-p10711225 | A-genome specific (napus-rapa)    | 0.9808612    | 0.7582816    | not scorable | not scorable | 0.5371901    |              | 0.7343397    |
| #### Bn-A08-p10716777 | genome unspecific (oleracea-rapa) | not scorable | not scorable | 0.9689922    | 0.7428809    | 0.9917355    |              | 0.8061255    |
| #### Bn-A08-p10733248 | A-genome specific (rapa only)     | not scorable | not scorable | not scorable | not scorable | 0.6363636    |              | 0.7307506    |
| #### Bn-A08-p1077419  | A-genome specific (napus-rapa)    | 0.9760765    | 0.6584157    | not scorable | not scorable | 0.9834711    |              | 0.6955462    |
| #### Bn-A08-p10774582 | A-genome specific (napus-rapa)    | 0.9808612    | 0.6727405    | not scorable | not scorable | 0.9917355    |              | 0.6978017    |
| #### Bn-A08-p1077573  | A-genome specific (napus-rapa)    | 0.9736842    | 0.3856481    | not scorable | not scorable |              | 1            | 0.7849017    |
| #### Bn-A08-p10778121 | A-genome specific (napus-rapa)    | 0.9712918    | 0.2117473    | not scorable | not scorable |              | 1            | 0.7414618    |
| #### Bn-A08-p10789401 | A-genome specific (napus-rapa)    | 0.9832536    | 0.2535925    | not scorable | not scorable |              | 1            | 0.7994356    |

|                       |                                |              |              |              |              |           |           |
|-----------------------|--------------------------------|--------------|--------------|--------------|--------------|-----------|-----------|
| #### Bn-A08-p10795996 | A-genome specific (napus-rapa) | 0.9688995    | 0.4827326    | not scorable | not scorable | 0.9917355 | 0.8137573 |
| #### Bn-A08-p10798067 | A-genome specific (napus-rapa) | 0.9832536    | 0.7172867    | not scorable | not scorable | 0.9917355 | 0.6651053 |
| #### Bn-A08-p10809139 | A-genome specific (napus-rapa) | 0.9617225    | 0.3817354    | not scorable | not scorable | 1         | 0.772925  |
| #### Bn-A08-p10822662 | A-genome specific (napus-rapa) | 0.9832536    | 0.2768858    | not scorable | not scorable | 0.9917355 | 0.7855615 |
| #### Bn-A08-p10824964 | A-genome specific (napus-rapa) | 0.9904306    | 0.7930767    | not scorable | not scorable | 1         | 0.737618  |
| #### Bn-A08-p10844808 | A-genome specific (napus-rapa) | 0.9784689    | 0.7289001    | not scorable | not scorable | 0.8760331 | 0.6979644 |
| #### Bn-A08-p10846901 | A-genome specific (napus-rapa) | 0.9760765    | 0.5190951    | not scorable | not scorable | 0.9917355 | 0.7366921 |
| #### Bn-A08-p1084991  | A-genome specific (napus-rapa) | 1            | 0.549558     | not scorable | not scorable | 1         | 0.5770498 |
| #### Bn-A08-p1088499  | A-genome specific (napus-rapa) | 0.9258373    | 0.3174111    | not scorable | not scorable | 1         | 0.6417577 |
| #### Bn-A08-p1088701  | A-genome specific (napus-rapa) | 0.9688995    | 0.283893     | not scorable | not scorable | 0.9586777 | 0.527246  |
| #### Bn-A08-p10887204 | A-genome specific (napus-rapa) | 0.9832536    | 0.542689     | not scorable | not scorable | 0.9917355 | 0.6185827 |
| #### Bn-A08-p1089123  | A-genome specific (rapa only)  | not scorable | not scorable | not scorable | not scorable | 0.9834711 | 0.7389272 |
| #### Bn-A08-p11212494 | genome unspecific (all in)     | 0.9784689    | 0.6514307    |              | 1 0.717452   | 1         | 0.8687323 |
| #### Bn-A08-p1123899  | A-genome specific (napus-rapa) | 0.9354067    | 0.4825349    | not scorable | not scorable | 1         | 0.9257681 |
| #### Bn-A08-p11304602 | A-genome specific (napus-rapa) | 0.9760765    | 0.4228844    | not scorable | not scorable | 0.9586777 | 0.7760714 |
| #### Bn-A08-p11308315 | A-genome specific (napus-rapa) | 0.9856459    | 0.2578464    | not scorable | not scorable | 1         | 0.5984881 |
| #### Bn-A08-p11310535 | A-genome specific (napus-rapa) | 0.9928229    | 0.7755086    | not scorable | not scorable | 0.9917355 | 0.8351377 |
| #### Bn-A08-p11329864 | A-genome specific (napus-rapa) | 0.9832536    | 0.5270699    | not scorable | not scorable | 0.9917355 | 0.651005  |
| #### Bn-A08-p11352069 | A-genome specific (rapa only)  | not scorable | not scorable | not scorable | not scorable | 0.9752066 | 0.5822136 |
| #### Bn-A08-p1136041  | A-genome specific (rapa only)  | not scorable | not scorable | not scorable | not scorable | 0.9834711 | 0.8050555 |
| #### Bn-A08-p11380260 | A-genome specific (napus-rapa) | 0.9736842    | 0.7654794    | not scorable | not scorable | 1         | 0.8447414 |
| #### Bn-A08-p11392487 | A-genome specific (napus-rapa) | 0.9880383    | 0.7783       | not scorable | not scorable | 0.9917355 | 0.7352872 |
| #### Bn-A08-p1140651  | A-genome specific (rapa only)  | not scorable | not scorable | not scorable | not scorable | 0.9834711 | 0.7574182 |
| #### Bn-A08-p11452221 | A-genome specific (napus-rapa) | 0.9952153    | 0.82335      | not scorable | not scorable | 0.9917355 | 0.7140292 |
| #### Bn-A08-p11458466 | A-genome specific (napus-rapa) | 1            | 0.5820088    | not scorable | not scorable | 0.9834711 | 0.6728942 |
| #### Bn-A08-p11459293 | A-genome specific (napus-rapa) | 0.9952153    | 0.5210328    | not scorable | not scorable | 0.9917355 | 0.6492701 |
| #### Bn-A08-p1151082  | A-genome specific (napus-rapa) | 0.9856459    | 0.2960261    | not scorable | not scorable | 0.9917355 | 0.7068456 |
| #### Bn-A08-p1166566  | A-genome specific (napus-rapa) | 0.9952153    | 0.6984143    | not scorable | not scorable | 1         | 0.6843472 |
| #### Bn-A08-p11667191 | A-genome specific (napus-rapa) | 0.9952153    | 0.6914552    | not scorable | not scorable | 0.9917355 | 0.6854061 |
| #### Bn-A08-p11679083 | genome unspecific (all in)     | 1            | 0.3319615    |              | 1 0.6912461  | 1         | 0.7677546 |
| #### Bn-A08-p1175573  | A-genome specific (rapa only)  | not scorable | not scorable | not scorable | not scorable | 0.9834711 | 0.6942466 |
| #### Bn-A08-p12054745 | A-genome specific (napus-rapa) | 1            | 0.5366774    | not scorable | not scorable | 0.9917355 | 0.760147  |
| #### Bn-A08-p12058242 | A-genome specific (napus-rapa) | 0.9928229    | 0.4989763    | not scorable | not scorable | 1         | 0.7378975 |

|                       |                                |              |              |              |              |              |              |
|-----------------------|--------------------------------|--------------|--------------|--------------|--------------|--------------|--------------|
| #### Bn-A08-p12064516 | A-genome specific (napus-rapa) | 1            | 0.5049411    | not scorable | not scorable | 1            | 0.8311688    |
| #### Bn-A08-p12360518 | A-genome specific (napus-rapa) | 1            | 0.5787135    | not scorable | not scorable | 0.9834711    | 0.6919542    |
| #### Bn-A08-p12526403 | all not scorable               | not scorable | not scorable | not scorable | not scorable | not scorable | not scorable |
| #### Bn-A08-p12555227 | A-genome specific (napus-rapa) | 0.9832536    | 0.6681888    | not scorable | not scorable | 1            | 0.7853712    |
| #### Bn-A08-p12556455 | A-genome specific (napus-rapa) | 0.9808612    | 0.4941472    | not scorable | not scorable | 1            | 0.7425567    |
| #### Bn-A08-p12559372 | A-genome specific (napus-rapa) | 0.9712918    | 0.4640133    | not scorable | not scorable | 0.9834711    | 0.6705237    |
| #### Bn-A08-p12564228 | A-genome specific (napus-rapa) | 0.9880383    | 0.4177187    | not scorable | not scorable | 1            | 0.9516799    |
| #### Bn-A08-p12599446 | A-genome specific (napus-rapa) | 0.9856459    | 0.766938     | not scorable | not scorable | 1            | 0.8082954    |
| #### Bn-A08-p12638473 | A-genome specific (napus-rapa) | 0.9808612    | 0.5560393    | not scorable | not scorable | 1            | 0.7590975    |
| #### Bn-A08-p12660208 | A-genome specific (napus-rapa) | 0.9856459    | 0.4347599    | not scorable | not scorable | 0.9917355    | 0.8428915    |
| #### Bn-A08-p12674243 | A-genome specific (napus-rapa) | 0.9832536    | 0.7557878    | not scorable | not scorable | 1            | 0.599916     |
| #### Bn-A08-p12674577 | A-genome specific (napus-rapa) | 0.9904306    | 0.6105172    | not scorable | not scorable | 1            | 0.8161302    |
| #### Bn-A08-p12698364 | A-genome specific (napus-rapa) | 0.9856459    | 0.3528363    | not scorable | not scorable | 0.9917355    | 0.7559443    |
| #### Bn-A08-p12699181 | A-genome specific (napus-rapa) | 0.9976076    | 0.3570108    | not scorable | not scorable | 0.9917355    | 0.7117128    |
| #### Bn-A08-p12752628 | A-genome specific (napus-rapa) | 0.9760765    | 0.3468559    | not scorable | not scorable | 1            | 0.6726246    |
| #### Bn-A08-p12761022 | A-genome specific (napus-rapa) | 0.9856459    | 0.7346784    | not scorable | not scorable | 1            | 0.5925114    |
| #### Bn-A08-p12767403 | A-genome specific (napus-rapa) | 0.9880383    | 0.7438109    | not scorable | not scorable | 0.9917355    | 0.7093746    |
| #### Bn-A08-p12781426 | A-genome specific (napus-rapa) | 0.9784689    | 0.2399872    | not scorable | not scorable | 1            | 0.5791867    |
| #### Bn-A08-p12794893 | A-genome specific (napus-rapa) | 0.9545454    | 0.7446579    | not scorable | not scorable | 1            | 0.7908237    |
| #### Bn-A08-p12797532 | A-genome specific (napus-rapa) | 0.9880383    | 0.7191821    | not scorable | not scorable | 1            | 0.7623987    |
| #### Bn-A08-p12812977 | A-genome specific (napus-rapa) | 0.9832536    | 0.4629743    | not scorable | not scorable | 1            | 0.7420965    |
| #### Bn-A08-p12814556 | A-genome specific (napus-rapa) | 0.9712918    | 0.8170494    | not scorable | not scorable | 1            | 0.6593067    |
| #### Bn-A08-p12820786 | A-genome specific (napus-rapa) | 0.9832536    | 0.768343     | not scorable | not scorable | 0.9834711    | 0.7133417    |
| #### Bn-A08-p12828472 | napus specific                 | 0.9856459    | 0.728376     | not scorable | not scorable | not scorable | not scorable |
| #### Bn-A08-p12836248 | A-genome specific (napus-rapa) | 1            | 0.7239203    | not scorable | not scorable | 0.9917355    | 0.8193718    |
| #### Bn-A08-p12902384 | genome unspecific (all in)     | 0.9856459    | 0.5089505    | 0.9922481    | 0.7885851    | 1            | 0.8142861    |
| #### Bn-A08-p12904087 | A-genome specific (napus-rapa) | 0.9832536    | 0.7771493    | not scorable | not scorable | 1            | 0.7824378    |
| #### Bn-A08-p12905848 | A-genome specific (napus-rapa) | 0.9760765    | 0.6915147    | not scorable | not scorable | 1            | 0.6732516    |
| #### Bn-A08-p12913949 | genome unspecific (all in)     | 0.9952153    | 0.3173668    |              | 1 0.7720907  | 0.9917355    | 0.7071902    |
| #### Bn-A08-p12923799 | A-genome specific (napus-rapa) | 0.645933     | 0.8165276    | not scorable | not scorable | 1            | 0.7731115    |
| #### Bn-A08-p12940197 | A-genome specific (napus-rapa) | 0.9856459    | 0.7623594    | not scorable | not scorable | 1            | 0.7924005    |
| #### Bn-A08-p13009633 | A-genome specific (napus-rapa) | 0.9760765    | 0.7820008    | not scorable | not scorable | 1            | 0.7812111    |
| #### Bn-A08-p13011710 | A-genome specific (napus-rapa) | 0.9784689    | 0.7573556    | not scorable | not scorable | 1            | 0.8107472    |



|                       |                                   |              |              |              |              |              |              |
|-----------------------|-----------------------------------|--------------|--------------|--------------|--------------|--------------|--------------|
| #### Bn-A08-p13019549 | genome unspecific (all in)        | 0.9712918    | 0.2718838    | 0.9844961    | 0.6770674    | 1            | 0.786476     |
| #### Bn-A08-p13030362 | A-genome specific (napus-rapa)    | 0.9425837    | 0.7688931    | not scorable | not scorable | 1            | 0.9175813    |
| #### Bn-A08-p13030439 | A-genome specific (napus-rapa)    | 0.9904306    | 0.8032939    | not scorable | not scorable | 1            | 0.7833056    |
| #### Bn-A08-p13036508 | A-genome specific (napus-rapa)    | 0.9545454    | 0.6617107    | not scorable | not scorable | 0.9752066    | 0.7024059    |
| #### Bn-A08-p13060591 | A-genome specific (napus-rapa)    | 1            | 0.7098818    | not scorable | not scorable | 0.9669421    | 0.7369743    |
| #### Bn-A08-p13066424 | A-genome specific (napus-rapa)    | 0.9760765    | 0.6722437    | not scorable | not scorable | 0.9917355    | 0.6774834    |
| #### Bn-A08-p13076304 | A-genome specific (napus-rapa)    | 0.9712918    | 0.7525585    | not scorable | not scorable | 0.9917355    | 0.6835856    |
| #### Bn-A08-p13076305 | A-genome specific (napus-rapa)    | 0.9784689    | 0.7481862    | not scorable | not scorable | 0.9752066    | 0.7580262    |
| #### Bn-A08-p1308299  | A-genome specific (napus-rapa)    | 0.9880383    | 0.7214794    | not scorable | not scorable | 1            | 0.7793948    |
| #### Bn-A08-p13091365 | A-genome specific (napus-rapa)    | 0.9832536    | 0.4530283    | not scorable | not scorable | 1            | 0.7853578    |
| #### Bn-A08-p1313629  | A-genome specific (napus-rapa)    | 0.9832536    | 0.4037682    | not scorable | not scorable | 0.9752066    | 0.6506844    |
| #### Bn-A08-p1319548  | A-genome specific (napus-rapa)    | 0.9808612    | 0.7406446    | not scorable | not scorable | 1            | 0.6781538    |
| #### Bn-A08-p1319949  | A-genome specific (napus-rapa)    | 0.9784689    | 0.7034558    | not scorable | not scorable | 0.9917355    | 0.7559012    |
| #### Bn-A08-p13200580 | A-genome specific (napus-rapa)    | 0.9712918    | 0.8198271    | not scorable | not scorable | 0.9834711    | 0.7780852    |
| #### Bn-A08-p13201183 | A-genome specific (napus-rapa)    | 0.9832536    | 0.7800843    | not scorable | not scorable | 0.9834711    | 0.8073279    |
| #### Bn-A08-p13207923 | A-genome specific (napus-rapa)    | 0.9736842    | 0.4075226    | not scorable | not scorable | 1            | 0.8165783    |
| #### Bn-A08-p13214314 | napus specific                    | 0.7464115    | 0.7745298    | not scorable | not scorable | not scorable | not scorable |
| #### Bn-A08-p13214532 | A-genome specific (napus-rapa)    | 0.9856459    | 0.4605435    | not scorable | not scorable | 0.9834711    | 0.795723     |
| #### Bn-A08-p13221380 | A-genome specific (napus-rapa)    | 1            | 0.589836     | not scorable | not scorable | 0.9917355    | 0.7540866    |
| #### Bn-A08-p13230287 | A-genome specific (napus-rapa)    | 0.9904306    | 0.7354334    | not scorable | not scorable | 1            | 0.9175813    |
| #### Bn-A08-p13239621 | A-genome specific (napus-rapa)    | 1            | 0.4893735    | not scorable | not scorable | 1            | 0.7834535    |
| #### Bn-A08-p13239816 | A-genome specific (napus-rapa)    | 0.9808612    | 0.52696      | not scorable | not scorable | 0.9504132    | 0.5904945    |
| #### Bn-A08-p1324618  | A-genome specific (napus-rapa)    | 0.9832536    | 0.7742633    | not scorable | not scorable | 0.9834711    | 0.834078     |
| #### Bn-A08-p1325427  | A-genome specific (napus-rapa)    | 0.9880383    | 0.5821217    | not scorable | not scorable | 0.9917355    | 0.6604397    |
| #### Bn-A08-p13256383 | A-genome specific (rapa only)     | not scorable | not scorable | not scorable | not scorable | 1            | 0.9435719    |
| #### Bn-A08-p13269999 | C-genome specific (oleracea only) | not scorable | not scorable | 0.9922481    | 0.2301177    | not scorable | not scorable |
| #### Bn-A08-p13270793 | A-genome specific (napus-rapa)    | 0.9760765    | 0.3576617    | not scorable | not scorable | 1            | 0.2932523    |
| #### Bn-A08-p13271519 | A-genome specific (napus-rapa)    | 0.9952153    | 0.7413367    | not scorable | not scorable | 1            | 0.8435433    |
| #### Bn-A08-p13271950 | A-genome specific (napus-rapa)    | 0.9641148    | 0.7852622    | not scorable | not scorable | 0.9917355    | 0.7989811    |
| #### Bn-A08-p13284369 | A-genome specific (napus-rapa)    | 0.9856459    | 0.793183     | not scorable | not scorable | 1            | 0.8479609    |
| #### Bn-A08-p13289070 | A-genome specific (napus-rapa)    | 0.9832536    | 0.7766135    | not scorable | not scorable | 1            | 0.8148142    |
| #### Bn-A08-p13294859 | A-genome specific (napus-rapa)    | 0.9952153    | 0.3260944    | not scorable | not scorable | 0.9669421    | 0.7124212    |
| #### Bn-A08-p13298788 | A-genome specific (napus-rapa)    | 0.9688995    | 0.6507995    | not scorable | not scorable | 0.9834711    | 0.7082127    |

|                       |                                |           |           |              |              |              |              |
|-----------------------|--------------------------------|-----------|-----------|--------------|--------------|--------------|--------------|
| #### Bn-A08-p13303525 | A-genome specific (napus-rapa) | 0.9784689 | 0.7411415 | not scorable | not scorable | 0.9752066    | 0.816041     |
| #### Bn-A08-p13322654 | A-genome specific (napus-rapa) | 0.9641148 | 0.3193102 | not scorable | not scorable | 0.9917355    | 0.8234416    |
| #### Bn-A08-p13325281 | A-genome specific (napus-rapa) | 0.9880383 | 0.4866602 | not scorable | not scorable | 1            | 0.7982978    |
| #### Bn-A08-p1332628  | A-genome specific (napus-rapa) | 0.9808612 | 0.7280689 | not scorable | not scorable | 1            | 0.9435856    |
| #### Bn-A08-p13327070 | A-genome specific (napus-rapa) | 0.9832536 | 0.5662796 | not scorable | not scorable | 0.9834711    | 0.7136531    |
| #### Bn-A08-p13328135 | A-genome specific (napus-rapa) | 0.9808612 | 0.4017509 | not scorable | not scorable | 0.9917355    | 0.7534598    |
| #### Bn-A08-p13342419 | A-genome specific (napus-rapa) | 0.9832536 | 0.309435  | not scorable | not scorable | 1            | 0.7287819    |
| #### Bn-A08-p13352430 | A-genome specific (napus-rapa) | 0.9688995 | 0.4021151 | not scorable | not scorable | 0.9752066    | 0.841405     |
| #### Bn-A08-p13354792 | A-genome specific (napus-rapa) | 0.9784689 | 0.7868638 | not scorable | not scorable | 0.9338843    | 0.8305634    |
| #### Bn-A08-p13357594 | A-genome specific (napus-rapa) | 0.9736842 | 0.3634974 | not scorable | not scorable | 1            | 0.6996869    |
| #### Bn-A08-p13357808 | A-genome specific (napus-rapa) | 0.9832536 | 0.7826896 | not scorable | not scorable | 1            | 0.7592937    |
| #### Bn-A08-p13363830 | A-genome specific (napus-rapa) | 0.9928229 | 0.7821588 | not scorable | not scorable | 0.9834711    | 0.6898463    |
| #### Bn-A08-p1336421  | A-genome specific (napus-rapa) | 0.9880383 | 0.2619199 | not scorable | not scorable | 0.9917355    | 0.7842947    |
| #### Bn-A08-p13376746 | napus specific                 | 0.9186603 | 0.4518753 | not scorable | not scorable | not scorable | not scorable |
| #### Bn-A08-p13379983 | A-genome specific (napus-rapa) | 0.9880383 | 0.350563  | not scorable | not scorable | 1            | 0.6859723    |
| #### Bn-A08-p13382119 | A-genome specific (napus-rapa) | 0.9808612 | 0.8069711 | not scorable | not scorable | 0.9917355    | 0.8398586    |
| #### Bn-A08-p13384059 | A-genome specific (napus-rapa) | 0.9832536 | 0.7241518 | not scorable | not scorable | 0.5206612    | 0.8584166    |
| #### Bn-A08-p13401821 | A-genome specific (napus-rapa) | 0.9904306 | 0.7612702 | not scorable | not scorable | 0.9917355    | 0.8101186    |
| #### Bn-A08-p13409843 | A-genome specific (napus-rapa) | 0.9832536 | 0.4079571 | not scorable | not scorable | 1            | 0.8161045    |
| #### Bn-A08-p1341937  | A-genome specific (napus-rapa) | 0.9736842 | 0.3887087 | not scorable | not scorable | 1            | 0.7641055    |
| #### Bn-A08-p1342021  | A-genome specific (napus-rapa) | 0.9808612 | 0.5215155 | not scorable | not scorable | 0.9917355    | 0.7163467    |
| #### Bn-A08-p13427247 | A-genome specific (napus-rapa) | 0.9784689 | 0.7739307 | not scorable | not scorable | 0.9752066    | 0.7420964    |
| #### Bn-A08-p13427290 | A-genome specific (napus-rapa) | 0.9808612 | 0.7338558 | not scorable | not scorable | 1            | 0.7793339    |
| #### Bn-A08-p13428079 | A-genome specific (napus-rapa) | 0.9784689 | 0.6693552 | not scorable | not scorable | 0.9917355    | 0.6206042    |
| #### Bn-A08-p13428547 | A-genome specific (napus-rapa) | 0.9904306 | 0.8219073 | not scorable | not scorable | 1            | 0.8013431    |
| #### Bn-A08-p13429015 | A-genome specific (napus-rapa) | 0.9808612 | 0.7708363 | not scorable | not scorable | 0.9917355    | 0.7729942    |
| #### Bn-A08-p13429249 | A-genome specific (napus-rapa) | 0.9928229 | 0.8119236 | not scorable | not scorable | 1            | 0.8059215    |
| #### Bn-A08-p13431798 | A-genome specific (napus-rapa) | 0.9832536 | 0.7561978 | not scorable | not scorable | 0.9834711    | 0.7718246    |
| #### Bn-A08-p13436029 | A-genome specific (napus-rapa) | 0.9904306 | 0.7691107 | not scorable | not scorable | 0.9917355    | 0.7835689    |
| #### Bn-A08-p13440837 | A-genome specific (napus-rapa) | 0.9928229 | 0.588908  | not scorable | not scorable | 0.9752066    | 0.6967586    |
| #### Bn-A08-p13454167 | A-genome specific (napus-rapa) | 0.9736842 | 0.4081443 | not scorable | not scorable | 1            | 0.6973116    |
| #### Bn-A08-p13460499 | A-genome specific (napus-rapa) | 0.9904306 | 0.7566097 | not scorable | not scorable | 1            | 0.8060577    |
| #### Bn-A08-p13462776 | A-genome specific (napus-rapa) | 0.9856459 | 0.7896398 | not scorable | not scorable | 1            | 0.9095516    |

|                       |                                |              |              |              |              |           |           |
|-----------------------|--------------------------------|--------------|--------------|--------------|--------------|-----------|-----------|
| #### Bn-A08-p13465514 | A-genome specific (napus-rapa) | 0.9832536    | 0.7765482    | not scorable | not scorable | 1         | 0.8084863 |
| #### Bn-A08-p13484039 | A-genome specific (napus-rapa) | 0.9712918    | 0.3250661    | not scorable | not scorable | 0.9834711 | 0.6913776 |
| #### Bn-A08-p13485948 | A-genome specific (napus-rapa) | 0.9688995    | 0.3712325    | not scorable | not scorable | 1         | 0.7949233 |
| #### Bn-A08-p13486356 | A-genome specific (napus-rapa) | 0.6961722    | 0.7582799    | not scorable | not scorable | 0.9669421 | 0.8569525 |
| #### Bn-A08-p13486650 | A-genome specific (napus-rapa) | 0.9880383    | 0.7967262    | not scorable | not scorable | 0.9917355 | 0.8190148 |
| #### Bn-A08-p13489827 | A-genome specific (napus-rapa) | 0.9808612    | 0.7460517    | not scorable | not scorable | 0.9917355 | 0.7724928 |
| #### Bn-A08-p13504812 | A-genome specific (rapa only)  | not scorable | not scorable | not scorable | not scorable | 0.9917355 | 0.6499287 |
| #### Bn-A08-p13515130 | A-genome specific (napus-rapa) | 0.9952153    | 0.6610716    | not scorable | not scorable | 0.9834711 | 0.6820153 |
| #### Bn-A08-p13515686 | A-genome specific (napus-rapa) | 0.9736842    | 0.4051953    | not scorable | not scorable | 0.9917355 | 0.7644158 |
| #### Bn-A08-p13516445 | A-genome specific (napus-rapa) | 0.9856459    | 0.7468003    | not scorable | not scorable | 0.9752066 | 0.734085  |
| #### Bn-A08-p13518735 | A-genome specific (napus-rapa) | 0.4665072    | 0.7176903    | not scorable | not scorable | 0.9834711 | 0.8942059 |
| #### Bn-A08-p13522752 | A-genome specific (napus-rapa) | 0.9904306    | 0.3754218    | not scorable | not scorable | 0.9917355 | 0.7061687 |
| #### Bn-A08-p13526497 | A-genome specific (napus-rapa) | 0.9904306    | 0.6715285    | not scorable | not scorable | 0.9752066 | 0.6584308 |
| #### Bn-A08-p13527152 | A-genome specific (napus-rapa) | 0.9904306    | 0.6006587    | not scorable | not scorable | 1         | 0.7934247 |
| #### Bn-A08-p1353718  | A-genome specific (napus-rapa) | 0.9856459    | 0.8230541    | not scorable | not scorable | 1         | 0.7005992 |
| #### Bn-A08-p13538895 | A-genome specific (napus-rapa) | 0.9904306    | 0.7984906    | not scorable | not scorable | 0.9752066 | 0.8020264 |
| #### Bn-A08-p13544679 | A-genome specific (napus-rapa) | 0.9617225    | 0.6846795    | not scorable | not scorable | 0.9752066 | 0.6387821 |
| #### Bn-A08-p13559192 | A-genome specific (napus-rapa) | 0.5717703    | 0.7576229    | not scorable | not scorable | 0.5206612 | 0.7322036 |
| #### Bn-A08-p1357142  | A-genome specific (napus-rapa) | 0.9928229    | 0.7240158    | not scorable | not scorable | 1         | 0.7870839 |
| #### Bn-A08-p13573114 | A-genome specific (napus-rapa) | 0.9808612    | 0.7747073    | not scorable | not scorable | 0.9917355 | 0.7438797 |
| #### Bn-A08-p13577914 | A-genome specific (napus-rapa) | 0.9832536    | 0.4347231    | not scorable | not scorable | 0.9917355 | 0.7176868 |
| #### Bn-A08-p13580050 | A-genome specific (rapa only)  | not scorable | not scorable | not scorable | not scorable | 0.9917355 | 0.7248273 |
| #### Bn-A08-p13606285 | A-genome specific (rapa only)  | not scorable | not scorable | not scorable | not scorable | 0.9917355 | 0.764535  |
| #### Bn-A08-p13616733 | A-genome specific (napus-rapa) | 0.9856459    | 0.30213      | not scorable | not scorable | 0.9586777 | 0.694885  |
| #### Bn-A08-p13626189 | A-genome specific (napus-rapa) | 0.9856459    | 0.8211529    | not scorable | not scorable | 1         | 0.7422519 |
| #### Bn-A08-p13626982 | A-genome specific (napus-rapa) | 0.9019139    | 0.6608065    | not scorable | not scorable | 0.9586777 | 0.5951089 |
| #### Bn-A08-p13638847 | A-genome specific (napus-rapa) | 0.9736842    | 0.7475149    | not scorable | not scorable | 0.9917355 | 0.7230738 |
| #### Bn-A08-p1364252  | A-genome specific (napus-rapa) | 0.9928229    | 0.7691087    | not scorable | not scorable | 0.9917355 | 0.7578447 |
| #### Bn-A08-p1365508  | A-genome specific (napus-rapa) | 0.8851675    | 0.6297947    | not scorable | not scorable | 1         | 0.7209266 |
| #### Bn-A08-p1365676  | A-genome specific (napus-rapa) | 0.9736842    | 0.4117468    | not scorable | not scorable | 0.9669421 | 0.7021748 |
| #### Bn-A08-p13670107 | A-genome specific (napus-rapa) | 0.9832536    | 0.7558179    | not scorable | not scorable | 0.9834711 | 0.7296391 |
| #### Bn-A08-p1369206  | A-genome specific (napus-rapa) | 0.9904306    | 0.7806839    | not scorable | not scorable | 1         | 0.7834415 |
| #### Bn-A08-p13692951 | A-genome specific (napus-rapa) | 0.9808612    | 0.7326179    | not scorable | not scorable | 0.9834711 | 0.6579385 |

|                       |                                |              |              |              |              |           |           |
|-----------------------|--------------------------------|--------------|--------------|--------------|--------------|-----------|-----------|
| #### Bn-A08-p13707991 | A-genome specific (rapa only)  | not scorable | not scorable | not scorable | not scorable | 0.9834711 | 0.6408657 |
| #### Bn-A08-p13708497 | A-genome specific (napus-rapa) | 0.9880383    | 0.7072301    | not scorable | not scorable | 0.9752066 | 0.7723715 |
| #### Bn-A08-p13708877 | A-genome specific (napus-rapa) | 0.9976076    | 0.7583297    | not scorable | not scorable | 0.9752066 | 0.8580109 |
| #### Bn-A08-p13709853 | A-genome specific (napus-rapa) | 1            | 0.7646243    | not scorable | not scorable | 0.9917355 | 0.7809315 |
| #### Bn-A08-p13785392 | A-genome specific (napus-rapa) | 1            | 0.7024118    | not scorable | not scorable | 1         | 0.7003649 |
| #### Bn-A08-p13785675 | A-genome specific (napus-rapa) | 0.9880383    | 0.5050971    | not scorable | not scorable | 1         | 0.8387734 |
| #### Bn-A08-p1379662  | A-genome specific (napus-rapa) | 0.9832536    | 0.7557718    | not scorable | not scorable | 1         | 0.6449985 |
| #### Bn-A08-p1379663  | A-genome specific (napus-rapa) | 0.9928229    | 0.8197119    | not scorable | not scorable | 1         | 0.7971297 |
| #### Bn-A08-p1379996  | A-genome specific (rapa only)  | not scorable | not scorable | not scorable | not scorable | 0.9917355 | 0.8881347 |
| #### Bn-A08-p13803301 | A-genome specific (napus-rapa) | 0.9976076    | 0.4384617    | not scorable | not scorable | 1         | 0.8177392 |
| #### Bn-A08-p1382630  | A-genome specific (napus-rapa) | 0.9904306    | 0.4466119    | not scorable | not scorable | 0.9669421 | 0.6441382 |
| #### Bn-A08-p13830207 | A-genome specific (napus-rapa) | 0.9760765    | 0.6501512    | not scorable | not scorable | 0.9752066 | 0.7677858 |
| #### Bn-A08-p13856852 | A-genome specific (napus-rapa) | 0.9641148    | 0.556392     | not scorable | not scorable | 0.9917355 | 0.6833251 |
| #### Bn-A08-p13860913 | A-genome specific (napus-rapa) | 0.9808612    | 0.6091045    | not scorable | not scorable | 0.9834711 | 0.7821854 |
| #### Bn-A08-p13864869 | A-genome specific (napus-rapa) | 0.9976076    | 0.7266436    | not scorable | not scorable | 1         | 0.7494547 |
| #### Bn-A08-p13876356 | A-genome specific (napus-rapa) | 0.9784689    | 0.6926655    | not scorable | not scorable | 0.9834711 | 0.6821687 |
| #### Bn-A08-p13892926 | A-genome specific (napus-rapa) | 0.9712918    | 0.7870539    | not scorable | not scorable | 1         | 0.7842708 |
| #### Bn-A08-p13897110 | A-genome specific (napus-rapa) | 0.9736842    | 0.7655779    | not scorable | not scorable | 1         | 0.8016255 |
| #### Bn-A08-p13901348 | A-genome specific (napus-rapa) | 0.9832536    | 0.2513254    | not scorable | not scorable | 1         | 0.7530598 |
| #### Bn-A08-p13932634 | A-genome specific (napus-rapa) | 0.9784689    | 0.7718806    | not scorable | not scorable | 0.9917355 | 0.7385697 |
| #### Bn-A08-p13935095 | A-genome specific (napus-rapa) | 0.9952153    | 0.7090839    | not scorable | not scorable | 0.9669421 | 0.6181641 |
| #### Bn-A08-p13938191 | A-genome specific (napus-rapa) | 0.9473684    | 0.5819089    | not scorable | not scorable | 0.9834711 | 0.4782797 |
| #### Bn-A08-p13944679 | A-genome specific (napus-rapa) | 0.9425837    | 0.397525     | not scorable | not scorable | 1         | 0.6211752 |
| #### Bn-A08-p13946032 | A-genome specific (napus-rapa) | 0.9688995    | 0.6532133    | not scorable | not scorable | 1         | 0.7039083 |
| #### Bn-A08-p13953904 | A-genome specific (napus-rapa) | 0.9736842    | 0.8208748    | not scorable | not scorable | 0.9917355 | 0.7891658 |
| #### Bn-A08-p13958465 | A-genome specific (napus-rapa) | 0.9880383    | 0.7612011    | not scorable | not scorable | 0.9917355 | 0.7981288 |
| #### Bn-A08-p13964091 | A-genome specific (napus-rapa) | 0.6244019    | 0.8225184    | not scorable | not scorable | 0.9917355 | 0.7606726 |
| #### Bn-A08-p13966241 | A-genome specific (napus-rapa) | 0.9832536    | 0.2502381    | not scorable | not scorable | 0.9421487 | 0.4816257 |
| #### Bn-A08-p13995190 | A-genome specific (napus-rapa) | 0.9904306    | 0.7453904    | not scorable | not scorable | 0.9917355 | 0.6691144 |
| #### Bn-A08-p14002120 | A-genome specific (napus-rapa) | 0.9904306    | 0.7892907    | not scorable | not scorable | 1         | 0.8515138 |
| #### Bn-A08-p1400360  | A-genome specific (napus-rapa) | 0.9976076    | 0.3585604    | not scorable | not scorable | 0.9834711 | 0.7673468 |
| #### Bn-A08-p14011080 | A-genome specific (rapa only)  | not scorable | not scorable | not scorable | not scorable | 0.9917355 | 0.7373464 |
| #### Bn-A08-p14011808 | A-genome specific (napus-rapa) | 0.9784689    | 0.4237094    | not scorable | not scorable | 1         | 0.8086002 |

|                       |                                |              |              |              |              |           |           |
|-----------------------|--------------------------------|--------------|--------------|--------------|--------------|-----------|-----------|
| #### Bn-A08-p14014365 | A-genome specific (napus-rapa) | 0.9904306    | 0.7807017    | not scorable | not scorable | 0.9917355 | 0.8429011 |
| #### Bn-A08-p14026432 | A-genome specific (napus-rapa) | 0.9952153    | 0.4128135    | not scorable | not scorable | 0.9752066 | 0.8260867 |
| #### Bn-A08-p14028012 | A-genome specific (napus-rapa) | 0.9952153    | 0.4983006    | not scorable | not scorable | 0.9752066 | 0.7756781 |
| #### Bn-A08-p1404321  | A-genome specific (napus-rapa) | 0.9856459    | 0.7515993    | not scorable | not scorable | 1         | 0.6855003 |
| #### Bn-A08-p1404439  | A-genome specific (napus-rapa) | 0.9952153    | 0.411542     | not scorable | not scorable | 1         | 0.657633  |
| #### Bn-A08-p14045962 | A-genome specific (napus-rapa) | 0.9760765    | 0.3673479    | not scorable | not scorable | 0.9917355 | 0.7690359 |
| #### Bn-A08-p14056618 | A-genome specific (napus-rapa) | 0.9856459    | 0.4710063    | not scorable | not scorable | 0.9917355 | 0.7326396 |
| #### Bn-A08-p14067094 | A-genome specific (napus-rapa) | 0.9665072    | 0.2823625    | not scorable | not scorable | 0.9752066 | 0.2002837 |
| #### Bn-A08-p14067361 | A-genome specific (napus-rapa) | 0.9497608    | 0.3305093    | not scorable | not scorable | 0.9752066 | 0.6787124 |
| #### Bn-A08-p14086488 | A-genome specific (napus-rapa) | 0.9952153    | 0.6464227    | not scorable | not scorable | 1         | 0.6951214 |
| #### Bn-A08-p14086982 | A-genome specific (napus-rapa) | 0.9784689    | 0.2620876    | not scorable | not scorable | 1         | 0.7124587 |
| #### Bn-A08-p14117791 | A-genome specific (napus-rapa) | 0.9760765    | 0.7456357    | not scorable | not scorable | 1         | 0.7114034 |
| #### Bn-A08-p14128886 | A-genome specific (napus-rapa) | 0.9832536    | 0.7369582    | not scorable | not scorable | 0.9752066 | 0.7844217 |
| #### Bn-A08-p14133917 | A-genome specific (napus-rapa) | 0.9712918    | 0.7573674    | not scorable | not scorable | 1         | 0.7956404 |
| #### Bn-A08-p14156050 | A-genome specific (napus-rapa) | 0.9784689    | 0.7736213    | not scorable | not scorable | 0.9917355 | 0.6756669 |
| #### Bn-A08-p14163751 | A-genome specific (napus-rapa) | 0.7559808    | 0.8066439    | not scorable | not scorable | 0.9586777 | 0.823768  |
| #### Bn-A08-p14167389 | A-genome specific (napus-rapa) | 0.9665072    | 0.4161954    | not scorable | not scorable | 1         | 0.7050966 |
| #### Bn-A08-p14218543 | A-genome specific (napus-rapa) | 0.9904306    | 0.4074846    | not scorable | not scorable | 1         | 0.7665086 |
| #### Bn-A08-p14218712 | A-genome specific (napus-rapa) | 1            | 0.3706646    | not scorable | not scorable | 1         | 0.7238111 |
| #### Bn-A08-p14240368 | A-genome specific (rapa only)  | not scorable | not scorable | not scorable | not scorable | 1         | 0.9175655 |
| #### Bn-A08-p14276094 | A-genome specific (napus-rapa) | 0.9808612    | 0.7419066    | not scorable | not scorable | 0.9586777 | 0.6502183 |
| #### Bn-A08-p1430241  | A-genome specific (napus-rapa) | 0.9928229    | 0.5887834    | not scorable | not scorable | 0.9669421 | 0.603796  |
| #### Bn-A08-p14327130 | A-genome specific (napus-rapa) | 1            | 0.3207365    | not scorable | not scorable | 0.9834711 | 0.3016595 |
| #### Bn-A08-p14327570 | A-genome specific (napus-rapa) | 1            | 0.549558     | not scorable | not scorable | 0.9917355 | 0.4827501 |
| #### Bn-A08-p14351609 | A-genome specific (napus-rapa) | 0.9976076    | 0.7990995    | not scorable | not scorable | 0.9917355 | 0.6834323 |
| #### Bn-A08-p14351709 | A-genome specific (napus-rapa) | 1            | 0.4867361    | not scorable | not scorable | 0.9917355 | 0.6827137 |
| #### Bn-A08-p14368762 | A-genome specific (rapa only)  | not scorable | not scorable | not scorable | not scorable | 1         | 0.7552192 |
| #### Bn-A08-p14369220 | A-genome specific (napus-rapa) | 1            | 0.8056798    | not scorable | not scorable | 0.9917355 | 0.7490473 |
| #### Bn-A08-p14375712 | A-genome specific (napus-rapa) | 1            | 0.6775352    | not scorable | not scorable | 1         | 0.7476085 |
| #### Bn-A08-p14447288 | A-genome specific (napus-rapa) | 1            | 0.5226766    | not scorable | not scorable | 1         | 0.5860245 |
| #### Bn-A08-p14462039 | A-genome specific (napus-rapa) | 1            | 0.6707929    | not scorable | not scorable | 1         | 0.7469221 |
| #### Bn-A08-p14493385 | A-genome specific (napus-rapa) | 0.9665072    | 0.4616932    | not scorable | not scorable | 0.9834711 | 0.5627677 |
| #### Bn-A08-p14496135 | A-genome specific (napus-rapa) | 0.9976076    | 0.5320114    | not scorable | not scorable | 0.9586777 | 0.7202093 |

|                       |                                |              |              |              |              |              |              |
|-----------------------|--------------------------------|--------------|--------------|--------------|--------------|--------------|--------------|
| #### Bn-A08-p14498301 | A-genome specific (napus-rapa) | 0.9760765    | 0.5013014    | not scorable | not scorable | 1            | 0.8071404    |
| #### Bn-A08-p14500962 | A-genome specific (napus-rapa) | 0.9593301    | 0.7557611    | not scorable | not scorable | 0.9834711    | 0.7771693    |
| #### Bn-A08-p14512862 | A-genome specific (napus-rapa) | 0.9665072    | 0.8194131    | not scorable | not scorable | 0.9421487    | 0.8041432    |
| #### Bn-A08-p14516260 | A-genome specific (napus-rapa) | 0.9066986    | 0.7885941    | not scorable | not scorable | 0.5289256    | 0.6976686    |
| #### Bn-A08-p14538807 | A-genome specific (napus-rapa) | 0.9808612    | 0.542357     | not scorable | not scorable | 1            | 0.6697234    |
| #### Bn-A08-p14554907 | A-genome specific (napus-rapa) | 0.9665072    | 0.7011716    | not scorable | not scorable | 0.9669421    | 0.654592     |
| #### Bn-A08-p14594465 | A-genome specific (napus-rapa) | 0.9976076    | 0.5580008    | not scorable | not scorable | 0.9917355    | 0.7232604    |
| #### Bn-A08-p14597378 | A-genome specific (napus-rapa) | 0.9976076    | 0.3168634    | not scorable | not scorable | 0.9917355    | 0.727214     |
| #### Bn-A08-p14597858 | A-genome specific (napus-rapa) | 0.9928229    | 0.7602863    | not scorable | not scorable | 0.9834711    | 0.7904994    |
| #### Bn-A08-p14611553 | A-genome specific (napus-rapa) | 0.9856459    | 0.7715573    | not scorable | not scorable | 0.9752066    | 0.7406379    |
| #### Bn-A08-p14615989 | all not scorable               | not scorable | not scorable | not scorable | not scorable | not scorable | not scorable |
| #### Bn-A08-p14616048 | A-genome specific (napus-rapa) | 0.9258373    | 0.7972419    | not scorable | not scorable | 0.9834711    | 0.8388934    |
| #### Bn-A08-p14616742 | A-genome specific (napus-rapa) | 0.9425837    | 0.7441213    | not scorable | not scorable | 0.9834711    | 0.7935271    |
| #### Bn-A08-p14644041 | A-genome specific (rapa only)  | not scorable | not scorable | not scorable | not scorable | 0.9752066    | 0.241728     |
| #### Bn-A08-p14658507 | A-genome specific (napus-rapa) | 0.9952153    | 0.5574246    | not scorable | not scorable | 0.9752066    | 0.7820827    |
| #### Bn-A08-p14673671 | A-genome specific (napus-rapa) | 0.9736842    | 0.4132182    | not scorable | not scorable | 1            | 0.8020144    |
| #### Bn-A08-p14684717 | A-genome specific (napus-rapa) | 0.9928229    | 0.7842848    | not scorable | not scorable | 0.9504132    | 0.8984625    |
| #### Bn-A08-p14688219 | A-genome specific (napus-rapa) | 0.9784689    | 0.7932727    | not scorable | not scorable | 0.9834711    | 0.7598116    |
| #### Bn-A08-p14689466 | A-genome specific (napus-rapa) | 0.9880383    | 0.6989907    | not scorable | not scorable | 0.9752066    | 0.8031629    |
| #### Bn-A08-p14692156 | A-genome specific (napus-rapa) | 0.9904306    | 0.7842581    | not scorable | not scorable | 0.9917355    | 0.7376867    |
| #### Bn-A08-p14693257 | A-genome specific (napus-rapa) | 0.9856459    | 0.7447882    | not scorable | not scorable | 1            | 0.8456256    |
| #### Bn-A08-p14693414 | A-genome specific (napus-rapa) | 0.9665072    | 0.4544643    | not scorable | not scorable | 0.9752066    | 0.7687355    |
| #### Bn-A08-p14694002 | A-genome specific (napus-rapa) | 1            | 0.8024407    | not scorable | not scorable | 0.9917355    | 0.7732947    |
| #### Bn-A08-p14694130 | A-genome specific (napus-rapa) | 0.9952153    | 0.7938545    | not scorable | not scorable | 0.9917355    | 0.8422094    |
| #### Bn-A08-p14694395 | A-genome specific (napus-rapa) | 0.9952153    | 0.710955     | not scorable | not scorable | 0.9917355    | 0.7052284    |
| #### Bn-A08-p14695487 | A-genome specific (napus-rapa) | 0.9712918    | 0.7840411    | not scorable | not scorable | 1            | 0.6838137    |
| #### Bn-A08-p14695762 | A-genome specific (napus-rapa) | 0.9808612    | 0.662787     | not scorable | not scorable | 1            | 0.7017391    |
| #### Bn-A08-p14697337 | A-genome specific (napus-rapa) | 0.9784689    | 0.7375551    | not scorable | not scorable | 0.9752066    | 0.8124008    |
| #### Bn-A08-p14698054 | A-genome specific (napus-rapa) | 0.9880383    | 0.6927181    | not scorable | not scorable | 1            | 0.7123927    |
| #### Bn-A08-p14704782 | A-genome specific (napus-rapa) | 0.9784689    | 0.3533159    | not scorable | not scorable | 0.9834711    | 0.4812842    |
| #### Bn-A08-p14713741 | A-genome specific (napus-rapa) | 0.9928229    | 0.7591743    | not scorable | not scorable | 0.9669421    | 0.7452249    |
| #### Bn-A08-p14715630 | A-genome specific (napus-rapa) | 0.9880383    | 0.7447215    | not scorable | not scorable | 1            | 0.7898999    |
| #### Bn-A08-p14718347 | A-genome specific (napus-rapa) | 0.9904306    | 0.7637758    | not scorable | not scorable | 0.9917355    | 0.7710676    |

|                       |                                |              |              |              |              |              |              |
|-----------------------|--------------------------------|--------------|--------------|--------------|--------------|--------------|--------------|
| #### Bn-A08-p14726546 | A-genome specific (napus-rapa) | 0.9976076    | 0.3520184    | not scorable | not scorable | 1            | 0.8085964    |
| #### Bn-A08-p14729101 | A-genome specific (napus-rapa) | 0.9880383    | 0.6804051    | not scorable | not scorable | 0.9669421    | 0.7369743    |
| #### Bn-A08-p14729648 | A-genome specific (napus-rapa) | 1            | 0.2774763    | not scorable | not scorable | 1            | 0.7377353    |
| #### Bn-A08-p14733187 | all not scorable               | not scorable | not scorable | not scorable | not scorable | not scorable | not scorable |
| #### Bn-A08-p14734078 | A-genome specific (napus-rapa) | 0.9952153    | 0.7401658    | not scorable | not scorable | 0.9917355    | 0.798181     |
| #### Bn-A08-p14736390 | A-genome specific (napus-rapa) | 0.9904306    | 0.6584744    | not scorable | not scorable | 1            | 0.6725802    |
| #### Bn-A08-p14736428 | A-genome specific (napus-rapa) | 1            | 0.7572091    | not scorable | not scorable | 0.9834711    | 0.8372141    |
| #### Bn-A08-p14737862 | A-genome specific (napus-rapa) | 0.9952153    | 0.3885764    | not scorable | not scorable | 0.9917355    | 0.7158684    |
| #### Bn-A08-p14739774 | A-genome specific (napus-rapa) | 0.9952153    | 0.7181246    | not scorable | not scorable | 0.9834711    | 0.7842862    |
| #### Bn-A08-p14740175 | A-genome specific (napus-rapa) | 0.9952153    | 0.6874983    | not scorable | not scorable | 0.9834711    | 0.6555788    |
| #### Bn-A08-p14740662 | A-genome specific (napus-rapa) | 0.9976076    | 0.7654111    | not scorable | not scorable | 0.9917355    | 0.746852     |
| #### Bn-A08-p14740941 | A-genome specific (napus-rapa) | 0.9976076    | 0.7926275    | not scorable | not scorable | 0.9917355    | 0.7386197    |
| #### Bn-A08-p14749618 | A-genome specific (napus-rapa) | 0.9976076    | 0.7535186    | not scorable | not scorable | 0.9752066    | 0.7814153    |
| #### Bn-A08-p14749890 | A-genome specific (napus-rapa) | 0.9928229    | 0.7784503    | not scorable | not scorable | 0.9752066    | 0.7651586    |
| #### Bn-A08-p14750320 | napus specific                 | 0.9760765    | 0.7839053    | not scorable | not scorable | not scorable | not scorable |
| #### Bn-A08-p14750863 | napus specific                 | 0.9832536    | 0.8079774    | not scorable | not scorable | not scorable | not scorable |
| #### Bn-A08-p14751184 | napus specific                 | 0.9856459    | 0.7314085    | not scorable | not scorable | not scorable | not scorable |
| #### Bn-A08-p14751256 | A-genome specific (rapa only)  | not scorable | not scorable | not scorable | not scorable | 0.5123967    | 0.842312     |
| #### Bn-A08-p14751316 | napus specific                 | 0.9760765    | 0.8675087    | not scorable | not scorable | not scorable | not scorable |
| #### Bn-A08-p14751458 | napus specific                 | 0.9760765    | 0.8046005    | not scorable | not scorable | not scorable | not scorable |
| #### Bn-A08-p14751606 | napus specific                 | 0.9784689    | 0.6804693    | not scorable | not scorable | not scorable | not scorable |
| #### Bn-A08-p14751701 | napus specific                 | 0.9784689    | 0.7615023    | not scorable | not scorable | not scorable | not scorable |
| #### Bn-A08-p14751756 | napus specific                 | 0.9784689    | 0.759581     | not scorable | not scorable | not scorable | not scorable |
| #### Bn-A08-p14752428 | napus specific                 | 0.9736842    | 0.7769974    | not scorable | not scorable | not scorable | not scorable |
| #### Bn-A08-p14752486 | napus specific                 | 0.9784689    | 0.8389307    | not scorable | not scorable | not scorable | not scorable |
| #### Bn-A08-p14752549 | napus specific                 | 0.9832536    | 0.7925423    | not scorable | not scorable | not scorable | not scorable |
| #### Bn-A08-p14752638 | A-genome specific (napus-rapa) | 0.9784689    | 0.8104526    | not scorable | not scorable | 0.553719     | 0.7443041    |
| #### Bn-A08-p14752710 | napus specific                 | 0.9784689    | 0.8199199    | not scorable | not scorable | not scorable | not scorable |
| #### Bn-A08-p14759185 | A-genome specific (napus-rapa) | 1            | 0.421481     | not scorable | not scorable | 0.9917355    | 0.7095686    |
| #### Bn-A08-p14765750 | A-genome specific (napus-rapa) | 0.9784689    | 0.2883588    | not scorable | not scorable | 1            | 0.6560418    |
| #### Bn-A08-p14766663 | A-genome specific (napus-rapa) | 0.9665072    | 0.8081924    | not scorable | not scorable | 0.9669421    | 0.8207738    |
| #### Bn-A08-p14784965 | A-genome specific (napus-rapa) | 0.9832536    | 0.6852937    | not scorable | not scorable | 0.9504132    | 0.6668087    |
| #### Bn-A08-p14790412 | A-genome specific (napus-rapa) | 0.9856459    | 0.3620435    | not scorable | not scorable | 0.9752066    | 0.626171     |

|                       |                                |              |              |              |              |              |              |
|-----------------------|--------------------------------|--------------|--------------|--------------|--------------|--------------|--------------|
| #### Bn-A08-p14799839 | A-genome specific (napus-rapa) | 1            | 0.4658643    | not scorable | not scorable | 1            | 0.9272014    |
| #### Bn-A08-p14806061 | A-genome specific (napus-rapa) | 1            | 0.7443517    | not scorable | not scorable | 1            | 0.6822557    |
| #### Bn-A08-p14813540 | A-genome specific (napus-rapa) | 0.9880383    | 0.6434368    | not scorable | not scorable | 1            | 0.5883259    |
| #### Bn-A08-p14846467 | A-genome specific (napus-rapa) | 0.9736842    | 0.2305731    | not scorable | not scorable | 1            | 0.7942618    |
| #### Bn-A08-p14906652 | A-genome specific (napus-rapa) | 1            | 0.4443101    | not scorable | not scorable | 1            | 0.6963229    |
| #### Bn-A08-p14955455 | A-genome specific (napus-rapa) | 0.9832536    | 0.2476946    | not scorable | not scorable | 0.9834711    | 0.5824713    |
| #### Bn-A08-p14970925 | A-genome specific (napus-rapa) | 0.9952153    | 0.6102314    | not scorable | not scorable | 1            | 0.7062756    |
| #### Bn-A08-p14976685 | A-genome specific (napus-rapa) | 0.9832536    | 0.7268704    | not scorable | not scorable | 0.9917355    | 0.7170695    |
| #### Bn-A08-p14977157 | A-genome specific (napus-rapa) | 0.9736842    | 0.6723061    | not scorable | not scorable | 0.9752066    | 0.7292722    |
| #### Bn-A08-p14980805 | A-genome specific (napus-rapa) | 0.9880383    | 0.7542846    | not scorable | not scorable | 1            | 0.8127519    |
| #### Bn-A08-p14988862 | A-genome specific (napus-rapa) | 0.9976076    | 0.7393754    | not scorable | not scorable | 0.9834711    | 0.7066681    |
| #### Bn-A08-p15027690 | A-genome specific (napus-rapa) | 0.9904306    | 0.7750999    | not scorable | not scorable | 0.9586777    | 0.8775906    |
| #### Bn-A08-p15031334 | A-genome specific (napus-rapa) | 0.9952153    | 0.7430192    | not scorable | not scorable | 0.9917355    | 0.7087575    |
| #### Bn-A08-p15031416 | A-genome specific (napus-rapa) | 0.9952153    | 0.8114975    | not scorable | not scorable | 0.9834711    | 0.8103238    |
| #### Bn-A08-p15031530 | A-genome specific (napus-rapa) | 0.9976076    | 0.6870798    | not scorable | not scorable | 0.9669421    | 0.7499957    |
| #### Bn-A08-p15031658 | A-genome specific (napus-rapa) | 0.9832536    | 0.6748194    | not scorable | not scorable | 0.9834711    | 0.6360926    |
| #### Bn-A08-p15033008 | A-genome specific (rapa only)  | not scorable | not scorable | not scorable | not scorable | 0.9917355    | 0.6813819    |
| #### Bn-A08-p15034231 | A-genome specific (napus-rapa) | 1            | 0.8101186    | not scorable | not scorable | 0.9917355    | 0.7930414    |
| #### Bn-A08-p15034494 | A-genome specific (napus-rapa) | 0.9952153    | 0.722468     | not scorable | not scorable | 0.9834711    | 0.719955     |
| #### Bn-A08-p15035231 | A-genome specific (napus-rapa) | 0.9976076    | 0.6821451    | not scorable | not scorable | 1            | 0.7439968    |
| #### Bn-A08-p15041593 | A-genome specific (napus-rapa) | 0.9401914    | 0.5471492    | not scorable | not scorable | 0.9917355    | 0.813073     |
| #### Bn-A08-p15042741 | all not scorable               | not scorable | not scorable | not scorable | not scorable | not scorable | not scorable |
| #### Bn-A08-p15043392 | A-genome specific (napus-rapa) | 0.9976076    | 0.7271839    | not scorable | not scorable | 0.9917355    | 0.6829393    |
| #### Bn-A08-p15053710 | A-genome specific (napus-rapa) | 0.9760765    | 0.6900953    | not scorable | not scorable | 1            | 0.6889933    |
| #### Bn-A08-p15067659 | A-genome specific (napus-rapa) | 0.9688995    | 0.3506548    | not scorable | not scorable | 0.9834711    | 0.6232097    |
| #### Bn-A08-p15067721 | A-genome specific (napus-rapa) | 1            | 0.5168093    | not scorable | not scorable | 1            | 0.4084805    |
| #### Bn-A08-p1506977  | A-genome specific (napus-rapa) | 1            | 0.4085747    | not scorable | not scorable | 0.9917355    | 0.734051     |
| #### Bn-A08-p15075119 | A-genome specific (napus-rapa) | 0.9880383    | 0.2991447    | not scorable | not scorable | 0.9669421    | 0.640554     |
| #### Bn-A08-p15095047 | A-genome specific (napus-rapa) | 0.9856459    | 0.7856959    | not scorable | not scorable | 1            | 0.7841997    |
| #### Bn-A08-p15122707 | A-genome specific (napus-rapa) | 0.9904306    | 0.7667211    | not scorable | not scorable | 0.9917355    | 0.727147     |
| #### Bn-A08-p15127926 | A-genome specific (napus-rapa) | 1            | 0.3990285    | not scorable | not scorable | 0.9917355    | 0.7014819    |
| #### Bn-A08-p1514861  | A-genome specific (napus-rapa) | 0.9856459    | 0.7839934    | not scorable | not scorable | 0.9834711    | 0.7132426    |
| #### Bn-A08-p15177299 | A-genome specific (napus-rapa) | 0.9880383    | 0.7985523    | not scorable | not scorable | 0.9917355    | 0.7965683    |



|                       |                                   |              |              |              |              |              |              |
|-----------------------|-----------------------------------|--------------|--------------|--------------|--------------|--------------|--------------|
| #### Bn-A08-p15213340 | A-genome specific (rapa only)     | not scorable | not scorable | not scorable | not scorable | 0.9834711    | 0.830932     |
| #### Bn-A08-p15223029 | A-genome specific (napus-rapa)    | 0.9952153    | 0.4814764    | not scorable | not scorable | 1            | 0.846821     |
| #### Bn-A08-p15231480 | A-genome specific (napus-rapa)    | 0.9904306    | 0.5157835    | not scorable | not scorable | 1            | 0.7300824    |
| #### Bn-A08-p15239295 | A-genome specific (napus-rapa)    | 0.9760765    | 0.7818404    | not scorable | not scorable | 1            | 0.8351696    |
| #### Bn-A08-p15239790 | A-genome specific (napus-rapa)    | 0.9976076    | 0.4716975    | not scorable | not scorable | 0.9586777    | 0.8087116    |
| #### Bn-A08-p15243115 | A-genome specific (napus-rapa)    | 0.9808612    | 0.754789     | not scorable | not scorable | 1            | 0.7540562    |
| #### Bn-A08-p15258493 | A-genome specific (napus-rapa)    | 0.9952153    | 0.3488404    | not scorable | not scorable | 0.9834711    | 0.760767     |
| #### Bn-A08-p15259781 | A-genome specific (napus-rapa)    | 0.9832536    | 0.7108674    | not scorable | not scorable | 0.9504132    | 0.7171257    |
| #### Bn-A08-p15265602 | A-genome specific (napus-rapa)    | 1            | 0.6961188    | not scorable | not scorable | 1            | 0.7415923    |
| #### Bn-A08-p15265969 | A-genome specific (napus-rapa)    | 0.9952153    | 0.7586069    | not scorable | not scorable | 1            | 0.776484     |
| #### Bn-A08-p15268077 | A-genome specific (napus-rapa)    | 0.9928229    | 0.6277458    | not scorable | not scorable | 1            | 0.7743337    |
| #### Bn-A08-p15273100 | A-genome specific (napus-rapa)    | 0.9641148    | 0.2924274    | not scorable | not scorable | 0.9834711    | 0.5027145    |
| #### Bn-A08-p15281365 | A-genome specific (napus-rapa)    | 1            | 0.9397784    | not scorable | not scorable | 1            | 0.7959012    |
| #### Bn-A08-p15283513 | A-genome specific (napus-rapa)    | 0.722488     | 0.7542588    | not scorable | not scorable | 1            | 0.9175813    |
| #### Bn-A08-p15301389 | A-genome specific (napus-rapa)    | 1            | 0.6714815    | not scorable | not scorable | 0.9917355    | 0.6622617    |
| #### Bn-A08-p15305183 | A-genome specific (rapa only)     | not scorable | not scorable | not scorable | not scorable | 0.9917355    | 0.6118674    |
| #### Bn-A08-p15322011 | A-genome specific (napus-rapa)    | 1            | 0.821589     | not scorable | not scorable | 0.9752066    | 0.7245917    |
| #### Bn-A08-p15326882 | A-genome specific (napus-rapa)    | 1            | 0.7187735    | not scorable | not scorable | 0.9917355    | 0.652752     |
| #### Bn-A08-p15341166 | A-genome specific (napus-rapa)    | 1            | 0.8303825    | not scorable | not scorable | 0.9752066    | 0.7267222    |
| #### Bn-A08-p15342008 | A-genome specific (napus-rapa)    | 1            | 0.5040693    | not scorable | not scorable | 0.9917355    | 0.7198294    |
| #### Bn-A08-p15353881 | A-genome specific (napus-rapa)    | 1            | 0.7477486    | not scorable | not scorable | 1            | 0.7637021    |
| #### Bn-A08-p15362382 | A-genome specific (napus-rapa)    | 0.9904306    | 0.7523206    | not scorable | not scorable | 0.9917355    | 0.8948965    |
| #### Bn-A08-p15367242 | napus specific                    | 1            | 0.5443758    | not scorable | not scorable | not scorable | not scorable |
| #### Bn-A08-p15437367 | genome unspecific (oleracea-rapa) | not scorable | not scorable | 0.9922481    | 0.5621072    | 1            | 0.8793001    |
| #### Bn-A08-p15448484 | A-genome specific (napus-rapa)    | 1            | 0.4903796    | not scorable | not scorable | 1            | 0.7518815    |
| #### Bn-A08-p15466459 | genome unspecific (oleracea-rapa) | not scorable | not scorable | 1            | 0.7310519    | 1            | 0.9269553    |
| #### Bn-A08-p15471679 | napus specific                    | 0.9880383    | 0.776268     | not scorable | not scorable | not scorable | not scorable |
| #### Bn-A08-p15484420 | A-genome specific (napus-rapa)    | 1            | 0.7976344    | not scorable | not scorable | 0.9917355    | 0.6296369    |
| #### Bn-A08-p15489686 | A-genome specific (napus-rapa)    | 0.9880383    | 0.7291779    | not scorable | not scorable | 0.9834711    | 0.7025554    |
| #### Bn-A08-p15498461 | A-genome specific (napus-rapa)    | 1            | 0.5057636    | not scorable | not scorable | 0.9917355    | 0.7038754    |
| #### Bn-A08-p15502867 | A-genome specific (napus-rapa)    | 0.9928229    | 0.5781735    | not scorable | not scorable | 0.9917355    | 0.8070427    |
| #### Bn-A08-p15507426 | A-genome specific (napus-rapa)    | 0.9832536    | 0.7552952    | not scorable | not scorable | 1            | 0.7607819    |
| #### Bn-A08-p1554055  | A-genome specific (napus-rapa)    | 0.9952153    | 0.408785     | not scorable | not scorable | 0.9917355    | 0.6717967    |

|                       |                                   |              |              |              |              |           |           |
|-----------------------|-----------------------------------|--------------|--------------|--------------|--------------|-----------|-----------|
| #### Bn-A08-p15594956 | genome unspecific (oleracea-rapa) | not scorable | not scorable | 0.9922481    | 0.5698329    | 0.9917355 | 0.7097191 |
| #### Bn-A08-p15614498 | A-genome specific (napus-rapa)    | 0.9641148    | 0.2948163    | not scorable | not scorable | 1         | 0.6913264 |
| #### Bn-A08-p15615914 | A-genome specific (rapa only)     | not scorable | not scorable | not scorable | not scorable | 1         | 0.7049326 |
| #### Bn-A08-p15616595 | A-genome specific (napus-rapa)    | 1            | 0.8686773    | not scorable | not scorable | 1         | 0.8137212 |
| #### Bn-A08-p15619709 | A-genome specific (napus-rapa)    | 0.9928229    | 0.3295322    | not scorable | not scorable | 0.9752066 | 0.6793841 |
| #### Bn-A08-p15620062 | A-genome specific (napus-rapa)    | 0.9832536    | 0.3100272    | not scorable | not scorable | 1         | 0.6711273 |
| #### Bn-A08-p15620471 | A-genome specific (napus-rapa)    | 0.9928229    | 0.6504499    | not scorable | not scorable | 0.9917355 | 0.7763811 |
| #### Bn-A08-p15620702 | A-genome specific (napus-rapa)    | 0.9976076    | 0.57054      | not scorable | not scorable | 0.9834711 | 0.7379047 |
| #### Bn-A08-p15700195 | A-genome specific (napus-rapa)    | 0.9736842    | 0.6457047    | not scorable | not scorable | 1         | 0.6314383 |
| #### Bn-A08-p15701695 | A-genome specific (napus-rapa)    | 0.9736842    | 0.540418     | not scorable | not scorable | 0.9917355 | 0.7387537 |
| #### Bn-A08-p15710460 | A-genome specific (napus-rapa)    | 0.9976076    | 0.7353904    | not scorable | not scorable | 0.9917355 | 0.8093066 |
| #### Bn-A08-p15710698 | A-genome specific (napus-rapa)    | 0.9449761    | 0.7160808    | not scorable | not scorable | 1         | 0.7750827 |
| #### Bn-A08-p15723645 | A-genome specific (napus-rapa)    | 0.9736842    | 0.4599066    | not scorable | not scorable | 0.9917355 | 0.7777671 |
| #### Bn-A08-p15736750 | A-genome specific (napus-rapa)    | 0.8492823    | 0.751748     | not scorable | not scorable | 1         | 0.7175544 |
| #### Bn-A08-p15737285 | A-genome specific (napus-rapa)    | 0.9976076    | 0.3588815    | not scorable | not scorable | 1         | 0.8415254 |
| #### Bn-A08-p15740524 | A-genome specific (napus-rapa)    | 1            | 0.3454714    | not scorable | not scorable | 1         | 0.6852795 |
| #### Bn-A08-p15767590 | A-genome specific (napus-rapa)    | 1            | 0.8304858    | not scorable | not scorable | 1         | 0.7078006 |
| #### Bn-A08-p15782077 | A-genome specific (napus-rapa)    | 0.9282297    | 0.7570635    | not scorable | not scorable | 0.9752066 | 0.8115677 |
| #### Bn-A08-p15782130 | A-genome specific (napus-rapa)    | 0.9114832    | 0.6391593    | not scorable | not scorable | 0.9752066 | 0.652249  |
| #### Bn-A08-p15782229 | A-genome specific (napus-rapa)    | 0.923445     | 0.7724901    | not scorable | not scorable | 0.9752066 | 0.7674943 |
| #### Bn-A08-p15782241 | A-genome specific (napus-rapa)    | 0.9090909    | 0.6656268    | not scorable | not scorable | 0.9834711 | 0.7279622 |
| #### Bn-A08-p15782307 | A-genome specific (napus-rapa)    | 0.9114832    | 0.6175084    | not scorable | not scorable | 0.9834711 | 0.6153713 |
| #### Bn-A08-p15790373 | A-genome specific (napus-rapa)    | 0.9665072    | 0.7294959    | not scorable | not scorable | 1         | 0.8722095 |
| #### Bn-A08-p15792069 | A-genome specific (napus-rapa)    | 0.9688995    | 0.759528     | not scorable | not scorable | 0.9917355 | 0.7288461 |
| #### Bn-A08-p15792369 | A-genome specific (napus-rapa)    | 0.9856459    | 0.7678716    | not scorable | not scorable | 1         | 0.8425372 |
| #### Bn-A08-p15792684 | A-genome specific (napus-rapa)    | 0.9593301    | 0.6006507    | not scorable | not scorable | 0.9917355 | 0.7431888 |
| #### Bn-A08-p15792942 | A-genome specific (napus-rapa)    | 0.9904306    | 0.7701051    | not scorable | not scorable | 0.9917355 | 0.7426181 |
| #### Bn-A08-p15802943 | A-genome specific (napus-rapa)    | 0.9832536    | 0.698797     | not scorable | not scorable | 0.9917355 | 0.7437253 |
| #### Bn-A08-p15804301 | A-genome specific (napus-rapa)    | 0.9712918    | 0.4986514    | not scorable | not scorable | 0.9917355 | 0.7321831 |
| #### Bn-A08-p1581891  | A-genome specific (napus-rapa)    | 0.9880383    | 0.7434773    | not scorable | not scorable | 0.9917355 | 0.70915   |
| #### Bn-A08-p15819039 | A-genome specific (napus-rapa)    | 1            | 0.6767948    | not scorable | not scorable | 1         | 0.7974067 |
| #### Bn-A08-p15819293 | A-genome specific (napus-rapa)    | 1            | 0.6285757    | not scorable | not scorable | 1         | 0.9486086 |
| #### Bn-A08-p1584454  | A-genome specific (napus-rapa)    | 0.9880383    | 0.6233695    | not scorable | not scorable | 0.9669421 | 0.5710965 |

|                       |                                |              |              |              |              |              |              |
|-----------------------|--------------------------------|--------------|--------------|--------------|--------------|--------------|--------------|
| #### Bn-A08-p1584455  | A-genome specific (napus-rapa) | 0.9928229    | 0.6009871    | not scorable | not scorable | 1            | 0.538093     |
| #### Bn-A08-p15872628 | A-genome specific (napus-rapa) | 0.9688995    | 0.7394422    | not scorable | not scorable | 0.9752066    | 0.7179329    |
| #### Bn-A08-p15888048 | A-genome specific (napus-rapa) | 0.9808612    | 0.3796383    | not scorable | not scorable | 1            | 0.6506382    |
| #### Bn-A08-p15906423 | A-genome specific (napus-rapa) | 0.9569378    | 0.7027695    | not scorable | not scorable | 0.9752066    | 0.7022258    |
| #### Bn-A08-p15914038 | A-genome specific (napus-rapa) | 0.9808612    | 0.7064698    | not scorable | not scorable | 0.9917355    | 0.6924574    |
| #### Bn-A08-p15945454 | A-genome specific (napus-rapa) | 0.9976076    | 0.4150518    | not scorable | not scorable | 0.9834711    | 0.5705033    |
| #### Bn-A08-p15952558 | A-genome specific (rapa only)  | not scorable | not scorable | not scorable | not scorable | 0.9834711    | 0.8091429    |
| #### Bn-A08-p15954904 | A-genome specific (napus-rapa) | 0.9832536    | 0.4454686    | not scorable | not scorable | 0.9917355    | 0.7709807    |
| #### Bn-A08-p15961655 | all not scorable               | not scorable | not scorable | not scorable | not scorable | not scorable | not scorable |
| #### Bn-A08-p15967287 | A-genome specific (rapa only)  | not scorable | not scorable | not scorable | not scorable | 0.9834711    | 0.7401192    |
| #### Bn-A08-p15972135 | A-genome specific (napus-rapa) | 0.9808612    | 0.2947623    | not scorable | not scorable | 1            | 0.6587988    |
| #### Bn-A08-p15991441 | A-genome specific (napus-rapa) | 0.9760765    | 0.2802714    | not scorable | not scorable | 0.9917355    | 0.7467468    |
| #### Bn-A08-p15994149 | A-genome specific (napus-rapa) | 0.9760765    | 0.7466782    | not scorable | not scorable | 1            | 0.7819176    |
| #### Bn-A08-p16028375 | A-genome specific (napus-rapa) | 0.9904306    | 0.6857809    | not scorable | not scorable | 0.9917355    | 0.6195766    |
| #### Bn-A08-p16030898 | A-genome specific (napus-rapa) | 0.9856459    | 0.6865789    | not scorable | not scorable | 0.9834711    | 0.7098432    |
| #### Bn-A08-p16039443 | A-genome specific (rapa only)  | not scorable | not scorable | not scorable | not scorable | 0.9917355    | 0.819433     |
| #### Bn-A08-p16039755 | A-genome specific (napus-rapa) | 0.9712918    | 0.701827     | not scorable | not scorable | 0.9834711    | 0.7232494    |
| #### Bn-A08-p16052172 | A-genome specific (napus-rapa) | 0.9784689    | 0.3957201    | not scorable | not scorable | 0.9917355    | 0.7681043    |
| #### Bn-A08-p16061843 | A-genome specific (napus-rapa) | 0.9497608    | 0.5720653    | not scorable | not scorable | 1            | 0.6823041    |
| #### Bn-A08-p16077598 | A-genome specific (rapa only)  | not scorable | not scorable | not scorable | not scorable | 0.9834711    | 0.7295938    |
| #### Bn-A08-p16111871 | A-genome specific (napus-rapa) | 0.9832536    | 0.3630373    | not scorable | not scorable | 0.9752066    | 0.749288     |
| #### Bn-A08-p1611335  | A-genome specific (napus-rapa) | 0.9928229    | 0.7344039    | not scorable | not scorable | 1            | 0.7905074    |
| #### Bn-A08-p16115851 | A-genome specific (napus-rapa) | 0.9688995    | 0.4126792    | not scorable | not scorable | 0.9834711    | 0.7694027    |
| #### Bn-A08-p16125811 | A-genome specific (napus-rapa) | 1            | 0.6535337    | not scorable | not scorable | 1            | 0.7014462    |
| #### Bn-A08-p16132462 | A-genome specific (napus-rapa) | 0.9952153    | 0.7407264    | not scorable | not scorable | 0.9917355    | 0.7263467    |
| #### Bn-A08-p16141425 | A-genome specific (napus-rapa) | 0.9880383    | 0.2538807    | not scorable | not scorable | 0.9917355    | 0.7207854    |
| #### Bn-A08-p16149197 | A-genome specific (napus-rapa) | 0.9880383    | 0.6816132    | not scorable | not scorable | 1            | 0.7161742    |
| #### Bn-A08-p16171460 | A-genome specific (napus-rapa) | 0.9784689    | 0.4666397    | not scorable | not scorable | 1            | 0.7445211    |
| #### Bn-A08-p16183708 | A-genome specific (napus-rapa) | 0.9952153    | 0.3712726    | not scorable | not scorable | 1            | 0.7700283    |
| #### Bn-A08-p16201029 | A-genome specific (napus-rapa) | 0.9114832    | 0.7868046    | not scorable | not scorable | 0.9504132    | 0.7471341    |
| #### Bn-A08-p16208029 | A-genome specific (napus-rapa) | 0.9162679    | 0.6693548    | not scorable | not scorable | 0.9834711    | 0.7067898    |
| #### Bn-A08-p16210589 | A-genome specific (napus-rapa) | 0.9952153    | 0.716375     | not scorable | not scorable | 0.9834711    | 0.8054916    |
| #### Bn-A08-p16211013 | A-genome specific (napus-rapa) | 0.9521531    | 0.3475773    | not scorable | not scorable | 0.5206612    | 0.6821043    |

|      |                  |                                |              |              |              |              |              |   |              |
|------|------------------|--------------------------------|--------------|--------------|--------------|--------------|--------------|---|--------------|
| #### | Bn-A08-p16216893 | A-genome specific (napus-rapa) | 0.9976076    | 0.4668112    | not scorable | not scorable |              | 1 | 0.5801633    |
| #### | Bn-A08-p16232132 | A-genome specific (napus-rapa) | 0.9856459    | 0.3828409    | not scorable | not scorable |              | 1 | 0.9167052    |
| #### | Bn-A08-p16248227 | A-genome specific (napus-rapa) | 0.9832536    | 0.4676508    | not scorable | not scorable | 0.9834711    |   | 0.6501055    |
| #### | Bn-A08-p16248633 | A-genome specific (napus-rapa) | 0.9090909    | 0.7021097    | not scorable | not scorable | 0.9834711    |   | 0.7324193    |
| #### | Bn-A08-p16253366 | all not scorable               | not scorable | not scorable | not scorable | not scorable | not scorable |   | not scorable |
| #### | Bn-A08-p16253891 | all not scorable               | not scorable | not scorable | not scorable | not scorable | not scorable |   | not scorable |
| #### | Bn-A08-p16259976 | A-genome specific (napus-rapa) | 0.8110048    | 0.7980835    | not scorable | not scorable | 0.9917355    |   | 0.8011823    |
| #### | Bn-A08-p16260215 | A-genome specific (napus-rapa) | 1            | 0.5338141    | not scorable | not scorable | 0.9917355    |   | 0.823888     |
| #### | Bn-A08-p16267662 | A-genome specific (rapa only)  | not scorable | not scorable | not scorable | not scorable | 0.9917355    |   | 0.7539268    |
| #### | Bn-A08-p16286008 | A-genome specific (napus-rapa) | 0.9880383    | 0.3818912    | not scorable | not scorable | 0.9834711    |   | 0.6488838    |
| #### | Bn-A08-p16286082 | A-genome specific (napus-rapa) | 0.9736842    | 0.4456542    | not scorable | not scorable |              | 1 | 0.5658448    |
| #### | Bn-A08-p16293275 | A-genome specific (napus-rapa) | 0.9736842    | 0.4660036    | not scorable | not scorable |              | 1 | 0.8106916    |
| #### | Bn-A08-p16299351 | A-genome specific (napus-rapa) | 0.9688995    | 0.5383243    | not scorable | not scorable | 0.9917355    |   | 0.7672632    |
| #### | Bn-A08-p16306425 | A-genome specific (napus-rapa) | 0.9736842    | 0.3533959    | not scorable | not scorable | 0.9834711    |   | 0.654533     |
| #### | Bn-A08-p16313016 | A-genome specific (napus-rapa) | 0.9736842    | 0.2863125    | not scorable | not scorable |              | 1 | 0.7541487    |
| #### | Bn-A08-p16314818 | A-genome specific (napus-rapa) | 0.9736842    | 0.745342     | not scorable | not scorable | 0.9917355    |   | 0.7772009    |
| #### | Bn-A08-p16317873 | A-genome specific (napus-rapa) | 0.9880383    | 0.7402241    | not scorable | not scorable |              | 1 | 0.6599168    |
| #### | Bn-A08-p16318709 | A-genome specific (napus-rapa) | 0.9880383    | 0.7758434    | not scorable | not scorable | 0.9917355    |   | 0.7915569    |
| #### | Bn-A08-p16318890 | A-genome specific (napus-rapa) | 1            | 0.7775016    | not scorable | not scorable |              | 1 | 0.8048949    |
| #### | Bn-A08-p16325858 | A-genome specific (napus-rapa) | 0.9832536    | 0.7756285    | not scorable | not scorable | 0.9834711    |   | 0.7714632    |
| #### | Bn-A08-p16328281 | A-genome specific (napus-rapa) | 0.9808612    | 0.745276     | not scorable | not scorable | 0.9752066    |   | 0.793826     |
| #### | Bn-A08-p16344396 | A-genome specific (napus-rapa) | 0.576555     | 0.7588399    | not scorable | not scorable | 0.9504132    |   | 0.608001     |
| #### | Bn-A08-p16349875 | A-genome specific (napus-rapa) | 0.9712918    | 0.420906     | not scorable | not scorable | 0.9752066    |   | 0.571896     |
| #### | Bn-A08-p16353006 | A-genome specific (napus-rapa) | 0.9712918    | 0.7005597    | not scorable | not scorable | 0.9669421    |   | 0.7210293    |
| #### | Bn-A08-p16366766 | A-genome specific (napus-rapa) | 0.9856459    | 0.6153917    | not scorable | not scorable | 0.9917355    |   | 0.6985115    |
| #### | Bn-A08-p16382380 | A-genome specific (napus-rapa) | 0.9808612    | 0.7538167    | not scorable | not scorable | 0.9669421    |   | 0.6988469    |
| #### | Bn-A08-p16382662 | A-genome specific (napus-rapa) | 1            | 0.9468353    | not scorable | not scorable | 0.9834711    |   | 0.9261117    |
| #### | Bn-A08-p16392743 | A-genome specific (napus-rapa) | 0.7655503    | 0.8223557    | not scorable | not scorable | 0.9338843    |   | 0.7851686    |
| #### | Bn-A08-p16392957 | A-genome specific (napus-rapa) | 0.9569378    | 0.7599421    | not scorable | not scorable | 0.9669421    |   | 0.815307     |
| #### | Bn-A08-p16403550 | A-genome specific (napus-rapa) | 0.9928229    | 0.463763     | not scorable | not scorable |              | 1 | 0.7932993    |
| #### | Bn-A08-p16412952 | A-genome specific (napus-rapa) | 0.9545454    | 0.7197533    | not scorable | not scorable |              | 1 | 0.7365086    |
| #### | Bn-A08-p16416932 | A-genome specific (napus-rapa) | 1            | 0.4504692    | not scorable | not scorable | 0.9917355    |   | 0.7132483    |
| #### | Bn-A08-p16418684 | A-genome specific (napus-rapa) | 0.9832536    | 0.7532946    | not scorable | not scorable | 0.9917355    |   | 0.7371082    |

|                       |                                |              |              |              |              |              |              |
|-----------------------|--------------------------------|--------------|--------------|--------------|--------------|--------------|--------------|
| #### Bn-A08-p16454339 | A-genome specific (napus-rapa) | 0.9976076    | 0.3816561    | not scorable | not scorable | 0.9752066    | 0.6584362    |
| #### Bn-A08-p1645510  | A-genome specific (rapa only)  | not scorable | not scorable | not scorable | not scorable | 0.9917355    | 0.7089961    |
| #### Bn-A08-p16457656 | A-genome specific (napus-rapa) | 0.9617225    | 0.4308603    | not scorable | not scorable | 0.9752066    | 0.706605     |
| #### Bn-A08-p16459840 | A-genome specific (napus-rapa) | 0.9808612    | 0.3720975    | not scorable | not scorable | 0.9752066    | 0.7859404    |
| #### Bn-A08-p16474855 | A-genome specific (napus-rapa) | 0.9665072    | 0.467796     | not scorable | not scorable | 0.9752066    | 0.6944501    |
| #### Bn-A08-p16477837 | A-genome specific (napus-rapa) | 0.9784689    | 0.5888137    | not scorable | not scorable | 1            | 0.6571057    |
| #### Bn-A08-p16477916 | A-genome specific (napus-rapa) | 0.9880383    | 0.6940607    | not scorable | not scorable | 1            | 0.6971439    |
| #### Bn-A08-p16477986 | A-genome specific (napus-rapa) | 0.9832536    | 0.4845256    | not scorable | not scorable | 0.9917355    | 0.7019104    |
| #### Bn-A08-p16514789 | A-genome specific (napus-rapa) | 0.861244     | 0.79743      | not scorable | not scorable | 0.9917355    | 0.7944049    |
| #### Bn-A08-p16521179 | A-genome specific (napus-rapa) | 0.9808612    | 0.7710541    | not scorable | not scorable | 1            | 0.7641519    |
| #### Bn-A08-p165219   | A-genome specific (napus-rapa) | 1            | 0.4882083    | not scorable | not scorable | 0.9669421    | 0.6751524    |
| #### Bn-A08-p16523108 | A-genome specific (napus-rapa) | 0.9808612    | 0.4934723    | not scorable | not scorable | 0.9917355    | 0.6779526    |
| #### Bn-A08-p16549391 | A-genome specific (napus-rapa) | 1            | 0.9089663    | not scorable | not scorable | 1            | 0.9089715    |
| #### Bn-A08-p16551334 | A-genome specific (rapa only)  | not scorable | not scorable | not scorable | not scorable | 0.8099173    | 0.7498307    |
| #### Bn-A08-p16559652 | A-genome specific (napus-rapa) | 0.9808612    | 0.2875005    | not scorable | not scorable | 1            | 0.7466789    |
| #### Bn-A08-p16562035 | A-genome specific (napus-rapa) | 0.9904306    | 0.4003223    | not scorable | not scorable | 0.9834711    | 0.657671     |
| #### Bn-A08-p16572658 | A-genome specific (napus-rapa) | 0.9880383    | 0.7534242    | not scorable | not scorable | 0.9917355    | 0.8450258    |
| #### Bn-A08-p16575548 | A-genome specific (napus-rapa) | 0.9712918    | 0.3704604    | not scorable | not scorable | 0.9752066    | 0.6578725    |
| #### Bn-A08-p16575796 | A-genome specific (napus-rapa) | 0.9712918    | 0.2878677    | not scorable | not scorable | 0.9834711    | 0.6699835    |
| #### Bn-A08-p16582191 | A-genome specific (napus-rapa) | 0.9856459    | 0.3601601    | not scorable | not scorable | 1            | 0.7263744    |
| #### Bn-A08-p16621345 | all not scorable               | not scorable | not scorable | not scorable | not scorable | not scorable | not scorable |
| #### Bn-A08-p16631459 | A-genome specific (napus-rapa) | 0.9832536    | 0.6116903    | not scorable | not scorable | 1            | 0.8504784    |
| #### Bn-A08-p16632230 | A-genome specific (napus-rapa) | 0.9569378    | 0.5017579    | not scorable | not scorable | 0.9917355    | 0.7926102    |
| #### Bn-A08-p16638835 | A-genome specific (napus-rapa) | 0.9784689    | 0.4577038    | not scorable | not scorable | 0.9834711    | 0.7637696    |
| #### Bn-A08-p16640519 | A-genome specific (napus-rapa) | 0.708134     | 0.7654087    | not scorable | not scorable | 0.9669421    | 0.713605     |
| #### Bn-A08-p16640580 | A-genome specific (napus-rapa) | 0.722488     | 0.7444568    | not scorable | not scorable | 0.9752066    | 0.726335     |
| #### Bn-A08-p16640710 | A-genome specific (napus-rapa) | 0.9569378    | 0.6895214    | not scorable | not scorable | 0.9669421    | 0.6979907    |
| #### Bn-A08-p16644247 | A-genome specific (napus-rapa) | 0.9808612    | 0.7021677    | not scorable | not scorable | 0.9917355    | 0.7805618    |
| #### Bn-A08-p16644519 | A-genome specific (napus-rapa) | 0.9712918    | 0.705158     | not scorable | not scorable | 0.9917355    | 0.7031229    |
| #### Bn-A08-p16653908 | A-genome specific (napus-rapa) | 0.9856459    | 0.6891265    | not scorable | not scorable | 0.9917355    | 0.5581195    |
| #### Bn-A08-p16655249 | A-genome specific (napus-rapa) | 0.9760765    | 0.7480031    | not scorable | not scorable | 0.9834711    | 0.7965673    |
| #### Bn-A08-p16672855 | A-genome specific (napus-rapa) | 0.9736842    | 0.3365422    | not scorable | not scorable | 1            | 0.7743334    |
| #### Bn-A08-p16673732 | A-genome specific (napus-rapa) | 0.9784689    | 0.7097529    | not scorable | not scorable | 0.9917355    | 0.7879597    |

|                       |                                |              |              |              |              |              |              |
|-----------------------|--------------------------------|--------------|--------------|--------------|--------------|--------------|--------------|
| #### Bn-A08-p16676967 | A-genome specific (napus-rapa) | 0.9808612    | 0.3970404    | not scorable | not scorable | 0.9834711    | 0.6449154    |
| #### Bn-A08-p16704644 | A-genome specific (napus-rapa) | 0.9808612    | 0.4583029    | not scorable | not scorable | 1            | 0.7464927    |
| #### Bn-A08-p16714223 | A-genome specific (napus-rapa) | 0.9617225    | 0.2873639    | not scorable | not scorable | 0.9917355    | 0.6745016    |
| #### Bn-A08-p16716010 | A-genome specific (napus-rapa) | 0.8923445    | 0.7644165    | not scorable | not scorable | 0.9834711    | 0.7037924    |
| #### Bn-A08-p16728548 | napus specific                 | 0.9066986    | 0.4372488    | not scorable | not scorable | not scorable | not scorable |
| #### Bn-A08-p16739744 | A-genome specific (rapa only)  | not scorable | not scorable | not scorable | not scorable | 1            | 0.6355771    |
| #### Bn-A08-p16742428 | A-genome specific (napus-rapa) | 0.9880383    | 0.7360083    | not scorable | not scorable | 1            | 0.7598014    |
| #### Bn-A08-p16744972 | A-genome specific (napus-rapa) | 0.9019139    | 0.7645298    | not scorable | not scorable | 0.9669421    | 0.6458588    |
| #### Bn-A08-p16770669 | A-genome specific (napus-rapa) | 0.9880383    | 0.2930399    | not scorable | not scorable | 1            | 0.7647154    |
| #### Bn-A08-p16770923 | A-genome specific (napus-rapa) | 0.9712918    | 0.3273615    | not scorable | not scorable | 0.9669421    | 0.7133275    |
| #### Bn-A08-p16771030 | A-genome specific (napus-rapa) | 0.9760765    | 0.7511979    | not scorable | not scorable | 0.9917355    | 0.7482117    |
| #### Bn-A08-p16771161 | A-genome specific (napus-rapa) | 0.9736842    | 0.7966015    | not scorable | not scorable | 0.9917355    | 0.7724778    |
| #### Bn-A08-p16793918 | A-genome specific (napus-rapa) | 0.9665072    | 0.2301202    | not scorable | not scorable | 0.9917355    | 0.6329177    |
| #### Bn-A08-p16799210 | A-genome specific (napus-rapa) | 0.9688995    | 0.2954113    | not scorable | not scorable | 1            | 0.73785      |
| #### Bn-A08-p16802197 | A-genome specific (rapa only)  | not scorable | not scorable | not scorable | not scorable | 0.9917355    | 0.8277065    |
| #### Bn-A08-p16809551 | A-genome specific (napus-rapa) | 0.9808612    | 0.3690223    | not scorable | not scorable | 1            | 0.6931778    |
| #### Bn-A08-p16829757 | A-genome specific (rapa only)  | not scorable | not scorable | not scorable | not scorable | 1            | 0.7881091    |
| #### Bn-A08-p16842687 | A-genome specific (napus-rapa) | 0.9688995    | 0.7810936    | not scorable | not scorable | 0.5041322    | 0.875113     |
| #### Bn-A08-p16842690 | napus specific                 | 0.9473684    | 0.6288002    | not scorable | not scorable | not scorable | not scorable |
| #### Bn-A08-p16846184 | A-genome specific (rapa only)  | not scorable | not scorable | not scorable | not scorable | 0.9504132    | 0.9203206    |
| #### Bn-A08-p16846907 | A-genome specific (napus-rapa) | 0.9712918    | 0.7189576    | not scorable | not scorable | 1            | 0.7668734    |
| #### Bn-A08-p16853718 | A-genome specific (rapa only)  | not scorable | not scorable | not scorable | not scorable | 0.9917355    | 0.8243408    |
| #### Bn-A08-p16859028 | A-genome specific (napus-rapa) | 0.9784689    | 0.4122377    | not scorable | not scorable | 0.9752066    | 0.7122601    |
| #### Bn-A08-p16859321 | A-genome specific (napus-rapa) | 0.9760765    | 0.6096449    | not scorable | not scorable | 0.9752066    | 0.7051224    |
| #### Bn-A08-p16870021 | A-genome specific (napus-rapa) | 0.9904306    | 0.4538498    | not scorable | not scorable | 1            | 0.6894418    |
| #### Bn-A08-p16894122 | A-genome specific (napus-rapa) | 0.9904306    | 0.7855898    | not scorable | not scorable | 0.9917355    | 0.7138398    |
| #### Bn-A08-p16894466 | all not scorable               | not scorable | not scorable | not scorable | not scorable | not scorable | not scorable |
| #### Bn-A08-p16895440 | A-genome specific (rapa only)  | not scorable | not scorable | not scorable | not scorable | 0.9834711    | 0.7575163    |
| #### Bn-A08-p16913215 | A-genome specific (napus-rapa) | 0.9856459    | 0.7830929    | not scorable | not scorable | 1            | 0.8016778    |
| #### Bn-A08-p16938935 | A-genome specific (napus-rapa) | 0.9617225    | 0.5342282    | not scorable | not scorable | 0.9834711    | 0.8013531    |
| #### Bn-A08-p16943139 | A-genome specific (napus-rapa) | 0.9928229    | 0.392502     | not scorable | not scorable | 1            | 0.7234081    |
| #### Bn-A08-p16943263 | A-genome specific (napus-rapa) | 0.9760765    | 0.4042083    | not scorable | not scorable | 0.9917355    | 0.6671808    |
| #### Bn-A08-p16956285 | napus specific                 | 0.9569378    | 0.5992429    | not scorable | not scorable | not scorable | not scorable |

|                       |                                |              |              |              |              |           |           |
|-----------------------|--------------------------------|--------------|--------------|--------------|--------------|-----------|-----------|
| #### Bn-A08-p16958537 | A-genome specific (napus-rapa) | 0.9784689    | 0.6595548    | not scorable | not scorable | 0.9834711 | 0.6772725 |
| #### Bn-A08-p16965932 | A-genome specific (rapa only)  | not scorable | not scorable | not scorable | not scorable | 0.9752066 | 0.4872755 |
| #### Bn-A08-p16966023 | genome unspecific (all in)     | 0.9832536    | 0.4157812    | 1            | 0.7681351    | 0.9917355 | 0.7447941 |
| #### Bn-A08-p16980526 | A-genome specific (napus-rapa) | 0.9832536    | 0.6699249    | not scorable | not scorable | 1         | 0.6979907 |
| #### Bn-A08-p16990347 | A-genome specific (napus-rapa) | 0.9856459    | 0.8073211    | not scorable | not scorable | 1         | 0.8331373 |
| #### Bn-A08-p16992690 | A-genome specific (napus-rapa) | 0.9712918    | 0.3654735    | not scorable | not scorable | 1         | 0.828562  |
| #### Bn-A08-p16998644 | A-genome specific (napus-rapa) | 0.9712918    | 0.8028448    | not scorable | not scorable | 0.9752066 | 0.7412005 |
| #### Bn-A08-p17000507 | A-genome specific (napus-rapa) | 0.9736842    | 0.4967887    | not scorable | not scorable | 0.9917355 | 0.8505976 |
| #### Bn-A08-p17005826 | A-genome specific (napus-rapa) | 0.9736842    | 0.5042979    | not scorable | not scorable | 1         | 0.6852239 |
| #### Bn-A08-p17050758 | A-genome specific (napus-rapa) | 0.9401914    | 0.7253552    | not scorable | not scorable | 0.9917355 | 0.5970019 |
| #### Bn-A08-p17061248 | A-genome specific (napus-rapa) | 0.9808612    | 0.7445751    | not scorable | not scorable | 0.9917355 | 0.6467949 |
| #### Bn-A08-p17062689 | A-genome specific (napus-rapa) | 0.9688995    | 0.7456404    | not scorable | not scorable | 0.9669421 | 0.7686931 |
| #### Bn-A08-p17067481 | A-genome specific (rapa only)  | not scorable | not scorable | not scorable | not scorable | 0.9917355 | 0.6426522 |
| #### Bn-A08-p17069605 | A-genome specific (napus-rapa) | 0.9665072    | 0.7133924    | not scorable | not scorable | 0.9586777 | 0.6993899 |
| #### Bn-A08-p17070496 | A-genome specific (napus-rapa) | 0.9856459    | 0.7674726    | not scorable | not scorable | 1         | 0.7694124 |
| #### Bn-A08-p17078349 | A-genome specific (napus-rapa) | 0.9832536    | 0.2632757    | not scorable | not scorable | 1         | 0.6897439 |
| #### Bn-A08-p17088758 | A-genome specific (napus-rapa) | 0.9832536    | 0.224512     | not scorable | not scorable | 0.9917355 | 0.7044244 |
| #### Bn-A08-p17094421 | A-genome specific (napus-rapa) | 0.9712918    | 0.3209208    | not scorable | not scorable | 0.9834711 | 0.6752192 |
| #### Bn-A08-p17105262 | A-genome specific (napus-rapa) | 0.9952153    | 0.4821025    | not scorable | not scorable | 1         | 0.775888  |
| #### Bn-A08-p17108442 | A-genome specific (napus-rapa) | 0.9928229    | 0.6718387    | not scorable | not scorable | 0.9338843 | 0.611343  |
| #### Bn-A08-p17111194 | A-genome specific (napus-rapa) | 0.9952153    | 0.5284692    | not scorable | not scorable | 0.9834711 | 0.6102902 |
| #### Bn-A08-p17124630 | A-genome specific (napus-rapa) | 1            | 0.4799542    | not scorable | not scorable | 0.9917355 | 0.7193901 |
| #### Bn-A08-p17125271 | A-genome specific (napus-rapa) | 1            | 0.3290696    | not scorable | not scorable | 0.9834711 | 0.7376556 |
| #### Bn-A08-p17130151 | A-genome specific (napus-rapa) | 1            | 0.8042853    | not scorable | not scorable | 0.9752066 | 0.8079795 |
| #### Bn-A08-p17144811 | A-genome specific (napus-rapa) | 0.9832536    | 0.6273222    | not scorable | not scorable | 1         | 0.7071902 |
| #### Bn-A08-p17152372 | A-genome specific (napus-rapa) | 0.9928229    | 0.4999849    | not scorable | not scorable | 0.9917355 | 0.8232405 |
| #### Bn-A08-p17158655 | A-genome specific (napus-rapa) | 0.9688995    | 0.7422901    | not scorable | not scorable | 0.9917355 | 0.7820827 |
| #### Bn-A08-p17159464 | A-genome specific (napus-rapa) | 0.9928229    | 0.7337393    | not scorable | not scorable | 1         | 0.8466524 |
| #### Bn-A08-p17161182 | A-genome specific (napus-rapa) | 0.9832536    | 0.5122476    | not scorable | not scorable | 0.9834711 | 0.8286703 |
| #### Bn-A08-p17162841 | A-genome specific (napus-rapa) | 0.9880383    | 0.7539791    | not scorable | not scorable | 0.9917355 | 0.8041344 |
| #### Bn-A08-p17186790 | A-genome specific (napus-rapa) | 0.9976076    | 0.4691283    | not scorable | not scorable | 0.9752066 | 0.5469385 |
| #### Bn-A08-p17187064 | genome unspecific (all in)     | 1            | 0.2444087    | 1            | 0.6678715    | 1         | 0.8085203 |
| #### Bn-A08-p17190098 | genome unspecific (all in)     | 0.9808612    | 0.3405956    | 1            | 0.6574814    | 1         | 0.8066999 |

|      |                  |                                |              |              |              |              |              |              |
|------|------------------|--------------------------------|--------------|--------------|--------------|--------------|--------------|--------------|
| #### | Bn-A08-p17191196 | A-genome specific (napus-rapa) | 1            | 0.448386     | not scorable | not scorable | 0.9834711    | 0.5348691    |
| #### | Bn-A08-p17191740 | A-genome specific (rapa only)  | not scorable | not scorable | not scorable | not scorable | 1            | 0.8508669    |
| #### | Bn-A08-p17192841 | A-genome specific (napus-rapa) | 0.9904306    | 0.6814371    | not scorable | not scorable | 0.9586777    | 0.6505626    |
| #### | Bn-A08-p17193797 | A-genome specific (napus-rapa) | 0.9952153    | 0.3307892    | not scorable | not scorable | 1            | 0.7552122    |
| #### | Bn-A08-p17195176 | A-genome specific (rapa only)  | not scorable | not scorable | not scorable | not scorable | 0.9917355    | 0.7097486    |
| #### | Bn-A08-p17202184 | A-genome specific (napus-rapa) | 0.9928229    | 0.7291711    | not scorable | not scorable | 0.9917355    | 0.6982439    |
| #### | Bn-A08-p17202527 | A-genome specific (napus-rapa) | 0.9904306    | 0.7669364    | not scorable | not scorable | 1            | 0.8421881    |
| #### | Bn-A08-p17202584 | A-genome specific (napus-rapa) | 0.923445     | 0.7630087    | not scorable | not scorable | 1            | 0.8615026    |
| #### | Bn-A08-p17202745 | A-genome specific (napus-rapa) | 0.9928229    | 0.730107     | not scorable | not scorable | 0.9917355    | 0.7672493    |
| #### | Bn-A08-p1720366  | A-genome specific (napus-rapa) | 0.9712918    | 0.4245166    | not scorable | not scorable | 1            | 0.772662     |
| #### | Bn-A08-p17209652 | A-genome specific (napus-rapa) | 0.9808612    | 0.7134556    | not scorable | not scorable | 0.9917355    | 0.7676536    |
| #### | Bn-A08-p17217296 | A-genome specific (napus-rapa) | 0.9952153    | 0.5438087    | not scorable | not scorable | 1            | 0.7569162    |
| #### | Bn-A08-p17221534 | napus specific                 | 0.8971292    | 0.7379231    | not scorable | not scorable | not scorable | not scorable |
| #### | Bn-A08-p17235030 | A-genome specific (napus-rapa) | 0.9904306    | 0.7993847    | not scorable | not scorable | 0.9917355    | 0.6458867    |
| #### | Bn-A08-p17236071 | A-genome specific (napus-rapa) | 0.9976076    | 0.3113943    | not scorable | not scorable | 0.9752066    | 0.7535641    |
| #### | Bn-A08-p17238995 | A-genome specific (napus-rapa) | 0.7488039    | 0.9319673    | not scorable | not scorable | 0.7272727    | 0.8578832    |
| #### | Bn-A08-p17249190 | A-genome specific (napus-rapa) | 0.9832536    | 0.6597176    | not scorable | not scorable | 0.9834711    | 0.7310339    |
| #### | Bn-A08-p17254975 | A-genome specific (napus-rapa) | 1            | 0.4694264    | not scorable | not scorable | 0.9917355    | 0.6674185    |
| #### | Bn-A08-p17255997 | A-genome specific (napus-rapa) | 1            | 0.7225236    | not scorable | not scorable | 0.9917355    | 0.7133515    |
| #### | Bn-A08-p17256848 | A-genome specific (rapa only)  | not scorable | not scorable | not scorable | not scorable | 0.9917355    | 0.435327     |
| #### | Bn-A08-p17291598 | A-genome specific (napus-rapa) | 0.9904306    | 0.7181342    | not scorable | not scorable | 0.9834711    | 0.6030661    |
| #### | Bn-A08-p17291679 | A-genome specific (napus-rapa) | 0.9712918    | 0.2194245    | not scorable | not scorable | 0.9834711    | 0.6737995    |
| #### | Bn-A08-p17293594 | A-genome specific (napus-rapa) | 0.9880383    | 0.7458118    | not scorable | not scorable | 0.9917355    | 0.7338513    |
| #### | Bn-A08-p17297704 | A-genome specific (napus-rapa) | 0.9593301    | 0.7755189    | not scorable | not scorable | 0.9752066    | 0.8061179    |
| #### | Bn-A08-p17297854 | A-genome specific (napus-rapa) | 0.9808612    | 0.7827562    | not scorable | not scorable | 0.9917355    | 0.7578574    |
| #### | Bn-A08-p17301557 | A-genome specific (napus-rapa) | 0.9880383    | 0.4315119    | not scorable | not scorable | 0.9917355    | 0.7952176    |
| #### | Bn-A08-p17306802 | napus specific                 | 0.9880383    | 0.1683578    | not scorable | not scorable | not scorable | not scorable |
| #### | Bn-A08-p17307247 | A-genome specific (rapa only)  | not scorable | not scorable | not scorable | not scorable | 0.9917355    | 0.7738006    |
| #### | Bn-A08-p17315378 | A-genome specific (napus-rapa) | 0.9832536    | 0.5759378    | not scorable | not scorable | 0.9834711    | 0.7257202    |
| #### | Bn-A08-p17327135 | A-genome specific (napus-rapa) | 0.9856459    | 0.7516732    | not scorable | not scorable | 0.9917355    | 0.803149     |
| #### | Bn-A08-p17330668 | A-genome specific (napus-rapa) | 0.9760765    | 0.2673762    | not scorable | not scorable | 1            | 0.9095823    |
| #### | Bn-A08-p17331714 | A-genome specific (rapa only)  | not scorable | not scorable | not scorable | not scorable | 1            | 0.7208267    |
| #### | Bn-A08-p17345947 | A-genome specific (napus-rapa) | 0.9114832    | 0.7475225    | not scorable | not scorable | 0.9669421    | 0.7435765    |



|                       |                                |              |              |              |              |              |              |
|-----------------------|--------------------------------|--------------|--------------|--------------|--------------|--------------|--------------|
| #### Bn-A08-p17351964 | A-genome specific (napus-rapa) | 0.9617225    | 0.6866667    | not scorable | not scorable | 1            | 0.8948696    |
| #### Bn-A08-p17353404 | A-genome specific (napus-rapa) | 0.9856459    | 0.7815497    | not scorable | not scorable | 0.9834711    | 0.7845232    |
| #### Bn-A08-p17353995 | A-genome specific (napus-rapa) | 0.9784689    | 0.6918838    | not scorable | not scorable | 0.9834711    | 0.7304516    |
| #### Bn-A08-p17354167 | A-genome specific (napus-rapa) | 0.9688995    | 0.7705219    | not scorable | not scorable | 0.9917355    | 0.7738287    |
| #### Bn-A08-p17355609 | A-genome specific (napus-rapa) | 0.9856459    | 0.2715607    | not scorable | not scorable | 0.9917355    | 0.7481762    |
| #### Bn-A08-p17355672 | A-genome specific (napus-rapa) | 0.9808612    | 0.5151772    | not scorable | not scorable | 0.9834711    | 0.7717442    |
| #### Bn-A08-p17363588 | A-genome specific (napus-rapa) | 0.9928229    | 0.2911588    | not scorable | not scorable | 1            | 0.7716698    |
| #### Bn-A08-p17366299 | A-genome specific (napus-rapa) | 0.9880383    | 0.506361     | not scorable | not scorable | 0.5123967    | 0.7993255    |
| #### Bn-A08-p17381323 | A-genome specific (napus-rapa) | 0.3373206    | 0.6715693    | not scorable | not scorable | 0.8842975    | 0.6636452    |
| #### Bn-A08-p17382135 | all not scorable               | not scorable | not scorable | not scorable | not scorable | not scorable | not scorable |
| #### Bn-A08-p17382231 | A-genome specific (napus-rapa) | 0.9784689    | 0.7532077    | not scorable | not scorable | 0.9917355    | 0.7805561    |
| #### Bn-A08-p17386548 | A-genome specific (napus-rapa) | 0.9904306    | 0.4171633    | not scorable | not scorable | 0.9834711    | 0.7940474    |
| #### Bn-A08-p17387138 | A-genome specific (napus-rapa) | 0.9784689    | 0.6299158    | not scorable | not scorable | 0.9917355    | 0.7615114    |
| #### Bn-A08-p17393018 | A-genome specific (napus-rapa) | 0.9784689    | 0.6813819    | not scorable | not scorable | 0.9834711    | 0.7549208    |
| #### Bn-A08-p17393046 | A-genome specific (napus-rapa) | 0.9880383    | 0.7596025    | not scorable | not scorable | 1            | 0.7773423    |
| #### Bn-A08-p17400256 | A-genome specific (napus-rapa) | 0.9952153    | 0.3920192    | not scorable | not scorable | 0.9917355    | 0.7483119    |
| #### Bn-A08-p17402165 | A-genome specific (napus-rapa) | 0.9832536    | 0.7705077    | not scorable | not scorable | 1            | 0.8175144    |
| #### Bn-A08-p17403283 | A-genome specific (napus-rapa) | 0.9976076    | 0.9205657    | not scorable | not scorable | 1            | 0.9205657    |
| #### Bn-A08-p17434041 | napus specific                 | 0.9736842    | 0.3077568    | not scorable | not scorable | not scorable | not scorable |
| #### Bn-A08-p17435209 | A-genome specific (napus-rapa) | 0.4090909    | 0.7950018    | not scorable | not scorable | 0.9586777    | 0.8170068    |
| #### Bn-A08-p17435316 | A-genome specific (napus-rapa) | 0.9928229    | 0.7606095    | not scorable | not scorable | 0.9917355    | 0.8140981    |
| #### Bn-A08-p17437898 | A-genome specific (napus-rapa) | 1            | 0.9361171    | not scorable | not scorable | 1            | 0.8354442    |
| #### Bn-A08-p17446253 | A-genome specific (napus-rapa) | 0.9641148    | 0.7761434    | not scorable | not scorable | 0.9752066    | 0.6737829    |
| #### Bn-A08-p17449031 | A-genome specific (napus-rapa) | 1            | 0.3523288    | not scorable | not scorable | 1            | 0.266394     |
| #### Bn-A08-p17449089 | A-genome specific (napus-rapa) | 1            | 0.3093683    | not scorable | not scorable | 1            | 0.4970111    |
| #### Bn-A08-p17449196 | A-genome specific (napus-rapa) | 1            | 0.5049689    | not scorable | not scorable | 0.9834711    | 0.4687511    |
| #### Bn-A08-p17449410 | A-genome specific (napus-rapa) | 0.9880383    | 0.643746     | not scorable | not scorable | 0.9752066    | 0.7143667    |
| #### Bn-A08-p17461463 | all not scorable               | not scorable | not scorable | not scorable | not scorable | not scorable | not scorable |
| #### Bn-A08-p17462017 | A-genome specific (napus-rapa) | 1            | 0.791207     | not scorable | not scorable | 0.9669421    | 0.7901036    |
| #### Bn-A08-p17468541 | A-genome specific (napus-rapa) | 0.9760765    | 0.6729537    | not scorable | not scorable | 0.9834711    | 0.7756222    |
| #### Bn-A08-p17470755 | A-genome specific (napus-rapa) | 0.9808612    | 0.3219924    | not scorable | not scorable | 0.9834711    | 0.7555611    |
| #### Bn-A08-p17472208 | A-genome specific (napus-rapa) | 0.9784689    | 0.4805166    | not scorable | not scorable | 1            | 0.6881164    |
| #### Bn-A08-p17507343 | A-genome specific (napus-rapa) | 0.9736842    | 0.7185735    | not scorable | not scorable | 0.9917355    | 0.9175813    |

|                       |                                |              |              |              |              |              |              |
|-----------------------|--------------------------------|--------------|--------------|--------------|--------------|--------------|--------------|
| #### Bn-A08-p17513789 | A-genome specific (napus-rapa) | 1            | 0.7379405    | not scorable | not scorable | 0.9917355    | 0.7212351    |
| #### Bn-A08-p17530580 | A-genome specific (napus-rapa) | 0.9952153    | 0.4733293    | not scorable | not scorable | 1            | 0.7226945    |
| #### Bn-A08-p17530617 | A-genome specific (napus-rapa) | 0.9760765    | 0.7001723    | not scorable | not scorable | 0.9752066    | 0.7015989    |
| #### Bn-A08-p17534858 | A-genome specific (napus-rapa) | 0.9904306    | 0.736154     | not scorable | not scorable | 1            | 0.6547264    |
| #### Bn-A08-p17535851 | A-genome specific (rapa only)  | not scorable | not scorable | not scorable | not scorable | 0.9834711    | 0.753154     |
| #### Bn-A08-p17547975 | A-genome specific (napus-rapa) | 0.9090909    | 0.4373066    | not scorable | not scorable | 0.9917355    | 0.7425946    |
| #### Bn-A08-p17559236 | A-genome specific (napus-rapa) | 0.9904306    | 0.5112807    | not scorable | not scorable | 0.9917355    | 0.7357076    |
| #### Bn-A08-p17565873 | A-genome specific (napus-rapa) | 0.9856459    | 0.4637241    | not scorable | not scorable | 0.9917355    | 0.6979887    |
| #### Bn-A08-p17570589 | A-genome specific (napus-rapa) | 0.9880383    | 0.7521467    | not scorable | not scorable | 0.9752066    | 0.7559701    |
| #### Bn-A08-p17578990 | A-genome specific (napus-rapa) | 0.9880383    | 0.5388873    | not scorable | not scorable | 0.9917355    | 0.6337391    |
| #### Bn-A08-p17586676 | A-genome specific (napus-rapa) | 0.9210526    | 0.3227486    | not scorable | not scorable | 0.9752066    | 0.8040345    |
| #### Bn-A08-p17612777 | A-genome specific (napus-rapa) | 1            | 0.4280843    | not scorable | not scorable | 0.9917355    | 0.6397213    |
| #### Bn-A08-p17612865 | A-genome specific (napus-rapa) | 0.9952153    | 0.7459167    | not scorable | not scorable | 0.9752066    | 0.7447212    |
| #### Bn-A08-p17613494 | A-genome specific (napus-rapa) | 0.9928229    | 0.4976599    | not scorable | not scorable | 0.9917355    | 0.7697068    |
| #### Bn-A08-p17613870 | A-genome specific (napus-rapa) | 1            | 0.7619068    | not scorable | not scorable | 0.9834711    | 0.6873872    |
| #### Bn-A08-p17618201 | A-genome specific (napus-rapa) | 0.9808612    | 0.7551565    | not scorable | not scorable | 0.9752066    | 0.6587221    |
| #### Bn-A08-p17639419 | A-genome specific (napus-rapa) | 0.9569378    | 0.4058828    | not scorable | not scorable | 0.9834711    | 0.6424839    |
| #### Bn-A08-p17647291 | A-genome specific (napus-rapa) | 0.9880383    | 0.7881773    | not scorable | not scorable | 0.9834711    | 0.743686     |
| #### Bn-A08-p17647346 | all not scorable               | not scorable | not scorable | not scorable | not scorable | not scorable | not scorable |
| #### Bn-A08-p17648611 | A-genome specific (napus-rapa) | 0.9928229    | 0.3497538    | not scorable | not scorable | 1            | 0.6507955    |
| #### Bn-A08-p17649841 | A-genome specific (napus-rapa) | 0.9904306    | 0.648732     | not scorable | not scorable | 1            | 0.8673102    |
| #### Bn-A08-p17654313 | A-genome specific (napus-rapa) | 0.9952153    | 0.789499     | not scorable | not scorable | 0.9834711    | 0.7405292    |
| #### Bn-A08-p17654367 | A-genome specific (napus-rapa) | 0.9976076    | 0.7972885    | not scorable | not scorable | 1            | 0.8146914    |
| #### Bn-A08-p17654459 | A-genome specific (napus-rapa) | 0.9808612    | 0.7408776    | not scorable | not scorable | 0.9917355    | 0.7489454    |
| #### Bn-A08-p17655953 | A-genome specific (napus-rapa) | 0.9856459    | 0.6968054    | not scorable | not scorable | 0.9834711    | 0.7143488    |
| #### Bn-A08-p17663954 | A-genome specific (napus-rapa) | 0.9904306    | 0.4073228    | not scorable | not scorable | 0.9834711    | 0.7482296    |
| #### Bn-A08-p17680057 | A-genome specific (napus-rapa) | 0.9832536    | 0.7406805    | not scorable | not scorable | 0.9917355    | 0.799634     |
| #### Bn-A08-p17681802 | A-genome specific (napus-rapa) | 0.9856459    | 0.7921103    | not scorable | not scorable | 0.9834711    | 0.7870649    |
| #### Bn-A08-p17686366 | A-genome specific (napus-rapa) | 1            | 0.7301555    | not scorable | not scorable | 0.9917355    | 0.7137545    |
| #### Bn-A08-p17686371 | A-genome specific (napus-rapa) | 1            | 0.7652588    | not scorable | not scorable | 0.9917355    | 0.7259292    |
| #### Bn-A08-p17686730 | A-genome specific (napus-rapa) | 0.9952153    | 0.78724      | not scorable | not scorable | 0.9917355    | 0.7806839    |
| #### Bn-A08-p17687210 | A-genome specific (napus-rapa) | 0.9904306    | 0.7818683    | not scorable | not scorable | 0.9834711    | 0.7870578    |
| #### Bn-A08-p17687648 | A-genome specific (napus-rapa) | 0.9880383    | 0.4324212    | not scorable | not scorable | 0.9752066    | 0.770266     |

|                       |                                   |              |              |              |              |              |              |
|-----------------------|-----------------------------------|--------------|--------------|--------------|--------------|--------------|--------------|
| #### Bn-A08-p17696796 | A-genome specific (rapa only)     | not scorable | not scorable | not scorable | not scorable | 1            | 0.8105489    |
| #### Bn-A08-p17698912 | A-genome specific (napus-rapa)    | 0.9856459    | 0.2988756    | not scorable | not scorable | 1            | 0.7318437    |
| #### Bn-A08-p17702727 | A-genome specific (napus-rapa)    | 0.9952153    | 0.239002     | not scorable | not scorable | 0.9917355    | 0.7660038    |
| #### Bn-A08-p17709729 | A-genome specific (napus-rapa)    | 0.9904306    | 0.786342     | not scorable | not scorable | 0.9917355    | 0.76847      |
| #### Bn-A08-p17710867 | A-genome specific (napus-rapa)    | 0.9808612    | 0.5910144    | not scorable | not scorable | 0.9834711    | 0.6925136    |
| #### Bn-A08-p17721455 | A-genome specific (napus-rapa)    | 0.9976076    | 0.7627323    | not scorable | not scorable | 0.9834711    | 0.6930342    |
| #### Bn-A08-p17723283 | A-genome specific (napus-rapa)    | 0.9856459    | 0.3686323    | not scorable | not scorable | 1            | 0.7570184    |
| #### Bn-A08-p17724619 | A-genome specific (napus-rapa)    | 0.9808612    | 0.748635     | not scorable | not scorable | 0.9834711    | 0.7566538    |
| #### Bn-A08-p177288   | A-genome specific (napus-rapa)    | 0.9114832    | 0.6650519    | not scorable | not scorable | 0.9834711    | 0.7835674    |
| #### Bn-A08-p17735673 | A-genome specific (napus-rapa)    | 0.9856459    | 0.7815613    | not scorable | not scorable | 0.9834711    | 0.7955333    |
| #### Bn-A08-p17740796 | A-genome specific (napus-rapa)    | 0.9736842    | 0.7750685    | not scorable | not scorable | 0.9752066    | 0.8166711    |
| #### Bn-A08-p17748884 | A-genome specific (napus-rapa)    | 0.9880383    | 0.4502439    | not scorable | not scorable | 1            | 0.6639984    |
| #### Bn-A08-p17772887 | A-genome specific (napus-rapa)    | 0.9952153    | 0.6118419    | not scorable | not scorable | 0.9917355    | 0.8526877    |
| #### Bn-A08-p17813465 | A-genome specific (napus-rapa)    | 0.9856459    | 0.7779728    | not scorable | not scorable | 0.9752066    | 0.7439549    |
| #### Bn-A08-p17816612 | A-genome specific (napus-rapa)    | 0.9569378    | 0.7133123    | not scorable | not scorable | 1            | 0.7807711    |
| #### Bn-A08-p17823277 | A-genome specific (napus-rapa)    | 0.9784689    | 0.3947513    | not scorable | not scorable | 0.9752066    | 0.7704409    |
| #### Bn-A08-p17824285 | A-genome specific (napus-rapa)    | 0.9928229    | 0.7909988    | not scorable | not scorable | 0.9917355    | 0.7864437    |
| #### Bn-A08-p17830772 | A-genome specific (napus-rapa)    | 0.9904306    | 0.7536553    | not scorable | not scorable | 1            | 0.6137222    |
| #### Bn-A08-p17848907 | A-genome specific (napus-rapa)    | 0.9808612    | 0.2975035    | not scorable | not scorable | 0.9917355    | 0.7680151    |
| #### Bn-A08-p17849621 | genome unspecific (all in)        | 0.9928229    | 0.4782264    | 0.9457364    | 0.7524514    | 1            | 0.6528217    |
| #### Bn-A08-p17851106 | A-genome specific (napus-rapa)    | 0.9688995    | 0.34148      | not scorable | not scorable | 0.9917355    | 0.6394748    |
| #### Bn-A08-p17857870 | genome unspecific (all in)        | 0.9856459    | 0.3185484    | 0.9689922    | 0.7280403    | 0.9834711    | 0.642708     |
| #### Bn-A08-p17859330 | napus specific                    | 0.9952153    | 0.6259512    | not scorable | not scorable | not scorable | not scorable |
| #### Bn-A08-p17863903 | A-genome specific (napus-rapa)    | 0.9880383    | 0.2295091    | not scorable | not scorable | 1            | 0.8186606    |
| #### Bn-A08-p1786408  | A-genome specific (rapa only)     | not scorable | not scorable | not scorable | not scorable | 0.9917355    | 0.7644255    |
| #### Bn-A08-p17887796 | A-genome specific (napus-rapa)    | 0.9928229    | 0.7467048    | not scorable | not scorable | 0.9917355    | 0.7465472    |
| #### Bn-A08-p17932590 | A-genome specific (napus-rapa)    | 0.9928229    | 0.4393416    | not scorable | not scorable | 0.9917355    | 0.7265912    |
| #### Bn-A08-p17938347 | genome unspecific (oleracea-rapa) | not scorable | not scorable | 0.744186     | 0.8107508    | 0.9834711    | 0.3093997    |
| #### Bn-A08-p17981717 | A-genome specific (napus-rapa)    | 1            | 0.2475546    | not scorable | not scorable | 0.9834711    | 0.6816656    |
| #### Bn-A08-p18000876 | A-genome specific (napus-rapa)    | 0.9952153    | 0.49534      | not scorable | not scorable | 0.9917355    | 0.7871124    |
| #### Bn-A08-p18045254 | A-genome specific (napus-rapa)    | 0.9976076    | 0.7408746    | not scorable | not scorable | 1            | 0.7908252    |
| #### Bn-A08-p18069035 | A-genome specific (napus-rapa)    | 1            | 0.5297076    | not scorable | not scorable | 0.9834711    | 0.8562654    |
| #### Bn-A08-p18070928 | A-genome specific (napus-rapa)    | 1            | 0.8206862    | not scorable | not scorable | 1            | 0.8268933    |

|                       |                                |           |           |              |              |              |              |
|-----------------------|--------------------------------|-----------|-----------|--------------|--------------|--------------|--------------|
| #### Bn-A08-p18078817 | A-genome specific (napus-rapa) | 1         | 0.4209138 | not scorable | not scorable | 1            | 0.7879347    |
| #### Bn-A08-p1809204  | A-genome specific (napus-rapa) | 1         | 0.7732586 | not scorable | not scorable | 0.9917355    | 0.7485776    |
| #### Bn-A08-p18107648 | A-genome specific (napus-rapa) | 0.9808612 | 0.5055182 | not scorable | not scorable | 1            | 0.7686139    |
| #### Bn-A08-p18112619 | A-genome specific (napus-rapa) | 0.9880383 | 0.6986709 | not scorable | not scorable | 0.9917355    | 0.7300707    |
| #### Bn-A08-p18144819 | A-genome specific (napus-rapa) | 1         | 0.777042  | not scorable | not scorable | 1            | 0.778234     |
| #### Bn-A08-p18153504 | A-genome specific (napus-rapa) | 1         | 0.7556182 | not scorable | not scorable | 0.9917355    | 0.7533605    |
| #### Bn-A08-p18200896 | A-genome specific (napus-rapa) | 0.9928229 | 0.402155  | not scorable | not scorable | 0.9917355    | 0.7194825    |
| #### Bn-A08-p18234758 | A-genome specific (napus-rapa) | 1         | 0.9488734 | not scorable | not scorable | 1            | 0.844545     |
| #### Bn-A08-p18248601 | A-genome specific (napus-rapa) | 0.9928229 | 0.7807055 | not scorable | not scorable | 0.9917355    | 0.8383251    |
| #### Bn-A08-p18286374 | A-genome specific (napus-rapa) | 1         | 0.5885314 | not scorable | not scorable | 0.9917355    | 0.8623458    |
| #### Bn-A08-p18290748 | A-genome specific (napus-rapa) | 1         | 0.2699524 | not scorable | not scorable | 0.9917355    | 0.5710168    |
| #### Bn-A08-p18291268 | A-genome specific (napus-rapa) | 0.9928229 | 0.8024222 | not scorable | not scorable | 0.9917355    | 0.7381589    |
| #### Bn-A08-p18310412 | A-genome specific (napus-rapa) | 0.9808612 | 0.7453195 | not scorable | not scorable | 0.9917355    | 0.7230432    |
| #### Bn-A08-p18321643 | A-genome specific (napus-rapa) | 0.9736842 | 0.707164  | not scorable | not scorable | 0.9586777    | 0.6797963    |
| #### Bn-A08-p18331012 | A-genome specific (napus-rapa) | 1         | 0.4647778 | not scorable | not scorable | 0.9834711    | 0.8112521    |
| #### Bn-A08-p18353208 | A-genome specific (napus-rapa) | 0.9856459 | 0.5136639 | not scorable | not scorable | 0.9752066    | 0.630504     |
| #### Bn-A08-p18356257 | A-genome specific (napus-rapa) | 0.9928229 | 0.739229  | not scorable | not scorable | 0.9834711    | 0.7069234    |
| #### Bn-A08-p18375745 | A-genome specific (napus-rapa) | 1         | 0.7736447 | not scorable | not scorable | 1            | 0.8450087    |
| #### Bn-A08-p18409864 | A-genome specific (napus-rapa) | 0.9569378 | 0.5899167 | not scorable | not scorable | 0.9834711    | 0.7036069    |
| #### Bn-A08-p18432711 | A-genome specific (napus-rapa) | 0.9952153 | 0.2990865 | not scorable | not scorable | 0.9917355    | 0.6727801    |
| #### Bn-A08-p18432800 | A-genome specific (napus-rapa) | 0.9928229 | 0.7861961 | not scorable | not scorable | 0.9752066    | 0.7048504    |
| #### Bn-A08-p18432919 | A-genome specific (napus-rapa) | 0.9593301 | 0.4689237 | not scorable | not scorable | 0.9669421    | 0.6166184    |
| #### Bn-A08-p18433093 | A-genome specific (napus-rapa) | 0.9856459 | 0.6460553 | not scorable | not scorable | 0.9669421    | 0.5621867    |
| #### Bn-A08-p18433672 | A-genome specific (napus-rapa) | 1         | 0.7290255 | not scorable | not scorable | 0.9834711    | 0.7530208    |
| #### Bn-A08-p18462668 | A-genome specific (napus-rapa) | 0.9928229 | 0.5822721 | not scorable | not scorable | 1            | 0.822473     |
| #### Bn-A08-p18463273 | napus specific                 | 0.9354067 | 0.7458162 | not scorable | not scorable | not scorable | not scorable |
| #### Bn-A08-p1847328  | A-genome specific (napus-rapa) | 1         | 0.5473153 | not scorable | not scorable | 1            | 0.799453     |
| #### Bn-A08-p18505527 | A-genome specific (napus-rapa) | 1         | 0.7614599 | not scorable | not scorable | 0.9917355    | 0.8063356    |
| #### Bn-A08-p18524830 | A-genome specific (napus-rapa) | 1         | 0.5321157 | not scorable | not scorable | 0.9917355    | 0.797058     |
| #### Bn-A08-p18526873 | A-genome specific (napus-rapa) | 1         | 0.5010932 | not scorable | not scorable | 0.9752066    | 0.7438529    |
| #### Bn-A08-p18538166 | napus specific                 | 0.9569378 | 0.8012992 | not scorable | not scorable | not scorable | not scorable |
| #### Bn-A08-p18543984 | napus specific                 | 0.9401914 | 0.7682242 | not scorable | not scorable | not scorable | not scorable |
| #### Bn-A08-p18592850 | A-genome specific (napus-rapa) | 1         | 0.357246  | not scorable | not scorable | 0.9834711    | 0.6954257    |

|                       |                                |              |              |              |              |           |           |
|-----------------------|--------------------------------|--------------|--------------|--------------|--------------|-----------|-----------|
| #### Bn-A08-p18597209 | A-genome specific (napus-rapa) | 1            | 0.5442618    | not scorable | not scorable | 0.9917355 | 0.7783009 |
| #### Bn-A08-p18605816 | A-genome specific (napus-rapa) | 0.9904306    | 0.4248573    | not scorable | not scorable | 0.9917355 | 0.7061687 |
| #### Bn-A08-p18630178 | genome unspecific (all in)     | 0.9904306    | 0.2242573    | 0.9689922    | 0.2697251    | 0.9834711 | 0.4368804 |
| #### Bn-A08-p18631047 | A-genome specific (napus-rapa) | 1            | 0.7828951    | not scorable | not scorable | 1         | 0.8004208 |
| #### Bn-A08-p18680503 | genome unspecific (all in)     | 0.9976076    | 0.3761509    | 0.9844961    | 0.7516866    | 1         | 0.8934562 |
| #### Bn-A08-p18704383 | A-genome specific (napus-rapa) | 1            | 0.4691772    | not scorable | not scorable | 1         | 0.6862456 |
| #### Bn-A08-p18720560 | A-genome specific (napus-rapa) | 0.9856459    | 0.379113     | not scorable | not scorable | 1         | 0.8704499 |
| #### Bn-A08-p18726458 | A-genome specific (napus-rapa) | 0.9832536    | 0.5372323    | not scorable | not scorable | 1         | 0.7656572 |
| #### Bn-A08-p18733383 | A-genome specific (rapa only)  | not scorable | not scorable | not scorable | not scorable | 0.9669421 | 0.9175813 |
| #### Bn-A08-p18750116 | A-genome specific (napus-rapa) | 0.9976076    | 0.7431535    | not scorable | not scorable | 0.9834711 | 0.8533476 |
| #### Bn-A08-p18750253 | A-genome specific (napus-rapa) | 0.9976076    | 0.7965384    | not scorable | not scorable | 0.9917355 | 0.7486218 |
| #### Bn-A08-p18754717 | A-genome specific (napus-rapa) | 0.9952153    | 0.3689315    | not scorable | not scorable | 0.9917355 | 0.6308598 |
| #### Bn-A08-p18781667 | A-genome specific (napus-rapa) | 0.9880383    | 0.4298766    | not scorable | not scorable | 0.9917355 | 0.7644429 |
| #### Bn-A08-p18784592 | A-genome specific (napus-rapa) | 1            | 0.8752145    | not scorable | not scorable | 1         | 0.7973551 |
| #### Bn-A08-p18785448 | A-genome specific (napus-rapa) | 0.9952153    | 0.3832569    | not scorable | not scorable | 0.9834711 | 0.8355278 |
| #### Bn-A08-p18789560 | A-genome specific (napus-rapa) | 0.9976076    | 0.6928993    | not scorable | not scorable | 0.9917355 | 0.7969459 |
| #### Bn-A08-p18798063 | A-genome specific (napus-rapa) | 0.9976076    | 0.6196849    | not scorable | not scorable | 0.9752066 | 0.6618628 |
| #### Bn-A08-p1880862  | genome unspecific (all in)     | 0.9976076    | 0.5028727    |              | 1 0.7815779  | 1         | 0.6987593 |
| #### Bn-A08-p18820218 | A-genome specific (napus-rapa) | 1            | 0.5450147    | not scorable | not scorable | 0.9917355 | 0.6397991 |
| #### Bn-A08-p18827698 | A-genome specific (napus-rapa) | 1            | 0.4804613    | not scorable | not scorable | 1         | 0.6605942 |
| #### Bn-A08-p18953939 | A-genome specific (napus-rapa) | 0.9976076    | 0.5222886    | not scorable | not scorable | 0.9917355 | 0.670787  |
| #### Bn-A08-p18954204 | A-genome specific (napus-rapa) | 0.9952153    | 0.6815509    | not scorable | not scorable | 0.9917355 | 0.6007106 |
| #### Bn-A08-p18966828 | A-genome specific (napus-rapa) | 0.9976076    | 0.7617497    | not scorable | not scorable | 0.9917355 | 0.7152377 |
| #### Bn-A08-p18980694 | A-genome specific (napus-rapa) | 0.9521531    | 0.7464362    | not scorable | not scorable | 0.9586777 | 0.7091212 |
| #### Bn-A08-p18989194 | A-genome specific (napus-rapa) | 0.9904306    | 0.7633184    | not scorable | not scorable | 0.9917355 | 0.7884095 |
| #### Bn-A08-p18989271 | A-genome specific (napus-rapa) | 0.9952153    | 0.8088096    | not scorable | not scorable | 1         | 0.7467136 |
| #### Bn-A08-p19005550 | A-genome specific (napus-rapa) | 0.9952153    | 0.3476385    | not scorable | not scorable | 0.9752066 | 0.7563453 |
| #### Bn-A08-p19007302 | A-genome specific (napus-rapa) | 0.9665072    | 0.7328869    | not scorable | not scorable | 1         | 0.7285932 |
| #### Bn-A08-p19008575 | A-genome specific (napus-rapa) | 0.9904306    | 0.7287877    | not scorable | not scorable | 0.9917355 | 0.6621293 |
| #### Bn-A08-p19008671 | A-genome specific (napus-rapa) | 0.9952153    | 0.7340862    | not scorable | not scorable | 0.9752066 | 0.7551784 |
| #### Bn-A08-p19009254 | A-genome specific (napus-rapa) | 0.9952153    | 0.714911     | not scorable | not scorable | 1         | 0.6765514 |
| #### Bn-A08-p19017689 | A-genome specific (napus-rapa) | 0.9856459    | 0.2469135    | not scorable | not scorable | 0.9917355 | 0.7070565 |
| #### Bn-A08-p19020094 | A-genome specific (napus-rapa) | 0.9976076    | 0.7151008    | not scorable | not scorable | 0.9917355 | 0.6864894 |

|                       |                                |              |              |              |              |              |              |
|-----------------------|--------------------------------|--------------|--------------|--------------|--------------|--------------|--------------|
| #### Bn-A08-p19035945 | A-genome specific (napus-rapa) | 0.9928229    | 0.4978746    | not scorable | not scorable | 0.9752066    | 0.765896     |
| #### Bn-A08-p19052340 | A-genome specific (napus-rapa) | 1            | 0.4858528    | not scorable | not scorable | 0.9586777    | 0.705521     |
| #### Bn-A08-p19052519 | A-genome specific (napus-rapa) | 0.9928229    | 0.4523145    | not scorable | not scorable | 0.9834711    | 0.5553482    |
| #### Bn-A08-p19056219 | napus specific                 | 0.9784689    | 0.7461027    | not scorable | not scorable | not scorable | not scorable |
| #### Bn-A08-p19056545 | A-genome specific (napus-rapa) | 0.9976076    | 0.6073171    | not scorable | not scorable | 0.9917355    | 0.6700893    |
| #### Bn-A08-p19069388 | A-genome specific (napus-rapa) | 0.9880383    | 0.7830454    | not scorable | not scorable | 0.5371901    | 0.7098351    |
| #### Bn-A08-p19084386 | A-genome specific (napus-rapa) | 1            | 0.7492126    | not scorable | not scorable | 0.9834711    | 0.7903211    |
| #### Bn-A08-p19122274 | A-genome specific (napus-rapa) | 0.9952153    | 0.8302764    | not scorable | not scorable | 0.9917355    | 0.7325852    |
| #### Bn-A08-p19173201 | A-genome specific (napus-rapa) | 0.9976076    | 0.7965955    | not scorable | not scorable | 0.9917355    | 0.8064727    |
| #### Bn-A08-p19176979 | A-genome specific (napus-rapa) | 1            | 0.3911634    | not scorable | not scorable | 0.9917355    | 0.825539     |
| #### Bn-A08-p19191183 | A-genome specific (napus-rapa) | 1            | 0.6546211    | not scorable | not scorable | 0.9917355    | 0.8421341    |
| #### Bn-A08-p19191695 | A-genome specific (napus-rapa) | 1            | 0.7574268    | not scorable | not scorable | 1            | 0.7549488    |
| #### Bn-A08-p19197746 | A-genome specific (napus-rapa) | 1            | 0.4011343    | not scorable | not scorable | 1            | 0.7463821    |
| #### Bn-A08-p19198891 | A-genome specific (napus-rapa) | 1            | 0.3823211    | not scorable | not scorable | 1            | 0.7993555    |
| #### Bn-A08-p19199087 | A-genome specific (rapa only)  | not scorable | not scorable | not scorable | not scorable | 0.9917355    | 0.6379594    |
| #### Bn-A08-p19199175 | A-genome specific (napus-rapa) | 0.9928229    | 0.4248236    | not scorable | not scorable | 1            | 0.8096681    |
| #### Bn-A08-p19217869 | A-genome specific (napus-rapa) | 0.9928229    | 0.7477753    | not scorable | not scorable | 1            | 0.8276629    |
| #### Bn-A08-p19243127 | A-genome specific (napus-rapa) | 1            | 0.7561342    | not scorable | not scorable | 1            | 0.8717616    |
| #### Bn-A08-p19244116 | A-genome specific (napus-rapa) | 1            | 0.5147906    | not scorable | not scorable | 1            | 0.5367693    |
| #### Bn-A08-p19261458 | A-genome specific (napus-rapa) | 1            | 0.8007685    | not scorable | not scorable | 0.9752066    | 0.8115316    |
| #### Bn-A08-p1928132  | A-genome specific (napus-rapa) | 0.9808612    | 0.5380195    | not scorable | not scorable | 0.9669421    | 0.8463083    |
| #### Bn-A08-p19284258 | A-genome specific (napus-rapa) | 1            | 0.4201502    | not scorable | not scorable | 1            | 0.5119068    |
| #### Bn-A08-p19287037 | A-genome specific (napus-rapa) | 1            | 0.5516438    | not scorable | not scorable | 0.9669421    | 0.708503     |
| #### Bn-A08-p19316413 | A-genome specific (rapa only)  | not scorable | not scorable | not scorable | not scorable | 1            | 0.6384211    |
| #### Bn-A08-p19326795 | A-genome specific (napus-rapa) | 1            | 0.4247208    | not scorable | not scorable | 0.9917355    | 0.8480447    |
| #### Bn-A08-p19327655 | A-genome specific (napus-rapa) | 0.9976076    | 0.2724608    | not scorable | not scorable | 0.9917355    | 0.6392583    |
| #### Bn-A08-p19346186 | A-genome specific (napus-rapa) | 0.9976076    | 0.2888763    | not scorable | not scorable | 1            | 0.4662573    |
| #### Bn-A08-p19346369 | A-genome specific (napus-rapa) | 1            | 0.7408062    | not scorable | not scorable | 0.9669421    | 0.7129262    |
| #### Bn-A08-p19363491 | A-genome specific (napus-rapa) | 1            | 0.2966877    | not scorable | not scorable | 0.9834711    | 0.7889557    |
| #### Bn-A08-p19365594 | A-genome specific (napus-rapa) | 1            | 0.6700317    | not scorable | not scorable | 1            | 0.7388553    |
| #### Bn-A08-p19407950 | A-genome specific (napus-rapa) | 0.9976076    | 0.3907483    | not scorable | not scorable | 1            | 0.6002054    |
| #### Bn-A08-p19410224 | A-genome specific (napus-rapa) | 0.9880383    | 0.7582366    | not scorable | not scorable | 0.9834711    | 0.7325903    |
| #### Bn-A08-p19428204 | A-genome specific (napus-rapa) | 0.9784689    | 0.7620742    | not scorable | not scorable | 0.5702479    | 0.8098666    |

|                       |                                |              |              |              |              |           |           |
|-----------------------|--------------------------------|--------------|--------------|--------------|--------------|-----------|-----------|
| #### Bn-A08-p19435224 | A-genome specific (napus-rapa) | 0.9832536    | 0.3911143    | not scorable | not scorable | 0.9917355 | 0.689774  |
| #### Bn-A08-p19440125 | A-genome specific (rapa only)  | not scorable | not scorable | not scorable | not scorable | 0.9504132 | 0.7193478 |
| #### Bn-A08-p19443099 | A-genome specific (napus-rapa) | 0.9760765    | 0.4190447    | not scorable | not scorable | 0.9917355 | 0.8257686 |
| #### Bn-A08-p19449546 | A-genome specific (napus-rapa) | 0.9880383    | 0.7495777    | not scorable | not scorable | 1         | 0.7715275 |
| #### Bn-A08-p19452520 | A-genome specific (napus-rapa) | 0.9880383    | 0.7630087    | not scorable | not scorable | 0.9834711 | 0.7482521 |
| #### Bn-A08-p19453024 | A-genome specific (napus-rapa) | 0.9976076    | 0.7764227    | not scorable | not scorable | 0.9917355 | 0.7859433 |
| #### Bn-A08-p19454534 | A-genome specific (napus-rapa) | 0.9880383    | 0.7834736    | not scorable | not scorable | 0.9834711 | 0.7474731 |
| #### Bn-A08-p19454590 | A-genome specific (napus-rapa) | 0.9856459    | 0.8060169    | not scorable | not scorable | 0.9504132 | 0.6578698 |
| #### Bn-A08-p19460659 | A-genome specific (napus-rapa) | 1            | 0.5622922    | not scorable | not scorable | 0.9917355 | 0.7301346 |
| #### Bn-A08-p19483726 | A-genome specific (napus-rapa) | 0.9976076    | 0.3191136    | not scorable | not scorable | 0.9586777 | 0.5022744 |
| #### Bn-A08-p19487830 | A-genome specific (napus-rapa) | 1            | 0.6760607    | not scorable | not scorable | 0.5454546 | 0.6592851 |
| #### Bn-A08-p19504101 | A-genome specific (napus-rapa) | 0.9976076    | 0.5008111    | not scorable | not scorable | 1         | 0.7828098 |
| #### Bn-A08-p19530023 | A-genome specific (napus-rapa) | 0.9928229    | 0.4728828    | not scorable | not scorable | 1         | 0.7687293 |
| #### Bn-A08-p19538361 | A-genome specific (napus-rapa) | 1            | 0.903637     | not scorable | not scorable | 1         | 0.8815182 |
| #### Bn-A08-p19541990 | genome unspecific (all in)     | 0.9952153    | 0.3576356    | 0.9922481    | 0.7626049    | 1         | 0.7642385 |
| #### Bn-A08-p19553756 | A-genome specific (napus-rapa) | 0.8995215    | 0.5738424    | not scorable | not scorable | 0.5041322 | 0.6180784 |
| #### Bn-A08-p19573947 | A-genome specific (napus-rapa) | 0.9928229    | 0.3124626    | not scorable | not scorable | 1         | 0.7136098 |
| #### Bn-A08-p19574453 | A-genome specific (napus-rapa) | 0.9976076    | 0.763723     | not scorable | not scorable | 0.9834711 | 0.7449914 |
| #### Bn-A08-p19575209 | A-genome specific (napus-rapa) | 0.9856459    | 0.6479187    | not scorable | not scorable | 1         | 0.7434095 |
| #### Bn-A08-p19578180 | A-genome specific (napus-rapa) | 0.9784689    | 0.3933849    | not scorable | not scorable | 0.9669421 | 0.6264133 |
| #### Bn-A08-p19599590 | A-genome specific (napus-rapa) | 0.9856459    | 0.7373402    | not scorable | not scorable | 1         | 0.7451775 |
| #### Bn-A08-p19608779 | A-genome specific (napus-rapa) | 0.9688995    | 0.6284514    | not scorable | not scorable | 0.9173554 | 0.6388057 |
| #### Bn-A08-p19619504 | A-genome specific (napus-rapa) | 0.9976076    | 0.7518882    | not scorable | not scorable | 1         | 0.8004208 |
| #### Bn-A08-p19626269 | A-genome specific (napus-rapa) | 0.9976076    | 0.7879347    | not scorable | not scorable | 0.9504132 | 0.6768016 |
| #### Bn-A08-p19642040 | A-genome specific (napus-rapa) | 0.9856459    | 0.5498239    | not scorable | not scorable | 0.9834711 | 0.7538786 |
| #### Bn-A08-p19646345 | A-genome specific (napus-rapa) | 0.9928229    | 0.7978668    | not scorable | not scorable | 0.9669421 | 0.7842627 |
| #### Bn-A08-p19659002 | A-genome specific (napus-rapa) | 0.937799     | 0.3537254    | not scorable | not scorable | 0.9834711 | 0.6043348 |
| #### Bn-A08-p19675091 | A-genome specific (napus-rapa) | 0.9928229    | 0.5351163    | not scorable | not scorable | 0.9917355 | 0.7208545 |
| #### Bn-A08-p19676486 | A-genome specific (napus-rapa) | 0.9473684    | 0.4694463    | not scorable | not scorable | 0.9917355 | 0.6617017 |
| #### Bn-A08-p19676498 | A-genome specific (napus-rapa) | 0.9880383    | 0.4954074    | not scorable | not scorable | 0.9917355 | 0.6858442 |
| #### Bn-A08-p19676653 | A-genome specific (napus-rapa) | 0.9545454    | 0.3933415    | not scorable | not scorable | 0.9834711 | 0.7043413 |
| #### Bn-A08-p19676751 | A-genome specific (napus-rapa) | 0.9688995    | 0.2488245    | not scorable | not scorable | 0.9586777 | 0.6212817 |
| #### Bn-A08-p19683899 | A-genome specific (napus-rapa) | 0.6746411    | 0.7203545    | not scorable | not scorable | 0.9669421 | 0.8495459 |

|                       |                                |              |              |              |              |              |              |
|-----------------------|--------------------------------|--------------|--------------|--------------|--------------|--------------|--------------|
| #### Bn-A08-p19686197 | A-genome specific (rapa only)  | not scorable | not scorable | not scorable | not scorable | 0.9669421    | 0.9071051    |
| #### Bn-A08-p19690298 | A-genome specific (napus-rapa) | 0.9760765    | 0.7466927    | not scorable | not scorable | 0.9752066    | 0.720772     |
| #### Bn-A08-p19690393 | A-genome specific (napus-rapa) | 0.9832536    | 0.7492031    | not scorable | not scorable | 0.9834711    | 0.7594606    |
| #### Bn-A08-p19699523 | A-genome specific (napus-rapa) | 0.9760765    | 0.2670389    | not scorable | not scorable | 0.9917355    | 0.7999254    |
| #### Bn-A08-p19715503 | A-genome specific (napus-rapa) | 0.9856459    | 0.4270445    | not scorable | not scorable | 0.9917355    | 0.7808266    |
| #### Bn-A08-p19719692 | A-genome specific (napus-rapa) | 0.9880383    | 0.361312     | not scorable | not scorable | 0.9834711    | 0.7799397    |
| #### Bn-A08-p19736692 | A-genome specific (napus-rapa) | 0.9760765    | 0.5905963    | not scorable | not scorable | 0.5371901    | 0.6625444    |
| #### Bn-A08-p19736774 | A-genome specific (rapa only)  | not scorable | not scorable | not scorable | not scorable | 0.9834711    | 0.7709506    |
| #### Bn-A08-p19757192 | A-genome specific (napus-rapa) | 0.9712918    | 0.3139263    | not scorable | not scorable | 0.9917355    | 0.7807485    |
| #### Bn-A08-p19782306 | A-genome specific (napus-rapa) | 0.9880383    | 0.3350843    | not scorable | not scorable | 0.9834711    | 0.6105582    |
| #### Bn-A08-p19782433 | A-genome specific (napus-rapa) | 1            | 0.3063191    | not scorable | not scorable | 0.9669421    | 0.4914125    |
| #### Bn-A08-p19792067 | A-genome specific (napus-rapa) | 1            | 0.5386348    | not scorable | not scorable | 1            | 0.7563457    |
| #### Bn-A08-p19799335 | A-genome specific (napus-rapa) | 0.9712918    | 0.7624666    | not scorable | not scorable | 1            | 0.7343857    |
| #### Bn-A08-p19799789 | A-genome specific (napus-rapa) | 0.9784689    | 0.8022789    | not scorable | not scorable | 0.9917355    | 0.8561981    |
| #### Bn-A08-p19800532 | A-genome specific (napus-rapa) | 0.9904306    | 0.72904      | not scorable | not scorable | 0.9917355    | 0.6602995    |
| #### Bn-A08-p19802597 | A-genome specific (napus-rapa) | 0.9952153    | 0.6957124    | not scorable | not scorable | 1            | 0.8027865    |
| #### Bn-A08-p19821458 | A-genome specific (napus-rapa) | 1            | 0.6354381    | not scorable | not scorable | 1            | 0.789915     |
| #### Bn-A08-p19834705 | A-genome specific (napus-rapa) | 0.9880383    | 0.8228031    | not scorable | not scorable | 1            | 0.8158048    |
| #### Bn-A08-p19871877 | A-genome specific (napus-rapa) | 1            | 0.9175813    | not scorable | not scorable | 0.9917355    | 0.8550459    |
| #### Bn-A08-p19879173 | A-genome specific (napus-rapa) | 1            | 0.7914145    | not scorable | not scorable | 1            | 0.7914145    |
| #### Bn-A08-p19879285 | A-genome specific (napus-rapa) | 1            | 0.3658348    | not scorable | not scorable | 0.9917355    | 0.6939829    |
| #### Bn-A08-p19879343 | A-genome specific (napus-rapa) | 0.9952153    | 0.75827      | not scorable | not scorable | 1            | 0.9011175    |
| #### Bn-A08-p19879488 | A-genome specific (napus-rapa) | 1            | 0.5085766    | not scorable | not scorable | 0.9834711    | 0.6388002    |
| #### Bn-A08-p19879499 | A-genome specific (napus-rapa) | 1            | 0.647505     | not scorable | not scorable | 0.9752066    | 0.7154159    |
| #### Bn-A08-p19888431 | A-genome specific (napus-rapa) | 1            | 0.6943637    | not scorable | not scorable | 1            | 0.7255546    |
| #### Bn-A08-p19903284 | A-genome specific (napus-rapa) | 0.9928229    | 0.5041437    | not scorable | not scorable | 1            | 0.8153117    |
| #### Bn-A08-p19905748 | A-genome specific (napus-rapa) | 0.9688995    | 0.4561025    | not scorable | not scorable | 0.9669421    | 0.6589147    |
| #### Bn-A08-p19907560 | A-genome specific (napus-rapa) | 1            | 0.3484062    | not scorable | not scorable | 0.9752066    | 0.8146542    |
| #### Bn-A08-p19908763 | napus specific                 | 0.9856459    | 0.4588375    | not scorable | not scorable | not scorable | not scorable |
| #### Bn-A08-p19919658 | A-genome specific (napus-rapa) | 0.9665072    | 0.6494439    | not scorable | not scorable | 0.9504132    | 0.7609519    |
| #### Bn-A08-p19919901 | A-genome specific (napus-rapa) | 0.9904306    | 0.6335893    | not scorable | not scorable | 0.9834711    | 0.5979702    |
| #### Bn-A08-p19921292 | all not scorable               | not scorable | not scorable | not scorable | not scorable | not scorable | not scorable |
| #### Bn-A08-p19924214 | A-genome specific (napus-rapa) | 0.9760765    | 0.6594644    | not scorable | not scorable | 1            | 0.5891807    |



|                       |                                |           |           |              |              |           |           |
|-----------------------|--------------------------------|-----------|-----------|--------------|--------------|-----------|-----------|
| #### Bn-A08-p19960214 | A-genome specific (napus-rapa) | 0.9784689 | 0.5672331 | not scorable | not scorable | 1         | 0.7701232 |
| #### Bn-A08-p19982640 | A-genome specific (napus-rapa) | 0.9880383 | 0.4665429 | not scorable | not scorable | 1         | 0.8240348 |
| #### Bn-A08-p19983972 | A-genome specific (napus-rapa) | 0.9712918 | 0.7006688 | not scorable | not scorable | 0.9917355 | 0.7090893 |
| #### Bn-A08-p19998345 | A-genome specific (napus-rapa) | 0.9880383 | 0.259649  | not scorable | not scorable | 0.9669421 | 0.7236249 |
| #### Bn-A08-p20002292 | A-genome specific (napus-rapa) | 1         | 0.8093123 | not scorable | not scorable | 0.9917355 | 0.8650669 |
| #### Bn-A08-p20014208 | A-genome specific (napus-rapa) | 0.9856459 | 0.772558  | not scorable | not scorable | 0.9917355 | 0.6020664 |
| #### Bn-A08-p20020511 | A-genome specific (napus-rapa) | 0.9856459 | 0.7658518 | not scorable | not scorable | 0.9834711 | 0.7392797 |
| #### Bn-A08-p20025646 | A-genome specific (napus-rapa) | 0.9928229 | 0.431285  | not scorable | not scorable | 0.9917355 | 0.7723722 |
| #### Bn-A08-p20037426 | A-genome specific (napus-rapa) | 0.9976076 | 0.4852574 | not scorable | not scorable | 1         | 0.6685315 |
| #### Bn-A08-p20042299 | A-genome specific (napus-rapa) | 0.9952153 | 0.4684456 | not scorable | not scorable | 0.9917355 | 0.6768491 |
| #### Bn-A08-p20068678 | A-genome specific (napus-rapa) | 0.9952153 | 0.774084  | not scorable | not scorable | 0.9917355 | 0.8071608 |
| #### Bn-A08-p20068977 | A-genome specific (napus-rapa) | 0.9712918 | 0.4049692 | not scorable | not scorable | 0.9917355 | 0.7103646 |
| #### Bn-A08-p20069265 | A-genome specific (napus-rapa) | 1         | 0.470187  | not scorable | not scorable | 0.9752066 | 0.7378665 |
| #### Bn-A08-p20070433 | A-genome specific (napus-rapa) | 0.9641148 | 0.5759972 | not scorable | not scorable | 0.9917355 | 0.804029  |
| #### Bn-A08-p20072457 | A-genome specific (napus-rapa) | 0.9784689 | 0.7697489 | not scorable | not scorable | 0.9917355 | 0.8199068 |
| #### Bn-A08-p20072731 | A-genome specific (napus-rapa) | 1         | 0.5043192 | not scorable | not scorable | 0.9752066 | 0.7167364 |
| #### Bn-A08-p20075062 | A-genome specific (napus-rapa) | 0.9784689 | 0.5827548 | not scorable | not scorable | 0.9917355 | 0.7749997 |
| #### Bn-A08-p20085504 | A-genome specific (napus-rapa) | 0.9928229 | 0.3702553 | not scorable | not scorable | 0.9834711 | 0.7294272 |
| #### Bn-A08-p20091818 | A-genome specific (napus-rapa) | 0.9808612 | 0.780544  | not scorable | not scorable | 0.9917355 | 0.7981747 |
| #### Bn-A08-p20092115 | A-genome specific (napus-rapa) | 0.9808612 | 0.7559173 | not scorable | not scorable | 0.9834711 | 0.7845092 |
| #### Bn-A08-p20096558 | A-genome specific (napus-rapa) | 0.9976076 | 0.3147799 | not scorable | not scorable | 0.9752066 | 0.4797814 |
| #### Bn-A08-p20104274 | A-genome specific (napus-rapa) | 1         | 0.4367384 | not scorable | not scorable | 0.9752066 | 0.746773  |
| #### Bn-A08-p20106099 | A-genome specific (napus-rapa) | 0.9521531 | 0.7129421 | not scorable | not scorable | 0.9586777 | 0.6757354 |
| #### Bn-A08-p20106529 | A-genome specific (napus-rapa) | 0.9688995 | 0.382538  | not scorable | not scorable | 0.9834711 | 0.7350631 |
| #### Bn-A08-p20114959 | A-genome specific (napus-rapa) | 0.9976076 | 0.8033351 | not scorable | not scorable | 0.9752066 | 0.680109  |
| #### Bn-A08-p201236   | A-genome specific (napus-rapa) | 0.9880383 | 0.7790589 | not scorable | not scorable | 0.8347107 | 0.6653997 |
| #### Bn-A08-p20134420 | A-genome specific (napus-rapa) | 0.9688995 | 0.6990616 | not scorable | not scorable | 0.9917355 | 0.7316711 |
| #### Bn-A08-p20169768 | A-genome specific (napus-rapa) | 0.5813397 | 0.7738742 | not scorable | not scorable | 1         | 0.7396851 |
| #### Bn-A08-p20170453 | A-genome specific (napus-rapa) | 0.9808612 | 0.5870705 | not scorable | not scorable | 1         | 0.574774  |
| #### Bn-A08-p20173109 | A-genome specific (napus-rapa) | 0.9736842 | 0.6926907 | not scorable | not scorable | 0.9917355 | 0.7759436 |
| #### Bn-A08-p20189027 | A-genome specific (napus-rapa) | 1         | 0.809444  | not scorable | not scorable | 0.9834711 | 0.8003237 |
| #### Bn-A08-p20216535 | A-genome specific (napus-rapa) | 0.9832536 | 0.787205  | not scorable | not scorable | 0.9917355 | 0.8131059 |
| #### Bn-A08-p20216905 | A-genome specific (napus-rapa) | 0.9952153 | 0.7914012 | not scorable | not scorable | 0.9917355 | 0.7696273 |

|                       |                                |              |              |              |              |              |              |
|-----------------------|--------------------------------|--------------|--------------|--------------|--------------|--------------|--------------|
| #### Bn-A08-p20226034 | A-genome specific (napus-rapa) | 0.9856459    | 0.7516232    | not scorable | not scorable | 0.9834711    | 0.9175813    |
| #### Bn-A08-p20238985 | A-genome specific (napus-rapa) | 1            | 0.7099062    | not scorable | not scorable | 1            | 0.6689079    |
| #### Bn-A08-p20244218 | A-genome specific (napus-rapa) | 0.9928229    | 0.4635632    | not scorable | not scorable | 0.9834711    | 0.6721757    |
| #### Bn-A08-p20245485 | A-genome specific (napus-rapa) | 0.9832536    | 0.3615585    | not scorable | not scorable | 1            | 0.682815     |
| #### Bn-A08-p20262207 | A-genome specific (rapa only)  | not scorable | not scorable | not scorable | not scorable | 1            | 0.7419709    |
| #### Bn-A08-p20277144 | A-genome specific (napus-rapa) | 0.9952153    | 0.6837681    | not scorable | not scorable | 0.9834711    | 0.5504884    |
| #### Bn-A08-p20286379 | napus specific                 | 0.9880383    | 0.4204692    | not scorable | not scorable | not scorable | not scorable |
| #### Bn-A08-p20294693 | A-genome specific (napus-rapa) | 1            | 0.7157722    | not scorable | not scorable | 1            | 0.6914184    |
| #### Bn-A08-p20305036 | A-genome specific (napus-rapa) | 0.9712918    | 0.7618081    | not scorable | not scorable | 0.9834711    | 0.6956896    |
| #### Bn-A08-p20306059 | A-genome specific (napus-rapa) | 0.7727273    | 0.7729027    | not scorable | not scorable | 0.9917355    | 0.9149132    |
| #### Bn-A08-p20306463 | A-genome specific (rapa only)  | not scorable | not scorable | not scorable | not scorable | 1            | 0.7272971    |
| #### Bn-A08-p20306567 | A-genome specific (napus-rapa) | 0.9904306    | 0.7936365    | not scorable | not scorable | 1            | 0.7761593    |
| #### Bn-A08-p20314411 | A-genome specific (napus-rapa) | 0.9641148    | 0.8325526    | not scorable | not scorable | 1            | 0.8685405    |
| #### Bn-A08-p20319696 | A-genome specific (napus-rapa) | 0.9712918    | 0.396864     | not scorable | not scorable | 0.9917355    | 0.7721856    |
| #### Bn-A08-p20319815 | napus specific                 | 0.9856459    | 0.75441      | not scorable | not scorable | not scorable | not scorable |
| #### Bn-A08-p20321558 | A-genome specific (napus-rapa) | 0.9976076    | 0.5635831    | not scorable | not scorable | 0.9421487    | 0.765696     |
| #### Bn-A08-p20324326 | A-genome specific (napus-rapa) | 1            | 0.4774818    | not scorable | not scorable | 1            | 0.5346791    |
| #### Bn-A08-p20336178 | A-genome specific (napus-rapa) | 1            | 0.6733703    | not scorable | not scorable | 1            | 0.6622245    |
| #### Bn-A08-p20341221 | A-genome specific (napus-rapa) | 0.9880383    | 0.8040019    | not scorable | not scorable | 0.9834711    | 0.8379419    |
| #### Bn-A08-p20343735 | napus specific                 | 0.9497608    | 0.79677      | not scorable | not scorable | not scorable | not scorable |
| #### Bn-A08-p20347040 | A-genome specific (napus-rapa) | 0.9904306    | 0.7918892    | not scorable | not scorable | 1            | 0.9092136    |
| #### Bn-A08-p20354125 | A-genome specific (rapa only)  | not scorable | not scorable | not scorable | not scorable | 0.8842975    | 0.7641606    |
| #### Bn-A08-p20354609 | A-genome specific (napus-rapa) | 0.9904306    | 0.4847742    | not scorable | not scorable | 1            | 0.6624553    |
| #### Bn-A08-p20355213 | A-genome specific (napus-rapa) | 0.9904306    | 0.7970481    | not scorable | not scorable | 1            | 0.7531837    |
| #### Bn-A08-p20356745 | A-genome specific (napus-rapa) | 0.9497608    | 0.4308973    | not scorable | not scorable | 0.9917355    | 0.7356362    |
| #### Bn-A08-p20360306 | A-genome specific (napus-rapa) | 0.9880383    | 0.7815387    | not scorable | not scorable | 0.9917355    | 0.6978741    |
| #### Bn-A08-p20373317 | A-genome specific (napus-rapa) | 0.9688995    | 0.3036288    | not scorable | not scorable | 0.9917355    | 0.7655306    |
| #### Bn-A08-p20373400 | A-genome specific (napus-rapa) | 0.9856459    | 0.2171527    | not scorable | not scorable | 1            | 0.8038322    |
| #### Bn-A08-p20394042 | A-genome specific (napus-rapa) | 1            | 0.2696431    | not scorable | not scorable | 0.9917355    | 0.7295676    |
| #### Bn-A08-p20395388 | A-genome specific (napus-rapa) | 0.9952153    | 0.2729613    | not scorable | not scorable | 0.9917355    | 0.7638897    |
| #### Bn-A08-p20416050 | A-genome specific (napus-rapa) | 1            | 0.5829232    | not scorable | not scorable | 1            | 0.7366338    |
| #### Bn-A08-p20441889 | genome unspecific (all in)     | 0.9928229    | 0.5285093    | 0.9844961    | 0.749165     | 0.9917355    | 0.6919312    |
| #### Bn-A08-p20474660 | A-genome specific (napus-rapa) | 1            | 0.5229706    | not scorable | not scorable | 0.9752066    | 0.6622719    |

|                       |                                   |              |              |              |              |           |           |
|-----------------------|-----------------------------------|--------------|--------------|--------------|--------------|-----------|-----------|
| #### Bn-A08-p20476359 | A-genome specific (napus-rapa)    | 0.9880383    | 0.7711915    | not scorable | not scorable | 0.9752066 | 0.7602765 |
| #### Bn-A08-p20480348 | A-genome specific (napus-rapa)    | 0.9808612    | 0.7772353    | not scorable | not scorable | 0.9834711 | 0.7801071 |
| #### Bn-A08-p20485374 | A-genome specific (napus-rapa)    | 1            | 0.6141052    | not scorable | not scorable | 1         | 0.8173911 |
| #### Bn-A08-p20490539 | A-genome specific (napus-rapa)    | 0.9784689    | 0.5078683    | not scorable | not scorable | 0.9917355 | 0.7904146 |
| #### Bn-A08-p20490691 | A-genome specific (napus-rapa)    | 1            | 0.4643644    | not scorable | not scorable | 0.9917355 | 0.6390108 |
| #### Bn-A08-p205262   | A-genome specific (napus-rapa)    | 0.9928229    | 0.3443298    | not scorable | not scorable | 0.6859504 | 0.7783838 |
| #### Bn-A08-p20529396 | A-genome specific (napus-rapa)    | 0.9186603    | 0.4111404    | not scorable | not scorable | 0.9917355 | 0.8080741 |
| #### Bn-A08-p20530487 | A-genome specific (napus-rapa)    | 0.9928229    | 0.8358379    | not scorable | not scorable | 1         | 0.8412589 |
| #### Bn-A08-p20537757 | A-genome specific (rapa only)     | not scorable | not scorable | not scorable | not scorable | 0.9834711 | 0.6574984 |
| #### Bn-A08-p20538517 | A-genome specific (napus-rapa)    | 0.9808612    | 0.5307912    | not scorable | not scorable | 0.9834711 | 0.6882576 |
| #### Bn-A08-p20546003 | A-genome specific (napus-rapa)    | 0.9904306    | 0.546978     | not scorable | not scorable | 1         | 0.6789795 |
| #### Bn-A08-p20546044 | A-genome specific (napus-rapa)    | 0.9808612    | 0.8005103    | not scorable | not scorable | 1         | 0.801665  |
| #### Bn-A08-p20546110 | A-genome specific (napus-rapa)    | 0.9952153    | 0.7508786    | not scorable | not scorable | 0.9834711 | 0.7667041 |
| #### Bn-A08-p20547091 | A-genome specific (napus-rapa)    | 0.9976076    | 0.7748445    | not scorable | not scorable | 1         | 0.8020419 |
| #### Bn-A08-p20548890 | A-genome specific (napus-rapa)    | 0.9808612    | 0.7745803    | not scorable | not scorable | 0.9917355 | 0.7690014 |
| #### Bn-A08-p20551301 | A-genome specific (napus-rapa)    | 1            | 0.5796024    | not scorable | not scorable | 0.9917355 | 0.5436272 |
| #### Bn-A08-p20554540 | A-genome specific (napus-rapa)    | 0.9760765    | 0.737654     | not scorable | not scorable | 0.9752066 | 0.6175711 |
| #### Bn-A08-p20555629 | A-genome specific (napus-rapa)    | 0.9808612    | 0.5422519    | not scorable | not scorable | 0.9917355 | 0.7900085 |
| #### Bn-A08-p20577960 | A-genome specific (napus-rapa)    | 0.9880383    | 0.8149862    | not scorable | not scorable | 0.9834711 | 0.8137556 |
| #### Bn-A08-p20587556 | A-genome specific (napus-rapa)    | 0.9784689    | 0.7901043    | not scorable | not scorable | 0.9917355 | 0.8087482 |
| #### Bn-A08-p20594698 | A-genome specific (napus-rapa)    | 0.9856459    | 0.6807564    | not scorable | not scorable | 0.9834711 | 0.6794593 |
| #### Bn-A08-p20594785 | A-genome specific (napus-rapa)    | 0.9784689    | 0.7632089    | not scorable | not scorable | 0.9504132 | 0.7284096 |
| #### Bn-A08-p20608675 | A-genome specific (napus-rapa)    | 0.9665072    | 0.7611325    | not scorable | not scorable | 0.9586777 | 0.7577352 |
| #### Bn-A08-p20679328 | A-genome specific (napus-rapa)    | 1            | 0.9535267    | not scorable | not scorable | 0.9917355 | 0.7706077 |
| #### Bn-A08-p20692045 | A-genome specific (napus-rapa)    | 1            | 0.5483476    | not scorable | not scorable | 1         | 0.6124076 |
| #### Bn-A08-p20717142 | genome unspecific (oleracea-rapa) | not scorable | not scorable | 0.9689922    | 0.539118     | 1         | 0.6191799 |
| #### Bn-A08-p20778097 | A-genome specific (napus-rapa)    | 1            | 0.4901778    | not scorable | not scorable | 0.9917355 | 0.7772037 |
| #### Bn-A08-p20801363 | A-genome specific (rapa only)     | not scorable | not scorable | not scorable | not scorable | 0.9834711 | 0.7722812 |
| #### Bn-A08-p20803469 | A-genome specific (napus-rapa)    | 0.9976076    | 0.8470154    | not scorable | not scorable | 0.9834711 | 0.7773928 |
| #### Bn-A08-p20820768 | A-genome specific (napus-rapa)    | 1            | 0.5228506    | not scorable | not scorable | 0.9752066 | 0.7247455 |
| #### Bn-A08-p20838949 | genome unspecific (all in)        | 1            | 0.4430424    |              | 1            | 0.6130789 | 0.9834711 |
| #### Bn-A08-p20839304 | A-genome specific (napus-rapa)    | 1            | 0.3734199    | not scorable | not scorable | 0.9917355 | 0.806812  |
| #### Bn-A08-p20846182 | A-genome specific (napus-rapa)    | 1            | 0.5029188    | not scorable | not scorable | 1         | 0.7811555 |

|                       |                                   |              |              |              |              |              |              |
|-----------------------|-----------------------------------|--------------|--------------|--------------|--------------|--------------|--------------|
| #### Bn-A08-p20855631 | A-genome specific (napus-rapa)    | 1            | 0.745658     | not scorable | not scorable | 0.9917355    | 0.7793339    |
| #### Bn-A08-p20865005 | A-genome specific (napus-rapa)    | 1            | 0.7878839    | not scorable | not scorable | 0.9834711    | 0.8201622    |
| #### Bn-A08-p20874645 | A-genome specific (napus-rapa)    | 1            | 0.7484789    | not scorable | not scorable | 0.9917355    | 0.836735     |
| #### Bn-A08-p20904948 | A-genome specific (napus-rapa)    | 0.9856459    | 0.4992076    | not scorable | not scorable | 1            | 0.6618145    |
| #### Bn-A08-p20913891 | A-genome specific (napus-rapa)    | 0.9760765    | 0.7398514    | not scorable | not scorable | 0.9669421    | 0.7920957    |
| #### Bn-A08-p20927339 | genome unspecific (all in)        | 1            | 0.3546185    |              | 1 0.8131415  | 0.9917355    | 0.7183332    |
| #### Bn-A08-p20931438 | A-genome specific (napus-rapa)    | 0.9904306    | 0.7059608    | not scorable | not scorable | 1            | 0.7194397    |
| #### Bn-A08-p20931690 | napus specific                    | 0.9976076    | 0.6552802    | not scorable | not scorable | not scorable | not scorable |
| #### Bn-A08-p20934184 | A-genome specific (napus-rapa)    | 0.9976076    | 0.6976816    | not scorable | not scorable | 0.9834711    | 0.677376     |
| #### Bn-A08-p20945277 | A-genome specific (napus-rapa)    | 0.9976076    | 0.6732516    | not scorable | not scorable | 0.6198347    | 0.7061046    |
| #### Bn-A08-p20950199 | A-genome specific (napus-rapa)    | 0.9832536    | 0.2434942    | not scorable | not scorable | 0.9917355    | 0.5685505    |
| #### Bn-A08-p20965113 | A-genome specific (napus-rapa)    | 0.9880383    | 0.7408397    | not scorable | not scorable | 0.9834711    | 0.799808     |
| #### Bn-A08-p20967165 | A-genome specific (napus-rapa)    | 0.9736842    | 0.3005719    | not scorable | not scorable | 1            | 0.5420017    |
| #### Bn-A08-p20968239 | A-genome specific (napus-rapa)    | 0.9808612    | 0.5305504    | not scorable | not scorable | 0.9917355    | 0.7609391    |
| #### Bn-A08-p20971092 | A-genome specific (napus-rapa)    | 1            | 0.7460027    | not scorable | not scorable | 0.9917355    | 0.8042552    |
| #### Bn-A08-p20993982 | genome unspecific (oleracea-rapa) | not scorable | not scorable | 0.9844961    | 0.7714862    | 0.9917355    | 0.7309088    |
| #### Bn-A08-p21036778 | A-genome specific (rapa only)     | not scorable | not scorable | not scorable | not scorable | 0.9752066    | 0.6612433    |
| #### Bn-A08-p21062076 | A-genome specific (napus-rapa)    | 1            | 0.5048922    | not scorable | not scorable | 0.9917355    | 0.784659     |
| #### Bn-A08-p21070052 | A-genome specific (napus-rapa)    | 0.9808612    | 0.7234263    | not scorable | not scorable | 1            | 0.7702276    |
| #### Bn-A08-p21076939 | A-genome specific (napus-rapa)    | 1            | 0.7879747    | not scorable | not scorable | 0.6528926    | 0.8833875    |
| #### Bn-A08-p21076987 | A-genome specific (napus-rapa)    | 0.9856459    | 0.7736317    | not scorable | not scorable | 0.9834711    | 0.7153606    |
| #### Bn-A08-p21077284 | A-genome specific (rapa only)     | not scorable | not scorable | not scorable | not scorable | 0.9752066    | 0.7661366    |
| #### Bn-A08-p211090   | A-genome specific (napus-rapa)    | 1            | 0.6847969    | not scorable | not scorable | 0.9752066    | 0.6185827    |
| #### Bn-A08-p21132027 | A-genome specific (napus-rapa)    | 0.9928229    | 0.4804736    | not scorable | not scorable | 0.661157     | 0.7809058    |
| #### Bn-A08-p21149542 | A-genome specific (napus-rapa)    | 1            | 0.9158829    | not scorable | not scorable | 1            | 0.7922041    |
| #### Bn-A08-p21168203 | A-genome specific (napus-rapa)    | 1            | 0.4607485    | not scorable | not scorable | 0.9752066    | 0.4234561    |
| #### Bn-A08-p21189645 | A-genome specific (napus-rapa)    | 0.9976076    | 0.5224899    | not scorable | not scorable | 1            | 0.7442623    |
| #### Bn-A08-p21199124 | A-genome specific (napus-rapa)    | 1            | 0.7475964    | not scorable | not scorable | 1            | 0.7193892    |
| #### Bn-A08-p21227076 | A-genome specific (napus-rapa)    | 1            | 0.8060617    | not scorable | not scorable | 0.9917355    | 0.8013431    |
| #### Bn-A08-p21228678 | A-genome specific (napus-rapa)    | 1            | 0.553148     | not scorable | not scorable | 0.9917355    | 0.7119542    |
| #### Bn-A08-p21241586 | A-genome specific (napus-rapa)    | 1            | 0.8625931    | not scorable | not scorable | 0.9752066    | 0.8385596    |
| #### Bn-A08-p21282852 | genome unspecific (oleracea-rapa) | not scorable | not scorable | 0.9612403    | 0.570429     | 0.9586777    | 0.6748781    |
| #### Bn-A08-p21283107 | A-genome specific (napus-rapa)    | 1            | 0.6943204    | not scorable | not scorable | 1            | 0.6591324    |

|                       |                                |              |              |              |              |              |              |
|-----------------------|--------------------------------|--------------|--------------|--------------|--------------|--------------|--------------|
| #### Bn-A08-p21283562 | A-genome specific (napus-rapa) | 0.9808612    | 0.4515332    | not scorable | not scorable | 1            | 0.8004208    |
| #### Bn-A08-p21319486 | genome unspecific (all in)     | 1            | 0.6751631    |              | 1 0.6650984  | 0.9917355    | 0.7825657    |
| #### Bn-A08-p21330967 | A-genome specific (napus-rapa) | 0.9976076    | 0.6642943    | not scorable | not scorable | 0.9586777    | 0.5816541    |
| #### Bn-A08-p21334007 | A-genome specific (napus-rapa) | 1            | 0.816532     | not scorable | not scorable | 0.9586777    | 0.824281     |
| #### Bn-A08-p21348310 | A-genome specific (napus-rapa) | 1            | 0.4786458    | not scorable | not scorable | 0.9834711    | 0.6466466    |
| #### Bn-A08-p21352716 | A-genome specific (napus-rapa) | 1            | 0.5806173    | not scorable | not scorable | 0.9917355    | 0.7451922    |
| #### Bn-A08-p21383689 | A-genome specific (napus-rapa) | 0.9952153    | 0.6267598    | not scorable | not scorable | 1            | 0.7730355    |
| #### Bn-A08-p21385759 | A-genome specific (napus-rapa) | 1            | 0.5174138    | not scorable | not scorable | 0.9917355    | 0.5595438    |
| #### Bn-A08-p21401348 | A-genome specific (napus-rapa) | 0.9904306    | 0.8638778    | not scorable | not scorable | 0.9834711    | 0.7113407    |
| #### Bn-A08-p21417592 | A-genome specific (napus-rapa) | 0.9904306    | 0.7039377    | not scorable | not scorable | 0.9834711    | 0.707826     |
| #### Bn-A08-p21434747 | A-genome specific (napus-rapa) | 1            | 0.3969177    | not scorable | not scorable | 1            | 0.6854973    |
| #### Bn-A08-p21463036 | A-genome specific (napus-rapa) | 1            | 0.3178516    | not scorable | not scorable | 0.9834711    | 0.6607876    |
| #### Bn-A08-p21557215 | all not scorable               | not scorable | not scorable | not scorable | not scorable | not scorable | not scorable |
| #### Bn-A08-p21557880 | all not scorable               | not scorable | not scorable | not scorable | not scorable | not scorable | not scorable |
| #### Bn-A08-p21557975 | A-genome specific (rapa only)  | not scorable | not scorable | not scorable | not scorable | 0.9586777    | 0.7277436    |
| #### Bn-A08-p21591824 | A-genome specific (napus-rapa) | 0.9952153    | 0.9205657    | not scorable | not scorable | 1            | 0.9175728    |
| #### Bn-A08-p2184922  | all not scorable               | not scorable | not scorable | not scorable | not scorable | not scorable | not scorable |
| #### Bn-A08-p2274232  | A-genome specific (napus-rapa) | 1            | 0.9205653    | not scorable | not scorable | 0.9917355    | 0.6660563    |
| #### Bn-A08-p2275410  | A-genome specific (napus-rapa) | 1            | 0.7581078    | not scorable | not scorable | 0.9917355    | 0.7662755    |
| #### Bn-A08-p2371175  | A-genome specific (napus-rapa) | 1            | 0.8145795    | not scorable | not scorable | 1            | 0.8848283    |
| #### Bn-A08-p2389244  | A-genome specific (napus-rapa) | 0.9736842    | 0.5281467    | not scorable | not scorable | 1            | 0.9260712    |
| #### Bn-A08-p2394252  | napus specific                 | 0.8779904    | 0.7805146    | not scorable | not scorable | not scorable | not scorable |
| #### Bn-A08-p2397885  | A-genome specific (napus-rapa) | 0.9952153    | 0.752197     | not scorable | not scorable | 0.9834711    | 0.7783809    |
| #### Bn-A08-p2406380  | A-genome specific (napus-rapa) | 0.9832536    | 0.3237465    | not scorable | not scorable | 0.9917355    | 0.7092858    |
| #### Bn-A08-p2415846  | A-genome specific (rapa only)  | not scorable | not scorable | not scorable | not scorable | 0.9917355    | 0.8887209    |
| #### Bn-A08-p2425057  | A-genome specific (napus-rapa) | 0.9880383    | 0.3900006    | not scorable | not scorable | 0.9917355    | 0.727371     |
| #### Bn-A08-p2425147  | A-genome specific (napus-rapa) | 1            | 0.5512959    | not scorable | not scorable | 0.9917355    | 0.6755672    |
| #### Bn-A08-p2425488  | A-genome specific (napus-rapa) | 0.9856459    | 0.3121437    | not scorable | not scorable | 1            | 0.8390996    |
| #### Bn-A08-p2433393  | A-genome specific (napus-rapa) | 0.9569378    | 0.6926226    | not scorable | not scorable | 0.9834711    | 0.6798539    |
| #### Bn-A08-p2448353  | A-genome specific (napus-rapa) | 0.9880383    | 0.4955754    | not scorable | not scorable | 1            | 0.7986042    |
| #### Bn-A08-p2451003  | A-genome specific (napus-rapa) | 0.9976076    | 0.682892     | not scorable | not scorable | 0.9917355    | 0.6578454    |
| #### Bn-A08-p2451084  | A-genome specific (rapa only)  | not scorable | not scorable | not scorable | not scorable | 0.553719     | 0.833203     |
| #### Bn-A08-p2451091  | A-genome specific (napus-rapa) | 0.9928229    | 0.8020067    | not scorable | not scorable | 0.9917355    | 0.6722238    |

|                      |                                |              |              |              |              |              |              |
|----------------------|--------------------------------|--------------|--------------|--------------|--------------|--------------|--------------|
| #### Bn-A08-p2461697 | A-genome specific (napus-rapa) | 0.9928229    | 0.7694168    | not scorable | not scorable | 0.9752066    | 0.7552428    |
| #### Bn-A08-p2509113 | A-genome specific (napus-rapa) | 0.8947368    | 0.7637344    | not scorable | not scorable | 0.9669421    | 0.7558497    |
| #### Bn-A08-p2511340 | A-genome specific (napus-rapa) | 0.9952153    | 0.762283     | not scorable | not scorable | 0.9917355    | 0.7978088    |
| #### Bn-A08-p2512020 | A-genome specific (napus-rapa) | 0.9019139    | 0.7288903    | not scorable | not scorable | 0.9752066    | 0.7349491    |
| #### Bn-A08-p2512477 | A-genome specific (napus-rapa) | 0.9473684    | 0.2702559    | not scorable | not scorable | 1            | 0.6055009    |
| #### Bn-A08-p2512893 | A-genome specific (napus-rapa) | 0.8971292    | 0.7503485    | not scorable | not scorable | 0.9834711    | 0.7932323    |
| #### Bn-A08-p2517407 | A-genome specific (napus-rapa) | 0.9880383    | 0.774521     | not scorable | not scorable | 1            | 0.815977     |
| #### Bn-A08-p2519736 | all not scorable               | not scorable | not scorable | not scorable | not scorable | not scorable | not scorable |
| #### Bn-A08-p2520421 | A-genome specific (napus-rapa) | 0.9593301    | 0.6385635    | not scorable | not scorable | 1            | 0.7197168    |
| #### Bn-A08-p2531081 | A-genome specific (napus-rapa) | 0.9736842    | 0.3366162    | not scorable | not scorable | 0.9917355    | 0.8274619    |
| #### Bn-A08-p2533244 | A-genome specific (napus-rapa) | 0.9832536    | 0.7605858    | not scorable | not scorable | 0.9834711    | 0.717544     |
| #### Bn-A08-p2534474 | A-genome specific (napus-rapa) | 0.9904306    | 0.585924     | not scorable | not scorable | 0.9834711    | 0.8094699    |
| #### Bn-A08-p2536015 | A-genome specific (napus-rapa) | 0.9784689    | 0.2304521    | not scorable | not scorable | 1            | 0.7034654    |
| #### Bn-A08-p2543882 | A-genome specific (napus-rapa) | 0.9712918    | 0.5076478    | not scorable | not scorable | 0.9917355    | 0.7411865    |
| #### Bn-A08-p2555365 | A-genome specific (rapa only)  | not scorable | not scorable | not scorable | not scorable | 0.5950413    | 0.7266333    |
| #### Bn-A08-p2561457 | A-genome specific (rapa only)  | not scorable | not scorable | not scorable | not scorable | 0.9834711    | 0.6834819    |
| #### Bn-A08-p2564131 | A-genome specific (napus-rapa) | 1            | 0.7738613    | not scorable | not scorable | 1            | 0.6454972    |
| #### Bn-A08-p2574453 | A-genome specific (napus-rapa) | 0.9832536    | 0.7681945    | not scorable | not scorable | 1            | 0.7901278    |
| #### Bn-A08-p2576185 | A-genome specific (napus-rapa) | 0.9952153    | 0.4843059    | not scorable | not scorable | 0.9917355    | 0.6850966    |
| #### Bn-A08-p2585031 | A-genome specific (napus-rapa) | 0.9928229    | 0.8199244    | not scorable | not scorable | 0.9669421    | 0.7420912    |
| #### Bn-A08-p2585836 | A-genome specific (napus-rapa) | 0.7727273    | 0.6810717    | not scorable | not scorable | 0.5702479    | 0.6689461    |
| #### Bn-A08-p2589956 | A-genome specific (napus-rapa) | 0.9928229    | 0.7574027    | not scorable | not scorable | 1            | 0.8321282    |
| #### Bn-A08-p2590415 | A-genome specific (napus-rapa) | 0.9952153    | 0.3697208    | not scorable | not scorable | 0.9752066    | 0.7009773    |
| #### Bn-A08-p2601211 | A-genome specific (napus-rapa) | 0.9904306    | 0.7189119    | not scorable | not scorable | 1            | 0.7336       |
| #### Bn-A08-p2605912 | A-genome specific (napus-rapa) | 0.8995215    | 0.7613223    | not scorable | not scorable | 0.6115702    | 0.7715244    |
| #### Bn-A08-p2618037 | A-genome specific (napus-rapa) | 0.9784689    | 0.7060212    | not scorable | not scorable | 0.9917355    | 0.7939635    |
| #### Bn-A08-p2630666 | A-genome specific (napus-rapa) | 0.9952153    | 0.8183997    | not scorable | not scorable | 1            | 0.822768     |
| #### Bn-A08-p264483  | A-genome specific (napus-rapa) | 0.9641148    | 0.2987382    | not scorable | not scorable | 0.9834711    | 0.6292757    |
| #### Bn-A08-p2660414 | A-genome specific (napus-rapa) | 0.9976076    | 0.6721611    | not scorable | not scorable | 1            | 0.702323     |
| #### Bn-A08-p2675098 | A-genome specific (napus-rapa) | 0.9928229    | 0.7051724    | not scorable | not scorable | 0.9834711    | 0.6575781    |
| #### Bn-A08-p2689572 | A-genome specific (napus-rapa) | 0.9736842    | 0.6790744    | not scorable | not scorable | 0.9834711    | 0.6377378    |
| #### Bn-A08-p2694807 | A-genome specific (napus-rapa) | 0.9665072    | 0.22452      | not scorable | not scorable | 0.9752066    | 0.7830281    |
| #### Bn-A08-p2696389 | A-genome specific (napus-rapa) | 0.9856459    | 0.6746178    | not scorable | not scorable | 0.9669421    | 0.6827481    |

|                      |                                |              |              |              |              |              |              |
|----------------------|--------------------------------|--------------|--------------|--------------|--------------|--------------|--------------|
| #### Bn-A08-p2711497 | A-genome specific (napus-rapa) | 0.9760765    | 0.3856903    | not scorable | not scorable | 0.9917355    | 0.8022159    |
| #### Bn-A08-p2712092 | A-genome specific (napus-rapa) | 0.7488039    | 0.7072378    | not scorable | not scorable | 0.9834711    | 0.687184     |
| #### Bn-A08-p2715086 | A-genome specific (napus-rapa) | 0.9712918    | 0.5064034    | not scorable | not scorable | 0.9917355    | 0.6955003    |
| #### Bn-A08-p2728670 | A-genome specific (napus-rapa) | 0.9832536    | 0.6785457    | not scorable | not scorable | 1            | 0.7546726    |
| #### Bn-A08-p2740174 | A-genome specific (napus-rapa) | 0.9736842    | 0.6344174    | not scorable | not scorable | 0.9752066    | 0.754527     |
| #### Bn-A08-p2741041 | all not scorable               | not scorable | not scorable | not scorable | not scorable | not scorable | not scorable |
| #### Bn-A08-p2749328 | A-genome specific (napus-rapa) | 0.9880383    | 0.4207869    | not scorable | not scorable | 1            | 0.7278932    |
| #### Bn-A08-p2749414 | A-genome specific (napus-rapa) | 0.9832536    | 0.8101276    | not scorable | not scorable | 0.9834711    | 0.7679681    |
| #### Bn-A08-p2757340 | A-genome specific (napus-rapa) | 0.9856459    | 0.4836923    | not scorable | not scorable | 0.9917355    | 0.7570009    |
| #### Bn-A08-p2771143 | A-genome specific (napus-rapa) | 0.9760765    | 0.2720367    | not scorable | not scorable | 0.9834711    | 0.6959115    |
| #### Bn-A08-p279186  | A-genome specific (napus-rapa) | 0.9641148    | 0.6179851    | not scorable | not scorable | 1            | 0.7655849    |
| #### Bn-A08-p2819820 | A-genome specific (napus-rapa) | 0.9832536    | 0.8069354    | not scorable | not scorable | 1            | 0.7774823    |
| #### Bn-A08-p2822224 | A-genome specific (napus-rapa) | 0.9569378    | 0.5991538    | not scorable | not scorable | 1            | 0.8843247    |
| #### Bn-A08-p2823223 | A-genome specific (napus-rapa) | 0.8923445    | 0.7856001    | not scorable | not scorable | 0.9586777    | 0.6901765    |
| #### Bn-A08-p2841059 | A-genome specific (napus-rapa) | 0.9928229    | 0.657279     | not scorable | not scorable | 0.9917355    | 0.7854376    |
| #### Bn-A08-p2841643 | A-genome specific (napus-rapa) | 0.9928229    | 0.7846941    | not scorable | not scorable | 0.9752066    | 0.7054439    |
| #### Bn-A08-p2883203 | A-genome specific (napus-rapa) | 0.937799     | 0.3096463    | not scorable | not scorable | 0.9669421    | 0.6920156    |
| #### Bn-A08-p2885855 | A-genome specific (napus-rapa) | 0.9880383    | 0.3622113    | not scorable | not scorable | 0.9834711    | 0.7411317    |
| #### Bn-A08-p2897827 | A-genome specific (napus-rapa) | 0.9712918    | 0.4400529    | not scorable | not scorable | 0.9669421    | 0.7789416    |
| #### Bn-A08-p2898446 | A-genome specific (napus-rapa) | 0.9736842    | 0.7735732    | not scorable | not scorable | 0.9752066    | 0.7447317    |
| #### Bn-A08-p2910044 | A-genome specific (napus-rapa) | 0.9832536    | 0.4288175    | not scorable | not scorable | 0.9752066    | 0.7339967    |
| #### Bn-A08-p2910816 | A-genome specific (napus-rapa) | 0.9641148    | 0.6680543    | not scorable | not scorable | 0.9669421    | 0.5823181    |
| #### Bn-A08-p2911101 | A-genome specific (napus-rapa) | 0.9712918    | 0.8041155    | not scorable | not scorable | 0.9669421    | 0.8528287    |
| #### Bn-A08-p2920715 | A-genome specific (napus-rapa) | 0.9736842    | 0.6957999    | not scorable | not scorable | 1            | 0.7058157    |
| #### Bn-A08-p2922263 | A-genome specific (napus-rapa) | 0.9688995    | 0.6645869    | not scorable | not scorable | 0.9917355    | 0.7137904    |
| #### Bn-A08-p293480  | A-genome specific (napus-rapa) | 0.9641148    | 0.2302184    | not scorable | not scorable | 0.9834711    | 0.813297     |
| #### Bn-A08-p2942782 | A-genome specific (napus-rapa) | 0.9952153    | 0.7222396    | not scorable | not scorable | 1            | 0.872526     |
| #### Bn-A08-p2973537 | A-genome specific (napus-rapa) | 0.9808612    | 0.6804605    | not scorable | not scorable | 1            | 0.9053969    |
| #### Bn-A08-p2989598 | A-genome specific (napus-rapa) | 0.9904306    | 0.7575099    | not scorable | not scorable | 1            | 0.8012351    |
| #### Bn-A08-p2995827 | A-genome specific (napus-rapa) | 0.9880383    | 0.4246819    | not scorable | not scorable | 0.9752066    | 0.7003257    |
| #### Bn-A08-p2997093 | genome unspecific (all in)     | 0.937799     | 0.3369548    | 0.9224806    | 0.403338     | 0.677686     | 0.9015687    |
| #### Bn-A08-p3031902 | A-genome specific (napus-rapa) | 0.9784689    | 0.3605358    | not scorable | not scorable | 1            | 0.7455966    |
| #### Bn-A08-p3064639 | A-genome specific (napus-rapa) | 0.9808612    | 0.8041373    | not scorable | not scorable | 1            | 0.7940322    |

|                      |                                |           |           |              |              |           |           |
|----------------------|--------------------------------|-----------|-----------|--------------|--------------|-----------|-----------|
| #### Bn-A08-p3068539 | A-genome specific (napus-rapa) | 0.9952153 | 0.2495349 | not scorable | not scorable | 1         | 0.8272848 |
| #### Bn-A08-p3068838 | A-genome specific (napus-rapa) | 0.9856459 | 0.6393164 | not scorable | not scorable | 0.9834711 | 0.7432579 |
| #### Bn-A08-p3079647 | A-genome specific (napus-rapa) | 0.9928229 | 0.7310153 | not scorable | not scorable | 1         | 0.7015187 |
| #### Bn-A08-p3086727 | A-genome specific (napus-rapa) | 0.9856459 | 0.3406137 | not scorable | not scorable | 1         | 0.9015024 |
| #### Bn-A08-p3090858 | A-genome specific (napus-rapa) | 0.9880383 | 0.786047  | not scorable | not scorable | 1         | 0.7901134 |
| #### Bn-A08-p3097626 | A-genome specific (napus-rapa) | 0.9904306 | 0.8137227 | not scorable | not scorable | 0.6528926 | 0.8916472 |
| #### Bn-A08-p3104517 | A-genome specific (napus-rapa) | 0.9952153 | 0.7920631 | not scorable | not scorable | 1         | 0.8604453 |
| #### Bn-A08-p3109145 | A-genome specific (napus-rapa) | 0.9976076 | 0.7647703 | not scorable | not scorable | 1         | 0.7740803 |
| #### Bn-A08-p3109726 | A-genome specific (napus-rapa) | 0.9976076 | 0.6999477 | not scorable | not scorable | 0.9917355 | 0.7104048 |
| #### Bn-A08-p3120976 | A-genome specific (napus-rapa) | 0.9976076 | 0.7319317 | not scorable | not scorable | 0.9917355 | 0.8154362 |
| #### Bn-A08-p3120986 | A-genome specific (napus-rapa) | 0.9952153 | 0.775043  | not scorable | not scorable | 0.9917355 | 0.7672514 |
| #### Bn-A08-p3121492 | A-genome specific (napus-rapa) | 0.9976076 | 0.7033117 | not scorable | not scorable | 1         | 0.8802622 |
| #### Bn-A08-p3138888 | A-genome specific (napus-rapa) | 0.9856459 | 0.4427755 | not scorable | not scorable | 1         | 0.6546818 |
| #### Bn-A08-p3161353 | A-genome specific (napus-rapa) | 0.9832536 | 0.6294896 | not scorable | not scorable | 0.9752066 | 0.7280322 |
| #### Bn-A08-p3168874 | A-genome specific (napus-rapa) | 0.8660287 | 0.4266673 | not scorable | not scorable | 0.9834711 | 0.7850553 |
| #### Bn-A08-p3178977 | A-genome specific (napus-rapa) | 0.9521531 | 0.7553862 | not scorable | not scorable | 0.9834711 | 0.7621901 |
| #### Bn-A08-p3182594 | A-genome specific (napus-rapa) | 0.9928229 | 0.7392605 | not scorable | not scorable | 0.9834711 | 0.6381438 |
| #### Bn-A08-p3182798 | A-genome specific (napus-rapa) | 0.9904306 | 0.7969508 | not scorable | not scorable | 1         | 0.7994031 |
| #### Bn-A08-p3184233 | A-genome specific (napus-rapa) | 0.7392344 | 0.6872752 | not scorable | not scorable | 0.661157  | 0.8600292 |
| #### Bn-A08-p3193662 | A-genome specific (napus-rapa) | 1         | 0.4952208 | not scorable | not scorable | 0.9917355 | 0.7916164 |
| #### Bn-A08-p3195277 | A-genome specific (napus-rapa) | 0.9904306 | 0.4410845 | not scorable | not scorable | 0.9834711 | 0.6381476 |
| #### Bn-A08-p3221528 | A-genome specific (napus-rapa) | 0.8157895 | 0.6995161 | not scorable | not scorable | 0.9752066 | 0.9146498 |
| #### Bn-A08-p3223002 | A-genome specific (napus-rapa) | 0.9832536 | 0.6887885 | not scorable | not scorable | 0.9669421 | 0.6384864 |
| #### Bn-A08-p3235095 | A-genome specific (napus-rapa) | 0.9856459 | 0.5504398 | not scorable | not scorable | 1         | 0.774995  |
| #### Bn-A08-p3237433 | A-genome specific (napus-rapa) | 0.9928229 | 0.7368999 | not scorable | not scorable | 1         | 0.6913313 |
| #### Bn-A08-p3246905 | A-genome specific (napus-rapa) | 0.5861244 | 0.782087  | not scorable | not scorable | 0.5702479 | 0.8634    |
| #### Bn-A08-p3269074 | A-genome specific (napus-rapa) | 0.9928229 | 0.7788523 | not scorable | not scorable | 1         | 0.6664315 |
| #### Bn-A08-p3269802 | A-genome specific (napus-rapa) | 0.9880383 | 0.7880414 | not scorable | not scorable | 0.9917355 | 0.7966246 |
| #### Bn-A08-p3270423 | A-genome specific (napus-rapa) | 0.9952153 | 0.741938  | not scorable | not scorable | 0.9917355 | 0.7448208 |
| #### Bn-A08-p3270600 | A-genome specific (napus-rapa) | 0.9712918 | 0.5235372 | not scorable | not scorable | 0.9669421 | 0.699442  |
| #### Bn-A08-p3270802 | A-genome specific (napus-rapa) | 0.9856459 | 0.7261519 | not scorable | not scorable | 0.9917355 | 0.695935  |
| #### Bn-A08-p3284482 | A-genome specific (napus-rapa) | 0.9736842 | 0.763261  | not scorable | not scorable | 1         | 0.7372245 |
| #### Bn-A08-p3284666 | A-genome specific (napus-rapa) | 0.9952153 | 0.7664834 | not scorable | not scorable | 1         | 0.7034988 |



|                      |                                   |              |              |              |              |           |           |           |
|----------------------|-----------------------------------|--------------|--------------|--------------|--------------|-----------|-----------|-----------|
| #### Bn-A08-p3284817 | A-genome specific (napus-rapa)    | 0.9952153    | 0.7144244    | not scorable | not scorable |           | 1         | 0.6609827 |
| #### Bn-A08-p3284955 | A-genome specific (napus-rapa)    | 0.9880383    | 0.7651791    | not scorable | not scorable | 0.9834711 |           | 0.7579679 |
| #### Bn-A08-p3285855 | A-genome specific (napus-rapa)    | 0.9688995    | 0.6608645    | not scorable | not scorable | 0.9752066 |           | 0.692127  |
| #### Bn-A08-p3298985 | A-genome specific (rapa only)     | not scorable | not scorable | not scorable | not scorable | 0.9504132 |           | 0.7934078 |
| #### Bn-A08-p3302700 | A-genome specific (napus-rapa)    | 0.9808612    | 0.6718942    | not scorable | not scorable | 0.9421487 |           | 0.6640561 |
| #### Bn-A08-p3336620 | A-genome specific (napus-rapa)    | 0.9593301    | 0.6664513    | not scorable | not scorable | 0.9917355 |           | 0.6303272 |
| #### Bn-A08-p3388906 | A-genome specific (napus-rapa)    | 0.9880383    | 0.5153577    | not scorable | not scorable | 0.9917355 |           | 0.7930924 |
| #### Bn-A08-p3433222 | A-genome specific (napus-rapa)    | 0.9808612    | 0.7830929    | not scorable | not scorable | 0.9834711 |           | 0.7973625 |
| #### Bn-A08-p3433878 | A-genome specific (napus-rapa)    | 0.9832536    | 0.7404299    | not scorable | not scorable | 0.9917355 |           | 0.7904047 |
| #### Bn-A08-p3436359 | A-genome specific (napus-rapa)    | 0.9784689    | 0.7233951    | not scorable | not scorable | 0.9917355 |           | 0.7795308 |
| #### Bn-A08-p3444437 | A-genome specific (rapa only)     | not scorable | not scorable | not scorable | not scorable | 0.9752066 |           | 0.591433  |
| #### Bn-A08-p345270  | genome unspecific (oleracea-rapa) | not scorable | not scorable |              | 1            | 0.9008779 |           | 0.9917355 |
| #### Bn-A08-p3464671 | A-genome specific (napus-rapa)    | 0.9808612    | 0.6821868    | not scorable | not scorable | 0.9917355 |           | 0.7273384 |
| #### Bn-A08-p350287  | A-genome specific (rapa only)     | not scorable | not scorable | not scorable | not scorable | 0.6859504 |           | 0.6509994 |
| #### Bn-A08-p3518817 | A-genome specific (napus-rapa)    | 0.9808612    | 0.3397964    | not scorable | not scorable | 0.9917355 |           | 0.7416654 |
| #### Bn-A08-p3519373 | A-genome specific (napus-rapa)    | 0.9736842    | 0.6731715    | not scorable | not scorable | 0.9008265 |           | 0.6608896 |
| #### Bn-A08-p3523325 | A-genome specific (rapa only)     | not scorable | not scorable | not scorable | not scorable | 0.9752066 |           | 0.5093075 |
| #### Bn-A08-p3529278 | A-genome specific (napus-rapa)    | 0.9832536    | 0.6111169    | not scorable | not scorable |           | 1         | 0.7206539 |
| #### Bn-A08-p3529542 | A-genome specific (napus-rapa)    | 0.9928229    | 0.7735921    | not scorable | not scorable | 0.9752066 |           | 0.8154362 |
| #### Bn-A08-p3530401 | A-genome specific (napus-rapa)    |              | 1            | 0.8755489    | not scorable |           | 1         | 0.7634893 |
| #### Bn-A08-p3531112 | A-genome specific (napus-rapa)    | 0.9928229    | 0.7328705    | not scorable | not scorable |           | 1         | 0.7592703 |
| #### Bn-A08-p3536202 | A-genome specific (rapa only)     | not scorable | not scorable | not scorable | not scorable |           | 1         | 0.816274  |
| #### Bn-A08-p3546013 | A-genome specific (napus-rapa)    | 0.9784689    | 0.6344491    | not scorable | not scorable | 0.9752066 |           | 0.7708877 |
| #### Bn-A08-p3549966 | A-genome specific (napus-rapa)    |              | 1            | 0.7161788    | not scorable |           | 0.9917355 | 0.7360603 |
| #### Bn-A08-p355936  | A-genome specific (napus-rapa)    |              | 1            | 0.8424293    | not scorable |           | 1         | 0.838245  |
| #### Bn-A08-p3566821 | A-genome specific (napus-rapa)    | 0.9928229    | 0.4623615    | not scorable | not scorable | 0.9917355 |           | 0.7168249 |
| #### Bn-A08-p3573966 | A-genome specific (napus-rapa)    | 0.9880383    | 0.7599296    | not scorable | not scorable |           | 1         | 0.906063  |
| #### Bn-A08-p3574400 | A-genome specific (napus-rapa)    | 0.9593301    | 0.3153222    | not scorable | not scorable |           | 1         | 0.830393  |
| #### Bn-A08-p358866  | A-genome specific (napus-rapa)    | 0.9712918    | 0.7151675    | not scorable | not scorable | 0.9338843 |           | 0.6945516 |
| #### Bn-A08-p359000  | A-genome specific (napus-rapa)    | 0.9784689    | 0.7569089    | not scorable | not scorable | 0.9338843 |           | 0.8089168 |
| #### Bn-A08-p359084  | A-genome specific (napus-rapa)    | 0.9784689    | 0.7001089    | not scorable | not scorable | 0.9421487 |           | 0.7527692 |
| #### Bn-A08-p359138  | A-genome specific (napus-rapa)    | 0.9425837    | 0.6218645    | not scorable | not scorable | 0.9421487 |           | 0.6613856 |
| #### Bn-A08-p359210  | A-genome specific (napus-rapa)    | 0.9760765    | 0.7183807    | not scorable | not scorable | 0.9421487 |           | 0.7322945 |

|                      |                                |              |              |              |              |           |           |
|----------------------|--------------------------------|--------------|--------------|--------------|--------------|-----------|-----------|
| #### Bn-A08-p359894  | A-genome specific (napus-rapa) | 0.9784689    | 0.7305423    | not scorable | not scorable | 0.9421487 | 0.7606549 |
| #### Bn-A08-p360373  | A-genome specific (napus-rapa) | 0.7416268    | 0.8105487    | not scorable | not scorable | 0.9173554 | 0.8311663 |
| #### Bn-A08-p360868  | A-genome specific (napus-rapa) | 0.9665072    | 0.633669     | not scorable | not scorable | 0.9256198 | 0.6506458 |
| #### Bn-A08-p360902  | A-genome specific (napus-rapa) | 0.9808612    | 0.710076     | not scorable | not scorable | 0.9421487 | 0.6873732 |
| #### Bn-A08-p3609963 | A-genome specific (napus-rapa) | 0.9808612    | 0.5290295    | not scorable | not scorable | 0.9669421 | 0.6505445 |
| #### Bn-A08-p361063  | A-genome specific (napus-rapa) | 0.9665072    | 0.7986453    | not scorable | not scorable | 0.9256198 | 0.7359726 |
| #### Bn-A08-p3614725 | A-genome specific (napus-rapa) | 0.9880383    | 0.6784611    | not scorable | not scorable | 0.9834711 | 0.7044753 |
| #### Bn-A08-p3614809 | A-genome specific (napus-rapa) | 0.9904306    | 0.5265258    | not scorable | not scorable | 0.9917355 | 0.5974328 |
| #### Bn-A08-p361637  | A-genome specific (napus-rapa) | 0.9736842    | 0.7923458    | not scorable | not scorable | 0.9421487 | 0.8387672 |
| #### Bn-A08-p361910  | A-genome specific (napus-rapa) | 0.9665072    | 0.7501233    | not scorable | not scorable | 0.9504132 | 0.7785625 |
| #### Bn-A08-p3625318 | A-genome specific (napus-rapa) | 0.9904306    | 0.5745654    | not scorable | not scorable | 0.9834711 | 0.7815909 |
| #### Bn-A08-p3628921 | A-genome specific (napus-rapa) | 0.9832536    | 0.393414     | not scorable | not scorable | 1         | 0.6814806 |
| #### Bn-A08-p363107  | A-genome specific (napus-rapa) | 0.9688995    | 0.6249927    | not scorable | not scorable | 0.9256198 | 0.6110886 |
| #### Bn-A08-p369443  | A-genome specific (rapa only)  | not scorable | not scorable | not scorable | not scorable | 0.9917355 | 0.7204278 |
| #### Bn-A08-p372048  | A-genome specific (napus-rapa) | 0.9760765    | 0.6793583    | not scorable | not scorable | 0.9917355 | 0.7987925 |
| #### Bn-A08-p3737287 | A-genome specific (napus-rapa) | 1            | 0.3473757    | not scorable | not scorable | 0.9834711 | 0.8231878 |
| #### Bn-A08-p3766285 | A-genome specific (napus-rapa) | 1            | 0.7826146    | not scorable | not scorable | 0.9917355 | 0.7961126 |
| #### Bn-A08-p3814869 | A-genome specific (napus-rapa) | 0.9952153    | 0.4384505    | not scorable | not scorable | 0.9586777 | 0.7829902 |
| #### Bn-A08-p3818854 | A-genome specific (napus-rapa) | 0.9832536    | 0.6732206    | not scorable | not scorable | 0.9008265 | 0.7473027 |
| #### Bn-A08-p3821120 | A-genome specific (napus-rapa) | 0.9688995    | 0.5039556    | not scorable | not scorable | 1         | 0.556718  |
| #### Bn-A08-p3822514 | A-genome specific (napus-rapa) | 0.9808612    | 0.7739378    | not scorable | not scorable | 0.9834711 | 0.7653715 |
| #### Bn-A08-p3840267 | A-genome specific (napus-rapa) | 0.9856459    | 0.2867023    | not scorable | not scorable | 0.9917355 | 0.784393  |
| #### Bn-A08-p3840983 | A-genome specific (napus-rapa) | 0.9976076    | 0.7665636    | not scorable | not scorable | 0.9752066 | 0.6917811 |
| #### Bn-A08-p3846272 | A-genome specific (napus-rapa) | 0.9904306    | 0.5101559    | not scorable | not scorable | 1         | 0.72476   |
| #### Bn-A08-p3862608 | A-genome specific (napus-rapa) | 0.9712918    | 0.5866889    | not scorable | not scorable | 0.9752066 | 0.6595297 |
| #### Bn-A08-p3874411 | A-genome specific (napus-rapa) | 0.9449761    | 0.3034199    | not scorable | not scorable | 0.9504132 | 0.8239495 |
| #### Bn-A08-p3875206 | A-genome specific (napus-rapa) | 0.8636364    | 0.6933598    | not scorable | not scorable | 1         | 0.8282926 |
| #### Bn-A08-p3881061 | A-genome specific (napus-rapa) | 0.9880383    | 0.6018795    | not scorable | not scorable | 0.9834711 | 0.7832584 |
| #### Bn-A08-p3881337 | A-genome specific (napus-rapa) | 0.8564593    | 0.6625592    | not scorable | not scorable | 1         | 0.7184436 |
| #### Bn-A08-p3881526 | A-genome specific (napus-rapa) | 0.9952153    | 0.8143284    | not scorable | not scorable | 0.9752066 | 0.7078663 |
| #### Bn-A08-p3883962 | A-genome specific (napus-rapa) | 0.8636364    | 0.854651     | not scorable | not scorable | 0.9752066 | 0.7766553 |
| #### Bn-A08-p3893922 | A-genome specific (napus-rapa) | 1            | 0.8072667    | not scorable | not scorable | 0.9834711 | 0.7709124 |
| #### Bn-A08-p3894164 | A-genome specific (napus-rapa) | 0.9808612    | 0.7267952    | not scorable | not scorable | 0.9834711 | 0.6764547 |

|                      |                                |              |              |              |              |           |           |
|----------------------|--------------------------------|--------------|--------------|--------------|--------------|-----------|-----------|
| #### Bn-A08-p3907214 | A-genome specific (napus-rapa) | 0.861244     | 0.7725772    | not scorable | not scorable | 1         | 0.6949639 |
| #### Bn-A08-p3907556 | A-genome specific (napus-rapa) | 0.9569378    | 0.6699541    | not scorable | not scorable | 0.9834711 | 0.7479984 |
| #### Bn-A08-p3919702 | A-genome specific (napus-rapa) | 0.9976076    | 0.7575278    | not scorable | not scorable | 0.9752066 | 0.78724   |
| #### Bn-A08-p3920722 | A-genome specific (napus-rapa) | 1            | 0.2774984    | not scorable | not scorable | 1         | 0.7757076 |
| #### Bn-A08-p3924770 | A-genome specific (napus-rapa) | 0.9928229    | 0.784003     | not scorable | not scorable | 1         | 0.7310675 |
| #### Bn-A08-p3926038 | A-genome specific (napus-rapa) | 0.9976076    | 0.7859437    | not scorable | not scorable | 1         | 0.8879493 |
| #### Bn-A08-p3959828 | A-genome specific (rapa only)  | not scorable | not scorable | not scorable | not scorable | 1         | 0.7538072 |
| #### Bn-A08-p3964610 | A-genome specific (napus-rapa) | 0.9784689    | 0.4291323    | not scorable | not scorable | 1         | 0.7387202 |
| #### Bn-A08-p3964840 | A-genome specific (napus-rapa) | 0.9784689    | 0.5068101    | not scorable | not scorable | 0.9917355 | 0.8137982 |
| #### Bn-A08-p4000353 | A-genome specific (napus-rapa) | 0.9880383    | 0.2780799    | not scorable | not scorable | 0.9834711 | 0.8559582 |
| #### Bn-A08-p4001683 | A-genome specific (napus-rapa) | 0.9784689    | 0.4895872    | not scorable | not scorable | 0.9834711 | 0.7362989 |
| #### Bn-A08-p4014130 | A-genome specific (napus-rapa) | 0.9880383    | 0.3899083    | not scorable | not scorable | 0.9917355 | 0.7410839 |
| #### Bn-A08-p4021680 | A-genome specific (napus-rapa) | 0.9856459    | 0.7762009    | not scorable | not scorable | 0.9917355 | 0.8523005 |
| #### Bn-A08-p4022450 | A-genome specific (napus-rapa) | 0.9928229    | 0.6841003    | not scorable | not scorable | 1         | 0.7803269 |
| #### Bn-A08-p4022688 | A-genome specific (napus-rapa) | 0.9808612    | 0.6632322    | not scorable | not scorable | 0.9917355 | 0.8483523 |
| #### Bn-A08-p4029890 | A-genome specific (napus-rapa) | 0.9880383    | 0.7282727    | not scorable | not scorable | 1         | 0.7602198 |
| #### Bn-A08-p4044726 | A-genome specific (napus-rapa) | 0.9521531    | 0.3272218    | not scorable | not scorable | 0.9008265 | 0.7639807 |
| #### Bn-A08-p4057882 | A-genome specific (napus-rapa) | 1            | 0.9258675    | not scorable | not scorable | 1         | 0.8402578 |
| #### Bn-A08-p4060142 | A-genome specific (napus-rapa) | 0.9952153    | 0.7427092    | not scorable | not scorable | 1         | 0.7503335 |
| #### Bn-A08-p4077507 | A-genome specific (napus-rapa) | 0.9880383    | 0.4826753    | not scorable | not scorable | 0.9834711 | 0.7416531 |
| #### Bn-A08-p4080428 | A-genome specific (rapa only)  | not scorable | not scorable | not scorable | not scorable | 0.9504132 | 0.5368612 |
| #### Bn-A08-p4096136 | A-genome specific (napus-rapa) | 0.9736842    | 0.7533888    | not scorable | not scorable | 0.9834711 | 0.7700711 |
| #### Bn-A08-p4100297 | A-genome specific (napus-rapa) | 0.9641148    | 0.3428925    | not scorable | not scorable | 0.9917355 | 0.7966691 |
| #### Bn-A08-p4102226 | A-genome specific (napus-rapa) | 0.9593301    | 0.7184135    | not scorable | not scorable | 0.9834711 | 0.7704945 |
| #### Bn-A08-p4107482 | A-genome specific (napus-rapa) | 0.9688995    | 0.6836044    | not scorable | not scorable | 1         | 0.7644212 |
| #### Bn-A08-p4145883 | A-genome specific (napus-rapa) | 0.9688995    | 0.7510878    | not scorable | not scorable | 0.9752066 | 0.7129104 |
| #### Bn-A08-p4146148 | A-genome specific (napus-rapa) | 0.9832536    | 0.8982633    | not scorable | not scorable | 0.9752066 | 0.9050869 |
| #### Bn-A08-p4146394 | A-genome specific (napus-rapa) | 0.9641148    | 0.7583131    | not scorable | not scorable | 0.9834711 | 0.6735066 |
| #### Bn-A08-p4146828 | A-genome specific (napus-rapa) | 0.9641148    | 0.6776673    | not scorable | not scorable | 0.9504132 | 0.6955881 |
| #### Bn-A08-p4147503 | A-genome specific (napus-rapa) | 0.9712918    | 0.7524803    | not scorable | not scorable | 0.9586777 | 0.7590345 |
| #### Bn-A08-p4147963 | A-genome specific (napus-rapa) | 0.9736842    | 0.6825424    | not scorable | not scorable | 0.9586777 | 0.6437851 |
| #### Bn-A08-p4148465 | A-genome specific (napus-rapa) | 0.9760765    | 0.7633673    | not scorable | not scorable | 0.9669421 | 0.7473105 |
| #### Bn-A08-p4148693 | A-genome specific (napus-rapa) | 0.9593301    | 0.7157468    | not scorable | not scorable | 0.9834711 | 0.5619653 |

|                      |                                |              |              |              |              |           |           |
|----------------------|--------------------------------|--------------|--------------|--------------|--------------|-----------|-----------|
| #### Bn-A08-p4152083 | A-genome specific (napus-rapa) | 0.9760765    | 0.445611     | not scorable | not scorable | 1         | 0.7914365 |
| #### Bn-A08-p4161305 | A-genome specific (napus-rapa) | 0.9904306    | 0.7732581    | not scorable | not scorable | 0.9917355 | 0.8142083 |
| #### Bn-A08-p4164372 | A-genome specific (rapa only)  | not scorable | not scorable | not scorable | not scorable | 0.9834711 | 0.643492  |
| #### Bn-A08-p4175442 | A-genome specific (napus-rapa) | 0.9784689    | 0.6884601    | not scorable | not scorable | 0.9834711 | 0.7047759 |
| #### Bn-A08-p4182726 | A-genome specific (napus-rapa) | 1            | 0.3919886    | not scorable | not scorable | 1         | 0.620105  |
| #### Bn-A08-p4207231 | A-genome specific (napus-rapa) | 0.9808612    | 0.4373848    | not scorable | not scorable | 1         | 0.675154  |
| #### Bn-A08-p4209834 | A-genome specific (napus-rapa) | 0.9856459    | 0.3252256    | not scorable | not scorable | 0.9834711 | 0.6651434 |
| #### Bn-A08-p423689  | A-genome specific (napus-rapa) | 0.9473684    | 0.778622     | not scorable | not scorable | 0.9504132 | 0.7691507 |
| #### Bn-A08-p424009  | A-genome specific (napus-rapa) | 0.9641148    | 0.7154346    | not scorable | not scorable | 0.9586777 | 0.7205207 |
| #### Bn-A08-p4253915 | A-genome specific (napus-rapa) | 0.9952153    | 0.6747593    | not scorable | not scorable | 1         | 0.7609816 |
| #### Bn-A08-p4254041 | A-genome specific (napus-rapa) | 1            | 0.6734862    | not scorable | not scorable | 0.9752066 | 0.6541497 |
| #### Bn-A08-p4255441 | A-genome specific (napus-rapa) | 0.9880383    | 0.790215     | not scorable | not scorable | 0.9834711 | 0.7357843 |
| #### Bn-A08-p4255458 | A-genome specific (napus-rapa) | 0.9976076    | 0.7303662    | not scorable | not scorable | 0.9917355 | 0.8150699 |
| #### Bn-A08-p4267191 | A-genome specific (napus-rapa) | 1            | 0.4337181    | not scorable | not scorable | 0.7520661 | 0.8381329 |
| #### Bn-A08-p4271010 | A-genome specific (napus-rapa) | 1            | 0.7854864    | not scorable | not scorable | 1         | 0.7992119 |
| #### Bn-A08-p4271262 | A-genome specific (napus-rapa) | 0.930622     | 0.7593695    | not scorable | not scorable | 0.9586777 | 0.6458468 |
| #### Bn-A08-p4273091 | A-genome specific (napus-rapa) | 0.9808612    | 0.7468504    | not scorable | not scorable | 0.9917355 | 0.7770905 |
| #### Bn-A08-p4285785 | A-genome specific (napus-rapa) | 0.9760765    | 0.6636054    | not scorable | not scorable | 0.6942149 | 0.6892113 |
| #### Bn-A08-p4293226 | A-genome specific (napus-rapa) | 1            | 0.3425717    | not scorable | not scorable | 0.9752066 | 0.7517914 |
| #### Bn-A08-p4338919 | A-genome specific (napus-rapa) | 1            | 0.9433836    | not scorable | not scorable | 1         | 0.9095823 |
| #### Bn-A08-p4342485 | A-genome specific (napus-rapa) | 0.9904306    | 0.7761105    | not scorable | not scorable | 0.9917355 | 0.7741779 |
| #### Bn-A08-p4347992 | A-genome specific (napus-rapa) | 0.9904306    | 0.7158819    | not scorable | not scorable | 1         | 0.729903  |
| #### Bn-A08-p4350997 | A-genome specific (napus-rapa) | 0.9593301    | 0.6269802    | not scorable | not scorable | 1         | 0.7033569 |
| #### Bn-A08-p4350998 | A-genome specific (napus-rapa) | 1            | 0.7884539    | not scorable | not scorable | 1         | 0.7494321 |
| #### Bn-A08-p4353407 | A-genome specific (napus-rapa) | 0.9856459    | 0.3961751    | not scorable | not scorable | 1         | 0.7604765 |
| #### Bn-A08-p4367412 | A-genome specific (napus-rapa) | 0.9952153    | 0.7760609    | not scorable | not scorable | 0.9834711 | 0.8313963 |
| #### Bn-A08-p4383325 | A-genome specific (napus-rapa) | 0.9952153    | 0.7246211    | not scorable | not scorable | 0.9917355 | 0.8046679 |
| #### Bn-A08-p4387831 | A-genome specific (napus-rapa) | 0.9784689    | 0.7463632    | not scorable | not scorable | 1         | 0.8123426 |
| #### Bn-A08-p4392909 | A-genome specific (napus-rapa) | 1            | 0.7249152    | not scorable | not scorable | 0.9834711 | 0.7663507 |
| #### Bn-A08-p4394837 | A-genome specific (napus-rapa) | 0.9928229    | 0.7191229    | not scorable | not scorable | 1         | 0.6878608 |
| #### Bn-A08-p4400287 | A-genome specific (napus-rapa) | 0.9952153    | 0.7473966    | not scorable | not scorable | 0.9917355 | 0.7753922 |
| #### Bn-A08-p4402695 | A-genome specific (napus-rapa) | 0.9880383    | 0.665525     | not scorable | not scorable | 1         | 0.6949795 |
| #### Bn-A08-p4404257 | A-genome specific (napus-rapa) | 1            | 0.7390944    | not scorable | not scorable | 1         | 0.9272014 |

|                      |                                |              |              |              |              |              |              |
|----------------------|--------------------------------|--------------|--------------|--------------|--------------|--------------|--------------|
| #### Bn-A08-p4407886 | A-genome specific (napus-rapa) | 0.9808612    | 0.4397368    | not scorable | not scorable | 0.9917355    | 0.6972839    |
| #### Bn-A08-p4413411 | A-genome specific (napus-rapa) | 0.9760765    | 0.5206532    | not scorable | not scorable | 0.9752066    | 0.784877     |
| #### Bn-A08-p4421921 | A-genome specific (napus-rapa) | 0.9784689    | 0.7314299    | not scorable | not scorable | 1            | 0.7512205    |
| #### Bn-A08-p4452015 | A-genome specific (napus-rapa) | 0.9808612    | 0.8080561    | not scorable | not scorable | 0.5371901    | 0.7769225    |
| #### Bn-A08-p4452888 | A-genome specific (napus-rapa) | 0.9856459    | 0.7641433    | not scorable | not scorable | 0.5289256    | 0.8187899    |
| #### Bn-A08-p4453282 | A-genome specific (napus-rapa) | 0.9928229    | 0.772931     | not scorable | not scorable | 1            | 0.7723771    |
| #### Bn-A08-p4467910 | A-genome specific (napus-rapa) | 0.9712918    | 0.2540897    | not scorable | not scorable | 0.5785124    | 0.78733      |
| #### Bn-A08-p4474747 | A-genome specific (napus-rapa) | 1            | 0.7135291    | not scorable | not scorable | 0.9008265    | 0.7155698    |
| #### Bn-A08-p4475073 | napus specific                 | 0.930622     | 0.1962676    | not scorable | not scorable | not scorable | not scorable |
| #### Bn-A08-p4475542 | A-genome specific (rapa only)  | not scorable | not scorable | not scorable | not scorable | 0.8842975    | 0.7988776    |
| #### Bn-A08-p4476107 | A-genome specific (rapa only)  | not scorable | not scorable | not scorable | not scorable | 0.9421487    | 0.4141003    |
| #### Bn-A08-p4476147 | napus specific                 | 0.9856459    | 0.1877422    | not scorable | not scorable | not scorable | not scorable |
| #### Bn-A08-p4483232 | A-genome specific (napus-rapa) | 1            | 0.9206702    | not scorable | not scorable | 0.7768595    | 0.9088567    |
| #### Bn-A08-p4521258 | A-genome specific (napus-rapa) | 0.9952153    | 0.8072444    | not scorable | not scorable | 0.9834711    | 0.7737827    |
| #### Bn-A08-p4528943 | A-genome specific (napus-rapa) | 0.9760765    | 0.5586246    | not scorable | not scorable | 0.9834711    | 0.680671     |
| #### Bn-A08-p4537897 | A-genome specific (napus-rapa) | 0.9784689    | 0.7436278    | not scorable | not scorable | 0.9256198    | 0.6451108    |
| #### Bn-A08-p4538107 | napus specific                 | 0.9712918    | 0.6559011    | not scorable | not scorable | not scorable | not scorable |
| #### Bn-A08-p4598270 | A-genome specific (napus-rapa) | 0.9641148    | 0.4039865    | not scorable | not scorable | 0.9834711    | 0.8089363    |
| #### Bn-A08-p4602542 | A-genome specific (napus-rapa) | 0.9904306    | 0.3389577    | not scorable | not scorable | 0.9834711    | 0.650598     |
| #### Bn-A08-p4603745 | A-genome specific (napus-rapa) | 0.9832536    | 0.7689157    | not scorable | not scorable | 0.9834711    | 0.8138024    |
| #### Bn-A08-p4624613 | A-genome specific (rapa only)  | not scorable | not scorable | not scorable | not scorable | 0.9586777    | 0.4722335    |
| #### Bn-A08-p4630998 | A-genome specific (napus-rapa) | 0.9593301    | 0.3103503    | not scorable | not scorable | 0.9917355    | 0.7631797    |
| #### Bn-A08-p4636503 | napus specific                 | 0.9856459    | 0.7766293    | not scorable | not scorable | not scorable | not scorable |
| #### Bn-A08-p4645422 | A-genome specific (napus-rapa) | 0.9760765    | 0.4917707    | not scorable | not scorable | 0.9917355    | 0.7732816    |
| #### Bn-A08-p4645913 | A-genome specific (napus-rapa) | 0.9808612    | 0.7604917    | not scorable | not scorable | 0.9834711    | 0.7134983    |
| #### Bn-A08-p4665843 | A-genome specific (rapa only)  | not scorable | not scorable | not scorable | not scorable | 0.9834711    | 0.722173     |
| #### Bn-A08-p4666053 | napus specific                 | 0.9736842    | 0.4175156    | not scorable | not scorable | not scorable | not scorable |
| #### Bn-A08-p4668561 | A-genome specific (napus-rapa) | 0.9688995    | 0.7109759    | not scorable | not scorable | 0.9504132    | 0.4187883    |
| #### Bn-A08-p4670469 | A-genome specific (napus-rapa) | 0.9808612    | 0.5492887    | not scorable | not scorable | 0.9917355    | 0.8064803    |
| #### Bn-A08-p4687828 | A-genome specific (napus-rapa) | 0.9832536    | 0.7511898    | not scorable | not scorable | 0.9917355    | 0.7214761    |
| #### Bn-A08-p4708904 | A-genome specific (napus-rapa) | 0.9880383    | 0.7941422    | not scorable | not scorable | 1            | 0.6745608    |
| #### Bn-A08-p4719687 | A-genome specific (napus-rapa) | 0.9808612    | 0.2356491    | not scorable | not scorable | 0.9504132    | 0.6575971    |
| #### Bn-A08-p4737849 | A-genome specific (napus-rapa) | 0.9832536    | 0.8298261    | not scorable | not scorable | 1            | 0.877594     |

|                      |                                |              |              |              |              |              |              |
|----------------------|--------------------------------|--------------|--------------|--------------|--------------|--------------|--------------|
| #### Bn-A08-p4758028 | genome unspecific (all in)     | 1            | 0.3250555    | 0.9922481    | 0.2595672    | 0.6033058    | 0.6545988    |
| #### Bn-A08-p4762095 | A-genome specific (napus-rapa) | 1            | 0.5988958    | not scorable | not scorable | 0.7024794    | 0.709928     |
| #### Bn-A08-p4765954 | napus specific                 | 0.8803828    | 0.7678742    | not scorable | not scorable | not scorable | not scorable |
| #### Bn-A08-p4775253 | all not scorable               | not scorable | not scorable | not scorable | not scorable | not scorable | not scorable |
| #### Bn-A08-p4783045 | A-genome specific (napus-rapa) | 1            | 0.8188108    | not scorable | not scorable | 0.9752066    | 0.7653129    |
| #### Bn-A08-p478696  | A-genome specific (napus-rapa) | 0.9832536    | 0.3330781    | not scorable | not scorable | 1            | 0.9334307    |
| #### Bn-A08-p482401  | A-genome specific (napus-rapa) | 0.9784689    | 0.3547326    | not scorable | not scorable | 1            | 0.6886954    |
| #### Bn-A08-p482505  | A-genome specific (napus-rapa) | 0.9928229    | 0.7969893    | not scorable | not scorable | 1            | 0.7718359    |
| #### Bn-A08-p4837890 | A-genome specific (napus-rapa) | 0.9665072    | 0.394276     | not scorable | not scorable | 0.9834711    | 0.781893     |
| #### Bn-A08-p4869575 | A-genome specific (napus-rapa) | 1            | 0.7603149    | not scorable | not scorable | 1            | 0.8416175    |
| #### Bn-A08-p4876592 | A-genome specific (napus-rapa) | 0.9976076    | 0.7296875    | not scorable | not scorable | 1            | 0.6146364    |
| #### Bn-A08-p4881192 | A-genome specific (napus-rapa) | 0.9976076    | 0.6195651    | not scorable | not scorable | 0.9669421    | 0.7597691    |
| #### Bn-A08-p4900525 | A-genome specific (rapa only)  | not scorable | not scorable | not scorable | not scorable | 0.9586777    | 0.5383351    |
| #### Bn-A08-p4902282 | A-genome specific (napus-rapa) | 0.9856459    | 0.5377231    | not scorable | not scorable | 0.9834711    | 0.6799201    |
| #### Bn-A08-p4931420 | A-genome specific (napus-rapa) | 1            | 0.5017123    | not scorable | not scorable | 1            | 0.6624389    |
| #### Bn-A08-p4936436 | A-genome specific (napus-rapa) | 0.9952153    | 0.4374482    | not scorable | not scorable | 1            | 0.7003699    |
| #### Bn-A08-p4954284 | A-genome specific (napus-rapa) | 1            | 0.7737637    | not scorable | not scorable | 0.9917355    | 0.8027025    |
| #### Bn-A08-p4993820 | A-genome specific (napus-rapa) | 0.9976076    | 0.8041225    | not scorable | not scorable | 0.6033058    | 0.7050927    |
| #### Bn-A08-p4994186 | A-genome specific (napus-rapa) | 0.9808612    | 0.3088307    | not scorable | not scorable | 0.9586777    | 0.5063446    |
| #### Bn-A08-p4994891 | A-genome specific (napus-rapa) | 1            | 0.9243709    | not scorable | not scorable | 0.6363636    | 0.8338418    |
| #### Bn-A08-p5006162 | A-genome specific (napus-rapa) | 0.9808612    | 0.8080176    | not scorable | not scorable | 1            | 0.8632445    |
| #### Bn-A08-p501373  | napus specific                 | 0.6004785    | 0.9375719    | not scorable | not scorable | not scorable | not scorable |
| #### Bn-A08-p5017136 | A-genome specific (napus-rapa) | 0.9736842    | 0.4115056    | not scorable | not scorable | 1            | 0.7153621    |
| #### Bn-A08-p5026482 | A-genome specific (napus-rapa) | 1            | 0.5161095    | not scorable | not scorable | 1            | 0.4990351    |
| #### Bn-A08-p5031773 | A-genome specific (napus-rapa) | 0.9904306    | 0.774353     | not scorable | not scorable | 0.9834711    | 0.8761271    |
| #### Bn-A08-p5044814 | A-genome specific (napus-rapa) | 0.9784689    | 0.5812414    | not scorable | not scorable | 0.9834711    | 0.6896119    |
| #### Bn-A08-p5046769 | A-genome specific (napus-rapa) | 0.9832536    | 0.5524263    | not scorable | not scorable | 0.9834711    | 0.8023478    |
| #### Bn-A08-p5051251 | A-genome specific (napus-rapa) | 1            | 0.9243191    | not scorable | not scorable | 1            | 0.9111372    |
| #### Bn-A08-p5054005 | A-genome specific (napus-rapa) | 0.9808612    | 0.6968379    | not scorable | not scorable | 0.9834711    | 0.7837587    |
| #### Bn-A08-p5054613 | A-genome specific (napus-rapa) | 0.9856459    | 0.8167256    | not scorable | not scorable | 0.9917355    | 0.7920063    |
| #### Bn-A08-p5056953 | A-genome specific (napus-rapa) | 0.9856459    | 0.7510008    | not scorable | not scorable | 0.9917355    | 0.7983456    |
| #### Bn-A08-p5084300 | A-genome specific (napus-rapa) | 0.9856459    | 0.3924778    | not scorable | not scorable | 1            | 0.5347752    |
| #### Bn-A08-p5096382 | A-genome specific (napus-rapa) | 0.9880383    | 0.5390944    | not scorable | not scorable | 1            | 0.7891991    |

|                      |                                |              |              |              |              |              |              |
|----------------------|--------------------------------|--------------|--------------|--------------|--------------|--------------|--------------|
| #### Bn-A08-p5104792 | A-genome specific (rapa only)  | not scorable | not scorable | not scorable | not scorable | 0.9917355    | 0.7740983    |
| #### Bn-A08-p5104945 | A-genome specific (napus-rapa) | 0.9784689    | 0.8146099    | not scorable | not scorable | 0.9834711    | 0.7059647    |
| #### Bn-A08-p5105745 | A-genome specific (napus-rapa) | 0.9952153    | 0.5325148    | not scorable | not scorable | 1            | 0.7006657    |
| #### Bn-A08-p510718  | genome unspecific (all in)     | 0.9856459    | 0.5601048    | 0.9457364    | 0.6916906    | 0.9752066    | 0.7922446    |
| #### Bn-A08-p5109706 | A-genome specific (napus-rapa) | 0.9784689    | 0.5609434    | not scorable | not scorable | 0.9752066    | 0.6613156    |
| #### Bn-A08-p5146710 | A-genome specific (napus-rapa) | 0.9832536    | 0.3026189    | not scorable | not scorable | 1            | 0.6369965    |
| #### Bn-A08-p5153375 | A-genome specific (napus-rapa) | 0.9904306    | 0.7882052    | not scorable | not scorable | 1            | 0.7309751    |
| #### Bn-A08-p5155511 | A-genome specific (napus-rapa) | 0.9641148    | 0.5399702    | not scorable | not scorable | 0.9917355    | 0.5554258    |
| #### Bn-A08-p5174518 | A-genome specific (napus-rapa) | 0.9832536    | 0.2541803    | not scorable | not scorable | 1            | 0.6746467    |
| #### Bn-A08-p5174818 | A-genome specific (napus-rapa) | 0.9904306    | 0.2808905    | not scorable | not scorable | 0.9834711    | 0.6492121    |
| #### Bn-A08-p5212067 | A-genome specific (napus-rapa) | 0.9784689    | 0.738986     | not scorable | not scorable | 0.9752066    | 0.8099267    |
| #### Bn-A08-p523111  | A-genome specific (napus-rapa) | 0.9832536    | 0.5033141    | not scorable | not scorable | 0.9917355    | 0.7033271    |
| #### Bn-A08-p5241894 | A-genome specific (rapa only)  | not scorable | not scorable | not scorable | not scorable | 0.9669421    | 0.6403041    |
| #### Bn-A08-p5242184 | A-genome specific (rapa only)  | not scorable | not scorable | not scorable | not scorable | 1            | 0.5376377    |
| #### Bn-A08-p5249573 | A-genome specific (napus-rapa) | 0.9952153    | 0.7788243    | not scorable | not scorable | 0.9917355    | 0.7531341    |
| #### Bn-A08-p5255647 | A-genome specific (napus-rapa) | 0.9880383    | 0.7799505    | not scorable | not scorable | 0.9917355    | 0.7470146    |
| #### Bn-A08-p5257044 | A-genome specific (napus-rapa) | 0.9856459    | 0.7765872    | not scorable | not scorable | 1            | 0.8135585    |
| #### Bn-A08-p5257814 | A-genome specific (napus-rapa) | 0.9712918    | 0.445129     | not scorable | not scorable | 0.9917355    | 0.8402446    |
| #### Bn-A08-p5263570 | A-genome specific (napus-rapa) | 0.9832536    | 0.7288274    | not scorable | not scorable | 0.9917355    | 0.7081193    |
| #### Bn-A08-p5266776 | genome unspecific (all in)     | 0.9545454    | 0.443765     | 0.9844961    | 0.6189148    | 1            | 0.8096699    |
| #### Bn-A08-p5300046 | A-genome specific (napus-rapa) | 0.9712918    | 0.4985043    | not scorable | not scorable | 0.9917355    | 0.8405636    |
| #### Bn-A08-p5300520 | A-genome specific (napus-rapa) | 0.9880383    | 0.8009316    | not scorable | not scorable | 1            | 0.877344     |
| #### Bn-A08-p5300648 | A-genome specific (napus-rapa) | 0.5717703    | 0.7026016    | not scorable | not scorable | 0.9752066    | 0.8392154    |
| #### Bn-A08-p5305309 | A-genome specific (napus-rapa) | 0.9952153    | 0.8002583    | not scorable | not scorable | 1            | 0.744638     |
| #### Bn-A08-p533195  | A-genome specific (napus-rapa) | 0.9832536    | 0.3821131    | not scorable | not scorable | 0.9917355    | 0.7551214    |
| #### Bn-A08-p5333513 | A-genome specific (napus-rapa) | 0.9760765    | 0.7872751    | not scorable | not scorable | 1            | 0.7660959    |
| #### Bn-A08-p5343622 | A-genome specific (napus-rapa) | 0.9784689    | 0.5947696    | not scorable | not scorable | 0.9752066    | 0.581582     |
| #### Bn-A08-p5351001 | A-genome specific (napus-rapa) | 0.9736842    | 0.7987571    | not scorable | not scorable | 0.9504132    | 0.7508981    |
| #### Bn-A08-p5361134 | A-genome specific (napus-rapa) | 0.9712918    | 0.2526645    | not scorable | not scorable | 0.9834711    | 0.6715183    |
| #### Bn-A08-p5364653 | A-genome specific (napus-rapa) | 0.9904306    | 0.6038405    | not scorable | not scorable | 1            | 0.8440034    |
| #### Bn-A08-p5366608 | all not scorable               | not scorable | not scorable | not scorable | not scorable | not scorable | not scorable |
| #### Bn-A08-p537474  | A-genome specific (napus-rapa) | 0.9736842    | 0.7235225    | not scorable | not scorable | 0.9917355    | 0.7437277    |
| #### Bn-A08-p5420503 | A-genome specific (napus-rapa) | 0.9904306    | 0.7115142    | not scorable | not scorable | 1            | 0.6793115    |

|                      |                                |              |              |              |              |           |           |
|----------------------|--------------------------------|--------------|--------------|--------------|--------------|-----------|-----------|
| #### Bn-A08-p543480  | A-genome specific (napus-rapa) | 0.6602871    | 0.7426755    | not scorable | not scorable | 0.9834711 | 0.766572  |
| #### Bn-A08-p5461032 | A-genome specific (napus-rapa) | 0.9856459    | 0.763956     | not scorable | not scorable | 1         | 0.783455  |
| #### Bn-A08-p5490050 | A-genome specific (napus-rapa) | 0.9712918    | 0.6906943    | not scorable | not scorable | 0.9917355 | 0.7805885 |
| #### Bn-A08-p5491239 | A-genome specific (napus-rapa) | 0.9832536    | 0.47551      | not scorable | not scorable | 0.9834711 | 0.658108  |
| #### Bn-A08-p5539128 | A-genome specific (napus-rapa) | 0.9736842    | 0.305658     | not scorable | not scorable | 1         | 0.7303285 |
| #### Bn-A08-p5540892 | A-genome specific (napus-rapa) | 0.9641148    | 0.3360897    | not scorable | not scorable | 0.9917355 | 0.6804265 |
| #### Bn-A08-p5583881 | A-genome specific (napus-rapa) | 0.9832536    | 0.399956     | not scorable | not scorable | 1         | 0.8157979 |
| #### Bn-A08-p5591333 | A-genome specific (napus-rapa) | 0.9856459    | 0.3612186    | not scorable | not scorable | 1         | 0.8526482 |
| #### Bn-A08-p5616343 | A-genome specific (rapa only)  | not scorable | not scorable | not scorable | not scorable | 0.9917355 | 0.7390338 |
| #### Bn-A08-p5626110 | A-genome specific (napus-rapa) | 0.9832536    | 0.7835032    | not scorable | not scorable | 1         | 0.8331373 |
| #### Bn-A08-p5626953 | A-genome specific (napus-rapa) | 0.9880383    | 0.7781911    | not scorable | not scorable | 0.9917355 | 0.7772944 |
| #### Bn-A08-p5627117 | A-genome specific (napus-rapa) | 0.9928229    | 0.7249776    | not scorable | not scorable | 0.9917355 | 0.8350288 |
| #### Bn-A08-p5635882 | A-genome specific (napus-rapa) | 0.9784689    | 0.7217452    | not scorable | not scorable | 0.9669421 | 0.7123613 |
| #### Bn-A08-p5636172 | A-genome specific (napus-rapa) | 1            | 0.7939545    | not scorable | not scorable | 0.9917355 | 0.7704828 |
| #### Bn-A08-p5636755 | A-genome specific (napus-rapa) | 0.9952153    | 0.7128866    | not scorable | not scorable | 0.9917355 | 0.7138062 |
| #### Bn-A08-p5636764 | A-genome specific (napus-rapa) | 0.9760765    | 0.5879017    | not scorable | not scorable | 0.9834711 | 0.6053268 |
| #### Bn-A08-p5638757 | A-genome specific (napus-rapa) | 0.9784689    | 0.6286483    | not scorable | not scorable | 1         | 0.6682655 |
| #### Bn-A08-p5640946 | A-genome specific (napus-rapa) | 0.9784689    | 0.2988837    | not scorable | not scorable | 1         | 0.7937303 |
| #### Bn-A08-p5652494 | A-genome specific (napus-rapa) | 0.9952153    | 0.7529622    | not scorable | not scorable | 1         | 0.7101274 |
| #### Bn-A08-p5664320 | A-genome specific (napus-rapa) | 0.9808612    | 0.2932149    | not scorable | not scorable | 1         | 0.3384484 |
| #### Bn-A08-p5696515 | A-genome specific (napus-rapa) | 0.9856459    | 0.7766078    | not scorable | not scorable | 1         | 0.8115303 |
| #### Bn-A08-p5697139 | A-genome specific (napus-rapa) | 0.9880383    | 0.6709234    | not scorable | not scorable | 1         | 0.741719  |
| #### Bn-A08-p5697224 | A-genome specific (napus-rapa) | 0.9736842    | 0.6136633    | not scorable | not scorable | 0.9917355 | 0.6693941 |
| #### Bn-A08-p5697643 | A-genome specific (napus-rapa) | 0.9904306    | 0.6859453    | not scorable | not scorable | 0.9834711 | 0.803592  |
| #### Bn-A08-p5697783 | A-genome specific (napus-rapa) | 1            | 0.7749629    | not scorable | not scorable | 0.9917355 | 0.8332034 |
| #### Bn-A08-p5698262 | A-genome specific (napus-rapa) | 0.9928229    | 0.7660457    | not scorable | not scorable | 0.9917355 | 0.6545298 |
| #### Bn-A08-p5698705 | A-genome specific (napus-rapa) | 0.9904306    | 0.7339934    | not scorable | not scorable | 0.9917355 | 0.6460103 |
| #### Bn-A08-p5699040 | A-genome specific (napus-rapa) | 0.9712918    | 0.6008889    | not scorable | not scorable | 0.9917355 | 0.6352985 |
| #### Bn-A08-p5700152 | A-genome specific (napus-rapa) | 0.9808612    | 0.7427377    | not scorable | not scorable | 0.9834711 | 0.8005624 |
| #### Bn-A08-p5700554 | A-genome specific (napus-rapa) | 0.9976076    | 0.7802736    | not scorable | not scorable | 1         | 0.881532  |
| #### Bn-A08-p5702921 | A-genome specific (napus-rapa) | 0.9808612    | 0.7819669    | not scorable | not scorable | 0.9917355 | 0.767135  |
| #### Bn-A08-p570304  | A-genome specific (napus-rapa) | 0.9712918    | 0.4476652    | not scorable | not scorable | 0.6942149 | 0.8246019 |
| #### Bn-A08-p5705625 | A-genome specific (rapa only)  | not scorable | not scorable | not scorable | not scorable | 0.9917355 | 0.8632711 |



|                      |                                |              |              |              |              |              |              |
|----------------------|--------------------------------|--------------|--------------|--------------|--------------|--------------|--------------|
| #### Bn-A08-p5721732 | A-genome specific (napus-rapa) | 0.9904306    | 0.7037584    | not scorable | not scorable | 0.9752066    | 0.7441415    |
| #### Bn-A08-p572531  | A-genome specific (napus-rapa) | 0.7942584    | 0.8062543    | not scorable | not scorable | 0.677686     | 0.783589     |
| #### Bn-A08-p5729023 | napus specific                 | 0.9976076    | 0.6057319    | not scorable | not scorable | not scorable | not scorable |
| #### Bn-A08-p5730628 | A-genome specific (napus-rapa) | 0.9712918    | 0.5818865    | not scorable | not scorable | 1            | 0.7914098    |
| #### Bn-A08-p575482  | A-genome specific (napus-rapa) | 0.9808612    | 0.7847302    | not scorable | not scorable | 0.677686     | 0.7654794    |
| #### Bn-A08-p5766271 | A-genome specific (napus-rapa) | 0.9784689    | 0.729461     | not scorable | not scorable | 0.9834711    | 0.6749147    |
| #### Bn-A08-p5806240 | A-genome specific (napus-rapa) | 1            | 0.56037      | not scorable | not scorable | 0.9917355    | 0.8459618    |
| #### Bn-A08-p5905574 | A-genome specific (napus-rapa) | 0.9952153    | 0.7212439    | not scorable | not scorable | 1            | 0.7001972    |
| #### Bn-A08-p5924891 | A-genome specific (napus-rapa) | 0.9593301    | 0.3734984    | not scorable | not scorable | 0.768595     | 0.6518933    |
| #### Bn-A08-p5938244 | A-genome specific (napus-rapa) | 1            | 0.6934806    | not scorable | not scorable | 1            | 0.6644136    |
| #### Bn-A08-p5975890 | A-genome specific (napus-rapa) | 0.9688995    | 0.8082688    | not scorable | not scorable | 1            | 0.807812     |
| #### Bn-A08-p6029041 | A-genome specific (napus-rapa) | 0.9808612    | 0.3065941    | not scorable | not scorable | 1            | 0.8361772    |
| #### Bn-A08-p6066021 | A-genome specific (napus-rapa) | 0.9665072    | 0.543319     | not scorable | not scorable | 0.9834711    | 0.8028172    |
| #### Bn-A08-p6101880 | A-genome specific (napus-rapa) | 0.9736842    | 0.3841554    | not scorable | not scorable | 0.9917355    | 0.7182956    |
| #### Bn-A08-p6104052 | A-genome specific (rapa only)  | not scorable | not scorable | not scorable | not scorable | 1            | 0.7754025    |
| #### Bn-A08-p6108703 | A-genome specific (napus-rapa) | 0.9401914    | 0.6490849    | not scorable | not scorable | 0.9834711    | 0.8007053    |
| #### Bn-A08-p6114046 | A-genome specific (napus-rapa) | 0.9545454    | 0.5322414    | not scorable | not scorable | 0.9752066    | 0.5734009    |
| #### Bn-A08-p6133005 | A-genome specific (napus-rapa) | 0.9401914    | 0.6785764    | not scorable | not scorable | 0.9917355    | 0.6498343    |
| #### Bn-A08-p6133601 | A-genome specific (napus-rapa) | 0.9617225    | 0.7687027    | not scorable | not scorable | 0.5619835    | 0.8474761    |
| #### Bn-A08-p6148686 | A-genome specific (napus-rapa) | 0.9928229    | 0.7764494    | not scorable | not scorable | 0.9834711    | 0.8315389    |
| #### Bn-A08-p6148996 | A-genome specific (napus-rapa) | 0.9880383    | 0.5816407    | not scorable | not scorable | 0.9834711    | 0.7013769    |
| #### Bn-A08-p6157861 | A-genome specific (napus-rapa) | 0.9856459    | 0.5524892    | not scorable | not scorable | 1            | 0.7440976    |
| #### Bn-A08-p6159705 | A-genome specific (napus-rapa) | 0.9952153    | 0.7614115    | not scorable | not scorable | 1            | 0.8018429    |
| #### Bn-A08-p6159768 | A-genome specific (napus-rapa) | 0.9928229    | 0.7677899    | not scorable | not scorable | 0.9917355    | 0.7848887    |
| #### Bn-A08-p6162616 | A-genome specific (napus-rapa) | 0.9473684    | 0.676946     | not scorable | not scorable | 1            | 0.7421274    |
| #### Bn-A08-p6162660 | A-genome specific (napus-rapa) | 0.9569378    | 0.4174708    | not scorable | not scorable | 1            | 0.7975635    |
| #### Bn-A08-p6164225 | A-genome specific (napus-rapa) | 0.9904306    | 0.7819768    | not scorable | not scorable | 1            | 0.7520856    |
| #### Bn-A08-p6164968 | A-genome specific (napus-rapa) | 0.9736842    | 0.4488381    | not scorable | not scorable | 1            | 0.8202772    |
| #### Bn-A08-p6165340 | A-genome specific (napus-rapa) | 0.9928229    | 0.7607111    | not scorable | not scorable | 0.9917355    | 0.7947426    |
| #### Bn-A08-p6165665 | A-genome specific (napus-rapa) | 0.9952153    | 0.7664756    | not scorable | not scorable | 1            | 0.7668184    |
| #### Bn-A08-p6170057 | A-genome specific (napus-rapa) | 0.9521531    | 0.6931098    | not scorable | not scorable | 0.9917355    | 0.677386     |
| #### Bn-A08-p6185551 | A-genome specific (napus-rapa) | 0.9736842    | 0.7423835    | not scorable | not scorable | 0.9586777    | 0.7071024    |
| #### Bn-A08-p6238237 | A-genome specific (napus-rapa) | 0.9856459    | 0.7114943    | not scorable | not scorable | 0.9834711    | 0.9306018    |

|                      |                                |              |              |              |              |              |              |
|----------------------|--------------------------------|--------------|--------------|--------------|--------------|--------------|--------------|
| #### Bn-A08-p6246411 | A-genome specific (napus-rapa) | 0.9904306    | 0.7553175    | not scorable | not scorable | 1            | 0.7356505    |
| #### Bn-A08-p6248437 | A-genome specific (napus-rapa) | 0.9736842    | 0.6553149    | not scorable | not scorable | 1            | 0.9243002    |
| #### Bn-A08-p6256690 | A-genome specific (napus-rapa) | 0.9904306    | 0.4078735    | not scorable | not scorable | 1            | 0.6930137    |
| #### Bn-A08-p6257665 | A-genome specific (napus-rapa) | 0.9976076    | 0.4404933    | not scorable | not scorable | 0.9917355    | 0.7914836    |
| #### Bn-A08-p626649  | napus specific                 | 0.5143541    | 0.7553053    | not scorable | not scorable | not scorable | not scorable |
| #### Bn-A08-p6268593 | A-genome specific (napus-rapa) | 0.9521531    | 0.2535119    | not scorable | not scorable | 0.9834711    | 0.6163465    |
| #### Bn-A08-p6278699 | A-genome specific (napus-rapa) | 0.9976076    | 0.719215     | not scorable | not scorable | 0.9917355    | 0.7000035    |
| #### Bn-A08-p6282126 | A-genome specific (napus-rapa) | 1            | 0.5443519    | not scorable | not scorable | 1            | 0.823622     |
| #### Bn-A08-p6284747 | A-genome specific (napus-rapa) | 1            | 0.4973581    | not scorable | not scorable | 0.9834711    | 0.7801051    |
| #### Bn-A08-p6297167 | A-genome specific (rapa only)  | not scorable | not scorable | not scorable | not scorable | 0.9834711    | 0.7996386    |
| #### Bn-A08-p6298340 | A-genome specific (napus-rapa) | 0.9832536    | 0.7035071    | not scorable | not scorable | 1            | 0.7026575    |
| #### Bn-A08-p6299307 | A-genome specific (napus-rapa) | 1            | 0.5529681    | not scorable | not scorable | 1            | 0.7504673    |
| #### Bn-A08-p6299938 | A-genome specific (napus-rapa) | 0.9641148    | 0.2596127    | not scorable | not scorable | 1            | 0.6644369    |
| #### Bn-A08-p6303585 | A-genome specific (rapa only)  | not scorable | not scorable | not scorable | not scorable | 0.6859504    | 0.7923775    |
| #### Bn-A08-p6306804 | A-genome specific (napus-rapa) | 0.08612441   | 0.7528717    | not scorable | not scorable | 0.8099173    | 0.8235053    |
| #### Bn-A08-p6319732 | A-genome specific (napus-rapa) | 0.9856459    | 0.7598988    | not scorable | not scorable | 1            | 0.7045088    |
| #### Bn-A08-p6319943 | A-genome specific (napus-rapa) | 0.9904306    | 0.7626891    | not scorable | not scorable | 1            | 0.7720672    |
| #### Bn-A08-p6320815 | all not scorable               | not scorable | not scorable | not scorable | not scorable | not scorable | not scorable |
| #### Bn-A08-p6332878 | A-genome specific (napus-rapa) | 0.9976076    | 0.770898     | not scorable | not scorable | 1            | 0.7896279    |
| #### Bn-A08-p6343431 | A-genome specific (napus-rapa) | 0.9736842    | 0.3263827    | not scorable | not scorable | 0.9834711    | 0.6363498    |
| #### Bn-A08-p6366258 | A-genome specific (napus-rapa) | 0.9928229    | 0.7719148    | not scorable | not scorable | 0.9752066    | 0.7265471    |
| #### Bn-A08-p6369194 | A-genome specific (napus-rapa) | 0.9688995    | 0.3275369    | not scorable | not scorable | 0.9752066    | 0.8270815    |
| #### Bn-A08-p6371865 | A-genome specific (napus-rapa) | 0.9856459    | 0.4194041    | not scorable | not scorable | 0.9917355    | 0.7365282    |
| #### Bn-A08-p6392789 | A-genome specific (napus-rapa) | 0.9952153    | 0.7508786    | not scorable | not scorable | 1            | 0.7759439    |
| #### Bn-A08-p6394232 | napus specific                 | 0.9641148    | 0.7861156    | not scorable | not scorable | not scorable | not scorable |
| #### Bn-A08-p6400378 | A-genome specific (napus-rapa) | 0.9880383    | 0.3374707    | not scorable | not scorable | 0.9834711    | 0.6305478    |
| #### Bn-A08-p6488809 | A-genome specific (napus-rapa) | 0.9712918    | 0.7725732    | not scorable | not scorable | 0.9752066    | 0.6166007    |
| #### Bn-A08-p6523926 | A-genome specific (napus-rapa) | 0.9928229    | 0.4766091    | not scorable | not scorable | 1            | 0.8359313    |
| #### Bn-A08-p6523952 | A-genome specific (napus-rapa) | 0.9736842    | 0.7307213    | not scorable | not scorable | 0.5785124    | 0.8277526    |
| #### Bn-A08-p657830  | A-genome specific (napus-rapa) | 0.9928229    | 0.761279     | not scorable | not scorable | 1            | 0.9175813    |
| #### Bn-A08-p663199  | all not scorable               | not scorable | not scorable | not scorable | not scorable | not scorable | not scorable |
| #### Bn-A08-p6721530 | genome unspecific (all in)     | 0.9832536    | 0.7002551    |              | 0            | 0.7164673    | 1            |
| #### Bn-A08-p6722442 | A-genome specific (napus-rapa) | 1            | 0.5807568    | not scorable | not scorable | 0.9917355    | 0.8240144    |

|                      |                                |              |              |              |              |           |           |
|----------------------|--------------------------------|--------------|--------------|--------------|--------------|-----------|-----------|
| #### Bn-A08-p6744560 | A-genome specific (napus-rapa) | 0.9880383    | 0.4246019    | not scorable | not scorable | 1         | 0.6878403 |
| #### Bn-A08-p6828854 | A-genome specific (napus-rapa) | 0.9856459    | 0.7401624    | not scorable | not scorable | 0.9173554 | 0.672336  |
| #### Bn-A08-p6828857 | A-genome specific (napus-rapa) | 1            | 0.5997616    | not scorable | not scorable | 1         | 0.8306017 |
| #### Bn-A08-p6829643 | A-genome specific (napus-rapa) | 1            | 0.5950714    | not scorable | not scorable | 0.9752066 | 0.5947483 |
| #### Bn-A08-p6836766 | A-genome specific (napus-rapa) | 0.9760765    | 0.8937139    | not scorable | not scorable | 0.6859504 | 0.7684302 |
| #### Bn-A08-p6836803 | A-genome specific (napus-rapa) | 0.9880383    | 0.9643053    | not scorable | not scorable | 0.9917355 | 0.7970167 |
| #### Bn-A08-p6887868 | A-genome specific (napus-rapa) | 1            | 0.7738749    | not scorable | not scorable | 0.9917355 | 0.7887149 |
| #### Bn-A08-p6889067 | A-genome specific (napus-rapa) | 1            | 0.5226027    | not scorable | not scorable | 0.7024794 | 0.573825  |
| #### Bn-A08-p6937293 | A-genome specific (napus-rapa) | 1            | 0.3168733    | not scorable | not scorable | 0.9752066 | 0.7013563 |
| #### Bn-A08-p6943246 | A-genome specific (napus-rapa) | 1            | 0.4829348    | not scorable | not scorable | 1         | 0.8001783 |
| #### Bn-A08-p694721  | A-genome specific (napus-rapa) | 0.9832536    | 0.2463595    | not scorable | not scorable | 1         | 0.785353  |
| #### Bn-A08-p6971574 | A-genome specific (napus-rapa) | 1            | 0.5922189    | not scorable | not scorable | 1         | 0.8259684 |
| #### Bn-A08-p697434  | A-genome specific (napus-rapa) | 0.9904306    | 0.485468     | not scorable | not scorable | 0.9917355 | 0.6424665 |
| #### Bn-A08-p7018554 | A-genome specific (napus-rapa) | 0.9784689    | 0.7387714    | not scorable | not scorable | 0.9752066 | 0.7611861 |
| #### Bn-A08-p7062593 | A-genome specific (napus-rapa) | 0.9952153    | 0.8048975    | not scorable | not scorable | 1         | 0.6775554 |
| #### Bn-A08-p7063045 | A-genome specific (napus-rapa) | 0.9928229    | 0.7520298    | not scorable | not scorable | 0.9834711 | 0.7472511 |
| #### Bn-A08-p7064296 | A-genome specific (napus-rapa) | 0.9880383    | 0.8218698    | not scorable | not scorable | 0.9917355 | 0.8097939 |
| #### Bn-A08-p7066465 | A-genome specific (napus-rapa) | 0.9880383    | 0.7170627    | not scorable | not scorable | 0.9917355 | 0.7881411 |
| #### Bn-A08-p7066594 | A-genome specific (napus-rapa) | 0.9832536    | 0.4113165    | not scorable | not scorable | 1         | 0.7592129 |
| #### Bn-A08-p7067073 | A-genome specific (napus-rapa) | 0.9904306    | 0.7355728    | not scorable | not scorable | 0.9917355 | 0.7020374 |
| #### Bn-A08-p7071333 | A-genome specific (napus-rapa) | 0.9880383    | 0.7930228    | not scorable | not scorable | 0.9917355 | 0.8350531 |
| #### Bn-A08-p7075341 | A-genome specific (napus-rapa) | 0.9784689    | 0.7628406    | not scorable | not scorable | 1         | 0.787917  |
| #### Bn-A08-p7078765 | A-genome specific (napus-rapa) | 0.9928229    | 0.592535     | not scorable | not scorable | 0.9834711 | 0.5985309 |
| #### Bn-A08-p7078920 | A-genome specific (napus-rapa) | 0.9856459    | 0.6846643    | not scorable | not scorable | 1         | 0.6628918 |
| #### Bn-A08-p7080277 | A-genome specific (napus-rapa) | 0.9832536    | 0.7712798    | not scorable | not scorable | 0.9917355 | 0.8648356 |
| #### Bn-A08-p7087866 | A-genome specific (napus-rapa) | 0.9736842    | 0.3470761    | not scorable | not scorable | 0.9917355 | 0.8375028 |
| #### Bn-A08-p7087999 | A-genome specific (napus-rapa) | 0.9617225    | 0.6655154    | not scorable | not scorable | 0.9917355 | 0.7857517 |
| #### Bn-A08-p7091133 | A-genome specific (rapa only)  | not scorable | not scorable | not scorable | not scorable | 0.9752066 | 0.7682148 |
| #### Bn-A08-p7092438 | A-genome specific (napus-rapa) | 0.9904306    | 0.8000849    | not scorable | not scorable | 0.9917355 | 0.7732205 |
| #### Bn-A08-p7099327 | A-genome specific (napus-rapa) | 0.9712918    | 0.2934707    | not scorable | not scorable | 1         | 0.8773792 |
| #### Bn-A08-p7110493 | A-genome specific (napus-rapa) | 0.9880383    | 0.8039078    | not scorable | not scorable | 0.9752066 | 0.7643591 |
| #### Bn-A08-p7110561 | A-genome specific (napus-rapa) | 0.9952153    | 0.7910505    | not scorable | not scorable | 1         | 0.8174409 |
| #### Bn-A08-p7112865 | A-genome specific (napus-rapa) | 0.9736842    | 0.2982198    | not scorable | not scorable | 1         | 0.8264138 |

|                      |                                |              |              |              |              |              |              |
|----------------------|--------------------------------|--------------|--------------|--------------|--------------|--------------|--------------|
| #### Bn-A08-p7120885 | A-genome specific (napus-rapa) | 0.9832536    | 0.689787     | not scorable | not scorable | 0.9917355    | 0.7730239    |
| #### Bn-A08-p7122254 | A-genome specific (napus-rapa) | 0.9832536    | 0.7670648    | not scorable | not scorable | 1            | 0.828833     |
| #### Bn-A08-p7123976 | A-genome specific (napus-rapa) | 0.9880383    | 0.3445188    | not scorable | not scorable | 1            | 0.7366643    |
| #### Bn-A08-p7139892 | A-genome specific (napus-rapa) | 0.9808612    | 0.7739996    | not scorable | not scorable | 1            | 0.8843162    |
| #### Bn-A08-p7151447 | all not scorable               | not scorable | not scorable | not scorable | not scorable | not scorable | not scorable |
| #### Bn-A08-p7152271 | A-genome specific (napus-rapa) | 0.9832536    | 0.6694374    | not scorable | not scorable | 1            | 0.8398961    |
| #### Bn-A08-p7162057 | A-genome specific (napus-rapa) | 0.9904306    | 0.3135282    | not scorable | not scorable | 1            | 0.8224842    |
| #### Bn-A08-p7178765 | A-genome specific (napus-rapa) | 0.9617225    | 0.4309516    | not scorable | not scorable | 1            | 0.8433763    |
| #### Bn-A08-p7178963 | A-genome specific (napus-rapa) | 0.9808612    | 0.3486135    | not scorable | not scorable | 0.9917355    | 0.6777378    |
| #### Bn-A08-p7202405 | A-genome specific (napus-rapa) | 1            | 0.6401185    | not scorable | not scorable | 0.9752066    | 0.6732808    |
| #### Bn-A08-p7222585 | A-genome specific (napus-rapa) | 0.9641148    | 0.5243064    | not scorable | not scorable | 0.9834711    | 0.8170387    |
| #### Bn-A08-p7223478 | all not scorable               | not scorable | not scorable | not scorable | not scorable | not scorable | not scorable |
| #### Bn-A08-p7243965 | A-genome specific (napus-rapa) | 0.9760765    | 0.3420053    | not scorable | not scorable | 0.9917355    | 0.8115303    |
| #### Bn-A08-p7260514 | A-genome specific (napus-rapa) | 0.9880383    | 0.3415857    | not scorable | not scorable | 0.9834711    | 0.7996677    |
| #### Bn-A08-p7261638 | A-genome specific (napus-rapa) | 0.9928229    | 0.7424904    | not scorable | not scorable | 1            | 0.7486961    |
| #### Bn-A08-p7261759 | A-genome specific (napus-rapa) | 0.9856459    | 0.7236691    | not scorable | not scorable | 1            | 0.7324979    |
| #### Bn-A08-p7263132 | A-genome specific (napus-rapa) | 0.9856459    | 0.7275688    | not scorable | not scorable | 0.9917355    | 0.695312     |
| #### Bn-A08-p7263741 | A-genome specific (napus-rapa) | 0.9856459    | 0.5590574    | not scorable | not scorable | 1            | 0.5824593    |
| #### Bn-A08-p7264462 | A-genome specific (napus-rapa) | 0.9808612    | 0.4958048    | not scorable | not scorable | 0.9917355    | 0.7150422    |
| #### Bn-A08-p7264513 | A-genome specific (napus-rapa) | 0.9760765    | 0.4977272    | not scorable | not scorable | 1            | 0.6884218    |
| #### Bn-A08-p7265146 | A-genome specific (napus-rapa) | 0.9928229    | 0.7327747    | not scorable | not scorable | 1            | 0.7391679    |
| #### Bn-A08-p7265333 | A-genome specific (napus-rapa) | 0.9904306    | 0.798516     | not scorable | not scorable | 1            | 0.7743862    |
| #### Bn-A08-p7265843 | A-genome specific (napus-rapa) | 0.9952153    | 0.8076898    | not scorable | not scorable | 1            | 0.8191368    |
| #### Bn-A08-p7265897 | A-genome specific (napus-rapa) | 0.9880383    | 0.7413705    | not scorable | not scorable | 0.9752066    | 0.6769241    |
| #### Bn-A08-p7271638 | A-genome specific (napus-rapa) | 0.9760765    | 0.6902415    | not scorable | not scorable | 0.9669421    | 0.7410153    |
| #### Bn-A08-p7273429 | A-genome specific (napus-rapa) | 0.9880383    | 0.6856606    | not scorable | not scorable | 0.9917355    | 0.8172124    |
| #### Bn-A08-p7276312 | A-genome specific (napus-rapa) | 0.9928229    | 0.7711571    | not scorable | not scorable | 1            | 0.8571636    |
| #### Bn-A08-p7282035 | A-genome specific (napus-rapa) | 0.9832536    | 0.7203039    | not scorable | not scorable | 0.9752066    | 0.7511598    |
| #### Bn-A08-p7288153 | A-genome specific (napus-rapa) | 0.9904306    | 0.6993263    | not scorable | not scorable | 1            | 0.7240397    |
| #### Bn-A08-p7303669 | A-genome specific (napus-rapa) | 0.9808612    | 0.6960297    | not scorable | not scorable | 0.9917355    | 0.7809719    |
| #### Bn-A08-p7303995 | A-genome specific (napus-rapa) | 0.9688995    | 0.3486538    | not scorable | not scorable | 1            | 0.8595511    |
| #### Bn-A08-p7315916 | A-genome specific (napus-rapa) | 0.9904306    | 0.7290953    | not scorable | not scorable | 0.9669421    | 0.6736414    |
| #### Bn-A08-p7318043 | A-genome specific (napus-rapa) | 0.9904306    | 0.3855744    | not scorable | not scorable | 1            | 0.6549749    |

|                      |                                |              |              |              |              |           |           |
|----------------------|--------------------------------|--------------|--------------|--------------|--------------|-----------|-----------|
| #### Bn-A08-p7336214 | A-genome specific (napus-rapa) | 0.9617225    | 0.1814705    | not scorable | not scorable | 0.9834711 | 0.564801  |
| #### Bn-A08-p7355372 | A-genome specific (napus-rapa) | 1            | 0.5331797    | not scorable | not scorable | 0.5785124 | 0.6885935 |
| #### Bn-A08-p7366507 | A-genome specific (napus-rapa) | 0.7727273    | 0.8955993    | not scorable | not scorable | 1         | 0.8207097 |
| #### Bn-A08-p7374884 | A-genome specific (napus-rapa) | 0.9832536    | 0.3392256    | not scorable | not scorable | 0.9834711 | 0.7245917 |
| #### Bn-A08-p7377024 | A-genome specific (napus-rapa) | 0.9928229    | 0.7403638    | not scorable | not scorable | 0.9752066 | 0.7337053 |
| #### Bn-A08-p7409992 | A-genome specific (napus-rapa) | 0.9593301    | 0.6571515    | not scorable | not scorable | 0.9917355 | 0.697695  |
| #### Bn-A08-p7410609 | A-genome specific (napus-rapa) | 0.9808612    | 0.3626376    | not scorable | not scorable | 0.9834711 | 0.6999585 |
| #### Bn-A08-p741480  | A-genome specific (napus-rapa) | 0.9808612    | 0.7482754    | not scorable | not scorable | 0.9917355 | 0.6875092 |
| #### Bn-A08-p7416849 | A-genome specific (napus-rapa) | 0.9712918    | 0.6691396    | not scorable | not scorable | 0.9834711 | 0.6450936 |
| #### Bn-A08-p7417420 | A-genome specific (napus-rapa) | 0.9784689    | 0.747717     | not scorable | not scorable | 0.9752066 | 0.8086574 |
| #### Bn-A08-p7417679 | A-genome specific (napus-rapa) | 0.9856459    | 0.7343101    | not scorable | not scorable | 0.9834711 | 0.7655786 |
| #### Bn-A08-p7417923 | A-genome specific (napus-rapa) | 0.9904306    | 0.6824265    | not scorable | not scorable | 0.9752066 | 0.6616881 |
| #### Bn-A08-p7418001 | A-genome specific (napus-rapa) | 0.9904306    | 0.6979718    | not scorable | not scorable | 0.9917355 | 0.6934751 |
| #### Bn-A08-p7418132 | A-genome specific (napus-rapa) | 0.9784689    | 0.6691884    | not scorable | not scorable | 0.9834711 | 0.6782905 |
| #### Bn-A08-p7420214 | A-genome specific (napus-rapa) | 0.9856459    | 0.6175172    | not scorable | not scorable | 0.9834711 | 0.6240729 |
| #### Bn-A08-p7420713 | A-genome specific (napus-rapa) | 0.9904306    | 0.600333     | not scorable | not scorable | 0.9752066 | 0.5782008 |
| #### Bn-A08-p7425294 | A-genome specific (napus-rapa) | 0.9832536    | 0.302253     | not scorable | not scorable | 0.9917355 | 0.7501308 |
| #### Bn-A08-p742965  | A-genome specific (rapa only)  | not scorable | not scorable | not scorable | not scorable | 0.9669421 | 0.5732173 |
| #### Bn-A08-p7438002 | A-genome specific (napus-rapa) | 0.9784689    | 0.8014626    | not scorable | not scorable | 0.9917355 | 0.7718359 |
| #### Bn-A08-p7438102 | A-genome specific (napus-rapa) | 0.9808612    | 0.7313783    | not scorable | not scorable | 0.9834711 | 0.7279527 |
| #### Bn-A08-p7439009 | A-genome specific (napus-rapa) | 0.9904306    | 0.7774475    | not scorable | not scorable | 0.9834711 | 0.7699121 |
| #### Bn-A08-p7439711 | A-genome specific (napus-rapa) | 0.9904306    | 0.7559376    | not scorable | not scorable | 0.9917355 | 0.8136061 |
| #### Bn-A08-p743985  | A-genome specific (napus-rapa) | 0.9856459    | 0.7994052    | not scorable | not scorable | 0.9917355 | 0.7617868 |
| #### Bn-A08-p7440367 | A-genome specific (napus-rapa) | 0.9880383    | 0.7165534    | not scorable | not scorable | 0.9669421 | 0.6919881 |
| #### Bn-A08-p7441624 | A-genome specific (napus-rapa) | 0.9832536    | 0.7565853    | not scorable | not scorable | 0.9834711 | 0.7707161 |
| #### Bn-A08-p7443922 | A-genome specific (napus-rapa) | 0.9760765    | 0.7196993    | not scorable | not scorable | 0.9752066 | 0.7339495 |
| #### Bn-A08-p7444336 | A-genome specific (napus-rapa) | 0.9784689    | 0.3743896    | not scorable | not scorable | 0.9917355 | 0.7681727 |
| #### Bn-A08-p744725  | A-genome specific (napus-rapa) | 0.9880383    | 0.7901106    | not scorable | not scorable | 0.9752066 | 0.6623116 |
| #### Bn-A08-p744837  | A-genome specific (napus-rapa) | 0.9904306    | 0.7693753    | not scorable | not scorable | 0.9917355 | 0.78628   |
| #### Bn-A08-p745168  | A-genome specific (napus-rapa) | 0.9880383    | 0.7640416    | not scorable | not scorable | 0.9834711 | 0.7896373 |
| #### Bn-A08-p7455782 | A-genome specific (napus-rapa) | 0.9593301    | 0.4789706    | not scorable | not scorable | 0.9917355 | 0.7463215 |
| #### Bn-A08-p7458611 | A-genome specific (napus-rapa) | 0.9712918    | 0.2709881    | not scorable | not scorable | 0.9917355 | 0.5984891 |
| #### Bn-A08-p7496720 | A-genome specific (napus-rapa) | 1            | 0.566737     | not scorable | not scorable | 0.9834711 | 0.5316518 |

|      |                 |                                |           |           |              |              |              |              |
|------|-----------------|--------------------------------|-----------|-----------|--------------|--------------|--------------|--------------|
| #### | Bn-A08-p7497342 | genome unspecific (all in)     | 1         | 0.4453157 | 1            | 0.6797058    | 0.9834711    | 0.5316518    |
| #### | Bn-A08-p7497415 | A-genome specific (napus-rapa) | 1         | 0.792895  | not scorable | not scorable | 0.9752066    | 0.6447164    |
| #### | Bn-A08-p7497920 | A-genome specific (napus-rapa) | 1         | 0.3234195 | not scorable | not scorable | 1            | 0.8523434    |
| #### | Bn-A08-p7497925 | A-genome specific (napus-rapa) | 1         | 0.3387561 | not scorable | not scorable | 0.9917355    | 0.745656     |
| #### | Bn-A08-p7533577 | A-genome specific (napus-rapa) | 1         | 0.5273958 | not scorable | not scorable | 0.9917355    | 0.7639434    |
| #### | Bn-A08-p754670  | A-genome specific (napus-rapa) | 0.9688995 | 0.7543066 | not scorable | not scorable | 0.9917355    | 0.5883837    |
| #### | Bn-A08-p7563202 | A-genome specific (napus-rapa) | 1         | 0.7743757 | not scorable | not scorable | 0.9752066    | 0.5698414    |
| #### | Bn-A08-p758590  | A-genome specific (napus-rapa) | 0.9641148 | 0.2881129 | not scorable | not scorable | 0.9752066    | 0.5651514    |
| #### | Bn-A08-p7587591 | A-genome specific (napus-rapa) | 0.9976076 | 0.699289  | not scorable | not scorable | 0.9752066    | 0.7251623    |
| #### | Bn-A08-p758977  | A-genome specific (napus-rapa) | 0.9736842 | 0.6443983 | not scorable | not scorable | 1            | 0.7989568    |
| #### | Bn-A08-p7596192 | napus specific                 | 1         | 0.8754691 | not scorable | not scorable | not scorable | not scorable |
| #### | Bn-A08-p7611203 | napus specific                 | 0.8660287 | 0.4002658 | not scorable | not scorable | not scorable | not scorable |
| #### | Bn-A08-p7698145 | A-genome specific (napus-rapa) | 1         | 0.4126693 | not scorable | not scorable | 0.9917355    | 0.6038958    |
| #### | Bn-A08-p7717256 | A-genome specific (napus-rapa) | 0.9425837 | 0.537231  | not scorable | not scorable | 0.9834711    | 0.2543485    |
| #### | Bn-A08-p7739750 | A-genome specific (napus-rapa) | 0.9736842 | 0.7142965 | not scorable | not scorable | 0.9752066    | 0.7561849    |
| #### | Bn-A08-p7747258 | A-genome specific (napus-rapa) | 0.9784689 | 0.7001524 | not scorable | not scorable | 0.9917355    | 0.7331883    |
| #### | Bn-A08-p7791369 | A-genome specific (napus-rapa) | 0.9665072 | 0.4057769 | not scorable | not scorable | 1            | 0.5648155    |
| #### | Bn-A08-p7799016 | A-genome specific (napus-rapa) | 0.9904306 | 0.6854421 | not scorable | not scorable | 0.9752066    | 0.734793     |
| #### | Bn-A08-p7803865 | A-genome specific (napus-rapa) | 0.9617225 | 0.3023704 | not scorable | not scorable | 0.9834711    | 0.7661917    |
| #### | Bn-A08-p7810122 | A-genome specific (napus-rapa) | 0.9760765 | 0.3926042 | not scorable | not scorable | 0.9669421    | 0.6331415    |
| #### | Bn-A08-p7814328 | A-genome specific (napus-rapa) | 0.9712918 | 0.3717062 | not scorable | not scorable | 0.9752066    | 0.7437822    |
| #### | Bn-A08-p7814432 | A-genome specific (napus-rapa) | 0.9880383 | 0.3287145 | not scorable | not scorable | 1            | 0.8377695    |
| #### | Bn-A08-p782784  | A-genome specific (napus-rapa) | 1         | 0.9205657 | not scorable | not scorable | 1            | 0.7398615    |
| #### | Bn-A08-p7835995 | A-genome specific (napus-rapa) | 0.9665072 | 0.5707351 | not scorable | not scorable | 0.9917355    | 0.5636408    |
| #### | Bn-A08-p7851497 | A-genome specific (napus-rapa) | 0.9880383 | 0.7145701 | not scorable | not scorable | 1            | 0.6656118    |
| #### | Bn-A08-p7856305 | A-genome specific (napus-rapa) | 1         | 0.4827181 | not scorable | not scorable | 1            | 0.671941     |
| #### | Bn-A08-p7856849 | A-genome specific (napus-rapa) | 1         | 0.6720213 | not scorable | not scorable | 1            | 0.7289684    |
| #### | Bn-A08-p7863392 | A-genome specific (napus-rapa) | 0.9832536 | 0.682907  | not scorable | not scorable | 1            | 0.7557174    |
| #### | Bn-A08-p7881489 | A-genome specific (napus-rapa) | 0.9043062 | 0.7572688 | not scorable | not scorable | 1            | 0.8524848    |
| #### | Bn-A08-p792162  | A-genome specific (napus-rapa) | 0.9928229 | 0.6202847 | not scorable | not scorable | 0.9917355    | 0.6854609    |
| #### | Bn-A08-p7934396 | A-genome specific (napus-rapa) | 1         | 0.5702917 | not scorable | not scorable | 0.9917355    | 0.599347     |
| #### | Bn-A08-p7947263 | A-genome specific (napus-rapa) | 0.9952153 | 0.7733009 | not scorable | not scorable | 1            | 0.8112679    |
| #### | Bn-A08-p797453  | A-genome specific (napus-rapa) | 1         | 0.7888584 | not scorable | not scorable | 1            | 0.9175813    |

|                      |                                   |              |              |              |              |              |              |
|----------------------|-----------------------------------|--------------|--------------|--------------|--------------|--------------|--------------|
| #### Bn-A08-p7984584 | A-genome specific (napus-rapa)    | 1            | 0.6818685    | not scorable | not scorable | 0.9917355    | 0.7399668    |
| #### Bn-A08-p798867  | A-genome specific (napus-rapa)    | 0.9904306    | 0.3031721    | not scorable | not scorable | 1            | 0.8813491    |
| #### Bn-A08-p798970  | A-genome specific (napus-rapa)    | 0.9736842    | 0.2750687    | not scorable | not scorable | 0.9752066    | 0.7866372    |
| #### Bn-A08-p7991606 | A-genome specific (napus-rapa)    | 0.9880383    | 0.7399741    | not scorable | not scorable | 0.9917355    | 0.8176618    |
| #### Bn-A08-p7998862 | A-genome specific (napus-rapa)    | 0.9856459    | 0.6821043    | not scorable | not scorable | 0.9917355    | 0.6777764    |
| #### Bn-A08-p8031289 | A-genome specific (napus-rapa)    | 0.9952153    | 0.5262048    | not scorable | not scorable | 0.9917355    | 0.5101426    |
| #### Bn-A08-p8068365 | A-genome specific (rapa only)     | not scorable | not scorable | not scorable | not scorable | 1            | 0.793008     |
| #### Bn-A08-p8073664 | A-genome specific (napus-rapa)    | 0.9904306    | 0.7599296    | not scorable | not scorable | 0.9834711    | 0.8241267    |
| #### Bn-A08-p8091811 | A-genome specific (napus-rapa)    | 0.9832536    | 0.4654782    | not scorable | not scorable | 0.9834711    | 0.7699666    |
| #### Bn-A08-p8114697 | A-genome specific (napus-rapa)    | 0.7559808    | 0.9495326    | not scorable | not scorable | 0.5454546    | 0.8359376    |
| #### Bn-A08-p8126392 | A-genome specific (rapa only)     | not scorable | not scorable | not scorable | not scorable | 0.9752066    | 0.7285634    |
| #### Bn-A08-p813316  | A-genome specific (napus-rapa)    | 0.9665072    | 0.2898568    | not scorable | not scorable | 0.6446281    | 0.7735826    |
| #### Bn-A08-p813510  | genome unspecific (oleracea-rapa) | not scorable | not scorable | 0.9612403    | 0.7306891    | 0.9834711    | 0.8291233    |
| #### Bn-A08-p814234  | A-genome specific (rapa only)     | not scorable | not scorable | not scorable | not scorable | 1            | 0.7384271    |
| #### Bn-A08-p8159163 | A-genome specific (napus-rapa)    | 0.9904306    | 0.7229494    | not scorable | not scorable | 0.9669421    | 0.6986179    |
| #### Bn-A08-p8161845 | A-genome specific (napus-rapa)    | 0.9928229    | 0.7519657    | not scorable | not scorable | 1            | 0.8102757    |
| #### Bn-A08-p8162230 | A-genome specific (napus-rapa)    | 0.9928229    | 0.7532908    | not scorable | not scorable | 0.9917355    | 0.7876139    |
| #### Bn-A08-p8179629 | A-genome specific (napus-rapa)    | 0.9688995    | 0.6480429    | not scorable | not scorable | 1            | 0.8597284    |
| #### Bn-A08-p8180093 | A-genome specific (napus-rapa)    | 0.9808612    | 0.7121077    | not scorable | not scorable | 0.9917355    | 0.784013     |
| #### Bn-A08-p8194731 | A-genome specific (napus-rapa)    | 0.9856459    | 0.7511637    | not scorable | not scorable | 0.9834711    | 0.6412926    |
| #### Bn-A08-p8195425 | A-genome specific (napus-rapa)    | 0.9880383    | 0.765776     | not scorable | not scorable | 0.9917355    | 0.6965343    |
| #### Bn-A08-p8218376 | A-genome specific (napus-rapa)    | 0.9784689    | 0.7264819    | not scorable | not scorable | 0.9834711    | 0.6995161    |
| #### Bn-A08-p8232026 | napus specific                    | 0.9617225    | 0.7188354    | not scorable | not scorable | not scorable | not scorable |
| #### Bn-A08-p8237891 | A-genome specific (napus-rapa)    | 0.9808612    | 0.5735974    | not scorable | not scorable | 0.9917355    | 0.6671249    |
| #### Bn-A08-p8242214 | A-genome specific (napus-rapa)    | 0.9808612    | 0.7584762    | not scorable | not scorable | 0.9834711    | 0.8143764    |
| #### Bn-A08-p8249952 | A-genome specific (napus-rapa)    | 0.9808612    | 0.7250744    | not scorable | not scorable | 0.9834711    | 0.7875881    |
| #### Bn-A08-p8260866 | A-genome specific (napus-rapa)    | 0.9784689    | 0.2706321    | not scorable | not scorable | 1            | 0.7660891    |
| #### Bn-A08-p8267272 | A-genome specific (napus-rapa)    | 0.9736842    | 0.6364175    | not scorable | not scorable | 1            | 0.6824055    |
| #### Bn-A08-p8273132 | A-genome specific (napus-rapa)    | 0.9736842    | 0.3790727    | not scorable | not scorable | 0.9917355    | 0.7943757    |
| #### Bn-A08-p8312619 | A-genome specific (napus-rapa)    | 0.937799     | 0.4506645    | not scorable | not scorable | 0.9917355    | 0.6853701    |
| #### Bn-A08-p8314631 | A-genome specific (napus-rapa)    | 0.9760765    | 0.6887128    | not scorable | not scorable | 0.9917355    | 0.7559217    |
| #### Bn-A08-p8320380 | A-genome specific (napus-rapa)    | 0.9688995    | 0.5308236    | not scorable | not scorable | 1            | 0.8441901    |
| #### Bn-A08-p8334516 | A-genome specific (napus-rapa)    | 0.8660287    | 0.2985525    | not scorable | not scorable | 0.9917355    | 0.8004208    |

|                      |                                |           |           |              |              |           |   |           |
|----------------------|--------------------------------|-----------|-----------|--------------|--------------|-----------|---|-----------|
| #### Bn-A08-p8335609 | A-genome specific (napus-rapa) | 0.9784689 | 0.7523024 | not scorable | not scorable |           | 1 | 0.8282343 |
| #### Bn-A08-p8351443 | A-genome specific (napus-rapa) | 0.9832536 | 0.7412987 | not scorable | not scorable | 0.9752066 |   | 0.6888669 |
| #### Bn-A08-p8352143 | A-genome specific (napus-rapa) | 0.9760765 | 0.4675939 | not scorable | not scorable |           | 1 | 0.752771  |
| #### Bn-A08-p8355054 | A-genome specific (napus-rapa) | 0.9952153 | 0.7581903 | not scorable | not scorable |           | 1 | 0.8309543 |
| #### Bn-A08-p836396  | A-genome specific (napus-rapa) | 0.9904306 | 0.7032702 | not scorable | not scorable | 0.9752066 |   | 0.695167  |
| #### Bn-A08-p8368744 | A-genome specific (napus-rapa) | 0.9736842 | 0.6694404 | not scorable | not scorable | 0.9834711 |   | 0.7538427 |
| #### Bn-A08-p8372495 | A-genome specific (napus-rapa) | 0.9856459 | 0.752614  | not scorable | not scorable | 0.9917355 |   | 0.7933016 |
| #### Bn-A08-p8372634 | A-genome specific (napus-rapa) | 0.9808612 | 0.7735647 | not scorable | not scorable | 0.5867769 |   | 0.8629302 |
| #### Bn-A08-p8374080 | A-genome specific (napus-rapa) | 0.9832536 | 0.7890488 | not scorable | not scorable | 0.9917355 |   | 0.7845222 |
| #### Bn-A08-p8378306 | A-genome specific (napus-rapa) | 0.9880383 | 0.7531717 | not scorable | not scorable |           | 1 | 0.7025185 |
| #### Bn-A08-p8378906 | A-genome specific (napus-rapa) | 0.9784689 | 0.756433  | not scorable | not scorable | 0.5702479 |   | 0.740873  |
| #### Bn-A08-p8385137 | A-genome specific (napus-rapa) | 0.9832536 | 0.6430655 | not scorable | not scorable | 0.9917355 |   | 0.7011356 |
| #### Bn-A08-p8386874 | A-genome specific (napus-rapa) | 0.9856459 | 0.7744559 | not scorable | not scorable |           | 1 | 0.837659  |
| #### Bn-A08-p8396508 | A-genome specific (napus-rapa) | 0.9688995 | 0.4287487 | not scorable | not scorable |           | 1 | 0.871141  |
| #### Bn-A08-p8397266 | A-genome specific (napus-rapa) | 0.9784689 | 0.4459237 | not scorable | not scorable |           | 1 | 0.7621083 |
| #### Bn-A08-p8414586 | A-genome specific (napus-rapa) | 0.9712918 | 0.5911309 | not scorable | not scorable | 0.5867769 |   | 0.6414596 |
| #### Bn-A08-p8426380 | A-genome specific (napus-rapa) | 0.9856459 | 0.319201  | not scorable | not scorable | 0.9752066 |   | 0.7492588 |
| #### Bn-A08-p8432548 | A-genome specific (napus-rapa) | 0.9904306 | 0.7357905 | not scorable | not scorable | 0.9752066 |   | 0.7689065 |
| #### Bn-A08-p8434044 | A-genome specific (napus-rapa) |           | 1         | 0.7399551    | not scorable |           | 1 | 0.7205004 |
| #### Bn-A08-p8446402 | A-genome specific (napus-rapa) | 0.9258373 | 0.3733401 | not scorable | not scorable | 0.9834711 |   | 0.7402275 |
| #### Bn-A08-p8447749 | A-genome specific (napus-rapa) | 0.9856459 | 0.7617109 | not scorable | not scorable | 0.9917355 |   | 0.7966691 |
| #### Bn-A08-p8453264 | A-genome specific (napus-rapa) | 0.9665072 | 0.8085693 | not scorable | not scorable | 0.5867769 |   | 0.7489746 |
| #### Bn-A08-p8458205 | A-genome specific (napus-rapa) | 0.9976076 | 0.7128272 | not scorable | not scorable | 0.9834711 |   | 0.7626262 |
| #### Bn-A08-p8470949 | A-genome specific (napus-rapa) | 0.9976076 | 0.7559544 | not scorable | not scorable | 0.9834711 |   | 0.8005899 |
| #### Bn-A08-p8471051 | A-genome specific (napus-rapa) | 0.9832536 | 0.6920353 | not scorable | not scorable | 0.9917355 |   | 0.6817443 |
| #### Bn-A08-p8479611 | A-genome specific (napus-rapa) | 0.9904306 | 0.7398008 | not scorable | not scorable | 0.9834711 |   | 0.8097162 |
| #### Bn-A08-p8479932 | A-genome specific (napus-rapa) | 0.9808612 | 0.3633473 | not scorable | not scorable | 0.9834711 |   | 0.7943421 |
| #### Bn-A08-p8480536 | A-genome specific (napus-rapa) | 0.9880383 | 0.3136298 | not scorable | not scorable | 0.8842975 |   | 0.80362   |
| #### Bn-A08-p848067  | A-genome specific (napus-rapa) | 0.9856459 | 0.3342542 | not scorable | not scorable | 0.9917355 |   | 0.7037784 |
| #### Bn-A08-p8480734 | A-genome specific (napus-rapa) | 0.9952153 | 0.5672078 | not scorable | not scorable |           | 1 | 0.9339153 |
| #### Bn-A08-p8482679 | A-genome specific (napus-rapa) | 0.9856459 | 0.7416572 | not scorable | not scorable |           | 1 | 0.9172953 |
| #### Bn-A08-p8493076 | A-genome specific (napus-rapa) | 0.9952153 | 0.7842048 | not scorable | not scorable |           | 1 | 0.7364642 |
| #### Bn-A08-p8494172 | A-genome specific (napus-rapa) |           | 1         | 0.8948976    | not scorable |           | 1 | 0.7918805 |



|                      |                                |              |              |              |              |              |              |
|----------------------|--------------------------------|--------------|--------------|--------------|--------------|--------------|--------------|
| #### Bn-A08-p8494463 | A-genome specific (napus-rapa) | 0.9856459    | 0.3148374    | not scorable | not scorable | 0.9917355    | 0.7884467    |
| #### Bn-A08-p8495489 | A-genome specific (napus-rapa) | 0.9928229    | 0.7247909    | not scorable | not scorable | 1            | 0.7152779    |
| #### Bn-A08-p8496013 | A-genome specific (napus-rapa) | 1            | 0.590987     | not scorable | not scorable | 1            | 0.806819     |
| #### Bn-A08-p8508603 | A-genome specific (napus-rapa) | 0.9880383    | 0.6716012    | not scorable | not scorable | 0.9834711    | 0.7858103    |
| #### Bn-A08-p8520595 | A-genome specific (napus-rapa) | 0.9832536    | 0.4346158    | not scorable | not scorable | 1            | 0.8234047    |
| #### Bn-A08-p8529251 | A-genome specific (napus-rapa) | 0.9952153    | 0.7664756    | not scorable | not scorable | 1            | 0.8077478    |
| #### Bn-A08-p8529342 | A-genome specific (napus-rapa) | 0.9880383    | 0.745873     | not scorable | not scorable | 0.9834711    | 0.7271577    |
| #### Bn-A08-p8533455 | A-genome specific (napus-rapa) | 0.9665072    | 0.5452027    | not scorable | not scorable | 0.5702479    | 0.7278635    |
| #### Bn-A08-p8542502 | A-genome specific (napus-rapa) | 0.9880383    | 0.6479052    | not scorable | not scorable | 0.9834711    | 0.8023693    |
| #### Bn-A08-p8543675 | A-genome specific (napus-rapa) | 0.9617225    | 0.679204     | not scorable | not scorable | 0.9834711    | 0.7830753    |
| #### Bn-A08-p8543898 | A-genome specific (napus-rapa) | 0.9736842    | 0.5235806    | not scorable | not scorable | 0.9834711    | 0.8303565    |
| #### Bn-A08-p8543911 | A-genome specific (napus-rapa) | 0.9641148    | 0.5095792    | not scorable | not scorable | 0.9917355    | 0.7223459    |
| #### Bn-A08-p8546560 | A-genome specific (napus-rapa) | 0.9688995    | 0.4939917    | not scorable | not scorable | 0.9834711    | 0.8653926    |
| #### Bn-A08-p8567139 | A-genome specific (rapa only)  | not scorable | not scorable | not scorable | not scorable | 0.9504132    | 0.9175813    |
| #### Bn-A08-p8567867 | A-genome specific (napus-rapa) | 0.9904306    | 0.529524     | not scorable | not scorable | 0.9917355    | 0.8654583    |
| #### Bn-A08-p8569187 | A-genome specific (napus-rapa) | 0.9952153    | 0.7550771    | not scorable | not scorable | 1            | 0.7999852    |
| #### Bn-A08-p8570810 | A-genome specific (napus-rapa) | 0.9760765    | 0.7517087    | not scorable | not scorable | 1            | 0.8861272    |
| #### Bn-A08-p8571258 | A-genome specific (napus-rapa) | 0.9832536    | 0.7783912    | not scorable | not scorable | 1            | 0.7996458    |
| #### Bn-A08-p8577291 | A-genome specific (napus-rapa) | 0.9928229    | 0.7244204    | not scorable | not scorable | 1            | 0.6940417    |
| #### Bn-A08-p8577353 | A-genome specific (napus-rapa) | 0.9928229    | 0.7493137    | not scorable | not scorable | 0.9917355    | 0.8244453    |
| #### Bn-A08-p8581123 | A-genome specific (napus-rapa) | 0.9736842    | 0.7036718    | not scorable | not scorable | 1            | 0.6605197    |
| #### Bn-A08-p8581899 | A-genome specific (napus-rapa) | 1            | 0.8014321    | not scorable | not scorable | 0.9752066    | 0.7717717    |
| #### Bn-A08-p8582072 | A-genome specific (napus-rapa) | 1            | 0.7343001    | not scorable | not scorable | 0.9834711    | 0.7072202    |
| #### Bn-A08-p8584951 | A-genome specific (napus-rapa) | 0.9880383    | 0.7372217    | not scorable | not scorable | 0.9752066    | 0.7220194    |
| #### Bn-A08-p8585255 | A-genome specific (napus-rapa) | 0.9976076    | 0.7637708    | not scorable | not scorable | 1            | 0.7661874    |
| #### Bn-A08-p8586356 | A-genome specific (napus-rapa) | 0.9880383    | 0.6986526    | not scorable | not scorable | 0.9917355    | 0.7388844    |
| #### Bn-A08-p8587056 | A-genome specific (rapa only)  | not scorable | not scorable | not scorable | not scorable | 0.9917355    | 0.6148033    |
| #### Bn-A08-p8589613 | A-genome specific (napus-rapa) | 0.9712918    | 0.7719939    | not scorable | not scorable | 0.9504132    | 0.7401214    |
| #### Bn-A08-p8601468 | A-genome specific (napus-rapa) | 0.9880383    | 0.6506673    | not scorable | not scorable | 1            | 0.9123752    |
| #### Bn-A08-p8633780 | A-genome specific (napus-rapa) | 0.9569378    | 0.7454523    | not scorable | not scorable | 0.5619835    | 0.909785     |
| #### Bn-A08-p8634610 | napus specific                 | 0.9808612    | 0.2990621    | not scorable | not scorable | not scorable | not scorable |
| #### Bn-A08-p8644010 | A-genome specific (napus-rapa) | 1            | 0.8295383    | not scorable | not scorable | 0.9669421    | 0.7754102    |
| #### Bn-A08-p8644734 | A-genome specific (napus-rapa) | 1            | 0.7568567    | not scorable | not scorable | 1            | 0.7573454    |

|                      |                                |              |              |              |              |           |           |
|----------------------|--------------------------------|--------------|--------------|--------------|--------------|-----------|-----------|
| #### Bn-A08-p8658074 | A-genome specific (napus-rapa) | 0.9880383    | 0.7387624    | not scorable | not scorable | 1         | 0.8172444 |
| #### Bn-A08-p8672999 | A-genome specific (napus-rapa) | 0.9712918    | 0.3002451    | not scorable | not scorable | 0.9834711 | 0.6239581 |
| #### Bn-A08-p8675006 | A-genome specific (napus-rapa) | 1            | 0.7242464    | not scorable | not scorable | 0.9752066 | 0.8127    |
| #### Bn-A08-p8690169 | A-genome specific (napus-rapa) | 0.9712918    | 0.3259956    | not scorable | not scorable | 0.9752066 | 0.8214075 |
| #### Bn-A08-p8703472 | A-genome specific (napus-rapa) | 0.9952153    | 0.5018604    | not scorable | not scorable | 0.9834711 | 0.60127   |
| #### Bn-A08-p8710166 | A-genome specific (napus-rapa) | 0.9162679    | 0.60052      | not scorable | not scorable | 0.5619835 | 0.7329958 |
| #### Bn-A08-p8716833 | A-genome specific (napus-rapa) | 0.9832536    | 0.6148947    | not scorable | not scorable | 0.9917355 | 0.7067898 |
| #### Bn-A08-p8721964 | A-genome specific (napus-rapa) | 0.9856459    | 0.4526624    | not scorable | not scorable | 0.9834711 | 0.6814371 |
| #### Bn-A08-p8727608 | A-genome specific (napus-rapa) | 0.9856459    | 0.5119544    | not scorable | not scorable | 1         | 0.7852309 |
| #### Bn-A08-p8740002 | A-genome specific (napus-rapa) | 0.9736842    | 0.375772     | not scorable | not scorable | 1         | 0.80988   |
| #### Bn-A08-p8755323 | A-genome specific (napus-rapa) | 0.9832536    | 0.2826594    | not scorable | not scorable | 1         | 0.8524848 |
| #### Bn-A08-p8783951 | A-genome specific (napus-rapa) | 0.9904306    | 0.7858701    | not scorable | not scorable | 0.9917355 | 0.8476016 |
| #### Bn-A08-p8784663 | A-genome specific (napus-rapa) | 0.9928229    | 0.7524529    | not scorable | not scorable | 0.9917355 | 0.7506523 |
| #### Bn-A08-p8808046 | A-genome specific (napus-rapa) | 0.9593301    | 0.731787     | not scorable | not scorable | 0.9669421 | 0.7297021 |
| #### Bn-A08-p8869180 | A-genome specific (napus-rapa) | 0.9593301    | 0.3775353    | not scorable | not scorable | 0.9834711 | 0.7405999 |
| #### Bn-A08-p8872384 | A-genome specific (napus-rapa) | 0.9928229    | 0.6001164    | not scorable | not scorable | 0.9834711 | 0.7229534 |
| #### Bn-A08-p8879495 | A-genome specific (napus-rapa) | 0.9641148    | 0.3045312    | not scorable | not scorable | 0.9752066 | 0.6925557 |
| #### Bn-A08-p8909433 | A-genome specific (napus-rapa) | 0.9976076    | 0.750703     | not scorable | not scorable | 1         | 0.7307606 |
| #### Bn-A08-p8924822 | A-genome specific (napus-rapa) | 0.9904306    | 0.7615907    | not scorable | not scorable | 1         | 0.7777814 |
| #### Bn-A08-p8945914 | A-genome specific (napus-rapa) | 0.9760765    | 0.7778239    | not scorable | not scorable | 1         | 0.9175813 |
| #### Bn-A08-p9133085 | A-genome specific (napus-rapa) | 1            | 0.5257806    | not scorable | not scorable | 0.9834711 | 0.4432094 |
| #### Bn-A08-p913985  | A-genome specific (rapa only)  | not scorable | not scorable | not scorable | not scorable | 0.9752066 | 0.8139131 |
| #### Bn-A08-p9146867 | A-genome specific (napus-rapa) | 0.9904306    | 0.5843483    | not scorable | not scorable | 0.7024794 | 0.8072308 |
| #### Bn-A08-p917004  | A-genome specific (napus-rapa) | 1            | 0.7548404    | not scorable | not scorable | 0.9669421 | 0.7686268 |
| #### Bn-A08-p9172893 | A-genome specific (napus-rapa) | 1            | 0.4277776    | not scorable | not scorable | 1         | 0.7765645 |
| #### Bn-A08-p9176343 | A-genome specific (napus-rapa) | 0.9952153    | 0.5789229    | not scorable | not scorable | 1         | 0.8318305 |
| #### Bn-A08-p9198307 | A-genome specific (napus-rapa) | 1            | 0.5230876    | not scorable | not scorable | 0.9917355 | 0.8324814 |
| #### Bn-A08-p9199303 | A-genome specific (napus-rapa) | 1            | 0.6088356    | not scorable | not scorable | 1         | 0.8232757 |
| #### Bn-A08-p9200154 | A-genome specific (napus-rapa) | 1            | 0.7519091    | not scorable | not scorable | 1         | 0.8259959 |
| #### Bn-A08-p9210562 | A-genome specific (rapa only)  | not scorable | not scorable | not scorable | not scorable | 0.9917355 | 0.740512  |
| #### Bn-A08-p9216064 | A-genome specific (napus-rapa) | 0.9952153    | 0.7462071    | not scorable | not scorable | 0.9834711 | 0.8130049 |
| #### Bn-A08-p9216239 | A-genome specific (napus-rapa) | 0.9952153    | 0.7506315    | not scorable | not scorable | 0.9834711 | 0.7893116 |
| #### Bn-A08-p9216723 | A-genome specific (napus-rapa) | 0.9952153    | 0.8379771    | not scorable | not scorable | 0.9834711 | 0.8333155 |

|                      |                                |              |              |              |              |           |           |
|----------------------|--------------------------------|--------------|--------------|--------------|--------------|-----------|-----------|
| #### Bn-A08-p9217601 | A-genome specific (napus-rapa) | 0.9736842    | 0.7652367    | not scorable | not scorable | 0.9669421 | 0.6642047 |
| #### Bn-A08-p9217703 | A-genome specific (napus-rapa) | 0.9928229    | 0.7474211    | not scorable | not scorable | 0.9834711 | 0.7445215 |
| #### Bn-A08-p9218159 | A-genome specific (napus-rapa) | 0.9976076    | 0.6453528    | not scorable | not scorable | 0.9917355 | 0.6887354 |
| #### Bn-A08-p9218449 | A-genome specific (napus-rapa) | 0.9880383    | 0.7781007    | not scorable | not scorable | 0.9917355 | 0.8650655 |
| #### Bn-A08-p9221373 | genome unspecific (all in)     | 0.9545454    | 0.7162962    | 0.1627907    | 0.7885745    | 0.9834711 | 0.7171359 |
| #### Bn-A08-p9226559 | A-genome specific (napus-rapa) | 0.9952153    | 0.7068456    | not scorable | not scorable | 0.9586777 | 0.7124085 |
| #### Bn-A08-p9226756 | A-genome specific (napus-rapa) | 0.9880383    | 0.7684141    | not scorable | not scorable | 0.9917355 | 0.8276489 |
| #### Bn-A08-p9230750 | A-genome specific (napus-rapa) | 0.9976076    | 0.7538814    | not scorable | not scorable | 0.6942149 | 0.8588175 |
| #### Bn-A08-p9232996 | A-genome specific (napus-rapa) | 0.9712918    | 0.7384533    | not scorable | not scorable | 0.9917355 | 0.7845775 |
| #### Bn-A08-p9247445 | A-genome specific (napus-rapa) | 0.9976076    | 0.430593     | not scorable | not scorable | 0.9917355 | 0.7084912 |
| #### Bn-A08-p9261989 | genome unspecific (all in)     | 0.9952153    | 0.4796654    | 0.9922481    | 0.5530014    | 1         | 0.7942656 |
| #### Bn-A08-p9265022 | A-genome specific (rapa only)  | not scorable | not scorable | not scorable | not scorable | 0.9917355 | 0.7172675 |
| #### Bn-A08-p9268915 | A-genome specific (rapa only)  | not scorable | not scorable | not scorable | not scorable | 0.8429752 | 0.8912598 |
| #### Bn-A08-p9301468 | A-genome specific (napus-rapa) | 0.9928229    | 0.7012419    | not scorable | not scorable | 1         | 0.7834514 |
| #### Bn-A08-p9308071 | A-genome specific (napus-rapa) | 1            | 0.6867127    | not scorable | not scorable | 1         | 0.7316926 |
| #### Bn-A08-p9312404 | A-genome specific (napus-rapa) | 0.9952153    | 0.8146653    | not scorable | not scorable | 0.9752066 | 0.7984031 |
| #### Bn-A08-p9316584 | A-genome specific (napus-rapa) | 0.9928229    | 0.8603142    | not scorable | not scorable | 1         | 0.7858442 |
| #### Bn-A08-p9323955 | A-genome specific (napus-rapa) | 0.9976076    | 0.3212394    | not scorable | not scorable | 1         | 0.7223522 |
| #### Bn-A08-p9325932 | A-genome specific (napus-rapa) | 0.9904306    | 0.2590597    | not scorable | not scorable | 0.9917355 | 0.6220159 |
| #### Bn-A08-p9326621 | A-genome specific (napus-rapa) | 1            | 0.7973751    | not scorable | not scorable | 0.9917355 | 0.8270639 |
| #### Bn-A08-p9341774 | A-genome specific (napus-rapa) | 1            | 0.4422708    | not scorable | not scorable | 1         | 0.7599784 |
| #### Bn-A08-p9341953 | A-genome specific (napus-rapa) | 0.9976076    | 0.3857411    | not scorable | not scorable | 1         | 0.9318351 |
| #### Bn-A08-p9343208 | A-genome specific (rapa only)  | not scorable | not scorable | not scorable | not scorable | 0.9917355 | 0.8228147 |
| #### Bn-A08-p934417  | A-genome specific (rapa only)  | not scorable | not scorable | not scorable | not scorable | 0.7024794 | 0.8242571 |
| #### Bn-A08-p9353221 | A-genome specific (napus-rapa) | 0.9976076    | 0.4833393    | not scorable | not scorable | 1         | 0.7908142 |
| #### Bn-A08-p9355940 | A-genome specific (napus-rapa) | 0.9952153    | 0.8078378    | not scorable | not scorable | 0.7024794 | 0.8123165 |
| #### Bn-A08-p9361440 | A-genome specific (napus-rapa) | 0.9976076    | 0.5722876    | not scorable | not scorable | 0.7107438 | 0.7135008 |
| #### Bn-A08-p9364108 | A-genome specific (napus-rapa) | 0.9928229    | 0.8327941    | not scorable | not scorable | 1         | 0.7844397 |
| #### Bn-A08-p9367767 | A-genome specific (napus-rapa) | 0.9976076    | 0.331815     | not scorable | not scorable | 0.9917355 | 0.7910783 |
| #### Bn-A08-p937299  | A-genome specific (napus-rapa) | 0.9832536    | 0.7829866    | not scorable | not scorable | 1         | 0.7507486 |
| #### Bn-A08-p9388258 | A-genome specific (napus-rapa) | 1            | 0.8883799    | not scorable | not scorable | 1         | 0.8547071 |
| #### Bn-A08-p940619  | A-genome specific (napus-rapa) | 0.8492823    | 0.7772758    | not scorable | not scorable | 0.9752066 | 0.8284717 |
| #### Bn-A08-p9413496 | A-genome specific (napus-rapa) | 1            | 0.3990171    | not scorable | not scorable | 1         | 0.8424324 |

|                      |                                |              |              |              |              |              |              |
|----------------------|--------------------------------|--------------|--------------|--------------|--------------|--------------|--------------|
| #### Bn-A08-p9429379 | A-genome specific (napus-rapa) | 1            | 0.5174188    | not scorable | not scorable | 1            | 0.8620515    |
| #### Bn-A08-p9433046 | A-genome specific (napus-rapa) | 0.9976076    | 0.4691747    | not scorable | not scorable | 0.9917355    | 0.5714562    |
| #### Bn-A08-p9435789 | A-genome specific (napus-rapa) | 0.9976076    | 0.7051652    | not scorable | not scorable | 0.9586777    | 0.58038      |
| #### Bn-A08-p9436384 | napus specific                 | 0.9976076    | 0.8031143    | not scorable | not scorable | not scorable | not scorable |
| #### Bn-A08-p9436578 | A-genome specific (napus-rapa) | 0.9976076    | 0.688527     | not scorable | not scorable | 0.9917355    | 0.7112406    |
| #### Bn-A08-p9440682 | all not scorable               | not scorable | not scorable | not scorable | not scorable | not scorable | not scorable |
| #### Bn-A08-p9450796 | A-genome specific (rapa only)  | not scorable | not scorable | not scorable | not scorable | 0.9917355    | 0.7575125    |
| #### Bn-A08-p9480351 | A-genome specific (napus-rapa) | 0.9856459    | 0.721759     | not scorable | not scorable | 0.6694215    | 0.7594206    |
| #### Bn-A08-p9486336 | A-genome specific (napus-rapa) | 0.9114832    | 0.9006878    | not scorable | not scorable | 0.6694215    | 0.7969478    |
| #### Bn-A08-p9486485 | A-genome specific (napus-rapa) | 0.9904306    | 0.7496225    | not scorable | not scorable | 1            | 0.7456379    |
| #### Bn-A08-p9503231 | A-genome specific (napus-rapa) | 0.9808612    | 0.2148352    | not scorable | not scorable | 0.9917355    | 0.5763954    |
| #### Bn-A08-p9504526 | A-genome specific (napus-rapa) | 0.9976076    | 0.488656     | not scorable | not scorable | 1            | 0.7557295    |
| #### Bn-A08-p9505581 | A-genome specific (napus-rapa) | 1            | 0.3644859    | not scorable | not scorable | 0.9834711    | 0.8366635    |
| #### Bn-A08-p9536971 | A-genome specific (napus-rapa) | 0.9784689    | 0.2722648    | not scorable | not scorable | 1            | 0.8342712    |
| #### Bn-A08-p9550162 | A-genome specific (rapa only)  | not scorable | not scorable | not scorable | not scorable | 0.8760331    | 0.7007175    |
| #### Bn-A08-p9550680 | A-genome specific (rapa only)  | not scorable | not scorable | not scorable | not scorable | 0.8677686    | 0.7250534    |
| #### Bn-A08-p9550767 | A-genome specific (rapa only)  | not scorable | not scorable | not scorable | not scorable | 0.9669421    | 0.6708121    |
| #### Bn-A08-p9551013 | A-genome specific (rapa only)  | not scorable | not scorable | not scorable | not scorable | 0.7933884    | 0.6531192    |
| #### Bn-A08-p9551155 | A-genome specific (rapa only)  | not scorable | not scorable | not scorable | not scorable | 0.7190083    | 0.6270379    |
| #### Bn-A08-p9555028 | A-genome specific (napus-rapa) | 0.9904306    | 0.5977489    | not scorable | not scorable | 1            | 0.8442716    |
| #### Bn-A08-p9555984 | A-genome specific (napus-rapa) | 0.9928229    | 0.4671479    | not scorable | not scorable | 0.9834711    | 0.7105341    |
| #### Bn-A08-p9567284 | A-genome specific (napus-rapa) | 0.9976076    | 0.7302084    | not scorable | not scorable | 0.9834711    | 0.7693871    |
| #### Bn-A08-p9582412 | A-genome specific (napus-rapa) | 0.9856459    | 0.5479812    | not scorable | not scorable | 1            | 0.6110925    |
| #### Bn-A08-p9619600 | A-genome specific (rapa only)  | not scorable | not scorable | not scorable | not scorable | 0.9669421    | 0.745869     |
| #### Bn-A08-p9656252 | A-genome specific (napus-rapa) | 0.9976076    | 0.6669703    | not scorable | not scorable | 1            | 0.8944473    |
| #### Bn-A08-p9699333 | A-genome specific (napus-rapa) | 0.9976076    | 0.8675472    | not scorable | not scorable | 0.9834711    | 0.8547246    |
| #### Bn-A08-p9705799 | A-genome specific (rapa only)  | not scorable | not scorable | not scorable | not scorable | 0.6859504    | 0.7670901    |
| #### Bn-A08-p9707204 | A-genome specific (napus-rapa) | 0.9808612    | 0.7301295    | not scorable | not scorable | 0.661157     | 0.6745524    |
| #### Bn-A08-p9708411 | all not scorable               | not scorable | not scorable | not scorable | not scorable | not scorable | not scorable |
| #### Bn-A08-p9713705 | A-genome specific (napus-rapa) | 0.9856459    | 0.7674521    | not scorable | not scorable | 0.7107438    | 0.740361     |
| #### Bn-A08-p9715574 | A-genome specific (napus-rapa) | 1            | 0.6325338    | not scorable | not scorable | 0.9917355    | 0.7797524    |
| #### Bn-A08-p9718210 | A-genome specific (napus-rapa) | 1            | 0.777066     | not scorable | not scorable | 0.9834711    | 0.7174947    |
| #### Bn-A08-p9718264 | A-genome specific (napus-rapa) | 0.9856459    | 0.4599976    | not scorable | not scorable | 0.9917355    | 0.7339371    |

|                       |                                   |              |              |              |              |              |              |
|-----------------------|-----------------------------------|--------------|--------------|--------------|--------------|--------------|--------------|
| #### Bn-A08-p9718553  | A-genome specific (napus-rapa)    | 0.9832536    | 0.792298     | not scorable | not scorable | 0.9752066    | 0.6795576    |
| #### Bn-A08-p9719082  | A-genome specific (napus-rapa)    | 0.9952153    | 0.8851118    | not scorable | not scorable | 1            | 0.8321076    |
| #### Bn-A08-p9720373  | A-genome specific (napus-rapa)    | 1            | 0.859118     | not scorable | not scorable | 0.9834711    | 0.7515081    |
| #### Bn-A08-p9720439  | A-genome specific (napus-rapa)    | 0.9928229    | 0.8227199    | not scorable | not scorable | 0.9917355    | 0.7422584    |
| #### Bn-A08-p9723809  | A-genome specific (napus-rapa)    | 0.9976076    | 0.7302501    | not scorable | not scorable | 0.9917355    | 0.7146232    |
| #### Bn-A08-p9729245  | A-genome specific (napus-rapa)    | 0.9976076    | 0.935304     | not scorable | not scorable | 0.9917355    | 0.7901706    |
| #### Bn-A08-p9729282  | A-genome specific (napus-rapa)    | 1            | 0.7111025    | not scorable | not scorable | 1            | 0.7099453    |
| #### Bn-A08-p9730934  | A-genome specific (napus-rapa)    | 1            | 0.740183     | not scorable | not scorable | 1            | 0.8076818    |
| #### Bn-A08-p9739790  | A-genome specific (napus-rapa)    | 1            | 0.6131364    | not scorable | not scorable | 0.9752066    | 0.6614323    |
| #### Bn-A08-p9740508  | A-genome specific (napus-rapa)    | 1            | 0.7752601    | not scorable | not scorable | 0.9752066    | 0.7590398    |
| #### Bn-A08-p9741074  | A-genome specific (napus-rapa)    | 0.9952153    | 0.7593707    | not scorable | not scorable | 0.9834711    | 0.7597765    |
| #### Bn-A08-p9749557  | A-genome specific (napus-rapa)    | 1            | 0.7292767    | not scorable | not scorable | 0.9752066    | 0.6603608    |
| #### Bn-A08-p9781356  | A-genome specific (napus-rapa)    | 0.9976076    | 0.6572384    | not scorable | not scorable | 0.9917355    | 0.7352476    |
| #### Bn-A08-p9781699  | A-genome specific (napus-rapa)    | 0.9952153    | 0.7459331    | not scorable | not scorable | 0.9669421    | 0.7056575    |
| #### Bn-A08-p9795033  | A-genome specific (napus-rapa)    | 0.9904306    | 0.3734134    | not scorable | not scorable | 0.9917355    | 0.8142342    |
| #### Bn-A08-p9795423  | A-genome specific (napus-rapa)    | 1            | 0.7487139    | not scorable | not scorable | 1            | 0.7737888    |
| #### Bn-A08-p980768   | napus specific                    | 1            | 0.2720842    | not scorable | not scorable | not scorable | not scorable |
| #### Bn-A08-p9917420  | A-genome specific (napus-rapa)    | 0.9760765    | 0.2977113    | not scorable | not scorable | 0.9834711    | 0.6088597    |
| #### Bn-A08-p9918228  | A-genome specific (napus-rapa)    | 0.9904306    | 0.7598416    | not scorable | not scorable | 1            | 0.5854415    |
| #### Bn-A09-p10019827 | A-genome specific (napus-rapa)    | 1            | 0.3419405    | not scorable | not scorable | 0.9752066    | 0.6658869    |
| #### Bn-A09-p10023881 | A-genome specific (napus-rapa)    | 0.9808612    | 0.7586314    | not scorable | not scorable | 0.9917355    | 0.7882631    |
| #### Bn-A09-p10024669 | A-genome specific (napus-rapa)    | 0.9952153    | 0.7045088    | not scorable | not scorable | 0.9917355    | 0.7429751    |
| #### Bn-A09-p10046047 | A-genome specific (napus-rapa)    | 0.9688995    | 0.2301028    | not scorable | not scorable | 0.9917355    | 0.663735     |
| #### Bn-A09-p100554   | genome unspecific (oleracea-rapa) | not scorable | not scorable |              | 1            | 0.6425314    | 0.9917355    |
| #### Bn-A09-p100631   | A-genome specific (rapa only)     | not scorable | not scorable | not scorable | not scorable | 0.9421487    | 0.5493332    |
| #### Bn-A09-p10064024 | A-genome specific (napus-rapa)    | 0.9688995    | 0.7454368    | not scorable | not scorable | 0.9669421    | 0.6876183    |
| #### Bn-A09-p100643   | A-genome specific (napus-rapa)    | 0.9712918    | 0.4742239    | not scorable | not scorable | 0.9917355    | 0.7204596    |
| #### Bn-A09-p10064773 | A-genome specific (napus-rapa)    | 0.9832536    | 0.8458741    | not scorable | not scorable | 0.9917355    | 0.8642675    |
| #### Bn-A09-p10092753 | A-genome specific (napus-rapa)    | 0.9904306    | 0.4723985    | not scorable | not scorable | 0.9917355    | 0.7854526    |
| #### Bn-A09-p10109790 | A-genome specific (napus-rapa)    | 0.9354067    | 0.2935803    | not scorable | not scorable | 0.9834711    | 0.7521862    |
| #### Bn-A09-p1011107  | A-genome specific (napus-rapa)    | 0.9712918    | 0.6940737    | not scorable | not scorable | 0.9834711    | 0.7064064    |
| #### Bn-A09-p10119818 | A-genome specific (napus-rapa)    | 1            | 0.5277659    | not scorable | not scorable | 0.9834711    | 0.7676092    |
| #### Bn-A09-p10172534 | A-genome specific (napus-rapa)    | 0.9928229    | 0.7903211    | not scorable | not scorable | 0.9917355    | 0.7865111    |

|                       |                                |              |              |              |              |              |              |
|-----------------------|--------------------------------|--------------|--------------|--------------|--------------|--------------|--------------|
| #### Bn-A09-p10176936 | A-genome specific (napus-rapa) | 0.9928229    | 0.7871319    | not scorable | not scorable | 0.9752066    | 0.8625828    |
| #### Bn-A09-p1018965  | A-genome specific (napus-rapa) | 0.9545454    | 0.7932       | not scorable | not scorable | 0.9834711    | 0.6995161    |
| #### Bn-A09-p10192314 | A-genome specific (napus-rapa) | 0.9904306    | 0.8050555    | not scorable | not scorable | 0.9917355    | 0.7736449    |
| #### Bn-A09-p10194119 | A-genome specific (napus-rapa) | 0.9952153    | 0.5339947    | not scorable | not scorable | 0.9752066    | 0.6609568    |
| #### Bn-A09-p10212596 | A-genome specific (napus-rapa) | 0.9880383    | 0.7204077    | not scorable | not scorable | 0.9669421    | 0.756188     |
| #### Bn-A09-p10212674 | A-genome specific (napus-rapa) | 0.9880383    | 0.7840126    | not scorable | not scorable | 0.9917355    | 0.8377294    |
| #### Bn-A09-p10212726 | A-genome specific (rapa only)  | not scorable | not scorable | not scorable | not scorable | 0.9421487    | 0.7980966    |
| #### Bn-A09-p10247512 | A-genome specific (napus-rapa) | 0.9425837    | 0.6074126    | not scorable | not scorable | 0.9917355    | 0.8652969    |
| #### Bn-A09-p10296510 | A-genome specific (rapa only)  | not scorable | not scorable | not scorable | not scorable | 0.9834711    | 0.7175999    |
| #### Bn-A09-p10297982 | A-genome specific (napus-rapa) | 0.9928229    | 0.4430167    | not scorable | not scorable | 1            | 0.6873536    |
| #### Bn-A09-p10306216 | A-genome specific (napus-rapa) | 0.9952153    | 0.451566     | not scorable | not scorable | 1            | 0.7740901    |
| #### Bn-A09-p10318807 | A-genome specific (napus-rapa) | 0.9832536    | 0.7792593    | not scorable | not scorable | 1            | 0.8546489    |
| #### Bn-A09-p10325493 | A-genome specific (napus-rapa) | 0.9736842    | 0.5661854    | not scorable | not scorable | 1            | 0.9483099    |
| #### Bn-A09-p10329846 | A-genome specific (napus-rapa) | 0.9952153    | 0.79784      | not scorable | not scorable | 1            | 0.9080718    |
| #### Bn-A09-p1032996  | A-genome specific (rapa only)  | not scorable | not scorable | not scorable | not scorable | 0.9917355    | 0.754338     |
| #### Bn-A09-p10336331 | A-genome specific (rapa only)  | not scorable | not scorable | not scorable | not scorable | 1            | 0.7447816    |
| #### Bn-A09-p10343752 | A-genome specific (napus-rapa) | 0.9784689    | 0.4077588    | not scorable | not scorable | 0.9917355    | 0.7741312    |
| #### Bn-A09-p10493965 | A-genome specific (napus-rapa) | 0.9904306    | 0.5743405    | not scorable | not scorable | 0.9834711    | 0.5291174    |
| #### Bn-A09-p10495974 | A-genome specific (napus-rapa) | 0.9904306    | 0.5240009    | not scorable | not scorable | 1            | 0.7102528    |
| #### Bn-A09-p10504507 | A-genome specific (napus-rapa) | 0.9928229    | 0.31064      | not scorable | not scorable | 1            | 0.7420948    |
| #### Bn-A09-p10531672 | A-genome specific (napus-rapa) | 0.9593301    | 0.8243174    | not scorable | not scorable | 0.7190083    | 0.8499019    |
| #### Bn-A09-p10536531 | all not scorable               | not scorable | not scorable | not scorable | not scorable | not scorable | not scorable |
| #### Bn-A09-p10536718 | A-genome specific (napus-rapa) | 0.9904306    | 0.6320502    | not scorable | not scorable | 0.9917355    | 0.8343857    |
| #### Bn-A09-p10544697 | A-genome specific (napus-rapa) | 0.9952153    | 0.5733508    | not scorable | not scorable | 1            | 0.7904778    |
| #### Bn-A09-p10549276 | napus specific                 | 1            | 0.5547176    | not scorable | not scorable | not scorable | not scorable |
| #### Bn-A09-p10558501 | A-genome specific (napus-rapa) | 1            | 0.6444352    | not scorable | not scorable | 1            | 0.6491711    |
| #### Bn-A09-p10577283 | A-genome specific (rapa only)  | not scorable | not scorable | not scorable | not scorable | 0.9752066    | 0.7947797    |
| #### Bn-A09-p10580560 | A-genome specific (napus-rapa) | 0.9856459    | 0.7807171    | not scorable | not scorable | 1            | 0.7967585    |
| #### Bn-A09-p10602037 | A-genome specific (napus-rapa) | 0.9952153    | 0.3731249    | not scorable | not scorable | 0.9752066    | 0.3334942    |
| #### Bn-A09-p10628904 | napus specific                 | 0.9641148    | 0.7317483    | not scorable | not scorable | not scorable | not scorable |
| #### Bn-A09-p10663133 | A-genome specific (napus-rapa) | 0.9832536    | 0.2685829    | not scorable | not scorable | 1            | 0.709211     |
| #### Bn-A09-p10712987 | A-genome specific (napus-rapa) | 1            | 0.892792     | not scorable | not scorable | 0.9917355    | 0.854561     |
| #### Bn-A09-p10713953 | A-genome specific (napus-rapa) | 0.9952153    | 0.8196499    | not scorable | not scorable | 0.9834711    | 0.7654459    |

|                       |                                |              |              |              |              |              |              |
|-----------------------|--------------------------------|--------------|--------------|--------------|--------------|--------------|--------------|
| #### Bn-A09-p10714432 | A-genome specific (napus-rapa) | 0.9688995    | 0.9083198    | not scorable | not scorable | 0.6942149    | 0.881979     |
| #### Bn-A09-p10756737 | genome unspecific (all in)     | 0.9904306    | 0.8958558    | 0.6666667    | 0.8067472    | 1            | 0.797058     |
| #### Bn-A09-p10757309 | A-genome specific (napus-rapa) | 0.9928229    | 0.7849824    | not scorable | not scorable | 0.9917355    | 0.7361958    |
| #### Bn-A09-p10759604 | A-genome specific (napus-rapa) | 1            | 0.8740647    | not scorable | not scorable | 1            | 0.7815285    |
| #### Bn-A09-p10761012 | A-genome specific (napus-rapa) | 0.9928229    | 0.5818751    | not scorable | not scorable | 1            | 0.6820409    |
| #### Bn-A09-p10771119 | A-genome specific (napus-rapa) | 0.9856459    | 0.781882     | not scorable | not scorable | 0.9917355    | 0.8434342    |
| #### Bn-A09-p10836683 | A-genome specific (rapa only)  | not scorable | not scorable | not scorable | not scorable | 0.5950413    | 0.7187331    |
| #### Bn-A09-p10841953 | A-genome specific (napus-rapa) | 0.9545454    | 0.8587106    | not scorable | not scorable | 0.6859504    | 0.8730612    |
| #### Bn-A09-p10842108 | A-genome specific (napus-rapa) | 0.9976076    | 0.4533265    | not scorable | not scorable | 0.9834711    | 0.5912624    |
| #### Bn-A09-p10842287 | A-genome specific (napus-rapa) | 0.9593301    | 0.7830971    | not scorable | not scorable | 0.6694215    | 0.809281     |
| #### Bn-A09-p10850022 | A-genome specific (napus-rapa) | 1            | 0.3465846    | not scorable | not scorable | 0.9669421    | 0.2889936    |
| #### Bn-A09-p10859693 | A-genome specific (napus-rapa) | 0.9545454    | 0.7005182    | not scorable | not scorable | 0.9834711    | 0.8467841    |
| #### Bn-A09-p10873462 | napus specific                 | 0.9569378    | 0.6932937    | not scorable | not scorable | not scorable | not scorable |
| #### Bn-A09-p10881353 | A-genome specific (napus-rapa) | 0.9545454    | 0.8815608    | not scorable | not scorable | 0.661157     | 0.88561      |
| #### Bn-A09-p10893080 | A-genome specific (napus-rapa) | 0.9521531    | 0.8694151    | not scorable | not scorable | 0.6694215    | 0.8646256    |
| #### Bn-A09-p10900375 | A-genome specific (napus-rapa) | 0.9569378    | 0.8332095    | not scorable | not scorable | 0.6446281    | 0.7844322    |
| #### Bn-A09-p10901534 | A-genome specific (napus-rapa) | 0.9593301    | 0.952307     | not scorable | not scorable | 0.6694215    | 0.7720731    |
| #### Bn-A09-p10903227 | A-genome specific (napus-rapa) | 0.9545454    | 0.8243176    | not scorable | not scorable | 0.6694215    | 0.7948815    |
| #### Bn-A09-p10904572 | A-genome specific (napus-rapa) | 0.9521531    | 0.8704344    | not scorable | not scorable | 0.677686     | 0.8284582    |
| #### Bn-A09-p10912706 | A-genome specific (napus-rapa) | 0.9521531    | 0.8675359    | not scorable | not scorable | 0.7933884    | 0.838248     |
| #### Bn-A09-p10946429 | A-genome specific (napus-rapa) | 0.9545454    | 0.8112001    | not scorable | not scorable | 0.6859504    | 0.8304033    |
| #### Bn-A09-p10947108 | A-genome specific (napus-rapa) | 0.9569378    | 0.7973883    | not scorable | not scorable | 0.677686     | 0.8568237    |
| #### Bn-A09-p10971822 | A-genome specific (napus-rapa) | 0.9545454    | 0.8749103    | not scorable | not scorable | 0.677686     | 0.805021     |
| #### Bn-A09-p109917   | all not scorable               | not scorable | not scorable | not scorable | not scorable | not scorable | not scorable |
| #### Bn-A09-p11006522 | A-genome specific (napus-rapa) | 0.9952153    | 0.5556992    | not scorable | not scorable | 0.661157     | 0.78749      |
| #### Bn-A09-p11039999 | A-genome specific (napus-rapa) | 0.9688995    | 0.8608685    | not scorable | not scorable | 0.6859504    | 0.6489927    |
| #### Bn-A09-p11110730 | A-genome specific (napus-rapa) | 0.9856459    | 0.8025817    | not scorable | not scorable | 0.9917355    | 0.8242991    |
| #### Bn-A09-p11114990 | A-genome specific (napus-rapa) | 0.9976076    | 0.3633642    | not scorable | not scorable | 0.9173554    | 0.7407601    |
| #### Bn-A09-p11126016 | A-genome specific (napus-rapa) | 0.9856459    | 0.3763203    | not scorable | not scorable | 0.9752066    | 0.6531566    |
| #### Bn-A09-p11126583 | A-genome specific (napus-rapa) | 0.9952153    | 0.5461331    | not scorable | not scorable | 0.9917355    | 0.837189     |
| #### Bn-A09-p11135440 | A-genome specific (napus-rapa) | 0.9904306    | 0.811587     | not scorable | not scorable | 0.9917355    | 0.762605     |
| #### Bn-A09-p11139874 | A-genome specific (napus-rapa) | 0.9928229    | 0.8252466    | not scorable | not scorable | 0.9834711    | 0.7922105    |
| #### Bn-A09-p11141656 | A-genome specific (napus-rapa) | 0.9880383    | 0.7864963    | not scorable | not scorable | 0.9834711    | 0.8682956    |

|                       |                                   |              |              |              |              |              |              |
|-----------------------|-----------------------------------|--------------|--------------|--------------|--------------|--------------|--------------|
| #### Bn-A09-p11141987 | A-genome specific (napus-rapa)    | 0.9880383    | 0.8433625    | not scorable | not scorable | 0.9669421    | 0.7090384    |
| #### Bn-A09-p11149722 | A-genome specific (napus-rapa)    | 0.9760765    | 0.7033604    | not scorable | not scorable | 0.9917355    | 0.696489     |
| #### Bn-A09-p11152092 | A-genome specific (napus-rapa)    | 0.9832536    | 0.5485595    | not scorable | not scorable | 1            | 0.6358939    |
| #### Bn-A09-p11164079 | all not scorable                  | not scorable | not scorable | not scorable | not scorable | not scorable | not scorable |
| #### Bn-A09-p11180241 | A-genome specific (napus-rapa)    | 0.9856459    | 0.6818446    | not scorable | not scorable | 0.9917355    | 0.7043785    |
| #### Bn-A09-p11181581 | A-genome specific (napus-rapa)    | 0.9928229    | 0.8105862    | not scorable | not scorable | 0.9917355    | 0.7893009    |
| #### Bn-A09-p11190460 | A-genome specific (napus-rapa)    | 0.9904306    | 0.8276094    | not scorable | not scorable | 0.9917355    | 0.8149722    |
| #### Bn-A09-p11210109 | A-genome specific (napus-rapa)    | 0.9856459    | 0.791746     | not scorable | not scorable | 0.9834711    | 0.7662954    |
| #### Bn-A09-p112102   | genome unspecific (oleracea-rapa) | not scorable | not scorable | 0.9922481    | 0.7159488    | 1            | 0.7155582    |
| #### Bn-A09-p11239885 | A-genome specific (napus-rapa)    | 0.9904306    | 0.7819003    | not scorable | not scorable | 1            | 0.7789389    |
| #### Bn-A09-p11242530 | A-genome specific (napus-rapa)    | 0.9976076    | 0.8407911    | not scorable | not scorable | 1            | 0.8497543    |
| #### Bn-A09-p11243089 | A-genome specific (napus-rapa)    | 0.9928229    | 0.8611046    | not scorable | not scorable | 1            | 0.7879903    |
| #### Bn-A09-p11251794 | A-genome specific (napus-rapa)    | 1            | 0.2838176    | not scorable | not scorable | 1            | 0.4944233    |
| #### Bn-A09-p11252662 | A-genome specific (napus-rapa)    | 1            | 0.5546721    | not scorable | not scorable | 0.9917355    | 0.5231664    |
| #### Bn-A09-p11260023 | A-genome specific (rapa only)     | not scorable | not scorable | not scorable | not scorable | 0.9834711    | 0.7020751    |
| #### Bn-A09-p11267401 | A-genome specific (napus-rapa)    | 0.9928229    | 0.8857388    | not scorable | not scorable | 1            | 0.8188589    |
| #### Bn-A09-p11278998 | genome unspecific (oleracea-rapa) | not scorable | not scorable | 0.9844961    | 0.781068     | 0.9834711    | 0.7445164    |
| #### Bn-A09-p11279200 | A-genome specific (napus-rapa)    | 1            | 0.8525947    | not scorable | not scorable | 0.9917355    | 0.8229404    |
| #### Bn-A09-p11284877 | all not scorable                  | not scorable | not scorable | not scorable | not scorable | not scorable | not scorable |
| #### Bn-A09-p11284928 | A-genome specific (napus-rapa)    | 0.9736842    | 0.5574286    | not scorable | not scorable | 0.9834711    | 0.451745     |
| #### Bn-A09-p11297498 | genome unspecific (all in)        | 0.9952153    | 0.5110664    |              | 1 0.6688043  | 0.9917355    | 0.8167168    |
| #### Bn-A09-p11297772 | A-genome specific (rapa only)     | not scorable | not scorable | not scorable | not scorable | 0.9917355    | 0.7470621    |
| #### Bn-A09-p11393003 | A-genome specific (napus-rapa)    | 0.9976076    | 0.5790365    | not scorable | not scorable | 0.9917355    | 0.7600892    |
| #### Bn-A09-p11400911 | A-genome specific (napus-rapa)    | 0.9928229    | 0.561918     | not scorable | not scorable | 0.9917355    | 0.8105205    |
| #### Bn-A09-p11461510 | A-genome specific (napus-rapa)    | 0.9928229    | 0.7111506    | not scorable | not scorable | 1            | 0.7752644    |
| #### Bn-A09-p11476056 | A-genome specific (napus-rapa)    | 0.9856459    | 0.3347396    | not scorable | not scorable | 0.9917355    | 0.6607934    |
| #### Bn-A09-p11477205 | A-genome specific (napus-rapa)    | 0.9904306    | 0.8201553    | not scorable | not scorable | 0.9917355    | 0.7301241    |
| #### Bn-A09-p11487820 | A-genome specific (napus-rapa)    | 0.9904306    | 0.8042438    | not scorable | not scorable | 0.9834711    | 0.8351309    |
| #### Bn-A09-p11491871 | A-genome specific (napus-rapa)    | 0.8397129    | 0.9143984    | not scorable | not scorable | 0.5950413    | 0.7893502    |
| #### Bn-A09-p11498983 | A-genome specific (napus-rapa)    | 0.9928229    | 0.3624052    | not scorable | not scorable | 0.9917355    | 0.8079572    |
| #### Bn-A09-p11505022 | A-genome specific (napus-rapa)    | 0.9665072    | 0.5589335    | not scorable | not scorable | 0.9256198    | 0.702389     |
| #### Bn-A09-p11512637 | A-genome specific (napus-rapa)    | 0.9928229    | 0.8283804    | not scorable | not scorable | 1            | 0.8687298    |
| #### Bn-A09-p11530621 | A-genome specific (napus-rapa)    | 0.9976076    | 0.7819484    | not scorable | not scorable | 1            | 0.76521      |



|                       |                                |              |              |              |              |              |              |
|-----------------------|--------------------------------|--------------|--------------|--------------|--------------|--------------|--------------|
| #### Bn-A09-p11539075 | A-genome specific (napus-rapa) | 0.9880383    | 0.7970597    | not scorable | not scorable | 0.9834711    | 0.7459437    |
| #### Bn-A09-p11542176 | A-genome specific (napus-rapa) | 0.9928229    | 0.8013493    | not scorable | not scorable | 1            | 0.8882805    |
| #### Bn-A09-p11544785 | A-genome specific (napus-rapa) | 0.9880383    | 0.6952392    | not scorable | not scorable | 0.9917355    | 0.7041456    |
| #### Bn-A09-p11558689 | A-genome specific (napus-rapa) | 1            | 0.3971626    | not scorable | not scorable | 0.9917355    | 0.6312121    |
| #### Bn-A09-p11589729 | A-genome specific (napus-rapa) | 0.9976076    | 0.3661952    | not scorable | not scorable | 1            | 0.8200133    |
| #### Bn-A09-p11595635 | A-genome specific (napus-rapa) | 0.9928229    | 0.5496597    | not scorable | not scorable | 0.9917355    | 0.7881554    |
| #### Bn-A09-p11614521 | A-genome specific (rapa only)  | not scorable | not scorable | not scorable | not scorable | 0.9917355    | 0.6918662    |
| #### Bn-A09-p11617195 | A-genome specific (napus-rapa) | 0.9928229    | 0.2473518    | not scorable | not scorable | 1            | 0.7355374    |
| #### Bn-A09-p11630515 | A-genome specific (napus-rapa) | 0.9904306    | 0.5194696    | not scorable | not scorable | 0.9752066    | 0.740707     |
| #### Bn-A09-p1165212  | A-genome specific (napus-rapa) | 0.9593301    | 0.7007297    | not scorable | not scorable | 0.9917355    | 0.8193871    |
| #### Bn-A09-p11689854 | A-genome specific (napus-rapa) | 0.9856459    | 0.5627939    | not scorable | not scorable | 1            | 0.7278904    |
| #### Bn-A09-p11690216 | A-genome specific (napus-rapa) | 0.9952153    | 0.7251408    | not scorable | not scorable | 1            | 0.6843218    |
| #### Bn-A09-p11692396 | A-genome specific (napus-rapa) | 0.9832536    | 0.72813      | not scorable | not scorable | 1            | 0.7859192    |
| #### Bn-A09-p11727553 | A-genome specific (napus-rapa) | 0.9952153    | 0.4632994    | not scorable | not scorable | 1            | 0.8050901    |
| #### Bn-A09-p1188091  | napus specific                 | 0.9473684    | 0.7300028    | not scorable | not scorable | not scorable | not scorable |
| #### Bn-A09-p12080295 | all not scorable               | not scorable | not scorable | not scorable | not scorable | not scorable | not scorable |
| #### Bn-A09-p1227639  | A-genome specific (rapa only)  | not scorable | not scorable | not scorable | not scorable | 0.9834711    | 0.7708933    |
| #### Bn-A09-p12327781 | A-genome specific (rapa only)  | not scorable | not scorable | not scorable | not scorable | 1            | 0.8548859    |
| #### Bn-A09-p1236359  | A-genome specific (rapa only)  | not scorable | not scorable | not scorable | not scorable | 0.9173554    | 0.4686335    |
| #### Bn-A09-p1243032  | A-genome specific (rapa only)  | not scorable | not scorable | not scorable | not scorable | 0.9917355    | 0.7734897    |
| #### Bn-A09-p12466272 | all not scorable               | not scorable | not scorable | not scorable | not scorable | not scorable | not scorable |
| #### Bn-A09-p1252014  | A-genome specific (napus-rapa) | 0.9832536    | 0.7170502    | not scorable | not scorable | 0.9917355    | 0.7257776    |
| #### Bn-A09-p1252150  | A-genome specific (napus-rapa) | 0.9808612    | 0.6436432    | not scorable | not scorable | 0.9834711    | 0.6274118    |
| #### Bn-A09-p12557952 | A-genome specific (napus-rapa) | 1            | 0.8446012    | not scorable | not scorable | 1            | 0.8963123    |
| #### Bn-A09-p12577050 | A-genome specific (napus-rapa) | 0.9952153    | 0.8164203    | not scorable | not scorable | 0.9834711    | 0.7910215    |
| #### Bn-A09-p1272298  | A-genome specific (napus-rapa) | 0.9808612    | 0.2979944    | not scorable | not scorable | 1            | 0.8388259    |
| #### Bn-A09-p12737707 | genome unspecific (all in)     | 0.9976076    | 0.891291     | 1            | 0.2369289    | 0.9752066    | 0.8815182    |
| #### Bn-A09-p12913174 | A-genome specific (napus-rapa) | 0.9641148    | 0.6756018    | not scorable | not scorable | 0.9917355    | 0.7410695    |
| #### Bn-A09-p12929078 | A-genome specific (napus-rapa) | 0.9736842    | 0.7551085    | not scorable | not scorable | 1            | 0.73063      |
| #### Bn-A09-p13021095 | A-genome specific (napus-rapa) | 1            | 0.6706561    | not scorable | not scorable | 1            | 0.7259181    |
| #### Bn-A09-p13151129 | A-genome specific (rapa only)  | not scorable | not scorable | not scorable | not scorable | 0.6363636    | 0.6782322    |
| #### Bn-A09-p13251498 | A-genome specific (napus-rapa) | 0.9688995    | 0.7342397    | not scorable | not scorable | 0.9834711    | 0.7641567    |
| #### Bn-A09-p13253434 | A-genome specific (napus-rapa) | 1            | 0.4629881    | not scorable | not scorable | 0.9834711    | 0.6367493    |





|                       |                                |              |              |              |              |              |              |
|-----------------------|--------------------------------|--------------|--------------|--------------|--------------|--------------|--------------|
| #### Bn-A09-p13952461 | A-genome specific (rapa only)  | not scorable | not scorable | not scorable | not scorable | 0.8429752    | 0.8199651    |
| #### Bn-A09-p13957074 | all not scorable               | not scorable | not scorable | not scorable | not scorable | not scorable | not scorable |
| #### Bn-A09-p13969906 | A-genome specific (napus-rapa) | 0.9593301    | 0.7782044    | not scorable | not scorable | 0.6280992    | 0.7299787    |
| #### Bn-A09-p13970641 | A-genome specific (napus-rapa) | 0.9760765    | 0.775623     | not scorable | not scorable | 0.9834711    | 0.7664817    |
| #### Bn-A09-p13983057 | A-genome specific (napus-rapa) | 0.9928229    | 0.7673842    | not scorable | not scorable | 0.9917355    | 0.8259931    |
| #### Bn-A09-p13983626 | A-genome specific (napus-rapa) | 0.9952153    | 0.7875317    | not scorable | not scorable | 1            | 0.7639561    |
| #### Bn-A09-p14016577 | A-genome specific (napus-rapa) | 0.9808612    | 0.3498078    | not scorable | not scorable | 1            | 0.7523708    |
| #### Bn-A09-p14017321 | A-genome specific (napus-rapa) | 0.7822967    | 0.7129608    | not scorable | not scorable | 1            | 0.7241706    |
| #### Bn-A09-p14024256 | all not scorable               | not scorable | not scorable | not scorable | not scorable | not scorable | not scorable |
| #### Bn-A09-p14024436 | A-genome specific (rapa only)  | not scorable | not scorable | not scorable | not scorable | 0.9834711    | 0.7065768    |
| #### Bn-A09-p14031358 | A-genome specific (napus-rapa) | 0.7583732    | 0.6561157    | not scorable | not scorable | 0.9917355    | 0.8197265    |
| #### Bn-A09-p1404415  | A-genome specific (napus-rapa) | 0.9641148    | 0.4500796    | not scorable | not scorable | 0.9834711    | 0.9584777    |
| #### Bn-A09-p1405207  | A-genome specific (napus-rapa) | 0.9976076    | 0.7787536    | not scorable | not scorable | 1            | 0.7220092    |
| #### Bn-A09-p14052967 | A-genome specific (rapa only)  | not scorable | not scorable | not scorable | not scorable | 1            | 0.7902251    |
| #### Bn-A09-p14081496 | A-genome specific (napus-rapa) | 0.9593301    | 0.3684198    | not scorable | not scorable | 1            | 0.735991     |
| #### Bn-A09-p14105923 | genome unspecific (all in)     | 1            | 0.2923659    |              | 1            | 0.7101301    | 1            |
| #### Bn-A09-p14106312 | A-genome specific (napus-rapa) | 1            | 0.7770717    | not scorable | not scorable | 1            | 0.7622204    |
| #### Bn-A09-p14115991 | A-genome specific (rapa only)  | not scorable | not scorable | not scorable | not scorable | 1            | 0.6901347    |
| #### Bn-A09-p14130668 | A-genome specific (napus-rapa) | 1            | 0.7828926    | not scorable | not scorable | 0.9752066    | 0.6606453    |
| #### Bn-A09-p14132945 | A-genome specific (napus-rapa) | 0.9856459    | 0.738956     | not scorable | not scorable | 0.9917355    | 0.7144488    |
| #### Bn-A09-p14133028 | A-genome specific (napus-rapa) | 0.9138756    | 0.7960334    | not scorable | not scorable | 0.9586777    | 0.7710209    |
| #### Bn-A09-p14137381 | A-genome specific (napus-rapa) | 0.9114832    | 0.7190226    | not scorable | not scorable | 0.9834711    | 0.6209649    |
| #### Bn-A09-p14137599 | A-genome specific (napus-rapa) | 0.9952153    | 0.8278503    | not scorable | not scorable | 0.9752066    | 0.69731      |
| #### Bn-A09-p14137607 | A-genome specific (napus-rapa) | 0.9928229    | 0.8034174    | not scorable | not scorable | 0.9917355    | 0.8285754    |
| #### Bn-A09-p14138079 | A-genome specific (rapa only)  | not scorable | not scorable | not scorable | not scorable | 1            | 0.5549561    |
| #### Bn-A09-p14147641 | A-genome specific (napus-rapa) | 1            | 0.8808514    | not scorable | not scorable | 0.9917355    | 0.6937382    |
| #### Bn-A09-p14147772 | A-genome specific (napus-rapa) | 0.9880383    | 0.7037124    | not scorable | not scorable | 0.9917355    | 0.6653843    |
| #### Bn-A09-p14147959 | A-genome specific (napus-rapa) | 0.9043062    | 0.8375533    | not scorable | not scorable | 0.9834711    | 0.7309983    |
| #### Bn-A09-p14149101 | A-genome specific (napus-rapa) | 0.9952153    | 0.8072155    | not scorable | not scorable | 1            | 0.9358074    |
| #### Bn-A09-p14161665 | A-genome specific (napus-rapa) | 0.9832536    | 0.6943715    | not scorable | not scorable | 0.9917355    | 0.6707661    |
| #### Bn-A09-p14166446 | A-genome specific (napus-rapa) | 1            | 0.5041009    | not scorable | not scorable | 1            | 0.5365424    |
| #### Bn-A09-p14167293 | A-genome specific (napus-rapa) | 0.9736842    | 0.2810199    | not scorable | not scorable | 1            | 0.7591171    |
| #### Bn-A09-p14179631 | A-genome specific (napus-rapa) | 0.2607656    | 0.770798     | not scorable | not scorable | 0.8760331    | 0.6807665    |

|                       |                                |              |              |              |              |              |              |
|-----------------------|--------------------------------|--------------|--------------|--------------|--------------|--------------|--------------|
| #### Bn-A09-p14182601 | A-genome specific (rapa only)  | not scorable | not scorable | not scorable | not scorable | 0.9917355    | 0.633513     |
| #### Bn-A09-p14199197 | A-genome specific (napus-rapa) | 1            | 0.8520517    | not scorable | not scorable | 1            | 0.8568143    |
| #### Bn-A09-p14204447 | A-genome specific (napus-rapa) | 0.9832536    | 0.8534163    | not scorable | not scorable | 0.9917355    | 0.7429277    |
| #### Bn-A09-p14204721 | A-genome specific (rapa only)  | not scorable | not scorable | not scorable | not scorable | 0.9669421    | 0.9175288    |
| #### Bn-A09-p14205256 | A-genome specific (napus-rapa) | 0.9976076    | 0.853748     | not scorable | not scorable | 0.9834711    | 0.6482345    |
| #### Bn-A09-p14205358 | A-genome specific (napus-rapa) | 1            | 0.7883556    | not scorable | not scorable | 0.9586777    | 0.5787016    |
| #### Bn-A09-p14217456 | A-genome specific (napus-rapa) | 0.2703349    | 0.730217     | not scorable | not scorable | 0.9669421    | 0.6532353    |
| #### Bn-A09-p14218230 | genome unspecific (all in)     | 0.3971292    | 0.753602     | 0.9612403    | 0.6572803    | 0.9504132    | 0.654341     |
| #### Bn-A09-p14223034 | A-genome specific (rapa only)  | not scorable | not scorable | not scorable | not scorable | 0.9917355    | 0.7895302    |
| #### Bn-A09-p14246053 | A-genome specific (napus-rapa) | 0.9641148    | 0.6932893    | not scorable | not scorable | 1            | 0.6709899    |
| #### Bn-A09-p14266174 | A-genome specific (napus-rapa) | 0.8253589    | 0.8467454    | not scorable | not scorable | 0.9834711    | 0.6774447    |
| #### Bn-A09-p14267034 | A-genome specific (napus-rapa) | 0.9760765    | 0.5087318    | not scorable | not scorable | 0.9917355    | 0.7884586    |
| #### Bn-A09-p14282683 | A-genome specific (napus-rapa) | 0.9832536    | 0.7101038    | not scorable | not scorable | 1            | 0.7372329    |
| #### Bn-A09-p14283410 | A-genome specific (napus-rapa) | 0.9928229    | 0.8520542    | not scorable | not scorable | 0.9752066    | 0.6865066    |
| #### Bn-A09-p14284094 | A-genome specific (napus-rapa) | 1            | 0.7909704    | not scorable | not scorable | 0.9834711    | 0.75929      |
| #### Bn-A09-p14285217 | A-genome specific (napus-rapa) | 0.9928229    | 0.7753471    | not scorable | not scorable | 0.9917355    | 0.8151718    |
| #### Bn-A09-p14287005 | genome unspecific (all in)     | 0.9712918    | 0.377437     | 0.9922481    | 0.6190458    | 1            | 0.7405906    |
| #### Bn-A09-p14287061 | A-genome specific (rapa only)  | not scorable | not scorable | not scorable | not scorable | 0.9752066    | 0.3547519    |
| #### Bn-A09-p14296015 | A-genome specific (napus-rapa) | 0.9904306    | 0.6891413    | not scorable | not scorable | 0.9586777    | 0.7509688    |
| #### Bn-A09-p14302455 | A-genome specific (napus-rapa) | 0.9928229    | 0.6330615    | not scorable | not scorable | 0.9669421    | 0.6922881    |
| #### Bn-A09-p14302563 | A-genome specific (napus-rapa) | 0.9880383    | 0.7773977    | not scorable | not scorable | 0.9586777    | 0.8738636    |
| #### Bn-A09-p14330510 | A-genome specific (napus-rapa) | 0.9928229    | 0.7306109    | not scorable | not scorable | 0.9669421    | 0.7799917    |
| #### Bn-A09-p14330786 | A-genome specific (napus-rapa) | 0.9856459    | 0.7390717    | not scorable | not scorable | 0.9504132    | 0.726854     |
| #### Bn-A09-p14330816 | A-genome specific (napus-rapa) | 0.9952153    | 0.7369478    | not scorable | not scorable | 0.9586777    | 0.7188144    |
| #### Bn-A09-p14376353 | A-genome specific (rapa only)  | not scorable | not scorable | not scorable | not scorable | 0.9834711    | 0.742852     |
| #### Bn-A09-p14432426 | A-genome specific (napus-rapa) | 0.9641148    | 0.6795076    | not scorable | not scorable | 0.9917355    | 0.6979551    |
| #### Bn-A09-p14452314 | A-genome specific (napus-rapa) | 0.9904306    | 0.8313509    | not scorable | not scorable | 0.9917355    | 0.8076341    |
| #### Bn-A09-p14468231 | A-genome specific (napus-rapa) | 0.9784689    | 0.7450918    | not scorable | not scorable | 0.9917355    | 0.8626987    |
| #### Bn-A09-p14501539 | napus specific                 | 0.9808612    | 0.6326552    | not scorable | not scorable | not scorable | not scorable |
| #### Bn-A09-p14535292 | A-genome specific (napus-rapa) | 0.9569378    | 0.6731238    | not scorable | not scorable | 0.9669421    | 0.9121973    |
| #### Bn-A09-p14585104 | A-genome specific (rapa only)  | not scorable | not scorable | not scorable | not scorable | 1            | 0.5788181    |
| #### Bn-A09-p14630762 | A-genome specific (rapa only)  | not scorable | not scorable | not scorable | not scorable | 0.9834711    | 0.7499247    |
| #### Bn-A09-p14631585 | A-genome specific (rapa only)  | not scorable | not scorable | not scorable | not scorable | 0.9917355    | 0.796132     |

|                       |                                |              |              |              |              |              |              |
|-----------------------|--------------------------------|--------------|--------------|--------------|--------------|--------------|--------------|
| #### Bn-A09-p14647697 | A-genome specific (napus-rapa) | 1            | 0.7304966    | not scorable | not scorable | 1            | 0.8230864    |
| #### Bn-A09-p14653854 | all not scorable               | not scorable | not scorable | not scorable | not scorable | not scorable | not scorable |
| #### Bn-A09-p146640   | A-genome specific (rapa only)  | not scorable | not scorable | not scorable | not scorable | 1            | 0.8254448    |
| #### Bn-A09-p14702686 | A-genome specific (napus-rapa) | 0.9688995    | 0.7181514    | not scorable | not scorable | 0.9917355    | 0.7691497    |
| #### Bn-A09-p14751809 | A-genome specific (napus-rapa) | 0.9928229    | 0.6610146    | not scorable | not scorable | 1            | 0.6638325    |
| #### Bn-A09-p14783306 | napus specific                 | 0.6961722    | 0.7482561    | not scorable | not scorable | not scorable | not scorable |
| #### Bn-A09-p14867417 | A-genome specific (napus-rapa) | 0.9928229    | 0.7440737    | not scorable | not scorable | 1            | 0.9036179    |
| #### Bn-A09-p149032   | A-genome specific (napus-rapa) | 1            | 0.5830583    | not scorable | not scorable | 1            | 0.5406489    |
| #### Bn-A09-p149317   | A-genome specific (napus-rapa) | 0.9569378    | 0.2299646    | not scorable | not scorable | 1            | 0.6724718    |
| #### Bn-A09-p149667   | A-genome specific (napus-rapa) | 0.9617225    | 0.720861     | not scorable | not scorable | 0.9752066    | 0.8145642    |
| #### Bn-A09-p14986234 | A-genome specific (napus-rapa) | 0.9712918    | 0.7637851    | not scorable | not scorable | 0.892562     | 0.731586     |
| #### Bn-A09-p14986845 | A-genome specific (rapa only)  | not scorable | not scorable | not scorable | not scorable | 0.9834711    | 0.7396738    |
| #### Bn-A09-p14987165 | A-genome specific (rapa only)  | not scorable | not scorable | not scorable | not scorable | 0.9834711    | 0.7583697    |
| #### Bn-A09-p15005673 | A-genome specific (rapa only)  | not scorable | not scorable | not scorable | not scorable | 0.9834711    | 0.6564046    |
| #### Bn-A09-p15042985 | A-genome specific (napus-rapa) | 0.9904306    | 0.5329614    | not scorable | not scorable | 1            | 0.84894      |
| #### Bn-A09-p15090180 | A-genome specific (napus-rapa) | 0.9808612    | 0.6660814    | not scorable | not scorable | 0.9669421    | 0.719496     |
| #### Bn-A09-p15105347 | A-genome specific (rapa only)  | not scorable | not scorable | not scorable | not scorable | 0.9917355    | 0.8102891    |
| #### Bn-A09-p15112850 | A-genome specific (napus-rapa) | 0.9832536    | 0.6003385    | not scorable | not scorable | 0.9917355    | 0.8742608    |
| #### Bn-A09-p15134898 | A-genome specific (napus-rapa) | 0.9784689    | 0.6945835    | not scorable | not scorable | 1            | 0.6264637    |
| #### Bn-A09-p15192631 | A-genome specific (napus-rapa) | 0.9856459    | 0.7788732    | not scorable | not scorable | 1            | 0.7750105    |
| #### Bn-A09-p15202528 | A-genome specific (napus-rapa) | 0.9976076    | 0.4973252    | not scorable | not scorable | 1            | 0.5474075    |
| #### Bn-A09-p15203129 | A-genome specific (napus-rapa) | 1            | 0.6714815    | not scorable | not scorable | 1            | 0.6460657    |
| #### Bn-A09-p15203190 | A-genome specific (napus-rapa) | 1            | 0.6305527    | not scorable | not scorable | 0.9008265    | 0.2277504    |
| #### Bn-A09-p15203308 | A-genome specific (napus-rapa) | 1            | 0.6169784    | not scorable | not scorable | 0.9917355    | 0.704528     |
| #### Bn-A09-p15203468 | A-genome specific (napus-rapa) | 0.9976076    | 0.5857258    | not scorable | not scorable | 1            | 0.6019612    |
| #### Bn-A09-p15262    | A-genome specific (rapa only)  | not scorable | not scorable | not scorable | not scorable | 1            | 0.6854191    |
| #### Bn-A09-p15270033 | A-genome specific (napus-rapa) | 1            | 0.4221076    | not scorable | not scorable | 0.9834711    | 0.7549351    |
| #### Bn-A09-p15353026 | A-genome specific (napus-rapa) | 1            | 0.8956033    | not scorable | not scorable | 1            | 0.8832561    |
| #### Bn-A09-p15362032 | genome unspecific (all in)     | 0.9856459    | 0.293573     |              | 1 0.8055723  | 1            | 0.9205657    |
| #### Bn-A09-p15416895 | A-genome specific (napus-rapa) | 1            | 0.7152719    | not scorable | not scorable | 1            | 0.8154516    |
| #### Bn-A09-p1541696  | A-genome specific (rapa only)  | not scorable | not scorable | not scorable | not scorable | 0.9586777    | 0.736979     |
| #### Bn-A09-p15420800 | A-genome specific (napus-rapa) | 1            | 0.9408026    | not scorable | not scorable | 1            | 0.932557     |
| #### Bn-A09-p15497972 | A-genome specific (napus-rapa) | 1            | 0.780192     | not scorable | not scorable | 1            | 0.7590387    |

|                       |                                |              |              |              |              |           |           |
|-----------------------|--------------------------------|--------------|--------------|--------------|--------------|-----------|-----------|
| #### Bn-A09-p1550543  | A-genome specific (rapa only)  | not scorable | not scorable | not scorable | not scorable | 0.9669421 | 0.7753711 |
| #### Bn-A09-p1552993  | A-genome specific (napus-rapa) | 0.9665072    | 0.7730399    | not scorable | not scorable | 0.9917355 | 0.7217907 |
| #### Bn-A09-p15556325 | A-genome specific (rapa only)  | not scorable | not scorable | not scorable | not scorable | 0.9586777 | 0.5190509 |
| #### Bn-A09-p1558529  | A-genome specific (rapa only)  | not scorable | not scorable | not scorable | not scorable | 0.9669421 | 0.6541501 |
| #### Bn-A09-p15648941 | A-genome specific (napus-rapa) | 0.9928229    | 0.6698877    | not scorable | not scorable | 1         | 0.6817179 |
| #### Bn-A09-p15665552 | A-genome specific (napus-rapa) | 1            | 0.9082823    | not scorable | not scorable | 0.9752066 | 0.9016797 |
| #### Bn-A09-p156691   | A-genome specific (napus-rapa) | 0.9545454    | 0.7500329    | not scorable | not scorable | 0.9752066 | 0.7965824 |
| #### Bn-A09-p1567071  | A-genome specific (rapa only)  | not scorable | not scorable | not scorable | not scorable | 1         | 0.6669489 |
| #### Bn-A09-p1570558  | A-genome specific (napus-rapa) | 0.9569378    | 0.3741006    | not scorable | not scorable | 1         | 0.8043644 |
| #### Bn-A09-p15826536 | A-genome specific (napus-rapa) | 0.9904306    | 0.7530042    | not scorable | not scorable | 1         | 0.8391486 |
| #### Bn-A09-p15852129 | genome unspecific (all in)     | 0.9808612    | 0.4669785    | 1            | 0.6924549    | 1         | 0.902379  |
| #### Bn-A09-p1588624  | A-genome specific (napus-rapa) | 0.937799     | 0.3672205    | not scorable | not scorable | 0.9834711 | 0.7153074 |
| #### Bn-A09-p15935674 | A-genome specific (napus-rapa) | 0.9952153    | 0.5509576    | not scorable | not scorable | 1         | 0.9175813 |
| #### Bn-A09-p15935917 | A-genome specific (napus-rapa) | 0.9880383    | 0.7862967    | not scorable | not scorable | 1         | 0.9477631 |
| #### Bn-A09-p15952662 | A-genome specific (napus-rapa) | 0.9808612    | 0.7383669    | not scorable | not scorable | 1         | 0.8938475 |
| #### Bn-A09-p15959411 | A-genome specific (napus-rapa) | 0.9832536    | 0.6497742    | not scorable | not scorable | 0.9834711 | 0.5894059 |
| #### Bn-A09-p15960787 | A-genome specific (napus-rapa) | 0.9856459    | 0.6679716    | not scorable | not scorable | 0.9917355 | 0.8114662 |
| #### Bn-A09-p15960945 | A-genome specific (napus-rapa) | 0.9856459    | 0.7602317    | not scorable | not scorable | 0.9834711 | 0.7503048 |
| #### Bn-A09-p15975138 | A-genome specific (rapa only)  | not scorable | not scorable | not scorable | not scorable | 0.9917355 | 0.7386792 |
| #### Bn-A09-p15981176 | A-genome specific (napus-rapa) | 0.9832536    | 0.725423     | not scorable | not scorable | 1         | 0.7591071 |
| #### Bn-A09-p15982584 | A-genome specific (napus-rapa) | 0.9712918    | 0.8183165    | not scorable | not scorable | 1         | 0.9211462 |
| #### Bn-A09-p15984968 | A-genome specific (napus-rapa) | 0.9928229    | 0.7649722    | not scorable | not scorable | 0.9834711 | 0.7161479 |
| #### Bn-A09-p15986311 | A-genome specific (napus-rapa) | 0.9784689    | 0.7480783    | not scorable | not scorable | 0.9917355 | 0.7575463 |
| #### Bn-A09-p16009460 | A-genome specific (rapa only)  | not scorable | not scorable | not scorable | not scorable | 0.9090909 | 0.7981799 |
| #### Bn-A09-p1603105  | A-genome specific (napus-rapa) | 0.9712918    | 0.7325644    | not scorable | not scorable | 0.9834711 | 0.7566667 |
| #### Bn-A09-p1603211  | A-genome specific (rapa only)  | not scorable | not scorable | not scorable | not scorable | 0.9834711 | 0.8037519 |
| #### Bn-A09-p1603989  | A-genome specific (napus-rapa) | 0.8971292    | 0.7662622    | not scorable | not scorable | 0.9834711 | 0.6788282 |
| #### Bn-A09-p160775   | A-genome specific (napus-rapa) | 0.9641148    | 0.6087862    | not scorable | not scorable | 0.9917355 | 0.6604964 |
| #### Bn-A09-p1608051  | A-genome specific (napus-rapa) | 0.9066986    | 0.7292571    | not scorable | not scorable | 0.9586777 | 0.7525004 |
| #### Bn-A09-p16090255 | A-genome specific (napus-rapa) | 0.9832536    | 0.784896     | not scorable | not scorable | 1         | 0.648378  |
| #### Bn-A09-p16094451 | A-genome specific (napus-rapa) | 0.9880383    | 0.73385      | not scorable | not scorable | 1         | 0.7210283 |
| #### Bn-A09-p1610631  | A-genome specific (napus-rapa) | 1            | 0.4080769    | not scorable | not scorable | 1         | 0.6884748 |
| #### Bn-A09-p16157117 | A-genome specific (napus-rapa) | 0.9712918    | 0.572365     | not scorable | not scorable | 1         | 0.6541426 |

|                       |                                |              |              |              |              |              |              |
|-----------------------|--------------------------------|--------------|--------------|--------------|--------------|--------------|--------------|
| #### Bn-A09-p16172780 | A-genome specific (napus-rapa) | 1            | 0.6064653    | not scorable | not scorable | 1            | 0.8544418    |
| #### Bn-A09-p1617368  | A-genome specific (napus-rapa) | 0.9952153    | 0.8536277    | not scorable | not scorable | 0.9834711    | 0.7110315    |
| #### Bn-A09-p16184825 | A-genome specific (napus-rapa) | 0.9880383    | 0.7753929    | not scorable | not scorable | 1            | 0.7485244    |
| #### Bn-A09-p16187931 | A-genome specific (napus-rapa) | 0.9952153    | 0.7102175    | not scorable | not scorable | 1            | 0.6818271    |
| #### Bn-A09-p16195258 | A-genome specific (rapa only)  | not scorable | not scorable | not scorable | not scorable | 0.9834711    | 0.8326831    |
| #### Bn-A09-p1623725  | A-genome specific (rapa only)  | not scorable | not scorable | not scorable | not scorable | 0.9834711    | 0.7386969    |
| #### Bn-A09-p1630301  | A-genome specific (napus-rapa) | 0.9736842    | 0.4008454    | not scorable | not scorable | 0.9752066    | 0.8137002    |
| #### Bn-A09-p1631944  | A-genome specific (napus-rapa) | 0.9784689    | 0.5401781    | not scorable | not scorable | 0.9752066    | 0.7466211    |
| #### Bn-A09-p16322417 | A-genome specific (napus-rapa) | 0.7703349    | 0.9371949    | not scorable | not scorable | 0.5454546    | 0.8572963    |
| #### Bn-A09-p1634229  | A-genome specific (napus-rapa) | 0.9832536    | 0.8283759    | not scorable | not scorable | 1            | 0.7301316    |
| #### Bn-A09-p1634504  | A-genome specific (napus-rapa) | 0.9617225    | 0.7671971    | not scorable | not scorable | 0.9917355    | 0.7774823    |
| #### Bn-A09-p1634652  | A-genome specific (napus-rapa) | 0.9832536    | 0.8171586    | not scorable | not scorable | 0.9504132    | 0.7003369    |
| #### Bn-A09-p16479468 | A-genome specific (rapa only)  | not scorable | not scorable | not scorable | not scorable | 0.9834711    | 0.2789664    |
| #### Bn-A09-p16479915 | all not scorable               | not scorable | not scorable | not scorable | not scorable | not scorable | not scorable |
| #### Bn-A09-p16519073 | A-genome specific (napus-rapa) | 0.9928229    | 0.8918749    | not scorable | not scorable | 1            | 0.7533305    |
| #### Bn-A09-p16540542 | A-genome specific (napus-rapa) | 0.9976076    | 0.8049463    | not scorable | not scorable | 1            | 0.7567014    |
| #### Bn-A09-p16569660 | A-genome specific (rapa only)  | not scorable | not scorable | not scorable | not scorable | 1            | 0.7044402    |
| #### Bn-A09-p1657554  | A-genome specific (napus-rapa) | 0.9832536    | 0.3414894    | not scorable | not scorable | 0.9834711    | 0.8447355    |
| #### Bn-A09-p16600344 | A-genome specific (napus-rapa) | 0.9832536    | 0.8219877    | not scorable | not scorable | 1            | 0.7108204    |
| #### Bn-A09-p16620672 | A-genome specific (napus-rapa) | 1            | 0.3670292    | not scorable | not scorable | 1            | 0.7452127    |
| #### Bn-A09-p16639867 | A-genome specific (napus-rapa) | 1            | 0.8681585    | not scorable | not scorable | 1            | 0.9055793    |
| #### Bn-A09-p16640011 | A-genome specific (napus-rapa) | 0.9904306    | 0.702097     | not scorable | not scorable | 0.9834711    | 0.4428112    |
| #### Bn-A09-p16655896 | A-genome specific (napus-rapa) | 0.9736842    | 0.9344635    | not scorable | not scorable | 0.892562     | 0.9547752    |
| #### Bn-A09-p16690775 | A-genome specific (napus-rapa) | 0.9904306    | 0.5482642    | not scorable | not scorable | 0.9504132    | 0.5819948    |
| #### Bn-A09-p1670138  | A-genome specific (napus-rapa) | 0.9688995    | 0.7803492    | not scorable | not scorable | 1            | 0.8455109    |
| #### Bn-A09-p1670189  | A-genome specific (napus-rapa) | 0.9688995    | 0.7933292    | not scorable | not scorable | 1            | 0.7251999    |
| #### Bn-A09-p16702435 | A-genome specific (napus-rapa) | 0.9928229    | 0.2862943    | not scorable | not scorable | 0.9917355    | 0.7492185    |
| #### Bn-A09-p1670665  | A-genome specific (napus-rapa) | 0.7703349    | 0.8127229    | not scorable | not scorable | 0.9256198    | 0.7748303    |
| #### Bn-A09-p16718038 | A-genome specific (napus-rapa) | 0.9928229    | 0.6208853    | not scorable | not scorable | 0.9917355    | 0.5844319    |
| #### Bn-A09-p16722238 | A-genome specific (napus-rapa) | 1            | 0.6633103    | not scorable | not scorable | 0.9917355    | 0.6312149    |
| #### Bn-A09-p16722618 | A-genome specific (napus-rapa) | 0.9952153    | 0.8110417    | not scorable | not scorable | 1            | 0.7605448    |
| #### Bn-A09-p16722814 | A-genome specific (napus-rapa) | 1            | 0.7078221    | not scorable | not scorable | 1            | 0.5544354    |
| #### Bn-A09-p16727301 | A-genome specific (rapa only)  | not scorable | not scorable | not scorable | not scorable | 0.9008265    | 0.8815182    |



|                       |                                   |              |              |              |              |              |              |
|-----------------------|-----------------------------------|--------------|--------------|--------------|--------------|--------------|--------------|
| #### Bn-A09-p16728084 | A-genome specific (napus-rapa)    | 0.9904306    | 0.7991586    | not scorable | not scorable | 0.6280992    | 0.665654     |
| #### Bn-A09-p1673884  | A-genome specific (rapa only)     | not scorable | not scorable | not scorable | not scorable | 0.8677686    | 0.8218619    |
| #### Bn-A09-p1674552  | A-genome specific (napus-rapa)    | 0.9760765    | 0.7605187    | not scorable | not scorable | 1            | 0.7850061    |
| #### Bn-A09-p1674796  | A-genome specific (napus-rapa)    | 0.9665072    | 0.7579148    | not scorable | not scorable | 1            | 0.8825686    |
| #### Bn-A09-p16766275 | A-genome specific (rapa only)     | not scorable | not scorable | not scorable | not scorable | 0.9917355    | 0.7207419    |
| #### Bn-A09-p16771727 | A-genome specific (rapa only)     | not scorable | not scorable | not scorable | not scorable | 0.9834711    | 0.7186703    |
| #### Bn-A09-p16781669 | napus specific                    | 0.9282297    | 0.7184814    | not scorable | not scorable | not scorable | not scorable |
| #### Bn-A09-p16805527 | A-genome specific (napus-rapa)    | 0.9258373    | 0.7172384    | not scorable | not scorable | 0.9834711    | 0.9032831    |
| #### Bn-A09-p1680594  | A-genome specific (napus-rapa)    | 0.9617225    | 0.4888214    | not scorable | not scorable | 1            | 0.8108501    |
| #### Bn-A09-p1681240  | A-genome specific (rapa only)     | not scorable | not scorable | not scorable | not scorable | 1            | 0.7853137    |
| #### Bn-A09-p16818644 | all not scorable                  | not scorable | not scorable | not scorable | not scorable | not scorable | not scorable |
| #### Bn-A09-p16833397 | A-genome specific (napus-rapa)    | 0.9641148    | 0.6496082    | not scorable | not scorable | 1            | 0.7884539    |
| #### Bn-A09-p16835122 | A-genome specific (napus-rapa)    | 0.9354067    | 0.667996     | not scorable | not scorable | 0.9917355    | 0.6812794    |
| #### Bn-A09-p16846786 | A-genome specific (napus-rapa)    | 0.9784689    | 0.6402774    | not scorable | not scorable | 0.9917355    | 0.6194888    |
| #### Bn-A09-p1690633  | A-genome specific (napus-rapa)    | 0.9665072    | 0.6744372    | not scorable | not scorable | 0.9917355    | 0.6891136    |
| #### Bn-A09-p1691589  | A-genome specific (rapa only)     | not scorable | not scorable | not scorable | not scorable | 1            | 0.7238413    |
| #### Bn-A09-p16967653 | A-genome specific (rapa only)     | not scorable | not scorable | not scorable | not scorable | 0.9917355    | 0.7887017    |
| #### Bn-A09-p16982554 | genome unspecific (oleracea-rapa) | not scorable | not scorable | 0.9922481    | 0.7135079    | 1            | 0.7960951    |
| #### Bn-A09-p1698812  | A-genome specific (rapa only)     | not scorable | not scorable | not scorable | not scorable | 0.9752066    | 0.7595022    |
| #### Bn-A09-p1699080  | A-genome specific (napus-rapa)    | 0.9593301    | 0.6420063    | not scorable | not scorable | 0.9834711    | 0.7362826    |
| #### Bn-A09-p1699131  | A-genome specific (napus-rapa)    | 0.9736842    | 0.7266374    | not scorable | not scorable | 0.9917355    | 0.728907     |
| #### Bn-A09-p16998291 | A-genome specific (napus-rapa)    | 0.9665072    | 0.4992132    | not scorable | not scorable | 1            | 0.8062403    |
| #### Bn-A09-p1700881  | A-genome specific (napus-rapa)    | 0.9617225    | 0.7733805    | not scorable | not scorable | 1            | 0.7471996    |
| #### Bn-A09-p1702352  | A-genome specific (napus-rapa)    | 0.9617225    | 0.6374499    | not scorable | not scorable | 0.9504132    | 0.6542115    |
| #### Bn-A09-p1702403  | A-genome specific (napus-rapa)    | 0.8373206    | 0.6298524    | not scorable | not scorable | 0.9752066    | 0.6236302    |
| #### Bn-A09-p17035876 | A-genome specific (rapa only)     | not scorable | not scorable | not scorable | not scorable | 0.9917355    | 0.6865491    |
| #### Bn-A09-p1711423  | A-genome specific (napus-rapa)    | 0.9641148    | 0.6734986    | not scorable | not scorable | 0.9752066    | 0.7570909    |
| #### Bn-A09-p1715714  | A-genome specific (napus-rapa)    | 0.9808612    | 0.6342644    | not scorable | not scorable | 0.9917355    | 0.511501     |
| #### Bn-A09-p17162263 | A-genome specific (napus-rapa)    | 0.9952153    | 0.8135551    | not scorable | not scorable | 0.9917355    | 0.7444665    |
| #### Bn-A09-p1716772  | A-genome specific (rapa only)     | not scorable | not scorable | not scorable | not scorable | 0.9834711    | 0.6695881    |
| #### Bn-A09-p1719501  | all not scorable                  | not scorable | not scorable | not scorable | not scorable | not scorable | not scorable |
| #### Bn-A09-p1719614  | A-genome specific (napus-rapa)    | 0.9641148    | 0.7478851    | not scorable | not scorable | 0.9834711    | 0.7001384    |
| #### Bn-A09-p1721492  | A-genome specific (rapa only)     | not scorable | not scorable | not scorable | not scorable | 0.9917355    | 0.7501706    |

|                       |                                   |              |              |              |              |              |              |
|-----------------------|-----------------------------------|--------------|--------------|--------------|--------------|--------------|--------------|
| #### Bn-A09-p1721507  | A-genome specific (napus-rapa)    | 0.930622     | 0.5889734    | not scorable | not scorable | 0.9917355    | 0.7688605    |
| #### Bn-A09-p1727484  | A-genome specific (rapa only)     | not scorable | not scorable | not scorable | not scorable | 1            | 0.6586436    |
| #### Bn-A09-p1727915  | A-genome specific (napus-rapa)    | 0.8899522    | 0.8743286    | not scorable | not scorable | 1            | 0.849866     |
| #### Bn-A09-p1727971  | A-genome specific (rapa only)     | not scorable | not scorable | not scorable | not scorable | 1            | 0.8017961    |
| #### Bn-A09-p17332686 | A-genome specific (napus-rapa)    | 0.9904306    | 0.2943069    | not scorable | not scorable | 0.9917355    | 0.3016852    |
| #### Bn-A09-p17342092 | A-genome specific (napus-rapa)    | 0.9569378    | 0.4576485    | not scorable | not scorable | 1            | 0.7467633    |
| #### Bn-A09-p17354112 | A-genome specific (napus-rapa)    | 0.9904306    | 0.6529992    | not scorable | not scorable | 0.9917355    | 0.8182366    |
| #### Bn-A09-p17415894 | A-genome specific (napus-rapa)    | 0.9928229    | 0.7470953    | not scorable | not scorable | 1            | 0.600991     |
| #### Bn-A09-p17415909 | A-genome specific (napus-rapa)    | 0.9688995    | 0.7479708    | not scorable | not scorable | 0.9917355    | 0.7666535    |
| #### Bn-A09-p17416038 | A-genome specific (napus-rapa)    | 0.9856459    | 0.7919899    | not scorable | not scorable | 0.9917355    | 0.7728239    |
| #### Bn-A09-p174327   | A-genome specific (rapa only)     | not scorable | not scorable | not scorable | not scorable | 0.9752066    | 0.70503      |
| #### Bn-A09-p17433463 | A-genome specific (napus-rapa)    | 0.9808612    | 0.765548     | not scorable | not scorable | 0.9917355    | 0.7009872    |
| #### Bn-A09-p17440923 | A-genome specific (napus-rapa)    | 0.9904306    | 0.6792608    | not scorable | not scorable | 0.9917355    | 0.6906203    |
| #### Bn-A09-p1746285  | A-genome specific (napus-rapa)    | 0.9784689    | 0.766669     | not scorable | not scorable | 0.9917355    | 0.7248909    |
| #### Bn-A09-p1746688  | A-genome specific (napus-rapa)    | 0.9760765    | 0.7156145    | not scorable | not scorable | 0.9917355    | 0.7491605    |
| #### Bn-A09-p1746892  | A-genome specific (napus-rapa)    | 0.9832536    | 0.7294152    | not scorable | not scorable | 1            | 0.7940932    |
| #### Bn-A09-p17474059 | all not scorable                  | not scorable | not scorable | not scorable | not scorable | not scorable | not scorable |
| #### Bn-A09-p17483853 | A-genome specific (napus-rapa)    | 0.9976076    | 0.8967907    | not scorable | not scorable | 1            | 0.8015756    |
| #### Bn-A09-p17483960 | A-genome specific (napus-rapa)    | 0.9976076    | 0.5738261    | not scorable | not scorable | 1            | 0.8147135    |
| #### Bn-A09-p17484188 | A-genome specific (napus-rapa)    | 1            | 0.4847554    | not scorable | not scorable | 1            | 0.8255556    |
| #### Bn-A09-p17509906 | A-genome specific (napus-rapa)    | 0.9497608    | 0.6265557    | not scorable | not scorable | 0.9917355    | 0.6220414    |
| #### Bn-A09-p17509910 | A-genome specific (napus-rapa)    | 0.9497608    | 0.4954782    | not scorable | not scorable | 0.9917355    | 0.6681834    |
| #### Bn-A09-p17511656 | A-genome specific (napus-rapa)    | 0.9736842    | 0.5278929    | not scorable | not scorable | 0.9917355    | 0.5686277    |
| #### Bn-A09-p175303   | A-genome specific (rapa only)     | not scorable | not scorable | not scorable | not scorable | 1            | 0.4708162    |
| #### Bn-A09-p17538848 | A-genome specific (rapa only)     | not scorable | not scorable | not scorable | not scorable | 1            | 0.6992245    |
| #### Bn-A09-p1756759  | A-genome specific (rapa only)     | not scorable | not scorable | not scorable | not scorable | 0.9917355    | 0.6812462    |
| #### Bn-A09-p17582590 | A-genome specific (napus-rapa)    | 0.9688995    | 0.300325     | not scorable | not scorable | 1            | 0.6580089    |
| #### Bn-A09-p17591228 | A-genome specific (rapa only)     | not scorable | not scorable | not scorable | not scorable | 0.9669421    | 0.7097797    |
| #### Bn-A09-p17600384 | genome unspecific (all in)        | 0.9880383    | 0.3679288    | 0.9922481    | 0.2738334    | 1            | 0.5366617    |
| #### Bn-A09-p17600725 | genome unspecific (oleracea-rapa) | not scorable | not scorable | 0.9689922    | 0.3203841    | 1            | 0.794313     |
| #### Bn-A09-p1760983  | A-genome specific (napus-rapa)    | 0.937799     | 0.7072551    | not scorable | not scorable | 0.9586777    | 0.7235581    |
| #### Bn-A09-p17609859 | A-genome specific (napus-rapa)    | 0.9425837    | 0.4735385    | not scorable | not scorable | 0.9752066    | 0.7676945    |
| #### Bn-A09-p1761036  | A-genome specific (napus-rapa)    | 0.9521531    | 0.9415838    | not scorable | not scorable | 0.9752066    | 0.6848523    |

|                       |                                |              |              |              |              |              |              |
|-----------------------|--------------------------------|--------------|--------------|--------------|--------------|--------------|--------------|
| #### Bn-A09-p17624347 | A-genome specific (rapa only)  | not scorable | not scorable | not scorable | not scorable | 1            | 0.7699929    |
| #### Bn-A09-p17657506 | A-genome specific (napus-rapa) | 0.9904306    | 0.7536312    | not scorable | not scorable | 0.9917355    | 0.8179459    |
| #### Bn-A09-p17657662 | A-genome specific (napus-rapa) | 0.9569378    | 0.496924     | not scorable | not scorable | 0.9834711    | 0.7448393    |
| #### Bn-A09-p1765907  | A-genome specific (napus-rapa) | 0.9784689    | 0.6918011    | not scorable | not scorable | 1            | 0.7791494    |
| #### Bn-A09-p1766799  | A-genome specific (rapa only)  | not scorable | not scorable | not scorable | not scorable | 0.9917355    | 0.7318926    |
| #### Bn-A09-p17669440 | A-genome specific (napus-rapa) | 0.9521531    | 0.421777     | not scorable | not scorable | 0.9834711    | 0.3528132    |
| #### Bn-A09-p17672066 | A-genome specific (napus-rapa) | 0.9760765    | 0.7579353    | not scorable | not scorable | 0.9917355    | 0.7314849    |
| #### Bn-A09-p17672507 | A-genome specific (napus-rapa) | 0.9856459    | 0.7556456    | not scorable | not scorable | 0.9834711    | 0.7409972    |
| #### Bn-A09-p17672835 | A-genome specific (napus-rapa) | 0.9736842    | 0.7413105    | not scorable | not scorable | 0.9917355    | 0.7801917    |
| #### Bn-A09-p17674977 | A-genome specific (napus-rapa) | 0.9808612    | 0.752623     | not scorable | not scorable | 0.9752066    | 0.8146119    |
| #### Bn-A09-p17686638 | A-genome specific (rapa only)  | not scorable | not scorable | not scorable | not scorable | 1            | 0.7791253    |
| #### Bn-A09-p17690155 | A-genome specific (napus-rapa) | 0.9688995    | 0.6516777    | not scorable | not scorable | 0.9752066    | 0.7011387    |
| #### Bn-A09-p17698726 | A-genome specific (napus-rapa) | 0.9760765    | 0.7548144    | not scorable | not scorable | 0.9917355    | 0.8605531    |
| #### Bn-A09-p17700863 | A-genome specific (napus-rapa) | 0.9736842    | 0.6928945    | not scorable | not scorable | 0.9752066    | 0.6249645    |
| #### Bn-A09-p17723940 | A-genome specific (napus-rapa) | 0.9760765    | 0.7215017    | not scorable | not scorable | 0.9917355    | 0.7259002    |
| #### Bn-A09-p17735771 | A-genome specific (napus-rapa) | 0.7057416    | 0.7573561    | not scorable | not scorable | 0.9834711    | 0.7652071    |
| #### Bn-A09-p17739465 | A-genome specific (napus-rapa) | 0.9880383    | 0.7375985    | not scorable | not scorable | 0.9834711    | 0.7938189    |
| #### Bn-A09-p17765321 | A-genome specific (napus-rapa) | 0.9736842    | 0.7311093    | not scorable | not scorable | 1            | 0.7040766    |
| #### Bn-A09-p1780211  | A-genome specific (rapa only)  | not scorable | not scorable | not scorable | not scorable | 0.9917355    | 0.7623719    |
| #### Bn-A09-p17834144 | A-genome specific (rapa only)  | not scorable | not scorable | not scorable | not scorable | 0.9917355    | 0.7266333    |
| #### Bn-A09-p17846566 | A-genome specific (rapa only)  | not scorable | not scorable | not scorable | not scorable | 1            | 0.7649372    |
| #### Bn-A09-p1785717  | A-genome specific (napus-rapa) | 0.9760765    | 0.7791514    | not scorable | not scorable | 0.9834711    | 0.7759042    |
| #### Bn-A09-p1785718  | A-genome specific (napus-rapa) | 0.9736842    | 0.7352676    | not scorable | not scorable | 1            | 0.7520746    |
| #### Bn-A09-p1786726  | A-genome specific (napus-rapa) | 0.9497608    | 0.6401256    | not scorable | not scorable | 0.9917355    | 0.6851513    |
| #### Bn-A09-p17869345 | A-genome specific (napus-rapa) | 0.9808612    | 0.7468504    | not scorable | not scorable | 1            | 0.7962925    |
| #### Bn-A09-p17915424 | A-genome specific (rapa only)  | not scorable | not scorable | not scorable | not scorable | 0.9917355    | 0.6218606    |
| #### Bn-A09-p17938318 | A-genome specific (napus-rapa) | 0.9760765    | 0.6508441    | not scorable | not scorable | 0.9917355    | 0.7645072    |
| #### Bn-A09-p17938471 | A-genome specific (napus-rapa) | 0.9856459    | 0.4648787    | not scorable | not scorable | 1            | 0.6963099    |
| #### Bn-A09-p17954328 | A-genome specific (napus-rapa) | 0.9808612    | 0.7471864    | not scorable | not scorable | 0.9917355    | 0.8235842    |
| #### Bn-A09-p17955698 | napus specific                 | 0.9760765    | 0.3842112    | not scorable | not scorable | not scorable | not scorable |
| #### Bn-A09-p1796337  | genome unspecific (all in)     | 0.9617225    | 0.5958747    | 0.9844961    | 0.543783     | 0.9834711    | 0.8222292    |
| #### Bn-A09-p18049051 | A-genome specific (rapa only)  | not scorable | not scorable | not scorable | not scorable | 1            | 0.8437037    |
| #### Bn-A09-p18092741 | A-genome specific (rapa only)  | not scorable | not scorable | not scorable | not scorable | 0.9917355    | 0.6884695    |

|                       |                                |              |              |              |              |              |              |
|-----------------------|--------------------------------|--------------|--------------|--------------|--------------|--------------|--------------|
| #### Bn-A09-p18132317 | A-genome specific (napus-rapa) | 1            | 0.8181767    | not scorable | not scorable | 1            | 0.8161811    |
| #### Bn-A09-p18156994 | A-genome specific (napus-rapa) | 0.9832536    | 0.3201533    | not scorable | not scorable | 1            | 0.639385     |
| #### Bn-A09-p18180174 | A-genome specific (napus-rapa) | 0.9952153    | 0.2495421    | not scorable | not scorable | 0.9917355    | 0.6355473    |
| #### Bn-A09-p1821136  | A-genome specific (rapa only)  | not scorable | not scorable | not scorable | not scorable | 1            | 0.8025645    |
| #### Bn-A09-p18258259 | A-genome specific (napus-rapa) | 0.9880383    | 0.5633866    | not scorable | not scorable | 1            | 0.7935923    |
| #### Bn-A09-p18258443 | A-genome specific (napus-rapa) | 0.9832536    | 0.8351358    | not scorable | not scorable | 0.6859504    | 0.7384886    |
| #### Bn-A09-p18269045 | A-genome specific (napus-rapa) | 0.8779904    | 0.6919149    | not scorable | not scorable | 0.9834711    | 0.585315     |
| #### Bn-A09-p18273980 | A-genome specific (napus-rapa) | 0.9880383    | 0.6535092    | not scorable | not scorable | 0.9917355    | 0.6840398    |
| #### Bn-A09-p18274708 | A-genome specific (napus-rapa) | 0.9760765    | 0.7172561    | not scorable | not scorable | 0.9917355    | 0.8508297    |
| #### Bn-A09-p18274781 | A-genome specific (napus-rapa) | 0.9856459    | 0.7163109    | not scorable | not scorable | 1            | 0.7267671    |
| #### Bn-A09-p18274919 | A-genome specific (napus-rapa) | 0.9952153    | 0.6715576    | not scorable | not scorable | 0.9917355    | 0.6659962    |
| #### Bn-A09-p18275501 | A-genome specific (napus-rapa) | 0.9856459    | 0.6938925    | not scorable | not scorable | 0.9834711    | 0.6833468    |
| #### Bn-A09-p18275618 | A-genome specific (napus-rapa) | 0.9808612    | 0.6198124    | not scorable | not scorable | 0.9752066    | 0.6371059    |
| #### Bn-A09-p18275862 | A-genome specific (napus-rapa) | 0.937799     | 0.7730699    | not scorable | not scorable | 1            | 0.7978444    |
| #### Bn-A09-p18283186 | A-genome specific (napus-rapa) | 0.9856459    | 0.6095965    | not scorable | not scorable | 1            | 0.7723771    |
| #### Bn-A09-p18289551 | A-genome specific (napus-rapa) | 0.9784689    | 0.7205629    | not scorable | not scorable | 1            | 0.7852842    |
| #### Bn-A09-p18297719 | A-genome specific (napus-rapa) | 0.9712918    | 0.4652208    | not scorable | not scorable | 0.9752066    | 0.7154562    |
| #### Bn-A09-p1829952  | A-genome specific (napus-rapa) | 0.9712918    | 0.7483537    | not scorable | not scorable | 0.9917355    | 0.7299048    |
| #### Bn-A09-p18306551 | A-genome specific (napus-rapa) | 0.9712918    | 0.7662812    | not scorable | not scorable | 1            | 0.7516969    |
| #### Bn-A09-p18306845 | A-genome specific (napus-rapa) | 0.9880383    | 0.4867991    | not scorable | not scorable | 0.9917355    | 0.7875881    |
| #### Bn-A09-p18316084 | A-genome specific (napus-rapa) | 0.9665072    | 0.4519597    | not scorable | not scorable | 0.9917355    | 0.7405835    |
| #### Bn-A09-p18324038 | A-genome specific (napus-rapa) | 0.9952153    | 0.8295543    | not scorable | not scorable | 1            | 0.803453     |
| #### Bn-A09-p1832760  | A-genome specific (rapa only)  | not scorable | not scorable | not scorable | not scorable | 0.9669421    | 0.7736667    |
| #### Bn-A09-p18352122 | A-genome specific (napus-rapa) | 0.9976076    | 0.4956273    | not scorable | not scorable | 0.9917355    | 0.6460914    |
| #### Bn-A09-p18355295 | all not scorable               | not scorable | not scorable | not scorable | not scorable | not scorable | not scorable |
| #### Bn-A09-p18403803 | A-genome specific (napus-rapa) | 1            | 0.5908332    | not scorable | not scorable | 1            | 0.6057319    |
| #### Bn-A09-p1841381  | A-genome specific (rapa only)  | not scorable | not scorable | not scorable | not scorable | 0.9338843    | 0.7695443    |
| #### Bn-A09-p184319   | A-genome specific (rapa only)  | not scorable | not scorable | not scorable | not scorable | 1            | 0.5878142    |
| #### Bn-A09-p1846673  | A-genome specific (rapa only)  | not scorable | not scorable | not scorable | not scorable | 0.9834711    | 0.7258376    |
| #### Bn-A09-p1856828  | A-genome specific (napus-rapa) | 0.9593301    | 0.701815     | not scorable | not scorable | 1            | 0.7701377    |
| #### Bn-A09-p1858563  | A-genome specific (napus-rapa) | 0.9832536    | 0.6846367    | not scorable | not scorable | 1            | 0.7488827    |
| #### Bn-A09-p1858591  | A-genome specific (napus-rapa) | 0.9808612    | 0.755307     | not scorable | not scorable | 0.9834711    | 0.781804     |
| #### Bn-A09-p18588652 | A-genome specific (napus-rapa) | 0.9928229    | 0.467645     | not scorable | not scorable | 0.9834711    | 0.6464854    |

|                       |                                |              |              |              |              |           |           |
|-----------------------|--------------------------------|--------------|--------------|--------------|--------------|-----------|-----------|
| #### Bn-A09-p1858913  | A-genome specific (napus-rapa) | 0.9808612    | 0.733477     | not scorable | not scorable | 0.9834711 | 0.7567917 |
| #### Bn-A09-p1860063  | A-genome specific (napus-rapa) | 0.9760765    | 0.7517874    | not scorable | not scorable | 0.9917355 | 0.8115054 |
| #### Bn-A09-p18670679 | A-genome specific (rapa only)  | not scorable | not scorable | not scorable | not scorable | 1         | 0.7478175 |
| #### Bn-A09-p18713965 | A-genome specific (napus-rapa) | 0.9449761    | 0.5050393    | not scorable | not scorable | 0.9504132 | 0.8932587 |
| #### Bn-A09-p18745571 | A-genome specific (napus-rapa) | 0.9856459    | 0.5182366    | not scorable | not scorable | 1         | 0.7493559 |
| #### Bn-A09-p18753596 | A-genome specific (napus-rapa) | 0.9904306    | 0.8082583    | not scorable | not scorable | 1         | 0.7824023 |
| #### Bn-A09-p18764246 | A-genome specific (napus-rapa) | 0.9952153    | 0.7975124    | not scorable | not scorable | 1         | 0.7947809 |
| #### Bn-A09-p18765584 | A-genome specific (napus-rapa) | 0.9952153    | 0.7099305    | not scorable | not scorable | 0.9917355 | 0.7154791 |
| #### Bn-A09-p18765663 | A-genome specific (rapa only)  | not scorable | not scorable | not scorable | not scorable | 1         | 0.6443363 |
| #### Bn-A09-p18789989 | A-genome specific (napus-rapa) | 0.9904306    | 0.4495766    | not scorable | not scorable | 1         | 0.7141731 |
| #### Bn-A09-p18803128 | A-genome specific (napus-rapa) | 0.9976076    | 0.7924319    | not scorable | not scorable | 1         | 0.7959344 |
| #### Bn-A09-p18803850 | A-genome specific (rapa only)  | not scorable | not scorable | not scorable | not scorable | 1         | 0.7486356 |
| #### Bn-A09-p18898633 | A-genome specific (napus-rapa) | 0.9952153    | 0.8120043    | not scorable | not scorable | 0.9834711 | 0.7897617 |
| #### Bn-A09-p18922925 | genome unspecific (all in)     | 0.9904306    | 0.4705645    |              | 1 0.6837454  | 1         | 0.8836589 |
| #### Bn-A09-p18923026 | A-genome specific (napus-rapa) | 0.9976076    | 0.4041927    | not scorable | not scorable | 1         | 0.767117  |
| #### Bn-A09-p18979474 | A-genome specific (napus-rapa) | 0.9952153    | 0.851141     | not scorable | not scorable | 0.9917355 | 0.6704551 |
| #### Bn-A09-p18982971 | A-genome specific (napus-rapa) | 0.9856459    | 0.7132213    | not scorable | not scorable | 0.9917355 | 0.776513  |
| #### Bn-A09-p18986611 | A-genome specific (napus-rapa) | 0.9880383    | 0.7856095    | not scorable | not scorable | 1         | 0.7850047 |
| #### Bn-A09-p19040325 | A-genome specific (napus-rapa) | 0.9880383    | 0.5112608    | not scorable | not scorable | 1         | 0.657066  |
| #### Bn-A09-p19043442 | A-genome specific (napus-rapa) | 0.9856459    | 0.4752737    | not scorable | not scorable | 0.9917355 | 0.6849987 |
| #### Bn-A09-p19055902 | A-genome specific (rapa only)  | not scorable | not scorable | not scorable | not scorable | 0.9834711 | 0.7626339 |
| #### Bn-A09-p19057312 | A-genome specific (napus-rapa) | 0.9641148    | 0.8336017    | not scorable | not scorable | 0.9917355 | 0.804256  |
| #### Bn-A09-p19068517 | A-genome specific (napus-rapa) | 0.9904306    | 0.8572642    | not scorable | not scorable | 0.9834711 | 0.7941084 |
| #### Bn-A09-p19069970 | A-genome specific (napus-rapa) | 0.9976076    | 0.3202491    | not scorable | not scorable | 0.9669421 | 0.6534418 |
| #### Bn-A09-p19087834 | A-genome specific (napus-rapa) | 0.9665072    | 0.8111277    | not scorable | not scorable | 1         | 0.8373985 |
| #### Bn-A09-p19089743 | A-genome specific (napus-rapa) | 0.9593301    | 0.8418195    | not scorable | not scorable | 1         | 0.7603425 |
| #### Bn-A09-p19106825 | A-genome specific (rapa only)  | not scorable | not scorable | not scorable | not scorable | 0.9917355 | 0.7624947 |
| #### Bn-A09-p19107481 | A-genome specific (napus-rapa) | 0.9952153    | 0.3742956    | not scorable | not scorable | 1         | 0.6457477 |
| #### Bn-A09-p19112065 | A-genome specific (napus-rapa) | 0.9952153    | 0.4159513    | not scorable | not scorable | 0.9834711 | 0.8358084 |
| #### Bn-A09-p19113008 | A-genome specific (napus-rapa) | 0.9928229    | 0.7969308    | not scorable | not scorable | 0.9917355 | 0.7130308 |
| #### Bn-A09-p19145862 | A-genome specific (napus-rapa) | 0.9976076    | 0.4948858    | not scorable | not scorable | 1         | 0.8031105 |
| #### Bn-A09-p19152331 | A-genome specific (napus-rapa) | 0.9880383    | 0.2135198    | not scorable | not scorable | 0.9917355 | 0.6943603 |
| #### Bn-A09-p19165649 | A-genome specific (napus-rapa) | 0.9880383    | 0.814532     | not scorable | not scorable | 1         | 0.7343186 |

|                       |                                |              |              |              |              |           |           |
|-----------------------|--------------------------------|--------------|--------------|--------------|--------------|-----------|-----------|
| #### Bn-A09-p19168927 | genome unspecific (all in)     | 1            | 0.3311874    | 0.8604651    | 0.3854423    | 1         | 0.6561806 |
| #### Bn-A09-p19169299 | A-genome specific (napus-rapa) | 0.9952153    | 0.8526514    | not scorable | not scorable | 1         | 0.7802977 |
| #### Bn-A09-p19171202 | A-genome specific (napus-rapa) | 0.9952153    | 0.7579028    | not scorable | not scorable | 0.9917355 | 0.7894034 |
| #### Bn-A09-p19172018 | A-genome specific (napus-rapa) | 0.9952153    | 0.7646552    | not scorable | not scorable | 0.9917355 | 0.6626094 |
| #### Bn-A09-p19181075 | A-genome specific (napus-rapa) | 0.9952153    | 0.6839129    | not scorable | not scorable | 1         | 0.6810375 |
| #### Bn-A09-p19187527 | A-genome specific (napus-rapa) | 0.9976076    | 0.8655014    | not scorable | not scorable | 0.9752066 | 0.7686638 |
| #### Bn-A09-p19187628 | A-genome specific (napus-rapa) | 1            | 0.8412169    | not scorable | not scorable | 0.9669421 | 0.6224946 |
| #### Bn-A09-p19188090 | A-genome specific (napus-rapa) | 1            | 0.7118206    | not scorable | not scorable | 0.9834711 | 0.692532  |
| #### Bn-A09-p19198146 | A-genome specific (napus-rapa) | 0.9976076    | 0.6396409    | not scorable | not scorable | 1         | 0.6908312 |
| #### Bn-A09-p19198948 | A-genome specific (napus-rapa) | 0.9928229    | 0.6327129    | not scorable | not scorable | 0.9917355 | 0.7859875 |
| #### Bn-A09-p19208887 | A-genome specific (napus-rapa) | 0.9952153    | 0.4476486    | not scorable | not scorable | 0.9586777 | 0.5035125 |
| #### Bn-A09-p19209425 | A-genome specific (napus-rapa) | 0.9904306    | 0.8637611    | not scorable | not scorable | 0.9834711 | 0.8694531 |
| #### Bn-A09-p19209609 | A-genome specific (napus-rapa) | 0.9952153    | 0.8286727    | not scorable | not scorable | 0.9917355 | 0.7403231 |
| #### Bn-A09-p19209695 | A-genome specific (napus-rapa) | 0.9952153    | 0.8594442    | not scorable | not scorable | 0.9834711 | 0.8353875 |
| #### Bn-A09-p19225304 | A-genome specific (napus-rapa) | 0.9976076    | 0.6443582    | not scorable | not scorable | 0.9834711 | 0.6155142 |
| #### Bn-A09-p19225424 | A-genome specific (napus-rapa) | 0.9976076    | 0.8621817    | not scorable | not scorable | 0.9917355 | 0.7351345 |
| #### Bn-A09-p19227824 | A-genome specific (napus-rapa) | 0.9952153    | 0.8479565    | not scorable | not scorable | 0.9917355 | 0.7570093 |
| #### Bn-A09-p19242388 | A-genome specific (napus-rapa) | 0.9976076    | 0.3656922    | not scorable | not scorable | 1         | 0.8575561 |
| #### Bn-A09-p19244125 | A-genome specific (napus-rapa) | 0.9928229    | 0.3560017    | not scorable | not scorable | 0.9669421 | 0.7762643 |
| #### Bn-A09-p19244566 | A-genome specific (napus-rapa) | 0.9952153    | 0.7970872    | not scorable | not scorable | 1         | 0.6572331 |
| #### Bn-A09-p1926105  | A-genome specific (rapa only)  | not scorable | not scorable | not scorable | not scorable | 0.5371901 | 0.8274865 |
| #### Bn-A09-p19267307 | A-genome specific (rapa only)  | not scorable | not scorable | not scorable | not scorable | 1         | 0.8044657 |
| #### Bn-A09-p19268137 | A-genome specific (napus-rapa) | 0.9880383    | 0.8131076    | not scorable | not scorable | 0.9917355 | 0.8537452 |
| #### Bn-A09-p19268663 | A-genome specific (napus-rapa) | 0.9928229    | 0.8437246    | not scorable | not scorable | 0.9834711 | 0.7582619 |
| #### Bn-A09-p19272074 | A-genome specific (napus-rapa) | 0.9186603    | 0.8474261    | not scorable | not scorable | 0.9586777 | 0.7959509 |
| #### Bn-A09-p19272189 | A-genome specific (napus-rapa) | 0.9186603    | 0.8317003    | not scorable | not scorable | 0.9752066 | 0.7778166 |
| #### Bn-A09-p19272475 | A-genome specific (napus-rapa) | 0.9186603    | 0.7847257    | not scorable | not scorable | 0.9752066 | 0.698459  |
| #### Bn-A09-p19282217 | A-genome specific (napus-rapa) | 0.9976076    | 0.8707552    | not scorable | not scorable | 1         | 0.7529176 |
| #### Bn-A09-p19283001 | A-genome specific (napus-rapa) | 0.9928229    | 0.8581483    | not scorable | not scorable | 0.9917355 | 0.8166372 |
| #### Bn-A09-p1929245  | A-genome specific (napus-rapa) | 0.9712918    | 0.7540259    | not scorable | not scorable | 1         | 0.8056469 |
| #### Bn-A09-p19297523 | A-genome specific (napus-rapa) | 0.9784689    | 0.7902428    | not scorable | not scorable | 0.7768595 | 0.7904778 |
| #### Bn-A09-p1931318  | A-genome specific (napus-rapa) | 0.9545454    | 0.7809942    | not scorable | not scorable | 0.9917355 | 0.7074083 |
| #### Bn-A09-p19316704 | A-genome specific (napus-rapa) | 0.9856459    | 0.8398861    | not scorable | not scorable | 1         | 0.7372768 |

|                       |                                |           |           |              |              |           |           |
|-----------------------|--------------------------------|-----------|-----------|--------------|--------------|-----------|-----------|
| #### Bn-A09-p19320500 | A-genome specific (napus-rapa) | 0.9856459 | 0.8564749 | not scorable | not scorable | 0.9917355 | 0.8739424 |
| #### Bn-A09-p19320658 | A-genome specific (napus-rapa) | 0.9114832 | 0.8790588 | not scorable | not scorable | 0.9421487 | 0.8182904 |
| #### Bn-A09-p19320740 | A-genome specific (napus-rapa) | 0.9114832 | 0.887681  | not scorable | not scorable | 0.9256198 | 0.7596332 |
| #### Bn-A09-p19320810 | A-genome specific (napus-rapa) | 0.9114832 | 0.8973734 | not scorable | not scorable | 0.9338843 | 0.8176688 |
| #### Bn-A09-p19321164 | A-genome specific (napus-rapa) | 0.9880383 | 0.8393443 | not scorable | not scorable | 0.9917355 | 0.756196  |
| #### Bn-A09-p19347448 | A-genome specific (napus-rapa) | 0.9904306 | 0.5093912 | not scorable | not scorable | 0.9834711 | 0.7373115 |
| #### Bn-A09-p19348447 | A-genome specific (napus-rapa) | 0.9928229 | 0.8797351 | not scorable | not scorable | 1         | 0.7736822 |
| #### Bn-A09-p19364150 | A-genome specific (napus-rapa) | 0.9928229 | 0.4744845 | not scorable | not scorable | 0.9752066 | 0.7579691 |
| #### Bn-A09-p19370807 | A-genome specific (napus-rapa) | 0.9928229 | 0.8595084 | not scorable | not scorable | 0.9917355 | 0.7703424 |
| #### Bn-A09-p19370880 | A-genome specific (napus-rapa) | 0.9952153 | 0.8529186 | not scorable | not scorable | 0.9834711 | 0.7989676 |
| #### Bn-A09-p19379073 | A-genome specific (napus-rapa) | 0.9904306 | 0.7679486 | not scorable | not scorable | 1         | 0.6913257 |
| #### Bn-A09-p19379912 | A-genome specific (napus-rapa) | 0.9952153 | 0.7567306 | not scorable | not scorable | 0.9834711 | 0.7691457 |
| #### Bn-A09-p19392577 | A-genome specific (napus-rapa) | 0.9952153 | 0.871685  | not scorable | not scorable | 0.9917355 | 0.6999236 |
| #### Bn-A09-p19400561 | A-genome specific (napus-rapa) | 0.9258373 | 0.8408322 | not scorable | not scorable | 0.9917355 | 0.7094409 |
| #### Bn-A09-p19400882 | A-genome specific (napus-rapa) | 0.9258373 | 0.8047041 | not scorable | not scorable | 1         | 0.887296  |
| #### Bn-A09-p19406640 | A-genome specific (napus-rapa) | 1         | 0.9051671 | not scorable | not scorable | 1         | 0.6954119 |
| #### Bn-A09-p19412946 | A-genome specific (napus-rapa) | 0.9258373 | 0.8018193 | not scorable | not scorable | 0.9917355 | 0.7534802 |
| #### Bn-A09-p19413084 | A-genome specific (napus-rapa) | 0.9258373 | 0.8947497 | not scorable | not scorable | 1         | 0.8328931 |
| #### Bn-A09-p19415047 | A-genome specific (napus-rapa) | 0.9282297 | 0.7678272 | not scorable | not scorable | 1         | 0.7623599 |
| #### Bn-A09-p19417282 | A-genome specific (napus-rapa) | 0.9258373 | 0.9226555 | not scorable | not scorable | 1         | 0.7618107 |
| #### Bn-A09-p19418268 | A-genome specific (napus-rapa) | 0.9258373 | 0.6707858 | not scorable | not scorable | 0.9917355 | 0.7404664 |
| #### Bn-A09-p19427814 | A-genome specific (napus-rapa) | 0.9928229 | 0.4343051 | not scorable | not scorable | 1         | 0.813342  |
| #### Bn-A09-p19438042 | A-genome specific (napus-rapa) | 0.9976076 | 0.501776  | not scorable | not scorable | 1         | 0.8689938 |
| #### Bn-A09-p19444777 | A-genome specific (napus-rapa) | 0.9186603 | 0.9272274 | not scorable | not scorable | 1         | 0.7759423 |
| #### Bn-A09-p19447656 | A-genome specific (napus-rapa) | 0.923445  | 0.8298796 | not scorable | not scorable | 1         | 0.7378352 |
| #### Bn-A09-p19451773 | A-genome specific (napus-rapa) | 0.9210526 | 0.9638076 | not scorable | not scorable | 1         | 0.7751682 |
| #### Bn-A09-p19452055 | A-genome specific (napus-rapa) | 0.9138756 | 0.8616869 | not scorable | not scorable | 0.9917355 | 0.6955196 |
| #### Bn-A09-p19452153 | A-genome specific (napus-rapa) | 0.9186603 | 0.9199729 | not scorable | not scorable | 0.9917355 | 0.8431894 |
| #### Bn-A09-p19452209 | A-genome specific (napus-rapa) | 0.9138756 | 0.8123488 | not scorable | not scorable | 1         | 0.7671824 |
| #### Bn-A09-p19452462 | A-genome specific (napus-rapa) | 0.9258373 | 0.9072019 | not scorable | not scorable | 0.9834711 | 0.7934078 |
| #### Bn-A09-p19452677 | A-genome specific (napus-rapa) | 0.9210526 | 0.8938447 | not scorable | not scorable | 1         | 0.8219598 |
| #### Bn-A09-p19452740 | A-genome specific (napus-rapa) | 0.9258373 | 0.9453568 | not scorable | not scorable | 1         | 0.7067898 |
| #### Bn-A09-p19452814 | A-genome specific (napus-rapa) | 0.9258373 | 0.9196624 | not scorable | not scorable | 0.9917355 | 0.7003915 |

|                       |                                |              |              |              |              |           |           |
|-----------------------|--------------------------------|--------------|--------------|--------------|--------------|-----------|-----------|
| #### Bn-A09-p19453248 | A-genome specific (napus-rapa) | 0.9210526    | 0.7281561    | not scorable | not scorable | 0.9834711 | 0.7523646 |
| #### Bn-A09-p19454867 | A-genome specific (napus-rapa) | 0.9976076    | 0.4174694    | not scorable | not scorable | 1         | 0.8379771 |
| #### Bn-A09-p19462041 | A-genome specific (napus-rapa) | 1            | 0.4947643    | not scorable | not scorable | 1         | 0.8228281 |
| #### Bn-A09-p19489065 | A-genome specific (napus-rapa) | 0.9928229    | 0.2654583    | not scorable | not scorable | 1         | 0.6025298 |
| #### Bn-A09-p19494485 | A-genome specific (napus-rapa) | 1            | 0.9205657    | not scorable | not scorable | 1         | 0.8318153 |
| #### Bn-A09-p19507076 | A-genome specific (rapa only)  | not scorable | not scorable | not scorable | not scorable | 0.9917355 | 0.8596438 |
| #### Bn-A09-p19513927 | A-genome specific (napus-rapa) | 0.9952153    | 0.8923882    | not scorable | not scorable | 1         | 0.8427479 |
| #### Bn-A09-p19514024 | A-genome specific (napus-rapa) | 0.9952153    | 0.7091796    | not scorable | not scorable | 0.9917355 | 0.6975948 |
| #### Bn-A09-p19514405 | A-genome specific (napus-rapa) | 1            | 0.7281003    | not scorable | not scorable | 0.9917355 | 0.5746059 |
| #### Bn-A09-p19514416 | A-genome specific (napus-rapa) | 0.9952153    | 0.6923317    | not scorable | not scorable | 1         | 0.5949302 |
| #### Bn-A09-p19514576 | A-genome specific (napus-rapa) | 0.9976076    | 0.8609589    | not scorable | not scorable | 1         | 0.7762085 |
| #### Bn-A09-p19515165 | A-genome specific (napus-rapa) | 0.9952153    | 0.8680917    | not scorable | not scorable | 1         | 0.7395545 |
| #### Bn-A09-p19515287 | A-genome specific (napus-rapa) | 0.9952153    | 0.8497646    | not scorable | not scorable | 1         | 0.7585613 |
| #### Bn-A09-p19520460 | A-genome specific (napus-rapa) | 1            | 0.3324905    | not scorable | not scorable | 0.9917355 | 0.8379771 |
| #### Bn-A09-p19524439 | A-genome specific (napus-rapa) | 0.9952153    | 0.6923962    | not scorable | not scorable | 0.9834711 | 0.6923504 |
| #### Bn-A09-p19533134 | A-genome specific (napus-rapa) | 0.9976076    | 0.9214536    | not scorable | not scorable | 0.9917355 | 0.6861849 |
| #### Bn-A09-p19537178 | A-genome specific (napus-rapa) | 0.9928229    | 0.8733361    | not scorable | not scorable | 0.9917355 | 0.8568639 |
| #### Bn-A09-p19539215 | A-genome specific (rapa only)  | not scorable | not scorable | not scorable | not scorable | 0.9834711 | 0.7493989 |
| #### Bn-A09-p19542797 | A-genome specific (napus-rapa) | 0.9856459    | 0.5332615    | not scorable | not scorable | 1         | 0.6349056 |
| #### Bn-A09-p19545956 | A-genome specific (napus-rapa) | 0.9856459    | 0.7696418    | not scorable | not scorable | 0.9917355 | 0.8276132 |
| #### Bn-A09-p19548419 | A-genome specific (napus-rapa) | 0.9976076    | 0.5594099    | not scorable | not scorable | 0.9917355 | 0.6197506 |
| #### Bn-A09-p19551395 | A-genome specific (napus-rapa) | 0.9784689    | 0.6747202    | not scorable | not scorable | 1         | 0.6496835 |
| #### Bn-A09-p19551714 | A-genome specific (napus-rapa) | 0.9880383    | 0.6670254    | not scorable | not scorable | 1         | 0.6412314 |
| #### Bn-A09-p19551816 | A-genome specific (napus-rapa) | 0.9856459    | 0.8028458    | not scorable | not scorable | 0.9917355 | 0.7804576 |
| #### Bn-A09-p19552388 | A-genome specific (napus-rapa) | 0.9928229    | 0.7678386    | not scorable | not scorable | 1         | 0.684432  |
| #### Bn-A09-p19552538 | A-genome specific (napus-rapa) | 0.9904306    | 0.6965472    | not scorable | not scorable | 1         | 0.6622676 |
| #### Bn-A09-p1956137  | A-genome specific (napus-rapa) | 0.9521531    | 0.7876974    | not scorable | not scorable | 0.9669421 | 0.657633  |
| #### Bn-A09-p19566744 | A-genome specific (napus-rapa) | 0.9976076    | 0.9371387    | not scorable | not scorable | 0.9834711 | 0.6800501 |
| #### Bn-A09-p19571341 | A-genome specific (napus-rapa) | 0.9928229    | 0.8631551    | not scorable | not scorable | 1         | 0.7526742 |
| #### Bn-A09-p19571521 | A-genome specific (napus-rapa) | 0.9928229    | 0.8774162    | not scorable | not scorable | 1         | 0.8222539 |
| #### Bn-A09-p19571970 | A-genome specific (napus-rapa) | 0.9952153    | 0.8207017    | not scorable | not scorable | 1         | 0.7834994 |
| #### Bn-A09-p19572122 | A-genome specific (napus-rapa) | 0.9904306    | 0.7922274    | not scorable | not scorable | 1         | 0.812296  |
| #### Bn-A09-p19578073 | A-genome specific (napus-rapa) | 0.9904306    | 0.819151     | not scorable | not scorable | 0.9917355 | 0.7791423 |



|                       |                                |              |              |              |              |           |           |
|-----------------------|--------------------------------|--------------|--------------|--------------|--------------|-----------|-----------|
| #### Bn-A09-p19578479 | A-genome specific (napus-rapa) | 0.9880383    | 0.8042438    | not scorable | not scorable | 0.9834711 | 0.7973625 |
| #### Bn-A09-p19579332 | A-genome specific (napus-rapa) | 0.9832536    | 0.7689041    | not scorable | not scorable | 0.9917355 | 0.7733468 |
| #### Bn-A09-p19581060 | A-genome specific (napus-rapa) | 0.9856459    | 0.8082591    | not scorable | not scorable | 1         | 0.7322983 |
| #### Bn-A09-p19583295 | A-genome specific (napus-rapa) | 0.9569378    | 0.9083246    | not scorable | not scorable | 0.9752066 | 0.7902848 |
| #### Bn-A09-p19589751 | A-genome specific (napus-rapa) | 1            | 0.71683      | not scorable | not scorable | 1         | 0.7172652 |
| #### Bn-A09-p19591679 | A-genome specific (napus-rapa) | 0.9928229    | 0.7975138    | not scorable | not scorable | 1         | 0.762297  |
| #### Bn-A09-p19592030 | A-genome specific (napus-rapa) | 0.9952153    | 0.7830779    | not scorable | not scorable | 1         | 0.7907527 |
| #### Bn-A09-p19592609 | A-genome specific (napus-rapa) | 0.9928229    | 0.7853642    | not scorable | not scorable | 1         | 0.836358  |
| #### Bn-A09-p19596070 | A-genome specific (napus-rapa) | 0.9928229    | 0.7304245    | not scorable | not scorable | 1         | 0.7716881 |
| #### Bn-A09-p19596462 | A-genome specific (napus-rapa) | 0.9952153    | 0.793758     | not scorable | not scorable | 1         | 0.8049341 |
| #### Bn-A09-p19596886 | A-genome specific (napus-rapa) | 1            | 0.8629825    | not scorable | not scorable | 1         | 0.6878925 |
| #### Bn-A09-p19614389 | A-genome specific (napus-rapa) | 0.9928229    | 0.8222635    | not scorable | not scorable | 1         | 0.8103792 |
| #### Bn-A09-p19616778 | A-genome specific (napus-rapa) | 0.9952153    | 0.8138542    | not scorable | not scorable | 0.9917355 | 0.7258978 |
| #### Bn-A09-p19619009 | A-genome specific (napus-rapa) | 1            | 0.5194758    | not scorable | not scorable | 1         | 0.718169  |
| #### Bn-A09-p19625255 | A-genome specific (rapa only)  | not scorable | not scorable | not scorable | not scorable | 0.9917355 | 0.6419168 |
| #### Bn-A09-p19641357 | A-genome specific (napus-rapa) | 0.9952153    | 0.3899699    | not scorable | not scorable | 1         | 0.6671779 |
| #### Bn-A09-p19649335 | A-genome specific (napus-rapa) | 0.9904306    | 0.73326      | not scorable | not scorable | 1         | 0.7359325 |
| #### Bn-A09-p19649635 | A-genome specific (napus-rapa) | 0.9928229    | 0.7792144    | not scorable | not scorable | 0.9917355 | 0.6654081 |
| #### Bn-A09-p19649882 | A-genome specific (napus-rapa) | 0.9928229    | 0.7239645    | not scorable | not scorable | 1         | 0.7107569 |
| #### Bn-A09-p19650716 | A-genome specific (napus-rapa) | 0.9928229    | 0.7235579    | not scorable | not scorable | 1         | 0.7399207 |
| #### Bn-A09-p19651041 | A-genome specific (napus-rapa) | 0.9928229    | 0.8120582    | not scorable | not scorable | 1         | 0.7691979 |
| #### Bn-A09-p19651425 | A-genome specific (napus-rapa) | 0.9952153    | 0.8206939    | not scorable | not scorable | 0.9917355 | 0.8435673 |
| #### Bn-A09-p19651913 | A-genome specific (napus-rapa) | 0.9928229    | 0.7192027    | not scorable | not scorable | 0.9917355 | 0.6876189 |
| #### Bn-A09-p19652139 | A-genome specific (napus-rapa) | 0.9904306    | 0.8455223    | not scorable | not scorable | 1         | 0.7579359 |
| #### Bn-A09-p19653446 | A-genome specific (napus-rapa) | 1            | 0.8936331    | not scorable | not scorable | 0.9669421 | 0.8310695 |
| #### Bn-A09-p19653782 | A-genome specific (napus-rapa) | 0.9928229    | 0.8337827    | not scorable | not scorable | 0.9752066 | 0.8130544 |
| #### Bn-A09-p19654219 | A-genome specific (napus-rapa) | 0.9928229    | 0.8199329    | not scorable | not scorable | 0.9752066 | 0.8585076 |
| #### Bn-A09-p19658011 | A-genome specific (rapa only)  | not scorable | not scorable | not scorable | not scorable | 1         | 0.8057268 |
| #### Bn-A09-p19666970 | A-genome specific (napus-rapa) | 0.9856459    | 0.7621427    | not scorable | not scorable | 0.9504132 | 0.7442987 |
| #### Bn-A09-p19667399 | A-genome specific (napus-rapa) | 0.9952153    | 0.8337346    | not scorable | not scorable | 0.9586777 | 0.8631464 |
| #### Bn-A09-p19667648 | A-genome specific (napus-rapa) | 0.9976076    | 0.7311871    | not scorable | not scorable | 0.9586777 | 0.6902485 |
| #### Bn-A09-p19667700 | A-genome specific (napus-rapa) | 0.9880383    | 0.7976837    | not scorable | not scorable | 0.9586777 | 0.7871816 |
| #### Bn-A09-p19668151 | A-genome specific (napus-rapa) | 0.9928229    | 0.6807206    | not scorable | not scorable | 0.9586777 | 0.637158  |

|                       |                                |           |           |              |              |              |              |
|-----------------------|--------------------------------|-----------|-----------|--------------|--------------|--------------|--------------|
| #### Bn-A09-p19668698 | A-genome specific (napus-rapa) | 0.9904306 | 0.7227462 | not scorable | not scorable | 0.9504132    | 0.6676131    |
| #### Bn-A09-p19668818 | A-genome specific (napus-rapa) | 0.9904306 | 0.8314662 | not scorable | not scorable | 0.9504132    | 0.8775315    |
| #### Bn-A09-p19668996 | A-genome specific (napus-rapa) | 0.9880383 | 0.8051868 | not scorable | not scorable | 0.9504132    | 0.8120424    |
| #### Bn-A09-p19669270 | A-genome specific (napus-rapa) | 0.9880383 | 0.7468294 | not scorable | not scorable | 0.9586777    | 0.7452739    |
| #### Bn-A09-p19670121 | A-genome specific (napus-rapa) | 1         | 0.879655  | not scorable | not scorable | 0.9669421    | 0.7635758    |
| #### Bn-A09-p19670340 | A-genome specific (napus-rapa) | 0.9928229 | 0.8133296 | not scorable | not scorable | 0.9669421    | 0.724223     |
| #### Bn-A09-p19671062 | A-genome specific (napus-rapa) | 0.9880383 | 0.7979314 | not scorable | not scorable | 0.9752066    | 0.8320708    |
| #### Bn-A09-p19671192 | A-genome specific (napus-rapa) | 0.9856459 | 0.8182877 | not scorable | not scorable | 0.9752066    | 0.8537236    |
| #### Bn-A09-p19671394 | A-genome specific (napus-rapa) | 0.9928229 | 0.7414147 | not scorable | not scorable | 0.9586777    | 0.7619807    |
| #### Bn-A09-p19671542 | A-genome specific (napus-rapa) | 0.9856459 | 0.836262  | not scorable | not scorable | 1            | 0.8617647    |
| #### Bn-A09-p19675265 | A-genome specific (napus-rapa) | 0.9952153 | 0.6985551 | not scorable | not scorable | 1            | 0.8172142    |
| #### Bn-A09-p19688476 | A-genome specific (napus-rapa) | 0.9952153 | 0.5252551 | not scorable | not scorable | 0.9752066    | 0.5847265    |
| #### Bn-A09-p19689884 | A-genome specific (napus-rapa) | 0.9928229 | 0.8374084 | not scorable | not scorable | 0.9834711    | 0.6313821    |
| #### Bn-A09-p19690311 | A-genome specific (napus-rapa) | 0.9928229 | 0.885325  | not scorable | not scorable | 0.9917355    | 0.7370362    |
| #### Bn-A09-p19690392 | A-genome specific (napus-rapa) | 0.9952153 | 0.8405822 | not scorable | not scorable | 0.9917355    | 0.6846656    |
| #### Bn-A09-p19690521 | A-genome specific (napus-rapa) | 0.9928229 | 0.8198642 | not scorable | not scorable | 0.9834711    | 0.6631289    |
| #### Bn-A09-p19690574 | A-genome specific (napus-rapa) | 0.9952153 | 0.8980752 | not scorable | not scorable | 0.9917355    | 0.6973079    |
| #### Bn-A09-p19690777 | A-genome specific (napus-rapa) | 0.9928229 | 0.6277205 | not scorable | not scorable | 0.9586777    | 0.8040635    |
| #### Bn-A09-p19692416 | A-genome specific (napus-rapa) | 0.9952153 | 0.8332791 | not scorable | not scorable | 0.9834711    | 0.685402     |
| #### Bn-A09-p19718543 | A-genome specific (napus-rapa) | 0.9880383 | 0.6874164 | not scorable | not scorable | 0.9752066    | 0.5971763    |
| #### Bn-A09-p19718581 | napus specific                 | 0.9880383 | 0.7647505 | not scorable | not scorable | not scorable | not scorable |
| #### Bn-A09-p19718831 | A-genome specific (napus-rapa) | 0.9904306 | 0.7102154 | not scorable | not scorable | 0.9834711    | 0.6903467    |
| #### Bn-A09-p19725386 | A-genome specific (napus-rapa) | 0.9832536 | 0.8286598 | not scorable | not scorable | 1            | 0.807584     |
| #### Bn-A09-p1973528  | A-genome specific (napus-rapa) | 0.9832536 | 0.8304937 | not scorable | not scorable | 0.9834711    | 0.8000373    |
| #### Bn-A09-p19743333 | A-genome specific (napus-rapa) | 0.9880383 | 0.7539968 | not scorable | not scorable | 1            | 0.7322832    |
| #### Bn-A09-p19743818 | A-genome specific (napus-rapa) | 0.9832536 | 0.8147816 | not scorable | not scorable | 0.9752066    | 0.8196257    |
| #### Bn-A09-p19749530 | A-genome specific (napus-rapa) | 0.9952153 | 0.2860272 | not scorable | not scorable | 0.9752066    | 0.6993238    |
| #### Bn-A09-p19753460 | napus specific                 | 0.9880383 | 0.5569202 | not scorable | not scorable | not scorable | not scorable |
| #### Bn-A09-p19754463 | A-genome specific (napus-rapa) | 0.9880383 | 0.831702  | not scorable | not scorable | 0.7190083    | 0.7844495    |
| #### Bn-A09-p19766078 | A-genome specific (napus-rapa) | 0.9952153 | 0.8254188 | not scorable | not scorable | 0.7355372    | 0.7795246    |
| #### Bn-A09-p19766741 | A-genome specific (napus-rapa) | 0.9856459 | 0.6607509 | not scorable | not scorable | 0.7272727    | 0.6552043    |
| #### Bn-A09-p19766911 | A-genome specific (napus-rapa) | 0.9904306 | 0.328939  | not scorable | not scorable | 1            | 0.6625645    |
| #### Bn-A09-p19770493 | A-genome specific (napus-rapa) | 0.9928229 | 0.8470035 | not scorable | not scorable | 0.9834711    | 0.7171257    |

|                       |                                |              |              |              |              |           |           |
|-----------------------|--------------------------------|--------------|--------------|--------------|--------------|-----------|-----------|
| #### Bn-A09-p19770545 | A-genome specific (napus-rapa) | 0.9952153    | 0.8229861    | not scorable | not scorable | 0.9586777 | 0.6982566 |
| #### Bn-A09-p19770719 | A-genome specific (napus-rapa) | 0.9952153    | 0.8412654    | not scorable | not scorable | 1         | 0.7980029 |
| #### Bn-A09-p19771174 | A-genome specific (napus-rapa) | 0.9928229    | 0.8104526    | not scorable | not scorable | 1         | 0.8088477 |
| #### Bn-A09-p19774967 | A-genome specific (napus-rapa) | 0.9904306    | 0.8296148    | not scorable | not scorable | 0.7355372 | 0.8112803 |
| #### Bn-A09-p19775158 | A-genome specific (napus-rapa) | 0.9880383    | 0.8593445    | not scorable | not scorable | 0.7272727 | 0.8201062 |
| #### Bn-A09-p19775290 | A-genome specific (napus-rapa) | 0.9856459    | 0.8232393    | not scorable | not scorable | 0.7272727 | 0.7660739 |
| #### Bn-A09-p19779966 | A-genome specific (napus-rapa) | 0.9880383    | 0.6708728    | not scorable | not scorable | 0.9917355 | 0.5933215 |
| #### Bn-A09-p19783822 | A-genome specific (napus-rapa) | 0.9880383    | 0.4679294    | not scorable | not scorable | 1         | 0.7539222 |
| #### Bn-A09-p19796502 | A-genome specific (napus-rapa) | 0.9928229    | 0.8092168    | not scorable | not scorable | 1         | 0.7775964 |
| #### Bn-A09-p19796581 | A-genome specific (napus-rapa) | 0.9928229    | 0.8223835    | not scorable | not scorable | 1         | 0.6553459 |
| #### Bn-A09-p19796626 | A-genome specific (napus-rapa) | 0.9952153    | 0.8383023    | not scorable | not scorable | 0.9834711 | 0.6740639 |
| #### Bn-A09-p19796916 | A-genome specific (napus-rapa) | 0.9976076    | 0.9237738    | not scorable | not scorable | 1         | 0.7450405 |
| #### Bn-A09-p19799940 | A-genome specific (napus-rapa) | 0.9976076    | 0.5687904    | not scorable | not scorable | 1         | 0.7925148 |
| #### Bn-A09-p19803046 | A-genome specific (napus-rapa) | 0.9880383    | 0.8257846    | not scorable | not scorable | 1         | 0.7030504 |
| #### Bn-A09-p19803535 | A-genome specific (napus-rapa) | 0.9952153    | 0.8688502    | not scorable | not scorable | 1         | 0.7954427 |
| #### Bn-A09-p19805361 | A-genome specific (napus-rapa) | 0.9928229    | 0.3740631    | not scorable | not scorable | 0.9586777 | 0.5899123 |
| #### Bn-A09-p19835714 | A-genome specific (napus-rapa) | 0.9880383    | 0.4950781    | not scorable | not scorable | 0.9917355 | 0.8434458 |
| #### Bn-A09-p19851523 | A-genome specific (napus-rapa) | 0.9976076    | 0.8293539    | not scorable | not scorable | 1         | 0.7924281 |
| #### Bn-A09-p19865476 | A-genome specific (napus-rapa) | 0.9952153    | 0.4454464    | not scorable | not scorable | 1         | 0.7680252 |
| #### Bn-A09-p19872952 | A-genome specific (napus-rapa) | 0.9976076    | 0.8555552    | not scorable | not scorable | 0.9917355 | 0.7756048 |
| #### Bn-A09-p19873361 | A-genome specific (napus-rapa) | 0.9976076    | 0.8247867    | not scorable | not scorable | 1         | 0.8553345 |
| #### Bn-A09-p1989556  | A-genome specific (napus-rapa) | 0.937799     | 0.7302205    | not scorable | not scorable | 0.9752066 | 0.8204356 |
| #### Bn-A09-p19939967 | A-genome specific (napus-rapa) | 0.9952153    | 0.7780461    | not scorable | not scorable | 1         | 0.8242052 |
| #### Bn-A09-p19941634 | A-genome specific (napus-rapa) | 0.9641148    | 0.3538768    | not scorable | not scorable | 0.9669421 | 0.7157819 |
| #### Bn-A09-p19948856 | A-genome specific (napus-rapa) | 0.9928229    | 0.7775424    | not scorable | not scorable | 0.9917355 | 0.8141502 |
| #### Bn-A09-p20006096 | A-genome specific (rapa only)  | not scorable | not scorable | not scorable | not scorable | 0.9917355 | 0.6738888 |
| #### Bn-A09-p20006533 | A-genome specific (napus-rapa) | 0.9952153    | 0.7359314    | not scorable | not scorable | 0.9917355 | 0.8215912 |
| #### Bn-A09-p20051040 | A-genome specific (napus-rapa) | 0.9880383    | 0.5522335    | not scorable | not scorable | 0.9752066 | 0.6784588 |
| #### Bn-A09-p20052851 | A-genome specific (napus-rapa) | 0.9019139    | 0.8042307    | not scorable | not scorable | 0.6694215 | 0.7193478 |
| #### Bn-A09-p20053737 | A-genome specific (napus-rapa) | 0.9043062    | 0.8084375    | not scorable | not scorable | 0.6859504 | 0.8694856 |
| #### Bn-A09-p20059101 | A-genome specific (napus-rapa) | 0.9760765    | 0.7428848    | not scorable | not scorable | 0.9834711 | 0.800005  |
| #### Bn-A09-p20061287 | A-genome specific (napus-rapa) | 0.9952153    | 0.7527555    | not scorable | not scorable | 0.9917355 | 0.6938264 |
| #### Bn-A09-p20074633 | A-genome specific (rapa only)  | not scorable | not scorable | not scorable | not scorable | 1         | 0.6678986 |



|                       |                                |              |              |              |              |              |              |
|-----------------------|--------------------------------|--------------|--------------|--------------|--------------|--------------|--------------|
| #### Bn-A09-p20198816 | A-genome specific (rapa only)  | not scorable | not scorable | not scorable | not scorable | 0.9752066    | 0.7379448    |
| #### Bn-A09-p20198871 | A-genome specific (napus-rapa) | 0.9880383    | 0.7893785    | not scorable | not scorable | 0.9834711    | 0.8051725    |
| #### Bn-A09-p20208747 | A-genome specific (napus-rapa) | 0.9688995    | 0.7671073    | not scorable | not scorable | 0.6942149    | 0.7191762    |
| #### Bn-A09-p20209419 | A-genome specific (napus-rapa) | 0.9760765    | 0.7700786    | not scorable | not scorable | 0.7024794    | 0.7057351    |
| #### Bn-A09-p20212765 | A-genome specific (napus-rapa) | 0.9784689    | 0.707734     | not scorable | not scorable | 0.9917355    | 0.6652893    |
| #### Bn-A09-p20214059 | A-genome specific (napus-rapa) | 0.9928229    | 0.7898555    | not scorable | not scorable | 1            | 0.8696305    |
| #### Bn-A09-p20215345 | A-genome specific (napus-rapa) | 0.9856459    | 0.7654361    | not scorable | not scorable | 0.9917355    | 0.7456076    |
| #### Bn-A09-p20263302 | A-genome specific (napus-rapa) | 1            | 0.8641714    | not scorable | not scorable | 1            | 0.8091722    |
| #### Bn-A09-p20327880 | A-genome specific (napus-rapa) | 0.9784689    | 0.7249923    | not scorable | not scorable | 0.661157     | 0.7724192    |
| #### Bn-A09-p2033221  | A-genome specific (napus-rapa) | 0.9593301    | 0.7727146    | not scorable | not scorable | 0.9834711    | 0.8058349    |
| #### Bn-A09-p20336623 | A-genome specific (napus-rapa) | 1            | 0.7678353    | not scorable | not scorable | 1            | 0.8131562    |
| #### Bn-A09-p2033767  | A-genome specific (napus-rapa) | 0.9688995    | 0.7770892    | not scorable | not scorable | 0.9917355    | 0.8003617    |
| #### Bn-A09-p20429966 | all not scorable               | not scorable | not scorable | not scorable | not scorable | not scorable | not scorable |
| #### Bn-A09-p2044817  | A-genome specific (napus-rapa) | 0.9593301    | 0.5646505    | not scorable | not scorable | 0.9834711    | 0.6823868    |
| #### Bn-A09-p20512896 | A-genome specific (napus-rapa) | 0.9808612    | 0.71449      | not scorable | not scorable | 0.9917355    | 0.7247356    |
| #### Bn-A09-p20516599 | A-genome specific (napus-rapa) | 0.9665072    | 0.6573416    | not scorable | not scorable | 0.9834711    | 0.6627742    |
| #### Bn-A09-p20516744 | A-genome specific (napus-rapa) | 0.9784689    | 0.7374884    | not scorable | not scorable | 0.9917355    | 0.7149264    |
| #### Bn-A09-p20517062 | A-genome specific (napus-rapa) | 0.9856459    | 0.7819115    | not scorable | not scorable | 0.9834711    | 0.7241183    |
| #### Bn-A09-p20517413 | A-genome specific (napus-rapa) | 0.9856459    | 0.7999213    | not scorable | not scorable | 0.9752066    | 0.7238413    |
| #### Bn-A09-p20517911 | A-genome specific (napus-rapa) | 0.9880383    | 0.7631497    | not scorable | not scorable | 0.9669421    | 0.6897457    |
| #### Bn-A09-p20523068 | A-genome specific (rapa only)  | not scorable | not scorable | not scorable | not scorable | 1            | 0.7197832    |
| #### Bn-A09-p20526508 | A-genome specific (napus-rapa) | 0.9856459    | 0.7069296    | not scorable | not scorable | 0.9917355    | 0.7352295    |
| #### Bn-A09-p20554631 | A-genome specific (napus-rapa) | 0.9952153    | 0.4644184    | not scorable | not scorable | 0.9834711    | 0.7458626    |
| #### Bn-A09-p20566614 | A-genome specific (napus-rapa) | 0.9904306    | 0.7499511    | not scorable | not scorable | 1            | 0.7741253    |
| #### Bn-A09-p20569783 | A-genome specific (rapa only)  | not scorable | not scorable | not scorable | not scorable | 1            | 0.4890353    |
| #### Bn-A09-p20569958 | A-genome specific (napus-rapa) | 0.9904306    | 0.7689714    | not scorable | not scorable | 0.9834711    | 0.7600004    |
| #### Bn-A09-p20649745 | A-genome specific (napus-rapa) | 0.9808612    | 0.4768362    | not scorable | not scorable | 0.9504132    | 0.7224899    |
| #### Bn-A09-p20652846 | A-genome specific (napus-rapa) | 0.9904306    | 0.757498     | not scorable | not scorable | 0.9752066    | 0.8217044    |
| #### Bn-A09-p2065608  | A-genome specific (rapa only)  | not scorable | not scorable | not scorable | not scorable | 1            | 0.8097148    |
| #### Bn-A09-p20672617 | A-genome specific (napus-rapa) | 0.9880383    | 0.7254151    | not scorable | not scorable | 0.9752066    | 0.7043232    |
| #### Bn-A09-p20678910 | A-genome specific (napus-rapa) | 0.9808612    | 0.7156326    | not scorable | not scorable | 0.9752066    | 0.7618698    |
| #### Bn-A09-p20684557 | A-genome specific (rapa only)  | not scorable | not scorable | not scorable | not scorable | 0.9669421    | 0.6049578    |
| #### Bn-A09-p20694373 | A-genome specific (napus-rapa) | 0.9976076    | 0.4454422    | not scorable | not scorable | 0.9338843    | 0.4647032    |

|                       |                                |              |              |              |              |              |              |
|-----------------------|--------------------------------|--------------|--------------|--------------|--------------|--------------|--------------|
| #### Bn-A09-p20720084 | A-genome specific (napus-rapa) | 0.9808612    | 0.3847861    | not scorable | not scorable | 1            | 0.6113875    |
| #### Bn-A09-p2076591  | A-genome specific (napus-rapa) | 0.9449761    | 0.7059209    | not scorable | not scorable | 0.9834711    | 0.7735592    |
| #### Bn-A09-p2076856  | A-genome specific (napus-rapa) | 0.8301435    | 0.7660027    | not scorable | not scorable | 0.9669421    | 0.7609254    |
| #### Bn-A09-p2081648  | A-genome specific (rapa only)  | not scorable | not scorable | not scorable | not scorable | 0.9669421    | 0.4353446    |
| #### Bn-A09-p2082298  | A-genome specific (rapa only)  | not scorable | not scorable | not scorable | not scorable | 1            | 0.732666     |
| #### Bn-A09-p2083933  | A-genome specific (napus-rapa) | 0.9665072    | 0.7630048    | not scorable | not scorable | 0.9917355    | 0.8584356    |
| #### Bn-A09-p20856553 | A-genome specific (rapa only)  | not scorable | not scorable | not scorable | not scorable | 1            | 0.9092472    |
| #### Bn-A09-p20863459 | all not scorable               | not scorable | not scorable | not scorable | not scorable | not scorable | not scorable |
| #### Bn-A09-p2116947  | A-genome specific (napus-rapa) | 0.9784689    | 0.764156     | not scorable | not scorable | 1            | 0.9064231    |
| #### Bn-A09-p21224256 | A-genome specific (napus-rapa) | 0.9976076    | 0.3906747    | not scorable | not scorable | 0.9917355    | 0.5883518    |
| #### Bn-A09-p2126525  | A-genome specific (rapa only)  | not scorable | not scorable | not scorable | not scorable | 0.9834711    | 0.8203456    |
| #### Bn-A09-p2131637  | A-genome specific (rapa only)  | not scorable | not scorable | not scorable | not scorable | 0.9752066    | 0.7888442    |
| #### Bn-A09-p2131851  | A-genome specific (napus-rapa) | 0.9617225    | 0.7617868    | not scorable | not scorable | 0.9834711    | 0.7273306    |
| #### Bn-A09-p21352125 | A-genome specific (rapa only)  | not scorable | not scorable | not scorable | not scorable | 1            | 0.6995199    |
| #### Bn-A09-p2157775  | A-genome specific (napus-rapa) | 0.9617225    | 0.6822422    | not scorable | not scorable | 0.9917355    | 0.7065479    |
| #### Bn-A09-p2160040  | A-genome specific (napus-rapa) | 0.9808612    | 0.593246     | not scorable | not scorable | 0.9917355    | 0.8501198    |
| #### Bn-A09-p21795879 | A-genome specific (napus-rapa) | 0.9976076    | 0.5572814    | not scorable | not scorable | 1            | 0.7993835    |
| #### Bn-A09-p21821777 | A-genome specific (rapa only)  | not scorable | not scorable | not scorable | not scorable | 0.5702479    | 0.7885153    |
| #### Bn-A09-p21821779 | A-genome specific (napus-rapa) | 0.9043062    | 0.4259256    | not scorable | not scorable | 0.5867769    | 0.6868334    |
| #### Bn-A09-p21865966 | A-genome specific (napus-rapa) | 0.9976076    | 0.4564156    | not scorable | not scorable | 1            | 0.8033848    |
| #### Bn-A09-p21914887 | A-genome specific (napus-rapa) | 1            | 0.3452584    | not scorable | not scorable | 1            | 0.7771733    |
| #### Bn-A09-p21921236 | A-genome specific (napus-rapa) | 1            | 0.9205657    | not scorable | not scorable | 0.9917355    | 0.8448214    |
| #### Bn-A09-p21921500 | A-genome specific (napus-rapa) | 0.9976076    | 0.7045506    | not scorable | not scorable | 0.9917355    | 0.7115262    |
| #### Bn-A09-p21922178 | A-genome specific (napus-rapa) | 0.9952153    | 0.7101336    | not scorable | not scorable | 0.9917355    | 0.7050539    |
| #### Bn-A09-p21922383 | A-genome specific (napus-rapa) | 1            | 0.7611665    | not scorable | not scorable | 1            | 0.6549973    |
| #### Bn-A09-p21923295 | A-genome specific (napus-rapa) | 0.9976076    | 0.7584217    | not scorable | not scorable | 0.9917355    | 0.7271564    |
| #### Bn-A09-p21924011 | A-genome specific (napus-rapa) | 1            | 0.7675539    | not scorable | not scorable | 1            | 0.7775959    |
| #### Bn-A09-p21931377 | A-genome specific (napus-rapa) | 1            | 0.8101005    | not scorable | not scorable | 1            | 0.7342113    |
| #### Bn-A09-p21932600 | A-genome specific (napus-rapa) | 0.9976076    | 0.7034009    | not scorable | not scorable | 0.9917355    | 0.6373618    |
| #### Bn-A09-p21935602 | A-genome specific (napus-rapa) | 0.9976076    | 0.5037545    | not scorable | not scorable | 1            | 0.8030698    |
| #### Bn-A09-p21939406 | A-genome specific (napus-rapa) | 1            | 0.8364352    | not scorable | not scorable | 0.9834711    | 0.7789251    |
| #### Bn-A09-p219538   | A-genome specific (rapa only)  | not scorable | not scorable | not scorable | not scorable | 0.9917355    | 0.7458562    |
| #### Bn-A09-p21969014 | A-genome specific (napus-rapa) | 1            | 0.725309     | not scorable | not scorable | 0.9917355    | 0.8104199    |

|                       |                                |              |              |              |              |           |           |
|-----------------------|--------------------------------|--------------|--------------|--------------|--------------|-----------|-----------|
| #### Bn-A09-p22003936 | A-genome specific (napus-rapa) | 1            | 0.7668738    | not scorable | not scorable | 0.9834711 | 0.7443119 |
| #### Bn-A09-p22021632 | A-genome specific (rapa only)  | not scorable | not scorable | not scorable | not scorable | 0.8512397 | 0.7326162 |
| #### Bn-A09-p22070817 | A-genome specific (napus-rapa) | 0.9856459    | 0.7460271    | not scorable | not scorable | 0.9752066 | 0.7301589 |
| #### Bn-A09-p22070848 | A-genome specific (napus-rapa) | 0.9952153    | 0.8128334    | not scorable | not scorable | 1         | 0.7991367 |
| #### Bn-A09-p22071523 | A-genome specific (napus-rapa) | 1            | 0.8537611    | not scorable | not scorable | 1         | 0.8343308 |
| #### Bn-A09-p2208929  | A-genome specific (napus-rapa) | 0.9641148    | 0.6533008    | not scorable | not scorable | 0.9834711 | 0.7918741 |
| #### Bn-A09-p2209142  | A-genome specific (napus-rapa) | 0.9832536    | 0.9313999    | not scorable | not scorable | 0.9917355 | 0.8771265 |
| #### Bn-A09-p22166884 | A-genome specific (napus-rapa) | 0.9976076    | 0.764394     | not scorable | not scorable | 0.9917355 | 0.734052  |
| #### Bn-A09-p22170209 | A-genome specific (napus-rapa) | 1            | 0.760653     | not scorable | not scorable | 1         | 0.6925044 |
| #### Bn-A09-p22197988 | A-genome specific (napus-rapa) | 0.9976076    | 0.8862217    | not scorable | not scorable | 1         | 0.7360497 |
| #### Bn-A09-p22212378 | A-genome specific (rapa only)  | not scorable | not scorable | not scorable | not scorable | 1         | 0.9098989 |
| #### Bn-A09-p222701   | A-genome specific (napus-rapa) | 0.9712918    | 0.7854255    | not scorable | not scorable | 1         | 0.8077791 |
| #### Bn-A09-p2232416  | A-genome specific (napus-rapa) | 0.9617225    | 0.7905844    | not scorable | not scorable | 1         | 0.923307  |
| #### Bn-A09-p22344523 | A-genome specific (napus-rapa) | 1            | 0.5569721    | not scorable | not scorable | 1         | 0.7129525 |
| #### Bn-A09-p22345800 | genome unspecific (all in)     | 1            | 0.5954536    | 1            | 0.3565369    | 0.9834711 | 0.4961698 |
| #### Bn-A09-p2241625  | A-genome specific (napus-rapa) | 0.9569378    | 0.7425883    | not scorable | not scorable | 0.5867769 | 0.7466311 |
| #### Bn-A09-p22462771 | A-genome specific (napus-rapa) | 1            | 0.5193347    | not scorable | not scorable | 0.9752066 | 0.7629906 |
| #### Bn-A09-p22495700 | A-genome specific (napus-rapa) | 1            | 0.9271777    | not scorable | not scorable | 0.9834711 | 0.8016287 |
| #### Bn-A09-p22612980 | A-genome specific (napus-rapa) | 0.9425837    | 0.2326248    | not scorable | not scorable | 0.9917355 | 0.6633987 |
| #### Bn-A09-p22656762 | A-genome specific (rapa only)  | not scorable | not scorable | not scorable | not scorable | 0.9504132 | 0.7331678 |
| #### Bn-A09-p22657080 | A-genome specific (rapa only)  | not scorable | not scorable | not scorable | not scorable | 0.6859504 | 0.7693989 |
| #### Bn-A09-p2280336  | A-genome specific (rapa only)  | not scorable | not scorable | not scorable | not scorable | 0.9917355 | 0.6219177 |
| #### Bn-A09-p22873685 | A-genome specific (napus-rapa) | 0.9976076    | 0.9204919    | not scorable | not scorable | 0.7851239 | 0.7711976 |
| #### Bn-A09-p22953858 | A-genome specific (napus-rapa) | 1            | 0.4451561    | not scorable | not scorable | 0.9917355 | 0.7756857 |
| #### Bn-A09-p22965277 | A-genome specific (napus-rapa) | 1            | 0.7096578    | not scorable | not scorable | 0.9917355 | 0.6600543 |
| #### Bn-A09-p2298880  | A-genome specific (napus-rapa) | 0.9736842    | 0.7764494    | not scorable | not scorable | 1         | 0.8639758 |
| #### Bn-A09-p23089160 | A-genome specific (rapa only)  | not scorable | not scorable | not scorable | not scorable | 1         | 0.8866403 |
| #### Bn-A09-p23089510 | A-genome specific (rapa only)  | not scorable | not scorable | not scorable | not scorable | 0.9752066 | 0.7953165 |
| #### Bn-A09-p23107846 | A-genome specific (napus-rapa) | 0.9808612    | 0.6939393    | not scorable | not scorable | 0.9669421 | 0.8352709 |
| #### Bn-A09-p23107847 | A-genome specific (napus-rapa) | 0.9880383    | 0.7250402    | not scorable | not scorable | 0.9752066 | 0.7442845 |
| #### Bn-A09-p23144404 | A-genome specific (napus-rapa) | 0.9880383    | 0.8684711    | not scorable | not scorable | 0.7107438 | 0.7136444 |
| #### Bn-A09-p23144931 | A-genome specific (napus-rapa) | 1            | 0.8807126    | not scorable | not scorable | 1         | 0.7060081 |
| #### Bn-A09-p23189250 | A-genome specific (napus-rapa) | 1            | 0.900176     | not scorable | not scorable | 0.9669421 | 0.7807196 |

|                       |                                |              |              |              |              |              |              |
|-----------------------|--------------------------------|--------------|--------------|--------------|--------------|--------------|--------------|
| #### Bn-A09-p23200280 | A-genome specific (napus-rapa) | 1            | 0.6463556    | not scorable | not scorable | 0.9504132    | 0.6734374    |
| #### Bn-A09-p23221438 | A-genome specific (napus-rapa) | 1            | 0.505798     | not scorable | not scorable | 0.9917355    | 0.7882942    |
| #### Bn-A09-p2323366  | A-genome specific (rapa only)  | not scorable | not scorable | not scorable | not scorable | 0.9834711    | 0.6886939    |
| #### Bn-A09-p23250129 | A-genome specific (napus-rapa) | 1            | 0.5901564    | not scorable | not scorable | 0.9917355    | 0.7204707    |
| #### Bn-A09-p23254203 | A-genome specific (napus-rapa) | 0.9976076    | 0.8315735    | not scorable | not scorable | 0.9834711    | 0.8136284    |
| #### Bn-A09-p23268918 | A-genome specific (napus-rapa) | 0.937799     | 0.895223     | not scorable | not scorable | 0.7272727    | 0.8165222    |
| #### Bn-A09-p23269680 | A-genome specific (napus-rapa) | 1            | 0.8199868    | not scorable | not scorable | 1            | 0.6561322    |
| #### Bn-A09-p23325795 | A-genome specific (napus-rapa) | 1            | 0.7817371    | not scorable | not scorable | 0.9834711    | 0.6935408    |
| #### Bn-A09-p23329474 | A-genome specific (napus-rapa) | 0.9928229    | 0.7818289    | not scorable | not scorable | 0.9834711    | 0.7503471    |
| #### Bn-A09-p23330048 | A-genome specific (napus-rapa) | 0.8397129    | 0.7573859    | not scorable | not scorable | 1            | 0.7238413    |
| #### Bn-A09-p23330054 | A-genome specific (napus-rapa) | 1            | 0.8889896    | not scorable | not scorable | 0.9917355    | 0.7761614    |
| #### Bn-A09-p23331059 | A-genome specific (napus-rapa) | 1            | 0.8682742    | not scorable | not scorable | 0.9834711    | 0.7337906    |
| #### Bn-A09-p23331135 | A-genome specific (napus-rapa) | 0.9880383    | 0.9322066    | not scorable | not scorable | 0.9586777    | 0.7310103    |
| #### Bn-A09-p23331742 | A-genome specific (napus-rapa) | 1            | 0.7742907    | not scorable | not scorable | 1            | 0.6622275    |
| #### Bn-A09-p23334889 | A-genome specific (napus-rapa) | 1            | 0.755635     | not scorable | not scorable | 0.9917355    | 0.816827     |
| #### Bn-A09-p23345719 | A-genome specific (napus-rapa) | 0.9952153    | 0.4543817    | not scorable | not scorable | 0.9917355    | 0.7448406    |
| #### Bn-A09-p23354310 | A-genome specific (napus-rapa) | 1            | 0.9189597    | not scorable | not scorable | 0.9752066    | 0.8649639    |
| #### Bn-A09-p23354810 | A-genome specific (napus-rapa) | 1            | 0.5731629    | not scorable | not scorable | 0.9752066    | 0.7525823    |
| #### Bn-A09-p23354848 | A-genome specific (napus-rapa) | 1            | 0.8698159    | not scorable | not scorable | 0.9752066    | 0.791905     |
| #### Bn-A09-p23356793 | A-genome specific (napus-rapa) | 1            | 0.8891025    | not scorable | not scorable | 0.9834711    | 0.655784     |
| #### Bn-A09-p23356947 | A-genome specific (napus-rapa) | 1            | 0.8715949    | not scorable | not scorable | 0.9834711    | 0.8218667    |
| #### Bn-A09-p23379304 | A-genome specific (napus-rapa) | 1            | 0.7400445    | not scorable | not scorable | 0.9752066    | 0.6886467    |
| #### Bn-A09-p23379933 | A-genome specific (napus-rapa) | 0.9928229    | 0.8290427    | not scorable | not scorable | 0.9917355    | 0.808273     |
| #### Bn-A09-p23382659 | A-genome specific (napus-rapa) | 0.9904306    | 0.5648226    | not scorable | not scorable | 1            | 0.7844039    |
| #### Bn-A09-p23410187 | A-genome specific (napus-rapa) | 1            | 0.9389927    | not scorable | not scorable | 1            | 0.7524254    |
| #### Bn-A09-p23416800 | A-genome specific (napus-rapa) | 1            | 0.4464415    | not scorable | not scorable | 1            | 0.7422866    |
| #### Bn-A09-p23419710 | all not scorable               | not scorable | not scorable | not scorable | not scorable | not scorable | not scorable |
| #### Bn-A09-p2343357  | A-genome specific (rapa only)  | not scorable | not scorable | not scorable | not scorable | 0.9834711    | 0.8388738    |
| #### Bn-A09-p2343613  | A-genome specific (rapa only)  | not scorable | not scorable | not scorable | not scorable | 0.9834711    | 0.7560263    |
| #### Bn-A09-p23436500 | A-genome specific (napus-rapa) | 1            | 0.4535982    | not scorable | not scorable | 0.9752066    | 0.5229124    |
| #### Bn-A09-p23438753 | A-genome specific (napus-rapa) | 0.9952153    | 0.8675697    | not scorable | not scorable | 0.9752066    | 0.7777033    |
| #### Bn-A09-p23445424 | genome unspecific (all in)     | 1            | 0.2860431    | 0.9922481    | 0.8044842    | 1            | 0.8085083    |
| #### Bn-A09-p234493   | A-genome specific (rapa only)  | not scorable | not scorable | not scorable | not scorable | 0.9917355    | 0.7297394    |



|                       |                                |              |              |              |              |           |           |
|-----------------------|--------------------------------|--------------|--------------|--------------|--------------|-----------|-----------|
| #### Bn-A09-p23461886 | A-genome specific (rapa only)  | not scorable | not scorable | not scorable | not scorable | 1         | 0.6437843 |
| #### Bn-A09-p2346796  | A-genome specific (rapa only)  | not scorable | not scorable | not scorable | not scorable | 1         | 0.8949167 |
| #### Bn-A09-p23489920 | A-genome specific (napus-rapa) | 1            | 0.8250576    | not scorable | not scorable | 0.9834711 | 0.7129645 |
| #### Bn-A09-p23494647 | A-genome specific (napus-rapa) | 0.9976076    | 0.3800089    | not scorable | not scorable | 0.9917355 | 0.7787027 |
| #### Bn-A09-p23515910 | A-genome specific (napus-rapa) | 0.9904306    | 0.7265752    | not scorable | not scorable | 1         | 0.8504481 |
| #### Bn-A09-p23516882 | A-genome specific (napus-rapa) | 0.9880383    | 0.7719574    | not scorable | not scorable | 1         | 0.683312  |
| #### Bn-A09-p23519665 | A-genome specific (napus-rapa) | 0.9832536    | 0.7845222    | not scorable | not scorable | 1         | 0.8676855 |
| #### Bn-A09-p23525690 | A-genome specific (napus-rapa) | 0.9928229    | 0.2183181    | not scorable | not scorable | 1         | 0.7713701 |
| #### Bn-A09-p23540416 | A-genome specific (napus-rapa) | 0.9880383    | 0.7451746    | not scorable | not scorable | 0.9834711 | 0.87477   |
| #### Bn-A09-p23541526 | A-genome specific (napus-rapa) | 0.9904306    | 0.7654971    | not scorable | not scorable | 0.9834711 | 0.8095816 |
| #### Bn-A09-p23545925 | A-genome specific (napus-rapa) | 0.9784689    | 0.6121876    | not scorable | not scorable | 1         | 0.5684268 |
| #### Bn-A09-p23546242 | A-genome specific (napus-rapa) | 0.9832536    | 0.7205381    | not scorable | not scorable | 1         | 0.831629  |
| #### Bn-A09-p23552075 | A-genome specific (napus-rapa) | 0.9880383    | 0.7516658    | not scorable | not scorable | 0.9834711 | 0.7936446 |
| #### Bn-A09-p23552530 | A-genome specific (napus-rapa) | 0.9617225    | 0.7756054    | not scorable | not scorable | 0.9752066 | 0.7912666 |
| #### Bn-A09-p23553955 | A-genome specific (napus-rapa) | 0.9736842    | 0.6520399    | not scorable | not scorable | 1         | 0.638094  |
| #### Bn-A09-p23554212 | A-genome specific (napus-rapa) | 0.7368421    | 0.9199842    | not scorable | not scorable | 0.9834711 | 0.9272014 |
| #### Bn-A09-p23554351 | A-genome specific (napus-rapa) | 0.7200957    | 0.894519     | not scorable | not scorable | 0.9834711 | 0.8004834 |
| #### Bn-A09-p23554402 | A-genome specific (napus-rapa) | 0.9856459    | 0.4073367    | not scorable | not scorable | 1         | 0.6542797 |
| #### Bn-A09-p23649871 | A-genome specific (napus-rapa) | 1            | 0.9271305    | not scorable | not scorable | 0.9834711 | 0.7847479 |
| #### Bn-A09-p23693948 | A-genome specific (napus-rapa) | 0.9832536    | 0.4141179    | not scorable | not scorable | 1         | 0.6772562 |
| #### Bn-A09-p23707462 | A-genome specific (napus-rapa) | 0.9928229    | 0.774188     | not scorable | not scorable | 0.9917355 | 0.7785345 |
| #### Bn-A09-p23708692 | A-genome specific (napus-rapa) | 0.9832536    | 0.7575907    | not scorable | not scorable | 0.9917355 | 0.7300116 |
| #### Bn-A09-p23713670 | A-genome specific (rapa only)  | not scorable | not scorable | not scorable | not scorable | 1         | 0.5785097 |
| #### Bn-A09-p23717291 | A-genome specific (napus-rapa) | 0.9952153    | 0.3427159    | not scorable | not scorable | 1         | 0.736471  |
| #### Bn-A09-p23722611 | A-genome specific (napus-rapa) | 0.9952153    | 0.3433593    | not scorable | not scorable | 0.9917355 | 0.6590238 |
| #### Bn-A09-p23724102 | A-genome specific (napus-rapa) | 0.9928229    | 0.7002256    | not scorable | not scorable | 0.9917355 | 0.7388729 |
| #### Bn-A09-p23724105 | A-genome specific (napus-rapa) | 0.9904306    | 0.7634133    | not scorable | not scorable | 0.9752066 | 0.7305493 |
| #### Bn-A09-p23724303 | A-genome specific (napus-rapa) | 0.9904306    | 0.7636324    | not scorable | not scorable | 0.9917355 | 0.8163617 |
| #### Bn-A09-p2374845  | A-genome specific (napus-rapa) | 0.8373206    | 0.9133171    | not scorable | not scorable | 0.9752066 | 0.7312728 |
| #### Bn-A09-p23756115 | A-genome specific (napus-rapa) | 0.9904306    | 0.9060767    | not scorable | not scorable | 0.9752066 | 0.7003915 |
| #### Bn-A09-p23773295 | A-genome specific (napus-rapa) | 0.9688995    | 0.8085797    | not scorable | not scorable | 1         | 0.7157466 |
| #### Bn-A09-p23778678 | A-genome specific (napus-rapa) | 0.9808612    | 0.8171082    | not scorable | not scorable | 1         | 0.7989676 |
| #### Bn-A09-p23780921 | A-genome specific (napus-rapa) | 0.9880383    | 0.8331675    | not scorable | not scorable | 1         | 0.7293484 |

|                       |                                |              |              |              |              |              |              |
|-----------------------|--------------------------------|--------------|--------------|--------------|--------------|--------------|--------------|
| #### Bn-A09-p23790907 | A-genome specific (napus-rapa) | 0.9856459    | 0.3778016    | not scorable | not scorable | 1            | 0.7197661    |
| #### Bn-A09-p23802586 | A-genome specific (rapa only)  | not scorable | not scorable | not scorable | not scorable | 0.9917355    | 0.6975835    |
| #### Bn-A09-p23802640 | A-genome specific (napus-rapa) | 0.9808612    | 0.2843363    | not scorable | not scorable | 1            | 0.6899431    |
| #### Bn-A09-p23802762 | A-genome specific (napus-rapa) | 0.9928229    | 0.3456801    | not scorable | not scorable | 1            | 0.7904019    |
| #### Bn-A09-p23802813 | A-genome specific (rapa only)  | not scorable | not scorable | not scorable | not scorable | 1            | 0.7662378    |
| #### Bn-A09-p23808067 | A-genome specific (napus-rapa) | 0.9904306    | 0.6171848    | not scorable | not scorable | 0.9834711    | 0.6560907    |
| #### Bn-A09-p23838725 | A-genome specific (napus-rapa) | 0.9976076    | 0.6874372    | not scorable | not scorable | 0.9752066    | 0.7912358    |
| #### Bn-A09-p23852034 | A-genome specific (napus-rapa) | 1            | 0.9027601    | not scorable | not scorable | 0.9834711    | 0.8137099    |
| #### Bn-A09-p23861045 | A-genome specific (napus-rapa) | 0.9952153    | 0.7081958    | not scorable | not scorable | 0.9669421    | 0.7032551    |
| #### Bn-A09-p23865794 | A-genome specific (napus-rapa) | 1            | 0.7201561    | not scorable | not scorable | 0.9917355    | 0.6899059    |
| #### Bn-A09-p23868070 | A-genome specific (napus-rapa) | 0.9832536    | 0.4802638    | not scorable | not scorable | 0.9834711    | 0.6608227    |
| #### Bn-A09-p23904657 | A-genome specific (rapa only)  | not scorable | not scorable | not scorable | not scorable | 0.9834711    | 0.7320114    |
| #### Bn-A09-p23904905 | A-genome specific (napus-rapa) | 1            | 0.7758602    | not scorable | not scorable | 0.9834711    | 0.5527825    |
| #### Bn-A09-p23904964 | A-genome specific (napus-rapa) | 1            | 0.9403487    | not scorable | not scorable | 0.9834711    | 0.7968212    |
| #### Bn-A09-p23913406 | A-genome specific (napus-rapa) | 0.9928229    | 0.3601988    | not scorable | not scorable | 0.9834711    | 0.8480014    |
| #### Bn-A09-p23918548 | napus specific                 | 0.9928229    | 0.8142461    | not scorable | not scorable | not scorable | not scorable |
| #### Bn-A09-p23921036 | A-genome specific (napus-rapa) | 0.9976076    | 0.4602334    | not scorable | not scorable | 1            | 0.8011118    |
| #### Bn-A09-p23928124 | A-genome specific (napus-rapa) | 1            | 0.8388985    | not scorable | not scorable | 0.9752066    | 0.7893193    |
| #### Bn-A09-p23928417 | A-genome specific (napus-rapa) | 1            | 0.9269271    | not scorable | not scorable | 0.9917355    | 0.7887312    |
| #### Bn-A09-p23928674 | A-genome specific (napus-rapa) | 1            | 0.3979169    | not scorable | not scorable | 1            | 0.6889881    |
| #### Bn-A09-p23940132 | A-genome specific (napus-rapa) | 1            | 0.3480559    | not scorable | not scorable | 1            | 0.7214183    |
| #### Bn-A09-p23948738 | A-genome specific (napus-rapa) | 0.9976076    | 0.2715191    | not scorable | not scorable | 0.9834711    | 0.6390642    |
| #### Bn-A09-p239851   | A-genome specific (rapa only)  | not scorable | not scorable | not scorable | not scorable | 1            | 0.8665706    |
| #### Bn-A09-p23986523 | A-genome specific (napus-rapa) | 0.9976076    | 0.9109733    | not scorable | not scorable | 0.9917355    | 0.823615     |
| #### Bn-A09-p23993823 | A-genome specific (rapa only)  | not scorable | not scorable | not scorable | not scorable | 1            | 0.7903211    |
| #### Bn-A09-p23994818 | A-genome specific (napus-rapa) | 1            | 0.6004285    | not scorable | not scorable | 1            | 0.7136396    |
| #### Bn-A09-p23995326 | A-genome specific (rapa only)  | not scorable | not scorable | not scorable | not scorable | 0.7768595    | 0.9189113    |
| #### Bn-A09-p24003401 | A-genome specific (napus-rapa) | 1            | 0.2954577    | not scorable | not scorable | 0.9834711    | 0.7409527    |
| #### Bn-A09-p24003969 | A-genome specific (napus-rapa) | 1            | 0.8397955    | not scorable | not scorable | 0.9917355    | 0.7605793    |
| #### Bn-A09-p24014257 | A-genome specific (napus-rapa) | 1            | 0.3629902    | not scorable | not scorable | 0.9917355    | 0.8249141    |
| #### Bn-A09-p24086990 | A-genome specific (napus-rapa) | 0.9976076    | 0.3523766    | not scorable | not scorable | 1            | 0.7147644    |
| #### Bn-A09-p24088098 | A-genome specific (napus-rapa) | 0.9856459    | 0.7435277    | not scorable | not scorable | 0.9917355    | 0.7327077    |
| #### Bn-A09-p24104666 | A-genome specific (napus-rapa) | 1            | 0.9138814    | not scorable | not scorable | 1            | 0.8415254    |

|                       |                                   |              |              |              |              |              |              |
|-----------------------|-----------------------------------|--------------|--------------|--------------|--------------|--------------|--------------|
| #### Bn-A09-p24105838 | A-genome specific (napus-rapa)    | 1            | 0.3232311    | not scorable | not scorable | 0.9917355    | 0.7722343    |
| #### Bn-A09-p24106965 | A-genome specific (napus-rapa)    | 1            | 0.4209407    | not scorable | not scorable | 0.9917355    | 0.7042683    |
| #### Bn-A09-p24113289 | A-genome specific (napus-rapa)    | 1            | 0.4932895    | not scorable | not scorable | 0.9917355    | 0.7398429    |
| #### Bn-A09-p24113399 | A-genome specific (napus-rapa)    | 1            | 0.3158101    | not scorable | not scorable | 0.9917355    | 0.7464707    |
| #### Bn-A09-p24131450 | A-genome specific (napus-rapa)    | 1            | 0.7893741    | not scorable | not scorable | 1            | 0.786476     |
| #### Bn-A09-p2415458  | A-genome specific (rapa only)     | not scorable | not scorable | not scorable | not scorable | 1            | 0.6520869    |
| #### Bn-A09-p2416564  | A-genome specific (rapa only)     | not scorable | not scorable | not scorable | not scorable | 1            | 0.8721333    |
| #### Bn-A09-p2419287  | A-genome specific (napus-rapa)    | 0.9808612    | 0.3858318    | not scorable | not scorable | 0.9917355    | 0.7625097    |
| #### Bn-A09-p24216715 | A-genome specific (napus-rapa)    | 1            | 0.3461279    | not scorable | not scorable | 1            | 0.6714849    |
| #### Bn-A09-p2429402  | A-genome specific (rapa only)     | not scorable | not scorable | not scorable | not scorable | 0.9752066    | 0.7807296    |
| #### Bn-A09-p24400007 | A-genome specific (napus-rapa)    | 0.9880383    | 0.847874     | not scorable | not scorable | 0.9834711    | 0.7229775    |
| #### Bn-A09-p24404    | A-genome specific (rapa only)     | not scorable | not scorable | not scorable | not scorable | 0.9752066    | 0.7232302    |
| #### Bn-A09-p24506395 | genome unspecific (oleracea-rapa) | not scorable | not scorable | 0.9844961    | 0.7466138    | 0.9834711    | 0.7006491    |
| #### Bn-A09-p24520612 | A-genome specific (rapa only)     | not scorable | not scorable | not scorable | not scorable | 0.9173554    | 0.8042423    |
| #### Bn-A09-p24556003 | A-genome specific (napus-rapa)    | 1            | 0.4416575    | not scorable | not scorable | 0.9917355    | 0.7077931    |
| #### Bn-A09-p24564546 | A-genome specific (napus-rapa)    | 0.9928229    | 0.8207017    | not scorable | not scorable | 0.9917355    | 0.7359298    |
| #### Bn-A09-p24597678 | all not scorable                  | not scorable | not scorable | not scorable | not scorable | not scorable | not scorable |
| #### Bn-A09-p24598452 | A-genome specific (rapa only)     | not scorable | not scorable | not scorable | not scorable | 0.9834711    | 0.7053446    |
| #### Bn-A09-p2462013  | A-genome specific (rapa only)     | not scorable | not scorable | not scorable | not scorable | 0.9669421    | 0.7050105    |
| #### Bn-A09-p24718991 | A-genome specific (napus-rapa)    | 0.9760765    | 0.6091859    | not scorable | not scorable | 0.9917355    | 0.6173236    |
| #### Bn-A09-p24720890 | A-genome specific (napus-rapa)    | 0.9976076    | 0.8458628    | not scorable | not scorable | 0.9917355    | 0.769265     |
| #### Bn-A09-p24724042 | A-genome specific (napus-rapa)    | 0.9976076    | 0.5728734    | not scorable | not scorable | 0.9834711    | 0.5421995    |
| #### Bn-A09-p24724971 | A-genome specific (napus-rapa)    | 1            | 0.8718382    | not scorable | not scorable | 1            | 0.7777848    |
| #### Bn-A09-p24737500 | A-genome specific (napus-rapa)    | 0.9976076    | 0.771101     | not scorable | not scorable | 1            | 0.6820245    |
| #### Bn-A09-p24738552 | A-genome specific (napus-rapa)    | 1            | 0.758696     | not scorable | not scorable | 1            | 0.8444654    |
| #### Bn-A09-p24791667 | A-genome specific (napus-rapa)    | 0.9976076    | 0.8529881    | not scorable | not scorable | 1            | 0.8021958    |
| #### Bn-A09-p24854950 | A-genome specific (napus-rapa)    | 1            | 0.5831141    | not scorable | not scorable | 0.9917355    | 0.7871539    |
| #### Bn-A09-p24855012 | A-genome specific (napus-rapa)    | 0.9976076    | 0.8135255    | not scorable | not scorable | 1            | 0.6829792    |
| #### Bn-A09-p24867641 | A-genome specific (napus-rapa)    | 1            | 0.7762452    | not scorable | not scorable | 0.9752066    | 0.7926518    |
| #### Bn-A09-p24907634 | A-genome specific (rapa only)     | not scorable | not scorable | not scorable | not scorable | 0.7272727    | 0.6843472    |
| #### Bn-A09-p24909461 | A-genome specific (napus-rapa)    | 1            | 0.8000723    | not scorable | not scorable | 0.9834711    | 0.7598321    |
| #### Bn-A09-p24921401 | A-genome specific (napus-rapa)    | 0.9832536    | 0.7191347    | not scorable | not scorable | 0.7355372    | 0.6383103    |
| #### Bn-A09-p24932536 | A-genome specific (napus-rapa)    | 1            | 0.4473982    | not scorable | not scorable | 0.9917355    | 0.7693       |

|                       |                                    |              |              |              |              |              |              |
|-----------------------|------------------------------------|--------------|--------------|--------------|--------------|--------------|--------------|
| #### Bn-A09-p24938815 | A-genome specific (rapa only)      | not scorable | not scorable | not scorable | not scorable | 0.7768595    | 0.8948976    |
| #### Bn-A09-p24938986 | A-genome specific (napus-rapa)     | 1            | 0.8138608    | not scorable | not scorable | 0.9917355    | 0.6977962    |
| #### Bn-A09-p24942194 | A-genome specific (napus-rapa)     | 1            | 0.4626075    | not scorable | not scorable | 1            | 0.8306848    |
| #### Bn-A09-p24943615 | A-genome specific (napus-rapa)     | 0.9976076    | 0.8903058    | not scorable | not scorable | 1            | 0.8147714    |
| #### Bn-A09-p24943679 | A-genome specific (napus-rapa)     | 1            | 0.9182323    | not scorable | not scorable | 1            | 0.8090855    |
| #### Bn-A09-p24973274 | all not scorable                   | not scorable | not scorable | not scorable | not scorable | not scorable | not scorable |
| #### Bn-A09-p24976222 | A-genome specific (napus-rapa)     | 1            | 0.8211293    | not scorable | not scorable | 0.9917355    | 0.7114482    |
| #### Bn-A09-p24979982 | A-genome specific (napus-rapa)     | 0.861244     | 0.770665     | not scorable | not scorable | 0.9917355    | 0.7472241    |
| #### Bn-A09-p24980725 | C-genome specific (napus-oleracea) | 0.9880383    | 0.63103      | 0.9689922    | 0.5959628    | not scorable | not scorable |
| #### Bn-A09-p24984795 | A-genome specific (napus-rapa)     | 1            | 0.7403379    | not scorable | not scorable | 0.7933884    | 0.7613766    |
| #### Bn-A09-p24986160 | A-genome specific (napus-rapa)     | 0.9928229    | 0.7636063    | not scorable | not scorable | 0.7520661    | 0.7351142    |
| #### Bn-A09-p24987467 | A-genome specific (napus-rapa)     | 0.9904306    | 0.8305039    | not scorable | not scorable | 0.9256198    | 0.7661493    |
| #### Bn-A09-p24987744 | A-genome specific (napus-rapa)     | 0.9976076    | 0.488121     | not scorable | not scorable | 0.9834711    | 0.7244767    |
| #### Bn-A09-p25004061 | A-genome specific (napus-rapa)     | 1            | 0.4852534    | not scorable | not scorable | 0.9504132    | 0.6458788    |
| #### Bn-A09-p25018422 | A-genome specific (napus-rapa)     | 0.9904306    | 0.4061602    | not scorable | not scorable | 0.9917355    | 0.7705488    |
| #### Bn-A09-p25031535 | A-genome specific (napus-rapa)     | 0.9976076    | 0.8925365    | not scorable | not scorable | 0.9834711    | 0.731616     |
| #### Bn-A09-p25042008 | A-genome specific (napus-rapa)     | 0.9928229    | 0.4181904    | not scorable | not scorable | 0.9834711    | 0.506758     |
| #### Bn-A09-p25042124 | A-genome specific (napus-rapa)     | 0.9976076    | 0.7557638    | not scorable | not scorable | 0.9917355    | 0.8339989    |
| #### Bn-A09-p25045741 | A-genome specific (napus-rapa)     | 1            | 0.8462481    | not scorable | not scorable | 0.9917355    | 0.7753516    |
| #### Bn-A09-p25046127 | A-genome specific (napus-rapa)     | 0.9952153    | 0.7359136    | not scorable | not scorable | 0.9917355    | 0.5838943    |
| #### Bn-A09-p25046263 | A-genome specific (napus-rapa)     | 1            | 0.8251249    | not scorable | not scorable | 1            | 0.8605184    |
| #### Bn-A09-p25050662 | A-genome specific (rapa only)      | not scorable | not scorable | not scorable | not scorable | 0.5867769    | 0.9095428    |
| #### Bn-A09-p25054325 | A-genome specific (napus-rapa)     | 0.9880383    | 0.5871887    | not scorable | not scorable | 0.9917355    | 0.7398267    |
| #### Bn-A09-p25076813 | A-genome specific (napus-rapa)     | 0.9976076    | 0.3742023    | not scorable | not scorable | 0.9917355    | 0.5859911    |
| #### Bn-A09-p25090295 | A-genome specific (napus-rapa)     | 0.9976076    | 0.5507737    | not scorable | not scorable | 0.9834711    | 0.8008876    |
| #### Bn-A09-p25113239 | A-genome specific (napus-rapa)     | 1            | 0.7307812    | not scorable | not scorable | 1            | 0.6692175    |
| #### Bn-A09-p25113520 | A-genome specific (napus-rapa)     | 0.9976076    | 0.7144852    | not scorable | not scorable | 0.9917355    | 0.7380748    |
| #### Bn-A09-p25128018 | A-genome specific (napus-rapa)     | 0.9928229    | 0.8070017    | not scorable | not scorable | 0.9669421    | 0.8234955    |
| #### Bn-A09-p25133968 | A-genome specific (napus-rapa)     | 1            | 0.3564835    | not scorable | not scorable | 0.9917355    | 0.6798306    |
| #### Bn-A09-p25139418 | A-genome specific (napus-rapa)     | 0.9545454    | 0.7558942    | not scorable | not scorable | 0.5867769    | 0.8004356    |
| #### Bn-A09-p25139597 | A-genome specific (napus-rapa)     | 1            | 0.4595054    | not scorable | not scorable | 0.5785124    | 0.7409972    |
| #### Bn-A09-p25141537 | A-genome specific (napus-rapa)     | 0.9760765    | 0.4777034    | not scorable | not scorable | 0.9834711    | 0.6367138    |
| #### Bn-A09-p25155338 | A-genome specific (napus-rapa)     | 1            | 0.8052281    | not scorable | not scorable | 1            | 0.7803517    |

|                       |                                |              |              |              |              |           |           |
|-----------------------|--------------------------------|--------------|--------------|--------------|--------------|-----------|-----------|
| #### Bn-A09-p25156399 | A-genome specific (napus-rapa) | 0.9880383    | 0.7955864    | not scorable | not scorable | 1         | 0.9478795 |
| #### Bn-A09-p25166951 | A-genome specific (napus-rapa) | 0.9928229    | 0.7592916    | not scorable | not scorable | 1         | 0.9417425 |
| #### Bn-A09-p25174630 | A-genome specific (napus-rapa) | 1            | 0.5127629    | not scorable | not scorable | 0.9917355 | 0.86121   |
| #### Bn-A09-p25187073 | A-genome specific (napus-rapa) | 1            | 0.8676841    | not scorable | not scorable | 1         | 0.7428835 |
| #### Bn-A09-p25212730 | A-genome specific (napus-rapa) | 0.9976076    | 0.5153338    | not scorable | not scorable | 0.9917355 | 0.8190902 |
| #### Bn-A09-p25224568 | A-genome specific (napus-rapa) | 0.9904306    | 0.4554019    | not scorable | not scorable | 1         | 0.6795005 |
| #### Bn-A09-p25236454 | A-genome specific (napus-rapa) | 0.9976076    | 0.7104652    | not scorable | not scorable | 1         | 0.7968681 |
| #### Bn-A09-p25236781 | A-genome specific (napus-rapa) | 0.9952153    | 0.7562177    | not scorable | not scorable | 0.9834711 | 0.7004686 |
| #### Bn-A09-p25237569 | A-genome specific (napus-rapa) | 0.9976076    | 0.5321769    | not scorable | not scorable | 1         | 0.8908554 |
| #### Bn-A09-p25238294 | A-genome specific (napus-rapa) | 0.9952153    | 0.4252291    | not scorable | not scorable | 0.9834711 | 0.7451816 |
| #### Bn-A09-p25243519 | A-genome specific (napus-rapa) | 0.9928229    | 0.348151     | not scorable | not scorable | 1         | 0.7758519 |
| #### Bn-A09-p25253827 | A-genome specific (napus-rapa) | 0.9928229    | 0.6761757    | not scorable | not scorable | 1         | 0.7239622 |
| #### Bn-A09-p25269364 | A-genome specific (napus-rapa) | 0.9952153    | 0.2391102    | not scorable | not scorable | 0.9917355 | 0.7273124 |
| #### Bn-A09-p25280192 | A-genome specific (napus-rapa) | 0.9928229    | 0.2937093    | not scorable | not scorable | 1         | 0.8396751 |
| #### Bn-A09-p25291094 | A-genome specific (rapa only)  | not scorable | not scorable | not scorable | not scorable | 0.9834711 | 0.7998216 |
| #### Bn-A09-p25309174 | A-genome specific (napus-rapa) | 0.9976076    | 0.7290323    | not scorable | not scorable | 0.9834711 | 0.7912417 |
| #### Bn-A09-p25309514 | A-genome specific (napus-rapa) | 0.9976076    | 0.8541786    | not scorable | not scorable | 0.9917355 | 0.7402171 |
| #### Bn-A09-p25316014 | A-genome specific (napus-rapa) | 0.9832536    | 0.5550537    | not scorable | not scorable | 1         | 0.7621915 |
| #### Bn-A09-p25316922 | A-genome specific (napus-rapa) | 1            | 0.79064      | not scorable | not scorable | 0.9834711 | 0.6706139 |
| #### Bn-A09-p25319349 | A-genome specific (napus-rapa) | 0.9856459    | 0.7717022    | not scorable | not scorable | 0.9917355 | 0.7635664 |
| #### Bn-A09-p25319672 | A-genome specific (napus-rapa) | 0.9808612    | 0.4071682    | not scorable | not scorable | 0.9917355 | 0.6889712 |
| #### Bn-A09-p25320119 | A-genome specific (napus-rapa) | 0.9928229    | 0.8277016    | not scorable | not scorable | 0.9834711 | 0.6796659 |
| #### Bn-A09-p25320259 | A-genome specific (napus-rapa) | 0.9952153    | 0.8338675    | not scorable | not scorable | 1         | 0.7782657 |
| #### Bn-A09-p25320373 | A-genome specific (napus-rapa) | 0.9760765    | 0.7256362    | not scorable | not scorable | 0.9834711 | 0.7477199 |
| #### Bn-A09-p25320436 | A-genome specific (napus-rapa) | 0.9952153    | 0.7833192    | not scorable | not scorable | 1         | 0.8681973 |
| #### Bn-A09-p25324332 | A-genome specific (napus-rapa) | 0.9808612    | 0.7741404    | not scorable | not scorable | 1         | 0.8202553 |
| #### Bn-A09-p25336380 | A-genome specific (napus-rapa) | 0.9928229    | 0.8067458    | not scorable | not scorable | 0.9834711 | 0.7766457 |
| #### Bn-A09-p25336452 | A-genome specific (napus-rapa) | 1            | 0.4780874    | not scorable | not scorable | 1         | 0.7232783 |
| #### Bn-A09-p25372544 | A-genome specific (napus-rapa) | 1            | 0.2720305    | not scorable | not scorable | 1         | 0.6795815 |
| #### Bn-A09-p25376723 | A-genome specific (napus-rapa) | 0.9952153    | 0.5891554    | not scorable | not scorable | 0.9834711 | 0.7033808 |
| #### Bn-A09-p2538450  | A-genome specific (napus-rapa) | 0.9688995    | 0.7173517    | not scorable | not scorable | 0.9917355 | 0.6946343 |
| #### Bn-A09-p25440365 | A-genome specific (napus-rapa) | 1            | 0.4615228    | not scorable | not scorable | 0.9917355 | 0.7447638 |
| #### Bn-A09-p25443253 | A-genome specific (napus-rapa) | 1            | 0.8784515    | not scorable | not scorable | 0.9834711 | 0.8051868 |

|                       |                                |              |              |              |              |              |              |
|-----------------------|--------------------------------|--------------|--------------|--------------|--------------|--------------|--------------|
| #### Bn-A09-p25443581 | A-genome specific (rapa only)  | not scorable | not scorable | not scorable | not scorable | 0.9917355    | 0.7465044    |
| #### Bn-A09-p25455888 | A-genome specific (napus-rapa) | 1            | 0.9136386    | not scorable | not scorable | 1            | 0.8040873    |
| #### Bn-A09-p2548356  | A-genome specific (napus-rapa) | 0.9760765    | 0.8266723    | not scorable | not scorable | 0.9834711    | 0.6860555    |
| #### Bn-A09-p2548974  | A-genome specific (napus-rapa) | 0.9497608    | 0.6858408    | not scorable | not scorable | 1            | 0.743357     |
| #### Bn-A09-p25491749 | A-genome specific (napus-rapa) | 1            | 0.9180646    | not scorable | not scorable | 1            | 0.7594752    |
| #### Bn-A09-p25492079 | A-genome specific (napus-rapa) | 1            | 0.4777797    | not scorable | not scorable | 0.9917355    | 0.7688598    |
| #### Bn-A09-p25492986 | A-genome specific (napus-rapa) | 0.9425837    | 0.8552207    | not scorable | not scorable | 0.7024794    | 0.782307     |
| #### Bn-A09-p25493173 | A-genome specific (napus-rapa) | 0.9976076    | 0.8002255    | not scorable | not scorable | 1            | 0.6919443    |
| #### Bn-A09-p25508290 | A-genome specific (napus-rapa) | 0.9904306    | 0.4764057    | not scorable | not scorable | 1            | 0.8313149    |
| #### Bn-A09-p25523186 | genome unspecific (all in)     | 1            | 0.440895     | 1            | 0.7890292    | 0.9917355    | 0.6847896    |
| #### Bn-A09-p25532977 | A-genome specific (napus-rapa) | 1            | 0.7384391    | not scorable | not scorable | 0.9834711    | 0.7315877    |
| #### Bn-A09-p25536905 | A-genome specific (napus-rapa) | 1            | 0.8380181    | not scorable | not scorable | 0.9834711    | 0.7029426    |
| #### Bn-A09-p25543730 | A-genome specific (napus-rapa) | 1            | 0.3832232    | not scorable | not scorable | 0.9834711    | 0.7489113    |
| #### Bn-A09-p2555630  | A-genome specific (rapa only)  | not scorable | not scorable | not scorable | not scorable | 0.9917355    | 0.8267591    |
| #### Bn-A09-p25558236 | A-genome specific (napus-rapa) | 0.9976076    | 0.6520244    | not scorable | not scorable | 0.9752066    | 0.6670989    |
| #### Bn-A09-p2557243  | A-genome specific (rapa only)  | not scorable | not scorable | not scorable | not scorable | 0.9917355    | 0.9301409    |
| #### Bn-A09-p25575397 | A-genome specific (napus-rapa) | 0.9832536    | 0.7062094    | not scorable | not scorable | 0.9917355    | 0.8400552    |
| #### Bn-A09-p25618420 | A-genome specific (rapa only)  | not scorable | not scorable | not scorable | not scorable | 0.9834711    | 0.7649652    |
| #### Bn-A09-p25633407 | A-genome specific (napus-rapa) | 0.9928229    | 0.8341333    | not scorable | not scorable | 0.9834711    | 0.6972542    |
| #### Bn-A09-p25635243 | A-genome specific (napus-rapa) | 1            | 0.8641478    | not scorable | not scorable | 1            | 0.7782916    |
| #### Bn-A09-p25636375 | A-genome specific (napus-rapa) | 1            | 0.7936805    | not scorable | not scorable | 0.9669421    | 0.7493464    |
| #### Bn-A09-p25637924 | A-genome specific (napus-rapa) | 1            | 0.9446349    | not scorable | not scorable | 1            | 0.8908595    |
| #### Bn-A09-p25638072 | A-genome specific (napus-rapa) | 1            | 0.8833996    | not scorable | not scorable | 1            | 0.8931593    |
| #### Bn-A09-p25638579 | A-genome specific (napus-rapa) | 0.9401914    | 0.7733161    | not scorable | not scorable | 1            | 0.7308909    |
| #### Bn-A09-p25652958 | A-genome specific (napus-rapa) | 1            | 0.8171955    | not scorable | not scorable | 1            | 0.7651085    |
| #### Bn-A09-p25652968 | A-genome specific (napus-rapa) | 1            | 0.9095414    | not scorable | not scorable | 0.9834711    | 0.7324387    |
| #### Bn-A09-p25653162 | A-genome specific (napus-rapa) | 0.9976076    | 0.8216871    | not scorable | not scorable | 0.9917355    | 0.8327492    |
| #### Bn-A09-p25654791 | A-genome specific (rapa only)  | not scorable | not scorable | not scorable | not scorable | 0.9917355    | 0.8058633    |
| #### Bn-A09-p25656794 | A-genome specific (napus-rapa) | 1            | 0.4555235    | not scorable | not scorable | 0.9752066    | 0.6837488    |
| #### Bn-A09-p25660797 | A-genome specific (napus-rapa) | 1            | 0.9198343    | not scorable | not scorable | 0.9752066    | 0.7309852    |
| #### Bn-A09-p25662730 | A-genome specific (napus-rapa) | 1            | 0.7624488    | not scorable | not scorable | 0.9917355    | 0.6905662    |
| #### Bn-A09-p25670603 | A-genome specific (napus-rapa) | 1            | 0.839586     | not scorable | not scorable | 1            | 0.769875     |
| #### Bn-A09-p25680334 | napus specific                 | 0.5526316    | 0.6346412    | not scorable | not scorable | not scorable | not scorable |

|                       |                                |              |              |              |              |           |           |
|-----------------------|--------------------------------|--------------|--------------|--------------|--------------|-----------|-----------|
| #### Bn-A09-p25695942 | A-genome specific (napus-rapa) | 0.9976076    | 0.3162028    | not scorable | not scorable | 0.9917355 | 0.705734  |
| #### Bn-A09-p2570919  | A-genome specific (rapa only)  | not scorable | not scorable | not scorable | not scorable | 0.9917355 | 0.702387  |
| #### Bn-A09-p25735963 | A-genome specific (napus-rapa) | 0.9952153    | 0.7951888    | not scorable | not scorable | 0.9917355 | 0.6514003 |
| #### Bn-A09-p25736089 | A-genome specific (napus-rapa) | 0.9952153    | 0.7669372    | not scorable | not scorable | 0.9834711 | 0.7731506 |
| #### Bn-A09-p25736905 | A-genome specific (napus-rapa) | 0.9976076    | 0.8890016    | not scorable | not scorable | 1         | 0.8948976 |
| #### Bn-A09-p25738255 | A-genome specific (napus-rapa) | 0.9952153    | 0.7591931    | not scorable | not scorable | 1         | 0.7645145 |
| #### Bn-A09-p25738298 | A-genome specific (napus-rapa) | 0.9904306    | 0.7743803    | not scorable | not scorable | 0.9917355 | 0.7236937 |
| #### Bn-A09-p25739064 | A-genome specific (napus-rapa) | 0.9952153    | 0.733708     | not scorable | not scorable | 1         | 0.7725505 |
| #### Bn-A09-p25740281 | A-genome specific (napus-rapa) | 0.9880383    | 0.6665267    | not scorable | not scorable | 0.9834711 | 0.6880801 |
| #### Bn-A09-p25747213 | A-genome specific (napus-rapa) | 0.9880383    | 0.8803753    | not scorable | not scorable | 0.9917355 | 0.8554773 |
| #### Bn-A09-p25747305 | A-genome specific (napus-rapa) | 1            | 0.8680544    | not scorable | not scorable | 0.9834711 | 0.8065946 |
| #### Bn-A09-p25749386 | A-genome specific (napus-rapa) | 0.9832536    | 0.7817187    | not scorable | not scorable | 0.9917355 | 0.7890227 |
| #### Bn-A09-p25750328 | A-genome specific (napus-rapa) | 0.9784689    | 0.6376797    | not scorable | not scorable | 0.9752066 | 0.6582332 |
| #### Bn-A09-p25777776 | A-genome specific (napus-rapa) | 0.9928229    | 0.3234162    | not scorable | not scorable | 0.9834711 | 0.6005818 |
| #### Bn-A09-p25779397 | A-genome specific (napus-rapa) | 1            | 0.5765454    | not scorable | not scorable | 0.9421487 | 0.598233  |
| #### Bn-A09-p25793645 | A-genome specific (napus-rapa) | 0.9928229    | 0.4427266    | not scorable | not scorable | 0.9917355 | 0.6924807 |
| #### Bn-A09-p25804956 | A-genome specific (napus-rapa) | 1            | 0.5496111    | not scorable | not scorable | 0.9752066 | 0.6541389 |
| #### Bn-A09-p25821544 | A-genome specific (napus-rapa) | 0.9832536    | 0.822781     | not scorable | not scorable | 0.7603306 | 0.7816781 |
| #### Bn-A09-p25823689 | A-genome specific (napus-rapa) | 1            | 0.3273914    | not scorable | not scorable | 1         | 0.764954  |
| #### Bn-A09-p25832607 | A-genome specific (napus-rapa) | 1            | 0.3554049    | not scorable | not scorable | 1         | 0.7486851 |
| #### Bn-A09-p25852108 | A-genome specific (napus-rapa) | 0.9449761    | 0.7698346    | not scorable | not scorable | 0.9917355 | 0.752178  |
| #### Bn-A09-p25872184 | A-genome specific (napus-rapa) | 0.9928229    | 0.3243808    | not scorable | not scorable | 1         | 0.727636  |
| #### Bn-A09-p25884785 | A-genome specific (napus-rapa) | 0.9952153    | 0.7674811    | not scorable | not scorable | 0.9917355 | 0.7441507 |
| #### Bn-A09-p25886596 | A-genome specific (napus-rapa) | 1            | 0.9147701    | not scorable | not scorable | 1         | 0.7698878 |
| #### Bn-A09-p25894427 | A-genome specific (napus-rapa) | 0.9019139    | 0.7543752    | not scorable | not scorable | 1         | 0.6180077 |
| #### Bn-A09-p25899239 | A-genome specific (napus-rapa) | 0.9712918    | 0.7908757    | not scorable | not scorable | 1         | 0.8320708 |
| #### Bn-A09-p25899875 | A-genome specific (napus-rapa) | 0.9856459    | 0.3359706    | not scorable | not scorable | 1         | 0.7378306 |
| #### Bn-A09-p25904062 | A-genome specific (napus-rapa) | 0.9760765    | 0.4739151    | not scorable | not scorable | 0.9917355 | 0.7996262 |
| #### Bn-A09-p25923686 | A-genome specific (napus-rapa) | 1            | 0.5349109    | not scorable | not scorable | 0.9917355 | 0.7067176 |
| #### Bn-A09-p25942252 | A-genome specific (napus-rapa) | 1            | 0.919562     | not scorable | not scorable | 1         | 0.8088477 |
| #### Bn-A09-p25960397 | A-genome specific (napus-rapa) | 1            | 0.3625049    | not scorable | not scorable | 0.9917355 | 0.818265  |
| #### Bn-A09-p25980030 | A-genome specific (napus-rapa) | 1            | 0.8646559    | not scorable | not scorable | 1         | 0.689553  |
| #### Bn-A09-p25980096 | A-genome specific (napus-rapa) | 1            | 0.9274309    | not scorable | not scorable | 0.9917355 | 0.7562969 |

|                       |                                |              |              |              |              |              |              |
|-----------------------|--------------------------------|--------------|--------------|--------------|--------------|--------------|--------------|
| #### Bn-A09-p25980581 | A-genome specific (napus-rapa) | 0.9976076    | 0.4932858    | not scorable | not scorable | 0.9917355    | 0.6478282    |
| #### Bn-A09-p26008548 | A-genome specific (napus-rapa) | 1            | 0.8657396    | not scorable | not scorable | 1            | 0.7286614    |
| #### Bn-A09-p26008706 | A-genome specific (napus-rapa) | 1            | 0.4097505    | not scorable | not scorable | 1            | 0.684692     |
| #### Bn-A09-p26054532 | A-genome specific (napus-rapa) | 1            | 0.3559574    | not scorable | not scorable | 0.9917355    | 0.7497823    |
| #### Bn-A09-p26062484 | A-genome specific (napus-rapa) | 1            | 0.3464638    | not scorable | not scorable | 1            | 0.6295599    |
| #### Bn-A09-p26081899 | A-genome specific (rapa only)  | not scorable | not scorable | not scorable | not scorable | 0.7355372    | 0.8284751    |
| #### Bn-A09-p260819   | A-genome specific (rapa only)  | not scorable | not scorable | not scorable | not scorable | 0.9752066    | 0.8172919    |
| #### Bn-A09-p2609043  | A-genome specific (napus-rapa) | 0.9497608    | 0.4215996    | not scorable | not scorable | 0.9752066    | 0.7870836    |
| #### Bn-A09-p26101323 | A-genome specific (napus-rapa) | 0.9856459    | 0.9020152    | not scorable | not scorable | 0.9173554    | 0.8520483    |
| #### Bn-A09-p26133745 | A-genome specific (napus-rapa) | 1            | 0.3346789    | not scorable | not scorable | 0.9917355    | 0.8139578    |
| #### Bn-A09-p26136023 | napus specific                 | 1            | 0.3702573    | not scorable | not scorable | not scorable | not scorable |
| #### Bn-A09-p26138669 | A-genome specific (napus-rapa) | 1            | 0.7421492    | not scorable | not scorable | 1            | 0.6565878    |
| #### Bn-A09-p26141650 | A-genome specific (napus-rapa) | 1            | 0.8570763    | not scorable | not scorable | 0.9917355    | 0.7815464    |
| #### Bn-A09-p26142571 | A-genome specific (napus-rapa) | 1            | 0.8285912    | not scorable | not scorable | 1            | 0.6782585    |
| #### Bn-A09-p26144798 | A-genome specific (napus-rapa) | 1            | 0.8221215    | not scorable | not scorable | 0.9917355    | 0.7022226    |
| #### Bn-A09-p26158627 | A-genome specific (napus-rapa) | 0.9976076    | 0.9041764    | not scorable | not scorable | 0.9752066    | 0.7427483    |
| #### Bn-A09-p26158694 | A-genome specific (napus-rapa) | 1            | 0.5286986    | not scorable | not scorable | 1            | 0.8401439    |
| #### Bn-A09-p26186084 | A-genome specific (napus-rapa) | 0.9425837    | 0.9223024    | not scorable | not scorable | 0.8842975    | 0.8019208    |
| #### Bn-A09-p26244223 | A-genome specific (napus-rapa) | 0.9976076    | 0.5008506    | not scorable | not scorable | 0.9752066    | 0.6399219    |
| #### Bn-A09-p26246760 | A-genome specific (napus-rapa) | 0.9952153    | 0.7318522    | not scorable | not scorable | 0.9917355    | 0.8000373    |
| #### Bn-A09-p26294118 | A-genome specific (napus-rapa) | 1            | 0.9423392    | not scorable | not scorable | 1            | 0.9161115    |
| #### Bn-A09-p26301343 | A-genome specific (napus-rapa) | 1            | 0.4842066    | not scorable | not scorable | 1            | 0.801259     |
| #### Bn-A09-p26304509 | napus specific                 | 1            | 0.9135851    | not scorable | not scorable | not scorable | not scorable |
| #### Bn-A09-p26307738 | A-genome specific (napus-rapa) | 1            | 0.9357589    | not scorable | not scorable | 1            | 0.9214464    |
| #### Bn-A09-p26323563 | A-genome specific (napus-rapa) | 1            | 0.7914145    | not scorable | not scorable | 1            | 0.7342311    |
| #### Bn-A09-p26346701 | A-genome specific (napus-rapa) | 1            | 0.9113243    | not scorable | not scorable | 1            | 0.869277     |
| #### Bn-A09-p26347498 | A-genome specific (napus-rapa) | 0.9904306    | 0.4480578    | not scorable | not scorable | 0.7190083    | 0.7531804    |
| #### Bn-A09-p26347709 | A-genome specific (napus-rapa) | 0.9784689    | 0.911304     | not scorable | not scorable | 1            | 0.7872695    |
| #### Bn-A09-p26349839 | A-genome specific (napus-rapa) | 1            | 0.8637698    | not scorable | not scorable | 0.9917355    | 0.8048069    |
| #### Bn-A09-p26353266 | A-genome specific (napus-rapa) | 1            | 0.8848283    | not scorable | not scorable | 0.9917355    | 0.7341648    |
| #### Bn-A09-p26355161 | A-genome specific (rapa only)  | not scorable | not scorable | not scorable | not scorable | 1            | 0.7689856    |
| #### Bn-A09-p26394411 | A-genome specific (napus-rapa) | 1            | 0.7216443    | not scorable | not scorable | 1            | 0.8229336    |
| #### Bn-A09-p26397574 | A-genome specific (napus-rapa) | 1            | 0.3827721    | not scorable | not scorable | 0.9917355    | 0.7474942    |



|                       |                                   |              |              |              |              |              |              |
|-----------------------|-----------------------------------|--------------|--------------|--------------|--------------|--------------|--------------|
| #### Bn-A09-p26400930 | A-genome specific (napus-rapa)    | 0.9832536    | 0.8510795    | not scorable | not scorable | 0.9752066    | 0.799178     |
| #### Bn-A09-p26451184 | A-genome specific (napus-rapa)    | 0.9976076    | 0.3592877    | not scorable | not scorable | 0.9917355    | 0.7212178    |
| #### Bn-A09-p26456605 | genome unspecific (oleracea-rapa) | not scorable | not scorable |              | 1            | 0.7905938    | 0.8760331    |
| #### Bn-A09-p26461272 | A-genome specific (napus-rapa)    | 1            | 0.6908552    | not scorable | not scorable | 1            | 0.6944501    |
| #### Bn-A09-p26469418 | C-genome specific (oleracea only) | not scorable | not scorable | 0.9069768    | 0.3756142    | not scorable | not scorable |
| #### Bn-A09-p264743   | A-genome specific (napus-rapa)    | 0.9736842    | 0.7373517    | not scorable | not scorable | 0.9752066    | 0.6577763    |
| #### Bn-A09-p26477673 | A-genome specific (napus-rapa)    | 1            | 0.364263     | not scorable | not scorable | 1            | 0.6768198    |
| #### Bn-A09-p26481517 | A-genome specific (napus-rapa)    | 1            | 0.9195426    | not scorable | not scorable | 1            | 0.8301644    |
| #### Bn-A09-p264855   | A-genome specific (napus-rapa)    | 0.9736842    | 0.7653093    | not scorable | not scorable | 0.9834711    | 0.6921301    |
| #### Bn-A09-p26492309 | A-genome specific (rapa only)     | not scorable | not scorable | not scorable | not scorable | 0.9834711    | 0.6305805    |
| #### Bn-A09-p26517614 | A-genome specific (napus-rapa)    | 0.9928229    | 0.8552446    | not scorable | not scorable | 1            | 0.7326261    |
| #### Bn-A09-p26521987 | A-genome specific (napus-rapa)    | 0.9928229    | 0.8761559    | not scorable | not scorable | 1            | 0.785912     |
| #### Bn-A09-p26522069 | A-genome specific (napus-rapa)    | 0.9928229    | 0.8831887    | not scorable | not scorable | 1            | 0.7684094    |
| #### Bn-A09-p26524436 | A-genome specific (napus-rapa)    | 1            | 0.5161095    | not scorable | not scorable | 0.9917355    | 0.7928575    |
| #### Bn-A09-p26530290 | A-genome specific (napus-rapa)    | 1            | 0.8313699    | not scorable | not scorable | 0.9917355    | 0.799201     |
| #### Bn-A09-p26532740 | A-genome specific (napus-rapa)    | 1            | 0.6179535    | not scorable | not scorable | 0.9917355    | 0.6611509    |
| #### Bn-A09-p26532777 | A-genome specific (napus-rapa)    | 1            | 0.6230366    | not scorable | not scorable | 1            | 0.6439063    |
| #### Bn-A09-p26543723 | A-genome specific (napus-rapa)    | 1            | 0.5485523    | not scorable | not scorable | 1            | 0.8290979    |
| #### Bn-A09-p26547937 | A-genome specific (napus-rapa)    | 1            | 0.6305527    | not scorable | not scorable | 1            | 0.6784759    |
| #### Bn-A09-p26570681 | A-genome specific (napus-rapa)    | 0.9449761    | 0.942239     | not scorable | not scorable | 0.7438017    | 0.8370926    |
| #### Bn-A09-p26577478 | A-genome specific (napus-rapa)    | 1            | 0.9204668    | not scorable | not scorable | 0.9834711    | 0.7631294    |
| #### Bn-A09-p26578444 | A-genome specific (napus-rapa)    | 1            | 0.3398159    | not scorable | not scorable | 0.9917355    | 0.6250975    |
| #### Bn-A09-p26578867 | A-genome specific (napus-rapa)    | 1            | 0.8805771    | not scorable | not scorable | 0.9917355    | 0.6623194    |
| #### Bn-A09-p26606418 | A-genome specific (napus-rapa)    | 1            | 0.7000986    | not scorable | not scorable | 0.9917355    | 0.6720926    |
| #### Bn-A09-p26620030 | A-genome specific (rapa only)     | not scorable | not scorable | not scorable | not scorable | 1            | 0.6500368    |
| #### Bn-A09-p26620447 | A-genome specific (napus-rapa)    | 1            | 0.3953337    | not scorable | not scorable | 0.9669421    | 0.7208327    |
| #### Bn-A09-p26625665 | A-genome specific (napus-rapa)    | 1            | 0.6751631    | not scorable | not scorable | 0.9917355    | 0.7455524    |
| #### Bn-A09-p26637002 | A-genome specific (napus-rapa)    | 1            | 0.5788181    | not scorable | not scorable | 0.9752066    | 0.6045591    |
| #### Bn-A09-p26662535 | A-genome specific (napus-rapa)    | 1            | 0.8910889    | not scorable | not scorable | 1            | 0.9051782    |
| #### Bn-A09-p26721456 | A-genome specific (napus-rapa)    | 1            | 0.9293141    | not scorable | not scorable | 0.9917355    | 0.8323846    |
| #### Bn-A09-p26721683 | A-genome specific (napus-rapa)    | 1            | 0.8460418    | not scorable | not scorable | 0.9752066    | 0.7401236    |
| #### Bn-A09-p26721815 | A-genome specific (napus-rapa)    | 1            | 0.8786294    | not scorable | not scorable | 1            | 0.8353261    |
| #### Bn-A09-p26727566 | A-genome specific (napus-rapa)    | 1            | 0.3973678    | not scorable | not scorable | 1            | 0.7881222    |

|                       |                                   |              |              |              |              |              |              |
|-----------------------|-----------------------------------|--------------|--------------|--------------|--------------|--------------|--------------|
| #### Bn-A09-p26761130 | A-genome specific (napus-rapa)    | 1            | 0.6120684    | not scorable | not scorable | 0.7355372    | 0.8205717    |
| #### Bn-A09-p26765098 | A-genome specific (napus-rapa)    | 1            | 0.9314895    | not scorable | not scorable | 0.9917355    | 0.748535     |
| #### Bn-A09-p26809036 | A-genome specific (napus-rapa)    | 1            | 0.8311043    | not scorable | not scorable | 1            | 0.7086643    |
| #### Bn-A09-p26812073 | A-genome specific (rapa only)     | not scorable | not scorable | not scorable | not scorable | 0.9834711    | 0.8103427    |
| #### Bn-A09-p26825500 | A-genome specific (napus-rapa)    | 0.9976076    | 0.5448092    | not scorable | not scorable | 1            | 0.5796849    |
| #### Bn-A09-p26831710 | A-genome specific (napus-rapa)    | 1            | 0.9143033    | not scorable | not scorable | 1            | 0.7781999    |
| #### Bn-A09-p26864664 | A-genome specific (napus-rapa)    | 0.9952153    | 0.7287819    | not scorable | not scorable | 0.9752066    | 0.6754633    |
| #### Bn-A09-p26873627 | all not scorable                  | not scorable | not scorable | not scorable | not scorable | not scorable | not scorable |
| #### Bn-A09-p26874249 | A-genome specific (napus-rapa)    | 1            | 0.8279201    | not scorable | not scorable | 0.9917355    | 0.7859643    |
| #### Bn-A09-p26874996 | A-genome specific (napus-rapa)    | 1            | 0.9152418    | not scorable | not scorable | 1            | 0.7917989    |
| #### Bn-A09-p26875060 | A-genome specific (napus-rapa)    | 0.9952153    | 0.8450498    | not scorable | not scorable | 1            | 0.7852644    |
| #### Bn-A09-p26877444 | A-genome specific (rapa only)     | not scorable | not scorable | not scorable | not scorable | 0.9834711    | 0.666525     |
| #### Bn-A09-p26881902 | A-genome specific (napus-rapa)    | 1            | 0.3404989    | not scorable | not scorable | 0.9669421    | 0.6986736    |
| #### Bn-A09-p27036273 | A-genome specific (napus-rapa)    | 1            | 0.8202379    | not scorable | not scorable | 0.9917355    | 0.8122088    |
| #### Bn-A09-p27037200 | genome unspecific (all in)        | 1            | 0.4446907    |              | 1            | 0.7029791    | 0.9917355    |
| #### Bn-A09-p2710152  | A-genome specific (napus-rapa)    | 0.9449761    | 0.7239713    | not scorable | not scorable | 0.9752066    | 0.708131     |
| #### Bn-A09-p27103683 | A-genome specific (napus-rapa)    | 1            | 0.508893     | not scorable | not scorable | 1            | 0.7495286    |
| #### Bn-A09-p27108615 | genome unspecific (all in)        | 1            | 0.7449335    | 0.9147287    | 0.3605579    | 0.9917355    | 0.7785981    |
| #### Bn-A09-p27109839 | A-genome specific (napus-rapa)    | 1            | 0.4574713    | not scorable | not scorable | 0.9752066    | 0.7883735    |
| #### Bn-A09-p2711315  | A-genome specific (napus-rapa)    | 0.9617225    | 0.7120498    | not scorable | not scorable | 0.9669421    | 0.8150262    |
| #### Bn-A09-p2730673  | genome unspecific (all in)        | 0.9880383    | 0.418015     |              | 1            | 0.6843472    | 1            |
| #### Bn-A09-p2733282  | A-genome specific (napus-rapa)    | 0.9712918    | 0.581253     | not scorable | not scorable | 1            | 0.9205636    |
| #### Bn-A09-p27351028 | A-genome specific (napus-rapa)    | 1            | 0.4858461    | not scorable | not scorable | 0.9917355    | 0.7796878    |
| #### Bn-A09-p27351047 | genome unspecific (all in)        | 1            | 0.3816279    | 0.9922481    | 0.8115349    | 0.9834711    | 0.7369407    |
| #### Bn-A09-p27370873 | genome unspecific (oleracea-rapa) | not scorable | not scorable |              | 1            | 0.6615384    | 1            |
| #### Bn-A09-p27436536 | A-genome specific (napus-rapa)    | 1            | 0.5195655    | not scorable | not scorable | 0.9752066    | 0.7149543    |
| #### Bn-A09-p27456915 | A-genome specific (napus-rapa)    | 1            | 0.9267406    | not scorable | not scorable | 1            | 0.9277653    |
| #### Bn-A09-p27529804 | A-genome specific (napus-rapa)    | 1            | 0.6854668    | not scorable | not scorable | 0.9834711    | 0.7238413    |
| #### Bn-A09-p27531548 | A-genome specific (napus-rapa)    | 1            | 0.7274882    | not scorable | not scorable | 0.9917355    | 0.62446      |
| #### Bn-A09-p27579758 | A-genome specific (napus-rapa)    | 1            | 0.5649461    | not scorable | not scorable | 1            | 0.8503642    |
| #### Bn-A09-p27580497 | A-genome specific (napus-rapa)    | 1            | 0.8526161    | not scorable | not scorable | 1            | 0.7716438    |
| #### Bn-A09-p27607559 | A-genome specific (napus-rapa)    | 1            | 0.8834949    | not scorable | not scorable | 0.9917355    | 0.5881888    |
| #### Bn-A09-p27610064 | genome unspecific (all in)        | 0.9952153    | 0.6221774    | 0.9689922    | 0.630191     | 1            | 0.6484397    |

|                       |                                   |              |              |              |              |              |              |
|-----------------------|-----------------------------------|--------------|--------------|--------------|--------------|--------------|--------------|
| #### Bn-A09-p27611114 | A-genome specific (napus-rapa)    | 1            | 0.912572     | not scorable | not scorable | 0.9917355    | 0.757465     |
| #### Bn-A09-p27614316 | A-genome specific (napus-rapa)    | 1            | 0.8395578    | not scorable | not scorable | 1            | 0.7688181    |
| #### Bn-A09-p27628825 | A-genome specific (napus-rapa)    | 0.9976076    | 0.9023602    | not scorable | not scorable | 0.9669421    | 0.728611     |
| #### Bn-A09-p27637967 | A-genome specific (napus-rapa)    | 0.9976076    | 0.4587538    | not scorable | not scorable | 1            | 0.8005722    |
| #### Bn-A09-p27642687 | A-genome specific (napus-rapa)    | 1            | 0.9389927    | not scorable | not scorable | 1            | 0.7799561    |
| #### Bn-A09-p27642788 | A-genome specific (napus-rapa)    | 1            | 0.9305049    | not scorable | not scorable | 0.9752066    | 0.7184989    |
| #### Bn-A09-p27642842 | A-genome specific (napus-rapa)    | 1            | 0.9389927    | not scorable | not scorable | 0.9917355    | 0.7392815    |
| #### Bn-A09-p27652538 | A-genome specific (rapa only)     | not scorable | not scorable | not scorable | not scorable | 1            | 0.9175813    |
| #### Bn-A09-p27656599 | A-genome specific (napus-rapa)    | 1            | 0.5569506    | not scorable | not scorable | 0.9917355    | 0.7958583    |
| #### Bn-A09-p27658438 | A-genome specific (napus-rapa)    | 1            | 0.9011671    | not scorable | not scorable | 1            | 0.6694198    |
| #### Bn-A09-p27666329 | A-genome specific (napus-rapa)    | 0.9976076    | 0.8912757    | not scorable | not scorable | 1            | 0.8270259    |
| #### Bn-A09-p27673543 | A-genome specific (napus-rapa)    | 1            | 0.9041511    | not scorable | not scorable | 1            | 0.7371384    |
| #### Bn-A09-p27678823 | A-genome specific (napus-rapa)    | 1            | 0.714629     | not scorable | not scorable | 0.9834711    | 0.719985     |
| #### Bn-A09-p27688300 | A-genome specific (napus-rapa)    | 0.9952153    | 0.7676174    | not scorable | not scorable | 1            | 0.7359099    |
| #### Bn-A09-p27772299 | genome unspecific (oleracea-rapa) | not scorable | not scorable | 0.9844961    | 0.8401572    | 0.9917355    | 0.7869544    |
| #### Bn-A09-p27775326 | A-genome specific (napus-rapa)    | 1            | 0.8209652    | not scorable | not scorable | 0.9586777    | 0.7096214    |
| #### Bn-A09-p27777480 | all not scorable                  | not scorable | not scorable | not scorable | not scorable | not scorable | not scorable |
| #### Bn-A09-p27787013 | A-genome specific (rapa only)     | not scorable | not scorable | not scorable | not scorable | 0.9669421    | 0.8135551    |
| #### Bn-A09-p27830289 | A-genome specific (napus-rapa)    | 1            | 0.7913421    | not scorable | not scorable | 1            | 0.7763173    |
| #### Bn-A09-p27864717 | A-genome specific (napus-rapa)    | 0.9952153    | 0.576607     | not scorable | not scorable | 0.9917355    | 0.8250067    |
| #### Bn-A09-p27867800 | A-genome specific (napus-rapa)    | 0.9856459    | 0.7831005    | not scorable | not scorable | 0.9917355    | 0.7761374    |
| #### Bn-A09-p27869414 | A-genome specific (napus-rapa)    | 1            | 0.8252548    | not scorable | not scorable | 1            | 0.6178517    |
| #### Bn-A09-p27873343 | A-genome specific (napus-rapa)    | 0.9976076    | 0.660013     | not scorable | not scorable | 1            | 0.4402596    |
| #### Bn-A09-p27886551 | A-genome specific (napus-rapa)    | 0.9976076    | 0.5436474    | not scorable | not scorable | 0.9917355    | 0.8163149    |
| #### Bn-A09-p27887024 | A-genome specific (rapa only)     | not scorable | not scorable | not scorable | not scorable | 1            | 0.827073     |
| #### Bn-A09-p27908768 | A-genome specific (napus-rapa)    | 1            | 0.9362358    | not scorable | not scorable | 1            | 0.7692035    |
| #### Bn-A09-p27918462 | A-genome specific (napus-rapa)    | 1            | 0.5314505    | not scorable | not scorable | 0.9917355    | 0.7945467    |
| #### Bn-A09-p27939579 | A-genome specific (napus-rapa)    | 1            | 0.5303448    | not scorable | not scorable | 0.9917355    | 0.6371468    |
| #### Bn-A09-p27943991 | A-genome specific (rapa only)     | not scorable | not scorable | not scorable | not scorable | 0.8264463    | 0.8516929    |
| #### Bn-A09-p27944522 | A-genome specific (napus-rapa)    | 0.8803828    | 0.8336471    | not scorable | not scorable | 0.8099173    | 0.747007     |
| #### Bn-A09-p27958031 | all not scorable                  | not scorable | not scorable | not scorable | not scorable | not scorable | not scorable |
| #### Bn-A09-p27965397 | A-genome specific (rapa only)     | not scorable | not scorable | not scorable | not scorable | 0.9421487    | 0.6641929    |
| #### Bn-A09-p27968747 | A-genome specific (napus-rapa)    | 0.9736842    | 0.790721     | not scorable | not scorable | 1            | 0.7506766    |

|                       |                                |              |              |              |              |           |           |
|-----------------------|--------------------------------|--------------|--------------|--------------|--------------|-----------|-----------|
| #### Bn-A09-p27969744 | A-genome specific (napus-rapa) | 0.9712918    | 0.7677513    | not scorable | not scorable | 0.9752066 | 0.7100145 |
| #### Bn-A09-p27974695 | A-genome specific (napus-rapa) | 0.9904306    | 0.7543263    | not scorable | not scorable | 0.9917355 | 0.7532527 |
| #### Bn-A09-p27975967 | A-genome specific (napus-rapa) | 0.9330143    | 0.6789165    | not scorable | not scorable | 0.9834711 | 0.697893  |
| #### Bn-A09-p27976341 | A-genome specific (napus-rapa) | 0.9760765    | 0.7677131    | not scorable | not scorable | 0.9586777 | 0.7293484 |
| #### Bn-A09-p27982460 | A-genome specific (rapa only)  | not scorable | not scorable | not scorable | not scorable | 1         | 0.8275868 |
| #### Bn-A09-p27982567 | A-genome specific (napus-rapa) | 0.9784689    | 0.738168     | not scorable | not scorable | 1         | 0.8170944 |
| #### Bn-A09-p27983743 | A-genome specific (napus-rapa) | 1            | 0.4886072    | not scorable | not scorable | 1         | 0.7864825 |
| #### Bn-A09-p27984417 | A-genome specific (rapa only)  | not scorable | not scorable | not scorable | not scorable | 0.7190083 | 0.9172811 |
| #### Bn-A09-p27992030 | A-genome specific (napus-rapa) | 0.8851675    | 0.9047539    | not scorable | not scorable | 0.9834711 | 0.765312  |
| #### Bn-A09-p28003463 | A-genome specific (napus-rapa) | 1            | 0.6382452    | not scorable | not scorable | 0.9917355 | 0.6820363 |
| #### Bn-A09-p28017415 | A-genome specific (napus-rapa) | 0.9856459    | 0.7628265    | not scorable | not scorable | 1         | 0.8027365 |
| #### Bn-A09-p28025169 | A-genome specific (napus-rapa) | 0.9880383    | 0.5714415    | not scorable | not scorable | 0.9834711 | 0.7116662 |
| #### Bn-A09-p28026997 | A-genome specific (napus-rapa) | 0.9856459    | 0.7927709    | not scorable | not scorable | 0.9834711 | 0.7637843 |
| #### Bn-A09-p28027675 | A-genome specific (napus-rapa) | 0.9736842    | 0.577642     | not scorable | not scorable | 0.9917355 | 0.8237606 |
| #### Bn-A09-p28027779 | A-genome specific (napus-rapa) | 0.9641148    | 0.4954897    | not scorable | not scorable | 0.9917355 | 0.7266544 |
| #### Bn-A09-p28041600 | A-genome specific (napus-rapa) | 0.8157895    | 0.8024307    | not scorable | not scorable | 0.7520661 | 0.8271351 |
| #### Bn-A09-p28043424 | A-genome specific (napus-rapa) | 1            | 0.3251921    | not scorable | not scorable | 1         | 0.698265  |
| #### Bn-A09-p28044674 | A-genome specific (napus-rapa) | 1            | 0.9318756    | not scorable | not scorable | 1         | 0.9195334 |
| #### Bn-A09-p28060237 | A-genome specific (napus-rapa) | 1            | 0.9286577    | not scorable | not scorable | 1         | 0.8042552 |
| #### Bn-A09-p28070330 | A-genome specific (napus-rapa) | 1            | 0.3538218    | not scorable | not scorable | 0.9834711 | 0.5518994 |
| #### Bn-A09-p28074719 | A-genome specific (napus-rapa) | 0.9401914    | 0.9293141    | not scorable | not scorable | 0.9669421 | 0.7889178 |
| #### Bn-A09-p28076316 | A-genome specific (napus-rapa) | 1            | 0.9376312    | not scorable | not scorable | 0.9834711 | 0.7673983 |
| #### Bn-A09-p28082973 | A-genome specific (napus-rapa) | 0.7703349    | 0.9188685    | not scorable | not scorable | 0.9917355 | 0.7826958 |
| #### Bn-A09-p28083029 | A-genome specific (napus-rapa) | 0.7703349    | 0.8869579    | not scorable | not scorable | 0.9917355 | 0.7785946 |
| #### Bn-A09-p28127211 | A-genome specific (napus-rapa) | 1            | 0.472908     | not scorable | not scorable | 0.9586777 | 0.7687597 |
| #### Bn-A09-p28137068 | A-genome specific (napus-rapa) | 1            | 0.6278696    | not scorable | not scorable | 0.9917355 | 0.8087636 |
| #### Bn-A09-p28142154 | A-genome specific (napus-rapa) | 0.9856459    | 0.4048111    | not scorable | not scorable | 1         | 0.9018846 |
| #### Bn-A09-p28142685 | A-genome specific (napus-rapa) | 0.9928229    | 0.6190461    | not scorable | not scorable | 1         | 0.5476729 |
| #### Bn-A09-p28149545 | A-genome specific (napus-rapa) | 1            | 0.6556053    | not scorable | not scorable | 0.9752066 | 0.6570534 |
| #### Bn-A09-p28161041 | A-genome specific (napus-rapa) | 1            | 0.4380367    | not scorable | not scorable | 1         | 0.7313734 |
| #### Bn-A09-p28161429 | A-genome specific (napus-rapa) | 1            | 0.55472      | not scorable | not scorable | 0.9834711 | 0.7723067 |
| #### Bn-A09-p281844   | A-genome specific (napus-rapa) | 0.9641148    | 0.7544756    | not scorable | not scorable | 1         | 0.7372217 |
| #### Bn-A09-p28191601 | A-genome specific (rapa only)  | not scorable | not scorable | not scorable | not scorable | 0.9752066 | 0.5719082 |

|                       |                                |              |              |              |              |              |              |
|-----------------------|--------------------------------|--------------|--------------|--------------|--------------|--------------|--------------|
| #### Bn-A09-p28202906 | A-genome specific (napus-rapa) | 1            | 0.8916208    | not scorable | not scorable | 1            | 0.7404073    |
| #### Bn-A09-p28203756 | A-genome specific (napus-rapa) | 1            | 0.8670297    | not scorable | not scorable | 0.9917355    | 0.8202938    |
| #### Bn-A09-p28209274 | A-genome specific (napus-rapa) | 0.9904306    | 0.6752316    | not scorable | not scorable | 0.9834711    | 0.8052878    |
| #### Bn-A09-p28212233 | A-genome specific (napus-rapa) | 0.9880383    | 0.448585     | not scorable | not scorable | 0.9917355    | 0.7351699    |
| #### Bn-A09-p28219155 | A-genome specific (napus-rapa) | 1            | 0.7734978    | not scorable | not scorable | 1            | 0.6291798    |
| #### Bn-A09-p28225347 | A-genome specific (napus-rapa) | 0.9976076    | 0.4164079    | not scorable | not scorable | 0.9834711    | 0.6776816    |
| #### Bn-A09-p28237378 | A-genome specific (napus-rapa) | 1            | 0.3605607    | not scorable | not scorable | 1            | 0.6359764    |
| #### Bn-A09-p28249213 | A-genome specific (napus-rapa) | 0.9114832    | 0.9262314    | not scorable | not scorable | 0.9917355    | 0.7786639    |
| #### Bn-A09-p28249307 | A-genome specific (napus-rapa) | 0.9114832    | 0.9398655    | not scorable | not scorable | 0.9917355    | 0.8174836    |
| #### Bn-A09-p28249925 | A-genome specific (napus-rapa) | 0.9090909    | 0.9416025    | not scorable | not scorable | 0.9834711    | 0.7135608    |
| #### Bn-A09-p28259332 | A-genome specific (rapa only)  | not scorable | not scorable | not scorable | not scorable | 0.9917355    | 0.8207583    |
| #### Bn-A09-p28265844 | A-genome specific (rapa only)  | not scorable | not scorable | not scorable | not scorable | 0.8677686    | 0.8452451    |
| #### Bn-A09-p28266331 | napus specific                 | 0.9665072    | 0.738286     | not scorable | not scorable | not scorable | not scorable |
| #### Bn-A09-p28269530 | A-genome specific (napus-rapa) | 1            | 0.9215351    | not scorable | not scorable | 0.9917355    | 0.7052842    |
| #### Bn-A09-p28282617 | A-genome specific (napus-rapa) | 1            | 0.8655372    | not scorable | not scorable | 0.9752066    | 0.7020374    |
| #### Bn-A09-p28290848 | A-genome specific (rapa only)  | not scorable | not scorable | not scorable | not scorable | 1            | 0.8705095    |
| #### Bn-A09-p28291555 | A-genome specific (napus-rapa) | 0.9976076    | 0.8613907    | not scorable | not scorable | 0.9917355    | 0.8363773    |
| #### Bn-A09-p28302787 | A-genome specific (napus-rapa) | 0.9976076    | 0.3424901    | not scorable | not scorable | 0.9917355    | 0.7780699    |
| #### Bn-A09-p28308685 | A-genome specific (napus-rapa) | 0.9976076    | 0.6707028    | not scorable | not scorable | 0.9917355    | 0.7040768    |
| #### Bn-A09-p28322032 | A-genome specific (napus-rapa) | 1            | 0.8293141    | not scorable | not scorable | 1            | 0.8207097    |
| #### Bn-A09-p28322383 | A-genome specific (napus-rapa) | 0.9976076    | 0.4442528    | not scorable | not scorable | 0.9917355    | 0.6806062    |
| #### Bn-A09-p28365530 | A-genome specific (napus-rapa) | 0.9928229    | 0.4794303    | not scorable | not scorable | 1            | 0.7500378    |
| #### Bn-A09-p28387669 | A-genome specific (napus-rapa) | 1            | 0.7883509    | not scorable | not scorable | 0.9917355    | 0.7474108    |
| #### Bn-A09-p28435678 | A-genome specific (napus-rapa) | 0.9976076    | 0.843761     | not scorable | not scorable | 1            | 0.7613055    |
| #### Bn-A09-p28463402 | A-genome specific (napus-rapa) | 0.9880383    | 0.7831394    | not scorable | not scorable | 0.9834711    | 0.6542276    |
| #### Bn-A09-p28466750 | A-genome specific (napus-rapa) | 0.9569378    | 0.4912847    | not scorable | not scorable | 1            | 0.5786598    |
| #### Bn-A09-p28500123 | A-genome specific (napus-rapa) | 1            | 0.8572574    | not scorable | not scorable | 1            | 0.7905059    |
| #### Bn-A09-p28510409 | A-genome specific (napus-rapa) | 1            | 0.4150609    | not scorable | not scorable | 0.9752066    | 0.5635195    |
| #### Bn-A09-p28511369 | A-genome specific (napus-rapa) | 0.9928229    | 0.928699     | not scorable | not scorable | 0.9917355    | 0.816196     |
| #### Bn-A09-p285148   | A-genome specific (rapa only)  | not scorable | not scorable | not scorable | not scorable | 0.9834711    | 0.6999747    |
| #### Bn-A09-p28518619 | A-genome specific (napus-rapa) | 0.9880383    | 0.4737529    | not scorable | not scorable | 0.9917355    | 0.8150848    |
| #### Bn-A09-p28565181 | A-genome specific (napus-rapa) | 1            | 0.5907719    | not scorable | not scorable | 1            | 0.6011006    |
| #### Bn-A09-p28565331 | A-genome specific (rapa only)  | not scorable | not scorable | not scorable | not scorable | 0.9669421    | 0.7770717    |

|                       |                                |              |              |              |              |              |              |
|-----------------------|--------------------------------|--------------|--------------|--------------|--------------|--------------|--------------|
| #### Bn-A09-p28566621 | A-genome specific (napus-rapa) | 1            | 0.3548803    | not scorable | not scorable | 0.9917355    | 0.4704888    |
| #### Bn-A09-p28580489 | A-genome specific (napus-rapa) | 1            | 0.3902364    | not scorable | not scorable | 1            | 0.6890005    |
| #### Bn-A09-p28589299 | all not scorable               | not scorable | not scorable | not scorable | not scorable | not scorable | not scorable |
| #### Bn-A09-p28602135 | A-genome specific (napus-rapa) | 0.9976076    | 0.6541455    | not scorable | not scorable | 1            | 0.7135683    |
| #### Bn-A09-p28603202 | A-genome specific (napus-rapa) | 0.9976076    | 0.567987     | not scorable | not scorable | 0.9917355    | 0.7835698    |
| #### Bn-A09-p28603388 | A-genome specific (napus-rapa) | 0.9784689    | 0.333721     | not scorable | not scorable | 1            | 0.7006222    |
| #### Bn-A09-p28628739 | A-genome specific (napus-rapa) | 0.9976076    | 0.8215872    | not scorable | not scorable | 0.9917355    | 0.6963507    |
| #### Bn-A09-p28654058 | A-genome specific (napus-rapa) | 0.9904306    | 0.7706004    | not scorable | not scorable | 0.9917355    | 0.8050456    |
| #### Bn-A09-p28670849 | A-genome specific (napus-rapa) | 0.9760765    | 0.59948      | not scorable | not scorable | 0.9917355    | 0.6870035    |
| #### Bn-A09-p28681656 | A-genome specific (napus-rapa) | 0.9641148    | 0.3841347    | not scorable | not scorable | 1            | 0.7337531    |
| #### Bn-A09-p28695042 | A-genome specific (napus-rapa) | 0.9712918    | 0.505237     | not scorable | not scorable | 0.9834711    | 0.638087     |
| #### Bn-A09-p28699275 | A-genome specific (napus-rapa) | 0.9712918    | 0.5163246    | not scorable | not scorable | 0.9917355    | 0.7460486    |
| #### Bn-A09-p28705871 | napus specific                 | 1            | 0.2974094    | not scorable | not scorable | not scorable | not scorable |
| #### Bn-A09-p28712265 | A-genome specific (napus-rapa) | 0.9952153    | 0.4580931    | not scorable | not scorable | 0.9917355    | 0.8477955    |
| #### Bn-A09-p28717690 | A-genome specific (napus-rapa) | 0.9832536    | 0.7789056    | not scorable | not scorable | 0.9834711    | 0.8356552    |
| #### Bn-A09-p28721875 | A-genome specific (napus-rapa) | 0.9641148    | 0.6767513    | not scorable | not scorable | 0.9917355    | 0.7246274    |
| #### Bn-A09-p28722989 | A-genome specific (napus-rapa) | 0.9856459    | 0.7824441    | not scorable | not scorable | 0.9834711    | 0.7692267    |
| #### Bn-A09-p28723813 | A-genome specific (napus-rapa) | 0.9617225    | 0.4921312    | not scorable | not scorable | 0.9834711    | 0.7298457    |
| #### Bn-A09-p28726474 | genome unspecific (all in)     | 0.9880383    | 0.298894     | 0.9379845    | 0.5240019    | 1            | 0.711467     |
| #### Bn-A09-p28737145 | A-genome specific (napus-rapa) | 1            | 0.5736849    | not scorable | not scorable | 0.9917355    | 0.8099309    |
| #### Bn-A09-p28754133 | A-genome specific (napus-rapa) | 1            | 0.9091493    | not scorable | not scorable | 1            | 0.8056173    |
| #### Bn-A09-p28758854 | A-genome specific (napus-rapa) | 0.9952153    | 0.8943982    | not scorable | not scorable | 0.7933884    | 0.8652903    |
| #### Bn-A09-p28759144 | A-genome specific (napus-rapa) | 0.9952153    | 0.6741204    | not scorable | not scorable | 0.7851239    | 0.7830055    |
| #### Bn-A09-p28759763 | A-genome specific (napus-rapa) | 0.9976076    | 0.9404228    | not scorable | not scorable | 0.7768595    | 0.8319115    |
| #### Bn-A09-p28765063 | A-genome specific (napus-rapa) | 0.8660287    | 0.7395744    | not scorable | not scorable | 0.7768595    | 0.7671781    |
| #### Bn-A09-p28779232 | all not scorable               | not scorable | not scorable | not scorable | not scorable | not scorable | not scorable |
| #### Bn-A09-p28797379 | A-genome specific (napus-rapa) | 1            | 0.4415005    | not scorable | not scorable | 1            | 0.9205657    |
| #### Bn-A09-p28802268 | A-genome specific (napus-rapa) | 0.9928229    | 0.7752942    | not scorable | not scorable | 0.9917355    | 0.7261202    |
| #### Bn-A09-p28822639 | A-genome specific (napus-rapa) | 0.9712918    | 0.6960593    | not scorable | not scorable | 0.9834711    | 0.7584732    |
| #### Bn-A09-p28865744 | A-genome specific (napus-rapa) | 1            | 0.7461982    | not scorable | not scorable | 1            | 0.6238935    |
| #### Bn-A09-p28881091 | A-genome specific (napus-rapa) | 1            | 0.58849      | not scorable | not scorable | 0.9834711    | 0.6966824    |
| #### Bn-A09-p28885939 | A-genome specific (rapa only)  | not scorable | not scorable | not scorable | not scorable | 0.8099173    | 0.7726825    |
| #### Bn-A09-p28887563 | A-genome specific (napus-rapa) | 0.9593301    | 0.3499534    | not scorable | not scorable | 1            | 0.7799481    |

|                       |                                |              |              |              |              |              |              |
|-----------------------|--------------------------------|--------------|--------------|--------------|--------------|--------------|--------------|
| #### Bn-A09-p28888373 | A-genome specific (rapa only)  | not scorable | not scorable | not scorable | not scorable | 0.9834711    | 0.8422362    |
| #### Bn-A09-p28888465 | A-genome specific (napus-rapa) | 1            | 0.9226989    | not scorable | not scorable | 1            | 0.9210644    |
| #### Bn-A09-p28910059 | A-genome specific (napus-rapa) | 0.9760765    | 0.6974295    | not scorable | not scorable | 1            | 0.6841726    |
| #### Bn-A09-p28910407 | A-genome specific (napus-rapa) | 1            | 0.923552     | not scorable | not scorable | 0.9917355    | 0.7829617    |
| #### Bn-A09-p28914189 | A-genome specific (napus-rapa) | 0.9808612    | 0.6805676    | not scorable | not scorable | 0.9917355    | 0.8473372    |
| #### Bn-A09-p28918272 | A-genome specific (napus-rapa) | 0.9688995    | 0.7658008    | not scorable | not scorable | 1            | 0.7235838    |
| #### Bn-A09-p28919016 | napus specific                 | 0.9688995    | 0.7790571    | not scorable | not scorable | not scorable | not scorable |
| #### Bn-A09-p28919262 | A-genome specific (rapa only)  | not scorable | not scorable | not scorable | not scorable | 0.9669421    | 0.6835476    |
| #### Bn-A09-p28921828 | A-genome specific (napus-rapa) | 0.9784689    | 0.7723716    | not scorable | not scorable | 1            | 0.8557011    |
| #### Bn-A09-p28925363 | A-genome specific (napus-rapa) | 0.9641148    | 0.6363034    | not scorable | not scorable | 0.9586777    | 0.6525397    |
| #### Bn-A09-p28951443 | A-genome specific (napus-rapa) | 0.9736842    | 0.7697844    | not scorable | not scorable | 0.9752066    | 0.8050555    |
| #### Bn-A09-p28966938 | A-genome specific (napus-rapa) | 1            | 0.937081     | not scorable | not scorable | 1            | 0.8122905    |
| #### Bn-A09-p28975119 | A-genome specific (napus-rapa) | 1            | 0.7641606    | not scorable | not scorable | 1            | 0.6812013    |
| #### Bn-A09-p28985128 | genome unspecific (all in)     | 0.9760765    | 0.9142767    | 0.9147287    | 0.8541924    | 0.9917355    | 0.8946093    |
| #### Bn-A09-p28987525 | genome unspecific (all in)     | 0.9784689    | 0.4203829    | 1            | 0.7175814    | 1            | 0.7242321    |
| #### Bn-A09-p28988322 | napus specific                 | 0.9569378    | 0.9283075    | not scorable | not scorable | not scorable | not scorable |
| #### Bn-A09-p28988381 | A-genome specific (napus-rapa) | 0.9688995    | 0.3100406    | not scorable | not scorable | 0.9669421    | 0.7814122    |
| #### Bn-A09-p28990334 | A-genome specific (napus-rapa) | 0.5119617    | 0.8382751    | not scorable | not scorable | 0.9752066    | 0.6954495    |
| #### Bn-A09-p28990432 | A-genome specific (napus-rapa) | 0.5167464    | 0.8585252    | not scorable | not scorable | 0.9834711    | 0.7075291    |
| #### Bn-A09-p28990648 | A-genome specific (napus-rapa) | 0.5119617    | 0.7531493    | not scorable | not scorable | 0.9917355    | 0.6470424    |
| #### Bn-A09-p28996871 | A-genome specific (napus-rapa) | 0.9784689    | 0.7606095    | not scorable | not scorable | 1            | 0.8385599    |
| #### Bn-A09-p29000054 | napus specific                 | 0.9976076    | 0.8105487    | not scorable | not scorable | not scorable | not scorable |
| #### Bn-A09-p29012402 | A-genome specific (napus-rapa) | 0.9497608    | 0.5749971    | not scorable | not scorable | 1            | 0.6838168    |
| #### Bn-A09-p29012798 | A-genome specific (napus-rapa) | 0.9976076    | 0.5565301    | not scorable | not scorable | 1            | 0.6429892    |
| #### Bn-A09-p29019543 | A-genome specific (napus-rapa) | 0.9736842    | 0.7307584    | not scorable | not scorable | 1            | 0.7771829    |
| #### Bn-A09-p29035265 | A-genome specific (napus-rapa) | 1            | 0.9265054    | not scorable | not scorable | 1            | 0.9205439    |
| #### Bn-A09-p29048790 | A-genome specific (napus-rapa) | 0.9832536    | 0.356729     | not scorable | not scorable | 0.9917355    | 0.7252629    |
| #### Bn-A09-p29052515 | A-genome specific (napus-rapa) | 0.9856459    | 0.7619005    | not scorable | not scorable | 1            | 0.7992466    |
| #### Bn-A09-p29052616 | A-genome specific (napus-rapa) | 0.9904306    | 0.5000108    | not scorable | not scorable | 1            | 0.8011191    |
| #### Bn-A09-p29070287 | A-genome specific (napus-rapa) | 0.9832536    | 0.260953     | not scorable | not scorable | 0.9917355    | 0.6455735    |
| #### Bn-A09-p29084281 | A-genome specific (napus-rapa) | 0.930622     | 0.771503     | not scorable | not scorable | 0.9834711    | 0.8040776    |
| #### Bn-A09-p29086743 | A-genome specific (napus-rapa) | 0.9904306    | 0.2392985    | not scorable | not scorable | 0.9752066    | 0.5613394    |
| #### Bn-A09-p29087590 | A-genome specific (napus-rapa) | 1            | 0.8907665    | not scorable | not scorable | 0.9917355    | 0.7020898    |

|                       |                                   |              |              |              |              |              |              |
|-----------------------|-----------------------------------|--------------|--------------|--------------|--------------|--------------|--------------|
| #### Bn-A09-p29092594 | A-genome specific (napus-rapa)    | 0.9928229    | 0.2958042    | not scorable | not scorable | 0.9834711    | 0.7141678    |
| #### Bn-A09-p29101305 | A-genome specific (napus-rapa)    | 0.9665072    | 0.4879895    | not scorable | not scorable | 1            | 0.817465     |
| #### Bn-A09-p29101339 | A-genome specific (napus-rapa)    | 0.9712918    | 0.7709036    | not scorable | not scorable | 1            | 0.8298761    |
| #### Bn-A09-p29106108 | A-genome specific (napus-rapa)    | 0.6244019    | 0.8653856    | not scorable | not scorable | 0.9917355    | 0.7815894    |
| #### Bn-A09-p29134207 | A-genome specific (napus-rapa)    | 0.9736842    | 0.3144735    | not scorable | not scorable | 0.9917355    | 0.7869797    |
| #### Bn-A09-p29134633 | genome unspecific (oleracea-rapa) | not scorable | not scorable | 0.9922481    | 0.7337815    | 1            | 0.7934196    |
| #### Bn-A09-p29146030 | A-genome specific (napus-rapa)    | 0.9760765    | 0.7526949    | not scorable | not scorable | 1            | 0.8465638    |
| #### Bn-A09-p29146468 | A-genome specific (napus-rapa)    | 0.9808612    | 0.3917193    | not scorable | not scorable | 1            | 0.7285444    |
| #### Bn-A09-p29150680 | A-genome specific (napus-rapa)    | 0.6985646    | 0.9162172    | not scorable | not scorable | 0.9752066    | 0.779151     |
| #### Bn-A09-p29151179 | A-genome specific (napus-rapa)    | 0.9760765    | 0.7534647    | not scorable | not scorable | 1            | 0.8089774    |
| #### Bn-A09-p29163307 | A-genome specific (napus-rapa)    | 0.9784689    | 0.3279098    | not scorable | not scorable | 1            | 0.83055      |
| #### Bn-A09-p29171797 | A-genome specific (napus-rapa)    | 0.9856459    | 0.7582849    | not scorable | not scorable | 1            | 0.8728314    |
| #### Bn-A09-p29172005 | A-genome specific (napus-rapa)    | 0.9760765    | 0.4818308    | not scorable | not scorable | 1            | 0.7694862    |
| #### Bn-A09-p29186255 | A-genome specific (napus-rapa)    | 0.9569378    | 0.781371     | not scorable | not scorable | 0.9834711    | 0.7021957    |
| #### Bn-A09-p29196000 | A-genome specific (napus-rapa)    | 0.861244     | 0.8970433    | not scorable | not scorable | 0.9669421    | 0.7824281    |
| #### Bn-A09-p29196648 | A-genome specific (rapa only)     | not scorable | not scorable | not scorable | not scorable | 0.8677686    | 0.7857608    |
| #### Bn-A09-p29198562 | A-genome specific (napus-rapa)    | 0.9904306    | 0.6851888    | not scorable | not scorable | 0.9834711    | 0.7462481    |
| #### Bn-A09-p29201922 | A-genome specific (napus-rapa)    | 0.9976076    | 0.5721643    | not scorable | not scorable | 0.9834711    | 0.7139885    |
| #### Bn-A09-p29215200 | A-genome specific (rapa only)     | not scorable | not scorable | not scorable | not scorable | 1            | 0.5606571    |
| #### Bn-A09-p29229941 | A-genome specific (napus-rapa)    | 0.9784689    | 0.7698848    | not scorable | not scorable | 0.9917355    | 0.7805383    |
| #### Bn-A09-p29238214 | napus specific                    | 0.9688995    | 0.6326917    | not scorable | not scorable | not scorable | not scorable |
| #### Bn-A09-p29241904 | A-genome specific (napus-rapa)    | 0.9736842    | 0.7903553    | not scorable | not scorable | 0.9917355    | 0.903213     |
| #### Bn-A09-p29245415 | A-genome specific (napus-rapa)    | 1            | 0.4252203    | not scorable | not scorable | 0.9834711    | 0.8269234    |
| #### Bn-A09-p29249462 | A-genome specific (napus-rapa)    | 1            | 0.8491731    | not scorable | not scorable | 0.9917355    | 0.6999236    |
| #### Bn-A09-p29250072 | all not scorable                  | not scorable | not scorable | not scorable | not scorable | not scorable | not scorable |
| #### Bn-A09-p29250220 | A-genome specific (napus-rapa)    | 1            | 0.9256925    | not scorable | not scorable | 0.9834711    | 0.824141     |
| #### Bn-A09-p29250304 | A-genome specific (napus-rapa)    | 1            | 0.8150962    | not scorable | not scorable | 0.9917355    | 0.7971185    |
| #### Bn-A09-p29250607 | A-genome specific (napus-rapa)    | 1            | 0.9099447    | not scorable | not scorable | 0.9834711    | 0.7999424    |
| #### Bn-A09-p29265453 | A-genome specific (napus-rapa)    | 0.9832536    | 0.4349675    | not scorable | not scorable | 0.9917355    | 0.7062419    |
| #### Bn-A09-p29272014 | A-genome specific (napus-rapa)    | 1            | 0.8762412    | not scorable | not scorable | 0.9834711    | 0.8201109    |
| #### Bn-A09-p29275947 | A-genome specific (napus-rapa)    | 0.9808612    | 0.4106307    | not scorable | not scorable | 0.9669421    | 0.6481375    |
| #### Bn-A09-p29282189 | A-genome specific (napus-rapa)    | 1            | 0.3296169    | not scorable | not scorable | 0.9917355    | 0.6960347    |
| #### Bn-A09-p29310462 | A-genome specific (napus-rapa)    | 1            | 0.596414     | not scorable | not scorable | 1            | 0.6001494    |



|                       |                                |              |              |              |              |              |              |
|-----------------------|--------------------------------|--------------|--------------|--------------|--------------|--------------|--------------|
| #### Bn-A09-p29321510 | A-genome specific (napus-rapa) | 0.9928229    | 0.311245     | not scorable | not scorable | 0.9669421    | 0.8197923    |
| #### Bn-A09-p29322628 | A-genome specific (napus-rapa) | 1            | 0.8139778    | not scorable | not scorable | 0.9917355    | 0.7335277    |
| #### Bn-A09-p29331470 | A-genome specific (napus-rapa) | 0.9401914    | 0.9199727    | not scorable | not scorable | 0.9917355    | 0.8938079    |
| #### Bn-A09-p29346712 | A-genome specific (napus-rapa) | 1            | 0.9249683    | not scorable | not scorable | 0.9752066    | 0.8379921    |
| #### Bn-A09-p29348596 | A-genome specific (napus-rapa) | 1            | 0.919562     | not scorable | not scorable | 0.9586777    | 0.7579365    |
| #### Bn-A09-p29368287 | A-genome specific (napus-rapa) | 1            | 0.4361749    | not scorable | not scorable | 1            | 0.7584694    |
| #### Bn-A09-p29378096 | A-genome specific (napus-rapa) | 0.9928229    | 0.4211283    | not scorable | not scorable | 1            | 0.7378409    |
| #### Bn-A09-p29379607 | A-genome specific (napus-rapa) | 1            | 0.9293141    | not scorable | not scorable | 0.9752066    | 0.8099664    |
| #### Bn-A09-p29388908 | A-genome specific (napus-rapa) | 1            | 0.7720424    | not scorable | not scorable | 1            | 0.7342986    |
| #### Bn-A09-p29399896 | A-genome specific (napus-rapa) | 1            | 0.9113932    | not scorable | not scorable | 0.9586777    | 0.6489322    |
| #### Bn-A09-p29400976 | genome unspecific (all in)     | 0.9976076    | 0.766621     | 0.6511628    | 0.8521166    | 0.9834711    | 0.7871458    |
| #### Bn-A09-p29416708 | A-genome specific (napus-rapa) | 1            | 0.9316057    | not scorable | not scorable | 1            | 0.8487855    |
| #### Bn-A09-p29420099 | A-genome specific (napus-rapa) | 0.9952153    | 0.8801423    | not scorable | not scorable | 1            | 0.7369211    |
| #### Bn-A09-p29444457 | A-genome specific (napus-rapa) | 1            | 0.9362306    | not scorable | not scorable | 0.9917355    | 0.7820823    |
| #### Bn-A09-p29446045 | napus specific                 | 0.7703349    | 0.8580077    | not scorable | not scorable | not scorable | not scorable |
| #### Bn-A09-p29449180 | A-genome specific (rapa only)  | not scorable | not scorable | not scorable | not scorable | 1            | 0.8814266    |
| #### Bn-A09-p29454619 | A-genome specific (napus-rapa) | 1            | 0.709502     | not scorable | not scorable | 0.9834711    | 0.6915736    |
| #### Bn-A09-p29457801 | A-genome specific (rapa only)  | not scorable | not scorable | not scorable | not scorable | 0.7851239    | 0.7976328    |
| #### Bn-A09-p29480022 | A-genome specific (napus-rapa) | 0.9904306    | 0.5406447    | not scorable | not scorable | 0.9834711    | 0.6642115    |
| #### Bn-A09-p29493614 | A-genome specific (napus-rapa) | 1            | 0.8014474    | not scorable | not scorable | 0.9752066    | 0.781743     |
| #### Bn-A09-p29494065 | A-genome specific (napus-rapa) | 1            | 0.4151853    | not scorable | not scorable | 1            | 0.7785012    |
| #### Bn-A09-p29496129 | A-genome specific (napus-rapa) | 0.9976076    | 0.6006535    | not scorable | not scorable | 0.9917355    | 0.7687771    |
| #### Bn-A09-p29496571 | A-genome specific (napus-rapa) | 1            | 0.8152444    | not scorable | not scorable | 1            | 0.7497477    |
| #### Bn-A09-p29496588 | A-genome specific (napus-rapa) | 0.9976076    | 0.919562     | not scorable | not scorable | 1            | 0.8316259    |
| #### Bn-A09-p29500238 | all not scorable               | not scorable | not scorable | not scorable | not scorable | not scorable | not scorable |
| #### Bn-A09-p29500640 | A-genome specific (napus-rapa) | 1            | 0.6186296    | not scorable | not scorable | 1            | 0.5922611    |
| #### Bn-A09-p29500865 | A-genome specific (rapa only)  | not scorable | not scorable | not scorable | not scorable | 0.9834711    | 0.4932976    |
| #### Bn-A09-p29507416 | A-genome specific (napus-rapa) | 0.8660287    | 0.6489306    | not scorable | not scorable | 0.7520661    | 0.650642     |
| #### Bn-A09-p29508036 | A-genome specific (napus-rapa) | 0.937799     | 0.7395847    | not scorable | not scorable | 0.9504132    | 0.5940043    |
| #### Bn-A09-p29519072 | A-genome specific (napus-rapa) | 1            | 0.7669629    | not scorable | not scorable | 1            | 0.7622204    |
| #### Bn-A09-p29617756 | all not scorable               | not scorable | not scorable | not scorable | not scorable | not scorable | not scorable |
| #### Bn-A09-p29617813 | A-genome specific (napus-rapa) | 0.9569378    | 0.6427428    | not scorable | not scorable | 1            | 0.7539053    |
| #### Bn-A09-p29628819 | A-genome specific (napus-rapa) | 0.9832536    | 0.6603269    | not scorable | not scorable | 0.9752066    | 0.7340146    |

|                       |                                   |              |              |              |              |              |              |
|-----------------------|-----------------------------------|--------------|--------------|--------------|--------------|--------------|--------------|
| #### Bn-A09-p29629155 | A-genome specific (napus-rapa)    | 0.9904306    | 0.42654      | not scorable | not scorable | 0.9834711    | 0.7127912    |
| #### Bn-A09-p29630906 | A-genome specific (napus-rapa)    | 0.9832536    | 0.6336879    | not scorable | not scorable | 0.9917355    | 0.7355146    |
| #### Bn-A09-p29631122 | genome unspecific (all in)        | 0.9856459    | 0.3342201    | 1            | 0.6972098    | 0.9834711    | 0.7990596    |
| #### Bn-A09-p2963981  | A-genome specific (rapa only)     | not scorable | not scorable | not scorable | not scorable | 0.9917355    | 0.8496107    |
| #### Bn-A09-p29676939 | A-genome specific (napus-rapa)    | 0.9832536    | 0.516788     | not scorable | not scorable | 0.9917355    | 0.7770497    |
| #### Bn-A09-p29699253 | A-genome specific (napus-rapa)    | 0.9976076    | 0.8636558    | not scorable | not scorable | 1            | 0.7648247    |
| #### Bn-A09-p297029   | A-genome specific (napus-rapa)    | 0.9665072    | 0.4043316    | not scorable | not scorable | 0.9752066    | 0.6905535    |
| #### Bn-A09-p29747854 | A-genome specific (napus-rapa)    | 1            | 0.3241896    | not scorable | not scorable | 1            | 0.6209395    |
| #### Bn-A09-p29756068 | A-genome specific (napus-rapa)    | 0.9712918    | 0.4892643    | not scorable | not scorable | 1            | 0.6919727    |
| #### Bn-A09-p29756845 | A-genome specific (napus-rapa)    | 0.9784689    | 0.2735136    | not scorable | not scorable | 0.9917355    | 0.7711049    |
| #### Bn-A09-p29763444 | napus specific                    | 0.9904306    | 0.3810365    | not scorable | not scorable | not scorable | not scorable |
| #### Bn-A09-p29785600 | A-genome specific (napus-rapa)    | 0.9832536    | 0.7868638    | not scorable | not scorable | 0.9752066    | 0.7449571    |
| #### Bn-A09-p29797321 | A-genome specific (napus-rapa)    | 0.9617225    | 0.6960927    | not scorable | not scorable | 0.9669421    | 0.7293394    |
| #### Bn-A09-p29859019 | A-genome specific (napus-rapa)    | 0.9832536    | 0.4334348    | not scorable | not scorable | 0.9917355    | 0.809451     |
| #### Bn-A09-p29882032 | A-genome specific (napus-rapa)    | 0.9976076    | 0.9205657    | not scorable | not scorable | 1            | 0.8337346    |
| #### Bn-A09-p29890020 | A-genome specific (napus-rapa)    | 0.9952153    | 0.8979293    | not scorable | not scorable | 0.9917355    | 0.7672565    |
| #### Bn-A09-p29944855 | A-genome specific (napus-rapa)    | 0.9736842    | 0.5066095    | not scorable | not scorable | 0.9917355    | 0.7815622    |
| #### Bn-A09-p29951785 | A-genome specific (napus-rapa)    | 1            | 0.7376376    | not scorable | not scorable | 1            | 0.7376376    |
| #### Bn-A09-p29953651 | A-genome specific (napus-rapa)    | 1            | 0.4308874    | not scorable | not scorable | 0.9834711    | 0.6798596    |
| #### Bn-A09-p29968210 | A-genome specific (napus-rapa)    | 0.9593301    | 0.6955431    | not scorable | not scorable | 0.9834711    | 0.7321752    |
| #### Bn-A09-p29968302 | A-genome specific (napus-rapa)    | 0.9569378    | 0.4131525    | not scorable | not scorable | 0.9752066    | 0.6717508    |
| #### Bn-A09-p29990966 | genome unspecific (oleracea-rapa) | not scorable | not scorable | 0.8294573    | 0.7056927    | 1            | 0.9473227    |
| #### Bn-A09-p29991084 | A-genome specific (rapa only)     | not scorable | not scorable | not scorable | not scorable | 1            | 0.9175813    |
| #### Bn-A09-p29991443 | A-genome specific (napus-rapa)    | 0.9976076    | 0.9114133    | not scorable | not scorable | 0.9917355    | 0.7833471    |
| #### Bn-A09-p30002747 | A-genome specific (napus-rapa)    | 0.9641148    | 0.4166516    | not scorable | not scorable | 0.9917355    | 0.7186883    |
| #### Bn-A09-p30007298 | genome unspecific (all in)        | 0.9928229    | 0.3364892    | 0.9844961    | 0.6726697    | 1            | 0.7135343    |
| #### Bn-A09-p30010889 | A-genome specific (napus-rapa)    | 0.9904306    | 0.6016957    | not scorable | not scorable | 1            | 0.6447915    |
| #### Bn-A09-p30016810 | A-genome specific (napus-rapa)    | 0.9617225    | 0.5280691    | not scorable | not scorable | 1            | 0.6923606    |
| #### Bn-A09-p30032125 | A-genome specific (napus-rapa)    | 0.9976076    | 0.5827813    | not scorable | not scorable | 1            | 0.8268561    |
| #### Bn-A09-p30058110 | A-genome specific (napus-rapa)    | 0.9856459    | 0.7558933    | not scorable | not scorable | 0.9917355    | 0.7439985    |
| #### Bn-A09-p30058247 | A-genome specific (napus-rapa)    | 1            | 0.5204653    | not scorable | not scorable | 1            | 0.7113391    |
| #### Bn-A09-p30073403 | A-genome specific (napus-rapa)    | 0.9976076    | 0.8366282    | not scorable | not scorable | 1            | 0.7285713    |
| #### Bn-A09-p30075198 | A-genome specific (napus-rapa)    | 0.9784689    | 0.817918     | not scorable | not scorable | 0.9917355    | 0.7873979    |

|                       |                                |              |              |              |              |           |           |
|-----------------------|--------------------------------|--------------|--------------|--------------|--------------|-----------|-----------|
| #### Bn-A09-p30102296 | A-genome specific (napus-rapa) | 0.9712918    | 0.3151694    | not scorable | not scorable | 0.9917355 | 0.71316   |
| #### Bn-A09-p30105255 | A-genome specific (napus-rapa) | 0.8325359    | 0.9384626    | not scorable | not scorable | 0.9834711 | 0.8015705 |
| #### Bn-A09-p30105467 | A-genome specific (napus-rapa) | 0.9545454    | 0.485852     | not scorable | not scorable | 0.9752066 | 0.6823665 |
| #### Bn-A09-p30108245 | A-genome specific (napus-rapa) | 0.9617225    | 0.6941791    | not scorable | not scorable | 0.9834711 | 0.6923961 |
| #### Bn-A09-p30108430 | A-genome specific (napus-rapa) | 0.9688995    | 0.6777315    | not scorable | not scorable | 0.9917355 | 0.7976868 |
| #### Bn-A09-p30112316 | A-genome specific (napus-rapa) | 0.9880383    | 0.6333923    | not scorable | not scorable | 1         | 0.71189   |
| #### Bn-A09-p30115693 | A-genome specific (napus-rapa) | 0.9665072    | 0.3087721    | not scorable | not scorable | 1         | 0.8164607 |
| #### Bn-A09-p30116087 | A-genome specific (rapa only)  | not scorable | not scorable | not scorable | not scorable | 1         | 0.7991281 |
| #### Bn-A09-p30117412 | A-genome specific (napus-rapa) | 0.9880383    | 0.7658518    | not scorable | not scorable | 0.9917355 | 0.791154  |
| #### Bn-A09-p30117469 | A-genome specific (napus-rapa) | 0.9090909    | 0.7559128    | not scorable | not scorable | 0.9752066 | 0.849389  |
| #### Bn-A09-p30119978 | A-genome specific (napus-rapa) | 0.9736842    | 0.661958     | not scorable | not scorable | 1         | 0.693365  |
| #### Bn-A09-p30121269 | A-genome specific (napus-rapa) | 0.9808612    | 0.7830902    | not scorable | not scorable | 0.9917355 | 0.8437894 |
| #### Bn-A09-p30129045 | A-genome specific (napus-rapa) | 0.9569378    | 0.4265368    | not scorable | not scorable | 0.9669421 | 0.6976879 |
| #### Bn-A09-p30141773 | A-genome specific (napus-rapa) | 0.6004785    | 0.7706793    | not scorable | not scorable | 0.9834711 | 0.7952369 |
| #### Bn-A09-p30145025 | A-genome specific (napus-rapa) | 0.9856459    | 0.3398588    | not scorable | not scorable | 1         | 0.8210095 |
| #### Bn-A09-p30147263 | A-genome specific (rapa only)  | not scorable | not scorable | not scorable | not scorable | 0.9834711 | 0.6032547 |
| #### Bn-A09-p30171993 | A-genome specific (napus-rapa) | 0.9952153    | 0.8662888    | not scorable | not scorable | 0.9917355 | 0.8251626 |
| #### Bn-A09-p301754   | A-genome specific (napus-rapa) | 0.9545454    | 0.6174268    | not scorable | not scorable | 0.9917355 | 0.5383376 |
| #### Bn-A09-p301830   | A-genome specific (rapa only)  | not scorable | not scorable | not scorable | not scorable | 0.9669421 | 0.6747513 |
| #### Bn-A09-p30191789 | A-genome specific (napus-rapa) | 0.9904306    | 0.8815182    | not scorable | not scorable | 0.9834711 | 0.6602995 |
| #### Bn-A09-p302062   | A-genome specific (napus-rapa) | 0.9354067    | 0.309833     | not scorable | not scorable | 0.9917355 | 0.5288697 |
| #### Bn-A09-p30206959 | A-genome specific (rapa only)  | not scorable | not scorable | not scorable | not scorable | 0.9834711 | 0.7483426 |
| #### Bn-A09-p30233844 | A-genome specific (napus-rapa) | 0.9928229    | 0.8947276    | not scorable | not scorable | 1         | 0.9037329 |
| #### Bn-A09-p3024539  | A-genome specific (napus-rapa) | 0.9952153    | 0.4080833    | not scorable | not scorable | 1         | 0.862369  |
| #### Bn-A09-p30257404 | A-genome specific (napus-rapa) | 0.9952153    | 0.7386714    | not scorable | not scorable | 0.9917355 | 0.8073414 |
| #### Bn-A09-p30260475 | A-genome specific (napus-rapa) | 0.9928229    | 0.7842279    | not scorable | not scorable | 0.9917355 | 0.810142  |
| #### Bn-A09-p30260757 | A-genome specific (napus-rapa) | 1            | 0.7176735    | not scorable | not scorable | 1         | 0.6972601 |
| #### Bn-A09-p30264461 | A-genome specific (napus-rapa) | 0.215311     | 0.7847849    | not scorable | not scorable | 1         | 0.7689275 |
| #### Bn-A09-p30264538 | A-genome specific (napus-rapa) | 0.9712918    | 0.7153922    | not scorable | not scorable | 0.9917355 | 0.7564096 |
| #### Bn-A09-p30265013 | A-genome specific (napus-rapa) | 0.9952153    | 0.9492502    | not scorable | not scorable | 0.9752066 | 0.7801442 |
| #### Bn-A09-p30269740 | A-genome specific (napus-rapa) | 0.9952153    | 0.8171835    | not scorable | not scorable | 1         | 0.7367941 |
| #### Bn-A09-p30270747 | A-genome specific (napus-rapa) | 1            | 0.5701922    | not scorable | not scorable | 0.9834711 | 0.7269222 |
| #### Bn-A09-p30278622 | A-genome specific (napus-rapa) | 0.9904306    | 0.7644336    | not scorable | not scorable | 0.9752066 | 0.7704409 |

|                       |                                   |              |              |              |              |           |           |
|-----------------------|-----------------------------------|--------------|--------------|--------------|--------------|-----------|-----------|
| #### Bn-A09-p30280052 | A-genome specific (napus-rapa)    | 0.9617225    | 0.739821     | not scorable | not scorable | 0.8264463 | 0.7558479 |
| #### Bn-A09-p30280973 | A-genome specific (napus-rapa)    | 0.9808612    | 0.7914102    | not scorable | not scorable | 0.9917355 | 0.7756612 |
| #### Bn-A09-p30282007 | A-genome specific (napus-rapa)    | 0.9712918    | 0.4905267    | not scorable | not scorable | 0.9834711 | 0.7447788 |
| #### Bn-A09-p30284632 | A-genome specific (napus-rapa)    | 0.9880383    | 0.7247595    | not scorable | not scorable | 0.9834711 | 0.6626194 |
| #### Bn-A09-p30284813 | A-genome specific (napus-rapa)    | 0.9832536    | 0.5031763    | not scorable | not scorable | 1         | 0.7135047 |
| #### Bn-A09-p30292279 | A-genome specific (rapa only)     | not scorable | not scorable | not scorable | not scorable | 0.9586777 | 0.7386903 |
| #### Bn-A09-p3029767  | A-genome specific (napus-rapa)    | 0.9880383    | 0.7699391    | not scorable | not scorable | 1         | 0.8467333 |
| #### Bn-A09-p30329420 | A-genome specific (napus-rapa)    | 0.9736842    | 0.4868321    | not scorable | not scorable | 0.9834711 | 0.8086451 |
| #### Bn-A09-p30329663 | A-genome specific (napus-rapa)    | 0.9880383    | 0.7335361    | not scorable | not scorable | 0.9834711 | 0.7085111 |
| #### Bn-A09-p30339735 | A-genome specific (napus-rapa)    | 0.9952153    | 0.8296732    | not scorable | not scorable | 0.9917355 | 0.7578138 |
| #### Bn-A09-p30344978 | A-genome specific (napus-rapa)    | 0.9952153    | 0.8475502    | not scorable | not scorable | 1         | 0.7928958 |
| #### Bn-A09-p30348281 | A-genome specific (napus-rapa)    | 0.9952153    | 0.9095823    | not scorable | not scorable | 0.9421487 | 0.7815622 |
| #### Bn-A09-p30358198 | genome unspecific (oleracea-rapa) | not scorable | not scorable |              | 1 0.6665264  | 1         | 0.7946526 |
| #### Bn-A09-p30371768 | A-genome specific (napus-rapa)    | 0.9784689    | 0.7660732    | not scorable | not scorable | 1         | 0.812547  |
| #### Bn-A09-p30373180 | A-genome specific (napus-rapa)    | 0.9665072    | 0.749106     | not scorable | not scorable | 0.9917355 | 0.7578807 |
| #### Bn-A09-p30387343 | A-genome specific (rapa only)     | not scorable | not scorable | not scorable | not scorable | 0.9669421 | 0.7416698 |
| #### Bn-A09-p30391674 | A-genome specific (napus-rapa)    | 0.9593301    | 0.5241153    | not scorable | not scorable | 0.9752066 | 0.7598953 |
| #### Bn-A09-p30395018 | A-genome specific (napus-rapa)    | 0.9330143    | 0.3264332    | not scorable | not scorable | 1         | 0.8445879 |
| #### Bn-A09-p30404228 | A-genome specific (napus-rapa)    | 0.9904306    | 0.7019078    | not scorable | not scorable | 1         | 0.7026423 |
| #### Bn-A09-p30406985 | A-genome specific (rapa only)     | not scorable | not scorable | not scorable | not scorable | 1         | 0.8246733 |
| #### Bn-A09-p30417650 | A-genome specific (napus-rapa)    | 0.9832536    | 0.8000373    | not scorable | not scorable | 0.9917355 | 0.8083651 |
| #### Bn-A09-p30422813 | A-genome specific (napus-rapa)    | 0.9808612    | 0.7488452    | not scorable | not scorable | 0.9917355 | 0.7989373 |
| #### Bn-A09-p30422888 | A-genome specific (napus-rapa)    | 0.9784689    | 0.7809652    | not scorable | not scorable | 0.9834711 | 0.79238   |
| #### Bn-A09-p30424208 | A-genome specific (napus-rapa)    | 0.9641148    | 0.5697289    | not scorable | not scorable | 0.9917355 | 0.8042249 |
| #### Bn-A09-p30424373 | A-genome specific (napus-rapa)    | 0.9736842    | 0.499887     | not scorable | not scorable | 0.9917355 | 0.6124943 |
| #### Bn-A09-p30431025 | A-genome specific (napus-rapa)    | 1            | 0.3818664    | not scorable | not scorable | 1         | 0.7977526 |
| #### Bn-A09-p30437673 | A-genome specific (napus-rapa)    | 0.9593301    | 0.6500793    | not scorable | not scorable | 0.9834711 | 0.6120725 |
| #### Bn-A09-p30439085 | A-genome specific (napus-rapa)    | 0.9665072    | 0.7253309    | not scorable | not scorable | 1         | 0.7426119 |
| #### Bn-A09-p30463234 | A-genome specific (napus-rapa)    | 0.9665072    | 0.6782959    | not scorable | not scorable | 1         | 0.7226057 |
| #### Bn-A09-p30464712 | A-genome specific (napus-rapa)    | 0.9760765    | 0.7872221    | not scorable | not scorable | 0.9917355 | 0.7691169 |
| #### Bn-A09-p30466030 | A-genome specific (napus-rapa)    | 0.9808612    | 0.577156     | not scorable | not scorable | 0.9669421 | 0.5753107 |
| #### Bn-A09-p3047090  | A-genome specific (napus-rapa)    | 0.9784689    | 0.6900472    | not scorable | not scorable | 1         | 0.7431923 |
| #### Bn-A09-p30488258 | A-genome specific (napus-rapa)    | 1            | 0.3093325    | not scorable | not scorable | 1         | 0.2664768 |

|                       |                                |              |              |              |              |              |              |
|-----------------------|--------------------------------|--------------|--------------|--------------|--------------|--------------|--------------|
| #### Bn-A09-p30494224 | A-genome specific (napus-rapa) | 1            | 0.6722217    | not scorable | not scorable | 1            | 0.786476     |
| #### Bn-A09-p30495797 | A-genome specific (napus-rapa) | 1            | 0.3318115    | not scorable | not scorable | 0.7933884    | 0.6991525    |
| #### Bn-A09-p30506895 | A-genome specific (napus-rapa) | 0.9760765    | 0.8482379    | not scorable | not scorable | 0.7768595    | 0.711912     |
| #### Bn-A09-p30507984 | napus specific                 | 0.215311     | 0.8473462    | not scorable | not scorable | not scorable | not scorable |
| #### Bn-A09-p3051349  | A-genome specific (napus-rapa) | 0.9880383    | 0.8196601    | not scorable | not scorable | 0.9917355    | 0.8412178    |
| #### Bn-A09-p30523149 | A-genome specific (napus-rapa) | 0.9976076    | 0.3071595    | not scorable | not scorable | 0.9917355    | 0.7801226    |
| #### Bn-A09-p3053532  | A-genome specific (napus-rapa) | 0.9784689    | 0.7586886    | not scorable | not scorable | 0.9586777    | 0.6675804    |
| #### Bn-A09-p30535727 | A-genome specific (napus-rapa) | 0.9904306    | 0.8221473    | not scorable | not scorable | 0.9834711    | 0.7862891    |
| #### Bn-A09-p3053860  | A-genome specific (napus-rapa) | 0.9832536    | 0.7839462    | not scorable | not scorable | 0.9669421    | 0.6062294    |
| #### Bn-A09-p30559416 | A-genome specific (napus-rapa) | 0.9952153    | 0.4847366    | not scorable | not scorable | 0.9834711    | 0.7125097    |
| #### Bn-A09-p30561532 | A-genome specific (napus-rapa) | 0.9736842    | 0.4195713    | not scorable | not scorable | 0.9669421    | 0.7930965    |
| #### Bn-A09-p30570466 | A-genome specific (napus-rapa) | 0.9952153    | 0.7002175    | not scorable | not scorable | 0.9669421    | 0.7359196    |
| #### Bn-A09-p30584271 | A-genome specific (napus-rapa) | 0.8516746    | 0.7745277    | not scorable | not scorable | 0.9586777    | 0.8194187    |
| #### Bn-A09-p30587291 | A-genome specific (napus-rapa) | 0.2870813    | 0.8713567    | not scorable | not scorable | 0.9917355    | 0.8031521    |
| #### Bn-A09-p30592138 | A-genome specific (napus-rapa) | 1            | 0.5821075    | not scorable | not scorable | 1            | 0.7549953    |
| #### Bn-A09-p30601385 | A-genome specific (napus-rapa) | 0.9904306    | 0.7282909    | not scorable | not scorable | 0.9752066    | 0.7208268    |
| #### Bn-A09-p30611158 | A-genome specific (napus-rapa) | 0.9928229    | 0.8954933    | not scorable | not scorable | 0.9917355    | 0.8082963    |
| #### Bn-A09-p30611162 | A-genome specific (napus-rapa) | 0.9952153    | 0.8130518    | not scorable | not scorable | 0.9917355    | 0.7344813    |
| #### Bn-A09-p30612667 | A-genome specific (napus-rapa) | 1            | 0.4754607    | not scorable | not scorable | 0.9917355    | 0.7552233    |
| #### Bn-A09-p30627540 | A-genome specific (napus-rapa) | 0.9928229    | 0.7095311    | not scorable | not scorable | 0.9752066    | 0.7064721    |
| #### Bn-A09-p3064935  | A-genome specific (napus-rapa) | 0.9880383    | 0.8529866    | not scorable | not scorable | 0.9834711    | 0.7480905    |
| #### Bn-A09-p30651428 | A-genome specific (napus-rapa) | 0.9784689    | 0.7783931    | not scorable | not scorable | 0.9917355    | 0.806216     |
| #### Bn-A09-p30654305 | A-genome specific (napus-rapa) | 0.9808612    | 0.8614011    | not scorable | not scorable | 0.9504132    | 0.770915     |
| #### Bn-A09-p30674713 | A-genome specific (napus-rapa) | 1            | 0.367871     | not scorable | not scorable | 0.9669421    | 0.650371     |
| #### Bn-A09-p30678275 | A-genome specific (napus-rapa) | 0.9952153    | 0.7595123    | not scorable | not scorable | 1            | 0.7001037    |
| #### Bn-A09-p30681640 | A-genome specific (napus-rapa) | 0.9976076    | 0.5953732    | not scorable | not scorable | 0.9752066    | 0.7400507    |
| #### Bn-A09-p30687979 | A-genome specific (napus-rapa) | 0.9928229    | 0.8456053    | not scorable | not scorable | 1            | 0.8644472    |
| #### Bn-A09-p30697212 | A-genome specific (rapa only)  | not scorable | not scorable | not scorable | not scorable | 0.9917355    | 0.7427243    |
| #### Bn-A09-p30707823 | A-genome specific (napus-rapa) | 0.9784689    | 0.8396066    | not scorable | not scorable | 0.9752066    | 0.6595158    |
| #### Bn-A09-p30707848 | A-genome specific (napus-rapa) | 0.9784689    | 0.9306402    | not scorable | not scorable | 0.9504132    | 0.6959602    |
| #### Bn-A09-p30709081 | A-genome specific (napus-rapa) | 0.9952153    | 0.8145307    | not scorable | not scorable | 0.9752066    | 0.6968284    |
| #### Bn-A09-p30710881 | A-genome specific (napus-rapa) | 0.9808612    | 0.5823149    | not scorable | not scorable | 0.8181818    | 0.7212843    |
| #### Bn-A09-p30711004 | A-genome specific (napus-rapa) | 1            | 0.5615681    | not scorable | not scorable | 1            | 0.7506011    |

|                       |                                   |              |              |              |              |           |           |
|-----------------------|-----------------------------------|--------------|--------------|--------------|--------------|-----------|-----------|
| #### Bn-A09-p30718480 | A-genome specific (napus-rapa)    | 1            | 0.4732591    | not scorable | not scorable | 0.9752066 | 0.629658  |
| #### Bn-A09-p30724789 | A-genome specific (napus-rapa)    | 0.9952153    | 0.523197     | not scorable | not scorable | 0.9917355 | 0.7978959 |
| #### Bn-A09-p30725020 | A-genome specific (napus-rapa)    | 0.9952153    | 0.8402064    | not scorable | not scorable | 0.9752066 | 0.7378855 |
| #### Bn-A09-p30729719 | A-genome specific (napus-rapa)    | 0.9952153    | 0.7691001    | not scorable | not scorable | 0.9834711 | 0.6556913 |
| #### Bn-A09-p30733739 | A-genome specific (napus-rapa)    | 0.9832536    | 0.3386516    | not scorable | not scorable | 0.9834711 | 0.6651096 |
| #### Bn-A09-p30740855 | A-genome specific (napus-rapa)    | 0.9952153    | 0.4309241    | not scorable | not scorable | 1         | 0.732636  |
| #### Bn-A09-p30755882 | A-genome specific (rapa only)     | not scorable | not scorable | not scorable | not scorable | 0.9917355 | 0.7961454 |
| #### Bn-A09-p30763709 | A-genome specific (rapa only)     | not scorable | not scorable | not scorable | not scorable | 0.5950413 | 0.7920883 |
| #### Bn-A09-p30771886 | A-genome specific (napus-rapa)    | 0.9449761    | 0.9195083    | not scorable | not scorable | 0.9917355 | 0.7150474 |
| #### Bn-A09-p30780421 | A-genome specific (napus-rapa)    | 0.9856459    | 0.6209029    | not scorable | not scorable | 0.9917355 | 0.7118433 |
| #### Bn-A09-p30780679 | A-genome specific (rapa only)     | not scorable | not scorable | not scorable | not scorable | 0.9834711 | 0.7410541 |
| #### Bn-A09-p30780890 | A-genome specific (rapa only)     | not scorable | not scorable | not scorable | not scorable | 0.9917355 | 0.7839213 |
| #### Bn-A09-p30788157 | A-genome specific (napus-rapa)    | 0.9928229    | 0.7931979    | not scorable | not scorable | 1         | 0.71273   |
| #### Bn-A09-p30800136 | A-genome specific (napus-rapa)    | 0.9688995    | 0.7755429    | not scorable | not scorable | 0.9669421 | 0.768564  |
| #### Bn-A09-p30805314 | A-genome specific (napus-rapa)    | 0.9688995    | 0.732584     | not scorable | not scorable | 0.9834711 | 0.8006429 |
| #### Bn-A09-p30805387 | A-genome specific (napus-rapa)    | 0.9952153    | 0.8567975    | not scorable | not scorable | 1         | 0.8494313 |
| #### Bn-A09-p30807188 | A-genome specific (rapa only)     | not scorable | not scorable | not scorable | not scorable | 0.7933884 | 0.7829539 |
| #### Bn-A09-p30830947 | genome unspecific (oleracea-rapa) | not scorable | not scorable | 0.627907     | 0.6168858    | 0.9834711 | 0.5633156 |
| #### Bn-A09-p30835062 | A-genome specific (rapa only)     | not scorable | not scorable | not scorable | not scorable | 0.9917355 | 0.7290791 |
| #### Bn-A09-p30846003 | A-genome specific (napus-rapa)    | 0.9976076    | 0.4686193    | not scorable | not scorable | 1         | 0.8442433 |
| #### Bn-A09-p30847721 | A-genome specific (napus-rapa)    | 0.9952153    | 0.8030774    | not scorable | not scorable | 1         | 0.723741  |
| #### Bn-A09-p30856402 | A-genome specific (napus-rapa)    | 0.9952153    | 0.7152818    | not scorable | not scorable | 0.9752066 | 0.805379  |
| #### Bn-A09-p30869609 | A-genome specific (napus-rapa)    | 0.9952153    | 0.8262509    | not scorable | not scorable | 1         | 0.7253276 |
| #### Bn-A09-p30876251 | A-genome specific (napus-rapa)    | 0.9952153    | 0.4125022    | not scorable | not scorable | 1         | 0.6976641 |
| #### Bn-A09-p30877022 | A-genome specific (rapa only)     | not scorable | not scorable | not scorable | not scorable | 1         | 0.5955581 |
| #### Bn-A09-p30877241 | A-genome specific (napus-rapa)    | 0.9952153    | 0.6176769    | not scorable | not scorable | 0.9586777 | 0.548677  |
| #### Bn-A09-p30877372 | A-genome specific (napus-rapa)    | 0.937799     | 0.2376528    | not scorable | not scorable | 1         | 0.7906438 |
| #### Bn-A09-p30887157 | A-genome specific (napus-rapa)    | 0.9952153    | 0.7755127    | not scorable | not scorable | 1         | 0.696617  |
| #### Bn-A09-p30890768 | A-genome specific (napus-rapa)    | 1            | 0.7288713    | not scorable | not scorable | 1         | 0.9175813 |
| #### Bn-A09-p30892887 | A-genome specific (napus-rapa)    | 0.9976076    | 0.3541925    | not scorable | not scorable | 0.9834711 | 0.7973794 |
| #### Bn-A09-p30897594 | A-genome specific (napus-rapa)    | 0.9976076    | 0.9038624    | not scorable | not scorable | 1         | 0.887705  |
| #### Bn-A09-p30900431 | A-genome specific (napus-rapa)    | 0.9808612    | 0.7596043    | not scorable | not scorable | 0.9669421 | 0.6924549 |
| #### Bn-A09-p30901490 | A-genome specific (rapa only)     | not scorable | not scorable | not scorable | not scorable | 1         | 0.9205657 |

|                       |                                |              |              |              |              |              |              |
|-----------------------|--------------------------------|--------------|--------------|--------------|--------------|--------------|--------------|
| #### Bn-A09-p30908648 | A-genome specific (napus-rapa) | 0.9976076    | 0.3824543    | not scorable | not scorable | 0.9917355    | 0.7534963    |
| #### Bn-A09-p30909393 | A-genome specific (napus-rapa) | 0.9928229    | 0.7750162    | not scorable | not scorable | 0.9917355    | 0.616589     |
| #### Bn-A09-p30917919 | A-genome specific (napus-rapa) | 0.9904306    | 0.8793069    | not scorable | not scorable | 0.9586777    | 0.7496452    |
| #### Bn-A09-p30918224 | A-genome specific (napus-rapa) | 0.9952153    | 0.73195      | not scorable | not scorable | 1            | 0.7892905    |
| #### Bn-A09-p30921980 | A-genome specific (napus-rapa) | 0.9952153    | 0.9059821    | not scorable | not scorable | 0.9917355    | 0.7124423    |
| #### Bn-A09-p30925903 | A-genome specific (napus-rapa) | 0.9952153    | 0.8457726    | not scorable | not scorable | 0.9834711    | 0.7312613    |
| #### Bn-A09-p30943916 | A-genome specific (rapa only)  | not scorable | not scorable | not scorable | not scorable | 0.9752066    | 0.6699126    |
| #### Bn-A09-p30954374 | A-genome specific (napus-rapa) | 1            | 0.6182323    | not scorable | not scorable | 0.9917355    | 0.5806714    |
| #### Bn-A09-p30956202 | A-genome specific (napus-rapa) | 1            | 0.4811895    | not scorable | not scorable | 0.9669421    | 0.6466617    |
| #### Bn-A09-p30965242 | A-genome specific (napus-rapa) | 0.9808612    | 0.8212922    | not scorable | not scorable | 0.7851239    | 0.7083241    |
| #### Bn-A09-p30971760 | A-genome specific (napus-rapa) | 0.9952153    | 0.9108731    | not scorable | not scorable | 0.9917355    | 0.7765817    |
| #### Bn-A09-p30971818 | A-genome specific (napus-rapa) | 0.9952153    | 0.8715949    | not scorable | not scorable | 0.9917355    | 0.7451774    |
| #### Bn-A09-p3097420  | A-genome specific (napus-rapa) | 0.9880383    | 0.7130753    | not scorable | not scorable | 0.9669421    | 0.7681088    |
| #### Bn-A09-p31013896 | A-genome specific (napus-rapa) | 0.9952153    | 0.4110916    | not scorable | not scorable | 1            | 0.7852316    |
| #### Bn-A09-p31036504 | A-genome specific (napus-rapa) | 0.9760765    | 0.4120516    | not scorable | not scorable | 0.9917355    | 0.7789972    |
| #### Bn-A09-p31040590 | A-genome specific (napus-rapa) | 0.9665072    | 0.7365437    | not scorable | not scorable | 0.9752066    | 0.6814411    |
| #### Bn-A09-p31041328 | A-genome specific (napus-rapa) | 0.9808612    | 0.7523403    | not scorable | not scorable | 0.9752066    | 0.7946503    |
| #### Bn-A09-p31049155 | A-genome specific (napus-rapa) | 0.9928229    | 0.68751      | not scorable | not scorable | 0.9917355    | 0.6265538    |
| #### Bn-A09-p31050548 | A-genome specific (napus-rapa) | 0.9952153    | 0.6961857    | not scorable | not scorable | 0.9752066    | 0.6412317    |
| #### Bn-A09-p31070303 | A-genome specific (rapa only)  | not scorable | not scorable | not scorable | not scorable | 0.9917355    | 0.8282617    |
| #### Bn-A09-p31071610 | A-genome specific (napus-rapa) | 1            | 0.7669629    | not scorable | not scorable | 1            | 0.7622204    |
| #### Bn-A09-p31118981 | A-genome specific (napus-rapa) | 0.9928229    | 0.8588341    | not scorable | not scorable | 1            | 0.8170735    |
| #### Bn-A09-p31152287 | genome unspecific (all in)     | 0.9976076    | 0.4501732    |              | 1 0.5309165  | 1            | 0.5881355    |
| #### Bn-A09-p3116738  | A-genome specific (napus-rapa) | 0.9904306    | 0.9071264    | not scorable | not scorable | 1            | 0.8202398    |
| #### Bn-A09-p31204477 | A-genome specific (rapa only)  | not scorable | not scorable | not scorable | not scorable | 0.9669421    | 0.7442192    |
| #### Bn-A09-p31204602 | A-genome specific (napus-rapa) | 0.9880383    | 0.3595686    | not scorable | not scorable | 0.9834711    | 0.7165644    |
| #### Bn-A09-p31231616 | A-genome specific (napus-rapa) | 1            | 0.4783177    | not scorable | not scorable | 1            | 0.6545694    |
| #### Bn-A09-p31270539 | napus specific                 | 1            | 0.3905939    | not scorable | not scorable | not scorable | not scorable |
| #### Bn-A09-p31377029 | A-genome specific (napus-rapa) | 0.9904306    | 0.8300294    | not scorable | not scorable | 0.9752066    | 0.7422651    |
| #### Bn-A09-p31388253 | A-genome specific (napus-rapa) | 0.9952153    | 0.4651677    | not scorable | not scorable | 1            | 0.8425763    |
| #### Bn-A09-p31393136 | A-genome specific (napus-rapa) | 0.9904306    | 0.7938625    | not scorable | not scorable | 0.9752066    | 0.660647     |
| #### Bn-A09-p31393314 | A-genome specific (napus-rapa) | 0.9904306    | 0.7417195    | not scorable | not scorable | 0.9834711    | 0.7477535    |
| #### Bn-A09-p31395071 | A-genome specific (napus-rapa) | 0.9736842    | 0.8804423    | not scorable | not scorable | 0.9917355    | 0.7608088    |

|                       |                                |              |              |              |              |           |           |
|-----------------------|--------------------------------|--------------|--------------|--------------|--------------|-----------|-----------|
| #### Bn-A09-p31402193 | A-genome specific (napus-rapa) | 0.9928229    | 0.8598635    | not scorable | not scorable | 0.9917355 | 0.8548979 |
| #### Bn-A09-p31412669 | A-genome specific (rapa only)  | not scorable | not scorable | not scorable | not scorable | 1         | 0.7940893 |
| #### Bn-A09-p31413712 | A-genome specific (napus-rapa) | 0.9976076    | 0.4928454    | not scorable | not scorable | 1         | 0.7849387 |
| #### Bn-A09-p31416695 | A-genome specific (napus-rapa) | 0.9904306    | 0.8741567    | not scorable | not scorable | 1         | 0.8284803 |
| #### Bn-A09-p31427478 | A-genome specific (rapa only)  | not scorable | not scorable | not scorable | not scorable | 0.9917355 | 0.7678105 |
| #### Bn-A09-p31453659 | A-genome specific (rapa only)  | not scorable | not scorable | not scorable | not scorable | 0.9834711 | 0.7667682 |
| #### Bn-A09-p31492693 | A-genome specific (napus-rapa) | 1            | 0.3818561    | not scorable | not scorable | 1         | 0.8341916 |
| #### Bn-A09-p31493152 | A-genome specific (rapa only)  | not scorable | not scorable | not scorable | not scorable | 0.9834711 | 0.8387285 |
| #### Bn-A09-p31494058 | A-genome specific (napus-rapa) | 0.9928229    | 0.8193082    | not scorable | not scorable | 0.9834711 | 0.82429   |
| #### Bn-A09-p31505811 | A-genome specific (napus-rapa) | 0.9928229    | 0.7946882    | not scorable | not scorable | 1         | 0.7325492 |
| #### Bn-A09-p31549008 | A-genome specific (rapa only)  | not scorable | not scorable | not scorable | not scorable | 1         | 0.7801604 |
| #### Bn-A09-p31549208 | A-genome specific (napus-rapa) | 0.9952153    | 0.8252542    | not scorable | not scorable | 0.9834711 | 0.7020374 |
| #### Bn-A09-p31549492 | A-genome specific (napus-rapa) | 0.9928229    | 0.7542984    | not scorable | not scorable | 0.9917355 | 0.7079551 |
| #### Bn-A09-p31549655 | A-genome specific (napus-rapa) | 0.9928229    | 0.8349395    | not scorable | not scorable | 0.9834711 | 0.8503494 |
| #### Bn-A09-p31554401 | A-genome specific (napus-rapa) | 0.9904306    | 0.7770306    | not scorable | not scorable | 0.9834711 | 0.749877  |
| #### Bn-A09-p31554524 | A-genome specific (napus-rapa) | 0.9952153    | 0.8054709    | not scorable | not scorable | 0.9669421 | 0.8063997 |
| #### Bn-A09-p31576965 | A-genome specific (napus-rapa) | 1            | 0.9175813    | not scorable | not scorable | 1         | 0.8912995 |
| #### Bn-A09-p31578167 | A-genome specific (napus-rapa) | 0.9736842    | 0.526404     | not scorable | not scorable | 0.9834711 | 0.7418329 |
| #### Bn-A09-p31580606 | A-genome specific (napus-rapa) | 0.9880383    | 0.530843     | not scorable | not scorable | 0.9917355 | 0.784053  |
| #### Bn-A09-p31582088 | A-genome specific (napus-rapa) | 0.9904306    | 0.84242      | not scorable | not scorable | 0.9834711 | 0.7629194 |
| #### Bn-A09-p31587667 | A-genome specific (napus-rapa) | 1            | 0.5369964    | not scorable | not scorable | 0.9834711 | 0.719678  |
| #### Bn-A09-p31597547 | A-genome specific (rapa only)  | not scorable | not scorable | not scorable | not scorable | 0.9917355 | 0.8131424 |
| #### Bn-A09-p31610860 | A-genome specific (rapa only)  | not scorable | not scorable | not scorable | not scorable | 0.9917355 | 0.7406517 |
| #### Bn-A09-p31611193 | A-genome specific (napus-rapa) | 0.9880383    | 0.8675472    | not scorable | not scorable | 0.9834711 | 0.7663664 |
| #### Bn-A09-p31611279 | A-genome specific (napus-rapa) | 0.9880383    | 0.7980484    | not scorable | not scorable | 0.9917355 | 0.7063671 |
| #### Bn-A09-p31611436 | A-genome specific (napus-rapa) | 0.9928229    | 0.8707797    | not scorable | not scorable | 0.9917355 | 0.832301  |
| #### Bn-A09-p31611521 | A-genome specific (napus-rapa) | 0.9904306    | 0.6342322    | not scorable | not scorable | 0.9917355 | 0.5764026 |
| #### Bn-A09-p31611638 | A-genome specific (napus-rapa) | 0.9880383    | 0.8614615    | not scorable | not scorable | 0.9917355 | 0.80098   |
| #### Bn-A09-p31612154 | A-genome specific (napus-rapa) | 0.9832536    | 0.6832529    | not scorable | not scorable | 1         | 0.8271158 |
| #### Bn-A09-p31613718 | A-genome specific (napus-rapa) | 0.9904306    | 0.8043426    | not scorable | not scorable | 0.9752066 | 0.6939242 |
| #### Bn-A09-p31614055 | A-genome specific (napus-rapa) | 0.9904306    | 0.8396742    | not scorable | not scorable | 0.9752066 | 0.7626089 |
| #### Bn-A09-p31614130 | A-genome specific (napus-rapa) | 0.9904306    | 0.8892304    | not scorable | not scorable | 0.9752066 | 0.7667011 |
| #### Bn-A09-p31614376 | A-genome specific (napus-rapa) | 0.9904306    | 0.8546504    | not scorable | not scorable | 0.9752066 | 0.8042927 |



|                       |                                |              |              |              |              |              |              |
|-----------------------|--------------------------------|--------------|--------------|--------------|--------------|--------------|--------------|
| #### Bn-A09-p31615419 | all not scorable               | not scorable | not scorable | not scorable | not scorable | not scorable | not scorable |
| #### Bn-A09-p31629427 | A-genome specific (napus-rapa) | 0.9928229    | 0.8359007    | not scorable | not scorable | 0.9917355    | 0.7545624    |
| #### Bn-A09-p31635684 | A-genome specific (napus-rapa) | 0.9976076    | 0.7213477    | not scorable | not scorable | 0.9834711    | 0.812021     |
| #### Bn-A09-p31651915 | A-genome specific (napus-rapa) | 0.9928229    | 0.9180309    | not scorable | not scorable | 0.9752066    | 0.8031629    |
| #### Bn-A09-p31658403 | A-genome specific (napus-rapa) | 0.9928229    | 0.8913651    | not scorable | not scorable | 0.9834711    | 0.8041821    |
| #### Bn-A09-p31660206 | A-genome specific (napus-rapa) | 0.9928229    | 0.8075634    | not scorable | not scorable | 0.9917355    | 0.7032052    |
| #### Bn-A09-p31663954 | A-genome specific (napus-rapa) | 0.9928229    | 0.8224733    | not scorable | not scorable | 0.9834711    | 0.7689394    |
| #### Bn-A09-p31678038 | A-genome specific (napus-rapa) | 0.9760765    | 0.8379186    | not scorable | not scorable | 0.9669421    | 0.7622833    |
| #### Bn-A09-p31704785 | A-genome specific (napus-rapa) | 0.9928229    | 0.8361747    | not scorable | not scorable | 1            | 0.6721092    |
| #### Bn-A09-p31706338 | A-genome specific (napus-rapa) | 0.9904306    | 0.7819293    | not scorable | not scorable | 0.9834711    | 0.6614168    |
| #### Bn-A09-p31706416 | A-genome specific (napus-rapa) | 0.9904306    | 0.7823711    | not scorable | not scorable | 0.9834711    | 0.7145322    |
| #### Bn-A09-p31706472 | A-genome specific (napus-rapa) | 0.9880383    | 0.8515416    | not scorable | not scorable | 0.9917355    | 0.8111624    |
| #### Bn-A09-p31709548 | A-genome specific (napus-rapa) | 0.9880383    | 0.8004577    | not scorable | not scorable | 1            | 0.7966599    |
| #### Bn-A09-p31716654 | A-genome specific (napus-rapa) | 0.9952153    | 0.7267553    | not scorable | not scorable | 1            | 0.6786479    |
| #### Bn-A09-p31725940 | A-genome specific (napus-rapa) | 0.930622     | 0.817765     | not scorable | not scorable | 0.9752066    | 0.8815182    |
| #### Bn-A09-p31726007 | A-genome specific (napus-rapa) | 0.930622     | 0.729059     | not scorable | not scorable | 0.9752066    | 0.7947999    |
| #### Bn-A09-p31726014 | A-genome specific (napus-rapa) | 0.930622     | 0.9014245    | not scorable | not scorable | 0.9834711    | 0.9175813    |
| #### Bn-A09-p31730182 | A-genome specific (napus-rapa) | 1            | 0.4728704    | not scorable | not scorable | 0.9834711    | 0.7704409    |
| #### Bn-A09-p3173488  | A-genome specific (napus-rapa) | 1            | 0.8930699    | not scorable | not scorable | 1            | 0.8329387    |
| #### Bn-A09-p31740290 | A-genome specific (napus-rapa) | 0.9928229    | 0.8950319    | not scorable | not scorable | 1            | 0.7952105    |
| #### Bn-A09-p31741551 | A-genome specific (napus-rapa) | 1            | 0.7570221    | not scorable | not scorable | 0.9669421    | 0.6348718    |
| #### Bn-A09-p31781629 | A-genome specific (napus-rapa) | 1            | 0.3973567    | not scorable | not scorable | 0.9586777    | 0.6609367    |
| #### Bn-A09-p31792154 | A-genome specific (napus-rapa) | 1            | 0.5231674    | not scorable | not scorable | 1            | 0.7207729    |
| #### Bn-A09-p31810193 | A-genome specific (napus-rapa) | 0.9952153    | 0.8767541    | not scorable | not scorable | 0.9669421    | 0.691943     |
| #### Bn-A09-p31821192 | A-genome specific (rapa only)  | not scorable | not scorable | not scorable | not scorable | 0.8429752    | 0.8622348    |
| #### Bn-A09-p31870750 | A-genome specific (napus-rapa) | 0.9976076    | 0.5566705    | not scorable | not scorable | 1            | 0.5025857    |
| #### Bn-A09-p31884693 | A-genome specific (napus-rapa) | 0.9712918    | 0.7924288    | not scorable | not scorable | 1            | 0.7834979    |
| #### Bn-A09-p31888714 | A-genome specific (rapa only)  | not scorable | not scorable | not scorable | not scorable | 0.9752066    | 0.6888669    |
| #### Bn-A09-p31890957 | A-genome specific (napus-rapa) | 0.9593301    | 0.8041298    | not scorable | not scorable | 0.9917355    | 0.7681646    |
| #### Bn-A09-p31891306 | A-genome specific (napus-rapa) | 0.7799043    | 0.8665402    | not scorable | not scorable | 0.7520661    | 0.7874824    |
| #### Bn-A09-p31905309 | A-genome specific (napus-rapa) | 0.9401914    | 0.7612463    | not scorable | not scorable | 0.9752066    | 0.7952949    |
| #### Bn-A09-p31941551 | all not scorable               | not scorable | not scorable | not scorable | not scorable | not scorable | not scorable |
| #### Bn-A09-p31949837 | A-genome specific (napus-rapa) | 1            | 0.6079728    | not scorable | not scorable | 1            | 0.7138681    |

|                       |                                   |              |              |              |              |              |              |
|-----------------------|-----------------------------------|--------------|--------------|--------------|--------------|--------------|--------------|
| #### Bn-A09-p31952879 | A-genome specific (napus-rapa)    | 0.9952153    | 0.864146     | not scorable | not scorable | 0.9834711    | 0.7039872    |
| #### Bn-A09-p31953653 | A-genome specific (napus-rapa)    | 0.9976076    | 0.5729403    | not scorable | not scorable | 0.9834711    | 0.8002082    |
| #### Bn-A09-p31957772 | A-genome specific (napus-rapa)    | 0.9928229    | 0.7613822    | not scorable | not scorable | 0.9752066    | 0.7131827    |
| #### Bn-A09-p31968693 | A-genome specific (napus-rapa)    | 0.9569378    | 0.6315663    | not scorable | not scorable | 0.9917355    | 0.7372329    |
| #### Bn-A09-p31969888 | A-genome specific (napus-rapa)    | 0.9760765    | 0.7391014    | not scorable | not scorable | 1            | 0.8001324    |
| #### Bn-A09-p31979689 | A-genome specific (napus-rapa)    | 0.5287082    | 0.8575299    | not scorable | not scorable | 0.9256198    | 0.6520789    |
| #### Bn-A09-p31982487 | A-genome specific (napus-rapa)    | 0.9952153    | 0.3179721    | not scorable | not scorable | 1            | 0.6793794    |
| #### Bn-A09-p31987382 | A-genome specific (napus-rapa)    | 0.9904306    | 0.8189395    | not scorable | not scorable | 0.9669421    | 0.7431902    |
| #### Bn-A09-p31987655 | A-genome specific (rapa only)     | not scorable | not scorable | not scorable | not scorable | 1            | 0.339139     |
| #### Bn-A09-p32025164 | A-genome specific (napus-rapa)    | 0.9952153    | 0.5219498    | not scorable | not scorable | 0.9586777    | 0.5424436    |
| #### Bn-A09-p32027483 | A-genome specific (napus-rapa)    | 0.9976076    | 0.2732661    | not scorable | not scorable | 0.9917355    | 0.8224073    |
| #### Bn-A09-p32066349 | A-genome specific (napus-rapa)    | 1            | 0.8418308    | not scorable | not scorable | 0.9917355    | 0.7695504    |
| #### Bn-A09-p32104929 | C-genome specific (oleracea only) | not scorable | not scorable |              | 1            | 0.5095836    | not scorable |
| #### Bn-A09-p32104974 | A-genome specific (napus-rapa)    | 0.9880383    | 0.4565871    | not scorable | not scorable | 1            | 0.6862987    |
| #### Bn-A09-p32105188 | A-genome specific (napus-rapa)    | 0.9760765    | 0.4183358    | not scorable | not scorable | 0.9752066    | 0.7575245    |
| #### Bn-A09-p321430   | A-genome specific (napus-rapa)    | 0.8397129    | 0.7990654    | not scorable | not scorable | 1            | 0.7733644    |
| #### Bn-A09-p32161150 | A-genome specific (napus-rapa)    | 0.9521531    | 0.548025     | not scorable | not scorable | 1            | 0.7289587    |
| #### Bn-A09-p32165581 | A-genome specific (napus-rapa)    | 0.9784689    | 0.3125493    | not scorable | not scorable | 1            | 0.7805973    |
| #### Bn-A09-p32167322 | A-genome specific (napus-rapa)    | 0.9760765    | 0.7713749    | not scorable | not scorable | 0.9834711    | 0.7763773    |
| #### Bn-A09-p32172515 | A-genome specific (napus-rapa)    | 0.9617225    | 0.7715759    | not scorable | not scorable | 1            | 0.8515661    |
| #### Bn-A09-p32223480 | A-genome specific (napus-rapa)    | 0.9856459    | 0.5144792    | not scorable | not scorable | 0.9917355    | 0.6466363    |
| #### Bn-A09-p32225646 | A-genome specific (napus-rapa)    | 0.9904306    | 0.818202     | not scorable | not scorable | 0.9917355    | 0.8177809    |
| #### Bn-A09-p3225300  | A-genome specific (rapa only)     | not scorable | not scorable | not scorable | not scorable | 1            | 0.8736121    |
| #### Bn-A09-p32254190 | A-genome specific (napus-rapa)    | 0.9976076    | 0.4818792    | not scorable | not scorable | 1            | 0.7836971    |
| #### Bn-A09-p32257776 | A-genome specific (napus-rapa)    | 0.9808612    | 0.8402642    | not scorable | not scorable | 0.9834711    | 0.7886117    |
| #### Bn-A09-p32258181 | A-genome specific (napus-rapa)    | 0.9952153    | 0.6130544    | not scorable | not scorable | 0.9834711    | 0.6884687    |
| #### Bn-A09-p32269283 | A-genome specific (napus-rapa)    | 1            | 0.4991131    | not scorable | not scorable | 1            | 0.8361844    |
| #### Bn-A09-p32270596 | A-genome specific (napus-rapa)    | 0.9976076    | 0.8266662    | not scorable | not scorable | 0.9834711    | 0.8028364    |
| #### Bn-A09-p32275168 | A-genome specific (napus-rapa)    | 1            | 0.3532677    | not scorable | not scorable | 0.9917355    | 0.6840998    |
| #### Bn-A09-p32321534 | A-genome specific (napus-rapa)    | 0.9545454    | 0.8715949    | not scorable | not scorable | 0.9752066    | 0.7689337    |
| #### Bn-A09-p3233005  | napus specific                    | 0.6220096    | 0.9499919    | not scorable | not scorable | not scorable | not scorable |
| #### Bn-A09-p3233129  | A-genome specific (napus-rapa)    | 0.9354067    | 0.9205657    | not scorable | not scorable | 0.9917355    | 0.9175813    |
| #### Bn-A09-p3234323  | A-genome specific (rapa only)     | not scorable | not scorable | not scorable | not scorable | 0.9917355    | 0.8132254    |

|                       |                                |              |              |              |              |              |              |
|-----------------------|--------------------------------|--------------|--------------|--------------|--------------|--------------|--------------|
| #### Bn-A09-p32344408 | A-genome specific (napus-rapa) | 0.9976076    | 0.6933987    | not scorable | not scorable | 1            | 0.738458     |
| #### Bn-A09-p3237193  | A-genome specific (napus-rapa) | 0.9712918    | 0.7733586    | not scorable | not scorable | 0.9917355    | 0.8391113    |
| #### Bn-A09-p32441297 | A-genome specific (napus-rapa) | 0.9976076    | 0.9205657    | not scorable | not scorable | 0.9834711    | 0.7555454    |
| #### Bn-A09-p3247915  | A-genome specific (napus-rapa) | 0.9712918    | 0.7720814    | not scorable | not scorable | 1            | 0.8533013    |
| #### Bn-A09-p3251545  | A-genome specific (napus-rapa) | 0.9928229    | 0.7598875    | not scorable | not scorable | 1            | 0.7307711    |
| #### Bn-A09-p3252267  | A-genome specific (napus-rapa) | 0.9808612    | 0.7668219    | not scorable | not scorable | 1            | 0.7305239    |
| #### Bn-A09-p32553111 | A-genome specific (napus-rapa) | 0.9976076    | 0.5575473    | not scorable | not scorable | 0.9834711    | 0.8345109    |
| #### Bn-A09-p3257371  | A-genome specific (napus-rapa) | 0.9832536    | 0.4822709    | not scorable | not scorable | 0.9421487    | 0.6684183    |
| #### Bn-A09-p32590303 | A-genome specific (napus-rapa) | 0.9976076    | 0.3792224    | not scorable | not scorable | 0.9752066    | 0.674539     |
| #### Bn-A09-p32624472 | A-genome specific (napus-rapa) | 0.9688995    | 0.6714967    | not scorable | not scorable | 0.9834711    | 0.685605     |
| #### Bn-A09-p32656218 | all not scorable               | not scorable | not scorable | not scorable | not scorable | not scorable | not scorable |
| #### Bn-A09-p32665710 | A-genome specific (napus-rapa) | 0.9760765    | 0.6125059    | not scorable | not scorable | 0.9834711    | 0.775782     |
| #### Bn-A09-p32666778 | A-genome specific (napus-rapa) | 0.9736842    | 0.3489781    | not scorable | not scorable | 0.9752066    | 0.6305217    |
| #### Bn-A09-p32669666 | A-genome specific (napus-rapa) | 0.9880383    | 0.3278498    | not scorable | not scorable | 1            | 0.9050321    |
| #### Bn-A09-p32713083 | A-genome specific (napus-rapa) | 1            | 0.5235151    | not scorable | not scorable | 1            | 0.8297023    |
| #### Bn-A09-p32717048 | A-genome specific (napus-rapa) | 0.9952153    | 0.8127866    | not scorable | not scorable | 1            | 0.8285535    |
| #### Bn-A09-p3275736  | A-genome specific (rapa only)  | not scorable | not scorable | not scorable | not scorable | 1            | 0.7557006    |
| #### Bn-A09-p32787589 | A-genome specific (napus-rapa) | 0.9928229    | 0.8362265    | not scorable | not scorable | 0.9917355    | 0.7900009    |
| #### Bn-A09-p32811261 | A-genome specific (napus-rapa) | 0.9928229    | 0.8096675    | not scorable | not scorable | 1            | 0.7910271    |
| #### Bn-A09-p32822165 | A-genome specific (napus-rapa) | 1            | 0.5021366    | not scorable | not scorable | 0.9752066    | 0.7953969    |
| #### Bn-A09-p32826561 | A-genome specific (napus-rapa) | 0.9928229    | 0.719432     | not scorable | not scorable | 0.9834711    | 0.6832818    |
| #### Bn-A09-p32841826 | A-genome specific (napus-rapa) | 0.9880383    | 0.8438043    | not scorable | not scorable | 0.9752066    | 0.7207757    |
| #### Bn-A09-p32849664 | napus specific                 | 0.9880383    | 0.7264609    | not scorable | not scorable | not scorable | not scorable |
| #### Bn-A09-p32862905 | A-genome specific (napus-rapa) | 0.9952153    | 0.8334178    | not scorable | not scorable | 1            | 0.8915582    |
| #### Bn-A09-p32864411 | A-genome specific (rapa only)  | not scorable | not scorable | not scorable | not scorable | 1            | 0.7127941    |
| #### Bn-A09-p32884256 | A-genome specific (napus-rapa) | 0.9976076    | 0.3245504    | not scorable | not scorable | 0.9917355    | 0.8176287    |
| #### Bn-A09-p32903518 | A-genome specific (napus-rapa) | 0.9904306    | 0.8171358    | not scorable | not scorable | 0.9669421    | 0.819418     |
| #### Bn-A09-p329151   | all not scorable               | not scorable | not scorable | not scorable | not scorable | not scorable | not scorable |
| #### Bn-A09-p32923447 | A-genome specific (napus-rapa) | 0.9880383    | 0.875282     | not scorable | not scorable | 0.9752066    | 0.9072468    |
| #### Bn-A09-p32923478 | A-genome specific (napus-rapa) | 0.9880383    | 0.8546351    | not scorable | not scorable | 0.9752066    | 0.8042249    |
| #### Bn-A09-p32937856 | A-genome specific (napus-rapa) | 0.9976076    | 0.5061779    | not scorable | not scorable | 0.9834711    | 0.6284678    |
| #### Bn-A09-p32944206 | A-genome specific (napus-rapa) | 0.9952153    | 0.7634423    | not scorable | not scorable | 1            | 0.7426777    |
| #### Bn-A09-p32945202 | A-genome specific (napus-rapa) | 0.9904306    | 0.4654619    | not scorable | not scorable | 0.9834711    | 0.6970503    |

|                       |                                |              |              |              |              |              |              |
|-----------------------|--------------------------------|--------------|--------------|--------------|--------------|--------------|--------------|
| #### Bn-A09-p32954471 | A-genome specific (napus-rapa) | 0.9952153    | 0.396433     | not scorable | not scorable | 0.9917355    | 0.6556292    |
| #### Bn-A09-p32959480 | A-genome specific (napus-rapa) | 0.9928229    | 0.8378162    | not scorable | not scorable | 1            | 0.7800255    |
| #### Bn-A09-p32974956 | all not scorable               | not scorable | not scorable | not scorable | not scorable | not scorable | not scorable |
| #### Bn-A09-p32978334 | genome unspecific (all in)     | 0.9928229    | 0.3554125    | 0.9767442    | 0.7300143    | 1            | 0.8274606    |
| #### Bn-A09-p32980100 | A-genome specific (napus-rapa) | 0.8995215    | 0.8521883    | not scorable | not scorable | 0.5123967    | 0.8775045    |
| #### Bn-A09-p32980153 | A-genome specific (napus-rapa) | 0.9976076    | 0.67168      | not scorable | not scorable | 0.9752066    | 0.7045184    |
| #### Bn-A09-p32993230 | A-genome specific (napus-rapa) | 1            | 0.5397117    | not scorable | not scorable | 1            | 0.8106013    |
| #### Bn-A09-p32995843 | A-genome specific (napus-rapa) | 0.9808612    | 0.8722407    | not scorable | not scorable | 0.9917355    | 0.6697245    |
| #### Bn-A09-p33006858 | A-genome specific (napus-rapa) | 0.9976076    | 0.7907098    | not scorable | not scorable | 0.9917355    | 0.7534524    |
| #### Bn-A09-p33009761 | A-genome specific (napus-rapa) | 0.9904306    | 0.3013384    | not scorable | not scorable | 1            | 0.8304128    |
| #### Bn-A09-p33013128 | A-genome specific (napus-rapa) | 0.9880383    | 0.5890306    | not scorable | not scorable | 0.9917355    | 0.7879508    |
| #### Bn-A09-p33015862 | A-genome specific (napus-rapa) | 1            | 0.5389668    | not scorable | not scorable | 1            | 0.5445634    |
| #### Bn-A09-p33025970 | A-genome specific (napus-rapa) | 0.9904306    | 0.404538     | not scorable | not scorable | 0.9834711    | 0.7480017    |
| #### Bn-A09-p33029336 | A-genome specific (napus-rapa) | 0.9856459    | 0.5707249    | not scorable | not scorable | 0.9917355    | 0.7052979    |
| #### Bn-A09-p33037403 | A-genome specific (rapa only)  | not scorable | not scorable | not scorable | not scorable | 1            | 0.7884093    |
| #### Bn-A09-p33040441 | A-genome specific (napus-rapa) | 0.9976076    | 0.8224128    | not scorable | not scorable | 1            | 0.7960336    |
| #### Bn-A09-p33058738 | A-genome specific (napus-rapa) | 0.9952153    | 0.4335076    | not scorable | not scorable | 0.9917355    | 0.7350124    |
| #### Bn-A09-p33061472 | A-genome specific (napus-rapa) | 0.9904306    | 0.4686193    | not scorable | not scorable | 0.9752066    | 0.8098912    |
| #### Bn-A09-p33073037 | A-genome specific (napus-rapa) | 0.9808612    | 0.8676176    | not scorable | not scorable | 0.9669421    | 0.8404479    |
| #### Bn-A09-p33073469 | A-genome specific (napus-rapa) | 1            | 0.4871245    | not scorable | not scorable | 0.9917355    | 0.8194354    |
| #### Bn-A09-p33100320 | A-genome specific (napus-rapa) | 0.9976076    | 0.8030575    | not scorable | not scorable | 0.9917355    | 0.7264583    |
| #### Bn-A09-p33105121 | A-genome specific (rapa only)  | not scorable | not scorable | not scorable | not scorable | 1            | 0.6751195    |
| #### Bn-A09-p33105204 | A-genome specific (rapa only)  | not scorable | not scorable | not scorable | not scorable | 1            | 0.7697616    |
| #### Bn-A09-p33179406 | A-genome specific (napus-rapa) | 0.9210526    | 0.9419289    | not scorable | not scorable | 0.9917355    | 0.7182063    |
| #### Bn-A09-p33193573 | A-genome specific (napus-rapa) | 0.9952153    | 0.3612759    | not scorable | not scorable | 0.9834711    | 0.7345056    |
| #### Bn-A09-p33256856 | A-genome specific (napus-rapa) | 1            | 0.7641606    | not scorable | not scorable | 0.9917355    | 0.674897     |
| #### Bn-A09-p33271433 | A-genome specific (napus-rapa) | 0.8971292    | 0.821741     | not scorable | not scorable | 0.9586777    | 0.9272014    |
| #### Bn-A09-p33278240 | A-genome specific (napus-rapa) | 0.9210526    | 0.845939     | not scorable | not scorable | 0.9669421    | 0.7741914    |
| #### Bn-A09-p33280    | napus specific                 | 0.5430622    | 0.9107866    | not scorable | not scorable | not scorable | not scorable |
| #### Bn-A09-p33344815 | A-genome specific (napus-rapa) | 0.9928229    | 0.4148104    | not scorable | not scorable | 0.9834711    | 0.770972     |
| #### Bn-A09-p33347853 | A-genome specific (napus-rapa) | 0.9928229    | 0.8286309    | not scorable | not scorable | 0.9917355    | 0.7485515    |
| #### Bn-A09-p33347915 | A-genome specific (napus-rapa) | 0.9904306    | 0.4736022    | not scorable | not scorable | 0.9504132    | 0.7289785    |
| #### Bn-A09-p33348200 | A-genome specific (napus-rapa) | 0.9856459    | 0.7124805    | not scorable | not scorable | 0.9834711    | 0.6450222    |

|                       |                                |              |              |              |              |              |              |
|-----------------------|--------------------------------|--------------|--------------|--------------|--------------|--------------|--------------|
| #### Bn-A09-p33348598 | A-genome specific (napus-rapa) | 0.9904306    | 0.8524128    | not scorable | not scorable | 0.9917355    | 0.7659664    |
| #### Bn-A09-p33349373 | A-genome specific (napus-rapa) | 0.9976076    | 0.5100223    | not scorable | not scorable | 0.9752066    | 0.7157844    |
| #### Bn-A09-p33349948 | A-genome specific (napus-rapa) | 0.9928229    | 0.8185129    | not scorable | not scorable | 0.9917355    | 0.7293511    |
| #### Bn-A09-p33358168 | A-genome specific (napus-rapa) | 0.9880383    | 0.7128057    | not scorable | not scorable | 0.9917355    | 0.7382981    |
| #### Bn-A09-p33358298 | A-genome specific (napus-rapa) | 0.9712918    | 0.7609667    | not scorable | not scorable | 0.9917355    | 0.759389     |
| #### Bn-A09-p33358356 | A-genome specific (napus-rapa) | 0.9712918    | 0.8206039    | not scorable | not scorable | 0.9586777    | 0.7075903    |
| #### Bn-A09-p33369348 | A-genome specific (napus-rapa) | 0.9569378    | 0.4568323    | not scorable | not scorable | 1            | 0.7540426    |
| #### Bn-A09-p33372131 | A-genome specific (napus-rapa) | 0.9928229    | 0.4291203    | not scorable | not scorable | 1            | 0.7867498    |
| #### Bn-A09-p33372204 | A-genome specific (napus-rapa) | 0.9928229    | 0.885168     | not scorable | not scorable | 1            | 0.835685     |
| #### Bn-A09-p33372571 | A-genome specific (napus-rapa) | 0.9880383    | 0.7323706    | not scorable | not scorable | 0.9586777    | 0.7342799    |
| #### Bn-A09-p33372831 | A-genome specific (napus-rapa) | 0.9856459    | 0.8024419    | not scorable | not scorable | 1            | 0.7564855    |
| #### Bn-A09-p33372891 | A-genome specific (napus-rapa) | 0.9856459    | 0.7385122    | not scorable | not scorable | 0.9834711    | 0.5713093    |
| #### Bn-A09-p33372925 | A-genome specific (napus-rapa) | 0.9904306    | 0.622003     | not scorable | not scorable | 1            | 0.6983167    |
| #### Bn-A09-p33374339 | A-genome specific (napus-rapa) | 1            | 0.81492      | not scorable | not scorable | 1            | 0.8054367    |
| #### Bn-A09-p33382398 | A-genome specific (napus-rapa) | 0.9856459    | 0.7974351    | not scorable | not scorable | 0.9752066    | 0.7015771    |
| #### Bn-A09-p33391361 | A-genome specific (napus-rapa) | 0.9928229    | 0.8067995    | not scorable | not scorable | 0.9917355    | 0.8045994    |
| #### Bn-A09-p33398481 | A-genome specific (napus-rapa) | 0.9928229    | 0.4384419    | not scorable | not scorable | 0.9752066    | 0.7475879    |
| #### Bn-A09-p33399849 | A-genome specific (napus-rapa) | 0.9856459    | 0.8329836    | not scorable | not scorable | 0.9917355    | 0.8247883    |
| #### Bn-A09-p33400463 | napus specific                 | 0.9856459    | 0.4753381    | not scorable | not scorable | not scorable | not scorable |
| #### Bn-A09-p33400597 | napus specific                 | 0.9952153    | 0.4961356    | not scorable | not scorable | not scorable | not scorable |
| #### Bn-A09-p33406111 | A-genome specific (napus-rapa) | 0.9904306    | 0.8187889    | not scorable | not scorable | 0.9752066    | 0.770389     |
| #### Bn-A09-p33406350 | A-genome specific (napus-rapa) | 0.9856459    | 0.8272999    | not scorable | not scorable | 1            | 0.8106052    |
| #### Bn-A09-p33406899 | A-genome specific (napus-rapa) | 0.9880383    | 0.8739209    | not scorable | not scorable | 0.9752066    | 0.8123493    |
| #### Bn-A09-p33415187 | A-genome specific (napus-rapa) | 0.9904306    | 0.7008521    | not scorable | not scorable | 0.9917355    | 0.6866202    |
| #### Bn-A09-p33419515 | A-genome specific (napus-rapa) | 0.9952153    | 0.9188852    | not scorable | not scorable | 1            | 0.7983059    |
| #### Bn-A09-p33427256 | A-genome specific (napus-rapa) | 0.9856459    | 0.7269418    | not scorable | not scorable | 0.9917355    | 0.6616563    |
| #### Bn-A09-p33428597 | A-genome specific (napus-rapa) | 0.9928229    | 0.7730171    | not scorable | not scorable | 0.9834711    | 0.7244663    |
| #### Bn-A09-p33431499 | A-genome specific (napus-rapa) | 0.9641148    | 0.6131203    | not scorable | not scorable | 0.7272727    | 0.7837734    |
| #### Bn-A09-p33434100 | A-genome specific (napus-rapa) | 1            | 0.9213539    | not scorable | not scorable | 1            | 0.9118061    |
| #### Bn-A09-p33434187 | A-genome specific (rapa only)  | not scorable | not scorable | not scorable | not scorable | 1            | 0.6841583    |
| #### Bn-A09-p33450690 | A-genome specific (napus-rapa) | 0.9928229    | 0.8942878    | not scorable | not scorable | 0.9752066    | 0.7853137    |
| #### Bn-A09-p33456655 | A-genome specific (rapa only)  | not scorable | not scorable | not scorable | not scorable | 0.9917355    | 0.723614     |
| #### Bn-A09-p33458611 | A-genome specific (napus-rapa) | 1            | 0.7641606    | not scorable | not scorable | 1            | 0.7770717    |

|                       |                                   |              |              |              |              |              |              |
|-----------------------|-----------------------------------|--------------|--------------|--------------|--------------|--------------|--------------|
| #### Bn-A09-p33459299 | A-genome specific (napus-rapa)    | 0.9928229    | 0.6259065    | not scorable | not scorable | 1            | 0.774757     |
| #### Bn-A09-p33464355 | A-genome specific (napus-rapa)    | 0.9712918    | 0.7624477    | not scorable | not scorable | 0.9752066    | 0.7960595    |
| #### Bn-A09-p33473254 | A-genome specific (napus-rapa)    | 0.9928229    | 0.4814443    | not scorable | not scorable | 1            | 0.7500039    |
| #### Bn-A09-p33475518 | A-genome specific (napus-rapa)    | 0.9856459    | 0.8385277    | not scorable | not scorable | 0.9834711    | 0.7852533    |
| #### Bn-A09-p3347911  | A-genome specific (napus-rapa)    | 0.9784689    | 0.5949384    | not scorable | not scorable | 0.9917355    | 0.7005759    |
| #### Bn-A09-p33485784 | A-genome specific (napus-rapa)    | 0.9976076    | 0.8045864    | not scorable | not scorable | 0.9834711    | 0.768675     |
| #### Bn-A09-p33487356 | A-genome specific (napus-rapa)    | 0.9832536    | 0.3657223    | not scorable | not scorable | 1            | 0.663372     |
| #### Bn-A09-p33491501 | A-genome specific (napus-rapa)    | 1            | 0.359118     | not scorable | not scorable | 1            | 0.7203684    |
| #### Bn-A09-p33496868 | A-genome specific (napus-rapa)    | 0.9617225    | 0.6695072    | not scorable | not scorable | 0.9917355    | 0.7033637    |
| #### Bn-A09-p33497174 | A-genome specific (napus-rapa)    | 0.9808612    | 0.9156388    | not scorable | not scorable | 0.9669421    | 0.678462     |
| #### Bn-A09-p33499505 | A-genome specific (napus-rapa)    | 0.9880383    | 0.7411389    | not scorable | not scorable | 0.9752066    | 0.6393942    |
| #### Bn-A09-p33499917 | A-genome specific (napus-rapa)    | 0.9856459    | 0.8191159    | not scorable | not scorable | 0.9917355    | 0.7880375    |
| #### Bn-A09-p33500473 | A-genome specific (napus-rapa)    | 0.9760765    | 0.9182026    | not scorable | not scorable | 0.9752066    | 0.6990251    |
| #### Bn-A09-p33512900 | A-genome specific (napus-rapa)    | 0.9928229    | 0.6325704    | not scorable | not scorable | 1            | 0.7868425    |
| #### Bn-A09-p33518379 | napus specific                    | 0.9976076    | 0.8048082    | not scorable | not scorable | not scorable | not scorable |
| #### Bn-A09-p33521094 | A-genome specific (napus-rapa)    | 0.9880383    | 0.7289067    | not scorable | not scorable | 1            | 0.6845975    |
| #### Bn-A09-p33535361 | A-genome specific (napus-rapa)    | 0.9904306    | 0.8143677    | not scorable | not scorable | 0.9834711    | 0.7632607    |
| #### Bn-A09-p33539118 | A-genome specific (napus-rapa)    | 0.9856459    | 0.7066043    | not scorable | not scorable | 1            | 0.6904881    |
| #### Bn-A09-p33542334 | A-genome specific (napus-rapa)    | 0.9665072    | 0.7405892    | not scorable | not scorable | 0.9917355    | 0.7134245    |
| #### Bn-A09-p33544191 | A-genome specific (napus-rapa)    | 0.9928229    | 0.5864204    | not scorable | not scorable | 0.9752066    | 0.639484     |
| #### Bn-A09-p33568547 | A-genome specific (rapa only)     | not scorable | not scorable | not scorable | not scorable | 0.9917355    | 0.7229741    |
| #### Bn-A09-p33574107 | napus specific                    | 0.9736842    | 0.8653774    | not scorable | not scorable | not scorable | not scorable |
| #### Bn-A09-p33582715 | napus specific                    | 0.9760765    | 0.6587477    | not scorable | not scorable | not scorable | not scorable |
| #### Bn-A09-p33587432 | A-genome specific (napus-rapa)    | 0.9928229    | 0.2651498    | not scorable | not scorable | 0.9917355    | 0.5142371    |
| #### Bn-A09-p33595011 | A-genome specific (napus-rapa)    | 0.9904306    | 0.7731886    | not scorable | not scorable | 0.9917355    | 0.7887411    |
| #### Bn-A09-p33595174 | A-genome specific (napus-rapa)    | 0.9856459    | 0.8376549    | not scorable | not scorable | 0.9917355    | 0.8226218    |
| #### Bn-A09-p33641390 | A-genome specific (napus-rapa)    | 1            | 0.4384731    | not scorable | not scorable | 0.9752066    | 0.7160406    |
| #### Bn-A09-p33650317 | A-genome specific (rapa only)     | not scorable | not scorable | not scorable | not scorable | 1            | 0.8993025    |
| #### Bn-A09-p33660289 | genome unspecific (all in)        | 0.9808612    | 0.4598179    |              | 1            | 0.6051971    | 1            |
| #### Bn-A09-p33694154 | A-genome specific (napus-rapa)    | 1            | 0.5523803    | not scorable | not scorable | 1            | 0.7189068    |
| #### Bn-A09-p33694194 | genome unspecific (oleracea-rapa) | not scorable | not scorable | 0.9844961    | 0.725432     | 1            | 0.6754787    |
| #### Bn-A09-p33706030 | A-genome specific (rapa only)     | not scorable | not scorable | not scorable | not scorable | 0.9669421    | 0.715422     |
| #### Bn-A09-p33716233 | A-genome specific (napus-rapa)    | 0.722488     | 0.7469196    | not scorable | not scorable | 0.7190083    | 0.8686347    |

|                       |                                   |              |              |              |              |           |           |
|-----------------------|-----------------------------------|--------------|--------------|--------------|--------------|-----------|-----------|
| #### Bn-A09-p33722405 | A-genome specific (napus-rapa)    | 0.7177033    | 0.7508796    | not scorable | not scorable | 0.7438017 | 0.8509206 |
| #### Bn-A09-p33723162 | A-genome specific (napus-rapa)    | 0.722488     | 0.8848293    | not scorable | not scorable | 0.768595  | 0.6853226 |
| #### Bn-A09-p33723456 | A-genome specific (rapa only)     | not scorable | not scorable | not scorable | not scorable | 0.7272727 | 0.8785812 |
| #### Bn-A09-p33724136 | A-genome specific (napus-rapa)    | 0.7200957    | 0.8598099    | not scorable | not scorable | 0.7438017 | 0.6853701 |
| #### Bn-A09-p33724178 | A-genome specific (napus-rapa)    | 0.708134     | 0.7980505    | not scorable | not scorable | 0.7438017 | 0.8263232 |
| #### Bn-A09-p33726811 | genome unspecific (all in)        | 0.9665072    | 0.8193245    |              | 1 0.7524039  | 0.7438017 | 0.761635  |
| #### Bn-A09-p33730723 | A-genome specific (napus-rapa)    | 0.722488     | 0.7570941    | not scorable | not scorable | 0.7355372 | 0.747763  |
| #### Bn-A09-p33731681 | A-genome specific (napus-rapa)    | 0.7272727    | 0.8594435    | not scorable | not scorable | 0.7438017 | 0.8880374 |
| #### Bn-A09-p33744089 | A-genome specific (napus-rapa)    | 0.9952153    | 0.9078257    | not scorable | not scorable | 1         | 0.8884922 |
| #### Bn-A09-p33777546 | A-genome specific (napus-rapa)    | 0.9856459    | 0.4889701    | not scorable | not scorable | 0.9752066 | 0.6790386 |
| #### Bn-A09-p33777987 | A-genome specific (napus-rapa)    | 0.9952153    | 0.8736631    | not scorable | not scorable | 0.9834711 | 0.7003647 |
| #### Bn-A09-p33783680 | A-genome specific (napus-rapa)    | 0.9952153    | 0.8134178    | not scorable | not scorable | 0.9586777 | 0.7842535 |
| #### Bn-A09-p33792068 | A-genome specific (napus-rapa)    | 0.9952153    | 0.5487479    | not scorable | not scorable | 0.9669421 | 0.7690949 |
| #### Bn-A09-p33803933 | A-genome specific (napus-rapa)    | 0.9976076    | 0.4977393    | not scorable | not scorable | 0.9752066 | 0.7825077 |
| #### Bn-A09-p33815163 | A-genome specific (napus-rapa)    | 0.9952153    | 0.919984     | not scorable | not scorable | 0.9917355 | 0.7675681 |
| #### Bn-A09-p33817337 | A-genome specific (napus-rapa)    | 0.9832536    | 0.9377959    | not scorable | not scorable | 0.9669421 | 0.7300334 |
| #### Bn-A09-p33821269 | A-genome specific (napus-rapa)    | 0.9808612    | 0.8688809    | not scorable | not scorable | 0.9834711 | 0.810931  |
| #### Bn-A09-p33822952 | A-genome specific (napus-rapa)    | 0.9952153    | 0.9362306    | not scorable | not scorable | 0.9917355 | 0.8095433 |
| #### Bn-A09-p33830942 | A-genome specific (napus-rapa)    | 0.04784689   | 0.9082291    | not scorable | not scorable | 1         | 0.8742704 |
| #### Bn-A09-p33841506 | A-genome specific (napus-rapa)    | 0.9952153    | 0.9108731    | not scorable | not scorable | 1         | 0.7796536 |
| #### Bn-A09-p33853347 | A-genome specific (napus-rapa)    | 0.9952153    | 0.9072376    | not scorable | not scorable | 1         | 0.8161981 |
| #### Bn-A09-p33853604 | A-genome specific (napus-rapa)    | 0.9952153    | 0.89916      | not scorable | not scorable | 0.9917355 | 0.8335069 |
| #### Bn-A09-p33855795 | A-genome specific (napus-rapa)    | 0.9401914    | 0.6319413    | not scorable | not scorable | 0.9917355 | 0.8182911 |
| #### Bn-A09-p33867909 | A-genome specific (rapa only)     | not scorable | not scorable | not scorable | not scorable | 0.9917355 | 0.6515852 |
| #### Bn-A09-p3387327  | A-genome specific (rapa only)     | not scorable | not scorable | not scorable | not scorable | 0.9917355 | 0.7045814 |
| #### Bn-A09-p33875531 | A-genome specific (napus-rapa)    | 0.9976076    | 0.7812378    | not scorable | not scorable | 0.9917355 | 0.6630006 |
| #### Bn-A09-p33875784 | A-genome specific (napus-rapa)    | 0.9856459    | 0.9109789    | not scorable | not scorable | 1         | 0.7327892 |
| #### Bn-A09-p33892344 | A-genome specific (napus-rapa)    | 0.9952153    | 0.5420422    | not scorable | not scorable | 0.9917355 | 0.6713666 |
| #### Bn-A09-p33894393 | genome unspecific (oleracea-rapa) | not scorable | not scorable | 0.9379845    | 0.6848523    | 1         | 0.6927072 |
| #### Bn-A09-p33915936 | A-genome specific (napus-rapa)    | 1            | 0.54527      | not scorable | not scorable | 1         | 0.9205657 |
| #### Bn-A09-p33925635 | A-genome specific (napus-rapa)    | 0.9952153    | 0.9168822    | not scorable | not scorable | 0.9669421 | 0.8076405 |
| #### Bn-A09-p33926185 | A-genome specific (napus-rapa)    | 0.9976076    | 0.4215567    | not scorable | not scorable | 0.9752066 | 0.7257464 |
| #### Bn-A09-p33927099 | A-genome specific (napus-rapa)    | 0.9952153    | 0.8450468    | not scorable | not scorable | 1         | 0.7797495 |

|                       |                                   |              |              |              |              |           |           |
|-----------------------|-----------------------------------|--------------|--------------|--------------|--------------|-----------|-----------|
| #### Bn-A09-p33942716 | A-genome specific (napus-rapa)    | 1            | 0.4132066    | not scorable | not scorable | 0.9917355 | 0.7027161 |
| #### Bn-A09-p33948825 | genome unspecific (oleracea-rapa) | not scorable | not scorable | 1            | 0.7501848    | 0.9917355 | 0.7755616 |
| #### Bn-A09-p33971771 | A-genome specific (napus-rapa)    | 0.9904306    | 0.837456     | not scorable | not scorable | 1         | 0.7732146 |
| #### Bn-A09-p33972258 | A-genome specific (napus-rapa)    | 0.9904306    | 0.7979949    | not scorable | not scorable | 0.9917355 | 0.6915176 |
| #### Bn-A09-p33973275 | A-genome specific (napus-rapa)    | 0.9904306    | 0.8700113    | not scorable | not scorable | 0.9752066 | 0.7880404 |
| #### Bn-A09-p33975396 | A-genome specific (napus-rapa)    | 0.9904306    | 0.8629555    | not scorable | not scorable | 0.9752066 | 0.699289  |
| #### Bn-A09-p33975959 | A-genome specific (napus-rapa)    | 0.9904306    | 0.8718938    | not scorable | not scorable | 1         | 0.7900558 |
| #### Bn-A09-p33976066 | A-genome specific (napus-rapa)    | 0.9904306    | 0.7978591    | not scorable | not scorable | 0.9917355 | 0.7419137 |
| #### Bn-A09-p33976347 | A-genome specific (napus-rapa)    | 0.9904306    | 0.8757601    | not scorable | not scorable | 0.9917355 | 0.8305892 |
| #### Bn-A09-p33976464 | A-genome specific (napus-rapa)    | 0.9904306    | 0.7490897    | not scorable | not scorable | 1         | 0.7459682 |
| #### Bn-A09-p33976515 | A-genome specific (napus-rapa)    | 0.9904306    | 0.7833455    | not scorable | not scorable | 1         | 0.7868024 |
| #### Bn-A09-p33981445 | A-genome specific (napus-rapa)    | 0.9904306    | 0.8261998    | not scorable | not scorable | 1         | 0.7065558 |
| #### Bn-A09-p33983999 | A-genome specific (napus-rapa)    | 1            | 0.5246109    | not scorable | not scorable | 1         | 0.7704931 |
| #### Bn-A09-p34005292 | A-genome specific (rapa only)     | not scorable | not scorable | not scorable | not scorable | 0.9917355 | 0.8170228 |
| #### Bn-A09-p34018790 | A-genome specific (napus-rapa)    | 0.9282297    | 0.8877921    | not scorable | not scorable | 0.9917355 | 0.6726452 |
| #### Bn-A09-p34022183 | A-genome specific (napus-rapa)    | 1            | 0.5467952    | not scorable | not scorable | 0.9834711 | 0.5570666 |
| #### Bn-A09-p34028225 | A-genome specific (napus-rapa)    | 1            | 0.6911451    | not scorable | not scorable | 1         | 0.7914711 |
| #### Bn-A09-p34029934 | A-genome specific (napus-rapa)    | 0.9282297    | 0.7645656    | not scorable | not scorable | 1         | 0.6722914 |
| #### Bn-A09-p34037290 | A-genome specific (rapa only)     | not scorable | not scorable | not scorable | not scorable | 0.9917355 | 0.7016978 |
| #### Bn-A09-p34039082 | A-genome specific (napus-rapa)    | 0.9282297    | 0.859854     | not scorable | not scorable | 0.9917355 | 0.7374783 |
| #### Bn-A09-p34044914 | A-genome specific (rapa only)     | not scorable | not scorable | not scorable | not scorable | 0.9752066 | 0.5809262 |
| #### Bn-A09-p34045999 | A-genome specific (napus-rapa)    | 0.9258373    | 0.815056     | not scorable | not scorable | 0.9917355 | 0.7393281 |
| #### Bn-A09-p34046789 | A-genome specific (napus-rapa)    | 0.9282297    | 0.8823376    | not scorable | not scorable | 0.9834711 | 0.8391659 |
| #### Bn-A09-p34053851 | A-genome specific (napus-rapa)    | 1            | 0.7914145    | not scorable | not scorable | 1         | 0.7494321 |
| #### Bn-A09-p34058517 | A-genome specific (napus-rapa)    | 0.9712918    | 0.5633187    | not scorable | not scorable | 0.9834711 | 0.7746187 |
| #### Bn-A09-p34063724 | A-genome specific (napus-rapa)    | 0.9688995    | 0.2144256    | not scorable | not scorable | 0.9421487 | 0.7312364 |
| #### Bn-A09-p34067269 | A-genome specific (napus-rapa)    | 1            | 0.6441509    | not scorable | not scorable | 0.9917355 | 0.7497517 |
| #### Bn-A09-p34247590 | genome unspecific (all in)        | 0.937799     | 0.7505377    | 0.9922481    | 0.7799261    | 0.9669421 | 0.7568001 |
| #### Bn-A09-p34308105 | A-genome specific (napus-rapa)    | 0.9952153    | 0.9236049    | not scorable | not scorable | 1         | 0.9309925 |
| #### Bn-A09-p34331338 | A-genome specific (rapa only)     | not scorable | not scorable | not scorable | not scorable | 0.7024794 | 0.8293341 |
| #### Bn-A09-p34373261 | A-genome specific (napus-rapa)    | 0.9904306    | 0.8655304    | not scorable | not scorable | 0.9752066 | 0.7842165 |
| #### Bn-A09-p34390255 | genome unspecific (oleracea-rapa) | not scorable | not scorable | 0.9612403    | 0.2676052    | 0.9586777 | 0.6434903 |
| #### Bn-A09-p34393068 | A-genome specific (napus-rapa)    | 0.9976076    | 0.6634488    | not scorable | not scorable | 1         | 0.7493589 |



|                       |                                   |              |              |              |              |           |           |
|-----------------------|-----------------------------------|--------------|--------------|--------------|--------------|-----------|-----------|
| #### Bn-A09-p34437367 | A-genome specific (napus-rapa)    | 1            | 0.5393463    | not scorable | not scorable | 0.9917355 | 0.6259768 |
| #### Bn-A09-p34469671 | A-genome specific (napus-rapa)    | 0.9880383    | 0.7206236    | not scorable | not scorable | 0.7272727 | 0.8372124 |
| #### Bn-A09-p34477765 | A-genome specific (rapa only)     | not scorable | not scorable | not scorable | not scorable | 0.9586777 | 0.8129001 |
| #### Bn-A09-p34482075 | A-genome specific (napus-rapa)    | 1            | 0.4575556    | not scorable | not scorable | 0.9586777 | 0.6546577 |
| #### Bn-A09-p3452203  | A-genome specific (napus-rapa)    | 0.9856459    | 0.7408582    | not scorable | not scorable | 1         | 0.7998095 |
| #### Bn-A09-p3453706  | A-genome specific (napus-rapa)    | 0.9880383    | 0.7425601    | not scorable | not scorable | 0.9834711 | 0.7932062 |
| #### Bn-A09-p34591600 | genome unspecific (oleracea-rapa) | not scorable | not scorable | 0.9457364    | 0.6944427    | 1         | 0.8182595 |
| #### Bn-A09-p34779068 | A-genome specific (napus-rapa)    | 1            | 0.6396297    | not scorable | not scorable | 1         | 0.7412596 |
| #### Bn-A09-p34794738 | A-genome specific (napus-rapa)    | 0.9976076    | 0.8218307    | not scorable | not scorable | 1         | 0.7519414 |
| #### Bn-A09-p34830    | A-genome specific (rapa only)     | not scorable | not scorable | not scorable | not scorable | 1         | 0.6638076 |
| #### Bn-A09-p34995048 | A-genome specific (napus-rapa)    | 0.9569378    | 0.6243077    | not scorable | not scorable | 0.9917355 | 0.7618445 |
| #### Bn-A09-p34995922 | A-genome specific (napus-rapa)    | 0.9641148    | 0.7743756    | not scorable | not scorable | 0.7851239 | 0.7747847 |
| #### Bn-A09-p35162641 | A-genome specific (napus-rapa)    | 0.8851675    | 0.7710619    | not scorable | not scorable | 0.9917355 | 0.9042432 |
| #### Bn-A09-p35221507 | A-genome specific (napus-rapa)    | 0.9569378    | 0.7953668    | not scorable | not scorable | 0.9834711 | 0.6657122 |
| #### Bn-A09-p35228442 | A-genome specific (rapa only)     | not scorable | not scorable | not scorable | not scorable | 0.9752066 | 0.7023531 |
| #### Bn-A09-p35262679 | A-genome specific (napus-rapa)    | 0.9282297    | 0.7227659    | not scorable | not scorable | 1         | 0.7066365 |
| #### Bn-A09-p35278018 | A-genome specific (napus-rapa)    | 0.9665072    | 0.4167131    | not scorable | not scorable | 0.9917355 | 0.7256728 |
| #### Bn-A09-p35279845 | A-genome specific (napus-rapa)    | 1            | 0.5025924    | not scorable | not scorable | 0.9917355 | 0.8592871 |
| #### Bn-A09-p35292945 | A-genome specific (napus-rapa)    | 1            | 0.4915872    | not scorable | not scorable | 1         | 0.756182  |
| #### Bn-A09-p35299111 | genome unspecific (all in)        | 0.9952153    | 0.5848294    |              | 1 0.7248618  | 0.9917355 | 0.6432505 |
| #### Bn-A09-p35303838 | A-genome specific (rapa only)     | not scorable | not scorable | not scorable | not scorable | 0.9917355 | 0.6340718 |
| #### Bn-A09-p35306248 | A-genome specific (rapa only)     | not scorable | not scorable | not scorable | not scorable | 1         | 0.7748243 |
| #### Bn-A09-p35321301 | A-genome specific (napus-rapa)    | 0.9808612    | 0.5158902    | not scorable | not scorable | 0.9917355 | 0.7163405 |
| #### Bn-A09-p35368467 | A-genome specific (napus-rapa)    | 0.923445     | 0.6772383    | not scorable | not scorable | 0.9917355 | 0.7129754 |
| #### Bn-A09-p35372226 | A-genome specific (napus-rapa)    | 0.9928229    | 0.5252194    | not scorable | not scorable | 0.9834711 | 0.7374808 |
| #### Bn-A09-p35389045 | A-genome specific (napus-rapa)    | 0.9928229    | 0.6034144    | not scorable | not scorable | 1         | 0.8210482 |
| #### Bn-A09-p35404670 | A-genome specific (napus-rapa)    | 1            | 0.5137869    | not scorable | not scorable | 1         | 0.7865902 |
| #### Bn-A09-p35425963 | A-genome specific (rapa only)     | not scorable | not scorable | not scorable | not scorable | 0.9917355 | 0.8295194 |
| #### Bn-A09-p35426888 | A-genome specific (napus-rapa)    | 0.9928229    | 0.7224923    | not scorable | not scorable | 0.9752066 | 0.5983971 |
| #### Bn-A09-p35437924 | A-genome specific (napus-rapa)    | 1            | 0.4467025    | not scorable | not scorable | 1         | 0.7634365 |
| #### Bn-A09-p3546619  | genome unspecific (oleracea-rapa) | not scorable | not scorable | 0.8682171    | 0.6964592    | 0.9669421 | 0.8431419 |
| #### Bn-A09-p35466517 | genome unspecific (oleracea-rapa) | not scorable | not scorable | 0.9689922    | 0.2572954    | 0.9834711 | 0.5356928 |
| #### Bn-A09-p35472661 | A-genome specific (rapa only)     | not scorable | not scorable | not scorable | not scorable | 0.9917355 | 0.7016293 |

|                       |                                |              |              |              |              |           |           |
|-----------------------|--------------------------------|--------------|--------------|--------------|--------------|-----------|-----------|
| #### Bn-A09-p35476619 | A-genome specific (rapa only)  | not scorable | not scorable | not scorable | not scorable | 1         | 0.5485603 |
| #### Bn-A09-p35477936 | A-genome specific (napus-rapa) | 0.9904306    | 0.7198515    | not scorable | not scorable | 1         | 0.7391044 |
| #### Bn-A09-p35479723 | A-genome specific (napus-rapa) | 0.9282297    | 0.8843778    | not scorable | not scorable | 0.9338843 | 0.9066116 |
| #### Bn-A09-p35480425 | A-genome specific (napus-rapa) | 0.9928229    | 0.8474625    | not scorable | not scorable | 0.9752066 | 0.7864904 |
| #### Bn-A09-p35480484 | A-genome specific (napus-rapa) | 0.9928229    | 0.8740647    | not scorable | not scorable | 0.9752066 | 0.8116367 |
| #### Bn-A09-p35481880 | A-genome specific (rapa only)  | not scorable | not scorable | not scorable | not scorable | 0.9917355 | 0.6251532 |
| #### Bn-A09-p35483201 | A-genome specific (napus-rapa) | 0.9808612    | 0.6623248    | not scorable | not scorable | 0.9752066 | 0.6704263 |
| #### Bn-A09-p35484843 | A-genome specific (rapa only)  | not scorable | not scorable | not scorable | not scorable | 0.9917355 | 0.7429457 |
| #### Bn-A09-p35485049 | A-genome specific (napus-rapa) | 0.9904306    | 0.9389927    | not scorable | not scorable | 0.9917355 | 0.7517654 |
| #### Bn-A09-p35485458 | A-genome specific (napus-rapa) | 0.9736842    | 0.3925271    | not scorable | not scorable | 0.9586777 | 0.675055  |
| #### Bn-A09-p35489554 | A-genome specific (napus-rapa) | 0.9928229    | 0.7360497    | not scorable | not scorable | 0.9752066 | 0.6982501 |
| #### Bn-A09-p35492133 | A-genome specific (napus-rapa) | 1            | 0.8799625    | not scorable | not scorable | 1         | 0.7412775 |
| #### Bn-A09-p35498001 | A-genome specific (napus-rapa) | 1            | 0.5394976    | not scorable | not scorable | 0.9834711 | 0.7294155 |
| #### Bn-A09-p35505057 | A-genome specific (napus-rapa) | 0.9904306    | 0.8006449    | not scorable | not scorable | 0.9834711 | 0.7159652 |
| #### Bn-A09-p35505120 | A-genome specific (napus-rapa) | 0.9928229    | 0.7958574    | not scorable | not scorable | 0.9917355 | 0.7016882 |
| #### Bn-A09-p35508720 | A-genome specific (napus-rapa) | 0.9736842    | 0.7931091    | not scorable | not scorable | 1         | 0.8138425 |
| #### Bn-A09-p35508955 | A-genome specific (napus-rapa) | 0.9784689    | 0.7884661    | not scorable | not scorable | 0.9834711 | 0.8280427 |
| #### Bn-A09-p35509044 | A-genome specific (napus-rapa) | 1            | 0.8133585    | not scorable | not scorable | 1         | 0.726661  |
| #### Bn-A09-p35510262 | A-genome specific (napus-rapa) | 1            | 0.9068574    | not scorable | not scorable | 1         | 0.8115042 |
| #### Bn-A09-p35510324 | A-genome specific (napus-rapa) | 0.9976076    | 0.2899894    | not scorable | not scorable | 0.9752066 | 0.7450857 |
| #### Bn-A09-p35512602 | A-genome specific (napus-rapa) | 0.6363636    | 0.7675302    | not scorable | not scorable | 1         | 0.8252356 |
| #### Bn-A09-p35519543 | A-genome specific (napus-rapa) | 1            | 0.6189892    | not scorable | not scorable | 0.9917355 | 0.7944539 |
| #### Bn-A09-p35520884 | A-genome specific (napus-rapa) | 0.9760765    | 0.7821279    | not scorable | not scorable | 0.9917355 | 0.8915215 |
| #### Bn-A09-p35520944 | A-genome specific (napus-rapa) | 0.9688995    | 0.7392474    | not scorable | not scorable | 0.9752066 | 0.8188994 |
| #### Bn-A09-p35529865 | A-genome specific (napus-rapa) | 0.9976076    | 0.9274238    | not scorable | not scorable | 0.9834711 | 0.8401572 |
| #### Bn-A09-p35531421 | A-genome specific (napus-rapa) | 0.9976076    | 0.861976     | not scorable | not scorable | 1         | 0.728611  |
| #### Bn-A09-p35534652 | A-genome specific (napus-rapa) | 0.9593301    | 0.3701451    | not scorable | not scorable | 1         | 0.7281697 |
| #### Bn-A09-p35559972 | A-genome specific (napus-rapa) | 0.9569378    | 0.3311768    | not scorable | not scorable | 0.9917355 | 0.6999641 |
| #### Bn-A09-p35563022 | A-genome specific (napus-rapa) | 0.9784689    | 0.8135551    | not scorable | not scorable | 0.9834711 | 0.6812139 |
| #### Bn-A09-p35571119 | A-genome specific (napus-rapa) | 0.9282297    | 0.8246192    | not scorable | not scorable | 0.9586777 | 0.8095865 |
| #### Bn-A09-p35594338 | A-genome specific (napus-rapa) | 0.9880383    | 0.7147654    | not scorable | not scorable | 0.9917355 | 0.6970153 |
| #### Bn-A09-p35598320 | A-genome specific (napus-rapa) | 0.9808612    | 0.8537585    | not scorable | not scorable | 0.9834711 | 0.7933562 |
| #### Bn-A09-p35604358 | A-genome specific (napus-rapa) | 0.9736842    | 0.7890954    | not scorable | not scorable | 1         | 0.8960949 |

|                       |                                   |              |              |              |              |              |              |
|-----------------------|-----------------------------------|--------------|--------------|--------------|--------------|--------------|--------------|
| #### Bn-A09-p35609789 | A-genome specific (napus-rapa)    | 1            | 0.456341     | not scorable | not scorable | 0.9917355    | 0.6899965    |
| #### Bn-A09-p35611451 | A-genome specific (rapa only)     | not scorable | not scorable | not scorable | not scorable | 1            | 0.8475013    |
| #### Bn-A09-p35624679 | A-genome specific (napus-rapa)    | 0.9928229    | 0.7788243    | not scorable | not scorable | 0.9917355    | 0.7657717    |
| #### Bn-A09-p35624767 | A-genome specific (napus-rapa)    | 0.9928229    | 0.4129707    | not scorable | not scorable | 0.9752066    | 0.6262574    |
| #### Bn-A09-p35647477 | genome unspecific (oleracea-rapa) | not scorable | not scorable |              | 1            | 0.703784     | 0.9917355    |
| #### Bn-A09-p35656352 | A-genome specific (napus-rapa)    | 0.9976076    | 0.7093098    | not scorable | not scorable | 0.9917355    | 0.682292     |
| #### Bn-A09-p35661872 | A-genome specific (napus-rapa)    | 0.9928229    | 0.3441785    | not scorable | not scorable | 0.9669421    | 0.6755332    |
| #### Bn-A09-p35672030 | A-genome specific (rapa only)     | not scorable | not scorable | not scorable | not scorable | 0.9752066    | 0.73926      |
| #### Bn-A09-p35681738 | A-genome specific (napus-rapa)    | 0.9928229    | 0.8153506    | not scorable | not scorable | 1            | 0.7450923    |
| #### Bn-A09-p35691478 | A-genome specific (rapa only)     | not scorable | not scorable | not scorable | not scorable | 0.9917355    | 0.6750005    |
| #### Bn-A09-p35703402 | A-genome specific (rapa only)     | not scorable | not scorable | not scorable | not scorable | 0.9834711    | 0.6920195    |
| #### Bn-A09-p35707505 | A-genome specific (napus-rapa)    | 0.5980861    | 0.5396106    | not scorable | not scorable | 1            | 0.774871     |
| #### Bn-A09-p35724973 | A-genome specific (napus-rapa)    | 0.9928229    | 0.6111192    | not scorable | not scorable | 0.9752066    | 0.5954102    |
| #### Bn-A09-p35728172 | A-genome specific (napus-rapa)    | 0.9928229    | 0.4187591    | not scorable | not scorable | 0.9669421    | 0.659313     |
| #### Bn-A09-p35753486 | A-genome specific (napus-rapa)    | 0.9856459    | 0.635446     | not scorable | not scorable | 0.9752066    | 0.5607597    |
| #### Bn-A09-p35790555 | A-genome specific (napus-rapa)    | 0.9976076    | 0.841576     | not scorable | not scorable | 0.9834711    | 0.802798     |
| #### Bn-A09-p35797282 | A-genome specific (rapa only)     | not scorable | not scorable | not scorable | not scorable | 0.9917355    | 0.7033582    |
| #### Bn-A09-p35797678 | A-genome specific (napus-rapa)    | 0.9832536    | 0.5865161    | not scorable | not scorable | 1            | 0.7669616    |
| #### Bn-A09-p35848630 | genome unspecific (oleracea-rapa) | not scorable | not scorable |              | 1            | 0.7407333    | 1            |
| #### Bn-A09-p35866195 | all not scorable                  | not scorable | not scorable | not scorable | not scorable | not scorable | not scorable |
| #### Bn-A09-p35867904 | A-genome specific (napus-rapa)    | 1            | 0.5659916    | not scorable | not scorable | 0.9834711    | 0.7380719    |
| #### Bn-A09-p35872518 | A-genome specific (napus-rapa)    | 0.9617225    | 0.7396364    | not scorable | not scorable | 0.9917355    | 0.7071448    |
| #### Bn-A09-p35872842 | A-genome specific (napus-rapa)    | 0.9808612    | 0.7978266    | not scorable | not scorable | 0.9917355    | 0.6879514    |
| #### Bn-A09-p35872885 | A-genome specific (napus-rapa)    | 0.9808612    | 0.7808316    | not scorable | not scorable | 0.9917355    | 0.7872649    |
| #### Bn-A09-p35879759 | A-genome specific (napus-rapa)    | 0.9760765    | 0.6012275    | not scorable | not scorable | 0.9917355    | 0.7208494    |
| #### Bn-A09-p35890304 | A-genome specific (napus-rapa)    | 0.9784689    | 0.7237885    | not scorable | not scorable | 1            | 0.7077492    |
| #### Bn-A09-p35901593 | A-genome specific (napus-rapa)    | 0.9976076    | 0.8467053    | not scorable | not scorable | 1            | 0.7321262    |
| #### Bn-A09-p35907846 | A-genome specific (napus-rapa)    | 0.9760765    | 0.7060875    | not scorable | not scorable | 0.9669421    | 0.7134802    |
| #### Bn-A09-p35908013 | A-genome specific (napus-rapa)    | 0.9688995    | 0.6729047    | not scorable | not scorable | 0.9752066    | 0.7032765    |
| #### Bn-A09-p35914702 | A-genome specific (napus-rapa)    | 0.9976076    | 0.8832312    | not scorable | not scorable | 1            | 0.9175813    |
| #### Bn-A09-p35935166 | A-genome specific (napus-rapa)    | 1            | 0.4773437    | not scorable | not scorable | 0.9586777    | 0.6180741    |
| #### Bn-A09-p35964883 | A-genome specific (napus-rapa)    | 0.9952153    | 0.8489783    | not scorable | not scorable | 1            | 0.782876     |
| #### Bn-A09-p35979119 | A-genome specific (rapa only)     | not scorable | not scorable | not scorable | not scorable | 1            | 0.8108381    |

|                       |                                   |              |              |              |              |              |              |
|-----------------------|-----------------------------------|--------------|--------------|--------------|--------------|--------------|--------------|
| #### Bn-A09-p35981493 | A-genome specific (napus-rapa)    | 0.9928229    | 0.8107351    | not scorable | not scorable | 1            | 0.6881169    |
| #### Bn-A09-p35981539 | A-genome specific (napus-rapa)    | 0.9976076    | 0.7601238    | not scorable | not scorable | 1            | 0.7153145    |
| #### Bn-A09-p36019854 | A-genome specific (napus-rapa)    | 0.9976076    | 0.7499121    | not scorable | not scorable | 1            | 0.6941605    |
| #### Bn-A09-p36033827 | A-genome specific (napus-rapa)    | 0.9976076    | 0.7371507    | not scorable | not scorable | 0.9917355    | 0.7284585    |
| #### Bn-A09-p36062760 | A-genome specific (napus-rapa)    | 0.9976076    | 0.9029595    | not scorable | not scorable | 0.9917355    | 0.7953957    |
| #### Bn-A09-p36062825 | A-genome specific (napus-rapa)    | 0.9976076    | 0.8815532    | not scorable | not scorable | 0.9917355    | 0.7467378    |
| #### Bn-A09-p36112515 | napus specific                    | 0.9784689    | 0.6896238    | not scorable | not scorable | not scorable | not scorable |
| #### Bn-A09-p36120469 | A-genome specific (rapa only)     | not scorable | not scorable | not scorable | not scorable | 1            | 0.7363847    |
| #### Bn-A09-p36136583 | A-genome specific (rapa only)     | not scorable | not scorable | not scorable | not scorable | 1            | 0.8219877    |
| #### Bn-A09-p36172635 | A-genome specific (napus-rapa)    | 1            | 0.5249528    | not scorable | not scorable | 0.9917355    | 0.7616321    |
| #### Bn-A09-p36173579 | A-genome specific (napus-rapa)    | 0.9976076    | 0.7207687    | not scorable | not scorable | 0.9752066    | 0.753529     |
| #### Bn-A09-p36200543 | A-genome specific (napus-rapa)    | 0.9808612    | 0.7853203    | not scorable | not scorable | 1            | 0.8328769    |
| #### Bn-A09-p36201113 | A-genome specific (napus-rapa)    | 0.9712918    | 0.5485409    | not scorable | not scorable | 0.9834711    | 0.681353     |
| #### Bn-A09-p36204736 | A-genome specific (napus-rapa)    | 0.9688995    | 0.6712565    | not scorable | not scorable | 0.9752066    | 0.7088608    |
| #### Bn-A09-p36206114 | A-genome specific (napus-rapa)    | 0.9617225    | 0.6845033    | not scorable | not scorable | 0.9917355    | 0.7849349    |
| #### Bn-A09-p36210166 | A-genome specific (rapa only)     | not scorable | not scorable | not scorable | not scorable | 0.9917355    | 0.7969656    |
| #### Bn-A09-p36210247 | A-genome specific (napus-rapa)    | 0.9712918    | 0.7686263    | not scorable | not scorable | 0.9752066    | 0.7236063    |
| #### Bn-A09-p36211880 | A-genome specific (napus-rapa)    | 0.9760765    | 0.7855622    | not scorable | not scorable | 0.9917355    | 0.7787027    |
| #### Bn-A09-p36221958 | A-genome specific (napus-rapa)    | 0.9832536    | 0.666528     | not scorable | not scorable | 0.6859504    | 0.7491413    |
| #### Bn-A09-p36248653 | A-genome specific (napus-rapa)    | 0.9856459    | 0.7938633    | not scorable | not scorable | 0.9834711    | 0.8131424    |
| #### Bn-A09-p36254037 | A-genome specific (napus-rapa)    | 0.9856459    | 0.8061187    | not scorable | not scorable | 0.9834711    | 0.8025972    |
| #### Bn-A09-p36259207 | A-genome specific (napus-rapa)    | 0.9784689    | 0.8268788    | not scorable | not scorable | 1            | 0.8249416    |
| #### Bn-A09-p36268830 | all not scorable                  | not scorable | not scorable | not scorable | not scorable | not scorable | not scorable |
| #### Bn-A09-p362846   | A-genome specific (rapa only)     | not scorable | not scorable | not scorable | not scorable | 0.9834711    | 0.7696847    |
| #### Bn-A09-p36290340 | A-genome specific (napus-rapa)    | 0.9856459    | 0.7313944    | not scorable | not scorable | 1            | 0.7236844    |
| #### Bn-A09-p36298053 | A-genome specific (napus-rapa)    | 1            | 0.5221621    | not scorable | not scorable | 0.9834711    | 0.6988664    |
| #### Bn-A09-p36327491 | A-genome specific (napus-rapa)    | 0.9784689    | 0.9375271    | not scorable | not scorable | 0.9752066    | 0.6751118    |
| #### Bn-A09-p36330477 | genome unspecific (oleracea-rapa) | not scorable | not scorable |              | 1            | 0.2653292    | 1            |
| #### Bn-A09-p36340882 | A-genome specific (napus-rapa)    | 1            | 0.7884586    | not scorable | not scorable | 1            | 0.7739488    |
| #### Bn-A09-p36363739 | A-genome specific (napus-rapa)    | 0.9808612    | 0.6311449    | not scorable | not scorable | 0.9917355    | 0.6881846    |
| #### Bn-A09-p36385502 | A-genome specific (napus-rapa)    | 1            | 0.6275744    | not scorable | not scorable | 0.9917355    | 0.590176     |
| #### Bn-A09-p36397959 | A-genome specific (rapa only)     | not scorable | not scorable | not scorable | not scorable | 1            | 0.8022041    |
| #### Bn-A09-p36402398 | A-genome specific (napus-rapa)    | 0.9784689    | 0.7765027    | not scorable | not scorable | 1            | 0.8219518    |

|                       |                                   |              |              |              |              |              |              |           |
|-----------------------|-----------------------------------|--------------|--------------|--------------|--------------|--------------|--------------|-----------|
| #### Bn-A09-p36402581 | A-genome specific (napus-rapa)    | 0.9712918    | 0.6263103    | not scorable | not scorable |              | 1            | 0.8095242 |
| #### Bn-A09-p36403465 | A-genome specific (napus-rapa)    | 0.9688995    | 0.7603257    | not scorable | not scorable |              | 1            | 0.8079159 |
| #### Bn-A09-p36410312 | A-genome specific (napus-rapa)    | 0.9617225    | 0.6633866    | not scorable | not scorable |              | 1            | 0.7741466 |
| #### Bn-A09-p36410528 | A-genome specific (napus-rapa)    | 0.9760765    | 0.7300339    | not scorable | not scorable |              | 1            | 0.78911   |
| #### Bn-A09-p36429976 | A-genome specific (rapa only)     | not scorable | not scorable | not scorable | not scorable | 0.9917355    |              | 0.7654794 |
| #### Bn-A09-p36434436 | A-genome specific (napus-rapa)    | 0.9617225    | 0.5783259    | not scorable | not scorable | 0.9669421    |              | 0.7832521 |
| #### Bn-A09-p36455112 | genome unspecific (oleracea-rapa) | not scorable | not scorable |              | 1            | 0.7891957    | 1            | 0.8428023 |
| #### Bn-A09-p36456115 | napus specific                    | 0.9808612    | 0.7257237    | not scorable | not scorable | not scorable | not scorable |           |
| #### Bn-A09-p36456505 | napus specific                    | 0.9904306    | 0.4694608    | not scorable | not scorable | not scorable | not scorable |           |
| #### Bn-A09-p36462450 | A-genome specific (napus-rapa)    | 0.9856459    | 0.6197482    | not scorable | not scorable | 0.9834711    |              | 0.6203048 |
| #### Bn-A09-p36467520 | A-genome specific (rapa only)     | not scorable | not scorable | not scorable | not scorable |              | 1            | 0.7351126 |
| #### Bn-A09-p36490411 | A-genome specific (napus-rapa)    | 0.9856459    | 0.697751     | not scorable | not scorable |              | 1            | 0.7435682 |
| #### Bn-A09-p36491715 | A-genome specific (napus-rapa)    | 0.9641148    | 0.7677127    | not scorable | not scorable | 0.9917355    |              | 0.7125625 |
| #### Bn-A09-p36550750 | genome unspecific (oleracea-rapa) | not scorable | not scorable | 0.9922481    | 0.7653514    | 0.9834711    |              | 0.7994348 |
| #### Bn-A09-p36551108 | A-genome specific (napus-rapa)    | 0.9832536    | 0.8002009    | not scorable | not scorable | 0.9752066    |              | 0.8040265 |
| #### Bn-A09-p36558536 | A-genome specific (napus-rapa)    | 0.9736842    | 0.7266514    | not scorable | not scorable | 0.9752066    |              | 0.8365129 |
| #### Bn-A09-p36619537 | A-genome specific (rapa only)     | not scorable | not scorable | not scorable | not scorable | 0.9752066    |              | 0.2499706 |
| #### Bn-A09-p36727719 | A-genome specific (rapa only)     | not scorable | not scorable | not scorable | not scorable | 0.9752066    |              | 0.8249314 |
| #### Bn-A09-p36803825 | A-genome specific (napus-rapa)    | 0.9736842    | 0.835305     | not scorable | not scorable | 0.9752066    |              | 0.7985325 |
| #### Bn-A09-p36805327 | A-genome specific (napus-rapa)    | 0.9736842    | 0.8040494    | not scorable | not scorable | 0.9586777    |              | 0.6896745 |
| #### Bn-A09-p36807928 | A-genome specific (napus-rapa)    | 0.9736842    | 0.8684382    | not scorable | not scorable | 0.9834711    |              | 0.779033  |
| #### Bn-A09-p36812148 | A-genome specific (napus-rapa)    |              | 1            | 0.7886282    | not scorable | not scorable | 1            | 0.7762409 |
| #### Bn-A09-p36815767 | A-genome specific (napus-rapa)    | 0.9880383    | 0.80316      | not scorable | not scorable |              | 1            | 0.7282208 |
| #### Bn-A09-p36842526 | A-genome specific (rapa only)     | not scorable | not scorable | not scorable | not scorable | 0.9752066    |              | 0.7845349 |
| #### Bn-A09-p36884091 | A-genome specific (rapa only)     | not scorable | not scorable | not scorable | not scorable | 0.9834711    |              | 0.7508981 |
| #### Bn-A09-p36886022 | A-genome specific (napus-rapa)    | 0.9712918    | 0.9139208    | not scorable | not scorable | 0.9752066    |              | 0.7366651 |
| #### Bn-A09-p36891089 | A-genome specific (napus-rapa)    | 0.9976076    | 0.4929074    | not scorable | not scorable | 0.9834711    |              | 0.7759107 |
| #### Bn-A09-p36891502 | A-genome specific (napus-rapa)    | 0.9736842    | 0.7027272    | not scorable | not scorable | 0.9917355    |              | 0.6852505 |
| #### Bn-A09-p36906070 | A-genome specific (napus-rapa)    |              | 1            | 0.3241225    | not scorable | not scorable | 1            | 0.7618226 |
| #### Bn-A09-p36915816 | genome unspecific (oleracea-rapa) | not scorable | not scorable |              | 1            | 0.7485991    | 1            | 0.5628911 |
| #### Bn-A09-p36939006 | A-genome specific (napus-rapa)    | 0.923445     | 0.8438627    | not scorable | not scorable | 0.9917355    |              | 0.7579154 |
| #### Bn-A09-p36939814 | A-genome specific (rapa only)     | not scorable | not scorable | not scorable | not scorable |              | 1            | 0.750249  |
| #### Bn-A09-p36969978 | A-genome specific (napus-rapa)    | 0.9258373    | 0.8643967    | not scorable | not scorable | 0.9834711    |              | 0.7790177 |

|                       |                                   |              |              |              |              |              |              |
|-----------------------|-----------------------------------|--------------|--------------|--------------|--------------|--------------|--------------|
| #### Bn-A09-p36970657 | A-genome specific (napus-rapa)    | 0.9880383    | 0.5750955    | not scorable | not scorable | 0.9669421    | 0.8308191    |
| #### Bn-A09-p36975005 | A-genome specific (napus-rapa)    | 0.9282297    | 0.9331613    | not scorable | not scorable | 1            | 0.7200636    |
| #### Bn-A09-p36991758 | genome unspecific (all in)        | 0.9880383    | 0.277822     | 0.9922481    | 0.7680858    | 1            | 0.7171137    |
| #### Bn-A09-p37001475 | A-genome specific (rapa only)     | not scorable | not scorable | not scorable | not scorable | 0.9917355    | 0.74055      |
| #### Bn-A09-p37010341 | A-genome specific (napus-rapa)    | 0.9282297    | 0.8707879    | not scorable | not scorable | 1            | 0.7784308    |
| #### Bn-A09-p37019231 | A-genome specific (napus-rapa)    | 0.9904306    | 0.3683563    | not scorable | not scorable | 0.9917355    | 0.6903178    |
| #### Bn-A09-p37024383 | A-genome specific (napus-rapa)    | 0.9784689    | 0.6044001    | not scorable | not scorable | 1            | 0.726559     |
| #### Bn-A09-p37029924 | A-genome specific (napus-rapa)    | 0.923445     | 0.7481481    | not scorable | not scorable | 0.9752066    | 0.6130729    |
| #### Bn-A09-p37031129 | A-genome specific (rapa only)     | not scorable | not scorable | not scorable | not scorable | 0.9834711    | 0.7636571    |
| #### Bn-A09-p37034993 | A-genome specific (rapa only)     | not scorable | not scorable | not scorable | not scorable | 1            | 0.8419566    |
| #### Bn-A09-p37048611 | A-genome specific (napus-rapa)    | 1            | 0.4486361    | not scorable | not scorable | 1            | 0.695455     |
| #### Bn-A09-p37056545 | genome unspecific (oleracea-rapa) | not scorable | not scorable |              | 1 0.8164113  | 1            | 0.7775097    |
| #### Bn-A09-p37070158 | A-genome specific (rapa only)     | not scorable | not scorable | not scorable | not scorable | 1            | 0.7184476    |
| #### Bn-A09-p37075737 | A-genome specific (rapa only)     | not scorable | not scorable | not scorable | not scorable | 1            | 0.8115605    |
| #### Bn-A09-p37082082 | A-genome specific (napus-rapa)    | 0.9856459    | 0.391181     | not scorable | not scorable | 1            | 0.8594185    |
| #### Bn-A09-p37097229 | A-genome specific (napus-rapa)    | 0.9258373    | 0.8563608    | not scorable | not scorable | 0.9917355    | 0.7830848    |
| #### Bn-A09-p37112947 | A-genome specific (napus-rapa)    | 0.923445     | 0.740202     | not scorable | not scorable | 1            | 0.6999773    |
| #### Bn-A09-p381059   | all not scorable                  | not scorable | not scorable | not scorable | not scorable | not scorable | not scorable |
| #### Bn-A09-p381724   | all not scorable                  | not scorable | not scorable | not scorable | not scorable | not scorable | not scorable |
| #### Bn-A09-p384043   | all not scorable                  | not scorable | not scorable | not scorable | not scorable | not scorable | not scorable |
| #### Bn-A09-p388989   | A-genome specific (rapa only)     | not scorable | not scorable | not scorable | not scorable | 1            | 0.7966747    |
| #### Bn-A09-p3908310  | A-genome specific (napus-rapa)    | 0.9521531    | 0.6433982    | not scorable | not scorable | 0.9586777    | 0.6676505    |
| #### Bn-A09-p3940412  | A-genome specific (napus-rapa)    | 0.9856459    | 0.7191411    | not scorable | not scorable | 0.9834711    | 0.7146556    |
| #### Bn-A09-p3940779  | A-genome specific (napus-rapa)    | 0.9928229    | 0.8288842    | not scorable | not scorable | 0.9834711    | 0.7999777    |
| #### Bn-A09-p3955243  | genome unspecific (all in)        | 0.9760765    | 0.5970172    | 0.9767442    | 0.3409413    | 1            | 0.8209689    |
| #### Bn-A09-p3994064  | A-genome specific (napus-rapa)    | 0.937799     | 0.7750958    | not scorable | not scorable | 0.5206612    | 0.8181702    |
| #### Bn-A09-p3994437  | A-genome specific (napus-rapa)    | 0.9856459    | 0.7860809    | not scorable | not scorable | 0.9834711    | 0.7933808    |
| #### Bn-A09-p4010053  | A-genome specific (rapa only)     | not scorable | not scorable | not scorable | not scorable | 0.9834711    | 0.7980775    |
| #### Bn-A09-p4011631  | A-genome specific (rapa only)     | not scorable | not scorable | not scorable | not scorable | 0.9834711    | 0.7884876    |
| #### Bn-A09-p4012239  | A-genome specific (napus-rapa)    | 0.9880383    | 0.7495263    | not scorable | not scorable | 1            | 0.9047226    |
| #### Bn-A09-p4021115  | A-genome specific (napus-rapa)    | 0.9856459    | 0.8005145    | not scorable | not scorable | 1            | 0.7024059    |
| #### Bn-A09-p4024494  | A-genome specific (napus-rapa)    | 0.9856459    | 0.7912036    | not scorable | not scorable | 0.9834711    | 0.7999731    |
| #### Bn-A09-p4024534  | A-genome specific (napus-rapa)    | 0.9856459    | 0.7648432    | not scorable | not scorable | 0.9917355    | 0.7656519    |

|                      |                                   |              |              |              |              |           |           |
|----------------------|-----------------------------------|--------------|--------------|--------------|--------------|-----------|-----------|
| #### Bn-A09-p403519  | A-genome specific (napus-rapa)    | 1            | 0.8135551    | not scorable | not scorable | 1         | 0.8114662 |
| #### Bn-A09-p4038403 | A-genome specific (rapa only)     | not scorable | not scorable | not scorable | not scorable | 1         | 0.7234913 |
| #### Bn-A09-p4044084 | A-genome specific (rapa only)     | not scorable | not scorable | not scorable | not scorable | 0.5206612 | 0.6767071 |
| #### Bn-A09-p408412  | A-genome specific (rapa only)     | not scorable | not scorable | not scorable | not scorable | 0.9834711 | 0.7351807 |
| #### Bn-A09-p4096474 | A-genome specific (napus-rapa)    | 0.9880383    | 0.7092206    | not scorable | not scorable | 0.9504132 | 0.6193671 |
| #### Bn-A09-p4163474 | A-genome specific (rapa only)     | not scorable | not scorable | not scorable | not scorable | 0.9917355 | 0.7834376 |
| #### Bn-A09-p4163989 | genome unspecific (oleracea-rapa) | not scorable | not scorable | 0.9767442    | 0.3167094    | 0.9421487 | 0.7213797 |
| #### Bn-A09-p4164576 | A-genome specific (napus-rapa)    | 0.9569378    | 0.430575     | not scorable | not scorable | 0.9669421 | 0.7186719 |
| #### Bn-A09-p4168039 | A-genome specific (rapa only)     | not scorable | not scorable | not scorable | not scorable | 0.9504132 | 0.3800382 |
| #### Bn-A09-p417110  | A-genome specific (rapa only)     | not scorable | not scorable | not scorable | not scorable | 1         | 0.6779793 |
| #### Bn-A09-p4206179 | A-genome specific (napus-rapa)    | 0.9832536    | 0.7425221    | not scorable | not scorable | 0.9834711 | 0.8300107 |
| #### Bn-A09-p4207679 | A-genome specific (rapa only)     | not scorable | not scorable | not scorable | not scorable | 0.9834711 | 0.737152  |
| #### Bn-A09-p4241780 | A-genome specific (napus-rapa)    | 0.9832536    | 0.7773614    | not scorable | not scorable | 0.9752066 | 0.7531138 |
| #### Bn-A09-p4262547 | A-genome specific (napus-rapa)    | 0.9856459    | 0.7731854    | not scorable | not scorable | 0.9834711 | 0.754176  |
| #### Bn-A09-p4275713 | A-genome specific (napus-rapa)    | 1            | 0.8143207    | not scorable | not scorable | 1         | 0.8004208 |
| #### Bn-A09-p427855  | A-genome specific (napus-rapa)    | 0.9736842    | 0.7735092    | not scorable | not scorable | 0.9917355 | 0.637463  |
| #### Bn-A09-p4282686 | A-genome specific (napus-rapa)    | 0.9712918    | 0.3091854    | not scorable | not scorable | 1         | 0.7203608 |
| #### Bn-A09-p42845   | A-genome specific (napus-rapa)    | 0.9593301    | 0.7724525    | not scorable | not scorable | 0.9752066 | 0.7406984 |
| #### Bn-A09-p4286317 | A-genome specific (napus-rapa)    | 0.9880383    | 0.7379685    | not scorable | not scorable | 0.9917355 | 0.8612741 |
| #### Bn-A09-p4288843 | A-genome specific (napus-rapa)    | 0.9856459    | 0.5908737    | not scorable | not scorable | 0.9917355 | 0.6321619 |
| #### Bn-A09-p4291965 | A-genome specific (napus-rapa)    | 0.9880383    | 0.7841256    | not scorable | not scorable | 0.9834711 | 0.7530379 |
| #### Bn-A09-p4300103 | A-genome specific (napus-rapa)    | 0.9808612    | 0.3534351    | not scorable | not scorable | 1         | 0.7664838 |
| #### Bn-A09-p43101   | A-genome specific (napus-rapa)    | 0.9569378    | 0.6682261    | not scorable | not scorable | 0.9752066 | 0.6731674 |
| #### Bn-A09-p433176  | A-genome specific (rapa only)     | not scorable | not scorable | not scorable | not scorable | 1         | 0.8231593 |
| #### Bn-A09-p4347835 | A-genome specific (rapa only)     | not scorable | not scorable | not scorable | not scorable | 1         | 0.8450369 |
| #### Bn-A09-p4351470 | A-genome specific (napus-rapa)    | 0.9569378    | 0.6919668    | not scorable | not scorable | 0.5702479 | 0.6772502 |
| #### Bn-A09-p4356331 | A-genome specific (rapa only)     | not scorable | not scorable | not scorable | not scorable | 0.5950413 | 0.7460535 |
| #### Bn-A09-p4384911 | A-genome specific (napus-rapa)    | 0.9808612    | 0.7407781    | not scorable | not scorable | 0.9504132 | 0.784744  |
| #### Bn-A09-p4416731 | A-genome specific (rapa only)     | not scorable | not scorable | not scorable | not scorable | 0.9752066 | 0.4414445 |
| #### Bn-A09-p4433127 | A-genome specific (rapa only)     | not scorable | not scorable | not scorable | not scorable | 1         | 0.8098336 |
| #### Bn-A09-p4433252 | A-genome specific (rapa only)     | not scorable | not scorable | not scorable | not scorable | 0.9834711 | 0.7446441 |
| #### Bn-A09-p4436808 | A-genome specific (napus-rapa)    | 0.9736842    | 0.2921019    | not scorable | not scorable | 0.9917355 | 0.6818502 |
| #### Bn-A09-p4447029 | A-genome specific (napus-rapa)    | 0.9880383    | 0.6951696    | not scorable | not scorable | 1         | 0.7078202 |

|                      |                                |              |              |              |              |              |              |
|----------------------|--------------------------------|--------------|--------------|--------------|--------------|--------------|--------------|
| #### Bn-A09-p4459348 | A-genome specific (rapa only)  | not scorable | not scorable | not scorable | not scorable | 1            | 0.7380372    |
| #### Bn-A09-p4463675 | A-genome specific (napus-rapa) | 0.9976076    | 0.6290071    | not scorable | not scorable | 1            | 0.7742175    |
| #### Bn-A09-p4465163 | A-genome specific (napus-rapa) | 0.8803828    | 0.9389927    | not scorable | not scorable | 0.9752066    | 0.6780864    |
| #### Bn-A09-p4475636 | A-genome specific (napus-rapa) | 0.9928229    | 0.5070472    | not scorable | not scorable | 0.9917355    | 0.7819434    |
| #### Bn-A09-p4509627 | A-genome specific (napus-rapa) | 0.9904306    | 0.8019554    | not scorable | not scorable | 1            | 0.4351322    |
| #### Bn-A09-p4542819 | A-genome specific (napus-rapa) | 0.9928229    | 0.4766975    | not scorable | not scorable | 0.9917355    | 0.7952386    |
| #### Bn-A09-p4616864 | A-genome specific (napus-rapa) | 0.9641148    | 0.6989469    | not scorable | not scorable | 0.5785124    | 0.8099043    |
| #### Bn-A09-p4652268 | A-genome specific (napus-rapa) | 0.9832536    | 0.6849757    | not scorable | not scorable | 0.9834711    | 0.7206799    |
| #### Bn-A09-p4655322 | genome unspecific (all in)     | 0.9736842    | 0.4408155    | 0.8527132    | 0.7104116    | 0.9752066    | 0.7092493    |
| #### Bn-A09-p4671467 | A-genome specific (napus-rapa) | 0.9760765    | 0.6796886    | not scorable | not scorable | 1            | 0.7609816    |
| #### Bn-A09-p4681749 | napus specific                 | 0.923445     | 0.7731006    | not scorable | not scorable | not scorable | not scorable |
| #### Bn-A09-p4683160 | napus specific                 | 0.930622     | 0.7132573    | not scorable | not scorable | not scorable | not scorable |
| #### Bn-A09-p4683384 | napus specific                 | 0.9258373    | 0.7751609    | not scorable | not scorable | not scorable | not scorable |
| #### Bn-A09-p4690204 | A-genome specific (napus-rapa) | 0.9330143    | 0.80323      | not scorable | not scorable | 0.5206612    | 0.8529027    |
| #### Bn-A09-p469758  | A-genome specific (napus-rapa) | 0.8277512    | 0.6433784    | not scorable | not scorable | 1            | 0.757363     |
| #### Bn-A09-p4735640 | A-genome specific (napus-rapa) | 0.9832536    | 0.5467623    | not scorable | not scorable | 0.9834711    | 0.7933192    |
| #### Bn-A09-p4776093 | A-genome specific (napus-rapa) | 0.9808612    | 0.8318138    | not scorable | not scorable | 0.9669421    | 0.6978582    |
| #### Bn-A09-p4777728 | A-genome specific (napus-rapa) | 0.9808612    | 0.7822268    | not scorable | not scorable | 0.9752066    | 0.786904     |
| #### Bn-A09-p4824263 | A-genome specific (rapa only)  | not scorable | not scorable | not scorable | not scorable | 0.9917355    | 0.7760811    |
| #### Bn-A09-p4831706 | A-genome specific (napus-rapa) | 0.9736842    | 0.4334123    | not scorable | not scorable | 0.9917355    | 0.8307745    |
| #### Bn-A09-p4835780 | A-genome specific (rapa only)  | not scorable | not scorable | not scorable | not scorable | 0.9586777    | 0.5939792    |
| #### Bn-A09-p4838767 | A-genome specific (napus-rapa) | 1            | 0.4628384    | not scorable | not scorable | 0.9917355    | 0.7416982    |
| #### Bn-A09-p4848610 | A-genome specific (napus-rapa) | 0.9904306    | 0.4889098    | not scorable | not scorable | 1            | 0.7947782    |
| #### Bn-A09-p4849057 | A-genome specific (rapa only)  | not scorable | not scorable | not scorable | not scorable | 0.9504132    | 0.7047819    |
| #### Bn-A09-p4850116 | A-genome specific (napus-rapa) | 0.9880383    | 0.2983746    | not scorable | not scorable | 0.9917355    | 0.5230218    |
| #### Bn-A09-p4850180 | genome unspecific (all in)     | 0.9688995    | 0.4739365    | 1            | 0.6999133    | 0.9917355    | 0.7391255    |
| #### Bn-A09-p4862871 | A-genome specific (napus-rapa) | 0.9641148    | 0.7655021    | not scorable | not scorable | 1            | 0.8109879    |
| #### Bn-A09-p4863472 | A-genome specific (napus-rapa) | 0.9880383    | 0.2801572    | not scorable | not scorable | 0.9834711    | 0.7279291    |
| #### Bn-A09-p487360  | A-genome specific (napus-rapa) | 0.9688995    | 0.7751663    | not scorable | not scorable | 1            | 0.7598014    |
| #### Bn-A09-p487432  | A-genome specific (rapa only)  | not scorable | not scorable | not scorable | not scorable | 1            | 0.5437853    |
| #### Bn-A09-p4895204 | all not scorable               | not scorable | not scorable | not scorable | not scorable | not scorable | not scorable |
| #### Bn-A09-p4895637 | A-genome specific (napus-rapa) | 0.9688995    | 0.7688206    | not scorable | not scorable | 0.9752066    | 0.8773268    |
| #### Bn-A09-p4905706 | A-genome specific (napus-rapa) | 0.9832536    | 0.7069931    | not scorable | not scorable | 1            | 0.7721075    |



|                      |                                |              |              |              |              |              |              |
|----------------------|--------------------------------|--------------|--------------|--------------|--------------|--------------|--------------|
| #### Bn-A09-p4905766 | A-genome specific (napus-rapa) | 0.9760765    | 0.6687414    | not scorable | not scorable | 0.9834711    | 0.6642047    |
| #### Bn-A09-p4913177 | A-genome specific (napus-rapa) | 0.9688995    | 0.7320268    | not scorable | not scorable | 0.9917355    | 0.7597949    |
| #### Bn-A09-p4913432 | A-genome specific (napus-rapa) | 0.9641148    | 0.7317603    | not scorable | not scorable | 1            | 0.7896478    |
| #### Bn-A09-p4916858 | A-genome specific (napus-rapa) | 0.9784689    | 0.7326469    | not scorable | not scorable | 0.9917355    | 0.8419041    |
| #### Bn-A09-p4927893 | A-genome specific (napus-rapa) | 0.9808612    | 0.4042502    | not scorable | not scorable | 0.9917355    | 0.8092358    |
| #### Bn-A09-p4932188 | napus specific                 | 0.9665072    | 0.781932     | not scorable | not scorable | not scorable | not scorable |
| #### Bn-A09-p4939799 | A-genome specific (napus-rapa) | 0.9832536    | 0.7781911    | not scorable | not scorable | 0.9834711    | 0.6652459    |
| #### Bn-A09-p4963985 | A-genome specific (napus-rapa) | 0.9808612    | 0.7449381    | not scorable | not scorable | 0.9917355    | 0.7578814    |
| #### Bn-A09-p4965726 | A-genome specific (napus-rapa) | 0.9545454    | 0.4688864    | not scorable | not scorable | 0.9586777    | 0.6135454    |
| #### Bn-A09-p4976736 | A-genome specific (napus-rapa) | 0.9952153    | 0.5386287    | not scorable | not scorable | 0.9834711    | 0.7753181    |
| #### Bn-A09-p4990811 | A-genome specific (napus-rapa) | 1            | 0.3324823    | not scorable | not scorable | 0.9917355    | 0.7627138    |
| #### Bn-A09-p4996710 | A-genome specific (napus-rapa) | 1            | 0.421504     | not scorable | not scorable | 0.9917355    | 0.783188     |
| #### Bn-A09-p4997670 | A-genome specific (napus-rapa) | 0.9952153    | 0.8045266    | not scorable | not scorable | 1            | 0.7315543    |
| #### Bn-A09-p5006353 | all not scorable               | not scorable | not scorable | not scorable | not scorable | not scorable | not scorable |
| #### Bn-A09-p5013589 | A-genome specific (napus-rapa) | 0.9952153    | 0.8067757    | not scorable | not scorable | 0.9504132    | 0.725637     |
| #### Bn-A09-p5031583 | genome unspecific (all in)     | 0.9856459    | 0.5069944    |              | 1 0.6272274  | 0.9834711    | 0.628118     |
| #### Bn-A09-p5033479 | A-genome specific (napus-rapa) | 0.9928229    | 0.7425682    | not scorable | not scorable | 0.9917355    | 0.8396309    |
| #### Bn-A09-p5034747 | A-genome specific (napus-rapa) | 0.9880383    | 0.7673566    | not scorable | not scorable | 0.9917355    | 0.8139451    |
| #### Bn-A09-p5037318 | A-genome specific (napus-rapa) | 0.9904306    | 0.795202     | not scorable | not scorable | 0.9917355    | 0.7600949    |
| #### Bn-A09-p5039439 | napus specific                 | 0.777512     | 0.9174144    | not scorable | not scorable | not scorable | not scorable |
| #### Bn-A09-p5040112 | A-genome specific (napus-rapa) | 0.9808612    | 0.7863276    | not scorable | not scorable | 0.9834711    | 0.7802081    |
| #### Bn-A09-p5040525 | A-genome specific (napus-rapa) | 0.9832536    | 0.7689756    | not scorable | not scorable | 0.9917355    | 0.7964392    |
| #### Bn-A09-p5054103 | A-genome specific (napus-rapa) | 0.9736842    | 0.7741275    | not scorable | not scorable | 0.9834711    | 0.7842148    |
| #### Bn-A09-p5061646 | A-genome specific (napus-rapa) | 0.9856459    | 0.6647478    | not scorable | not scorable | 1            | 0.6919443    |
| #### Bn-A09-p5062101 | A-genome specific (napus-rapa) | 0.9641148    | 0.1787639    | not scorable | not scorable | 0.9917355    | 0.2851585    |
| #### Bn-A09-p5118197 | A-genome specific (rapa only)  | not scorable | not scorable | not scorable | not scorable | 1            | 0.7917065    |
| #### Bn-A09-p5132918 | A-genome specific (napus-rapa) | 0.9760765    | 0.6900904    | not scorable | not scorable | 0.9917355    | 0.7068807    |
| #### Bn-A09-p5144107 | A-genome specific (rapa only)  | not scorable | not scorable | not scorable | not scorable | 0.9752066    | 0.7776366    |
| #### Bn-A09-p5149149 | A-genome specific (napus-rapa) | 0.9904306    | 0.8843162    | not scorable | not scorable | 0.9752066    | 0.7970055    |
| #### Bn-A09-p5157169 | A-genome specific (napus-rapa) | 0.9736842    | 0.4812745    | not scorable | not scorable | 1            | 0.8175948    |
| #### Bn-A09-p5168276 | A-genome specific (napus-rapa) | 0.9928229    | 0.7704199    | not scorable | not scorable | 0.9917355    | 0.6974431    |
| #### Bn-A09-p5189883 | A-genome specific (napus-rapa) | 0.9904306    | 0.8816431    | not scorable | not scorable | 0.9834711    | 0.7474361    |
| #### Bn-A09-p5190180 | A-genome specific (napus-rapa) | 0.9880383    | 0.4691574    | not scorable | not scorable | 0.9917355    | 0.7507792    |

|                      |                                |              |              |              |              |              |              |
|----------------------|--------------------------------|--------------|--------------|--------------|--------------|--------------|--------------|
| #### Bn-A09-p5190641 | A-genome specific (rapa only)  | not scorable | not scorable | not scorable | not scorable | 0.9834711    | 0.64606      |
| #### Bn-A09-p5200256 | A-genome specific (napus-rapa) | 0.9832536    | 0.4914135    | not scorable | not scorable | 0.9917355    | 0.6999851    |
| #### Bn-A09-p5215814 | A-genome specific (napus-rapa) | 0.9808612    | 0.7870815    | not scorable | not scorable | 0.5785124    | 0.8809718    |
| #### Bn-A09-p5219527 | A-genome specific (napus-rapa) | 0.9808612    | 0.7583001    | not scorable | not scorable | 1            | 0.8144872    |
| #### Bn-A09-p5225650 | A-genome specific (napus-rapa) | 0.923445     | 0.3944638    | not scorable | not scorable | 1            | 0.7570472    |
| #### Bn-A09-p5232967 | A-genome specific (napus-rapa) | 0.9521531    | 0.2305414    | not scorable | not scorable | 1            | 0.8016035    |
| #### Bn-A09-p5244764 | A-genome specific (rapa only)  | not scorable | not scorable | not scorable | not scorable | 0.9834711    | 0.6058801    |
| #### Bn-A09-p5246171 | A-genome specific (napus-rapa) | 0.9760765    | 0.6846452    | not scorable | not scorable | 1            | 0.7335306    |
| #### Bn-A09-p5246229 | A-genome specific (napus-rapa) | 0.9760765    | 0.7490008    | not scorable | not scorable | 0.9917355    | 0.7242284    |
| #### Bn-A09-p5251134 | A-genome specific (napus-rapa) | 0.9760765    | 0.4494615    | not scorable | not scorable | 0.9917355    | 0.7724911    |
| #### Bn-A09-p5255753 | A-genome specific (napus-rapa) | 0.8971292    | 0.5513323    | not scorable | not scorable | 0.9917355    | 0.8287731    |
| #### Bn-A09-p5258401 | A-genome specific (napus-rapa) | 0.9736842    | 0.7476039    | not scorable | not scorable | 1            | 0.76249      |
| #### Bn-A09-p5267535 | A-genome specific (napus-rapa) | 0.7009569    | 0.7546919    | not scorable | not scorable | 0.9752066    | 0.7493378    |
| #### Bn-A09-p5274560 | napus specific                 | 0.9712918    | 0.625423     | not scorable | not scorable | not scorable | not scorable |
| #### Bn-A09-p5285034 | A-genome specific (napus-rapa) | 0.9497608    | 0.7066888    | not scorable | not scorable | 0.9917355    | 0.7865238    |
| #### Bn-A09-p5286216 | A-genome specific (napus-rapa) | 0.9641148    | 0.7904177    | not scorable | not scorable | 0.9834711    | 0.7822285    |
| #### Bn-A09-p5298381 | A-genome specific (napus-rapa) | 0.9832536    | 0.3286492    | not scorable | not scorable | 0.9917355    | 0.6999294    |
| #### Bn-A09-p5298521 | A-genome specific (napus-rapa) | 0.9617225    | 0.6318974    | not scorable | not scorable | 1            | 0.8143176    |
| #### Bn-A09-p5322252 | A-genome specific (rapa only)  | not scorable | not scorable | not scorable | not scorable | 1            | 0.7563441    |
| #### Bn-A09-p5327731 | A-genome specific (napus-rapa) | 0.9617225    | 0.7667454    | not scorable | not scorable | 1            | 0.8321488    |
| #### Bn-A09-p5329868 | A-genome specific (napus-rapa) | 0.9617225    | 0.683293     | not scorable | not scorable | 1            | 0.7619222    |
| #### Bn-A09-p5331841 | A-genome specific (napus-rapa) | 0.9593301    | 0.8044721    | not scorable | not scorable | 1            | 0.8632411    |
| #### Bn-A09-p5332906 | A-genome specific (napus-rapa) | 0.9617225    | 0.7764152    | not scorable | not scorable | 1            | 0.6941759    |
| #### Bn-A09-p5334820 | A-genome specific (napus-rapa) | 0.9928229    | 0.4799261    | not scorable | not scorable | 0.9752066    | 0.757252     |
| #### Bn-A09-p5337372 | A-genome specific (napus-rapa) | 0.9617225    | 0.7681427    | not scorable | not scorable | 1            | 0.7287459    |
| #### Bn-A09-p5343993 | A-genome specific (napus-rapa) | 0.9617225    | 0.7710374    | not scorable | not scorable | 0.9917355    | 0.8272437    |
| #### Bn-A09-p5348717 | A-genome specific (napus-rapa) | 0.7894737    | 0.5774227    | not scorable | not scorable | 1            | 0.7266041    |
| #### Bn-A09-p5382769 | A-genome specific (rapa only)  | not scorable | not scorable | not scorable | not scorable | 0.9752066    | 0.7666582    |
| #### Bn-A09-p5406597 | A-genome specific (napus-rapa) | 0.9952153    | 0.3627931    | not scorable | not scorable | 1            | 0.6600155    |
| #### Bn-A09-p5406959 | A-genome specific (napus-rapa) | 0.9665072    | 0.7289798    | not scorable | not scorable | 0.9586777    | 0.7050037    |
| #### Bn-A09-p5416801 | A-genome specific (napus-rapa) | 0.9449761    | 0.4629615    | not scorable | not scorable | 0.9917355    | 0.6017036    |
| #### Bn-A09-p5418207 | A-genome specific (rapa only)  | not scorable | not scorable | not scorable | not scorable | 0.9834711    | 0.56967      |
| #### Bn-A09-p5418342 | A-genome specific (rapa only)  | not scorable | not scorable | not scorable | not scorable | 0.9586777    | 0.3420794    |

|                      |                                   |              |              |              |              |           |           |
|----------------------|-----------------------------------|--------------|--------------|--------------|--------------|-----------|-----------|
| #### Bn-A09-p5431352 | A-genome specific (rapa only)     | not scorable | not scorable | not scorable | not scorable | 0.9752066 | 0.6449673 |
| #### Bn-A09-p5432697 | A-genome specific (napus-rapa)    | 0.9019139    | 0.7806062    | not scorable | not scorable | 0.7851239 | 0.7906627 |
| #### Bn-A09-p5442608 | A-genome specific (napus-rapa)    | 0.9665072    | 0.7672513    | not scorable | not scorable | 0.9917355 | 0.8651981 |
| #### Bn-A09-p5444807 | A-genome specific (rapa only)     | not scorable | not scorable | not scorable | not scorable | 1         | 0.7478645 |
| #### Bn-A09-p5454067 | A-genome specific (rapa only)     | not scorable | not scorable | not scorable | not scorable | 0.9834711 | 0.7193478 |
| #### Bn-A09-p5455608 | A-genome specific (napus-rapa)    | 0.9808612    | 0.3797586    | not scorable | not scorable | 1         | 0.7544222 |
| #### Bn-A09-p5470888 | A-genome specific (napus-rapa)    | 0.9617225    | 0.7238625    | not scorable | not scorable | 0.9834711 | 0.6769891 |
| #### Bn-A09-p5476558 | A-genome specific (napus-rapa)    | 0.9832536    | 0.3172276    | not scorable | not scorable | 1         | 0.8088477 |
| #### Bn-A09-p5601358 | A-genome specific (rapa only)     | not scorable | not scorable | not scorable | not scorable | 1         | 0.6336754 |
| #### Bn-A09-p5603209 | A-genome specific (rapa only)     | not scorable | not scorable | not scorable | not scorable | 0.9834711 | 0.6931959 |
| #### Bn-A09-p5631441 | A-genome specific (napus-rapa)    | 0.9712918    | 0.8082213    | not scorable | not scorable | 1         | 0.763607  |
| #### Bn-A09-p5678953 | A-genome specific (napus-rapa)    | 0.9617225    | 0.6545711    | not scorable | not scorable | 0.9917355 | 0.6932586 |
| #### Bn-A09-p5680812 | genome unspecific (oleracea-rapa) | not scorable | not scorable |              | 1 0.797483   | 1         | 0.7984924 |
| #### Bn-A09-p574205  | A-genome specific (napus-rapa)    | 0.9497608    | 0.6220557    | not scorable | not scorable | 0.9834711 | 0.6683896 |
| #### Bn-A09-p5781490 | A-genome specific (rapa only)     | not scorable | not scorable | not scorable | not scorable | 0.9834711 | 0.693639  |
| #### Bn-A09-p584756  | A-genome specific (rapa only)     | not scorable | not scorable | not scorable | not scorable | 0.9834711 | 0.7618532 |
| #### Bn-A09-p586357  | A-genome specific (napus-rapa)    | 0.9617225    | 0.7527344    | not scorable | not scorable | 1         | 0.706755  |
| #### Bn-A09-p594794  | A-genome specific (napus-rapa)    | 0.9593301    | 0.692848     | not scorable | not scorable | 0.9917355 | 0.8328364 |
| #### Bn-A09-p5958009 | A-genome specific (napus-rapa)    | 1            | 0.8562576    | not scorable | not scorable | 1         | 0.7640795 |
| #### Bn-A09-p5958764 | A-genome specific (napus-rapa)    | 1            | 0.4458803    | not scorable | not scorable | 0.9917355 | 0.815373  |
| #### Bn-A09-p596014  | A-genome specific (napus-rapa)    | 0.937799     | 0.7960857    | not scorable | not scorable | 0.661157  | 0.7952774 |
| #### Bn-A09-p5966342 | A-genome specific (napus-rapa)    | 0.9354067    | 0.8009366    | not scorable | not scorable | 0.9586777 | 0.8004208 |
| #### Bn-A09-p5966858 | A-genome specific (rapa only)     | not scorable | not scorable | not scorable | not scorable | 0.9504132 | 0.8242866 |
| #### Bn-A09-p5975583 | A-genome specific (rapa only)     | not scorable | not scorable | not scorable | not scorable | 0.9917355 | 0.6840369 |
| #### Bn-A09-p5977032 | A-genome specific (napus-rapa)    | 0.9545454    | 0.5744513    | not scorable | not scorable | 1         | 0.670569  |
| #### Bn-A09-p5992    | A-genome specific (rapa only)     | not scorable | not scorable | not scorable | not scorable | 1         | 0.6483224 |
| #### Bn-A09-p599316  | A-genome specific (rapa only)     | not scorable | not scorable | not scorable | not scorable | 0.9834711 | 0.7631436 |
| #### Bn-A09-p6010593 | A-genome specific (napus-rapa)    | 0.9569378    | 0.6429607    | not scorable | not scorable | 0.9752066 | 0.6397281 |
| #### Bn-A09-p6021939 | A-genome specific (napus-rapa)    | 0.9784689    | 0.7848654    | not scorable | not scorable | 1         | 0.8062638 |
| #### Bn-A09-p603278  | A-genome specific (rapa only)     | not scorable | not scorable | not scorable | not scorable | 0.9752066 | 0.7192181 |
| #### Bn-A09-p6057858 | A-genome specific (rapa only)     | not scorable | not scorable | not scorable | not scorable | 1         | 0.7485937 |
| #### Bn-A09-p6090256 | A-genome specific (napus-rapa)    | 0.9401914    | 0.1923451    | not scorable | not scorable | 0.9917355 | 0.8345292 |
| #### Bn-A09-p6133524 | A-genome specific (napus-rapa)    | 0.9904306    | 0.7154657    | not scorable | not scorable | 0.9834711 | 0.7079616 |

|                      |                                   |              |              |              |              |           |           |
|----------------------|-----------------------------------|--------------|--------------|--------------|--------------|-----------|-----------|
| #### Bn-A09-p6140805 | A-genome specific (rapa only)     | not scorable | not scorable | not scorable | not scorable | 0.9917355 | 0.7173991 |
| #### Bn-A09-p614715  | A-genome specific (napus-rapa)    | 0.9617225    | 0.7797239    | not scorable | not scorable | 0.9834711 | 0.6497747 |
| #### Bn-A09-p616919  | A-genome specific (napus-rapa)    | 0.9736842    | 0.4168147    | not scorable | not scorable | 1         | 0.8206428 |
| #### Bn-A09-p620595  | A-genome specific (napus-rapa)    | 0.9641148    | 0.801636     | not scorable | not scorable | 1         | 0.8232456 |
| #### Bn-A09-p6295669 | A-genome specific (rapa only)     | not scorable | not scorable | not scorable | not scorable | 0.9834711 | 0.7470379 |
| #### Bn-A09-p631411  | A-genome specific (napus-rapa)    | 0.9641148    | 0.8586184    | not scorable | not scorable | 1         | 0.8447355 |
| #### Bn-A09-p632449  | A-genome specific (rapa only)     | not scorable | not scorable | not scorable | not scorable | 1         | 0.7845956 |
| #### Bn-A09-p6357468 | A-genome specific (rapa only)     | not scorable | not scorable | not scorable | not scorable | 0.9173554 | 0.6663267 |
| #### Bn-A09-p642046  | A-genome specific (napus-rapa)    | 0.9712918    | 0.8044969    | not scorable | not scorable | 1         | 0.6616563 |
| #### Bn-A09-p643947  | A-genome specific (rapa only)     | not scorable | not scorable | not scorable | not scorable | 0.9917355 | 0.8319932 |
| #### Bn-A09-p6445844 | A-genome specific (napus-rapa)    | 0.9904306    | 0.7934247    | not scorable | not scorable | 0.9917355 | 0.7859197 |
| #### Bn-A09-p6459935 | A-genome specific (napus-rapa)    | 1            | 0.8700376    | not scorable | not scorable | 1         | 0.8597358 |
| #### Bn-A09-p652580  | A-genome specific (napus-rapa)    | 0.9665072    | 0.8355671    | not scorable | not scorable | 1         | 0.7603102 |
| #### Bn-A09-p6546149 | A-genome specific (napus-rapa)    | 1            | 0.5383334    | not scorable | not scorable | 0.9917355 | 0.5092235 |
| #### Bn-A09-p6562874 | A-genome specific (napus-rapa)    | 0.9976076    | 0.6213395    | not scorable | not scorable | 0.9669421 | 0.7165536 |
| #### Bn-A09-p6574470 | genome unspecific (oleracea-rapa) | not scorable | not scorable | 0.6899225    | 0.7594174    | 0.9834711 | 0.7780849 |
| #### Bn-A09-p660753  | A-genome specific (napus-rapa)    | 0.937799     | 0.8717517    | not scorable | not scorable | 0.6859504 | 0.8161849 |
| #### Bn-A09-p660775  | A-genome specific (rapa only)     | not scorable | not scorable | not scorable | not scorable | 0.5867769 | 0.7168652 |
| #### Bn-A09-p6615722 | A-genome specific (rapa only)     | not scorable | not scorable | not scorable | not scorable | 0.9752066 | 0.6528595 |
| #### Bn-A09-p6616042 | A-genome specific (rapa only)     | not scorable | not scorable | not scorable | not scorable | 0.9917355 | 0.7821866 |
| #### Bn-A09-p6616405 | A-genome specific (napus-rapa)    | 0.9473684    | 0.7423339    | not scorable | not scorable | 0.9834711 | 0.6243979 |
| #### Bn-A09-p6630867 | A-genome specific (rapa only)     | not scorable | not scorable | not scorable | not scorable | 0.9669421 | 0.6902872 |
| #### Bn-A09-p6632506 | A-genome specific (napus-rapa)    | 0.9665072    | 0.3430493    | not scorable | not scorable | 0.9917355 | 0.5159227 |
| #### Bn-A09-p664845  | A-genome specific (napus-rapa)    | 0.9617225    | 0.861363     | not scorable | not scorable | 0.9917355 | 0.8651067 |
| #### Bn-A09-p6674663 | A-genome specific (napus-rapa)    | 1            | 0.8624865    | not scorable | not scorable | 0.9669421 | 0.7873905 |
| #### Bn-A09-p675589  | A-genome specific (rapa only)     | not scorable | not scorable | not scorable | not scorable | 1         | 0.6277844 |
| #### Bn-A09-p6783843 | A-genome specific (rapa only)     | not scorable | not scorable | not scorable | not scorable | 1         | 0.7274089 |
| #### Bn-A09-p678387  | A-genome specific (rapa only)     | not scorable | not scorable | not scorable | not scorable | 1         | 0.7629083 |
| #### Bn-A09-p679276  | A-genome specific (rapa only)     | not scorable | not scorable | not scorable | not scorable | 1         | 0.7620021 |
| #### Bn-A09-p6817144 | A-genome specific (rapa only)     | not scorable | not scorable | not scorable | not scorable | 1         | 0.8581187 |
| #### Bn-A09-p6829125 | A-genome specific (rapa only)     | not scorable | not scorable | not scorable | not scorable | 0.9917355 | 0.7711393 |
| #### Bn-A09-p6852464 | A-genome specific (napus-rapa)    | 0.9688995    | 0.7415988    | not scorable | not scorable | 1         | 0.7014856 |
| #### Bn-A09-p6866176 | A-genome specific (napus-rapa)    | 0.9856459    | 0.4920447    | not scorable | not scorable | 0.9917355 | 0.7313633 |

|                      |                                   |              |              |              |              |           |           |
|----------------------|-----------------------------------|--------------|--------------|--------------|--------------|-----------|-----------|
| #### Bn-A09-p6879008 | A-genome specific (napus-rapa)    | 0.9760765    | 0.7060012    | not scorable | not scorable | 0.9917355 | 0.7975833 |
| #### Bn-A09-p688895  | A-genome specific (rapa only)     | not scorable | not scorable | not scorable | not scorable | 0.9752066 | 0.8366876 |
| #### Bn-A09-p6922467 | A-genome specific (napus-rapa)    | 0.9569378    | 0.6659523    | not scorable | not scorable | 0.553719  | 0.7706444 |
| #### Bn-A09-p694190  | genome unspecific (oleracea-rapa) | not scorable | not scorable |              | 1 0.8289383  | 1         | 0.9215922 |
| #### Bn-A09-p6950255 | A-genome specific (rapa only)     | not scorable | not scorable | not scorable | not scorable | 0.9917355 | 0.7509562 |
| #### Bn-A09-p696636  | A-genome specific (napus-rapa)    | 0.9521531    | 0.2326096    | not scorable | not scorable | 0.9834711 | 0.6116205 |
| #### Bn-A09-p6970158 | A-genome specific (rapa only)     | not scorable | not scorable | not scorable | not scorable | 1         | 0.591867  |
| #### Bn-A09-p702173  | A-genome specific (napus-rapa)    | 0.8349282    | 0.7343408    | not scorable | not scorable | 0.5619835 | 0.7505296 |
| #### Bn-A09-p704028  | A-genome specific (napus-rapa)    | 0.9712918    | 0.7777714    | not scorable | not scorable | 1         | 0.7737294 |
| #### Bn-A09-p7047022 | A-genome specific (napus-rapa)    | 0.9808612    | 0.7731497    | not scorable | not scorable | 1         | 0.811154  |
| #### Bn-A09-p706265  | A-genome specific (rapa only)     | not scorable | not scorable | not scorable | not scorable | 1         | 0.772052  |
| #### Bn-A09-p7071738 | A-genome specific (rapa only)     | not scorable | not scorable | not scorable | not scorable | 0.9917355 | 0.8159977 |
| #### Bn-A09-p708660  | A-genome specific (rapa only)     | not scorable | not scorable | not scorable | not scorable | 0.9917355 | 0.8513979 |
| #### Bn-A09-p7086863 | A-genome specific (rapa only)     | not scorable | not scorable | not scorable | not scorable | 1         | 0.6808664 |
| #### Bn-A09-p7087772 | A-genome specific (napus-rapa)    | 0.9545454    | 0.549324     | not scorable | not scorable | 0.9586777 | 0.5292387 |
| #### Bn-A09-p7096041 | genome unspecific (all in)        | 0.9760765    | 0.4348067    | 0.9922481    | 0.5872974    | 0.5702479 | 0.6765413 |
| #### Bn-A09-p7101179 | A-genome specific (rapa only)     | not scorable | not scorable | not scorable | not scorable | 0.9917355 | 0.8149536 |
| #### Bn-A09-p7174944 | A-genome specific (napus-rapa)    | 0.6794258    | 0.8070216    | not scorable | not scorable | 1         | 0.8004208 |
| #### Bn-A09-p7176234 | A-genome specific (rapa only)     | not scorable | not scorable | not scorable | not scorable | 0.9917355 | 0.7989518 |
| #### Bn-A09-p718444  | A-genome specific (rapa only)     | not scorable | not scorable | not scorable | not scorable | 0.9917355 | 0.80323   |
| #### Bn-A09-p7191362 | A-genome specific (napus-rapa)    | 0.9856459    | 0.6740993    | not scorable | not scorable | 0.9917355 | 0.6123618 |
| #### Bn-A09-p7191369 | A-genome specific (napus-rapa)    | 0.9976076    | 0.767617     | not scorable | not scorable | 0.9917355 | 0.6985396 |
| #### Bn-A09-p7199203 | A-genome specific (napus-rapa)    | 0.9784689    | 0.6612681    | not scorable | not scorable | 0.9752066 | 0.7184675 |
| #### Bn-A09-p7287912 | A-genome specific (napus-rapa)    | 1            | 0.3055814    | not scorable | not scorable | 1         | 0.6296516 |
| #### Bn-A09-p731402  | A-genome specific (napus-rapa)    | 0.9593301    | 0.8994339    | not scorable | not scorable | 1         | 0.8443965 |
| #### Bn-A09-p7317278 | A-genome specific (napus-rapa)    | 0.9880383    | 0.6646872    | not scorable | not scorable | 0.9917355 | 0.6485745 |
| #### Bn-A09-p7318713 | genome unspecific (oleracea-rapa) | not scorable | not scorable | 0.9922481    | 0.605808     | 0.9669421 | 0.6118923 |
| #### Bn-A09-p7327691 | genome unspecific (all in)        | 0.9784689    | 0.555302     | 0.9767442    | 0.6487459    | 0.9752066 | 0.6463921 |
| #### Bn-A09-p7329993 | A-genome specific (napus-rapa)    | 0.9736842    | 0.7882518    | not scorable | not scorable | 0.5785124 | 0.8888375 |
| #### Bn-A09-p7331034 | A-genome specific (napus-rapa)    | 0.9832536    | 0.7138566    | not scorable | not scorable | 0.5950413 | 0.8239566 |
| #### Bn-A09-p7331063 | A-genome specific (napus-rapa)    | 0.9760765    | 0.7763967    | not scorable | not scorable | 0.5785124 | 0.85756   |
| #### Bn-A09-p7332680 | A-genome specific (napus-rapa)    | 1            | 0.6660782    | not scorable | not scorable | 1         | 0.5829788 |
| #### Bn-A09-p733947  | A-genome specific (rapa only)     | not scorable | not scorable | not scorable | not scorable | 1         | 0.7819619 |

|                      |                                   |              |              |              |              |              |           |           |
|----------------------|-----------------------------------|--------------|--------------|--------------|--------------|--------------|-----------|-----------|
| #### Bn-A09-p739088  | A-genome specific (napus-rapa)    | 0.9856459    | 0.4303638    | not scorable | not scorable |              | 1         | 0.8006716 |
| #### Bn-A09-p7397116 | A-genome specific (napus-rapa)    | 0.9952153    | 0.5936755    | not scorable | not scorable |              | 1         | 0.8185696 |
| #### Bn-A09-p7454442 | A-genome specific (napus-rapa)    | 0.9473684    | 0.73238      | not scorable | not scorable | 0.9834711    |           | 0.7665496 |
| #### Bn-A09-p7472401 | A-genome specific (napus-rapa)    | 0.9688995    | 0.7540587    | not scorable | not scorable |              | 1         | 0.7354135 |
| #### Bn-A09-p7490528 | A-genome specific (napus-rapa)    | 0.9497608    | 0.4662322    | not scorable | not scorable | 0.9834711    |           | 0.7192605 |
| #### Bn-A09-p7490626 | A-genome specific (rapa only)     | not scorable | not scorable | not scorable | not scorable | 0.9917355    |           | 0.4768641 |
| #### Bn-A09-p7491672 | A-genome specific (napus-rapa)    | 0.8971292    | 0.2439758    | not scorable | not scorable |              | 1         | 0.3168432 |
| #### Bn-A09-p7494889 | A-genome specific (napus-rapa)    | 0.9617225    | 0.7926523    | not scorable | not scorable | 0.9669421    |           | 0.7473096 |
| #### Bn-A09-p7499345 | A-genome specific (napus-rapa)    | 0.9880383    | 0.478056     | not scorable | not scorable | 0.9834711    |           | 0.7333252 |
| #### Bn-A09-p7503009 | A-genome specific (rapa only)     | not scorable | not scorable | not scorable | not scorable | 0.9917355    |           | 0.842319  |
| #### Bn-A09-p750455  | A-genome specific (napus-rapa)    | 0.84689      | 0.8812667    | not scorable | not scorable |              | 1         | 0.8815182 |
| #### Bn-A09-p7510345 | A-genome specific (napus-rapa)    | 0.9617225    | 0.7467045    | not scorable | not scorable | 0.9917355    |           | 0.7691161 |
| #### Bn-A09-p7517353 | A-genome specific (napus-rapa)    | 0.9712918    | 0.7687171    | not scorable | not scorable | 0.9669421    |           | 0.6508276 |
| #### Bn-A09-p751817  | genome unspecific (oleracea-rapa) | not scorable | not scorable |              | 1            | 0.7294201    | 0.9834711 | 0.7695127 |
| #### Bn-A09-p7560188 | A-genome specific (napus-rapa)    | 0.9712918    | 0.3325977    | not scorable | not scorable |              | 1         | 0.7892063 |
| #### Bn-A09-p757653  | A-genome specific (rapa only)     | not scorable | not scorable | not scorable | not scorable |              | 1         | 0.6947604 |
| #### Bn-A09-p763204  | A-genome specific (napus-rapa)    | 0.9330143    | 0.7023031    | not scorable | not scorable | 0.9834711    |           | 0.6939188 |
| #### Bn-A09-p765293  | A-genome specific (rapa only)     | not scorable | not scorable | not scorable | not scorable | 0.9917355    |           | 0.8013308 |
| #### Bn-A09-p7663062 | A-genome specific (napus-rapa)    |              | 1            | 0.4695294    | not scorable | not scorable | 1         | 0.6729678 |
| #### Bn-A09-p768355  | A-genome specific (rapa only)     | not scorable | not scorable | not scorable | not scorable |              | 1         | 0.7867247 |
| #### Bn-A09-p7741917 | A-genome specific (napus-rapa)    |              | 1            | 0.522387     | not scorable | not scorable | 0.9752066 | 0.6824779 |
| #### Bn-A09-p775340  | A-genome specific (rapa only)     | not scorable | not scorable | not scorable | not scorable | 0.9834711    |           | 0.7232386 |
| #### Bn-A09-p788109  | A-genome specific (rapa only)     | not scorable | not scorable | not scorable | not scorable |              | 1         | 0.68543   |
| #### Bn-A09-p788595  | A-genome specific (rapa only)     | not scorable | not scorable | not scorable | not scorable | 0.9586777    |           | 0.6703168 |
| #### Bn-A09-p7892057 | A-genome specific (rapa only)     | not scorable | not scorable | not scorable | not scorable | 0.9008265    |           | 0.678963  |
| #### Bn-A09-p8044910 | A-genome specific (napus-rapa)    | 0.9976076    | 0.6261827    | not scorable | not scorable | 0.9917355    |           | 0.6508787 |
| #### Bn-A09-p8239411 | A-genome specific (napus-rapa)    |              | 1            | 0.8580102    | not scorable | not scorable | 1         | 0.7976179 |
| #### Bn-A09-p8291726 | A-genome specific (napus-rapa)    |              | 1            | 0.7526401    | not scorable | not scorable | 1         | 0.7142267 |
| #### Bn-A09-p854992  | A-genome specific (napus-rapa)    | 0.9712918    | 0.7699522    | not scorable | not scorable |              | 1         | 0.6975581 |
| #### Bn-A09-p855112  | A-genome specific (napus-rapa)    | 0.9736842    | 0.7553295    | not scorable | not scorable | 0.9752066    |           | 0.7570184 |
| #### Bn-A09-p8591730 | A-genome specific (napus-rapa)    | 0.9880383    | 0.7523107    | not scorable | not scorable |              | 1         | 0.7962558 |
| #### Bn-A09-p8591746 | A-genome specific (napus-rapa)    | 0.9832536    | 0.7576999    | not scorable | not scorable | 0.9917355    |           | 0.7097784 |
| #### Bn-A09-p8598652 | A-genome specific (napus-rapa)    | 0.9521531    | 0.7290323    | not scorable | not scorable |              | 1         | 0.6863819 |

|                      |                                |              |              |              |              |           |           |
|----------------------|--------------------------------|--------------|--------------|--------------|--------------|-----------|-----------|
| #### Bn-A09-p8611536 | A-genome specific (napus-rapa) | 1            | 0.6054083    | not scorable | not scorable | 1         | 0.5791867 |
| #### Bn-A09-p86293   | A-genome specific (napus-rapa) | 0.9712918    | 0.6212147    | not scorable | not scorable | 1         | 0.7882439 |
| #### Bn-A09-p8634971 | genome unspecific (all in)     | 0.9832536    | 0.4406843    |              | 1            | 0.5526558 | 1         |
| #### Bn-A09-p8635608 | genome unspecific (all in)     | 0.9952153    | 0.4463334    |              | 1            | 0.7346863 | 1         |
| #### Bn-A09-p8635777 | A-genome specific (napus-rapa) | 0.9928229    | 0.3875624    | not scorable | not scorable | 0.9917355 | 0.8257984 |
| #### Bn-A09-p865058  | A-genome specific (rapa only)  | not scorable | not scorable | not scorable | not scorable | 0.9669421 | 0.668492  |
| #### Bn-A09-p865922  | A-genome specific (rapa only)  | not scorable | not scorable | not scorable | not scorable | 0.9752066 | 0.6990505 |
| #### Bn-A09-p867036  | A-genome specific (napus-rapa) | 0.9808612    | 0.7248186    | not scorable | not scorable | 0.9752066 | 0.775528  |
| #### Bn-A09-p8679695 | A-genome specific (napus-rapa) | 0.9354067    | 0.8373741    | not scorable | not scorable | 0.9669421 | 0.6862206 |
| #### Bn-A09-p868589  | A-genome specific (napus-rapa) | 0.9688995    | 0.7627386    | not scorable | not scorable | 0.9917355 | 0.8092792 |
| #### Bn-A09-p869372  | A-genome specific (napus-rapa) | 0.9497608    | 0.6808839    | not scorable | not scorable | 0.9752066 | 0.7038062 |
| #### Bn-A09-p8713449 | A-genome specific (rapa only)  | not scorable | not scorable | not scorable | not scorable | 1         | 0.91548   |
| #### Bn-A09-p8770590 | A-genome specific (napus-rapa) | 0.9736842    | 0.7707306    | not scorable | not scorable | 1         | 0.8305271 |
| #### Bn-A09-p8773859 | A-genome specific (napus-rapa) | 0.9641148    | 0.6061384    | not scorable | not scorable | 0.9917355 | 0.6143078 |
| #### Bn-A09-p8783204 | A-genome specific (napus-rapa) | 0.9162679    | 0.9217019    | not scorable | not scorable | 0.5785124 | 0.8562264 |
| #### Bn-A09-p8784896 | A-genome specific (rapa only)  | not scorable | not scorable | not scorable | not scorable | 0.5702479 | 0.775216  |
| #### Bn-A09-p8787239 | A-genome specific (napus-rapa) | 0.9856459    | 0.8078167    | not scorable | not scorable | 1         | 0.6944383 |
| #### Bn-A09-p8787573 | A-genome specific (napus-rapa) | 0.9880383    | 0.6169657    | not scorable | not scorable | 1         | 0.5740249 |
| #### Bn-A09-p8788225 | A-genome specific (napus-rapa) | 0.9904306    | 0.7183248    | not scorable | not scorable | 1         | 0.7537234 |
| #### Bn-A09-p8791527 | A-genome specific (napus-rapa) | 0.9760765    | 0.8116162    | not scorable | not scorable | 0.9834711 | 0.7096455 |
| #### Bn-A09-p8793873 | A-genome specific (napus-rapa) | 0.9665072    | 0.5032585    | not scorable | not scorable | 0.9834711 | 0.6074334 |
| #### Bn-A09-p8798692 | A-genome specific (napus-rapa) | 0.9928229    | 0.3358216    | not scorable | not scorable | 0.9917355 | 0.6650375 |
| #### Bn-A09-p8798760 | A-genome specific (napus-rapa) | 0.9904306    | 0.4901089    | not scorable | not scorable | 0.9917355 | 0.7532339 |
| #### Bn-A09-p8800446 | A-genome specific (napus-rapa) | 0.9904306    | 0.4123461    | not scorable | not scorable | 0.9834711 | 0.6918456 |
| #### Bn-A09-p8810292 | A-genome specific (napus-rapa) | 0.9712918    | 0.5841851    | not scorable | not scorable | 0.5867769 | 0.769749  |
| #### Bn-A09-p8823608 | A-genome specific (napus-rapa) | 0.9641148    | 0.7783825    | not scorable | not scorable | 0.6115702 | 0.8031858 |
| #### Bn-A09-p8823667 | A-genome specific (napus-rapa) | 0.9617225    | 0.7776722    | not scorable | not scorable | 0.5867769 | 0.7652918 |
| #### Bn-A09-p8828707 | A-genome specific (napus-rapa) | 0.9808612    | 0.5127032    | not scorable | not scorable | 0.9917355 | 0.7270272 |
| #### Bn-A09-p8828806 | A-genome specific (napus-rapa) | 0.8779904    | 0.8838952    | not scorable | not scorable | 0.6115702 | 0.7888572 |
| #### Bn-A09-p8877444 | A-genome specific (napus-rapa) | 0.9784689    | 0.5992092    | not scorable | not scorable | 1         | 0.8305373 |
| #### Bn-A09-p8891015 | A-genome specific (napus-rapa) | 0.9856459    | 0.3199806    | not scorable | not scorable | 1         | 0.9060698 |
| #### Bn-A09-p8891277 | A-genome specific (napus-rapa) | 0.9784689    | 0.7608459    | not scorable | not scorable | 1         | 0.7337609 |
| #### Bn-A09-p8911821 | A-genome specific (napus-rapa) | 0.9114832    | 0.3413338    | not scorable | not scorable | 0.9917355 | 0.8213661 |

|                      |                                   |              |              |              |              |              |              |
|----------------------|-----------------------------------|--------------|--------------|--------------|--------------|--------------|--------------|
| #### Bn-A09-p8942646 | A-genome specific (napus-rapa)    | 0.9880383    | 0.7858909    | not scorable | not scorable | 1            | 0.6632929    |
| #### Bn-A09-p8943559 | A-genome specific (rapa only)     | not scorable | not scorable | not scorable | not scorable | 1            | 0.8407157    |
| #### Bn-A09-p8957856 | A-genome specific (napus-rapa)    | 0.9760765    | 0.7913759    | not scorable | not scorable | 0.9917355    | 0.8392213    |
| #### Bn-A09-p9030563 | A-genome specific (napus-rapa)    | 0.9976076    | 0.4101485    | not scorable | not scorable | 0.9917355    | 0.7431923    |
| #### Bn-A09-p9040117 | A-genome specific (rapa only)     | not scorable | not scorable | not scorable | not scorable | 0.5619835    | 0.7611821    |
| #### Bn-A09-p9063447 | A-genome specific (napus-rapa)    | 0.9712918    | 0.7706968    | not scorable | not scorable | 1            | 0.7987472    |
| #### Bn-A09-p9083090 | A-genome specific (napus-rapa)    | 0.8086125    | 0.9205657    | not scorable | not scorable | 0.5371901    | 0.8587651    |
| #### Bn-A09-p9083366 | A-genome specific (napus-rapa)    | 0.791866     | 0.745571     | not scorable | not scorable | 0.5206612    | 0.8027369    |
| #### Bn-A09-p9083445 | A-genome specific (napus-rapa)    | 0.8014354    | 0.7389812    | not scorable | not scorable | 0.5206612    | 0.7874197    |
| #### Bn-A09-p9097901 | napus specific                    | 0.9952153    | 0.848197     | not scorable | not scorable | not scorable | not scorable |
| #### Bn-A09-p9098267 | napus specific                    | 0.9593301    | 0.8329545    | not scorable | not scorable | not scorable | not scorable |
| #### Bn-A09-p9100536 | A-genome specific (napus-rapa)    | 0.9712918    | 0.7703121    | not scorable | not scorable | 0.9917355    | 0.8044221    |
| #### Bn-A09-p9100736 | A-genome specific (napus-rapa)    | 0.9952153    | 0.8175394    | not scorable | not scorable | 0.9752066    | 0.7442838    |
| #### Bn-A09-p9101925 | A-genome specific (napus-rapa)    | 0.9617225    | 0.6343148    | not scorable | not scorable | 0.9917355    | 0.8028262    |
| #### Bn-A09-p9103739 | A-genome specific (napus-rapa)    | 0.9712918    | 0.6722866    | not scorable | not scorable | 0.9917355    | 0.7805475    |
| #### Bn-A09-p9135388 | A-genome specific (napus-rapa)    | 0.9641148    | 0.7517864    | not scorable | not scorable | 0.9917355    | 0.6397132    |
| #### Bn-A09-p9206874 | A-genome specific (napus-rapa)    | 0.9952153    | 0.4527254    | not scorable | not scorable | 0.9669421    | 0.7069226    |
| #### Bn-A09-p9315814 | A-genome specific (napus-rapa)    | 0.9952153    | 0.7525488    | not scorable | not scorable | 0.9917355    | 0.7151629    |
| #### Bn-A09-p9315824 | A-genome specific (napus-rapa)    | 0.9760765    | 0.7404435    | not scorable | not scorable | 0.9917355    | 0.7678723    |
| #### Bn-A09-p9317714 | A-genome specific (napus-rapa)    | 0.9880383    | 0.7443041    | not scorable | not scorable | 1            | 0.7943537    |
| #### Bn-A09-p9325852 | A-genome specific (rapa only)     | not scorable | not scorable | not scorable | not scorable | 1            | 0.779687     |
| #### Bn-A09-p9325966 | A-genome specific (napus-rapa)    | 0.9832536    | 0.7381849    | not scorable | not scorable | 0.9834711    | 0.8332496    |
| #### Bn-A09-p9354510 | A-genome specific (rapa only)     | not scorable | not scorable | not scorable | not scorable | 1            | 0.7773933    |
| #### Bn-A09-p9371106 | genome unspecific (oleracea-rapa) | not scorable | not scorable | 0.9922481    | 0.786652     | 0.9917355    | 0.7751511    |
| #### Bn-A09-p9379347 | A-genome specific (napus-rapa)    | 0.9880383    | 0.7474923    | not scorable | not scorable | 0.9917355    | 0.8270501    |
| #### Bn-A09-p941202  | A-genome specific (napus-rapa)    | 0.9928229    | 0.5125338    | not scorable | not scorable | 1            | 0.7915307    |
| #### Bn-A09-p94205   | A-genome specific (rapa only)     | not scorable | not scorable | not scorable | not scorable | 0.9917355    | 0.7774317    |
| #### Bn-A09-p9421306 | A-genome specific (napus-rapa)    | 0.9784689    | 0.4123889    | not scorable | not scorable | 1            | 0.6653513    |
| #### Bn-A09-p9423176 | A-genome specific (napus-rapa)    | 0.9904306    | 0.7404481    | not scorable | not scorable | 1            | 0.7802463    |
| #### Bn-A09-p942734  | A-genome specific (rapa only)     | not scorable | not scorable | not scorable | not scorable | 0.9917355    | 0.6756669    |
| #### Bn-A09-p9443127 | A-genome specific (napus-rapa)    | 0.9760765    | 0.7771939    | not scorable | not scorable | 0.9917355    | 0.6732516    |
| #### Bn-A09-p9444998 | A-genome specific (napus-rapa)    | 0.9330143    | 0.6329758    | not scorable | not scorable | 1            | 0.7258827    |
| #### Bn-A09-p9445474 | A-genome specific (napus-rapa)    | 0.9952153    | 0.7589524    | not scorable | not scorable | 1            | 0.7555968    |



|                      |                                |              |              |              |              |           |           |
|----------------------|--------------------------------|--------------|--------------|--------------|--------------|-----------|-----------|
| #### Bn-A09-p9446903 | genome unspecific (all in)     | 0.9856459    | 0.5376879    | 1            | 0.7325708    | 1         | 0.8260867 |
| #### Bn-A09-p9450845 | A-genome specific (napus-rapa) | 0.9856459    | 0.7438328    | not scorable | not scorable | 0.9917355 | 0.7921681 |
| #### Bn-A09-p9450916 | A-genome specific (napus-rapa) | 0.9880383    | 0.7384287    | not scorable | not scorable | 0.9917355 | 0.777998  |
| #### Bn-A09-p9452891 | A-genome specific (napus-rapa) | 0.9832536    | 0.7836977    | not scorable | not scorable | 0.9917355 | 0.7574038 |
| #### Bn-A09-p9463840 | A-genome specific (napus-rapa) | 0.9904306    | 0.7643477    | not scorable | not scorable | 0.9752066 | 0.7744913 |
| #### Bn-A09-p9464949 | A-genome specific (rapa only)  | not scorable | not scorable | not scorable | not scorable | 0.9834711 | 0.8351377 |
| #### Bn-A09-p9480770 | A-genome specific (napus-rapa) | 0.9856459    | 0.4159842    | not scorable | not scorable | 0.5702479 | 0.6581001 |
| #### Bn-A09-p9497384 | A-genome specific (napus-rapa) | 0.9449761    | 0.5633817    | not scorable | not scorable | 0.9834711 | 0.8194786 |
| #### Bn-A09-p951202  | A-genome specific (napus-rapa) | 0.9593301    | 0.7365682    | not scorable | not scorable | 1         | 0.8183559 |
| #### Bn-A09-p9512316 | A-genome specific (napus-rapa) | 0.9952153    | 0.5485147    | not scorable | not scorable | 0.9834711 | 0.7546999 |
| #### Bn-A09-p9558015 | A-genome specific (napus-rapa) | 0.9784689    | 0.5316222    | not scorable | not scorable | 1         | 0.8327318 |
| #### Bn-A09-p9558692 | A-genome specific (napus-rapa) | 0.9832536    | 0.5236287    | not scorable | not scorable | 0.9917355 | 0.7651247 |
| #### Bn-A09-p9558834 | A-genome specific (napus-rapa) | 0.9784689    | 0.4977239    | not scorable | not scorable | 1         | 0.7465204 |
| #### Bn-A09-p9559997 | A-genome specific (napus-rapa) | 0.9856459    | 0.593719     | not scorable | not scorable | 0.9917355 | 0.80839   |
| #### Bn-A09-p9563670 | A-genome specific (napus-rapa) | 0.9904306    | 0.7084023    | not scorable | not scorable | 0.9917355 | 0.7299716 |
| #### Bn-A09-p9563948 | A-genome specific (napus-rapa) | 0.9976076    | 0.7763991    | not scorable | not scorable | 0.9917355 | 0.7017441 |
| #### Bn-A09-p957959  | A-genome specific (napus-rapa) | 0.9736842    | 0.6979845    | not scorable | not scorable | 0.9834711 | 0.7310815 |
| #### Bn-A09-p9613588 | A-genome specific (rapa only)  | not scorable | not scorable | not scorable | not scorable | 1         | 0.7540458 |
| #### Bn-A09-p962254  | A-genome specific (rapa only)  | not scorable | not scorable | not scorable | not scorable | 0.9834711 | 0.7543041 |
| #### Bn-A09-p9624934 | A-genome specific (rapa only)  | not scorable | not scorable | not scorable | not scorable | 0.9752066 | 0.7075786 |
| #### Bn-A09-p9627969 | A-genome specific (napus-rapa) | 1            | 0.6986263    | not scorable | not scorable | 1         | 0.6475353 |
| #### Bn-A09-p9655424 | A-genome specific (napus-rapa) | 1            | 0.9557924    | not scorable | not scorable | 0.9917355 | 0.724842  |
| #### Bn-A09-p9656145 | A-genome specific (napus-rapa) | 1            | 0.7914237    | not scorable | not scorable | 1         | 0.7101169 |
| #### Bn-A09-p9667631 | A-genome specific (napus-rapa) | 1            | 0.7932276    | not scorable | not scorable | 1         | 0.7415537 |
| #### Bn-A09-p9669847 | A-genome specific (napus-rapa) | 0.9976076    | 0.60457      | not scorable | not scorable | 0.9834711 | 0.6967894 |
| #### Bn-A09-p9671359 | A-genome specific (napus-rapa) | 0.9976076    | 0.7513728    | not scorable | not scorable | 0.9834711 | 0.694164  |
| #### Bn-A09-p9691088 | A-genome specific (napus-rapa) | 1            | 0.7205499    | not scorable | not scorable | 1         | 0.6961468 |
| #### Bn-A09-p9702226 | A-genome specific (napus-rapa) | 0.9952153    | 0.355863     | not scorable | not scorable | 0.5702479 | 0.7291039 |
| #### Bn-A09-p972043  | A-genome specific (rapa only)  | not scorable | not scorable | not scorable | not scorable | 0.9669421 | 0.7627951 |
| #### Bn-A09-p9724274 | A-genome specific (napus-rapa) | 0.9928229    | 0.7667827    | not scorable | not scorable | 1         | 0.8326911 |
| #### Bn-A09-p9728715 | A-genome specific (napus-rapa) | 0.9880383    | 0.3273889    | not scorable | not scorable | 0.9917355 | 0.6671988 |
| #### Bn-A09-p9747402 | A-genome specific (rapa only)  | not scorable | not scorable | not scorable | not scorable | 1         | 0.8513596 |
| #### Bn-A09-p9765092 | A-genome specific (rapa only)  | not scorable | not scorable | not scorable | not scorable | 0.9834711 | 0.6627436 |

|                       |                                |              |              |              |              |              |              |
|-----------------------|--------------------------------|--------------|--------------|--------------|--------------|--------------|--------------|
| #### Bn-A09-p9771068  | A-genome specific (napus-rapa) | 0.8708134    | 0.9244957    | not scorable | not scorable | 0.5702479    | 0.7939192    |
| #### Bn-A09-p9774483  | A-genome specific (napus-rapa) | 0.9880383    | 0.7118833    | not scorable | not scorable | 0.9917355    | 0.6852289    |
| #### Bn-A09-p9774806  | napus specific                 | 0.8588517    | 0.9119831    | not scorable | not scorable | not scorable | not scorable |
| #### Bn-A09-p9788623  | A-genome specific (rapa only)  | not scorable | not scorable | not scorable | not scorable | 0.5785124    | 0.8205484    |
| #### Bn-A09-p9789590  | A-genome specific (napus-rapa) | 0.9688995    | 0.4921851    | not scorable | not scorable | 1            | 0.8120642    |
| #### Bn-A09-p9789898  | A-genome specific (napus-rapa) | 0.9832536    | 0.7338526    | not scorable | not scorable | 0.9917355    | 0.7330953    |
| #### Bn-A09-p9789943  | A-genome specific (napus-rapa) | 0.9665072    | 0.5831832    | not scorable | not scorable | 1            | 0.6701838    |
| #### Bn-A09-p984186   | A-genome specific (napus-rapa) | 0.9760765    | 0.7843028    | not scorable | not scorable | 0.9834711    | 0.8010354    |
| #### Bn-A09-p9845028  | A-genome specific (napus-rapa) | 0.9832536    | 0.4585763    | not scorable | not scorable | 1            | 0.8202652    |
| #### Bn-A09-p9854305  | A-genome specific (rapa only)  | not scorable | not scorable | not scorable | not scorable | 0.9834711    | 0.7861193    |
| #### Bn-A09-p985671   | A-genome specific (rapa only)  | not scorable | not scorable | not scorable | not scorable | 0.9834711    | 0.7980695    |
| #### Bn-A09-p9862616  | A-genome specific (napus-rapa) | 0.9904306    | 0.494022     | not scorable | not scorable | 0.9917355    | 0.6326282    |
| #### Bn-A09-p9863993  | A-genome specific (rapa only)  | not scorable | not scorable | not scorable | not scorable | 1            | 0.6663224    |
| #### Bn-A09-p9865556  | A-genome specific (napus-rapa) | 1            | 0.8141077    | not scorable | not scorable | 0.6198347    | 0.8060105    |
| #### Bn-A09-p9877560  | A-genome specific (napus-rapa) | 1            | 0.8629119    | not scorable | not scorable | 0.9834711    | 0.6940855    |
| #### Bn-A09-p9878665  | A-genome specific (napus-rapa) | 1            | 0.8924836    | not scorable | not scorable | 0.9834711    | 0.8293855    |
| #### Bn-A09-p996577   | A-genome specific (napus-rapa) | 0.9665072    | 0.6975631    | not scorable | not scorable | 0.9917355    | 0.710373     |
| #### Bn-A09-p9980036  | A-genome specific (napus-rapa) | 0.9976076    | 0.5846751    | not scorable | not scorable | 1            | 0.7633747    |
| #### Bn-A09-p9987709  | A-genome specific (rapa only)  | not scorable | not scorable | not scorable | not scorable | 0.9834711    | 0.7322261    |
| #### Bn-A09-p999098   | A-genome specific (napus-rapa) | 0.9784689    | 0.5406622    | not scorable | not scorable | 1            | 0.7803556    |
| #### Bn-A10-p10001280 | A-genome specific (napus-rapa) | 0.9593301    | 0.8612419    | not scorable | not scorable | 0.9669421    | 0.9275892    |
| #### Bn-A10-p10005671 | A-genome specific (napus-rapa) | 0.9736842    | 0.7923185    | not scorable | not scorable | 0.9669421    | 0.8387859    |
| #### Bn-A10-p1001670  | A-genome specific (napus-rapa) | 0.9019139    | 0.7091562    | not scorable | not scorable | 0.9504132    | 0.7287721    |
| #### Bn-A10-p10020060 | A-genome specific (napus-rapa) | 0.9952153    | 0.7924223    | not scorable | not scorable | 1            | 0.8115303    |
| #### Bn-A10-p1002178  | A-genome specific (napus-rapa) | 0.9066986    | 0.7265144    | not scorable | not scorable | 0.9504132    | 0.7473843    |
| #### Bn-A10-p10026077 | A-genome specific (napus-rapa) | 0.8732057    | 0.8229336    | not scorable | not scorable | 0.9421487    | 0.8348498    |
| #### Bn-A10-p1002706  | A-genome specific (napus-rapa) | 0.8755981    | 0.8053252    | not scorable | not scorable | 0.9421487    | 0.7642339    |
| #### Bn-A10-p1003667  | A-genome specific (napus-rapa) | 0.9090909    | 0.6625258    | not scorable | not scorable | 0.9669421    | 0.6336848    |
| #### Bn-A10-p10042838 | A-genome specific (napus-rapa) | 0.569378     | 0.9131867    | not scorable | not scorable | 0.9834711    | 0.7740704    |
| #### Bn-A10-p10068411 | A-genome specific (rapa only)  | not scorable | not scorable | not scorable | not scorable | 0.9586777    | 0.7338036    |
| #### Bn-A10-p10070473 | A-genome specific (napus-rapa) | 0.9832536    | 0.7697572    | not scorable | not scorable | 0.5371901    | 0.8548818    |
| #### Bn-A10-p10082237 | A-genome specific (napus-rapa) | 0.9832536    | 0.6987011    | not scorable | not scorable | 0.9669421    | 0.6741426    |
| #### Bn-A10-p10083397 | genome unspecific (all in)     | 0.9976076    | 0.824755     |              | 1 0.8149503  | 1            | 0.8793069    |

|                       |                                |              |              |              |              |              |              |
|-----------------------|--------------------------------|--------------|--------------|--------------|--------------|--------------|--------------|
| #### Bn-A10-p10083483 | A-genome specific (rapa only)  | not scorable | not scorable | not scorable | not scorable | 0.9256198    | 0.2754074    |
| #### Bn-A10-p10088522 | A-genome specific (napus-rapa) | 1            | 0.8795602    | not scorable | not scorable | 0.9834711    | 0.737223     |
| #### Bn-A10-p10108321 | A-genome specific (napus-rapa) | 0.9808612    | 0.5087297    | not scorable | not scorable | 0.9917355    | 0.7801366    |
| #### Bn-A10-p1010963  | A-genome specific (napus-rapa) | 0.9976076    | 0.4458803    | not scorable | not scorable | 1            | 0.6992257    |
| #### Bn-A10-p10120142 | A-genome specific (rapa only)  | not scorable | not scorable | not scorable | not scorable | 1            | 0.7600495    |
| #### Bn-A10-p10132309 | A-genome specific (napus-rapa) | 0.9904306    | 0.4117742    | not scorable | not scorable | 0.9834711    | 0.7661763    |
| #### Bn-A10-p10133034 | A-genome specific (napus-rapa) | 0.9808612    | 0.7450195    | not scorable | not scorable | 0.9421487    | 0.6796404    |
| #### Bn-A10-p10134254 | A-genome specific (napus-rapa) | 0.9760765    | 0.7621386    | not scorable | not scorable | 0.9669421    | 0.7887194    |
| #### Bn-A10-p10134322 | A-genome specific (napus-rapa) | 0.9808612    | 0.7751637    | not scorable | not scorable | 0.9917355    | 0.7549881    |
| #### Bn-A10-p10141249 | A-genome specific (napus-rapa) | 0.9928229    | 0.5181701    | not scorable | not scorable | 0.9917355    | 0.800726     |
| #### Bn-A10-p10149557 | A-genome specific (napus-rapa) | 0.9784689    | 0.342492     | not scorable | not scorable | 0.9173554    | 0.575085     |
| #### Bn-A10-p10155781 | A-genome specific (napus-rapa) | 0.9760765    | 0.7705043    | not scorable | not scorable | 1            | 0.7383697    |
| #### Bn-A10-p10156893 | A-genome specific (napus-rapa) | 0.9832536    | 0.6213201    | not scorable | not scorable | 1            | 0.7589498    |
| #### Bn-A10-p10186330 | A-genome specific (napus-rapa) | 0.9641148    | 0.8323905    | not scorable | not scorable | 0.9504132    | 0.7684887    |
| #### Bn-A10-p10221610 | A-genome specific (napus-rapa) | 0.9282297    | 0.7442288    | not scorable | not scorable | 0.8595041    | 0.795408     |
| #### Bn-A10-p1023294  | A-genome specific (napus-rapa) | 0.9617225    | 0.3307208    | not scorable | not scorable | 1            | 0.7301422    |
| #### Bn-A10-p10244506 | A-genome specific (napus-rapa) | 0.9784689    | 0.4469684    | not scorable | not scorable | 0.9338843    | 0.7664899    |
| #### Bn-A10-p10244709 | A-genome specific (napus-rapa) | 1            | 0.4747376    | not scorable | not scorable | 0.9917355    | 0.7130499    |
| #### Bn-A10-p10245283 | A-genome specific (napus-rapa) | 0.4138756    | 0.8496375    | not scorable | not scorable | 0.9173554    | 0.7080396    |
| #### Bn-A10-p10251191 | A-genome specific (napus-rapa) | 0.9760765    | 0.496428     | not scorable | not scorable | 0.9834711    | 0.7695723    |
| #### Bn-A10-p10252741 | A-genome specific (napus-rapa) | 1            | 0.8263758    | not scorable | not scorable | 0.9917355    | 0.7149964    |
| #### Bn-A10-p10284834 | A-genome specific (napus-rapa) | 1            | 0.4975533    | not scorable | not scorable | 0.9917355    | 0.6955267    |
| #### Bn-A10-p10298013 | A-genome specific (napus-rapa) | 0.9832536    | 0.58255      | not scorable | not scorable | 0.9586777    | 0.6167286    |
| #### Bn-A10-p10327896 | A-genome specific (napus-rapa) | 0.9760765    | 0.7663139    | not scorable | not scorable | 1            | 0.8443965    |
| #### Bn-A10-p10328918 | A-genome specific (rapa only)  | not scorable | not scorable | not scorable | not scorable | 0.9917355    | 0.783982     |
| #### Bn-A10-p10331665 | A-genome specific (napus-rapa) | 0.9736842    | 0.4513459    | not scorable | not scorable | 0.9917355    | 0.7790642    |
| #### Bn-A10-p10346764 | A-genome specific (napus-rapa) | 0.9880383    | 0.3352933    | not scorable | not scorable | 0.9834711    | 0.5742965    |
| #### Bn-A10-p10361031 | A-genome specific (napus-rapa) | 0.9641148    | 0.3087012    | not scorable | not scorable | 0.9752066    | 0.6824595    |
| #### Bn-A10-p10374273 | A-genome specific (napus-rapa) | 0.9401914    | 0.5190056    | not scorable | not scorable | 0.9834711    | 0.8015306    |
| #### Bn-A10-p10374644 | A-genome specific (napus-rapa) | 0.9856459    | 0.2852402    | not scorable | not scorable | 1            | 0.7050514    |
| #### Bn-A10-p10375710 | A-genome specific (napus-rapa) | 0.9808612    | 0.6770898    | not scorable | not scorable | 0.9917355    | 0.8412496    |
| #### Bn-A10-p10379466 | A-genome specific (napus-rapa) | 0.9928229    | 0.8266035    | not scorable | not scorable | 0.9834711    | 0.6673796    |
| #### Bn-A10-p10381898 | napus specific                 | 0.9497608    | 0.8570575    | not scorable | not scorable | not scorable | not scorable |

|                       |                                |              |              |              |              |           |           |
|-----------------------|--------------------------------|--------------|--------------|--------------|--------------|-----------|-----------|
| #### Bn-A10-p10386159 | A-genome specific (napus-rapa) | 0.9736842    | 0.7740884    | not scorable | not scorable | 0.9917355 | 0.8370368 |
| #### Bn-A10-p10387954 | A-genome specific (napus-rapa) | 0.9856459    | 0.2944061    | not scorable | not scorable | 1         | 0.6424443 |
| #### Bn-A10-p10392191 | A-genome specific (napus-rapa) | 0.9832536    | 0.722245     | not scorable | not scorable | 0.9752066 | 0.6671888 |
| #### Bn-A10-p10394413 | A-genome specific (napus-rapa) | 0.9952153    | 0.8207402    | not scorable | not scorable | 0.9917355 | 0.7375805 |
| #### Bn-A10-p10395508 | genome unspecific (all in)     | 0.9904306    | 0.3973992    | 0.9922481    | 0.8068117    | 1         | 0.7811862 |
| #### Bn-A10-p10395990 | A-genome specific (napus-rapa) | 0.9617225    | 0.4865379    | not scorable | not scorable | 0.9834711 | 0.6656255 |
| #### Bn-A10-p1040224  | A-genome specific (napus-rapa) | 0.9593301    | 0.731583     | not scorable | not scorable | 1         | 0.6373847 |
| #### Bn-A10-p10402358 | A-genome specific (napus-rapa) | 0.9760765    | 0.4397999    | not scorable | not scorable | 0.9917355 | 0.8701526 |
| #### Bn-A10-p1041199  | A-genome specific (napus-rapa) | 0.9138756    | 0.6628361    | not scorable | not scorable | 0.9834711 | 0.6529854 |
| #### Bn-A10-p10423500 | A-genome specific (napus-rapa) | 0.9066986    | 0.7603302    | not scorable | not scorable | 0.9834711 | 0.762973  |
| #### Bn-A10-p10429303 | A-genome specific (rapa only)  | not scorable | not scorable | not scorable | not scorable | 1         | 0.7456264 |
| #### Bn-A10-p10445439 | A-genome specific (rapa only)  | not scorable | not scorable | not scorable | not scorable | 0.9834711 | 0.7764187 |
| #### Bn-A10-p10454385 | A-genome specific (napus-rapa) | 0.9880383    | 0.7613528    | not scorable | not scorable | 1         | 0.7162473 |
| #### Bn-A10-p10456395 | A-genome specific (napus-rapa) | 0.9545454    | 0.3878288    | not scorable | not scorable | 0.9917355 | 0.8287287 |
| #### Bn-A10-p10460400 | A-genome specific (napus-rapa) | 0.9928229    | 0.6978979    | not scorable | not scorable | 0.9834711 | 0.6737181 |
| #### Bn-A10-p10464159 | A-genome specific (napus-rapa) | 0.9808612    | 0.8286452    | not scorable | not scorable | 0.9752066 | 0.7576362 |
| #### Bn-A10-p10469649 | A-genome specific (rapa only)  | not scorable | not scorable | not scorable | not scorable | 0.9917355 | 0.7960496 |
| #### Bn-A10-p10485888 | A-genome specific (napus-rapa) | 1            | 0.577769     | not scorable | not scorable | 0.9834711 | 0.7296091 |
| #### Bn-A10-p10492266 | A-genome specific (napus-rapa) | 0.9760765    | 0.5439067    | not scorable | not scorable | 1         | 0.8062701 |
| #### Bn-A10-p10508795 | A-genome specific (napus-rapa) | 1            | 0.86197      | not scorable | not scorable | 0.9834711 | 0.7164841 |
| #### Bn-A10-p10509825 | A-genome specific (napus-rapa) | 0.9856459    | 0.7014778    | not scorable | not scorable | 1         | 0.7426529 |
| #### Bn-A10-p10516377 | A-genome specific (napus-rapa) | 0.9712918    | 0.5206734    | not scorable | not scorable | 0.9917355 | 0.7382931 |
| #### Bn-A10-p10527142 | A-genome specific (napus-rapa) | 0.9784689    | 0.3426733    | not scorable | not scorable | 1         | 0.7835189 |
| #### Bn-A10-p10540729 | A-genome specific (napus-rapa) | 0.9976076    | 0.4622889    | not scorable | not scorable | 0.9834711 | 0.7964111 |
| #### Bn-A10-p10555057 | A-genome specific (napus-rapa) | 0.9736842    | 0.3396207    | not scorable | not scorable | 0.9917355 | 0.7705864 |
| #### Bn-A10-p10562376 | A-genome specific (napus-rapa) | 0.8971292    | 0.7197289    | not scorable | not scorable | 0.9834711 | 0.7190322 |
| #### Bn-A10-p10562649 | A-genome specific (napus-rapa) | 0.9856459    | 0.7941719    | not scorable | not scorable | 0.9504132 | 0.78872   |
| #### Bn-A10-p10575106 | A-genome specific (napus-rapa) | 0.7799043    | 0.920304     | not scorable | not scorable | 0.9338843 | 0.6786534 |
| #### Bn-A10-p10576878 | A-genome specific (napus-rapa) | 0.9976076    | 0.8176753    | not scorable | not scorable | 1         | 0.7881677 |
| #### Bn-A10-p10588597 | A-genome specific (napus-rapa) | 0.9808612    | 0.4152611    | not scorable | not scorable | 0.9752066 | 0.6566663 |
| #### Bn-A10-p10613361 | A-genome specific (napus-rapa) | 0.9976076    | 0.7010332    | not scorable | not scorable | 1         | 0.7001985 |
| #### Bn-A10-p10647252 | A-genome specific (napus-rapa) | 0.9808612    | 0.7038931    | not scorable | not scorable | 0.9669421 | 0.7545079 |
| #### Bn-A10-p10651432 | A-genome specific (napus-rapa) | 0.9904306    | 0.7892098    | not scorable | not scorable | 1         | 0.7668716 |

|                       |                                   |              |              |              |              |              |              |
|-----------------------|-----------------------------------|--------------|--------------|--------------|--------------|--------------|--------------|
| #### Bn-A10-p10651872 | A-genome specific (rapa only)     | not scorable | not scorable | not scorable | not scorable | 1            | 0.7160246    |
| #### Bn-A10-p10652964 | A-genome specific (napus-rapa)    | 0.9688995    | 0.729795     | not scorable | not scorable | 0.5123967    | 0.7320327    |
| #### Bn-A10-p10654061 | A-genome specific (napus-rapa)    | 0.9952153    | 0.7922186    | not scorable | not scorable | 1            | 0.7481738    |
| #### Bn-A10-p10660780 | all not scorable                  | not scorable | not scorable | not scorable | not scorable | not scorable | not scorable |
| #### Bn-A10-p10668111 | A-genome specific (napus-rapa)    | 0.9856459    | 0.3339156    | not scorable | not scorable | 1            | 0.7549012    |
| #### Bn-A10-p10669303 | A-genome specific (napus-rapa)    | 0.9928229    | 0.7428257    | not scorable | not scorable | 0.9834711    | 0.7331651    |
| #### Bn-A10-p10671726 | A-genome specific (napus-rapa)    | 0.9569378    | 0.7254519    | not scorable | not scorable | 0.5289256    | 0.7390925    |
| #### Bn-A10-p10672359 | A-genome specific (napus-rapa)    | 0.9521531    | 0.7093201    | not scorable | not scorable | 0.5371901    | 0.8026639    |
| #### Bn-A10-p10672457 | A-genome specific (napus-rapa)    | 0.9521531    | 0.7531816    | not scorable | not scorable | 0.5206612    | 0.8521188    |
| #### Bn-A10-p10677237 | A-genome specific (napus-rapa)    | 0.9976076    | 0.6420892    | not scorable | not scorable | 0.9917355    | 0.6785457    |
| #### Bn-A10-p10680827 | A-genome specific (napus-rapa)    | 0.9928229    | 0.6836824    | not scorable | not scorable | 0.9917355    | 0.662024     |
| #### Bn-A10-p10691761 | genome unspecific (oleracea-rapa) | not scorable | not scorable | 0.9844961    | 0.7114617    | 1            | 0.8276608    |
| #### Bn-A10-p10700101 | A-genome specific (napus-rapa)    | 0.9952153    | 0.4677293    | not scorable | not scorable | 0.9752066    | 0.6987374    |
| #### Bn-A10-p10703469 | A-genome specific (napus-rapa)    | 0.9904306    | 0.7281541    | not scorable | not scorable | 0.9669421    | 0.684514     |
| #### Bn-A10-p10714593 | A-genome specific (napus-rapa)    | 0.9736842    | 0.6273991    | not scorable | not scorable | 0.9917355    | 0.7162572    |
| #### Bn-A10-p10717595 | genome unspecific (all in)        | 1            | 0.6988194    | 0.9612403    | 0.5839299    | 1            | 0.8141759    |
| #### Bn-A10-p10725779 | A-genome specific (napus-rapa)    | 0.9880383    | 0.7851217    | not scorable | not scorable | 0.9917355    | 0.7618891    |
| #### Bn-A10-p10726590 | A-genome specific (napus-rapa)    | 0.9473684    | 0.6162455    | not scorable | not scorable | 0.9752066    | 0.8177375    |
| #### Bn-A10-p10728078 | A-genome specific (napus-rapa)    | 0.9808612    | 0.3868105    | not scorable | not scorable | 1            | 0.6505589    |
| #### Bn-A10-p10748653 | A-genome specific (napus-rapa)    | 0.9665072    | 0.4390662    | not scorable | not scorable | 1            | 0.7100022    |
| #### Bn-A10-p10751752 | A-genome specific (napus-rapa)    | 0.9880383    | 0.329287     | not scorable | not scorable | 0.9834711    | 0.7681888    |
| #### Bn-A10-p10755216 | A-genome specific (napus-rapa)    | 0.9832536    | 0.7882491    | not scorable | not scorable | 0.9917355    | 0.8106359    |
| #### Bn-A10-p10764928 | A-genome specific (napus-rapa)    | 0.9928229    | 0.3572859    | not scorable | not scorable | 1            | 0.7735323    |
| #### Bn-A10-p10768736 | A-genome specific (rapa only)     | not scorable | not scorable | not scorable | not scorable | 1            | 0.8223547    |
| #### Bn-A10-p10777142 | A-genome specific (napus-rapa)    | 0.9952153    | 0.4863777    | not scorable | not scorable | 0.9917355    | 0.7825384    |
| #### Bn-A10-p10814517 | A-genome specific (napus-rapa)    | 1            | 0.5668473    | not scorable | not scorable | 1            | 0.8144157    |
| #### Bn-A10-p10828176 | A-genome specific (rapa only)     | not scorable | not scorable | not scorable | not scorable | 0.9917355    | 0.7830168    |
| #### Bn-A10-p10830979 | A-genome specific (napus-rapa)    | 1            | 0.8084481    | not scorable | not scorable | 0.9834711    | 0.779614     |
| #### Bn-A10-p10840792 | A-genome specific (napus-rapa)    | 0.9976076    | 0.4319952    | not scorable | not scorable | 0.9834711    | 0.6236287    |
| #### Bn-A10-p10847605 | napus specific                    | 0.8397129    | 0.5705976    | not scorable | not scorable | not scorable | not scorable |
| #### Bn-A10-p10848079 | A-genome specific (rapa only)     | not scorable | not scorable | not scorable | not scorable | 0.9917355    | 0.5044813    |
| #### Bn-A10-p10848415 | A-genome specific (napus-rapa)    | 0.8349282    | 0.6724958    | not scorable | not scorable | 1            | 0.7134259    |
| #### Bn-A10-p10866946 | A-genome specific (napus-rapa)    | 0.9904306    | 0.643258     | not scorable | not scorable | 0.9834711    | 0.6880914    |

|                       |                                |              |              |              |              |              |              |
|-----------------------|--------------------------------|--------------|--------------|--------------|--------------|--------------|--------------|
| #### Bn-A10-p10876460 | A-genome specific (napus-rapa) | 0.5550239    | 0.8420039    | not scorable | not scorable | 0.9586777    | 0.7752034    |
| #### Bn-A10-p10877049 | A-genome specific (napus-rapa) | 0.5          | 0.7154423    | not scorable | not scorable | 0.9834711    | 0.9137471    |
| #### Bn-A10-p10877107 | A-genome specific (napus-rapa) | 0.5382775    | 0.7896025    | not scorable | not scorable | 0.9586777    | 0.7940516    |
| #### Bn-A10-p10882669 | A-genome specific (rapa only)  | not scorable | not scorable | not scorable | not scorable | 1            | 0.8255701    |
| #### Bn-A10-p10891069 | A-genome specific (rapa only)  | not scorable | not scorable | not scorable | not scorable | 0.9917355    | 0.7956327    |
| #### Bn-A10-p10902810 | A-genome specific (napus-rapa) | 0.9665072    | 0.4943754    | not scorable | not scorable | 1            | 0.6597059    |
| #### Bn-A10-p10914713 | A-genome specific (napus-rapa) | 0.9976076    | 0.8917182    | not scorable | not scorable | 1            | 0.757384     |
| #### Bn-A10-p10918889 | A-genome specific (napus-rapa) | 1            | 0.527977     | not scorable | not scorable | 1            | 0.7899588    |
| #### Bn-A10-p10921712 | A-genome specific (napus-rapa) | 0.9952153    | 0.7398222    | not scorable | not scorable | 1            | 0.6002842    |
| #### Bn-A10-p10924342 | A-genome specific (napus-rapa) | 0.9856459    | 0.8042489    | not scorable | not scorable | 0.9917355    | 0.7419872    |
| #### Bn-A10-p10927965 | A-genome specific (napus-rapa) | 1            | 0.8948212    | not scorable | not scorable | 1            | 0.802115     |
| #### Bn-A10-p10936233 | genome unspecific (all in)     | 1            | 0.5716816    | 0.9767442    | 0.7091986    | 1            | 0.8206825    |
| #### Bn-A10-p10936559 | A-genome specific (napus-rapa) | 1            | 0.843452     | not scorable | not scorable | 1            | 0.7417137    |
| #### Bn-A10-p10949218 | A-genome specific (napus-rapa) | 1            | 0.3432468    | not scorable | not scorable | 0.9917355    | 0.738131     |
| #### Bn-A10-p10954176 | napus specific                 | 0.9688995    | 0.7286063    | not scorable | not scorable | not scorable | not scorable |
| #### Bn-A10-p10954641 | A-genome specific (rapa only)  | not scorable | not scorable | not scorable | not scorable | 0.661157     | 0.8332553    |
| #### Bn-A10-p10982591 | A-genome specific (napus-rapa) | 0.9688995    | 0.7688587    | not scorable | not scorable | 1            | 0.7190583    |
| #### Bn-A10-p10996646 | A-genome specific (napus-rapa) | 1            | 0.7571846    | not scorable | not scorable | 1            | 0.7228838    |
| #### Bn-A10-p10997884 | A-genome specific (napus-rapa) | 0.9449761    | 0.7674471    | not scorable | not scorable | 0.9917355    | 0.7875267    |
| #### Bn-A10-p110116   | A-genome specific (napus-rapa) | 0.9952153    | 0.8116007    | not scorable | not scorable | 1            | 0.8732033    |
| #### Bn-A10-p11038926 | A-genome specific (napus-rapa) | 1            | 0.652329     | not scorable | not scorable | 1            | 0.7099487    |
| #### Bn-A10-p11041623 | A-genome specific (napus-rapa) | 0.9808612    | 0.8304045    | not scorable | not scorable | 0.9917355    | 0.794216     |
| #### Bn-A10-p11042627 | A-genome specific (napus-rapa) | 0.9808612    | 0.8307937    | not scorable | not scorable | 0.9917355    | 0.7696369    |
| #### Bn-A10-p11043549 | A-genome specific (rapa only)  | not scorable | not scorable | not scorable | not scorable | 0.5619835    | 0.4240668    |
| #### Bn-A10-p11043924 | A-genome specific (napus-rapa) | 0.9976076    | 0.316981     | not scorable | not scorable | 0.9752066    | 0.4458539    |
| #### Bn-A10-p11048886 | A-genome specific (napus-rapa) | 0.9952153    | 0.4167039    | not scorable | not scorable | 0.9752066    | 0.6683031    |
| #### Bn-A10-p11052814 | A-genome specific (napus-rapa) | 1            | 0.4711       | not scorable | not scorable | 1            | 0.5544041    |
| #### Bn-A10-p11052877 | A-genome specific (napus-rapa) | 1            | 0.4787823    | not scorable | not scorable | 1            | 0.5287368    |
| #### Bn-A10-p11059267 | A-genome specific (napus-rapa) | 1            | 0.5298907    | not scorable | not scorable | 1            | 0.7345095    |
| #### Bn-A10-p11064857 | A-genome specific (napus-rapa) | 1            | 0.5396132    | not scorable | not scorable | 1            | 0.7807286    |
| #### Bn-A10-p11075240 | A-genome specific (napus-rapa) | 0.9760765    | 0.7744071    | not scorable | not scorable | 1            | 0.6854999    |
| #### Bn-A10-p11082862 | A-genome specific (napus-rapa) | 0.9569378    | 0.3537498    | not scorable | not scorable | 1            | 0.6966668    |
| #### Bn-A10-p1108975  | A-genome specific (napus-rapa) | 0.9832536    | 0.3417439    | not scorable | not scorable | 0.9834711    | 0.8314693    |

|                       |                                |              |              |              |              |              |              |
|-----------------------|--------------------------------|--------------|--------------|--------------|--------------|--------------|--------------|
| #### Bn-A10-p11093167 | A-genome specific (napus-rapa) | 0.9880383    | 0.3333955    | not scorable | not scorable | 0.9834711    | 0.8018882    |
| #### Bn-A10-p11105998 | A-genome specific (napus-rapa) | 0.9760765    | 0.7727542    | not scorable | not scorable | 0.9834711    | 0.8258233    |
| #### Bn-A10-p11107162 | A-genome specific (napus-rapa) | 0.9976076    | 0.6449797    | not scorable | not scorable | 1            | 0.7894644    |
| #### Bn-A10-p11120420 | A-genome specific (napus-rapa) | 0.9617225    | 0.5197899    | not scorable | not scorable | 0.9917355    | 0.8841643    |
| #### Bn-A10-p11122156 | all not scorable               | not scorable | not scorable | not scorable | not scorable | not scorable | not scorable |
| #### Bn-A10-p11125092 | A-genome specific (napus-rapa) | 0.9760765    | 0.4653145    | not scorable | not scorable | 0.9256198    | 0.7416162    |
| #### Bn-A10-p11131283 | A-genome specific (napus-rapa) | 0.9641148    | 0.7846481    | not scorable | not scorable | 0.9834711    | 0.7138177    |
| #### Bn-A10-p11132656 | A-genome specific (napus-rapa) | 0.9928229    | 0.7252181    | not scorable | not scorable | 1            | 0.9175813    |
| #### Bn-A10-p11138874 | A-genome specific (napus-rapa) | 0.9186603    | 0.7631082    | not scorable | not scorable | 0.9834711    | 0.6402504    |
| #### Bn-A10-p11169419 | A-genome specific (napus-rapa) | 0.9976076    | 0.4402867    | not scorable | not scorable | 0.9256198    | 0.5520991    |
| #### Bn-A10-p11183840 | A-genome specific (napus-rapa) | 1            | 0.3570361    | not scorable | not scorable | 0.9834711    | 0.7621475    |
| #### Bn-A10-p11192168 | A-genome specific (napus-rapa) | 1            | 0.6206563    | not scorable | not scorable | 0.9917355    | 0.7309704    |
| #### Bn-A10-p11201481 | A-genome specific (napus-rapa) | 0.9880383    | 0.7651185    | not scorable | not scorable | 1            | 0.7734983    |
| #### Bn-A10-p11221861 | A-genome specific (napus-rapa) | 0.9641148    | 0.573195     | not scorable | not scorable | 1            | 0.6852363    |
| #### Bn-A10-p11230418 | A-genome specific (napus-rapa) | 0.9808612    | 0.6612899    | not scorable | not scorable | 0.9917355    | 0.6878793    |
| #### Bn-A10-p1123189  | A-genome specific (napus-rapa) | 1            | 0.7726768    | not scorable | not scorable | 1            | 0.773996     |
| #### Bn-A10-p11238287 | genome unspecific (all in)     | 0.9928229    | 0.3677918    | 0.9922481    | 0.7290037    | 1            | 0.8462282    |
| #### Bn-A10-p112405   | A-genome specific (napus-rapa) | 0.9952153    | 0.8437856    | not scorable | not scorable | 0.9752066    | 0.7358652    |
| #### Bn-A10-p1125100  | A-genome specific (napus-rapa) | 0.9952153    | 0.7524986    | not scorable | not scorable | 1            | 0.7669923    |
| #### Bn-A10-p1125156  | A-genome specific (napus-rapa) | 0.9641148    | 0.6412609    | not scorable | not scorable | 0.9256198    | 0.6522061    |
| #### Bn-A10-p11253262 | A-genome specific (rapa only)  | not scorable | not scorable | not scorable | not scorable | 0.9834711    | 0.8027313    |
| #### Bn-A10-p11260826 | A-genome specific (napus-rapa) | 0.9760765    | 0.4923214    | not scorable | not scorable | 1            | 0.7356893    |
| #### Bn-A10-p112610   | A-genome specific (napus-rapa) | 0.9952153    | 0.5852603    | not scorable | not scorable | 0.9917355    | 0.580194     |
| #### Bn-A10-p11268601 | A-genome specific (napus-rapa) | 1            | 0.8333248    | not scorable | not scorable | 0.9917355    | 0.8496676    |
| #### Bn-A10-p11272184 | A-genome specific (napus-rapa) | 0.9928229    | 0.4467996    | not scorable | not scorable | 1            | 0.8227564    |
| #### Bn-A10-p112852   | A-genome specific (napus-rapa) | 0.9952153    | 0.7889045    | not scorable | not scorable | 1            | 0.8225392    |
| #### Bn-A10-p11297252 | A-genome specific (rapa only)  | not scorable | not scorable | not scorable | not scorable | 0.9917355    | 0.7772287    |
| #### Bn-A10-p11299415 | A-genome specific (napus-rapa) | 0.9976076    | 0.8692951    | not scorable | not scorable | 0.9917355    | 0.8267455    |
| #### Bn-A10-p11302032 | A-genome specific (napus-rapa) | 0.930622     | 0.5762539    | not scorable | not scorable | 0.9752066    | 0.8143751    |
| #### Bn-A10-p11311329 | A-genome specific (napus-rapa) | 0.9856459    | 0.7832028    | not scorable | not scorable | 1            | 0.7492932    |
| #### Bn-A10-p11311425 | A-genome specific (napus-rapa) | 0.9976076    | 0.8337647    | not scorable | not scorable | 0.9917355    | 0.6973467    |
| #### Bn-A10-p11312705 | A-genome specific (napus-rapa) | 1            | 0.4635239    | not scorable | not scorable | 1            | 0.5832156    |
| #### Bn-A10-p1131424  | A-genome specific (napus-rapa) | 0.9808612    | 0.7609718    | not scorable | not scorable | 0.9917355    | 0.7415131    |





|                       |                                |              |              |              |              |              |              |
|-----------------------|--------------------------------|--------------|--------------|--------------|--------------|--------------|--------------|
| #### Bn-A10-p11601681 | A-genome specific (napus-rapa) | 0.9880383    | 0.7961137    | not scorable | not scorable | 0.9917355    | 0.6978017    |
| #### Bn-A10-p11607526 | A-genome specific (napus-rapa) | 0.9880383    | 0.7461382    | not scorable | not scorable | 0.9917355    | 0.7391928    |
| #### Bn-A10-p11608926 | A-genome specific (napus-rapa) | 0.9832536    | 0.7562108    | not scorable | not scorable | 0.9917355    | 0.7828956    |
| #### Bn-A10-p11608969 | A-genome specific (napus-rapa) | 0.9880383    | 0.7998698    | not scorable | not scorable | 0.9834711    | 0.8007368    |
| #### Bn-A10-p11609327 | A-genome specific (napus-rapa) | 0.9832536    | 0.7816483    | not scorable | not scorable | 0.9834711    | 0.7267652    |
| #### Bn-A10-p1161115  | A-genome specific (napus-rapa) | 0.9808612    | 0.7890448    | not scorable | not scorable | 0.9752066    | 0.7409177    |
| #### Bn-A10-p11613529 | A-genome specific (napus-rapa) | 0.9880383    | 0.4857231    | not scorable | not scorable | 1            | 0.7691175    |
| #### Bn-A10-p1162422  | A-genome specific (napus-rapa) | 0.9808612    | 0.580083     | not scorable | not scorable | 0.9834711    | 0.6746724    |
| #### Bn-A10-p1162937  | A-genome specific (napus-rapa) | 0.9952153    | 0.8103128    | not scorable | not scorable | 0.9917355    | 0.6836009    |
| #### Bn-A10-p11637678 | A-genome specific (napus-rapa) | 0.9736842    | 0.7635987    | not scorable | not scorable | 0.9917355    | 0.827836     |
| #### Bn-A10-p11637847 | A-genome specific (napus-rapa) | 0.9880383    | 0.7910042    | not scorable | not scorable | 0.9669421    | 0.6971117    |
| #### Bn-A10-p11639214 | A-genome specific (napus-rapa) | 0.9832536    | 0.7989914    | not scorable | not scorable | 1            | 0.7914277    |
| #### Bn-A10-p11643022 | A-genome specific (rapa only)  | not scorable | not scorable | not scorable | not scorable | 0.9917355    | 0.8406091    |
| #### Bn-A10-p11649398 | A-genome specific (napus-rapa) | 0.9832536    | 0.3845879    | not scorable | not scorable | 0.9834711    | 0.6765655    |
| #### Bn-A10-p11656890 | A-genome specific (napus-rapa) | 0.9952153    | 0.5340304    | not scorable | not scorable | 1            | 0.7401044    |
| #### Bn-A10-p1166564  | all not scorable               | not scorable | not scorable | not scorable | not scorable | not scorable | not scorable |
| #### Bn-A10-p11704587 | A-genome specific (napus-rapa) | 1            | 0.6622275    | not scorable | not scorable | 1            | 0.6475449    |
| #### Bn-A10-p11723249 | A-genome specific (napus-rapa) | 0.9952153    | 0.3361854    | not scorable | not scorable | 1            | 0.6566479    |
| #### Bn-A10-p1172344  | A-genome specific (napus-rapa) | 0.9880383    | 0.7224445    | not scorable | not scorable | 0.9834711    | 0.7355546    |
| #### Bn-A10-p11723882 | genome unspecific (all in)     | 0.9928229    | 0.4641909    |              | 1 0.7502124  | 1            | 0.7031322    |
| #### Bn-A10-p11744746 | A-genome specific (napus-rapa) | 0.9904306    | 0.2725559    | not scorable | not scorable | 0.9834711    | 0.6302253    |
| #### Bn-A10-p11745226 | A-genome specific (napus-rapa) | 0.9976076    | 0.5216055    | not scorable | not scorable | 0.9917355    | 0.7367527    |
| #### Bn-A10-p11749802 | A-genome specific (napus-rapa) | 0.9952153    | 0.850344     | not scorable | not scorable | 0.9752066    | 0.7388744    |
| #### Bn-A10-p11749987 | A-genome specific (napus-rapa) | 0.9976076    | 0.9020887    | not scorable | not scorable | 0.9669421    | 0.7444674    |
| #### Bn-A10-p11759698 | A-genome specific (napus-rapa) | 0.9928229    | 0.4363398    | not scorable | not scorable | 0.9752066    | 0.7403231    |
| #### Bn-A10-p11765520 | A-genome specific (napus-rapa) | 0.9880383    | 0.4761708    | not scorable | not scorable | 0.5123967    | 0.7195455    |
| #### Bn-A10-p11777344 | A-genome specific (napus-rapa) | 0.9952153    | 0.4806269    | not scorable | not scorable | 1            | 0.8644955    |
| #### Bn-A10-p11783750 | A-genome specific (napus-rapa) | 0.9138756    | 0.6419535    | not scorable | not scorable | 0.9917355    | 0.6735023    |
| #### Bn-A10-p11789263 | A-genome specific (napus-rapa) | 0.8947368    | 0.7522335    | not scorable | not scorable | 1            | 0.7140875    |
| #### Bn-A10-p11814912 | all not scorable               | not scorable | not scorable | not scorable | not scorable | not scorable | not scorable |
| #### Bn-A10-p11817272 | A-genome specific (napus-rapa) | 0.9952153    | 0.6819038    | not scorable | not scorable | 0.9834711    | 0.6746857    |
| #### Bn-A10-p11819120 | A-genome specific (napus-rapa) | 0.9952153    | 0.7520964    | not scorable | not scorable | 0.9669421    | 0.790121     |
| #### Bn-A10-p11822315 | A-genome specific (napus-rapa) | 0.9832536    | 0.7007366    | not scorable | not scorable | 0.9834711    | 0.585025     |

|                       |                                |              |              |              |              |              |              |
|-----------------------|--------------------------------|--------------|--------------|--------------|--------------|--------------|--------------|
| #### Bn-A10-p11826776 | A-genome specific (napus-rapa) | 0.9832536    | 0.4361236    | not scorable | not scorable | 0.9752066    | 0.7180929    |
| #### Bn-A10-p11831091 | A-genome specific (napus-rapa) | 0.9928229    | 0.6827702    | not scorable | not scorable | 0.9917355    | 0.6631168    |
| #### Bn-A10-p11834103 | A-genome specific (rapa only)  | not scorable | not scorable | not scorable | not scorable | 1            | 0.8106006    |
| #### Bn-A10-p11839709 | A-genome specific (napus-rapa) | 0.9665072    | 0.7313429    | not scorable | not scorable | 0.9917355    | 0.7370891    |
| #### Bn-A10-p11839863 | A-genome specific (napus-rapa) | 0.9952153    | 0.7603857    | not scorable | not scorable | 0.9917355    | 0.7534353    |
| #### Bn-A10-p11839950 | A-genome specific (napus-rapa) | 0.9808612    | 0.7320411    | not scorable | not scorable | 0.9917355    | 0.7503242    |
| #### Bn-A10-p11843630 | A-genome specific (napus-rapa) | 0.9832536    | 0.7564083    | not scorable | not scorable | 0.9669421    | 0.781332     |
| #### Bn-A10-p11850386 | A-genome specific (napus-rapa) | 0.9784689    | 0.7300818    | not scorable | not scorable | 1            | 0.6581514    |
| #### Bn-A10-p11850829 | A-genome specific (napus-rapa) | 0.9832536    | 0.8111178    | not scorable | not scorable | 1            | 0.7471668    |
| #### Bn-A10-p11858346 | A-genome specific (napus-rapa) | 0.9521531    | 0.4987463    | not scorable | not scorable | 0.9917355    | 0.7736661    |
| #### Bn-A10-p11871893 | A-genome specific (napus-rapa) | 0.9832536    | 0.5052227    | not scorable | not scorable | 0.9834711    | 0.6868028    |
| #### Bn-A10-p11874688 | A-genome specific (napus-rapa) | 0.9688995    | 0.5478034    | not scorable | not scorable | 1            | 0.7479799    |
| #### Bn-A10-p1187541  | A-genome specific (napus-rapa) | 0.9952153    | 0.7777434    | not scorable | not scorable | 1            | 0.7817719    |
| #### Bn-A10-p11883432 | A-genome specific (napus-rapa) | 0.9043062    | 0.6636202    | not scorable | not scorable | 0.5289256    | 0.8207097    |
| #### Bn-A10-p11883855 | napus specific                 | 0.8995215    | 0.6293705    | not scorable | not scorable | not scorable | not scorable |
| #### Bn-A10-p11888837 | genome unspecific (all in)     | 0.9976076    | 0.4964076    |              | 1            | 0.7283961    | 0.9752066    |
| #### Bn-A10-p11894540 | A-genome specific (rapa only)  | not scorable | not scorable | not scorable | not scorable | 1            | 0.7491125    |
| #### Bn-A10-p11906064 | A-genome specific (napus-rapa) | 0.9593301    | 0.583111     | not scorable | not scorable | 1            | 0.7090961    |
| #### Bn-A10-p11908544 | A-genome specific (napus-rapa) | 0.9976076    | 0.9052103    | not scorable | not scorable | 0.9917355    | 0.8068888    |
| #### Bn-A10-p11914509 | A-genome specific (napus-rapa) | 0.9617225    | 0.9454458    | not scorable | not scorable | 0.9752066    | 0.7044402    |
| #### Bn-A10-p11918400 | A-genome specific (napus-rapa) | 0.9712918    | 0.7878854    | not scorable | not scorable | 0.9834711    | 0.7901261    |
| #### Bn-A10-p1193336  | A-genome specific (napus-rapa) | 0.9928229    | 0.7273038    | not scorable | not scorable | 1            | 0.6605548    |
| #### Bn-A10-p11933992 | A-genome specific (napus-rapa) | 0.9976076    | 0.8384073    | not scorable | not scorable | 0.9752066    | 0.7808607    |
| #### Bn-A10-p1194688  | A-genome specific (napus-rapa) | 0.9928229    | 0.7957367    | not scorable | not scorable | 0.9917355    | 0.7868598    |
| #### Bn-A10-p119498   | A-genome specific (napus-rapa) | 0.9976076    | 0.788599     | not scorable | not scorable | 1            | 0.7966291    |
| #### Bn-A10-p11961507 | A-genome specific (napus-rapa) | 0.9449761    | 0.4669483    | not scorable | not scorable | 0.9917355    | 0.7364947    |
| #### Bn-A10-p1196851  | A-genome specific (napus-rapa) | 0.9928229    | 0.7681983    | not scorable | not scorable | 1            | 0.7696324    |
| #### Bn-A10-p119690   | A-genome specific (napus-rapa) | 0.9928229    | 0.8054243    | not scorable | not scorable | 1            | 0.8744386    |
| #### Bn-A10-p11980796 | A-genome specific (rapa only)  | not scorable | not scorable | not scorable | not scorable | 0.9917355    | 0.7145358    |
| #### Bn-A10-p11986942 | A-genome specific (rapa only)  | not scorable | not scorable | not scorable | not scorable | 1            | 0.7697211    |
| #### Bn-A10-p11995663 | A-genome specific (napus-rapa) | 0.9473684    | 0.8560527    | not scorable | not scorable | 1            | 0.8872645    |
| #### Bn-A10-p12000106 | A-genome specific (napus-rapa) | 0.9808612    | 0.4823523    | not scorable | not scorable | 1            | 0.7782255    |
| #### Bn-A10-p12014652 | A-genome specific (napus-rapa) | 0.9688995    | 0.7858595    | not scorable | not scorable | 0.9917355    | 0.6069065    |

|                       |                                |              |              |              |              |           |           |
|-----------------------|--------------------------------|--------------|--------------|--------------|--------------|-----------|-----------|
| #### Bn-A10-p12021448 | A-genome specific (napus-rapa) | 1            | 0.6003959    | not scorable | not scorable | 0.9917355 | 0.7337224 |
| #### Bn-A10-p12065852 | A-genome specific (napus-rapa) | 0.9880383    | 0.3852561    | not scorable | not scorable | 0.9834711 | 0.7623109 |
| #### Bn-A10-p12066688 | A-genome specific (napus-rapa) | 0.9736842    | 0.7352507    | not scorable | not scorable | 0.9421487 | 0.8477515 |
| #### Bn-A10-p12066927 | A-genome specific (napus-rapa) | 0.9760765    | 0.7777713    | not scorable | not scorable | 0.9669421 | 0.7550972 |
| #### Bn-A10-p12067020 | A-genome specific (napus-rapa) | 0.9665072    | 0.7713618    | not scorable | not scorable | 0.9669421 | 0.8400418 |
| #### Bn-A10-p12067206 | A-genome specific (napus-rapa) | 0.9712918    | 0.7908966    | not scorable | not scorable | 0.9421487 | 0.7049029 |
| #### Bn-A10-p12067415 | A-genome specific (napus-rapa) | 0.9880383    | 0.7448215    | not scorable | not scorable | 1         | 0.7589557 |
| #### Bn-A10-p12067474 | A-genome specific (napus-rapa) | 0.9856459    | 0.7746813    | not scorable | not scorable | 1         | 0.7202193 |
| #### Bn-A10-p12072376 | A-genome specific (napus-rapa) | 0.9688995    | 0.8156497    | not scorable | not scorable | 0.9669421 | 0.6798559 |
| #### Bn-A10-p12072631 | A-genome specific (napus-rapa) | 0.9904306    | 0.7242453    | not scorable | not scorable | 1         | 0.7911373 |
| #### Bn-A10-p12072657 | A-genome specific (napus-rapa) | 0.9880383    | 0.6680128    | not scorable | not scorable | 0.9834711 | 0.6344033 |
| #### Bn-A10-p12099007 | A-genome specific (napus-rapa) | 0.9904306    | 0.8095888    | not scorable | not scorable | 0.9421487 | 0.8689758 |
| #### Bn-A10-p12099059 | A-genome specific (napus-rapa) | 0.9904306    | 0.7389055    | not scorable | not scorable | 0.9421487 | 0.6988599 |
| #### Bn-A10-p12099302 | A-genome specific (napus-rapa) | 0.9904306    | 0.7309546    | not scorable | not scorable | 0.9421487 | 0.2296474 |
| #### Bn-A10-p1215039  | A-genome specific (napus-rapa) | 0.9856459    | 0.6010439    | not scorable | not scorable | 0.9752066 | 0.7934735 |
| #### Bn-A10-p1215054  | A-genome specific (napus-rapa) | 0.9976076    | 0.8269934    | not scorable | not scorable | 0.9669421 | 0.6387163 |
| #### Bn-A10-p12198293 | A-genome specific (rapa only)  | not scorable | not scorable | not scorable | not scorable | 0.9917355 | 0.8135551 |
| #### Bn-A10-p12201411 | A-genome specific (napus-rapa) | 0.9904306    | 0.2733431    | not scorable | not scorable | 0.9917355 | 0.6777368 |
| #### Bn-A10-p12205899 | A-genome specific (napus-rapa) | 1            | 0.7168892    | not scorable | not scorable | 1         | 0.7739488 |
| #### Bn-A10-p12214779 | A-genome specific (napus-rapa) | 0.9952153    | 0.6026782    | not scorable | not scorable | 1         | 0.8979173 |
| #### Bn-A10-p12225681 | A-genome specific (napus-rapa) | 0.9976076    | 0.8335385    | not scorable | not scorable | 0.9917355 | 0.7561488 |
| #### Bn-A10-p12226123 | A-genome specific (napus-rapa) | 0.9976076    | 0.8187407    | not scorable | not scorable | 1         | 0.9515135 |
| #### Bn-A10-p12231523 | A-genome specific (napus-rapa) | 0.9976076    | 0.6929074    | not scorable | not scorable | 0.9752066 | 0.6848933 |
| #### Bn-A10-p12297280 | A-genome specific (napus-rapa) | 0.9688995    | 0.531593     | not scorable | not scorable | 0.9917355 | 0.7130447 |
| #### Bn-A10-p12307115 | A-genome specific (napus-rapa) | 0.9569378    | 0.4021088    | not scorable | not scorable | 0.9917355 | 0.6341668 |
| #### Bn-A10-p12308946 | A-genome specific (napus-rapa) | 0.9593301    | 0.8220717    | not scorable | not scorable | 0.9752066 | 0.7453101 |
| #### Bn-A10-p12311753 | A-genome specific (napus-rapa) | 0.9688995    | 0.7455535    | not scorable | not scorable | 1         | 0.8330376 |
| #### Bn-A10-p12311817 | A-genome specific (napus-rapa) | 0.9688995    | 0.7587919    | not scorable | not scorable | 0.9834711 | 0.7604743 |
| #### Bn-A10-p12313235 | A-genome specific (napus-rapa) | 0.9712918    | 0.7070759    | not scorable | not scorable | 0.9917355 | 0.682309  |
| #### Bn-A10-p12313613 | A-genome specific (napus-rapa) | 0.9593301    | 0.7309594    | not scorable | not scorable | 1         | 0.784576  |
| #### Bn-A10-p12315853 | A-genome specific (napus-rapa) | 0.9569378    | 0.7169254    | not scorable | not scorable | 0.9917355 | 0.8066399 |
| #### Bn-A10-p12315948 | A-genome specific (napus-rapa) | 0.9593301    | 0.7253484    | not scorable | not scorable | 0.9917355 | 0.8274917 |
| #### Bn-A10-p12316390 | A-genome specific (napus-rapa) | 0.9760765    | 0.6841053    | not scorable | not scorable | 0.9917355 | 0.7623163 |

|                       |                                |              |              |              |              |              |              |
|-----------------------|--------------------------------|--------------|--------------|--------------|--------------|--------------|--------------|
| #### Bn-A10-p12316420 | A-genome specific (napus-rapa) | 0.9641148    | 0.7145146    | not scorable | not scorable | 0.9834711    | 0.7691226    |
| #### Bn-A10-p12316487 | A-genome specific (napus-rapa) | 0.9641148    | 0.7163997    | not scorable | not scorable | 1            | 0.7568363    |
| #### Bn-A10-p12316874 | A-genome specific (napus-rapa) | 0.9665072    | 0.5878552    | not scorable | not scorable | 1            | 0.7921001    |
| #### Bn-A10-p12316900 | A-genome specific (napus-rapa) | 0.9712918    | 0.7462154    | not scorable | not scorable | 0.9917355    | 0.7956853    |
| #### Bn-A10-p12317050 | A-genome specific (napus-rapa) | 0.9593301    | 0.5348912    | not scorable | not scorable | 0.9834711    | 0.7488373    |
| #### Bn-A10-p12317263 | A-genome specific (napus-rapa) | 0.9712918    | 0.750119     | not scorable | not scorable | 1            | 0.854561     |
| #### Bn-A10-p12318696 | A-genome specific (napus-rapa) | 0.9712918    | 0.6963564    | not scorable | not scorable | 0.9834711    | 0.7583887    |
| #### Bn-A10-p12322873 | A-genome specific (napus-rapa) | 0.9545454    | 0.6994408    | not scorable | not scorable | 0.9834711    | 0.7490203    |
| #### Bn-A10-p12324365 | A-genome specific (napus-rapa) | 0.9808612    | 0.7541033    | not scorable | not scorable | 0.9834711    | 0.7527182    |
| #### Bn-A10-p12326585 | A-genome specific (napus-rapa) | 0.9904306    | 0.761795     | not scorable | not scorable | 1            | 0.919915     |
| #### Bn-A10-p12330918 | A-genome specific (napus-rapa) | 0.9808612    | 0.7880577    | not scorable | not scorable | 0.9834711    | 0.7846166    |
| #### Bn-A10-p12331294 | A-genome specific (napus-rapa) | 0.9736842    | 0.7543571    | not scorable | not scorable | 1            | 0.7480881    |
| #### Bn-A10-p12331790 | A-genome specific (napus-rapa) | 0.9880383    | 0.7872478    | not scorable | not scorable | 0.9752066    | 0.6762734    |
| #### Bn-A10-p12353464 | A-genome specific (napus-rapa) | 0.9521531    | 0.5564815    | not scorable | not scorable | 1            | 0.6619625    |
| #### Bn-A10-p12366655 | A-genome specific (napus-rapa) | 0.9904306    | 0.693218     | not scorable | not scorable | 1            | 0.7232493    |
| #### Bn-A10-p12368127 | A-genome specific (napus-rapa) | 0.9593301    | 0.3720435    | not scorable | not scorable | 1            | 0.6248851    |
| #### Bn-A10-p12382686 | A-genome specific (napus-rapa) | 0.9904306    | 0.5378358    | not scorable | not scorable | 1            | 0.781629     |
| #### Bn-A10-p12439754 | A-genome specific (napus-rapa) | 1            | 0.35042      | not scorable | not scorable | 1            | 0.7929158    |
| #### Bn-A10-p12463322 | genome unspecific (all in)     | 0.930622     | 0.7866653    |              | 1 0.7954347  | 0.9421487    | 0.8040135    |
| #### Bn-A10-p12465530 | A-genome specific (napus-rapa) | 0.9066986    | 0.5910962    | not scorable | not scorable | 0.9504132    | 0.7799243    |
| #### Bn-A10-p12485323 | A-genome specific (napus-rapa) | 0.9784689    | 0.5015084    | not scorable | not scorable | 0.9917355    | 0.819798     |
| #### Bn-A10-p12491298 | A-genome specific (napus-rapa) | 0.9784689    | 0.7433728    | not scorable | not scorable | 0.9834711    | 0.7392732    |
| #### Bn-A10-p12491610 | A-genome specific (napus-rapa) | 0.9736842    | 0.7663167    | not scorable | not scorable | 1            | 0.7038922    |
| #### Bn-A10-p12492845 | A-genome specific (napus-rapa) | 0.9904306    | 0.7974178    | not scorable | not scorable | 0.9917355    | 0.6683089    |
| #### Bn-A10-p12494650 | A-genome specific (napus-rapa) | 0.9473684    | 0.6117191    | not scorable | not scorable | 0.9834711    | 0.5945355    |
| #### Bn-A10-p12501815 | A-genome specific (napus-rapa) | 0.9928229    | 0.749154     | not scorable | not scorable | 0.9752066    | 0.674348     |
| #### Bn-A10-p12574115 | A-genome specific (napus-rapa) | 0.9569378    | 0.7554882    | not scorable | not scorable | 0.9917355    | 0.7773839    |
| #### Bn-A10-p12574211 | A-genome specific (napus-rapa) | 0.9665072    | 0.2872854    | not scorable | not scorable | 0.9917355    | 0.6768278    |
| #### Bn-A10-p12584468 | all not scorable               | not scorable | not scorable | not scorable | not scorable | not scorable | not scorable |
| #### Bn-A10-p12597952 | A-genome specific (napus-rapa) | 0.9521531    | 0.5415794    | not scorable | not scorable | 1            | 0.6146118    |
| #### Bn-A10-p12603365 | A-genome specific (napus-rapa) | 0.9736842    | 0.7372676    | not scorable | not scorable | 0.9752066    | 0.7866122    |
| #### Bn-A10-p12604580 | A-genome specific (napus-rapa) | 0.9904306    | 0.8238515    | not scorable | not scorable | 1            | 0.6783049    |
| #### Bn-A10-p12611994 | A-genome specific (napus-rapa) | 0.9952153    | 0.463181     | not scorable | not scorable | 1            | 0.7975641    |

|                       |                                   |              |              |              |              |           |           |
|-----------------------|-----------------------------------|--------------|--------------|--------------|--------------|-----------|-----------|
| #### Bn-A10-p126180   | A-genome specific (napus-rapa)    | 1            | 0.4791024    | not scorable | not scorable | 0.9917355 | 0.8028389 |
| #### Bn-A10-p12627247 | A-genome specific (napus-rapa)    | 0.9808612    | 0.7968231    | not scorable | not scorable | 1         | 0.8007799 |
| #### Bn-A10-p12631480 | A-genome specific (napus-rapa)    | 0.9856459    | 0.7443985    | not scorable | not scorable | 1         | 0.8054837 |
| #### Bn-A10-p12631706 | A-genome specific (napus-rapa)    | 0.9880383    | 0.7223469    | not scorable | not scorable | 1         | 0.6849554 |
| #### Bn-A10-p12632289 | A-genome specific (napus-rapa)    | 0.9784689    | 0.8071901    | not scorable | not scorable | 1         | 0.7463034 |
| #### Bn-A10-p12633352 | A-genome specific (napus-rapa)    | 0.9784689    | 0.702957     | not scorable | not scorable | 1         | 0.7637197 |
| #### Bn-A10-p12633469 | A-genome specific (napus-rapa)    | 0.9832536    | 0.7510178    | not scorable | not scorable | 1         | 0.7142768 |
| #### Bn-A10-p12633663 | A-genome specific (napus-rapa)    | 0.9904306    | 0.7731478    | not scorable | not scorable | 1         | 0.7505519 |
| #### Bn-A10-p12637008 | A-genome specific (napus-rapa)    | 0.9760765    | 0.7370013    | not scorable | not scorable | 0.9834711 | 0.7257587 |
| #### Bn-A10-p12639538 | A-genome specific (napus-rapa)    | 0.9928229    | 0.7836755    | not scorable | not scorable | 1         | 0.6916301 |
| #### Bn-A10-p1264986  | A-genome specific (rapa only)     | not scorable | not scorable | not scorable | not scorable | 0.9752066 | 0.791843  |
| #### Bn-A10-p12680158 | A-genome specific (napus-rapa)    | 0.9952153    | 0.8055664    | not scorable | not scorable | 1         | 0.7812058 |
| #### Bn-A10-p12680466 | A-genome specific (napus-rapa)    | 0.9712918    | 0.6313232    | not scorable | not scorable | 1         | 0.7440146 |
| #### Bn-A10-p1268549  | A-genome specific (napus-rapa)    | 0.9760765    | 0.5593054    | not scorable | not scorable | 1         | 0.7682431 |
| #### Bn-A10-p12690502 | A-genome specific (napus-rapa)    | 0.9736842    | 0.448013     | not scorable | not scorable | 1         | 0.7994043 |
| #### Bn-A10-p1269116  | genome unspecific (oleracea-rapa) | not scorable | not scorable | 0.9922481    | 0.6755672    | 1         | 0.4472867 |
| #### Bn-A10-p12714738 | A-genome specific (napus-rapa)    | 0.9665072    | 0.3973124    | not scorable | not scorable | 1         | 0.8738275 |
| #### Bn-A10-p12718710 | A-genome specific (napus-rapa)    | 0.9856459    | 0.6628273    | not scorable | not scorable | 1         | 0.6721754 |
| #### Bn-A10-p12727662 | A-genome specific (napus-rapa)    | 0.9904306    | 0.4168678    | not scorable | not scorable | 1         | 0.7785044 |
| #### Bn-A10-p1273491  | A-genome specific (napus-rapa)    | 0.9856459    | 0.754757     | not scorable | not scorable | 0.9669421 | 0.6734463 |
| #### Bn-A10-p12742934 | A-genome specific (napus-rapa)    | 0.9952153    | 0.3973567    | not scorable | not scorable | 0.9917355 | 0.2122694 |
| #### Bn-A10-p12770346 | A-genome specific (rapa only)     | not scorable | not scorable | not scorable | not scorable | 0.9917355 | 0.7153614 |
| #### Bn-A10-p12774471 | A-genome specific (napus-rapa)    | 0.9880383    | 0.4038556    | not scorable | not scorable | 1         | 0.7373362 |
| #### Bn-A10-p12789615 | A-genome specific (napus-rapa)    | 0.9928229    | 0.7479427    | not scorable | not scorable | 0.9917355 | 0.7073451 |
| #### Bn-A10-p12790730 | A-genome specific (napus-rapa)    | 0.937799     | 0.7263016    | not scorable | not scorable | 0.9917355 | 0.704466  |
| #### Bn-A10-p12810049 | genome unspecific (all in)        | 0.9688995    | 0.3819537    | 0.9379845    | 0.2787744    | 1         | 0.904893  |
| #### Bn-A10-p12815150 | A-genome specific (napus-rapa)    | 0.9976076    | 0.3514519    | not scorable | not scorable | 0.9917355 | 0.5614758 |
| #### Bn-A10-p12828161 | A-genome specific (napus-rapa)    | 1            | 0.5143194    | not scorable | not scorable | 0.9834711 | 0.7239892 |
| #### Bn-A10-p12842513 | A-genome specific (napus-rapa)    | 0.9641148    | 0.7667712    | not scorable | not scorable | 1         | 0.6279708 |
| #### Bn-A10-p12856990 | A-genome specific (napus-rapa)    | 0.9952153    | 0.6103459    | not scorable | not scorable | 1         | 0.6006213 |
| #### Bn-A10-p12857310 | A-genome specific (napus-rapa)    | 1            | 0.8115303    | not scorable | not scorable | 0.9834711 | 0.8032163 |
| #### Bn-A10-p12863402 | A-genome specific (napus-rapa)    | 0.9976076    | 0.5122399    | not scorable | not scorable | 0.9834711 | 0.7446377 |
| #### Bn-A10-p12864230 | A-genome specific (napus-rapa)    | 0.9880383    | 0.5695484    | not scorable | not scorable | 0.9917355 | 0.6660419 |



|                       |                                |              |              |              |              |           |           |
|-----------------------|--------------------------------|--------------|--------------|--------------|--------------|-----------|-----------|
| #### Bn-A10-p13138159 | A-genome specific (napus-rapa) | 0.9904306    | 0.9079503    | not scorable | not scorable | 0.9834711 | 0.8577806 |
| #### Bn-A10-p13138769 | A-genome specific (napus-rapa) | 0.9976076    | 0.3248909    | not scorable | not scorable | 1         | 0.7447742 |
| #### Bn-A10-p13139635 | A-genome specific (napus-rapa) | 0.9904306    | 0.4324996    | not scorable | not scorable | 1         | 0.7066604 |
| #### Bn-A10-p13142215 | A-genome specific (napus-rapa) | 0.9904306    | 0.6103879    | not scorable | not scorable | 0.9917355 | 0.7524711 |
| #### Bn-A10-p13142579 | A-genome specific (napus-rapa) | 0.9832536    | 0.2574128    | not scorable | not scorable | 0.9752066 | 0.3578795 |
| #### Bn-A10-p13162021 | A-genome specific (napus-rapa) | 0.9712918    | 0.4028151    | not scorable | not scorable | 0.9752066 | 0.5973377 |
| #### Bn-A10-p13164379 | A-genome specific (napus-rapa) | 0.9665072    | 0.7159845    | not scorable | not scorable | 1         | 0.7926748 |
| #### Bn-A10-p13164536 | A-genome specific (napus-rapa) | 0.9976076    | 0.6727865    | not scorable | not scorable | 0.9917355 | 0.8011723 |
| #### Bn-A10-p13165001 | A-genome specific (napus-rapa) | 1            | 0.7682135    | not scorable | not scorable | 1         | 0.7697797 |
| #### Bn-A10-p13165101 | A-genome specific (napus-rapa) | 0.9688995    | 0.7260618    | not scorable | not scorable | 0.9917355 | 0.7547259 |
| #### Bn-A10-p13169213 | A-genome specific (napus-rapa) | 0.9760765    | 0.7597309    | not scorable | not scorable | 1         | 0.7661464 |
| #### Bn-A10-p1318385  | A-genome specific (napus-rapa) | 0.9952153    | 0.7578163    | not scorable | not scorable | 0.9834711 | 0.6847287 |
| #### Bn-A10-p13190230 | A-genome specific (napus-rapa) | 0.9952153    | 0.7782835    | not scorable | not scorable | 0.9917355 | 0.8147016 |
| #### Bn-A10-p13192787 | A-genome specific (napus-rapa) | 0.9736842    | 0.7933494    | not scorable | not scorable | 0.6694215 | 0.6465377 |
| #### Bn-A10-p13195966 | A-genome specific (napus-rapa) | 0.9880383    | 0.4003738    | not scorable | not scorable | 1         | 0.7877276 |
| #### Bn-A10-p13205889 | A-genome specific (napus-rapa) | 0.9688995    | 0.7456232    | not scorable | not scorable | 0.5867769 | 0.6724377 |
| #### Bn-A10-p13207985 | A-genome specific (napus-rapa) | 0.6578947    | 0.7922813    | not scorable | not scorable | 0.9586777 | 0.7194968 |
| #### Bn-A10-p13216313 | A-genome specific (napus-rapa) | 1            | 0.6388901    | not scorable | not scorable | 0.9752066 | 0.5705004 |
| #### Bn-A10-p13216768 | A-genome specific (napus-rapa) | 0.9952153    | 0.7651546    | not scorable | not scorable | 1         | 0.7720458 |
| #### Bn-A10-p13218309 | A-genome specific (napus-rapa) | 0.9904306    | 0.7481866    | not scorable | not scorable | 0.9917355 | 0.7657866 |
| #### Bn-A10-p13218425 | A-genome specific (napus-rapa) | 1            | 0.8381552    | not scorable | not scorable | 1         | 0.7366022 |
| #### Bn-A10-p13219229 | A-genome specific (napus-rapa) | 0.8110048    | 0.9142062    | not scorable | not scorable | 0.9752066 | 0.7245917 |
| #### Bn-A10-p13230002 | A-genome specific (napus-rapa) | 0.9928229    | 0.6565449    | not scorable | not scorable | 0.9917355 | 0.7829027 |
| #### Bn-A10-p13243690 | A-genome specific (napus-rapa) | 0.9928229    | 0.7634153    | not scorable | not scorable | 0.9834711 | 0.8119402 |
| #### Bn-A10-p13245203 | A-genome specific (napus-rapa) | 0.9976076    | 0.717692     | not scorable | not scorable | 1         | 0.9117453 |
| #### Bn-A10-p13263227 | genome unspecific (all in)     | 0.9688995    | 0.4665968    | 0.9767442    | 0.8024942    | 0.9917355 | 0.833212  |
| #### Bn-A10-p13266157 | A-genome specific (napus-rapa) | 0.9712918    | 0.506949     | not scorable | not scorable | 0.9338843 | 0.760594  |
| #### Bn-A10-p13267698 | A-genome specific (rapa only)  | not scorable | not scorable | not scorable | not scorable | 0.9669421 | 0.8515851 |
| #### Bn-A10-p13283073 | A-genome specific (napus-rapa) | 0.937799     | 0.3108014    | not scorable | not scorable | 1         | 0.7694589 |
| #### Bn-A10-p13289368 | A-genome specific (napus-rapa) | 0.9449761    | 0.4034824    | not scorable | not scorable | 0.9834711 | 0.6219763 |
| #### Bn-A10-p13299250 | A-genome specific (napus-rapa) | 0.9904306    | 0.7927987    | not scorable | not scorable | 0.9834711 | 0.6545008 |
| #### Bn-A10-p13304208 | A-genome specific (napus-rapa) | 0.9928229    | 0.3740194    | not scorable | not scorable | 0.9917355 | 0.8040947 |
| #### Bn-A10-p13308862 | A-genome specific (napus-rapa) | 0.9952153    | 0.4471844    | not scorable | not scorable | 0.9834711 | 0.6930711 |

|                       |                                |              |              |              |              |           |           |
|-----------------------|--------------------------------|--------------|--------------|--------------|--------------|-----------|-----------|
| #### Bn-A10-p13309178 | A-genome specific (napus-rapa) | 1            | 0.5205516    | not scorable | not scorable | 0.9917355 | 0.6562978 |
| #### Bn-A10-p13318061 | A-genome specific (napus-rapa) | 0.9952153    | 0.8433421    | not scorable | not scorable | 1         | 0.7164444 |
| #### Bn-A10-p13319988 | A-genome specific (napus-rapa) | 0.9808612    | 0.3337416    | not scorable | not scorable | 0.9917355 | 0.6493196 |
| #### Bn-A10-p13320085 | A-genome specific (napus-rapa) | 0.9784689    | 0.5456303    | not scorable | not scorable | 0.9834711 | 0.6624432 |
| #### Bn-A10-p13321828 | A-genome specific (napus-rapa) | 0.9976076    | 0.8465967    | not scorable | not scorable | 0.9752066 | 0.8106248 |
| #### Bn-A10-p13323873 | A-genome specific (napus-rapa) | 0.9928229    | 0.4761163    | not scorable | not scorable | 0.9834711 | 0.79784   |
| #### Bn-A10-p13327024 | A-genome specific (napus-rapa) | 0.9856459    | 0.7971229    | not scorable | not scorable | 0.9917355 | 0.8203968 |
| #### Bn-A10-p13330145 | A-genome specific (napus-rapa) | 0.9976076    | 0.8546489    | not scorable | not scorable | 0.9917355 | 0.7452467 |
| #### Bn-A10-p13330418 | A-genome specific (napus-rapa) | 0.9976076    | 0.8727329    | not scorable | not scorable | 0.9917355 | 0.7841102 |
| #### Bn-A10-p13335021 | A-genome specific (napus-rapa) | 0.9904306    | 0.7828027    | not scorable | not scorable | 0.9917355 | 0.7720496 |
| #### Bn-A10-p13343454 | A-genome specific (napus-rapa) | 0.9904306    | 0.7843804    | not scorable | not scorable | 1         | 0.7634772 |
| #### Bn-A10-p13358504 | A-genome specific (napus-rapa) | 0.9138756    | 0.6926226    | not scorable | not scorable | 0.9752066 | 0.6338087 |
| #### Bn-A10-p13358856 | A-genome specific (napus-rapa) | 0.9976076    | 0.3720602    | not scorable | not scorable | 0.9917355 | 0.6338912 |
| #### Bn-A10-p13364232 | A-genome specific (napus-rapa) | 0.9976076    | 0.7323387    | not scorable | not scorable | 0.9917355 | 0.6250155 |
| #### Bn-A10-p13375342 | A-genome specific (napus-rapa) | 0.9928229    | 0.8236221    | not scorable | not scorable | 1         | 0.7752646 |
| #### Bn-A10-p13384066 | A-genome specific (napus-rapa) | 0.9976076    | 0.6875932    | not scorable | not scorable | 1         | 0.7734969 |
| #### Bn-A10-p13387522 | A-genome specific (napus-rapa) | 0.9808612    | 0.8748645    | not scorable | not scorable | 1         | 0.7415617 |
| #### Bn-A10-p13390065 | A-genome specific (napus-rapa) | 0.9832536    | 0.9268253    | not scorable | not scorable | 0.9917355 | 0.8175383 |
| #### Bn-A10-p13393956 | A-genome specific (napus-rapa) | 0.9019139    | 0.5118429    | not scorable | not scorable | 1         | 0.8086051 |
| #### Bn-A10-p13396422 | A-genome specific (napus-rapa) | 0.9976076    | 0.798168     | not scorable | not scorable | 1         | 0.7825652 |
| #### Bn-A10-p13401328 | A-genome specific (napus-rapa) | 0.9952153    | 0.5736283    | not scorable | not scorable | 0.9752066 | 0.6203014 |
| #### Bn-A10-p13410287 | A-genome specific (napus-rapa) | 0.9952153    | 0.4339882    | not scorable | not scorable | 1         | 0.702436  |
| #### Bn-A10-p13410414 | A-genome specific (rapa only)  | not scorable | not scorable | not scorable | not scorable | 0.9752066 | 0.9175813 |
| #### Bn-A10-p13423663 | A-genome specific (napus-rapa) | 0.9952153    | 0.4241804    | not scorable | not scorable | 1         | 0.6638849 |
| #### Bn-A10-p13427869 | A-genome specific (napus-rapa) | 1            | 0.6941605    | not scorable | not scorable | 0.9917355 | 0.6732535 |
| #### Bn-A10-p13429321 | A-genome specific (napus-rapa) | 0.9952153    | 0.7474919    | not scorable | not scorable | 0.9586777 | 0.5948999 |
| #### Bn-A10-p13433604 | A-genome specific (napus-rapa) | 0.9952153    | 0.6158749    | not scorable | not scorable | 0.9669421 | 0.5448343 |
| #### Bn-A10-p13435288 | A-genome specific (napus-rapa) | 1            | 0.3767604    | not scorable | not scorable | 0.9752066 | 0.3558082 |
| #### Bn-A10-p13446086 | A-genome specific (napus-rapa) | 0.9976076    | 0.7914011    | not scorable | not scorable | 0.9917355 | 0.6993032 |
| #### Bn-A10-p13447899 | A-genome specific (napus-rapa) | 0.9952153    | 0.7494707    | not scorable | not scorable | 0.9917355 | 0.6749234 |
| #### Bn-A10-p13447958 | A-genome specific (napus-rapa) | 0.9928229    | 0.8379095    | not scorable | not scorable | 1         | 0.6996551 |
| #### Bn-A10-p1345255  | A-genome specific (napus-rapa) | 0.9808612    | 0.71061      | not scorable | not scorable | 0.9834711 | 0.7653408 |
| #### Bn-A10-p13455391 | A-genome specific (napus-rapa) | 0.9976076    | 0.7563893    | not scorable | not scorable | 0.9752066 | 0.6768464 |





|                       |                                    |              |              |              |              |              |              |
|-----------------------|------------------------------------|--------------|--------------|--------------|--------------|--------------|--------------|
| #### Bn-A10-p13710321 | A-genome specific (napus-rapa)     | 0.9760765    | 0.7736971    | not scorable | not scorable | 0.9834711    | 0.798296     |
| #### Bn-A10-p13723140 | A-genome specific (napus-rapa)     | 0.9952153    | 0.8557022    | not scorable | not scorable | 0.9917355    | 0.8319088    |
| #### Bn-A10-p13730383 | A-genome specific (napus-rapa)     | 0.8086125    | 0.824119     | not scorable | not scorable | 1            | 0.7777944    |
| #### Bn-A10-p13734245 | A-genome specific (napus-rapa)     | 0.9617225    | 0.7608673    | not scorable | not scorable | 0.9834711    | 0.7749183    |
| #### Bn-A10-p13739326 | A-genome specific (napus-rapa)     | 1            | 0.8009924    | not scorable | not scorable | 1            | 0.6615048    |
| #### Bn-A10-p13740342 | A-genome specific (napus-rapa)     | 0.9928229    | 0.5941921    | not scorable | not scorable | 1            | 0.6850994    |
| #### Bn-A10-p13747995 | A-genome specific (napus-rapa)     | 0.9928229    | 0.4621942    | not scorable | not scorable | 1            | 0.6906607    |
| #### Bn-A10-p13758377 | A-genome specific (napus-rapa)     | 0.9784689    | 0.7161754    | not scorable | not scorable | 1            | 0.7045665    |
| #### Bn-A10-p13778875 | A-genome specific (rapa only)      | not scorable | not scorable | not scorable | not scorable | 1            | 0.6725159    |
| #### Bn-A10-p13779014 | A-genome specific (napus-rapa)     | 0.9880383    | 0.3554115    | not scorable | not scorable | 0.9917355    | 0.6673809    |
| #### Bn-A10-p13786294 | A-genome specific (napus-rapa)     | 0.9569378    | 0.4212253    | not scorable | not scorable | 0.9917355    | 0.7919037    |
| #### Bn-A10-p13786487 | C-genome specific (napus-oleracea) | 0.9880383    | 0.8052437    | 0.7674419    | 0.7030286    | not scorable | not scorable |
| #### Bn-A10-p13787477 | A-genome specific (napus-rapa)     | 1            | 0.7325492    | not scorable | not scorable | 1            | 0.8215947    |
| #### Bn-A10-p13788629 | A-genome specific (napus-rapa)     | 0.9928229    | 0.814936     | not scorable | not scorable | 0.9917355    | 0.7301115    |
| #### Bn-A10-p13789579 | A-genome specific (napus-rapa)     | 0.9856459    | 0.7171831    | not scorable | not scorable | 0.9834711    | 0.6760703    |
| #### Bn-A10-p13796417 | A-genome specific (napus-rapa)     | 0.9976076    | 0.8198225    | not scorable | not scorable | 0.9917355    | 0.860729     |
| #### Bn-A10-p13796426 | A-genome specific (rapa only)      | not scorable | not scorable | not scorable | not scorable | 0.9338843    | 0.9267577    |
| #### Bn-A10-p13798602 | A-genome specific (napus-rapa)     | 0.9473684    | 0.4042677    | not scorable | not scorable | 1            | 0.7390317    |
| #### Bn-A10-p13810929 | A-genome specific (napus-rapa)     | 0.6076555    | 0.8948966    | not scorable | not scorable | 0.9586777    | 0.9142767    |
| #### Bn-A10-p13815263 | A-genome specific (napus-rapa)     | 1            | 0.400547     | not scorable | not scorable | 1            | 0.6595343    |
| #### Bn-A10-p13817274 | A-genome specific (napus-rapa)     | 0.9856459    | 0.7665411    | not scorable | not scorable | 1            | 0.7335865    |
| #### Bn-A10-p13818569 | A-genome specific (napus-rapa)     | 0.9928229    | 0.7850449    | not scorable | not scorable | 0.9752066    | 0.7195156    |
| #### Bn-A10-p13827678 | A-genome specific (napus-rapa)     | 0.9928229    | 0.3956472    | not scorable | not scorable | 0.9917355    | 0.6269065    |
| #### Bn-A10-p13837373 | A-genome specific (napus-rapa)     | 1            | 0.8121946    | not scorable | not scorable | 0.9834711    | 0.8609979    |
| #### Bn-A10-p13841213 | A-genome specific (rapa only)      | not scorable | not scorable | not scorable | not scorable | 0.9586777    | 0.6865948    |
| #### Bn-A10-p13845694 | A-genome specific (napus-rapa)     | 0.9904306    | 0.5290745    | not scorable | not scorable | 0.9917355    | 0.7725152    |
| #### Bn-A10-p13846108 | A-genome specific (napus-rapa)     | 0.9952153    | 0.3721105    | not scorable | not scorable | 1            | 0.668995     |
| #### Bn-A10-p13849675 | A-genome specific (napus-rapa)     | 0.9976076    | 0.2945149    | not scorable | not scorable | 1            | 0.7077793    |
| #### Bn-A10-p13875041 | A-genome specific (napus-rapa)     | 0.9832536    | 0.6816249    | not scorable | not scorable | 0.9917355    | 0.7110348    |
| #### Bn-A10-p13882091 | A-genome specific (napus-rapa)     | 0.9641148    | 0.7042722    | not scorable | not scorable | 1            | 0.7649884    |
| #### Bn-A10-p13882718 | A-genome specific (napus-rapa)     | 0.9880383    | 0.5571621    | not scorable | not scorable | 0.9834711    | 0.835687     |
| #### Bn-A10-p13897407 | A-genome specific (napus-rapa)     | 0.9712918    | 0.7367966    | not scorable | not scorable | 0.9834711    | 0.7895731    |
| #### Bn-A10-p13913564 | A-genome specific (napus-rapa)     | 0.9736842    | 0.3858903    | not scorable | not scorable | 1            | 0.8034464    |















|                       |                                |           |           |              |              |              |              |
|-----------------------|--------------------------------|-----------|-----------|--------------|--------------|--------------|--------------|
| #### Bn-A10-p15328039 | A-genome specific (napus-rapa) | 0.9832536 | 0.3424402 | not scorable | not scorable | 0.9917355    | 0.6720314    |
| #### Bn-A10-p15330528 | A-genome specific (napus-rapa) | 0.9832536 | 0.6368157 | not scorable | not scorable | 1            | 0.7035785    |
| #### Bn-A10-p15330596 | A-genome specific (napus-rapa) | 0.9976076 | 0.7730079 | not scorable | not scorable | 0.9917355    | 0.7950382    |
| #### Bn-A10-p15355521 | A-genome specific (napus-rapa) | 0.9784689 | 0.7261109 | not scorable | not scorable | 0.9917355    | 0.6907364    |
| #### Bn-A10-p15361519 | A-genome specific (napus-rapa) | 1         | 0.8755466 | not scorable | not scorable | 0.9752066    | 0.7564367    |
| #### Bn-A10-p15367240 | A-genome specific (napus-rapa) | 0.9880383 | 0.8442262 | not scorable | not scorable | 0.9586777    | 0.7389939    |
| #### Bn-A10-p15372875 | A-genome specific (napus-rapa) | 0.9976076 | 0.4221858 | not scorable | not scorable | 1            | 0.8700839    |
| #### Bn-A10-p15378551 | A-genome specific (napus-rapa) | 1         | 0.904218  | not scorable | not scorable | 0.9917355    | 0.759029     |
| #### Bn-A10-p15381751 | A-genome specific (napus-rapa) | 0.9976076 | 0.6211538 | not scorable | not scorable | 0.9917355    | 0.7765283    |
| #### Bn-A10-p15387634 | A-genome specific (napus-rapa) | 1         | 0.8441771 | not scorable | not scorable | 0.9752066    | 0.7095814    |
| #### Bn-A10-p15387894 | A-genome specific (napus-rapa) | 0.9976076 | 0.9222492 | not scorable | not scorable | 0.9917355    | 0.6896008    |
| #### Bn-A10-p15398137 | A-genome specific (napus-rapa) | 1         | 0.880056  | not scorable | not scorable | 0.9752066    | 0.7595304    |
| #### Bn-A10-p15401999 | A-genome specific (napus-rapa) | 0.9976076 | 0.2960947 | not scorable | not scorable | 0.9752066    | 0.62378      |
| #### Bn-A10-p15405149 | A-genome specific (napus-rapa) | 0.9976076 | 0.434658  | not scorable | not scorable | 1            | 0.837907     |
| #### Bn-A10-p15408188 | A-genome specific (napus-rapa) | 1         | 0.8301802 | not scorable | not scorable | 0.9834711    | 0.6965325    |
| #### Bn-A10-p15410481 | napus specific                 | 0.8277512 | 0.762836  | not scorable | not scorable | not scorable | not scorable |
| #### Bn-A10-p15412233 | A-genome specific (napus-rapa) | 0.9856459 | 0.7949237 | not scorable | not scorable | 0.9752066    | 0.7454566    |
| #### Bn-A10-p15433413 | A-genome specific (napus-rapa) | 0.9784689 | 0.6047239 | not scorable | not scorable | 0.9669421    | 0.7162619    |
| #### Bn-A10-p15437444 | A-genome specific (napus-rapa) | 1         | 0.862032  | not scorable | not scorable | 0.9752066    | 0.7942092    |
| #### Bn-A10-p15442975 | napus specific                 | 0.9904306 | 0.3690675 | not scorable | not scorable | not scorable | not scorable |
| #### Bn-A10-p15444223 | A-genome specific (napus-rapa) | 0.9976076 | 0.8530434 | not scorable | not scorable | 1            | 0.7539736    |
| #### Bn-A10-p15446038 | A-genome specific (napus-rapa) | 0.9808612 | 0.8278934 | not scorable | not scorable | 0.9669421    | 0.6962846    |
| #### Bn-A10-p15447032 | A-genome specific (napus-rapa) | 0.9976076 | 0.8297237 | not scorable | not scorable | 0.9917355    | 0.8215568    |
| #### Bn-A10-p15455160 | A-genome specific (napus-rapa) | 0.9904306 | 0.768655  | not scorable | not scorable | 1            | 0.7206949    |
| #### Bn-A10-p15455862 | A-genome specific (napus-rapa) | 1         | 0.7635936 | not scorable | not scorable | 1            | 0.8004208    |
| #### Bn-A10-p15458720 | A-genome specific (napus-rapa) | 0.9808612 | 0.5050887 | not scorable | not scorable | 0.9834711    | 0.7106405    |
| #### Bn-A10-p15467334 | A-genome specific (napus-rapa) | 0.9904306 | 0.7249707 | not scorable | not scorable | 0.9917355    | 0.6527938    |
| #### Bn-A10-p15476300 | A-genome specific (napus-rapa) | 0.9880383 | 0.3812341 | not scorable | not scorable | 1            | 0.7812833    |
| #### Bn-A10-p15485139 | A-genome specific (napus-rapa) | 0.9952153 | 0.7918794 | not scorable | not scorable | 0.9917355    | 0.7614521    |
| #### Bn-A10-p15488923 | A-genome specific (napus-rapa) | 0.9976076 | 0.6034115 | not scorable | not scorable | 0.9917355    | 0.7957312    |
| #### Bn-A10-p15496817 | A-genome specific (napus-rapa) | 0.9736842 | 0.767635  | not scorable | not scorable | 1            | 0.805713     |
| #### Bn-A10-p15497556 | A-genome specific (napus-rapa) | 0.9784689 | 0.4795493 | not scorable | not scorable | 0.9669421    | 0.7901053    |
| #### Bn-A10-p15507350 | A-genome specific (napus-rapa) | 1         | 0.8753159 | not scorable | not scorable | 1            | 0.7542245    |

|                       |                                |           |           |              |              |              |              |
|-----------------------|--------------------------------|-----------|-----------|--------------|--------------|--------------|--------------|
| #### Bn-A10-p15542820 | A-genome specific (napus-rapa) | 0.9952153 | 0.8463164 | not scorable | not scorable | 0.9752066    | 0.7590758    |
| #### Bn-A10-p15591443 | A-genome specific (napus-rapa) | 0.9928229 | 0.4162993 | not scorable | not scorable | 0.9917355    | 0.6748902    |
| #### Bn-A10-p15597364 | A-genome specific (napus-rapa) | 0.9856459 | 0.6770467 | not scorable | not scorable | 0.9917355    | 0.6138117    |
| #### Bn-A10-p15601027 | A-genome specific (napus-rapa) | 1         | 0.4475479 | not scorable | not scorable | 1            | 0.5473236    |
| #### Bn-A10-p15605556 | napus specific                 | 0.8708134 | 0.6081611 | not scorable | not scorable | not scorable | not scorable |
| #### Bn-A10-p15606935 | genome unspecific (all in)     | 0.9904306 | 0.6999573 | 0.751938     | 0.6747848    | 0.9834711    | 0.6315838    |
| #### Bn-A10-p15607468 | A-genome specific (napus-rapa) | 0.9928229 | 0.6974984 | not scorable | not scorable | 0.9752066    | 0.6430619    |
| #### Bn-A10-p15632527 | A-genome specific (napus-rapa) | 0.9904306 | 0.6869729 | not scorable | not scorable | 0.9752066    | 0.7231261    |
| #### Bn-A10-p15633321 | A-genome specific (napus-rapa) | 0.9904306 | 0.4692364 | not scorable | not scorable | 0.9834711    | 0.7261634    |
| #### Bn-A10-p15637848 | A-genome specific (napus-rapa) | 0.9976076 | 0.3600836 | not scorable | not scorable | 0.9752066    | 0.6887374    |
| #### Bn-A10-p15640144 | A-genome specific (napus-rapa) | 0.9784689 | 0.7314825 | not scorable | not scorable | 1            | 0.7805949    |
| #### Bn-A10-p15651383 | A-genome specific (napus-rapa) | 1         | 0.6776448 | not scorable | not scorable | 1            | 0.6656966    |
| #### Bn-A10-p15657263 | A-genome specific (napus-rapa) | 0.9138756 | 0.8113781 | not scorable | not scorable | 0.7024794    | 0.7571257    |
| #### Bn-A10-p15658567 | A-genome specific (napus-rapa) | 1         | 0.5516846 | not scorable | not scorable | 1            | 0.6825689    |
| #### Bn-A10-p15660472 | A-genome specific (napus-rapa) | 0.9617225 | 0.4512268 | not scorable | not scorable | 0.6446281    | 0.6842846    |
| #### Bn-A10-p15668415 | napus specific                 | 0.9258373 | 0.8696513 | not scorable | not scorable | not scorable | not scorable |
| #### Bn-A10-p15670267 | A-genome specific (napus-rapa) | 0.9258373 | 0.8577845 | not scorable | not scorable | 0.6033058    | 0.7976655    |
| #### Bn-A10-p15672303 | A-genome specific (napus-rapa) | 0.9952153 | 0.8061102 | not scorable | not scorable | 0.9834711    | 0.8354092    |
| #### Bn-A10-p15706333 | A-genome specific (napus-rapa) | 0.9880383 | 0.7926045 | not scorable | not scorable | 0.9834711    | 0.796658     |
| #### Bn-A10-p15711469 | A-genome specific (napus-rapa) | 0.9497608 | 0.7194904 | not scorable | not scorable | 0.9917355    | 0.6084114    |
| #### Bn-A10-p15719803 | A-genome specific (napus-rapa) | 0.9856459 | 0.6721742 | not scorable | not scorable | 0.9834711    | 0.6409334    |
| #### Bn-A10-p15727608 | A-genome specific (napus-rapa) | 0.9904306 | 0.7579653 | not scorable | not scorable | 0.9834711    | 0.7672726    |
| #### Bn-A10-p15728402 | A-genome specific (napus-rapa) | 0.9760765 | 0.7452662 | not scorable | not scorable | 1            | 0.757046     |
| #### Bn-A10-p15729205 | A-genome specific (napus-rapa) | 0.9856459 | 0.7470197 | not scorable | not scorable | 0.9917355    | 0.7105273    |
| #### Bn-A10-p15731773 | A-genome specific (napus-rapa) | 0.9688995 | 0.5180884 | not scorable | not scorable | 0.9917355    | 0.7467922    |
| #### Bn-A10-p15734598 | A-genome specific (napus-rapa) | 0.8062201 | 0.867538  | not scorable | not scorable | 0.677686     | 0.8659752    |
| #### Bn-A10-p15735290 | A-genome specific (napus-rapa) | 0.9832536 | 0.809186  | not scorable | not scorable | 0.9917355    | 0.6968417    |
| #### Bn-A10-p15736726 | A-genome specific (napus-rapa) | 0.9928229 | 0.7594078 | not scorable | not scorable | 1            | 0.8336111    |
| #### Bn-A10-p15737116 | A-genome specific (napus-rapa) | 0.9928229 | 0.6628361 | not scorable | not scorable | 1            | 0.7292119    |
| #### Bn-A10-p15737423 | A-genome specific (napus-rapa) | 0.9904306 | 0.7644478 | not scorable | not scorable | 1            | 0.8411323    |
| #### Bn-A10-p15738808 | A-genome specific (napus-rapa) | 0.9808612 | 0.7565527 | not scorable | not scorable | 1            | 0.8477979    |
| #### Bn-A10-p15740896 | A-genome specific (napus-rapa) | 0.9904306 | 0.6953332 | not scorable | not scorable | 0.9917355    | 0.6714765    |
| #### Bn-A10-p15741819 | A-genome specific (napus-rapa) | 0.8133971 | 0.8584056 | not scorable | not scorable | 0.6280992    | 0.913828     |

|                       |                                |              |              |              |              |              |              |
|-----------------------|--------------------------------|--------------|--------------|--------------|--------------|--------------|--------------|
| #### Bn-A10-p15742125 | A-genome specific (napus-rapa) | 0.9832536    | 0.7582628    | not scorable | not scorable | 1            | 0.8504661    |
| #### Bn-A10-p15742287 | A-genome specific (napus-rapa) | 0.9760765    | 0.6473944    | not scorable | not scorable | 0.9917355    | 0.6344622    |
| #### Bn-A10-p15742689 | A-genome specific (napus-rapa) | 0.9904306    | 0.4872994    | not scorable | not scorable | 1            | 0.8050945    |
| #### Bn-A10-p157450   | A-genome specific (napus-rapa) | 1            | 0.842741     | not scorable | not scorable | 0.9917355    | 0.741301     |
| #### Bn-A10-p15746238 | A-genome specific (napus-rapa) | 0.9976076    | 0.411265     | not scorable | not scorable | 1            | 0.6619377    |
| #### Bn-A10-p15760933 | A-genome specific (napus-rapa) | 0.9952153    | 0.83237      | not scorable | not scorable | 0.9752066    | 0.7603579    |
| #### Bn-A10-p15762163 | A-genome specific (napus-rapa) | 0.9952153    | 0.6706323    | not scorable | not scorable | 0.9917355    | 0.7751966    |
| #### Bn-A10-p15774860 | A-genome specific (napus-rapa) | 0.9712918    | 0.3830625    | not scorable | not scorable | 0.9752066    | 0.7705543    |
| #### Bn-A10-p15786012 | A-genome specific (napus-rapa) | 0.9688995    | 0.4463387    | not scorable | not scorable | 0.9917355    | 0.7362146    |
| #### Bn-A10-p15793623 | A-genome specific (napus-rapa) | 0.9928229    | 0.8105839    | not scorable | not scorable | 0.9917355    | 0.6634912    |
| #### Bn-A10-p1580627  | A-genome specific (napus-rapa) | 0.9904306    | 0.874624     | not scorable | not scorable | 1            | 0.6897746    |
| #### Bn-A10-p158082   | A-genome specific (napus-rapa) | 0.9880383    | 0.8145568    | not scorable | not scorable | 1            | 0.8071563    |
| #### Bn-A10-p15817344 | A-genome specific (napus-rapa) | 1            | 0.5159939    | not scorable | not scorable | 0.9917355    | 0.6060262    |
| #### Bn-A10-p15824883 | A-genome specific (napus-rapa) | 1            | 0.4698265    | not scorable | not scorable | 0.9834711    | 0.7153745    |
| #### Bn-A10-p1582619  | A-genome specific (napus-rapa) | 0.9880383    | 0.5734403    | not scorable | not scorable | 1            | 0.7559936    |
| #### Bn-A10-p1582783  | A-genome specific (napus-rapa) | 0.9808612    | 0.8240044    | not scorable | not scorable | 0.9917355    | 0.8488503    |
| #### Bn-A10-p15837575 | A-genome specific (napus-rapa) | 0.9976076    | 0.7595348    | not scorable | not scorable | 0.9834711    | 0.729543     |
| #### Bn-A10-p15838863 | A-genome specific (napus-rapa) | 1            | 0.8894926    | not scorable | not scorable | 0.9834711    | 0.7200636    |
| #### Bn-A10-p15838932 | A-genome specific (napus-rapa) | 1            | 0.7745699    | not scorable | not scorable | 0.9834711    | 0.6729047    |
| #### Bn-A10-p15849160 | A-genome specific (napus-rapa) | 0.8899522    | 0.8168875    | not scorable | not scorable | 0.7933884    | 0.7265797    |
| #### Bn-A10-p15863143 | A-genome specific (napus-rapa) | 0.9784689    | 0.7776473    | not scorable | not scorable | 1            | 0.6865921    |
| #### Bn-A10-p15863972 | A-genome specific (rapa only)  | not scorable | not scorable | not scorable | not scorable | 0.9917355    | 0.6851012    |
| #### Bn-A10-p15864056 | A-genome specific (napus-rapa) | 0.9904306    | 0.7664756    | not scorable | not scorable | 0.9834711    | 0.7743284    |
| #### Bn-A10-p15867888 | A-genome specific (napus-rapa) | 0.9641148    | 0.8032165    | not scorable | not scorable | 0.9917355    | 0.7934247    |
| #### Bn-A10-p15868115 | napus specific                 | 0.9976076    | 0.8011951    | not scorable | not scorable | not scorable | not scorable |
| #### Bn-A10-p15868364 | A-genome specific (napus-rapa) | 0.9736842    | 0.4242879    | not scorable | not scorable | 0.9834711    | 0.7041051    |
| #### Bn-A10-p15884544 | A-genome specific (napus-rapa) | 0.9928229    | 0.8428732    | not scorable | not scorable | 0.9917355    | 0.8076818    |
| #### Bn-A10-p15885356 | A-genome specific (napus-rapa) | 0.9976076    | 0.4459182    | not scorable | not scorable | 1            | 0.8833492    |
| #### Bn-A10-p15894309 | A-genome specific (napus-rapa) | 1            | 0.8351377    | not scorable | not scorable | 0.9917355    | 0.7610669    |
| #### Bn-A10-p15894501 | A-genome specific (napus-rapa) | 0.9976076    | 0.8575119    | not scorable | not scorable | 0.9834711    | 0.7047601    |
| #### Bn-A10-p1590088  | A-genome specific (rapa only)  | not scorable | not scorable | not scorable | not scorable | 0.9338843    | 0.8348507    |
| #### Bn-A10-p15901873 | A-genome specific (napus-rapa) | 1            | 0.7228405    | not scorable | not scorable | 0.9752066    | 0.6703045    |
| #### Bn-A10-p15903564 | A-genome specific (napus-rapa) | 0.9904306    | 0.8399122    | not scorable | not scorable | 1            | 0.8112373    |

|                       |                                |              |              |              |              |              |              |
|-----------------------|--------------------------------|--------------|--------------|--------------|--------------|--------------|--------------|
| #### Bn-A10-p15908393 | A-genome specific (napus-rapa) | 1            | 0.7460018    | not scorable | not scorable | 0.9834711    | 0.8293141    |
| #### Bn-A10-p15924608 | A-genome specific (napus-rapa) | 0.9976076    | 0.4812949    | not scorable | not scorable | 1            | 0.6582533    |
| #### Bn-A10-p15924755 | A-genome specific (napus-rapa) | 0.9976076    | 0.8099626    | not scorable | not scorable | 0.9917355    | 0.7809884    |
| #### Bn-A10-p1592490  | A-genome specific (napus-rapa) | 0.9688995    | 0.8010958    | not scorable | not scorable | 0.9586777    | 0.7276283    |
| #### Bn-A10-p15925135 | A-genome specific (rapa only)  | not scorable | not scorable | not scorable | not scorable | 1            | 0.8170935    |
| #### Bn-A10-p15948040 | A-genome specific (napus-rapa) | 0.6985646    | 0.8685921    | not scorable | not scorable | 0.7107438    | 0.8546489    |
| #### Bn-A10-p1595235  | A-genome specific (napus-rapa) | 0.9641148    | 0.5009918    | not scorable | not scorable | 0.9752066    | 0.6855304    |
| #### Bn-A10-p15955591 | A-genome specific (napus-rapa) | 0.9856459    | 0.7520785    | not scorable | not scorable | 0.9834711    | 0.8496761    |
| #### Bn-A10-p15964373 | A-genome specific (napus-rapa) | 0.9784689    | 0.4051603    | not scorable | not scorable | 1            | 0.7254823    |
| #### Bn-A10-p15967013 | A-genome specific (napus-rapa) | 0.9808612    | 0.7886401    | not scorable | not scorable | 1            | 0.7722343    |
| #### Bn-A10-p1596948  | A-genome specific (napus-rapa) | 0.9473684    | 0.6814377    | not scorable | not scorable | 0.9834711    | 0.7907889    |
| #### Bn-A10-p15971312 | A-genome specific (napus-rapa) | 0.9617225    | 0.5172325    | not scorable | not scorable | 1            | 0.8356822    |
| #### Bn-A10-p15975142 | A-genome specific (napus-rapa) | 0.9880383    | 0.8014868    | not scorable | not scorable | 0.9834711    | 0.6805297    |
| #### Bn-A10-p15977416 | A-genome specific (napus-rapa) | 0.9808612    | 0.79114      | not scorable | not scorable | 1            | 0.7962656    |
| #### Bn-A10-p15997363 | A-genome specific (napus-rapa) | 0.9665072    | 0.5079632    | not scorable | not scorable | 1            | 0.8912995    |
| #### Bn-A10-p15997433 | A-genome specific (napus-rapa) | 0.9928229    | 0.8197227    | not scorable | not scorable | 0.9917355    | 0.7743487    |
| #### Bn-A10-p15997448 | A-genome specific (napus-rapa) | 0.9808612    | 0.8316827    | not scorable | not scorable | 0.9834711    | 0.7753748    |
| #### Bn-A10-p16005880 | A-genome specific (napus-rapa) | 0.5119617    | 0.8537235    | not scorable | not scorable | 0.9669421    | 0.8948976    |
| #### Bn-A10-p16008207 | A-genome specific (napus-rapa) | 0.9665072    | 0.4848957    | not scorable | not scorable | 0.9834711    | 0.7585       |
| #### Bn-A10-p16017024 | napus specific                 | 0.8205742    | 0.6844471    | not scorable | not scorable | not scorable | not scorable |
| #### Bn-A10-p16021831 | A-genome specific (napus-rapa) | 0.9904306    | 0.7931944    | not scorable | not scorable | 0.9917355    | 0.8015463    |
| #### Bn-A10-p16029222 | A-genome specific (napus-rapa) | 0.9569378    | 0.4286304    | not scorable | not scorable | 0.9917355    | 0.7724445    |
| #### Bn-A10-p16030162 | A-genome specific (napus-rapa) | 0.9832536    | 0.4688884    | not scorable | not scorable | 0.9917355    | 0.8488526    |
| #### Bn-A10-p16030644 | A-genome specific (napus-rapa) | 0.9760765    | 0.7537933    | not scorable | not scorable | 0.9752066    | 0.7576257    |
| #### Bn-A10-p16032125 | A-genome specific (napus-rapa) | 0.9976076    | 0.7705176    | not scorable | not scorable | 1            | 0.779707     |
| #### Bn-A10-p16036488 | A-genome specific (napus-rapa) | 0.9497608    | 0.3309751    | not scorable | not scorable | 1            | 0.7952783    |
| #### Bn-A10-p16037268 | A-genome specific (napus-rapa) | 0.9880383    | 0.7896252    | not scorable | not scorable | 0.9917355    | 0.8527318    |
| #### Bn-A10-p16060706 | A-genome specific (napus-rapa) | 0.9880383    | 0.7628219    | not scorable | not scorable | 1            | 0.6936162    |
| #### Bn-A10-p16061207 | A-genome specific (napus-rapa) | 0.9593301    | 0.7962028    | not scorable | not scorable | 0.9752066    | 0.7293126    |
| #### Bn-A10-p1606279  | A-genome specific (napus-rapa) | 0.9952153    | 0.7760945    | not scorable | not scorable | 0.9917355    | 0.7959908    |
| #### Bn-A10-p16063158 | A-genome specific (napus-rapa) | 0.9832536    | 0.7624756    | not scorable | not scorable | 1            | 0.8048375    |
| #### Bn-A10-p16067573 | A-genome specific (napus-rapa) | 0.9928229    | 0.4415575    | not scorable | not scorable | 0.9917355    | 0.7513771    |
| #### Bn-A10-p16071525 | A-genome specific (napus-rapa) | 0.9665072    | 0.7791053    | not scorable | not scorable | 1            | 0.8073172    |

|                       |                                |              |              |              |              |              |              |
|-----------------------|--------------------------------|--------------|--------------|--------------|--------------|--------------|--------------|
| #### Bn-A10-p16074706 | A-genome specific (napus-rapa) | 0.9665072    | 0.7818044    | not scorable | not scorable | 1            | 0.8078213    |
| #### Bn-A10-p16087066 | A-genome specific (napus-rapa) | 0.9928229    | 0.5129055    | not scorable | not scorable | 0.9917355    | 0.5907702    |
| #### Bn-A10-p16102918 | A-genome specific (napus-rapa) | 0.9832536    | 0.7156221    | not scorable | not scorable | 0.9752066    | 0.7304749    |
| #### Bn-A10-p16109898 | genome unspecific (all in)     | 0.9760765    | 0.55548      | 0.6511628    | 0.771888     | 0.9752066    | 0.6952603    |
| #### Bn-A10-p1611838  | A-genome specific (napus-rapa) | 1            | 0.4341467    | not scorable | not scorable | 0.9586777    | 0.5351287    |
| #### Bn-A10-p1611973  | A-genome specific (napus-rapa) | 0.9976076    | 0.7287837    | not scorable | not scorable | 0.9834711    | 0.6923664    |
| #### Bn-A10-p16133231 | A-genome specific (napus-rapa) | 0.9617225    | 0.5664024    | not scorable | not scorable | 0.9669421    | 0.7320617    |
| #### Bn-A10-p16142232 | A-genome specific (napus-rapa) | 0.9282297    | 0.8292632    | not scorable | not scorable | 0.5950413    | 0.8050921    |
| #### Bn-A10-p16152327 | A-genome specific (napus-rapa) | 0.9688995    | 0.6644346    | not scorable | not scorable | 0.9834711    | 0.7360232    |
| #### Bn-A10-p16158247 | A-genome specific (napus-rapa) | 0.9976076    | 0.3085144    | not scorable | not scorable | 1            | 0.6434359    |
| #### Bn-A10-p16158770 | A-genome specific (napus-rapa) | 0.9976076    | 0.5415778    | not scorable | not scorable | 1            | 0.7389528    |
| #### Bn-A10-p16162575 | A-genome specific (napus-rapa) | 0.9976076    | 0.6860476    | not scorable | not scorable | 0.9917355    | 0.6412179    |
| #### Bn-A10-p16164252 | A-genome specific (napus-rapa) | 1            | 0.7595295    | not scorable | not scorable | 1            | 0.7794786    |
| #### Bn-A10-p16170080 | A-genome specific (napus-rapa) | 0.9880383    | 0.4688526    | not scorable | not scorable | 1            | 0.7770089    |
| #### Bn-A10-p16172900 | A-genome specific (napus-rapa) | 1            | 0.8805304    | not scorable | not scorable | 0.9917355    | 0.6048523    |
| #### Bn-A10-p16180969 | A-genome specific (rapa only)  | not scorable | not scorable | not scorable | not scorable | 0.9669421    | 0.8813323    |
| #### Bn-A10-p16184233 | A-genome specific (napus-rapa) | 0.9808612    | 0.3583027    | not scorable | not scorable | 1            | 0.7901095    |
| #### Bn-A10-p16185535 | A-genome specific (napus-rapa) | 0.9928229    | 0.7897659    | not scorable | not scorable | 1            | 0.7753766    |
| #### Bn-A10-p16187017 | A-genome specific (napus-rapa) | 0.9617225    | 0.7764987    | not scorable | not scorable | 0.9421487    | 0.7414319    |
| #### Bn-A10-p16187357 | A-genome specific (napus-rapa) | 1            | 0.5384446    | not scorable | not scorable | 0.9917355    | 0.7444738    |
| #### Bn-A10-p16190708 | A-genome specific (napus-rapa) | 0.9880383    | 0.8189114    | not scorable | not scorable | 0.5950413    | 0.798256     |
| #### Bn-A10-p16198852 | all not scorable               | not scorable | not scorable | not scorable | not scorable | not scorable | not scorable |
| #### Bn-A10-p16207908 | A-genome specific (napus-rapa) | 1            | 0.5288974    | not scorable | not scorable | 0.9834711    | 0.7275873    |
| #### Bn-A10-p16210702 | A-genome specific (napus-rapa) | 1            | 0.5905794    | not scorable | not scorable | 0.9917355    | 0.4480403    |
| #### Bn-A10-p16213045 | A-genome specific (napus-rapa) | 0.9880383    | 0.6654876    | not scorable | not scorable | 0.9834711    | 0.7438427    |
| #### Bn-A10-p16215165 | A-genome specific (napus-rapa) | 0.923445     | 0.726858     | not scorable | not scorable | 0.5785124    | 0.6165801    |
| #### Bn-A10-p16215351 | A-genome specific (napus-rapa) | 0.923445     | 0.6696105    | not scorable | not scorable | 1            | 0.6275694    |
| #### Bn-A10-p16224024 | A-genome specific (napus-rapa) | 0.9952153    | 0.7706705    | not scorable | not scorable | 0.9834711    | 0.7245935    |
| #### Bn-A10-p16237178 | A-genome specific (napus-rapa) | 0.9784689    | 0.3315449    | not scorable | not scorable | 0.9834711    | 0.7220358    |
| #### Bn-A10-p16240511 | A-genome specific (napus-rapa) | 1            | 0.7492146    | not scorable | not scorable | 0.9917355    | 0.6879878    |
| #### Bn-A10-p16240958 | A-genome specific (napus-rapa) | 0.9736842    | 0.6658589    | not scorable | not scorable | 0.9504132    | 0.6187034    |
| #### Bn-A10-p16249484 | A-genome specific (napus-rapa) | 0.9880383    | 0.3345674    | not scorable | not scorable | 0.8099173    | 0.74273      |
| #### Bn-A10-p16285282 | A-genome specific (napus-rapa) | 0.9928229    | 0.6960153    | not scorable | not scorable | 0.9834711    | 0.6792908    |

|                       |                                |              |              |              |              |              |              |
|-----------------------|--------------------------------|--------------|--------------|--------------|--------------|--------------|--------------|
| #### Bn-A10-p16287574 | A-genome specific (rapa only)  | not scorable | not scorable | not scorable | not scorable | 0.9752066    | 0.7242953    |
| #### Bn-A10-p1629545  | napus specific                 | 0.9712918    | 0.7763747    | not scorable | not scorable | not scorable | not scorable |
| #### Bn-A10-p16296069 | A-genome specific (napus-rapa) | 0.8971292    | 0.7897708    | not scorable | not scorable | 0.677686     | 0.8652539    |
| #### Bn-A10-p16312405 | A-genome specific (napus-rapa) | 0.9976076    | 0.7835496    | not scorable | not scorable | 0.9834711    | 0.7604439    |
| #### Bn-A10-p16317798 | A-genome specific (napus-rapa) | 0.9976076    | 0.3324583    | not scorable | not scorable | 0.9917355    | 0.7980728    |
| #### Bn-A10-p16326058 | A-genome specific (napus-rapa) | 0.9019139    | 0.7984244    | not scorable | not scorable | 0.9834711    | 0.722799     |
| #### Bn-A10-p16326486 | A-genome specific (napus-rapa) | 0.9066986    | 0.4675737    | not scorable | not scorable | 0.9917355    | 0.7415087    |
| #### Bn-A10-p16331328 | napus specific                 | 0.777512     | 0.7793047    | not scorable | not scorable | not scorable | not scorable |
| #### Bn-A10-p16336708 | A-genome specific (napus-rapa) | 0.9784689    | 0.7867067    | not scorable | not scorable | 0.6528926    | 0.7166948    |
| #### Bn-A10-p16344917 | A-genome specific (napus-rapa) | 0.7416268    | 0.6859205    | not scorable | not scorable | 0.9504132    | 0.6703981    |
| #### Bn-A10-p16354622 | A-genome specific (napus-rapa) | 0.9808612    | 0.3454809    | not scorable | not scorable | 0.9834711    | 0.611343     |
| #### Bn-A10-p16357479 | A-genome specific (napus-rapa) | 0.9784689    | 0.7717725    | not scorable | not scorable | 0.9917355    | 0.7064669    |
| #### Bn-A10-p16360911 | A-genome specific (napus-rapa) | 1            | 0.6970024    | not scorable | not scorable | 0.9834711    | 0.6969439    |
| #### Bn-A10-p16363196 | A-genome specific (napus-rapa) | 1            | 0.4201565    | not scorable | not scorable | 0.9834711    | 0.6947065    |
| #### Bn-A10-p16368552 | A-genome specific (napus-rapa) | 0.9449761    | 0.4229895    | not scorable | not scorable | 1            | 0.6944501    |
| #### Bn-A10-p16377145 | A-genome specific (napus-rapa) | 0.9545454    | 0.3283698    | not scorable | not scorable | 0.9917355    | 0.6193482    |
| #### Bn-A10-p16396586 | A-genome specific (napus-rapa) | 0.8923445    | 0.4043234    | not scorable | not scorable | 0.9917355    | 0.7004697    |
| #### Bn-A10-p16401876 | A-genome specific (napus-rapa) | 0.9425837    | 0.8121082    | not scorable | not scorable | 1            | 0.7695781    |
| #### Bn-A10-p16401982 | A-genome specific (napus-rapa) | 0.9952153    | 0.8012605    | not scorable | not scorable | 0.9917355    | 0.6667968    |
| #### Bn-A10-p16404507 | A-genome specific (napus-rapa) | 0.9688995    | 0.4519111    | not scorable | not scorable | 1            | 0.6403595    |
| #### Bn-A10-p16405686 | A-genome specific (napus-rapa) | 0.9928229    | 0.7621616    | not scorable | not scorable | 0.9917355    | 0.7888688    |
| #### Bn-A10-p16415851 | A-genome specific (napus-rapa) | 0.9856459    | 0.5119116    | not scorable | not scorable | 0.9834711    | 0.812551     |
| #### Bn-A10-p16421672 | A-genome specific (napus-rapa) | 0.9832536    | 0.7223124    | not scorable | not scorable | 0.9834711    | 0.6498818    |
| #### Bn-A10-p16424917 | A-genome specific (napus-rapa) | 0.9856459    | 0.7634772    | not scorable | not scorable | 0.9917355    | 0.7314978    |
| #### Bn-A10-p16425155 | genome unspecific (all in)     | 0.9712918    | 0.5460922    |              | 1 0.7908622  | 1            | 0.6084729    |
| #### Bn-A10-p16433241 | A-genome specific (napus-rapa) | 0.9928229    | 0.6977424    | not scorable | not scorable | 1            | 0.620243     |
| #### Bn-A10-p16433338 | A-genome specific (napus-rapa) | 0.9760765    | 0.7941719    | not scorable | not scorable | 0.9834711    | 0.8232808    |
| #### Bn-A10-p16437131 | A-genome specific (napus-rapa) | 0.9856459    | 0.6778185    | not scorable | not scorable | 0.9917355    | 0.7813592    |
| #### Bn-A10-p16439150 | A-genome specific (napus-rapa) | 0.9808612    | 0.5002791    | not scorable | not scorable | 0.9917355    | 0.788502     |
| #### Bn-A10-p16442531 | A-genome specific (napus-rapa) | 0.9712918    | 0.2992925    | not scorable | not scorable | 0.9752066    | 0.5823309    |
| #### Bn-A10-p16448121 | A-genome specific (napus-rapa) | 0.8827751    | 0.8708013    | not scorable | not scorable | 0.9752066    | 0.7592736    |
| #### Bn-A10-p16450218 | A-genome specific (napus-rapa) | 0.9569378    | 0.5610559    | not scorable | not scorable | 1            | 0.6942282    |
| #### Bn-A10-p16450580 | A-genome specific (napus-rapa) | 0.9258373    | 0.7510371    | not scorable | not scorable | 0.5950413    | 0.8633928    |

|                       |                                   |              |              |              |              |              |              |
|-----------------------|-----------------------------------|--------------|--------------|--------------|--------------|--------------|--------------|
| #### Bn-A10-p16451834 | genome unspecific (all in)        | 0.9736842    | 0.5040826    | 1            | 0.7758955    | 0.9834711    | 0.6866167    |
| #### Bn-A10-p16516985 | A-genome specific (napus-rapa)    | 0.9688995    | 0.4237947    | not scorable | not scorable | 0.9752066    | 0.4597722    |
| #### Bn-A10-p16522658 | A-genome specific (napus-rapa)    | 0.9808612    | 0.5334057    | not scorable | not scorable | 0.9917355    | 0.6715519    |
| #### Bn-A10-p1655784  | A-genome specific (napus-rapa)    | 0.9736842    | 0.7655461    | not scorable | not scorable | 0.9421487    | 0.8083101    |
| #### Bn-A10-p16595840 | A-genome specific (napus-rapa)    | 0.9976076    | 0.5576317    | not scorable | not scorable | 0.9834711    | 0.6520524    |
| #### Bn-A10-p16620627 | A-genome specific (napus-rapa)    | 0.9928229    | 0.8598883    | not scorable | not scorable | 1            | 0.6886985    |
| #### Bn-A10-p16621651 | all not scorable                  | not scorable | not scorable | not scorable | not scorable | not scorable | not scorable |
| #### Bn-A10-p16626615 | A-genome specific (napus-rapa)    | 0.9904306    | 0.8661646    | not scorable | not scorable | 0.9917355    | 0.8322049    |
| #### Bn-A10-p16640315 | A-genome specific (napus-rapa)    | 0.9976076    | 0.7192289    | not scorable | not scorable | 1            | 0.6481135    |
| #### Bn-A10-p16672063 | A-genome specific (napus-rapa)    | 0.9952153    | 0.7545348    | not scorable | not scorable | 0.9834711    | 0.6794593    |
| #### Bn-A10-p16673324 | all not scorable                  | not scorable | not scorable | not scorable | not scorable | not scorable | not scorable |
| #### Bn-A10-p16673808 | A-genome specific (napus-rapa)    | 1            | 0.765373     | not scorable | not scorable | 1            | 0.7042676    |
| #### Bn-A10-p16674476 | A-genome specific (napus-rapa)    | 1            | 0.8240278    | not scorable | not scorable | 0.9917355    | 0.7314572    |
| #### Bn-A10-p16694218 | A-genome specific (napus-rapa)    | 0.9665072    | 0.6964099    | not scorable | not scorable | 1            | 0.7832364    |
| #### Bn-A10-p16694564 | A-genome specific (napus-rapa)    | 1            | 0.7580874    | not scorable | not scorable | 1            | 0.7958946    |
| #### Bn-A10-p16695705 | A-genome specific (napus-rapa)    | 0.9784689    | 0.3158245    | not scorable | not scorable | 0.9917355    | 0.7320851    |
| #### Bn-A10-p16696977 | A-genome specific (napus-rapa)    | 0.9569378    | 0.4056763    | not scorable | not scorable | 1            | 0.6906306    |
| #### Bn-A10-p16703268 | A-genome specific (napus-rapa)    | 0.9545454    | 0.4110819    | not scorable | not scorable | 0.9917355    | 0.7413341    |
| #### Bn-A10-p16706289 | A-genome specific (napus-rapa)    | 0.9760765    | 0.4744934    | not scorable | not scorable | 1            | 0.8135551    |
| #### Bn-A10-p16712853 | A-genome specific (napus-rapa)    | 0.9904306    | 0.6850141    | not scorable | not scorable | 0.9917355    | 0.6531819    |
| #### Bn-A10-p16718558 | A-genome specific (napus-rapa)    | 0.9880383    | 0.7887299    | not scorable | not scorable | 0.9834711    | 0.7900936    |
| #### Bn-A10-p16737974 | A-genome specific (napus-rapa)    | 0.9928229    | 0.8371594    | not scorable | not scorable | 0.9917355    | 0.754951     |
| #### Bn-A10-p16752445 | A-genome specific (napus-rapa)    | 0.9832536    | 0.6877334    | not scorable | not scorable | 1            | 0.631754     |
| #### Bn-A10-p16754116 | A-genome specific (napus-rapa)    | 0.9760765    | 0.7915128    | not scorable | not scorable | 1            | 0.8039128    |
| #### Bn-A10-p16796374 | A-genome specific (napus-rapa)    | 0.7177033    | 0.6657584    | not scorable | not scorable | 0.9504132    | 0.7807334    |
| #### Bn-A10-p16816027 | A-genome specific (rapa only)     | not scorable | not scorable | not scorable | not scorable | 0.9834711    | 0.8884342    |
| #### Bn-A10-p16821888 | A-genome specific (rapa only)     | not scorable | not scorable | not scorable | not scorable | 0.6446281    | 0.7812293    |
| #### Bn-A10-p16824950 | A-genome specific (napus-rapa)    | 0.9688995    | 0.3461921    | not scorable | not scorable | 0.9834711    | 0.5237926    |
| #### Bn-A10-p16836688 | A-genome specific (napus-rapa)    | 0.9808612    | 0.403413     | not scorable | not scorable | 0.9917355    | 0.7689971    |
| #### Bn-A10-p16837056 | A-genome specific (napus-rapa)    | 1            | 0.7436585    | not scorable | not scorable | 0.9917355    | 0.8026143    |
| #### Bn-A10-p16849280 | genome unspecific (oleracea-rapa) | not scorable | not scorable | 0.9922481    | 0.7941284    | 0.9917355    | 0.7771693    |
| #### Bn-A10-p16862809 | A-genome specific (napus-rapa)    | 0.3181818    | 0.8579317    | not scorable | not scorable | 0.9917355    | 0.8026348    |
| #### Bn-A10-p16871085 | A-genome specific (napus-rapa)    | 0.9856459    | 0.6676899    | not scorable | not scorable | 0.9834711    | 0.6564031    |

|                       |                                |              |              |              |              |              |              |
|-----------------------|--------------------------------|--------------|--------------|--------------|--------------|--------------|--------------|
| #### Bn-A10-p16879904 | A-genome specific (napus-rapa) | 0.9976076    | 0.6831111    | not scorable | not scorable | 1            | 0.7349294    |
| #### Bn-A10-p16918181 | A-genome specific (napus-rapa) | 0.9736842    | 0.5263358    | not scorable | not scorable | 0.9917355    | 0.7848277    |
| #### Bn-A10-p16918661 | A-genome specific (napus-rapa) | 0.9808612    | 0.7701046    | not scorable | not scorable | 0.9917355    | 0.7303502    |
| #### Bn-A10-p16919120 | A-genome specific (napus-rapa) | 1            | 0.8959246    | not scorable | not scorable | 1            | 0.8050069    |
| #### Bn-A10-p16924111 | A-genome specific (napus-rapa) | 0.9808612    | 0.7651073    | not scorable | not scorable | 0.9834711    | 0.7069353    |
| #### Bn-A10-p16927895 | A-genome specific (napus-rapa) | 0.9952153    | 0.3899819    | not scorable | not scorable | 1            | 0.827477     |
| #### Bn-A10-p16932737 | A-genome specific (napus-rapa) | 0.9880383    | 0.8036504    | not scorable | not scorable | 0.9834711    | 0.6656956    |
| #### Bn-A10-p16933405 | A-genome specific (napus-rapa) | 0.9928229    | 0.8076818    | not scorable | not scorable | 1            | 0.7960822    |
| #### Bn-A10-p16935603 | A-genome specific (napus-rapa) | 0.9736842    | 0.9104227    | not scorable | not scorable | 0.9173554    | 0.7761008    |
| #### Bn-A10-p1698746  | A-genome specific (napus-rapa) | 0.8923445    | 0.8806823    | not scorable | not scorable | 0.9917355    | 0.8085446    |
| #### Bn-A10-p17088392 | A-genome specific (napus-rapa) | 0.9784689    | 0.4213316    | not scorable | not scorable | 0.9917355    | 0.6468633    |
| #### Bn-A10-p17089148 | A-genome specific (napus-rapa) | 0.9832536    | 0.754097     | not scorable | not scorable | 0.9917355    | 0.7600426    |
| #### Bn-A10-p17089502 | A-genome specific (napus-rapa) | 0.9856459    | 0.7862545    | not scorable | not scorable | 1            | 0.8324271    |
| #### Bn-A10-p17089726 | A-genome specific (napus-rapa) | 0.9688995    | 0.6243928    | not scorable | not scorable | 0.9917355    | 0.6337016    |
| #### Bn-A10-p17089814 | A-genome specific (napus-rapa) | 0.9832536    | 0.7492737    | not scorable | not scorable | 0.9834711    | 0.8163355    |
| #### Bn-A10-p17123813 | napus specific                 | 0.9832536    | 0.8231425    | not scorable | not scorable | not scorable | not scorable |
| #### Bn-A10-p17125825 | napus specific                 | 0.3588517    | 0.7533694    | not scorable | not scorable | not scorable | not scorable |
| #### Bn-A10-p17146557 | A-genome specific (napus-rapa) | 0.8133971    | 0.7759107    | not scorable | not scorable | 0.7355372    | 0.8207097    |
| #### Bn-A10-p17148313 | A-genome specific (napus-rapa) | 0.9617225    | 0.7348576    | not scorable | not scorable | 0.9752066    | 0.7654288    |
| #### Bn-A10-p17160136 | A-genome specific (napus-rapa) | 0.9808612    | 0.725681     | not scorable | not scorable | 0.9917355    | 0.7373461    |
| #### Bn-A10-p17169081 | A-genome specific (rapa only)  | not scorable | not scorable | not scorable | not scorable | 0.9917355    | 0.7428123    |
| #### Bn-A10-p17262954 | A-genome specific (napus-rapa) | 0.9665072    | 0.7722156    | not scorable | not scorable | 0.9917355    | 0.7684846    |
| #### Bn-A10-p17273374 | A-genome specific (napus-rapa) | 0.9760765    | 0.8160982    | not scorable | not scorable | 0.9917355    | 0.7565523    |
| #### Bn-A10-p17279612 | A-genome specific (napus-rapa) | 1            | 0.5638762    | not scorable | not scorable | 0.9752066    | 0.8214436    |
| #### Bn-A10-p17302908 | A-genome specific (napus-rapa) | 0.9736842    | 0.7972963    | not scorable | not scorable | 1            | 0.6425219    |
| #### Bn-A10-p17321665 | A-genome specific (napus-rapa) | 0.9976076    | 0.4862685    | not scorable | not scorable | 0.9834711    | 0.8153247    |
| #### Bn-A10-p17327421 | A-genome specific (napus-rapa) | 0.9856459    | 0.4270704    | not scorable | not scorable | 0.9917355    | 0.82103      |
| #### Bn-A10-p17344603 | A-genome specific (napus-rapa) | 0.9736842    | 0.5443195    | not scorable | not scorable | 0.9421487    | 0.8137556    |
| #### Bn-A10-p173508   | A-genome specific (napus-rapa) | 0.9928229    | 0.5659644    | not scorable | not scorable | 1            | 0.8036112    |
| #### Bn-A10-p17367157 | A-genome specific (napus-rapa) | 0.9736842    | 0.3911012    | not scorable | not scorable | 1            | 0.7662695    |
| #### Bn-A10-p17371072 | A-genome specific (napus-rapa) | 0.6866029    | 0.8195331    | not scorable | not scorable | 1            | 0.7583688    |
| #### Bn-A10-p173989   | A-genome specific (napus-rapa) | 0.9856459    | 0.7908655    | not scorable | not scorable | 1            | 0.8005844    |
| #### Bn-A10-p17414621 | A-genome specific (napus-rapa) | 0.9569378    | 0.8027128    | not scorable | not scorable | 1            | 0.7439968    |



|                       |                                |              |              |              |              |           |           |
|-----------------------|--------------------------------|--------------|--------------|--------------|--------------|-----------|-----------|
| #### Bn-A10-p17421322 | A-genome specific (napus-rapa) | 0.9688995    | 0.7770782    | not scorable | not scorable | 1         | 0.7947605 |
| #### Bn-A10-p17434951 | A-genome specific (napus-rapa) | 0.9736842    | 0.7432006    | not scorable | not scorable | 1         | 0.7492483 |
| #### Bn-A10-p174519   | A-genome specific (napus-rapa) | 0.9928229    | 0.7176599    | not scorable | not scorable | 1         | 0.8110293 |
| #### Bn-A10-p1746455  | A-genome specific (napus-rapa) | 0.9952153    | 0.8082915    | not scorable | not scorable | 0.9917355 | 0.8301459 |
| #### Bn-A10-p17470876 | A-genome specific (napus-rapa) | 0.9617225    | 0.4182801    | not scorable | not scorable | 0.9834711 | 0.7365118 |
| #### Bn-A10-p17500897 | A-genome specific (napus-rapa) | 1            | 0.3265182    | not scorable | not scorable | 0.9917355 | 0.772669  |
| #### Bn-A10-p17541781 | A-genome specific (napus-rapa) | 0.9736842    | 0.305143     | not scorable | not scorable | 1         | 0.7833098 |
| #### Bn-A10-p17549759 | A-genome specific (rapa only)  | not scorable | not scorable | not scorable | not scorable | 1         | 0.6547505 |
| #### Bn-A10-p17555032 | A-genome specific (napus-rapa) | 0.9688995    | 0.2994066    | not scorable | not scorable | 1         | 0.6054037 |
| #### Bn-A10-p17561217 | A-genome specific (napus-rapa) | 0.930622     | 0.7344189    | not scorable | not scorable | 0.9752066 | 0.8224964 |
| #### Bn-A10-p175613   | A-genome specific (napus-rapa) | 0.9928229    | 0.7044045    | not scorable | not scorable | 1         | 0.7770699 |
| #### Bn-A10-p17565344 | A-genome specific (napus-rapa) | 1            | 0.7590684    | not scorable | not scorable | 1         | 0.8105538 |
| #### Bn-A10-p17565347 | A-genome specific (napus-rapa) | 1            | 0.8835643    | not scorable | not scorable | 1         | 0.9165596 |
| #### Bn-A10-p175661   | A-genome specific (napus-rapa) | 0.9976076    | 0.8031486    | not scorable | not scorable | 1         | 0.7289162 |
| #### Bn-A10-p17566833 | A-genome specific (napus-rapa) | 0.9569378    | 0.8000373    | not scorable | not scorable | 0.9752066 | 0.7129328 |
| #### Bn-A10-p17568393 | A-genome specific (napus-rapa) | 0.9473684    | 0.7876917    | not scorable | not scorable | 0.9834711 | 0.7658891 |
| #### Bn-A10-p17575474 | A-genome specific (napus-rapa) | 0.9784689    | 0.272985     | not scorable | not scorable | 0.9752066 | 0.7065215 |
| #### Bn-A10-p1782825  | A-genome specific (napus-rapa) | 0.9808612    | 0.8049427    | not scorable | not scorable | 0.9834711 | 0.8302105 |
| #### Bn-A10-p1787348  | A-genome specific (rapa only)  | not scorable | not scorable | not scorable | not scorable | 0.9752066 | 0.7822778 |
| #### Bn-A10-p1791974  | A-genome specific (napus-rapa) | 0.9952153    | 0.7553325    | not scorable | not scorable | 1         | 0.7841386 |
| #### Bn-A10-p1800811  | A-genome specific (napus-rapa) | 0.9928229    | 0.8516998    | not scorable | not scorable | 0.9586777 | 0.7312071 |
| #### Bn-A10-p180934   | A-genome specific (napus-rapa) | 1            | 0.7362843    | not scorable | not scorable | 0.9917355 | 0.7141855 |
| #### Bn-A10-p182060   | A-genome specific (napus-rapa) | 0.9952153    | 0.4001305    | not scorable | not scorable | 0.9752066 | 0.7172196 |
| #### Bn-A10-p1881790  | A-genome specific (rapa only)  | not scorable | not scorable | not scorable | not scorable | 0.9834711 | 0.7690871 |
| #### Bn-A10-p189638   | A-genome specific (napus-rapa) | 1            | 0.7318142    | not scorable | not scorable | 0.9834711 | 0.6940708 |
| #### Bn-A10-p189778   | A-genome specific (napus-rapa) | 1            | 0.7458546    | not scorable | not scorable | 0.9834711 | 0.6967735 |
| #### Bn-A10-p1900932  | A-genome specific (napus-rapa) | 0.9904306    | 0.7936185    | not scorable | not scorable | 1         | 0.7781186 |
| #### Bn-A10-p190381   | A-genome specific (napus-rapa) | 0.9856459    | 0.7617105    | not scorable | not scorable | 0.9917355 | 0.7831849 |
| #### Bn-A10-p191051   | A-genome specific (napus-rapa) | 1            | 0.7155635    | not scorable | not scorable | 0.9834711 | 0.6305295 |
| #### Bn-A10-p191555   | A-genome specific (napus-rapa) | 0.9976076    | 0.6865596    | not scorable | not scorable | 1         | 0.6880512 |
| #### Bn-A10-p191700   | A-genome specific (napus-rapa) | 0.9928229    | 0.7040524    | not scorable | not scorable | 1         | 0.7437179 |
| #### Bn-A10-p1919293  | A-genome specific (napus-rapa) | 1            | 0.4452642    | not scorable | not scorable | 1         | 0.7934788 |
| #### Bn-A10-p1920466  | A-genome specific (napus-rapa) | 0.9856459    | 0.8344903    | not scorable | not scorable | 1         | 0.879253  |

|                      |                                |              |              |              |              |           |   |           |
|----------------------|--------------------------------|--------------|--------------|--------------|--------------|-----------|---|-----------|
| #### Bn-A10-p1939668 | A-genome specific (napus-rapa) | 0.9976076    | 0.8323119    | not scorable | not scorable |           | 1 | 0.5776853 |
| #### Bn-A10-p1939809 | A-genome specific (napus-rapa) | 0.9880383    | 0.7099395    | not scorable | not scorable |           | 1 | 0.7933686 |
| #### Bn-A10-p1956075 | A-genome specific (napus-rapa) | 0.9928229    | 0.8178176    | not scorable | not scorable | 0.9834711 |   | 0.8491353 |
| #### Bn-A10-p1956491 | A-genome specific (napus-rapa) | 0.9952153    | 0.7691042    | not scorable | not scorable |           | 1 | 0.9441485 |
| #### Bn-A10-p1957591 | A-genome specific (napus-rapa) | 0.9712918    | 0.4359731    | not scorable | not scorable | 0.9834711 |   | 0.7103029 |
| #### Bn-A10-p1962854 | A-genome specific (napus-rapa) | 0.9856459    | 0.8420845    | not scorable | not scorable | 0.9586777 |   | 0.6824803 |
| #### Bn-A10-p2008903 | A-genome specific (napus-rapa) | 0.9880383    | 0.7934527    | not scorable | not scorable | 0.9917355 |   | 0.6792608 |
| #### Bn-A10-p2010205 | A-genome specific (napus-rapa) | 0.9904306    | 0.7219845    | not scorable | not scorable | 0.9917355 |   | 0.7291554 |
| #### Bn-A10-p2012635 | A-genome specific (napus-rapa) | 0.9904306    | 0.7113459    | not scorable | not scorable | 0.9834711 |   | 0.7181741 |
| #### Bn-A10-p2022381 | genome unspecific (all in)     | 0.930622     | 0.5842606    | 0.9767442    | 0.8176827    | 0.9917355 |   | 0.6640208 |
| #### Bn-A10-p2034005 | A-genome specific (napus-rapa) | 1            | 0.7579936    | not scorable | not scorable |           | 1 | 0.7914145 |
| #### Bn-A10-p2034006 | A-genome specific (rapa only)  | not scorable | not scorable | not scorable | not scorable |           | 1 | 0.7673845 |
| #### Bn-A10-p2035810 | A-genome specific (napus-rapa) | 0.9952153    | 0.7933395    | not scorable | not scorable | 0.9752066 |   | 0.8349444 |
| #### Bn-A10-p2042679 | A-genome specific (napus-rapa) | 0.9688995    | 0.779614     | not scorable | not scorable | 0.9669421 |   | 0.785157  |
| #### Bn-A10-p2042772 | A-genome specific (napus-rapa) | 0.9952153    | 0.7287646    | not scorable | not scorable | 0.9917355 |   | 0.6795306 |
| #### Bn-A10-p2044339 | A-genome specific (napus-rapa) | 0.9976076    | 0.6844441    | not scorable | not scorable |           | 1 | 0.7748827 |
| #### Bn-A10-p2048753 | A-genome specific (napus-rapa) | 0.3325359    | 0.6873912    | not scorable | not scorable | 0.9917355 |   | 0.747707  |
| #### Bn-A10-p2048923 | A-genome specific (napus-rapa) | 0.9904306    | 0.824527     | not scorable | not scorable | 0.9834711 |   | 0.7297707 |
| #### Bn-A10-p2056053 | A-genome specific (napus-rapa) | 0.9760765    | 0.5054495    | not scorable | not scorable | 0.9752066 |   | 0.845739  |
| #### Bn-A10-p2059382 | A-genome specific (napus-rapa) | 0.9880383    | 0.772545     | not scorable | not scorable |           | 1 | 0.7992573 |
| #### Bn-A10-p206167  | A-genome specific (napus-rapa) | 0.9976076    | 0.5268167    | not scorable | not scorable |           | 1 | 0.5109285 |
| #### Bn-A10-p2062185 | A-genome specific (napus-rapa) | 0.9952153    | 0.7989367    | not scorable | not scorable | 0.9834711 |   | 0.7562366 |
| #### Bn-A10-p2065185 | A-genome specific (napus-rapa) | 0.9712918    | 0.78929      | not scorable | not scorable |           | 1 | 0.7241176 |
| #### Bn-A10-p2065818 | A-genome specific (napus-rapa) | 0.9760765    | 0.8251441    | not scorable | not scorable | 0.9917355 |   | 0.7223995 |
| #### Bn-A10-p2065917 | A-genome specific (napus-rapa) | 0.9928229    | 0.641221     | not scorable | not scorable |           | 1 | 0.7584216 |
| #### Bn-A10-p2074000 | A-genome specific (napus-rapa) | 0.9928229    | 0.7646579    | not scorable | not scorable | 0.9917355 |   | 0.7024543 |
| #### Bn-A10-p2084182 | A-genome specific (napus-rapa) | 0.9808612    | 0.7345482    | not scorable | not scorable |           | 1 | 0.7622204 |
| #### Bn-A10-p2086836 | A-genome specific (napus-rapa) | 0.9784689    | 0.7848219    | not scorable | not scorable | 0.9834711 |   | 0.729246  |
| #### Bn-A10-p2092612 | A-genome specific (napus-rapa) | 0.9593301    | 0.7749472    | not scorable | not scorable |           | 1 | 0.9033502 |
| #### Bn-A10-p2096179 | A-genome specific (napus-rapa) | 1            | 0.7860808    | not scorable | not scorable |           | 1 | 0.9165989 |
| #### Bn-A10-p2096482 | A-genome specific (napus-rapa) | 0.9880383    | 0.7758817    | not scorable | not scorable | 0.9917355 |   | 0.6963516 |
| #### Bn-A10-p2104477 | A-genome specific (napus-rapa) | 0.9784689    | 0.3765519    | not scorable | not scorable |           | 1 | 0.8734245 |
| #### Bn-A10-p2106781 | A-genome specific (napus-rapa) | 0.9832536    | 0.7183256    | not scorable | not scorable |           | 1 | 0.8019897 |

|                      |                                |           |           |              |              |              |              |
|----------------------|--------------------------------|-----------|-----------|--------------|--------------|--------------|--------------|
| #### Bn-A10-p2107649 | A-genome specific (napus-rapa) | 0.9832536 | 0.5325173 | not scorable | not scorable | 0.9917355    | 0.6688266    |
| #### Bn-A10-p2107673 | A-genome specific (napus-rapa) | 0.9928229 | 0.7754029 | not scorable | not scorable | 0.9917355    | 0.7775643    |
| #### Bn-A10-p2113222 | A-genome specific (napus-rapa) | 1         | 0.5810553 | not scorable | not scorable | 1            | 0.753584     |
| #### Bn-A10-p212837  | A-genome specific (napus-rapa) | 1         | 0.8467478 | not scorable | not scorable | 0.9669421    | 0.7139894    |
| #### Bn-A10-p213607  | A-genome specific (napus-rapa) | 1         | 0.6154373 | not scorable | not scorable | 1            | 0.725806     |
| #### Bn-A10-p2153847 | napus specific                 | 0.9617225 | 0.799237  | not scorable | not scorable | not scorable | not scorable |
| #### Bn-A10-p2156484 | A-genome specific (napus-rapa) | 0.4904306 | 0.9018453 | not scorable | not scorable | 0.9586777    | 0.7847098    |
| #### Bn-A10-p2166959 | A-genome specific (napus-rapa) | 0.9784689 | 0.7453718 | not scorable | not scorable | 0.9669421    | 0.734412     |
| #### Bn-A10-p2171166 | A-genome specific (napus-rapa) | 0.9641148 | 0.7063888 | not scorable | not scorable | 0.9504132    | 0.6720399    |
| #### Bn-A10-p2174043 | A-genome specific (napus-rapa) | 0.9880383 | 0.6455783 | not scorable | not scorable | 0.9504132    | 0.652864     |
| #### Bn-A10-p2174162 | A-genome specific (napus-rapa) | 0.9856459 | 0.6633876 | not scorable | not scorable | 0.9421487    | 0.6747661    |
| #### Bn-A10-p2174249 | A-genome specific (napus-rapa) | 0.9760765 | 0.7441902 | not scorable | not scorable | 0.9586777    | 0.7800575    |
| #### Bn-A10-p2176252 | A-genome specific (napus-rapa) | 0.9784689 | 0.7337916 | not scorable | not scorable | 0.9669421    | 0.8484451    |
| #### Bn-A10-p2196623 | A-genome specific (napus-rapa) | 0.7535885 | 0.702437  | not scorable | not scorable | 0.9917355    | 0.6043087    |
| #### Bn-A10-p2208158 | A-genome specific (napus-rapa) | 0.6913875 | 0.7645225 | not scorable | not scorable | 0.9504132    | 0.7855847    |
| #### Bn-A10-p2240635 | A-genome specific (napus-rapa) | 0.9712918 | 0.7087677 | not scorable | not scorable | 0.9917355    | 0.868124     |
| #### Bn-A10-p2246688 | A-genome specific (napus-rapa) | 0.9904306 | 0.7602899 | not scorable | not scorable | 1            | 0.829812     |
| #### Bn-A10-p2247699 | A-genome specific (napus-rapa) | 0.9617225 | 0.7045063 | not scorable | not scorable | 0.9917355    | 0.8090026    |
| #### Bn-A10-p2260170 | A-genome specific (napus-rapa) | 0.9641148 | 0.3438975 | not scorable | not scorable | 0.9669421    | 0.7791584    |
| #### Bn-A10-p226207  | A-genome specific (napus-rapa) | 0.9976076 | 0.7708207 | not scorable | not scorable | 0.9669421    | 0.7519488    |
| #### Bn-A10-p2262873 | A-genome specific (napus-rapa) | 0.9736842 | 0.7856001 | not scorable | not scorable | 0.9669421    | 0.8092177    |
| #### Bn-A10-p2266029 | A-genome specific (napus-rapa) | 0.9784689 | 0.689738  | not scorable | not scorable | 0.9752066    | 0.7669784    |
| #### Bn-A10-p2268467 | A-genome specific (napus-rapa) | 0.9617225 | 0.7238718 | not scorable | not scorable | 0.9917355    | 0.848021     |
| #### Bn-A10-p2268881 | A-genome specific (napus-rapa) | 0.9808612 | 0.6930628 | not scorable | not scorable | 1            | 0.6438069    |
| #### Bn-A10-p2279962 | A-genome specific (napus-rapa) | 1         | 0.467035  | not scorable | not scorable | 0.9917355    | 0.7437346    |
| #### Bn-A10-p2282    | A-genome specific (napus-rapa) | 1         | 0.6681895 | not scorable | not scorable | 1            | 0.7007138    |
| #### Bn-A10-p2292633 | A-genome specific (napus-rapa) | 0.9665072 | 0.2696739 | not scorable | not scorable | 1            | 0.6992411    |
| #### Bn-A10-p2294849 | A-genome specific (napus-rapa) | 0.9784689 | 0.7507748 | not scorable | not scorable | 1            | 0.8493426    |
| #### Bn-A10-p2295027 | A-genome specific (napus-rapa) | 0.9712918 | 0.7191273 | not scorable | not scorable | 1            | 0.7912976    |
| #### Bn-A10-p2309307 | A-genome specific (napus-rapa) | 0.8133971 | 0.8149901 | not scorable | not scorable | 1            | 0.8069351    |
| #### Bn-A10-p2309584 | A-genome specific (napus-rapa) | 0.8157895 | 0.8027672 | not scorable | not scorable | 0.9834711    | 0.6905791    |
| #### Bn-A10-p2311797 | A-genome specific (napus-rapa) | 0.8133971 | 0.8338172 | not scorable | not scorable | 0.9917355    | 0.7474023    |
| #### Bn-A10-p2312209 | A-genome specific (napus-rapa) | 0.8157895 | 0.8877317 | not scorable | not scorable | 0.9834711    | 0.6776016    |

|                      |                                |           |           |              |              |              |              |
|----------------------|--------------------------------|-----------|-----------|--------------|--------------|--------------|--------------|
| #### Bn-A10-p2315491 | A-genome specific (napus-rapa) | 1         | 0.8589982 | not scorable | not scorable | 1            | 0.9272014    |
| #### Bn-A10-p2315612 | A-genome specific (napus-rapa) | 0.9856459 | 0.4319704 | not scorable | not scorable | 0.9917355    | 0.7390939    |
| #### Bn-A10-p2337558 | A-genome specific (napus-rapa) | 0.9928229 | 0.6686432 | not scorable | not scorable | 0.9834711    | 0.6543377    |
| #### Bn-A10-p234189  | A-genome specific (napus-rapa) | 1         | 0.5120278 | not scorable | not scorable | 1            | 0.538463     |
| #### Bn-A10-p235238  | A-genome specific (napus-rapa) | 0.9952153 | 0.8279414 | not scorable | not scorable | 0.9917355    | 0.8013614    |
| #### Bn-A10-p2356781 | A-genome specific (napus-rapa) | 1         | 0.8928258 | not scorable | not scorable | 1            | 0.8279583    |
| #### Bn-A10-p2357401 | napus specific                 | 1         | 0.4831921 | not scorable | not scorable | not scorable | not scorable |
| #### Bn-A10-p2367479 | A-genome specific (napus-rapa) | 0.9641148 | 0.7686175 | not scorable | not scorable | 0.9586777    | 0.7602418    |
| #### Bn-A10-p2369024 | A-genome specific (napus-rapa) | 0.9760765 | 0.8105356 | not scorable | not scorable | 0.9834711    | 0.8480155    |
| #### Bn-A10-p2369622 | A-genome specific (napus-rapa) | 0.9688995 | 0.7891755 | not scorable | not scorable | 1            | 0.7453461    |
| #### Bn-A10-p237443  | A-genome specific (napus-rapa) | 0.9928229 | 0.4325292 | not scorable | not scorable | 1            | 0.767697     |
| #### Bn-A10-p2374648 | A-genome specific (napus-rapa) | 0.9760765 | 0.597609  | not scorable | not scorable | 1            | 0.7130358    |
| #### Bn-A10-p2385591 | A-genome specific (napus-rapa) | 0.9736842 | 0.6046669 | not scorable | not scorable | 0.9917355    | 0.7392402    |
| #### Bn-A10-p2403813 | A-genome specific (napus-rapa) | 0.9736842 | 0.4431009 | not scorable | not scorable | 1            | 0.7822807    |
| #### Bn-A10-p2415609 | A-genome specific (napus-rapa) | 0.9904306 | 0.7696739 | not scorable | not scorable | 1            | 0.7365522    |
| #### Bn-A10-p2416648 | A-genome specific (napus-rapa) | 0.9880383 | 0.7980523 | not scorable | not scorable | 1            | 0.4915406    |
| #### Bn-A10-p2425437 | A-genome specific (napus-rapa) | 0.2105263 | 0.868973  | not scorable | not scorable | 0.9669421    | 0.7401779    |
| #### Bn-A10-p2431843 | A-genome specific (napus-rapa) | 0.9928229 | 0.560106  | not scorable | not scorable | 0.9752066    | 0.7929088    |
| #### Bn-A10-p2443900 | A-genome specific (napus-rapa) | 0.9952153 | 0.8774131 | not scorable | not scorable | 1            | 0.9054094    |
| #### Bn-A10-p2444751 | A-genome specific (napus-rapa) | 0.9928229 | 0.371062  | not scorable | not scorable | 1            | 0.6143657    |
| #### Bn-A10-p2444761 | A-genome specific (napus-rapa) | 0.9880383 | 0.5115483 | not scorable | not scorable | 0.9917355    | 0.7410038    |
| #### Bn-A10-p2449120 | A-genome specific (napus-rapa) | 1         | 0.8517401 | not scorable | not scorable | 0.9917355    | 0.8124221    |
| #### Bn-A10-p2461822 | A-genome specific (napus-rapa) | 0.9952153 | 0.7979294 | not scorable | not scorable | 0.9669421    | 0.6933806    |
| #### Bn-A10-p2465908 | A-genome specific (napus-rapa) | 0.9928229 | 0.7767431 | not scorable | not scorable | 1            | 0.894273     |
| #### Bn-A10-p246700  | A-genome specific (napus-rapa) | 0.9952153 | 0.8402625 | not scorable | not scorable | 0.9917355    | 0.763689     |
| #### Bn-A10-p2468308 | A-genome specific (napus-rapa) | 0.9928229 | 0.3657592 | not scorable | not scorable | 0.9917355    | 0.827442     |
| #### Bn-A10-p2468805 | A-genome specific (napus-rapa) | 0.9976076 | 0.8724003 | not scorable | not scorable | 0.9752066    | 0.8204397    |
| #### Bn-A10-p2489044 | A-genome specific (napus-rapa) | 0.9976076 | 0.5249776 | not scorable | not scorable | 0.9917355    | 0.7687998    |
| #### Bn-A10-p2495533 | A-genome specific (napus-rapa) | 0.9856459 | 0.6044824 | not scorable | not scorable | 0.9917355    | 0.6898537    |
| #### Bn-A10-p2495652 | A-genome specific (napus-rapa) | 1         | 0.7835901 | not scorable | not scorable | 0.9917355    | 0.7004061    |
| #### Bn-A10-p2500393 | A-genome specific (napus-rapa) | 0.9808612 | 0.8505054 | not scorable | not scorable | 0.9752066    | 0.7145247    |
| #### Bn-A10-p2500523 | napus specific                 | 0.8588517 | 0.7686697 | not scorable | not scorable | not scorable | not scorable |
| #### Bn-A10-p2523110 | A-genome specific (napus-rapa) | 0.9856459 | 0.7747983 | not scorable | not scorable | 0.9917355    | 0.7210502    |

|                      |                                |              |              |              |              |              |              |
|----------------------|--------------------------------|--------------|--------------|--------------|--------------|--------------|--------------|
| #### Bn-A10-p2523239 | A-genome specific (napus-rapa) | 0.9928229    | 0.8367413    | not scorable | not scorable | 1            | 0.8535332    |
| #### Bn-A10-p2529144 | A-genome specific (napus-rapa) | 1            | 0.8575726    | not scorable | not scorable | 0.9917355    | 0.8412918    |
| #### Bn-A10-p2532668 | A-genome specific (napus-rapa) | 1            | 0.9108959    | not scorable | not scorable | 0.9834711    | 0.7887669    |
| #### Bn-A10-p2535072 | A-genome specific (napus-rapa) | 0.9904306    | 0.8697847    | not scorable | not scorable | 1            | 0.7737657    |
| #### Bn-A10-p2536196 | A-genome specific (napus-rapa) | 1            | 0.8805279    | not scorable | not scorable | 1            | 0.8351785    |
| #### Bn-A10-p2545412 | A-genome specific (napus-rapa) | 0.9976076    | 0.4116734    | not scorable | not scorable | 1            | 0.7841897    |
| #### Bn-A10-p2553059 | A-genome specific (rapa only)  | not scorable | not scorable | not scorable | not scorable | 0.9752066    | 0.6405118    |
| #### Bn-A10-p2554535 | A-genome specific (napus-rapa) | 1            | 0.8305296    | not scorable | not scorable | 1            | 0.7636814    |
| #### Bn-A10-p2557960 | A-genome specific (napus-rapa) | 0.9976076    | 0.8089374    | not scorable | not scorable | 0.9917355    | 0.6477692    |
| #### Bn-A10-p2580811 | A-genome specific (napus-rapa) | 1            | 0.7519353    | not scorable | not scorable | 1            | 0.7620944    |
| #### Bn-A10-p2589024 | A-genome specific (napus-rapa) | 1            | 0.5140564    | not scorable | not scorable | 0.9917355    | 0.777806     |
| #### Bn-A10-p2687844 | A-genome specific (napus-rapa) | 0.9760765    | 0.449448     | not scorable | not scorable | 0.9752066    | 0.7512195    |
| #### Bn-A10-p2710961 | A-genome specific (napus-rapa) | 0.7990431    | 0.6561385    | not scorable | not scorable | 0.9917355    | 0.7171748    |
| #### Bn-A10-p2713478 | all not scorable               | not scorable | not scorable | not scorable | not scorable | not scorable | not scorable |
| #### Bn-A10-p2728481 | A-genome specific (napus-rapa) | 1            | 0.3607854    | not scorable | not scorable | 0.9917355    | 0.7878538    |
| #### Bn-A10-p2742493 | A-genome specific (napus-rapa) | 1            | 0.3297577    | not scorable | not scorable | 1            | 0.8128426    |
| #### Bn-A10-p2747164 | A-genome specific (napus-rapa) | 0.9976076    | 0.7117746    | not scorable | not scorable | 1            | 0.5673592    |
| #### Bn-A10-p2762385 | A-genome specific (napus-rapa) | 0.9856459    | 0.779334     | not scorable | not scorable | 1            | 0.7732087    |
| #### Bn-A10-p2764779 | A-genome specific (napus-rapa) | 1            | 0.4985861    | not scorable | not scorable | 0.9917355    | 0.7934843    |
| #### Bn-A10-p2765290 | A-genome specific (napus-rapa) | 0.9856459    | 0.7787702    | not scorable | not scorable | 0.9752066    | 0.8271715    |
| #### Bn-A10-p2776972 | all not scorable               | not scorable | not scorable | not scorable | not scorable | not scorable | not scorable |
| #### Bn-A10-p2777921 | genome unspecific (all in)     | 0.9808612    | 0.7041458    | 0.9922481    | 0.6323129    | 0.9752066    | 0.7044718    |
| #### Bn-A10-p2804340 | A-genome specific (napus-rapa) | 0.9449761    | 0.5748204    | not scorable | not scorable | 1            | 0.8615158    |
| #### Bn-A10-p2805505 | A-genome specific (napus-rapa) | 0.9808612    | 0.4218142    | not scorable | not scorable | 0.9752066    | 0.7668982    |
| #### Bn-A10-p2809123 | A-genome specific (napus-rapa) | 0.9832536    | 0.3496706    | not scorable | not scorable | 0.9834711    | 0.6436501    |
| #### Bn-A10-p2819947 | A-genome specific (napus-rapa) | 0.9832536    | 0.7694426    | not scorable | not scorable | 0.9917355    | 0.852238     |
| #### Bn-A10-p2833336 | A-genome specific (napus-rapa) | 0.9138756    | 0.8351263    | not scorable | not scorable | 0.9917355    | 0.8250373    |
| #### Bn-A10-p284701  | A-genome specific (napus-rapa) | 0.9928229    | 0.7730957    | not scorable | not scorable | 0.9917355    | 0.7168198    |
| #### Bn-A10-p284815  | A-genome specific (napus-rapa) | 0.9928229    | 0.7619769    | not scorable | not scorable | 1            | 0.7716021    |
| #### Bn-A10-p2849300 | A-genome specific (napus-rapa) | 0.923445     | 0.6632551    | not scorable | not scorable | 0.9917355    | 0.8555309    |
| #### Bn-A10-p285080  | A-genome specific (napus-rapa) | 1            | 0.8279437    | not scorable | not scorable | 0.9917355    | 0.8010204    |
| #### Bn-A10-p285203  | A-genome specific (napus-rapa) | 0.9976076    | 0.6853052    | not scorable | not scorable | 0.9917355    | 0.6422943    |
| #### Bn-A10-p2852183 | A-genome specific (napus-rapa) | 0.923445     | 0.830679     | not scorable | not scorable | 0.9917355    | 0.785041     |

|                      |                                |              |              |              |              |              |              |
|----------------------|--------------------------------|--------------|--------------|--------------|--------------|--------------|--------------|
| #### Bn-A10-p285279  | A-genome specific (napus-rapa) | 0.9904306    | 0.7965924    | not scorable | not scorable | 1            | 0.8316744    |
| #### Bn-A10-p285533  | A-genome specific (napus-rapa) | 0.9856459    | 0.7957848    | not scorable | not scorable | 0.9917355    | 0.7817261    |
| #### Bn-A10-p285601  | A-genome specific (napus-rapa) | 1            | 0.891522     | not scorable | not scorable | 0.9834711    | 0.8367536    |
| #### Bn-A10-p286279  | A-genome specific (napus-rapa) | 0.9952153    | 0.7414835    | not scorable | not scorable | 1            | 0.8361847    |
| #### Bn-A10-p286335  | A-genome specific (napus-rapa) | 0.9952153    | 0.5818755    | not scorable | not scorable | 1            | 0.7344266    |
| #### Bn-A10-p2890008 | A-genome specific (napus-rapa) | 0.9952153    | 0.3302358    | not scorable | not scorable | 0.9669421    | 0.7281348    |
| #### Bn-A10-p2899850 | A-genome specific (napus-rapa) | 0.9760765    | 0.4973585    | not scorable | not scorable | 1            | 0.8141627    |
| #### Bn-A10-p292846  | A-genome specific (napus-rapa) | 0.9712918    | 0.2894929    | not scorable | not scorable | 1            | 0.8198369    |
| #### Bn-A10-p2937911 | A-genome specific (napus-rapa) | 0.9928229    | 0.6968681    | not scorable | not scorable | 0.9834711    | 0.7320368    |
| #### Bn-A10-p2939364 | A-genome specific (napus-rapa) | 0.9569378    | 0.4161762    | not scorable | not scorable | 0.9917355    | 0.7469749    |
| #### Bn-A10-p2941216 | A-genome specific (napus-rapa) | 0.9617225    | 0.8084012    | not scorable | not scorable | 0.892562     | 0.7441228    |
| #### Bn-A10-p2947958 | A-genome specific (napus-rapa) | 0.9832536    | 0.8067186    | not scorable | not scorable | 0.5041322    | 0.7749746    |
| #### Bn-A10-p2970564 | A-genome specific (napus-rapa) | 0.9521531    | 0.7706658    | not scorable | not scorable | 0.9917355    | 0.5897122    |
| #### Bn-A10-p2972293 | A-genome specific (napus-rapa) | 0.9952153    | 0.4338102    | not scorable | not scorable | 1            | 0.6764519    |
| #### Bn-A10-p2976330 | napus specific                 | 0.9401914    | 0.4376361    | not scorable | not scorable | not scorable | not scorable |
| #### Bn-A10-p2977092 | all not scorable               | not scorable | not scorable | not scorable | not scorable | not scorable | not scorable |
| #### Bn-A10-p2992421 | A-genome specific (napus-rapa) | 1            | 0.7107314    | not scorable | not scorable | 1            | 0.7770717    |
| #### Bn-A10-p2992463 | A-genome specific (napus-rapa) | 0.9856459    | 0.7833302    | not scorable | not scorable | 0.9834711    | 0.7806539    |
| #### Bn-A10-p2993544 | A-genome specific (napus-rapa) | 0.9880383    | 0.8038822    | not scorable | not scorable | 1            | 0.7635399    |
| #### Bn-A10-p2993567 | A-genome specific (napus-rapa) | 0.9665072    | 0.653776     | not scorable | not scorable | 0.9586777    | 0.625217     |
| #### Bn-A10-p2997098 | genome unspecific (all in)     | 0.937799     | 0.5457677    | 1            | 0.7690172    | 0.9917355    | 0.7854846    |
| #### Bn-A10-p2997237 | A-genome specific (napus-rapa) | 0.9665072    | 0.3249915    | not scorable | not scorable | 0.9917355    | 0.7308815    |
| #### Bn-A10-p302099  | A-genome specific (napus-rapa) | 0.9832536    | 0.3027433    | not scorable | not scorable | 1            | 0.8335243    |
| #### Bn-A10-p303664  | A-genome specific (napus-rapa) | 1            | 0.8291737    | not scorable | not scorable | 0.9834711    | 0.7940944    |
| #### Bn-A10-p3042880 | A-genome specific (napus-rapa) | 0.9425837    | 0.4181288    | not scorable | not scorable | 0.9834711    | 0.6314692    |
| #### Bn-A10-p3044426 | A-genome specific (napus-rapa) | 0.9521531    | 0.7551865    | not scorable | not scorable | 0.9834711    | 0.6479967    |
| #### Bn-A10-p3053568 | A-genome specific (napus-rapa) | 0.9856459    | 0.8093303    | not scorable | not scorable | 1            | 0.7310942    |
| #### Bn-A10-p3063220 | A-genome specific (napus-rapa) | 0.9593301    | 0.5350556    | not scorable | not scorable | 0.9834711    | 0.6608995    |
| #### Bn-A10-p306851  | A-genome specific (napus-rapa) | 0.9808612    | 0.5605769    | not scorable | not scorable | 1            | 0.6640093    |
| #### Bn-A10-p3078181 | A-genome specific (napus-rapa) | 0.9856459    | 0.9145832    | not scorable | not scorable | 0.9752066    | 0.7017391    |
| #### Bn-A10-p309723  | all not scorable               | not scorable | not scorable | not scorable | not scorable | not scorable | not scorable |
| #### Bn-A10-p3100309 | napus specific                 | 1            | 0.3793292    | not scorable | not scorable | not scorable | not scorable |
| #### Bn-A10-p3116203 | A-genome specific (napus-rapa) | 1            | 0.8719797    | not scorable | not scorable | 1            | 0.7607463    |

|                      |                                |              |              |              |              |              |              |
|----------------------|--------------------------------|--------------|--------------|--------------|--------------|--------------|--------------|
| #### Bn-A10-p3118613 | A-genome specific (napus-rapa) | 1            | 0.7770647    | not scorable | not scorable | 1            | 0.7160045    |
| #### Bn-A10-p3182217 | A-genome specific (napus-rapa) | 1            | 0.9078146    | not scorable | not scorable | 1            | 0.841814     |
| #### Bn-A10-p320201  | napus specific                 | 0.6722488    | 0.7593613    | not scorable | not scorable | not scorable | not scorable |
| #### Bn-A10-p320209  | A-genome specific (napus-rapa) | 0.6889952    | 0.7845024    | not scorable | not scorable | 0.5619835    | 0.7241978    |
| #### Bn-A10-p3229296 | napus specific                 | 0.9856459    | 0.355563     | not scorable | not scorable | not scorable | not scorable |
| #### Bn-A10-p3235646 | A-genome specific (napus-rapa) | 0.9976076    | 0.851882     | not scorable | not scorable | 0.9669421    | 0.6440648    |
| #### Bn-A10-p3243369 | A-genome specific (napus-rapa) | 0.9952153    | 0.8696268    | not scorable | not scorable | 0.9669421    | 0.9180621    |
| #### Bn-A10-p326170  | A-genome specific (napus-rapa) | 0.9138756    | 0.8584898    | not scorable | not scorable | 0.5454546    | 0.8618053    |
| #### Bn-A10-p3266570 | A-genome specific (napus-rapa) | 0.9688995    | 0.7897212    | not scorable | not scorable | 0.9917355    | 0.7656367    |
| #### Bn-A10-p327056  | A-genome specific (napus-rapa) | 0.9114832    | 0.7840084    | not scorable | not scorable | 0.7355372    | 0.8334489    |
| #### Bn-A10-p3329131 | A-genome specific (rapa only)  | not scorable | not scorable | not scorable | not scorable | 0.9834711    | 0.7908944    |
| #### Bn-A10-p348441  | A-genome specific (napus-rapa) | 0.9952153    | 0.6591114    | not scorable | not scorable | 0.553719     | 0.8109616    |
| #### Bn-A10-p349032  | A-genome specific (rapa only)  | not scorable | not scorable | not scorable | not scorable | 0.5867769    | 0.9144777    |
| #### Bn-A10-p349436  | A-genome specific (napus-rapa) | 0.8971292    | 0.8578208    | not scorable | not scorable | 0.5289256    | 0.9207065    |
| #### Bn-A10-p3512464 | A-genome specific (napus-rapa) | 1            | 0.6109477    | not scorable | not scorable | 1            | 0.8684199    |
| #### Bn-A10-p353725  | napus specific                 | 0.9904306    | 0.3716651    | not scorable | not scorable | not scorable | not scorable |
| #### Bn-A10-p3587974 | all not scorable               | not scorable | not scorable | not scorable | not scorable | not scorable | not scorable |
| #### Bn-A10-p3605582 | A-genome specific (napus-rapa) | 0.9928229    | 0.7829856    | not scorable | not scorable | 1            | 0.6663204    |
| #### Bn-A10-p3605726 | A-genome specific (napus-rapa) | 0.9688995    | 0.4339044    | not scorable | not scorable | 1            | 0.605454     |
| #### Bn-A10-p3605865 | A-genome specific (napus-rapa) | 0.9952153    | 0.7819906    | not scorable | not scorable | 0.9669421    | 0.7785349    |
| #### Bn-A10-p3648582 | A-genome specific (napus-rapa) | 0.9808612    | 0.8016371    | not scorable | not scorable | 1            | 0.8445285    |
| #### Bn-A10-p3649288 | A-genome specific (napus-rapa) | 0.9904306    | 0.7930079    | not scorable | not scorable | 0.9834711    | 0.804226     |
| #### Bn-A10-p3649424 | A-genome specific (napus-rapa) | 1            | 0.7295069    | not scorable | not scorable | 0.9834711    | 0.6482357    |
| #### Bn-A10-p3649434 | A-genome specific (napus-rapa) | 0.9736842    | 0.7316037    | not scorable | not scorable | 1            | 0.7310835    |
| #### Bn-A10-p3649554 | A-genome specific (napus-rapa) | 0.9808612    | 0.7744894    | not scorable | not scorable | 0.9834711    | 0.6231135    |
| #### Bn-A10-p3651562 | A-genome specific (napus-rapa) | 0.9952153    | 0.7685624    | not scorable | not scorable | 0.9834711    | 0.7643678    |
| #### Bn-A10-p3652309 | A-genome specific (napus-rapa) | 0.9880383    | 0.756425     | not scorable | not scorable | 1            | 0.7747793    |
| #### Bn-A10-p3652425 | A-genome specific (napus-rapa) | 0.9904306    | 0.7024894    | not scorable | not scorable | 1            | 0.6922547    |
| #### Bn-A10-p366002  | A-genome specific (napus-rapa) | 0.9808612    | 0.3860921    | not scorable | not scorable | 0.5785124    | 0.8573523    |
| #### Bn-A10-p3669813 | A-genome specific (napus-rapa) | 1            | 0.8830097    | not scorable | not scorable | 0.9917355    | 0.918264     |
| #### Bn-A10-p3677315 | A-genome specific (napus-rapa) | 0.9904306    | 0.6470094    | not scorable | not scorable | 0.9917355    | 0.7800404    |
| #### Bn-A10-p3677867 | A-genome specific (napus-rapa) | 0.9712918    | 0.6961985    | not scorable | not scorable | 0.9834711    | 0.6180837    |
| #### Bn-A10-p37005   | A-genome specific (napus-rapa) | 1            | 0.8333707    | not scorable | not scorable | 0.9917355    | 0.789511     |

|                      |                                |              |              |              |              |           |           |
|----------------------|--------------------------------|--------------|--------------|--------------|--------------|-----------|-----------|
| #### Bn-A10-p3700919 | A-genome specific (napus-rapa) | 0.9976076    | 0.3986724    | not scorable | not scorable | 0.9917355 | 0.4343666 |
| #### Bn-A10-p3710328 | A-genome specific (napus-rapa) | 0.9808612    | 0.3671402    | not scorable | not scorable | 1         | 0.6918436 |
| #### Bn-A10-p3711074 | A-genome specific (napus-rapa) | 0.9880383    | 0.6836212    | not scorable | not scorable | 0.9917355 | 0.8071507 |
| #### Bn-A10-p3725533 | A-genome specific (napus-rapa) | 0.9066986    | 0.7575079    | not scorable | not scorable | 0.5867769 | 0.8115106 |
| #### Bn-A10-p3728041 | A-genome specific (rapa only)  | not scorable | not scorable | not scorable | not scorable | 0.9917355 | 0.6230052 |
| #### Bn-A10-p3744140 | A-genome specific (napus-rapa) | 0.9736842    | 0.3084136    | not scorable | not scorable | 0.9917355 | 0.8310251 |
| #### Bn-A10-p3745157 | A-genome specific (napus-rapa) | 0.8851675    | 0.5110677    | not scorable | not scorable | 0.6198347 | 0.7558461 |
| #### Bn-A10-p3745691 | A-genome specific (napus-rapa) | 0.8181818    | 0.5991948    | not scorable | not scorable | 0.9917355 | 0.7244709 |
| #### Bn-A10-p3745973 | A-genome specific (napus-rapa) | 0.9952153    | 0.4780883    | not scorable | not scorable | 1         | 0.7264342 |
| #### Bn-A10-p3747583 | A-genome specific (napus-rapa) | 0.9928229    | 0.27957      | not scorable | not scorable | 0.7190083 | 0.7097502 |
| #### Bn-A10-p3782582 | genome unspecific (all in)     | 1            | 0.7548527    |              | 1 0.5588592  | 1         | 0.7414348 |
| #### Bn-A10-p3782643 | A-genome specific (napus-rapa) | 0.9832536    | 0.4100993    | not scorable | not scorable | 0.9834711 | 0.7380078 |
| #### Bn-A10-p378724  | A-genome specific (napus-rapa) | 1            | 0.3418665    | not scorable | not scorable | 0.9917355 | 0.8072823 |
| #### Bn-A10-p3806889 | A-genome specific (napus-rapa) | 0.9808612    | 0.5856242    | not scorable | not scorable | 0.9917355 | 0.7774823 |
| #### Bn-A10-p3809773 | A-genome specific (napus-rapa) | 0.9952153    | 0.57217      | not scorable | not scorable | 0.9917355 | 0.7043742 |
| #### Bn-A10-p3825331 | A-genome specific (napus-rapa) | 0.9976076    | 0.8286639    | not scorable | not scorable | 0.9917355 | 0.8362865 |
| #### Bn-A10-p382954  | A-genome specific (napus-rapa) | 0.9114832    | 0.7204109    | not scorable | not scorable | 0.5041322 | 0.6876521 |
| #### Bn-A10-p3845546 | A-genome specific (napus-rapa) | 0.9880383    | 0.7404888    | not scorable | not scorable | 0.9256198 | 0.6997514 |
| #### Bn-A10-p3856673 | A-genome specific (napus-rapa) | 0.9928229    | 0.3514151    | not scorable | not scorable | 0.9834711 | 0.7984714 |
| #### Bn-A10-p3894990 | A-genome specific (napus-rapa) | 1            | 0.7761794    | not scorable | not scorable | 0.9917355 | 0.7937105 |
| #### Bn-A10-p3903845 | A-genome specific (napus-rapa) | 0.9976076    | 0.7896689    | not scorable | not scorable | 1         | 0.7976477 |
| #### Bn-A10-p3905100 | genome unspecific (all in)     | 0.9928229    | 0.4422096    |              | 1 0.7859675  | 0.9752066 | 0.8530003 |
| #### Bn-A10-p3905295 | A-genome specific (napus-rapa) | 0.9928229    | 0.7842095    | not scorable | not scorable | 1         | 0.7775424 |
| #### Bn-A10-p3906905 | A-genome specific (napus-rapa) | 0.9904306    | 0.7800155    | not scorable | not scorable | 0.9917355 | 0.8114939 |
| #### Bn-A10-p3909275 | genome unspecific (all in)     | 1            | 0.5618595    |              | 1 0.7433302  | 1         | 0.6828672 |
| #### Bn-A10-p3921433 | A-genome specific (napus-rapa) | 0.9976076    | 0.5162637    | not scorable | not scorable | 0.9834711 | 0.65877   |
| #### Bn-A10-p3944803 | A-genome specific (napus-rapa) | 0.8995215    | 0.4957627    | not scorable | not scorable | 1         | 0.8135551 |
| #### Bn-A10-p395236  | A-genome specific (napus-rapa) | 0.6937799    | 0.6379746    | not scorable | not scorable | 0.6446281 | 0.6904846 |
| #### Bn-A10-p3955901 | A-genome specific (napus-rapa) | 0.9952153    | 0.7292498    | not scorable | not scorable | 0.9586777 | 0.7687771 |
| #### Bn-A10-p3966740 | A-genome specific (napus-rapa) | 0.9928229    | 0.7406096    | not scorable | not scorable | 1         | 0.8339535 |
| #### Bn-A10-p3970485 | A-genome specific (napus-rapa) | 0.9425837    | 0.5111343    | not scorable | not scorable | 0.9917355 | 0.7451091 |
| #### Bn-A10-p3978242 | A-genome specific (napus-rapa) | 0.9976076    | 0.7639903    | not scorable | not scorable | 1         | 0.7985791 |
| #### Bn-A10-p3980498 | A-genome specific (napus-rapa) | 0.9904306    | 0.6298398    | not scorable | not scorable | 0.9834711 | 0.5906259 |



|                      |                                |              |              |              |              |              |              |
|----------------------|--------------------------------|--------------|--------------|--------------|--------------|--------------|--------------|
| #### Bn-A10-p3981548 | A-genome specific (napus-rapa) | 0.8277512    | 0.7788109    | not scorable | not scorable | 0.9669421    | 0.7212706    |
| #### Bn-A10-p3988046 | A-genome specific (napus-rapa) | 1            | 0.5216063    | not scorable | not scorable | 1            | 0.6819379    |
| #### Bn-A10-p3991393 | A-genome specific (rapa only)  | not scorable | not scorable | not scorable | not scorable | 1            | 0.9205657    |
| #### Bn-A10-p3991855 | A-genome specific (napus-rapa) | 1            | 0.8066823    | not scorable | not scorable | 0.9917355    | 0.7260448    |
| #### Bn-A10-p4038884 | A-genome specific (napus-rapa) | 0.9832536    | 0.8685921    | not scorable | not scorable | 0.9917355    | 0.8439103    |
| #### Bn-A10-p4040298 | A-genome specific (napus-rapa) | 0.9856459    | 0.4250874    | not scorable | not scorable | 1            | 0.8401917    |
| #### Bn-A10-p4076884 | A-genome specific (napus-rapa) | 0.9880383    | 0.8538519    | not scorable | not scorable | 0.9834711    | 0.6755968    |
| #### Bn-A10-p4078158 | A-genome specific (napus-rapa) | 0.9808612    | 0.7992153    | not scorable | not scorable | 0.9752066    | 0.6840755    |
| #### Bn-A10-p4079529 | A-genome specific (napus-rapa) | 0.9808612    | 0.5293638    | not scorable | not scorable | 1            | 0.7513102    |
| #### Bn-A10-p4080011 | A-genome specific (napus-rapa) | 0.9880383    | 0.5544009    | not scorable | not scorable | 0.9834711    | 0.8166133    |
| #### Bn-A10-p408589  | A-genome specific (napus-rapa) | 0.9952153    | 0.3554324    | not scorable | not scorable | 0.9752066    | 0.7841043    |
| #### Bn-A10-p4088438 | A-genome specific (napus-rapa) | 0.9880383    | 0.366237     | not scorable | not scorable | 1            | 0.8178149    |
| #### Bn-A10-p4089670 | A-genome specific (napus-rapa) | 0.9066986    | 0.8651148    | not scorable | not scorable | 0.6115702    | 0.7571229    |
| #### Bn-A10-p4101984 | A-genome specific (napus-rapa) | 0.9952153    | 0.5837125    | not scorable | not scorable | 0.9917355    | 0.6756599    |
| #### Bn-A10-p4104015 | A-genome specific (napus-rapa) | 0.9641148    | 0.8841014    | not scorable | not scorable | 0.7603306    | 0.741387     |
| #### Bn-A10-p4108968 | A-genome specific (napus-rapa) | 1            | 0.8261644    | not scorable | not scorable | 0.9917355    | 0.6730143    |
| #### Bn-A10-p4112636 | A-genome specific (napus-rapa) | 0.9808612    | 0.8098173    | not scorable | not scorable | 0.9917355    | 0.6795701    |
| #### Bn-A10-p4114397 | A-genome specific (napus-rapa) | 0.9976076    | 0.802838     | not scorable | not scorable | 0.9752066    | 0.7689749    |
| #### Bn-A10-p4114477 | A-genome specific (napus-rapa) | 0.9928229    | 0.7921647    | not scorable | not scorable | 1            | 0.7062029    |
| #### Bn-A10-p4115062 | A-genome specific (napus-rapa) | 0.9880383    | 0.8301952    | not scorable | not scorable | 0.9917355    | 0.7358777    |
| #### Bn-A10-p4118433 | A-genome specific (napus-rapa) | 0.9856459    | 0.8476062    | not scorable | not scorable | 0.9752066    | 0.7894387    |
| #### Bn-A10-p4120782 | A-genome specific (napus-rapa) | 0.9928229    | 0.7621327    | not scorable | not scorable | 0.9917355    | 0.7490292    |
| #### Bn-A10-p4127274 | A-genome specific (napus-rapa) | 0.9904306    | 0.7741612    | not scorable | not scorable | 1            | 0.7345287    |
| #### Bn-A10-p4134125 | A-genome specific (napus-rapa) | 0.9952153    | 0.4593946    | not scorable | not scorable | 0.9917355    | 0.7212125    |
| #### Bn-A10-p4138782 | A-genome specific (napus-rapa) | 0.8779904    | 0.8780878    | not scorable | not scorable | 0.9504132    | 0.7628012    |
| #### Bn-A10-p4138801 | A-genome specific (napus-rapa) | 0.9880383    | 0.5600041    | not scorable | not scorable | 1            | 0.8958186    |
| #### Bn-A10-p4151991 | A-genome specific (napus-rapa) | 0.9688995    | 0.5736063    | not scorable | not scorable | 0.9917355    | 0.6885037    |
| #### Bn-A10-p4154238 | napus specific                 | 0.9808612    | 0.7546273    | not scorable | not scorable | not scorable | not scorable |
| #### Bn-A10-p4197906 | A-genome specific (napus-rapa) | 0.9856459    | 0.8385459    | not scorable | not scorable | 0.9917355    | 0.7729109    |
| #### Bn-A10-p4211081 | A-genome specific (rapa only)  | not scorable | not scorable | not scorable | not scorable | 0.9669421    | 0.7194001    |
| #### Bn-A10-p4212056 | A-genome specific (napus-rapa) | 0.9904306    | 0.7337264    | not scorable | not scorable | 0.9834711    | 0.7463987    |
| #### Bn-A10-p4214836 | A-genome specific (rapa only)  | not scorable | not scorable | not scorable | not scorable | 0.9669421    | 0.5722938    |
| #### Bn-A10-p4268080 | A-genome specific (napus-rapa) | 0.9497608    | 0.3843619    | not scorable | not scorable | 0.9834711    | 0.6736229    |

|                      |                                |              |              |              |              |              |              |
|----------------------|--------------------------------|--------------|--------------|--------------|--------------|--------------|--------------|
| #### Bn-A10-p4272881 | A-genome specific (rapa only)  | not scorable | not scorable | not scorable | not scorable | 1            | 0.6805447    |
| #### Bn-A10-p4287815 | genome unspecific (all in)     | 0.9569378    | 0.4697362    | 0.9534883    | 0.7855898    | 0.9917355    | 0.7780061    |
| #### Bn-A10-p4296387 | A-genome specific (napus-rapa) | 0.9952153    | 0.7819158    | not scorable | not scorable | 1            | 0.7349127    |
| #### Bn-A10-p4304707 | A-genome specific (napus-rapa) | 0.9928229    | 0.3171419    | not scorable | not scorable | 0.9917355    | 0.2699968    |
| #### Bn-A10-p4305337 | A-genome specific (napus-rapa) | 0.8995215    | 0.7417696    | not scorable | not scorable | 1            | 0.8052686    |
| #### Bn-A10-p4311291 | A-genome specific (napus-rapa) | 0.9880383    | 0.8088486    | not scorable | not scorable | 0.9586777    | 0.7101038    |
| #### Bn-A10-p4332413 | napus specific                 | 0.9784689    | 0.7760258    | not scorable | not scorable | not scorable | not scorable |
| #### Bn-A10-p4339494 | A-genome specific (napus-rapa) | 0.9760765    | 0.7732616    | not scorable | not scorable | 0.9669421    | 0.6822746    |
| #### Bn-A10-p4347862 | A-genome specific (napus-rapa) | 0.9976076    | 0.5806084    | not scorable | not scorable | 0.9917355    | 0.6766195    |
| #### Bn-A10-p4355593 | A-genome specific (napus-rapa) | 0.9976076    | 0.8556632    | not scorable | not scorable | 0.9834711    | 0.6871284    |
| #### Bn-A10-p4355648 | A-genome specific (napus-rapa) | 1            | 0.884192     | not scorable | not scorable | 0.9917355    | 0.7921438    |
| #### Bn-A10-p4355682 | A-genome specific (napus-rapa) | 0.9976076    | 0.8384765    | not scorable | not scorable | 0.9834711    | 0.7251029    |
| #### Bn-A10-p4355750 | A-genome specific (napus-rapa) | 1            | 0.8783022    | not scorable | not scorable | 1            | 0.7843527    |
| #### Bn-A10-p4355840 | A-genome specific (napus-rapa) | 0.9976076    | 0.8324411    | not scorable | not scorable | 1            | 0.7993701    |
| #### Bn-A10-p4356450 | A-genome specific (napus-rapa) | 0.9976076    | 0.7405363    | not scorable | not scorable | 0.9752066    | 0.7064049    |
| #### Bn-A10-p4381139 | A-genome specific (napus-rapa) | 0.9976076    | 0.3672053    | not scorable | not scorable | 0.8099173    | 0.7201635    |
| #### Bn-A10-p4418919 | A-genome specific (napus-rapa) | 1            | 0.6933997    | not scorable | not scorable | 0.9834711    | 0.7934043    |
| #### Bn-A10-p4425066 | A-genome specific (napus-rapa) | 1            | 0.5272424    | not scorable | not scorable | 0.9834711    | 0.7342907    |
| #### Bn-A10-p4425312 | A-genome specific (napus-rapa) | 0.9952153    | 0.8122581    | not scorable | not scorable | 0.9917355    | 0.8294625    |
| #### Bn-A10-p4437644 | A-genome specific (napus-rapa) | 0.9976076    | 0.6515196    | not scorable | not scorable | 1            | 0.8019293    |
| #### Bn-A10-p4460099 | A-genome specific (napus-rapa) | 1            | 0.8840945    | not scorable | not scorable | 0.9834711    | 0.7939947    |
| #### Bn-A10-p4466886 | A-genome specific (napus-rapa) | 0.9976076    | 0.8179253    | not scorable | not scorable | 1            | 0.7232896    |
| #### Bn-A10-p4467083 | A-genome specific (napus-rapa) | 0.9880383    | 0.8740647    | not scorable | not scorable | 0.9917355    | 0.8036891    |
| #### Bn-A10-p4469775 | A-genome specific (napus-rapa) | 0.9952153    | 0.830659     | not scorable | not scorable | 0.6446281    | 0.838864     |
| #### Bn-A10-p4477499 | A-genome specific (napus-rapa) | 0.9976076    | 0.7644109    | not scorable | not scorable | 0.9834711    | 0.7284817    |
| #### Bn-A10-p4477601 | A-genome specific (napus-rapa) | 0.9976076    | 0.8379165    | not scorable | not scorable | 0.9669421    | 0.7865425    |
| #### Bn-A10-p4477643 | A-genome specific (napus-rapa) | 0.9976076    | 0.8908416    | not scorable | not scorable | 1            | 0.7970148    |
| #### Bn-A10-p4478046 | A-genome specific (napus-rapa) | 0.9976076    | 0.8587393    | not scorable | not scorable | 1            | 0.7951206    |
| #### Bn-A10-p4478343 | A-genome specific (napus-rapa) | 0.9952153    | 0.7880878    | not scorable | not scorable | 1            | 0.7937365    |
| #### Bn-A10-p4478469 | A-genome specific (napus-rapa) | 0.9976076    | 0.8387734    | not scorable | not scorable | 0.6694215    | 0.769631     |
| #### Bn-A10-p4478517 | A-genome specific (napus-rapa) | 0.9976076    | 0.8489037    | not scorable | not scorable | 0.9834711    | 0.7765656    |
| #### Bn-A10-p4480010 | A-genome specific (napus-rapa) | 0.9880383    | 0.7859184    | not scorable | not scorable | 0.8099173    | 0.5929275    |
| #### Bn-A10-p4504517 | A-genome specific (napus-rapa) | 0.9976076    | 0.7924704    | not scorable | not scorable | 0.9917355    | 0.6897708    |

|                      |                                |           |           |              |              |           |           |
|----------------------|--------------------------------|-----------|-----------|--------------|--------------|-----------|-----------|
| #### Bn-A10-p4504641 | A-genome specific (napus-rapa) | 0.9904306 | 0.6629629 | not scorable | not scorable | 0.9834711 | 0.7146892 |
| #### Bn-A10-p4506059 | A-genome specific (napus-rapa) | 0.9808612 | 0.8426518 | not scorable | not scorable | 1         | 0.6880749 |
| #### Bn-A10-p4506119 | A-genome specific (napus-rapa) | 0.9976076 | 0.7044909 | not scorable | not scorable | 0.9917355 | 0.7400385 |
| #### Bn-A10-p4512626 | A-genome specific (napus-rapa) | 0.9880383 | 0.3095226 | not scorable | not scorable | 0.9586777 | 0.6258196 |
| #### Bn-A10-p4553957 | A-genome specific (napus-rapa) | 0.9952153 | 0.7551216 | not scorable | not scorable | 0.9752066 | 0.6450546 |
| #### Bn-A10-p4555527 | A-genome specific (napus-rapa) | 1         | 0.4694569 | not scorable | not scorable | 0.9752066 | 0.7369743 |
| #### Bn-A10-p4558688 | genome unspecific (all in)     | 0.9856459 | 0.2495961 |              | 1 0.5564626  | 0.9752066 | 0.5743467 |
| #### Bn-A10-p4563194 | A-genome specific (napus-rapa) | 0.9904306 | 0.6559877 | not scorable | not scorable | 1         | 0.7360825 |
| #### Bn-A10-p4566109 | A-genome specific (napus-rapa) | 0.9354067 | 0.6630544 | not scorable | not scorable | 1         | 0.7067679 |
| #### Bn-A10-p4574423 | A-genome specific (napus-rapa) | 0.9856459 | 0.3451293 | not scorable | not scorable | 1         | 0.8174266 |
| #### Bn-A10-p4575458 | A-genome specific (napus-rapa) | 0.9952153 | 0.7886724 | not scorable | not scorable | 1         | 0.7303392 |
| #### Bn-A10-p4577455 | A-genome specific (napus-rapa) | 1         | 0.344698  | not scorable | not scorable | 1         | 0.6611464 |
| #### Bn-A10-p46022   | A-genome specific (napus-rapa) | 0.9952153 | 0.8780337 | not scorable | not scorable | 0.9834711 | 0.6891577 |
| #### Bn-A10-p4605721 | A-genome specific (napus-rapa) | 1         | 0.5938754 | not scorable | not scorable | 0.9752066 | 0.6852748 |
| #### Bn-A10-p4606815 | A-genome specific (napus-rapa) | 1         | 0.8729708 | not scorable | not scorable | 1         | 0.8419127 |
| #### Bn-A10-p4613784 | A-genome specific (napus-rapa) | 0.9976076 | 0.8749638 | not scorable | not scorable | 1         | 0.8176208 |
| #### Bn-A10-p4613978 | A-genome specific (napus-rapa) | 0.9976076 | 0.387943  | not scorable | not scorable | 0.9917355 | 0.6803098 |
| #### Bn-A10-p4619653 | A-genome specific (napus-rapa) | 0.9952153 | 0.8522627 | not scorable | not scorable | 1         | 0.7029594 |
| #### Bn-A10-p4619719 | A-genome specific (napus-rapa) | 0.9904306 | 0.8298746 | not scorable | not scorable | 0.9834711 | 0.8006145 |
| #### Bn-A10-p4621384 | A-genome specific (napus-rapa) | 0.9928229 | 0.8828979 | not scorable | not scorable | 0.9834711 | 0.7152185 |
| #### Bn-A10-p4621842 | A-genome specific (napus-rapa) | 0.9952153 | 0.8403066 | not scorable | not scorable | 1         | 0.8824396 |
| #### Bn-A10-p4622176 | A-genome specific (napus-rapa) | 1         | 0.8509685 | not scorable | not scorable | 0.9917355 | 0.6995802 |
| #### Bn-A10-p4622209 | A-genome specific (napus-rapa) | 0.9976076 | 0.8594337 | not scorable | not scorable | 1         | 0.8109377 |
| #### Bn-A10-p4622333 | A-genome specific (napus-rapa) | 0.9952153 | 0.806722  | not scorable | not scorable | 1         | 0.8028059 |
| #### Bn-A10-p4622728 | A-genome specific (napus-rapa) | 0.9904306 | 0.9387431 | not scorable | not scorable | 1         | 0.7871841 |
| #### Bn-A10-p4622812 | A-genome specific (napus-rapa) | 1         | 0.9114551 | not scorable | not scorable | 0.9834711 | 0.6420683 |
| #### Bn-A10-p4623073 | A-genome specific (napus-rapa) | 0.9976076 | 0.9248809 | not scorable | not scorable | 0.9917355 | 0.7523792 |
| #### Bn-A10-p4623186 | A-genome specific (napus-rapa) | 0.9928229 | 0.798762  | not scorable | not scorable | 0.9917355 | 0.7092569 |
| #### Bn-A10-p4623492 | A-genome specific (napus-rapa) | 0.9880383 | 0.8617073 | not scorable | not scorable | 1         | 0.73344   |
| #### Bn-A10-p4624712 | A-genome specific (napus-rapa) | 0.9976076 | 0.7824394 | not scorable | not scorable | 1         | 0.7553073 |
| #### Bn-A10-p4625350 | A-genome specific (napus-rapa) | 0.9952153 | 0.8751873 | not scorable | not scorable | 0.9917355 | 0.7042962 |
| #### Bn-A10-p4627479 | A-genome specific (napus-rapa) | 0.9928229 | 0.8498084 | not scorable | not scorable | 0.9917355 | 0.7800288 |
| #### Bn-A10-p46331   | A-genome specific (napus-rapa) | 0.9976076 | 0.5408136 | not scorable | not scorable | 1         | 0.7982807 |

|                      |                                |           |           |              |              |           |           |
|----------------------|--------------------------------|-----------|-----------|--------------|--------------|-----------|-----------|
| #### Bn-A10-p4639202 | A-genome specific (napus-rapa) | 0.9712918 | 0.4146493 | not scorable | not scorable | 1         | 0.7197577 |
| #### Bn-A10-p4642637 | A-genome specific (napus-rapa) | 0.9880383 | 0.4459139 | not scorable | not scorable | 1         | 0.7587057 |
| #### Bn-A10-p4653595 | A-genome specific (napus-rapa) | 1         | 0.8731054 | not scorable | not scorable | 1         | 0.6309736 |
| #### Bn-A10-p4663138 | A-genome specific (napus-rapa) | 1         | 0.4472256 | not scorable | not scorable | 0.9917355 | 0.8077157 |
| #### Bn-A10-p466849  | A-genome specific (napus-rapa) | 0.9856459 | 0.4202994 | not scorable | not scorable | 0.9917355 | 0.8307075 |
| #### Bn-A10-p467507  | A-genome specific (napus-rapa) | 0.9928229 | 0.381553  | not scorable | not scorable | 0.9917355 | 0.7211518 |
| #### Bn-A10-p4695520 | A-genome specific (napus-rapa) | 1         | 0.7055244 | not scorable | not scorable | 0.9669421 | 0.6537867 |
| #### Bn-A10-p4701756 | A-genome specific (napus-rapa) | 0.8995215 | 0.726382  | not scorable | not scorable | 0.677686  | 0.7976073 |
| #### Bn-A10-p4706425 | A-genome specific (napus-rapa) | 1         | 0.3588482 | not scorable | not scorable | 0.9917355 | 0.7584655 |
| #### Bn-A10-p4725713 | A-genome specific (napus-rapa) | 0.9880383 | 0.5674672 | not scorable | not scorable | 0.9834711 | 0.807821  |
| #### Bn-A10-p4727374 | A-genome specific (napus-rapa) | 0.9808612 | 0.8501562 | not scorable | not scorable | 0.9090909 | 0.7961174 |
| #### Bn-A10-p4731968 | A-genome specific (napus-rapa) | 1         | 0.4733905 | not scorable | not scorable | 1         | 0.6791383 |
| #### Bn-A10-p4742940 | A-genome specific (napus-rapa) | 0.9952153 | 0.4732732 | not scorable | not scorable | 1         | 0.7093385 |
| #### Bn-A10-p4755899 | A-genome specific (napus-rapa) | 0.9976076 | 0.3260111 | not scorable | not scorable | 0.9834711 | 0.5864017 |
| #### Bn-A10-p4757850 | A-genome specific (napus-rapa) | 0.9976076 | 0.340666  | not scorable | not scorable | 0.9917355 | 0.73738   |
| #### Bn-A10-p4786596 | A-genome specific (napus-rapa) | 1         | 0.5021904 | not scorable | not scorable | 1         | 0.7261717 |
| #### Bn-A10-p4792793 | A-genome specific (napus-rapa) | 0.9952153 | 0.565092  | not scorable | not scorable | 1         | 0.7432572 |
| #### Bn-A10-p4798449 | A-genome specific (napus-rapa) | 1         | 0.643455  | not scorable | not scorable | 1         | 0.6585889 |
| #### Bn-A10-p4802341 | A-genome specific (napus-rapa) | 0.9928229 | 0.5475751 | not scorable | not scorable | 0.9917355 | 0.7175694 |
| #### Bn-A10-p4813171 | A-genome specific (napus-rapa) | 0.9952153 | 0.5476528 | not scorable | not scorable | 0.9917355 | 0.7888723 |
| #### Bn-A10-p4821527 | A-genome specific (napus-rapa) | 1         | 0.8376498 | not scorable | not scorable | 1         | 0.7754871 |
| #### Bn-A10-p4829546 | A-genome specific (napus-rapa) | 1         | 0.7109981 | not scorable | not scorable | 1         | 0.7534884 |
| #### Bn-A10-p4840892 | A-genome specific (napus-rapa) | 0.9976076 | 0.7529515 | not scorable | not scorable | 0.9917355 | 0.667549  |
| #### Bn-A10-p4859385 | A-genome specific (napus-rapa) | 1         | 0.6894262 | not scorable | not scorable | 1         | 0.7101142 |
| #### Bn-A10-p4871099 | A-genome specific (napus-rapa) | 0.8564593 | 0.6943008 | not scorable | not scorable | 1         | 0.90944   |
| #### Bn-A10-p4897556 | A-genome specific (napus-rapa) | 0.9712918 | 0.4725021 | not scorable | not scorable | 1         | 0.9175813 |
| #### Bn-A10-p4922362 | A-genome specific (napus-rapa) | 1         | 0.7844095 | not scorable | not scorable | 1         | 0.931931  |
| #### Bn-A10-p4935553 | A-genome specific (napus-rapa) | 0.9928229 | 0.7674702 | not scorable | not scorable | 0.9834711 | 0.767252  |
| #### Bn-A10-p4950011 | A-genome specific (napus-rapa) | 1         | 0.7834342 | not scorable | not scorable | 0.9834711 | 0.7579803 |
| #### Bn-A10-p4962508 | A-genome specific (napus-rapa) | 0.9880383 | 0.8010873 | not scorable | not scorable | 1         | 0.8017662 |
| #### Bn-A10-p496266  | A-genome specific (napus-rapa) | 0.9162679 | 0.704804  | not scorable | not scorable | 0.9586777 | 0.648532  |
| #### Bn-A10-p4966927 | A-genome specific (napus-rapa) | 0.9928229 | 0.7812129 | not scorable | not scorable | 0.9917355 | 0.8108304 |
| #### Bn-A10-p4968720 | A-genome specific (napus-rapa) | 0.9928229 | 0.8007973 | not scorable | not scorable | 0.9917355 | 0.7393474 |

|                      |                                |              |              |              |              |              |              |
|----------------------|--------------------------------|--------------|--------------|--------------|--------------|--------------|--------------|
| #### Bn-A10-p4968727 | A-genome specific (napus-rapa) | 0.9880383    | 0.7227521    | not scorable | not scorable | 0.9834711    | 0.6632878    |
| #### Bn-A10-p4968918 | A-genome specific (napus-rapa) | 0.9976076    | 0.8087121    | not scorable | not scorable | 1            | 0.7935032    |
| #### Bn-A10-p4969803 | A-genome specific (napus-rapa) | 0.9976076    | 0.7276636    | not scorable | not scorable | 0.9917355    | 0.6983677    |
| #### Bn-A10-p4972228 | A-genome specific (napus-rapa) | 0.9928229    | 0.7830059    | not scorable | not scorable | 0.9834711    | 0.6602401    |
| #### Bn-A10-p4972604 | A-genome specific (napus-rapa) | 1            | 0.8146687    | not scorable | not scorable | 1            | 0.803492     |
| #### Bn-A10-p4972839 | A-genome specific (napus-rapa) | 0.9880383    | 0.4833054    | not scorable | not scorable | 1            | 0.7865695    |
| #### Bn-A10-p4972939 | A-genome specific (napus-rapa) | 0.9928229    | 0.8063747    | not scorable | not scorable | 0.9834711    | 0.6637839    |
| #### Bn-A10-p4983427 | A-genome specific (napus-rapa) | 0.9952153    | 0.6972537    | not scorable | not scorable | 0.9917355    | 0.7189351    |
| #### Bn-A10-p4985950 | A-genome specific (napus-rapa) | 0.9832536    | 0.4070969    | not scorable | not scorable | 0.9917355    | 0.6466877    |
| #### Bn-A10-p4986275 | A-genome specific (napus-rapa) | 0.9856459    | 0.4539791    | not scorable | not scorable | 0.9834711    | 0.7035602    |
| #### Bn-A10-p4995181 | A-genome specific (napus-rapa) | 0.9832536    | 0.7220966    | not scorable | not scorable | 1            | 0.7125282    |
| #### Bn-A10-p5004521 | A-genome specific (napus-rapa) | 0.9760765    | 0.2972063    | not scorable | not scorable | 0.9917355    | 0.7556626    |
| #### Bn-A10-p5005845 | A-genome specific (napus-rapa) | 0.9904306    | 0.7878187    | not scorable | not scorable | 0.9834711    | 0.7915506    |
| #### Bn-A10-p5007924 | A-genome specific (rapa only)  | not scorable | not scorable | not scorable | not scorable | 1            | 0.8300496    |
| #### Bn-A10-p502169  | napus specific                 | 0.8875598    | 0.805737     | not scorable | not scorable | not scorable | not scorable |
| #### Bn-A10-p5035362 | A-genome specific (napus-rapa) | 0.9976076    | 0.7735426    | not scorable | not scorable | 1            | 0.7389649    |
| #### Bn-A10-p5039340 | napus specific                 | 0.9712918    | 0.8092616    | not scorable | not scorable | not scorable | not scorable |
| #### Bn-A10-p5040430 | A-genome specific (napus-rapa) | 0.9904306    | 0.8595043    | not scorable | not scorable | 0.9917355    | 0.6659746    |
| #### Bn-A10-p5047195 | A-genome specific (napus-rapa) | 0.9808612    | 0.7547831    | not scorable | not scorable | 0.9834711    | 0.6598156    |
| #### Bn-A10-p5050557 | A-genome specific (rapa only)  | not scorable | not scorable | not scorable | not scorable | 1            | 0.7293484    |
| #### Bn-A10-p5052658 | A-genome specific (napus-rapa) | 0.9904306    | 0.2781298    | not scorable | not scorable | 1            | 0.665193     |
| #### Bn-A10-p5066911 | A-genome specific (rapa only)  | not scorable | not scorable | not scorable | not scorable | 0.9752066    | 0.6761311    |
| #### Bn-A10-p5070820 | A-genome specific (napus-rapa) | 1            | 0.7569394    | not scorable | not scorable | 0.9917355    | 0.7283961    |
| #### Bn-A10-p510846  | A-genome specific (napus-rapa) | 0.9784689    | 0.8332176    | not scorable | not scorable | 0.9917355    | 0.7853411    |
| #### Bn-A10-p5127309 | A-genome specific (napus-rapa) | 0.9880383    | 0.8024557    | not scorable | not scorable | 1            | 0.9489192    |
| #### Bn-A10-p5128067 | A-genome specific (napus-rapa) | 0.9808612    | 0.4703029    | not scorable | not scorable | 0.9752066    | 0.6562614    |
| #### Bn-A10-p5132669 | A-genome specific (napus-rapa) | 0.9904306    | 0.4328448    | not scorable | not scorable | 0.9834711    | 0.7034099    |
| #### Bn-A10-p5135356 | A-genome specific (napus-rapa) | 1            | 0.7869063    | not scorable | not scorable | 0.9834711    | 0.7998415    |
| #### Bn-A10-p5143067 | A-genome specific (napus-rapa) | 0.9856459    | 0.6843434    | not scorable | not scorable | 1            | 0.611343     |
| #### Bn-A10-p5143614 | A-genome specific (napus-rapa) | 0.9712918    | 0.6918248    | not scorable | not scorable | 0.9669421    | 0.7002946    |
| #### Bn-A10-p5151975 | A-genome specific (napus-rapa) | 0.9856459    | 0.735135     | not scorable | not scorable | 1            | 0.9228864    |
| #### Bn-A10-p515442  | A-genome specific (napus-rapa) | 0.9928229    | 0.7354988    | not scorable | not scorable | 0.9586777    | 0.6695487    |
| #### Bn-A10-p5178249 | A-genome specific (napus-rapa) | 0.9856459    | 0.8005862    | not scorable | not scorable | 1            | 0.9183761    |

|                      |                                |           |           |              |              |              |              |
|----------------------|--------------------------------|-----------|-----------|--------------|--------------|--------------|--------------|
| #### Bn-A10-p5183795 | A-genome specific (napus-rapa) | 0.9760765 | 0.6631976 | not scorable | not scorable | 0.9834711    | 0.585862     |
| #### Bn-A10-p5183890 | A-genome specific (napus-rapa) | 0.9808612 | 0.7067606 | not scorable | not scorable | 1            | 0.8182797    |
| #### Bn-A10-p5185255 | A-genome specific (napus-rapa) | 0.9712918 | 0.7459168 | not scorable | not scorable | 0.9917355    | 0.6861849    |
| #### Bn-A10-p5202031 | A-genome specific (napus-rapa) | 0.9736842 | 0.3839973 | not scorable | not scorable | 0.9917355    | 0.6819846    |
| #### Bn-A10-p5209915 | A-genome specific (napus-rapa) | 0.9880383 | 0.806943  | not scorable | not scorable | 0.9834711    | 0.752088     |
| #### Bn-A10-p5210009 | A-genome specific (napus-rapa) | 0.9976076 | 0.7639121 | not scorable | not scorable | 1            | 0.8154628    |
| #### Bn-A10-p5210045 | A-genome specific (napus-rapa) | 0.9736842 | 0.7676963 | not scorable | not scorable | 1            | 0.7097515    |
| #### Bn-A10-p5210204 | A-genome specific (napus-rapa) | 0.9904306 | 0.7979899 | not scorable | not scorable | 0.9917355    | 0.8163942    |
| #### Bn-A10-p5210238 | A-genome specific (napus-rapa) | 0.9976076 | 0.7751357 | not scorable | not scorable | 1            | 0.750022     |
| #### Bn-A10-p5210317 | A-genome specific (napus-rapa) | 0.9976076 | 0.7268255 | not scorable | not scorable | 1            | 0.7211281    |
| #### Bn-A10-p5210325 | A-genome specific (napus-rapa) | 0.9928229 | 0.5626448 | not scorable | not scorable | 0.9917355    | 0.755307     |
| #### Bn-A10-p5210388 | A-genome specific (napus-rapa) | 0.9330143 | 0.6474931 | not scorable | not scorable | 0.9917355    | 0.5879209    |
| #### Bn-A10-p5212114 | A-genome specific (napus-rapa) | 0.9928229 | 0.7797222 | not scorable | not scorable | 0.9917355    | 0.7764847    |
| #### Bn-A10-p5213281 | A-genome specific (napus-rapa) | 0.9928229 | 0.8102263 | not scorable | not scorable | 1            | 0.6656585    |
| #### Bn-A10-p5218803 | A-genome specific (napus-rapa) | 0.9880383 | 0.5801547 | not scorable | not scorable | 0.9917355    | 0.7614237    |
| #### Bn-A10-p5219035 | A-genome specific (napus-rapa) | 0.9976076 | 0.8060136 | not scorable | not scorable | 0.9834711    | 0.8031629    |
| #### Bn-A10-p5219089 | A-genome specific (napus-rapa) | 0.9880383 | 0.7791774 | not scorable | not scorable | 1            | 0.7651019    |
| #### Bn-A10-p5224680 | A-genome specific (napus-rapa) | 0.9952153 | 0.7826234 | not scorable | not scorable | 0.9917355    | 0.6907074    |
| #### Bn-A10-p5225089 | A-genome specific (napus-rapa) | 0.9736842 | 0.7657243 | not scorable | not scorable | 1            | 0.9178027    |
| #### Bn-A10-p5225094 | A-genome specific (napus-rapa) | 0.9808612 | 0.8605748 | not scorable | not scorable | 1            | 0.7258548    |
| #### Bn-A10-p5234281 | A-genome specific (napus-rapa) | 0.9904306 | 0.397115  | not scorable | not scorable | 0.9917355    | 0.704466     |
| #### Bn-A10-p5236071 | A-genome specific (napus-rapa) | 0.9952153 | 0.7142358 | not scorable | not scorable | 0.9834711    | 0.7571446    |
| #### Bn-A10-p5239454 | A-genome specific (napus-rapa) | 0.9952153 | 0.7292783 | not scorable | not scorable | 1            | 0.6968953    |
| #### Bn-A10-p5239634 | A-genome specific (napus-rapa) | 0.9904306 | 0.6897439 | not scorable | not scorable | 1            | 0.7161165    |
| #### Bn-A10-p5239938 | A-genome specific (napus-rapa) | 0.9952153 | 0.7585381 | not scorable | not scorable | 0.9917355    | 0.7060928    |
| #### Bn-A10-p5240072 | A-genome specific (napus-rapa) | 0.9952153 | 0.7485303 | not scorable | not scorable | 0.9917355    | 0.6596768    |
| #### Bn-A10-p5240139 | A-genome specific (napus-rapa) | 0.9928229 | 0.7243637 | not scorable | not scorable | 0.9752066    | 0.7374884    |
| #### Bn-A10-p5240656 | A-genome specific (napus-rapa) | 0.9928229 | 0.7209074 | not scorable | not scorable | 0.9917355    | 0.7054588    |
| #### Bn-A10-p5242221 | A-genome specific (napus-rapa) | 0.9928229 | 0.5477378 | not scorable | not scorable | 0.9834711    | 0.7123927    |
| #### Bn-A10-p5244792 | A-genome specific (napus-rapa) | 0.9784689 | 0.7474954 | not scorable | not scorable | 0.9752066    | 0.7657538    |
| #### Bn-A10-p5250586 | A-genome specific (napus-rapa) | 0.9856459 | 0.7682698 | not scorable | not scorable | 0.9752066    | 0.759107     |
| #### Bn-A10-p5267588 | A-genome specific (napus-rapa) | 0.9904306 | 0.4978592 | not scorable | not scorable | 1            | 0.7787368    |
| #### Bn-A10-p529306  | napus specific                 | 0.9856459 | 0.2933349 | not scorable | not scorable | not scorable | not scorable |

|                      |                                |              |              |              |              |           |           |
|----------------------|--------------------------------|--------------|--------------|--------------|--------------|-----------|-----------|
| #### Bn-A10-p5299784 | A-genome specific (napus-rapa) | 0.9736842    | 0.4114861    | not scorable | not scorable | 0.9834711 | 0.6645761 |
| #### Bn-A10-p5302094 | A-genome specific (napus-rapa) | 0.9808612    | 0.7947458    | not scorable | not scorable | 0.9752066 | 0.8362204 |
| #### Bn-A10-p5317804 | A-genome specific (napus-rapa) | 0.9880383    | 0.5088241    | not scorable | not scorable | 0.9917355 | 0.6125194 |
| #### Bn-A10-p5330675 | A-genome specific (napus-rapa) | 0.937799     | 0.4638968    | not scorable | not scorable | 1         | 0.8057191 |
| #### Bn-A10-p5341726 | A-genome specific (napus-rapa) | 0.9545454    | 0.6453698    | not scorable | not scorable | 0.9917355 | 0.796928  |
| #### Bn-A10-p5342414 | A-genome specific (napus-rapa) | 0.9641148    | 0.6383288    | not scorable | not scorable | 0.9834711 | 0.7443574 |
| #### Bn-A10-p5342465 | A-genome specific (rapa only)  | not scorable | not scorable | not scorable | not scorable | 0.9752066 | 0.5484882 |
| #### Bn-A10-p5525609 | A-genome specific (napus-rapa) | 0.6507177    | 0.8396102    | not scorable | not scorable | 0.5785124 | 0.8142649 |
| #### Bn-A10-p5532832 | A-genome specific (napus-rapa) | 0.9880383    | 0.7145707    | not scorable | not scorable | 0.9917355 | 0.6773831 |
| #### Bn-A10-p5604463 | A-genome specific (napus-rapa) | 1            | 0.6101475    | not scorable | not scorable | 0.9917355 | 0.7845681 |
| #### Bn-A10-p5606181 | A-genome specific (napus-rapa) | 1            | 0.5540295    | not scorable | not scorable | 0.9834711 | 0.7771561 |
| #### Bn-A10-p5635816 | A-genome specific (rapa only)  | not scorable | not scorable | not scorable | not scorable | 0.9669421 | 0.786476  |
| #### Bn-A10-p5662796 | A-genome specific (napus-rapa) | 0.9736842    | 0.7070868    | not scorable | not scorable | 0.9669421 | 0.8143303 |
| #### Bn-A10-p5666711 | A-genome specific (napus-rapa) | 0.9928229    | 0.7732958    | not scorable | not scorable | 1         | 0.8068349 |
| #### Bn-A10-p5669630 | A-genome specific (napus-rapa) | 0.9904306    | 0.7928365    | not scorable | not scorable | 1         | 0.92787   |
| #### Bn-A10-p5670945 | A-genome specific (napus-rapa) | 0.9904306    | 0.8123146    | not scorable | not scorable | 0.9917355 | 0.6689087 |
| #### Bn-A10-p5673195 | A-genome specific (napus-rapa) | 0.9952153    | 0.2679578    | not scorable | not scorable | 1         | 0.6793889 |
| #### Bn-A10-p5673588 | A-genome specific (napus-rapa) | 0.9976076    | 0.785466     | not scorable | not scorable | 1         | 0.8366535 |
| #### Bn-A10-p5675953 | A-genome specific (napus-rapa) | 0.9641148    | 0.8743931    | not scorable | not scorable | 1         | 0.6931572 |
| #### Bn-A10-p5679914 | A-genome specific (napus-rapa) | 0.9784689    | 0.8169551    | not scorable | not scorable | 0.9834711 | 0.7823378 |
| #### Bn-A10-p5680678 | A-genome specific (napus-rapa) | 0.8444976    | 0.746716     | not scorable | not scorable | 0.9917355 | 0.7879935 |
| #### Bn-A10-p5684074 | A-genome specific (napus-rapa) | 0.9880383    | 0.5215792    | not scorable | not scorable | 1         | 0.754023  |
| #### Bn-A10-p5712509 | A-genome specific (napus-rapa) | 0.9904306    | 0.7771121    | not scorable | not scorable | 1         | 0.7690235 |
| #### Bn-A10-p5721147 | A-genome specific (napus-rapa) | 0.9928229    | 0.6488947    | not scorable | not scorable | 1         | 0.7358698 |
| #### Bn-A10-p5727780 | A-genome specific (napus-rapa) | 0.9593301    | 0.3839064    | not scorable | not scorable | 1         | 0.7560734 |
| #### Bn-A10-p5730775 | A-genome specific (napus-rapa) | 0.9928229    | 0.757611     | not scorable | not scorable | 0.9917355 | 0.7333371 |
| #### Bn-A10-p5746168 | A-genome specific (napus-rapa) | 0.9808612    | 0.7533643    | not scorable | not scorable | 0.9834711 | 0.6629016 |
| #### Bn-A10-p5762378 | A-genome specific (napus-rapa) | 0.9593301    | 0.6496496    | not scorable | not scorable | 0.9752066 | 0.5671229 |
| #### Bn-A10-p5774002 | A-genome specific (napus-rapa) | 0.9545454    | 0.3831647    | not scorable | not scorable | 0.9752066 | 0.6632957 |
| #### Bn-A10-p5778609 | A-genome specific (napus-rapa) | 0.9545454    | 0.7942775    | not scorable | not scorable | 0.9504132 | 0.7131827 |
| #### Bn-A10-p5781113 | A-genome specific (napus-rapa) | 0.9449761    | 0.8032197    | not scorable | not scorable | 0.9586777 | 0.738682  |
| #### Bn-A10-p5799347 | A-genome specific (napus-rapa) | 0.9665072    | 0.5835006    | not scorable | not scorable | 1         | 0.7441994 |
| #### Bn-A10-p5819027 | A-genome specific (napus-rapa) | 0.9641148    | 0.3621838    | not scorable | not scorable | 0.9834711 | 0.7719952 |

|                      |                                |              |              |              |              |              |              |
|----------------------|--------------------------------|--------------|--------------|--------------|--------------|--------------|--------------|
| #### Bn-A10-p5831782 | A-genome specific (napus-rapa) | 0.9856459    | 0.6938325    | not scorable | not scorable | 0.9917355    | 0.6717075    |
| #### Bn-A10-p5832298 | A-genome specific (rapa only)  | not scorable | not scorable | not scorable | not scorable | 0.9834711    | 0.7100073    |
| #### Bn-A10-p5832645 | A-genome specific (napus-rapa) | 0.9928229    | 0.7836132    | not scorable | not scorable | 0.9917355    | 0.6893673    |
| #### Bn-A10-p5834005 | A-genome specific (rapa only)  | not scorable | not scorable | not scorable | not scorable | 1            | 0.6626194    |
| #### Bn-A10-p5845294 | A-genome specific (rapa only)  | not scorable | not scorable | not scorable | not scorable | 0.9669421    | 0.5551412    |
| #### Bn-A10-p585176  | A-genome specific (napus-rapa) | 0.9808612    | 0.5064421    | not scorable | not scorable | 1            | 0.7804295    |
| #### Bn-A10-p5860913 | A-genome specific (rapa only)  | not scorable | not scorable | not scorable | not scorable | 0.9834711    | 0.6623592    |
| #### Bn-A10-p5869175 | A-genome specific (napus-rapa) | 0.9545454    | 0.3244598    | not scorable | not scorable | 0.9917355    | 0.7743863    |
| #### Bn-A10-p58713   | A-genome specific (napus-rapa) | 0.6842105    | 0.8202039    | not scorable | not scorable | 0.5289256    | 0.9185206    |
| #### Bn-A10-p5873429 | A-genome specific (napus-rapa) | 0.9760765    | 0.7804452    | not scorable | not scorable | 1            | 0.7466972    |
| #### Bn-A10-p5888302 | A-genome specific (napus-rapa) | 0.9904306    | 0.7729529    | not scorable | not scorable | 1            | 0.7167921    |
| #### Bn-A10-p5892580 | A-genome specific (napus-rapa) | 0.9880383    | 0.7845982    | not scorable | not scorable | 0.9752066    | 0.7888931    |
| #### Bn-A10-p58959   | A-genome specific (napus-rapa) | 0.6842105    | 0.8059507    | not scorable | not scorable | 0.5289256    | 0.7608685    |
| #### Bn-A10-p592763  | A-genome specific (napus-rapa) | 0.9712918    | 0.5659093    | not scorable | not scorable | 0.9917355    | 0.7461112    |
| #### Bn-A10-p5996125 | A-genome specific (napus-rapa) | 0.3444976    | 0.9386803    | not scorable | not scorable | 0.9834711    | 0.6662353    |
| #### Bn-A10-p600021  | A-genome specific (rapa only)  | not scorable | not scorable | not scorable | not scorable | 0.9917355    | 0.6862456    |
| #### Bn-A10-p6012827 | napus specific                 | 0.9832536    | 0.8493534    | not scorable | not scorable | not scorable | not scorable |
| #### Bn-A10-p6055143 | A-genome specific (napus-rapa) | 0.9832536    | 0.7540269    | not scorable | not scorable | 0.9669421    | 0.8349551    |
| #### Bn-A10-p6120400 | A-genome specific (napus-rapa) | 0.9497608    | 0.46403      | not scorable | not scorable | 1            | 0.7970298    |
| #### Bn-A10-p6126590 | A-genome specific (napus-rapa) | 0.9617225    | 0.3809739    | not scorable | not scorable | 1            | 0.7607509    |
| #### Bn-A10-p6137434 | A-genome specific (napus-rapa) | 1            | 0.3691785    | not scorable | not scorable | 0.9917355    | 0.8100984    |
| #### Bn-A10-p6148523 | A-genome specific (napus-rapa) | 0.9545454    | 0.6384335    | not scorable | not scorable | 0.9834711    | 0.7961192    |
| #### Bn-A10-p6159693 | A-genome specific (napus-rapa) | 1            | 0.8060631    | not scorable | not scorable | 1            | 0.7382665    |
| #### Bn-A10-p6160352 | A-genome specific (napus-rapa) | 1            | 0.8321317    | not scorable | not scorable | 0.9669421    | 0.8148932    |
| #### Bn-A10-p6162838 | A-genome specific (napus-rapa) | 0.9976076    | 0.5501103    | not scorable | not scorable | 0.9834711    | 0.8058633    |
| #### Bn-A10-p6166631 | A-genome specific (napus-rapa) | 0.9641148    | 0.7290801    | not scorable | not scorable | 0.9669421    | 0.6925284    |
| #### Bn-A10-p6176593 | A-genome specific (napus-rapa) | 0.9856459    | 0.7722023    | not scorable | not scorable | 1            | 0.8096758    |
| #### Bn-A10-p6177431 | A-genome specific (napus-rapa) | 0.9760765    | 0.4751695    | not scorable | not scorable | 0.9917355    | 0.8047553    |
| #### Bn-A10-p6180693 | A-genome specific (napus-rapa) | 0.9784689    | 0.5621231    | not scorable | not scorable | 0.9834711    | 0.7611846    |
| #### Bn-A10-p6192971 | A-genome specific (napus-rapa) | 0.9952153    | 0.7962654    | not scorable | not scorable | 0.9917355    | 0.7318051    |
| #### Bn-A10-p6195984 | all not scorable               | not scorable | not scorable | not scorable | not scorable | not scorable | not scorable |
| #### Bn-A10-p6198988 | A-genome specific (napus-rapa) | 0.9784689    | 0.798765     | not scorable | not scorable | 1            | 0.8216213    |
| #### Bn-A10-p6204788 | A-genome specific (napus-rapa) | 0.9952153    | 0.4702185    | not scorable | not scorable | 0.9586777    | 0.721669     |



|                      |                                |              |              |              |              |           |           |
|----------------------|--------------------------------|--------------|--------------|--------------|--------------|-----------|-----------|
| #### Bn-A10-p62077   | A-genome specific (napus-ropa) | 0.6794258    | 0.81073      | not scorable | not scorable | 0.6446281 | 0.8445446 |
| #### Bn-A10-p6228003 | A-genome specific (napus-ropa) | 0.9665072    | 0.2912016    | not scorable | not scorable | 0.9834711 | 0.7923967 |
| #### Bn-A10-p6233556 | A-genome specific (napus-ropa) | 0.9712918    | 0.7721791    | not scorable | not scorable | 0.9917355 | 0.7506369 |
| #### Bn-A10-p6240637 | A-genome specific (napus-ropa) | 0.9665072    | 0.4728128    | not scorable | not scorable | 1         | 0.7717801 |
| #### Bn-A10-p6247519 | A-genome specific (napus-ropa) | 0.9880383    | 0.7677879    | not scorable | not scorable | 1         | 0.7343105 |
| #### Bn-A10-p6270494 | A-genome specific (napus-ropa) | 0.9832536    | 0.6770668    | not scorable | not scorable | 1         | 0.6422465 |
| #### Bn-A10-p6271467 | A-genome specific (napus-ropa) | 0.9760765    | 0.8013405    | not scorable | not scorable | 1         | 0.7820441 |
| #### Bn-A10-p6271554 | A-genome specific (napus-ropa) | 0.9832536    | 0.7818072    | not scorable | not scorable | 0.9752066 | 0.8158318 |
| #### Bn-A10-p6271776 | A-genome specific (napus-ropa) | 0.9928229    | 0.8041685    | not scorable | not scorable | 1         | 0.8050096 |
| #### Bn-A10-p6278596 | A-genome specific (napus-ropa) | 0.9712918    | 0.7772024    | not scorable | not scorable | 1         | 0.8210795 |
| #### Bn-A10-p6280436 | A-genome specific (napus-ropa) | 0.9808612    | 0.4058546    | not scorable | not scorable | 0.9917355 | 0.6576438 |
| #### Bn-A10-p6290949 | A-genome specific (napus-ropa) | 0.9784689    | 0.7876921    | not scorable | not scorable | 1         | 0.9205657 |
| #### Bn-A10-p6299839 | A-genome specific (napus-ropa) | 0.9880383    | 0.7966517    | not scorable | not scorable | 0.9834711 | 0.7562191 |
| #### Bn-A10-p6309983 | A-genome specific (ropa only)  | not scorable | not scorable | not scorable | not scorable | 0.9917355 | 0.705292  |
| #### Bn-A10-p6322788 | A-genome specific (napus-ropa) | 0.9952153    | 0.794944     | not scorable | not scorable | 0.9917355 | 0.8343771 |
| #### Bn-A10-p6323527 | A-genome specific (napus-ropa) | 0.9976076    | 0.782175     | not scorable | not scorable | 0.9917355 | 0.7002567 |
| #### Bn-A10-p6324850 | A-genome specific (napus-ropa) | 0.9904306    | 0.7688979    | not scorable | not scorable | 1         | 0.799218  |
| #### Bn-A10-p6332974 | A-genome specific (napus-ropa) | 0.9928229    | 0.4698577    | not scorable | not scorable | 0.9917355 | 0.8303306 |
| #### Bn-A10-p6344414 | A-genome specific (napus-ropa) | 0.9928229    | 0.7401308    | not scorable | not scorable | 0.9752066 | 0.8116733 |
| #### Bn-A10-p634822  | A-genome specific (napus-ropa) | 0.7392344    | 0.8046323    | not scorable | not scorable | 1         | 0.7932006 |
| #### Bn-A10-p6364237 | A-genome specific (napus-ropa) | 0.9832536    | 0.5474221    | not scorable | not scorable | 0.9917355 | 0.6733986 |
| #### Bn-A10-p6371190 | A-genome specific (napus-ropa) | 0.9808612    | 0.4530067    | not scorable | not scorable | 1         | 0.7507418 |
| #### Bn-A10-p6405472 | A-genome specific (napus-ropa) | 0.9832536    | 0.7632298    | not scorable | not scorable | 1         | 0.8536915 |
| #### Bn-A10-p6412022 | A-genome specific (napus-ropa) | 0.9688995    | 0.5896956    | not scorable | not scorable | 1         | 0.686577  |
| #### Bn-A10-p6418601 | A-genome specific (napus-ropa) | 0.9760765    | 0.5749778    | not scorable | not scorable | 1         | 0.8484223 |
| #### Bn-A10-p64365   | A-genome specific (napus-ropa) | 0.6866029    | 0.6633605    | not scorable | not scorable | 0.5619835 | 0.7859959 |
| #### Bn-A10-p6457220 | A-genome specific (napus-ropa) | 0.9856459    | 0.7658644    | not scorable | not scorable | 0.9834711 | 0.8793033 |
| #### Bn-A10-p6459258 | A-genome specific (napus-ropa) | 0.9880383    | 0.7628332    | not scorable | not scorable | 1         | 0.7619165 |
| #### Bn-A10-p6459782 | A-genome specific (napus-ropa) | 0.9784689    | 0.7539162    | not scorable | not scorable | 1         | 0.7053635 |
| #### Bn-A10-p6460164 | A-genome specific (napus-ropa) | 0.9665072    | 0.6349262    | not scorable | not scorable | 0.9917355 | 0.7744581 |
| #### Bn-A10-p6464869 | A-genome specific (napus-ropa) | 0.9880383    | 0.7810514    | not scorable | not scorable | 0.9917355 | 0.7902365 |
| #### Bn-A10-p6468609 | A-genome specific (napus-ropa) | 0.9330143    | 0.77848      | not scorable | not scorable | 1         | 0.6856725 |
| #### Bn-A10-p65275   | A-genome specific (napus-ropa) | 0.6842105    | 0.8225061    | not scorable | not scorable | 0.5206612 | 0.8428996 |

|                      |                                |              |              |              |              |              |              |
|----------------------|--------------------------------|--------------|--------------|--------------|--------------|--------------|--------------|
| #### Bn-A10-p6537045 | A-genome specific (napus-rapa) | 0.9760765    | 0.7838798    | not scorable | not scorable | 0.9669421    | 0.8451544    |
| #### Bn-A10-p6539423 | A-genome specific (napus-rapa) | 0.9688995    | 0.6419836    | not scorable | not scorable | 1            | 0.8074905    |
| #### Bn-A10-p6540548 | A-genome specific (napus-rapa) | 0.9760765    | 0.7508962    | not scorable | not scorable | 1            | 0.8024603    |
| #### Bn-A10-p6541418 | A-genome specific (napus-rapa) | 0.9904306    | 0.7958425    | not scorable | not scorable | 1            | 0.8222046    |
| #### Bn-A10-p6555288 | A-genome specific (napus-rapa) | 0.9641148    | 0.7027357    | not scorable | not scorable | 1            | 0.7719299    |
| #### Bn-A10-p6558564 | A-genome specific (napus-rapa) | 0.9808612    | 0.7939903    | not scorable | not scorable | 0.9834711    | 0.7575049    |
| #### Bn-A10-p6561569 | A-genome specific (napus-rapa) | 0.9210526    | 0.4253356    | not scorable | not scorable | 0.9917355    | 0.811204     |
| #### Bn-A10-p6582015 | A-genome specific (rapa only)  | not scorable | not scorable | not scorable | not scorable | 0.9834711    | 0.7091959    |
| #### Bn-A10-p6600373 | A-genome specific (napus-rapa) | 0.9784689    | 0.8066537    | not scorable | not scorable | 0.9917355    | 0.8299361    |
| #### Bn-A10-p6600844 | A-genome specific (napus-rapa) | 0.9688995    | 0.4361064    | not scorable | not scorable | 0.9917355    | 0.8058843    |
| #### Bn-A10-p6604928 | A-genome specific (napus-rapa) | 0.9760765    | 0.8316441    | not scorable | not scorable | 0.9917355    | 0.7705125    |
| #### Bn-A10-p6609801 | A-genome specific (napus-rapa) | 0.9665072    | 0.3676564    | not scorable | not scorable | 0.9834711    | 0.7919323    |
| #### Bn-A10-p6624071 | A-genome specific (napus-rapa) | 0.9617225    | 0.3093245    | not scorable | not scorable | 1            | 0.8111141    |
| #### Bn-A10-p6632002 | A-genome specific (napus-rapa) | 0.9617225    | 0.7783731    | not scorable | not scorable | 0.9834711    | 0.6679955    |
| #### Bn-A10-p6638864 | A-genome specific (napus-rapa) | 0.9784689    | 0.7489855    | not scorable | not scorable | 0.9917355    | 0.8034671    |
| #### Bn-A10-p6639652 | A-genome specific (napus-rapa) | 0.9808612    | 0.7685673    | not scorable | not scorable | 0.9917355    | 0.7316309    |
| #### Bn-A10-p6643953 | A-genome specific (napus-rapa) | 0.9712918    | 0.3695155    | not scorable | not scorable | 1            | 0.6472768    |
| #### Bn-A10-p6671842 | napus specific                 | 0.9736842    | 0.6312414    | not scorable | not scorable | not scorable | not scorable |
| #### Bn-A10-p6678779 | A-genome specific (napus-rapa) | 0.9521531    | 0.4118009    | not scorable | not scorable | 0.9917355    | 0.8103834    |
| #### Bn-A10-p6724918 | A-genome specific (napus-rapa) | 0.9976076    | 0.8574045    | not scorable | not scorable | 0.9669421    | 0.7517765    |
| #### Bn-A10-p6730588 | A-genome specific (napus-rapa) | 0.9952153    | 0.3554479    | not scorable | not scorable | 0.9917355    | 0.565666     |
| #### Bn-A10-p6743896 | A-genome specific (napus-rapa) | 0.9856459    | 0.2959432    | not scorable | not scorable | 0.9917355    | 0.6690605    |
| #### Bn-A10-p6760255 | A-genome specific (napus-rapa) | 0.9832536    | 0.3813339    | not scorable | not scorable | 1            | 0.752762     |
| #### Bn-A10-p6760664 | A-genome specific (napus-rapa) | 1            | 0.7617713    | not scorable | not scorable | 1            | 0.7662225    |
| #### Bn-A10-p6760904 | A-genome specific (napus-rapa) | 1            | 0.5461611    | not scorable | not scorable | 1            | 0.6578111    |
| #### Bn-A10-p6761330 | A-genome specific (napus-rapa) | 0.9928229    | 0.7255899    | not scorable | not scorable | 0.9917355    | 0.6941558    |
| #### Bn-A10-p6763376 | A-genome specific (napus-rapa) | 0.9665072    | 0.6903758    | not scorable | not scorable | 1            | 0.8948976    |
| #### Bn-A10-p6765523 | A-genome specific (napus-rapa) | 0.9784689    | 0.5587026    | not scorable | not scorable | 1            | 0.8366517    |
| #### Bn-A10-p6770590 | A-genome specific (napus-rapa) | 0.9114832    | 0.7603872    | not scorable | not scorable | 0.9586777    | 0.9034953    |
| #### Bn-A10-p6773336 | A-genome specific (napus-rapa) | 0.9019139    | 0.8049541    | not scorable | not scorable | 0.9504132    | 0.6763673    |
| #### Bn-A10-p6779480 | A-genome specific (rapa only)  | not scorable | not scorable | not scorable | not scorable | 0.9421487    | 0.7230939    |
| #### Bn-A10-p6792798 | A-genome specific (napus-rapa) | 0.9784689    | 0.5427592    | not scorable | not scorable | 0.9669421    | 0.7701296    |
| #### Bn-A10-p6796120 | A-genome specific (napus-rapa) | 0.9736842    | 0.4058971    | not scorable | not scorable | 0.9917355    | 0.7846308    |

|                      |                                |              |              |              |              |              |              |
|----------------------|--------------------------------|--------------|--------------|--------------|--------------|--------------|--------------|
| #### Bn-A10-p6838885 | A-genome specific (napus-rapa) | 0.9856459    | 0.4621698    | not scorable | not scorable | 0.9917355    | 0.7046102    |
| #### Bn-A10-p6851091 | A-genome specific (napus-rapa) | 0.9641148    | 0.2994389    | not scorable | not scorable | 0.9917355    | 0.7078884    |
| #### Bn-A10-p6851375 | A-genome specific (napus-rapa) | 0.9832536    | 0.2933111    | not scorable | not scorable | 1            | 0.6626291    |
| #### Bn-A10-p6864839 | A-genome specific (napus-rapa) | 0.9665072    | 0.8468056    | not scorable | not scorable | 1            | 0.8146109    |
| #### Bn-A10-p6880184 | A-genome specific (napus-rapa) | 0.9952153    | 0.6994392    | not scorable | not scorable | 1            | 0.6027883    |
| #### Bn-A10-p6881287 | A-genome specific (napus-rapa) | 0.9712918    | 0.34154      | not scorable | not scorable | 1            | 0.7532065    |
| #### Bn-A10-p68823   | A-genome specific (napus-rapa) | 0.861244     | 0.5735543    | not scorable | not scorable | 1            | 0.8773956    |
| #### Bn-A10-p688412  | A-genome specific (napus-rapa) | 0.9665072    | 0.790646     | not scorable | not scorable | 0.9834711    | 0.8223573    |
| #### Bn-A10-p6896063 | A-genome specific (napus-rapa) | 0.9928229    | 0.558556     | not scorable | not scorable | 0.9752066    | 0.7356497    |
| #### Bn-A10-p6915231 | A-genome specific (napus-rapa) | 0.9976076    | 0.5163593    | not scorable | not scorable | 0.9917355    | 0.8330199    |
| #### Bn-A10-p693390  | A-genome specific (napus-rapa) | 0.9904306    | 0.7838979    | not scorable | not scorable | 0.9834711    | 0.8765259    |
| #### Bn-A10-p6967288 | A-genome specific (napus-rapa) | 0.9952153    | 0.5684628    | not scorable | not scorable | 0.9834711    | 0.6824703    |
| #### Bn-A10-p6968402 | A-genome specific (napus-rapa) | 1            | 0.8801373    | not scorable | not scorable | 0.9834711    | 0.7193207    |
| #### Bn-A10-p700896  | A-genome specific (napus-rapa) | 0.9880383    | 0.8370886    | not scorable | not scorable | 0.9917355    | 0.7447721    |
| #### Bn-A10-p7065016 | napus specific                 | 0.9425837    | 0.4978624    | not scorable | not scorable | not scorable | not scorable |
| #### Bn-A10-p7069659 | A-genome specific (napus-rapa) | 1            | 0.44986      | not scorable | not scorable | 0.9752066    | 0.655123     |
| #### Bn-A10-p7076810 | A-genome specific (napus-rapa) | 1            | 0.508494     | not scorable | not scorable | 1            | 0.7121087    |
| #### Bn-A10-p7078693 | A-genome specific (napus-rapa) | 0.9952153    | 0.8149408    | not scorable | not scorable | 0.9834711    | 0.7388045    |
| #### Bn-A10-p7078767 | A-genome specific (napus-rapa) | 0.9952153    | 0.7473429    | not scorable | not scorable | 1            | 0.7134317    |
| #### Bn-A10-p708566  | A-genome specific (napus-rapa) | 0.9928229    | 0.8426731    | not scorable | not scorable | 0.9917355    | 0.8188379    |
| #### Bn-A10-p709526  | A-genome specific (rapa only)  | not scorable | not scorable | not scorable | not scorable | 0.9917355    | 0.771594     |
| #### Bn-A10-p709917  | A-genome specific (napus-rapa) | 0.9736842    | 0.8158504    | not scorable | not scorable | 1            | 0.7452687    |
| #### Bn-A10-p7109137 | A-genome specific (napus-rapa) | 1            | 0.4071889    | not scorable | not scorable | 0.9917355    | 0.7906649    |
| #### Bn-A10-p7118112 | A-genome specific (napus-rapa) | 0.9976076    | 0.8067715    | not scorable | not scorable | 1            | 0.7702933    |
| #### Bn-A10-p718048  | A-genome specific (napus-rapa) | 0.9473684    | 0.4125063    | not scorable | not scorable | 1            | 0.7192907    |
| #### Bn-A10-p7182541 | A-genome specific (napus-rapa) | 0.9832536    | 0.7992373    | not scorable | not scorable | 0.9669421    | 0.8571433    |
| #### Bn-A10-p7186465 | genome unspecific (all in)     | 0.9928229    | 0.3704362    | 1            | 0.6106974    | 1            | 0.7126489    |
| #### Bn-A10-p7231726 | A-genome specific (napus-rapa) | 0.9904306    | 0.5359418    | not scorable | not scorable | 1            | 0.8074011    |
| #### Bn-A10-p7247322 | A-genome specific (napus-rapa) | 0.9760765    | 0.3899743    | not scorable | not scorable | 0.9834711    | 0.7281453    |
| #### Bn-A10-p7250703 | A-genome specific (napus-rapa) | 0.5526316    | 0.9061331    | not scorable | not scorable | 0.9917355    | 0.7313615    |
| #### Bn-A10-p7252424 | A-genome specific (napus-rapa) | 1            | 0.6241663    | not scorable | not scorable | 1            | 0.67845      |
| #### Bn-A10-p7260660 | A-genome specific (napus-rapa) | 0.9760765    | 0.812552     | not scorable | not scorable | 0.9586777    | 0.7754651    |
| #### Bn-A10-p7262868 | A-genome specific (napus-rapa) | 0.9880383    | 0.7956076    | not scorable | not scorable | 0.9834711    | 0.8044092    |

|                      |                                |           |           |              |              |              |              |
|----------------------|--------------------------------|-----------|-----------|--------------|--------------|--------------|--------------|
| #### Bn-A10-p7278102 | A-genome specific (napus-rapa) | 0.9688995 | 0.5733529 | not scorable | not scorable | 0.9669421    | 0.710384     |
| #### Bn-A10-p7278188 | A-genome specific (napus-rapa) | 0.9856459 | 0.7899894 | not scorable | not scorable | 1            | 0.842967     |
| #### Bn-A10-p7283605 | A-genome specific (napus-rapa) | 0.9904306 | 0.8013551 | not scorable | not scorable | 1            | 0.6524715    |
| #### Bn-A10-p73025   | A-genome specific (napus-rapa) | 0.8660287 | 0.4973737 | not scorable | not scorable | 1            | 0.5488182    |
| #### Bn-A10-p7309029 | A-genome specific (napus-rapa) | 1         | 0.7550291 | not scorable | not scorable | 0.9917355    | 0.7986906    |
| #### Bn-A10-p73255   | A-genome specific (napus-rapa) | 0.9401914 | 0.161885  | not scorable | not scorable | 0.9834711    | 0.5836527    |
| #### Bn-A10-p7326339 | A-genome specific (napus-rapa) | 0.9976076 | 0.7500221 | not scorable | not scorable | 0.9752066    | 0.6939823    |
| #### Bn-A10-p7341107 | A-genome specific (napus-rapa) | 0.9952153 | 0.8536093 | not scorable | not scorable | 1            | 0.7815349    |
| #### Bn-A10-p7346569 | A-genome specific (napus-rapa) | 0.9904306 | 0.8944837 | not scorable | not scorable | 0.9834711    | 0.7773287    |
| #### Bn-A10-p7347530 | A-genome specific (napus-rapa) | 0.9928229 | 0.5592754 | not scorable | not scorable | 0.9669421    | 0.6718805    |
| #### Bn-A10-p7349925 | A-genome specific (napus-rapa) | 0.9880383 | 0.3857927 | not scorable | not scorable | 0.9917355    | 0.6286691    |
| #### Bn-A10-p7357100 | A-genome specific (napus-rapa) | 0.9976076 | 0.6640239 | not scorable | not scorable | 0.9752066    | 0.6022741    |
| #### Bn-A10-p7357442 | A-genome specific (napus-rapa) | 0.9808612 | 0.8007532 | not scorable | not scorable | 0.9752066    | 0.7470635    |
| #### Bn-A10-p7357555 | A-genome specific (napus-rapa) | 0.9928229 | 0.6141087 | not scorable | not scorable | 0.9834711    | 0.8400975    |
| #### Bn-A10-p7360229 | A-genome specific (napus-rapa) | 0.9019139 | 0.7062963 | not scorable | not scorable | 0.9834711    | 0.6608227    |
| #### Bn-A10-p7365704 | A-genome specific (napus-rapa) | 0.9928229 | 0.6612417 | not scorable | not scorable | 1            | 0.7035602    |
| #### Bn-A10-p7376910 | napus specific                 | 0.9665072 | 0.5945254 | not scorable | not scorable | not scorable | not scorable |
| #### Bn-A10-p7388008 | A-genome specific (napus-rapa) | 0.9856459 | 0.3826141 | not scorable | not scorable | 0.9752066    | 0.7711895    |
| #### Bn-A10-p7393471 | A-genome specific (napus-rapa) | 0.9832536 | 0.4146211 | not scorable | not scorable | 0.9834711    | 0.6810765    |
| #### Bn-A10-p7393632 | A-genome specific (napus-rapa) | 1         | 0.862545  | not scorable | not scorable | 0.9834711    | 0.8207138    |
| #### Bn-A10-p7394180 | A-genome specific (napus-rapa) | 0.9856459 | 0.7286399 | not scorable | not scorable | 0.9834711    | 0.7419199    |
| #### Bn-A10-p7394578 | A-genome specific (napus-rapa) | 1         | 0.8642377 | not scorable | not scorable | 1            | 0.7622377    |
| #### Bn-A10-p7410271 | A-genome specific (napus-rapa) | 0.9952153 | 0.4623219 | not scorable | not scorable | 0.9669421    | 0.7732815    |
| #### Bn-A10-p7444203 | A-genome specific (napus-rapa) | 0.9928229 | 0.6308038 | not scorable | not scorable | 1            | 0.7401044    |
| #### Bn-A10-p7453695 | A-genome specific (napus-rapa) | 0.9282297 | 0.5061395 | not scorable | not scorable | 0.9752066    | 0.7839935    |
| #### Bn-A10-p7454278 | A-genome specific (napus-rapa) | 0.9952153 | 0.7360692 | not scorable | not scorable | 0.9834711    | 0.644972     |
| #### Bn-A10-p7454604 | A-genome specific (napus-rapa) | 0.9904306 | 0.8183203 | not scorable | not scorable | 0.9586777    | 0.7346973    |
| #### Bn-A10-p7480192 | A-genome specific (napus-rapa) | 0.9760765 | 0.4382563 | not scorable | not scorable | 0.9421487    | 0.760651     |
| #### Bn-A10-p7480918 | A-genome specific (napus-rapa) | 0.9880383 | 0.5224184 | not scorable | not scorable | 0.9917355    | 0.7822075    |
| #### Bn-A10-p7482568 | A-genome specific (napus-rapa) | 0.9832536 | 0.2795177 | not scorable | not scorable | 0.9752066    | 0.6840211    |
| #### Bn-A10-p7492957 | A-genome specific (napus-rapa) | 0.9928229 | 0.8181945 | not scorable | not scorable | 0.9917355    | 0.7700318    |
| #### Bn-A10-p749870  | A-genome specific (napus-rapa) | 0.9976076 | 0.3954904 | not scorable | not scorable | 1            | 0.7401044    |
| #### Bn-A10-p7500176 | A-genome specific (napus-rapa) | 0.9952153 | 0.6307399 | not scorable | not scorable | 0.9917355    | 0.5605534    |

|                      |                                |              |              |              |              |              |              |
|----------------------|--------------------------------|--------------|--------------|--------------|--------------|--------------|--------------|
| #### Bn-A10-p7502551 | A-genome specific (napus-rapa) | 0.9976076    | 0.8725684    | not scorable | not scorable | 1            | 0.7759002    |
| #### Bn-A10-p7502935 | A-genome specific (napus-rapa) | 0.9856459    | 0.7260077    | not scorable | not scorable | 0.9834711    | 0.721446     |
| #### Bn-A10-p7504317 | A-genome specific (napus-rapa) | 0.9928229    | 0.3336009    | not scorable | not scorable | 0.9917355    | 0.7547496    |
| #### Bn-A10-p750464  | A-genome specific (napus-rapa) | 0.9808612    | 0.803159     | not scorable | not scorable | 1            | 0.6760187    |
| #### Bn-A10-p750738  | A-genome specific (napus-rapa) | 0.9665072    | 0.678649     | not scorable | not scorable | 0.9752066    | 0.6913436    |
| #### Bn-A10-p7510542 | A-genome specific (napus-rapa) | 0.9880383    | 0.3653634    | not scorable | not scorable | 0.9917355    | 0.651333     |
| #### Bn-A10-p7513409 | A-genome specific (napus-rapa) | 0.9952153    | 0.5968788    | not scorable | not scorable | 1            | 0.7461335    |
| #### Bn-A10-p754316  | A-genome specific (napus-rapa) | 0.9497608    | 0.4692791    | not scorable | not scorable | 1            | 0.7561079    |
| #### Bn-A10-p754475  | A-genome specific (napus-rapa) | 0.9904306    | 0.7807971    | not scorable | not scorable | 0.9917355    | 0.8338297    |
| #### Bn-A10-p7554677 | A-genome specific (napus-rapa) | 0.9880383    | 0.8923159    | not scorable | not scorable | 0.9917355    | 0.7627955    |
| #### Bn-A10-p7560857 | A-genome specific (napus-rapa) | 0.9976076    | 0.7520917    | not scorable | not scorable | 1            | 0.7059445    |
| #### Bn-A10-p7578202 | A-genome specific (napus-rapa) | 1            | 0.8692008    | not scorable | not scorable | 1            | 0.8729413    |
| #### Bn-A10-p7586742 | A-genome specific (napus-rapa) | 0.9952153    | 0.3481812    | not scorable | not scorable | 0.9917355    | 0.7165353    |
| #### Bn-A10-p758707  | napus specific                 | 0.9521531    | 0.3657051    | not scorable | not scorable | not scorable | not scorable |
| #### Bn-A10-p7587166 | A-genome specific (napus-rapa) | 0.9808612    | 0.849731     | not scorable | not scorable | 0.9834711    | 0.731105     |
| #### Bn-A10-p7588274 | A-genome specific (napus-rapa) | 0.9952153    | 0.8290427    | not scorable | not scorable | 0.9834711    | 0.7676514    |
| #### Bn-A10-p7599250 | A-genome specific (napus-rapa) | 0.9976076    | 0.2832601    | not scorable | not scorable | 0.9834711    | 0.6634367    |
| #### Bn-A10-p7600250 | A-genome specific (napus-rapa) | 0.9880383    | 0.8127929    | not scorable | not scorable | 0.9586777    | 0.7610781    |
| #### Bn-A10-p7611277 | A-genome specific (napus-rapa) | 0.9880383    | 0.838463     | not scorable | not scorable | 0.6198347    | 0.8540351    |
| #### Bn-A10-p7611361 | A-genome specific (rapa only)  | not scorable | not scorable | not scorable | not scorable | 0.6280992    | 0.7871782    |
| #### Bn-A10-p7628181 | A-genome specific (rapa only)  | not scorable | not scorable | not scorable | not scorable | 0.9669421    | 0.687937     |
| #### Bn-A10-p7636136 | A-genome specific (napus-rapa) | 0.9712918    | 0.3221268    | not scorable | not scorable | 1            | 0.7198105    |
| #### Bn-A10-p7644362 | A-genome specific (napus-rapa) | 0.9784689    | 0.7749609    | not scorable | not scorable | 0.9917355    | 0.7770448    |
| #### Bn-A10-p7647619 | A-genome specific (napus-rapa) | 0.9760765    | 0.7487223    | not scorable | not scorable | 0.9917355    | 0.7144969    |
| #### Bn-A10-p7650629 | A-genome specific (napus-rapa) | 0.9880383    | 0.7502471    | not scorable | not scorable | 1            | 0.6831981    |
| #### Bn-A10-p7650750 | A-genome specific (napus-rapa) | 0.9760765    | 0.722441     | not scorable | not scorable | 0.9834711    | 0.7339107    |
| #### Bn-A10-p7650844 | A-genome specific (napus-rapa) | 0.9880383    | 0.7719246    | not scorable | not scorable | 0.9752066    | 0.8359204    |
| #### Bn-A10-p7652354 | A-genome specific (napus-rapa) | 1            | 0.6738957    | not scorable | not scorable | 1            | 0.6806328    |
| #### Bn-A10-p7652705 | A-genome specific (napus-rapa) | 0.9760765    | 0.4457831    | not scorable | not scorable | 0.9752066    | 0.7049609    |
| #### Bn-A10-p7657767 | A-genome specific (napus-rapa) | 0.9712918    | 0.7769371    | not scorable | not scorable | 1            | 0.7477918    |
| #### Bn-A10-p7669513 | A-genome specific (napus-rapa) | 0.9928229    | 0.7801484    | not scorable | not scorable | 0.9834711    | 0.7404937    |
| #### Bn-A10-p7669574 | A-genome specific (napus-rapa) | 0.9904306    | 0.7943406    | not scorable | not scorable | 0.9752066    | 0.837308     |
| #### Bn-A10-p7671244 | A-genome specific (napus-rapa) | 0.9808612    | 0.7502079    | not scorable | not scorable | 1            | 0.7763242    |

|                      |                                |              |              |              |              |           |           |
|----------------------|--------------------------------|--------------|--------------|--------------|--------------|-----------|-----------|
| #### Bn-A10-p7679761 | A-genome specific (napus-rapa) | 0.9832536    | 0.8122957    | not scorable | not scorable | 0.9834711 | 0.8006827 |
| #### Bn-A10-p7679960 | A-genome specific (napus-rapa) | 0.9784689    | 0.7347137    | not scorable | not scorable | 0.9917355 | 0.7875881 |
| #### Bn-A10-p7680500 | A-genome specific (napus-rapa) | 1            | 0.8033734    | not scorable | not scorable | 0.9834711 | 0.7425764 |
| #### Bn-A10-p7698184 | A-genome specific (napus-rapa) | 0.9952153    | 0.4078329    | not scorable | not scorable | 0.9669421 | 0.7304161 |
| #### Bn-A10-p7699017 | A-genome specific (napus-rapa) | 0.9976076    | 0.8675472    | not scorable | not scorable | 1         | 0.7714006 |
| #### Bn-A10-p7704373 | A-genome specific (napus-rapa) | 0.9904306    | 0.8632044    | not scorable | not scorable | 0.9834711 | 0.7540721 |
| #### Bn-A10-p7706746 | A-genome specific (napus-rapa) | 0.9952153    | 0.8156591    | not scorable | not scorable | 0.9834711 | 0.7447481 |
| #### Bn-A10-p7706894 | A-genome specific (napus-rapa) | 0.9976076    | 0.8918679    | not scorable | not scorable | 0.9917355 | 0.6805646 |
| #### Bn-A10-p7707416 | A-genome specific (napus-rapa) | 0.9952153    | 0.3637141    | not scorable | not scorable | 0.9917355 | 0.7128786 |
| #### Bn-A10-p7720931 | A-genome specific (napus-rapa) | 0.9952153    | 0.4825867    | not scorable | not scorable | 0.9917355 | 0.7887035 |
| #### Bn-A10-p7757976 | A-genome specific (napus-rapa) | 0.9904306    | 0.7390845    | not scorable | not scorable | 0.9917355 | 0.7814875 |
| #### Bn-A10-p7760481 | A-genome specific (napus-rapa) | 0.9880383    | 0.7836477    | not scorable | not scorable | 0.9917355 | 0.7863113 |
| #### Bn-A10-p7767853 | A-genome specific (napus-rapa) | 0.9976076    | 0.3550264    | not scorable | not scorable | 0.9834711 | 0.5520422 |
| #### Bn-A10-p7769785 | A-genome specific (napus-rapa) | 0.9784689    | 0.7563993    | not scorable | not scorable | 0.9917355 | 0.7267899 |
| #### Bn-A10-p7772340 | A-genome specific (napus-rapa) | 0.9952153    | 0.779793     | not scorable | not scorable | 1         | 0.8220951 |
| #### Bn-A10-p7774373 | A-genome specific (napus-rapa) | 0.9904306    | 0.5775404    | not scorable | not scorable | 0.9917355 | 0.7490695 |
| #### Bn-A10-p7787682 | A-genome specific (napus-rapa) | 0.9784689    | 0.498879     | not scorable | not scorable | 0.9917355 | 0.7045886 |
| #### Bn-A10-p7790953 | A-genome specific (napus-rapa) | 0.9904306    | 0.8022441    | not scorable | not scorable | 0.9917355 | 0.6871123 |
| #### Bn-A10-p7791536 | A-genome specific (napus-rapa) | 0.9712918    | 0.7561773    | not scorable | not scorable | 0.9917355 | 0.6873076 |
| #### Bn-A10-p7793015 | A-genome specific (napus-rapa) | 0.9952153    | 0.720768     | not scorable | not scorable | 0.9917355 | 0.7639838 |
| #### Bn-A10-p7795745 | A-genome specific (napus-rapa) | 0.9784689    | 0.4105907    | not scorable | not scorable | 0.9834711 | 0.6832876 |
| #### Bn-A10-p7795907 | A-genome specific (napus-rapa) | 0.9617225    | 0.6283304    | not scorable | not scorable | 1         | 0.7408474 |
| #### Bn-A10-p7802218 | A-genome specific (napus-rapa) | 0.9952153    | 0.7922938    | not scorable | not scorable | 0.9917355 | 0.7066938 |
| #### Bn-A10-p7805981 | A-genome specific (napus-rapa) | 0.9760765    | 0.7794523    | not scorable | not scorable | 0.9917355 | 0.7289358 |
| #### Bn-A10-p7809041 | A-genome specific (napus-rapa) | 0.9784689    | 0.7018062    | not scorable | not scorable | 1         | 0.7400952 |
| #### Bn-A10-p7814196 | A-genome specific (napus-rapa) | 0.9928229    | 0.8297879    | not scorable | not scorable | 0.9917355 | 0.773018  |
| #### Bn-A10-p7814272 | A-genome specific (napus-rapa) | 0.9976076    | 0.7490064    | not scorable | not scorable | 0.9834711 | 0.7411638 |
| #### Bn-A10-p7823219 | A-genome specific (rapa only)  | not scorable | not scorable | not scorable | not scorable | 0.9752066 | 0.7271397 |
| #### Bn-A10-p7824378 | A-genome specific (napus-rapa) | 0.9928229    | 0.7324725    | not scorable | not scorable | 1         | 0.7355934 |
| #### Bn-A10-p7830321 | A-genome specific (napus-rapa) | 0.9976076    | 0.31977      | not scorable | not scorable | 0.9834711 | 0.6223335 |
| #### Bn-A10-p7835472 | A-genome specific (napus-rapa) | 0.9952153    | 0.535372     | not scorable | not scorable | 0.9752066 | 0.5929219 |
| #### Bn-A10-p78356   | genome unspecific (all in)     | 1            | 0.5544047    | 0.9534883    | 0.1794321    | 1         | 0.5782492 |
| #### Bn-A10-p7841942 | A-genome specific (napus-rapa) | 0.9904306    | 0.3648257    | not scorable | not scorable | 0.9917355 | 0.7100675 |

|                      |                                |              |              |              |              |              |              |
|----------------------|--------------------------------|--------------|--------------|--------------|--------------|--------------|--------------|
| #### Bn-A10-p7850480 | A-genome specific (rapa only)  | not scorable | not scorable | not scorable | not scorable | 0.8016529    | 0.7150631    |
| #### Bn-A10-p7850897 | A-genome specific (napus-rapa) | 1            | 0.7657131    | not scorable | not scorable | 1            | 0.7139323    |
| #### Bn-A10-p7866191 | A-genome specific (napus-rapa) | 0.9760765    | 0.3103524    | not scorable | not scorable | 0.9504132    | 0.5274858    |
| #### Bn-A10-p7867506 | A-genome specific (napus-rapa) | 0.9928229    | 0.8536879    | not scorable | not scorable | 0.9917355    | 0.7858909    |
| #### Bn-A10-p7869438 | A-genome specific (napus-rapa) | 1            | 0.4165801    | not scorable | not scorable | 1            | 0.6696508    |
| #### Bn-A10-p7873560 | A-genome specific (napus-rapa) | 0.9928229    | 0.4023568    | not scorable | not scorable | 0.9917355    | 0.7149791    |
| #### Bn-A10-p788337  | A-genome specific (napus-rapa) | 0.9641148    | 0.3930544    | not scorable | not scorable | 0.9917355    | 0.6364981    |
| #### Bn-A10-p7904737 | A-genome specific (napus-rapa) | 0.9952153    | 0.7156481    | not scorable | not scorable | 0.9917355    | 0.7180308    |
| #### Bn-A10-p7905059 | A-genome specific (napus-rapa) | 0.9928229    | 0.3350295    | not scorable | not scorable | 0.9669421    | 0.7478339    |
| #### Bn-A10-p7906281 | A-genome specific (napus-rapa) | 0.9808612    | 0.4411805    | not scorable | not scorable | 0.9669421    | 0.6368121    |
| #### Bn-A10-p7913022 | A-genome specific (napus-rapa) | 0.8732057    | 0.7246636    | not scorable | not scorable | 0.9917355    | 0.7539691    |
| #### Bn-A10-p7917510 | A-genome specific (napus-rapa) | 0.9952153    | 0.6948831    | not scorable | not scorable | 0.9669421    | 0.6242929    |
| #### Bn-A10-p7932013 | A-genome specific (napus-rapa) | 1            | 0.8505416    | not scorable | not scorable | 0.9917355    | 0.797832     |
| #### Bn-A10-p7946574 | A-genome specific (napus-rapa) | 1            | 0.8754446    | not scorable | not scorable | 1            | 0.7508194    |
| #### Bn-A10-p7975206 | A-genome specific (napus-rapa) | 0.9880383    | 0.550711     | not scorable | not scorable | 1            | 0.8122962    |
| #### Bn-A10-p7976115 | A-genome specific (napus-rapa) | 0.9928229    | 0.8271944    | not scorable | not scorable | 0.9917355    | 0.8490821    |
| #### Bn-A10-p7979799 | A-genome specific (napus-rapa) | 0.9976076    | 0.6217576    | not scorable | not scorable | 1            | 0.8149486    |
| #### Bn-A10-p7985707 | A-genome specific (napus-rapa) | 0.9952153    | 0.5562285    | not scorable | not scorable | 0.9917355    | 0.699963     |
| #### Bn-A10-p7988223 | A-genome specific (napus-rapa) | 0.9976076    | 0.5098308    | not scorable | not scorable | 1            | 0.7095814    |
| #### Bn-A10-p8025520 | A-genome specific (napus-rapa) | 0.9976076    | 0.5223405    | not scorable | not scorable | 1            | 0.6311471    |
| #### Bn-A10-p8027866 | A-genome specific (napus-rapa) | 0.9976076    | 0.7329693    | not scorable | not scorable | 0.9752066    | 0.6443327    |
| #### Bn-A10-p8036516 | A-genome specific (napus-rapa) | 1            | 0.7181901    | not scorable | not scorable | 1            | 0.6312869    |
| #### Bn-A10-p8036658 | A-genome specific (napus-rapa) | 1            | 0.835318     | not scorable | not scorable | 0.9834711    | 0.6846266    |
| #### Bn-A10-p8040898 | A-genome specific (napus-rapa) | 0.9760765    | 0.8130498    | not scorable | not scorable | 1            | 0.8806965    |
| #### Bn-A10-p8044126 | A-genome specific (napus-rapa) | 0.9952153    | 0.6895095    | not scorable | not scorable | 0.9917355    | 0.6846035    |
| #### Bn-A10-p8044188 | A-genome specific (napus-rapa) | 0.9976076    | 0.7899917    | not scorable | not scorable | 1            | 0.681731     |
| #### Bn-A10-p8049073 | A-genome specific (napus-rapa) | 0.9976076    | 0.7383086    | not scorable | not scorable | 0.9752066    | 0.6949836    |
| #### Bn-A10-p8059950 | all not scorable               | not scorable | not scorable | not scorable | not scorable | not scorable | not scorable |
| #### Bn-A10-p8063505 | A-genome specific (napus-rapa) | 1            | 0.7552732    | not scorable | not scorable | 0.9834711    | 0.7423599    |
| #### Bn-A10-p8070229 | napus specific                 | 0.9928229    | 0.9306044    | not scorable | not scorable | not scorable | not scorable |
| #### Bn-A10-p8072724 | A-genome specific (rapa only)  | not scorable | not scorable | not scorable | not scorable | 0.9752066    | 0.7003915    |
| #### Bn-A10-p8083623 | A-genome specific (napus-rapa) | 0.9952153    | 0.7574635    | not scorable | not scorable | 0.9917355    | 0.6893705    |
| #### Bn-A10-p8087617 | A-genome specific (napus-rapa) | 0.9808612    | 0.8458771    | not scorable | not scorable | 0.9586777    | 0.578383     |

|                       |                                |           |           |              |              |           |           |
|-----------------------|--------------------------------|-----------|-----------|--------------|--------------|-----------|-----------|
| ##### Bn-A10-p8093150 | A-genome specific (napus-rapa) | 0.9952153 | 0.5486664 | not scorable | not scorable | 0.9752066 | 0.7826631 |
| ##### Bn-A10-p8104368 | A-genome specific (napus-rapa) | 1         | 0.9182243 | not scorable | not scorable | 0.9834711 | 0.6687207 |
| ##### Bn-A10-p8104479 | A-genome specific (napus-rapa) | 0.9976076 | 0.8996301 | not scorable | not scorable | 0.9917355 | 0.7068456 |
| ##### Bn-A10-p8106826 | A-genome specific (napus-rapa) | 0.9976076 | 0.7914922 | not scorable | not scorable | 0.9752066 | 0.7509905 |
| ##### Bn-A10-p8108242 | A-genome specific (napus-rapa) | 0.9976076 | 0.824138  | not scorable | not scorable | 0.9752066 | 0.7995104 |
| ##### Bn-A10-p8125136 | A-genome specific (napus-rapa) | 0.9976076 | 0.8584656 | not scorable | not scorable | 0.9917355 | 0.7088029 |
| ##### Bn-A10-p8129578 | A-genome specific (napus-rapa) | 0.9976076 | 0.8412906 | not scorable | not scorable | 0.9917355 | 0.7098054 |
| ##### Bn-A10-p8155153 | A-genome specific (napus-rapa) | 0.9976076 | 0.7097265 | not scorable | not scorable | 0.9834711 | 0.74079   |
| ##### Bn-A10-p8173477 | A-genome specific (napus-rapa) | 0.9976076 | 0.7770298 | not scorable | not scorable | 0.9752066 | 0.8107097 |
| ##### Bn-A10-p8173651 | A-genome specific (napus-rapa) | 1         | 0.8358898 | not scorable | not scorable | 0.9834711 | 0.73869   |
| ##### Bn-A10-p8202766 | A-genome specific (napus-rapa) | 0.9928229 | 0.5352365 | not scorable | not scorable | 1         | 0.8336751 |
| ##### Bn-A10-p8204003 | A-genome specific (napus-rapa) | 0.9760765 | 0.8185092 | not scorable | not scorable | 0.9752066 | 0.8382971 |
| ##### Bn-A10-p8213398 | A-genome specific (napus-rapa) | 1         | 0.4944382 | not scorable | not scorable | 0.9834711 | 0.7511958 |
| ##### Bn-A10-p8237821 | A-genome specific (napus-rapa) | 0.9952153 | 0.7498513 | not scorable | not scorable | 1         | 0.6981876 |
| ##### Bn-A10-p8257748 | A-genome specific (napus-rapa) | 0.9904306 | 0.4872345 | not scorable | not scorable | 0.9917355 | 0.7712774 |
| ##### Bn-A10-p8285049 | A-genome specific (napus-rapa) | 0.9928229 | 0.4582258 | not scorable | not scorable | 0.9338843 | 0.4248531 |
| ##### Bn-A10-p8290065 | A-genome specific (napus-rapa) | 0.9952153 | 0.8336643 | not scorable | not scorable | 0.9917355 | 0.7798041 |
| ##### Bn-A10-p8290448 | A-genome specific (napus-rapa) | 0.9952153 | 0.7356966 | not scorable | not scorable | 0.9752066 | 0.7659997 |
| ##### Bn-A10-p8292854 | A-genome specific (napus-rapa) | 1         | 0.7333777 | not scorable | not scorable | 1         | 0.7841626 |
| ##### Bn-A10-p8304815 | A-genome specific (napus-rapa) | 0.9856459 | 0.7368042 | not scorable | not scorable | 0.9917355 | 0.6235346 |
| ##### Bn-A10-p8308769 | A-genome specific (napus-rapa) | 0.576555  | 0.7503467 | not scorable | not scorable | 0.9834711 | 0.6918588 |
| ##### Bn-A10-p8309983 | A-genome specific (napus-rapa) | 0.9976076 | 0.6167277 | not scorable | not scorable | 0.9917355 | 0.8059768 |
| ##### Bn-A10-p8315549 | A-genome specific (napus-rapa) | 1         | 0.5611973 | not scorable | not scorable | 1         | 0.754976  |
| ##### Bn-A10-p8320886 | A-genome specific (napus-rapa) | 1         | 0.9051911 | not scorable | not scorable | 0.9834711 | 0.7579015 |
| ##### Bn-A10-p8322965 | A-genome specific (napus-rapa) | 0.9928229 | 0.7023143 | not scorable | not scorable | 0.9834711 | 0.6653688 |
| ##### Bn-A10-p8328622 | A-genome specific (napus-rapa) | 0.9976076 | 0.5185678 | not scorable | not scorable | 0.9834711 | 0.6747425 |
| ##### Bn-A10-p8329751 | A-genome specific (napus-rapa) | 0.9976076 | 0.7184483 | not scorable | not scorable | 0.9917355 | 0.7035062 |
| ##### Bn-A10-p8330489 | A-genome specific (napus-rapa) | 0.9952153 | 0.7705043 | not scorable | not scorable | 1         | 0.8098735 |
| ##### Bn-A10-p8331925 | A-genome specific (napus-rapa) | 0.9928229 | 0.6918994 | not scorable | not scorable | 0.9669421 | 0.7738256 |
| ##### Bn-A10-p8340529 | A-genome specific (napus-rapa) | 0.9880383 | 0.7988785 | not scorable | not scorable | 0.9917355 | 0.7543262 |
| ##### Bn-A10-p8343376 | A-genome specific (napus-rapa) | 0.9976076 | 0.8403064 | not scorable | not scorable | 0.9586777 | 0.758944  |
| ##### Bn-A10-p8359538 | A-genome specific (napus-rapa) | 0.9952153 | 0.5214313 | not scorable | not scorable | 0.9917355 | 0.7175236 |
| ##### Bn-A10-p8359675 | A-genome specific (napus-rapa) | 0.9904306 | 0.5690189 | not scorable | not scorable | 0.9917355 | 0.7545403 |



|                      |                                   |              |              |              |              |              |              |
|----------------------|-----------------------------------|--------------|--------------|--------------|--------------|--------------|--------------|
| #### Bn-A10-p8359990 | A-genome specific (napus-rapa)    | 0.9976076    | 0.731478     | not scorable | not scorable | 0.9669421    | 0.6723284    |
| #### Bn-A10-p8369642 | A-genome specific (napus-rapa)    | 0.9904306    | 0.5699064    | not scorable | not scorable | 1            | 0.7065274    |
| #### Bn-A10-p8379385 | A-genome specific (napus-rapa)    | 1            | 0.8373294    | not scorable | not scorable | 1            | 0.886314     |
| #### Bn-A10-p8383686 | A-genome specific (napus-rapa)    | 0.9976076    | 0.5591534    | not scorable | not scorable | 1            | 0.7240071    |
| #### Bn-A10-p8383995 | A-genome specific (napus-rapa)    | 0.9976076    | 0.7522963    | not scorable | not scorable | 0.9917355    | 0.748507     |
| #### Bn-A10-p8385677 | A-genome specific (napus-rapa)    | 0.9976076    | 0.8173611    | not scorable | not scorable | 0.9917355    | 0.7728156    |
| #### Bn-A10-p8387158 | A-genome specific (napus-rapa)    | 0.9904306    | 0.3955848    | not scorable | not scorable | 0.9917355    | 0.7158597    |
| #### Bn-A10-p8398873 | A-genome specific (napus-rapa)    | 0.9880383    | 0.4964448    | not scorable | not scorable | 0.9917355    | 0.7739339    |
| #### Bn-A10-p8408212 | A-genome specific (napus-rapa)    | 0.9856459    | 0.612254     | not scorable | not scorable | 0.9752066    | 0.7219324    |
| #### Bn-A10-p8409315 | A-genome specific (napus-rapa)    | 1            | 0.5079864    | not scorable | not scorable | 1            | 0.7701529    |
| #### Bn-A10-p8419263 | A-genome specific (napus-rapa)    | 1            | 0.7756076    | not scorable | not scorable | 1            | 0.8448393    |
| #### Bn-A10-p8419569 | A-genome specific (napus-rapa)    | 0.9928229    | 0.8978113    | not scorable | not scorable | 0.9834711    | 0.855333     |
| #### Bn-A10-p8423162 | genome unspecific (oleracea-rapa) | not scorable | not scorable |              | 1            | 0.6652997    | 1            |
| #### Bn-A10-p84343   | A-genome specific (napus-rapa)    | 0.8684211    | 0.8364236    | not scorable | not scorable | 0.9917355    | 0.8128071    |
| #### Bn-A10-p8441474 | A-genome specific (napus-rapa)    | 0.9856459    | 0.5240979    | not scorable | not scorable | 1            | 0.7873393    |
| #### Bn-A10-p8443505 | A-genome specific (napus-rapa)    | 0.9976076    | 0.8985865    | not scorable | not scorable | 1            | 0.8304425    |
| #### Bn-A10-p8444450 | A-genome specific (napus-rapa)    | 0.9928229    | 0.6907768    | not scorable | not scorable | 0.9834711    | 0.6725073    |
| #### Bn-A10-p8448368 | A-genome specific (napus-rapa)    | 1            | 0.6771882    | not scorable | not scorable | 0.9917355    | 0.7127329    |
| #### Bn-A10-p8452135 | A-genome specific (napus-rapa)    | 0.9976076    | 0.8491316    | not scorable | not scorable | 1            | 0.7778271    |
| #### Bn-A10-p8456410 | A-genome specific (napus-rapa)    | 0.9976076    | 0.6884207    | not scorable | not scorable | 0.9917355    | 0.6513751    |
| #### Bn-A10-p8456551 | A-genome specific (napus-rapa)    | 1            | 0.7857971    | not scorable | not scorable | 0.9917355    | 0.7301769    |
| #### Bn-A10-p8465363 | A-genome specific (napus-rapa)    | 0.9904306    | 0.7506639    | not scorable | not scorable | 1            | 0.8312376    |
| #### Bn-A10-p8466391 | A-genome specific (napus-rapa)    | 0.9856459    | 0.8630195    | not scorable | not scorable | 0.9917355    | 0.6705382    |
| #### Bn-A10-p8466407 | napus specific                    | 0.9952153    | 0.8279935    | not scorable | not scorable | not scorable | not scorable |
| #### Bn-A10-p8470821 | A-genome specific (napus-rapa)    | 0.9976076    | 0.8881013    | not scorable | not scorable | 1            | 0.8439463    |
| #### Bn-A10-p8475601 | A-genome specific (napus-rapa)    | 1            | 0.8841382    | not scorable | not scorable | 1            | 0.674564     |
| #### Bn-A10-p8487448 | genome unspecific (all in)        | 0.9952153    | 0.5605502    |              | 1            | 0.8088436    | 0.9917355    |
| #### Bn-A10-p8503752 | A-genome specific (napus-rapa)    | 1            | 0.4414902    | not scorable | not scorable | 1            | 0.8377294    |
| #### Bn-A10-p8518310 | A-genome specific (napus-rapa)    | 0.9904306    | 0.5769701    | not scorable | not scorable | 0.9834711    | 0.7714859    |
| #### Bn-A10-p8529364 | A-genome specific (napus-rapa)    | 1            | 0.4405078    | not scorable | not scorable | 0.9834711    | 0.7916954    |
| #### Bn-A10-p8544988 | A-genome specific (napus-rapa)    | 0.9880383    | 0.4841136    | not scorable | not scorable | 0.9752066    | 0.8065522    |
| #### Bn-A10-p8546406 | A-genome specific (rapa only)     | not scorable | not scorable | not scorable | not scorable | 0.5867769    | 0.9515806    |
| #### Bn-A10-p8553366 | A-genome specific (napus-rapa)    | 0.9904306    | 0.8913044    | not scorable | not scorable | 0.9752066    | 0.8584728    |

|                      |                                |              |              |              |              |              |              |
|----------------------|--------------------------------|--------------|--------------|--------------|--------------|--------------|--------------|
| #### Bn-A10-p8559413 | A-genome specific (napus-rapa) | 0.9976076    | 0.5305785    | not scorable | not scorable | 0.9834711    | 0.6658044    |
| #### Bn-A10-p8560686 | A-genome specific (napus-rapa) | 1            | 0.8434653    | not scorable | not scorable | 0.9917355    | 0.7734094    |
| #### Bn-A10-p8564698 | A-genome specific (napus-rapa) | 0.9976076    | 0.7942337    | not scorable | not scorable | 1            | 0.7154919    |
| #### Bn-A10-p8572267 | A-genome specific (napus-rapa) | 0.9976076    | 0.5708631    | not scorable | not scorable | 1            | 0.7909105    |
| #### Bn-A10-p8577924 | A-genome specific (napus-rapa) | 0.9952153    | 0.7996359    | not scorable | not scorable | 0.9752066    | 0.7388693    |
| #### Bn-A10-p8582852 | A-genome specific (napus-rapa) | 1            | 0.7607602    | not scorable | not scorable | 1            | 0.7793117    |
| #### Bn-A10-p8583543 | A-genome specific (napus-rapa) | 0.9665072    | 0.3746195    | not scorable | not scorable | 1            | 0.7068552    |
| #### Bn-A10-p8584829 | A-genome specific (napus-rapa) | 0.9976076    | 0.8793175    | not scorable | not scorable | 0.9917355    | 0.8132122    |
| #### Bn-A10-p8587028 | A-genome specific (napus-rapa) | 0.08851675   | 0.7021487    | not scorable | not scorable | 0.9669421    | 0.6977743    |
| #### Bn-A10-p8589353 | A-genome specific (napus-rapa) | 0.9880383    | 0.4357504    | not scorable | not scorable | 0.9917355    | 0.7950817    |
| #### Bn-A10-p8608729 | A-genome specific (napus-rapa) | 0.9976076    | 0.7947423    | not scorable | not scorable | 1            | 0.8579552    |
| #### Bn-A10-p862     | A-genome specific (napus-rapa) | 0.9952153    | 0.7946694    | not scorable | not scorable | 0.9504132    | 0.6587221    |
| #### Bn-A10-p8620702 | A-genome specific (napus-rapa) | 0.9976076    | 0.5580734    | not scorable | not scorable | 1            | 0.7062747    |
| #### Bn-A10-p8622237 | A-genome specific (napus-rapa) | 1            | 0.5403171    | not scorable | not scorable | 0.9834711    | 0.7651512    |
| #### Bn-A10-p8646816 | A-genome specific (napus-rapa) | 0.9976076    | 0.8055938    | not scorable | not scorable | 1            | 0.7905158    |
| #### Bn-A10-p8655897 | A-genome specific (rapa only)  | not scorable | not scorable | not scorable | not scorable | 1            | 0.6800721    |
| #### Bn-A10-p8656908 | A-genome specific (napus-rapa) | 0.9928229    | 0.3805188    | not scorable | not scorable | 0.9917355    | 0.7051357    |
| #### Bn-A10-p8659651 | A-genome specific (napus-rapa) | 0.9952153    | 0.7807139    | not scorable | not scorable | 0.9917355    | 0.7089485    |
| #### Bn-A10-p8696396 | A-genome specific (napus-rapa) | 0.9976076    | 0.6328794    | not scorable | not scorable | 0.9917355    | 0.6898742    |
| #### Bn-A10-p8701134 | A-genome specific (napus-rapa) | 0.9808612    | 0.4315709    | not scorable | not scorable | 0.9834711    | 0.7060315    |
| #### Bn-A10-p8712919 | all not scorable               | not scorable | not scorable | not scorable | not scorable | not scorable | not scorable |
| #### Bn-A10-p8722713 | A-genome specific (napus-rapa) | 0.8851675    | 0.7624673    | not scorable | not scorable | 1            | 0.792304     |
| #### Bn-A10-p8723171 | A-genome specific (napus-rapa) | 0.9736842    | 0.7561656    | not scorable | not scorable | 0.9917355    | 0.7682536    |
| #### Bn-A10-p8729146 | A-genome specific (napus-rapa) | 1            | 0.6030642    | not scorable | not scorable | 0.9834711    | 0.7968689    |
| #### Bn-A10-p8733734 | A-genome specific (napus-rapa) | 0.9569378    | 0.9314091    | not scorable | not scorable | 0.9669421    | 0.7529008    |
| #### Bn-A10-p8737359 | napus specific                 | 0.9976076    | 0.4394975    | not scorable | not scorable | not scorable | not scorable |
| #### Bn-A10-p8741886 | A-genome specific (napus-rapa) | 0.9928229    | 0.6377183    | not scorable | not scorable | 0.9834711    | 0.7971047    |
| #### Bn-A10-p8743143 | A-genome specific (napus-rapa) | 0.9976076    | 0.6424578    | not scorable | not scorable | 0.9917355    | 0.7564576    |
| #### Bn-A10-p8744180 | A-genome specific (napus-rapa) | 0.9952153    | 0.7508937    | not scorable | not scorable | 0.9834711    | 0.7161742    |
| #### Bn-A10-p8745850 | A-genome specific (napus-rapa) | 0.9952153    | 0.7439545    | not scorable | not scorable | 1            | 0.7396184    |
| #### Bn-A10-p8747062 | A-genome specific (napus-rapa) | 0.9952153    | 0.5828391    | not scorable | not scorable | 0.9834711    | 0.5813835    |
| #### Bn-A10-p8766754 | A-genome specific (rapa only)  | not scorable | not scorable | not scorable | not scorable | 0.9752066    | 0.4497875    |
| #### Bn-A10-p8767803 | A-genome specific (napus-rapa) | 0.9760765    | 0.4292886    | not scorable | not scorable | 0.9834711    | 0.6340447    |

|                      |                                |           |           |              |              |              |              |
|----------------------|--------------------------------|-----------|-----------|--------------|--------------|--------------|--------------|
| #### Bn-A10-p8793078 | napus specific                 | 0.9760765 | 0.848325  | not scorable | not scorable | not scorable | not scorable |
| #### Bn-A10-p8797828 | A-genome specific (napus-rapa) | 0.9928229 | 0.8372144 | not scorable | not scorable | 1            | 0.8190211    |
| #### Bn-A10-p8822075 | A-genome specific (napus-rapa) | 1         | 0.5553021 | not scorable | not scorable | 1            | 0.6552743    |
| #### Bn-A10-p8823141 | A-genome specific (napus-rapa) | 1         | 0.6120897 | not scorable | not scorable | 1            | 0.7045814    |
| #### Bn-A10-p8826205 | A-genome specific (napus-rapa) | 0.9952153 | 0.6781925 | not scorable | not scorable | 0.9834711    | 0.8321518    |
| #### Bn-A10-p8832970 | A-genome specific (napus-rapa) | 0.9928229 | 0.4153134 | not scorable | not scorable | 1            | 0.6194402    |
| #### Bn-A10-p8834914 | A-genome specific (napus-rapa) | 0.9880383 | 0.5481089 | not scorable | not scorable | 1            | 0.7891571    |
| #### Bn-A10-p8845117 | A-genome specific (napus-rapa) | 0.9880383 | 0.4934517 | not scorable | not scorable | 0.9834711    | 0.6964927    |
| #### Bn-A10-p8867175 | A-genome specific (napus-rapa) | 0.9784689 | 0.4723875 | not scorable | not scorable | 0.6198347    | 0.8163554    |
| #### Bn-A10-p8872642 | A-genome specific (napus-rapa) | 1         | 0.5348554 | not scorable | not scorable | 1            | 0.7443592    |
| #### Bn-A10-p8890067 | A-genome specific (napus-rapa) | 0.9952153 | 0.8139225 | not scorable | not scorable | 0.9917355    | 0.730525     |
| #### Bn-A10-p8904827 | A-genome specific (napus-rapa) | 0.9952153 | 0.8234018 | not scorable | not scorable | 0.9669421    | 0.7043841    |
| #### Bn-A10-p8910368 | A-genome specific (napus-rapa) | 0.9688995 | 0.8076419 | not scorable | not scorable | 0.9752066    | 0.7963718    |
| #### Bn-A10-p8917543 | A-genome specific (napus-rapa) | 0.9928229 | 0.7567869 | not scorable | not scorable | 0.9917355    | 0.6974539    |
| #### Bn-A10-p89338   | A-genome specific (napus-rapa) | 0.8732057 | 0.8202176 | not scorable | not scorable | 0.9834711    | 0.7729732    |
| #### Bn-A10-p8937723 | A-genome specific (napus-rapa) | 0.9784689 | 0.8242998 | not scorable | not scorable | 1            | 0.8177654    |
| #### Bn-A10-p8941    | A-genome specific (napus-rapa) | 0.9904306 | 0.7368489 | not scorable | not scorable | 1            | 0.8105487    |
| #### Bn-A10-p8948483 | A-genome specific (napus-rapa) | 0.9904306 | 0.7509315 | not scorable | not scorable | 0.9586777    | 0.702965     |
| #### Bn-A10-p8951109 | A-genome specific (napus-rapa) | 0.9976076 | 0.5759795 | not scorable | not scorable | 0.9586777    | 0.6975001    |
| #### Bn-A10-p8953338 | A-genome specific (napus-rapa) | 0.9784689 | 0.7920853 | not scorable | not scorable | 0.9917355    | 0.8146774    |
| #### Bn-A10-p8957186 | A-genome specific (napus-rapa) | 0.9688995 | 0.287263  | not scorable | not scorable | 1            | 0.8979875    |
| #### Bn-A10-p8960651 | A-genome specific (napus-rapa) | 1         | 0.7832498 | not scorable | not scorable | 1            | 0.8698078    |
| #### Bn-A10-p8960805 | A-genome specific (napus-rapa) | 1         | 0.8186467 | not scorable | not scorable | 1            | 0.7469682    |
| #### Bn-A10-p8961320 | A-genome specific (napus-rapa) | 0.9856459 | 0.7095327 | not scorable | not scorable | 0.9917355    | 0.6702248    |
| #### Bn-A10-p8961465 | A-genome specific (napus-rapa) | 0.9760765 | 0.7854128 | not scorable | not scorable | 0.9834711    | 0.8187584    |
| #### Bn-A10-p8963952 | A-genome specific (napus-rapa) | 0.9880383 | 0.6113854 | not scorable | not scorable | 1            | 0.7770717    |
| #### Bn-A10-p8964484 | A-genome specific (napus-rapa) | 1         | 0.6444719 | not scorable | not scorable | 1            | 0.6721575    |
| #### Bn-A10-p8965800 | A-genome specific (napus-rapa) | 1         | 0.6540301 | not scorable | not scorable | 0.9834711    | 0.5769768    |
| #### Bn-A10-p8981561 | A-genome specific (napus-rapa) | 0.9976076 | 0.4189363 | not scorable | not scorable | 0.9752066    | 0.6027436    |
| #### Bn-A10-p8984096 | A-genome specific (napus-rapa) | 0.9952153 | 0.7638283 | not scorable | not scorable | 0.9669421    | 0.5661735    |
| #### Bn-A10-p8996669 | A-genome specific (napus-rapa) | 1         | 0.4109873 | not scorable | not scorable | 0.9834711    | 0.7704325    |
| #### Bn-A10-p8997545 | A-genome specific (napus-rapa) | 0.9928229 | 0.5988817 | not scorable | not scorable | 0.9008265    | 0.7242633    |
| #### Bn-A10-p9006854 | A-genome specific (napus-rapa) | 0.9760765 | 0.3772138 | not scorable | not scorable | 1            | 0.7635576    |

|                      |                                |              |              |              |              |           |           |
|----------------------|--------------------------------|--------------|--------------|--------------|--------------|-----------|-----------|
| #### Bn-A10-p90069   | A-genome specific (napus-rapa) | 0.9665072    | 0.58964      | not scorable | not scorable | 1         | 0.7139658 |
| #### Bn-A10-p9009598 | A-genome specific (napus-rapa) | 0.9856459    | 0.4072346    | not scorable | not scorable | 0.9752066 | 0.6744593 |
| #### Bn-A10-p9010950 | A-genome specific (napus-rapa) | 0.9832536    | 0.656409     | not scorable | not scorable | 0.9586777 | 0.680281  |
| #### Bn-A10-p9015222 | A-genome specific (napus-rapa) | 1            | 0.6372369    | not scorable | not scorable | 1         | 0.6777194 |
| #### Bn-A10-p9018814 | A-genome specific (napus-rapa) | 1            | 0.8377294    | not scorable | not scorable | 1         | 0.8646054 |
| #### Bn-A10-p902245  | A-genome specific (rapa only)  | not scorable | not scorable | not scorable | not scorable | 0.8099173 | 0.9116796 |
| #### Bn-A10-p9026    | A-genome specific (rapa only)  | not scorable | not scorable | not scorable | not scorable | 0.9917355 | 0.9431289 |
| #### Bn-A10-p9039610 | A-genome specific (napus-rapa) | 1            | 0.4087974    | not scorable | not scorable | 0.9586777 | 0.376782  |
| #### Bn-A10-p9050329 | A-genome specific (napus-rapa) | 0.9832536    | 0.5031969    | not scorable | not scorable | 0.9752066 | 0.6947003 |
| #### Bn-A10-p9052583 | A-genome specific (napus-rapa) | 0.9976076    | 0.7782548    | not scorable | not scorable | 0.9917355 | 0.7191823 |
| #### Bn-A10-p9052683 | A-genome specific (napus-rapa) | 0.9090909    | 0.7962569    | not scorable | not scorable | 0.9917355 | 0.6969169 |
| #### Bn-A10-p9059990 | A-genome specific (napus-rapa) | 1            | 0.6136456    | not scorable | not scorable | 0.9834711 | 0.836849  |
| #### Bn-A10-p9065082 | A-genome specific (napus-rapa) | 0.9617225    | 0.7340637    | not scorable | not scorable | 1         | 0.7650899 |
| #### Bn-A10-p9065520 | A-genome specific (napus-rapa) | 0.9880383    | 0.7969302    | not scorable | not scorable | 1         | 0.7521945 |
| #### Bn-A10-p9079327 | A-genome specific (napus-rapa) | 1            | 0.5397012    | not scorable | not scorable | 1         | 0.824636  |
| #### Bn-A10-p9084421 | A-genome specific (napus-rapa) | 0.9880383    | 0.8740647    | not scorable | not scorable | 0.9504132 | 0.7812534 |
| #### Bn-A10-p9086612 | A-genome specific (napus-rapa) | 1            | 0.5179246    | not scorable | not scorable | 0.9917355 | 0.7519764 |
| #### Bn-A10-p9099489 | A-genome specific (napus-rapa) | 0.9904306    | 0.7962397    | not scorable | not scorable | 0.9752066 | 0.8273551 |
| #### Bn-A10-p9100606 | A-genome specific (napus-rapa) | 0.9760765    | 0.8016267    | not scorable | not scorable | 0.9586777 | 0.7889354 |
| #### Bn-A10-p9114896 | A-genome specific (napus-rapa) | 0.8995215    | 0.8387285    | not scorable | not scorable | 0.9917355 | 0.8388586 |
| #### Bn-A10-p9117984 | A-genome specific (napus-rapa) | 1            | 0.8625689    | not scorable | not scorable | 1         | 0.6876047 |
| #### Bn-A10-p9118672 | A-genome specific (napus-rapa) | 1            | 0.7233281    | not scorable | not scorable | 1         | 0.7261562 |
| #### Bn-A10-p9118675 | A-genome specific (napus-rapa) | 0.9952153    | 0.5747801    | not scorable | not scorable | 1         | 0.6984177 |
| #### Bn-A10-p9120500 | A-genome specific (napus-rapa) | 0.9976076    | 0.7551998    | not scorable | not scorable | 1         | 0.8503912 |
| #### Bn-A10-p9121306 | A-genome specific (napus-rapa) | 0.9928229    | 0.5385889    | not scorable | not scorable | 1         | 0.6808658 |
| #### Bn-A10-p9124552 | A-genome specific (napus-rapa) | 1            | 0.748244     | not scorable | not scorable | 0.9834711 | 0.7051016 |
| #### Bn-A10-p9128660 | A-genome specific (napus-rapa) | 0.9928229    | 0.8221704    | not scorable | not scorable | 0.9917355 | 0.7609628 |
| #### Bn-A10-p9150150 | A-genome specific (napus-rapa) | 1            | 0.3282298    | not scorable | not scorable | 0.9752066 | 0.7858098 |
| #### Bn-A10-p9150359 | A-genome specific (napus-rapa) | 0.9976076    | 0.841028     | not scorable | not scorable | 0.9834711 | 0.7330295 |
| #### Bn-A10-p9151217 | A-genome specific (napus-rapa) | 0.9904306    | 0.8082788    | not scorable | not scorable | 0.9917355 | 0.8935276 |
| #### Bn-A10-p9160244 | A-genome specific (napus-rapa) | 0.9832536    | 0.7455561    | not scorable | not scorable | 1         | 0.7914145 |
| #### Bn-A10-p9166440 | A-genome specific (napus-rapa) | 0.9784689    | 0.7701694    | not scorable | not scorable | 0.9917355 | 0.7752589 |
| #### Bn-A10-p9166504 | A-genome specific (napus-rapa) | 0.9976076    | 0.8126085    | not scorable | not scorable | 0.9917355 | 0.8025727 |

|                      |                                |              |              |              |              |              |              |
|----------------------|--------------------------------|--------------|--------------|--------------|--------------|--------------|--------------|
| #### Bn-A10-p9181902 | A-genome specific (napus-rapa) | 0.9952153    | 0.6916112    | not scorable | not scorable | 0.9752066    | 0.6249846    |
| #### Bn-A10-p9184064 | A-genome specific (napus-rapa) | 0.9880383    | 0.3456948    | not scorable | not scorable | 1            | 0.7072448    |
| #### Bn-A10-p9186877 | A-genome specific (napus-rapa) | 0.9856459    | 0.4604723    | not scorable | not scorable | 0.9752066    | 0.7201163    |
| #### Bn-A10-p9193298 | A-genome specific (napus-rapa) | 1            | 0.8197805    | not scorable | not scorable | 0.9834711    | 0.5006821    |
| #### Bn-A10-p9202216 | all not scorable               | not scorable | not scorable | not scorable | not scorable | not scorable | not scorable |
| #### Bn-A10-p9209872 | A-genome specific (napus-rapa) | 0.9736842    | 0.5105911    | not scorable | not scorable | 1            | 0.6854939    |
| #### Bn-A10-p9218381 | genome unspecific (all in)     | 0.9856459    | 0.5169428    |              | 1            | 0.688679     | 0.9834711    |
| #### Bn-A10-p922511  | A-genome specific (rapa only)  | not scorable | not scorable | not scorable | not scorable | 0.6198347    | 0.890877     |
| #### Bn-A10-p923788  | all not scorable               | not scorable | not scorable | not scorable | not scorable | not scorable | not scorable |
| #### Bn-A10-p9241008 | napus specific                 | 0.9856459    | 0.7718697    | not scorable | not scorable | not scorable | not scorable |
| #### Bn-A10-p9245966 | A-genome specific (napus-rapa) | 0.9952153    | 0.7481838    | not scorable | not scorable | 0.9752066    | 0.8334604    |
| #### Bn-A10-p9255041 | A-genome specific (napus-rapa) | 1            | 0.5019066    | not scorable | not scorable | 1            | 0.7802626    |
| #### Bn-A10-p9259792 | A-genome specific (napus-rapa) | 1            | 0.8177654    | not scorable | not scorable | 1            | 0.7860788    |
| #### Bn-A10-p926733  | A-genome specific (napus-rapa) | 0.9808612    | 0.8078446    | not scorable | not scorable | 0.9917355    | 0.4012026    |
| #### Bn-A10-p9269078 | A-genome specific (napus-rapa) | 0.2727273    | 0.9188052    | not scorable | not scorable | 0.9669421    | 0.797593     |
| #### Bn-A10-p9270767 | A-genome specific (rapa only)  | not scorable | not scorable | not scorable | not scorable | 0.9669421    | 0.6174433    |
| #### Bn-A10-p9271334 | A-genome specific (rapa only)  | not scorable | not scorable | not scorable | not scorable | 0.9421487    | 0.6546358    |
| #### Bn-A10-p9271807 | A-genome specific (napus-rapa) | 0.9665072    | 0.4880719    | not scorable | not scorable | 0.9834711    | 0.7766989    |
| #### Bn-A10-p9272075 | A-genome specific (napus-rapa) | 0.9832536    | 0.5680323    | not scorable | not scorable | 0.9917355    | 0.747699     |
| #### Bn-A10-p9272156 | A-genome specific (napus-rapa) | 0.9952153    | 0.793845     | not scorable | not scorable | 0.9834711    | 0.7862273    |
| #### Bn-A10-p9273618 | A-genome specific (napus-rapa) | 0.9976076    | 0.3578036    | not scorable | not scorable | 1            | 0.7503625    |
| #### Bn-A10-p9274675 | A-genome specific (napus-rapa) | 0.9808612    | 0.8327296    | not scorable | not scorable | 0.9669421    | 0.7174363    |
| #### Bn-A10-p9275540 | A-genome specific (napus-rapa) | 0.9976076    | 0.8526589    | not scorable | not scorable | 1            | 0.8637204    |
| #### Bn-A10-p9275674 | A-genome specific (napus-rapa) | 1            | 0.9046278    | not scorable | not scorable | 1            | 0.8736588    |
| #### Bn-A10-p9287837 | A-genome specific (napus-rapa) | 1            | 0.8456466    | not scorable | not scorable | 1            | 0.8376443    |
| #### Bn-A10-p9292495 | A-genome specific (napus-rapa) | 0.9976076    | 0.8474512    | not scorable | not scorable | 0.9917355    | 0.7860619    |
| #### Bn-A10-p9294425 | A-genome specific (napus-rapa) | 0.9976076    | 0.8540559    | not scorable | not scorable | 1            | 0.9089181    |
| #### Bn-A10-p9294809 | A-genome specific (napus-rapa) | 0.9976076    | 0.8274619    | not scorable | not scorable | 1            | 0.8511346    |
| #### Bn-A10-p9300298 | A-genome specific (napus-rapa) | 1            | 0.770486     | not scorable | not scorable | 1            | 0.7082736    |
| #### Bn-A10-p9308500 | A-genome specific (napus-rapa) | 0.9976076    | 0.5555414    | not scorable | not scorable | 1            | 0.8912996    |
| #### Bn-A10-p9318940 | A-genome specific (napus-rapa) | 0.9832536    | 0.7853769    | not scorable | not scorable | 1            | 0.8560166    |
| #### Bn-A10-p9324856 | A-genome specific (napus-rapa) | 0.9976076    | 0.866995     | not scorable | not scorable | 0.9421487    | 0.7537001    |
| #### Bn-A10-p9327364 | A-genome specific (napus-rapa) | 0.9952153    | 0.7832997    | not scorable | not scorable | 1            | 0.7999851    |

|                      |                                |              |              |              |              |           |           |
|----------------------|--------------------------------|--------------|--------------|--------------|--------------|-----------|-----------|
| #### Bn-A10-p9327975 | A-genome specific (napus-rapa) | 1            | 0.5028039    | not scorable | not scorable | 1         | 0.7688178 |
| #### Bn-A10-p9329804 | A-genome specific (napus-rapa) | 0.9904306    | 0.4283153    | not scorable | not scorable | 0.9752066 | 0.733845  |
| #### Bn-A10-p9344718 | A-genome specific (napus-rapa) | 1            | 0.7917417    | not scorable | not scorable | 0.9834711 | 0.785068  |
| #### Bn-A10-p9352439 | A-genome specific (napus-rapa) | 0.9928229    | 0.8084283    | not scorable | not scorable | 0.9834711 | 0.8139494 |
| #### Bn-A10-p9353671 | A-genome specific (rapa only)  | not scorable | not scorable | not scorable | not scorable | 0.9834711 | 0.7838931 |
| #### Bn-A10-p9363322 | A-genome specific (rapa only)  | not scorable | not scorable | not scorable | not scorable | 0.9586777 | 0.6922139 |
| #### Bn-A10-p9365540 | A-genome specific (napus-rapa) | 0.9712918    | 0.4733053    | not scorable | not scorable | 0.9917355 | 0.8440231 |
| #### Bn-A10-p9370046 | A-genome specific (napus-rapa) | 0.9856459    | 0.5400981    | not scorable | not scorable | 0.9917355 | 0.7720699 |
| #### Bn-A10-p9374169 | A-genome specific (napus-rapa) | 0.9760765    | 0.40384      | not scorable | not scorable | 1         | 0.7113227 |
| #### Bn-A10-p9378974 | A-genome specific (napus-rapa) | 0.9808612    | 0.7878469    | not scorable | not scorable | 1         | 0.7180917 |
| #### Bn-A10-p9381557 | A-genome specific (napus-rapa) | 0.9808612    | 0.3673172    | not scorable | not scorable | 0.9834711 | 0.7512183 |
| #### Bn-A10-p9396364 | A-genome specific (napus-rapa) | 1            | 0.7893602    | not scorable | not scorable | 0.9917355 | 0.8679863 |
| #### Bn-A10-p9436205 | A-genome specific (napus-rapa) | 0.9904306    | 0.4970157    | not scorable | not scorable | 0.9752066 | 0.7543399 |
| #### Bn-A10-p9459037 | A-genome specific (napus-rapa) | 0.9880383    | 0.3785051    | not scorable | not scorable | 0.9834711 | 0.8106441 |
| #### Bn-A10-p9470646 | A-genome specific (napus-rapa) | 0.9904306    | 0.7719429    | not scorable | not scorable | 0.9834711 | 0.7521605 |
| #### Bn-A10-p9473804 | A-genome specific (napus-rapa) | 0.9952153    | 0.5200961    | not scorable | not scorable | 0.9917355 | 0.7425197 |
| #### Bn-A10-p9473886 | A-genome specific (napus-rapa) | 0.9904306    | 0.5054667    | not scorable | not scorable | 0.9917355 | 0.8138261 |
| #### Bn-A10-p9496981 | A-genome specific (napus-rapa) | 0.9976076    | 0.4367741    | not scorable | not scorable | 0.9917355 | 0.7882086 |
| #### Bn-A10-p9514802 | A-genome specific (napus-rapa) | 1            | 0.8777398    | not scorable | not scorable | 0.9917355 | 0.6867127 |
| #### Bn-A10-p9528776 | A-genome specific (napus-rapa) | 0.9928229    | 0.593689     | not scorable | not scorable | 0.9752066 | 0.744959  |
| #### Bn-A10-p9536045 | A-genome specific (napus-rapa) | 1            | 0.5747656    | not scorable | not scorable | 0.9917355 | 0.7967073 |
| #### Bn-A10-p9543329 | A-genome specific (napus-rapa) | 0.9976076    | 0.8333951    | not scorable | not scorable | 0.9834711 | 0.8812581 |
| #### Bn-A10-p9544357 | A-genome specific (napus-rapa) | 0.9976076    | 0.7892364    | not scorable | not scorable | 0.9834711 | 0.7009526 |
| #### Bn-A10-p9549226 | A-genome specific (napus-rapa) | 1            | 0.5895658    | not scorable | not scorable | 1         | 0.8848283 |
| #### Bn-A10-p9558311 | A-genome specific (napus-rapa) | 1            | 0.4343726    | not scorable | not scorable | 0.9917355 | 0.6798539 |
| #### Bn-A10-p9561249 | A-genome specific (napus-rapa) | 0.9880383    | 0.3948433    | not scorable | not scorable | 1         | 0.8540464 |
| #### Bn-A10-p95651   | A-genome specific (napus-rapa) | 0.9952153    | 0.3766147    | not scorable | not scorable | 0.9917355 | 0.7570803 |
| #### Bn-A10-p9579123 | A-genome specific (napus-rapa) | 0.9976076    | 0.5608613    | not scorable | not scorable | 0.9917355 | 0.7182382 |
| #### Bn-A10-p9581812 | A-genome specific (napus-rapa) | 0.9952153    | 0.5469216    | not scorable | not scorable | 1         | 0.632104  |
| #### Bn-A10-p9592692 | A-genome specific (napus-rapa) | 1            | 0.8094961    | not scorable | not scorable | 0.9917355 | 0.7646639 |
| #### Bn-A10-p9594548 | A-genome specific (napus-rapa) | 0.9976076    | 0.4843757    | not scorable | not scorable | 1         | 0.6929117 |
| #### Bn-A10-p9605069 | A-genome specific (napus-rapa) | 0.9760765    | 0.4377561    | not scorable | not scorable | 0.9917355 | 0.5591921 |
| #### Bn-A10-p9605153 | A-genome specific (napus-rapa) | 1            | 0.3894823    | not scorable | not scorable | 0.9917355 | 0.80881   |

|                      |                                |              |              |              |              |           |           |
|----------------------|--------------------------------|--------------|--------------|--------------|--------------|-----------|-----------|
| #### Bn-A10-p9607076 | A-genome specific (napus-rapa) | 0.7464115    | 0.7106566    | not scorable | not scorable | 0.9752066 | 0.7709971 |
| #### Bn-A10-p9607474 | A-genome specific (napus-rapa) | 1            | 0.8455155    | not scorable | not scorable | 1         | 0.7367873 |
| #### Bn-A10-p9615291 | A-genome specific (napus-rapa) | 0.9832536    | 0.4431368    | not scorable | not scorable | 0.9917355 | 0.8327354 |
| #### Bn-A10-p9615362 | A-genome specific (napus-rapa) | 0.9928229    | 0.7887646    | not scorable | not scorable | 0.9752066 | 0.7954779 |
| #### Bn-A10-p9618292 | A-genome specific (napus-rapa) | 0.5526316    | 0.6506146    | not scorable | not scorable | 0.5619835 | 0.6243005 |
| #### Bn-A10-p9624125 | A-genome specific (napus-rapa) | 0.9904306    | 0.727132     | not scorable | not scorable | 0.9752066 | 0.7287834 |
| #### Bn-A10-p9630194 | A-genome specific (napus-rapa) | 0.9760765    | 0.5657938    | not scorable | not scorable | 0.9586777 | 0.6982571 |
| #### Bn-A10-p9631366 | A-genome specific (napus-rapa) | 0.9808612    | 0.6181055    | not scorable | not scorable | 0.9917355 | 0.7095918 |
| #### Bn-A10-p9638494 | A-genome specific (napus-rapa) | 1            | 0.7617229    | not scorable | not scorable | 1         | 0.7514223 |
| #### Bn-A10-p9645373 | A-genome specific (napus-rapa) | 0.9880383    | 0.7720498    | not scorable | not scorable | 1         | 0.7953251 |
| #### Bn-A10-p9645870 | A-genome specific (napus-rapa) | 0.9832536    | 0.756775     | not scorable | not scorable | 1         | 0.8044038 |
| #### Bn-A10-p9648940 | A-genome specific (napus-rapa) | 0.9928229    | 0.4478161    | not scorable | not scorable | 1         | 0.7866484 |
| #### Bn-A10-p9675325 | A-genome specific (napus-rapa) | 0.9593301    | 0.6295146    | not scorable | not scorable | 0.9917355 | 0.6801084 |
| #### Bn-A10-p9694236 | A-genome specific (napus-rapa) | 0.9976076    | 0.5044857    | not scorable | not scorable | 0.9752066 | 0.8034799 |
| #### Bn-A10-p9695953 | A-genome specific (napus-rapa) | 0.6004785    | 0.8907277    | not scorable | not scorable | 0.9752066 | 0.8115279 |
| #### Bn-A10-p9696331 | A-genome specific (napus-rapa) | 1            | 0.5176179    | not scorable | not scorable | 0.9504132 | 0.6709909 |
| #### Bn-A10-p971793  | A-genome specific (napus-rapa) | 0.9712918    | 0.5696785    | not scorable | not scorable | 1         | 0.8391773 |
| #### Bn-A10-p9722784 | A-genome specific (napus-rapa) | 0.9976076    | 0.7999395    | not scorable | not scorable | 1         | 0.8057313 |
| #### Bn-A10-p9730740 | A-genome specific (napus-rapa) | 0.9976076    | 0.8429736    | not scorable | not scorable | 1         | 0.8259525 |
| #### Bn-A10-p973131  | A-genome specific (rapa only)  | not scorable | not scorable | not scorable | not scorable | 0.9917355 | 0.6872219 |
| #### Bn-A10-p9732666 | A-genome specific (napus-rapa) | 0.9138756    | 0.7902365    | not scorable | not scorable | 0.9752066 | 0.8414558 |
| #### Bn-A10-p9738703 | A-genome specific (napus-rapa) | 1            | 0.4100959    | not scorable | not scorable | 1         | 0.7948874 |
| #### Bn-A10-p9740870 | A-genome specific (napus-rapa) | 0.9808612    | 0.8202416    | not scorable | not scorable | 0.9834711 | 0.7616888 |
| #### Bn-A10-p9746391 | A-genome specific (napus-rapa) | 0.9712918    | 0.6007918    | not scorable | not scorable | 0.9917355 | 0.7156668 |
| #### Bn-A10-p9747217 | A-genome specific (napus-rapa) | 0.9880383    | 0.7305425    | not scorable | not scorable | 1         | 0.8063037 |
| #### Bn-A10-p9747551 | A-genome specific (napus-rapa) | 0.9952153    | 0.7404119    | not scorable | not scorable | 1         | 0.7331623 |
| #### Bn-A10-p9748274 | A-genome specific (napus-rapa) | 0.9928229    | 0.8005396    | not scorable | not scorable | 0.9586777 | 0.7741518 |
| #### Bn-A10-p9751890 | A-genome specific (napus-rapa) | 0.9904306    | 0.684154     | not scorable | not scorable | 0.9752066 | 0.525018  |
| #### Bn-A10-p9770913 | A-genome specific (napus-rapa) | 0.9736842    | 0.7609743    | not scorable | not scorable | 1         | 0.6873565 |
| #### Bn-A10-p9772527 | A-genome specific (napus-rapa) | 0.9856459    | 0.777453     | not scorable | not scorable | 0.9917355 | 0.752902  |
| #### Bn-A10-p9774980 | A-genome specific (napus-rapa) | 0.9904306    | 0.766729     | not scorable | not scorable | 1         | 0.7815909 |
| #### Bn-A10-p9778555 | A-genome specific (napus-rapa) | 0.9808612    | 0.7404037    | not scorable | not scorable | 1         | 0.7482107 |
| #### Bn-A10-p9779455 | A-genome specific (napus-rapa) | 0.9593301    | 0.6479963    | not scorable | not scorable | 1         | 0.5733383 |

|                        |                                    |              |              |              |              |              |              |
|------------------------|------------------------------------|--------------|--------------|--------------|--------------|--------------|--------------|
| #### Bn-A10-p9780139   | A-genome specific (napus-rapa)     | 0.9641148    | 0.7426334    | not scorable | not scorable | 0.9834711    | 0.6910116    |
| #### Bn-A10-p9784501   | A-genome specific (napus-rapa)     | 0.9928229    | 0.7527182    | not scorable | not scorable | 0.9917355    | 0.7829291    |
| #### Bn-A10-p9790101   | A-genome specific (napus-rapa)     | 0.9569378    | 0.4542641    | not scorable | not scorable | 1            | 0.7623911    |
| #### Bn-A10-p9800674   | A-genome specific (napus-rapa)     | 1            | 0.6980245    | not scorable | not scorable | 1            | 0.690158     |
| #### Bn-A10-p9802574   | A-genome specific (napus-rapa)     | 0.9760765    | 0.7625579    | not scorable | not scorable | 0.9917355    | 0.814608     |
| #### Bn-A10-p9811809   | A-genome specific (napus-rapa)     | 0.9904306    | 0.8282459    | not scorable | not scorable | 1            | 0.9225116    |
| #### Bn-A10-p983013    | A-genome specific (napus-rapa)     | 0.9808612    | 0.7516618    | not scorable | not scorable | 0.9917355    | 0.7203119    |
| #### Bn-A10-p9845811   | A-genome specific (napus-rapa)     | 1            | 0.8569525    | not scorable | not scorable | 0.9752066    | 0.9171299    |
| #### Bn-A10-p9846287   | A-genome specific (napus-rapa)     | 0.9665072    | 0.4748041    | not scorable | not scorable | 0.9917355    | 0.7658972    |
| #### Bn-A10-p9854395   | A-genome specific (napus-rapa)     | 0.9904306    | 0.7807009    | not scorable | not scorable | 0.9917355    | 0.8186073    |
| #### Bn-A10-p9862315   | A-genome specific (napus-rapa)     | 0.9760765    | 0.6871123    | not scorable | not scorable | 0.9752066    | 0.7917665    |
| #### Bn-A10-p9868026   | A-genome specific (napus-rapa)     | 0.9760765    | 0.7678137    | not scorable | not scorable | 1            | 0.7086762    |
| #### Bn-A10-p9868333   | A-genome specific (napus-rapa)     | 0.9880383    | 0.7746914    | not scorable | not scorable | 1            | 0.8792831    |
| #### Bn-A10-p9877760   | A-genome specific (napus-rapa)     | 0.9593301    | 0.4084836    | not scorable | not scorable | 1            | 0.7898005    |
| #### Bn-A10-p9887525   | A-genome specific (napus-rapa)     | 0.9688995    | 0.7170929    | not scorable | not scorable | 0.9752066    | 0.789252     |
| #### Bn-A10-p9888229   | A-genome specific (napus-rapa)     | 0.9760765    | 0.8195805    | not scorable | not scorable | 0.9752066    | 0.7897659    |
| #### Bn-A10-p9892016   | A-genome specific (napus-rapa)     | 1            | 0.5686827    | not scorable | not scorable | 1            | 0.890597     |
| #### Bn-A10-p991199    | A-genome specific (napus-rapa)     | 0.9856459    | 0.7955331    | not scorable | not scorable | 1            | 0.8022232    |
| #### Bn-A10-p991279    | A-genome specific (napus-rapa)     | 0.9784689    | 0.7858193    | not scorable | not scorable | 0.9917355    | 0.7600601    |
| #### Bn-A10-p992281    | A-genome specific (rapa only)      | not scorable | not scorable | not scorable | not scorable | 0.9834711    | 0.6788282    |
| #### Bn-A10-p9933632   | A-genome specific (napus-rapa)     | 0.9641148    | 0.7896066    | not scorable | not scorable | 0.9586777    | 0.8470235    |
| #### Bn-A10-p9966843   | A-genome specific (napus-rapa)     | 0.9976076    | 0.7864437    | not scorable | not scorable | 0.9917355    | 0.8249918    |
| #### Bn-A10-p9973634   | A-genome specific (napus-rapa)     | 0.9904306    | 0.7201635    | not scorable | not scorable | 0.9917355    | 0.8250261    |
| #### Bn-A10-p9973811   | A-genome specific (napus-rapa)     | 0.9808612    | 0.7716913    | not scorable | not scorable | 1            | 0.7481874    |
| #### Bn-A10-p9979372   | A-genome specific (napus-rapa)     | 1            | 0.5379064    | not scorable | not scorable | 0.9917355    | 0.7418191    |
| #### Bn-A10-p9981528   | A-genome specific (napus-rapa)     | 0.9928229    | 0.8343857    | not scorable | not scorable | 1            | 0.8111703    |
| #### Bn-A10-p9981957   | A-genome specific (napus-rapa)     | 0.9976076    | 0.8003325    | not scorable | not scorable | 0.9917355    | 0.7809431    |
| #### Bn-C13475881-p87  | C-genome specific (napus-oleracea) | 0.9019139    | 0.4744242    |              | 1            | 0.41292      | not scorable |
| #### Bn-C13488683-p154 | C-genome specific (napus-oleracea) | 0.9114832    | 0.7080138    | 0.7209302    | 0.7748305    | not scorable | not scorable |
| #### Bn-C13489745-p85  | C-genome specific (napus-oleracea) | 0.9928229    | 0.6898658    | 0.8527132    | 0.1664177    | not scorable | not scorable |
| #### Bn-C13496975-p159 | C-genome specific (napus-oleracea) | 0.9712918    | 0.3643612    | 0.751938     | 0.2966933    | not scorable | not scorable |
| #### Bn-C13497395-p102 | A-genome specific (napus-rapa)     | 0.9354067    | 0.2653292    | not scorable | not scorable | 1            | 0.6741632    |
| #### Bn-C13529254-p142 | C-genome specific (napus-oleracea) | 0.9904306    | 0.5277621    | 0.9922481    | 0.4689596    | not scorable | not scorable |





|                              |                                    |              |              |              |              |              |              |
|------------------------------|------------------------------------|--------------|--------------|--------------|--------------|--------------|--------------|
| #### Bn-C14051598-p519       | genome unspecific (all in)         | 0.9425837    | 0.56932      | 1            | 0.7627391    | 1            | 0.8754691    |
| #### Bn-C14112808-p1668      | genome unspecific (all in)         | 0.7559808    | 0.5581238    | 1            | 0.7563868    | 1            | 0.937623     |
| #### Bn-C14160250-p2254      | napus specific                     | 0.9665072    | 0.3087303    | not scorable | not scorable | not scorable | not scorable |
| #### Bn-C14160250-p3687      | napus specific                     | 0.9736842    | 0.4240992    | not scorable | not scorable | not scorable | not scorable |
| #### Bn-C14160250-p885       | C-genome specific (napus-oleracea) | 0.9904306    | 0.4184677    | 0.4186046    | 0.783098     | not scorable | not scorable |
| #### Bn-scaff_15576_1-p11135 | C-genome specific (napus-oleracea) | 0.9904306    | 0.8069486    | 1            | 0.7678726    | not scorable | not scorable |
| #### Bn-scaff_15576_1-p11526 | C-genome specific (napus-oleracea) | 0.9904306    | 0.8429908    | 1            | 0.8085241    | not scorable | not scorable |
| #### Bn-scaff_15576_1-p14085 | C-genome specific (napus-oleracea) | 0.9928229    | 0.7881607    | 0.9844961    | 0.7410839    | not scorable | not scorable |
| #### Bn-scaff_15576_1-p15959 | genome unspecific (all in)         | 0.9521531    | 0.2595741    | 1            | 0.7685981    | 0.9834711    | 0.3359804    |
| #### Bn-scaff_15576_1-p16226 | genome unspecific (oleracea-rapa)  | not scorable | not scorable | 1            | 0.6961026    | 0.9834711    | 0.716348     |
| #### Bn-scaff_15576_1-p18958 | C-genome specific (napus-oleracea) | 0.9760765    | 0.7806541    | 1            | 0.853574     | not scorable | not scorable |
| #### Bn-scaff_15576_1-p19661 | C-genome specific (napus-oleracea) | 0.9880383    | 0.7095814    | 0.9379845    | 0.7766307    | not scorable | not scorable |
| #### Bn-scaff_15576_1-p20171 | genome unspecific (all in)         | 0.9688995    | 0.3145776    | 0.9844961    | 0.5510473    | 1            | 0.7294585    |
| #### Bn-scaff_15576_1-p22593 | genome unspecific (all in)         | 0.9688995    | 0.802978     | 0.9922481    | 0.8238184    | 0.9504132    | 0.9479796    |
| #### Bn-scaff_15576_1-p22678 | C-genome specific (napus-oleracea) | 0.9665072    | 0.7617868    | 1            | 0.8518353    | not scorable | not scorable |
| #### Bn-scaff_15576_1-p22867 | C-genome specific (napus-oleracea) | 0.9832536    | 0.733174     | 1            | 0.7489557    | not scorable | not scorable |
| #### Bn-scaff_15576_1-p24086 | napus specific                     | 0.9688995    | 0.5700505    | not scorable | not scorable | not scorable | not scorable |
| #### Bn-scaff_15576_1-p26589 | C-genome specific (napus-oleracea) | 0.9688995    | 0.7956287    | 0.9689922    | 0.7963094    | not scorable | not scorable |
| #### Bn-scaff_15576_1-p26612 | C-genome specific (napus-oleracea) | 0.9688995    | 0.7675013    | 0.9689922    | 0.8033191    | not scorable | not scorable |
| #### Bn-scaff_15576_1-p30720 | C-genome specific (napus-oleracea) | 0.9688995    | 0.7715907    | 1            | 0.7860002    | not scorable | not scorable |
| #### Bn-scaff_15576_1-p31650 | C-genome specific (napus-oleracea) | 0.9952153    | 0.6951472    | 1            | 0.7417953    | not scorable | not scorable |
| #### Bn-scaff_15576_1-p31704 | C-genome specific (napus-oleracea) | 0.9545454    | 0.7012553    | 1            | 0.7748728    | not scorable | not scorable |
| #### Bn-scaff_15576_1-p32321 | napus specific                     | 0.9784689    | 0.6972537    | not scorable | not scorable | not scorable | not scorable |
| #### Bn-scaff_15576_1-p32355 | napus specific                     | 0.9712918    | 0.7357005    | not scorable | not scorable | not scorable | not scorable |
| #### Bn-scaff_15576_1-p32862 | C-genome specific (napus-oleracea) | 0.9784689    | 0.7300424    | 0.9767442    | 0.7378091    | not scorable | not scorable |
| #### Bn-scaff_15576_1-p32866 | C-genome specific (napus-oleracea) | 0.9688995    | 0.741938     | 0.9844961    | 0.7684853    | not scorable | not scorable |
| #### Bn-scaff_15576_1-p32939 | C-genome specific (napus-oleracea) | 0.9641148    | 0.7681882    | 0.9922481    | 0.8259367    | not scorable | not scorable |
| #### Bn-scaff_15576_1-p32955 | C-genome specific (napus-oleracea) | 0.9449761    | 0.5500076    | 0.9844961    | 0.7649398    | not scorable | not scorable |
| #### Bn-scaff_15576_1-p33537 | genome unspecific (all in)         | 0.9569378    | 0.5146787    | 0.9922481    | 0.5677554    | 1            | 0.9406571    |
| #### Bn-scaff_15576_1-p33594 | C-genome specific (napus-oleracea) | 0.9593301    | 0.7546985    | 0.9612403    | 0.8456472    | not scorable | not scorable |
| #### Bn-scaff_15576_1-p33595 | C-genome specific (napus-oleracea) | 0.9665072    | 0.7226309    | 1            | 0.7567325    | not scorable | not scorable |
| #### Bn-scaff_15576_1-p33675 | C-genome specific (napus-oleracea) | 0.9617225    | 0.7684563    | 0.9922481    | 0.8145193    | not scorable | not scorable |
| #### Bn-scaff_15576_1-p33745 | C-genome specific (napus-oleracea) | 0.9593301    | 0.7352111    | 1            | 0.793462     | not scorable | not scorable |

|                                                                 |              |              |              |              |              |              |
|-----------------------------------------------------------------|--------------|--------------|--------------|--------------|--------------|--------------|
| #### Bn-scaff_15576_1-p35261A-genome specific (rapa only)       | not scorable | not scorable | not scorable | not scorable | 1            | 0.6804142    |
| #### Bn-scaff_15576_1-p36422 napus specific                     | 0.9641148    | 0.7069424    | not scorable | not scorable | not scorable | not scorable |
| #### Bn-scaff_15576_1-p36805 C-genome specific (napus-oleracea) | 0.9856459    | 0.7730461    | 0.9922481    | 0.8485698    | not scorable | not scorable |
| #### Bn-scaff_15576_1-p37407A-genome specific (napus-rapa)      | 0.9976076    | 0.3199382    | not scorable | not scorable | 0.9917355    | 0.6183597    |
| #### Bn-scaff_15576_1-p37523 genome unspecific (all in)         | 0.9712918    | 0.3090173    | 0.9922481    | 0.696214     | 1            | 0.7914145    |
| #### Bn-scaff_15576_1-p41741napus specific                      | 0.9569378    | 0.8386032    | not scorable | not scorable | not scorable | not scorable |
| #### Bn-scaff_15576_1-p41782 C-genome specific (napus-oleracea) | 0.9282297    | 0.7910401    | 0.7984496    | 0.8045577    | not scorable | not scorable |
| #### Bn-scaff_15576_1-p41788 C-genome specific (napus-oleracea) | 0.930622     | 0.8448651    | 0.8062016    | 0.8332821    | not scorable | not scorable |
| #### Bn-scaff_15576_1-p41836 napus specific                     | 0.9593301    | 0.7532662    | not scorable | not scorable | not scorable | not scorable |
| #### Bn-scaff_15576_1-p41856 C-genome specific (napus-oleracea) | 0.9832536    | 0.7621112    | 0.8062016    | 0.816034     | not scorable | not scorable |
| #### Bn-scaff_15576_1-p42490 napus specific                     | 0.9617225    | 0.7676493    | not scorable | not scorable | not scorable | not scorable |
| #### Bn-scaff_15576_1-p42551 C-genome specific (napus-oleracea) | 0.9545454    | 0.7691292    | 0.7984496    | 0.7485349    | not scorable | not scorable |
| #### Bn-scaff_15576_1-p42558 napus specific                     | 0.9521531    | 0.7900753    | not scorable | not scorable | not scorable | not scorable |
| #### Bn-scaff_15576_1-p43741 C-genome specific (napus-oleracea) | 0.9354067    | 0.9002196    | 0.2403101    | 0.7245029    | not scorable | not scorable |
| #### Bn-scaff_15576_1-p45573 genome unspecific (all in)         | 0.9736842    | 0.2458022    | 0.9922481    | 0.6986197    | 1            | 0.7770717    |
| #### Bn-scaff_15576_1-p47598 C-genome specific (napus-oleracea) | 0.9760765    | 0.7490321    | 1            | 0.8107114    | not scorable | not scorable |
| #### Bn-scaff_15576_1-p51182 genome unspecific (all in)         | 0.9928229    | 0.5948734    | 0.9922481    | 0.7211987    | 1            | 0.9271874    |
| #### Bn-scaff_15576_1-p53963 C-genome specific (napus-oleracea) | 0.9688995    | 0.646619     | 1            | 0.7208878    | not scorable | not scorable |
| #### Bn-scaff_15576_1-p54062 C-genome specific (napus-oleracea) | 0.9928229    | 0.6917429    | 1            | 0.7025656    | not scorable | not scorable |
| #### Bn-scaff_15576_1-p54528 A-genome specific (napus-rapa)     | 1            | 0.6605194    | not scorable | not scorable | 0.9586777    | 0.6274468    |
| #### Bn-scaff_15576_1-p57377 C-genome specific (napus-oleracea) | 0.9952153    | 0.8934089    | 0.9767442    | 0.7373986    | not scorable | not scorable |
| #### Bn-scaff_15576_1-p57906 genome unspecific (all in)         | 0.9952153    | 0.4898994    | 1            | 0.8307504    | 1            | 0.924921     |
| #### Bn-scaff_15576_1-p58574 C-genome specific (napus-oleracea) | 0.9880383    | 0.791876     | 0.9844961    | 0.7943957    | not scorable | not scorable |
| #### Bn-scaff_15576_1-p58580 C-genome specific (napus-oleracea) | 0.9904306    | 0.8276458    | 0.9922481    | 0.8313727    | not scorable | not scorable |
| #### Bn-scaff_15576_1-p60845 C-genome specific (napus-oleracea) | 0.9952153    | 0.8251034    | 1            | 0.849408     | not scorable | not scorable |
| #### Bn-scaff_15576_1-p60997 C-genome specific (napus-oleracea) | 0.9880383    | 0.8315215    | 1            | 0.8397878    | not scorable | not scorable |
| #### Bn-scaff_15576_1-p61422 C-genome specific (napus-oleracea) | 0.9928229    | 0.8291832    | 0.7984496    | 0.7347574    | not scorable | not scorable |
| #### Bn-scaff_15576_1-p63465 C-genome specific (oleracea only)  | not scorable | not scorable | 1            | 0.8084512    | not scorable | not scorable |
| #### Bn-scaff_15576_1-p63771 C-genome specific (napus-oleracea) | 0.9952153    | 0.833028     | 0.9922481    | 0.8403684    | not scorable | not scorable |
| #### Bn-scaff_15576_1-p63947 A-genome specific (napus-rapa)     | 1            | 0.7135423    | not scorable | not scorable | 1            | 0.5854768    |
| #### Bn-scaff_15576_1-p64206 all not scorable                   | not scorable | not scorable | not scorable | not scorable | not scorable | not scorable |
| #### Bn-scaff_15576_1-p65360 genome unspecific (oleracea-rapa)  | not scorable | not scorable | 1            | 0.8255733    | 0.9917355    | 0.8704451    |
| #### Bn-scaff_15576_1-p65466 C-genome specific (napus-oleracea) | 0.9880383    | 0.7076067    | 1            | 0.752593     | not scorable | not scorable |













|                                                                 |              |              |              |              |              |              |
|-----------------------------------------------------------------|--------------|--------------|--------------|--------------|--------------|--------------|
| #### Bn-scaff_15627_1-p48187 napus specific                     | 0.9976076    | 0.7138755    | not scorable | not scorable | not scorable | not scorable |
| #### Bn-scaff_15627_1-p48223 genome unspecific (all in)         | 0.9952153    | 0.3861855    | 0.9844961    | 0.7172675    | 1            | 0.8135551    |
| #### Bn-scaff_15627_1-p48591 genome unspecific (all in)         | 1            | 0.3275491    | 0.5658914    | 0.8930573    | 0.9834711    | 0.6984253    |
| #### Bn-scaff_15627_1-p73207 genome unspecific (all in)         | 0.9904306    | 0.239038     | 0.9844961    | 0.2744228    | 1            | 0.8965025    |
| #### Bn-scaff_15635_1-p22020 napus specific                     | 0.9832536    | 0.6733841    | not scorable | not scorable | not scorable | not scorable |
| #### Bn-scaff_15636_1-p22241A-genome specific (rapa only)       | not scorable | not scorable | not scorable | not scorable | 0.9752066    | 0.4287158    |
| #### Bn-scaff_15636_1-p29470 napus specific                     | 0.7464115    | 0.9234052    | not scorable | not scorable | not scorable | not scorable |
| #### Bn-scaff_15648_1-p11896 napus specific                     | 0.9760765    | 0.7353052    | not scorable | not scorable | not scorable | not scorable |
| #### Bn-scaff_15648_1-p24578 C-genome specific (napus-oleracea) | 0.9976076    | 0.7618458    | 1            | 0.7773218    | not scorable | not scorable |
| #### Bn-scaff_15648_1-p27124 C-genome specific (napus-oleracea) | 1            | 0.3957796    | 1            | 0.5219904    | not scorable | not scorable |
| #### Bn-scaff_15648_1-p2967 A-genome specific (napus-rapa)      | 0.9976076    | 0.4652088    | not scorable | not scorable | 0.9669421    | 0.5611419    |
| #### Bn-scaff_15648_1-p31159 A-genome specific (napus-rapa)     | 0.9880383    | 0.2660621    | not scorable | not scorable | 1            | 0.8278005    |
| #### Bn-scaff_15648_1-p46851 genome unspecific (all in)         | 0.9808612    | 0.3715362    | 1            | 0.8778474    | 0.9752066    | 0.7691477    |
| #### Bn-scaff_15648_1-p46853 A-genome specific (rapa only)      | not scorable | not scorable | not scorable | not scorable | 1            | 0.6986725    |
| #### Bn-scaff_15648_1-p47013 A-genome specific (napus-rapa)     | 0.9904306    | 0.5314313    | not scorable | not scorable | 1            | 0.7745082    |
| #### Bn-scaff_15648_1-p53856 A-genome specific (napus-rapa)     | 0.9928229    | 0.3458257    | not scorable | not scorable | 1            | 0.8769208    |
| #### Bn-scaff_15648_1-p54127 A-genome specific (rapa only)      | not scorable | not scorable | not scorable | not scorable | 1            | 0.7931717    |
| #### Bn-scaff_15648_1-p54133 A-genome specific (napus-rapa)     | 0.9904306    | 0.2919524    | not scorable | not scorable | 1            | 0.6050068    |
| #### Bn-scaff_15648_1-p54162 A-genome specific (napus-rapa)     | 0.9952153    | 0.3357537    | not scorable | not scorable | 1            | 0.6787906    |
| #### Bn-scaff_15648_1-p55866 C-genome specific (oleracea only)  | not scorable | not scorable | 1            | 0.6408319    | not scorable | not scorable |
| #### Bn-scaff_15650_1-p10751 genome unspecific (all in)         | 1            | 0.7467584    | 1            | 0.6321529    | 1            | 0.7369611    |
| #### Bn-scaff_15650_1-p25617 genome unspecific (oleracea-rapa)  | not scorable | not scorable | 0.8372093    | 0.6763648    | 1            | 0.8441321    |
| #### Bn-scaff_15650_1-p32125 C-genome specific (napus-oleracea) | 0.9019139    | 0.7434272    | 1            | 0.7212331    | not scorable | not scorable |
| #### Bn-scaff_15650_1-p35392 C-genome specific (napus-oleracea) | 0.9043062    | 0.7335013    | 0.9767442    | 0.7579587    | not scorable | not scorable |
| #### Bn-scaff_15650_1-p36856 C-genome specific (napus-oleracea) | 0.8564593    | 0.7150122    | 0.9922481    | 0.8750072    | not scorable | not scorable |
| #### Bn-scaff_15650_1-p41540 C-genome specific (napus-oleracea) | 0.9114832    | 0.7556325    | 1            | 0.8644328    | not scorable | not scorable |
| #### Bn-scaff_15650_1-p45061 napus specific                     | 0.9473684    | 0.7650951    | not scorable | not scorable | not scorable | not scorable |
| #### Bn-scaff_15650_1-p48091 C-genome specific (napus-oleracea) | 0.9043062    | 0.5386774    | 0.9922481    | 0.5928218    | not scorable | not scorable |
| #### Bn-scaff_15650_1-p52790 C-genome specific (napus-oleracea) | 0.9114832    | 0.7453501    | 0.9922481    | 0.796994     | not scorable | not scorable |
| #### Bn-scaff_15650_1-p52823 napus specific                     | 0.4808612    | 0.7951167    | not scorable | not scorable | not scorable | not scorable |
| #### Bn-scaff_15650_1-p62400 C-genome specific (napus-oleracea) | 0.9066986    | 0.7122045    | 1            | 0.6747184    | not scorable | not scorable |
| #### Bn-scaff_15650_1-p64301 C-genome specific (napus-oleracea) | 0.8923445    | 0.7392648    | 0.5658914    | 0.7472085    | not scorable | not scorable |
| #### Bn-scaff_15650_1-p65578 genome unspecific (all in)         | 0.9449761    | 0.4488359    | 1            | 0.6500508    | 1            | 0.8948636    |

|                                                                 |              |              |              |              |              |              |
|-----------------------------------------------------------------|--------------|--------------|--------------|--------------|--------------|--------------|
| #### Bn-scaff_15650_1-p66695 C-genome specific (napus-oleracea) | 0.8971292    | 0.6256734    | 0.9534883    | 0.7377756    | not scorable | not scorable |
| #### Bn-scaff_15650_1-p68340 C-genome specific (napus-oleracea) | 0.9043062    | 0.743093     | 0.9844961    | 0.8041134    | not scorable | not scorable |
| #### Bn-scaff_15650_1-p70761 A-genome specific (napus-rapa)     | 0.9928229    | 0.3322838    | not scorable | not scorable | 0.9917355    | 0.5565995    |
| #### Bn-scaff_15650_1-p71148 A-genome specific (napus-rapa)     | 1            | 0.92027      | not scorable | not scorable | 1            | 0.9464117    |
| #### Bn-scaff_15650_1-p71436 genome unspecific (all in)         | 0.9449761    | 0.5020791    | 0.9689922    | 0.5092605    | 0.9586777    | 0.9180369    |
| #### Bn-scaff_15650_1-p72102 A-genome specific (napus-rapa)     | 0.9736842    | 0.4888542    | not scorable | not scorable | 1            | 0.8517616    |
| #### Bn-scaff_15650_1-p75045 C-genome specific (napus-oleracea) | 0.9162679    | 0.7526016    | 1            | 0.8231711    | not scorable | not scorable |
| #### Bn-scaff_15650_1-p75441 C-genome specific (napus-oleracea) | 0.8971292    | 0.6778125    | 0.9379845    | 0.7342225    | not scorable | not scorable |
| #### Bn-scaff_15650_1-p88650 genome unspecific (all in)         | 0.9449761    | 0.2694926    | 1            | 0.743599     | 1            | 0.7622204    |
| #### Bn-scaff_15650_1-p90536 napus specific                     | 1            | 0.7462145    | not scorable | not scorable | not scorable | not scorable |
| #### Bn-scaff_15650_1-p90863 genome unspecific (all in)         | 0.9856459    | 0.5122027    | 1            | 0.7205606    | 1            | 0.8098058    |
| #### Bn-scaff_15650_1-p92460 C-genome specific (napus-oleracea) | 0.9186603    | 0.7410551    | 1            | 0.7554129    | not scorable | not scorable |
| #### Bn-scaff_15676_1-p29867 A-genome specific (napus-rapa)     | 0.9952153    | 0.3199189    | not scorable | not scorable | 1            | 0.7227655    |
| #### Bn-scaff_15676_1-p34150 C-genome specific (napus-oleracea) | 0.9569378    | 0.8846251    | 1            | 0.8186453    | not scorable | not scorable |
| #### Bn-scaff_15676_1-p34248 C-genome specific (napus-oleracea) | 0.9712918    | 0.7115313    | 0.9922481    | 0.6780086    | not scorable | not scorable |
| #### Bn-scaff_15676_1-p34308 genome unspecific (oleracea-rapa)  | not scorable | not scorable | 0.9922481    | 0.6741807    | 1            | 0.7494321    |
| #### Bn-scaff_15676_1-p34477 genome unspecific (oleracea-rapa)  | not scorable | not scorable | 0.9844961    | 0.8587967    | 0.9338843    | 0.9390375    |
| #### Bn-scaff_15676_1-p36150 all not scorable                   | not scorable | not scorable | not scorable | not scorable | not scorable | not scorable |
| #### Bn-scaff_15676_1-p47157 A-genome specific (napus-rapa)     | 0.9545454    | 0.3901955    | not scorable | not scorable | 1            | 0.7024104    |
| #### Bn-scaff_15676_1-p52690 genome unspecific (oleracea-rapa)  | not scorable | not scorable | 0.9844961    | 0.8055719    | 1            | 0.8536061    |
| #### Bn-scaff_15676_1-p92150 genome unspecific (all in)         | 0.9688995    | 0.5482896    | 0.9767442    | 0.5641843    | 0.9917355    | 0.6932615    |
| #### Bn-scaff_15690_1-p37228 A-genome specific (napus-rapa)     | 0.9952153    | 0.2759618    | not scorable | not scorable | 0.9917355    | 0.5092366    |
| #### Bn-scaff_15690_1-p40637 genome unspecific (all in)         | 0.9904306    | 0.3611307    | 1            | 0.7249551    | 0.9917355    | 0.7224866    |
| #### Bn-scaff_15695_1-p28112 genome unspecific (all in)         | 0.9784689    | 0.4035926    | 1            | 0.4804745    | 1            | 0.928686     |
| #### Bn-scaff_15695_1-p28823 C-genome specific (napus-oleracea) | 0.9736842    | 0.6885099    | 1            | 0.7570314    | not scorable | not scorable |
| #### Bn-scaff_15695_1-p28882 A-genome specific (rapa only)      | not scorable | not scorable | not scorable | not scorable | 0.9752066    | 0.4905007    |
| #### Bn-scaff_15695_1-p29489 genome unspecific (all in)         | 0.9904306    | 0.474348     | 1            | 0.7590519    | 1            | 0.9205657    |
| #### Bn-scaff_15695_1-p38048 C-genome specific (napus-oleracea) | 0.9856459    | 0.7761529    | 1            | 0.7897818    | not scorable | not scorable |
| #### Bn-scaff_15695_1-p38063 C-genome specific (napus-oleracea) | 0.9928229    | 0.6512812    | 1            | 0.6440674    | not scorable | not scorable |
| #### Bn-scaff_15695_1-p38295 C-genome specific (napus-oleracea) | 1            | 0.6901932    | 0.9767442    | 0.6843849    | not scorable | not scorable |
| #### Bn-scaff_15695_1-p38301 C-genome specific (napus-oleracea) | 0.9928229    | 0.6892272    | 1            | 0.737633     | not scorable | not scorable |
| #### Bn-scaff_15695_1-p38451 C-genome specific (napus-oleracea) | 0.9808612    | 0.6844745    | 1            | 0.7583615    | not scorable | not scorable |
| #### Bn-scaff_15695_1-p39296 A-genome specific (napus-rapa)     | 0.9688995    | 0.668469     | not scorable | not scorable | 0.9586777    | 0.7211047    |

|                                                                 |              |              |              |              |              |              |
|-----------------------------------------------------------------|--------------|--------------|--------------|--------------|--------------|--------------|
| #### Bn-scaff_15695_1-p47075 C-genome specific (napus-oleracea) | 0.9952153    | 0.7473257    | 0.9922481    | 0.75304      | not scorable | not scorable |
| #### Bn-scaff_15695_1-p56480 napus specific                     | 0.9641148    | 0.7884749    | not scorable | not scorable | not scorable | not scorable |
| #### Bn-scaff_15695_1-p61150 genome unspecific (all in)         | 0.9808612    | 0.5241284    | 1            | 0.6587946    | 0.9917355    | 0.9236353    |
| #### Bn-scaff_15695_1-p61376 C-genome specific (napus-oleracea) | 0.9832536    | 0.7764258    | 0.9844961    | 0.833666     | not scorable | not scorable |
| #### Bn-scaff_15695_1-p62227 A-genome specific (napus-rapa)     | 1            | 0.7410527    | not scorable | not scorable | 1            | 0.9084841    |
| #### Bn-scaff_15695_1-p77580 C-genome specific (napus-oleracea) | 0.5454546    | 0.7816472    | 0.9922481    | 0.8644004    | not scorable | not scorable |
| #### Bn-scaff_15695_1-p77637 C-genome specific (napus-oleracea) | 0.9808612    | 0.6969048    | 1            | 0.7497477    | not scorable | not scorable |
| #### Bn-scaff_15695_1-p77679 C-genome specific (napus-oleracea) | 0.9904306    | 0.7666045    | 0.9922481    | 0.8763633    | not scorable | not scorable |
| #### Bn-scaff_15695_1-p77762 C-genome specific (napus-oleracea) | 0.9808612    | 0.6809356    | 0.9534883    | 0.7106301    | not scorable | not scorable |
| #### Bn-scaff_15695_1-p77780 C-genome specific (napus-oleracea) | 0.9880383    | 0.6931905    | 0.9534883    | 0.7233866    | not scorable | not scorable |
| #### Bn-scaff_15695_1-p77786 C-genome specific (napus-oleracea) | 0.9808612    | 0.6827018    | 0.9612403    | 0.7018501    | not scorable | not scorable |
| #### Bn-scaff_15695_1-p77791 C-genome specific (napus-oleracea) | 0.9808612    | 0.6775352    | 1            | 0.6971771    | not scorable | not scorable |
| #### Bn-scaff_15695_1-p78049 C-genome specific (napus-oleracea) | 0.9641148    | 0.4757258    | 0.9844961    | 0.3923621    | not scorable | not scorable |
| #### Bn-scaff_15695_2-p20093 C-genome specific (oleracea only)  | not scorable | not scorable | 0.6666667    | 0.7771224    | not scorable | not scorable |
| #### Bn-scaff_15695_2-p26357 napus specific                     | 1            | 0.6290278    | not scorable | not scorable | not scorable | not scorable |
| #### Bn-scaff_15695_2-p26589 C-genome specific (napus-oleracea) | 0.9832536    | 0.7297282    | 0.8372093    | 0.8128658    | not scorable | not scorable |
| #### Bn-scaff_15695_2-p26700 A-genome specific (napus-rapa)     | 0.9976076    | 0.7170917    | not scorable | not scorable | 1            | 0.8851159    |
| #### Bn-scaff_15695_2-p26751 A-genome specific (napus-rapa)     | 1            | 0.5030417    | not scorable | not scorable | 1            | 0.5209835    |
| #### Bn-scaff_15695_2-p26797 genome unspecific (all in)         | 0.9617225    | 0.1749241    | 0.9767442    | 0.2981356    | 1            | 0.7229721    |
| #### Bn-scaff_15695_2-p26861 A-genome specific (napus-rapa)     | 0.9736842    | 0.2712866    | not scorable | not scorable | 1            | 0.8108987    |
| #### Bn-scaff_15695_2-p28854 napus specific                     | 0.9832536    | 0.3264601    | not scorable | not scorable | not scorable | not scorable |
| #### Bn-scaff_15695_2-p3315 napus specific                      | 0.7440192    | 0.2668932    | not scorable | not scorable | not scorable | not scorable |
| #### Bn-scaff_15695_2-p3368 all not scorable                    | not scorable | not scorable | not scorable | not scorable | not scorable | not scorable |
| #### Bn-scaff_15695_2-p41304 C-genome specific (napus-oleracea) | 0.9832536    | 0.5878623    | 0.9922481    | 0.7096615    | not scorable | not scorable |
| #### Bn-scaff_15695_2-p41315 C-genome specific (napus-oleracea) | 0.9784689    | 0.7164068    | 0.9922481    | 0.6932181    | not scorable | not scorable |
| #### Bn-scaff_15695_2-p41322 C-genome specific (napus-oleracea) | 0.9856459    | 0.7372089    | 0.9922481    | 0.7152221    | not scorable | not scorable |
| #### Bn-scaff_15695_2-p41363 A-genome specific (napus-rapa)     | 0.9976076    | 0.379653     | not scorable | not scorable | 1            | 0.6771432    |
| #### Bn-scaff_15695_2-p42386 napus specific                     | 0.9832536    | 0.7687359    | not scorable | not scorable | not scorable | not scorable |
| #### Bn-scaff_15695_2-p44895 C-genome specific (napus-oleracea) | 0.9904306    | 0.7678621    | 0.9844961    | 0.8000253    | not scorable | not scorable |
| #### Bn-scaff_15695_2-p4548 napus specific                      | 0.7535885    | 0.3706653    | not scorable | not scorable | not scorable | not scorable |
| #### Bn-scaff_15699_1-p12341 C-genome specific (napus-oleracea) | 0.9976076    | 0.6845919    | 1            | 0.615495     | not scorable | not scorable |
| #### Bn-scaff_15699_1-p34048 A-genome specific (napus-rapa)     | 1            | 0.7135291    | not scorable | not scorable | 1            | 0.7155698    |
| #### Bn-scaff_15699_1-p41754 genome unspecific (all in)         | 0.9952153    | 0.3461304    | 1            | 0.8358764    | 1            | 0.8948976    |

|                                                                 |              |              |              |              |              |              |
|-----------------------------------------------------------------|--------------|--------------|--------------|--------------|--------------|--------------|
| #### Bn-scaff_15699_1-p57791A-genome specific (rapa only)       | not scorable | not scorable | not scorable | not scorable | 1            | 0.8571784    |
| #### Bn-scaff_15699_1-p57812 napus specific                     | 1            | 0.9095823    | not scorable | not scorable | not scorable | not scorable |
| #### Bn-scaff_15699_1-p69626 all not scorable                   | not scorable | not scorable | not scorable | not scorable | not scorable | not scorable |
| #### Bn-scaff_15699_1-p8944 napus specific                      | 0.9952153    | 0.6950894    | not scorable | not scorable | not scorable | not scorable |
| #### Bn-scaff_15701_1-p10152 genome unspecific (all in)         | 1            | 0.6334835    | 1            | 0.6988977    | 1            | 0.8956157    |
| #### Bn-scaff_15701_1-p10520 genome unspecific (oleracea-rapa)  | not scorable | not scorable | 0.8682171    | 0.3566819    | 0.9834711    | 0.9164855    |
| #### Bn-scaff_15701_1-p10521 genome unspecific (all in)         | 0.9976076    | 0.343699     | 0.875969     | 0.3022137    | 0.9917355    | 0.9091781    |
| #### Bn-scaff_15701_1-p12162 C-genome specific (napus-oleracea) | 0.9114832    | 0.7329247    | 0.9922481    | 0.7630746    | not scorable | not scorable |
| #### Bn-scaff_15701_1-p12355 genome unspecific (all in)         | 0.9354067    | 0.7155759    | 1            | 0.7700363    | 1            | 0.9398195    |
| #### Bn-scaff_15701_1-p15202 A-genome specific (napus-rapa)     | 1            | 0.6540826    | not scorable | not scorable | 1            | 0.8243048    |
| #### Bn-scaff_15701_1-p21481 C-genome specific (napus-oleracea) | 0.9186603    | 0.7493378    | 0.9689922    | 0.6057714    | not scorable | not scorable |
| #### Bn-scaff_15701_1-p43331 C-genome specific (napus-oleracea) | 0.9952153    | 0.5671297    | 0.9767442    | 0.5710426    | not scorable | not scorable |
| #### Bn-scaff_15701_1-p70335 napus specific                     | 0.923445     | 0.9172135    | not scorable | not scorable | not scorable | not scorable |
| #### Bn-scaff_15701_1-p71406 genome unspecific (all in)         | 0.9952153    | 0.4568528    | 0.9922481    | 0.7091641    | 1            | 0.845325     |
| #### Bn-scaff_15701_1-p73786 napus specific                     | 0.9904306    | 0.9103374    | not scorable | not scorable | not scorable | not scorable |
| #### Bn-scaff_15701_1-p88472 napus specific                     | 0.923445     | 0.8579854    | not scorable | not scorable | not scorable | not scorable |
| #### Bn-scaff_15701_1-p88538 A-genome specific (napus-rapa)     | 1            | 0.8178852    | not scorable | not scorable | 1            | 0.9174906    |
| #### Bn-scaff_15701_1-p99489 napus specific                     | 0.9784689    | 0.3093624    | not scorable | not scorable | not scorable | not scorable |
| #### Bn-scaff_15703_1-p18631 A-genome specific (napus-rapa)     | 0.9976076    | 0.3793097    | not scorable | not scorable | 0.9338843    | 0.564554     |
| #### Bn-scaff_15703_1-p18642 napus specific                     | 0.9856459    | 0.1873166    | not scorable | not scorable | not scorable | not scorable |
| #### Bn-scaff_15703_1-p44024 genome unspecific (all in)         | 0.9880383    | 0.328194     | 0.9224806    | 0.8265579    | 1            | 0.692138     |
| #### Bn-scaff_15703_1-p53309 genome unspecific (all in)         | 0.9952153    | 0.4441151    | 0.9922481    | 0.7248371    | 1            | 0.9095823    |
| #### Bn-scaff_15703_1-p55464 A-genome specific (rapa only)      | not scorable | not scorable | not scorable | not scorable | 0.9917355    | 0.8462438    |
| #### Bn-scaff_15703_1-p75133 C-genome specific (oleracea only)  | not scorable | not scorable | 0.875969     | 0.7135979    | not scorable | not scorable |
| #### Bn-scaff_15703_1-p96330 genome unspecific (all in)         | 0.9784689    | 0.2340111    | 1            | 0.3201512    | 0.8677686    | 0.7914163    |
| #### Bn-scaff_15705_1-p10157 C-genome specific (napus-oleracea) | 0.9449761    | 0.3788729    | 0.875969     | 0.7742175    | not scorable | not scorable |
| #### Bn-scaff_15705_1-p10856 C-genome specific (napus-oleracea) | 0.9688995    | 0.8042116    | 1            | 0.8278039    | not scorable | not scorable |
| #### Bn-scaff_15705_1-p10904 A-genome specific (rapa only)      | not scorable | not scorable | not scorable | not scorable | 1            | 0.7649698    |
| #### Bn-scaff_15705_1-p12145 genome unspecific (all in)         | 0.9641148    | 0.6116235    | 1            | 0.7913733    | 1            | 0.8948976    |
| #### Bn-scaff_15705_1-p12149 C-genome specific (napus-oleracea) | 0.9473684    | 0.568074     | 1            | 0.7908827    | not scorable | not scorable |
| #### Bn-scaff_15705_1-p12383 genome unspecific (oleracea-rapa)  | not scorable | not scorable | 1            | 0.7623909    | 0.9917355    | 0.7426431    |
| #### Bn-scaff_15705_1-p12845 napus specific                     | 0.9019139    | 0.664838     | not scorable | not scorable | not scorable | not scorable |
| #### Bn-scaff_15705_1-p13087 A-genome specific (napus-rapa)     | 0.9904306    | 0.3785436    | not scorable | not scorable | 1            | 0.8188161    |

|                                                                |              |              |              |              |              |              |
|----------------------------------------------------------------|--------------|--------------|--------------|--------------|--------------|--------------|
| #### Bn-scaff_15705_1-p13248genome unspecific (all in)         | 0.9856459    | 0.3391254    | 1            | 0.7073054    | 1            | 0.8151672    |
| #### Bn-scaff_15705_1-p13249genome unspecific (oleracea-rapa)  | not scorable | not scorable | 0.9302326    | 0.3811634    | 1            | 0.8943946    |
| #### Bn-scaff_15705_1-p13322napus specific                     | 0.9880383    | 0.7245987    | not scorable | not scorable | not scorable | not scorable |
| #### Bn-scaff_15705_1-p13507genome unspecific (all in)         | 0.9832536    | 0.3277776    | 1            | 0.7204505    | 1            | 0.7884539    |
| #### Bn-scaff_15705_1-p13513C-genome specific (napus-oleracea) | 0.9928229    | 0.791964     | 0.9379845    | 0.7387673    | not scorable | not scorable |
| #### Bn-scaff_15705_1-p13553C-genome specific (napus-oleracea) | 0.9856459    | 0.7128313    | 1            | 0.7129886    | not scorable | not scorable |
| #### Bn-scaff_15705_1-p13563napus specific                     | 1            | 0.8440535    | not scorable | not scorable | not scorable | not scorable |
| #### Bn-scaff_15705_1-p13835C-genome specific (napus-oleracea) | 0.9904306    | 0.7481975    | 1            | 0.7220803    | not scorable | not scorable |
| #### Bn-scaff_15705_1-p13939C-genome specific (napus-oleracea) | 0.9856459    | 0.6494659    | 1            | 0.7075041    | not scorable | not scorable |
| #### Bn-scaff_15705_1-p13942C-genome specific (napus-oleracea) | 0.9904306    | 0.757594     | 1            | 0.7479724    | not scorable | not scorable |
| #### Bn-scaff_15705_1-p14037C-genome specific (napus-oleracea) | 0.9569378    | 0.7342703    | 0.3410853    | 0.9271505    | not scorable | not scorable |
| #### Bn-scaff_15705_1-p14038C-genome specific (napus-oleracea) | 0.9808612    | 0.7564206    | 1            | 0.7622047    | not scorable | not scorable |
| #### Bn-scaff_15705_1-p14151genome unspecific (all in)         | 0.9712918    | 0.3357344    | 0.9767442    | 0.647296     | 1            | 0.5784814    |
| #### Bn-scaff_15705_1-p14330C-genome specific (napus-oleracea) | 0.9856459    | 0.7034416    | 1            | 0.7546523    | not scorable | not scorable |
| #### Bn-scaff_15705_1-p14331genome unspecific (all in)         | 0.9497608    | 0.5597038    | 0.9922481    | 0.7344735    | 0.9669421    | 0.7154098    |
| #### Bn-scaff_15705_1-p14333genome unspecific (all in)         | 0.9665072    | 0.4161448    | 1            | 0.7748297    | 1            | 0.8900404    |
| #### Bn-scaff_15705_1-p14355A-genome specific (napus-rapa)     | 0.9712918    | 0.2443177    | not scorable | not scorable | 1            | 0.8127       |
| #### Bn-scaff_15705_1-p14790C-genome specific (napus-oleracea) | 0.9808612    | 0.7024132    | 1            | 0.7824178    | not scorable | not scorable |
| #### Bn-scaff_15705_1-p14801C-genome specific (napus-oleracea) | 0.9832536    | 0.8015579    | 1            | 0.8239597    | not scorable | not scorable |
| #### Bn-scaff_15705_1-p14815napus specific                     | 0.9808612    | 0.6940425    | not scorable | not scorable | not scorable | not scorable |
| #### Bn-scaff_15705_1-p14815C-genome specific (napus-oleracea) | 0.9856459    | 0.7584246    | 1            | 0.7834181    | not scorable | not scorable |
| #### Bn-scaff_15705_1-p14915C-genome specific (napus-oleracea) | 0.9784689    | 0.8057364    | 0.9844961    | 0.7728407    | not scorable | not scorable |
| #### Bn-scaff_15705_1-p14933C-genome specific (napus-oleracea) | 0.9760765    | 0.7927637    | 0.9844961    | 0.8333299    | not scorable | not scorable |
| #### Bn-scaff_15705_1-p14934C-genome specific (napus-oleracea) | 0.9808612    | 0.800918     | 1            | 0.8920822    | not scorable | not scorable |
| #### Bn-scaff_15705_1-p14937C-genome specific (napus-oleracea) | 0.9617225    | 0.7306909    | 0.9922481    | 0.7463457    | not scorable | not scorable |
| #### Bn-scaff_15705_1-p15198genome unspecific (all in)         | 0.9904306    | 0.3335084    | 1            | 0.6852979    | 1            | 0.7349294    |
| #### Bn-scaff_15705_1-p15240C-genome specific (napus-oleracea) | 0.9808612    | 0.7304457    | 0.9844961    | 0.7180818    | not scorable | not scorable |
| #### Bn-scaff_15705_1-p15337genome unspecific (all in)         | 0.9545454    | 0.7296807    | 1            | 0.7958496    | 0.9917355    | 0.9062161    |
| #### Bn-scaff_15705_1-p15491C-genome specific (oleracea only)  | not scorable | not scorable | 0.8217054    | 0.7998886    | not scorable | not scorable |
| #### Bn-scaff_15705_1-p15539A-genome specific (napus-rapa)     | 0.9928229    | 0.4617523    | not scorable | not scorable | 1            | 0.9175813    |
| #### Bn-scaff_15705_1-p15653genome unspecific (all in)         | 0.9976076    | 0.3340484    | 0.9844961    | 0.7465214    | 0.9917355    | 0.6033775    |
| #### Bn-scaff_15705_1-p15671C-genome specific (napus-oleracea) | 0.9760765    | 0.7906279    | 1            | 0.8133213    | not scorable | not scorable |
| #### Bn-scaff_15705_1-p15728genome unspecific (all in)         | 1            | 0.3749127    | 1            | 0.8117129    | 1            | 0.6276289    |

|                                                                |              |              |              |              |              |              |
|----------------------------------------------------------------|--------------|--------------|--------------|--------------|--------------|--------------|
| #### Bn-scaff_15705_1-p16192A-genome specific (rapa only)      | not scorable | not scorable | not scorable | not scorable | 0.9917355    | 0.7566328    |
| #### Bn-scaff_15705_1-p16288genome unspecific (all in)         | 0.9784689    | 0.6512406    | 0.9922481    | 0.7629007    | 0.9917355    | 0.897743     |
| #### Bn-scaff_15705_1-p16288genome unspecific (all in)         | 0.9760765    | 0.5906986    | 0.9922481    | 0.72637      | 1            | 0.7289364    |
| #### Bn-scaff_15705_1-p16730C-genome specific (napus-oleracea) | 0.9928229    | 0.8734265    | 0.9922481    | 0.7482063    | not scorable | not scorable |
| #### Bn-scaff_15705_1-p17099C-genome specific (napus-oleracea) | 0.9904306    | 0.72071      | 0.9922481    | 0.7281753    | not scorable | not scorable |
| #### Bn-scaff_15705_1-p17101C-genome specific (napus-oleracea) | 0.9880383    | 0.7922174    | 0.9922481    | 0.8405247    | not scorable | not scorable |
| #### Bn-scaff_15705_1-p17174C-genome specific (napus-oleracea) | 0.9569378    | 0.8602734    | 0.9922481    | 0.7529233    | not scorable | not scorable |
| #### Bn-scaff_15705_1-p17180 napus specific                    | 0.9545454    | 0.7424949    | not scorable | not scorable | not scorable | not scorable |
| #### Bn-scaff_15705_1-p17180C-genome specific (napus-oleracea) | 0.9569378    | 0.7431058    | 0.9689922    | 0.7964363    | not scorable | not scorable |
| #### Bn-scaff_15705_1-p17181napus specific                     | 0.9760765    | 0.7472379    | not scorable | not scorable | not scorable | not scorable |
| #### Bn-scaff_15705_1-p17191C-genome specific (napus-oleracea) | 0.9569378    | 0.7565879    | 0.9922481    | 0.7261999    | not scorable | not scorable |
| #### Bn-scaff_15705_1-p17195 napus specific                    | 0.9904306    | 0.6934255    | not scorable | not scorable | not scorable | not scorable |
| #### Bn-scaff_15705_1-p17198C-genome specific (napus-oleracea) | 0.9952153    | 0.7802736    | 1            | 0.8537922    | not scorable | not scorable |
| #### Bn-scaff_15705_1-p17237C-genome specific (napus-oleracea) | 0.9880383    | 0.7990407    | 0.9922481    | 0.782368     | not scorable | not scorable |
| #### Bn-scaff_15705_1-p17240C-genome specific (napus-oleracea) | 0.9904306    | 0.672551     | 1            | 0.6688457    | not scorable | not scorable |
| #### Bn-scaff_15705_1-p17305C-genome specific (napus-oleracea) | 0.9880383    | 0.7060237    | 1            | 0.7440839    | not scorable | not scorable |
| #### Bn-scaff_15705_1-p17425C-genome specific (napus-oleracea) | 0.9904306    | 0.7882779    | 1            | 0.7674081    | not scorable | not scorable |
| #### Bn-scaff_15705_1-p17918C-genome specific (napus-oleracea) | 0.9473684    | 0.8351524    | 1            | 0.7814004    | not scorable | not scorable |
| #### Bn-scaff_15705_1-p17967C-genome specific (napus-oleracea) | 0.9736842    | 0.8704469    | 0.9922481    | 0.7896715    | not scorable | not scorable |
| #### Bn-scaff_15705_1-p18054A-genome specific (napus-rapa)     | 0.9928229    | 0.4483257    | not scorable | not scorable | 0.9917355    | 0.8253549    |
| #### Bn-scaff_15705_1-p18120C-genome specific (napus-oleracea) | 0.9928229    | 0.7751673    | 1            | 0.859554     | not scorable | not scorable |
| #### Bn-scaff_15705_1-p18181C-genome specific (napus-oleracea) | 0.9928229    | 0.6258447    | 0.9922481    | 0.5764929    | not scorable | not scorable |
| #### Bn-scaff_15705_1-p19611C-genome specific (napus-oleracea) | 0.9066986    | 0.5271851    | 0.9534883    | 0.5013961    | not scorable | not scorable |
| #### Bn-scaff_15705_1-p21954A-genome specific (napus-rapa)     | 1            | 0.9226868    | not scorable | not scorable | 1            | 0.9390333    |
| #### Bn-scaff_15705_1-p21956A-genome specific (rapa only)      | not scorable | not scorable | not scorable | not scorable | 1            | 0.9080839    |
| #### Bn-scaff_15705_1-p22444genome unspecific (all in)         | 1            | 0.3266682    | 0.9844961    | 0.8193918    | 1            | 0.8340504    |
| #### Bn-scaff_15705_1-p22478 napus specific                    | 1            | 0.9064752    | not scorable | not scorable | not scorable | not scorable |
| #### Bn-scaff_15705_1-p22482genome unspecific (all in)         | 0.9952153    | 0.5817849    | 1            | 0.764181     | 1            | 0.9173623    |
| #### Bn-scaff_15705_1-p22492A-genome specific (rapa only)      | not scorable | not scorable | not scorable | not scorable | 1            | 0.6890886    |
| #### Bn-scaff_15705_1-p22492A-genome specific (rapa only)      | not scorable | not scorable | not scorable | not scorable | 1            | 0.7243353    |
| #### Bn-scaff_15705_1-p22679genome unspecific (all in)         | 0.9736842    | 0.7695454    | 1            | 0.7423835    | 0.9421487    | 0.7847824    |
| #### Bn-scaff_15705_1-p22744C-genome specific (napus-oleracea) | 0.9880383    | 0.711604     | 0.9379845    | 0.6684908    | not scorable | not scorable |
| #### Bn-scaff_15705_1-p22798C-genome specific (napus-oleracea) | 0.9736842    | 0.7422885    | 1            | 0.7701381    | not scorable | not scorable |

|                                                                 |              |              |              |              |              |              |              |
|-----------------------------------------------------------------|--------------|--------------|--------------|--------------|--------------|--------------|--------------|
| #### Bn-scaff_15705_1-p22829 A-genome specific (rapa only)      | not scorable | not scorable | not scorable | not scorable |              | 1            | 0.8393       |
| #### Bn-scaff_15705_1-p22832 genome unspecific (oleracea-rapa)  | not scorable | not scorable |              | 1            | 0.7570428    | 0.9917355    | 0.6887231    |
| #### Bn-scaff_15705_1-p23175 C-genome specific (napus-oleracea) | 0.9952153    | 0.8548985    |              | 1            | 0.8168341    | not scorable | not scorable |
| #### Bn-scaff_15705_1-p25041 napus specific                     | 0.9641148    | 0.7272082    | not scorable | not scorable | not scorable | not scorable |              |
| #### Bn-scaff_15705_1-p25044 napus specific                     | 0.9832536    | 0.7015852    | not scorable | not scorable | not scorable | not scorable |              |
| #### Bn-scaff_15705_1-p25358 A-genome specific (napus-rapa)     | 0.9952153    | 0.6287634    | not scorable | not scorable |              | 1            | 0.8126013    |
| #### Bn-scaff_15705_1-p25902 C-genome specific (napus-oleracea) | 0.9880383    | 0.7911271    | 0.9922481    | 0.7921304    | not scorable | not scorable |              |
| #### Bn-scaff_15705_1-p26178 C-genome specific (napus-oleracea) | 0.9952153    | 0.7660807    | 0.9612403    | 0.8508376    | not scorable | not scorable |              |
| #### Bn-scaff_15705_1-p26227 genome unspecific (all in)         | 0.9880383    | 0.3572233    | 0.9612403    | 0.7563745    | 0.7933884    | 0.7694519    |              |
| #### Bn-scaff_15705_1-p26265 C-genome specific (napus-oleracea) | 0.9856459    | 0.7929573    |              | 1            | 0.8583915    | not scorable | not scorable |
| #### Bn-scaff_15705_1-p26270 C-genome specific (napus-oleracea) | 0.9856459    | 0.7003334    | 0.9922481    | 0.7244256    | not scorable | not scorable |              |
| #### Bn-scaff_15705_1-p26432 C-genome specific (napus-oleracea) | 0.9976076    | 0.8060686    |              | 1            | 0.7904128    | not scorable | not scorable |
| #### Bn-scaff_15705_1-p27002 napus specific                     | 1            | 0.8534144    | not scorable | not scorable | not scorable | not scorable |              |
| #### Bn-scaff_15705_1-p27025 C-genome specific (napus-oleracea) | 0.9952153    | 0.8036577    |              | 1            | 0.891538     | not scorable | not scorable |
| #### Bn-scaff_15705_1-p27056 C-genome specific (napus-oleracea) | 0.9928229    | 0.7913971    | 0.8139535    | 0.7291192    | not scorable | not scorable |              |
| #### Bn-scaff_15705_1-p27407 A-genome specific (napus-rapa)     | 0.9712918    | 0.7171095    | not scorable | not scorable |              | 1            | 0.6735542    |
| #### Bn-scaff_15705_1-p27589 napus specific                     | 1            | 0.8308545    | not scorable | not scorable | not scorable | not scorable |              |
| #### Bn-scaff_15705_1-p29022 napus specific                     | 0.9904306    | 0.5447077    | not scorable | not scorable | not scorable | not scorable |              |
| #### Bn-scaff_15705_1-p29030 C-genome specific (napus-oleracea) | 0.9952153    | 0.8134855    | 0.9922481    | 0.7735092    | not scorable | not scorable |              |
| #### Bn-scaff_15705_1-p29032 C-genome specific (napus-oleracea) | 0.9952153    | 0.82582      | 0.9844961    | 0.766008     | not scorable | not scorable |              |
| #### Bn-scaff_15705_1-p29090 C-genome specific (napus-oleracea) | 0.9976076    | 0.8046679    |              | 1            | 0.7596881    | not scorable | not scorable |
| #### Bn-scaff_15705_1-p29713 genome unspecific (all in)         | 0.9928229    | 0.3208896    |              | 1            | 0.7923799    | 1            | 0.75378      |
| #### Bn-scaff_15705_1-p30001 genome unspecific (oleracea-rapa)  | not scorable | not scorable | 0.9922481    | 0.8320229    | 0.9917355    | 0.6664404    |              |
| #### Bn-scaff_15705_1-p31492 A-genome specific (rapa only)      | not scorable | not scorable | not scorable | not scorable |              | 1            | 0.7945284    |
| #### Bn-scaff_15705_1-p32917 napus specific                     | 0.9976076    | 0.2736323    | not scorable | not scorable | not scorable | not scorable |              |
| #### Bn-scaff_15705_1-p37336 C-genome specific (napus-oleracea) | 0.9712918    | 0.7714099    |              | 1            | 0.8454366    | not scorable | not scorable |
| #### Bn-scaff_15705_1-p37414 C-genome specific (napus-oleracea) | 0.9808612    | 0.7668903    | 0.9922481    | 0.8523242    | not scorable | not scorable |              |
| #### Bn-scaff_15705_1-p37418 napus specific                     | 0.9808612    | 0.243619     | not scorable | not scorable | not scorable | not scorable |              |
| #### Bn-scaff_15705_1-p37419 C-genome specific (napus-oleracea) | 0.9569378    | 0.4341779    | 0.9922481    | 0.7322134    | not scorable | not scorable |              |
| #### Bn-scaff_15705_1-p37429 genome unspecific (oleracea-rapa)  | not scorable | not scorable |              | 1            | 0.7438364    | 1            | 0.871139     |
| #### Bn-scaff_15705_1-p37439 A-genome specific (napus-rapa)     | 0.7966507    | 0.2046721    | not scorable | not scorable |              | 1            | 0.7353089    |
| #### Bn-scaff_15705_1-p37801 C-genome specific (napus-oleracea) | 0.9665072    | 0.8033703    | 0.9534883    | 0.7421058    | not scorable | not scorable |              |
| #### Bn-scaff_15705_1-p37986 C-genome specific (napus-oleracea) | 0.9569378    | 0.5511224    |              | 1            | 0.54857      | not scorable | not scorable |

|                                                                 |              |              |              |              |              |              |
|-----------------------------------------------------------------|--------------|--------------|--------------|--------------|--------------|--------------|
| #### Bn-scaff_15705_1-p38246 C-genome specific (napus-oleracea) | 0.9736842    | 0.7761294    | 0.9922481    | 0.7710179    | not scorable | not scorable |
| #### Bn-scaff_15705_1-p38340 C-genome specific (napus-oleracea) | 0.9210526    | 0.4371245    | 0.8294573    | 0.5318545    | not scorable | not scorable |
| #### Bn-scaff_15705_1-p38968 genome unspecific (all in)         | 0.9736842    | 0.3314074    | 0.9534883    | 0.7971883    | 1            | 0.9175813    |
| #### Bn-scaff_15705_1-p39267 C-genome specific (napus-oleracea) | 0.9760765    | 0.7849145    | 1            | 0.7662798    | not scorable | not scorable |
| #### Bn-scaff_15705_1-p39409 C-genome specific (napus-oleracea) | 0.9832536    | 0.6731265    | 1            | 0.6959124    | not scorable | not scorable |
| #### Bn-scaff_15705_1-p39486 C-genome specific (napus-oleracea) | 0.9880383    | 0.7314968    | 0.9457364    | 0.7142636    | not scorable | not scorable |
| #### Bn-scaff_15705_1-p40017 all not scorable                   | not scorable | not scorable | not scorable | not scorable | not scorable | not scorable |
| #### Bn-scaff_15705_1-p40371 genome unspecific (all in)         | 0.9832536    | 0.3409653    | 0.9534883    | 0.7632377    | 1            | 0.8764092    |
| #### Bn-scaff_15705_1-p42758 genome unspecific (oleracea-rapa)  | not scorable | not scorable | 1            | 0.6738831    | 1            | 0.7770717    |
| #### Bn-scaff_15705_1-p43162 A-genome specific (napus-rapa)     | 0.9282297    | 0.3767127    | not scorable | not scorable | 0.9917355    | 0.6318433    |
| #### Bn-scaff_15705_1-p43222 C-genome specific (napus-oleracea) | 0.9808612    | 0.7729505    | 0.9922481    | 0.7720631    | not scorable | not scorable |
| #### Bn-scaff_15705_1-p43271 C-genome specific (napus-oleracea) | 0.9976076    | 0.7874824    | 0.9844961    | 0.768692     | not scorable | not scorable |
| #### Bn-scaff_15705_1-p45990 C-genome specific (napus-oleracea) | 0.9952153    | 0.7027034    | 1            | 0.7306709    | not scorable | not scorable |
| #### Bn-scaff_15705_1-p46008 genome unspecific (all in)         | 0.9712918    | 0.5319771    | 1            | 0.6973109    | 1            | 0.9175813    |
| #### Bn-scaff_15705_1-p47705 napus specific                     | 0.9856459    | 0.7626086    | not scorable | not scorable | not scorable | not scorable |
| #### Bn-scaff_15705_1-p47846 genome unspecific (oleracea-rapa)  | not scorable | not scorable | 0.9844961    | 0.7013516    | 1            | 0.8477806    |
| #### Bn-scaff_15705_1-p48096 genome unspecific (all in)         | 0.9856459    | 0.6609219    | 1            | 0.7475684    | 1            | 0.9167837    |
| #### Bn-scaff_15705_1-p49601 genome unspecific (all in)         | 0.9760765    | 0.2016079    | 1            | 0.7209806    | 0.9834711    | 0.7098742    |
| #### Bn-scaff_15705_1-p52372 genome unspecific (all in)         | 0.9545454    | 0.3010939    | 1            | 0.7947931    | 0.9834711    | 0.7584623    |
| #### Bn-scaff_15705_1-p56064 genome unspecific (all in)         | 0.9808612    | 0.3622066    | 1            | 0.8477686    | 1            | 0.9095823    |
| #### Bn-scaff_15705_1-p56116 C-genome specific (napus-oleracea) | 0.9904306    | 0.8376184    | 0.6666667    | 0.878421     | not scorable | not scorable |
| #### Bn-scaff_15705_1-p56281 genome unspecific (all in)         | 0.9880383    | 0.4578438    | 1            | 0.6883867    | 1            | 0.7091959    |
| #### Bn-scaff_15705_1-p57732 C-genome specific (napus-oleracea) | 0.9928229    | 0.787383     | 1            | 0.8135572    | not scorable | not scorable |
| #### Bn-scaff_15705_1-p58311 all not scorable                   | not scorable | not scorable | not scorable | not scorable | not scorable | not scorable |
| #### Bn-scaff_15705_1-p60560 genome unspecific (all in)         | 0.9832536    | 0.4571306    | 1            | 0.7967921    | 1            | 0.808735     |
| #### Bn-scaff_15705_1-p70173 all not scorable                   | not scorable | not scorable | not scorable | not scorable | not scorable | not scorable |
| #### Bn-scaff_15705_1-p70303 A-genome specific (napus-rapa)     | 0.9617225    | 0.2793556    | not scorable | not scorable | 1            | 0.7819687    |
| #### Bn-scaff_15705_1-p70398 A-genome specific (rapa only)      | not scorable | not scorable | not scorable | not scorable | 0.8429752    | 0.6082957    |
| #### Bn-scaff_15705_1-p77391 C-genome specific (napus-oleracea) | 0.9976076    | 0.7203788    | 0.9922481    | 0.684747     | not scorable | not scorable |
| #### Bn-scaff_15705_1-p78022 A-genome specific (napus-rapa)     | 0.9736842    | 0.4452761    | not scorable | not scorable | 0.9917355    | 0.6055503    |
| #### Bn-scaff_15705_1-p78987 C-genome specific (napus-oleracea) | 0.9976076    | 0.7822061    | 1            | 0.7664534    | not scorable | not scorable |
| #### Bn-scaff_15705_1-p84123 A-genome specific (napus-rapa)     | 0.9641148    | 0.1742277    | not scorable | not scorable | 0.9917355    | 0.6668295    |
| #### Bn-scaff_15705_1-p84236 genome unspecific (all in)         | 0.9904306    | 0.3481429    | 0.9767442    | 0.6560594    | 1            | 0.8119248    |



|                                                                 |              |              |              |              |              |              |
|-----------------------------------------------------------------|--------------|--------------|--------------|--------------|--------------|--------------|
| #### Bn-scaff_15705_2-p37963 A-genome specific (napus-rapa)     | 1            | 0.8801212    | not scorable | not scorable | 1            | 0.9272014    |
| #### Bn-scaff_15705_2-p41179 napus specific                     | 0.9832536    | 0.2736776    | not scorable | not scorable | not scorable | not scorable |
| #### Bn-scaff_15705_2-p41525 napus specific                     | 0.9904306    | 0.3462877    | not scorable | not scorable | not scorable | not scorable |
| #### Bn-scaff_15705_2-p73782 C-genome specific (napus-oleracea) | 1            | 0.7994917    |              | 1            | 0.7115681    | not scorable |
| #### Bn-scaff_15705_2-p74782 napus specific                     | 1            | 0.3354626    | not scorable | not scorable | not scorable | not scorable |
| #### Bn-scaff_15705_2-p75907 napus specific                     | 1            | 0.727636     | not scorable | not scorable | not scorable | not scorable |
| #### Bn-scaff_15705_2-p76656 A-genome specific (napus-rapa)     | 0.9784689    | 0.4050141    | not scorable | not scorable | 0.9752066    | 0.7427377    |
| #### Bn-scaff_15705_2-p77083 napus specific                     | 1            | 0.8026422    | not scorable | not scorable | not scorable | not scorable |
| #### Bn-scaff_15705_2-p79733 A-genome specific (napus-rapa)     | 0.9808612    | 0.4408049    | not scorable | not scorable | 1            | 0.7459277    |
| #### Bn-scaff_15705_2-p79863 A-genome specific (napus-rapa)     | 0.9784689    | 0.4130455    | not scorable | not scorable | 1            | 0.7606472    |
| #### Bn-scaff_15705_2-p83267 A-genome specific (napus-rapa)     | 0.9736842    | 0.3516045    | not scorable | not scorable | 0.9917355    | 0.6651146    |
| #### Bn-scaff_15705_2-p83394 genome unspecific (oleracea-rapa)  | not scorable | not scorable |              | 1            | 0.8081579    | 1            |
| #### Bn-scaff_15705_2-p92026 A-genome specific (rapa only)      | not scorable | not scorable | not scorable | not scorable | 1            | 0.7663227    |
| #### Bn-scaff_15705_2-p93154 all not scorable                   | not scorable | not scorable | not scorable | not scorable | not scorable | not scorable |
| #### Bn-scaff_15705_2-p96234 genome unspecific (all in)         | 0.9904306    | 0.1924392    |              | 1            | 0.2545585    | 0.9752066    |
| #### Bn-scaff_15705_3-p12932 genome unspecific (all in)         | 0.9784689    | 0.5263388    | 0.9922481    | 0.7552425    | 0.9917355    | 0.8266963    |
| #### Bn-scaff_15705_3-p13188 C-genome specific (napus-oleracea) | 0.9880383    | 0.8026064    | 0.9922481    | 0.8122081    | not scorable | not scorable |
| #### Bn-scaff_15705_3-p15971 C-genome specific (napus-oleracea) | 0.9832536    | 0.7278127    | 0.9922481    | 0.6560605    | not scorable | not scorable |
| #### Bn-scaff_15705_3-p23411 genome unspecific (all in)         | 1            | 0.3918157    |              | 1            | 0.7894384    | 1            |
| #### Bn-scaff_15705_3-p23457 C-genome specific (napus-oleracea) | 1            | 0.6734448    |              | 1            | 0.6044077    | not scorable |
| #### Bn-scaff_15705_3-p23478 C-genome specific (napus-oleracea) | 1            | 0.892644     |              | 1            | 0.794237     | not scorable |
| #### Bn-scaff_15705_3-p23498 C-genome specific (napus-oleracea) | 1            | 0.9226617    | 0.9767442    | 0.8177624    | not scorable | not scorable |
| #### Bn-scaff_15705_3-p24182 C-genome specific (oleracea only)  | not scorable | not scorable | 0.9844961    | 0.8046116    | not scorable | not scorable |
| #### Bn-scaff_15705_3-p24375 A-genome specific (rapa only)      | not scorable | not scorable | not scorable | not scorable | 0.9256198    | 0.6740161    |
| #### Bn-scaff_15705_3-p24596 C-genome specific (napus-oleracea) | 0.9688995    | 0.7690879    | 0.6589147    | 0.7405181    | not scorable | not scorable |
| #### Bn-scaff_15705_3-p24621 C-genome specific (napus-oleracea) | 0.5430622    | 0.7723554    | 0.6821706    | 0.7075229    | not scorable | not scorable |
| #### Bn-scaff_15705_3-p25302 genome unspecific (all in)         | 1            | 0.6778668    |              | 1            | 0.7888538    | 1            |
| #### Bn-scaff_15705_3-p25696 napus specific                     | 0.9928229    | 0.7591171    | not scorable | not scorable | not scorable | not scorable |
| #### Bn-scaff_15705_3-p26135 C-genome specific (napus-oleracea) | 0.9880383    | 0.6383933    | 0.9922481    | 0.7167431    | not scorable | not scorable |
| #### Bn-scaff_15705_3-p26202 genome unspecific (all in)         | 0.9928229    | 0.6499308    |              | 1            | 0.6990198    | 1            |
| #### Bn-scaff_15705_3-p30819 A-genome specific (napus-rapa)     | 0.9641148    | 0.4193738    | not scorable | not scorable | 1            | 0.8082395    |
| #### Bn-scaff_15705_3-p35140 genome unspecific (all in)         | 0.9928229    | 0.358746     |              | 1            | 0.7091103    | 1            |
| #### Bn-scaff_15705_3-p43684 C-genome specific (napus-oleracea) | 0.9784689    | 0.7406307    | 0.9844961    | 0.7321286    | not scorable | not scorable |

|                                                                 |              |              |              |              |              |              |              |              |
|-----------------------------------------------------------------|--------------|--------------|--------------|--------------|--------------|--------------|--------------|--------------|
| #### Bn-scaff_15705_3-p43698 A-genome specific (napus-rapa)     | 0.9521531    | 0.2990422    | not scorable | not scorable | 0.9834711    | 0.7485256    |              |              |
| #### Bn-scaff_15705_3-p44076 genome unspecific (all in)         | 0.9736842    | 0.3617822    |              | 1            | 0.719432     | 1            | 0.8003483    |              |
| #### Bn-scaff_15705_3-p45043 genome unspecific (all in)         | 0.9641148    | 0.6322932    |              | 1            | 0.7194548    | 1            | 0.9327859    |              |
| #### Bn-scaff_15705_3-p45503 C-genome specific (napus-oleracea) | 0.9808612    | 0.7158253    | 0.9844961    | 0.6846692    | not scorable | not scorable |              |              |
| #### Bn-scaff_15705_3-p58286 genome unspecific (oleracea-rapa)  | not scorable | not scorable | 0.9922481    | 0.5446155    |              | 1            | 0.8649822    |              |
| #### Bn-scaff_15705_3-p58758 napus specific                     | 0.9880383    | 0.8067682    | not scorable | not scorable | not scorable | not scorable |              |              |
| #### Bn-scaff_15705_3-p60183 C-genome specific (napus-oleracea) | 0.9856459    | 0.7581339    | 0.9922481    | 0.8465074    | not scorable | not scorable |              |              |
| #### Bn-scaff_15705_3-p61661 C-genome specific (napus-oleracea) | 0.9856459    | 0.7725804    | 0.9922481    | 0.8237938    | not scorable | not scorable |              |              |
| #### Bn-scaff_15705_3-p61667 C-genome specific (napus-oleracea) | 0.9856459    | 0.780628     | 0.9922481    | 0.8202015    | not scorable | not scorable |              |              |
| #### Bn-scaff_15705_3-p61929 C-genome specific (napus-oleracea) | 0.9665072    | 0.6993269    | 0.9844961    | 0.7173789    | not scorable | not scorable |              |              |
| #### Bn-scaff_15705_3-p62059 C-genome specific (napus-oleracea) | 0.9856459    | 0.7864177    | 0.9922481    | 0.8225629    | not scorable | not scorable |              |              |
| #### Bn-scaff_15705_3-p67478 C-genome specific (napus-oleracea) | 0.9856459    | 0.780005     |              | 1            | 0.8377294    | not scorable | not scorable |              |
| #### Bn-scaff_15705_3-p82150 genome unspecific (all in)         | 0.9952153    | 0.5557538    | 0.9767442    | 0.8175263    |              | 1            | 0.9175813    |              |
| #### Bn-scaff_15709_1-p58075 all not scorable                   | not scorable | not scorable | not scorable | not scorable | not scorable | not scorable |              |              |
| #### Bn-scaff_15709_1-p67334 all not scorable                   | not scorable | not scorable | not scorable | not scorable | not scorable | not scorable |              |              |
| #### Bn-scaff_15709_1-p74248 A-genome specific (rapa only)      | not scorable | not scorable | not scorable | not scorable | 0.9834711    | 0.7974015    |              |              |
| #### Bn-scaff_15712_1-p11370 A-genome specific (napus-rapa)     | 0.9760765    | 0.360106     | not scorable | not scorable |              | 1            | 0.9166158    |              |
| #### Bn-scaff_15712_1-p12748 napus specific                     |              | 1            | 0.6531543    | not scorable | not scorable | not scorable | not scorable |              |
| #### Bn-scaff_15712_1-p20488 napus specific                     | 0.9904306    | 0.7888584    | not scorable | not scorable | not scorable | not scorable |              |              |
| #### Bn-scaff_15712_1-p27851 C-genome specific (napus-oleracea) |              | 1            | 0.9095823    |              | 1            | 0.8716906    | not scorable | not scorable |
| #### Bn-scaff_15712_1-p79597 napus specific                     |              | 1            | 0.3936169    | not scorable | not scorable | not scorable | not scorable |              |
| #### Bn-scaff_15712_1-p81654 A-genome specific (rapa only)      | not scorable | not scorable | not scorable | not scorable |              | 1            | 0.4867485    |              |
| #### Bn-scaff_15712_1-p84192 genome unspecific (all in)         | 0.9976076    | 0.5177487    |              | 1            | 0.7619247    | 1            | 0.8847247    |              |
| #### Bn-scaff_15712_1-p89945 C-genome specific (napus-oleracea) |              | 1            | 0.9367666    |              | 1            | 0.8417628    | not scorable | not scorable |
| #### Bn-scaff_15712_10-p1038 genome unspecific (all in)         |              | 1            | 0.5784019    | 0.9922481    | 0.73975      | 1            | 0.9265267    |              |
| #### Bn-scaff_15712_10-p1083 all not scorable                   | not scorable | not scorable | not scorable | not scorable | not scorable | not scorable |              |              |
| #### Bn-scaff_15712_10-p1182 genome unspecific (all in)         | 0.9880383    | 0.3879879    |              | 1            | 0.7316149    | 1            | 0.863709     |              |
| #### Bn-scaff_15712_10-p1412 genome unspecific (all in)         |              | 1            | 0.61317      | 0.9922481    | 0.7928951    | 0.9752066    | 0.8537473    |              |
| #### Bn-scaff_15712_10-p1739 C-genome specific (napus-oleracea) | 0.9976076    | 0.864657     | 0.9844961    | 0.7995093    | not scorable | not scorable |              |              |
| #### Bn-scaff_15712_10-p1995 napus specific                     | 0.9688995    | 0.7104577    | not scorable | not scorable | not scorable | not scorable |              |              |
| #### Bn-scaff_15712_10-p2041 A-genome specific (rapa only)      | not scorable | not scorable | not scorable | not scorable | 0.9586777    | 0.4624579    |              |              |
| #### Bn-scaff_15712_10-p2614 A-genome specific (napus-rapa)     | 0.9976076    | 0.8004208    | not scorable | not scorable | 0.9669421    | 0.7992797    |              |              |
| #### Bn-scaff_15712_10-p3727 C-genome specific (napus-oleracea) | 0.9904306    | 0.7825954    |              | 1            | 0.8660337    | not scorable | not scorable |              |

|                                                                |              |              |              |              |              |              |
|----------------------------------------------------------------|--------------|--------------|--------------|--------------|--------------|--------------|
| #### Bn-scaff_15712_10-p3771C-genome specific (napus-oleracea) | 0.9808612    | 0.6666946    | 0.9922481    | 0.7125282    | not scorable | not scorable |
| #### Bn-scaff_15712_10-p3782C-genome specific (napus-oleracea) | 0.9832536    | 0.692793     | 0.9922481    | 0.6783994    | not scorable | not scorable |
| #### Bn-scaff_15712_10-p3809C-genome specific (napus-oleracea) | 0.9856459    | 0.7711915    | 0.9922481    | 0.7926033    | not scorable | not scorable |
| #### Bn-scaff_15712_10-p4230C-genome specific (napus-oleracea) | 0.9665072    | 0.7672179    | 0.9767442    | 0.7656984    | not scorable | not scorable |
| #### Bn-scaff_15712_10-p4437genome unspecific (all in)         | 0.9760765    | 0.7026157    | 0.9069768    | 0.686158     | 0.9669421    | 0.6605161    |
| #### Bn-scaff_15712_10-p4685genome unspecific (all in)         | 0.9521531    | 0.3124329    | 0.9767442    | 0.3627689    | 1            | 0.7998539    |
| #### Bn-scaff_15712_10-p4685genome unspecific (all in)         | 0.9401914    | 0.2707393    | 0.7829458    | 0.4688266    | 0.9338843    | 0.8790621    |
| #### Bn-scaff_15712_10-p4723genome unspecific (all in)         | 0.9449761    | 0.4774351    | 0.9844961    | 0.7542019    | 0.9834711    | 0.8152258    |
| #### Bn-scaff_15712_10-p4953C-genome specific (napus-oleracea) | 0.9976076    | 0.5095907    | 1            | 0.4173732    | not scorable | not scorable |
| #### Bn-scaff_15712_10-p4974A-genome specific (napus-rapa)     | 0.9952153    | 0.5744389    | not scorable | not scorable | 0.8181818    | 0.9175813    |
| #### Bn-scaff_15712_10-p5053C-genome specific (napus-oleracea) | 0.9904306    | 0.7801375    | 1            | 0.8352932    | not scorable | not scorable |
| #### Bn-scaff_15712_10-p5056C-genome specific (napus-oleracea) | 0.9593301    | 0.7119212    | 1            | 0.7795575    | not scorable | not scorable |
| #### Bn-scaff_15712_10-p5208genome unspecific (all in)         | 0.9593301    | 0.5501935    | 1            | 0.7172681    | 0.9090909    | 0.7315859    |
| #### Bn-scaff_15712_10-p5225napus specific                     | 0.9952153    | 0.8023399    | not scorable | not scorable | not scorable | not scorable |
| #### Bn-scaff_15712_10-p5282A-genome specific (napus-rapa)     | 0.9712918    | 0.5722155    | not scorable | not scorable | 0.9834711    | 0.7803386    |
| #### Bn-scaff_15712_10-p5983genome unspecific (all in)         | 0.9784689    | 0.2695393    | 1            | 0.7357428    | 1            | 0.8493451    |
| #### Bn-scaff_15712_10-p6694genome unspecific (oleracea-rapa)  | not scorable | not scorable | 1            | 0.8291194    | 1            | 0.8650456    |
| #### Bn-scaff_15712_10-p7041A-genome specific (napus-rapa)     | 1            | 0.4830857    | not scorable | not scorable | 0.9917355    | 0.8661309    |
| #### Bn-scaff_15712_10-p7170A-genome specific (napus-rapa)     | 1            | 0.4508285    | not scorable | not scorable | 1            | 0.752335     |
| #### Bn-scaff_15712_10-p9272C-genome specific (napus-oleracea) | 1            | 0.6733703    | 0.9844961    | 0.6488826    | not scorable | not scorable |
| #### Bn-scaff_15712_10-p9942C-genome specific (napus-oleracea) | 1            | 0.5770261    | 1            | 0.5540717    | not scorable | not scorable |
| #### Bn-scaff_15712_11-p1034C-genome specific (napus-oleracea) | 0.9808612    | 0.7622049    | 0.9612403    | 0.746982     | not scorable | not scorable |
| #### Bn-scaff_15712_11-p1046C-genome specific (napus-oleracea) | 0.9832536    | 0.7683334    | 0.9612403    | 0.8741567    | not scorable | not scorable |
| #### Bn-scaff_15712_11-p1050C-genome specific (napus-oleracea) | 0.9593301    | 0.7261266    | 0.9612403    | 0.7636759    | not scorable | not scorable |
| #### Bn-scaff_15712_11-p1057C-genome specific (napus-oleracea) | 0.9808612    | 0.7016025    | 0.9612403    | 0.7999961    | not scorable | not scorable |
| #### Bn-scaff_15712_11-p1059C-genome specific (napus-oleracea) | 0.9808612    | 0.7551914    | 0.9612403    | 0.8206939    | not scorable | not scorable |
| #### Bn-scaff_15712_11-p1379C-genome specific (napus-oleracea) | 0.9712918    | 0.7652028    | 0.9612403    | 0.8472053    | not scorable | not scorable |
| #### Bn-scaff_15712_11-p1567C-genome specific (napus-oleracea) | 0.9665072    | 0.7853858    | 0.9534883    | 0.845997     | not scorable | not scorable |
| #### Bn-scaff_15712_11-p1803C-genome specific (napus-oleracea) | 0.9617225    | 0.7219643    | 0.9612403    | 0.7821153    | not scorable | not scorable |
| #### Bn-scaff_15712_11-p1816C-genome specific (napus-oleracea) | 0.9880383    | 0.7729154    | 0.9612403    | 0.8537922    | not scorable | not scorable |
| #### Bn-scaff_15712_11-p1858C-genome specific (napus-oleracea) | 0.9832536    | 0.7749591    | 0.9612403    | 0.8786317    | not scorable | not scorable |
| #### Bn-scaff_15712_11-p2135C-genome specific (napus-oleracea) | 0.9641148    | 0.7552019    | 0.9612403    | 0.8257558    | not scorable | not scorable |
| #### Bn-scaff_15712_11-p2400C-genome specific (napus-oleracea) | 0.9545454    | 0.5310994    | 1            | 0.5552897    | not scorable | not scorable |

|                                                                |              |              |              |              |              |              |
|----------------------------------------------------------------|--------------|--------------|--------------|--------------|--------------|--------------|
| #### Bn-scaff_15712_11-p2551C-genome specific (napus-oleracea) | 0.9593301    | 0.7821835    | 0.9457364    | 0.7830167    | not scorable | not scorable |
| #### Bn-scaff_15712_11-p3557C-genome specific (napus-oleracea) | 0.9545454    | 0.7574556    | 0.9612403    | 0.8824396    | not scorable | not scorable |
| #### Bn-scaff_15712_11-p3614C-genome specific (napus-oleracea) | 0.9736842    | 0.768433     | 0.9612403    | 0.7937241    | not scorable | not scorable |
| #### Bn-scaff_15712_11-p4022C-genome specific (napus-oleracea) | 0.9808612    | 0.7540259    | 0.9612403    | 0.8496736    | not scorable | not scorable |
| #### Bn-scaff_15712_11-p4646C-genome specific (napus-oleracea) | 0.9712918    | 0.2633616    | 0.9612403    | 0.6107397    | not scorable | not scorable |
| #### Bn-scaff_15712_11-p4815C-genome specific (napus-oleracea) | 0.9832536    | 0.7550545    | 0.9612403    | 0.7962632    | not scorable | not scorable |
| #### Bn-scaff_15712_11-p6019C-genome specific (napus-oleracea) | 0.9712918    | 0.7860854    | 0.9534883    | 0.8050555    | not scorable | not scorable |
| #### Bn-scaff_15712_11-p6378C-genome specific (napus-oleracea) | 0.9832536    | 0.6905941    | 0.9689922    | 0.7375283    | not scorable | not scorable |
| #### Bn-scaff_15712_11-p6473C-genome specific (napus-oleracea) | 0.9617225    | 0.7642192    | 0.9612403    | 0.853023     | not scorable | not scorable |
| #### Bn-scaff_15712_11-p6487C-genome specific (napus-oleracea) | 0.9521531    | 0.7226629    | 0.9534883    | 0.7762848    | not scorable | not scorable |
| #### Bn-scaff_15712_11-p6947C-genome specific (napus-oleracea) | 0.9736842    | 0.7533713    | 0.9534883    | 0.785518     | not scorable | not scorable |
| #### Bn-scaff_15712_11-p7583C-genome specific (napus-oleracea) | 0.9784689    | 0.7703121    | 0.9612403    | 0.8523816    | not scorable | not scorable |
| #### Bn-scaff_15712_12-p2141genome unspecific (all in)         | 0.9784689    | 0.4843377    | 0.9689922    | 0.7064139    | 1            | 0.9175813    |
| #### Bn-scaff_15712_12-p5675genome unspecific (all in)         | 0.9856459    | 0.5962826    | 0.9922481    | 0.7488335    | 1            | 0.9095823    |
| #### Bn-scaff_15712_12-p5737genome unspecific (all in)         | 0.9880383    | 0.2993637    | 1            | 0.8282926    | 0.9752066    | 0.7599771    |
| #### Bn-scaff_15712_12-p5921genome unspecific (all in)         | 0.9736842    | 0.3853821    | 0.9767442    | 0.6805493    | 1            | 0.8622282    |
| #### Bn-scaff_15712_13-p3306genome unspecific (all in)         | 0.9808612    | 0.3573493    | 1            | 0.8082134    | 1            | 0.9069104    |
| #### Bn-scaff_15712_13-p3813C-genome specific (napus-oleracea) | 0.9019139    | 0.7631091    | 1            | 0.7632755    | not scorable | not scorable |
| #### Bn-scaff_15712_13-p4316C-genome specific (napus-oleracea) | 0.9019139    | 0.7774234    | 0.8062016    | 0.8324453    | not scorable | not scorable |
| #### Bn-scaff_15712_13-p6136C-genome specific (napus-oleracea) | 0.9258373    | 0.7384429    | 1            | 0.7310137    | not scorable | not scorable |
| #### Bn-scaff_15712_13-p6332C-genome specific (napus-oleracea) | 0.9162679    | 0.7313254    | 0.9922481    | 0.7281514    | not scorable | not scorable |
| #### Bn-scaff_15712_13-p8475A-genome specific (rapa only)      | not scorable | not scorable | not scorable | not scorable | 0.9421487    | 0.6512308    |
| #### Bn-scaff_15712_13-p8500A-genome specific (rapa only)      | not scorable | not scorable | not scorable | not scorable | 0.9421487    | 0.7435127    |
| #### Bn-scaff_15712_18-p3243C-genome specific (napus-oleracea) | 0.9808612    | 0.7677682    | 1            | 0.8526646    | not scorable | not scorable |
| #### Bn-scaff_15712_2-p10462C-genome specific (napus-oleracea) | 0.9688995    | 0.7343246    | 1            | 0.7192596    | not scorable | not scorable |
| #### Bn-scaff_15712_2-p10918C-genome specific (napus-oleracea) | 0.9617225    | 0.7499973    | 1            | 0.8103189    | not scorable | not scorable |
| #### Bn-scaff_15712_2-p10927C-genome specific (napus-oleracea) | 0.9569378    | 0.711466     | 1            | 0.7764793    | not scorable | not scorable |
| #### Bn-scaff_15712_2-p14588C-genome specific (napus-oleracea) | 0.9497608    | 0.2233002    | 1            | 0.8114987    | not scorable | not scorable |
| #### Bn-scaff_15712_2-p14966napus specific                     | 0.9952153    | 0.5196296    | not scorable | not scorable | not scorable | not scorable |
| #### Bn-scaff_15712_2-p15006genome unspecific (all in)         | 0.9688995    | 0.2315463    | 0.9922481    | 0.581099     | 1            | 0.888634     |
| #### Bn-scaff_15712_2-p18850C-genome specific (napus-oleracea) | 0.9736842    | 0.7359495    | 0.9689922    | 0.8331586    | not scorable | not scorable |
| #### Bn-scaff_15712_2-p19276C-genome specific (napus-oleracea) | 0.9856459    | 0.768935     | 0.9612403    | 0.8404474    | not scorable | not scorable |
| #### Bn-scaff_15712_2-p25382C-genome specific (napus-oleracea) | 0.9952153    | 0.7643907    | 0.9844961    | 0.7269822    | not scorable | not scorable |

|                                                                 |              |              |              |              |              |              |
|-----------------------------------------------------------------|--------------|--------------|--------------|--------------|--------------|--------------|
| #### Bn-scaff_15712_2-p27589 C-genome specific (napus-oleracea) | 0.9928229    | 0.794594     | 0.9844961    | 0.7519269    | not scorable | not scorable |
| #### Bn-scaff_15712_2-p28682 C-genome specific (napus-oleracea) | 0.9856459    | 0.7598833    | 0.9922481    | 0.8059768    | not scorable | not scorable |
| #### Bn-scaff_15712_2-p28959 C-genome specific (napus-oleracea) | 0.9641148    | 0.7640097    | 0.9767442    | 0.8095469    | not scorable | not scorable |
| #### Bn-scaff_15712_2-p32176 napus specific                     | 0.9856459    | 0.8712834    | not scorable | not scorable | not scorable | not scorable |
| #### Bn-scaff_15712_2-p34974 A-genome specific (napus-rapa)     | 0.9976076    | 0.5195166    | not scorable | not scorable | 1            | 0.577954     |
| #### Bn-scaff_15712_2-p36560 C-genome specific (napus-oleracea) | 0.9928229    | 0.8133171    | 0.9922481    | 0.6977822    | not scorable | not scorable |
| #### Bn-scaff_15712_2-p39041 C-genome specific (napus-oleracea) | 0.9688995    | 0.7963876    | 0.9922481    | 0.8166713    | not scorable | not scorable |
| #### Bn-scaff_15712_2-p42339 C-genome specific (napus-oleracea) | 0.9952153    | 0.8034752    | 0.9922481    | 0.7532953    | not scorable | not scorable |
| #### Bn-scaff_15712_2-p47486 C-genome specific (napus-oleracea) | 0.9784689    | 0.7534119    | 0.9844961    | 0.7662428    | not scorable | not scorable |
| #### Bn-scaff_15712_2-p49244 C-genome specific (napus-oleracea) | 0.9904306    | 0.887847     | 1            | 0.8638511    | not scorable | not scorable |
| #### Bn-scaff_15712_2-p51239 C-genome specific (napus-oleracea) | 0.9928229    | 0.7840406    | 1            | 0.8268749    | not scorable | not scorable |
| #### Bn-scaff_15712_2-p62997 genome unspecific (all in)         | 1            | 0.3525605    | 0.8294573    | 0.2308024    | 0.9752066    | 0.9282776    |
| #### Bn-scaff_15712_2-p66261 napus specific                     | 0.9976076    | 0.8315022    | not scorable | not scorable | not scorable | not scorable |
| #### Bn-scaff_15712_2-p74031 C-genome specific (napus-oleracea) | 0.9712918    | 0.7554224    | 1            | 0.8606652    | not scorable | not scorable |
| #### Bn-scaff_15712_2-p75476 C-genome specific (napus-oleracea) | 0.9641148    | 0.7773046    | 1            | 0.8197403    | not scorable | not scorable |
| #### Bn-scaff_15712_2-p75500 C-genome specific (napus-oleracea) | 0.9760765    | 0.8011286    | 0.9922481    | 0.8137817    | not scorable | not scorable |
| #### Bn-scaff_15712_2-p76730 C-genome specific (napus-oleracea) | 0.9760765    | 0.8123856    | 1            | 0.8587967    | not scorable | not scorable |
| #### Bn-scaff_15712_2-p76733 C-genome specific (napus-oleracea) | 0.9712918    | 0.757501     | 0.9922481    | 0.7549968    | not scorable | not scorable |
| #### Bn-scaff_15712_2-p76747 genome unspecific (all in)         | 0.9760765    | 0.6309469    | 1            | 0.7739471    | 1            | 0.9405178    |
| #### Bn-scaff_15712_2-p76920 C-genome specific (napus-oleracea) | 0.9832536    | 0.706402     | 1            | 0.7367783    | not scorable | not scorable |
| #### Bn-scaff_15712_2-p77011 C-genome specific (napus-oleracea) | 0.9808612    | 0.6677198    | 1            | 0.7164009    | not scorable | not scorable |
| #### Bn-scaff_15712_2-p77081 C-genome specific (napus-oleracea) | 0.9928229    | 0.764156     | 0.9457364    | 0.7905479    | not scorable | not scorable |
| #### Bn-scaff_15712_2-p77130 C-genome specific (napus-oleracea) | 0.9880383    | 0.7496954    | 0.9844961    | 0.7105392    | not scorable | not scorable |
| #### Bn-scaff_15712_2-p77138 C-genome specific (napus-oleracea) | 0.9569378    | 0.4647449    | 1            | 0.5584844    | not scorable | not scorable |
| #### Bn-scaff_15712_2-p77268 C-genome specific (napus-oleracea) | 0.9880383    | 0.7656775    | 1            | 0.7672234    | not scorable | not scorable |
| #### Bn-scaff_15712_2-p79132 C-genome specific (oleracea only)  | not scorable | not scorable | 0.9922481    | 0.7448593    | not scorable | not scorable |
| #### Bn-scaff_15712_2-p80080 C-genome specific (napus-oleracea) | 0.9856459    | 0.7403354    | 1            | 0.7255177    | not scorable | not scorable |
| #### Bn-scaff_15712_2-p80096 C-genome specific (napus-oleracea) | 0.9904306    | 0.7734323    | 1            | 0.6966886    | not scorable | not scorable |
| #### Bn-scaff_15712_2-p80206 C-genome specific (napus-oleracea) | 0.9808612    | 0.8089078    | 1            | 0.866051     | not scorable | not scorable |
| #### Bn-scaff_15712_2-p80215 C-genome specific (napus-oleracea) | 0.9832536    | 0.8197052    | 1            | 0.8434783    | not scorable | not scorable |
| #### Bn-scaff_15712_2-p80535 C-genome specific (napus-oleracea) | 0.9760765    | 0.7783077    | 0.9922481    | 0.8523906    | not scorable | not scorable |
| #### Bn-scaff_15712_2-p80544 C-genome specific (napus-oleracea) | 0.9784689    | 0.7985945    | 0.9922481    | 0.8217574    | not scorable | not scorable |
| #### Bn-scaff_15712_2-p81072 C-genome specific (napus-oleracea) | 0.9808612    | 0.7910773    | 1            | 0.8561248    | not scorable | not scorable |

|                                                                 |           |           |           |   |           |              |              |
|-----------------------------------------------------------------|-----------|-----------|-----------|---|-----------|--------------|--------------|
| #### Bn-scaff_15712_2-p81078 C-genome specific (napus-oleracea) | 0.9808612 | 0.7721447 |           | 1 | 0.8084567 | not scorable | not scorable |
| #### Bn-scaff_15712_2-p81103 C-genome specific (napus-oleracea) | 0.9928229 | 0.7703729 |           | 1 | 0.7490544 | not scorable | not scorable |
| #### Bn-scaff_15712_2-p81739 C-genome specific (napus-oleracea) | 0.9904306 | 0.7830058 | 0.9612403 |   | 0.8303071 | not scorable | not scorable |
| #### Bn-scaff_15712_2-p86441 C-genome specific (napus-oleracea) | 0.9569378 | 0.5403852 | 0.9379845 |   | 0.548322  | not scorable | not scorable |
| #### Bn-scaff_15712_3-p15694 C-genome specific (napus-oleracea) | 0.9641148 | 0.7589447 | 0.9922481 |   | 0.7902725 | not scorable | not scorable |
| #### Bn-scaff_15712_3-p15702 C-genome specific (napus-oleracea) | 0.9665072 | 0.8210545 | 0.9922481 |   | 0.8999212 | not scorable | not scorable |
| #### Bn-scaff_15712_3-p15712 C-genome specific (napus-oleracea) | 0.9545454 | 0.8201872 | 0.9922481 |   | 0.829099  | not scorable | not scorable |
| #### Bn-scaff_15712_3-p15754 C-genome specific (napus-oleracea) | 0.9665072 | 0.8214448 | 0.9922481 |   | 0.9004473 | not scorable | not scorable |
| #### Bn-scaff_15712_3-p15768 C-genome specific (napus-oleracea) | 0.9545454 | 0.818117  | 0.9922481 |   | 0.8515416 | not scorable | not scorable |
| #### Bn-scaff_15712_3-p15841 C-genome specific (napus-oleracea) | 0.9712918 | 0.8268861 | 0.9922481 |   | 0.8521696 | not scorable | not scorable |
| #### Bn-scaff_15712_3-p15857 C-genome specific (napus-oleracea) | 0.9712918 | 0.842319  |           | 1 | 0.823579  | not scorable | not scorable |
| #### Bn-scaff_15712_3-p15874 C-genome specific (napus-oleracea) | 0.9545454 | 0.794326  | 0.9844961 |   | 0.8458152 | not scorable | not scorable |
| #### Bn-scaff_15712_3-p15892 C-genome specific (napus-oleracea) | 0.9688995 | 0.8120371 | 0.9922481 |   | 0.8414158 | not scorable | not scorable |
| #### Bn-scaff_15712_3-p15953 C-genome specific (napus-oleracea) | 0.9665072 | 0.6879981 | 0.9922481 |   | 0.7117054 | not scorable | not scorable |
| #### Bn-scaff_15712_3-p15960 C-genome specific (napus-oleracea) | 0.9641148 | 0.7418661 |           | 1 | 0.7886941 | not scorable | not scorable |
| #### Bn-scaff_15712_3-p15992 C-genome specific (napus-oleracea) | 0.9617225 | 0.715348  | 0.9922481 |   | 0.8997134 | not scorable | not scorable |
| #### Bn-scaff_15712_3-p15999 C-genome specific (napus-oleracea) | 0.9569378 | 0.6737888 | 0.9922481 |   | 0.9071888 | not scorable | not scorable |
| #### Bn-scaff_15712_3-p16239 C-genome specific (napus-oleracea) | 0.9641148 | 0.7720703 |           | 1 | 0.8212268 | not scorable | not scorable |
| #### Bn-scaff_15712_3-p16364 C-genome specific (napus-oleracea) | 0.9688995 | 0.8102298 |           | 1 | 0.826528  | not scorable | not scorable |
| #### Bn-scaff_15712_3-p16381 C-genome specific (napus-oleracea) | 0.9665072 | 0.8109272 | 0.8604651 |   | 0.8517019 | not scorable | not scorable |
| #### Bn-scaff_15712_3-p16387 C-genome specific (napus-oleracea) | 0.9736842 | 0.8393997 |           | 1 | 0.8322114 | not scorable | not scorable |
| #### Bn-scaff_15712_3-p17630 C-genome specific (napus-oleracea) | 0.6818182 | 0.7757485 | 0.9844961 |   | 0.7264007 | not scorable | not scorable |
| #### Bn-scaff_15712_3-p20318 C-genome specific (napus-oleracea) | 0.7344497 | 0.7218725 | 0.9922481 |   | 0.8129125 | not scorable | not scorable |
| #### Bn-scaff_15712_3-p20577 C-genome specific (napus-oleracea) | 0.7392344 | 0.723191  |           | 1 | 0.6923596 | not scorable | not scorable |
| #### Bn-scaff_15712_3-p20582 C-genome specific (napus-oleracea) | 0.7416268 | 0.7036281 | 0.9844961 |   | 0.6880202 | not scorable | not scorable |
| #### Bn-scaff_15712_3-p20878 genome unspecific (all in)         | 0.9593301 | 0.6236644 |           | 1 | 0.6721032 |              | 1 0.8709421  |
| #### Bn-scaff_15712_3-p25117 C-genome specific (napus-oleracea) | 0.6818182 | 0.9095757 | 0.8837209 |   | 0.7378953 | not scorable | not scorable |
| #### Bn-scaff_15712_3-p32381 C-genome specific (napus-oleracea) | 0.7320574 | 0.7512477 | 0.9922481 |   | 0.7704008 | not scorable | not scorable |
| #### Bn-scaff_15712_3-p32397 C-genome specific (napus-oleracea) | 0.7320574 | 0.7919421 | 0.9922481 |   | 0.8316178 | not scorable | not scorable |
| #### Bn-scaff_15712_3-p32437 C-genome specific (napus-oleracea) | 0.7392344 | 0.7859703 |           | 1 | 0.7757724 | not scorable | not scorable |
| #### Bn-scaff_15712_3-p34247 C-genome specific (napus-oleracea) | 0.7392344 | 0.7582349 | 0.9922481 |   | 0.7743871 | not scorable | not scorable |
| #### Bn-scaff_15712_3-p34252 C-genome specific (napus-oleracea) | 0.7368421 | 0.7926641 |           | 1 | 0.8399591 | not scorable | not scorable |
| #### Bn-scaff_15712_3-p34320 C-genome specific (napus-oleracea) | 0.7392344 | 0.7877457 |           | 1 | 0.8458923 | not scorable | not scorable |

|                                                                 |              |              |              |              |              |              |
|-----------------------------------------------------------------|--------------|--------------|--------------|--------------|--------------|--------------|
| #### Bn-scaff_15712_3-p34413 C-genome specific (napus-oleracea) | 0.7344497    | 0.776226     | 1            | 0.7563545    | not scorable | not scorable |
| #### Bn-scaff_15712_3-p34443 C-genome specific (napus-oleracea) | 0.7320574    | 0.6897247    | 0.9689922    | 0.7270191    | not scorable | not scorable |
| #### Bn-scaff_15712_3-p34622 C-genome specific (napus-oleracea) | 0.7344497    | 0.7973726    | 1            | 0.8415254    | not scorable | not scorable |
| #### Bn-scaff_15712_3-p35340 C-genome specific (oleracea only)  | not scorable | not scorable | 1            | 0.8751436    | not scorable | not scorable |
| #### Bn-scaff_15712_3-p39016 genome unspecific (all in)         | 0.6913875    | 0.6822034    | 0.9922481    | 0.8472586    | 1            | 0.6889873    |
| #### Bn-scaff_15712_3-p46743 C-genome specific (napus-oleracea) | 0.6842105    | 0.857971     | 0.9767442    | 0.7990686    | not scorable | not scorable |
| #### Bn-scaff_15712_3-p48008 C-genome specific (napus-oleracea) | 0.8803828    | 0.7070655    | 0.9922481    | 0.7132125    | not scorable | not scorable |
| #### Bn-scaff_15712_3-p48073 C-genome specific (napus-oleracea) | 0.8803828    | 0.6766129    | 0.9922481    | 0.7146183    | not scorable | not scorable |
| #### Bn-scaff_15712_3-p48100 C-genome specific (napus-oleracea) | 0.8875598    | 0.7583562    | 0.9922481    | 0.7627645    | not scorable | not scorable |
| #### Bn-scaff_15712_3-p48262 C-genome specific (napus-oleracea) | 0.9545454    | 0.4586607    | 0.8294573    | 0.6847422    | not scorable | not scorable |
| #### Bn-scaff_15712_3-p48973 C-genome specific (napus-oleracea) | 0.8803828    | 0.7349212    | 1            | 0.7470142    | not scorable | not scorable |
| #### Bn-scaff_15712_3-p49337 C-genome specific (napus-oleracea) | 0.8803828    | 0.7121899    | 0.9922481    | 0.7152933    | not scorable | not scorable |
| #### Bn-scaff_15712_3-p50486 C-genome specific (napus-oleracea) | 0.8899522    | 0.8164074    | 0.9922481    | 0.8264216    | not scorable | not scorable |
| #### Bn-scaff_15712_3-p50766 A-genome specific (rapa only)      | not scorable | not scorable | not scorable | not scorable | 0.9917355    | 0.7092695    |
| #### Bn-scaff_15712_3-p50806 A-genome specific (rapa only)      | not scorable | not scorable | not scorable | not scorable | 0.9917355    | 0.7181703    |
| #### Bn-scaff_15712_3-p50987 C-genome specific (napus-oleracea) | 0.8636364    | 0.7683098    | 0.9689922    | 0.8610958    | not scorable | not scorable |
| #### Bn-scaff_15712_3-p51638 C-genome specific (napus-oleracea) | 0.8827751    | 0.7466918    | 0.9612403    | 0.8864053    | not scorable | not scorable |
| #### Bn-scaff_15712_3-p51820 C-genome specific (napus-oleracea) | 0.8779904    | 0.7006544    | 0.9689922    | 0.7110013    | not scorable | not scorable |
| #### Bn-scaff_15712_3-p52605 napus specific                     | 0.5095694    | 0.9272014    | not scorable | not scorable | not scorable | not scorable |
| #### Bn-scaff_15712_3-p53638 C-genome specific (napus-oleracea) | 0.8779904    | 0.7464885    | 0.9689922    | 0.7891837    | not scorable | not scorable |
| #### Bn-scaff_15712_3-p54312 C-genome specific (napus-oleracea) | 0.8827751    | 0.6829426    | 0.9612403    | 0.7025383    | not scorable | not scorable |
| #### Bn-scaff_15712_3-p54844 C-genome specific (napus-oleracea) | 0.8947368    | 0.7692059    | 1            | 0.716806     | not scorable | not scorable |
| #### Bn-scaff_15712_3-p54858 C-genome specific (napus-oleracea) | 0.8923445    | 0.7575302    | 0.9922481    | 0.7947791    | not scorable | not scorable |
| #### Bn-scaff_15712_3-p54874 C-genome specific (napus-oleracea) | 0.8875598    | 0.7535788    | 0.9767442    | 0.7129082    | not scorable | not scorable |
| #### Bn-scaff_15712_3-p54875 C-genome specific (napus-oleracea) | 0.8827751    | 0.7740493    | 0.9922481    | 0.7743902    | not scorable | not scorable |
| #### Bn-scaff_15712_3-p56087 C-genome specific (napus-oleracea) | 0.8732057    | 0.7110093    | 0.9922481    | 0.7651125    | not scorable | not scorable |
| #### Bn-scaff_15712_3-p56134 C-genome specific (napus-oleracea) | 0.8851675    | 0.7594844    | 0.9922481    | 0.7937157    | not scorable | not scorable |
| #### Bn-scaff_15712_3-p56147 C-genome specific (napus-oleracea) | 0.8827751    | 0.788763     | 0.9922481    | 0.8170273    | not scorable | not scorable |
| #### Bn-scaff_15712_3-p56182 C-genome specific (napus-oleracea) | 0.8827751    | 0.7797758    | 0.9922481    | 0.8042844    | not scorable | not scorable |
| #### Bn-scaff_15712_3-p56190 C-genome specific (napus-oleracea) | 0.8755981    | 0.8136275    | 0.9922481    | 0.823782     | not scorable | not scorable |
| #### Bn-scaff_15712_3-p56222 C-genome specific (napus-oleracea) | 0.8827751    | 0.7157839    | 0.9922481    | 0.7094467    | not scorable | not scorable |
| #### Bn-scaff_15712_3-p56611 C-genome specific (napus-oleracea) | 0.9354067    | 0.6562518    | 0.9844961    | 0.8255473    | not scorable | not scorable |
| #### Bn-scaff_15712_3-p58644 C-genome specific (napus-oleracea) | 0.8827751    | 0.7920821    | 1            | 0.8224317    | not scorable | not scorable |

|                                                                |              |              |              |   |              |              |              |
|----------------------------------------------------------------|--------------|--------------|--------------|---|--------------|--------------|--------------|
| #### Bn-scaff_15712_3-p58661C-genome specific (napus-oleracea) | 0.8923445    | 0.7675483    |              | 1 | 0.8048314    | not scorable | not scorable |
| #### Bn-scaff_15712_3-p58673genome unspecific (all in)         | 0.8755981    | 0.6121945    |              | 1 | 0.7445771    | 0.9338843    | 0.7921556    |
| #### Bn-scaff_15712_3-p58708C-genome specific (napus-oleracea) | 0.8851675    | 0.7633528    |              | 1 | 0.8095496    | not scorable | not scorable |
| #### Bn-scaff_15712_3-p58764C-genome specific (napus-oleracea) | 0.8851675    | 0.7770895    |              | 1 | 0.8345922    | not scorable | not scorable |
| #### Bn-scaff_15712_3-p59054all not scorable                   | not scorable | not scorable | not scorable |   | not scorable | not scorable | not scorable |
| #### Bn-scaff_15712_3-p59065C-genome specific (napus-oleracea) | 0.8851675    | 0.7917039    |              | 1 | 0.8193797    | not scorable | not scorable |
| #### Bn-scaff_15712_3-p59088C-genome specific (napus-oleracea) | 0.8851675    | 0.7850293    |              | 1 | 0.8186982    | not scorable | not scorable |
| #### Bn-scaff_15712_3-p59106C-genome specific (napus-oleracea) | 0.8875598    | 0.7662855    |              | 1 | 0.8019781    | not scorable | not scorable |
| #### Bn-scaff_15712_3-p62448C-genome specific (napus-oleracea) | 0.8755981    | 0.7082406    | 0.9689922    |   | 0.7915581    | not scorable | not scorable |
| #### Bn-scaff_15712_3-p62455C-genome specific (napus-oleracea) | 0.8708134    | 0.7962254    |              | 1 | 0.8233228    | not scorable | not scorable |
| #### Bn-scaff_15712_3-p62719C-genome specific (napus-oleracea) | 0.8851675    | 0.7041515    | 0.9922481    |   | 0.7819287    | not scorable | not scorable |
| #### Bn-scaff_15712_3-p62746C-genome specific (napus-oleracea) | 0.8851675    | 0.6993927    |              | 1 | 0.8348858    | not scorable | not scorable |
| #### Bn-scaff_15712_3-p62793C-genome specific (napus-oleracea) | 0.8803828    | 0.7401277    | 0.9922481    |   | 0.8192713    | not scorable | not scorable |
| #### Bn-scaff_15712_3-p63669C-genome specific (napus-oleracea) | 0.8923445    | 0.792094     |              | 1 | 0.7384117    | not scorable | not scorable |
| #### Bn-scaff_15712_3-p63686C-genome specific (napus-oleracea) | 0.8875598    | 0.7934706    |              | 1 | 0.8327063    | not scorable | not scorable |
| #### Bn-scaff_15712_3-p63696C-genome specific (napus-oleracea) | 0.8875598    | 0.7627096    | 0.9612403    |   | 0.8181634    | not scorable | not scorable |
| #### Bn-scaff_15712_3-p63702napus specific                     | 0.8851675    | 0.7872221    | not scorable |   | not scorable | not scorable | not scorable |
| #### Bn-scaff_15712_3-p63797C-genome specific (napus-oleracea) | 0.8851675    | 0.7846125    |              | 1 | 0.8524848    | not scorable | not scorable |
| #### Bn-scaff_15712_3-p63813C-genome specific (napus-oleracea) | 0.8851675    | 0.7923279    |              | 1 | 0.8318133    | not scorable | not scorable |
| #### Bn-scaff_15712_3-p63837C-genome specific (napus-oleracea) | 0.8875598    | 0.7117264    | 0.9457364    |   | 0.8087338    | not scorable | not scorable |
| #### Bn-scaff_15712_3-p63870all not scorable                   | not scorable | not scorable | not scorable |   | not scorable | not scorable | not scorable |
| #### Bn-scaff_15712_3-p63914C-genome specific (napus-oleracea) | 0.8923445    | 0.7784836    |              | 1 | 0.8704059    | not scorable | not scorable |
| #### Bn-scaff_15712_3-p63915C-genome specific (napus-oleracea) | 0.8851675    | 0.8001754    |              | 1 | 0.7193376    | not scorable | not scorable |
| #### Bn-scaff_15712_3-p63933C-genome specific (napus-oleracea) | 0.8923445    | 0.7870471    | 0.9922481    |   | 0.7494957    | not scorable | not scorable |
| #### Bn-scaff_15712_3-p63938C-genome specific (napus-oleracea) | 0.8899522    | 0.7665915    |              | 1 | 0.7957829    | not scorable | not scorable |
| #### Bn-scaff_15712_3-p63939C-genome specific (napus-oleracea) | 0.8947368    | 0.7597939    | 0.9844961    |   | 0.7777416    | not scorable | not scorable |
| #### Bn-scaff_15712_3-p63948C-genome specific (napus-oleracea) | 0.8899522    | 0.7035195    |              | 1 | 0.7563423    | not scorable | not scorable |
| #### Bn-scaff_15712_3-p65352C-genome specific (napus-oleracea) | 0.8803828    | 0.6633885    | 0.9922481    |   | 0.6731589    | not scorable | not scorable |
| #### Bn-scaff_15712_3-p66697C-genome specific (oleracea only)  | not scorable | not scorable |              | 1 | 0.7355849    | not scorable | not scorable |
| #### Bn-scaff_15712_3-p70329C-genome specific (napus-oleracea) | 0.6961722    | 0.8059768    |              | 1 | 0.8141455    | not scorable | not scorable |
| #### Bn-scaff_15712_3-p78532C-genome specific (napus-oleracea) | 0.6889952    | 0.7858388    | 0.9922481    |   | 0.7758705    | not scorable | not scorable |
| #### Bn-scaff_15712_3-p80420napus specific                     | 0.6961722    | 0.739943     | not scorable |   | not scorable | not scorable | not scorable |
| #### Bn-scaff_15712_3-p80435genome unspecific (all in)         | 0.9928229    | 0.4625483    | 0.9844961    |   | 0.7462972    |              | 1 0.8667216  |



|                                                                |              |              |              |              |              |              |
|----------------------------------------------------------------|--------------|--------------|--------------|--------------|--------------|--------------|
| #### Bn-scaff_15712_3-p80613C-genome specific (napus-oleracea) | 0.6866029    | 0.6207578    | 0.9922481    | 0.6108053    | not scorable | not scorable |
| #### Bn-scaff_15712_3-p80791C-genome specific (napus-oleracea) | 0.7009569    | 0.7733645    | 0.9844961    | 0.7943805    | not scorable | not scorable |
| #### Bn-scaff_15712_3-p80841C-genome specific (napus-oleracea) | 0.6889952    | 0.8250002    | 0.9844961    | 0.8279707    | not scorable | not scorable |
| #### Bn-scaff_15712_3-p81817C-genome specific (napus-oleracea) | 0.6961722    | 0.7738235    | 0.9844961    | 0.6743568    | not scorable | not scorable |
| #### Bn-scaff_15712_3-p83293C-genome specific (napus-oleracea) | 0.6985646    | 0.6923664    | 0.9379845    | 0.7624943    | not scorable | not scorable |
| #### Bn-scaff_15712_3-p85540 napus specific                    | 0.7009569    | 0.7996956    | not scorable | not scorable | not scorable | not scorable |
| #### Bn-scaff_15712_3-p88356 genome unspecific (all in)        | 0.9856459    | 0.508599     | 1            | 0.7287191    | 1            | 0.9205657    |
| #### Bn-scaff_15712_4-p50204 A-genome specific (napus-rapa)    | 1            | 0.2426062    | not scorable | not scorable | 1            | 0.863504     |
| #### Bn-scaff_15712_5-p10211C-genome specific (napus-oleracea) | 0.9186603    | 0.8250074    | 1            | 0.7378453    | not scorable | not scorable |
| #### Bn-scaff_15712_5-p10447 A-genome specific (napus-rapa)    | 0.9736842    | 0.36921      | not scorable | not scorable | 1            | 0.8814923    |
| #### Bn-scaff_15712_5-p10712C-genome specific (napus-oleracea) | 0.9904306    | 0.7662368    | 1            | 0.7626275    | not scorable | not scorable |
| #### Bn-scaff_15712_5-p10718C-genome specific (napus-oleracea) | 0.9928229    | 0.7462977    | 1            | 0.72434      | not scorable | not scorable |
| #### Bn-scaff_15712_5-p10781C-genome specific (napus-oleracea) | 0.9641148    | 0.7020014    | 1            | 0.7351869    | not scorable | not scorable |
| #### Bn-scaff_15712_5-p10782C-genome specific (napus-oleracea) | 0.9760765    | 0.735646     | 1            | 0.7431915    | not scorable | not scorable |
| #### Bn-scaff_15712_5-p10784C-genome specific (napus-oleracea) | 0.9665072    | 0.7520939    | 1            | 0.7841455    | not scorable | not scorable |
| #### Bn-scaff_15712_5-p10844 genome unspecific (all in)        | 0.9760765    | 0.4401369    | 1            | 0.7318829    | 0.9917355    | 0.8265304    |
| #### Bn-scaff_15712_5-p11020C-genome specific (napus-oleracea) | 0.9832536    | 0.7353838    | 0.9689922    | 0.7323602    | not scorable | not scorable |
| #### Bn-scaff_15712_5-p11233C-genome specific (oleracea only)  | not scorable | not scorable | 0.9224806    | 0.268882     | not scorable | not scorable |
| #### Bn-scaff_15712_5-p11239C-genome specific (napus-oleracea) | 0.9856459    | 0.2436017    | 0.9612403    | 0.697055     | not scorable | not scorable |
| #### Bn-scaff_15712_5-p11249 all not scorable                  | not scorable | not scorable | not scorable | not scorable | not scorable | not scorable |
| #### Bn-scaff_15712_5-p11963 A-genome specific (napus-rapa)    | 0.9736842    | 0.7947918    | not scorable | not scorable | 1            | 0.7032726    |
| #### Bn-scaff_15712_5-p12417C-genome specific (napus-oleracea) | 0.9928229    | 0.793542     | 1            | 0.746033     | not scorable | not scorable |
| #### Bn-scaff_15712_5-p13064C-genome specific (napus-oleracea) | 0.9928229    | 0.9079438    | 1            | 0.8374124    | not scorable | not scorable |
| #### Bn-scaff_15712_5-p13717C-genome specific (napus-oleracea) | 0.9928229    | 0.9189959    | 1            | 0.8246316    | not scorable | not scorable |
| #### Bn-scaff_15712_5-p13720C-genome specific (napus-oleracea) | 0.9904306    | 0.8297564    | 1            | 0.8492721    | not scorable | not scorable |
| #### Bn-scaff_15712_5-p15088C-genome specific (napus-oleracea) | 0.9928229    | 0.8547394    | 1            | 0.8316999    | not scorable | not scorable |
| #### Bn-scaff_15712_5-p15116C-genome specific (napus-oleracea) | 0.9904306    | 0.8088734    | 1            | 0.7773242    | not scorable | not scorable |
| #### Bn-scaff_15712_5-p15117C-genome specific (napus-oleracea) | 0.9880383    | 0.7872539    | 1            | 0.7867026    | not scorable | not scorable |
| #### Bn-scaff_15712_5-p16810C-genome specific (napus-oleracea) | 0.9904306    | 0.9124792    | 0.9689922    | 0.8849232    | not scorable | not scorable |
| #### Bn-scaff_15712_5-p16823C-genome specific (napus-oleracea) | 0.9904306    | 0.895646     | 0.9689922    | 0.901428     | not scorable | not scorable |
| #### Bn-scaff_15712_5-p16859 all not scorable                  | not scorable | not scorable | not scorable | not scorable | not scorable | not scorable |
| #### Bn-scaff_15712_5-p16891C-genome specific (napus-oleracea) | 0.9880383    | 0.8629723    | 0.9689922    | 0.9013923    | not scorable | not scorable |
| #### Bn-scaff_15712_5-p17640C-genome specific (napus-oleracea) | 0.9928229    | 0.7227733    | 1            | 0.8097162    | not scorable | not scorable |

|                                                                 |              |              |           |           |              |              |
|-----------------------------------------------------------------|--------------|--------------|-----------|-----------|--------------|--------------|
| #### Bn-scaff_15712_5-p1779 C-genome specific (napus-oleracea)  | 0.9928229    | 0.8600844    | 0.9689922 | 0.7748231 | not scorable | not scorable |
| #### Bn-scaff_15712_5-p17832 C-genome specific (napus-oleracea) | 0.9856459    | 0.8129197    | 0.9689922 | 0.8635404 | not scorable | not scorable |
| #### Bn-scaff_15712_5-p18615 C-genome specific (napus-oleracea) | 0.9760765    | 0.7620827    | 0.9767442 | 0.7652344 | not scorable | not scorable |
| #### Bn-scaff_15712_5-p18642 C-genome specific (napus-oleracea) | 0.9808612    | 0.7444389    | 0.9689922 | 0.81305   | not scorable | not scorable |
| #### Bn-scaff_15712_5-p18658 C-genome specific (napus-oleracea) | 0.9856459    | 0.8291974    | 0.9689922 | 0.8138442 | not scorable | not scorable |
| #### Bn-scaff_15712_5-p19185 C-genome specific (napus-oleracea) | 0.9880383    | 0.7502717    | 0.9689922 | 0.6685791 | not scorable | not scorable |
| #### Bn-scaff_15712_5-p20153 C-genome specific (napus-oleracea) | 0.9904306    | 0.7833138    | 0.9922481 | 0.8558815 | not scorable | not scorable |
| #### Bn-scaff_15712_5-p20229 C-genome specific (napus-oleracea) | 0.9904306    | 0.8928397    | 0.9457364 | 0.7217167 | not scorable | not scorable |
| #### Bn-scaff_15712_5-p20246 C-genome specific (napus-oleracea) | 0.9880383    | 0.846779     | 1         | 0.8396915 | not scorable | not scorable |
| #### Bn-scaff_15712_5-p20254 C-genome specific (napus-oleracea) | 0.9880383    | 0.8563085    | 1         | 0.8701028 | not scorable | not scorable |
| #### Bn-scaff_15712_5-p20262 C-genome specific (napus-oleracea) | 0.9928229    | 0.915528     | 1         | 0.8642169 | not scorable | not scorable |
| #### Bn-scaff_15712_5-p20803 C-genome specific (napus-oleracea) | 0.9856459    | 0.782601     | 1         | 0.7783959 | not scorable | not scorable |
| #### Bn-scaff_15712_5-p21829 C-genome specific (napus-oleracea) | 0.9904306    | 0.8767771    | 0.9612403 | 0.8233824 | not scorable | not scorable |
| #### Bn-scaff_15712_5-p22175 C-genome specific (napus-oleracea) | 0.9856459    | 0.7731622    | 0.9689922 | 0.8304465 | not scorable | not scorable |
| #### Bn-scaff_15712_5-p22214 C-genome specific (napus-oleracea) | 0.9928229    | 0.9172509    | 0.9457364 | 0.837648  | not scorable | not scorable |
| #### Bn-scaff_15712_5-p22248 C-genome specific (napus-oleracea) | 0.9880383    | 0.8586637    | 0.9457364 | 0.8632017 | not scorable | not scorable |
| #### Bn-scaff_15712_5-p22248 C-genome specific (napus-oleracea) | 0.9928229    | 0.8904835    | 0.9457364 | 0.8331404 | not scorable | not scorable |
| #### Bn-scaff_15712_5-p22271 C-genome specific (napus-oleracea) | 0.9904306    | 0.8547245    | 0.9457364 | 0.7309838 | not scorable | not scorable |
| #### Bn-scaff_15712_5-p22337 C-genome specific (napus-oleracea) | 0.9904306    | 0.6701074    | 0.9844961 | 0.862936  | not scorable | not scorable |
| #### Bn-scaff_15712_5-p22343 C-genome specific (oleracea only)  | not scorable | not scorable | 1         | 0.6964734 | not scorable | not scorable |
| #### Bn-scaff_15712_5-p22828 C-genome specific (napus-oleracea) | 0.9880383    | 0.8429673    | 0.9689922 | 0.8490655 | not scorable | not scorable |
| #### Bn-scaff_15712_5-p22895 C-genome specific (napus-oleracea) | 0.9928229    | 0.9197085    | 0.9612403 | 0.8988141 | not scorable | not scorable |
| #### Bn-scaff_15712_5-p22909 C-genome specific (napus-oleracea) | 0.9928229    | 0.8526352    | 0.9612403 | 0.8548937 | not scorable | not scorable |
| #### Bn-scaff_15712_5-p23682 C-genome specific (napus-oleracea) | 0.9808612    | 0.5999284    | 0.9689922 | 0.7521721 | not scorable | not scorable |
| #### Bn-scaff_15712_5-p23719 C-genome specific (napus-oleracea) | 0.9928229    | 0.9095485    | 0.9689922 | 0.8721992 | not scorable | not scorable |
| #### Bn-scaff_15712_5-p23742 C-genome specific (napus-oleracea) | 0.9904306    | 0.8691443    | 0.9689922 | 0.8736063 | not scorable | not scorable |
| #### Bn-scaff_15712_5-p23778 C-genome specific (napus-oleracea) | 0.9880383    | 0.8686814    | 0.9689922 | 0.8170699 | not scorable | not scorable |
| #### Bn-scaff_15712_5-p23792 C-genome specific (napus-oleracea) | 0.9928229    | 0.802568     | 0.9689922 | 0.753091  | not scorable | not scorable |
| #### Bn-scaff_15712_5-p23827 C-genome specific (napus-oleracea) | 0.9928229    | 0.9251885    | 0.9767442 | 0.8953093 | not scorable | not scorable |
| #### Bn-scaff_15712_5-p23844 C-genome specific (napus-oleracea) | 0.9928229    | 0.8860492    | 0.9689922 | 0.8227398 | not scorable | not scorable |
| #### Bn-scaff_15712_5-p23878 C-genome specific (napus-oleracea) | 0.9904306    | 0.897532     | 0.9689922 | 0.8152878 | not scorable | not scorable |
| #### Bn-scaff_15712_5-p23925 C-genome specific (napus-oleracea) | 0.9904306    | 0.8788755    | 0.9689922 | 0.9223233 | not scorable | not scorable |
| #### Bn-scaff_15712_5-p23928 C-genome specific (napus-oleracea) | 0.9928229    | 0.8848003    | 0.9767442 | 0.8491545 | not scorable | not scorable |

|                                                                 |              |              |              |              |              |              |
|-----------------------------------------------------------------|--------------|--------------|--------------|--------------|--------------|--------------|
| #### Bn-scaff_15712_5-p23946 C-genome specific (napus-oleracea) | 0.9904306    | 0.8494958    | 0.9689922    | 0.7311122    | not scorable | not scorable |
| #### Bn-scaff_15712_5-p23966 C-genome specific (napus-oleracea) | 0.9904306    | 0.8916957    | 0.9689922    | 0.8164383    | not scorable | not scorable |
| #### Bn-scaff_15712_5-p23995 C-genome specific (napus-oleracea) | 0.9880383    | 0.8539087    | 0.9689922    | 0.8142641    | not scorable | not scorable |
| #### Bn-scaff_15712_5-p24091 C-genome specific (napus-oleracea) | 0.9928229    | 0.8864487    | 0.9689922    | 0.8934444    | not scorable | not scorable |
| #### Bn-scaff_15712_5-p24121 C-genome specific (napus-oleracea) | 0.9928229    | 0.8709083    | 0.9689922    | 0.9272929    | not scorable | not scorable |
| #### Bn-scaff_15712_5-p24397 C-genome specific (napus-oleracea) | 0.9880383    | 0.836688     | 1            | 0.8079875    | not scorable | not scorable |
| #### Bn-scaff_15712_5-p24547 napus specific                     | 0.9904306    | 0.5322253    | not scorable | not scorable | not scorable | not scorable |
| #### Bn-scaff_15712_5-p24825 C-genome specific (napus-oleracea) | 0.9904306    | 0.8811724    | 0.9534883    | 0.7815951    | not scorable | not scorable |
| #### Bn-scaff_15712_5-p25718 C-genome specific (napus-oleracea) | 0.9904306    | 0.8795897    | 1            | 0.8580914    | not scorable | not scorable |
| #### Bn-scaff_15712_5-p26376 C-genome specific (oleracea only)  | not scorable | not scorable | 1            | 0.873587     | not scorable | not scorable |
| #### Bn-scaff_15712_5-p26463 C-genome specific (napus-oleracea) | 0.9880383    | 0.7645022    | 1            | 0.7242132    | not scorable | not scorable |
| #### Bn-scaff_15712_5-p26471 C-genome specific (napus-oleracea) | 0.9880383    | 0.7852626    | 1            | 0.7522572    | not scorable | not scorable |
| #### Bn-scaff_15712_5-p26497 C-genome specific (napus-oleracea) | 0.9856459    | 0.841338     | 1            | 0.8165699    | not scorable | not scorable |
| #### Bn-scaff_15712_5-p26505 C-genome specific (napus-oleracea) | 0.9880383    | 0.7772054    | 1            | 0.7684287    | not scorable | not scorable |
| #### Bn-scaff_15712_5-p26592 C-genome specific (napus-oleracea) | 0.9832536    | 0.7147414    | 1            | 0.7329642    | not scorable | not scorable |
| #### Bn-scaff_15712_5-p26601 C-genome specific (napus-oleracea) | 0.9808612    | 0.7309077    | 1            | 0.7256762    | not scorable | not scorable |
| #### Bn-scaff_15712_5-p26615 C-genome specific (napus-oleracea) | 0.9856459    | 0.7115297    | 1            | 0.6648405    | not scorable | not scorable |
| #### Bn-scaff_15712_5-p26674 genome unspecific (all in)         | 0.9904306    | 0.6300964    | 0.9844961    | 0.6718522    | 0.9834711    | 0.5369107    |
| #### Bn-scaff_15712_5-p26697 C-genome specific (napus-oleracea) | 0.9904306    | 0.851753     | 1            | 0.8530504    | not scorable | not scorable |
| #### Bn-scaff_15712_5-p26713 C-genome specific (napus-oleracea) | 0.9880383    | 0.798623     | 1            | 0.7307172    | not scorable | not scorable |
| #### Bn-scaff_15712_5-p26764 C-genome specific (napus-oleracea) | 0.9904306    | 0.6672788    | 1            | 0.6369036    | not scorable | not scorable |
| #### Bn-scaff_15712_5-p26777 napus specific                     | 0.9880383    | 0.762603     | not scorable | not scorable | not scorable | not scorable |
| #### Bn-scaff_15712_5-p26803 C-genome specific (napus-oleracea) | 0.9880383    | 0.7381893    | 1            | 0.7087952    | not scorable | not scorable |
| #### Bn-scaff_15712_5-p26915 C-genome specific (napus-oleracea) | 0.9856459    | 0.8478034    | 0.9767442    | 0.7420782    | not scorable | not scorable |
| #### Bn-scaff_15712_5-p26922 C-genome specific (napus-oleracea) | 0.9784689    | 0.7341195    | 0.9922481    | 0.7995139    | not scorable | not scorable |
| #### Bn-scaff_15712_5-p26932 C-genome specific (napus-oleracea) | 0.9808612    | 0.7391033    | 0.9922481    | 0.8063174    | not scorable | not scorable |
| #### Bn-scaff_15712_5-p27646 C-genome specific (napus-oleracea) | 0.9808612    | 0.8356346    | 0.9689922    | 0.7700154    | not scorable | not scorable |
| #### Bn-scaff_15712_5-p27652 C-genome specific (napus-oleracea) | 0.9832536    | 0.7465351    | 0.9534883    | 0.6302902    | not scorable | not scorable |
| #### Bn-scaff_15712_5-p27662 C-genome specific (napus-oleracea) | 0.9832536    | 0.783868     | 0.9612403    | 0.6912196    | not scorable | not scorable |
| #### Bn-scaff_15712_5-p27667 C-genome specific (napus-oleracea) | 0.9832536    | 0.9233747    | 0.9689922    | 0.8735234    | not scorable | not scorable |
| #### Bn-scaff_15712_5-p27699 C-genome specific (napus-oleracea) | 0.9712918    | 0.3694704    | 0.9302326    | 0.4397239    | not scorable | not scorable |
| #### Bn-scaff_15712_5-p27717 C-genome specific (napus-oleracea) | 0.9808612    | 0.9168051    | 0.9457364    | 0.729017     | not scorable | not scorable |
| #### Bn-scaff_15712_5-p27765 C-genome specific (napus-oleracea) | 0.9784689    | 0.7660481    | 0.9689922    | 0.7214007    | not scorable | not scorable |

|                                                                 |              |              |              |              |              |              |
|-----------------------------------------------------------------|--------------|--------------|--------------|--------------|--------------|--------------|
| #### Bn-scaff_15712_5-p27772 C-genome specific (napus-oleracea) | 0.9808612    | 0.7567793    | 0.9689922    | 0.674378     | not scorable | not scorable |
| #### Bn-scaff_15712_5-p27784 C-genome specific (napus-oleracea) | 0.9784689    | 0.8039747    | 0.9689922    | 0.7543278    | not scorable | not scorable |
| #### Bn-scaff_15712_5-p29024 C-genome specific (napus-oleracea) | 0.9856459    | 0.7135343    | 1            | 0.7057259    | not scorable | not scorable |
| #### Bn-scaff_15712_5-p30222 C-genome specific (napus-oleracea) | 0.9928229    | 0.8813893    | 0.9922481    | 0.8897347    | not scorable | not scorable |
| #### Bn-scaff_15712_5-p30230 C-genome specific (napus-oleracea) | 0.9856459    | 0.8450078    | 1            | 0.7838182    | not scorable | not scorable |
| #### Bn-scaff_15712_5-p30234 napus specific                     | 0.9904306    | 0.8444183    | not scorable | not scorable | not scorable | not scorable |
| #### Bn-scaff_15712_5-p30672 C-genome specific (napus-oleracea) | 0.9904306    | 0.8309312    | 1            | 0.763175     | not scorable | not scorable |
| #### Bn-scaff_15712_5-p30675 napus specific                     | 0.9928229    | 0.9283756    | not scorable | not scorable | not scorable | not scorable |
| #### Bn-scaff_15712_5-p30856 C-genome specific (napus-oleracea) | 0.9928229    | 0.9186146    | 1            | 0.877709     | not scorable | not scorable |
| #### Bn-scaff_15712_5-p31245 C-genome specific (napus-oleracea) | 0.9904306    | 0.9211998    | 0.9922481    | 0.8007241    | not scorable | not scorable |
| #### Bn-scaff_15712_5-p31315 C-genome specific (napus-oleracea) | 0.9904306    | 0.7769946    | 0.9767442    | 0.703596     | not scorable | not scorable |
| #### Bn-scaff_15712_5-p31323 C-genome specific (napus-oleracea) | 0.9928229    | 0.8617783    | 1            | 0.8018759    | not scorable | not scorable |
| #### Bn-scaff_15712_5-p31369 C-genome specific (napus-oleracea) | 0.9928229    | 0.7595492    | 0.9844961    | 0.7065899    | not scorable | not scorable |
| #### Bn-scaff_15712_5-p31532 C-genome specific (napus-oleracea) | 0.9904306    | 0.8909506    | 1            | 0.8796859    | not scorable | not scorable |
| #### Bn-scaff_15712_5-p31811 C-genome specific (oleracea only)  | not scorable | not scorable | 0.9302326    | 0.80262      | not scorable | not scorable |
| #### Bn-scaff_15712_5-p33272 C-genome specific (napus-oleracea) | 0.6411483    | 0.7053532    | 0.8294573    | 0.7194678    | not scorable | not scorable |
| #### Bn-scaff_15712_5-p34437 C-genome specific (napus-oleracea) | 0.9162679    | 0.800707     | 0.9844961    | 0.8433032    | not scorable | not scorable |
| #### Bn-scaff_15712_5-p35584 A-genome specific (napus-rapa)     | 0.9760765    | 0.390434     | not scorable | not scorable | 0.9834711    | 0.6116744    |
| #### Bn-scaff_15712_5-p38476 genome unspecific (oleracea-rapa)  | not scorable | not scorable | 1            | 0.8157367    | 1            | 0.7275822    |
| #### Bn-scaff_15712_5-p38920 genome unspecific (oleracea-rapa)  | not scorable | not scorable | 1            | 0.7168585    | 0.9834711    | 0.9175813    |
| #### Bn-scaff_15712_5-p40206 C-genome specific (napus-oleracea) | 0.9904306    | 0.9236096    | 0.9922481    | 0.8222175    | not scorable | not scorable |
| #### Bn-scaff_15712_5-p41308 C-genome specific (napus-oleracea) | 0.9162679    | 0.8031629    | 1            | 0.8443334    | not scorable | not scorable |
| #### Bn-scaff_15712_5-p42050 C-genome specific (napus-oleracea) | 0.9162679    | 0.8056173    | 1            | 0.8478113    | not scorable | not scorable |
| #### Bn-scaff_15712_5-p42317 napus specific                     | 0.9856459    | 0.8233621    | not scorable | not scorable | not scorable | not scorable |
| #### Bn-scaff_15712_5-p42407 C-genome specific (napus-oleracea) | 0.9832536    | 0.7501382    | 0.9922481    | 0.6500126    | not scorable | not scorable |
| #### Bn-scaff_15712_5-p42612 C-genome specific (napus-oleracea) | 0.923445     | 0.8595685    | 1            | 0.8324659    | not scorable | not scorable |
| #### Bn-scaff_15712_5-p42717 napus specific                     | 0.9210526    | 0.8113159    | not scorable | not scorable | not scorable | not scorable |
| #### Bn-scaff_15712_5-p44278 C-genome specific (napus-oleracea) | 0.9186603    | 0.8893547    | 0.9844961    | 0.7169277    | not scorable | not scorable |
| #### Bn-scaff_15712_5-p44279 C-genome specific (napus-oleracea) | 0.9162679    | 0.8681472    | 0.9922481    | 0.8172711    | not scorable | not scorable |
| #### Bn-scaff_15712_5-p44301 C-genome specific (napus-oleracea) | 0.9186603    | 0.7390075    | 1            | 0.6948308    | not scorable | not scorable |
| #### Bn-scaff_15712_5-p44373 napus specific                     | 0.9210526    | 0.7860651    | not scorable | not scorable | not scorable | not scorable |
| #### Bn-scaff_15712_5-p44553 napus specific                     | 0.9210526    | 0.7529421    | not scorable | not scorable | not scorable | not scorable |
| #### Bn-scaff_15712_5-p44559 C-genome specific (napus-oleracea) | 0.9162679    | 0.8095989    | 0.9844961    | 0.8023661    | not scorable | not scorable |

|                                                                |              |              |              |              |              |              |
|----------------------------------------------------------------|--------------|--------------|--------------|--------------|--------------|--------------|
| #### Bn-scaff_15712_5-p45361C-genome specific (napus-oleracea) | 0.9904306    | 0.8462995    | 0.9922481    | 0.7145084    | not scorable | not scorable |
| #### Bn-scaff_15712_5-p45552C-genome specific (napus-oleracea) | 0.9186603    | 0.7668788    | 0.9844961    | 0.7503124    | not scorable | not scorable |
| #### Bn-scaff_15712_5-p46941all not scorable                   | not scorable | not scorable | not scorable | not scorable | not scorable | not scorable |
| #### Bn-scaff_15712_5-p49452genome unspecific (all in)         | 0.9617225    | 0.4047033    | 0.9689922    | 0.5508316    | 1            | 0.9022775    |
| #### Bn-scaff_15712_5-p49456C-genome specific (napus-oleracea) | 0.9186603    | 0.7855116    | 1            | 0.7188482    | not scorable | not scorable |
| #### Bn-scaff_15712_5-p50347C-genome specific (napus-oleracea) | 0.9904306    | 0.7504035    | 1            | 0.7643198    | not scorable | not scorable |
| #### Bn-scaff_15712_5-p50478C-genome specific (napus-oleracea) | 0.9186603    | 0.8688973    | 1            | 0.8577759    | not scorable | not scorable |
| #### Bn-scaff_15712_5-p52076C-genome specific (napus-oleracea) | 0.9210526    | 0.8594856    | 1            | 0.8171958    | not scorable | not scorable |
| #### Bn-scaff_15712_5-p53061C-genome specific (napus-oleracea) | 0.9856459    | 0.7627523    | 0.9922481    | 0.7085232    | not scorable | not scorable |
| #### Bn-scaff_15712_5-p54157C-genome specific (napus-oleracea) | 0.9138756    | 0.7254947    | 0.9922481    | 0.7739704    | not scorable | not scorable |
| #### Bn-scaff_15712_5-p54164C-genome specific (napus-oleracea) | 0.9210526    | 0.670363     | 0.9922481    | 0.7034022    | not scorable | not scorable |
| #### Bn-scaff_15712_5-p54344all not scorable                   | not scorable | not scorable | not scorable | not scorable | not scorable | not scorable |
| #### Bn-scaff_15712_5-p54420C-genome specific (oleracea only)  | not scorable | not scorable | 1            | 0.7608932    | not scorable | not scorable |
| #### Bn-scaff_15712_5-p58164C-genome specific (napus-oleracea) | 0.8995215    | 0.772637     | 0.9922481    | 0.7154919    | not scorable | not scorable |
| #### Bn-scaff_15712_5-p58171C-genome specific (napus-oleracea) | 0.9019139    | 0.8324489    | 0.9922481    | 0.8623519    | not scorable | not scorable |
| #### Bn-scaff_15712_5-p58194C-genome specific (napus-oleracea) | 0.8995215    | 0.8233361    | 0.9922481    | 0.8393613    | not scorable | not scorable |
| #### Bn-scaff_15712_5-p58218A-genome specific (napus-rapa)     | 0.9952153    | 0.382814     | not scorable | not scorable | 0.9752066    | 0.7483441    |
| #### Bn-scaff_15712_5-p60654napus specific                     | 0.6842105    | 0.7089435    | not scorable | not scorable | not scorable | not scorable |
| #### Bn-scaff_15712_5-p63081all not scorable                   | not scorable | not scorable | not scorable | not scorable | not scorable | not scorable |
| #### Bn-scaff_15712_5-p64731napus specific                     | 0.9401914    | 0.2523581    | not scorable | not scorable | not scorable | not scorable |
| #### Bn-scaff_15712_5-p64991genome unspecific (all in)         | 0.9856459    | 0.460281     | 1            | 0.8175959    | 1            | 0.9144461    |
| #### Bn-scaff_15712_5-p65296genome unspecific (oleracea-rapa)  | not scorable | not scorable | 1            | 0.6738692    | 1            | 0.6426485    |
| #### Bn-scaff_15712_5-p66661A-genome specific (napus-rapa)     | 0.9880383    | 0.2754244    | not scorable | not scorable | 1            | 0.7914145    |
| #### Bn-scaff_15712_5-p67204A-genome specific (napus-rapa)     | 0.9832536    | 0.6243092    | not scorable | not scorable | 0.9834711    | 0.5600239    |
| #### Bn-scaff_15712_5-p7269 C-genome specific (napus-oleracea) | 0.9928229    | 0.9021927    | 0.9844961    | 0.8010396    | not scorable | not scorable |
| #### Bn-scaff_15712_5-p74499C-genome specific (napus-oleracea) | 0.9019139    | 0.8968301    | 0.9922481    | 0.7943062    | not scorable | not scorable |
| #### Bn-scaff_15712_5-p74862C-genome specific (napus-oleracea) | 0.9904306    | 0.9045102    | 1            | 0.8550674    | not scorable | not scorable |
| #### Bn-scaff_15712_5-p75507C-genome specific (napus-oleracea) | 0.8947368    | 0.6991098    | 0.9844961    | 0.6841862    | not scorable | not scorable |
| #### Bn-scaff_15712_5-p7770 C-genome specific (napus-oleracea) | 0.9354067    | 0.4838798    | 0.9844961    | 0.4976535    | not scorable | not scorable |
| #### Bn-scaff_15712_5-p79546A-genome specific (rapa only)      | not scorable | not scorable | not scorable | not scorable | 1            | 0.6386266    |
| #### Bn-scaff_15712_5-p82387genome unspecific (oleracea-rapa)  | not scorable | not scorable | 1            | 0.308456     | 1            | 0.9118403    |
| #### Bn-scaff_15712_5-p87737C-genome specific (napus-oleracea) | 0.9928229    | 0.8767771    | 1            | 0.8973391    | not scorable | not scorable |
| #### Bn-scaff_15712_5-p89048C-genome specific (napus-oleracea) | 0.9928229    | 0.9480183    | 1            | 0.9086568    | not scorable | not scorable |

|                                                                 |              |              |              |              |              |              |
|-----------------------------------------------------------------|--------------|--------------|--------------|--------------|--------------|--------------|
| #### Bn-scaff_15712_5-p89345 all not scorable                   | not scorable | not scorable | not scorable | not scorable | not scorable | not scorable |
| #### Bn-scaff_15712_5-p89346 C-genome specific (napus-oleracea) | 0.9904306    | 0.84628      | 1            | 0.8942753    | not scorable | not scorable |
| #### Bn-scaff_15712_5-p89472 C-genome specific (napus-oleracea) | 0.9856459    | 0.839346     | 0.9379845    | 0.8114358    | not scorable | not scorable |
| #### Bn-scaff_15712_5-p90003 C-genome specific (napus-oleracea) | 0.9904306    | 0.9213631    | 0.9767442    | 0.8845167    | not scorable | not scorable |
| #### Bn-scaff_15712_5-p90412 C-genome specific (napus-oleracea) | 0.9928229    | 0.8863769    | 1            | 0.8227125    | not scorable | not scorable |
| #### Bn-scaff_15712_5-p90754 C-genome specific (napus-oleracea) | 0.9904306    | 0.8859758    | 1            | 0.8312172    | not scorable | not scorable |
| #### Bn-scaff_15712_5-p90931 C-genome specific (napus-oleracea) | 0.9904306    | 0.8733531    | 1            | 0.7447327    | not scorable | not scorable |
| #### Bn-scaff_15712_5-p94156 C-genome specific (napus-oleracea) | 0.9186603    | 0.7945542    | 1            | 0.8722882    | not scorable | not scorable |
| #### Bn-scaff_15712_5-p94288 C-genome specific (napus-oleracea) | 0.9210526    | 0.8706975    | 1            | 0.7772711    | not scorable | not scorable |
| #### Bn-scaff_15712_5-p95045 C-genome specific (napus-oleracea) | 0.9210526    | 0.82326      | 1            | 0.827772     | not scorable | not scorable |
| #### Bn-scaff_15712_5-p99121 napus specific                     | 0.923445     | 0.8833905    | not scorable | not scorable | not scorable | not scorable |
| #### Bn-scaff_15712_5-p99143 all not scorable                   | not scorable | not scorable | not scorable | not scorable | not scorable | not scorable |
| #### Bn-scaff_15712_6-p10050 C-genome specific (napus-oleracea) | 0.9904306    | 0.854651     | 0.9922481    | 0.8142844    | not scorable | not scorable |
| #### Bn-scaff_15712_6-p10259 C-genome specific (napus-oleracea) | 0.9856459    | 0.6667007    | 0.9689922    | 0.7448407    | not scorable | not scorable |
| #### Bn-scaff_15712_6-p10293 napus specific                     | 0.9784689    | 0.3703023    | not scorable | not scorable | not scorable | not scorable |
| #### Bn-scaff_15712_6-p10591 C-genome specific (napus-oleracea) | 0.9928229    | 0.7803772    | 0.9767442    | 0.790824     | not scorable | not scorable |
| #### Bn-scaff_15712_6-p10980 C-genome specific (napus-oleracea) | 0.9784689    | 0.7384287    | 0.9844961    | 0.778285     | not scorable | not scorable |
| #### Bn-scaff_15712_6-p10989 C-genome specific (napus-oleracea) | 0.9904306    | 0.7148657    | 0.9689922    | 0.7635617    | not scorable | not scorable |
| #### Bn-scaff_15712_6-p10991 C-genome specific (napus-oleracea) | 0.9832536    | 0.6660292    | 0.9534883    | 0.6864532    | not scorable | not scorable |
| #### Bn-scaff_15712_6-p11101 C-genome specific (napus-oleracea) | 0.9784689    | 0.704579     | 1            | 0.7352977    | not scorable | not scorable |
| #### Bn-scaff_15712_6-p11188 C-genome specific (napus-oleracea) | 0.9856459    | 0.7195401    | 0.9922481    | 0.8190739    | not scorable | not scorable |
| #### Bn-scaff_15712_6-p11191 C-genome specific (napus-oleracea) | 0.9856459    | 0.6904757    | 0.9844961    | 0.7209949    | not scorable | not scorable |
| #### Bn-scaff_15712_6-p11195 C-genome specific (napus-oleracea) | 0.9856459    | 0.7609897    | 1            | 0.8127       | not scorable | not scorable |
| #### Bn-scaff_15712_6-p11622 C-genome specific (napus-oleracea) | 0.9593301    | 0.7161289    | 0.9844961    | 0.7829009    | not scorable | not scorable |
| #### Bn-scaff_15712_6-p11683 C-genome specific (napus-oleracea) | 0.9904306    | 0.752745     | 0.9767442    | 0.8525977    | not scorable | not scorable |
| #### Bn-scaff_15712_6-p11701 C-genome specific (napus-oleracea) | 0.9808612    | 0.7647805    | 1            | 0.8379771    | not scorable | not scorable |
| #### Bn-scaff_15712_6-p11703 genome unspecific (oleracea-rapa)  | not scorable | not scorable | 1            | 0.736126     | 1            | 0.8571479    |
| #### Bn-scaff_15712_6-p11821 C-genome specific (napus-oleracea) | 0.9569378    | 0.7078518    | 0.9302326    | 0.8082984    | not scorable | not scorable |
| #### Bn-scaff_15712_6-p11985 C-genome specific (napus-oleracea) | 0.9832536    | 0.7688046    | 0.9844961    | 0.738979     | not scorable | not scorable |
| #### Bn-scaff_15712_6-p11986 C-genome specific (napus-oleracea) | 0.9784689    | 0.7737532    | 0.9922481    | 0.7928686    | not scorable | not scorable |
| #### Bn-scaff_15712_6-p12001 C-genome specific (napus-oleracea) | 0.9736842    | 0.752907     | 0.9922481    | 0.7244166    | not scorable | not scorable |
| #### Bn-scaff_15712_6-p12054 C-genome specific (napus-oleracea) | 0.9665072    | 0.7584487    | 0.8992248    | 0.831663     | not scorable | not scorable |
| #### Bn-scaff_15712_6-p12056 C-genome specific (napus-oleracea) | 0.9784689    | 0.7717099    | 0.9457364    | 0.7955169    | not scorable | not scorable |

|                                                                 |              |              |              |              |              |              |
|-----------------------------------------------------------------|--------------|--------------|--------------|--------------|--------------|--------------|
| #### Bn-scaff_15712_6-p12062 C-genome specific (napus-oleracea) | 0.9688995    | 0.7666798    | 0.8837209    | 0.7495541    | not scorable | not scorable |
| #### Bn-scaff_15712_6-p12082 C-genome specific (napus-oleracea) | 0.9856459    | 0.7377868    | 0.9767442    | 0.7169043    | not scorable | not scorable |
| #### Bn-scaff_15712_6-p12094 C-genome specific (napus-oleracea) | 0.9808612    | 0.7367703    | 0.9689922    | 0.7186342    | not scorable | not scorable |
| #### Bn-scaff_15712_6-p12272 genome unspecific (all in)         | 0.9736842    | 0.6123807    | 0.9767442    | 0.7842588    | 1            | 0.9335724    |
| #### Bn-scaff_15712_6-p12412 C-genome specific (napus-oleracea) | 0.9784689    | 0.7405179    | 0.9689922    | 0.711874     | not scorable | not scorable |
| #### Bn-scaff_15712_6-p12489 C-genome specific (napus-oleracea) | 0.9856459    | 0.7115141    | 0.9689922    | 0.6945985    | not scorable | not scorable |
| #### Bn-scaff_15712_6-p12549 C-genome specific (napus-oleracea) | 0.9904306    | 0.6726199    | 0.9922481    | 0.716031     | not scorable | not scorable |
| #### Bn-scaff_15712_6-p12605 C-genome specific (napus-oleracea) | 0.9952153    | 0.8566238    | 0.9922481    | 0.7871201    | not scorable | not scorable |
| #### Bn-scaff_15712_6-p12744 C-genome specific (napus-oleracea) | 0.9688995    | 0.7932432    | 0.7364341    | 0.8650698    | not scorable | not scorable |
| #### Bn-scaff_15712_6-p13341 C-genome specific (napus-oleracea) | 0.9688995    | 0.7772941    | 0.9844961    | 0.8088473    | not scorable | not scorable |
| #### Bn-scaff_15712_6-p13361 C-genome specific (napus-oleracea) | 0.715311     | 0.8247826    | 0.7751938    | 0.7591087    | not scorable | not scorable |
| #### Bn-scaff_15712_6-p13567 C-genome specific (napus-oleracea) | 0.9736842    | 0.7190298    | 0.9922481    | 0.7815371    | not scorable | not scorable |
| #### Bn-scaff_15712_6-p13592 C-genome specific (napus-oleracea) | 0.9832536    | 0.7266994    | 0.9844961    | 0.7644336    | not scorable | not scorable |
| #### Bn-scaff_15712_6-p13624 C-genome specific (napus-oleracea) | 0.9784689    | 0.7482963    | 0.9844961    | 0.7075962    | not scorable | not scorable |
| #### Bn-scaff_15712_6-p13660 C-genome specific (oleracea only)  | not scorable | not scorable | 0.9844961    | 0.793751     | not scorable | not scorable |
| #### Bn-scaff_15712_6-p13662 C-genome specific (napus-oleracea) | 0.9760765    | 0.7523403    | 0.9767442    | 0.7732549    | not scorable | not scorable |
| #### Bn-scaff_15712_6-p13692 C-genome specific (napus-oleracea) | 0.9856459    | 0.7672294    | 0.9689922    | 0.7933862    | not scorable | not scorable |
| #### Bn-scaff_15712_6-p15724 genome unspecific (all in)         | 0.9952153    | 0.3881479    | 1            | 0.8265413    | 0.9752066    | 0.824542     |
| #### Bn-scaff_15712_6-p15813 genome unspecific (oleracea-rapa)  | not scorable | not scorable | 1            | 0.7983918    | 0.9917355    | 0.674894     |
| #### Bn-scaff_15712_6-p18472 C-genome specific (napus-oleracea) | 0.9928229    | 0.8292843    | 0.9922481    | 0.7940474    | not scorable | not scorable |
| #### Bn-scaff_15712_6-p18632 C-genome specific (napus-oleracea) | 0.9856459    | 0.8092892    | 0.5581396    | 0.8953645    | not scorable | not scorable |
| #### Bn-scaff_15712_6-p19024 C-genome specific (napus-oleracea) | 0.9928229    | 0.8263893    | 0.9689922    | 0.8718999    | not scorable | not scorable |
| #### Bn-scaff_15712_6-p19036 C-genome specific (napus-oleracea) | 0.9928229    | 0.7745425    | 0.9689922    | 0.7039019    | not scorable | not scorable |
| #### Bn-scaff_15712_6-p20720 C-genome specific (napus-oleracea) | 0.9808612    | 0.3449836    | 0.9612403    | 0.4041652    | not scorable | not scorable |
| #### Bn-scaff_15712_6-p21422 C-genome specific (napus-oleracea) | 0.9928229    | 0.7777209    | 1            | 0.8452469    | not scorable | not scorable |
| #### Bn-scaff_15712_6-p24079 C-genome specific (napus-oleracea) | 0.9880383    | 0.7501774    | 0.9922481    | 0.6916426    | not scorable | not scorable |
| #### Bn-scaff_15712_6-p24101 C-genome specific (napus-oleracea) | 0.9928229    | 0.8218378    | 0.9922481    | 0.6948672    | not scorable | not scorable |
| #### Bn-scaff_15712_6-p25695 all not scorable                   | not scorable | not scorable | not scorable | not scorable | not scorable | not scorable |
| #### Bn-scaff_15712_6-p26178 C-genome specific (napus-oleracea) | 0.9904306    | 0.8839512    | 1            | 0.7497785    | not scorable | not scorable |
| #### Bn-scaff_15712_6-p27395 C-genome specific (napus-oleracea) | 0.9952153    | 0.8153456    | 0.9922481    | 0.7707668    | not scorable | not scorable |
| #### Bn-scaff_15712_6-p27396 C-genome specific (napus-oleracea) | 0.9880383    | 0.8187729    | 0.9534883    | 0.7976509    | not scorable | not scorable |
| #### Bn-scaff_15712_6-p27804 all not scorable                   | not scorable | not scorable | not scorable | not scorable | not scorable | not scorable |
| #### Bn-scaff_15712_6-p28261 C-genome specific (napus-oleracea) | 0.9904306    | 0.8338675    | 0.9922481    | 0.8404556    | not scorable | not scorable |

|                                                                |              |              |              |              |              |              |
|----------------------------------------------------------------|--------------|--------------|--------------|--------------|--------------|--------------|
| #### Bn-scaff_15712_6-p29247genome unspecific (all in)         | 0.9976076    | 0.405237     | 1            | 0.7793339    | 1            | 0.8945568    |
| #### Bn-scaff_15712_6-p33208C-genome specific (napus-oleracea) | 0.9976076    | 0.606315     | 1            | 0.8771975    | not scorable | not scorable |
| #### Bn-scaff_15712_6-p34596C-genome specific (napus-oleracea) | 0.9952153    | 0.8558089    | 1            | 0.831741     | not scorable | not scorable |
| #### Bn-scaff_15712_6-p34606C-genome specific (napus-oleracea) | 0.9928229    | 0.8086256    | 1            | 0.8891258    | not scorable | not scorable |
| #### Bn-scaff_15712_6-p35792genome unspecific (all in)         | 0.9976076    | 0.3849691    | 0.9922481    | 0.6616876    | 1            | 0.8334262    |
| #### Bn-scaff_15712_6-p42750napus specific                     | 0.9928229    | 0.7993041    | not scorable | not scorable | not scorable | not scorable |
| #### Bn-scaff_15712_6-p47029genome unspecific (all in)         | 0.9976076    | 0.2567285    | 1            | 0.7532444    | 1            | 0.8708652    |
| #### Bn-scaff_15712_6-p47046napus specific                     | 0.9976076    | 0.3514058    | not scorable | not scorable | not scorable | not scorable |
| #### Bn-scaff_15712_6-p55012C-genome specific (napus-oleracea) | 0.9928229    | 0.8255511    | 1            | 0.7201203    | not scorable | not scorable |
| #### Bn-scaff_15712_6-p56124genome unspecific (oleracea-rapa)  | not scorable | not scorable | 0.9922481    | 0.731727     | 1            | 0.8877609    |
| #### Bn-scaff_15712_6-p56149genome unspecific (all in)         | 0.9928229    | 0.3453749    | 1            | 0.7331263    | 1            | 0.8119806    |
| #### Bn-scaff_15712_6-p57172C-genome specific (napus-oleracea) | 0.9904306    | 0.7806745    | 1            | 0.8105904    | not scorable | not scorable |
| #### Bn-scaff_15712_6-p57292C-genome specific (napus-oleracea) | 0.9808612    | 0.7390814    | 0.9922481    | 0.7417953    | not scorable | not scorable |
| #### Bn-scaff_15712_6-p57472C-genome specific (napus-oleracea) | 0.9856459    | 0.7665607    | 0.9922481    | 0.7997397    | not scorable | not scorable |
| #### Bn-scaff_15712_6-p57483C-genome specific (napus-oleracea) | 0.9856459    | 0.772879     | 1            | 0.7197717    | not scorable | not scorable |
| #### Bn-scaff_15712_6-p57866C-genome specific (napus-oleracea) | 0.9880383    | 0.7790666    | 0.9844961    | 0.8053418    | not scorable | not scorable |
| #### Bn-scaff_15712_6-p58467C-genome specific (napus-oleracea) | 0.9856459    | 0.7606415    | 1            | 0.8115088    | not scorable | not scorable |
| #### Bn-scaff_15712_6-p58539C-genome specific (napus-oleracea) | 0.9784689    | 0.680814     | 1            | 0.7119981    | not scorable | not scorable |
| #### Bn-scaff_15712_6-p59085all not scorable                   | not scorable | not scorable | not scorable | not scorable | not scorable | not scorable |
| #### Bn-scaff_15712_6-p59243genome unspecific (all in)         | 0.9976076    | 0.3366905    | 0.7829458    | 0.8328116    | 0.9834711    | 0.7824477    |
| #### Bn-scaff_15712_6-p59927C-genome specific (napus-oleracea) | 0.9880383    | 0.7193738    | 1            | 0.738277     | not scorable | not scorable |
| #### Bn-scaff_15712_6-p59955C-genome specific (napus-oleracea) | 0.9784689    | 0.6257285    | 1            | 0.6965157    | not scorable | not scorable |
| #### Bn-scaff_15712_6-p59998C-genome specific (napus-oleracea) | 0.9856459    | 0.6941605    | 1            | 0.7424766    | not scorable | not scorable |
| #### Bn-scaff_15712_6-p60006C-genome specific (napus-oleracea) | 0.9928229    | 0.7289969    | 1            | 0.7622663    | not scorable | not scorable |
| #### Bn-scaff_15712_6-p60026C-genome specific (napus-oleracea) | 0.9856459    | 0.6830564    | 1            | 0.7098026    | not scorable | not scorable |
| #### Bn-scaff_15712_6-p60045C-genome specific (napus-oleracea) | 0.9736842    | 0.6180014    | 1            | 0.5900641    | not scorable | not scorable |
| #### Bn-scaff_15712_6-p60053C-genome specific (napus-oleracea) | 0.9832536    | 0.6421056    | 1            | 0.6685718    | not scorable | not scorable |
| #### Bn-scaff_15712_6-p60114C-genome specific (napus-oleracea) | 0.9736842    | 0.6796892    | 1            | 0.6755589    | not scorable | not scorable |
| #### Bn-scaff_15712_6-p60120C-genome specific (napus-oleracea) | 0.9880383    | 0.6962284    | 1            | 0.7018631    | not scorable | not scorable |
| #### Bn-scaff_15712_6-p60225C-genome specific (napus-oleracea) | 0.9856459    | 0.7459254    | 1            | 0.8034059    | not scorable | not scorable |
| #### Bn-scaff_15712_6-p61473C-genome specific (napus-oleracea) | 0.9904306    | 0.8016847    | 0.8604651    | 0.811019     | not scorable | not scorable |
| #### Bn-scaff_15712_6-p62058C-genome specific (napus-oleracea) | 0.9928229    | 0.7969667    | 0.9844961    | 0.7683403    | not scorable | not scorable |
| #### Bn-scaff_15712_6-p62116C-genome specific (napus-oleracea) | 0.9760765    | 0.7807363    | 0.9844961    | 0.7401723    | not scorable | not scorable |



|                                                                 |              |              |              |              |              |              |
|-----------------------------------------------------------------|--------------|--------------|--------------|--------------|--------------|--------------|
| #### Bn-scaff_15712_6-p62365 A-genome specific (napus-rapa)     | 0.9832536    | 0.292006     | not scorable | not scorable | 0.9834711    | 0.757777     |
| #### Bn-scaff_15712_6-p62906 C-genome specific (napus-oleracea) | 0.9832536    | 0.7684527    | 0.9767442    | 0.7908642    | not scorable | not scorable |
| #### Bn-scaff_15712_6-p64896 genome unspecific (all in)         | 0.9569378    | 0.4005885    | 0.9767442    | 0.8044701    | 0.9586777    | 0.6999906    |
| #### Bn-scaff_15712_6-p66210 genome unspecific (all in)         | 0.9832536    | 0.3873825    | 1            | 0.7950557    | 1            | 0.8289244    |
| #### Bn-scaff_15712_6-p76221 C-genome specific (napus-oleracea) | 0.9880383    | 0.7897554    | 0.9922481    | 0.8318305    | not scorable | not scorable |
| #### Bn-scaff_15712_6-p76398 C-genome specific (napus-oleracea) | 0.9856459    | 0.7890847    | 0.9767442    | 0.8124008    | not scorable | not scorable |
| #### Bn-scaff_15712_6-p76406 C-genome specific (napus-oleracea) | 0.9976076    | 0.7950347    | 0.9922481    | 0.815918     | not scorable | not scorable |
| #### Bn-scaff_15712_6-p76490 C-genome specific (napus-oleracea) | 0.9880383    | 0.7968587    | 0.9922481    | 0.7977241    | not scorable | not scorable |
| #### Bn-scaff_15712_6-p76491 C-genome specific (napus-oleracea) | 0.9904306    | 0.7700548    | 0.9922481    | 0.842741     | not scorable | not scorable |
| #### Bn-scaff_15712_6-p77578 C-genome specific (napus-oleracea) | 0.9904306    | 0.744899     | 0.9922481    | 0.7756447    | not scorable | not scorable |
| #### Bn-scaff_15712_6-p80197 C-genome specific (napus-oleracea) | 0.9880383    | 0.7927826    | 1            | 0.758837     | not scorable | not scorable |
| #### Bn-scaff_15712_6-p80270 genome unspecific (all in)         | 0.9928229    | 0.7113175    | 0.9844961    | 0.7132151    | 0.9917355    | 0.7738006    |
| #### Bn-scaff_15712_6-p80317 C-genome specific (napus-oleracea) | 0.9904306    | 0.8417646    | 0.9922481    | 0.7814676    | not scorable | not scorable |
| #### Bn-scaff_15712_6-p80338 genome unspecific (all in)         | 0.9952153    | 0.5023161    | 0.9922481    | 0.601063     | 1            | 0.7500918    |
| #### Bn-scaff_15712_6-p80380 A-genome specific (napus-rapa)     | 0.9976076    | 0.3645457    | not scorable | not scorable | 0.9917355    | 0.8155863    |
| #### Bn-scaff_15712_6-p81174 C-genome specific (napus-oleracea) | 0.9904306    | 0.8584728    | 0.9922481    | 0.7565035    | not scorable | not scorable |
| #### Bn-scaff_15712_6-p81280 C-genome specific (napus-oleracea) | 0.9928229    | 0.7656247    | 0.9922481    | 0.7248507    | not scorable | not scorable |
| #### Bn-scaff_15712_6-p81307 C-genome specific (napus-oleracea) | 0.9832536    | 0.7938612    | 0.9922481    | 0.7297593    | not scorable | not scorable |
| #### Bn-scaff_15712_6-p81704 C-genome specific (napus-oleracea) | 0.9880383    | 0.802458     | 0.9844961    | 0.7852947    | not scorable | not scorable |
| #### Bn-scaff_15712_6-p83451 C-genome specific (napus-oleracea) | 0.9856459    | 0.8487641    | 1            | 0.8012401    | not scorable | not scorable |
| #### Bn-scaff_15712_6-p83457 C-genome specific (napus-oleracea) | 0.9832536    | 0.8275521    | 1            | 0.7930965    | not scorable | not scorable |
| #### Bn-scaff_15712_6-p83457 C-genome specific (napus-oleracea) | 0.9856459    | 0.842021     | 0.9844961    | 0.7981291    | not scorable | not scorable |
| #### Bn-scaff_15712_6-p83645 C-genome specific (napus-oleracea) | 0.9904306    | 0.8004723    | 1            | 0.8047553    | not scorable | not scorable |
| #### Bn-scaff_15712_6-p85274 C-genome specific (napus-oleracea) | 0.9880383    | 0.8480265    | 0.9922481    | 0.8401484    | not scorable | not scorable |
| #### Bn-scaff_15712_6-p86575 all not scorable                   | not scorable | not scorable | not scorable | not scorable | not scorable | not scorable |
| #### Bn-scaff_15712_6-p93223 C-genome specific (napus-oleracea) | 0.9856459    | 0.8580345    | 1            | 0.8341933    | not scorable | not scorable |
| #### Bn-scaff_15712_6-p93441 C-genome specific (napus-oleracea) | 0.9928229    | 0.8498252    | 0.9922481    | 0.8318586    | not scorable | not scorable |
| #### Bn-scaff_15712_6-p9442 napus specific                      | 0.9832536    | 0.7521467    | not scorable | not scorable | not scorable | not scorable |
| #### Bn-scaff_15712_6-p97643 C-genome specific (napus-oleracea) | 0.9952153    | 0.8499318    | 0.9922481    | 0.8136267    | not scorable | not scorable |
| #### Bn-scaff_15712_7-p11566 C-genome specific (napus-oleracea) | 1            | 0.8260419    | 1            | 0.8707518    | not scorable | not scorable |
| #### Bn-scaff_15712_7-p11655 C-genome specific (napus-oleracea) | 1            | 0.9286593    | 1            | 0.9061558    | not scorable | not scorable |
| #### Bn-scaff_15712_7-p11686 C-genome specific (napus-oleracea) | 1            | 0.8785784    | 1            | 0.8496686    | not scorable | not scorable |
| #### Bn-scaff_15712_7-p3111 C-genome specific (napus-oleracea)  | 1            | 0.8733574    | 1            | 0.8496981    | not scorable | not scorable |

|                                                                 |              |              |              |              |              |              |
|-----------------------------------------------------------------|--------------|--------------|--------------|--------------|--------------|--------------|
| #### Bn-scaff_15712_7-p3451 C-genome specific (napus-oleracea)  | 0.9952153    | 0.8574322    | 1            | 0.8026925    | not scorable | not scorable |
| #### Bn-scaff_15712_7-p3492 C-genome specific (napus-oleracea)  | 1            | 0.895905     | 1            | 0.8440294    | not scorable | not scorable |
| #### Bn-scaff_15712_7-p3586 C-genome specific (napus-oleracea)  | 1            | 0.9020342    | 1            | 0.8546827    | not scorable | not scorable |
| #### Bn-scaff_15712_7-p53042 C-genome specific (oleracea only)  | not scorable | not scorable | 0.9922481    | 0.4212619    | not scorable | not scorable |
| #### Bn-scaff_15712_7-p56783 C-genome specific (napus-oleracea) | 1            | 0.3549555    | 0.8449612    | 0.3149613    | not scorable | not scorable |
| #### Bn-scaff_15712_7-p57117 C-genome specific (napus-oleracea) | 0.9641148    | 0.1687513    | 1            | 0.6430234    | not scorable | not scorable |
| #### Bn-scaff_15712_7-p57159 napus specific                     | 0.9760765    | 0.3564094    | not scorable | not scorable | not scorable | not scorable |
| #### Bn-scaff_15712_7-p57282 napus specific                     | 0.9760765    | 0.2551034    | not scorable | not scorable | not scorable | not scorable |
| #### Bn-scaff_15712_7-p57348 C-genome specific (napus-oleracea) | 1            | 0.3826012    | 0.9922481    | 0.2637565    | not scorable | not scorable |
| #### Bn-scaff_15712_7-p58034 all not scorable                   | not scorable | not scorable | not scorable | not scorable | not scorable | not scorable |
| #### Bn-scaff_15712_7-p58147 C-genome specific (napus-oleracea) | 0.9808612    | 0.4148616    | 1            | 0.7000968    | not scorable | not scorable |
| #### Bn-scaff_15712_7-p58282 napus specific                     | 0.9880383    | 0.4644431    | not scorable | not scorable | not scorable | not scorable |
| #### Bn-scaff_15712_7-p59142 genome unspecific (oleracea-rapa)  | not scorable | not scorable | 1            | 0.7051072    | 0.9669421    | 0.8921902    |
| #### Bn-scaff_15712_8-p11048 C-genome specific (napus-oleracea) | 0.9784689    | 0.7616979    | 0.9922481    | 0.815589     | not scorable | not scorable |
| #### Bn-scaff_15712_8-p12059 A-genome specific (napus-rapa)     | 0.9617225    | 0.5085448    | not scorable | not scorable | 1            | 0.773533     |
| #### Bn-scaff_15712_8-p12072 C-genome specific (napus-oleracea) | 0.9856459    | 0.7639754    | 0.9922481    | 0.6540656    | not scorable | not scorable |
| #### Bn-scaff_15712_8-p12085 C-genome specific (napus-oleracea) | 0.9617225    | 0.6863697    | 1            | 0.7226265    | not scorable | not scorable |
| #### Bn-scaff_15712_8-p12100 C-genome specific (napus-oleracea) | 0.9880383    | 0.7515121    | 1            | 0.7089314    | not scorable | not scorable |
| #### Bn-scaff_15712_8-p12111 C-genome specific (napus-oleracea) | 0.9880383    | 0.7697844    | 1            | 0.8196469    | not scorable | not scorable |
| #### Bn-scaff_15712_8-p12122 C-genome specific (napus-oleracea) | 0.9712918    | 0.754918     | 1            | 0.7592814    | not scorable | not scorable |
| #### Bn-scaff_15712_8-p12129 C-genome specific (napus-oleracea) | 0.9832536    | 0.7754679    | 0.9689922    | 0.8622906    | not scorable | not scorable |
| #### Bn-scaff_15712_8-p12135 C-genome specific (napus-oleracea) | 0.9712918    | 0.7739516    | 0.9689922    | 0.8463767    | not scorable | not scorable |
| #### Bn-scaff_15712_8-p12191 C-genome specific (napus-oleracea) | 0.9904306    | 0.7708716    | 0.9767442    | 0.8803667    | not scorable | not scorable |
| #### Bn-scaff_15712_8-p13492 C-genome specific (napus-oleracea) | 0.9784689    | 0.6634791    | 0.9844961    | 0.7062528    | not scorable | not scorable |
| #### Bn-scaff_15712_8-p13520 C-genome specific (napus-oleracea) | 0.9712918    | 0.7458111    | 0.9922481    | 0.840983     | not scorable | not scorable |
| #### Bn-scaff_15712_8-p14530 C-genome specific (napus-oleracea) | 0.9641148    | 0.7787827    | 1            | 0.8688273    | not scorable | not scorable |
| #### Bn-scaff_15712_8-p19268 napus specific                     | 0.9617225    | 0.7693042    | not scorable | not scorable | not scorable | not scorable |
| #### Bn-scaff_15712_8-p19567 C-genome specific (napus-oleracea) | 0.9712918    | 0.7754042    | 0.9922481    | 0.6869198    | not scorable | not scorable |
| #### Bn-scaff_15712_8-p19572 napus specific                     | 0.9688995    | 0.7839704    | not scorable | not scorable | not scorable | not scorable |
| #### Bn-scaff_15712_8-p19650 napus specific                     | 0.9401914    | 0.5677988    | not scorable | not scorable | not scorable | not scorable |
| #### Bn-scaff_15712_8-p20035 C-genome specific (napus-oleracea) | 0.9521531    | 0.7470533    | 0.9767442    | 0.7419512    | not scorable | not scorable |
| #### Bn-scaff_15712_8-p22283 C-genome specific (napus-oleracea) | 0.9712918    | 0.5220795    | 1            | 0.815002     | not scorable | not scorable |
| #### Bn-scaff_15712_8-p24171 C-genome specific (napus-oleracea) | 0.9880383    | 0.7682708    | 0.9922481    | 0.7255361    | not scorable | not scorable |

|                                                                 |           |           |              |              |              |              |
|-----------------------------------------------------------------|-----------|-----------|--------------|--------------|--------------|--------------|
| #### Bn-scaff_15712_8-p24173 C-genome specific (napus-oleracea) | 0.9688995 | 0.7643334 | 1            | 0.7729341    | not scorable | not scorable |
| #### Bn-scaff_15712_8-p24179 C-genome specific (napus-oleracea) | 0.9688995 | 0.7405041 | 0.9922481    | 0.7630792    | not scorable | not scorable |
| #### Bn-scaff_15712_8-p25243 napus specific                     | 0.9736842 | 0.7448737 | not scorable | not scorable | not scorable | not scorable |
| #### Bn-scaff_15712_8-p32715 C-genome specific (napus-oleracea) | 0.9641148 | 0.6557199 | 0.9922481    | 0.6630738    | not scorable | not scorable |
| #### Bn-scaff_15712_8-p35728 napus specific                     | 0.9856459 | 0.7661971 | not scorable | not scorable | not scorable | not scorable |
| #### Bn-scaff_15712_8-p35754 genome unspecific (all in)         | 0.9617225 | 0.3575355 | 0.9922481    | 0.8343744    | 1            | 0.9293141    |
| #### Bn-scaff_15712_8-p35900 C-genome specific (napus-oleracea) | 0.9880383 | 0.7225279 | 0.9844961    | 0.6966769    | not scorable | not scorable |
| #### Bn-scaff_15712_8-p35997 C-genome specific (napus-oleracea) | 0.9593301 | 0.7313324 | 0.9689922    | 0.814167     | not scorable | not scorable |
| #### Bn-scaff_15712_8-p36037 C-genome specific (napus-oleracea) | 0.9808612 | 0.7807398 | 0.9379845    | 0.6884164    | not scorable | not scorable |
| #### Bn-scaff_15712_9-p13189 genome unspecific (all in)         | 1         | 0.5860808 | 1            | 0.5588989    | 1            | 0.6589679    |
| #### Bn-scaff_15712_9-p17394 C-genome specific (napus-oleracea) | 0.9712918 | 0.6778101 | 1            | 0.747816     | not scorable | not scorable |
| #### Bn-scaff_15712_9-p17446 C-genome specific (napus-oleracea) | 0.9665072 | 0.7639667 | 1            | 0.8037497    | not scorable | not scorable |
| #### Bn-scaff_15712_9-p17513 C-genome specific (napus-oleracea) | 0.9665072 | 0.7537708 | 1            | 0.8830142    | not scorable | not scorable |
| #### Bn-scaff_15712_9-p22293 genome unspecific (all in)         | 0.9665072 | 0.5627314 | 0.9612403    | 0.6532724    | 0.9834711    | 0.7907523    |
| #### Bn-scaff_15712_9-p36907 C-genome specific (napus-oleracea) | 0.9952153 | 0.3350406 | 1            | 0.7916033    | not scorable | not scorable |
| #### Bn-scaff_15712_9-p41159 C-genome specific (napus-oleracea) | 0.9784689 | 0.5331722 | 1            | 0.5611998    | not scorable | not scorable |
| #### Bn-scaff_15712_9-p41162 C-genome specific (napus-oleracea) | 0.9832536 | 0.4737844 | 0.9689922    | 0.6062868    | not scorable | not scorable |
| #### Bn-scaff_15712_9-p41274 C-genome specific (napus-oleracea) | 0.9904306 | 0.750372  | 1            | 0.7985357    | not scorable | not scorable |
| #### Bn-scaff_15712_9-p49814 C-genome specific (napus-oleracea) | 0.9904306 | 0.5524885 | 0.9457364    | 0.6761826    | not scorable | not scorable |
| #### Bn-scaff_15712_9-p49868 genome unspecific (all in)         | 0.9904306 | 0.6960034 | 0.9767442    | 0.6832628    | 1            | 0.9085257    |
| #### Bn-scaff_15712_9-p51841 genome unspecific (all in)         | 0.9904306 | 0.2907146 | 0.9689922    | 0.5249262    | 1            | 0.786476     |
| #### Bn-scaff_15712_9-p52888 C-genome specific (napus-oleracea) | 0.9688995 | 0.7348472 | 0.9922481    | 0.7525514    | not scorable | not scorable |
| #### Bn-scaff_15712_9-p53020 C-genome specific (napus-oleracea) | 0.9808612 | 0.7796149 | 0.9922481    | 0.7767254    | not scorable | not scorable |
| #### Bn-scaff_15712_9-p53066 C-genome specific (napus-oleracea) | 0.9736842 | 0.7694609 | 0.9922481    | 0.7027053    | not scorable | not scorable |
| #### Bn-scaff_15712_9-p53884 C-genome specific (napus-oleracea) | 0.9784689 | 0.811673  | 0.9844961    | 0.897554     | not scorable | not scorable |
| #### Bn-scaff_15712_9-p53959 C-genome specific (napus-oleracea) | 0.9665072 | 0.7492695 | 0.9922481    | 0.7190692    | not scorable | not scorable |
| #### Bn-scaff_15712_9-p54022 C-genome specific (napus-oleracea) | 0.9784689 | 0.7207404 | 0.9844961    | 0.7898915    | not scorable | not scorable |
| #### Bn-scaff_15712_9-p55269 C-genome specific (napus-oleracea) | 0.9736842 | 0.7598171 | 0.9922481    | 0.820734     | not scorable | not scorable |
| #### Bn-scaff_15712_9-p55276 C-genome specific (napus-oleracea) | 0.9832536 | 0.8022474 | 0.9922481    | 0.7625161    | not scorable | not scorable |
| #### Bn-scaff_15712_9-p55317 C-genome specific (napus-oleracea) | 0.9880383 | 0.6660157 | 1            | 0.6207092    | not scorable | not scorable |
| #### Bn-scaff_15712_9-p57094 C-genome specific (napus-oleracea) | 0.9736842 | 0.7748942 | 1            | 0.8055367    | not scorable | not scorable |
| #### Bn-scaff_15712_9-p57152 C-genome specific (napus-oleracea) | 0.9736842 | 0.7599395 | 1            | 0.8101645    | not scorable | not scorable |
| #### Bn-scaff_15712_9-p57193 C-genome specific (napus-oleracea) | 0.9832536 | 0.804453  | 1            | 0.8558707    | not scorable | not scorable |

|                                                                 |              |              |              |              |              |              |
|-----------------------------------------------------------------|--------------|--------------|--------------|--------------|--------------|--------------|
| #### Bn-scaff_15712_9-p6089 C-genome specific (napus-oleracea)  | 0.9736842    | 0.7964128    | 0.9844961    | 0.8266276    | not scorable | not scorable |
| #### Bn-scaff_15712_9-p61764 C-genome specific (napus-oleracea) | 0.9928229    | 0.7799253    | 1            | 0.8796144    | not scorable | not scorable |
| #### Bn-scaff_15712_9-p6181 C-genome unspecific (all in)        | 0.9688995    | 0.3927196    | 0.9302326    | 0.3299064    | 1            | 0.8711777    |
| #### Bn-scaff_15712_9-p62111 C-genome specific (napus-oleracea) | 0.9832536    | 0.7506448    | 1            | 0.7500799    | not scorable | not scorable |
| #### Bn-scaff_15712_9-p6218 C-genome specific (napus-oleracea)  | 0.9808612    | 0.7764385    | 1            | 0.795936     | not scorable | not scorable |
| #### Bn-scaff_15712_9-p62597 C-genome specific (napus-oleracea) | 0.9856459    | 0.7178044    | 0.9922481    | 0.7459043    | not scorable | not scorable |
| #### Bn-scaff_15712_9-p6268 C-genome specific (napus-oleracea)  | 0.9736842    | 0.7607067    | 1            | 0.8376405    | not scorable | not scorable |
| #### Bn-scaff_15712_9-p6347 C-genome specific (napus-oleracea)  | 0.9784689    | 0.7815394    | 1            | 0.8560459    | not scorable | not scorable |
| #### Bn-scaff_15712_9-p6369 C-genome specific (napus-oleracea)  | 0.9832536    | 0.7689065    | 1            | 0.7592529    | not scorable | not scorable |
| #### Bn-scaff_15712_9-p6432 C-genome specific (napus-oleracea)  | 0.9593301    | 0.639111     | 0.9844961    | 0.6891651    | not scorable | not scorable |
| #### Bn-scaff_15712_9-p6603 C-genome specific (napus-oleracea)  | 0.9617225    | 0.8052762    | 0.9767442    | 0.8108574    | not scorable | not scorable |
| #### Bn-scaff_15712_9-p6863 C-genome specific (napus-oleracea)  | 0.9497608    | 0.4712261    | 1            | 0.7603163    | not scorable | not scorable |
| #### Bn-scaff_15712_9-p6924 C-genome specific (napus-oleracea)  | 0.9425837    | 0.7671554    | 0.9922481    | 0.7734257    | not scorable | not scorable |
| #### Bn-scaff_15712_9-p6953 C-genome specific (napus-oleracea)  | 0.9784689    | 0.7256446    | 0.9844961    | 0.8944872    | not scorable | not scorable |
| #### Bn-scaff_15712_9-p7918 C-genome specific (napus-oleracea)  | 0.8995215    | 0.4724415    | 0.9844961    | 0.6431578    | not scorable | not scorable |
| #### Bn-scaff_15712_9-p8014 C-genome specific (napus-oleracea)  | 0.9856459    | 0.7422382    | 1            | 0.7748256    | not scorable | not scorable |
| #### Bn-scaff_15712_9-p8223 C-genome specific (napus-oleracea)  | 0.9952153    | 0.9225993    | 1            | 0.8481144    | not scorable | not scorable |
| #### Bn-scaff_15713_1-p1417 C-genome specific (napus-oleracea)  | 0.9593301    | 0.7864708    | 1            | 0.7930654    | not scorable | not scorable |
| #### Bn-scaff_15713_1-p1649 C-genome specific (napus-oleracea)  | 0.8803828    | 0.8318391    | 0.4341085    | 0.7482476    | not scorable | not scorable |
| #### Bn-scaff_15713_1-p1706 C-genome specific (oleracea only)   | not scorable | not scorable | 0.4263566    | 0.7961553    | not scorable | not scorable |
| #### Bn-scaff_15713_1-p2648 C-genome specific (napus-oleracea)  | 0.8899522    | 0.7862438    | 0.4263566    | 0.4707985    | not scorable | not scorable |
| #### Bn-scaff_15713_1-p2658 C-genome specific (napus-oleracea)  | 0.8923445    | 0.8156171    | 0.4418605    | 0.9230189    | not scorable | not scorable |
| #### Bn-scaff_15713_1-p3450 C-genome specific (napus-oleracea)  | 0.9760765    | 0.7441863    | 1            | 0.8170443    | not scorable | not scorable |
| #### Bn-scaff_15713_1-p3776 genome unspecific (all in)          | 0.9569378    | 0.5901116    | 1            | 0.7321163    | 1            | 0.9175813    |
| #### Bn-scaff_15714_1-p1014 C-genome specific (napus-oleracea)  | 0.8947368    | 0.7640958    | 0.9844961    | 0.7765006    | not scorable | not scorable |
| #### Bn-scaff_15714_1-p1014 C-genome specific (napus-oleracea)  | 0.9401914    | 0.7317051    | 0.9922481    | 0.7717333    | not scorable | not scorable |
| #### Bn-scaff_15714_1-p1026 C-genome specific (napus-oleracea)  | 0.9521531    | 0.7331978    | 1            | 0.8127312    | not scorable | not scorable |
| #### Bn-scaff_15714_1-p1063 A-genome specific (napus-rapa)      | 0.9665072    | 0.4055235    | not scorable | not scorable | 1            | 0.7687215    |
| #### Bn-scaff_15714_1-p1080 genome unspecific (all in)          | 0.9856459    | 0.4659943    | 0.9922481    | 0.8215568    | 1            | 0.9115915    |
| #### Bn-scaff_15714_1-p1091 C-genome specific (oleracea only)   | not scorable | not scorable | 0.7674419    | 0.6364716    | not scorable | not scorable |
| #### Bn-scaff_15714_1-p1099 genome unspecific (all in)          | 0.8827751    | 0.748863     | 1            | 0.7612306    | 0.9917355    | 0.8405242    |
| #### Bn-scaff_15714_1-p1185 C-genome specific (napus-oleracea)  | 0.9138756    | 0.7860183    | 0.9534883    | 0.6808522    | not scorable | not scorable |
| #### Bn-scaff_15714_1-p1210 genome unspecific (all in)          | 0.9832536    | 0.3089637    | 1            | 0.8485919    | 1            | 0.9095823    |

|                                                                 |              |              |              |              |              |              |              |
|-----------------------------------------------------------------|--------------|--------------|--------------|--------------|--------------|--------------|--------------|
| #### Bn-scaff_15714_1-p12214 C-genome specific (napus-oleracea) | 0.9043062    | 0.6930085    |              | 1            | 0.750604     | not scorable | not scorable |
| #### Bn-scaff_15714_1-p12283 C-genome specific (napus-oleracea) | 0.9162679    | 0.7718543    | 0.9844961    |              | 0.8185682    | not scorable | not scorable |
| #### Bn-scaff_15714_1-p12291 C-genome specific (oleracea only)  | not scorable | not scorable | 0.9224806    |              | 0.7976912    | not scorable | not scorable |
| #### Bn-scaff_15714_1-p12545 napus specific                     | 0.9808612    | 0.6934323    | not scorable |              | not scorable | not scorable | not scorable |
| #### Bn-scaff_15714_1-p13490 C-genome specific (napus-oleracea) | 0.9138756    | 0.7746888    |              | 1            | 0.8019744    | not scorable | not scorable |
| #### Bn-scaff_15714_1-p13522 C-genome specific (napus-oleracea) | 0.9186603    | 0.7989499    |              | 1            | 0.8566507    | not scorable | not scorable |
| #### Bn-scaff_15714_1-p13529 napus specific                     | 0.9210526    | 0.6669195    | not scorable |              | not scorable | not scorable | not scorable |
| #### Bn-scaff_15714_1-p13640 genome unspecific (all in)         |              | 1            | 0.2897281    | 0.8294573    | 0.2515472    |              | 1 0.7990345  |
| #### Bn-scaff_15714_1-p15379 genome unspecific (oleracea-rapa)  | not scorable | not scorable |              | 0.9147287    | 0.741185     |              | 1 0.7569847  |
| #### Bn-scaff_15714_1-p15768 napus specific                     | 0.8875598    | 0.6231737    | not scorable |              | not scorable | not scorable | not scorable |
| #### Bn-scaff_15714_1-p17674 A-genome specific (napus-rapa)     |              | 1            | 0.7986167    | not scorable | not scorable | 0.9669421    | 0.726584     |
| #### Bn-scaff_15714_1-p17874 genome unspecific (all in)         | 0.9784689    | 0.4583318    | 0.9922481    |              | 0.8185424    |              | 1 0.9152009  |
| #### Bn-scaff_15714_1-p18451 genome unspecific (oleracea-rapa)  | not scorable | not scorable |              | 0.9767442    | 0.7481802    |              | 1 0.8653769  |
| #### Bn-scaff_15714_1-p18545 A-genome specific (rapa only)      | not scorable | not scorable | not scorable |              | not scorable | 0.9669421    | 0.786476     |
| #### Bn-scaff_15714_1-p18642 napus specific                     | 0.8947368    | 0.7578592    | not scorable |              | not scorable | not scorable | not scorable |
| #### Bn-scaff_15714_1-p18678 C-genome specific (napus-oleracea) | 0.8923445    | 0.7291897    |              | 1            | 0.8566455    | not scorable | not scorable |
| #### Bn-scaff_15714_1-p18902 C-genome specific (napus-oleracea) | 0.9019139    | 0.6148745    | 0.9922481    |              | 0.6513229    | not scorable | not scorable |
| #### Bn-scaff_15714_1-p18909 napus specific                     | 0.8827751    | 0.7349986    | not scorable |              | not scorable | not scorable | not scorable |
| #### Bn-scaff_15714_1-p18909 napus specific                     | 0.8995215    | 0.7465289    | not scorable |              | not scorable | not scorable | not scorable |
| #### Bn-scaff_15714_1-p18929 napus specific                     | 0.9066986    | 0.7133862    | not scorable |              | not scorable | not scorable | not scorable |
| #### Bn-scaff_15714_1-p19005 C-genome specific (napus-oleracea) | 0.9090909    | 0.7070264    | 0.9922481    |              | 0.7910903    | not scorable | not scorable |
| #### Bn-scaff_15714_1-p19006 C-genome specific (napus-oleracea) | 0.9186603    | 0.739195     |              | 1            | 0.8150135    | not scorable | not scorable |
| #### Bn-scaff_15714_1-p19348 A-genome specific (napus-rapa)     | 0.9928229    | 0.7754679    | not scorable |              | not scorable | 0.9917355    | 0.8372604    |
| #### Bn-scaff_15714_1-p19493 genome unspecific (all in)         | 0.9712918    | 0.2774008    |              | 1            | 0.7191334    |              | 1 0.8521508  |
| #### Bn-scaff_15714_1-p19494 napus specific                     | 0.9210526    | 0.9292546    | not scorable |              | not scorable | not scorable | not scorable |
| #### Bn-scaff_15714_1-p19496 A-genome specific (rapa only)      | not scorable | not scorable | not scorable |              | not scorable | 0.9917355    | 0.8895636    |
| #### Bn-scaff_15714_1-p19667 napus specific                     | 0.9641148    | 0.5878392    | not scorable |              | not scorable | not scorable | not scorable |
| #### Bn-scaff_15714_1-p19836 A-genome specific (napus-rapa)     | 0.9904306    | 0.4023829    | not scorable |              | not scorable |              | 1 0.762176   |
| #### Bn-scaff_15714_1-p20484 all not scorable                   | not scorable | not scorable | not scorable |              | not scorable | not scorable | not scorable |
| #### Bn-scaff_15714_1-p20511 napus specific                     | 0.9138756    | 0.8512455    | not scorable |              | not scorable | not scorable | not scorable |
| #### Bn-scaff_15714_1-p20715 A-genome specific (rapa only)      | not scorable | not scorable | not scorable |              | not scorable | 0.9834711    | 0.699509     |
| #### Bn-scaff_15714_1-p21048 C-genome specific (napus-oleracea) | 0.9162679    | 0.8077404    | 0.9457364    |              | 0.832678     | not scorable | not scorable |
| #### Bn-scaff_15714_1-p21130 C-genome specific (napus-oleracea) | 0.9138756    | 0.773623     |              | 1            | 0.7313014    | not scorable | not scorable |

|                                                                |              |              |              |              |              |              |
|----------------------------------------------------------------|--------------|--------------|--------------|--------------|--------------|--------------|
| #### Bn-scaff_15714_1-p22971C-genome specific (napus-oleracea) | 0.8971292    | 0.7629046    | 0.9922481    | 0.7823053    | not scorable | not scorable |
| #### Bn-scaff_15714_1-p22977all not scorable                   | not scorable | not scorable | not scorable | not scorable | not scorable | not scorable |
| #### Bn-scaff_15714_1-p22981C-genome specific (napus-oleracea) | 0.8875598    | 0.6727316    | 0.9767442    | 0.7094554    | not scorable | not scorable |
| #### Bn-scaff_15714_1-p22987all not scorable                   | not scorable | not scorable | not scorable | not scorable | not scorable | not scorable |
| #### Bn-scaff_15714_1-p22992genome unspecific (all in)         | 0.9066986    | 0.718774     | 0.9922481    | 0.7389606    | 0.8099173    | 0.8946988    |
| #### Bn-scaff_15714_1-p23305napus specific                     | 0.8827751    | 0.7355814    | not scorable | not scorable | not scorable | not scorable |
| #### Bn-scaff_15714_1-p23308C-genome specific (napus-oleracea) | 0.9019139    | 0.7586573    | 1            | 0.802054     | not scorable | not scorable |
| #### Bn-scaff_15714_1-p23684genome unspecific (all in)         | 1            | 0.465947     | 0.9844961    | 0.8020429    | 1            | 0.8314037    |
| #### Bn-scaff_15714_1-p23836C-genome specific (oleracea only)  | not scorable | not scorable | 1            | 0.781507     | not scorable | not scorable |
| #### Bn-scaff_15714_1-p23836genome unspecific (all in)         | 0.9856459    | 0.4225428    | 1            | 0.7395651    | 1            | 0.9205657    |
| #### Bn-scaff_15714_1-p23837genome unspecific (all in)         | 0.9928229    | 0.3871016    | 1            | 0.7786656    | 1            | 0.8784608    |
| #### Bn-scaff_15714_1-p23923C-genome specific (napus-oleracea) | 0.9880383    | 0.7451897    | 1            | 0.6533151    | not scorable | not scorable |
| #### Bn-scaff_15714_1-p24130napus specific                     | 0.9090909    | 0.7594568    | not scorable | not scorable | not scorable | not scorable |
| #### Bn-scaff_15714_1-p24813C-genome specific (napus-oleracea) | 0.8995215    | 0.7410733    | 1            | 0.8059311    | not scorable | not scorable |
| #### Bn-scaff_15714_1-p24894genome unspecific (oleracea-rapa)  | not scorable | not scorable | 1            | 0.5050447    | 0.9917355    | 0.7079173    |
| #### Bn-scaff_15714_1-p24898genome unspecific (oleracea-rapa)  | not scorable | not scorable | 0.8527132    | 0.6940445    | 0.9917355    | 0.7043195    |
| #### Bn-scaff_15714_1-p24925genome unspecific (oleracea-rapa)  | not scorable | not scorable | 1            | 0.73063      | 0.9834711    | 0.7129104    |
| #### Bn-scaff_15714_1-p25550all not scorable                   | not scorable | not scorable | not scorable | not scorable | not scorable | not scorable |
| #### Bn-scaff_15714_1-p25577genome unspecific (oleracea-rapa)  | not scorable | not scorable | 1            | 0.8337346    | 0.9834711    | 0.6976111    |
| #### Bn-scaff_15714_1-p25671genome unspecific (all in)         | 0.9976076    | 0.404121     | 1            | 0.6122782    | 1            | 0.7749854    |
| #### Bn-scaff_15714_1-p25696genome unspecific (all in)         | 0.9976076    | 0.5193374    | 1            | 0.5184838    | 0.9917355    | 0.6463459    |
| #### Bn-scaff_15714_1-p27040C-genome specific (napus-oleracea) | 0.8899522    | 0.68153      | 0.9844961    | 0.7937923    | not scorable | not scorable |
| #### Bn-scaff_15714_1-p27239A-genome specific (napus-rapa)     | 0.9784689    | 0.4142333    | not scorable | not scorable | 0.9917355    | 0.7825554    |
| #### Bn-scaff_15714_1-p27948all not scorable                   | not scorable | not scorable | not scorable | not scorable | not scorable | not scorable |
| #### Bn-scaff_15714_1-p28179genome unspecific (oleracea-rapa)  | not scorable | not scorable | 1            | 0.626411     | 1            | 0.8521279    |
| #### Bn-scaff_15714_1-p28949C-genome specific (napus-oleracea) | 0.9641148    | 0.412443     | 0.7596899    | 0.8914757    | not scorable | not scorable |
| #### Bn-scaff_15714_1-p28950C-genome specific (napus-oleracea) | 0.8779904    | 0.6825759    | 0.7596899    | 0.7852471    | not scorable | not scorable |
| #### Bn-scaff_15714_1-p28953A-genome specific (rapa only)      | not scorable | not scorable | not scorable | not scorable | 0.9917355    | 0.7741084    |
| #### Bn-scaff_15714_1-p29780genome unspecific (all in)         | 0.9832536    | 0.3872401    | 1            | 0.8340598    | 1            | 0.9002177    |
| #### Bn-scaff_15714_1-p29899C-genome specific (napus-oleracea) | 0.9043062    | 0.7039711    | 0.8682171    | 0.7412566    | not scorable | not scorable |
| #### Bn-scaff_15714_1-p29952genome unspecific (all in)         | 0.9712918    | 0.3498094    | 1            | 0.8484963    | 1            | 0.9293141    |
| #### Bn-scaff_15714_1-p29953C-genome specific (napus-oleracea) | 0.8947368    | 0.6881995    | 0.9922481    | 0.6464492    | not scorable | not scorable |
| #### Bn-scaff_15714_1-p30013C-genome specific (napus-oleracea) | 0.9019139    | 0.7360877    | 1            | 0.6999125    | not scorable | not scorable |

|                                                                 |              |              |              |   |              |              |              |
|-----------------------------------------------------------------|--------------|--------------|--------------|---|--------------|--------------|--------------|
| #### Bn-scaff_15714_1-p30076 C-genome specific (napus-oleracea) | 0.9019139    | 0.672435     |              | 1 | 0.6250374    | not scorable | not scorable |
| #### Bn-scaff_15714_1-p30077 C-genome specific (napus-oleracea) | 0.9904306    | 0.3914658    |              | 1 | 0.7459276    | not scorable | not scorable |
| #### Bn-scaff_15714_1-p30592 C-genome specific (napus-oleracea) | 0.9090909    | 0.8420207    | 0.9844961    |   | 0.8330965    | not scorable | not scorable |
| #### Bn-scaff_15714_1-p30594 C-genome specific (napus-oleracea) | 0.9114832    | 0.866755     | 0.9922481    |   | 0.8318169    | not scorable | not scorable |
| #### Bn-scaff_15714_1-p30608 C-genome specific (napus-oleracea) | 0.9066986    | 0.7250549    |              | 1 | 0.8305827    | not scorable | not scorable |
| #### Bn-scaff_15714_1-p30635 C-genome specific (napus-oleracea) | 0.8971292    | 0.8703679    | 0.9844961    |   | 0.8318089    | not scorable | not scorable |
| #### Bn-scaff_15714_1-p30638 C-genome specific (napus-oleracea) | 0.8947368    | 0.7342641    | 0.9689922    |   | 0.7700216    | not scorable | not scorable |
| #### Bn-scaff_15714_1-p30659 C-genome specific (napus-oleracea) | 0.9138756    | 0.7007231    | 0.9844961    |   | 0.855713     | not scorable | not scorable |
| #### Bn-scaff_15714_1-p30876 C-genome specific (napus-oleracea) | 0.9114832    | 0.6900985    |              | 1 | 0.8486626    | not scorable | not scorable |
| #### Bn-scaff_15714_1-p30876 C-genome specific (napus-oleracea) | 0.9090909    | 0.870151     |              | 1 | 0.7419177    | not scorable | not scorable |
| #### Bn-scaff_15714_1-p31058 napus specific                     | 0.9019139    | 0.7282552    | not scorable |   | not scorable | not scorable | not scorable |
| #### Bn-scaff_15714_1-p31109 genome unspecific (oleracea-rapa)  | not scorable | not scorable | 0.9922481    |   | 0.8125154    |              | 1 0.9283541  |
| #### Bn-scaff_15714_1-p31385 genome unspecific (all in)         | 0.9976076    | 0.3966675    |              | 1 | 0.649823     |              | 1 0.8120205  |
| #### Bn-scaff_15714_1-p32162 C-genome specific (napus-oleracea) |              | 1 0.8753613  |              | 1 | 0.7791283    | not scorable | not scorable |
| #### Bn-scaff_15714_1-p32163 C-genome specific (napus-oleracea) | 0.9784689    | 0.7735571    | 0.9922481    |   | 0.7880354    | not scorable | not scorable |
| #### Bn-scaff_15714_1-p32212 C-genome specific (napus-oleracea) | 0.9736842    | 0.8305992    | 0.9767442    |   | 0.8473618    | not scorable | not scorable |
| #### Bn-scaff_15714_1-p32222 C-genome specific (napus-oleracea) | 0.9928229    | 0.7924204    |              | 1 | 0.804214     | not scorable | not scorable |
| #### Bn-scaff_15714_1-p32240 C-genome specific (napus-oleracea) | 0.9880383    | 0.7777212    | 0.9922481    |   | 0.8325793    | not scorable | not scorable |
| #### Bn-scaff_15714_1-p32261 C-genome specific (napus-oleracea) | 0.9760765    | 0.7917461    |              | 1 | 0.8002981    | not scorable | not scorable |
| #### Bn-scaff_15714_1-p32875 C-genome specific (napus-oleracea) | 0.9186603    | 0.8196729    |              | 1 | 0.8280389    | not scorable | not scorable |
| #### Bn-scaff_15714_1-p34290 C-genome specific (napus-oleracea) | 0.9138756    | 0.747155     |              | 1 | 0.8382685    | not scorable | not scorable |
| #### Bn-scaff_15714_1-p34601 C-genome specific (napus-oleracea) | 0.9138756    | 0.7708583    |              | 1 | 0.8538578    | not scorable | not scorable |
| #### Bn-scaff_15714_1-p34619 C-genome specific (napus-oleracea) | 0.9162679    | 0.800162     |              | 1 | 0.8577354    | not scorable | not scorable |
| #### Bn-scaff_15714_1-p34629 napus specific                     | 0.8684211    | 0.969227     | not scorable |   | not scorable | not scorable | not scorable |
| #### Bn-scaff_15714_1-p34888 C-genome specific (napus-oleracea) | 0.9186603    | 0.8254656    | 0.9922481    |   | 0.89279      | not scorable | not scorable |
| #### Bn-scaff_15714_1-p35759 C-genome specific (napus-oleracea) | 0.8684211    | 0.913697     | 0.8527132    |   | 0.8305039    | not scorable | not scorable |
| #### Bn-scaff_15714_1-p36512 C-genome specific (napus-oleracea) | 0.9138756    | 0.7880544    |              | 1 | 0.8967366    | not scorable | not scorable |
| #### Bn-scaff_15714_1-p36827 C-genome specific (napus-oleracea) | 0.923445     | 0.8010893    |              | 1 | 0.7911669    | not scorable | not scorable |
| #### Bn-scaff_15714_1-p36894 C-genome specific (napus-oleracea) | 0.9138756    | 0.6962321    |              | 1 | 0.74115      | not scorable | not scorable |
| #### Bn-scaff_15714_1-p37801 C-genome specific (napus-oleracea) | 0.8732057    | 0.753103     |              | 1 | 0.6619141    | not scorable | not scorable |
| #### Bn-scaff_15714_1-p42089 C-genome specific (napus-oleracea) | 0.8971292    | 0.7268761    | 0.9922481    |   | 0.8011114    | not scorable | not scorable |
| #### Bn-scaff_15714_1-p48339 genome unspecific (oleracea-rapa)  | not scorable | not scorable | 0.875969     |   | 0.8083512    |              | 1 0.7730481  |
| #### Bn-scaff_15714_1-p48973 C-genome specific (napus-oleracea) | 0.8947368    | 0.7285163    | 0.9689922    |   | 0.817441     | not scorable | not scorable |

|                                                                 |              |              |              |              |              |              |
|-----------------------------------------------------------------|--------------|--------------|--------------|--------------|--------------|--------------|
| #### Bn-scaff_15714_1-p51752 napus specific                     | 0.7799043    | 0.8659544    | not scorable | not scorable | not scorable | not scorable |
| #### Bn-scaff_15714_1-p51928 genome unspecific (oleracea-rapa)  | not scorable | not scorable | 0.8914729    | 0.7364023    | 0.9917355    | 0.8020373    |
| #### Bn-scaff_15714_1-p55370 C-genome specific (napus-oleracea) | 0.9090909    | 0.8198537    | 0.9457364    | 0.725411     | not scorable | not scorable |
| #### Bn-scaff_15714_1-p58554 genome unspecific (oleracea-rapa)  | not scorable | not scorable | 0.9844961    | 0.7820535    | 0.9173554    | 0.8899603    |
| #### Bn-scaff_15714_1-p58587 A-genome specific (napus-rapa)     | 1            | 0.917894     | not scorable | not scorable | 1            | 0.9100935    |
| #### Bn-scaff_15714_1-p59289 A-genome specific (napus-rapa)     | 0.9784689    | 0.2961675    | not scorable | not scorable | 0.9752066    | 0.6518636    |
| #### Bn-scaff_15714_1-p59315 A-genome specific (rapa only)      | not scorable | not scorable | not scorable | not scorable | 1            | 0.6786613    |
| #### Bn-scaff_15714_1-p59479 genome unspecific (oleracea-rapa)  | not scorable | not scorable | 0.9767442    | 0.4279584    | 0.9834711    | 0.5219567    |
| #### Bn-scaff_15714_1-p61597 A-genome specific (napus-rapa)     | 0.7679426    | 0.6290641    | not scorable | not scorable | 0.9669421    | 0.6637204    |
| #### Bn-scaff_15714_1-p63377 C-genome specific (napus-oleracea) | 0.9066986    | 0.7791731    | 0.9379845    | 0.7983149    | not scorable | not scorable |
| #### Bn-scaff_15714_1-p63394 napus specific                     | 0.715311     | 0.9141125    | not scorable | not scorable | not scorable | not scorable |
| #### Bn-scaff_15714_1-p64285 A-genome specific (rapa only)      | not scorable | not scorable | not scorable | not scorable | 0.9669421    | 0.3524873    |
| #### Bn-scaff_15714_1-p68970 genome unspecific (oleracea-rapa)  | not scorable | not scorable | 0.9379845    | 0.7509438    | 0.9917355    | 0.8948976    |
| #### Bn-scaff_15714_1-p68983 C-genome specific (napus-oleracea) | 0.9162679    | 0.873669     | 0.9922481    | 0.781095     | not scorable | not scorable |
| #### Bn-scaff_15714_1-p69258 C-genome specific (napus-oleracea) | 0.8995215    | 0.7008027    | 0.9767442    | 0.7109284    | not scorable | not scorable |
| #### Bn-scaff_15714_1-p69632 C-genome specific (napus-oleracea) | 0.8995215    | 0.7364534    | 1            | 0.8060523    | not scorable | not scorable |
| #### Bn-scaff_15714_1-p69658 C-genome specific (oleracea only)  | not scorable | not scorable | 0.9844961    | 0.7372253    | not scorable | not scorable |
| #### Bn-scaff_15714_1-p69658 C-genome specific (napus-oleracea) | 0.9784689    | 0.6841583    | 0.9844961    | 0.6862457    | not scorable | not scorable |
| #### Bn-scaff_15714_1-p70862 C-genome specific (napus-oleracea) | 0.9186603    | 0.7847266    | 1            | 0.8229594    | not scorable | not scorable |
| #### Bn-scaff_15714_1-p72348 C-genome specific (napus-oleracea) | 0.9090909    | 0.7525455    | 1            | 0.8152776    | not scorable | not scorable |
| #### Bn-scaff_15714_1-p72389 genome unspecific (oleracea-rapa)  | not scorable | not scorable | 0.9922481    | 0.2878542    | 0.9834711    | 0.7101712    |
| #### Bn-scaff_15714_1-p72513 C-genome specific (napus-oleracea) | 0.9066986    | 0.6910401    | 0.9922481    | 0.7086588    | not scorable | not scorable |
| #### Bn-scaff_15714_1-p72791 genome unspecific (all in)         | 0.9904306    | 0.4161356    | 1            | 0.8054627    | 1            | 0.9105523    |
| #### Bn-scaff_15714_1-p73325 C-genome specific (napus-oleracea) | 0.9043062    | 0.6125731    | 0.9689922    | 0.6484185    | not scorable | not scorable |
| #### Bn-scaff_15714_1-p73476 C-genome specific (napus-oleracea) | 0.8564593    | 0.6461253    | 0.9534883    | 0.7187064    | not scorable | not scorable |
| #### Bn-scaff_15714_1-p73645 C-genome specific (napus-oleracea) | 0.9114832    | 0.7675679    | 0.9922481    | 0.8057764    | not scorable | not scorable |
| #### Bn-scaff_15714_1-p74113 C-genome specific (napus-oleracea) | 0.9090909    | 0.7758852    | 1            | 0.760932     | not scorable | not scorable |
| #### Bn-scaff_15714_1-p74520 C-genome specific (napus-oleracea) | 0.8947368    | 0.7650203    | 0.9844961    | 0.8339493    | not scorable | not scorable |
| #### Bn-scaff_15714_1-p77240 genome unspecific (all in)         | 0.9880383    | 0.4507522    | 1            | 0.6328449    | 1            | 0.935311     |
| #### Bn-scaff_15714_1-p77245 genome unspecific (all in)         | 0.9282297    | 0.452484     | 0.9534883    | 0.6326174    | 1            | 0.9401839    |
| #### Bn-scaff_15714_1-p77345 C-genome specific (napus-oleracea) | 0.9090909    | 0.6861778    | 0.9922481    | 0.7114168    | not scorable | not scorable |
| #### Bn-scaff_15714_1-p77450 C-genome specific (napus-oleracea) | 0.9162679    | 0.7864653    | 0.9922481    | 0.7948359    | not scorable | not scorable |
| #### Bn-scaff_15714_1-p78055 C-genome specific (napus-oleracea) | 0.9019139    | 0.7438833    | 0.9689922    | 0.6946703    | not scorable | not scorable |



|                                                                 |              |              |              |              |              |              |
|-----------------------------------------------------------------|--------------|--------------|--------------|--------------|--------------|--------------|
| #### Bn-scaff_15714_1-p78552 C-genome specific (napus-oleracea) | 0.8923445    | 0.7317112    | 0.9767442    | 0.7978273    | not scorable | not scorable |
| #### Bn-scaff_15714_1-p78573 C-genome specific (napus-oleracea) | 0.8899522    | 0.7296377    | 0.9767442    | 0.8579308    | not scorable | not scorable |
| #### Bn-scaff_15714_1-p79026 napus specific                     | 0.930622     | 0.4507695    | not scorable | not scorable | not scorable | not scorable |
| #### Bn-scaff_15714_1-p79034 C-genome specific (napus-oleracea) | 0.8803828    | 0.678477     | 0.9534883    | 0.719362     | not scorable | not scorable |
| #### Bn-scaff_15714_1-p79114 C-genome specific (napus-oleracea) | 0.8899522    | 0.7264095    | 0.9534883    | 0.7628109    | not scorable | not scorable |
| #### Bn-scaff_15714_1-p79806 C-genome specific (oleracea only)  | not scorable | not scorable | 0.9922481    | 0.8154327    | not scorable | not scorable |
| #### Bn-scaff_15714_1-p80135 C-genome specific (napus-oleracea) | 0.8947368    | 0.748015     | 0.8449612    | 0.7836018    | not scorable | not scorable |
| #### Bn-scaff_15714_1-p80140 C-genome specific (napus-oleracea) | 0.8755981    | 0.7378632    | 0.9379845    | 0.7501577    | not scorable | not scorable |
| #### Bn-scaff_15714_1-p80363 napus specific                     | 0.5717703    | 0.8153998    | not scorable | not scorable | not scorable | not scorable |
| #### Bn-scaff_15714_1-p82329 C-genome specific (napus-oleracea) | 0.8971292    | 0.6606644    | 1            | 0.7372052    | not scorable | not scorable |
| #### Bn-scaff_15714_1-p83290 C-genome specific (napus-oleracea) | 0.8971292    | 0.6846254    | 1            | 0.704776     | not scorable | not scorable |
| #### Bn-scaff_15714_1-p83296 C-genome specific (napus-oleracea) | 0.8923445    | 0.6783778    | 1            | 0.7085758    | not scorable | not scorable |
| #### Bn-scaff_15714_1-p83353 genome unspecific (all in)         | 0.9712918    | 0.7590094    | 1            | 0.8927117    | 0.9504132    | 0.9175813    |
| #### Bn-scaff_15714_1-p83391 C-genome specific (napus-oleracea) | 0.8923445    | 0.7402735    | 0.9922481    | 0.8216306    | not scorable | not scorable |
| #### Bn-scaff_15714_1-p83431 C-genome specific (napus-oleracea) | 0.8875598    | 0.6643592    | 1            | 0.7304756    | not scorable | not scorable |
| #### Bn-scaff_15714_1-p83545 C-genome specific (napus-oleracea) | 0.8588517    | 0.5783535    | 1            | 0.5743911    | not scorable | not scorable |
| #### Bn-scaff_15714_1-p86559 C-genome specific (napus-oleracea) | 0.8899522    | 0.7141906    | 0.9767442    | 0.8264398    | not scorable | not scorable |
| #### Bn-scaff_15714_1-p88109 C-genome specific (napus-oleracea) | 0.8947368    | 0.6701192    | 0.9922481    | 0.7643986    | not scorable | not scorable |
| #### Bn-scaff_15714_1-p96602 C-genome specific (napus-oleracea) | 0.8923445    | 0.6607165    | 0.9767442    | 0.6563909    | not scorable | not scorable |
| #### Bn-scaff_15714_1-p97784 A-genome specific (napus-rapa)     | 0.9976076    | 0.3111167    | not scorable | not scorable | 0.9917355    | 0.7582895    |
| #### Bn-scaff_15714_1-p99072 genome unspecific (all in)         | 0.9688995    | 0.330655     | 0.9844961    | 0.6496901    | 1            | 0.7227655    |
| #### Bn-scaff_15715_1-p20294 A-genome specific (napus-rapa)     | 0.9641148    | 0.3602446    | not scorable | not scorable | 1            | 0.7148005    |
| #### Bn-scaff_15715_1-p20434 genome unspecific (all in)         | 0.9665072    | 0.3766043    | 0.8604651    | 0.8499477    | 0.9834711    | 0.8707225    |
| #### Bn-scaff_15715_1-p26006 C-genome specific (napus-oleracea) | 1            | 0.9249924    | 0.9922481    | 0.7522554    | not scorable | not scorable |
| #### Bn-scaff_15743_1-p13056 C-genome specific (napus-oleracea) | 1            | 0.8651183    | 0.9379845    | 0.4977984    | not scorable | not scorable |
| #### Bn-scaff_15743_1-p17921 all not scorable                   | not scorable | not scorable | not scorable | not scorable | not scorable | not scorable |
| #### Bn-scaff_15743_1-p22417 genome unspecific (all in)         | 0.9569378    | 0.2321063    | 0.9844961    | 0.8863125    | 1            | 0.8948976    |
| #### Bn-scaff_15743_1-p22785 C-genome specific (napus-oleracea) | 0.9330143    | 0.6915179    | 1            | 0.8315879    | not scorable | not scorable |
| #### Bn-scaff_15743_1-p22800 napus specific                     | 0.9784689    | 0.7580717    | not scorable | not scorable | not scorable | not scorable |
| #### Bn-scaff_15743_1-p23272 C-genome specific (napus-oleracea) | 0.9736842    | 0.6701508    | 1            | 0.7723672    | not scorable | not scorable |
| #### Bn-scaff_15743_1-p23301 C-genome specific (napus-oleracea) | 0.9760765    | 0.6791333    | 1            | 0.7482339    | not scorable | not scorable |
| #### Bn-scaff_15743_1-p23497 C-genome specific (napus-oleracea) | 0.9808612    | 0.7490799    | 0.9922481    | 0.8919082    | not scorable | not scorable |
| #### Bn-scaff_15743_1-p23500 C-genome specific (napus-oleracea) | 0.9569378    | 0.7260402    | 1            | 0.7745852    | not scorable | not scorable |

|                                                                  |              |              |              |              |              |              |              |
|------------------------------------------------------------------|--------------|--------------|--------------|--------------|--------------|--------------|--------------|
| ##### Bn-scaff_15743_1-p24399 C-genome specific (napus-oleracea) | 0.9880383    | 0.7155767    |              | 1            | 0.7093762    | not scorable | not scorable |
| ##### Bn-scaff_15743_1-p25574 C-genome specific (napus-oleracea) | 0.9688995    | 0.7468233    | 0.9922481    |              | 0.8442395    | not scorable | not scorable |
| ##### Bn-scaff_15743_1-p25972 C-genome specific (napus-oleracea) | 0.9808612    | 0.7551472    | 0.9922481    |              | 0.7575368    | not scorable | not scorable |
| ##### Bn-scaff_15743_1-p26515 C-genome specific (napus-oleracea) | 0.9880383    | 0.7694124    |              | 1            | 0.7029373    | not scorable | not scorable |
| ##### Bn-scaff_15743_1-p26527 C-genome specific (napus-oleracea) | 0.9856459    | 0.7702551    |              | 1            | 0.9031178    | not scorable | not scorable |
| ##### Bn-scaff_15743_1-p26884 C-genome specific (napus-oleracea) | 0.9856459    | 0.7109978    |              | 1            | 0.7740188    | not scorable | not scorable |
| ##### Bn-scaff_15743_1-p28089 C-genome specific (napus-oleracea) | 0.9832536    | 0.7506553    |              | 1            | 0.8485454    | not scorable | not scorable |
| ##### Bn-scaff_15743_1-p28318 C-genome specific (napus-oleracea) | 0.9880383    | 0.7493644    | 0.9844961    |              | 0.8584814    | not scorable | not scorable |
| ##### Bn-scaff_15743_1-p28335 C-genome specific (napus-oleracea) | 0.9760765    | 0.6683737    | 0.9457364    |              | 0.8273145    | not scorable | not scorable |
| ##### Bn-scaff_15743_1-p28466 C-genome specific (napus-oleracea) | 0.9952153    | 0.7611595    |              | 1            | 0.8408107    | not scorable | not scorable |
| ##### Bn-scaff_15743_1-p28468 C-genome specific (napus-oleracea) | 0.9832536    | 0.3844398    | 0.9767442    |              | 0.4579518    | not scorable | not scorable |
| ##### Bn-scaff_15743_1-p28486 C-genome specific (napus-oleracea) | 0.9880383    | 0.7393349    |              | 1            | 0.8161615    | not scorable | not scorable |
| ##### Bn-scaff_15743_1-p29196 C-genome specific (napus-oleracea) | 0.9736842    | 0.7084544    | 0.9844961    |              | 0.7234182    | not scorable | not scorable |
| ##### Bn-scaff_15743_1-p29228 C-genome specific (napus-oleracea) | 0.9832536    | 0.7566043    | 0.9922481    |              | 0.8360596    | not scorable | not scorable |
| ##### Bn-scaff_15743_1-p31857 C-genome specific (napus-oleracea) | 0.9712918    | 0.7352494    |              | 1            | 0.8106176    | not scorable | not scorable |
| ##### Bn-scaff_15743_1-p34650 C-genome specific (napus-oleracea) | 0.9138756    | 0.769767     |              | 1            | 0.8275562    | not scorable | not scorable |
| ##### Bn-scaff_15743_1-p35262 napus specific                     | 0.9043062    | 0.7669555    | not scorable | not scorable | not scorable | not scorable | not scorable |
| ##### Bn-scaff_15743_1-p35271 napus specific                     | 0.9066986    | 0.7638903    | not scorable | not scorable | not scorable | not scorable | not scorable |
| ##### Bn-scaff_15743_1-p35314 napus specific                     | 0.9066986    | 0.7497908    | not scorable | not scorable | not scorable | not scorable | not scorable |
| ##### Bn-scaff_15743_1-p35346 napus specific                     | 0.9066986    | 0.7352906    | not scorable | not scorable | not scorable | not scorable | not scorable |
| ##### Bn-scaff_15743_1-p37040 C-genome specific (oleracea only)  | not scorable | not scorable |              | 1            | 0.7346311    | not scorable | not scorable |
| ##### Bn-scaff_15743_1-p37077 C-genome specific (napus-oleracea) | 0.9952153    | 0.3151694    | 0.8837209    |              | 0.1913366    | not scorable | not scorable |
| ##### Bn-scaff_15743_1-p37083 C-genome specific (napus-oleracea) | 0.9401914    | 0.2308877    |              | 1            | 0.7152818    | not scorable | not scorable |
| ##### Bn-scaff_15743_1-p39298 C-genome specific (napus-oleracea) | 0.8277512    | 0.8454663    | 0.9612403    |              | 0.7998289    | not scorable | not scorable |
| ##### Bn-scaff_15743_1-p39342 C-genome specific (napus-oleracea) | 0.9066986    | 0.735511     |              | 1            | 0.7969639    | not scorable | not scorable |
| ##### Bn-scaff_15743_1-p41316 C-genome specific (napus-oleracea) | 0.9162679    | 0.7458601    |              | 1            | 0.8495047    | not scorable | not scorable |
| ##### Bn-scaff_15743_1-p41348 napus specific                     | 0.9019139    | 0.6656474    | not scorable | not scorable | not scorable | not scorable | not scorable |
| ##### Bn-scaff_15743_1-p41542 napus specific                     | 0.9090909    | 0.7271654    | not scorable | not scorable | not scorable | not scorable | not scorable |
| ##### Bn-scaff_15743_1-p41773 napus specific                     | 0.9114832    | 0.7433685    | not scorable | not scorable | not scorable | not scorable | not scorable |
| ##### Bn-scaff_15743_1-p41783 napus specific                     | 0.9090909    | 0.7519648    | not scorable | not scorable | not scorable | not scorable | not scorable |
| ##### Bn-scaff_15743_1-p42077 napus specific                     | 0.9066986    | 0.7658742    | not scorable | not scorable | not scorable | not scorable | not scorable |
| ##### Bn-scaff_15743_1-p46251A-genome specific (napus-rapa)      | 0.9665072    | 0.3730426    | not scorable | not scorable |              | 1            | 0.8793069    |
| ##### Bn-scaff_15743_1-p48413 C-genome specific (napus-oleracea) | 0.9114832    | 0.8041726    | 0.9147287    |              | 0.7581163    | not scorable | not scorable |

|                                                                 |              |              |              |              |              |              |
|-----------------------------------------------------------------|--------------|--------------|--------------|--------------|--------------|--------------|
| #### Bn-scaff_15743_1-p51120 C-genome specific (napus-oleracea) | 0.9043062    | 0.7746027    | 0.5426357    | 0.7959931    | not scorable | not scorable |
| #### Bn-scaff_15743_1-p51185 C-genome specific (napus-oleracea) | 0.9090909    | 0.7504973    | 0.9922481    | 0.8541599    | not scorable | not scorable |
| #### Bn-scaff_15743_1-p51335 napus specific                     | 0.9138756    | 0.7610792    | not scorable | not scorable | not scorable | not scorable |
| #### Bn-scaff_15743_1-p51431 napus specific                     | 0.9066986    | 0.7446693    | not scorable | not scorable | not scorable | not scorable |
| #### Bn-scaff_15743_1-p51437 C-genome specific (napus-oleracea) | 0.9066986    | 0.7716519    | 0.5503876    | 0.8120127    | not scorable | not scorable |
| #### Bn-scaff_15743_1-p51923 C-genome specific (napus-oleracea) | 0.9066986    | 0.7000598    | 1            | 0.7917273    | not scorable | not scorable |
| #### Bn-scaff_15743_1-p53530 C-genome specific (napus-oleracea) | 0.8947368    | 0.7058955    | 0.4651163    | 0.8790965    | not scorable | not scorable |
| #### Bn-scaff_15743_1-p53681 napus specific                     | 0.9904306    | 0.3837373    | not scorable | not scorable | not scorable | not scorable |
| #### Bn-scaff_15743_1-p53876 C-genome specific (napus-oleracea) | 0.8995215    | 0.7693703    | 1            | 0.7267005    | not scorable | not scorable |
| #### Bn-scaff_15743_1-p54271 C-genome specific (napus-oleracea) | 0.9138756    | 0.6411665    | 0.9922481    | 0.6747       | not scorable | not scorable |
| #### Bn-scaff_15743_1-p54906 C-genome specific (napus-oleracea) | 0.9066986    | 0.6493095    | 0.9844961    | 0.7240599    | not scorable | not scorable |
| #### Bn-scaff_15743_1-p57389 C-genome specific (napus-oleracea) | 0.9114832    | 0.7972159    | 1            | 0.8200087    | not scorable | not scorable |
| #### Bn-scaff_15743_1-p57991 C-genome specific (napus-oleracea) | 0.9114832    | 0.7426102    | 1            | 0.8034809    | not scorable | not scorable |
| #### Bn-scaff_15743_1-p58029 C-genome specific (napus-oleracea) | 0.8995215    | 0.7146456    | 0.9922481    | 0.7646884    | not scorable | not scorable |
| #### Bn-scaff_15743_1-p58068 C-genome specific (napus-oleracea) | 0.9043062    | 0.6102715    | 0.9844961    | 0.6708387    | not scorable | not scorable |
| #### Bn-scaff_15743_1-p59089 genome unspecific (all in)         | 0.9449761    | 0.5629458    | 0.9844961    | 0.8599347    | 1            | 0.9327134    |
| #### Bn-scaff_15743_1-p59095 C-genome specific (napus-oleracea) | 0.9043062    | 0.7850423    | 1            | 0.7944183    | not scorable | not scorable |
| #### Bn-scaff_15743_1-p59135 C-genome specific (napus-oleracea) | 0.9019139    | 0.7004953    | 1            | 0.7430955    | not scorable | not scorable |
| #### Bn-scaff_15743_1-p59722 C-genome specific (napus-oleracea) | 0.8899522    | 0.7543038    | 0.9922481    | 0.7286072    | not scorable | not scorable |
| #### Bn-scaff_15743_1-p59941 C-genome specific (napus-oleracea) | 0.8947368    | 0.7439955    | 0.9844961    | 0.8390859    | not scorable | not scorable |
| #### Bn-scaff_15743_1-p61658 C-genome specific (oleracea only)  | not scorable | not scorable | 0.9922481    | 0.7925456    | not scorable | not scorable |
| #### Bn-scaff_15743_1-p63578 C-genome specific (napus-oleracea) | 0.9138756    | 0.6678326    | 0.9844961    | 0.6937156    | not scorable | not scorable |
| #### Bn-scaff_15743_1-p63594 genome unspecific (oleracea-rapa)  | not scorable | not scorable | 0.9767442    | 0.3744064    | 1            | 0.4687693    |
| #### Bn-scaff_15743_1-p63825 C-genome specific (napus-oleracea) | 0.8851675    | 0.6565985    | 0.8217054    | 0.6816607    | not scorable | not scorable |
| #### Bn-scaff_15743_1-p63855 all not scorable                   | not scorable | not scorable | not scorable | not scorable | not scorable | not scorable |
| #### Bn-scaff_15743_1-p64411 A-genome specific (rapa only)      | not scorable | not scorable | not scorable | not scorable | 0.9917355    | 0.7523182    |
| #### Bn-scaff_15743_1-p64537 napus specific                     | 0.9258373    | 0.6854169    | not scorable | not scorable | not scorable | not scorable |
| #### Bn-scaff_15743_1-p66065 C-genome specific (napus-oleracea) | 0.9138756    | 0.7536408    | 1            | 0.8059779    | not scorable | not scorable |
| #### Bn-scaff_15743_1-p66066 C-genome specific (napus-oleracea) | 0.9114832    | 0.7597322    | 1            | 0.7637952    | not scorable | not scorable |
| #### Bn-scaff_15743_1-p75010 genome unspecific (all in)         | 0.9138756    | 0.5164296    | 0.9844961    | 0.7809491    | 1            | 0.9140812    |
| #### Bn-scaff_15746_1-p10176 C-genome specific (napus-oleracea) | 0.9904306    | 0.8199931    | 0.9689922    | 0.801024     | not scorable | not scorable |
| #### Bn-scaff_15746_1-p12835 C-genome specific (napus-oleracea) | 0.9832536    | 0.7913308    | 1            | 0.88561      | not scorable | not scorable |
| #### Bn-scaff_15746_1-p1299 A-genome specific (napus-rapa)      | 0.9688995    | 0.3829091    | not scorable | not scorable | 1            | 0.8263997    |



|                                                                |              |              |              |   |              |              |              |
|----------------------------------------------------------------|--------------|--------------|--------------|---|--------------|--------------|--------------|
| #### Bn-scaff_15747_1-p38141C-genome specific (napus-oleracea) | 0.9880383    | 0.859216     |              | 1 | 0.7754677    | not scorable | not scorable |
| #### Bn-scaff_15747_1-p38761napus specific                     | 0.9641148    | 0.7267241    | not scorable |   | not scorable | not scorable | not scorable |
| #### Bn-scaff_15747_1-p39546C-genome specific (napus-oleracea) | 0.9401914    | 0.525732     |              | 1 | 0.8196748    | not scorable | not scorable |
| #### Bn-scaff_15747_1-p39608C-genome specific (napus-oleracea) | 0.9401914    | 0.5435067    | 0.9922481    |   | 0.7738692    | not scorable | not scorable |
| #### Bn-scaff_15747_1-p39704A-genome specific (napus-rapa)     | 0.9497608    | 0.4651174    | not scorable |   | not scorable | 1            | 0.7609816    |
| #### Bn-scaff_15747_1-p39756genome unspecific (all in)         | 0.9976076    | 0.3226027    |              | 1 | 0.739969     | 0.9917355    | 0.7091461    |
| #### Bn-scaff_15747_1-p40096C-genome specific (napus-oleracea) | 0.9641148    | 0.748741     |              | 1 | 0.8150912    | not scorable | not scorable |
| #### Bn-scaff_15747_1-p40149C-genome specific (napus-oleracea) | 0.9832536    | 0.7613368    |              | 1 | 0.8791603    | not scorable | not scorable |
| #### Bn-scaff_15747_1-p40212C-genome specific (napus-oleracea) | 0.9688995    | 0.735256     |              | 1 | 0.7871816    | not scorable | not scorable |
| #### Bn-scaff_15747_1-p41775napus specific                     | 0.9354067    | 0.5411519    | not scorable |   | not scorable | not scorable | not scorable |
| #### Bn-scaff_15747_1-p41894all not scorable                   | not scorable | not scorable | not scorable |   | not scorable | not scorable | not scorable |
| #### Bn-scaff_15747_1-p42405A-genome specific (napus-rapa)     | 0.9688995    | 0.328603     | not scorable |   | not scorable | 1            | 0.8883443    |
| #### Bn-scaff_15747_1-p44318A-genome specific (napus-rapa)     | 0.9736842    | 0.4969905    | not scorable |   | not scorable | 1            | 0.9272014    |
| #### Bn-scaff_15747_1-p44601C-genome specific (napus-oleracea) | 0.9760765    | 0.7355593    |              | 1 | 0.8351855    | not scorable | not scorable |
| #### Bn-scaff_15747_1-p46224genome unspecific (all in)         | 0.9904306    | 0.3761941    |              | 1 | 0.8341107    | 1            | 0.6770475    |
| #### Bn-scaff_15747_1-p47853C-genome specific (napus-oleracea) | 0.9856459    | 0.7183215    | 0.9922481    |   | 0.7225604    | not scorable | not scorable |
| #### Bn-scaff_15747_1-p54403A-genome specific (napus-rapa)     | 0.9880383    | 0.5410414    | not scorable |   | not scorable | 1            | 0.7104266    |
| #### Bn-scaff_15747_1-p54452A-genome specific (rapa only)      | not scorable | not scorable | not scorable |   | not scorable | 0.9917355    | 0.662329     |
| #### Bn-scaff_15747_1-p59164C-genome specific (napus-oleracea) | 0.8851675    | 0.77314      | 0.9922481    |   | 0.7012532    | not scorable | not scorable |
| #### Bn-scaff_15747_1-p62767C-genome specific (napus-oleracea) | 0.8636364    | 0.7082558    |              | 1 | 0.824069     | not scorable | not scorable |
| #### Bn-scaff_15747_1-p62899C-genome specific (napus-oleracea) | 0.9808612    | 0.6860608    |              | 1 | 0.6801178    | not scorable | not scorable |
| #### Bn-scaff_15747_1-p64334C-genome specific (napus-oleracea) | 0.8684211    | 0.6952389    | 0.9922481    |   | 0.6961258    | not scorable | not scorable |
| #### Bn-scaff_15747_1-p64903A-genome specific (napus-rapa)     | 0.9354067    | 0.3044946    | not scorable |   | not scorable | 1            | 0.7043225    |
| #### Bn-scaff_15747_1-p64942A-genome specific (rapa only)      | not scorable | not scorable | not scorable |   | not scorable | 0.9917355    | 0.7038997    |
| #### Bn-scaff_15747_1-p66094genome unspecific (all in)         | 0.9808612    | 0.6957672    |              | 1 | 0.7517037    | 1            | 0.9007304    |
| #### Bn-scaff_15747_1-p66744C-genome specific (napus-oleracea) | 0.8732057    | 0.7745187    | 0.9922481    |   | 0.7367632    | not scorable | not scorable |
| #### Bn-scaff_15747_1-p7015 genome unspecific (all in)         | 0.9952153    | 0.5505375    |              | 1 | 0.733823     | 1            | 0.9284418    |
| #### Bn-scaff_15747_1-p71903C-genome specific (napus-oleracea) | 0.8636364    | 0.7176068    | 0.8062016    |   | 0.7845715    | not scorable | not scorable |
| #### Bn-scaff_15747_1-p72936C-genome specific (napus-oleracea) | 0.8779904    | 0.7388223    |              | 1 | 0.8381146    | not scorable | not scorable |
| #### Bn-scaff_15747_1-p73488C-genome specific (napus-oleracea) | 0.8636364    | 0.7814851    | 0.9844961    |   | 0.8550599    | not scorable | not scorable |
| #### Bn-scaff_15747_1-p73489C-genome specific (napus-oleracea) | 0.8516746    | 0.7066539    | 0.9844961    |   | 0.690971     | not scorable | not scorable |
| #### Bn-scaff_15747_1-p74046C-genome specific (napus-oleracea) | 0.8708134    | 0.7011272    |              | 1 | 0.6830246    | not scorable | not scorable |
| #### Bn-scaff_15747_1-p74102C-genome specific (napus-oleracea) | 0.861244     | 0.7400278    |              | 1 | 0.7872977    | not scorable | not scorable |

|                                                                  |              |              |              |              |              |              |
|------------------------------------------------------------------|--------------|--------------|--------------|--------------|--------------|--------------|
| ##### Bn-scaff_15747_1-p74998 C-genome specific (napus-oleracea) | 0.861244     | 0.7701684    | 0.9922481    | 0.821207     | not scorable | not scorable |
| ##### Bn-scaff_15747_1-p75028 C-genome specific (napus-oleracea) | 0.8660287    | 0.7292053    | 0.9922481    | 0.791198     | not scorable | not scorable |
| ##### Bn-scaff_15747_1-p75029 C-genome specific (napus-oleracea) | 0.8636364    | 0.7288098    | 0.9534883    | 0.7147226    | not scorable | not scorable |
| ##### Bn-scaff_15747_1-p75081 C-genome specific (napus-oleracea) | 0.8755981    | 0.7385988    | 1            | 0.813022     | not scorable | not scorable |
| ##### Bn-scaff_15747_1-p75089 C-genome specific (napus-oleracea) | 0.8803828    | 0.7489679    | 1            | 0.819947     | not scorable | not scorable |
| ##### Bn-scaff_15747_1-p75530 all not scorable                   | not scorable | not scorable | not scorable | not scorable | not scorable | not scorable |
| ##### Bn-scaff_15747_1-p75837 C-genome specific (napus-oleracea) | 0.8636364    | 0.6905042    | 1            | 0.8417323    | not scorable | not scorable |
| ##### Bn-scaff_15747_1-p75846 C-genome specific (napus-oleracea) | 0.861244     | 0.737422     | 1            | 0.7649807    | not scorable | not scorable |
| ##### Bn-scaff_15747_1-p75869 C-genome specific (napus-oleracea) | 0.8636364    | 0.7364737    | 1            | 0.8189787    | not scorable | not scorable |
| ##### Bn-scaff_15747_1-p77090 C-genome specific (napus-oleracea) | 0.8636364    | 0.7370449    | 1            | 0.8591915    | not scorable | not scorable |
| ##### Bn-scaff_15747_1-p77108 genome unspecific (all in)         | 0.9665072    | 0.2765479    | 0.9922481    | 0.6435621    | 1            | 0.823379     |
| ##### Bn-scaff_15747_1-p77298 C-genome specific (napus-oleracea) | 0.8636364    | 0.6231178    | 1            | 0.7274901    | not scorable | not scorable |
| ##### Bn-scaff_15747_1-p77424 C-genome specific (napus-oleracea) | 0.9641148    | 0.7647519    | 0.9922481    | 0.7444736    | not scorable | not scorable |
| ##### Bn-scaff_15747_1-p77520 A-genome specific (napus-rapa)     | 0.9928229    | 0.3712139    | not scorable | not scorable | 0.9834711    | 0.8288428    |
| ##### Bn-scaff_15747_1-p77611 A-genome specific (napus-rapa)     | 0.9832536    | 0.2947007    | not scorable | not scorable | 0.9834711    | 0.6118604    |
| ##### Bn-scaff_15747_1-p77786 C-genome specific (napus-oleracea) | 0.854067     | 0.7062061    | 0.9147287    | 0.7370908    | not scorable | not scorable |
| ##### Bn-scaff_15747_1-p78467 C-genome specific (napus-oleracea) | 0.8708134    | 0.7581488    | 1            | 0.879939     | not scorable | not scorable |
| ##### Bn-scaff_15747_1-p78554 C-genome specific (napus-oleracea) | 0.8444976    | 0.7505794    | 1            | 0.8531109    | not scorable | not scorable |
| ##### Bn-scaff_15747_1-p79047 C-genome specific (napus-oleracea) | 0.8588517    | 0.759295     | 1            | 0.8587967    | not scorable | not scorable |
| ##### Bn-scaff_15747_1-p79171 C-genome specific (napus-oleracea) | 0.8732057    | 0.6357737    | 0.9922481    | 0.7073055    | not scorable | not scorable |
| ##### Bn-scaff_15747_1-p79361 genome unspecific (all in)         | 0.9019139    | 0.4825752    | 0.9457364    | 0.7304664    | 1            | 0.8851543    |
| ##### Bn-scaff_15747_1-p94111 genome unspecific (all in)         | 0.9856459    | 0.6404235    | 1            | 0.7611665    | 0.9586777    | 0.903599     |
| ##### Bn-scaff_15747_2-p12730 C-genome specific (napus-oleracea) | 0.9976076    | 0.6984674    | 0.9767442    | 0.7744981    | not scorable | not scorable |
| ##### Bn-scaff_15747_2-p21790 C-genome specific (napus-oleracea) | 1            | 0.9175813    | 1            | 0.7597055    | not scorable | not scorable |
| ##### Bn-scaff_15747_2-p25974 A-genome specific (napus-rapa)     | 0.9952153    | 0.4632168    | not scorable | not scorable | 0.9917355    | 0.4482066    |
| ##### Bn-scaff_15747_2-p38734 genome unspecific (all in)         | 0.9976076    | 0.518904     | 1            | 0.7824529    | 0.9834711    | 0.7815998    |
| ##### Bn-scaff_15747_2-p38770 napus specific                     | 0.9976076    | 0.6386566    | not scorable | not scorable | not scorable | not scorable |
| ##### Bn-scaff_15747_2-p67333 C-genome specific (napus-oleracea) | 0.9976076    | 0.8403716    | 1            | 0.7537695    | not scorable | not scorable |
| ##### Bn-scaff_15749_1-p10417 C-genome specific (napus-oleracea) | 0.9354067    | 0.5193477    | 0.9767442    | 0.813221     | not scorable | not scorable |
| ##### Bn-scaff_15749_1-p11817 C-genome specific (napus-oleracea) | 0.9688995    | 0.5050838    | 0.9844961    | 0.3918514    | not scorable | not scorable |
| ##### Bn-scaff_15749_1-p11923 C-genome specific (napus-oleracea) | 0.9760765    | 0.7851776    | 1            | 0.8419428    | not scorable | not scorable |
| ##### Bn-scaff_15749_1-p14998 C-genome specific (napus-oleracea) | 0.9712918    | 0.6884547    | 1            | 0.72405      | not scorable | not scorable |
| ##### Bn-scaff_15749_1-p17125 genome unspecific (oleracea-rapa)  | not scorable | not scorable | 0.9767442    | 0.5656402    | 1            | 0.9388858    |

|                                                                 |              |              |              |              |              |              |
|-----------------------------------------------------------------|--------------|--------------|--------------|--------------|--------------|--------------|
| #### Bn-scaff_15749_1-p17130 A-genome specific (rapa only)      | not scorable | not scorable | not scorable | not scorable | 1            | 0.9307728    |
| #### Bn-scaff_15749_1-p17220 C-genome specific (napus-oleracea) | 0.9712918    | 0.6494452    | 0.9922481    | 0.7278167    | not scorable | not scorable |
| #### Bn-scaff_15749_1-p17227 C-genome specific (napus-oleracea) | 0.9880383    | 0.767693     | 1            | 0.8387734    | not scorable | not scorable |
| #### Bn-scaff_15749_1-p17246 C-genome specific (napus-oleracea) | 0.9688995    | 0.7495118    | 1            | 0.7220892    | not scorable | not scorable |
| #### Bn-scaff_15749_1-p21512 C-genome specific (napus-oleracea) | 0.9952153    | 0.7814276    | 1            | 0.8820906    | not scorable | not scorable |
| #### Bn-scaff_15749_1-p21533 C-genome specific (napus-oleracea) | 0.9856459    | 0.7890037    | 1            | 0.8377294    | not scorable | not scorable |
| #### Bn-scaff_15749_1-p21567 C-genome specific (napus-oleracea) | 0.9856459    | 0.7852031    | 1            | 0.7750944    | not scorable | not scorable |
| #### Bn-scaff_15749_1-p21658 C-genome specific (napus-oleracea) | 0.9832536    | 0.7912036    | 1            | 0.8394567    | not scorable | not scorable |
| #### Bn-scaff_15749_1-p22186 C-genome specific (napus-oleracea) | 0.9760765    | 0.6793432    | 1            | 0.7105326    | not scorable | not scorable |
| #### Bn-scaff_15749_1-p22205 C-genome specific (napus-oleracea) | 0.9784689    | 0.7686352    | 1            | 0.825089     | not scorable | not scorable |
| #### Bn-scaff_15749_1-p22256 C-genome specific (napus-oleracea) | 0.9712918    | 0.7155632    | 1            | 0.7827834    | not scorable | not scorable |
| #### Bn-scaff_15749_1-p22261 napus specific                     | 0.8205742    | 0.8948922    | not scorable | not scorable | not scorable | not scorable |
| #### Bn-scaff_15749_1-p25114 genome unspecific (all in)         | 0.937799     | 0.4484189    | 1            | 0.7269737    | 1            | 0.9091029    |
| #### Bn-scaff_15749_1-p25613 C-genome specific (napus-oleracea) | 0.9665072    | 0.7719146    | 1            | 0.8307728    | not scorable | not scorable |
| #### Bn-scaff_15749_1-p25650 C-genome specific (napus-oleracea) | 0.9760765    | 0.7910626    | 1            | 0.8568647    | not scorable | not scorable |
| #### Bn-scaff_15749_1-p28224 genome unspecific (all in)         | 0.9928229    | 0.4418217    | 1            | 0.8270233    | 0.9834711    | 0.7503025    |
| #### Bn-scaff_15749_1-p30079 C-genome specific (napus-oleracea) | 0.937799     | 0.769228     | 0.8992248    | 0.8436937    | not scorable | not scorable |
| #### Bn-scaff_15749_1-p30836 C-genome specific (napus-oleracea) | 0.9856459    | 0.6926226    | 1            | 0.7710248    | not scorable | not scorable |
| #### Bn-scaff_15749_1-p30921 C-genome specific (napus-oleracea) | 0.9665072    | 0.6369685    | 1            | 0.6948738    | not scorable | not scorable |
| #### Bn-scaff_15749_1-p30941 C-genome specific (napus-oleracea) | 0.9832536    | 0.681233     | 1            | 0.70758      | not scorable | not scorable |
| #### Bn-scaff_15749_1-p30951 C-genome specific (napus-oleracea) | 0.9760765    | 0.6791974    | 1            | 0.7746196    | not scorable | not scorable |
| #### Bn-scaff_15749_1-p30957 C-genome specific (napus-oleracea) | 0.9760765    | 0.7040231    | 0.9922481    | 0.7159262    | not scorable | not scorable |
| #### Bn-scaff_15749_1-p31036 C-genome specific (napus-oleracea) | 0.9784689    | 0.7894885    | 1            | 0.7706975    | not scorable | not scorable |
| #### Bn-scaff_15749_1-p31043 C-genome specific (napus-oleracea) | 0.9880383    | 0.7023702    | 0.9922481    | 0.8107752    | not scorable | not scorable |
| #### Bn-scaff_15749_1-p31051 C-genome specific (napus-oleracea) | 0.9784689    | 0.7180917    | 0.9922481    | 0.7552096    | not scorable | not scorable |
| #### Bn-scaff_15749_1-p31090 C-genome specific (napus-oleracea) | 0.9736842    | 0.7106262    | 0.9922481    | 0.7364287    | not scorable | not scorable |
| #### Bn-scaff_15749_1-p31099 C-genome specific (napus-oleracea) | 0.9808612    | 0.7697535    | 1            | 0.7719007    | not scorable | not scorable |
| #### Bn-scaff_15749_1-p31107 C-genome specific (napus-oleracea) | 0.9760765    | 0.6752211    | 1            | 0.7146654    | not scorable | not scorable |
| #### Bn-scaff_15749_1-p31120 C-genome specific (napus-oleracea) | 0.9760765    | 0.7906533    | 1            | 0.8517241    | not scorable | not scorable |
| #### Bn-scaff_15749_1-p31171 C-genome specific (napus-oleracea) | 0.9760765    | 0.6573224    | 0.9922481    | 0.6529665    | not scorable | not scorable |
| #### Bn-scaff_15749_1-p31179 C-genome specific (napus-oleracea) | 0.9832536    | 0.6908004    | 0.9922481    | 0.6764538    | not scorable | not scorable |
| #### Bn-scaff_15749_1-p31839 C-genome specific (napus-oleracea) | 0.9760765    | 0.7914615    | 0.9612403    | 0.8002688    | not scorable | not scorable |
| #### Bn-scaff_15749_1-p32141 genome unspecific (all in)         | 0.9760765    | 0.5293779    | 0.9922481    | 0.754473     | 1            | 0.9177127    |

|                                                                 |           |           |           |           |              |              |
|-----------------------------------------------------------------|-----------|-----------|-----------|-----------|--------------|--------------|
| #### Bn-scaff_15749_1-p33278 C-genome specific (napus-oleracea) | 0.9736842 | 0.5247535 | 0.9689922 | 0.6615463 | not scorable | not scorable |
| #### Bn-scaff_15749_1-p33318 C-genome specific (napus-oleracea) | 0.9736842 | 0.8105687 | 0.9689922 | 0.8177522 | not scorable | not scorable |
| #### Bn-scaff_15749_1-p33558 C-genome specific (napus-oleracea) | 0.9832536 | 0.7121027 | 1         | 0.6775261 | not scorable | not scorable |
| #### Bn-scaff_15749_1-p33673 C-genome specific (napus-oleracea) | 0.9665072 | 0.6374993 | 1         | 0.6162109 | not scorable | not scorable |
| #### Bn-scaff_15749_1-p33784 C-genome specific (napus-oleracea) | 0.9784689 | 0.7726684 | 1         | 0.8320346 | not scorable | not scorable |
| #### Bn-scaff_15749_1-p33808 C-genome specific (napus-oleracea) | 0.9832536 | 0.7047002 | 1         | 0.753085  | not scorable | not scorable |
| #### Bn-scaff_15749_1-p33835 C-genome specific (napus-oleracea) | 0.9856459 | 0.7786703 | 1         | 0.8241953 | not scorable | not scorable |
| #### Bn-scaff_15749_1-p33838 C-genome specific (napus-oleracea) | 0.9832536 | 0.7886873 | 0.9922481 | 0.7955181 | not scorable | not scorable |
| #### Bn-scaff_15749_1-p33871 C-genome specific (napus-oleracea) | 0.9808612 | 0.8166267 | 0.9922481 | 0.8391241 | not scorable | not scorable |
| #### Bn-scaff_15749_1-p33884 C-genome specific (napus-oleracea) | 0.9736842 | 0.7703121 | 1         | 0.8428671 | not scorable | not scorable |
| #### Bn-scaff_15749_1-p33899 C-genome specific (napus-oleracea) | 0.9832536 | 0.7673287 | 1         | 0.8010147 | not scorable | not scorable |
| #### Bn-scaff_15749_1-p33903 C-genome specific (napus-oleracea) | 0.9808612 | 0.7262647 | 1         | 0.6811781 | not scorable | not scorable |
| #### Bn-scaff_15749_1-p33914 C-genome specific (napus-oleracea) | 0.9784689 | 0.7649667 | 1         | 0.8353608 | not scorable | not scorable |
| #### Bn-scaff_15749_1-p33944 C-genome specific (napus-oleracea) | 0.9784689 | 0.7149212 | 1         | 0.7464372 | not scorable | not scorable |
| #### Bn-scaff_15749_1-p33949 C-genome specific (napus-oleracea) | 0.9832536 | 0.7482932 | 1         | 0.8067945 | not scorable | not scorable |
| #### Bn-scaff_15749_1-p33990 C-genome specific (napus-oleracea) | 0.9760765 | 0.6993159 | 0.8217054 | 0.8099628 | not scorable | not scorable |
| #### Bn-scaff_15749_1-p36444 C-genome specific (napus-oleracea) | 0.9760765 | 0.7866874 | 1         | 0.8432545 | not scorable | not scorable |
| #### Bn-scaff_15749_1-p37381 C-genome specific (napus-oleracea) | 0.9760765 | 0.7970698 | 0.9922481 | 0.7901828 | not scorable | not scorable |
| #### Bn-scaff_15749_1-p40112 C-genome specific (napus-oleracea) | 0.9545454 | 0.4208254 | 0.9922481 | 0.7186427 | not scorable | not scorable |
| #### Bn-scaff_15749_1-p40491 C-genome specific (napus-oleracea) | 0.9808612 | 0.6185381 | 0.9922481 | 0.7733682 | not scorable | not scorable |
| #### Bn-scaff_15749_1-p40535 C-genome specific (napus-oleracea) | 0.9760765 | 0.7294047 | 0.9922481 | 0.7235253 | not scorable | not scorable |
| #### Bn-scaff_15749_1-p40603 C-genome specific (napus-oleracea) | 0.9832536 | 0.7904851 | 1         | 0.8374376 | not scorable | not scorable |
| #### Bn-scaff_15749_1-p40626 C-genome specific (napus-oleracea) | 0.9736842 | 0.76249   | 1         | 0.8204536 | not scorable | not scorable |
| #### Bn-scaff_15749_1-p40637 C-genome specific (napus-oleracea) | 0.9808612 | 0.787383  | 1         | 0.7637478 | not scorable | not scorable |
| #### Bn-scaff_15749_1-p40926 C-genome specific (napus-oleracea) | 0.9832536 | 0.7564698 | 1         | 0.6993375 | not scorable | not scorable |
| #### Bn-scaff_15749_1-p40938 C-genome specific (napus-oleracea) | 0.9808612 | 0.7975124 | 0.9922481 | 0.7517939 | not scorable | not scorable |
| #### Bn-scaff_15749_1-p40947 C-genome specific (napus-oleracea) | 0.9688995 | 0.7758871 | 1         | 0.8289795 | not scorable | not scorable |
| #### Bn-scaff_15749_1-p43355 C-genome specific (napus-oleracea) | 0.9832536 | 0.7719121 | 1         | 0.8425223 | not scorable | not scorable |
| #### Bn-scaff_15749_1-p43364 C-genome specific (napus-oleracea) | 0.9880383 | 0.7574923 | 1         | 0.8439672 | not scorable | not scorable |
| #### Bn-scaff_15749_1-p44803 C-genome specific (napus-oleracea) | 0.9736842 | 0.6757784 | 0.9922481 | 0.6787507 | not scorable | not scorable |
| #### Bn-scaff_15749_1-p44834 C-genome specific (napus-oleracea) | 0.9856459 | 0.6773878 | 1         | 0.6910247 | not scorable | not scorable |
| #### Bn-scaff_15749_1-p44900 C-genome specific (napus-oleracea) | 0.9784689 | 0.6738516 | 0.9844961 | 0.6953231 | not scorable | not scorable |
| #### Bn-scaff_15749_1-p44922 C-genome specific (napus-oleracea) | 0.9593301 | 0.5518588 | 1         | 0.5466673 | not scorable | not scorable |



|                                                                 |              |              |              |              |              |              |
|-----------------------------------------------------------------|--------------|--------------|--------------|--------------|--------------|--------------|
| #### Bn-scaff_15749_1-p44970 C-genome specific (napus-oleracea) | 0.9641148    | 0.6313108    | 0.9922481    | 0.6442349    | not scorable | not scorable |
| #### Bn-scaff_15749_1-p46925 C-genome specific (napus-oleracea) | 0.8732057    | 0.7605278    | 0.7751938    | 0.8383599    | not scorable | not scorable |
| #### Bn-scaff_15749_1-p47777 C-genome specific (napus-oleracea) | 0.9808612    | 0.7200286    | 1            | 0.7621135    | not scorable | not scorable |
| #### Bn-scaff_15749_1-p48496 C-genome specific (napus-oleracea) | 0.9808612    | 0.5951089    | 0.9767442    | 0.603867     | not scorable | not scorable |
| #### Bn-scaff_15749_1-p48540 C-genome specific (napus-oleracea) | 0.9784689    | 0.669567     | 1            | 0.6608227    | not scorable | not scorable |
| #### Bn-scaff_15749_1-p52748 C-genome specific (napus-oleracea) | 0.9784689    | 0.7138481    | 0.9767442    | 0.7688043    | not scorable | not scorable |
| #### Bn-scaff_15749_1-p55373 C-genome specific (napus-oleracea) | 0.9688995    | 0.678528     | 0.9767442    | 0.740355     | not scorable | not scorable |
| #### Bn-scaff_15752_1-p204 napus specific                       | 1            | 0.7252899    | not scorable | not scorable | not scorable | not scorable |
| #### Bn-scaff_15754_1-p10966 C-genome specific (napus-oleracea) | 0.9641148    | 0.5633957    | 1            | 0.5907137    | not scorable | not scorable |
| #### Bn-scaff_15754_1-p11412 C-genome specific (napus-oleracea) | 0.9976076    | 0.7906036    | 1            | 0.8303101    | not scorable | not scorable |
| #### Bn-scaff_15754_1-p11414 C-genome specific (napus-oleracea) | 0.9976076    | 0.8477573    | 0.9922481    | 0.7512361    | not scorable | not scorable |
| #### Bn-scaff_15754_1-p11416 C-genome specific (napus-oleracea) | 0.9928229    | 0.8289676    | 0.9922481    | 0.7745852    | not scorable | not scorable |
| #### Bn-scaff_15754_1-p11418 C-genome specific (napus-oleracea) | 0.9976076    | 0.825917     | 1            | 0.8229464    | not scorable | not scorable |
| #### Bn-scaff_15754_1-p11473 C-genome specific (napus-oleracea) | 0.9952153    | 0.7816312    | 1            | 0.8607379    | not scorable | not scorable |
| #### Bn-scaff_15754_1-p12025 C-genome specific (napus-oleracea) | 0.9952153    | 0.7669207    | 1            | 0.8411788    | not scorable | not scorable |
| #### Bn-scaff_15754_1-p12124 C-genome specific (napus-oleracea) | 0.9952153    | 0.7884394    | 0.9922481    | 0.8364049    | not scorable | not scorable |
| #### Bn-scaff_15754_1-p12140 C-genome specific (napus-oleracea) | 0.9880383    | 0.6956221    | 0.9844961    | 0.7088114    | not scorable | not scorable |
| #### Bn-scaff_15754_1-p12154 C-genome specific (napus-oleracea) | 0.9952153    | 0.7329385    | 0.9922481    | 0.6784137    | not scorable | not scorable |
| #### Bn-scaff_15754_1-p12253 C-genome specific (napus-oleracea) | 0.9808612    | 0.7190434    | 1            | 0.7315165    | not scorable | not scorable |
| #### Bn-scaff_15754_1-p12686 genome unspecific (oleracea-rapa)  | not scorable | not scorable | 1            | 0.5125092    | 0.9669421    | 0.7713996    |
| #### Bn-scaff_15754_1-p13773 C-genome specific (oleracea only)  | not scorable | not scorable | 0.9689922    | 0.8509076    | not scorable | not scorable |
| #### Bn-scaff_15754_1-p14037 C-genome specific (napus-oleracea) | 0.9736842    | 0.6849855    | 1            | 0.8220954    | not scorable | not scorable |
| #### Bn-scaff_15754_1-p14165 C-genome specific (napus-oleracea) | 0.9808612    | 0.6895347    | 0.9922481    | 0.7138872    | not scorable | not scorable |
| #### Bn-scaff_15754_1-p14254 C-genome specific (napus-oleracea) | 0.9808612    | 0.7205525    | 0.9922481    | 0.6920379    | not scorable | not scorable |
| #### Bn-scaff_15754_1-p14268 C-genome specific (napus-oleracea) | 0.9856459    | 0.7446377    | 1            | 0.6420886    | not scorable | not scorable |
| #### Bn-scaff_15754_1-p14300 C-genome specific (napus-oleracea) | 0.9976076    | 0.7565088    | 0.9922481    | 0.9101837    | not scorable | not scorable |
| #### Bn-scaff_15754_1-p14302 C-genome specific (napus-oleracea) | 0.9880383    | 0.7771732    | 1            | 0.8599881    | not scorable | not scorable |
| #### Bn-scaff_15754_1-p14358 C-genome specific (napus-oleracea) | 0.9880383    | 0.7617568    | 0.9922481    | 0.8191361    | not scorable | not scorable |
| #### Bn-scaff_15754_1-p14376 C-genome specific (napus-oleracea) | 0.9856459    | 0.7537187    | 0.9844961    | 0.8196729    | not scorable | not scorable |
| #### Bn-scaff_15754_1-p14563 C-genome specific (napus-oleracea) | 0.9976076    | 0.7193376    | 1            | 0.6962134    | not scorable | not scorable |
| #### Bn-scaff_15754_1-p24010 C-genome specific (napus-oleracea) | 0.9928229    | 0.7718659    | 0.9922481    | 0.8282195    | not scorable | not scorable |
| #### Bn-scaff_15754_1-p24093 C-genome specific (napus-oleracea) | 0.9784689    | 0.7946881    | 0.9844961    | 0.8975849    | not scorable | not scorable |
| #### Bn-scaff_15754_1-p24211 napus specific                     | 0.9665072    | 0.7691874    | not scorable | not scorable | not scorable | not scorable |

|                                                                 |              |              |              |              |              |              |
|-----------------------------------------------------------------|--------------|--------------|--------------|--------------|--------------|--------------|
| #### Bn-scaff_15754_1-p24309 C-genome specific (napus-oleracea) | 0.9808612    | 0.7628273    | 0.9767442    | 0.8906622    | not scorable | not scorable |
| #### Bn-scaff_15754_1-p24317 C-genome specific (napus-oleracea) | 0.9808612    | 0.7794334    | 0.9922481    | 0.8867009    | not scorable | not scorable |
| #### Bn-scaff_15754_1-p24569 C-genome specific (napus-oleracea) | 0.9784689    | 0.7488706    | 0.9844961    | 0.8036568    | not scorable | not scorable |
| #### Bn-scaff_15754_1-p24629 C-genome specific (napus-oleracea) | 0.9617225    | 0.6319943    | 1            | 0.6423814    | not scorable | not scorable |
| #### Bn-scaff_15754_1-p24649 C-genome specific (napus-oleracea) | 0.9760765    | 0.7688718    | 0.9922481    | 0.8161563    | not scorable | not scorable |
| #### Bn-scaff_15754_1-p28273 A-genome specific (napus-rapa)     | 1            | 0.5314127    | not scorable | not scorable | 1            | 0.5343732    |
| #### Bn-scaff_15754_1-p28609 C-genome specific (napus-oleracea) | 0.9976076    | 0.7761322    | 0.9767442    | 0.8168349    | not scorable | not scorable |
| #### Bn-scaff_15754_1-p29497 genome unspecific (all in)         | 0.9425837    | 0.3996004    | 1            | 0.6349505    | 0.768595     | 0.7984706    |
| #### Bn-scaff_15754_1-p43720 C-genome specific (napus-oleracea) | 1            | 0.7641606    | 0.9844961    | 0.760457     | not scorable | not scorable |
| #### Bn-scaff_15754_1-p44190 C-genome specific (napus-oleracea) | 0.9880383    | 0.7719246    | 0.9689922    | 0.8218825    | not scorable | not scorable |
| #### Bn-scaff_15754_1-p45027 C-genome specific (napus-oleracea) | 0.9952153    | 0.6465223    | 0.9922481    | 0.6571041    | not scorable | not scorable |
| #### Bn-scaff_15754_1-p45263 C-genome specific (napus-oleracea) | 0.9736842    | 0.3825997    | 0.9922481    | 0.4737054    | not scorable | not scorable |
| #### Bn-scaff_15754_1-p46515 genome unspecific (all in)         | 0.9880383    | 0.2858997    | 0.9922481    | 0.6016986    | 1            | 0.7770717    |
| #### Bn-scaff_15754_1-p47766 genome unspecific (all in)         | 0.9856459    | 0.702295     | 0.9922481    | 0.6986491    | 1            | 0.9239604    |
| #### Bn-scaff_15754_1-p47825 C-genome specific (napus-oleracea) | 0.9904306    | 0.6476121    | 1            | 0.6520399    | not scorable | not scorable |
| #### Bn-scaff_15754_1-p47873 genome unspecific (all in)         | 0.9952153    | 0.4000856    | 1            | 0.7875246    | 1            | 0.9116173    |
| #### Bn-scaff_15754_1-p47899 C-genome specific (napus-oleracea) | 0.9760765    | 0.375537     | 1            | 0.6351091    | not scorable | not scorable |
| #### Bn-scaff_15754_1-p49609 A-genome specific (napus-rapa)     | 0.9473684    | 0.3247277    | not scorable | not scorable | 0.9917355    | 0.7923127    |
| #### Bn-scaff_15754_1-p50964 C-genome specific (napus-oleracea) | 0.9832536    | 0.7422501    | 1            | 0.7934086    | not scorable | not scorable |
| #### Bn-scaff_15754_1-p51928 C-genome specific (napus-oleracea) | 0.9712918    | 0.7390206    | 1            | 0.6022141    | not scorable | not scorable |
| #### Bn-scaff_15754_1-p51982 C-genome specific (napus-oleracea) | 0.9832536    | 0.7477885    | 0.9612403    | 0.8544983    | not scorable | not scorable |
| #### Bn-scaff_15754_1-p53864 A-genome specific (napus-rapa)     | 1            | 0.8203557    | not scorable | not scorable | 0.9338843    | 0.8165783    |
| #### Bn-scaff_15754_1-p55507 C-genome specific (napus-oleracea) | 0.9904306    | 0.6417273    | 1            | 0.6424698    | not scorable | not scorable |
| #### Bn-scaff_15754_1-p65184 napus specific                     | 0.9784689    | 0.7859687    | not scorable | not scorable | not scorable | not scorable |
| #### Bn-scaff_15754_1-p68847 C-genome specific (napus-oleracea) | 0.9856459    | 0.6977621    | 1            | 0.7272382    | not scorable | not scorable |
| #### Bn-scaff_15754_1-p69166 C-genome specific (napus-oleracea) | 0.9688995    | 0.6228772    | 0.7674419    | 0.6890315    | not scorable | not scorable |
| #### Bn-scaff_15754_1-p69189 C-genome specific (napus-oleracea) | 0.9665072    | 0.6548462    | 0.7906977    | 0.664893     | not scorable | not scorable |
| #### Bn-scaff_15754_1-p69214 C-genome specific (napus-oleracea) | 0.9641148    | 0.6402054    | 0.7906977    | 0.7295427    | not scorable | not scorable |
| #### Bn-scaff_15754_1-p69291 genome unspecific (all in)         | 0.9593301    | 0.5669137    | 0.7829458    | 0.695167     | 0.9917355    | 0.7662292    |
| #### Bn-scaff_15754_1-p73087 genome unspecific (oleracea-rapa)  | not scorable | not scorable | 0.9534883    | 0.7051219    | 0.9090909    | 0.434082     |
| #### Bn-scaff_15754_1-p7814 all not scorable                    | not scorable | not scorable | not scorable | not scorable | not scorable | not scorable |
| #### Bn-scaff_15754_1-p80258 C-genome specific (napus-oleracea) | 1            | 0.7662818    | 1            | 0.6536004    | not scorable | not scorable |
| #### Bn-scaff_15754_1-p82758 napus specific                     | 0.9976076    | 0.9232724    | not scorable | not scorable | not scorable | not scorable |

|                                                                 |              |              |              |              |              |              |
|-----------------------------------------------------------------|--------------|--------------|--------------|--------------|--------------|--------------|
| #### Bn-scaff_15754_1-p8277C genome unspecific (all in)         | 0.9976076    | 0.3990285    | 1            | 0.9390823    | 1            | 0.9293141    |
| #### Bn-scaff_15754_1-p8279E A-genome specific (napus-rapa)     | 0.9880383    | 0.3528213    | not scorable | not scorable | 1            | 0.7148531    |
| #### Bn-scaff_15758_1-p36244 napus specific                     | 0.9976076    | 0.8257136    | not scorable | not scorable | not scorable | not scorable |
| #### Bn-scaff_15758_1-p3719C napus specific                     | 1            | 0.5098791    | not scorable | not scorable | not scorable | not scorable |
| #### Bn-scaff_15758_3-p10822A A-genome specific (napus-rapa)    | 1            | 0.6117677    | not scorable | not scorable | 1            | 0.6037343    |
| #### Bn-scaff_15758_3-p10852 napus specific                     | 1            | 0.6688801    | not scorable | not scorable | not scorable | not scorable |
| #### Bn-scaff_15758_3-p1324C C-genome specific (napus-oleracea) | 1            | 0.7834215    | 0.9922481    | 0.7173789    | not scorable | not scorable |
| #### Bn-scaff_15758_3-p2615C genome unspecific (all in)         | 1            | 0.2583551    | 1            | 0.6049935    | 1            | 0.9175068    |
| #### Bn-scaff_15758_3-p3581E genome unspecific (oleracea-rapa)  | not scorable | not scorable | 1            | 0.6971124    | 0.9834711    | 0.8071905    |
| #### Bn-scaff_15758_3-p55912 napus specific                     | 1            | 0.7873875    | not scorable | not scorable | not scorable | not scorable |
| #### Bn-scaff_15758_3-p7273C napus specific                     | 0.9856459    | 0.6681207    | not scorable | not scorable | not scorable | not scorable |
| #### Bn-scaff_15758_3-p73192 napus specific                     | 0.9976076    | 0.9076045    | not scorable | not scorable | not scorable | not scorable |
| #### Bn-scaff_15758_3-p8956E A-genome specific (napus-rapa)     | 1            | 0.7641606    | not scorable | not scorable | 1            | 0.7876139    |
| #### Bn-scaff_15762_1-p1096E A-genome specific (napus-rapa)     | 0.9880383    | 0.2941682    | not scorable | not scorable | 0.9834711    | 0.7544948    |
| #### Bn-scaff_15762_1-p1131E A-genome specific (rapa only)      | not scorable | not scorable | not scorable | not scorable | 0.9669421    | 0.6558977    |
| #### Bn-scaff_15762_1-p11327A A-genome specific (napus-rapa)    | 0.9712918    | 0.311032     | not scorable | not scorable | 1            | 0.8194062    |
| #### Bn-scaff_15762_1-p2582E C-genome specific (napus-oleracea) | 1            | 0.8902379    | 1            | 0.566788     | not scorable | not scorable |
| #### Bn-scaff_15762_1-p2587E C-genome specific (napus-oleracea) | 0.9952153    | 0.816863     | 0.9922481    | 0.740123     | not scorable | not scorable |
| #### Bn-scaff_15762_1-p47582 napus specific                     | 1            | 0.5709352    | not scorable | not scorable | not scorable | not scorable |
| #### Bn-scaff_15762_1-p4770E C-genome specific (napus-oleracea) | 1            | 0.7155698    | 1            | 0.6893401    | not scorable | not scorable |
| #### Bn-scaff_15762_1-p5884C A-genome specific (rapa only)      | not scorable | not scorable | not scorable | not scorable | 1            | 0.8014089    |
| #### Bn-scaff_15762_1-p58904 A-genome specific (rapa only)      | not scorable | not scorable | not scorable | not scorable | 0.9834711    | 0.3211282    |
| #### Bn-scaff_15762_1-p66582 genome unspecific (all in)         | 0.9928229    | 0.4698649    | 1            | 0.4695695    | 1            | 0.6657144    |
| #### Bn-scaff_15762_1-p67031 napus specific                     | 1            | 0.9272014    | not scorable | not scorable | not scorable | not scorable |
| #### Bn-scaff_15762_1-p71722A A-genome specific (napus-rapa)    | 0.9928229    | 0.5399259    | not scorable | not scorable | 0.9338843    | 0.7528131    |
| #### Bn-scaff_15762_1-p7546E C-genome specific (napus-oleracea) | 0.9976076    | 0.7711663    | 0.9922481    | 0.7047658    | not scorable | not scorable |
| #### Bn-scaff_15762_1-p8216E C-genome specific (napus-oleracea) | 0.9952153    | 0.6990649    | 0.8682171    | 0.8295538    | not scorable | not scorable |
| #### Bn-scaff_15762_1-p99537 genome unspecific (all in)         | 0.9425837    | 0.3449756    | 1            | 0.8162472    | 1            | 0.7610561    |
| #### Bn-scaff_15763_1-p1029E genome unspecific (all in)         | 0.9928229    | 0.4320002    | 1            | 0.739518     | 1            | 0.735211     |
| #### Bn-scaff_15763_1-p10484 genome unspecific (all in)         | 0.9976076    | 0.3233256    | 1            | 0.6589515    | 1            | 0.487809     |
| #### Bn-scaff_15763_1-p10491 napus specific                     | 0.9665072    | 0.7315249    | not scorable | not scorable | not scorable | not scorable |
| #### Bn-scaff_15763_1-p1089E genome unspecific (all in)         | 0.9856459    | 0.3796655    | 1            | 0.8144403    | 1            | 0.694368     |
| #### Bn-scaff_15763_1-p1090E genome unspecific (all in)         | 0.9617225    | 0.4091359    | 1            | 0.838721     | 1            | 0.8267694    |

|                                                                 |           |           |              |              |              |              |
|-----------------------------------------------------------------|-----------|-----------|--------------|--------------|--------------|--------------|
| #### Bn-scaff_15763_1-p1090 genome unspecific (all in)          | 0.9688995 | 0.2700804 | 0.9844961    | 0.6797275    | 0.9917355    | 0.7012163    |
| #### Bn-scaff_15763_1-p11193 napus specific                     | 0.9952153 | 0.9225278 | not scorable | not scorable | not scorable | not scorable |
| #### Bn-scaff_15763_1-p11912 napus specific                     | 0.9904306 | 0.683753  | not scorable | not scorable | not scorable | not scorable |
| #### Bn-scaff_15763_1-p12343 A-genome specific (napus-rapa)     | 0.9880383 | 0.373692  | not scorable | not scorable | 0.9917355    | 0.7002153    |
| #### Bn-scaff_15763_1-p13326 genome unspecific (all in)         | 0.9976076 | 0.2984695 |              | 1            | 0.5686738    | 1            |
| #### Bn-scaff_15763_1-p13821 A-genome specific (napus-rapa)     |           | 1         | 0.7495064    | not scorable | not scorable | 1            |
| #### Bn-scaff_15763_1-p14014 napus specific                     | 0.9952153 | 0.8677401 | not scorable | not scorable | not scorable | not scorable |
| #### Bn-scaff_15763_1-p14039 napus specific                     | 0.9952153 | 0.884316  | not scorable | not scorable | not scorable | not scorable |
| #### Bn-scaff_15763_1-p14118 napus specific                     | 0.9976076 | 0.8664028 | not scorable | not scorable | not scorable | not scorable |
| #### Bn-scaff_15763_1-p14136 genome unspecific (all in)         | 0.9808612 | 0.4352854 |              | 1            | 0.8494142    | 1            |
| #### Bn-scaff_15763_1-p14139 napus specific                     | 0.9952153 | 0.8454599 | not scorable | not scorable | not scorable | not scorable |
| #### Bn-scaff_15763_1-p14187 C-genome specific (napus-oleracea) | 0.9952153 | 0.7475684 | 0.9922481    | 0.7503659    | not scorable | not scorable |
| #### Bn-scaff_15763_1-p14195 C-genome specific (napus-oleracea) | 0.9904306 | 0.8244392 |              | 1            | 0.7941609    | not scorable |
| #### Bn-scaff_15763_1-p14243 C-genome specific (napus-oleracea) | 0.9832536 | 0.74496   |              | 1            | 0.8452988    | not scorable |
| #### Bn-scaff_15763_1-p14340 C-genome specific (napus-oleracea) | 0.9928229 | 0.8364791 | 0.8062016    | 0.8470504    | not scorable | not scorable |
| #### Bn-scaff_15763_1-p14345 C-genome specific (napus-oleracea) | 0.9688995 | 0.7597486 | 0.7286822    | 0.7224116    | not scorable | not scorable |
| #### Bn-scaff_15763_1-p14401 C-genome specific (napus-oleracea) | 0.9904306 | 0.8926522 | 0.8062016    | 0.7761344    | not scorable | not scorable |
| #### Bn-scaff_15763_1-p14403 C-genome specific (napus-oleracea) | 0.9928229 | 0.8018168 | 0.7984496    | 0.7966443    | not scorable | not scorable |
| #### Bn-scaff_15763_1-p14403 C-genome specific (napus-oleracea) | 0.9952153 | 0.8413204 | 0.7984496    | 0.7787789    | not scorable | not scorable |
| #### Bn-scaff_15763_1-p14405 C-genome specific (napus-oleracea) | 0.9928229 | 0.8426402 | 0.8139535    | 0.8452194    | not scorable | not scorable |
| #### Bn-scaff_15763_1-p14419 C-genome specific (napus-oleracea) | 0.9952153 | 0.8644328 | 0.7984496    | 0.8192276    | not scorable | not scorable |
| #### Bn-scaff_15763_1-p14436 C-genome specific (napus-oleracea) | 0.9784689 | 0.7509399 | 0.9612403    | 0.8325714    | not scorable | not scorable |
| #### Bn-scaff_15763_1-p14440 C-genome specific (napus-oleracea) | 0.9641148 | 0.8098577 | 0.8914729    | 0.7376452    | not scorable | not scorable |
| #### Bn-scaff_15763_1-p14441 C-genome specific (napus-oleracea) | 0.9952153 | 0.8469126 |              | 1            | 0.8586752    | not scorable |
| #### Bn-scaff_15763_1-p14443 napus specific                     | 0.9952153 | 0.8924311 | not scorable | not scorable | not scorable | not scorable |
| #### Bn-scaff_15763_1-p14444 C-genome specific (napus-oleracea) | 0.9928229 | 0.88907   | 0.9844961    | 0.840809     | not scorable | not scorable |
| #### Bn-scaff_15763_1-p14445 C-genome specific (napus-oleracea) | 0.9952153 | 0.8918174 |              | 1            | 0.7927638    | not scorable |
| #### Bn-scaff_15763_1-p14446 napus specific                     | 0.9928229 | 0.8299427 | not scorable | not scorable | not scorable | not scorable |
| #### Bn-scaff_15763_1-p14448 C-genome specific (napus-oleracea) | 0.9952153 | 0.8995502 |              | 1            | 0.8735623    | not scorable |
| #### Bn-scaff_15763_1-p14454 C-genome specific (napus-oleracea) | 0.9880383 | 0.8684158 |              | 1            | 0.7380287    | not scorable |
| #### Bn-scaff_15763_1-p14457 C-genome specific (napus-oleracea) | 0.9952153 | 0.8090735 | 0.9689922    | 0.7462776    | not scorable | not scorable |
| #### Bn-scaff_15763_1-p14564 C-genome specific (napus-oleracea) | 0.9880383 | 0.7069653 | 0.9612403    | 0.6876255    | not scorable | not scorable |
| #### Bn-scaff_15763_1-p14565 C-genome specific (napus-oleracea) | 0.9928229 | 0.9060143 | 0.9534883    | 0.8240305    | not scorable | not scorable |

|                                                                 |              |              |              |              |              |              |
|-----------------------------------------------------------------|--------------|--------------|--------------|--------------|--------------|--------------|
| #### Bn-scaff_15763_1-p14597 C-genome specific (napus-oleracea) | 0.8779904    | 0.9378943    | 0.7751938    | 0.7999857    | not scorable | not scorable |
| #### Bn-scaff_15763_1-p14603 C-genome specific (napus-oleracea) | 0.9880383    | 0.8054131    | 1            | 0.770483     | not scorable | not scorable |
| #### Bn-scaff_15763_1-p14605 C-genome specific (napus-oleracea) | 0.9976076    | 0.8784505    | 1            | 0.7612949    | not scorable | not scorable |
| #### Bn-scaff_15763_1-p14605 C-genome specific (napus-oleracea) | 0.9880383    | 0.8244137    | 0.9922481    | 0.7800694    | not scorable | not scorable |
| #### Bn-scaff_15763_1-p14618 C-genome specific (napus-oleracea) | 0.9976076    | 0.818771     | 0.9844961    | 0.7869104    | not scorable | not scorable |
| #### Bn-scaff_15763_1-p14620 C-genome specific (napus-oleracea) | 0.9928229    | 0.8353385    | 0.9844961    | 0.807141     | not scorable | not scorable |
| #### Bn-scaff_15763_1-p14623 C-genome specific (napus-oleracea) | 0.9880383    | 0.8202029    | 0.9922481    | 0.8241368    | not scorable | not scorable |
| #### Bn-scaff_15763_1-p14631 C-genome specific (napus-oleracea) | 0.9952153    | 0.84067      | 1            | 0.769404     | not scorable | not scorable |
| #### Bn-scaff_15763_1-p14634 C-genome specific (napus-oleracea) | 0.9928229    | 0.8063037    | 1            | 0.8609294    | not scorable | not scorable |
| #### Bn-scaff_15763_1-p14636 C-genome specific (napus-oleracea) | 0.9928229    | 0.8234053    | 1            | 0.8354996    | not scorable | not scorable |
| #### Bn-scaff_15763_1-p14644 C-genome specific (napus-oleracea) | 0.9952153    | 0.8001288    | 1            | 0.7628372    | not scorable | not scorable |
| #### Bn-scaff_15763_1-p14816 genome unspecific (all in)         | 0.9928229    | 0.4649731    | 1            | 0.7568068    | 1            | 0.9138421    |
| #### Bn-scaff_15763_1-p14921 C-genome specific (napus-oleracea) | 0.9976076    | 0.805865     | 0.9767442    | 0.6049549    | not scorable | not scorable |
| #### Bn-scaff_15763_1-p14923 C-genome specific (napus-oleracea) | 1            | 0.8115134    | 1            | 0.7972817    | not scorable | not scorable |
| #### Bn-scaff_15763_1-p14960 C-genome specific (napus-oleracea) | 0.9019139    | 0.8905943    | 0.8449612    | 0.864722     | not scorable | not scorable |
| #### Bn-scaff_15763_1-p15015 C-genome specific (napus-oleracea) | 0.9952153    | 0.7528178    | 0.9922481    | 0.7416368    | not scorable | not scorable |
| #### Bn-scaff_15763_1-p15577 A-genome specific (napus-rapa)     | 1            | 0.7012962    | not scorable | not scorable | 1            | 0.6910841    |
| #### Bn-scaff_15763_1-p18802 A-genome specific (napus-rapa)     | 1            | 0.7622204    | not scorable | not scorable | 1            | 0.7252899    |
| #### Bn-scaff_15763_1-p18915 genome unspecific (oleracea-rapa)  | not scorable | not scorable | 1            | 0.796897     | 1            | 0.8364989    |
| #### Bn-scaff_15763_1-p22178 A-genome specific (napus-rapa)     | 1            | 0.764954     | not scorable | not scorable | 1            | 0.752191     |
| #### Bn-scaff_15763_1-p23314 C-genome specific (napus-oleracea) | 0.9856459    | 0.7957419    | 0.9922481    | 0.8055201    | not scorable | not scorable |
| #### Bn-scaff_15763_1-p23399 C-genome specific (napus-oleracea) | 0.9928229    | 0.5729422    | 0.9922481    | 0.5493739    | not scorable | not scorable |
| #### Bn-scaff_15763_1-p23454 C-genome specific (napus-oleracea) | 0.9856459    | 0.6871605    | 1            | 0.6218106    | not scorable | not scorable |
| #### Bn-scaff_15763_1-p24189 genome unspecific (oleracea-rapa)  | not scorable | not scorable | 1            | 0.7349061    | 0.9752066    | 0.7588475    |
| #### Bn-scaff_15763_1-p25587 C-genome specific (napus-oleracea) | 0.9904306    | 0.6471367    | 0.9844961    | 0.6399209    | not scorable | not scorable |
| #### Bn-scaff_15763_1-p26241 genome unspecific (oleracea-rapa)  | not scorable | not scorable | 1            | 0.7500797    | 0.9421487    | 0.7816314    |
| #### Bn-scaff_15763_1-p27752 A-genome specific (napus-rapa)     | 1            | 0.4693085    | not scorable | not scorable | 1            | 0.5313225    |
| #### Bn-scaff_15763_1-p28165 C-genome specific (napus-oleracea) | 0.9760765    | 0.6941916    | 0.9922481    | 0.6788162    | not scorable | not scorable |
| #### Bn-scaff_15763_1-p28201 napus specific                     | 0.9593301    | 0.3865525    | not scorable | not scorable | not scorable | not scorable |
| #### Bn-scaff_15763_1-p28542 C-genome specific (napus-oleracea) | 0.9736842    | 0.6853173    | 1            | 0.6962675    | not scorable | not scorable |
| #### Bn-scaff_15763_1-p28756 C-genome specific (napus-oleracea) | 0.9784689    | 0.718389     | 0.9922481    | 0.7182099    | not scorable | not scorable |
| #### Bn-scaff_15763_1-p28814 C-genome specific (napus-oleracea) | 0.5502392    | 0.945125     | 0.379845     | 0.8270228    | not scorable | not scorable |
| #### Bn-scaff_15763_1-p31307 C-genome specific (napus-oleracea) | 0.9832536    | 0.6974734    | 0.9922481    | 0.70758      | not scorable | not scorable |

|                                                                 |              |              |              |           |              |              |              |
|-----------------------------------------------------------------|--------------|--------------|--------------|-----------|--------------|--------------|--------------|
| #### Bn-scaff_15763_1-p31342 C-genome specific (napus-oleracea) | 0.9904306    | 0.789126     |              | 1         | 0.7626157    | not scorable | not scorable |
| #### Bn-scaff_15763_1-p31587 C-genome specific (napus-oleracea) | 0.9904306    | 0.7891486    |              | 1         | 0.7717578    | not scorable | not scorable |
| #### Bn-scaff_15763_1-p31690 C-genome specific (napus-oleracea) | 0.9784689    | 0.7907963    | 0.9922481    |           | 0.8243905    | not scorable | not scorable |
| #### Bn-scaff_15763_1-p32041 C-genome specific (napus-oleracea) | 0.9856459    | 0.7022559    | 0.9922481    |           | 0.7523691    | not scorable | not scorable |
| #### Bn-scaff_15763_1-p34244 C-genome specific (napus-oleracea) | 0.9712918    | 0.8103778    | 0.9689922    |           | 0.7926074    | not scorable | not scorable |
| #### Bn-scaff_15763_1-p34249 C-genome specific (napus-oleracea) | 0.9760765    | 0.8095437    |              | 1         | 0.7598103    | not scorable | not scorable |
| #### Bn-scaff_15763_1-p34262 C-genome specific (napus-oleracea) | 0.9904306    | 0.7799702    | 0.9922481    |           | 0.7118785    | not scorable | not scorable |
| #### Bn-scaff_15763_1-p34721 genome unspecific (oleracea-rapa)  | not scorable | not scorable |              | 1         | 0.6518623    | 0.9917355    | 0.7227316    |
| #### Bn-scaff_15763_1-p50613 A-genome specific (napus-rapa)     | 0.9928229    | 0.3064243    | not scorable |           | not scorable |              | 1 0.7791142  |
| #### Bn-scaff_15763_1-p50630 A-genome specific (napus-rapa)     | 0.9808612    | 0.2920417    | not scorable |           | not scorable | 0.9752066    | 0.7673253    |
| #### Bn-scaff_15763_1-p51495 C-genome specific (napus-oleracea) | 1            | 0.8198476    |              | 1         | 0.7390066    | not scorable | not scorable |
| #### Bn-scaff_15763_1-p52284 C-genome specific (napus-oleracea) | 1            | 0.8166729    |              | 1         | 0.7602928    | not scorable | not scorable |
| #### Bn-scaff_15763_1-p54141 napus specific                     | 1            | 0.7591223    | not scorable |           | not scorable | not scorable | not scorable |
| #### Bn-scaff_15763_1-p54813 genome unspecific (all in)         | 1            | 0.3887769    |              | 1         | 0.5639789    |              | 1 0.9176046  |
| #### Bn-scaff_15763_1-p55398 napus specific                     | 0.9856459    | 0.7300811    | not scorable |           | not scorable | not scorable | not scorable |
| #### Bn-scaff_15763_1-p57249 A-genome specific (napus-rapa)     | 0.9736842    | 0.737561     | not scorable |           | not scorable | 0.9834711    | 0.8324401    |
| #### Bn-scaff_15763_1-p57375 C-genome specific (napus-oleracea) | 0.9880383    | 0.7452385    |              | 1         | 0.7011225    | not scorable | not scorable |
| #### Bn-scaff_15763_1-p57527 C-genome specific (napus-oleracea) | 0.9832536    | 0.7500987    |              | 1         | 0.8649482    | not scorable | not scorable |
| #### Bn-scaff_15763_1-p58832 C-genome specific (napus-oleracea) | 0.9760765    | 0.7483698    | 0.9922481    |           | 0.815521     | not scorable | not scorable |
| #### Bn-scaff_15763_1-p58869 C-genome specific (oleracea only)  | not scorable | not scorable |              | 0.9612403 | 0.7985541    | not scorable | not scorable |
| #### Bn-scaff_15763_1-p58887 C-genome specific (napus-oleracea) | 0.9784689    | 0.8039406    | 0.9844961    |           | 0.8779765    | not scorable | not scorable |
| #### Bn-scaff_15763_1-p59435 C-genome specific (napus-oleracea) | 0.9880383    | 0.7673253    | 0.8139535    |           | 0.8736063    | not scorable | not scorable |
| #### Bn-scaff_15763_1-p59509 C-genome specific (napus-oleracea) | 0.9928229    | 0.7673253    | 0.9844961    |           | 0.8237866    | not scorable | not scorable |
| #### Bn-scaff_15763_1-p59531 C-genome specific (napus-oleracea) | 0.9832536    | 0.7205555    |              | 1         | 0.682749     | not scorable | not scorable |
| #### Bn-scaff_15763_1-p59557 C-genome specific (napus-oleracea) | 0.9808612    | 0.7077142    |              | 1         | 0.7711229    | not scorable | not scorable |
| #### Bn-scaff_15763_1-p59639 C-genome specific (napus-oleracea) | 0.9760765    | 0.7726422    | 0.9612403    |           | 0.9019647    | not scorable | not scorable |
| #### Bn-scaff_15763_1-p60419 C-genome specific (napus-oleracea) | 0.9712918    | 0.6909629    | 0.9767442    |           | 0.8021759    | not scorable | not scorable |
| #### Bn-scaff_15763_1-p60429 C-genome specific (napus-oleracea) | 0.9760765    | 0.7588422    | 0.9922481    |           | 0.8334558    | not scorable | not scorable |
| #### Bn-scaff_15763_1-p62299 genome unspecific (all in)         | 0.9904306    | 0.5456231    |              | 1         | 0.7753015    |              | 1 0.9175813  |
| #### Bn-scaff_15763_1-p63608 genome unspecific (all in)         | 0.9904306    | 0.6926746    | 0.9379845    |           | 0.7480181    |              | 1 0.9403123  |
| #### Bn-scaff_15763_1-p63652 C-genome specific (napus-oleracea) | 0.9928229    | 0.8632956    | 0.9534883    |           | 0.8392692    | not scorable | not scorable |
| #### Bn-scaff_15763_1-p63749 genome unspecific (all in)         | 0.9856459    | 0.4425346    | 0.9534883    |           | 0.8673132    | 0.9917355    | 0.7960303    |
| #### Bn-scaff_15763_1-p64281 C-genome specific (napus-oleracea) | 0.9808612    | 0.7924087    | 0.9379845    |           | 0.7280531    | not scorable | not scorable |

|                                                                  |              |              |              |              |              |              |
|------------------------------------------------------------------|--------------|--------------|--------------|--------------|--------------|--------------|
| ##### Bn-scaff_15763_1-p64439 C-genome specific (napus-oleracea) | 0.9856459    | 0.8032992    | 0.9457364    | 0.8146216    | not scorable | not scorable |
| ##### Bn-scaff_15763_1-p64447 C-genome specific (napus-oleracea) | 0.9904306    | 0.8039257    | 0.9457364    | 0.7884784    | not scorable | not scorable |
| ##### Bn-scaff_15763_1-p64466 C-genome specific (napus-oleracea) | 0.9928229    | 0.8568738    | 0.9457364    | 0.8281851    | not scorable | not scorable |
| ##### Bn-scaff_15763_1-p64474 C-genome specific (napus-oleracea) | 0.9904306    | 0.7926641    | 0.9534883    | 0.8350775    | not scorable | not scorable |
| ##### Bn-scaff_15763_1-p64522 C-genome specific (napus-oleracea) | 0.9880383    | 0.6215652    | 0.9534883    | 0.6095347    | not scorable | not scorable |
| ##### Bn-scaff_15763_1-p64847 C-genome specific (napus-oleracea) | 0.9952153    | 0.777774     | 0.9844961    | 0.7546035    | not scorable | not scorable |
| ##### Bn-scaff_15763_1-p64886 C-genome specific (napus-oleracea) | 0.9856459    | 0.7005234    | 0.9922481    | 0.7776622    | not scorable | not scorable |
| ##### Bn-scaff_15763_1-p64897 C-genome specific (napus-oleracea) | 0.9904306    | 0.6783065    | 0.9844961    | 0.659824     | not scorable | not scorable |
| ##### Bn-scaff_15763_1-p65766 C-genome specific (napus-oleracea) | 0.9832536    | 0.685545     | 1            | 0.7098629    | not scorable | not scorable |
| ##### Bn-scaff_15763_1-p66205 genome unspecific (all in)         | 0.9665072    | 0.4245344    | 0.9922481    | 0.8034974    | 1            | 0.8653011    |
| ##### Bn-scaff_15763_1-p66823 C-genome specific (napus-oleracea) | 0.9928229    | 0.7867139    | 1            | 0.7609842    | not scorable | not scorable |
| ##### Bn-scaff_15763_1-p67554 C-genome specific (napus-oleracea) | 0.9665072    | 0.4580126    | 0.9767442    | 0.5623347    | not scorable | not scorable |
| ##### Bn-scaff_15763_1-p67759 C-genome specific (napus-oleracea) | 0.9688995    | 0.7117251    | 0.9534883    | 0.8427988    | not scorable | not scorable |
| ##### Bn-scaff_15763_1-p68131 genome unspecific (all in)         | 0.9545454    | 0.4445653    | 0.9922481    | 0.8632833    | 1            | 0.9264635    |
| ##### Bn-scaff_15763_1-p68152 C-genome specific (napus-oleracea) | 0.9856459    | 0.7874246    | 0.9922481    | 0.8360342    | not scorable | not scorable |
| ##### Bn-scaff_15763_1-p68225 C-genome specific (napus-oleracea) | 0.9665072    | 0.7720481    | 1            | 0.8309609    | not scorable | not scorable |
| ##### Bn-scaff_15763_1-p70695 C-genome specific (napus-oleracea) | 0.9760765    | 0.7461545    | 0.9844961    | 0.7348091    | not scorable | not scorable |
| ##### Bn-scaff_15763_1-p71373 C-genome specific (napus-oleracea) | 0.9545454    | 0.2640317    | 0.9844961    | 0.6922873    | not scorable | not scorable |
| ##### Bn-scaff_15763_1-p72930 A-genome specific (napus-rapa)     | 1            | 0.7134259    | not scorable | not scorable | 1            | 0.743265     |
| ##### Bn-scaff_15763_1-p80903 A-genome specific (napus-rapa)     | 1            | 0.587085     | not scorable | not scorable | 1            | 0.6222353    |
| ##### Bn-scaff_15763_1-p87690 A-genome specific (rapa only)      | not scorable | not scorable | not scorable | not scorable | 0.9917355    | 0.7368358    |
| ##### Bn-scaff_15765_1-p14552 napus specific                     | 1            | 0.8135551    | not scorable | not scorable | not scorable | not scorable |
| ##### Bn-scaff_15766_1-p10215 C-genome specific (napus-oleracea) | 1            | 0.9454609    | 0.9922481    | 0.8851676    | not scorable | not scorable |
| ##### Bn-scaff_15766_1-p10372 A-genome specific (napus-rapa)     | 1            | 0.3327669    | not scorable | not scorable | 0.9917355    | 0.7245011    |
| ##### Bn-scaff_15766_1-p10374 A-genome specific (napus-rapa)     | 0.9928229    | 0.3889703    | not scorable | not scorable | 1            | 0.7937827    |
| ##### Bn-scaff_15766_1-p10385 A-genome specific (napus-rapa)     | 0.9952153    | 0.452485     | not scorable | not scorable | 0.9917355    | 0.8014634    |
| ##### Bn-scaff_15766_1-p10716 C-genome specific (napus-oleracea) | 0.9904306    | 0.7335966    | 0.6899225    | 0.6980245    | not scorable | not scorable |
| ##### Bn-scaff_15766_1-p11043 C-genome specific (napus-oleracea) | 0.9904306    | 0.7036457    | 0.6821706    | 0.688441     | not scorable | not scorable |
| ##### Bn-scaff_15766_1-p11193 C-genome specific (napus-oleracea) | 0.9928229    | 0.7977912    | 0.6976744    | 0.7087153    | not scorable | not scorable |
| ##### Bn-scaff_15766_1-p11589 C-genome specific (napus-oleracea) | 0.9904306    | 0.9446349    | 0.9844961    | 0.8330786    | not scorable | not scorable |
| ##### Bn-scaff_15766_1-p11617 C-genome specific (napus-oleracea) | 0.9904306    | 0.6716466    | 0.9767442    | 0.5921305    | not scorable | not scorable |
| ##### Bn-scaff_15766_1-p11687 C-genome specific (napus-oleracea) | 0.9904306    | 0.8073841    | 1            | 0.7082456    | not scorable | not scorable |
| ##### Bn-scaff_15766_1-p11711 C-genome specific (napus-oleracea) | 0.9904306    | 0.856998     | 1            | 0.7710276    | not scorable | not scorable |

|                                                                 |              |              |              |              |              |              |
|-----------------------------------------------------------------|--------------|--------------|--------------|--------------|--------------|--------------|
| #### Bn-scaff_15766_1-p11737 C-genome specific (napus-oleracea) | 0.9904306    | 0.8139279    | 1            | 0.7004859    | not scorable | not scorable |
| #### Bn-scaff_15766_1-p11740 C-genome specific (napus-oleracea) | 0.9904306    | 0.6595145    | 0.9767442    | 0.6340725    | not scorable | not scorable |
| #### Bn-scaff_15766_1-p11752 C-genome specific (napus-oleracea) | 0.9904306    | 0.8967716    | 0.9922481    | 0.8196729    | not scorable | not scorable |
| #### Bn-scaff_15766_1-p11770 C-genome specific (napus-oleracea) | 0.9904306    | 0.7530587    | 0.9844961    | 0.6903664    | not scorable | not scorable |
| #### Bn-scaff_15766_1-p12087 C-genome specific (napus-oleracea) | 0.9976076    | 0.7656587    | 0.9612403    | 0.7404336    | not scorable | not scorable |
| #### Bn-scaff_15766_1-p12285 C-genome specific (napus-oleracea) | 1            | 0.8839097    | 0.9922481    | 0.7249669    | not scorable | not scorable |
| #### Bn-scaff_15766_1-p12358 C-genome specific (napus-oleracea) | 1            | 0.7441286    | 0.9922481    | 0.6930982    | not scorable | not scorable |
| #### Bn-scaff_15766_1-p12847 C-genome specific (napus-oleracea) | 1            | 0.9123309    | 0.9922481    | 0.8241779    | not scorable | not scorable |
| #### Bn-scaff_15766_1-p12974 C-genome specific (napus-oleracea) | 1            | 0.8047602    | 1            | 0.6933103    | not scorable | not scorable |
| #### Bn-scaff_15766_1-p13125 C-genome specific (napus-oleracea) | 0.9976076    | 0.9192023    | 1            | 0.8607441    | not scorable | not scorable |
| #### Bn-scaff_15766_1-p13180 C-genome specific (napus-oleracea) | 1            | 0.9081127    | 0.9922481    | 0.8327345    | not scorable | not scorable |
| #### Bn-scaff_15766_1-p13370 C-genome specific (napus-oleracea) | 1            | 0.9200735    | 1            | 0.8203984    | not scorable | not scorable |
| #### Bn-scaff_15766_1-p13446 all not scorable                   | not scorable | not scorable | not scorable | not scorable | not scorable | not scorable |
| #### Bn-scaff_15766_1-p13449 C-genome specific (napus-oleracea) | 1            | 0.9243795    | 0.9922481    | 0.8517241    | not scorable | not scorable |
| #### Bn-scaff_15766_1-p13460 C-genome specific (napus-oleracea) | 1            | 0.9608957    | 0.9767442    | 0.7460386    | not scorable | not scorable |
| #### Bn-scaff_15766_1-p13501 C-genome specific (napus-oleracea) | 1            | 0.7936192    | 0.9689922    | 0.7548395    | not scorable | not scorable |
| #### Bn-scaff_15766_1-p13567 C-genome specific (napus-oleracea) | 1            | 0.851095     | 1            | 0.8495085    | not scorable | not scorable |
| #### Bn-scaff_15766_1-p13643 C-genome specific (napus-oleracea) | 1            | 0.9401793    | 0.9844961    | 0.7953984    | not scorable | not scorable |
| #### Bn-scaff_15766_1-p14108 C-genome specific (napus-oleracea) | 1            | 0.9323691    | 1            | 0.8124685    | not scorable | not scorable |
| #### Bn-scaff_15766_1-p14116 C-genome specific (napus-oleracea) | 0.9976076    | 0.9230189    | 1            | 0.8074919    | not scorable | not scorable |
| #### Bn-scaff_15766_1-p14331 C-genome specific (napus-oleracea) | 1            | 0.7141287    | 0.9844961    | 0.6632774    | not scorable | not scorable |
| #### Bn-scaff_15766_1-p15991 C-genome specific (napus-oleracea) | 1            | 0.8895556    | 1            | 0.7959259    | not scorable | not scorable |
| #### Bn-scaff_15766_1-p16073 C-genome specific (napus-oleracea) | 1            | 0.7989519    | 1            | 0.6744878    | not scorable | not scorable |
| #### Bn-scaff_15766_1-p16160 C-genome specific (napus-oleracea) | 1            | 0.8671879    | 0.9767442    | 0.7159085    | not scorable | not scorable |
| #### Bn-scaff_15766_1-p16364 C-genome specific (napus-oleracea) | 1            | 0.83319      | 1            | 0.7935991    | not scorable | not scorable |
| #### Bn-scaff_15766_1-p16403 C-genome specific (napus-oleracea) | 1            | 0.8791798    | 1            | 0.6965586    | not scorable | not scorable |
| #### Bn-scaff_15766_1-p16481 C-genome specific (napus-oleracea) | 1            | 0.8414616    | 1            | 0.6171259    | not scorable | not scorable |
| #### Bn-scaff_15766_1-p16494 C-genome specific (napus-oleracea) | 1            | 0.7434856    | 1            | 0.661467     | not scorable | not scorable |
| #### Bn-scaff_15766_1-p16510 C-genome specific (napus-oleracea) | 1            | 0.8446529    | 0.9922481    | 0.7478725    | not scorable | not scorable |
| #### Bn-scaff_15766_1-p17575 C-genome specific (napus-oleracea) | 0.9928229    | 0.8752893    | 0.6744186    | 0.8297012    | not scorable | not scorable |
| #### Bn-scaff_15766_1-p17709 C-genome specific (napus-oleracea) | 0.9928229    | 0.9376312    | 0.6899225    | 0.860751     | not scorable | not scorable |
| #### Bn-scaff_15766_1-p19597 C-genome specific (napus-oleracea) | 0.9928229    | 0.8435257    | 0.7054263    | 0.8011456    | not scorable | not scorable |
| #### Bn-scaff_15766_1-p19774 C-genome specific (napus-oleracea) | 0.9928229    | 0.8153901    | 0.6899225    | 0.8911924    | not scorable | not scorable |



|                                                                 |           |           |              |              |              |              |
|-----------------------------------------------------------------|-----------|-----------|--------------|--------------|--------------|--------------|
| #### Bn-scaff_15766_1-p20339 C-genome specific (napus-oleracea) | 0.9928229 | 0.9046636 | 0.6976744    | 0.8213103    | not scorable | not scorable |
| #### Bn-scaff_15766_1-p20537 C-genome specific (napus-oleracea) | 0.9928229 | 0.901065  | 0.6976744    | 0.7858182    | not scorable | not scorable |
| #### Bn-scaff_15766_1-p21067 C-genome specific (napus-oleracea) | 0.9928229 | 0.8989417 | 0.6744186    | 0.8637215    | not scorable | not scorable |
| #### Bn-scaff_15766_1-p21074 C-genome specific (napus-oleracea) | 0.9928229 | 0.9180646 | 0.7286822    | 0.915528     | not scorable | not scorable |
| #### Bn-scaff_15766_1-p21706 C-genome specific (napus-oleracea) | 0.9928229 | 0.8052589 | 0.6744186    | 0.7753825    | not scorable | not scorable |
| #### Bn-scaff_15766_1-p23746 A-genome specific (napus-rapa)     | 1         | 0.6628417 | not scorable | not scorable | 1            | 0.6154503    |
| #### Bn-scaff_15766_1-p26048 C-genome specific (napus-oleracea) | 1         | 0.7075324 | 0.9612403    | 0.6903664    | not scorable | not scorable |
| #### Bn-scaff_15766_1-p27115 C-genome specific (napus-oleracea) | 1         | 0.764651  | 1            | 0.6959554    | not scorable | not scorable |
| #### Bn-scaff_15766_1-p27137 C-genome specific (napus-oleracea) | 1         | 0.8871223 | 1            | 0.7682846    | not scorable | not scorable |
| #### Bn-scaff_15766_1-p27143 genome unspecific (all in)         | 1         | 0.648931  | 0.9767442    | 0.717777     | 1            | 0.9076399    |
| #### Bn-scaff_15766_1-p27205 C-genome specific (napus-oleracea) | 1         | 0.9622415 | 0.9922481    | 0.8402116    | not scorable | not scorable |
| #### Bn-scaff_15766_1-p27212 C-genome specific (napus-oleracea) | 1         | 0.9247878 | 0.9922481    | 0.8530269    | not scorable | not scorable |
| #### Bn-scaff_15766_1-p27218 C-genome specific (napus-oleracea) | 1         | 0.956283  | 0.9767442    | 0.9040118    | not scorable | not scorable |
| #### Bn-scaff_15766_1-p27234 C-genome specific (napus-oleracea) | 0.9976076 | 0.7873675 | 0.9844961    | 0.6971439    | not scorable | not scorable |
| #### Bn-scaff_15766_1-p28533 C-genome specific (napus-oleracea) | 1         | 0.9423418 | 1            | 0.8179167    | not scorable | not scorable |
| #### Bn-scaff_15766_1-p29351 C-genome specific (napus-oleracea) | 0.9976076 | 0.7483026 | 0.9922481    | 0.5642669    | not scorable | not scorable |
| #### Bn-scaff_15766_1-p34395 C-genome specific (napus-oleracea) | 1         | 0.7783496 | 1            | 0.7090369    | not scorable | not scorable |
| #### Bn-scaff_15766_1-p34398 C-genome specific (napus-oleracea) | 1         | 0.8686499 | 0.9844961    | 0.8683047    | not scorable | not scorable |
| #### Bn-scaff_15766_1-p39455 C-genome specific (napus-oleracea) | 1         | 0.9161513 | 1            | 0.855675     | not scorable | not scorable |
| #### Bn-scaff_15766_1-p42008 C-genome specific (napus-oleracea) | 1         | 0.9043673 | 0.9922481    | 0.791235     | not scorable | not scorable |
| #### Bn-scaff_15766_1-p42331 C-genome specific (napus-oleracea) | 1         | 0.9633834 | 0.9767442    | 0.8454157    | not scorable | not scorable |
| #### Bn-scaff_15766_1-p48730 C-genome specific (napus-oleracea) | 1         | 0.8427823 | 1            | 0.7257575    | not scorable | not scorable |
| #### Bn-scaff_15766_1-p48781 C-genome specific (napus-oleracea) | 1         | 0.923552  | 1            | 0.8320149    | not scorable | not scorable |
| #### Bn-scaff_15766_1-p48919 C-genome specific (napus-oleracea) | 1         | 0.9389624 | 1            | 0.7889431    | not scorable | not scorable |
| #### Bn-scaff_15766_1-p49101 C-genome specific (napus-oleracea) | 1         | 0.9095539 | 1            | 0.693262     | not scorable | not scorable |
| #### Bn-scaff_15766_1-p49146 C-genome specific (napus-oleracea) | 1         | 0.9072319 | 1            | 0.7486839    | not scorable | not scorable |
| #### Bn-scaff_15766_1-p49383 C-genome specific (napus-oleracea) | 1         | 0.9114255 | 0.9922481    | 0.8289162    | not scorable | not scorable |
| #### Bn-scaff_15766_1-p50081 C-genome specific (napus-oleracea) | 1         | 0.7347764 | 0.9767442    | 0.7689072    | not scorable | not scorable |
| #### Bn-scaff_15766_1-p50119 C-genome specific (napus-oleracea) | 1         | 0.8723229 | 0.9922481    | 0.7944306    | not scorable | not scorable |
| #### Bn-scaff_15766_1-p50179 C-genome specific (napus-oleracea) | 1         | 0.7652568 | 0.9922481    | 0.7632425    | not scorable | not scorable |
| #### Bn-scaff_15766_1-p52017 C-genome specific (napus-oleracea) | 1         | 0.9200073 | 0.9767442    | 0.7760515    | not scorable | not scorable |
| #### Bn-scaff_15766_1-p52169 C-genome specific (napus-oleracea) | 1         | 0.8563325 | 0.9689922    | 0.7802395    | not scorable | not scorable |
| #### Bn-scaff_15766_1-p52285 C-genome specific (napus-oleracea) | 1         | 0.8521898 | 0.9767442    | 0.7198662    | not scorable | not scorable |

|                                                                 |              |              |           |           |              |              |
|-----------------------------------------------------------------|--------------|--------------|-----------|-----------|--------------|--------------|
| #### Bn-scaff_15766_1-p53587 C-genome specific (napus-oleracea) | 1            | 0.9179805    | 0.9922481 | 0.8215568 | not scorable | not scorable |
| #### Bn-scaff_15766_1-p53699 C-genome specific (napus-oleracea) | 1            | 0.9555724    | 0.9767442 | 0.869119  | not scorable | not scorable |
| #### Bn-scaff_15766_1-p54339 genome unspecific (all in)         | 1            | 0.6992734    | 0.9844961 | 0.8421025 | 0.9834711    | 0.7372392    |
| #### Bn-scaff_15766_1-p54771 C-genome specific (napus-oleracea) | 1            | 0.7032636    | 1         | 0.6519774 | not scorable | not scorable |
| #### Bn-scaff_15766_1-p54979 C-genome specific (napus-oleracea) | 1            | 0.8901431    | 0.9922481 | 0.7378846 | not scorable | not scorable |
| #### Bn-scaff_15766_1-p55139 C-genome specific (napus-oleracea) | 1            | 0.8864994    | 0.9922481 | 0.7245228 | not scorable | not scorable |
| #### Bn-scaff_15766_1-p55265 C-genome specific (napus-oleracea) | 0.9928229    | 0.7078859    | 0.9689922 | 0.6982946 | not scorable | not scorable |
| #### Bn-scaff_15766_1-p55479 C-genome specific (napus-oleracea) | 1            | 0.9436982    | 1         | 0.7996721 | not scorable | not scorable |
| #### Bn-scaff_15766_1-p55590 C-genome specific (napus-oleracea) | 1            | 0.9292029    | 1         | 0.8653591 | not scorable | not scorable |
| #### Bn-scaff_15766_1-p56389 C-genome specific (napus-oleracea) | 1            | 0.669514     | 0.9767442 | 0.6342595 | not scorable | not scorable |
| #### Bn-scaff_15766_1-p56627 C-genome specific (napus-oleracea) | 1            | 0.7545085    | 1         | 0.661194  | not scorable | not scorable |
| #### Bn-scaff_15766_1-p56840 C-genome specific (napus-oleracea) | 1            | 0.8763622    | 0.9767442 | 0.798164  | not scorable | not scorable |
| #### Bn-scaff_15766_1-p57067 C-genome specific (napus-oleracea) | 1            | 0.6748519    | 0.9767442 | 0.7625621 | not scorable | not scorable |
| #### Bn-scaff_15766_1-p57238 C-genome specific (napus-oleracea) | 1            | 0.7112511    | 0.9844961 | 0.6466193 | not scorable | not scorable |
| #### Bn-scaff_15766_1-p57511 C-genome specific (napus-oleracea) | 1            | 0.848595     | 0.9767442 | 0.7351466 | not scorable | not scorable |
| #### Bn-scaff_15766_1-p57610 C-genome specific (napus-oleracea) | 0.9976076    | 0.8038307    | 1         | 0.7664075 | not scorable | not scorable |
| #### Bn-scaff_15766_1-p57672 C-genome specific (napus-oleracea) | 1            | 0.7323507    | 0.9767442 | 0.6877584 | not scorable | not scorable |
| #### Bn-scaff_15766_1-p57815 C-genome specific (napus-oleracea) | 1            | 0.8401483    | 0.9922481 | 0.7363236 | not scorable | not scorable |
| #### Bn-scaff_15766_1-p57835 C-genome specific (napus-oleracea) | 1            | 0.863923     | 0.9922481 | 0.7248383 | not scorable | not scorable |
| #### Bn-scaff_15766_1-p58048 C-genome specific (napus-oleracea) | 1            | 0.6936159    | 0.9844961 | 0.6202425 | not scorable | not scorable |
| #### Bn-scaff_15766_1-p58476 C-genome specific (napus-oleracea) | 1            | 0.6608328    | 1         | 0.6243005 | not scorable | not scorable |
| #### Bn-scaff_15766_1-p58828 C-genome specific (napus-oleracea) | 0.9976076    | 0.7773052    | 1         | 0.697272  | not scorable | not scorable |
| #### Bn-scaff_15766_1-p71564 C-genome specific (napus-oleracea) | 1            | 0.9358131    | 0.9767442 | 0.8562624 | not scorable | not scorable |
| #### Bn-scaff_15766_1-p72290 C-genome specific (oleracea only)  | not scorable | not scorable | 0.9069768 | 0.8075793 | not scorable | not scorable |
| #### Bn-scaff_15766_1-p72345 C-genome specific (napus-oleracea) | 0.9928229    | 0.757559     | 0.9224806 | 0.7903396 | not scorable | not scorable |
| #### Bn-scaff_15766_1-p81573 C-genome specific (napus-oleracea) | 1            | 0.8642296    | 0.9922481 | 0.7675668 | not scorable | not scorable |
| #### Bn-scaff_15766_1-p85489 C-genome specific (napus-oleracea) | 1            | 0.8038312    | 0.9922481 | 0.7695352 | not scorable | not scorable |
| #### Bn-scaff_15766_1-p85624 C-genome specific (napus-oleracea) | 1            | 0.7838537    | 0.9922481 | 0.7085029 | not scorable | not scorable |
| #### Bn-scaff_15766_1-p85781 C-genome specific (napus-oleracea) | 1            | 0.7472963    | 0.9767442 | 0.7129886 | not scorable | not scorable |
| #### Bn-scaff_15766_1-p86450 C-genome specific (napus-oleracea) | 1            | 0.7709031    | 0.9767442 | 0.6988934 | not scorable | not scorable |
| #### Bn-scaff_15766_1-p86963 C-genome specific (napus-oleracea) | 1            | 0.7733243    | 0.9922481 | 0.6875441 | not scorable | not scorable |
| #### Bn-scaff_15766_1-p87134 C-genome specific (napus-oleracea) | 0.9976076    | 0.7475775    | 0.9922481 | 0.5893042 | not scorable | not scorable |
| #### Bn-scaff_15766_1-p87304 C-genome specific (napus-oleracea) | 1            | 0.9098398    | 0.9922481 | 0.8304423 | not scorable | not scorable |

|                                                                  |              |              |              |              |              |              |
|------------------------------------------------------------------|--------------|--------------|--------------|--------------|--------------|--------------|
| ##### Bn-scaff_15766_1-p87349 C-genome specific (napus-oleracea) | 1            | 0.6723413    | 0.9844961    | 0.588989     | not scorable | not scorable |
| ##### Bn-scaff_15766_1-p87406 C-genome specific (napus-oleracea) | 1            | 0.8005927    | 0.9922481    | 0.753969     | not scorable | not scorable |
| ##### Bn-scaff_15766_1-p88203 C-genome specific (napus-oleracea) | 1            | 0.8042443    | 0.9767442    | 0.7151247    | not scorable | not scorable |
| ##### Bn-scaff_15766_1-p88683 C-genome specific (napus-oleracea) | 1            | 0.6644125    | 0.9922481    | 0.4806345    | not scorable | not scorable |
| ##### Bn-scaff_15766_1-p88948 C-genome specific (napus-oleracea) | 1            | 0.7092084    | 0.9844961    | 0.6744514    | not scorable | not scorable |
| ##### Bn-scaff_15766_1-p89913 C-genome specific (napus-oleracea) | 0.9976076    | 0.5795736    | 0.9612403    | 0.5555001    | not scorable | not scorable |
| ##### Bn-scaff_15766_1-p94144 C-genome specific (napus-oleracea) | 1            | 0.9408537    | 1            | 0.8579911    | not scorable | not scorable |
| ##### Bn-scaff_15766_1-p95851 C-genome specific (oleracea only)  | not scorable | not scorable | 1            | 0.275146     | not scorable | not scorable |
| ##### Bn-scaff_15766_1-p95928 genome unspecific (all in)         | 1            | 0.3365696    | 0.9689922    | 0.572331     | 1            | 0.8034999    |
| ##### Bn-scaff_15767_1-p10048 all not scorable                   | not scorable | not scorable | not scorable | not scorable | not scorable | not scorable |
| ##### Bn-scaff_15767_1-p10494 genome unspecific (all in)         | 0.9976076    | 0.7629367    | 0.9922481    | 0.8038363    | 1            | 0.8973734    |
| ##### Bn-scaff_15767_1-p10865 genome unspecific (all in)         | 1            | 0.4705824    | 0.9844961    | 0.8337068    | 1            | 0.94666      |
| ##### Bn-scaff_15767_1-p11047 C-genome specific (napus-oleracea) | 0.9904306    | 0.7542291    | 0.8527132    | 0.7452555    | not scorable | not scorable |
| ##### Bn-scaff_15767_1-p11328 C-genome specific (napus-oleracea) | 0.9952153    | 0.9048317    | 0.9922481    | 0.754588     | not scorable | not scorable |
| ##### Bn-scaff_15767_1-p11477 C-genome specific (napus-oleracea) | 1            | 0.8418729    | 0.9767442    | 0.7454732    | not scorable | not scorable |
| ##### Bn-scaff_15767_1-p11785 C-genome specific (napus-oleracea) | 0.9928229    | 0.9132344    | 1            | 0.8424635    | not scorable | not scorable |
| ##### Bn-scaff_15767_1-p14996 C-genome specific (napus-oleracea) | 0.9880383    | 0.732312     | 0.9844961    | 0.771524     | not scorable | not scorable |
| ##### Bn-scaff_15767_1-p15060 C-genome specific (napus-oleracea) | 0.9856459    | 0.7274724    | 0.9844961    | 0.6980916    | not scorable | not scorable |
| ##### Bn-scaff_15767_1-p17457 genome unspecific (all in)         | 0.9904306    | 0.7473382    | 0.9534883    | 0.70705      | 1            | 0.8244771    |
| ##### Bn-scaff_15767_1-p17467 C-genome specific (napus-oleracea) | 0.9880383    | 0.7282637    | 0.9534883    | 0.6993644    | not scorable | not scorable |
| ##### Bn-scaff_15767_1-p19548 C-genome specific (napus-oleracea) | 0.9784689    | 0.7756563    | 0.9379845    | 0.6957384    | not scorable | not scorable |
| ##### Bn-scaff_15767_1-p20310 C-genome specific (napus-oleracea) | 0.9832536    | 0.7364721    | 0.7906977    | 0.7583615    | not scorable | not scorable |
| ##### Bn-scaff_15767_1-p20349 C-genome specific (napus-oleracea) | 0.9784689    | 0.8122577    | 0.7984496    | 0.7943666    | not scorable | not scorable |
| ##### Bn-scaff_15767_1-p20481 C-genome specific (napus-oleracea) | 0.9928229    | 0.7356828    | 1            | 0.7331805    | not scorable | not scorable |
| ##### Bn-scaff_15767_1-p31896 C-genome specific (napus-oleracea) | 0.9928229    | 0.8206444    | 1            | 0.7980044    | not scorable | not scorable |
| ##### Bn-scaff_15767_1-p47078 C-genome specific (napus-oleracea) | 1            | 0.3402242    | 0.9844961    | 0.3651129    | not scorable | not scorable |
| ##### Bn-scaff_15767_1-p61876 C-genome specific (napus-oleracea) | 0.9665072    | 0.8797238    | 0.8449612    | 0.8101634    | not scorable | not scorable |
| ##### Bn-scaff_15767_1-p90788 C-genome specific (napus-oleracea) | 0.9736842    | 0.7744869    | 0.620155     | 0.7845883    | not scorable | not scorable |
| ##### Bn-scaff_15767_1-p90867 C-genome specific (napus-oleracea) | 0.9736842    | 0.8426246    | 0.627907     | 0.7577521    | not scorable | not scorable |
| ##### Bn-scaff_15779_1-p12326 A-genome specific (rapa only)      | not scorable | not scorable | not scorable | not scorable | 0.9917355    | 0.8427789    |
| ##### Bn-scaff_15779_1-p14936 napus specific                     | 0.9688995    | 0.743237     | not scorable | not scorable | not scorable | not scorable |
| ##### Bn-scaff_15779_1-p15897 C-genome specific (napus-oleracea) | 0.9928229    | 0.7996044    | 0.9844961    | 0.8133513    | not scorable | not scorable |
| ##### Bn-scaff_15779_1-p18174 C-genome specific (napus-oleracea) | 0.9282297    | 0.7132944    | 0.9612403    | 0.758893     | not scorable | not scorable |

|                                                                 |              |              |              |              |              |              |
|-----------------------------------------------------------------|--------------|--------------|--------------|--------------|--------------|--------------|
| #### Bn-scaff_15779_1-p18654 C-genome specific (napus-oleracea) | 0.9808612    | 0.7621984    | 0.9844961    | 0.7765525    | not scorable | not scorable |
| #### Bn-scaff_15779_1-p19307 C-genome specific (napus-oleracea) | 0.9569378    | 0.7463568    | 0.8682171    | 0.7152752    | not scorable | not scorable |
| #### Bn-scaff_15779_1-p21263 C-genome specific (napus-oleracea) | 0.9880383    | 0.4296372    | 0.9612403    | 0.6575131    | not scorable | not scorable |
| #### Bn-scaff_15779_1-p23856 C-genome specific (napus-oleracea) | 0.9712918    | 0.7685665    | 0.9844961    | 0.8292779    | not scorable | not scorable |
| #### Bn-scaff_15779_1-p31863 C-genome specific (napus-oleracea) | 0.9976076    | 0.7454655    | 0.9922481    | 0.7341858    | not scorable | not scorable |
| #### Bn-scaff_15779_1-p40000 C-genome specific (napus-oleracea) | 0.9976076    | 0.7488601    | 0.9922481    | 0.6749495    | not scorable | not scorable |
| #### Bn-scaff_15779_1-p41353 C-genome specific (napus-oleracea) | 0.9880383    | 0.7857999    | 0.9922481    | 0.8404903    | not scorable | not scorable |
| #### Bn-scaff_15779_1-p94004 genome unspecific (all in)         | 0.9593301    | 0.435292     | 1            | 0.8233085    | 1            | 0.8439403    |
| #### Bn-scaff_15779_1-p94543 C-genome specific (napus-oleracea) | 0.9665072    | 0.7101267    | 1            | 0.6486302    | not scorable | not scorable |
| #### Bn-scaff_15782_1-p10746 C-genome specific (napus-oleracea) | 0.9808612    | 0.6866854    | 1            | 0.8377779    | not scorable | not scorable |
| #### Bn-scaff_15782_1-p10751 C-genome specific (napus-oleracea) | 0.9832536    | 0.7460198    | 1            | 0.7696123    | not scorable | not scorable |
| #### Bn-scaff_15782_1-p11107 C-genome specific (napus-oleracea) | 0.9904306    | 0.8161058    | 0.9922481    | 0.8012987    | not scorable | not scorable |
| #### Bn-scaff_15782_1-p11121 C-genome specific (napus-oleracea) | 0.9880383    | 0.8327885    | 0.9844961    | 0.7870252    | not scorable | not scorable |
| #### Bn-scaff_15782_1-p11529 C-genome specific (napus-oleracea) | 0.9880383    | 0.8150707    | 1            | 0.8907985    | not scorable | not scorable |
| #### Bn-scaff_15782_1-p11544 C-genome specific (napus-oleracea) | 0.9928229    | 0.7717345    | 1            | 0.7392038    | not scorable | not scorable |
| #### Bn-scaff_15782_1-p11561 C-genome specific (napus-oleracea) | 0.9928229    | 0.811859     | 1            | 0.8489336    | not scorable | not scorable |
| #### Bn-scaff_15782_1-p11587 C-genome specific (oleracea only)  | not scorable | not scorable | 0.9922481    | 0.6484191    | not scorable | not scorable |
| #### Bn-scaff_15782_1-p11592 C-genome specific (napus-oleracea) | 0.9904306    | 0.8003415    | 0.9844961    | 0.6546048    | not scorable | not scorable |
| #### Bn-scaff_15782_1-p11732 C-genome specific (napus-oleracea) | 0.9880383    | 0.8072708    | 1            | 0.7802666    | not scorable | not scorable |
| #### Bn-scaff_15782_1-p11743 C-genome specific (napus-oleracea) | 0.9856459    | 0.8157482    | 0.9844961    | 0.7791188    | not scorable | not scorable |
| #### Bn-scaff_15782_1-p11763 C-genome specific (napus-oleracea) | 0.9832536    | 0.8255156    | 1            | 0.787331     | not scorable | not scorable |
| #### Bn-scaff_15782_1-p12907 C-genome specific (napus-oleracea) | 0.9856459    | 0.7791468    | 0.9922481    | 0.7769274    | not scorable | not scorable |
| #### Bn-scaff_15782_1-p12913 C-genome specific (napus-oleracea) | 0.9856459    | 0.7859316    | 1            | 0.837162     | not scorable | not scorable |
| #### Bn-scaff_15782_1-p12921 all not scorable                   | not scorable | not scorable | not scorable | not scorable | not scorable | not scorable |
| #### Bn-scaff_15782_1-p12979 C-genome specific (napus-oleracea) | 0.9904306    | 0.7488667    | 0.9844961    | 0.7217996    | not scorable | not scorable |
| #### Bn-scaff_15782_1-p12993 C-genome specific (napus-oleracea) | 0.9856459    | 0.7271105    | 0.9922481    | 0.7203564    | not scorable | not scorable |
| #### Bn-scaff_15782_1-p13002 C-genome specific (napus-oleracea) | 0.9904306    | 0.6890675    | 0.9922481    | 0.6549277    | not scorable | not scorable |
| #### Bn-scaff_15782_1-p13028 C-genome specific (napus-oleracea) | 0.9808612    | 0.7001463    | 0.9844961    | 0.6293889    | not scorable | not scorable |
| #### Bn-scaff_15782_1-p13065 C-genome specific (napus-oleracea) | 0.9856459    | 0.8534992    | 0.9689922    | 0.7590718    | not scorable | not scorable |
| #### Bn-scaff_15782_1-p13547 C-genome specific (napus-oleracea) | 0.9712918    | 0.7526736    | 1            | 0.8046354    | not scorable | not scorable |
| #### Bn-scaff_15782_1-p13770 C-genome specific (napus-oleracea) | 0.9665072    | 0.7060833    | 0.9922481    | 0.7613826    | not scorable | not scorable |
| #### Bn-scaff_15782_1-p17246 C-genome specific (napus-oleracea) | 0.9736842    | 0.7367528    | 0.9689922    | 0.676163     | not scorable | not scorable |
| #### Bn-scaff_15782_1-p17270 napus specific                     | 0.9688995    | 0.7642471    | not scorable | not scorable | not scorable | not scorable |

|                                                                 |              |              |              |              |              |              |
|-----------------------------------------------------------------|--------------|--------------|--------------|--------------|--------------|--------------|
| #### Bn-scaff_15782_1-p19228 C-genome specific (napus-oleracea) | 0.5933014    | 0.657766     | 0.9689922    | 0.8172573    | not scorable | not scorable |
| #### Bn-scaff_15782_1-p19528 napus specific                     | 0.9688995    | 0.7880573    | not scorable | not scorable | not scorable | not scorable |
| #### Bn-scaff_15782_1-p19682 all not scorable                   | not scorable | not scorable | not scorable | not scorable | not scorable | not scorable |
| #### Bn-scaff_15782_1-p21731 napus specific                     | 0.9712918    | 0.7830813    | not scorable | not scorable | not scorable | not scorable |
| #### Bn-scaff_15782_1-p22004 napus specific                     | 0.6244019    | 0.7989216    | not scorable | not scorable | not scorable | not scorable |
| #### Bn-scaff_15782_1-p23584 C-genome specific (napus-oleracea) | 0.6339713    | 0.7632838    | 0.8372093    | 0.7067977    | not scorable | not scorable |
| #### Bn-scaff_15782_1-p24198 C-genome specific (napus-oleracea) | 0.9521531    | 0.6353674    | 1            | 0.6138855    | not scorable | not scorable |
| #### Bn-scaff_15782_1-p24618 C-genome specific (oleracea only)  | not scorable | not scorable | 0.8294573    | 0.7419274    | not scorable | not scorable |
| #### Bn-scaff_15782_1-p24647 C-genome specific (napus-oleracea) | 0.5980861    | 0.8927867    | 0.8217054    | 0.7762619    | not scorable | not scorable |
| #### Bn-scaff_15782_1-p24656 C-genome specific (napus-oleracea) | 0.9665072    | 0.5641702    | 1            | 0.8047594    | not scorable | not scorable |
| #### Bn-scaff_15782_1-p25048 C-genome specific (napus-oleracea) | 0.9760765    | 0.7363529    | 1            | 0.7664952    | not scorable | not scorable |
| #### Bn-scaff_15782_1-p25056 C-genome specific (napus-oleracea) | 0.9688995    | 0.7468965    | 1            | 0.7666275    | not scorable | not scorable |
| #### Bn-scaff_15782_1-p25478 C-genome specific (napus-oleracea) | 0.9880383    | 0.8085217    | 1            | 0.7675097    | not scorable | not scorable |
| #### Bn-scaff_15782_1-p25500 C-genome specific (napus-oleracea) | 0.9808612    | 0.7323286    | 1            | 0.8172364    | not scorable | not scorable |
| #### Bn-scaff_15782_1-p25535 C-genome specific (napus-oleracea) | 0.9688995    | 0.7372795    | 0.9922481    | 0.6513186    | not scorable | not scorable |
| #### Bn-scaff_15782_1-p25624 C-genome specific (napus-oleracea) | 0.9856459    | 0.7315941    | 1            | 0.5634661    | not scorable | not scorable |
| #### Bn-scaff_15782_1-p25656 C-genome specific (napus-oleracea) | 0.9712918    | 0.7684527    | 1            | 0.8114942    | not scorable | not scorable |
| #### Bn-scaff_15782_1-p25669 C-genome specific (napus-oleracea) | 0.9712918    | 0.745297     | 1            | 0.6109367    | not scorable | not scorable |
| #### Bn-scaff_15782_1-p25834 C-genome specific (napus-oleracea) | 0.9760765    | 0.7723106    | 1            | 0.6363677    | not scorable | not scorable |
| #### Bn-scaff_15782_1-p25888 C-genome specific (napus-oleracea) | 0.9808612    | 0.6593082    | 1            | 0.7017765    | not scorable | not scorable |
| #### Bn-scaff_15782_1-p25964 C-genome specific (napus-oleracea) | 0.9497608    | 0.6142759    | 0.9922481    | 0.7149698    | not scorable | not scorable |
| #### Bn-scaff_15782_1-p25978 C-genome specific (napus-oleracea) | 0.9808612    | 0.7420546    | 1            | 0.7451997    | not scorable | not scorable |
| #### Bn-scaff_15782_1-p25999 C-genome specific (napus-oleracea) | 0.9617225    | 0.7462569    | 1            | 0.7134541    | not scorable | not scorable |
| #### Bn-scaff_15782_1-p26052 C-genome specific (napus-oleracea) | 0.9688995    | 0.7699175    | 1            | 0.8274794    | not scorable | not scorable |
| #### Bn-scaff_15782_1-p26136 C-genome specific (napus-oleracea) | 0.9665072    | 0.7786727    | 1            | 0.8101866    | not scorable | not scorable |
| #### Bn-scaff_15782_1-p27845 C-genome specific (napus-oleracea) | 0.9665072    | 0.7127749    | 0.9922481    | 0.7651443    | not scorable | not scorable |
| #### Bn-scaff_15782_1-p37811 C-genome specific (napus-oleracea) | 0.9617225    | 0.6965863    | 1            | 0.5370017    | not scorable | not scorable |
| #### Bn-scaff_15782_1-p38010 C-genome specific (napus-oleracea) | 0.9736842    | 0.7700041    | 0.9844961    | 0.8294601    | not scorable | not scorable |
| #### Bn-scaff_15782_1-p38060 C-genome specific (napus-oleracea) | 0.9712918    | 0.6918336    | 0.9922481    | 0.7518246    | not scorable | not scorable |
| #### Bn-scaff_15782_1-p56968 genome unspecific (all in)         | 0.9545454    | 0.5899549    | 0.9844961    | 0.6802285    | 0.9917355    | 0.9409741    |
| #### Bn-scaff_15782_1-p71063 genome unspecific (all in)         | 0.9593301    | 0.3290516    | 1            | 0.7542533    | 1            | 0.8849061    |
| #### Bn-scaff_15782_1-p72137 genome unspecific (all in)         | 0.9521531    | 0.3556382    | 0.9922481    | 0.7217996    | 0.8181818    | 0.802008     |
| #### Bn-scaff_15783_1-p17833 genome unspecific (oleracea-rapa)  | not scorable | not scorable | 0.9922481    | 0.7759429    | 0.9834711    | 0.8002325    |

|                                                                 |              |              |              |              |              |              |
|-----------------------------------------------------------------|--------------|--------------|--------------|--------------|--------------|--------------|
| #### Bn-scaff_15783_1-p26293 C-genome specific (napus-oleracea) | 0.9449761    | 0.3885443    | 1            | 0.7645996    | not scorable | not scorable |
| #### Bn-scaff_15783_1-p27309 A-genome specific (napus-rapa)     | 0.9641148    | 0.5954452    | not scorable | not scorable | 0.9752066    | 0.6558075    |
| #### Bn-scaff_15783_1-p34614 all not scorable                   | not scorable | not scorable | not scorable | not scorable | not scorable | not scorable |
| #### Bn-scaff_15783_1-p34972 A-genome specific (napus-rapa)     | 1            | 0.7669629    | not scorable | not scorable | 1            | 0.752191     |
| #### Bn-scaff_15783_1-p35037 A-genome specific (napus-rapa)     | 0.9617225    | 0.303584     | not scorable | not scorable | 0.9917355    | 0.7293615    |
| #### Bn-scaff_15783_1-p36732 A-genome specific (rapa only)      | not scorable | not scorable | not scorable | not scorable | 0.9917355    | 0.8427498    |
| #### Bn-scaff_15783_1-p36780 napus specific                     | 0.8181818    | 0.6916869    | not scorable | not scorable | not scorable | not scorable |
| #### Bn-scaff_15783_1-p36839 all not scorable                   | not scorable | not scorable | not scorable | not scorable | not scorable | not scorable |
| #### Bn-scaff_15783_1-p37670 C-genome specific (napus-oleracea) | 0.9808612    | 0.7598944    | 0.9844961    | 0.7965175    | not scorable | not scorable |
| #### Bn-scaff_15783_1-p37684 napus specific                     | 0.9976076    | 0.8690603    | not scorable | not scorable | not scorable | not scorable |
| #### Bn-scaff_15783_1-p37687 C-genome specific (napus-oleracea) | 0.9688995    | 0.539135     | 1            | 0.37725      | not scorable | not scorable |
| #### Bn-scaff_15783_1-p37996 A-genome specific (napus-rapa)     | 1            | 0.6322484    | not scorable | not scorable | 1            | 0.702597     |
| #### Bn-scaff_15783_1-p38116 genome unspecific (oleracea-rapa)  | not scorable | not scorable | 0.9147287    | 0.695472     | 0.9834711    | 0.9016184    |
| #### Bn-scaff_15783_1-p50069 genome unspecific (oleracea-rapa)  | not scorable | not scorable | 0.9224806    | 0.7639211    | 1            | 0.8515124    |
| #### Bn-scaff_15783_1-p50117 genome unspecific (oleracea-rapa)  | not scorable | not scorable | 0.9922481    | 0.3287504    | 1            | 0.7376376    |
| #### Bn-scaff_15783_1-p50148 genome unspecific (oleracea-rapa)  | not scorable | not scorable | 0.9767442    | 0.7868755    | 0.9752066    | 0.5738395    |
| #### Bn-scaff_15783_1-p51981 A-genome specific (rapa only)      | not scorable | not scorable | not scorable | not scorable | 1            | 0.4814632    |
| #### Bn-scaff_15783_1-p52046 A-genome specific (rapa only)      | not scorable | not scorable | not scorable | not scorable | 1            | 0.752191     |
| #### Bn-scaff_15789_1-p13861 C-genome specific (napus-oleracea) | 0.9114832    | 0.7824734    | 0.9767442    | 0.7971575    | not scorable | not scorable |
| #### Bn-scaff_15791_1-p10371 C-genome specific (napus-oleracea) | 0.9641148    | 0.6420749    | 0.9922481    | 0.6831554    | not scorable | not scorable |
| #### Bn-scaff_15791_1-p10533 C-genome specific (napus-oleracea) | 0.9856459    | 0.7776662    | 0.9922481    | 0.732235     | not scorable | not scorable |
| #### Bn-scaff_15791_1-p11290 C-genome specific (napus-oleracea) | 0.9784689    | 0.7611737    | 1            | 0.8485919    | not scorable | not scorable |
| #### Bn-scaff_15791_1-p11533 C-genome specific (napus-oleracea) | 0.9808612    | 0.7470018    | 1            | 0.8830289    | not scorable | not scorable |
| #### Bn-scaff_15791_1-p11539 C-genome specific (napus-oleracea) | 0.9808612    | 0.6939689    | 0.9922481    | 0.7584354    | not scorable | not scorable |
| #### Bn-scaff_15791_1-p11649 C-genome specific (napus-oleracea) | 0.9856459    | 0.7715074    | 1            | 0.843302     | not scorable | not scorable |
| #### Bn-scaff_15791_1-p11657 C-genome specific (napus-oleracea) | 0.9832536    | 0.7517628    | 1            | 0.8363926    | not scorable | not scorable |
| #### Bn-scaff_15791_1-p11668 C-genome specific (napus-oleracea) | 0.9808612    | 0.7741631    | 1            | 0.7967075    | not scorable | not scorable |
| #### Bn-scaff_15791_1-p11720 C-genome specific (napus-oleracea) | 0.9832536    | 0.7435601    | 1            | 0.65844      | not scorable | not scorable |
| #### Bn-scaff_15791_1-p11727 C-genome specific (napus-oleracea) | 0.9880383    | 0.7603089    | 1            | 0.8432119    | not scorable | not scorable |
| #### Bn-scaff_15791_1-p11735 C-genome specific (napus-oleracea) | 0.9856459    | 0.7852408    | 1            | 0.8483146    | not scorable | not scorable |
| #### Bn-scaff_15791_1-p11738 C-genome specific (napus-oleracea) | 0.9856459    | 0.7814348    | 1            | 0.8319035    | not scorable | not scorable |
| #### Bn-scaff_15791_1-p12827 C-genome specific (napus-oleracea) | 0.9856459    | 0.7097763    | 1            | 0.8365471    | not scorable | not scorable |
| #### Bn-scaff_15791_1-p13102 C-genome specific (napus-oleracea) | 0.9760765    | 0.7704151    | 1            | 0.814608     | not scorable | not scorable |

|                                                                 |              |              |              |              |              |              |
|-----------------------------------------------------------------|--------------|--------------|--------------|--------------|--------------|--------------|
| #### Bn-scaff_15791_1-p13595 C-genome specific (napus-oleracea) | 0.9712918    | 0.7019117    | 0.9922481    | 0.7240423    | not scorable | not scorable |
| #### Bn-scaff_15791_1-p13676 C-genome specific (napus-oleracea) | 0.9808612    | 0.70071      | 1            | 0.7281115    | not scorable | not scorable |
| #### Bn-scaff_15791_1-p13734 C-genome specific (napus-oleracea) | 0.9665072    | 0.6238195    | 1            | 0.6363881    | not scorable | not scorable |
| #### Bn-scaff_15791_1-p13852 napus specific                     | 0.9688995    | 0.6609151    | not scorable | not scorable | not scorable | not scorable |
| #### Bn-scaff_15791_1-p13904 C-genome specific (napus-oleracea) | 0.9856459    | 0.7450139    | 1            | 0.7016436    | not scorable | not scorable |
| #### Bn-scaff_15791_1-p13908 C-genome specific (napus-oleracea) | 0.9808612    | 0.738151     | 0.9844961    | 0.733679     | not scorable | not scorable |
| #### Bn-scaff_15791_1-p13919 C-genome specific (napus-oleracea) | 0.9593301    | 0.6495231    | 0.9922481    | 0.6703582    | not scorable | not scorable |
| #### Bn-scaff_15791_1-p15926 C-genome specific (napus-oleracea) | 0.9784689    | 0.7520855    | 0.9922481    | 0.8050844    | not scorable | not scorable |
| #### Bn-scaff_15791_1-p15963 C-genome specific (napus-oleracea) | 0.9784689    | 0.7590571    | 1            | 0.7976328    | not scorable | not scorable |
| #### Bn-scaff_15791_1-p17613 C-genome specific (napus-oleracea) | 0.9832536    | 0.8092452    | 1            | 0.842741     | not scorable | not scorable |
| #### Bn-scaff_15791_1-p17957 C-genome specific (napus-oleracea) | 0.9736842    | 0.7579666    | 1            | 0.8147926    | not scorable | not scorable |
| #### Bn-scaff_15791_1-p19558 C-genome specific (napus-oleracea) | 0.9784689    | 0.7907242    | 1            | 0.8176108    | not scorable | not scorable |
| #### Bn-scaff_15791_1-p19628 C-genome specific (napus-oleracea) | 0.9617225    | 0.6853293    | 0.9922481    | 0.694905     | not scorable | not scorable |
| #### Bn-scaff_15791_1-p19757 C-genome specific (oleracea only)  | not scorable | not scorable | 0.9844961    | 0.822301     | not scorable | not scorable |
| #### Bn-scaff_15791_1-p20877 C-genome specific (napus-oleracea) | 0.9760765    | 0.7806568    | 1            | 0.8338223    | not scorable | not scorable |
| #### Bn-scaff_15791_1-p20975 C-genome specific (napus-oleracea) | 0.9760765    | 0.6917442    | 1            | 0.7204567    | not scorable | not scorable |
| #### Bn-scaff_15791_1-p21050 C-genome specific (napus-oleracea) | 0.9784689    | 0.7518858    | 1            | 0.7931546    | not scorable | not scorable |
| #### Bn-scaff_15791_1-p32569 C-genome specific (napus-oleracea) | 0.9760765    | 0.7613741    | 1            | 0.8219309    | not scorable | not scorable |
| #### Bn-scaff_15791_1-p34725 C-genome specific (oleracea only)  | not scorable | not scorable | 0.9534883    | 0.7942313    | not scorable | not scorable |
| #### Bn-scaff_15791_1-p36503 C-genome specific (napus-oleracea) | 0.9617225    | 0.645335     | 0.9844961    | 0.7616214    | not scorable | not scorable |
| #### Bn-scaff_15791_1-p3927 C-genome specific (napus-oleracea)  | 0.9784689    | 0.6991499    | 0.9922481    | 0.711332     | not scorable | not scorable |
| #### Bn-scaff_15791_1-p43592 C-genome specific (napus-oleracea) | 0.9736842    | 0.7640952    | 0.9922481    | 0.788801     | not scorable | not scorable |
| #### Bn-scaff_15791_1-p67268 C-genome specific (napus-oleracea) | 0.9712918    | 0.8035988    | 0.9922481    | 0.8467922    | not scorable | not scorable |
| #### Bn-scaff_15791_1-p75723 C-genome specific (napus-oleracea) | 0.9593301    | 0.8991936    | 0.9922481    | 0.798801     | not scorable | not scorable |
| #### Bn-scaff_15791_1-p89304 C-genome specific (napus-oleracea) | 0.9688995    | 0.6824485    | 1            | 0.6844921    | not scorable | not scorable |
| #### Bn-scaff_15791_1-p89788 C-genome specific (napus-oleracea) | 0.9832536    | 0.758992     | 0.9922481    | 0.752807     | not scorable | not scorable |
| #### Bn-scaff_15791_1-p90377 C-genome specific (napus-oleracea) | 0.9808612    | 0.6964929    | 1            | 0.5726441    | not scorable | not scorable |
| #### Bn-scaff_15791_1-p91375 C-genome specific (napus-oleracea) | 0.9856459    | 0.7499067    | 1            | 0.8191772    | not scorable | not scorable |
| #### Bn-scaff_15791_1-p92475 C-genome specific (napus-oleracea) | 0.9832536    | 0.6575781    | 1            | 0.6655169    | not scorable | not scorable |
| #### Bn-scaff_15791_1-p93803 C-genome specific (napus-oleracea) | 0.9784689    | 0.6774554    | 1            | 0.6038323    | not scorable | not scorable |
| #### Bn-scaff_15791_1-p94650 C-genome specific (napus-oleracea) | 0.9760765    | 0.6666391    | 1            | 0.7034009    | not scorable | not scorable |
| #### Bn-scaff_15791_1-p94980 C-genome specific (napus-oleracea) | 0.9784689    | 0.7726405    | 1            | 0.8147027    | not scorable | not scorable |
| #### Bn-scaff_15794_1-p15718 C-genome specific (napus-oleracea) | 0.9593301    | 0.7721097    | 1            | 0.8190123    | not scorable | not scorable |

|                                                                 |              |              |              |              |              |              |
|-----------------------------------------------------------------|--------------|--------------|--------------|--------------|--------------|--------------|
| #### Bn-scaff_15794_1-p17836 C-genome specific (napus-oleracea) | 0.7511961    | 0.9052811    | 0.620155     | 0.8555363    | not scorable | not scorable |
| #### Bn-scaff_15794_1-p23662 napus specific                     | 0.9736842    | 0.3697569    | not scorable | not scorable | not scorable | not scorable |
| #### Bn-scaff_15794_1-p23672 A-genome specific (napus-rapa)     | 0.9641148    | 0.5199085    | not scorable | not scorable | 1            | 0.5910235    |
| #### Bn-scaff_15794_1-p24020 A-genome specific (napus-rapa)     | 0.9952153    | 0.329045     | not scorable | not scorable | 1            | 0.7650204    |
| #### Bn-scaff_15794_1-p31059 C-genome specific (napus-oleracea) | 0.9497608    | 0.7686924    | 1            | 0.8686281    | not scorable | not scorable |
| #### Bn-scaff_15794_1-p31229 genome unspecific (all in)         | 0.9665072    | 0.3570769    | 1            | 0.896391     | 1            | 0.9197028    |
| #### Bn-scaff_15794_1-p31378 C-genome specific (napus-oleracea) | 0.9784689    | 0.581037     | 0.9767442    | 0.737231     | not scorable | not scorable |
| #### Bn-scaff_15794_1-p34739 C-genome specific (napus-oleracea) | 0.9688995    | 0.7659022    | 0.9844961    | 0.8383578    | not scorable | not scorable |
| #### Bn-scaff_15794_1-p34796 C-genome specific (napus-oleracea) | 0.9880383    | 0.7591875    | 0.9922481    | 0.7475627    | not scorable | not scorable |
| #### Bn-scaff_15794_1-p35472 C-genome specific (napus-oleracea) | 0.9784689    | 0.743686     | 1            | 0.6846357    | not scorable | not scorable |
| #### Bn-scaff_15794_1-p41558 C-genome specific (oleracea only)  | not scorable | not scorable | 0.9767442    | 0.7913314    | not scorable | not scorable |
| #### Bn-scaff_15794_1-p41576 C-genome specific (oleracea only)  | not scorable | not scorable | 0.9534883    | 0.7406892    | not scorable | not scorable |
| #### Bn-scaff_15794_1-p43210 C-genome specific (napus-oleracea) | 0.9569378    | 0.6911244    | 0.9922481    | 0.8306924    | not scorable | not scorable |
| #### Bn-scaff_15794_1-p43220 C-genome specific (napus-oleracea) | 0.9641148    | 0.6736636    | 1            | 0.735745     | not scorable | not scorable |
| #### Bn-scaff_15794_1-p43786 C-genome specific (napus-oleracea) | 0.9641148    | 0.7359579    | 0.9689922    | 0.7254934    | not scorable | not scorable |
| #### Bn-scaff_15794_1-p84457 A-genome specific (napus-rapa)     | 0.9856459    | 0.3445713    | not scorable | not scorable | 0.9917355    | 0.7803617    |
| #### Bn-scaff_15794_1-p96454 napus specific                     | 0.9880383    | 0.5367954    | not scorable | not scorable | not scorable | not scorable |
| #### Bn-scaff_15794_2-p14714 A-genome specific (napus-rapa)     | 1            | 0.4793564    | not scorable | not scorable | 0.9917355    | 0.5313225    |
| #### Bn-scaff_15794_2-p21488 C-genome specific (napus-oleracea) | 0.9760765    | 0.7467756    | 1            | 0.8621874    | not scorable | not scorable |
| #### Bn-scaff_15794_2-p21848 napus specific                     | 0.9856459    | 0.9065244    | not scorable | not scorable | not scorable | not scorable |
| #### Bn-scaff_15794_2-p22096 C-genome specific (oleracea only)  | not scorable | not scorable | 0.9534883    | 0.5922939    | not scorable | not scorable |
| #### Bn-scaff_15794_2-p22935 C-genome specific (napus-oleracea) | 0.9641148    | 0.7681508    | 1            | 0.7690519    | not scorable | not scorable |
| #### Bn-scaff_15794_2-p25098 C-genome specific (oleracea only)  | not scorable | not scorable | 1            | 0.7979119    | not scorable | not scorable |
| #### Bn-scaff_15794_2-p25123 A-genome specific (napus-rapa)     | 0.9832536    | 0.3145152    | not scorable | not scorable | 0.9752066    | 0.5589989    |
| #### Bn-scaff_15794_2-p80390 C-genome specific (napus-oleracea) | 0.9880383    | 0.744435     | 0.9922481    | 0.6547921    | not scorable | not scorable |
| #### Bn-scaff_15794_3-p10803 C-genome specific (napus-oleracea) | 0.9856459    | 0.5337279    | 1            | 0.869669     | not scorable | not scorable |
| #### Bn-scaff_15794_3-p13783 C-genome specific (napus-oleracea) | 0.9928229    | 0.7939495    | 0.9922481    | 0.8454599    | not scorable | not scorable |
| #### Bn-scaff_15794_3-p14636 C-genome specific (napus-oleracea) | 0.9928229    | 0.8382434    | 1            | 0.7972453    | not scorable | not scorable |
| #### Bn-scaff_15794_3-p14643 C-genome specific (napus-oleracea) | 0.9976076    | 0.8034988    | 1            | 0.8292631    | not scorable | not scorable |
| #### Bn-scaff_15794_3-p14695 C-genome specific (napus-oleracea) | 0.9904306    | 0.817013     | 1            | 0.8291498    | not scorable | not scorable |
| #### Bn-scaff_15794_3-p14701 C-genome specific (napus-oleracea) | 0.9880383    | 0.8100007    | 0.9922481    | 0.8636461    | not scorable | not scorable |
| #### Bn-scaff_15794_3-p15329 C-genome specific (napus-oleracea) | 0.9521531    | 0.6353626    | 0.9767442    | 0.6311356    | not scorable | not scorable |
| #### Bn-scaff_15794_3-p15403 C-genome specific (napus-oleracea) | 0.9928229    | 0.7981747    | 0.9534883    | 0.8713163    | not scorable | not scorable |



|                                                                 |              |              |              |              |              |              |
|-----------------------------------------------------------------|--------------|--------------|--------------|--------------|--------------|--------------|
| #### Bn-scaff_15794_3-p15454 C-genome specific (napus-oleracea) | 0.9976076    | 0.7214014    | 1            | 0.7344813    | not scorable | not scorable |
| #### Bn-scaff_15794_3-p15475 C-genome specific (napus-oleracea) | 0.9976076    | 0.7859365    | 1            | 0.800019     | not scorable | not scorable |
| #### Bn-scaff_15794_3-p15512 napus specific                     | 0.9497608    | 0.6965157    | not scorable | not scorable | not scorable | not scorable |
| #### Bn-scaff_15794_3-p16428 C-genome specific (napus-oleracea) | 0.9928229    | 0.7504848    | 1            | 0.8850875    | not scorable | not scorable |
| #### Bn-scaff_15794_3-p16449 C-genome specific (napus-oleracea) | 1            | 0.7735121    | 1            | 0.7432082    | not scorable | not scorable |
| #### Bn-scaff_15794_3-p16488 C-genome specific (napus-oleracea) | 0.9952153    | 0.7890211    | 1            | 0.8927588    | not scorable | not scorable |
| #### Bn-scaff_15794_3-p16542 C-genome specific (napus-oleracea) | 0.9952153    | 0.7644242    | 1            | 0.8596392    | not scorable | not scorable |
| #### Bn-scaff_15794_3-p25604 C-genome specific (napus-oleracea) | 0.9736842    | 0.688538     | 1            | 0.7420965    | not scorable | not scorable |
| #### Bn-scaff_15794_3-p26476 genome unspecific (all in)         | 0.9401914    | 0.3891511    | 1            | 0.6885355    | 1            | 0.8264208    |
| #### Bn-scaff_15794_3-p26695 C-genome specific (napus-oleracea) | 0.9880383    | 0.7161956    | 1            | 0.7488255    | not scorable | not scorable |
| #### Bn-scaff_15794_3-p28635 C-genome specific (napus-oleracea) | 0.9688995    | 0.7420899    | 1            | 0.7617979    | not scorable | not scorable |
| #### Bn-scaff_15794_3-p28647 C-genome specific (napus-oleracea) | 0.9880383    | 0.6679538    | 1            | 0.7274901    | not scorable | not scorable |
| #### Bn-scaff_15794_3-p28771 C-genome specific (napus-oleracea) | 0.9880383    | 0.7550399    | 1            | 0.9120374    | not scorable | not scorable |
| #### Bn-scaff_15794_3-p29214 genome unspecific (all in)         | 0.9497608    | 0.6316144    | 0.9069768    | 0.7898671    | 0.9256198    | 0.930713     |
| #### Bn-scaff_15794_3-p29784 C-genome specific (napus-oleracea) | 0.9976076    | 0.8494952    | 0.9689922    | 0.8226346    | not scorable | not scorable |
| #### Bn-scaff_15794_3-p29807 C-genome specific (napus-oleracea) | 0.9928229    | 0.7870558    | 0.9844961    | 0.7314765    | not scorable | not scorable |
| #### Bn-scaff_15794_3-p31898 genome unspecific (all in)         | 0.9688995    | 0.5147972    | 1            | 0.9227058    | 1            | 0.9175813    |
| #### Bn-scaff_15794_3-p32092 C-genome specific (napus-oleracea) | 0.9904306    | 0.7795022    | 0.9689922    | 0.7726183    | not scorable | not scorable |
| #### Bn-scaff_15794_3-p32373 C-genome specific (napus-oleracea) | 1            | 0.8727692    | 0.9457364    | 0.8430917    | not scorable | not scorable |
| #### Bn-scaff_15794_3-p32788 C-genome specific (napus-oleracea) | 0.9760765    | 0.7142974    | 0.9922481    | 0.7429828    | not scorable | not scorable |
| #### Bn-scaff_15794_3-p32845 C-genome specific (napus-oleracea) | 0.9688995    | 0.7344706    | 0.9922481    | 0.8551714    | not scorable | not scorable |
| #### Bn-scaff_15794_3-p33647 C-genome specific (napus-oleracea) | 0.9952153    | 0.7746872    | 0.9534883    | 0.8294397    | not scorable | not scorable |
| #### Bn-scaff_15794_3-p33848 C-genome specific (napus-oleracea) | 0.9952153    | 0.8034075    | 0.9534883    | 0.8628033    | not scorable | not scorable |
| #### Bn-scaff_15794_3-p33912 C-genome specific (napus-oleracea) | 1            | 0.8447563    | 0.9302326    | 0.7321869    | not scorable | not scorable |
| #### Bn-scaff_15794_3-p34099 C-genome specific (napus-oleracea) | 0.9952153    | 0.8032082    | 0.9612403    | 0.763994     | not scorable | not scorable |
| #### Bn-scaff_15794_3-p34363 all not scorable                   | not scorable | not scorable | not scorable | not scorable | not scorable | not scorable |
| #### Bn-scaff_15794_3-p42858 C-genome specific (napus-oleracea) | 0.9641148    | 0.7337142    | 0.9689922    | 0.8345463    | not scorable | not scorable |
| #### Bn-scaff_15794_3-p42937 C-genome specific (napus-oleracea) | 0.9473684    | 0.7325594    | 0.8837209    | 0.8375604    | not scorable | not scorable |
| #### Bn-scaff_15794_3-p42953 C-genome specific (napus-oleracea) | 0.9665072    | 0.7350795    | 0.9612403    | 0.8512895    | not scorable | not scorable |
| #### Bn-scaff_15794_3-p47290 C-genome specific (oleracea only)  | not scorable | not scorable | 0.9922481    | 0.7723792    | not scorable | not scorable |
| #### Bn-scaff_15794_3-p47519 C-genome specific (napus-oleracea) | 0.9760765    | 0.6952867    | 1            | 0.845194     | not scorable | not scorable |
| #### Bn-scaff_15794_3-p50812 C-genome specific (napus-oleracea) | 0.9688995    | 0.7394891    | 1            | 0.8450915    | not scorable | not scorable |
| #### Bn-scaff_15794_3-p52783 C-genome specific (napus-oleracea) | 0.9593301    | 0.6697282    | 0.9922481    | 0.8440018    | not scorable | not scorable |

|                                                                 |              |              |              |              |              |              |
|-----------------------------------------------------------------|--------------|--------------|--------------|--------------|--------------|--------------|
| #### Bn-scaff_15794_3-p53387 C-genome specific (napus-oleracea) | 0.9712918    | 0.7291733    | 0.9922481    | 0.8485919    | not scorable | not scorable |
| #### Bn-scaff_15794_3-p60805 C-genome specific (napus-oleracea) | 0.9952153    | 0.885444     | 0.9844961    | 0.7376071    | not scorable | not scorable |
| #### Bn-scaff_15794_3-p62430 C-genome specific (napus-oleracea) | 0.9258373    | 0.7532074    | not scorable | not scorable | not scorable | not scorable |
| #### Bn-scaff_15794_3-p75109 C-genome specific (napus-oleracea) | 0.9976076    | 0.7820827    | 1            | 0.7235709    | not scorable | not scorable |
| #### Bn-scaff_15794_3-p75392 C-genome specific (napus-oleracea) | 0.9976076    | 0.8578569    | 0.9844961    | 0.7803776    | not scorable | not scorable |
| #### Bn-scaff_15794_3-p75709 C-genome specific (napus-oleracea) | 0.9904306    | 0.8067211    | 0.9922481    | 0.8784505    | not scorable | not scorable |
| #### Bn-scaff_15794_3-p75895 C-genome specific (napus-oleracea) | 0.9952153    | 0.8155364    | 0.9844961    | 0.8206125    | not scorable | not scorable |
| #### Bn-scaff_15794_3-p82037 C-genome specific (napus-oleracea) | 0.9952153    | 0.753476     | 1            | 0.9116576    | not scorable | not scorable |
| #### Bn-scaff_15794_3-p83984 C-genome specific (napus-oleracea) | 0.9904306    | 0.7531751    | 0.9457364    | 0.6596167    | not scorable | not scorable |
| #### Bn-scaff_15794_3-p84106 C-genome specific (napus-oleracea) | 0.9952153    | 0.7807409    | 1            | 0.8089717    | not scorable | not scorable |
| #### Bn-scaff_15794_3-p84885 C-genome specific (napus-oleracea) | 0.9401914    | 0.8185682    | 0.9922481    | 0.7744596    | not scorable | not scorable |
| #### Bn-scaff_15794_3-p85266 C-genome specific (napus-oleracea) | 0.9904306    | 0.7929381    | 0.9612403    | 0.8144552    | not scorable | not scorable |
| #### Bn-scaff_15794_3-p85516 C-genome specific (napus-oleracea) | 0.9928229    | 0.7704242    | 0.9612403    | 0.7542176    | not scorable | not scorable |
| #### Bn-scaff_15794_3-p85803 C-genome specific (napus-oleracea) | 0.9952153    | 0.8332953    | 1            | 0.8229404    | not scorable | not scorable |
| #### Bn-scaff_15794_3-p85935 all not scorable                   | not scorable | not scorable | not scorable | not scorable | not scorable | not scorable |
| #### Bn-scaff_15794_3-p86538 all not scorable                   | not scorable | not scorable | not scorable | not scorable | not scorable | not scorable |
| #### Bn-scaff_15794_3-p86751 C-genome specific (napus-oleracea) | 0.9856459    | 0.8013991    | 1            | 0.7999702    | not scorable | not scorable |
| #### Bn-scaff_15794_3-p87517 C-genome specific (napus-oleracea) | 0.9928229    | 0.7775403    | 0.9922481    | 0.8352038    | not scorable | not scorable |
| #### Bn-scaff_15794_3-p89166 C-genome specific (napus-oleracea) | 0.9952153    | 0.8242809    | 0.9689922    | 0.8193879    | not scorable | not scorable |
| #### Bn-scaff_15794_3-p89442 C-genome specific (napus-oleracea) | 0.9928229    | 0.7571508    | 0.9612403    | 0.8637521    | not scorable | not scorable |
| #### Bn-scaff_15794_3-p89881 C-genome specific (napus-oleracea) | 0.9952153    | 0.8151291    | 0.9379845    | 0.8350133    | not scorable | not scorable |
| #### Bn-scaff_15794_3-p89999 C-genome specific (napus-oleracea) | 0.9880383    | 0.8528718    | 1            | 0.8774162    | not scorable | not scorable |
| #### Bn-scaff_15794_3-p90139 C-genome specific (napus-oleracea) | 0.9904306    | 0.8104987    | 0.9922481    | 0.8372042    | not scorable | not scorable |
| #### Bn-scaff_15794_3-p9180 C-genome specific (napus-oleracea)  | 0.9928229    | 0.8328394    | 0.9844961    | 0.8384425    | not scorable | not scorable |
| #### Bn-scaff_15798_1-p10148 C-genome specific (napus-oleracea) | 1            | 0.8190007    | 1            | 0.7828925    | not scorable | not scorable |
| #### Bn-scaff_15798_1-p10160 C-genome specific (napus-oleracea) | 0.9928229    | 0.7613296    | 1            | 0.6005825    | not scorable | not scorable |
| #### Bn-scaff_15798_1-p10223 C-genome specific (napus-oleracea) | 0.9952153    | 0.7777914    | 1            | 0.7821143    | not scorable | not scorable |
| #### Bn-scaff_15798_1-p10314 C-genome specific (napus-oleracea) | 0.9019139    | 0.885814     | 0.9457364    | 0.7814622    | not scorable | not scorable |
| #### Bn-scaff_15798_1-p10333 napus specific                     | 0.9928229    | 0.8294539    | not scorable | not scorable | not scorable | not scorable |
| #### Bn-scaff_15798_1-p10336 napus specific                     | 0.9880383    | 0.7315232    | not scorable | not scorable | not scorable | not scorable |
| #### Bn-scaff_15798_1-p10368 napus specific                     | 0.9904306    | 0.8171075    | not scorable | not scorable | not scorable | not scorable |
| #### Bn-scaff_15798_1-p10427 C-genome specific (napus-oleracea) | 0.9952153    | 0.8571342    | 1            | 0.7912086    | not scorable | not scorable |
| #### Bn-scaff_15798_1-p10445 C-genome specific (napus-oleracea) | 0.9880383    | 0.822121     | 0.9922481    | 0.8346413    | not scorable | not scorable |

|                                                                 |              |              |              |              |              |              |
|-----------------------------------------------------------------|--------------|--------------|--------------|--------------|--------------|--------------|
| #### Bn-scaff_15798_1-p10459 C-genome specific (napus-oleracea) | 0.9904306    | 0.791207     | 0.9922481    | 0.7976379    | not scorable | not scorable |
| #### Bn-scaff_15798_1-p10572 C-genome specific (napus-oleracea) | 0.9904306    | 0.7508355    | 0.9767442    | 0.7583268    | not scorable | not scorable |
| #### Bn-scaff_15798_1-p10575 A-genome specific (napus-olera)    | 0.9617225    | 0.393707     | not scorable | not scorable | 1            | 0.7485446    |
| #### Bn-scaff_15798_1-p10583 genome unspecific (all in)         | 0.9808612    | 0.4279584    | 1            | 0.7499976    | 1            | 0.8207097    |
| #### Bn-scaff_15798_1-p10609 C-genome specific (napus-oleracea) | 0.9952153    | 0.839668     | 0.9922481    | 0.7575556    | not scorable | not scorable |
| #### Bn-scaff_15798_1-p10621 C-genome specific (napus-oleracea) | 0.9928229    | 0.8234208    | 1            | 0.7695872    | not scorable | not scorable |
| #### Bn-scaff_15798_1-p10647 C-genome specific (napus-oleracea) | 0.9880383    | 0.7919436    | 0.9767442    | 0.8020911    | not scorable | not scorable |
| #### Bn-scaff_15798_1-p10678 C-genome specific (napus-oleracea) | 0.9928229    | 0.8093907    | 0.9689922    | 0.8151305    | not scorable | not scorable |
| #### Bn-scaff_15798_1-p10817 napus specific                     | 0.9808612    | 0.773805     | not scorable | not scorable | not scorable | not scorable |
| #### Bn-scaff_15798_1-p10818 napus specific                     | 0.9832536    | 0.8606333    | not scorable | not scorable | not scorable | not scorable |
| #### Bn-scaff_15798_1-p10819 napus specific                     | 0.9856459    | 0.5704043    | not scorable | not scorable | not scorable | not scorable |
| #### Bn-scaff_15798_1-p10966 C-genome specific (napus-oleracea) | 0.9904306    | 0.7570899    | 0.9689922    | 0.7104864    | not scorable | not scorable |
| #### Bn-scaff_15798_1-p11048 C-genome specific (napus-oleracea) | 0.9904306    | 0.8004438    | 1            | 0.8394179    | not scorable | not scorable |
| #### Bn-scaff_15798_1-p11166 C-genome specific (napus-oleracea) | 0.9952153    | 0.8157398    | 0.9612403    | 0.7476513    | not scorable | not scorable |
| #### Bn-scaff_15798_1-p11257 C-genome specific (napus-oleracea) | 0.9976076    | 0.7060285    | 0.9457364    | 0.7235095    | not scorable | not scorable |
| #### Bn-scaff_15798_1-p11298 C-genome specific (napus-oleracea) | 0.9952153    | 0.7199841    | 0.9534883    | 0.7079579    | not scorable | not scorable |
| #### Bn-scaff_15798_1-p11384 C-genome specific (napus-oleracea) | 0.9976076    | 0.7518297    | 1            | 0.7778155    | not scorable | not scorable |
| #### Bn-scaff_15798_1-p11495 C-genome specific (napus-oleracea) | 0.9904306    | 0.6880202    | 0.9922481    | 0.6809539    | not scorable | not scorable |
| #### Bn-scaff_15798_1-p11569 C-genome specific (napus-oleracea) | 0.9976076    | 0.7943186    | 0.9844961    | 0.7579193    | not scorable | not scorable |
| #### Bn-scaff_15798_1-p11710 C-genome specific (napus-oleracea) | 0.9904306    | 0.8481429    | 1            | 0.8398426    | not scorable | not scorable |
| #### Bn-scaff_15798_1-p11795 C-genome specific (napus-oleracea) | 0.9928229    | 0.8358933    | 0.9612403    | 0.766228     | not scorable | not scorable |
| #### Bn-scaff_15798_1-p11801 C-genome specific (napus-oleracea) | 0.9976076    | 0.8591496    | 0.9922481    | 0.7986265    | not scorable | not scorable |
| #### Bn-scaff_15798_1-p11929 C-genome specific (napus-oleracea) | 0.9928229    | 0.7899417    | 0.9922481    | 0.7729207    | not scorable | not scorable |
| #### Bn-scaff_15798_1-p12140 C-genome specific (napus-oleracea) | 0.9760765    | 0.7716472    | 0.9767442    | 0.7891468    | not scorable | not scorable |
| #### Bn-scaff_15798_1-p13162 all not scorable                   | not scorable | not scorable | not scorable | not scorable | not scorable | not scorable |
| #### Bn-scaff_15798_1-p13219 C-genome specific (napus-oleracea) | 0.9952153    | 0.8273209    | 0.9922481    | 0.7402113    | not scorable | not scorable |
| #### Bn-scaff_15798_1-p13261 C-genome specific (napus-oleracea) | 1            | 0.8960122    | 1            | 0.7902654    | not scorable | not scorable |
| #### Bn-scaff_15798_1-p13561 C-genome specific (napus-oleracea) | 1            | 0.7896671    | 1            | 0.8279663    | not scorable | not scorable |
| #### Bn-scaff_15798_1-p13584 C-genome specific (napus-oleracea) | 0.9880383    | 0.7406535    | 0.9844961    | 0.6813185    | not scorable | not scorable |
| #### Bn-scaff_15798_1-p13663 C-genome specific (napus-oleracea) | 0.9832536    | 0.8137996    | 0.9767442    | 0.8095676    | not scorable | not scorable |
| #### Bn-scaff_15798_1-p13912 C-genome specific (napus-oleracea) | 0.9856459    | 0.7941163    | 0.9922481    | 0.8272632    | not scorable | not scorable |
| #### Bn-scaff_15798_1-p15213 C-genome specific (napus-oleracea) | 0.9904306    | 0.5133009    | 1            | 0.4814035    | not scorable | not scorable |
| #### Bn-scaff_15798_1-p15346 C-genome specific (napus-oleracea) | 0.9928229    | 0.788303     | 1            | 0.7944258    | not scorable | not scorable |

|                                                                 |              |              |              |              |              |              |
|-----------------------------------------------------------------|--------------|--------------|--------------|--------------|--------------|--------------|
| #### Bn-scaff_15798_1-p15485 C-genome specific (napus-oleracea) | 0.9856459    | 0.6555617    | 0.9612403    | 0.6680951    | not scorable | not scorable |
| #### Bn-scaff_15798_1-p15797 C-genome specific (napus-oleracea) | 0.9928229    | 0.8136073    | 0.9379845    | 0.7063009    | not scorable | not scorable |
| #### Bn-scaff_15798_1-p16077 C-genome specific (napus-oleracea) | 0.9928229    | 0.8904615    | 0.9922481    | 0.7607414    | not scorable | not scorable |
| #### Bn-scaff_15798_1-p16083 C-genome specific (napus-oleracea) | 0.9832536    | 0.784795     | 0.9844961    | 0.8548362    | not scorable | not scorable |
| #### Bn-scaff_15798_1-p16089 C-genome specific (napus-oleracea) | 0.9952153    | 0.7908224    | 0.9689922    | 0.7568849    | not scorable | not scorable |
| #### Bn-scaff_15798_1-p16259 C-genome specific (napus-oleracea) | 0.9880383    | 0.8676384    | 0.9302326    | 0.7397785    | not scorable | not scorable |
| #### Bn-scaff_15798_1-p16451 C-genome specific (napus-oleracea) | 0.9976076    | 0.830886     | 0.9767442    | 0.8088477    | not scorable | not scorable |
| #### Bn-scaff_15798_1-p16538 C-genome specific (napus-oleracea) | 0.9976076    | 0.8007197    | 0.9922481    | 0.7533931    | not scorable | not scorable |
| #### Bn-scaff_15798_1-p16579 C-genome specific (napus-oleracea) | 0.9952153    | 0.8108608    | 0.9922481    | 0.8330182    | not scorable | not scorable |
| #### Bn-scaff_15798_1-p17305 C-genome specific (napus-oleracea) | 0.9928229    | 0.8013259    | 1            | 0.7520419    | not scorable | not scorable |
| #### Bn-scaff_15798_1-p17837 C-genome specific (napus-oleracea) | 0.9784689    | 0.7571956    | 0.9922481    | 0.7371359    | not scorable | not scorable |
| #### Bn-scaff_15798_1-p17927 C-genome specific (napus-oleracea) | 0.9904306    | 0.7484156    | 0.9844961    | 0.8169245    | not scorable | not scorable |
| #### Bn-scaff_15798_1-p17954 C-genome specific (napus-oleracea) | 0.9904306    | 0.7354106    | 1            | 0.7194732    | not scorable | not scorable |
| #### Bn-scaff_15798_1-p18388 C-genome specific (napus-oleracea) | 1            | 0.8208079    | 1            | 0.8322309    | not scorable | not scorable |
| #### Bn-scaff_15798_1-p19490 A-genome specific (rapa only)      | not scorable | not scorable | not scorable | not scorable | 0.9256198    | 0.7536827    |
| #### Bn-scaff_15798_1-p20255 C-genome specific (napus-oleracea) | 0.9736842    | 0.801959     | 1            | 0.7483772    | not scorable | not scorable |
| #### Bn-scaff_15798_1-p20619 C-genome specific (napus-oleracea) | 0.9928229    | 0.6627873    | 1            | 0.7176092    | not scorable | not scorable |
| #### Bn-scaff_15798_1-p20941 C-genome specific (napus-oleracea) | 0.9952153    | 0.7027575    | 0.9534883    | 0.7079209    | not scorable | not scorable |
| #### Bn-scaff_15798_1-p22364 napus specific                     | 0.9976076    | 0.7323372    | not scorable | not scorable | not scorable | not scorable |
| #### Bn-scaff_15798_1-p22739 C-genome specific (napus-oleracea) | 0.9760765    | 0.6946192    | 0.9457364    | 0.6491382    | not scorable | not scorable |
| #### Bn-scaff_15798_1-p22745 C-genome specific (napus-oleracea) | 0.9880383    | 0.7281258    | 0.9922481    | 0.726003     | not scorable | not scorable |
| #### Bn-scaff_15798_1-p23575 C-genome specific (napus-oleracea) | 0.9880383    | 0.7924657    | 0.9844961    | 0.7537339    | not scorable | not scorable |
| #### Bn-scaff_15798_1-p23587 C-genome specific (napus-oleracea) | 0.9976076    | 0.8243678    | 1            | 0.768202     | not scorable | not scorable |
| #### Bn-scaff_15798_1-p24173 C-genome specific (napus-oleracea) | 0.9832536    | 0.7654626    | 0.9844961    | 0.7929482    | not scorable | not scorable |
| #### Bn-scaff_15798_1-p24180 C-genome specific (napus-oleracea) | 0.9784689    | 0.7676831    | 0.9844961    | 0.7896236    | not scorable | not scorable |
| #### Bn-scaff_15798_1-p24241 C-genome specific (napus-oleracea) | 0.9952153    | 0.8239623    | 0.9844961    | 0.8566455    | not scorable | not scorable |
| #### Bn-scaff_15798_1-p24590 C-genome specific (napus-oleracea) | 0.9880383    | 0.8455496    | 0.9844961    | 0.7512702    | not scorable | not scorable |
| #### Bn-scaff_15798_1-p24972 C-genome specific (napus-oleracea) | 0.9856459    | 0.6317111    | 0.9612403    | 0.6238673    | not scorable | not scorable |
| #### Bn-scaff_15798_1-p25126 C-genome specific (napus-oleracea) | 0.9952153    | 0.8362435    | 0.9844961    | 0.7981234    | not scorable | not scorable |
| #### Bn-scaff_15798_1-p26112 C-genome specific (napus-oleracea) | 0.9952153    | 0.855387     | 0.9844961    | 0.8605715    | not scorable | not scorable |
| #### Bn-scaff_15798_1-p26395 C-genome specific (napus-oleracea) | 0.9904306    | 0.8782446    | 0.9922481    | 0.8309628    | not scorable | not scorable |
| #### Bn-scaff_15798_1-p26811 C-genome specific (napus-oleracea) | 0.9976076    | 0.8369943    | 0.9922481    | 0.7999339    | not scorable | not scorable |
| #### Bn-scaff_15798_1-p26825 C-genome specific (napus-oleracea) | 0.9976076    | 0.7013001    | 0.9767442    | 0.6820153    | not scorable | not scorable |

|                                                                 |              |              |              |              |              |              |
|-----------------------------------------------------------------|--------------|--------------|--------------|--------------|--------------|--------------|
| #### Bn-scaff_15798_1-p2689 C-genome specific (napus-oleracea)  | 0.9880383    | 0.7112849    | 0.9922481    | 0.6998854    | not scorable | not scorable |
| #### Bn-scaff_15798_1-p27126 C-genome specific (napus-oleracea) | 0.9904306    | 0.7326374    | 0.9689922    | 0.7103029    | not scorable | not scorable |
| #### Bn-scaff_15798_1-p27207 C-genome specific (napus-oleracea) | 0.9904306    | 0.6939689    | 0.9922481    | 0.6955034    | not scorable | not scorable |
| #### Bn-scaff_15798_1-p27262 C-genome specific (napus-oleracea) | 0.9928229    | 0.7155506    | 0.9844961    | 0.6899231    | not scorable | not scorable |
| #### Bn-scaff_15798_1-p27273 C-genome specific (napus-oleracea) | 0.9952153    | 0.8712693    | 0.9689922    | 0.7818978    | not scorable | not scorable |
| #### Bn-scaff_15798_1-p27283 C-genome specific (napus-oleracea) | 0.9976076    | 0.7443632    | 0.9767442    | 0.6693439    | not scorable | not scorable |
| #### Bn-scaff_15798_1-p27288 C-genome specific (napus-oleracea) | 0.9976076    | 0.8437552    | 0.9844961    | 0.8312953    | not scorable | not scorable |
| #### Bn-scaff_15798_1-p28104 C-genome specific (napus-oleracea) | 0.9928229    | 0.833212     | 0.9844961    | 0.7403072    | not scorable | not scorable |
| #### Bn-scaff_15798_1-p28111 C-genome specific (napus-oleracea) | 0.9976076    | 0.7871125    | 0.9844961    | 0.7467067    | not scorable | not scorable |
| #### Bn-scaff_15798_1-p28149 C-genome specific (napus-oleracea) | 0.9856459    | 0.8134235    | 0.9689922    | 0.8330817    | not scorable | not scorable |
| #### Bn-scaff_15798_1-p28174 C-genome specific (napus-oleracea) | 0.9928229    | 0.8686249    | 0.9689922    | 0.8071767    | not scorable | not scorable |
| #### Bn-scaff_15798_1-p28200 C-genome specific (napus-oleracea) | 0.9952153    | 0.8758249    | 1            | 0.8381849    | not scorable | not scorable |
| #### Bn-scaff_15798_1-p28214 C-genome specific (napus-oleracea) | 0.9880383    | 0.8203477    | 0.9767442    | 0.82165      | not scorable | not scorable |
| #### Bn-scaff_15798_1-p28255 C-genome specific (napus-oleracea) | 0.9880383    | 0.6337827    | 0.9922481    | 0.5920601    | not scorable | not scorable |
| #### Bn-scaff_15798_1-p28381 C-genome specific (napus-oleracea) | 0.9976076    | 0.8964322    | 1            | 0.8870232    | not scorable | not scorable |
| #### Bn-scaff_15798_1-p28939 A-genome specific (napus-rapa)     | 0.9952153    | 0.4789951    | not scorable | not scorable | 0.9917355    | 0.7402059    |
| #### Bn-scaff_15798_1-p29020 A-genome specific (napus-rapa)     | 0.9976076    | 0.5338299    | not scorable | not scorable | 1            | 0.7445664    |
| #### Bn-scaff_15798_1-p29310 C-genome specific (napus-oleracea) | 0.9952153    | 0.6568081    | 0.9689922    | 0.6714892    | not scorable | not scorable |
| #### Bn-scaff_15798_1-p29358 C-genome specific (oleracea only)  | not scorable | not scorable | 0.9534883    | 0.6968854    | not scorable | not scorable |
| #### Bn-scaff_15798_1-p31042 C-genome specific (napus-oleracea) | 0.9904306    | 0.7597977    | 0.9922481    | 0.7549847    | not scorable | not scorable |
| #### Bn-scaff_15798_1-p41905 A-genome specific (napus-rapa)     | 1            | 0.3597206    | not scorable | not scorable | 1            | 0.7245917    |
| #### Bn-scaff_15798_1-p42247 C-genome specific (napus-oleracea) | 0.9952153    | 0.7248024    | 1            | 0.7643426    | not scorable | not scorable |
| #### Bn-scaff_15798_1-p45650 napus specific                     | 0.9712918    | 0.7672581    | not scorable | not scorable | not scorable | not scorable |
| #### Bn-scaff_15798_1-p4794 genome unspecific (all in)          | 0.9880383    | 0.5499071    | 0.9922481    | 0.8274275    | 1            | 0.9274955    |
| #### Bn-scaff_15798_1-p69984 C-genome specific (napus-oleracea) | 0.9784689    | 0.9120374    | 0.8682171    | 0.8096738    | not scorable | not scorable |
| #### Bn-scaff_15798_1-p69997 C-genome specific (napus-oleracea) | 0.9688995    | 0.8292297    | 0.875969     | 0.8759561    | not scorable | not scorable |
| #### Bn-scaff_15798_1-p70351 C-genome specific (napus-oleracea) | 0.9880383    | 0.7534448    | 0.8604651    | 0.773591     | not scorable | not scorable |
| #### Bn-scaff_15798_1-p70869 C-genome specific (napus-oleracea) | 0.9952153    | 0.8502356    | 0.8604651    | 0.8131424    | not scorable | not scorable |
| #### Bn-scaff_15798_1-p71119 C-genome specific (napus-oleracea) | 1            | 0.738956     | 1            | 0.7562023    | not scorable | not scorable |
| #### Bn-scaff_15798_1-p71202 C-genome specific (napus-oleracea) | 0.9521531    | 0.6284523    | 0.9922481    | 0.6648483    | not scorable | not scorable |
| #### Bn-scaff_15798_1-p72565 C-genome specific (napus-oleracea) | 0.9976076    | 0.6857262    | 1            | 0.8277054    | not scorable | not scorable |
| #### Bn-scaff_15798_1-p72933 C-genome specific (napus-oleracea) | 1            | 0.7757726    | 1            | 0.7580861    | not scorable | not scorable |
| #### Bn-scaff_15798_1-p73173 C-genome specific (napus-oleracea) | 0.9928229    | 0.8118302    | 1            | 0.7475371    | not scorable | not scorable |

|                                                                |              |              |              |              |              |              |
|----------------------------------------------------------------|--------------|--------------|--------------|--------------|--------------|--------------|
| #### Bn-scaff_15798_1-p73252genome unspecific (all in)         | 0.9856459    | 0.4878578    | 1            | 0.7100784    | 1            | 0.5943371    |
| #### Bn-scaff_15798_1-p73321genome unspecific (all in)         | 0.9976076    | 0.3840823    | 1            | 0.8366635    | 1            | 0.716208     |
| #### Bn-scaff_15798_1-p75506C-genome specific (napus-oleracea) | 0.9856459    | 0.9053149    | 1            | 0.7789767    | not scorable | not scorable |
| #### Bn-scaff_15798_1-p75513C-genome specific (napus-oleracea) | 0.9928229    | 0.8429303    | 0.9767442    | 0.7880381    | not scorable | not scorable |
| #### Bn-scaff_15798_1-p75996C-genome specific (napus-oleracea) | 0.9760765    | 0.7992336    | 1            | 0.7938269    | not scorable | not scorable |
| #### Bn-scaff_15798_1-p76108C-genome specific (napus-oleracea) | 0.9928229    | 0.8886477    | 0.9922481    | 0.8187464    | not scorable | not scorable |
| #### Bn-scaff_15798_1-p77734C-genome specific (napus-oleracea) | 1            | 0.8823397    | 0.9767442    | 0.7830779    | not scorable | not scorable |
| #### Bn-scaff_15798_1-p81345genome unspecific (all in)         | 0.9712918    | 0.62449      | 1            | 0.7301145    | 0.9256198    | 0.9175813    |
| #### Bn-scaff_15798_1-p81627napus specific                     | 0.9880383    | 0.7109228    | not scorable | not scorable | not scorable | not scorable |
| #### Bn-scaff_15798_1-p93547C-genome specific (napus-oleracea) | 0.9928229    | 0.8031629    | 0.9767442    | 0.8291255    | not scorable | not scorable |
| #### Bn-scaff_15798_1-p93801C-genome specific (napus-oleracea) | 0.9952153    | 0.8394934    | 1            | 0.8460279    | not scorable | not scorable |
| #### Bn-scaff_15798_1-p94100napus specific                     | 0.9976076    | 0.5601621    | not scorable | not scorable | not scorable | not scorable |
| #### Bn-scaff_15798_1-p94229C-genome specific (napus-oleracea) | 0.9736842    | 0.7307009    | 0.9224806    | 0.4443133    | not scorable | not scorable |
| #### Bn-scaff_15798_1-p94601C-genome specific (napus-oleracea) | 0.9952153    | 0.8657862    | 1            | 0.8350077    | not scorable | not scorable |
| #### Bn-scaff_15798_1-p94781C-genome specific (napus-oleracea) | 0.9904306    | 0.8868889    | 0.9844961    | 0.8310959    | not scorable | not scorable |
| #### Bn-scaff_15798_1-p94900C-genome specific (napus-oleracea) | 0.9976076    | 0.9126314    | 0.9844961    | 0.8537286    | not scorable | not scorable |
| #### Bn-scaff_15798_1-p95925C-genome specific (napus-oleracea) | 0.9856459    | 0.7751274    | 0.9689922    | 0.8059742    | not scorable | not scorable |
| #### Bn-scaff_15798_1-p96198C-genome specific (napus-oleracea) | 0.9952153    | 0.879887     | 0.9844961    | 0.8339671    | not scorable | not scorable |
| #### Bn-scaff_15798_1-p97409genome unspecific (all in)         | 0.9928229    | 0.7736127    | 0.9922481    | 0.8327085    | 0.9834711    | 0.7332025    |
| #### Bn-scaff_15798_1-p97942C-genome specific (napus-oleracea) | 0.9928229    | 0.8620445    | 1            | 0.794655     | not scorable | not scorable |
| #### Bn-scaff_15798_1-p98201A-genome specific (rapa only)      | not scorable | not scorable | not scorable | not scorable | 0.9917355    | 0.9314687    |
| #### Bn-scaff_15798_1-p98610C-genome specific (napus-oleracea) | 0.9904306    | 0.7161172    | 0.9767442    | 0.6743219    | not scorable | not scorable |
| #### Bn-scaff_15798_1-p99822C-genome specific (napus-oleracea) | 0.9952153    | 0.758837     | 1            | 0.680512     | not scorable | not scorable |
| #### Bn-scaff_15803_1-p43466all not scorable                   | not scorable | not scorable | not scorable | not scorable | not scorable | not scorable |
| #### Bn-scaff_15803_1-p44018C-genome specific (napus-oleracea) | 0.8397129    | 0.7410938    | 0.9689922    | 0.8208321    | not scorable | not scorable |
| #### Bn-scaff_15803_1-p45228C-genome specific (napus-oleracea) | 0.8660287    | 0.7465416    | 0.9844961    | 0.7901388    | not scorable | not scorable |
| #### Bn-scaff_15803_1-p45263C-genome specific (napus-oleracea) | 0.8803828    | 0.7181574    | 0.9922481    | 0.8168131    | not scorable | not scorable |
| #### Bn-scaff_15803_1-p45434C-genome specific (napus-oleracea) | 0.8708134    | 0.6697758    | 1            | 0.8132016    | not scorable | not scorable |
| #### Bn-scaff_15803_1-p45434C-genome specific (napus-oleracea) | 0.8755981    | 0.7294556    | 0.9922481    | 0.8277064    | not scorable | not scorable |
| #### Bn-scaff_15803_1-p45605C-genome specific (napus-oleracea) | 0.8732057    | 0.7729499    | 0.9844961    | 0.8418539    | not scorable | not scorable |
| #### Bn-scaff_15803_1-p46627C-genome specific (napus-oleracea) | 0.9401914    | 0.5457998    | 1            | 0.7287537    | not scorable | not scorable |
| #### Bn-scaff_15803_1-p47456napus specific                     | 0.861244     | 0.8508198    | not scorable | not scorable | not scorable | not scorable |
| #### Bn-scaff_15803_1-p48295C-genome specific (napus-oleracea) | 0.8660287    | 0.7896048    | 0.9844961    | 0.7341391    | not scorable | not scorable |

|                                                                 |              |              |              |              |              |              |
|-----------------------------------------------------------------|--------------|--------------|--------------|--------------|--------------|--------------|
| #### Bn-scaff_15803_1-p48327 napus specific                     | 0.861244     | 0.7459697    | not scorable | not scorable | not scorable | not scorable |
| #### Bn-scaff_15803_1-p49037 napus specific                     | 0.8636364    | 0.7510298    | not scorable | not scorable | not scorable | not scorable |
| #### Bn-scaff_15803_1-p53529 C-genome specific (napus-oleracea) | 0.8684211    | 0.7246448    | 0.9922481    | 0.8115303    | not scorable | not scorable |
| #### Bn-scaff_15803_1-p54280 all not scorable                   | not scorable | not scorable | not scorable | not scorable | not scorable | not scorable |
| #### Bn-scaff_15803_1-p55847 C-genome specific (oleracea only)  | not scorable | not scorable | 0.8139535    | 0.8646814    | not scorable | not scorable |
| #### Bn-scaff_15803_1-p57179 napus specific                     | 0.8684211    | 0.7319835    | not scorable | not scorable | not scorable | not scorable |
| #### Bn-scaff_15803_1-p57253 all not scorable                   | not scorable | not scorable | not scorable | not scorable | not scorable | not scorable |
| #### Bn-scaff_15803_1-p57375 C-genome specific (napus-oleracea) | 0.8732057    | 0.7284667    |              | 1            | 0.7000407    | not scorable |
| #### Bn-scaff_15803_1-p57475 C-genome specific (napus-oleracea) | 0.8660287    | 0.652833     | 0.9922481    | 0.7009104    | not scorable | not scorable |
| #### Bn-scaff_15803_1-p60742 napus specific                     | 0.8588517    | 0.7364068    | not scorable | not scorable | not scorable | not scorable |
| #### Bn-scaff_15803_1-p60754 C-genome specific (napus-oleracea) | 0.8636364    | 0.7243194    |              | 1            | 0.8072873    | not scorable |
| #### Bn-scaff_15803_1-p61292 C-genome specific (napus-oleracea) | 0.8564593    | 0.7352855    |              | 1            | 0.7612904    | not scorable |
| #### Bn-scaff_15803_1-p61382 napus specific                     | 0.8708134    | 0.7168876    | not scorable | not scorable | not scorable | not scorable |
| #### Bn-scaff_15803_1-p66826 napus specific                     | 0.8660287    | 0.7458601    | not scorable | not scorable | not scorable | not scorable |
| #### Bn-scaff_15803_1-p67216 C-genome specific (napus-oleracea) | 0.8516746    | 0.6772055    | 0.9767442    | 0.9373589    | not scorable | not scorable |
| #### Bn-scaff_15803_1-p67751 C-genome specific (napus-oleracea) | 0.8564593    | 0.7253465    |              | 1            | 0.7678972    | not scorable |
| #### Bn-scaff_15803_1-p67872 napus specific                     | 0.8588517    | 0.6382145    | not scorable | not scorable | not scorable | not scorable |
| #### Bn-scaff_15803_1-p67898 C-genome specific (napus-oleracea) | 0.8636364    | 0.7313552    |              | 1            | 0.7392163    | not scorable |
| #### Bn-scaff_15803_1-p69522 napus specific                     | 0.8564593    | 0.7645683    | not scorable | not scorable | not scorable | not scorable |
| #### Bn-scaff_15803_1-p72962 genome unspecific (all in)         | 0.9688995    | 0.393997     |              | 1            | 0.8460528    | 1            |
| #### Bn-scaff_15803_1-p73390 napus specific                     |              | 1            | 0.4505462    | not scorable | not scorable | not scorable |
| #### Bn-scaff_15803_1-p73411 A-genome specific (rapa only)      | not scorable | not scorable | not scorable | not scorable |              | 1            |
| #### Bn-scaff_15803_1-p73439 A-genome specific (rapa only)      | not scorable | not scorable | not scorable | not scorable |              | 1            |
| #### Bn-scaff_15803_1-p80087 C-genome specific (napus-oleracea) | 0.9593301    | 0.3325505    |              | 1            | 0.7578324    | not scorable |
| #### Bn-scaff_15803_1-p80239 C-genome specific (oleracea only)  | not scorable | not scorable | 0.9069768    | 0.7080795    | not scorable | not scorable |
| #### Bn-scaff_15803_1-p81173 genome unspecific (all in)         | 0.9617225    | 0.2806344    |              | 1            | 0.7193097    | 1            |
| #### Bn-scaff_15803_1-p81351 genome unspecific (oleracea-rapa)  | not scorable | not scorable |              | 1            | 0.6159871    | 0.9834711    |
| #### Bn-scaff_15803_1-p83724 C-genome specific (napus-oleracea) | 0.8732057    | 0.6818107    | 0.9922481    | 0.8061043    | not scorable | not scorable |
| #### Bn-scaff_15803_1-p83730 C-genome specific (napus-oleracea) | 0.8421053    | 0.6566387    | 0.9689922    | 0.8133077    | not scorable | not scorable |
| #### Bn-scaff_15803_1-p83749 C-genome specific (napus-oleracea) | 0.861244     | 0.7371302    | 0.9922481    | 0.8213951    | not scorable | not scorable |
| #### Bn-scaff_15803_1-p85543 genome unspecific (oleracea-rapa)  | not scorable | not scorable |              | 1            | 0.8434277    | 1            |
| #### Bn-scaff_15808_1-p10701 A-genome specific (rapa only)      | not scorable | not scorable | not scorable | not scorable |              | 1            |
| #### Bn-scaff_15808_1-p23698 A-genome specific (napus-rapa)     |              | 1            | 0.8135551    | not scorable | not scorable | 1            |

|                                                                 |              |              |              |              |              |              |
|-----------------------------------------------------------------|--------------|--------------|--------------|--------------|--------------|--------------|
| #### Bn-scaff_15808_1-p23777 genome unspecific (all in)         | 0.9976076    | 0.4933473    | 0.9844961    | 0.6890675    | 1            | 0.7884539    |
| #### Bn-scaff_15808_1-p23778 genome unspecific (all in)         | 0.9880383    | 0.639773     | 0.9922481    | 0.6994298    | 1            | 0.8981175    |
| #### Bn-scaff_15808_1-p24015 A-genome specific (napus-rapa)     | 0.9976076    | 0.3296758    | not scorable | not scorable | 1            | 0.8815182    |
| #### Bn-scaff_15808_1-p24064 A-genome specific (napus-rapa)     | 1            | 0.8919291    | not scorable | not scorable | 1            | 0.877073     |
| #### Bn-scaff_15808_1-p24700 genome unspecific (all in)         | 1            | 0.320148     | 0.9844961    | 0.4493217    | 1            | 0.8560838    |
| #### Bn-scaff_15808_1-p29856 genome unspecific (all in)         | 0.9617225    | 0.2549892    | 1            | 0.7524865    | 1            | 0.7998559    |
| #### Bn-scaff_15808_1-p31207 A-genome specific (napus-rapa)     | 0.9904306    | 0.3518266    | not scorable | not scorable | 1            | 0.742586     |
| #### Bn-scaff_15808_1-p31258 A-genome specific (napus-rapa)     | 1            | 0.4682187    | not scorable | not scorable | 0.9834711    | 0.6849413    |
| #### Bn-scaff_15808_1-p33708 A-genome specific (napus-rapa)     | 0.9928229    | 0.3876256    | not scorable | not scorable | 0.9834711    | 0.7259446    |
| #### Bn-scaff_15808_1-p33745 A-genome specific (napus-rapa)     | 0.9976076    | 0.3570361    | not scorable | not scorable | 1            | 0.7161625    |
| #### Bn-scaff_15808_1-p38829 genome unspecific (all in)         | 0.9976076    | 0.5455977    | 1            | 0.7905928    | 1            | 0.9316157    |
| #### Bn-scaff_15808_1-p39022 C-genome specific (oleracea only)  | not scorable | not scorable | 1            | 0.6865138    | not scorable | not scorable |
| #### Bn-scaff_15808_1-p39044 C-genome specific (napus-oleracea) | 0.9952153    | 0.6588842    | 0.9922481    | 0.7048972    | not scorable | not scorable |
| #### Bn-scaff_15808_1-p39208 C-genome specific (napus-oleracea) | 0.9808612    | 0.930127     | 0.5503876    | 0.8081897    | not scorable | not scorable |
| #### Bn-scaff_15808_1-p39344 genome unspecific (all in)         | 0.9976076    | 0.3999216    | 1            | 0.5851297    | 1            | 0.6783607    |
| #### Bn-scaff_15808_1-p39890 all not scorable                   | not scorable | not scorable | not scorable | not scorable | not scorable | not scorable |
| #### Bn-scaff_15808_1-p40484 C-genome specific (napus-oleracea) | 0.9976076    | 0.7761772    | 1            | 0.7686638    | not scorable | not scorable |
| #### Bn-scaff_15808_1-p40593 C-genome specific (napus-oleracea) | 0.9928229    | 0.8669724    | 1            | 0.8847142    | not scorable | not scorable |
| #### Bn-scaff_15808_1-p40628 C-genome specific (napus-oleracea) | 0.9976076    | 0.845473     | 0.9922481    | 0.8256904    | not scorable | not scorable |
| #### Bn-scaff_15808_1-p40632 napus specific                     | 0.9952153    | 0.7217167    | not scorable | not scorable | not scorable | not scorable |
| #### Bn-scaff_15808_1-p40903 C-genome specific (napus-oleracea) | 0.9976076    | 0.8072661    | 1            | 0.7877597    | not scorable | not scorable |
| #### Bn-scaff_15808_1-p40997 C-genome specific (napus-oleracea) | 0.9928229    | 0.8739637    | 1            | 0.5843614    | not scorable | not scorable |
| #### Bn-scaff_15808_1-p41178 C-genome specific (napus-oleracea) | 0.9928229    | 0.8314662    | 1            | 0.8597979    | not scorable | not scorable |
| #### Bn-scaff_15808_1-p41184 C-genome specific (napus-oleracea) | 0.9976076    | 0.712622     | 1            | 0.6521389    | not scorable | not scorable |
| #### Bn-scaff_15808_1-p41470 C-genome specific (napus-oleracea) | 0.9808612    | 0.7379718    | 0.7286822    | 0.8157042    | not scorable | not scorable |
| #### Bn-scaff_15808_1-p41668 napus specific                     | 0.9760765    | 0.6325072    | not scorable | not scorable | not scorable | not scorable |
| #### Bn-scaff_15808_1-p41685 napus specific                     | 0.9784689    | 0.7649671    | not scorable | not scorable | not scorable | not scorable |
| #### Bn-scaff_15808_1-p41818 napus specific                     | 0.9808612    | 0.7891119    | not scorable | not scorable | not scorable | not scorable |
| #### Bn-scaff_15808_1-p41868 C-genome specific (napus-oleracea) | 0.9808612    | 0.7198979    | 0.5348837    | 0.7918724    | not scorable | not scorable |
| #### Bn-scaff_15808_1-p41951 C-genome specific (napus-oleracea) | 0.9832536    | 0.7201481    | 0.496124     | 0.7077365    | not scorable | not scorable |
| #### Bn-scaff_15808_1-p42080 C-genome specific (napus-oleracea) | 1            | 0.8883033    | 0.9844961    | 0.9002826    | not scorable | not scorable |
| #### Bn-scaff_15808_1-p42481 C-genome specific (napus-oleracea) | 0.9952153    | 0.7623653    | 0.9844961    | 0.7925876    | not scorable | not scorable |
| #### Bn-scaff_15808_1-p42551 C-genome specific (napus-oleracea) | 1            | 0.9471166    | 1            | 0.8690122    | not scorable | not scorable |



|                                                                 |              |              |              |              |              |              |
|-----------------------------------------------------------------|--------------|--------------|--------------|--------------|--------------|--------------|
| #### Bn-scaff_15808_1-p42633 napus specific                     | 1            | 0.8778641    | not scorable | not scorable | not scorable | not scorable |
| #### Bn-scaff_15808_1-p43007 C-genome specific (napus-oleracea) | 0.9976076    | 0.7361253    | 1            | 0.5863065    | not scorable | not scorable |
| #### Bn-scaff_15808_1-p43013 C-genome specific (napus-oleracea) | 1            | 0.8276817    | 1            | 0.7446334    | not scorable | not scorable |
| #### Bn-scaff_15808_1-p43064 C-genome specific (napus-oleracea) | 0.9952153    | 0.7738741    | 1            | 0.8689702    | not scorable | not scorable |
| #### Bn-scaff_15808_1-p43097 C-genome specific (napus-oleracea) | 0.9976076    | 0.7732242    | 1            | 0.6008573    | not scorable | not scorable |
| #### Bn-scaff_15808_1-p43132 C-genome specific (napus-oleracea) | 0.9952153    | 0.8234416    | 1            | 0.8283496    | not scorable | not scorable |
| #### Bn-scaff_15808_1-p43155 C-genome specific (napus-oleracea) | 0.9952153    | 0.8143513    | 1            | 0.7574458    | not scorable | not scorable |
| #### Bn-scaff_15808_1-p43252 C-genome specific (napus-oleracea) | 0.9976076    | 0.7221727    | 1            | 0.7446258    | not scorable | not scorable |
| #### Bn-scaff_15808_1-p43259 C-genome specific (napus-oleracea) | 0.9952153    | 0.6914746    | 1            | 0.6812292    | not scorable | not scorable |
| #### Bn-scaff_15808_1-p43262 C-genome specific (napus-oleracea) | 0.9976076    | 0.7510804    | 1            | 0.7068367    | not scorable | not scorable |
| #### Bn-scaff_15808_1-p43294 C-genome specific (napus-oleracea) | 0.9976076    | 0.72663      | 1            | 0.7710248    | not scorable | not scorable |
| #### Bn-scaff_15808_1-p43312 C-genome specific (napus-oleracea) | 0.9976076    | 0.7848828    | 1            | 0.7605278    | not scorable | not scorable |
| #### Bn-scaff_15808_1-p43319 C-genome specific (napus-oleracea) | 0.9976076    | 0.7186193    | 1            | 0.7532917    | not scorable | not scorable |
| #### Bn-scaff_15808_1-p43349 C-genome specific (napus-oleracea) | 0.9952153    | 0.7469207    | 0.9922481    | 0.7553792    | not scorable | not scorable |
| #### Bn-scaff_15808_1-p43394 C-genome specific (napus-oleracea) | 0.9976076    | 0.7182099    | 1            | 0.8124126    | not scorable | not scorable |
| #### Bn-scaff_15808_1-p43434 C-genome specific (napus-oleracea) | 0.9976076    | 0.8152073    | 1            | 0.8582306    | not scorable | not scorable |
| #### Bn-scaff_15808_1-p43733 C-genome specific (napus-oleracea) | 0.9952153    | 0.6974766    | 1            | 0.7233397    | not scorable | not scorable |
| #### Bn-scaff_15808_1-p44038 C-genome specific (napus-oleracea) | 0.9976076    | 0.7100502    | 1            | 0.632499     | not scorable | not scorable |
| #### Bn-scaff_15808_1-p44230 C-genome specific (napus-oleracea) | 1            | 0.7551109    | 1            | 0.8849852    | not scorable | not scorable |
| #### Bn-scaff_15808_1-p44599 genome unspecific (all in)         | 0.9952153    | 0.6148065    | 0.9922481    | 0.6826162    | 1            | 0.9372814    |
| #### Bn-scaff_15808_1-p44605 genome unspecific (oleracea-rapa)  | not scorable | not scorable | 1            | 0.6108444    | 1            | 0.9127591    |
| #### Bn-scaff_15808_1-p44670 C-genome specific (napus-oleracea) | 0.9976076    | 0.8289337    | 1            | 0.722477     | not scorable | not scorable |
| #### Bn-scaff_15808_1-p48748 genome unspecific (all in)         | 0.9952153    | 0.4695136    | 0.9922481    | 0.6621079    | 1            | 0.6999866    |
| #### Bn-scaff_15808_1-p50319 A-genome specific (napus-rapa)     | 1            | 0.5578579    | not scorable | not scorable | 0.9917355    | 0.6625109    |
| #### Bn-scaff_15808_1-p51922 genome unspecific (all in)         | 0.9976076    | 0.352041     | 1            | 0.8085859    | 1            | 0.7517914    |
| #### Bn-scaff_15808_1-p51966 genome unspecific (all in)         | 1            | 0.4632394    | 0.9922481    | 0.5098884    | 1            | 0.786476     |
| #### Bn-scaff_15808_1-p52526 genome unspecific (all in)         | 0.9976076    | 0.7642202    | 1            | 0.8277078    | 0.9669421    | 0.8231755    |
| #### Bn-scaff_15808_1-p52907 genome unspecific (all in)         | 0.9976076    | 0.6147858    | 0.9922481    | 0.6224191    | 1            | 0.765148     |
| #### Bn-scaff_15808_1-p56362 genome unspecific (oleracea-rapa)  | not scorable | not scorable | 1            | 0.7295701    | 1            | 0.7425158    |
| #### Bn-scaff_15808_1-p57559 C-genome specific (napus-oleracea) | 0.9712918    | 0.8393649    | 0.5658914    | 0.7467903    | not scorable | not scorable |
| #### Bn-scaff_15808_1-p58308 C-genome specific (napus-oleracea) | 0.9736842    | 0.8947073    | 0.5658914    | 0.7519947    | not scorable | not scorable |
| #### Bn-scaff_15808_1-p58459 C-genome specific (napus-oleracea) | 1            | 0.7497663    | 1            | 0.7102559    | not scorable | not scorable |
| #### Bn-scaff_15808_1-p58570 C-genome specific (napus-oleracea) | 0.9760765    | 0.8587204    | 0.9922481    | 0.7377029    | not scorable | not scorable |

|                                                                 |              |              |              |              |              |              |
|-----------------------------------------------------------------|--------------|--------------|--------------|--------------|--------------|--------------|
| #### Bn-scaff_15808_1-p58583 C-genome specific (napus-oleracea) | 0.9976076    | 0.7976596    | 0.9844961    | 0.8569303    | not scorable | not scorable |
| #### Bn-scaff_15808_1-p62181 C-genome specific (napus-oleracea) | 0.638756     | 0.8088622    | 0.9379845    | 0.3706724    | not scorable | not scorable |
| #### Bn-scaff_15808_1-p64483 A-genome specific (napus-rapa)     | 0.9976076    | 0.3006265    | not scorable | not scorable | 1            | 0.8312469    |
| #### Bn-scaff_15808_1-p64570 genome unspecific (all in)         | 1            | 0.3855938    | 0.9922481    | 0.7677677    | 1            | 0.8207097    |
| #### Bn-scaff_15808_1-p64570 genome unspecific (all in)         | 0.9976076    | 0.7326889    | 0.9922481    | 0.7733308    | 0.9256198    | 0.9000528    |
| #### Bn-scaff_15808_1-p64579 genome unspecific (all in)         | 0.9976076    | 0.5419286    | 1            | 0.738274     | 1            | 0.8487188    |
| #### Bn-scaff_15808_1-p64634 A-genome specific (napus-rapa)     | 1            | 0.4355227    | not scorable | not scorable | 1            | 0.5389559    |
| #### Bn-scaff_15808_1-p64643 A-genome specific (napus-rapa)     | 1            | 0.4604971    | not scorable | not scorable | 1            | 0.7001542    |
| #### Bn-scaff_15808_1-p64676 genome unspecific (all in)         | 0.9952153    | 0.3565032    | 1            | 0.6437093    | 1            | 0.8070397    |
| #### Bn-scaff_15808_1-p64784 C-genome specific (napus-oleracea) | 0.9952153    | 0.6695288    | 1            | 0.5120054    | not scorable | not scorable |
| #### Bn-scaff_15808_1-p64793 C-genome specific (napus-oleracea) | 0.9928229    | 0.7285067    | 1            | 0.8689587    | not scorable | not scorable |
| #### Bn-scaff_15808_1-p68097 genome unspecific (all in)         | 0.9976076    | 0.3490131    | 1            | 0.7546132    | 0.9917355    | 0.6542969    |
| #### Bn-scaff_15808_1-p74257 genome unspecific (all in)         | 1            | 0.5178711    | 1            | 0.6208526    | 1            | 0.9168878    |
| #### Bn-scaff_15808_1-p74267 genome unspecific (all in)         | 1            | 0.5169734    | 1            | 0.8438205    | 1            | 0.9175813    |
| #### Bn-scaff_15808_1-p74384 genome unspecific (all in)         | 0.9952153    | 0.576394     | 1            | 0.6277679    | 1            | 0.8387965    |
| #### Bn-scaff_15808_1-p78409 C-genome specific (napus-oleracea) | 0.9928229    | 0.8429615    | 0.9689922    | 0.7002256    | not scorable | not scorable |
| #### Bn-scaff_15808_1-p78601 C-genome specific (napus-oleracea) | 0.9952153    | 0.8011099    | 0.9844961    | 0.7235579    | not scorable | not scorable |
| #### Bn-scaff_15808_1-p79786 genome unspecific (all in)         | 1            | 0.5276653    | 0.9922481    | 0.7581432    | 1            | 0.6970476    |
| #### Bn-scaff_15808_1-p92071 A-genome specific (napus-rapa)     | 1            | 0.5228792    | not scorable | not scorable | 1            | 0.8207127    |
| #### Bn-scaff_15808_1-p92391 napus specific                     | 1            | 0.3109264    | not scorable | not scorable | not scorable | not scorable |
| #### Bn-scaff_15809_1-p10923 napus specific                     | 0.9952153    | 0.8015733    | not scorable | not scorable | not scorable | not scorable |
| #### Bn-scaff_15809_1-p11014 napus specific                     | 0.9928229    | 0.7732494    | not scorable | not scorable | not scorable | not scorable |
| #### Bn-scaff_15809_1-p15928 napus specific                     | 0.9880383    | 0.7840621    | not scorable | not scorable | not scorable | not scorable |
| #### Bn-scaff_15809_1-p15935 C-genome specific (napus-oleracea) | 0.9904306    | 0.7611538    | 0.9922481    | 0.8453355    | not scorable | not scorable |
| #### Bn-scaff_15809_1-p15980 napus specific                     | 0.9880383    | 0.699104     | not scorable | not scorable | not scorable | not scorable |
| #### Bn-scaff_15809_1-p15986 napus specific                     | 1            | 0.7723619    | not scorable | not scorable | not scorable | not scorable |
| #### Bn-scaff_15809_1-p16019 C-genome specific (napus-oleracea) | 0.9928229    | 0.7415133    | 1            | 0.7272493    | not scorable | not scorable |
| #### Bn-scaff_15809_1-p16095 C-genome specific (napus-oleracea) | 0.9928229    | 0.7585989    | 0.9922481    | 0.8261215    | not scorable | not scorable |
| #### Bn-scaff_15809_1-p16103 napus specific                     | 0.9904306    | 0.7633066    | not scorable | not scorable | not scorable | not scorable |
| #### Bn-scaff_15809_1-p16109 napus specific                     | 0.9952153    | 0.7704928    | not scorable | not scorable | not scorable | not scorable |
| #### Bn-scaff_15809_1-p16214 all not scorable                   | not scorable | not scorable | not scorable | not scorable | not scorable | not scorable |
| #### Bn-scaff_15809_1-p17202 napus specific                     | 0.9952153    | 0.7596734    | not scorable | not scorable | not scorable | not scorable |
| #### Bn-scaff_15809_1-p17211 napus specific                     | 0.9904306    | 0.7276201    | not scorable | not scorable | not scorable | not scorable |

|                                                                 |              |              |              |              |              |              |
|-----------------------------------------------------------------|--------------|--------------|--------------|--------------|--------------|--------------|
| #### Bn-scaff_15809_1-p17242 napus specific                     | 0.9928229    | 0.7243537    | not scorable | not scorable | not scorable | not scorable |
| #### Bn-scaff_15809_1-p17277 napus specific                     | 0.9928229    | 0.6715325    | not scorable | not scorable | not scorable | not scorable |
| #### Bn-scaff_15809_1-p17283 napus specific                     | 0.9928229    | 0.6835222    | not scorable | not scorable | not scorable | not scorable |
| #### Bn-scaff_15809_1-p20782 napus specific                     | 0.9832536    | 0.8283062    | not scorable | not scorable | not scorable | not scorable |
| #### Bn-scaff_15809_1-p20906 C-genome specific (napus-oleracea) | 0.9976076    | 0.6984828    |              | 1            | 0.6616437    | not scorable |
| #### Bn-scaff_15809_1-p21036 napus specific                     | 0.9904306    | 0.6958279    | not scorable | not scorable | not scorable | not scorable |
| #### Bn-scaff_15809_1-p21041 napus specific                     | 0.9904306    | 0.6501505    | not scorable | not scorable | not scorable | not scorable |
| #### Bn-scaff_15809_1-p21347 napus specific                     | 0.9952153    | 0.8135045    | not scorable | not scorable | not scorable | not scorable |
| #### Bn-scaff_15809_1-p21470 napus specific                     | 0.9952153    | 0.729435     | not scorable | not scorable | not scorable | not scorable |
| #### Bn-scaff_15809_1-p21619 napus specific                     | 0.9928229    | 0.7656445    | not scorable | not scorable | not scorable | not scorable |
| #### Bn-scaff_15809_1-p21905 napus specific                     | 0.9593301    | 0.3012248    | not scorable | not scorable | not scorable | not scorable |
| #### Bn-scaff_15809_1-p22330 napus specific                     | 0.9928229    | 0.7151726    | not scorable | not scorable | not scorable | not scorable |
| #### Bn-scaff_15809_1-p42129 napus specific                     | 0.9976076    | 0.6989217    | not scorable | not scorable | not scorable | not scorable |
| #### Bn-scaff_15809_1-p43156 napus specific                     | 0.9904306    | 0.7098289    | not scorable | not scorable | not scorable | not scorable |
| #### Bn-scaff_15809_1-p43465 napus specific                     | 0.9856459    | 0.7030087    | not scorable | not scorable | not scorable | not scorable |
| #### Bn-scaff_15809_1-p46488 napus specific                     | 0.9856459    | 0.7730185    | not scorable | not scorable | not scorable | not scorable |
| #### Bn-scaff_15809_1-p46507 napus specific                     | 0.9856459    | 0.8437402    | not scorable | not scorable | not scorable | not scorable |
| #### Bn-scaff_15809_1-p46634 napus specific                     | 0.9880383    | 0.7243327    | not scorable | not scorable | not scorable | not scorable |
| #### Bn-scaff_15809_1-p46703 napus specific                     | 0.9976076    | 0.8112099    | not scorable | not scorable | not scorable | not scorable |
| #### Bn-scaff_15809_1-p80006 napus specific                     | 0.9928229    | 0.72032      | not scorable | not scorable | not scorable | not scorable |
| #### Bn-scaff_15809_1-p81364 napus specific                     | 0.9928229    | 0.7167513    | not scorable | not scorable | not scorable | not scorable |
| #### Bn-scaff_15809_1-p81816 C-genome specific (napus-oleracea) | 0.9904306    | 0.7247683    | 0.9224806    | 0.2561831    | not scorable | not scorable |
| #### Bn-scaff_15809_1-p81882 C-genome specific (napus-oleracea) | 0.9904306    | 0.6958864    |              | 1            | 0.6531345    | not scorable |
| #### Bn-scaff_15809_1-p82009 napus specific                     | 0.9832536    | 0.6743168    | not scorable | not scorable | not scorable | not scorable |
| #### Bn-scaff_15809_1-p88785 napus specific                     | 0.9904306    | 0.6780698    | not scorable | not scorable | not scorable | not scorable |
| #### Bn-scaff_15809_1-p94915 napus specific                     | 0.9952153    | 0.8229515    | not scorable | not scorable | not scorable | not scorable |
| #### Bn-scaff_15809_1-p97289 napus specific                     | 0.9952153    | 0.7556095    | not scorable | not scorable | not scorable | not scorable |
| #### Bn-scaff_15818_1-p14881 C-genome specific (oleracea only)  | not scorable | not scorable | 0.9069768    | 0.854336     | not scorable | not scorable |
| #### Bn-scaff_15818_1-p15038 A-genome specific (napus-rapa)     | 0.9688995    | 0.7498953    | not scorable | not scorable | 1            | 0.6753082    |
| #### Bn-scaff_15818_1-p15799 A-genome specific (napus-rapa)     | 0.9856459    | 0.332244     | not scorable | not scorable | 0.9834711    | 0.7494264    |
| #### Bn-scaff_15818_1-p16901 C-genome specific (napus-oleracea) | 0.9665072    | 0.9062407    | 0.9844961    | 0.8131957    | not scorable | not scorable |
| #### Bn-scaff_15818_1-p18719 A-genome specific (napus-rapa)     | 0.9641148    | 0.3075679    | not scorable | not scorable | 1            | 0.8047179    |
| #### Bn-scaff_15818_1-p20221 C-genome specific (napus-oleracea) | 1            | 0.7678436    |              | 1            | 0.641887     | not scorable |

|                                                                |              |              |              |              |              |              |
|----------------------------------------------------------------|--------------|--------------|--------------|--------------|--------------|--------------|
| #### Bn-scaff_15818_1-p20291C-genome specific (napus-oleracea) | 0.9928229    | 0.8404304    | 0.9612403    | 0.7774501    | not scorable | not scorable |
| #### Bn-scaff_15818_1-p20299genome unspecific (all in)         | 1            | 0.5790484    | 1            | 0.8009222    | 1            | 0.9320224    |
| #### Bn-scaff_15818_1-p21037A-genome specific (napus-rapa)     | 1            | 0.752191     | not scorable | not scorable | 1            | 0.6721627    |
| #### Bn-scaff_15818_1-p21659A-genome specific (napus-rapa)     | 0.9425837    | 0.1888179    | not scorable | not scorable | 0.9917355    | 0.7345857    |
| #### Bn-scaff_15818_1-p21784all not scorable                   | not scorable | not scorable | not scorable | not scorable | not scorable | not scorable |
| #### Bn-scaff_15818_1-p22705C-genome specific (napus-oleracea) | 0.9808612    | 0.7285218    | 0.9844961    | 0.7322186    | not scorable | not scorable |
| #### Bn-scaff_15818_1-p23310A-genome specific (napus-rapa)     | 0.9904306    | 0.3206906    | not scorable | not scorable | 0.9834711    | 0.6922861    |
| #### Bn-scaff_15818_1-p23556C-genome specific (napus-oleracea) | 0.9473684    | 0.6476613    | 1            | 0.8423486    | not scorable | not scorable |
| #### Bn-scaff_15818_1-p23654C-genome specific (napus-oleracea) | 0.9808612    | 0.4252169    | 0.9922481    | 0.6413196    | not scorable | not scorable |
| #### Bn-scaff_15818_1-p23655A-genome specific (napus-rapa)     | 0.9641148    | 0.507434     | not scorable | not scorable | 1            | 0.7897919    |
| #### Bn-scaff_15818_1-p23710C-genome specific (napus-oleracea) | 0.9856459    | 0.7476515    | 0.9379845    | 0.8069227    | not scorable | not scorable |
| #### Bn-scaff_15818_1-p23712C-genome specific (napus-oleracea) | 0.9808612    | 0.7699199    | 1            | 0.7502152    | not scorable | not scorable |
| #### Bn-scaff_15818_1-p23743C-genome specific (napus-oleracea) | 0.9856459    | 0.7819669    | 0.9922481    | 0.7989805    | not scorable | not scorable |
| #### Bn-scaff_15818_1-p23748C-genome specific (napus-oleracea) | 0.9856459    | 0.7573136    | 0.9767442    | 0.8848003    | not scorable | not scorable |
| #### Bn-scaff_15818_1-p23763C-genome specific (napus-oleracea) | 0.9856459    | 0.5627385    | 0.9379845    | 0.5808313    | not scorable | not scorable |
| #### Bn-scaff_15818_1-p23803C-genome specific (napus-oleracea) | 0.9688995    | 0.7892641    | 0.8604651    | 0.7844155    | not scorable | not scorable |
| #### Bn-scaff_15818_1-p23809C-genome specific (napus-oleracea) | 0.9784689    | 0.7498342    | 0.9302326    | 0.8341879    | not scorable | not scorable |
| #### Bn-scaff_15818_1-p23816C-genome specific (napus-oleracea) | 0.9856459    | 0.7787027    | 0.9302326    | 0.7283099    | not scorable | not scorable |
| #### Bn-scaff_15818_1-p23819C-genome specific (napus-oleracea) | 0.9808612    | 0.7720936    | 0.9379845    | 0.8215796    | not scorable | not scorable |
| #### Bn-scaff_15818_1-p23822C-genome specific (napus-oleracea) | 0.9808612    | 0.7488068    | 0.9379845    | 0.7769482    | not scorable | not scorable |
| #### Bn-scaff_15818_1-p23826C-genome specific (napus-oleracea) | 0.9880383    | 0.7688701    | 0.9379845    | 0.8043686    | not scorable | not scorable |
| #### Bn-scaff_15818_1-p23829C-genome specific (napus-oleracea) | 0.9880383    | 0.7723844    | 0.9379845    | 0.7473665    | not scorable | not scorable |
| #### Bn-scaff_15818_1-p23833all not scorable                   | not scorable | not scorable | not scorable | not scorable | not scorable | not scorable |
| #### Bn-scaff_15818_1-p23951C-genome specific (napus-oleracea) | 0.9736842    | 0.7935508    | 0.875969     | 0.7922168    | not scorable | not scorable |
| #### Bn-scaff_15818_1-p23951C-genome specific (napus-oleracea) | 0.9688995    | 0.7922851    | 0.875969     | 0.7408248    | not scorable | not scorable |
| #### Bn-scaff_15818_1-p23952C-genome specific (napus-oleracea) | 0.9808612    | 0.796594     | 1            | 0.8168937    | not scorable | not scorable |
| #### Bn-scaff_15818_1-p23957C-genome specific (napus-oleracea) | 0.9928229    | 0.7666526    | 1            | 0.750263     | not scorable | not scorable |
| #### Bn-scaff_15818_1-p23959C-genome specific (napus-oleracea) | 0.9856459    | 0.7659114    | 0.9844961    | 0.8059192    | not scorable | not scorable |
| #### Bn-scaff_15818_1-p23971napus specific                     | 0.9904306    | 0.7717268    | not scorable | not scorable | not scorable | not scorable |
| #### Bn-scaff_15818_1-p23997C-genome specific (napus-oleracea) | 0.9784689    | 0.7245914    | 0.9844961    | 0.8053012    | not scorable | not scorable |
| #### Bn-scaff_15818_1-p23998napus specific                     | 0.9712918    | 0.7562647    | not scorable | not scorable | not scorable | not scorable |
| #### Bn-scaff_15818_1-p24047genome unspecific (all in)         | 0.9856459    | 0.7271874    | 0.9844961    | 0.6935959    | 0.7603306    | 0.8296305    |
| #### Bn-scaff_15818_1-p25150genome unspecific (all in)         | 0.9856459    | 0.287053     | 1            | 0.7578855    | 1            | 0.8848283    |

|                                                                 |              |              |              |              |              |              |
|-----------------------------------------------------------------|--------------|--------------|--------------|--------------|--------------|--------------|
| #### Bn-scaff_15818_1-p25162genome unspecific (all in)          | 0.9617225    | 0.3307199    | 0.9922481    | 0.6829866    | 1            | 0.7770717    |
| #### Bn-scaff_15818_1-p25285 napus specific                     | 0.9617225    | 0.7465215    | not scorable | not scorable | not scorable | not scorable |
| #### Bn-scaff_15818_1-p25322 C-genome specific (napus-oleracea) | 0.9736842    | 0.6584958    | 0.9844961    | 0.6597219    | not scorable | not scorable |
| #### Bn-scaff_15818_1-p25432 A-genome specific (napus-rapa)     | 0.9688995    | 0.3896684    | not scorable | not scorable | 0.9917355    | 0.7597869    |
| #### Bn-scaff_15818_1-p26337 A-genome specific (napus-rapa)     | 0.9808612    | 0.3720863    | not scorable | not scorable | 0.9917355    | 0.7418951    |
| #### Bn-scaff_15818_1-p27730 genome unspecific (oleracea-rapa)  | not scorable | not scorable | 1            | 0.8636341    | 0.9338843    | 0.9272014    |
| #### Bn-scaff_15818_1-p27841 C-genome specific (napus-oleracea) | 0.9736842    | 0.645805     | 1            | 0.6955488    | not scorable | not scorable |
| #### Bn-scaff_15818_1-p28767 genome unspecific (all in)         | 0.9760765    | 0.2850302    | 0.9844961    | 0.6932868    | 1            | 0.5247356    |
| #### Bn-scaff_15818_1-p28897 C-genome specific (napus-oleracea) | 0.9952153    | 0.790136     | 1            | 0.8328236    | not scorable | not scorable |
| #### Bn-scaff_15818_1-p28908 C-genome specific (napus-oleracea) | 0.9880383    | 0.7873887    | 1            | 0.8679668    | not scorable | not scorable |
| #### Bn-scaff_15818_1-p28911 C-genome specific (napus-oleracea) | 0.9976076    | 0.7787827    | 1            | 0.8755895    | not scorable | not scorable |
| #### Bn-scaff_15818_1-p28919 C-genome specific (napus-oleracea) | 0.9952153    | 0.7658596    | 1            | 0.7827739    | not scorable | not scorable |
| #### Bn-scaff_15818_1-p29053 C-genome specific (napus-oleracea) | 0.9904306    | 0.8537922    | 0.6589147    | 0.8789657    | not scorable | not scorable |
| #### Bn-scaff_15818_1-p29078 napus specific                     | 1            | 0.9268792    | not scorable | not scorable | not scorable | not scorable |
| #### Bn-scaff_15818_1-p29097 genome unspecific (all in)         | 0.9952153    | 0.2747905    | 0.6589147    | 0.8257641    | 0.9834711    | 0.9175813    |
| #### Bn-scaff_15818_1-p29216 C-genome specific (napus-oleracea) | 0.9880383    | 0.7202094    | 0.8604651    | 0.8666298    | not scorable | not scorable |
| #### Bn-scaff_15818_1-p29287 C-genome specific (napus-oleracea) | 0.9665072    | 0.759462     | 1            | 0.807792     | not scorable | not scorable |
| #### Bn-scaff_15818_1-p29795 C-genome specific (napus-oleracea) | 1            | 0.8268084    | 0.9922481    | 0.7170732    | not scorable | not scorable |
| #### Bn-scaff_15818_1-p30328 C-genome specific (napus-oleracea) | 0.9904306    | 0.6820537    | 0.9844961    | 0.7010086    | not scorable | not scorable |
| #### Bn-scaff_15818_1-p30340 C-genome specific (napus-oleracea) | 0.9904306    | 0.6826338    | 0.9922481    | 0.6422269    | not scorable | not scorable |
| #### Bn-scaff_15818_1-p30349 C-genome specific (napus-oleracea) | 0.9832536    | 0.7006515    | 0.9922481    | 0.6011223    | not scorable | not scorable |
| #### Bn-scaff_15818_1-p30501 genome unspecific (all in)         | 0.9856459    | 0.8064219    | 0.9922481    | 0.7155336    | 1            | 0.8776575    |
| #### Bn-scaff_15818_1-p30571 C-genome specific (napus-oleracea) | 0.9928229    | 0.8336674    | 0.9922481    | 0.7790787    | not scorable | not scorable |
| #### Bn-scaff_15818_1-p30691 napus specific                     | 1            | 0.5441366    | not scorable | not scorable | not scorable | not scorable |
| #### Bn-scaff_15818_1-p30723 C-genome specific (napus-oleracea) | 0.9856459    | 0.7233397    | 0.9379845    | 0.7154657    | not scorable | not scorable |
| #### Bn-scaff_15818_1-p30752 C-genome specific (napus-oleracea) | 0.9928229    | 0.6850833    | 0.9922481    | 0.6821627    | not scorable | not scorable |
| #### Bn-scaff_15818_1-p31099 genome unspecific (oleracea-rapa)  | not scorable | not scorable | 0.9922481    | 0.6437427    | 0.8842975    | 0.9282606    |
| #### Bn-scaff_15818_1-p31722 C-genome specific (napus-oleracea) | 0.9832536    | 0.8667295    | 0.9069768    | 0.8044738    | not scorable | not scorable |
| #### Bn-scaff_15818_1-p31759 C-genome specific (napus-oleracea) | 0.9880383    | 0.6957673    | 0.8914729    | 0.6607057    | not scorable | not scorable |
| #### Bn-scaff_15818_1-p32035 C-genome specific (napus-oleracea) | 1            | 0.4668279    | 1            | 0.557325     | not scorable | not scorable |
| #### Bn-scaff_15818_1-p32039 C-genome specific (napus-oleracea) | 0.9856459    | 0.8103702    | 1            | 0.8043749    | not scorable | not scorable |
| #### Bn-scaff_15818_1-p32047 C-genome specific (napus-oleracea) | 0.9880383    | 0.8166116    | 0.9922481    | 0.8213767    | not scorable | not scorable |
| #### Bn-scaff_15818_1-p32231 C-genome specific (napus-oleracea) | 0.9952153    | 0.8573447    | 0.9844961    | 0.7152719    | not scorable | not scorable |

|                                                                 |           |           |              |              |              |              |
|-----------------------------------------------------------------|-----------|-----------|--------------|--------------|--------------|--------------|
| #### Bn-scaff_15818_1-p32293 C-genome specific (napus-oleracea) | 0.9952153 | 0.7854185 | 0.9767442    | 0.7436179    | not scorable | not scorable |
| #### Bn-scaff_15818_1-p32294 C-genome specific (napus-oleracea) | 0.9928229 | 0.852936  | 0.9844961    | 0.7632725    | not scorable | not scorable |
| #### Bn-scaff_15818_1-p32396 C-genome specific (napus-oleracea) | 0.9904306 | 0.6916176 | 0.9922481    | 0.781979     | not scorable | not scorable |
| #### Bn-scaff_15818_1-p33081 A-genome specific (napus-rapa)     | 0.9330143 | 0.3138361 | not scorable | not scorable | 1            | 0.6970574    |
| #### Bn-scaff_15818_1-p33100 C-genome specific (napus-oleracea) | 0.9952153 | 0.8986366 | 0.9922481    | 0.8481324    | not scorable | not scorable |
| #### Bn-scaff_15818_1-p33107 napus specific                     | 0.9545454 | 0.3975497 | not scorable | not scorable | not scorable | not scorable |
| #### Bn-scaff_15818_1-p33388 A-genome specific (napus-rapa)     | 1         | 0.3454435 | not scorable | not scorable | 1            | 0.7369406    |
| #### Bn-scaff_15818_1-p34556 C-genome specific (napus-oleracea) | 1         | 0.716302  | 1            | 0.7114743    | not scorable | not scorable |
| #### Bn-scaff_15818_1-p35220 C-genome specific (napus-oleracea) | 0.9976076 | 0.8068036 | 1            | 0.8140073    | not scorable | not scorable |
| #### Bn-scaff_15818_1-p36362 C-genome specific (napus-oleracea) | 0.9593301 | 0.7798696 | 1            | 0.8437542    | not scorable | not scorable |
| #### Bn-scaff_15818_1-p37443 C-genome specific (napus-oleracea) | 0.9784689 | 0.7503123 | 0.9844961    | 0.8587967    | not scorable | not scorable |
| #### Bn-scaff_15818_1-p39057 C-genome specific (napus-oleracea) | 0.9880383 | 0.7202057 | 0.9844961    | 0.8069834    | not scorable | not scorable |
| #### Bn-scaff_15818_1-p42767 C-genome specific (napus-oleracea) | 0.9880383 | 0.7329195 | 0.9844961    | 0.8481429    | not scorable | not scorable |
| #### Bn-scaff_15818_1-p42825 C-genome specific (napus-oleracea) | 0.9856459 | 0.7340425 | 0.9844961    | 0.8347971    | not scorable | not scorable |
| #### Bn-scaff_15818_1-p45322 C-genome specific (napus-oleracea) | 0.9832536 | 0.7289092 | 1            | 0.7136158    | not scorable | not scorable |
| #### Bn-scaff_15818_1-p45342 C-genome specific (napus-oleracea) | 0.9904306 | 0.6976758 | 1            | 0.7646896    | not scorable | not scorable |
| #### Bn-scaff_15818_1-p45350 C-genome specific (napus-oleracea) | 0.9880383 | 0.6617125 | 0.9844961    | 0.6780001    | not scorable | not scorable |
| #### Bn-scaff_15818_1-p45362 C-genome specific (napus-oleracea) | 0.9832536 | 0.7396271 | 0.9844961    | 0.7221391    | not scorable | not scorable |
| #### Bn-scaff_15818_1-p45519 C-genome specific (napus-oleracea) | 0.9880383 | 0.7240508 | 0.9922481    | 0.8637795    | not scorable | not scorable |
| #### Bn-scaff_15818_1-p45807 C-genome specific (napus-oleracea) | 0.9904306 | 0.7584344 | 1            | 0.8044588    | not scorable | not scorable |
| #### Bn-scaff_15818_1-p46769 C-genome specific (napus-oleracea) | 0.9760765 | 0.7308016 | 1            | 0.8156642    | not scorable | not scorable |
| #### Bn-scaff_15818_1-p46840 C-genome specific (napus-oleracea) | 0.9808612 | 0.7118732 | 1            | 0.7398585    | not scorable | not scorable |
| #### Bn-scaff_15818_1-p46937 C-genome specific (napus-oleracea) | 0.9808612 | 0.6868356 | 1            | 0.724765     | not scorable | not scorable |
| #### Bn-scaff_15818_1-p47016 C-genome specific (napus-oleracea) | 0.9832536 | 0.7473073 | 0.9922481    | 0.7945678    | not scorable | not scorable |
| #### Bn-scaff_15818_1-p47110 C-genome specific (napus-oleracea) | 0.9808612 | 0.7548079 | 1            | 0.7941706    | not scorable | not scorable |
| #### Bn-scaff_15818_1-p47906 C-genome specific (napus-oleracea) | 0.9760765 | 0.7352329 | 1            | 0.7578233    | not scorable | not scorable |
| #### Bn-scaff_15818_1-p47991 C-genome specific (napus-oleracea) | 0.9856459 | 0.7117622 | 1            | 0.7382163    | not scorable | not scorable |
| #### Bn-scaff_15818_1-p49304 A-genome specific (napus-rapa)     | 0.9880383 | 0.7357385 | not scorable | not scorable | 0.9834711    | 0.7947745    |
| #### Bn-scaff_15818_1-p49507 C-genome specific (napus-oleracea) | 0.9760765 | 0.7100103 | 0.9922481    | 0.8729007    | not scorable | not scorable |
| #### Bn-scaff_15818_1-p49509 C-genome specific (napus-oleracea) | 0.9880383 | 0.7686751 | 0.9844961    | 0.9056556    | not scorable | not scorable |
| #### Bn-scaff_15818_1-p49629 C-genome specific (napus-oleracea) | 0.9856459 | 0.7622439 | 1            | 0.7822306    | not scorable | not scorable |
| #### Bn-scaff_15818_1-p50314 C-genome specific (napus-oleracea) | 0.9880383 | 0.6879698 | 1            | 0.8292418    | not scorable | not scorable |
| #### Bn-scaff_15818_1-p51182 C-genome specific (napus-oleracea) | 0.9928229 | 0.7036673 | 1            | 0.8316899    | not scorable | not scorable |

|                                                                 |              |              |              |              |              |              |
|-----------------------------------------------------------------|--------------|--------------|--------------|--------------|--------------|--------------|
| #### Bn-scaff_15818_1-p51244 C-genome specific (napus-oleracea) | 0.9904306    | 0.757917     | 0.9922481    | 0.8283236    | not scorable | not scorable |
| #### Bn-scaff_15818_1-p51601 C-genome specific (napus-oleracea) | 0.9832536    | 0.7566628    | 0.9922481    | 0.8457916    | not scorable | not scorable |
| #### Bn-scaff_15818_1-p51628 C-genome specific (napus-oleracea) | 0.9808612    | 0.6902836    | 1            | 0.7695617    | not scorable | not scorable |
| #### Bn-scaff_15818_1-p53151 C-genome specific (napus-oleracea) | 1            | 0.7234249    | 0.9844961    | 0.6661558    | not scorable | not scorable |
| #### Bn-scaff_15818_1-p55044 C-genome specific (napus-oleracea) | 1            | 0.9308694    | 0.9922481    | 0.8230509    | not scorable | not scorable |
| #### Bn-scaff_15818_1-p60264 genome unspecific (all in)         | 1            | 0.3895948    | 0.9844961    | 0.7754354    | 1            | 0.9260686    |
| #### Bn-scaff_15818_1-p66789 napus specific                     | 1            | 0.3682229    | not scorable | not scorable | not scorable | not scorable |
| #### Bn-scaff_15818_1-p67820 C-genome specific (napus-oleracea) | 0.9976076    | 0.8248345    | 1            | 0.6826377    | not scorable | not scorable |
| #### Bn-scaff_15818_1-p71336 C-genome specific (napus-oleracea) | 0.9976076    | 0.908001     | 1            | 0.8627497    | not scorable | not scorable |
| #### Bn-scaff_15818_1-p74676 C-genome specific (napus-oleracea) | 0.9976076    | 0.494047     | 0.8217054    | 0.4644381    | not scorable | not scorable |
| #### Bn-scaff_15818_1-p74700 C-genome specific (napus-oleracea) | 0.9976076    | 0.7378272    | 0.9534883    | 0.4893971    | not scorable | not scorable |
| #### Bn-scaff_15818_1-p83246 A-genome specific (napus-rapa)     | 0.9904306    | 0.3645486    | not scorable | not scorable | 1            | 0.7111877    |
| #### Bn-scaff_15818_1-p85873 A-genome specific (napus-rapa)     | 0.9736842    | 0.3257625    | not scorable | not scorable | 1            | 0.8381304    |
| #### Bn-scaff_15818_1-p85879 napus specific                     | 0.9880383    | 0.371711     | not scorable | not scorable | not scorable | not scorable |
| #### Bn-scaff_15818_2-p10273 napus specific                     | 0.9808612    | 0.7444711    | not scorable | not scorable | not scorable | not scorable |
| #### Bn-scaff_15818_2-p10286 napus specific                     | 0.9712918    | 0.6201708    | not scorable | not scorable | not scorable | not scorable |
| #### Bn-scaff_15818_2-p11423 C-genome specific (napus-oleracea) | 0.9832536    | 0.747171     | 0.9922481    | 0.7635931    | not scorable | not scorable |
| #### Bn-scaff_15818_2-p11449 genome unspecific (oleracea-rapa)  | not scorable | not scorable | 0.9922481    | 0.6409426    | 0.9834711    | 0.7118787    |
| #### Bn-scaff_15818_2-p11462 C-genome specific (napus-oleracea) | 0.9784689    | 0.6882324    | 0.9844961    | 0.8086823    | not scorable | not scorable |
| #### Bn-scaff_15818_2-p11664 C-genome specific (napus-oleracea) | 0.9688995    | 0.6210733    | 0.9844961    | 0.7103947    | not scorable | not scorable |
| #### Bn-scaff_15818_2-p11694 C-genome specific (napus-oleracea) | 0.9617225    | 0.7340953    | 1            | 0.7516896    | not scorable | not scorable |
| #### Bn-scaff_15818_2-p11870 C-genome specific (napus-oleracea) | 0.9832536    | 0.7764933    | 0.9612403    | 0.764141     | not scorable | not scorable |
| #### Bn-scaff_15818_2-p12033 C-genome specific (napus-oleracea) | 0.9784689    | 0.8001944    | 0.9612403    | 0.8174017    | not scorable | not scorable |
| #### Bn-scaff_15818_2-p12071 C-genome specific (napus-oleracea) | 0.9712918    | 0.7901636    | 0.9689922    | 0.8470805    | not scorable | not scorable |
| #### Bn-scaff_15818_2-p12092 C-genome specific (napus-oleracea) | 0.9880383    | 0.7672928    | 0.9767442    | 0.8083671    | not scorable | not scorable |
| #### Bn-scaff_15818_2-p12102 C-genome specific (napus-oleracea) | 0.9808612    | 0.6742523    | 0.9922481    | 0.6971771    | not scorable | not scorable |
| #### Bn-scaff_15818_2-p12125 C-genome specific (napus-oleracea) | 0.9928229    | 0.7390017    | 0.9922481    | 0.7651325    | not scorable | not scorable |
| #### Bn-scaff_15818_2-p12135 C-genome specific (napus-oleracea) | 0.9808612    | 0.6550305    | 0.9224806    | 0.6546048    | not scorable | not scorable |
| #### Bn-scaff_15818_2-p12236 C-genome specific (napus-oleracea) | 0.9832536    | 0.7457242    | 0.9689922    | 0.8372763    | not scorable | not scorable |
| #### Bn-scaff_15818_2-p12248 C-genome specific (napus-oleracea) | 0.9736842    | 0.746158     | 0.9689922    | 0.8327052    | not scorable | not scorable |
| #### Bn-scaff_15818_2-p12251 C-genome specific (napus-oleracea) | 0.9760765    | 0.7273019    | 1            | 0.8033031    | not scorable | not scorable |
| #### Bn-scaff_15818_2-p12254 C-genome specific (napus-oleracea) | 0.9856459    | 0.7503873    | 1            | 0.8252805    | not scorable | not scorable |
| #### Bn-scaff_15818_2-p12315 C-genome specific (napus-oleracea) | 0.9928229    | 0.6663796    | 0.9922481    | 0.6762738    | not scorable | not scorable |

|                                                                 |              |              |              |              |              |              |
|-----------------------------------------------------------------|--------------|--------------|--------------|--------------|--------------|--------------|
| #### Bn-scaff_15818_2-p12355 C-genome specific (napus-oleracea) | 0.9952153    | 0.8795602    | 1            | 0.7482051    | not scorable | not scorable |
| #### Bn-scaff_15818_2-p12364 C-genome specific (napus-oleracea) | 0.9928229    | 0.8670594    | 1            | 0.7095043    | not scorable | not scorable |
| #### Bn-scaff_15818_2-p12385 genome unspecific (all in)         | 1            | 0.355199     | 0.9224806    | 0.5680376    | 0.9917355    | 0.7483465    |
| #### Bn-scaff_15818_2-p12875 A-genome specific (napus-rapa)     | 0.9976076    | 0.5672333    | not scorable | not scorable | 1            | 0.9223674    |
| #### Bn-scaff_15818_2-p13856 C-genome specific (napus-oleracea) | 1            | 0.7793162    | 1            | 0.8056468    | not scorable | not scorable |
| #### Bn-scaff_15818_2-p14300 genome unspecific (all in)         | 1            | 0.2807634    | 0.7906977    | 0.2798356    | 1            | 0.8687926    |
| #### Bn-scaff_15818_2-p14318 C-genome specific (napus-oleracea) | 1            | 0.7129886    | 0.9767442    | 0.7168183    | not scorable | not scorable |
| #### Bn-scaff_15818_2-p14887 C-genome specific (napus-oleracea) | 0.9856459    | 0.7600648    | 1            | 0.7684591    | not scorable | not scorable |
| #### Bn-scaff_15818_2-p14888 C-genome specific (napus-oleracea) | 0.9856459    | 0.7052999    | 0.9612403    | 0.7111819    | not scorable | not scorable |
| #### Bn-scaff_15818_2-p14889 C-genome specific (napus-oleracea) | 0.9880383    | 0.6837302    | 0.9922481    | 0.7268735    | not scorable | not scorable |
| #### Bn-scaff_15818_2-p14894 C-genome specific (napus-oleracea) | 0.9784689    | 0.6504704    | 1            | 0.6735309    | not scorable | not scorable |
| #### Bn-scaff_15818_2-p14905 C-genome specific (napus-oleracea) | 0.9928229    | 0.7736197    | 0.9922481    | 0.8483146    | not scorable | not scorable |
| #### Bn-scaff_15818_2-p14910 C-genome specific (napus-oleracea) | 0.9880383    | 0.7665526    | 0.9844961    | 0.811372     | not scorable | not scorable |
| #### Bn-scaff_15818_2-p15077 C-genome specific (napus-oleracea) | 0.9832536    | 0.682498     | 0.9767442    | 0.6747661    | not scorable | not scorable |
| #### Bn-scaff_15818_2-p15078 C-genome specific (napus-oleracea) | 0.9904306    | 0.6541323    | 0.9844961    | 0.6453344    | not scorable | not scorable |
| #### Bn-scaff_15818_2-p15080 C-genome specific (napus-oleracea) | 0.9928229    | 0.7633241    | 1            | 0.7994422    | not scorable | not scorable |
| #### Bn-scaff_15818_2-p15089 C-genome specific (napus-oleracea) | 0.9808612    | 0.7729471    | 1            | 0.7212858    | not scorable | not scorable |
| #### Bn-scaff_15818_2-p15160 all not scorable                   | not scorable | not scorable | not scorable | not scorable | not scorable | not scorable |
| #### Bn-scaff_15818_2-p15226 C-genome specific (napus-oleracea) | 0.9880383    | 0.7790086    | 0.9767442    | 0.7953252    | not scorable | not scorable |
| #### Bn-scaff_15818_2-p15345 genome unspecific (all in)         | 0.9760765    | 0.3371205    | 0.9689922    | 0.6333897    | 1            | 0.8457859    |
| #### Bn-scaff_15818_2-p15355 all not scorable                   | not scorable | not scorable | not scorable | not scorable | not scorable | not scorable |
| #### Bn-scaff_15818_2-p15548 C-genome specific (napus-oleracea) | 0.9976076    | 0.8607335    | 0.9224806    | 0.8186098    | not scorable | not scorable |
| #### Bn-scaff_15818_2-p15549 C-genome specific (napus-oleracea) | 1            | 0.8132162    | 1            | 0.8249918    | not scorable | not scorable |
| #### Bn-scaff_15818_2-p15551 C-genome specific (napus-oleracea) | 1            | 0.8422323    | 1            | 0.7158232    | not scorable | not scorable |
| #### Bn-scaff_15818_2-p15551 C-genome specific (napus-oleracea) | 1            | 0.729185     | 1            | 0.6715459    | not scorable | not scorable |
| #### Bn-scaff_15818_2-p15661 genome unspecific (oleracea-rapa)  | not scorable | not scorable | 0.9534883    | 0.7376692    | 1            | 0.90833      |
| #### Bn-scaff_15818_2-p15662 all not scorable                   | not scorable | not scorable | not scorable | not scorable | not scorable | not scorable |
| #### Bn-scaff_15818_2-p15663 C-genome specific (napus-oleracea) | 0.9976076    | 0.8167481    | 0.9767442    | 0.7543161    | not scorable | not scorable |
| #### Bn-scaff_15818_2-p15664 C-genome specific (napus-oleracea) | 0.9784689    | 0.7556049    | 0.7906977    | 0.7764007    | not scorable | not scorable |
| #### Bn-scaff_15818_2-p15669 A-genome specific (napus-rapa)     | 0.9976076    | 0.5414732    | not scorable | not scorable | 1            | 0.4340441    |
| #### Bn-scaff_15818_2-p15675 C-genome specific (napus-oleracea) | 0.9952153    | 0.8012966    | 0.9844961    | 0.6707428    | not scorable | not scorable |
| #### Bn-scaff_15818_2-p15868 C-genome specific (napus-oleracea) | 0.9928229    | 0.8816202    | 0.9844961    | 0.826838     | not scorable | not scorable |
| #### Bn-scaff_15818_2-p15872 genome unspecific (oleracea-rapa)  | not scorable | not scorable | 0.9844961    | 0.7430256    | 1            | 0.8653011    |



|                                                                 |              |              |           |           |              |              |
|-----------------------------------------------------------------|--------------|--------------|-----------|-----------|--------------|--------------|
| #### Bn-scaff_15818_2-p16104 C-genome specific (napus-oleracea) | 1            | 0.7590141    | 1         | 0.7692412 | not scorable | not scorable |
| #### Bn-scaff_15818_2-p16379 C-genome specific (napus-oleracea) | 0.9928229    | 0.7141287    | 1         | 0.6173183 | not scorable | not scorable |
| #### Bn-scaff_15818_2-p16980 C-genome specific (napus-oleracea) | 0.9952153    | 0.7870494    | 0.9844961 | 0.7066918 | not scorable | not scorable |
| #### Bn-scaff_15818_2-p16994 C-genome specific (napus-oleracea) | 0.9976076    | 0.7900909    | 1         | 0.8175465 | not scorable | not scorable |
| #### Bn-scaff_15818_2-p17185 C-genome specific (napus-oleracea) | 1            | 0.6715764    | 0.9922481 | 0.7042192 | not scorable | not scorable |
| #### Bn-scaff_15818_2-p17298 genome unspecific (oleracea-rapa)  | not scorable | not scorable | 1         | 0.776779  | 1            | 0.7349506    |
| #### Bn-scaff_15818_2-p17365 C-genome specific (oleracea only)  | not scorable | not scorable | 0.9922481 | 0.3427662 | not scorable | not scorable |
| #### Bn-scaff_15818_2-p17488 C-genome specific (napus-oleracea) | 0.9976076    | 0.7857721    | 1         | 0.7375283 | not scorable | not scorable |
| #### Bn-scaff_15818_2-p17589 genome unspecific (all in)         | 0.9497608    | 0.3432354    | 0.9922481 | 0.7029373 | 1            | 0.7007138    |
| #### Bn-scaff_15818_2-p17593 C-genome specific (oleracea only)  | not scorable | not scorable | 1         | 0.4558178 | not scorable | not scorable |
| #### Bn-scaff_15818_2-p17600 C-genome specific (napus-oleracea) | 0.9688995    | 0.543602     | 0.9922481 | 0.5886669 | not scorable | not scorable |
| #### Bn-scaff_15818_2-p17803 C-genome specific (napus-oleracea) | 0.9880383    | 0.8825033    | 1         | 0.8377194 | not scorable | not scorable |
| #### Bn-scaff_15818_2-p18171 C-genome specific (napus-oleracea) | 0.9928229    | 0.8805139    | 0.9922481 | 0.8127    | not scorable | not scorable |
| #### Bn-scaff_15818_2-p18278 C-genome specific (napus-oleracea) | 0.9952153    | 0.6704263    | 1         | 0.7000631 | not scorable | not scorable |
| #### Bn-scaff_15818_2-p18389 C-genome specific (napus-oleracea) | 0.9880383    | 0.6862734    | 1         | 0.6921359 | not scorable | not scorable |
| #### Bn-scaff_15818_2-p18421 C-genome specific (napus-oleracea) | 0.9928229    | 0.7794656    | 1         | 0.7498609 | not scorable | not scorable |
| #### Bn-scaff_15818_2-p18428 C-genome specific (napus-oleracea) | 0.9976076    | 0.7202061    | 1         | 0.7260862 | not scorable | not scorable |
| #### Bn-scaff_15818_2-p18472 C-genome specific (napus-oleracea) | 0.9952153    | 0.7193658    | 1         | 0.7511533 | not scorable | not scorable |
| #### Bn-scaff_15818_2-p18494 C-genome specific (napus-oleracea) | 0.9952153    | 0.7193631    | 1         | 0.7384802 | not scorable | not scorable |
| #### Bn-scaff_15818_2-p18505 genome unspecific (all in)         | 0.9880383    | 0.5955322    | 1         | 0.622416  | 0.9834711    | 0.711467     |
| #### Bn-scaff_15818_2-p18574 C-genome specific (napus-oleracea) | 0.9928229    | 0.7419133    | 1         | 0.7507687 | not scorable | not scorable |
| #### Bn-scaff_15818_2-p18744 C-genome specific (napus-oleracea) | 0.9090909    | 0.9354609    | 0.9689922 | 0.8546489 | not scorable | not scorable |
| #### Bn-scaff_15818_2-p18745 C-genome specific (napus-oleracea) | 0.9832536    | 0.761408     | 1         | 0.7463001 | not scorable | not scorable |
| #### Bn-scaff_15818_2-p18747 C-genome specific (napus-oleracea) | 0.9880383    | 0.7070256    | 0.9922481 | 0.7400035 | not scorable | not scorable |
| #### Bn-scaff_15818_2-p18749 C-genome specific (napus-oleracea) | 0.9880383    | 0.7272439    | 1         | 0.6887223 | not scorable | not scorable |
| #### Bn-scaff_15818_2-p18750 C-genome specific (napus-oleracea) | 0.9928229    | 0.7289512    | 1         | 0.7615538 | not scorable | not scorable |
| #### Bn-scaff_15818_2-p19026 C-genome specific (napus-oleracea) | 0.9856459    | 0.7677682    | 1         | 0.7834958 | not scorable | not scorable |
| #### Bn-scaff_15818_2-p19036 C-genome specific (napus-oleracea) | 0.9904306    | 0.7523009    | 0.9922481 | 0.8336736 | not scorable | not scorable |
| #### Bn-scaff_15818_2-p19041 C-genome specific (napus-oleracea) | 0.9832536    | 0.7726763    | 0.9767442 | 0.7798425 | not scorable | not scorable |
| #### Bn-scaff_15818_2-p19042 C-genome specific (napus-oleracea) | 0.9832536    | 0.6795026    | 0.9844961 | 0.713192  | not scorable | not scorable |
| #### Bn-scaff_15818_2-p19044 C-genome specific (napus-oleracea) | 0.9808612    | 0.7265171    | 0.9844961 | 0.679337  | not scorable | not scorable |
| #### Bn-scaff_15818_2-p19073 C-genome specific (napus-oleracea) | 0.9114832    | 0.8563426    | 0.9689922 | 0.7068552 | not scorable | not scorable |
| #### Bn-scaff_15818_2-p19086 C-genome specific (napus-oleracea) | 0.9904306    | 0.7642748    | 1         | 0.8448135 | not scorable | not scorable |

|                                                                 |              |              |              |              |              |              |
|-----------------------------------------------------------------|--------------|--------------|--------------|--------------|--------------|--------------|
| #### Bn-scaff_15818_2-p19208 C-genome specific (napus-oleracea) | 0.9952153    | 0.7628781    | 1            | 0.8172345    | not scorable | not scorable |
| #### Bn-scaff_15818_2-p19275 genome unspecific (all in)         | 0.9808612    | 0.3520573    | 1            | 0.7169504    | 0.8347107    | 0.9220066    |
| #### Bn-scaff_15818_2-p19409 C-genome specific (napus-oleracea) | 0.9784689    | 0.7554469    | 0.9689922    | 0.8008093    | not scorable | not scorable |
| #### Bn-scaff_15818_2-p19415 C-genome specific (napus-oleracea) | 0.8181818    | 0.7822006    | 0.9224806    | 0.7818       | not scorable | not scorable |
| #### Bn-scaff_15818_2-p19423 C-genome specific (napus-oleracea) | 0.9856459    | 0.7376693    | 0.9689922    | 0.7755706    | not scorable | not scorable |
| #### Bn-scaff_15818_2-p19424 C-genome specific (napus-oleracea) | 0.9928229    | 0.7476794    | 0.9767442    | 0.808546     | not scorable | not scorable |
| #### Bn-scaff_15818_2-p19433 C-genome specific (napus-oleracea) | 0.9928229    | 0.7758434    | 1            | 0.7608289    | not scorable | not scorable |
| #### Bn-scaff_15818_2-p19450 C-genome specific (napus-oleracea) | 0.9832536    | 0.7688663    | 0.9767442    | 0.7323395    | not scorable | not scorable |
| #### Bn-scaff_15818_2-p19452 all not scorable                   | not scorable | not scorable | not scorable | not scorable | not scorable | not scorable |
| #### Bn-scaff_15818_2-p19454 C-genome specific (napus-oleracea) | 0.9904306    | 0.6477371    | 0.9922481    | 0.6469177    | not scorable | not scorable |
| #### Bn-scaff_15818_2-p19456 C-genome specific (napus-oleracea) | 0.9928229    | 0.7037041    | 1            | 0.749359     | not scorable | not scorable |
| #### Bn-scaff_15818_2-p19458 C-genome specific (napus-oleracea) | 0.9066986    | 0.8948951    | 0.9457364    | 0.7913944    | not scorable | not scorable |
| #### Bn-scaff_15818_2-p19605 C-genome specific (napus-oleracea) | 0.9928229    | 0.764156     | 1            | 0.8163235    | not scorable | not scorable |
| #### Bn-scaff_15818_2-p19607 C-genome specific (napus-oleracea) | 0.9952153    | 0.7669906    | 0.9844961    | 0.7595798    | not scorable | not scorable |
| #### Bn-scaff_15818_2-p19926 C-genome specific (napus-oleracea) | 0.9832536    | 0.7776402    | 0.9844961    | 0.8236743    | not scorable | not scorable |
| #### Bn-scaff_15818_2-p19951 C-genome specific (napus-oleracea) | 0.9880383    | 0.7403936    | 0.9922481    | 0.6718913    | not scorable | not scorable |
| #### Bn-scaff_15818_2-p19956 C-genome specific (napus-oleracea) | 0.9880383    | 0.7041502    | 1            | 0.6471207    | not scorable | not scorable |
| #### Bn-scaff_15818_2-p20019 C-genome specific (napus-oleracea) | 0.9784689    | 0.6047204    | 1            | 0.6071104    | not scorable | not scorable |
| #### Bn-scaff_15818_2-p20022 C-genome specific (napus-oleracea) | 0.9952153    | 0.7223313    | 1            | 0.7194872    | not scorable | not scorable |
| #### Bn-scaff_15818_2-p20607 C-genome specific (napus-oleracea) | 0.9928229    | 0.7337619    | 0.9767442    | 0.7001009    | not scorable | not scorable |
| #### Bn-scaff_15818_2-p20807 genome unspecific (all in)         | 0.9856459    | 0.5725961    | 0.9844961    | 0.7736661    | 1            | 0.9049132    |
| #### Bn-scaff_15818_2-p21089 C-genome specific (napus-oleracea) | 0.9808612    | 0.7680168    | 1            | 0.7772273    | not scorable | not scorable |
| #### Bn-scaff_15818_2-p2109 A-genome specific (rapa only)       | not scorable | not scorable | not scorable | not scorable | 0.9586777    | 0.7560335    |
| #### Bn-scaff_15818_2-p28891 C-genome specific (napus-oleracea) | 1            | 0.8548126    | 0.9302326    | 0.7591815    | not scorable | not scorable |
| #### Bn-scaff_15818_2-p28900 C-genome specific (napus-oleracea) | 0.9952153    | 0.9389927    | 0.9224806    | 0.8556293    | not scorable | not scorable |
| #### Bn-scaff_15818_2-p48511 genome unspecific (all in)         | 1            | 0.6111928    | 1            | 0.6761763    | 1            | 0.86824      |
| #### Bn-scaff_15818_2-p48516 genome unspecific (all in)         | 0.9952153    | 0.3177271    | 1            | 0.938123     | 1            | 0.9272014    |
| #### Bn-scaff_15818_2-p50287 C-genome specific (napus-oleracea) | 0.9976076    | 0.8761905    | 1            | 0.886243     | not scorable | not scorable |
| #### Bn-scaff_15818_2-p50359 genome unspecific (oleracea-rapa)  | not scorable | not scorable | 1            | 0.5229772    | 1            | 0.7442623    |
| #### Bn-scaff_15818_2-p50438 genome unspecific (all in)         | 0.8708134    | 0.3317417    | 1            | 0.8205748    | 0.9834711    | 0.7516944    |
| #### Bn-scaff_15818_2-p50580 genome unspecific (all in)         | 1            | 0.5359046    | 1            | 0.3458345    | 1            | 0.7494321    |
| #### Bn-scaff_15818_2-p69328 genome unspecific (all in)         | 1            | 0.8980794    | 1            | 0.8814828    | 1            | 0.9175813    |
| #### Bn-scaff_15818_2-p75766 C-genome specific (napus-oleracea) | 0.9832536    | 0.667131     | 1            | 0.6175259    | not scorable | not scorable |

|                                                                 |           |           |              |              |              |              |
|-----------------------------------------------------------------|-----------|-----------|--------------|--------------|--------------|--------------|
| #### Bn-scaff_15818_2-p78404 C-genome specific (napus-oleracea) | 0.9617225 | 0.720186  | 1            | 0.762893     | not scorable | not scorable |
| #### Bn-scaff_15818_2-p78634 C-genome specific (napus-oleracea) | 0.9712918 | 0.6523209 | 0.8992248    | 0.7199326    | not scorable | not scorable |
| #### Bn-scaff_15832_1-p52737 C-genome specific (napus-oleracea) | 0.9210526 | 0.7719436 | 0.9922481    | 0.8396772    | not scorable | not scorable |
| #### Bn-scaff_15832_1-p62268 C-genome specific (napus-oleracea) | 0.9162679 | 0.6539183 | 0.9922481    | 0.6258281    | not scorable | not scorable |
| #### Bn-scaff_15832_1-p74342 genome unspecific (all in)         | 0.9641148 | 0.4985888 | 0.9922481    | 0.6869473    | 1            | 0.9031745    |
| #### Bn-scaff_15838_1-p10188 C-genome specific (napus-oleracea) | 0.9066986 | 0.7659994 | 1            | 0.7384509    | not scorable | not scorable |
| #### Bn-scaff_15838_1-p10200 C-genome specific (napus-oleracea) | 0.9114832 | 0.7549996 | 1            | 0.8557939    | not scorable | not scorable |
| #### Bn-scaff_15838_1-p10311 napus specific                     | 0.9832536 | 0.2144029 | not scorable | not scorable | not scorable | not scorable |
| #### Bn-scaff_15838_1-p10355 C-genome specific (napus-oleracea) | 0.9282297 | 0.5902759 | 0.9922481    | 0.6198558    | not scorable | not scorable |
| #### Bn-scaff_15838_1-p10371 C-genome specific (napus-oleracea) | 0.9090909 | 0.7570307 | 1            | 0.8713735    | not scorable | not scorable |
| #### Bn-scaff_15838_1-p10377 C-genome specific (napus-oleracea) | 0.9162679 | 0.7504573 | 0.9922481    | 0.8885021    | not scorable | not scorable |
| #### Bn-scaff_15838_1-p10397 C-genome specific (napus-oleracea) | 0.9066986 | 0.7474772 | 0.9922481    | 0.7660332    | not scorable | not scorable |
| #### Bn-scaff_15838_1-p10405 C-genome specific (napus-oleracea) | 0.9066986 | 0.706662  | 1            | 0.7589376    | not scorable | not scorable |
| #### Bn-scaff_15838_1-p10451 C-genome specific (napus-oleracea) | 0.9138756 | 0.750429  | 1            | 0.8024746    | not scorable | not scorable |
| #### Bn-scaff_15838_1-p10453 C-genome specific (napus-oleracea) | 0.9090909 | 0.7362574 | 1            | 0.8525947    | not scorable | not scorable |
| #### Bn-scaff_15838_1-p10454 C-genome specific (napus-oleracea) | 0.9090909 | 0.7273257 | 1            | 0.7108166    | not scorable | not scorable |
| #### Bn-scaff_15838_1-p10457 C-genome specific (napus-oleracea) | 0.9019139 | 0.7328578 | 0.9922481    | 0.6967914    | not scorable | not scorable |
| #### Bn-scaff_15838_1-p10489 C-genome specific (napus-oleracea) | 0.9019139 | 0.6576501 | 1            | 0.6636953    | not scorable | not scorable |
| #### Bn-scaff_15838_1-p10519 C-genome specific (napus-oleracea) | 0.8995215 | 0.7237367 | 0.9844961    | 0.7739726    | not scorable | not scorable |
| #### Bn-scaff_15838_1-p10610 C-genome specific (napus-oleracea) | 0.9210526 | 0.7606665 | 1            | 0.838773     | not scorable | not scorable |
| #### Bn-scaff_15838_1-p10620 C-genome specific (napus-oleracea) | 0.9090909 | 0.741171  | 1            | 0.7649956    | not scorable | not scorable |
| #### Bn-scaff_15838_1-p10629 C-genome specific (napus-oleracea) | 0.9186603 | 0.7155027 | 1            | 0.6307546    | not scorable | not scorable |
| #### Bn-scaff_15838_1-p10653 C-genome specific (napus-oleracea) | 0.9138756 | 0.6762279 | 0.9922481    | 0.6613536    | not scorable | not scorable |
| #### Bn-scaff_15838_1-p11263 C-genome specific (napus-oleracea) | 0.9258373 | 0.7007018 | 1            | 0.6264637    | not scorable | not scorable |
| #### Bn-scaff_15838_1-p11903 genome unspecific (all in)         | 0.9449761 | 0.4418872 | 0.9844961    | 0.7881429    | 1            | 0.9275062    |
| #### Bn-scaff_15838_1-p11990 C-genome specific (napus-oleracea) | 0.9162679 | 0.6713359 | 0.9844961    | 0.6952136    | not scorable | not scorable |
| #### Bn-scaff_15838_1-p11990 C-genome specific (napus-oleracea) | 0.9114832 | 0.6465096 | 0.9534883    | 0.618729     | not scorable | not scorable |
| #### Bn-scaff_15838_1-p11992 C-genome specific (napus-oleracea) | 0.9043062 | 0.7721307 | 0.9534883    | 0.7615889    | not scorable | not scorable |
| #### Bn-scaff_15838_1-p12181 C-genome specific (napus-oleracea) | 0.9114832 | 0.695949  | 1            | 0.6840748    | not scorable | not scorable |
| #### Bn-scaff_15838_1-p12939 C-genome specific (napus-oleracea) | 0.9210526 | 0.7888792 | 0.9922481    | 0.8347557    | not scorable | not scorable |
| #### Bn-scaff_15838_1-p12959 genome unspecific (all in)         | 0.9808612 | 0.5805761 | 0.9922481    | 0.771282     | 1            | 0.7148775    |
| #### Bn-scaff_15838_1-p12964 C-genome specific (napus-oleracea) | 0.9952153 | 0.946049  | 1            | 0.8238209    | not scorable | not scorable |
| #### Bn-scaff_15838_1-p13471 genome unspecific (all in)         | 0.9976076 | 0.3832507 | 1            | 0.8495595    | 0.9834711    | 0.7176905    |

|                                                                |              |              |              |              |              |              |
|----------------------------------------------------------------|--------------|--------------|--------------|--------------|--------------|--------------|
| #### Bn-scaff_15838_1-p13474genome unspecific (all in)         | 1            | 0.80316      | 1            | 0.7792432    | 1            | 0.7914145    |
| #### Bn-scaff_15838_1-p13479genome unspecific (all in)         | 1            | 0.8004208    | 1            | 0.7679853    | 1            | 0.7591171    |
| #### Bn-scaff_15838_1-p13600C-genome specific (napus-oleracea) | 0.8660287    | 0.7637359    | 0.9767442    | 0.8478431    | not scorable | not scorable |
| #### Bn-scaff_15838_1-p13647C-genome specific (napus-oleracea) | 0.9258373    | 0.7588069    | 1            | 0.757777     | not scorable | not scorable |
| #### Bn-scaff_15838_1-p13648C-genome specific (napus-oleracea) | 0.9114832    | 0.722505     | 0.9922481    | 0.7781454    | not scorable | not scorable |
| #### Bn-scaff_15838_1-p13668C-genome specific (napus-oleracea) | 0.9114832    | 0.7066236    | 1            | 0.6897746    | not scorable | not scorable |
| #### Bn-scaff_15838_1-p13669C-genome specific (napus-oleracea) | 0.9090909    | 0.6792204    | 0.9922481    | 0.6034732    | not scorable | not scorable |
| #### Bn-scaff_15838_1-p13676C-genome specific (napus-oleracea) | 0.9162679    | 0.7626495    | 1            | 0.7310918    | not scorable | not scorable |
| #### Bn-scaff_15838_1-p13721C-genome specific (napus-oleracea) | 0.9186603    | 0.5390682    | 0.9844961    | 0.7199439    | not scorable | not scorable |
| #### Bn-scaff_15838_1-p14037C-genome specific (napus-oleracea) | 0.9090909    | 0.6350712    | 0.9922481    | 0.561894     | not scorable | not scorable |
| #### Bn-scaff_15838_1-p14300C-genome specific (napus-oleracea) | 0.9186603    | 0.6993269    | 1            | 0.7146763    | not scorable | not scorable |
| #### Bn-scaff_15838_1-p14403genome unspecific (all in)         | 0.9832536    | 0.3380358    | 0.9922481    | 0.778967     | 1            | 0.9175248    |
| #### Bn-scaff_15838_1-p14512genome unspecific (all in)         | 0.9904306    | 0.4265059    | 1            | 0.6813399    | 1            | 0.7593464    |
| #### Bn-scaff_15838_1-p14526genome unspecific (all in)         | 0.9928229    | 0.3012732    | 1            | 0.7277738    | 0.9834711    | 0.6604419    |
| #### Bn-scaff_15838_1-p14586genome unspecific (all in)         | 1            | 0.5448225    | 1            | 0.4689133    | 1            | 0.6033282    |
| #### Bn-scaff_15838_1-p14667C-genome specific (napus-oleracea) | 0.923445     | 0.768077     | 1            | 0.8417441    | not scorable | not scorable |
| #### Bn-scaff_15838_1-p14678C-genome specific (napus-oleracea) | 0.9904306    | 0.6957791    | 0.9922481    | 0.663013     | not scorable | not scorable |
| #### Bn-scaff_15838_1-p14766genome unspecific (all in)         | 0.9641148    | 0.5474737    | 0.9922481    | 0.8291255    | 1            | 0.9287815    |
| #### Bn-scaff_15838_1-p14972all not scorable                   | not scorable | not scorable | not scorable | not scorable | not scorable | not scorable |
| #### Bn-scaff_15838_1-p15269C-genome specific (napus-oleracea) | 0.9114832    | 0.7952774    | 1            | 0.7688704    | not scorable | not scorable |
| #### Bn-scaff_15838_1-p15321genome unspecific (oleracea-rapa)  | not scorable | not scorable | 1            | 0.741734     | 1            | 0.903107     |
| #### Bn-scaff_15838_1-p15479A-genome specific (rapa only)      | not scorable | not scorable | not scorable | not scorable | 0.9834711    | 0.8735928    |
| #### Bn-scaff_15838_1-p15516napus specific                     | 0.8899522    | 0.635063     | not scorable | not scorable | not scorable | not scorable |
| #### Bn-scaff_15838_1-p15517C-genome specific (napus-oleracea) | 0.8923445    | 0.6454955    | 0.9457364    | 0.6842597    | not scorable | not scorable |
| #### Bn-scaff_15838_1-p15541C-genome specific (napus-oleracea) | 0.6794258    | 0.7188882    | 1            | 0.8517904    | not scorable | not scorable |
| #### Bn-scaff_15838_1-p15565C-genome specific (napus-oleracea) | 0.8779904    | 0.7932458    | 0.9302326    | 0.7116257    | not scorable | not scorable |
| #### Bn-scaff_15838_1-p15568C-genome specific (napus-oleracea) | 0.9066986    | 0.7244009    | 0.9302326    | 0.7436216    | not scorable | not scorable |
| #### Bn-scaff_15838_1-p15568C-genome specific (napus-oleracea) | 0.8899522    | 0.7002053    | 0.8992248    | 0.8124503    | not scorable | not scorable |
| #### Bn-scaff_15838_1-p15728genome unspecific (all in)         | 0.9545454    | 0.3638696    | 1            | 0.7112057    | 1            | 0.9205657    |
| #### Bn-scaff_15838_1-p15739A-genome specific (napus-rapa)     | 0.9641148    | 0.2936155    | not scorable | not scorable | 1            | 0.8135551    |
| #### Bn-scaff_15838_1-p15853C-genome specific (napus-oleracea) | 0.9760765    | 0.7747207    | 0.9147287    | 0.8981692    | not scorable | not scorable |
| #### Bn-scaff_15838_1-p16144C-genome specific (napus-oleracea) | 0.9090909    | 0.743867     | 0.9844961    | 0.8099419    | not scorable | not scorable |
| #### Bn-scaff_15838_1-p16167C-genome specific (napus-oleracea) | 0.9186603    | 0.7525488    | 0.9534883    | 0.7427327    | not scorable | not scorable |

|                                                                |              |              |              |              |              |              |
|----------------------------------------------------------------|--------------|--------------|--------------|--------------|--------------|--------------|
| #### Bn-scaff_15838_1-p16807genome unspecific (all in)         | 0.9784689    | 0.4123234    | 0.9612403    | 0.6919271    | 1            | 0.9036015    |
| #### Bn-scaff_15838_1-p16846C-genome specific (napus-oleracea) | 0.9066986    | 0.6436813    | 0.9767442    | 0.6529312    | not scorable | not scorable |
| #### Bn-scaff_15838_1-p17245genome unspecific (all in)         | 1            | 0.6379088    | 1            | 0.6230366    | 1            | 0.7007107    |
| #### Bn-scaff_15838_1-p18042C-genome specific (napus-oleracea) | 0.9019139    | 0.750668     | 1            | 0.8166723    | not scorable | not scorable |
| #### Bn-scaff_15838_1-p18042C-genome specific (napus-oleracea) | 0.9114832    | 0.7101324    | 1            | 0.753561     | not scorable | not scorable |
| #### Bn-scaff_15838_1-p18064C-genome specific (napus-oleracea) | 0.9138756    | 0.6631542    | 1            | 0.6468887    | not scorable | not scorable |
| #### Bn-scaff_15838_1-p18100C-genome specific (napus-oleracea) | 0.9162679    | 0.6962684    | 1            | 0.6658912    | not scorable | not scorable |
| #### Bn-scaff_15838_1-p18695genome unspecific (oleracea-rapa)  | not scorable | not scorable | 1            | 0.7018165    | 0.9917355    | 0.6424839    |
| #### Bn-scaff_15838_1-p18817C-genome specific (napus-oleracea) | 0.9043062    | 0.7824895    | 1            | 0.919545     | not scorable | not scorable |
| #### Bn-scaff_15838_1-p19171C-genome specific (napus-oleracea) | 0.9593301    | 0.73847      | 1            | 0.7366039    | not scorable | not scorable |
| #### Bn-scaff_15838_1-p19421C-genome specific (napus-oleracea) | 0.02392345   | 0.8899963    | 0.9844961    | 0.7713825    | not scorable | not scorable |
| #### Bn-scaff_15838_1-p20183genome unspecific (all in)         | 0.9976076    | 0.3466434    | 1            | 0.8433859    | 1            | 0.8334932    |
| #### Bn-scaff_15838_1-p20290C-genome specific (napus-oleracea) | 0.9736842    | 0.7970674    | 1            | 0.7411535    | not scorable | not scorable |
| #### Bn-scaff_15838_1-p20331C-genome specific (oleracea only)  | not scorable | not scorable | 0.9224806    | 0.6445416    | not scorable | not scorable |
| #### Bn-scaff_15838_1-p20359C-genome specific (napus-oleracea) | 0.9473684    | 0.5406664    | 0.9612403    | 0.7552512    | not scorable | not scorable |
| #### Bn-scaff_15838_1-p20396C-genome specific (napus-oleracea) | 0.9760765    | 0.7953154    | 0.9767442    | 0.8490459    | not scorable | not scorable |
| #### Bn-scaff_15838_1-p21036genome unspecific (all in)         | 0.9832536    | 0.2989712    | 1            | 0.7590677    | 1            | 0.6769841    |
| #### Bn-scaff_15838_1-p21042genome unspecific (all in)         | 0.9856459    | 0.4023165    | 1            | 0.8356677    | 1            | 0.9124616    |
| #### Bn-scaff_15838_1-p21449C-genome specific (napus-oleracea) | 0.9784689    | 0.757746     | 1            | 0.6722789    | not scorable | not scorable |
| #### Bn-scaff_15838_1-p22129C-genome specific (napus-oleracea) | 0.9641148    | 0.7352918    | 0.9767442    | 0.6719659    | not scorable | not scorable |
| #### Bn-scaff_15838_1-p22358C-genome specific (napus-oleracea) | 0.9712918    | 0.7932795    | 0.9922481    | 0.7686119    | not scorable | not scorable |
| #### Bn-scaff_15838_1-p22535genome unspecific (all in)         | 0.9856459    | 0.4600556    | 0.9612403    | 0.7249453    | 1            | 0.9072468    |
| #### Bn-scaff_15838_1-p22610genome unspecific (all in)         | 0.9880383    | 0.4199557    | 1            | 0.7285115    | 0.9917355    | 0.7724212    |
| #### Bn-scaff_15838_1-p22686C-genome specific (napus-oleracea) | 0.9856459    | 0.7663167    | 0.9689922    | 0.6953977    | not scorable | not scorable |
| #### Bn-scaff_15838_1-p23633genome unspecific (oleracea-rapa)  | not scorable | not scorable | 0.9922481    | 0.5427086    | 0.9834711    | 0.6516918    |
| #### Bn-scaff_15838_1-p23664genome unspecific (all in)         | 0.9808612    | 0.4614346    | 0.9844961    | 0.8754337    | 0.9917355    | 0.7065156    |
| #### Bn-scaff_15838_1-p3224 genome unspecific (all in)         | 0.9784689    | 0.2746161    | 1            | 0.5535624    | 1            | 0.6628183    |
| #### Bn-scaff_15838_1-p43109A-genome specific (rapa only)      | not scorable | not scorable | not scorable | not scorable | 1            | 0.8402781    |
| #### Bn-scaff_15838_1-p43126C-genome specific (napus-oleracea) | 0.9043062    | 0.7221478    | 0.9767442    | 0.7354022    | not scorable | not scorable |
| #### Bn-scaff_15838_1-p51787A-genome specific (napus-rapa)     | 0.9473684    | 0.6365053    | not scorable | not scorable | 0.9752066    | 0.743719     |
| #### Bn-scaff_15838_1-p52091genome unspecific (oleracea-rapa)  | not scorable | not scorable | 0.9922481    | 0.7709821    | 1            | 0.9154649    |
| #### Bn-scaff_15838_1-p53302genome unspecific (all in)         | 0.9282297    | 0.5064788    | 1            | 0.7269444    | 0.9752066    | 0.6131886    |
| #### Bn-scaff_15838_1-p53652C-genome specific (napus-oleracea) | 0.8995215    | 0.7358662    | 1            | 0.7204753    | not scorable | not scorable |

|                                                                |              |              |              |              |              |              |
|----------------------------------------------------------------|--------------|--------------|--------------|--------------|--------------|--------------|
| #### Bn-scaff_15838_1-p5545 genome unspecific (oleracea-rapa)  | not scorable | not scorable | 1            | 0.5720314    | 0.9834711    | 0.7168785    |
| #### Bn-scaff_15838_1-p5766 C-genome specific (napus-oleracea) | 0.9186603    | 0.7518371    | 1            | 0.7813232    | not scorable | not scorable |
| #### Bn-scaff_15838_1-p5864 C-genome specific (napus-oleracea) | 0.7033493    | 0.7388051    | 0.4496124    | 0.7911538    | not scorable | not scorable |
| #### Bn-scaff_15838_1-p6145 C-genome specific (napus-oleracea) | 0.9162679    | 0.6764283    | 1            | 0.7159276    | not scorable | not scorable |
| #### Bn-scaff_15838_1-p6257 C-genome specific (napus-oleracea) | 0.9162679    | 0.7718185    | 1            | 0.7524053    | not scorable | not scorable |
| #### Bn-scaff_15838_1-p6285 genome unspecific (all in)         | 0.9497608    | 0.5647845    | 1            | 0.7442682    | 1            | 0.9502475    |
| #### Bn-scaff_15838_1-p6285 C-genome specific (napus-oleracea) | 0.9066986    | 0.6911053    | 1            | 0.7602334    | not scorable | not scorable |
| #### Bn-scaff_15838_1-p6412 C-genome specific (napus-oleracea) | 0.9162679    | 0.7335567    | 0.9922481    | 0.7913099    | not scorable | not scorable |
| #### Bn-scaff_15838_1-p6487 C-genome specific (napus-oleracea) | 0.9019139    | 0.6656674    | 1            | 0.694525     | not scorable | not scorable |
| #### Bn-scaff_15838_1-p6800 C-genome specific (napus-oleracea) | 0.9090909    | 0.7162507    | 0.9922481    | 0.6764469    | not scorable | not scorable |
| #### Bn-scaff_15838_1-p6938 C-genome specific (napus-oleracea) | 0.9665072    | 0.3332753    | 1            | 0.6721119    | not scorable | not scorable |
| #### Bn-scaff_15838_1-p6940 C-genome specific (napus-oleracea) | 0.9497608    | 0.5699432    | 1            | 0.9009522    | not scorable | not scorable |
| #### Bn-scaff_15838_1-p7114 C-genome specific (napus-oleracea) | 0.8516746    | 0.8242605    | 0.9534883    | 0.6616526    | not scorable | not scorable |
| #### Bn-scaff_15838_1-p7144 C-genome specific (napus-oleracea) | 0.9186603    | 0.75802      | 1            | 0.8942062    | not scorable | not scorable |
| #### Bn-scaff_15838_1-p7239 C-genome specific (napus-oleracea) | 0.9114832    | 0.7125737    | 0.9844961    | 0.7843902    | not scorable | not scorable |
| #### Bn-scaff_15838_1-p7244 genome unspecific (oleracea-rapa)  | not scorable | not scorable | 1            | 0.6671352    | 1            | 0.8974696    |
| #### Bn-scaff_15838_1-p7365 napus specific                     | 0.9066986    | 0.9479796    | not scorable | not scorable | not scorable | not scorable |
| #### Bn-scaff_15838_1-p7408 genome unspecific (all in)         | 0.9784689    | 0.3552738    | 0.6899225    | 0.7149415    | 1            | 0.8919281    |
| #### Bn-scaff_15838_1-p7410 genome unspecific (all in)         | 0.9712918    | 0.3379277    | 1            | 0.6303325    | 1            | 0.8004208    |
| #### Bn-scaff_15838_1-p7433 C-genome specific (napus-oleracea) | 0.9904306    | 0.7767804    | 0.9922481    | 0.8736707    | not scorable | not scorable |
| #### Bn-scaff_15838_1-p7476 C-genome specific (napus-oleracea) | 0.9282297    | 0.8151874    | 0.9922481    | 0.7543767    | not scorable | not scorable |
| #### Bn-scaff_15838_1-p7677 genome unspecific (all in)         | 0.9976076    | 0.3361139    | 1            | 0.7910699    | 1            | 0.8215089    |
| #### Bn-scaff_15838_1-p7755 C-genome specific (napus-oleracea) | 0.930622     | 0.8350273    | 1            | 0.7449293    | not scorable | not scorable |
| #### Bn-scaff_15838_1-p7871 C-genome specific (napus-oleracea) | 0.9043062    | 0.5773335    | 0.9844961    | 0.5965033    | not scorable | not scorable |
| #### Bn-scaff_15838_1-p7909 C-genome specific (napus-oleracea) | 0.9066986    | 0.7579535    | 1            | 0.8020552    | not scorable | not scorable |
| #### Bn-scaff_15838_1-p7921 C-genome specific (napus-oleracea) | 0.9330143    | 0.7790921    | 1            | 0.8541718    | not scorable | not scorable |
| #### Bn-scaff_15838_1-p7934 C-genome specific (napus-oleracea) | 0.9162679    | 0.7492962    | 1            | 0.8155442    | not scorable | not scorable |
| #### Bn-scaff_15838_1-p7935 C-genome specific (napus-oleracea) | 0.923445     | 0.5937594    | 1            | 0.552351     | not scorable | not scorable |
| #### Bn-scaff_15838_1-p7935 C-genome specific (napus-oleracea) | 0.9114832    | 0.6882596    | 1            | 0.7553515    | not scorable | not scorable |
| #### Bn-scaff_15838_1-p7944 C-genome specific (napus-oleracea) | 0.9210526    | 0.6586583    | 1            | 0.6069186    | not scorable | not scorable |
| #### Bn-scaff_15838_1-p7949 C-genome specific (napus-oleracea) | 0.9114832    | 0.6677091    | 1            | 0.7127789    | not scorable | not scorable |
| #### Bn-scaff_15838_1-p7956 C-genome specific (napus-oleracea) | 0.9114832    | 0.5882062    | 1            | 0.6250569    | not scorable | not scorable |
| #### Bn-scaff_15838_1-p7988 C-genome specific (oleracea only)  | not scorable | not scorable | 0.9922481    | 0.8142606    | not scorable | not scorable |

|                                                                 |              |              |              |              |              |              |
|-----------------------------------------------------------------|--------------|--------------|--------------|--------------|--------------|--------------|
| #### Bn-scaff_15838_1-p80564 genome unspecific (all in)         | 0.9688995    | 0.2693087    | 0.9379845    | 0.239535     | 1            | 0.7770717    |
| #### Bn-scaff_15838_1-p81095 C-genome specific (napus-oleracea) | 0.9138756    | 0.7555806    | 0.9922481    | 0.7929051    | not scorable | not scorable |
| #### Bn-scaff_15838_1-p81315 C-genome specific (napus-oleracea) | 0.9019139    | 0.689499     | 0.9534883    | 0.7590486    | not scorable | not scorable |
| #### Bn-scaff_15838_1-p82284 C-genome specific (napus-oleracea) | 0.9066986    | 0.7041005    | 1            | 0.6453262    | not scorable | not scorable |
| #### Bn-scaff_15838_1-p83062 C-genome specific (napus-oleracea) | 0.8971292    | 0.7484653    | 0.9534883    | 0.9255108    | not scorable | not scorable |
| #### Bn-scaff_15838_1-p84111 C-genome specific (napus-oleracea) | 0.8995215    | 0.7488835    | 0.7984496    | 0.7077223    | not scorable | not scorable |
| #### Bn-scaff_15838_1-p84248 genome unspecific (all in)         | 1            | 0.7043204    | 1            | 0.6274173    | 1            | 0.711467     |
| #### Bn-scaff_15838_1-p84934 C-genome specific (napus-oleracea) | 0.8779904    | 0.5183741    | 1            | 0.5763208    | not scorable | not scorable |
| #### Bn-scaff_15838_1-p84940 C-genome specific (napus-oleracea) | 0.9162679    | 0.7360046    | 1            | 0.9268661    | not scorable | not scorable |
| #### Bn-scaff_15838_1-p85682 C-genome specific (napus-oleracea) | 0.9114832    | 0.7181396    | 0.9844961    | 0.786283     | not scorable | not scorable |
| #### Bn-scaff_15838_1-p86149 C-genome specific (napus-oleracea) | 0.9138756    | 0.7754157    | 1            | 0.7271172    | not scorable | not scorable |
| #### Bn-scaff_15838_1-p86799 napus specific                     | 0.8947368    | 0.7281067    | not scorable | not scorable | not scorable | not scorable |
| #### Bn-scaff_15838_1-p86819 C-genome specific (oleracea only)  | not scorable | not scorable | 0.7596899    | 0.820022     | not scorable | not scorable |
| #### Bn-scaff_15838_1-p86846 C-genome specific (napus-oleracea) | 0.9210526    | 0.6874257    | 0.7751938    | 0.8065496    | not scorable | not scorable |
| #### Bn-scaff_15838_1-p86859 C-genome specific (napus-oleracea) | 0.9186603    | 0.6901129    | 0.7829458    | 0.6758208    | not scorable | not scorable |
| #### Bn-scaff_15838_1-p86981 C-genome specific (napus-oleracea) | 0.9114832    | 0.7041878    | 0.7286822    | 0.6966454    | not scorable | not scorable |
| #### Bn-scaff_15838_1-p88193 C-genome specific (napus-oleracea) | 0.9186603    | 0.7351052    | 0.9844961    | 0.8508353    | not scorable | not scorable |
| #### Bn-scaff_15838_1-p92309 C-genome specific (napus-oleracea) | 0.9114832    | 0.7421373    | 0.9767442    | 0.8379771    | not scorable | not scorable |
| #### Bn-scaff_15838_1-p92551 C-genome specific (napus-oleracea) | 0.9043062    | 0.7650304    | 0.9844961    | 0.7711571    | not scorable | not scorable |
| #### Bn-scaff_15838_1-p94306 C-genome specific (napus-oleracea) | 0.9043062    | 0.6650762    | 1            | 0.7340815    | not scorable | not scorable |
| #### Bn-scaff_15838_1-p94937 C-genome specific (napus-oleracea) | 0.8899522    | 0.6010675    | 1            | 0.9519937    | not scorable | not scorable |
| #### Bn-scaff_15838_1-p96143 C-genome specific (napus-oleracea) | 0.6028708    | 0.694553     | 0.7209302    | 0.7042028    | not scorable | not scorable |
| #### Bn-scaff_15838_1-p97775 C-genome specific (napus-oleracea) | 0.6985646    | 0.7702654    | 0.9224806    | 0.8681306    | not scorable | not scorable |
| #### Bn-scaff_15838_1-p97780 C-genome specific (napus-oleracea) | 0.7033493    | 0.7693344    | 1            | 0.7864525    | not scorable | not scorable |
| #### Bn-scaff_15838_1-p97782 C-genome specific (napus-oleracea) | 0.6937799    | 0.7241697    | 0.9767442    | 0.7277146    | not scorable | not scorable |
| #### Bn-scaff_15838_1-p97794 C-genome specific (napus-oleracea) | 0.7057416    | 0.7586768    | 1            | 0.8479301    | not scorable | not scorable |
| #### Bn-scaff_15838_1-p97988 C-genome specific (napus-oleracea) | 0.8995215    | 0.7014814    | 0.9922481    | 0.819697     | not scorable | not scorable |
| #### Bn-scaff_15838_2-p10160 genome unspecific (all in)         | 1            | 0.4049727    | 0.9922481    | 0.7345057    | 1            | 0.8848242    |
| #### Bn-scaff_15838_2-p10799 C-genome specific (napus-oleracea) | 0.9617225    | 0.585201     | 0.9767442    | 0.7297021    | not scorable | not scorable |
| #### Bn-scaff_15838_2-p11581 genome unspecific (all in)         | 0.9952153    | 0.3560777    | 1            | 0.7619143    | 1            | 0.77891      |
| #### Bn-scaff_15838_2-p12622 C-genome specific (napus-oleracea) | 0.9880383    | 0.79684      | 1            | 0.8928754    | not scorable | not scorable |
| #### Bn-scaff_15838_2-p13586 genome unspecific (all in)         | 0.9641148    | 0.4050305    | 1            | 0.6018038    | 1            | 0.8004208    |
| #### Bn-scaff_15838_2-p13660 genome unspecific (all in)         | 0.9688995    | 0.3481486    | 1            | 0.737636     | 1            | 0.9024424    |

|                                                                 |              |              |              |              |              |              |
|-----------------------------------------------------------------|--------------|--------------|--------------|--------------|--------------|--------------|
| #### Bn-scaff_15838_2-p14257 genome unspecific (all in)         | 0.9976076    | 0.7240551    | 0.9922481    | 0.6788507    | 1            | 0.9238637    |
| #### Bn-scaff_15838_2-p14307 C-genome specific (napus-oleracea) | 1            | 0.8135551    | 1            | 0.8473358    | not scorable | not scorable |
| #### Bn-scaff_15838_2-p18636 C-genome specific (napus-oleracea) | 0.9832536    | 0.2295952    | 0.9457364    | 0.197783     | not scorable | not scorable |
| #### Bn-scaff_15838_2-p5064 genome unspecific (all in)          | 0.9952153    | 0.7815622    | 0.9767442    | 0.7244778    | 0.9917355    | 0.8846407    |
| #### Bn-scaff_15838_2-p67488 genome unspecific (all in)         | 0.9784689    | 0.3570752    | 0.9844961    | 0.8196601    | 1            | 0.9175813    |
| #### Bn-scaff_15838_2-p97896 genome unspecific (all in)         | 0.9688995    | 0.5855939    | 0.9922481    | 0.8270407    | 0.9917355    | 0.8906888    |
| #### Bn-scaff_15838_3-p15045 C-genome specific (oleracea only)  | not scorable | not scorable | 1            | 0.8285981    | not scorable | not scorable |
| #### Bn-scaff_15838_3-p22034 genome unspecific (all in)         | 0.9856459    | 0.4616229    | 1            | 0.7145908    | 0.9917355    | 0.6641929    |
| #### Bn-scaff_15838_3-p22734 genome unspecific (all in)         | 1            | 0.8824379    | 1            | 0.6386324    | 1            | 0.9175813    |
| #### Bn-scaff_15838_3-p25612 genome unspecific (all in)         | 0.9952153    | 0.3452875    | 0.9922481    | 0.8457299    | 0.9834711    | 0.8153504    |
| #### Bn-scaff_15838_3-p25676 genome unspecific (all in)         | 0.9832536    | 0.324807     | 1            | 0.7555573    | 0.9917355    | 0.7122919    |
| #### Bn-scaff_15838_3-p30171 genome unspecific (oleracea-rapa)  | not scorable | not scorable | 0.8217054    | 0.7360603    | 1            | 0.7282816    |
| #### Bn-scaff_15838_3-p61272 genome unspecific (oleracea-rapa)  | not scorable | not scorable | 1            | 0.8003951    | 1            | 0.7149587    |
| #### Bn-scaff_15838_3-p61315 genome unspecific (all in)         | 1            | 0.4849706    | 1            | 0.7202407    | 1            | 0.6678302    |
| #### Bn-scaff_15838_3-p96872 C-genome specific (napus-oleracea) | 0.9904306    | 0.9205657    | 1            | 0.856598     | not scorable | not scorable |
| #### Bn-scaff_15838_5-p10045 C-genome specific (napus-oleracea) | 0.9904306    | 0.7812452    | 0.9922481    | 0.7317144    | not scorable | not scorable |
| #### Bn-scaff_15838_5-p10247 all not scorable                   | not scorable | not scorable | not scorable | not scorable | not scorable | not scorable |
| #### Bn-scaff_15838_5-p10431 genome unspecific (all in)         | 0.9473684    | 0.3674333    | 0.9844961    | 0.6973731    | 1            | 0.8552796    |
| #### Bn-scaff_15838_5-p10928 genome unspecific (oleracea-rapa)  | not scorable | not scorable | 0.9069768    | 0.2626706    | 1            | 0.7770717    |
| #### Bn-scaff_15838_5-p10933 genome unspecific (all in)         | 0.9665072    | 0.5122195    | 0.9922481    | 0.6362737    | 0.9917355    | 0.786476     |
| #### Bn-scaff_15838_5-p10972 C-genome specific (napus-oleracea) | 0.9736842    | 0.3777969    | 0.9844961    | 0.4996245    | not scorable | not scorable |
| #### Bn-scaff_15838_5-p11120 genome unspecific (all in)         | 0.9784689    | 0.6653843    | 0.9922481    | 0.7513835    | 0.9421487    | 0.9175813    |
| #### Bn-scaff_15838_5-p11581 C-genome specific (napus-oleracea) | 0.9832536    | 0.6782857    | 1            | 0.720181     | not scorable | not scorable |
| #### Bn-scaff_15838_5-p11623 C-genome specific (napus-oleracea) | 0.9808612    | 0.7497383    | 0.9922481    | 0.7928317    | not scorable | not scorable |
| #### Bn-scaff_15838_5-p11675 C-genome specific (napus-oleracea) | 0.9784689    | 0.7404081    | 1            | 0.6730816    | not scorable | not scorable |
| #### Bn-scaff_15838_5-p11700 genome unspecific (all in)         | 0.9928229    | 0.4438719    | 1            | 0.6952047    | 1            | 0.8613923    |
| #### Bn-scaff_15838_5-p11736 C-genome specific (napus-oleracea) | 0.9808612    | 0.7565048    | 0.9922481    | 0.8248826    | not scorable | not scorable |
| #### Bn-scaff_15838_5-p11736 C-genome specific (napus-oleracea) | 0.9641148    | 0.7543193    | 0.9612403    | 0.7533143    | not scorable | not scorable |
| #### Bn-scaff_15838_5-p11812 C-genome specific (napus-oleracea) | 0.9832536    | 0.6877885    | 0.9922481    | 0.7184302    | not scorable | not scorable |
| #### Bn-scaff_15838_5-p11812 C-genome specific (napus-oleracea) | 0.9808612    | 0.6936713    | 1            | 0.6691985    | not scorable | not scorable |
| #### Bn-scaff_15838_5-p11815 C-genome specific (napus-oleracea) | 0.9856459    | 0.7171472    | 0.9844961    | 0.7365826    | not scorable | not scorable |
| #### Bn-scaff_15838_5-p11817 C-genome specific (napus-oleracea) | 0.9784689    | 0.6627536    | 0.9844961    | 0.6893823    | not scorable | not scorable |
| #### Bn-scaff_15838_5-p11829 C-genome specific (napus-oleracea) | 0.9904306    | 0.9103745    | 1            | 0.6906772    | not scorable | not scorable |



|                                                                 |              |              |              |              |              |              |
|-----------------------------------------------------------------|--------------|--------------|--------------|--------------|--------------|--------------|
| #### Bn-scaff_15838_5-p11883 C-genome specific (napus-oleracea) | 0.8899522    | 0.7663167    | 0.9844961    | 0.8005809    | not scorable | not scorable |
| #### Bn-scaff_15838_5-p11886 C-genome specific (napus-oleracea) | 0.8851675    | 0.7697857    | 1            | 0.8071468    | not scorable | not scorable |
| #### Bn-scaff_15838_5-p11901 C-genome specific (napus-oleracea) | 0.8827751    | 0.7746943    | 1            | 0.8154362    | not scorable | not scorable |
| #### Bn-scaff_15838_5-p12086 C-genome specific (napus-oleracea) | 0.9856459    | 0.7631521    | 1            | 0.8127       | not scorable | not scorable |
| #### Bn-scaff_15838_5-p12087 genome unspecific (all in)         | 0.8995215    | 0.7022842    | 1            | 0.7575403    | 0.9504132    | 0.8814295    |
| #### Bn-scaff_15838_5-p12088 C-genome specific (napus-oleracea) | 0.9784689    | 0.7575043    | 1            | 0.8212696    | not scorable | not scorable |
| #### Bn-scaff_15838_5-p12099 C-genome specific (napus-oleracea) | 0.8779904    | 0.7569055    | 0.8294573    | 0.8165641    | not scorable | not scorable |
| #### Bn-scaff_15838_5-p12104 C-genome specific (napus-oleracea) | 0.8684211    | 0.6307732    | 0.7984496    | 0.590927     | not scorable | not scorable |
| #### Bn-scaff_15838_5-p12109 C-genome specific (napus-oleracea) | 0.8779904    | 0.7759107    | 0.8139535    | 0.9175085    | not scorable | not scorable |
| #### Bn-scaff_15838_5-p12116 C-genome specific (napus-oleracea) | 0.8732057    | 0.7662509    | 0.7984496    | 0.8357803    | not scorable | not scorable |
| #### Bn-scaff_15838_5-p12156 C-genome specific (napus-oleracea) | 0.9760765    | 0.721269     | 1            | 0.7526337    | not scorable | not scorable |
| #### Bn-scaff_15838_5-p12212 C-genome specific (napus-oleracea) | 0.9712918    | 0.7430815    | 0.9922481    | 0.7626158    | not scorable | not scorable |
| #### Bn-scaff_15838_5-p12277 C-genome specific (napus-oleracea) | 0.9736842    | 0.5975158    | 0.9922481    | 0.5425583    | not scorable | not scorable |
| #### Bn-scaff_15838_5-p12365 genome unspecific (all in)         | 0.9904306    | 0.4744081    | 1            | 0.8061102    | 1            | 0.9174613    |
| #### Bn-scaff_15838_5-p12394 napus specific                     | 0.9425837    | 0.4679078    | not scorable | not scorable | not scorable | not scorable |
| #### Bn-scaff_15838_5-p12892 genome unspecific (all in)         | 0.9545454    | 0.5203501    | 1            | 0.6324833    | 1            | 0.9095823    |
| #### Bn-scaff_15838_5-p14516 C-genome specific (napus-oleracea) | 0.9497608    | 0.7422295    | 0.9922481    | 0.6892745    | not scorable | not scorable |
| #### Bn-scaff_15838_5-p14521 C-genome specific (napus-oleracea) | 0.9617225    | 0.7676246    | 1            | 0.6873076    | not scorable | not scorable |
| #### Bn-scaff_15838_5-p14535 C-genome specific (napus-oleracea) | 0.9617225    | 0.7245184    | 1            | 0.6332958    | not scorable | not scorable |
| #### Bn-scaff_15838_5-p14556 C-genome specific (napus-oleracea) | 0.9545454    | 0.7084365    | 0.9844961    | 0.7942191    | not scorable | not scorable |
| #### Bn-scaff_15838_5-p14579 C-genome specific (napus-oleracea) | 0.9497608    | 0.7669237    | 0.9922481    | 0.7084682    | not scorable | not scorable |
| #### Bn-scaff_15838_5-p14632 C-genome specific (napus-oleracea) | 0.9688995    | 0.6807288    | 1            | 0.6797891    | not scorable | not scorable |
| #### Bn-scaff_15838_5-p14793 C-genome specific (napus-oleracea) | 0.9712918    | 0.754038     | 0.9922481    | 0.7404652    | not scorable | not scorable |
| #### Bn-scaff_15838_5-p14796 C-genome specific (napus-oleracea) | 0.9784689    | 0.6981521    | 1            | 0.7169385    | not scorable | not scorable |
| #### Bn-scaff_15838_5-p15173 genome unspecific (all in)         | 0.9880383    | 0.3206498    | 0.9767442    | 0.7606221    | 1            | 0.9072468    |
| #### Bn-scaff_15838_5-p15207 C-genome specific (oleracea only)  | not scorable | not scorable | 0.9844961    | 0.7943795    | not scorable | not scorable |
| #### Bn-scaff_15838_5-p16009 C-genome specific (napus-oleracea) | 0.9688995    | 0.7706623    | 0.9844961    | 0.8097821    | not scorable | not scorable |
| #### Bn-scaff_15838_5-p16455 C-genome specific (napus-oleracea) | 0.9569378    | 0.6816269    | 0.9379845    | 0.7631711    | not scorable | not scorable |
| #### Bn-scaff_15838_5-p16509 C-genome specific (napus-oleracea) | 0.9473684    | 0.6920989    | 0.9844961    | 0.6461961    | not scorable | not scorable |
| #### Bn-scaff_15838_5-p17032 C-genome specific (napus-oleracea) | 0.9641148    | 0.6965163    | 0.9534883    | 0.6376854    | not scorable | not scorable |
| #### Bn-scaff_15838_5-p17039 C-genome specific (napus-oleracea) | 0.9593301    | 0.7678372    | 0.9844961    | 0.7765036    | not scorable | not scorable |
| #### Bn-scaff_15838_5-p17144 C-genome specific (napus-oleracea) | 0.8660287    | 0.7186455    | 0.9689922    | 0.7610611    | not scorable | not scorable |
| #### Bn-scaff_15838_5-p17192 C-genome specific (napus-oleracea) | 0.9449761    | 0.6598437    | 0.9844961    | 0.773315     | not scorable | not scorable |

|                                                                 |              |              |              |              |              |              |              |
|-----------------------------------------------------------------|--------------|--------------|--------------|--------------|--------------|--------------|--------------|
| #### Bn-scaff_15838_5-p20243 C-genome specific (napus-oleracea) | 0.9617225    | 0.6859115    |              | 1            | 0.8236294    | not scorable | not scorable |
| #### Bn-scaff_15838_5-p21729 genome unspecific (all in)         | 0.9760765    | 0.4427914    |              | 1            | 0.8364645    |              | 1 0.9080688  |
| #### Bn-scaff_15838_5-p22449 genome unspecific (oleracea-rapa)  | not scorable | not scorable |              | 0.9922481    | 0.7465372    |              | 1 0.7770717  |
| #### Bn-scaff_15838_5-p22505 C-genome specific (napus-oleracea) | 0.9784689    | 0.7606187    |              | 1            | 0.6924239    | not scorable | not scorable |
| #### Bn-scaff_15838_5-p22511 C-genome specific (napus-oleracea) | 0.9784689    | 0.7072452    |              | 0.9844961    | 0.7372329    | not scorable | not scorable |
| #### Bn-scaff_15838_5-p22763 C-genome specific (napus-oleracea) | 0.9808612    | 0.7359737    |              | 1            | 0.7087808    | not scorable | not scorable |
| #### Bn-scaff_15838_5-p23011 C-genome specific (napus-oleracea) | 0.9569378    | 0.7785606    |              | 1            | 0.816644     | not scorable | not scorable |
| #### Bn-scaff_15838_5-p23697 C-genome specific (napus-oleracea) | 0.9784689    | 0.7548403    |              | 0.9767442    | 0.7374408    | not scorable | not scorable |
| #### Bn-scaff_15838_5-p24118 C-genome specific (napus-oleracea) | 0.9688995    | 0.7141911    |              | 1            | 0.7354141    | not scorable | not scorable |
| #### Bn-scaff_15838_5-p30430 C-genome specific (napus-oleracea) | 0.9712918    | 0.6662787    |              | 1            | 0.6625258    | not scorable | not scorable |
| #### Bn-scaff_15838_5-p30898 C-genome specific (napus-oleracea) | 0.9712918    | 0.7413821    |              | 0.8062016    | 0.7416925    | not scorable | not scorable |
| #### Bn-scaff_15838_5-p31349 C-genome specific (napus-oleracea) | 0.9760765    | 0.7421457    |              | 0.9922481    | 0.751099     | not scorable | not scorable |
| #### Bn-scaff_15838_5-p31771 genome unspecific (oleracea-rapa)  | not scorable | not scorable |              | 1            | 0.6796432    |              | 1 0.7326238  |
| #### Bn-scaff_15838_5-p32953 C-genome specific (napus-oleracea) | 0.9808612    | 0.7297193    |              | 0.9922481    | 0.7545731    | not scorable | not scorable |
| #### Bn-scaff_15838_5-p33054 C-genome specific (napus-oleracea) | 0.9880383    | 0.6937472    |              | 0.9922481    | 0.6392193    | not scorable | not scorable |
| #### Bn-scaff_15838_5-p33163 C-genome specific (napus-oleracea) | 0.9688995    | 0.7245887    |              | 0.9844961    | 0.7836741    | not scorable | not scorable |
| #### Bn-scaff_15838_5-p33598 C-genome specific (napus-oleracea) | 0.9808612    | 0.6823885    |              | 0.9922481    | 0.6523402    | not scorable | not scorable |
| #### Bn-scaff_15838_5-p37123 C-genome specific (napus-oleracea) | 0.9521531    | 0.7458726    |              | 0.9922481    | 0.7885893    | not scorable | not scorable |
| #### Bn-scaff_15838_5-p37537 C-genome specific (napus-oleracea) | 0.9712918    | 0.7138584    |              | 1            | 0.7405181    | not scorable | not scorable |
| #### Bn-scaff_15838_5-p38296 C-genome specific (napus-oleracea) | 0.5263158    | 0.7973625    |              | 0.620155     | 0.6177785    | not scorable | not scorable |
| #### Bn-scaff_15838_5-p39054 C-genome specific (napus-oleracea) | 0.9641148    | 0.7817567    |              | 0.9612403    | 0.7565842    | not scorable | not scorable |
| #### Bn-scaff_15838_5-p42055 C-genome specific (napus-oleracea) | 0.9760765    | 0.7709733    |              | 1            | 0.8549398    | not scorable | not scorable |
| #### Bn-scaff_15838_5-p42897 C-genome specific (napus-oleracea) | 0.9665072    | 0.7593786    |              | 0.9767442    | 0.7349899    | not scorable | not scorable |
| #### Bn-scaff_15838_5-p43450 genome unspecific (all in)         | 0.9832536    | 0.4609492    |              | 0.9922481    | 0.6843346    |              | 1 0.8960865  |
| #### Bn-scaff_15838_5-p44165 genome unspecific (all in)         | 0.9688995    | 0.4947532    |              | 1            | 0.6191128    |              | 1 0.8521355  |
| #### Bn-scaff_15838_5-p44485 C-genome specific (napus-oleracea) | 0.9712918    | 0.7148792    |              | 0.9922481    | 0.7093273    | not scorable | not scorable |
| #### Bn-scaff_15838_5-p44487 A-genome specific (rapa only)      | not scorable | not scorable | not scorable | not scorable |              |              | 1 0.8965772  |
| #### Bn-scaff_15838_5-p44605 C-genome specific (napus-oleracea) | 0.9497608    | 0.7561096    |              | 1            | 0.7857537    | not scorable | not scorable |
| #### Bn-scaff_15838_5-p46877 genome unspecific (all in)         | 0.9928229    | 0.3325094    |              | 1            | 0.7796014    | 0.9917355    | 0.4775625    |
| #### Bn-scaff_15838_5-p47868 C-genome specific (napus-oleracea) | 0.9712918    | 0.7723844    |              | 0.6744186    | 0.8761463    | not scorable | not scorable |
| #### Bn-scaff_15838_5-p47943 C-genome specific (napus-oleracea) | 0.9665072    | 0.7552177    |              | 0.6899225    | 0.7495686    | not scorable | not scorable |
| #### Bn-scaff_15838_5-p48049 C-genome specific (napus-oleracea) | 0.9258373    | 0.5286745    |              | 0.6899225    | 0.8026012    | not scorable | not scorable |
| #### Bn-scaff_15838_5-p48056 napus specific                     | 0.9473684    | 0.6915604    | not scorable | not scorable | not scorable | not scorable | not scorable |

|                                                                 |              |              |              |              |              |              |
|-----------------------------------------------------------------|--------------|--------------|--------------|--------------|--------------|--------------|
| #### Bn-scaff_15838_5-p48095 A-genome specific (napus-rapa)     | 0.9473684    | 0.6277809    | not scorable | not scorable | 1            | 0.9367582    |
| #### Bn-scaff_15838_5-p48318 C-genome specific (napus-oleracea) | 0.9904306    | 0.7099178    |              | 1            | 0.6844036    | not scorable |
| #### Bn-scaff_15838_5-p48401 A-genome specific (napus-rapa)     | 0.9712918    | 0.3879394    | not scorable | not scorable | 1            | 0.8574906    |
| #### Bn-scaff_15838_5-p48930 genome unspecific (oleracea-rapa)  | not scorable | not scorable | 0.6356589    | 0.6369411    | 1            | 0.9116549    |
| #### Bn-scaff_15838_5-p51373 C-genome specific (oleracea only)  | not scorable | not scorable |              | 1            | 0.7183215    | not scorable |
| #### Bn-scaff_15838_5-p51943 genome unspecific (oleracea-rapa)  | not scorable | not scorable |              | 1            | 0.6818704    | 1            |
| #### Bn-scaff_15838_5-p56828 genome unspecific (all in)         | 0.6794258    | 0.8657426    | 0.9922481    | 0.7720066    | 0.8677686    | 0.9281533    |
| #### Bn-scaff_15838_5-p60365 genome unspecific (all in)         | 0.9856459    | 0.6065878    |              | 1            | 0.6708384    | 0.9917355    |
| #### Bn-scaff_15838_5-p62578 C-genome specific (napus-oleracea) | 0.9784689    | 0.7698895    | 0.9224806    | 0.7899907    | not scorable | not scorable |
| #### Bn-scaff_15838_5-p62607 C-genome specific (napus-oleracea) | 0.9593301    | 0.7781218    |              | 1            | 0.800707     | not scorable |
| #### Bn-scaff_15838_5-p63558 genome unspecific (all in)         | 0.9928229    | 0.5885847    |              | 1            | 0.7104319    | 1            |
| #### Bn-scaff_15838_5-p64538 C-genome specific (napus-oleracea) | 0.9712918    | 0.736586     |              | 1            | 0.7322379    | not scorable |
| #### Bn-scaff_15838_5-p64808 genome unspecific (all in)         | 0.9976076    | 0.332675     |              | 1            | 0.8275309    | 1            |
| #### Bn-scaff_15838_5-p65734 C-genome specific (napus-oleracea) | 0.9569378    | 0.6982605    | 0.9922481    | 0.6868622    | not scorable | not scorable |
| #### Bn-scaff_15838_5-p65751 C-genome specific (napus-oleracea) | 0.9688995    | 0.7586569    |              | 1            | 0.8791124    | not scorable |
| #### Bn-scaff_15838_5-p65757 C-genome specific (napus-oleracea) | 0.9904306    | 0.8228186    |              | 1            | 0.7424666    | not scorable |
| #### Bn-scaff_15838_5-p65866 C-genome specific (napus-oleracea) | 0.9736842    | 0.763127     |              | 1            | 0.738348     | not scorable |
| #### Bn-scaff_15838_5-p65958 C-genome specific (napus-oleracea) | 0.9641148    | 0.7886032    |              | 1            | 0.7312708    | not scorable |
| #### Bn-scaff_15838_5-p66418 napus specific                     | 0.6961722    | 0.8182406    | not scorable | not scorable | not scorable | not scorable |
| #### Bn-scaff_15838_5-p67288 C-genome specific (napus-oleracea) | 0.9569378    | 0.689793     |              | 1            | 0.7565626    | not scorable |
| #### Bn-scaff_15838_5-p67297 genome unspecific (all in)         | 0.9904306    | 0.4571347    | 0.9767442    | 0.7963724    |              | 1            |
| #### Bn-scaff_15838_5-p69373 C-genome specific (napus-oleracea) | 0.8444976    | 0.6868398    | 0.9922481    | 0.689607     | not scorable | not scorable |
| #### Bn-scaff_15838_5-p70671 C-genome specific (napus-oleracea) | 0.9617225    | 0.6337047    |              | 1            | 0.6491383    | not scorable |
| #### Bn-scaff_15838_5-p75959 genome unspecific (all in)         | 0.9617225    | 0.5359018    | 0.9767442    | 0.7106344    |              | 1            |
| #### Bn-scaff_15838_5-p77907 C-genome specific (napus-oleracea) | 0.9736842    | 0.6255273    | 0.9379845    | 0.5867134    | not scorable | not scorable |
| #### Bn-scaff_15838_5-p80029 C-genome specific (napus-oleracea) | 0.9784689    | 0.7593381    | 0.9844961    | 0.8147106    | not scorable | not scorable |
| #### Bn-scaff_15838_5-p85044 C-genome specific (napus-oleracea) | 0.9928229    | 0.8574906    |              | 1            | 0.703708     | not scorable |
| #### Bn-scaff_15838_5-p85096 genome unspecific (all in)         | 0.9641148    | 0.2934986    |              | 1            | 0.6237212    | 1            |
| #### Bn-scaff_15838_5-p88482 C-genome specific (napus-oleracea) | 0.9952153    | 0.5028774    |              | 1            | 0.6688196    | not scorable |
| #### Bn-scaff_15838_5-p88516 C-genome specific (napus-oleracea) | 0.9928229    | 0.7668344    |              | 1            | 0.7887106    | not scorable |
| #### Bn-scaff_15838_5-p88545 genome unspecific (oleracea-rapa)  | not scorable | not scorable |              | 1            | 0.8335571    | 0.9917355    |
| #### Bn-scaff_15838_5-p88565 C-genome specific (napus-oleracea) | 0.9832536    | 0.7536872    |              | 1            | 0.7129645    | not scorable |
| #### Bn-scaff_15838_5-p88656 C-genome specific (napus-oleracea) | 0.9904306    | 0.8114195    | 0.9922481    | 0.8290625    | not scorable | not scorable |

|                                                                 |              |              |              |              |              |              |
|-----------------------------------------------------------------|--------------|--------------|--------------|--------------|--------------|--------------|
| #### Bn-scaff_15838_5-p89398 C-genome specific (napus-oleracea) | 0.9736842    | 0.8060953    | 0.9767442    | 0.6212271    | not scorable | not scorable |
| #### Bn-scaff_15838_5-p92956 genome unspecific (all in)         | 0.9617225    | 0.5351081    | 1            | 0.6887857    | 1            | 0.7029167    |
| #### Bn-scaff_15838_5-p94435 genome unspecific (all in)         | 0.9736842    | 0.294549     | 0.9922481    | 0.6141943    | 1            | 0.6697234    |
| #### Bn-scaff_15838_5-p94787 genome unspecific (all in)         | 0.9617225    | 0.5625172    | 0.9922481    | 0.6517687    | 1            | 0.9117953    |
| #### Bn-scaff_15838_5-p95283 C-genome specific (napus-oleracea) | 0.8086125    | 0.7700058    | 0.9612403    | 0.8135988    | not scorable | not scorable |
| #### Bn-scaff_15838_5-p95458 C-genome specific (napus-oleracea) | 0.9832536    | 0.6824558    | 0.8992248    | 0.6839622    | not scorable | not scorable |
| #### Bn-scaff_15838_5-p98040 C-genome specific (napus-oleracea) | 0.9760765    | 0.7634664    | 0.9922481    | 0.7276903    | not scorable | not scorable |
| #### Bn-scaff_15839_1-p18056 napus specific                     | 0.9401914    | 0.7158083    | not scorable | not scorable | not scorable | not scorable |
| #### Bn-scaff_15839_1-p18235 C-genome specific (napus-oleracea) | 0.9569378    | 0.678107     | 1            | 0.753        | not scorable | not scorable |
| #### Bn-scaff_15839_1-p18351 C-genome specific (napus-oleracea) | 0.9832536    | 0.7742773    | 1            | 0.8477494    | not scorable | not scorable |
| #### Bn-scaff_15839_1-p19052 C-genome specific (napus-oleracea) | 0.9497608    | 0.7710781    | 0.9844961    | 0.7937631    | not scorable | not scorable |
| #### Bn-scaff_15839_1-p19137 C-genome specific (napus-oleracea) | 0.9593301    | 0.5600057    | 1            | 0.7311505    | not scorable | not scorable |
| #### Bn-scaff_15839_1-p19342 C-genome specific (napus-oleracea) | 0.9569378    | 0.7815532    | 0.8682171    | 0.7852361    | not scorable | not scorable |
| #### Bn-scaff_15839_1-p82468 C-genome specific (napus-oleracea) | 0.9688995    | 0.8031405    | 0.9922481    | 0.7920651    | not scorable | not scorable |
| #### Bn-scaff_15844_1-p11192 C-genome specific (napus-oleracea) | 0.9832536    | 0.7468823    | 1            | 0.7181874    | not scorable | not scorable |
| #### Bn-scaff_15844_1-p11921 C-genome specific (napus-oleracea) | 0.9952153    | 0.7994303    | 1            | 0.6868247    | not scorable | not scorable |
| #### Bn-scaff_15844_1-p15098 C-genome specific (napus-oleracea) | 0.9880383    | 0.7856851    | 0.9922481    | 0.8135502    | not scorable | not scorable |
| #### Bn-scaff_15844_1-p15920 C-genome specific (napus-oleracea) | 0.9688995    | 0.2607071    | 0.9922481    | 0.3891932    | not scorable | not scorable |
| #### Bn-scaff_15844_1-p16399 genome unspecific (all in)         | 0.9688995    | 0.3685441    | 1            | 0.6809477    | 1            | 0.8133299    |
| #### Bn-scaff_15844_1-p18416 C-genome specific (napus-oleracea) | 0.9784689    | 0.7159424    | 1            | 0.6810759    | not scorable | not scorable |
| #### Bn-scaff_15844_1-p19792 C-genome specific (napus-oleracea) | 0.9760765    | 0.751574     | 0.9844961    | 0.7356328    | not scorable | not scorable |
| #### Bn-scaff_15844_1-p19884 C-genome specific (napus-oleracea) | 0.9856459    | 0.7581455    | 0.9844961    | 0.6976242    | not scorable | not scorable |
| #### Bn-scaff_15844_1-p19954 C-genome specific (napus-oleracea) | 0.9688995    | 0.728865     | 0.9844961    | 0.753148     | not scorable | not scorable |
| #### Bn-scaff_15844_1-p20026 C-genome specific (napus-oleracea) | 0.9688995    | 0.6523267    | 0.9767442    | 0.578501     | not scorable | not scorable |
| #### Bn-scaff_15844_1-p20790 C-genome specific (napus-oleracea) | 0.9856459    | 0.8014926    | 0.9844961    | 0.7592829    | not scorable | not scorable |
| #### Bn-scaff_15844_1-p22229 all not scorable                   | not scorable | not scorable | not scorable | not scorable | not scorable | not scorable |
| #### Bn-scaff_15844_1-p22840 C-genome specific (napus-oleracea) | 0.9521531    | 0.7398177    | 1            | 0.7064286    | not scorable | not scorable |
| #### Bn-scaff_15844_1-p6065 C-genome specific (napus-oleracea)  | 0.9641148    | 0.5757234    | 1            | 0.5921937    | not scorable | not scorable |
| #### Bn-scaff_15844_1-p6285 genome unspecific (oleracea-rapa)   | not scorable | not scorable | 1            | 0.6290665    | 1            | 0.702597     |
| #### Bn-scaff_15844_1-p9633 genome unspecific (oleracea-rapa)   | not scorable | not scorable | 0.9612403    | 0.3657054    | 1            | 0.7252899    |
| #### Bn-scaff_15844_1-p98520 genome unspecific (all in)         | 0.9760765    | 0.6333263    | 1            | 0.7491999    | 1            | 0.6927173    |
| #### Bn-scaff_15847_1-p12154 C-genome specific (napus-oleracea) | 1            | 0.7838537    | 0.9922481    | 0.7372329    | not scorable | not scorable |
| #### Bn-scaff_15847_1-p14249 C-genome specific (napus-oleracea) | 1            | 0.7460472    | 0.9922481    | 0.6740808    | not scorable | not scorable |

|                                                                 |              |              |           |           |              |              |
|-----------------------------------------------------------------|--------------|--------------|-----------|-----------|--------------|--------------|
| #### Bn-scaff_15847_1-p15895 C-genome specific (napus-oleracea) | 1            | 0.8120428    | 0.9844961 | 0.7760102 | not scorable | not scorable |
| #### Bn-scaff_15847_1-p15955 C-genome specific (napus-oleracea) | 1            | 0.8209652    | 0.9844961 | 0.7165254 | not scorable | not scorable |
| #### Bn-scaff_15847_1-p17595 C-genome specific (napus-oleracea) | 1            | 0.90805      | 1         | 0.8957603 | not scorable | not scorable |
| #### Bn-scaff_15847_1-p20502 C-genome specific (napus-oleracea) | 1            | 0.9436982    | 1         | 0.8015531 | not scorable | not scorable |
| #### Bn-scaff_15847_1-p26464 genome unspecific (oleracea-rapa)  | not scorable | not scorable | 1         | 0.7461236 | 1            | 0.9162525    |
| #### Bn-scaff_15847_1-p26513 genome unspecific (all in)         | 0.9449761    | 0.4119228    | 1         | 0.748183  | 1            | 0.8755707    |
| #### Bn-scaff_15847_1-p27394 C-genome specific (napus-oleracea) | 0.8947368    | 0.7266271    | 0.9922481 | 0.7711915 | not scorable | not scorable |
| #### Bn-scaff_15847_1-p90166 C-genome specific (napus-oleracea) | 0.9976076    | 0.8571163    | 1         | 0.7280881 | not scorable | not scorable |
| #### Bn-scaff_15847_1-p90176 C-genome specific (napus-oleracea) | 1            | 0.8192064    | 1         | 0.7277154 | not scorable | not scorable |
| #### Bn-scaff_15847_1-p94395 C-genome specific (napus-oleracea) | 0.9976076    | 0.8732372    | 0.9844961 | 0.8049076 | not scorable | not scorable |
| #### Bn-scaff_15852_1-p10317 C-genome specific (napus-oleracea) | 0.9928229    | 0.8412439    | 0.9844961 | 0.7953267 | not scorable | not scorable |
| #### Bn-scaff_15852_1-p10400 C-genome specific (napus-oleracea) | 0.9736842    | 0.8483998    | 0.9844961 | 0.8058669 | not scorable | not scorable |
| #### Bn-scaff_15852_1-p11254 C-genome specific (napus-oleracea) | 0.9928229    | 0.7549202    | 0.9844961 | 0.7897424 | not scorable | not scorable |
| #### Bn-scaff_15852_1-p11603 C-genome specific (napus-oleracea) | 0.9808612    | 0.7876231    | 0.9922481 | 0.8677452 | not scorable | not scorable |
| #### Bn-scaff_15852_1-p11933 C-genome specific (napus-oleracea) | 0.9952153    | 0.7964792    | 1         | 0.8694858 | not scorable | not scorable |
| #### Bn-scaff_15852_1-p12119 C-genome specific (napus-oleracea) | 0.9952153    | 0.8950295    | 0.9922481 | 0.8394457 | not scorable | not scorable |
| #### Bn-scaff_15852_1-p12363 C-genome specific (napus-oleracea) | 0.9976076    | 0.8933992    | 0.9922481 | 0.8487749 | not scorable | not scorable |
| #### Bn-scaff_15852_1-p12749 C-genome specific (napus-oleracea) | 0.9856459    | 0.7333324    | 1         | 0.7022446 | not scorable | not scorable |
| #### Bn-scaff_15852_1-p13071 C-genome specific (napus-oleracea) | 0.9952153    | 0.830265     | 0.9922481 | 0.8353559 | not scorable | not scorable |
| #### Bn-scaff_15852_1-p13581 C-genome specific (napus-oleracea) | 0.9976076    | 0.7757741    | 1         | 0.7982572 | not scorable | not scorable |
| #### Bn-scaff_15852_1-p23414 genome unspecific (all in)         | 1            | 0.907063     | 1         | 0.9460576 | 1            | 0.9032743    |
| #### Bn-scaff_15852_1-p23456 genome unspecific (all in)         | 0.8492823    | 0.342639     | 1         | 0.9201545 | 1            | 0.8064193    |
| #### Bn-scaff_15852_1-p25790 C-genome specific (napus-oleracea) | 0.9976076    | 0.742196     | 1         | 0.8291013 | not scorable | not scorable |
| #### Bn-scaff_15852_1-p25862 C-genome specific (napus-oleracea) | 0.9928229    | 0.8258846    | 1         | 0.752576  | not scorable | not scorable |
| #### Bn-scaff_15852_1-p25870 C-genome specific (napus-oleracea) | 0.9928229    | 0.6934704    | 0.9844961 | 0.619645  | not scorable | not scorable |
| #### Bn-scaff_15852_1-p25880 C-genome specific (napus-oleracea) | 0.9976076    | 0.7739855    | 1         | 0.7490193 | not scorable | not scorable |
| #### Bn-scaff_15852_1-p25912 C-genome specific (napus-oleracea) | 0.9928229    | 0.6625594    | 0.9302326 | 0.6352966 | not scorable | not scorable |
| #### Bn-scaff_15852_1-p26388 C-genome specific (napus-oleracea) | 0.9904306    | 0.6255943    | 1         | 0.5235109 | not scorable | not scorable |
| #### Bn-scaff_15852_1-p26398 C-genome specific (napus-oleracea) | 1            | 0.6376945    | 0.9844961 | 0.6392368 | not scorable | not scorable |
| #### Bn-scaff_15852_1-p34057 genome unspecific (all in)         | 1            | 0.4026324    | 1         | 0.4348963 | 1            | 0.4947054    |
| #### Bn-scaff_15852_1-p40428 C-genome specific (napus-oleracea) | 0.9880383    | 0.6012388    | 1         | 0.8646116 | not scorable | not scorable |
| #### Bn-scaff_15852_1-p43510 genome unspecific (all in)         | 0.9928229    | 0.4595836    | 1         | 0.7795117 | 1            | 0.7190346    |
| #### Bn-scaff_15852_1-p48381 genome unspecific (all in)         | 1            | 0.7043204    | 1         | 0.7792308 | 1            | 0.8182409    |

|                                                                 |              |              |              |              |              |              |
|-----------------------------------------------------------------|--------------|--------------|--------------|--------------|--------------|--------------|
| #### Bn-scaff_15852_1-p48407 C-genome specific (napus-oleracea) | 0.9904306    | 0.7619257    | 0.9767442    | 0.8362076    | not scorable | not scorable |
| #### Bn-scaff_15852_1-p48458 C-genome specific (napus-oleracea) | 0.9976076    | 0.8353326    | 0.9844961    | 0.8273427    | not scorable | not scorable |
| #### Bn-scaff_15852_1-p49608 napus specific                     | 0.9904306    | 0.360957     | not scorable | not scorable | not scorable | not scorable |
| #### Bn-scaff_15852_1-p52243 C-genome specific (napus-oleracea) | 0.9880383    | 0.2489642    | 0.8992248    | 0.2387546    | not scorable | not scorable |
| #### Bn-scaff_15852_1-p52679 C-genome specific (oleracea only)  | not scorable | not scorable | 0.9844961    | 0.7758808    | not scorable | not scorable |
| #### Bn-scaff_15852_1-p52729 C-genome specific (napus-oleracea) | 0.9832536    | 0.737221     | 0.9922481    | 0.6871555    | not scorable | not scorable |
| #### Bn-scaff_15852_1-p53086 C-genome specific (napus-oleracea) | 0.9880383    | 0.6853318    | 0.9844961    | 0.731356     | not scorable | not scorable |
| #### Bn-scaff_15852_1-p53141 C-genome specific (napus-oleracea) | 0.9928229    | 0.8494784    | 0.8914729    | 0.8262625    | not scorable | not scorable |
| #### Bn-scaff_15852_1-p53246 C-genome specific (napus-oleracea) | 0.9856459    | 0.7240341    | 0.8837209    | 0.6863196    | not scorable | not scorable |
| #### Bn-scaff_15852_1-p53367 genome unspecific (all in)         | 0.9976076    | 0.517276     | 0.9922481    | 0.6583664    | 0.9173554    | 0.8508033    |
| #### Bn-scaff_15852_1-p53513 all not scorable                   | not scorable | not scorable | not scorable | not scorable | not scorable | not scorable |
| #### Bn-scaff_15852_1-p53540 C-genome specific (napus-oleracea) | 0.9952153    | 0.8395101    | 1            | 0.7550281    | not scorable | not scorable |
| #### Bn-scaff_15852_1-p54219 C-genome specific (napus-oleracea) | 0.9856459    | 0.7394965    | 0.9922481    | 0.6790866    | not scorable | not scorable |
| #### Bn-scaff_15852_1-p54753 C-genome specific (napus-oleracea) | 0.9928229    | 0.782795     | 0.9922481    | 0.8018       | not scorable | not scorable |
| #### Bn-scaff_15852_1-p54766 C-genome specific (napus-oleracea) | 0.9928229    | 0.8483146    | 0.9844961    | 0.8227547    | not scorable | not scorable |
| #### Bn-scaff_15852_1-p54980 C-genome specific (napus-oleracea) | 0.9880383    | 0.7639263    | 1            | 0.9099769    | not scorable | not scorable |
| #### Bn-scaff_15852_1-p58376 C-genome specific (napus-oleracea) | 0.9928229    | 0.8525339    | 0.9767442    | 0.720198     | not scorable | not scorable |
| #### Bn-scaff_15852_1-p59306 C-genome specific (napus-oleracea) | 0.9593301    | 0.7906002    | 0.9457364    | 0.7859291    | not scorable | not scorable |
| #### Bn-scaff_15852_1-p60424 C-genome specific (napus-oleracea) | 0.9928229    | 0.854634     | 1            | 0.7090991    | not scorable | not scorable |
| #### Bn-scaff_15852_1-p60579 genome unspecific (all in)         | 0.9808612    | 0.3900792    | 0.9844961    | 0.786872     | 1            | 0.8983776    |
| #### Bn-scaff_15852_1-p60659 C-genome specific (napus-oleracea) | 0.9856459    | 0.7835455    | 0.9922481    | 0.7973213    | not scorable | not scorable |
| #### Bn-scaff_15852_1-p62051 C-genome specific (oleracea only)  | not scorable | not scorable | 0.9767442    | 0.7221058    | not scorable | not scorable |
| #### Bn-scaff_15852_1-p62257 C-genome specific (napus-oleracea) | 0.9928229    | 0.4514552    | 0.9534883    | 0.2396145    | not scorable | not scorable |
| #### Bn-scaff_15852_1-p63328 C-genome specific (napus-oleracea) | 0.9856459    | 0.8758593    | 0.9844961    | 0.7877725    | not scorable | not scorable |
| #### Bn-scaff_15852_1-p63953 C-genome specific (napus-oleracea) | 0.9928229    | 0.7400283    | 0.9922481    | 0.608371     | not scorable | not scorable |
| #### Bn-scaff_15852_1-p66272 C-genome specific (napus-oleracea) | 0.9976076    | 0.7258087    | 0.9922481    | 0.772056     | not scorable | not scorable |
| #### Bn-scaff_15852_1-p69100 A-genome specific (napus-rapa)     | 0.9904306    | 0.3469647    | not scorable | not scorable | 0.9834711    | 0.7487484    |
| #### Bn-scaff_15856_1-p11939 C-genome specific (napus-oleracea) | 0.9497608    | 0.6717063    | 1            | 0.7392973    | not scorable | not scorable |
| #### Bn-scaff_15856_1-p12919 C-genome specific (napus-oleracea) | 0.9449761    | 0.7903634    | 0.9767442    | 0.8340876    | not scorable | not scorable |
| #### Bn-scaff_15856_1-p50968 napus specific                     | 0.8851675    | 0.702098     | not scorable | not scorable | not scorable | not scorable |
| #### Bn-scaff_15856_1-p55934 C-genome specific (napus-oleracea) | 0.9521531    | 0.7598017    | 1            | 0.7692637    | not scorable | not scorable |
| #### Bn-scaff_15856_1-p78904 genome unspecific (all in)         | 0.9928229    | 0.250872     | 0.9922481    | 0.6460914    | 1            | 0.7155698    |
| #### Bn-scaff_15856_1-p79207 genome unspecific (all in)         | 1            | 0.7252899    | 1            | 0.7061575    | 1            | 0.7395847    |

|                                                                 |              |              |              |              |              |              |
|-----------------------------------------------------------------|--------------|--------------|--------------|--------------|--------------|--------------|
| #### Bn-scaff_15856_1-p8069 genome unspecific (all in)          | 1            | 0.451377     | 1            | 0.650753     | 1            | 0.7068633    |
| #### Bn-scaff_15856_1-p81552 genome unspecific (all in)         | 0.9928229    | 0.5256924    | 1            | 0.7923849    | 0.9917355    | 0.7235161    |
| #### Bn-scaff_15856_1-p81608 genome unspecific (all in)         | 0.9784689    | 0.5267844    | 0.9844961    | 0.708038     | 1            | 0.8756027    |
| #### Bn-scaff_15856_1-p83663 C-genome specific (napus-oleracea) | 0.9473684    | 0.6516841    | 1            | 0.7442268    | not scorable | not scorable |
| #### Bn-scaff_15877_1-p10154 genome unspecific (all in)         | 0.7631579    | 0.6297238    | 1            | 0.6563946    | 1            | 0.841265     |
| #### Bn-scaff_15877_1-p10222 C-genome specific (napus-oleracea) | 0.7655503    | 0.8643786    | 0.7829458    | 0.8266566    | not scorable | not scorable |
| #### Bn-scaff_15877_1-p10502 C-genome specific (napus-oleracea) | 0.7583732    | 0.7584058    | 0.9844961    | 0.8296677    | not scorable | not scorable |
| #### Bn-scaff_15877_1-p10508 C-genome specific (napus-oleracea) | 0.7607656    | 0.7012938    | 0.9534883    | 0.7838408    | not scorable | not scorable |
| #### Bn-scaff_15877_1-p10513 C-genome specific (napus-oleracea) | 0.7703349    | 0.8353626    | 0.9922481    | 0.7801553    | not scorable | not scorable |
| #### Bn-scaff_15877_1-p10514 genome unspecific (all in)         | 0.7751196    | 0.8760113    | 0.9922481    | 0.8042761    | 1            | 0.6121841    |
| #### Bn-scaff_15877_1-p10679 genome unspecific (all in)         | 0.9952153    | 0.3356966    | 0.9844961    | 0.6674343    | 1            | 0.7252899    |
| #### Bn-scaff_15877_1-p10730 all not scorable                   | not scorable | not scorable | not scorable | not scorable | not scorable | not scorable |
| #### Bn-scaff_15877_1-p10740 genome unspecific (all in)         | 0.9904306    | 0.386072     | 1            | 0.8334014    | 1            | 0.9050066    |
| #### Bn-scaff_15877_1-p12237 C-genome specific (napus-oleracea) | 0.7559808    | 0.7226467    | 0.9767442    | 0.7934184    | not scorable | not scorable |
| #### Bn-scaff_15877_1-p12384 C-genome specific (napus-oleracea) | 0.7583732    | 0.7731881    | 0.9147287    | 0.7744491    | not scorable | not scorable |
| #### Bn-scaff_15877_1-p14321 C-genome specific (napus-oleracea) | 0.7607656    | 0.7668267    | 0.9922481    | 0.7639561    | not scorable | not scorable |
| #### Bn-scaff_15877_1-p14705 C-genome specific (napus-oleracea) | 0.7631579    | 0.7407516    | 0.9922481    | 0.6892657    | not scorable | not scorable |
| #### Bn-scaff_15877_1-p15256 C-genome specific (napus-oleracea) | 0.7583732    | 0.7355757    | 1            | 0.7457246    | not scorable | not scorable |
| #### Bn-scaff_15877_1-p17365 genome unspecific (oleracea-rapa)  | not scorable | not scorable | 0.9922481    | 0.3604176    | 1            | 0.8289363    |
| #### Bn-scaff_15877_1-p17381 genome unspecific (oleracea-rapa)  | not scorable | not scorable | 1            | 0.852777     | 1            | 0.7236918    |
| #### Bn-scaff_15877_1-p17876 C-genome specific (napus-oleracea) | 0.7631579    | 0.6794311    | 0.9922481    | 0.6603745    | not scorable | not scorable |
| #### Bn-scaff_15877_1-p18438 C-genome specific (oleracea only)  | not scorable | not scorable | 1            | 0.706785     | not scorable | not scorable |
| #### Bn-scaff_15877_1-p18481 genome unspecific (all in)         | 0.9186603    | 0.2306774    | 1            | 0.6697234    | 0.9586777    | 0.6354859    |
| #### Bn-scaff_15877_1-p18486 genome unspecific (all in)         | 0.923445     | 0.3967426    | 1            | 0.6156994    | 0.9834711    | 0.6247374    |
| #### Bn-scaff_15877_1-p18492 genome unspecific (oleracea-rapa)  | not scorable | not scorable | 0.9767442    | 0.6576771    | 1            | 0.727636     |
| #### Bn-scaff_15877_1-p18577 genome unspecific (oleracea-rapa)  | not scorable | not scorable | 0.9689922    | 0.5556968    | 1            | 0.6615951    |
| #### Bn-scaff_15877_1-p18652 C-genome specific (napus-oleracea) | 0.7631579    | 0.7542586    | 0.7209302    | 0.7654794    | not scorable | not scorable |
| #### Bn-scaff_15877_1-p18990 C-genome specific (napus-oleracea) | 0.7583732    | 0.7166982    | 1            | 0.6865176    | not scorable | not scorable |
| #### Bn-scaff_15877_1-p19179 all not scorable                   | not scorable | not scorable | not scorable | not scorable | not scorable | not scorable |
| #### Bn-scaff_15877_1-p19866 C-genome specific (oleracea only)  | not scorable | not scorable | 0.5968992    | 0.6979599    | not scorable | not scorable |
| #### Bn-scaff_15877_1-p20018 napus specific                     | 0.4521531    | 0.6950296    | not scorable | not scorable | not scorable | not scorable |
| #### Bn-scaff_15877_1-p20510 genome unspecific (oleracea-rapa)  | not scorable | not scorable | 1            | 0.831619     | 0.9917355    | 0.7436349    |
| #### Bn-scaff_15877_1-p27375 C-genome specific (napus-oleracea) | 0.7607656    | 0.7630087    | 0.9922481    | 0.8219877    | not scorable | not scorable |

|                                                                |           |           |           |           |              |              |
|----------------------------------------------------------------|-----------|-----------|-----------|-----------|--------------|--------------|
| #### Bn-scaff_15877_1-p2739 genome unspecific (all in)         | 0.7488039 | 0.669976  | 1         | 0.6976621 | 0.9917355    | 0.8904344    |
| #### Bn-scaff_15877_1-p2782 C-genome specific (napus-oleracea) | 0.7607656 | 0.7587563 | 1         | 0.869749  | not scorable | not scorable |
| #### Bn-scaff_15877_1-p2785 C-genome specific (napus-oleracea) | 0.7488039 | 0.6698549 | 1         | 0.7870682 | not scorable | not scorable |
| #### Bn-scaff_15877_1-p2788 C-genome specific (napus-oleracea) | 0.7559808 | 0.8048437 | 0.9844961 | 0.7380677 | not scorable | not scorable |
| #### Bn-scaff_15877_1-p2795 C-genome specific (napus-oleracea) | 0.7679426 | 0.7740884 | 0.9922481 | 0.7598026 | not scorable | not scorable |
| #### Bn-scaff_15877_1-p2820 C-genome specific (napus-oleracea) | 0.7583732 | 0.6946388 | 1         | 0.6775305 | not scorable | not scorable |
| #### Bn-scaff_15877_1-p2897 C-genome specific (napus-oleracea) | 0.7464115 | 0.6356452 | 1         | 0.6748191 | not scorable | not scorable |
| #### Bn-scaff_15877_1-p2918 C-genome specific (napus-oleracea) | 0.7440192 | 0.7126912 | 0.9844961 | 0.737728  | not scorable | not scorable |
| #### Bn-scaff_15877_1-p2929 C-genome specific (napus-oleracea) | 0.7559808 | 0.726447  | 0.9922481 | 0.7810045 | not scorable | not scorable |
| #### Bn-scaff_15877_1-p2933 C-genome specific (napus-oleracea) | 0.7655503 | 0.713331  | 1         | 0.7044899 | not scorable | not scorable |
| #### Bn-scaff_15877_1-p2935 C-genome specific (napus-oleracea) | 0.7583732 | 0.744974  | 1         | 0.7508675 | not scorable | not scorable |
| #### Bn-scaff_15877_1-p2935 C-genome specific (napus-oleracea) | 0.7631579 | 0.7262703 | 0.9922481 | 0.7312962 | not scorable | not scorable |
| #### Bn-scaff_15877_1-p2948 C-genome specific (napus-oleracea) | 0.7583732 | 0.7282584 | 1         | 0.7426161 | not scorable | not scorable |
| #### Bn-scaff_15877_1-p2948 C-genome specific (napus-oleracea) | 0.7583732 | 0.7065238 | 0.9922481 | 0.7274275 | not scorable | not scorable |
| #### Bn-scaff_15877_1-p2951 C-genome specific (napus-oleracea) | 0.7511961 | 0.6717195 | 0.9689922 | 0.6388019 | not scorable | not scorable |
| #### Bn-scaff_15877_1-p2952 C-genome specific (napus-oleracea) | 0.7631579 | 0.7566946 | 0.9922481 | 0.8158385 | not scorable | not scorable |
| #### Bn-scaff_15877_1-p2953 C-genome specific (napus-oleracea) | 0.7631579 | 0.7380676 | 0.9922481 | 0.7926579 | not scorable | not scorable |
| #### Bn-scaff_15877_1-p3061 C-genome specific (napus-oleracea) | 0.7631579 | 0.7596586 | 0.9844961 | 0.8536939 | not scorable | not scorable |
| #### Bn-scaff_15877_1-p3461 C-genome specific (napus-oleracea) | 0.7464115 | 0.7367873 | 0.9069768 | 0.7547225 | not scorable | not scorable |
| #### Bn-scaff_15877_1-p3498 C-genome specific (napus-oleracea) | 0.7440192 | 0.7388815 | 1         | 0.8272521 | not scorable | not scorable |
| #### Bn-scaff_15877_1-p3534 C-genome specific (napus-oleracea) | 0.7464115 | 0.7625396 | 1         | 0.8235188 | not scorable | not scorable |
| #### Bn-scaff_15877_1-p3639 C-genome specific (napus-oleracea) | 0.7488039 | 0.7373827 | 0.9844961 | 0.8556469 | not scorable | not scorable |
| #### Bn-scaff_15877_1-p3647 C-genome specific (napus-oleracea) | 0.7559808 | 0.6555059 | 1         | 0.7604169 | not scorable | not scorable |
| #### Bn-scaff_15877_1-p3951 genome unspecific (all in)         | 0.9856459 | 0.3517397 | 1         | 0.8283045 | 0.9917355    | 0.8286875    |
| #### Bn-scaff_15877_1-p4169 C-genome specific (napus-oleracea) | 0.7464115 | 0.7431281 | 0.9922481 | 0.7268499 | not scorable | not scorable |
| #### Bn-scaff_15877_1-p4201 genome unspecific (all in)         | 0.7535885 | 0.7473617 | 0.7596899 | 0.7488335 | 0.9834711    | 0.8472018    |
| #### Bn-scaff_15877_1-p4231 genome unspecific (all in)         | 0.7392344 | 0.5892358 | 1         | 0.5536748 | 0.9917355    | 0.8961709    |
| #### Bn-scaff_15877_1-p4543 C-genome specific (napus-oleracea) | 0.7440192 | 0.756617  | 1         | 0.829908  | not scorable | not scorable |
| #### Bn-scaff_15877_1-p4684 genome unspecific (all in)         | 0.9904306 | 0.2930005 | 0.9689922 | 0.8054933 | 1            | 0.9272014    |
| #### Bn-scaff_15877_1-p4760 C-genome specific (napus-oleracea) | 0.7488039 | 0.6546393 | 1         | 0.6933371 | not scorable | not scorable |
| #### Bn-scaff_15877_1-p4795 C-genome specific (napus-oleracea) | 0.7631579 | 0.7831405 | 1         | 0.7644336 | not scorable | not scorable |
| #### Bn-scaff_15877_1-p4822 genome unspecific (all in)         | 0.9784689 | 0.496148  | 1         | 0.7582585 | 0.9917355    | 0.6865935    |
| #### Bn-scaff_15877_1-p5557 C-genome specific (napus-oleracea) | 0.7655503 | 0.6631887 | 1         | 0.7318531 | not scorable | not scorable |



|                                                                 |           |           |           |           |              |              |
|-----------------------------------------------------------------|-----------|-----------|-----------|-----------|--------------|--------------|
| #### Bn-scaff_15877_1-p59844 C-genome specific (napus-oleracea) | 0.7583732 | 0.7711571 | 0.9844961 | 0.8237219 | not scorable | not scorable |
| #### Bn-scaff_15877_1-p61792 C-genome specific (napus-oleracea) | 0.7559808 | 0.6804076 | 1         | 0.6696322 | not scorable | not scorable |
| #### Bn-scaff_15877_1-p63541 C-genome specific (napus-oleracea) | 0.7511961 | 0.7629178 | 0.9689922 | 0.7819999 | not scorable | not scorable |
| #### Bn-scaff_15877_1-p64765 genome unspecific (all in)         | 0.7320574 | 0.6230205 | 0.9922481 | 0.7181178 | 1            | 0.9097312    |
| #### Bn-scaff_15877_1-p64821 C-genome specific (napus-oleracea) | 0.7488039 | 0.7519632 | 0.9922481 | 0.82033   | not scorable | not scorable |
| #### Bn-scaff_15877_1-p64969 C-genome specific (napus-oleracea) | 0.7488039 | 0.6943029 | 0.9844961 | 0.7470518 | not scorable | not scorable |
| #### Bn-scaff_15877_1-p65593 C-genome specific (napus-oleracea) | 0.7440192 | 0.7458601 | 0.8294573 | 0.8335251 | not scorable | not scorable |
| #### Bn-scaff_15877_1-p69630 C-genome specific (napus-oleracea) | 0.7631579 | 0.671018  | 1         | 0.6453845 | not scorable | not scorable |
| #### Bn-scaff_15877_1-p69781 C-genome specific (napus-oleracea) | 0.7535885 | 0.6612042 | 1         | 0.584706  | not scorable | not scorable |
| #### Bn-scaff_15877_1-p71568 genome unspecific (all in)         | 1         | 0.4557307 | 1         | 0.7348449 | 0.9917355    | 0.7689109    |
| #### Bn-scaff_15877_1-p71774 genome unspecific (all in)         | 1         | 0.3704277 | 0.9689922 | 0.4694324 | 1            | 0.8313738    |
| #### Bn-scaff_15877_1-p71809 genome unspecific (all in)         | 0.9617225 | 0.3922873 | 0.9922481 | 0.7043155 | 1            | 0.8016686    |
| #### Bn-scaff_15877_1-p71994 C-genome specific (napus-oleracea) | 0.7535885 | 0.7522286 | 0.9922481 | 0.7621022 | not scorable | not scorable |
| #### Bn-scaff_15877_1-p73034 C-genome specific (napus-oleracea) | 0.7583732 | 0.7355271 | 0.9844961 | 0.754332  | not scorable | not scorable |
| #### Bn-scaff_15877_1-p73035 C-genome specific (napus-oleracea) | 0.7511961 | 0.7356511 | 1         | 0.7601808 | not scorable | not scorable |
| #### Bn-scaff_15877_1-p73044 C-genome specific (napus-oleracea) | 0.7464115 | 0.7574917 | 0.9922481 | 0.8266126 | not scorable | not scorable |
| #### Bn-scaff_15877_1-p73057 C-genome specific (napus-oleracea) | 0.7631579 | 0.7367037 | 1         | 0.7713305 | not scorable | not scorable |
| #### Bn-scaff_15877_1-p73075 C-genome specific (napus-oleracea) | 0.7559808 | 0.7592188 | 0.9922481 | 0.7759567 | not scorable | not scorable |
| #### Bn-scaff_15877_1-p73082 C-genome specific (napus-oleracea) | 0.7320574 | 0.6603463 | 1         | 0.7598797 | not scorable | not scorable |
| #### Bn-scaff_15877_1-p73113 C-genome specific (napus-oleracea) | 0.7464115 | 0.7391605 | 1         | 0.823746  | not scorable | not scorable |
| #### Bn-scaff_15877_1-p73115 C-genome specific (napus-oleracea) | 0.7583732 | 0.745801  | 0.9922481 | 0.7288336 | not scorable | not scorable |
| #### Bn-scaff_15877_1-p73121 C-genome specific (napus-oleracea) | 0.7511961 | 0.734612  | 1         | 0.731451  | not scorable | not scorable |
| #### Bn-scaff_15877_1-p73247 C-genome specific (napus-oleracea) | 0.7607656 | 0.7311646 | 1         | 0.7903926 | not scorable | not scorable |
| #### Bn-scaff_15877_1-p73286 C-genome specific (napus-oleracea) | 0.7392344 | 0.7315807 | 0.9844961 | 0.8278096 | not scorable | not scorable |
| #### Bn-scaff_15877_1-p73767 C-genome specific (napus-oleracea) | 0.7464115 | 0.6516765 | 0.9922481 | 0.7429327 | not scorable | not scorable |
| #### Bn-scaff_15877_1-p73784 C-genome specific (napus-oleracea) | 0.7511961 | 0.7519674 | 0.9922481 | 0.82846   | not scorable | not scorable |
| #### Bn-scaff_15877_1-p73810 C-genome specific (napus-oleracea) | 0.7272727 | 0.5295266 | 0.9767442 | 0.5336786 | not scorable | not scorable |
| #### Bn-scaff_15877_1-p74167 C-genome specific (napus-oleracea) | 0.6722488 | 0.675881  | 0.8294573 | 0.7408474 | not scorable | not scorable |
| #### Bn-scaff_15877_1-p74247 C-genome specific (napus-oleracea) | 0.6722488 | 0.6712862 | 0.6821706 | 0.6634036 | not scorable | not scorable |
| #### Bn-scaff_15877_1-p74336 C-genome specific (napus-oleracea) | 0.6722488 | 0.7429646 | 0.6821706 | 0.7469072 | not scorable | not scorable |
| #### Bn-scaff_15877_1-p74422 C-genome specific (napus-oleracea) | 0.6698565 | 0.7426233 | 0.9147287 | 0.7440705 | not scorable | not scorable |
| #### Bn-scaff_15877_1-p74448 C-genome specific (napus-oleracea) | 0.6698565 | 0.6869249 | 0.8294573 | 0.6939355 | not scorable | not scorable |
| #### Bn-scaff_15877_1-p74448 C-genome specific (napus-oleracea) | 0.6722488 | 0.7488014 | 0.8294573 | 0.8420187 | not scorable | not scorable |

|                                                                 |              |              |              |              |              |              |
|-----------------------------------------------------------------|--------------|--------------|--------------|--------------|--------------|--------------|
| #### Bn-scaff_15877_1-p74456 C-genome specific (napus-oleracea) | 0.6674641    | 0.7251672    | 0.8294573    | 0.6921369    | not scorable | not scorable |
| #### Bn-scaff_15877_1-p74699 genome unspecific (oleracea-rapa)  | not scorable | not scorable | 1            | 0.6698612    | 0.9917355    | 0.6749196    |
| #### Bn-scaff_15877_1-p75495 C-genome specific (napus-oleracea) | 0.7511961    | 0.7676539    | 1            | 0.7642001    | not scorable | not scorable |
| #### Bn-scaff_15877_1-p77330 C-genome specific (napus-oleracea) | 0.7511961    | 0.7516446    | 0.9922481    | 0.8699803    | not scorable | not scorable |
| #### Bn-scaff_15877_1-p80248 C-genome specific (napus-oleracea) | 0.7535885    | 0.7467306    | 1            | 0.7738713    | not scorable | not scorable |
| #### Bn-scaff_15877_1-p83599 all not scorable                   | not scorable | not scorable | not scorable | not scorable | not scorable | not scorable |
| #### Bn-scaff_15877_1-p86284 C-genome specific (oleracea only)  | not scorable | not scorable | 1            | 0.8293523    | not scorable | not scorable |
| #### Bn-scaff_15877_1-p87884 C-genome specific (napus-oleracea) | 0.7535885    | 0.7058496    | 0.9922481    | 0.6412938    | not scorable | not scorable |
| #### Bn-scaff_15877_1-p90131 C-genome specific (napus-oleracea) | 0.7607656    | 0.5999748    | 0.9689922    | 0.605036     | not scorable | not scorable |
| #### Bn-scaff_15877_1-p90785 C-genome specific (oleracea only)  | not scorable | not scorable | 1            | 0.847058     | not scorable | not scorable |
| #### Bn-scaff_15877_1-p90805 C-genome specific (napus-oleracea) | 0.7655503    | 0.7682251    | 1            | 0.8582783    | not scorable | not scorable |
| #### Bn-scaff_15877_1-p92107 genome unspecific (oleracea-rapa)  | not scorable | not scorable | 1            | 0.6276203    | 0.9917355    | 0.6867038    |
| #### Bn-scaff_15877_1-p92295 C-genome specific (napus-oleracea) | 0.7631579    | 0.7300377    | 1            | 0.8593744    | not scorable | not scorable |
| #### Bn-scaff_15877_1-p92311 C-genome specific (napus-oleracea) | 0.7631579    | 0.7786611    | 0.5968992    | 0.8657237    | not scorable | not scorable |
| #### Bn-scaff_15877_1-p92673 C-genome specific (napus-oleracea) | 0.7464115    | 0.7679833    | 0.9767442    | 0.8609757    | not scorable | not scorable |
| #### Bn-scaff_15877_1-p92833 C-genome specific (napus-oleracea) | 0.7679426    | 0.7778447    | 1            | 0.88203      | not scorable | not scorable |
| #### Bn-scaff_15877_1-p93694 A-genome specific (napus-rapa)     | 0.9784689    | 0.2760813    | not scorable | not scorable | 1            | 0.7972026    |
| #### Bn-scaff_15877_1-p94114 C-genome specific (napus-oleracea) | 0.6507177    | 0.8037198    | 0.4031008    | 0.9275362    | not scorable | not scorable |
| #### Bn-scaff_15877_1-p94132 C-genome specific (napus-oleracea) | 0.6507177    | 0.7471736    | 0.4418605    | 0.9170315    | not scorable | not scorable |
| #### Bn-scaff_15877_1-p98522 genome unspecific (all in)         | 0.9354067    | 0.4221906    | 0.9844961    | 0.7705298    | 1            | 0.9072155    |
| #### Bn-scaff_15877_1-p99985 C-genome specific (napus-oleracea) | 0.7655503    | 0.8008724    | 0.9844961    | 0.7746726    | not scorable | not scorable |
| #### Bn-scaff_15879_1-p21018 genome unspecific (all in)         | 0.9832536    | 0.3020783    | 1            | 0.3001855    | 1            | 0.8403066    |
| #### Bn-scaff_15879_1-p22763 C-genome specific (oleracea only)  | not scorable | not scorable | 0.2790698    | 0.8891258    | not scorable | not scorable |
| #### Bn-scaff_15879_1-p29129 genome unspecific (all in)         | 0.9784689    | 0.3206576    | 1            | 0.6579346    | 1            | 0.7620345    |
| #### Bn-scaff_15879_1-p29379 C-genome specific (napus-oleracea) | 0.9712918    | 0.736703     | 1            | 0.8115801    | not scorable | not scorable |
| #### Bn-scaff_15879_1-p31965 C-genome specific (napus-oleracea) | 0.9736842    | 0.7460517    | 1            | 0.8280852    | not scorable | not scorable |
| #### Bn-scaff_15879_1-p32742 C-genome specific (oleracea only)  | not scorable | not scorable | 0.8527132    | 0.7771507    | not scorable | not scorable |
| #### Bn-scaff_15879_1-p38682 C-genome specific (napus-oleracea) | 0.9832536    | 0.7716223    | 1            | 0.8831324    | not scorable | not scorable |
| #### Bn-scaff_15879_1-p40391 genome unspecific (all in)         | 0.9665072    | 0.5179822    | 1            | 0.8118718    | 0.9917355    | 0.6834819    |
| #### Bn-scaff_15879_1-p42618 A-genome specific (napus-rapa)     | 0.9856459    | 0.7333401    | not scorable | not scorable | 0.9752066    | 0.7581358    |
| #### Bn-scaff_15879_1-p46722 C-genome specific (napus-oleracea) | 0.9688995    | 0.741077     | 0.9767442    | 0.8138432    | not scorable | not scorable |
| #### Bn-scaff_15879_1-p51584 C-genome specific (napus-oleracea) | 0.9832536    | 0.7202266    | 1            | 0.7885382    | not scorable | not scorable |
| #### Bn-scaff_15879_1-p60429 C-genome specific (napus-oleracea) | 0.9928229    | 0.7526004    | 1            | 0.7100519    | not scorable | not scorable |

|                                                                 |              |              |           |   |           |              |              |
|-----------------------------------------------------------------|--------------|--------------|-----------|---|-----------|--------------|--------------|
| #### Bn-scaff_15879_1-p69053 C-genome specific (napus-oleracea) | 0.9928229    | 0.7227137    |           | 1 | 0.6764802 | not scorable | not scorable |
| #### Bn-scaff_15879_1-p71538 C-genome specific (napus-oleracea) | 0.9928229    | 0.8587686    |           | 1 | 0.8917475 | not scorable | not scorable |
| #### Bn-scaff_15879_1-p75940 C-genome specific (napus-oleracea) | 0.9832536    | 0.7646431    |           | 1 | 0.7701128 | not scorable | not scorable |
| #### Bn-scaff_15879_1-p79732 C-genome specific (napus-oleracea) | 0.9880383    | 0.7609836    |           | 1 | 0.7499452 | not scorable | not scorable |
| #### Bn-scaff_15879_1-p96393 C-genome specific (oleracea only)  | not scorable | not scorable | 0.9844961 |   | 0.5484315 | not scorable | not scorable |
| #### Bn-scaff_15881_1-p11894 C-genome specific (napus-oleracea) | 0.9928229    | 0.8042637    |           | 1 | 0.7654338 | not scorable | not scorable |
| #### Bn-scaff_15881_1-p12352 C-genome specific (napus-oleracea) | 0.9880383    | 0.674763     | 0.9534883 |   | 0.5994358 | not scorable | not scorable |
| #### Bn-scaff_15881_1-p13944 C-genome specific (napus-oleracea) | 0.9808612    | 0.8067049    | 0.5503876 |   | 0.7732255 | not scorable | not scorable |
| #### Bn-scaff_15881_1-p15392 C-genome specific (napus-oleracea) | 0.9808612    | 0.7480691    | 0.9457364 |   | 0.764093  | not scorable | not scorable |
| #### Bn-scaff_15881_1-p15394 C-genome specific (napus-oleracea) | 0.9904306    | 0.7387909    |           | 1 | 0.792224  | not scorable | not scorable |
| #### Bn-scaff_15881_1-p16135 C-genome specific (napus-oleracea) | 0.9976076    | 0.8138713    |           | 1 | 0.839842  | not scorable | not scorable |
| #### Bn-scaff_15881_1-p16602 C-genome specific (oleracea only)  | not scorable | not scorable | 0.9844961 |   | 0.7773817 | not scorable | not scorable |
| #### Bn-scaff_15881_1-p16723 C-genome specific (napus-oleracea) | 0.9904306    | 0.8393989    | 0.9922481 |   | 0.8455326 | not scorable | not scorable |
| #### Bn-scaff_15881_1-p16750 C-genome specific (napus-oleracea) | 0.9952153    | 0.8484318    |           | 1 | 0.8086596 | not scorable | not scorable |
| #### Bn-scaff_15881_1-p18181 C-genome specific (napus-oleracea) | 0.9832536    | 0.7441071    | 0.9224806 |   | 0.8413277 | not scorable | not scorable |
| #### Bn-scaff_15881_1-p92161 C-genome specific (napus-oleracea) | 0.9976076    | 0.6605194    |           | 1 | 0.7252899 | not scorable | not scorable |
| #### Bn-scaff_15881_1-p99457 genome unspecific (all in)         | 0.9880383    | 0.4439105    | 0.9767442 |   | 0.6160765 | 1            | 0.8911878    |
| #### Bn-scaff_15892_1-p10037 genome unspecific (all in)         | 0.9832536    | 0.2394102    |           | 1 | 0.9115234 | 0.9917355    | 0.7360462    |
| #### Bn-scaff_15892_1-p11131 C-genome specific (napus-oleracea) | 0.9114832    | 0.731827     |           | 1 | 0.7345549 | not scorable | not scorable |
| #### Bn-scaff_15892_1-p11150 C-genome specific (napus-oleracea) | 0.9090909    | 0.7492349    |           | 1 | 0.7647579 | not scorable | not scorable |
| #### Bn-scaff_15892_1-p11255 C-genome specific (napus-oleracea) | 0.6794258    | 0.8387504    | 0.9689922 |   | 0.67713   | not scorable | not scorable |
| #### Bn-scaff_15892_1-p11411 genome unspecific (all in)         | 0.9808612    | 0.279311     |           | 1 | 0.5611795 | 1            | 0.8361462    |
| #### Bn-scaff_15892_1-p11489 C-genome specific (napus-oleracea) | 0.9066986    | 0.6638831    | 0.6511628 |   | 0.706425  | not scorable | not scorable |
| #### Bn-scaff_15892_1-p11498 C-genome specific (napus-oleracea) | 0.9114832    | 0.7010145    | 0.6434109 |   | 0.731315  | not scorable | not scorable |
| #### Bn-scaff_15892_1-p11517 C-genome specific (napus-oleracea) | 0.9114832    | 0.7555559    | 0.6356589 |   | 0.7836425 | not scorable | not scorable |
| #### Bn-scaff_15892_1-p11707 genome unspecific (all in)         | 0.9928229    | 0.3493654    | 0.9844961 |   | 0.5420019 | 1            | 0.858219     |
| #### Bn-scaff_15892_1-p11708 genome unspecific (all in)         | 0.9593301    | 0.3394839    |           | 1 | 0.6757173 | 1            | 0.9215404    |
| #### Bn-scaff_15892_1-p11855 C-genome specific (napus-oleracea) | 0.9569378    | 0.4910188    | 0.9534883 |   | 0.5528791 | not scorable | not scorable |
| #### Bn-scaff_15892_1-p11941 C-genome specific (napus-oleracea) | 0.8899522    | 0.5229878    | 0.9844961 |   | 0.5507653 | not scorable | not scorable |
| #### Bn-scaff_15892_1-p11943 C-genome specific (napus-oleracea) | 0.9066986    | 0.738928     |           | 1 | 0.8493617 | not scorable | not scorable |
| #### Bn-scaff_15892_1-p11966 C-genome specific (napus-oleracea) | 0.9138756    | 0.6840705    |           | 1 | 0.7698179 | not scorable | not scorable |
| #### Bn-scaff_15892_1-p11970 C-genome specific (napus-oleracea) | 0.9138756    | 0.747566     |           | 1 | 0.7952904 | not scorable | not scorable |
| #### Bn-scaff_15892_1-p11972 C-genome specific (napus-oleracea) | 0.9066986    | 0.6349795    |           | 1 | 0.6147286 | not scorable | not scorable |

|                                                                 |              |              |              |              |              |              |
|-----------------------------------------------------------------|--------------|--------------|--------------|--------------|--------------|--------------|
| #### Bn-scaff_15892_1-p11972 C-genome specific (napus-oleracea) | 0.923445     | 0.6822506    | 1            | 0.7622866    | not scorable | not scorable |
| #### Bn-scaff_15892_1-p12215 C-genome specific (napus-oleracea) | 0.9138756    | 0.6825452    | 1            | 0.6780678    | not scorable | not scorable |
| #### Bn-scaff_15892_1-p12275 C-genome specific (napus-oleracea) | 0.9186603    | 0.7321758    | 1            | 0.7535851    | not scorable | not scorable |
| #### Bn-scaff_15892_1-p12379 C-genome specific (napus-oleracea) | 0.9186603    | 0.7009812    | 1            | 0.702355     | not scorable | not scorable |
| #### Bn-scaff_15892_1-p12987 C-genome specific (napus-oleracea) | 0.9066986    | 0.7598026    | 1            | 0.8477979    | not scorable | not scorable |
| #### Bn-scaff_15892_1-p13001 genome unspecific (all in)         | 0.9928229    | 0.3478744    | 1            | 0.7898114    | 1            | 0.9091055    |
| #### Bn-scaff_15892_1-p13026 C-genome specific (napus-oleracea) | 0.8923445    | 0.7053736    | 1            | 0.7098461    | not scorable | not scorable |
| #### Bn-scaff_15892_1-p13436 A-genome specific (napus-olera)    | 0.9641148    | 0.4908317    | not scorable | not scorable | 1            | 0.7565769    |
| #### Bn-scaff_15892_1-p14516 C-genome specific (napus-oleracea) | 0.9162679    | 0.7648305    | 1            | 0.8626896    | not scorable | not scorable |
| #### Bn-scaff_15892_1-p14812 genome unspecific (all in)         | 1            | 0.8542894    | 1            | 0.8062617    | 1            | 0.8970837    |
| #### Bn-scaff_15892_1-p14820 genome unspecific (all in)         | 0.9808612    | 0.5239041    | 1            | 0.7690306    | 1            | 0.7482786    |
| #### Bn-scaff_15892_1-p15120 C-genome specific (napus-oleracea) | 0.9043062    | 0.7409031    | 1            | 0.838542     | not scorable | not scorable |
| #### Bn-scaff_15892_1-p15230 C-genome specific (napus-oleracea) | 0.9258373    | 0.7355722    | 0.9922481    | 0.5025878    | not scorable | not scorable |
| #### Bn-scaff_15892_1-p15458 C-genome specific (napus-oleracea) | 0.9186603    | 0.6254926    | 1            | 0.6719935    | not scorable | not scorable |
| #### Bn-scaff_15892_1-p15662 C-genome specific (napus-oleracea) | 0.9138756    | 0.7005246    | 0.9922481    | 0.6795795    | not scorable | not scorable |
| #### Bn-scaff_15892_1-p15664 C-genome specific (napus-oleracea) | 0.9162679    | 0.772097     | 1            | 0.8330855    | not scorable | not scorable |
| #### Bn-scaff_15892_1-p15665 C-genome specific (napus-oleracea) | 0.9449761    | 0.7048844    | 1            | 0.7139428    | not scorable | not scorable |
| #### Bn-scaff_15892_1-p15685 C-genome specific (napus-oleracea) | 0.9210526    | 0.7391033    | 0.9844961    | 0.7251825    | not scorable | not scorable |
| #### Bn-scaff_15892_1-p15707 C-genome specific (napus-oleracea) | 0.923445     | 0.69186      | 1            | 0.7148229    | not scorable | not scorable |
| #### Bn-scaff_15892_1-p16544 C-genome specific (napus-oleracea) | 0.8995215    | 0.7274528    | 0.6511628    | 0.8226054    | not scorable | not scorable |
| #### Bn-scaff_15892_1-p16578 C-genome specific (napus-oleracea) | 0.9138756    | 0.7762009    | 1            | 0.8953628    | not scorable | not scorable |
| #### Bn-scaff_15892_1-p16769 C-genome specific (napus-oleracea) | 0.9090909    | 0.7290612    | 0.8139535    | 0.8057614    | not scorable | not scorable |
| #### Bn-scaff_15892_1-p16778 C-genome specific (napus-oleracea) | 0.9043062    | 0.7358925    | 1            | 0.9223077    | not scorable | not scorable |
| #### Bn-scaff_15892_1-p16789 genome unspecific (all in)         | 0.937799     | 0.473134     | 1            | 0.7876368    | 1            | 0.9365596    |
| #### Bn-scaff_15892_1-p16829 C-genome specific (napus-oleracea) | 0.9090909    | 0.7337434    | 0.9922481    | 0.7328172    | not scorable | not scorable |
| #### Bn-scaff_15892_1-p16860 C-genome specific (napus-oleracea) | 0.9090909    | 0.6907058    | 0.9844961    | 0.8310131    | not scorable | not scorable |
| #### Bn-scaff_15892_1-p16880 C-genome specific (napus-oleracea) | 0.9114832    | 0.7409031    | 0.9922481    | 0.6625951    | not scorable | not scorable |
| #### Bn-scaff_15892_1-p16973 genome unspecific (all in)         | 0.9856459    | 0.318428     | 1            | 0.739518     | 1            | 0.723677     |
| #### Bn-scaff_15892_1-p19125 C-genome specific (napus-oleracea) | 0.9688995    | 0.255428     | 1            | 0.6175172    | not scorable | not scorable |
| #### Bn-scaff_15892_1-p19313 C-genome specific (napus-oleracea) | 0.9258373    | 0.7256762    | 0.9922481    | 0.6501432    | not scorable | not scorable |
| #### Bn-scaff_15892_1-p20193 genome unspecific (oleracea-olera) | not scorable | not scorable | 0.9224806    | 0.2555144    | 1            | 0.7770717    |
| #### Bn-scaff_15892_1-p20678 C-genome specific (napus-oleracea) | 0.9880383    | 0.302001     | 1            | 0.806868     | not scorable | not scorable |
| #### Bn-scaff_15892_1-p31075 C-genome specific (napus-oleracea) | 0.9258373    | 0.9139233    | 1            | 0.7835203    | not scorable | not scorable |

|                                                                 |              |              |              |              |              |              |
|-----------------------------------------------------------------|--------------|--------------|--------------|--------------|--------------|--------------|
| #### Bn-scaff_15892_1-p31143 C-genome specific (napus-oleracea) | 0.9043062    | 0.8944651    | 0.9147287    | 0.7707722    | not scorable | not scorable |
| #### Bn-scaff_15892_1-p32626 C-genome specific (oleracea only)  | not scorable | not scorable | 1            | 0.7170855    | not scorable | not scorable |
| #### Bn-scaff_15892_1-p32689 C-genome specific (napus-oleracea) | 0.9258373    | 0.8551255    | 1            | 0.8205087    | not scorable | not scorable |
| #### Bn-scaff_15892_1-p34596 C-genome specific (napus-oleracea) | 0.9258373    | 0.8776037    | 1            | 0.7423564    | not scorable | not scorable |
| #### Bn-scaff_15892_1-p34602 C-genome specific (napus-oleracea) | 0.923445     | 0.8003668    | 0.9922481    | 0.7236229    | not scorable | not scorable |
| #### Bn-scaff_15892_1-p36542 C-genome specific (napus-oleracea) | 0.923445     | 0.8789676    | 0.9922481    | 0.7338362    | not scorable | not scorable |
| #### Bn-scaff_15892_1-p36558 C-genome specific (napus-oleracea) | 0.923445     | 0.9173554    | 1            | 0.7999777    | not scorable | not scorable |
| #### Bn-scaff_15892_1-p36738 genome unspecific (all in)         | 0.923445     | 0.613125     | 0.9844961    | 0.8407762    | 0.9090909    | 0.9318828    |
| #### Bn-scaff_15892_1-p36797 C-genome specific (napus-oleracea) | 0.923445     | 0.7497401    | 0.9844961    | 0.6530485    | not scorable | not scorable |
| #### Bn-scaff_15892_1-p36846 C-genome specific (napus-oleracea) | 0.923445     | 0.7669629    | 0.9922481    | 0.6955034    | not scorable | not scorable |
| #### Bn-scaff_15892_1-p36866 C-genome specific (napus-oleracea) | 0.923445     | 0.8096522    | 0.9922481    | 0.7390807    | not scorable | not scorable |
| #### Bn-scaff_15892_1-p36868 C-genome specific (napus-oleracea) | 0.923445     | 0.8318605    | 0.9922481    | 0.7014663    | not scorable | not scorable |
| #### Bn-scaff_15892_1-p40425 C-genome specific (napus-oleracea) | 0.9186603    | 0.7668244    | 0.9069768    | 0.6335204    | not scorable | not scorable |
| #### Bn-scaff_15892_1-p43133 C-genome specific (napus-oleracea) | 0.923445     | 0.9080515    | 0.9922481    | 0.7672934    | not scorable | not scorable |
| #### Bn-scaff_15892_1-p44675 C-genome specific (napus-oleracea) | 0.9258373    | 0.7915036    | 0.9922481    | 0.7559376    | not scorable | not scorable |
| #### Bn-scaff_15892_1-p44777 C-genome specific (napus-oleracea) | 0.923445     | 0.9002409    | 1            | 0.8343771    | not scorable | not scorable |
| #### Bn-scaff_15892_1-p54481 genome unspecific (all in)         | 0.9904306    | 0.3267722    | 1            | 0.6384943    | 1            | 0.7149404    |
| #### Bn-scaff_15892_1-p55383 genome unspecific (all in)         | 0.9832536    | 0.4609282    | 0.9922481    | 0.6541316    | 1            | 0.8988901    |
| #### Bn-scaff_15892_1-p56152 C-genome specific (napus-oleracea) | 0.8995215    | 0.6623705    | 0.7131783    | 0.6660993    | not scorable | not scorable |
| #### Bn-scaff_15892_1-p56398 genome unspecific (all in)         | 0.9186603    | 0.6716062    | 1            | 0.6660626    | 0.892562     | 0.6705318    |
| #### Bn-scaff_15892_1-p61080 C-genome specific (napus-oleracea) | 0.923445     | 0.7716163    | 1            | 0.6627528    | not scorable | not scorable |
| #### Bn-scaff_15892_1-p61208 C-genome specific (napus-oleracea) | 0.923445     | 0.9053578    | 0.9379845    | 0.7350561    | not scorable | not scorable |
| #### Bn-scaff_15892_1-p62396 genome unspecific (all in)         | 0.9210526    | 0.8211863    | 1            | 0.719931     | 0.892562     | 0.9080027    |
| #### Bn-scaff_15892_1-p72079 C-genome specific (napus-oleracea) | 0.923445     | 0.8728537    | 1            | 0.682712     | not scorable | not scorable |
| #### Bn-scaff_15892_1-p76542 napus specific                     | 0.9114832    | 0.8080764    | not scorable | not scorable | not scorable | not scorable |
| #### Bn-scaff_15892_1-p95900 C-genome specific (napus-oleracea) | 0.9760765    | 0.4683974    | 0.9689922    | 0.5242822    | not scorable | not scorable |
| #### Bn-scaff_15892_1-p99304 C-genome specific (oleracea only)  | not scorable | not scorable | 1            | 0.4326627    | not scorable | not scorable |
| #### Bn-scaff_15895_1-p12283 genome unspecific (all in)         | 1            | 0.3517603    | 1            | 0.7724004    | 0.9917355    | 0.767707     |
| #### Bn-scaff_15895_1-p16709 genome unspecific (all in)         | 0.9856459    | 0.3323888    | 1            | 0.8568823    | 0.9917355    | 0.7080892    |
| #### Bn-scaff_15896_1-p11369 C-genome specific (napus-oleracea) | 0.9760765    | 0.7751676    | 1            | 0.7940474    | not scorable | not scorable |
| #### Bn-scaff_15896_1-p11393 C-genome specific (napus-oleracea) | 0.9665072    | 0.7548439    | 1            | 0.7625699    | not scorable | not scorable |
| #### Bn-scaff_15896_1-p11565 C-genome specific (napus-oleracea) | 0.9784689    | 0.6208834    | 1            | 0.6280122    | not scorable | not scorable |
| #### Bn-scaff_15896_1-p21902 C-genome specific (napus-oleracea) | 0.9736842    | 0.6547102    | 1            | 0.6703264    | not scorable | not scorable |

|                                                                 |              |              |           |           |              |              |
|-----------------------------------------------------------------|--------------|--------------|-----------|-----------|--------------|--------------|
| #### Bn-scaff_15896_1-p23538 C-genome specific (napus-oleracea) | 0.9641148    | 0.7373394    | 0.9224806 | 0.7238718 | not scorable | not scorable |
| #### Bn-scaff_15896_1-p24010 C-genome specific (napus-oleracea) | 0.9856459    | 0.7687441    | 0.9922481 | 0.7719036 | not scorable | not scorable |
| #### Bn-scaff_15896_1-p24096 C-genome specific (napus-oleracea) | 0.9880383    | 0.7570425    | 1         | 0.7504904 | not scorable | not scorable |
| #### Bn-scaff_15896_1-p25507 C-genome specific (napus-oleracea) | 0.9688995    | 0.704793     | 1         | 0.7057723 | not scorable | not scorable |
| #### Bn-scaff_15896_1-p25509 C-genome specific (napus-oleracea) | 0.9808612    | 0.7668887    | 0.9922481 | 0.7593611 | not scorable | not scorable |
| #### Bn-scaff_15896_1-p27943 C-genome specific (napus-oleracea) | 0.9784689    | 0.6913479    | 1         | 0.7598116 | not scorable | not scorable |
| #### Bn-scaff_15896_1-p45405 C-genome specific (napus-oleracea) | 0.9784689    | 0.6650302    | 1         | 0.6956356 | not scorable | not scorable |
| #### Bn-scaff_15896_1-p45631 genome unspecific (oleracea-rapa)  | not scorable | not scorable | 0.9922481 | 0.7889467 | 1            | 0.9303687    |
| #### Bn-scaff_15896_1-p46640 C-genome specific (napus-oleracea) | 0.9617225    | 0.7215605    | 1         | 0.7501156 | not scorable | not scorable |
| #### Bn-scaff_15896_1-p51867 C-genome specific (napus-oleracea) | 0.9736842    | 0.7838446    | 1         | 0.7549709 | not scorable | not scorable |
| #### Bn-scaff_15896_1-p52378 C-genome specific (napus-oleracea) | 0.9593301    | 0.7792799    | 1         | 0.8499895 | not scorable | not scorable |
| #### Bn-scaff_15896_1-p52777 C-genome specific (napus-oleracea) | 0.9832536    | 0.6734825    | 1         | 0.7129725 | not scorable | not scorable |
| #### Bn-scaff_15896_1-p54107 C-genome specific (napus-oleracea) | 0.9688995    | 0.7637426    | 1         | 0.8627577 | not scorable | not scorable |
| #### Bn-scaff_15896_1-p54376 C-genome specific (napus-oleracea) | 0.9688995    | 0.6970456    | 1         | 0.7504022 | not scorable | not scorable |
| #### Bn-scaff_15896_1-p54396 C-genome specific (napus-oleracea) | 0.9760765    | 0.6783569    | 0.9844961 | 0.6631585 | not scorable | not scorable |
| #### Bn-scaff_15896_1-p54563 C-genome specific (napus-oleracea) | 0.9808612    | 0.7715102    | 1         | 0.8801268 | not scorable | not scorable |
| #### Bn-scaff_15896_1-p55003 C-genome specific (oleracea only)  | not scorable | not scorable | 0.8604651 | 0.2757607 | not scorable | not scorable |
| #### Bn-scaff_15896_1-p55043 C-genome specific (napus-oleracea) | 0.9497608    | 0.3756135    | 0.9302326 | 0.3847843 | not scorable | not scorable |
| #### Bn-scaff_15896_1-p55758 C-genome specific (napus-oleracea) | 0.9808612    | 0.7637708    | 0.9922481 | 0.8134274 | not scorable | not scorable |
| #### Bn-scaff_15896_1-p55770 C-genome specific (napus-oleracea) | 0.9736842    | 0.7607339    | 1         | 0.8647554 | not scorable | not scorable |
| #### Bn-scaff_15896_1-p55823 C-genome specific (napus-oleracea) | 0.9688995    | 0.7712578    | 1         | 0.7839756 | not scorable | not scorable |
| #### Bn-scaff_15896_1-p55840 C-genome specific (napus-oleracea) | 0.9736842    | 0.7800558    | 1         | 0.8596826 | not scorable | not scorable |
| #### Bn-scaff_15896_1-p56729 C-genome specific (napus-oleracea) | 0.9784689    | 0.6721492    | 1         | 0.564907  | not scorable | not scorable |
| #### Bn-scaff_15896_1-p57376 C-genome specific (napus-oleracea) | 0.9832536    | 0.6964611    | 1         | 0.7513465 | not scorable | not scorable |
| #### Bn-scaff_15896_1-p57406 C-genome specific (napus-oleracea) | 0.9736842    | 0.6916213    | 1         | 0.7155414 | not scorable | not scorable |
| #### Bn-scaff_15896_1-p58702 C-genome specific (napus-oleracea) | 0.9928229    | 0.7414562    | 1         | 0.7560192 | not scorable | not scorable |
| #### Bn-scaff_15896_1-p58839 C-genome specific (napus-oleracea) | 0.9641148    | 0.77526      | 1         | 0.8253856 | not scorable | not scorable |
| #### Bn-scaff_15896_1-p59503 C-genome specific (napus-oleracea) | 0.9832536    | 0.7494233    | 1         | 0.7349811 | not scorable | not scorable |
| #### Bn-scaff_15896_1-p59620 C-genome specific (napus-oleracea) | 0.9641148    | 0.6584958    | 1         | 0.6526463 | not scorable | not scorable |
| #### Bn-scaff_15896_1-p59639 C-genome specific (napus-oleracea) | 0.9832536    | 0.6687414    | 1         | 0.7033386 | not scorable | not scorable |
| #### Bn-scaff_15896_1-p61074 C-genome specific (napus-oleracea) | 0.9784689    | 0.8020646    | 1         | 0.8072116 | not scorable | not scorable |
| #### Bn-scaff_15896_1-p61337 genome unspecific (all in)         | 0.9617225    | 0.3250938    | 1         | 0.9236904 | 0.9917355    | 0.7800896    |
| #### Bn-scaff_15896_1-p62020 C-genome specific (napus-oleracea) | 0.9641148    | 0.7549924    | 1         | 0.7816492 | not scorable | not scorable |

|                                                                 |           |           |           |           |              |              |
|-----------------------------------------------------------------|-----------|-----------|-----------|-----------|--------------|--------------|
| #### Bn-scaff_15896_1-p62295 C-genome specific (napus-oleracea) | 0.9569378 | 0.7903302 | 0.9612403 | 0.8415334 | not scorable | not scorable |
| #### Bn-scaff_15896_1-p62352 C-genome specific (napus-oleracea) | 0.9832536 | 0.775041  | 1         | 0.8453992 | not scorable | not scorable |
| #### Bn-scaff_15896_1-p62359 C-genome specific (napus-oleracea) | 0.9712918 | 0.7670724 | 1         | 0.8842855 | not scorable | not scorable |
| #### Bn-scaff_15896_1-p63669 genome unspecific (all in)         | 0.9808612 | 0.4099519 | 0.9922481 | 0.7486716 | 1            | 0.8470228    |
| #### Bn-scaff_15896_1-p64515 C-genome specific (napus-oleracea) | 0.9593301 | 0.4965907 | 0.9689922 | 0.3372367 | not scorable | not scorable |
| #### Bn-scaff_15896_1-p64950 C-genome specific (napus-oleracea) | 0.9832536 | 0.8031419 | 1         | 0.8401249 | not scorable | not scorable |
| #### Bn-scaff_15896_1-p64984 C-genome specific (napus-oleracea) | 0.9736842 | 0.7698919 | 1         | 0.8770171 | not scorable | not scorable |
| #### Bn-scaff_15896_1-p65092 C-genome specific (napus-oleracea) | 0.9688995 | 0.7178053 | 1         | 0.7269135 | not scorable | not scorable |
| #### Bn-scaff_15896_1-p66285 C-genome specific (napus-oleracea) | 0.9665072 | 0.7681655 | 1         | 0.7372329 | not scorable | not scorable |
| #### Bn-scaff_15896_1-p68685 C-genome specific (napus-oleracea) | 0.9545454 | 0.5528681 | 0.9844961 | 0.7040502 | not scorable | not scorable |
| #### Bn-scaff_15896_1-p68831 C-genome specific (napus-oleracea) | 0.9784689 | 0.7557195 | 1         | 0.8093963 | not scorable | not scorable |
| #### Bn-scaff_15896_1-p69437 C-genome specific (napus-oleracea) | 0.9784689 | 0.795469  | 0.9922481 | 0.749503  | not scorable | not scorable |
| #### Bn-scaff_15896_1-p72859 C-genome specific (napus-oleracea) | 0.9808612 | 0.7557421 | 0.9767442 | 0.7639561 | not scorable | not scorable |
| #### Bn-scaff_15896_1-p74409 C-genome specific (napus-oleracea) | 0.9760765 | 0.6869108 | 0.9922481 | 0.7562679 | not scorable | not scorable |
| #### Bn-scaff_15896_1-p75066 C-genome specific (napus-oleracea) | 0.9688995 | 0.5872799 | 1         | 0.5860114 | not scorable | not scorable |
| #### Bn-scaff_15896_1-p76830 genome unspecific (all in)         | 0.9736842 | 0.3734036 | 1         | 0.6718804 | 1            | 0.8388831    |
| #### Bn-scaff_15906_1-p11142 C-genome specific (napus-oleracea) | 0.9760765 | 0.7714075 | 0.9922481 | 0.8379428 | not scorable | not scorable |
| #### Bn-scaff_15906_1-p11298 C-genome specific (napus-oleracea) | 0.9760765 | 0.7940632 | 1         | 0.7894884 | not scorable | not scorable |
| #### Bn-scaff_15906_1-p11480 C-genome specific (napus-oleracea) | 0.9784689 | 0.7819554 | 1         | 0.7277081 | not scorable | not scorable |
| #### Bn-scaff_15906_1-p11548 C-genome specific (napus-oleracea) | 0.9760765 | 0.6285031 | 0.9689922 | 0.6973138 | not scorable | not scorable |
| #### Bn-scaff_15906_1-p11656 C-genome specific (napus-oleracea) | 0.9784689 | 0.7681118 | 0.9922481 | 0.8228431 | not scorable | not scorable |
| #### Bn-scaff_15906_1-p11672 C-genome specific (napus-oleracea) | 0.9784689 | 0.7663723 | 1         | 0.8172386 | not scorable | not scorable |
| #### Bn-scaff_15906_1-p11804 C-genome specific (napus-oleracea) | 0.9665072 | 0.6456885 | 0.9767442 | 0.7268997 | not scorable | not scorable |
| #### Bn-scaff_15906_1-p11812 C-genome specific (napus-oleracea) | 0.9760765 | 0.7557258 | 0.9922481 | 0.8376804 | not scorable | not scorable |
| #### Bn-scaff_15906_1-p12083 C-genome specific (napus-oleracea) | 0.9712918 | 0.71294   | 0.9922481 | 0.788597  | not scorable | not scorable |
| #### Bn-scaff_15906_1-p12085 C-genome specific (napus-oleracea) | 0.9856459 | 0.7779629 | 1         | 0.7919607 | not scorable | not scorable |
| #### Bn-scaff_15906_1-p12107 C-genome specific (napus-oleracea) | 0.9832536 | 0.7660055 | 1         | 0.8376696 | not scorable | not scorable |
| #### Bn-scaff_15906_1-p12414 C-genome specific (napus-oleracea) | 0.9832536 | 0.7728481 | 0.9922481 | 0.8127683 | not scorable | not scorable |
| #### Bn-scaff_15906_1-p12582 C-genome specific (napus-oleracea) | 0.9808612 | 0.7778046 | 1         | 0.8055069 | not scorable | not scorable |
| #### Bn-scaff_15906_1-p12587 C-genome specific (napus-oleracea) | 0.9760765 | 0.7392313 | 0.9767442 | 0.8094839 | not scorable | not scorable |
| #### Bn-scaff_15906_1-p12694 C-genome specific (napus-oleracea) | 0.9808612 | 0.7545273 | 1         | 0.7691652 | not scorable | not scorable |
| #### Bn-scaff_15906_1-p12847 C-genome specific (napus-oleracea) | 0.9832536 | 0.7785712 | 1         | 0.8415254 | not scorable | not scorable |
| #### Bn-scaff_15906_1-p13525 C-genome specific (napus-oleracea) | 0.9665072 | 0.6033824 | 1         | 0.5748241 | not scorable | not scorable |

|                                                                 |              |              |           |           |              |              |
|-----------------------------------------------------------------|--------------|--------------|-----------|-----------|--------------|--------------|
| #### Bn-scaff_15906_1-p13582 C-genome specific (napus-oleracea) | 0.9784689    | 0.7922528    | 0.9922481 | 0.8187077 | not scorable | not scorable |
| #### Bn-scaff_15906_1-p13614 C-genome specific (napus-oleracea) | 0.9784689    | 0.7555333    | 1         | 0.7897657 | not scorable | not scorable |
| #### Bn-scaff_15906_1-p14529 C-genome specific (napus-oleracea) | 0.9712918    | 0.8199507    | 0.7674419 | 0.6939149 | not scorable | not scorable |
| #### Bn-scaff_15906_1-p15765 C-genome specific (napus-oleracea) | 0.9832536    | 0.7765799    | 1         | 0.7527255 | not scorable | not scorable |
| #### Bn-scaff_15906_1-p17559 C-genome specific (napus-oleracea) | 0.9808612    | 0.7039908    | 1         | 0.6430678 | not scorable | not scorable |
| #### Bn-scaff_15906_1-p18953 C-genome specific (napus-oleracea) | 0.8636364    | 0.8149487    | 0.7829458 | 0.7596582 | not scorable | not scorable |
| #### Bn-scaff_15906_1-p19008 C-genome specific (napus-oleracea) | 0.9760765    | 0.7437284    | 1         | 0.8383364 | not scorable | not scorable |
| #### Bn-scaff_15906_1-p19026 C-genome specific (napus-oleracea) | 0.9784689    | 0.6521146    | 1         | 0.637399  | not scorable | not scorable |
| #### Bn-scaff_15906_1-p19086 C-genome specific (napus-oleracea) | 0.9617225    | 0.6810971    | 0.9922481 | 0.6762226 | not scorable | not scorable |
| #### Bn-scaff_15906_1-p19086 C-genome specific (napus-oleracea) | 0.9760765    | 0.7910416    | 0.9922481 | 0.8113534 | not scorable | not scorable |
| #### Bn-scaff_15906_1-p22166 C-genome specific (napus-oleracea) | 0.9665072    | 0.8003625    | 0.9302326 | 0.7066762 | not scorable | not scorable |
| #### Bn-scaff_15906_1-p23711 C-genome specific (napus-oleracea) | 0.9808612    | 0.7613775    | 1         | 0.8482705 | not scorable | not scorable |
| #### Bn-scaff_15906_1-p24012 C-genome specific (napus-oleracea) | 0.9808612    | 0.78065      | 1         | 0.7379336 | not scorable | not scorable |
| #### Bn-scaff_15906_1-p26901 C-genome specific (napus-oleracea) | 0.9641148    | 0.7082031    | 1         | 0.6897292 | not scorable | not scorable |
| #### Bn-scaff_15906_1-p27607 C-genome specific (napus-oleracea) | 0.9354067    | 0.6280125    | 0.9922481 | 0.6702309 | not scorable | not scorable |
| #### Bn-scaff_15906_1-p28046 C-genome specific (oleracea only)  | not scorable | not scorable | 1         | 0.7412501 | not scorable | not scorable |
| #### Bn-scaff_15906_1-p28140 C-genome specific (napus-oleracea) | 0.9832536    | 0.8017685    | 0.9922481 | 0.8305445 | not scorable | not scorable |
| #### Bn-scaff_15906_1-p28388 C-genome specific (napus-oleracea) | 0.9808612    | 0.7871521    | 1         | 0.7741172 | not scorable | not scorable |
| #### Bn-scaff_15906_1-p28515 genome unspecific (all in)         | 0.9880383    | 0.6914226    | 0.9922481 | 0.6595297 | 0.8595041    | 0.9047479    |
| #### Bn-scaff_15906_1-p28715 C-genome specific (napus-oleracea) | 0.9808612    | 0.6925931    | 0.9922481 | 0.6677091 | not scorable | not scorable |
| #### Bn-scaff_15906_1-p28717 C-genome specific (napus-oleracea) | 0.9832536    | 0.7863656    | 0.9922481 | 0.7224004 | not scorable | not scorable |
| #### Bn-scaff_15906_1-p28725 C-genome specific (napus-oleracea) | 0.9784689    | 0.7230079    | 0.9922481 | 0.7689959 | not scorable | not scorable |
| #### Bn-scaff_15906_1-p28868 C-genome specific (napus-oleracea) | 0.9808612    | 0.7535642    | 1         | 0.7913679 | not scorable | not scorable |
| #### Bn-scaff_15906_1-p28958 C-genome specific (napus-oleracea) | 0.9808612    | 0.7382674    | 1         | 0.6947512 | not scorable | not scorable |
| #### Bn-scaff_15906_1-p29088 C-genome specific (napus-oleracea) | 0.9880383    | 0.7356252    | 1         | 0.838961  | not scorable | not scorable |
| #### Bn-scaff_15906_1-p29500 C-genome specific (napus-oleracea) | 0.9784689    | 0.7069201    | 1         | 0.7361917 | not scorable | not scorable |
| #### Bn-scaff_15906_1-p29995 C-genome specific (napus-oleracea) | 0.9784689    | 0.7924985    | 1         | 0.8496823 | not scorable | not scorable |
| #### Bn-scaff_15906_1-p30564 C-genome specific (napus-oleracea) | 0.9736842    | 0.7560567    | 0.9844961 | 0.7776212 | not scorable | not scorable |
| #### Bn-scaff_15906_1-p30589 C-genome specific (napus-oleracea) | 0.9760765    | 0.6611301    | 0.9844961 | 0.6927312 | not scorable | not scorable |
| #### Bn-scaff_15906_1-p30606 C-genome specific (napus-oleracea) | 0.9808612    | 0.782831     | 0.9922481 | 0.8213499 | not scorable | not scorable |
| #### Bn-scaff_15906_1-p30719 C-genome specific (napus-oleracea) | 0.9736842    | 0.6717374    | 0.9922481 | 0.7206949 | not scorable | not scorable |
| #### Bn-scaff_15906_1-p30740 C-genome specific (napus-oleracea) | 0.9784689    | 0.7674183    | 0.9922481 | 0.828292  | not scorable | not scorable |
| #### Bn-scaff_15906_1-p31138 C-genome specific (napus-oleracea) | 0.9832536    | 0.7781072    | 0.9922481 | 0.8363836 | not scorable | not scorable |



|                                                                 |              |              |           |           |              |              |
|-----------------------------------------------------------------|--------------|--------------|-----------|-----------|--------------|--------------|
| #### Bn-scaff_15906_1-p31954 C-genome specific (napus-oleracea) | 0.9688995    | 0.536182     | 0.9844961 | 0.4597929 | not scorable | not scorable |
| #### Bn-scaff_15906_1-p33863 genome unspecific (oleracea-rapa)  | not scorable | not scorable | 0.9922481 | 0.2582051 | 1            | 0.7609816    |
| #### Bn-scaff_15906_1-p33915 genome unspecific (oleracea-rapa)  | not scorable | not scorable | 0.8682171 | 0.1882501 | 1            | 0.7367962    |
| #### Bn-scaff_15906_1-p35183 C-genome specific (napus-oleracea) | 0.9880383    | 0.7091309    | 0.9922481 | 0.7193605 | not scorable | not scorable |
| #### Bn-scaff_15906_1-p35246 C-genome specific (napus-oleracea) | 0.9688995    | 0.6733518    | 0.9922481 | 0.7470477 | not scorable | not scorable |
| #### Bn-scaff_15906_1-p35437 C-genome specific (napus-oleracea) | 0.9736842    | 0.6580419    | 0.9689922 | 0.7151176 | not scorable | not scorable |
| #### Bn-scaff_15906_1-p35455 C-genome specific (napus-oleracea) | 0.9736842    | 0.3897233    | 1         | 0.5430411 | not scorable | not scorable |
| #### Bn-scaff_15906_1-p35884 C-genome specific (napus-oleracea) | 0.9712918    | 0.6535811    | 0.9922481 | 0.681475  | not scorable | not scorable |
| #### Bn-scaff_15906_1-p36703 genome unspecific (all in)         | 1            | 0.5370017    | 1         | 0.5916608 | 0.9917355    | 0.4838086    |
| #### Bn-scaff_15906_1-p39882 C-genome specific (napus-oleracea) | 0.9784689    | 0.7584816    | 0.9922481 | 0.6661382 | not scorable | not scorable |
| #### Bn-scaff_15906_1-p41376 C-genome specific (oleracea only)  | not scorable | not scorable | 0.9379845 | 0.5509599 | not scorable | not scorable |
| #### Bn-scaff_15906_1-p41530 genome unspecific (all in)         | 0.9665072    | 0.6297282    | 0.9922481 | 0.8359321 | 0.9917355    | 0.8973938    |
| #### Bn-scaff_15906_1-p45217 C-genome specific (napus-oleracea) | 0.9784689    | 0.7677508    | 1         | 0.8329912 | not scorable | not scorable |
| #### Bn-scaff_15906_1-p45864 C-genome specific (napus-oleracea) | 0.9832536    | 0.7595155    | 0.9922481 | 0.7719851 | not scorable | not scorable |
| #### Bn-scaff_15906_1-p45887 C-genome specific (napus-oleracea) | 0.9736842    | 0.79805      | 0.9147287 | 0.6924072 | not scorable | not scorable |
| #### Bn-scaff_15906_1-p48122 genome unspecific (all in)         | 0.9354067    | 0.6740322    | 1         | 0.6715128 | 0.9917355    | 0.8250779    |
| #### Bn-scaff_15906_1-p48150 C-genome specific (napus-oleracea) | 0.9425837    | 0.788262     | 0.9922481 | 0.7880491 | not scorable | not scorable |
| #### Bn-scaff_15906_1-p50116 C-genome specific (napus-oleracea) | 0.9760765    | 0.6626078    | 1         | 0.6450031 | not scorable | not scorable |
| #### Bn-scaff_15906_1-p51438 C-genome specific (napus-oleracea) | 0.9808612    | 0.6970767    | 1         | 0.7144854 | not scorable | not scorable |
| #### Bn-scaff_15906_1-p54056 C-genome specific (napus-oleracea) | 0.9808612    | 0.6811977    | 0.9844961 | 0.7049294 | not scorable | not scorable |
| #### Bn-scaff_15906_1-p54230 C-genome specific (napus-oleracea) | 0.9832536    | 0.6791295    | 1         | 0.7127789 | not scorable | not scorable |
| #### Bn-scaff_15906_1-p54827 genome unspecific (all in)         | 0.9545454    | 0.55608      | 1         | 0.7607039 | 1            | 0.8254819    |
| #### Bn-scaff_15906_1-p57702 C-genome specific (napus-oleracea) | 0.9641148    | 0.667428     | 0.8217054 | 0.7040766 | not scorable | not scorable |
| #### Bn-scaff_15906_1-p57713 C-genome specific (napus-oleracea) | 0.9784689    | 0.6450936    | 0.8217054 | 0.6179587 | not scorable | not scorable |
| #### Bn-scaff_15906_1-p57915 C-genome specific (napus-oleracea) | 0.9330143    | 0.6520879    | 0.8217054 | 0.6379159 | not scorable | not scorable |
| #### Bn-scaff_15906_1-p59145 C-genome specific (napus-oleracea) | 0.9736842    | 0.806325     | 1         | 0.8104565 | not scorable | not scorable |
| #### Bn-scaff_15906_1-p59277 C-genome specific (napus-oleracea) | 0.9688995    | 0.7829773    | 0.9922481 | 0.792659  | not scorable | not scorable |
| #### Bn-scaff_15906_1-p59328 C-genome specific (napus-oleracea) | 0.9641148    | 0.7547142    | 0.9922481 | 0.7519069 | not scorable | not scorable |
| #### Bn-scaff_15906_1-p61901 C-genome specific (napus-oleracea) | 0.9808612    | 0.6795901    | 1         | 0.7409858 | not scorable | not scorable |
| #### Bn-scaff_15906_1-p62280 C-genome specific (napus-oleracea) | 0.9808612    | 0.6628109    | 1         | 0.6562966 | not scorable | not scorable |
| #### Bn-scaff_15906_1-p67010 C-genome specific (napus-oleracea) | 0.9784689    | 0.6898537    | 0.9844961 | 0.671083  | not scorable | not scorable |
| #### Bn-scaff_15906_1-p70337 C-genome specific (napus-oleracea) | 0.9641148    | 0.7216165    | 1         | 0.6852316 | not scorable | not scorable |
| #### Bn-scaff_15906_1-p72059 C-genome specific (napus-oleracea) | 0.9784689    | 0.7959908    | 1         | 0.7577856 | not scorable | not scorable |

|                                                                 |              |              |           |           |              |              |
|-----------------------------------------------------------------|--------------|--------------|-----------|-----------|--------------|--------------|
| #### Bn-scaff_15906_1-p74842 C-genome specific (napus-oleracea) | 0.9712918    | 0.5737586    | 0.9689922 | 0.7920814 | not scorable | not scorable |
| #### Bn-scaff_15906_1-p89907 C-genome specific (napus-oleracea) | 0.9784689    | 0.6469018    | 0.9922481 | 0.6919174 | not scorable | not scorable |
| #### Bn-scaff_15906_1-p91555 genome unspecific (all in)         | 0.9832536    | 0.5065405    | 1         | 0.774418  | 1            | 0.9020236    |
| #### Bn-scaff_15908_1-p10048 genome unspecific (all in)         | 1            | 0.3781786    | 0.9922481 | 0.7490673 | 1            | 0.8877828    |
| #### Bn-scaff_15908_1-p10246 C-genome specific (napus-oleracea) | 0.9856459    | 0.8900068    | 0.5968992 | 0.8063605 | not scorable | not scorable |
| #### Bn-scaff_15908_1-p10329 C-genome specific (napus-oleracea) | 0.9808612    | 0.8396915    | 0.5891473 | 0.8466339 | not scorable | not scorable |
| #### Bn-scaff_15908_1-p10483 C-genome specific (napus-oleracea) | 0.9856459    | 0.8970109    | 0.9224806 | 0.795783  | not scorable | not scorable |
| #### Bn-scaff_15908_1-p10485 C-genome specific (napus-oleracea) | 0.9880383    | 0.8495439    | 0.9224806 | 0.7187298 | not scorable | not scorable |
| #### Bn-scaff_15908_1-p10980 C-genome specific (napus-oleracea) | 1            | 0.4890861    | 0.9767442 | 0.8210269 | not scorable | not scorable |
| #### Bn-scaff_15908_1-p11144 C-genome specific (napus-oleracea) | 0.9736842    | 0.8003314    | 0.875969  | 0.8268238 | not scorable | not scorable |
| #### Bn-scaff_15908_1-p11244 C-genome specific (napus-oleracea) | 0.9832536    | 0.7588212    | 1         | 0.8604615 | not scorable | not scorable |
| #### Bn-scaff_15908_1-p11285 C-genome specific (napus-oleracea) | 0.9712918    | 0.7266428    | 1         | 0.8457965 | not scorable | not scorable |
| #### Bn-scaff_15908_1-p11297 C-genome specific (napus-oleracea) | 0.9760765    | 0.7811657    | 1         | 0.8476638 | not scorable | not scorable |
| #### Bn-scaff_15908_1-p11361 genome unspecific (all in)         | 0.9904306    | 0.4722925    | 0.9922481 | 0.7149271 | 0.9917355    | 0.7165815    |
| #### Bn-scaff_15908_1-p11365 C-genome specific (napus-oleracea) | 0.9832536    | 0.8072453    | 0.9922481 | 0.7676235 | not scorable | not scorable |
| #### Bn-scaff_15908_1-p11440 C-genome specific (napus-oleracea) | 0.9282297    | 0.3674846    | 0.9922481 | 0.3214592 | not scorable | not scorable |
| #### Bn-scaff_15908_1-p11478 C-genome specific (oleracea only)  | not scorable | not scorable | 1         | 0.6469948 | not scorable | not scorable |
| #### Bn-scaff_15908_1-p11492 C-genome specific (napus-oleracea) | 0.9641148    | 0.7764152    | 1         | 0.8683155 | not scorable | not scorable |
| #### Bn-scaff_15908_1-p11590 C-genome specific (napus-oleracea) | 0.9832536    | 0.6992367    | 0.9922481 | 0.6931905 | not scorable | not scorable |
| #### Bn-scaff_15908_1-p11593 C-genome specific (napus-oleracea) | 0.9736842    | 0.6871438    | 1         | 0.6409135 | not scorable | not scorable |
| #### Bn-scaff_15908_1-p11594 C-genome specific (napus-oleracea) | 0.9952153    | 0.7002597    | 1         | 0.7224707 | not scorable | not scorable |
| #### Bn-scaff_15908_1-p11596 C-genome specific (napus-oleracea) | 0.9856459    | 0.6859579    | 0.9922481 | 0.6416119 | not scorable | not scorable |
| #### Bn-scaff_15908_1-p11601 C-genome specific (napus-oleracea) | 0.9856459    | 0.6753842    | 1         | 0.6127259 | not scorable | not scorable |
| #### Bn-scaff_15908_1-p11635 C-genome specific (napus-oleracea) | 0.9928229    | 0.7386134    | 0.9922481 | 0.7155991 | not scorable | not scorable |
| #### Bn-scaff_15908_1-p11744 C-genome specific (napus-oleracea) | 0.9760765    | 0.6891034    | 0.9612403 | 0.6271846 | not scorable | not scorable |
| #### Bn-scaff_15908_1-p11799 genome unspecific (oleracea-rapa)  | not scorable | not scorable | 0.9922481 | 0.5923765 | 0.9752066    | 0.5593904    |
| #### Bn-scaff_15908_1-p11810 C-genome specific (napus-oleracea) | 0.9784689    | 0.3854361    | 0.9922481 | 0.6813985 | not scorable | not scorable |
| #### Bn-scaff_15908_1-p11883 genome unspecific (all in)         | 0.9736842    | 0.6314521    | 1         | 0.6904899 | 1            | 0.7790666    |
| #### Bn-scaff_15908_1-p11987 C-genome specific (napus-oleracea) | 0.9641148    | 0.5886687    | 0.9767442 | 0.5664783 | not scorable | not scorable |
| #### Bn-scaff_15908_1-p12008 C-genome specific (napus-oleracea) | 0.9760765    | 0.7999759    | 0.9844961 | 0.8528098 | not scorable | not scorable |
| #### Bn-scaff_15908_1-p13810 genome unspecific (all in)         | 0.9617225    | 0.5837017    | 0.9844961 | 0.722455  | 0.9917355    | 0.9124124    |
| #### Bn-scaff_15908_1-p14005 genome unspecific (all in)         | 1            | 0.4946845    | 1         | 0.8138028 | 0.9669421    | 0.5641201    |
| #### Bn-scaff_15908_1-p28003 genome unspecific (all in)         | 0.9904306    | 0.2916716    | 0.9147287 | 0.2814786 | 1            | 0.8573824    |

|                                                                |              |              |              |              |              |              |
|----------------------------------------------------------------|--------------|--------------|--------------|--------------|--------------|--------------|
| #### Bn-scaff_15908_1-p2890C-genome specific (napus-oleracea)  | 0.9952153    | 0.8099093    | 0.9922481    | 0.6538326    | not scorable | not scorable |
| #### Bn-scaff_15908_1-p29032C-genome specific (oleracea only)  | not scorable | not scorable | 0.9612403    | 0.662137     | not scorable | not scorable |
| #### Bn-scaff_15908_1-p30104genome unspecific (all in)         | 0.9976076    | 0.6748952    | 0.9689922    | 0.7672473    | 1            | 0.9391224    |
| #### Bn-scaff_15908_1-p33686genome unspecific (all in)         | 0.9856459    | 0.5467353    | 0.9844961    | 0.6711047    | 0.9917355    | 0.9093952    |
| #### Bn-scaff_15908_1-p34682C-genome specific (napus-oleracea) | 0.9976076    | 0.6979734    | 0.9844961    | 0.699396     | not scorable | not scorable |
| #### Bn-scaff_15908_1-p40202C-genome specific (napus-oleracea) | 0.9832536    | 0.7638664    | 1            | 0.8532991    | not scorable | not scorable |
| #### Bn-scaff_15908_1-p43285genome unspecific (oleracea-rapa)  | not scorable | not scorable | 0.9689922    | 0.3196437    | 1            | 0.5059956    |
| #### Bn-scaff_15908_1-p46471C-genome specific (napus-oleracea) | 0.9784689    | 0.7310308    | 0.9767442    | 0.8415083    | not scorable | not scorable |
| #### Bn-scaff_15908_1-p47271C-genome specific (oleracea only)  | not scorable | not scorable | 0.9922481    | 0.7615712    | not scorable | not scorable |
| #### Bn-scaff_15908_1-p4989C-genome unspecific (all in)        | 0.9880383    | 0.7624484    | 0.7209302    | 0.7426074    | 0.9834711    | 0.7929143    |
| #### Bn-scaff_15908_1-p50908C-genome specific (oleracea only)  | not scorable | not scorable | 0.9612403    | 0.7194229    | not scorable | not scorable |
| #### Bn-scaff_15908_1-p52476C-genome specific (napus-oleracea) | 0.9688995    | 0.7706603    | 0.9922481    | 0.7752917    | not scorable | not scorable |
| #### Bn-scaff_15908_1-p52828C-genome specific (napus-oleracea) | 0.9665072    | 0.8095026    | 0.9612403    | 0.7273884    | not scorable | not scorable |
| #### Bn-scaff_15908_1-p5354C-genome specific (napus-oleracea)  | 0.9617225    | 0.7873297    | 0.9844961    | 0.7621061    | not scorable | not scorable |
| #### Bn-scaff_15908_1-p54195genome unspecific (all in)         | 0.9617225    | 0.4024139    | 1            | 0.7365384    | 0.9917355    | 0.8484671    |
| #### Bn-scaff_15908_1-p54544C-genome specific (napus-oleracea) | 0.9832536    | 0.7279628    | 0.9689922    | 0.7000848    | not scorable | not scorable |
| #### Bn-scaff_15908_1-p54634C-genome specific (napus-oleracea) | 0.9712918    | 0.5837818    | 1            | 0.5139189    | not scorable | not scorable |
| #### Bn-scaff_15908_1-p5571C-genome specific (napus-oleracea)  | 1            | 0.6927601    | 0.9844961    | 0.6487691    | not scorable | not scorable |
| #### Bn-scaff_15908_1-p59245C-genome specific (napus-oleracea) | 0.9784689    | 0.7469125    | 1            | 0.7563759    | not scorable | not scorable |
| #### Bn-scaff_15908_1-p60887C-genome specific (napus-oleracea) | 0.9856459    | 0.7771413    | 0.9689922    | 0.7649407    | not scorable | not scorable |
| #### Bn-scaff_15908_1-p60961A-genome specific (napus-rapa)     | 0.9952153    | 0.5174332    | not scorable | not scorable | 0.9834711    | 0.5479429    |
| #### Bn-scaff_15908_1-p61264genome unspecific (all in)         | 0.9569378    | 0.4311355    | 0.9844961    | 0.6750459    | 1            | 0.7070662    |
| #### Bn-scaff_15908_1-p63948C-genome specific (napus-oleracea) | 0.9880383    | 0.7787027    | 0.9767442    | 0.8262101    | not scorable | not scorable |
| #### Bn-scaff_15908_1-p65176genome unspecific (all in)         | 0.9856459    | 0.5539916    | 0.9922481    | 0.6656585    | 0.9917355    | 0.9180038    |
| #### Bn-scaff_15908_1-p67066C-genome specific (napus-oleracea) | 0.9856459    | 0.7739775    | 1            | 0.6876103    | not scorable | not scorable |
| #### Bn-scaff_15908_1-p75546C-genome specific (napus-oleracea) | 0.9784689    | 0.6012004    | 1            | 0.778666     | not scorable | not scorable |
| #### Bn-scaff_15908_1-p77093C-genome specific (napus-oleracea) | 0.9904306    | 0.7598193    | 0.9922481    | 0.7532709    | not scorable | not scorable |
| #### Bn-scaff_15908_1-p77197C-genome specific (napus-oleracea) | 0.9832536    | 0.7598851    | 1            | 0.665424     | not scorable | not scorable |
| #### Bn-scaff_15908_1-p77219C-genome specific (napus-oleracea) | 0.9688995    | 0.7213235    | 0.9922481    | 0.7179614    | not scorable | not scorable |
| #### Bn-scaff_15908_1-p79878C-genome specific (napus-oleracea) | 0.9808612    | 0.7228162    | 1            | 0.7424204    | not scorable | not scorable |
| #### Bn-scaff_15908_1-p80748C-genome specific (napus-oleracea) | 0.9712918    | 0.7107872    | 0.9922481    | 0.6870373    | not scorable | not scorable |
| #### Bn-scaff_15908_1-p80812C-genome specific (napus-oleracea) | 0.9282297    | 0.6838001    | 0.9922481    | 0.8337666    | not scorable | not scorable |
| #### Bn-scaff_15908_1-p81966C-genome specific (napus-oleracea) | 0.9760765    | 0.7498962    | 0.9922481    | 0.8373728    | not scorable | not scorable |

|                                                                 |              |              |              |              |              |              |
|-----------------------------------------------------------------|--------------|--------------|--------------|--------------|--------------|--------------|
| #### Bn-scaff_15908_1-p82270 C-genome specific (napus-oleracea) | 0.9736842    | 0.7700424    | 0.9767442    | 0.8188614    | not scorable | not scorable |
| #### Bn-scaff_15908_1-p83315 C-genome specific (napus-oleracea) | 0.9880383    | 0.7497289    | 0.9922481    | 0.8082171    | not scorable | not scorable |
| #### Bn-scaff_15908_1-p83554 C-genome specific (napus-oleracea) | 0.9808612    | 0.7297177    | 0.9844961    | 0.7216703    | not scorable | not scorable |
| #### Bn-scaff_15908_1-p84401 C-genome specific (napus-oleracea) | 0.9808612    | 0.7528663    | 1            | 0.8260473    | not scorable | not scorable |
| #### Bn-scaff_15908_1-p84408 C-genome specific (napus-oleracea) | 0.9760765    | 0.7525347    | 0.9922481    | 0.7884488    | not scorable | not scorable |
| #### Bn-scaff_15908_1-p84413 C-genome specific (napus-oleracea) | 0.9928229    | 0.7495916    | 1            | 0.8440034    | not scorable | not scorable |
| #### Bn-scaff_15908_1-p85005 C-genome specific (napus-oleracea) | 0.9808612    | 0.7437082    | 1            | 0.7472867    | not scorable | not scorable |
| #### Bn-scaff_15908_1-p85457 genome unspecific (all in)         | 0.9617225    | 0.4613922    | 0.9689922    | 0.7767596    | 1            | 0.9158036    |
| #### Bn-scaff_15908_1-p87594 genome unspecific (oleracea-rapa)  | not scorable | not scorable | 0.9922481    | 0.7523942    | 1            | 0.7262191    |
| #### Bn-scaff_15908_1-p88516 C-genome specific (napus-oleracea) | 0.9784689    | 0.7735092    | 0.9922481    | 0.8110747    | not scorable | not scorable |
| #### Bn-scaff_15908_1-p88523 C-genome specific (napus-oleracea) | 0.9880383    | 0.7639281    | 1            | 0.7165425    | not scorable | not scorable |
| #### Bn-scaff_15908_1-p88600 C-genome specific (napus-oleracea) | 0.9784689    | 0.781553     | 0.9844961    | 0.8353971    | not scorable | not scorable |
| #### Bn-scaff_15908_1-p88639 C-genome specific (napus-oleracea) | 0.9593301    | 0.7897335    | 1            | 0.7187088    | not scorable | not scorable |
| #### Bn-scaff_15908_1-p90342 genome unspecific (all in)         | 0.937799     | 0.376439     | 0.9922481    | 0.5533395    | 1            | 0.9049978    |
| #### Bn-scaff_15908_1-p91166 genome unspecific (oleracea-rapa)  | not scorable | not scorable | 1            | 0.796087     | 1            | 0.8976148    |
| #### Bn-scaff_15908_1-p92310 C-genome specific (napus-oleracea) | 0.9952153    | 0.7999393    | 1            | 0.7661645    | not scorable | not scorable |
| #### Bn-scaff_15908_1-p93882 genome unspecific (all in)         | 0.9904306    | 0.6108922    | 0.9534883    | 0.6968243    | 0.7768595    | 0.7876987    |
| #### Bn-scaff_15908_1-p95843 C-genome specific (napus-oleracea) | 0.9928229    | 0.3199163    | 1            | 0.7270799    | not scorable | not scorable |
| #### Bn-scaff_15908_1-p95888 C-genome specific (napus-oleracea) | 0.9784689    | 0.7153785    | 0.9922481    | 0.7446853    | not scorable | not scorable |
| #### Bn-scaff_15908_1-p96678 C-genome specific (napus-oleracea) | 0.9880383    | 0.9240721    | 0.9302326    | 0.6928805    | not scorable | not scorable |
| #### Bn-scaff_15911_1-p15553 C-genome specific (napus-oleracea) | 0.9832536    | 0.7705129    | 0.9767442    | 0.7939726    | not scorable | not scorable |
| #### Bn-scaff_15911_1-p17744 napus specific                     | 0.9832536    | 0.4845187    | not scorable | not scorable | not scorable | not scorable |
| #### Bn-scaff_15911_1-p21199 C-genome specific (napus-oleracea) | 0.9904306    | 0.7759089    | 0.9922481    | 0.8154362    | not scorable | not scorable |
| #### Bn-scaff_15911_1-p21905 C-genome specific (napus-oleracea) | 0.9976076    | 0.4763975    | 1            | 0.4871291    | not scorable | not scorable |
| #### Bn-scaff_15911_1-p25332 all not scorable                   | not scorable | not scorable | not scorable | not scorable | not scorable | not scorable |
| #### Bn-scaff_15911_1-p25336 C-genome specific (napus-oleracea) | 1            | 0.8110062    | 0.9767442    | 0.8041461    | not scorable | not scorable |
| #### Bn-scaff_15911_1-p25383 C-genome specific (napus-oleracea) | 0.9928229    | 0.6426504    | 0.9767442    | 0.5183933    | not scorable | not scorable |
| #### Bn-scaff_15911_1-p25643 C-genome specific (napus-oleracea) | 0.9856459    | 0.7540727    | 0.9844961    | 0.7724669    | not scorable | not scorable |
| #### Bn-scaff_15911_1-p25664 C-genome specific (napus-oleracea) | 0.9856459    | 0.8695959    | 0.9922481    | 0.7937827    | not scorable | not scorable |
| #### Bn-scaff_15911_1-p25674 C-genome specific (napus-oleracea) | 0.9928229    | 0.7072855    | 0.9767442    | 0.7425744    | not scorable | not scorable |
| #### Bn-scaff_15911_1-p25900 C-genome specific (napus-oleracea) | 0.9880383    | 0.7323259    | 0.9689922    | 0.7660771    | not scorable | not scorable |
| #### Bn-scaff_15911_1-p26038 C-genome specific (napus-oleracea) | 0.9928229    | 0.8819197    | 0.9767442    | 0.8077902    | not scorable | not scorable |
| #### Bn-scaff_15911_1-p27198 C-genome specific (napus-oleracea) | 0.9952153    | 0.8092792    | 1            | 0.8191361    | not scorable | not scorable |

|                                                                 |           |           |           |           |              |              |
|-----------------------------------------------------------------|-----------|-----------|-----------|-----------|--------------|--------------|
| #### Bn-scaff_15911_1-p28449 C-genome specific (napus-oleracea) | 0.9880383 | 0.8715212 | 0.9922481 | 0.7654101 | not scorable | not scorable |
| #### Bn-scaff_15911_1-p28786 C-genome specific (napus-oleracea) | 0.9952153 | 0.779803  | 1         | 0.6785457 | not scorable | not scorable |
| #### Bn-scaff_15911_1-p29063 C-genome specific (napus-oleracea) | 0.9952153 | 0.8010458 | 0.9922481 | 0.675717  | not scorable | not scorable |
| #### Bn-scaff_15911_1-p29156 C-genome specific (napus-oleracea) | 0.9904306 | 0.8402446 | 0.9844961 | 0.7835218 | not scorable | not scorable |
| #### Bn-scaff_15911_1-p30043 C-genome specific (napus-oleracea) | 1         | 0.9005004 | 0.9922481 | 0.8197532 | not scorable | not scorable |
| #### Bn-scaff_15911_1-p31254 C-genome specific (napus-oleracea) | 0.9976076 | 0.8247299 | 0.9844961 | 0.7187812 | not scorable | not scorable |
| #### Bn-scaff_15911_1-p31360 C-genome specific (napus-oleracea) | 0.9928229 | 0.7200301 | 1         | 0.7553492 | not scorable | not scorable |
| #### Bn-scaff_15911_1-p31406 C-genome specific (napus-oleracea) | 0.9952153 | 0.7337867 | 0.9922481 | 0.7473207 | not scorable | not scorable |
| #### Bn-scaff_15911_1-p31425 C-genome specific (napus-oleracea) | 0.9976076 | 0.7046708 | 0.9922481 | 0.7061774 | not scorable | not scorable |
| #### Bn-scaff_15911_1-p31431 C-genome specific (napus-oleracea) | 0.9928229 | 0.7372295 | 0.9844961 | 0.6976792 | not scorable | not scorable |
| #### Bn-scaff_15911_1-p31653 C-genome specific (napus-oleracea) | 0.9976076 | 0.6208793 | 0.9612403 | 0.5762829 | not scorable | not scorable |
| #### Bn-scaff_15911_1-p31666 C-genome specific (napus-oleracea) | 0.9976076 | 0.7756254 | 0.9922481 | 0.7982246 | not scorable | not scorable |
| #### Bn-scaff_15911_1-p31680 C-genome specific (napus-oleracea) | 0.9952153 | 0.8876377 | 0.9844961 | 0.7936386 | not scorable | not scorable |
| #### Bn-scaff_15911_1-p31728 genome unspecific (all in)         | 0.9952153 | 0.6919309 | 0.9767442 | 0.6574543 | 1            | 0.8738006    |
| #### Bn-scaff_15911_1-p31733 C-genome specific (napus-oleracea) | 0.9808612 | 0.6609425 | 0.9767442 | 0.6807764 | not scorable | not scorable |
| #### Bn-scaff_15911_1-p31767 C-genome specific (napus-oleracea) | 0.9928229 | 0.8406879 | 0.9767442 | 0.777199  | not scorable | not scorable |
| #### Bn-scaff_15911_1-p31768 C-genome specific (napus-oleracea) | 1         | 0.8492962 | 0.9767442 | 0.7824923 | not scorable | not scorable |
| #### Bn-scaff_15911_1-p32268 C-genome specific (napus-oleracea) | 0.9880383 | 0.7072051 | 1         | 0.7524275 | not scorable | not scorable |
| #### Bn-scaff_15911_1-p32279 C-genome specific (napus-oleracea) | 0.9904306 | 0.7081141 | 0.9689922 | 0.7109882 | not scorable | not scorable |
| #### Bn-scaff_15911_1-p32709 C-genome specific (napus-oleracea) | 0.9952153 | 0.8492553 | 0.9767442 | 0.7760546 | not scorable | not scorable |
| #### Bn-scaff_15911_1-p32716 C-genome specific (napus-oleracea) | 0.9928229 | 0.797749  | 0.9844961 | 0.7492178 | not scorable | not scorable |
| #### Bn-scaff_15911_1-p33086 C-genome specific (napus-oleracea) | 0.9880383 | 0.6924406 | 0.9612403 | 0.6937376 | not scorable | not scorable |
| #### Bn-scaff_15911_1-p33195 genome unspecific (all in)         | 0.9952153 | 0.5550631 | 0.9767442 | 0.7908625 | 1            | 0.9170496    |
| #### Bn-scaff_15911_1-p33360 C-genome specific (napus-oleracea) | 0.9976076 | 0.786852  | 0.9844961 | 0.7501829 | not scorable | not scorable |
| #### Bn-scaff_15911_1-p33942 C-genome specific (napus-oleracea) | 0.9832536 | 0.6902971 | 0.9534883 | 0.699289  | not scorable | not scorable |
| #### Bn-scaff_15911_1-p33997 C-genome specific (napus-oleracea) | 0.9952153 | 0.7819977 | 0.9922481 | 0.8570334 | not scorable | not scorable |
| #### Bn-scaff_15911_1-p34603 C-genome specific (napus-oleracea) | 0.9904306 | 0.7237259 | 1         | 0.8386346 | not scorable | not scorable |
| #### Bn-scaff_15911_1-p34663 C-genome specific (napus-oleracea) | 0.9904306 | 0.6880317 | 0.9767442 | 0.6706141 | not scorable | not scorable |
| #### Bn-scaff_15911_1-p34691 C-genome specific (napus-oleracea) | 0.9904306 | 0.7682082 | 1         | 0.8300086 | not scorable | not scorable |
| #### Bn-scaff_15911_1-p34703 C-genome specific (napus-oleracea) | 0.9928229 | 0.7025474 | 0.9612403 | 0.7237009 | not scorable | not scorable |
| #### Bn-scaff_15911_1-p34715 C-genome specific (napus-oleracea) | 0.9880383 | 0.7761089 | 0.9767442 | 0.7065215 | not scorable | not scorable |
| #### Bn-scaff_15911_1-p34745 C-genome specific (napus-oleracea) | 0.9952153 | 0.7055662 | 0.9767442 | 0.7209759 | not scorable | not scorable |
| #### Bn-scaff_15911_1-p34787 C-genome specific (napus-oleracea) | 0.9928229 | 0.7131797 | 0.9767442 | 0.7167961 | not scorable | not scorable |

|                                                                |           |           |           |           |              |              |
|----------------------------------------------------------------|-----------|-----------|-----------|-----------|--------------|--------------|
| #### Bn-scaff_15911_1-p34791C-genome specific (napus-oleracea) | 0.9760765 | 0.6732132 | 0.9767442 | 0.670917  | not scorable | not scorable |
| #### Bn-scaff_15911_1-p34821C-genome specific (napus-oleracea) | 0.9832536 | 0.6793541 | 1         | 0.6946095 | not scorable | not scorable |
| #### Bn-scaff_15911_1-p34845C-genome specific (napus-oleracea) | 0.9904306 | 0.7608529 | 0.9689922 | 0.7108802 | not scorable | not scorable |
| #### Bn-scaff_15911_1-p34853C-genome specific (napus-oleracea) | 0.9904306 | 0.7752187 | 0.9922481 | 0.8093328 | not scorable | not scorable |
| #### Bn-scaff_15911_1-p34873C-genome specific (napus-oleracea) | 0.9832536 | 0.5944369 | 0.9534883 | 0.565582  | not scorable | not scorable |
| #### Bn-scaff_15911_1-p34881C-genome specific (napus-oleracea) | 0.9856459 | 0.6612067 | 0.9844961 | 0.5923135 | not scorable | not scorable |
| #### Bn-scaff_15911_1-p34939C-genome specific (napus-oleracea) | 0.9880383 | 0.7951985 | 0.9844961 | 0.7875881 | not scorable | not scorable |
| #### Bn-scaff_15911_1-p34949C-genome specific (napus-oleracea) | 0.9856459 | 0.7140427 | 0.9844961 | 0.7871001 | not scorable | not scorable |
| #### Bn-scaff_15911_1-p34956C-genome specific (napus-oleracea) | 0.9880383 | 0.7458557 | 0.9844961 | 0.7884135 | not scorable | not scorable |
| #### Bn-scaff_15911_1-p34969C-genome specific (napus-oleracea) | 0.9856459 | 0.6805757 | 0.9689922 | 0.6285746 | not scorable | not scorable |
| #### Bn-scaff_15911_1-p34974C-genome specific (napus-oleracea) | 0.9880383 | 0.6958279 | 0.9612403 | 0.6913701 | not scorable | not scorable |
| #### Bn-scaff_15911_1-p35450C-genome specific (napus-oleracea) | 0.9976076 | 0.7494481 | 1         | 0.8568916 | not scorable | not scorable |
| #### Bn-scaff_15911_1-p35453C-genome specific (napus-oleracea) | 0.9880383 | 0.8228628 | 0.9767442 | 0.7489151 | not scorable | not scorable |
| #### Bn-scaff_15911_1-p35476C-genome specific (napus-oleracea) | 0.9976076 | 0.6209211 | 0.9767442 | 0.6438241 | not scorable | not scorable |
| #### Bn-scaff_15911_1-p35481C-genome specific (napus-oleracea) | 1         | 0.7117757 | 0.9844961 | 0.7416425 | not scorable | not scorable |
| #### Bn-scaff_15911_1-p35615C-genome specific (napus-oleracea) | 0.9928229 | 0.7117215 | 1         | 0.7693058 | not scorable | not scorable |
| #### Bn-scaff_15911_1-p35709C-genome specific (napus-oleracea) | 0.9928229 | 0.7072051 | 0.9767442 | 0.7940391 | not scorable | not scorable |
| #### Bn-scaff_15911_1-p35731C-genome specific (napus-oleracea) | 0.9904306 | 0.6999377 | 0.9767442 | 0.7356798 | not scorable | not scorable |
| #### Bn-scaff_15911_1-p35802C-genome specific (napus-oleracea) | 0.9856459 | 0.7101927 | 0.9612403 | 0.7699012 | not scorable | not scorable |
| #### Bn-scaff_15911_1-p35835C-genome specific (napus-oleracea) | 0.9976076 | 0.7577325 | 0.9689922 | 0.7649435 | not scorable | not scorable |
| #### Bn-scaff_15911_1-p35889C-genome specific (napus-oleracea) | 0.9904306 | 0.7884802 | 0.9922481 | 0.7794901 | not scorable | not scorable |
| #### Bn-scaff_15911_1-p35935C-genome specific (napus-oleracea) | 0.9904306 | 0.7368774 | 0.9767442 | 0.6349313 | not scorable | not scorable |
| #### Bn-scaff_15911_1-p36003C-genome specific (napus-oleracea) | 0.9952153 | 0.8760633 | 0.9922481 | 0.7874824 | not scorable | not scorable |
| #### Bn-scaff_15911_1-p36038C-genome specific (napus-oleracea) | 0.9928229 | 0.841732  | 0.9767442 | 0.7749981 | not scorable | not scorable |
| #### Bn-scaff_15911_1-p36043C-genome specific (napus-oleracea) | 0.9976076 | 0.7214646 | 0.9844961 | 0.7785016 | not scorable | not scorable |
| #### Bn-scaff_15911_1-p36218C-genome specific (napus-oleracea) | 0.9976076 | 0.7611865 | 0.9844961 | 0.7629244 | not scorable | not scorable |
| #### Bn-scaff_15911_1-p36246C-genome specific (napus-oleracea) | 0.9808612 | 0.7574112 | 0.9612403 | 0.6967734 | not scorable | not scorable |
| #### Bn-scaff_15911_1-p36260C-genome specific (napus-oleracea) | 0.9736842 | 0.7135357 | 0.9224806 | 0.7040766 | not scorable | not scorable |
| #### Bn-scaff_15911_1-p36298C-genome specific (napus-oleracea) | 0.9928229 | 0.8589104 | 0.9844961 | 0.7788464 | not scorable | not scorable |
| #### Bn-scaff_15911_1-p36314C-genome specific (napus-oleracea) | 0.9473684 | 0.7468474 | 0.8992248 | 0.6044595 | not scorable | not scorable |
| #### Bn-scaff_15911_1-p36345C-genome specific (napus-oleracea) | 0.9904306 | 0.7885571 | 0.9922481 | 0.8793033 | not scorable | not scorable |
| #### Bn-scaff_15911_1-p36777C-genome specific (napus-oleracea) | 0.9928229 | 0.770365  | 0.9767442 | 0.6883289 | not scorable | not scorable |
| #### Bn-scaff_15911_1-p36783C-genome specific (napus-oleracea) | 0.9904306 | 0.7025294 | 0.9689922 | 0.648405  | not scorable | not scorable |

|                                                                |              |              |              |              |              |              |
|----------------------------------------------------------------|--------------|--------------|--------------|--------------|--------------|--------------|
| #### Bn-scaff_15911_1-p37381C-genome specific (napus-oleracea) | 0.9928229    | 0.7658756    | 0.9844961    | 0.7905483    | not scorable | not scorable |
| #### Bn-scaff_15911_1-p37463C-genome specific (napus-oleracea) | 0.9832536    | 0.6837014    | 0.9689922    | 0.7073276    | not scorable | not scorable |
| #### Bn-scaff_15911_1-p37629C-genome specific (napus-oleracea) | 0.9952153    | 0.7713711    | 0.9844961    | 0.7865587    | not scorable | not scorable |
| #### Bn-scaff_15911_1-p37660C-genome specific (napus-oleracea) | 0.9784689    | 0.809246     | 0.9922481    | 0.7786286    | not scorable | not scorable |
| #### Bn-scaff_15911_1-p43114C-genome specific (napus-oleracea) | 0.9976076    | 0.8529261    | 1            | 0.7341887    | not scorable | not scorable |
| #### Bn-scaff_15911_1-p43121C-genome specific (napus-oleracea) | 0.9904306    | 0.8366014    | 0.9922481    | 0.7212113    | not scorable | not scorable |
| #### Bn-scaff_15911_1-p43348C-genome specific (napus-oleracea) | 0.9856459    | 0.8291876    | 0.9689922    | 0.7577175    | not scorable | not scorable |
| #### Bn-scaff_15911_1-p43365C-genome specific (napus-oleracea) | 0.9928229    | 0.8384618    | 1            | 0.8198679    | not scorable | not scorable |
| #### Bn-scaff_15911_1-p43376C-genome specific (napus-oleracea) | 0.9856459    | 0.7786362    | 0.9922481    | 0.7314759    | not scorable | not scorable |
| #### Bn-scaff_15911_1-p43412C-genome specific (napus-oleracea) | 0.9904306    | 0.7814167    | 0.9922481    | 0.7130664    | not scorable | not scorable |
| #### Bn-scaff_15911_1-p43503C-genome specific (napus-oleracea) | 0.9856459    | 0.7560933    | 0.9844961    | 0.7019052    | not scorable | not scorable |
| #### Bn-scaff_15911_1-p43537C-genome specific (napus-oleracea) | 0.9856459    | 0.7536473    | 0.9844961    | 0.8054164    | not scorable | not scorable |
| #### Bn-scaff_15911_1-p43624C-genome specific (napus-oleracea) | 0.9832536    | 0.779408     | 0.9844961    | 0.7678161    | not scorable | not scorable |
| #### Bn-scaff_15911_1-p43666C-genome specific (napus-oleracea) | 0.9880383    | 0.6959094    | 0.9922481    | 0.6574672    | not scorable | not scorable |
| #### Bn-scaff_15911_1-p43704C-genome specific (napus-oleracea) | 0.9880383    | 0.840552     | 0.9844961    | 0.7574062    | not scorable | not scorable |
| #### Bn-scaff_15911_1-p44108C-genome specific (oleracea only)  | not scorable | not scorable | 0.9612403    | 0.6896145    | not scorable | not scorable |
| #### Bn-scaff_15911_1-p44758C-genome specific (napus-oleracea) | 0.9928229    | 0.7005038    | 0.9767442    | 0.7175651    | not scorable | not scorable |
| #### Bn-scaff_15911_1-p51088genome unspecific (all in)         | 0.9928229    | 0.5511395    | 0.9612403    | 0.5410624    | 1            | 0.8843402    |
| #### Bn-scaff_15911_1-p51647C-genome specific (napus-oleracea) | 0.9952153    | 0.8702264    | 0.9844961    | 0.7905973    | not scorable | not scorable |
| #### Bn-scaff_15911_1-p51690C-genome specific (napus-oleracea) | 1            | 0.7886401    | 0.9844961    | 0.7970688    | not scorable | not scorable |
| #### Bn-scaff_15911_1-p51698C-genome specific (napus-oleracea) | 0.9952153    | 0.7442423    | 0.9922481    | 0.8123073    | not scorable | not scorable |
| #### Bn-scaff_15911_1-p53948A-genome specific (napus-rapa)     | 0.9760765    | 0.8433538    | not scorable | not scorable | 1            | 0.8210985    |
| #### Bn-scaff_15911_1-p54596C-genome specific (napus-oleracea) | 1            | 0.8306457    | 0.9767442    | 0.8029032    | not scorable | not scorable |
| #### Bn-scaff_15911_1-p54602C-genome specific (napus-oleracea) | 0.9928229    | 0.6417168    | 0.9534883    | 0.507638     | not scorable | not scorable |
| #### Bn-scaff_15911_1-p55587C-genome specific (napus-oleracea) | 0.9928229    | 0.7113676    | 0.9844961    | 0.7848738    | not scorable | not scorable |
| #### Bn-scaff_15911_1-p55986C-genome specific (napus-oleracea) | 0.9712918    | 0.5988576    | 0.9844961    | 0.6557199    | not scorable | not scorable |
| #### Bn-scaff_15911_1-p56073napus specific                     | 0.9617225    | 0.8188319    | not scorable | not scorable | not scorable | not scorable |
| #### Bn-scaff_15911_1-p56079C-genome specific (napus-oleracea) | 0.9928229    | 0.7693138    | 1            | 0.6964433    | not scorable | not scorable |
| #### Bn-scaff_15911_1-p56084C-genome specific (napus-oleracea) | 0.9904306    | 0.7325917    | 0.9844961    | 0.6959355    | not scorable | not scorable |
| #### Bn-scaff_15911_1-p56818C-genome specific (napus-oleracea) | 0.9928229    | 0.6962872    | 0.9922481    | 0.6951423    | not scorable | not scorable |
| #### Bn-scaff_15911_1-p56911C-genome specific (napus-oleracea) | 0.9880383    | 0.7412056    | 0.9767442    | 0.7268139    | not scorable | not scorable |
| #### Bn-scaff_15911_1-p56923C-genome specific (napus-oleracea) | 0.9856459    | 0.7586228    | 0.9379845    | 0.6955941    | not scorable | not scorable |
| #### Bn-scaff_15911_1-p56923C-genome specific (napus-oleracea) | 0.9856459    | 0.7241849    | 0.9844961    | 0.7397462    | not scorable | not scorable |

|                                                                 |              |              |              |              |              |              |
|-----------------------------------------------------------------|--------------|--------------|--------------|--------------|--------------|--------------|
| #### Bn-scaff_15911_1-p56939 C-genome specific (napus-oleracea) | 0.9856459    | 0.7904981    | 0.9767442    | 0.745228     | not scorable | not scorable |
| #### Bn-scaff_15911_1-p56976 C-genome specific (napus-oleracea) | 0.9928229    | 0.8281155    | 0.9767442    | 0.7862617    | not scorable | not scorable |
| #### Bn-scaff_15911_1-p56981 C-genome specific (napus-oleracea) | 0.9856459    | 0.7751364    | 0.9534883    | 0.624242     | not scorable | not scorable |
| #### Bn-scaff_15911_1-p57032 C-genome specific (napus-oleracea) | 0.9856459    | 0.8686242    | 0.9844961    | 0.7981157    | not scorable | not scorable |
| #### Bn-scaff_15911_1-p57044 C-genome specific (napus-oleracea) | 0.9665072    | 0.5665278    | 0.9689922    | 0.8071346    | not scorable | not scorable |
| #### Bn-scaff_15911_1-p57124 C-genome specific (napus-oleracea) | 0.9928229    | 0.8674516    | 0.9922481    | 0.7400556    | not scorable | not scorable |
| #### Bn-scaff_15911_1-p57184 C-genome specific (napus-oleracea) | 0.9832536    | 0.6974576    | 0.9534883    | 0.7814606    | not scorable | not scorable |
| #### Bn-scaff_15911_1-p57976 C-genome specific (napus-oleracea) | 1            | 0.8141462    | 0.9767442    | 0.7414566    | not scorable | not scorable |
| #### Bn-scaff_15911_1-p58098 C-genome specific (napus-oleracea) | 0.9928229    | 0.7763813    | 0.9689922    | 0.8098179    | not scorable | not scorable |
| #### Bn-scaff_15911_1-p58131 C-genome specific (napus-oleracea) | 0.9928229    | 0.7186152    | 0.9534883    | 0.7068205    | not scorable | not scorable |
| #### Bn-scaff_15911_1-p58142 C-genome specific (napus-oleracea) | 0.9617225    | 0.9205657    | 0.6744186    | 0.8251224    | not scorable | not scorable |
| #### Bn-scaff_15911_1-p58170 C-genome specific (napus-oleracea) | 0.9832536    | 0.7929136    | 0.9767442    | 0.7779575    | not scorable | not scorable |
| #### Bn-scaff_15911_1-p58216 C-genome specific (napus-oleracea) | 0.9880383    | 0.8057875    | 0.9534883    | 0.7313847    | not scorable | not scorable |
| #### Bn-scaff_15911_1-p58225 genome unspecific (oleracea-rapa)  | not scorable | not scorable | 0.9767442    | 0.3980071    | 1            | 0.9486657    |
| #### Bn-scaff_15911_1-p58230 genome unspecific (oleracea-rapa)  | not scorable | not scorable | 0.9302326    | 0.4277845    | 1            | 0.9508801    |
| #### Bn-scaff_15911_1-p58255 C-genome specific (napus-oleracea) | 0.9832536    | 0.7015785    | 0.9844961    | 0.7740891    | not scorable | not scorable |
| #### Bn-scaff_15911_1-p58399 C-genome specific (napus-oleracea) | 0.9952153    | 0.8549489    | 0.9844961    | 0.8095888    | not scorable | not scorable |
| #### Bn-scaff_15911_1-p58454 C-genome specific (napus-oleracea) | 0.9952153    | 0.747087     | 0.9767442    | 0.7541271    | not scorable | not scorable |
| #### Bn-scaff_15911_1-p59068 C-genome specific (napus-oleracea) | 0.9976076    | 0.831186     | 1            | 0.6743361    | not scorable | not scorable |
| #### Bn-scaff_15911_1-p59239 C-genome specific (napus-oleracea) | 0.9808612    | 0.6148573    | 1            | 0.781056     | not scorable | not scorable |
| #### Bn-scaff_15911_1-p59606 C-genome specific (napus-oleracea) | 1            | 0.71272      | 0.9922481    | 0.7221122    | not scorable | not scorable |
| #### Bn-scaff_15911_1-p60032 C-genome specific (napus-oleracea) | 0.9928229    | 0.7140315    | 1            | 0.7453101    | not scorable | not scorable |
| #### Bn-scaff_15911_1-p61194 napus specific                     | 0.9928229    | 0.9256247    | not scorable | not scorable | not scorable | not scorable |
| #### Bn-scaff_15911_1-p62376 genome unspecific (all in)         | 0.9976076    | 0.4289688    | 1            | 0.6527334    | 1            | 0.8333703    |
| #### Bn-scaff_15911_1-p62411 C-genome specific (napus-oleracea) | 0.9856459    | 0.6616679    | 0.9922481    | 0.6179664    | not scorable | not scorable |
| #### Bn-scaff_15911_1-p62523 C-genome specific (napus-oleracea) | 0.9832536    | 0.725956     | 0.9844961    | 0.6904959    | not scorable | not scorable |
| #### Bn-scaff_15911_1-p63558 C-genome specific (napus-oleracea) | 0.9952153    | 0.8200575    | 0.9844961    | 0.8043242    | not scorable | not scorable |
| #### Bn-scaff_15911_1-p64968 C-genome specific (napus-oleracea) | 0.9952153    | 0.7708591    | 0.9922481    | 0.8339385    | not scorable | not scorable |
| #### Bn-scaff_15911_1-p64984 C-genome specific (napus-oleracea) | 0.9880383    | 0.6983698    | 0.9689922    | 0.701827     | not scorable | not scorable |
| #### Bn-scaff_15911_1-p65092 C-genome specific (napus-oleracea) | 0.9928229    | 0.7935868    | 0.9922481    | 0.8181487    | not scorable | not scorable |
| #### Bn-scaff_15911_1-p65148 C-genome specific (napus-oleracea) | 0.9928229    | 0.7386692    | 1            | 0.8069624    | not scorable | not scorable |
| #### Bn-scaff_15911_1-p65648 C-genome specific (napus-oleracea) | 0.9856459    | 0.7872759    | 0.9844961    | 0.7509014    | not scorable | not scorable |
| #### Bn-scaff_15911_1-p65890 C-genome specific (napus-oleracea) | 0.9952153    | 0.8712869    | 1            | 0.761018     | not scorable | not scorable |



|                                                                 |           |           |           |           |              |              |
|-----------------------------------------------------------------|-----------|-----------|-----------|-----------|--------------|--------------|
| #### Bn-scaff_15911_1-p65905 C-genome specific (napus-oleracea) | 0.9880383 | 0.7484874 | 1         | 0.8374124 | not scorable | not scorable |
| #### Bn-scaff_15911_1-p65958 C-genome specific (napus-oleracea) | 0.9952153 | 0.6686772 | 1         | 0.6338095 | not scorable | not scorable |
| #### Bn-scaff_15911_1-p65965 C-genome specific (napus-oleracea) | 0.9928229 | 0.694736  | 0.9922481 | 0.6883867 | not scorable | not scorable |
| #### Bn-scaff_15911_1-p66058 C-genome specific (napus-oleracea) | 0.9928229 | 0.6957997 | 1         | 0.6421795 | not scorable | not scorable |
| #### Bn-scaff_15911_1-p66067 C-genome specific (napus-oleracea) | 0.9928229 | 0.6993734 | 0.9844961 | 0.743234  | not scorable | not scorable |
| #### Bn-scaff_15911_1-p66081 C-genome specific (napus-oleracea) | 0.9904306 | 0.7344867 | 1         | 0.6469993 | not scorable | not scorable |
| #### Bn-scaff_15911_1-p66081 C-genome specific (napus-oleracea) | 0.9976076 | 0.7775385 | 1         | 0.833128  | not scorable | not scorable |
| #### Bn-scaff_15911_1-p66093 C-genome specific (napus-oleracea) | 0.9976076 | 0.6890536 | 1         | 0.6592447 | not scorable | not scorable |
| #### Bn-scaff_15911_1-p66112 C-genome specific (napus-oleracea) | 0.9928229 | 0.847214  | 0.9767442 | 0.7401705 | not scorable | not scorable |
| #### Bn-scaff_15911_1-p66124 C-genome specific (napus-oleracea) | 0.9928229 | 0.7160019 | 1         | 0.7702355 | not scorable | not scorable |
| #### Bn-scaff_15911_1-p68217 C-genome specific (napus-oleracea) | 0.9952153 | 0.7374452 | 0.9844961 | 0.8335804 | not scorable | not scorable |
| #### Bn-scaff_15911_1-p68222 C-genome specific (napus-oleracea) | 0.9952153 | 0.642156  | 1         | 0.5997742 | not scorable | not scorable |
| #### Bn-scaff_15911_1-p68509 C-genome specific (napus-oleracea) | 0.9880383 | 0.6982534 | 0.9844961 | 0.7243308 | not scorable | not scorable |
| #### Bn-scaff_15911_1-p68591 C-genome specific (napus-oleracea) | 0.9976076 | 0.7295695 | 0.9844961 | 0.6885834 | not scorable | not scorable |
| #### Bn-scaff_15911_1-p68728 C-genome specific (napus-oleracea) | 0.9928229 | 0.694372  | 0.9767442 | 0.6527258 | not scorable | not scorable |
| #### Bn-scaff_15911_1-p68746 C-genome specific (napus-oleracea) | 0.9952153 | 0.7006917 | 0.9767442 | 0.658435  | not scorable | not scorable |
| #### Bn-scaff_15911_1-p71700 C-genome specific (napus-oleracea) | 0.9832536 | 0.8216969 | 1         | 0.8305349 | not scorable | not scorable |
| #### Bn-scaff_15911_1-p74298 C-genome specific (napus-oleracea) | 0.9856459 | 0.7994537 | 1         | 0.8530719 | not scorable | not scorable |
| #### Bn-scaff_15911_1-p74327 C-genome specific (napus-oleracea) | 0.9641148 | 0.8266339 | 0.9457364 | 0.8531508 | not scorable | not scorable |
| #### Bn-scaff_15911_1-p74684 C-genome specific (napus-oleracea) | 0.9856459 | 0.8030758 | 1         | 0.8177654 | not scorable | not scorable |
| #### Bn-scaff_15911_1-p75318 C-genome specific (napus-oleracea) | 0.9880383 | 0.7122665 | 1         | 0.7604798 | not scorable | not scorable |
| #### Bn-scaff_15911_1-p75377 C-genome specific (napus-oleracea) | 0.9928229 | 0.8189395 | 0.9612403 | 0.7472615 | not scorable | not scorable |
| #### Bn-scaff_15911_1-p75440 C-genome specific (napus-oleracea) | 0.9856459 | 0.6961198 | 0.9922481 | 0.7949941 | not scorable | not scorable |
| #### Bn-scaff_15911_1-p75468 C-genome specific (napus-oleracea) | 0.9904306 | 0.5762198 | 0.9767442 | 0.610276  | not scorable | not scorable |
| #### Bn-scaff_15911_1-p75475 C-genome specific (napus-oleracea) | 0.9880383 | 0.6993383 | 0.9844961 | 0.7051915 | not scorable | not scorable |
| #### Bn-scaff_15911_1-p75518 C-genome specific (napus-oleracea) | 0.9904306 | 0.7740809 | 1         | 0.7083132 | not scorable | not scorable |
| #### Bn-scaff_15911_1-p75539 C-genome specific (napus-oleracea) | 0.9904306 | 0.8000099 | 0.9844961 | 0.7722383 | not scorable | not scorable |
| #### Bn-scaff_15911_1-p75580 C-genome specific (napus-oleracea) | 0.9880383 | 0.744022  | 0.9844961 | 0.7114133 | not scorable | not scorable |
| #### Bn-scaff_15911_1-p75747 C-genome specific (napus-oleracea) | 0.9880383 | 0.710559  | 0.9922481 | 0.7644398 | not scorable | not scorable |
| #### Bn-scaff_15911_1-p75755 C-genome specific (napus-oleracea) | 0.9880383 | 0.8016061 | 1         | 0.7500259 | not scorable | not scorable |
| #### Bn-scaff_15911_1-p75828 C-genome specific (napus-oleracea) | 0.9856459 | 0.7544802 | 0.9922481 | 0.6967949 | not scorable | not scorable |
| #### Bn-scaff_15911_1-p76238 C-genome specific (napus-oleracea) | 0.9832536 | 0.7711241 | 1         | 0.8213215 | not scorable | not scorable |
| #### Bn-scaff_15911_1-p78312 genome unspecific (all in)         | 0.9952153 | 0.5697556 | 0.9689922 | 0.7340873 | 0.7768595    | 0.6610643    |

|                                                                |           |           |           |           |              |              |
|----------------------------------------------------------------|-----------|-----------|-----------|-----------|--------------|--------------|
| #### Bn-scaff_15911_1-p79741C-genome specific (napus-oleracea) | 0.9928229 | 0.7065864 | 1         | 0.7312977 | not scorable | not scorable |
| #### Bn-scaff_15911_1-p79743C-genome specific (napus-oleracea) | 0.9784689 | 0.6821544 | 0.9844961 | 0.6103159 | not scorable | not scorable |
| #### Bn-scaff_15911_1-p79764C-genome specific (napus-oleracea) | 0.9880383 | 0.7127105 | 0.9922481 | 0.6569886 | not scorable | not scorable |
| #### Bn-scaff_15911_1-p79769C-genome specific (napus-oleracea) | 0.9832536 | 0.7125723 | 1         | 0.6851784 | not scorable | not scorable |
| #### Bn-scaff_15911_1-p79837C-genome specific (napus-oleracea) | 0.9880383 | 0.7790506 | 1         | 0.7596221 | not scorable | not scorable |
| #### Bn-scaff_15911_1-p79865C-genome specific (napus-oleracea) | 0.9832536 | 0.7167341 | 0.9844961 | 0.8419359 | not scorable | not scorable |
| #### Bn-scaff_15911_1-p80145genome unspecific (all in)         | 0.9832536 | 0.7010058 | 1         | 0.7002256 | 1            | 0.8974569    |
| #### Bn-scaff_15911_1-p80159C-genome specific (napus-oleracea) | 0.9784689 | 0.7103267 | 0.9922481 | 0.8393124 | not scorable | not scorable |
| #### Bn-scaff_15911_1-p80364C-genome specific (napus-oleracea) | 0.9880383 | 0.7860413 | 0.9844961 | 0.6989003 | not scorable | not scorable |
| #### Bn-scaff_15911_1-p80380C-genome specific (napus-oleracea) | 0.9856459 | 0.7035115 | 0.9767442 | 0.7062156 | not scorable | not scorable |
| #### Bn-scaff_15911_1-p80428C-genome specific (napus-oleracea) | 0.9880383 | 0.7174062 | 0.9922481 | 0.7372793 | not scorable | not scorable |
| #### Bn-scaff_15911_1-p81350C-genome specific (napus-oleracea) | 0.9808612 | 0.7653657 | 0.4806201 | 0.8044956 | not scorable | not scorable |
| #### Bn-scaff_15911_1-p82783C-genome specific (napus-oleracea) | 0.9760765 | 0.8198761 | 0.4108527 | 0.7272967 | not scorable | not scorable |
| #### Bn-scaff_15911_1-p85210C-genome specific (napus-oleracea) | 0.9832536 | 0.4767039 | 0.9922481 | 0.4723234 | not scorable | not scorable |
| #### Bn-scaff_15911_1-p90659C-genome specific (napus-oleracea) | 0.9904306 | 0.7140671 | 0.9922481 | 0.7106612 | not scorable | not scorable |
| #### Bn-scaff_15918_1-p16111C-genome specific (napus-oleracea) | 0.9760765 | 0.6855043 | 0.9844961 | 0.8618298 | not scorable | not scorable |
| #### Bn-scaff_15918_1-p19057C-genome specific (napus-oleracea) | 0.7416268 | 0.6964992 | 0.9534883 | 0.7359099 | not scorable | not scorable |
| #### Bn-scaff_15918_1-p19063C-genome specific (napus-oleracea) | 0.7272727 | 0.6575131 | 0.9534883 | 0.7596421 | not scorable | not scorable |
| #### Bn-scaff_15918_1-p19670genome unspecific (all in)         | 0.9832536 | 0.5445261 | 0.9844961 | 0.7740276 | 1            | 0.9186355    |
| #### Bn-scaff_15918_1-p22775C-genome specific (napus-oleracea) | 0.9784689 | 0.7693931 | 0.9844961 | 0.7701661 | not scorable | not scorable |
| #### Bn-scaff_15918_1-p22967C-genome specific (napus-oleracea) | 0.9736842 | 0.682751  | 1         | 0.7893398 | not scorable | not scorable |
| #### Bn-scaff_15918_1-p22993C-genome specific (napus-oleracea) | 0.9808612 | 0.6567379 | 1         | 0.7507479 | not scorable | not scorable |
| #### Bn-scaff_15918_1-p22998C-genome specific (napus-oleracea) | 0.9712918 | 0.7028666 | 1         | 0.8281509 | not scorable | not scorable |
| #### Bn-scaff_15918_1-p23060C-genome specific (napus-oleracea) | 0.9808612 | 0.7646613 | 1         | 0.8272757 | not scorable | not scorable |
| #### Bn-scaff_15918_1-p23070C-genome specific (napus-oleracea) | 0.9784689 | 0.6513727 | 1         | 0.7038682 | not scorable | not scorable |
| #### Bn-scaff_15918_1-p30329genome unspecific (all in)         | 0.9880383 | 0.540113  | 1         | 0.7749426 | 1            | 0.8948976    |
| #### Bn-scaff_15918_1-p30381genome unspecific (all in)         | 0.9928229 | 0.3494298 | 0.9922481 | 0.4772808 | 1            | 0.7739488    |
| #### Bn-scaff_15918_1-p31063C-genome specific (napus-oleracea) | 0.9880383 | 0.675907  | 0.9844961 | 0.7297185 | not scorable | not scorable |
| #### Bn-scaff_15918_1-p31214C-genome specific (napus-oleracea) | 0.9856459 | 0.5946111 | 1         | 0.5763402 | not scorable | not scorable |
| #### Bn-scaff_15918_1-p31273C-genome specific (napus-oleracea) | 0.9904306 | 0.6891719 | 1         | 0.6866312 | not scorable | not scorable |
| #### Bn-scaff_15918_1-p31819C-genome specific (napus-oleracea) | 0.9856459 | 0.6871577 | 1         | 0.8146036 | not scorable | not scorable |
| #### Bn-scaff_15918_1-p31846C-genome specific (napus-oleracea) | 0.9784689 | 0.644563  | 1         | 0.6536983 | not scorable | not scorable |
| #### Bn-scaff_15918_1-p77389genome unspecific (all in)         | 0.9880383 | 0.2714268 | 0.9612403 | 0.3068373 | 1            | 0.8135551    |

|                                                                |              |              |              |              |              |              |
|----------------------------------------------------------------|--------------|--------------|--------------|--------------|--------------|--------------|
| #### Bn-scaff_15918_1-p77407genome unspecific (all in)         | 0.9928229    | 0.3595686    | 0.9922481    | 0.7874761    | 1            | 0.8070906    |
| #### Bn-scaff_15918_1-p77494genome unspecific (all in)         | 0.9952153    | 0.3882609    | 0.9922481    | 0.7900832    | 1            | 0.8918099    |
| #### Bn-scaff_15918_1-p77704genome unspecific (all in)         | 0.9880383    | 0.546382     | 0.9922481    | 0.699442     | 1            | 0.8049572    |
| #### Bn-scaff_15918_1-p82985C-genome specific (napus-oleracea) | 0.9856459    | 0.7587342    | 1            | 0.8701476    | not scorable | not scorable |
| #### Bn-scaff_15918_1-p83785genome unspecific (all in)         | 0.9856459    | 0.4083004    | 0.9689922    | 0.4563935    | 1            | 0.9095452    |
| #### Bn-scaff_15918_1-p84259A-genome specific (rapa only)      | not scorable | not scorable | not scorable | not scorable | 1            | 0.8103756    |
| #### Bn-scaff_15919_1-p9462 C-genome specific (napus-oleracea) | 0.9928229    | 0.7007276    | 0.9922481    | 0.7529396    | not scorable | not scorable |
| #### Bn-scaff_15923_1-p10961genome unspecific (all in)         | 0.9976076    | 0.377241     | 1            | 0.7736661    | 0.9917355    | 0.7371155    |
| #### Bn-scaff_15923_1-p12026genome unspecific (all in)         | 0.9976076    | 0.8892775    | 1            | 0.7136915    | 0.9834711    | 0.9068294    |
| #### Bn-scaff_15923_1-p12693napus specific                     | 0.9545454    | 0.4490276    | not scorable | not scorable | not scorable | not scorable |
| #### Bn-scaff_15923_1-p12824C-genome specific (oleracea only)  | not scorable | not scorable | 0.9069768    | 0.2010545    | not scorable | not scorable |
| #### Bn-scaff_15923_1-p46551C-genome specific (napus-oleracea) | 0.9880383    | 0.7332401    | 0.8604651    | 0.6478432    | not scorable | not scorable |
| #### Bn-scaff_15923_1-p48661C-genome specific (napus-oleracea) | 1            | 0.7014819    | 1            | 0.8631852    | not scorable | not scorable |
| #### Bn-scaff_15923_1-p48904C-genome specific (napus-oleracea) | 1            | 0.8402069    | 1            | 0.8366888    | not scorable | not scorable |
| #### Bn-scaff_15923_1-p63509C-genome specific (napus-oleracea) | 0.9641148    | 0.687772     | 0.6511628    | 0.7993028    | not scorable | not scorable |
| #### Bn-scaff_15923_1-p78567C-genome specific (napus-oleracea) | 0.9952153    | 0.420352     | 0.7674419    | 0.770871     | not scorable | not scorable |
| #### Bn-scaff_15923_1-p9725 C-genome specific (napus-oleracea) | 1            | 0.7054392    | 1            | 0.8533       | not scorable | not scorable |
| #### Bn-scaff_15930_1-p10496genome unspecific (all in)         | 0.9593301    | 0.3267715    | 0.9844961    | 0.5606273    | 1            | 0.823429     |
| #### Bn-scaff_15930_1-p10516all not scorable                   | not scorable | not scorable | not scorable | not scorable | not scorable | not scorable |
| #### Bn-scaff_15930_1-p20299genome unspecific (all in)         | 1            | 0.7298371    | 0.9844961    | 0.7769151    | 0.9917355    | 0.6813169    |
| #### Bn-scaff_15930_1-p20480genome unspecific (oleracea-rapa)  | not scorable | not scorable | 1            | 0.5895641    | 1            | 0.7998772    |
| #### Bn-scaff_15930_1-p25945napus specific                     | 0.9712918    | 0.7000318    | not scorable | not scorable | not scorable | not scorable |
| #### Bn-scaff_15930_1-p72371all not scorable                   | not scorable | not scorable | not scorable | not scorable | not scorable | not scorable |
| #### Bn-scaff_15936_1-p13936genome unspecific (oleracea-rapa)  | not scorable | not scorable | 1            | 0.5967305    | 0.9752066    | 0.8761232    |
| #### Bn-scaff_15936_1-p14409C-genome specific (napus-oleracea) | 0.9760765    | 0.7393728    | 1            | 0.8892958    | not scorable | not scorable |
| #### Bn-scaff_15936_1-p15921C-genome specific (napus-oleracea) | 0.9784689    | 0.7633336    | 1            | 0.8807514    | not scorable | not scorable |
| #### Bn-scaff_15936_1-p17631C-genome specific (napus-oleracea) | 0.9736842    | 0.7429343    | 1            | 0.8476686    | not scorable | not scorable |
| #### Bn-scaff_15936_1-p18778C-genome specific (napus-oleracea) | 0.9736842    | 0.7583297    | 1            | 0.8413109    | not scorable | not scorable |
| #### Bn-scaff_15936_1-p18927C-genome specific (napus-oleracea) | 0.9760765    | 0.6817712    | 1            | 0.7264988    | not scorable | not scorable |
| #### Bn-scaff_15936_1-p20128genome unspecific (all in)         | 1            | 0.5197646    | 1            | 0.799109     | 1            | 0.8961831    |
| #### Bn-scaff_15936_1-p20218genome unspecific (oleracea-rapa)  | not scorable | not scorable | 1            | 0.7058705    | 0.9917355    | 0.8912995    |
| #### Bn-scaff_15936_1-p20468napus specific                     | 0.9449761    | 0.7966762    | not scorable | not scorable | not scorable | not scorable |
| #### Bn-scaff_15936_1-p21204C-genome specific (napus-oleracea) | 0.9569378    | 0.7617588    | 0.9612403    | 0.7409906    | not scorable | not scorable |

|                                                                 |              |              |              |              |              |              |
|-----------------------------------------------------------------|--------------|--------------|--------------|--------------|--------------|--------------|
| #### Bn-scaff_15936_1-p21253 C-genome specific (napus-oleracea) | 0.6818182    | 0.904734     | 0.7054263    | 0.8422822    | not scorable | not scorable |
| #### Bn-scaff_15936_1-p22344 C-genome specific (oleracea only)  | not scorable | not scorable | 0.9922481    | 0.659231     | not scorable | not scorable |
| #### Bn-scaff_15936_1-p22637 C-genome specific (napus-oleracea) | 0.9808612    | 0.7771861    | 1            | 0.8591248    | not scorable | not scorable |
| #### Bn-scaff_15936_1-p22650 C-genome specific (napus-oleracea) | 0.9354067    | 0.6978396    | 0.9922481    | 0.8099282    | not scorable | not scorable |
| #### Bn-scaff_15936_1-p24532 C-genome specific (napus-oleracea) | 0.9760765    | 0.6862893    | 0.9922481    | 0.6575093    | not scorable | not scorable |
| #### Bn-scaff_15936_1-p26459 genome unspecific (all in)         | 0.9665072    | 0.650736     | 0.9767442    | 0.6617538    | 1            | 0.9315472    |
| #### Bn-scaff_15936_1-p27091 napus specific                     | 0.8995215    | 0.7701963    | not scorable | not scorable | not scorable | not scorable |
| #### Bn-scaff_15936_1-p34831 C-genome specific (napus-oleracea) | 0.9138756    | 0.7745314    | 1            | 0.7830372    | not scorable | not scorable |
| #### Bn-scaff_15936_1-p35552 C-genome specific (napus-oleracea) | 0.9162679    | 0.8028923    | 1            | 0.8164211    | not scorable | not scorable |
| #### Bn-scaff_15936_1-p35766 C-genome specific (napus-oleracea) | 0.9138756    | 0.8464848    | 0.9922481    | 0.742232     | not scorable | not scorable |
| #### Bn-scaff_15936_1-p35880 C-genome specific (napus-oleracea) | 0.9114832    | 0.8126452    | 1            | 0.7043327    | not scorable | not scorable |
| #### Bn-scaff_15936_1-p37267 C-genome specific (napus-oleracea) | 0.9138756    | 0.7866492    | 0.9922481    | 0.756457     | not scorable | not scorable |
| #### Bn-scaff_15936_1-p38188 C-genome specific (napus-oleracea) | 0.9138756    | 0.7912685    | 1            | 0.7323982    | not scorable | not scorable |
| #### Bn-scaff_15936_1-p38313 C-genome specific (napus-oleracea) | 0.8947368    | 0.5833172    | 1            | 0.7399979    | not scorable | not scorable |
| #### Bn-scaff_15936_1-p39599 C-genome specific (napus-oleracea) | 0.9162679    | 0.7683542    | 1            | 0.8855652    | not scorable | not scorable |
| #### Bn-scaff_15936_1-p39725 C-genome specific (napus-oleracea) | 0.9138756    | 0.7726125    | 1            | 0.8148271    | not scorable | not scorable |
| #### Bn-scaff_15936_1-p39885 genome unspecific (all in)         | 0.9162679    | 0.6833394    | 1            | 0.766781     | 1            | 0.8776575    |
| #### Bn-scaff_15936_1-p39926 genome unspecific (all in)         | 0.9736842    | 0.7017498    | 1            | 0.8544768    | 0.9669421    | 0.9335362    |
| #### Bn-scaff_15936_1-p40032 C-genome specific (napus-oleracea) | 0.9114832    | 0.7734596    | 1            | 0.9205518    | not scorable | not scorable |
| #### Bn-scaff_15936_1-p44160 genome unspecific (oleracea-rapa)  | not scorable | not scorable | 1            | 0.6448556    | 0.9752066    | 0.7397065    |
| #### Bn-scaff_15936_1-p44487 all not scorable                   | not scorable | not scorable | not scorable | not scorable | not scorable | not scorable |
| #### Bn-scaff_15936_1-p44499 C-genome specific (napus-oleracea) | 0.8995215    | 0.7614334    | 1            | 0.745667     | not scorable | not scorable |
| #### Bn-scaff_15936_1-p52759 C-genome specific (napus-oleracea) | 0.8995215    | 0.7736173    | 0.9844961    | 0.785064     | not scorable | not scorable |
| #### Bn-scaff_15959_1-p14151 genome unspecific (all in)         | 0.9832536    | 0.4026195    | 1            | 0.818383     | 1            | 0.9098991    |
| #### Bn-scaff_15959_1-p35176 genome unspecific (all in)         | 1            | 0.6247367    | 1            | 0.6027094    | 0.9917355    | 0.874098     |
| #### Bn-scaff_15959_1-p35192 C-genome specific (napus-oleracea) | 1            | 0.6460657    | 1            | 0.6384549    | not scorable | not scorable |
| #### Bn-scaff_15959_1-p37450 genome unspecific (all in)         | 0.9952153    | 0.3644503    | 1            | 0.6049414    | 1            | 0.6986263    |
| #### Bn-scaff_15959_1-p65742 A-genome specific (napus-rapa)     | 0.9976076    | 0.4108091    | not scorable | not scorable | 1            | 0.788796     |
| #### Bn-scaff_15959_1-p92102 genome unspecific (all in)         | 1            | 0.352641     | 1            | 0.8378411    | 1            | 0.7734866    |
| #### Bn-scaff_15969_1-p19115 C-genome specific (napus-oleracea) | 0.8636364    | 0.8089699    | 1            | 0.7891807    | not scorable | not scorable |
| #### Bn-scaff_15969_1-p20080 C-genome specific (napus-oleracea) | 0.8588517    | 0.970398     | 1            | 0.799879     | not scorable | not scorable |
| #### Bn-scaff_15969_1-p20144 C-genome specific (napus-oleracea) | 0.8349282    | 0.9176697    | 1            | 0.8142372    | not scorable | not scorable |
| #### Bn-scaff_15969_1-p20543 C-genome specific (napus-oleracea) | 0.84689      | 0.7507176    | 0.9844961    | 0.593358     | not scorable | not scorable |

|                                                                 |              |              |              |              |              |              |
|-----------------------------------------------------------------|--------------|--------------|--------------|--------------|--------------|--------------|
| #### Bn-scaff_15969_1-p21573 C-genome specific (napus-oleracea) | 0.8564593    | 0.8023399    | 1            | 0.7370362    | not scorable | not scorable |
| #### Bn-scaff_15969_1-p22613 C-genome specific (napus-oleracea) | 0.84689      | 0.8415428    | 0.6821706    | 0.9020618    | not scorable | not scorable |
| #### Bn-scaff_15969_1-p22898 C-genome specific (napus-oleracea) | 0.8492823    | 0.7899715    | 0.6821706    | 0.7567845    | not scorable | not scorable |
| #### Bn-scaff_15969_1-p22908 C-genome specific (napus-oleracea) | 0.8492823    | 0.7870414    | 0.6821706    | 0.7444704    | not scorable | not scorable |
| #### Bn-scaff_15969_1-p24239 C-genome specific (napus-oleracea) | 0.8636364    | 0.9371181    | 0.9922481    | 0.8063259    | not scorable | not scorable |
| #### Bn-scaff_15969_1-p24245 C-genome specific (napus-oleracea) | 0.8588517    | 0.9216935    | 0.9922481    | 0.7805473    | not scorable | not scorable |
| #### Bn-scaff_15969_1-p25908 C-genome specific (napus-oleracea) | 0.8516746    | 0.8668561    | 1            | 0.7379817    | not scorable | not scorable |
| #### Bn-scaff_15969_1-p27615 C-genome specific (napus-oleracea) | 0.861244     | 0.8972722    | 1            | 0.8327601    | not scorable | not scorable |
| #### Bn-scaff_15969_1-p27628 C-genome specific (napus-oleracea) | 0.8588517    | 0.8677786    | 0.9922481    | 0.8057207    | not scorable | not scorable |
| #### Bn-scaff_15975_1-p11640 all not scorable                   | not scorable | not scorable | not scorable | not scorable | not scorable | not scorable |
| #### Bn-scaff_15980_1-p3760 C-genome specific (napus-oleracea)  | 1            | 0.6033282    | 1            | 0.5507117    | not scorable | not scorable |
| #### Bn-scaff_15983_1-p58469 genome unspecific (all in)         | 0.9784689    | 0.301511     | 1            | 0.8140526    | 0.9834711    | 0.7584049    |
| #### Bn-scaff_15993_1-p38945 C-genome specific (oleracea only)  | not scorable | not scorable | 0.379845     | 0.7854238    | not scorable | not scorable |
| #### Bn-scaff_15993_1-p3906 C-genome specific (napus-oleracea)  | 0.9665072    | 0.73017      | 0.9844961    | 0.7434418    | not scorable | not scorable |
| #### Bn-scaff_15993_1-p46047 C-genome specific (napus-oleracea) | 0.9760765    | 0.6841829    | 1            | 0.7462287    | not scorable | not scorable |
| #### Bn-scaff_15993_1-p61763 genome unspecific (all in)         | 0.9521531    | 0.3694637    | 0.9922481    | 0.7891571    | 1            | 0.8409751    |
| #### Bn-scaff_15993_1-p65353 C-genome specific (napus-oleracea) | 0.9880383    | 0.7767553    | 0.9922481    | 0.8226991    | not scorable | not scorable |
| #### Bn-scaff_15993_1-p7562 C-genome specific (napus-oleracea)  | 0.9856459    | 0.679038     | 0.9767442    | 0.7065215    | not scorable | not scorable |
| #### Bn-scaff_16002_1-p10021 genome unspecific (all in)         | 0.9976076    | 0.3351724    | 1            | 0.8347951    | 0.9256198    | 0.315654     |
| #### Bn-scaff_16002_1-p10145 genome unspecific (all in)         | 1            | 0.9072468    | 1            | 0.7658321    | 1            | 0.9141794    |
| #### Bn-scaff_16002_1-p11548 C-genome specific (napus-oleracea) | 0.9928229    | 0.8302366    | 1            | 0.8567975    | not scorable | not scorable |
| #### Bn-scaff_16002_1-p12249 C-genome specific (napus-oleracea) | 0.9856459    | 0.7679087    | 0.9457364    | 0.804602     | not scorable | not scorable |
| #### Bn-scaff_16002_1-p12272 C-genome specific (napus-oleracea) | 0.9808612    | 0.753693     | 1            | 0.7732918    | not scorable | not scorable |
| #### Bn-scaff_16002_1-p12356 C-genome specific (napus-oleracea) | 0.9832536    | 0.7688961    | 1            | 0.7509337    | not scorable | not scorable |
| #### Bn-scaff_16002_1-p12707 C-genome specific (napus-oleracea) | 0.9904306    | 0.8214248    | 0.9922481    | 0.7396514    | not scorable | not scorable |
| #### Bn-scaff_16002_1-p12708 genome unspecific (oleracea-rapa)  | not scorable | not scorable | 0.9767442    | 0.390861     | 1            | 0.7518046    |
| #### Bn-scaff_16002_1-p12747 C-genome specific (napus-oleracea) | 0.9952153    | 0.6520397    | 0.9922481    | 0.6380758    | not scorable | not scorable |
| #### Bn-scaff_16002_1-p12995 C-genome specific (napus-oleracea) | 0.9880383    | 0.7966235    | 0.9922481    | 0.8043706    | not scorable | not scorable |
| #### Bn-scaff_16002_1-p13344 genome unspecific (all in)         | 0.9976076    | 0.2591715    | 0.9922481    | 0.6731951    | 1            | 0.7139672    |
| #### Bn-scaff_16002_1-p13397 C-genome specific (napus-oleracea) | 0.9856459    | 0.8176508    | 0.8837209    | 0.8298615    | not scorable | not scorable |
| #### Bn-scaff_16002_1-p13501 C-genome specific (napus-oleracea) | 0.9976076    | 0.3814132    | 1            | 0.7492505    | not scorable | not scorable |
| #### Bn-scaff_16002_1-p13548 genome unspecific (all in)         | 0.9880383    | 0.5105916    | 0.9922481    | 0.8371419    | 1            | 0.871974     |
| #### Bn-scaff_16002_1-p13765 C-genome specific (napus-oleracea) | 0.9880383    | 0.7421057    | 0.379845     | 0.7896485    | not scorable | not scorable |

|                                                                 |              |              |              |              |              |              |
|-----------------------------------------------------------------|--------------|--------------|--------------|--------------|--------------|--------------|
| #### Bn-scaff_16002_1-p13826 C-genome specific (napus-oleracea) | 0.9784689    | 0.7696884    | 1            | 0.7451396    | not scorable | not scorable |
| #### Bn-scaff_16002_1-p13926 genome unspecific (all in)         | 1            | 0.5346358    | 1            | 0.8835656    | 1            | 0.8024253    |
| #### Bn-scaff_16002_1-p13956 C-genome specific (napus-oleracea) | 1            | 0.8191361    | 0.9922481    | 0.7700176    | not scorable | not scorable |
| #### Bn-scaff_16002_1-p13957 C-genome specific (napus-oleracea) | 0.9760765    | 0.8209688    | 0.9689922    | 0.7790502    | not scorable | not scorable |
| #### Bn-scaff_16002_1-p14002 C-genome specific (napus-oleracea) | 0.9593301    | 0.3281321    | 1            | 0.6153536    | not scorable | not scorable |
| #### Bn-scaff_16002_1-p14006 C-genome specific (napus-oleracea) | 0.9928229    | 0.7518564    | 0.8914729    | 0.7262033    | not scorable | not scorable |
| #### Bn-scaff_16002_1-p14022 genome unspecific (all in)         | 0.9952153    | 0.3755287    | 1            | 0.779506     | 1            | 0.8781597    |
| #### Bn-scaff_16002_1-p14039 C-genome specific (napus-oleracea) | 1            | 0.7363541    | 1            | 0.7548212    | not scorable | not scorable |
| #### Bn-scaff_16002_1-p14044 C-genome specific (napus-oleracea) | 0.9856459    | 0.6090232    | 1            | 0.6201903    | not scorable | not scorable |
| #### Bn-scaff_16002_1-p14116 C-genome specific (napus-oleracea) | 0.9856459    | 0.8506687    | 0.9844961    | 0.7369543    | not scorable | not scorable |
| #### Bn-scaff_16002_1-p14119 all not scorable                   | not scorable | not scorable | not scorable | not scorable | not scorable | not scorable |
| #### Bn-scaff_16002_1-p14610 C-genome specific (napus-oleracea) | 0.9904306    | 0.7912595    | 1            | 0.6922119    | not scorable | not scorable |
| #### Bn-scaff_16002_1-p14677 C-genome specific (napus-oleracea) | 0.9665072    | 0.7596303    | 1            | 0.7848471    | not scorable | not scorable |
| #### Bn-scaff_16002_1-p15015 C-genome specific (napus-oleracea) | 0.9952153    | 0.7806745    | 1            | 0.7792333    | not scorable | not scorable |
| #### Bn-scaff_16002_1-p15110 C-genome specific (napus-oleracea) | 0.9856459    | 0.7804598    | 1            | 0.8107226    | not scorable | not scorable |
| #### Bn-scaff_16002_1-p15177 C-genome specific (napus-oleracea) | 0.9856459    | 0.7701545    | 1            | 0.7191254    | not scorable | not scorable |
| #### Bn-scaff_16002_1-p15248 C-genome specific (napus-oleracea) | 0.9856459    | 0.8170318    | 0.9689922    | 0.794933     | not scorable | not scorable |
| #### Bn-scaff_16002_1-p15370 genome unspecific (oleracea-rapa)  | not scorable | not scorable | 1            | 0.7109348    | 1            | 0.5562013    |
| #### Bn-scaff_16002_1-p15374 C-genome specific (napus-oleracea) | 0.9760765    | 0.6354389    | 0.9844961    | 0.643882     | not scorable | not scorable |
| #### Bn-scaff_16002_1-p15387 genome unspecific (all in)         | 1            | 0.9293141    | 1            | 0.8816628    | 1            | 0.9272014    |
| #### Bn-scaff_16002_1-p15543 C-genome specific (napus-oleracea) | 1            | 0.9213614    | 1            | 0.7765799    | not scorable | not scorable |
| #### Bn-scaff_16002_1-p15690 genome unspecific (oleracea-rapa)  | not scorable | not scorable | 0.9922481    | 0.8442286    | 1            | 0.8635859    |
| #### Bn-scaff_16002_1-p15690 genome unspecific (all in)         | 0.9952153    | 0.5314127    | 1            | 0.8097931    | 1            | 0.7919678    |
| #### Bn-scaff_16002_1-p15833 C-genome specific (napus-oleracea) | 0.9952153    | 0.7859496    | 1            | 0.7423987    | not scorable | not scorable |
| #### Bn-scaff_16002_1-p15933 C-genome specific (napus-oleracea) | 0.9952153    | 0.7646724    | 1            | 0.7713787    | not scorable | not scorable |
| #### Bn-scaff_16002_1-p15949 C-genome specific (napus-oleracea) | 0.9904306    | 0.7765573    | 1            | 0.8109148    | not scorable | not scorable |
| #### Bn-scaff_16002_1-p15950 genome unspecific (all in)         | 0.9449761    | 0.5151505    | 0.9922481    | 0.5841703    | 1            | 0.9101914    |
| #### Bn-scaff_16002_1-p15952 genome unspecific (all in)         | 0.9569378    | 0.5042835    | 0.9767442    | 0.5688587    | 0.9752066    | 0.786476     |
| #### Bn-scaff_16002_1-p15970 C-genome specific (napus-oleracea) | 0.9784689    | 0.780573     | 1            | 0.8253259    | not scorable | not scorable |
| #### Bn-scaff_16002_1-p16021 C-genome specific (napus-oleracea) | 0.9952153    | 0.7203699    | 1            | 0.6680546    | not scorable | not scorable |
| #### Bn-scaff_16002_1-p16030 C-genome specific (napus-oleracea) | 0.9952153    | 0.7369958    | 0.9844961    | 0.6370661    | not scorable | not scorable |
| #### Bn-scaff_16002_1-p16048 C-genome specific (napus-oleracea) | 0.9952153    | 0.8361048    | 1            | 0.7650969    | not scorable | not scorable |
| #### Bn-scaff_16002_1-p16189 C-genome specific (napus-oleracea) | 0.9904306    | 0.7926412    | 0.9767442    | 0.7897986    | not scorable | not scorable |

|                                                                 |              |              |           |           |              |              |
|-----------------------------------------------------------------|--------------|--------------|-----------|-----------|--------------|--------------|
| #### Bn-scaff_16002_1-p16274 C-genome specific (napus-oleracea) | 0.9712918    | 0.60127      | 1         | 0.657665  | not scorable | not scorable |
| #### Bn-scaff_16002_1-p16276 genome unspecific (oleracea-rapa)  | not scorable | not scorable | 0.9844961 | 0.7048008 | 0.9917355    | 0.9061797    |
| #### Bn-scaff_16002_1-p16281 C-genome specific (napus-oleracea) | 0.9928229    | 0.7615479    | 1         | 0.8835683 | not scorable | not scorable |
| #### Bn-scaff_16002_1-p16282 C-genome specific (napus-oleracea) | 0.9784689    | 0.7571871    | 1         | 0.8271451 | not scorable | not scorable |
| #### Bn-scaff_16002_1-p16302 C-genome specific (napus-oleracea) | 0.9832536    | 0.6684284    | 0.9922481 | 0.671054  | not scorable | not scorable |
| #### Bn-scaff_16002_1-p16608 C-genome specific (napus-oleracea) | 0.9712918    | 0.6601928    | 1         | 0.7114804 | not scorable | not scorable |
| #### Bn-scaff_16002_1-p16619 C-genome specific (oleracea only)  | not scorable | not scorable | 1         | 0.674539  | not scorable | not scorable |
| #### Bn-scaff_16002_1-p16629 genome unspecific (oleracea-rapa)  | not scorable | not scorable | 1         | 0.8515962 | 0.9752066    | 0.8264239    |
| #### Bn-scaff_16002_1-p16660 genome unspecific (all in)         | 0.9593301    | 0.3716945    | 1         | 0.7161742 | 1            | 0.7225545    |
| #### Bn-scaff_16002_1-p16685 C-genome specific (napus-oleracea) | 1            | 0.8014746    | 1         | 0.8894926 | not scorable | not scorable |
| #### Bn-scaff_16002_1-p16764 C-genome specific (napus-oleracea) | 0.9665072    | 0.6767545    | 0.9844961 | 0.7234877 | not scorable | not scorable |
| #### Bn-scaff_16002_1-p16778 C-genome specific (napus-oleracea) | 0.9473684    | 0.6900237    | 0.9534883 | 0.70902   | not scorable | not scorable |
| #### Bn-scaff_16002_1-p16882 C-genome specific (napus-oleracea) | 0.9688995    | 0.6453779    | 1         | 0.7462071 | not scorable | not scorable |
| #### Bn-scaff_16002_1-p16887 C-genome specific (napus-oleracea) | 0.9832536    | 0.6528722    | 1         | 0.6675206 | not scorable | not scorable |
| #### Bn-scaff_16002_1-p16995 C-genome specific (napus-oleracea) | 0.9736842    | 0.7395697    | 1         | 0.7579544 | not scorable | not scorable |
| #### Bn-scaff_16002_1-p17112 C-genome specific (napus-oleracea) | 0.9832536    | 0.6515232    | 1         | 0.7010878 | not scorable | not scorable |
| #### Bn-scaff_16002_1-p17137 C-genome specific (napus-oleracea) | 0.9808612    | 0.7462071    | 0.9302326 | 0.8474159 | not scorable | not scorable |
| #### Bn-scaff_16002_1-p17163 C-genome specific (oleracea only)  | not scorable | not scorable | 0.9844961 | 0.609675  | not scorable | not scorable |
| #### Bn-scaff_16002_1-p17179 C-genome specific (napus-oleracea) | 0.9760765    | 0.7337422    | 0.9922481 | 0.8077766 | not scorable | not scorable |
| #### Bn-scaff_16002_1-p17258 genome unspecific (all in)         | 0.9641148    | 0.3851575    | 0.9767442 | 0.6991158 | 1            | 0.7791482    |
| #### Bn-scaff_16002_1-p17313 genome unspecific (all in)         | 0.9617225    | 0.3982784    | 1         | 0.4992017 | 1            | 0.9175813    |
| #### Bn-scaff_16002_1-p17353 C-genome specific (napus-oleracea) | 0.9904306    | 0.7559173    | 1         | 0.7775098 | not scorable | not scorable |
| #### Bn-scaff_16002_1-p17623 C-genome specific (napus-oleracea) | 0.9976076    | 0.6705366    | 1         | 0.6694431 | not scorable | not scorable |
| #### Bn-scaff_16002_1-p17623 C-genome specific (napus-oleracea) | 0.9760765    | 0.6296077    | 1         | 0.644143  | not scorable | not scorable |
| #### Bn-scaff_16002_1-p17625 genome unspecific (all in)         | 0.9712918    | 0.6500648    | 1         | 0.6701508 | 1            | 0.8933609    |
| #### Bn-scaff_16002_1-p17656 C-genome specific (napus-oleracea) | 0.9665072    | 0.7983934    | 0.9922481 | 0.7513109 | not scorable | not scorable |
| #### Bn-scaff_16002_1-p17662 genome unspecific (all in)         | 0.9976076    | 0.3778543    | 1         | 0.8317549 | 1            | 0.7524064    |
| #### Bn-scaff_16002_1-p17677 genome unspecific (all in)         | 0.9856459    | 0.3718595    | 1         | 0.8052078 | 0.9834711    | 0.7422826    |
| #### Bn-scaff_16002_1-p17717 genome unspecific (oleracea-rapa)  | not scorable | not scorable | 0.9612403 | 0.4473903 | 1            | 0.612938     |
| #### Bn-scaff_16002_1-p17821 C-genome specific (napus-oleracea) | 0.9832536    | 0.741603     | 0.9844961 | 0.7138345 | not scorable | not scorable |
| #### Bn-scaff_16002_1-p17824 genome unspecific (all in)         | 0.9928229    | 0.3040145    | 0.9612403 | 0.7600267 | 1            | 0.8532034    |
| #### Bn-scaff_16002_1-p17830 C-genome specific (napus-oleracea) | 0.9186603    | 0.8566163    | 0.9844961 | 0.789594  | not scorable | not scorable |
| #### Bn-scaff_16002_1-p18006 C-genome specific (napus-oleracea) | 0.9976076    | 0.7985011    | 0.9922481 | 0.8239496 | not scorable | not scorable |

|                                                                 |              |              |              |              |              |              |              |
|-----------------------------------------------------------------|--------------|--------------|--------------|--------------|--------------|--------------|--------------|
| #### Bn-scaff_16002_1-p18008 C-genome specific (napus-oleracea) | 0.9832536    | 0.7565613    |              | 1            | 0.7505825    | not scorable | not scorable |
| #### Bn-scaff_16002_1-p18030 C-genome specific (napus-oleracea) | 0.9808612    | 0.7703121    |              | 1            | 0.8260473    | not scorable | not scorable |
| #### Bn-scaff_16002_1-p18046 C-genome specific (napus-oleracea) |              | 1            | 0.8135014    | 0.9844961    | 0.8426096    | not scorable | not scorable |
| #### Bn-scaff_16002_1-p18062 C-genome specific (oleracea only)  | not scorable | not scorable |              | 0.9302326    | 0.6913174    | not scorable | not scorable |
| #### Bn-scaff_16002_1-p18068 C-genome specific (napus-oleracea) | 0.9808612    | 0.769326     |              | 0.9922481    | 0.7438304    | not scorable | not scorable |
| #### Bn-scaff_16002_1-p18260 C-genome specific (napus-oleracea) | 0.9928229    | 0.6334302    |              | 0.9844961    | 0.5693914    | not scorable | not scorable |
| #### Bn-scaff_16002_1-p18266 genome unspecific (all in)         | 0.9784689    | 0.6339132    |              | 1            | 0.6697388    | 0.7603306    | 0.8776575    |
| #### Bn-scaff_16002_1-p18269 C-genome specific (oleracea only)  | not scorable | not scorable |              | 0.9844961    | 0.5181272    | not scorable | not scorable |
| #### Bn-scaff_16002_1-p18420 C-genome specific (napus-oleracea) | 0.9832536    | 0.6873499    |              | 0.9767442    | 0.7418345    | not scorable | not scorable |
| #### Bn-scaff_16002_1-p18429 C-genome specific (napus-oleracea) | 0.9976076    | 0.7600101    |              | 0.9689922    | 0.7573065    | not scorable | not scorable |
| #### Bn-scaff_16002_1-p19168 genome unspecific (all in)         | 0.9832536    | 0.428151     |              | 1            | 0.7450302    | 0.9917355    | 0.7664476    |
| #### Bn-scaff_16002_1-p19928 napus specific                     | 0.6004785    | 0.7298593    | not scorable | not scorable | not scorable | not scorable |              |
| #### Bn-scaff_16002_1-p19986 genome unspecific (all in)         | 0.9784689    | 0.4603706    |              | 1            | 0.7915874    | 1            | 0.93667      |
| #### Bn-scaff_16002_1-p20104 C-genome specific (napus-oleracea) | 0.9808612    | 0.7276705    |              | 1            | 0.6822914    | not scorable | not scorable |
| #### Bn-scaff_16002_1-p20126 genome unspecific (all in)         | 0.9473684    | 0.4885986    |              | 1            | 0.7809351    | 1            | 0.9357331    |
| #### Bn-scaff_16002_1-p20148 C-genome specific (napus-oleracea) | 0.9856459    | 0.7503873    |              | 1            | 0.8472415    | not scorable | not scorable |
| #### Bn-scaff_16002_1-p20260 C-genome specific (napus-oleracea) | 0.5837321    | 0.7276379    | 0.9069768    |              | 0.7950425    | not scorable | not scorable |
| #### Bn-scaff_16002_1-p20262 C-genome specific (napus-oleracea) | 0.7822967    | 0.7043204    | 0.9612403    |              | 0.6165055    | not scorable | not scorable |
| #### Bn-scaff_16002_1-p20321 C-genome specific (napus-oleracea) | 0.9880383    | 0.753754     | 0.9922481    |              | 0.7495515    | not scorable | not scorable |
| #### Bn-scaff_16002_1-p20350 C-genome specific (napus-oleracea) | 1            | 0.879566     | 1            |              | 0.8286022    | not scorable | not scorable |
| #### Bn-scaff_16002_1-p20368 C-genome specific (napus-oleracea) | 0.9665072    | 0.6968712    | 0.9922481    |              | 0.8050973    | not scorable | not scorable |
| #### Bn-scaff_16002_1-p20372 C-genome specific (napus-oleracea) | 0.9641148    | 0.7339224    | 1            |              | 0.7818224    | not scorable | not scorable |
| #### Bn-scaff_16002_1-p20375 C-genome specific (napus-oleracea) | 0.9880383    | 0.5243102    | 1            |              | 0.515185     | not scorable | not scorable |
| #### Bn-scaff_16002_1-p20379 genome unspecific (oleracea-rapa)  | not scorable | not scorable | 0.9922481    |              | 0.5566812    | 1            | 0.8912129    |
| #### Bn-scaff_16002_1-p20413 C-genome specific (napus-oleracea) | 0.9760765    | 0.6637144    | 0.9767442    |              | 0.6054007    | not scorable | not scorable |
| #### Bn-scaff_16002_1-p20415 C-genome specific (napus-oleracea) | 0.9832536    | 0.7503729    | 0.9767442    |              | 0.7190552    | not scorable | not scorable |
| #### Bn-scaff_16002_1-p20416 C-genome specific (napus-oleracea) | 0.9617225    | 0.7322021    | 0.9612403    |              | 0.8681164    | not scorable | not scorable |
| #### Bn-scaff_16002_1-p20529 genome unspecific (all in)         | 0.9880383    | 0.5458583    | 1            |              | 0.7718312    | 1            | 0.9222944    |
| #### Bn-scaff_16002_1-p20544 C-genome specific (napus-oleracea) | 0.9736842    | 0.7504053    | 0.9844961    |              | 0.8040277    | not scorable | not scorable |
| #### Bn-scaff_16002_1-p20555 genome unspecific (all in)         | 1            | 0.7710662    | 1            |              | 0.6850035    | 1            | 0.8343507    |
| #### Bn-scaff_16002_1-p20574 C-genome specific (napus-oleracea) | 0.9976076    | 0.7864437    | 1            |              | 0.732949     | not scorable | not scorable |
| #### Bn-scaff_16002_1-p20660 genome unspecific (oleracea-rapa)  | not scorable | not scorable | 1            |              | 0.6115426    | 1            | 0.6986263    |
| #### Bn-scaff_16002_1-p20763 C-genome specific (napus-oleracea) | 0.9832536    | 0.7721131    | 0.9534883    |              | 0.7899666    | not scorable | not scorable |



|                                                                 |           |           |           |           |              |              |
|-----------------------------------------------------------------|-----------|-----------|-----------|-----------|--------------|--------------|
| #### Bn-scaff_16002_1-p20807 C-genome specific (napus-oleracea) | 0.9832536 | 0.7995924 | 1         | 0.865297  | not scorable | not scorable |
| #### Bn-scaff_16002_1-p21174 C-genome specific (napus-oleracea) | 0.9760765 | 0.7670937 | 1         | 0.7580921 | not scorable | not scorable |
| #### Bn-scaff_16002_1-p21269 C-genome specific (napus-oleracea) | 1         | 0.9138354 | 1         | 0.6931663 | not scorable | not scorable |
| #### Bn-scaff_16002_1-p21300 genome unspecific (all in)         | 0.9952153 | 0.727636  | 1         | 0.6869836 | 0.9917355    | 0.5194501    |
| #### Bn-scaff_16002_1-p21318 C-genome specific (napus-oleracea) | 0.5741627 | 0.7714959 | 0.9844961 | 0.6662689 | not scorable | not scorable |
| #### Bn-scaff_16002_1-p21331 C-genome specific (napus-oleracea) | 0.9617225 | 0.649798  | 1         | 0.6467398 | not scorable | not scorable |
| #### Bn-scaff_16002_1-p21336 C-genome specific (napus-oleracea) | 0.9808612 | 0.7251341 | 1         | 0.7106124 | not scorable | not scorable |
| #### Bn-scaff_16002_1-p21341 C-genome specific (napus-oleracea) | 0.9736842 | 0.761143  | 1         | 0.8653839 | not scorable | not scorable |
| #### Bn-scaff_16002_1-p21350 C-genome specific (napus-oleracea) | 0.9760765 | 0.7444752 | 0.7906977 | 0.8306628 | not scorable | not scorable |
| #### Bn-scaff_16002_1-p21357 C-genome specific (napus-oleracea) | 0.9712918 | 0.741171  | 0.8062016 | 0.8879755 | not scorable | not scorable |
| #### Bn-scaff_16002_1-p21360 C-genome specific (napus-oleracea) | 0.9760765 | 0.7458082 | 0.7906977 | 0.8634635 | not scorable | not scorable |
| #### Bn-scaff_16002_1-p21443 C-genome specific (napus-oleracea) | 0.9832536 | 0.7995955 | 0.9844961 | 0.8651429 | not scorable | not scorable |
| #### Bn-scaff_16002_1-p21515 C-genome specific (napus-oleracea) | 0.9904306 | 0.8001673 | 0.8992248 | 0.7796749 | not scorable | not scorable |
| #### Bn-scaff_16002_1-p21531 C-genome specific (napus-oleracea) | 0.9784689 | 0.8115487 | 0.9922481 | 0.8098673 | not scorable | not scorable |
| #### Bn-scaff_16002_1-p21532 C-genome specific (napus-oleracea) | 0.9928229 | 0.8158282 | 0.9844961 | 0.7168607 | not scorable | not scorable |
| #### Bn-scaff_16002_1-p21561 C-genome specific (napus-oleracea) | 0.9928229 | 0.9274993 | 1         | 0.8400254 | not scorable | not scorable |
| #### Bn-scaff_16002_1-p21603 C-genome specific (napus-oleracea) | 0.9928229 | 0.7217231 | 0.9767442 | 0.7062419 | not scorable | not scorable |
| #### Bn-scaff_16002_1-p21610 C-genome specific (napus-oleracea) | 0.9856459 | 0.433323  | 0.9922481 | 0.5708901 | not scorable | not scorable |
| #### Bn-scaff_16002_1-p21613 C-genome specific (napus-oleracea) | 0.9808612 | 0.508473  | 0.9922481 | 0.6218271 | not scorable | not scorable |
| #### Bn-scaff_16002_1-p21638 C-genome specific (napus-oleracea) | 0.9712918 | 0.7471852 | 0.9767442 | 0.7722816 | not scorable | not scorable |
| #### Bn-scaff_16002_1-p21640 C-genome specific (napus-oleracea) | 0.9976076 | 0.7387909 | 0.9922481 | 0.7083493 | not scorable | not scorable |
| #### Bn-scaff_16002_1-p21673 C-genome specific (napus-oleracea) | 0.9521531 | 0.6846365 | 1         | 0.8070802 | not scorable | not scorable |
| #### Bn-scaff_16002_1-p21682 C-genome specific (napus-oleracea) | 0.9856459 | 0.7157895 | 1         | 0.769021  | not scorable | not scorable |
| #### Bn-scaff_16002_1-p21685 C-genome specific (napus-oleracea) | 0.9880383 | 0.7066951 | 0.9767442 | 0.6945985 | not scorable | not scorable |
| #### Bn-scaff_16002_1-p21694 C-genome specific (napus-oleracea) | 0.9808612 | 0.6367042 | 0.9922481 | 0.7221346 | not scorable | not scorable |
| #### Bn-scaff_16002_1-p21695 C-genome specific (napus-oleracea) | 0.9976076 | 0.7248667 | 0.9767442 | 0.6828246 | not scorable | not scorable |
| #### Bn-scaff_16002_1-p21698 C-genome specific (napus-oleracea) | 0.9760765 | 0.6534177 | 0.9922481 | 0.6996433 | not scorable | not scorable |
| #### Bn-scaff_16002_1-p21703 C-genome specific (napus-oleracea) | 0.9856459 | 0.6399112 | 1         | 0.7352579 | not scorable | not scorable |
| #### Bn-scaff_16002_1-p21709 C-genome specific (napus-oleracea) | 0.9904306 | 0.6679937 | 1         | 0.7085328 | not scorable | not scorable |
| #### Bn-scaff_16002_1-p21711 C-genome specific (napus-oleracea) | 0.9928229 | 0.6891651 | 0.9922481 | 0.7098209 | not scorable | not scorable |
| #### Bn-scaff_16002_1-p21724 C-genome specific (napus-oleracea) | 0.9808612 | 0.6273204 | 1         | 0.6454831 | not scorable | not scorable |
| #### Bn-scaff_16002_1-p21728 C-genome specific (napus-oleracea) | 0.9952153 | 0.7297913 | 1         | 0.6761311 | not scorable | not scorable |
| #### Bn-scaff_16002_1-p21837 C-genome specific (napus-oleracea) | 0.9736842 | 0.6552143 | 0.9767442 | 0.6300688 | not scorable | not scorable |

|                                                                |              |              |              |              |              |              |
|----------------------------------------------------------------|--------------|--------------|--------------|--------------|--------------|--------------|
| #### Bn-scaff_16002_1-p21901napus specific                     | 0.9952153    | 0.6942177    | not scorable | not scorable | not scorable | not scorable |
| #### Bn-scaff_16002_1-p22015C-genome specific (napus-oleracea) | 0.9880383    | 0.6798539    | 1            | 0.6510965    | not scorable | not scorable |
| #### Bn-scaff_16002_1-p22158C-genome specific (napus-oleracea) | 0.8492823    | 0.6996554    | 0.9302326    | 0.8254597    | not scorable | not scorable |
| #### Bn-scaff_16002_1-p22173genome unspecific (all in)         | 0.9856459    | 0.7532902    | 0.9922481    | 0.7371932    | 0.9173554    | 0.9039531    |
| #### Bn-scaff_16002_1-p22217C-genome specific (napus-oleracea) | 0.9784689    | 0.5645437    | 1            | 0.5885527    | not scorable | not scorable |
| #### Bn-scaff_16002_1-p22223C-genome specific (napus-oleracea) | 0.9856459    | 0.772922     | 1            | 0.8282926    | not scorable | not scorable |
| #### Bn-scaff_16002_1-p22274C-genome specific (napus-oleracea) | 0.9928229    | 0.7827763    | 1            | 0.7795191    | not scorable | not scorable |
| #### Bn-scaff_16002_1-p22281C-genome specific (napus-oleracea) | 0.9808612    | 0.802645     | 0.9922481    | 0.7487756    | not scorable | not scorable |
| #### Bn-scaff_16002_1-p22282C-genome specific (napus-oleracea) | 0.9856459    | 0.7619065    | 0.9922481    | 0.7771278    | not scorable | not scorable |
| #### Bn-scaff_16002_1-p22284C-genome specific (napus-oleracea) | 0.9832536    | 0.7907581    | 1            | 0.7654794    | not scorable | not scorable |
| #### Bn-scaff_16002_1-p22286C-genome specific (napus-oleracea) | 0.9832536    | 0.7346817    | 0.9922481    | 0.7256436    | not scorable | not scorable |
| #### Bn-scaff_16002_1-p22295C-genome specific (napus-oleracea) | 0.9832536    | 0.7181879    | 1            | 0.7683113    | not scorable | not scorable |
| #### Bn-scaff_16002_1-p22331C-genome specific (napus-oleracea) | 0.9952153    | 0.8027814    | 0.9922481    | 0.8584121    | not scorable | not scorable |
| #### Bn-scaff_16002_1-p22410C-genome specific (napus-oleracea) | 0.9282297    | 0.7268772    | 0.9922481    | 0.8228475    | not scorable | not scorable |
| #### Bn-scaff_16002_1-p22434genome unspecific (all in)         | 0.9258373    | 0.4639213    | 1            | 0.689658     | 1            | 0.8942754    |
| #### Bn-scaff_16002_1-p22441C-genome specific (napus-oleracea) | 0.9880383    | 0.6823689    | 1            | 0.655784     | not scorable | not scorable |
| #### Bn-scaff_16002_1-p22459C-genome specific (oleracea only)  | not scorable | not scorable | 0.9922481    | 0.4636586    | not scorable | not scorable |
| #### Bn-scaff_16002_1-p22476C-genome specific (napus-oleracea) | 0.9832536    | 0.6713064    | 1            | 0.6912593    | not scorable | not scorable |
| #### Bn-scaff_16002_1-p22778C-genome specific (napus-oleracea) | 0.9688995    | 0.7927971    | 0.9844961    | 0.7127736    | not scorable | not scorable |
| #### Bn-scaff_16002_1-p22826C-genome specific (napus-oleracea) | 0.9808612    | 0.7700562    | 1            | 0.8389751    | not scorable | not scorable |
| #### Bn-scaff_16002_1-p22850C-genome specific (napus-oleracea) | 0.9928229    | 0.7065635    | 0.9922481    | 0.7025818    | not scorable | not scorable |
| #### Bn-scaff_16002_1-p22902C-genome specific (napus-oleracea) | 0.9736842    | 0.7499902    | 1            | 0.7247418    | not scorable | not scorable |
| #### Bn-scaff_16002_1-p22919C-genome specific (napus-oleracea) | 0.9760765    | 0.6732006    | 1            | 0.6636251    | not scorable | not scorable |
| #### Bn-scaff_16002_1-p22920C-genome specific (napus-oleracea) | 0.9808612    | 0.6352597    | 0.9922481    | 0.6359683    | not scorable | not scorable |
| #### Bn-scaff_16002_1-p22986C-genome specific (napus-oleracea) | 0.9832536    | 0.7842848    | 1            | 0.8546489    | not scorable | not scorable |
| #### Bn-scaff_16002_1-p22990C-genome specific (napus-oleracea) | 0.9712918    | 0.7787197    | 1            | 0.8566455    | not scorable | not scorable |
| #### Bn-scaff_16002_1-p23019C-genome specific (napus-oleracea) | 0.9736842    | 0.7652078    | 0.9922481    | 0.7816188    | not scorable | not scorable |
| #### Bn-scaff_16002_1-p23046C-genome specific (napus-oleracea) | 0.9784689    | 0.7632838    | 0.9922481    | 0.748816     | not scorable | not scorable |
| #### Bn-scaff_16002_1-p23064C-genome specific (napus-oleracea) | 0.9688995    | 0.7501856    | 0.9922481    | 0.6994873    | not scorable | not scorable |
| #### Bn-scaff_16002_1-p23072C-genome specific (napus-oleracea) | 0.9425837    | 0.6426657    | 0.9922481    | 0.7120528    | not scorable | not scorable |
| #### Bn-scaff_16002_1-p23073C-genome specific (napus-oleracea) | 0.9712918    | 0.7672186    | 0.9922481    | 0.7463776    | not scorable | not scorable |
| #### Bn-scaff_16002_1-p23079C-genome specific (napus-oleracea) | 0.9784689    | 0.773173     | 1            | 0.7691919    | not scorable | not scorable |
| #### Bn-scaff_16002_1-p23166C-genome specific (oleracea only)  | not scorable | not scorable | 0.9767442    | 0.5968433    | not scorable | not scorable |

|                                                                 |              |              |              |              |              |              |
|-----------------------------------------------------------------|--------------|--------------|--------------|--------------|--------------|--------------|
| #### Bn-scaff_16002_1-p23167 C-genome specific (napus-oleracea) | 0.9808612    | 0.6785957    | 0.9612403    | 0.5818242    | not scorable | not scorable |
| #### Bn-scaff_16002_1-p23209 C-genome specific (napus-oleracea) | 0.9760765    | 0.5712219    | 0.9844961    | 0.7310435    | not scorable | not scorable |
| #### Bn-scaff_16002_1-p23212 C-genome specific (napus-oleracea) | 0.9928229    | 0.6921163    | 1            | 0.7364052    | not scorable | not scorable |
| #### Bn-scaff_16002_1-p23212 C-genome specific (napus-oleracea) | 0.9904306    | 0.7022441    | 1            | 0.7543976    | not scorable | not scorable |
| #### Bn-scaff_16002_1-p23346 genome unspecific (oleracea-rapa)  | not scorable | not scorable | 0.8914729    | 0.2955396    | 1            | 0.786476     |
| #### Bn-scaff_16002_1-p24210 C-genome specific (napus-oleracea) | 0.9617225    | 0.4973226    | 0.8682171    | 0.634873     | not scorable | not scorable |
| #### Bn-scaff_16002_1-p24413 genome unspecific (all in)         | 0.9856459    | 0.4490135    | 1            | 0.7840542    | 1            | 0.9283247    |
| #### Bn-scaff_16002_1-p24687 C-genome specific (napus-oleracea) | 0.9736842    | 0.7096146    | 1            | 0.7940954    | not scorable | not scorable |
| #### Bn-scaff_16002_1-p24689 C-genome specific (napus-oleracea) | 0.9928229    | 0.6693823    | 1            | 0.7214007    | not scorable | not scorable |
| #### Bn-scaff_16002_1-p24691 C-genome specific (napus-oleracea) | 0.9904306    | 0.6853763    | 1            | 0.7076735    | not scorable | not scorable |
| #### Bn-scaff_16002_1-p24710 C-genome specific (oleracea only)  | not scorable | not scorable | 0.9922481    | 0.751123     | not scorable | not scorable |
| #### Bn-scaff_16002_1-p24915 C-genome specific (napus-oleracea) | 0.9736842    | 0.7564595    | 0.9922481    | 0.7589561    | not scorable | not scorable |
| #### Bn-scaff_16002_1-p24916 C-genome specific (napus-oleracea) | 0.9952153    | 0.7407816    | 1            | 0.7444884    | not scorable | not scorable |
| #### Bn-scaff_16002_1-p24972 genome unspecific (all in)         | 0.9473684    | 0.5638533    | 1            | 0.7935414    | 1            | 0.9100471    |
| #### Bn-scaff_16002_1-p25111 genome unspecific (all in)         | 0.9904306    | 0.3494118    | 0.9922481    | 0.666232     | 1            | 0.7884539    |
| #### Bn-scaff_16002_1-p25129 genome unspecific (all in)         | 1            | 0.3095291    | 1            | 0.8425691    | 1            | 0.8139511    |
| #### Bn-scaff_16002_1-p25172 C-genome specific (napus-oleracea) | 0.9856459    | 0.736617     | 0.9922481    | 0.7209303    | not scorable | not scorable |
| #### Bn-scaff_16002_1-p25177 genome unspecific (all in)         | 0.9904306    | 0.5138355    | 1            | 0.704538     | 1            | 0.8517848    |
| #### Bn-scaff_16002_1-p25193 C-genome specific (napus-oleracea) | 0.9904306    | 0.6647314    | 0.9844961    | 0.6807653    | not scorable | not scorable |
| #### Bn-scaff_16002_1-p29878 C-genome specific (napus-oleracea) | 0.9665072    | 0.7548525    | 0.9767442    | 0.7285779    | not scorable | not scorable |
| #### Bn-scaff_16002_1-p30964 C-genome specific (napus-oleracea) | 0.9521531    | 0.5442804    | 0.8992248    | 0.7050785    | not scorable | not scorable |
| #### Bn-scaff_16002_1-p32974 genome unspecific (all in)         | 0.9928229    | 0.3473528    | 1            | 0.7903796    | 0.9256198    | 0.7829685    |
| #### Bn-scaff_16002_1-p34140 C-genome specific (napus-oleracea) | 0.9976076    | 0.7433119    | 0.9534883    | 0.718055     | not scorable | not scorable |
| #### Bn-scaff_16002_1-p38831 napus specific                     | 0.8397129    | 0.813672     | not scorable | not scorable | not scorable | not scorable |
| #### Bn-scaff_16002_1-p39717 C-genome specific (napus-oleracea) | 0.9665072    | 0.7657339    | 1            | 0.7896829    | not scorable | not scorable |
| #### Bn-scaff_16002_1-p39794 C-genome specific (napus-oleracea) | 0.9784689    | 0.7858303    | 0.9922481    | 0.7777141    | not scorable | not scorable |
| #### Bn-scaff_16002_1-p40610 C-genome specific (napus-oleracea) | 0.9808612    | 0.6744326    | 1            | 0.7058436    | not scorable | not scorable |
| #### Bn-scaff_16002_1-p42033 C-genome specific (napus-oleracea) | 0.9401914    | 0.7395006    | 0.9922481    | 0.8335571    | not scorable | not scorable |
| #### Bn-scaff_16002_1-p43489 C-genome specific (napus-oleracea) | 0.9760765    | 0.7220529    | 0.9922481    | 0.7448314    | not scorable | not scorable |
| #### Bn-scaff_16002_1-p43497 C-genome specific (napus-oleracea) | 0.9712918    | 0.8049662    | 0.9922481    | 0.8191031    | not scorable | not scorable |
| #### Bn-scaff_16002_1-p43620 C-genome specific (napus-oleracea) | 0.9760765    | 0.7778447    | 1            | 0.8678825    | not scorable | not scorable |
| #### Bn-scaff_16002_1-p44580 C-genome specific (napus-oleracea) | 0.8947368    | 0.7564855    | 0.7829458    | 0.8359021    | not scorable | not scorable |
| #### Bn-scaff_16002_1-p44580 C-genome specific (napus-oleracea) | 0.8660287    | 0.6788161    | 0.7829458    | 0.7206042    | not scorable | not scorable |

|                                                                 |              |              |              |              |              |              |
|-----------------------------------------------------------------|--------------|--------------|--------------|--------------|--------------|--------------|
| #### Bn-scaff_16002_1-p48274 C-genome specific (napus-oleracea) | 0.9760765    | 0.7350442    | 1            | 0.7302672    | not scorable | not scorable |
| #### Bn-scaff_16002_1-p51126 C-genome specific (napus-oleracea) | 0.9904306    | 0.6876985    | 0.9922481    | 0.6764677    | not scorable | not scorable |
| #### Bn-scaff_16002_1-p58078 genome unspecific (all in)         | 0.9593301    | 0.2992269    | 1            | 0.6977108    | 0.9752066    | 0.3332441    |
| #### Bn-scaff_16002_1-p60276 genome unspecific (all in)         | 0.9473684    | 0.4897747    | 0.9844961    | 0.7631361    | 1            | 0.9165109    |
| #### Bn-scaff_16002_1-p65011 C-genome specific (napus-oleracea) | 0.9976076    | 0.8062981    | 0.9922481    | 0.8751893    | not scorable | not scorable |
| #### Bn-scaff_16002_1-p66265 C-genome specific (napus-oleracea) | 0.9904306    | 0.8470858    | 1            | 0.8486445    | not scorable | not scorable |
| #### Bn-scaff_16002_1-p66770 C-genome specific (napus-oleracea) | 0.9928229    | 0.7436317    | 0.9767442    | 0.7298357    | not scorable | not scorable |
| #### Bn-scaff_16002_1-p72631 C-genome specific (napus-oleracea) | 0.9928229    | 0.8065936    | 1            | 0.8009024    | not scorable | not scorable |
| #### Bn-scaff_16002_1-p72747 genome unspecific (all in)         | 0.9952153    | 0.3683662    | 1            | 0.7688625    | 0.9338843    | 0.9175813    |
| #### Bn-scaff_16002_1-p72908 genome unspecific (oleracea-rapa)  | not scorable | not scorable | 1            | 0.8154713    | 1            | 0.9394404    |
| #### Bn-scaff_16002_1-p72977 C-genome specific (napus-oleracea) | 0.9904306    | 0.8140981    | 0.9844961    | 0.8003778    | not scorable | not scorable |
| #### Bn-scaff_16002_1-p73470 C-genome specific (napus-oleracea) | 0.9425837    | 0.5219447    | 0.9689922    | 0.751031     | not scorable | not scorable |
| #### Bn-scaff_16002_1-p76523 genome unspecific (all in)         | 0.9952153    | 0.5648909    | 1            | 0.7486659    | 1            | 0.9189249    |
| #### Bn-scaff_16002_1-p76680 C-genome specific (napus-oleracea) | 0.6339713    | 0.7218537    | 0.7674419    | 0.7560501    | not scorable | not scorable |
| #### Bn-scaff_16002_1-p76725 C-genome specific (napus-oleracea) | 0.9976076    | 0.7693732    | 0.9844961    | 0.8236592    | not scorable | not scorable |
| #### Bn-scaff_16002_1-p77298 C-genome specific (napus-oleracea) | 0.9043062    | 0.6941844    | 0.6434109    | 0.7206222    | not scorable | not scorable |
| #### Bn-scaff_16002_1-p77860 C-genome specific (napus-oleracea) | 0.9808612    | 0.7534647    | 0.8604651    | 0.7944789    | not scorable | not scorable |
| #### Bn-scaff_16002_1-p77887 C-genome specific (napus-oleracea) | 0.9784689    | 0.7541932    | 0.7286822    | 0.8007197    | not scorable | not scorable |
| #### Bn-scaff_16002_1-p78536 C-genome specific (napus-oleracea) | 0.7822967    | 0.7776469    | 0.7984496    | 0.8381542    | not scorable | not scorable |
| #### Bn-scaff_16002_1-p78537 C-genome specific (napus-oleracea) | 0.7894737    | 0.755128     | 1            | 0.728469     | not scorable | not scorable |
| #### Bn-scaff_16002_1-p78598 genome unspecific (all in)         | 1            | 0.5899701    | 1            | 0.9124391    | 0.9917355    | 0.7673287    |
| #### Bn-scaff_16002_1-p80244 C-genome specific (napus-oleracea) | 0.9928229    | 0.8067725    | 0.9767442    | 0.7414618    | not scorable | not scorable |
| #### Bn-scaff_16002_1-p84296 napus specific                     | 0.9976076    | 0.8270501    | not scorable | not scorable | not scorable | not scorable |
| #### Bn-scaff_16002_1-p84389 C-genome specific (napus-oleracea) | 0.9928229    | 0.771277     | 0.8139535    | 0.8715583    | not scorable | not scorable |
| #### Bn-scaff_16002_1-p84866 C-genome specific (napus-oleracea) | 0.9904306    | 0.7809569    | 0.9534883    | 0.7464372    | not scorable | not scorable |
| #### Bn-scaff_16002_1-p98019 genome unspecific (all in)         | 1            | 0.8548262    | 1            | 0.9035347    | 1            | 0.850401     |
| #### Bn-scaff_16002_1-p98019 genome unspecific (all in)         | 1            | 0.9090798    | 1            | 0.7991693    | 1            | 0.9072168    |
| #### Bn-scaff_16002_1-p99865 genome unspecific (all in)         | 0.9976076    | 0.337904     | 1            | 0.7626158    | 0.9917355    | 0.7985098    |
| #### Bn-scaff_16021_1-p11543 genome unspecific (all in)         | 0.9832536    | 0.4479112    | 1            | 0.706137     | 1            | 0.8758195    |
| #### Bn-scaff_16021_1-p16746 genome unspecific (all in)         | 0.9832536    | 0.2822452    | 1            | 0.4897087    | 1            | 0.8135551    |
| #### Bn-scaff_16021_1-p16777 genome unspecific (oleracea-rapa)  | not scorable | not scorable | 0.9922481    | 0.2439286    | 1            | 0.529458     |
| #### Bn-scaff_16021_1-p16784 genome unspecific (oleracea-rapa)  | not scorable | not scorable | 0.9922481    | 0.6805241    | 1            | 0.7367962    |
| #### Bn-scaff_16021_1-p16788 genome unspecific (all in)         | 0.9832536    | 0.3711671    | 1            | 0.8072308    | 0.9752066    | 0.6243086    |

|                                                                 |              |              |              |              |              |              |
|-----------------------------------------------------------------|--------------|--------------|--------------|--------------|--------------|--------------|
| #### Bn-scaff_16021_1-p17557 genome unspecific (all in)         | 0.9760765    | 0.3226697    | 1            | 0.7321237    | 1            | 0.8195806    |
| #### Bn-scaff_16021_1-p22566 C-genome specific (napus-oleracea) | 0.9736842    | 0.717919     | 0.9922481    | 0.7241114    | not scorable | not scorable |
| #### Bn-scaff_16021_1-p22593 genome unspecific (oleracea-rapa)  | not scorable | not scorable | 0.9689922    | 0.2203387    | 0.9586777    | 0.3104167    |
| #### Bn-scaff_16021_1-p23113 genome unspecific (all in)         | 0.9497608    | 0.5365283    | 1            | 0.7264826    | 0.9917355    | 0.9142054    |
| #### Bn-scaff_16021_1-p23219 C-genome specific (napus-oleracea) | 0.9688995    | 0.7924642    | 0.9922481    | 0.8237613    | not scorable | not scorable |
| #### Bn-scaff_16021_1-p27139 C-genome specific (napus-oleracea) | 0.9736842    | 0.7582602    | 0.9922481    | 0.7480333    | not scorable | not scorable |
| #### Bn-scaff_16021_1-p40514 C-genome specific (napus-oleracea) | 0.9569378    | 0.6255491    | 0.9844961    | 0.5687214    | not scorable | not scorable |
| #### Bn-scaff_16021_1-p49079 all not scorable                   | not scorable | not scorable | not scorable | not scorable | not scorable | not scorable |
| #### Bn-scaff_16021_1-p49235 genome unspecific (all in)         | 0.9665072    | 0.4508892    | 1            | 0.7494518    | 1            | 0.8690364    |
| #### Bn-scaff_16021_1-p58576 C-genome specific (napus-oleracea) | 0.9593301    | 0.7704454    | 0.9922481    | 0.7204586    | not scorable | not scorable |
| #### Bn-scaff_16021_1-p58886 genome unspecific (all in)         | 0.9545454    | 0.7521917    | 0.9302326    | 0.8191361    | 1            | 0.9244215    |
| #### Bn-scaff_16021_1-p61102 C-genome specific (napus-oleracea) | 0.9784689    | 0.7802736    | 1            | 0.7861338    | not scorable | not scorable |
| #### Bn-scaff_16021_1-p61335 C-genome specific (napus-oleracea) | 0.9569378    | 0.7996386    | 0.9224806    | 0.7650447    | not scorable | not scorable |
| #### Bn-scaff_16021_1-p61441 genome unspecific (oleracea-rapa)  | not scorable | not scorable | 1            | 0.8855213    | 1            | 0.9179212    |
| #### Bn-scaff_16021_1-p61870 genome unspecific (all in)         | 0.9856459    | 0.2978273    | 1            | 0.8525571    | 1            | 0.7770717    |
| #### Bn-scaff_16021_1-p62486 genome unspecific (all in)         | 0.9976076    | 0.279855     | 0.9922481    | 0.7916039    | 1            | 0.8116589    |
| #### Bn-scaff_16021_1-p62538 genome unspecific (all in)         | 1            | 0.6094983    | 1            | 0.5435486    | 1            | 0.6045818    |
| #### Bn-scaff_16021_1-p63795 genome unspecific (all in)         | 1            | 0.8825471    | 1            | 0.7660382    | 1            | 0.8543575    |
| #### Bn-scaff_16021_1-p64439 genome unspecific (oleracea-rapa)  | not scorable | not scorable | 0.9457364    | 0.7047548    | 1            | 0.7609816    |
| #### Bn-scaff_16021_1-p65088 genome unspecific (oleracea-rapa)  | not scorable | not scorable | 1            | 0.7289211    | 1            | 0.8080536    |
| #### Bn-scaff_16021_1-p65278 C-genome specific (oleracea only)  | not scorable | not scorable | 1            | 0.522497     | not scorable | not scorable |
| #### Bn-scaff_16021_1-p66154 C-genome specific (napus-oleracea) | 0.9617225    | 0.793625     | 0.9922481    | 0.7921719    | not scorable | not scorable |
| #### Bn-scaff_16021_1-p70869 C-genome specific (napus-oleracea) | 0.9688995    | 0.7667614    | 1            | 0.7232618    | not scorable | not scorable |
| #### Bn-scaff_16021_1-p75322 genome unspecific (oleracea-rapa)  | not scorable | not scorable | 0.9844961    | 0.3070586    | 1            | 0.9116483    |
| #### Bn-scaff_16021_1-p81116 C-genome specific (napus-oleracea) | 0.9665072    | 0.8024875    | 0.9922481    | 0.8318305    | not scorable | not scorable |
| #### Bn-scaff_16021_1-p86581 C-genome specific (napus-oleracea) | 0.9760765    | 0.7356511    | 0.9922481    | 0.7162569    | not scorable | not scorable |
| #### Bn-scaff_16021_1-p94049 C-genome specific (napus-oleracea) | 0.9760765    | 0.794462     | 1            | 0.7670333    | not scorable | not scorable |
| #### Bn-scaff_16022_1-p14361 genome unspecific (all in)         | 0.9545454    | 0.4313125    | 1            | 0.8083456    | 1            | 0.7197788    |
| #### Bn-scaff_16022_1-p35664 napus specific                     | 0.9138756    | 0.7063437    | not scorable | not scorable | not scorable | not scorable |
| #### Bn-scaff_16022_1-p40893 C-genome specific (napus-oleracea) | 0.9808612    | 0.7941481    | 0.9767442    | 0.8022788    | not scorable | not scorable |
| #### Bn-scaff_16022_1-p41300 genome unspecific (all in)         | 0.9186603    | 0.3556729    | 0.9922481    | 0.757688     | 1            | 0.8601938    |
| #### Bn-scaff_16022_1-p42857 genome unspecific (all in)         | 0.9736842    | 0.3437259    | 1            | 0.5072435    | 1            | 0.8927267    |
| #### Bn-scaff_16022_1-p44938 C-genome specific (napus-oleracea) | 1            | 0.9099925    | 1            | 0.617698     | not scorable | not scorable |

|                                                                 |              |              |              |              |              |              |
|-----------------------------------------------------------------|--------------|--------------|--------------|--------------|--------------|--------------|
| #### Bn-scaff_16022_1-p47573 C-genome specific (napus-oleracea) | 0.9736842    | 0.4892043    | 1            | 0.7147303    | not scorable | not scorable |
| #### Bn-scaff_16022_1-p47929 A-genome specific (napus-rapa)     | 1            | 0.5409952    | not scorable | not scorable | 1            | 0.806406     |
| #### Bn-scaff_16022_1-p49338 C-genome specific (napus-oleracea) | 0.9784689    | 0.6167595    | 0.9922481    | 0.8289795    | not scorable | not scorable |
| #### Bn-scaff_16022_1-p49643 C-genome specific (napus-oleracea) | 0.9880383    | 0.7686666    | 0.9922481    | 0.7803867    | not scorable | not scorable |
| #### Bn-scaff_16022_1-p50230 C-genome specific (napus-oleracea) | 0.9808612    | 0.702389     | 0.9922481    | 0.6823732    | not scorable | not scorable |
| #### Bn-scaff_16022_1-p50266 C-genome specific (napus-oleracea) | 0.9856459    | 0.6805487    | 0.9922481    | 0.6104545    | not scorable | not scorable |
| #### Bn-scaff_16022_1-p50776 C-genome specific (napus-oleracea) | 0.9880383    | 0.7976239    | 0.9922481    | 0.7640801    | not scorable | not scorable |
| #### Bn-scaff_16022_1-p50788 C-genome specific (napus-oleracea) | 0.9904306    | 0.8081741    | 0.9922481    | 0.8077934    | not scorable | not scorable |
| #### Bn-scaff_16022_1-p50852 C-genome specific (napus-oleracea) | 0.9832536    | 0.8031159    | 0.9844961    | 0.7866976    | not scorable | not scorable |
| #### Bn-scaff_16022_1-p51127 C-genome specific (napus-oleracea) | 0.9928229    | 0.7876976    | 0.9767442    | 0.7860573    | not scorable | not scorable |
| #### Bn-scaff_16022_1-p59600 C-genome specific (napus-oleracea) | 0.9760765    | 0.7811384    | 0.9767442    | 0.8347269    | not scorable | not scorable |
| #### Bn-scaff_16022_1-p60231 C-genome specific (napus-oleracea) | 0.9880383    | 0.7132172    | 1            | 0.7327434    | not scorable | not scorable |
| #### Bn-scaff_16022_1-p84943 napus specific                     | 0.9904306    | 0.4665909    | not scorable | not scorable | not scorable | not scorable |
| #### Bn-scaff_16022_1-p861 C-genome specific (napus-oleracea)   | 0.9736842    | 0.5413007    | 1            | 0.8037136    | not scorable | not scorable |
| #### Bn-scaff_16027_1-p18199 C-genome specific (napus-oleracea) | 0.9090909    | 0.7281212    | 0.9844961    | 0.8095958    | not scorable | not scorable |
| #### Bn-scaff_16027_1-p21042 C-genome specific (napus-oleracea) | 0.9138756    | 0.7676806    | 1            | 0.7870615    | not scorable | not scorable |
| #### Bn-scaff_16027_1-p22136 genome unspecific (all in)         | 0.9114832    | 0.6301115    | 1            | 0.640465     | 1            | 0.9239482    |
| #### Bn-scaff_16027_1-p31931 C-genome specific (napus-oleracea) | 0.923445     | 0.6429637    | 0.9844961    | 0.7136218    | not scorable | not scorable |
| #### Bn-scaff_16027_1-p31936 C-genome specific (napus-oleracea) | 0.9258373    | 0.5775895    | 1            | 0.6828967    | not scorable | not scorable |
| #### Bn-scaff_16027_1-p31945 C-genome specific (napus-oleracea) | 0.9282297    | 0.7684846    | 0.9922481    | 0.7187059    | not scorable | not scorable |
| #### Bn-scaff_16027_1-p32666 C-genome specific (napus-oleracea) | 0.9210526    | 0.7966368    | 1            | 0.8085264    | not scorable | not scorable |
| #### Bn-scaff_16027_1-p32672 C-genome specific (napus-oleracea) | 0.3373206    | 0.9589707    | 0.7364341    | 0.8436936    | not scorable | not scorable |
| #### Bn-scaff_16027_1-p32698 C-genome specific (napus-oleracea) | 0.9210526    | 0.7641943    | 0.9767442    | 0.8072895    | not scorable | not scorable |
| #### Bn-scaff_16027_1-p32879 C-genome specific (napus-oleracea) | 0.9210526    | 0.7680893    | 0.9922481    | 0.7942212    | not scorable | not scorable |
| #### Bn-scaff_16027_1-p32918 C-genome specific (napus-oleracea) | 0.9258373    | 0.759648     | 0.9844961    | 0.8031524    | not scorable | not scorable |
| #### Bn-scaff_16027_1-p35229 genome unspecific (oleracea-rapa)  | not scorable | not scorable | 1            | 0.7079276    | 1            | 0.8080618    |
| #### Bn-scaff_16027_1-p35273 genome unspecific (all in)         | 0.923445     | 0.7091712    | 0.9922481    | 0.7684661    | 0.9917355    | 0.8601228    |
| #### Bn-scaff_16027_1-p35313 C-genome specific (napus-oleracea) | 0.923445     | 0.7779592    | 0.9922481    | 0.8136061    | not scorable | not scorable |
| #### Bn-scaff_16027_1-p35583 C-genome specific (napus-oleracea) | 0.9186603    | 0.780502     | 0.9922481    | 0.9261821    | not scorable | not scorable |
| #### Bn-scaff_16027_1-p35637 C-genome specific (napus-oleracea) | 0.9282297    | 0.7777259    | 0.9844961    | 0.8483146    | not scorable | not scorable |
| #### Bn-scaff_16027_1-p35643 C-genome specific (napus-oleracea) | 0.9210526    | 0.7078311    | 1            | 0.6997161    | not scorable | not scorable |
| #### Bn-scaff_16027_1-p35723 C-genome specific (napus-oleracea) | 0.9138756    | 0.683194     | 0.9922481    | 0.8486626    | not scorable | not scorable |
| #### Bn-scaff_16027_1-p35743 C-genome specific (napus-oleracea) | 0.9162679    | 0.7906671    | 1            | 0.7547234    | not scorable | not scorable |

|                                                                |              |              |              |              |              |              |
|----------------------------------------------------------------|--------------|--------------|--------------|--------------|--------------|--------------|
| #### Bn-scaff_16027_1-p3579C-genome specific (napus-oleracea)  | 0.9258373    | 0.7740299    | 0.9922481    | 0.794845     | not scorable | not scorable |
| #### Bn-scaff_16027_1-p36482C-genome specific (napus-oleracea) | 0.9162679    | 0.7489199    | 0.8062016    | 0.7527012    | not scorable | not scorable |
| #### Bn-scaff_16027_1-p36709C-genome specific (napus-oleracea) | 0.9210526    | 0.7599296    | 0.9379845    | 0.7566565    | not scorable | not scorable |
| #### Bn-scaff_16027_1-p3864C-genome unspecific (all in)        | 0.9880383    | 0.5007705    | 0.9844961    | 0.7953452    | 0.9917355    | 0.9095823    |
| #### Bn-scaff_16027_1-p39792C-genome specific (napus-oleracea) | 0.8732057    | 0.4629848    | 0.9922481    | 0.7654803    | not scorable | not scorable |
| #### Bn-scaff_16027_1-p58518 napus specific                    | 0.7057416    | 0.8241628    | not scorable | not scorable | not scorable | not scorable |
| #### Bn-scaff_16027_1-p63045 genome unspecific (oleracea-rapa) | not scorable | not scorable | 1            | 0.8642943    | 1            | 0.9316646    |
| #### Bn-scaff_16027_1-p66837 genome unspecific (all in)        | 0.9545454    | 0.4396406    | 1            | 0.6110512    | 0.9586777    | 0.6176974    |
| #### Bn-scaff_16027_1-p70704 genome unspecific (all in)        | 0.9904306    | 0.4792638    | 0.9844961    | 0.7889431    | 1            | 0.9272014    |
| #### Bn-scaff_16042_1-p10178 genome unspecific (all in)        | 0.9832536    | 0.5950007    | 1            | 0.7667827    | 1            | 0.9307742    |
| #### Bn-scaff_16042_1-p12654 genome unspecific (all in)        | 0.9880383    | 0.3467751    | 1            | 0.6877546    | 0.9917355    | 0.7419661    |
| #### Bn-scaff_16042_1-p31991C-genome specific (napus-oleracea) | 0.9712918    | 0.5385402    | 0.9224806    | 0.6653946    | not scorable | not scorable |
| #### Bn-scaff_16042_1-p3201C napus specific                    | 0.861244     | 0.9216952    | not scorable | not scorable | not scorable | not scorable |
| #### Bn-scaff_16042_1-p32092 napus specific                    | 0.9832536    | 0.3573393    | not scorable | not scorable | not scorable | not scorable |
| #### Bn-scaff_16042_1-p33131C-genome specific (napus-oleracea) | 0.9904306    | 0.338196     | 1            | 0.6718425    | not scorable | not scorable |
| #### Bn-scaff_16042_1-p98299 genome unspecific (all in)        | 0.9760765    | 0.541805     | 1            | 0.552925     | 0.9917355    | 0.5592564    |
| #### Bn-scaff_16045_1-p1476C-genome specific (napus-oleracea)  | 0.9736842    | 0.7667558    | 1            | 0.7771507    | not scorable | not scorable |
| #### Bn-scaff_16045_1-p17497C-genome specific (napus-oleracea) | 0.9856459    | 0.7183346    | 1            | 0.7758379    | not scorable | not scorable |
| #### Bn-scaff_16045_1-p18206C-genome specific (oleracea only)  | not scorable | not scorable | 1            | 0.801131     | not scorable | not scorable |
| #### Bn-scaff_16045_1-p23541C-genome specific (napus-oleracea) | 0.9904306    | 0.7743437    | 1            | 0.8469404    | not scorable | not scorable |
| #### Bn-scaff_16045_1-p32641 genome unspecific (all in)        | 0.9880383    | 0.4995422    | 1            | 0.7433608    | 0.9586777    | 0.9076087    |
| #### Bn-scaff_16045_1-p36117C-genome specific (napus-oleracea) | 0.9641148    | 0.7002175    | 1            | 0.8071398    | not scorable | not scorable |
| #### Bn-scaff_16055_1-p10534C-genome specific (napus-oleracea) | 0.9784689    | 0.7764494    | 0.9844961    | 0.8091784    | not scorable | not scorable |
| #### Bn-scaff_16055_1-p10539C-genome specific (napus-oleracea) | 0.9784689    | 0.7700267    | 1            | 0.8811159    | not scorable | not scorable |
| #### Bn-scaff_16055_1-p1055C-genome specific (napus-oleracea)  | 0.9808612    | 0.6781774    | 1            | 0.6740808    | not scorable | not scorable |
| #### Bn-scaff_16055_1-p10606C-genome specific (napus-oleracea) | 0.9904306    | 0.796224     | 1            | 0.7107702    | not scorable | not scorable |
| #### Bn-scaff_16055_1-p10609C-genome specific (napus-oleracea) | 0.9688995    | 0.8162457    | 1            | 0.811864     | not scorable | not scorable |
| #### Bn-scaff_16055_1-p10622C-genome specific (napus-oleracea) | 0.9856459    | 0.7689322    | 1            | 0.7628194    | not scorable | not scorable |
| #### Bn-scaff_16055_1-p11177C-genome specific (napus-oleracea) | 0.9760765    | 0.5513566    | 1            | 0.6707281    | not scorable | not scorable |
| #### Bn-scaff_16055_1-p11178C-genome specific (napus-oleracea) | 0.9712918    | 0.6307786    | 1            | 0.5824713    | not scorable | not scorable |
| #### Bn-scaff_16055_1-p11198C-genome specific (napus-oleracea) | 0.9928229    | 0.8331373    | 1            | 0.8153858    | not scorable | not scorable |
| #### Bn-scaff_16055_1-p1120C-genome specific (napus-oleracea)  | 0.9736842    | 0.7964799    | 1            | 0.738941     | not scorable | not scorable |
| #### Bn-scaff_16055_1-p11204C-genome specific (napus-oleracea) | 0.9784689    | 0.8306141    | 1            | 0.704466     | not scorable | not scorable |

|                                                                 |              |              |           |           |              |              |
|-----------------------------------------------------------------|--------------|--------------|-----------|-----------|--------------|--------------|
| #### Bn-scaff_16055_1-p11217 C-genome specific (oleracea only)  | not scorable | not scorable | 0.9612403 | 0.7005541 | not scorable | not scorable |
| #### Bn-scaff_16055_1-p11256 C-genome specific (napus-oleracea) | 0.9808612    | 0.7315996    | 1         | 0.7458258 | not scorable | not scorable |
| #### Bn-scaff_16055_1-p11261 C-genome specific (napus-oleracea) | 0.9736842    | 0.6932443    | 1         | 0.7043213 | not scorable | not scorable |
| #### Bn-scaff_16055_1-p11268 C-genome specific (napus-oleracea) | 0.9760765    | 0.8381987    | 0.9922481 | 0.8219349 | not scorable | not scorable |
| #### Bn-scaff_16055_1-p11288 C-genome specific (napus-oleracea) | 0.9808612    | 0.7973794    | 1         | 0.8486239 | not scorable | not scorable |
| #### Bn-scaff_16055_1-p11290 C-genome specific (napus-oleracea) | 0.9760765    | 0.7037492    | 1         | 0.7985677 | not scorable | not scorable |
| #### Bn-scaff_16055_1-p11293 C-genome specific (napus-oleracea) | 0.9760765    | 0.8094406    | 1         | 0.8286523 | not scorable | not scorable |
| #### Bn-scaff_16055_1-p11774 C-genome specific (napus-oleracea) | 0.9808612    | 0.828145     | 1         | 0.6265095 | not scorable | not scorable |
| #### Bn-scaff_16055_1-p11872 C-genome specific (napus-oleracea) | 0.9641148    | 0.6875772    | 1         | 0.8297535 | not scorable | not scorable |
| #### Bn-scaff_16055_1-p11882 C-genome specific (napus-oleracea) | 0.9784689    | 0.7952328    | 1         | 0.7643309 | not scorable | not scorable |
| #### Bn-scaff_16055_1-p11982 C-genome specific (napus-oleracea) | 0.9784689    | 0.7330611    | 0.9922481 | 0.8073711 | not scorable | not scorable |
| #### Bn-scaff_16055_1-p12148 C-genome specific (napus-oleracea) | 0.9593301    | 0.7273095    | 0.9224806 | 0.3997883 | not scorable | not scorable |
| #### Bn-scaff_16055_1-p12166 C-genome specific (napus-oleracea) | 0.9665072    | 0.6659019    | 1         | 0.8327926 | not scorable | not scorable |
| #### Bn-scaff_16055_1-p12186 C-genome specific (napus-oleracea) | 0.9904306    | 0.8212364    | 1         | 0.8044307 | not scorable | not scorable |
| #### Bn-scaff_16055_1-p12186 C-genome specific (napus-oleracea) | 0.9784689    | 0.8063173    | 1         | 0.8149468 | not scorable | not scorable |
| #### Bn-scaff_16055_1-p12224 C-genome specific (napus-oleracea) | 0.9760765    | 0.8368543    | 0.9922481 | 0.7520255 | not scorable | not scorable |
| #### Bn-scaff_16055_1-p12229 C-genome specific (oleracea only)  | not scorable | not scorable | 1         | 0.8893886 | not scorable | not scorable |
| #### Bn-scaff_16055_1-p12349 C-genome specific (napus-oleracea) | 0.9904306    | 0.6797698    | 1         | 0.7518217 | not scorable | not scorable |
| #### Bn-scaff_16055_1-p12427 C-genome specific (napus-oleracea) | 0.9880383    | 0.7837298    | 0.9922481 | 0.6030797 | not scorable | not scorable |
| #### Bn-scaff_16055_1-p12438 C-genome specific (napus-oleracea) | 0.9832536    | 0.7368148    | 1         | 0.6228867 | not scorable | not scorable |
| #### Bn-scaff_16055_1-p12439 C-genome specific (napus-oleracea) | 0.9904306    | 0.8200852    | 1         | 0.7411184 | not scorable | not scorable |
| #### Bn-scaff_16055_1-p12475 C-genome specific (napus-oleracea) | 0.9641148    | 0.7460431    | 0.9922481 | 0.8343484 | not scorable | not scorable |
| #### Bn-scaff_16055_1-p12476 C-genome specific (napus-oleracea) | 0.9856459    | 0.8186666    | 0.9922481 | 0.7907627 | not scorable | not scorable |
| #### Bn-scaff_16055_1-p12479 C-genome specific (napus-oleracea) | 0.9736842    | 0.8056497    | 0.9844961 | 0.7381302 | not scorable | not scorable |
| #### Bn-scaff_16055_1-p12511 C-genome specific (napus-oleracea) | 0.9617225    | 0.7177759    | 0.9922481 | 0.7815195 | not scorable | not scorable |
| #### Bn-scaff_16055_1-p12576 C-genome specific (napus-oleracea) | 0.9784689    | 0.7036099    | 1         | 0.658803  | not scorable | not scorable |
| #### Bn-scaff_16055_1-p12618 genome unspecific (all in)         | 0.9258373    | 0.6937725    | 1         | 0.936802  | 1            | 0.9199228    |
| #### Bn-scaff_16055_1-p12631 C-genome specific (napus-oleracea) | 0.9904306    | 0.7863845    | 1         | 0.719024  | not scorable | not scorable |
| #### Bn-scaff_16055_1-p12632 C-genome specific (napus-oleracea) | 0.9736842    | 0.7405865    | 1         | 0.8665947 | not scorable | not scorable |
| #### Bn-scaff_16055_1-p12667 C-genome specific (napus-oleracea) | 0.9808612    | 0.7623614    | 1         | 0.7912186 | not scorable | not scorable |
| #### Bn-scaff_16055_1-p12686 C-genome specific (napus-oleracea) | 0.9665072    | 0.8432651    | 1         | 0.6504939 | not scorable | not scorable |
| #### Bn-scaff_16055_1-p12687 C-genome specific (napus-oleracea) | 0.9904306    | 0.8216323    | 1         | 0.7723906 | not scorable | not scorable |
| #### Bn-scaff_16055_1-p12695 C-genome specific (napus-oleracea) | 0.9736842    | 0.7821852    | 1         | 0.7771507 | not scorable | not scorable |



|                                                                 |              |              |           |           |              |              |
|-----------------------------------------------------------------|--------------|--------------|-----------|-----------|--------------|--------------|
| #### Bn-scaff_16055_1-p12714 C-genome specific (napus-oleracea) | 0.9760765    | 0.8958967    | 1         | 0.79995   | not scorable | not scorable |
| #### Bn-scaff_16055_1-p12715 C-genome specific (napus-oleracea) | 0.9473684    | 0.5481639    | 0.9922481 | 0.748931  | not scorable | not scorable |
| #### Bn-scaff_16055_1-p12855 C-genome specific (oleracea only)  | not scorable | not scorable | 0.9844961 | 0.8522956 | not scorable | not scorable |
| #### Bn-scaff_16055_1-p12895 C-genome specific (napus-oleracea) | 0.9904306    | 0.802099     | 1         | 0.8271682 | not scorable | not scorable |
| #### Bn-scaff_16055_1-p13155 C-genome specific (napus-oleracea) | 0.9928229    | 0.837958     | 1         | 0.834371  | not scorable | not scorable |
| #### Bn-scaff_16055_1-p13159 C-genome specific (napus-oleracea) | 0.9784689    | 0.7124959    | 1         | 0.5896462 | not scorable | not scorable |
| #### Bn-scaff_16055_1-p13160 C-genome specific (napus-oleracea) | 0.9904306    | 0.8097162    | 1         | 0.6298181 | not scorable | not scorable |
| #### Bn-scaff_16055_1-p13170 C-genome specific (napus-oleracea) | 0.9832536    | 0.694525     | 1         | 0.6090961 | not scorable | not scorable |
| #### Bn-scaff_16055_1-p13204 C-genome specific (napus-oleracea) | 0.9808612    | 0.7947085    | 1         | 0.8815864 | not scorable | not scorable |
| #### Bn-scaff_16055_1-p13215 C-genome specific (napus-oleracea) | 0.9808612    | 0.6186723    | 1         | 0.6945279 | not scorable | not scorable |
| #### Bn-scaff_16055_1-p13384 C-genome specific (napus-oleracea) | 0.9904306    | 0.8194966    | 1         | 0.8051295 | not scorable | not scorable |
| #### Bn-scaff_16055_1-p13488 C-genome specific (napus-oleracea) | 0.9760765    | 0.8046602    | 1         | 0.7013235 | not scorable | not scorable |
| #### Bn-scaff_16055_1-p13889 C-genome specific (napus-oleracea) | 0.9545454    | 0.666014     | 1         | 0.6685429 | not scorable | not scorable |
| #### Bn-scaff_16055_1-p14578 genome unspecific (all in)         | 1            | 0.6491711    | 0.9767442 | 0.3830342 | 1            | 0.6529949    |
| #### Bn-scaff_16055_1-p14637 C-genome specific (napus-oleracea) | 0.9784689    | 0.7564994    | 0.9922481 | 0.7027276 | not scorable | not scorable |
| #### Bn-scaff_16055_1-p14814 C-genome specific (napus-oleracea) | 0.9617225    | 0.351928     | 0.9224806 | 0.1892242 | not scorable | not scorable |
| #### Bn-scaff_16055_1-p15436 genome unspecific (all in)         | 0.9976076    | 0.4989409    | 1         | 0.7051469 | 1            | 0.8652792    |
| #### Bn-scaff_16055_1-p15627 C-genome specific (napus-oleracea) | 0.9880383    | 0.5304871    | 0.9844961 | 0.4921005 | not scorable | not scorable |
| #### Bn-scaff_16055_1-p16059 genome unspecific (all in)         | 0.9712918    | 0.351072     | 1         | 0.6464701 | 0.9752066    | 0.7133579    |
| #### Bn-scaff_16055_1-p19961 C-genome specific (napus-oleracea) | 0.9952153    | 0.5051944    | 1         | 0.7621537 | not scorable | not scorable |
| #### Bn-scaff_16055_1-p21080 genome unspecific (all in)         | 1            | 0.6032484    | 1         | 0.602145  | 1            | 0.5830583    |
| #### Bn-scaff_16055_1-p26073 C-genome specific (napus-oleracea) | 0.8803828    | 0.8603077    | 0.7674419 | 0.8411664 | not scorable | not scorable |
| #### Bn-scaff_16055_1-p39921 genome unspecific (all in)         | 0.9784689    | 0.735344     | 0.9922481 | 0.7676714 | 1            | 0.8653563    |
| #### Bn-scaff_16055_1-p40192 genome unspecific (oleracea-rapa)  | not scorable | not scorable | 0.9302326 | 0.4471522 | 1            | 0.9104934    |
| #### Bn-scaff_16055_1-p40978 C-genome specific (napus-oleracea) | 0.9354067    | 0.6269483    | 1         | 0.7687075 | not scorable | not scorable |
| #### Bn-scaff_16055_1-p41010 C-genome specific (napus-oleracea) | 0.9617225    | 0.7562324    | 0.9922481 | 0.7705176 | not scorable | not scorable |
| #### Bn-scaff_16055_1-p41068 C-genome specific (napus-oleracea) | 0.9665072    | 0.7959683    | 0.9689922 | 0.7625377 | not scorable | not scorable |
| #### Bn-scaff_16055_1-p44896 C-genome specific (napus-oleracea) | 0.9760765    | 0.770026     | 0.9844961 | 0.8450764 | not scorable | not scorable |
| #### Bn-scaff_16055_1-p44901 C-genome specific (napus-oleracea) | 0.9832536    | 0.7451177    | 0.9844961 | 0.7407741 | not scorable | not scorable |
| #### Bn-scaff_16055_1-p45142 C-genome specific (napus-oleracea) | 0.9880383    | 0.6981561    | 0.9844961 | 0.7399979 | not scorable | not scorable |
| #### Bn-scaff_16055_1-p47542 C-genome specific (napus-oleracea) | 0.9712918    | 0.6943743    | 1         | 0.7113869 | not scorable | not scorable |
| #### Bn-scaff_16055_1-p47740 genome unspecific (oleracea-rapa)  | not scorable | not scorable | 1         | 0.6560127 | 1            | 0.9448497    |
| #### Bn-scaff_16055_1-p47747 C-genome specific (napus-oleracea) | 0.9617225    | 0.6023471    | 0.9844961 | 0.5617165 | not scorable | not scorable |

|                                                                 |              |              |           |           |              |              |
|-----------------------------------------------------------------|--------------|--------------|-----------|-----------|--------------|--------------|
| #### Bn-scaff_16055_1-p50334 C-genome specific (napus-oleracea) | 0.9521531    | 0.7139826    | 0.9922481 | 0.8026356 | not scorable | not scorable |
| #### Bn-scaff_16055_1-p50786 C-genome specific (napus-oleracea) | 0.9569378    | 0.7839261    | 1         | 0.8842176 | not scorable | not scorable |
| #### Bn-scaff_16055_1-p51601 C-genome specific (napus-oleracea) | 0.9688995    | 0.7183296    | 0.9922481 | 0.7895423 | not scorable | not scorable |
| #### Bn-scaff_16055_1-p51608 C-genome specific (napus-oleracea) | 0.9593301    | 0.6760786    | 1         | 0.6856328 | not scorable | not scorable |
| #### Bn-scaff_16055_1-p51624 C-genome specific (napus-oleracea) | 0.9688995    | 0.7500578    | 0.9844961 | 0.7286336 | not scorable | not scorable |
| #### Bn-scaff_16055_1-p51629 C-genome specific (napus-oleracea) | 0.9617225    | 0.3502033    | 0.9922481 | 0.7520401 | not scorable | not scorable |
| #### Bn-scaff_16055_1-p61255 C-genome specific (napus-oleracea) | 0.9593301    | 0.7295427    | 1         | 0.6623936 | not scorable | not scorable |
| #### Bn-scaff_16055_1-p61261 C-genome specific (napus-oleracea) | 0.9808612    | 0.7776792    | 1         | 0.7666395 | not scorable | not scorable |
| #### Bn-scaff_16055_1-p61337 C-genome specific (napus-oleracea) | 0.9641148    | 0.7623729    | 0.9844961 | 0.6260399 | not scorable | not scorable |
| #### Bn-scaff_16055_1-p67872 C-genome specific (napus-oleracea) | 0.9425837    | 0.7426652    | 1         | 0.8455274 | not scorable | not scorable |
| #### Bn-scaff_16055_1-p69593 C-genome specific (napus-oleracea) | 0.9808612    | 0.779097     | 1         | 0.793625  | not scorable | not scorable |
| #### Bn-scaff_16055_1-p69893 C-genome specific (napus-oleracea) | 0.937799     | 0.7480295    | 1         | 0.7495622 | not scorable | not scorable |
| #### Bn-scaff_16055_1-p74225 C-genome specific (napus-oleracea) | 0.9808612    | 0.7549638    | 1         | 0.7814705 | not scorable | not scorable |
| #### Bn-scaff_16055_1-p76942 C-genome specific (napus-oleracea) | 0.9736842    | 0.7790937    | 0.9844961 | 0.7563142 | not scorable | not scorable |
| #### Bn-scaff_16055_1-p77149 C-genome specific (napus-oleracea) | 0.9808612    | 0.7686065    | 0.9844961 | 0.7095718 | not scorable | not scorable |
| #### Bn-scaff_16055_1-p77177 C-genome specific (napus-oleracea) | 0.9760765    | 0.764713     | 1         | 0.6738463 | not scorable | not scorable |
| #### Bn-scaff_16055_1-p77216 C-genome specific (napus-oleracea) | 0.9617225    | 0.787612     | 0.9844961 | 0.7393542 | not scorable | not scorable |
| #### Bn-scaff_16055_1-p77365 C-genome specific (napus-oleracea) | 0.9808612    | 0.7021037    | 1         | 0.6756871 | not scorable | not scorable |
| #### Bn-scaff_16055_1-p77610 C-genome specific (napus-oleracea) | 0.9545454    | 0.7401437    | 0.9612403 | 0.7400616 | not scorable | not scorable |
| #### Bn-scaff_16055_1-p77767 C-genome specific (napus-oleracea) | 0.9832536    | 0.7772586    | 1         | 0.7707475 | not scorable | not scorable |
| #### Bn-scaff_16055_1-p77790 C-genome specific (napus-oleracea) | 0.9736842    | 0.7698848    | 0.9922481 | 0.7625421 | not scorable | not scorable |
| #### Bn-scaff_16055_1-p78527 genome unspecific (all in)         | 0.9665072    | 0.6575281    | 1         | 0.8286739 | 1            | 0.9398974    |
| #### Bn-scaff_16055_1-p84673 C-genome specific (napus-oleracea) | 0.9593301    | 0.6278492    | 0.9844961 | 0.6429148 | not scorable | not scorable |
| #### Bn-scaff_16055_1-p85147 C-genome specific (napus-oleracea) | 0.9736842    | 0.7014576    | 1         | 0.6798792 | not scorable | not scorable |
| #### Bn-scaff_16055_1-p91644 genome unspecific (all in)         | 0.9354067    | 0.5272365    | 0.9844961 | 0.751821  | 1            | 0.9406738    |
| #### Bn-scaff_16055_1-p92272 C-genome specific (napus-oleracea) | 0.9832536    | 0.7671971    | 1         | 0.8379963 | not scorable | not scorable |
| #### Bn-scaff_16055_1-p97511 C-genome specific (oleracea only)  | not scorable | not scorable | 1         | 0.8540489 | not scorable | not scorable |
| #### Bn-scaff_16056_1-p12343 genome unspecific (all in)         | 0.9784689    | 0.4627435    | 0.9922481 | 0.8415815 | 1            | 0.9141991    |
| #### Bn-scaff_16056_1-p15468 C-genome specific (napus-oleracea) | 0.9593301    | 0.747385     | 0.9922481 | 0.7661276 | not scorable | not scorable |
| #### Bn-scaff_16056_1-p15556 C-genome specific (napus-oleracea) | 0.9688995    | 0.6736414    | 0.9922481 | 0.7710248 | not scorable | not scorable |
| #### Bn-scaff_16056_1-p16322 C-genome specific (napus-oleracea) | 0.9569378    | 0.7686226    | 0.9922481 | 0.7716408 | not scorable | not scorable |
| #### Bn-scaff_16056_1-p23427 C-genome specific (napus-oleracea) | 0.9569378    | 0.7283916    | 0.9844961 | 0.8637789 | not scorable | not scorable |
| #### Bn-scaff_16056_1-p23486 C-genome specific (napus-oleracea) | 0.9617225    | 0.7783745    | 0.9844961 | 0.7303104 | not scorable | not scorable |

|                                                                 |              |              |              |              |              |              |
|-----------------------------------------------------------------|--------------|--------------|--------------|--------------|--------------|--------------|
| #### Bn-scaff_16056_1-p25376 C-genome specific (napus-oleracea) | 0.9593301    | 0.794888     | 0.9767442    | 0.8129011    | not scorable | not scorable |
| #### Bn-scaff_16062_1-p14800 C-genome specific (napus-oleracea) | 1            | 0.8574853    | 1            | 0.6851246    | not scorable | not scorable |
| #### Bn-scaff_16062_1-p19072 C-genome specific (oleracea only)  | not scorable | not scorable | 1            | 0.7617018    | not scorable | not scorable |
| #### Bn-scaff_16062_1-p19174 C-genome specific (napus-oleracea) | 0.9904306    | 0.5846033    | 1            | 0.850278     | not scorable | not scorable |
| #### Bn-scaff_16062_1-p19181 C-genome specific (oleracea only)  | not scorable | not scorable | 0.9844961    | 0.800903     | not scorable | not scorable |
| #### Bn-scaff_16062_1-p19235 C-genome specific (napus-oleracea) | 0.9712918    | 0.3256648    | 0.9534883    | 0.8343484    | not scorable | not scorable |
| #### Bn-scaff_16062_1-p28988 C-genome specific (napus-oleracea) | 0.9808612    | 0.690796     | 0.9922481    | 0.7468991    | not scorable | not scorable |
| #### Bn-scaff_16062_1-p29508 genome unspecific (all in)         | 0.9712918    | 0.3148635    | 0.9922481    | 0.4401395    | 1            | 0.7622204    |
| #### Bn-scaff_16062_1-p29537 genome unspecific (all in)         | 0.9760765    | 0.5730179    | 1            | 0.7163496    | 1            | 0.9201254    |
| #### Bn-scaff_16062_1-p29551 genome unspecific (all in)         | 0.9665072    | 0.2672715    | 0.9922481    | 0.267938     | 1            | 0.6939149    |
| #### Bn-scaff_16062_1-p29569 genome unspecific (all in)         | 0.9904306    | 0.5426844    | 1            | 0.6241212    | 1            | 0.8613519    |
| #### Bn-scaff_16062_1-p29643 C-genome specific (napus-oleracea) | 0.9856459    | 0.7586261    | 1            | 0.8108861    | not scorable | not scorable |
| #### Bn-scaff_16062_1-p29973 C-genome specific (napus-oleracea) | 0.9856459    | 0.7811896    | 1            | 0.7156986    | not scorable | not scorable |
| #### Bn-scaff_16062_1-p34550 C-genome specific (napus-oleracea) | 0.9880383    | 0.7758122    | 0.9844961    | 0.7262066    | not scorable | not scorable |
| #### Bn-scaff_16062_1-p34560 C-genome specific (napus-oleracea) | 0.9688995    | 0.5954198    | 0.9844961    | 0.5666228    | not scorable | not scorable |
| #### Bn-scaff_16062_1-p34927 C-genome specific (napus-oleracea) | 0.9665072    | 0.7320811    | 0.9844961    | 0.7230852    | not scorable | not scorable |
| #### Bn-scaff_16064_1-p10097 napus specific                     | 0.9019139    | 0.6707573    | not scorable | not scorable | not scorable | not scorable |
| #### Bn-scaff_16064_1-p10464 C-genome specific (napus-oleracea) | 1            | 0.6292592    | 1            | 0.7254939    | not scorable | not scorable |
| #### Bn-scaff_16064_1-p10477 C-genome specific (napus-oleracea) | 0.9138756    | 0.7689537    | 0.6744186    | 0.7719569    | not scorable | not scorable |
| #### Bn-scaff_16064_1-p10524 C-genome specific (napus-oleracea) | 0.9186603    | 0.7920763    | 1            | 0.8331373    | not scorable | not scorable |
| #### Bn-scaff_16064_1-p10561 C-genome specific (napus-oleracea) | 0.9066986    | 0.7878498    | 1            | 0.8162035    | not scorable | not scorable |
| #### Bn-scaff_16064_1-p10737 C-genome specific (napus-oleracea) | 0.9617225    | 0.6375136    | 0.9922481    | 0.8314648    | not scorable | not scorable |
| #### Bn-scaff_16064_1-p10754 C-genome specific (napus-oleracea) | 0.9162679    | 0.7524425    | 0.9922481    | 0.8252573    | not scorable | not scorable |
| #### Bn-scaff_16064_1-p10756 C-genome specific (napus-oleracea) | 0.8947368    | 0.6988692    | 0.9922481    | 0.8416706    | not scorable | not scorable |
| #### Bn-scaff_16064_1-p10760 C-genome specific (napus-oleracea) | 0.9019139    | 0.7490885    | 0.9922481    | 0.7948635    | not scorable | not scorable |
| #### Bn-scaff_16064_1-p10864 genome unspecific (oleracea-rapa)  | not scorable | not scorable | 0.9922481    | 0.5842141    | 0.9917355    | 0.5952035    |
| #### Bn-scaff_16064_1-p11242 C-genome specific (napus-oleracea) | 1            | 0.8572048    | 1            | 0.7554464    | not scorable | not scorable |
| #### Bn-scaff_16064_1-p11245 C-genome specific (napus-oleracea) | 0.9856459    | 0.7837316    | 1            | 0.8460509    | not scorable | not scorable |
| #### Bn-scaff_16064_1-p11265 C-genome specific (napus-oleracea) | 0.9976076    | 0.5876467    | 0.9844961    | 0.5839158    | not scorable | not scorable |
| #### Bn-scaff_16064_1-p11291 C-genome specific (napus-oleracea) | 1            | 0.8691639    | 1            | 0.8563944    | not scorable | not scorable |
| #### Bn-scaff_16064_1-p11291 C-genome specific (napus-oleracea) | 0.9952153    | 0.8941385    | 1            | 0.8620939    | not scorable | not scorable |
| #### Bn-scaff_16064_1-p11292 C-genome specific (oleracea only)  | not scorable | not scorable | 0.5193799    | 0.8336939    | not scorable | not scorable |
| #### Bn-scaff_16064_1-p11293 C-genome specific (napus-oleracea) | 1            | 0.8804961    | 0.9922481    | 0.8147027    | not scorable | not scorable |

|                                                                |              |              |              |              |              |              |
|----------------------------------------------------------------|--------------|--------------|--------------|--------------|--------------|--------------|
| #### Bn-scaff_16064_1-p11371C-genome specific (napus-oleracea) | 0.9808612    | 0.8855912    | 1            | 0.7236686    | not scorable | not scorable |
| #### Bn-scaff_16064_1-p11422C-genome specific (napus-oleracea) | 0.9952153    | 0.8429088    | 0.9844961    | 0.8596901    | not scorable | not scorable |
| #### Bn-scaff_16064_1-p11444C-genome specific (napus-oleracea) | 0.9904306    | 0.8620079    | 1            | 0.8322569    | not scorable | not scorable |
| #### Bn-scaff_16064_1-p11445C-genome specific (napus-oleracea) | 1            | 0.8800518    | 0.9922481    | 0.8068786    | not scorable | not scorable |
| #### Bn-scaff_16064_1-p11458genome unspecific (all in)         | 0.9856459    | 0.6666182    | 1            | 0.8221858    | 1            | 0.9406413    |
| #### Bn-scaff_16064_1-p11469A-genome specific (rapa only)      | not scorable | not scorable | not scorable | not scorable | 0.9917355    | 0.6566929    |
| #### Bn-scaff_16064_1-p11542genome unspecific (all in)         | 0.9904306    | 0.4134692    | 1            | 0.8006061    | 1            | 0.8887275    |
| #### Bn-scaff_16064_1-p11879genome unspecific (all in)         | 0.9186603    | 0.2035783    | 0.8372093    | 0.2266196    | 1            | 0.7252899    |
| #### Bn-scaff_16064_1-p12646C-genome specific (napus-oleracea) | 0.9617225    | 0.6505567    | 0.9534883    | 0.6607027    | not scorable | not scorable |
| #### Bn-scaff_16064_1-p13167C-genome specific (napus-oleracea) | 0.8995215    | 0.7505705    | 1            | 0.789346     | not scorable | not scorable |
| #### Bn-scaff_16064_1-p13237genome unspecific (all in)         | 0.9545454    | 0.4473491    | 1            | 0.8545067    | 0.9917355    | 0.7331713    |
| #### Bn-scaff_16064_1-p13739genome unspecific (all in)         | 0.9641148    | 0.4298888    | 1            | 0.8196049    | 0.9917355    | 0.851132     |
| #### Bn-scaff_16064_1-p14180genome unspecific (all in)         | 0.9736842    | 0.5039477    | 0.9767442    | 0.4878431    | 1            | 0.9080027    |
| #### Bn-scaff_16064_1-p14420genome unspecific (all in)         | 0.9521531    | 0.5301538    | 0.9922481    | 0.5775427    | 1            | 0.8948976    |
| #### Bn-scaff_16064_1-p14421C-genome specific (napus-oleracea) | 0.9880383    | 0.7832668    | 1            | 0.8555887    | not scorable | not scorable |
| #### Bn-scaff_16064_1-p14471C-genome specific (napus-oleracea) | 0.8971292    | 0.7297426    | 0.9844961    | 0.7868593    | not scorable | not scorable |
| #### Bn-scaff_16064_1-p14559C-genome specific (napus-oleracea) | 0.8947368    | 0.6915748    | 0.9844961    | 0.7908302    | not scorable | not scorable |
| #### Bn-scaff_16064_1-p14684C-genome specific (napus-oleracea) | 0.9593301    | 0.3447024    | 1            | 0.8110542    | not scorable | not scorable |
| #### Bn-scaff_16064_1-p15184C-genome specific (napus-oleracea) | 0.9019139    | 0.6907942    | 0.9689922    | 0.7432139    | not scorable | not scorable |
| #### Bn-scaff_16064_1-p15293genome unspecific (all in)         | 1            | 0.3933978    | 1            | 0.8050097    | 1            | 0.7139018    |
| #### Bn-scaff_16064_1-p15534C-genome specific (napus-oleracea) | 0.9043062    | 0.6965379    | 0.9767442    | 0.7187214    | not scorable | not scorable |
| #### Bn-scaff_16064_1-p15873genome unspecific (oleracea-rapa)  | not scorable | not scorable | 1            | 0.8770575    | 0.9917355    | 0.6535662    |
| #### Bn-scaff_16064_1-p20358C-genome specific (napus-oleracea) | 0.8995215    | 0.7601631    | 0.9844961    | 0.8402116    | not scorable | not scorable |
| #### Bn-scaff_16064_1-p20630C-genome specific (napus-oleracea) | 0.9066986    | 0.760559     | 0.9844961    | 0.8222123    | not scorable | not scorable |
| #### Bn-scaff_16064_1-p21522genome unspecific (all in)         | 1            | 0.4393705    | 1            | 0.4349402    | 0.9917355    | 0.5266061    |
| #### Bn-scaff_16064_1-p22653C-genome specific (napus-oleracea) | 0.7368421    | 0.7672489    | 0.9689922    | 0.8703123    | not scorable | not scorable |
| #### Bn-scaff_16064_1-p23375C-genome specific (napus-oleracea) | 0.9043062    | 0.776328     | 0.9922481    | 0.6596027    | not scorable | not scorable |
| #### Bn-scaff_16064_1-p24730C-genome specific (napus-oleracea) | 0.8947368    | 0.7222245    | 0.9922481    | 0.830638     | not scorable | not scorable |
| #### Bn-scaff_16064_1-p24999C-genome specific (napus-oleracea) | 0.9019139    | 0.5901754    | 0.9922481    | 0.581593     | not scorable | not scorable |
| #### Bn-scaff_16064_1-p25302C-genome specific (napus-oleracea) | 0.9066986    | 0.8044113    | 0.9844961    | 0.699053     | not scorable | not scorable |
| #### Bn-scaff_16064_1-p26689C-genome specific (napus-oleracea) | 0.9138756    | 0.7567359    | 0.9922481    | 0.7660391    | not scorable | not scorable |
| #### Bn-scaff_16064_1-p26703C-genome specific (napus-oleracea) | 0.9162679    | 0.7509342    | 0.9612403    | 0.6406603    | not scorable | not scorable |
| #### Bn-scaff_16064_1-p27178C-genome specific (napus-oleracea) | 0.9043062    | 0.7604255    | 1            | 0.8270004    | not scorable | not scorable |

|                                                                 |              |              |           |           |              |              |
|-----------------------------------------------------------------|--------------|--------------|-----------|-----------|--------------|--------------|
| #### Bn-scaff_16064_1-p32215 C-genome specific (napus-oleracea) | 0.9210526    | 0.7443363    | 0.9767442 | 0.8063037 | not scorable | not scorable |
| #### Bn-scaff_16064_1-p34183 C-genome specific (napus-oleracea) | 0.9019139    | 0.7580879    | 1         | 0.7788359 | not scorable | not scorable |
| #### Bn-scaff_16064_1-p34629 C-genome specific (napus-oleracea) | 0.9090909    | 0.7458168    | 1         | 0.8245012 | not scorable | not scorable |
| #### Bn-scaff_16064_1-p36002 C-genome specific (napus-oleracea) | 0.9066986    | 0.7705672    | 1         | 0.8300001 | not scorable | not scorable |
| #### Bn-scaff_16064_1-p36496 C-genome specific (napus-oleracea) | 0.9019139    | 0.7564902    | 1         | 0.7570025 | not scorable | not scorable |
| #### Bn-scaff_16064_1-p37513 C-genome specific (napus-oleracea) | 0.9162679    | 0.683749     | 1         | 0.6918421 | not scorable | not scorable |
| #### Bn-scaff_16064_1-p38004 C-genome specific (napus-oleracea) | 0.9114832    | 0.6893615    | 1         | 0.7251219 | not scorable | not scorable |
| #### Bn-scaff_16064_1-p38059 C-genome specific (napus-oleracea) | 0.9066986    | 0.7016028    | 1         | 0.8202965 | not scorable | not scorable |
| #### Bn-scaff_16064_1-p38087 C-genome specific (napus-oleracea) | 0.9114832    | 0.7690021    | 0.9922481 | 0.8437892 | not scorable | not scorable |
| #### Bn-scaff_16064_1-p55080 genome unspecific (all in)         | 0.9904306    | 0.6422246    | 1         | 0.804708  | 1            | 0.9177526    |
| #### Bn-scaff_16064_1-p61562 genome unspecific (oleracea-rapa)  | not scorable | not scorable | 1         | 0.7186291 | 0.9834711    | 0.6540996    |
| #### Bn-scaff_16064_1-p7157 C-genome specific (napus-oleracea)  | 0.9043062    | 0.6900896    | 1         | 0.7373399 | not scorable | not scorable |
| #### Bn-scaff_16064_1-p81619 C-genome specific (napus-oleracea) | 0.9521531    | 0.4082469    | 1         | 0.7312282 | not scorable | not scorable |
| #### Bn-scaff_16064_1-p85169 genome unspecific (oleracea-rapa)  | not scorable | not scorable | 1         | 0.8805429 | 0.9834711    | 0.658749     |
| #### Bn-scaff_16064_1-p9281 C-genome specific (napus-oleracea)  | 0.9090909    | 0.7432019    | 1         | 0.8163905 | not scorable | not scorable |
| #### Bn-scaff_16064_1-p93813 C-genome specific (napus-oleracea) | 0.9138756    | 0.698468     | 0.9844961 | 0.826764  | not scorable | not scorable |
| #### Bn-scaff_16064_1-p93840 C-genome specific (napus-oleracea) | 0.9162679    | 0.7050222    | 0.9922481 | 0.6844036 | not scorable | not scorable |
| #### Bn-scaff_16064_1-p94890 genome unspecific (all in)         | 0.9928229    | 0.4026272    | 1         | 0.8459578 | 1            | 0.9175813    |
| #### Bn-scaff_16069_1-p10446 C-genome specific (napus-oleracea) | 0.9832536    | 0.5344754    | 0.9922481 | 0.6576833 | not scorable | not scorable |
| #### Bn-scaff_16069_1-p10449 C-genome specific (napus-oleracea) | 0.9952153    | 0.7884198    | 0.9922481 | 0.8934702 | not scorable | not scorable |
| #### Bn-scaff_16069_1-p10502 C-genome specific (napus-oleracea) | 0.9928229    | 0.786909     | 0.9922481 | 0.853572  | not scorable | not scorable |
| #### Bn-scaff_16069_1-p10518 C-genome specific (napus-oleracea) | 0.9856459    | 0.7648053    | 0.9922481 | 0.8354479 | not scorable | not scorable |
| #### Bn-scaff_16069_1-p11015 C-genome specific (napus-oleracea) | 0.9760765    | 0.5958455    | 0.9922481 | 0.701827  | not scorable | not scorable |
| #### Bn-scaff_16069_1-p11048 C-genome specific (napus-oleracea) | 0.9688995    | 0.6659657    | 0.9844961 | 0.8165436 | not scorable | not scorable |
| #### Bn-scaff_16069_1-p11050 genome unspecific (all in)         | 0.9952153    | 0.4465092    | 0.9922481 | 0.8251266 | 1            | 0.9132643    |
| #### Bn-scaff_16069_1-p11116 C-genome specific (napus-oleracea) | 0.9904306    | 0.790215     | 0.744186  | 0.824917  | not scorable | not scorable |
| #### Bn-scaff_16069_1-p11197 C-genome specific (napus-oleracea) | 0.9928229    | 0.8386404    | 0.7829458 | 0.7991064 | not scorable | not scorable |
| #### Bn-scaff_16069_1-p11269 C-genome specific (napus-oleracea) | 0.9880383    | 0.8072347    | 0.9844961 | 0.8343771 | not scorable | not scorable |
| #### Bn-scaff_16069_1-p11270 C-genome specific (napus-oleracea) | 0.9808612    | 0.8047348    | 0.9922481 | 0.8264911 | not scorable | not scorable |
| #### Bn-scaff_16069_1-p11314 C-genome specific (napus-oleracea) | 0.9904306    | 0.7782043    | 0.9922481 | 0.8540177 | not scorable | not scorable |
| #### Bn-scaff_16069_1-p11319 C-genome specific (napus-oleracea) | 0.9832536    | 0.7185704    | 0.9922481 | 0.7720063 | not scorable | not scorable |
| #### Bn-scaff_16069_1-p11319 C-genome specific (napus-oleracea) | 0.9856459    | 0.7538632    | 0.9922481 | 0.7029535 | not scorable | not scorable |
| #### Bn-scaff_16069_1-p11321 C-genome specific (napus-oleracea) | 0.9808612    | 0.6921834    | 0.9922481 | 0.7764985 | not scorable | not scorable |

|                                                                 |              |              |           |           |              |              |
|-----------------------------------------------------------------|--------------|--------------|-----------|-----------|--------------|--------------|
| #### Bn-scaff_16069_1-p11322 C-genome specific (napus-oleracea) | 0.9856459    | 0.6128835    | 0.7751938 | 0.5598592 | not scorable | not scorable |
| #### Bn-scaff_16069_1-p11325 C-genome specific (napus-oleracea) | 0.9784689    | 0.6702707    | 0.9922481 | 0.6517566 | not scorable | not scorable |
| #### Bn-scaff_16069_1-p11328 C-genome specific (napus-oleracea) | 0.9784689    | 0.6501432    | 0.9922481 | 0.6421019 | not scorable | not scorable |
| #### Bn-scaff_16069_1-p11330 C-genome specific (napus-oleracea) | 0.9808612    | 0.6462318    | 0.9767442 | 0.6492948 | not scorable | not scorable |
| #### Bn-scaff_16069_1-p11331 C-genome specific (napus-oleracea) | 0.9880383    | 0.6791692    | 0.9922481 | 0.725991  | not scorable | not scorable |
| #### Bn-scaff_16069_1-p11332 C-genome specific (napus-oleracea) | 0.9856459    | 0.6724226    | 0.9922481 | 0.7205694 | not scorable | not scorable |
| #### Bn-scaff_16069_1-p11334 C-genome specific (napus-oleracea) | 0.9928229    | 0.6831464    | 0.9922481 | 0.6700054 | not scorable | not scorable |
| #### Bn-scaff_16069_1-p11343 C-genome specific (napus-oleracea) | 0.9880383    | 0.73763      | 0.9922481 | 0.7938541 | not scorable | not scorable |
| #### Bn-scaff_16069_1-p11361 C-genome specific (napus-oleracea) | 0.9928229    | 0.745749     | 0.9922481 | 0.7440028 | not scorable | not scorable |
| #### Bn-scaff_16069_1-p11376 C-genome specific (napus-oleracea) | 0.9928229    | 0.7960953    | 0.9922481 | 0.841767  | not scorable | not scorable |
| #### Bn-scaff_16069_1-p11507 genome unspecific (all in)         | 0.9856459    | 0.4297109    | 1         | 0.7758431 | 1            | 0.7453039    |
| #### Bn-scaff_16069_1-p11515 genome unspecific (all in)         | 0.9928229    | 0.7160402    | 0.9922481 | 0.6881458 | 1            | 0.8955111    |
| #### Bn-scaff_16069_1-p11521 genome unspecific (oleracea-rapa)  | not scorable | not scorable | 1         | 0.826779  | 1            | 0.9175813    |
| #### Bn-scaff_16069_1-p11623 C-genome specific (napus-oleracea) | 0.9736842    | 0.7057152    | 1         | 0.7410839 | not scorable | not scorable |
| #### Bn-scaff_16069_1-p11643 C-genome specific (napus-oleracea) | 0.9952153    | 0.8474329    | 0.9922481 | 0.7552902 | not scorable | not scorable |
| #### Bn-scaff_16069_1-p11804 C-genome specific (napus-oleracea) | 1            | 0.729004     | 0.9844961 | 0.6678562 | not scorable | not scorable |
| #### Bn-scaff_16069_1-p11840 C-genome specific (napus-oleracea) | 0.9976076    | 0.7436125    | 0.9767442 | 0.6397267 | not scorable | not scorable |
| #### Bn-scaff_16069_1-p11849 C-genome specific (napus-oleracea) | 0.9976076    | 0.7373455    | 0.9767442 | 0.7030711 | not scorable | not scorable |
| #### Bn-scaff_16069_1-p11884 genome unspecific (all in)         | 0.9880383    | 0.3705804    | 0.9922481 | 0.6506041 | 1            | 0.8948976    |
| #### Bn-scaff_16069_1-p11999 genome unspecific (oleracea-rapa)  | not scorable | not scorable | 0.9844961 | 0.6982489 | 0.9669421    | 0.90067      |
| #### Bn-scaff_16069_1-p12021 genome unspecific (all in)         | 0.9497608    | 0.8654594    | 0.5193799 | 0.6506854 | 0.8264463    | 0.9059441    |
| #### Bn-scaff_16069_1-p12028 genome unspecific (all in)         | 0.9808612    | 0.2676618    | 1         | 0.7511771 | 1            | 0.7885901    |
| #### Bn-scaff_16069_1-p12044 C-genome specific (napus-oleracea) | 0.861244     | 0.9221785    | 0.379845  | 0.8295543 | not scorable | not scorable |
| #### Bn-scaff_16069_1-p12044 genome unspecific (all in)         | 0.9449761    | 0.5358417    | 0.4108527 | 0.8428157 | 1            | 0.9101454    |
| #### Bn-scaff_16069_1-p12215 genome unspecific (oleracea-rapa)  | not scorable | not scorable | 0.9922481 | 0.3825544 | 1            | 0.9174331    |
| #### Bn-scaff_16069_1-p12591 C-genome specific (napus-oleracea) | 1            | 0.8880509    | 0.9922481 | 0.7600404 | not scorable | not scorable |
| #### Bn-scaff_16069_1-p12687 C-genome specific (napus-oleracea) | 0.9904306    | 0.7333347    | 0.9922481 | 0.7012474 | not scorable | not scorable |
| #### Bn-scaff_16069_1-p12699 C-genome specific (napus-oleracea) | 0.9784689    | 0.6936942    | 0.9767442 | 0.7184723 | not scorable | not scorable |
| #### Bn-scaff_16069_1-p12793 C-genome specific (napus-oleracea) | 0.9880383    | 0.801186     | 0.7984496 | 0.698202  | not scorable | not scorable |
| #### Bn-scaff_16069_1-p13601 C-genome specific (napus-oleracea) | 0.9976076    | 0.7317548    | 0.9767442 | 0.6574833 | not scorable | not scorable |
| #### Bn-scaff_16069_1-p13632 C-genome specific (napus-oleracea) | 0.9856459    | 0.7554623    | 0.9922481 | 0.8544461 | not scorable | not scorable |
| #### Bn-scaff_16069_1-p13755 C-genome specific (napus-oleracea) | 1            | 0.8036081    | 0.9922481 | 0.856635  | not scorable | not scorable |
| #### Bn-scaff_16069_1-p13940 C-genome specific (napus-oleracea) | 0.9784689    | 0.5967674    | 0.9844961 | 0.7739038 | not scorable | not scorable |

|                                                                |              |              |              |              |              |              |
|----------------------------------------------------------------|--------------|--------------|--------------|--------------|--------------|--------------|
| #### Bn-scaff_16069_1-p13962genome unspecific (all in)         | 0.9784689    | 0.3493049    | 1            | 0.8884757    | 1            | 0.7744159    |
| #### Bn-scaff_16069_1-p13979C-genome specific (napus-oleracea) | 0.9952153    | 0.8291974    | 0.8992248    | 0.7737449    | not scorable | not scorable |
| #### Bn-scaff_16069_1-p14014C-genome specific (napus-oleracea) | 0.9904306    | 0.8065313    | 0.9689922    | 0.8042188    | not scorable | not scorable |
| #### Bn-scaff_16069_1-p14016C-genome specific (napus-oleracea) | 0.9880383    | 0.6682261    | 0.9689922    | 0.6735574    | not scorable | not scorable |
| #### Bn-scaff_16069_1-p14079C-genome specific (napus-oleracea) | 0.4545455    | 0.7572579    | 0.8682171    | 0.6644136    | not scorable | not scorable |
| #### Bn-scaff_16069_1-p14085C-genome specific (napus-oleracea) | 0.4569378    | 0.7993222    | 0.8604651    | 0.6538725    | not scorable | not scorable |
| #### Bn-scaff_16069_1-p14088C-genome specific (napus-oleracea) | 0.4545455    | 0.7885202    | 0.8604651    | 0.7101707    | not scorable | not scorable |
| #### Bn-scaff_16069_1-p14338C-genome specific (napus-oleracea) | 0.9904306    | 0.7815613    | 0.9612403    | 0.750858     | not scorable | not scorable |
| #### Bn-scaff_16069_1-p14359C-genome specific (napus-oleracea) | 0.9928229    | 0.7730442    | 0.9922481    | 0.7036229    | not scorable | not scorable |
| #### Bn-scaff_16069_1-p14442C-genome specific (napus-oleracea) | 0.9832536    | 0.7569678    | 0.9457364    | 0.7148432    | not scorable | not scorable |
| #### Bn-scaff_16069_1-p14562C-genome specific (napus-oleracea) | 0.9928229    | 0.7131979    | 0.9844961    | 0.6636251    | not scorable | not scorable |
| #### Bn-scaff_16069_1-p14648C-genome specific (napus-oleracea) | 0.9952153    | 0.6984571    | 0.9844961    | 0.7433756    | not scorable | not scorable |
| #### Bn-scaff_16069_1-p14694genome unspecific (all in)         | 0.9497608    | 0.4401253    | 1            | 0.7816119    | 0.9669421    | 0.6628624    |
| #### Bn-scaff_16069_1-p14835C-genome specific (napus-oleracea) | 0.9760765    | 0.7470583    | 0.9922481    | 0.7261096    | not scorable | not scorable |
| #### Bn-scaff_16069_1-p15267genome unspecific (all in)         | 0.9928229    | 0.3486693    | 1            | 0.7879251    | 1            | 0.9175813    |
| #### Bn-scaff_16069_1-p15295C-genome specific (napus-oleracea) | 0.9856459    | 0.812086     | 0.9922481    | 0.7451921    | not scorable | not scorable |
| #### Bn-scaff_16069_1-p15299C-genome specific (napus-oleracea) | 0.9904306    | 0.7733535    | 0.9922481    | 0.8154603    | not scorable | not scorable |
| #### Bn-scaff_16069_1-p15302C-genome specific (napus-oleracea) | 0.9904306    | 0.7186193    | 0.9922481    | 0.6964638    | not scorable | not scorable |
| #### Bn-scaff_16069_1-p15306C-genome specific (napus-oleracea) | 0.9688995    | 0.6295323    | 0.9922481    | 0.6709727    | not scorable | not scorable |
| #### Bn-scaff_16069_1-p15312C-genome specific (napus-oleracea) | 0.9928229    | 0.7205229    | 0.9922481    | 0.7050685    | not scorable | not scorable |
| #### Bn-scaff_16069_1-p15315C-genome specific (napus-oleracea) | 0.9832536    | 0.7111052    | 0.8217054    | 0.7119159    | not scorable | not scorable |
| #### Bn-scaff_16069_1-p15317C-genome specific (napus-oleracea) | 0.9880383    | 0.6592495    | 0.9922481    | 0.5983165    | not scorable | not scorable |
| #### Bn-scaff_16069_1-p15319C-genome specific (napus-oleracea) | 0.9880383    | 0.8024307    | 0.9922481    | 0.7927088    | not scorable | not scorable |
| #### Bn-scaff_16069_1-p15320C-genome specific (napus-oleracea) | 0.9736842    | 0.6721375    | 0.9922481    | 0.6148995    | not scorable | not scorable |
| #### Bn-scaff_16069_1-p15322C-genome specific (oleracea only)  | not scorable | not scorable | 0.9689922    | 0.6526888    | not scorable | not scorable |
| #### Bn-scaff_16069_1-p15358C-genome specific (napus-oleracea) | 0.9282297    | 0.4646295    | 1            | 0.7669243    | not scorable | not scorable |
| #### Bn-scaff_16069_1-p15523genome unspecific (oleracea-rapa)  | not scorable | not scorable | 0.9379845    | 0.8168184    | 1            | 0.8227494    |
| #### Bn-scaff_16069_1-p15640genome unspecific (all in)         | 0.9856459    | 0.5490037    | 1            | 0.8393649    | 1            | 0.9272014    |
| #### Bn-scaff_16069_1-p15792C-genome specific (napus-oleracea) | 0.9952153    | 0.8046117    | 0.9922481    | 0.7941359    | not scorable | not scorable |
| #### Bn-scaff_16069_1-p15955genome unspecific (all in)         | 1            | 0.5901685    | 1            | 0.6032484    | 1            | 0.6716551    |
| #### Bn-scaff_16069_1-p16514C-genome specific (napus-oleracea) | 0.9736842    | 0.8616185    | 0.9922481    | 0.7736471    | not scorable | not scorable |
| #### Bn-scaff_16069_1-p16648all not scorable                   | not scorable | not scorable | not scorable | not scorable | not scorable | not scorable |
| #### Bn-scaff_16069_1-p16679C-genome specific (napus-oleracea) | 0.9904306    | 0.7940474    | 0.9922481    | 0.7687188    | not scorable | not scorable |

|                                                                 |              |              |              |              |              |              |
|-----------------------------------------------------------------|--------------|--------------|--------------|--------------|--------------|--------------|
| #### Bn-scaff_16069_1-p16686 C-genome specific (napus-oleracea) | 0.9665072    | 0.771827     | 0.9922481    | 0.7539262    | not scorable | not scorable |
| #### Bn-scaff_16069_1-p16700 C-genome specific (napus-oleracea) | 0.9569378    | 0.8008263    | 0.9922481    | 0.6993666    | not scorable | not scorable |
| #### Bn-scaff_16069_1-p16941 C-genome specific (napus-oleracea) | 0.9952153    | 0.7868258    | 0.9922481    | 0.7750877    | not scorable | not scorable |
| #### Bn-scaff_16069_1-p16957 C-genome specific (napus-oleracea) | 0.9641148    | 0.8146611    | 0.9767442    | 0.7350562    | not scorable | not scorable |
| #### Bn-scaff_16069_1-p17072 C-genome specific (napus-oleracea) | 0.9808612    | 0.8063577    | 0.9767442    | 0.6688777    | not scorable | not scorable |
| #### Bn-scaff_16069_1-p17088 C-genome specific (napus-oleracea) | 0.9904306    | 0.6847009    | 0.9922481    | 0.6433161    | not scorable | not scorable |
| #### Bn-scaff_16069_1-p17322 genome unspecific (all in)         | 0.9880383    | 0.3925502    | 1            | 0.5951692    | 1            | 0.9050173    |
| #### Bn-scaff_16069_1-p17584 C-genome specific (napus-oleracea) | 0.7894737    | 0.8666317    | 0.9922481    | 0.8863727    | not scorable | not scorable |
| #### Bn-scaff_16069_1-p17760 genome unspecific (all in)         | 0.9784689    | 0.3467909    | 1            | 0.8410167    | 1            | 0.8110762    |
| #### Bn-scaff_16069_1-p17810 C-genome specific (napus-oleracea) | 0.9904306    | 0.7649667    | 0.9922481    | 0.7602775    | not scorable | not scorable |
| #### Bn-scaff_16069_1-p17829 C-genome specific (napus-oleracea) | 0.7966507    | 0.8299864    | 0.9379845    | 0.7210994    | not scorable | not scorable |
| #### Bn-scaff_16069_1-p17869 all not scorable                   | not scorable | not scorable | not scorable | not scorable | not scorable | not scorable |
| #### Bn-scaff_16069_1-p17890 genome unspecific (all in)         | 0.9736842    | 0.7758686    | 1            | 0.8335392    | 0.9917355    | 0.9244215    |
| #### Bn-scaff_16069_1-p18158 C-genome specific (napus-oleracea) | 0.9641148    | 0.7659058    | 0.9922481    | 0.7137139    | not scorable | not scorable |
| #### Bn-scaff_16069_1-p18785 genome unspecific (oleracea-rapa)  | not scorable | not scorable | 1            | 0.8686579    | 1            | 0.7946294    |
| #### Bn-scaff_16069_1-p19162 genome unspecific (oleracea-rapa)  | not scorable | not scorable | 0.9767442    | 0.4380031    | 1            | 0.7252899    |
| #### Bn-scaff_16069_1-p19433 napus specific                     | 0.9832536    | 0.7893865    | not scorable | not scorable | not scorable | not scorable |
| #### Bn-scaff_16069_1-p19461 C-genome specific (napus-oleracea) | 0.9641148    | 0.8034937    | 0.6046512    | 0.8729934    | not scorable | not scorable |
| #### Bn-scaff_16069_1-p19467 C-genome specific (napus-oleracea) | 0.9688995    | 0.7712309    | 0.620155     | 0.7847197    | not scorable | not scorable |
| #### Bn-scaff_16069_1-p19579 C-genome specific (napus-oleracea) | 0.9784689    | 0.7112521    | 0.627907     | 0.7390317    | not scorable | not scorable |
| #### Bn-scaff_16069_1-p19586 C-genome specific (napus-oleracea) | 0.9736842    | 0.6702137    | 0.627907     | 0.6857647    | not scorable | not scorable |
| #### Bn-scaff_16069_1-p19596 C-genome specific (napus-oleracea) | 0.9569378    | 0.7610868    | 0.627907     | 0.8405083    | not scorable | not scorable |
| #### Bn-scaff_16069_1-p19682 C-genome specific (napus-oleracea) | 0.9832536    | 0.8140482    | 0.6124031    | 0.8334864    | not scorable | not scorable |
| #### Bn-scaff_16069_1-p19692 C-genome specific (napus-oleracea) | 0.9904306    | 0.7684152    | 0.9844961    | 0.7582983    | not scorable | not scorable |
| #### Bn-scaff_16069_1-p19847 C-genome specific (napus-oleracea) | 0.9928229    | 0.8292667    | 0.9922481    | 0.8344219    | not scorable | not scorable |
| #### Bn-scaff_16069_1-p19860 genome unspecific (all in)         | 0.9928229    | 0.3948785    | 1            | 0.6784759    | 1            | 0.4737935    |
| #### Bn-scaff_16069_1-p20278 C-genome specific (napus-oleracea) | 0.9330143    | 0.6726577    | 0.8449612    | 0.7671589    | not scorable | not scorable |
| #### Bn-scaff_16069_1-p20280 C-genome specific (oleracea only)  | not scorable | not scorable | 1            | 0.3209585    | not scorable | not scorable |
| #### Bn-scaff_16069_1-p20417 C-genome specific (napus-oleracea) | 0.9688995    | 0.6979907    | 1            | 0.7495229    | not scorable | not scorable |
| #### Bn-scaff_16069_1-p20593 C-genome specific (oleracea only)  | not scorable | not scorable | 0.8992248    | 0.7162342    | not scorable | not scorable |
| #### Bn-scaff_16069_1-p20727 C-genome specific (napus-oleracea) | 0.9856459    | 0.7518736    | 0.9534883    | 0.8462225    | not scorable | not scorable |
| #### Bn-scaff_16069_1-p20832 C-genome specific (napus-oleracea) | 0.9784689    | 0.7200113    | 0.9844961    | 0.7161987    | not scorable | not scorable |
| #### Bn-scaff_16069_1-p21350 C-genome specific (napus-oleracea) | 0.9952153    | 0.6752451    | 0.9767442    | 0.6628189    | not scorable | not scorable |



|                                                                 |              |              |           |           |              |              |
|-----------------------------------------------------------------|--------------|--------------|-----------|-----------|--------------|--------------|
| #### Bn-scaff_16069_1-p21425 genome unspecific (all in)         | 0.9736842    | 0.2882991    | 0.9922481 | 0.7325116 | 0.9504132    | 0.5490875    |
| #### Bn-scaff_16069_1-p21743 C-genome specific (napus-oleracea) | 0.9880383    | 0.7639281    | 0.9922481 | 0.8713458 | not scorable | not scorable |
| #### Bn-scaff_16069_1-p21939 genome unspecific (all in)         | 1            | 0.3788282    | 1         | 0.6833342 | 0.9917355    | 0.4457276    |
| #### Bn-scaff_16069_1-p22055 C-genome specific (napus-oleracea) | 0.9832536    | 0.7330434    | 0.9767442 | 0.7353013 | not scorable | not scorable |
| #### Bn-scaff_16069_1-p22125 C-genome specific (napus-oleracea) | 0.9856459    | 0.7501152    | 0.7209302 | 0.8123498 | not scorable | not scorable |
| #### Bn-scaff_16069_1-p22164 C-genome specific (napus-oleracea) | 0.9641148    | 0.7493378    | 0.9147287 | 0.8375285 | not scorable | not scorable |
| #### Bn-scaff_16069_1-p22223 C-genome specific (napus-oleracea) | 0.9784689    | 0.7575034    | 0.9147287 | 0.7827897 | not scorable | not scorable |
| #### Bn-scaff_16069_1-p22224 C-genome specific (napus-oleracea) | 0.9617225    | 0.7158874    | 0.9224806 | 0.8363813 | not scorable | not scorable |
| #### Bn-scaff_16069_1-p22227 C-genome specific (napus-oleracea) | 0.8588517    | 0.7298541    | 0.751938  | 0.7862336 | not scorable | not scorable |
| #### Bn-scaff_16069_1-p22321 C-genome specific (napus-oleracea) | 0.9856459    | 0.7567131    | 0.9844961 | 0.7572922 | not scorable | not scorable |
| #### Bn-scaff_16069_1-p22792 genome unspecific (oleracea-rapa)  | not scorable | not scorable | 0.9844961 | 0.808674  | 1            | 0.8653011    |
| #### Bn-scaff_16069_1-p22806 C-genome specific (napus-oleracea) | 0.9808612    | 0.7019051    | 0.9922481 | 0.7138398 | not scorable | not scorable |
| #### Bn-scaff_16069_1-p22880 C-genome specific (napus-oleracea) | 0.9617225    | 0.7003295    | 0.9767442 | 0.7106326 | not scorable | not scorable |
| #### Bn-scaff_16069_1-p22959 C-genome specific (napus-oleracea) | 0.9712918    | 0.7397079    | 0.9922481 | 0.795423  | not scorable | not scorable |
| #### Bn-scaff_16069_1-p23233 C-genome specific (napus-oleracea) | 0.9665072    | 0.731345     | 0.9844961 | 0.7151247 | not scorable | not scorable |
| #### Bn-scaff_16069_1-p23447 C-genome specific (napus-oleracea) | 0.9760765    | 0.7602777    | 0.9844961 | 0.8496783 | not scorable | not scorable |
| #### Bn-scaff_16069_1-p23718 genome unspecific (all in)         | 0.9736842    | 0.3666043    | 0.9922481 | 0.7986845 | 1            | 0.9225228    |
| #### Bn-scaff_16069_1-p24085 genome unspecific (all in)         | 0.9617225    | 0.4571588    | 1         | 0.791638  | 1            | 0.9095306    |
| #### Bn-scaff_16069_1-p25703 C-genome specific (napus-oleracea) | 0.9736842    | 0.5524474    | 0.9379845 | 0.5299826 | not scorable | not scorable |
| #### Bn-scaff_16069_1-p25715 C-genome specific (napus-oleracea) | 0.9904306    | 0.671567     | 0.9922481 | 0.6958005 | not scorable | not scorable |
| #### Bn-scaff_16069_1-p25722 C-genome specific (napus-oleracea) | 0.9880383    | 0.7757718    | 0.9922481 | 0.7774823 | not scorable | not scorable |
| #### Bn-scaff_16069_1-p25722 C-genome specific (napus-oleracea) | 0.9784689    | 0.708217     | 0.9922481 | 0.8224858 | not scorable | not scorable |
| #### Bn-scaff_16069_1-p25723 C-genome specific (napus-oleracea) | 0.9856459    | 0.7626587    | 0.9922481 | 0.7688447 | not scorable | not scorable |
| #### Bn-scaff_16069_1-p25726 C-genome specific (napus-oleracea) | 0.9880383    | 0.6603041    | 1         | 0.7125723 | not scorable | not scorable |
| #### Bn-scaff_16069_1-p25728 C-genome specific (napus-oleracea) | 0.9904306    | 0.7584208    | 1         | 0.8455426 | not scorable | not scorable |
| #### Bn-scaff_16069_1-p25729 C-genome specific (napus-oleracea) | 0.9904306    | 0.7585008    | 0.9922481 | 0.8154541 | not scorable | not scorable |
| #### Bn-scaff_16069_1-p25731 C-genome specific (napus-oleracea) | 0.9880383    | 0.7537494    | 0.9922481 | 0.7860349 | not scorable | not scorable |
| #### Bn-scaff_16069_1-p25738 C-genome specific (napus-oleracea) | 0.9665072    | 0.8740787    | 0.9922481 | 0.8364524 | not scorable | not scorable |
| #### Bn-scaff_16069_1-p25744 C-genome specific (napus-oleracea) | 0.9736842    | 0.8460075    | 0.9069768 | 0.7653856 | not scorable | not scorable |
| #### Bn-scaff_16069_1-p25745 C-genome specific (napus-oleracea) | 0.9712918    | 0.6883557    | 0.9844961 | 0.7602447 | not scorable | not scorable |
| #### Bn-scaff_16069_1-p25770 C-genome specific (napus-oleracea) | 0.9832536    | 0.8106207    | 0.9767442 | 0.796706  | not scorable | not scorable |
| #### Bn-scaff_16069_1-p25776 C-genome specific (napus-oleracea) | 0.9976076    | 0.7631791    | 0.9767442 | 0.7964208 | not scorable | not scorable |
| #### Bn-scaff_16069_1-p25776 C-genome specific (napus-oleracea) | 0.9760765    | 0.7200034    | 0.9922481 | 0.6965201 | not scorable | not scorable |

|                                                                 |              |              |           |           |              |              |
|-----------------------------------------------------------------|--------------|--------------|-----------|-----------|--------------|--------------|
| #### Bn-scaff_16069_1-p25846 C-genome specific (napus-oleracea) | 0.9736842    | 0.6565771    | 0.9922481 | 0.794561  | not scorable | not scorable |
| #### Bn-scaff_16069_1-p26058 C-genome specific (napus-oleracea) | 0.9832536    | 0.7460797    | 0.9922481 | 0.7886745 | not scorable | not scorable |
| #### Bn-scaff_16069_1-p26063 C-genome specific (napus-oleracea) | 0.9880383    | 0.728367     | 0.9844961 | 0.8302019 | not scorable | not scorable |
| #### Bn-scaff_16069_1-p26072 C-genome specific (napus-oleracea) | 0.9808612    | 0.7231849    | 0.9922481 | 0.867096  | not scorable | not scorable |
| #### Bn-scaff_16069_1-p26117 C-genome specific (napus-oleracea) | 0.9760765    | 0.6844848    | 0.9844961 | 0.7093575 | not scorable | not scorable |
| #### Bn-scaff_16069_1-p26140 C-genome specific (napus-oleracea) | 0.9760765    | 0.6914114    | 0.9147287 | 0.6629171 | not scorable | not scorable |
| #### Bn-scaff_16069_1-p26391 C-genome specific (napus-oleracea) | 0.9617225    | 0.782471     | 0.6821706 | 0.8289251 | not scorable | not scorable |
| #### Bn-scaff_16069_1-p26415 C-genome specific (napus-oleracea) | 0.6339713    | 0.7639142    | 0.6046512 | 0.8172905 | not scorable | not scorable |
| #### Bn-scaff_16069_1-p26533 C-genome specific (napus-oleracea) | 0.9832536    | 0.7511019    | 0.9922481 | 0.9050666 | not scorable | not scorable |
| #### Bn-scaff_16069_1-p26607 C-genome specific (oleracea only)  | not scorable | not scorable | 0.5193799 | 0.7216522 | not scorable | not scorable |
| #### Bn-scaff_16069_1-p26661 C-genome specific (napus-oleracea) | 0.9904306    | 0.7340494    | 0.9844961 | 0.7229785 | not scorable | not scorable |
| #### Bn-scaff_16069_1-p26779 genome unspecific (all in)         | 0.9976076    | 0.5240101    | 1         | 0.8114886 | 0.9917355    | 0.6908602    |
| #### Bn-scaff_16069_1-p26803 C-genome specific (napus-oleracea) | 0.9856459    | 0.6652689    | 0.9689922 | 0.7063597 | not scorable | not scorable |
| #### Bn-scaff_16069_1-p27059 genome unspecific (oleracea-rapa)  | not scorable | not scorable | 1         | 0.4391934 | 1            | 0.7770717    |
| #### Bn-scaff_16069_1-p27228 C-genome specific (napus-oleracea) | 0.9904306    | 0.741869     | 0.9534883 | 0.7420342 | not scorable | not scorable |
| #### Bn-scaff_16069_1-p27649 C-genome specific (napus-oleracea) | 0.9904306    | 0.7108974    | 0.9922481 | 0.8389795 | not scorable | not scorable |
| #### Bn-scaff_16069_1-p27649 genome unspecific (all in)         | 0.9976076    | 0.3565241    | 1         | 0.8415737 | 1            | 0.9095822    |
| #### Bn-scaff_16069_1-p27651 genome unspecific (all in)         | 0.9784689    | 0.4116834    | 1         | 0.8135551 | 1            | 0.7683082    |
| #### Bn-scaff_16069_1-p28207 genome unspecific (all in)         | 0.9952153    | 0.5006022    | 0.9689922 | 0.8129001 | 1            | 0.9136907    |
| #### Bn-scaff_16069_1-p28210 genome unspecific (all in)         | 1            | 0.6186296    | 1         | 0.5692675 | 1            | 0.6856379    |
| #### Bn-scaff_16069_1-p28213 genome unspecific (all in)         | 1            | 0.4798315    | 1         | 0.8064802 | 1            | 0.8941569    |
| #### Bn-scaff_16069_1-p28663 genome unspecific (all in)         | 0.9497608    | 0.222669     | 1         | 0.7182003 | 0.9834711    | 0.7936514    |
| #### Bn-scaff_16069_1-p28678 genome unspecific (all in)         | 0.9593301    | 0.4565969    | 1         | 0.7565519 | 1            | 0.9078591    |
| #### Bn-scaff_16069_1-p28854 C-genome specific (napus-oleracea) | 0.9928229    | 0.7204843    | 0.9844961 | 0.8182911 | not scorable | not scorable |
| #### Bn-scaff_16069_1-p28971 genome unspecific (all in)         | 0.9880383    | 0.5583426    | 0.8217054 | 0.6592469 | 0.9752066    | 0.7383918    |
| #### Bn-scaff_16069_1-p28989 C-genome specific (napus-oleracea) | 0.9832536    | 0.7637215    | 0.9767442 | 0.8041852 | not scorable | not scorable |
| #### Bn-scaff_16069_1-p29460 C-genome specific (napus-oleracea) | 0.9808612    | 0.7752141    | 0.5736434 | 0.8179531 | not scorable | not scorable |
| #### Bn-scaff_16069_1-p29742 C-genome specific (napus-oleracea) | 0.9712918    | 0.742927     | 0.9922481 | 0.8805727 | not scorable | not scorable |
| #### Bn-scaff_16069_1-p29847 C-genome specific (napus-oleracea) | 0.9545454    | 0.7534086    | 0.9922481 | 0.7975586 | not scorable | not scorable |
| #### Bn-scaff_16069_1-p29920 C-genome specific (napus-oleracea) | 0.9736842    | 0.3359756    | 0.9922481 | 0.6921651 | not scorable | not scorable |
| #### Bn-scaff_16069_1-p29929 C-genome specific (napus-oleracea) | 0.9497608    | 0.7595717    | 0.9922481 | 0.8134633 | not scorable | not scorable |
| #### Bn-scaff_16069_1-p29931 C-genome specific (napus-oleracea) | 0.9593301    | 0.7103472    | 0.9844961 | 0.7411174 | not scorable | not scorable |
| #### Bn-scaff_16069_1-p29941 C-genome specific (napus-oleracea) | 0.9401914    | 0.6411815    | 0.9922481 | 0.8023607 | not scorable | not scorable |

|                                                                  |              |              |              |              |              |              |
|------------------------------------------------------------------|--------------|--------------|--------------|--------------|--------------|--------------|
| ##### Bn-scaff_16069_1-p29945 C-genome specific (napus-oleracea) | 0.9904306    | 0.7911087    | 0.9922481    | 0.8077309    | not scorable | not scorable |
| ##### Bn-scaff_16069_1-p29949 C-genome specific (napus-oleracea) | 0.9473684    | 0.6978495    | 0.9767442    | 0.7111819    | not scorable | not scorable |
| ##### Bn-scaff_16069_1-p29949 C-genome specific (napus-oleracea) | 0.9593301    | 0.7000189    | 0.9922481    | 0.8062271    | not scorable | not scorable |
| ##### Bn-scaff_16069_1-p29950 C-genome specific (napus-oleracea) | 0.9617225    | 0.6863813    | 0.9767442    | 0.6947669    | not scorable | not scorable |
| ##### Bn-scaff_16069_1-p29957 C-genome specific (napus-oleracea) | 0.9880383    | 0.6917368    | 0.9922481    | 0.8085203    | not scorable | not scorable |
| ##### Bn-scaff_16069_1-p29966 genome unspecific (all in)         | 0.9856459    | 0.4948004    | 0.9844961    | 0.6539844    | 0.9917355    | 0.7439453    |
| ##### Bn-scaff_16069_1-p30241 C-genome specific (napus-oleracea) | 0.9760765    | 0.7446724    | 0.9767442    | 0.8353684    | not scorable | not scorable |
| ##### Bn-scaff_16069_1-p30666 C-genome specific (napus-oleracea) | 0.9832536    | 0.709604     | 0.9224806    | 0.7277089    | not scorable | not scorable |
| ##### Bn-scaff_16069_1-p30710 C-genome specific (napus-oleracea) | 0.9856459    | 0.7408288    | 0.9844961    | 0.7740147    | not scorable | not scorable |
| ##### Bn-scaff_16069_1-p30938 C-genome specific (napus-oleracea) | 0.9090909    | 0.7211108    | 0.8992248    | 0.7366087    | not scorable | not scorable |
| ##### Bn-scaff_16069_1-p30988 C-genome specific (napus-oleracea) | 0.9138756    | 0.7394922    | 0.6976744    | 0.8243482    | not scorable | not scorable |
| ##### Bn-scaff_16069_1-p30996 C-genome specific (napus-oleracea) | 0.9880383    | 0.7672822    | 0.9844961    | 0.7740224    | not scorable | not scorable |
| ##### Bn-scaff_16069_1-p31076 C-genome specific (napus-oleracea) | 0.9617225    | 0.7410517    | 0.9689922    | 0.8472719    | not scorable | not scorable |
| ##### Bn-scaff_16069_1-p31081 C-genome specific (napus-oleracea) | 0.9688995    | 0.764156     | 0.9689922    | 0.8162686    | not scorable | not scorable |
| ##### Bn-scaff_16069_1-p31160 C-genome specific (napus-oleracea) | 0.9784689    | 0.7430273    | 0.9922481    | 0.5460854    | not scorable | not scorable |
| ##### Bn-scaff_16069_1-p31177 C-genome specific (napus-oleracea) | 0.9832536    | 0.7731881    | 0.9922481    | 0.8391924    | not scorable | not scorable |
| ##### Bn-scaff_16069_1-p31204 C-genome specific (napus-oleracea) | 0.8516746    | 0.7791632    | 0.9534883    | 0.8177668    | not scorable | not scorable |
| ##### Bn-scaff_16069_1-p31313 C-genome specific (napus-oleracea) | 0.9712918    | 0.6856481    | 0.9922481    | 0.8152537    | not scorable | not scorable |
| ##### Bn-scaff_16069_1-p31352 C-genome specific (napus-oleracea) | 0.9832536    | 0.7653406    | 0.9922481    | 0.7670388    | not scorable | not scorable |
| ##### Bn-scaff_16069_1-p31385 C-genome specific (napus-oleracea) | 0.930622     | 0.7578477    | 0.5503876    | 0.7331649    | not scorable | not scorable |
| ##### Bn-scaff_16069_1-p31544 C-genome specific (napus-oleracea) | 0.9880383    | 0.6827736    | 0.9922481    | 0.7899011    | not scorable | not scorable |
| ##### Bn-scaff_16069_1-p31698 C-genome specific (napus-oleracea) | 0.9952153    | 0.7174255    | 0.9379845    | 0.8011974    | not scorable | not scorable |
| ##### Bn-scaff_16069_1-p32100 C-genome specific (napus-oleracea) | 0.9928229    | 0.8615763    | 0.9689922    | 0.7696612    | not scorable | not scorable |
| ##### Bn-scaff_16069_1-p32105 C-genome specific (napus-oleracea) | 0.9832536    | 0.7543617    | 0.9844961    | 0.8092591    | not scorable | not scorable |
| ##### Bn-scaff_16069_1-p32129 C-genome specific (napus-oleracea) | 0.9114832    | 0.6560901    | 0.6821706    | 0.6229259    | not scorable | not scorable |
| ##### Bn-scaff_16069_1-p32132 C-genome specific (napus-oleracea) | 0.9282297    | 0.7904859    | 0.6899225    | 0.8627644    | not scorable | not scorable |
| ##### Bn-scaff_16069_1-p32144 all not scorable                   | not scorable | not scorable | not scorable | not scorable | not scorable | not scorable |
| ##### Bn-scaff_16069_1-p32171 C-genome specific (napus-oleracea) | 0.9736842    | 0.7975986    | 0.9922481    | 0.8454774    | not scorable | not scorable |
| ##### Bn-scaff_16069_1-p32171 C-genome specific (napus-oleracea) | 0.9904306    | 0.7698119    | 0.9689922    | 0.7313488    | not scorable | not scorable |
| ##### Bn-scaff_16069_1-p32309 C-genome specific (napus-oleracea) | 0.9856459    | 0.7067745    | 0.9844961    | 0.6955878    | not scorable | not scorable |
| ##### Bn-scaff_16069_1-p32322 napus specific                     | 0.9856459    | 0.7521319    | not scorable | not scorable | not scorable | not scorable |
| ##### Bn-scaff_16069_1-p32637 C-genome specific (oleracea only)  | not scorable | not scorable | 0.9689922    | 0.6683282    | not scorable | not scorable |
| ##### Bn-scaff_16069_1-p32747 C-genome specific (napus-oleracea) | 0.9928229    | 0.8027346    | 0.9922481    | 0.9029104    | not scorable | not scorable |

|                                                                 |              |              |              |              |              |              |
|-----------------------------------------------------------------|--------------|--------------|--------------|--------------|--------------|--------------|
| #### Bn-scaff_16069_1-p32752 C-genome specific (napus-oleracea) | 0.9808612    | 0.7615688    | 0.9767442    | 0.7773374    | not scorable | not scorable |
| #### Bn-scaff_16069_1-p33074 genome unspecific (all in)         | 0.9736842    | 0.4596689    | 0.9922481    | 0.7210209    | 1            | 0.8965459    |
| #### Bn-scaff_16069_1-p33111 C-genome specific (napus-oleracea) | 0.9832536    | 0.7751198    | 0.9922481    | 0.8806298    | not scorable | not scorable |
| #### Bn-scaff_16069_1-p33117 genome unspecific (all in)         | 0.9473684    | 0.5337464    | 1            | 0.8051853    | 1            | 0.906221     |
| #### Bn-scaff_16069_1-p33130 C-genome specific (napus-oleracea) | 0.9832536    | 0.7907431    | 1            | 0.8176722    | not scorable | not scorable |
| #### Bn-scaff_16069_1-p33154 C-genome specific (napus-oleracea) | 0.9521531    | 0.7868134    | 0.9612403    | 0.7537695    | not scorable | not scorable |
| #### Bn-scaff_16069_1-p33169 C-genome specific (napus-oleracea) | 0.9904306    | 0.7741535    | 0.9922481    | 0.8520283    | not scorable | not scorable |
| #### Bn-scaff_16069_1-p33169 C-genome specific (napus-oleracea) | 0.9617225    | 0.7046944    | 0.9922481    | 0.7918259    | not scorable | not scorable |
| #### Bn-scaff_16069_1-p33511 C-genome specific (napus-oleracea) | 0.9712918    | 0.7643237    | 0.9922481    | 0.7992423    | not scorable | not scorable |
| #### Bn-scaff_16069_1-p33514 C-genome specific (napus-oleracea) | 0.9760765    | 0.7970734    | 0.9922481    | 0.84005      | not scorable | not scorable |
| #### Bn-scaff_16069_1-p33521 C-genome specific (napus-oleracea) | 0.8803828    | 0.7368883    | 0.9767442    | 0.7687133    | not scorable | not scorable |
| #### Bn-scaff_16069_1-p33523 C-genome specific (napus-oleracea) | 0.9952153    | 0.7100155    | 0.9922481    | 0.5628911    | not scorable | not scorable |
| #### Bn-scaff_16069_1-p33523 C-genome specific (napus-oleracea) | 0.9808612    | 0.7988849    | 0.9922481    | 0.843569     | not scorable | not scorable |
| #### Bn-scaff_16069_1-p33524 C-genome specific (napus-oleracea) | 0.9856459    | 0.7762827    | 0.9844961    | 0.8133442    | not scorable | not scorable |
| #### Bn-scaff_16069_1-p33528 C-genome specific (napus-oleracea) | 0.9736842    | 0.7842372    | 0.9922481    | 0.8302019    | not scorable | not scorable |
| #### Bn-scaff_16069_1-p33533 all not scorable                   | not scorable | not scorable | not scorable | not scorable | not scorable | not scorable |
| #### Bn-scaff_16069_1-p33755 C-genome specific (napus-oleracea) | 0.9952153    | 0.7326329    | 0.9302326    | 0.73276      | not scorable | not scorable |
| #### Bn-scaff_16069_1-p33781 C-genome specific (napus-oleracea) | 0.9736842    | 0.6625336    | 0.9922481    | 0.6682717    | not scorable | not scorable |
| #### Bn-scaff_16069_1-p33926 C-genome specific (napus-oleracea) | 0.9856459    | 0.7639281    | 0.9922481    | 0.8050601    | not scorable | not scorable |
| #### Bn-scaff_16069_1-p34171 C-genome specific (napus-oleracea) | 0.9904306    | 0.7701765    | 0.9922481    | 0.8332357    | not scorable | not scorable |
| #### Bn-scaff_16069_1-p34215 C-genome specific (napus-oleracea) | 0.9856459    | 0.6851705    | 0.9922481    | 0.7770222    | not scorable | not scorable |
| #### Bn-scaff_16069_1-p34218 C-genome specific (napus-oleracea) | 0.9617225    | 0.6172398    | 0.9844961    | 0.6412031    | not scorable | not scorable |
| #### Bn-scaff_16069_1-p34238 C-genome specific (napus-oleracea) | 0.9617225    | 0.5390237    | 0.9844961    | 0.7437751    | not scorable | not scorable |
| #### Bn-scaff_16069_1-p34287 C-genome specific (napus-oleracea) | 0.9904306    | 0.7566336    | 0.9922481    | 0.7919301    | not scorable | not scorable |
| #### Bn-scaff_16069_1-p34358 C-genome specific (napus-oleracea) | 0.9952153    | 0.7213328    | 0.9922481    | 0.7622788    | not scorable | not scorable |
| #### Bn-scaff_16069_1-p34462 C-genome specific (napus-oleracea) | 1            | 0.827311     | 0.9922481    | 0.7830343    | not scorable | not scorable |
| #### Bn-scaff_16069_1-p34464 C-genome specific (napus-oleracea) | 0.5980861    | 0.9178285    | 0.9767442    | 0.6969539    | not scorable | not scorable |
| #### Bn-scaff_16069_1-p34547 C-genome specific (napus-oleracea) | 0.4162679    | 0.9257365    | 0.9224806    | 0.839176     | not scorable | not scorable |
| #### Bn-scaff_16069_1-p34555 C-genome specific (napus-oleracea) | 0.9880383    | 0.7554532    | 0.9844961    | 0.8325775    | not scorable | not scorable |
| #### Bn-scaff_16069_1-p34563 C-genome specific (napus-oleracea) | 0.9641148    | 0.7637809    | 0.9534883    | 0.7416374    | not scorable | not scorable |
| #### Bn-scaff_16069_1-p34607 C-genome specific (napus-oleracea) | 1            | 0.8216576    | 0.9922481    | 0.8483816    | not scorable | not scorable |
| #### Bn-scaff_16069_1-p34637 genome unspecific (all in)         | 1            | 0.60763      | 1            | 0.7583615    | 1            | 0.910328     |
| #### Bn-scaff_16069_1-p34706 C-genome specific (napus-oleracea) | 0.9760765    | 0.6596906    | 0.9844961    | 0.6887916    | not scorable | not scorable |

|                                                                 |              |              |           |           |              |              |
|-----------------------------------------------------------------|--------------|--------------|-----------|-----------|--------------|--------------|
| #### Bn-scaff_16069_1-p34789 C-genome specific (napus-oleracea) | 1            | 0.755971     | 0.9922481 | 0.7304818 | not scorable | not scorable |
| #### Bn-scaff_16069_1-p34793 C-genome specific (napus-oleracea) | 0.9784689    | 0.6946927    | 0.9922481 | 0.7136098 | not scorable | not scorable |
| #### Bn-scaff_16069_1-p34846 genome unspecific (oleracea-rapa)  | not scorable | not scorable | 1         | 0.7479953 | 1            | 0.8893034    |
| #### Bn-scaff_16069_1-p34863 C-genome specific (napus-oleracea) | 0.9712918    | 0.7264103    | 0.9922481 | 0.7715982 | not scorable | not scorable |
| #### Bn-scaff_16069_1-p35108 genome unspecific (all in)         | 0.9976076    | 0.491702     | 0.9922481 | 0.7297653 | 0.9917355    | 0.7519268    |
| #### Bn-scaff_16069_1-p35657 C-genome specific (napus-oleracea) | 0.9808612    | 0.7520823    | 0.9844961 | 0.8101299 | not scorable | not scorable |
| #### Bn-scaff_16069_1-p35835 genome unspecific (all in)         | 1            | 0.4182033    | 1         | 0.6617971 | 0.9752066    | 0.5887339    |
| #### Bn-scaff_16069_1-p35964 C-genome specific (napus-oleracea) | 0.9784689    | 0.6636748    | 0.9922481 | 0.7588993 | not scorable | not scorable |
| #### Bn-scaff_16069_1-p35965 C-genome specific (napus-oleracea) | 0.562201     | 0.7721979    | 0.8449612 | 0.7125158 | not scorable | not scorable |
| #### Bn-scaff_16069_1-p36026 genome unspecific (all in)         | 0.9401914    | 0.2005263    | 0.9922481 | 0.6992844 | 1            | 0.5818383    |
| #### Bn-scaff_16069_1-p36084 genome unspecific (all in)         | 0.9976076    | 0.3269991    | 1         | 0.85739   | 1            | 0.8155382    |
| #### Bn-scaff_16069_1-p36106 C-genome specific (napus-oleracea) | 0.9880383    | 0.7878602    | 0.9922481 | 0.7925733 | not scorable | not scorable |
| #### Bn-scaff_16069_1-p36112 C-genome specific (napus-oleracea) | 0.9976076    | 0.7515282    | 0.9922481 | 0.3824873 | not scorable | not scorable |
| #### Bn-scaff_16069_1-p36116 C-genome specific (napus-oleracea) | 0.9904306    | 0.7750423    | 0.9922481 | 0.738277  | not scorable | not scorable |
| #### Bn-scaff_16069_1-p36176 C-genome specific (napus-oleracea) | 0.9904306    | 0.7455249    | 0.9844961 | 0.7957506 | not scorable | not scorable |
| #### Bn-scaff_16069_1-p36177 C-genome specific (napus-oleracea) | 0.9784689    | 0.6789932    | 0.9922481 | 0.777673  | not scorable | not scorable |
| #### Bn-scaff_16069_1-p36232 genome unspecific (all in)         | 0.9976076    | 0.5455611    | 0.9767442 | 0.6689926 | 1            | 0.6551644    |
| #### Bn-scaff_16069_1-p36311 C-genome specific (napus-oleracea) | 0.6028708    | 0.7389871    | 0.8604651 | 0.6723316 | not scorable | not scorable |
| #### Bn-scaff_16069_1-p36366 C-genome specific (napus-oleracea) | 0.9904306    | 0.7841175    | 0.9922481 | 0.7638699 | not scorable | not scorable |
| #### Bn-scaff_16069_1-p36385 C-genome specific (napus-oleracea) | 0.9808612    | 0.8104526    | 0.8527132 | 0.7626341 | not scorable | not scorable |
| #### Bn-scaff_16069_1-p36392 C-genome specific (napus-oleracea) | 0.9832536    | 0.7415534    | 0.8527132 | 0.7197025 | not scorable | not scorable |
| #### Bn-scaff_16069_1-p36395 C-genome specific (napus-oleracea) | 0.9832536    | 0.848672     | 0.8449612 | 0.8308673 | not scorable | not scorable |
| #### Bn-scaff_16069_1-p36530 C-genome specific (napus-oleracea) | 0.9928229    | 0.7878512    | 0.9922481 | 0.8571205 | not scorable | not scorable |
| #### Bn-scaff_16069_1-p36537 genome unspecific (all in)         | 0.9976076    | 0.4414101    | 1         | 0.8185463 | 1            | 0.8948976    |
| #### Bn-scaff_16069_1-p36612 C-genome specific (napus-oleracea) | 0.9856459    | 0.8033183    | 0.9844961 | 0.7454812 | not scorable | not scorable |
| #### Bn-scaff_16069_1-p36633 genome unspecific (all in)         | 0.9976076    | 0.2285937    | 1         | 0.5215563 | 1            | 0.786476     |
| #### Bn-scaff_16069_1-p36641 genome unspecific (oleracea-rapa)  | not scorable | not scorable | 1         | 0.7125875 | 1            | 0.702597     |
| #### Bn-scaff_16069_1-p36740 C-genome specific (napus-oleracea) | 0.9617225    | 0.9158981    | 0.7674419 | 0.8756817 | not scorable | not scorable |
| #### Bn-scaff_16069_1-p36753 genome unspecific (all in)         | 0.9976076    | 0.3802426    | 0.9922481 | 0.6390905 | 1            | 0.7395847    |
| #### Bn-scaff_16069_1-p36755 genome unspecific (all in)         | 0.9976076    | 0.484497     | 1         | 0.8137938 | 1            | 0.9176309    |
| #### Bn-scaff_16069_1-p36766 C-genome specific (napus-oleracea) | 0.9976076    | 0.4404081    | 1         | 0.779734  | not scorable | not scorable |
| #### Bn-scaff_16069_1-p36896 C-genome specific (oleracea only)  | not scorable | not scorable | 0.9922481 | 0.7598116 | not scorable | not scorable |
| #### Bn-scaff_16069_1-p37242 genome unspecific (all in)         | 1            | 0.4191148    | 1         | 0.8885087 | 0.9834711    | 0.8007501    |

|                                                                 |              |              |              |              |              |              |
|-----------------------------------------------------------------|--------------|--------------|--------------|--------------|--------------|--------------|
| #### Bn-scaff_16069_1-p37319 C-genome specific (oleracea only)  | not scorable | not scorable | 0.9612403    | 0.6565124    | not scorable | not scorable |
| #### Bn-scaff_16069_1-p37320 C-genome specific (napus-oleracea) | 0.9976076    | 0.9054326    | 0.9922481    | 0.700942     | not scorable | not scorable |
| #### Bn-scaff_16069_1-p37320 C-genome specific (napus-oleracea) | 0.9976076    | 0.8943542    | 0.9922481    | 0.8433501    | not scorable | not scorable |
| #### Bn-scaff_16069_1-p37447 C-genome specific (napus-oleracea) | 0.9665072    | 0.8265594    | 0.9457364    | 0.8116826    | not scorable | not scorable |
| #### Bn-scaff_16069_1-p37483 C-genome specific (napus-oleracea) | 1            | 0.8270501    | 0.9922481    | 0.848218     | not scorable | not scorable |
| #### Bn-scaff_16069_1-p37496 genome unspecific (all in)         | 0.9904306    | 0.4706224    | 1            | 0.7635297    | 1            | 0.6887809    |
| #### Bn-scaff_16069_1-p37507 genome unspecific (all in)         | 0.9904306    | 0.5060349    | 0.9922481    | 0.5407917    | 1            | 0.8073817    |
| #### Bn-scaff_16069_1-p37707 C-genome specific (napus-oleracea) | 0.9976076    | 0.8458923    | 0.9922481    | 0.7649062    | not scorable | not scorable |
| #### Bn-scaff_16069_1-p37804 C-genome specific (napus-oleracea) | 0.9736842    | 0.7115236    | 0.9689922    | 0.7009395    | not scorable | not scorable |
| #### Bn-scaff_16069_1-p38610 C-genome specific (napus-oleracea) | 0.9976076    | 0.7526529    | 0.9767442    | 0.6803636    | not scorable | not scorable |
| #### Bn-scaff_16069_1-p38649 A-genome specific (rapa only)      | not scorable | not scorable | not scorable | not scorable | 0.9917355    | 0.5138401    |
| #### Bn-scaff_16069_1-p38829 C-genome specific (napus-oleracea) | 0.9856459    | 0.6706721    | 1            | 0.6751298    | not scorable | not scorable |
| #### Bn-scaff_16069_1-p38873 genome unspecific (all in)         | 0.9832536    | 0.6665191    | 1            | 0.7361924    | 1            | 0.8837315    |
| #### Bn-scaff_16069_1-p39063 C-genome specific (napus-oleracea) | 0.9928229    | 0.7077503    | 1            | 0.692371     | not scorable | not scorable |
| #### Bn-scaff_16069_1-p39090 C-genome specific (napus-oleracea) | 0.9904306    | 0.7012504    | 1            | 0.6357876    | not scorable | not scorable |
| #### Bn-scaff_16069_1-p39267 napus specific                     | 0.9880383    | 0.8066242    | not scorable | not scorable | not scorable | not scorable |
| #### Bn-scaff_16069_1-p39377 genome unspecific (all in)         | 0.9784689    | 0.7471409    | 0.9922481    | 0.6971661    | 0.9834711    | 0.7933302    |
| #### Bn-scaff_16069_1-p39407 C-genome specific (napus-oleracea) | 0.9880383    | 0.7745325    | 0.9457364    | 0.9124109    | not scorable | not scorable |
| #### Bn-scaff_16069_1-p39429 C-genome specific (napus-oleracea) | 0.9952153    | 0.7807961    | 1            | 0.7728823    | not scorable | not scorable |
| #### Bn-scaff_16069_1-p39452 C-genome specific (napus-oleracea) | 0.9928229    | 0.7607467    | 1            | 0.7498183    | not scorable | not scorable |
| #### Bn-scaff_16069_1-p39517 C-genome specific (napus-oleracea) | 0.9688995    | 0.7495215    | 0.8372093    | 0.7025568    | not scorable | not scorable |
| #### Bn-scaff_16069_1-p39699 C-genome specific (napus-oleracea) | 0.9665072    | 0.6514085    | 0.9844961    | 0.7277582    | not scorable | not scorable |
| #### Bn-scaff_16069_1-p40070 genome unspecific (all in)         | 1            | 0.7814018    | 1            | 0.7154319    | 1            | 0.892122     |
| #### Bn-scaff_16069_1-p40308 C-genome specific (napus-oleracea) | 0.9928229    | 0.7657909    | 1            | 0.7867753    | not scorable | not scorable |
| #### Bn-scaff_16069_1-p40338 C-genome specific (napus-oleracea) | 0.9904306    | 0.6972801    | 1            | 0.7845727    | not scorable | not scorable |
| #### Bn-scaff_16069_1-p40357 C-genome specific (napus-oleracea) | 0.9856459    | 0.703822     | 0.9689922    | 0.8602357    | not scorable | not scorable |
| #### Bn-scaff_16069_1-p40397 C-genome specific (napus-oleracea) | 0.9880383    | 0.6985738    | 1            | 0.7657071    | not scorable | not scorable |
| #### Bn-scaff_16069_1-p40454 C-genome specific (napus-oleracea) | 0.9808612    | 0.7701765    | 1            | 0.7469984    | not scorable | not scorable |
| #### Bn-scaff_16069_1-p40460 genome unspecific (all in)         | 0.9545454    | 0.4358723    | 1            | 0.7896438    | 0.7768595    | 0.7768335    |
| #### Bn-scaff_16069_1-p40663 C-genome specific (napus-oleracea) | 0.9880383    | 0.704294     | 0.9922481    | 0.7728036    | not scorable | not scorable |
| #### Bn-scaff_16069_1-p40669 C-genome specific (napus-oleracea) | 0.9976076    | 0.8182024    | 1            | 0.8060756    | not scorable | not scorable |
| #### Bn-scaff_16069_1-p40680 C-genome specific (napus-oleracea) | 0.9880383    | 0.7613397    | 1            | 0.8492793    | not scorable | not scorable |
| #### Bn-scaff_16069_1-p40716 C-genome specific (napus-oleracea) | 0.9784689    | 0.6768466    | 1            | 0.6968854    | not scorable | not scorable |

|                                                                 |              |              |              |              |              |              |
|-----------------------------------------------------------------|--------------|--------------|--------------|--------------|--------------|--------------|
| #### Bn-scaff_16069_1-p4074C C-genome specific (napus-oleracea) | 0.9808612    | 0.7727687    | 1            | 0.8348503    | not scorable | not scorable |
| #### Bn-scaff_16069_1-p4085E C-genome specific (napus-oleracea) | 0.9880383    | 0.7821718    | 1            | 0.8549002    | not scorable | not scorable |
| #### Bn-scaff_16069_1-p4092E C-genome specific (napus-oleracea) | 0.9952153    | 0.6834262    | 1            | 0.72434      | not scorable | not scorable |
| #### Bn-scaff_16069_1-p4119E C-genome specific (napus-oleracea) | 0.937799     | 0.8375678    | 0.8139535    | 0.7378953    | not scorable | not scorable |
| #### Bn-scaff_16069_1-p41977 C-genome specific (napus-oleracea) | 0.9712918    | 0.7190772    | 0.9302326    | 0.7297385    | not scorable | not scorable |
| #### Bn-scaff_16069_1-p42282 C-genome specific (napus-oleracea) | 0.9736842    | 0.8006301    | 0.9922481    | 0.8365434    | not scorable | not scorable |
| #### Bn-scaff_16069_1-p42334 C-genome specific (napus-oleracea) | 0.9880383    | 0.8235744    | 0.9767442    | 0.7964792    | not scorable | not scorable |
| #### Bn-scaff_16069_1-p4235E genome unspecific (all in)         | 0.9545454    | 0.5484758    | 0.9922481    | 0.8380898    | 1            | 0.9487648    |
| #### Bn-scaff_16069_1-p4240E C-genome specific (oleracea only)  | not scorable | not scorable | 0.9612403    | 0.3836927    | not scorable | not scorable |
| #### Bn-scaff_16069_1-p42462 C-genome specific (oleracea only)  | not scorable | not scorable | 0.8372093    | 0.7561625    | not scorable | not scorable |
| #### Bn-scaff_16069_1-p42527 genome unspecific (all in)         | 0.9808612    | 0.6980153    | 0.9922481    | 0.8374124    | 1            | 0.9490815    |
| #### Bn-scaff_16069_1-p4277E C-genome specific (napus-oleracea) | 0.9880383    | 0.7054843    | 0.9922481    | 0.6895328    | not scorable | not scorable |
| #### Bn-scaff_16069_1-p4304E C-genome specific (napus-oleracea) | 0.9641148    | 0.7193481    | 1            | 0.6714174    | not scorable | not scorable |
| #### Bn-scaff_16069_1-p43064 C-genome specific (napus-oleracea) | 0.9856459    | 0.7064714    | 0.9767442    | 0.7161625    | not scorable | not scorable |
| #### Bn-scaff_16069_1-p4306E C-genome specific (napus-oleracea) | 0.9784689    | 0.7862728    | 1            | 0.7315748    | not scorable | not scorable |
| #### Bn-scaff_16069_1-p4309E C-genome specific (napus-oleracea) | 0.9904306    | 0.8311598    | 0.9844961    | 0.8326129    | not scorable | not scorable |
| #### Bn-scaff_16069_1-p4317E genome unspecific (all in)         | 1            | 0.8413551    | 1            | 0.6968428    | 1            | 0.9039531    |
| #### Bn-scaff_16069_1-p4324E C-genome specific (oleracea only)  | not scorable | not scorable | 0.8527132    | 0.8115516    | not scorable | not scorable |
| #### Bn-scaff_16069_1-p4327E C-genome specific (napus-oleracea) | 0.9641148    | 0.6309271    | 1            | 0.7497717    | not scorable | not scorable |
| #### Bn-scaff_16069_1-p4332E C-genome specific (napus-oleracea) | 0.9952153    | 0.7237314    | 1            | 0.7573885    | not scorable | not scorable |
| #### Bn-scaff_16069_1-p43334 C-genome specific (napus-oleracea) | 0.9928229    | 0.7665007    | 1            | 0.7938295    | not scorable | not scorable |
| #### Bn-scaff_16069_1-p4333E C-genome specific (napus-oleracea) | 0.9688995    | 0.5426952    | 0.9922481    | 0.5596187    | not scorable | not scorable |
| #### Bn-scaff_16069_1-p43411 C-genome specific (napus-oleracea) | 0.9784689    | 0.6340542    | 0.9767442    | 0.6491463    | not scorable | not scorable |
| #### Bn-scaff_16069_1-p43477 genome unspecific (all in)         | 0.9712918    | 0.3831224    | 0.9612403    | 0.5556896    | 1            | 0.8231055    |
| #### Bn-scaff_16069_1-p43571 C-genome specific (napus-oleracea) | 0.9880383    | 0.6971192    | 0.9767442    | 0.7552096    | not scorable | not scorable |
| #### Bn-scaff_16069_1-p4358E C-genome specific (napus-oleracea) | 0.9856459    | 0.753837     | 0.9922481    | 0.8140981    | not scorable | not scorable |
| #### Bn-scaff_16069_1-p4359C C-genome specific (napus-oleracea) | 0.9904306    | 0.7556579    | 1            | 0.8379771    | not scorable | not scorable |
| #### Bn-scaff_16069_1-p4361E C-genome specific (napus-oleracea) | 0.9880383    | 0.7582029    | 0.9922481    | 0.845463     | not scorable | not scorable |
| #### Bn-scaff_16069_1-p4382C genome unspecific (all in)         | 0.9976076    | 0.6815924    | 0.7984496    | 0.8025022    | 1            | 0.7559193    |
| #### Bn-scaff_16069_1-p4392E genome unspecific (all in)         | 0.9665072    | 0.299096     | 0.9767442    | 0.7538548    | 0.9917355    | 0.8557055    |
| #### Bn-scaff_16069_1-p4396E napus specific                     | 0.5550239    | 0.9364911    | not scorable | not scorable | not scorable | not scorable |
| #### Bn-scaff_16069_1-p4461C C-genome specific (napus-oleracea) | 0.9712918    | 0.7711168    | 0.9767442    | 0.8031008    | not scorable | not scorable |
| #### Bn-scaff_16069_1-p4461E genome unspecific (all in)         | 0.9976076    | 0.8077899    | 1            | 0.7124315    | 0.9917355    | 0.9149999    |

|                                                                 |              |              |           |           |              |              |
|-----------------------------------------------------------------|--------------|--------------|-----------|-----------|--------------|--------------|
| #### Bn-scaff_16069_1-p44643 C-genome specific (napus-oleracea) | 0.9641148    | 0.7022654    | 1         | 0.8241919 | not scorable | not scorable |
| #### Bn-scaff_16069_1-p44666 genome unspecific (all in)         | 0.9688995    | 0.3615553    | 0.9922481 | 0.6673838 | 1            | 0.7982026    |
| #### Bn-scaff_16069_1-p44682 C-genome specific (napus-oleracea) | 0.9832536    | 0.7577022    | 0.9922481 | 0.7938421 | not scorable | not scorable |
| #### Bn-scaff_16069_1-p44784 C-genome specific (napus-oleracea) | 0.9904306    | 0.7552984    | 0.9922481 | 0.7736035 | not scorable | not scorable |
| #### Bn-scaff_16069_1-p44792 genome unspecific (all in)         | 0.9712918    | 0.3353685    | 1         | 0.791468  | 1            | 0.7985681    |
| #### Bn-scaff_16069_1-p44797 genome unspecific (oleracea-rapa)  | not scorable | not scorable | 0.9767442 | 0.7773335 | 1            | 0.9272014    |
| #### Bn-scaff_16069_1-p44828 C-genome specific (napus-oleracea) | 0.9808612    | 0.690145     | 0.9922481 | 0.7267105 | not scorable | not scorable |
| #### Bn-scaff_16069_1-p44848 C-genome specific (napus-oleracea) | 0.8516746    | 0.7543584    | 0.9379845 | 0.7977504 | not scorable | not scorable |
| #### Bn-scaff_16069_1-p44865 C-genome specific (napus-oleracea) | 0.8636364    | 0.7496845    | 0.9224806 | 0.7137259 | not scorable | not scorable |
| #### Bn-scaff_16069_1-p44892 C-genome specific (napus-oleracea) | 0.9856459    | 0.7677996    | 1         | 0.745652  | not scorable | not scorable |
| #### Bn-scaff_16069_1-p44991 genome unspecific (all in)         | 0.9617225    | 0.5932386    | 0.9922481 | 0.5912605 | 1            | 0.9291515    |
| #### Bn-scaff_16069_1-p45105 C-genome specific (napus-oleracea) | 0.9904306    | 0.7701377    | 0.9844961 | 0.8191159 | not scorable | not scorable |
| #### Bn-scaff_16069_1-p45283 genome unspecific (all in)         | 0.9545454    | 0.4871204    | 0.9689922 | 0.6940425 | 1            | 0.8412718    |
| #### Bn-scaff_16069_1-p45309 C-genome specific (napus-oleracea) | 0.9880383    | 0.7782684    | 1         | 0.7694305 | not scorable | not scorable |
| #### Bn-scaff_16069_1-p45468 C-genome specific (napus-oleracea) | 0.9808612    | 0.7811325    | 0.6666667 | 0.8814192 | not scorable | not scorable |
| #### Bn-scaff_16069_1-p45536 C-genome specific (napus-oleracea) | 0.9784689    | 0.7190431    | 0.9689922 | 0.8295987 | not scorable | not scorable |
| #### Bn-scaff_16069_1-p45669 C-genome specific (napus-oleracea) | 0.9880383    | 0.713716     | 0.9844961 | 0.704466  | not scorable | not scorable |
| #### Bn-scaff_16069_1-p45676 C-genome specific (napus-oleracea) | 0.9856459    | 0.7389331    | 0.9844961 | 0.8051868 | not scorable | not scorable |
| #### Bn-scaff_16069_1-p45676 C-genome specific (napus-oleracea) | 0.9784689    | 0.6253174    | 0.9922481 | 0.6363043 | not scorable | not scorable |
| #### Bn-scaff_16069_1-p46052 genome unspecific (all in)         | 0.9880383    | 0.4660361    | 0.9922481 | 0.7437963 | 1            | 0.8381558    |
| #### Bn-scaff_16069_1-p46053 C-genome specific (napus-oleracea) | 0.9904306    | 0.787746     | 1         | 0.7978211 | not scorable | not scorable |
| #### Bn-scaff_16069_1-p46055 genome unspecific (all in)         | 0.9904306    | 0.2645336    | 0.9922481 | 0.5498847 | 1            | 0.5680013    |
| #### Bn-scaff_16069_1-p46057 genome unspecific (all in)         | 0.9784689    | 0.4656332    | 1         | 0.82848   | 1            | 0.9196083    |
| #### Bn-scaff_16069_1-p46096 C-genome specific (napus-oleracea) | 0.6244019    | 0.7421391    | 0.9612403 | 0.6518235 | not scorable | not scorable |
| #### Bn-scaff_16069_1-p46207 C-genome specific (napus-oleracea) | 0.9784689    | 0.7390824    | 0.9922481 | 0.699828  | not scorable | not scorable |
| #### Bn-scaff_16069_1-p46208 C-genome specific (napus-oleracea) | 0.9832536    | 0.7364142    | 1         | 0.7662025 | not scorable | not scorable |
| #### Bn-scaff_16069_1-p46208 C-genome specific (napus-oleracea) | 0.9880383    | 0.7729505    | 1         | 0.8078856 | not scorable | not scorable |
| #### Bn-scaff_16069_1-p46209 C-genome specific (napus-oleracea) | 0.9832536    | 0.7555419    | 0.9922481 | 0.819433  | not scorable | not scorable |
| #### Bn-scaff_16069_1-p46249 C-genome specific (napus-oleracea) | 0.9808612    | 0.6629235    | 1         | 0.7306693 | not scorable | not scorable |
| #### Bn-scaff_16069_1-p46425 genome unspecific (all in)         | 0.9736842    | 0.2849453    | 0.9922481 | 0.7899224 | 1            | 0.9175813    |
| #### Bn-scaff_16069_1-p46454 C-genome specific (napus-oleracea) | 0.9808612    | 0.6990397    | 1         | 0.7442602 | not scorable | not scorable |
| #### Bn-scaff_16069_1-p46462 C-genome specific (napus-oleracea) | 0.9784689    | 0.6535308    | 1         | 0.6834102 | not scorable | not scorable |
| #### Bn-scaff_16069_1-p46462 C-genome specific (napus-oleracea) | 0.9880383    | 0.6776279    | 0.9922481 | 0.7038341 | not scorable | not scorable |



|                                                                 |              |              |           |           |              |              |
|-----------------------------------------------------------------|--------------|--------------|-----------|-----------|--------------|--------------|
| #### Bn-scaff_16069_1-p46464 C-genome specific (napus-oleracea) | 0.9904306    | 0.7540554    | 0.9922481 | 0.7941951 | not scorable | not scorable |
| #### Bn-scaff_16069_1-p46480 C-genome specific (oleracea only)  | not scorable | not scorable | 0.6666667 | 0.6827499 | not scorable | not scorable |
| #### Bn-scaff_16069_1-p46488 C-genome specific (napus-oleracea) | 0.9832536    | 0.6928124    | 1         | 0.7543887 | not scorable | not scorable |
| #### Bn-scaff_16069_1-p46662 genome unspecific (all in)         | 0.9784689    | 0.5350703    | 1         | 0.7756593 | 1            | 0.9421924    |
| #### Bn-scaff_16069_1-p46698 C-genome specific (napus-oleracea) | 0.9880383    | 0.7609032    | 0.9922481 | 0.811385  | not scorable | not scorable |
| #### Bn-scaff_16069_1-p46703 C-genome specific (napus-oleracea) | 0.9856459    | 0.7395364    | 1         | 0.8145135 | not scorable | not scorable |
| #### Bn-scaff_16069_1-p46707 C-genome specific (napus-oleracea) | 0.9976076    | 0.8170173    | 0.8449612 | 0.8715212 | not scorable | not scorable |
| #### Bn-scaff_16069_1-p46720 C-genome specific (napus-oleracea) | 0.9712918    | 0.6278687    | 0.9922481 | 0.6941633 | not scorable | not scorable |
| #### Bn-scaff_16069_1-p46768 genome unspecific (oleracea-rapa)  | not scorable | not scorable | 1         | 0.7404479 | 0.9834711    | 0.6986929    |
| #### Bn-scaff_16069_1-p46861 C-genome specific (napus-oleracea) | 0.9832536    | 0.68543      | 0.6899225 | 0.7248667 | not scorable | not scorable |
| #### Bn-scaff_16069_1-p47297 C-genome specific (napus-oleracea) | 0.9808612    | 0.7975511    | 0.9844961 | 0.7652262 | not scorable | not scorable |
| #### Bn-scaff_16069_1-p47353 C-genome specific (napus-oleracea) | 0.9808612    | 0.4855852    | 1         | 0.6408588 | not scorable | not scorable |
| #### Bn-scaff_16069_1-p47416 C-genome specific (napus-oleracea) | 0.9808612    | 0.7145907    | 0.8992248 | 0.7211601 | not scorable | not scorable |
| #### Bn-scaff_16069_1-p47455 C-genome specific (napus-oleracea) | 0.9736842    | 0.6609182    | 1         | 0.7106151 | not scorable | not scorable |
| #### Bn-scaff_16069_1-p47526 genome unspecific (all in)         | 0.9952153    | 0.5002074    | 1         | 0.770798  | 1            | 0.8379614    |
| #### Bn-scaff_16069_1-p47593 C-genome specific (napus-oleracea) | 0.9952153    | 0.7131225    | 0.9844961 | 0.742819  | not scorable | not scorable |
| #### Bn-scaff_16069_1-p48029 genome unspecific (all in)         | 0.9760765    | 0.4878689    | 0.9689922 | 0.689005  | 1            | 0.9175813    |
| #### Bn-scaff_16069_1-p48031 genome unspecific (all in)         | 0.9736842    | 0.3137731    | 0.9534883 | 0.7072672 | 1            | 0.8298871    |
| #### Bn-scaff_16069_1-p48032 genome unspecific (all in)         | 0.9569378    | 0.3319167    | 0.9844961 | 0.6897708 | 1            | 0.7653608    |
| #### Bn-scaff_16069_1-p48052 C-genome specific (napus-oleracea) | 0.9712918    | 0.2423244    | 0.9457364 | 0.4193532 | not scorable | not scorable |
| #### Bn-scaff_16069_1-p48053 C-genome specific (napus-oleracea) | 0.9832536    | 0.765662     | 0.9767442 | 0.7658214 | not scorable | not scorable |
| #### Bn-scaff_16069_1-p48053 C-genome specific (napus-oleracea) | 0.9808612    | 0.6892523    | 0.9767442 | 0.6666115 | not scorable | not scorable |
| #### Bn-scaff_16069_1-p48082 C-genome specific (napus-oleracea) | 0.9760765    | 0.7626783    | 0.9767442 | 0.7792307 | not scorable | not scorable |
| #### Bn-scaff_16069_1-p48086 C-genome specific (napus-oleracea) | 0.9808612    | 0.7877402    | 1         | 0.7586564 | not scorable | not scorable |
| #### Bn-scaff_16069_1-p48088 C-genome specific (napus-oleracea) | 0.9760765    | 0.7812665    | 0.9767442 | 0.8027055 | not scorable | not scorable |
| #### Bn-scaff_16069_1-p48090 C-genome specific (napus-oleracea) | 0.9880383    | 0.7775737    | 0.9689922 | 0.7976916 | not scorable | not scorable |
| #### Bn-scaff_16069_1-p48104 C-genome specific (napus-oleracea) | 0.9808612    | 0.7621797    | 0.9844961 | 0.7257863 | not scorable | not scorable |
| #### Bn-scaff_16069_1-p48131 C-genome specific (napus-oleracea) | 0.9760765    | 0.7153903    | 0.9767442 | 0.7091869 | not scorable | not scorable |
| #### Bn-scaff_16069_1-p48137 C-genome specific (napus-oleracea) | 0.9832536    | 0.7684494    | 0.9844961 | 0.7980337 | not scorable | not scorable |
| #### Bn-scaff_16069_1-p48139 C-genome specific (napus-oleracea) | 0.9760765    | 0.7424412    | 0.9844961 | 0.7587402 | not scorable | not scorable |
| #### Bn-scaff_16069_1-p48140 C-genome specific (napus-oleracea) | 0.9856459    | 0.7160099    | 0.9844961 | 0.694553  | not scorable | not scorable |
| #### Bn-scaff_16069_1-p48140 C-genome specific (napus-oleracea) | 0.9832536    | 0.7534611    | 0.9922481 | 0.7527096 | not scorable | not scorable |
| #### Bn-scaff_16069_1-p48145 C-genome specific (napus-oleracea) | 0.9952153    | 0.7679433    | 0.9844961 | 0.7062383 | not scorable | not scorable |

|                                                                 |              |              |              |              |              |              |
|-----------------------------------------------------------------|--------------|--------------|--------------|--------------|--------------|--------------|
| #### Bn-scaff_16069_1-p48152 C-genome specific (napus-oleracea) | 0.9784689    | 0.7688704    | 0.9612403    | 0.7680722    | not scorable | not scorable |
| #### Bn-scaff_16069_1-p48192 C-genome specific (napus-oleracea) | 0.9186603    | 0.7047536    | 0.8837209    | 0.7175519    | not scorable | not scorable |
| #### Bn-scaff_16069_1-p48198 genome unspecific (all in)         | 0.9545454    | 0.3812371    | 0.9689922    | 0.8883776    | 1            | 0.8803949    |
| #### Bn-scaff_16069_1-p48231 C-genome specific (napus-oleracea) | 0.9162679    | 0.8376521    | 0.8837209    | 0.8082386    | not scorable | not scorable |
| #### Bn-scaff_16069_1-p48231 C-genome specific (napus-oleracea) | 0.9832536    | 0.7803839    | 0.9844961    | 0.7961473    | not scorable | not scorable |
| #### Bn-scaff_16069_1-p48281 genome unspecific (all in)         | 0.9593301    | 0.6607997    | 0.9844961    | 0.6012635    | 1            | 0.9112313    |
| #### Bn-scaff_16069_1-p48334 C-genome specific (napus-oleracea) | 0.9832536    | 0.7492348    | 1            | 0.7850232    | not scorable | not scorable |
| #### Bn-scaff_16069_1-p48402 C-genome specific (napus-oleracea) | 0.9258373    | 0.8019885    | 0.8837209    | 0.793935     | not scorable | not scorable |
| #### Bn-scaff_16069_1-p48489 genome unspecific (all in)         | 0.9856459    | 0.4083178    | 1            | 0.7999414    | 1            | 0.809435     |
| #### Bn-scaff_16069_1-p48493 genome unspecific (all in)         | 0.9856459    | 0.2622395    | 0.9922481    | 0.6594314    | 1            | 0.7494321    |
| #### Bn-scaff_16069_1-p48545 genome unspecific (all in)         | 0.9330143    | 0.3012131    | 1            | 0.5641459    | 1            | 0.8703513    |
| #### Bn-scaff_16069_1-p48895 C-genome specific (napus-oleracea) | 0.9856459    | 0.7520543    | 0.9922481    | 0.764825     | not scorable | not scorable |
| #### Bn-scaff_16069_1-p48953 genome unspecific (all in)         | 0.9760765    | 0.5609879    | 0.9844961    | 0.6112232    | 1            | 0.7015575    |
| #### Bn-scaff_16069_1-p48969 genome unspecific (all in)         | 0.9712918    | 0.4863713    | 0.9844961    | 0.6538987    | 1            | 0.9021205    |
| #### Bn-scaff_16069_1-p48982 napus specific                     | 0.9473684    | 0.7909442    | not scorable | not scorable | not scorable | not scorable |
| #### Bn-scaff_16069_1-p49458 C-genome specific (napus-oleracea) | 0.9880383    | 0.7758795    | 0.9767442    | 0.8009066    | not scorable | not scorable |
| #### Bn-scaff_16069_1-p49653 C-genome specific (napus-oleracea) | 0.9880383    | 0.7871124    | 0.9844961    | 0.8292511    | not scorable | not scorable |
| #### Bn-scaff_16069_1-p52957 C-genome specific (napus-oleracea) | 0.9856459    | 0.7623382    | 0.9767442    | 0.7830933    | not scorable | not scorable |
| #### Bn-scaff_16069_1-p52958 C-genome specific (napus-oleracea) | 0.9880383    | 0.7735333    | 0.9922481    | 0.8729286    | not scorable | not scorable |
| #### Bn-scaff_16069_1-p52967 C-genome specific (napus-oleracea) | 0.9952153    | 0.7711571    | 0.9844961    | 0.8420728    | not scorable | not scorable |
| #### Bn-scaff_16069_1-p53026 C-genome specific (napus-oleracea) | 0.9904306    | 0.7672179    | 0.9922481    | 0.752358     | not scorable | not scorable |
| #### Bn-scaff_16069_1-p53044 C-genome specific (napus-oleracea) | 0.9856459    | 0.763114     | 0.9767442    | 0.842271     | not scorable | not scorable |
| #### Bn-scaff_16069_1-p53049 C-genome specific (napus-oleracea) | 0.9904306    | 0.7207029    | 0.9689922    | 0.7240012    | not scorable | not scorable |
| #### Bn-scaff_16069_1-p54100 C-genome specific (oleracea only)  | not scorable | not scorable | 0.7674419    | 0.7642136    | not scorable | not scorable |
| #### Bn-scaff_16069_1-p54492 C-genome specific (napus-oleracea) | 0.9808612    | 0.7301974    | 0.9689922    | 0.702647     | not scorable | not scorable |
| #### Bn-scaff_16069_1-p54493 C-genome specific (napus-oleracea) | 0.9784689    | 0.795308     | 0.9922481    | 0.8122581    | not scorable | not scorable |
| #### Bn-scaff_16069_1-p54584 C-genome specific (napus-oleracea) | 0.9808612    | 0.7836021    | 0.9844961    | 0.7599987    | not scorable | not scorable |
| #### Bn-scaff_16069_1-p55016 C-genome specific (napus-oleracea) | 0.9832536    | 0.7300824    | 0.9844961    | 0.6704715    | not scorable | not scorable |
| #### Bn-scaff_16069_1-p55032 C-genome specific (napus-oleracea) | 0.9880383    | 0.7748593    | 0.9922481    | 0.8182766    | not scorable | not scorable |
| #### Bn-scaff_16069_1-p55694 C-genome specific (napus-oleracea) | 0.9665072    | 0.7247238    | 0.9922481    | 0.8122143    | not scorable | not scorable |
| #### Bn-scaff_16069_1-p55775 C-genome specific (napus-oleracea) | 0.9784689    | 0.7780271    | 0.9922481    | 0.8279148    | not scorable | not scorable |
| #### Bn-scaff_16069_1-p55781 C-genome specific (napus-oleracea) | 0.9904306    | 0.7889162    | 0.9844961    | 0.7861037    | not scorable | not scorable |
| #### Bn-scaff_16069_1-p55787 C-genome specific (napus-oleracea) | 0.9832536    | 0.7864437    | 0.9922481    | 0.8104995    | not scorable | not scorable |

|                                                                  |              |              |           |           |              |              |
|------------------------------------------------------------------|--------------|--------------|-----------|-----------|--------------|--------------|
| ##### Bn-scaff_16069_1-p56039 C-genome specific (napus-oleracea) | 0.4019139    | 0.9585097    | 0.8914729 | 0.875246  | not scorable | not scorable |
| ##### Bn-scaff_16069_1-p56075 C-genome specific (napus-oleracea) | 0.9736842    | 0.7939221    | 0.7751938 | 0.8618178 | not scorable | not scorable |
| ##### Bn-scaff_16069_1-p56087 C-genome specific (napus-oleracea) | 0.9712918    | 0.7503325    | 0.9922481 | 0.8148319 | not scorable | not scorable |
| ##### Bn-scaff_16069_1-p56324 C-genome specific (oleracea only)  | not scorable | not scorable | 0.8682171 | 0.8569676 | not scorable | not scorable |
| ##### Bn-scaff_16069_1-p56381 C-genome specific (napus-oleracea) | 0.9856459    | 0.7929479    | 0.9612403 | 0.77057   | not scorable | not scorable |
| ##### Bn-scaff_16069_1-p56387 C-genome specific (napus-oleracea) | 0.9880383    | 0.8709372    | 0.9612403 | 0.8232162 | not scorable | not scorable |
| ##### Bn-scaff_16069_1-p56729 C-genome specific (napus-oleracea) | 0.9904306    | 0.8480888    | 0.9767442 | 0.8318138 | not scorable | not scorable |
| ##### Bn-scaff_16069_1-p56758 C-genome specific (napus-oleracea) | 0.9784689    | 0.7916661    | 0.9534883 | 0.7637079 | not scorable | not scorable |
| ##### Bn-scaff_16069_1-p56827 C-genome specific (napus-oleracea) | 0.9856459    | 0.8146427    | 0.9922481 | 0.7923343 | not scorable | not scorable |
| ##### Bn-scaff_16069_1-p56846 C-genome specific (napus-oleracea) | 0.9808612    | 0.7923037    | 0.9844961 | 0.7470873 | not scorable | not scorable |
| ##### Bn-scaff_16069_1-p57346 C-genome specific (napus-oleracea) | 0.9760765    | 0.7989851    | 0.9844961 | 0.829416  | not scorable | not scorable |
| ##### Bn-scaff_16069_1-p57375 C-genome specific (napus-oleracea) | 0.9808612    | 0.7250217    | 0.9844961 | 0.7251224 | not scorable | not scorable |
| ##### Bn-scaff_16069_1-p57380 C-genome specific (napus-oleracea) | 0.9928229    | 0.8100366    | 0.9612403 | 0.7855009 | not scorable | not scorable |
| ##### Bn-scaff_16069_1-p57648 C-genome specific (napus-oleracea) | 0.9856459    | 0.6904959    | 0.9844961 | 0.7177476 | not scorable | not scorable |
| ##### Bn-scaff_16069_1-p57662 C-genome specific (napus-oleracea) | 0.9760765    | 0.6706557    | 0.9767442 | 0.6681253 | not scorable | not scorable |
| ##### Bn-scaff_16069_1-p57708 C-genome specific (napus-oleracea) | 0.9808612    | 0.7639972    | 0.9844961 | 0.7603514 | not scorable | not scorable |
| ##### Bn-scaff_16069_1-p57718 C-genome specific (napus-oleracea) | 0.9760765    | 0.6608399    | 0.9767442 | 0.6500126 | not scorable | not scorable |
| ##### Bn-scaff_16069_1-p58358 C-genome specific (napus-oleracea) | 0.9712918    | 0.7194364    | 0.9534883 | 0.7722088 | not scorable | not scorable |
| ##### Bn-scaff_16069_1-p58392 C-genome specific (napus-oleracea) | 0.9904306    | 0.8620602    | 0.9844961 | 0.8444079 | not scorable | not scorable |
| ##### Bn-scaff_16069_1-p59146 genome unspecific (all in)         | 0.9928229    | 0.7213051    | 1         | 0.819243  | 1            | 0.9244215    |
| ##### Bn-scaff_16069_1-p59148 C-genome specific (napus-oleracea) | 0.9880383    | 0.8629977    | 0.9922481 | 0.8450921 | not scorable | not scorable |
| ##### Bn-scaff_16069_1-p59161 C-genome specific (napus-oleracea) | 0.9808612    | 0.7843692    | 0.9844961 | 0.7264665 | not scorable | not scorable |
| ##### Bn-scaff_16069_1-p59173 C-genome specific (napus-oleracea) | 0.9856459    | 0.8408254    | 0.9767442 | 0.8508198 | not scorable | not scorable |
| ##### Bn-scaff_16069_1-p59195 C-genome specific (napus-oleracea) | 0.9856459    | 0.8327661    | 0.9922481 | 0.7775663 | not scorable | not scorable |
| ##### Bn-scaff_16069_1-p59779 C-genome specific (napus-oleracea) | 0.9904306    | 0.8321019    | 0.9767442 | 0.8325432 | not scorable | not scorable |
| ##### Bn-scaff_16069_1-p59941 C-genome specific (napus-oleracea) | 0.9880383    | 0.8652759    | 0.9767442 | 0.8405654 | not scorable | not scorable |
| ##### Bn-scaff_16069_1-p59970 C-genome specific (napus-oleracea) | 0.9904306    | 0.8436139    | 0.9922481 | 0.8412461 | not scorable | not scorable |
| ##### Bn-scaff_16069_1-p59972 C-genome specific (napus-oleracea) | 0.9784689    | 0.8523126    | 0.9767442 | 0.8508198 | not scorable | not scorable |
| ##### Bn-scaff_16069_1-p60136 C-genome specific (napus-oleracea) | 0.9832536    | 0.8062928    | 0.9844961 | 0.8434105 | not scorable | not scorable |
| ##### Bn-scaff_16069_1-p60143 C-genome specific (napus-oleracea) | 0.9808612    | 0.7843984    | 0.9767442 | 0.8461775 | not scorable | not scorable |
| ##### Bn-scaff_16069_1-p60179 C-genome specific (napus-oleracea) | 0.9904306    | 0.8461589    | 0.9922481 | 0.8324538 | not scorable | not scorable |
| ##### Bn-scaff_16069_1-p60215 C-genome specific (napus-oleracea) | 0.9856459    | 0.7705932    | 0.9844961 | 0.8112734 | not scorable | not scorable |
| ##### Bn-scaff_16069_1-p60222 C-genome specific (napus-oleracea) | 0.9832536    | 0.8263119    | 0.9922481 | 0.8177736 | not scorable | not scorable |

|                                                                 |              |              |              |              |              |              |
|-----------------------------------------------------------------|--------------|--------------|--------------|--------------|--------------|--------------|
| #### Bn-scaff_16069_1-p60230 C-genome specific (napus-oleracea) | 0.9904306    | 0.821059     | 0.9767442    | 0.8146949    | not scorable | not scorable |
| #### Bn-scaff_16069_1-p60263 C-genome specific (napus-oleracea) | 0.9712918    | 0.7304441    | 0.9767442    | 0.741698     | not scorable | not scorable |
| #### Bn-scaff_16069_1-p60276 C-genome specific (napus-oleracea) | 0.9808612    | 0.8004807    | 0.9922481    | 0.858786     | not scorable | not scorable |
| #### Bn-scaff_16069_1-p60290 C-genome specific (napus-oleracea) | 0.9784689    | 0.8098648    | 0.9767442    | 0.8433517    | not scorable | not scorable |
| #### Bn-scaff_16069_1-p60305 C-genome specific (napus-oleracea) | 0.9856459    | 0.8130335    | 0.9767442    | 0.8189003    | not scorable | not scorable |
| #### Bn-scaff_16069_1-p60312 C-genome specific (napus-oleracea) | 0.9784689    | 0.7432569    | 0.9844961    | 0.7028604    | not scorable | not scorable |
| #### Bn-scaff_16069_1-p60502 C-genome specific (napus-oleracea) | 0.9856459    | 0.82831      | 0.9844961    | 0.8436651    | not scorable | not scorable |
| #### Bn-scaff_16069_1-p60753 C-genome specific (napus-oleracea) | 0.9952153    | 0.8114063    | 0.9844961    | 0.8168722    | not scorable | not scorable |
| #### Bn-scaff_16069_1-p62599 C-genome specific (napus-oleracea) | 0.9952153    | 0.7300853    | 0.9612403    | 0.690697     | not scorable | not scorable |
| #### Bn-scaff_16069_1-p62856 C-genome specific (napus-oleracea) | 0.9880383    | 0.7766094    | 0.9767442    | 0.7218317    | not scorable | not scorable |
| #### Bn-scaff_16069_1-p64388 C-genome specific (oleracea only)  | not scorable | not scorable | 0.7674419    | 0.7962564    | not scorable | not scorable |
| #### Bn-scaff_16069_1-p65289 C-genome specific (oleracea only)  | not scorable | not scorable | 0.9922481    | 0.6753706    | not scorable | not scorable |
| #### Bn-scaff_16069_1-p68510 C-genome specific (napus-oleracea) | 0.9784689    | 0.7492183    | 1            | 0.7271105    | not scorable | not scorable |
| #### Bn-scaff_16069_1-p69527 C-genome specific (napus-oleracea) | 0.9832536    | 0.6290934    | 0.9922481    | 0.6446858    | not scorable | not scorable |
| #### Bn-scaff_16069_1-p69533 C-genome specific (napus-oleracea) | 0.9784689    | 0.7253126    | 0.9922481    | 0.7449881    | not scorable | not scorable |
| #### Bn-scaff_16069_1-p69541 C-genome specific (napus-oleracea) | 0.9856459    | 0.7477065    | 0.9844961    | 0.803022     | not scorable | not scorable |
| #### Bn-scaff_16069_1-p70057 C-genome specific (napus-oleracea) | 0.9856459    | 0.7533612    | 1            | 0.738869     | not scorable | not scorable |
| #### Bn-scaff_16069_1-p70062 C-genome specific (napus-oleracea) | 0.9736842    | 0.7525151    | 0.9844961    | 0.8044007    | not scorable | not scorable |
| #### Bn-scaff_16069_1-p70147 C-genome specific (napus-oleracea) | 0.9808612    | 0.7049634    | 0.9767442    | 0.7972655    | not scorable | not scorable |
| #### Bn-scaff_16069_1-p70257 C-genome specific (napus-oleracea) | 0.9736842    | 0.7734261    | 0.8837209    | 0.7431267    | not scorable | not scorable |
| #### Bn-scaff_16069_1-p70313 C-genome specific (napus-oleracea) | 0.9760765    | 0.8105792    | 0.8914729    | 0.7944538    | not scorable | not scorable |
| #### Bn-scaff_16069_1-p70580 C-genome specific (napus-oleracea) | 0.9760765    | 0.7876648    | 0.9767442    | 0.7881105    | not scorable | not scorable |
| #### Bn-scaff_16069_1-p70598 C-genome specific (napus-oleracea) | 0.9808612    | 0.7823256    | 0.8682171    | 0.740404     | not scorable | not scorable |
| #### Bn-scaff_16069_1-p70891 C-genome specific (napus-oleracea) | 0.9880383    | 0.7692443    | 0.9767442    | 0.6815034    | not scorable | not scorable |
| #### Bn-scaff_16069_1-p72638 C-genome specific (napus-oleracea) | 0.9880383    | 0.7722476    | 0.9922481    | 0.8608119    | not scorable | not scorable |
| #### Bn-scaff_16069_1-p72653 C-genome specific (napus-oleracea) | 0.9832536    | 0.7877016    | 0.9922481    | 0.8385912    | not scorable | not scorable |
| #### Bn-scaff_16069_1-p73021 C-genome specific (napus-oleracea) | 0.9928229    | 0.7534838    | 0.9922481    | 0.8103997    | not scorable | not scorable |
| #### Bn-scaff_16069_1-p75284 C-genome specific (napus-oleracea) | 0.9928229    | 0.7213281    | 0.9922481    | 0.7879632    | not scorable | not scorable |
| #### Bn-scaff_16069_1-p75418 C-genome specific (napus-oleracea) | 0.9521531    | 0.6619733    | 0.8449612    | 0.5907784    | not scorable | not scorable |
| #### Bn-scaff_16069_1-p76217 C-genome specific (napus-oleracea) | 0.9904306    | 0.5353862    | 0.9689922    | 0.5346531    | not scorable | not scorable |
| #### Bn-scaff_16069_1-p7747 A-genome specific (napus-rapa)      | 0.9808612    | 0.3261896    | not scorable | not scorable | 1            | 0.8656319    |
| #### Bn-scaff_16069_1-p77657 C-genome specific (napus-oleracea) | 0.9880383    | 0.7869062    | 0.9689922    | 0.9030225    | not scorable | not scorable |
| #### Bn-scaff_16069_1-p78143 genome unspecific (all in)         | 0.9832536    | 0.5191463    | 1            | 0.8421799    | 1            | 0.9206591    |

|                                                                 |              |              |              |              |              |              |
|-----------------------------------------------------------------|--------------|--------------|--------------|--------------|--------------|--------------|
| #### Bn-scaff_16069_1-p80174 C-genome specific (napus-oleracea) | 0.8923445    | 0.7822347    | 0.7286822    | 0.7233706    | not scorable | not scorable |
| #### Bn-scaff_16069_1-p80537 C-genome specific (napus-oleracea) | 0.9066986    | 0.7693535    | 0.7364341    | 0.7743023    | not scorable | not scorable |
| #### Bn-scaff_16069_1-p80589 C-genome specific (napus-oleracea) | 0.9114832    | 0.6625459    | 0.7364341    | 0.6442221    | not scorable | not scorable |
| #### Bn-scaff_16069_1-p81006 C-genome specific (napus-oleracea) | 0.9952153    | 0.7443778    | 0.9922481    | 0.7929       | not scorable | not scorable |
| #### Bn-scaff_16069_1-p81238 C-genome specific (napus-oleracea) | 0.9736842    | 0.6486835    | 0.9767442    | 0.6149917    | not scorable | not scorable |
| #### Bn-scaff_16069_1-p84976 C-genome specific (napus-oleracea) | 0.9665072    | 0.6182757    | 0.9689922    | 0.8752722    | not scorable | not scorable |
| #### Bn-scaff_16069_1-p85007 C-genome specific (napus-oleracea) | 0.9880383    | 0.7476484    | 0.9844961    | 0.7717584    | not scorable | not scorable |
| #### Bn-scaff_16069_1-p85028 C-genome specific (oleracea only)  | not scorable | not scorable | 0.5116279    | 0.7691256    | not scorable | not scorable |
| #### Bn-scaff_16069_1-p85040 C-genome specific (oleracea only)  | not scorable | not scorable | 0.9844961    | 0.7856718    | not scorable | not scorable |
| #### Bn-scaff_16069_1-p85070 C-genome specific (napus-oleracea) | 0.9856459    | 0.7169626    | 0.9922481    | 0.7351805    | not scorable | not scorable |
| #### Bn-scaff_16069_1-p85075 C-genome specific (napus-oleracea) | 0.9976076    | 0.7456622    | 0.9689922    | 0.7482651    | not scorable | not scorable |
| #### Bn-scaff_16069_1-p85088 C-genome specific (napus-oleracea) | 0.9832536    | 0.6803021    | 0.9922481    | 0.7097523    | not scorable | not scorable |
| #### Bn-scaff_16069_1-p86823 C-genome specific (napus-oleracea) | 0.9880383    | 0.7935416    | 0.9844961    | 0.7640806    | not scorable | not scorable |
| #### Bn-scaff_16069_1-p86823 C-genome specific (napus-oleracea) | 0.9832536    | 0.7331053    | 0.9844961    | 0.6815724    | not scorable | not scorable |
| #### Bn-scaff_16069_1-p9308 genome unspecific (all in)          | 0.9856459    | 0.4063972    | 1            | 0.856598     | 0.9917355    | 0.8084403    |
| #### Bn-scaff_16069_1-p93935 C-genome specific (napus-oleracea) | 0.9641148    | 0.7691143    | 0.6821706    | 0.8792118    | not scorable | not scorable |
| #### Bn-scaff_16069_1-p94268 C-genome specific (napus-oleracea) | 0.9688995    | 0.7633699    | 0.5503876    | 0.8238466    | not scorable | not scorable |
| #### Bn-scaff_16069_1-p94349 genome unspecific (oleracea-rapa)  | not scorable | not scorable | 1            | 0.5229741    | 1            | 0.5531122    |
| #### Bn-scaff_16069_1-p94431 genome unspecific (all in)         | 0.9856459    | 0.4417507    | 1            | 0.6892305    | 0.9834711    | 0.6646785    |
| #### Bn-scaff_16069_1-p94458 genome unspecific (all in)         | 0.9976076    | 0.492626     | 0.9922481    | 0.69127      | 1            | 0.5350085    |
| #### Bn-scaff_16069_1-p95308 C-genome specific (napus-oleracea) | 0.9832536    | 0.736809     | 0.6124031    | 0.5834147    | not scorable | not scorable |
| #### Bn-scaff_16069_1-p95541 C-genome specific (napus-oleracea) | 0.9784689    | 0.7465377    | 0.9922481    | 0.7424766    | not scorable | not scorable |
| #### Bn-scaff_16069_1-p95556 C-genome specific (napus-oleracea) | 0.9784689    | 0.6921162    | 0.9922481    | 0.71036      | not scorable | not scorable |
| #### Bn-scaff_16069_1-p96005 C-genome specific (napus-oleracea) | 0.9952153    | 0.74347      | 0.9612403    | 0.561894     | not scorable | not scorable |
| #### Bn-scaff_16069_1-p99517 C-genome specific (napus-oleracea) | 0.9521531    | 0.7589674    | 0.3410853    | 0.9158558    | not scorable | not scorable |
| #### Bn-scaff_16082_1-p16502 genome unspecific (all in)         | 1            | 0.438134     | 1            | 0.8788942    | 1            | 0.9236712    |
| #### Bn-scaff_16082_1-p17710 genome unspecific (all in)         | 0.9928229    | 0.3446451    | 0.9844961    | 0.8363664    | 1            | 0.8991036    |
| #### Bn-scaff_16082_1-p18991 all not scorable                   | not scorable | not scorable | not scorable | not scorable | not scorable | not scorable |
| #### Bn-scaff_16082_1-p20805 C-genome specific (napus-oleracea) | 0.9354067    | 0.9072514    | 0.9922481    | 0.7734415    | not scorable | not scorable |
| #### Bn-scaff_16082_1-p23735 genome unspecific (all in)         | 1            | 0.5165538    | 1            | 0.5542085    | 1            | 0.7205489    |
| #### Bn-scaff_16082_1-p24750 C-genome specific (napus-oleracea) | 1            | 0.6460657    | 1            | 0.227559     | not scorable | not scorable |
| #### Bn-scaff_16082_1-p25021 C-genome specific (napus-oleracea) | 0.9856459    | 0.8385887    | 1            | 0.8151391    | not scorable | not scorable |
| #### Bn-scaff_16082_1-p26083 C-genome specific (napus-oleracea) | 0.9856459    | 0.6965218    | 0.9844961    | 0.6891034    | not scorable | not scorable |

|                                                                |              |              |           |           |              |              |
|----------------------------------------------------------------|--------------|--------------|-----------|-----------|--------------|--------------|
| #### Bn-scaff_16082_1-p2780C-genome specific (napus-oleracea)  | 0.9856459    | 0.7031065    | 1         | 0.7469699 | not scorable | not scorable |
| #### Bn-scaff_16082_1-p27815C-genome specific (napus-oleracea) | 0.9952153    | 0.8173457    | 1         | 0.798389  | not scorable | not scorable |
| #### Bn-scaff_16082_1-p27821C-genome specific (napus-oleracea) | 0.9952153    | 0.7832148    | 1         | 0.8056031 | not scorable | not scorable |
| #### Bn-scaff_16082_1-p27829genome unspecific (all in)         | 0.9952153    | 0.8227113    | 1         | 0.8306848 | 0.9752066    | 0.8114148    |
| #### Bn-scaff_16082_1-p29567C-genome specific (oleracea only)  | not scorable | not scorable | 0.9689922 | 0.7271975 | not scorable | not scorable |
| #### Bn-scaff_16082_1-p29643C-genome specific (napus-oleracea) | 0.9904306    | 0.8021467    | 1         | 0.8612984 | not scorable | not scorable |
| #### Bn-scaff_16082_1-p31898C-genome specific (napus-oleracea) | 0.9880383    | 0.8228854    | 0.9844961 | 0.7854289 | not scorable | not scorable |
| #### Bn-scaff_16082_1-p33791genome unspecific (all in)         | 1            | 0.5669659    | 0.9922481 | 0.8437074 | 1            | 0.9175813    |
| #### Bn-scaff_16082_1-p35323C-genome specific (napus-oleracea) | 0.9904306    | 0.7859641    | 0.9844961 | 0.8035361 | not scorable | not scorable |
| #### Bn-scaff_16082_1-p45024C-genome specific (napus-oleracea) | 0.9904306    | 0.7929664    | 0.9767442 | 0.8123565 | not scorable | not scorable |
| #### Bn-scaff_16082_1-p45487genome unspecific (all in)         | 0.9928229    | 0.4985047    | 0.9844961 | 0.7950913 | 1            | 0.9175813    |
| #### Bn-scaff_16082_1-p46492C-genome specific (napus-oleracea) | 0.9856459    | 0.7679359    | 0.9922481 | 0.7683722 | not scorable | not scorable |
| #### Bn-scaff_16082_1-p46504C-genome specific (napus-oleracea) | 0.9784689    | 0.7177035    | 1         | 0.7883799 | not scorable | not scorable |
| #### Bn-scaff_16082_1-p46699genome unspecific (all in)         | 0.9856459    | 0.8412015    | 1         | 0.8085933 | 0.9834711    | 0.9175813    |
| #### Bn-scaff_16082_1-p50349genome unspecific (all in)         | 0.9688995    | 0.2726312    | 1         | 0.754976  | 0.9586777    | 0.3227347    |
| #### Bn-scaff_16082_1-p51806C-genome specific (napus-oleracea) | 0.9904306    | 0.7117585    | 1         | 0.7476198 | not scorable | not scorable |
| #### Bn-scaff_16082_1-p54384genome unspecific (all in)         | 0.9712918    | 0.5880185    | 0.9767442 | 0.5565222 | 1            | 0.8036479    |
| #### Bn-scaff_16082_1-p54394genome unspecific (all in)         | 0.9736842    | 0.5015394    | 1         | 0.687906  | 1            | 0.7818793    |
| #### Bn-scaff_16082_1-p55161genome unspecific (all in)         | 1            | 0.347361     | 1         | 0.8145931 | 0.9917355    | 0.8063339    |
| #### Bn-scaff_16082_1-p55637C-genome specific (napus-oleracea) | 0.9832536    | 0.7466219    | 0.9922481 | 0.7277988 | not scorable | not scorable |
| #### Bn-scaff_16082_1-p55697C-genome specific (napus-oleracea) | 0.9904306    | 0.7575043    | 1         | 0.8744244 | not scorable | not scorable |
| #### Bn-scaff_16082_1-p55714C-genome specific (napus-oleracea) | 0.9712918    | 0.6627706    | 0.9922481 | 0.7711856 | not scorable | not scorable |
| #### Bn-scaff_16082_1-p56630C-genome specific (napus-oleracea) | 0.9832536    | 0.7838399    | 1         | 0.8154703 | not scorable | not scorable |
| #### Bn-scaff_16082_1-p57918genome unspecific (all in)         | 0.9976076    | 0.3670132    | 1         | 0.8194789 | 1            | 0.8597729    |
| #### Bn-scaff_16082_1-p58606C-genome specific (napus-oleracea) | 0.9928229    | 0.7806609    | 0.9922481 | 0.8227184 | not scorable | not scorable |
| #### Bn-scaff_16082_1-p59282C-genome specific (napus-oleracea) | 0.9784689    | 0.5740662    | 0.9844961 | 0.5828757 | not scorable | not scorable |
| #### Bn-scaff_16082_1-p59407C-genome specific (napus-oleracea) | 0.9784689    | 0.7274277    | 0.9767442 | 0.739007  | not scorable | not scorable |
| #### Bn-scaff_16082_1-p70004genome unspecific (all in)         | 0.9952153    | 0.5191154    | 1         | 0.8547527 | 1            | 0.9097382    |
| #### Bn-scaff_16092_1-p10027C-genome specific (napus-oleracea) | 0.9712918    | 0.8002816    | 0.5968992 | 0.9112604 | not scorable | not scorable |
| #### Bn-scaff_16092_1-p10238C-genome specific (napus-oleracea) | 0.9856459    | 0.6725751    | 0.9922481 | 0.6523323 | not scorable | not scorable |
| #### Bn-scaff_16092_1-p10969C-genome specific (napus-oleracea) | 0.9760765    | 0.7164287    | 0.9844961 | 0.7187071 | not scorable | not scorable |
| #### Bn-scaff_16092_1-p11235C-genome specific (napus-oleracea) | 0.9832536    | 0.7724776    | 0.9922481 | 0.804377  | not scorable | not scorable |
| #### Bn-scaff_16092_1-p12983genome unspecific (all in)         | 0.9808612    | 0.4294995    | 1         | 0.7963313 | 1            | 0.8290207    |

|                                                                 |              |              |              |              |              |              |
|-----------------------------------------------------------------|--------------|--------------|--------------|--------------|--------------|--------------|
| #### Bn-scaff_16092_1-p14726 genome unspecific (all in)         | 1            | 0.6045818    | 1            | 0.5770498    | 1            | 0.6066825    |
| #### Bn-scaff_16092_1-p15340 C-genome specific (napus-oleracea) | 0.9856459    | 0.7648318    | 1            | 0.593376     | not scorable | not scorable |
| #### Bn-scaff_16092_1-p15350 C-genome specific (napus-oleracea) | 0.9952153    | 0.9664041    | 0.9844961    | 0.8490586    | not scorable | not scorable |
| #### Bn-scaff_16092_1-p17533 C-genome specific (napus-oleracea) | 0.9832536    | 0.7485244    | 0.9922481    | 0.7862371    | not scorable | not scorable |
| #### Bn-scaff_16092_1-p17708 C-genome specific (napus-oleracea) | 0.9617225    | 0.7559227    | 0.6046512    | 0.7528021    | not scorable | not scorable |
| #### Bn-scaff_16092_1-p20596 C-genome specific (napus-oleracea) | 0.9952153    | 0.6761103    | 0.7906977    | 0.6937411    | not scorable | not scorable |
| #### Bn-scaff_16092_1-p21827 C-genome specific (napus-oleracea) | 0.9856459    | 0.753204     | 0.9844961    | 0.7539551    | not scorable | not scorable |
| #### Bn-scaff_16092_1-p23514 C-genome specific (napus-oleracea) | 0.9928229    | 0.7928882    | 0.9922481    | 0.7956021    | not scorable | not scorable |
| #### Bn-scaff_16092_1-p25666 genome unspecific (all in)         | 0.9688995    | 0.5847284    | 1            | 0.6274489    | 1            | 0.9362968    |
| #### Bn-scaff_16092_1-p30397 C-genome specific (napus-oleracea) | 0.9880383    | 0.8305898    | 1            | 0.7827718    | not scorable | not scorable |
| #### Bn-scaff_16092_1-p33394 C-genome specific (oleracea only)  | not scorable | not scorable | 1            | 0.7514223    | not scorable | not scorable |
| #### Bn-scaff_16092_1-p33863 C-genome specific (napus-oleracea) | 0.9880383    | 0.8873461    | 0.9844961    | 0.9021639    | not scorable | not scorable |
| #### Bn-scaff_16092_1-p35956 genome unspecific (all in)         | 0.9856459    | 0.3353705    | 1            | 0.7086947    | 1            | 0.8101827    |
| #### Bn-scaff_16092_1-p37028 C-genome specific (oleracea only)  | not scorable | not scorable | 1            | 0.8056433    | not scorable | not scorable |
| #### Bn-scaff_16092_1-p42795 C-genome specific (napus-oleracea) | 1            | 0.9240773    | 1            | 0.762664     | not scorable | not scorable |
| #### Bn-scaff_16092_1-p46278 C-genome specific (napus-oleracea) | 0.9784689    | 0.7730699    | 0.8449612    | 0.5972932    | not scorable | not scorable |
| #### Bn-scaff_16092_1-p46698 C-genome specific (napus-oleracea) | 0.9688995    | 0.6552993    | 0.7984496    | 0.6751604    | not scorable | not scorable |
| #### Bn-scaff_16092_1-p46720 C-genome specific (napus-oleracea) | 0.9976076    | 0.8366329    | 0.9302326    | 0.6011459    | not scorable | not scorable |
| #### Bn-scaff_16092_1-p46782 A-genome specific (napus-rapa)     | 1            | 0.7211344    | not scorable | not scorable | 1            | 0.9205851    |
| #### Bn-scaff_16092_1-p46798 C-genome specific (napus-oleracea) | 0.9952153    | 0.8554066    | 0.9302326    | 0.8112626    | not scorable | not scorable |
| #### Bn-scaff_16092_1-p47655 genome unspecific (all in)         | 0.9976076    | 0.7552952    | 1            | 0.8318305    | 0.9917355    | 0.9200076    |
| #### Bn-scaff_16092_1-p49453 genome unspecific (all in)         | 1            | 0.5422733    | 1            | 0.4863823    | 1            | 0.6585889    |
| #### Bn-scaff_16092_1-p50284 C-genome specific (napus-oleracea) | 0.9904306    | 0.7686627    | 0.9534883    | 0.8704703    | not scorable | not scorable |
| #### Bn-scaff_16092_1-p50781 C-genome specific (napus-oleracea) | 0.9090909    | 0.7414263    | 0.4573644    | 0.7806081    | not scorable | not scorable |
| #### Bn-scaff_16092_1-p50823 all not scorable                   | not scorable | not scorable | not scorable | not scorable | not scorable | not scorable |
| #### Bn-scaff_16092_1-p54117 C-genome specific (napus-oleracea) | 0.9928229    | 0.7599317    | 0.9922481    | 0.8166741    | not scorable | not scorable |
| #### Bn-scaff_16092_1-p54524 C-genome specific (oleracea only)  | not scorable | not scorable | 1            | 0.5787178    | not scorable | not scorable |
| #### Bn-scaff_16092_1-p54840 C-genome specific (napus-oleracea) | 0.9952153    | 0.706902     | 1            | 0.7550596    | not scorable | not scorable |
| #### Bn-scaff_16092_1-p57115 C-genome specific (napus-oleracea) | 0.9114832    | 0.8315542    | 0.6511628    | 0.8381677    | not scorable | not scorable |
| #### Bn-scaff_16092_1-p62490 C-genome specific (napus-oleracea) | 0.9952153    | 0.7711571    | 0.9922481    | 0.8571838    | not scorable | not scorable |
| #### Bn-scaff_16092_1-p62765 C-genome specific (napus-oleracea) | 0.9904306    | 0.8048117    | 1            | 0.9426177    | not scorable | not scorable |
| #### Bn-scaff_16092_1-p64623 C-genome specific (napus-oleracea) | 0.9928229    | 0.6973286    | 1            | 0.7249707    | not scorable | not scorable |
| #### Bn-scaff_16092_1-p64728 C-genome specific (napus-oleracea) | 0.9832536    | 0.7667674    | 1            | 0.7921158    | not scorable | not scorable |

|                                                                 |              |              |              |              |              |              |
|-----------------------------------------------------------------|--------------|--------------|--------------|--------------|--------------|--------------|
| #### Bn-scaff_16092_1-p65472 C-genome specific (napus-oleracea) | 0.8971292    | 0.7176554    | 0.9844961    | 0.7330413    | not scorable | not scorable |
| #### Bn-scaff_16092_1-p66289 C-genome specific (napus-oleracea) | 0.9808612    | 0.7177262    | 1            | 0.8036093    | not scorable | not scorable |
| #### Bn-scaff_16092_1-p67187 genome unspecific (all in)         | 0.9808612    | 0.3754263    | 1            | 0.8346153    | 1            | 0.8448323    |
| #### Bn-scaff_16092_1-p67192 genome unspecific (all in)         | 0.9497608    | 0.4264664    | 1            | 0.7720829    | 0.9917355    | 0.7853785    |
| #### Bn-scaff_16092_1-p67644 C-genome specific (napus-oleracea) | 0.9832536    | 0.7575099    | 1            | 0.8411109    | not scorable | not scorable |
| #### Bn-scaff_16092_1-p67661 C-genome specific (napus-oleracea) | 0.9928229    | 0.7681945    | 0.9844961    | 0.7969443    | not scorable | not scorable |
| #### Bn-scaff_16092_1-p67662 C-genome specific (napus-oleracea) | 0.9856459    | 0.7817925    | 0.9922481    | 0.8518671    | not scorable | not scorable |
| #### Bn-scaff_16092_1-p67709 genome unspecific (all in)         | 1            | 0.5312809    | 1            | 0.5723342    | 1            | 0.9175805    |
| #### Bn-scaff_16092_1-p68185 C-genome specific (oleracea only)  | not scorable | not scorable | 1            | 0.7733576    | not scorable | not scorable |
| #### Bn-scaff_16092_1-p68941 C-genome specific (napus-oleracea) | 0.9736842    | 0.7536933    | 0.5348837    | 0.8352089    | not scorable | not scorable |
| #### Bn-scaff_16092_1-p68997 C-genome specific (napus-oleracea) | 0.9928229    | 0.770234     | 1            | 0.8234417    | not scorable | not scorable |
| #### Bn-scaff_16092_1-p69804 C-genome specific (napus-oleracea) | 0.9688995    | 0.6712341    | 0.9689922    | 0.6686759    | not scorable | not scorable |
| #### Bn-scaff_16092_1-p70067 C-genome specific (oleracea only)  | not scorable | not scorable | 0.9767442    | 0.83942      | not scorable | not scorable |
| #### Bn-scaff_16092_1-p70324 C-genome specific (napus-oleracea) | 0.9928229    | 0.7798346    | 1            | 0.7787454    | not scorable | not scorable |
| #### Bn-scaff_16092_1-p70330 C-genome specific (napus-oleracea) | 0.9760765    | 0.7030532    | 1            | 0.7912313    | not scorable | not scorable |
| #### Bn-scaff_16092_1-p70365 C-genome specific (napus-oleracea) | 0.9688995    | 0.7397858    | 0.5503876    | 0.7501165    | not scorable | not scorable |
| #### Bn-scaff_16092_1-p70489 C-genome specific (napus-oleracea) | 0.9856459    | 0.7706968    | 0.9922481    | 0.8351873    | not scorable | not scorable |
| #### Bn-scaff_16092_1-p75344 C-genome specific (napus-oleracea) | 0.9904306    | 0.8756502    | 0.8062016    | 0.6798135    | not scorable | not scorable |
| #### Bn-scaff_16092_1-p81531 C-genome specific (napus-oleracea) | 0.9904306    | 0.7311553    | 1            | 0.7979488    | not scorable | not scorable |
| #### Bn-scaff_16092_1-p81960 C-genome specific (napus-oleracea) | 1            | 0.7732185    | 0.8682171    | 0.7840025    | not scorable | not scorable |
| #### Bn-scaff_16092_1-p83492 C-genome specific (napus-oleracea) | 1            | 0.857989     | 1            | 0.767601     | not scorable | not scorable |
| #### Bn-scaff_16092_1-p84568 C-genome specific (napus-oleracea) | 0.9904306    | 0.7524039    | 0.875969     | 0.8188727    | not scorable | not scorable |
| #### Bn-scaff_16092_1-p84666 C-genome specific (napus-oleracea) | 0.9856459    | 0.6946229    | 0.8604651    | 0.7766983    | not scorable | not scorable |
| #### Bn-scaff_16092_1-p84800 C-genome specific (napus-oleracea) | 0.9928229    | 0.7715926    | 1            | 0.7689328    | not scorable | not scorable |
| #### Bn-scaff_16092_1-p85048 C-genome specific (napus-oleracea) | 0.9976076    | 0.859825     | 1            | 0.8676912    | not scorable | not scorable |
| #### Bn-scaff_16092_1-p86325 C-genome specific (oleracea only)  | not scorable | not scorable | 0.9069768    | 0.5902182    | not scorable | not scorable |
| #### Bn-scaff_16092_1-p86513 C-genome specific (napus-oleracea) | 0.9952153    | 0.7573189    | 0.9922481    | 0.6569331    | not scorable | not scorable |
| #### Bn-scaff_16092_1-p86691 napus specific                     | 0.9401914    | 0.7090035    | not scorable | not scorable | not scorable | not scorable |
| #### Bn-scaff_16092_1-p87015 C-genome specific (napus-oleracea) | 0.9952153    | 0.8736187    | 1            | 0.8262877    | not scorable | not scorable |
| #### Bn-scaff_16092_1-p87892 C-genome specific (napus-oleracea) | 0.9928229    | 0.7694459    | 0.9922481    | 0.7825689    | not scorable | not scorable |
| #### Bn-scaff_16092_1-p88250 C-genome specific (napus-oleracea) | 0.9928229    | 0.8731505    | 0.9922481    | 0.786313     | not scorable | not scorable |
| #### Bn-scaff_16092_1-p88259 C-genome specific (napus-oleracea) | 0.9904306    | 0.8841608    | 0.9922481    | 0.8291255    | not scorable | not scorable |
| #### Bn-scaff_16092_1-p88950 genome unspecific (all in)         | 0.9808612    | 0.7114549    | 0.8914729    | 0.8168168    | 1            | 0.7743627    |



|                                                                |              |              |              |              |              |              |
|----------------------------------------------------------------|--------------|--------------|--------------|--------------|--------------|--------------|
| #### Bn-scaff_16092_1-p92378genome unspecific (all in)         | 1            | 0.6696819    | 1            | 0.6518132    | 1            | 0.8411418    |
| #### Bn-scaff_16092_1-p92476C-genome specific (napus-oleracea) | 0.9904306    | 0.9293141    | 0.8682171    | 0.8786212    | not scorable | not scorable |
| #### Bn-scaff_16093_1-p21864C-genome specific (napus-oleracea) | 1            | 0.7801634    | 0.9922481    | 0.7094697    | not scorable | not scorable |
| #### Bn-scaff_16093_1-p30745C-genome specific (napus-oleracea) | 1            | 0.9115193    | 0.9767442    | 0.7232381    | not scorable | not scorable |
| #### Bn-scaff_16093_1-p44383C-genome specific (napus-oleracea) | 1            | 0.8482478    | 0.9922481    | 0.7473108    | not scorable | not scorable |
| #### Bn-scaff_16093_1-p5778 C-genome specific (napus-oleracea) | 0.9880383    | 0.6672788    | 0.7984496    | 0.6722306    | not scorable | not scorable |
| #### Bn-scaff_16095_1-p12022C-genome specific (napus-oleracea) | 0.9712918    | 0.7617878    | 1            | 0.7563435    | not scorable | not scorable |
| #### Bn-scaff_16095_1-p13663C-genome specific (napus-oleracea) | 0.9952153    | 0.7972952    | 0.9922481    | 0.8013431    | not scorable | not scorable |
| #### Bn-scaff_16095_1-p22585C-genome specific (napus-oleracea) | 0.9784689    | 0.8483987    | 0.9767442    | 0.7927988    | not scorable | not scorable |
| #### Bn-scaff_16095_1-p24601C-genome specific (napus-oleracea) | 0.9856459    | 0.8374137    | 0.9844961    | 0.8096885    | not scorable | not scorable |
| #### Bn-scaff_16095_1-p28021C-genome specific (napus-oleracea) | 0.9952153    | 0.7659238    | 1            | 0.7481326    | not scorable | not scorable |
| #### Bn-scaff_16095_1-p30079C-genome specific (napus-oleracea) | 0.9808612    | 0.8752829    | 0.9844961    | 0.7177001    | not scorable | not scorable |
| #### Bn-scaff_16095_1-p31859C-genome specific (napus-oleracea) | 0.9712918    | 0.7497492    | 0.9844961    | 0.825489     | not scorable | not scorable |
| #### Bn-scaff_16095_1-p32625C-genome specific (napus-oleracea) | 0.9736842    | 0.7283694    | 1            | 0.7573734    | not scorable | not scorable |
| #### Bn-scaff_16095_1-p41243C-genome specific (napus-oleracea) | 0.9760765    | 0.7898111    | 0.9844961    | 0.8427185    | not scorable | not scorable |
| #### Bn-scaff_16095_1-p43615C-genome specific (napus-oleracea) | 0.9808612    | 0.6535662    | 0.9844961    | 0.6435465    | not scorable | not scorable |
| #### Bn-scaff_16095_1-p66527C-genome specific (napus-oleracea) | 0.9856459    | 0.7746943    | 0.9922481    | 0.8224311    | not scorable | not scorable |
| #### Bn-scaff_16095_1-p72547C-genome specific (napus-oleracea) | 0.9880383    | 0.7366868    | 1            | 0.783226     | not scorable | not scorable |
| #### Bn-scaff_16095_1-p82767C-genome specific (napus-oleracea) | 0.9784689    | 0.7628121    | 1            | 0.8610131    | not scorable | not scorable |
| #### Bn-scaff_16095_1-p9430 C-genome specific (napus-oleracea) | 0.9856459    | 0.7758936    | 1            | 0.7410775    | not scorable | not scorable |
| #### Bn-scaff_16100_1-p39885C-genome specific (napus-oleracea) | 0.9952153    | 0.856226     | 0.9922481    | 0.7397938    | not scorable | not scorable |
| #### Bn-scaff_16100_1-p61716C-genome specific (napus-oleracea) | 1            | 0.6651105    | 1            | 0.7830903    | not scorable | not scorable |
| #### Bn-scaff_16100_1-p77213C-genome specific (napus-oleracea) | 1            | 0.9344788    | 0.9922481    | 0.8279912    | not scorable | not scorable |
| #### Bn-scaff_16100_1-p89006C-genome specific (napus-oleracea) | 1            | 0.8001958    | 1            | 0.8119068    | not scorable | not scorable |
| #### Bn-scaff_16110_1-p10491napus specific                     | 0.9880383    | 0.6058552    | not scorable | not scorable | not scorable | not scorable |
| #### Bn-scaff_16110_1-p10582genome unspecific (all in)         | 0.9856459    | 0.3222428    | 1            | 0.8802992    | 1            | 0.7914135    |
| #### Bn-scaff_16110_1-p10583genome unspecific (all in)         | 0.9928229    | 0.818416     | 1            | 0.8114182    | 0.9834711    | 0.824349     |
| #### Bn-scaff_16110_1-p10752genome unspecific (oleracea-rapa)  | not scorable | not scorable | 1            | 0.8327052    | 0.9917355    | 0.9172357    |
| #### Bn-scaff_16110_1-p10768genome unspecific (oleracea-rapa)  | not scorable | not scorable | 0.9767442    | 0.8480439    | 0.9917355    | 0.83334      |
| #### Bn-scaff_16110_1-p10769genome unspecific (all in)         | 0.9880383    | 0.2288209    | 1            | 0.714219     | 1            | 0.8430495    |
| #### Bn-scaff_16110_1-p11160genome unspecific (all in)         | 1            | 0.2448161    | 1            | 0.7359164    | 1            | 0.7914145    |
| #### Bn-scaff_16110_1-p11171genome unspecific (oleracea-rapa)  | not scorable | not scorable | 0.9379845    | 0.5617542    | 1            | 0.6916012    |
| #### Bn-scaff_16110_1-p11393C-genome specific (napus-oleracea) | 0.9641148    | 0.7199951    | 0.9844961    | 0.7252071    | not scorable | not scorable |

|                                                                 |              |              |              |              |              |              |
|-----------------------------------------------------------------|--------------|--------------|--------------|--------------|--------------|--------------|
| #### Bn-scaff_16110_1-p1181 genome unspecific (all in)          | 0.9712918    | 0.6553432    | 0.9922481    | 0.7138398    | 1            | 0.9177843    |
| #### Bn-scaff_16110_1-p11854 C-genome specific (napus-oleracea) | 0.9880383    | 0.6503857    | 0.9922481    | 0.671145     | not scorable | not scorable |
| #### Bn-scaff_16110_1-p11931 C-genome specific (napus-oleracea) | 0.9784689    | 0.819482     | 0.9922481    | 0.8272894    | not scorable | not scorable |
| #### Bn-scaff_16110_1-p1204 C-genome specific (napus-oleracea)  | 0.9856459    | 0.707856     | 0.9844961    | 0.6566635    | not scorable | not scorable |
| #### Bn-scaff_16110_1-p1230 genome unspecific (all in)          | 0.9952153    | 0.4229559    | 1            | 0.7531066    | 1            | 0.9178622    |
| #### Bn-scaff_16110_1-p1250 C-genome specific (oleracea only)   | not scorable | not scorable | 0.6589147    | 0.7853552    | not scorable | not scorable |
| #### Bn-scaff_16110_1-p13157 C-genome specific (napus-oleracea) | 0.9688995    | 0.6225507    | 0.9612403    | 0.7515913    | not scorable | not scorable |
| #### Bn-scaff_16110_1-p13242 C-genome specific (napus-oleracea) | 0.9904306    | 0.7566035    | 0.9844961    | 0.7410751    | not scorable | not scorable |
| #### Bn-scaff_16110_1-p13291 C-genome specific (napus-oleracea) | 0.9832536    | 0.7286771    | 0.9844961    | 0.7728385    | not scorable | not scorable |
| #### Bn-scaff_16110_1-p13292 genome unspecific (oleracea-rapa)  | not scorable | not scorable | 0.9922481    | 0.6818022    | 1            | 0.7928635    |
| #### Bn-scaff_16110_1-p1330 C-genome specific (napus-oleracea)  | 0.9856459    | 0.6809356    | 0.9844961    | 0.7066       | not scorable | not scorable |
| #### Bn-scaff_16110_1-p13561 C-genome specific (napus-oleracea) | 1            | 0.9047122    | 1            | 0.7150792    | not scorable | not scorable |
| #### Bn-scaff_16110_1-p13884 C-genome specific (napus-oleracea) | 0.9952153    | 0.7758002    | 1            | 0.7145743    | not scorable | not scorable |
| #### Bn-scaff_16110_1-p1389 C-genome specific (napus-rapa)      | 0.9832536    | 0.3157798    | not scorable | not scorable | 1            | 0.8075728    |
| #### Bn-scaff_16110_1-p13894 C-genome specific (oleracea only)  | not scorable | not scorable | 0.5116279    | 0.8081124    | not scorable | not scorable |
| #### Bn-scaff_16110_1-p1399 genome unspecific (oleracea-rapa)   | not scorable | not scorable | 1            | 0.6422541    | 1            | 0.6323978    |
| #### Bn-scaff_16110_1-p1410 C-genome specific (napus-oleracea)  | 0.9928229    | 0.8002009    | 1            | 0.8360181    | not scorable | not scorable |
| #### Bn-scaff_16110_1-p14104 C-genome specific (napus-oleracea) | 0.9904306    | 0.8050289    | 0.9844961    | 0.8390075    | not scorable | not scorable |
| #### Bn-scaff_16110_1-p1451 C-genome specific (napus-oleracea)  | 0.9928229    | 0.7557049    | 0.9922481    | 0.680581     | not scorable | not scorable |
| #### Bn-scaff_16110_1-p1533 C-genome specific (napus-oleracea)  | 0.9066986    | 0.8268808    | 0.8217054    | 0.7378173    | not scorable | not scorable |
| #### Bn-scaff_16110_1-p1582 C-genome specific (napus-oleracea)  | 0.9928229    | 0.7997956    | 1            | 0.7316726    | not scorable | not scorable |
| #### Bn-scaff_16110_1-p1591 genome unspecific (all in)          | 0.9904306    | 0.4262306    | 1            | 0.7154136    | 1            | 0.841643     |
| #### Bn-scaff_16110_1-p1597 genome unspecific (all in)          | 0.9880383    | 0.4408407    | 0.9844961    | 0.8121407    | 1            | 0.93104      |
| #### Bn-scaff_16110_1-p1689 C-genome specific (napus-oleracea)  | 0.9617225    | 0.5947801    | 0.4108527    | 0.8361828    | not scorable | not scorable |
| #### Bn-scaff_16110_1-p1786 genome unspecific (oleracea-rapa)   | not scorable | not scorable | 0.9224806    | 0.6286279    | 1            | 0.7252899    |
| #### Bn-scaff_16110_1-p1802 genome unspecific (all in)          | 1            | 0.3332023    | 1            | 0.8904601    | 0.9917355    | 0.8126968    |
| #### Bn-scaff_16110_1-p1891 genome unspecific (all in)          | 0.9473684    | 0.4660517    | 1            | 0.7248369    | 1            | 0.7334021    |
| #### Bn-scaff_16110_1-p19364 C-genome specific (napus-oleracea) | 0.9880383    | 0.7512689    | 1            | 0.896381     | not scorable | not scorable |
| #### Bn-scaff_16110_1-p1937 C-genome specific (napus-oleracea)  | 0.9880383    | 0.7552106    | 1            | 0.7805938    | not scorable | not scorable |
| #### Bn-scaff_16110_1-p19381 C-genome specific (napus-oleracea) | 0.9856459    | 0.7187269    | 0.9922481    | 0.7369742    | not scorable | not scorable |
| #### Bn-scaff_16110_1-p1938 C-genome specific (napus-oleracea)  | 0.9952153    | 0.7352659    | 0.9767442    | 0.74534      | not scorable | not scorable |
| #### Bn-scaff_16110_1-p1938 C-genome specific (napus-oleracea)  | 0.9928229    | 0.6753607    | 0.9922481    | 0.7147384    | not scorable | not scorable |
| #### Bn-scaff_16110_1-p1939 C-genome specific (napus-oleracea)  | 0.9808612    | 0.7150348    | 0.9922481    | 0.7771531    | not scorable | not scorable |

|                                                                 |              |              |              |              |              |              |
|-----------------------------------------------------------------|--------------|--------------|--------------|--------------|--------------|--------------|
| #### Bn-scaff_16110_1-p19402 C-genome specific (napus-oleracea) | 0.9928229    | 0.720872     | 1            | 0.8123828    | not scorable | not scorable |
| #### Bn-scaff_16110_1-p19404 C-genome specific (napus-oleracea) | 0.9880383    | 0.7228902    | 1            | 0.8400829    | not scorable | not scorable |
| #### Bn-scaff_16110_1-p19404 C-genome specific (napus-oleracea) | 0.9808612    | 0.756146     | 1            | 0.8475642    | not scorable | not scorable |
| #### Bn-scaff_16110_1-p19405 C-genome specific (napus-oleracea) | 0.9808612    | 0.7472566    | 1            | 0.7812948    | not scorable | not scorable |
| #### Bn-scaff_16110_1-p19484 C-genome specific (napus-oleracea) | 0.9856459    | 0.7643616    | 1            | 0.742065     | not scorable | not scorable |
| #### Bn-scaff_16110_1-p19716 C-genome specific (napus-oleracea) | 0.9569378    | 0.8495848    | 0.9922481    | 0.7295154    | not scorable | not scorable |
| #### Bn-scaff_16110_1-p19868 genome unspecific (all in)         | 0.9641148    | 0.2884135    | 0.9844961    | 0.3207844    | 1            | 0.8044381    |
| #### Bn-scaff_16110_1-p19870 A-genome specific (rapa only)      | not scorable | not scorable | not scorable | not scorable | 1            | 0.4340441    |
| #### Bn-scaff_16110_1-p19904 genome unspecific (all in)         | 0.9832536    | 0.2412348    | 1            | 0.8222658    | 1            | 0.9172673    |
| #### Bn-scaff_16110_1-p19905 genome unspecific (all in)         | 0.9928229    | 0.294294     | 1            | 0.8185275    | 1            | 0.9138403    |
| #### Bn-scaff_16110_1-p19907 C-genome specific (oleracea only)  | not scorable | not scorable | 0.9147287    | 0.900272     | not scorable | not scorable |
| #### Bn-scaff_16110_1-p19908 C-genome specific (oleracea only)  | not scorable | not scorable | 0.9147287    | 0.8994553    | not scorable | not scorable |
| #### Bn-scaff_16110_1-p20280 genome unspecific (all in)         | 1            | 0.8057268    | 0.9689922    | 0.8890449    | 0.7520661    | 0.910212     |
| #### Bn-scaff_16110_1-p20298 genome unspecific (all in)         | 0.9688995    | 0.4652044    | 1            | 0.9053742    | 0.9338843    | 0.8604427    |
| #### Bn-scaff_16110_1-p20300 genome unspecific (all in)         | 1            | 0.4772641    | 0.9922481    | 0.7121229    | 1            | 0.8675939    |
| #### Bn-scaff_16110_1-p20442 C-genome specific (napus-oleracea) | 0.9928229    | 0.7297359    | 0.9844961    | 0.7611749    | not scorable | not scorable |
| #### Bn-scaff_16110_1-p20464 genome unspecific (all in)         | 1            | 0.6414437    | 1            | 0.7038771    | 0.9752066    | 0.7191611    |
| #### Bn-scaff_16110_1-p21425 A-genome specific (napus-rapa)     | 0.9904306    | 0.3760978    | not scorable | not scorable | 0.8760331    | 0.7979358    |
| #### Bn-scaff_16110_1-p21680 genome unspecific (all in)         | 1            | 0.8516504    | 1            | 0.8707505    | 1            | 0.8537815    |
| #### Bn-scaff_16110_1-p21684 genome unspecific (all in)         | 0.9976076    | 0.7473924    | 0.9767442    | 0.7937205    | 0.9421487    | 0.8705452    |
| #### Bn-scaff_16110_1-p22613 genome unspecific (all in)         | 0.9641148    | 0.5492414    | 0.9922481    | 0.7480124    | 1            | 0.9175889    |
| #### Bn-scaff_16110_1-p22621 C-genome specific (oleracea only)  | not scorable | not scorable | 0.9147287    | 0.9382685    | not scorable | not scorable |
| #### Bn-scaff_16110_1-p22752 C-genome specific (napus-oleracea) | 0.9928229    | 0.8161573    | 0.9922481    | 0.7736737    | not scorable | not scorable |
| #### Bn-scaff_16110_1-p22813 C-genome specific (napus-oleracea) | 1            | 0.8127084    | 1            | 0.7770222    | not scorable | not scorable |
| #### Bn-scaff_16110_1-p22814 C-genome specific (napus-oleracea) | 1            | 0.729241     | 1            | 0.6895393    | not scorable | not scorable |
| #### Bn-scaff_16110_1-p23362 genome unspecific (all in)         | 1            | 0.4916449    | 1            | 0.7940373    | 1            | 0.8906502    |
| #### Bn-scaff_16110_1-p23363 C-genome specific (napus-oleracea) | 1            | 0.903152     | 1            | 0.8746908    | not scorable | not scorable |
| #### Bn-scaff_16110_1-p24037 C-genome specific (napus-oleracea) | 1            | 0.8687926    | 1            | 0.7793403    | not scorable | not scorable |
| #### Bn-scaff_16110_1-p24122 C-genome specific (napus-oleracea) | 0.9760765    | 0.7530042    | 0.9922481    | 0.8446275    | not scorable | not scorable |
| #### Bn-scaff_16110_1-p24123 C-genome specific (napus-oleracea) | 0.9832536    | 0.7408746    | 0.9922481    | 0.8383496    | not scorable | not scorable |
| #### Bn-scaff_16110_1-p24162 genome unspecific (all in)         | 0.9832536    | 0.6284961    | 0.9922481    | 0.6777378    | 0.892562     | 0.747567     |
| #### Bn-scaff_16110_1-p24327 C-genome specific (napus-oleracea) | 0.9928229    | 0.7877598    | 1            | 0.8631774    | not scorable | not scorable |
| #### Bn-scaff_16110_1-p24327 C-genome specific (napus-oleracea) | 0.9904306    | 0.6601648    | 1            | 0.8401045    | not scorable | not scorable |

|                                                                 |              |              |              |              |              |              |
|-----------------------------------------------------------------|--------------|--------------|--------------|--------------|--------------|--------------|
| #### Bn-scaff_16110_1-p24393 C-genome specific (napus-oleracea) | 0.9904306    | 0.7715138    | 0.9922481    | 0.8452138    | not scorable | not scorable |
| #### Bn-scaff_16110_1-p24832 A-genome specific (rapa only)      | not scorable | not scorable | not scorable | not scorable | 1            | 0.8080764    |
| #### Bn-scaff_16110_1-p24832 genome unspecific (all in)         | 0.9904306    | 0.6928117    | 1            | 0.7105102    | 0.9917355    | 0.8690005    |
| #### Bn-scaff_16110_1-p24889 C-genome specific (napus-oleracea) | 0.9688995    | 0.6689684    | 1            | 0.739057     | not scorable | not scorable |
| #### Bn-scaff_16110_1-p24892 genome unspecific (all in)         | 0.9904306    | 0.7349274    | 0.9844961    | 0.8313663    | 0.9338843    | 0.9197205    |
| #### Bn-scaff_16110_1-p24895 C-genome specific (napus-oleracea) | 0.9856459    | 0.4932351    | 1            | 0.5461172    | not scorable | not scorable |
| #### Bn-scaff_16110_1-p25058 C-genome specific (napus-oleracea) | 0.9832536    | 0.7617868    | 1            | 0.8402446    | not scorable | not scorable |
| #### Bn-scaff_16110_1-p25227 C-genome specific (napus-oleracea) | 0.9952153    | 0.7606419    | 0.9922481    | 0.8287825    | not scorable | not scorable |
| #### Bn-scaff_16110_1-p25239 C-genome specific (napus-oleracea) | 0.9832536    | 0.7594743    | 0.9922481    | 0.8670852    | not scorable | not scorable |
| #### Bn-scaff_16110_1-p25299 C-genome specific (napus-oleracea) | 0.9928229    | 0.6609151    | 1            | 0.6916008    | not scorable | not scorable |
| #### Bn-scaff_16110_1-p25325 C-genome specific (napus-oleracea) | 0.9880383    | 0.8223446    | 0.9689922    | 0.7923443    | not scorable | not scorable |
| #### Bn-scaff_16110_1-p25408 genome unspecific (all in)         | 0.9904306    | 0.6374811    | 1            | 0.7273511    | 1            | 0.899765     |
| #### Bn-scaff_16110_1-p25547 genome unspecific (oleracea-rapa)  | not scorable | not scorable | 0.9767442    | 0.5265421    | 1            | 0.4693085    |
| #### Bn-scaff_16110_1-p25561 genome unspecific (all in)         | 0.9856459    | 0.3176243    | 0.9922481    | 0.615495     | 1            | 0.727636     |
| #### Bn-scaff_16110_1-p25572 genome unspecific (all in)         | 1            | 0.3450245    | 0.9922481    | 0.69628      | 1            | 0.7494321    |
| #### Bn-scaff_16110_1-p25704 genome unspecific (oleracea-rapa)  | not scorable | not scorable | 0.9767442    | 0.5951684    | 1            | 0.6104358    |
| #### Bn-scaff_16110_1-p25715 genome unspecific (all in)         | 0.9784689    | 0.4738885    | 0.9457364    | 0.7784492    | 1            | 0.9149548    |
| #### Bn-scaff_16110_1-p25763 C-genome specific (napus-oleracea) | 0.9856459    | 0.8262208    | 0.9922481    | 0.8130202    | not scorable | not scorable |
| #### Bn-scaff_16110_1-p25765 C-genome specific (napus-oleracea) | 0.9904306    | 0.824246     | 1            | 0.8662431    | not scorable | not scorable |
| #### Bn-scaff_16110_1-p25803 C-genome specific (napus-oleracea) | 0.9641148    | 0.6539599    | 0.5891473    | 0.765412     | not scorable | not scorable |
| #### Bn-scaff_16110_1-p25983 C-genome specific (napus-oleracea) | 0.9904306    | 0.684297     | 0.9922481    | 0.7051915    | not scorable | not scorable |
| #### Bn-scaff_16110_1-p26122 C-genome specific (napus-oleracea) | 0.9880383    | 0.7945382    | 0.9844961    | 0.7987276    | not scorable | not scorable |
| #### Bn-scaff_16110_1-p26252 genome unspecific (oleracea-rapa)  | not scorable | not scorable | 0.9302326    | 0.545304     | 0.9917355    | 0.8712552    |
| #### Bn-scaff_16110_1-p26558 C-genome specific (napus-oleracea) | 0.9473684    | 0.6025229    | 1            | 0.7047876    | not scorable | not scorable |
| #### Bn-scaff_16110_1-p27215 genome unspecific (all in)         | 0.9521531    | 0.3312038    | 1            | 0.7016671    | 1            | 0.6852584    |
| #### Bn-scaff_16110_1-p27939 C-genome specific (napus-oleracea) | 0.9880383    | 0.7533621    | 1            | 0.7496554    | not scorable | not scorable |
| #### Bn-scaff_16110_1-p28902 genome unspecific (all in)         | 0.9425837    | 0.3617742    | 0.9147287    | 0.5361825    | 1            | 0.9039531    |
| #### Bn-scaff_16110_1-p28911 genome unspecific (all in)         | 1            | 0.7914145    | 1            | 0.7864616    | 1            | 0.8106202    |
| #### Bn-scaff_16110_1-p29213 genome unspecific (oleracea-rapa)  | not scorable | not scorable | 0.9922481    | 0.8207017    | 1            | 0.9175811    |
| #### Bn-scaff_16110_1-p29385 C-genome specific (napus-oleracea) | 0.708134     | 0.6641482    | 0.3255814    | 0.770787     | not scorable | not scorable |
| #### Bn-scaff_16110_1-p29502 C-genome specific (napus-oleracea) | 0.9904306    | 0.828639     | 1            | 0.746033     | not scorable | not scorable |
| #### Bn-scaff_16110_1-p29513 C-genome specific (napus-oleracea) | 0.9928229    | 0.8236551    | 1            | 0.8497643    | not scorable | not scorable |
| #### Bn-scaff_16110_1-p29654 C-genome specific (napus-oleracea) | 0.9928229    | 0.768411     | 0.9767442    | 0.7082015    | not scorable | not scorable |

|                                                                |              |              |              |              |              |              |
|----------------------------------------------------------------|--------------|--------------|--------------|--------------|--------------|--------------|
| #### Bn-scaff_16110_1-p29717genome unspecific (oleracea-rapa)  | not scorable | not scorable | 1            | 0.5356272    | 0.9917355    | 0.3279116    |
| #### Bn-scaff_16110_1-p29733C-genome specific (napus-oleracea) | 0.9880383    | 0.7123879    | 0.9844961    | 0.766649     | not scorable | not scorable |
| #### Bn-scaff_16110_1-p29739genome unspecific (all in)         | 0.9784689    | 0.3761946    | 1            | 0.6943616    | 1            | 0.8177654    |
| #### Bn-scaff_16110_1-p29739genome unspecific (oleracea-rapa)  | not scorable | not scorable | 1            | 0.8204387    | 0.9834711    | 0.8520455    |
| #### Bn-scaff_16110_1-p29862all not scorable                   | not scorable | not scorable | not scorable | not scorable | not scorable | not scorable |
| #### Bn-scaff_16110_1-p29865genome unspecific (oleracea-rapa)  | not scorable | not scorable | 0.9922481    | 0.5797446    | 0.9752066    | 0.5706365    |
| #### Bn-scaff_16110_1-p29865genome unspecific (all in)         | 1            | 0.5674333    | 1            | 0.5955055    | 1            | 0.6479939    |
| #### Bn-scaff_16110_1-p29869genome unspecific (all in)         | 1            | 0.7770717    | 1            | 0.8696184    | 1            | 0.7934839    |
| #### Bn-scaff_16110_1-p29872A-genome specific (rapa only)      | not scorable | not scorable | not scorable | not scorable | 1            | 0.4919487    |
| #### Bn-scaff_16110_1-p29872C-genome specific (oleracea only)  | not scorable | not scorable | 1            | 0.6106538    | not scorable | not scorable |
| #### Bn-scaff_16110_1-p29900genome unspecific (oleracea-rapa)  | not scorable | not scorable | 1            | 0.5754513    | 1            | 0.7155698    |
| #### Bn-scaff_16110_1-p29920C-genome specific (napus-oleracea) | 0.9880383    | 0.6786208    | 0.9922481    | 0.6562504    | not scorable | not scorable |
| #### Bn-scaff_16110_1-p30158A-genome specific (napus-rapa)     | 0.9545454    | 0.3226698    | not scorable | not scorable | 1            | 0.8207097    |
| #### Bn-scaff_16110_1-p30162A-genome specific (rapa only)      | not scorable | not scorable | not scorable | not scorable | 1            | 0.7868095    |
| #### Bn-scaff_16110_1-p30166C-genome specific (napus-oleracea) | 0.9928229    | 0.8048726    | 1            | 0.7320305    | not scorable | not scorable |
| #### Bn-scaff_16110_1-p30184C-genome specific (oleracea only)  | not scorable | not scorable | 0.7906977    | 0.8314847    | not scorable | not scorable |
| #### Bn-scaff_16110_1-p30190C-genome specific (napus-oleracea) | 0.9904306    | 0.7580958    | 0.9612403    | 0.7470953    | not scorable | not scorable |
| #### Bn-scaff_16110_1-p30465C-genome specific (napus-oleracea) | 0.9354067    | 0.7927554    | 0.8914729    | 0.733851     | not scorable | not scorable |
| #### Bn-scaff_16110_1-p30543genome unspecific (all in)         | 0.9856459    | 0.3357022    | 1            | 0.8348731    | 0.9917355    | 0.5694932    |
| #### Bn-scaff_16110_1-p30547genome unspecific (all in)         | 0.9976076    | 0.59733      | 1            | 0.7572635    | 1            | 0.9195589    |
| #### Bn-scaff_16110_1-p30754genome unspecific (all in)         | 0.9976076    | 0.4746016    | 1            | 0.8108702    | 1            | 0.9175813    |
| #### Bn-scaff_16110_1-p30759genome unspecific (all in)         | 0.9952153    | 0.5136697    | 0.9844961    | 0.6991207    | 1            | 0.8064243    |
| #### Bn-scaff_16110_1-p30771C-genome specific (oleracea only)  | not scorable | not scorable | 0.8992248    | 0.8546166    | not scorable | not scorable |
| #### Bn-scaff_16110_1-p30922C-genome specific (napus-oleracea) | 0.9952153    | 0.6230142    | 1            | 0.8091807    | not scorable | not scorable |
| #### Bn-scaff_16110_1-p31681C-genome specific (napus-oleracea) | 0.9688995    | 0.7674375    | 1            | 0.8208144    | not scorable | not scorable |
| #### Bn-scaff_16110_1-p31682C-genome specific (napus-oleracea) | 0.9784689    | 0.8092101    | 0.9922481    | 0.8708646    | not scorable | not scorable |
| #### Bn-scaff_16110_1-p31849genome unspecific (oleracea-rapa)  | not scorable | not scorable | 1            | 0.5104026    | 0.9586777    | 0.6091408    |
| #### Bn-scaff_16110_1-p31979C-genome specific (napus-oleracea) | 0.9688995    | 0.7503093    | 0.9844961    | 0.8454599    | not scorable | not scorable |
| #### Bn-scaff_16110_1-p31986C-genome specific (napus-oleracea) | 0.9665072    | 0.7709173    | 0.9844961    | 0.8372931    | not scorable | not scorable |
| #### Bn-scaff_16110_1-p31987C-genome specific (napus-oleracea) | 0.9832536    | 0.7974324    | 0.9844961    | 0.8587967    | not scorable | not scorable |
| #### Bn-scaff_16110_1-p31992C-genome specific (napus-oleracea) | 0.9712918    | 0.8027802    | 0.9844961    | 0.8624436    | not scorable | not scorable |
| #### Bn-scaff_16110_1-p31994C-genome specific (napus-oleracea) | 0.9784689    | 0.8121571    | 0.9844961    | 0.8394091    | not scorable | not scorable |
| #### Bn-scaff_16110_1-p32469C-genome specific (napus-oleracea) | 0.9904306    | 0.7871521    | 1            | 0.836674     | not scorable | not scorable |

|                                                                |              |              |           |           |              |              |
|----------------------------------------------------------------|--------------|--------------|-----------|-----------|--------------|--------------|
| #### Bn-scaff_16110_1-p32541C-genome specific (napus-oleracea) | 0.9880383    | 0.7964972    | 1         | 0.8079813 | not scorable | not scorable |
| #### Bn-scaff_16110_1-p32774genome unspecific (all in)         | 0.9784689    | 0.3816076    | 1         | 0.7518234 | 1            | 0.7208077    |
| #### Bn-scaff_16110_1-p33234genome unspecific (all in)         | 0.9784689    | 0.4234942    | 1         | 0.8536212 | 1            | 0.9208025    |
| #### Bn-scaff_16110_1-p33464C-genome specific (napus-oleracea) | 0.9617225    | 0.7902915    | 1         | 0.8606297 | not scorable | not scorable |
| #### Bn-scaff_16110_1-p33674C-genome specific (napus-oleracea) | 0.9880383    | 0.7375026    | 1         | 0.8518185 | not scorable | not scorable |
| #### Bn-scaff_16110_1-p33685C-genome specific (napus-oleracea) | 0.9880383    | 0.6608643    | 1         | 0.7180634 | not scorable | not scorable |
| #### Bn-scaff_16110_1-p34373genome unspecific (all in)         | 0.9904306    | 0.4991502    | 1         | 0.7903776 | 1            | 0.9384137    |
| #### Bn-scaff_16110_1-p34970C-genome specific (napus-oleracea) | 0.9832536    | 0.6863716    | 1         | 0.8628644 | not scorable | not scorable |
| #### Bn-scaff_16110_1-p34982C-genome specific (napus-oleracea) | 0.9808612    | 0.7495396    | 1         | 0.8786294 | not scorable | not scorable |
| #### Bn-scaff_16110_1-p35036C-genome specific (napus-oleracea) | 0.9976076    | 0.9200246    | 0.9612403 | 0.7831902 | not scorable | not scorable |
| #### Bn-scaff_16110_1-p35041C-genome specific (napus-oleracea) | 0.9976076    | 0.8988662    | 0.9844961 | 0.7902876 | not scorable | not scorable |
| #### Bn-scaff_16110_1-p35042C-genome specific (napus-oleracea) | 0.9784689    | 0.7328021    | 0.9922481 | 0.8129567 | not scorable | not scorable |
| #### Bn-scaff_16110_1-p35075C-genome specific (napus-oleracea) | 0.9832536    | 0.6671287    | 0.9922481 | 0.7373903 | not scorable | not scorable |
| #### Bn-scaff_16110_1-p35124C-genome specific (oleracea only)  | not scorable | not scorable | 0.9457364 | 0.8492454 | not scorable | not scorable |
| #### Bn-scaff_16110_1-p35152C-genome specific (napus-oleracea) | 0.9784689    | 0.756389     | 0.9922481 | 0.8236657 | not scorable | not scorable |
| #### Bn-scaff_16110_1-p35153C-genome specific (napus-oleracea) | 0.9784689    | 0.747943     | 0.9922481 | 0.8265637 | not scorable | not scorable |
| #### Bn-scaff_16110_1-p35228C-genome specific (napus-oleracea) | 0.9832536    | 0.7631489    | 0.9922481 | 0.876217  | not scorable | not scorable |
| #### Bn-scaff_16110_1-p35576C-genome specific (napus-oleracea) | 0.4449761    | 0.9005267    | 0.6899225 | 0.8176173 | not scorable | not scorable |
| #### Bn-scaff_16110_1-p35636genome unspecific (all in)         | 0.9856459    | 0.5711663    | 1         | 0.7630472 | 1            | 0.8824345    |
| #### Bn-scaff_16110_1-p35840C-genome specific (napus-oleracea) | 0.9593301    | 0.7773907    | 0.9767442 | 0.8198239 | not scorable | not scorable |
| #### Bn-scaff_16110_1-p35840C-genome specific (napus-oleracea) | 0.9760765    | 0.7859743    | 0.9844961 | 0.8000129 | not scorable | not scorable |
| #### Bn-scaff_16110_1-p35860C-genome specific (napus-oleracea) | 0.9712918    | 0.7763622    | 1         | 0.7646896 | not scorable | not scorable |
| #### Bn-scaff_16110_1-p35911C-genome specific (napus-oleracea) | 0.9832536    | 0.7703482    | 1         | 0.8391287 | not scorable | not scorable |
| #### Bn-scaff_16110_1-p36246C-genome specific (napus-oleracea) | 0.9665072    | 0.7813243    | 1         | 0.8401146 | not scorable | not scorable |
| #### Bn-scaff_16110_1-p36253C-genome specific (napus-oleracea) | 0.9665072    | 0.7826588    | 0.9922481 | 0.8167948 | not scorable | not scorable |
| #### Bn-scaff_16110_1-p36254C-genome specific (napus-oleracea) | 0.9066986    | 0.7957289    | 0.8294573 | 0.6705081 | not scorable | not scorable |
| #### Bn-scaff_16110_1-p36255C-genome specific (napus-oleracea) | 0.9665072    | 0.7763104    | 0.9922481 | 0.8386191 | not scorable | not scorable |
| #### Bn-scaff_16110_1-p36260C-genome specific (napus-oleracea) | 0.9880383    | 0.7936323    | 0.9767442 | 0.7994912 | not scorable | not scorable |
| #### Bn-scaff_16110_1-p36325C-genome specific (napus-oleracea) | 0.9832536    | 0.7840836    | 0.9379845 | 0.8260867 | not scorable | not scorable |
| #### Bn-scaff_16110_1-p36446C-genome specific (napus-oleracea) | 0.9665072    | 0.7563856    | 0.9767442 | 0.691062  | not scorable | not scorable |
| #### Bn-scaff_16110_1-p36547C-genome specific (napus-oleracea) | 0.9617225    | 0.7193145    | 1         | 0.796281  | not scorable | not scorable |
| #### Bn-scaff_16110_1-p36561C-genome specific (napus-oleracea) | 0.9688995    | 0.7647193    | 0.9922481 | 0.7881615 | not scorable | not scorable |
| #### Bn-scaff_16110_1-p36607C-genome specific (napus-oleracea) | 0.9665072    | 0.7210143    | 0.9689922 | 0.7526619 | not scorable | not scorable |

|                                                                 |              |              |              |              |              |              |
|-----------------------------------------------------------------|--------------|--------------|--------------|--------------|--------------|--------------|
| #### Bn-scaff_16110_1-p36608 C-genome specific (oleracea only)  | not scorable | not scorable | 0.7751938    | 0.8086239    | not scorable | not scorable |
| #### Bn-scaff_16110_1-p36621 C-genome specific (napus-oleracea) | 0.9784689    | 0.792906     | 0.9922481    | 0.7999577    | not scorable | not scorable |
| #### Bn-scaff_16110_1-p36625 C-genome specific (napus-oleracea) | 0.9784689    | 0.7676787    | 0.9922481    | 0.825515     | not scorable | not scorable |
| #### Bn-scaff_16110_1-p36626 genome unspecific (all in)         | 0.9928229    | 0.4080198    | 0.9689922    | 0.7841349    | 0.9917355    | 0.8951162    |
| #### Bn-scaff_16110_1-p36630 C-genome specific (napus-oleracea) | 0.9808612    | 0.7663334    | 0.9689922    | 0.7577602    | not scorable | not scorable |
| #### Bn-scaff_16110_1-p36631 napus specific                     | 0.9641148    | 0.3900551    | not scorable | not scorable | not scorable | not scorable |
| #### Bn-scaff_16110_1-p36634 C-genome specific (napus-oleracea) | 0.9856459    | 0.7806745    | 0.9922481    | 0.7732854    | not scorable | not scorable |
| #### Bn-scaff_16110_1-p36635 C-genome specific (napus-oleracea) | 0.9784689    | 0.738869     | 0.9922481    | 0.7037273    | not scorable | not scorable |
| #### Bn-scaff_16110_1-p36635 C-genome specific (napus-oleracea) | 0.9808612    | 0.6840535    | 0.9689922    | 0.7105392    | not scorable | not scorable |
| #### Bn-scaff_16110_1-p36637 C-genome specific (napus-oleracea) | 0.9545454    | 0.6816485    | 0.9689922    | 0.7323372    | not scorable | not scorable |
| #### Bn-scaff_16110_1-p36655 C-genome specific (napus-oleracea) | 0.9736842    | 0.7885215    | 0.9767442    | 0.794251     | not scorable | not scorable |
| #### Bn-scaff_16110_1-p36656 C-genome specific (napus-oleracea) | 0.9784689    | 0.769213     | 0.9922481    | 0.7682706    | not scorable | not scorable |
| #### Bn-scaff_16110_1-p36657 C-genome specific (napus-oleracea) | 0.9712918    | 0.7255096    | 0.9767442    | 0.7189066    | not scorable | not scorable |
| #### Bn-scaff_16110_1-p36749 C-genome specific (napus-oleracea) | 0.9760765    | 0.7510963    | 0.9922481    | 0.7894307    | not scorable | not scorable |
| #### Bn-scaff_16110_1-p36977 C-genome specific (napus-oleracea) | 0.9904306    | 0.8314192    | 0.9767442    | 0.8108955    | not scorable | not scorable |
| #### Bn-scaff_16110_1-p36978 C-genome specific (napus-oleracea) | 0.9952153    | 0.8025242    | 1            | 0.6559812    | not scorable | not scorable |
| #### Bn-scaff_16110_1-p36983 C-genome specific (napus-oleracea) | 0.9760765    | 0.6898181    | 0.9844961    | 0.7501254    | not scorable | not scorable |
| #### Bn-scaff_16110_1-p37005 C-genome specific (napus-oleracea) | 0.9832536    | 0.8723277    | 0.9922481    | 0.8358598    | not scorable | not scorable |
| #### Bn-scaff_16110_1-p37007 C-genome specific (napus-oleracea) | 0.9880383    | 0.8576068    | 0.9922481    | 0.7863463    | not scorable | not scorable |
| #### Bn-scaff_16110_1-p37136 C-genome specific (napus-oleracea) | 0.9832536    | 0.802054     | 1            | 0.8384765    | not scorable | not scorable |
| #### Bn-scaff_16110_1-p41052 genome unspecific (all in)         | 0.9856459    | 0.4360817    | 0.9922481    | 0.7404979    | 1            | 0.9130185    |
| #### Bn-scaff_16110_1-p42654 C-genome specific (napus-oleracea) | 0.9808612    | 0.7845073    | 0.9922481    | 0.798326     | not scorable | not scorable |
| #### Bn-scaff_16110_1-p43231 C-genome specific (napus-oleracea) | 0.9832536    | 0.7580762    | 0.9922481    | 0.8362314    | not scorable | not scorable |
| #### Bn-scaff_16110_1-p43241 C-genome specific (napus-oleracea) | 0.9856459    | 0.7891349    | 0.9922481    | 0.8318645    | not scorable | not scorable |
| #### Bn-scaff_16110_1-p43627 C-genome specific (napus-oleracea) | 0.9736842    | 0.6856029    | 1            | 0.7740328    | not scorable | not scorable |
| #### Bn-scaff_16110_1-p46355 all not scorable                   | not scorable | not scorable | not scorable | not scorable | not scorable | not scorable |
| #### Bn-scaff_16110_1-p46936 C-genome specific (napus-oleracea) | 0.9856459    | 0.7908651    | 0.9379845    | 0.7690014    | not scorable | not scorable |
| #### Bn-scaff_16110_1-p47180 C-genome specific (napus-oleracea) | 0.9760765    | 0.6639393    | 0.7054263    | 0.7356639    | not scorable | not scorable |
| #### Bn-scaff_16110_1-p52711 genome unspecific (all in)         | 1            | 0.7914145    | 1            | 0.7390317    | 1            | 0.8004208    |
| #### Bn-scaff_16110_1-p55047 genome unspecific (all in)         | 0.9712918    | 0.6922283    | 1            | 0.7225711    | 0.9338843    | 0.9093749    |
| #### Bn-scaff_16110_1-p55478 C-genome specific (napus-oleracea) | 0.9688995    | 0.6637079    | 0.9069768    | 0.8685762    | not scorable | not scorable |
| #### Bn-scaff_16110_1-p57547 genome unspecific (all in)         | 0.9808612    | 0.2905847    | 0.9922481    | 0.7413774    | 1            | 0.8174986    |
| #### Bn-scaff_16110_1-p58745 C-genome specific (napus-oleracea) | 0.9784689    | 0.7536408    | 0.9457364    | 0.8231701    | not scorable | not scorable |

|                                                                 |              |              |           |           |              |              |
|-----------------------------------------------------------------|--------------|--------------|-----------|-----------|--------------|--------------|
| #### Bn-scaff_16110_1-p59425 C-genome specific (napus-oleracea) | 0.9712918    | 0.7104164    | 0.9922481 | 0.7542778 | not scorable | not scorable |
| #### Bn-scaff_16110_1-p59533 C-genome specific (napus-oleracea) | 0.9808612    | 0.823469     | 0.9922481 | 0.8204702 | not scorable | not scorable |
| #### Bn-scaff_16110_1-p59557 C-genome specific (napus-oleracea) | 0.9688995    | 0.7778965    | 0.9844961 | 0.8080045 | not scorable | not scorable |
| #### Bn-scaff_16110_1-p62813 genome unspecific (oleracea-rapa)  | not scorable | not scorable | 0.9069768 | 0.2861981 | 0.9669421    | 0.7005256    |
| #### Bn-scaff_16110_1-p64875 C-genome specific (napus-oleracea) | 0.9497608    | 0.6891801    | 0.9844961 | 0.7085557 | not scorable | not scorable |
| #### Bn-scaff_16110_1-p65001 C-genome specific (napus-oleracea) | 0.9712918    | 0.7421396    | 0.9922481 | 0.6659756 | not scorable | not scorable |
| #### Bn-scaff_16110_1-p66742 C-genome specific (napus-oleracea) | 0.9832536    | 0.2795691    | 0.9844961 | 0.5673326 | not scorable | not scorable |
| #### Bn-scaff_16110_1-p67099 C-genome specific (napus-oleracea) | 0.9688995    | 0.6857836    | 0.9922481 | 0.7281509 | not scorable | not scorable |
| #### Bn-scaff_16110_1-p67131 C-genome specific (napus-oleracea) | 0.9760765    | 0.6979624    | 0.9689922 | 0.7801154 | not scorable | not scorable |
| #### Bn-scaff_16110_1-p68525 C-genome specific (napus-oleracea) | 0.9880383    | 0.7225222    | 1         | 0.7731722 | not scorable | not scorable |
| #### Bn-scaff_16110_1-p68542 C-genome specific (napus-oleracea) | 0.9832536    | 0.67836      | 0.9922481 | 0.7421232 | not scorable | not scorable |
| #### Bn-scaff_16110_1-p87945 genome unspecific (oleracea-rapa)  | not scorable | not scorable | 1         | 0.8447297 | 0.9338843    | 0.7552003    |
| #### Bn-scaff_16110_1-p90004 genome unspecific (all in)         | 1            | 0.4555241    | 1         | 0.7472186 | 1            | 0.8687926    |
| #### Bn-scaff_16110_1-p93117 C-genome specific (napus-oleracea) | 1            | 0.8936912    | 1         | 0.9241201 | not scorable | not scorable |
| #### Bn-scaff_16110_1-p94776 genome unspecific (all in)         | 1            | 0.5055784    | 0.9612403 | 0.5440934 | 1            | 0.752191     |
| #### Bn-scaff_16110_1-p97585 C-genome specific (napus-oleracea) | 1            | 0.9148039    | 1         | 0.8989468 | not scorable | not scorable |
| #### Bn-scaff_16110_1-p97651 C-genome specific (napus-oleracea) | 0.9976076    | 0.9484729    | 1         | 0.8856457 | not scorable | not scorable |
| #### Bn-scaff_16116_1-p10276 genome unspecific (oleracea-rapa)  | not scorable | not scorable | 1         | 0.8686187 | 0.9752066    | 0.832651     |
| #### Bn-scaff_16116_1-p11087 C-genome specific (napus-oleracea) | 0.8995215    | 0.8186615    | 0.744186  | 0.8677223 | not scorable | not scorable |
| #### Bn-scaff_16116_1-p11398 C-genome specific (napus-oleracea) | 0.9066986    | 0.7385515    | 0.9922481 | 0.8957631 | not scorable | not scorable |
| #### Bn-scaff_16116_1-p17259 genome unspecific (all in)         | 1            | 0.6094983    | 1         | 0.5904204 | 1            | 0.7155698    |
| #### Bn-scaff_16116_1-p19859 genome unspecific (all in)         | 0.9760765    | 0.3830962    | 1         | 0.8243142 | 1            | 0.8250304    |
| #### Bn-scaff_16116_1-p26416 genome unspecific (oleracea-rapa)  | not scorable | not scorable | 1         | 0.5109285 | 0.9917355    | 0.7936301    |
| #### Bn-scaff_16116_1-p26502 genome unspecific (all in)         | 0.9521531    | 0.5187635    | 0.9922481 | 0.7032765 | 1            | 0.8923385    |
| #### Bn-scaff_16116_1-p36760 genome unspecific (all in)         | 0.9545454    | 0.5147294    | 1         | 0.824075  | 0.9917355    | 0.7547364    |
| #### Bn-scaff_16116_1-p37385 genome unspecific (all in)         | 0.9521531    | 0.3331025    | 1         | 0.7829709 | 0.9669421    | 0.6216279    |
| #### Bn-scaff_16116_1-p37957 genome unspecific (all in)         | 0.9760765    | 0.4105737    | 1         | 0.7438364 | 1            | 0.8687926    |
| #### Bn-scaff_16116_1-p40447 C-genome specific (napus-oleracea) | 0.9114832    | 0.7425952    | 1         | 0.8127036 | not scorable | not scorable |
| #### Bn-scaff_16116_1-p40633 C-genome specific (napus-oleracea) | 0.9138756    | 0.7534937    | 1         | 0.796159  | not scorable | not scorable |
| #### Bn-scaff_16116_1-p40953 C-genome specific (napus-oleracea) | 0.9090909    | 0.6912937    | 0.9767442 | 0.7064285 | not scorable | not scorable |
| #### Bn-scaff_16116_1-p45073 genome unspecific (all in)         | 0.9186603    | 0.4983085    | 1         | 0.8094535 | 1            | 0.8687926    |
| #### Bn-scaff_16116_1-p48638 C-genome specific (napus-oleracea) | 0.9090909    | 0.8597062    | 0.9922481 | 0.9095584 | not scorable | not scorable |
| #### Bn-scaff_16116_1-p48706 C-genome specific (napus-oleracea) | 0.9138756    | 0.704073     | 0.9922481 | 0.8203916 | not scorable | not scorable |



|                                                                 |              |              |           |           |              |              |
|-----------------------------------------------------------------|--------------|--------------|-----------|-----------|--------------|--------------|
| #### Bn-scaff_16116_1-p50186 C-genome specific (napus-oleracea) | 0.8971292    | 0.7487407    | 0.9844961 | 0.7357219 | not scorable | not scorable |
| #### Bn-scaff_16116_1-p54507 genome unspecific (all in)         | 0.8947368    | 0.7209949    | 0.9689922 | 0.6861096 | 0.9752066    | 0.8330885    |
| #### Bn-scaff_16116_1-p60537 genome unspecific (all in)         | 0.9617225    | 0.6258985    | 0.9922481 | 0.8259585 | 0.9752066    | 0.8576245    |
| #### Bn-scaff_16116_1-p61892 C-genome specific (napus-oleracea) | 0.9138756    | 0.7053007    | 0.9844961 | 0.7351104 | not scorable | not scorable |
| #### Bn-scaff_16116_1-p72136 genome unspecific (all in)         | 1            | 0.4698372    | 1         | 0.8528999 | 0.9834711    | 0.7681853    |
| #### Bn-scaff_16116_1-p7960 C-genome specific (napus-oleracea)  | 0.9138756    | 0.795323     | 0.9922481 | 0.7961207 | not scorable | not scorable |
| #### Bn-scaff_16116_1-p84056 genome unspecific (oleracea-rapa)  | not scorable | not scorable | 1         | 0.4348489 | 0.9917355    | 0.4567047    |
| #### Bn-scaff_16116_1-p99991 genome unspecific (all in)         | 0.9976076    | 0.7641606    | 0.9302326 | 0.8386114 | 0.9752066    | 0.783029     |
| #### Bn-scaff_16128_1-p11511 genome unspecific (all in)         | 0.9856459    | 0.4355725    | 1         | 0.857478  | 1            | 0.7839547    |
| #### Bn-scaff_16128_1-p29253 C-genome specific (oleracea only)  | not scorable | not scorable | 1         | 0.7721443 | not scorable | not scorable |
| #### Bn-scaff_16128_1-p47151 C-genome specific (napus-oleracea) | 0.9808612    | 0.4389974    | 0.5968992 | 0.9068918 | not scorable | not scorable |
| #### Bn-scaff_16128_1-p49955 genome unspecific (all in)         | 1            | 0.4424284    | 0.9922481 | 0.7094598 | 0.9834711    | 0.7841538    |
| #### Bn-scaff_16128_1-p50508 genome unspecific (all in)         | 0.9688995    | 0.4094602    | 0.9922481 | 0.5153016 | 1            | 0.8701416    |
| #### Bn-scaff_16128_2-p10625 C-genome specific (napus-oleracea) | 0.9617225    | 0.8305441    | 1         | 0.8100605 | not scorable | not scorable |
| #### Bn-scaff_16128_2-p11307 C-genome specific (napus-oleracea) | 0.9832536    | 0.6931581    | 1         | 0.7676099 | not scorable | not scorable |
| #### Bn-scaff_16128_2-p11316 C-genome specific (napus-oleracea) | 0.9856459    | 0.7363001    | 1         | 0.8022041 | not scorable | not scorable |
| #### Bn-scaff_16128_2-p11341 C-genome specific (napus-oleracea) | 0.9808612    | 0.5652714    | 1         | 0.6039438 | not scorable | not scorable |
| #### Bn-scaff_16128_2-p12168 C-genome specific (napus-oleracea) | 0.9808612    | 0.6833308    | 1         | 0.7847552 | not scorable | not scorable |
| #### Bn-scaff_16128_2-p12310 C-genome specific (napus-oleracea) | 0.9545454    | 0.8159503    | 1         | 0.765233  | not scorable | not scorable |
| #### Bn-scaff_16128_2-p12427 C-genome specific (napus-oleracea) | 0.9688995    | 0.8867546    | 0.9922481 | 0.8323468 | not scorable | not scorable |
| #### Bn-scaff_16128_2-p13036 genome unspecific (all in)         | 0.9784689    | 0.4958122    | 0.9844961 | 0.7438364 | 1            | 0.9148549    |
| #### Bn-scaff_16128_2-p13136 C-genome specific (napus-oleracea) | 0.9784689    | 0.7925511    | 1         | 0.8221028 | not scorable | not scorable |
| #### Bn-scaff_16128_2-p13188 C-genome specific (napus-oleracea) | 0.9784689    | 0.7245615    | 1         | 0.9074375 | not scorable | not scorable |
| #### Bn-scaff_16128_2-p14960 C-genome specific (napus-oleracea) | 0.9880383    | 0.7186707    | 0.9844961 | 0.7970492 | not scorable | not scorable |
| #### Bn-scaff_16128_2-p15091 C-genome specific (napus-oleracea) | 0.9641148    | 0.9362358    | 0.9922481 | 0.8750072 | not scorable | not scorable |
| #### Bn-scaff_16128_2-p15859 C-genome specific (napus-oleracea) | 0.8971292    | 0.709411     | 0.9767442 | 0.8668438 | not scorable | not scorable |
| #### Bn-scaff_16128_2-p18011 C-genome specific (napus-oleracea) | 0.9641148    | 0.8019723    | 0.4496124 | 0.8769661 | not scorable | not scorable |
| #### Bn-scaff_16128_2-p18934 C-genome specific (napus-oleracea) | 0.9712918    | 0.6531506    | 0.8294573 | 0.6941313 | not scorable | not scorable |
| #### Bn-scaff_16128_2-p29226 C-genome specific (napus-oleracea) | 0.9736842    | 0.7074514    | 0.9534883 | 0.9224551 | not scorable | not scorable |
| #### Bn-scaff_16128_2-p29287 C-genome specific (napus-oleracea) | 0.9808612    | 0.6693823    | 0.9689922 | 0.941512  | not scorable | not scorable |
| #### Bn-scaff_16128_2-p29363 C-genome specific (napus-oleracea) | 0.9569378    | 0.5010852    | 0.9457364 | 0.5601133 | not scorable | not scorable |
| #### Bn-scaff_16128_2-p33988 C-genome specific (napus-oleracea) | 0.9904306    | 0.8542838    | 1         | 0.9233884 | not scorable | not scorable |
| #### Bn-scaff_16130_1-p10094 C-genome specific (napus-oleracea) | 0.9880383    | 0.7791497    | 1         | 0.8779329 | not scorable | not scorable |

|                                                                 |              |              |              |              |              |              |
|-----------------------------------------------------------------|--------------|--------------|--------------|--------------|--------------|--------------|
| #### Bn-scaff_16130_1-p10134 C-genome specific (napus-oleracea) | 0.9808612    | 0.721002     | 1            | 0.8004727    | not scorable | not scorable |
| #### Bn-scaff_16130_1-p10206 C-genome specific (napus-oleracea) | 0.9856459    | 0.7636845    | 0.9767442    | 0.8478737    | not scorable | not scorable |
| #### Bn-scaff_16130_1-p10262 C-genome specific (napus-oleracea) | 0.9856459    | 0.7552605    | 0.9922481    | 0.8271449    | not scorable | not scorable |
| #### Bn-scaff_16130_1-p10269 C-genome specific (napus-oleracea) | 0.9808612    | 0.6768466    | 1            | 0.7457469    | not scorable | not scorable |
| #### Bn-scaff_16130_1-p10282 C-genome specific (napus-oleracea) | 0.9832536    | 0.7911289    | 0.9689922    | 0.855427     | not scorable | not scorable |
| #### Bn-scaff_16130_1-p10312 C-genome specific (napus-oleracea) | 0.9880383    | 0.7659114    | 0.9922481    | 0.8129001    | not scorable | not scorable |
| #### Bn-scaff_16130_1-p10313 C-genome specific (napus-oleracea) | 0.9928229    | 0.7806602    | 0.9922481    | 0.8210297    | not scorable | not scorable |
| #### Bn-scaff_16130_1-p10348 C-genome specific (napus-oleracea) | 0.9832536    | 0.7989306    | 0.9689922    | 0.8372832    | not scorable | not scorable |
| #### Bn-scaff_16130_1-p10349 C-genome specific (napus-oleracea) | 0.9928229    | 0.6929089    | 0.9534883    | 0.7055997    | not scorable | not scorable |
| #### Bn-scaff_16130_1-p10362 C-genome specific (napus-oleracea) | 0.9832536    | 0.7641512    | 0.9922481    | 0.753795     | not scorable | not scorable |
| #### Bn-scaff_16130_1-p10367 C-genome specific (napus-oleracea) | 0.9808612    | 0.7822467    | 1            | 0.7719412    | not scorable | not scorable |
| #### Bn-scaff_16130_1-p10391 C-genome specific (napus-oleracea) | 0.9736842    | 0.6916008    | 0.9922481    | 0.6652563    | not scorable | not scorable |
| #### Bn-scaff_16130_1-p10394 C-genome specific (napus-oleracea) | 0.9066986    | 0.9084929    | 0.9689922    | 0.782795     | not scorable | not scorable |
| #### Bn-scaff_16130_1-p10394 genome unspecific (all in)         | 0.9832536    | 0.6302219    | 0.9844961    | 0.6734952    | 1            | 0.9497412    |
| #### Bn-scaff_16130_1-p10394 C-genome specific (napus-oleracea) | 0.9688995    | 0.7009377    | 0.9612403    | 0.7347131    | not scorable | not scorable |
| #### Bn-scaff_16130_1-p10425 C-genome specific (napus-oleracea) | 0.9928229    | 0.7771561    | 0.9922481    | 0.7934247    | not scorable | not scorable |
| #### Bn-scaff_16130_1-p10506 C-genome specific (napus-oleracea) | 0.9856459    | 0.7638035    | 1            | 0.8237607    | not scorable | not scorable |
| #### Bn-scaff_16130_1-p10912 C-genome specific (napus-oleracea) | 0.9736842    | 0.6246307    | 0.9612403    | 0.6826817    | not scorable | not scorable |
| #### Bn-scaff_16130_1-p10913 C-genome specific (napus-oleracea) | 0.9808612    | 0.7619256    | 1            | 0.8050272    | not scorable | not scorable |
| #### Bn-scaff_16130_1-p10914 C-genome specific (napus-oleracea) | 0.9784689    | 0.7902045    | 1            | 0.7621129    | not scorable | not scorable |
| #### Bn-scaff_16130_1-p11020 C-genome specific (napus-oleracea) | 0.9856459    | 0.6804605    | 1            | 0.7405181    | not scorable | not scorable |
| #### Bn-scaff_16130_1-p11147 C-genome specific (napus-oleracea) | 0.9808612    | 0.7157418    | 0.9534883    | 0.7314335    | not scorable | not scorable |
| #### Bn-scaff_16130_1-p11362 C-genome specific (napus-oleracea) | 0.9832536    | 0.7244326    | 1            | 0.7902669    | not scorable | not scorable |
| #### Bn-scaff_16130_1-p11382 C-genome specific (napus-oleracea) | 0.9832536    | 0.7716467    | 1            | 0.8112738    | not scorable | not scorable |
| #### Bn-scaff_16130_1-p11568 C-genome specific (napus-oleracea) | 1            | 0.7557361    | 1            | 0.8584631    | not scorable | not scorable |
| #### Bn-scaff_16130_1-p11584 genome unspecific (all in)         | 0.9784689    | 0.5824662    | 0.8604651    | 0.6947535    | 1            | 0.9281453    |
| #### Bn-scaff_16130_1-p11994 C-genome specific (napus-oleracea) | 0.9904306    | 0.7904041    | 1            | 0.840507     | not scorable | not scorable |
| #### Bn-scaff_16130_1-p12297 A-genome specific (rapa only)      | not scorable | not scorable | not scorable | not scorable | 1            | 0.9039531    |
| #### Bn-scaff_16130_1-p13137 genome unspecific (all in)         | 0.9593301    | 0.5949255    | 0.5891473    | 0.7392179    | 1            | 0.7135814    |
| #### Bn-scaff_16130_1-p14103 C-genome specific (napus-oleracea) | 0.9928229    | 0.892848     | 0.8682171    | 0.7319673    | not scorable | not scorable |
| #### Bn-scaff_16130_1-p16232 genome unspecific (all in)         | 0.9545454    | 0.4871527    | 1            | 0.8073252    | 0.9586777    | 0.6592097    |
| #### Bn-scaff_16130_1-p17420 C-genome specific (napus-oleracea) | 0.9784689    | 0.7601141    | 1            | 0.8360636    | not scorable | not scorable |
| #### Bn-scaff_16130_1-p17560 C-genome specific (napus-oleracea) | 0.9832536    | 0.7693703    | 1            | 0.9185675    | not scorable | not scorable |

|                                                                 |              |              |           |           |              |              |
|-----------------------------------------------------------------|--------------|--------------|-----------|-----------|--------------|--------------|
| #### Bn-scaff_16130_1-p18107 C-genome specific (napus-oleracea) | 0.9976076    | 0.8798963    | 1         | 0.8405713 | not scorable | not scorable |
| #### Bn-scaff_16130_1-p18114 C-genome specific (napus-oleracea) | 0.9976076    | 0.794997     | 0.9922481 | 0.7879519 | not scorable | not scorable |
| #### Bn-scaff_16130_1-p18125 genome unspecific (all in)         | 0.9976076    | 0.5794175    | 1         | 0.7757788 | 1            | 0.9434139    |
| #### Bn-scaff_16130_1-p18128 C-genome specific (napus-oleracea) | 0.9976076    | 0.8948194    | 1         | 0.8547357 | not scorable | not scorable |
| #### Bn-scaff_16130_1-p18308 C-genome specific (napus-oleracea) | 0.9952153    | 0.8446367    | 1         | 0.7664952 | not scorable | not scorable |
| #### Bn-scaff_16130_1-p18311 C-genome specific (napus-oleracea) | 0.9952153    | 0.8095886    | 0.9922481 | 0.7464261 | not scorable | not scorable |
| #### Bn-scaff_16130_1-p18428 C-genome specific (napus-oleracea) | 1            | 0.9019001    | 1         | 0.8613805 | not scorable | not scorable |
| #### Bn-scaff_16130_1-p18428 C-genome specific (napus-oleracea) | 0.9976076    | 0.8839269    | 1         | 0.8088419 | not scorable | not scorable |
| #### Bn-scaff_16130_1-p18452 C-genome specific (napus-oleracea) | 0.9952153    | 0.8336638    | 1         | 0.8490753 | not scorable | not scorable |
| #### Bn-scaff_16130_1-p18464 C-genome specific (napus-oleracea) | 1            | 0.8313839    | 0.9922481 | 0.8238627 | not scorable | not scorable |
| #### Bn-scaff_16130_1-p18528 C-genome specific (napus-oleracea) | 1            | 0.7450133    | 0.9922481 | 0.670373  | not scorable | not scorable |
| #### Bn-scaff_16130_1-p18607 C-genome specific (napus-oleracea) | 0.9976076    | 0.7799897    | 1         | 0.8293761 | not scorable | not scorable |
| #### Bn-scaff_16130_1-p19011 genome unspecific (all in)         | 0.9904306    | 0.7189938    | 0.751938  | 0.8395541 | 1            | 0.9391171    |
| #### Bn-scaff_16130_1-p19603 genome unspecific (all in)         | 0.9952153    | 0.4347542    | 0.9147287 | 0.5213248 | 1            | 0.9180354    |
| #### Bn-scaff_16130_1-p19979 C-genome specific (napus-oleracea) | 0.9952153    | 0.8024051    | 0.9922481 | 0.751393  | not scorable | not scorable |
| #### Bn-scaff_16130_1-p20013 C-genome specific (napus-oleracea) | 0.9928229    | 0.6702052    | 0.9612403 | 0.641018  | not scorable | not scorable |
| #### Bn-scaff_16130_1-p20015 C-genome specific (oleracea only)  | not scorable | not scorable | 0.9922481 | 0.8955117 | not scorable | not scorable |
| #### Bn-scaff_16130_1-p20062 C-genome specific (napus-oleracea) | 0.9904306    | 0.3406784    | 0.9922481 | 0.8187172 | not scorable | not scorable |
| #### Bn-scaff_16130_1-p20073 C-genome specific (oleracea only)  | not scorable | not scorable | 0.9612403 | 0.6957721 | not scorable | not scorable |
| #### Bn-scaff_16130_1-p20075 C-genome specific (napus-oleracea) | 0.9904306    | 0.4104032    | 0.9922481 | 0.9205509 | not scorable | not scorable |
| #### Bn-scaff_16130_1-p20076 C-genome specific (oleracea only)  | not scorable | not scorable | 0.9922481 | 0.8843321 | not scorable | not scorable |
| #### Bn-scaff_16130_1-p20080 C-genome specific (napus-oleracea) | 0.9952153    | 0.7914145    | 0.9922481 | 0.7858955 | not scorable | not scorable |
| #### Bn-scaff_16130_1-p21039 C-genome specific (napus-oleracea) | 0.9952153    | 0.8116053    | 0.9844961 | 0.7804198 | not scorable | not scorable |
| #### Bn-scaff_16130_1-p21055 C-genome specific (napus-oleracea) | 0.9976076    | 0.8108019    | 1         | 0.7169652 | not scorable | not scorable |
| #### Bn-scaff_16130_1-p21065 C-genome specific (napus-oleracea) | 1            | 0.8634353    | 0.9844961 | 0.7180979 | not scorable | not scorable |
| #### Bn-scaff_16130_1-p21069 C-genome specific (napus-oleracea) | 0.9976076    | 0.8274963    | 0.9922481 | 0.7877374 | not scorable | not scorable |
| #### Bn-scaff_16130_1-p21079 C-genome specific (napus-oleracea) | 0.9928229    | 0.7291188    | 0.9689922 | 0.7168393 | not scorable | not scorable |
| #### Bn-scaff_16130_1-p21213 C-genome specific (napus-oleracea) | 0.9976076    | 0.8329576    | 0.9922481 | 0.7419871 | not scorable | not scorable |
| #### Bn-scaff_16130_1-p21299 C-genome specific (napus-oleracea) | 0.9952153    | 0.7945867    | 0.9457364 | 0.6906376 | not scorable | not scorable |
| #### Bn-scaff_16130_1-p21312 C-genome specific (napus-oleracea) | 0.9928229    | 0.8280378    | 0.9922481 | 0.818469  | not scorable | not scorable |
| #### Bn-scaff_16130_1-p21385 C-genome specific (napus-oleracea) | 1            | 0.7988209    | 0.9922481 | 0.7458994 | not scorable | not scorable |
| #### Bn-scaff_16130_1-p21395 C-genome specific (napus-oleracea) | 0.9976076    | 0.8513039    | 0.9922481 | 0.8426715 | not scorable | not scorable |
| #### Bn-scaff_16130_1-p21396 C-genome specific (napus-oleracea) | 1            | 0.7966307    | 0.9922481 | 0.7605084 | not scorable | not scorable |

|                                                                 |              |              |              |              |              |              |
|-----------------------------------------------------------------|--------------|--------------|--------------|--------------|--------------|--------------|
| #### Bn-scaff_16130_1-p21409 C-genome specific (napus-oleracea) | 0.9976076    | 0.7117163    | 0.9922481    | 0.7010605    | not scorable | not scorable |
| #### Bn-scaff_16130_1-p21416 C-genome specific (napus-oleracea) | 0.9880383    | 0.8387734    | 0.7751938    | 0.8074841    | not scorable | not scorable |
| #### Bn-scaff_16130_1-p21472 C-genome specific (oleracea only)  | not scorable | not scorable | 0.9069768    | 0.7973101    | not scorable | not scorable |
| #### Bn-scaff_16130_1-p21674 C-genome specific (napus-oleracea) | 0.9856459    | 0.7524177    | 1            | 0.7811804    | not scorable | not scorable |
| #### Bn-scaff_16130_1-p21831 C-genome specific (napus-oleracea) | 0.9832536    | 0.4314889    | 1            | 0.7192956    | not scorable | not scorable |
| #### Bn-scaff_16130_1-p22244 C-genome specific (napus-oleracea) | 0.9904306    | 0.7733884    | 1            | 0.7996466    | not scorable | not scorable |
| #### Bn-scaff_16130_1-p22460 C-genome specific (napus-oleracea) | 0.9856459    | 0.7312972    | 0.9767442    | 0.730893     | not scorable | not scorable |
| #### Bn-scaff_16130_1-p22460 C-genome specific (napus-oleracea) | 0.9856459    | 0.6495158    | 0.9612403    | 0.6596345    | not scorable | not scorable |
| #### Bn-scaff_16130_1-p22482 C-genome specific (napus-oleracea) | 0.9856459    | 0.7305868    | 1            | 0.8626049    | not scorable | not scorable |
| #### Bn-scaff_16130_1-p22482 C-genome specific (napus-oleracea) | 0.9521531    | 0.5168738    | 0.9844961    | 0.9074876    | not scorable | not scorable |
| #### Bn-scaff_16130_1-p22516 C-genome specific (napus-oleracea) | 0.9665072    | 0.7382789    | 0.9922481    | 0.8074287    | not scorable | not scorable |
| #### Bn-scaff_16130_1-p22545 C-genome specific (napus-oleracea) | 0.9808612    | 0.7759103    | 0.9922481    | 0.8694528    | not scorable | not scorable |
| #### Bn-scaff_16130_1-p22592 genome unspecific (all in)         | 0.9952153    | 0.6767651    | 1            | 0.8904023    | 1            | 0.7409858    |
| #### Bn-scaff_16130_1-p22647 C-genome specific (napus-oleracea) | 0.9784689    | 0.6296543    | 0.9767442    | 0.7519814    | not scorable | not scorable |
| #### Bn-scaff_16130_1-p22829 genome unspecific (all in)         | 0.9569378    | 0.3815923    | 1            | 0.7639033    | 0.9834711    | 0.7426034    |
| #### Bn-scaff_16130_1-p22962 C-genome specific (napus-oleracea) | 0.9641148    | 0.5406035    | 0.9767442    | 0.7947772    | not scorable | not scorable |
| #### Bn-scaff_16130_1-p22989 C-genome specific (napus-oleracea) | 0.9880383    | 0.764156     | 1            | 0.7975012    | not scorable | not scorable |
| #### Bn-scaff_16130_1-p22990 genome unspecific (all in)         | 0.9688995    | 0.6402127    | 1            | 0.762643     | 0.9834711    | 0.9325455    |
| #### Bn-scaff_16130_1-p22995 C-genome specific (napus-oleracea) | 0.9736842    | 0.7565833    | 1            | 0.8339247    | not scorable | not scorable |
| #### Bn-scaff_16130_1-p23057 C-genome specific (napus-oleracea) | 0.9808612    | 0.7756137    | 0.9844961    | 0.8223446    | not scorable | not scorable |
| #### Bn-scaff_16130_1-p23312 all not scorable                   | not scorable | not scorable | not scorable | not scorable | not scorable | not scorable |
| #### Bn-scaff_16130_1-p23710 C-genome specific (napus-oleracea) | 0.9808612    | 0.7632057    | 0.9922481    | 0.7598178    | not scorable | not scorable |
| #### Bn-scaff_16130_1-p23754 C-genome specific (napus-oleracea) | 1            | 0.8328663    | 1            | 0.8769249    | not scorable | not scorable |
| #### Bn-scaff_16130_1-p24128 genome unspecific (oleracea-rapa)  | not scorable | not scorable | 0.8527132    | 0.5984698    | 0.9752066    | 0.7367962    |
| #### Bn-scaff_16130_1-p24200 C-genome specific (napus-oleracea) | 0.9904306    | 0.7555345    | 1            | 0.7568567    | not scorable | not scorable |
| #### Bn-scaff_16130_1-p24264 genome unspecific (all in)         | 1            | 0.3588379    | 0.9922481    | 0.5645009    | 1            | 0.5825732    |
| #### Bn-scaff_16130_1-p24265 C-genome specific (oleracea only)  | not scorable | not scorable | 1            | 0.8822099    | not scorable | not scorable |
| #### Bn-scaff_16130_1-p24266 genome unspecific (oleracea-rapa)  | not scorable | not scorable | 0.9922481    | 0.6594481    | 1            | 0.6663731    |
| #### Bn-scaff_16130_1-p24331 genome unspecific (all in)         | 0.9665072    | 0.5253989    | 1            | 0.7934003    | 1            | 0.9392906    |
| #### Bn-scaff_16130_1-p25256 C-genome specific (napus-oleracea) | 0.9928229    | 0.7090513    | 0.9922481    | 0.6476911    | not scorable | not scorable |
| #### Bn-scaff_16130_1-p25284 C-genome specific (napus-oleracea) | 0.9880383    | 0.7033045    | 1            | 0.8320936    | not scorable | not scorable |
| #### Bn-scaff_16130_1-p25287 C-genome specific (napus-oleracea) | 0.9952153    | 0.7591155    | 1            | 0.7694398    | not scorable | not scorable |
| #### Bn-scaff_16130_1-p25402 C-genome specific (napus-oleracea) | 0.9880383    | 0.6813868    | 1            | 0.7065608    | not scorable | not scorable |

|                                                                 |              |              |           |           |              |              |
|-----------------------------------------------------------------|--------------|--------------|-----------|-----------|--------------|--------------|
| #### Bn-scaff_16130_1-p25547 C-genome specific (napus-oleracea) | 0.9760765    | 0.7038214    | 0.9767442 | 0.7731722 | not scorable | not scorable |
| #### Bn-scaff_16130_1-p25553 C-genome specific (napus-oleracea) | 0.9832536    | 0.7400059    | 0.9922481 | 0.7217494 | not scorable | not scorable |
| #### Bn-scaff_16130_1-p25560 C-genome specific (napus-oleracea) | 0.9880383    | 0.7003915    | 0.9767442 | 0.7482651 | not scorable | not scorable |
| #### Bn-scaff_16130_1-p25563 C-genome specific (napus-oleracea) | 0.9784689    | 0.6871831    | 0.9922481 | 0.7013001 | not scorable | not scorable |
| #### Bn-scaff_16130_1-p25563 C-genome specific (napus-oleracea) | 0.9736842    | 0.6608399    | 0.9534883 | 0.5125183 | not scorable | not scorable |
| #### Bn-scaff_16130_1-p25571 C-genome specific (napus-oleracea) | 0.9856459    | 0.7530955    | 0.9922481 | 0.7343571 | not scorable | not scorable |
| #### Bn-scaff_16130_1-p25578 C-genome specific (napus-oleracea) | 0.9832536    | 0.6430467    | 0.9922481 | 0.6982377 | not scorable | not scorable |
| #### Bn-scaff_16130_1-p25586 C-genome specific (napus-oleracea) | 0.9856459    | 0.6803365    | 0.9844961 | 0.7073658 | not scorable | not scorable |
| #### Bn-scaff_16130_1-p25588 C-genome specific (napus-oleracea) | 0.9832536    | 0.6995335    | 0.9922481 | 0.743436  | not scorable | not scorable |
| #### Bn-scaff_16130_1-p25599 C-genome specific (napus-oleracea) | 0.9832536    | 0.7301778    | 0.9922481 | 0.7576653 | not scorable | not scorable |
| #### Bn-scaff_16130_1-p25603 C-genome specific (napus-oleracea) | 0.9832536    | 0.7590005    | 0.9689922 | 0.7487913 | not scorable | not scorable |
| #### Bn-scaff_16130_1-p25604 C-genome specific (napus-oleracea) | 0.9784689    | 0.7174888    | 0.9767442 | 0.856971  | not scorable | not scorable |
| #### Bn-scaff_16130_1-p25853 C-genome specific (napus-oleracea) | 0.9880383    | 0.6332244    | 0.744186  | 0.6944891 | not scorable | not scorable |
| #### Bn-scaff_16130_1-p26044 C-genome specific (napus-oleracea) | 0.9784689    | 0.7732131    | 0.744186  | 0.7914145 | not scorable | not scorable |
| #### Bn-scaff_16130_1-p26086 C-genome specific (napus-oleracea) | 0.9856459    | 0.6828104    | 0.744186  | 0.7029277 | not scorable | not scorable |
| #### Bn-scaff_16130_1-p26608 genome unspecific (all in)         | 0.9665072    | 0.6146661    | 1         | 0.9175616 | 1            | 0.9481753    |
| #### Bn-scaff_16130_1-p26613 C-genome specific (napus-oleracea) | 0.9880383    | 0.7194811    | 0.744186  | 0.8126143 | not scorable | not scorable |
| #### Bn-scaff_16130_1-p26633 C-genome specific (napus-oleracea) | 0.9808612    | 0.7550387    | 0.744186  | 0.8694379 | not scorable | not scorable |
| #### Bn-scaff_16130_1-p27181 genome unspecific (oleracea-rapa)  | not scorable | not scorable | 1         | 0.8207097 | 0.9752066    | 0.8775992    |
| #### Bn-scaff_16130_1-p27391 C-genome specific (napus-oleracea) | 0.9832536    | 0.7650425    | 1         | 0.8276103 | not scorable | not scorable |
| #### Bn-scaff_16130_1-p27473 C-genome specific (napus-oleracea) | 0.9832536    | 0.7505742    | 0.9922481 | 0.8639066 | not scorable | not scorable |
| #### Bn-scaff_16130_1-p28071 C-genome specific (napus-oleracea) | 0.9928229    | 0.63816      | 1         | 0.6559787 | not scorable | not scorable |
| #### Bn-scaff_16130_1-p28091 C-genome specific (napus-oleracea) | 0.9928229    | 0.7530033    | 1         | 0.7450857 | not scorable | not scorable |
| #### Bn-scaff_16130_1-p28094 C-genome specific (napus-oleracea) | 0.9928229    | 0.7333475    | 1         | 0.7307606 | not scorable | not scorable |
| #### Bn-scaff_16130_1-p28162 C-genome specific (oleracea only)  | not scorable | not scorable | 0.7286822 | 0.9232385 | not scorable | not scorable |
| #### Bn-scaff_16130_1-p28618 C-genome specific (napus-oleracea) | 0.9832536    | 0.7326829    | 1         | 0.7811435 | not scorable | not scorable |
| #### Bn-scaff_16130_1-p28742 C-genome specific (napus-oleracea) | 0.9880383    | 0.7619749    | 1         | 0.9422503 | not scorable | not scorable |
| #### Bn-scaff_16130_1-p28906 C-genome specific (napus-oleracea) | 0.9856459    | 0.7560015    | 1         | 0.7921715 | not scorable | not scorable |
| #### Bn-scaff_16130_1-p28943 C-genome specific (napus-oleracea) | 0.9856459    | 0.696372     | 0.9922481 | 0.7140323 | not scorable | not scorable |
| #### Bn-scaff_16130_1-p28961 C-genome specific (napus-oleracea) | 0.9760765    | 0.6950207    | 1         | 0.7487117 | not scorable | not scorable |
| #### Bn-scaff_16130_1-p28994 C-genome specific (napus-oleracea) | 0.9784689    | 0.672459     | 1         | 0.8406609 | not scorable | not scorable |
| #### Bn-scaff_16130_1-p29007 C-genome specific (napus-oleracea) | 0.9832536    | 0.6844828    | 1         | 0.7093799 | not scorable | not scorable |
| #### Bn-scaff_16130_1-p29038 C-genome specific (napus-oleracea) | 0.9808612    | 0.7551377    | 0.9922481 | 0.7917252 | not scorable | not scorable |

|                                                                 |              |              |              |              |              |              |
|-----------------------------------------------------------------|--------------|--------------|--------------|--------------|--------------|--------------|
| #### Bn-scaff_16130_1-p29044 C-genome specific (napus-oleracea) | 0.9904306    | 0.7221653    | 0.9922481    | 0.7523407    | not scorable | not scorable |
| #### Bn-scaff_16130_1-p29068 C-genome specific (napus-oleracea) | 0.9904306    | 0.6724386    | 1            | 0.8351569    | not scorable | not scorable |
| #### Bn-scaff_16130_1-p29075 C-genome specific (napus-oleracea) | 0.9784689    | 0.7316619    | 0.9922481    | 0.717243     | not scorable | not scorable |
| #### Bn-scaff_16130_1-p29081 C-genome specific (napus-oleracea) | 0.9760765    | 0.6956197    | 0.9922481    | 0.7108678    | not scorable | not scorable |
| #### Bn-scaff_16130_1-p29340 napus specific                     | 0.9832536    | 0.7192945    | not scorable | not scorable | not scorable | not scorable |
| #### Bn-scaff_16130_1-p29364 C-genome specific (napus-oleracea) | 0.2751196    | 0.906221     | 0.7286822    | 0.7217042    | not scorable | not scorable |
| #### Bn-scaff_16130_1-p29649 C-genome specific (napus-oleracea) | 0.9856459    | 0.7357124    | 1            | 0.8864283    | not scorable | not scorable |
| #### Bn-scaff_16130_1-p29779 A-genome specific (rapa only)      | not scorable | not scorable | not scorable | not scorable | 1            | 0.9516597    |
| #### Bn-scaff_16130_1-p29784 C-genome specific (napus-oleracea) | 0.9808612    | 0.6991344    | 0.9844961    | 0.7487576    | not scorable | not scorable |
| #### Bn-scaff_16130_1-p31776 napus specific                     | 0.9760765    | 0.7223019    | not scorable | not scorable | not scorable | not scorable |
| #### Bn-scaff_16130_1-p31856 C-genome specific (napus-oleracea) | 0.9880383    | 0.6731117    | 1            | 0.8517241    | not scorable | not scorable |
| #### Bn-scaff_16130_1-p33827 C-genome specific (napus-oleracea) | 1            | 0.9125023    | 0.9922481    | 0.7431285    | not scorable | not scorable |
| #### Bn-scaff_16130_1-p37302 napus specific                     | 0.9976076    | 0.7753335    | not scorable | not scorable | not scorable | not scorable |
| #### Bn-scaff_16130_1-p44771 napus specific                     | 0.1555024    | 0.7580128    | not scorable | not scorable | not scorable | not scorable |
| #### Bn-scaff_16130_1-p46045 C-genome specific (napus-oleracea) | 0.9856459    | 0.8968379    | 1            | 0.8386554    | not scorable | not scorable |
| #### Bn-scaff_16130_1-p46117 C-genome specific (napus-oleracea) | 0.9832536    | 0.742947     | 0.9922481    | 0.818535     | not scorable | not scorable |
| #### Bn-scaff_16130_1-p46118 C-genome specific (napus-oleracea) | 0.9928229    | 0.7893193    | 0.9922481    | 0.8210201    | not scorable | not scorable |
| #### Bn-scaff_16130_1-p46124 C-genome specific (napus-oleracea) | 0.9832536    | 0.7278901    | 1            | 0.7766114    | not scorable | not scorable |
| #### Bn-scaff_16130_1-p46130 C-genome specific (napus-oleracea) | 0.9832536    | 0.710771     | 0.9844961    | 0.8008999    | not scorable | not scorable |
| #### Bn-scaff_16130_1-p46151 C-genome specific (napus-oleracea) | 0.9928229    | 0.7101983    | 0.9844961    | 0.7972356    | not scorable | not scorable |
| #### Bn-scaff_16130_1-p46156 A-genome specific (napus-rapa)     | 0.9832536    | 0.3918132    | not scorable | not scorable | 0.9917355    | 0.9191418    |
| #### Bn-scaff_16130_1-p46164 C-genome specific (napus-oleracea) | 0.9904306    | 0.6832181    | 0.9922481    | 0.7793118    | not scorable | not scorable |
| #### Bn-scaff_16130_1-p46183 C-genome specific (napus-oleracea) | 0.9928229    | 0.6540999    | 0.9844961    | 0.7109121    | not scorable | not scorable |
| #### Bn-scaff_16130_1-p46191 C-genome specific (napus-oleracea) | 0.9928229    | 0.700563     | 0.9922481    | 0.7879097    | not scorable | not scorable |
| #### Bn-scaff_16130_1-p46894 C-genome specific (napus-oleracea) | 0.9832536    | 0.7242484    | 0.9844961    | 0.7969794    | not scorable | not scorable |
| #### Bn-scaff_16130_1-p46948 C-genome specific (napus-oleracea) | 0.9808612    | 0.706836     | 1            | 0.7990261    | not scorable | not scorable |
| #### Bn-scaff_16130_1-p46979 C-genome specific (napus-oleracea) | 0.9832536    | 0.7221658    | 1            | 0.8308795    | not scorable | not scorable |
| #### Bn-scaff_16130_1-p47201 C-genome specific (napus-oleracea) | 0.9880383    | 0.7515227    | 0.9922481    | 0.8628796    | not scorable | not scorable |
| #### Bn-scaff_16130_1-p47244 C-genome specific (napus-oleracea) | 0.9904306    | 0.9287344    | 0.9689922    | 0.4437347    | not scorable | not scorable |
| #### Bn-scaff_16130_1-p51604 all not scorable                   | not scorable | not scorable | not scorable | not scorable | not scorable | not scorable |
| #### Bn-scaff_16130_1-p54275 C-genome specific (napus-oleracea) | 0.3899522    | 0.9375989    | 0.8914729    | 0.9043776    | not scorable | not scorable |
| #### Bn-scaff_16130_1-p55468 C-genome specific (napus-oleracea) | 0.9904306    | 0.8243917    | 0.9069768    | 0.8598599    | not scorable | not scorable |
| #### Bn-scaff_16130_1-p56730 C-genome specific (napus-oleracea) | 0.9952153    | 0.8683751    | 0.9922481    | 0.8176157    | not scorable | not scorable |

|                                                                |              |              |           |           |              |              |
|----------------------------------------------------------------|--------------|--------------|-----------|-----------|--------------|--------------|
| #### Bn-scaff_16130_1-p64633genome unspecific (oleracea-rapa)  | not scorable | not scorable | 0.9844961 | 0.4566025 | 1            | 0.4835326    |
| #### Bn-scaff_16130_1-p65904C-genome specific (napus-oleracea) | 0.9688995    | 0.7411504    | 1         | 0.7495101 | not scorable | not scorable |
| #### Bn-scaff_16130_1-p65959C-genome specific (napus-oleracea) | 0.9880383    | 0.7562021    | 0.9922481 | 0.7364486 | not scorable | not scorable |
| #### Bn-scaff_16130_1-p66498C-genome specific (napus-oleracea) | 0.9784689    | 0.7477693    | 1         | 0.8795688 | not scorable | not scorable |
| #### Bn-scaff_16130_1-p66697C-genome specific (napus-oleracea) | 0.9593301    | 0.5279863    | 1         | 0.8492553 | not scorable | not scorable |
| #### Bn-scaff_16130_1-p67342C-genome specific (napus-oleracea) | 0.930622     | 0.4529858    | 0.9922481 | 0.728611  | not scorable | not scorable |
| #### Bn-scaff_16130_1-p68948C-genome specific (napus-oleracea) | 0.9665072    | 0.7780116    | 1         | 0.7613781 | not scorable | not scorable |
| #### Bn-scaff_16130_1-p68963C-genome specific (napus-oleracea) | 0.9712918    | 0.7574438    | 1         | 0.7686071 | not scorable | not scorable |
| #### Bn-scaff_16130_1-p69659C-genome specific (napus-oleracea) | 0.9832536    | 0.8777544    | 1         | 0.8112952 | not scorable | not scorable |
| #### Bn-scaff_16130_1-p69714C-genome specific (napus-oleracea) | 0.9712918    | 0.7863276    | 0.9922481 | 0.8173026 | not scorable | not scorable |
| #### Bn-scaff_16130_1-p70387genome unspecific (all in)         | 0.9952153    | 0.9175813    | 1         | 0.8976937 | 0.9834711    | 0.9371489    |
| #### Bn-scaff_16130_1-p73365C-genome specific (napus-oleracea) | 0.9569378    | 0.6524314    | 0.9379845 | 0.8123176 | not scorable | not scorable |
| #### Bn-scaff_16130_1-p76363C-genome specific (napus-oleracea) | 0.9832536    | 0.743214     | 1         | 0.8166504 | not scorable | not scorable |
| #### Bn-scaff_16130_1-p76405C-genome specific (napus-oleracea) | 0.9665072    | 0.7429911    | 0.9922481 | 0.7266024 | not scorable | not scorable |
| #### Bn-scaff_16130_1-p76694C-genome specific (napus-oleracea) | 0.9904306    | 0.7388166    | 1         | 0.7966035 | not scorable | not scorable |
| #### Bn-scaff_16130_1-p79967genome unspecific (oleracea-rapa)  | not scorable | not scorable | 1         | 0.6890073 | 0.9834711    | 0.719228     |
| #### Bn-scaff_16130_1-p80012genome unspecific (all in)         | 0.9928229    | 0.5081936    | 0.9922481 | 0.6871157 | 1            | 0.8129746    |
| #### Bn-scaff_16130_1-p80052genome unspecific (all in)         | 0.9976076    | 0.3404989    | 1         | 0.8406022 | 1            | 0.7868351    |
| #### Bn-scaff_16130_1-p80124C-genome specific (napus-oleracea) | 0.9904306    | 0.756011     | 1         | 0.8320746 | not scorable | not scorable |
| #### Bn-scaff_16130_1-p80409C-genome specific (napus-oleracea) | 0.9880383    | 0.8635191    | 0.9689922 | 0.7074521 | not scorable | not scorable |
| #### Bn-scaff_16130_1-p81097C-genome specific (napus-oleracea) | 0.9976076    | 0.7532428    | 1         | 0.7751205 | not scorable | not scorable |
| #### Bn-scaff_16130_1-p82288genome unspecific (all in)         | 0.9928229    | 0.6707965    | 1         | 0.8030182 | 1            | 0.9510943    |
| #### Bn-scaff_16130_1-p84812C-genome specific (napus-oleracea) | 0.9952153    | 0.8240942    | 1         | 0.8110662 | not scorable | not scorable |
| #### Bn-scaff_16130_1-p91013C-genome specific (napus-oleracea) | 0.9904306    | 0.7112141    | 0.9612403 | 0.7871536 | not scorable | not scorable |
| #### Bn-scaff_16130_1-p91684C-genome specific (napus-oleracea) | 0.9856459    | 0.7595046    | 0.9922481 | 0.7797229 | not scorable | not scorable |
| #### Bn-scaff_16130_1-p98133C-genome specific (napus-oleracea) | 0.9808612    | 0.7136126    | 1         | 0.7372921 | not scorable | not scorable |
| #### Bn-scaff_16130_1-p98276C-genome specific (napus-oleracea) | 0.9784689    | 0.6638261    | 0.9767442 | 0.66968   | not scorable | not scorable |
| #### Bn-scaff_16130_1-p98334C-genome specific (napus-oleracea) | 0.9736842    | 0.6142724    | 1         | 0.6695796 | not scorable | not scorable |
| #### Bn-scaff_16130_2-p37468genome unspecific (all in)         | 0.9712918    | 0.4356408    | 1         | 0.7291188 | 1            | 0.8207097    |
| #### Bn-scaff_16130_2-p37499genome unspecific (oleracea-rapa)  | not scorable | not scorable | 1         | 0.7470211 | 1            | 0.8813996    |
| #### Bn-scaff_16130_2-p37520genome unspecific (all in)         | 1            | 0.3095185    | 1         | 0.8855539 | 1            | 0.9113158    |
| #### Bn-scaff_16130_2-p37586genome unspecific (all in)         | 0.9856459    | 0.6856534    | 1         | 0.7257867 | 1            | 0.9083866    |
| #### Bn-scaff_16130_2-p37596C-genome specific (oleracea only)  | not scorable | not scorable | 0.8372093 | 0.6832529 | not scorable | not scorable |

|                                                                 |           |           |              |              |              |              |
|-----------------------------------------------------------------|-----------|-----------|--------------|--------------|--------------|--------------|
| #### Bn-scaff_16130_2-p37659 C-genome specific (napus-oleracea) | 0.7511961 | 0.8945396 | 0.4341085    | 0.6181029    | not scorable | not scorable |
| #### Bn-scaff_16130_2-p37837 C-genome specific (napus-oleracea) | 0.8492823 | 0.8267891 | 0.8682171    | 0.8204706    | not scorable | not scorable |
| #### Bn-scaff_16130_2-p40339 genome unspecific (all in)         | 0.9760765 | 0.4090258 | 0.9922481    | 0.8166574    | 1            | 0.9014851    |
| #### Bn-scaff_16130_2-p41179 C-genome specific (napus-oleracea) | 0.9665072 | 0.8046713 | 0.8837209    | 0.7822952    | not scorable | not scorable |
| #### Bn-scaff_16130_2-p41352 C-genome specific (napus-oleracea) | 0.9832536 | 0.7182938 | 0.8914729    | 0.7820436    | not scorable | not scorable |
| #### Bn-scaff_16130_2-p41373 C-genome specific (napus-oleracea) | 0.9808612 | 0.6893472 | 0.8837209    | 0.7309077    | not scorable | not scorable |
| #### Bn-scaff_16130_2-p41390 C-genome specific (napus-oleracea) | 0.9784689 | 0.6956778 | 0.8914729    | 0.7069178    | not scorable | not scorable |
| #### Bn-scaff_16130_2-p41398 C-genome specific (napus-oleracea) | 0.9665072 | 0.667549  | 0.8914729    | 0.6816372    | not scorable | not scorable |
| #### Bn-scaff_16130_2-p41418 C-genome specific (napus-oleracea) | 0.9688995 | 0.6471408 | 0.8914729    | 0.6584697    | not scorable | not scorable |
| #### Bn-scaff_16130_2-p41426 C-genome specific (napus-oleracea) | 0.9665072 | 0.6913174 | 0.8837209    | 0.7414774    | not scorable | not scorable |
| #### Bn-scaff_16130_2-p41436 C-genome specific (napus-oleracea) | 0.9784689 | 0.7151951 | 0.8837209    | 0.7775826    | not scorable | not scorable |
| #### Bn-scaff_16130_2-p41585 C-genome specific (napus-oleracea) | 0.9808612 | 0.6902314 | 0.8914729    | 0.7138301    | not scorable | not scorable |
| #### Bn-scaff_16130_2-p41605 C-genome specific (napus-oleracea) | 0.9736842 | 0.6793432 | 0.8914729    | 0.7138675    | not scorable | not scorable |
| #### Bn-scaff_16130_2-p41775 C-genome specific (napus-oleracea) | 0.9784689 | 0.6728373 | 0.8914729    | 0.6658531    | not scorable | not scorable |
| #### Bn-scaff_16130_2-p41780 C-genome specific (napus-oleracea) | 0.9856459 | 0.6924976 | 0.8914729    | 0.76938      | not scorable | not scorable |
| #### Bn-scaff_16130_2-p41815 C-genome specific (napus-oleracea) | 0.9856459 | 0.6874186 | 0.8837209    | 0.7286076    | not scorable | not scorable |
| #### Bn-scaff_16130_2-p41846 C-genome specific (napus-oleracea) | 0.9665072 | 0.6259515 | 0.8992248    | 0.5435486    | not scorable | not scorable |
| #### Bn-scaff_16130_2-p41853 C-genome specific (napus-oleracea) | 0.9784689 | 0.7039872 | 0.8837209    | 0.7651601    | not scorable | not scorable |
| #### Bn-scaff_16130_2-p41937 C-genome specific (napus-oleracea) | 0.9832536 | 0.7079926 | 0.8837209    | 0.7774039    | not scorable | not scorable |
| #### Bn-scaff_16130_2-p47079 C-genome specific (napus-oleracea) | 0.84689   | 0.9297748 | 0.9147287    | 0.855504     | not scorable | not scorable |
| #### Bn-scaff_16130_2-p47226 C-genome specific (napus-oleracea) | 0.9880383 | 0.7504809 | 0.9922481    | 0.8020325    | not scorable | not scorable |
| #### Bn-scaff_16130_2-p48486 C-genome specific (napus-oleracea) | 0.9832536 | 0.6867529 | 0.9922481    | 0.7088397    | not scorable | not scorable |
| #### Bn-scaff_16130_2-p48498 C-genome specific (napus-oleracea) | 0.9856459 | 0.7640725 | 0.9922481    | 0.78069      | not scorable | not scorable |
| #### Bn-scaff_16130_2-p52421 genome unspecific (all in)         | 0.9617225 | 0.3153982 | 0.9922481    | 0.702767     | 1            | 0.7739488    |
| #### Bn-scaff_16130_2-p52557 C-genome specific (napus-oleracea) | 0.9880383 | 0.399521  | 1            | 0.8355566    | not scorable | not scorable |
| #### Bn-scaff_16130_2-p54623 C-genome specific (napus-oleracea) | 0.9593301 | 0.523324  | 0.9689922    | 0.729794     | not scorable | not scorable |
| #### Bn-scaff_16130_2-p70748 C-genome specific (napus-oleracea) | 0.9880383 | 0.7275388 | 0.9922481    | 0.7694519    | not scorable | not scorable |
| #### Bn-scaff_16130_2-p71311 C-genome specific (napus-oleracea) | 0.9736842 | 0.7269871 | 0.9767442    | 0.6680984    | not scorable | not scorable |
| #### Bn-scaff_16130_2-p71372 C-genome specific (napus-oleracea) | 0.9880383 | 0.7796919 | 0.9922481    | 0.7814922    | not scorable | not scorable |
| #### Bn-scaff_16130_2-p71466 C-genome specific (napus-oleracea) | 0.9832536 | 0.6462975 | 0.9844961    | 0.6448386    | not scorable | not scorable |
| #### Bn-scaff_16130_2-p71838 C-genome specific (napus-oleracea) | 0.9856459 | 0.7067583 | 0.9922481    | 0.732394     | not scorable | not scorable |
| #### Bn-scaff_16130_2-p80146 A-genome specific (napus-rapa)     | 0.9928229 | 0.6947928 | not scorable | not scorable | 0.9917355    | 0.9066931    |
| #### Bn-scaff_16130_2-p80151 C-genome specific (napus-oleracea) | 0.9952153 | 0.7761381 | 0.9922481    | 0.8142083    | not scorable | not scorable |



|                                                                 |              |              |              |              |              |              |
|-----------------------------------------------------------------|--------------|--------------|--------------|--------------|--------------|--------------|
| #### Bn-scaff_16130_3-p31975 genome unspecific (oleracea-rapa)  | not scorable | not scorable | 1            | 0.8861172    | 1            | 0.8188784    |
| #### Bn-scaff_16130_3-p5466 C-genome specific (napus-oleracea)  | 0.9904306    | 0.7169514    | 1            | 0.7200589    | not scorable | not scorable |
| #### Bn-scaff_16130_5-p10410 C-genome specific (napus-oleracea) | 0.9976076    | 0.9196638    | 0.9767442    | 0.8284472    | not scorable | not scorable |
| #### Bn-scaff_16130_5-p12919 genome unspecific (all in)         | 0.9856459    | 0.2729064    | 1            | 0.6274324    | 0.9173554    | 0.5589049    |
| #### Bn-scaff_16130_5-p92194 genome unspecific (all in)         | 0.9976076    | 0.4358076    | 0.9922481    | 0.7065994    | 1            | 0.9044131    |
| #### Bn-scaff_16130_5-p92290 genome unspecific (oleracea-rapa)  | not scorable | not scorable | 1            | 0.6212523    | 0.9834711    | 0.7388269    |
| #### Bn-scaff_16135_1-p15112 C-genome specific (napus-oleracea) | 1            | 0.7810912    | 1            | 0.7493569    | not scorable | not scorable |
| #### Bn-scaff_16135_1-p16845 C-genome specific (napus-oleracea) | 0.9808612    | 0.7492076    | 0.9922481    | 0.8346204    | not scorable | not scorable |
| #### Bn-scaff_16135_1-p17000 C-genome specific (napus-oleracea) | 0.9952153    | 0.759129     | 1            | 0.772879     | not scorable | not scorable |
| #### Bn-scaff_16135_1-p18382 genome unspecific (oleracea-rapa)  | not scorable | not scorable | 0.7906977    | 0.7159085    | 1            | 0.8600792    |
| #### Bn-scaff_16135_1-p18428 C-genome specific (napus-oleracea) | 0.9736842    | 0.6218073    | 0.9767442    | 0.7536678    | not scorable | not scorable |
| #### Bn-scaff_16135_1-p19597 genome unspecific (all in)         | 0.9569378    | 0.4823027    | 0.9844961    | 0.6307786    | 1            | 0.6879954    |
| #### Bn-scaff_16135_1-p19692 genome unspecific (oleracea-rapa)  | not scorable | not scorable | 1            | 0.7122613    | 0.9834711    | 0.6932641    |
| #### Bn-scaff_16135_1-p23041 genome unspecific (all in)         | 0.9904306    | 0.7118271    | 0.9767442    | 0.7808782    | 0.9917355    | 0.8064223    |
| #### Bn-scaff_16135_1-p25732 C-genome specific (napus-oleracea) | 0.9904306    | 0.6779377    | 0.9922481    | 0.6111323    | not scorable | not scorable |
| #### Bn-scaff_16135_1-p28055 A-genome specific (napus-rapa)     | 0.9904306    | 0.266366     | not scorable | not scorable | 1            | 0.9045586    |
| #### Bn-scaff_16135_1-p29041 C-genome specific (napus-oleracea) | 0.9928229    | 0.7580255    | 0.9767442    | 0.8045345    | not scorable | not scorable |
| #### Bn-scaff_16135_1-p30951 genome unspecific (oleracea-rapa)  | not scorable | not scorable | 1            | 0.824549     | 0.9917355    | 0.7687798    |
| #### Bn-scaff_16135_1-p30957 C-genome specific (napus-oleracea) | 0.9641148    | 0.7574744    | 0.5581396    | 0.8649225    | not scorable | not scorable |
| #### Bn-scaff_16135_1-p31170 C-genome specific (napus-oleracea) | 0.9928229    | 0.6610458    | 1            | 0.920139     | not scorable | not scorable |
| #### Bn-scaff_16135_1-p31546 genome unspecific (all in)         | 1            | 0.4286132    | 0.9844961    | 0.7300146    | 0.9834711    | 0.5676121    |
| #### Bn-scaff_16135_1-p32898 C-genome specific (napus-oleracea) | 0.9904306    | 0.7030239    | 1            | 0.7311106    | not scorable | not scorable |
| #### Bn-scaff_16135_1-p62894 C-genome specific (napus-oleracea) | 0.9904306    | 0.789615     | 1            | 0.8034802    | not scorable | not scorable |
| #### Bn-scaff_16139_1-p10273 genome unspecific (all in)         | 0.9760765    | 0.297868     | 0.9844961    | 0.5263441    | 1            | 0.7770717    |
| #### Bn-scaff_16139_1-p10510 C-genome specific (napus-oleracea) | 0.8875598    | 0.8136209    | 1            | 0.8500696    | not scorable | not scorable |
| #### Bn-scaff_16139_1-p10638 C-genome specific (napus-oleracea) | 0.8947368    | 0.69902      | 0.9224806    | 0.7368882    | not scorable | not scorable |
| #### Bn-scaff_16139_1-p10720 C-genome specific (napus-oleracea) | 0.8803828    | 0.7909557    | 0.9069768    | 0.9399145    | not scorable | not scorable |
| #### Bn-scaff_16139_1-p10743 genome unspecific (all in)         | 0.9952153    | 0.3393979    | 1            | 0.6934206    | 1            | 0.6165329    |
| #### Bn-scaff_16139_1-p10903 genome unspecific (all in)         | 0.8732057    | 0.4928259    | 0.9767442    | 0.6041119    | 1            | 0.6859401    |
| #### Bn-scaff_16139_1-p11028 C-genome specific (napus-oleracea) | 0.8947368    | 0.7792391    | 1            | 0.8487388    | not scorable | not scorable |
| #### Bn-scaff_16139_1-p11030 C-genome specific (napus-oleracea) | 0.8923445    | 0.7765155    | 1            | 0.8524848    | not scorable | not scorable |
| #### Bn-scaff_16139_1-p11032 C-genome specific (napus-oleracea) | 0.9019139    | 0.7728208    | 1            | 0.8336234    | not scorable | not scorable |
| #### Bn-scaff_16139_1-p11347 C-genome specific (napus-oleracea) | 0.8684211    | 0.6808663    | 0.9922481    | 0.7173385    | not scorable | not scorable |

|                                                                 |              |              |              |              |              |              |
|-----------------------------------------------------------------|--------------|--------------|--------------|--------------|--------------|--------------|
| #### Bn-scaff_16139_1-p12616 C-genome specific (napus-oleracea) | 0.8923445    | 0.7935103    | 0.9767442    | 0.8136061    | not scorable | not scorable |
| #### Bn-scaff_16139_1-p12668 C-genome specific (oleracea only)  | not scorable | not scorable | 0.9922481    | 0.8153176    | not scorable | not scorable |
| #### Bn-scaff_16139_1-p12673 C-genome specific (napus-oleracea) | 0.8875598    | 0.7073507    | 0.9922481    | 0.8014004    | not scorable | not scorable |
| #### Bn-scaff_16139_1-p12674 C-genome specific (napus-oleracea) | 0.8899522    | 0.7362946    | 1            | 0.7314535    | not scorable | not scorable |
| #### Bn-scaff_16139_1-p12700 C-genome specific (napus-oleracea) | 0.8851675    | 0.7791513    | 0.9922481    | 0.7795618    | not scorable | not scorable |
| #### Bn-scaff_16139_1-p12716 C-genome specific (napus-oleracea) | 0.8947368    | 0.7056094    | 0.9612403    | 0.923575     | not scorable | not scorable |
| #### Bn-scaff_16139_1-p12717 C-genome specific (napus-oleracea) | 0.8899522    | 0.7040293    | 0.9302326    | 0.8348234    | not scorable | not scorable |
| #### Bn-scaff_16139_1-p12753 C-genome specific (napus-oleracea) | 0.8947368    | 0.7451771    | 0.8682171    | 0.7883111    | not scorable | not scorable |
| #### Bn-scaff_16139_1-p12759 C-genome specific (napus-oleracea) | 0.9043062    | 0.7447727    | 1            | 0.8797193    | not scorable | not scorable |
| #### Bn-scaff_16139_1-p12766 C-genome specific (napus-oleracea) | 0.854067     | 0.7429159    | 0.7984496    | 0.8582764    | not scorable | not scorable |
| #### Bn-scaff_16139_1-p12778 C-genome specific (napus-oleracea) | 0.8851675    | 0.7033011    | 0.8062016    | 0.8360634    | not scorable | not scorable |
| #### Bn-scaff_16139_1-p12795 C-genome specific (napus-oleracea) | 0.8875598    | 0.7173378    | 0.9922481    | 0.7089314    | not scorable | not scorable |
| #### Bn-scaff_16139_1-p12795 C-genome specific (napus-oleracea) | 0.8636364    | 0.7871428    | 0.9922481    | 0.7190608    | not scorable | not scorable |
| #### Bn-scaff_16139_1-p12809 C-genome specific (napus-oleracea) | 0.8779904    | 0.7322783    | 0.8062016    | 0.8606403    | not scorable | not scorable |
| #### Bn-scaff_16139_1-p12816 C-genome specific (napus-oleracea) | 0.8684211    | 0.6119151    | 1            | 0.7777422    | not scorable | not scorable |
| #### Bn-scaff_16139_1-p12828 C-genome specific (napus-oleracea) | 0.8923445    | 0.6902386    | 0.8062016    | 0.7254871    | not scorable | not scorable |
| #### Bn-scaff_16139_1-p12850 C-genome specific (napus-oleracea) | 0.8803828    | 0.6753151    | 0.8139535    | 0.803524     | not scorable | not scorable |
| #### Bn-scaff_16139_1-p12911 genome unspecific (all in)         | 0.9736842    | 0.4612198    | 1            | 0.7239731    | 1            | 0.8996203    |
| #### Bn-scaff_16139_1-p12951 genome unspecific (all in)         | 0.9688995    | 0.568855     | 0.9689922    | 0.5673592    | 1            | 0.725799     |
| #### Bn-scaff_16139_1-p13372 A-genome specific (napus-rapa)     | 0.9712918    | 0.4311233    | not scorable | not scorable | 1            | 0.7018563    |
| #### Bn-scaff_16139_1-p13881 C-genome specific (napus-oleracea) | 0.8708134    | 0.7732702    | 0.9844961    | 0.8288428    | not scorable | not scorable |
| #### Bn-scaff_16139_1-p13938 C-genome specific (napus-oleracea) | 0.8851675    | 0.689366     | 0.9844961    | 0.8218365    | not scorable | not scorable |
| #### Bn-scaff_16139_1-p14966 C-genome specific (napus-oleracea) | 1            | 0.6318281    | 1            | 0.6806386    | not scorable | not scorable |
| #### Bn-scaff_16139_1-p16052 genome unspecific (all in)         | 0.937799     | 0.4757222    | 0.9612403    | 0.6620934    | 1            | 0.8964232    |
| #### Bn-scaff_16139_1-p16057 C-genome specific (napus-oleracea) | 0.9019139    | 0.519286     | 1            | 0.6607949    | not scorable | not scorable |
| #### Bn-scaff_16139_1-p17711 genome unspecific (oleracea-rapa)  | not scorable | not scorable | 1            | 0.7339805    | 1            | 0.9205657    |
| #### Bn-scaff_16139_1-p18542 C-genome specific (napus-oleracea) | 0.8492823    | 0.8128649    | 0.9767442    | 0.7797094    | not scorable | not scorable |
| #### Bn-scaff_16139_1-p18780 C-genome specific (napus-oleracea) | 0.8899522    | 0.7746543    | 1            | 0.7755646    | not scorable | not scorable |
| #### Bn-scaff_16139_1-p19009 C-genome specific (napus-oleracea) | 0.9066986    | 0.7341004    | 1            | 0.7775016    | not scorable | not scorable |
| #### Bn-scaff_16139_1-p19032 C-genome specific (napus-oleracea) | 0.8827751    | 0.8110116    | 1            | 0.8329887    | not scorable | not scorable |
| #### Bn-scaff_16139_1-p19853 C-genome specific (napus-oleracea) | 0.8875598    | 0.8081153    | 0.9689922    | 0.8116841    | not scorable | not scorable |
| #### Bn-scaff_16139_1-p20866 C-genome specific (napus-oleracea) | 0.8995215    | 0.7874246    | 0.9922481    | 0.8318138    | not scorable | not scorable |
| #### Bn-scaff_16139_1-p23717 C-genome specific (napus-oleracea) | 0.8827751    | 0.7562518    | 1            | 0.8414354    | not scorable | not scorable |

|                                                                 |              |              |              |              |              |              |
|-----------------------------------------------------------------|--------------|--------------|--------------|--------------|--------------|--------------|
| #### Bn-scaff_16139_1-p23903 C-genome specific (napus-oleracea) | 0.8995215    | 0.4754845    | 1            | 0.8157581    | not scorable | not scorable |
| #### Bn-scaff_16139_1-p25928 C-genome specific (napus-oleracea) | 0.9162679    | 0.7882261    | 0.9844961    | 0.7233305    | not scorable | not scorable |
| #### Bn-scaff_16139_1-p25981 C-genome specific (napus-oleracea) | 0.9162679    | 0.8257824    | 0.9844961    | 0.8125394    | not scorable | not scorable |
| #### Bn-scaff_16139_1-p26033 napus specific                     | 0.2535885    | 0.7761521    | not scorable | not scorable | not scorable | not scorable |
| #### Bn-scaff_16139_1-p26047 C-genome specific (napus-oleracea) | 0.8971292    | 0.8677998    | 0.9534883    | 0.7466789    | not scorable | not scorable |
| #### Bn-scaff_16139_1-p26048 napus specific                     | 0.937799     | 0.5149981    | not scorable | not scorable | not scorable | not scorable |
| #### Bn-scaff_16139_1-p28203 genome unspecific (all in)         | 0.9521531    | 0.2264118    | 1            | 0.4609619    | 1            | 0.7739488    |
| #### Bn-scaff_16139_1-p28904 C-genome specific (napus-oleracea) | 0.9043062    | 0.7048666    | 1            | 0.6879746    | not scorable | not scorable |
| #### Bn-scaff_16139_1-p32824 A-genome specific (rapa only)      | not scorable | not scorable | not scorable | not scorable | 1            | 0.8840837    |
| #### Bn-scaff_16139_1-p34414 C-genome specific (napus-oleracea) | 0.9019139    | 0.751393     | 1            | 0.7425367    | not scorable | not scorable |
| #### Bn-scaff_16139_1-p38092 C-genome specific (napus-oleracea) | 0.9138756    | 0.9257124    | 1            | 0.7756962    | not scorable | not scorable |
| #### Bn-scaff_16139_1-p41083 C-genome specific (napus-oleracea) | 0.9090909    | 0.8526697    | 0.9844961    | 0.7491018    | not scorable | not scorable |
| #### Bn-scaff_16139_1-p41217 C-genome specific (napus-oleracea) | 0.8995215    | 0.6892037    | 0.5503876    | 0.7420393    | not scorable | not scorable |
| #### Bn-scaff_16139_1-p43416 C-genome specific (napus-oleracea) | 0.9114832    | 0.7257867    | 0.9844961    | 0.6771308    | not scorable | not scorable |
| #### Bn-scaff_16139_1-p43551 C-genome specific (napus-oleracea) | 0.9043062    | 0.6886268    | 0.9844961    | 0.6533513    | not scorable | not scorable |
| #### Bn-scaff_16139_1-p46265 C-genome specific (napus-oleracea) | 0.8971292    | 0.7186773    | 1            | 0.7814022    | not scorable | not scorable |
| #### Bn-scaff_16139_1-p46267 C-genome specific (napus-oleracea) | 0.8875598    | 0.7757513    | 0.9844961    | 0.7900184    | not scorable | not scorable |
| #### Bn-scaff_16139_1-p46313 C-genome specific (napus-oleracea) | 0.8779904    | 0.7543061    | 0.9922481    | 0.7209991    | not scorable | not scorable |
| #### Bn-scaff_16139_1-p46934 C-genome specific (napus-oleracea) | 0.8947368    | 0.7717155    | 1            | 0.7791343    | not scorable | not scorable |
| #### Bn-scaff_16139_1-p47188 C-genome specific (oleracea only)  | not scorable | not scorable | 0.9922481    | 0.7389157    | not scorable | not scorable |
| #### Bn-scaff_16139_1-p488 napus specific                       | 0.9019139    | 0.7135198    | not scorable | not scorable | not scorable | not scorable |
| #### Bn-scaff_16139_1-p4995 genome unspecific (all in)          | 0.9210526    | 0.5474709    | 1            | 0.7699567    | 1            | 0.9243011    |
| #### Bn-scaff_16139_1-p64104 C-genome specific (napus-oleracea) | 0.8732057    | 0.4842316    | 0.9844961    | 0.7189646    | not scorable | not scorable |
| #### Bn-scaff_16139_1-p64329 C-genome specific (napus-oleracea) | 0.8899522    | 0.7138619    | 0.9767442    | 0.7551646    | not scorable | not scorable |
| #### Bn-scaff_16139_1-p64333 C-genome specific (napus-oleracea) | 0.8875598    | 0.8092186    | 0.9922481    | 0.785125     | not scorable | not scorable |
| #### Bn-scaff_16139_1-p64564 C-genome specific (napus-oleracea) | 0.9043062    | 0.7894999    | 0.9922481    | 0.8063623    | not scorable | not scorable |
| #### Bn-scaff_16139_1-p65351 C-genome specific (napus-oleracea) | 0.8995215    | 0.7814133    | 1            | 0.7912019    | not scorable | not scorable |
| #### Bn-scaff_16139_1-p65524 C-genome specific (napus-oleracea) | 0.8851675    | 0.7840089    | 1            | 0.798973     | not scorable | not scorable |
| #### Bn-scaff_16139_1-p65532 genome unspecific (oleracea-rapa)  | not scorable | not scorable | 0.7751938    | 0.8370007    | 0.9586777    | 0.6747298    |
| #### Bn-scaff_16139_1-p66050 C-genome specific (napus-oleracea) | 0.9019139    | 0.7735092    | 0.9767442    | 0.7913706    | not scorable | not scorable |
| #### Bn-scaff_16139_1-p66293 C-genome specific (napus-oleracea) | 0.8277512    | 0.7407708    | 1            | 0.8372213    | not scorable | not scorable |
| #### Bn-scaff_16139_1-p67045 C-genome specific (napus-oleracea) | 0.9019139    | 0.7593281    | 1            | 0.8021557    | not scorable | not scorable |
| #### Bn-scaff_16139_1-p72071 C-genome specific (napus-oleracea) | 0.9114832    | 0.7639561    | 1            | 0.6936616    | not scorable | not scorable |

|                                                                |              |              |              |              |              |              |
|----------------------------------------------------------------|--------------|--------------|--------------|--------------|--------------|--------------|
| #### Bn-scaff_16139_1-p7217C-genome specific (napus-oleracea)  | 0.9521531    | 0.4533718    | 1            | 0.5910395    | not scorable | not scorable |
| #### Bn-scaff_16139_1-p78541C-genome specific (napus-oleracea) | 0.9976076    | 0.8632054    | 0.9767442    | 0.8436045    | not scorable | not scorable |
| #### Bn-scaff_16139_1-p9212C-genome specific (napus-oleracea)  | 0.8636364    | 0.771107     | 0.5968992    | 0.7975317    | not scorable | not scorable |
| #### Bn-scaff_16139_1-p92155genome unspecific (all in)         | 0.923445     | 0.2920583    | 0.9767442    | 0.6903172    | 1            | 0.7914145    |
| #### Bn-scaff_16139_1-p92344genome unspecific (all in)         | 0.9473684    | 0.5845191    | 0.9922481    | 0.7782375    | 0.9586777    | 0.719079     |
| #### Bn-scaff_16139_1-p92771C-genome specific (napus-oleracea) | 0.8923445    | 0.6275262    | 0.9844961    | 0.7572568    | not scorable | not scorable |
| #### Bn-scaff_16139_1-p92776genome unspecific (all in)         | 0.8636364    | 0.6985306    | 0.9922481    | 0.7248917    | 1            | 0.9094268    |
| #### Bn-scaff_16139_1-p92867C-genome specific (napus-oleracea) | 0.8732057    | 0.6237761    | 0.9922481    | 0.8172061    | not scorable | not scorable |
| #### Bn-scaff_16139_1-p95158C-genome specific (napus-oleracea) | 0.8803828    | 0.7058476    | 0.9767442    | 0.7752082    | not scorable | not scorable |
| #### Bn-scaff_16139_1-p95937napus specific                     | 0.8827751    | 0.7387958    | not scorable | not scorable | not scorable | not scorable |
| #### Bn-scaff_16139_1-p97837C-genome specific (napus-oleracea) | 0.861244     | 0.7049581    | 1            | 0.8773268    | not scorable | not scorable |
| #### Bn-scaff_16141_1-p10648all not scorable                   | not scorable | not scorable | not scorable | not scorable | not scorable | not scorable |
| #### Bn-scaff_16141_1-p13194C-genome specific (napus-oleracea) | 0.9976076    | 0.9095823    | 0.9224806    | 0.8147205    | not scorable | not scorable |
| #### Bn-scaff_16141_1-p29826C-genome specific (napus-oleracea) | 0.9976076    | 0.9151769    | 0.9922481    | 0.8499077    | not scorable | not scorable |
| #### Bn-scaff_16141_1-p55687A-genome specific (napus-rapa)     | 0.9808612    | 0.8350937    | not scorable | not scorable | 0.9917355    | 0.7318213    |
| #### Bn-scaff_16142_1-p1099C-genome specific (napus-oleracea)  | 0.9952153    | 0.9623154    | 0.9922481    | 0.8063101    | not scorable | not scorable |
| #### Bn-scaff_16142_1-p13609C-genome specific (napus-oleracea) | 0.9976076    | 0.8023493    | 0.9767442    | 0.7908338    | not scorable | not scorable |
| #### Bn-scaff_16142_1-p15825genome unspecific (all in)         | 0.9354067    | 0.4892898    | 0.9922481    | 0.7578902    | 1            | 0.9048901    |
| #### Bn-scaff_16142_1-p16696genome unspecific (all in)         | 0.9497608    | 0.2235638    | 1            | 0.761795     | 1            | 0.8073078    |
| #### Bn-scaff_16142_1-p17181C-genome specific (napus-oleracea) | 0.9856459    | 0.724196     | 0.9844961    | 0.7718707    | not scorable | not scorable |
| #### Bn-scaff_16142_1-p18354C-genome specific (napus-oleracea) | 0.9473684    | 0.7295963    | 0.4806201    | 0.9324304    | not scorable | not scorable |
| #### Bn-scaff_16142_1-p20323C-genome specific (napus-oleracea) | 0.9688995    | 0.6240938    | 0.9922481    | 0.6132968    | not scorable | not scorable |
| #### Bn-scaff_16142_1-p20347C-genome specific (napus-oleracea) | 0.9521531    | 0.6475658    | 0.9922481    | 0.7124436    | not scorable | not scorable |
| #### Bn-scaff_16142_1-p24936C-genome specific (napus-oleracea) | 0.9808612    | 0.7412235    | 1            | 0.8385548    | not scorable | not scorable |
| #### Bn-scaff_16142_1-p27323C-genome specific (napus-oleracea) | 0.9904306    | 0.7551472    | 0.9922481    | 0.8214239    | not scorable | not scorable |
| #### Bn-scaff_16142_1-p27999C-genome specific (napus-oleracea) | 0.9712918    | 0.7597834    | 1            | 0.8331937    | not scorable | not scorable |
| #### Bn-scaff_16142_1-p28053C-genome specific (napus-oleracea) | 0.9712918    | 0.7215147    | 0.9844961    | 0.7516899    | not scorable | not scorable |
| #### Bn-scaff_16142_1-p28481C-genome specific (napus-oleracea) | 0.9784689    | 0.7467951    | 0.9922481    | 0.8400154    | not scorable | not scorable |
| #### Bn-scaff_16142_1-p29586C-genome specific (napus-oleracea) | 0.9880383    | 0.7536498    | 0.9922481    | 0.7753654    | not scorable | not scorable |
| #### Bn-scaff_16142_1-p30068C-genome specific (napus-oleracea) | 0.9784689    | 0.7194113    | 0.9922481    | 0.7748351    | not scorable | not scorable |
| #### Bn-scaff_16142_1-p339 C-genome specific (napus-oleracea)  | 0.9808612    | 0.7847885    | 0.9922481    | 0.7147834    | not scorable | not scorable |
| #### Bn-scaff_16142_1-p41148genome unspecific (all in)         | 0.9545454    | 0.2785129    | 1            | 0.7770377    | 0.9834711    | 0.6540392    |
| #### Bn-scaff_16142_1-p41881C-genome specific (napus-oleracea) | 0.9976076    | 0.8336715    | 0.9922481    | 0.8524395    | not scorable | not scorable |

|                                                                 |              |              |           |   |           |              |                           |
|-----------------------------------------------------------------|--------------|--------------|-----------|---|-----------|--------------|---------------------------|
| #### Bn-scaff_16142_1-p47324 C-genome specific (napus-oleracea) | 0.9736842    | 0.7528302    |           | 1 | 0.7907942 | not scorable | not scorable              |
| #### Bn-scaff_16142_1-p60066 C-genome specific (napus-oleracea) |              | 1            | 0.918201  |   | 1         | 0.9095051    | not scorable not scorable |
| #### Bn-scaff_16142_1-p64013 C-genome specific (napus-oleracea) | 0.9593301    | 0.7502769    | 0.4186046 |   |           | 0.9067578    | not scorable not scorable |
| #### Bn-scaff_16142_1-p64070 C-genome specific (napus-oleracea) | 0.9545454    | 0.7553257    | 0.4186046 |   |           | 0.7742361    | not scorable not scorable |
| #### Bn-scaff_16142_1-p71107 genome unspecific (oleracea-rapa)  | not scorable | not scorable | 0.8449612 |   | 0.6988849 |              | 1 0.7199746               |
| #### Bn-scaff_16142_1-p71422 C-genome specific (oleracea only)  | not scorable | not scorable | 0.8449612 |   | 0.68486   | not scorable | not scorable              |
| #### Bn-scaff_16142_1-p71471 C-genome specific (oleracea only)  | not scorable | not scorable | 0.8449612 |   | 0.8538443 | not scorable | not scorable              |
| #### Bn-scaff_16142_1-p71598 C-genome specific (oleracea only)  | not scorable | not scorable | 0.8449612 |   | 0.5318645 | not scorable | not scorable              |
| #### Bn-scaff_16142_1-p72394 C-genome specific (oleracea only)  | not scorable | not scorable | 0.8449612 |   | 0.8107185 | not scorable | not scorable              |
| #### Bn-scaff_16142_1-p72499 C-genome specific (oleracea only)  | not scorable | not scorable | 0.8449612 |   | 0.826259  | not scorable | not scorable              |
| #### Bn-scaff_16142_1-p72641 C-genome specific (oleracea only)  | not scorable | not scorable | 0.7906977 |   | 0.4138513 | not scorable | not scorable              |
| #### Bn-scaff_16142_1-p88822 C-genome specific (napus-oleracea) | 0.9760765    | 0.7485968    |           | 1 | 0.8883853 | not scorable | not scorable              |
| #### Bn-scaff_16142_1-p89854 C-genome specific (napus-oleracea) | 0.9976076    | 0.9235998    |           | 1 | 0.8422079 | not scorable | not scorable              |
| #### Bn-scaff_16142_1-p90468 C-genome specific (napus-oleracea) | 0.9808612    | 0.7382452    |           | 1 | 0.8326993 | not scorable | not scorable              |
| #### Bn-scaff_16142_1-p97696 C-genome specific (oleracea only)  | not scorable | not scorable |           | 1 | 0.7366728 | not scorable | not scorable              |
| #### Bn-scaff_16142_1-p97803 genome unspecific (all in)         | 0.9641148    | 0.2415387    |           | 1 | 0.7890052 |              | 1 0.7914145               |
| #### Bn-scaff_16148_1-p12132 C-genome specific (napus-oleracea) | 0.9904306    | 0.3455032    |           | 1 | 0.8479792 | not scorable | not scorable              |
| #### Bn-scaff_16148_1-p12147 genome unspecific (oleracea-rapa)  | not scorable | not scorable |           | 1 | 0.7027949 | 0.9917355    | 0.7503993                 |
| #### Bn-scaff_16148_1-p15997 C-genome specific (napus-oleracea) | 0.9784689    | 0.7791908    | 0.9844961 |   | 0.8130782 | not scorable | not scorable              |
| #### Bn-scaff_16148_1-p17861 C-genome specific (napus-oleracea) | 0.9641148    | 0.7840859    | 0.9922481 |   | 0.824152  | not scorable | not scorable              |
| #### Bn-scaff_16148_1-p21352 C-genome specific (napus-oleracea) | 0.9904306    | 0.7373455    | 0.9379845 |   | 0.6726004 | not scorable | not scorable              |
| #### Bn-scaff_16148_1-p21353 C-genome specific (oleracea only)  | not scorable | not scorable |           | 1 | 0.6444971 | not scorable | not scorable              |
| #### Bn-scaff_16148_1-p23001 C-genome specific (napus-oleracea) | 0.9904306    | 0.7637047    | 0.7829458 |   | 0.6662384 | not scorable | not scorable              |
| #### Bn-scaff_16148_1-p23759 genome unspecific (all in)         | 0.9760765    | 0.6322984    | 0.9844961 |   | 0.6879592 | 0.9173554    | 0.8935195                 |
| #### Bn-scaff_16148_1-p29498 C-genome specific (napus-oleracea) | 0.9760765    | 0.7921427    |           | 1 | 0.856487  | not scorable | not scorable              |
| #### Bn-scaff_16148_1-p33483 C-genome specific (napus-oleracea) | 0.9856459    | 0.7043204    | 0.5271318 |   | 0.7099133 | not scorable | not scorable              |
| #### Bn-scaff_16148_1-p36548 genome unspecific (all in)         | 0.9952153    | 0.3471323    | 0.9379845 |   | 0.5742044 |              | 1 0.8004208               |
| #### Bn-scaff_16148_1-p5434 C-genome specific (napus-oleracea)  | 0.9976076    | 0.81752      | 0.9922481 |   | 0.7624211 | not scorable | not scorable              |
| #### Bn-scaff_16148_1-p61488 C-genome specific (napus-oleracea) | 0.9904306    | 0.7963747    |           | 1 | 0.8804193 | not scorable | not scorable              |
| #### Bn-scaff_16148_1-p63709 C-genome specific (napus-oleracea) | 0.9808612    | 0.7039534    | 0.9922481 |   | 0.7022258 | not scorable | not scorable              |
| #### Bn-scaff_16148_1-p93513 genome unspecific (oleracea-rapa)  | not scorable | not scorable | 0.9844961 |   | 0.7983749 |              | 1 0.92827                 |
| #### Bn-scaff_16148_1-p94877 genome unspecific (all in)         | 0.9617225    | 0.4147442    |           | 1 | 0.8742115 |              | 1 0.8490437               |
| #### Bn-scaff_16148_1-p94937 genome unspecific (all in)         | 0.9808612    | 0.2998123    | 0.8682171 |   | 0.9153903 | 0.9338843    | 0.8820693                 |

|                                                                |              |              |           |           |              |              |
|----------------------------------------------------------------|--------------|--------------|-----------|-----------|--------------|--------------|
| #### Bn-scaff_16158_1-p13597genome unspecific (all in)         | 0.9976076    | 0.7739488    | 1         | 0.7616975 | 1            | 0.9148312    |
| #### Bn-scaff_16158_1-p13861C-genome specific (napus-oleracea) | 1            | 0.6080962    | 1         | 0.7762429 | not scorable | not scorable |
| #### Bn-scaff_16158_1-p13973C-genome specific (napus-oleracea) | 1            | 0.8141087    | 1         | 0.7152021 | not scorable | not scorable |
| #### Bn-scaff_16158_1-p14114genome unspecific (all in)         | 1            | 0.8355495    | 1         | 0.8435255 | 0.9421487    | 0.5219055    |
| #### Bn-scaff_16158_1-p14204C-genome specific (napus-oleracea) | 0.9904306    | 0.8537342    | 1         | 0.8746518 | not scorable | not scorable |
| #### Bn-scaff_16158_1-p14473genome unspecific (all in)         | 1            | 0.6305527    | 1         | 0.6251532 | 1            | 0.9039531    |
| #### Bn-scaff_16158_1-p14668C-genome specific (napus-oleracea) | 0.9976076    | 0.7138557    | 1         | 0.7715608 | not scorable | not scorable |
| #### Bn-scaff_16158_1-p15065C-genome specific (napus-oleracea) | 0.9928229    | 0.7122831    | 0.9922481 | 0.8047041 | not scorable | not scorable |
| #### Bn-scaff_16158_1-p16315genome unspecific (all in)         | 0.9952153    | 0.6413402    | 1         | 0.786476  | 1            | 0.9202363    |
| #### Bn-scaff_16158_1-p16992C-genome specific (napus-oleracea) | 0.9904306    | 0.888524     | 1         | 0.7511793 | not scorable | not scorable |
| #### Bn-scaff_16158_1-p17150C-genome specific (napus-oleracea) | 1            | 0.8302425    | 1         | 0.7763669 | not scorable | not scorable |
| #### Bn-scaff_16158_1-p21240C-genome specific (napus-oleracea) | 1            | 0.7732121    | 1         | 0.9759222 | not scorable | not scorable |
| #### Bn-scaff_16158_1-p22723C-genome specific (napus-oleracea) | 0.9976076    | 0.7108871    | 0.9844961 | 0.6974871 | not scorable | not scorable |
| #### Bn-scaff_16158_1-p22765C-genome specific (napus-oleracea) | 0.9904306    | 0.862368     | 1         | 0.9177185 | not scorable | not scorable |
| #### Bn-scaff_16158_1-p22796C-genome specific (napus-oleracea) | 0.9976076    | 0.7453654    | 1         | 0.9483303 | not scorable | not scorable |
| #### Bn-scaff_16158_1-p23406C-genome specific (napus-oleracea) | 1            | 0.8017906    | 1         | 0.7556056 | not scorable | not scorable |
| #### Bn-scaff_16158_1-p23426C-genome specific (napus-oleracea) | 0.9952153    | 0.8231856    | 1         | 0.8397174 | not scorable | not scorable |
| #### Bn-scaff_16158_1-p24590C-genome specific (napus-oleracea) | 1            | 0.8191189    | 0.9922481 | 0.7219614 | not scorable | not scorable |
| #### Bn-scaff_16158_1-p24596C-genome specific (napus-oleracea) | 1            | 0.8643967    | 1         | 0.7914796 | not scorable | not scorable |
| #### Bn-scaff_16158_1-p27658C-genome specific (napus-oleracea) | 0.9976076    | 0.9363583    | 1         | 0.7573561 | not scorable | not scorable |
| #### Bn-scaff_16158_1-p27903C-genome specific (napus-oleracea) | 1            | 0.8178641    | 1         | 0.8519205 | not scorable | not scorable |
| #### Bn-scaff_16158_1-p27981C-genome specific (napus-oleracea) | 1            | 0.7752332    | 1         | 0.9041836 | not scorable | not scorable |
| #### Bn-scaff_16158_1-p28420C-genome specific (napus-oleracea) | 1            | 0.6449073    | 1         | 0.6460343 | not scorable | not scorable |
| #### Bn-scaff_16158_1-p28492genome unspecific (all in)         | 0.9976076    | 0.6437265    | 1         | 0.8169509 | 1            | 0.9125765    |
| #### Bn-scaff_16158_1-p29212C-genome specific (napus-oleracea) | 1            | 0.7871521    | 1         | 0.6361656 | not scorable | not scorable |
| #### Bn-scaff_16158_1-p29215C-genome specific (napus-oleracea) | 1            | 0.8440521    | 1         | 0.9310591 | not scorable | not scorable |
| #### Bn-scaff_16158_1-p29229C-genome specific (napus-oleracea) | 1            | 0.785942     | 1         | 0.7641148 | not scorable | not scorable |
| #### Bn-scaff_16158_1-p29239C-genome specific (napus-oleracea) | 1            | 0.7262964    | 1         | 0.7579914 | not scorable | not scorable |
| #### Bn-scaff_16158_1-p29271C-genome specific (napus-oleracea) | 0.9976076    | 0.8284123    | 1         | 0.8239589 | not scorable | not scorable |
| #### Bn-scaff_16158_1-p29864C-genome specific (oleracea only)  | not scorable | not scorable | 1         | 0.7308558 | not scorable | not scorable |
| #### Bn-scaff_16158_1-p29996C-genome specific (napus-oleracea) | 0.9952153    | 0.7354926    | 1         | 0.7240012 | not scorable | not scorable |
| #### Bn-scaff_16158_1-p30010C-genome specific (napus-oleracea) | 1            | 0.7305416    | 1         | 0.8699583 | not scorable | not scorable |
| #### Bn-scaff_16158_1-p30071C-genome specific (napus-oleracea) | 0.9976076    | 0.7446334    | 1         | 0.7699404 | not scorable | not scorable |

|                                                                 |              |              |              |              |              |              |
|-----------------------------------------------------------------|--------------|--------------|--------------|--------------|--------------|--------------|
| #### Bn-scaff_16158_1-p30174 C-genome specific (napus-oleracea) | 0.9880383    | 0.7154489    | 1            | 0.8812894    | not scorable | not scorable |
| #### Bn-scaff_16158_1-p30194 C-genome specific (napus-oleracea) | 1            | 0.7290358    | 1            | 0.7884833    | not scorable | not scorable |
| #### Bn-scaff_16158_1-p30212 C-genome specific (napus-oleracea) | 1            | 0.7644842    | 1            | 0.7892551    | not scorable | not scorable |
| #### Bn-scaff_16158_1-p32738 C-genome specific (napus-oleracea) | 1            | 0.7388532    | 1            | 0.7244121    | not scorable | not scorable |
| #### Bn-scaff_16158_1-p32870 C-genome specific (napus-oleracea) | 0.9952153    | 0.8305928    | 1            | 0.8684301    | not scorable | not scorable |
| #### Bn-scaff_16158_1-p33240 C-genome specific (napus-oleracea) | 0.9880383    | 0.8680195    | 1            | 0.94419      | not scorable | not scorable |
| #### Bn-scaff_16158_1-p33280 C-genome specific (napus-oleracea) | 0.9952153    | 0.9295946    | 1            | 0.7844322    | not scorable | not scorable |
| #### Bn-scaff_16158_1-p33344 C-genome specific (napus-oleracea) | 0.9976076    | 0.7288179    | 1            | 0.9092721    | not scorable | not scorable |
| #### Bn-scaff_16158_1-p33796 genome unspecific (all in)         | 1            | 0.6622245    | 1            | 0.6558859    | 1            | 0.6491711    |
| #### Bn-scaff_16158_1-p37777 C-genome specific (napus-oleracea) | 1            | 0.8892005    | 1            | 0.8092516    | not scorable | not scorable |
| #### Bn-scaff_16158_1-p41066 C-genome specific (napus-oleracea) | 1            | 0.8218763    | 1            | 0.9269255    | not scorable | not scorable |
| #### Bn-scaff_16158_1-p68492 C-genome specific (napus-oleracea) | 0.9952153    | 0.8533114    | 0.9922481    | 0.7812471    | not scorable | not scorable |
| #### Bn-scaff_16158_1-p69034 C-genome specific (napus-oleracea) | 0.9952153    | 0.9095539    | 0.9922481    | 0.8043094    | not scorable | not scorable |
| #### Bn-scaff_16158_1-p70581 C-genome specific (napus-oleracea) | 0.9976076    | 0.8069816    | 1            | 0.7990537    | not scorable | not scorable |
| #### Bn-scaff_16158_1-p70887 C-genome specific (napus-oleracea) | 0.9928229    | 0.8374195    | 1            | 0.8704984    | not scorable | not scorable |
| #### Bn-scaff_16158_1-p71322 C-genome specific (napus-oleracea) | 0.9832536    | 0.800442     | 1            | 0.8861588    | not scorable | not scorable |
| #### Bn-scaff_16158_1-p71738 C-genome specific (napus-oleracea) | 0.9928229    | 0.8664243    | 0.9922481    | 0.9158558    | not scorable | not scorable |
| #### Bn-scaff_16158_1-p92749 C-genome specific (napus-oleracea) | 0.9928229    | 0.7552363    | 1            | 0.8847607    | not scorable | not scorable |
| #### Bn-scaff_16159_1-p49922 C-genome specific (napus-oleracea) | 1            | 0.6129675    | 1            | 0.185831     | not scorable | not scorable |
| #### Bn-scaff_16159_1-p51408 C-genome specific (napus-oleracea) | 1            | 0.4792059    | 1            | 0.4982702    | not scorable | not scorable |
| #### Bn-scaff_16159_1-p54705 C-genome specific (napus-oleracea) | 1            | 0.5249787    | 1            | 0.5375564    | not scorable | not scorable |
| #### Bn-scaff_16159_1-p68850 genome unspecific (all in)         | 1            | 0.7367962    | 1            | 0.6169784    | 1            | 0.9262152    |
| #### Bn-scaff_16162_1-p65545 napus specific                     | 0.8684211    | 0.3649908    | not scorable | not scorable | not scorable | not scorable |
| #### Bn-scaff_16162_1-p70563 napus specific                     | 0.9856459    | 0.4859138    | not scorable | not scorable | not scorable | not scorable |
| #### Bn-scaff_16162_1-p78008 C-genome specific (napus-oleracea) | 0.9688995    | 0.8363416    | 0.9844961    | 0.7177598    | not scorable | not scorable |
| #### Bn-scaff_16162_1-p79842 C-genome specific (napus-oleracea) | 0.9880383    | 0.8638411    | 0.9922481    | 0.821264     | not scorable | not scorable |
| #### Bn-scaff_16162_1-p8271 all not scorable                    | not scorable | not scorable | not scorable | not scorable | not scorable | not scorable |
| #### Bn-scaff_16166_1-p40741 genome unspecific (all in)         | 0.9904306    | 0.2209855    | 1            | 0.745086     | 1            | 0.6019793    |
| #### Bn-scaff_16166_1-p42174 napus specific                     | 0.3229665    | 0.7815173    | not scorable | not scorable | not scorable | not scorable |
| #### Bn-scaff_16166_1-p44558 genome unspecific (all in)         | 1            | 0.823379     | 1            | 0.8799366    | 1            | 0.8207097    |
| #### Bn-scaff_16166_1-p47086 genome unspecific (all in)         | 1            | 0.5435486    | 1            | 0.5266715    | 0.9917355    | 0.528818     |
| #### Bn-scaff_16166_1-p48235 C-genome specific (napus-oleracea) | 0.9976076    | 0.9234052    | 1            | 0.9077201    | not scorable | not scorable |
| #### Bn-scaff_16168_1-p136 A-genome specific (rapa only)        | not scorable | not scorable | not scorable | not scorable | 1            | 0.9101632    |

|                                                                |              |              |              |              |              |              |
|----------------------------------------------------------------|--------------|--------------|--------------|--------------|--------------|--------------|
| #### Bn-scaff_16174_1-p10335genome unspecific (all in)         | 0.9976076    | 0.3481387    | 0.9922481    | 0.643258     | 1            | 0.7376376    |
| #### Bn-scaff_16174_1-p10729C-genome specific (napus-oleracea) | 0.9928229    | 0.7016438    | 0.5813953    | 0.6558145    | not scorable | not scorable |
| #### Bn-scaff_16174_1-p10737C-genome specific (napus-oleracea) | 0.9856459    | 0.6563956    | 0.751938     | 0.6400236    | not scorable | not scorable |
| #### Bn-scaff_16174_1-p11636C-genome specific (napus-oleracea) | 0.9760765    | 0.7400826    | 1            | 0.865175     | not scorable | not scorable |
| #### Bn-scaff_16174_1-p11851C-genome specific (napus-oleracea) | 0.9425837    | 0.7372329    | 1            | 0.7035155    | not scorable | not scorable |
| #### Bn-scaff_16174_1-p12050C-genome specific (napus-oleracea) | 0.9856459    | 0.7026362    | 1            | 0.7322236    | not scorable | not scorable |
| #### Bn-scaff_16174_1-p12371C-genome specific (napus-oleracea) | 0.9832536    | 0.7730923    | 0.9922481    | 0.832885     | not scorable | not scorable |
| #### Bn-scaff_16174_1-p12476C-genome specific (napus-oleracea) | 0.9641148    | 0.8263552    | 0.9844961    | 0.802733     | not scorable | not scorable |
| #### Bn-scaff_16174_1-p12552C-genome specific (napus-oleracea) | 0.9856459    | 0.7676799    | 0.9922481    | 0.8176157    | not scorable | not scorable |
| #### Bn-scaff_16174_1-p12651genome unspecific (all in)         | 0.9832536    | 0.5444524    | 1            | 0.7346194    | 1            | 0.9184411    |
| #### Bn-scaff_16174_1-p12942C-genome specific (napus-oleracea) | 0.9832536    | 0.6803278    | 1            | 0.6660022    | not scorable | not scorable |
| #### Bn-scaff_16174_1-p13088C-genome specific (napus-oleracea) | 0.9880383    | 0.7310703    | 0.9534883    | 0.7306494    | not scorable | not scorable |
| #### Bn-scaff_16174_1-p13089C-genome specific (napus-oleracea) | 0.9976076    | 0.7528368    | 1            | 0.7845219    | not scorable | not scorable |
| #### Bn-scaff_16174_1-p13092C-genome specific (napus-oleracea) | 0.9880383    | 0.7644939    | 1            | 0.7966691    | not scorable | not scorable |
| #### Bn-scaff_16174_1-p13116C-genome specific (napus-oleracea) | 0.9832536    | 0.7117299    | 0.9767442    | 0.7121454    | not scorable | not scorable |
| #### Bn-scaff_16174_1-p13209napus specific                     | 0.9641148    | 0.795607     | not scorable | not scorable | not scorable | not scorable |
| #### Bn-scaff_16174_1-p13351C-genome specific (napus-oleracea) | 0.9856459    | 0.6680449    | 0.9767442    | 0.7089393    | not scorable | not scorable |
| #### Bn-scaff_16174_1-p13353C-genome specific (napus-oleracea) | 0.9832536    | 0.7017631    | 1            | 0.7348804    | not scorable | not scorable |
| #### Bn-scaff_16174_1-p13397C-genome specific (oleracea only)  | not scorable | not scorable | 0.9767442    | 0.6999856    | not scorable | not scorable |
| #### Bn-scaff_16174_1-p13399C-genome specific (napus-oleracea) | 0.9808612    | 0.858265     | 0.9844961    | 0.847669     | not scorable | not scorable |
| #### Bn-scaff_16174_1-p13407C-genome specific (oleracea only)  | not scorable | not scorable | 0.9922481    | 0.8140981    | not scorable | not scorable |
| #### Bn-scaff_16174_1-p13422genome unspecific (all in)         | 0.9688995    | 0.4841169    | 1            | 0.5916801    | 1            | 0.8114662    |
| #### Bn-scaff_16174_1-p13776C-genome specific (napus-oleracea) | 0.9736842    | 0.6552883    | 0.9147287    | 0.6177903    | not scorable | not scorable |
| #### Bn-scaff_16174_1-p13860C-genome specific (napus-oleracea) | 0.9880383    | 0.7567547    | 0.9689922    | 0.7589679    | not scorable | not scorable |
| #### Bn-scaff_16174_1-p14449C-genome specific (napus-oleracea) | 0.9856459    | 0.8140712    | 0.9534883    | 0.7037082    | not scorable | not scorable |
| #### Bn-scaff_16174_1-p14450C-genome specific (napus-oleracea) | 0.9808612    | 0.8802516    | 0.9767442    | 0.8836465    | not scorable | not scorable |
| #### Bn-scaff_16174_1-p15055C-genome specific (napus-oleracea) | 1            | 0.874715     | 0.9534883    | 0.7816535    | not scorable | not scorable |
| #### Bn-scaff_16174_1-p15511C-genome specific (napus-oleracea) | 0.9904306    | 0.7365938    | 0.9922481    | 0.836735     | not scorable | not scorable |
| #### Bn-scaff_16174_1-p19311A-genome specific (rapa only)      | not scorable | not scorable | not scorable | not scorable | 1            | 0.7851591    |
| #### Bn-scaff_16174_1-p65301C-genome specific (napus-oleracea) | 0.9976076    | 0.8907307    | 0.9767442    | 0.7479241    | not scorable | not scorable |
| #### Bn-scaff_16174_1-p6960 genome unspecific (oleracea-rapa)  | not scorable | not scorable | 1            | 0.7795782    | 0.9752066    | 0.8455558    |
| #### Bn-scaff_16181_1-p14591genome unspecific (oleracea-rapa)  | not scorable | not scorable | 1            | 0.7560581    | 1            | 0.9085045    |
| #### Bn-scaff_16181_1-p15961genome unspecific (all in)         | 1            | 0.8491583    | 1            | 0.7769441    | 1            | 0.9000611    |



|                                                                |              |              |              |           |              |              |   |              |
|----------------------------------------------------------------|--------------|--------------|--------------|-----------|--------------|--------------|---|--------------|
| #### Bn-scaff_16181_1-p44437genome unspecific (all in)         | 0.9976076    | 0.3431169    |              | 1         | 0.5595266    |              | 1 | 0.7770717    |
| #### Bn-scaff_16181_1-p45725genome unspecific (oleracea-rapa)  | not scorable | not scorable |              | 1         | 0.6325735    | 0.9917355    |   | 0.5364875    |
| #### Bn-scaff_16182_1-p17555C-genome specific (napus-oleracea) | 0.9138756    | 0.6551495    |              | 0.9844961 | 0.6874186    | not scorable |   | not scorable |
| #### Bn-scaff_16182_1-p19735C-genome specific (oleracea only)  | not scorable | not scorable |              | 0.9922481 | 0.8334873    | not scorable |   | not scorable |
| #### Bn-scaff_16182_1-p28260genome unspecific (all in)         | 0.9688995    | 0.3598563    |              | 1         | 0.5714908    |              | 1 | 0.8294855    |
| #### Bn-scaff_16182_1-p29667C-genome specific (napus-oleracea) | 0.9952153    | 0.8083314    |              | 1         | 0.8276504    | not scorable |   | not scorable |
| #### Bn-scaff_16182_1-p31912genome unspecific (all in)         | 0.9856459    | 0.4744081    |              | 0.9844961 | 0.8096452    |              | 1 | 0.9272014    |
| #### Bn-scaff_16182_1-p45165C-genome specific (napus-oleracea) | 0.9952153    | 0.6983293    |              | 1         | 0.6609219    | not scorable |   | not scorable |
| #### Bn-scaff_16182_1-p48170genome unspecific (all in)         | 0.9760765    | 0.4975482    |              | 1         | 0.8257847    | 0.9917355    |   | 0.7899784    |
| #### Bn-scaff_16182_1-p52285C-genome specific (napus-oleracea) | 0.9904306    | 0.729969     |              | 0.9534883 | 0.7390317    | not scorable |   | not scorable |
| #### Bn-scaff_16182_1-p52484C-genome specific (napus-oleracea) | 0.9928229    | 0.6538658    |              | 1         | 0.6076435    | not scorable |   | not scorable |
| #### Bn-scaff_16182_1-p52507C-genome specific (napus-oleracea) | 0.9904306    | 0.8103882    |              | 1         | 0.7909678    | not scorable |   | not scorable |
| #### Bn-scaff_16182_1-p52531C-genome specific (napus-oleracea) | 0.9736842    | 0.7975057    |              | 0.9767442 | 0.786689     | not scorable |   | not scorable |
| #### Bn-scaff_16182_1-p52549C-genome specific (napus-oleracea) | 0.9952153    | 0.8264481    |              | 0.9922481 | 0.8315895    | not scorable |   | not scorable |
| #### Bn-scaff_16182_1-p54236C-genome specific (napus-oleracea) | 0.9832536    | 0.7828539    |              | 0.9844961 | 0.8059768    | not scorable |   | not scorable |
| #### Bn-scaff_16182_1-p54594C-genome specific (napus-oleracea) | 0.9976076    | 0.8249918    |              | 0.9922481 | 0.8794909    | not scorable |   | not scorable |
| #### Bn-scaff_16182_1-p56061C-genome specific (oleracea only)  | not scorable | not scorable |              | 0.8062016 | 0.7377506    | not scorable |   | not scorable |
| #### Bn-scaff_16182_1-p56073C-genome specific (napus-oleracea) | 0.9928229    | 0.7689445    |              | 0.9844961 | 0.7080132    | not scorable |   | not scorable |
| #### Bn-scaff_16182_1-p56807C-genome specific (napus-oleracea) | 0.9856459    | 0.5604889    |              | 1         | 0.6829425    | not scorable |   | not scorable |
| #### Bn-scaff_16182_1-p57156C-genome specific (oleracea only)  | not scorable | not scorable |              | 0.7131783 | 0.8035795    | not scorable |   | not scorable |
| #### Bn-scaff_16182_1-p58151C-genome specific (napus-oleracea) | 0.9928229    | 0.8687073    |              | 0.9844961 | 0.8222046    | not scorable |   | not scorable |
| #### Bn-scaff_16182_1-p58188C-genome specific (napus-oleracea) | 0.9904306    | 0.8393538    |              | 0.9844961 | 0.7543025    | not scorable |   | not scorable |
| #### Bn-scaff_16182_1-p62908genome unspecific (all in)         | 0.9880383    | 0.3795481    |              | 1         | 0.6765334    |              | 1 | 0.8158733    |
| #### Bn-scaff_16182_1-p63213C-genome specific (napus-oleracea) | 0.9856459    | 0.7910275    |              | 0.9922481 | 0.7843596    | not scorable |   | not scorable |
| #### Bn-scaff_16192_1-p12662C-genome specific (napus-oleracea) | 0.9952153    | 0.7088715    |              | 1         | 0.7982957    | not scorable |   | not scorable |
| #### Bn-scaff_16192_1-p12984C-genome specific (napus-oleracea) | 0.9904306    | 0.7358542    |              | 1         | 0.7641515    | not scorable |   | not scorable |
| #### Bn-scaff_16192_1-p13326C-genome specific (napus-oleracea) | 0.9808612    | 0.6198376    |              | 1         | 0.723284     | not scorable |   | not scorable |
| #### Bn-scaff_16192_1-p13583C-genome specific (napus-oleracea) | 0.9928229    | 0.669354     |              | 1         | 0.7690306    | not scorable |   | not scorable |
| #### Bn-scaff_16192_1-p28121all not scorable                   | not scorable | not scorable | not scorable |           | not scorable | not scorable |   | not scorable |
| #### Bn-scaff_16192_1-p34689C-genome specific (napus-oleracea) | 0.9760765    | 0.7703042    |              | 1         | 0.5842327    | not scorable |   | not scorable |
| #### Bn-scaff_16192_1-p40364C-genome specific (napus-oleracea) | 0.9904306    | 0.7024246    |              | 1         | 0.7208662    | not scorable |   | not scorable |
| #### Bn-scaff_16192_1-p40986C-genome specific (napus-oleracea) | 0.9736842    | 0.6938785    |              | 1         | 0.8367326    | not scorable |   | not scorable |
| #### Bn-scaff_16192_1-p41250C-genome specific (napus-oleracea) | 0.9808612    | 0.7583154    |              | 1         | 0.9073727    | not scorable |   | not scorable |

|                                                                |              |              |           |           |              |              |
|----------------------------------------------------------------|--------------|--------------|-----------|-----------|--------------|--------------|
| #### Bn-scaff_16192_1-p42221C-genome specific (napus-oleracea) | 0.9760765    | 0.7368505    | 1         | 0.8466594 | not scorable | not scorable |
| #### Bn-scaff_16192_1-p45536C-genome specific (napus-oleracea) | 0.9880383    | 0.7504615    | 1         | 0.8621432 | not scorable | not scorable |
| #### Bn-scaff_16192_1-p8856 C-genome specific (napus-oleracea) | 1            | 0.8240293    | 1         | 0.7470953 | not scorable | not scorable |
| #### Bn-scaff_16192_1-p8979 C-genome specific (napus-oleracea) | 0.9760765    | 0.6670169    | 1         | 0.6433131 | not scorable | not scorable |
| #### Bn-scaff_16192_1-p98410C-genome specific (napus-oleracea) | 0.9880383    | 0.8264861    | 0.9922481 | 0.9256359 | not scorable | not scorable |
| #### Bn-scaff_16192_1-p99535C-genome specific (napus-oleracea) | 0.9760765    | 0.6910638    | 0.9922481 | 0.5711945 | not scorable | not scorable |
| #### Bn-scaff_16197_1-p10083C-genome specific (napus-oleracea) | 0.9856459    | 0.6968508    | 1         | 0.7056151 | not scorable | not scorable |
| #### Bn-scaff_16197_1-p10137C-genome specific (napus-oleracea) | 0.9808612    | 0.786463     | 0.9922481 | 0.7398698 | not scorable | not scorable |
| #### Bn-scaff_16197_1-p10145C-genome specific (napus-oleracea) | 0.9832536    | 0.7662081    | 1         | 0.6910904 | not scorable | not scorable |
| #### Bn-scaff_16197_1-p10151C-genome specific (napus-oleracea) | 0.9856459    | 0.7237525    | 0.9922481 | 0.7558627 | not scorable | not scorable |
| #### Bn-scaff_16197_1-p10160C-genome specific (napus-oleracea) | 0.9832536    | 0.7628192    | 0.9922481 | 0.7963846 | not scorable | not scorable |
| #### Bn-scaff_16197_1-p10292genome unspecific (all in)         | 0.9784689    | 0.3923039    | 1         | 0.7599983 | 1            | 0.864892     |
| #### Bn-scaff_16197_1-p10329C-genome specific (oleracea only)  | not scorable | not scorable | 0.5736434 | 0.8154657 | not scorable | not scorable |
| #### Bn-scaff_16197_1-p10396genome unspecific (all in)         | 1            | 0.3342306    | 0.9844961 | 0.4045429 | 1            | 0.9175813    |
| #### Bn-scaff_16197_1-p10396genome unspecific (all in)         | 1            | 0.6622245    | 1         | 0.6493671 | 0.9917355    | 0.6510744    |
| #### Bn-scaff_16197_1-p10524C-genome specific (napus-oleracea) | 0.9832536    | 0.6990677    | 1         | 0.7356622 | not scorable | not scorable |
| #### Bn-scaff_16197_1-p10636genome unspecific (oleracea-rapa)  | not scorable | not scorable | 0.5426357 | 0.8403739 | 1            | 0.91908      |
| #### Bn-scaff_16197_1-p10875genome unspecific (all in)         | 1            | 0.4457023    | 0.9922481 | 0.6963905 | 1            | 0.8135551    |
| #### Bn-scaff_16197_1-p10934C-genome specific (napus-oleracea) | 0.9880383    | 0.7815909    | 1         | 0.845948  | not scorable | not scorable |
| #### Bn-scaff_16197_1-p10936C-genome specific (napus-oleracea) | 0.9880383    | 0.7163951    | 1         | 0.7112245 | not scorable | not scorable |
| #### Bn-scaff_16197_1-p10947C-genome specific (napus-oleracea) | 0.9904306    | 0.794031     | 0.9844961 | 0.803154  | not scorable | not scorable |
| #### Bn-scaff_16197_1-p10963C-genome specific (napus-oleracea) | 0.9928229    | 0.7884061    | 0.9922481 | 0.8253519 | not scorable | not scorable |
| #### Bn-scaff_16197_1-p10984genome unspecific (all in)         | 0.9952153    | 0.3376653    | 1         | 0.720324  | 1            | 0.8321248    |
| #### Bn-scaff_16197_1-p10987genome unspecific (all in)         | 0.9928229    | 0.4712056    | 1         | 0.8389055 | 1            | 0.9205657    |
| #### Bn-scaff_16197_1-p11005C-genome specific (napus-oleracea) | 0.9832536    | 0.8313839    | 1         | 0.8409041 | not scorable | not scorable |
| #### Bn-scaff_16197_1-p11067C-genome specific (napus-oleracea) | 0.9856459    | 0.8506143    | 0.9767442 | 0.7130678 | not scorable | not scorable |
| #### Bn-scaff_16197_1-p11067C-genome specific (napus-oleracea) | 0.9880383    | 0.8719482    | 0.9844961 | 0.7239487 | not scorable | not scorable |
| #### Bn-scaff_16197_1-p11200C-genome specific (napus-oleracea) | 0.9832536    | 0.7278957    | 1         | 0.8181239 | not scorable | not scorable |
| #### Bn-scaff_16197_1-p11371genome unspecific (all in)         | 0.9688995    | 0.2623543    | 1         | 0.7253986 | 1            | 0.897448     |
| #### Bn-scaff_16197_1-p11490C-genome specific (napus-oleracea) | 0.9760765    | 0.7058491    | 0.9922481 | 0.649752  | not scorable | not scorable |
| #### Bn-scaff_16197_1-p11491C-genome specific (napus-oleracea) | 0.9784689    | 0.666948     | 0.9922481 | 0.6499797 | not scorable | not scorable |
| #### Bn-scaff_16197_1-p11563C-genome specific (napus-oleracea) | 0.9760765    | 0.6916327    | 0.9844961 | 0.7723717 | not scorable | not scorable |
| #### Bn-scaff_16197_1-p11605C-genome specific (napus-oleracea) | 0.9856459    | 0.725976     | 0.9922481 | 0.761499  | not scorable | not scorable |

|                                                                 |              |              |           |           |              |              |
|-----------------------------------------------------------------|--------------|--------------|-----------|-----------|--------------|--------------|
| #### Bn-scaff_16197_1-p11665 C-genome specific (napus-oleracea) | 0.9784689    | 0.6587954    | 0.9922481 | 0.7266632 | not scorable | not scorable |
| #### Bn-scaff_16197_1-p11681 C-genome specific (napus-oleracea) | 0.9760765    | 0.7587734    | 1         | 0.7985581 | not scorable | not scorable |
| #### Bn-scaff_16197_1-p11928 genome unspecific (all in)         | 0.9832536    | 0.3544942    | 0.9767442 | 0.8009096 | 1            | 0.9205657    |
| #### Bn-scaff_16197_1-p11931 C-genome specific (napus-oleracea) | 0.9880383    | 0.7632838    | 1         | 0.7908182 | not scorable | not scorable |
| #### Bn-scaff_16197_1-p11935 genome unspecific (all in)         | 0.9712918    | 0.3373004    | 1         | 0.7039821 | 1            | 0.7770717    |
| #### Bn-scaff_16197_1-p12238 C-genome specific (napus-oleracea) | 0.9569378    | 0.5189494    | 0.9922481 | 0.6281049 | not scorable | not scorable |
| #### Bn-scaff_16197_1-p12494 genome unspecific (oleracea-rapa)  | not scorable | not scorable | 0.9922481 | 0.7561634 | 1            | 0.9043359    |
| #### Bn-scaff_16197_1-p12577 genome unspecific (all in)         | 1            | 0.478526     | 0.9844961 | 0.8706398 | 0.9917355    | 0.7430806    |
| #### Bn-scaff_16197_1-p12611 C-genome specific (napus-oleracea) | 0.9832536    | 0.6352119    | 0.9922481 | 0.6339198 | not scorable | not scorable |
| #### Bn-scaff_16197_1-p12873 C-genome specific (napus-oleracea) | 0.9760765    | 0.7873591    | 1         | 0.772032  | not scorable | not scorable |
| #### Bn-scaff_16197_1-p13064 genome unspecific (all in)         | 0.9688995    | 0.5802538    | 0.9922481 | 0.7930965 | 0.8016529    | 0.6246377    |
| #### Bn-scaff_16197_1-p13111 C-genome specific (napus-oleracea) | 0.9832536    | 0.7491208    | 1         | 0.7662436 | not scorable | not scorable |
| #### Bn-scaff_16197_1-p13115 C-genome specific (napus-oleracea) | 0.9928229    | 0.7625359    | 1         | 0.7558138 | not scorable | not scorable |
| #### Bn-scaff_16197_1-p13135 C-genome specific (napus-oleracea) | 0.9760765    | 0.7435865    | 0.9922481 | 0.8566455 | not scorable | not scorable |
| #### Bn-scaff_16197_1-p13178 genome unspecific (all in)         | 0.9808612    | 0.6701967    | 0.9922481 | 0.7266035 | 0.7851239    | 0.7579868    |
| #### Bn-scaff_16197_1-p13334 C-genome specific (napus-oleracea) | 0.9928229    | 0.7234035    | 0.9922481 | 0.8603069 | not scorable | not scorable |
| #### Bn-scaff_16197_1-p13391 C-genome specific (napus-oleracea) | 0.9545454    | 0.2623526    | 0.8992248 | 0.3035676 | not scorable | not scorable |
| #### Bn-scaff_16197_1-p13487 genome unspecific (all in)         | 0.9832536    | 0.7970674    | 1         | 0.7849942 | 0.9669421    | 0.7470195    |
| #### Bn-scaff_16197_1-p13507 genome unspecific (all in)         | 1            | 0.3890912    | 0.9922481 | 0.7035092 | 1            | 0.8116166    |
| #### Bn-scaff_16197_1-p13549 C-genome specific (napus-oleracea) | 0.9880383    | 0.7621364    | 0.9844961 | 0.76203   | not scorable | not scorable |
| #### Bn-scaff_16197_1-p13556 C-genome specific (oleracea only)  | not scorable | not scorable | 0.9922481 | 0.8527662 | not scorable | not scorable |
| #### Bn-scaff_16197_1-p13670 C-genome specific (napus-oleracea) | 0.9808612    | 0.7891334    | 1         | 0.7667552 | not scorable | not scorable |
| #### Bn-scaff_16197_1-p13807 C-genome specific (napus-oleracea) | 0.9736842    | 0.627903     | 0.9922481 | 0.8578489 | not scorable | not scorable |
| #### Bn-scaff_16197_1-p13812 C-genome specific (napus-oleracea) | 0.9808612    | 0.7544839    | 0.9767442 | 0.722585  | not scorable | not scorable |
| #### Bn-scaff_16197_1-p13814 C-genome specific (napus-oleracea) | 0.9880383    | 0.7603831    | 1         | 0.721442  | not scorable | not scorable |
| #### Bn-scaff_16197_1-p13821 C-genome specific (napus-oleracea) | 0.9904306    | 0.7072957    | 0.9922481 | 0.6974347 | not scorable | not scorable |
| #### Bn-scaff_16197_1-p13882 genome unspecific (all in)         | 0.9976076    | 0.3822606    | 1         | 0.6606176 | 0.9917355    | 0.6266003    |
| #### Bn-scaff_16197_1-p13988 genome unspecific (all in)         | 0.9736842    | 0.2657095    | 1         | 0.6919609 | 0.9834711    | 0.6680382    |
| #### Bn-scaff_16197_1-p13989 C-genome specific (napus-oleracea) | 0.9736842    | 0.780257     | 0.9922481 | 0.8474721 | not scorable | not scorable |
| #### Bn-scaff_16197_1-p14002 C-genome specific (napus-oleracea) | 0.9784689    | 0.7623944    | 0.9922481 | 0.7344928 | not scorable | not scorable |
| #### Bn-scaff_16197_1-p14041 C-genome specific (napus-oleracea) | 0.9832536    | 0.7610742    | 0.9922481 | 0.7705654 | not scorable | not scorable |
| #### Bn-scaff_16197_1-p14137 C-genome specific (napus-oleracea) | 0.9784689    | 0.7947034    | 1         | 0.7862567 | not scorable | not scorable |
| #### Bn-scaff_16197_1-p14166 genome unspecific (all in)         | 1            | 0.9039531    | 1         | 0.7125625 | 1            | 0.9397761    |



|                                                                 |              |              |           |           |              |              |
|-----------------------------------------------------------------|--------------|--------------|-----------|-----------|--------------|--------------|
| #### Bn-scaff_16197_1-p18023 C-genome specific (napus-oleracea) | 0.9904306    | 0.8303372    | 0.9844961 | 0.8439318 | not scorable | not scorable |
| #### Bn-scaff_16197_1-p18026 C-genome specific (napus-oleracea) | 0.9880383    | 0.7958123    | 0.9922481 | 0.8059214 | not scorable | not scorable |
| #### Bn-scaff_16197_1-p18027 C-genome specific (napus-oleracea) | 0.9904306    | 0.7886016    | 0.9922481 | 0.857085  | not scorable | not scorable |
| #### Bn-scaff_16197_1-p18055 C-genome specific (napus-oleracea) | 0.9760765    | 0.7612379    | 0.9922481 | 0.8224655 | not scorable | not scorable |
| #### Bn-scaff_16197_1-p18058 C-genome specific (napus-oleracea) | 0.9928229    | 0.7786703    | 1         | 0.856953  | not scorable | not scorable |
| #### Bn-scaff_16197_1-p18060 C-genome specific (napus-oleracea) | 0.9856459    | 0.8013629    | 0.9922481 | 0.834829  | not scorable | not scorable |
| #### Bn-scaff_16197_1-p18080 genome unspecific (all in)         | 0.9784689    | 0.4603123    | 1         | 0.6629943 | 1            | 0.843542     |
| #### Bn-scaff_16197_1-p18081 genome unspecific (all in)         | 1            | 0.4571307    | 1         | 0.7793185 | 1            | 0.7026432    |
| #### Bn-scaff_16197_1-p18222 genome unspecific (oleracea-rapa)  | not scorable | not scorable | 0.9922481 | 0.7195914 | 1            | 0.8004208    |
| #### Bn-scaff_16197_1-p18232 C-genome specific (napus-oleracea) | 0.9952153    | 0.7865318    | 1         | 0.7573248 | not scorable | not scorable |
| #### Bn-scaff_16197_1-p18239 C-genome specific (napus-oleracea) | 0.9976076    | 0.7743896    | 1         | 0.7503859 | not scorable | not scorable |
| #### Bn-scaff_16197_1-p18304 C-genome specific (napus-oleracea) | 0.9976076    | 0.790215     | 1         | 0.7437084 | not scorable | not scorable |
| #### Bn-scaff_16197_1-p18319 C-genome specific (napus-oleracea) | 0.9976076    | 0.7970411    | 1         | 0.8526703 | not scorable | not scorable |
| #### Bn-scaff_16197_1-p18397 C-genome specific (napus-oleracea) | 0.9880383    | 0.7529609    | 0.9922481 | 0.7718444 | not scorable | not scorable |
| #### Bn-scaff_16197_1-p18494 C-genome specific (napus-oleracea) | 0.9569378    | 0.5108575    | 0.9379845 | 0.377651  | not scorable | not scorable |
| #### Bn-scaff_16197_1-p18508 C-genome specific (napus-oleracea) | 0.9880383    | 0.7049531    | 0.9147287 | 0.7530742 | not scorable | not scorable |
| #### Bn-scaff_16197_1-p18554 genome unspecific (all in)         | 0.9808612    | 0.556597     | 1         | 0.607715  | 1            | 0.9159623    |
| #### Bn-scaff_16197_1-p18887 C-genome specific (napus-oleracea) | 0.9928229    | 0.7475355    | 0.9922481 | 0.743422  | not scorable | not scorable |
| #### Bn-scaff_16197_1-p18955 genome unspecific (all in)         | 0.9904306    | 0.7464195    | 1         | 0.7077903 | 0.9669421    | 0.9035117    |
| #### Bn-scaff_16197_1-p19011 C-genome specific (napus-oleracea) | 0.9952153    | 0.772689     | 0.9922481 | 0.7580739 | not scorable | not scorable |
| #### Bn-scaff_16197_1-p19043 C-genome specific (napus-oleracea) | 0.9904306    | 0.7702154    | 1         | 0.8250186 | not scorable | not scorable |
| #### Bn-scaff_16197_1-p19048 C-genome specific (napus-oleracea) | 0.9952153    | 0.7326804    | 0.9922481 | 0.7702305 | not scorable | not scorable |
| #### Bn-scaff_16197_1-p19057 genome unspecific (all in)         | 1            | 0.4457276    | 1         | 0.4817718 | 1            | 0.5628364    |
| #### Bn-scaff_16197_1-p19066 C-genome specific (napus-oleracea) | 0.9856459    | 0.5717062    | 0.9844961 | 0.5742407 | not scorable | not scorable |
| #### Bn-scaff_16197_1-p19126 C-genome specific (napus-oleracea) | 0.9952153    | 0.7934532    | 1         | 0.7615492 | not scorable | not scorable |
| #### Bn-scaff_16197_1-p19129 genome unspecific (all in)         | 0.9880383    | 0.6539937    | 0.9922481 | 0.8431339 | 1            | 0.9397432    |
| #### Bn-scaff_16197_1-p19134 C-genome specific (napus-oleracea) | 0.9976076    | 0.747852     | 1         | 0.8146868 | not scorable | not scorable |
| #### Bn-scaff_16197_1-p19196 C-genome specific (napus-oleracea) | 0.9976076    | 0.7051578    | 0.9922481 | 0.7197124 | not scorable | not scorable |
| #### Bn-scaff_16197_1-p19432 C-genome specific (napus-oleracea) | 1            | 0.83522      | 0.9844961 | 0.8054677 | not scorable | not scorable |
| #### Bn-scaff_16197_1-p19445 C-genome specific (napus-oleracea) | 1            | 0.7545345    | 0.9844961 | 0.7170051 | not scorable | not scorable |
| #### Bn-scaff_16197_1-p19705 genome unspecific (all in)         | 0.9880383    | 0.4348489    | 0.9922481 | 0.7294401 | 1            | 0.9118785    |
| #### Bn-scaff_16197_1-p19749 C-genome specific (napus-oleracea) | 1            | 0.6516646    | 1         | 0.6325374 | not scorable | not scorable |
| #### Bn-scaff_16197_1-p19808 C-genome specific (oleracea only)  | not scorable | not scorable | 1         | 0.7042617 | not scorable | not scorable |

|                                                                 |              |              |           |           |              |              |
|-----------------------------------------------------------------|--------------|--------------|-----------|-----------|--------------|--------------|
| #### Bn-scaff_16197_1-p19812genome unspecific (oleracea-rapa)   | not scorable | not scorable | 0.9844961 | 0.8408713 | 1            | 0.8650683    |
| #### Bn-scaff_16197_1-p19815 C-genome specific (napus-oleracea) | 0.9976076    | 0.3400784    | 1         | 0.8388633 | not scorable | not scorable |
| #### Bn-scaff_16197_1-p20429 C-genome specific (napus-oleracea) | 0.9856459    | 0.7542771    | 1         | 0.7283765 | not scorable | not scorable |
| #### Bn-scaff_16197_1-p20489 C-genome specific (napus-oleracea) | 0.9928229    | 0.7346336    | 1         | 0.7401044 | not scorable | not scorable |
| #### Bn-scaff_16197_1-p20508 C-genome specific (napus-oleracea) | 0.9928229    | 0.798973     | 0.7984496 | 0.8731311 | not scorable | not scorable |
| #### Bn-scaff_16197_1-p20511 C-genome specific (oleracea only)  | not scorable | not scorable | 1         | 0.829932  | not scorable | not scorable |
| #### Bn-scaff_16197_1-p20578 genome unspecific (all in)         | 0.9904306    | 0.3688835    | 0.8837209 | 0.6520748 | 1            | 0.9275322    |
| #### Bn-scaff_16197_1-p20578 C-genome specific (napus-oleracea) | 0.9904306    | 0.8319383    | 1         | 0.850821  | not scorable | not scorable |
| #### Bn-scaff_16197_1-p20588 C-genome specific (napus-oleracea) | 0.9928229    | 0.8331548    | 0.8527132 | 0.8187367 | not scorable | not scorable |
| #### Bn-scaff_16197_1-p20689 C-genome specific (napus-oleracea) | 0.9760765    | 0.8403066    | 0.8527132 | 0.7903211 | not scorable | not scorable |
| #### Bn-scaff_16197_1-p20966 C-genome specific (napus-oleracea) | 0.9521531    | 0.8009151    | 0.9922481 | 0.7061423 | not scorable | not scorable |
| #### Bn-scaff_16197_1-p20979 C-genome specific (napus-oleracea) | 0.9736842    | 0.8681706    | 0.9922481 | 0.7917303 | not scorable | not scorable |
| #### Bn-scaff_16197_1-p20981 C-genome specific (napus-oleracea) | 0.9880383    | 0.8289949    | 0.9922481 | 0.7800183 | not scorable | not scorable |
| #### Bn-scaff_16197_1-p20982 C-genome specific (napus-oleracea) | 0.9904306    | 0.7931815    | 1         | 0.7684985 | not scorable | not scorable |
| #### Bn-scaff_16197_1-p20995 C-genome specific (napus-oleracea) | 0.9665072    | 0.8819402    | 0.9689922 | 0.7204691 | not scorable | not scorable |
| #### Bn-scaff_16197_1-p20997 C-genome specific (napus-oleracea) | 0.9808612    | 0.8488758    | 0.9922481 | 0.762125  | not scorable | not scorable |
| #### Bn-scaff_16197_1-p20999 C-genome specific (napus-oleracea) | 0.9832536    | 0.7850631    | 1         | 0.7529176 | not scorable | not scorable |
| #### Bn-scaff_16197_1-p21000 C-genome specific (napus-oleracea) | 0.9808612    | 0.8847283    | 0.9844961 | 0.7606444 | not scorable | not scorable |
| #### Bn-scaff_16197_1-p21004 C-genome specific (napus-oleracea) | 0.9832536    | 0.767391     | 1         | 0.6978003 | not scorable | not scorable |
| #### Bn-scaff_16197_1-p21006 C-genome specific (napus-oleracea) | 0.9784689    | 0.6818758    | 0.9767442 | 0.5934989 | not scorable | not scorable |
| #### Bn-scaff_16197_1-p21012 C-genome specific (napus-oleracea) | 0.9665072    | 0.8136919    | 1         | 0.787617  | not scorable | not scorable |
| #### Bn-scaff_16197_1-p21016 C-genome specific (napus-oleracea) | 0.9784689    | 0.813933     | 0.8372093 | 0.7606095 | not scorable | not scorable |
| #### Bn-scaff_16197_1-p21017 C-genome specific (napus-oleracea) | 0.9736842    | 0.919674     | 0.9379845 | 0.7412924 | not scorable | not scorable |
| #### Bn-scaff_16197_1-p21022 C-genome specific (napus-oleracea) | 0.9712918    | 0.8482879    | 0.8372093 | 0.7651782 | not scorable | not scorable |
| #### Bn-scaff_16197_1-p21023 C-genome specific (napus-oleracea) | 0.9832536    | 0.8413112    | 0.8449612 | 0.7777268 | not scorable | not scorable |
| #### Bn-scaff_16197_1-p21037 C-genome specific (napus-oleracea) | 0.9808612    | 0.7938419    | 0.9922481 | 0.7205415 | not scorable | not scorable |
| #### Bn-scaff_16197_1-p21047 C-genome specific (napus-oleracea) | 0.9856459    | 0.8040851    | 0.9922481 | 0.8114537 | not scorable | not scorable |
| #### Bn-scaff_16197_1-p21049 C-genome specific (napus-oleracea) | 0.9497608    | 0.7403892    | 0.8449612 | 0.7505164 | not scorable | not scorable |
| #### Bn-scaff_16197_1-p21170 C-genome specific (napus-oleracea) | 0.9808612    | 0.8260741    | 0.9844961 | 0.7058802 | not scorable | not scorable |
| #### Bn-scaff_16197_1-p21175 C-genome specific (napus-oleracea) | 0.9904306    | 0.8086886    | 0.9689922 | 0.6987692 | not scorable | not scorable |
| #### Bn-scaff_16197_1-p21189 C-genome specific (napus-oleracea) | 0.9952153    | 0.8141992    | 0.9767442 | 0.744701  | not scorable | not scorable |
| #### Bn-scaff_16197_1-p21190 C-genome specific (napus-oleracea) | 0.9760765    | 0.8096336    | 0.9844961 | 0.7385343 | not scorable | not scorable |
| #### Bn-scaff_16197_1-p21193 C-genome specific (napus-oleracea) | 0.9856459    | 0.7386258    | 0.9844961 | 0.8114042 | not scorable | not scorable |

|                                                                 |              |              |              |              |              |              |
|-----------------------------------------------------------------|--------------|--------------|--------------|--------------|--------------|--------------|
| #### Bn-scaff_16197_1-p21194 C-genome specific (napus-oleracea) | 0.9832536    | 0.7097695    | 0.9689922    | 0.7372517    | not scorable | not scorable |
| #### Bn-scaff_16197_1-p21227 C-genome specific (napus-oleracea) | 0.9880383    | 0.84152      | 0.9844961    | 0.7705176    | not scorable | not scorable |
| #### Bn-scaff_16197_1-p21242 genome unspecific (oleracea-rapa)  | not scorable | not scorable | 0.9457364    | 0.4474131    | 1            | 0.8731051    |
| #### Bn-scaff_16197_1-p21274 C-genome specific (napus-oleracea) | 0.9712918    | 0.748916     | 0.8449612    | 0.6907074    | not scorable | not scorable |
| #### Bn-scaff_16197_1-p21426 C-genome specific (napus-oleracea) | 0.9760765    | 0.7353263    | 1            | 0.7597989    | not scorable | not scorable |
| #### Bn-scaff_16197_1-p21442 C-genome specific (napus-oleracea) | 0.9808612    | 0.7956952    | 0.9844961    | 0.8031432    | not scorable | not scorable |
| #### Bn-scaff_16197_1-p21446 C-genome specific (napus-oleracea) | 0.9904306    | 0.7798157    | 0.9689922    | 0.7080627    | not scorable | not scorable |
| #### Bn-scaff_16197_1-p21498 C-genome specific (napus-oleracea) | 0.9712918    | 0.7158873    | 0.9922481    | 0.7314869    | not scorable | not scorable |
| #### Bn-scaff_16197_1-p21501 C-genome specific (napus-oleracea) | 0.8038278    | 0.9279973    | 0.5348837    | 0.7930823    | not scorable | not scorable |
| #### Bn-scaff_16197_1-p21505 genome unspecific (all in)         | 0.9449761    | 0.4462446    | 0.9922481    | 0.8414466    | 1            | 0.8653011    |
| #### Bn-scaff_16197_1-p22206 C-genome specific (napus-oleracea) | 0.9904306    | 0.8293325    | 0.9922481    | 0.8200796    | not scorable | not scorable |
| #### Bn-scaff_16197_1-p22215 C-genome specific (napus-oleracea) | 0.9808612    | 0.8282926    | 0.8139535    | 0.7565494    | not scorable | not scorable |
| #### Bn-scaff_16197_1-p22228 genome unspecific (all in)         | 1            | 0.5070999    | 1            | 0.2955077    | 1            | 0.5547176    |
| #### Bn-scaff_16197_1-p22545 genome unspecific (all in)         | 0.9928229    | 0.2340267    | 1            | 0.8944538    | 0.9669421    | 0.7525274    |
| #### Bn-scaff_16197_1-p22546 C-genome specific (napus-oleracea) | 0.9904306    | 0.7635936    | 1            | 0.8113496    | not scorable | not scorable |
| #### Bn-scaff_16197_1-p22579 C-genome specific (napus-oleracea) | 0.8875598    | 0.8046775    | 0.7751938    | 0.9059514    | not scorable | not scorable |
| #### Bn-scaff_16197_1-p22590 genome unspecific (all in)         | 1            | 0.3578919    | 0.9922481    | 0.8203763    | 1            | 0.8623426    |
| #### Bn-scaff_16197_1-p22614 C-genome specific (napus-oleracea) | 0.9856459    | 0.6401603    | 1            | 0.6736619    | not scorable | not scorable |
| #### Bn-scaff_16197_1-p22728 C-genome specific (napus-oleracea) | 0.9976076    | 0.8485919    | 1            | 0.7540472    | not scorable | not scorable |
| #### Bn-scaff_16197_1-p22823 all not scorable                   | not scorable | not scorable | not scorable | not scorable | not scorable | not scorable |
| #### Bn-scaff_16197_1-p23039 C-genome specific (napus-oleracea) | 1            | 0.8297254    | 1            | 0.7060472    | not scorable | not scorable |
| #### Bn-scaff_16197_1-p23054 C-genome specific (napus-oleracea) | 0.9976076    | 0.8530136    | 0.9922481    | 0.7578807    | not scorable | not scorable |
| #### Bn-scaff_16197_1-p23097 C-genome specific (napus-oleracea) | 0.8827751    | 0.6772702    | 0.2015504    | 0.6786112    | not scorable | not scorable |
| #### Bn-scaff_16197_1-p23102 C-genome specific (napus-oleracea) | 0.9880383    | 0.8038796    | 1            | 0.3372295    | not scorable | not scorable |
| #### Bn-scaff_16197_1-p23134 C-genome specific (napus-oleracea) | 0.9904306    | 0.7916951    | 1            | 0.8056695    | not scorable | not scorable |
| #### Bn-scaff_16197_1-p23298 C-genome specific (napus-oleracea) | 0.9952153    | 0.6754357    | 0.9767442    | 0.6387419    | not scorable | not scorable |
| #### Bn-scaff_16197_1-p23307 C-genome specific (napus-oleracea) | 0.9904306    | 0.7833753    | 0.9844961    | 0.8260867    | not scorable | not scorable |
| #### Bn-scaff_16197_1-p23308 C-genome specific (napus-oleracea) | 0.9952153    | 0.8175719    | 0.9922481    | 0.8090261    | not scorable | not scorable |
| #### Bn-scaff_16197_1-p23311 C-genome specific (napus-oleracea) | 1            | 0.9018453    | 0.9767442    | 0.7360901    | not scorable | not scorable |
| #### Bn-scaff_16197_1-p23336 C-genome specific (napus-oleracea) | 0.9856459    | 0.7666343    | 0.9844961    | 0.8414873    | not scorable | not scorable |
| #### Bn-scaff_16197_1-p23358 C-genome specific (napus-oleracea) | 0.9617225    | 0.7818495    | 0.9922481    | 0.6372459    | not scorable | not scorable |
| #### Bn-scaff_16197_1-p23379 genome unspecific (all in)         | 1            | 0.7857798    | 0.744186     | 0.7278452    | 0.9586777    | 0.7588119    |
| #### Bn-scaff_16197_1-p23489 C-genome specific (napus-oleracea) | 0.9928229    | 0.7990976    | 0.9767442    | 0.7772106    | not scorable | not scorable |

|                                                                 |              |              |              |              |              |              |
|-----------------------------------------------------------------|--------------|--------------|--------------|--------------|--------------|--------------|
| #### Bn-scaff_16197_1-p23495 C-genome specific (oleracea only)  | not scorable | not scorable | 0.9534883    | 0.7093611    | not scorable | not scorable |
| #### Bn-scaff_16197_1-p23523 C-genome specific (napus-oleracea) | 0.9976076    | 0.5049368    | 0.9844961    | 0.6700429    | not scorable | not scorable |
| #### Bn-scaff_16197_1-p23564 genome unspecific (all in)         | 0.9665072    | 0.4547098    | 0.9922481    | 0.6903598    | 1            | 0.8022305    |
| #### Bn-scaff_16197_1-p23565 C-genome specific (napus-oleracea) | 0.9952153    | 0.7092205    | 0.9922481    | 0.6149451    | not scorable | not scorable |
| #### Bn-scaff_16197_1-p23655 C-genome specific (napus-oleracea) | 0.9210526    | 0.8075571    | 0.9534883    | 0.7225426    | not scorable | not scorable |
| #### Bn-scaff_16197_1-p23655 C-genome specific (napus-oleracea) | 0.8875598    | 0.8913665    | 0.8837209    | 0.8538013    | not scorable | not scorable |
| #### Bn-scaff_16197_1-p23664 C-genome specific (napus-oleracea) | 0.9952153    | 0.7694595    | 0.9844961    | 0.7178214    | not scorable | not scorable |
| #### Bn-scaff_16197_1-p23673 C-genome specific (napus-oleracea) | 0.9952153    | 0.7917134    | 0.9922481    | 0.6515604    | not scorable | not scorable |
| #### Bn-scaff_16197_1-p23782 C-genome specific (napus-oleracea) | 0.8133971    | 0.7291675    | 0.6434109    | 0.7599509    | not scorable | not scorable |
| #### Bn-scaff_16197_1-p23985 C-genome specific (napus-oleracea) | 1            | 0.7802514    | 1            | 0.8212826    | not scorable | not scorable |
| #### Bn-scaff_16197_1-p24052 C-genome specific (napus-oleracea) | 0.9497608    | 0.8507531    | 0.9689922    | 0.7101301    | not scorable | not scorable |
| #### Bn-scaff_16197_1-p24062 C-genome specific (napus-oleracea) | 0.9904306    | 0.8315715    | 1            | 0.7387437    | not scorable | not scorable |
| #### Bn-scaff_16197_1-p24064 C-genome specific (napus-oleracea) | 0.9952153    | 0.8322501    | 1            | 0.7860874    | not scorable | not scorable |
| #### Bn-scaff_16197_1-p24333 C-genome specific (napus-oleracea) | 0.9880383    | 0.8194354    | 0.9922481    | 0.7756836    | not scorable | not scorable |
| #### Bn-scaff_16197_1-p24358 C-genome specific (napus-oleracea) | 0.9641148    | 0.8254837    | 0.9844961    | 0.7680888    | not scorable | not scorable |
| #### Bn-scaff_16197_1-p24360 C-genome specific (napus-oleracea) | 0.9808612    | 0.7841285    | 0.9922481    | 0.8126388    | not scorable | not scorable |
| #### Bn-scaff_16197_1-p24457 genome unspecific (all in)         | 1            | 0.3800774    | 0.9922481    | 0.2523817    | 1            | 0.7937694    |
| #### Bn-scaff_16197_1-p24686 C-genome specific (napus-oleracea) | 0.9688995    | 0.8171268    | 0.9767442    | 0.8524848    | not scorable | not scorable |
| #### Bn-scaff_16197_1-p24760 C-genome specific (oleracea only)  | not scorable | not scorable | 1            | 0.7201628    | not scorable | not scorable |
| #### Bn-scaff_16197_1-p24812 C-genome specific (napus-oleracea) | 0.9904306    | 0.7993532    | 1            | 0.6663409    | not scorable | not scorable |
| #### Bn-scaff_16197_1-p24825 genome unspecific (oleracea-rapa)  | not scorable | not scorable | 0.9844961    | 0.7883499    | 0.9834711    | 0.8840816    |
| #### Bn-scaff_16197_1-p24870 C-genome specific (napus-oleracea) | 0.9712918    | 0.7872874    | 0.9767442    | 0.7285525    | not scorable | not scorable |
| #### Bn-scaff_16197_1-p24885 C-genome specific (napus-oleracea) | 1            | 0.8920239    | 1            | 0.6943095    | not scorable | not scorable |
| #### Bn-scaff_16197_1-p24918 genome unspecific (all in)         | 0.9904306    | 0.8089899    | 1            | 0.7567359    | 0.7603306    | 0.905454     |
| #### Bn-scaff_16197_1-p24920 genome unspecific (all in)         | 0.9976076    | 0.6224476    | 1            | 0.7576935    | 1            | 0.9090797    |
| #### Bn-scaff_16197_1-p24923 C-genome specific (napus-oleracea) | 1            | 0.8931724    | 1            | 0.7465196    | not scorable | not scorable |
| #### Bn-scaff_16197_1-p24934 genome unspecific (all in)         | 0.9928229    | 0.473803     | 1            | 0.8409605    | 1            | 0.9226826    |
| #### Bn-scaff_16197_1-p24954 C-genome specific (napus-oleracea) | 0.9952153    | 0.8369689    | 1            | 0.6896185    | not scorable | not scorable |
| #### Bn-scaff_16197_1-p24990 napus specific                     | 0.9641148    | 0.8510053    | not scorable | not scorable | not scorable | not scorable |
| #### Bn-scaff_16197_1-p25209 genome unspecific (all in)         | 1            | 0.6771721    | 0.9844961    | 0.7189939    | 0.9008265    | 0.9011838    |
| #### Bn-scaff_16197_1-p25215 genome unspecific (all in)         | 0.9066986    | 0.3244297    | 0.9922481    | 0.2336971    | 1            | 0.7641606    |
| #### Bn-scaff_16197_1-p25216 C-genome specific (napus-oleracea) | 0.9976076    | 0.9065384    | 0.9844961    | 0.7069139    | not scorable | not scorable |
| #### Bn-scaff_16197_1-p25219 genome unspecific (all in)         | 1            | 0.6951002    | 1            | 0.6636602    | 1            | 0.7453299    |



|                                                                |              |              |           |           |              |              |
|----------------------------------------------------------------|--------------|--------------|-----------|-----------|--------------|--------------|
| #### Bn-scaff_16197_1-p25221C-genome specific (napus-oleracea) | 0.9617225    | 0.3504814    | 0.9844961 | 0.8008887 | not scorable | not scorable |
| #### Bn-scaff_16197_1-p25222C-genome specific (napus-oleracea) | 0.9856459    | 0.8213012    | 1         | 0.6720785 | not scorable | not scorable |
| #### Bn-scaff_16197_1-p25233genome unspecific (all in)         | 0.9832536    | 0.4951566    | 0.9844961 | 0.7455313 | 1            | 0.7733544    |
| #### Bn-scaff_16197_1-p25252genome unspecific (all in)         | 0.9952153    | 0.7893525    | 1         | 0.733865  | 1            | 0.6332505    |
| #### Bn-scaff_16197_1-p25409C-genome specific (napus-oleracea) | 0.9856459    | 0.7843671    | 0.9922481 | 0.6114538 | not scorable | not scorable |
| #### Bn-scaff_16197_1-p25413C-genome specific (napus-oleracea) | 0.9832536    | 0.8523114    | 1         | 0.7499615 | not scorable | not scorable |
| #### Bn-scaff_16197_1-p25458C-genome specific (napus-oleracea) | 0.9928229    | 0.829612     | 1         | 0.7799159 | not scorable | not scorable |
| #### Bn-scaff_16197_1-p25493C-genome specific (napus-oleracea) | 0.9904306    | 0.7955946    | 1         | 0.7136511 | not scorable | not scorable |
| #### Bn-scaff_16197_1-p25655C-genome specific (napus-oleracea) | 0.9880383    | 0.8634912    | 0.9922481 | 0.7483241 | not scorable | not scorable |
| #### Bn-scaff_16197_1-p25658C-genome specific (napus-oleracea) | 0.9928229    | 0.8402875    | 0.9844961 | 0.8187077 | not scorable | not scorable |
| #### Bn-scaff_16197_1-p25767C-genome specific (napus-oleracea) | 0.9952153    | 0.8574878    | 0.9922481 | 0.8004217 | not scorable | not scorable |
| #### Bn-scaff_16197_1-p25810genome unspecific (all in)         | 0.9569378    | 0.2497977    | 0.9844961 | 0.638211  | 1            | 0.7159263    |
| #### Bn-scaff_16197_1-p25816genome unspecific (oleracea-rapa)  | not scorable | not scorable | 0.9922481 | 0.7934078 | 0.9917355    | 0.4999031    |
| #### Bn-scaff_16197_1-p25819genome unspecific (all in)         | 0.9641148    | 0.6597981    | 1         | 0.6392398 | 1            | 0.6641932    |
| #### Bn-scaff_16197_1-p25826genome unspecific (all in)         | 0.9593301    | 0.4382612    | 1         | 0.7477578 | 1            | 0.8343507    |
| #### Bn-scaff_16197_1-p25930genome unspecific (all in)         | 0.9545454    | 0.5710263    | 0.9922481 | 0.6367947 | 1            | 0.9070752    |
| #### Bn-scaff_16197_1-p25973C-genome specific (napus-oleracea) | 0.9976076    | 0.5987982    | 1         | 0.5854536 | not scorable | not scorable |
| #### Bn-scaff_16197_1-p26021C-genome specific (napus-oleracea) | 0.9593301    | 0.7868108    | 1         | 0.8317356 | not scorable | not scorable |
| #### Bn-scaff_16197_1-p26035C-genome specific (napus-oleracea) | 0.9928229    | 0.7402357    | 0.9612403 | 0.6407964 | not scorable | not scorable |
| #### Bn-scaff_16197_1-p26055C-genome specific (napus-oleracea) | 0.9760765    | 0.7819453    | 1         | 0.8007032 | not scorable | not scorable |
| #### Bn-scaff_16197_1-p26148C-genome specific (napus-oleracea) | 0.9736842    | 0.7954239    | 1         | 0.7363606 | not scorable | not scorable |
| #### Bn-scaff_16197_1-p26209C-genome specific (napus-oleracea) | 0.9688995    | 0.7740192    | 1         | 0.8252024 | not scorable | not scorable |
| #### Bn-scaff_16197_1-p26217C-genome specific (napus-oleracea) | 0.9712918    | 0.7175997    | 1         | 0.7160178 | not scorable | not scorable |
| #### Bn-scaff_16197_1-p26264C-genome specific (napus-oleracea) | 0.9928229    | 0.708252     | 0.9922481 | 0.6700429 | not scorable | not scorable |
| #### Bn-scaff_16197_1-p26360genome unspecific (all in)         | 0.9521531    | 0.4382001    | 1         | 0.6618797 | 1            | 0.8803408    |
| #### Bn-scaff_16197_1-p26400C-genome specific (napus-oleracea) | 0.9712918    | 0.7166955    | 1         | 0.6821707 | not scorable | not scorable |
| #### Bn-scaff_16197_1-p26450C-genome specific (napus-oleracea) | 0.9665072    | 0.7761682    | 0.9922481 | 0.7311127 | not scorable | not scorable |
| #### Bn-scaff_16197_1-p26622genome unspecific (all in)         | 1            | 0.5516927    | 1         | 0.524036  | 1            | 0.5547521    |
| #### Bn-scaff_16197_1-p27340C-genome specific (napus-oleracea) | 0.9856459    | 0.8282089    | 0.9922481 | 0.7781072 | not scorable | not scorable |
| #### Bn-scaff_16197_1-p27961C-genome specific (napus-oleracea) | 0.9856459    | 0.8673421    | 1         | 0.6628261 | not scorable | not scorable |
| #### Bn-scaff_16197_1-p28361genome unspecific (oleracea-rapa)  | not scorable | not scorable | 1         | 0.6957944 | 0.7851239    | 0.9431019    |
| #### Bn-scaff_16197_1-p28489C-genome specific (napus-oleracea) | 0.9928229    | 0.8236247    | 1         | 0.8319871 | not scorable | not scorable |
| #### Bn-scaff_16197_1-p28524C-genome specific (napus-oleracea) | 0.9712918    | 0.8591458    | 1         | 0.7393389 | not scorable | not scorable |

|                                                                  |              |              |              |              |              |              |
|------------------------------------------------------------------|--------------|--------------|--------------|--------------|--------------|--------------|
| ##### Bn-scaff_16197_1-p28533 C-genome specific (napus-oleracea) | 0.9688995    | 0.8397588    | 1            | 0.7850338    | not scorable | not scorable |
| ##### Bn-scaff_16197_1-p28725 napus specific                     | 0.9712918    | 0.2396837    | not scorable | not scorable | not scorable | not scorable |
| ##### Bn-scaff_16197_1-p28727 C-genome specific (napus-oleracea) | 0.9808612    | 0.796161     | 0.9844961    | 0.7425784    | not scorable | not scorable |
| ##### Bn-scaff_16197_1-p28727 C-genome specific (napus-oleracea) | 0.9928229    | 0.8098274    | 0.9922481    | 0.8647357    | not scorable | not scorable |
| ##### Bn-scaff_16197_1-p28729 C-genome specific (napus-oleracea) | 1            | 0.8795602    | 1            | 0.8192506    | not scorable | not scorable |
| ##### Bn-scaff_16197_1-p28805 C-genome specific (napus-oleracea) | 0.9928229    | 0.8199552    | 0.9922481    | 0.7594723    | not scorable | not scorable |
| ##### Bn-scaff_16197_1-p28806 C-genome specific (napus-oleracea) | 0.9832536    | 0.7930545    | 1            | 0.760958     | not scorable | not scorable |
| ##### Bn-scaff_16197_1-p28808 C-genome specific (napus-oleracea) | 0.9904306    | 0.8107279    | 1            | 0.7544396    | not scorable | not scorable |
| ##### Bn-scaff_16197_1-p28817 C-genome specific (napus-oleracea) | 0.9952153    | 0.8817193    | 0.9844961    | 0.709303     | not scorable | not scorable |
| ##### Bn-scaff_16197_1-p28830 C-genome specific (napus-oleracea) | 0.9952153    | 0.8618682    | 1            | 0.8677482    | not scorable | not scorable |
| ##### Bn-scaff_16197_1-p28904 C-genome specific (napus-oleracea) | 0.8875598    | 0.8631776    | 0.5348837    | 0.7864848    | not scorable | not scorable |
| ##### Bn-scaff_16197_1-p28912 C-genome specific (napus-oleracea) | 0.9210526    | 0.8605065    | 0.5503876    | 0.7730435    | not scorable | not scorable |
| ##### Bn-scaff_16197_1-p28913 C-genome specific (napus-oleracea) | 0.9114832    | 0.8094932    | 0.5813953    | 0.7931103    | not scorable | not scorable |
| ##### Bn-scaff_16197_1-p28933 C-genome specific (napus-oleracea) | 0.9138756    | 0.8650401    | 0.5813953    | 0.8596498    | not scorable | not scorable |
| ##### Bn-scaff_16197_1-p28974 genome unspecific (all in)         | 0.937799     | 0.5093047    | 0.9844961    | 0.552497     | 1            | 0.6665939    |
| ##### Bn-scaff_16197_1-p29110 genome unspecific (all in)         | 0.9712918    | 0.5368646    | 0.9922481    | 0.6736414    | 1            | 0.9175709    |
| ##### Bn-scaff_16197_1-p29345 C-genome specific (oleracea only)  | not scorable | not scorable | 1            | 0.5099606    | not scorable | not scorable |
| ##### Bn-scaff_16197_1-p29566 C-genome specific (napus-oleracea) | 0.9856459    | 0.6749403    | 0.9844961    | 0.6772634    | not scorable | not scorable |
| ##### Bn-scaff_16197_1-p29576 genome unspecific (all in)         | 1            | 0.7776622    | 1            | 0.6937456    | 1            | 0.8211691    |
| ##### Bn-scaff_16197_1-p29580 genome unspecific (oleracea-rapa)  | not scorable | not scorable | 1            | 0.7536136    | 0.9917355    | 0.7750327    |
| ##### Bn-scaff_16197_1-p29582 genome unspecific (all in)         | 0.9521531    | 0.434488     | 1            | 0.728646     | 1            | 0.8164994    |
| ##### Bn-scaff_16197_1-p29585 C-genome specific (napus-oleracea) | 0.9760765    | 0.776042     | 0.9689922    | 0.7990595    | not scorable | not scorable |
| ##### Bn-scaff_16197_1-p29585 C-genome specific (napus-oleracea) | 0.9904306    | 0.7349766    | 0.9922481    | 0.7646528    | not scorable | not scorable |
| ##### Bn-scaff_16197_1-p29586 genome unspecific (all in)         | 0.9569378    | 0.3732007    | 1            | 0.5380238    | 1            | 0.7359305    |
| ##### Bn-scaff_16197_1-p29599 genome unspecific (all in)         | 0.9425837    | 0.3393253    | 1            | 0.7448032    | 1            | 0.8249918    |
| ##### Bn-scaff_16197_1-p29623 genome unspecific (all in)         | 0.9545454    | 0.4077694    | 0.9844961    | 0.5840071    | 1            | 0.7089341    |
| ##### Bn-scaff_16197_1-p29634 genome unspecific (oleracea-rapa)  | not scorable | not scorable | 0.9844961    | 0.2824662    | 0.9917355    | 0.5258967    |
| ##### Bn-scaff_16197_1-p29684 genome unspecific (all in)         | 0.9665072    | 0.4186385    | 1            | 0.7035888    | 1            | 0.8657575    |
| ##### Bn-scaff_16197_1-p29710 C-genome specific (napus-oleracea) | 0.9832536    | 0.7536161    | 0.8992248    | 0.7463189    | not scorable | not scorable |
| ##### Bn-scaff_16197_1-p29761 C-genome specific (napus-oleracea) | 0.9712918    | 0.7163737    | 1            | 0.7173659    | not scorable | not scorable |
| ##### Bn-scaff_16197_1-p29799 C-genome specific (napus-oleracea) | 0.9904306    | 0.6395709    | 0.9689922    | 0.6343918    | not scorable | not scorable |
| ##### Bn-scaff_16197_1-p30069 C-genome specific (napus-oleracea) | 0.9641148    | 0.7420033    | 0.9922481    | 0.6868801    | not scorable | not scorable |
| ##### Bn-scaff_16197_1-p30197 genome unspecific (all in)         | 0.9425837    | 0.2821268    | 0.9844961    | 0.413291     | 0.9917355    | 0.7787284    |

|                                                                |              |              |              |              |              |              |
|----------------------------------------------------------------|--------------|--------------|--------------|--------------|--------------|--------------|
| #### Bn-scaff_16197_1-p3019 genome unspecific (all in)         | 0.9904306    | 0.3081612    | 1            | 0.8143823    | 1            | 0.874771     |
| #### Bn-scaff_16197_1-p3020 genome unspecific (all in)         | 0.9856459    | 0.2884337    | 0.9922481    | 0.7362744    | 1            | 0.8110922    |
| #### Bn-scaff_16197_1-p3020 genome unspecific (all in)         | 0.9617225    | 0.4873697    | 1            | 0.6850112    | 1            | 0.8331257    |
| #### Bn-scaff_16197_1-p3020 genome unspecific (all in)         | 1            | 0.7495229    | 1            | 0.7252185    | 0.9917355    | 0.7239951    |
| #### Bn-scaff_16197_1-p3021 genome unspecific (all in)         | 0.9712918    | 0.2562172    | 1            | 0.6893715    | 1            | 0.79346      |
| #### Bn-scaff_16197_1-p3021 genome unspecific (all in)         | 0.9688995    | 0.1806713    | 0.9767442    | 0.3258957    | 1            | 0.8085203    |
| #### Bn-scaff_16197_1-p3021 C-genome specific (napus-oleracea) | 0.9856459    | 0.7802658    | 1            | 0.7856351    | not scorable | not scorable |
| #### Bn-scaff_16197_1-p3022 C-genome specific (napus-oleracea) | 0.9688995    | 0.673045     | 1            | 0.6263876    | not scorable | not scorable |
| #### Bn-scaff_16197_1-p3023 C-genome specific (napus-oleracea) | 0.9952153    | 0.7617941    | 1            | 0.7680285    | not scorable | not scorable |
| #### Bn-scaff_16197_1-p3025 C-genome specific (napus-oleracea) | 0.9856459    | 0.7768792    | 0.9767442    | 0.7322744    | not scorable | not scorable |
| #### Bn-scaff_16197_1-p3026 C-genome specific (napus-oleracea) | 0.8444976    | 0.8065313    | 0.9844961    | 0.7845801    | not scorable | not scorable |
| #### Bn-scaff_16197_1-p3031 C-genome specific (napus-oleracea) | 0.9904306    | 0.7885851    | 1            | 0.8587635    | not scorable | not scorable |
| #### Bn-scaff_16197_1-p3054 C-genome specific (napus-oleracea) | 1            | 0.6963655    | 0.9689922    | 0.7121516    | not scorable | not scorable |
| #### Bn-scaff_16197_1-p3061 C-genome specific (napus-oleracea) | 0.9856459    | 0.8401798    | 1            | 0.7825878    | not scorable | not scorable |
| #### Bn-scaff_16197_1-p3061 C-genome specific (napus-oleracea) | 0.9952153    | 0.832815     | 0.9767442    | 0.7655       | not scorable | not scorable |
| #### Bn-scaff_16197_1-p3061 C-genome specific (napus-oleracea) | 0.9904306    | 0.8287335    | 0.9922481    | 0.8018759    | not scorable | not scorable |
| #### Bn-scaff_16197_1-p3061 C-genome specific (napus-oleracea) | 1            | 0.8233944    | 0.9844961    | 0.8097562    | not scorable | not scorable |
| #### Bn-scaff_16197_1-p3062 genome unspecific (all in)         | 0.9593301    | 0.3580153    | 1            | 0.6228359    | 1            | 0.6824545    |
| #### Bn-scaff_16197_1-p3066 C-genome specific (napus-oleracea) | 0.9760765    | 0.8217804    | 1            | 0.748133     | not scorable | not scorable |
| #### Bn-scaff_16197_1-p3070 C-genome specific (napus-oleracea) | 0.9880383    | 0.7464877    | 1            | 0.7609118    | not scorable | not scorable |
| #### Bn-scaff_16197_1-p3070 C-genome specific (napus-oleracea) | 0.9784689    | 0.7564287    | 1            | 0.7686688    | not scorable | not scorable |
| #### Bn-scaff_16197_1-p3082 C-genome specific (napus-oleracea) | 0.9904306    | 0.7641233    | 1            | 0.7561952    | not scorable | not scorable |
| #### Bn-scaff_16197_1-p3089 C-genome specific (napus-oleracea) | 0.9880383    | 0.7987608    | 0.9922481    | 0.8426073    | not scorable | not scorable |
| #### Bn-scaff_16197_1-p3102 C-genome specific (napus-oleracea) | 0.9928229    | 0.8022934    | 1            | 0.3139056    | not scorable | not scorable |
| #### Bn-scaff_16197_1-p3104 genome unspecific (all in)         | 0.9712918    | 0.5054612    | 1            | 0.7546762    | 1            | 0.9083893    |
| #### Bn-scaff_16197_1-p3111 C-genome specific (napus-oleracea) | 0.9712918    | 0.8180534    | 0.9922481    | 0.7844344    | not scorable | not scorable |
| #### Bn-scaff_16197_1-p3112 genome unspecific (all in)         | 0.9760765    | 0.4148359    | 1            | 0.7395546    | 0.9752066    | 0.7213839    |
| #### Bn-scaff_16197_1-p3112 genome unspecific (all in)         | 0.9784689    | 0.3789105    | 1            | 0.770614     | 1            | 0.5997501    |
| #### Bn-scaff_16197_1-p3112 genome unspecific (oleracea-rapa)  | not scorable | not scorable | 1            | 0.5797136    | 1            | 0.894881     |
| #### Bn-scaff_16197_1-p3117 C-genome specific (napus-oleracea) | 0.9904306    | 0.7502405    | 1            | 0.753015     | not scorable | not scorable |
| #### Bn-scaff_16197_1-p3138 all not scorable                   | not scorable | not scorable | not scorable | not scorable | not scorable | not scorable |
| #### Bn-scaff_16197_1-p3148 genome unspecific (all in)         | 0.9928229    | 0.3334319    | 0.9767442    | 0.4193668    | 1            | 0.7494321    |
| #### Bn-scaff_16197_1-p3148 C-genome specific (napus-oleracea) | 0.9928229    | 0.7985083    | 0.9922481    | 0.8075142    | not scorable | not scorable |

|                                                                |              |              |              |              |              |              |
|----------------------------------------------------------------|--------------|--------------|--------------|--------------|--------------|--------------|
| #### Bn-scaff_16197_1-p31488genome unspecific (all in)         | 0.9928229    | 0.3186427    | 0.9767442    | 0.690545     | 1            | 0.8772781    |
| #### Bn-scaff_16197_1-p31501C-genome specific (oleracea only)  | not scorable | not scorable | 0.4263566    | 0.6867775    | not scorable | not scorable |
| #### Bn-scaff_16197_1-p31527C-genome specific (napus-oleracea) | 0.9904306    | 0.8097827    | 0.9922481    | 0.7448154    | not scorable | not scorable |
| #### Bn-scaff_16197_1-p31556C-genome specific (napus-oleracea) | 0.9952153    | 0.7627608    | 0.9767442    | 0.7249802    | not scorable | not scorable |
| #### Bn-scaff_16197_1-p32416C-genome specific (oleracea only)  | not scorable | not scorable | 0.9147287    | 0.5176792    | not scorable | not scorable |
| #### Bn-scaff_16197_1-p32417C-genome specific (napus-oleracea) | 0.9641148    | 0.9355028    | 1            | 0.7114246    | not scorable | not scorable |
| #### Bn-scaff_16197_1-p32560C-genome specific (napus-oleracea) | 0.9904306    | 0.8589305    | 0.9922481    | 0.8178437    | not scorable | not scorable |
| #### Bn-scaff_16197_1-p32598C-genome specific (napus-oleracea) | 0.9904306    | 0.8084451    | 0.9922481    | 0.699357     | not scorable | not scorable |
| #### Bn-scaff_16197_1-p32947C-genome specific (napus-oleracea) | 1            | 0.8404243    | 1            | 0.7990327    | not scorable | not scorable |
| #### Bn-scaff_16197_1-p36281A-genome specific (rapa only)      | not scorable | not scorable | not scorable | not scorable | 0.9752066    | 0.8087772    |
| #### Bn-scaff_16197_1-p37224C-genome specific (napus-oleracea) | 0.9904306    | 0.7914495    | 1            | 0.4466404    | not scorable | not scorable |
| #### Bn-scaff_16197_1-p37249genome unspecific (all in)         | 1            | 0.6063917    | 1            | 0.3920189    | 1            | 0.9175813    |
| #### Bn-scaff_16197_1-p38517C-genome specific (oleracea only)  | not scorable | not scorable | 0.9689922    | 0.400192     | not scorable | not scorable |
| #### Bn-scaff_16197_1-p38571C-genome specific (oleracea only)  | not scorable | not scorable | 0.8914729    | 0.4237112    | not scorable | not scorable |
| #### Bn-scaff_16197_1-p38657C-genome specific (napus-oleracea) | 0.9688995    | 0.5598012    | 0.8914729    | 0.1784509    | not scorable | not scorable |
| #### Bn-scaff_16197_1-p39416C-genome specific (napus-oleracea) | 0.9784689    | 0.8807104    | 0.9922481    | 0.7679947    | not scorable | not scorable |
| #### Bn-scaff_16197_1-p39745C-genome specific (napus-oleracea) | 0.9856459    | 0.7661377    | 1            | 0.5026341    | not scorable | not scorable |
| #### Bn-scaff_16197_1-p40482C-genome specific (napus-oleracea) | 0.9904306    | 0.8381331    | 0.9922481    | 0.7975124    | not scorable | not scorable |
| #### Bn-scaff_16197_1-p41835C-genome specific (napus-oleracea) | 0.9904306    | 0.7638845    | 0.9922481    | 0.6769027    | not scorable | not scorable |
| #### Bn-scaff_16197_1-p41848C-genome specific (napus-oleracea) | 0.9904306    | 0.842873     | 0.9844961    | 0.7036459    | not scorable | not scorable |
| #### Bn-scaff_16197_1-p41871C-genome specific (napus-oleracea) | 0.9880383    | 0.9179149    | 0.9922481    | 0.7623905    | not scorable | not scorable |
| #### Bn-scaff_16197_1-p42445C-genome specific (napus-oleracea) | 0.9880383    | 0.6507745    | 1            | 0.5230411    | not scorable | not scorable |
| #### Bn-scaff_16197_1-p43803C-genome specific (napus-oleracea) | 0.9952153    | 0.7172833    | 0.9844961    | 0.7925426    | not scorable | not scorable |
| #### Bn-scaff_16197_1-p45383genome unspecific (all in)         | 0.9688995    | 0.4004668    | 0.9922481    | 0.6048372    | 1            | 0.7641606    |
| #### Bn-scaff_16197_1-p47391genome unspecific (all in)         | 1            | 0.6921808    | 1            | 0.6872432    | 1            | 0.7495647    |
| #### Bn-scaff_16197_1-p48963genome unspecific (all in)         | 0.9976076    | 0.4186262    | 0.9922481    | 0.6176597    | 1            | 0.7884539    |
| #### Bn-scaff_16197_1-p48997genome unspecific (oleracea-rapa)  | not scorable | not scorable | 1            | 0.6807591    | 1            | 0.786476     |
| #### Bn-scaff_16197_1-p49009genome unspecific (oleracea-rapa)  | not scorable | not scorable | 1            | 0.7313752    | 1            | 0.6824055    |
| #### Bn-scaff_16197_1-p49064genome unspecific (oleracea-rapa)  | not scorable | not scorable | 1            | 0.782326     | 0.9752066    | 0.7956088    |
| #### Bn-scaff_16197_1-p49755C-genome specific (oleracea only)  | not scorable | not scorable | 0.6046512    | 0.8191612    | not scorable | not scorable |
| #### Bn-scaff_16197_1-p50482genome unspecific (all in)         | 0.9545454    | 0.3201406    | 1            | 0.5346096    | 1            | 0.8543575    |
| #### Bn-scaff_16197_1-p50676C-genome specific (napus-oleracea) | 0.9976076    | 0.4231236    | 0.9844961    | 0.5985748    | not scorable | not scorable |
| #### Bn-scaff_16197_1-p50878genome unspecific (all in)         | 0.9760765    | 0.3574779    | 0.9767442    | 0.7037721    | 1            | 0.7641606    |

|                                                                 |              |              |           |           |              |              |
|-----------------------------------------------------------------|--------------|--------------|-----------|-----------|--------------|--------------|
| #### Bn-scaff_16197_1-p51513 C-genome specific (napus-oleracea) | 0.9904306    | 0.8230423    | 0.9844961 | 0.8106634 | not scorable | not scorable |
| #### Bn-scaff_16197_1-p54983 C-genome specific (napus-oleracea) | 0.9904306    | 0.9115705    | 0.9922481 | 0.7908303 | not scorable | not scorable |
| #### Bn-scaff_16197_1-p55399 C-genome specific (napus-oleracea) | 0.9736842    | 0.775292     | 0.9922481 | 0.635372  | not scorable | not scorable |
| #### Bn-scaff_16197_1-p55733 C-genome specific (napus-oleracea) | 0.9712918    | 0.7256416    | 1         | 0.6461747 | not scorable | not scorable |
| #### Bn-scaff_16197_1-p56166 C-genome specific (napus-oleracea) | 0.9617225    | 0.8231333    | 1         | 0.7541816 | not scorable | not scorable |
| #### Bn-scaff_16197_1-p56700 C-genome specific (napus-oleracea) | 0.9928229    | 0.741977     | 1         | 0.6990294 | not scorable | not scorable |
| #### Bn-scaff_16197_1-p59529 C-genome specific (napus-oleracea) | 0.9856459    | 0.797675     | 0.9922481 | 0.7010472 | not scorable | not scorable |
| #### Bn-scaff_16197_1-p62576 C-genome specific (napus-oleracea) | 0.9569378    | 0.5667346    | 1         | 0.7130056 | not scorable | not scorable |
| #### Bn-scaff_16197_1-p63009 C-genome specific (napus-oleracea) | 0.8564593    | 0.8027508    | 0.9844961 | 0.7703126 | not scorable | not scorable |
| #### Bn-scaff_16197_1-p63428 genome unspecific (all in)         | 0.9593301    | 0.6096658    | 0.9922481 | 0.6443874 | 1            | 0.8588856    |
| #### Bn-scaff_16197_1-p63638 C-genome specific (napus-oleracea) | 0.9712918    | 0.7846763    | 1         | 0.7956621 | not scorable | not scorable |
| #### Bn-scaff_16197_1-p63640 genome unspecific (oleracea-rapa)  | not scorable | not scorable | 1         | 0.7550988 | 1            | 0.6973529    |
| #### Bn-scaff_16197_1-p63712 C-genome specific (napus-oleracea) | 0.9712918    | 0.788237     | 1         | 0.7671918 | not scorable | not scorable |
| #### Bn-scaff_16197_1-p65261 genome unspecific (oleracea-rapa)  | not scorable | not scorable | 1         | 0.7243945 | 1            | 0.8378905    |
| #### Bn-scaff_16197_1-p65454 C-genome specific (napus-oleracea) | 0.9784689    | 0.7782308    | 1         | 0.8397336 | not scorable | not scorable |
| #### Bn-scaff_16197_1-p65463 C-genome specific (napus-oleracea) | 0.9712918    | 0.7843971    | 1         | 0.8595253 | not scorable | not scorable |
| #### Bn-scaff_16197_1-p65894 C-genome specific (napus-oleracea) | 0.9784689    | 0.7685593    | 0.9922481 | 0.7993114 | not scorable | not scorable |
| #### Bn-scaff_16197_1-p65948 C-genome specific (napus-oleracea) | 0.9808612    | 0.8045948    | 0.9922481 | 0.8315618 | not scorable | not scorable |
| #### Bn-scaff_16197_1-p65958 C-genome specific (oleracea only)  | not scorable | not scorable | 0.9767442 | 0.6983387 | not scorable | not scorable |
| #### Bn-scaff_16197_1-p67928 genome unspecific (all in)         | 0.9736842    | 0.2926626    | 0.9457364 | 0.6329885 | 1            | 0.8943084    |
| #### Bn-scaff_16197_1-p68961 C-genome specific (napus-oleracea) | 0.9808612    | 0.8213499    | 1         | 0.7973794 | not scorable | not scorable |
| #### Bn-scaff_16197_1-p69700 genome unspecific (all in)         | 0.9832536    | 0.7577586    | 1         | 0.7654147 | 1            | 0.7635757    |
| #### Bn-scaff_16197_1-p72464 C-genome specific (napus-oleracea) | 0.9880383    | 0.806964     | 1         | 0.7193589 | not scorable | not scorable |
| #### Bn-scaff_16197_1-p73281 C-genome specific (napus-oleracea) | 0.9760765    | 0.7307901    | 0.4031008 | 0.6874918 | not scorable | not scorable |
| #### Bn-scaff_16197_1-p73964 genome unspecific (all in)         | 0.9665072    | 0.3178284    | 0.9844961 | 0.3902797 | 0.9917355    | 0.4796524    |
| #### Bn-scaff_16197_1-p73997 genome unspecific (all in)         | 0.9856459    | 0.4652398    | 0.9767442 | 0.8729028 | 1            | 0.8911306    |
| #### Bn-scaff_16197_1-p74008 genome unspecific (all in)         | 0.9904306    | 0.464584     | 0.7906977 | 0.8262141 | 1            | 0.9039531    |
| #### Bn-scaff_16197_1-p74067 genome unspecific (all in)         | 1            | 0.5408691    | 1         | 0.67302   | 1            | 0.9091996    |
| #### Bn-scaff_16197_1-p78078 genome unspecific (all in)         | 0.9832536    | 0.411171     | 0.9922481 | 0.7571561 | 1            | 0.9095823    |
| #### Bn-scaff_16197_1-p78479 C-genome specific (napus-oleracea) | 0.9832536    | 0.7155926    | 1         | 0.7764187 | not scorable | not scorable |
| #### Bn-scaff_16197_1-p78504 genome unspecific (all in)         | 0.9593301    | 0.5519986    | 1         | 0.724251  | 1            | 0.8670918    |
| #### Bn-scaff_16197_1-p78521 C-genome specific (napus-oleracea) | 0.9688995    | 0.8045976    | 1         | 0.7578043 | not scorable | not scorable |
| #### Bn-scaff_16197_1-p78627 genome unspecific (all in)         | 0.9712918    | 0.3507836    | 1         | 0.8444358 | 1            | 0.8765727    |

|                                                                 |              |              |           |           |              |              |
|-----------------------------------------------------------------|--------------|--------------|-----------|-----------|--------------|--------------|
| #### Bn-scaff_16197_1-p7874C-genome specific (napus-oleracea)   | 0.9760765    | 0.8026251    | 0.9767442 | 0.7463781 | not scorable | not scorable |
| #### Bn-scaff_16197_1-p7874E C-genome specific (napus-oleracea) | 0.9593301    | 0.7456042    | 0.9922481 | 0.7509478 | not scorable | not scorable |
| #### Bn-scaff_16197_1-p8039C-genome specific (oleracea only)    | not scorable | not scorable | 1         | 0.845591  | not scorable | not scorable |
| #### Bn-scaff_16197_1-p8366C-genome specific (napus-oleracea)   | 0.9832536    | 0.7370965    | 0.9922481 | 0.9265992 | not scorable | not scorable |
| #### Bn-scaff_16197_1-p83684 C-genome specific (napus-oleracea) | 0.9760765    | 0.7803876    | 0.8914729 | 0.7380643 | not scorable | not scorable |
| #### Bn-scaff_16197_1-p83711C-genome specific (napus-oleracea)  | 0.9880383    | 0.8120371    | 1         | 0.8361726 | not scorable | not scorable |
| #### Bn-scaff_16197_1-p84181C-genome specific (napus-oleracea)  | 0.9928229    | 0.692532     | 1         | 0.6856031 | not scorable | not scorable |
| #### Bn-scaff_16197_1-p8436C-genome specific (napus-oleracea)   | 1            | 0.676788     | 0.9922481 | 0.8239208 | not scorable | not scorable |
| #### Bn-scaff_16197_1-p8437C C-genome specific (napus-oleracea) | 0.9760765    | 0.8950272    | 0.8139535 | 0.9233003 | not scorable | not scorable |
| #### Bn-scaff_16197_1-p8703C genome unspecific (all in)         | 0.9760765    | 0.4497709    | 1         | 0.8321436 | 0.7933884    | 0.7066646    |
| #### Bn-scaff_16197_1-p90114 C-genome specific (napus-oleracea) | 0.9880383    | 0.7641038    | 0.9457364 | 0.3890782 | not scorable | not scorable |
| #### Bn-scaff_16197_1-p9742E C-genome specific (napus-oleracea) | 0.9808612    | 0.7916477    | 1         | 0.7776212 | not scorable | not scorable |
| #### Bn-scaff_16197_1-p97462 C-genome specific (napus-oleracea) | 0.9784689    | 0.7496215    | 1         | 0.32278   | not scorable | not scorable |
| #### Bn-scaff_16200_1-p1003C-genome specific (napus-oleracea)   | 0.9952153    | 0.8085457    | 0.9922481 | 0.7833143 | not scorable | not scorable |
| #### Bn-scaff_16200_1-p10542 C-genome specific (napus-oleracea) | 0.9497608    | 0.6944198    | 1         | 0.712751  | not scorable | not scorable |
| #### Bn-scaff_16200_1-p1060C-genome specific (napus-oleracea)   | 0.9880383    | 0.8097403    | 0.9844961 | 0.7534585 | not scorable | not scorable |
| #### Bn-scaff_16200_1-p1064C-genome specific (napus-oleracea)   | 0.9856459    | 0.8101604    | 0.9922481 | 0.8140981 | not scorable | not scorable |
| #### Bn-scaff_16200_1-p1110C genome unspecific (all in)         | 0.9928229    | 0.3965001    | 0.9922481 | 0.7607111 | 1            | 0.9272014    |
| #### Bn-scaff_16200_1-p1194C genome unspecific (all in)         | 1            | 0.7786983    | 1         | 0.7975953 | 1            | 0.9176252    |
| #### Bn-scaff_16200_1-p1221C C-genome specific (napus-oleracea) | 0.9928229    | 0.8468325    | 1         | 0.7236756 | not scorable | not scorable |
| #### Bn-scaff_16200_1-p13764 C-genome specific (napus-oleracea) | 0.9952153    | 0.8936422    | 0.8604651 | 0.7439271 | not scorable | not scorable |
| #### Bn-scaff_16200_1-p1556C genome unspecific (all in)         | 0.9928229    | 0.366493     | 0.9922481 | 0.8467675 | 1            | 0.9039531    |
| #### Bn-scaff_16200_1-p1559C genome unspecific (all in)         | 0.9952153    | 0.4272007    | 0.9922481 | 0.837291  | 1            | 0.9095823    |
| #### Bn-scaff_16200_1-p20861C-genome specific (napus-oleracea)  | 0.9952153    | 0.8127341    | 0.9922481 | 0.836735  | not scorable | not scorable |
| #### Bn-scaff_16200_1-p22642 C-genome specific (napus-oleracea) | 1            | 0.9167603    | 0.9922481 | 0.7857872 | not scorable | not scorable |
| #### Bn-scaff_16200_1-p2418C-genome specific (napus-oleracea)   | 0.9976076    | 0.8687372    | 1         | 0.8557734 | not scorable | not scorable |
| #### Bn-scaff_16200_1-p2437C-genome specific (napus-oleracea)   | 0.9832536    | 0.7663646    | 0.9922481 | 0.8371316 | not scorable | not scorable |
| #### Bn-scaff_16200_1-p25561C-genome specific (napus-oleracea)  | 0.9976076    | 0.7839882    | 0.9922481 | 0.6372186 | not scorable | not scorable |
| #### Bn-scaff_16200_1-p25697 C-genome specific (napus-oleracea) | 0.9952153    | 0.9195747    | 0.9922481 | 0.8136466 | not scorable | not scorable |
| #### Bn-scaff_16200_1-p2809C-genome specific (napus-oleracea)   | 1            | 0.8380252    | 1         | 0.6921532 | not scorable | not scorable |
| #### Bn-scaff_16200_1-p28784 C-genome specific (oleracea only)  | not scorable | not scorable | 0.751938  | 0.8241953 | not scorable | not scorable |
| #### Bn-scaff_16200_1-p29054 C-genome specific (napus-oleracea) | 0.9976076    | 0.9213119    | 1         | 0.8906526 | not scorable | not scorable |
| #### Bn-scaff_16200_1-p2905C-genome specific (napus-oleracea)   | 0.9856459    | 0.6812245    | 0.9147287 | 0.8144085 | not scorable | not scorable |

|                                                                 |              |              |           |           |              |              |
|-----------------------------------------------------------------|--------------|--------------|-----------|-----------|--------------|--------------|
| #### Bn-scaff_16200_1-p29148 C-genome specific (napus-oleracea) | 1            | 0.8316517    | 1         | 0.7043457 | not scorable | not scorable |
| #### Bn-scaff_16200_1-p29196 C-genome specific (napus-oleracea) | 1            | 0.8029019    | 0.9922481 | 0.7621223 | not scorable | not scorable |
| #### Bn-scaff_16200_1-p29242 C-genome specific (napus-oleracea) | 1            | 0.8899474    | 1         | 0.872362  | not scorable | not scorable |
| #### Bn-scaff_16200_1-p29849 C-genome specific (napus-oleracea) | 1            | 0.836996     | 1         | 0.8181477 | not scorable | not scorable |
| #### Bn-scaff_16200_1-p29865 C-genome specific (napus-oleracea) | 0.9976076    | 0.8863364    | 1         | 0.8283199 | not scorable | not scorable |
| #### Bn-scaff_16200_1-p29880 C-genome specific (napus-oleracea) | 0.9952153    | 0.9071677    | 0.9922481 | 0.7795315 | not scorable | not scorable |
| #### Bn-scaff_16200_1-p29886 C-genome specific (napus-oleracea) | 1            | 0.8684509    | 0.9922481 | 0.727371  | not scorable | not scorable |
| #### Bn-scaff_16200_1-p30723 C-genome specific (napus-oleracea) | 1            | 0.8950664    | 1         | 0.8193315 | not scorable | not scorable |
| #### Bn-scaff_16200_1-p30742 C-genome specific (napus-oleracea) | 1            | 0.903627     | 1         | 0.88561   | not scorable | not scorable |
| #### Bn-scaff_16200_1-p30902 C-genome specific (napus-oleracea) | 1            | 0.8423572    | 1         | 0.6559978 | not scorable | not scorable |
| #### Bn-scaff_16200_1-p30917 C-genome specific (napus-oleracea) | 1            | 0.7861119    | 1         | 0.6439286 | not scorable | not scorable |
| #### Bn-scaff_16200_1-p30920 C-genome specific (napus-oleracea) | 1            | 0.7203313    | 1         | 0.5886879 | not scorable | not scorable |
| #### Bn-scaff_16200_1-p30932 C-genome specific (napus-oleracea) | 1            | 0.7796704    | 1         | 0.6908767 | not scorable | not scorable |
| #### Bn-scaff_16200_1-p30944 C-genome specific (napus-oleracea) | 1            | 0.8744903    | 1         | 0.7781793 | not scorable | not scorable |
| #### Bn-scaff_16200_1-p30950 C-genome specific (napus-oleracea) | 1            | 0.8535587    | 1         | 0.7964025 | not scorable | not scorable |
| #### Bn-scaff_16200_1-p32197 C-genome specific (napus-oleracea) | 1            | 0.8615024    | 1         | 0.7706004 | not scorable | not scorable |
| #### Bn-scaff_16200_1-p32276 C-genome specific (oleracea only)  | not scorable | not scorable | 0.9844961 | 0.6236893 | not scorable | not scorable |
| #### Bn-scaff_16200_1-p33843 C-genome specific (napus-oleracea) | 1            | 0.7576007    | 0.9844961 | 0.6695426 | not scorable | not scorable |
| #### Bn-scaff_16200_1-p33933 genome unspecific (all in)         | 0.9641148    | 0.4882645    | 1         | 0.7582659 | 0.9917355    | 0.698265     |
| #### Bn-scaff_16200_1-p34057 genome unspecific (all in)         | 0.9976076    | 0.3770953    | 1         | 0.8258137 | 1            | 0.9168775    |
| #### Bn-scaff_16200_1-p34103 C-genome specific (napus-oleracea) | 1            | 0.8262355    | 0.9922481 | 0.7218658 | not scorable | not scorable |
| #### Bn-scaff_16200_1-p38615 C-genome specific (napus-oleracea) | 1            | 0.8821363    | 1         | 0.7544709 | not scorable | not scorable |
| #### Bn-scaff_16200_1-p38624 C-genome specific (napus-oleracea) | 1            | 0.8939438    | 1         | 0.7999996 | not scorable | not scorable |
| #### Bn-scaff_16200_1-p38809 C-genome specific (napus-oleracea) | 1            | 0.8873124    | 1         | 0.6936627 | not scorable | not scorable |
| #### Bn-scaff_16200_1-p38815 C-genome specific (napus-oleracea) | 1            | 0.8073252    | 1         | 0.6783251 | not scorable | not scorable |
| #### Bn-scaff_16200_1-p38825 C-genome specific (napus-oleracea) | 1            | 0.9212042    | 0.9922481 | 0.72118   | not scorable | not scorable |
| #### Bn-scaff_16200_1-p38835 C-genome specific (napus-oleracea) | 1            | 0.7645022    | 1         | 0.677412  | not scorable | not scorable |
| #### Bn-scaff_16200_1-p39531 C-genome specific (napus-oleracea) | 1            | 0.9293589    | 1         | 0.7848819 | not scorable | not scorable |
| #### Bn-scaff_16200_1-p39689 C-genome specific (napus-oleracea) | 0.9976076    | 0.8138216    | 1         | 0.7112275 | not scorable | not scorable |
| #### Bn-scaff_16200_1-p39707 C-genome specific (napus-oleracea) | 1            | 0.9320928    | 0.9922481 | 0.8056372 | not scorable | not scorable |
| #### Bn-scaff_16200_1-p43415 C-genome specific (oleracea only)  | not scorable | not scorable | 1         | 0.6109257 | not scorable | not scorable |
| #### Bn-scaff_16200_1-p49559 C-genome specific (napus-oleracea) | 1            | 0.812252     | 1         | 0.6821917 | not scorable | not scorable |
| #### Bn-scaff_16200_1-p49866 C-genome specific (napus-oleracea) | 1            | 0.9311773    | 0.9922481 | 0.8779464 | not scorable | not scorable |

|                                                                 |           |           |           |           |              |              |
|-----------------------------------------------------------------|-----------|-----------|-----------|-----------|--------------|--------------|
| #### Bn-scaff_16200_1-p50312 C-genome specific (napus-oleracea) | 1         | 0.8317537 | 1         | 0.7896977 | not scorable | not scorable |
| #### Bn-scaff_16200_1-p50318 C-genome specific (napus-oleracea) | 1         | 0.8352826 | 0.9922481 | 0.8358084 | not scorable | not scorable |
| #### Bn-scaff_16200_1-p51258 C-genome specific (napus-oleracea) | 1         | 0.8158085 | 1         | 0.7440802 | not scorable | not scorable |
| #### Bn-scaff_16200_1-p51320 C-genome specific (napus-oleracea) | 1         | 0.9023647 | 1         | 0.7381935 | not scorable | not scorable |
| #### Bn-scaff_16200_1-p51363 genome unspecific (all in)         | 1         | 0.7080706 | 0.9922481 | 0.6458294 | 1            | 0.9473335    |
| #### Bn-scaff_16200_1-p51384 C-genome specific (napus-oleracea) | 1         | 0.8158085 | 1         | 0.7125625 | not scorable | not scorable |
| #### Bn-scaff_16200_1-p51831 C-genome specific (napus-oleracea) | 1         | 0.9376312 | 1         | 0.8899033 | not scorable | not scorable |
| #### Bn-scaff_16200_1-p52620 C-genome specific (napus-oleracea) | 0.9952153 | 0.6991149 | 0.9922481 | 0.7075725 | not scorable | not scorable |
| #### Bn-scaff_16200_1-p52631 C-genome specific (napus-oleracea) | 1         | 0.9171544 | 1         | 0.7769735 | not scorable | not scorable |
| #### Bn-scaff_16200_1-p53128 C-genome specific (napus-oleracea) | 1         | 0.8158085 | 1         | 0.7261356 | not scorable | not scorable |
| #### Bn-scaff_16200_1-p53184 C-genome specific (napus-oleracea) | 0.9976076 | 0.901748  | 0.9922481 | 0.7730647 | not scorable | not scorable |
| #### Bn-scaff_16200_1-p53207 C-genome specific (napus-oleracea) | 1         | 0.9523706 | 1         | 0.786407  | not scorable | not scorable |
| #### Bn-scaff_16200_1-p53270 C-genome specific (napus-oleracea) | 1         | 0.9269184 | 1         | 0.7675838 | not scorable | not scorable |
| #### Bn-scaff_16200_1-p53321 C-genome specific (napus-oleracea) | 1         | 0.8830298 | 1         | 0.7381003 | not scorable | not scorable |
| #### Bn-scaff_16200_1-p53384 C-genome specific (napus-oleracea) | 0.9976076 | 0.8247565 | 0.9922481 | 0.8218346 | not scorable | not scorable |
| #### Bn-scaff_16200_1-p53443 C-genome specific (napus-oleracea) | 0.9976076 | 0.9318619 | 1         | 0.8247944 | not scorable | not scorable |
| #### Bn-scaff_16200_1-p53502 C-genome specific (napus-oleracea) | 0.9976076 | 0.7444279 | 1         | 0.7222494 | not scorable | not scorable |
| #### Bn-scaff_16200_1-p53528 C-genome specific (napus-oleracea) | 0.9976076 | 0.7186032 | 0.9767442 | 0.7825791 | not scorable | not scorable |
| #### Bn-scaff_16200_1-p53531 C-genome specific (napus-oleracea) | 0.9976076 | 0.738382  | 1         | 0.8091806 | not scorable | not scorable |
| #### Bn-scaff_16200_1-p53626 C-genome specific (napus-oleracea) | 1         | 0.8450904 | 1         | 0.7588543 | not scorable | not scorable |
| #### Bn-scaff_16200_1-p53710 C-genome specific (napus-oleracea) | 1         | 0.7290323 | 1         | 0.7302479 | not scorable | not scorable |
| #### Bn-scaff_16200_1-p53717 C-genome specific (napus-oleracea) | 1         | 0.8469821 | 0.9922481 | 0.7435468 | not scorable | not scorable |
| #### Bn-scaff_16200_1-p53728 C-genome specific (napus-oleracea) | 1         | 0.8757626 | 1         | 0.7696621 | not scorable | not scorable |
| #### Bn-scaff_16200_1-p54055 C-genome specific (napus-oleracea) | 0.9976076 | 0.8848283 | 1         | 0.8486876 | not scorable | not scorable |
| #### Bn-scaff_16200_1-p54084 C-genome specific (napus-oleracea) | 1         | 0.8376489 | 1         | 0.7369433 | not scorable | not scorable |
| #### Bn-scaff_16200_1-p54104 C-genome specific (napus-oleracea) | 1         | 0.8214626 | 1         | 0.7114801 | not scorable | not scorable |
| #### Bn-scaff_16200_1-p54112 C-genome specific (napus-oleracea) | 1         | 0.8750705 | 1         | 0.6771253 | not scorable | not scorable |
| #### Bn-scaff_16200_1-p55600 C-genome specific (napus-oleracea) | 1         | 0.9030885 | 1         | 0.6993545 | not scorable | not scorable |
| #### Bn-scaff_16200_1-p55744 C-genome specific (napus-oleracea) | 1         | 0.8543575 | 0.9922481 | 0.7119666 | not scorable | not scorable |
| #### Bn-scaff_16200_1-p56555 C-genome specific (napus-oleracea) | 1         | 0.7762685 | 1         | 0.6794034 | not scorable | not scorable |
| #### Bn-scaff_16200_1-p56598 C-genome specific (napus-oleracea) | 1         | 0.7229455 | 1         | 0.6384323 | not scorable | not scorable |
| #### Bn-scaff_16200_1-p56604 genome unspecific (all in)         | 1         | 0.7263595 | 1         | 0.6849238 | 1            | 0.8691216    |
| #### Bn-scaff_16200_1-p56605 C-genome specific (napus-oleracea) | 1         | 0.8852234 | 1         | 0.7926592 | not scorable | not scorable |



|                                                                 |              |              |           |           |              |              |
|-----------------------------------------------------------------|--------------|--------------|-----------|-----------|--------------|--------------|
| #### Bn-scaff_16200_1-p56610 C-genome specific (napus-oleracea) | 1            | 0.7385063    | 1         | 0.6173902 | not scorable | not scorable |
| #### Bn-scaff_16200_1-p56690 C-genome specific (napus-oleracea) | 1            | 0.8438457    | 1         | 0.7042133 | not scorable | not scorable |
| #### Bn-scaff_16200_1-p57124 C-genome specific (napus-oleracea) | 1            | 0.9538258    | 0.9922481 | 0.7548326 | not scorable | not scorable |
| #### Bn-scaff_16200_1-p57135 C-genome specific (napus-oleracea) | 1            | 0.8824967    | 0.9922481 | 0.7284595 | not scorable | not scorable |
| #### Bn-scaff_16200_1-p57195 C-genome specific (napus-oleracea) | 1            | 0.8384218    | 1         | 0.697577  | not scorable | not scorable |
| #### Bn-scaff_16200_1-p57247 C-genome specific (oleracea only)  | not scorable | not scorable | 0.9147287 | 0.7837269 | not scorable | not scorable |
| #### Bn-scaff_16200_1-p59185 C-genome specific (napus-oleracea) | 1            | 0.9017226    | 1         | 0.7812085 | not scorable | not scorable |
| #### Bn-scaff_16200_1-p59926 C-genome specific (napus-oleracea) | 1            | 0.9293589    | 0.9922481 | 0.8703881 | not scorable | not scorable |
| #### Bn-scaff_16200_1-p60038 C-genome specific (napus-oleracea) | 1            | 0.8984413    | 1         | 0.8566455 | not scorable | not scorable |
| #### Bn-scaff_16200_1-p60565 C-genome specific (napus-oleracea) | 1            | 0.918692     | 0.9844961 | 0.8237612 | not scorable | not scorable |
| #### Bn-scaff_16200_1-p60587 C-genome specific (napus-oleracea) | 1            | 0.8085339    | 0.9224806 | 0.773598  | not scorable | not scorable |
| #### Bn-scaff_16200_1-p60607 C-genome specific (napus-oleracea) | 1            | 0.9323691    | 1         | 0.8234416 | not scorable | not scorable |
| #### Bn-scaff_16200_1-p60747 C-genome specific (napus-oleracea) | 1            | 0.867734     | 0.9844961 | 0.7479758 | not scorable | not scorable |
| #### Bn-scaff_16200_1-p60755 C-genome specific (oleracea only)  | not scorable | not scorable | 0.9844961 | 0.6910141 | not scorable | not scorable |
| #### Bn-scaff_16200_1-p60856 C-genome specific (napus-oleracea) | 0.9952153    | 0.7165195    | 1         | 0.6231655 | not scorable | not scorable |
| #### Bn-scaff_16200_1-p60953 C-genome specific (napus-oleracea) | 1            | 0.7349294    | 0.9922481 | 0.6324359 | not scorable | not scorable |
| #### Bn-scaff_16200_1-p61050 C-genome specific (napus-oleracea) | 1            | 0.7545085    | 1         | 0.669212  | not scorable | not scorable |
| #### Bn-scaff_16200_1-p61096 C-genome specific (napus-oleracea) | 1            | 0.8706274    | 1         | 0.8368558 | not scorable | not scorable |
| #### Bn-scaff_16200_1-p61113 C-genome specific (napus-oleracea) | 0.9952153    | 0.7588659    | 0.9922481 | 0.6589787 | not scorable | not scorable |
| #### Bn-scaff_16200_1-p61179 C-genome specific (napus-oleracea) | 0.9952153    | 0.7275584    | 1         | 0.6629262 | not scorable | not scorable |
| #### Bn-scaff_16200_1-p61184 C-genome specific (napus-oleracea) | 0.9976076    | 0.73637      | 0.9844961 | 0.5280848 | not scorable | not scorable |
| #### Bn-scaff_16200_1-p61266 C-genome specific (napus-oleracea) | 1            | 0.7959142    | 1         | 0.6784087 | not scorable | not scorable |
| #### Bn-scaff_16200_1-p61305 C-genome specific (napus-oleracea) | 1            | 0.8371369    | 1         | 0.7444557 | not scorable | not scorable |
| #### Bn-scaff_16200_1-p61310 C-genome specific (napus-oleracea) | 1            | 0.799529     | 1         | 0.7534146 | not scorable | not scorable |
| #### Bn-scaff_16200_1-p61609 C-genome specific (napus-oleracea) | 1            | 0.9291054    | 1         | 0.8367667 | not scorable | not scorable |
| #### Bn-scaff_16200_1-p61639 C-genome specific (napus-oleracea) | 1            | 0.7978843    | 1         | 0.6738086 | not scorable | not scorable |
| #### Bn-scaff_16200_1-p61655 C-genome specific (napus-oleracea) | 1            | 0.8838897    | 1         | 0.6803544 | not scorable | not scorable |
| #### Bn-scaff_16200_1-p61670 C-genome specific (napus-oleracea) | 1            | 0.9371949    | 1         | 0.8449612 | not scorable | not scorable |
| #### Bn-scaff_16200_1-p61684 C-genome specific (napus-oleracea) | 1            | 0.9385212    | 1         | 0.7758741 | not scorable | not scorable |
| #### Bn-scaff_16200_1-p61701 C-genome specific (napus-oleracea) | 1            | 0.7121259    | 1         | 0.6063746 | not scorable | not scorable |
| #### Bn-scaff_16200_1-p61747 C-genome specific (napus-oleracea) | 1            | 0.7609893    | 1         | 0.6364658 | not scorable | not scorable |
| #### Bn-scaff_16200_1-p61816 C-genome specific (napus-oleracea) | 1            | 0.6380093    | 1         | 0.555928  | not scorable | not scorable |
| #### Bn-scaff_16200_1-p62217 C-genome specific (napus-oleracea) | 0.9976076    | 0.8035975    | 1         | 0.6479979 | not scorable | not scorable |

|                                                                 |              |              |              |              |              |              |
|-----------------------------------------------------------------|--------------|--------------|--------------|--------------|--------------|--------------|
| #### Bn-scaff_16200_1-p62504 C-genome specific (napus-oleracea) | 0.9904306    | 0.9184232    | 0.6976744    | 0.7589585    | not scorable | not scorable |
| #### Bn-scaff_16200_1-p62517 C-genome specific (napus-oleracea) | 1            | 0.8684286    | 1            | 0.7488259    | not scorable | not scorable |
| #### Bn-scaff_16200_1-p63772 C-genome specific (napus-oleracea) | 1            | 0.9179708    | 1            | 0.8560718    | not scorable | not scorable |
| #### Bn-scaff_16200_1-p65647 genome unspecific (all in)         | 1            | 0.7770717    | 0.9224806    | 0.1657261    | 1            | 0.7227655    |
| #### Bn-scaff_16200_1-p65675 C-genome specific (napus-oleracea) | 0.9976076    | 0.8844402    | 1            | 0.7560115    | not scorable | not scorable |
| #### Bn-scaff_16200_1-p65693 C-genome specific (napus-oleracea) | 0.9976076    | 0.7101336    | 1            | 0.7643138    | not scorable | not scorable |
| #### Bn-scaff_16200_1-p65938 C-genome specific (napus-oleracea) | 0.9976076    | 0.8303202    | 0.9922481    | 0.7226449    | not scorable | not scorable |
| #### Bn-scaff_16200_1-p65954 C-genome specific (napus-oleracea) | 1            | 0.9330355    | 0.9922481    | 0.762782     | not scorable | not scorable |
| #### Bn-scaff_16200_1-p75131 C-genome specific (oleracea only)  | not scorable | not scorable | 0.9922481    | 0.7250885    | not scorable | not scorable |
| #### Bn-scaff_16200_1-p83053 C-genome specific (napus-oleracea) | 0.9736842    | 0.8810532    | 0.9922481    | 0.8312837    | not scorable | not scorable |
| #### Bn-scaff_16200_1-p83214 C-genome specific (napus-oleracea) | 0.9736842    | 0.7996312    | 0.9689922    | 0.7706608    | not scorable | not scorable |
| #### Bn-scaff_16200_1-p83898 C-genome specific (napus-oleracea) | 0.9928229    | 0.7828596    | 1            | 0.8260473    | not scorable | not scorable |
| #### Bn-scaff_16200_1-p84553 C-genome specific (napus-oleracea) | 0.9808612    | 0.6797386    | 1            | 0.6395833    | not scorable | not scorable |
| #### Bn-scaff_16200_1-p91053 C-genome specific (napus-oleracea) | 0.937799     | 0.8014576    | 0.9922481    | 0.6824331    | not scorable | not scorable |
| #### Bn-scaff_16200_1-p95910 C-genome specific (napus-oleracea) | 0.9282297    | 0.8871842    | 0.9689922    | 0.7425534    | not scorable | not scorable |
| #### Bn-scaff_16209_1-p11182 C-genome specific (napus-oleracea) | 0.9473684    | 0.7953535    | 0.9844961    | 0.7884996    | not scorable | not scorable |
| #### Bn-scaff_16209_1-p11701 C-genome specific (napus-oleracea) | 0.9473684    | 0.7566104    | 1            | 0.700643     | not scorable | not scorable |
| #### Bn-scaff_16209_1-p11714 C-genome specific (napus-oleracea) | 0.9449761    | 0.7235926    | 1            | 0.6902494    | not scorable | not scorable |
| #### Bn-scaff_16209_1-p11896 C-genome specific (napus-oleracea) | 0.9449761    | 0.7659397    | 0.9767442    | 0.6489936    | not scorable | not scorable |
| #### Bn-scaff_16209_1-p12098 all not scorable                   | not scorable | not scorable | not scorable | not scorable | not scorable | not scorable |
| #### Bn-scaff_16209_1-p12895 genome unspecific (all in)         | 0.9617225    | 0.4579704    | 0.9689922    | 0.6886382    | 1            | 0.9173386    |
| #### Bn-scaff_16209_1-p12921 C-genome specific (napus-oleracea) | 0.9497608    | 0.7739038    | 0.9767442    | 0.7323372    | not scorable | not scorable |
| #### Bn-scaff_16209_1-p12928 C-genome specific (napus-oleracea) | 0.9473684    | 0.7471977    | 0.9689922    | 0.7574112    | not scorable | not scorable |
| #### Bn-scaff_16209_1-p12960 C-genome specific (napus-oleracea) | 0.9473684    | 0.7724884    | 0.9922481    | 0.751633     | not scorable | not scorable |
| #### Bn-scaff_16209_1-p12982 C-genome specific (napus-oleracea) | 0.9593301    | 0.765012     | 0.9844961    | 0.7389073    | not scorable | not scorable |
| #### Bn-scaff_16209_1-p13100 C-genome specific (napus-oleracea) | 0.9497608    | 0.7829067    | 0.9844961    | 0.8214802    | not scorable | not scorable |
| #### Bn-scaff_16209_1-p39110 C-genome specific (napus-oleracea) | 0.9497608    | 0.761161     | 1            | 0.6724226    | not scorable | not scorable |
| #### Bn-scaff_16209_1-p39709 C-genome specific (napus-oleracea) | 0.9521531    | 0.7280102    | 1            | 0.6695452    | not scorable | not scorable |
| #### Bn-scaff_16209_1-p40189 C-genome specific (napus-oleracea) | 0.9545454    | 0.7177106    | 0.9922481    | 0.7331119    | not scorable | not scorable |
| #### Bn-scaff_16209_1-p40383 C-genome specific (napus-oleracea) | 0.9473684    | 0.671054     | 0.9767442    | 0.6638191    | not scorable | not scorable |
| #### Bn-scaff_16209_1-p46740 napus specific                     | 0.9138756    | 0.3830886    | not scorable | not scorable | not scorable | not scorable |
| #### Bn-scaff_16209_1-p7649 C-genome specific (oleracea only)   | not scorable | not scorable | 0.8682171    | 0.276082     | not scorable | not scorable |
| #### Bn-scaff_16214_1-p10488 C-genome specific (napus-oleracea) | 0.9904306    | 0.9124091    | 0.9844961    | 0.8823041    | not scorable | not scorable |

|                                                                 |              |              |              |              |              |              |
|-----------------------------------------------------------------|--------------|--------------|--------------|--------------|--------------|--------------|
| #### Bn-scaff_16214_1-p17272 C-genome specific (napus-oleracea) | 0.9904306    | 0.7841848    | 0.9844961    | 0.8175112    | not scorable | not scorable |
| #### Bn-scaff_16214_1-p19595 genome unspecific (all in)         | 0.9497608    | 0.5638515    | 1            | 0.9244463    | 1            | 0.9350736    |
| #### Bn-scaff_16214_1-p26385 C-genome specific (napus-oleracea) | 0.9880383    | 0.7681561    | 1            | 0.7016672    | not scorable | not scorable |
| #### Bn-scaff_16214_1-p26504 genome unspecific (all in)         | 0.9545454    | 0.3447925    | 0.9922481    | 0.5273815    | 1            | 0.8114662    |
| #### Bn-scaff_16214_1-p26523 A-genome specific (rapa only)      | not scorable | not scorable | not scorable | not scorable | 0.9834711    | 0.5468993    |
| #### Bn-scaff_16214_1-p29513 C-genome specific (napus-oleracea) | 0.9976076    | 0.8076818    | 0.9922481    | 0.8598582    | not scorable | not scorable |
| #### Bn-scaff_16214_1-p30078 C-genome specific (napus-oleracea) | 1            | 0.8361189    | 0.9767442    | 0.6527446    | not scorable | not scorable |
| #### Bn-scaff_16214_1-p30126 genome unspecific (all in)         | 0.9688995    | 0.4104339    | 0.9844961    | 0.7062419    | 1            | 0.7688165    |
| #### Bn-scaff_16214_1-p32153 genome unspecific (all in)         | 1            | 0.6117677    | 1            | 0.568906     | 0.9586777    | 0.8492951    |
| #### Bn-scaff_16214_1-p34722 C-genome specific (napus-oleracea) | 0.7368421    | 0.6947336    | 0.9689922    | 0.6539311    | not scorable | not scorable |
| #### Bn-scaff_16214_1-p34757 C-genome specific (napus-oleracea) | 0.7368421    | 0.6741514    | 0.8992248    | 0.7550937    | not scorable | not scorable |
| #### Bn-scaff_16214_1-p34775 C-genome specific (napus-oleracea) | 0.7464115    | 0.7579653    | 0.8992248    | 0.8082236    | not scorable | not scorable |
| #### Bn-scaff_16214_1-p34907 C-genome specific (napus-oleracea) | 0.9832536    | 0.7784859    | 0.9069768    | 0.7106818    | not scorable | not scorable |
| #### Bn-scaff_16214_1-p37701 genome unspecific (all in)         | 0.9688995    | 0.3196524    | 0.9612403    | 0.2329231    | 1            | 0.865951     |
| #### Bn-scaff_16214_1-p37754 genome unspecific (all in)         | 0.9832536    | 0.2543149    | 0.9379845    | 0.2610522    | 0.9917355    | 0.9297844    |
| #### Bn-scaff_16214_1-p40152 C-genome specific (napus-oleracea) | 0.7464115    | 0.8502002    | 0.8372093    | 0.8248895    | not scorable | not scorable |
| #### Bn-scaff_16214_1-p40230 C-genome specific (oleracea only)  | not scorable | not scorable | 0.9922481    | 0.5918043    | not scorable | not scorable |
| #### Bn-scaff_16214_1-p42360 C-genome specific (napus-oleracea) | 0.9521531    | 0.930081     | 1            | 0.707849     | not scorable | not scorable |
| #### Bn-scaff_16214_1-p44735 C-genome specific (napus-oleracea) | 0.6722488    | 0.6167753    | 0.9379845    | 0.6083611    | not scorable | not scorable |
| #### Bn-scaff_16214_1-p45531 genome unspecific (all in)         | 0.9736842    | 0.4243793    | 1            | 0.7977852    | 0.9917355    | 0.7610269    |
| #### Bn-scaff_16214_1-p45789 C-genome specific (napus-oleracea) | 0.9784689    | 0.7819823    | 0.9379845    | 0.813467     | not scorable | not scorable |
| #### Bn-scaff_16214_1-p46487 C-genome specific (napus-oleracea) | 0.9712918    | 0.7768251    | 0.9379845    | 0.7323036    | not scorable | not scorable |
| #### Bn-scaff_16214_1-p47705 genome unspecific (all in)         | 1            | 0.448141     | 1            | 0.7652888    | 0.9917355    | 0.705815     |
| #### Bn-scaff_16214_1-p52989 C-genome specific (napus-oleracea) | 0.9114832    | 0.5411679    | 0.8682171    | 0.8277903    | not scorable | not scorable |
| #### Bn-scaff_16214_1-p56272 C-genome specific (oleracea only)  | not scorable | not scorable | 0.5813953    | 0.7596795    | not scorable | not scorable |
| #### Bn-scaff_16214_1-p69186 C-genome specific (napus-oleracea) | 0.9904306    | 0.7593095    | 1            | 0.7403178    | not scorable | not scorable |
| #### Bn-scaff_16214_1-p70115 C-genome specific (napus-oleracea) | 0.9832536    | 0.7683485    | 0.9922481    | 0.835524     | not scorable | not scorable |
| #### Bn-scaff_16215_1-p47306 A-genome specific (rapa only)      | not scorable | not scorable | not scorable | not scorable | 1            | 0.8852502    |
| #### Bn-scaff_16215_1-p52684 C-genome specific (napus-oleracea) | 0.9832536    | 0.9202406    | 0.9922481    | 0.829378     | not scorable | not scorable |
| #### Bn-scaff_16215_1-p77959 C-genome specific (napus-oleracea) | 0.9952153    | 0.5422323    | 0.9922481    | 0.5331801    | not scorable | not scorable |
| #### Bn-scaff_16217_1-p11230 genome unspecific (all in)         | 0.9712918    | 0.4881364    | 0.9844961    | 0.7287545    | 1            | 0.8948976    |
| #### Bn-scaff_16217_1-p11415 C-genome specific (napus-oleracea) | 0.9856459    | 0.8107423    | 0.9844961    | 0.6796468    | not scorable | not scorable |
| #### Bn-scaff_16217_1-p11474 C-genome specific (napus-oleracea) | 0.9904306    | 0.7885301    | 0.9379845    | 0.8038625    | not scorable | not scorable |

|                                                                  |              |              |              |              |              |              |
|------------------------------------------------------------------|--------------|--------------|--------------|--------------|--------------|--------------|
| ##### Bn-scaff_16217_1-p11682 C-genome specific (napus-oleracea) | 1            | 0.7902362    | 1            | 0.7678061    | not scorable | not scorable |
| ##### Bn-scaff_16217_1-p12125 C-genome specific (napus-oleracea) | 0.9808612    | 0.5856148    | 0.9922481    | 0.5603636    | not scorable | not scorable |
| ##### Bn-scaff_16217_1-p12303 C-genome specific (napus-oleracea) | 0.9904306    | 0.7999287    | 1            | 0.7573565    | not scorable | not scorable |
| ##### Bn-scaff_16217_1-p13213 genome unspecific (all in)         | 0.9808612    | 0.6367694    | 1            | 0.7547718    | 1            | 0.9389887    |
| ##### Bn-scaff_16217_1-p14334 napus specific                     | 0.9760765    | 0.8017017    | not scorable | not scorable | not scorable | not scorable |
| ##### Bn-scaff_16217_1-p18142 C-genome specific (napus-oleracea) | 0.9928229    | 0.8516755    | 1            | 0.7717758    | not scorable | not scorable |
| ##### Bn-scaff_16217_1-p18950 C-genome specific (napus-oleracea) | 0.9976076    | 0.6647815    | 0.9922481    | 0.7582978    | not scorable | not scorable |
| ##### Bn-scaff_16217_1-p26431 C-genome specific (napus-oleracea) | 0.9904306    | 0.7335368    | 0.9922481    | 0.7129645    | not scorable | not scorable |
| ##### Bn-scaff_16217_1-p26511 C-genome specific (napus-oleracea) | 0.9952153    | 0.7226787    | 0.9922481    | 0.69691      | not scorable | not scorable |
| ##### Bn-scaff_16217_1-p27026 genome unspecific (all in)         | 1            | 0.4800761    | 1            | 0.741034     | 1            | 0.8085203    |
| ##### Bn-scaff_16217_1-p37666 C-genome specific (napus-oleracea) | 0.9976076    | 0.8625916    | 1            | 0.7182701    | not scorable | not scorable |
| ##### Bn-scaff_16217_1-p39593 C-genome specific (napus-oleracea) | 0.9952153    | 0.758969     | 0.9922481    | 0.7034984    | not scorable | not scorable |
| ##### Bn-scaff_16217_1-p39849 C-genome specific (napus-oleracea) | 0.9976076    | 0.7854298    | 1            | 0.7321084    | not scorable | not scorable |
| ##### Bn-scaff_16217_1-p41973 genome unspecific (all in)         | 0.9904306    | 0.3886659    | 0.9922481    | 0.6811728    | 1            | 0.7914145    |
| ##### Bn-scaff_16217_1-p42840 genome unspecific (all in)         | 0.9976076    | 0.302242     | 0.9922481    | 0.7123008    | 1            | 0.8268219    |
| ##### Bn-scaff_16217_1-p43628 C-genome specific (napus-oleracea) | 0.9425837    | 0.6109245    | 0.9922481    | 0.6701869    | not scorable | not scorable |
| ##### Bn-scaff_16217_1-p45790 genome unspecific (all in)         | 0.9856459    | 0.7163019    | 0.9844961    | 0.7132795    | 1            | 0.9439378    |
| ##### Bn-scaff_16217_1-p47148 C-genome specific (napus-oleracea) | 0.9904306    | 0.766985     | 1            | 0.6667518    | not scorable | not scorable |
| ##### Bn-scaff_16217_1-p47316 C-genome specific (napus-oleracea) | 0.9880383    | 0.7579765    | 0.9844961    | 0.6124516    | not scorable | not scorable |
| ##### Bn-scaff_16217_1-p52517 C-genome specific (napus-oleracea) | 0.9904306    | 0.8372108    | 0.9922481    | 0.6633559    | not scorable | not scorable |
| ##### Bn-scaff_16217_1-p59756 C-genome specific (napus-oleracea) | 0.9928229    | 0.8068796    | 0.9922481    | 0.8035825    | not scorable | not scorable |
| ##### Bn-scaff_16217_1-p60470 C-genome specific (napus-oleracea) | 0.9760765    | 0.7731122    | 0.9922481    | 0.8458266    | not scorable | not scorable |
| ##### Bn-scaff_16217_1-p60494 C-genome specific (napus-oleracea) | 0.9784689    | 0.8316322    | 0.9844961    | 0.7168048    | not scorable | not scorable |
| ##### Bn-scaff_16217_1-p85817 C-genome specific (napus-oleracea) | 0.9976076    | 0.7497237    | 1            | 0.6866867    | not scorable | not scorable |
| ##### Bn-scaff_16217_1-p87998 C-genome specific (napus-oleracea) | 0.9928229    | 0.3891312    | 1            | 0.5974804    | not scorable | not scorable |
| ##### Bn-scaff_16226_1-p1835 genome unspecific (oleracea-rapa)   | not scorable | not scorable | 0.9844961    | 0.817488     | 1            | 0.9502211    |
| ##### Bn-scaff_16226_1-p4282 C-genome specific (napus-oleracea)  | 0.9641148    | 0.8531542    | 0.8837209    | 0.6858689    | not scorable | not scorable |
| ##### Bn-scaff_16228_1-p17171 genome unspecific (all in)         | 0.9952153    | 0.3589553    | 1            | 0.7488132    | 0.9917355    | 0.7481907    |
| ##### Bn-scaff_16231_1-p10113 genome unspecific (all in)         | 1            | 0.3676345    | 0.9844961    | 0.4102629    | 1            | 0.9081016    |
| ##### Bn-scaff_16231_1-p10142 genome unspecific (all in)         | 0.9545454    | 0.4971242    | 1            | 0.7705702    | 1            | 0.8116447    |
| ##### Bn-scaff_16231_1-p10151 genome unspecific (oleracea-rapa)  | not scorable | not scorable | 1            | 0.6962346    | 0.9669421    | 0.7435806    |
| ##### Bn-scaff_16231_1-p10246 C-genome specific (napus-oleracea) | 1            | 0.7125279    | 1            | 0.7275224    | not scorable | not scorable |
| ##### Bn-scaff_16231_1-p10251 genome unspecific (all in)         | 0.9952153    | 0.2928948    | 1            | 0.6498672    | 1            | 0.8801318    |

|                                                                |              |              |              |              |              |              |
|----------------------------------------------------------------|--------------|--------------|--------------|--------------|--------------|--------------|
| #### Bn-scaff_16231_1-p10263genome unspecific (all in)         | 1            | 0.3427801    | 1            | 0.7766681    | 1            | 0.8659816    |
| #### Bn-scaff_16231_1-p10366genome unspecific (all in)         | 1            | 0.3721546    | 1            | 0.8471074    | 0.9917355    | 0.8737493    |
| #### Bn-scaff_16231_1-p10445napus specific                     | 0.7655503    | 0.7303835    | not scorable | not scorable | not scorable | not scorable |
| #### Bn-scaff_16231_1-p10934C-genome specific (napus-oleracea) | 0.9904306    | 0.7775861    | 0.9767442    | 0.6823732    | not scorable | not scorable |
| #### Bn-scaff_16231_1-p11201C-genome specific (napus-oleracea) | 0.9784689    | 0.7992033    | 0.9922481    | 0.7327632    | not scorable | not scorable |
| #### Bn-scaff_16231_1-p11765C-genome specific (napus-oleracea) | 0.9928229    | 0.7842221    | 1            | 0.7243845    | not scorable | not scorable |
| #### Bn-scaff_16231_1-p11767genome unspecific (all in)         | 0.9928229    | 0.2974142    | 0.9922481    | 0.5293412    | 1            | 0.7442623    |
| #### Bn-scaff_16231_1-p11769genome unspecific (all in)         | 0.9760765    | 0.3507512    | 0.9844961    | 0.7023335    | 1            | 0.7900271    |
| #### Bn-scaff_16231_1-p11771genome unspecific (all in)         | 0.9976076    | 0.3524832    | 0.9922481    | 0.4839814    | 1            | 0.8948976    |
| #### Bn-scaff_16231_1-p11809C-genome specific (napus-oleracea) | 0.9856459    | 0.7474951    | 0.9922481    | 0.6330345    | not scorable | not scorable |
| #### Bn-scaff_16231_1-p11839C-genome specific (napus-oleracea) | 0.9760765    | 0.7728514    | 0.9922481    | 0.6564814    | not scorable | not scorable |
| #### Bn-scaff_16231_1-p11847C-genome specific (napus-oleracea) | 0.9784689    | 0.8205748    | 0.9922481    | 0.8361687    | not scorable | not scorable |
| #### Bn-scaff_16231_1-p11852C-genome specific (napus-oleracea) | 0.9832536    | 0.8501813    | 1            | 0.7437257    | not scorable | not scorable |
| #### Bn-scaff_16231_1-p11868C-genome specific (napus-oleracea) | 0.9904306    | 0.7690465    | 0.9922481    | 0.7222976    | not scorable | not scorable |
| #### Bn-scaff_16231_1-p11869C-genome specific (napus-oleracea) | 0.9856459    | 0.8078724    | 1            | 0.8168492    | not scorable | not scorable |
| #### Bn-scaff_16231_1-p11870C-genome specific (napus-oleracea) | 0.9784689    | 0.666427     | 1            | 0.5970005    | not scorable | not scorable |
| #### Bn-scaff_16231_1-p11875C-genome specific (napus-oleracea) | 0.9928229    | 0.7971504    | 1            | 0.7689841    | not scorable | not scorable |
| #### Bn-scaff_16231_1-p11876C-genome specific (napus-oleracea) | 0.9880383    | 0.784669     | 1            | 0.7621825    | not scorable | not scorable |
| #### Bn-scaff_16231_1-p11877C-genome specific (napus-oleracea) | 0.9760765    | 0.8208687    | 1            | 0.7839587    | not scorable | not scorable |
| #### Bn-scaff_16231_1-p11889C-genome specific (napus-oleracea) | 0.9928229    | 0.8468807    | 0.9844961    | 0.8526963    | not scorable | not scorable |
| #### Bn-scaff_16231_1-p11890C-genome specific (napus-oleracea) | 0.9688995    | 0.5740478    | 1            | 0.7619578    | not scorable | not scorable |
| #### Bn-scaff_16231_1-p12044C-genome specific (oleracea only)  | not scorable | not scorable | 0.8449612    | 0.8525285    | not scorable | not scorable |
| #### Bn-scaff_16231_1-p12046C-genome specific (napus-oleracea) | 0.9880383    | 0.7851153    | 1            | 0.7256689    | not scorable | not scorable |
| #### Bn-scaff_16231_1-p12092C-genome specific (napus-oleracea) | 0.9784689    | 0.8460885    | 0.9922481    | 0.5893075    | not scorable | not scorable |
| #### Bn-scaff_16231_1-p12318C-genome specific (napus-oleracea) | 0.9760765    | 0.5821766    | 0.9844961    | 0.5212209    | not scorable | not scorable |
| #### Bn-scaff_16231_1-p12358C-genome specific (napus-oleracea) | 0.9904306    | 0.6862861    | 1            | 0.6853701    | not scorable | not scorable |
| #### Bn-scaff_16231_1-p12458genome unspecific (all in)         | 1            | 0.7447929    | 1            | 0.7791959    | 1            | 0.7770717    |
| #### Bn-scaff_16231_1-p12561C-genome specific (napus-oleracea) | 0.9904306    | 0.7964604    | 0.9922481    | 0.7957006    | not scorable | not scorable |
| #### Bn-scaff_16231_1-p12563C-genome specific (napus-oleracea) | 0.9832536    | 0.8086614    | 0.9844961    | 0.6780404    | not scorable | not scorable |
| #### Bn-scaff_16231_1-p12568genome unspecific (all in)         | 0.9856459    | 0.3855938    | 0.9224806    | 0.547484     | 1            | 0.8186626    |
| #### Bn-scaff_16231_1-p12749C-genome specific (napus-oleracea) | 0.9880383    | 0.8469257    | 0.9379845    | 0.7821038    | not scorable | not scorable |
| #### Bn-scaff_16231_1-p13434C-genome specific (napus-oleracea) | 0.437799     | 0.7399379    | 0.4806201    | 0.847431     | not scorable | not scorable |
| #### Bn-scaff_16231_1-p13987A-genome specific (napus-rapa)     | 0.9760765    | 0.7720731    | not scorable | not scorable | 0.8429752    | 0.8135551    |

|                                                                |              |              |              |              |              |              |
|----------------------------------------------------------------|--------------|--------------|--------------|--------------|--------------|--------------|
| #### Bn-scaff_16231_1-p14844A-genome specific (napus-rapa)     | 1            | 0.2897281    | not scorable | not scorable | 1            | 0.7839393    |
| #### Bn-scaff_16231_1-p14848genome unspecific (all in)         | 1            | 0.4258085    |              | 1            | 0.7181988    | 0.9834711    |
| #### Bn-scaff_16231_1-p14849genome unspecific (all in)         | 0.9784689    | 0.2792267    |              | 1            | 0.7385327    | 1            |
| #### Bn-scaff_16231_1-p15067genome unspecific (all in)         | 1            | 0.876306     |              | 1            | 0.8843396    | 1            |
| #### Bn-scaff_16231_1-p15605genome unspecific (all in)         | 0.9521531    | 0.3493246    |              | 1            | 0.7469087    | 1            |
| #### Bn-scaff_16231_1-p16294genome unspecific (oleracea-rapa)  | not scorable | not scorable |              | 1            | 0.537686     | 1            |
| #### Bn-scaff_16231_1-p16430C-genome specific (napus-oleracea) | 0.9952153    | 0.8319963    |              | 1            | 0.6758776    | not scorable |
| #### Bn-scaff_16231_1-p17781genome unspecific (oleracea-rapa)  | not scorable | not scorable |              | 1            | 0.5331423    | 1            |
| #### Bn-scaff_16231_1-p17784C-genome specific (napus-oleracea) | 1            | 0.6988935    | 0.9922481    | 0.8067086    | not scorable | not scorable |
| #### Bn-scaff_16231_1-p18414genome unspecific (all in)         | 0.9736842    | 0.4566732    |              | 1            | 0.7227267    | 0.9834711    |
| #### Bn-scaff_16231_1-p20276napus specific                     | 0.9880383    | 0.5092169    | not scorable | not scorable | not scorable | not scorable |
| #### Bn-scaff_16231_1-p20281napus specific                     | 1            | 0.5171382    | not scorable | not scorable | not scorable | not scorable |
| #### Bn-scaff_16231_1-p20283C-genome specific (napus-oleracea) | 0.9904306    | 0.468648     |              | 1            | 0.4408745    | not scorable |
| #### Bn-scaff_16231_1-p20283napus specific                     | 0.9928229    | 0.4972769    | not scorable | not scorable | not scorable | not scorable |
| #### Bn-scaff_16231_1-p20387C-genome specific (napus-oleracea) | 0.9928229    | 0.5015394    |              | 1            | 0.6991515    | not scorable |
| #### Bn-scaff_16231_1-p20421genome unspecific (all in)         | 1            | 0.6145933    | 0.9612403    | 0.2018693    |              | 1            |
| #### Bn-scaff_16231_1-p20431genome unspecific (oleracea-rapa)  | not scorable | not scorable | 0.9922481    | 0.2320001    | 0.9917355    | 0.6950321    |
| #### Bn-scaff_16231_1-p20443A-genome specific (rapa only)      | not scorable | not scorable | not scorable | not scorable | 0.8512397    | 0.9071856    |
| #### Bn-scaff_16231_1-p20484genome unspecific (all in)         | 0.9593301    | 0.4216111    |              | 1            | 0.6831111    | 0.7603306    |
| #### Bn-scaff_16231_1-p20506genome unspecific (all in)         | 0.9976076    | 0.4848412    | 0.9302326    | 0.7085781    |              | 1            |
| #### Bn-scaff_16231_1-p22132C-genome specific (napus-oleracea) | 0.9904306    | 0.7502894    |              | 1            | 0.672938     | not scorable |
| #### Bn-scaff_16231_1-p22137C-genome specific (napus-oleracea) | 0.9928229    | 0.7282462    | 0.875969     | 0.7916174    | not scorable | not scorable |
| #### Bn-scaff_16231_1-p22332genome unspecific (oleracea-rapa)  | not scorable | not scorable | 0.9457364    | 0.6703766    |              | 1            |
| #### Bn-scaff_16231_1-p22668C-genome specific (oleracea only)  | not scorable | not scorable | 0.9224806    | 0.4457312    | not scorable | not scorable |
| #### Bn-scaff_16231_1-p22743genome unspecific (all in)         | 1            | 0.5666384    |              | 1            | 0.5678121    | 1            |
| #### Bn-scaff_16231_1-p22744genome unspecific (all in)         | 0.9976076    | 0.3494716    | 0.9844961    | 0.5134326    |              | 1            |
| #### Bn-scaff_16231_1-p22873genome unspecific (oleracea-rapa)  | not scorable | not scorable |              | 1            | 0.604068     | 0.9917355    |
| #### Bn-scaff_16231_1-p23039C-genome specific (napus-oleracea) | 0.9952153    | 0.7662798    | 0.9922481    | 0.9159245    | not scorable | not scorable |
| #### Bn-scaff_16231_1-p23069C-genome specific (napus-oleracea) | 0.9712918    | 0.766353     |              | 1            | 0.8484792    | not scorable |
| #### Bn-scaff_16231_1-p29679C-genome specific (napus-oleracea) | 1            | 0.8355803    |              | 1            | 0.7182389    | not scorable |
| #### Bn-scaff_16231_1-p44290genome unspecific (all in)         | 1            | 0.8850875    |              | 1            | 0.79012      | 0.9752066    |
| #### Bn-scaff_16231_1-p47103genome unspecific (all in)         | 0.9976076    | 0.7626712    | 0.9844961    | 0.6236328    |              | 1            |
| #### Bn-scaff_16231_1-p49055genome unspecific (all in)         | 1            | 0.8694528    |              | 1            | 0.864202     | 1            |

|                                                                  |              |              |              |              |              |              |              |              |              |
|------------------------------------------------------------------|--------------|--------------|--------------|--------------|--------------|--------------|--------------|--------------|--------------|
| ##### Bn-scaff_16231_1-p56376 A-genome specific (rapa only)      | not scorable | not scorable | not scorable | not scorable |              | 1            | 0.8700819    |              |              |
| ##### Bn-scaff_16231_1-p57638 genome unspecific (all in)         |              | 1            | 0.822527     |              | 1            | 0.8618233    | 1            | 0.8339247    |              |
| ##### Bn-scaff_16231_1-p57663 genome unspecific (oleracea-rapa)  | not scorable | not scorable |              | 0.9767442    | 0.6997084    | 0.9834711    |              | 0.7156493    |              |
| ##### Bn-scaff_16231_1-p57710 genome unspecific (all in)         |              | 0.9952153    | 0.3404317    |              | 1            | 0.695714     | 0.9917355    | 0.6914846    |              |
| ##### Bn-scaff_16231_1-p66272 C-genome specific (napus-oleracea) |              | 1            | 0.9218493    | 0.9922481    | 0.7579653    | not scorable |              | not scorable |              |
| ##### Bn-scaff_16231_1-p67859 C-genome specific (napus-oleracea) |              | 0.9880383    | 0.6877561    |              | 1            | 0.7899736    | not scorable | not scorable |              |
| ##### Bn-scaff_16231_1-p71576 genome unspecific (all in)         |              | 1            | 0.3093325    | 0.9844961    | 0.3676223    |              | 1            | 0.7505636    |              |
| ##### Bn-scaff_16231_1-p73470 genome unspecific (all in)         |              | 1            | 0.6903476    |              | 1            | 0.7853137    |              | 1            | 0.65646      |
| ##### Bn-scaff_16231_1-p73497 genome unspecific (all in)         |              | 1            | 0.4897007    |              | 1            | 0.4659145    |              | 1            | 0.7213968    |
| ##### Bn-scaff_16231_1-p74551 genome unspecific (all in)         |              | 1            | 0.4762041    |              | 1            | 0.6629088    |              | 1            | 0.9171497    |
| ##### Bn-scaff_16231_1-p74581 genome unspecific (all in)         |              | 0.9928229    | 0.886328     |              | 1            | 0.6616358    | 0.8595041    |              | 0.7637082    |
| ##### Bn-scaff_16231_1-p74692 genome unspecific (all in)         |              | 1            | 0.7376704    | 0.9612403    | 0.6323055    |              | 1            |              | 0.8142357    |
| ##### Bn-scaff_16231_1-p74702 genome unspecific (all in)         |              | 1            | 0.5979624    | 0.9922481    | 0.7150683    |              | 1            |              | 0.9026646    |
| ##### Bn-scaff_16231_1-p78046 genome unspecific (all in)         |              | 1            | 0.3902909    |              | 1            | 0.8315938    |              | 1            | 0.8608275    |
| ##### Bn-scaff_16231_1-p78048 C-genome specific (napus-oleracea) |              | 0.9928229    | 0.6852979    | 0.9767442    | 0.5946217    | not scorable |              |              | not scorable |
| ##### Bn-scaff_16231_1-p78075 genome unspecific (oleracea-rapa)  | not scorable | not scorable |              |              | 1            | 0.7935161    | 0.9834711    |              | 0.7062565    |
| ##### Bn-scaff_16231_1-p78626 C-genome specific (napus-oleracea) |              | 0.9928229    | 0.783111     | 0.9844961    | 0.7747205    | not scorable |              |              | not scorable |
| ##### Bn-scaff_16231_1-p79281 C-genome specific (napus-oleracea) |              | 0.9976076    | 0.8439621    |              | 1            | 0.7310072    | not scorable |              | not scorable |
| ##### Bn-scaff_16231_1-p79507 genome unspecific (all in)         |              | 0.9856459    | 0.5894029    | 0.9844961    | 0.7093881    |              | 1            |              | 0.9178508    |
| ##### Bn-scaff_16231_1-p79546 genome unspecific (all in)         |              | 0.9952153    | 0.5213832    | 0.9922481    | 0.6951214    | 0.9917355    |              |              | 0.7843907    |
| ##### Bn-scaff_16231_1-p79551 genome unspecific (all in)         |              | 0.9952153    | 0.8249874    | 0.9922481    | 0.7387307    | 0.8595041    |              |              | 0.9039531    |
| ##### Bn-scaff_16231_1-p79564 genome unspecific (all in)         |              | 0.9880383    | 0.4725704    | 0.9844961    | 0.7852819    |              | 1            |              | 0.9095823    |
| ##### Bn-scaff_16231_1-p80135 C-genome specific (napus-oleracea) |              | 1            | 0.2265472    |              | 1            | 0.846351     | not scorable |              | not scorable |
| ##### Bn-scaff_16231_1-p84703 all not scorable                   | not scorable | not scorable | not scorable | not scorable | not scorable | not scorable |              |              | not scorable |
| ##### Bn-scaff_16231_1-p85015 genome unspecific (all in)         |              | 0.9976076    | 0.3170826    |              | 1            | 0.6467739    |              | 1            | 0.7859105    |
| ##### Bn-scaff_16231_1-p85379 genome unspecific (oleracea-rapa)  | not scorable | not scorable |              |              | 1            | 0.7684356    | 0.9586777    |              | 0.8158817    |
| ##### Bn-scaff_16231_1-p87699 C-genome specific (napus-oleracea) |              | 0.9784689    | 0.7051915    | 0.9922481    | 0.7606136    | not scorable |              |              | not scorable |
| ##### Bn-scaff_16231_1-p89694 C-genome specific (napus-oleracea) |              | 0.9976076    | 0.7224126    |              | 1            | 0.69669      | not scorable |              | not scorable |
| ##### Bn-scaff_16231_1-p89738 C-genome specific (napus-oleracea) |              | 0.9928229    | 0.7194107    |              | 1            | 0.6339313    | not scorable |              | not scorable |
| ##### Bn-scaff_16231_1-p89738 C-genome specific (napus-oleracea) |              | 0.9952153    | 0.7733707    | 0.9844961    | 0.7209599    | not scorable |              |              | not scorable |
| ##### Bn-scaff_16231_1-p89954 C-genome specific (napus-oleracea) |              | 0.9952153    | 0.7635785    |              | 1            | 0.6989657    | not scorable |              | not scorable |
| ##### Bn-scaff_16231_1-p89970 C-genome specific (napus-oleracea) |              | 0.9880383    | 0.7890705    | 0.9844961    | 0.7422077    | not scorable |              |              | not scorable |
| ##### Bn-scaff_16231_1-p90158 C-genome specific (napus-oleracea) |              | 0.9952153    | 0.7975361    | 0.9844961    | 0.7134481    | not scorable |              |              | not scorable |

|                                                                  |              |              |              |              |              |              |
|------------------------------------------------------------------|--------------|--------------|--------------|--------------|--------------|--------------|
| ##### Bn-scaff_16231_1-p90304 genome unspecific (oleracea-rapa)  | not scorable | not scorable | 0.9844961    | 0.3539725    | 0.9917355    | 0.9242031    |
| ##### Bn-scaff_16231_1-p90554 C-genome specific (napus-oleracea) | 0.9976076    | 0.8004208    | 1            | 0.7002369    | not scorable | not scorable |
| ##### Bn-scaff_16231_1-p90556 C-genome specific (napus-oleracea) | 0.9904306    | 0.7092054    | 1            | 0.7853963    | not scorable | not scorable |
| ##### Bn-scaff_16231_1-p98296 C-genome specific (napus-oleracea) | 0.9904306    | 0.7882779    | 1            | 0.8344878    | not scorable | not scorable |
| ##### Bn-scaff_16240_1-p10163 genome unspecific (oleracea-rapa)  | not scorable | not scorable | 1            | 0.7868627    | 0.9752066    | 0.8006638    |
| ##### Bn-scaff_16240_1-p13277 genome unspecific (oleracea-rapa)  | not scorable | not scorable | 0.9844961    | 0.6159089    | 1            | 0.8963574    |
| ##### Bn-scaff_16240_1-p15203 C-genome specific (napus-oleracea) | 0.9976076    | 0.6354495    | 1            | 0.690843     | not scorable | not scorable |
| ##### Bn-scaff_16240_1-p2078 A-genome specific (rapa only)       | not scorable | not scorable | not scorable | not scorable | 1            | 0.9392819    |
| ##### Bn-scaff_16240_1-p24623 genome unspecific (oleracea-rapa)  | not scorable | not scorable | 0.7596899    | 0.6845598    | 0.9834711    | 0.7360603    |
| ##### Bn-scaff_16240_1-p31084 genome unspecific (all in)         | 0.9593301    | 0.3431998    | 1            | 0.9022249    | 0.9669421    | 0.7349528    |
| ##### Bn-scaff_16240_1-p31091 genome unspecific (all in)         | 0.9880383    | 0.3742297    | 1            | 0.3034688    | 1            | 0.7530766    |
| ##### Bn-scaff_16240_1-p31145 genome unspecific (all in)         | 1            | 0.720054     | 1            | 0.6839622    | 0.9752066    | 0.7492094    |
| ##### Bn-scaff_16240_1-p8665 genome unspecific (all in)          | 0.9808612    | 0.4396264    | 1            | 0.7346026    | 0.9834711    | 0.7575175    |
| ##### Bn-scaff_16244_1-p11950 genome unspecific (all in)         | 0.9880383    | 0.6660378    | 1            | 0.8431964    | 1            | 0.9319193    |
| ##### Bn-scaff_16244_1-p25214 C-genome specific (napus-oleracea) | 0.9880383    | 0.8053656    | 1            | 0.7297423    | not scorable | not scorable |
| ##### Bn-scaff_16244_1-p28539 C-genome specific (napus-oleracea) | 0.9856459    | 0.7368883    | 1            | 0.7251681    | not scorable | not scorable |
| ##### Bn-scaff_16244_1-p3472 C-genome specific (oleracea only)   | not scorable | not scorable | 0.9922481    | 0.7367576    | not scorable | not scorable |
| ##### Bn-scaff_16244_1-p5026 C-genome specific (napus-oleracea)  | 0.9880383    | 0.6129219    | 1            | 0.7969319    | not scorable | not scorable |
| ##### Bn-scaff_16244_1-p8089 C-genome specific (napus-oleracea)  | 0.9928229    | 0.8417687    | 1            | 0.8001788    | not scorable | not scorable |
| ##### Bn-scaff_16244_1-p8635 C-genome specific (oleracea only)   | not scorable | not scorable | 0.7829458    | 0.7692102    | not scorable | not scorable |
| ##### Bn-scaff_16246_1-p10141 genome unspecific (oleracea-rapa)  | not scorable | not scorable | 1            | 0.5845692    | 1            | 0.8330705    |
| ##### Bn-scaff_16246_1-p15114 genome unspecific (all in)         | 1            | 0.3809727    | 1            | 0.8381133    | 1            | 0.856462     |
| ##### Bn-scaff_16246_1-p15363 genome unspecific (all in)         | 1            | 0.8014655    | 1            | 0.7691318    | 1            | 0.9013131    |
| ##### Bn-scaff_16246_1-p25306 C-genome specific (napus-oleracea) | 0.9976076    | 0.2396947    | 1            | 0.8733113    | not scorable | not scorable |
| ##### Bn-scaff_16246_1-p34306 genome unspecific (all in)         | 0.9928229    | 0.7884539    | 1            | 0.8042694    | 1            | 0.8052867    |
| ##### Bn-scaff_16246_1-p58643 genome unspecific (all in)         | 1            | 0.8159249    | 1            | 0.7340873    | 1            | 0.8793069    |
| ##### Bn-scaff_16246_1-p73641 napus specific                     | 0.9952153    | 0.5174165    | not scorable | not scorable | not scorable | not scorable |
| ##### Bn-scaff_16246_1-p73643 all not scorable                   | not scorable | not scorable | not scorable | not scorable | not scorable | not scorable |
| ##### Bn-scaff_16246_1-p73834 C-genome specific (oleracea only)  | not scorable | not scorable | 0.9224806    | 0.566199     | not scorable | not scorable |
| ##### Bn-scaff_16246_1-p83273 C-genome specific (napus-oleracea) | 1            | 0.6256036    | 1            | 0.5618715    | not scorable | not scorable |
| ##### Bn-scaff_16246_1-p97570 C-genome specific (oleracea only)  | not scorable | not scorable | 0.9534883    | 0.1839215    | not scorable | not scorable |
| ##### Bn-scaff_16246_2-p17924 C-genome specific (napus-oleracea) | 0.9808612    | 0.7698318    | 0.9922481    | 0.8190148    | not scorable | not scorable |
| ##### Bn-scaff_16246_2-p17950 C-genome specific (napus-oleracea) | 0.9784689    | 0.7681945    | 0.9922481    | 0.8268576    | not scorable | not scorable |



|                                                                  |              |              |              |              |              |              |
|------------------------------------------------------------------|--------------|--------------|--------------|--------------|--------------|--------------|
| ##### Bn-scaff_16246_2-p21963 genome unspecific (oleracea-rapa)  | not scorable | not scorable | 1            | 0.6882331    | 0.9338843    | 0.8354086    |
| ##### Bn-scaff_16246_2-p3090 C-genome specific (napus-oleracea)  | 0.9736842    | 0.7685393    | 1            | 0.7632961    | not scorable | not scorable |
| ##### Bn-scaff_16246_2-p49006 C-genome specific (napus-oleracea) | 0.9832536    | 0.7611266    | 0.9922481    | 0.7933606    | not scorable | not scorable |
| ##### Bn-scaff_16246_2-p49102 genome unspecific (oleracea-rapa)  | not scorable | not scorable | 1            | 0.7765799    | 0.9834711    | 0.9175813    |
| ##### Bn-scaff_16246_2-p75351 C-genome specific (napus-oleracea) | 0.9952153    | 0.7437473    | 1            | 0.3265846    | not scorable | not scorable |
| ##### Bn-scaff_16246_2-p82398 C-genome specific (napus-oleracea) | 0.9545454    | 0.7138973    | 0.9689922    | 0.7831451    | not scorable | not scorable |
| ##### Bn-scaff_16247_1-p730 C-genome specific (oleracea only)    | not scorable | not scorable | 1            | 0.5634876    | not scorable | not scorable |
| ##### Bn-scaff_16263_1-p10970 napus specific                     | 0.8397129    | 0.7632988    | not scorable | not scorable | not scorable | not scorable |
| ##### Bn-scaff_16263_1-p26046 C-genome specific (napus-oleracea) | 0.9976076    | 0.7795391    | 0.9689922    | 0.6794105    | not scorable | not scorable |
| ##### Bn-scaff_16263_1-p41062 C-genome specific (oleracea only)  | not scorable | not scorable | 0.7751938    | 0.2426062    | not scorable | not scorable |
| ##### Bn-scaff_16263_1-p44574 A-genome specific (rapa only)      | not scorable | not scorable | not scorable | not scorable | 0.9834711    | 0.685151     |
| ##### Bn-scaff_16263_1-p44601 genome unspecific (all in)         | 0.9928229    | 0.3240363    | 1            | 0.8467131    | 1            | 0.8267812    |
| ##### Bn-scaff_16263_1-p44609 genome unspecific (all in)         | 0.9952153    | 0.3734711    | 0.9922481    | 0.859677     | 0.9917355    | 0.740224     |
| ##### Bn-scaff_16263_1-p44622 genome unspecific (all in)         | 0.9952153    | 0.2268477    | 1            | 0.7153881    | 1            | 0.7353838    |
| ##### Bn-scaff_16263_1-p45959 genome unspecific (all in)         | 0.9952153    | 0.3530736    | 1            | 0.7339723    | 1            | 0.760062     |
| ##### Bn-scaff_16263_1-p45965 genome unspecific (all in)         | 0.9880383    | 0.2197476    | 1            | 0.7098576    | 1            | 0.743643     |
| ##### Bn-scaff_16263_1-p45993 genome unspecific (all in)         | 0.9928229    | 0.4356878    | 1            | 0.6909213    | 0.9917355    | 0.6294355    |
| ##### Bn-scaff_16263_2-p50282 C-genome specific (napus-oleracea) | 1            | 0.4197336    | 0.9844961    | 0.5007332    | not scorable | not scorable |
| ##### Bn-scaff_16263_2-p55262 genome unspecific (all in)         | 0.9641148    | 0.2942638    | 1            | 0.6212041    | 0.9834711    | 0.5800974    |
| ##### Bn-scaff_16268_1-p12483 C-genome specific (napus-oleracea) | 1            | 0.815909     | 1            | 0.6273827    | not scorable | not scorable |
| ##### Bn-scaff_16268_1-p24724 C-genome specific (napus-oleracea) | 1            | 0.9389839    | 1            | 0.7941719    | not scorable | not scorable |
| ##### Bn-scaff_16268_1-p25879 C-genome specific (napus-oleracea) | 1            | 0.7336281    | 1            | 0.6607053    | not scorable | not scorable |
| ##### Bn-scaff_16268_1-p25930 C-genome specific (napus-oleracea) | 0.9904306    | 0.9036368    | 1            | 0.7553017    | not scorable | not scorable |
| ##### Bn-scaff_16268_1-p26134 C-genome specific (napus-oleracea) | 0.9976076    | 0.7050796    | 1            | 0.6714318    | not scorable | not scorable |
| ##### Bn-scaff_16268_1-p26299 C-genome specific (napus-oleracea) | 0.9928229    | 0.786991     | 1            | 0.6526966    | not scorable | not scorable |
| ##### Bn-scaff_16268_1-p29982 C-genome specific (napus-oleracea) | 0.9952153    | 0.8751893    | 1            | 0.7154126    | not scorable | not scorable |
| ##### Bn-scaff_16268_1-p30049 C-genome specific (napus-oleracea) | 0.9976076    | 0.7223517    | 1            | 0.5900792    | not scorable | not scorable |
| ##### Bn-scaff_16268_1-p32052 C-genome specific (napus-oleracea) | 0.9976076    | 0.7331351    | 0.9922481    | 0.7084692    | not scorable | not scorable |
| ##### Bn-scaff_16268_1-p37707 C-genome specific (napus-oleracea) | 0.9928229    | 0.7853919    | 1            | 0.6664152    | not scorable | not scorable |
| ##### Bn-scaff_16268_1-p37733 C-genome specific (napus-oleracea) | 0.9904306    | 0.7170973    | 1            | 0.8249918    | not scorable | not scorable |
| ##### Bn-scaff_16268_1-p37833 C-genome specific (napus-oleracea) | 0.9976076    | 0.7464474    | 1            | 0.8016099    | not scorable | not scorable |
| ##### Bn-scaff_16268_1-p38973 C-genome specific (napus-oleracea) | 0.9952153    | 0.780384     | 1            | 0.6957857    | not scorable | not scorable |
| ##### Bn-scaff_16268_1-p39996 C-genome specific (napus-oleracea) | 0.9904306    | 0.7794225    | 1            | 0.8148981    | not scorable | not scorable |

|                                                                |           |           |           |           |              |              |
|----------------------------------------------------------------|-----------|-----------|-----------|-----------|--------------|--------------|
| #### Bn-scaff_16268_1-p4380C-genome specific (napus-oleracea)  | 0.9904306 | 0.7746937 | 1         | 0.7897948 | not scorable | not scorable |
| #### Bn-scaff_16268_1-p4442C-genome specific (napus-oleracea)  | 0.9880383 | 0.8272135 | 0.9922481 | 0.7742912 | not scorable | not scorable |
| #### Bn-scaff_16268_1-p45644C-genome specific (napus-oleracea) | 0.9904306 | 0.6614309 | 1         | 0.7446765 | not scorable | not scorable |
| #### Bn-scaff_16268_1-p4646C-genome specific (napus-oleracea)  | 0.9928229 | 0.7842356 | 1         | 0.7772486 | not scorable | not scorable |
| #### Bn-scaff_16268_1-p50711C-genome specific (napus-oleracea) | 0.9952153 | 0.907346  | 0.9844961 | 0.8444967 | not scorable | not scorable |
| #### Bn-scaff_16268_1-p5323C-genome specific (napus-oleracea)  | 0.9976076 | 0.8141243 | 1         | 0.7984783 | not scorable | not scorable |
| #### Bn-scaff_16268_1-p53354genome unspecific (all in)         | 0.9952153 | 0.3862564 | 1         | 0.716629  | 1            | 0.7908068    |
| #### Bn-scaff_16268_1-p5338C-genome specific (napus-oleracea)  | 0.9976076 | 0.8191969 | 0.9302326 | 0.6216264 | not scorable | not scorable |
| #### Bn-scaff_16268_1-p5431C-genome specific (napus-oleracea)  | 1         | 0.4212004 | 1         | 0.7934078 | not scorable | not scorable |
| #### Bn-scaff_16268_1-p5482C-genome specific (napus-oleracea)  | 0.9928229 | 0.8387042 | 0.9224806 | 0.7768046 | not scorable | not scorable |
| #### Bn-scaff_16268_1-p5483C-genome specific (napus-oleracea)  | 0.9928229 | 0.9192792 | 0.9379845 | 0.8434208 | not scorable | not scorable |
| #### Bn-scaff_16268_1-p5620genome unspecific (all in)          | 0.9712918 | 0.4613532 | 1         | 0.581221  | 0.9917355    | 0.6862456    |
| #### Bn-scaff_16268_1-p56484C-genome specific (napus-oleracea) | 0.9928229 | 0.6988072 | 0.9922481 | 0.7302158 | not scorable | not scorable |
| #### Bn-scaff_16268_1-p5707C-genome specific (napus-oleracea)  | 0.9832536 | 0.751667  | 0.9767442 | 0.7575541 | not scorable | not scorable |
| #### Bn-scaff_16268_1-p5709C-genome specific (napus-oleracea)  | 0.9904306 | 0.7701377 | 1         | 0.8252621 | not scorable | not scorable |
| #### Bn-scaff_16268_1-p57114C-genome specific (napus-oleracea) | 0.9880383 | 0.7547844 | 1         | 0.7640675 | not scorable | not scorable |
| #### Bn-scaff_16268_1-p5737C-genome specific (napus-oleracea)  | 0.9617225 | 0.7262858 | 0.9922481 | 0.8485919 | not scorable | not scorable |
| #### Bn-scaff_16268_1-p57527C-genome specific (napus-oleracea) | 0.9904306 | 0.7605482 | 1         | 0.7393931 | not scorable | not scorable |
| #### Bn-scaff_16268_1-p57531C-genome specific (napus-oleracea) | 0.9784689 | 0.742889  | 1         | 0.7873951 | not scorable | not scorable |
| #### Bn-scaff_16268_1-p5887C-genome specific (napus-oleracea)  | 0.9832536 | 0.7527182 | 1         | 0.791815  | not scorable | not scorable |
| #### Bn-scaff_16268_1-p5995C-genome specific (napus-oleracea)  | 0.9856459 | 0.7639237 | 1         | 0.6876723 | not scorable | not scorable |
| #### Bn-scaff_16268_1-p60007C-genome specific (napus-oleracea) | 0.9832536 | 0.7447588 | 1         | 0.7582539 | not scorable | not scorable |
| #### Bn-scaff_16268_1-p60052C-genome specific (napus-oleracea) | 0.9856459 | 0.3271716 | 0.9457364 | 0.2653841 | not scorable | not scorable |
| #### Bn-scaff_16268_1-p6018genome unspecific (all in)          | 0.9784689 | 0.5933817 | 0.9767442 | 0.6193283 | 1            | 0.9176918    |
| #### Bn-scaff_16268_1-p6024C-genome specific (napus-oleracea)  | 0.9880383 | 0.7548144 | 1         | 0.8486626 | not scorable | not scorable |
| #### Bn-scaff_16268_1-p6076C-genome specific (napus-oleracea)  | 0.9928229 | 0.746301  | 1         | 0.6702788 | not scorable | not scorable |
| #### Bn-scaff_16268_1-p6082C-genome specific (napus-oleracea)  | 0.9736842 | 0.759238  | 1         | 0.7069373 | not scorable | not scorable |
| #### Bn-scaff_16268_1-p6089C-genome specific (napus-oleracea)  | 0.9880383 | 0.7673511 | 1         | 0.7782158 | not scorable | not scorable |
| #### Bn-scaff_16268_1-p6094C-genome specific (napus-oleracea)  | 0.9832536 | 0.7099181 | 1         | 0.6645685 | not scorable | not scorable |
| #### Bn-scaff_16268_1-p63531C-genome specific (napus-oleracea) | 0.9784689 | 0.7596586 | 1         | 0.7274151 | not scorable | not scorable |
| #### Bn-scaff_16268_1-p63957C-genome specific (napus-oleracea) | 0.9784689 | 0.6812479 | 1         | 0.7082067 | not scorable | not scorable |
| #### Bn-scaff_16268_1-p6400C-genome specific (napus-oleracea)  | 0.9808612 | 0.7541033 | 1         | 0.9244691 | not scorable | not scorable |
| #### Bn-scaff_16268_1-p6408C-genome specific (napus-oleracea)  | 0.9880383 | 0.6626584 | 1         | 0.6949927 | not scorable | not scorable |

|                                                                 |              |              |           |           |              |              |
|-----------------------------------------------------------------|--------------|--------------|-----------|-----------|--------------|--------------|
| #### Bn-scaff_16268_1-p6410 genome unspecific (all in)          | 0.9952153    | 0.5891011    | 1         | 0.5852411 | 1            | 0.8722028    |
| #### Bn-scaff_16268_1-p6433 C-genome specific (napus-oleracea)  | 0.9856459    | 0.6823863    | 1         | 0.737061  | not scorable | not scorable |
| #### Bn-scaff_16268_1-p87361 genome unspecific (all in)         | 0.9665072    | 0.3481412    | 1         | 0.7561491 | 1            | 0.7124087    |
| #### Bn-scaff_16268_1-p9957 C-genome specific (napus-oleracea)  | 0.9784689    | 0.752191     | 0.5581396 | 0.6717956 | not scorable | not scorable |
| #### Bn-scaff_16269_1-p10727 C-genome specific (napus-oleracea) | 0.9162679    | 0.7384438    | 0.8992248 | 0.8207639 | not scorable | not scorable |
| #### Bn-scaff_16269_1-p17394 C-genome specific (napus-oleracea) | 0.9258373    | 0.8061417    | 0.9922481 | 0.8213413 | not scorable | not scorable |
| #### Bn-scaff_16269_1-p19243 C-genome specific (napus-oleracea) | 0.9210526    | 0.7618266    | 1         | 0.7701506 | not scorable | not scorable |
| #### Bn-scaff_16269_1-p19777 genome unspecific (oleracea-rapa)  | not scorable | not scorable | 0.9922481 | 0.6166513 | 0.9917355    | 0.6145041    |
| #### Bn-scaff_16269_1-p2424 genome unspecific (all in)          | 1            | 0.3621218    | 1         | 0.7909569 | 1            | 0.8915204    |
| #### Bn-scaff_16269_1-p2429 genome unspecific (oleracea-rapa)   | not scorable | not scorable | 0.9922481 | 0.7866264 | 0.9586777    | 0.7096214    |
| #### Bn-scaff_16269_1-p29626 genome unspecific (all in)         | 0.9856459    | 0.3492872    | 1         | 0.6720281 | 1            | 0.7770717    |
| #### Bn-scaff_16269_1-p30177 C-genome specific (napus-oleracea) | 0.9114832    | 0.8625509    | 1         | 0.7912669 | not scorable | not scorable |
| #### Bn-scaff_16269_1-p30451 genome unspecific (all in)         | 0.9808612    | 0.2571217    | 1         | 0.6653305 | 0.9834711    | 0.6098089    |
| #### Bn-scaff_16269_1-p30826 C-genome specific (napus-oleracea) | 0.9138756    | 0.8077723    | 0.9844961 | 0.7088198 | not scorable | not scorable |
| #### Bn-scaff_16269_1-p32944 genome unspecific (all in)         | 0.9856459    | 0.4250091    | 1         | 0.7526578 | 1            | 0.7547736    |
| #### Bn-scaff_16269_1-p3598 C-genome specific (napus-oleracea)  | 0.9186603    | 0.7719436    | 1         | 0.8587967 | not scorable | not scorable |
| #### Bn-scaff_16269_1-p35997 genome unspecific (oleracea-rapa)  | not scorable | not scorable | 1         | 0.8189056 | 1            | 0.6960483    |
| #### Bn-scaff_16269_1-p48484 genome unspecific (all in)         | 0.9904306    | 0.3215086    | 0.9922481 | 0.761591  | 0.9917355    | 0.767014     |
| #### Bn-scaff_16269_1-p52763 C-genome specific (napus-oleracea) | 0.8875598    | 0.6977822    | 1         | 0.6916533 | not scorable | not scorable |
| #### Bn-scaff_16269_1-p52934 genome unspecific (all in)         | 0.9928229    | 0.509809     | 0.9922481 | 0.7539402 | 1            | 0.8947634    |
| #### Bn-scaff_16269_1-p52969 genome unspecific (all in)         | 1            | 0.3334861    | 0.9922481 | 0.775049  | 1            | 0.778577     |
| #### Bn-scaff_16269_1-p5325 genome unspecific (all in)          | 0.9665072    | 0.3445337    | 0.9922481 | 0.6958047 | 1            | 0.9048646    |
| #### Bn-scaff_16269_1-p53394 C-genome specific (napus-oleracea) | 0.9090909    | 0.7951081    | 0.9457364 | 0.6762416 | not scorable | not scorable |
| #### Bn-scaff_16269_1-p53463 genome unspecific (all in)         | 0.9665072    | 0.3672573    | 1         | 0.6886802 | 0.9917355    | 0.6777844    |
| #### Bn-scaff_16269_1-p5706 C-genome specific (napus-oleracea)  | 0.9138756    | 0.6698275    | 1         | 0.6361586 | not scorable | not scorable |
| #### Bn-scaff_16269_1-p59957 C-genome specific (oleracea only)  | not scorable | not scorable | 0.9922481 | 0.4286028 | not scorable | not scorable |
| #### Bn-scaff_16269_1-p60015 genome unspecific (oleracea-rapa)  | not scorable | not scorable | 0.9922481 | 0.3130101 | 1            | 0.8391452    |
| #### Bn-scaff_16269_1-p60961 genome unspecific (all in)         | 0.9712918    | 0.4806587    | 1         | 0.7081385 | 1            | 0.7768715    |
| #### Bn-scaff_16269_1-p6218 C-genome specific (napus-oleracea)  | 0.9736842    | 0.7906482    | 0.744186  | 0.7971311 | not scorable | not scorable |
| #### Bn-scaff_16269_1-p66085 C-genome specific (napus-oleracea) | 0.9138756    | 0.7507443    | 1         | 0.8001016 | not scorable | not scorable |
| #### Bn-scaff_16269_1-p66411 C-genome specific (napus-oleracea) | 0.9066986    | 0.7191887    | 1         | 0.8375188 | not scorable | not scorable |
| #### Bn-scaff_16269_1-p98735 C-genome specific (napus-oleracea) | 0.9186603    | 0.7046825    | 1         | 0.7054231 | not scorable | not scorable |
| #### Bn-scaff_16270_1-p3496 genome unspecific (all in)          | 1            | 0.6186296    | 1         | 0.5510001 | 1            | 0.8494042    |

|                                                                 |              |              |              |              |              |              |
|-----------------------------------------------------------------|--------------|--------------|--------------|--------------|--------------|--------------|
| #### Bn-scaff_16273_1-p10759 C-genome specific (napus-oleracea) | 0.9904306    | 0.7760811    | 1            | 0.881584     | not scorable | not scorable |
| #### Bn-scaff_16273_1-p10768 C-genome specific (napus-oleracea) | 0.9832536    | 0.7379125    | 1            | 0.6882073    | not scorable | not scorable |
| #### Bn-scaff_16273_1-p10861 C-genome specific (oleracea only)  | not scorable | not scorable | 1            | 0.5769591    | not scorable | not scorable |
| #### Bn-scaff_16273_1-p12907 C-genome specific (napus-oleracea) | 0.9593301    | 0.7726657    | 0.9922481    | 0.842469     | not scorable | not scorable |
| #### Bn-scaff_16273_1-p13373 C-genome specific (napus-oleracea) | 0.9928229    | 0.7673253    | 1            | 0.7411656    | not scorable | not scorable |
| #### Bn-scaff_16273_1-p14301 C-genome specific (napus-oleracea) | 0.9712918    | 0.7583966    | 1            | 0.7670901    | not scorable | not scorable |
| #### Bn-scaff_16273_1-p14328 C-genome specific (napus-oleracea) | 0.9904306    | 0.7754619    | 1            | 0.718114     | not scorable | not scorable |
| #### Bn-scaff_16273_1-p14339 C-genome specific (napus-oleracea) | 0.9736842    | 0.7805551    | 1            | 0.8272225    | not scorable | not scorable |
| #### Bn-scaff_16273_1-p15016 C-genome specific (napus-oleracea) | 0.7105263    | 0.8265153    | 1            | 0.7903717    | not scorable | not scorable |
| #### Bn-scaff_16273_1-p15398 C-genome specific (napus-oleracea) | 0.9904306    | 0.7752942    | 0.9922481    | 0.8398725    | not scorable | not scorable |
| #### Bn-scaff_16273_1-p18129 genome unspecific (all in)         | 0.9952153    | 0.550276     | 0.9922481    | 0.5380898    | 1            | 0.4324969    |
| #### Bn-scaff_16273_1-p18227 genome unspecific (all in)         | 1            | 0.5904691    | 1            | 0.5266746    | 1            | 0.5576342    |
| #### Bn-scaff_16273_1-p21951 C-genome specific (napus-oleracea) | 0.9760765    | 0.7514983    | 1            | 0.707        | not scorable | not scorable |
| #### Bn-scaff_16273_1-p22795 genome unspecific (all in)         | 0.9952153    | 0.5368182    | 1            | 0.6796017    | 1            | 0.8114662    |
| #### Bn-scaff_16273_1-p22899 genome unspecific (all in)         | 0.9593301    | 0.4387937    | 1            | 0.7336861    | 1            | 0.9175813    |
| #### Bn-scaff_16273_1-p22908 C-genome specific (napus-oleracea) | 0.9856459    | 0.7750593    | 0.9922481    | 0.6917211    | not scorable | not scorable |
| #### Bn-scaff_16273_1-p22958 C-genome specific (napus-oleracea) | 0.9688995    | 0.7811199    | 1            | 0.7436693    | not scorable | not scorable |
| #### Bn-scaff_16273_1-p23247 napus specific                     | 0.9736842    | 0.6547102    | not scorable | not scorable | not scorable | not scorable |
| #### Bn-scaff_16273_1-p27640 C-genome specific (napus-oleracea) | 0.9688995    | 0.6161427    | 0.9922481    | 0.5755178    | not scorable | not scorable |
| #### Bn-scaff_16273_1-p29025 genome unspecific (all in)         | 0.9617225    | 0.331237     | 1            | 0.697157     | 1            | 0.789445     |
| #### Bn-scaff_16273_1-p29128 genome unspecific (all in)         | 0.9760765    | 0.2252026    | 1            | 0.8607183    | 0.9917355    | 0.6789532    |
| #### Bn-scaff_16273_1-p29149 genome unspecific (all in)         | 1            | 0.8687454    | 1            | 0.7845546    | 1            | 0.8212111    |
| #### Bn-scaff_16273_1-p31181 C-genome specific (napus-oleracea) | 0.9832536    | 0.7161217    | 1            | 0.6767222    | not scorable | not scorable |
| #### Bn-scaff_16273_1-p31923 genome unspecific (all in)         | 0.9665072    | 0.6489445    | 1            | 0.7617244    | 0.9917355    | 0.9305819    |
| #### Bn-scaff_16273_1-p32952 C-genome specific (napus-oleracea) | 0.9856459    | 0.7141998    | 1            | 0.7410733    | not scorable | not scorable |
| #### Bn-scaff_16273_1-p33136 C-genome specific (napus-oleracea) | 0.9712918    | 0.7863894    | 1            | 0.884899     | not scorable | not scorable |
| #### Bn-scaff_16273_1-p33141 C-genome specific (napus-oleracea) | 0.9593301    | 0.5237226    | 1            | 0.5393083    | not scorable | not scorable |
| #### Bn-scaff_16273_1-p33337 C-genome specific (napus-oleracea) | 0.9832536    | 0.7825071    | 1            | 0.7499141    | not scorable | not scorable |
| #### Bn-scaff_16273_1-p33975 C-genome specific (napus-oleracea) | 0.9760765    | 0.7323483    | 0.9689922    | 0.6849551    | not scorable | not scorable |
| #### Bn-scaff_16273_1-p34067 C-genome specific (napus-oleracea) | 0.9928229    | 0.7386435    | 0.9689922    | 0.8190888    | not scorable | not scorable |
| #### Bn-scaff_16273_1-p34079 C-genome specific (napus-oleracea) | 0.9688995    | 0.6486868    | 0.9689922    | 0.5688617    | not scorable | not scorable |
| #### Bn-scaff_16273_1-p34223 C-genome specific (napus-oleracea) | 0.9784689    | 0.6903692    | 1            | 0.6570231    | not scorable | not scorable |
| #### Bn-scaff_16273_1-p34231 C-genome specific (napus-oleracea) | 0.9928229    | 0.7279769    | 1            | 0.8062574    | not scorable | not scorable |

|                                                                 |              |              |              |   |              |              |              |
|-----------------------------------------------------------------|--------------|--------------|--------------|---|--------------|--------------|--------------|
| #### Bn-scaff_16273_1-p34238 C-genome specific (napus-oleracea) | 0.9880383    | 0.7772273    |              | 1 | 0.7627727    | not scorable | not scorable |
| #### Bn-scaff_16273_1-p34371 C-genome specific (napus-oleracea) | 0.9928229    | 0.7598979    |              | 1 | 0.7533547    | not scorable | not scorable |
| #### Bn-scaff_16273_1-p34444 C-genome specific (napus-oleracea) | 0.9808612    | 0.6949428    |              | 1 | 0.6593912    | not scorable | not scorable |
| #### Bn-scaff_16273_1-p34485 C-genome specific (napus-oleracea) | 0.9928229    | 0.7009593    |              | 1 | 0.6873184    | not scorable | not scorable |
| #### Bn-scaff_16273_1-p34509 C-genome specific (napus-oleracea) | 0.9688995    | 0.6957021    |              | 1 | 0.725631     | not scorable | not scorable |
| #### Bn-scaff_16273_1-p34577 C-genome specific (napus-oleracea) | 0.9784689    | 0.7917765    | 0.9612403    |   | 0.8917705    | not scorable | not scorable |
| #### Bn-scaff_16273_1-p34849 C-genome specific (napus-oleracea) | 0.9641148    | 0.7914881    | 0.9922481    |   | 0.7965317    | not scorable | not scorable |
| #### Bn-scaff_16273_1-p34884 C-genome specific (napus-oleracea) | 0.9736842    | 0.7707056    |              | 1 | 0.731683     | not scorable | not scorable |
| #### Bn-scaff_16273_1-p35437 C-genome specific (napus-oleracea) | 0.9665072    | 0.701754     |              | 1 | 0.7396266    | not scorable | not scorable |
| #### Bn-scaff_16273_1-p35669 C-genome specific (napus-oleracea) | 0.9832536    | 0.6860622    |              | 1 | 0.6769689    | not scorable | not scorable |
| #### Bn-scaff_16273_1-p35843 C-genome specific (napus-oleracea) | 0.9760765    | 0.7603459    |              | 1 | 0.743249     | not scorable | not scorable |
| #### Bn-scaff_16273_1-p35859 C-genome specific (napus-oleracea) | 0.9712918    | 0.6787457    |              | 1 | 0.6755653    | not scorable | not scorable |
| #### Bn-scaff_16273_1-p35870 C-genome specific (napus-oleracea) | 0.9832536    | 0.6831603    |              | 1 | 0.6453773    | not scorable | not scorable |
| #### Bn-scaff_16273_1-p35932 C-genome specific (napus-oleracea) | 0.9760765    | 0.6793603    |              | 1 | 0.6457277    | not scorable | not scorable |
| #### Bn-scaff_16273_1-p36086 C-genome specific (napus-oleracea) | 0.9665072    | 0.7576133    | 0.9844961    |   | 0.7772381    | not scorable | not scorable |
| #### Bn-scaff_16273_1-p36354 C-genome specific (napus-oleracea) | 0.9760765    | 0.6552993    |              | 1 | 0.7035734    | not scorable | not scorable |
| #### Bn-scaff_16273_1-p37597 C-genome specific (napus-oleracea) | 0.9808612    | 0.704294     | 0.9689922    |   | 0.7294403    | not scorable | not scorable |
| #### Bn-scaff_16273_1-p40388 C-genome specific (oleracea only)  | not scorable | not scorable |              | 1 | 0.5662653    | not scorable | not scorable |
| #### Bn-scaff_16273_1-p42842 genome unspecific (all in)         | 1            | 0.5290589    |              | 1 | 0.5126538    | 0.9917355    | 0.5378139    |
| #### Bn-scaff_16273_1-p42874 A-genome specific (napus-rapa)     | 1            | 0.4122455    | not scorable |   | not scorable | 0.9917355    | 0.5079258    |
| #### Bn-scaff_16273_1-p43160 C-genome specific (napus-oleracea) | 0.9593301    | 0.7471039    | 0.9379845    |   | 0.6570905    | not scorable | not scorable |
| #### Bn-scaff_16273_1-p43240 C-genome specific (napus-oleracea) | 0.9952153    | 0.7604128    |              | 1 | 0.7272118    | not scorable | not scorable |
| #### Bn-scaff_16273_1-p43396 genome unspecific (all in)         | 0.9832536    | 0.2955392    |              | 1 | 0.9020703    | 1            | 0.8146256    |
| #### Bn-scaff_16273_1-p57737 genome unspecific (all in)         | 1            | 0.5481735    |              | 1 | 0.5281984    | 1            | 0.5228792    |
| #### Bn-scaff_16273_1-p75339 genome unspecific (all in)         | 0.9832536    | 0.2937629    | 0.9689922    |   | 0.2786015    | 1            | 0.8035471    |
| #### Bn-scaff_16273_1-p75922 C-genome specific (oleracea only)  | not scorable | not scorable | 0.9844961    |   | 0.5777968    | not scorable | not scorable |
| #### Bn-scaff_16273_1-p89717 C-genome specific (napus-oleracea) | 0.9736842    | 0.7638767    | 0.9767442    |   | 0.7906485    | not scorable | not scorable |
| #### Bn-scaff_16273_1-p93057 A-genome specific (napus-rapa)     | 1            | 0.4899909    | not scorable |   | not scorable | 1            | 0.6426485    |
| #### Bn-scaff_16273_1-p93249 genome unspecific (all in)         | 0.9473684    | 0.2369977    | 0.9767442    |   | 0.250279     | 1            | 0.7948785    |
| #### Bn-scaff_16273_1-p93542 genome unspecific (all in)         | 0.9617225    | 0.2255657    | 0.9612403    |   | 0.4080629    | 1            | 0.8945853    |
| #### Bn-scaff_16275_1-p819 C-genome specific (napus-oleracea)   | 0.9976076    | 0.8404837    | 0.9689922    |   | 0.8222445    | not scorable | not scorable |
| #### Bn-scaff_16287_1-p11276 C-genome specific (napus-oleracea) | 0.9569378    | 0.7822825    | 0.9922481    |   | 0.7020041    | not scorable | not scorable |
| #### Bn-scaff_16287_1-p14660 C-genome specific (napus-oleracea) | 0.9617225    | 0.6446488    | 0.6046512    |   | 0.6821627    | not scorable | not scorable |

|                                                                |              |              |              |              |              |              |
|----------------------------------------------------------------|--------------|--------------|--------------|--------------|--------------|--------------|
| #### Bn-scaff_16287_1-p14711C-genome specific (napus-oleracea) | 0.9808612    | 0.7639387    | 0.9767442    | 0.8389751    | not scorable | not scorable |
| #### Bn-scaff_16287_1-p15005C-genome specific (napus-oleracea) | 0.9784689    | 0.73782      | 1            | 0.766317     | not scorable | not scorable |
| #### Bn-scaff_16287_1-p16172C-genome specific (napus-oleracea) | 0.9760765    | 0.7655531    | 0.9922481    | 0.7398256    | not scorable | not scorable |
| #### Bn-scaff_16287_1-p17071C-genome specific (napus-oleracea) | 0.9808612    | 0.7673983    | 1            | 0.8707974    | not scorable | not scorable |
| #### Bn-scaff_16287_1-p17103C-genome specific (napus-oleracea) | 0.9736842    | 0.7561312    | 1            | 0.6739169    | not scorable | not scorable |
| #### Bn-scaff_16287_1-p17366C-genome specific (napus-oleracea) | 0.9473684    | 0.744682     | 1            | 0.7221599    | not scorable | not scorable |
| #### Bn-scaff_16287_1-p17742C-genome specific (oleracea only)  | not scorable | not scorable | 0.9612403    | 0.7791601    | not scorable | not scorable |
| #### Bn-scaff_16287_1-p18347C-genome specific (napus-oleracea) | 0.9808612    | 0.7941611    | 0.6744186    | 0.8055391    | not scorable | not scorable |
| #### Bn-scaff_16287_1-p18727C-genome specific (napus-oleracea) | 0.9593301    | 0.7587575    | 1            | 0.7942184    | not scorable | not scorable |
| #### Bn-scaff_16287_1-p20789C-genome specific (napus-oleracea) | 0.9617225    | 0.7487409    | 0.4651163    | 0.7752104    | not scorable | not scorable |
| #### Bn-scaff_16287_1-p21083C-genome specific (napus-oleracea) | 0.9856459    | 0.7230275    | 1            | 0.8038915    | not scorable | not scorable |
| #### Bn-scaff_16287_1-p21330C-genome specific (napus-oleracea) | 0.9641148    | 0.704603     | 0.8604651    | 0.7300201    | not scorable | not scorable |
| #### Bn-scaff_16287_1-p22157C-genome specific (napus-oleracea) | 0.923445     | 0.7729505    | 0.5968992    | 0.7498211    | not scorable | not scorable |
| #### Bn-scaff_16287_1-p22361C-genome specific (napus-oleracea) | 0.8995215    | 0.7609649    | 0.5968992    | 0.8176993    | not scorable | not scorable |
| #### Bn-scaff_16287_1-p22381C-genome specific (napus-oleracea) | 0.8947368    | 0.7596588    | 0.6046512    | 0.7966397    | not scorable | not scorable |
| #### Bn-scaff_16287_1-p24896C-genome specific (napus-oleracea) | 1            | 0.5169325    | 1            | 0.5359073    | not scorable | not scorable |
| #### Bn-scaff_16287_1-p25216C-genome specific (oleracea only)  | not scorable | not scorable | 0.9612403    | 0.2568029    | not scorable | not scorable |
| #### Bn-scaff_16287_1-p28266C-genome specific (napus-oleracea) | 0.9641148    | 0.6875714    | 0.627907     | 0.6684641    | not scorable | not scorable |
| #### Bn-scaff_16287_1-p28345C-genome specific (napus-oleracea) | 0.9569378    | 0.6621611    | 0.627907     | 0.6834303    | not scorable | not scorable |
| #### Bn-scaff_16287_1-p28462C-genome specific (napus-oleracea) | 0.9617225    | 0.5340907    | 0.627907     | 0.7702414    | not scorable | not scorable |
| #### Bn-scaff_16287_1-p28498A-genome specific (napus-rapa)     | 1            | 0.5443506    | not scorable | not scorable | 0.9752066    | 0.8201027    |
| #### Bn-scaff_16287_1-p29406C-genome specific (napus-oleracea) | 0.9401914    | 0.7795215    | 0.6821706    | 0.7837604    | not scorable | not scorable |
| #### Bn-scaff_16287_1-p29408C-genome specific (napus-oleracea) | 0.9569378    | 0.6153246    | 0.6124031    | 0.664094     | not scorable | not scorable |
| #### Bn-scaff_16287_1-p29421C-genome specific (napus-oleracea) | 0.9473684    | 0.6379159    | 0.627907     | 0.6038411    | not scorable | not scorable |
| #### Bn-scaff_16287_1-p30404C-genome specific (napus-oleracea) | 0.9497608    | 0.6137288    | 0.627907     | 0.6807734    | not scorable | not scorable |
| #### Bn-scaff_16287_1-p30520genome unspecific (all in)         | 0.9569378    | 0.6649361    | 0.627907     | 0.7659131    | 0.9586777    | 0.7703183    |
| #### Bn-scaff_16287_1-p30659C-genome specific (napus-oleracea) | 0.9569378    | 0.6835936    | 1            | 0.7050335    | not scorable | not scorable |
| #### Bn-scaff_16287_1-p30751C-genome specific (oleracea only)  | not scorable | not scorable | 0.6046512    | 0.6344576    | not scorable | not scorable |
| #### Bn-scaff_16287_1-p33303C-genome specific (napus-oleracea) | 1            | 0.789525     | 1            | 0.6875615    | not scorable | not scorable |
| #### Bn-scaff_16287_1-p34369C-genome specific (napus-oleracea) | 0.9473684    | 0.6714179    | 0.7364341    | 0.7290749    | not scorable | not scorable |
| #### Bn-scaff_16287_1-p34729C-genome specific (napus-oleracea) | 0.9497608    | 0.6168745    | 0.627907     | 0.7240143    | not scorable | not scorable |
| #### Bn-scaff_16287_1-p34752napus specific                     | 0.9641148    | 0.7431056    | not scorable | not scorable | not scorable | not scorable |
| #### Bn-scaff_16287_1-p34843C-genome specific (napus-oleracea) | 0.9425837    | 0.7385895    | 0.627907     | 0.8353207    | not scorable | not scorable |

|                                                                  |              |              |              |              |              |              |
|------------------------------------------------------------------|--------------|--------------|--------------|--------------|--------------|--------------|
| ##### Bn-scaff_16287_1-p34924 C-genome specific (napus-oleracea) | 0.9736842    | 0.7304158    | 0.627907     | 0.7600592    | not scorable | not scorable |
| ##### Bn-scaff_16287_1-p35192 C-genome specific (napus-oleracea) | 0.9880383    | 0.7567792    | 1            | 0.7533976    | not scorable | not scorable |
| ##### Bn-scaff_16287_1-p36658 C-genome specific (napus-oleracea) | 0.9688995    | 0.8015736    | 0.9147287    | 0.7477388    | not scorable | not scorable |
| ##### Bn-scaff_16287_1-p36797 genome unspecific (oleracea-rapa)  | not scorable | not scorable | 0.7984496    | 0.5723306    | 1            | 0.8653966    |
| ##### Bn-scaff_16287_1-p36829 genome unspecific (oleracea-rapa)  | not scorable | not scorable | 0.8062016    | 0.4947635    | 0.9752066    | 0.7749076    |
| ##### Bn-scaff_16287_1-p36837 C-genome specific (napus-oleracea) | 0.9928229    | 0.8567401    | 0.8294573    | 0.835699     | not scorable | not scorable |
| ##### Bn-scaff_16287_1-p39439 C-genome specific (napus-oleracea) | 0.9641148    | 0.6909401    | 0.620155     | 0.6121508    | not scorable | not scorable |
| ##### Bn-scaff_16287_1-p39588 genome unspecific (all in)         | 0.9688995    | 0.3113595    | 1            | 0.8374326    | 0.9669421    | 0.6740393    |
| ##### Bn-scaff_16287_1-p40202 C-genome specific (napus-oleracea) | 0.9928229    | 0.7978308    | 1            | 0.6716062    | not scorable | not scorable |
| ##### Bn-scaff_16287_1-p41615 C-genome specific (napus-oleracea) | 0.9784689    | 0.7680618    | 0.627907     | 0.7507707    | not scorable | not scorable |
| ##### Bn-scaff_16287_1-p42984 napus specific                     | 0.9952153    | 0.3629257    | not scorable | not scorable | not scorable | not scorable |
| ##### Bn-scaff_16287_1-p43085 C-genome specific (napus-oleracea) | 0.9880383    | 0.7760096    | 0.627907     | 0.7691875    | not scorable | not scorable |
| ##### Bn-scaff_16287_1-p43385 C-genome specific (napus-oleracea) | 1            | 0.733587     | 0.9922481    | 0.6545689    | not scorable | not scorable |
| ##### Bn-scaff_16287_1-p43400 C-genome specific (napus-oleracea) | 0.9976076    | 0.7312977    | 1            | 0.6490251    | not scorable | not scorable |
| ##### Bn-scaff_16287_1-p43457 C-genome specific (napus-oleracea) | 0.9928229    | 0.8740647    | 0.9844961    | 0.7813672    | not scorable | not scorable |
| ##### Bn-scaff_16287_1-p43680 C-genome specific (napus-oleracea) | 1            | 0.8733574    | 1            | 0.8070593    | not scorable | not scorable |
| ##### Bn-scaff_16287_1-p43961 C-genome specific (napus-oleracea) | 0.9976076    | 0.8773272    | 1            | 0.7537316    | not scorable | not scorable |
| ##### Bn-scaff_16287_1-p44189 C-genome specific (napus-oleracea) | 0.9760765    | 0.8269773    | 0.627907     | 0.8384088    | not scorable | not scorable |
| ##### Bn-scaff_16287_1-p44194 C-genome specific (napus-oleracea) | 0.9784689    | 0.8071567    | 0.627907     | 0.7935723    | not scorable | not scorable |
| ##### Bn-scaff_16287_1-p44449 C-genome specific (napus-oleracea) | 0.9832536    | 0.851667     | 0.627907     | 0.7991648    | not scorable | not scorable |
| ##### Bn-scaff_16287_1-p45215 C-genome specific (napus-oleracea) | 0.9880383    | 0.890377     | 0.627907     | 0.8273676    | not scorable | not scorable |
| ##### Bn-scaff_16287_1-p45233 C-genome specific (napus-oleracea) | 0.9880383    | 0.8638859    | 0.6976744    | 0.7923881    | not scorable | not scorable |
| ##### Bn-scaff_16287_1-p48312 all not scorable                   | not scorable | not scorable | not scorable | not scorable | not scorable | not scorable |
| ##### Bn-scaff_16287_1-p48329 C-genome specific (napus-oleracea) | 0.9880383    | 0.851338     | 0.627907     | 0.7574178    | not scorable | not scorable |
| ##### Bn-scaff_16287_1-p50172 C-genome specific (napus-oleracea) | 0.9736842    | 0.6128306    | 0.9922481    | 0.6016238    | not scorable | not scorable |
| ##### Bn-scaff_16287_1-p50300 C-genome specific (napus-oleracea) | 0.9688995    | 0.7576067    | 0.620155     | 0.7901043    | not scorable | not scorable |
| ##### Bn-scaff_16287_1-p57105 A-genome specific (napus-rapa)     | 0.9712918    | 0.7157379    | not scorable | not scorable | 0.9586777    | 0.6522425    |
| ##### Bn-scaff_16287_1-p65139 C-genome specific (napus-oleracea) | 0.9712918    | 0.3495445    | 0.9922481    | 0.7477663    | not scorable | not scorable |
| ##### Bn-scaff_16294_1-p20697 C-genome specific (napus-oleracea) | 1            | 0.3870146    | 0.9534883    | 0.5092198    | not scorable | not scorable |
| ##### Bn-scaff_16294_1-p20699 C-genome specific (napus-oleracea) | 0.9976076    | 0.62479      | 1            | 0.5723927    | not scorable | not scorable |
| ##### Bn-scaff_16297_1-p16584 napus specific                     | 0.9856459    | 0.7875693    | not scorable | not scorable | not scorable | not scorable |
| ##### Bn-scaff_16297_1-p25965 genome unspecific (all in)         | 1            | 0.752191     | 1            | 0.7174197    | 1            | 0.7401631    |
| ##### Bn-scaff_16297_1-p30821 C-genome specific (napus-oleracea) | 0.9976076    | 0.5542884    | 0.9922481    | 0.6221803    | not scorable | not scorable |

|                                                                 |              |              |              |   |              |              |              |
|-----------------------------------------------------------------|--------------|--------------|--------------|---|--------------|--------------|--------------|
| #### Bn-scaff_16297_1-p39254 C-genome specific (napus-oleracea) | 0.9928229    | 0.4769768    |              | 1 | 0.8476889    | not scorable | not scorable |
| #### Bn-scaff_16297_1-p79851 C-genome specific (napus-oleracea) | 0.9952153    | 0.6176064    |              | 1 | 0.5588514    | not scorable | not scorable |
| #### Bn-scaff_16297_1-p99269 C-genome specific (napus-oleracea) | 0.9976076    | 0.8414111    |              | 1 | 0.6699034    | not scorable | not scorable |
| #### Bn-scaff_16297_2-p34182 genome unspecific (all in)         |              | 1            | 0.5030201    |   | 0.5993088    | 0.9917355    | 0.4965794    |
| #### Bn-scaff_16298_1-p10217 C-genome specific (napus-oleracea) | 0.9880383    | 0.7456586    |              | 1 | 0.7676097    | not scorable | not scorable |
| #### Bn-scaff_16298_1-p10255 C-genome specific (napus-oleracea) | 0.9928229    | 0.6863935    |              | 1 | 0.7134532    | not scorable | not scorable |
| #### Bn-scaff_16298_1-p10395 C-genome specific (napus-oleracea) | 0.9904306    | 0.7389055    |              | 1 | 0.7754583    | not scorable | not scorable |
| #### Bn-scaff_16298_1-p10507 C-genome specific (napus-oleracea) | 0.9904306    | 0.7893403    |              | 1 | 0.7087183    | not scorable | not scorable |
| #### Bn-scaff_16298_1-p10563 C-genome specific (napus-oleracea) | 0.9952153    | 0.7326475    |              | 1 | 0.8152102    | not scorable | not scorable |
| #### Bn-scaff_16298_1-p10731 C-genome specific (napus-oleracea) | 0.9904306    | 0.7511854    |              | 1 | 0.7757167    | not scorable | not scorable |
| #### Bn-scaff_16298_1-p10854 C-genome specific (napus-oleracea) | 0.9904306    | 0.8456472    |              | 1 | 0.8729413    | not scorable | not scorable |
| #### Bn-scaff_16298_1-p10880 C-genome specific (napus-oleracea) | 0.9928229    | 0.8897923    |              | 1 | 0.8460174    | not scorable | not scorable |
| #### Bn-scaff_16298_1-p10921 C-genome specific (napus-oleracea) | 0.9904306    | 0.7601866    |              | 1 | 0.8320671    | not scorable | not scorable |
| #### Bn-scaff_16298_1-p11129 C-genome specific (napus-oleracea) | 0.9856459    | 0.8214255    |              | 1 | 0.7803184    | not scorable | not scorable |
| #### Bn-scaff_16298_1-p11152 C-genome specific (napus-oleracea) | 0.9904306    | 0.7677294    | 0.9844961    |   | 0.743686     | not scorable | not scorable |
| #### Bn-scaff_16298_1-p13021 C-genome specific (napus-oleracea) | 0.9928229    | 0.8244966    | 0.9844961    |   | 0.7842765    | not scorable | not scorable |
| #### Bn-scaff_16298_1-p15068 C-genome specific (napus-oleracea) | 0.9904306    | 0.6873698    |              | 1 | 0.6206859    | not scorable | not scorable |
| #### Bn-scaff_16298_1-p15647 all not scorable                   | not scorable | not scorable | not scorable |   | not scorable | not scorable | not scorable |
| #### Bn-scaff_16298_1-p15782 napus specific                     | 0.9545454    | 0.8700293    | not scorable |   | not scorable | not scorable | not scorable |
| #### Bn-scaff_16298_1-p15810 napus specific                     | 0.9617225    | 0.8815719    | not scorable |   | not scorable | not scorable | not scorable |
| #### Bn-scaff_16298_1-p16810 C-genome specific (napus-oleracea) | 0.9856459    | 0.8294553    | 0.9147287    |   | 0.6944501    | not scorable | not scorable |
| #### Bn-scaff_16298_1-p19279 C-genome specific (napus-oleracea) | 0.9952153    | 0.5572198    |              | 1 | 0.5388229    | not scorable | not scorable |
| #### Bn-scaff_16298_1-p21523 genome unspecific (all in)         | 0.9832536    | 0.5577422    |              | 1 | 0.5791068    |              | 1 0.8319369  |
| #### Bn-scaff_16298_1-p21655 C-genome specific (napus-oleracea) | 0.9952153    | 0.8367915    |              | 1 | 0.7954685    | not scorable | not scorable |
| #### Bn-scaff_16298_1-p21674 C-genome specific (napus-oleracea) | 0.9904306    | 0.6785621    |              | 1 | 0.5984891    | not scorable | not scorable |
| #### Bn-scaff_16298_1-p23062 C-genome specific (napus-oleracea) | 0.9928229    | 0.880586     |              | 1 | 0.7583382    | not scorable | not scorable |
| #### Bn-scaff_16298_1-p23069 C-genome specific (napus-oleracea) | 0.9928229    | 0.8897946    |              | 1 | 0.7581806    | not scorable | not scorable |
| #### Bn-scaff_16298_1-p24761 C-genome specific (napus-oleracea) | 0.9928229    | 0.8659114    |              | 1 | 0.8191421    | not scorable | not scorable |
| #### Bn-scaff_16298_1-p24905 C-genome specific (napus-oleracea) | 0.9880383    | 0.8103641    |              | 1 | 0.7516031    | not scorable | not scorable |
| #### Bn-scaff_16298_1-p26210 C-genome specific (napus-oleracea) | 0.9856459    | 0.7447952    | 0.9147287    |   | 0.5956636    | not scorable | not scorable |
| #### Bn-scaff_16298_1-p26740 C-genome specific (napus-oleracea) | 0.9880383    | 0.4567434    |              | 1 | 0.8188729    | not scorable | not scorable |
| #### Bn-scaff_16298_1-p46362 C-genome specific (napus-oleracea) | 0.9688995    | 0.8527403    | 0.7984496    |   | 0.7858819    | not scorable | not scorable |
| #### Bn-scaff_16298_1-p75507 C-genome specific (napus-oleracea) | 0.9258373    | 0.8143503    | 0.9224806    |   | 0.7533786    | not scorable | not scorable |





|                                                                  |              |              |              |              |              |              |
|------------------------------------------------------------------|--------------|--------------|--------------|--------------|--------------|--------------|
| ##### Bn-scaff_16300_1-p21741C-genome specific (napus-oleracea)  | 0.9736842    | 0.8086421    | 0.6356589    | 0.8147027    | not scorable | not scorable |
| ##### Bn-scaff_16300_1-p2226C C-genome specific (napus-oleracea) | 0.9832536    | 0.7287129    | 0.6744186    | 0.7294667    | not scorable | not scorable |
| ##### Bn-scaff_16300_1-p22285 napus specific                     | 0.9760765    | 0.7557514    | not scorable | not scorable | not scorable | not scorable |
| ##### Bn-scaff_16300_1-p23102 C-genome specific (napus-oleracea) | 0.9832536    | 0.8576446    | 0.6744186    | 0.812524     | not scorable | not scorable |
| ##### Bn-scaff_16300_1-p2492C C-genome specific (napus-oleracea) | 0.9904306    | 0.8589982    | 0.9689922    | 0.5631604    | not scorable | not scorable |
| ##### Bn-scaff_16300_1-p24941C-genome specific (napus-oleracea)  | 0.9832536    | 0.8181897    | 0.5658914    | 0.759475     | not scorable | not scorable |
| ##### Bn-scaff_16300_1-p25025 C-genome specific (napus-oleracea) | 0.9928229    | 0.8297408    | 0.9689922    | 0.4052185    | not scorable | not scorable |
| ##### Bn-scaff_16300_1-p26523 C-genome specific (napus-oleracea) | 0.9904306    | 0.7947772    | 1            | 0.737002     | not scorable | not scorable |
| ##### Bn-scaff_16300_1-p28454 genome unspecific (all in)         | 0.9665072    | 0.5773522    | 0.9922481    | 0.5305356    | 0.9586777    | 0.8169855    |
| ##### Bn-scaff_16300_1-p31192 C-genome specific (napus-oleracea) | 0.9904306    | 0.6474215    | 1            | 0.5614039    | not scorable | not scorable |
| ##### Bn-scaff_16300_1-p31295 genome unspecific (all in)         | 0.9856459    | 0.4854147    | 1            | 0.7522646    | 1            | 0.8565345    |
| ##### Bn-scaff_16300_1-p33977 genome unspecific (all in)         | 0.9736842    | 0.5104113    | 0.9612403    | 0.7012425    | 1            | 0.891185     |
| ##### Bn-scaff_16300_1-p41985 A-genome specific (napus-rapa)     | 0.9952153    | 0.572311     | not scorable | not scorable | 1            | 0.9085519    |
| ##### Bn-scaff_16300_1-p42041 C-genome specific (napus-oleracea) | 0.9904306    | 0.74861      | 1            | 0.6643009    | not scorable | not scorable |
| ##### Bn-scaff_16300_1-p4765C C-genome specific (napus-oleracea) | 0.9904306    | 0.8839993    | 1            | 0.7291378    | not scorable | not scorable |
| ##### Bn-scaff_16300_1-p56112 C-genome specific (napus-oleracea) | 0.9856459    | 0.7190002    | 0.9689922    | 0.7454337    | not scorable | not scorable |
| ##### Bn-scaff_16300_1-p61408 C-genome specific (napus-oleracea) | 0.9904306    | 0.7431301    | 1            | 0.7135708    | not scorable | not scorable |
| ##### Bn-scaff_16300_1-p62567 C-genome specific (napus-oleracea) | 0.9928229    | 0.8626205    | 1            | 0.5393081    | not scorable | not scorable |
| ##### Bn-scaff_16300_1-p6258C C-genome specific (napus-oleracea) | 0.9904306    | 0.5987108    | 1            | 0.6482345    | not scorable | not scorable |
| ##### Bn-scaff_16300_1-p83138 genome unspecific (oleracea-rapa)  | not scorable | not scorable | 1            | 0.580637     | 1            | 0.7007138    |
| ##### Bn-scaff_16300_1-p83165 genome unspecific (oleracea-rapa)  | not scorable | not scorable | 1            | 0.7148669    | 0.9669421    | 0.7365615    |
| ##### Bn-scaff_16300_1-p83197 genome unspecific (oleracea-rapa)  | not scorable | not scorable | 0.9922481    | 0.2614636    | 1            | 0.7644379    |
| ##### Bn-scaff_16300_1-p87023 genome unspecific (oleracea-rapa)  | not scorable | not scorable | 1            | 0.7368002    | 1            | 0.9481909    |
| ##### Bn-scaff_16300_1-p88248 C-genome specific (napus-oleracea) | 0.9880383    | 0.8569817    | 0.6356589    | 0.8156649    | not scorable | not scorable |
| ##### Bn-scaff_16300_1-p88291 C-genome specific (napus-oleracea) | 0.9904306    | 0.7896671    | 0.6356589    | 0.5844468    | not scorable | not scorable |
| ##### Bn-scaff_16300_1-p88296 C-genome specific (napus-oleracea) | 0.9880383    | 0.850454     | 0.6356589    | 0.7206976    | not scorable | not scorable |
| ##### Bn-scaff_16300_1-p89024 C-genome specific (napus-oleracea) | 0.9904306    | 0.8017709    | 1            | 0.7973674    | not scorable | not scorable |
| ##### Bn-scaff_16300_1-p93302 C-genome specific (napus-oleracea) | 0.9856459    | 0.824479     | 0.6356589    | 0.7919205    | not scorable | not scorable |
| ##### Bn-scaff_16300_1-p94194 C-genome specific (napus-oleracea) | 0.9856459    | 0.7809103    | 0.6356589    | 0.6959434    | not scorable | not scorable |
| ##### Bn-scaff_16300_1-p95704 C-genome specific (napus-oleracea) | 0.9880383    | 0.8315733    | 0.9922481    | 0.8004494    | not scorable | not scorable |
| ##### Bn-scaff_16300_1-p96366 C-genome specific (napus-oleracea) | 0.9880383    | 0.7330492    | 0.9844961    | 0.6762125    | not scorable | not scorable |
| ##### Bn-scaff_16300_1-p96842 C-genome specific (napus-oleracea) | 0.9880383    | 0.8668782    | 1            | 0.743688     | not scorable | not scorable |
| ##### Bn-scaff_16300_1-p96934 C-genome specific (napus-oleracea) | 0.9952153    | 0.8423656    | 1            | 0.7512152    | not scorable | not scorable |

|                                                                  |              |              |              |              |              |              |
|------------------------------------------------------------------|--------------|--------------|--------------|--------------|--------------|--------------|
| ##### Bn-scaff_16300_1-p97089 C-genome specific (napus-oleracea) | 0.9928229    | 0.7097386    | 1            | 0.7066595    | not scorable | not scorable |
| ##### Bn-scaff_16300_1-p99007 all not scorable                   | not scorable | not scorable | not scorable | not scorable | not scorable | not scorable |
| ##### Bn-scaff_16301_1-p10878 C-genome specific (napus-oleracea) | 0.9856459    | 0.6376448    | 0.9844961    | 0.7117475    | not scorable | not scorable |
| ##### Bn-scaff_16301_1-p11881 C-genome specific (napus-oleracea) | 0.9832536    | 0.619529     | 1            | 0.780765     | not scorable | not scorable |
| ##### Bn-scaff_16301_1-p18709 C-genome specific (napus-oleracea) | 0.9904306    | 0.7680481    | 1            | 0.8172321    | not scorable | not scorable |
| ##### Bn-scaff_16301_1-p18938 C-genome specific (napus-oleracea) | 0.9904306    | 0.5838453    | 1            | 0.7732097    | not scorable | not scorable |
| ##### Bn-scaff_16301_1-p23012 C-genome specific (napus-oleracea) | 0.9952153    | 0.7959594    | 1            | 0.7711703    | not scorable | not scorable |
| ##### Bn-scaff_16301_1-p23061 C-genome specific (napus-oleracea) | 0.9952153    | 0.7933091    | 1            | 0.7073662    | not scorable | not scorable |
| ##### Bn-scaff_16301_1-p24076 C-genome specific (napus-oleracea) | 0.9617225    | 0.8729008    | 1            | 0.855713     | not scorable | not scorable |
| ##### Bn-scaff_16301_1-p24824 C-genome specific (napus-oleracea) | 0.9784689    | 0.7581867    | 1            | 0.7327783    | not scorable | not scorable |
| ##### Bn-scaff_16301_1-p24967 C-genome specific (napus-oleracea) | 0.9880383    | 0.7498897    | 1            | 0.7883198    | not scorable | not scorable |
| ##### Bn-scaff_16301_1-p4240 C-genome specific (napus-oleracea)  | 0.9808612    | 0.8189053    | 1            | 0.7695519    | not scorable | not scorable |
| ##### Bn-scaff_16301_1-p7854 C-genome specific (napus-oleracea)  | 0.9880383    | 0.747694     | 1            | 0.9028643    | not scorable | not scorable |
| ##### Bn-scaff_16309_1-p11636 C-genome specific (napus-oleracea) | 0.9784689    | 0.7771114    | 1            | 0.909127     | not scorable | not scorable |
| ##### Bn-scaff_16309_1-p13798 C-genome specific (oleracea only)  | not scorable | not scorable | 1            | 0.7957312    | not scorable | not scorable |
| ##### Bn-scaff_16309_1-p14481 C-genome specific (napus-oleracea) | 0.9880383    | 0.6833504    | 0.9534883    | 0.7227655    | not scorable | not scorable |
| ##### Bn-scaff_16309_1-p14580 C-genome specific (napus-oleracea) | 0.9952153    | 0.7195829    | 1            | 0.4300391    | not scorable | not scorable |
| ##### Bn-scaff_16309_1-p16455 C-genome specific (napus-oleracea) | 1            | 0.7772155    | 0.9922481    | 0.726255     | not scorable | not scorable |
| ##### Bn-scaff_16309_1-p18726 C-genome specific (napus-oleracea) | 0.9856459    | 0.7520133    | 0.9922481    | 0.7766513    | not scorable | not scorable |
| ##### Bn-scaff_16309_1-p18742 C-genome specific (napus-oleracea) | 0.9952153    | 0.7453853    | 1            | 0.7935092    | not scorable | not scorable |
| ##### Bn-scaff_16309_1-p21568 C-genome specific (napus-oleracea) | 0.9808612    | 0.7576548    | 0.9844961    | 0.7792854    | not scorable | not scorable |
| ##### Bn-scaff_16309_1-p24109 genome unspecific (all in)         | 0.9880383    | 0.3979321    | 0.9922481    | 0.4063108    | 1            | 0.903981     |
| ##### Bn-scaff_16309_1-p26035 genome unspecific (all in)         | 0.9736842    | 0.566428     | 0.9844961    | 0.661412     | 1            | 0.9285011    |
| ##### Bn-scaff_16309_1-p27055 C-genome specific (napus-oleracea) | 0.9665072    | 0.8269078    | 0.9922481    | 0.9516799    | not scorable | not scorable |
| ##### Bn-scaff_16309_1-p28740 C-genome specific (napus-oleracea) | 0.9976076    | 0.7541033    | 1            | 0.7719246    | not scorable | not scorable |
| ##### Bn-scaff_16309_1-p44347 C-genome specific (napus-oleracea) | 0.9904306    | 0.7578342    | 0.9767442    | 0.7765427    | not scorable | not scorable |
| ##### Bn-scaff_16309_1-p61351 C-genome specific (napus-oleracea) | 0.9832536    | 0.7440358    | 0.9689922    | 0.7137586    | not scorable | not scorable |
| ##### Bn-scaff_16309_1-p62538 C-genome specific (napus-oleracea) | 0.9617225    | 0.7601517    | 0.9844961    | 0.8190085    | not scorable | not scorable |
| ##### Bn-scaff_16309_1-p63105 C-genome specific (napus-oleracea) | 0.9545454    | 0.7417997    | 0.9844961    | 0.7857593    | not scorable | not scorable |
| ##### Bn-scaff_16309_1-p67518 C-genome specific (napus-oleracea) | 0.9952153    | 0.8080475    | 0.9767442    | 0.7076771    | not scorable | not scorable |
| ##### Bn-scaff_16309_1-p70660 C-genome specific (napus-oleracea) | 0.9832536    | 0.7335628    | 0.9922481    | 0.7227067    | not scorable | not scorable |
| ##### Bn-scaff_16310_1-p23931 genome unspecific (oleracea-rapa)  | not scorable | not scorable | 1            | 0.3585051    | 0.9917355    | 0.7022004    |
| ##### Bn-scaff_16310_1-p23938 genome unspecific (all in)         | 0.9952153    | 0.5095648    | 1            | 0.8085203    | 0.9917355    | 0.6903104    |

|                                                                  |           |           |           |           |              |              |
|------------------------------------------------------------------|-----------|-----------|-----------|-----------|--------------|--------------|
| ##### Bn-scaff_16310_1-p27908 C-genome specific (napus-oleracea) | 0.9880383 | 0.7319353 | 1         | 0.7557827 | not scorable | not scorable |
| ##### Bn-scaff_16310_1-p33031 C-genome specific (napus-oleracea) | 0.9928229 | 0.3601086 | 1         | 0.7809359 | not scorable | not scorable |
| ##### Bn-scaff_16310_1-p44871 genome unspecific (all in)         | 0.9856459 | 0.3413354 | 1         | 0.6991402 | 0.9752066    | 0.9243986    |
| ##### Bn-scaff_16310_1-p45097 C-genome specific (napus-oleracea) | 0.9736842 | 0.799237  | 0.9069768 | 0.7522218 | not scorable | not scorable |
| ##### Bn-scaff_16310_1-p45733 C-genome specific (napus-oleracea) | 0.9808612 | 0.7558884 | 0.9069768 | 0.6972953 | not scorable | not scorable |
| ##### Bn-scaff_16310_1-p46017 C-genome specific (napus-oleracea) | 0.9832536 | 0.7463752 | 0.9069768 | 0.7443637 | not scorable | not scorable |
| ##### Bn-scaff_16310_1-p46451 C-genome specific (napus-oleracea) | 0.9832536 | 0.8598151 | 0.9069768 | 0.916963  | not scorable | not scorable |
| ##### Bn-scaff_16310_1-p66628 C-genome specific (napus-oleracea) | 0.9019139 | 0.7768897 | 0.8372093 | 0.7980048 | not scorable | not scorable |
| ##### Bn-scaff_16310_1-p83439 C-genome specific (napus-oleracea) | 0.9043062 | 0.8309709 | 0.8837209 | 0.7965046 | not scorable | not scorable |
| ##### Bn-scaff_16310_1-p83713 C-genome specific (napus-oleracea) | 0.9569378 | 0.6440835 | 0.8914729 | 0.8027885 | not scorable | not scorable |
| ##### Bn-scaff_16310_1-p85836 C-genome specific (napus-oleracea) | 0.9904306 | 0.8199255 | 1         | 0.9170848 | not scorable | not scorable |
| ##### Bn-scaff_16312_1-p11760 C-genome specific (napus-oleracea) | 0.9832536 | 0.7311673 | 0.9922481 | 0.7496127 | not scorable | not scorable |
| ##### Bn-scaff_16312_1-p12008 C-genome specific (napus-oleracea) | 0.9880383 | 0.7729529 | 0.9844961 | 0.8445919 | not scorable | not scorable |
| ##### Bn-scaff_16312_1-p12019 C-genome specific (napus-oleracea) | 0.9904306 | 0.7499061 | 1         | 0.7498747 | not scorable | not scorable |
| ##### Bn-scaff_16312_1-p12020 C-genome specific (napus-oleracea) | 0.9856459 | 0.7794684 | 1         | 0.8280402 | not scorable | not scorable |
| ##### Bn-scaff_16312_1-p12037 C-genome specific (napus-oleracea) | 0.9784689 | 0.6506082 | 1         | 0.5849617 | not scorable | not scorable |
| ##### Bn-scaff_16312_1-p12620 C-genome specific (napus-oleracea) | 0.9904306 | 0.7268253 | 1         | 0.6556619 | not scorable | not scorable |
| ##### Bn-scaff_16312_1-p12646 C-genome specific (napus-oleracea) | 0.9928229 | 0.7188805 | 0.9844961 | 0.6789951 | not scorable | not scorable |
| ##### Bn-scaff_16312_1-p12658 C-genome specific (napus-oleracea) | 1         | 0.8135551 | 1         | 0.8085203 | not scorable | not scorable |
| ##### Bn-scaff_16312_1-p12668 C-genome specific (napus-oleracea) | 0.9904306 | 0.6113289 | 1         | 0.7543442 | not scorable | not scorable |
| ##### Bn-scaff_16312_1-p15094 C-genome specific (napus-oleracea) | 0.9880383 | 0.7770818 | 0.9534883 | 0.7794791 | not scorable | not scorable |
| ##### Bn-scaff_16312_1-p18166 C-genome specific (napus-oleracea) | 0.9880383 | 0.7989782 | 0.9844961 | 0.715203  | not scorable | not scorable |
| ##### Bn-scaff_16312_1-p18945 C-genome specific (napus-oleracea) | 0.9784689 | 0.6766884 | 0.9844961 | 0.5415194 | not scorable | not scorable |
| ##### Bn-scaff_16312_1-p18951 C-genome specific (napus-oleracea) | 0.9952153 | 0.7407477 | 0.9844961 | 0.7204651 | not scorable | not scorable |
| ##### Bn-scaff_16312_1-p18957 C-genome specific (napus-oleracea) | 0.9952153 | 0.7709637 | 0.9922481 | 0.9076712 | not scorable | not scorable |
| ##### Bn-scaff_16312_1-p18970 C-genome specific (napus-oleracea) | 0.9784689 | 0.7485714 | 0.9922481 | 0.5426556 | not scorable | not scorable |
| ##### Bn-scaff_16312_1-p18992 C-genome specific (napus-oleracea) | 0.9904306 | 0.7967427 | 0.9844961 | 0.8014797 | not scorable | not scorable |
| ##### Bn-scaff_16312_1-p18994 C-genome specific (napus-oleracea) | 0.9856459 | 0.7762493 | 0.9844961 | 0.7095004 | not scorable | not scorable |
| ##### Bn-scaff_16312_1-p33849 C-genome specific (napus-oleracea) | 0.9521531 | 0.8057315 | 1         | 0.7828982 | not scorable | not scorable |
| ##### Bn-scaff_16312_1-p34040 C-genome specific (napus-oleracea) | 0.9904306 | 0.723354  | 0.9922481 | 0.8368197 | not scorable | not scorable |
| ##### Bn-scaff_16312_1-p34201 C-genome specific (napus-oleracea) | 0.9832536 | 0.7667729 | 0.9844961 | 0.7702794 | not scorable | not scorable |
| ##### Bn-scaff_16312_1-p49769 C-genome specific (napus-oleracea) | 0.9808612 | 0.7954034 | 1         | 0.8264207 | not scorable | not scorable |
| ##### Bn-scaff_16312_1-p71537 C-genome specific (napus-oleracea) | 0.9880383 | 0.8154362 | 1         | 0.7673122 | not scorable | not scorable |

|                                                                 |              |              |              |              |              |              |
|-----------------------------------------------------------------|--------------|--------------|--------------|--------------|--------------|--------------|
| #### Bn-scaff_16312_1-p73823 C-genome specific (napus-oleracea) | 0.9880383    | 0.7559513    | 0.9844961    | 0.7941825    | not scorable | not scorable |
| #### Bn-scaff_16312_1-p73981 C-genome specific (napus-oleracea) | 0.9784689    | 0.7685649    | 0.9922481    | 0.7921771    | not scorable | not scorable |
| #### Bn-scaff_16312_1-p82096 C-genome specific (napus-oleracea) | 0.9856459    | 0.7235268    | 0.9844961    | 0.792042     | not scorable | not scorable |
| #### Bn-scaff_16312_1-p82155 C-genome specific (napus-oleracea) | 0.9880383    | 0.7746596    | 1            | 0.7244819    | not scorable | not scorable |
| #### Bn-scaff_16312_1-p89216 genome unspecific (all in)         | 0.9784689    | 0.4865599    | 0.9844961    | 0.6723188    | 1            | 0.8896501    |
| #### Bn-scaff_16312_1-p95384 genome unspecific (all in)         | 0.9832536    | 0.4633552    | 0.9844961    | 0.80618      | 1            | 0.8930406    |
| #### Bn-scaff_16314_1-p42138 C-genome specific (napus-oleracea) | 0.9832536    | 0.6237569    | 1            | 0.726252     | not scorable | not scorable |
| #### Bn-scaff_16323_1-p17133 genome unspecific (all in)         | 0.9736842    | 0.6370012    | 1            | 0.9356467    | 0.9834711    | 0.7845683    |
| #### Bn-scaff_16323_1-p22670 C-genome specific (napus-oleracea) | 1            | 0.9161429    | 1            | 0.9091604    | not scorable | not scorable |
| #### Bn-scaff_16323_1-p39826 A-genome specific (rapa only)      | not scorable | not scorable | not scorable | not scorable | 1            | 0.6464615    |
| #### Bn-scaff_16325_1-p11728 genome unspecific (oleracea-rapa)  | not scorable | not scorable | 1            | 0.7384313    | 1            | 0.9205657    |
| #### Bn-scaff_16325_1-p13272 C-genome specific (napus-oleracea) | 0.9760765    | 0.7673075    | 1            | 0.7345734    | not scorable | not scorable |
| #### Bn-scaff_16325_1-p17740 C-genome specific (napus-oleracea) | 0.9880383    | 0.7569925    | 1            | 0.675883     | not scorable | not scorable |
| #### Bn-scaff_16325_1-p30397 C-genome specific (napus-oleracea) | 0.9641148    | 0.7209569    | 1            | 0.7022575    | not scorable | not scorable |
| #### Bn-scaff_16325_1-p74762 C-genome specific (napus-oleracea) | 0.9712918    | 0.7602445    | 0.6899225    | 0.6929731    | not scorable | not scorable |
| #### Bn-scaff_16328_1-p10639 C-genome specific (napus-oleracea) | 0.9952153    | 0.8779334    | 1            | 0.7298126    | not scorable | not scorable |
| #### Bn-scaff_16328_1-p10861 C-genome specific (napus-oleracea) | 0.9928229    | 0.8897946    | 0.9922481    | 0.7074122    | not scorable | not scorable |
| #### Bn-scaff_16328_1-p10917 C-genome specific (napus-oleracea) | 0.9952153    | 0.8586428    | 1            | 0.7310918    | not scorable | not scorable |
| #### Bn-scaff_16328_1-p11172 all not scorable                   | not scorable | not scorable | not scorable | not scorable | not scorable | not scorable |
| #### Bn-scaff_16328_1-p11396 C-genome specific (napus-oleracea) | 0.9952153    | 0.900327     | 0.9922481    | 0.7238715    | not scorable | not scorable |
| #### Bn-scaff_16328_1-p11468 C-genome specific (napus-oleracea) | 0.9952153    | 0.9078225    | 1            | 0.7179056    | not scorable | not scorable |
| #### Bn-scaff_16328_1-p11530 C-genome specific (napus-oleracea) | 0.9952153    | 0.898599     | 1            | 0.726719     | not scorable | not scorable |
| #### Bn-scaff_16328_1-p15720 C-genome specific (napus-oleracea) | 0.9904306    | 0.5475731    | 1            | 0.4262122    | not scorable | not scorable |
| #### Bn-scaff_16328_1-p15914 C-genome specific (napus-oleracea) | 0.9880383    | 0.6661861    | 0.9922481    | 0.6783817    | not scorable | not scorable |
| #### Bn-scaff_16328_1-p16412 genome unspecific (all in)         | 1            | 0.7154319    | 0.9767442    | 0.2810241    | 1            | 0.7297614    |
| #### Bn-scaff_16328_1-p16462 genome unspecific (oleracea-rapa)  | not scorable | not scorable | 0.9302326    | 0.2436066    | 0.9917355    | 0.4922449    |
| #### Bn-scaff_16328_1-p16551 genome unspecific (oleracea-rapa)  | not scorable | not scorable | 0.9302326    | 0.2347556    | 1            | 0.6679053    |
| #### Bn-scaff_16328_1-p18416 genome unspecific (all in)         | 0.9904306    | 0.3473975    | 1            | 0.5785761    | 1            | 0.8142017    |
| #### Bn-scaff_16328_1-p19381 C-genome specific (napus-oleracea) | 0.9880383    | 0.8407751    | 0.9689922    | 0.7123447    | not scorable | not scorable |
| #### Bn-scaff_16328_1-p19618 C-genome specific (napus-oleracea) | 0.9904306    | 0.8260065    | 1            | 0.7701765    | not scorable | not scorable |
| #### Bn-scaff_16328_1-p19824 C-genome specific (napus-oleracea) | 0.9928229    | 0.7366818    | 0.9922481    | 0.6846497    | not scorable | not scorable |
| #### Bn-scaff_16328_1-p20039 C-genome specific (napus-oleracea) | 0.9928229    | 0.8819333    | 0.9457364    | 0.7699164    | not scorable | not scorable |
| #### Bn-scaff_16328_1-p20986 C-genome specific (napus-oleracea) | 0.9904306    | 0.7701954    | 0.9922481    | 0.6552268    | not scorable | not scorable |

|                                                                 |              |              |              |              |              |              |
|-----------------------------------------------------------------|--------------|--------------|--------------|--------------|--------------|--------------|
| #### Bn-scaff_16328_1-p21026 C-genome specific (napus-oleracea) | 0.9952153    | 0.9202849    | 1            | 0.8991154    | not scorable | not scorable |
| #### Bn-scaff_16328_1-p21210 genome unspecific (all in)         | 1            | 0.7093489    | 1            | 0.8416119    | 1            | 0.79687      |
| #### Bn-scaff_16328_1-p21465 C-genome specific (napus-oleracea) | 0.9976076    | 0.4374545    | 1            | 0.3278992    | not scorable | not scorable |
| #### Bn-scaff_16328_1-p21929 C-genome specific (napus-oleracea) | 0.9856459    | 0.8649834    | 0.9302326    | 0.7480782    | not scorable | not scorable |
| #### Bn-scaff_16328_1-p22879 C-genome specific (oleracea only)  | not scorable | not scorable | 0.9302326    | 0.9020792    | not scorable | not scorable |
| #### Bn-scaff_16328_1-p23931 genome unspecific (oleracea-rapa)  | not scorable | not scorable | 0.9457364    | 0.1714616    | 1            | 0.8974569    |
| #### Bn-scaff_16328_1-p25550 C-genome specific (napus-oleracea) | 0.9880383    | 0.8366904    | 0.9302326    | 0.7059619    | not scorable | not scorable |
| #### Bn-scaff_16328_1-p28454 C-genome specific (napus-oleracea) | 0.9856459    | 0.8609788    | 0.9302326    | 0.6718931    | not scorable | not scorable |
| #### Bn-scaff_16328_1-p29469 C-genome specific (napus-oleracea) | 0.9832536    | 0.7654588    | 1            | 0.6252659    | not scorable | not scorable |
| #### Bn-scaff_16328_1-p30284 C-genome specific (oleracea only)  | not scorable | not scorable | 0.9534883    | 0.6921073    | not scorable | not scorable |
| #### Bn-scaff_16328_1-p30960 C-genome specific (oleracea only)  | not scorable | not scorable | 0.9534883    | 0.672159     | not scorable | not scorable |
| #### Bn-scaff_16328_1-p31160 C-genome specific (napus-oleracea) | 0.9784689    | 0.7958894    | 0.9534883    | 0.7856773    | not scorable | not scorable |
| #### Bn-scaff_16328_1-p32127 C-genome specific (napus-oleracea) | 0.9856459    | 0.733837     | 0.9534883    | 0.6309669    | not scorable | not scorable |
| #### Bn-scaff_16328_1-p32200 C-genome specific (napus-oleracea) | 0.9880383    | 0.7360177    | 0.9534883    | 0.6361744    | not scorable | not scorable |
| #### Bn-scaff_16328_1-p32555 C-genome specific (napus-oleracea) | 0.9856459    | 0.871883     | 1            | 0.7142135    | not scorable | not scorable |
| #### Bn-scaff_16328_1-p32951 C-genome specific (napus-oleracea) | 0.9832536    | 0.7106301    | 0.9534883    | 0.6661591    | not scorable | not scorable |
| #### Bn-scaff_16328_1-p33117 C-genome specific (napus-oleracea) | 0.9904306    | 0.7771852    | 0.9534883    | 0.7419396    | not scorable | not scorable |
| #### Bn-scaff_16328_1-p33232 C-genome specific (napus-oleracea) | 0.9832536    | 0.7028889    | 1            | 0.6469875    | not scorable | not scorable |
| #### Bn-scaff_16328_1-p33489 C-genome specific (napus-oleracea) | 0.9856459    | 0.8799148    | 1            | 0.7423275    | not scorable | not scorable |
| #### Bn-scaff_16328_1-p33675 C-genome specific (napus-oleracea) | 0.9832536    | 0.7103357    | 0.9379845    | 0.5767988    | not scorable | not scorable |
| #### Bn-scaff_16328_1-p33775 C-genome specific (napus-oleracea) | 0.9856459    | 0.8337678    | 0.9534883    | 0.6921345    | not scorable | not scorable |
| #### Bn-scaff_16328_1-p34111 C-genome specific (napus-oleracea) | 0.9904306    | 0.9122969    | 0.9302326    | 0.6760716    | not scorable | not scorable |
| #### Bn-scaff_16328_1-p40506 C-genome specific (napus-oleracea) | 0.9856459    | 0.6888121    | 1            | 0.5650809    | not scorable | not scorable |
| #### Bn-scaff_16328_1-p43475 C-genome specific (napus-oleracea) | 0.9928229    | 0.8954863    | 0.9844961    | 0.7322091    | not scorable | not scorable |
| #### Bn-scaff_16328_1-p48134 C-genome specific (napus-oleracea) | 0.9832536    | 0.8855714    | 0.751938     | 0.7374465    | not scorable | not scorable |
| #### Bn-scaff_16328_1-p48932 C-genome specific (napus-oleracea) | 0.9880383    | 0.8379788    | 0.9922481    | 0.7781261    | not scorable | not scorable |
| #### Bn-scaff_16328_1-p49111 C-genome specific (napus-oleracea) | 0.9688995    | 0.8433754    | 0.5426357    | 0.7619047    | not scorable | not scorable |
| #### Bn-scaff_16328_1-p49296 C-genome specific (napus-oleracea) | 0.9760765    | 0.7446451    | 0.5503876    | 0.6638831    | not scorable | not scorable |
| #### Bn-scaff_16328_1-p49695 C-genome specific (napus-oleracea) | 0.9736842    | 0.7138687    | 0.5426357    | 0.6789193    | not scorable | not scorable |
| #### Bn-scaff_16328_1-p49707 C-genome specific (napus-oleracea) | 0.9808612    | 0.8185682    | 0.5426357    | 0.7995432    | not scorable | not scorable |
| #### Bn-scaff_16328_1-p49891 C-genome specific (napus-oleracea) | 0.9952153    | 0.7828761    | 1            | 0.7071137    | not scorable | not scorable |
| #### Bn-scaff_16328_1-p49946 C-genome specific (napus-oleracea) | 0.9928229    | 0.7367306    | 1            | 0.7155552    | not scorable | not scorable |
| #### Bn-scaff_16328_1-p50640 A-genome specific (napus-rapa)     | 0.9928229    | 0.6338497    | not scorable | not scorable | 1            | 0.6301174    |

|                                                                 |           |           |              |              |              |              |
|-----------------------------------------------------------------|-----------|-----------|--------------|--------------|--------------|--------------|
| #### Bn-scaff_16328_1-p50804 C-genome specific (napus-oleracea) | 0.9880383 | 0.6987579 | 0.9612403    | 0.6120887    | not scorable | not scorable |
| #### Bn-scaff_16328_1-p52507 genome unspecific (all in)         | 0.9832536 | 0.6158956 | 1            | 0.6854918    | 1            | 0.9175813    |
| #### Bn-scaff_16328_1-p53767 C-genome specific (napus-oleracea) | 0.9880383 | 0.8942316 | 1            | 0.8497643    | not scorable | not scorable |
| #### Bn-scaff_16328_1-p54798 C-genome specific (napus-oleracea) | 0.9880383 | 0.8404809 | 0.9302326    | 0.6774226    | not scorable | not scorable |
| #### Bn-scaff_16328_1-p54888 C-genome specific (napus-oleracea) | 0.9856459 | 0.7379753 | 1            | 0.7447788    | not scorable | not scorable |
| #### Bn-scaff_16328_1-p54904 C-genome specific (napus-oleracea) | 0.9856459 | 0.7670828 | 1            | 0.6580934    | not scorable | not scorable |
| #### Bn-scaff_16328_1-p54938 C-genome specific (napus-oleracea) | 0.9856459 | 0.7252212 | 1            | 0.6342744    | not scorable | not scorable |
| #### Bn-scaff_16328_1-p55433 C-genome specific (napus-oleracea) | 0.9952153 | 0.8347641 | 1            | 0.6578766    | not scorable | not scorable |
| #### Bn-scaff_16328_1-p55731 C-genome specific (napus-oleracea) | 0.9952153 | 0.7785122 | 1            | 0.7240438    | not scorable | not scorable |
| #### Bn-scaff_16328_1-p55878 C-genome specific (napus-oleracea) | 0.9904306 | 0.7004805 | 1            | 0.5565503    | not scorable | not scorable |
| #### Bn-scaff_16328_1-p56151 C-genome specific (napus-oleracea) | 0.9952153 | 0.7512821 | 0.9922481    | 0.6860266    | not scorable | not scorable |
| #### Bn-scaff_16328_1-p56288 C-genome specific (napus-oleracea) | 0.9856459 | 0.7421477 | 0.9767442    | 0.6005436    | not scorable | not scorable |
| #### Bn-scaff_16328_1-p56342 C-genome specific (napus-oleracea) | 0.9904306 | 0.7591577 | 0.9844961    | 0.6898537    | not scorable | not scorable |
| #### Bn-scaff_16328_1-p56641 C-genome specific (napus-oleracea) | 0.9928229 | 0.7212331 | 0.9844961    | 0.6901347    | not scorable | not scorable |
| #### Bn-scaff_16328_1-p56864 C-genome specific (napus-oleracea) | 0.9904306 | 0.7457149 | 1            | 0.7163305    | not scorable | not scorable |
| #### Bn-scaff_16328_1-p57184 C-genome specific (napus-oleracea) | 0.9856459 | 0.6261443 | 0.9922481    | 0.5279818    | not scorable | not scorable |
| #### Bn-scaff_16328_1-p57221 C-genome specific (napus-oleracea) | 0.9856459 | 0.90627   | 0.9922481    | 0.62327      | not scorable | not scorable |
| #### Bn-scaff_16328_1-p57624 C-genome specific (napus-oleracea) | 0.9904306 | 0.6907324 | 1            | 0.6011921    | not scorable | not scorable |
| #### Bn-scaff_16328_1-p57626 C-genome specific (napus-oleracea) | 0.9952153 | 0.7307606 | 1            | 0.6301372    | not scorable | not scorable |
| #### Bn-scaff_16328_1-p57725 C-genome specific (napus-oleracea) | 0.9856459 | 0.674914  | 1            | 0.6234646    | not scorable | not scorable |
| #### Bn-scaff_16328_1-p57931 C-genome specific (napus-oleracea) | 0.9952153 | 0.7392804 | 1            | 0.6641811    | not scorable | not scorable |
| #### Bn-scaff_16328_1-p58083 C-genome specific (napus-oleracea) | 0.9808612 | 0.7298774 | 0.9069768    | 0.6370532    | not scorable | not scorable |
| #### Bn-scaff_16328_1-p58110 napus specific                     | 1         | 0.4448704 | not scorable | not scorable | not scorable | not scorable |
| #### Bn-scaff_16328_1-p58243 C-genome specific (napus-oleracea) | 0.9832536 | 0.7788241 | 0.8992248    | 0.7437963    | not scorable | not scorable |
| #### Bn-scaff_16328_1-p58272 C-genome specific (napus-oleracea) | 0.9784689 | 0.7282739 | 0.9147287    | 0.6937936    | not scorable | not scorable |
| #### Bn-scaff_16328_1-p58299 C-genome specific (napus-oleracea) | 0.9784689 | 0.7437819 | 0.9069768    | 0.6980491    | not scorable | not scorable |
| #### Bn-scaff_16328_1-p58318 C-genome specific (napus-oleracea) | 0.9808612 | 0.7232235 | 0.9147287    | 0.6783624    | not scorable | not scorable |
| #### Bn-scaff_16328_1-p58878 C-genome specific (napus-oleracea) | 0.9928229 | 0.9297643 | 1            | 0.8693853    | not scorable | not scorable |
| #### Bn-scaff_16328_1-p59633 C-genome specific (napus-oleracea) | 0.9880383 | 0.7609816 | 1            | 0.6686426    | not scorable | not scorable |
| #### Bn-scaff_16328_1-p59969 C-genome specific (napus-oleracea) | 0.9904306 | 0.9076052 | 1            | 0.7294955    | not scorable | not scorable |
| #### Bn-scaff_16328_1-p61434 genome unspecific (all in)         | 0.9976076 | 0.5967128 | 0.9534883    | 0.2130029    | 1            | 0.8142306    |
| #### Bn-scaff_16328_1-p62255 C-genome specific (napus-oleracea) | 0.9832536 | 0.9012826 | 1            | 0.8852186    | not scorable | not scorable |
| #### Bn-scaff_16328_1-p62351 C-genome specific (napus-oleracea) | 0.9832536 | 0.8412025 | 0.9844961    | 0.7876581    | not scorable | not scorable |

|                                                                 |              |              |              |              |              |              |
|-----------------------------------------------------------------|--------------|--------------|--------------|--------------|--------------|--------------|
| #### Bn-scaff_16328_1-p62556 C-genome specific (napus-oleracea) | 0.9928229    | 0.8764226    | 0.9922481    | 0.8683702    | not scorable | not scorable |
| #### Bn-scaff_16328_1-p63678 C-genome specific (napus-oleracea) | 0.9880383    | 0.8148164    | 1            | 0.7310025    | not scorable | not scorable |
| #### Bn-scaff_16328_1-p68368 C-genome specific (napus-oleracea) | 0.9904306    | 0.8114975    | 1            | 0.7165967    | not scorable | not scorable |
| #### Bn-scaff_16328_1-p71855 C-genome specific (napus-oleracea) | 0.9928229    | 0.7651644    | 0.9844961    | 0.6625004    | not scorable | not scorable |
| #### Bn-scaff_16328_1-p72575 C-genome specific (napus-oleracea) | 0.9880383    | 0.7673687    | 0.9844961    | 0.6450031    | not scorable | not scorable |
| #### Bn-scaff_16328_1-p75183 C-genome specific (napus-oleracea) | 0.9832536    | 0.7436024    | 1            | 0.7598116    | not scorable | not scorable |
| #### Bn-scaff_16328_1-p75577 C-genome specific (napus-oleracea) | 0.9832536    | 0.7680252    | 0.9844961    | 0.7177374    | not scorable | not scorable |
| #### Bn-scaff_16328_1-p79360 C-genome specific (napus-oleracea) | 0.9904306    | 0.7931353    | 0.9844961    | 0.5601985    | not scorable | not scorable |
| #### Bn-scaff_16328_1-p81634 C-genome specific (napus-oleracea) | 0.9928229    | 0.8809272    | 1            | 0.8209879    | not scorable | not scorable |
| #### Bn-scaff_16328_1-p83991 C-genome specific (oleracea only)  | not scorable | not scorable | 0.9922481    | 0.7839525    | not scorable | not scorable |
| #### Bn-scaff_16328_1-p84434 C-genome specific (oleracea only)  | not scorable | not scorable | 1            | 0.7589004    | not scorable | not scorable |
| #### Bn-scaff_16328_1-p84608 C-genome specific (napus-oleracea) | 0.9880383    | 0.5999707    | 1            | 0.630865     | not scorable | not scorable |
| #### Bn-scaff_16328_1-p84788 C-genome specific (napus-oleracea) | 0.9856459    | 0.6536735    | 0.9534883    | 0.6659959    | not scorable | not scorable |
| #### Bn-scaff_16328_1-p84940 C-genome specific (napus-oleracea) | 0.9880383    | 0.8727978    | 0.9379845    | 0.8088477    | not scorable | not scorable |
| #### Bn-scaff_16328_1-p85834 C-genome specific (napus-oleracea) | 0.9832536    | 0.8618174    | 0.9457364    | 0.7039309    | not scorable | not scorable |
| #### Bn-scaff_16328_1-p90202 genome unspecific (oleracea-rapa)  | not scorable | not scorable | 1            | 0.7591015    | 1            | 0.9516725    |
| #### Bn-scaff_16328_1-p91099 genome unspecific (all in)         | 0.9784689    | 0.6424443    | 1            | 0.8207097    | 0.8512397    | 0.9175813    |
| #### Bn-scaff_16328_1-p91718 C-genome specific (napus-oleracea) | 0.9282297    | 0.9387431    | 1            | 0.7562031    | not scorable | not scorable |
| #### Bn-scaff_16328_1-p92541 C-genome specific (napus-oleracea) | 0.9904306    | 0.7523292    | 1            | 0.707045     | not scorable | not scorable |
| #### Bn-scaff_16328_1-p93156 C-genome specific (napus-oleracea) | 0.9784689    | 0.8103216    | 1            | 0.7618177    | not scorable | not scorable |
| #### Bn-scaff_16328_1-p93988 C-genome specific (napus-oleracea) | 0.9928229    | 0.9192872    | 0.9922481    | 0.730319     | not scorable | not scorable |
| #### Bn-scaff_16328_1-p94189 C-genome specific (oleracea only)  | not scorable | not scorable | 1            | 0.9269365    | not scorable | not scorable |
| #### Bn-scaff_16328_1-p95456 C-genome specific (napus-oleracea) | 0.9832536    | 0.8298464    | 0.9922481    | 0.8165086    | not scorable | not scorable |
| #### Bn-scaff_16328_1-p97171 genome unspecific (all in)         | 0.9976076    | 0.7519246    | 0.9689922    | 0.7712903    | 1            | 0.7485284    |
| #### Bn-scaff_16328_1-p97187 genome unspecific (all in)         | 0.9928229    | 0.3937547    | 0.9922481    | 0.4294038    | 1            | 0.9091696    |
| #### Bn-scaff_16328_1-p99023 genome unspecific (all in)         | 0.9880383    | 0.4253276    | 0.9922481    | 0.6591173    | 0.9752066    | 0.6364077    |
| #### Bn-scaff_16342_1-p10496 genome unspecific (oleracea-rapa)  | not scorable | not scorable | 1            | 0.8413093    | 0.9752066    | 0.8203765    |
| #### Bn-scaff_16342_1-p13842 C-genome specific (oleracea only)  | not scorable | not scorable | 0.9767442    | 0.7485403    | not scorable | not scorable |
| #### Bn-scaff_16342_1-p21556 C-genome specific (oleracea only)  | not scorable | not scorable | 1            | 0.7314791    | not scorable | not scorable |
| #### Bn-scaff_16342_1-p24211 genome unspecific (all in)         | 1            | 0.7915192    | 1            | 0.7748384    | 1            | 0.8502292    |
| #### Bn-scaff_16342_1-p28765 A-genome specific (rapa only)      | not scorable | not scorable | not scorable | not scorable | 1            | 0.5200676    |
| #### Bn-scaff_16342_1-p37982 genome unspecific (oleracea-rapa)  | not scorable | not scorable | 0.9922481    | 0.5619139    | 0.9917355    | 0.6376151    |
| #### Bn-scaff_16342_1-p66673 C-genome specific (napus-oleracea) | 0.9066986    | 0.7047879    | 1            | 0.8207097    | not scorable | not scorable |



|                                                                 |              |              |              |              |              |              |
|-----------------------------------------------------------------|--------------|--------------|--------------|--------------|--------------|--------------|
| #### Bn-scaff_16342_1-p97838 C-genome specific (napus-oleracea) | 0.5382775    | 0.8449259    | 1            | 0.6884732    | not scorable | not scorable |
| #### Bn-scaff_16350_1-p17274 C-genome specific (napus-oleracea) | 0.9976076    | 0.920656     | 0.9922481    | 0.8497543    | not scorable | not scorable |
| #### Bn-scaff_16350_1-p17810 C-genome specific (napus-oleracea) | 0.9976076    | 0.7003422    | 1            | 0.9321116    | not scorable | not scorable |
| #### Bn-scaff_16350_1-p20262 genome unspecific (all in)         | 1            | 0.897875     | 1            | 0.9077558    | 1            | 0.9248484    |
| #### Bn-scaff_16350_1-p20521 C-genome specific (napus-oleracea) | 1            | 0.6916499    | 1            | 0.7591171    | not scorable | not scorable |
| #### Bn-scaff_16350_1-p24845 C-genome specific (napus-oleracea) | 0.9952153    | 0.7928436    | 1            | 0.9089518    | not scorable | not scorable |
| #### Bn-scaff_16350_1-p57999 genome unspecific (all in)         | 1            | 0.6201955    | 1            | 0.6230366    | 1            | 0.6230366    |
| #### Bn-scaff_16350_1-p66190 C-genome specific (napus-oleracea) | 0.9976076    | 0.875069     | 1            | 0.3594851    | not scorable | not scorable |
| #### Bn-scaff_16350_1-p68217 all not scorable                   | not scorable | not scorable | not scorable | not scorable | not scorable | not scorable |
| #### Bn-scaff_16352_1-p10076 genome unspecific (all in)         | 0.9856459    | 0.507683     | 1            | 0.8173154    | 0.9917355    | 0.7212055    |
| #### Bn-scaff_16352_1-p10633 C-genome specific (napus-oleracea) | 0.9952153    | 0.8603135    | 1            | 0.6902077    | not scorable | not scorable |
| #### Bn-scaff_16352_1-p10973 C-genome specific (napus-oleracea) | 0.9832536    | 0.6752499    | 1            | 0.646632     | not scorable | not scorable |
| #### Bn-scaff_16352_1-p11541 C-genome specific (napus-oleracea) | 0.9760765    | 0.6719751    | 1            | 0.7533933    | not scorable | not scorable |
| #### Bn-scaff_16352_1-p11550 C-genome specific (napus-oleracea) | 0.9736842    | 0.6513192    | 1            | 0.6475336    | not scorable | not scorable |
| #### Bn-scaff_16352_1-p11560 C-genome specific (napus-oleracea) | 0.9736842    | 0.7526286    | 1            | 0.8841899    | not scorable | not scorable |
| #### Bn-scaff_16352_1-p11561 C-genome specific (napus-oleracea) | 0.9856459    | 0.6628361    | 1            | 0.6537956    | not scorable | not scorable |
| #### Bn-scaff_16352_1-p11562 C-genome specific (napus-oleracea) | 0.9688995    | 0.7040507    | 1            | 0.7570035    | not scorable | not scorable |
| #### Bn-scaff_16352_1-p11563 C-genome specific (napus-oleracea) | 0.9736842    | 0.6675907    | 1            | 0.6751894    | not scorable | not scorable |
| #### Bn-scaff_16352_1-p11612 C-genome specific (napus-oleracea) | 0.9569378    | 0.738672     | 0.9689922    | 0.7558257    | not scorable | not scorable |
| #### Bn-scaff_16352_1-p11617 C-genome specific (napus-oleracea) | 0.9449761    | 0.7755948    | 0.9767442    | 0.6937472    | not scorable | not scorable |
| #### Bn-scaff_16352_1-p11645 C-genome specific (napus-oleracea) | 0.9521531    | 0.7394087    | 0.9922481    | 0.7920339    | not scorable | not scorable |
| #### Bn-scaff_16352_1-p11647 C-genome specific (napus-oleracea) | 0.9569378    | 0.761865     | 0.9922481    | 0.8454313    | not scorable | not scorable |
| #### Bn-scaff_16352_1-p11653 C-genome specific (napus-oleracea) | 0.9736842    | 0.7703029    | 0.9767442    | 0.7416703    | not scorable | not scorable |
| #### Bn-scaff_16352_1-p11655 C-genome specific (napus-oleracea) | 0.9593301    | 0.7627196    | 0.9844961    | 0.8068754    | not scorable | not scorable |
| #### Bn-scaff_16352_1-p11655 C-genome specific (napus-oleracea) | 0.9569378    | 0.7173877    | 0.9844961    | 0.6634073    | not scorable | not scorable |
| #### Bn-scaff_16352_1-p11744 C-genome specific (napus-oleracea) | 0.9808612    | 0.7469156    | 0.9922481    | 0.6708013    | not scorable | not scorable |
| #### Bn-scaff_16352_1-p11745 C-genome specific (napus-oleracea) | 0.9617225    | 0.7484446    | 1            | 0.8097579    | not scorable | not scorable |
| #### Bn-scaff_16352_1-p11747 C-genome specific (napus-oleracea) | 0.9880383    | 0.7276315    | 1            | 0.6902002    | not scorable | not scorable |
| #### Bn-scaff_16352_1-p11748 C-genome specific (napus-oleracea) | 0.9784689    | 0.7481027    | 0.9922481    | 0.7675501    | not scorable | not scorable |
| #### Bn-scaff_16352_1-p11756 C-genome specific (napus-oleracea) | 0.9832536    | 0.6776465    | 1            | 0.7068776    | not scorable | not scorable |
| #### Bn-scaff_16352_1-p11757 C-genome specific (napus-oleracea) | 0.9760765    | 0.6832352    | 0.9922481    | 0.6221237    | not scorable | not scorable |
| #### Bn-scaff_16352_1-p11759 C-genome specific (napus-oleracea) | 0.9784689    | 0.6179218    | 1            | 0.6147286    | not scorable | not scorable |
| #### Bn-scaff_16352_1-p11760 C-genome specific (napus-oleracea) | 0.9569378    | 0.7341449    | 1            | 0.7159939    | not scorable | not scorable |

|                                                                 |           |           |           |           |              |              |
|-----------------------------------------------------------------|-----------|-----------|-----------|-----------|--------------|--------------|
| #### Bn-scaff_16352_1-p11765 C-genome specific (napus-oleracea) | 0.9832536 | 0.7518371 | 1         | 0.7858567 | not scorable | not scorable |
| #### Bn-scaff_16352_1-p11775 genome unspecific (all in)         | 0.9808612 | 0.5590478 | 0.9844961 | 0.4919315 | 0.9834711    | 0.809144     |
| #### Bn-scaff_16352_1-p11776 C-genome specific (napus-oleracea) | 0.9760765 | 0.7091815 | 1         | 0.7172377 | not scorable | not scorable |
| #### Bn-scaff_16352_1-p11777 C-genome specific (napus-oleracea) | 0.9808612 | 0.7530487 | 1         | 0.7357246 | not scorable | not scorable |
| #### Bn-scaff_16352_1-p11778 C-genome specific (napus-oleracea) | 0.9449761 | 0.6460513 | 0.9922481 | 0.7024652 | not scorable | not scorable |
| #### Bn-scaff_16352_1-p11779 C-genome specific (napus-oleracea) | 0.9712918 | 0.7594085 | 1         | 0.9038795 | not scorable | not scorable |
| #### Bn-scaff_16352_1-p11780 C-genome specific (napus-oleracea) | 0.9808612 | 0.7050815 | 1         | 0.6856689 | not scorable | not scorable |
| #### Bn-scaff_16352_1-p11781 C-genome specific (napus-oleracea) | 0.9784689 | 0.7565585 | 1         | 0.7819811 | not scorable | not scorable |
| #### Bn-scaff_16352_1-p11783 C-genome specific (napus-oleracea) | 0.9712918 | 0.6856826 | 1         | 0.6141333 | not scorable | not scorable |
| #### Bn-scaff_16352_1-p11789 C-genome specific (napus-oleracea) | 0.9808612 | 0.7394284 | 1         | 0.7163741 | not scorable | not scorable |
| #### Bn-scaff_16352_1-p11790 C-genome specific (napus-oleracea) | 0.9928229 | 0.7508978 | 1         | 0.6988555 | not scorable | not scorable |
| #### Bn-scaff_16352_1-p11799 C-genome specific (napus-oleracea) | 0.9712918 | 0.6741778 | 1         | 0.7105449 | not scorable | not scorable |
| #### Bn-scaff_16352_1-p11801 C-genome specific (napus-oleracea) | 0.9808612 | 0.7490593 | 1         | 0.8282192 | not scorable | not scorable |
| #### Bn-scaff_16352_1-p11802 C-genome specific (napus-oleracea) | 0.9760765 | 0.6132439 | 0.9922481 | 0.5557305 | not scorable | not scorable |
| #### Bn-scaff_16352_1-p11808 C-genome specific (napus-oleracea) | 0.9832536 | 0.6457101 | 1         | 0.6241262 | not scorable | not scorable |
| #### Bn-scaff_16352_1-p11809 C-genome specific (napus-oleracea) | 0.9712918 | 0.633154  | 1         | 0.5993218 | not scorable | not scorable |
| #### Bn-scaff_16352_1-p11813 C-genome specific (napus-oleracea) | 0.9688995 | 0.6288965 | 1         | 0.6946625 | not scorable | not scorable |
| #### Bn-scaff_16352_1-p11818 C-genome specific (napus-oleracea) | 0.9760765 | 0.7402601 | 1         | 0.7944932 | not scorable | not scorable |
| #### Bn-scaff_16352_1-p11819 C-genome specific (napus-oleracea) | 0.9832536 | 0.718073  | 1         | 0.7551241 | not scorable | not scorable |
| #### Bn-scaff_16352_1-p11829 C-genome specific (napus-oleracea) | 0.9784689 | 0.7450426 | 1         | 0.7578141 | not scorable | not scorable |
| #### Bn-scaff_16352_1-p11882 C-genome specific (napus-oleracea) | 0.9784689 | 0.6892245 | 1         | 0.6851348 | not scorable | not scorable |
| #### Bn-scaff_16352_1-p11885 C-genome specific (napus-oleracea) | 0.9856459 | 0.7561342 | 1         | 0.7719069 | not scorable | not scorable |
| #### Bn-scaff_16352_1-p11886 C-genome specific (napus-oleracea) | 0.9688995 | 0.7535557 | 1         | 0.7549148 | not scorable | not scorable |
| #### Bn-scaff_16352_1-p11918 C-genome specific (napus-oleracea) | 0.9832536 | 0.7224248 | 1         | 0.6658225 | not scorable | not scorable |
| #### Bn-scaff_16352_1-p11919 C-genome specific (napus-oleracea) | 0.9688995 | 0.662352  | 1         | 0.6959044 | not scorable | not scorable |
| #### Bn-scaff_16352_1-p11955 C-genome specific (napus-oleracea) | 0.9665072 | 0.9111597 | 1         | 0.8592612 | not scorable | not scorable |
| #### Bn-scaff_16352_1-p11956 C-genome specific (napus-oleracea) | 0.9712918 | 0.7237539 | 1         | 0.8262665 | not scorable | not scorable |
| #### Bn-scaff_16352_1-p11960 C-genome specific (napus-oleracea) | 0.9617225 | 0.7012673 | 1         | 0.6970722 | not scorable | not scorable |
| #### Bn-scaff_16352_1-p12037 C-genome specific (napus-oleracea) | 0.9952153 | 0.7956669 | 0.9767442 | 0.7516446 | not scorable | not scorable |
| #### Bn-scaff_16352_1-p12040 C-genome specific (napus-oleracea) | 0.9760765 | 0.7707781 | 1         | 0.7536134 | not scorable | not scorable |
| #### Bn-scaff_16352_1-p12051 C-genome specific (napus-oleracea) | 0.9832536 | 0.759379  | 1         | 0.7516732 | not scorable | not scorable |
| #### Bn-scaff_16352_1-p12052 C-genome specific (napus-oleracea) | 0.9832536 | 0.7523107 | 1         | 0.8182175 | not scorable | not scorable |
| #### Bn-scaff_16352_1-p12119 genome unspecific (all in)         | 0.9784689 | 0.6755404 | 0.9844961 | 0.6283789 | 1            | 0.9375445    |

|                                                                |              |              |           |           |              |              |
|----------------------------------------------------------------|--------------|--------------|-----------|-----------|--------------|--------------|
| #### Bn-scaff_16352_1-p12121C-genome specific (napus-oleracea) | 0.9617225    | 0.6600103    | 0.9922481 | 0.6951095 | not scorable | not scorable |
| #### Bn-scaff_16352_1-p12123C-genome specific (napus-oleracea) | 0.9688995    | 0.6792983    | 1         | 0.7130597 | not scorable | not scorable |
| #### Bn-scaff_16352_1-p12127C-genome specific (napus-oleracea) | 0.9665072    | 0.7428087    | 1         | 0.7470328 | not scorable | not scorable |
| #### Bn-scaff_16352_1-p12130C-genome specific (napus-oleracea) | 0.9856459    | 0.7116851    | 1         | 0.6514964 | not scorable | not scorable |
| #### Bn-scaff_16352_1-p12134C-genome specific (napus-oleracea) | 0.9784689    | 0.6626839    | 1         | 0.7148775 | not scorable | not scorable |
| #### Bn-scaff_16352_1-p12210C-genome specific (napus-oleracea) | 0.9617225    | 0.7532058    | 0.9689922 | 0.7467108 | not scorable | not scorable |
| #### Bn-scaff_16352_1-p12212C-genome specific (napus-oleracea) | 0.9641148    | 0.7245109    | 1         | 0.6905849 | not scorable | not scorable |
| #### Bn-scaff_16352_1-p12358genome unspecific (oleracea-rapa)  | not scorable | not scorable | 0.9379845 | 0.6582416 | 1            | 0.7497237    |
| #### Bn-scaff_16352_1-p12358genome unspecific (oleracea-rapa)  | not scorable | not scorable | 1         | 0.4881899 | 1            | 0.9138754    |
| #### Bn-scaff_16352_1-p12366C-genome specific (napus-oleracea) | 0.9928229    | 0.751667     | 1         | 0.7709826 | not scorable | not scorable |
| #### Bn-scaff_16352_1-p12368C-genome specific (napus-oleracea) | 0.9665072    | 0.7446274    | 1         | 0.7160633 | not scorable | not scorable |
| #### Bn-scaff_16352_1-p12371C-genome specific (napus-oleracea) | 0.9832536    | 0.729519     | 1         | 0.7168167 | not scorable | not scorable |
| #### Bn-scaff_16352_1-p12372C-genome specific (napus-oleracea) | 0.9856459    | 0.6662353    | 1         | 0.677173  | not scorable | not scorable |
| #### Bn-scaff_16352_1-p12375C-genome specific (napus-oleracea) | 0.9736842    | 0.7231488    | 1         | 0.7336698 | not scorable | not scorable |
| #### Bn-scaff_16352_1-p12376C-genome specific (napus-oleracea) | 0.9784689    | 0.7658378    | 1         | 0.6801934 | not scorable | not scorable |
| #### Bn-scaff_16352_1-p12384C-genome specific (napus-oleracea) | 0.9904306    | 0.6903857    | 1         | 0.691236  | not scorable | not scorable |
| #### Bn-scaff_16352_1-p12388C-genome specific (napus-oleracea) | 0.9736842    | 0.6601005    | 1         | 0.6843218 | not scorable | not scorable |
| #### Bn-scaff_16352_1-p12398C-genome specific (napus-oleracea) | 0.9665072    | 0.6155142    | 0.9922481 | 0.5944929 | not scorable | not scorable |
| #### Bn-scaff_16352_1-p12424C-genome specific (napus-oleracea) | 0.9976076    | 0.7567834    | 1         | 0.4580402 | not scorable | not scorable |
| #### Bn-scaff_16352_1-p12526C-genome specific (napus-oleracea) | 0.9880383    | 0.7595617    | 1         | 0.8460979 | not scorable | not scorable |
| #### Bn-scaff_16352_1-p12527C-genome specific (napus-oleracea) | 0.9832536    | 0.7545391    | 1         | 0.7719954 | not scorable | not scorable |
| #### Bn-scaff_16352_1-p12549C-genome specific (napus-oleracea) | 0.9784689    | 0.7330598    | 1         | 0.7038101 | not scorable | not scorable |
| #### Bn-scaff_16352_1-p12615C-genome specific (napus-oleracea) | 0.9712918    | 0.747254     | 0.9922481 | 0.7919911 | not scorable | not scorable |
| #### Bn-scaff_16352_1-p12616C-genome specific (napus-oleracea) | 0.9688995    | 0.7704958    | 1         | 0.7400342 | not scorable | not scorable |
| #### Bn-scaff_16352_1-p12646C-genome specific (napus-oleracea) | 0.9712918    | 0.7445574    | 1         | 0.6834868 | not scorable | not scorable |
| #### Bn-scaff_16352_1-p12878genome unspecific (all in)         | 0.9665072    | 0.6268451    | 1         | 0.5790798 | 1            | 0.8885053    |
| #### Bn-scaff_16352_1-p13070C-genome specific (napus-oleracea) | 0.9712918    | 0.7541827    | 1         | 0.3275342 | not scorable | not scorable |
| #### Bn-scaff_16352_1-p13150C-genome specific (napus-oleracea) | 0.9832536    | 0.8317472    | 0.9844961 | 0.7224126 | not scorable | not scorable |
| #### Bn-scaff_16352_1-p13199C-genome specific (napus-oleracea) | 0.9832536    | 0.9371949    | 0.9767442 | 0.7649303 | not scorable | not scorable |
| #### Bn-scaff_16352_1-p13636C-genome specific (napus-oleracea) | 0.9784689    | 0.6223561    | 0.9922481 | 0.4774703 | not scorable | not scorable |
| #### Bn-scaff_16352_1-p13644C-genome specific (napus-oleracea) | 0.9856459    | 0.6801355    | 0.9844961 | 0.7578505 | not scorable | not scorable |
| #### Bn-scaff_16352_1-p13644C-genome specific (napus-oleracea) | 0.777512     | 0.8163306    | 0.7984496 | 0.770465  | not scorable | not scorable |
| #### Bn-scaff_16352_1-p14678C-genome specific (napus-oleracea) | 0.9832536    | 0.7415912    | 1         | 0.288635  | not scorable | not scorable |

|                                                                 |              |              |              |   |              |              |              |
|-----------------------------------------------------------------|--------------|--------------|--------------|---|--------------|--------------|--------------|
| #### Bn-scaff_16352_1-p17155 genome unspecific (all in)         | 0.9832536    | 0.3390653    |              | 1 | 0.8138371    | 0.9917355    | 0.7318825    |
| #### Bn-scaff_16352_1-p17449 C-genome specific (napus-oleracea) | 0.9856459    | 0.7925876    |              | 1 | 0.7945571    | not scorable | not scorable |
| #### Bn-scaff_16352_1-p17478 C-genome specific (napus-oleracea) | 0.9880383    | 0.7629986    | 0.9844961    |   | 0.7744946    | not scorable | not scorable |
| #### Bn-scaff_16352_1-p19005 C-genome specific (oleracea only)  | not scorable | not scorable | 0.9922481    |   | 0.6985431    | not scorable | not scorable |
| #### Bn-scaff_16352_1-p19012 C-genome specific (napus-oleracea) | 0.9904306    | 0.7679282    |              | 1 | 0.8125052    | not scorable | not scorable |
| #### Bn-scaff_16352_1-p19090 C-genome specific (napus-oleracea) | 0.9856459    | 0.7507761    | 0.9922481    |   | 0.6437435    | not scorable | not scorable |
| #### Bn-scaff_16352_1-p19163 C-genome specific (napus-oleracea) | 0.9784689    | 0.681715     | 0.9844961    |   | 0.6585901    | not scorable | not scorable |
| #### Bn-scaff_16352_1-p19201 C-genome specific (napus-oleracea) | 0.9904306    | 0.6825497    | 0.9922481    |   | 0.6617785    | not scorable | not scorable |
| #### Bn-scaff_16352_1-p19328 C-genome specific (napus-oleracea) | 0.9784689    | 0.6854244    | 0.9922481    |   | 0.6690769    | not scorable | not scorable |
| #### Bn-scaff_16352_1-p19504 all not scorable                   | not scorable | not scorable | not scorable |   | not scorable | not scorable | not scorable |
| #### Bn-scaff_16352_1-p19742 C-genome specific (napus-oleracea) | 0.9856459    | 0.6588127    |              | 1 | 0.5528579    | not scorable | not scorable |
| #### Bn-scaff_16352_1-p19989 C-genome specific (napus-oleracea) | 0.9832536    | 0.6682717    |              | 1 | 0.6561204    | not scorable | not scorable |
| #### Bn-scaff_16352_1-p2104 genome unspecific (oleracea-rapa)   | not scorable | not scorable |              | 1 | 0.3497194    |              | 1 0.8442147  |
| #### Bn-scaff_16352_1-p21080 C-genome specific (napus-oleracea) | 0.9760765    | 0.8078385    |              | 1 | 0.9244215    | not scorable | not scorable |
| #### Bn-scaff_16352_1-p22467 C-genome specific (napus-oleracea) | 0.9760765    | 0.7167736    |              | 1 | 0.335546     | not scorable | not scorable |
| #### Bn-scaff_16352_1-p22633 C-genome specific (napus-oleracea) | 0.9784689    | 0.6793423    |              | 1 | 0.4665271    | not scorable | not scorable |
| #### Bn-scaff_16352_1-p22878 C-genome specific (napus-oleracea) | 0.9808612    | 0.6705524    |              | 1 | 0.5493587    | not scorable | not scorable |
| #### Bn-scaff_16352_1-p23282 C-genome specific (napus-oleracea) | 0.9641148    | 0.703282     |              | 1 | 0.7272943    | not scorable | not scorable |
| #### Bn-scaff_16352_1-p24334 C-genome specific (napus-oleracea) | 0.9808612    | 0.7668887    |              | 1 | 0.4873315    | not scorable | not scorable |
| #### Bn-scaff_16352_1-p25266 C-genome specific (napus-oleracea) | 0.9760765    | 0.750089     |              | 1 | 0.4350778    | not scorable | not scorable |
| #### Bn-scaff_16352_1-p25354 C-genome specific (napus-oleracea) | 0.9760765    | 0.7625799    |              | 1 | 0.4469746    | not scorable | not scorable |
| #### Bn-scaff_16352_1-p25406 C-genome specific (napus-oleracea) | 0.9760765    | 0.7650304    |              | 1 | 0.5154387    | not scorable | not scorable |
| #### Bn-scaff_16352_1-p25595 C-genome specific (napus-oleracea) | 0.9856459    | 0.8796322    |              | 1 | 0.7512714    | not scorable | not scorable |
| #### Bn-scaff_16352_1-p25995 genome unspecific (all in)         | 0.9808612    | 0.173135     | 0.9767442    |   | 0.3775225    |              | 1 0.8247704  |
| #### Bn-scaff_16352_1-p26489 C-genome specific (napus-oleracea) | 0.9760765    | 0.7622048    |              | 1 | 0.4582007    | not scorable | not scorable |
| #### Bn-scaff_16352_1-p27050 C-genome specific (napus-oleracea) | 0.9856459    | 0.7477756    |              | 1 | 0.7751617    | not scorable | not scorable |
| #### Bn-scaff_16352_1-p27080 C-genome specific (napus-oleracea) | 0.9760765    | 0.763114     |              | 1 | 0.4227182    | not scorable | not scorable |
| #### Bn-scaff_16352_1-p27166 C-genome specific (napus-oleracea) | 0.9904306    | 0.7782611    |              | 1 | 0.2967747    | not scorable | not scorable |
| #### Bn-scaff_16352_1-p27439 C-genome specific (napus-oleracea) | 0.9641148    | 0.7530627    | 0.9922481    |   | 0.6279883    | not scorable | not scorable |
| #### Bn-scaff_16352_1-p27450 C-genome specific (napus-oleracea) | 0.9617225    | 0.7579066    | 0.9922481    |   | 0.8377294    | not scorable | not scorable |
| #### Bn-scaff_16352_1-p27549 C-genome specific (napus-oleracea) | 0.9641148    | 0.7243361    | 0.9922481    |   | 0.7346299    | not scorable | not scorable |
| #### Bn-scaff_16352_1-p27653 C-genome specific (napus-oleracea) | 0.9760765    | 0.7584553    |              | 1 | 0.8334139    | not scorable | not scorable |
| #### Bn-scaff_16352_1-p27826 C-genome specific (napus-oleracea) | 0.9688995    | 0.7562324    |              | 1 | 0.8912963    | not scorable | not scorable |

|                                                                 |              |              |           |           |              |              |
|-----------------------------------------------------------------|--------------|--------------|-----------|-----------|--------------|--------------|
| #### Bn-scaff_16352_1-p27997 C-genome specific (napus-oleracea) | 0.9593301    | 0.762969     | 0.9922481 | 0.8597758 | not scorable | not scorable |
| #### Bn-scaff_16352_1-p28031 C-genome specific (napus-oleracea) | 0.9736842    | 0.7329577    | 0.9767442 | 0.8116145 | not scorable | not scorable |
| #### Bn-scaff_16352_1-p28755 C-genome specific (napus-oleracea) | 0.9880383    | 0.7640613    | 1         | 0.8063055 | not scorable | not scorable |
| #### Bn-scaff_16352_1-p28804 C-genome specific (napus-oleracea) | 0.9736842    | 0.7176567    | 1         | 0.8681151 | not scorable | not scorable |
| #### Bn-scaff_16352_1-p28862 C-genome specific (napus-oleracea) | 0.9808612    | 0.7499294    | 1         | 0.908123  | not scorable | not scorable |
| #### Bn-scaff_16352_1-p30856 C-genome specific (napus-oleracea) | 0.9856459    | 0.7754695    | 0.9922481 | 0.8382936 | not scorable | not scorable |
| #### Bn-scaff_16352_1-p32572 C-genome specific (napus-oleracea) | 0.9952153    | 0.7493648    | 1         | 0.8669521 | not scorable | not scorable |
| #### Bn-scaff_16352_1-p32951 C-genome specific (napus-oleracea) | 0.9665072    | 0.7520427    | 0.9922481 | 0.8107114 | not scorable | not scorable |
| #### Bn-scaff_16352_1-p33364 C-genome specific (napus-oleracea) | 0.9976076    | 0.4030051    | 1         | 0.8810822 | not scorable | not scorable |
| #### Bn-scaff_16352_1-p33529 C-genome specific (napus-oleracea) | 0.9808612    | 0.6521096    | 1         | 0.6862115 | not scorable | not scorable |
| #### Bn-scaff_16352_1-p33806 C-genome specific (napus-oleracea) | 0.9712918    | 0.7631649    | 0.9922481 | 0.755955  | not scorable | not scorable |
| #### Bn-scaff_16352_1-p33863 C-genome specific (napus-oleracea) | 0.9617225    | 0.6963379    | 0.9844961 | 0.7105592 | not scorable | not scorable |
| #### Bn-scaff_16352_1-p33890 C-genome specific (napus-oleracea) | 0.9784689    | 0.6886059    | 1         | 0.707109  | not scorable | not scorable |
| #### Bn-scaff_16352_1-p35977 genome unspecific (oleracea-rapa)  | not scorable | not scorable | 0.9922481 | 0.2469135 | 0.9917355    | 0.7019293    |
| #### Bn-scaff_16352_1-p36144 C-genome specific (napus-oleracea) | 0.9473684    | 0.7556579    | 0.9922481 | 0.7487698 | not scorable | not scorable |
| #### Bn-scaff_16352_1-p36268 C-genome specific (napus-oleracea) | 0.9569378    | 0.7379528    | 0.9302326 | 0.6827388 | not scorable | not scorable |
| #### Bn-scaff_16352_1-p36325 C-genome specific (napus-oleracea) | 0.9784689    | 0.6718295    | 1         | 0.9203722 | not scorable | not scorable |
| #### Bn-scaff_16352_1-p36412 C-genome specific (napus-oleracea) | 0.9808612    | 0.7020971    | 1         | 0.7142606 | not scorable | not scorable |
| #### Bn-scaff_16352_1-p36724 genome unspecific (all in)         | 0.9641148    | 0.3914349    | 0.9844961 | 0.7907324 | 1            | 0.8084838    |
| #### Bn-scaff_16352_1-p36770 C-genome specific (napus-oleracea) | 0.9736842    | 0.3488553    | 1         | 0.6023229 | not scorable | not scorable |
| #### Bn-scaff_16352_1-p37762 genome unspecific (all in)         | 0.9880383    | 0.3587746    | 1         | 0.7929521 | 1            | 0.7023043    |
| #### Bn-scaff_16352_1-p38880 C-genome specific (napus-oleracea) | 0.937799     | 0.782206     | 0.9147287 | 0.6849843 | not scorable | not scorable |
| #### Bn-scaff_16352_1-p43991 C-genome specific (napus-oleracea) | 0.9928229    | 0.8291725    | 0.9767442 | 0.8248905 | not scorable | not scorable |
| #### Bn-scaff_16352_1-p44202 C-genome specific (napus-oleracea) | 0.9832536    | 0.6718705    | 0.9767442 | 0.7186021 | not scorable | not scorable |
| #### Bn-scaff_16352_1-p46887 genome unspecific (all in)         | 0.9880383    | 0.4339529    | 1         | 0.8149654 | 0.9917355    | 0.7411073    |
| #### Bn-scaff_16352_1-p48850 C-genome specific (napus-oleracea) | 0.9808612    | 0.8382455    | 0.9922481 | 0.7934078 | not scorable | not scorable |
| #### Bn-scaff_16352_1-p49691 genome unspecific (all in)         | 0.9928229    | 0.2688649    | 1         | 0.8368157 | 0.9834711    | 0.7204457    |
| #### Bn-scaff_16352_1-p53857 genome unspecific (all in)         | 0.9808612    | 0.7560939    | 0.9922481 | 0.7351643 | 0.9669421    | 0.8601228    |
| #### Bn-scaff_16352_1-p55704 C-genome specific (napus-oleracea) | 0.9832536    | 0.7481866    | 0.9922481 | 0.80375   | not scorable | not scorable |
| #### Bn-scaff_16352_1-p5784 genome unspecific (oleracea-rapa)   | not scorable | not scorable | 1         | 0.8692445 | 1            | 0.9046104    |
| #### Bn-scaff_16352_1-p5909 C-genome specific (napus-oleracea)  | 0.9880383    | 0.6822485    | 1         | 0.7183145 | not scorable | not scorable |
| #### Bn-scaff_16352_1-p60526 C-genome specific (napus-oleracea) | 0.9832536    | 0.7552561    | 0.6821706 | 0.7288112 | not scorable | not scorable |
| #### Bn-scaff_16352_1-p60536 C-genome specific (napus-oleracea) | 0.9976076    | 0.8616822    | 0.9922481 | 0.7352082 | not scorable | not scorable |

|                                                                 |              |              |              |              |              |              |
|-----------------------------------------------------------------|--------------|--------------|--------------|--------------|--------------|--------------|
| #### Bn-scaff_16352_1-p62643 genome unspecific (all in)         | 0.9856459    | 0.4407642    | 0.9767442    | 0.7765134    | 1            | 0.789369     |
| #### Bn-scaff_16352_1-p63919 C-genome specific (napus-oleracea) | 0.9976076    | 0.7261752    | 0.9922481    | 0.6187747    | not scorable | not scorable |
| #### Bn-scaff_16352_1-p64587 C-genome specific (napus-oleracea) | 0.9808612    | 0.3815987    | 0.9922481    | 0.6044004    | not scorable | not scorable |
| #### Bn-scaff_16352_1-p64723 C-genome specific (napus-oleracea) | 0.9880383    | 0.7184795    | 0.9922481    | 0.7801937    | not scorable | not scorable |
| #### Bn-scaff_16352_1-p72061 C-genome specific (napus-oleracea) | 0.9808612    | 0.776123     | 1            | 0.7618878    | not scorable | not scorable |
| #### Bn-scaff_16352_1-p74436 C-genome specific (napus-oleracea) | 0.9808612    | 0.7565561    | 0.9844961    | 0.7445235    | not scorable | not scorable |
| #### Bn-scaff_16352_1-p76268 C-genome specific (napus-oleracea) | 0.9856459    | 0.8951788    | 0.9689922    | 0.6579046    | not scorable | not scorable |
| #### Bn-scaff_16352_1-p82391 C-genome specific (napus-oleracea) | 0.9832536    | 0.8309836    | 0.9922481    | 0.8274806    | not scorable | not scorable |
| #### Bn-scaff_16352_1-p83169 C-genome specific (napus-oleracea) | 0.9808612    | 0.7356062    | 1            | 0.6572484    | not scorable | not scorable |
| #### Bn-scaff_16352_1-p83845 genome unspecific (all in)         | 1            | 0.3323847    | 1            | 0.8004208    | 0.9917355    | 0.7281482    |
| #### Bn-scaff_16352_1-p84720 C-genome specific (napus-oleracea) | 0.9784689    | 0.8100386    | 1            | 0.8258129    | not scorable | not scorable |
| #### Bn-scaff_16352_1-p8584 C-genome specific (napus-oleracea)  | 0.9784689    | 0.6730152    | 1            | 0.5206339    | not scorable | not scorable |
| #### Bn-scaff_16352_1-p8952 C-genome specific (napus-oleracea)  | 0.9928229    | 0.7551357    | 1            | 0.3900067    | not scorable | not scorable |
| #### Bn-scaff_16353_1-p41335 C-genome specific (napus-oleracea) | 0.9832536    | 0.9293126    | 0.9147287    | 0.8157037    | not scorable | not scorable |
| #### Bn-scaff_16353_1-p41558 C-genome specific (oleracea only)  | not scorable | not scorable | 1            | 0.7188644    | not scorable | not scorable |
| #### Bn-scaff_16353_1-p47829 C-genome specific (napus-oleracea) | 0.9688995    | 0.6670118    | 1            | 0.6706693    | not scorable | not scorable |
| #### Bn-scaff_16353_1-p48212 C-genome specific (napus-oleracea) | 0.9904306    | 0.8905582    | 1            | 0.9050534    | not scorable | not scorable |
| #### Bn-scaff_16356_1-p14359 C-genome specific (napus-oleracea) | 0.9282297    | 0.8246436    | 0.9844961    | 0.7670394    | not scorable | not scorable |
| #### Bn-scaff_16356_1-p17864 C-genome specific (napus-oleracea) | 0.9114832    | 0.7143991    | 1            | 0.7531558    | not scorable | not scorable |
| #### Bn-scaff_16356_1-p41349 C-genome specific (napus-oleracea) | 0.9114832    | 0.7672445    | 0.9844961    | 0.8213475    | not scorable | not scorable |
| #### Bn-scaff_16356_1-p41354 C-genome specific (napus-oleracea) | 0.930622     | 0.8151687    | 0.9922481    | 0.7766278    | not scorable | not scorable |
| #### Bn-scaff_16356_1-p42154 genome unspecific (all in)         | 0.9880383    | 0.3876036    | 1            | 0.8948976    | 1            | 0.9006062    |
| #### Bn-scaff_16356_1-p42317 C-genome specific (oleracea only)  | not scorable | not scorable | 1            | 0.7548622    | not scorable | not scorable |
| #### Bn-scaff_16356_1-p42628 genome unspecific (all in)         | 1            | 0.9256757    | 1            | 0.9159461    | 1            | 0.9012966    |
| #### Bn-scaff_16356_1-p42659 genome unspecific (oleracea-rapa)  | not scorable | not scorable | 0.9922481    | 0.6917838    | 0.9917355    | 0.7944117    |
| #### Bn-scaff_16356_1-p60006 genome unspecific (all in)         | 1            | 0.908528     | 1            | 0.9125642    | 1            | 0.9198571    |
| #### Bn-scaff_16356_1-p60107 genome unspecific (all in)         | 1            | 0.4051692    | 1            | 0.6677406    | 0.9917355    | 0.4784209    |
| #### Bn-scaff_16356_1-p60133 genome unspecific (oleracea-rapa)  | not scorable | not scorable | 1            | 0.7770717    | 1            | 0.7661228    |
| #### Bn-scaff_16356_1-p61309 genome unspecific (all in)         | 0.9832536    | 0.2223488    | 1            | 0.681638     | 0.9917355    | 0.6528106    |
| #### Bn-scaff_16356_1-p69775 genome unspecific (all in)         | 0.9832536    | 0.4514746    | 1            | 0.8764164    | 1            | 0.850603     |
| #### Bn-scaff_16356_1-p69920 genome unspecific (all in)         | 0.9904306    | 0.3192602    | 1            | 0.8308578    | 0.9917355    | 0.8235931    |
| #### Bn-scaff_16356_1-p78632 C-genome specific (napus-oleracea) | 0.9904306    | 0.6791692    | 0.9767442    | 0.6901101    | not scorable | not scorable |
| #### Bn-scaff_16357_1-p17085 napus specific                     | 0.9019139    | 0.7744253    | not scorable | not scorable | not scorable | not scorable |

|                                                                 |              |              |           |           |              |              |
|-----------------------------------------------------------------|--------------|--------------|-----------|-----------|--------------|--------------|
| #### Bn-scaff_16361_1-p10039 C-genome specific (oleracea only)  | not scorable | not scorable | 0.9767442 | 0.6823353 | not scorable | not scorable |
| #### Bn-scaff_16361_1-p10079 genome unspecific (all in)         | 0.9880383    | 0.5439187    | 1         | 0.6978017 | 1            | 0.8313751    |
| #### Bn-scaff_16361_1-p10526 genome unspecific (oleracea-rapa)  | not scorable | not scorable | 1         | 0.642302  | 1            | 0.7770717    |
| #### Bn-scaff_16361_1-p10535 C-genome specific (napus-oleracea) | 0.9856459    | 0.3801782    | 0.9844961 | 0.7905569 | not scorable | not scorable |
| #### Bn-scaff_16361_1-p10537 genome unspecific (oleracea-rapa)  | not scorable | not scorable | 1         | 0.8336895 | 0.9917355    | 0.7836741    |
| #### Bn-scaff_16361_1-p10563 genome unspecific (all in)         | 0.9928229    | 0.3349906    | 0.9922481 | 0.399175  | 1            | 0.7317021    |
| #### Bn-scaff_16361_1-p10566 genome unspecific (all in)         | 0.9856459    | 0.431139     | 0.9689922 | 0.7379047 | 1            | 0.8687926    |
| #### Bn-scaff_16361_1-p10695 genome unspecific (all in)         | 0.9976076    | 0.3381074    | 0.9689922 | 0.2646756 | 1            | 0.8379226    |
| #### Bn-scaff_16361_1-p10727 C-genome specific (napus-oleracea) | 0.9976076    | 0.8134166    | 0.9767442 | 0.7678963 | not scorable | not scorable |
| #### Bn-scaff_16361_1-p11220 C-genome specific (napus-oleracea) | 0.9928229    | 0.8846332    | 0.9922481 | 0.8551025 | not scorable | not scorable |
| #### Bn-scaff_16361_1-p11278 genome unspecific (all in)         | 0.9976076    | 0.4359972    | 1         | 0.5684747 | 1            | 0.6865117    |
| #### Bn-scaff_16361_1-p11498 genome unspecific (all in)         | 1            | 0.8294551    | 0.9844961 | 0.3532677 | 1            | 0.9472297    |
| #### Bn-scaff_16361_1-p12056 genome unspecific (oleracea-rapa)  | not scorable | not scorable | 0.9379845 | 0.5993218 | 1            | 0.7763178    |
| #### Bn-scaff_16361_1-p12058 genome unspecific (oleracea-rapa)  | not scorable | not scorable | 0.9844961 | 0.449172  | 0.9917355    | 0.7335086    |
| #### Bn-scaff_16361_1-p12231 C-genome specific (napus-oleracea) | 0.9904306    | 0.7460663    | 0.9844961 | 0.7840705 | not scorable | not scorable |
| #### Bn-scaff_16361_1-p12232 C-genome specific (napus-oleracea) | 0.9760765    | 0.7448927    | 1         | 0.6481208 | not scorable | not scorable |
| #### Bn-scaff_16361_1-p12276 genome unspecific (all in)         | 0.9976076    | 0.4434653    | 1         | 0.5720066 | 1            | 0.9073547    |
| #### Bn-scaff_16361_1-p12331 C-genome specific (oleracea only)  | not scorable | not scorable | 0.9224806 | 0.6392775 | not scorable | not scorable |
| #### Bn-scaff_16361_1-p12410 C-genome specific (napus-oleracea) | 0.9808612    | 0.806552     | 0.9922481 | 0.8086088 | not scorable | not scorable |
| #### Bn-scaff_16361_1-p12564 C-genome specific (napus-oleracea) | 0.9784689    | 0.841526     | 0.8837209 | 0.7493152 | not scorable | not scorable |
| #### Bn-scaff_16361_1-p12581 C-genome specific (napus-oleracea) | 0.9856459    | 0.7109356    | 0.9689922 | 0.6805297 | not scorable | not scorable |
| #### Bn-scaff_16361_1-p12615 C-genome specific (napus-oleracea) | 0.9665072    | 0.6201712    | 0.9379845 | 0.5630405 | not scorable | not scorable |
| #### Bn-scaff_16361_1-p12633 C-genome specific (napus-oleracea) | 0.9904306    | 0.8195071    | 0.9147287 | 0.7938378 | not scorable | not scorable |
| #### Bn-scaff_16361_1-p12673 C-genome specific (napus-oleracea) | 1            | 0.8398467    | 0.9844961 | 0.7623196 | not scorable | not scorable |
| #### Bn-scaff_16361_1-p12676 C-genome specific (napus-oleracea) | 0.9928229    | 0.7818983    | 1         | 0.8404323 | not scorable | not scorable |
| #### Bn-scaff_16361_1-p12775 genome unspecific (all in)         | 0.9593301    | 0.4335023    | 0.9612403 | 0.472004  | 1            | 0.8546102    |
| #### Bn-scaff_16361_1-p12828 genome unspecific (all in)         | 0.9856459    | 0.7165657    | 1         | 0.8017359 | 0.9504132    | 0.8948976    |
| #### Bn-scaff_16361_1-p13240 C-genome specific (napus-oleracea) | 0.9784689    | 0.7115332    | 1         | 0.6872942 | not scorable | not scorable |
| #### Bn-scaff_16361_1-p13311 C-genome specific (napus-oleracea) | 0.9832536    | 0.598187     | 0.9844961 | 0.6175513 | not scorable | not scorable |
| #### Bn-scaff_16361_1-p13434 C-genome specific (napus-oleracea) | 0.9856459    | 0.7753154    | 0.9922481 | 0.7314344 | not scorable | not scorable |
| #### Bn-scaff_16361_1-p13437 C-genome specific (oleracea only)  | not scorable | not scorable | 0.9612403 | 0.4689556 | not scorable | not scorable |
| #### Bn-scaff_16361_1-p13504 C-genome specific (napus-oleracea) | 0.9832536    | 0.7586254    | 1         | 0.7884558 | not scorable | not scorable |
| #### Bn-scaff_16361_1-p13546 C-genome specific (napus-oleracea) | 0.9832536    | 0.7745599    | 1         | 0.7795849 | not scorable | not scorable |

|                                                                |              |              |           |           |              |              |
|----------------------------------------------------------------|--------------|--------------|-----------|-----------|--------------|--------------|
| #### Bn-scaff_16361_1-p13601C-genome specific (napus-oleracea) | 0.9808612    | 0.6964815    | 0.9922481 | 0.5607081 | not scorable | not scorable |
| #### Bn-scaff_16361_1-p13672C-genome specific (napus-oleracea) | 0.9832536    | 0.7888517    | 1         | 0.7860523 | not scorable | not scorable |
| #### Bn-scaff_16361_1-p13677C-genome specific (napus-oleracea) | 0.9736842    | 0.8075888    | 0.9922481 | 0.7567416 | not scorable | not scorable |
| #### Bn-scaff_16361_1-p13678C-genome specific (napus-oleracea) | 0.9784689    | 0.7270799    | 0.9844961 | 0.6579687 | not scorable | not scorable |
| #### Bn-scaff_16361_1-p13678C-genome specific (napus-oleracea) | 0.9760765    | 0.7653219    | 0.9767442 | 0.574402  | not scorable | not scorable |
| #### Bn-scaff_16361_1-p13780C-genome specific (napus-oleracea) | 0.9832536    | 0.7883245    | 1         | 0.7465051 | not scorable | not scorable |
| #### Bn-scaff_16361_1-p13785C-genome specific (oleracea only)  | not scorable | not scorable | 0.9612403 | 0.6896449 | not scorable | not scorable |
| #### Bn-scaff_16361_1-p13798C-genome specific (napus-oleracea) | 0.9856459    | 0.6494454    | 1         | 0.585544  | not scorable | not scorable |
| #### Bn-scaff_16361_1-p13801C-genome specific (napus-oleracea) | 0.9832536    | 0.7646112    | 1         | 0.683462  | not scorable | not scorable |
| #### Bn-scaff_16361_1-p13803C-genome specific (napus-oleracea) | 0.9928229    | 0.764693     | 1         | 0.7370197 | not scorable | not scorable |
| #### Bn-scaff_16361_1-p13804C-genome specific (napus-oleracea) | 0.8349282    | 0.9268457    | 0.6666667 | 0.9095823 | not scorable | not scorable |
| #### Bn-scaff_16361_1-p13871C-genome specific (napus-oleracea) | 1            | 0.8027549    | 0.9922481 | 0.7116041 | not scorable | not scorable |
| #### Bn-scaff_16361_1-p13896genome unspecific (all in)         | 0.9904306    | 0.3748531    | 1         | 0.7013962 | 1            | 0.7924235    |
| #### Bn-scaff_16361_1-p13907C-genome specific (napus-oleracea) | 0.9952153    | 0.773034     | 0.9844961 | 0.8065649 | not scorable | not scorable |
| #### Bn-scaff_16361_1-p13981C-genome specific (oleracea only)  | not scorable | not scorable | 0.9302326 | 0.2614949 | not scorable | not scorable |
| #### Bn-scaff_16361_1-p14029C-genome specific (napus-oleracea) | 0.9832536    | 0.7539849    | 1         | 0.7450414 | not scorable | not scorable |
| #### Bn-scaff_16361_1-p14430genome unspecific (all in)         | 0.9712918    | 0.4653748    | 0.9689922 | 0.7659463 | 1            | 0.5722415    |
| #### Bn-scaff_16361_1-p14550C-genome specific (napus-oleracea) | 0.9952153    | 0.7874832    | 0.9922481 | 0.6643792 | not scorable | not scorable |
| #### Bn-scaff_16361_1-p14665C-genome specific (napus-oleracea) | 0.9904306    | 0.6639004    | 1         | 0.6749588 | not scorable | not scorable |
| #### Bn-scaff_16361_1-p14679C-genome specific (napus-oleracea) | 0.9832536    | 0.642414     | 0.9922481 | 0.6784226 | not scorable | not scorable |
| #### Bn-scaff_16361_1-p14968genome unspecific (all in)         | 0.9856459    | 0.4853293    | 1         | 0.7473352 | 1            | 0.9006202    |
| #### Bn-scaff_16361_1-p14972genome unspecific (all in)         | 0.9712918    | 0.3509853    | 1         | 0.5401466 | 0.9834711    | 0.7663205    |
| #### Bn-scaff_16361_1-p14976genome unspecific (all in)         | 0.9904306    | 0.4825241    | 0.9922481 | 0.673157  | 1            | 0.8225502    |
| #### Bn-scaff_16361_1-p15000genome unspecific (all in)         | 1            | 0.3697753    | 1         | 0.6428018 | 0.9917355    | 0.8206263    |
| #### Bn-scaff_16361_1-p15001genome unspecific (all in)         | 1            | 0.3814368    | 1         | 0.6114067 | 0.9917355    | 0.8435903    |
| #### Bn-scaff_16361_1-p15035C-genome specific (napus-oleracea) | 0.9880383    | 0.7067291    | 0.9922481 | 0.7993762 | not scorable | not scorable |
| #### Bn-scaff_16361_1-p15041C-genome specific (napus-oleracea) | 0.9928229    | 0.7294087    | 0.9612403 | 0.8217707 | not scorable | not scorable |
| #### Bn-scaff_16361_1-p15041C-genome specific (napus-oleracea) | 0.9904306    | 0.7936916    | 0.9689922 | 0.7975774 | not scorable | not scorable |
| #### Bn-scaff_16361_1-p15056C-genome specific (napus-oleracea) | 0.9904306    | 0.7111948    | 0.9767442 | 0.7073705 | not scorable | not scorable |
| #### Bn-scaff_16361_1-p15087C-genome specific (napus-oleracea) | 0.9952153    | 0.6919596    | 0.8992248 | 0.5136786 | not scorable | not scorable |
| #### Bn-scaff_16361_1-p15205C-genome specific (napus-oleracea) | 0.9928229    | 0.6873598    | 0.9844961 | 0.6982946 | not scorable | not scorable |
| #### Bn-scaff_16361_1-p15212C-genome specific (napus-oleracea) | 0.9856459    | 0.7026336    | 0.9922481 | 0.8185682 | not scorable | not scorable |
| #### Bn-scaff_16361_1-p15215C-genome specific (napus-oleracea) | 0.9808612    | 0.7938351    | 0.9767442 | 0.7846066 | not scorable | not scorable |



|                                                                 |              |              |              |              |              |              |
|-----------------------------------------------------------------|--------------|--------------|--------------|--------------|--------------|--------------|
| #### Bn-scaff_16361_1-p15487 C-genome specific (napus-oleracea) | 0.9904306    | 0.7293857    | 0.9922481    | 0.7251559    | not scorable | not scorable |
| #### Bn-scaff_16361_1-p15673 C-genome specific (napus-oleracea) | 0.9880383    | 0.7449486    | 0.9922481    | 0.8181186    | not scorable | not scorable |
| #### Bn-scaff_16361_1-p15691 genome unspecific (all in)         | 0.9832536    | 0.2387249    | 0.9844961    | 0.7392648    | 0.9917355    | 0.5688493    |
| #### Bn-scaff_16361_1-p15693 genome unspecific (oleracea-rapa)  | not scorable | not scorable | 1            | 0.7058485    | 1            | 0.7572198    |
| #### Bn-scaff_16361_1-p15698 genome unspecific (all in)         | 0.9976076    | 0.5222771    | 1            | 0.868624     | 1            | 0.8059814    |
| #### Bn-scaff_16361_1-p15709 genome unspecific (all in)         | 0.9832536    | 0.5466241    | 1            | 0.8021239    | 1            | 0.8747241    |
| #### Bn-scaff_16361_1-p15744 C-genome specific (oleracea only)  | not scorable | not scorable | 0.9922481    | 0.6650742    | not scorable | not scorable |
| #### Bn-scaff_16361_1-p15996 C-genome specific (napus-oleracea) | 1            | 0.6770107    | 0.9922481    | 0.6339083    | not scorable | not scorable |
| #### Bn-scaff_16361_1-p16562 A-genome specific (napus-rapa)     | 0.9712918    | 0.4714301    | not scorable | not scorable | 1            | 0.7914145    |
| #### Bn-scaff_16361_1-p16583 C-genome specific (napus-oleracea) | 0.9976076    | 0.6333901    | 0.9844961    | 0.624625     | not scorable | not scorable |
| #### Bn-scaff_16361_1-p16696 A-genome specific (napus-rapa)     | 0.9880383    | 0.5120032    | not scorable | not scorable | 1            | 0.9178508    |
| #### Bn-scaff_16361_1-p16903 genome unspecific (all in)         | 0.9904306    | 0.2492338    | 0.9767442    | 0.5287026    | 1            | 0.752191     |
| #### Bn-scaff_16361_1-p17138 genome unspecific (all in)         | 0.9904306    | 0.3915931    | 0.9767442    | 0.6514416    | 1            | 0.807187     |
| #### Bn-scaff_16361_1-p17150 genome unspecific (all in)         | 0.9856459    | 0.5622556    | 0.9767442    | 0.7141159    | 0.9917355    | 0.687932     |
| #### Bn-scaff_16361_1-p17490 C-genome specific (oleracea only)  | not scorable | not scorable | 1            | 0.7216226    | not scorable | not scorable |
| #### Bn-scaff_16361_1-p19437 C-genome specific (napus-oleracea) | 0.9976076    | 0.8872046    | 0.9844961    | 0.7387823    | not scorable | not scorable |
| #### Bn-scaff_16361_1-p19742 genome unspecific (oleracea-rapa)  | not scorable | not scorable | 0.9767442    | 0.7842708    | 0.9504132    | 0.7217692    |
| #### Bn-scaff_16361_1-p19937 C-genome specific (napus-oleracea) | 0.9712918    | 0.6708732    | 1            | 0.8057969    | not scorable | not scorable |
| #### Bn-scaff_16361_1-p19939 C-genome specific (napus-oleracea) | 0.9760765    | 0.7267442    | 1            | 0.7445058    | not scorable | not scorable |
| #### Bn-scaff_16361_1-p20161 C-genome specific (napus-oleracea) | 0.9521531    | 0.7771621    | 1            | 0.7513949    | not scorable | not scorable |
| #### Bn-scaff_16361_1-p20377 C-genome specific (napus-oleracea) | 0.9784689    | 0.7481866    | 1            | 0.8261225    | not scorable | not scorable |
| #### Bn-scaff_16361_1-p20381 C-genome specific (napus-oleracea) | 0.9832536    | 0.7432981    | 1            | 0.5927449    | not scorable | not scorable |
| #### Bn-scaff_16361_1-p20478 C-genome specific (napus-oleracea) | 0.9449761    | 0.4666507    | 0.9612403    | 0.5357886    | not scorable | not scorable |
| #### Bn-scaff_16361_1-p20523 C-genome specific (napus-oleracea) | 0.9976076    | 0.8584824    | 0.9922481    | 0.7531677    | not scorable | not scorable |
| #### Bn-scaff_16361_1-p20647 genome unspecific (all in)         | 1            | 0.8004208    | 1            | 0.8237183    | 1            | 0.7739488    |
| #### Bn-scaff_16361_1-p20802 genome unspecific (all in)         | 1            | 0.5382591    | 0.9379845    | 0.7195674    | 1            | 0.7367962    |
| #### Bn-scaff_16361_1-p21150 C-genome specific (napus-oleracea) | 0.9952153    | 0.7652692    | 1            | 0.9175813    | not scorable | not scorable |
| #### Bn-scaff_16361_1-p21387 all not scorable                   | not scorable | not scorable | not scorable | not scorable | not scorable | not scorable |
| #### Bn-scaff_16361_1-p22567 C-genome specific (napus-oleracea) | 0.9976076    | 0.8751466    | 0.9922481    | 0.7602519    | not scorable | not scorable |
| #### Bn-scaff_16361_1-p22626 genome unspecific (all in)         | 0.9952153    | 0.4296462    | 1            | 0.6124516    | 1            | 0.8004208    |
| #### Bn-scaff_16361_1-p22630 genome unspecific (all in)         | 0.9760765    | 0.3474415    | 1            | 0.64634      | 1            | 0.8279412    |
| #### Bn-scaff_16361_1-p22636 genome unspecific (all in)         | 0.9808612    | 0.4850531    | 1            | 0.7452768    | 1            | 0.9205657    |
| #### Bn-scaff_16361_1-p22655 genome unspecific (all in)         | 0.9593301    | 0.5165217    | 1            | 0.7982533    | 1            | 0.8371394    |

|                                                                 |              |              |              |              |              |              |
|-----------------------------------------------------------------|--------------|--------------|--------------|--------------|--------------|--------------|
| #### Bn-scaff_16361_1-p22689 C-genome specific (napus-oleracea) | 0.9712918    | 0.7863798    | 0.9922481    | 0.7037115    | not scorable | not scorable |
| #### Bn-scaff_16361_1-p22731 C-genome specific (napus-oleracea) | 0.9688995    | 0.7909547    | 0.9844961    | 0.7271923    | not scorable | not scorable |
| #### Bn-scaff_16361_1-p22910 C-genome specific (napus-oleracea) | 0.9688995    | 0.7935369    | 0.9844961    | 0.7135015    | not scorable | not scorable |
| #### Bn-scaff_16361_1-p22917 genome unspecific (all in)         | 0.8827751    | 0.7944409    | 0.9922481    | 0.7689758    | 0.9834711    | 0.9435222    |
| #### Bn-scaff_16361_1-p23428 genome unspecific (all in)         | 1            | 0.4686335    | 1            | 0.8207097    | 0.9917355    | 0.7959884    |
| #### Bn-scaff_16361_1-p23504 C-genome specific (napus-oleracea) | 0.9856459    | 0.6411815    | 1            | 0.6148542    | not scorable | not scorable |
| #### Bn-scaff_16361_1-p23535 C-genome specific (napus-oleracea) | 0.9928229    | 0.698205     | 0.9767442    | 0.5842835    | not scorable | not scorable |
| #### Bn-scaff_16361_1-p23540 C-genome specific (napus-oleracea) | 0.9880383    | 0.7328545    | 0.9922481    | 0.7503892    | not scorable | not scorable |
| #### Bn-scaff_16361_1-p23573 C-genome specific (napus-oleracea) | 0.9808612    | 0.778896     | 0.744186     | 0.7191041    | not scorable | not scorable |
| #### Bn-scaff_16361_1-p23612 napus specific                     | 0.9904306    | 0.7752211    | not scorable | not scorable | not scorable | not scorable |
| #### Bn-scaff_16361_1-p23663 genome unspecific (all in)         | 0.9545454    | 0.5293257    | 0.7984496    | 0.8523402    | 1            | 0.9154983    |
| #### Bn-scaff_16361_1-p23889 C-genome specific (napus-oleracea) | 0.9904306    | 0.787953     | 1            | 0.7820795    | not scorable | not scorable |
| #### Bn-scaff_16361_1-p23987 C-genome specific (napus-oleracea) | 0.9880383    | 0.6903124    | 0.9844961    | 0.4019232    | not scorable | not scorable |
| #### Bn-scaff_16361_1-p24006 C-genome specific (napus-oleracea) | 0.9928229    | 0.8631551    | 0.9922481    | 0.8368361    | not scorable | not scorable |
| #### Bn-scaff_16361_1-p24014 C-genome specific (napus-oleracea) | 0.9928229    | 0.7338399    | 1            | 0.6864888    | not scorable | not scorable |
| #### Bn-scaff_16361_1-p24025 C-genome specific (napus-oleracea) | 0.9928229    | 0.7642573    | 1            | 0.7390944    | not scorable | not scorable |
| #### Bn-scaff_16361_1-p24115 C-genome specific (napus-oleracea) | 0.9976076    | 0.8859241    | 1            | 0.8459556    | not scorable | not scorable |
| #### Bn-scaff_16361_1-p24145 C-genome specific (napus-oleracea) | 0.9856459    | 0.7117897    | 1            | 0.6423395    | not scorable | not scorable |
| #### Bn-scaff_16361_1-p24183 C-genome specific (napus-oleracea) | 0.9928229    | 0.7403147    | 1            | 0.8135551    | not scorable | not scorable |
| #### Bn-scaff_16361_1-p24605 C-genome specific (napus-oleracea) | 0.9976076    | 0.9205657    | 1            | 0.9175813    | not scorable | not scorable |
| #### Bn-scaff_16361_1-p24618 genome unspecific (all in)         | 1            | 0.4966312    | 1            | 0.914777     | 1            | 0.8783022    |
| #### Bn-scaff_16361_1-p24736 genome unspecific (all in)         | 0.9808612    | 0.4906667    | 1            | 0.7650404    | 1            | 0.9175813    |
| #### Bn-scaff_16361_1-p24883 C-genome specific (napus-oleracea) | 0.9928229    | 0.7178582    | 1            | 0.6450673    | not scorable | not scorable |
| #### Bn-scaff_16361_1-p24934 C-genome specific (napus-oleracea) | 0.9976076    | 0.8724114    | 1            | 0.9012723    | not scorable | not scorable |
| #### Bn-scaff_16361_1-p25186 C-genome specific (napus-oleracea) | 0.9952153    | 0.8647583    | 0.9922481    | 0.7128009    | not scorable | not scorable |
| #### Bn-scaff_16361_1-p25239 genome unspecific (all in)         | 0.9832536    | 0.5208774    | 0.9767442    | 0.7097957    | 1            | 0.8919709    |
| #### Bn-scaff_16361_1-p25293 genome unspecific (all in)         | 0.9952153    | 0.462874     | 1            | 0.4272656    | 1            | 0.9205657    |
| #### Bn-scaff_16361_1-p25323 genome unspecific (oleracea-rapa)  | not scorable | not scorable | 1            | 0.5924712    | 1            | 0.7669629    |
| #### Bn-scaff_16361_1-p25328 genome unspecific (all in)         | 0.9904306    | 0.2957437    | 0.9922481    | 0.3113663    | 1            | 0.8114662    |
| #### Bn-scaff_16361_1-p25329 genome unspecific (all in)         | 0.9904306    | 0.6530934    | 1            | 0.6622922    | 0.9917355    | 0.7703729    |
| #### Bn-scaff_16361_1-p25331 genome unspecific (all in)         | 0.9904306    | 0.2891426    | 1            | 0.6951322    | 1            | 0.8085203    |
| #### Bn-scaff_16361_1-p25416 C-genome specific (napus-oleracea) | 0.9904306    | 0.7897344    | 0.9844961    | 0.7574444    | not scorable | not scorable |
| #### Bn-scaff_16361_1-p25454 genome unspecific (all in)         | 0.9952153    | 0.3543261    | 1            | 0.8653119    | 1            | 0.6926275    |

|                                                                |              |              |              |              |              |              |
|----------------------------------------------------------------|--------------|--------------|--------------|--------------|--------------|--------------|
| #### Bn-scaff_16361_1-p25457genome unspecific (all in)         | 0.9832536    | 0.501164     | 1            | 0.7471812    | 1            | 0.7531248    |
| #### Bn-scaff_16361_1-p25637genome unspecific (all in)         | 0.9928229    | 0.270542     | 1            | 0.7622204    | 1            | 0.7669629    |
| #### Bn-scaff_16361_1-p27251genome unspecific (all in)         | 0.9880383    | 0.4856566    | 0.9379845    | 0.7839206    | 1            | 0.9205657    |
| #### Bn-scaff_16361_1-p27307C-genome specific (napus-oleracea) | 0.9832536    | 0.7931684    | 1            | 0.9140596    | not scorable | not scorable |
| #### Bn-scaff_16361_1-p27500C-genome specific (napus-oleracea) | 0.9736842    | 0.8029374    | 0.9922481    | 0.8133306    | not scorable | not scorable |
| #### Bn-scaff_16361_1-p27505C-genome specific (napus-oleracea) | 0.9832536    | 0.7854695    | 1            | 0.8401484    | not scorable | not scorable |
| #### Bn-scaff_16361_1-p27530C-genome specific (napus-oleracea) | 0.9856459    | 0.7797244    | 0.9767442    | 0.8026064    | not scorable | not scorable |
| #### Bn-scaff_16361_1-p27531C-genome specific (napus-oleracea) | 0.9641148    | 0.6873888    | 0.9534883    | 0.6841455    | not scorable | not scorable |
| #### Bn-scaff_16361_1-p27932C-genome specific (oleracea only)  | not scorable | not scorable | 1            | 0.8010183    | not scorable | not scorable |
| #### Bn-scaff_16361_1-p27934C-genome specific (napus-oleracea) | 0.9521531    | 0.6628417    | 0.9147287    | 0.6706561    | not scorable | not scorable |
| #### Bn-scaff_16361_1-p27938genome unspecific (all in)         | 0.9880383    | 0.3367904    | 1            | 0.8004208    | 0.9917355    | 0.7306837    |
| #### Bn-scaff_16361_1-p28139genome unspecific (all in)         | 0.9784689    | 0.3211818    | 0.9922481    | 0.8301793    | 0.9917355    | 0.7541764    |
| #### Bn-scaff_16361_1-p28187genome unspecific (oleracea-rapa)  | not scorable | not scorable | 0.9689922    | 0.3615815    | 1            | 0.8979602    |
| #### Bn-scaff_16361_1-p29112genome unspecific (oleracea-rapa)  | not scorable | not scorable | 1            | 0.7524353    | 0.9917355    | 0.295859     |
| #### Bn-scaff_16361_1-p29786genome unspecific (all in)         | 0.9976076    | 0.3208973    | 1            | 0.8868747    | 0.9834711    | 0.7713143    |
| #### Bn-scaff_16361_1-p30026napus specific                     | 0.9593301    | 0.7390317    | not scorable | not scorable | not scorable | not scorable |
| #### Bn-scaff_16361_1-p30043C-genome specific (napus-oleracea) | 0.9617225    | 0.7165879    | 0.4806201    | 0.7884539    | not scorable | not scorable |
| #### Bn-scaff_16361_1-p30941genome unspecific (all in)         | 0.9784689    | 0.2836539    | 1            | 0.9175813    | 0.9917355    | 0.8094396    |
| #### Bn-scaff_16361_1-p31028A-genome specific (napus-rapa)     | 0.9952153    | 0.3400425    | not scorable | not scorable | 1            | 0.6989083    |
| #### Bn-scaff_16361_1-p31207C-genome specific (napus-oleracea) | 0.9904306    | 0.7066236    | 1            | 0.701258     | not scorable | not scorable |
| #### Bn-scaff_16361_1-p31776C-genome specific (napus-oleracea) | 0.9880383    | 0.742927     | 1            | 0.7408294    | not scorable | not scorable |
| #### Bn-scaff_16361_1-p31831genome unspecific (all in)         | 0.9760765    | 0.4440827    | 0.9689922    | 0.5154238    | 1            | 0.9322696    |
| #### Bn-scaff_16361_1-p31892C-genome specific (napus-oleracea) | 0.9976076    | 0.8587967    | 0.9922481    | 0.8338223    | not scorable | not scorable |
| #### Bn-scaff_16361_1-p31918C-genome specific (napus-oleracea) | 0.7966507    | 0.7251185    | 0.4108527    | 0.8184212    | not scorable | not scorable |
| #### Bn-scaff_16361_1-p32502genome unspecific (all in)         | 1            | 0.3762134    | 1            | 0.6921083    | 0.9834711    | 0.4920844    |
| #### Bn-scaff_16361_1-p32652C-genome specific (napus-oleracea) | 1            | 0.8826642    | 1            | 0.6276578    | not scorable | not scorable |
| #### Bn-scaff_16361_1-p33027C-genome specific (napus-oleracea) | 0.9976076    | 0.7821921    | 0.9844961    | 0.8085042    | not scorable | not scorable |
| #### Bn-scaff_16361_1-p33258C-genome specific (napus-oleracea) | 0.9641148    | 0.6488555    | 0.9689922    | 0.6415093    | not scorable | not scorable |
| #### Bn-scaff_16361_1-p33281genome unspecific (all in)         | 1            | 0.8848283    | 1            | 0.8948976    | 1            | 0.8948976    |
| #### Bn-scaff_16361_1-p33509C-genome specific (napus-oleracea) | 0.9784689    | 0.7655174    | 0.9844961    | 0.780461     | not scorable | not scorable |
| #### Bn-scaff_16361_1-p33541C-genome specific (napus-oleracea) | 0.9808612    | 0.6235346    | 1            | 0.6113289    | not scorable | not scorable |
| #### Bn-scaff_16361_1-p33542C-genome specific (napus-oleracea) | 0.9736842    | 0.4985364    | 0.9922481    | 0.4225411    | not scorable | not scorable |
| #### Bn-scaff_16361_1-p33542genome unspecific (all in)         | 0.9976076    | 0.549558     | 0.9922481    | 0.3079796    | 1            | 0.7641606    |

|                                                                |              |              |              |              |              |              |
|----------------------------------------------------------------|--------------|--------------|--------------|--------------|--------------|--------------|
| #### Bn-scaff_16361_1-p33547genome unspecific (all in)         | 0.9880383    | 0.668399     | 1            | 0.6872665    | 1            | 0.6624402    |
| #### Bn-scaff_16361_1-p33549genome unspecific (oleracea-rapa)  | not scorable | not scorable | 1            | 0.8570381    | 1            | 0.8025764    |
| #### Bn-scaff_16361_1-p33553C-genome specific (napus-oleracea) | 0.9712918    | 0.6702888    | 0.9922481    | 0.7139156    | not scorable | not scorable |
| #### Bn-scaff_16361_1-p33973C-genome specific (napus-oleracea) | 0.9928229    | 0.7685678    | 1            | 0.7445564    | not scorable | not scorable |
| #### Bn-scaff_16361_1-p33975C-genome specific (napus-oleracea) | 0.9832536    | 0.7034786    | 0.8372093    | 0.7116493    | not scorable | not scorable |
| #### Bn-scaff_16361_1-p34122genome unspecific (all in)         | 0.9784689    | 0.3411137    | 0.9689922    | 0.2228238    | 1            | 0.7928563    |
| #### Bn-scaff_16361_1-p41026C-genome specific (napus-oleracea) | 0.9856459    | 0.8081014    | 0.9844961    | 0.6848236    | not scorable | not scorable |
| #### Bn-scaff_16361_1-p41553C-genome specific (napus-oleracea) | 0.9928229    | 0.7864428    | 0.9922481    | 0.8308302    | not scorable | not scorable |
| #### Bn-scaff_16361_1-p42309C-genome specific (napus-oleracea) | 0.9952153    | 0.7002256    | 0.9922481    | 0.662327     | not scorable | not scorable |
| #### Bn-scaff_16361_1-p43353C-genome specific (napus-oleracea) | 0.9808612    | 0.8679674    | 0.9922481    | 0.7452312    | not scorable | not scorable |
| #### Bn-scaff_16361_1-p43451C-genome specific (napus-oleracea) | 0.9928229    | 0.5765858    | 1            | 0.4885934    | not scorable | not scorable |
| #### Bn-scaff_16361_1-p43852napus specific                     | 0.9880383    | 0.3575667    | not scorable | not scorable | not scorable | not scorable |
| #### Bn-scaff_16361_1-p43930C-genome specific (napus-oleracea) | 0.9856459    | 0.8095585    | 0.9922481    | 0.7481303    | not scorable | not scorable |
| #### Bn-scaff_16361_1-p45105C-genome specific (napus-oleracea) | 0.9497608    | 0.8293324    | 0.7364341    | 0.7473506    | not scorable | not scorable |
| #### Bn-scaff_16361_1-p45635C-genome specific (napus-oleracea) | 0.9976076    | 0.9064742    | 1            | 0.7910854    | not scorable | not scorable |
| #### Bn-scaff_16361_1-p45793C-genome specific (napus-oleracea) | 0.9952153    | 0.7885464    | 1            | 0.6898542    | not scorable | not scorable |
| #### Bn-scaff_16361_1-p46121genome unspecific (all in)         | 0.9856459    | 0.4742213    | 1            | 0.665654     | 1            | 0.796497     |
| #### Bn-scaff_16361_1-p47069genome unspecific (all in)         | 1            | 0.4369231    | 1            | 0.7827987    | 0.9752066    | 0.7731791    |
| #### Bn-scaff_16361_1-p48509C-genome specific (napus-oleracea) | 0.9928229    | 0.8665325    | 1            | 0.8571454    | not scorable | not scorable |
| #### Bn-scaff_16361_1-p50644C-genome specific (napus-oleracea) | 0.9976076    | 0.6794143    | 1            | 0.5959725    | not scorable | not scorable |
| #### Bn-scaff_16361_1-p50831genome unspecific (all in)         | 0.9952153    | 0.3843744    | 1            | 0.6668456    | 1            | 0.9222585    |
| #### Bn-scaff_16361_1-p54650C-genome specific (napus-oleracea) | 0.9808612    | 0.9082764    | 0.372093     | 0.7912274    | not scorable | not scorable |
| #### Bn-scaff_16361_1-p54878genome unspecific (all in)         | 1            | 0.5173578    | 0.9922481    | 0.7900509    | 1            | 0.9167353    |
| #### Bn-scaff_16361_1-p56378genome unspecific (all in)         | 0.9976076    | 0.3856398    | 1            | 0.8059124    | 0.9917355    | 0.7441644    |
| #### Bn-scaff_16361_1-p63543genome unspecific (all in)         | 0.9928229    | 0.2872922    | 0.9922481    | 0.2940535    | 1            | 0.8114662    |
| #### Bn-scaff_16361_1-p66426C-genome specific (oleracea only)  | not scorable | not scorable | 0.8294573    | 0.9111422    | not scorable | not scorable |
| #### Bn-scaff_16361_1-p66467C-genome specific (napus-oleracea) | 0.9282297    | 0.7842209    | 1            | 0.7825758    | not scorable | not scorable |
| #### Bn-scaff_16361_1-p68691genome unspecific (oleracea-rapa)  | not scorable | not scorable | 0.9767442    | 0.6985037    | 0.9752066    | 0.8476157    |
| #### Bn-scaff_16361_1-p72702C-genome specific (napus-oleracea) | 0.9832536    | 0.7767749    | 0.9922481    | 0.7384694    | not scorable | not scorable |
| #### Bn-scaff_16361_1-p72751C-genome specific (napus-oleracea) | 0.9832536    | 0.7260219    | 0.9612403    | 0.7322744    | not scorable | not scorable |
| #### Bn-scaff_16361_1-p75959C-genome specific (napus-oleracea) | 0.9904306    | 0.7776528    | 1            | 0.7591299    | not scorable | not scorable |
| #### Bn-scaff_16361_1-p79488genome unspecific (all in)         | 0.9880383    | 0.4028826    | 0.9844961    | 0.5768241    | 1            | 0.917518     |
| #### Bn-scaff_16361_1-p84144C-genome specific (napus-oleracea) | 0.9497608    | 0.7245228    | 0.8294573    | 0.7108664    | not scorable | not scorable |

|                                                                 |              |              |              |              |              |              |
|-----------------------------------------------------------------|--------------|--------------|--------------|--------------|--------------|--------------|
| #### Bn-scaff_16361_1-p84988 C-genome specific (napus-oleracea) | 0.9545454    | 0.7352715    | 0.8372093    | 0.6701013    | not scorable | not scorable |
| #### Bn-scaff_16361_1-p88873 genome unspecific (oleracea-rapa)  | not scorable | not scorable | 1            | 0.6741583    | 1            | 0.7155698    |
| #### Bn-scaff_16361_1-p88910 C-genome specific (napus-oleracea) | 0.9928229    | 0.8854839    | 0.8527132    | 0.6199921    | not scorable | not scorable |
| #### Bn-scaff_16361_1-p88912 C-genome specific (napus-oleracea) | 1            | 0.6462444    | 1            | 0.4703185    | not scorable | not scorable |
| #### Bn-scaff_16361_1-p89408 genome unspecific (all in)         | 1            | 0.8055906    | 1            | 0.7177218    | 1            | 0.888696     |
| #### Bn-scaff_16361_1-p90051 C-genome specific (oleracea only)  | not scorable | not scorable | 1            | 0.4692855    | not scorable | not scorable |
| #### Bn-scaff_16361_1-p90172 C-genome specific (napus-oleracea) | 0.9904306    | 0.7617611    | 0.9922481    | 0.7578639    | not scorable | not scorable |
| #### Bn-scaff_16361_1-p93006 C-genome specific (napus-oleracea) | 0.9976076    | 0.7738094    | 0.9844961    | 0.6917909    | not scorable | not scorable |
| #### Bn-scaff_16361_1-p93055 C-genome specific (napus-oleracea) | 0.9904306    | 0.7670739    | 1            | 0.7109561    | not scorable | not scorable |
| #### Bn-scaff_16361_1-p93061 C-genome specific (napus-oleracea) | 0.9904306    | 0.7785611    | 0.9844961    | 0.8359548    | not scorable | not scorable |
| #### Bn-scaff_16361_1-p93071 C-genome specific (napus-oleracea) | 0.9904306    | 0.8236495    | 0.9922481    | 0.7374365    | not scorable | not scorable |
| #### Bn-scaff_16361_1-p93085 C-genome specific (napus-oleracea) | 0.9976076    | 0.8291293    | 0.9922481    | 0.7472649    | not scorable | not scorable |
| #### Bn-scaff_16361_1-p93339 genome unspecific (all in)         | 0.9784689    | 0.6831244    | 1            | 0.7423613    | 0.9669421    | 0.7664449    |
| #### Bn-scaff_16361_1-p93527 C-genome specific (napus-oleracea) | 0.9928229    | 0.821665     | 0.9922481    | 0.7491314    | not scorable | not scorable |
| #### Bn-scaff_16361_1-p94175 all not scorable                   | not scorable | not scorable | not scorable | not scorable | not scorable | not scorable |
| #### Bn-scaff_16361_1-p94747 genome unspecific (all in)         | 1            | 0.813789     | 1            | 0.8218915    | 0.9917355    | 0.8970913    |
| #### Bn-scaff_16361_1-p95283 genome unspecific (oleracea-rapa)  | not scorable | not scorable | 0.875969     | 0.4868091    | 0.9504132    | 0.2671028    |
| #### Bn-scaff_16361_1-p95304 C-genome specific (napus-oleracea) | 1            | 0.6827499    | 1            | 0.7007138    | not scorable | not scorable |
| #### Bn-scaff_16361_1-p98028 genome unspecific (all in)         | 0.9904306    | 0.3362985    | 1            | 0.9094207    | 0.9917355    | 0.7906627    |
| #### Bn-scaff_16362_1-p12417 genome unspecific (all in)         | 1            | 0.3175831    | 1            | 0.6993508    | 0.9917355    | 0.6468914    |
| #### Bn-scaff_16362_1-p14328 genome unspecific (all in)         | 1            | 0.8835704    | 1            | 0.9097291    | 1            | 0.8745925    |
| #### Bn-scaff_16362_1-p30750 genome unspecific (oleracea-rapa)  | not scorable | not scorable | 0.9844961    | 0.6863435    | 0.9917355    | 0.7462569    |
| #### Bn-scaff_16362_1-p38098 C-genome specific (napus-oleracea) | 0.9952153    | 0.8789126    | 0.9922481    | 0.7444065    | not scorable | not scorable |
| #### Bn-scaff_16362_1-p38146 C-genome specific (napus-oleracea) | 0.9952153    | 0.7405528    | 0.9922481    | 0.6932696    | not scorable | not scorable |
| #### Bn-scaff_16362_1-p38561 napus specific                     | 0.9808612    | 0.8928753    | not scorable | not scorable | not scorable | not scorable |
| #### Bn-scaff_16362_1-p39661 C-genome specific (napus-oleracea) | 0.9952153    | 0.834201     | 0.9767442    | 0.5904586    | not scorable | not scorable |
| #### Bn-scaff_16362_1-p40307 C-genome specific (napus-oleracea) | 0.9976076    | 0.947334     | 0.9922481    | 0.8120428    | not scorable | not scorable |
| #### Bn-scaff_16362_1-p40313 C-genome specific (napus-oleracea) | 0.9976076    | 0.8395494    | 1            | 0.8521366    | not scorable | not scorable |
| #### Bn-scaff_16362_1-p40319 C-genome specific (napus-oleracea) | 0.9952153    | 0.8549709    | 0.8217054    | 0.8365995    | not scorable | not scorable |
| #### Bn-scaff_16362_1-p40405 C-genome specific (napus-oleracea) | 0.9976076    | 0.919562     | 1            | 0.8622252    | not scorable | not scorable |
| #### Bn-scaff_16362_1-p40416 C-genome specific (napus-oleracea) | 0.9976076    | 0.7498521    | 1            | 0.7051532    | not scorable | not scorable |
| #### Bn-scaff_16362_1-p40441 C-genome specific (napus-oleracea) | 0.9976076    | 0.9159594    | 1            | 0.7359892    | not scorable | not scorable |
| #### Bn-scaff_16362_1-p40449 C-genome specific (napus-oleracea) | 0.9952153    | 0.9506561    | 0.9922481    | 0.7658536    | not scorable | not scorable |

|                                                                 |              |              |              |              |              |              |
|-----------------------------------------------------------------|--------------|--------------|--------------|--------------|--------------|--------------|
| #### Bn-scaff_16362_1-p4088C C-genome specific (napus-oleracea) | 0.9976076    | 0.8931082    | 1            | 0.770678     | not scorable | not scorable |
| #### Bn-scaff_16362_1-p4251C C-genome specific (napus-oleracea) | 0.9593301    | 0.8437201    | 0.9922481    | 0.7178663    | not scorable | not scorable |
| #### Bn-scaff_16362_1-p42557 C-genome specific (napus-oleracea) | 0.9856459    | 0.6451733    | 0.9922481    | 0.6048328    | not scorable | not scorable |
| #### Bn-scaff_16362_1-p46557 napus specific                     | 0.7822967    | 0.9707817    | not scorable | not scorable | not scorable | not scorable |
| #### Bn-scaff_16362_1-p49037 C-genome specific (napus-oleracea) | 0.9952153    | 0.8058572    | 0.9922481    | 0.7556691    | not scorable | not scorable |
| #### Bn-scaff_16362_1-p5416C C-genome specific (napus-oleracea) | 0.9856459    | 0.824545     | 1            | 0.7936578    | not scorable | not scorable |
| #### Bn-scaff_16362_1-p5420C C-genome specific (napus-oleracea) | 0.9856459    | 0.7614522    | 0.9922481    | 0.6717154    | not scorable | not scorable |
| #### Bn-scaff_16362_1-p5684 genome unspecific (all in)          | 0.9952153    | 0.5416804    | 0.9922481    | 0.7951562    | 1            | 0.8237822    |
| #### Bn-scaff_16362_1-p5723C C-genome specific (napus-oleracea) | 0.9904306    | 0.9140136    | 0.9922481    | 0.813054     | not scorable | not scorable |
| #### Bn-scaff_16362_1-p57297 C-genome specific (napus-oleracea) | 0.9904306    | 0.8577036    | 0.9922481    | 0.7087428    | not scorable | not scorable |
| #### Bn-scaff_16362_1-p6160C C-genome specific (napus-oleracea) | 0.9904306    | 0.7133945    | 0.9844961    | 0.715791     | not scorable | not scorable |
| #### Bn-scaff_16362_1-p61612 C-genome specific (napus-oleracea) | 0.9904306    | 0.7244503    | 1            | 0.5459621    | not scorable | not scorable |
| #### Bn-scaff_16362_1-p62181 C-genome specific (napus-oleracea) | 0.9760765    | 0.7509905    | 1            | 0.5568302    | not scorable | not scorable |
| #### Bn-scaff_16362_1-p6325C C-genome specific (napus-oleracea) | 0.9808612    | 0.7253019    | 1            | 0.8181876    | not scorable | not scorable |
| #### Bn-scaff_16362_1-p6339A A-genome specific (napus-rapa)     | 0.8732057    | 0.2462481    | not scorable | not scorable | 1            | 0.7740709    |
| #### Bn-scaff_16362_1-p6506C C-genome specific (napus-oleracea) | 0.9880383    | 0.7912955    | 1            | 0.4755051    | not scorable | not scorable |
| #### Bn-scaff_16362_1-p6555C C-genome specific (napus-oleracea) | 0.9617225    | 0.6815649    | 0.9922481    | 0.755298     | not scorable | not scorable |
| #### Bn-scaff_16362_1-p71321 genome unspecific (all in)         | 1            | 0.3206733    | 0.9844961    | 0.7031692    | 1            | 0.7405498    |
| #### Bn-scaff_16362_1-p8151 genome unspecific (oleracea-rapa)   | not scorable | not scorable | 1            | 0.8385645    | 0.9917355    | 0.7392269    |
| #### Bn-scaff_16362_1-p8152C C-genome specific (napus-oleracea) | 0.9928229    | 0.5517944    | 1            | 0.9174349    | not scorable | not scorable |
| #### Bn-scaff_16362_1-p84297 genome unspecific (all in)         | 1            | 0.3631863    | 1            | 0.8275068    | 1            | 0.9175813    |
| #### Bn-scaff_16362_1-p8474 genome unspecific (all in)          | 1            | 0.5264038    | 1            | 0.920435     | 0.9834711    | 0.8092654    |
| #### Bn-scaff_16362_1-p9107 genome unspecific (all in)          | 0.9952153    | 0.3828204    | 1            | 0.7470211    | 0.9669421    | 0.6574078    |
| #### Bn-scaff_16369_1-p16861 C-genome specific (napus-oleracea) | 0.9904306    | 0.8884799    | 0.9534883    | 0.8010476    | not scorable | not scorable |
| #### Bn-scaff_16369_1-p1736C napus specific                     | 1            | 0.291299     | not scorable | not scorable | not scorable | not scorable |
| #### Bn-scaff_16369_1-p1816C C-genome specific (napus-oleracea) | 0.9880383    | 0.7192171    | 0.7906977    | 0.6388825    | not scorable | not scorable |
| #### Bn-scaff_16369_1-p1818C C-genome specific (napus-oleracea) | 0.9880383    | 0.7871914    | 0.7906977    | 0.7037976    | not scorable | not scorable |
| #### Bn-scaff_16369_1-p1828C C-genome specific (napus-oleracea) | 0.9904306    | 0.7366292    | 0.7906977    | 0.7685873    | not scorable | not scorable |
| #### Bn-scaff_16369_1-p18557 C-genome specific (napus-oleracea) | 0.9880383    | 0.7173856    | 0.9922481    | 0.6613508    | not scorable | not scorable |
| #### Bn-scaff_16369_1-p1999C C-genome specific (napus-oleracea) | 0.9521531    | 0.6276436    | 1            | 0.6344349    | not scorable | not scorable |
| #### Bn-scaff_16369_1-p20031 C-genome specific (napus-oleracea) | 0.9712918    | 0.758348     | 1            | 0.8222019    | not scorable | not scorable |
| #### Bn-scaff_16369_1-p2007C C-genome specific (napus-oleracea) | 0.9641148    | 0.6931271    | 1            | 0.6816394    | not scorable | not scorable |
| #### Bn-scaff_16369_1-p2009C C-genome specific (napus-oleracea) | 0.9712918    | 0.7133009    | 1            | 0.7680373    | not scorable | not scorable |

|                                                                 |              |              |           |           |              |              |
|-----------------------------------------------------------------|--------------|--------------|-----------|-----------|--------------|--------------|
| #### Bn-scaff_16369_1-p20133 C-genome specific (napus-oleracea) | 0.9904306    | 0.6927842    | 1         | 0.6143916 | not scorable | not scorable |
| #### Bn-scaff_16369_1-p20154 C-genome specific (napus-oleracea) | 0.9712918    | 0.7664489    | 1         | 0.7537159 | not scorable | not scorable |
| #### Bn-scaff_16369_1-p30233 C-genome specific (napus-oleracea) | 0.9808612    | 0.9585074    | 0.9922481 | 0.7760952 | not scorable | not scorable |
| #### Bn-scaff_16369_1-p30281 C-genome specific (napus-oleracea) | 0.9880383    | 0.9215519    | 1         | 0.7693092 | not scorable | not scorable |
| #### Bn-scaff_16369_1-p82394 C-genome specific (napus-oleracea) | 0.9545454    | 0.6717854    | 0.875969  | 0.7245073 | not scorable | not scorable |
| #### Bn-scaff_16369_1-p90302 C-genome specific (napus-oleracea) | 0.9688995    | 0.8012778    | 1         | 0.7995224 | not scorable | not scorable |
| #### Bn-scaff_16371_1-p10181 C-genome specific (napus-oleracea) | 1            | 0.7645022    | 1         | 0.6995161 | not scorable | not scorable |
| #### Bn-scaff_16371_1-p10219 C-genome specific (napus-oleracea) | 0.9976076    | 0.9124733    | 0.9922481 | 0.756707  | not scorable | not scorable |
| #### Bn-scaff_16371_1-p11069 genome unspecific (all in)         | 0.9832536    | 0.3409411    | 1         | 0.7806462 | 1            | 0.7804177    |
| #### Bn-scaff_16371_1-p11786 C-genome specific (napus-oleracea) | 0.9976076    | 0.7819406    | 1         | 0.665654  | not scorable | not scorable |
| #### Bn-scaff_16371_1-p12984 C-genome specific (napus-oleracea) | 0.9856459    | 0.4670389    | 0.4883721 | 0.4192354 | not scorable | not scorable |
| #### Bn-scaff_16371_1-p13058 C-genome specific (napus-oleracea) | 0.9856459    | 0.8984492    | 0.4806201 | 0.8446547 | not scorable | not scorable |
| #### Bn-scaff_16371_1-p13074 C-genome specific (napus-oleracea) | 0.9880383    | 0.8840088    | 0.4883721 | 0.8576671 | not scorable | not scorable |
| #### Bn-scaff_16371_1-p13085 C-genome specific (napus-oleracea) | 0.9880383    | 0.8912995    | 0.4806201 | 0.842766  | not scorable | not scorable |
| #### Bn-scaff_16371_1-p14029 C-genome specific (napus-oleracea) | 0.9976076    | 0.9189738    | 0.9922481 | 0.7624145 | not scorable | not scorable |
| #### Bn-scaff_16371_1-p7515 C-genome specific (napus-oleracea)  | 0.9976076    | 0.8566389    | 0.9922481 | 0.7534984 | not scorable | not scorable |
| #### Bn-scaff_16371_1-p87206 C-genome specific (napus-oleracea) | 0.9976076    | 0.912392     | 0.9844961 | 0.6752742 | not scorable | not scorable |
| #### Bn-scaff_16371_1-p90370 C-genome specific (napus-oleracea) | 0.9856459    | 0.9679713    | 0.9224806 | 0.7566912 | not scorable | not scorable |
| #### Bn-scaff_16371_1-p99818 genome unspecific (all in)         | 0.9617225    | 0.1954347    | 1         | 0.6231682 | 0.9917355    | 0.4475733    |
| #### Bn-scaff_16372_1-p10691 genome unspecific (all in)         | 0.9425837    | 0.3459391    | 0.9844961 | 0.4460302 | 1            | 0.7622204    |
| #### Bn-scaff_16372_1-p13055 C-genome specific (napus-oleracea) | 0.9521531    | 0.6012028    | 0.9302326 | 0.7909613 | not scorable | not scorable |
| #### Bn-scaff_16372_1-p13184 genome unspecific (all in)         | 0.9641148    | 0.5151984    | 1         | 0.4076251 | 1            | 0.8904502    |
| #### Bn-scaff_16372_1-p19665 C-genome specific (napus-oleracea) | 0.9904306    | 0.767184     | 0.9767442 | 0.8458748 | not scorable | not scorable |
| #### Bn-scaff_16372_1-p29992 C-genome specific (napus-oleracea) | 0.9736842    | 0.7952042    | 0.9689922 | 0.7028648 | not scorable | not scorable |
| #### Bn-scaff_16372_1-p43235 C-genome specific (napus-oleracea) | 0.9904306    | 0.7943522    | 1         | 0.4813659 | not scorable | not scorable |
| #### Bn-scaff_16372_1-p78027 C-genome specific (napus-oleracea) | 0.9641148    | 0.7244463    | 0.9844961 | 0.6974508 | not scorable | not scorable |
| #### Bn-scaff_16372_1-p89003 C-genome specific (napus-oleracea) | 0.9665072    | 0.7579809    | 1         | 0.7517814 | not scorable | not scorable |
| #### Bn-scaff_16372_1-p93422 C-genome specific (napus-oleracea) | 0.9760765    | 0.7910765    | 0.9767442 | 0.8504321 | not scorable | not scorable |
| #### Bn-scaff_16372_1-p94487 C-genome specific (napus-oleracea) | 0.9904306    | 0.7863805    | 1         | 0.7430799 | not scorable | not scorable |
| #### Bn-scaff_16378_1-p20179 genome unspecific (all in)         | 0.9952153    | 0.4747981    | 1         | 0.6825719 | 1            | 0.786476     |
| #### Bn-scaff_16378_1-p20798 genome unspecific (oleracea-rapa)  | not scorable | not scorable | 1         | 0.6387589 | 1            | 0.7296906    |
| #### Bn-scaff_16382_1-p11512 genome unspecific (oleracea-rapa)  | not scorable | not scorable | 1         | 0.5987751 | 1            | 0.6657422    |
| #### Bn-scaff_16389_1-p12505 genome unspecific (all in)         | 1            | 0.7280706    | 1         | 0.8391525 | 0.9752066    | 0.8582783    |

|                                                                 |              |              |              |              |              |              |
|-----------------------------------------------------------------|--------------|--------------|--------------|--------------|--------------|--------------|
| #### Bn-scaff_16389_1-p13358 C-genome specific (napus-oleracea) | 0.937799     | 0.9289076    | 0.9457364    | 0.829494     | not scorable | not scorable |
| #### Bn-scaff_16389_1-p14232 C-genome specific (oleracea only)  | not scorable | not scorable | 1            | 0.8576346    | not scorable | not scorable |
| #### Bn-scaff_16389_1-p15216 genome unspecific (oleracea-rapa)  | not scorable | not scorable | 0.9612403    | 0.2182734    | 1            | 0.8004208    |
| #### Bn-scaff_16389_1-p15236 napus specific                     | 0.9401914    | 0.5639763    | not scorable | not scorable | not scorable | not scorable |
| #### Bn-scaff_16389_1-p21420 genome unspecific (oleracea-rapa)  | not scorable | not scorable | 1            | 0.6916533    | 1            | 0.8004208    |
| #### Bn-scaff_16389_1-p21560 genome unspecific (all in)         | 0.9928229    | 0.2685924    | 1            | 0.8119903    | 0.9421487    | 0.5540209    |
| #### Bn-scaff_16389_1-p21991 C-genome specific (napus-oleracea) | 0.9401914    | 0.9266775    | 0.9922481    | 0.7263002    | not scorable | not scorable |
| #### Bn-scaff_16389_1-p28405 genome unspecific (oleracea-rapa)  | not scorable | not scorable | 0.9922481    | 0.774134     | 1            | 0.8872522    |
| #### Bn-scaff_16389_1-p30919 C-genome specific (napus-oleracea) | 0.9330143    | 0.9205657    | 1            | 0.9162531    | not scorable | not scorable |
| #### Bn-scaff_16389_1-p37433 genome unspecific (oleracea-rapa)  | not scorable | not scorable | 1            | 0.7399859    | 1            | 0.6225425    |
| #### Bn-scaff_16389_1-p39442 C-genome specific (napus-oleracea) | 0.8803828    | 0.7680137    | 0.9612403    | 0.7592517    | not scorable | not scorable |
| #### Bn-scaff_16389_1-p40339 genome unspecific (all in)         | 0.9856459    | 0.3788841    | 1            | 0.7568743    | 0.9504132    | 0.5538147    |
| #### Bn-scaff_16389_1-p40750 C-genome specific (oleracea only)  | not scorable | not scorable | 0.9844961    | 0.816942     | not scorable | not scorable |
| #### Bn-scaff_16389_1-p41009 genome unspecific (all in)         | 0.9856459    | 0.3071284    | 1            | 0.5517728    | 1            | 0.7672578    |
| #### Bn-scaff_16389_1-p41172 C-genome specific (napus-oleracea) | 0.930622     | 0.9205657    | 1            | 0.9048332    | not scorable | not scorable |
| #### Bn-scaff_16389_1-p42590 genome unspecific (all in)         | 0.9832536    | 0.3547892    | 1            | 0.9175813    | 0.9917355    | 0.7244594    |
| #### Bn-scaff_16389_1-p42626 genome unspecific (oleracea-rapa)  | not scorable | not scorable | 1            | 0.7884539    | 0.9752066    | 0.5287216    |
| #### Bn-scaff_16389_1-p42633 C-genome specific (oleracea only)  | not scorable | not scorable | 1            | 0.6863394    | not scorable | not scorable |
| #### Bn-scaff_16389_1-p42679 genome unspecific (oleracea-rapa)  | not scorable | not scorable | 1            | 0.8233182    | 1            | 0.7281691    |
| #### Bn-scaff_16389_1-p42782 genome unspecific (all in)         | 0.9880383    | 0.3539516    | 1            | 0.9115074    | 0.9834711    | 0.8180066    |
| #### Bn-scaff_16389_1-p42806 genome unspecific (all in)         | 0.9976076    | 0.7982241    | 0.4418605    | 0.8497803    | 1            | 0.7364703    |
| #### Bn-scaff_16389_1-p43657 C-genome specific (napus-oleracea) | 0.9330143    | 0.7476679    | 0.9922481    | 0.7472389    | not scorable | not scorable |
| #### Bn-scaff_16389_1-p43853 C-genome specific (napus-oleracea) | 0.937799     | 0.7581779    | 1            | 0.7725779    | not scorable | not scorable |
| #### Bn-scaff_16389_1-p46839 C-genome specific (napus-oleracea) | 0.861244     | 0.6589033    | 0.9379845    | 0.6168523    | not scorable | not scorable |
| #### Bn-scaff_16389_1-p47753 C-genome specific (napus-oleracea) | 0.9330143    | 0.780829     | 0.9379845    | 0.9110625    | not scorable | not scorable |
| #### Bn-scaff_16389_1-p51339 C-genome specific (napus-oleracea) | 0.9162679    | 0.8064325    | 0.9922481    | 0.8434917    | not scorable | not scorable |
| #### Bn-scaff_16389_1-p52648 C-genome specific (napus-oleracea) | 0.923445     | 0.814497     | 1            | 0.7942891    | not scorable | not scorable |
| #### Bn-scaff_16389_1-p52778 C-genome specific (oleracea only)  | not scorable | not scorable | 0.9767442    | 0.2532803    | not scorable | not scorable |
| #### Bn-scaff_16389_1-p53997 C-genome specific (napus-oleracea) | 0.8971292    | 0.7879426    | 0.9844961    | 0.7593891    | not scorable | not scorable |
| #### Bn-scaff_16389_1-p57778 genome unspecific (oleracea-rapa)  | not scorable | not scorable | 0.9767442    | 0.3079099    | 1            | 0.7445363    |
| #### Bn-scaff_16389_1-p57807 genome unspecific (oleracea-rapa)  | not scorable | not scorable | 1            | 0.8091774    | 0.9917355    | 0.8036464    |
| #### Bn-scaff_16389_1-p58504 C-genome specific (napus-oleracea) | 0.9210526    | 0.7501116    | 0.9922481    | 0.8144695    | not scorable | not scorable |
| #### Bn-scaff_16389_1-p61075 A-genome specific (rapa only)      | not scorable | not scorable | not scorable | not scorable | 0.9917355    | 0.3205647    |



|                                                                |              |              |           |           |              |              |
|----------------------------------------------------------------|--------------|--------------|-----------|-----------|--------------|--------------|
| #### Bn-scaff_16389_1-p61172genome unspecific (all in)         | 0.9808612    | 0.6054597    | 1         | 0.9058153 | 0.9917355    | 0.7229615    |
| #### Bn-scaff_16389_1-p63123C-genome specific (napus-oleracea) | 0.8349282    | 0.8402013    | 0.8294573 | 0.7884027 | not scorable | not scorable |
| #### Bn-scaff_16389_1-p63395genome unspecific (oleracea-rapa)  | not scorable | not scorable | 0.9767442 | 0.5486218 | 0.9834711    | 0.5498269    |
| #### Bn-scaff_16389_1-p63515C-genome specific (oleracea only)  | not scorable | not scorable | 0.9224806 | 0.7539499 | not scorable | not scorable |
| #### Bn-scaff_16389_1-p64144genome unspecific (all in)         | 0.9712918    | 0.3716917    | 0.9844961 | 0.8681085 | 1            | 0.9236432    |
| #### Bn-scaff_16389_1-p65457C-genome specific (napus-oleracea) | 0.9856459    | 0.4932063    | 1         | 0.7913927 | not scorable | not scorable |
| #### Bn-scaff_16389_1-p66055genome unspecific (all in)         | 0.9784689    | 0.3806656    | 0.9767442 | 0.3874933 | 1            | 0.8338956    |
| #### Bn-scaff_16389_1-p66149genome unspecific (oleracea-rapa)  | not scorable | not scorable | 1         | 0.6282821 | 1            | 0.5786536    |
| #### Bn-scaff_16389_1-p67921C-genome specific (napus-oleracea) | 0.923445     | 0.8833954    | 0.9767442 | 0.8207017 | not scorable | not scorable |
| #### Bn-scaff_16389_1-p68801C-genome specific (napus-oleracea) | 0.9258373    | 0.8844294    | 0.9767442 | 0.7233422 | not scorable | not scorable |
| #### Bn-scaff_16389_1-p68840C-genome specific (napus-oleracea) | 0.9282297    | 0.8633171    | 0.9922481 | 0.7955123 | not scorable | not scorable |
| #### Bn-scaff_16389_1-p69033C-genome specific (napus-oleracea) | 0.923445     | 0.7815909    | 0.9457364 | 0.7748593 | not scorable | not scorable |
| #### Bn-scaff_16389_1-p69123genome unspecific (all in)         | 0.9090909    | 0.880426     | 0.9922481 | 0.7829973 | 0.5454546    | 0.699442     |
| #### Bn-scaff_16389_1-p74032C-genome specific (napus-oleracea) | 0.9521531    | 0.781674     | 0.9922481 | 0.8560559 | not scorable | not scorable |
| #### Bn-scaff_16389_1-p74904C-genome specific (napus-oleracea) | 0.9497608    | 0.7803012    | 0.9844961 | 0.7128351 | not scorable | not scorable |
| #### Bn-scaff_16389_1-p74961genome unspecific (all in)         | 0.9832536    | 0.2066021    | 1         | 0.8072782 | 0.9834711    | 0.6218508    |
| #### Bn-scaff_16389_1-p75046C-genome specific (napus-oleracea) | 0.9401914    | 0.7772456    | 0.9689922 | 0.7175786 | not scorable | not scorable |
| #### Bn-scaff_16389_1-p75145genome unspecific (oleracea-rapa)  | not scorable | not scorable | 1         | 0.7772858 | 0.9834711    | 0.9354552    |
| #### Bn-scaff_16389_1-p76658C-genome specific (oleracea only)  | not scorable | not scorable | 0.9922481 | 0.2563208 | not scorable | not scorable |
| #### Bn-scaff_16389_1-p76689C-genome specific (napus-oleracea) | 0.9593301    | 0.7874479    | 1         | 0.8379771 | not scorable | not scorable |
| #### Bn-scaff_16389_1-p76717C-genome specific (napus-oleracea) | 0.9449761    | 0.5182359    | 0.9612403 | 0.361751  | not scorable | not scorable |
| #### Bn-scaff_16389_1-p76834C-genome specific (napus-oleracea) | 0.9641148    | 0.7567944    | 1         | 0.810524  | not scorable | not scorable |
| #### Bn-scaff_16389_1-p76847C-genome specific (napus-oleracea) | 0.9401914    | 0.7004474    | 1         | 0.7506104 | not scorable | not scorable |
| #### Bn-scaff_16389_1-p76860C-genome specific (napus-oleracea) | 0.9569378    | 0.7022055    | 1         | 0.7283592 | not scorable | not scorable |
| #### Bn-scaff_16389_1-p77113C-genome specific (napus-oleracea) | 0.9617225    | 0.766591     | 0.9844961 | 0.6823937 | not scorable | not scorable |
| #### Bn-scaff_16389_1-p77669genome unspecific (all in)         | 0.9425837    | 0.6131817    | 0.9922481 | 0.7078277 | 0.9504132    | 0.724062     |
| #### Bn-scaff_16389_1-p77924C-genome specific (napus-oleracea) | 0.9617225    | 0.7509251    | 0.9844961 | 0.7837359 | not scorable | not scorable |
| #### Bn-scaff_16389_1-p78126C-genome specific (napus-oleracea) | 0.9449761    | 0.7463372    | 1         | 0.7345276 | not scorable | not scorable |
| #### Bn-scaff_16389_1-p82051C-genome specific (napus-oleracea) | 0.9449761    | 0.6717374    | 0.9689922 | 0.7612548 | not scorable | not scorable |
| #### Bn-scaff_16389_1-p84266C-genome specific (oleracea only)  | not scorable | not scorable | 0.9844961 | 0.5072445 | not scorable | not scorable |
| #### Bn-scaff_16389_1-p90764C-genome specific (napus-oleracea) | 0.923445     | 0.2449412    | 1         | 0.7383137 | not scorable | not scorable |
| #### Bn-scaff_16391_1-p142 C-genome specific (napus-oleracea)  | 0.9688995    | 0.7075026    | 1         | 0.7953157 | not scorable | not scorable |
| #### Bn-scaff_16394_1-p1000C-genome specific (napus-oleracea)  | 0.9976076    | 0.7934078    | 1         | 0.5508747 | not scorable | not scorable |

|                                                                 |              |              |              |              |              |              |
|-----------------------------------------------------------------|--------------|--------------|--------------|--------------|--------------|--------------|
| #### Bn-scaff_16394_1-p10004 C-genome specific (napus-oleracea) | 0.9928229    | 0.7694409    | 1            | 0.4861982    | not scorable | not scorable |
| #### Bn-scaff_16394_1-p10025 C-genome specific (napus-oleracea) | 0.9952153    | 0.7566921    | 0.9069768    | 0.5573822    | not scorable | not scorable |
| #### Bn-scaff_16394_1-p10457 C-genome specific (napus-oleracea) | 0.9665072    | 0.637979     | 0.9922481    | 0.7660736    | not scorable | not scorable |
| #### Bn-scaff_16394_1-p10850 C-genome specific (napus-oleracea) | 0.9880383    | 0.6905941    | 1            | 0.5280329    | not scorable | not scorable |
| #### Bn-scaff_16394_1-p10908 C-genome specific (napus-oleracea) | 0.9712918    | 0.7283558    | 1            | 0.7990022    | not scorable | not scorable |
| #### Bn-scaff_16394_1-p11214 genome unspecific (all in)         | 0.9617225    | 0.4903319    | 1            | 0.7010965    | 1            | 0.8971679    |
| #### Bn-scaff_16394_1-p11221 C-genome specific (oleracea only)  | not scorable | not scorable | 0.9767442    | 0.5606036    | not scorable | not scorable |
| #### Bn-scaff_16394_1-p11222 all not scorable                   | not scorable | not scorable | not scorable | not scorable | not scorable | not scorable |
| #### Bn-scaff_16394_1-p11223 genome unspecific (oleracea-rapa)  | not scorable | not scorable | 0.9767442    | 0.7358871    | 1            | 0.8733356    |
| #### Bn-scaff_16394_1-p11224 C-genome specific (oleracea only)  | not scorable | not scorable | 0.9147287    | 0.7884539    | not scorable | not scorable |
| #### Bn-scaff_16394_1-p11235 napus specific                     | 0.8875598    | 0.5601177    | not scorable | not scorable | not scorable | not scorable |
| #### Bn-scaff_16394_1-p11294 C-genome specific (napus-oleracea) | 0.9712918    | 0.7517006    | 0.8914729    | 0.8054447    | not scorable | not scorable |
| #### Bn-scaff_16394_1-p11317 C-genome specific (napus-oleracea) | 0.5909091    | 0.815285     | 1            | 0.8219849    | not scorable | not scorable |
| #### Bn-scaff_16394_1-p11343 C-genome specific (napus-oleracea) | 0.9760765    | 0.7613437    | 0.8992248    | 0.7358275    | not scorable | not scorable |
| #### Bn-scaff_16394_1-p11549 C-genome specific (napus-oleracea) | 0.9186603    | 0.5073655    | 0.8449612    | 0.9095823    | not scorable | not scorable |
| #### Bn-scaff_16394_1-p11953 genome unspecific (oleracea-rapa)  | not scorable | not scorable | 1            | 0.7914145    | 0.9917355    | 0.6632454    |
| #### Bn-scaff_16394_1-p12401 C-genome specific (napus-oleracea) | 0.9712918    | 0.7870387    | 0.9224806    | 0.8773354    | not scorable | not scorable |
| #### Bn-scaff_16394_1-p13082 genome unspecific (all in)         | 0.9808612    | 0.3335466    | 1            | 0.771216     | 1            | 0.7978156    |
| #### Bn-scaff_16394_1-p13420 genome unspecific (all in)         | 0.9856459    | 0.3196112    | 0.9922481    | 0.3483222    | 1            | 0.7770717    |
| #### Bn-scaff_16394_1-p13868 C-genome specific (oleracea only)  | not scorable | not scorable | 0.6589147    | 0.683278     | not scorable | not scorable |
| #### Bn-scaff_16394_1-p14429 C-genome specific (napus-oleracea) | 0.8779904    | 0.6830677    | 0.9224806    | 0.7161742    | not scorable | not scorable |
| #### Bn-scaff_16394_1-p14748 C-genome specific (oleracea only)  | not scorable | not scorable | 1            | 0.713779     | not scorable | not scorable |
| #### Bn-scaff_16394_1-p15028 genome unspecific (all in)         | 0.9904306    | 0.5503881    | 1            | 0.8053023    | 0.9834711    | 0.5884724    |
| #### Bn-scaff_16394_1-p15110 genome unspecific (all in)         | 0.9856459    | 0.3497103    | 1            | 0.8261876    | 0.9834711    | 0.7689552    |
| #### Bn-scaff_16394_1-p15163 C-genome specific (napus-oleracea) | 0.9904306    | 0.7214385    | 1            | 0.7544215    | not scorable | not scorable |
| #### Bn-scaff_16394_1-p15164 C-genome specific (napus-oleracea) | 1            | 0.9197696    | 1            | 0.8960404    | not scorable | not scorable |
| #### Bn-scaff_16394_1-p15216 genome unspecific (all in)         | 1            | 0.5370017    | 1            | 0.4799645    | 1            | 0.5353597    |
| #### Bn-scaff_16394_1-p17034 genome unspecific (all in)         | 0.9976076    | 0.5287157    | 1            | 0.892243     | 0.892562     | 0.9315522    |
| #### Bn-scaff_16394_1-p18508 C-genome specific (napus-oleracea) | 0.9952153    | 0.6999496    | 0.9922481    | 0.6782494    | not scorable | not scorable |
| #### Bn-scaff_16394_1-p18753 genome unspecific (all in)         | 0.9952153    | 0.4797054    | 0.9844961    | 0.7884539    | 1            | 0.6496276    |
| #### Bn-scaff_16394_1-p19452 C-genome specific (napus-oleracea) | 0.9808612    | 0.7015303    | 0.9922481    | 0.6314116    | not scorable | not scorable |
| #### Bn-scaff_16394_1-p22298 C-genome specific (oleracea only)  | not scorable | not scorable | 1            | 0.746285     | not scorable | not scorable |
| #### Bn-scaff_16394_1-p22723 C-genome specific (oleracea only)  | not scorable | not scorable | 1            | 0.5683277    | not scorable | not scorable |

|                                                                 |              |              |           |           |              |              |
|-----------------------------------------------------------------|--------------|--------------|-----------|-----------|--------------|--------------|
| #### Bn-scaff_16394_1-p23356 genome unspecific (oleracea-rapa)  | not scorable | not scorable | 1         | 0.8336745 | 1            | 0.8083761    |
| #### Bn-scaff_16394_1-p23678 C-genome specific (napus-oleracea) | 1            | 0.8813683    | 1         | 0.7238413 | not scorable | not scorable |
| #### Bn-scaff_16394_1-p23704 genome unspecific (all in)         | 1            | 0.8155281    | 1         | 0.8642705 | 0.9834711    | 0.8680173    |
| #### Bn-scaff_16394_1-p23732 C-genome specific (napus-oleracea) | 0.9760765    | 0.7460967    | 1         | 0.781321  | not scorable | not scorable |
| #### Bn-scaff_16394_1-p24238 C-genome specific (napus-oleracea) | 1            | 0.9116787    | 0.9922481 | 0.6951858 | not scorable | not scorable |
| #### Bn-scaff_16394_1-p30889 C-genome specific (napus-oleracea) | 0.9784689    | 0.7706004    | 0.9302326 | 0.7963158 | not scorable | not scorable |
| #### Bn-scaff_16394_1-p36351 genome unspecific (oleracea-rapa)  | not scorable | not scorable | 0.9689922 | 0.3982363 | 0.9669421    | 0.6051316    |
| #### Bn-scaff_16394_1-p36357 C-genome specific (oleracea only)  | not scorable | not scorable | 0.9844961 | 0.8815643 | not scorable | not scorable |
| #### Bn-scaff_16394_1-p40158 genome unspecific (oleracea-rapa)  | not scorable | not scorable | 0.9767442 | 0.3665501 | 1            | 0.8131983    |
| #### Bn-scaff_16394_1-p40189 genome unspecific (all in)         | 0.9593301    | 0.50994      | 0.9844961 | 0.615805  | 1            | 0.9095823    |
| #### Bn-scaff_16394_1-p40225 genome unspecific (oleracea-rapa)  | not scorable | not scorable | 1         | 0.6640749 | 1            | 0.8901672    |
| #### Bn-scaff_16394_1-p41186 C-genome specific (napus-oleracea) | 0.9712918    | 0.7551026    | 0.8914729 | 0.9175813 | not scorable | not scorable |
| #### Bn-scaff_16394_1-p41658 C-genome specific (napus-oleracea) | 0.9832536    | 0.6900355    | 0.9922481 | 0.6591358 | not scorable | not scorable |
| #### Bn-scaff_16394_1-p41680 C-genome specific (napus-oleracea) | 0.9832536    | 0.7265018    | 0.9844961 | 0.7779648 | not scorable | not scorable |
| #### Bn-scaff_16394_1-p41687 C-genome specific (napus-oleracea) | 0.9760765    | 0.7446274    | 0.9922481 | 0.8088477 | not scorable | not scorable |
| #### Bn-scaff_16394_1-p41730 C-genome specific (napus-oleracea) | 0.9856459    | 0.6906163    | 1         | 0.6663815 | not scorable | not scorable |
| #### Bn-scaff_16394_1-p41793 C-genome specific (napus-oleracea) | 0.9880383    | 0.687111     | 0.9922481 | 0.6644234 | not scorable | not scorable |
| #### Bn-scaff_16394_1-p41819 C-genome specific (napus-oleracea) | 0.9760765    | 0.6745659    | 0.9922481 | 0.7278452 | not scorable | not scorable |
| #### Bn-scaff_16394_1-p41906 C-genome specific (napus-oleracea) | 0.9856459    | 0.7648872    | 0.9767442 | 0.776421  | not scorable | not scorable |
| #### Bn-scaff_16394_1-p41990 C-genome specific (napus-oleracea) | 0.9856459    | 0.742858     | 0.9844961 | 0.8194435 | not scorable | not scorable |
| #### Bn-scaff_16394_1-p42022 C-genome specific (napus-oleracea) | 0.9808612    | 0.7216012    | 0.9922481 | 0.7677401 | not scorable | not scorable |
| #### Bn-scaff_16394_1-p42038 C-genome specific (napus-oleracea) | 0.9736842    | 0.7548903    | 1         | 0.7546566 | not scorable | not scorable |
| #### Bn-scaff_16394_1-p42875 C-genome specific (napus-oleracea) | 0.9952153    | 0.8473144    | 1         | 0.728344  | not scorable | not scorable |
| #### Bn-scaff_16394_1-p44084 C-genome specific (napus-oleracea) | 0.9665072    | 0.7413499    | 1         | 0.7888356 | not scorable | not scorable |
| #### Bn-scaff_16394_1-p44554 C-genome specific (napus-oleracea) | 0.9688995    | 0.7097239    | 0.9844961 | 0.7798202 | not scorable | not scorable |
| #### Bn-scaff_16394_1-p44705 C-genome specific (napus-oleracea) | 0.9712918    | 0.7464817    | 1         | 0.8123536 | not scorable | not scorable |
| #### Bn-scaff_16394_1-p45436 C-genome specific (napus-oleracea) | 0.9641148    | 0.6743578    | 0.8372093 | 0.7536394 | not scorable | not scorable |
| #### Bn-scaff_16394_1-p45452 C-genome specific (napus-oleracea) | 0.9880383    | 0.7244983    | 0.9069768 | 0.7027928 | not scorable | not scorable |
| #### Bn-scaff_16394_1-p47072 C-genome specific (napus-oleracea) | 0.9712918    | 0.711263     | 0.9922481 | 0.757055  | not scorable | not scorable |
| #### Bn-scaff_16394_1-p47091 C-genome specific (napus-oleracea) | 0.9617225    | 0.7468455    | 0.6356589 | 0.8077066 | not scorable | not scorable |
| #### Bn-scaff_16394_1-p47178 C-genome specific (napus-oleracea) | 0.9641148    | 0.6776084    | 1         | 0.6649265 | not scorable | not scorable |
| #### Bn-scaff_16394_1-p47422 C-genome specific (napus-oleracea) | 0.9952153    | 0.803114     | 0.9844961 | 0.8332527 | not scorable | not scorable |
| #### Bn-scaff_16394_1-p50595 C-genome specific (oleracea only)  | not scorable | not scorable | 0.9844961 | 0.8207097 | not scorable | not scorable |

|                                                                 |              |              |              |              |           |              |              |
|-----------------------------------------------------------------|--------------|--------------|--------------|--------------|-----------|--------------|--------------|
| #### Bn-scaff_16394_1-p51658 C-genome specific (napus-oleracea) | 0.9952153    | 0.7498151    |              | 1            | 0.9027914 | not scorable | not scorable |
| #### Bn-scaff_16394_1-p52100 C-genome specific (napus-oleracea) | 0.9904306    | 0.8858269    |              | 1            | 0.9103662 | not scorable | not scorable |
| #### Bn-scaff_16394_1-p52596 genome unspecific (all in)         | 0.9712918    | 0.4569781    | 0.9922481    |              | 0.8108668 | 1            | 0.9095823    |
| #### Bn-scaff_16394_1-p52735 genome unspecific (oleracea-rapa)  | not scorable | not scorable | 0.8914729    |              | 0.7830042 | 1            | 0.8004208    |
| #### Bn-scaff_16394_1-p52759 C-genome specific (napus-oleracea) | 0.7033493    | 0.6889489    | 0.8837209    |              | 0.7945656 | not scorable | not scorable |
| #### Bn-scaff_16394_1-p52917 genome unspecific (all in)         | 0.6866029    | 0.4845628    | 0.9147287    |              | 0.6805167 | 0.9834711    | 0.9042964    |
| #### Bn-scaff_16394_1-p53124 C-genome specific (napus-oleracea) | 0.7200957    | 0.6720217    | 0.8914729    |              | 0.7474202 | not scorable | not scorable |
| #### Bn-scaff_16394_1-p55169 genome unspecific (oleracea-rapa)  | not scorable | not scorable |              | 1            | 0.6427142 | 0.9586777    | 0.5761908    |
| #### Bn-scaff_16394_1-p55190 genome unspecific (all in)         | 0.9880383    | 0.3616205    |              | 1            | 0.8135551 |              | 0.7243512    |
| #### Bn-scaff_16394_1-p56613 C-genome specific (napus-oleracea) | 0.9808612    | 0.7147281    | 0.9922481    |              | 0.8188151 | not scorable | not scorable |
| #### Bn-scaff_16394_1-p56759 C-genome specific (napus-oleracea) | 0.9856459    | 0.7473891    | 0.9922481    |              | 0.7602575 | not scorable | not scorable |
| #### Bn-scaff_16394_1-p60781 C-genome specific (napus-oleracea) | 0.9736842    | 0.3018032    | 0.9767442    |              | 0.3610331 | not scorable | not scorable |
| #### Bn-scaff_16394_1-p60940 C-genome specific (napus-oleracea) | 0.9736842    | 0.8732251    |              | 1            | 0.7227208 | not scorable | not scorable |
| #### Bn-scaff_16394_1-p61999 C-genome specific (napus-oleracea) | 0.9736842    | 0.394025     |              | 1            | 0.5246695 | not scorable | not scorable |
| #### Bn-scaff_16394_1-p62330 genome unspecific (all in)         | 0.9688995    | 0.6267419    | 0.9844961    |              | 0.7199873 | 1            | 0.9223346    |
| #### Bn-scaff_16394_1-p64641 C-genome specific (napus-oleracea) | 0.708134     | 0.3918858    | 0.8682171    |              | 0.5632122 | not scorable | not scorable |
| #### Bn-scaff_16394_1-p64683 A-genome specific (napus-rapa)     | 0.9043062    | 0.4678043    | not scorable | not scorable |           | 1            | 0.6746547    |
| #### Bn-scaff_16394_1-p72231 C-genome specific (oleracea only)  | not scorable | not scorable |              | 1            | 0.6877812 | not scorable | not scorable |
| #### Bn-scaff_16394_1-p72258 genome unspecific (oleracea-rapa)  | not scorable | not scorable |              | 1            | 0.7837667 | 1            | 0.8512301    |
| #### Bn-scaff_16394_1-p72831 genome unspecific (oleracea-rapa)  | not scorable | not scorable | 0.9922481    |              | 0.8714699 | 1            | 0.9140422    |
| #### Bn-scaff_16394_1-p73139 C-genome specific (napus-oleracea) | 0.9904306    | 0.7263663    |              | 1            | 0.4355535 | not scorable | not scorable |
| #### Bn-scaff_16394_1-p75558 genome unspecific (all in)         |              | 1            | 0.58972      | 1            | 0.7884539 | 0.8181818    | 0.819803     |
| #### Bn-scaff_16394_1-p76648 C-genome specific (napus-oleracea) | 0.9904306    | 0.6713283    | 0.9844961    |              | 0.6406001 | not scorable | not scorable |
| #### Bn-scaff_16394_1-p76772 C-genome specific (napus-oleracea) | 0.9976076    | 0.786075     |              | 1            | 0.8161746 | not scorable | not scorable |
| #### Bn-scaff_16394_1-p76783 C-genome specific (napus-oleracea) | 0.9832536    | 0.7847225    |              | 1            | 0.8029664 | not scorable | not scorable |
| #### Bn-scaff_16394_1-p77402 C-genome specific (napus-oleracea) | 0.9928229    | 0.8249698    | 0.9844961    |              | 0.8094081 | not scorable | not scorable |
| #### Bn-scaff_16394_1-p77414 C-genome specific (napus-oleracea) |              | 1            | 0.8432921    | 1            | 0.7197761 | not scorable | not scorable |
| #### Bn-scaff_16394_1-p77471 C-genome specific (napus-oleracea) | 0.9928229    | 0.7833192    | 0.9844961    |              | 0.8197837 | not scorable | not scorable |
| #### Bn-scaff_16394_1-p79652 C-genome specific (napus-oleracea) | 0.9808612    | 0.7352965    | 0.9922481    |              | 0.4325611 | not scorable | not scorable |
| #### Bn-scaff_16394_1-p83655 C-genome specific (napus-oleracea) | 0.9784689    | 0.7614213    |              | 1            | 0.8136466 | not scorable | not scorable |
| #### Bn-scaff_16394_1-p84238 C-genome specific (napus-oleracea) | 0.9784689    | 0.7681085    | 0.9922481    |              | 0.7479794 | not scorable | not scorable |
| #### Bn-scaff_16394_1-p84763 C-genome specific (napus-oleracea) | 0.9880383    | 0.7762009    |              | 1            | 0.7839714 | not scorable | not scorable |
| #### Bn-scaff_16394_1-p85021 C-genome specific (oleracea only)  | not scorable | not scorable | 0.9922481    |              | 0.7361465 | not scorable | not scorable |

|                                                                 |              |              |           |           |              |              |
|-----------------------------------------------------------------|--------------|--------------|-----------|-----------|--------------|--------------|
| #### Bn-scaff_16394_1-p85194 C-genome specific (napus-oleracea) | 0.9712918    | 0.7767639    | 0.9922481 | 0.7661505 | not scorable | not scorable |
| #### Bn-scaff_16394_1-p85343 C-genome specific (napus-oleracea) | 0.9569378    | 0.7716004    | 0.9922481 | 0.8524848 | not scorable | not scorable |
| #### Bn-scaff_16394_1-p85626 C-genome specific (napus-oleracea) | 0.8708134    | 0.7102529    | 1         | 0.7784742 | not scorable | not scorable |
| #### Bn-scaff_16394_1-p92074 C-genome specific (napus-oleracea) | 0.9760765    | 0.7629806    | 0.9922481 | 0.7921448 | not scorable | not scorable |
| #### Bn-scaff_16394_1-p96414 C-genome specific (napus-oleracea) | 0.9784689    | 0.8002045    | 0.9767442 | 0.7562321 | not scorable | not scorable |
| #### Bn-scaff_16394_1-p98709 C-genome specific (napus-oleracea) | 0.9952153    | 0.7977432    | 1         | 0.7652442 | not scorable | not scorable |
| #### Bn-scaff_16394_2-p10140 genome unspecific (all in)         | 0.9736842    | 0.4146177    | 0.9922481 | 0.9038987 | 1            | 0.8680884    |
| #### Bn-scaff_16394_2-p10234 C-genome specific (napus-oleracea) | 0.9808612    | 0.8108311    | 0.9922481 | 0.7250833 | not scorable | not scorable |
| #### Bn-scaff_16394_2-p10276 C-genome specific (napus-oleracea) | 0.9736842    | 0.7893522    | 1         | 0.7257249 | not scorable | not scorable |
| #### Bn-scaff_16394_2-p10360 C-genome specific (napus-oleracea) | 0.9569378    | 0.6524379    | 1         | 0.8035321 | not scorable | not scorable |
| #### Bn-scaff_16394_2-p10382 C-genome specific (napus-oleracea) | 0.9808612    | 0.8044935    | 0.9922481 | 0.7904562 | not scorable | not scorable |
| #### Bn-scaff_16394_2-p10614 genome unspecific (oleracea-rapa)  | not scorable | not scorable | 0.9922481 | 0.7991781 | 1            | 0.8819914    |
| #### Bn-scaff_16394_2-p10619 genome unspecific (all in)         | 1            | 0.3494475    | 1         | 0.758696  | 0.9917355    | 0.6972198    |
| #### Bn-scaff_16394_2-p10755 genome unspecific (oleracea-rapa)  | not scorable | not scorable | 0.9922481 | 0.3504216 | 1            | 0.8112975    |
| #### Bn-scaff_16394_2-p10759 genome unspecific (all in)         | 0.9473684    | 0.3272656    | 1         | 0.6790832 | 1            | 0.7366631    |
| #### Bn-scaff_16394_2-p10841 C-genome specific (napus-oleracea) | 0.9928229    | 0.7139206    | 1         | 0.7771034 | not scorable | not scorable |
| #### Bn-scaff_16394_2-p10844 genome unspecific (all in)         | 1            | 0.5385494    | 1         | 0.9164303 | 1            | 0.8272352    |
| #### Bn-scaff_16394_2-p10854 genome unspecific (all in)         | 1            | 0.3196795    | 1         | 0.7918906 | 1            | 0.7320438    |
| #### Bn-scaff_16394_2-p10866 C-genome specific (napus-oleracea) | 0.9569378    | 0.6896889    | 1         | 0.6739501 | not scorable | not scorable |
| #### Bn-scaff_16394_2-p11059 C-genome specific (napus-oleracea) | 0.9760765    | 0.6418472    | 0.9922481 | 0.7622789 | not scorable | not scorable |
| #### Bn-scaff_16394_2-p11081 C-genome specific (napus-oleracea) | 0.9928229    | 0.7493395    | 1         | 0.517974  | not scorable | not scorable |
| #### Bn-scaff_16394_2-p11084 C-genome specific (napus-oleracea) | 0.9760765    | 0.6813381    | 1         | 0.6978788 | not scorable | not scorable |
| #### Bn-scaff_16394_2-p11085 C-genome specific (napus-oleracea) | 0.9784689    | 0.6430366    | 1         | 0.6484935 | not scorable | not scorable |
| #### Bn-scaff_16394_2-p11517 C-genome specific (napus-oleracea) | 0.9760765    | 0.6104978    | 1         | 0.6709439 | not scorable | not scorable |
| #### Bn-scaff_16394_2-p11652 C-genome specific (napus-oleracea) | 0.9808612    | 0.7752303    | 0.9922481 | 0.7747704 | not scorable | not scorable |
| #### Bn-scaff_16394_2-p11768 C-genome specific (napus-oleracea) | 0.9928229    | 0.7832495    | 1         | 0.7695275 | not scorable | not scorable |
| #### Bn-scaff_16394_2-p11773 genome unspecific (all in)         | 0.9856459    | 0.4032216    | 0.9922481 | 0.7625524 | 1            | 0.8930683    |
| #### Bn-scaff_16394_2-p11780 genome unspecific (all in)         | 0.9856459    | 0.471772     | 0.9844961 | 0.7108922 | 1            | 0.9175813    |
| #### Bn-scaff_16394_2-p11985 genome unspecific (oleracea-rapa)  | not scorable | not scorable | 1         | 0.8207097 | 1            | 0.6779336    |
| #### Bn-scaff_16394_2-p12063 C-genome specific (oleracea only)  | not scorable | not scorable | 1         | 0.5102852 | not scorable | not scorable |
| #### Bn-scaff_16394_2-p12105 C-genome specific (napus-oleracea) | 0.9856459    | 0.7749752    | 1         | 0.576489  | not scorable | not scorable |
| #### Bn-scaff_16394_2-p12222 C-genome specific (napus-oleracea) | 0.9856459    | 0.7788228    | 1         | 0.7541007 | not scorable | not scorable |
| #### Bn-scaff_16394_2-p12223 C-genome specific (napus-oleracea) | 0.9784689    | 0.7641447    | 1         | 0.7459687 | not scorable | not scorable |

|                                                                 |              |              |           |           |              |              |
|-----------------------------------------------------------------|--------------|--------------|-----------|-----------|--------------|--------------|
| #### Bn-scaff_16394_2-p12630 genome unspecific (oleracea-rapa)  | not scorable | not scorable | 1         | 0.7619675 | 1            | 0.7533373    |
| #### Bn-scaff_16394_2-p12633 genome unspecific (all in)         | 1            | 0.3769074    | 1         | 0.8948976 | 0.9917355    | 0.8440034    |
| #### Bn-scaff_16394_2-p12649 C-genome specific (napus-oleracea) | 0.9760765    | 0.8001707    | 0.9767442 | 0.8509997 | not scorable | not scorable |
| #### Bn-scaff_16394_2-p13647 genome unspecific (all in)         | 1            | 0.5932571    | 1         | 0.6366503 | 0.9834711    | 0.6540547    |
| #### Bn-scaff_16394_2-p13739 C-genome specific (napus-oleracea) | 0.9497608    | 0.7710416    | 0.5968992 | 0.7939634 | not scorable | not scorable |
| #### Bn-scaff_16394_2-p13743 C-genome specific (napus-oleracea) | 0.9569378    | 0.7551769    | 0.7286822 | 0.786509  | not scorable | not scorable |
| #### Bn-scaff_16394_2-p13749 C-genome specific (napus-oleracea) | 0.9688995    | 0.7824997    | 0.5736434 | 0.8996784 | not scorable | not scorable |
| #### Bn-scaff_16394_2-p13772 C-genome specific (napus-oleracea) | 0.9688995    | 0.7715861    | 0.5813953 | 0.3364892 | not scorable | not scorable |
| #### Bn-scaff_16394_2-p14316 genome unspecific (all in)         | 0.9569378    | 0.2648718    | 0.9922481 | 0.2906966 | 1            | 0.752191     |
| #### Bn-scaff_16394_2-p14460 C-genome specific (napus-oleracea) | 0.9856459    | 0.7933212    | 1         | 0.7780581 | not scorable | not scorable |
| #### Bn-scaff_16394_2-p14609 C-genome specific (napus-oleracea) | 0.9856459    | 0.7743756    | 0.9922481 | 0.7866631 | not scorable | not scorable |
| #### Bn-scaff_16394_2-p14947 C-genome specific (napus-oleracea) | 0.9832536    | 0.7819176    | 1         | 0.7379603 | not scorable | not scorable |
| #### Bn-scaff_16394_2-p14985 C-genome specific (napus-oleracea) | 0.9880383    | 0.7283884    | 1         | 0.6603782 | not scorable | not scorable |
| #### Bn-scaff_16394_2-p17451 genome unspecific (all in)         | 0.9904306    | 0.3918184    | 1         | 0.8616547 | 0.9834711    | 0.8171474    |
| #### Bn-scaff_16394_2-p17543 genome unspecific (oleracea-rapa)  | not scorable | not scorable | 0.9379845 | 0.6729419 | 0.9917355    | 0.9341547    |
| #### Bn-scaff_16394_2-p17852 genome unspecific (oleracea-rapa)  | not scorable | not scorable | 0.9922481 | 0.8194962 | 1            | 0.9174234    |
| #### Bn-scaff_16394_2-p17875 genome unspecific (oleracea-rapa)  | not scorable | not scorable | 1         | 0.5755478 | 0.9586777    | 0.4068187    |
| #### Bn-scaff_16394_2-p17882 genome unspecific (oleracea-rapa)  | not scorable | not scorable | 0.8294573 | 0.7614793 | 0.9669421    | 0.9272014    |
| #### Bn-scaff_16394_2-p19900 C-genome specific (napus-oleracea) | 0.9688995    | 0.7883568    | 0.9922481 | 0.7859224 | not scorable | not scorable |
| #### Bn-scaff_16394_2-p20345 genome unspecific (all in)         | 0.9760765    | 0.6171673    | 1         | 0.7494848 | 1            | 0.9304637    |
| #### Bn-scaff_16394_2-p20718 C-genome specific (napus-oleracea) | 0.9808612    | 0.52783      | 0.9922481 | 0.5028464 | not scorable | not scorable |
| #### Bn-scaff_16394_2-p20801 C-genome specific (napus-oleracea) | 0.9497608    | 0.3407804    | 1         | 0.8004208 | not scorable | not scorable |
| #### Bn-scaff_16394_2-p21794 C-genome specific (napus-oleracea) | 0.9856459    | 0.7840026    | 0.9922481 | 0.8506401 | not scorable | not scorable |
| #### Bn-scaff_16394_2-p22777 C-genome specific (oleracea only)  | not scorable | not scorable | 0.9147287 | 0.8015386 | not scorable | not scorable |
| #### Bn-scaff_16394_2-p24318 C-genome specific (napus-oleracea) | 0.9976076    | 0.9104767    | 0.8527132 | 0.7786269 | not scorable | not scorable |
| #### Bn-scaff_16394_2-p24621 C-genome specific (napus-oleracea) | 0.9856459    | 0.655784     | 0.9922481 | 0.6755426 | not scorable | not scorable |
| #### Bn-scaff_16394_2-p24778 genome unspecific (oleracea-rapa)  | not scorable | not scorable | 0.9922481 | 0.321599  | 0.9669421    | 0.6650828    |
| #### Bn-scaff_16394_2-p25281 C-genome specific (napus-oleracea) | 0.9808612    | 0.7651129    | 0.9767442 | 0.708384  | not scorable | not scorable |
| #### Bn-scaff_16394_2-p26861 C-genome specific (napus-oleracea) | 0.9784689    | 0.6491058    | 1         | 0.6175084 | not scorable | not scorable |
| #### Bn-scaff_16394_2-p26891 C-genome specific (oleracea only)  | not scorable | not scorable | 0.4496124 | 0.7000403 | not scorable | not scorable |
| #### Bn-scaff_16394_2-p33042 C-genome specific (napus-oleracea) | 0.9665072    | 0.7617548    | 1         | 0.805927  | not scorable | not scorable |
| #### Bn-scaff_16394_2-p33065 C-genome specific (napus-oleracea) | 0.9784689    | 0.7385731    | 1         | 0.7875136 | not scorable | not scorable |
| #### Bn-scaff_16394_2-p34796 C-genome specific (napus-oleracea) | 0.9904306    | 0.8050262    | 0.9767442 | 0.798973  | not scorable | not scorable |

|                                                                  |              |              |              |              |              |              |
|------------------------------------------------------------------|--------------|--------------|--------------|--------------|--------------|--------------|
| ##### Bn-scaff_16394_2-p34819 C-genome specific (napus-oleracea) | 0.9808612    | 0.7819669    | 1            | 0.8053433    | not scorable | not scorable |
| ##### Bn-scaff_16394_2-p38343 C-genome specific (napus-oleracea) | 0.9760765    | 0.7668068    | 1            | 0.8401484    | not scorable | not scorable |
| ##### Bn-scaff_16394_2-p38356 genome unspecific (all in)         | 0.9928229    | 0.4006843    | 1            | 0.7543939    | 1            | 0.9033396    |
| ##### Bn-scaff_16394_2-p40571 C-genome specific (napus-oleracea) | 0.9952153    | 0.73256      | 1            | 0.6966767    | not scorable | not scorable |
| ##### Bn-scaff_16394_2-p41590 C-genome specific (napus-oleracea) | 0.9784689    | 0.7962028    | 0.9922481    | 0.8602838    | not scorable | not scorable |
| ##### Bn-scaff_16394_2-p44820 C-genome specific (napus-oleracea) | 0.9665072    | 0.7731006    | 1            | 0.7400759    | not scorable | not scorable |
| ##### Bn-scaff_16394_2-p44951 genome unspecific (all in)         | 0.9856459    | 0.5512971    | 0.9844961    | 0.8153886    | 1            | 0.917429     |
| ##### Bn-scaff_16394_2-p45531 C-genome specific (napus-oleracea) | 0.9712918    | 0.7845109    | 0.8914729    | 0.8422135    | not scorable | not scorable |
| ##### Bn-scaff_16394_2-p46939 C-genome specific (napus-oleracea) | 0.9593301    | 0.6733509    | 0.9689922    | 0.6902232    | not scorable | not scorable |
| ##### Bn-scaff_16394_2-p46958 A-genome specific (rapa only)      | not scorable | not scorable | not scorable | not scorable | 1            | 0.7602959    |
| ##### Bn-scaff_16394_2-p47165 genome unspecific (all in)         | 0.9282297    | 0.64733      | 0.9147287    | 0.5720658    | 0.9752066    | 0.7366899    |
| ##### Bn-scaff_16394_2-p48209 genome unspecific (all in)         | 0.9952153    | 0.445083     | 1            | 0.9175627    | 1            | 0.8443989    |
| ##### Bn-scaff_16394_2-p50433 C-genome specific (napus-oleracea) | 0.9832536    | 0.8183655    | 1            | 0.6749574    | not scorable | not scorable |
| ##### Bn-scaff_16394_2-p50818 C-genome specific (napus-oleracea) | 0.9712918    | 0.7678322    | 1            | 0.8524848    | not scorable | not scorable |
| ##### Bn-scaff_16394_2-p50872 C-genome specific (napus-oleracea) | 0.9856459    | 0.7961736    | 0.9922481    | 0.8471794    | not scorable | not scorable |
| ##### Bn-scaff_16394_2-p51006 C-genome specific (napus-oleracea) | 0.9688995    | 0.7245648    | 0.9302326    | 0.8834365    | not scorable | not scorable |
| ##### Bn-scaff_16394_2-p51165 C-genome specific (napus-oleracea) | 0.9808612    | 0.7048444    | 0.9302326    | 0.6539579    | not scorable | not scorable |
| ##### Bn-scaff_16394_2-p51510 C-genome specific (napus-oleracea) | 0.9712918    | 0.7832689    | 0.9224806    | 0.813444     | not scorable | not scorable |
| ##### Bn-scaff_16394_2-p52507 C-genome specific (napus-oleracea) | 0.9688995    | 0.7512766    | 0.9302326    | 0.7354813    | not scorable | not scorable |
| ##### Bn-scaff_16394_2-p52516 C-genome specific (napus-oleracea) | 0.9784689    | 0.7782966    | 0.9302326    | 0.7269047    | not scorable | not scorable |
| ##### Bn-scaff_16394_2-p52695 C-genome specific (oleracea only)  | not scorable | not scorable | 0.8992248    | 0.8140918    | not scorable | not scorable |
| ##### Bn-scaff_16394_2-p52707 C-genome specific (oleracea only)  | not scorable | not scorable | 1            | 0.7164587    | not scorable | not scorable |
| ##### Bn-scaff_16394_2-p52768 genome unspecific (all in)         | 0.9904306    | 0.4683618    | 1            | 0.8302689    | 0.9834711    | 0.9373432    |
| ##### Bn-scaff_16394_2-p52794 C-genome specific (napus-oleracea) | 0.9832536    | 0.6483189    | 0.9922481    | 0.7696872    | not scorable | not scorable |
| ##### Bn-scaff_16394_2-p52912 C-genome specific (napus-oleracea) | 0.9904306    | 0.707522     | 0.9922481    | 0.6760967    | not scorable | not scorable |
| ##### Bn-scaff_16394_2-p53053 C-genome specific (napus-oleracea) | 0.9832536    | 0.7740884    | 1            | 0.7874824    | not scorable | not scorable |
| ##### Bn-scaff_16394_2-p53603 C-genome specific (napus-oleracea) | 0.9856459    | 0.8033746    | 0.9922481    | 0.8049536    | not scorable | not scorable |
| ##### Bn-scaff_16394_2-p54254 C-genome specific (napus-oleracea) | 0.9784689    | 0.7948459    | 1            | 0.6753237    | not scorable | not scorable |
| ##### Bn-scaff_16394_2-p54834 C-genome specific (napus-oleracea) | 0.9808612    | 0.8088339    | 0.9612403    | 0.6561165    | not scorable | not scorable |
| ##### Bn-scaff_16394_2-p55100 C-genome specific (napus-oleracea) | 0.9784689    | 0.6917183    | 0.9844961    | 0.7044816    | not scorable | not scorable |
| ##### Bn-scaff_16394_2-p55132 C-genome specific (napus-oleracea) | 0.9808612    | 0.6992245    | 1            | 0.6906683    | not scorable | not scorable |
| ##### Bn-scaff_16394_2-p55173 C-genome specific (napus-oleracea) | 0.9856459    | 0.6924198    | 1            | 0.6947597    | not scorable | not scorable |
| ##### Bn-scaff_16394_2-p55378 C-genome specific (napus-oleracea) | 0.9904306    | 0.6866454    | 1            | 0.6127259    | not scorable | not scorable |

|                                                                |              |              |           |           |              |              |
|----------------------------------------------------------------|--------------|--------------|-----------|-----------|--------------|--------------|
| #### Bn-scaff_16394_2-p55381C-genome specific (napus-oleracea) | 0.9784689    | 0.6560418    | 1         | 0.5841053 | not scorable | not scorable |
| #### Bn-scaff_16394_2-p55472C-genome specific (napus-oleracea) | 0.9808612    | 0.7999259    | 0.9922481 | 0.7628289 | not scorable | not scorable |
| #### Bn-scaff_16394_2-p55723C-genome specific (napus-oleracea) | 0.9593301    | 0.736599     | 0.9689922 | 0.7945997 | not scorable | not scorable |
| #### Bn-scaff_16394_2-p55727C-genome specific (oleracea only)  | not scorable | not scorable | 0.875969  | 0.7482574 | not scorable | not scorable |
| #### Bn-scaff_16394_2-p55819C-genome specific (napus-oleracea) | 0.9880383    | 0.7723554    | 1         | 0.7686067 | not scorable | not scorable |
| #### Bn-scaff_16394_2-p55831C-genome specific (napus-oleracea) | 0.9808612    | 0.7843651    | 0.9922481 | 0.7977526 | not scorable | not scorable |
| #### Bn-scaff_16394_2-p55845C-genome specific (napus-oleracea) | 0.9784689    | 0.7879533    | 1         | 0.7902774 | not scorable | not scorable |
| #### Bn-scaff_16394_2-p55880C-genome specific (napus-oleracea) | 0.9665072    | 0.7557372    | 1         | 0.8657485 | not scorable | not scorable |
| #### Bn-scaff_16394_2-p55928C-genome specific (napus-oleracea) | 0.9808612    | 0.8201841    | 1         | 0.6557849 | not scorable | not scorable |
| #### Bn-scaff_16394_2-p56449C-genome specific (napus-oleracea) | 0.9665072    | 0.7683855    | 1         | 0.8536354 | not scorable | not scorable |
| #### Bn-scaff_16394_2-p56517C-genome specific (napus-oleracea) | 0.9665072    | 0.67401      | 0.9922481 | 0.7266843 | not scorable | not scorable |
| #### Bn-scaff_16394_2-p56617C-genome specific (napus-oleracea) | 0.9928229    | 0.7916407    | 1         | 0.8713183 | not scorable | not scorable |
| #### Bn-scaff_16394_2-p56767C-genome specific (napus-oleracea) | 0.9784689    | 0.7931648    | 1         | 0.7537695 | not scorable | not scorable |
| #### Bn-scaff_16394_2-p63041C-genome specific (napus-oleracea) | 0.9808612    | 0.8135011    | 0.9844961 | 0.701698  | not scorable | not scorable |
| #### Bn-scaff_16394_2-p63521C-genome specific (napus-oleracea) | 0.9712918    | 0.7732561    | 0.9922481 | 0.8260473 | not scorable | not scorable |
| #### Bn-scaff_16394_2-p63797C-genome specific (napus-oleracea) | 0.9712918    | 0.5428294    | 0.9534883 | 0.70705   | not scorable | not scorable |
| #### Bn-scaff_16394_2-p64196C-genome specific (napus-oleracea) | 0.9712918    | 0.7885662    | 0.9302326 | 0.7161461 | not scorable | not scorable |
| #### Bn-scaff_16394_2-p67050C-genome specific (napus-oleracea) | 0.9832536    | 0.7752942    | 1         | 0.7596586 | not scorable | not scorable |
| #### Bn-scaff_16394_2-p67261C-genome specific (napus-oleracea) | 0.9617225    | 0.8161328    | 0.9922481 | 0.793625  | not scorable | not scorable |
| #### Bn-scaff_16394_2-p67269genome unspecific (all in)         | 0.9856459    | 0.735269     | 0.9844961 | 0.7997325 | 1            | 0.9398968    |
| #### Bn-scaff_16394_2-p67382C-genome specific (napus-oleracea) | 0.9760765    | 0.6682916    | 1         | 0.5754941 | not scorable | not scorable |
| #### Bn-scaff_16394_2-p67731C-genome specific (napus-oleracea) | 0.8110048    | 0.8468974    | 0.8062016 | 0.7313474 | not scorable | not scorable |
| #### Bn-scaff_16394_2-p69503C-genome specific (napus-oleracea) | 0.9760765    | 0.7456871    | 0.8217054 | 0.6703183 | not scorable | not scorable |
| #### Bn-scaff_16394_2-p69531C-genome specific (napus-oleracea) | 0.9784689    | 0.7745585    | 0.9844961 | 0.8586034 | not scorable | not scorable |
| #### Bn-scaff_16394_2-p69551C-genome specific (napus-oleracea) | 0.9808612    | 0.7693331    | 0.9922481 | 0.7611046 | not scorable | not scorable |
| #### Bn-scaff_16394_2-p71285C-genome specific (napus-oleracea) | 0.9856459    | 0.7982512    | 1         | 0.7528579 | not scorable | not scorable |
| #### Bn-scaff_16394_2-p71424C-genome specific (napus-oleracea) | 0.9904306    | 0.7765799    | 0.9689922 | 0.8240315 | not scorable | not scorable |
| #### Bn-scaff_16394_2-p72496C-genome specific (napus-oleracea) | 0.9617225    | 0.6976418    | 0.9844961 | 0.7204551 | not scorable | not scorable |
| #### Bn-scaff_16394_2-p72537C-genome specific (napus-oleracea) | 0.9760765    | 0.7636057    | 0.9922481 | 0.7452693 | not scorable | not scorable |
| #### Bn-scaff_16394_2-p72566C-genome specific (napus-oleracea) | 0.9880383    | 0.7055805    | 1         | 0.6708747 | not scorable | not scorable |
| #### Bn-scaff_16394_2-p72670C-genome specific (napus-oleracea) | 0.9569378    | 0.6033824    | 0.9922481 | 0.5722253 | not scorable | not scorable |
| #### Bn-scaff_16394_2-p73881C-genome specific (napus-oleracea) | 0.9712918    | 0.7804598    | 0.6434109 | 0.6689355 | not scorable | not scorable |
| #### Bn-scaff_16394_2-p76879C-genome specific (napus-oleracea) | 0.9832536    | 0.7639561    | 0.9922481 | 0.7968234 | not scorable | not scorable |



|                                                                 |              |              |              |              |              |              |
|-----------------------------------------------------------------|--------------|--------------|--------------|--------------|--------------|--------------|
| #### Bn-scaff_16394_2-p7690 all not scorable                    | not scorable | not scorable | not scorable | not scorable | not scorable | not scorable |
| #### Bn-scaff_16394_2-p77652 C-genome specific (napus-oleracea) | 0.9808612    | 0.6391939    | 0.9922481    | 0.4880325    | not scorable | not scorable |
| #### Bn-scaff_16394_2-p77746 C-genome specific (napus-oleracea) | 0.9688995    | 0.7792761    | 1            | 0.7045546    | not scorable | not scorable |
| #### Bn-scaff_16394_2-p77792 C-genome specific (napus-oleracea) | 0.9712918    | 0.6682261    | 1            | 0.6547123    | not scorable | not scorable |
| #### Bn-scaff_16394_2-p78169 genome unspecific (all in)         | 0.9665072    | 0.7625436    | 1            | 0.7761326    | 0.9504132    | 0.9493444    |
| #### Bn-scaff_16394_2-p78458 C-genome specific (napus-oleracea) | 0.9832536    | 0.6172823    | 1            | 0.6060526    | not scorable | not scorable |
| #### Bn-scaff_16394_2-p78504 C-genome specific (napus-oleracea) | 0.9712918    | 0.6262645    | 1            | 0.5795608    | not scorable | not scorable |
| #### Bn-scaff_16394_2-p78507 C-genome specific (napus-oleracea) | 0.9593301    | 0.5525747    | 0.9922481    | 0.5623359    | not scorable | not scorable |
| #### Bn-scaff_16394_2-p78531 C-genome specific (napus-oleracea) | 0.9760765    | 0.7705901    | 1            | 0.8037301    | not scorable | not scorable |
| #### Bn-scaff_16394_2-p78540 C-genome specific (napus-oleracea) | 0.9760765    | 0.6771559    | 0.9767442    | 0.6679229    | not scorable | not scorable |
| #### Bn-scaff_16394_2-p78592 C-genome specific (napus-oleracea) | 0.9784689    | 0.3237022    | 1            | 0.7137796    | not scorable | not scorable |
| #### Bn-scaff_16394_2-p78638 C-genome specific (napus-oleracea) | 0.9880383    | 0.7586944    | 0.9922481    | 0.7424439    | not scorable | not scorable |
| #### Bn-scaff_16394_2-p78645 C-genome specific (napus-oleracea) | 0.9760765    | 0.6650302    | 1            | 0.5453591    | not scorable | not scorable |
| #### Bn-scaff_16394_2-p78688 C-genome specific (napus-oleracea) | 0.9665072    | 0.5748671    | 0.9844961    | 0.5979214    | not scorable | not scorable |
| #### Bn-scaff_16394_2-p79048 A-genome specific (rapa only)      | not scorable | not scorable | not scorable | not scorable | 1            | 0.6654865    |
| #### Bn-scaff_16394_2-p79086 all not scorable                   | not scorable | not scorable | not scorable | not scorable | not scorable | not scorable |
| #### Bn-scaff_16394_2-p79628 genome unspecific (all in)         | 0.9736842    | 0.7192333    | 1            | 0.7790994    | 0.8347107    | 0.7730501    |
| #### Bn-scaff_16394_2-p79742 C-genome specific (napus-oleracea) | 0.9760765    | 0.7823833    | 0.9922481    | 0.8091516    | not scorable | not scorable |
| #### Bn-scaff_16394_2-p80633 C-genome specific (napus-oleracea) | 0.9736842    | 0.8018771    | 0.9922481    | 0.5908008    | not scorable | not scorable |
| #### Bn-scaff_16394_2-p81416 C-genome specific (napus-oleracea) | 0.9808612    | 0.6841583    | 0.9689922    | 0.6813326    | not scorable | not scorable |
| #### Bn-scaff_16394_2-p83140 C-genome specific (napus-oleracea) | 0.9688995    | 0.7340661    | 0.8992248    | 0.7503526    | not scorable | not scorable |
| #### Bn-scaff_16394_2-p88347 C-genome specific (napus-oleracea) | 0.9880383    | 0.7531488    | 1            | 0.8058102    | not scorable | not scorable |
| #### Bn-scaff_16394_2-p88361 C-genome specific (napus-oleracea) | 0.9808612    | 0.7742839    | 1            | 0.8800609    | not scorable | not scorable |
| #### Bn-scaff_16394_2-p90537 C-genome specific (napus-oleracea) | 0.9688995    | 0.6919096    | 1            | 0.6580207    | not scorable | not scorable |
| #### Bn-scaff_16394_2-p90766 C-genome specific (napus-oleracea) | 0.9760765    | 0.7793883    | 1            | 0.7526423    | not scorable | not scorable |
| #### Bn-scaff_16394_2-p90896 C-genome specific (napus-oleracea) | 0.9904306    | 0.7300696    | 0.9844961    | 0.7300606    | not scorable | not scorable |
| #### Bn-scaff_16394_2-p97939 C-genome specific (napus-oleracea) | 0.9760765    | 0.7688314    | 0.9922481    | 0.7941517    | not scorable | not scorable |
| #### Bn-scaff_16394_2-p97962 C-genome specific (napus-oleracea) | 0.9736842    | 0.7847538    | 0.9922481    | 0.8163781    | not scorable | not scorable |
| #### Bn-scaff_16394_2-p99280 C-genome specific (napus-oleracea) | 0.9856459    | 0.7271894    | 0.9379845    | 0.7264474    | not scorable | not scorable |
| #### Bn-scaff_16394_2-p99286 C-genome specific (napus-oleracea) | 0.9808612    | 0.7831711    | 0.9147287    | 0.7910549    | not scorable | not scorable |
| #### Bn-scaff_16394_2-p99730 C-genome specific (napus-oleracea) | 0.9760765    | 0.7994081    | 0.9922481    | 0.7378731    | not scorable | not scorable |
| #### Bn-scaff_16397_1-p10046 C-genome specific (napus-oleracea) | 0.9258373    | 0.8275369    | 0.9844961    | 0.8015463    | not scorable | not scorable |
| #### Bn-scaff_16397_1-p10124 C-genome specific (napus-oleracea) | 0.9210526    | 0.7253199    | 0.9457364    | 0.7127312    | not scorable | not scorable |

|                                                                 |              |              |              |              |              |              |
|-----------------------------------------------------------------|--------------|--------------|--------------|--------------|--------------|--------------|
| #### Bn-scaff_16397_1-p10130 C-genome specific (napus-oleracea) | 0.9090909    | 0.85567      | 0.9922481    | 0.8325726    | not scorable | not scorable |
| #### Bn-scaff_16397_1-p10216 C-genome specific (napus-oleracea) | 0.9186603    | 0.7926419    | 1            | 0.6366304    | not scorable | not scorable |
| #### Bn-scaff_16397_1-p10235 C-genome specific (napus-oleracea) | 0.923445     | 0.9087479    | 0.9844961    | 0.7986955    | not scorable | not scorable |
| #### Bn-scaff_16397_1-p10256 C-genome specific (napus-oleracea) | 0.9162679    | 0.8346753    | 0.9922481    | 0.857857     | not scorable | not scorable |
| #### Bn-scaff_16397_1-p10343 C-genome specific (napus-oleracea) | 0.9186603    | 0.7711603    | 0.9844961    | 0.6705433    | not scorable | not scorable |
| #### Bn-scaff_16397_1-p10444 C-genome specific (napus-oleracea) | 0.9114832    | 0.8127332    | 1            | 0.7114366    | not scorable | not scorable |
| #### Bn-scaff_16397_1-p10521 C-genome specific (napus-oleracea) | 0.9114832    | 0.7384287    | 0.9767442    | 0.6523818    | not scorable | not scorable |
| #### Bn-scaff_16397_1-p10589 C-genome specific (napus-oleracea) | 0.9162679    | 0.8743467    | 1            | 0.7418972    | not scorable | not scorable |
| #### Bn-scaff_16397_1-p10646 C-genome specific (napus-oleracea) | 0.9162679    | 0.739871     | 1            | 0.5694259    | not scorable | not scorable |
| #### Bn-scaff_16397_1-p11440 genome unspecific (all in)         | 0.9593301    | 0.5149565    | 1            | 0.480997     | 0.7603306    | 0.818028     |
| #### Bn-scaff_16397_1-p16188 C-genome specific (oleracea only)  | not scorable | not scorable | 0.9147287    | 0.9175813    | not scorable | not scorable |
| #### Bn-scaff_16397_1-p16560 C-genome specific (napus-oleracea) | 0.9066986    | 0.6907637    | 1            | 0.6035933    | not scorable | not scorable |
| #### Bn-scaff_16397_1-p16570 C-genome specific (napus-oleracea) | 0.9138756    | 0.7113642    | 0.9922481    | 0.7543672    | not scorable | not scorable |
| #### Bn-scaff_16397_1-p16580 C-genome specific (oleracea only)  | not scorable | not scorable | 0.5736434    | 0.8375335    | not scorable | not scorable |
| #### Bn-scaff_16397_1-p16618 C-genome specific (napus-oleracea) | 0.9258373    | 0.8406363    | 0.9844961    | 0.6767825    | not scorable | not scorable |
| #### Bn-scaff_16397_1-p16627 napus specific                     | 0.8684211    | 0.8193083    | not scorable | not scorable | not scorable | not scorable |
| #### Bn-scaff_16397_1-p16653 C-genome specific (napus-oleracea) | 0.9114832    | 0.7905546    | 1            | 0.8275008    | not scorable | not scorable |
| #### Bn-scaff_16397_1-p18112 C-genome specific (napus-oleracea) | 0.9114832    | 0.7435678    | 1            | 0.7558741    | not scorable | not scorable |
| #### Bn-scaff_16397_1-p20015 C-genome specific (napus-oleracea) | 1            | 0.8888358    | 1            | 0.8325643    | not scorable | not scorable |
| #### Bn-scaff_16397_1-p21413 genome unspecific (all in)         | 0.8875598    | 0.6038969    | 0.9457364    | 0.6846508    | 1            | 0.7889646    |
| #### Bn-scaff_16397_1-p21961 genome unspecific (all in)         | 0.8421053    | 0.5427436    | 0.9844961    | 0.7284333    | 1            | 0.8150276    |
| #### Bn-scaff_16397_1-p22776 C-genome specific (napus-oleracea) | 0.9114832    | 0.7479579    | 1            | 0.7440751    | not scorable | not scorable |
| #### Bn-scaff_16397_1-p22778 C-genome specific (napus-oleracea) | 0.9138756    | 0.759701     | 0.9922481    | 0.8057642    | not scorable | not scorable |
| #### Bn-scaff_16397_1-p29152 C-genome specific (napus-oleracea) | 1            | 0.4367741    | 0.9922481    | 0.4235723    | not scorable | not scorable |
| #### Bn-scaff_16397_1-p32614 C-genome specific (napus-oleracea) | 0.9138756    | 0.7389939    | 1            | 0.8247842    | not scorable | not scorable |
| #### Bn-scaff_16397_1-p36029 C-genome specific (napus-oleracea) | 0.9521531    | 0.5100586    | 0.9844961    | 0.8224012    | not scorable | not scorable |
| #### Bn-scaff_16397_1-p36029 genome unspecific (all in)         | 0.9497608    | 0.4439543    | 1            | 0.7352988    | 1            | 0.8649648    |
| #### Bn-scaff_16397_1-p36037 C-genome specific (oleracea only)  | not scorable | not scorable | 1            | 0.9095575    | not scorable | not scorable |
| #### Bn-scaff_16397_1-p42487 genome unspecific (oleracea-rapa)  | not scorable | not scorable | 1            | 0.8222982    | 1            | 0.9039531    |
| #### Bn-scaff_16397_1-p48115 C-genome specific (napus-oleracea) | 0.9162679    | 0.7829807    | 1            | 0.7412698    | not scorable | not scorable |
| #### Bn-scaff_16397_1-p51170 C-genome specific (napus-oleracea) | 0.9186603    | 0.690599     | 1            | 0.6833512    | not scorable | not scorable |
| #### Bn-scaff_16397_1-p51238 C-genome specific (napus-oleracea) | 0.9114832    | 0.7757513    | 0.9922481    | 0.6999747    | not scorable | not scorable |
| #### Bn-scaff_16397_1-p51302 C-genome specific (napus-oleracea) | 0.9138756    | 0.7749931    | 0.9922481    | 0.8325794    | not scorable | not scorable |

|                                                                 |              |              |           |           |              |              |
|-----------------------------------------------------------------|--------------|--------------|-----------|-----------|--------------|--------------|
| #### Bn-scaff_16397_1-p51376 C-genome specific (napus-oleracea) | 0.9186603    | 0.6980805    | 0.9922481 | 0.7132907 | not scorable | not scorable |
| #### Bn-scaff_16397_1-p51493 C-genome specific (napus-oleracea) | 0.9162679    | 0.6886059    | 0.9922481 | 0.6869255 | not scorable | not scorable |
| #### Bn-scaff_16397_1-p54234 C-genome specific (napus-oleracea) | 0.8875598    | 0.9003994    | 0.3410853 | 0.8215731 | not scorable | not scorable |
| #### Bn-scaff_16397_1-p54287 C-genome specific (napus-oleracea) | 0.9210526    | 0.7042567    | 0.9922481 | 0.6979942 | not scorable | not scorable |
| #### Bn-scaff_16397_1-p54732 C-genome specific (napus-oleracea) | 0.9090909    | 0.8989384    | 0.9922481 | 0.8682042 | not scorable | not scorable |
| #### Bn-scaff_16397_1-p55035 C-genome specific (oleracea only)  | not scorable | not scorable | 0.9844961 | 0.9023912 | not scorable | not scorable |
| #### Bn-scaff_16397_1-p55165 C-genome specific (napus-oleracea) | 0.9186603    | 0.8196644    | 1         | 0.766388  | not scorable | not scorable |
| #### Bn-scaff_16397_1-p56027 C-genome specific (napus-oleracea) | 0.9904306    | 0.709821     | 0.9767442 | 0.6720281 | not scorable | not scorable |
| #### Bn-scaff_16397_1-p56112 C-genome specific (napus-oleracea) | 0.923445     | 0.8333524    | 0.9767442 | 0.7258755 | not scorable | not scorable |
| #### Bn-scaff_16397_1-p56738 C-genome specific (napus-oleracea) | 0.9258373    | 0.8954893    | 0.9689922 | 0.7845252 | not scorable | not scorable |
| #### Bn-scaff_16397_1-p56813 C-genome specific (napus-oleracea) | 0.9138756    | 0.8004534    | 0.9767442 | 0.7798988 | not scorable | not scorable |
| #### Bn-scaff_16397_1-p56820 C-genome specific (napus-oleracea) | 0.923445     | 0.7384033    | 0.9767442 | 0.81497   | not scorable | not scorable |
| #### Bn-scaff_16397_1-p56823 C-genome specific (napus-oleracea) | 0.9258373    | 0.8334013    | 0.9767442 | 0.8255889 | not scorable | not scorable |
| #### Bn-scaff_16397_1-p56830 C-genome specific (napus-oleracea) | 0.9258373    | 0.758829     | 0.9767442 | 0.7597879 | not scorable | not scorable |
| #### Bn-scaff_16397_1-p56838 C-genome specific (napus-oleracea) | 0.9258373    | 0.8891258    | 0.9767442 | 0.7856342 | not scorable | not scorable |
| #### Bn-scaff_16397_1-p58435 C-genome specific (napus-oleracea) | 0.9210526    | 0.7847127    | 1         | 0.6848523 | not scorable | not scorable |
| #### Bn-scaff_16397_1-p59721 C-genome specific (napus-oleracea) | 0.9162679    | 0.7386691    | 1         | 0.6761461 | not scorable | not scorable |
| #### Bn-scaff_16397_1-p59798 C-genome specific (napus-oleracea) | 0.9186603    | 0.8015631    | 0.9922481 | 0.7784378 | not scorable | not scorable |
| #### Bn-scaff_16397_1-p59809 C-genome specific (napus-oleracea) | 0.9186603    | 0.7967952    | 1         | 0.7879079 | not scorable | not scorable |
| #### Bn-scaff_16397_1-p60219 genome unspecific (all in)         | 0.9976076    | 0.7792903    | 1         | 0.7433316 | 1            | 0.8543575    |
| #### Bn-scaff_16397_1-p60722 C-genome specific (oleracea only)  | not scorable | not scorable | 0.9922481 | 0.7707201 | not scorable | not scorable |
| #### Bn-scaff_16397_1-p60737 C-genome specific (napus-oleracea) | 0.784689     | 0.8208153    | 0.9922481 | 0.7584647 | not scorable | not scorable |
| #### Bn-scaff_16397_1-p62127 C-genome specific (napus-oleracea) | 0.9066986    | 0.7406252    | 1         | 0.6296867 | not scorable | not scorable |
| #### Bn-scaff_16397_1-p62210 C-genome specific (oleracea only)  | not scorable | not scorable | 1         | 0.3906359 | not scorable | not scorable |
| #### Bn-scaff_16397_1-p62289 C-genome specific (napus-oleracea) | 0.9114832    | 0.7608055    | 1         | 0.3300779 | not scorable | not scorable |
| #### Bn-scaff_16397_1-p62579 C-genome specific (napus-oleracea) | 0.492823     | 0.8132497    | 1         | 0.6581964 | not scorable | not scorable |
| #### Bn-scaff_16397_1-p62643 C-genome specific (napus-oleracea) | 0.9114832    | 0.752248     | 1         | 0.8051696 | not scorable | not scorable |
| #### Bn-scaff_16397_1-p62677 C-genome specific (napus-oleracea) | 0.9090909    | 0.6385329    | 1         | 0.5486904 | not scorable | not scorable |
| #### Bn-scaff_16397_1-p63283 C-genome specific (napus-oleracea) | 0.923445     | 0.7704808    | 1         | 0.8216841 | not scorable | not scorable |
| #### Bn-scaff_16397_1-p63687 C-genome specific (napus-oleracea) | 0.9186603    | 0.8149744    | 0.9922481 | 0.6613218 | not scorable | not scorable |
| #### Bn-scaff_16397_1-p64318 genome unspecific (all in)         | 0.9688995    | 0.3619901    | 0.9922481 | 0.7246335 | 1            | 0.8948976    |
| #### Bn-scaff_16397_1-p66877 C-genome specific (napus-oleracea) | 0.9186603    | 0.8578618    | 1         | 0.7281739 | not scorable | not scorable |
| #### Bn-scaff_16397_1-p66892 C-genome specific (napus-oleracea) | 0.9210526    | 0.7048348    | 0.9844961 | 0.7281744 | not scorable | not scorable |

|                                                                 |              |              |           |           |              |              |
|-----------------------------------------------------------------|--------------|--------------|-----------|-----------|--------------|--------------|
| #### Bn-scaff_16397_1-p66948 C-genome specific (napus-oleracea) | 0.9258373    | 0.6995144    | 0.9922481 | 0.6081792 | not scorable | not scorable |
| #### Bn-scaff_16397_1-p67529 C-genome specific (napus-oleracea) | 0.9210526    | 0.8738227    | 0.9922481 | 0.862047  | not scorable | not scorable |
| #### Bn-scaff_16397_1-p67657 C-genome specific (napus-oleracea) | 0.9162679    | 0.7517749    | 0.9844961 | 0.7716514 | not scorable | not scorable |
| #### Bn-scaff_16397_1-p67669 C-genome specific (napus-oleracea) | 0.9186603    | 0.8900254    | 0.9844961 | 0.8093948 | not scorable | not scorable |
| #### Bn-scaff_16397_1-p67746 C-genome specific (napus-oleracea) | 0.923445     | 0.8402875    | 1         | 0.8513472 | not scorable | not scorable |
| #### Bn-scaff_16397_1-p68454 C-genome specific (napus-oleracea) | 0.923445     | 0.767538     | 0.9922481 | 0.814762  | not scorable | not scorable |
| #### Bn-scaff_16397_1-p68471 C-genome specific (napus-oleracea) | 0.923445     | 0.9021522    | 1         | 0.8031201 | not scorable | not scorable |
| #### Bn-scaff_16397_1-p68484 C-genome specific (napus-oleracea) | 0.9210526    | 0.8875538    | 0.9922481 | 0.7940495 | not scorable | not scorable |
| #### Bn-scaff_16397_1-p68525 C-genome specific (napus-oleracea) | 0.9258373    | 0.862813     | 0.9767442 | 0.7288028 | not scorable | not scorable |
| #### Bn-scaff_16397_1-p69523 genome unspecific (oleracea-rapa)  | not scorable | not scorable | 1         | 0.7808172 | 0.9917355    | 0.6219917    |
| #### Bn-scaff_16397_1-p71041 C-genome specific (napus-oleracea) | 0.9162679    | 0.7145132    | 0.9922481 | 0.7851145 | not scorable | not scorable |
| #### Bn-scaff_16397_1-p71661 genome unspecific (oleracea-rapa)  | not scorable | not scorable | 0.9922481 | 0.7774436 | 0.9917355    | 0.7396941    |
| #### Bn-scaff_16397_1-p72229 C-genome specific (napus-oleracea) | 0.9258373    | 0.7545111    | 0.9844961 | 0.7260466 | not scorable | not scorable |
| #### Bn-scaff_16397_1-p73566 genome unspecific (oleracea-rapa)  | not scorable | not scorable | 0.9612403 | 0.7070044 | 1            | 0.7914145    |
| #### Bn-scaff_16397_1-p80571 C-genome specific (napus-oleracea) | 0.9258373    | 0.8457983    | 1         | 0.7232243 | not scorable | not scorable |
| #### Bn-scaff_16397_1-p80907 C-genome specific (napus-oleracea) | 0.9210526    | 0.8343045    | 1         | 0.7947387 | not scorable | not scorable |
| #### Bn-scaff_16397_1-p80914 C-genome specific (napus-oleracea) | 0.923445     | 0.8369734    | 1         | 0.8072402 | not scorable | not scorable |
| #### Bn-scaff_16397_1-p81378 genome unspecific (oleracea-rapa)  | not scorable | not scorable | 0.9922481 | 0.736829  | 0.9917355    | 0.7863722    |
| #### Bn-scaff_16397_1-p81890 genome unspecific (all in)         | 0.9617225    | 0.4073172    | 0.9922481 | 0.7325664 | 1            | 0.9175813    |
| #### Bn-scaff_16397_1-p83255 C-genome specific (napus-oleracea) | 0.923445     | 0.7309386    | 1         | 0.5988854 | not scorable | not scorable |
| #### Bn-scaff_16397_1-p92684 C-genome specific (napus-oleracea) | 0.9162679    | 0.8527613    | 0.9922481 | 0.5380672 | not scorable | not scorable |
| #### Bn-scaff_16397_1-p96559 C-genome specific (napus-oleracea) | 0.923445     | 0.7708794    | 0.9922481 | 0.5917131 | not scorable | not scorable |
| #### Bn-scaff_16397_1-p97924 C-genome specific (napus-oleracea) | 0.9210526    | 0.7072645    | 0.9922481 | 0.5805974 | not scorable | not scorable |
| #### Bn-scaff_16397_1-p99946 C-genome specific (napus-oleracea) | 0.9186603    | 0.8128633    | 0.9844961 | 0.8270501 | not scorable | not scorable |
| #### Bn-scaff_16402_1-p16325 genome unspecific (oleracea-rapa)  | not scorable | not scorable | 1         | 0.6249692 | 0.9669421    | 0.5928238    |
| #### Bn-scaff_16402_1-p16404 genome unspecific (all in)         | 0.9856459    | 0.3025808    | 1         | 0.7972026 | 1            | 0.6977532    |
| #### Bn-scaff_16402_1-p76139 genome unspecific (oleracea-rapa)  | not scorable | not scorable | 1         | 0.7848775 | 0.9669421    | 0.6498063    |
| #### Bn-scaff_16414_1-p10164 C-genome specific (napus-oleracea) | 0.9952153    | 0.7533851    | 1         | 0.6551007 | not scorable | not scorable |
| #### Bn-scaff_16414_1-p10317 genome unspecific (all in)         | 0.9760765    | 0.4964749    | 1         | 0.6593529 | 0.9917355    | 0.7022086    |
| #### Bn-scaff_16414_1-p10346 C-genome specific (napus-oleracea) | 0.9856459    | 0.6508414    | 0.9922481 | 0.6126543 | not scorable | not scorable |
| #### Bn-scaff_16414_1-p10479 C-genome specific (napus-oleracea) | 0.9928229    | 0.8473811    | 0.9922481 | 0.8384669 | not scorable | not scorable |
| #### Bn-scaff_16414_1-p10516 C-genome specific (napus-oleracea) | 0.9904306    | 0.7522117    | 0.9534883 | 0.8430853 | not scorable | not scorable |
| #### Bn-scaff_16414_1-p10518 C-genome specific (napus-oleracea) | 0.9952153    | 0.788848     | 1         | 0.7137747 | not scorable | not scorable |

|                                                                 |              |              |           |           |              |              |
|-----------------------------------------------------------------|--------------|--------------|-----------|-----------|--------------|--------------|
| #### Bn-scaff_16414_1-p10720 genome unspecific (all in)         | 1            | 0.3851407    | 1         | 0.7770717 | 1            | 0.7182841    |
| #### Bn-scaff_16414_1-p10861 C-genome specific (napus-oleracea) | 0.4760765    | 0.7631096    | 0.9534883 | 0.5509209 | not scorable | not scorable |
| #### Bn-scaff_16414_1-p10873 C-genome specific (napus-oleracea) | 0.4760765    | 0.7930179    | 0.9612403 | 0.5055047 | not scorable | not scorable |
| #### Bn-scaff_16414_1-p10874 C-genome specific (napus-oleracea) | 0.4808612    | 0.7791837    | 0.9612403 | 0.6551549 | not scorable | not scorable |
| #### Bn-scaff_16414_1-p10874 C-genome specific (napus-oleracea) | 0.4569378    | 0.8214445    | 0.9612403 | 0.565958  | not scorable | not scorable |
| #### Bn-scaff_16414_1-p11146 C-genome specific (napus-oleracea) | 0.9904306    | 0.7867443    | 1         | 0.7585705 | not scorable | not scorable |
| #### Bn-scaff_16414_1-p11152 C-genome specific (napus-oleracea) | 0.9928229    | 0.7842841    | 0.9922481 | 0.7836486 | not scorable | not scorable |
| #### Bn-scaff_16414_1-p11165 C-genome specific (napus-oleracea) | 1            | 0.6815942    | 1         | 0.6740311 | not scorable | not scorable |
| #### Bn-scaff_16414_1-p11862 genome unspecific (oleracea-rapa)  | not scorable | not scorable | 0.9922481 | 0.7769798 | 1            | 0.8266841    |
| #### Bn-scaff_16414_1-p11865 genome unspecific (all in)         | 0.9976076    | 0.2295952    | 1         | 0.591603  | 1            | 0.6639977    |
| #### Bn-scaff_16414_1-p12081 genome unspecific (all in)         | 0.9976076    | 0.5091038    | 1         | 0.6185723 | 1            | 0.6102927    |
| #### Bn-scaff_16414_1-p13321 genome unspecific (all in)         | 0.9976076    | 0.4799126    | 1         | 0.8004208 | 0.9669421    | 0.6972135    |
| #### Bn-scaff_16414_1-p14213 genome unspecific (all in)         | 0.9904306    | 0.6893505    | 0.8837209 | 0.6779448 | 0.9917355    | 0.8559545    |
| #### Bn-scaff_16414_1-p14509 genome unspecific (all in)         | 0.923445     | 0.41935      | 0.9767442 | 0.7265491 | 1            | 0.8343507    |
| #### Bn-scaff_16414_1-p14688 C-genome specific (oleracea only)  | not scorable | not scorable | 0.9844961 | 0.544791  | not scorable | not scorable |
| #### Bn-scaff_16414_1-p14697 genome unspecific (all in)         | 0.9808612    | 0.4921283    | 1         | 0.5439488 | 1            | 0.8790727    |
| #### Bn-scaff_16414_1-p14699 genome unspecific (all in)         | 0.9928229    | 0.537282     | 1         | 0.3441374 | 1            | 0.880525     |
| #### Bn-scaff_16414_1-p14708 C-genome specific (napus-oleracea) | 0.9880383    | 0.7947981    | 0.9922481 | 0.8544068 | not scorable | not scorable |
| #### Bn-scaff_16414_1-p14708 C-genome specific (napus-oleracea) | 0.9904306    | 0.8489208    | 1         | 0.8497643 | not scorable | not scorable |
| #### Bn-scaff_16414_1-p14966 C-genome specific (napus-oleracea) | 0.9952153    | 0.8063211    | 1         | 0.6966304 | not scorable | not scorable |
| #### Bn-scaff_16414_1-p14999 genome unspecific (all in)         | 0.9976076    | 0.5876882    | 0.9922481 | 0.6194704 | 1            | 0.7891851    |
| #### Bn-scaff_16414_1-p15397 C-genome specific (napus-oleracea) | 0.9952153    | 0.7518966    | 1         | 0.6298982 | not scorable | not scorable |
| #### Bn-scaff_16414_1-p16020 C-genome specific (napus-oleracea) | 1            | 0.9277821    | 1         | 0.9175813 | not scorable | not scorable |
| #### Bn-scaff_16414_1-p16107 C-genome specific (napus-oleracea) | 1            | 0.854862     | 0.9922481 | 0.7024593 | not scorable | not scorable |
| #### Bn-scaff_16414_1-p16107 C-genome specific (napus-oleracea) | 1            | 0.9254025    | 1         | 0.8581942 | not scorable | not scorable |
| #### Bn-scaff_16414_1-p16273 C-genome specific (napus-oleracea) | 1            | 0.922085     | 1         | 0.7387311 | not scorable | not scorable |
| #### Bn-scaff_16414_1-p16273 C-genome specific (napus-oleracea) | 1            | 0.9180808    | 1         | 0.7604722 | not scorable | not scorable |
| #### Bn-scaff_16414_1-p16311 genome unspecific (all in)         | 1            | 0.7912397    | 1         | 0.5430092 | 1            | 0.9479796    |
| #### Bn-scaff_16414_1-p16331 C-genome specific (napus-oleracea) | 0.9928229    | 0.6475782    | 0.9767442 | 0.4510082 | not scorable | not scorable |
| #### Bn-scaff_16414_1-p16359 C-genome specific (napus-oleracea) | 1            | 0.8732119    | 0.9922481 | 0.8210743 | not scorable | not scorable |
| #### Bn-scaff_16414_1-p16363 genome unspecific (all in)         | 0.9952153    | 0.9143375    | 0.9922481 | 0.8070813 | 0.9834711    | 0.8601228    |
| #### Bn-scaff_16414_1-p16529 genome unspecific (all in)         | 0.9880383    | 0.4320078    | 1         | 0.5650502 | 1            | 0.8545052    |
| #### Bn-scaff_16414_1-p16798 genome unspecific (all in)         | 0.9928229    | 0.4810072    | 1         | 0.852149  | 1            | 0.7358895    |

|                                                                 |              |              |              |              |              |              |
|-----------------------------------------------------------------|--------------|--------------|--------------|--------------|--------------|--------------|
| #### Bn-scaff_16414_1-p17204 napus specific                     | 1            | 0.6304477    | not scorable | not scorable | not scorable | not scorable |
| #### Bn-scaff_16414_1-p17264 C-genome specific (napus-oleracea) | 0.9904306    | 0.7428377    | 0.9147287    | 0.6813985    | not scorable | not scorable |
| #### Bn-scaff_16414_1-p17445 C-genome specific (napus-oleracea) | 0.9904306    | 0.7323933    | 1            | 0.5391432    | not scorable | not scorable |
| #### Bn-scaff_16414_1-p17445 C-genome specific (napus-oleracea) | 0.9832536    | 0.8445992    | 0.7984496    | 0.7666865    | not scorable | not scorable |
| #### Bn-scaff_16414_1-p17463 C-genome specific (napus-oleracea) | 0.9952153    | 0.8239616    | 1            | 0.799242     | not scorable | not scorable |
| #### Bn-scaff_16414_1-p17478 C-genome specific (napus-oleracea) | 0.9976076    | 0.7130352    | 0.9922481    | 0.637848     | not scorable | not scorable |
| #### Bn-scaff_16414_1-p17509 C-genome specific (napus-oleracea) | 0.9880383    | 0.7760204    | 0.9069768    | 0.7178094    | not scorable | not scorable |
| #### Bn-scaff_16414_1-p17524 C-genome specific (napus-oleracea) | 0.9928229    | 0.888553     | 0.9922481    | 0.783144     | not scorable | not scorable |
| #### Bn-scaff_16414_1-p17536 C-genome specific (napus-oleracea) | 0.9808612    | 0.7687296    | 0.9922481    | 0.7771292    | not scorable | not scorable |
| #### Bn-scaff_16414_1-p17589 C-genome specific (napus-oleracea) | 0.9976076    | 0.8752369    | 1            | 0.8881006    | not scorable | not scorable |
| #### Bn-scaff_16414_1-p17648 C-genome specific (napus-oleracea) | 0.9952153    | 0.8416283    | 1            | 0.7874824    | not scorable | not scorable |
| #### Bn-scaff_16414_1-p17746 genome unspecific (all in)         | 0.8755981    | 0.7038465    | 0.9922481    | 0.7749683    | 1            | 0.9149426    |
| #### Bn-scaff_16414_1-p17851 genome unspecific (all in)         | 0.9928229    | 0.5238851    | 1            | 0.7144135    | 1            | 0.9205657    |
| #### Bn-scaff_16414_1-p28122 genome unspecific (all in)         | 0.9928229    | 0.3924755    | 0.9922481    | 0.7972026    | 0.7933884    | 0.6806791    |
| #### Bn-scaff_16414_1-p30944 genome unspecific (all in)         | 0.9401914    | 0.3690364    | 1            | 0.6813831    | 0.9917355    | 0.6928834    |
| #### Bn-scaff_16414_1-p30975 C-genome specific (napus-oleracea) | 0.9952153    | 0.8306848    | 1            | 0.7827747    | not scorable | not scorable |
| #### Bn-scaff_16414_1-p30983 genome unspecific (all in)         | 0.9832536    | 0.4556781    | 1            | 0.7468756    | 0.9917355    | 0.7761419    |
| #### Bn-scaff_16414_1-p31024 genome unspecific (oleracea-rapa)  | not scorable | not scorable | 1            | 0.7720192    | 0.9834711    | 0.6702051    |
| #### Bn-scaff_16414_1-p42811 genome unspecific (all in)         | 0.9617225    | 0.3497902    | 1            | 0.6917979    | 1            | 0.7579653    |
| #### Bn-scaff_16414_1-p50604 genome unspecific (all in)         | 0.9928229    | 0.6999325    | 0.9844961    | 0.7620289    | 1            | 0.8808329    |
| #### Bn-scaff_16414_1-p53853 C-genome specific (napus-oleracea) | 0.9832536    | 0.7517865    | 1            | 0.7793366    | not scorable | not scorable |
| #### Bn-scaff_16414_1-p53932 C-genome specific (napus-oleracea) | 0.9760765    | 0.7283241    | 1            | 0.7252592    | not scorable | not scorable |
| #### Bn-scaff_16414_1-p53947 genome unspecific (all in)         | 0.9545454    | 0.4682157    | 0.9612403    | 0.5903408    | 1            | 0.7367962    |
| #### Bn-scaff_16414_1-p54038 C-genome specific (napus-oleracea) | 0.9880383    | 0.7251489    | 1            | 0.7278007    | not scorable | not scorable |
| #### Bn-scaff_16414_1-p54157 C-genome specific (napus-oleracea) | 0.9736842    | 0.671567     | 0.9379845    | 0.6886279    | not scorable | not scorable |
| #### Bn-scaff_16414_1-p54158 C-genome specific (napus-oleracea) | 0.9808612    | 0.7762386    | 1            | 0.6976201    | not scorable | not scorable |
| #### Bn-scaff_16414_1-p61010 genome unspecific (all in)         | 1            | 0.9108371    | 1            | 0.9095823    | 1            | 0.9093598    |
| #### Bn-scaff_16414_1-p62029 genome unspecific (all in)         | 0.9976076    | 0.394264     | 0.9922481    | 0.8034453    | 1            | 0.8948976    |
| #### Bn-scaff_16414_1-p62367 C-genome specific (napus-oleracea) | 1            | 0.8331139    | 0.9844961    | 0.7927082    | not scorable | not scorable |
| #### Bn-scaff_16414_1-p62484 C-genome specific (napus-oleracea) | 1            | 0.8774751    | 0.9922481    | 0.7420452    | not scorable | not scorable |
| #### Bn-scaff_16414_1-p62512 C-genome specific (napus-oleracea) | 0.9952153    | 0.7411053    | 1            | 0.6642311    | not scorable | not scorable |
| #### Bn-scaff_16414_1-p64733 C-genome specific (napus-oleracea) | 1            | 0.7170457    | 0.9922481    | 0.6464622    | not scorable | not scorable |
| #### Bn-scaff_16414_1-p65041 genome unspecific (all in)         | 0.9976076    | 0.405493     | 1            | 0.5462834    | 1            | 0.7884539    |

|                                                                 |              |              |              |              |              |              |
|-----------------------------------------------------------------|--------------|--------------|--------------|--------------|--------------|--------------|
| #### Bn-scaff_16414_1-p65118 C-genome specific (napus-oleracea) | 0.9066986    | 0.8702213    | 0.8682171    | 0.8158156    | not scorable | not scorable |
| #### Bn-scaff_16414_1-p71853 C-genome specific (napus-oleracea) | 0.9832536    | 0.8156559    | 1            | 0.9169651    | not scorable | not scorable |
| #### Bn-scaff_16414_1-p72836 C-genome specific (napus-oleracea) | 0.9856459    | 0.8125018    | 1            | 0.7789081    | not scorable | not scorable |
| #### Bn-scaff_16414_1-p72893 C-genome specific (napus-oleracea) | 0.9880383    | 0.7773916    | 0.9844961    | 0.6956102    | not scorable | not scorable |
| #### Bn-scaff_16414_1-p73046 C-genome specific (napus-oleracea) | 0.9976076    | 0.8333315    | 0.9844961    | 0.6684341    | not scorable | not scorable |
| #### Bn-scaff_16414_1-p73765 C-genome specific (napus-oleracea) | 0.9760765    | 0.7780294    | 1            | 0.7505493    | not scorable | not scorable |
| #### Bn-scaff_16414_1-p74057 C-genome specific (napus-oleracea) | 0.9856459    | 0.7931922    | 1            | 0.755547     | not scorable | not scorable |
| #### Bn-scaff_16414_1-p77231 C-genome specific (napus-oleracea) | 0.9760765    | 0.802054     | 1            | 0.4087176    | not scorable | not scorable |
| #### Bn-scaff_16414_1-p77289 C-genome specific (napus-oleracea) | 0.9856459    | 0.8066242    | 1            | 0.8338223    | not scorable | not scorable |
| #### Bn-scaff_16414_1-p77341 C-genome specific (napus-oleracea) | 0.9952153    | 0.7916056    | 1            | 0.688688     | not scorable | not scorable |
| #### Bn-scaff_16414_1-p77488 C-genome specific (napus-oleracea) | 0.9808612    | 0.7990407    | 0.9922481    | 0.7562531    | not scorable | not scorable |
| #### Bn-scaff_16414_1-p77727 C-genome specific (napus-oleracea) | 0.9832536    | 0.7753379    | 0.9844961    | 0.7437671    | not scorable | not scorable |
| #### Bn-scaff_16414_1-p79801 genome unspecific (all in)         | 0.9736842    | 0.3751341    | 1            | 0.4484642    | 1            | 0.8978068    |
| #### Bn-scaff_16414_1-p83436 C-genome specific (napus-oleracea) | 0.9928229    | 0.5742146    | 1            | 0.5254878    | not scorable | not scorable |
| #### Bn-scaff_16414_1-p83617 genome unspecific (all in)         | 0.9784689    | 0.5415128    | 1            | 0.7577417    | 1            | 0.7177635    |
| #### Bn-scaff_16414_1-p86359 C-genome specific (napus-oleracea) | 0.9976076    | 0.8135584    | 0.9844961    | 0.7234175    | not scorable | not scorable |
| #### Bn-scaff_16414_1-p86378 genome unspecific (all in)         | 1            | 0.3965141    | 1            | 0.8837301    | 1            | 0.8182366    |
| #### Bn-scaff_16414_1-p86459 genome unspecific (all in)         | 1            | 0.8309315    | 1            | 0.8320888    | 1            | 0.9176416    |
| #### Bn-scaff_16414_1-p87449 C-genome specific (napus-oleracea) | 0.9856459    | 0.7938658    | 1            | 0.9272014    | not scorable | not scorable |
| #### Bn-scaff_16414_1-p87941 genome unspecific (all in)         | 1            | 0.3535381    | 1            | 0.8085203    | 1            | 0.7257035    |
| #### Bn-scaff_16414_1-p88459 C-genome specific (napus-oleracea) | 0.9856459    | 0.7947458    | 0.9457364    | 0.7108651    | not scorable | not scorable |
| #### Bn-scaff_16414_1-p90400 C-genome specific (napus-oleracea) | 0.9808612    | 0.8688043    | 0.9534883    | 0.7793339    | not scorable | not scorable |
| #### Bn-scaff_16414_1-p91571 genome unspecific (all in)         | 0.9641148    | 0.4734848    | 0.9922481    | 0.6993971    | 1            | 0.8899236    |
| #### Bn-scaff_16414_1-p91763 C-genome specific (napus-oleracea) | 0.9736842    | 0.7454129    | 0.8837209    | 0.8116826    | not scorable | not scorable |
| #### Bn-scaff_16414_1-p93150 C-genome specific (napus-oleracea) | 0.9808612    | 0.7519314    | 0.9844961    | 0.820116     | not scorable | not scorable |
| #### Bn-scaff_16414_1-p93227 genome unspecific (all in)         | 0.9976076    | 0.3283555    | 1            | 0.7539231    | 1            | 0.7682976    |
| #### Bn-scaff_16414_1-p93235 genome unspecific (all in)         | 0.9904306    | 0.4379193    | 1            | 0.7777978    | 1            | 0.9175318    |
| #### Bn-scaff_16414_1-p93269 genome unspecific (all in)         | 0.9976076    | 0.4337741    | 0.9767442    | 0.8229336    | 1            | 0.9141848    |
| #### Bn-scaff_16414_1-p95169 C-genome specific (napus-oleracea) | 0.9832536    | 0.739195     | 0.9844961    | 0.793748     | not scorable | not scorable |
| #### Bn-scaff_16414_1-p95889 C-genome specific (napus-oleracea) | 0.9808612    | 0.7617573    | 0.9922481    | 0.8011554    | not scorable | not scorable |
| #### Bn-scaff_16414_1-p96363 all not scorable                   | not scorable | not scorable | not scorable | not scorable | not scorable | not scorable |
| #### Bn-scaff_16414_1-p98361 C-genome specific (napus-oleracea) | 0.9736842    | 0.6835896    | 1            | 0.8421823    | not scorable | not scorable |
| #### Bn-scaff_16414_1-p99655 C-genome specific (napus-oleracea) | 0.9928229    | 0.8651979    | 1            | 0.8526646    | not scorable | not scorable |

|                                                                  |              |              |           |   |           |              |              |
|------------------------------------------------------------------|--------------|--------------|-----------|---|-----------|--------------|--------------|
| ##### Bn-scaff_16414_1-p99707 C-genome specific (napus-oleracea) | 0.9904306    | 0.561698     |           | 1 | 0.8199747 | not scorable | not scorable |
| ##### Bn-scaff_16437_1-p12295 C-genome specific (napus-oleracea) | 0.9784689    | 0.8222721    | 0.8372093 |   | 0.83517   | not scorable | not scorable |
| ##### Bn-scaff_16437_1-p19309 C-genome specific (napus-oleracea) | 0.9712918    | 0.8351386    | 0.8372093 |   | 0.7228522 | not scorable | not scorable |
| ##### Bn-scaff_16437_1-p25006 C-genome specific (oleracea only)  | not scorable | not scorable | 0.8372093 |   | 0.9175813 | not scorable | not scorable |
| ##### Bn-scaff_16437_1-p36113 C-genome specific (napus-oleracea) | 0.9832536    | 0.8774251    |           | 1 | 0.7540259 | not scorable | not scorable |
| ##### Bn-scaff_16437_1-p53425 C-genome specific (napus-oleracea) | 0.9880383    | 0.8244691    |           | 1 | 0.7108045 | not scorable | not scorable |
| ##### Bn-scaff_16437_1-p63154 C-genome specific (napus-oleracea) | 0.9880383    | 0.7435464    |           | 1 | 0.6354154 | not scorable | not scorable |
| ##### Bn-scaff_16443_1-p1306 genome unspecific (all in)          | 0.9641148    | 0.8610423    | 0.9612403 |   | 0.7142128 | 0.9586777    | 0.8704001    |
| ##### Bn-scaff_16445_1-p10319 C-genome specific (napus-oleracea) | 0.7631579    | 0.8302898    | 0.8527132 |   | 0.7805737 | not scorable | not scorable |
| ##### Bn-scaff_16445_1-p10355 C-genome specific (napus-oleracea) | 0.854067     | 0.7563297    | 0.8372093 |   | 0.9323228 | not scorable | not scorable |
| ##### Bn-scaff_16445_1-p10622 C-genome specific (napus-oleracea) | 0.930622     | 0.7588936    | 0.9302326 |   | 0.6411313 | not scorable | not scorable |
| ##### Bn-scaff_16445_1-p10761 C-genome specific (napus-oleracea) | 0.6794258    | 0.6853012    | 0.7364341 |   | 0.6639891 | not scorable | not scorable |
| ##### Bn-scaff_16445_1-p10850 C-genome specific (napus-oleracea) | 0.9401914    | 0.7651865    |           | 1 | 0.8860806 | not scorable | not scorable |
| ##### Bn-scaff_16445_1-p11137 genome unspecific (all in)         | 0.9856459    | 0.5281724    |           | 1 | 0.7451263 |              | 1 0.9205657  |
| ##### Bn-scaff_16445_1-p11171 C-genome specific (napus-oleracea) | 0.9521531    | 0.7524816    |           | 1 | 0.7349916 | not scorable | not scorable |
| ##### Bn-scaff_16445_1-p11213 C-genome specific (oleracea only)  | not scorable | not scorable | 0.9922481 |   | 0.884855  | not scorable | not scorable |
| ##### Bn-scaff_16445_1-p12388 C-genome specific (napus-oleracea) | 0.9354067    | 0.8672249    | 0.9844961 |   | 0.6632057 | not scorable | not scorable |
| ##### Bn-scaff_16445_1-p12794 C-genome specific (napus-oleracea) | 0.9593301    | 0.8297596    |           | 1 | 0.8085214 | not scorable | not scorable |
| ##### Bn-scaff_16445_1-p12917 C-genome specific (napus-oleracea) | 0.9449761    | 0.7748665    | 0.7984496 |   | 0.8439565 | not scorable | not scorable |
| ##### Bn-scaff_16445_1-p13113 C-genome specific (oleracea only)  | not scorable | not scorable | 0.875969  |   | 0.907922  | not scorable | not scorable |
| ##### Bn-scaff_16445_1-p13255 genome unspecific (oleracea-rapa)  | not scorable | not scorable | 0.9922481 |   | 0.6807151 |              | 1 0.8948705  |
| ##### Bn-scaff_16445_1-p13429 C-genome specific (napus-oleracea) | 0.9665072    | 0.6735549    | 0.9767442 |   | 0.7365086 | not scorable | not scorable |
| ##### Bn-scaff_16445_1-p13555 genome unspecific (all in)         |              | 1 0.6066825  |           | 1 | 0.6180222 |              | 1 0.5845541  |
| ##### Bn-scaff_16445_1-p13698 genome unspecific (all in)         | 0.9808612    | 0.3368609    |           | 1 | 0.2661476 |              | 1 0.8077832  |
| ##### Bn-scaff_16445_1-p13887 C-genome specific (oleracea only)  | not scorable | not scorable | 0.9844961 |   | 0.2435013 | not scorable | not scorable |
| ##### Bn-scaff_16445_1-p13912 C-genome specific (oleracea only)  | not scorable | not scorable |           | 1 | 0.6148995 | not scorable | not scorable |
| ##### Bn-scaff_16445_1-p13947 genome unspecific (all in)         | 0.9760765    | 0.3767861    | 0.9922481 |   | 0.7929273 |              | 1 0.7739103  |
| ##### Bn-scaff_16445_1-p14057 C-genome specific (napus-oleracea) | 0.9784689    | 0.7318171    |           | 1 | 0.708142  | not scorable | not scorable |
| ##### Bn-scaff_16445_1-p14098 C-genome specific (napus-oleracea) | 0.9784689    | 0.7719246    | 0.9844961 |   | 0.6894199 | not scorable | not scorable |
| ##### Bn-scaff_16445_1-p14190 C-genome specific (oleracea only)  | not scorable | not scorable | 0.9767442 |   | 0.6964207 | not scorable | not scorable |
| ##### Bn-scaff_16445_1-p14192 C-genome specific (napus-oleracea) | 0.9832536    | 0.7564316    | 0.9922481 |   | 0.8305736 | not scorable | not scorable |
| ##### Bn-scaff_16445_1-p14340 genome unspecific (all in)         |              | 1 0.9483678  |           | 1 | 0.9533434 | 0.9669421    | 0.9593318    |
| ##### Bn-scaff_16445_1-p14406 C-genome specific (napus-oleracea) | 0.9688995    | 0.7595288    | 0.9612403 |   | 0.7364383 | not scorable | not scorable |



|                                                                |              |              |              |              |              |              |
|----------------------------------------------------------------|--------------|--------------|--------------|--------------|--------------|--------------|
| #### Bn-scaff_16445_1-p14411genome unspecific (all in)         | 0.9473684    | 0.3799147    | 1            | 0.4041795    | 1            | 0.6821573    |
| #### Bn-scaff_16445_1-p14413genome unspecific (all in)         | 0.9330143    | 0.26247      | 1            | 0.6305047    | 1            | 0.7155698    |
| #### Bn-scaff_16445_1-p14432C-genome specific (napus-oleracea) | 0.9832536    | 0.677132     | 1            | 0.7375898    | not scorable | not scorable |
| #### Bn-scaff_16445_1-p14459C-genome specific (napus-oleracea) | 0.9497608    | 0.6907133    | 0.9844961    | 0.6833893    | not scorable | not scorable |
| #### Bn-scaff_16445_1-p14470C-genome specific (napus-oleracea) | 0.9617225    | 0.7784672    | 0.9534883    | 0.7607387    | not scorable | not scorable |
| #### Bn-scaff_16445_1-p14483C-genome specific (napus-oleracea) | 0.9665072    | 0.7590318    | 0.9922481    | 0.8008413    | not scorable | not scorable |
| #### Bn-scaff_16445_1-p14502C-genome specific (napus-oleracea) | 0.9665072    | 0.768498     | 0.9844961    | 0.7665728    | not scorable | not scorable |
| #### Bn-scaff_16445_1-p14502C-genome specific (napus-oleracea) | 0.9593301    | 0.7406518    | 0.9689922    | 0.6797504    | not scorable | not scorable |
| #### Bn-scaff_16445_1-p14511C-genome specific (napus-oleracea) | 0.9617225    | 0.7753746    | 0.9302326    | 0.7680534    | not scorable | not scorable |
| #### Bn-scaff_16445_1-p14512C-genome specific (napus-oleracea) | 0.9688995    | 0.7714624    | 0.9922481    | 0.7774927    | not scorable | not scorable |
| #### Bn-scaff_16445_1-p14513napus specific                     | 0.9473684    | 0.4841074    | not scorable | not scorable | not scorable | not scorable |
| #### Bn-scaff_16445_1-p14518C-genome specific (napus-oleracea) | 0.9569378    | 0.7692139    | 0.9767442    | 0.7034166    | not scorable | not scorable |
| #### Bn-scaff_16445_1-p14519C-genome specific (napus-oleracea) | 0.9617225    | 0.7759123    | 0.9689922    | 0.7373413    | not scorable | not scorable |
| #### Bn-scaff_16445_1-p14527C-genome specific (napus-oleracea) | 0.9688995    | 0.7846898    | 0.9612403    | 0.7975124    | not scorable | not scorable |
| #### Bn-scaff_16445_1-p14538C-genome specific (oleracea only)  | not scorable | not scorable | 0.4651163    | 0.9287523    | not scorable | not scorable |
| #### Bn-scaff_16445_1-p14592C-genome specific (napus-oleracea) | 0.9712918    | 0.7630782    | 0.9844961    | 0.7741706    | not scorable | not scorable |
| #### Bn-scaff_16445_1-p14601C-genome specific (napus-oleracea) | 0.9808612    | 0.7008322    | 0.9922481    | 0.7488434    | not scorable | not scorable |
| #### Bn-scaff_16445_1-p14606C-genome specific (napus-oleracea) | 0.9712918    | 0.775792     | 0.9844961    | 0.814497     | not scorable | not scorable |
| #### Bn-scaff_16445_1-p15131C-genome specific (napus-oleracea) | 0.9688995    | 0.7614927    | 0.7131783    | 0.7695364    | not scorable | not scorable |
| #### Bn-scaff_16445_1-p15305C-genome specific (napus-oleracea) | 0.9736842    | 0.7601249    | 1            | 0.7530103    | not scorable | not scorable |
| #### Bn-scaff_16445_1-p15317C-genome specific (napus-oleracea) | 0.9665072    | 0.523068     | 1            | 0.4774476    | not scorable | not scorable |
| #### Bn-scaff_16445_1-p15317C-genome specific (napus-oleracea) | 0.9832536    | 0.7753927    | 1            | 0.7395723    | not scorable | not scorable |
| #### Bn-scaff_16445_1-p15484C-genome specific (oleracea only)  | not scorable | not scorable | 0.5581396    | 0.9092495    | not scorable | not scorable |
| #### Bn-scaff_16445_1-p15485C-genome specific (napus-oleracea) | 0.9856459    | 0.7682899    | 0.9922481    | 0.740887     | not scorable | not scorable |
| #### Bn-scaff_16445_1-p15725C-genome specific (napus-oleracea) | 0.9688995    | 0.7237192    | 1            | 0.486087     | not scorable | not scorable |
| #### Bn-scaff_16445_1-p16021C-genome specific (napus-oleracea) | 0.9784689    | 0.7767254    | 1            | 0.6476118    | not scorable | not scorable |
| #### Bn-scaff_16445_1-p16031C-genome specific (napus-oleracea) | 0.9784689    | 0.7766914    | 0.9922481    | 0.7818056    | not scorable | not scorable |
| #### Bn-scaff_16445_1-p16033C-genome specific (napus-oleracea) | 0.9760765    | 0.805576     | 0.9922481    | 0.7619962    | not scorable | not scorable |
| #### Bn-scaff_16445_1-p16071C-genome specific (napus-oleracea) | 0.9688995    | 0.7850232    | 1            | 0.784916     | not scorable | not scorable |
| #### Bn-scaff_16445_1-p16074C-genome specific (napus-oleracea) | 0.9736842    | 0.6970671    | 1            | 0.7311122    | not scorable | not scorable |
| #### Bn-scaff_16445_1-p16076genome unspecific (all in)         | 0.9880383    | 0.480633     | 1            | 0.3651638    | 1            | 0.4868795    |
| #### Bn-scaff_16445_1-p16091C-genome specific (napus-oleracea) | 0.9856459    | 0.8108376    | 0.9844961    | 0.8004421    | not scorable | not scorable |
| #### Bn-scaff_16445_1-p16282genome unspecific (oleracea-rapa)  | not scorable | not scorable | 1            | 0.7760801    | 0.9834711    | 0.8362355    |

|                                                                 |              |              |              |              |              |              |
|-----------------------------------------------------------------|--------------|--------------|--------------|--------------|--------------|--------------|
| #### Bn-scaff_16445_1-p16399 C-genome specific (napus-oleracea) | 0.9784689    | 0.7729529    | 0.9844961    | 0.824253     | not scorable | not scorable |
| #### Bn-scaff_16445_1-p16408 genome unspecific (all in)         | 0.9712918    | 0.401337     | 0.9844961    | 0.7180732    | 0.9917355    | 0.7851955    |
| #### Bn-scaff_16445_1-p16565 genome unspecific (oleracea-rapa)  | not scorable | not scorable | 0.9844961    | 0.242365     | 0.9421487    | 0.4935297    |
| #### Bn-scaff_16445_1-p16567 C-genome specific (napus-oleracea) | 0.9736842    | 0.730056     | 0.9844961    | 0.7198194    | not scorable | not scorable |
| #### Bn-scaff_16445_1-p16578 genome unspecific (all in)         | 0.9401914    | 0.5197831    | 1            | 0.7751541    | 1            | 0.8799174    |
| #### Bn-scaff_16445_1-p16730 C-genome specific (napus-oleracea) | 0.9856459    | 0.7017427    | 0.9922481    | 0.7272971    | not scorable | not scorable |
| #### Bn-scaff_16445_1-p16735 C-genome specific (napus-oleracea) | 0.9928229    | 0.7353033    | 0.9844961    | 0.7585862    | not scorable | not scorable |
| #### Bn-scaff_16445_1-p16737 C-genome specific (napus-oleracea) | 0.9880383    | 0.7804855    | 0.9844961    | 0.7153145    | not scorable | not scorable |
| #### Bn-scaff_16445_1-p16746 C-genome specific (napus-oleracea) | 0.9904306    | 0.6843115    | 0.9922481    | 0.6466402    | not scorable | not scorable |
| #### Bn-scaff_16445_1-p16795 C-genome specific (oleracea only)  | not scorable | not scorable | 0.4883721    | 0.9090635    | not scorable | not scorable |
| #### Bn-scaff_16445_1-p17002 C-genome specific (napus-oleracea) | 0.9904306    | 0.8408971    | 1            | 0.7573221    | not scorable | not scorable |
| #### Bn-scaff_16445_1-p17547 C-genome specific (oleracea only)  | not scorable | not scorable | 0.9534883    | 0.7666713    | not scorable | not scorable |
| #### Bn-scaff_16445_1-p17604 C-genome specific (oleracea only)  | not scorable | not scorable | 0.9534883    | 0.76897      | not scorable | not scorable |
| #### Bn-scaff_16445_1-p17638 A-genome specific (rapa only)      | not scorable | not scorable | not scorable | not scorable | 1            | 0.9333743    |
| #### Bn-scaff_16445_1-p17639 C-genome specific (oleracea only)  | not scorable | not scorable | 0.9534883    | 0.8560188    | not scorable | not scorable |
| #### Bn-scaff_16445_1-p17641 C-genome specific (oleracea only)  | not scorable | not scorable | 0.9534883    | 0.8884034    | not scorable | not scorable |
| #### Bn-scaff_16445_1-p17728 C-genome specific (napus-oleracea) | 0.9976076    | 0.7395421    | 0.9922481    | 0.747922     | not scorable | not scorable |
| #### Bn-scaff_16445_1-p17802 C-genome specific (oleracea only)  | not scorable | not scorable | 0.9922481    | 0.6813018    | not scorable | not scorable |
| #### Bn-scaff_16445_1-p17879 C-genome specific (napus-oleracea) | 0.9545454    | 0.7548895    | 1            | 0.6162547    | not scorable | not scorable |
| #### Bn-scaff_16445_1-p17979 C-genome specific (napus-oleracea) | 0.9593301    | 0.7336602    | 1            | 0.718072     | not scorable | not scorable |
| #### Bn-scaff_16445_1-p18071 C-genome specific (napus-oleracea) | 0.9736842    | 0.7312095    | 0.9379845    | 0.6619973    | not scorable | not scorable |
| #### Bn-scaff_16445_1-p18155 genome unspecific (all in)         | 0.937799     | 0.4217321    | 0.9922481    | 0.685702     | 1            | 0.9317082    |
| #### Bn-scaff_16445_1-p18234 C-genome specific (napus-oleracea) | 0.9832536    | 0.7568942    | 1            | 0.7664756    | not scorable | not scorable |
| #### Bn-scaff_16445_1-p18341 genome unspecific (all in)         | 0.9808612    | 0.639111     | 1            | 0.645568     | 0.9421487    | 0.6601918    |
| #### Bn-scaff_16445_1-p18346 genome unspecific (all in)         | 0.9928229    | 0.4543231    | 1            | 0.7384855    | 0.9752066    | 0.9093129    |
| #### Bn-scaff_16445_1-p18366 C-genome specific (napus-oleracea) | 0.9880383    | 0.7595627    | 0.9844961    | 0.6526314    | not scorable | not scorable |
| #### Bn-scaff_16445_1-p18367 C-genome specific (napus-oleracea) | 0.9856459    | 0.6456465    | 0.9922481    | 0.6279262    | not scorable | not scorable |
| #### Bn-scaff_16445_1-p18399 genome unspecific (all in)         | 1            | 0.4463615    | 1            | 0.8652656    | 0.9421487    | 0.6916079    |
| #### Bn-scaff_16445_1-p18959 C-genome specific (napus-oleracea) | 0.9736842    | 0.8204612    | 0.9922481    | 0.6699214    | not scorable | not scorable |
| #### Bn-scaff_16445_1-p19212 C-genome specific (oleracea only)  | not scorable | not scorable | 0.9224806    | 0.92966      | not scorable | not scorable |
| #### Bn-scaff_16445_1-p19428 C-genome specific (napus-oleracea) | 0.9928229    | 0.848779     | 0.9767442    | 0.6906044    | not scorable | not scorable |
| #### Bn-scaff_16445_1-p19474 C-genome specific (napus-oleracea) | 0.9497608    | 0.6061274    | 1            | 0.8248929    | not scorable | not scorable |
| #### Bn-scaff_16445_1-p19772 C-genome specific (napus-oleracea) | 0.9545454    | 0.8345421    | 1            | 0.7499195    | not scorable | not scorable |

|                                                                 |              |              |           |           |              |              |
|-----------------------------------------------------------------|--------------|--------------|-----------|-----------|--------------|--------------|
| #### Bn-scaff_16445_1-p20089 C-genome specific (napus-oleracea) | 0.9425837    | 0.7828267    | 0.9612403 | 0.7923158 | not scorable | not scorable |
| #### Bn-scaff_16445_1-p20112 C-genome specific (napus-oleracea) | 0.9952153    | 0.7580577    | 1         | 0.6743119 | not scorable | not scorable |
| #### Bn-scaff_16445_1-p20114 genome unspecific (all in)         | 0.9688995    | 0.3387991    | 0.9689922 | 0.4130365 | 1            | 0.8243735    |
| #### Bn-scaff_16445_1-p20117 C-genome specific (napus-oleracea) | 0.937799     | 0.7897983    | 0.9534883 | 0.8617938 | not scorable | not scorable |
| #### Bn-scaff_16445_1-p20124 genome unspecific (all in)         | 1            | 0.6628417    | 1         | 0.6143916 | 1            | 0.7461635    |
| #### Bn-scaff_16445_1-p20134 genome unspecific (all in)         | 0.9976076    | 0.3864501    | 1         | 0.9095795 | 0.9586777    | 0.5421396    |
| #### Bn-scaff_16445_1-p20169 C-genome specific (napus-oleracea) | 0.9712918    | 0.670197     | 1         | 0.6777807 | not scorable | not scorable |
| #### Bn-scaff_16445_1-p20169 C-genome specific (napus-oleracea) | 0.9976076    | 0.7064223    | 0.9457364 | 0.5933246 | not scorable | not scorable |
| #### Bn-scaff_16445_1-p20226 C-genome specific (napus-oleracea) | 0.9665072    | 0.7568788    | 1         | 0.7663827 | not scorable | not scorable |
| #### Bn-scaff_16445_1-p20261 C-genome specific (napus-oleracea) | 0.9401914    | 0.820179     | 0.9534883 | 0.6675286 | not scorable | not scorable |
| #### Bn-scaff_16445_1-p21068 genome unspecific (oleracea-rapa)  | not scorable | not scorable | 0.9922481 | 0.6692112 | 0.9752066    | 0.6449209    |
| #### Bn-scaff_16445_1-p21148 genome unspecific (all in)         | 0.9880383    | 0.3330252    | 1         | 0.4796524 | 1            | 0.7149687    |
| #### Bn-scaff_16445_1-p21179 genome unspecific (all in)         | 0.9545454    | 0.3010989    | 1         | 0.6559129 | 1            | 0.7622204    |
| #### Bn-scaff_16445_1-p21186 C-genome specific (napus-oleracea) | 0.9736842    | 0.7273139    | 1         | 0.7375293 | not scorable | not scorable |
| #### Bn-scaff_16445_1-p21188 C-genome specific (napus-oleracea) | 0.9641148    | 0.6389049    | 1         | 0.6295918 | not scorable | not scorable |
| #### Bn-scaff_16445_1-p21188 C-genome specific (napus-oleracea) | 0.9784689    | 0.5948144    | 1         | 0.5866939 | not scorable | not scorable |
| #### Bn-scaff_16445_1-p21190 genome unspecific (all in)         | 0.9521531    | 0.2889598    | 0.9689922 | 0.5236188 | 1            | 0.8353339    |
| #### Bn-scaff_16445_1-p21194 C-genome specific (napus-oleracea) | 0.9952153    | 0.806463     | 1         | 0.6603146 | not scorable | not scorable |
| #### Bn-scaff_16445_1-p21205 C-genome specific (napus-oleracea) | 0.9641148    | 0.7654598    | 1         | 0.7224116 | not scorable | not scorable |
| #### Bn-scaff_16445_1-p21255 C-genome specific (napus-oleracea) | 0.9665072    | 0.6261728    | 1         | 0.7884539 | not scorable | not scorable |
| #### Bn-scaff_16445_1-p21321 C-genome specific (napus-oleracea) | 0.9832536    | 0.6700429    | 1         | 0.6974347 | not scorable | not scorable |
| #### Bn-scaff_16445_1-p21332 genome unspecific (all in)         | 1            | 0.8999876    | 1         | 0.9090073 | 1            | 0.902935     |
| #### Bn-scaff_16445_1-p21332 genome unspecific (all in)         | 0.9665072    | 0.2785671    | 1         | 0.3407695 | 1            | 0.7914145    |
| #### Bn-scaff_16445_1-p21335 genome unspecific (all in)         | 0.9904306    | 0.5039755    | 0.9922481 | 0.5936866 | 0.9917355    | 0.816977     |
| #### Bn-scaff_16445_1-p21415 C-genome specific (napus-oleracea) | 0.9712918    | 0.6668531    | 1         | 0.6910553 | not scorable | not scorable |
| #### Bn-scaff_16445_1-p21465 genome unspecific (all in)         | 1            | 0.3192144    | 0.9534883 | 0.2585424 | 1            | 0.7494321    |
| #### Bn-scaff_16445_1-p22189 C-genome specific (napus-oleracea) | 0.9856459    | 0.7451832    | 1         | 0.9095823 | not scorable | not scorable |
| #### Bn-scaff_16445_1-p22271 genome unspecific (all in)         | 0.8947368    | 0.5201085    | 0.5116279 | 0.774303  | 1            | 0.8793062    |
| #### Bn-scaff_16445_1-p22531 C-genome specific (napus-oleracea) | 0.9736842    | 0.7445138    | 1         | 0.3727942 | not scorable | not scorable |
| #### Bn-scaff_16445_1-p22551 C-genome specific (napus-oleracea) | 0.9449761    | 0.8437604    | 0.9612403 | 0.7552074 | not scorable | not scorable |
| #### Bn-scaff_16445_1-p22622 genome unspecific (all in)         | 0.9473684    | 0.3355103    | 1         | 0.7083641 | 1            | 0.7741938    |
| #### Bn-scaff_16445_1-p22789 C-genome specific (napus-oleracea) | 0.8803828    | 0.8313538    | 0.9379845 | 0.818213  | not scorable | not scorable |
| #### Bn-scaff_16445_1-p22849 genome unspecific (all in)         | 0.9952153    | 0.4073884    | 0.9612403 | 0.6595374 | 1            | 0.8522506    |

|                                                                 |              |              |              |              |              |              |
|-----------------------------------------------------------------|--------------|--------------|--------------|--------------|--------------|--------------|
| #### Bn-scaff_16445_1-p24139 C-genome specific (oleracea only)  | not scorable | not scorable | 0.9844961    | 0.7368222    | not scorable | not scorable |
| #### Bn-scaff_16445_1-p24447 C-genome specific (oleracea only)  | not scorable | not scorable | 0.9767442    | 0.6652421    | not scorable | not scorable |
| #### Bn-scaff_16445_1-p25065 C-genome specific (napus-oleracea) | 0.9760765    | 0.6795723    | 0.9922481    | 0.6570214    | not scorable | not scorable |
| #### Bn-scaff_16445_1-p25234 genome unspecific (all in)         | 0.9569378    | 0.5904558    | 0.9922481    | 0.5419065    | 1            | 0.846218     |
| #### Bn-scaff_16445_1-p25285 C-genome specific (napus-oleracea) | 0.9928229    | 0.8811746    | 1            | 0.6606907    | not scorable | not scorable |
| #### Bn-scaff_16445_1-p25497 genome unspecific (oleracea-rapa)  | not scorable | not scorable | 0.9844961    | 0.5967255    | 0.9834711    | 0.61247      |
| #### Bn-scaff_16445_1-p26011 genome unspecific (all in)         | 0.9880383    | 0.5881147    | 0.9922481    | 0.689853     | 1            | 0.9181559    |
| #### Bn-scaff_16445_1-p26132 C-genome specific (napus-oleracea) | 0.9880383    | 0.6811556    | 0.9922481    | 0.7264388    | not scorable | not scorable |
| #### Bn-scaff_16445_1-p26243 genome unspecific (oleracea-rapa)  | not scorable | not scorable | 0.9767442    | 0.4743938    | 1            | 0.786476     |
| #### Bn-scaff_16445_1-p26306 C-genome specific (napus-oleracea) | 0.9593301    | 0.7856627    | 0.9922481    | 0.6354948    | not scorable | not scorable |
| #### Bn-scaff_16445_1-p26357 C-genome specific (napus-oleracea) | 0.9760765    | 0.7295105    | 0.9767442    | 0.6683546    | not scorable | not scorable |
| #### Bn-scaff_16445_1-p26394 C-genome specific (napus-oleracea) | 0.9976076    | 0.4630231    | 0.9922481    | 0.815444     | not scorable | not scorable |
| #### Bn-scaff_16445_1-p26566 C-genome specific (oleracea only)  | not scorable | not scorable | 0.9147287    | 0.3183968    | not scorable | not scorable |
| #### Bn-scaff_16445_1-p26657 genome unspecific (all in)         | 0.9784689    | 0.4218024    | 1            | 0.78423      | 1            | 0.8508786    |
| #### Bn-scaff_16445_1-p26821 C-genome specific (napus-oleracea) | 0.8803828    | 0.6662353    | 0.9379845    | 0.6706141    | not scorable | not scorable |
| #### Bn-scaff_16445_1-p28085 C-genome specific (napus-oleracea) | 0.9904306    | 0.7622204    | 1            | 0.6790723    | not scorable | not scorable |
| #### Bn-scaff_16445_1-p28324 C-genome specific (napus-oleracea) | 0.6052632    | 0.8201996    | 0.7984496    | 0.8105487    | not scorable | not scorable |
| #### Bn-scaff_16445_1-p28448 C-genome specific (oleracea only)  | not scorable | not scorable | 1            | 0.6936579    | not scorable | not scorable |
| #### Bn-scaff_16445_1-p28628 genome unspecific (oleracea-rapa)  | not scorable | not scorable | 0.7751938    | 0.9268072    | 0.9917355    | 0.7081475    |
| #### Bn-scaff_16445_1-p28653 genome unspecific (all in)         | 0.9928229    | 0.5510196    | 0.875969     | 0.9637917    | 1            | 0.7642243    |
| #### Bn-scaff_16445_1-p29295 all not scorable                   | not scorable | not scorable | not scorable | not scorable | not scorable | not scorable |
| #### Bn-scaff_16445_1-p30789 C-genome specific (napus-oleracea) | 0.9186603    | 0.8585922    | 0.9844961    | 0.8034068    | not scorable | not scorable |
| #### Bn-scaff_16445_1-p31154 genome unspecific (oleracea-rapa)  | not scorable | not scorable | 1            | 0.778811     | 0.9504132    | 0.6633693    |
| #### Bn-scaff_16445_1-p31154 genome unspecific (all in)         | 0.9425837    | 0.6951036    | 0.7596899    | 0.7984335    | 0.9090909    | 0.9335362    |
| #### Bn-scaff_16445_1-p31239 C-genome specific (napus-oleracea) | 0.9282297    | 0.6959115    | 0.9844961    | 0.7744279    | not scorable | not scorable |
| #### Bn-scaff_16445_1-p31344 genome unspecific (all in)         | 0.9401914    | 0.3999627    | 0.6976744    | 0.8687926    | 1            | 0.7663614    |
| #### Bn-scaff_16445_1-p31451 C-genome specific (napus-oleracea) | 0.9282297    | 0.6741738    | 0.627907     | 0.7156241    | not scorable | not scorable |
| #### Bn-scaff_16445_1-p35164 C-genome specific (napus-oleracea) | 0.9401914    | 0.7795902    | 0.9457364    | 0.8379831    | not scorable | not scorable |
| #### Bn-scaff_16445_1-p35577 C-genome specific (napus-oleracea) | 0.9449761    | 0.7845219    | 1            | 0.4487436    | not scorable | not scorable |
| #### Bn-scaff_16445_1-p35864 C-genome specific (napus-oleracea) | 0.9330143    | 0.7924653    | 0.9922481    | 0.8118147    | not scorable | not scorable |
| #### Bn-scaff_16445_1-p35892 C-genome specific (napus-oleracea) | 0.9401914    | 0.7228263    | 0.9922481    | 0.6402149    | not scorable | not scorable |
| #### Bn-scaff_16445_1-p36224 C-genome specific (napus-oleracea) | 0.8995215    | 0.8064459    | 0.9922481    | 0.741222     | not scorable | not scorable |
| #### Bn-scaff_16445_1-p36249 C-genome specific (napus-oleracea) | 0.8971292    | 0.7535165    | 1            | 0.7060433    | not scorable | not scorable |

|                                                                 |              |              |              |              |              |              |
|-----------------------------------------------------------------|--------------|--------------|--------------|--------------|--------------|--------------|
| #### Bn-scaff_16445_1-p36299 C-genome specific (napus-oleracea) | 0.9330143    | 0.7742794    | 1            | 0.2271739    | not scorable | not scorable |
| #### Bn-scaff_16445_1-p36318 C-genome specific (napus-oleracea) | 0.9282297    | 0.7785729    | 0.9922481    | 0.7809429    | not scorable | not scorable |
| #### Bn-scaff_16445_1-p36400 C-genome specific (napus-oleracea) | 0.9425837    | 0.770566     | 1            | 0.3582017    | not scorable | not scorable |
| #### Bn-scaff_16445_1-p36484 C-genome specific (napus-oleracea) | 0.9425837    | 0.7654243    | 1            | 0.2322368    | not scorable | not scorable |
| #### Bn-scaff_16445_1-p36599 C-genome specific (napus-oleracea) | 0.9784689    | 0.3661258    | 0.9922481    | 0.7939495    | not scorable | not scorable |
| #### Bn-scaff_16445_1-p36623 genome unspecific (all in)         | 0.9617225    | 0.3326051    | 0.9922481    | 0.6829118    | 1            | 0.8710585    |
| #### Bn-scaff_16445_1-p36771 C-genome specific (napus-oleracea) | 0.9282297    | 0.7681593    | 0.9922481    | 0.5184515    | not scorable | not scorable |
| #### Bn-scaff_16445_1-p37509 C-genome specific (napus-oleracea) | 0.9401914    | 0.7290028    | 0.9844961    | 0.7633296    | not scorable | not scorable |
| #### Bn-scaff_16445_1-p37760 C-genome specific (napus-oleracea) | 0.9354067    | 0.8019353    | 0.9767442    | 0.8093814    | not scorable | not scorable |
| #### Bn-scaff_16445_1-p37825 A-genome specific (rapa only)      | not scorable | not scorable | not scorable | not scorable | 1            | 0.6804142    |
| #### Bn-scaff_16445_1-p38059 C-genome specific (napus-oleracea) | 0.9210526    | 0.7793384    | 0.9612403    | 0.7919131    | not scorable | not scorable |
| #### Bn-scaff_16445_1-p41467 C-genome specific (napus-oleracea) | 0.923445     | 0.7906556    | 1            | 0.5107809    | not scorable | not scorable |
| #### Bn-scaff_16445_1-p41788 C-genome specific (napus-oleracea) | 0.923445     | 0.7858909    | 0.9844961    | 0.7329424    | not scorable | not scorable |
| #### Bn-scaff_16445_1-p41894 genome unspecific (oleracea-rapa)  | not scorable | not scorable | 0.8837209    | 0.4352105    | 0.9917355    | 0.716633     |
| #### Bn-scaff_16445_1-p41895 genome unspecific (oleracea-rapa)  | not scorable | not scorable | 0.9224806    | 0.4487712    | 0.9834711    | 0.426027     |
| #### Bn-scaff_16445_1-p43728 C-genome specific (napus-oleracea) | 0.937799     | 0.6501842    | 1            | 0.6429775    | not scorable | not scorable |
| #### Bn-scaff_16445_1-p46094 C-genome specific (napus-oleracea) | 0.9449761    | 0.7858874    | 1            | 0.713864     | not scorable | not scorable |
| #### Bn-scaff_16445_1-p47839 C-genome specific (napus-oleracea) | 0.9449761    | 0.8056895    | 0.9922481    | 0.7745782    | not scorable | not scorable |
| #### Bn-scaff_16445_1-p49159 genome unspecific (all in)         | 0.9784689    | 0.3241225    | 1            | 0.6687579    | 1            | 0.8207097    |
| #### Bn-scaff_16445_1-p49273 C-genome specific (napus-oleracea) | 0.937799     | 0.7032379    | 0.9844961    | 0.6548       | not scorable | not scorable |
| #### Bn-scaff_16445_1-p52101 genome unspecific (all in)         | 0.9354067    | 0.2658429    | 1            | 0.3069576    | 1            | 0.9072468    |
| #### Bn-scaff_16445_1-p52333 C-genome specific (napus-oleracea) | 0.930622     | 0.6730393    | 0.9922481    | 0.6763629    | not scorable | not scorable |
| #### Bn-scaff_16445_1-p55294 C-genome specific (napus-oleracea) | 0.8253589    | 0.8236353    | 1            | 0.7646344    | not scorable | not scorable |
| #### Bn-scaff_16445_1-p55546 C-genome specific (napus-oleracea) | 0.9210526    | 0.5702942    | 0.9844961    | 0.6817516    | not scorable | not scorable |
| #### Bn-scaff_16445_1-p56653 C-genome specific (napus-oleracea) | 0.9449761    | 0.7581099    | 1            | 0.467869     | not scorable | not scorable |
| #### Bn-scaff_16445_1-p58465 C-genome specific (napus-oleracea) | 0.9401914    | 0.6959172    | 1            | 0.7121763    | not scorable | not scorable |
| #### Bn-scaff_16445_1-p58559 C-genome specific (napus-oleracea) | 0.937799     | 0.7474831    | 1            | 0.6961259    | not scorable | not scorable |
| #### Bn-scaff_16445_1-p58683 C-genome specific (napus-oleracea) | 0.9449761    | 0.7808316    | 0.9612403    | 0.793604     | not scorable | not scorable |
| #### Bn-scaff_16445_1-p58868 C-genome specific (napus-oleracea) | 0.9449761    | 0.696325     | 1            | 0.6454819    | not scorable | not scorable |
| #### Bn-scaff_16445_1-p59142 C-genome specific (napus-oleracea) | 0.9497608    | 0.7884964    | 1            | 0.797505     | not scorable | not scorable |
| #### Bn-scaff_16445_1-p59414 genome unspecific (all in)         | 0.9569378    | 0.3216797    | 1            | 0.6875218    | 1            | 0.5958627    |
| #### Bn-scaff_16445_1-p59883 C-genome specific (napus-oleracea) | 0.6578947    | 0.8217779    | 0.9922481    | 0.8042583    | not scorable | not scorable |
| #### Bn-scaff_16445_1-p59973 C-genome specific (napus-oleracea) | 0.6674641    | 0.8362314    | 0.9922481    | 0.7904916    | not scorable | not scorable |

|                                                                  |              |              |           |           |              |              |
|------------------------------------------------------------------|--------------|--------------|-----------|-----------|--------------|--------------|
| ##### Bn-scaff_16445_1-p61152 C-genome specific (napus-oleracea) | 0.9473684    | 0.7866683    | 0.9922481 | 0.7876254 | not scorable | not scorable |
| ##### Bn-scaff_16445_1-p61552 C-genome specific (napus-oleracea) | 0.9449761    | 0.7959908    | 0.9922481 | 0.8458923 | not scorable | not scorable |
| ##### Bn-scaff_16445_1-p62126 C-genome specific (napus-oleracea) | 0.9545454    | 0.7840031    | 0.9922481 | 0.7888021 | not scorable | not scorable |
| ##### Bn-scaff_16445_1-p62174 C-genome specific (napus-oleracea) | 0.6961722    | 0.7531994    | 1         | 0.6813985 | not scorable | not scorable |
| ##### Bn-scaff_16445_1-p62599 C-genome specific (napus-oleracea) | 0.9473684    | 0.6471672    | 1         | 0.5949981 | not scorable | not scorable |
| ##### Bn-scaff_16445_1-p63124 C-genome specific (napus-oleracea) | 0.9401914    | 0.782224     | 0.9922481 | 0.7695051 | not scorable | not scorable |
| ##### Bn-scaff_16445_1-p63237 C-genome specific (napus-oleracea) | 0.9521531    | 0.7975494    | 0.9922481 | 0.8130331 | not scorable | not scorable |
| ##### Bn-scaff_16445_1-p66378 C-genome specific (napus-oleracea) | 0.6435407    | 0.771101     | 0.9224806 | 0.7135286 | not scorable | not scorable |
| ##### Bn-scaff_16445_1-p69844 C-genome specific (napus-oleracea) | 0.937799     | 0.7595431    | 1         | 0.7654694 | not scorable | not scorable |
| ##### Bn-scaff_16445_1-p69943 C-genome specific (napus-oleracea) | 0.9425837    | 0.7524872    | 1         | 0.8426623 | not scorable | not scorable |
| ##### Bn-scaff_16445_1-p69946 C-genome specific (napus-oleracea) | 0.9497608    | 0.7628844    | 1         | 0.8062136 | not scorable | not scorable |
| ##### Bn-scaff_16445_1-p72360 genome unspecific (all in)         | 0.9880383    | 0.3225476    | 0.9534883 | 0.4019741 | 0.6446281    | 0.8102824    |
| ##### Bn-scaff_16445_1-p72401 C-genome specific (oleracea only)  | not scorable | not scorable | 0.9379845 | 0.732151  | not scorable | not scorable |
| ##### Bn-scaff_16445_1-p72747 C-genome specific (napus-oleracea) | 0.722488     | 0.690641     | 0.8992248 | 0.8137556 | not scorable | not scorable |
| ##### Bn-scaff_16445_1-p72769 C-genome specific (napus-oleracea) | 0.7105263    | 0.6859905    | 0.8992248 | 0.8107423 | not scorable | not scorable |
| ##### Bn-scaff_16445_1-p72884 C-genome specific (napus-oleracea) | 0.9401914    | 0.7040662    | 1         | 0.8174979 | not scorable | not scorable |
| ##### Bn-scaff_16445_1-p72893 C-genome specific (napus-oleracea) | 0.9473684    | 0.7818675    | 1         | 0.7461218 | not scorable | not scorable |
| ##### Bn-scaff_16445_1-p74355 genome unspecific (all in)         | 0.9880383    | 0.3823885    | 0.9534883 | 0.6483994 | 0.7438017    | 0.8440363    |
| ##### Bn-scaff_16445_1-p74638 genome unspecific (all in)         | 0.9138756    | 0.429024     | 0.8372093 | 0.6963919 | 1            | 0.8475425    |
| ##### Bn-scaff_16445_1-p74943 genome unspecific (all in)         | 1            | 0.2813656    | 0.9767442 | 0.2554187 | 1            | 0.7749483    |
| ##### Bn-scaff_16445_1-p76644 C-genome specific (napus-oleracea) | 0.9760765    | 0.427651     | 0.9922481 | 0.5969182 | not scorable | not scorable |
| ##### Bn-scaff_16445_1-p76664 genome unspecific (all in)         | 0.9593301    | 0.4256606    | 1         | 0.7403231 | 1            | 0.8125131    |
| ##### Bn-scaff_16445_1-p76670 genome unspecific (all in)         | 0.9138756    | 0.6785589    | 0.9922481 | 0.7566753 | 1            | 0.9279919    |
| ##### Bn-scaff_16445_1-p76682 genome unspecific (all in)         | 0.9736842    | 0.2864099    | 0.9922481 | 0.6219632 | 1            | 0.6921083    |
| ##### Bn-scaff_16445_1-p77585 C-genome specific (napus-oleracea) | 0.9473684    | 0.7188417    | 1         | 0.7416199 | not scorable | not scorable |
| ##### Bn-scaff_16445_1-p78293 genome unspecific (all in)         | 0.9473684    | 0.7211178    | 1         | 0.6274511 | 0.9090909    | 0.8709851    |
| ##### Bn-scaff_16445_1-p78341 C-genome specific (napus-oleracea) | 0.9473684    | 0.7451308    | 1         | 0.6967611 | not scorable | not scorable |
| ##### Bn-scaff_16445_1-p79637 C-genome specific (napus-oleracea) | 0.9521531    | 0.7945864    | 1         | 0.5861883 | not scorable | not scorable |
| ##### Bn-scaff_16445_1-p80026 genome unspecific (all in)         | 0.9952153    | 0.6242713    | 0.9147287 | 0.7181217 | 0.9752066    | 0.8356783    |
| ##### Bn-scaff_16445_1-p80033 C-genome specific (napus-oleracea) | 0.930622     | 0.7895293    | 0.5813953 | 0.6993755 | not scorable | not scorable |
| ##### Bn-scaff_16445_1-p80986 C-genome specific (napus-oleracea) | 0.9425837    | 0.7850714    | 1         | 0.7997578 | not scorable | not scorable |
| ##### Bn-scaff_16445_1-p81500 C-genome specific (napus-oleracea) | 0.9354067    | 0.6756812    | 1         | 0.6774101 | not scorable | not scorable |
| ##### Bn-scaff_16445_1-p82501 C-genome specific (oleracea only)  | not scorable | not scorable | 0.9922481 | 0.5074663 | not scorable | not scorable |

|                                                                 |              |              |              |              |              |              |
|-----------------------------------------------------------------|--------------|--------------|--------------|--------------|--------------|--------------|
| #### Bn-scaff_16445_1-p82664 genome unspecific (all in)         | 0.9521531    | 0.5806225    | 0.9767442    | 0.7610868    | 1            | 0.9083316    |
| #### Bn-scaff_16445_1-p85250 C-genome specific (napus-oleracea) | 0.9401914    | 0.7424482    | 1            | 0.670423     | not scorable | not scorable |
| #### Bn-scaff_16445_1-p85336 C-genome specific (napus-oleracea) | 0.9473684    | 0.7736467    | 0.9689922    | 0.3887709    | not scorable | not scorable |
| #### Bn-scaff_16445_1-p85638 C-genome specific (napus-oleracea) | 0.8947368    | 0.7893634    | 0.9612403    | 0.7571341    | not scorable | not scorable |
| #### Bn-scaff_16445_1-p85667 genome unspecific (all in)         | 0.9688995    | 0.3625517    | 1            | 0.8118678    | 1            | 0.8580052    |
| #### Bn-scaff_16445_1-p87853 C-genome specific (napus-oleracea) | 0.9186603    | 0.7297964    | 0.9922481    | 0.7606689    | not scorable | not scorable |
| #### Bn-scaff_16445_1-p89435 genome unspecific (all in)         | 0.9760765    | 0.2565071    | 0.9922481    | 0.6025388    | 1            | 0.9196481    |
| #### Bn-scaff_16445_1-p89585 C-genome specific (napus-oleracea) | 0.9473684    | 0.7725828    | 0.9922481    | 0.7632879    | not scorable | not scorable |
| #### Bn-scaff_16445_1-p89855 C-genome specific (oleracea only)  | not scorable | not scorable | 0.9767442    | 0.6296123    | not scorable | not scorable |
| #### Bn-scaff_16445_1-p92553 genome unspecific (all in)         | 0.9856459    | 0.316838     | 1            | 0.5110801    | 1            | 0.7395847    |
| #### Bn-scaff_16445_1-p93215 genome unspecific (all in)         | 0.9449761    | 0.3963317    | 1            | 0.8948976    | 1            | 0.9039528    |
| #### Bn-scaff_16445_1-p93269 genome unspecific (all in)         | 0.9569378    | 0.3762255    | 1            | 0.9146371    | 0.9917355    | 0.924176     |
| #### Bn-scaff_16445_1-p93325 genome unspecific (all in)         | 0.9784689    | 0.2996202    | 1            | 0.8612623    | 1            | 0.8124865    |
| #### Bn-scaff_16445_1-p96876 A-genome specific (rapa only)      | not scorable | not scorable | not scorable | not scorable | 1            | 0.8438566    |
| #### Bn-scaff_16445_1-p97367 genome unspecific (all in)         | 0.930622     | 0.3968713    | 0.9922481    | 0.6146414    | 1            | 0.8873499    |
| #### Bn-scaff_16445_1-p98482 C-genome specific (napus-oleracea) | 0.9569378    | 0.8754998    | 0.9844961    | 0.746751     | not scorable | not scorable |
| #### Bn-scaff_16445_1-p99259 genome unspecific (oleracea-rapa)  | not scorable | not scorable | 1            | 0.702597     | 0.9917355    | 0.6145644    |
| #### Bn-scaff_16447_1-p22184 all not scorable                   | not scorable | not scorable | not scorable | not scorable | not scorable | not scorable |
| #### Bn-scaff_16447_1-p39338 genome unspecific (all in)         | 0.9976076    | 0.4525616    | 1            | 0.7443624    | 0.9834711    | 0.7038225    |
| #### Bn-scaff_16447_1-p40324 C-genome specific (napus-oleracea) | 1            | 0.841469     | 0.9844961    | 0.8343857    | not scorable | not scorable |
| #### Bn-scaff_16447_1-p40671 A-genome specific (napus-rapa)     | 1            | 0.549558     | not scorable | not scorable | 1            | 0.8824204    |
| #### Bn-scaff_16447_1-p44685 all not scorable                   | not scorable | not scorable | not scorable | not scorable | not scorable | not scorable |
| #### Bn-scaff_16447_1-p51324 A-genome specific (rapa only)      | not scorable | not scorable | not scorable | not scorable | 0.9586777    | 0.7750874    |
| #### Bn-scaff_16447_1-p51395 C-genome specific (napus-oleracea) | 0.9808612    | 0.2925135    | 0.9224806    | 0.2547619    | not scorable | not scorable |
| #### Bn-scaff_16449_1-p10164 napus specific                     | 0.9880383    | 0.6536735    | not scorable | not scorable | not scorable | not scorable |
| #### Bn-scaff_16449_1-p10205 C-genome specific (napus-oleracea) | 0.9928229    | 0.7776175    | 1            | 0.8661698    | not scorable | not scorable |
| #### Bn-scaff_16449_1-p10205 C-genome specific (napus-oleracea) | 0.9856459    | 0.6695158    | 0.9767442    | 0.5883749    | not scorable | not scorable |
| #### Bn-scaff_16449_1-p10206 C-genome specific (napus-oleracea) | 0.9928229    | 0.8098478    | 1            | 0.6917949    | not scorable | not scorable |
| #### Bn-scaff_16449_1-p13856 C-genome specific (napus-oleracea) | 0.9712918    | 0.7956564    | 1            | 0.7404796    | not scorable | not scorable |
| #### Bn-scaff_16449_1-p13914 all not scorable                   | not scorable | not scorable | not scorable | not scorable | not scorable | not scorable |
| #### Bn-scaff_16449_1-p14328 C-genome specific (napus-oleracea) | 0.9665072    | 0.755159     | 0.9922481    | 0.842504     | not scorable | not scorable |
| #### Bn-scaff_16449_1-p17755 all not scorable                   | not scorable | not scorable | not scorable | not scorable | not scorable | not scorable |
| #### Bn-scaff_16449_1-p18117 C-genome specific (napus-oleracea) | 0.9760765    | 0.6713029    | 0.9844961    | 0.629602     | not scorable | not scorable |

|                                                                 |           |           |           |           |              |              |
|-----------------------------------------------------------------|-----------|-----------|-----------|-----------|--------------|--------------|
| #### Bn-scaff_16449_1-p18120 genome unspecific (all in)         | 0.9832536 | 0.2803207 | 0.9302326 | 0.3728203 | 1            | 0.7477845    |
| #### Bn-scaff_16449_1-p20119 C-genome specific (napus-oleracea) | 0.9760765 | 0.7402217 | 0.9922481 | 0.7941925 | not scorable | not scorable |
| #### Bn-scaff_16449_1-p20185 C-genome specific (napus-oleracea) | 0.9712918 | 0.7797969 | 0.9844961 | 0.7492433 | not scorable | not scorable |
| #### Bn-scaff_16449_1-p20234 C-genome specific (napus-oleracea) | 0.9688995 | 0.6623459 | 0.9922481 | 0.7220441 | not scorable | not scorable |
| #### Bn-scaff_16449_1-p20347 C-genome specific (napus-oleracea) | 0.9521531 | 0.8768434 | 1         | 0.7284673 | not scorable | not scorable |
| #### Bn-scaff_16449_1-p24484 C-genome specific (napus-oleracea) | 0.9665072 | 0.7927212 | 0.7829458 | 0.760575  | not scorable | not scorable |
| #### Bn-scaff_16449_1-p24506 C-genome specific (napus-oleracea) | 0.9808612 | 0.736791  | 1         | 0.82844   | not scorable | not scorable |
| #### Bn-scaff_16449_1-p24617 C-genome specific (napus-oleracea) | 0.9784689 | 0.7226679 | 0.9922481 | 0.727873  | not scorable | not scorable |
| #### Bn-scaff_16449_1-p24694 C-genome specific (napus-oleracea) | 0.9760765 | 0.6672766 | 1         | 0.6574162 | not scorable | not scorable |
| #### Bn-scaff_16449_1-p24775 C-genome specific (napus-oleracea) | 0.9736842 | 0.7390264 | 1         | 0.7146035 | not scorable | not scorable |
| #### Bn-scaff_16449_1-p24813 genome unspecific (all in)         | 0.9856459 | 0.4301403 | 1         | 0.7018429 | 1            | 0.7884539    |
| #### Bn-scaff_16449_1-p25152 genome unspecific (all in)         | 0.9545454 | 0.4130471 | 1         | 0.5463395 | 1            | 0.9272014    |
| #### Bn-scaff_16449_1-p25368 genome unspecific (all in)         | 0.9641148 | 0.593721  | 0.9922481 | 0.6895486 | 1            | 0.9123333    |
| #### Bn-scaff_16449_1-p31832 C-genome specific (napus-oleracea) | 0.9712918 | 0.7468372 | 0.9922481 | 0.6353652 | not scorable | not scorable |
| #### Bn-scaff_16449_1-p32095 C-genome specific (napus-oleracea) | 0.9688995 | 0.7629336 | 0.9922481 | 0.7123038 | not scorable | not scorable |
| #### Bn-scaff_16449_1-p32121 C-genome specific (napus-oleracea) | 0.9521531 | 0.9144835 | 0.9922481 | 0.703544  | not scorable | not scorable |
| #### Bn-scaff_16449_1-p32148 C-genome specific (napus-oleracea) | 0.9712918 | 0.8711675 | 0.9922481 | 0.7394786 | not scorable | not scorable |
| #### Bn-scaff_16449_1-p32785 C-genome specific (napus-oleracea) | 0.9736842 | 0.7569245 | 1         | 0.6642377 | not scorable | not scorable |
| #### Bn-scaff_16449_1-p33402 C-genome specific (napus-oleracea) | 0.9521531 | 0.668139  | 1         | 0.7580685 | not scorable | not scorable |
| #### Bn-scaff_16449_1-p33477 C-genome specific (napus-oleracea) | 0.9760765 | 0.7452328 | 0.9922481 | 0.7251071 | not scorable | not scorable |
| #### Bn-scaff_16449_1-p33497 C-genome specific (napus-oleracea) | 0.9880383 | 0.7093217 | 1         | 0.7049776 | not scorable | not scorable |
| #### Bn-scaff_16449_1-p34894 C-genome specific (napus-oleracea) | 0.9593301 | 0.7057384 | 0.9147287 | 0.7598747 | not scorable | not scorable |
| #### Bn-scaff_16449_1-p35089 genome unspecific (all in)         | 0.9521531 | 0.5155376 | 1         | 0.7153463 | 0.9834711    | 0.932282     |
| #### Bn-scaff_16449_1-p38496 C-genome specific (napus-oleracea) | 0.9617225 | 0.7372445 | 1         | 0.6734795 | not scorable | not scorable |
| #### Bn-scaff_16449_1-p38861 C-genome specific (napus-oleracea) | 0.9593301 | 0.7702329 | 1         | 0.8698785 | not scorable | not scorable |
| #### Bn-scaff_16449_1-p39065 C-genome specific (napus-oleracea) | 0.9665072 | 0.9109733 | 0.9922481 | 0.8343861 | not scorable | not scorable |
| #### Bn-scaff_16449_1-p39195 C-genome specific (napus-oleracea) | 0.9808612 | 0.7271373 | 1         | 0.6231369 | not scorable | not scorable |
| #### Bn-scaff_16449_1-p39978 C-genome specific (napus-oleracea) | 0.930622  | 0.6523751 | 0.9922481 | 0.7104144 | not scorable | not scorable |
| #### Bn-scaff_16449_1-p40101 C-genome specific (napus-oleracea) | 0.937799  | 0.8773554 | 1         | 0.7916833 | not scorable | not scorable |
| #### Bn-scaff_16449_1-p40328 C-genome specific (napus-oleracea) | 0.9593301 | 0.8071558 | 0.9844961 | 0.7072069 | not scorable | not scorable |
| #### Bn-scaff_16449_1-p41550 C-genome specific (napus-oleracea) | 0.930622  | 0.8511971 | 1         | 0.7204137 | not scorable | not scorable |
| #### Bn-scaff_16449_1-p46462 C-genome specific (napus-oleracea) | 0.9258373 | 0.7945043 | 1         | 0.7812302 | not scorable | not scorable |
| #### Bn-scaff_16449_1-p47010 C-genome specific (napus-oleracea) | 0.9401914 | 0.8128284 | 0.9922481 | 0.7404473 | not scorable | not scorable |



|                                                                 |              |              |              |              |              |              |
|-----------------------------------------------------------------|--------------|--------------|--------------|--------------|--------------|--------------|
| #### Bn-scaff_16449_1-p4996 genome unspecific (all in)          | 0.9688995    | 0.5384709    | 0.9767442    | 0.6543908    | 0.9917355    | 0.9301436    |
| #### Bn-scaff_16449_1-p50437 C-genome specific (napus-oleracea) | 0.9808612    | 0.7863117    | 0.9147287    | 0.8016525    | not scorable | not scorable |
| #### Bn-scaff_16449_1-p51890 genome unspecific (all in)         | 0.8492823    | 0.9142365    | 0.6744186    | 0.9175813    | 1            | 0.9241781    |
| #### Bn-scaff_16449_1-p55532 genome unspecific (all in)         | 0.9760765    | 0.5482881    | 1            | 0.8223361    | 1            | 0.8761539    |
| #### Bn-scaff_16449_1-p55563 genome unspecific (all in)         | 1            | 0.7933006    | 1            | 0.8347176    | 1            | 0.8108987    |
| #### Bn-scaff_16449_1-p55992 C-genome specific (napus-oleracea) | 0.9904306    | 0.7832189    | 0.9922481    | 0.8243488    | not scorable | not scorable |
| #### Bn-scaff_16449_1-p57097 C-genome specific (napus-oleracea) | 0.9880383    | 0.7953969    | 0.9922481    | 0.8029774    | not scorable | not scorable |
| #### Bn-scaff_16449_1-p67019 C-genome specific (napus-oleracea) | 0.9928229    | 0.6974347    | 1            | 0.6729705    | not scorable | not scorable |
| #### Bn-scaff_16449_1-p68896 genome unspecific (oleracea-rapa)  | not scorable | not scorable | 1            | 0.4294452    | 1            | 0.7376376    |
| #### Bn-scaff_16449_1-p69605 C-genome specific (napus-oleracea) | 0.9808612    | 0.7970409    | 1            | 0.7624881    | not scorable | not scorable |
| #### Bn-scaff_16449_1-p71165 genome unspecific (all in)         | 0.9688995    | 0.6480152    | 1            | 0.5959367    | 0.9834711    | 0.7806608    |
| #### Bn-scaff_16449_1-p76222 genome unspecific (all in)         | 0.9832536    | 0.3337075    | 0.9922481    | 0.2852623    | 1            | 0.7508122    |
| #### Bn-scaff_16449_1-p7643 C-genome specific (napus-oleracea)  | 0.9473684    | 0.7985375    | 1            | 0.6625004    | not scorable | not scorable |
| #### Bn-scaff_16449_1-p7984 C-genome specific (napus-oleracea)  | 0.923445     | 0.8519487    | 1            | 0.7464131    | not scorable | not scorable |
| #### Bn-scaff_16449_1-p81087 C-genome specific (napus-oleracea) | 0.9928229    | 0.8160564    | 1            | 0.9385613    | not scorable | not scorable |
| #### Bn-scaff_16449_1-p8465 C-genome specific (napus-oleracea)  | 0.9569378    | 0.7089104    | 0.9922481    | 0.7629539    | not scorable | not scorable |
| #### Bn-scaff_16449_1-p85052 C-genome specific (napus-oleracea) | 0.9880383    | 0.8440306    | 1            | 0.7928687    | not scorable | not scorable |
| #### Bn-scaff_16449_1-p86718 C-genome specific (napus-oleracea) | 0.9952153    | 0.8644658    | 0.9844961    | 0.7051774    | not scorable | not scorable |
| #### Bn-scaff_16449_1-p87597 C-genome specific (napus-oleracea) | 0.9904306    | 0.8448101    | 0.9689922    | 0.7730362    | not scorable | not scorable |
| #### Bn-scaff_16449_1-p87814 C-genome specific (napus-oleracea) | 0.9952153    | 0.7609546    | 0.9922481    | 0.5690081    | not scorable | not scorable |
| #### Bn-scaff_16449_1-p91246 napus specific                     | 0.9617225    | 0.9044991    | not scorable | not scorable | not scorable | not scorable |
| #### Bn-scaff_16449_1-p92326 C-genome specific (napus-oleracea) | 0.9784689    | 0.7475615    | 0.7984496    | 0.7604301    | not scorable | not scorable |
| #### Bn-scaff_16449_1-p92407 C-genome specific (napus-oleracea) | 0.9736842    | 0.6793234    | 1            | 0.6483488    | not scorable | not scorable |
| #### Bn-scaff_16449_1-p95026 C-genome specific (napus-oleracea) | 0.9904306    | 0.7790921    | 1            | 0.8498898    | not scorable | not scorable |
| #### Bn-scaff_16449_1-p98686 napus specific                     | 0.9808612    | 0.9233251    | not scorable | not scorable | not scorable | not scorable |
| #### Bn-scaff_16449_1-p98978 C-genome specific (napus-oleracea) | 0.9688995    | 0.6981785    | 0.9844961    | 0.9329557    | not scorable | not scorable |
| #### Bn-scaff_16449_2-p12259 C-genome specific (napus-oleracea) | 0.9736842    | 0.782562     | 0.9922481    | 0.8239086    | not scorable | not scorable |
| #### Bn-scaff_16449_2-p12519 C-genome specific (napus-oleracea) | 0.9760765    | 0.749298     | 1            | 0.7206302    | not scorable | not scorable |
| #### Bn-scaff_16449_2-p12571 C-genome specific (napus-oleracea) | 0.9784689    | 0.7709254    | 0.9922481    | 0.7829072    | not scorable | not scorable |
| #### Bn-scaff_16449_2-p18145 C-genome specific (napus-oleracea) | 0.9521531    | 0.5136976    | 0.9844961    | 0.7245917    | not scorable | not scorable |
| #### Bn-scaff_16449_2-p20703 C-genome specific (oleracea only)  | not scorable | not scorable | 0.9922481    | 0.7659394    | not scorable | not scorable |
| #### Bn-scaff_16449_2-p37267 C-genome specific (napus-oleracea) | 0.9712918    | 0.771109     | 0.9922481    | 0.8220954    | not scorable | not scorable |
| #### Bn-scaff_16449_2-p37719 C-genome specific (oleracea only)  | not scorable | not scorable | 0.6976744    | 0.9033858    | not scorable | not scorable |

|                                                                 |              |              |              |              |              |              |
|-----------------------------------------------------------------|--------------|--------------|--------------|--------------|--------------|--------------|
| #### Bn-scaff_16449_2-p37856 C-genome specific (napus-oleracea) | 0.9688995    | 0.7776746    | 0.9844961    | 0.8437496    | not scorable | not scorable |
| #### Bn-scaff_16449_3-p10312 C-genome specific (napus-oleracea) | 0.9784689    | 0.6866634    | 1            | 0.6942781    | not scorable | not scorable |
| #### Bn-scaff_16449_3-p5650 C-genome specific (napus-oleracea)  | 0.9617225    | 0.7697589    | 1            | 0.7752942    | not scorable | not scorable |
| #### Bn-scaff_16449_3-p6862 C-genome specific (napus-oleracea)  | 0.9808612    | 0.7671058    | 1            | 0.7301905    | not scorable | not scorable |
| #### Bn-scaff_16449_3-p9708 C-genome specific (napus-oleracea)  | 0.9928229    | 0.9172825    | 1            | 0.9175813    | not scorable | not scorable |
| #### Bn-scaff_16449_3-p9805 C-genome specific (napus-oleracea)  | 0.9641148    | 0.7336323    | 1            | 0.6905129    | not scorable | not scorable |
| #### Bn-scaff_16450_1-p10187 C-genome specific (napus-oleracea) | 0.9808612    | 0.7535894    | 0.9844961    | 0.7775492    | not scorable | not scorable |
| #### Bn-scaff_16450_1-p10648 genome unspecific (all in)         | 0.9665072    | 0.3520468    | 0.9844961    | 0.6962644    | 1            | 0.7921412    |
| #### Bn-scaff_16450_1-p15270 C-genome specific (napus-oleracea) | 0.9856459    | 0.6840516    | 1            | 0.6387878    | not scorable | not scorable |
| #### Bn-scaff_16450_1-p16882 genome unspecific (oleracea-rapa)  | not scorable | not scorable | 0.9689922    | 0.2288208    | 1            | 0.7494321    |
| #### Bn-scaff_16450_1-p28287 C-genome specific (napus-oleracea) | 0.9641148    | 0.5982515    | 0.9224806    | 0.5838332    | not scorable | not scorable |
| #### Bn-scaff_16450_1-p28698 genome unspecific (all in)         | 0.9712918    | 0.5023471    | 0.9844961    | 0.7069122    | 1            | 0.9095823    |
| #### Bn-scaff_16450_1-p34303 C-genome specific (napus-oleracea) | 0.9354067    | 0.5250697    | 0.8527132    | 0.7440476    | not scorable | not scorable |
| #### Bn-scaff_16450_1-p36897 A-genome specific (rapa only)      | not scorable | not scorable | not scorable | not scorable | 1            | 0.5780199    |
| #### Bn-scaff_16450_1-p40608 C-genome specific (napus-oleracea) | 0.9688995    | 0.6899365    | 0.7674419    | 0.8611382    | not scorable | not scorable |
| #### Bn-scaff_16450_1-p72895 C-genome specific (napus-oleracea) | 0.9856459    | 0.772785     | 0.9922481    | 0.7939171    | not scorable | not scorable |
| #### Bn-scaff_16454_1-p14934 genome unspecific (oleracea-rapa)  | not scorable | not scorable | 1            | 0.842458     | 0.9834711    | 0.3432466    |
| #### Bn-scaff_16454_1-p17405 C-genome specific (napus-oleracea) | 0.9928229    | 0.9489046    | 1            | 0.7634322    | not scorable | not scorable |
| #### Bn-scaff_16454_1-p31795 genome unspecific (all in)         | 0.9832536    | 0.3110724    | 1            | 0.8518597    | 0.9917355    | 0.8675869    |
| #### Bn-scaff_16454_1-p39346 genome unspecific (all in)         | 1            | 0.7914145    | 1            | 0.7884539    | 1            | 0.7983645    |
| #### Bn-scaff_16454_1-p39374 genome unspecific (all in)         | 0.9832536    | 0.3202763    | 1            | 0.9133482    | 0.9917355    | 0.810855     |
| #### Bn-scaff_16454_1-p45944 C-genome specific (napus-oleracea) | 0.9928229    | 0.6705366    | 1            | 0.8004208    | not scorable | not scorable |
| #### Bn-scaff_16454_1-p56466 genome unspecific (all in)         | 0.9832536    | 0.3633982    | 1            | 0.714363     | 0.9752066    | 0.7305511    |
| #### Bn-scaff_16454_1-p68560 genome unspecific (all in)         | 0.9928229    | 0.5025495    | 1            | 0.8392912    | 1            | 0.9205655    |
| #### Bn-scaff_16454_1-p69587 C-genome specific (napus-oleracea) | 0.9928229    | 0.8407958    | 0.9844961    | 0.8061934    | not scorable | not scorable |
| #### Bn-scaff_16454_1-p69983 C-genome specific (napus-oleracea) | 0.9952153    | 0.7288752    | 1            | 0.6805803    | not scorable | not scorable |
| #### Bn-scaff_16454_1-p73573 A-genome specific (rapa only)      | not scorable | not scorable | not scorable | not scorable | 0.9586777    | 0.9510197    |
| #### Bn-scaff_16454_1-p87124 C-genome specific (napus-oleracea) | 0.9952153    | 0.6929349    | 0.9844961    | 0.6309304    | not scorable | not scorable |
| #### Bn-scaff_16454_1-p88040 C-genome specific (napus-oleracea) | 1            | 0.7717652    | 1            | 0.6437835    | not scorable | not scorable |
| #### Bn-scaff_16454_1-p88490 all not scorable                   | not scorable | not scorable | not scorable | not scorable | not scorable | not scorable |
| #### Bn-scaff_16454_1-p94386 C-genome specific (napus-oleracea) | 1            | 0.9061035    | 1            | 0.8936638    | not scorable | not scorable |
| #### Bn-scaff_16456_1-p12134 C-genome specific (oleracea only)  | not scorable | not scorable | 1            | 0.7659664    | not scorable | not scorable |
| #### Bn-scaff_16456_1-p23009 C-genome specific (napus-oleracea) | 0.9904306    | 0.760488     | 1            | 0.7451836    | not scorable | not scorable |

|                                                                |              |              |              |              |              |              |
|----------------------------------------------------------------|--------------|--------------|--------------|--------------|--------------|--------------|
| #### Bn-scaff_16456_1-p34901C-genome specific (napus-oleracea) | 0.9880383    | 0.74742      | 1            | 0.8564736    | not scorable | not scorable |
| #### Bn-scaff_16456_1-p35658genome unspecific (oleracea-rapa)  | not scorable | not scorable | 1            | 0.8041802    | 1            | 0.8318484    |
| #### Bn-scaff_16456_1-p40383C-genome specific (napus-oleracea) | 0.9736842    | 0.7492349    | 0.9767442    | 0.7766055    | not scorable | not scorable |
| #### Bn-scaff_16456_1-p40637C-genome specific (napus-oleracea) | 0.9808612    | 0.7777259    | 1            | 0.8262588    | not scorable | not scorable |
| #### Bn-scaff_16456_1-p40826C-genome specific (oleracea only)  | not scorable | not scorable | 1            | 0.6424635    | not scorable | not scorable |
| #### Bn-scaff_16456_1-p41581C-genome specific (napus-oleracea) | 0.9760765    | 0.7515379    | 0.9922481    | 0.7532398    | not scorable | not scorable |
| #### Bn-scaff_16456_1-p45340genome unspecific (all in)         | 0.9688995    | 0.6385659    | 1            | 0.6942552    | 1            | 0.9057811    |
| #### Bn-scaff_16456_1-p47243C-genome specific (oleracea only)  | not scorable | not scorable | 0.9069768    | 0.9175813    | not scorable | not scorable |
| #### Bn-scaff_16456_1-p48112C-genome specific (oleracea only)  | not scorable | not scorable | 0.8992248    | 0.891441     | not scorable | not scorable |
| #### Bn-scaff_16456_1-p48564genome unspecific (all in)         | 1            | 0.4491377    | 1            | 0.7398931    | 1            | 0.7905719    |
| #### Bn-scaff_16456_1-p55436A-genome specific (napus-rapa)     | 1            | 0.6268359    | not scorable | not scorable | 1            | 0.938266     |
| #### Bn-scaff_16456_1-p56157C-genome specific (napus-oleracea) | 1            | 0.6734034    | 1            | 0.7739488    | not scorable | not scorable |
| #### Bn-scaff_16456_1-p57033genome unspecific (all in)         | 0.9832536    | 0.3271142    | 1            | 0.6858631    | 0.9669421    | 0.420367     |
| #### Bn-scaff_16456_1-p73482C-genome specific (napus-oleracea) | 0.3923445    | 0.7078395    | 0.5891473    | 0.7770717    | not scorable | not scorable |
| #### Bn-scaff_16456_1-p73543genome unspecific (all in)         | 0.7559808    | 0.7377619    | 0.5891473    | 0.7830434    | 0.9256198    | 0.7675161    |
| #### Bn-scaff_16456_1-p73574C-genome specific (napus-oleracea) | 0.3875598    | 0.7204968    | 0.5968992    | 0.7739488    | not scorable | not scorable |
| #### Bn-scaff_16456_1-p74478C-genome specific (napus-oleracea) | 0.9904306    | 0.3831355    | 0.9844961    | 0.9341145    | not scorable | not scorable |
| #### Bn-scaff_16456_1-p81769genome unspecific (all in)         | 0.9856459    | 0.419998     | 1            | 0.9101667    | 0.9752066    | 0.8982891    |
| #### Bn-scaff_16456_1-p83234genome unspecific (all in)         | 0.9832536    | 0.5020441    | 1            | 0.9272014    | 1            | 0.9205657    |
| #### Bn-scaff_16468_1-p10092C-genome specific (napus-oleracea) | 0.9617225    | 0.5179775    | 0.9922481    | 0.2807873    | not scorable | not scorable |
| #### Bn-scaff_16468_1-p10165C-genome specific (napus-oleracea) | 0.9808612    | 0.7716073    | 1            | 0.8067125    | not scorable | not scorable |
| #### Bn-scaff_16468_1-p10445C-genome specific (napus-oleracea) | 0.9712918    | 0.7764159    | 1            | 0.7977852    | not scorable | not scorable |
| #### Bn-scaff_16468_1-p11027C-genome specific (napus-oleracea) | 0.9665072    | 0.7641447    | 1            | 0.7548146    | not scorable | not scorable |
| #### Bn-scaff_16468_1-p11354C-genome specific (napus-oleracea) | 0.9856459    | 0.7608863    | 1            | 0.7529774    | not scorable | not scorable |
| #### Bn-scaff_16468_1-p11406C-genome specific (napus-oleracea) | 0.9832536    | 0.7624269    | 1            | 0.786087     | not scorable | not scorable |
| #### Bn-scaff_16468_1-p11416C-genome specific (napus-oleracea) | 0.9760765    | 0.7013813    | 1            | 0.7476176    | not scorable | not scorable |
| #### Bn-scaff_16468_1-p12683C-genome specific (napus-oleracea) | 0.9736842    | 0.7732848    | 1            | 0.8006949    | not scorable | not scorable |
| #### Bn-scaff_16468_1-p14079C-genome specific (napus-oleracea) | 0.9593301    | 0.749787     | 0.9844961    | 0.6867234    | not scorable | not scorable |
| #### Bn-scaff_16468_1-p14169C-genome specific (napus-oleracea) | 0.9880383    | 0.776706     | 1            | 0.7940474    | not scorable | not scorable |
| #### Bn-scaff_16468_1-p14213C-genome specific (napus-oleracea) | 0.9688995    | 0.7316677    | 1            | 0.7028005    | not scorable | not scorable |
| #### Bn-scaff_16468_1-p14233C-genome specific (napus-oleracea) | 0.9904306    | 0.7723307    | 1            | 0.7875429    | not scorable | not scorable |
| #### Bn-scaff_16468_1-p14270C-genome specific (napus-oleracea) | 0.9736842    | 0.7353849    | 1            | 0.7336926    | not scorable | not scorable |
| #### Bn-scaff_16468_1-p15379C-genome specific (napus-oleracea) | 0.9665072    | 0.6830937    | 1            | 0.6980514    | not scorable | not scorable |

|                                                                 |              |              |           |   |           |              |              |
|-----------------------------------------------------------------|--------------|--------------|-----------|---|-----------|--------------|--------------|
| #### Bn-scaff_16468_1-p16318 C-genome specific (napus-oleracea) | 0.9521531    | 0.7005882    |           | 1 | 0.685146  | not scorable | not scorable |
| #### Bn-scaff_16468_1-p17445 C-genome specific (napus-oleracea) | 0.9760765    | 0.7471101    |           | 1 | 0.7580657 | not scorable | not scorable |
| #### Bn-scaff_16468_1-p18551 C-genome specific (napus-oleracea) | 0.9497608    | 0.6745757    | 0.9922481 |   | 0.7392926 | not scorable | not scorable |
| #### Bn-scaff_16468_1-p18594 C-genome specific (napus-oleracea) | 0.9760765    | 0.7695084    | 0.9922481 |   | 0.7582693 | not scorable | not scorable |
| #### Bn-scaff_16468_1-p18864 C-genome specific (napus-oleracea) | 0.9593301    | 0.5628087    |           | 1 | 0.7189808 | not scorable | not scorable |
| #### Bn-scaff_16468_1-p18948 C-genome specific (napus-oleracea) | 0.9904306    | 0.7134907    |           | 1 | 0.8026637 | not scorable | not scorable |
| #### Bn-scaff_16468_1-p18988 C-genome specific (napus-oleracea) | 0.9760765    | 0.7449477    |           | 1 | 0.6959226 | not scorable | not scorable |
| #### Bn-scaff_16468_1-p19861 C-genome specific (napus-oleracea) | 0.9760765    | 0.7740652    |           | 1 | 0.763023  | not scorable | not scorable |
| #### Bn-scaff_16468_1-p19870 C-genome specific (napus-oleracea) | 0.9569378    | 0.6886263    |           | 1 | 0.685779  | not scorable | not scorable |
| #### Bn-scaff_16468_1-p21799 C-genome specific (napus-oleracea) | 0.9688995    | 0.7529473    |           | 1 | 0.854561  | not scorable | not scorable |
| #### Bn-scaff_16468_1-p21870 C-genome specific (napus-oleracea) | 0.9832536    | 0.667131     |           | 1 | 0.698265  | not scorable | not scorable |
| #### Bn-scaff_16468_1-p21923 C-genome specific (napus-oleracea) | 0.9784689    | 0.7711915    |           | 1 | 0.8599298 | not scorable | not scorable |
| #### Bn-scaff_16468_1-p22054 C-genome specific (napus-oleracea) | 0.9641148    | 0.6494905    |           | 1 | 0.6229455 | not scorable | not scorable |
| #### Bn-scaff_16468_1-p22093 C-genome specific (napus-oleracea) | 0.9856459    | 0.7338774    |           | 1 | 0.6746892 | not scorable | not scorable |
| #### Bn-scaff_16468_1-p22153 C-genome specific (napus-oleracea) | 0.9736842    | 0.6938334    |           | 1 | 0.6833032 | not scorable | not scorable |
| #### Bn-scaff_16468_1-p22810 C-genome specific (napus-oleracea) | 0.9593301    | 0.5952131    |           | 1 | 0.6015682 | not scorable | not scorable |
| #### Bn-scaff_16468_1-p24103 C-genome specific (napus-oleracea) | 0.9880383    | 0.6755653    |           | 1 | 0.7322224 | not scorable | not scorable |
| #### Bn-scaff_16468_1-p24207 C-genome specific (napus-oleracea) | 0.9545454    | 0.5340011    |           | 1 | 0.5314681 | not scorable | not scorable |
| #### Bn-scaff_16468_1-p28121 genome unspecific (oleracea-rapa)  | not scorable | not scorable | 0.9767442 |   | 0.5293133 | 1            | 0.8237632    |
| #### Bn-scaff_16468_1-p28898 C-genome specific (napus-oleracea) | 0.9736842    | 0.773899     |           | 1 | 0.81508   | not scorable | not scorable |
| #### Bn-scaff_16468_1-p29002 C-genome specific (napus-oleracea) | 0.9856459    | 0.7593741    |           | 1 | 0.8022158 | not scorable | not scorable |
| #### Bn-scaff_16468_1-p29482 C-genome specific (napus-oleracea) | 0.9736842    | 0.6759574    |           | 1 | 0.718382  | not scorable | not scorable |
| #### Bn-scaff_16468_1-p29500 C-genome specific (napus-oleracea) | 0.9856459    | 0.7131819    |           | 1 | 0.709409  | not scorable | not scorable |
| #### Bn-scaff_16468_1-p29561 C-genome specific (napus-oleracea) | 0.9760765    | 0.7208327    |           | 1 | 0.6604778 | not scorable | not scorable |
| #### Bn-scaff_16468_1-p29690 C-genome specific (napus-oleracea) | 0.9736842    | 0.7549481    |           | 1 | 0.7014122 | not scorable | not scorable |
| #### Bn-scaff_16468_1-p29804 C-genome specific (napus-oleracea) | 0.9760765    | 0.6348242    |           | 1 | 0.5685691 | not scorable | not scorable |
| #### Bn-scaff_16468_1-p29804 C-genome specific (napus-oleracea) | 0.9808612    | 0.7540135    |           | 1 | 0.7375652 | not scorable | not scorable |
| #### Bn-scaff_16468_1-p29855 C-genome specific (napus-oleracea) | 0.9712918    | 0.7634963    |           | 1 | 0.7631978 | not scorable | not scorable |
| #### Bn-scaff_16468_1-p29958 C-genome specific (napus-oleracea) | 0.9856459    | 0.6838155    |           | 1 | 0.6782348 | not scorable | not scorable |
| #### Bn-scaff_16468_1-p30060 C-genome specific (napus-oleracea) | 0.9545454    | 0.7673863    | 0.9844961 |   | 0.7125404 | not scorable | not scorable |
| #### Bn-scaff_16468_1-p30661 C-genome specific (napus-oleracea) | 0.9497608    | 0.6780812    | 0.9922481 |   | 0.7170591 | not scorable | not scorable |
| #### Bn-scaff_16468_1-p30671 C-genome specific (napus-oleracea) | 0.9784689    | 0.772691     |           | 1 | 0.7440841 | not scorable | not scorable |
| #### Bn-scaff_16468_1-p30679 C-genome specific (napus-oleracea) | 0.9617225    | 0.4312728    |           | 1 | 0.8320879 | not scorable | not scorable |

|                                                               |              |              |              |              |              |              |
|---------------------------------------------------------------|--------------|--------------|--------------|--------------|--------------|--------------|
| #### Bn-scaff_16468_1-p3082C genome unspecific (all in)       | 0.9449761    | 0.4847183    | 1            | 0.7111765    | 0.9752066    | 0.9063874    |
| #### Bn-scaff_16468_1-p3082C genome unspecific (all in)       | 0.930622     | 0.3800788    | 1            | 0.7655963    | 0.9752066    | 0.9753342    |
| #### Bn-scaff_16468_1-p3116C genome specific (napus-oleracea) | 0.9880383    | 0.7682557    | 1            | 0.8429182    | not scorable | not scorable |
| #### Bn-scaff_16468_1-p3121C genome specific (napus-oleracea) | 0.9856459    | 0.7562064    | 1            | 0.8675887    | not scorable | not scorable |
| #### Bn-scaff_16468_1-p3536C genome specific (napus-oleracea) | 0.9688995    | 0.7711241    | 1            | 0.765447     | not scorable | not scorable |
| #### Bn-scaff_16468_1-p3540C genome specific (napus-oleracea) | 0.9856459    | 0.7740884    | 1            | 0.881908     | not scorable | not scorable |
| #### Bn-scaff_16468_1-p3554C genome specific (napus-oleracea) | 0.9784689    | 0.7095       | 1            | 0.6855436    | not scorable | not scorable |
| #### Bn-scaff_16468_1-p3589C genome specific (napus-oleracea) | 0.9784689    | 0.766491     | 0.9922481    | 0.8007047    | not scorable | not scorable |
| #### Bn-scaff_16468_1-p3592C genome specific (napus-oleracea) | 0.9784689    | 0.7387477    | 1            | 0.8273427    | not scorable | not scorable |
| #### Bn-scaff_16468_1-p4135C genome specific (napus-oleracea) | 0.9712918    | 0.6814731    | 1            | 0.6733218    | not scorable | not scorable |
| #### Bn-scaff_16468_1-p4191 genome unspecific (all in)        | 1            | 0.5418807    | 1            | 0.565666     | 1            | 0.6520638    |
| #### Bn-scaff_16468_1-p4501C genome specific (napus-oleracea) | 0.9976076    | 0.8968374    | 0.9922481    | 0.7376692    | not scorable | not scorable |
| #### Bn-scaff_16468_1-p9569C genome specific (napus-oleracea) | 0.9808612    | 0.6532639    | 1            | 0.6518705    | not scorable | not scorable |
| #### Bn-scaff_16468_1-p9673C genome specific (napus-oleracea) | 0.9617225    | 0.7114002    | 1            | 0.7428636    | not scorable | not scorable |
| #### Bn-scaff_16468_1-p9881C genome specific (napus-oleracea) | 0.9784689    | 0.6963379    | 1            | 0.7672493    | not scorable | not scorable |
| #### Bn-scaff_16468_1-p9993C genome specific (napus-oleracea) | 0.9832536    | 0.7020119    | 1            | 0.7044402    | not scorable | not scorable |
| #### Bn-scaff_16478_1-p1015 genome unspecific (all in)        | 1            | 0.8225559    | 1            | 0.8433948    | 1            | 0.8279581    |
| #### Bn-scaff_16478_1-p1051 genome unspecific (oleracea-rapa) | not scorable | not scorable | 1            | 0.6725035    | 0.9917355    | 0.7369636    |
| #### Bn-scaff_16478_1-p1065C genome specific (napus-oleracea) | 0.9928229    | 0.9216242    | 1            | 0.8472182    | not scorable | not scorable |
| #### Bn-scaff_16478_1-p1065C genome specific (napus-oleracea) | 1            | 0.708327     | 1            | 0.6053467    | not scorable | not scorable |
| #### Bn-scaff_16478_1-p4472C genome specific (napus-oleracea) | 0.9976076    | 0.8435827    | 1            | 0.695912     | not scorable | not scorable |
| #### Bn-scaff_16478_1-p4981 genome unspecific (all in)        | 0.9952153    | 0.7470211    | 1            | 0.8060433    | 0.7438017    | 0.8114662    |
| #### Bn-scaff_16478_1-p5096C genome specific (napus-oleracea) | 0.9952153    | 0.7874541    | 1            | 0.7796232    | not scorable | not scorable |
| #### Bn-scaff_16478_1-p5288 genome unspecific (all in)        | 1            | 0.3642358    | 1            | 0.9279663    | 0.9917355    | 0.7931963    |
| #### Bn-scaff_16478_1-p5673 genome unspecific (all in)        | 0.9928229    | 0.5739063    | 1            | 0.8004208    | 1            | 0.8168693    |
| #### Bn-scaff_16478_1-p6308C genome specific (oleracea only)  | not scorable | not scorable | 0.9767442    | 0.4115656    | not scorable | not scorable |
| #### Bn-scaff_16478_1-p6311C genome specific (oleracea only)  | not scorable | not scorable | 1            | 0.7741675    | not scorable | not scorable |
| #### Bn-scaff_16478_1-p6590 all not scorable                  | not scorable | not scorable | not scorable | not scorable | not scorable | not scorable |
| #### Bn-scaff_16478_1-p7566 genome unspecific (all in)        | 1            | 0.5709352    | 1            | 0.7821922    | 1            | 0.4871115    |
| #### Bn-scaff_16485_1-p1010C genome specific (napus-oleracea) | 0.9856459    | 0.8061599    | 0.9302326    | 0.7860149    | not scorable | not scorable |
| #### Bn-scaff_16485_1-p1040 napus specific                    | 0.9976076    | 0.4252975    | not scorable | not scorable | not scorable | not scorable |
| #### Bn-scaff_16485_1-p1041A genome specific (rapa only)      | not scorable | not scorable | not scorable | not scorable | 0.9917355    | 0.5309913    |
| #### Bn-scaff_16485_1-p1043 genome unspecific (all in)        | 0.9904306    | 0.366282     | 0.9844961    | 0.4655136    | 1            | 0.6687586    |

|                                                                 |              |              |              |              |              |              |
|-----------------------------------------------------------------|--------------|--------------|--------------|--------------|--------------|--------------|
| #### Bn-scaff_16485_1-p10933 C-genome specific (napus-oleracea) | 0.9976076    | 0.7471198    | 0.9767442    | 0.7382397    | not scorable | not scorable |
| #### Bn-scaff_16485_1-p11423 A-genome specific (rapa only)      | not scorable | not scorable | not scorable | not scorable | 1            | 0.8973816    |
| #### Bn-scaff_16485_1-p11866 C-genome specific (napus-oleracea) | 0.9904306    | 0.9305648    | 0.9922481    | 0.9272014    | not scorable | not scorable |
| #### Bn-scaff_16485_1-p11870 genome unspecific (all in)         | 0.9832536    | 0.342595     | 0.9689922    | 0.2529975    | 1            | 0.8375481    |
| #### Bn-scaff_16485_1-p11986 genome unspecific (all in)         | 0.9928229    | 0.7372375    | 0.9844961    | 0.8093597    | 1            | 0.9347161    |
| #### Bn-scaff_16485_1-p12250 C-genome specific (napus-oleracea) | 0.9880383    | 0.8208053    | 0.9844961    | 0.8259574    | not scorable | not scorable |
| #### Bn-scaff_16485_1-p12255 genome unspecific (all in)         | 0.9784689    | 0.6196926    | 1            | 0.7453811    | 1            | 0.9420302    |
| #### Bn-scaff_16485_1-p12607 C-genome specific (napus-oleracea) | 0.9832536    | 0.9267086    | 0.9069768    | 0.8336643    | not scorable | not scorable |
| #### Bn-scaff_16485_1-p12612 C-genome specific (napus-oleracea) | 0.9880383    | 0.8152764    | 0.9147287    | 0.8010613    | not scorable | not scorable |
| #### Bn-scaff_16485_1-p12616 C-genome specific (napus-oleracea) | 0.9808612    | 0.7966008    | 0.9302326    | 0.7261337    | not scorable | not scorable |
| #### Bn-scaff_16485_1-p12629 C-genome specific (napus-oleracea) | 0.9856459    | 0.8888741    | 0.9224806    | 0.7456861    | not scorable | not scorable |
| #### Bn-scaff_16485_1-p12633 C-genome specific (napus-oleracea) | 0.9880383    | 0.8763751    | 0.9069768    | 0.8543414    | not scorable | not scorable |
| #### Bn-scaff_16485_1-p12642 genome unspecific (all in)         | 0.9976076    | 0.6842539    | 0.9689922    | 0.6377361    | 0.6942149    | 0.6444474    |
| #### Bn-scaff_16485_1-p12670 C-genome specific (napus-oleracea) | 0.9832536    | 0.8868982    | 0.9147287    | 0.7972773    | not scorable | not scorable |
| #### Bn-scaff_16485_1-p12722 C-genome specific (napus-oleracea) | 0.9952153    | 0.707109     | 0.9922481    | 0.6939807    | not scorable | not scorable |
| #### Bn-scaff_16485_1-p12927 C-genome specific (napus-oleracea) | 0.9880383    | 0.8476419    | 1            | 0.7491218    | not scorable | not scorable |
| #### Bn-scaff_16485_1-p13173 C-genome specific (napus-oleracea) | 0.9952153    | 0.7744744    | 0.9844961    | 0.7571673    | not scorable | not scorable |
| #### Bn-scaff_16485_1-p13177 C-genome specific (napus-oleracea) | 0.9880383    | 0.7965746    | 0.9844961    | 0.6722715    | not scorable | not scorable |
| #### Bn-scaff_16485_1-p13349 C-genome specific (napus-oleracea) | 0.9856459    | 0.8410723    | 1            | 0.8585836    | not scorable | not scorable |
| #### Bn-scaff_16485_1-p13583 C-genome specific (oleracea only)  | not scorable | not scorable | 0.9922481    | 0.5593591    | not scorable | not scorable |
| #### Bn-scaff_16485_1-p13785 C-genome specific (napus-oleracea) | 0.9832536    | 0.7064283    | 0.9689922    | 0.7460155    | not scorable | not scorable |
| #### Bn-scaff_16485_1-p13786 C-genome specific (napus-oleracea) | 0.9880383    | 0.8119172    | 0.9767442    | 0.7589751    | not scorable | not scorable |
| #### Bn-scaff_16485_1-p13851 C-genome specific (napus-oleracea) | 0.9928229    | 0.8891597    | 1            | 0.7441957    | not scorable | not scorable |
| #### Bn-scaff_16485_1-p13854 C-genome specific (napus-oleracea) | 0.9904306    | 0.833212     | 1            | 0.7807333    | not scorable | not scorable |
| #### Bn-scaff_16485_1-p13862 C-genome specific (napus-oleracea) | 0.9880383    | 0.9252878    | 1            | 0.7967273    | not scorable | not scorable |
| #### Bn-scaff_16485_1-p13865 C-genome specific (napus-oleracea) | 0.9904306    | 0.8453355    | 1            | 0.7552749    | not scorable | not scorable |
| #### Bn-scaff_16485_1-p13946 C-genome specific (napus-oleracea) | 0.9904306    | 0.921492     | 0.9689922    | 0.7827465    | not scorable | not scorable |
| #### Bn-scaff_16485_1-p14001 genome unspecific (all in)         | 1            | 0.6534131    | 1            | 0.6734915    | 1            | 0.654828     |
| #### Bn-scaff_16485_1-p14195 C-genome specific (napus-oleracea) | 0.9952153    | 0.8595492    | 0.9922481    | 0.8407471    | not scorable | not scorable |
| #### Bn-scaff_16485_1-p14299 C-genome specific (napus-oleracea) | 0.9760765    | 0.5089352    | 1            | 0.4749033    | not scorable | not scorable |
| #### Bn-scaff_16485_1-p14686 C-genome specific (napus-oleracea) | 0.9856459    | 0.8954426    | 1            | 0.7656663    | not scorable | not scorable |
| #### Bn-scaff_16485_1-p14687 C-genome specific (napus-oleracea) | 0.9904306    | 0.8030753    | 0.9922481    | 0.8297051    | not scorable | not scorable |
| #### Bn-scaff_16485_1-p14698 C-genome specific (napus-oleracea) | 0.9952153    | 0.8679162    | 0.9922481    | 0.7532904    | not scorable | not scorable |

|                                                                 |              |              |              |              |              |              |
|-----------------------------------------------------------------|--------------|--------------|--------------|--------------|--------------|--------------|
| #### Bn-scaff_16485_1-p14699 C-genome specific (napus-oleracea) | 0.9880383    | 0.9381273    | 1            | 0.7454708    | not scorable | not scorable |
| #### Bn-scaff_16485_1-p14711 C-genome specific (napus-oleracea) | 0.9904306    | 0.9145705    | 1            | 0.7742064    | not scorable | not scorable |
| #### Bn-scaff_16485_1-p14712 all not scorable                   | not scorable | not scorable | not scorable | not scorable | not scorable | not scorable |
| #### Bn-scaff_16485_1-p14841 C-genome specific (napus-oleracea) | 0.9856459    | 0.9437591    | 0.875969     | 0.722456     | not scorable | not scorable |
| #### Bn-scaff_16485_1-p14864 C-genome specific (napus-oleracea) | 0.9856459    | 0.6973608    | 0.9689922    | 0.6701848    | not scorable | not scorable |
| #### Bn-scaff_16485_1-p14865 C-genome specific (napus-oleracea) | 0.9928229    | 0.824479     | 0.9844961    | 0.8018759    | not scorable | not scorable |
| #### Bn-scaff_16485_1-p15611 C-genome specific (napus-oleracea) | 0.9952153    | 0.6842968    | 0.9844961    | 0.7694705    | not scorable | not scorable |
| #### Bn-scaff_16485_1-p15685 C-genome specific (napus-oleracea) | 0.9904306    | 0.6533276    | 0.9844961    | 0.5959725    | not scorable | not scorable |
| #### Bn-scaff_16485_1-p15759 C-genome specific (napus-oleracea) | 0.9736842    | 0.8550788    | 0.620155     | 0.7503842    | not scorable | not scorable |
| #### Bn-scaff_16485_1-p15782 A-genome specific (napus-rapa)     | 1            | 0.5601621    | not scorable | not scorable | 1            | 0.5249787    |
| #### Bn-scaff_16485_1-p15797 C-genome specific (napus-oleracea) | 0.9784689    | 0.9089317    | 0.9534883    | 0.7105647    | not scorable | not scorable |
| #### Bn-scaff_16485_1-p15857 C-genome specific (napus-oleracea) | 0.9712918    | 0.7368708    | 0.5968992    | 0.7366022    | not scorable | not scorable |
| #### Bn-scaff_16485_1-p16116 C-genome specific (napus-oleracea) | 0.9760765    | 0.70345      | 0.7829458    | 0.603666     | not scorable | not scorable |
| #### Bn-scaff_16485_1-p16140 C-genome specific (napus-oleracea) | 0.9832536    | 0.8555552    | 0.7751938    | 0.7377731    | not scorable | not scorable |
| #### Bn-scaff_16485_1-p16141 C-genome specific (napus-oleracea) | 0.9832536    | 0.7192615    | 0.7906977    | 0.6700485    | not scorable | not scorable |
| #### Bn-scaff_16485_1-p16222 C-genome specific (napus-oleracea) | 0.9760765    | 0.774021     | 0.7906977    | 0.6969471    | not scorable | not scorable |
| #### Bn-scaff_16485_1-p16839 A-genome specific (napus-rapa)     | 0.9832536    | 0.4102819    | not scorable | not scorable | 1            | 0.9010456    |
| #### Bn-scaff_16485_1-p16937 genome unspecific (all in)         | 1            | 0.5547521    | 1            | 0.729185     | 1            | 0.5643941    |
| #### Bn-scaff_16485_1-p17070 C-genome specific (napus-oleracea) | 0.9808612    | 0.8317649    | 0.620155     | 0.7640582    | not scorable | not scorable |
| #### Bn-scaff_16485_1-p17070 genome unspecific (all in)         | 0.9832536    | 0.6411709    | 0.620155     | 0.7151101    | 0.9834711    | 0.829736     |
| #### Bn-scaff_16485_1-p17106 C-genome specific (napus-oleracea) | 0.9880383    | 0.6893434    | 0.9612403    | 0.6514044    | not scorable | not scorable |
| #### Bn-scaff_16485_1-p17116 C-genome specific (napus-oleracea) | 0.9904306    | 0.84772      | 0.9612403    | 0.8183952    | not scorable | not scorable |
| #### Bn-scaff_16485_1-p35434 genome unspecific (all in)         | 1            | 0.5999944    | 1            | 0.7494321    | 1            | 0.8194411    |
| #### Bn-scaff_16485_1-p46055 genome unspecific (all in)         | 0.9928229    | 0.3849204    | 0.9844961    | 0.749825     | 1            | 0.8948976    |
| #### Bn-scaff_16485_1-p49457 genome unspecific (all in)         | 1            | 0.7641606    | 1            | 0.7739488    | 1            | 0.7591171    |
| #### Bn-scaff_16485_1-p53130 C-genome specific (oleracea only)  | not scorable | not scorable | 0.9689922    | 0.7541808    | not scorable | not scorable |
| #### Bn-scaff_16485_1-p55788 C-genome specific (napus-oleracea) | 0.9976076    | 0.828748     | 1            | 0.7541655    | not scorable | not scorable |
| #### Bn-scaff_16485_1-p56757 C-genome specific (napus-oleracea) | 1            | 0.8584232    | 1            | 0.8415065    | not scorable | not scorable |
| #### Bn-scaff_16485_1-p56842 C-genome specific (napus-oleracea) | 0.9928229    | 0.7803084    | 1            | 0.7962347    | not scorable | not scorable |
| #### Bn-scaff_16485_1-p57126 C-genome specific (napus-oleracea) | 0.9928229    | 0.7325791    | 0.9767442    | 0.6927431    | not scorable | not scorable |
| #### Bn-scaff_16485_1-p57139 C-genome specific (napus-oleracea) | 0.9928229    | 0.7085264    | 1            | 0.695455     | not scorable | not scorable |
| #### Bn-scaff_16485_1-p57154 C-genome specific (napus-oleracea) | 0.9952153    | 0.9410518    | 1            | 0.8606652    | not scorable | not scorable |
| #### Bn-scaff_16485_1-p57159 C-genome specific (napus-oleracea) | 1            | 0.7322897    | 1            | 0.6612612    | not scorable | not scorable |

|                                                                 |              |              |              |              |              |              |
|-----------------------------------------------------------------|--------------|--------------|--------------|--------------|--------------|--------------|
| #### Bn-scaff_16485_1-p58786 C-genome specific (napus-oleracea) | 0.9808612    | 0.7571595    | 0.9922481    | 0.6725579    | not scorable | not scorable |
| #### Bn-scaff_16485_1-p59260 C-genome specific (napus-oleracea) | 0.9952153    | 0.3585924    | 1            | 0.7267411    | not scorable | not scorable |
| #### Bn-scaff_16485_1-p63026 C-genome specific (napus-oleracea) | 0.9784689    | 0.7888147    | 0.7751938    | 0.7087772    | not scorable | not scorable |
| #### Bn-scaff_16485_1-p64703 genome unspecific (all in)         | 0.9736842    | 0.6684889    | 0.9922481    | 0.6185066    | 1            | 0.8545133    |
| #### Bn-scaff_16485_1-p66811 C-genome specific (napus-oleracea) | 0.9665072    | 0.8293754    | 1            | 0.8675459    | not scorable | not scorable |
| #### Bn-scaff_16485_1-p67661 C-genome specific (napus-oleracea) | 0.9688995    | 0.8309836    | 1            | 0.7002335    | not scorable | not scorable |
| #### Bn-scaff_16485_1-p68242 C-genome specific (napus-oleracea) | 0.9976076    | 0.8062238    | 1            | 0.7022085    | not scorable | not scorable |
| #### Bn-scaff_16485_1-p69142 genome unspecific (oleracea-rapa)  | not scorable | not scorable | 0.9767442    | 0.6848005    | 0.9917355    | 0.7802688    |
| #### Bn-scaff_16485_1-p74717 genome unspecific (all in)         | 0.9856459    | 0.5567515    | 1            | 0.7178199    | 1            | 0.6165407    |
| #### Bn-scaff_16485_1-p80349 C-genome specific (napus-oleracea) | 0.9952153    | 0.6110167    | 1            | 0.510988     | not scorable | not scorable |
| #### Bn-scaff_16485_1-p82540 C-genome specific (napus-oleracea) | 0.9928229    | 0.9111933    | 1            | 0.8818766    | not scorable | not scorable |
| #### Bn-scaff_16485_1-p82643 C-genome specific (napus-oleracea) | 0.9832536    | 0.7429096    | 0.9922481    | 0.6497559    | not scorable | not scorable |
| #### Bn-scaff_16485_1-p82759 C-genome specific (napus-oleracea) | 0.9928229    | 0.8356836    | 1            | 0.6713747    | not scorable | not scorable |
| #### Bn-scaff_16485_1-p82792 C-genome specific (napus-oleracea) | 0.9904306    | 0.9149361    | 1            | 0.8377027    | not scorable | not scorable |
| #### Bn-scaff_16485_1-p85739 C-genome specific (napus-oleracea) | 0.9976076    | 0.4323357    | 0.8837209    | 0.4568567    | not scorable | not scorable |
| #### Bn-scaff_16485_1-p85754 C-genome specific (oleracea only)  | not scorable | not scorable | 0.9534883    | 0.2428397    | not scorable | not scorable |
| #### Bn-scaff_16485_1-p89057 C-genome specific (oleracea only)  | not scorable | not scorable | 0.9379845    | 0.8499187    | not scorable | not scorable |
| #### Bn-scaff_16485_1-p95676 napus specific                     | 0.9784689    | 0.7585766    | not scorable | not scorable | not scorable | not scorable |
| #### Bn-scaff_16485_1-p96001 C-genome specific (napus-oleracea) | 0.9856459    | 0.8475494    | 0.9922481    | 0.8124242    | not scorable | not scorable |
| #### Bn-scaff_16485_1-p97397 C-genome specific (napus-oleracea) | 0.9808612    | 0.8583217    | 0.9147287    | 0.8570353    | not scorable | not scorable |
| #### Bn-scaff_16486_1-p22444 C-genome specific (oleracea only)  | not scorable | not scorable | 0.5193799    | 0.768562     | not scorable | not scorable |
| #### Bn-scaff_16486_1-p39141 genome unspecific (all in)         | 0.9784689    | 0.4389609    | 1            | 0.7785434    | 1            | 0.8585358    |
| #### Bn-scaff_16486_1-p51229 genome unspecific (oleracea-rapa)  | not scorable | not scorable | 1            | 0.8147097    | 1            | 0.9366239    |
| #### Bn-scaff_16486_1-p77468 genome unspecific (oleracea-rapa)  | not scorable | not scorable | 1            | 0.80891      | 0.9917355    | 0.4732163    |
| #### Bn-scaff_16486_1-p88236 A-genome specific (napus-rapa)     | 0.8755981    | 0.4044233    | not scorable | not scorable | 0.9917355    | 0.8137043    |
| #### Bn-scaff_16486_1-p88463 genome unspecific (oleracea-rapa)  | not scorable | not scorable | 1            | 0.6480725    | 1            | 0.7609816    |
| #### Bn-scaff_16503_1-p12271 C-genome specific (napus-oleracea) | 0.9928229    | 0.7818713    | 1            | 0.8135222    | not scorable | not scorable |
| #### Bn-scaff_16503_1-p12271 C-genome specific (napus-oleracea) | 0.9904306    | 0.6711875    | 1            | 0.8139095    | not scorable | not scorable |
| #### Bn-scaff_16503_1-p12280 C-genome specific (napus-oleracea) | 0.9928229    | 0.6418802    | 1            | 0.7770717    | not scorable | not scorable |
| #### Bn-scaff_16503_1-p12296 C-genome specific (napus-oleracea) | 0.9952153    | 0.7591043    | 1            | 0.9175813    | not scorable | not scorable |
| #### Bn-scaff_16503_1-p12315 C-genome specific (napus-oleracea) | 0.9952153    | 0.6548759    | 1            | 0.7752098    | not scorable | not scorable |
| #### Bn-scaff_16503_1-p12497 C-genome specific (napus-oleracea) | 0.9952153    | 0.6886952    | 1            | 0.8004208    | not scorable | not scorable |
| #### Bn-scaff_16503_1-p12957 C-genome specific (napus-oleracea) | 1            | 0.8527163    | 1            | 0.8085203    | not scorable | not scorable |



|                                                                 |           |           |           |           |              |              |
|-----------------------------------------------------------------|-----------|-----------|-----------|-----------|--------------|--------------|
| #### Bn-scaff_16503_1-p13036 C-genome specific (napus-oleracea) | 0.9880383 | 0.6608703 | 1         | 0.8538533 | not scorable | not scorable |
| #### Bn-scaff_16503_1-p13230 C-genome specific (napus-oleracea) | 0.9904306 | 0.7531586 | 1         | 0.8473279 | not scorable | not scorable |
| #### Bn-scaff_16503_1-p13237 C-genome specific (napus-oleracea) | 0.9952153 | 0.7078093 | 1         | 0.8085203 | not scorable | not scorable |
| #### Bn-scaff_16503_1-p13264 C-genome specific (napus-oleracea) | 0.9952153 | 0.6753781 | 1         | 0.8004208 | not scorable | not scorable |
| #### Bn-scaff_16503_1-p13572 C-genome specific (napus-oleracea) | 0.9928229 | 0.7689573 | 1         | 0.8454691 | not scorable | not scorable |
| #### Bn-scaff_16503_1-p14269 C-genome specific (napus-oleracea) | 0.9880383 | 0.7114903 | 1         | 0.8243406 | not scorable | not scorable |
| #### Bn-scaff_16503_1-p14304 C-genome specific (napus-oleracea) | 0.9928229 | 0.7320747 | 1         | 0.8543575 | not scorable | not scorable |
| #### Bn-scaff_16503_1-p14684 C-genome specific (napus-oleracea) | 0.9928229 | 0.8608738 | 1         | 0.9191787 | not scorable | not scorable |
| #### Bn-scaff_16503_1-p15248 C-genome specific (napus-oleracea) | 0.9952153 | 0.6988683 | 1         | 0.7622204 | not scorable | not scorable |
| #### Bn-scaff_16503_1-p15280 C-genome specific (napus-oleracea) | 0.9928229 | 0.8836802 | 1         | 0.9272014 | not scorable | not scorable |
| #### Bn-scaff_16503_1-p15327 C-genome specific (napus-oleracea) | 0.9880383 | 0.7662367 | 1         | 0.9156408 | not scorable | not scorable |
| #### Bn-scaff_16503_1-p15352 C-genome specific (napus-oleracea) | 0.9808612 | 0.7715433 | 0.9922481 | 0.90039   | not scorable | not scorable |
| #### Bn-scaff_16503_1-p15494 genome unspecific (all in)         | 0.9976076 | 0.7123157 | 1         | 0.9175813 | 0.9917355    | 0.8640727    |
| #### Bn-scaff_16503_1-p16762 C-genome specific (napus-oleracea) | 0.9904306 | 0.7606037 | 1         | 0.9096776 | not scorable | not scorable |
| #### Bn-scaff_16503_1-p16784 C-genome specific (napus-oleracea) | 0.9976076 | 0.7469361 | 1         | 0.8004208 | not scorable | not scorable |
| #### Bn-scaff_16503_1-p16794 C-genome specific (napus-oleracea) | 0.9880383 | 0.5942191 | 1         | 0.5390038 | not scorable | not scorable |
| #### Bn-scaff_16503_1-p16853 C-genome specific (napus-oleracea) | 0.9904306 | 0.8132032 | 1         | 0.9033505 | not scorable | not scorable |
| #### Bn-scaff_16503_1-p16915 C-genome specific (napus-oleracea) | 0.9976076 | 0.834103  | 1         | 0.9205657 | not scorable | not scorable |
| #### Bn-scaff_16503_1-p16922 C-genome specific (napus-oleracea) | 0.9952153 | 0.8734608 | 1         | 0.8627119 | not scorable | not scorable |
| #### Bn-scaff_16503_1-p17095 C-genome specific (napus-oleracea) | 0.9952153 | 0.7388229 | 1         | 0.8521883 | not scorable | not scorable |
| #### Bn-scaff_16503_1-p17105 C-genome specific (napus-oleracea) | 0.9904306 | 0.7138771 | 1         | 0.9172055 | not scorable | not scorable |
| #### Bn-scaff_16503_1-p17876 C-genome specific (napus-oleracea) | 0.9808612 | 0.7978182 | 1         | 0.7715356 | not scorable | not scorable |
| #### Bn-scaff_16503_1-p17906 genome unspecific (all in)         | 0.9856459 | 0.4339834 | 1         | 0.9175328 | 1            | 0.9175813    |
| #### Bn-scaff_16503_1-p18031 C-genome specific (napus-oleracea) | 0.9856459 | 0.7575317 | 1         | 0.8816521 | not scorable | not scorable |
| #### Bn-scaff_16503_1-p18220 C-genome specific (napus-oleracea) | 0.9880383 | 0.7427951 | 1         | 0.8135551 | not scorable | not scorable |
| #### Bn-scaff_16503_1-p19108 C-genome specific (napus-oleracea) | 0.9952153 | 0.7419689 | 1         | 0.8197255 | not scorable | not scorable |
| #### Bn-scaff_16503_1-p19112 C-genome specific (napus-oleracea) | 0.9952153 | 0.8487815 | 1         | 0.8502717 | not scorable | not scorable |
| #### Bn-scaff_16503_1-p19207 C-genome specific (napus-oleracea) | 0.9904306 | 0.7049513 | 1         | 0.7208613 | not scorable | not scorable |
| #### Bn-scaff_16503_1-p19209 C-genome specific (napus-oleracea) | 0.9928229 | 0.6978495 | 1         | 0.7884539 | not scorable | not scorable |
| #### Bn-scaff_16503_1-p19265 C-genome specific (napus-oleracea) | 0.9952153 | 0.7333786 | 1         | 0.9092583 | not scorable | not scorable |
| #### Bn-scaff_16503_1-p19541 C-genome specific (napus-oleracea) | 0.9928229 | 0.9124498 | 1         | 0.9272014 | not scorable | not scorable |
| #### Bn-scaff_16503_1-p19568 C-genome specific (napus-oleracea) | 0.9856459 | 0.8865179 | 1         | 0.909814  | not scorable | not scorable |
| #### Bn-scaff_16503_1-p19665 C-genome specific (napus-oleracea) | 0.9928229 | 0.7321614 | 0.9922481 | 0.7675534 | not scorable | not scorable |

|                                                                 |              |              |              |   |              |              |              |           |
|-----------------------------------------------------------------|--------------|--------------|--------------|---|--------------|--------------|--------------|-----------|
| #### Bn-scaff_16503_1-p19727 genome unspecific (all in)         | 0.9832536    | 0.5299818    |              | 1 | 0.9126433    | 0.8264463    | 0.9259171    |           |
| #### Bn-scaff_16503_1-p19896 genome unspecific (all in)         |              | 1            | 0.4652286    |   | 1            | 0.8168709    | 0.9917355    | 0.9382206 |
| #### Bn-scaff_16503_1-p20176 C-genome specific (napus-oleracea) | 0.9808612    | 0.9132716    |              | 1 | 0.9175813    | not scorable | not scorable |           |
| #### Bn-scaff_16503_1-p20260 C-genome specific (napus-oleracea) | 0.9976076    | 0.8857461    |              | 1 | 0.9468798    | not scorable | not scorable |           |
| #### Bn-scaff_16503_1-p21114 C-genome specific (napus-oleracea) | 0.9976076    | 0.7492349    |              | 1 | 0.9175813    | not scorable | not scorable |           |
| #### Bn-scaff_16503_1-p21172 C-genome specific (napus-oleracea) | 0.9976076    | 0.8057196    | 0.9922481    |   | 0.8869264    | not scorable | not scorable |           |
| #### Bn-scaff_16503_1-p21262 C-genome specific (napus-oleracea) | 0.9976076    | 0.7498337    |              | 1 | 0.8660957    | not scorable | not scorable |           |
| #### Bn-scaff_16503_1-p22290 napus specific                     | 0.9976076    | 0.591603     | not scorable |   | not scorable | not scorable | not scorable |           |
| #### Bn-scaff_16503_1-p22320 C-genome specific (napus-oleracea) | 0.9832536    | 0.8665248    | 0.9922481    |   | 0.7697223    | not scorable | not scorable |           |
| #### Bn-scaff_16503_1-p22408 C-genome specific (napus-oleracea) | 0.9904306    | 0.7393868    |              | 1 | 0.9153004    | not scorable | not scorable |           |
| #### Bn-scaff_16503_1-p22436 C-genome specific (napus-oleracea) | 0.9784689    | 0.7079863    |              | 1 | 0.7622204    | not scorable | not scorable |           |
| #### Bn-scaff_16503_1-p22468 C-genome specific (napus-oleracea) | 0.9904306    | 0.5563859    |              | 1 | 0.8117844    | not scorable | not scorable |           |
| #### Bn-scaff_16503_1-p22482 C-genome specific (napus-oleracea) | 0.9832536    | 0.7901205    |              | 1 | 0.7770717    | not scorable | not scorable |           |
| #### Bn-scaff_16503_1-p22542 C-genome specific (napus-oleracea) | 0.9952153    | 0.8876377    |              | 1 | 0.9205657    | not scorable | not scorable |           |
| #### Bn-scaff_16503_1-p22584 C-genome specific (napus-oleracea) | 0.9856459    | 0.6983611    |              | 1 | 0.8135551    | not scorable | not scorable |           |
| #### Bn-scaff_16503_1-p22617 C-genome specific (napus-oleracea) | 0.9736842    | 0.6738448    |              | 1 | 0.7770717    | not scorable | not scorable |           |
| #### Bn-scaff_16503_1-p22661 C-genome specific (napus-oleracea) | 0.9952153    | 0.8404164    |              | 1 | 0.9175813    | not scorable | not scorable |           |
| #### Bn-scaff_16503_1-p22720 all not scorable                   | not scorable | not scorable | not scorable |   | not scorable | not scorable | not scorable |           |
| #### Bn-scaff_16503_1-p22739 C-genome specific (napus-oleracea) | 0.9976076    | 0.7128854    |              | 1 | 0.9158321    | not scorable | not scorable |           |
| #### Bn-scaff_16503_1-p22741 C-genome specific (napus-oleracea) | 0.9952153    | 0.7645459    |              | 1 | 0.9095795    | not scorable | not scorable |           |
| #### Bn-scaff_16503_1-p22787 C-genome specific (napus-oleracea) | 0.9904306    | 0.7053953    | 0.9922481    |   | 0.9141728    | not scorable | not scorable |           |
| #### Bn-scaff_16503_1-p22853 C-genome specific (napus-oleracea) | 0.9976076    | 0.8579998    |              | 1 | 0.9272014    | not scorable | not scorable |           |
| #### Bn-scaff_16503_1-p22873 C-genome specific (napus-oleracea) | 0.9952153    | 0.7873839    |              | 1 | 0.8948976    | not scorable | not scorable |           |
| #### Bn-scaff_16503_1-p22897 C-genome specific (napus-oleracea) | 0.9952153    | 0.7732518    |              | 1 | 0.9186266    | not scorable | not scorable |           |
| #### Bn-scaff_16503_1-p22911 C-genome specific (napus-oleracea) | 0.9976076    | 0.8970806    |              | 1 | 0.9384232    | not scorable | not scorable |           |
| #### Bn-scaff_16503_1-p22922 C-genome specific (napus-oleracea) | 0.9952153    | 0.7704541    |              | 1 | 0.9148515    | not scorable | not scorable |           |
| #### Bn-scaff_16503_1-p22938 C-genome specific (napus-oleracea) | 0.9952153    | 0.8465647    |              | 1 | 0.917559     | not scorable | not scorable |           |
| #### Bn-scaff_16503_1-p22978 C-genome specific (napus-oleracea) | 0.9952153    | 0.8871543    |              | 1 | 0.9205657    | not scorable | not scorable |           |
| #### Bn-scaff_16503_1-p22980 C-genome specific (napus-oleracea) | 0.9952153    | 0.7890632    |              | 1 | 0.9193484    | not scorable | not scorable |           |
| #### Bn-scaff_16503_1-p22996 C-genome specific (napus-oleracea) | 0.9952153    | 0.8001714    |              | 1 | 0.9060925    | not scorable | not scorable |           |
| #### Bn-scaff_16503_1-p24566 C-genome specific (napus-oleracea) | 0.9808612    | 0.8504002    | 0.9922481    |   | 0.8578107    | not scorable | not scorable |           |
| #### Bn-scaff_16503_1-p24863 C-genome specific (napus-oleracea) | 0.9856459    | 0.7611436    | 0.9689922    |   | 0.8198208    | not scorable | not scorable |           |
| #### Bn-scaff_16503_1-p24883 C-genome specific (napus-oleracea) | 0.9856459    | 0.8238274    |              | 1 | 0.837845     | not scorable | not scorable |           |

|                                                                  |           |           |           |           |              |              |
|------------------------------------------------------------------|-----------|-----------|-----------|-----------|--------------|--------------|
| ##### Bn-scaff_16503_1-p24919 C-genome specific (napus-oleracea) | 0.9976076 | 0.8652954 | 1         | 0.9432388 | not scorable | not scorable |
| ##### Bn-scaff_16503_1-p24933 C-genome specific (napus-oleracea) | 0.9856459 | 0.7893785 | 1         | 0.9068525 | not scorable | not scorable |
| ##### Bn-scaff_16503_1-p24938 C-genome specific (napus-oleracea) | 0.9760765 | 0.7761661 | 1         | 0.8261504 | not scorable | not scorable |
| ##### Bn-scaff_16503_1-p24955 C-genome specific (napus-oleracea) | 0.9928229 | 0.7623785 | 1         | 0.8343507 | not scorable | not scorable |
| ##### Bn-scaff_16503_1-p25191 C-genome specific (napus-oleracea) | 0.9904306 | 0.8867087 | 1         | 0.9178148 | not scorable | not scorable |
| ##### Bn-scaff_16503_1-p25217 C-genome specific (napus-oleracea) | 0.9808612 | 0.7349377 | 1         | 0.9158708 | not scorable | not scorable |
| ##### Bn-scaff_16503_1-p25225 C-genome specific (napus-oleracea) | 0.9880383 | 0.631436  | 1         | 0.8207097 | not scorable | not scorable |
| ##### Bn-scaff_16503_1-p25236 C-genome specific (napus-oleracea) | 0.9904306 | 0.7813284 | 1         | 0.7999783 | not scorable | not scorable |
| ##### Bn-scaff_16503_1-p25242 C-genome specific (napus-oleracea) | 0.9712918 | 0.7646177 | 1         | 0.9175168 | not scorable | not scorable |
| ##### Bn-scaff_16503_1-p26034 C-genome specific (napus-oleracea) | 0.9976076 | 0.8120484 | 1         | 0.9175813 | not scorable | not scorable |
| ##### Bn-scaff_16503_1-p26111 C-genome specific (napus-oleracea) | 0.9904306 | 0.7086738 | 1         | 0.724444  | not scorable | not scorable |
| ##### Bn-scaff_16503_1-p26117 C-genome specific (napus-oleracea) | 0.9928229 | 0.7512537 | 1         | 0.7384716 | not scorable | not scorable |
| ##### Bn-scaff_16503_1-p26161 C-genome specific (napus-oleracea) | 0.9976076 | 0.6750913 | 1         | 0.8509355 | not scorable | not scorable |
| ##### Bn-scaff_16503_1-p26164 C-genome specific (napus-oleracea) | 0.9832536 | 0.6919895 | 1         | 0.857876  | not scorable | not scorable |
| ##### Bn-scaff_16503_1-p26219 C-genome specific (napus-oleracea) | 0.9760765 | 0.68543   | 1         | 0.8126563 | not scorable | not scorable |
| ##### Bn-scaff_16503_1-p26236 C-genome specific (napus-oleracea) | 0.9952153 | 0.5883715 | 1         | 0.6186296 | not scorable | not scorable |
| ##### Bn-scaff_16503_1-p26280 C-genome specific (napus-oleracea) | 0.9808612 | 0.6368557 | 1         | 0.7376376 | not scorable | not scorable |
| ##### Bn-scaff_16503_1-p26281 C-genome specific (napus-oleracea) | 0.9904306 | 0.6698173 | 1         | 0.8687756 | not scorable | not scorable |
| ##### Bn-scaff_16503_1-p26336 C-genome specific (napus-oleracea) | 0.9904306 | 0.8493534 | 1         | 0.7970674 | not scorable | not scorable |
| ##### Bn-scaff_16503_1-p26358 C-genome specific (napus-oleracea) | 0.9952153 | 0.8262779 | 1         | 0.9092545 | not scorable | not scorable |
| ##### Bn-scaff_16503_1-p27477 C-genome specific (napus-oleracea) | 0.9856459 | 0.6513569 | 1         | 0.5904945 | not scorable | not scorable |
| ##### Bn-scaff_16503_1-p27715 C-genome specific (napus-oleracea) | 0.9952153 | 0.886989  | 1         | 0.9205657 | not scorable | not scorable |
| ##### Bn-scaff_16503_1-p27761 C-genome specific (napus-oleracea) | 0.9856459 | 0.7806181 | 1         | 0.9016217 | not scorable | not scorable |
| ##### Bn-scaff_16503_1-p29140 C-genome specific (napus-oleracea) | 0.9832536 | 0.6879076 | 0.9922481 | 0.6783931 | not scorable | not scorable |
| ##### Bn-scaff_16503_1-p29141 C-genome specific (napus-oleracea) | 0.9736842 | 0.7570546 | 0.9922481 | 0.7914145 | not scorable | not scorable |
| ##### Bn-scaff_16503_1-p29152 C-genome specific (napus-oleracea) | 0.9760765 | 0.71859   | 1         | 0.6377361 | not scorable | not scorable |
| ##### Bn-scaff_16503_1-p29217 C-genome specific (napus-oleracea) | 0.9808612 | 0.6888106 | 0.9844961 | 0.8033274 | not scorable | not scorable |
| ##### Bn-scaff_16503_1-p29246 C-genome specific (napus-oleracea) | 0.9880383 | 0.7034009 | 1         | 0.7325775 | not scorable | not scorable |
| ##### Bn-scaff_16503_1-p29266 C-genome specific (napus-oleracea) | 0.9784689 | 0.7678942 | 1         | 0.8300486 | not scorable | not scorable |
| ##### Bn-scaff_16503_1-p30666 C-genome specific (napus-oleracea) | 0.9856459 | 0.7980971 | 1         | 0.9074102 | not scorable | not scorable |
| ##### Bn-scaff_16503_1-p30681 genome unspecific (all in)         | 0.9808612 | 0.6721375 | 1         | 0.7494321 | 0.892562     | 0.9080027    |
| ##### Bn-scaff_16503_1-p30808 C-genome specific (napus-oleracea) | 0.9808612 | 0.6767965 | 1         | 0.7952201 | not scorable | not scorable |
| ##### Bn-scaff_16503_1-p30837 C-genome specific (napus-oleracea) | 0.9856459 | 0.7040502 | 1         | 0.8207097 | not scorable | not scorable |

|                                                                 |           |           |           |           |              |              |
|-----------------------------------------------------------------|-----------|-----------|-----------|-----------|--------------|--------------|
| #### Bn-scaff_16503_1-p30843 C-genome specific (napus-oleracea) | 0.9736842 | 0.697561  | 1         | 0.7770717 | not scorable | not scorable |
| #### Bn-scaff_16503_1-p30851 C-genome specific (napus-oleracea) | 0.9736842 | 0.7428253 | 1         | 0.8172545 | not scorable | not scorable |
| #### Bn-scaff_16503_1-p30875 C-genome specific (napus-oleracea) | 0.9736842 | 0.6916245 | 1         | 0.7884539 | not scorable | not scorable |
| #### Bn-scaff_16503_1-p31099 C-genome specific (napus-oleracea) | 0.9808612 | 0.7005477 | 1         | 0.8135551 | not scorable | not scorable |
| #### Bn-scaff_16503_1-p31109 C-genome specific (napus-oleracea) | 0.9330143 | 0.8549035 | 1         | 0.9273319 | not scorable | not scorable |
| #### Bn-scaff_16503_1-p31378 C-genome specific (napus-oleracea) | 0.9760765 | 0.7942365 | 1         | 0.9406679 | not scorable | not scorable |
| #### Bn-scaff_16503_1-p31458 C-genome specific (napus-oleracea) | 0.9856459 | 0.845903  | 0.9922481 | 0.9515547 | not scorable | not scorable |
| #### Bn-scaff_16503_1-p31546 C-genome specific (napus-oleracea) | 0.9952153 | 0.8513733 | 0.9922481 | 0.9424543 | not scorable | not scorable |
| #### Bn-scaff_16503_1-p32162 C-genome specific (napus-oleracea) | 0.9808612 | 0.8247073 | 1         | 0.9175813 | not scorable | not scorable |
| #### Bn-scaff_16503_1-p32191 C-genome specific (napus-oleracea) | 0.9665072 | 0.6159559 | 0.9922481 | 0.8065732 | not scorable | not scorable |
| #### Bn-scaff_16503_1-p33259 C-genome specific (napus-oleracea) | 0.9808612 | 0.6639142 | 1         | 0.7884539 | not scorable | not scorable |
| #### Bn-scaff_16503_1-p33268 genome unspecific (all in)         | 0.9904306 | 0.7276573 | 1         | 0.7641606 | 1            | 0.9244215    |
| #### Bn-scaff_16503_1-p33557 C-genome specific (napus-oleracea) | 0.9856459 | 0.9006563 | 1         | 0.9120771 | not scorable | not scorable |
| #### Bn-scaff_16503_1-p33589 C-genome specific (napus-oleracea) | 1         | 0.8435404 | 1         | 0.9175813 | not scorable | not scorable |
| #### Bn-scaff_16503_1-p33668 C-genome specific (napus-oleracea) | 0.9832536 | 0.7880369 | 1         | 0.8339776 | not scorable | not scorable |
| #### Bn-scaff_16503_1-p33772 C-genome specific (napus-oleracea) | 0.9880383 | 0.8149223 | 1         | 0.9174632 | not scorable | not scorable |
| #### Bn-scaff_16503_1-p33795 C-genome specific (napus-oleracea) | 0.9856459 | 0.7715757 | 0.9922481 | 0.8249127 | not scorable | not scorable |
| #### Bn-scaff_16503_1-p34120 C-genome specific (napus-oleracea) | 0.9928229 | 0.8053266 | 1         | 0.7539588 | not scorable | not scorable |
| #### Bn-scaff_16503_1-p34140 C-genome specific (napus-oleracea) | 0.9976076 | 0.8367688 | 1         | 0.9349398 | not scorable | not scorable |
| #### Bn-scaff_16503_1-p34366 C-genome specific (napus-oleracea) | 0.9784689 | 0.7494825 | 1         | 0.9004565 | not scorable | not scorable |
| #### Bn-scaff_16503_1-p34539 C-genome specific (napus-oleracea) | 0.9808612 | 0.791159  | 1         | 0.8231594 | not scorable | not scorable |
| #### Bn-scaff_16503_1-p35422 C-genome specific (napus-oleracea) | 0.9928229 | 0.831068  | 0.9844961 | 0.6522436 | not scorable | not scorable |
| #### Bn-scaff_16503_1-p35877 C-genome specific (napus-oleracea) | 0.9808612 | 0.7174469 | 1         | 0.7156777 | not scorable | not scorable |
| #### Bn-scaff_16503_1-p36072 C-genome specific (napus-oleracea) | 0.9736842 | 0.7472842 | 1         | 0.834528  | not scorable | not scorable |
| #### Bn-scaff_16503_1-p36095 C-genome specific (napus-oleracea) | 0.9856459 | 0.7645112 | 0.9689922 | 0.8789797 | not scorable | not scorable |
| #### Bn-scaff_16503_1-p36100 C-genome specific (napus-oleracea) | 0.9928229 | 0.7240155 | 1         | 0.8004208 | not scorable | not scorable |
| #### Bn-scaff_16503_1-p36136 C-genome specific (napus-oleracea) | 0.9784689 | 0.7414052 | 1         | 0.6450305 | not scorable | not scorable |
| #### Bn-scaff_16503_1-p36148 C-genome specific (napus-oleracea) | 0.9880383 | 0.7211886 | 1         | 0.7494321 | not scorable | not scorable |
| #### Bn-scaff_16503_1-p36153 C-genome specific (napus-oleracea) | 0.9736842 | 0.7573882 | 1         | 0.6659524 | not scorable | not scorable |
| #### Bn-scaff_16503_1-p36203 C-genome specific (napus-oleracea) | 0.9808612 | 0.7911444 | 1         | 0.8191233 | not scorable | not scorable |
| #### Bn-scaff_16503_1-p36803 C-genome specific (napus-oleracea) | 0.9928229 | 0.8621582 | 0.9689922 | 0.9296797 | not scorable | not scorable |
| #### Bn-scaff_16503_1-p36901 C-genome specific (napus-oleracea) | 0.9952153 | 0.705714  | 0.9689922 | 0.9310349 | not scorable | not scorable |
| #### Bn-scaff_16503_1-p40674 C-genome specific (napus-oleracea) | 0.9808612 | 0.8021467 | 1         | 0.8601127 | not scorable | not scorable |

|                                                                |              |              |              |              |              |              |
|----------------------------------------------------------------|--------------|--------------|--------------|--------------|--------------|--------------|
| #### Bn-scaff_16503_1-p53371genome unspecific (all in)         | 0.9928229    | 0.5317722    | 0.9922481    | 0.7401188    | 1            | 0.9039075    |
| #### Bn-scaff_16503_1-p53448C-genome specific (napus-oleracea) | 0.9784689    | 0.5627897    | 0.9922481    | 0.7884539    | not scorable | not scorable |
| #### Bn-scaff_16503_1-p53669C-genome specific (napus-oleracea) | 0.9808612    | 0.7668719    | 0.9844961    | 0.7893571    | not scorable | not scorable |
| #### Bn-scaff_16503_1-p53912C-genome specific (napus-oleracea) | 0.9832536    | 0.695017     | 0.9922481    | 0.7622204    | not scorable | not scorable |
| #### Bn-scaff_16503_1-p53965C-genome specific (napus-oleracea) | 0.9760765    | 0.7347764    | 0.9922481    | 0.8234268    | not scorable | not scorable |
| #### Bn-scaff_16503_1-p54138C-genome specific (napus-oleracea) | 0.9856459    | 0.8065475    | 0.9922481    | 0.8080927    | not scorable | not scorable |
| #### Bn-scaff_16503_1-p54145C-genome specific (napus-oleracea) | 0.9760765    | 0.8383811    | 0.9922481    | 0.8207097    | not scorable | not scorable |
| #### Bn-scaff_16503_1-p54559C-genome specific (napus-oleracea) | 0.9808612    | 0.7897272    | 0.9922481    | 0.7622204    | not scorable | not scorable |
| #### Bn-scaff_16503_1-p5635 C-genome specific (napus-oleracea) | 0.9928229    | 0.8484055    | 1            | 0.9272014    | not scorable | not scorable |
| #### Bn-scaff_16503_1-p59215C-genome specific (napus-oleracea) | 0.9784689    | 0.8683751    | 0.9922481    | 0.8815182    | not scorable | not scorable |
| #### Bn-scaff_16503_1-p68337C-genome specific (napus-oleracea) | 0.9760765    | 0.6272471    | 0.9922481    | 0.7252899    | not scorable | not scorable |
| #### Bn-scaff_16503_1-p68760C-genome specific (napus-oleracea) | 0.9760765    | 0.7644333    | 0.9922481    | 0.9172731    | not scorable | not scorable |
| #### Bn-scaff_16503_1-p68930C-genome specific (napus-oleracea) | 0.9665072    | 0.7155506    | 0.9922481    | 0.8085203    | not scorable | not scorable |
| #### Bn-scaff_16503_1-p76954C-genome specific (napus-oleracea) | 0.9808612    | 0.8510653    | 0.9922481    | 0.8551736    | not scorable | not scorable |
| #### Bn-scaff_16503_1-p89585C-genome specific (napus-oleracea) | 0.9808612    | 0.7807593    | 0.9922481    | 0.6751118    | not scorable | not scorable |
| #### Bn-scaff_16503_1-p89929C-genome specific (napus-oleracea) | 0.9856459    | 0.8011456    | 0.9922481    | 0.7494354    | not scorable | not scorable |
| #### Bn-scaff_16503_1-p90263C-genome specific (napus-oleracea) | 0.9832536    | 0.8745482    | 0.9844961    | 0.75206      | not scorable | not scorable |
| #### Bn-scaff_16503_1-p91768C-genome specific (napus-oleracea) | 0.9880383    | 0.8941577    | 0.9922481    | 0.8898385    | not scorable | not scorable |
| #### Bn-scaff_16510_1-p12919C-genome specific (napus-oleracea) | 0.9808612    | 0.9155516    | 1            | 0.7840836    | not scorable | not scorable |
| #### Bn-scaff_16510_1-p18282C-genome specific (oleracea only)  | not scorable | not scorable | 1            | 0.2257279    | not scorable | not scorable |
| #### Bn-scaff_16510_1-p23424genome unspecific (all in)         | 0.9593301    | 0.4733226    | 0.8604651    | 0.6367297    | 1            | 0.8687906    |
| #### Bn-scaff_16510_1-p23927C-genome specific (napus-oleracea) | 0.9856459    | 0.7087327    | 0.9767442    | 0.7119015    | not scorable | not scorable |
| #### Bn-scaff_16510_1-p24250C-genome specific (napus-oleracea) | 0.9784689    | 0.7658518    | 1            | 0.5725881    | not scorable | not scorable |
| #### Bn-scaff_16510_1-p27930genome unspecific (all in)         | 0.9760765    | 0.4169646    | 0.9922481    | 0.6260363    | 1            | 0.7622204    |
| #### Bn-scaff_16510_1-p27982genome unspecific (all in)         | 0.937799     | 0.2623308    | 0.9844961    | 0.7255253    | 1            | 0.8301998    |
| #### Bn-scaff_16510_1-p32533C-genome specific (napus-oleracea) | 1            | 0.8286468    | 0.9922481    | 0.7348371    | not scorable | not scorable |
| #### Bn-scaff_16510_1-p36244A-genome specific (napus-rapa)     | 0.9688995    | 0.2227632    | not scorable | not scorable | 0.9834711    | 0.9175813    |
| #### Bn-scaff_16510_1-p68089C-genome specific (napus-oleracea) | 0.9904306    | 0.7350165    | 1            | 0.7181289    | not scorable | not scorable |
| #### Bn-scaff_16510_1-p68254C-genome specific (napus-oleracea) | 0.9904306    | 0.7288729    | 0.9844961    | 0.7933881    | not scorable | not scorable |
| #### Bn-scaff_16510_1-p68283C-genome specific (napus-oleracea) | 0.9784689    | 0.6647314    | 0.8992248    | 0.6514682    | not scorable | not scorable |
| #### Bn-scaff_16510_1-p69233C-genome specific (napus-oleracea) | 0.9760765    | 0.6764308    | 0.875969     | 0.7071049    | not scorable | not scorable |
| #### Bn-scaff_16510_1-p70266C-genome specific (napus-oleracea) | 0.9880383    | 0.7093202    | 0.9922481    | 0.346266     | not scorable | not scorable |
| #### Bn-scaff_16510_1-p70403C-genome specific (napus-oleracea) | 0.9688995    | 0.7630488    | 1            | 0.472758     | not scorable | not scorable |

|                                                                 |           |           |              |              |              |              |
|-----------------------------------------------------------------|-----------|-----------|--------------|--------------|--------------|--------------|
| #### Bn-scaff_16510_1-p7140C-genome specific (napus-oleracea)   | 0.9784689 | 0.7265931 | 1            | 0.82666      | not scorable | not scorable |
| #### Bn-scaff_16510_1-p7149E C-genome specific (napus-oleracea) | 0.9880383 | 0.6482037 | 0.9844961    | 0.6833086    | not scorable | not scorable |
| #### Bn-scaff_16510_1-p7158E C-genome specific (napus-oleracea) | 0.9760765 | 0.8787005 | 0.9767442    | 0.7897618    | not scorable | not scorable |
| #### Bn-scaff_16510_1-p7374E C-genome specific (napus-oleracea) | 0.9688995 | 0.8492893 | 0.8837209    | 0.8796701    | not scorable | not scorable |
| #### Bn-scaff_16510_1-p8813E C-genome specific (napus-oleracea) | 0.9808612 | 0.8611098 | 1            | 0.7537616    | not scorable | not scorable |
| #### Bn-scaff_16510_1-p88904 C-genome specific (napus-oleracea) | 0.9665072 | 0.6664439 | 1            | 0.6274489    | not scorable | not scorable |
| #### Bn-scaff_16511_1-p10001C-genome specific (napus-oleracea)  | 0.9856459 | 0.7678191 | 1            | 0.8653011    | not scorable | not scorable |
| #### Bn-scaff_16511_1-p1000E C-genome specific (napus-oleracea) | 0.9880383 | 0.8567016 | 1            | 0.6735836    | not scorable | not scorable |
| #### Bn-scaff_16511_1-p10014 C-genome specific (napus-oleracea) | 0.9952153 | 0.8705653 | 1            | 0.9117754    | not scorable | not scorable |
| #### Bn-scaff_16511_1-p1001E C-genome specific (napus-oleracea) | 0.9928229 | 0.8147416 | 1            | 0.7235014    | not scorable | not scorable |
| #### Bn-scaff_16511_1-p1001E C-genome specific (napus-oleracea) | 0.9928229 | 0.9198989 | 1            | 0.9034875    | not scorable | not scorable |
| #### Bn-scaff_16511_1-p1001E C-genome specific (napus-oleracea) | 0.9832536 | 0.8171834 | 1            | 0.6625738    | not scorable | not scorable |
| #### Bn-scaff_16511_1-p1002E C-genome specific (napus-oleracea) | 0.9952153 | 0.8351473 | 1            | 0.6575539    | not scorable | not scorable |
| #### Bn-scaff_16511_1-p1010E C-genome specific (napus-oleracea) | 0.9760765 | 0.8981067 | 1            | 0.6983081    | not scorable | not scorable |
| #### Bn-scaff_16511_1-p10104 A-genome specific (napus-rapa)     | 0.9976076 | 0.4329868 | not scorable | not scorable | 1            | 0.8487188    |
| #### Bn-scaff_16511_1-p1010E C-genome specific (napus-oleracea) | 0.9976076 | 0.6880437 | 1            | 0.8308055    | not scorable | not scorable |
| #### Bn-scaff_16511_1-p1080E C-genome specific (napus-oleracea) | 0.9976076 | 0.6775566 | 1            | 0.588761     | not scorable | not scorable |
| #### Bn-scaff_16511_1-p1083E C-genome specific (napus-oleracea) | 0.9808612 | 0.8091519 | 1            | 0.8463125    | not scorable | not scorable |
| #### Bn-scaff_16511_1-p1085E C-genome specific (napus-oleracea) | 0.9736842 | 0.8720909 | 0.9922481    | 0.7781218    | not scorable | not scorable |
| #### Bn-scaff_16511_1-p1097E C-genome specific (napus-oleracea) | 0.9736842 | 0.847874  | 1            | 0.8403028    | not scorable | not scorable |
| #### Bn-scaff_16511_1-p11001C-genome specific (napus-oleracea)  | 0.9928229 | 0.4891542 | 0.9922481    | 0.8338113    | not scorable | not scorable |
| #### Bn-scaff_16511_1-p1100E C-genome specific (napus-oleracea) | 0.9760765 | 0.9182839 | 1            | 0.7261627    | not scorable | not scorable |
| #### Bn-scaff_16511_1-p11007 C-genome specific (napus-oleracea) | 0.9976076 | 0.7961922 | 1            | 0.6007426    | not scorable | not scorable |
| #### Bn-scaff_16511_1-p1101E C-genome specific (napus-oleracea) | 0.9928229 | 0.7961333 | 1            | 0.7425836    | not scorable | not scorable |
| #### Bn-scaff_16511_1-p11031C-genome specific (napus-oleracea)  | 0.9736842 | 0.8854252 | 1            | 0.751667     | not scorable | not scorable |
| #### Bn-scaff_16511_1-p11061C-genome specific (napus-oleracea)  | 0.9856459 | 0.6994308 | 1            | 0.8362731    | not scorable | not scorable |
| #### Bn-scaff_16511_1-p1108E C-genome specific (napus-oleracea) | 0.9832536 | 0.8984499 | 1            | 0.917371     | not scorable | not scorable |
| #### Bn-scaff_16511_1-p1108E C-genome specific (napus-oleracea) | 0.9688995 | 0.8667834 | 1            | 0.768873     | not scorable | not scorable |
| #### Bn-scaff_16511_1-p1113E C-genome specific (napus-oleracea) | 0.9856459 | 0.7675074 | 1            | 0.7853132    | not scorable | not scorable |
| #### Bn-scaff_16511_1-p1113E C-genome specific (napus-oleracea) | 0.9760765 | 0.7370661 | 0.9922481    | 0.6456337    | not scorable | not scorable |
| #### Bn-scaff_16511_1-p1122E C-genome specific (napus-oleracea) | 0.9832536 | 0.7815297 | 1            | 0.5937957    | not scorable | not scorable |
| #### Bn-scaff_16511_1-p11234 C-genome specific (napus-oleracea) | 0.9856459 | 0.7752882 | 1            | 0.5655956    | not scorable | not scorable |
| #### Bn-scaff_16511_1-p1123E C-genome specific (napus-oleracea) | 0.9784689 | 0.81703   | 1            | 0.5730211    | not scorable | not scorable |

|                                                                 |              |              |           |           |              |              |
|-----------------------------------------------------------------|--------------|--------------|-----------|-----------|--------------|--------------|
| #### Bn-scaff_16511_1-p11239 C-genome specific (napus-oleracea) | 0.9784689    | 0.7924795    | 1         | 0.5978193 | not scorable | not scorable |
| #### Bn-scaff_16511_1-p11242 C-genome specific (napus-oleracea) | 0.9808612    | 0.7331172    | 1         | 0.6347953 | not scorable | not scorable |
| #### Bn-scaff_16511_1-p11246 C-genome specific (napus-oleracea) | 0.9760765    | 0.788363     | 0.9767442 | 0.6650164 | not scorable | not scorable |
| #### Bn-scaff_16511_1-p11257 C-genome specific (napus-oleracea) | 0.9880383    | 0.8559195    | 1         | 0.6949443 | not scorable | not scorable |
| #### Bn-scaff_16511_1-p11266 C-genome specific (napus-oleracea) | 0.9856459    | 0.7492901    | 1         | 0.6687953 | not scorable | not scorable |
| #### Bn-scaff_16511_1-p11268 C-genome specific (napus-oleracea) | 0.9832536    | 0.668492     | 1         | 0.6009595 | not scorable | not scorable |
| #### Bn-scaff_16511_1-p11268 C-genome specific (napus-oleracea) | 0.9832536    | 0.8294411    | 1         | 0.9013812 | not scorable | not scorable |
| #### Bn-scaff_16511_1-p11270 C-genome specific (napus-oleracea) | 0.9904306    | 0.8899474    | 1         | 0.6901329 | not scorable | not scorable |
| #### Bn-scaff_16511_1-p11270 C-genome specific (napus-oleracea) | 0.9760765    | 0.7762038    | 1         | 0.622758  | not scorable | not scorable |
| #### Bn-scaff_16511_1-p11276 C-genome specific (napus-oleracea) | 0.9808612    | 0.7751893    | 1         | 0.6845677 | not scorable | not scorable |
| #### Bn-scaff_16511_1-p11278 C-genome specific (oleracea only)  | not scorable | not scorable | 0.9844961 | 0.677738  | not scorable | not scorable |
| #### Bn-scaff_16511_1-p11279 C-genome specific (napus-oleracea) | 0.9976076    | 0.8377255    | 1         | 0.7799702 | not scorable | not scorable |
| #### Bn-scaff_16511_1-p11445 C-genome specific (napus-oleracea) | 0.9856459    | 0.8320135    | 1         | 0.7678378 | not scorable | not scorable |
| #### Bn-scaff_16511_1-p11461 C-genome specific (napus-oleracea) | 0.9976076    | 0.8618909    | 1         | 0.919382  | not scorable | not scorable |
| #### Bn-scaff_16511_1-p11465 C-genome specific (napus-oleracea) | 0.9952153    | 0.8388252    | 1         | 0.7359571 | not scorable | not scorable |
| #### Bn-scaff_16511_1-p11467 C-genome specific (napus-oleracea) | 0.9880383    | 0.6819859    | 1         | 0.5709894 | not scorable | not scorable |
| #### Bn-scaff_16511_1-p11765 C-genome specific (napus-oleracea) | 0.9784689    | 0.7480413    | 1         | 0.7884539 | not scorable | not scorable |
| #### Bn-scaff_16511_1-p11765 C-genome specific (napus-oleracea) | 0.9952153    | 0.8164716    | 1         | 0.6833012 | not scorable | not scorable |
| #### Bn-scaff_16511_1-p11766 C-genome specific (napus-oleracea) | 0.9784689    | 0.7842667    | 1         | 0.6335053 | not scorable | not scorable |
| #### Bn-scaff_16511_1-p11768 C-genome specific (napus-oleracea) | 0.9736842    | 0.7903903    | 1         | 0.8682392 | not scorable | not scorable |
| #### Bn-scaff_16511_1-p11769 C-genome specific (napus-oleracea) | 0.9808612    | 0.7245826    | 1         | 0.7273303 | not scorable | not scorable |
| #### Bn-scaff_16511_1-p11769 C-genome specific (napus-oleracea) | 0.9904306    | 0.7876879    | 1         | 0.8802011 | not scorable | not scorable |
| #### Bn-scaff_16511_1-p11772 C-genome specific (napus-oleracea) | 0.9784689    | 0.7702048    | 1         | 0.9175813 | not scorable | not scorable |
| #### Bn-scaff_16511_1-p11773 C-genome specific (napus-oleracea) | 0.9880383    | 0.8005403    | 1         | 0.6452534 | not scorable | not scorable |
| #### Bn-scaff_16511_1-p11776 C-genome specific (napus-oleracea) | 0.9784689    | 0.7663758    | 1         | 0.6884743 | not scorable | not scorable |
| #### Bn-scaff_16511_1-p11777 C-genome specific (napus-oleracea) | 1            | 0.8601169    | 1         | 0.6597151 | not scorable | not scorable |
| #### Bn-scaff_16511_1-p11782 C-genome specific (napus-oleracea) | 0.9904306    | 0.8088208    | 1         | 0.7259795 | not scorable | not scorable |
| #### Bn-scaff_16511_1-p11786 C-genome specific (napus-oleracea) | 0.9880383    | 0.7463614    | 1         | 0.5736644 | not scorable | not scorable |
| #### Bn-scaff_16511_1-p11790 C-genome specific (napus-oleracea) | 0.9784689    | 0.7721439    | 1         | 0.7519009 | not scorable | not scorable |
| #### Bn-scaff_16511_1-p11824 C-genome specific (napus-oleracea) | 0.9880383    | 0.8199599    | 1         | 0.578472  | not scorable | not scorable |
| #### Bn-scaff_16511_1-p11826 C-genome specific (napus-oleracea) | 1            | 0.7793737    | 1         | 0.8385133 | not scorable | not scorable |
| #### Bn-scaff_16511_1-p11828 C-genome specific (napus-oleracea) | 0.9856459    | 0.7837522    | 1         | 0.6445946 | not scorable | not scorable |
| #### Bn-scaff_16511_1-p11831 C-genome specific (napus-oleracea) | 0.9856459    | 0.8052264    | 1         | 0.5390083 | not scorable | not scorable |

|                                                                 |           |           |              |              |              |              |
|-----------------------------------------------------------------|-----------|-----------|--------------|--------------|--------------|--------------|
| #### Bn-scaff_16511_1-p11835 C-genome specific (napus-oleracea) | 0.9856459 | 0.774166  | 1            | 0.6491383    | not scorable | not scorable |
| #### Bn-scaff_16511_1-p11840 C-genome specific (napus-oleracea) | 1         | 0.8521282 | 1            | 0.9039411    | not scorable | not scorable |
| #### Bn-scaff_16511_1-p11840 C-genome specific (napus-oleracea) | 0.9928229 | 0.8355051 | 1            | 0.7208796    | not scorable | not scorable |
| #### Bn-scaff_16511_1-p11854 C-genome specific (napus-oleracea) | 0.9880383 | 0.9090195 | 0.9844961    | 0.7319322    | not scorable | not scorable |
| #### Bn-scaff_16511_1-p11859 C-genome specific (napus-oleracea) | 0.9856459 | 0.7772946 | 1            | 0.5743321    | not scorable | not scorable |
| #### Bn-scaff_16511_1-p11862 C-genome specific (napus-oleracea) | 0.9928229 | 0.8304625 | 0.9767442    | 0.697173     | not scorable | not scorable |
| #### Bn-scaff_16511_1-p11865 C-genome specific (napus-oleracea) | 0.9904306 | 0.8922637 | 1            | 0.6729499    | not scorable | not scorable |
| #### Bn-scaff_16511_1-p11865 C-genome specific (napus-oleracea) | 0.9952153 | 0.8457331 | 1            | 0.6383963    | not scorable | not scorable |
| #### Bn-scaff_16511_1-p11872 C-genome specific (napus-oleracea) | 0.9760765 | 0.8125808 | 1            | 0.7349759    | not scorable | not scorable |
| #### Bn-scaff_16511_1-p11874 C-genome specific (napus-oleracea) | 0.9856459 | 0.8901238 | 1            | 0.7690023    | not scorable | not scorable |
| #### Bn-scaff_16511_1-p11876 C-genome specific (napus-oleracea) | 0.9784689 | 0.855875  | 1            | 0.6385277    | not scorable | not scorable |
| #### Bn-scaff_16511_1-p11878 C-genome specific (napus-oleracea) | 0.9856459 | 0.8197368 | 1            | 0.3116581    | not scorable | not scorable |
| #### Bn-scaff_16511_1-p11879 C-genome specific (napus-oleracea) | 0.9856459 | 0.8480631 | 1            | 0.5796049    | not scorable | not scorable |
| #### Bn-scaff_16511_1-p11883 C-genome specific (napus-oleracea) | 0.9832536 | 0.7729285 | 1            | 0.9119573    | not scorable | not scorable |
| #### Bn-scaff_16511_1-p11884 C-genome specific (napus-oleracea) | 0.9784689 | 0.7668034 | 0.9844961    | 0.6834239    | not scorable | not scorable |
| #### Bn-scaff_16511_1-p11884 C-genome specific (napus-oleracea) | 0.9808612 | 0.8314526 | 0.9922481    | 0.7209759    | not scorable | not scorable |
| #### Bn-scaff_16511_1-p11886 C-genome specific (napus-oleracea) | 0.9808612 | 0.7403085 | 1            | 0.7232928    | not scorable | not scorable |
| #### Bn-scaff_16511_1-p11974 C-genome specific (napus-oleracea) | 0.9856459 | 0.9130765 | 1            | 0.7654198    | not scorable | not scorable |
| #### Bn-scaff_16511_1-p11978 C-genome specific (napus-oleracea) | 0.9952153 | 0.7739789 | 1            | 0.4876617    | not scorable | not scorable |
| #### Bn-scaff_16511_1-p12017 C-genome specific (napus-oleracea) | 0.9736842 | 0.8197821 | 1            | 0.7748649    | not scorable | not scorable |
| #### Bn-scaff_16511_1-p12021 C-genome specific (napus-oleracea) | 0.9904306 | 0.8811226 | 1            | 0.6670399    | not scorable | not scorable |
| #### Bn-scaff_16511_1-p12042 C-genome specific (napus-oleracea) | 0.9832536 | 0.7318158 | 1            | 0.7946844    | not scorable | not scorable |
| #### Bn-scaff_16511_1-p12043 C-genome specific (napus-oleracea) | 0.9760765 | 0.7680432 | 1            | 0.5830727    | not scorable | not scorable |
| #### Bn-scaff_16511_1-p12049 C-genome specific (napus-oleracea) | 0.9760765 | 0.8538078 | 1            | 0.7780613    | not scorable | not scorable |
| #### Bn-scaff_16511_1-p12163 C-genome specific (napus-oleracea) | 0.9952153 | 0.8994421 | 1            | 0.7508262    | not scorable | not scorable |
| #### Bn-scaff_16511_1-p12164 C-genome specific (napus-oleracea) | 0.9952153 | 0.8696917 | 1            | 0.502952     | not scorable | not scorable |
| #### Bn-scaff_16511_1-p12300 C-genome specific (napus-oleracea) | 0.9712918 | 0.7964646 | 0.9844961    | 0.6911652    | not scorable | not scorable |
| #### Bn-scaff_16511_1-p12314 C-genome specific (napus-oleracea) | 0.9760765 | 0.8749571 | 1            | 0.7971577    | not scorable | not scorable |
| #### Bn-scaff_16511_1-p12316 C-genome specific (napus-oleracea) | 0.9928229 | 0.8743051 | 1            | 0.9175813    | not scorable | not scorable |
| #### Bn-scaff_16511_1-p12318 napus specific                     | 0.9904306 | 0.741909  | not scorable | not scorable | not scorable | not scorable |
| #### Bn-scaff_16511_1-p12364 C-genome specific (napus-oleracea) | 0.9928229 | 0.7858406 | 1            | 0.7397582    | not scorable | not scorable |
| #### Bn-scaff_16511_1-p12386 C-genome specific (napus-oleracea) | 0.9928229 | 0.750268  | 1            | 0.6675302    | not scorable | not scorable |
| #### Bn-scaff_16511_1-p12389 C-genome specific (napus-oleracea) | 0.9712918 | 0.7571614 | 1            | 0.7112507    | not scorable | not scorable |



|                                                                |           |           |           |           |              |              |
|----------------------------------------------------------------|-----------|-----------|-----------|-----------|--------------|--------------|
| #### Bn-scaff_16511_1-p12391C-genome specific (napus-oleracea) | 0.9952153 | 0.8838626 | 1         | 0.917609  | not scorable | not scorable |
| #### Bn-scaff_16511_1-p12398C-genome specific (napus-oleracea) | 0.9880383 | 0.8222458 | 0.9767442 | 0.7244986 | not scorable | not scorable |
| #### Bn-scaff_16511_1-p12398genome unspecific (all in)         | 0.9760765 | 0.5869498 | 1         | 0.5972513 | 1            | 0.889019     |
| #### Bn-scaff_16511_1-p12415C-genome specific (napus-oleracea) | 0.9712918 | 0.75849   | 1         | 0.7045869 | not scorable | not scorable |
| #### Bn-scaff_16511_1-p12424C-genome specific (napus-oleracea) | 0.9928229 | 0.6691585 | 1         | 0.5622357 | not scorable | not scorable |
| #### Bn-scaff_16511_1-p12427C-genome specific (napus-oleracea) | 0.9952153 | 0.7854084 | 1         | 0.7762688 | not scorable | not scorable |
| #### Bn-scaff_16511_1-p12428C-genome specific (napus-oleracea) | 0.9904306 | 0.8024307 | 1         | 0.7194202 | not scorable | not scorable |
| #### Bn-scaff_16511_1-p12434C-genome specific (napus-oleracea) | 0.9760765 | 0.7862527 | 1         | 0.7278327 | not scorable | not scorable |
| #### Bn-scaff_16511_1-p12521C-genome specific (napus-oleracea) | 0.9928229 | 0.8391497 | 1         | 0.7468815 | not scorable | not scorable |
| #### Bn-scaff_16511_1-p12521C-genome specific (napus-oleracea) | 0.9904306 | 0.8906622 | 1         | 0.8224563 | not scorable | not scorable |
| #### Bn-scaff_16511_1-p12523C-genome specific (napus-oleracea) | 0.9856459 | 0.7440221 | 1         | 0.8271542 | not scorable | not scorable |
| #### Bn-scaff_16511_1-p12523C-genome specific (napus-oleracea) | 0.9952153 | 0.798973  | 1         | 0.9205657 | not scorable | not scorable |
| #### Bn-scaff_16511_1-p12524C-genome specific (napus-oleracea) | 0.9760765 | 0.7661971 | 1         | 0.780603  | not scorable | not scorable |
| #### Bn-scaff_16511_1-p12560C-genome specific (napus-oleracea) | 0.9808612 | 0.7523772 | 1         | 0.6926309 | not scorable | not scorable |
| #### Bn-scaff_16511_1-p12566C-genome specific (napus-oleracea) | 0.9808612 | 0.7040022 | 1         | 0.8656014 | not scorable | not scorable |
| #### Bn-scaff_16511_1-p12567C-genome specific (napus-oleracea) | 0.9808612 | 0.7580879 | 1         | 0.7244188 | not scorable | not scorable |
| #### Bn-scaff_16511_1-p12651C-genome specific (napus-oleracea) | 0.9952153 | 0.8476523 | 1         | 0.9423814 | not scorable | not scorable |
| #### Bn-scaff_16511_1-p12652C-genome specific (napus-oleracea) | 0.9784689 | 0.6983112 | 1         | 0.8279625 | not scorable | not scorable |
| #### Bn-scaff_16511_1-p12670C-genome specific (napus-oleracea) | 0.9928229 | 0.8098286 | 1         | 0.8308226 | not scorable | not scorable |
| #### Bn-scaff_16511_1-p12672C-genome specific (napus-oleracea) | 0.9952153 | 0.8237117 | 1         | 0.7644812 | not scorable | not scorable |
| #### Bn-scaff_16511_1-p12672C-genome specific (napus-oleracea) | 0.9952153 | 0.8871842 | 1         | 0.757611  | not scorable | not scorable |
| #### Bn-scaff_16511_1-p12676C-genome specific (napus-oleracea) | 0.9976076 | 0.7287906 | 1         | 0.79844   | not scorable | not scorable |
| #### Bn-scaff_16511_1-p12679C-genome specific (napus-oleracea) | 0.9856459 | 0.7231056 | 1         | 0.5922718 | not scorable | not scorable |
| #### Bn-scaff_16511_1-p12682C-genome specific (napus-oleracea) | 0.9880383 | 0.6733707 | 1         | 0.5447427 | not scorable | not scorable |
| #### Bn-scaff_16511_1-p12775C-genome specific (napus-oleracea) | 0.9928229 | 0.7193478 | 1         | 0.6574454 | not scorable | not scorable |
| #### Bn-scaff_16511_1-p12776C-genome specific (napus-oleracea) | 0.9808612 | 0.7637809 | 1         | 0.6970661 | not scorable | not scorable |
| #### Bn-scaff_16511_1-p12810C-genome specific (napus-oleracea) | 0.9784689 | 0.7361564 | 1         | 0.7744447 | not scorable | not scorable |
| #### Bn-scaff_16511_1-p12810C-genome specific (napus-oleracea) | 0.9832536 | 0.7915844 | 1         | 0.7962748 | not scorable | not scorable |
| #### Bn-scaff_16511_1-p12812C-genome specific (napus-oleracea) | 0.9880383 | 0.3338768 | 1         | 0.8293141 | not scorable | not scorable |
| #### Bn-scaff_16511_1-p12814C-genome specific (napus-oleracea) | 0.9904306 | 0.8265825 | 1         | 0.8815182 | not scorable | not scorable |
| #### Bn-scaff_16511_1-p12817C-genome specific (napus-oleracea) | 0.9880383 | 0.8044852 | 1         | 0.7615299 | not scorable | not scorable |
| #### Bn-scaff_16511_1-p12828C-genome specific (napus-oleracea) | 0.9832536 | 0.7517806 | 1         | 0.8773082 | not scorable | not scorable |
| #### Bn-scaff_16511_1-p12837C-genome specific (napus-oleracea) | 0.9832536 | 0.806746  | 1         | 0.7779451 | not scorable | not scorable |

|                                                                |              |              |           |           |              |              |
|----------------------------------------------------------------|--------------|--------------|-----------|-----------|--------------|--------------|
| #### Bn-scaff_16511_1-p12851C-genome specific (napus-oleracea) | 0.9904306    | 0.6092245    | 1         | 0.6724718 | not scorable | not scorable |
| #### Bn-scaff_16511_1-p12891C-genome specific (napus-oleracea) | 0.9904306    | 0.6455026    | 1         | 0.7494321 | not scorable | not scorable |
| #### Bn-scaff_16511_1-p12891C-genome specific (napus-oleracea) | 0.9808612    | 0.7864717    | 1         | 0.7187483 | not scorable | not scorable |
| #### Bn-scaff_16511_1-p12894C-genome specific (napus-oleracea) | 0.9880383    | 0.6760591    | 1         | 0.786476  | not scorable | not scorable |
| #### Bn-scaff_16511_1-p12895C-genome specific (napus-oleracea) | 0.9952153    | 0.7260085    | 1         | 0.6847569 | not scorable | not scorable |
| #### Bn-scaff_16511_1-p12899C-genome specific (napus-oleracea) | 0.9928229    | 0.6805183    | 1         | 0.5736661 | not scorable | not scorable |
| #### Bn-scaff_16511_1-p12907C-genome specific (napus-oleracea) | 0.9976076    | 0.7460555    | 1         | 0.6430716 | not scorable | not scorable |
| #### Bn-scaff_16511_1-p12909C-genome specific (napus-oleracea) | 0.9952153    | 0.7552702    | 1         | 0.6825594 | not scorable | not scorable |
| #### Bn-scaff_16511_1-p12910C-genome specific (napus-oleracea) | 0.9952153    | 0.791932     | 1         | 0.6547318 | not scorable | not scorable |
| #### Bn-scaff_16511_1-p12912C-genome specific (napus-oleracea) | 0.9880383    | 0.7708787    | 1         | 0.7624202 | not scorable | not scorable |
| #### Bn-scaff_16511_1-p12914C-genome specific (napus-oleracea) | 0.9808612    | 0.7419165    | 1         | 0.8076015 | not scorable | not scorable |
| #### Bn-scaff_16511_1-p13159C-genome specific (napus-oleracea) | 0.9832536    | 0.7390049    | 1         | 0.689514  | not scorable | not scorable |
| #### Bn-scaff_16511_1-p13161C-genome specific (napus-oleracea) | 0.9952153    | 0.7216364    | 1         | 0.6063052 | not scorable | not scorable |
| #### Bn-scaff_16511_1-p13165C-genome specific (napus-oleracea) | 0.9808612    | 0.6337047    | 1         | 0.6450936 | not scorable | not scorable |
| #### Bn-scaff_16511_1-p13165C-genome specific (napus-oleracea) | 0.9880383    | 0.7291193    | 1         | 0.5406899 | not scorable | not scorable |
| #### Bn-scaff_16511_1-p13166C-genome specific (napus-oleracea) | 0.9832536    | 0.6276442    | 1         | 0.6227993 | not scorable | not scorable |
| #### Bn-scaff_16511_1-p13198C-genome specific (oleracea only)  | not scorable | not scorable | 1         | 0.6206918 | not scorable | not scorable |
| #### Bn-scaff_16511_1-p13823genome unspecific (all in)         | 1            | 0.6706561    | 1         | 0.6493671 | 1            | 0.8592297    |
| #### Bn-scaff_16511_1-p13928C-genome specific (napus-oleracea) | 0.7464115    | 0.8598664    | 1         | 0.9046076 | not scorable | not scorable |
| #### Bn-scaff_16511_1-p13947C-genome specific (napus-oleracea) | 0.7368421    | 0.7091835    | 1         | 0.6221046 | not scorable | not scorable |
| #### Bn-scaff_16511_1-p13948C-genome specific (napus-oleracea) | 0.7488039    | 0.8212866    | 1         | 0.7257506 | not scorable | not scorable |
| #### Bn-scaff_16511_1-p13948C-genome specific (napus-oleracea) | 0.7272727    | 0.6526015    | 1         | 0.7641606 | not scorable | not scorable |
| #### Bn-scaff_16511_1-p14010C-genome specific (napus-oleracea) | 0.7440192    | 0.8007748    | 1         | 0.7228103 | not scorable | not scorable |
| #### Bn-scaff_16511_1-p14019C-genome specific (napus-oleracea) | 0.7368421    | 0.7425901    | 0.9844961 | 0.821676  | not scorable | not scorable |
| #### Bn-scaff_16511_1-p14031C-genome specific (napus-oleracea) | 0.7464115    | 0.6736899    | 1         | 0.5716552 | not scorable | not scorable |
| #### Bn-scaff_16511_1-p14033C-genome specific (napus-oleracea) | 0.7416268    | 0.6591585    | 0.9922481 | 0.6529352 | not scorable | not scorable |
| #### Bn-scaff_16511_1-p14039C-genome specific (napus-oleracea) | 0.7368421    | 0.7565936    | 1         | 0.7897122 | not scorable | not scorable |
| #### Bn-scaff_16511_1-p14045C-genome specific (napus-oleracea) | 0.7320574    | 0.7526208    | 1         | 0.7793536 | not scorable | not scorable |
| #### Bn-scaff_16511_1-p14054C-genome specific (napus-oleracea) | 0.7535885    | 0.8467369    | 1         | 0.9175813 | not scorable | not scorable |
| #### Bn-scaff_16511_1-p14060C-genome specific (napus-oleracea) | 0.9856459    | 0.7712145    | 1         | 0.7647843 | not scorable | not scorable |
| #### Bn-scaff_16511_1-p14063C-genome specific (napus-oleracea) | 0.9904306    | 0.7994729    | 1         | 0.8252519 | not scorable | not scorable |
| #### Bn-scaff_16511_1-p14067C-genome specific (napus-oleracea) | 0.9856459    | 0.7816647    | 1         | 0.8081143 | not scorable | not scorable |
| #### Bn-scaff_16511_1-p14089C-genome specific (napus-oleracea) | 0.9904306    | 0.8104526    | 1         | 0.7149409 | not scorable | not scorable |



|                                                                 |           |           |           |           |              |              |
|-----------------------------------------------------------------|-----------|-----------|-----------|-----------|--------------|--------------|
| #### Bn-scaff_16511_1-p46534 C-genome specific (napus-oleracea) | 0.9952153 | 0.8701791 | 1         | 0.9260307 | not scorable | not scorable |
| #### Bn-scaff_16511_1-p52990 C-genome specific (napus-oleracea) | 0.9784689 | 0.749826  | 1         | 0.7607198 | not scorable | not scorable |
| #### Bn-scaff_16511_1-p53031 C-genome specific (napus-oleracea) | 0.9976076 | 0.8283845 | 1         | 0.9089903 | not scorable | not scorable |
| #### Bn-scaff_16511_1-p53131 C-genome specific (napus-oleracea) | 0.9832536 | 0.7666522 | 1         | 0.8912995 | not scorable | not scorable |
| #### Bn-scaff_16511_1-p53539 genome unspecific (all in)         | 0.9904306 | 0.5432249 | 0.9689922 | 0.6676937 | 1            | 0.8844453    |
| #### Bn-scaff_16511_1-p53540 C-genome specific (napus-oleracea) | 0.9880383 | 0.8001699 | 1         | 0.8653011 | not scorable | not scorable |
| #### Bn-scaff_16511_1-p53550 C-genome specific (napus-oleracea) | 0.9928229 | 0.8807137 | 1         | 0.9175813 | not scorable | not scorable |
| #### Bn-scaff_16511_1-p53574 C-genome specific (napus-oleracea) | 0.9856459 | 0.7548519 | 1         | 0.9046139 | not scorable | not scorable |
| #### Bn-scaff_16511_1-p53848 C-genome specific (napus-oleracea) | 0.9784689 | 0.7090331 | 1         | 0.9158597 | not scorable | not scorable |
| #### Bn-scaff_16511_1-p53976 C-genome specific (napus-oleracea) | 0.9880383 | 0.8559368 | 1         | 0.9176167 | not scorable | not scorable |
| #### Bn-scaff_16511_1-p54014 C-genome specific (napus-oleracea) | 0.9928229 | 0.8287888 | 1         | 0.8631368 | not scorable | not scorable |
| #### Bn-scaff_16511_1-p54055 C-genome specific (napus-oleracea) | 0.9832536 | 0.73639   | 1         | 0.8948976 | not scorable | not scorable |
| #### Bn-scaff_16511_1-p54069 C-genome specific (napus-oleracea) | 0.9808612 | 0.7960812 | 1         | 0.8484669 | not scorable | not scorable |
| #### Bn-scaff_16511_1-p54091 C-genome specific (napus-oleracea) | 0.9832536 | 0.7211984 | 1         | 0.9272014 | not scorable | not scorable |
| #### Bn-scaff_16511_1-p54122 C-genome specific (napus-oleracea) | 0.9904306 | 0.7472959 | 0.9922481 | 0.7012719 | not scorable | not scorable |
| #### Bn-scaff_16511_1-p54147 C-genome specific (napus-oleracea) | 0.9928229 | 0.6796852 | 1         | 0.7704193 | not scorable | not scorable |
| #### Bn-scaff_16511_1-p54227 C-genome specific (napus-oleracea) | 0.9760765 | 0.7885366 | 1         | 0.8867714 | not scorable | not scorable |
| #### Bn-scaff_16511_1-p54278 C-genome specific (napus-oleracea) | 1         | 0.7668775 | 1         | 0.8877835 | not scorable | not scorable |
| #### Bn-scaff_16511_1-p54334 C-genome specific (napus-oleracea) | 0.8492823 | 0.7872237 | 0.9844961 | 0.8495759 | not scorable | not scorable |
| #### Bn-scaff_16511_1-p54483 C-genome specific (napus-oleracea) | 0.9952153 | 0.8280001 | 0.9922481 | 0.9447603 | not scorable | not scorable |
| #### Bn-scaff_16511_1-p54516 C-genome specific (napus-oleracea) | 0.9976076 | 0.8426763 | 1         | 0.9231287 | not scorable | not scorable |
| #### Bn-scaff_16511_1-p55051 C-genome specific (napus-oleracea) | 0.9856459 | 0.7983741 | 1         | 0.9009889 | not scorable | not scorable |
| #### Bn-scaff_16511_1-p55053 C-genome specific (napus-oleracea) | 0.9808612 | 0.6993501 | 1         | 0.6626505 | not scorable | not scorable |
| #### Bn-scaff_16511_1-p55059 C-genome specific (napus-oleracea) | 0.9880383 | 0.7678978 | 1         | 0.894294  | not scorable | not scorable |
| #### Bn-scaff_16511_1-p55162 C-genome specific (napus-oleracea) | 0.9856459 | 0.6984034 | 1         | 0.8114662 | not scorable | not scorable |
| #### Bn-scaff_16511_1-p55249 C-genome specific (napus-oleracea) | 0.9760765 | 0.7586808 | 1         | 0.9130331 | not scorable | not scorable |
| #### Bn-scaff_16511_1-p55271 C-genome specific (napus-oleracea) | 0.9808612 | 0.654915  | 1         | 0.8326837 | not scorable | not scorable |
| #### Bn-scaff_16511_1-p55338 C-genome specific (napus-oleracea) | 0.9760765 | 0.7343788 | 0.9922481 | 0.8290603 | not scorable | not scorable |
| #### Bn-scaff_16511_1-p55341 C-genome specific (napus-oleracea) | 0.9928229 | 0.877194  | 1         | 0.9175813 | not scorable | not scorable |
| #### Bn-scaff_16511_1-p57383 C-genome specific (napus-oleracea) | 0.9928229 | 0.7442364 | 1         | 0.7254147 | not scorable | not scorable |
| #### Bn-scaff_16511_1-p57448 C-genome specific (napus-oleracea) | 0.9856459 | 0.8155184 | 1         | 0.842206  | not scorable | not scorable |
| #### Bn-scaff_16511_1-p57677 C-genome specific (napus-oleracea) | 0.9832536 | 0.7680533 | 0.9922481 | 0.9207402 | not scorable | not scorable |
| #### Bn-scaff_16511_1-p57843 C-genome specific (napus-oleracea) | 0.9976076 | 0.7313404 | 1         | 0.7770717 | not scorable | not scorable |

|                                                                 |              |              |              |              |              |              |
|-----------------------------------------------------------------|--------------|--------------|--------------|--------------|--------------|--------------|
| #### Bn-scaff_16511_1-p57859 C-genome specific (napus-oleracea) | 0.9880383    | 0.7462204    | 1            | 0.7884539    | not scorable | not scorable |
| #### Bn-scaff_16511_1-p57862 C-genome specific (napus-oleracea) | 0.9928229    | 0.712321     | 1            | 0.8004208    | not scorable | not scorable |
| #### Bn-scaff_16511_1-p57881 C-genome specific (napus-oleracea) | 0.9880383    | 0.6408235    | 1            | 0.702597     | not scorable | not scorable |
| #### Bn-scaff_16511_1-p57979 C-genome specific (napus-oleracea) | 1            | 0.7161598    | 1            | 0.7740555    | not scorable | not scorable |
| #### Bn-scaff_16511_1-p57986 C-genome specific (napus-oleracea) | 0.9928229    | 0.7223991    | 1            | 0.8004208    | not scorable | not scorable |
| #### Bn-scaff_16511_1-p60160 C-genome specific (napus-oleracea) | 0.9856459    | 0.7500265    | 1            | 0.8543575    | not scorable | not scorable |
| #### Bn-scaff_16511_1-p61139 napus specific                     | 0.9569378    | 0.7464407    | not scorable | not scorable | not scorable | not scorable |
| #### Bn-scaff_16511_1-p61572 C-genome specific (napus-oleracea) | 0.9952153    | 0.8677033    | 1            | 0.8103592    | not scorable | not scorable |
| #### Bn-scaff_16511_1-p61743 C-genome specific (napus-oleracea) | 0.9880383    | 0.8260867    | 1            | 0.9053454    | not scorable | not scorable |
| #### Bn-scaff_16511_1-p61781 C-genome specific (napus-oleracea) | 0.9808612    | 0.7227077    | 1            | 0.9128314    | not scorable | not scorable |
| #### Bn-scaff_16511_1-p62303 all not scorable                   | not scorable | not scorable | not scorable | not scorable | not scorable | not scorable |
| #### Bn-scaff_16511_1-p63222 C-genome specific (napus-oleracea) | 0.9904306    | 0.8364386    | 0.9922481    | 0.9094567    | not scorable | not scorable |
| #### Bn-scaff_16511_1-p64023 C-genome specific (napus-oleracea) | 0.9880383    | 0.782521     | 0.9844961    | 0.793394     | not scorable | not scorable |
| #### Bn-scaff_16511_1-p64408 C-genome specific (napus-oleracea) | 0.9976076    | 0.859277     | 1            | 0.9224412    | not scorable | not scorable |
| #### Bn-scaff_16511_1-p64416 C-genome specific (napus-oleracea) | 1            | 0.8455172    | 1            | 0.9205657    | not scorable | not scorable |
| #### Bn-scaff_16511_1-p65501 C-genome specific (napus-oleracea) | 0.9880383    | 0.8094466    | 1            | 0.9063933    | not scorable | not scorable |
| #### Bn-scaff_16511_1-p65650 C-genome specific (napus-oleracea) | 0.9952153    | 0.8234157    | 1            | 0.8811586    | not scorable | not scorable |
| #### Bn-scaff_16511_1-p65679 C-genome specific (napus-oleracea) | 0.9856459    | 0.787013     | 1            | 0.9272014    | not scorable | not scorable |
| #### Bn-scaff_16511_1-p65697 C-genome specific (napus-oleracea) | 0.9904306    | 0.8422057    | 1            | 0.8444776    | not scorable | not scorable |
| #### Bn-scaff_16511_1-p65791 C-genome specific (napus-oleracea) | 0.9760765    | 0.7253033    | 1            | 0.9293141    | not scorable | not scorable |
| #### Bn-scaff_16511_1-p65889 C-genome specific (napus-oleracea) | 0.9832536    | 0.7460982    | 1            | 0.9145055    | not scorable | not scorable |
| #### Bn-scaff_16511_1-p66423 C-genome specific (napus-oleracea) | 0.9952153    | 0.750358     | 1            | 0.9151813    | not scorable | not scorable |
| #### Bn-scaff_16511_1-p66615 genome unspecific (all in)         | 0.9880383    | 0.4275049    | 1            | 0.5901233    | 1            | 0.8219866    |
| #### Bn-scaff_16511_1-p67080 C-genome specific (napus-oleracea) | 0.9760765    | 0.7990389    | 1            | 0.8569237    | not scorable | not scorable |
| #### Bn-scaff_16511_1-p67296 C-genome specific (napus-oleracea) | 0.9904306    | 0.8351108    | 1            | 0.833822     | not scorable | not scorable |
| #### Bn-scaff_16511_1-p67341 C-genome specific (napus-oleracea) | 0.9904306    | 0.845646     | 1            | 0.8097162    | not scorable | not scorable |
| #### Bn-scaff_16511_1-p67342 C-genome specific (napus-oleracea) | 0.9928229    | 0.8117121    | 0.9922481    | 0.5809243    | not scorable | not scorable |
| #### Bn-scaff_16511_1-p67356 C-genome specific (napus-oleracea) | 0.9808612    | 0.7129521    | 1            | 0.8948976    | not scorable | not scorable |
| #### Bn-scaff_16511_1-p67373 C-genome specific (napus-oleracea) | 0.9856459    | 0.7209101    | 1            | 0.8529817    | not scorable | not scorable |
| #### Bn-scaff_16511_1-p67401 C-genome specific (napus-oleracea) | 0.9904306    | 0.767147     | 1            | 0.9094946    | not scorable | not scorable |
| #### Bn-scaff_16511_1-p67497 C-genome specific (napus-oleracea) | 0.9928229    | 0.8862244    | 1            | 0.8974045    | not scorable | not scorable |
| #### Bn-scaff_16511_1-p67513 C-genome specific (napus-oleracea) | 0.9904306    | 0.7759631    | 0.9922481    | 0.8150674    | not scorable | not scorable |
| #### Bn-scaff_16511_1-p67536 C-genome specific (napus-oleracea) | 0.9928229    | 0.7856716    | 1            | 0.7506596    | not scorable | not scorable |

|                                                                 |              |              |              |              |              |              |
|-----------------------------------------------------------------|--------------|--------------|--------------|--------------|--------------|--------------|
| #### Bn-scaff_16511_1-p67555 C-genome specific (napus-oleracea) | 1            | 0.8138955    | 1            | 0.9018844    | not scorable | not scorable |
| #### Bn-scaff_16511_1-p67565 C-genome specific (napus-oleracea) | 0.9760765    | 0.7814816    | 1            | 0.9093013    | not scorable | not scorable |
| #### Bn-scaff_16511_1-p6787 C-genome specific (napus-oleracea)  | 0.9976076    | 0.81889      | 1            | 0.9205657    | not scorable | not scorable |
| #### Bn-scaff_16511_1-p68658 genome unspecific (oleracea-rapa)  | not scorable | not scorable | 1            | 0.914787     | 1            | 0.9456015    |
| #### Bn-scaff_16511_1-p68709 C-genome specific (napus-oleracea) | 0.9880383    | 0.5863579    | 0.9922481    | 0.6630284    | not scorable | not scorable |
| #### Bn-scaff_16511_1-p68903 C-genome specific (napus-oleracea) | 0.9976076    | 0.8168821    | 1            | 0.8224058    | not scorable | not scorable |
| #### Bn-scaff_16511_1-p69188 C-genome specific (napus-oleracea) | 0.9784689    | 0.7169164    | 1            | 0.7395847    | not scorable | not scorable |
| #### Bn-scaff_16511_1-p69657 C-genome specific (napus-oleracea) | 0.9928229    | 0.7888584    | 1            | 0.9272014    | not scorable | not scorable |
| #### Bn-scaff_16511_1-p69695 C-genome specific (napus-oleracea) | 0.9904306    | 0.7839252    | 1            | 0.7217122    | not scorable | not scorable |
| #### Bn-scaff_16511_1-p69743 C-genome specific (napus-oleracea) | 0.9760765    | 0.7529163    | 1            | 0.8293141    | not scorable | not scorable |
| #### Bn-scaff_16511_1-p69791 napus specific                     | 1            | 0.4085525    | not scorable | not scorable | not scorable | not scorable |
| #### Bn-scaff_16511_1-p69819 C-genome specific (napus-oleracea) | 0.9928229    | 0.6734201    | 1            | 0.7155698    | not scorable | not scorable |
| #### Bn-scaff_16511_1-p69839 C-genome specific (napus-oleracea) | 0.9760765    | 0.7344921    | 1            | 0.8004208    | not scorable | not scorable |
| #### Bn-scaff_16511_1-p69881 C-genome specific (napus-oleracea) | 0.9904306    | 0.5749777    | 1            | 0.8135551    | not scorable | not scorable |
| #### Bn-scaff_16511_1-p69906 C-genome specific (napus-oleracea) | 0.9760765    | 0.8040754    | 1            | 0.6846291    | not scorable | not scorable |
| #### Bn-scaff_16511_1-p69948 C-genome specific (napus-oleracea) | 0.9952153    | 0.7399213    | 1            | 0.8793069    | not scorable | not scorable |
| #### Bn-scaff_16511_1-p69974 C-genome specific (napus-oleracea) | 0.9952153    | 0.8445407    | 1            | 0.7627193    | not scorable | not scorable |
| #### Bn-scaff_16511_1-p69985 C-genome specific (napus-oleracea) | 0.9976076    | 0.8036736    | 0.9844961    | 0.8657077    | not scorable | not scorable |
| #### Bn-scaff_16511_1-p69991 C-genome specific (napus-oleracea) | 0.9880383    | 0.6911499    | 1            | 0.9047789    | not scorable | not scorable |
| #### Bn-scaff_16511_1-p70316 C-genome specific (napus-oleracea) | 0.9952153    | 0.7630112    | 1            | 0.8004208    | not scorable | not scorable |
| #### Bn-scaff_16511_1-p70385 C-genome specific (napus-oleracea) | 0.9904306    | 0.6755589    | 1            | 0.8004208    | not scorable | not scorable |
| #### Bn-scaff_16511_1-p70387 C-genome specific (napus-oleracea) | 1            | 0.6970972    | 1            | 0.8137881    | not scorable | not scorable |
| #### Bn-scaff_16511_1-p70440 C-genome specific (napus-oleracea) | 0.9832536    | 0.7727245    | 1            | 0.8800499    | not scorable | not scorable |
| #### Bn-scaff_16511_1-p70455 C-genome specific (napus-oleracea) | 0.9928229    | 0.8859979    | 1            | 0.8945633    | not scorable | not scorable |
| #### Bn-scaff_16511_1-p70550 C-genome specific (napus-oleracea) | 0.9832536    | 0.8890854    | 1            | 0.9279943    | not scorable | not scorable |
| #### Bn-scaff_16511_1-p70559 C-genome specific (napus-oleracea) | 0.9976076    | 0.8568234    | 1            | 0.9264641    | not scorable | not scorable |
| #### Bn-scaff_16511_1-p70590 C-genome specific (napus-oleracea) | 0.9976076    | 0.7618603    | 1            | 0.9272273    | not scorable | not scorable |
| #### Bn-scaff_16511_1-p70657 C-genome specific (napus-oleracea) | 0.9952153    | 0.7796789    | 1            | 0.8793468    | not scorable | not scorable |
| #### Bn-scaff_16511_1-p70676 C-genome specific (napus-oleracea) | 0.9832536    | 0.9296436    | 1            | 0.9096168    | not scorable | not scorable |
| #### Bn-scaff_16511_1-p70683 C-genome specific (napus-oleracea) | 0.9808612    | 0.8080773    | 1            | 0.870802     | not scorable | not scorable |
| #### Bn-scaff_16511_1-p70687 C-genome specific (napus-oleracea) | 0.9856459    | 0.7687672    | 1            | 0.6527777    | not scorable | not scorable |
| #### Bn-scaff_16511_1-p70726 C-genome specific (napus-oleracea) | 0.9808612    | 0.8182916    | 1            | 0.6719009    | not scorable | not scorable |
| #### Bn-scaff_16511_1-p70743 C-genome specific (napus-oleracea) | 0.9760765    | 0.7507653    | 1            | 0.9118776    | not scorable | not scorable |

|                                                                 |           |           |           |           |              |              |
|-----------------------------------------------------------------|-----------|-----------|-----------|-----------|--------------|--------------|
| #### Bn-scaff_16511_1-p70787 C-genome specific (napus-oleracea) | 0.9808612 | 0.8854687 | 1         | 0.8988641 | not scorable | not scorable |
| #### Bn-scaff_16511_1-p70974 C-genome specific (napus-oleracea) | 0.9688995 | 0.7159861 | 0.9922481 | 0.7547913 | not scorable | not scorable |
| #### Bn-scaff_16511_1-p71153 C-genome specific (napus-oleracea) | 0.9952153 | 0.7218419 | 0.9922481 | 0.818989  | not scorable | not scorable |
| #### Bn-scaff_16511_1-p71557 C-genome specific (napus-oleracea) | 0.9928229 | 0.7685629 | 1         | 0.7940007 | not scorable | not scorable |
| #### Bn-scaff_16511_1-p71733 C-genome specific (napus-oleracea) | 0.9928229 | 0.7587597 | 1         | 0.7278247 | not scorable | not scorable |
| #### Bn-scaff_16511_1-p71792 C-genome specific (napus-oleracea) | 0.9976076 | 0.7872074 | 1         | 0.8199511 | not scorable | not scorable |
| #### Bn-scaff_16511_1-p71893 C-genome specific (napus-oleracea) | 0.5645933 | 0.8754714 | 1         | 0.7407441 | not scorable | not scorable |
| #### Bn-scaff_16511_1-p71895 C-genome specific (napus-oleracea) | 0.5382775 | 0.8841014 | 1         | 0.9364661 | not scorable | not scorable |
| #### Bn-scaff_16511_1-p71909 C-genome specific (napus-oleracea) | 0.5454546 | 0.8576143 | 1         | 0.8793069 | not scorable | not scorable |
| #### Bn-scaff_16511_1-p71970 C-genome specific (napus-oleracea) | 0.9952153 | 0.8704451 | 1         | 0.9175659 | not scorable | not scorable |
| #### Bn-scaff_16511_1-p72107 C-genome specific (napus-oleracea) | 0.9808612 | 0.7408763 | 1         | 0.6823961 | not scorable | not scorable |
| #### Bn-scaff_16511_1-p72213 C-genome specific (napus-oleracea) | 0.9808612 | 0.5718078 | 1         | 0.6131648 | not scorable | not scorable |
| #### Bn-scaff_16511_1-p72219 C-genome specific (napus-oleracea) | 0.9832536 | 0.6781039 | 1         | 0.786551  | not scorable | not scorable |
| #### Bn-scaff_16511_1-p72244 C-genome specific (napus-oleracea) | 0.9880383 | 0.7896671 | 1         | 0.9046531 | not scorable | not scorable |
| #### Bn-scaff_16511_1-p72245 C-genome specific (napus-oleracea) | 0.9784689 | 0.6382148 | 1         | 0.7884539 | not scorable | not scorable |
| #### Bn-scaff_16511_1-p72263 C-genome specific (napus-oleracea) | 0.9784689 | 0.8207347 | 1         | 0.8207097 | not scorable | not scorable |
| #### Bn-scaff_16511_1-p72264 C-genome specific (napus-oleracea) | 0.9760765 | 0.7381626 | 1         | 0.6637272 | not scorable | not scorable |
| #### Bn-scaff_16511_1-p72284 C-genome specific (napus-oleracea) | 0.9976076 | 0.6785275 | 0.9922481 | 0.6851784 | not scorable | not scorable |
| #### Bn-scaff_16511_1-p72791 C-genome specific (napus-oleracea) | 0.9976076 | 0.8914168 | 1         | 0.7849663 | not scorable | not scorable |
| #### Bn-scaff_16511_1-p72912 C-genome specific (napus-oleracea) | 0.9952153 | 0.8697229 | 1         | 0.7608561 | not scorable | not scorable |
| #### Bn-scaff_16511_1-p73109 C-genome specific (napus-oleracea) | 0.9952153 | 0.7595715 | 0.9844961 | 0.8347685 | not scorable | not scorable |
| #### Bn-scaff_16511_1-p73232 C-genome specific (napus-oleracea) | 0.9928229 | 0.699396  | 1         | 0.5932705 | not scorable | not scorable |
| #### Bn-scaff_16511_1-p73266 C-genome specific (napus-oleracea) | 0.9832536 | 0.7015873 | 1         | 0.7235581 | not scorable | not scorable |
| #### Bn-scaff_16511_1-p73334 C-genome specific (napus-oleracea) | 0.9928229 | 0.7376432 | 1         | 0.5357886 | not scorable | not scorable |
| #### Bn-scaff_16511_1-p7404 C-genome specific (napus-oleracea)  | 0.9760765 | 0.9140867 | 1         | 0.9459047 | not scorable | not scorable |
| #### Bn-scaff_16511_1-p74471 C-genome specific (napus-oleracea) | 0.9808612 | 0.7554837 | 1         | 0.8326486 | not scorable | not scorable |
| #### Bn-scaff_16511_1-p74476 C-genome specific (napus-oleracea) | 0.9976076 | 0.6840137 | 0.9922481 | 0.7573968 | not scorable | not scorable |
| #### Bn-scaff_16511_1-p74524 C-genome specific (napus-oleracea) | 0.9952153 | 0.8455607 | 1         | 0.7725469 | not scorable | not scorable |
| #### Bn-scaff_16511_1-p75284 C-genome specific (napus-oleracea) | 0.9976076 | 0.8077785 | 1         | 0.8207097 | not scorable | not scorable |
| #### Bn-scaff_16511_1-p75905 C-genome specific (napus-oleracea) | 1         | 0.8356779 | 1         | 0.9163651 | not scorable | not scorable |
| #### Bn-scaff_16511_1-p76450 C-genome specific (napus-oleracea) | 0.9928229 | 0.8897392 | 1         | 0.8956641 | not scorable | not scorable |
| #### Bn-scaff_16511_1-p76551 C-genome specific (napus-oleracea) | 0.9784689 | 0.7851952 | 1         | 0.7414471 | not scorable | not scorable |
| #### Bn-scaff_16511_1-p78534 C-genome specific (napus-oleracea) | 0.9928229 | 0.7178259 | 1         | 0.7263415 | not scorable | not scorable |

|                                                                 |           |           |              |              |              |              |
|-----------------------------------------------------------------|-----------|-----------|--------------|--------------|--------------|--------------|
| #### Bn-scaff_16511_1-p79559 C-genome specific (napus-oleracea) | 0.9904306 | 0.896624  | 1            | 0.9175813    | not scorable | not scorable |
| #### Bn-scaff_16511_1-p79587 C-genome specific (napus-oleracea) | 0.9904306 | 0.7588589 | 1            | 0.692691     | not scorable | not scorable |
| #### Bn-scaff_16511_1-p79625 C-genome specific (napus-oleracea) | 0.9880383 | 0.8833086 | 1            | 0.8647661    | not scorable | not scorable |
| #### Bn-scaff_16511_1-p79651 C-genome specific (napus-oleracea) | 0.9928229 | 0.8670548 | 1            | 0.7543449    | not scorable | not scorable |
| #### Bn-scaff_16511_1-p79677 C-genome specific (napus-oleracea) | 0.9880383 | 0.7749159 | 1            | 0.7227778    | not scorable | not scorable |
| #### Bn-scaff_16511_1-p79969 C-genome specific (napus-oleracea) | 0.9760765 | 0.5938486 | 1            | 0.6706561    | not scorable | not scorable |
| #### Bn-scaff_16511_1-p81820 C-genome specific (napus-oleracea) | 0.9928229 | 0.8304387 | 1            | 0.9249313    | not scorable | not scorable |
| #### Bn-scaff_16511_1-p82099 C-genome specific (napus-oleracea) | 0.9808612 | 0.8457219 | 1            | 0.9175813    | not scorable | not scorable |
| #### Bn-scaff_16511_1-p82171 C-genome specific (napus-oleracea) | 0.9904306 | 0.8497104 | 1            | 0.8542734    | not scorable | not scorable |
| #### Bn-scaff_16511_1-p82409 genome unspecific (all in)         | 0.9952153 | 0.4037815 | 1            | 0.7266802    | 1            | 0.8589161    |
| #### Bn-scaff_16511_1-p82413 C-genome specific (napus-oleracea) | 0.9952153 | 0.8465709 | 1            | 0.9179868    | not scorable | not scorable |
| #### Bn-scaff_16511_1-p82451 C-genome specific (napus-oleracea) | 0.9928229 | 0.849255  | 1            | 0.7399772    | not scorable | not scorable |
| #### Bn-scaff_16511_1-p82824 C-genome specific (napus-oleracea) | 0.9808612 | 0.9041651 | 1            | 0.916867     | not scorable | not scorable |
| #### Bn-scaff_16511_1-p83227 C-genome specific (napus-oleracea) | 0.9856459 | 0.6387864 | 0.9844961    | 0.8042582    | not scorable | not scorable |
| #### Bn-scaff_16511_1-p83430 A-genome specific (napus-rapa)     | 0.9880383 | 0.4704725 | not scorable | not scorable | 1            | 0.9349306    |
| #### Bn-scaff_16511_1-p83436 C-genome specific (napus-oleracea) | 0.9928229 | 0.7600639 | 1            | 0.5824619    | not scorable | not scorable |
| #### Bn-scaff_16511_1-p83500 C-genome specific (napus-oleracea) | 0.9832536 | 0.8892083 | 1            | 0.7050593    | not scorable | not scorable |
| #### Bn-scaff_16511_1-p83524 C-genome specific (napus-oleracea) | 0.9760765 | 0.7651012 | 1            | 0.6287239    | not scorable | not scorable |
| #### Bn-scaff_16511_1-p83530 C-genome specific (napus-oleracea) | 0.9736842 | 0.7931405 | 1            | 0.7257575    | not scorable | not scorable |
| #### Bn-scaff_16511_1-p83626 C-genome specific (napus-oleracea) | 0.9904306 | 0.833028  | 1            | 0.7300828    | not scorable | not scorable |
| #### Bn-scaff_16511_1-p83684 C-genome specific (napus-oleracea) | 0.9832536 | 0.77919   | 1            | 0.617974     | not scorable | not scorable |
| #### Bn-scaff_16511_1-p83747 C-genome specific (napus-oleracea) | 0.9928229 | 0.8363355 | 1            | 0.8720311    | not scorable | not scorable |
| #### Bn-scaff_16511_1-p83753 C-genome specific (napus-oleracea) | 0.9760765 | 0.8862571 | 1            | 0.758315     | not scorable | not scorable |
| #### Bn-scaff_16511_1-p83839 C-genome specific (napus-oleracea) | 0.9904306 | 0.6954457 | 1            | 0.6642161    | not scorable | not scorable |
| #### Bn-scaff_16511_1-p83882 C-genome specific (napus-oleracea) | 0.9760765 | 0.772878  | 1            | 0.7641606    | not scorable | not scorable |
| #### Bn-scaff_16511_1-p83937 C-genome specific (napus-oleracea) | 0.9736842 | 0.9586187 | 0.9767442    | 0.8013093    | not scorable | not scorable |
| #### Bn-scaff_16511_1-p84063 C-genome specific (napus-oleracea) | 0.9832536 | 0.6817704 | 1            | 0.5880451    | not scorable | not scorable |
| #### Bn-scaff_16511_1-p84071 C-genome specific (napus-oleracea) | 0.9928229 | 0.6642607 | 1            | 0.558939     | not scorable | not scorable |
| #### Bn-scaff_16511_1-p84116 C-genome specific (napus-oleracea) | 0.9784689 | 0.7499624 | 1            | 0.6301254    | not scorable | not scorable |
| #### Bn-scaff_16511_1-p84128 C-genome specific (napus-oleracea) | 0.9880383 | 0.6990761 | 1            | 0.6481414    | not scorable | not scorable |
| #### Bn-scaff_16511_1-p84966 C-genome specific (napus-oleracea) | 0.9904306 | 0.7743394 | 1            | 0.7402385    | not scorable | not scorable |
| #### Bn-scaff_16511_1-p84994 C-genome specific (napus-oleracea) | 0.9928229 | 0.7647392 | 0.9922481    | 0.8476549    | not scorable | not scorable |
| #### Bn-scaff_16511_1-p85012 C-genome specific (napus-oleracea) | 0.9928229 | 0.8059726 | 1            | 0.683633     | not scorable | not scorable |



|                                                                 |              |              |              |              |              |              |
|-----------------------------------------------------------------|--------------|--------------|--------------|--------------|--------------|--------------|
| #### Bn-scaff_16511_1-p85025 C-genome specific (napus-oleracea) | 1            | 0.8723964    | 1            | 0.9175813    | not scorable | not scorable |
| #### Bn-scaff_16511_1-p85111 C-genome specific (napus-oleracea) | 0.9904306    | 0.8126822    | 1            | 0.7077674    | not scorable | not scorable |
| #### Bn-scaff_16511_1-p85129 C-genome specific (napus-oleracea) | 0.9928229    | 0.81984      | 1            | 0.729779     | not scorable | not scorable |
| #### Bn-scaff_16511_1-p85203 C-genome specific (napus-oleracea) | 0.9856459    | 0.7212887    | 1            | 0.7594158    | not scorable | not scorable |
| #### Bn-scaff_16511_1-p85217 C-genome specific (napus-oleracea) | 0.9928229    | 0.8519318    | 1            | 0.5741603    | not scorable | not scorable |
| #### Bn-scaff_16511_1-p85256 C-genome specific (napus-oleracea) | 0.9904306    | 0.7827972    | 0.9844961    | 0.6047027    | not scorable | not scorable |
| #### Bn-scaff_16511_1-p85437 C-genome specific (napus-oleracea) | 0.9904306    | 0.7730786    | 1            | 0.7785247    | not scorable | not scorable |
| #### Bn-scaff_16511_1-p85476 C-genome specific (napus-oleracea) | 0.9904306    | 0.7849414    | 1            | 0.8056173    | not scorable | not scorable |
| #### Bn-scaff_16511_1-p85498 C-genome specific (napus-oleracea) | 0.9904306    | 0.8099818    | 1            | 0.8863496    | not scorable | not scorable |
| #### Bn-scaff_16511_1-p85542 C-genome specific (napus-oleracea) | 0.9952153    | 0.838326     | 1            | 0.6913446    | not scorable | not scorable |
| #### Bn-scaff_16511_1-p85682 C-genome specific (napus-oleracea) | 0.9832536    | 0.6654162    | 1            | 0.6961026    | not scorable | not scorable |
| #### Bn-scaff_16511_1-p85967 C-genome specific (napus-oleracea) | 0.9928229    | 0.8417703    | 1            | 0.7959292    | not scorable | not scorable |
| #### Bn-scaff_16511_1-p86048 C-genome specific (napus-oleracea) | 0.9880383    | 0.6855828    | 1            | 0.7629906    | not scorable | not scorable |
| #### Bn-scaff_16511_1-p86093 C-genome specific (napus-oleracea) | 0.9928229    | 0.8774753    | 1            | 0.7741154    | not scorable | not scorable |
| #### Bn-scaff_16511_1-p86423 all not scorable                   | not scorable | not scorable | not scorable | not scorable | not scorable | not scorable |
| #### Bn-scaff_16511_1-p86656 C-genome specific (oleracea only)  | not scorable | not scorable | 1            | 0.7283543    | not scorable | not scorable |
| #### Bn-scaff_16511_1-p87281 C-genome specific (napus-oleracea) | 0.9952153    | 0.8637515    | 1            | 0.9090234    | not scorable | not scorable |
| #### Bn-scaff_16511_1-p87370 C-genome specific (napus-oleracea) | 0.9832536    | 0.7053502    | 1            | 0.7055256    | not scorable | not scorable |
| #### Bn-scaff_16511_1-p87378 C-genome specific (napus-oleracea) | 0.9760765    | 0.7934511    | 1            | 0.7134245    | not scorable | not scorable |
| #### Bn-scaff_16511_1-p87413 C-genome specific (napus-oleracea) | 0.9856459    | 0.7697697    | 0.9922481    | 0.7024298    | not scorable | not scorable |
| #### Bn-scaff_16511_1-p87876 C-genome specific (napus-oleracea) | 0.9832536    | 0.7959754    | 1            | 0.8207847    | not scorable | not scorable |
| #### Bn-scaff_16511_1-p87907 C-genome specific (napus-oleracea) | 0.9880383    | 0.6851705    | 1            | 0.6915924    | not scorable | not scorable |
| #### Bn-scaff_16511_1-p87936 C-genome specific (napus-oleracea) | 0.9736842    | 0.7595381    | 1            | 0.7299718    | not scorable | not scorable |
| #### Bn-scaff_16511_1-p87949 C-genome specific (napus-oleracea) | 0.9832536    | 0.6799832    | 1            | 0.6223946    | not scorable | not scorable |
| #### Bn-scaff_16511_1-p88003 C-genome specific (napus-oleracea) | 0.9832536    | 0.7112918    | 1            | 0.5978521    | not scorable | not scorable |
| #### Bn-scaff_16511_1-p88034 C-genome specific (napus-oleracea) | 0.9832536    | 0.6774993    | 1            | 0.6624027    | not scorable | not scorable |
| #### Bn-scaff_16511_1-p88254 C-genome specific (napus-oleracea) | 0.9928229    | 0.7709889    | 1            | 0.7279162    | not scorable | not scorable |
| #### Bn-scaff_16511_1-p88519 C-genome specific (napus-oleracea) | 0.9928229    | 0.8726763    | 1            | 0.772884     | not scorable | not scorable |
| #### Bn-scaff_16511_1-p88547 C-genome specific (napus-oleracea) | 0.9952153    | 0.8701301    | 1            | 0.5973224    | not scorable | not scorable |
| #### Bn-scaff_16511_1-p88879 C-genome specific (napus-oleracea) | 0.9808612    | 0.7987789    | 0.9844961    | 0.7739446    | not scorable | not scorable |
| #### Bn-scaff_16511_1-p89193 C-genome specific (napus-oleracea) | 0.9880383    | 0.8883443    | 1            | 0.8241323    | not scorable | not scorable |
| #### Bn-scaff_16511_1-p89218 C-genome specific (napus-oleracea) | 1            | 0.8296152    | 1            | 0.807764     | not scorable | not scorable |
| #### Bn-scaff_16511_1-p89273 C-genome specific (napus-oleracea) | 0.9760765    | 0.551498     | 1            | 0.6968569    | not scorable | not scorable |

|                                                                 |              |              |              |              |              |              |
|-----------------------------------------------------------------|--------------|--------------|--------------|--------------|--------------|--------------|
| #### Bn-scaff_16511_1-p89286 C-genome specific (napus-oleracea) | 0.9952153    | 0.8855912    | 1            | 0.9265532    | not scorable | not scorable |
| #### Bn-scaff_16511_1-p89475 C-genome specific (napus-oleracea) | 0.9928229    | 0.5549258    | 1            | 0.7158967    | not scorable | not scorable |
| #### Bn-scaff_16511_1-p94083 C-genome specific (napus-oleracea) | 0.9736842    | 0.8232906    | 1            | 0.629861     | not scorable | not scorable |
| #### Bn-scaff_16511_1-p94088 C-genome specific (napus-oleracea) | 0.9784689    | 0.6485912    | 1            | 0.6426485    | not scorable | not scorable |
| #### Bn-scaff_16511_1-p94091 C-genome specific (napus-oleracea) | 0.9808612    | 0.7734299    | 1            | 0.6739812    | not scorable | not scorable |
| #### Bn-scaff_16511_1-p94161 C-genome specific (napus-oleracea) | 0.9760765    | 0.6876289    | 1            | 0.8207097    | not scorable | not scorable |
| #### Bn-scaff_16511_1-p95805 C-genome specific (napus-oleracea) | 0.9760765    | 0.7271105    | 1            | 0.6723188    | not scorable | not scorable |
| #### Bn-scaff_16511_1-p96146 C-genome specific (napus-oleracea) | 0.9976076    | 0.5878346    | 1            | 0.501025     | not scorable | not scorable |
| #### Bn-scaff_16511_1-p96162 C-genome specific (napus-oleracea) | 0.9880383    | 0.7923986    | 1            | 0.692166     | not scorable | not scorable |
| #### Bn-scaff_16511_1-p96203 C-genome specific (napus-oleracea) | 0.9760765    | 0.7635729    | 1            | 0.6448778    | not scorable | not scorable |
| #### Bn-scaff_16511_1-p96229 C-genome specific (napus-oleracea) | 0.9736842    | 0.7908152    | 1            | 0.638636     | not scorable | not scorable |
| #### Bn-scaff_16511_1-p96964 C-genome specific (napus-oleracea) | 0.9856459    | 0.8761444    | 1            | 0.6547159    | not scorable | not scorable |
| #### Bn-scaff_16511_1-p97022 C-genome specific (napus-oleracea) | 0.9832536    | 0.7844481    | 0.9922481    | 0.7234941    | not scorable | not scorable |
| #### Bn-scaff_16511_1-p97067 C-genome specific (napus-oleracea) | 0.9904306    | 0.8062873    | 1            | 0.6927186    | not scorable | not scorable |
| #### Bn-scaff_16511_1-p97076 C-genome specific (napus-oleracea) | 0.9928229    | 0.8492553    | 1            | 0.7389564    | not scorable | not scorable |
| #### Bn-scaff_16511_1-p97092 C-genome specific (napus-oleracea) | 0.9952153    | 0.881908     | 1            | 0.729718     | not scorable | not scorable |
| #### Bn-scaff_16511_1-p97113 all not scorable                   | not scorable | not scorable | not scorable | not scorable | not scorable | not scorable |
| #### Bn-scaff_16511_1-p97206 C-genome specific (napus-oleracea) | 0.9880383    | 0.7100443    | 1            | 0.6136869    | not scorable | not scorable |
| #### Bn-scaff_16511_1-p97229 C-genome specific (napus-oleracea) | 0.9832536    | 0.7923877    | 1            | 0.9132726    | not scorable | not scorable |
| #### Bn-scaff_16511_1-p97241 C-genome specific (napus-oleracea) | 0.9832536    | 0.8005192    | 1            | 0.6502741    | not scorable | not scorable |
| #### Bn-scaff_16511_1-p97252 C-genome specific (napus-oleracea) | 0.9808612    | 0.8358467    | 1            | 0.8384157    | not scorable | not scorable |
| #### Bn-scaff_16511_1-p97459 C-genome specific (napus-oleracea) | 0.9952153    | 0.7409376    | 1            | 0.7236319    | not scorable | not scorable |
| #### Bn-scaff_16511_1-p97466 C-genome specific (napus-oleracea) | 0.9880383    | 0.7547673    | 1            | 0.6438098    | not scorable | not scorable |
| #### Bn-scaff_16511_1-p97485 C-genome specific (napus-oleracea) | 0.9808612    | 0.7559662    | 1            | 0.8139196    | not scorable | not scorable |
| #### Bn-scaff_16511_1-p97495 C-genome specific (napus-oleracea) | 0.9880383    | 0.6777676    | 1            | 0.8245497    | not scorable | not scorable |
| #### Bn-scaff_16511_1-p97831 C-genome specific (napus-oleracea) | 0.9952153    | 0.8876377    | 1            | 0.9272014    | not scorable | not scorable |
| #### Bn-scaff_16511_1-p97854 C-genome specific (napus-oleracea) | 0.9832536    | 0.7362478    | 1            | 0.9073073    | not scorable | not scorable |
| #### Bn-scaff_16511_1-p97880 C-genome specific (napus-oleracea) | 0.9736842    | 0.8218877    | 0.9922481    | 0.7169248    | not scorable | not scorable |
| #### Bn-scaff_16511_1-p98017 genome unspecific (all in)         | 0.9928229    | 0.6023861    | 0.9844961    | 0.8139567    | 1            | 0.907495     |
| #### Bn-scaff_16511_1-p98537 C-genome specific (napus-oleracea) | 0.9856459    | 0.5376469    | 1            | 0.7853137    | not scorable | not scorable |
| #### Bn-scaff_16511_1-p98646 C-genome specific (napus-oleracea) | 0.9952153    | 0.8530033    | 1            | 0.6727682    | not scorable | not scorable |
| #### Bn-scaff_16511_1-p98956 C-genome specific (napus-oleracea) | 0.9952153    | 0.7464055    | 1            | 0.7051058    | not scorable | not scorable |
| #### Bn-scaff_16511_1-p98982 C-genome specific (napus-oleracea) | 0.9856459    | 0.7486749    | 1            | 0.7854373    | not scorable | not scorable |

|                                                                 |              |              |              |              |              |              |              |
|-----------------------------------------------------------------|--------------|--------------|--------------|--------------|--------------|--------------|--------------|
| #### Bn-scaff_16511_1-p99170 C-genome specific (napus-oleracea) | 0.9808612    | 0.7165272    |              | 1            | 0.6707216    | not scorable | not scorable |
| #### Bn-scaff_16511_1-p99461 C-genome specific (napus-oleracea) | 0.9952153    | 0.759135     |              | 1            | 0.7302773    | not scorable | not scorable |
| #### Bn-scaff_16511_1-p99663 C-genome specific (napus-oleracea) | 0.9760765    | 0.8117794    | 0.9922481    |              | 0.767634     | not scorable | not scorable |
| #### Bn-scaff_16511_1-p99722 C-genome specific (napus-oleracea) | 0.9952153    | 0.8243424    |              | 1            | 0.8793069    | not scorable | not scorable |
| #### Bn-scaff_16511_1-p99906 C-genome specific (napus-oleracea) | 0.9952153    | 0.8461775    |              | 1            | 0.6069234    | not scorable | not scorable |
| #### Bn-scaff_16511_1-p99912 C-genome specific (napus-oleracea) | 0.9928229    | 0.8248717    |              | 1            | 0.7629721    | not scorable | not scorable |
| #### Bn-scaff_16511_1-p99967 C-genome specific (napus-oleracea) | 0.9952153    | 0.8669171    | 0.9922481    |              | 0.6533305    | not scorable | not scorable |
| #### Bn-scaff_16514_1-p12474 C-genome specific (napus-oleracea) | 0.9760765    | 0.8237977    | 0.9147287    |              | 0.7521269    | not scorable | not scorable |
| #### Bn-scaff_16514_1-p12491 C-genome specific (napus-oleracea) | 0.9784689    | 0.7390405    | 0.9147287    |              | 0.7005754    | not scorable | not scorable |
| #### Bn-scaff_16514_1-p12496 C-genome specific (oleracea only)  | not scorable | not scorable | 0.9302326    |              | 0.6265235    | not scorable | not scorable |
| #### Bn-scaff_16514_1-p12513 C-genome specific (napus-oleracea) | 0.9760765    | 0.8590682    | 0.9147287    |              | 0.7644048    | not scorable | not scorable |
| #### Bn-scaff_16514_1-p13300 C-genome specific (napus-oleracea) | 0.9760765    | 0.8068207    | 0.9379845    |              | 0.8166608    | not scorable | not scorable |
| #### Bn-scaff_16514_1-p15969 C-genome specific (napus-oleracea) | 0.9736842    | 0.7159162    | 0.9457364    |              | 0.6960853    | not scorable | not scorable |
| #### Bn-scaff_16514_1-p15984 C-genome specific (napus-oleracea) | 0.9712918    | 0.6849396    | 0.9457364    |              | 0.7033637    | not scorable | not scorable |
| #### Bn-scaff_16514_1-p16119 C-genome specific (napus-oleracea) | 0.9760765    | 0.713782     | 0.9224806    |              | 0.7124407    | not scorable | not scorable |
| #### Bn-scaff_16514_1-p25721 genome unspecific (all in)         |              | 1            | 0.4655951    | 1            | 0.8300442    | 0.9669421    | 0.3946595    |
| #### Bn-scaff_16514_1-p41089 genome unspecific (all in)         | 0.9784689    | 0.644549     | 0.9922481    |              | 0.6683037    | 0.9834711    | 0.7165075    |
| #### Bn-scaff_16514_1-p47789 genome unspecific (all in)         | 0.9808612    | 0.6370892    | 0.9767442    |              | 0.7670208    |              | 1 0.9512798  |
| #### Bn-scaff_16514_1-p50048 C-genome specific (napus-oleracea) | 0.9808612    | 0.6805447    | 0.9689922    |              | 0.68604      | not scorable | not scorable |
| #### Bn-scaff_16514_1-p56208 C-genome specific (napus-oleracea) | 0.9665072    | 0.772161     | 0.9844961    |              | 0.7262668    | not scorable | not scorable |
| #### Bn-scaff_16514_1-p58483 C-genome specific (napus-oleracea) | 0.9641148    | 0.7770207    | 0.9922481    |              | 0.7459936    | not scorable | not scorable |
| #### Bn-scaff_16514_1-p58570 C-genome specific (napus-oleracea) | 0.9641148    | 0.7627699    | 0.9767442    |              | 0.7702017    | not scorable | not scorable |
| #### Bn-scaff_16514_1-p62538 C-genome specific (napus-oleracea) | 0.9641148    | 0.7640022    | 0.9844961    |              | 0.7644122    | not scorable | not scorable |
| #### Bn-scaff_16514_1-p65334 genome unspecific (all in)         | 0.9712918    | 0.5352839    | 0.9844961    |              | 0.6158699    |              | 1 0.9480298  |
| #### Bn-scaff_16514_1-p73994 genome unspecific (all in)         |              | 1            | 0.3501519    | 0.9457364    | 0.4335033    | 0.9669421    | 0.8233132    |
| #### Bn-scaff_16514_1-p86571 C-genome specific (napus-oleracea) | 0.9617225    | 0.6594238    | 0.9302326    |              | 0.6035734    | not scorable | not scorable |
| #### Bn-scaff_16516_1-p17380 all not scorable                   | not scorable | not scorable | not scorable | not scorable | not scorable | not scorable | not scorable |
| #### Bn-scaff_16516_1-p57960 genome unspecific (all in)         | 0.9593301    | 0.4163632    |              | 1            | 0.9037712    |              | 1 0.8948976  |
| #### Bn-scaff_16517_1-p10510 genome unspecific (all in)         | 0.9976076    | 0.4328186    |              | 1            | 0.9271281    | 0.9669421    | 0.7870119    |
| #### Bn-scaff_16517_1-p11541 C-genome specific (napus-oleracea) | 0.9330143    | 0.9541248    | 0.9767442    |              | 0.8015883    | not scorable | not scorable |
| #### Bn-scaff_16517_1-p11582 C-genome specific (napus-oleracea) | 0.9330143    | 0.8252271    | 0.9767442    |              | 0.7193478    | not scorable | not scorable |
| #### Bn-scaff_16517_1-p11682 C-genome specific (napus-oleracea) | 0.9282297    | 0.7377711    | 0.8682171    |              | 0.8873767    | not scorable | not scorable |
| #### Bn-scaff_16517_1-p13325 A-genome specific (napus-rapa)     | 0.9856459    | 0.4396019    | not scorable | not scorable |              |              | 1 0.8131645  |

|                                                                 |              |              |              |              |              |              |
|-----------------------------------------------------------------|--------------|--------------|--------------|--------------|--------------|--------------|
| #### Bn-scaff_16517_1-p19215 genome unspecific (oleracea-rapa)  | not scorable | not scorable | 1            | 0.5635894    | 0.9834711    | 0.7226887    |
| #### Bn-scaff_16517_1-p23424 C-genome specific (napus-oleracea) | 0.9952153    | 0.9117107    | 1            | 0.8497643    | not scorable | not scorable |
| #### Bn-scaff_16517_1-p23878 C-genome specific (oleracea only)  | not scorable | not scorable | 0.8992248    | 0.7033099    | not scorable | not scorable |
| #### Bn-scaff_16517_1-p24386 C-genome specific (napus-oleracea) | 1            | 0.8093552    | 0.8914729    | 0.6760463    | not scorable | not scorable |
| #### Bn-scaff_16517_1-p24404 C-genome specific (napus-oleracea) | 0.9976076    | 0.807938     | 0.9922481    | 0.7079396    | not scorable | not scorable |
| #### Bn-scaff_16517_1-p24503 C-genome specific (napus-oleracea) | 0.9880383    | 0.6325575    | 0.9767442    | 0.4791748    | not scorable | not scorable |
| #### Bn-scaff_16517_1-p25894 C-genome specific (oleracea only)  | not scorable | not scorable | 0.9844961    | 0.6885251    | not scorable | not scorable |
| #### Bn-scaff_16517_1-p28367 genome unspecific (oleracea-rapa)  | not scorable | not scorable | 0.9922481    | 0.7339225    | 1            | 0.8605704    |
| #### Bn-scaff_16517_1-p35430 genome unspecific (all in)         | 0.9688995    | 0.2045268    | 0.9767442    | 0.7238421    | 0.9917355    | 0.7668899    |
| #### Bn-scaff_16517_1-p36468 C-genome specific (oleracea only)  | not scorable | not scorable | 0.9302326    | 0.19472      | not scorable | not scorable |
| #### Bn-scaff_16517_1-p36483 C-genome specific (oleracea only)  | not scorable | not scorable | 1            | 0.6275218    | not scorable | not scorable |
| #### Bn-scaff_16517_1-p46045 genome unspecific (all in)         | 0.9880383    | 0.2932349    | 1            | 0.5830583    | 0.9834711    | 0.6190125    |
| #### Bn-scaff_16517_1-p55476 C-genome specific (napus-oleracea) | 1            | 0.7689703    | 0.9844961    | 0.8318138    | not scorable | not scorable |
| #### Bn-scaff_16517_1-p56151 genome unspecific (all in)         | 1            | 0.4594161    | 1            | 0.7462659    | 0.9834711    | 0.6674513    |
| #### Bn-scaff_16517_1-p56182 genome unspecific (all in)         | 0.9976076    | 0.4352542    | 0.9767442    | 0.7512478    | 1            | 0.9161441    |
| #### Bn-scaff_16517_1-p56185 genome unspecific (all in)         | 1            | 0.5026748    | 1            | 0.6679077    | 0.9752066    | 0.6129918    |
| #### Bn-scaff_16517_1-p58403 genome unspecific (oleracea-rapa)  | not scorable | not scorable | 0.9612403    | 0.2192048    | 0.9834711    | 0.3042101    |
| #### Bn-scaff_16517_1-p63005 C-genome specific (napus-oleracea) | 1            | 0.3235967    | 1            | 0.4706998    | not scorable | not scorable |
| #### Bn-scaff_16517_1-p63013 genome unspecific (oleracea-rapa)  | not scorable | not scorable | 1            | 0.8367791    | 0.9669421    | 0.6914573    |
| #### Bn-scaff_16517_1-p63354 C-genome specific (napus-oleracea) | 1            | 0.6895861    | 0.9844961    | 0.5936894    | not scorable | not scorable |
| #### Bn-scaff_16517_1-p63413 genome unspecific (all in)         | 0.9401914    | 0.3445192    | 1            | 0.577053     | 0.9834711    | 0.5655084    |
| #### Bn-scaff_16517_1-p63542 C-genome specific (napus-oleracea) | 1            | 0.7565721    | 1            | 0.6445875    | not scorable | not scorable |
| #### Bn-scaff_16517_1-p65624 C-genome specific (napus-oleracea) | 0.9904306    | 0.2262941    | 0.9457364    | 0.3755261    | not scorable | not scorable |
| #### Bn-scaff_16517_1-p65633 genome unspecific (all in)         | 0.9928229    | 0.4718317    | 0.6511628    | 0.4818675    | 1            | 0.794653     |
| #### Bn-scaff_16517_1-p65646 all not scorable                   | not scorable | not scorable | not scorable | not scorable | not scorable | not scorable |
| #### Bn-scaff_16517_1-p67995 genome unspecific (oleracea-rapa)  | not scorable | not scorable | 1            | 0.760515     | 1            | 0.8740282    |
| #### Bn-scaff_16517_1-p68054 genome unspecific (all in)         | 1            | 0.5171255    | 0.9922481    | 0.6022038    | 1            | 0.917062     |
| #### Bn-scaff_16517_1-p68140 genome unspecific (all in)         | 1            | 0.426027     | 0.9922481    | 0.2431926    | 1            | 0.4926165    |
| #### Bn-scaff_16517_1-p68262 C-genome specific (napus-oleracea) | 1            | 0.9011622    | 1            | 0.8913333    | not scorable | not scorable |
| #### Bn-scaff_16517_1-p68266 A-genome specific (rapa only)      | not scorable | not scorable | not scorable | not scorable | 1            | 0.8274801    |
| #### Bn-scaff_16517_1-p68395 genome unspecific (oleracea-rapa)  | not scorable | not scorable | 1            | 0.6885806    | 1            | 0.6564396    |
| #### Bn-scaff_16517_1-p91597 genome unspecific (all in)         | 1            | 0.436119     | 1            | 0.7641606    | 0.9917355    | 0.78237      |
| #### Bn-scaff_16526_1-p24333 C-genome specific (napus-oleracea) | 0.9880383    | 0.7729001    | 1            | 0.7555608    | not scorable | not scorable |

|                                                                 |              |              |           |           |              |              |
|-----------------------------------------------------------------|--------------|--------------|-----------|-----------|--------------|--------------|
| #### Bn-scaff_16526_1-p28769 C-genome specific (napus-oleracea) | 0.9665072    | 0.7697589    | 0.9922481 | 0.8343771 | not scorable | not scorable |
| #### Bn-scaff_16526_1-p28879 genome unspecific (all in)         | 0.9617225    | 0.254519     | 0.9922481 | 0.7148229 | 1            | 0.752191     |
| #### Bn-scaff_16526_1-p42180 C-genome specific (napus-oleracea) | 0.9712918    | 0.7266814    | 0.9922481 | 0.7084065 | not scorable | not scorable |
| #### Bn-scaff_16526_1-p7694 C-genome specific (napus-oleracea)  | 0.9665072    | 0.7792128    | 0.9922481 | 0.7824886 | not scorable | not scorable |
| #### Bn-scaff_16531_1-p14958 C-genome specific (napus-oleracea) | 0.9784689    | 0.7294681    | 1         | 0.739047  | not scorable | not scorable |
| #### Bn-scaff_16531_1-p17239 C-genome specific (napus-oleracea) | 0.9784689    | 0.6907232    | 0.9844961 | 0.7140895 | not scorable | not scorable |
| #### Bn-scaff_16531_1-p17868 C-genome specific (napus-oleracea) | 0.9808612    | 0.738821     | 0.9922481 | 0.79493   | not scorable | not scorable |
| #### Bn-scaff_16531_1-p17928 C-genome specific (napus-oleracea) | 0.9688995    | 0.7698874    | 0.9612403 | 0.7015479 | not scorable | not scorable |
| #### Bn-scaff_16531_1-p20285 C-genome specific (napus-oleracea) | 0.9784689    | 0.8544788    | 0.9844961 | 0.7409779 | not scorable | not scorable |
| #### Bn-scaff_16531_1-p20889 C-genome specific (napus-oleracea) | 0.9808612    | 0.6936516    | 1         | 0.6725258 | not scorable | not scorable |
| #### Bn-scaff_16531_1-p21060 C-genome specific (napus-oleracea) | 0.9808612    | 0.8712174    | 0.9689922 | 0.7776437 | not scorable | not scorable |
| #### Bn-scaff_16531_1-p21799 C-genome specific (napus-oleracea) | 0.9449761    | 0.8479937    | 1         | 0.7639865 | not scorable | not scorable |
| #### Bn-scaff_16531_1-p22226 C-genome specific (napus-oleracea) | 0.9784689    | 0.7331264    | 0.9922481 | 0.6064722 | not scorable | not scorable |
| #### Bn-scaff_16531_1-p22855 C-genome specific (napus-oleracea) | 0.9856459    | 0.7480128    | 1         | 0.7643691 | not scorable | not scorable |
| #### Bn-scaff_16531_1-p23051 C-genome specific (napus-oleracea) | 0.9784689    | 0.7466874    | 0.9922481 | 0.8151325 | not scorable | not scorable |
| #### Bn-scaff_16531_1-p23068 C-genome specific (napus-oleracea) | 0.9808612    | 0.6647611    | 0.9922481 | 0.7710896 | not scorable | not scorable |
| #### Bn-scaff_16531_1-p23168 C-genome specific (napus-oleracea) | 0.9856459    | 0.7896587    | 1         | 0.7516934 | not scorable | not scorable |
| #### Bn-scaff_16531_1-p25808 C-genome specific (napus-oleracea) | 0.9832536    | 0.3262231    | 0.9302326 | 0.2360853 | not scorable | not scorable |
| #### Bn-scaff_16531_1-p27810 C-genome specific (napus-oleracea) | 0.9760765    | 0.7701377    | 0.9767442 | 0.8402994 | not scorable | not scorable |
| #### Bn-scaff_16531_1-p28449 genome unspecific (oleracea-rapa)  | not scorable | not scorable | 1         | 0.7255881 | 1            | 0.7914145    |
| #### Bn-scaff_16531_1-p28467 genome unspecific (all in)         | 0.9856459    | 0.6286067    | 0.9922481 | 0.7906694 | 1            | 0.9330845    |
| #### Bn-scaff_16531_1-p28627 genome unspecific (all in)         | 0.9880383    | 0.7452575    | 0.9224806 | 0.8286708 | 0.7768595    | 0.775953     |
| #### Bn-scaff_16531_1-p31059 genome unspecific (all in)         | 1            | 0.6706561    | 1         | 0.6268953 | 1            | 0.7556818    |
| #### Bn-scaff_16531_1-p33620 C-genome specific (oleracea only)  | not scorable | not scorable | 0.9689922 | 0.4446192 | not scorable | not scorable |
| #### Bn-scaff_16531_1-p33923 C-genome specific (napus-oleracea) | 0.9449761    | 0.915098     | 0.8372093 | 0.8182366 | not scorable | not scorable |
| #### Bn-scaff_16531_1-p33944 C-genome specific (napus-oleracea) | 0.9569378    | 0.7545345    | 0.9457364 | 0.72118   | not scorable | not scorable |
| #### Bn-scaff_16531_1-p34394 C-genome specific (napus-oleracea) | 0.9569378    | 0.83837      | 1         | 0.7613397 | not scorable | not scorable |
| #### Bn-scaff_16531_1-p34594 C-genome specific (napus-oleracea) | 0.9497608    | 0.7998001    | 0.9767442 | 0.6681842 | not scorable | not scorable |
| #### Bn-scaff_16531_1-p34601 C-genome specific (napus-oleracea) | 0.9569378    | 0.8288981    | 1         | 0.7811716 | not scorable | not scorable |
| #### Bn-scaff_16531_1-p34843 C-genome specific (napus-oleracea) | 0.8803828    | 0.8006732    | 0.8837209 | 0.704466  | not scorable | not scorable |
| #### Bn-scaff_16531_1-p36808 C-genome specific (napus-oleracea) | 0.9736842    | 0.6364136    | 0.9922481 | 0.6238505 | not scorable | not scorable |
| #### Bn-scaff_16531_1-p36966 C-genome specific (napus-oleracea) | 0.9880383    | 0.75261      | 1         | 0.7768323 | not scorable | not scorable |
| #### Bn-scaff_16531_1-p37573 C-genome specific (napus-oleracea) | 0.9784689    | 0.7927583    | 1         | 0.7396187 | not scorable | not scorable |

|                                                                 |              |              |              |              |              |              |
|-----------------------------------------------------------------|--------------|--------------|--------------|--------------|--------------|--------------|
| #### Bn-scaff_16531_1-p37613 C-genome specific (napus-oleracea) | 0.9760765    | 0.702203     | 0.9844961    | 0.8289331    | not scorable | not scorable |
| #### Bn-scaff_16531_1-p37735 C-genome specific (napus-oleracea) | 0.9832536    | 0.9271509    | 0.9922481    | 0.8304806    | not scorable | not scorable |
| #### Bn-scaff_16531_1-p37743 C-genome specific (napus-oleracea) | 0.9617225    | 0.8597434    | 0.9844961    | 0.8124471    | not scorable | not scorable |
| #### Bn-scaff_16531_1-p37772 C-genome specific (napus-oleracea) | 0.9425837    | 0.8445207    | 1            | 0.7930973    | not scorable | not scorable |
| #### Bn-scaff_16531_1-p37930 C-genome specific (napus-oleracea) | 0.9712918    | 0.7316726    | 0.9844961    | 0.6674343    | not scorable | not scorable |
| #### Bn-scaff_16531_1-p38435 genome unspecific (all in)         | 1            | 0.7622204    | 1            | 0.7494321    | 1            | 0.7641606    |
| #### Bn-scaff_16531_1-p39419 C-genome specific (napus-oleracea) | 0.9665072    | 0.7473164    | 1            | 0.7465752    | not scorable | not scorable |
| #### Bn-scaff_16531_1-p42657 C-genome specific (napus-oleracea) | 0.9641148    | 0.7802967    | 1            | 0.6509166    | not scorable | not scorable |
| #### Bn-scaff_16531_1-p42774 C-genome specific (napus-oleracea) | 0.9665072    | 0.9118918    | 1            | 0.7773838    | not scorable | not scorable |
| #### Bn-scaff_16531_1-p42889 C-genome specific (napus-oleracea) | 0.9545454    | 0.7034765    | 0.9534883    | 0.6372062    | not scorable | not scorable |
| #### Bn-scaff_16531_1-p43532 C-genome specific (napus-oleracea) | 0.9760765    | 0.6349291    | 0.9689922    | 0.6124989    | not scorable | not scorable |
| #### Bn-scaff_16531_1-p43675 all not scorable                   | not scorable | not scorable | not scorable | not scorable | not scorable | not scorable |
| #### Bn-scaff_16531_1-p50163 C-genome specific (napus-oleracea) | 0.9832536    | 0.8438694    | 1            | 0.7270372    | not scorable | not scorable |
| #### Bn-scaff_16531_1-p50207 C-genome specific (napus-oleracea) | 0.9736842    | 0.8982514    | 1            | 0.7731762    | not scorable | not scorable |
| #### Bn-scaff_16531_1-p51167 C-genome specific (napus-oleracea) | 0.9760765    | 0.7822179    | 0.9224806    | 0.7196254    | not scorable | not scorable |
| #### Bn-scaff_16531_1-p52180 C-genome specific (napus-oleracea) | 0.9832536    | 0.7584761    | 0.9922481    | 0.748007     | not scorable | not scorable |
| #### Bn-scaff_16531_1-p52190 C-genome specific (oleracea only)  | not scorable | not scorable | 0.9922481    | 0.7285662    | not scorable | not scorable |
| #### Bn-scaff_16531_1-p52555 C-genome specific (napus-oleracea) | 0.9473684    | 0.845622     | 1            | 0.8280853    | not scorable | not scorable |
| #### Bn-scaff_16531_1-p52613 C-genome specific (napus-oleracea) | 0.9688995    | 0.80804      | 1            | 0.6362818    | not scorable | not scorable |
| #### Bn-scaff_16531_1-p52622 C-genome specific (napus-oleracea) | 0.9258373    | 0.8690093    | 1            | 0.7176255    | not scorable | not scorable |
| #### Bn-scaff_16531_1-p52667 C-genome specific (napus-oleracea) | 0.9569378    | 0.8226752    | 0.9922481    | 0.6581497    | not scorable | not scorable |
| #### Bn-scaff_16531_1-p54656 C-genome specific (napus-oleracea) | 0.9497608    | 0.8160213    | 1            | 0.8115944    | not scorable | not scorable |
| #### Bn-scaff_16531_1-p54978 C-genome specific (napus-oleracea) | 0.9712918    | 0.7081179    | 1            | 0.7743072    | not scorable | not scorable |
| #### Bn-scaff_16531_1-p55211 C-genome specific (napus-oleracea) | 0.9497608    | 0.7390114    | 1            | 0.7647316    | not scorable | not scorable |
| #### Bn-scaff_16531_1-p55212 C-genome specific (napus-oleracea) | 0.9569378    | 0.7799101    | 0.9844961    | 0.7711571    | not scorable | not scorable |
| #### Bn-scaff_16531_1-p57903 C-genome specific (napus-oleracea) | 0.9425837    | 0.3487032    | 0.9689922    | 0.3012248    | not scorable | not scorable |
| #### Bn-scaff_16531_1-p61361 genome unspecific (all in)         | 0.9856459    | 0.6033686    | 1            | 0.666232     | 0.9752066    | 0.6834439    |
| #### Bn-scaff_16531_1-p62908 genome unspecific (all in)         | 1            | 0.9023904    | 1            | 0.835928     | 1            | 0.9261978    |
| #### Bn-scaff_16531_1-p63091 C-genome specific (napus-oleracea) | 0.9928229    | 0.7191162    | 1            | 0.6360012    | not scorable | not scorable |
| #### Bn-scaff_16531_1-p63096 A-genome specific (rapa only)      | not scorable | not scorable | not scorable | not scorable | 1            | 0.896948     |
| #### Bn-scaff_16531_1-p64041 C-genome specific (napus-oleracea) | 0.9904306    | 0.6867971    | 0.9922481    | 0.7088264    | not scorable | not scorable |
| #### Bn-scaff_16531_1-p64093 C-genome specific (napus-oleracea) | 0.9856459    | 0.7324889    | 0.9844961    | 0.812893     | not scorable | not scorable |
| #### Bn-scaff_16531_1-p64224 C-genome specific (napus-oleracea) | 0.9856459    | 0.6740177    | 0.9844961    | 0.5206705    | not scorable | not scorable |

|                                                                |              |              |              |              |              |              |
|----------------------------------------------------------------|--------------|--------------|--------------|--------------|--------------|--------------|
| #### Bn-scaff_16531_1-p64271C-genome specific (napus-oleracea) | 0.9808612    | 0.8610411    | 0.9922481    | 0.7991892    | not scorable | not scorable |
| #### Bn-scaff_16531_1-p64359C-genome specific (napus-oleracea) | 0.9856459    | 0.6961871    | 0.9767442    | 0.6348231    | not scorable | not scorable |
| #### Bn-scaff_16531_1-p68469C-genome specific (napus-oleracea) | 1            | 0.765294     | 1            | 0.9092288    | not scorable | not scorable |
| #### Bn-scaff_16531_1-p76469C-genome specific (napus-oleracea) | 0.9784689    | 0.7452304    | 0.9922481    | 0.7190707    | not scorable | not scorable |
| #### Bn-scaff_16531_1-p76747C-genome specific (napus-oleracea) | 0.9808612    | 0.7590284    | 0.9922481    | 0.809902     | not scorable | not scorable |
| #### Bn-scaff_16531_1-p85874C-genome specific (napus-oleracea) | 0.9712918    | 0.7541725    | 0.8682171    | 0.799876     | not scorable | not scorable |
| #### Bn-scaff_16531_1-p86797C-genome specific (napus-oleracea) | 0.9736842    | 0.8301172    | 0.9922481    | 0.6918566    | not scorable | not scorable |
| #### Bn-scaff_16531_1-p88934C-genome specific (napus-oleracea) | 0.9832536    | 0.7391242    | 0.9922481    | 0.8034873    | not scorable | not scorable |
| #### Bn-scaff_16532_1-p1471 C-genome specific (oleracea only)  | not scorable | not scorable | 0.9767442    | 0.6815958    | not scorable | not scorable |
| #### Bn-scaff_16532_1-p4546 genome unspecific (all in)         | 0.9736842    | 0.4772815    | 1            | 0.8326811    | 1            | 0.9093836    |
| #### Bn-scaff_16532_1-p8308 C-genome specific (napus-oleracea) | 0.9736842    | 0.7805963    | 1            | 0.7790955    | not scorable | not scorable |
| #### Bn-scaff_16534_1-p11126C-genome specific (napus-oleracea) | 0.9976076    | 0.7050703    | 1            | 0.7875881    | not scorable | not scorable |
| #### Bn-scaff_16534_1-p11464C-genome specific (napus-oleracea) | 0.9904306    | 0.6421509    | 1            | 0.5239356    | not scorable | not scorable |
| #### Bn-scaff_16534_1-p11613A-genome specific (rapa only)      | not scorable | not scorable | not scorable | not scorable | 1            | 0.8587261    |
| #### Bn-scaff_16534_1-p11628C-genome specific (napus-oleracea) | 0.9712918    | 0.6522359    | 0.9612403    | 0.6620278    | not scorable | not scorable |
| #### Bn-scaff_16534_1-p11671C-genome specific (napus-oleracea) | 0.9569378    | 0.6051117    | 1            | 0.7006748    | not scorable | not scorable |
| #### Bn-scaff_16534_1-p11817genome unspecific (all in)         | 0.9736842    | 0.362093     | 0.9922481    | 0.7336737    | 1            | 0.8370643    |
| #### Bn-scaff_16534_1-p11835C-genome specific (napus-oleracea) | 0.9784689    | 0.7208422    | 1            | 0.6939344    | not scorable | not scorable |
| #### Bn-scaff_16534_1-p12207genome unspecific (oleracea-rapa)  | not scorable | not scorable | 0.8449612    | 0.7146656    | 1            | 0.9375036    |
| #### Bn-scaff_16534_1-p12554C-genome specific (napus-oleracea) | 0.9354067    | 0.7168382    | 0.9844961    | 0.8028682    | not scorable | not scorable |
| #### Bn-scaff_16534_1-p12626C-genome specific (napus-oleracea) | 0.9976076    | 0.8008389    | 0.9922481    | 0.7791217    | not scorable | not scorable |
| #### Bn-scaff_16534_1-p12632C-genome specific (napus-oleracea) | 0.9736842    | 0.816272     | 1            | 0.7239053    | not scorable | not scorable |
| #### Bn-scaff_16534_1-p12674C-genome specific (napus-oleracea) | 0.9832536    | 0.5759013    | 1            | 0.6096802    | not scorable | not scorable |
| #### Bn-scaff_16534_1-p12801C-genome specific (napus-oleracea) | 0.9832536    | 0.8297672    | 1            | 0.7699248    | not scorable | not scorable |
| #### Bn-scaff_16534_1-p12878genome unspecific (all in)         | 0.9401914    | 0.6036537    | 0.9844961    | 0.7577665    | 1            | 0.9112142    |
| #### Bn-scaff_16534_1-p13134C-genome specific (oleracea only)  | not scorable | not scorable | 1            | 0.8309122    | not scorable | not scorable |
| #### Bn-scaff_16534_1-p13281genome unspecific (all in)         | 0.9784689    | 0.5366685    | 1            | 0.8463342    | 1            | 0.9272014    |
| #### Bn-scaff_16534_1-p13397C-genome specific (napus-oleracea) | 0.9976076    | 0.7853209    | 0.9767442    | 0.8270203    | not scorable | not scorable |
| #### Bn-scaff_16534_1-p13401C-genome specific (napus-oleracea) | 0.9617225    | 0.621191     | 1            | 0.7258548    | not scorable | not scorable |
| #### Bn-scaff_16534_1-p13407C-genome specific (napus-oleracea) | 0.9832536    | 0.7711915    | 1            | 0.8229404    | not scorable | not scorable |
| #### Bn-scaff_16534_1-p13421C-genome specific (napus-oleracea) | 0.9856459    | 0.8064746    | 1            | 0.8835047    | not scorable | not scorable |
| #### Bn-scaff_16534_1-p13578C-genome specific (napus-oleracea) | 0.8923445    | 0.8376203    | 0.6899225    | 0.7742941    | not scorable | not scorable |
| #### Bn-scaff_16534_1-p13725C-genome specific (napus-oleracea) | 0.9521531    | 0.7532113    | 0.9922481    | 0.7444221    | not scorable | not scorable |

|                                                                 |              |              |              |              |              |              |
|-----------------------------------------------------------------|--------------|--------------|--------------|--------------|--------------|--------------|
| #### Bn-scaff_16534_1-p1386 C-genome specific (napus-oleracea)  | 0.9976076    | 0.7554141    | 0.9844961    | 0.6847183    | not scorable | not scorable |
| #### Bn-scaff_16534_1-p13877 C-genome specific (napus-oleracea) | 0.9928229    | 0.7273588    | 1            | 0.7401044    | not scorable | not scorable |
| #### Bn-scaff_16534_1-p13941 genome unspecific (all in)         | 0.9784689    | 0.5747801    | 1            | 0.9205657    | 1            | 0.7867034    |
| #### Bn-scaff_16534_1-p14202 C-genome specific (napus-oleracea) | 1            | 0.8227078    | 0.9922481    | 0.7143077    | not scorable | not scorable |
| #### Bn-scaff_16534_1-p14219 C-genome specific (napus-oleracea) | 0.9904306    | 0.7488391    | 1            | 0.6688262    | not scorable | not scorable |
| #### Bn-scaff_16534_1-p14295 C-genome specific (napus-oleracea) | 0.9952153    | 0.8138497    | 1            | 0.8036841    | not scorable | not scorable |
| #### Bn-scaff_16534_1-p14300 C-genome specific (napus-oleracea) | 0.9665072    | 0.8688376    | 0.9767442    | 0.7971351    | not scorable | not scorable |
| #### Bn-scaff_16534_1-p14574 C-genome specific (napus-oleracea) | 0.9904306    | 0.9052789    | 1            | 0.8727665    | not scorable | not scorable |
| #### Bn-scaff_16534_1-p14588 genome unspecific (all in)         | 0.9904306    | 0.4710386    | 1            | 0.7731355    | 0.9917355    | 0.8651676    |
| #### Bn-scaff_16534_1-p14683 C-genome specific (napus-oleracea) | 0.9904306    | 0.8860148    | 0.9922481    | 0.8173739    | not scorable | not scorable |
| #### Bn-scaff_16534_1-p14748 genome unspecific (all in)         | 0.9856459    | 0.4226798    | 0.9767442    | 0.6626194    | 1            | 0.8543575    |
| #### Bn-scaff_16534_1-p14825 C-genome specific (napus-oleracea) | 0.9856459    | 0.7903834    | 1            | 0.7106134    | not scorable | not scorable |
| #### Bn-scaff_16534_1-p14996 C-genome specific (napus-oleracea) | 0.9736842    | 0.907747     | 1            | 0.8028007    | not scorable | not scorable |
| #### Bn-scaff_16534_1-p14996 C-genome specific (napus-oleracea) | 0.8779904    | 0.7485019    | 0.9612403    | 0.6476092    | not scorable | not scorable |
| #### Bn-scaff_16534_1-p15001 C-genome specific (napus-oleracea) | 0.9976076    | 0.8206241    | 0.9844961    | 0.7089628    | not scorable | not scorable |
| #### Bn-scaff_16534_1-p15077 C-genome specific (napus-oleracea) | 0.9449761    | 0.6647811    | 0.9844961    | 0.8195524    | not scorable | not scorable |
| #### Bn-scaff_16534_1-p15106 C-genome specific (napus-oleracea) | 0.9712918    | 0.879939     | 1            | 0.7686781    | not scorable | not scorable |
| #### Bn-scaff_16534_1-p15106 C-genome specific (napus-oleracea) | 0.9569378    | 0.894435     | 1            | 0.7545885    | not scorable | not scorable |
| #### Bn-scaff_16534_1-p15461 genome unspecific (oleracea-rapa)  | not scorable | not scorable | 1            | 0.6494992    | 0.9421487    | 0.8029252    |
| #### Bn-scaff_16534_1-p15597 C-genome specific (napus-oleracea) | 0.8851675    | 0.7433808    | 0.8527132    | 0.6323319    | not scorable | not scorable |
| #### Bn-scaff_16534_1-p16071 napus specific                     | 0.9258373    | 0.6025469    | not scorable | not scorable | not scorable | not scorable |
| #### Bn-scaff_16534_1-p16532 C-genome specific (napus-oleracea) | 0.9497608    | 0.9109492    | 0.6666667    | 0.814633     | not scorable | not scorable |
| #### Bn-scaff_16534_1-p17246 C-genome specific (napus-oleracea) | 0.8779904    | 0.8867428    | 0.8604651    | 0.7032821    | not scorable | not scorable |
| #### Bn-scaff_16534_1-p17709 genome unspecific (all in)         | 0.9832536    | 0.5374265    | 0.9844961    | 0.6825682    | 1            | 0.8884247    |
| #### Bn-scaff_16534_1-p17857 genome unspecific (all in)         | 0.9880383    | 0.3525706    | 0.9922481    | 0.6791295    | 1            | 0.8105487    |
| #### Bn-scaff_16534_1-p18042 all not scorable                   | not scorable | not scorable | not scorable | not scorable | not scorable | not scorable |
| #### Bn-scaff_16534_1-p18277 C-genome specific (napus-oleracea) | 0.9688995    | 0.6247499    | 0.9922481    | 0.6084784    | not scorable | not scorable |
| #### Bn-scaff_16534_1-p18424 genome unspecific (all in)         | 0.9856459    | 0.2975229    | 1            | 0.8857163    | 0.9917355    | 0.8331967    |
| #### Bn-scaff_16534_1-p18467 C-genome specific (napus-oleracea) | 0.9617225    | 0.8231989    | 0.9922481    | 0.6799805    | not scorable | not scorable |
| #### Bn-scaff_16534_1-p18580 genome unspecific (oleracea-rapa)  | not scorable | not scorable | 0.9767442    | 0.8712201    | 1            | 0.8061312    |
| #### Bn-scaff_16534_1-p18623 C-genome specific (napus-oleracea) | 0.9545454    | 0.8652093    | 0.9922481    | 0.7626003    | not scorable | not scorable |
| #### Bn-scaff_16534_1-p18914 C-genome specific (napus-oleracea) | 0.9880383    | 0.7760931    | 0.9922481    | 0.8185677    | not scorable | not scorable |
| #### Bn-scaff_16534_1-p18955 C-genome specific (napus-oleracea) | 0.9138756    | 0.7758971    | 1            | 0.7356656    | not scorable | not scorable |



|                                                                 |              |              |              |              |              |              |
|-----------------------------------------------------------------|--------------|--------------|--------------|--------------|--------------|--------------|
| #### Bn-scaff_16534_1-p18958 C-genome specific (napus-oleracea) | 0.9832536    | 0.8851573    | 0.9922481    | 0.7914415    | not scorable | not scorable |
| #### Bn-scaff_16534_1-p18979 C-genome specific (napus-oleracea) | 0.8684211    | 0.7583561    | 0.9147287    | 0.8642167    | not scorable | not scorable |
| #### Bn-scaff_16534_1-p19005 genome unspecific (all in)         | 0.9928229    | 0.307118     | 1            | 0.6767095    | 0.9752066    | 0.7449024    |
| #### Bn-scaff_16534_1-p19012 C-genome specific (napus-oleracea) | 0.9401914    | 0.8399879    | 0.9922481    | 0.7353472    | not scorable | not scorable |
| #### Bn-scaff_16534_1-p19379 C-genome specific (oleracea only)  | not scorable | not scorable | 0.9069768    | 0.6987293    | not scorable | not scorable |
| #### Bn-scaff_16534_1-p19452 C-genome specific (oleracea only)  | not scorable | not scorable | 0.9147287    | 0.7462659    | not scorable | not scorable |
| #### Bn-scaff_16534_1-p19872 C-genome specific (oleracea only)  | not scorable | not scorable | 0.7984496    | 0.585544     | not scorable | not scorable |
| #### Bn-scaff_16534_1-p20071 genome unspecific (all in)         | 0.9593301    | 0.3657342    | 1            | 0.7603203    | 1            | 0.759656     |
| #### Bn-scaff_16534_1-p20701 C-genome specific (napus-oleracea) | 0.9569378    | 0.9265254    | 1            | 0.7769598    | not scorable | not scorable |
| #### Bn-scaff_16534_1-p20996 C-genome specific (napus-oleracea) | 0.9928229    | 0.8400735    | 1            | 0.6580865    | not scorable | not scorable |
| #### Bn-scaff_16534_1-p21662 all not scorable                   | not scorable | not scorable | not scorable | not scorable | not scorable | not scorable |
| #### Bn-scaff_16534_1-p22225 C-genome specific (napus-oleracea) | 0.9210526    | 0.8218374    | 1            | 0.6972165    | not scorable | not scorable |
| #### Bn-scaff_16534_1-p22229 C-genome specific (napus-oleracea) | 0.9545454    | 0.7752091    | 0.9922481    | 0.8652433    | not scorable | not scorable |
| #### Bn-scaff_16534_1-p22254 C-genome specific (napus-oleracea) | 0.9952153    | 0.9160012    | 1            | 0.8352249    | not scorable | not scorable |
| #### Bn-scaff_16534_1-p22373 genome unspecific (all in)         | 0.9545454    | 0.2296353    | 1            | 0.4645265    | 0.9917355    | 0.6779572    |
| #### Bn-scaff_16534_1-p22483 genome unspecific (oleracea-rapa)  | not scorable | not scorable | 0.9767442    | 0.7574732    | 0.9504132    | 0.5811627    |
| #### Bn-scaff_16534_1-p23202 C-genome specific (napus-oleracea) | 0.9976076    | 0.9395142    | 0.9922481    | 0.8008999    | not scorable | not scorable |
| #### Bn-scaff_16534_1-p23282 napus specific                     | 0.8373206    | 0.9188551    | not scorable | not scorable | not scorable | not scorable |
| #### Bn-scaff_16534_1-p23428 C-genome specific (napus-oleracea) | 0.9760765    | 0.8208867    | 0.9922481    | 0.7354705    | not scorable | not scorable |
| #### Bn-scaff_16534_1-p24195 napus specific                     | 0.9401914    | 0.7754328    | not scorable | not scorable | not scorable | not scorable |
| #### Bn-scaff_16534_1-p24248 genome unspecific (all in)         | 0.9688995    | 0.3471316    | 1            | 0.8530908    | 0.9752066    | 0.7980748    |
| #### Bn-scaff_16534_1-p24249 genome unspecific (all in)         | 0.9736842    | 0.389971     | 1            | 0.8132538    | 1            | 0.9174559    |
| #### Bn-scaff_16534_1-p24343 genome unspecific (oleracea-rapa)  | not scorable | not scorable | 0.9922481    | 0.9107052    | 0.9834711    | 0.3070028    |
| #### Bn-scaff_16534_1-p24359 C-genome specific (napus-oleracea) | 0.9736842    | 0.632261     | 0.9844961    | 0.6348737    | not scorable | not scorable |
| #### Bn-scaff_16534_1-p24359 C-genome specific (napus-oleracea) | 0.9736842    | 0.8636848    | 0.9844961    | 0.852513     | not scorable | not scorable |
| #### Bn-scaff_16534_1-p24393 C-genome specific (napus-oleracea) | 0.9784689    | 0.8052077    | 1            | 0.8466147    | not scorable | not scorable |
| #### Bn-scaff_16534_1-p24705 C-genome specific (napus-oleracea) | 0.9808612    | 0.728719     | 1            | 0.7325971    | not scorable | not scorable |
| #### Bn-scaff_16534_1-p24881 C-genome specific (napus-oleracea) | 0.9952153    | 0.7832189    | 0.9844961    | 0.8567475    | not scorable | not scorable |
| #### Bn-scaff_16534_1-p24903 C-genome specific (napus-oleracea) | 0.9904306    | 0.8114225    | 0.9922481    | 0.8178766    | not scorable | not scorable |
| #### Bn-scaff_16534_1-p25352 genome unspecific (all in)         | 1            | 0.5628911    | 1            | 0.5709352    | 1            | 0.6445521    |
| #### Bn-scaff_16534_1-p25360 genome unspecific (all in)         | 1            | 0.6253552    | 0.9844961    | 0.6221778    | 1            | 0.7631779    |
| #### Bn-scaff_16534_1-p25360 genome unspecific (all in)         | 1            | 0.4987312    | 1            | 0.4990351    | 1            | 0.634805     |
| #### Bn-scaff_16534_1-p25445 genome unspecific (all in)         | 0.9952153    | 0.35543      | 0.9922481    | 0.2973153    | 1            | 0.8196729    |

|                                                                 |              |              |              |              |              |              |
|-----------------------------------------------------------------|--------------|--------------|--------------|--------------|--------------|--------------|
| #### Bn-scaff_16534_1-p25445 C-genome specific (napus-oleracea) | 0.9880383    | 0.767542     | 0.9922481    | 0.668775     | not scorable | not scorable |
| #### Bn-scaff_16534_1-p25491 C-genome specific (napus-oleracea) | 0.9904306    | 0.8182114    | 1            | 0.8051868    | not scorable | not scorable |
| #### Bn-scaff_16534_1-p25494 C-genome specific (napus-oleracea) | 0.9856459    | 0.8490243    | 0.9922481    | 0.8304201    | not scorable | not scorable |
| #### Bn-scaff_16534_1-p25523 C-genome specific (napus-oleracea) | 0.9665072    | 0.8376573    | 1            | 0.811239     | not scorable | not scorable |
| #### Bn-scaff_16534_1-p25699 genome unspecific (all in)         | 0.9904306    | 0.5855842    | 0.9922481    | 0.8055169    | 1            | 0.9412267    |
| #### Bn-scaff_16534_1-p25805 C-genome specific (napus-oleracea) | 0.9976076    | 0.7387168    | 0.9767442    | 0.8187649    | not scorable | not scorable |
| #### Bn-scaff_16534_1-p25819 C-genome specific (napus-oleracea) | 0.9521531    | 0.7811786    | 0.9922481    | 0.6916133    | not scorable | not scorable |
| #### Bn-scaff_16534_1-p25854 genome unspecific (all in)         | 0.9760765    | 0.5422033    | 0.9844961    | 0.6018751    | 0.8760331    | 0.9140136    |
| #### Bn-scaff_16534_1-p25893 C-genome specific (napus-oleracea) | 1            | 0.7494369    | 0.9922481    | 0.6899946    | not scorable | not scorable |
| #### Bn-scaff_16534_1-p25961 C-genome specific (napus-oleracea) | 0.9760765    | 0.6052337    | 0.9922481    | 0.6803868    | not scorable | not scorable |
| #### Bn-scaff_16534_1-p25977 C-genome specific (oleracea only)  | not scorable | not scorable | 1            | 0.7750463    | not scorable | not scorable |
| #### Bn-scaff_16534_1-p27709 C-genome specific (napus-oleracea) | 0.9210526    | 0.7409109    | 0.9844961    | 0.6906353    | not scorable | not scorable |
| #### Bn-scaff_16534_1-p27835 C-genome specific (napus-oleracea) | 0.9928229    | 0.7823473    | 1            | 0.6601675    | not scorable | not scorable |
| #### Bn-scaff_16534_1-p27849 C-genome specific (napus-oleracea) | 0.9880383    | 0.6643642    | 1            | 0.6228659    | not scorable | not scorable |
| #### Bn-scaff_16534_1-p28002 C-genome specific (napus-oleracea) | 0.9832536    | 0.9122601    | 0.9922481    | 0.8111967    | not scorable | not scorable |
| #### Bn-scaff_16534_1-p28103 C-genome specific (napus-oleracea) | 0.9904306    | 0.85657      | 1            | 0.7908112    | not scorable | not scorable |
| #### Bn-scaff_16534_1-p28260 C-genome specific (napus-oleracea) | 0.9856459    | 0.9018925    | 0.9922481    | 0.8521354    | not scorable | not scorable |
| #### Bn-scaff_16534_1-p28856 C-genome specific (napus-oleracea) | 0.9952153    | 0.8621043    | 1            | 0.8224843    | not scorable | not scorable |
| #### Bn-scaff_16534_1-p28868 C-genome specific (napus-oleracea) | 0.9952153    | 0.904153     | 1            | 0.8365898    | not scorable | not scorable |
| #### Bn-scaff_16534_1-p33291 genome unspecific (all in)         | 0.9952153    | 0.3375485    | 1            | 0.7692639    | 1            | 0.7583826    |
| #### Bn-scaff_16534_1-p33406 all not scorable                   | not scorable | not scorable | not scorable | not scorable | not scorable | not scorable |
| #### Bn-scaff_16534_1-p39969 C-genome specific (napus-oleracea) | 0.9904306    | 0.9293995    | 0.9922481    | 0.7912927    | not scorable | not scorable |
| #### Bn-scaff_16534_1-p48677 C-genome specific (napus-oleracea) | 0.7655503    | 0.6776776    | 0.9612403    | 0.5985035    | not scorable | not scorable |
| #### Bn-scaff_16534_1-p49825 genome unspecific (oleracea-rapa)  | not scorable | not scorable | 0.9844961    | 0.7870805    | 1            | 0.9267835    |
| #### Bn-scaff_16534_1-p50071 genome unspecific (all in)         | 1            | 0.808095     | 1            | 0.7634147    | 1            | 0.8059745    |
| #### Bn-scaff_16534_1-p50090 genome unspecific (all in)         | 0.9688995    | 0.4272761    | 1            | 0.8296279    | 0.9917355    | 0.7499804    |
| #### Bn-scaff_16534_1-p50493 C-genome specific (napus-oleracea) | 0.8779904    | 0.8795284    | 0.9844961    | 0.7798049    | not scorable | not scorable |
| #### Bn-scaff_16534_1-p50575 genome unspecific (oleracea-rapa)  | not scorable | not scorable | 1            | 0.9175713    | 0.9834711    | 0.7668332    |
| #### Bn-scaff_16534_1-p50960 C-genome specific (napus-oleracea) | 0.9880383    | 0.7870117    | 0.9922481    | 0.7657658    | not scorable | not scorable |
| #### Bn-scaff_16534_1-p51427 genome unspecific (all in)         | 0.9736842    | 0.320089     | 0.9689922    | 0.4206888    | 1            | 0.9174682    |
| #### Bn-scaff_16534_1-p51472 genome unspecific (all in)         | 0.9665072    | 0.4188788    | 0.9922481    | 0.7766871    | 1            | 0.8948976    |
| #### Bn-scaff_16534_1-p52486 C-genome specific (napus-oleracea) | 0.9784689    | 0.7980525    | 0.9767442    | 0.815281     | not scorable | not scorable |
| #### Bn-scaff_16534_1-p52520 C-genome specific (napus-oleracea) | 0.9880383    | 0.8000473    | 0.9922481    | 0.8187077    | not scorable | not scorable |

|                                                                 |              |              |              |              |              |              |
|-----------------------------------------------------------------|--------------|--------------|--------------|--------------|--------------|--------------|
| #### Bn-scaff_16534_1-p55139 C-genome specific (napus-oleracea) | 0.9784689    | 0.8035148    | 0.9922481    | 0.788522     | not scorable | not scorable |
| #### Bn-scaff_16534_1-p58406 C-genome specific (oleracea only)  | not scorable | not scorable | 0.9224806    | 0.271932     | not scorable | not scorable |
| #### Bn-scaff_16534_1-p64879 genome unspecific (all in)         | 0.9736842    | 0.4349581    | 1            | 0.6490086    | 0.9917355    | 0.572926     |
| #### Bn-scaff_16534_1-p65083 genome unspecific (all in)         | 0.9617225    | 0.3919443    | 1            | 0.9057191    | 0.9917355    | 0.7631508    |
| #### Bn-scaff_16534_1-p66633 genome unspecific (all in)         | 0.9856459    | 0.419914     | 0.9922481    | 0.6408934    | 1            | 0.8214718    |
| #### Bn-scaff_16534_1-p67910 C-genome specific (napus-oleracea) | 0.9952153    | 0.7793477    | 1            | 0.8291255    | not scorable | not scorable |
| #### Bn-scaff_16534_1-p68995 C-genome specific (napus-oleracea) | 0.9928229    | 0.8001264    | 1            | 0.7758593    | not scorable | not scorable |
| #### Bn-scaff_16534_1-p69227 C-genome specific (oleracea only)  | not scorable | not scorable | 0.7906977    | 0.8497456    | not scorable | not scorable |
| #### Bn-scaff_16534_1-p69262 C-genome specific (napus-oleracea) | 0.9904306    | 0.8068492    | 0.9767442    | 0.809936     | not scorable | not scorable |
| #### Bn-scaff_16534_1-p70780 C-genome specific (napus-oleracea) | 0.9952153    | 0.7832189    | 1            | 0.8033177    | not scorable | not scorable |
| #### Bn-scaff_16534_1-p71870 genome unspecific (all in)         | 0.8851675    | 0.6834697    | 0.9844961    | 0.8769395    | 1            | 0.9074451    |
| #### Bn-scaff_16534_1-p71921 genome unspecific (all in)         | 0.9760765    | 0.4096212    | 0.9922481    | 0.5861265    | 1            | 0.7834218    |
| #### Bn-scaff_16534_1-p72894 genome unspecific (oleracea-rapa)  | not scorable | not scorable | 0.9922481    | 0.8046679    | 1            | 0.8945528    |
| #### Bn-scaff_16534_1-p72980 C-genome specific (napus-oleracea) | 0.9976076    | 0.7945466    | 1            | 0.8671215    | not scorable | not scorable |
| #### Bn-scaff_16534_1-p73235 C-genome specific (napus-oleracea) | 0.9880383    | 0.6652241    | 1            | 0.6408106    | not scorable | not scorable |
| #### Bn-scaff_16534_1-p80123 C-genome specific (napus-oleracea) | 0.9928229    | 0.9483656    | 0.9767442    | 0.7695886    | not scorable | not scorable |
| #### Bn-scaff_16534_1-p80712 C-genome specific (napus-oleracea) | 0.9928229    | 0.8477035    | 0.9147287    | 0.7521821    | not scorable | not scorable |
| #### Bn-scaff_16534_1-p80734 C-genome specific (napus-oleracea) | 0.9976076    | 0.937354     | 0.9224806    | 0.8393459    | not scorable | not scorable |
| #### Bn-scaff_16534_1-p80807 C-genome specific (napus-oleracea) | 1            | 0.8897848    | 0.9844961    | 0.8254889    | not scorable | not scorable |
| #### Bn-scaff_16534_1-p82788 genome unspecific (all in)         | 1            | 0.9272014    | 1            | 0.9205657    | 1            | 0.9175386    |
| #### Bn-scaff_16534_1-p87252 all not scorable                   | not scorable | not scorable | not scorable | not scorable | not scorable | not scorable |
| #### Bn-scaff_16534_1-p92175 genome unspecific (all in)         | 0.9808612    | 0.6551064    | 0.9922481    | 0.7881327    | 1            | 0.9492153    |
| #### Bn-scaff_16534_2-p12519 napus specific                     | 0.9593301    | 0.6169105    | not scorable | not scorable | not scorable | not scorable |
| #### Bn-scaff_16534_2-p12648 C-genome specific (napus-oleracea) | 0.9736842    | 0.7848489    | 0.9922481    | 0.8520203    | not scorable | not scorable |
| #### Bn-scaff_16534_2-p12655 C-genome specific (napus-oleracea) | 0.9545454    | 0.7572201    | 0.5193799    | 0.8250377    | not scorable | not scorable |
| #### Bn-scaff_16534_2-p12937 A-genome specific (napus-rapa)     | 0.9521531    | 0.5323141    | not scorable | not scorable | 1            | 0.9492011    |
| #### Bn-scaff_16534_2-p14449 napus specific                     | 0.9401914    | 0.789668     | not scorable | not scorable | not scorable | not scorable |
| #### Bn-scaff_16534_2-p14558 C-genome specific (napus-oleracea) | 0.9497608    | 0.7558695    | 0.5271318    | 0.75273      | not scorable | not scorable |
| #### Bn-scaff_16534_2-p15022 C-genome specific (napus-oleracea) | 0.9688995    | 0.7870815    | 0.503876     | 0.7906119    | not scorable | not scorable |
| #### Bn-scaff_16534_2-p15180 C-genome specific (napus-oleracea) | 0.9688995    | 0.699918     | 0.503876     | 0.8385581    | not scorable | not scorable |
| #### Bn-scaff_16534_2-p15366 napus specific                     | 0.9593301    | 0.7566672    | not scorable | not scorable | not scorable | not scorable |
| #### Bn-scaff_16534_2-p15862 genome unspecific (oleracea-rapa)  | not scorable | not scorable | 0.9689922    | 0.6974595    | 1            | 0.8933609    |
| #### Bn-scaff_16534_2-p15965 napus specific                     | 0.9449761    | 0.8667584    | not scorable | not scorable | not scorable | not scorable |

|                                                                 |              |              |              |              |              |              |
|-----------------------------------------------------------------|--------------|--------------|--------------|--------------|--------------|--------------|
| #### Bn-scaff_16534_2-p17177 all not scorable                   | not scorable | not scorable | not scorable | not scorable | not scorable | not scorable |
| #### Bn-scaff_16534_2-p17419 C-genome specific (napus-oleracea) | 0.6315789    | 0.8115318    | 0.3255814    | 0.8367541    | not scorable | not scorable |
| #### Bn-scaff_16534_2-p1986 C-genome specific (napus-oleracea)  | 0.6435407    | 0.6835919    | 0.3255814    | 0.8267595    | not scorable | not scorable |
| #### Bn-scaff_16534_2-p19977 C-genome specific (napus-oleracea) | 0.9736842    | 0.7067699    | 0.9612403    | 0.8557903    | not scorable | not scorable |
| #### Bn-scaff_16534_2-p21134 C-genome specific (napus-oleracea) | 0.9521531    | 0.8087107    | 0.9534883    | 0.6828651    | not scorable | not scorable |
| #### Bn-scaff_16534_2-p21141 C-genome specific (napus-oleracea) | 0.9617225    | 0.7154738    | 1            | 0.7037941    | not scorable | not scorable |
| #### Bn-scaff_16534_2-p21338 napus specific                     | 0.5813397    | 0.9142767    | not scorable | not scorable | not scorable | not scorable |
| #### Bn-scaff_16534_2-p21434 C-genome specific (napus-oleracea) | 0.9712918    | 0.76242      | 1            | 0.7761537    | not scorable | not scorable |
| #### Bn-scaff_16534_2-p22368 C-genome specific (oleracea only)  | not scorable | not scorable | 1            | 0.6459426    | not scorable | not scorable |
| #### Bn-scaff_16534_2-p23541 C-genome specific (napus-oleracea) | 0.9688995    | 0.7007146    | 1            | 0.7210749    | not scorable | not scorable |
| #### Bn-scaff_16534_2-p23581 C-genome specific (napus-oleracea) | 0.9832536    | 0.7260427    | 1            | 0.7109981    | not scorable | not scorable |
| #### Bn-scaff_16534_2-p23609 C-genome specific (napus-oleracea) | 0.9688995    | 0.6990678    | 1            | 0.7812393    | not scorable | not scorable |
| #### Bn-scaff_16534_2-p23850 C-genome specific (napus-oleracea) | 0.9545454    | 0.6428863    | 1            | 0.6958233    | not scorable | not scorable |
| #### Bn-scaff_16534_2-p23873 C-genome specific (napus-oleracea) | 0.9617225    | 0.6942898    | 1            | 0.8695174    | not scorable | not scorable |
| #### Bn-scaff_16534_2-p24403 C-genome specific (napus-oleracea) | 0.9808612    | 0.776193     | 1            | 0.6929351    | not scorable | not scorable |
| #### Bn-scaff_16534_2-p24444 C-genome specific (napus-oleracea) | 0.9736842    | 0.7425238    | 1            | 0.6718634    | not scorable | not scorable |
| #### Bn-scaff_16534_2-p24489 C-genome specific (napus-oleracea) | 0.9832536    | 0.7420356    | 1            | 0.6742611    | not scorable | not scorable |
| #### Bn-scaff_16534_2-p24857 napus specific                     | 0.8660287    | 0.7454007    | not scorable | not scorable | not scorable | not scorable |
| #### Bn-scaff_16534_2-p27580 C-genome specific (napus-oleracea) | 0.9736842    | 0.7932307    | 0.9922481    | 0.7288027    | not scorable | not scorable |
| #### Bn-scaff_16534_2-p28467 genome unspecific (oleracea-rapa)  | not scorable | not scorable | 1            | 0.6931572    | 1            | 0.910212     |
| #### Bn-scaff_16534_2-p30484 genome unspecific (all in)         | 0.9569378    | 0.3858001    | 1            | 0.7262322    | 1            | 0.9090096    |
| #### Bn-scaff_16534_2-p30796 genome unspecific (all in)         | 0.9736842    | 0.5856455    | 0.9612403    | 0.699122     | 0.9752066    | 0.5584655    |
| #### Bn-scaff_16534_2-p31061 C-genome specific (napus-oleracea) | 0.9641148    | 0.722493     | 0.9767442    | 0.7138681    | not scorable | not scorable |
| #### Bn-scaff_16534_2-p38670 C-genome specific (napus-oleracea) | 0.6626794    | 0.7083492    | 0.9844961    | 0.7949099    | not scorable | not scorable |
| #### Bn-scaff_16534_2-p40563 C-genome specific (napus-oleracea) | 0.6483254    | 0.6735511    | 1            | 0.6754312    | not scorable | not scorable |
| #### Bn-scaff_16534_2-p42262 C-genome specific (napus-oleracea) | 0.6794258    | 0.7260401    | 1            | 0.6998192    | not scorable | not scorable |
| #### Bn-scaff_16534_2-p51823 C-genome specific (napus-oleracea) | 0.9497608    | 0.741206     | 0.503876     | 0.7595872    | not scorable | not scorable |
| #### Bn-scaff_16534_2-p72001 C-genome specific (napus-oleracea) | 0.9736842    | 0.7925178    | 1            | 0.7732242    | not scorable | not scorable |
| #### Bn-scaff_16534_2-p78431 C-genome specific (napus-oleracea) | 0.9665072    | 0.7677682    | 0.503876     | 0.7697565    | not scorable | not scorable |
| #### Bn-scaff_16534_2-p79059 napus specific                     | 0.9545454    | 0.7725519    | not scorable | not scorable | not scorable | not scorable |
| #### Bn-scaff_16534_2-p79383 napus specific                     | 0.9425837    | 0.7833355    | not scorable | not scorable | not scorable | not scorable |
| #### Bn-scaff_16534_2-p80260 napus specific                     | 0.9688995    | 0.7394321    | not scorable | not scorable | not scorable | not scorable |
| #### Bn-scaff_16534_2-p80512 napus specific                     | 0.9545454    | 0.7634963    | not scorable | not scorable | not scorable | not scorable |

|                                                                 |              |              |              |              |              |              |
|-----------------------------------------------------------------|--------------|--------------|--------------|--------------|--------------|--------------|
| #### Bn-scaff_16534_2-p81288 napus specific                     | 0.9593301    | 0.7541968    | not scorable | not scorable | not scorable | not scorable |
| #### Bn-scaff_16534_2-p81704 genome unspecific (all in)         | 0.9641148    | 0.3626555    | 1            | 0.8177654    | 1            | 0.9228111    |
| #### Bn-scaff_16534_2-p81780 C-genome specific (napus-oleracea) | 0.9569378    | 0.7601721    | 0.5348837    | 0.9151567    | not scorable | not scorable |
| #### Bn-scaff_16534_2-p82025 napus specific                     | 0.937799     | 0.8070062    | not scorable | not scorable | not scorable | not scorable |
| #### Bn-scaff_16534_2-p86956 C-genome specific (napus-oleracea) | 0.9856459    | 0.7662134    | 0.9844961    | 0.7406207    | not scorable | not scorable |
| #### Bn-scaff_16534_2-p88292 C-genome specific (napus-oleracea) | 0.9593301    | 0.688988     | 1            | 0.6931335    | not scorable | not scorable |
| #### Bn-scaff_16534_2-p89468 C-genome specific (napus-oleracea) | 0.9641148    | 0.8684998    | 0.5116279    | 0.7830616    | not scorable | not scorable |
| #### Bn-scaff_16538_1-p5478 genome unspecific (oleracea-rapa)   | not scorable | not scorable | 0.9767442    | 0.6806278    | 1            | 0.9516448    |
| #### Bn-scaff_16541_1-p22508 genome unspecific (oleracea-rapa)  | not scorable | not scorable | 1            | 0.6469957    | 0.9834711    | 0.5274692    |
| #### Bn-scaff_16541_1-p23820 genome unspecific (all in)         | 0.9832536    | 0.3664682    | 1            | 0.8403006    | 1            | 0.7940285    |
| #### Bn-scaff_16541_1-p26394 C-genome specific (napus-oleracea) | 0.937799     | 0.3450259    | 1            | 0.91764      | not scorable | not scorable |
| #### Bn-scaff_16541_1-p52632 C-genome specific (napus-oleracea) | 0.9976076    | 0.7069653    | 0.9379845    | 0.6333901    | not scorable | not scorable |
| #### Bn-scaff_16541_1-p72003 genome unspecific (all in)         | 0.9784689    | 0.5180312    | 1            | 0.868463     | 1            | 0.7790069    |
| #### Bn-scaff_16545_1-p11034 C-genome specific (napus-oleracea) | 0.9641148    | 0.4164273    | 1            | 0.9035925    | not scorable | not scorable |
| #### Bn-scaff_16545_1-p17260 C-genome specific (napus-oleracea) | 0.9545454    | 0.9178839    | 0.627907     | 0.8055052    | not scorable | not scorable |
| #### Bn-scaff_16545_1-p1764 C-genome specific (napus-oleracea)  | 0.9497608    | 0.7552688    | 0.627907     | 0.6296077    | not scorable | not scorable |
| #### Bn-scaff_16545_1-p1958 C-genome specific (napus-oleracea)  | 0.9880383    | 0.6915965    | 1            | 0.6538689    | not scorable | not scorable |
| #### Bn-scaff_16545_1-p19626 genome unspecific (oleracea-rapa)  | not scorable | not scorable | 0.9844961    | 0.4622913    | 0.9917355    | 0.7951167    |
| #### Bn-scaff_16545_1-p19833 C-genome specific (napus-oleracea) | 0.9808612    | 0.7434272    | 1            | 0.7380704    | not scorable | not scorable |
| #### Bn-scaff_16545_1-p20093 C-genome specific (napus-oleracea) | 0.9521531    | 0.6189264    | 0.9147287    | 0.6753067    | not scorable | not scorable |
| #### Bn-scaff_16545_1-p21077 C-genome specific (napus-oleracea) | 0.9760765    | 0.754097     | 0.627907     | 0.8951052    | not scorable | not scorable |
| #### Bn-scaff_16545_1-p23622 genome unspecific (all in)         | 0.9593301    | 0.4434828    | 1            | 0.5655084    | 1            | 0.8065407    |
| #### Bn-scaff_16545_1-p23839 C-genome specific (oleracea only)  | not scorable | not scorable | 1            | 0.7972119    | not scorable | not scorable |
| #### Bn-scaff_16545_1-p24667 C-genome specific (napus-oleracea) | 1            | 0.8087705    | 1            | 0.7588277    | not scorable | not scorable |
| #### Bn-scaff_16545_1-p25645 C-genome specific (napus-oleracea) | 0.9784689    | 0.7542394    | 0.9147287    | 0.7519125    | not scorable | not scorable |
| #### Bn-scaff_16545_1-p26057 C-genome specific (napus-oleracea) | 0.9880383    | 0.7503558    | 0.9922481    | 0.8372873    | not scorable | not scorable |
| #### Bn-scaff_16545_1-p27306 genome unspecific (all in)         | 0.9808612    | 0.6605542    | 0.9689922    | 0.7171348    | 1            | 0.8057353    |
| #### Bn-scaff_16545_1-p27395 C-genome specific (napus-oleracea) | 0.9880383    | 0.7138154    | 1            | 0.7948517    | not scorable | not scorable |
| #### Bn-scaff_16545_1-p28439 C-genome specific (napus-oleracea) | 0.9856459    | 0.7267328    | 1            | 0.6908023    | not scorable | not scorable |
| #### Bn-scaff_16545_1-p28505 C-genome specific (napus-oleracea) | 0.9856459    | 0.6888415    | 0.9922481    | 0.7354022    | not scorable | not scorable |
| #### Bn-scaff_16545_1-p29060 C-genome specific (napus-oleracea) | 0.9641148    | 0.5975026    | 1            | 0.6172453    | not scorable | not scorable |
| #### Bn-scaff_16545_1-p29693 C-genome specific (napus-oleracea) | 0.9832536    | 0.7431349    | 0.9844961    | 0.7241301    | not scorable | not scorable |
| #### Bn-scaff_16545_1-p30859 C-genome specific (napus-oleracea) | 0.9880383    | 0.6730843    | 1            | 0.6438779    | not scorable | not scorable |

|                                                                  |              |              |              |              |              |              |
|------------------------------------------------------------------|--------------|--------------|--------------|--------------|--------------|--------------|
| ##### Bn-scaff_16545_1-p30915 C-genome specific (napus-oleracea) | 0.9928229    | 0.7135752    | 1            | 0.7921975    | not scorable | not scorable |
| ##### Bn-scaff_16545_1-p34938 C-genome specific (napus-oleracea) | 0.9832536    | 0.8221294    | 0.9922481    | 0.7628559    | not scorable | not scorable |
| ##### Bn-scaff_16545_1-p35111 C-genome specific (napus-oleracea) | 0.9784689    | 0.9147261    | 1            | 0.9170789    | not scorable | not scorable |
| ##### Bn-scaff_16545_1-p35326 C-genome specific (napus-oleracea) | 0.9856459    | 0.9562877    | 1            | 0.3710537    | not scorable | not scorable |
| ##### Bn-scaff_16545_1-p35496 C-genome specific (napus-oleracea) | 0.9928229    | 0.9014796    | 1            | 0.851758     | not scorable | not scorable |
| ##### Bn-scaff_16545_1-p35677 C-genome specific (napus-oleracea) | 0.9712918    | 0.8501109    | 0.6666667    | 0.7728514    | not scorable | not scorable |
| ##### Bn-scaff_16545_1-p36257 napus specific                     | 0.9736842    | 0.7113195    | not scorable | not scorable | not scorable | not scorable |
| ##### Bn-scaff_16545_1-p41775 C-genome specific (napus-oleracea) | 0.9665072    | 0.7654834    | 0.6589147    | 0.7024368    | not scorable | not scorable |
| ##### Bn-scaff_16545_1-p44418 genome unspecific (all in)         | 0.9880383    | 0.4872891    | 0.9922481    | 0.7051507    | 1            | 0.8609508    |
| ##### Bn-scaff_16545_1-p44737 C-genome specific (oleracea only)  | not scorable | not scorable | 1            | 0.652104     | not scorable | not scorable |
| ##### Bn-scaff_16545_1-p44917 C-genome specific (napus-oleracea) | 0.9856459    | 0.82638      | 1            | 0.772981     | not scorable | not scorable |
| ##### Bn-scaff_16545_1-p45039 C-genome specific (oleracea only)  | not scorable | not scorable | 0.9689922    | 0.6411699    | not scorable | not scorable |
| ##### Bn-scaff_16545_1-p45922 genome unspecific (all in)         | 0.9832536    | 0.7914934    | 1            | 0.8624023    | 0.9669421    | 0.5298823    |
| ##### Bn-scaff_16545_1-p47128 C-genome specific (napus-oleracea) | 0.9904306    | 0.8734435    | 1            | 0.8544516    | not scorable | not scorable |
| ##### Bn-scaff_16545_1-p47265 C-genome specific (napus-oleracea) | 0.9880383    | 0.7714037    | 1            | 0.7095628    | not scorable | not scorable |
| ##### Bn-scaff_16545_1-p47362 C-genome specific (napus-oleracea) | 0.9880383    | 0.9275949    | 1            | 0.7992485    | not scorable | not scorable |
| ##### Bn-scaff_16545_1-p49634 C-genome specific (napus-oleracea) | 0.9880383    | 0.7703606    | 0.9844961    | 0.7150611    | not scorable | not scorable |
| ##### Bn-scaff_16545_1-p52637 C-genome specific (napus-oleracea) | 0.9856459    | 0.7706924    | 1            | 0.8162628    | not scorable | not scorable |
| ##### Bn-scaff_16545_1-p53588 C-genome specific (napus-oleracea) | 0.9928229    | 0.7876419    | 1            | 0.719717     | not scorable | not scorable |
| ##### Bn-scaff_16545_1-p54252 C-genome specific (napus-oleracea) | 0.9808612    | 0.7381804    | 1            | 0.8480899    | not scorable | not scorable |
| ##### Bn-scaff_16545_1-p54306 C-genome specific (napus-oleracea) | 0.9856459    | 0.9165189    | 1            | 0.7885069    | not scorable | not scorable |
| ##### Bn-scaff_16545_1-p56789 C-genome specific (napus-oleracea) | 0.9641148    | 0.7340415    | 0.8604651    | 0.5573873    | not scorable | not scorable |
| ##### Bn-scaff_16545_1-p64160 C-genome specific (napus-oleracea) | 0.9904306    | 0.7291132    | 0.9612403    | 0.6564116    | not scorable | not scorable |
| ##### Bn-scaff_16545_1-p65202 C-genome specific (napus-oleracea) | 0.9665072    | 0.9298512    | 0.6511628    | 0.7582121    | not scorable | not scorable |
| ##### Bn-scaff_16545_1-p7009 genome unspecific (all in)          | 0.9784689    | 0.5233703    | 0.9922481    | 0.7868572    | 1            | 0.9205657    |
| ##### Bn-scaff_16545_1-p71231 C-genome specific (napus-oleracea) | 0.9832536    | 0.8347435    | 1            | 0.7455394    | not scorable | not scorable |
| ##### Bn-scaff_16545_1-p72714 C-genome specific (napus-oleracea) | 0.9784689    | 0.6179327    | 0.9922481    | 0.6156291    | not scorable | not scorable |
| ##### Bn-scaff_16545_1-p74076 C-genome specific (napus-oleracea) | 0.9856459    | 0.9231977    | 0.9844961    | 0.871112     | not scorable | not scorable |
| ##### Bn-scaff_16545_1-p74155 C-genome specific (napus-oleracea) | 0.9880383    | 0.7771171    | 1            | 0.7261428    | not scorable | not scorable |
| ##### Bn-scaff_16545_1-p74272 C-genome specific (napus-oleracea) | 0.9641148    | 0.7224118    | 0.6511628    | 0.7632149    | not scorable | not scorable |
| ##### Bn-scaff_16545_1-p74343 C-genome specific (napus-oleracea) | 0.9832536    | 0.6901306    | 0.9844961    | 0.6525951    | not scorable | not scorable |
| ##### Bn-scaff_16545_1-p74941 C-genome specific (oleracea only)  | not scorable | not scorable | 0.9922481    | 0.6850427    | not scorable | not scorable |
| ##### Bn-scaff_16545_1-p75186 C-genome specific (napus-oleracea) | 0.9856459    | 0.6737197    | 1            | 0.6071779    | not scorable | not scorable |

|                                                                 |              |              |           |           |              |              |
|-----------------------------------------------------------------|--------------|--------------|-----------|-----------|--------------|--------------|
| #### Bn-scaff_16545_1-p77226 C-genome specific (napus-oleracea) | 0.9880383    | 0.7263635    | 1         | 0.7552641 | not scorable | not scorable |
| #### Bn-scaff_16545_1-p77503 C-genome specific (napus-oleracea) | 0.9856459    | 0.7001607    | 1         | 0.7321514 | not scorable | not scorable |
| #### Bn-scaff_16545_1-p77560 C-genome specific (napus-oleracea) | 0.9832536    | 0.7137872    | 1         | 0.7802822 | not scorable | not scorable |
| #### Bn-scaff_16545_1-p78309 C-genome specific (napus-oleracea) | 0.9641148    | 0.7257002    | 0.6666667 | 0.6972182 | not scorable | not scorable |
| #### Bn-scaff_16545_1-p79361 genome unspecific (oleracea-rapa)  | not scorable | not scorable | 0.9844961 | 0.3032664 | 1            | 0.7704166    |
| #### Bn-scaff_16545_1-p80303 C-genome specific (napus-oleracea) | 0.9641148    | 0.7670106    | 0.627907  | 0.8434878 | not scorable | not scorable |
| #### Bn-scaff_16545_1-p80883 C-genome specific (napus-oleracea) | 0.9665072    | 0.7542147    | 0.627907  | 0.8395879 | not scorable | not scorable |
| #### Bn-scaff_16545_1-p81733 C-genome specific (napus-oleracea) | 0.9808612    | 0.7067776    | 1         | 0.6153789 | not scorable | not scorable |
| #### Bn-scaff_16545_1-p82275 C-genome specific (napus-oleracea) | 0.9880383    | 0.7817115    | 1         | 0.7384163 | not scorable | not scorable |
| #### Bn-scaff_16545_1-p82381 C-genome specific (napus-oleracea) | 0.9545454    | 0.9300993    | 0.6124031 | 0.7849976 | not scorable | not scorable |
| #### Bn-scaff_16545_1-p82660 genome unspecific (all in)         | 0.9928229    | 0.3472658    | 0.9767442 | 0.3388528 | 1            | 0.8912995    |
| #### Bn-scaff_16545_1-p82816 C-genome specific (napus-oleracea) | 0.9736842    | 0.8835696    | 0.627907  | 0.7962679 | not scorable | not scorable |
| #### Bn-scaff_16545_1-p83042 C-genome specific (napus-oleracea) | 0.9928229    | 0.8188731    | 1         | 0.6569836 | not scorable | not scorable |
| #### Bn-scaff_16545_1-p83042 C-genome specific (napus-oleracea) | 0.9688995    | 0.8147992    | 0.6666667 | 0.6852541 | not scorable | not scorable |
| #### Bn-scaff_16545_1-p84969 C-genome specific (napus-oleracea) | 0.9784689    | 0.759911     | 0.627907  | 0.7525515 | not scorable | not scorable |
| #### Bn-scaff_16545_1-p85558 C-genome specific (napus-oleracea) | 0.9880383    | 0.507816     | 1         | 0.41165   | not scorable | not scorable |
| #### Bn-scaff_16545_1-p85642 C-genome specific (napus-oleracea) | 0.9354067    | 0.6443375    | 0.620155  | 0.6968246 | not scorable | not scorable |
| #### Bn-scaff_16545_1-p86185 genome unspecific (all in)         | 0.9856459    | 0.6172622    | 0.9922481 | 0.5165606 | 1            | 0.8264481    |
| #### Bn-scaff_16545_1-p86253 C-genome specific (napus-oleracea) | 0.9880383    | 0.7323181    | 1         | 0.6324359 | not scorable | not scorable |
| #### Bn-scaff_16545_1-p86393 C-genome specific (napus-oleracea) | 0.9952153    | 0.8955456    | 1         | 0.7489722 | not scorable | not scorable |
| #### Bn-scaff_16545_1-p86447 C-genome specific (napus-oleracea) | 0.9904306    | 0.7795782    | 1         | 0.7256063 | not scorable | not scorable |
| #### Bn-scaff_16545_1-p86986 C-genome specific (napus-oleracea) | 0.9904306    | 0.7306489    | 0.9844961 | 0.7168741 | not scorable | not scorable |
| #### Bn-scaff_16545_1-p87340 C-genome specific (napus-oleracea) | 0.9928229    | 0.7779354    | 1         | 0.7958565 | not scorable | not scorable |
| #### Bn-scaff_16545_1-p87441 C-genome specific (napus-oleracea) | 0.9952153    | 0.7816874    | 1         | 0.4701861 | not scorable | not scorable |
| #### Bn-scaff_16545_1-p90296 C-genome specific (napus-oleracea) | 0.9928229    | 0.7531577    | 1         | 0.7084435 | not scorable | not scorable |
| #### Bn-scaff_16545_1-p90406 C-genome specific (napus-oleracea) | 0.9904306    | 0.749599     | 0.9844961 | 0.8591455 | not scorable | not scorable |
| #### Bn-scaff_16545_1-p90474 C-genome specific (napus-oleracea) | 0.9641148    | 0.7343434    | 0.9612403 | 0.7756521 | not scorable | not scorable |
| #### Bn-scaff_16545_1-p94842 C-genome specific (napus-oleracea) | 0.9856459    | 0.7458054    | 1         | 0.7648459 | not scorable | not scorable |
| #### Bn-scaff_16545_1-p95267 C-genome specific (napus-oleracea) | 0.9688995    | 0.7590083    | 0.6356589 | 0.8115091 | not scorable | not scorable |
| #### Bn-scaff_16545_1-p96241 C-genome specific (napus-oleracea) | 0.9736842    | 0.7518997    | 1         | 0.7171399 | not scorable | not scorable |
| #### Bn-scaff_16545_1-p98899 C-genome specific (napus-oleracea) | 0.9832536    | 0.7584344    | 0.9844961 | 0.7919685 | not scorable | not scorable |
| #### Bn-scaff_16547_1-p11185 C-genome specific (napus-oleracea) | 0.9138756    | 0.7560665    | 0.9534883 | 0.577416  | not scorable | not scorable |
| #### Bn-scaff_16547_1-p14651 C-genome specific (napus-oleracea) | 0.9162679    | 0.6931832    | 0.9844961 | 0.6566969 | not scorable | not scorable |

|                                                                 |              |              |              |              |              |              |
|-----------------------------------------------------------------|--------------|--------------|--------------|--------------|--------------|--------------|
| #### Bn-scaff_16547_1-p15385 C-genome specific (napus-oleracea) | 0.9138756    | 0.7039066    | 1            | 0.6427953    | not scorable | not scorable |
| #### Bn-scaff_16547_1-p15888 C-genome specific (napus-oleracea) | 0.9138756    | 0.826221     | 0.9689922    | 0.7260684    | not scorable | not scorable |
| #### Bn-scaff_16547_1-p17954 C-genome specific (napus-oleracea) | 0.9114832    | 0.6891875    | 0.9922481    | 0.6576363    | not scorable | not scorable |
| #### Bn-scaff_16547_1-p23113 C-genome specific (napus-oleracea) | 0.9138756    | 0.7617868    | 1            | 0.8282926    | not scorable | not scorable |
| #### Bn-scaff_16547_1-p25442 genome unspecific (all in)         | 0.9665072    | 0.4808798    | 1            | 0.7324553    | 1            | 0.8446736    |
| #### Bn-scaff_16547_1-p25511 genome unspecific (all in)         | 0.9569378    | 0.54993      | 1            | 0.7588801    | 1            | 0.8558477    |
| #### Bn-scaff_16547_1-p29078 A-genome specific (rapa only)      | not scorable | not scorable | not scorable | not scorable | 0.9669421    | 0.2856929    |
| #### Bn-scaff_16547_1-p29089 C-genome specific (napus-oleracea) | 0.9186603    | 0.7435077    | 0.9689922    | 0.8060073    | not scorable | not scorable |
| #### Bn-scaff_16547_1-p29259 genome unspecific (all in)         | 0.9784689    | 0.2367029    | 1            | 0.6600737    | 0.9917355    | 0.6200599    |
| #### Bn-scaff_16547_1-p30796 genome unspecific (all in)         | 0.9808612    | 0.5053509    | 0.9689922    | 0.5658564    | 1            | 0.9244215    |
| #### Bn-scaff_16547_1-p31084 genome unspecific (all in)         | 0.9880383    | 0.4137668    | 1            | 0.6128349    | 1            | 0.7252899    |
| #### Bn-scaff_16547_1-p31551 C-genome specific (napus-oleracea) | 0.9497608    | 0.3654318    | 0.8139535    | 0.7923539    | not scorable | not scorable |
| #### Bn-scaff_16547_1-p31767 C-genome specific (napus-oleracea) | 0.9162679    | 0.8335474    | 0.9689922    | 0.9306884    | not scorable | not scorable |
| #### Bn-scaff_16547_1-p32132 C-genome specific (napus-oleracea) | 0.7344497    | 0.9205657    | 0.875969     | 0.9175813    | not scorable | not scorable |
| #### Bn-scaff_16547_1-p33100 C-genome specific (napus-oleracea) | 0.9186603    | 0.8916047    | 0.9302326    | 0.7923558    | not scorable | not scorable |
| #### Bn-scaff_16547_1-p33178 C-genome specific (oleracea only)  | not scorable | not scorable | 1            | 0.7360302    | not scorable | not scorable |
| #### Bn-scaff_16547_1-p34318 C-genome specific (napus-oleracea) | 0.9186603    | 0.7562535    | 0.9767442    | 0.7455629    | not scorable | not scorable |
| #### Bn-scaff_16547_1-p34517 genome unspecific (all in)         | 1            | 0.5709352    | 1            | 0.5576342    | 1            | 0.5446512    |
| #### Bn-scaff_16547_1-p36616 C-genome specific (napus-oleracea) | 0.9210526    | 0.9384021    | 0.9767442    | 0.7826825    | not scorable | not scorable |
| #### Bn-scaff_16547_1-p36655 C-genome specific (napus-oleracea) | 0.9210526    | 0.9382524    | 0.9689922    | 0.8216213    | not scorable | not scorable |
| #### Bn-scaff_16547_1-p36656 C-genome specific (napus-oleracea) | 0.9210526    | 0.9362951    | 0.9922481    | 0.8226293    | not scorable | not scorable |
| #### Bn-scaff_16547_1-p38290 C-genome specific (napus-oleracea) | 0.9210526    | 0.7764149    | 0.9844961    | 0.7613635    | not scorable | not scorable |
| #### Bn-scaff_16547_1-p48849 C-genome specific (napus-oleracea) | 0.9114832    | 0.720338     | 0.9767442    | 0.6726961    | not scorable | not scorable |
| #### Bn-scaff_16547_1-p59615 genome unspecific (all in)         | 0.9521531    | 0.512369     | 0.9844961    | 0.7200843    | 1            | 0.8948976    |
| #### Bn-scaff_16547_1-p85743 C-genome specific (oleracea only)  | not scorable | not scorable | 0.9844961    | 0.7304022    | not scorable | not scorable |
| #### Bn-scaff_16547_1-p95612 C-genome specific (napus-oleracea) | 0.9138756    | 0.8201796    | 0.9922481    | 0.7606003    | not scorable | not scorable |
| #### Bn-scaff_16553_1-p15698 C-genome specific (napus-oleracea) | 0.9928229    | 0.9188372    | 1            | 0.8333231    | not scorable | not scorable |
| #### Bn-scaff_16553_1-p33772 C-genome specific (napus-oleracea) | 0.9593301    | 0.3484254    | 1            | 0.880959     | not scorable | not scorable |
| #### Bn-scaff_16553_1-p34179 genome unspecific (all in)         | 0.9641148    | 0.3698399    | 1            | 0.7885377    | 0.9752066    | 0.6774502    |
| #### Bn-scaff_16553_1-p34303 genome unspecific (all in)         | 0.9928229    | 0.4042222    | 1            | 0.8529303    | 0.9917355    | 0.7554494    |
| #### Bn-scaff_16553_1-p36608 genome unspecific (all in)         | 1            | 0.6141026    | 1            | 0.8147944    | 0.9834711    | 0.9291645    |
| #### Bn-scaff_16553_1-p6126 C-genome specific (napus-oleracea)  | 0.9976076    | 0.9382701    | 0.9767442    | 0.7811204    | not scorable | not scorable |
| #### Bn-scaff_16553_1-p6185 C-genome specific (napus-oleracea)  | 0.9832536    | 0.8091791    | 0.9689922    | 0.7352082    | not scorable | not scorable |



|                                                                 |              |              |           |           |              |              |
|-----------------------------------------------------------------|--------------|--------------|-----------|-----------|--------------|--------------|
| #### Bn-scaff_16553_1-p6743 C-genome specific (napus-oleracea)  | 0.9880383    | 0.800828     | 0.8992248 | 0.6681035 | not scorable | not scorable |
| #### Bn-scaff_16553_1-p78455 C-genome specific (napus-oleracea) | 0.9617225    | 0.6000491    | 0.9922481 | 0.7516484 | not scorable | not scorable |
| #### Bn-scaff_16553_1-p87504 C-genome specific (napus-oleracea) | 0.9856459    | 0.7544396    | 0.9922481 | 0.800547  | not scorable | not scorable |
| #### Bn-scaff_16553_1-p87747 C-genome specific (napus-oleracea) | 0.9832536    | 0.7498142    | 0.9922481 | 0.7817762 | not scorable | not scorable |
| #### Bn-scaff_16553_1-p88896 C-genome specific (napus-oleracea) | 0.9736842    | 0.5767993    | 1         | 0.5101801 | not scorable | not scorable |
| #### Bn-scaff_16554_1-p13328 C-genome specific (napus-oleracea) | 0.5741627    | 0.9175813    | 1         | 0.8030027 | not scorable | not scorable |
| #### Bn-scaff_16554_1-p16000 C-genome specific (oleracea only)  | not scorable | not scorable | 1         | 0.9175605 | not scorable | not scorable |
| #### Bn-scaff_16554_1-p16006 C-genome specific (oleracea only)  | not scorable | not scorable | 1         | 0.9065945 | not scorable | not scorable |
| #### Bn-scaff_16554_1-p16009 C-genome specific (oleracea only)  | not scorable | not scorable | 1         | 0.9113752 | not scorable | not scorable |
| #### Bn-scaff_16554_1-p16018 C-genome specific (oleracea only)  | not scorable | not scorable | 1         | 0.8892885 | not scorable | not scorable |
| #### Bn-scaff_16554_1-p16028 C-genome specific (oleracea only)  | not scorable | not scorable | 1         | 0.9315313 | not scorable | not scorable |
| #### Bn-scaff_16554_1-p16046 C-genome specific (oleracea only)  | not scorable | not scorable | 1         | 0.904113  | not scorable | not scorable |
| #### Bn-scaff_16554_1-p16095 C-genome specific (napus-oleracea) | 0.9090909    | 0.9414617    | 1         | 0.8343771 | not scorable | not scorable |
| #### Bn-scaff_16554_1-p16147 C-genome specific (oleracea only)  | not scorable | not scorable | 1         | 0.8177851 | not scorable | not scorable |
| #### Bn-scaff_16564_1-p15360 C-genome specific (napus-oleracea) | 1            | 0.9272014    | 1         | 0.9272014 | not scorable | not scorable |
| #### Bn-scaff_16564_1-p23660 C-genome specific (napus-oleracea) | 0.9976076    | 0.73619      | 1         | 0.7495137 | not scorable | not scorable |
| #### Bn-scaff_16565_1-p10620 genome unspecific (oleracea-rapa)  | not scorable | not scorable | 1         | 0.8004208 | 1            | 0.2971505    |
| #### Bn-scaff_16565_1-p10654 genome unspecific (all in)         | 1            | 0.489922     | 1         | 0.9039531 | 1            | 0.9069422    |
| #### Bn-scaff_16565_1-p10692 C-genome specific (napus-oleracea) | 0.9593301    | 0.8468585    | 1         | 0.7340418 | not scorable | not scorable |
| #### Bn-scaff_16565_1-p11652 C-genome specific (napus-oleracea) | 0.9928229    | 0.9371097    | 1         | 0.8260867 | not scorable | not scorable |
| #### Bn-scaff_16565_1-p11693 genome unspecific (all in)         | 0.9545454    | 0.5455086    | 1         | 0.8131883 | 1            | 0.9361662    |
| #### Bn-scaff_16565_1-p12664 genome unspecific (oleracea-rapa)  | not scorable | not scorable | 0.9302326 | 0.2193059 | 1            | 0.8681423    |
| #### Bn-scaff_16565_1-p22108 genome unspecific (all in)         | 0.9880383    | 0.8135673    | 0.9069768 | 0.9122387 | 1            | 0.8443413    |
| #### Bn-scaff_16565_1-p24689 C-genome specific (napus-oleracea) | 0.9880383    | 0.8868102    | 0.9844961 | 0.7599394 | not scorable | not scorable |
| #### Bn-scaff_16565_1-p41457 C-genome specific (napus-oleracea) | 0.9904306    | 0.8378905    | 1         | 0.8543575 | not scorable | not scorable |
| #### Bn-scaff_16565_1-p41717 genome unspecific (all in)         | 0.9856459    | 0.3996969    | 0.9534883 | 0.2061501 | 0.9504132    | 0.8465937    |
| #### Bn-scaff_16565_1-p50400 C-genome specific (napus-oleracea) | 0.9330143    | 0.7542073    | 0.6046512 | 0.7838481 | not scorable | not scorable |
| #### Bn-scaff_16565_1-p76143 C-genome specific (napus-oleracea) | 0.9880383    | 0.8975518    | 1         | 0.779287  | not scorable | not scorable |
| #### Bn-scaff_16565_1-p76785 C-genome specific (napus-oleracea) | 0.9928229    | 0.8352287    | 1         | 0.5947877 | not scorable | not scorable |
| #### Bn-scaff_16565_1-p77060 C-genome specific (oleracea only)  | not scorable | not scorable | 1         | 0.7527766 | not scorable | not scorable |
| #### Bn-scaff_16565_1-p77181 C-genome specific (napus-oleracea) | 0.9856459    | 0.8213333    | 0.7984496 | 0.6834819 | not scorable | not scorable |
| #### Bn-scaff_16565_1-p77823 C-genome specific (napus-oleracea) | 0.9904306    | 0.9001306    | 0.9844961 | 0.7940191 | not scorable | not scorable |
| #### Bn-scaff_16565_1-p77840 C-genome specific (napus-oleracea) | 0.9856459    | 0.9528525    | 0.9379845 | 0.6542309 | not scorable | not scorable |

|                                                                  |              |              |              |              |              |              |
|------------------------------------------------------------------|--------------|--------------|--------------|--------------|--------------|--------------|
| #### Bn-scaff_16565_1-p7784C C-genome specific (napus-oleracea)  | 0.9808612    | 0.8558398    | 0.7209302    | 0.611501     | not scorable | not scorable |
| #### Bn-scaff_16565_1-p80382C C-genome specific (napus-oleracea) | 0.9904306    | 0.3861855    | 1            | 0.8036571    | not scorable | not scorable |
| #### Bn-scaff_16565_1-p80394 all not scorable                    | not scorable | not scorable | not scorable | not scorable | not scorable | not scorable |
| #### Bn-scaff_16565_1-p80404 C-genome specific (oleracea only)   | not scorable | not scorable | 0.9534883    | 0.2045489    | not scorable | not scorable |
| #### Bn-scaff_16565_1-p86002 C-genome specific (napus-oleracea)  | 0.9545454    | 0.7507502    | 0.9922481    | 0.6724489    | not scorable | not scorable |
| #### Bn-scaff_16565_1-p88304 C-genome specific (napus-oleracea)  | 0.9593301    | 0.789023     | 0.9612403    | 0.73684      | not scorable | not scorable |
| #### Bn-scaff_16565_1-p89983 C-genome specific (napus-oleracea)  | 0.9712918    | 0.8109684    | 0.9844961    | 0.809931     | not scorable | not scorable |
| #### Bn-scaff_16565_1-p9159C C-genome specific (napus-oleracea)  | 0.9593301    | 0.878804     | 1            | 0.893934     | not scorable | not scorable |
| #### Bn-scaff_16565_1-p93741 genome unspecific (all in)          | 0.9712918    | 0.3550422    | 1            | 0.7771622    | 0.9917355    | 0.8250079    |
| #### Bn-scaff_16565_1-p97076 C-genome specific (napus-oleracea)  | 0.9354067    | 0.8515812    | 0.5116279    | 0.7444842    | not scorable | not scorable |
| #### Bn-scaff_16565_1-p97701 genome unspecific (all in)          | 0.9641148    | 0.471182     | 1            | 0.8021975    | 0.8347107    | 0.6456747    |
| #### Bn-scaff_16567_1-p11422 genome unspecific (all in)          | 0.9808612    | 0.4079212    | 1            | 0.8981502    | 0.9917355    | 0.6759985    |
| #### Bn-scaff_16567_1-p40709 A-genome specific (rapa only)       | not scorable | not scorable | not scorable | not scorable | 1            | 0.8409711    |
| #### Bn-scaff_16567_1-p97437 genome unspecific (oleracea-rapa)   | not scorable | not scorable | 1            | 0.8506805    | 0.9586777    | 0.7161742    |
| #### Bn-scaff_16567_1-p98742 genome unspecific (all in)          | 0.9425837    | 0.3303956    | 1            | 0.7937493    | 1            | 0.9034928    |
| #### Bn-scaff_16569_1-p10496 C-genome specific (napus-oleracea)  | 0.9976076    | 0.5987751    | 1            | 0.5516754    | not scorable | not scorable |
| #### Bn-scaff_16569_1-p41122 C-genome specific (napus-oleracea)  | 1            | 0.8167846    | 0.9844961    | 0.678266     | not scorable | not scorable |
| #### Bn-scaff_16569_1-p56777 genome unspecific (all in)          | 0.9976076    | 0.4264996    | 1            | 0.8116186    | 1            | 0.80887      |
| #### Bn-scaff_16569_1-p59372 genome unspecific (all in)          | 0.9928229    | 0.4294379    | 1            | 0.7645079    | 1            | 0.834886     |
| #### Bn-scaff_16569_1-p65043 C-genome specific (napus-oleracea)  | 1            | 0.727636     | 0.9922481    | 0.6377922    | not scorable | not scorable |
| #### Bn-scaff_16569_1-p65048 C-genome specific (oleracea only)   | not scorable | not scorable | 1            | 0.7933352    | not scorable | not scorable |
| #### Bn-scaff_16569_1-p67498 C-genome specific (napus-oleracea)  | 0.9928229    | 0.9205657    | 0.9689922    | 0.9046125    | not scorable | not scorable |
| #### Bn-scaff_16576_1-p12998 C-genome specific (napus-oleracea)  | 0.9760765    | 0.7749044    | 0.9844961    | 0.7063881    | not scorable | not scorable |
| #### Bn-scaff_16576_1-p16392 C-genome specific (oleracea only)   | not scorable | not scorable | 0.5813953    | 0.9175813    | not scorable | not scorable |
| #### Bn-scaff_16576_1-p16551 genome unspecific (all in)          | 0.9760765    | 0.6313125    | 0.9922481    | 0.7054906    | 1            | 0.9327664    |
| #### Bn-scaff_16576_1-p1666C C-genome specific (napus-oleracea)  | 0.9928229    | 0.8395622    | 0.9767442    | 0.8401571    | not scorable | not scorable |
| #### Bn-scaff_16576_1-p18033 C-genome specific (napus-oleracea)  | 0.9952153    | 0.6724017    | 1            | 0.8410454    | not scorable | not scorable |
| #### Bn-scaff_16576_1-p19217 C-genome specific (napus-oleracea)  | 0.9928229    | 0.7807541    | 1            | 0.7570299    | not scorable | not scorable |
| #### Bn-scaff_16576_1-p19242 C-genome specific (napus-oleracea)  | 0.9976076    | 0.7800341    | 1            | 0.8405334    | not scorable | not scorable |
| #### Bn-scaff_16576_1-p19245 C-genome specific (napus-oleracea)  | 0.9952153    | 0.8417158    | 1            | 0.766947     | not scorable | not scorable |
| #### Bn-scaff_16576_1-p2023C C-genome specific (napus-oleracea)  | 0.9952153    | 0.85351      | 1            | 0.7616534    | not scorable | not scorable |
| #### Bn-scaff_16576_1-p22614 C-genome specific (napus-oleracea)  | 0.9928229    | 0.8680206    | 1            | 0.7553674    | not scorable | not scorable |
| #### Bn-scaff_16576_1-p23214 C-genome specific (napus-oleracea)  | 0.9952153    | 0.8730649    | 0.9922481    | 0.6998311    | not scorable | not scorable |

|                                                                 |              |              |           |           |              |              |
|-----------------------------------------------------------------|--------------|--------------|-----------|-----------|--------------|--------------|
| #### Bn-scaff_16576_1-p23454 C-genome specific (oleracea only)  | not scorable | not scorable | 0.9612403 | 0.6821151 | not scorable | not scorable |
| #### Bn-scaff_16576_1-p23526 C-genome specific (napus-oleracea) | 0.9880383    | 0.8183073    | 0.9922481 | 0.8154362 | not scorable | not scorable |
| #### Bn-scaff_16576_1-p23538 C-genome specific (napus-oleracea) | 0.9976076    | 0.8511866    | 1         | 0.744796  | not scorable | not scorable |
| #### Bn-scaff_16576_1-p23674 C-genome specific (napus-oleracea) | 0.9952153    | 0.843301     | 0.9922481 | 0.8316965 | not scorable | not scorable |
| #### Bn-scaff_16576_1-p24227 C-genome specific (napus-oleracea) | 0.9808612    | 0.7715604    | 0.9612403 | 0.6921191 | not scorable | not scorable |
| #### Bn-scaff_16576_1-p24234 C-genome specific (napus-oleracea) | 0.9904306    | 0.8008552    | 1         | 0.7508614 | not scorable | not scorable |
| #### Bn-scaff_16576_1-p24646 C-genome specific (napus-oleracea) | 0.9952153    | 0.8332064    | 0.9534883 | 0.7859111 | not scorable | not scorable |
| #### Bn-scaff_16576_1-p25636 genome unspecific (all in)         | 0.9928229    | 0.6735536    | 1         | 0.7226567 | 0.8842975    | 0.6073998    |
| #### Bn-scaff_16576_1-p26137 C-genome specific (napus-oleracea) | 0.9856459    | 0.7063597    | 1         | 0.6458033 | not scorable | not scorable |
| #### Bn-scaff_16576_1-p26213 C-genome specific (napus-oleracea) | 0.9952153    | 0.7043232    | 1         | 0.6417164 | not scorable | not scorable |
| #### Bn-scaff_16576_1-p26223 C-genome specific (napus-oleracea) | 0.9832536    | 0.7103051    | 0.9922481 | 0.7226275 | not scorable | not scorable |
| #### Bn-scaff_16576_1-p26235 C-genome specific (napus-oleracea) | 0.9976076    | 0.7440817    | 1         | 0.7055051 | not scorable | not scorable |
| #### Bn-scaff_16576_1-p26262 C-genome specific (napus-oleracea) | 0.9904306    | 0.7586213    | 1         | 0.699068  | not scorable | not scorable |
| #### Bn-scaff_16576_1-p26405 C-genome specific (napus-oleracea) | 0.9832536    | 0.8083586    | 0.9922481 | 0.7850885 | not scorable | not scorable |
| #### Bn-scaff_16576_1-p26735 C-genome specific (napus-oleracea) | 0.9832536    | 0.6938896    | 1         | 0.6649629 | not scorable | not scorable |
| #### Bn-scaff_16576_1-p27215 C-genome specific (napus-oleracea) | 0.9880383    | 0.723166     | 0.9922481 | 0.7503625 | not scorable | not scorable |
| #### Bn-scaff_16576_1-p27326 C-genome specific (napus-oleracea) | 0.9904306    | 0.7045088    | 1         | 0.6909375 | not scorable | not scorable |
| #### Bn-scaff_16576_1-p27341 C-genome specific (napus-oleracea) | 0.9856459    | 0.7888045    | 1         | 0.8443965 | not scorable | not scorable |
| #### Bn-scaff_16576_1-p28206 C-genome specific (napus-oleracea) | 0.9880383    | 0.6339293    | 1         | 0.7397032 | not scorable | not scorable |
| #### Bn-scaff_16576_1-p28752 C-genome specific (napus-oleracea) | 0.9904306    | 0.7913967    | 1         | 0.8537236 | not scorable | not scorable |
| #### Bn-scaff_16576_1-p28927 genome unspecific (all in)         | 0.9760765    | 0.5384197    | 1         | 0.9092741 | 1            | 0.7607016    |
| #### Bn-scaff_16576_1-p31829 C-genome specific (napus-oleracea) | 0.9832536    | 0.7824833    | 0.9689922 | 0.7704966 | not scorable | not scorable |
| #### Bn-scaff_16576_1-p32318 C-genome specific (oleracea only)  | not scorable | not scorable | 0.9844961 | 0.7854438 | not scorable | not scorable |
| #### Bn-scaff_16576_1-p32437 C-genome specific (napus-oleracea) | 0.9904306    | 0.4213665    | 0.9767442 | 0.5531216 | not scorable | not scorable |
| #### Bn-scaff_16576_1-p32706 C-genome specific (napus-oleracea) | 0.9736842    | 0.7362207    | 1         | 0.7333621 | not scorable | not scorable |
| #### Bn-scaff_16576_1-p33358 C-genome specific (napus-oleracea) | 0.9832536    | 0.7659622    | 1         | 0.7246211 | not scorable | not scorable |
| #### Bn-scaff_16576_1-p34931 C-genome specific (napus-oleracea) | 0.9880383    | 0.805576     | 1         | 0.8076818 | not scorable | not scorable |
| #### Bn-scaff_16576_1-p34948 C-genome specific (napus-oleracea) | 0.9952153    | 0.784493     | 0.9922481 | 0.7839258 | not scorable | not scorable |
| #### Bn-scaff_16576_1-p37117 C-genome specific (napus-oleracea) | 0.9808612    | 0.7584503    | 1         | 0.7811933 | not scorable | not scorable |
| #### Bn-scaff_16576_1-p38537 genome unspecific (all in)         | 0.9545454    | 0.3865149    | 1         | 0.8693698 | 1            | 0.8091941    |
| #### Bn-scaff_16576_1-p44196 C-genome specific (napus-oleracea) | 0.9928229    | 0.8906265    | 0.9922481 | 0.8660154 | not scorable | not scorable |
| #### Bn-scaff_16576_1-p44280 C-genome specific (napus-oleracea) | 0.9665072    | 0.7382789    | 1         | 0.8547438 | not scorable | not scorable |
| #### Bn-scaff_16576_1-p50038 C-genome specific (napus-oleracea) | 0.9928229    | 0.7943656    | 0.9922481 | 0.836027  | not scorable | not scorable |

|                                                                 |              |              |              |              |              |              |
|-----------------------------------------------------------------|--------------|--------------|--------------|--------------|--------------|--------------|
| #### Bn-scaff_16576_1-p50047 C-genome specific (napus-oleracea) | 0.9784689    | 0.7946351    | 0.9922481    | 0.7576268    | not scorable | not scorable |
| #### Bn-scaff_16576_1-p50065 C-genome specific (napus-oleracea) | 0.9856459    | 0.7986424    | 1            | 0.8417687    | not scorable | not scorable |
| #### Bn-scaff_16576_1-p51893 C-genome specific (oleracea only)  | not scorable | not scorable | 1            | 0.6262196    | not scorable | not scorable |
| #### Bn-scaff_16576_1-p55452 C-genome specific (napus-oleracea) | 0.9952153    | 0.8096758    | 0.9534883    | 0.4166161    | not scorable | not scorable |
| #### Bn-scaff_16576_1-p57916 C-genome specific (napus-oleracea) | 0.9856459    | 0.8469498    | 0.9612403    | 0.7640134    | not scorable | not scorable |
| #### Bn-scaff_16576_1-p57999 C-genome specific (napus-oleracea) | 0.9928229    | 0.7535309    | 0.9689922    | 0.8533445    | not scorable | not scorable |
| #### Bn-scaff_16576_1-p58013 C-genome specific (napus-oleracea) | 0.9880383    | 0.744328     | 0.5968992    | 0.6740658    | not scorable | not scorable |
| #### Bn-scaff_16576_1-p58253 genome unspecific (all in)         | 0.9736842    | 0.6156786    | 1            | 0.6577988    | 0.8512397    | 0.9154612    |
| #### Bn-scaff_16576_1-p95164 C-genome specific (napus-oleracea) | 0.9976076    | 0.7867884    | 0.9922481    | 0.6978647    | not scorable | not scorable |
| #### Bn-scaff_16576_1-p97169 C-genome specific (napus-oleracea) | 0.9952153    | 0.7872725    | 1            | 0.9091646    | not scorable | not scorable |
| #### Bn-scaff_16581_1-p258 napus specific                       | 0.9904306    | 0.3814925    | not scorable | not scorable | not scorable | not scorable |
| #### Bn-scaff_16614_1-p10134 genome unspecific (all in)         | 0.9593301    | 0.4033448    | 0.9922481    | 0.7453259    | 1            | 0.9149473    |
| #### Bn-scaff_16614_1-p10598 C-genome specific (napus-oleracea) | 0.9162679    | 0.6902691    | 1            | 0.408457     | not scorable | not scorable |
| #### Bn-scaff_16614_1-p10699 C-genome specific (napus-oleracea) | 0.6889952    | 0.9262495    | 0.7596899    | 0.7598515    | not scorable | not scorable |
| #### Bn-scaff_16614_1-p10832 genome unspecific (all in)         | 0.9545454    | 0.5119944    | 1            | 0.6610539    | 0.9917355    | 0.7770717    |
| #### Bn-scaff_16614_1-p10922 C-genome specific (napus-oleracea) | 0.9162679    | 0.9317776    | 1            | 0.7746606    | not scorable | not scorable |
| #### Bn-scaff_16614_1-p11202 C-genome specific (napus-oleracea) | 0.9090909    | 0.9161605    | 1            | 0.7924657    | not scorable | not scorable |
| #### Bn-scaff_16614_1-p11224 C-genome specific (napus-oleracea) | 0.923445     | 0.8801816    | 1            | 0.9095823    | not scorable | not scorable |
| #### Bn-scaff_16614_1-p11293 C-genome specific (napus-oleracea) | 0.923445     | 0.8921039    | 1            | 0.8312569    | not scorable | not scorable |
| #### Bn-scaff_16614_1-p11510 all not scorable                   | not scorable | not scorable | not scorable | not scorable | not scorable | not scorable |
| #### Bn-scaff_16614_1-p11513 C-genome specific (oleracea only)  | not scorable | not scorable | 1            | 0.8125936    | not scorable | not scorable |
| #### Bn-scaff_16614_1-p11517 C-genome specific (oleracea only)  | not scorable | not scorable | 1            | 0.9200217    | not scorable | not scorable |
| #### Bn-scaff_16614_1-p11616 C-genome specific (oleracea only)  | not scorable | not scorable | 1            | 0.9165882    | not scorable | not scorable |
| #### Bn-scaff_16614_1-p11675 C-genome specific (oleracea only)  | not scorable | not scorable | 1            | 0.8109213    | not scorable | not scorable |
| #### Bn-scaff_16614_1-p11678 C-genome specific (oleracea only)  | not scorable | not scorable | 1            | 0.8364948    | not scorable | not scorable |
| #### Bn-scaff_16614_1-p11679 C-genome specific (oleracea only)  | not scorable | not scorable | 1            | 0.8321551    | not scorable | not scorable |
| #### Bn-scaff_16614_1-p11714 genome unspecific (oleracea-rapa)  | not scorable | not scorable | 1            | 0.9171606    | 0.9917355    | 0.7673915    |
| #### Bn-scaff_16614_1-p11890 genome unspecific (all in)         | 1            | 0.7622204    | 1            | 0.7494745    | 1            | 0.6879622    |
| #### Bn-scaff_16614_1-p11914 C-genome specific (oleracea only)  | not scorable | not scorable | 1            | 0.7227896    | not scorable | not scorable |
| #### Bn-scaff_16614_1-p11948 C-genome specific (napus-oleracea) | 0.9019139    | 0.729948     | 0.9534883    | 0.7452611    | not scorable | not scorable |
| #### Bn-scaff_16614_1-p11954 C-genome specific (oleracea only)  | not scorable | not scorable | 0.9922481    | 0.4120528    | not scorable | not scorable |
| #### Bn-scaff_16614_1-p12037 genome unspecific (all in)         | 0.9808612    | 0.46616      | 0.9767442    | 0.4291922    | 0.9917355    | 0.5262566    |
| #### Bn-scaff_16614_1-p12160 C-genome specific (napus-oleracea) | 0.9258373    | 0.7927212    | 0.9922481    | 0.8186453    | not scorable | not scorable |

|                                                                 |              |              |           |           |              |              |
|-----------------------------------------------------------------|--------------|--------------|-----------|-----------|--------------|--------------|
| #### Bn-scaff_16614_1-p12509 C-genome specific (napus-oleracea) | 0.9210526    | 0.7728608    | 1         | 0.8415254 | not scorable | not scorable |
| #### Bn-scaff_16614_1-p12675 C-genome specific (napus-oleracea) | 0.9282297    | 0.8076742    | 0.9844961 | 0.6199207 | not scorable | not scorable |
| #### Bn-scaff_16614_1-p12682 C-genome specific (napus-oleracea) | 0.9186603    | 0.7628344    | 0.9767442 | 0.7907544 | not scorable | not scorable |
| #### Bn-scaff_16614_1-p12916 C-genome specific (napus-oleracea) | 0.9186603    | 0.8301415    | 0.9534883 | 0.7819453 | not scorable | not scorable |
| #### Bn-scaff_16614_1-p12919 C-genome specific (napus-oleracea) | 0.9019139    | 0.8255621    | 0.8604651 | 0.7966112 | not scorable | not scorable |
| #### Bn-scaff_16614_1-p13073 C-genome specific (napus-oleracea) | 0.9019139    | 0.7565374    | 0.875969  | 0.7303104 | not scorable | not scorable |
| #### Bn-scaff_16614_1-p13266 C-genome specific (napus-oleracea) | 0.9162679    | 0.7298105    | 1         | 0.7161251 | not scorable | not scorable |
| #### Bn-scaff_16614_1-p13283 C-genome specific (napus-oleracea) | 0.7583732    | 0.9169394    | 1         | 0.703276  | not scorable | not scorable |
| #### Bn-scaff_16614_1-p13356 genome unspecific (all in)         | 0.9760765    | 0.355254     | 0.9922481 | 0.909846  | 1            | 0.9272014    |
| #### Bn-scaff_16614_1-p13616 genome unspecific (all in)         | 0.9688995    | 0.633142     | 1         | 0.7884539 | 1            | 0.7012163    |
| #### Bn-scaff_16614_1-p13651 genome unspecific (all in)         | 0.9569378    | 0.5422112    | 1         | 0.7475697 | 1            | 0.8867075    |
| #### Bn-scaff_16614_1-p14247 C-genome specific (napus-oleracea) | 0.8708134    | 0.8986326    | 1         | 0.6838955 | not scorable | not scorable |
| #### Bn-scaff_16614_1-p14677 C-genome specific (napus-oleracea) | 0.9282297    | 0.8508368    | 0.9767442 | 0.7265623 | not scorable | not scorable |
| #### Bn-scaff_16614_1-p14800 C-genome specific (napus-oleracea) | 0.9258373    | 0.7845391    | 1         | 0.850296  | not scorable | not scorable |
| #### Bn-scaff_16614_1-p15355 C-genome specific (oleracea only)  | not scorable | not scorable | 1         | 0.8872983 | not scorable | not scorable |
| #### Bn-scaff_16614_1-p16331 C-genome specific (oleracea only)  | not scorable | not scorable | 1         | 0.8135551 | not scorable | not scorable |
| #### Bn-scaff_16614_1-p16462 C-genome specific (napus-oleracea) | 0.9282297    | 0.7105957    | 1         | 0.6932542 | not scorable | not scorable |
| #### Bn-scaff_16614_1-p16499 genome unspecific (all in)         | 0.9282297    | 0.7615632    | 0.9922481 | 0.8343857 | 0.9834711    | 0.9175813    |
| #### Bn-scaff_16614_1-p16534 C-genome specific (napus-oleracea) | 0.923445     | 0.8288418    | 0.9612403 | 0.7036541 | not scorable | not scorable |
| #### Bn-scaff_16614_1-p16831 C-genome specific (napus-oleracea) | 0.9210526    | 0.8154678    | 0.8372093 | 0.7118592 | not scorable | not scorable |
| #### Bn-scaff_16614_1-p16926 C-genome specific (napus-oleracea) | 0.9210526    | 0.8467798    | 1         | 0.7338862 | not scorable | not scorable |
| #### Bn-scaff_16614_1-p16953 C-genome specific (napus-oleracea) | 0.9354067    | 0.7557343    | 0.9844961 | 0.7428352 | not scorable | not scorable |
| #### Bn-scaff_16614_1-p17206 C-genome specific (napus-oleracea) | 0.9066986    | 0.7827353    | 1         | 0.8204575 | not scorable | not scorable |
| #### Bn-scaff_16614_1-p17485 genome unspecific (all in)         | 0.9545454    | 0.4585952    | 1         | 0.7138681 | 1            | 0.8005308    |
| #### Bn-scaff_16614_1-p17584 C-genome specific (napus-oleracea) | 0.9258373    | 0.7638683    | 0.7131783 | 0.7338374 | not scorable | not scorable |
| #### Bn-scaff_16614_1-p17633 C-genome specific (napus-oleracea) | 0.9210526    | 0.8634633    | 0.9844961 | 0.6568268 | not scorable | not scorable |
| #### Bn-scaff_16614_1-p17654 C-genome specific (napus-oleracea) | 0.923445     | 0.9350557    | 1         | 0.7946097 | not scorable | not scorable |
| #### Bn-scaff_16614_1-p17703 genome unspecific (oleracea-rapa)  | not scorable | not scorable | 1         | 0.9284418 | 1            | 0.686775     |
| #### Bn-scaff_16614_1-p17705 C-genome specific (napus-oleracea) | 0.9354067    | 0.7577574    | 0.9922481 | 0.6781087 | not scorable | not scorable |
| #### Bn-scaff_16614_1-p17718 genome unspecific (oleracea-rapa)  | not scorable | not scorable | 1         | 0.6577225 | 1            | 0.9193622    |
| #### Bn-scaff_16614_1-p17728 C-genome specific (napus-oleracea) | 0.930622     | 0.8468795    | 0.9844961 | 0.6317506 | not scorable | not scorable |
| #### Bn-scaff_16614_1-p17853 C-genome specific (napus-oleracea) | 0.9186603    | 0.9092029    | 0.9844961 | 0.8054749 | not scorable | not scorable |
| #### Bn-scaff_16614_1-p18048 genome unspecific (oleracea-rapa)  | not scorable | not scorable | 1         | 0.9039531 | 0.9917355    | 0.7204154    |

|                                                                |              |              |           |           |              |              |
|----------------------------------------------------------------|--------------|--------------|-----------|-----------|--------------|--------------|
| #### Bn-scaff_16614_1-p1835C-genome specific (napus-oleracea)  | 0.9210526    | 0.7392537    | 0.9612403 | 0.6517789 | not scorable | not scorable |
| #### Bn-scaff_16614_1-p18923genome unspecific (all in)         | 0.9569378    | 0.4629389    | 1         | 0.8207097 | 0.9917355    | 0.8541743    |
| #### Bn-scaff_16614_1-p18933genome unspecific (oleracea-rapa)  | not scorable | not scorable | 1         | 0.7914145 | 0.9917355    | 0.7063218    |
| #### Bn-scaff_16614_1-p19052genome unspecific (all in)         | 0.9521531    | 0.3964682    | 0.9844961 | 0.2138175 | 1            | 0.8815182    |
| #### Bn-scaff_16614_1-p19838C-genome specific (oleracea only)  | not scorable | not scorable | 0.9922481 | 0.7730275 | not scorable | not scorable |
| #### Bn-scaff_16614_1-p19866C-genome specific (napus-oleracea) | 0.9210526    | 0.7481466    | 1         | 0.751883  | not scorable | not scorable |
| #### Bn-scaff_16614_1-p19871C-genome specific (oleracea only)  | not scorable | not scorable | 0.9844961 | 0.7740883 | not scorable | not scorable |
| #### Bn-scaff_16614_1-p19873C-genome specific (oleracea only)  | not scorable | not scorable | 0.9922481 | 0.8086873 | not scorable | not scorable |
| #### Bn-scaff_16614_1-p19874C-genome specific (oleracea only)  | not scorable | not scorable | 0.9689922 | 0.6655633 | not scorable | not scorable |
| #### Bn-scaff_16614_1-p19884C-genome specific (oleracea only)  | not scorable | not scorable | 0.7984496 | 0.7393156 | not scorable | not scorable |
| #### Bn-scaff_16614_1-p1995C-genome specific (napus-oleracea)  | 0.8995215    | 0.6795183    | 1         | 0.7395847 | not scorable | not scorable |
| #### Bn-scaff_16614_1-p19951genome unspecific (all in)         | 0.9090909    | 0.6604045    | 0.9844961 | 0.6726981 | 1            | 0.8810853    |
| #### Bn-scaff_16614_1-p19991C-genome specific (napus-oleracea) | 0.9019139    | 0.7731722    | 0.9922481 | 0.6868529 | not scorable | not scorable |
| #### Bn-scaff_16614_1-p19994genome unspecific (all in)         | 0.9569378    | 0.593012     | 1         | 0.8546101 | 1            | 0.9197803    |
| #### Bn-scaff_16614_1-p20133C-genome specific (napus-oleracea) | 0.9138756    | 0.9752461    | 0.9922481 | 0.8182911 | not scorable | not scorable |
| #### Bn-scaff_16614_1-p2014C-genome specific (oleracea only)   | not scorable | not scorable | 1         | 0.7279448 | not scorable | not scorable |
| #### Bn-scaff_16614_1-p20353genome unspecific (oleracea-rapa)  | not scorable | not scorable | 1         | 0.6925154 | 1            | 0.8402575    |
| #### Bn-scaff_16614_1-p2047C-genome unspecific (oleracea-rapa) | not scorable | not scorable | 1         | 0.8472826 | 1            | 0.9192517    |
| #### Bn-scaff_16614_1-p20555C-genome specific (napus-oleracea) | 0.8827751    | 0.7343959    | 0.9922481 | 0.6432272 | not scorable | not scorable |
| #### Bn-scaff_16614_1-p21389C-genome specific (napus-oleracea) | 0.8851675    | 0.7593072    | 0.9844961 | 0.723284  | not scorable | not scorable |
| #### Bn-scaff_16614_1-p2171C-genome specific (napus-oleracea)  | 0.8875598    | 0.8253475    | 0.9844961 | 0.8377294 | not scorable | not scorable |
| #### Bn-scaff_16614_1-p2188C-genome specific (napus-oleracea)  | 0.8851675    | 0.8071831    | 0.9767442 | 0.8123261 | not scorable | not scorable |
| #### Bn-scaff_16614_1-p21911genome unspecific (all in)         | 0.9976076    | 0.6408564    | 0.9922481 | 0.7786578 | 1            | 0.9190056    |
| #### Bn-scaff_16614_1-p21937C-genome specific (oleracea only)  | not scorable | not scorable | 0.8294573 | 0.839226  | not scorable | not scorable |
| #### Bn-scaff_16614_1-p2203C-genome specific (napus-oleracea)  | 0.8899522    | 0.7269822    | 0.9922481 | 0.6967408 | not scorable | not scorable |
| #### Bn-scaff_16614_1-p22031C-genome specific (napus-oleracea) | 0.8899522    | 0.7710248    | 0.9922481 | 0.6755653 | not scorable | not scorable |
| #### Bn-scaff_16614_1-p22062C-genome specific (napus-oleracea) | 0.8899522    | 0.7674605    | 0.9844961 | 0.6488328 | not scorable | not scorable |
| #### Bn-scaff_16614_1-p22063C-genome specific (napus-oleracea) | 0.8875598    | 0.8562025    | 0.9844961 | 0.8340688 | not scorable | not scorable |
| #### Bn-scaff_16614_1-p22134C-genome specific (napus-oleracea) | 0.8875598    | 0.8293354    | 0.9844961 | 0.8438197 | not scorable | not scorable |
| #### Bn-scaff_16614_1-p22187C-genome specific (napus-oleracea) | 0.8875598    | 0.8480029    | 0.9922481 | 0.8418326 | not scorable | not scorable |
| #### Bn-scaff_16614_1-p22195C-genome specific (napus-oleracea) | 0.8899522    | 0.7785102    | 0.9844961 | 0.7035717 | not scorable | not scorable |
| #### Bn-scaff_16614_1-p22196C-genome specific (napus-oleracea) | 0.8875598    | 0.7552174    | 0.9844961 | 0.6798178 | not scorable | not scorable |
| #### Bn-scaff_16614_1-p22616C-genome specific (napus-oleracea) | 0.8636364    | 0.7039966    | 0.9922481 | 0.8412989 | not scorable | not scorable |

|                                                                 |              |              |              |              |              |              |
|-----------------------------------------------------------------|--------------|--------------|--------------|--------------|--------------|--------------|
| #### Bn-scaff_16614_1-p22643 C-genome specific (napus-oleracea) | 0.9330143    | 0.7969053    | 0.9922481    | 0.8262221    | not scorable | not scorable |
| #### Bn-scaff_16614_1-p23321 C-genome specific (napus-oleracea) | 0.8971292    | 0.8017994    | 1            | 0.5713157    | not scorable | not scorable |
| #### Bn-scaff_16614_1-p24014 C-genome specific (napus-oleracea) | 0.9210526    | 0.7656648    | 0.9922481    | 0.8108715    | not scorable | not scorable |
| #### Bn-scaff_16614_1-p24560 C-genome specific (napus-oleracea) | 0.9354067    | 0.7686282    | 1            | 0.8628951    | not scorable | not scorable |
| #### Bn-scaff_16614_1-p26348 C-genome specific (napus-oleracea) | 0.930622     | 0.7793289    | 0.9612403    | 0.8276196    | not scorable | not scorable |
| #### Bn-scaff_16614_1-p28145 genome unspecific (all in)         | 0.9593301    | 0.5344436    | 0.9844961    | 0.6657392    | 1            | 0.878723     |
| #### Bn-scaff_16614_1-p30184 C-genome specific (napus-oleracea) | 0.923445     | 0.899856     | 0.9689922    | 0.7332789    | not scorable | not scorable |
| #### Bn-scaff_16614_1-p35809 genome unspecific (oleracea-rapa)  | not scorable | not scorable | 1            | 0.7855347    | 1            | 0.7854595    |
| #### Bn-scaff_16614_1-p35827 genome unspecific (oleracea-rapa)  | not scorable | not scorable | 1            | 0.5904691    | 0.9917355    | 0.6236762    |
| #### Bn-scaff_16614_1-p36934 C-genome specific (napus-oleracea) | 0.9354067    | 0.398987     | 0.9922481    | 0.8198109    | not scorable | not scorable |
| #### Bn-scaff_16614_1-p37351 genome unspecific (oleracea-rapa)  | not scorable | not scorable | 1            | 0.8950763    | 1            | 0.7049306    |
| #### Bn-scaff_16614_1-p40079 genome unspecific (oleracea-rapa)  | not scorable | not scorable | 1            | 0.3437694    | 1            | 0.7770717    |
| #### Bn-scaff_16614_1-p42453 C-genome specific (napus-oleracea) | 0.9019139    | 0.8503038    | 1            | 0.791116     | not scorable | not scorable |
| #### Bn-scaff_16614_1-p43213 genome unspecific (all in)         | 0.9665072    | 0.4991739    | 0.503876     | 0.6639215    | 1            | 0.8543575    |
| #### Bn-scaff_16614_1-p50989 C-genome specific (napus-oleracea) | 0.8899522    | 0.8913553    | 0.9922481    | 0.8095304    | not scorable | not scorable |
| #### Bn-scaff_16614_1-p53417 C-genome specific (napus-oleracea) | 0.9210526    | 0.6827018    | 0.9922481    | 0.7124087    | not scorable | not scorable |
| #### Bn-scaff_16614_1-p54602 genome unspecific (oleracea-rapa)  | not scorable | not scorable | 0.9612403    | 0.7818888    | 1            | 0.9294748    |
| #### Bn-scaff_16614_1-p56204 C-genome specific (napus-oleracea) | 0.9210526    | 0.8976445    | 0.9922481    | 0.759981     | not scorable | not scorable |
| #### Bn-scaff_16614_1-p56536 A-genome specific (napus-rapa)     | 0.9760765    | 0.284667     | not scorable | not scorable | 0.9586777    | 0.6058604    |
| #### Bn-scaff_16614_1-p57135 C-genome specific (napus-oleracea) | 0.9282297    | 0.7033097    | 1            | 0.4824823    | not scorable | not scorable |
| #### Bn-scaff_16614_1-p57859 C-genome specific (napus-oleracea) | 0.9066986    | 0.6396661    | 1            | 0.8968939    | not scorable | not scorable |
| #### Bn-scaff_16614_1-p61191 genome unspecific (oleracea-rapa)  | not scorable | not scorable | 0.9612403    | 0.3446464    | 0.9917355    | 0.5818125    |
| #### Bn-scaff_16614_1-p63629 C-genome specific (oleracea only)  | not scorable | not scorable | 1            | 0.7481165    | not scorable | not scorable |
| #### Bn-scaff_16614_1-p63635 C-genome specific (oleracea only)  | not scorable | not scorable | 1            | 0.6406013    | not scorable | not scorable |
| #### Bn-scaff_16614_1-p63642 C-genome specific (oleracea only)  | not scorable | not scorable | 0.9767442    | 0.8311672    | not scorable | not scorable |
| #### Bn-scaff_16614_1-p63642 A-genome specific (rapa only)      | not scorable | not scorable | not scorable | not scorable | 0.9917355    | 0.6518334    |
| #### Bn-scaff_16614_1-p64256 genome unspecific (all in)         | 0.9641148    | 0.403166     | 1            | 0.8650558    | 1            | 0.9272014    |
| #### Bn-scaff_16614_1-p64288 genome unspecific (oleracea-rapa)  | not scorable | not scorable | 1            | 0.6382271    | 1            | 0.7805821    |
| #### Bn-scaff_16614_1-p64329 genome unspecific (oleracea-rapa)  | not scorable | not scorable | 1            | 0.7593135    | 0.9917355    | 0.6809199    |
| #### Bn-scaff_16614_1-p64337 genome unspecific (oleracea-rapa)  | not scorable | not scorable | 1            | 0.7619962    | 1            | 0.9293141    |
| #### Bn-scaff_16614_1-p64384 genome unspecific (oleracea-rapa)  | not scorable | not scorable | 0.9922481    | 0.3685586    | 1            | 0.7017803    |
| #### Bn-scaff_16614_1-p65802 C-genome specific (napus-oleracea) | 0.9330143    | 0.7709971    | 1            | 0.7952591    | not scorable | not scorable |
| #### Bn-scaff_16614_1-p66119 C-genome specific (oleracea only)  | not scorable | not scorable | 1            | 0.9175813    | not scorable | not scorable |

|                                                                |              |              |              |              |              |              |
|----------------------------------------------------------------|--------------|--------------|--------------|--------------|--------------|--------------|
| #### Bn-scaff_16614_1-p67744genome unspecific (oleracea-rapa)  | not scorable | not scorable | 1            | 0.9593662    | 1            | 0.8490545    |
| #### Bn-scaff_16614_1-p70218C-genome specific (oleracea only)  | not scorable | not scorable | 0.9844961    | 0.2952758    | not scorable | not scorable |
| #### Bn-scaff_16614_1-p70289napus specific                     | 0.9114832    | 0.6862444    | not scorable | not scorable | not scorable | not scorable |
| #### Bn-scaff_16614_1-p70494C-genome specific (napus-oleracea) | 0.930622     | 0.777016     | 1            | 0.6729945    | not scorable | not scorable |
| #### Bn-scaff_16614_1-p71701C-genome specific (napus-oleracea) | 0.9210526    | 0.7595288    | 1            | 0.7396195    | not scorable | not scorable |
| #### Bn-scaff_16614_1-p72129C-genome specific (napus-oleracea) | 0.9258373    | 0.7105326    | 0.9767442    | 0.6978486    | not scorable | not scorable |
| #### Bn-scaff_16614_1-p72282C-genome specific (napus-oleracea) | 0.9210526    | 0.7703495    | 0.9224806    | 0.6522369    | not scorable | not scorable |
| #### Bn-scaff_16614_1-p72450C-genome specific (napus-oleracea) | 0.9282297    | 0.7917358    | 1            | 0.7770044    | not scorable | not scorable |
| #### Bn-scaff_16614_1-p72521C-genome specific (napus-oleracea) | 0.9258373    | 0.7226676    | 0.9844961    | 0.7059684    | not scorable | not scorable |
| #### Bn-scaff_16614_1-p73107C-genome specific (napus-oleracea) | 0.930622     | 0.7856187    | 0.9922481    | 0.7131619    | not scorable | not scorable |
| #### Bn-scaff_16614_1-p73193C-genome specific (napus-oleracea) | 0.9138756    | 0.749676     | 1            | 0.8077468    | not scorable | not scorable |
| #### Bn-scaff_16614_1-p73425genome unspecific (all in)         | 0.8755981    | 0.5686976    | 0.9922481    | 0.5984487    | 1            | 0.9243297    |
| #### Bn-scaff_16614_1-p75068genome unspecific (oleracea-rapa)  | not scorable | not scorable | 1            | 0.803978     | 1            | 0.7280475    |
| #### Bn-scaff_16614_1-p84682C-genome specific (napus-oleracea) | 0.923445     | 0.8326097    | 0.9844961    | 0.6990505    | not scorable | not scorable |
| #### Bn-scaff_16614_1-p84750C-genome specific (napus-oleracea) | 0.923445     | 0.7871124    | 0.9922481    | 0.8671491    | not scorable | not scorable |
| #### Bn-scaff_16614_1-p84762C-genome specific (napus-oleracea) | 0.930622     | 0.7977526    | 1            | 0.7933195    | not scorable | not scorable |
| #### Bn-scaff_16614_1-p87356C-genome specific (napus-oleracea) | 0.9186603    | 0.7367303    | 0.9844961    | 0.7000582    | not scorable | not scorable |
| #### Bn-scaff_16614_1-p88469C-genome specific (napus-oleracea) | 0.9114832    | 0.7377192    | 0.9922481    | 0.6796966    | not scorable | not scorable |
| #### Bn-scaff_16614_1-p88988genome unspecific (all in)         | 0.9401914    | 0.5105609    | 1            | 0.668497     | 1            | 0.8816374    |
| #### Bn-scaff_16614_1-p89073genome unspecific (oleracea-rapa)  | not scorable | not scorable | 1            | 0.6727874    | 0.9917355    | 0.8434078    |
| #### Bn-scaff_16614_1-p91298C-genome specific (napus-oleracea) | 0.9186603    | 0.844823     | 0.9069768    | 0.725991     | not scorable | not scorable |
| #### Bn-scaff_16614_1-p91337C-genome specific (napus-oleracea) | 0.9210526    | 0.7033823    | 0.9224806    | 0.6617119    | not scorable | not scorable |
| #### Bn-scaff_16619_1-p15534C-genome specific (napus-oleracea) | 1            | 0.3618983    | 0.9844961    | 0.7226329    | not scorable | not scorable |
| #### Bn-scaff_16619_1-p15539C-genome specific (oleracea only)  | not scorable | not scorable | 1            | 0.6389918    | not scorable | not scorable |
| #### Bn-scaff_16619_1-p15623C-genome specific (oleracea only)  | not scorable | not scorable | 0.9844961    | 0.6573574    | not scorable | not scorable |
| #### Bn-scaff_16619_1-p20826C-genome specific (oleracea only)  | not scorable | not scorable | 0.9922481    | 0.5230865    | not scorable | not scorable |
| #### Bn-scaff_16619_1-p20893genome unspecific (all in)         | 0.9976076    | 0.4045404    | 1            | 0.7462659    | 0.9917355    | 0.8580447    |
| #### Bn-scaff_16619_1-p22845C-genome specific (oleracea only)  | not scorable | not scorable | 1            | 0.8555868    | not scorable | not scorable |
| #### Bn-scaff_16619_1-p22865genome unspecific (oleracea-rapa)  | not scorable | not scorable | 0.9844961    | 0.7941719    | 1            | 0.9272014    |
| #### Bn-scaff_16619_1-p22907genome unspecific (all in)         | 0.9976076    | 0.4576998    | 1            | 0.896171     | 1            | 0.8305327    |
| #### Bn-scaff_16619_1-p24599C-genome specific (napus-oleracea) | 0.9976076    | 0.3602994    | 0.9922481    | 0.3124968    | not scorable | not scorable |
| #### Bn-scaff_16619_1-p27715genome unspecific (all in)         | 1            | 0.8295954    | 1            | 0.7602985    | 0.9586777    | 0.7576742    |
| #### Bn-scaff_16625_1-p10893C-genome specific (napus-oleracea) | 0.9784689    | 0.6874186    | 0.9689922    | 0.7193943    | not scorable | not scorable |



|                                                                 |              |              |           |   |           |              |              |
|-----------------------------------------------------------------|--------------|--------------|-----------|---|-----------|--------------|--------------|
| #### Bn-scaff_16625_1-p11055 C-genome specific (napus-oleracea) | 0.9856459    | 0.7405181    |           | 1 | 0.7830434 | not scorable | not scorable |
| #### Bn-scaff_16625_1-p11418 C-genome specific (napus-oleracea) | 0.9808612    | 0.7531428    |           | 1 | 0.9063814 | not scorable | not scorable |
| #### Bn-scaff_16625_1-p12440 C-genome specific (napus-oleracea) | 0.7033493    | 0.8441691    | 0.8294573 |   | 0.7527766 | not scorable | not scorable |
| #### Bn-scaff_16625_1-p12870 C-genome specific (oleracea only)  | not scorable | not scorable | 0.9767442 |   | 0.7011049 | not scorable | not scorable |
| #### Bn-scaff_16625_1-p13560 C-genome specific (napus-oleracea) | 0.9617225    | 0.7824227    |           | 1 | 0.8268808 | not scorable | not scorable |
| #### Bn-scaff_16625_1-p40853 genome unspecific (all in)         | 1            | 0.3289186    | 0.9689922 |   | 0.2704466 | 0.9917355    | 0.856692     |
| #### Bn-scaff_16625_1-p41761 C-genome specific (napus-oleracea) | 0.9880383    | 0.84435      |           | 1 | 0.7364376 | not scorable | not scorable |
| #### Bn-scaff_16625_1-p60807 genome unspecific (all in)         | 0.9688995    | 0.4330678    |           | 1 | 0.8566455 |              | 1 0.9175813  |
| #### Bn-scaff_16625_1-p64201 C-genome specific (napus-oleracea) | 0.9808612    | 0.8632445    | 0.9922481 |   | 0.8180546 | not scorable | not scorable |
| #### Bn-scaff_16625_1-p79987 C-genome specific (napus-oleracea) | 0.9856459    | 0.8101205    |           | 1 | 0.6873815 | not scorable | not scorable |
| #### Bn-scaff_16627_1-p10540 C-genome specific (napus-oleracea) | 0.9521531    | 0.8258312    |           | 1 | 0.9019591 | not scorable | not scorable |
| #### Bn-scaff_16627_1-p10703 C-genome specific (napus-oleracea) | 0.9545454    | 0.5679556    |           | 1 | 0.5461793 | not scorable | not scorable |
| #### Bn-scaff_16627_1-p52302 C-genome specific (napus-oleracea) | 0.9593301    | 0.8224391    |           | 1 | 0.8492355 | not scorable | not scorable |
| #### Bn-scaff_16627_1-p66196 C-genome specific (napus-oleracea) | 0.9449761    | 0.8793659    |           | 1 | 0.8054754 | not scorable | not scorable |
| #### Bn-scaff_16627_1-p67100 C-genome specific (napus-oleracea) | 0.9593301    | 0.7068591    |           | 1 | 0.8018014 | not scorable | not scorable |
| #### Bn-scaff_16627_1-p67157 C-genome specific (napus-oleracea) | 0.9665072    | 0.767693     |           | 1 | 0.8916855 | not scorable | not scorable |
| #### Bn-scaff_16627_1-p7760 C-genome specific (napus-oleracea)  | 0.9641148    | 0.7907466    | 0.9844961 |   | 0.7896809 | not scorable | not scorable |
| #### Bn-scaff_16647_1-p1229 C-genome specific (napus-oleracea)  | 0.9665072    | 0.5371234    | 0.9302326 |   | 0.6192243 | not scorable | not scorable |
| #### Bn-scaff_16647_1-p15310 C-genome specific (napus-oleracea) | 0.9928229    | 0.6745074    | 0.9922481 |   | 0.695455  | not scorable | not scorable |
| #### Bn-scaff_16647_1-p16264 C-genome specific (napus-oleracea) | 0.9808612    | 0.725121     | 0.9767442 |   | 0.7910743 | not scorable | not scorable |
| #### Bn-scaff_16647_1-p16439 C-genome specific (napus-oleracea) | 0.9952153    | 0.7056885    |           | 1 | 0.7158969 | not scorable | not scorable |
| #### Bn-scaff_16647_1-p16486 C-genome specific (napus-oleracea) | 0.9808612    | 0.6825837    | 0.9844961 |   | 0.6451722 | not scorable | not scorable |
| #### Bn-scaff_16647_1-p16888 C-genome specific (napus-oleracea) | 0.9904306    | 0.7820309    | 0.9689922 |   | 0.8032105 | not scorable | not scorable |
| #### Bn-scaff_16647_1-p16907 C-genome specific (napus-oleracea) | 0.9952153    | 0.7700251    | 0.9844961 |   | 0.866841  | not scorable | not scorable |
| #### Bn-scaff_16647_1-p16914 C-genome specific (napus-oleracea) | 0.9904306    | 0.7946288    | 0.9767442 |   | 0.7312974 | not scorable | not scorable |
| #### Bn-scaff_16647_1-p16959 C-genome specific (napus-oleracea) | 0.9904306    | 0.7789488    | 0.9844961 |   | 0.7789677 | not scorable | not scorable |
| #### Bn-scaff_16647_1-p18938 C-genome specific (napus-oleracea) | 0.9856459    | 0.7870815    | 0.9147287 |   | 0.8462251 | not scorable | not scorable |
| #### Bn-scaff_16647_1-p18948 C-genome specific (napus-oleracea) | 0.9976076    | 0.7740884    | 0.9689922 |   | 0.78891   | not scorable | not scorable |
| #### Bn-scaff_16647_1-p19011 C-genome specific (napus-oleracea) | 0.9880383    | 0.7575596    | 0.9844961 |   | 0.8016306 | not scorable | not scorable |
| #### Bn-scaff_16647_1-p19026 C-genome specific (napus-oleracea) | 0.9976076    | 0.7784298    | 0.9922481 |   | 0.7288445 | not scorable | not scorable |
| #### Bn-scaff_16647_1-p19051 C-genome specific (napus-oleracea) | 0.9904306    | 0.7817704    | 0.9689922 |   | 0.7742832 | not scorable | not scorable |
| #### Bn-scaff_16647_1-p19689 C-genome specific (napus-oleracea) | 0.9952153    | 0.7764494    | 0.9844961 |   | 0.8383284 | not scorable | not scorable |
| #### Bn-scaff_16647_1-p21288 C-genome specific (napus-oleracea) | 0.9641148    | 0.8037235    | 0.9922481 |   | 0.8779329 | not scorable | not scorable |

|                                                                 |              |              |              |              |              |              |
|-----------------------------------------------------------------|--------------|--------------|--------------|--------------|--------------|--------------|
| #### Bn-scaff_16647_1-p21305 all not scorable                   | not scorable | not scorable | not scorable | not scorable | not scorable | not scorable |
| #### Bn-scaff_16647_1-p22366 C-genome specific (napus-oleracea) | 0.9976076    | 0.9389927    | 0.9767442    | 0.777305     | not scorable | not scorable |
| #### Bn-scaff_16647_1-p23995 genome unspecific (all in)         | 0.9497608    | 0.5159481    | 0.9069768    | 0.5541487    | 1            | 0.9137846    |
| #### Bn-scaff_16647_1-p24722 C-genome specific (napus-oleracea) | 0.9832536    | 0.9105914    | 0.9922481    | 0.8264951    | not scorable | not scorable |
| #### Bn-scaff_16647_1-p25119 C-genome specific (napus-oleracea) | 0.9593301    | 0.6706981    | 0.9844961    | 0.7432192    | not scorable | not scorable |
| #### Bn-scaff_16647_1-p27676 C-genome specific (napus-oleracea) | 0.9712918    | 0.7850515    | 0.9922481    | 0.7342445    | not scorable | not scorable |
| #### Bn-scaff_16647_1-p28246 C-genome specific (napus-oleracea) | 0.9545454    | 0.8467293    | 1            | 0.7455424    | not scorable | not scorable |
| #### Bn-scaff_16647_1-p28407 C-genome specific (napus-oleracea) | 0.9712918    | 0.6847357    | 1            | 0.6683483    | not scorable | not scorable |
| #### Bn-scaff_16647_1-p28613 C-genome specific (oleracea only)  | not scorable | not scorable | 0.9922481    | 0.6184333    | not scorable | not scorable |
| #### Bn-scaff_16647_1-p28709 C-genome specific (napus-oleracea) | 0.9928229    | 0.6866291    | 0.9844961    | 0.6228884    | not scorable | not scorable |
| #### Bn-scaff_16647_1-p28800 C-genome specific (napus-oleracea) | 0.9856459    | 0.7547992    | 0.9844961    | 0.6607167    | not scorable | not scorable |
| #### Bn-scaff_16647_1-p29194 C-genome specific (napus-oleracea) | 0.9736842    | 0.6577424    | 0.9922481    | 0.6123582    | not scorable | not scorable |
| #### Bn-scaff_16647_1-p29215 C-genome specific (napus-oleracea) | 0.9832536    | 0.7491826    | 0.9844961    | 0.6587859    | not scorable | not scorable |
| #### Bn-scaff_16647_1-p29244 C-genome specific (napus-oleracea) | 0.9808612    | 0.7909484    | 0.9922481    | 0.7398432    | not scorable | not scorable |
| #### Bn-scaff_16647_1-p29250 C-genome specific (napus-oleracea) | 0.9784689    | 0.8003233    | 0.9844961    | 0.8249788    | not scorable | not scorable |
| #### Bn-scaff_16647_1-p29296 C-genome specific (napus-oleracea) | 0.9617225    | 0.7698354    | 0.9844961    | 0.8091447    | not scorable | not scorable |
| #### Bn-scaff_16647_1-p29309 C-genome specific (napus-oleracea) | 0.9856459    | 0.7362806    | 1            | 0.7549009    | not scorable | not scorable |
| #### Bn-scaff_16647_1-p29332 C-genome specific (napus-oleracea) | 0.9880383    | 0.7797762    | 0.9922481    | 0.8345547    | not scorable | not scorable |
| #### Bn-scaff_16647_1-p29382 C-genome specific (napus-oleracea) | 0.9856459    | 0.7832031    | 0.9922481    | 0.8826979    | not scorable | not scorable |
| #### Bn-scaff_16647_1-p29388 C-genome specific (napus-oleracea) | 0.9808612    | 0.7988776    | 0.9922481    | 0.8260867    | not scorable | not scorable |
| #### Bn-scaff_16647_1-p29391 C-genome specific (napus-oleracea) | 0.9808612    | 0.7868962    | 0.9922481    | 0.7927665    | not scorable | not scorable |
| #### Bn-scaff_16647_1-p29482 C-genome specific (napus-oleracea) | 0.9736842    | 0.6329612    | 0.9844961    | 0.6853529    | not scorable | not scorable |
| #### Bn-scaff_16647_1-p29556 C-genome specific (napus-oleracea) | 0.9880383    | 0.6682844    | 1            | 0.6064798    | not scorable | not scorable |
| #### Bn-scaff_16647_1-p29639 C-genome specific (napus-oleracea) | 0.9712918    | 0.6818681    | 1            | 0.7140731    | not scorable | not scorable |
| #### Bn-scaff_16647_1-p29697 C-genome specific (napus-oleracea) | 0.9760765    | 0.7168528    | 0.9922481    | 0.7004051    | not scorable | not scorable |
| #### Bn-scaff_16647_1-p29717 C-genome specific (napus-oleracea) | 0.9736842    | 0.6758708    | 0.9922481    | 0.6372067    | not scorable | not scorable |
| #### Bn-scaff_16647_1-p29731 C-genome specific (napus-oleracea) | 0.9904306    | 0.7616003    | 0.9922481    | 0.758563     | not scorable | not scorable |
| #### Bn-scaff_16647_1-p29741 C-genome specific (napus-oleracea) | 0.9952153    | 0.7834763    | 0.9922481    | 0.8504825    | not scorable | not scorable |
| #### Bn-scaff_16647_1-p29756 C-genome specific (napus-oleracea) | 0.9784689    | 0.6548272    | 1            | 0.6627514    | not scorable | not scorable |
| #### Bn-scaff_16647_1-p32442 C-genome specific (napus-oleracea) | 0.9928229    | 0.7471447    | 0.9767442    | 0.7506486    | not scorable | not scorable |
| #### Bn-scaff_16647_1-p32779 C-genome specific (napus-oleracea) | 0.9856459    | 0.7015321    | 0.9767442    | 0.8132076    | not scorable | not scorable |
| #### Bn-scaff_16647_1-p32796 C-genome specific (napus-oleracea) | 0.9760765    | 0.7605006    | 0.9457364    | 0.754698     | not scorable | not scorable |
| #### Bn-scaff_16647_1-p33438 C-genome specific (napus-oleracea) | 0.9784689    | 0.7711011    | 0.8294573    | 0.8519404    | not scorable | not scorable |

|                                                                 |              |              |              |              |              |              |
|-----------------------------------------------------------------|--------------|--------------|--------------|--------------|--------------|--------------|
| #### Bn-scaff_16647_1-p34475 C-genome specific (napus-oleracea) | 0.9688995    | 0.5746166    | 0.9922481    | 0.5474449    | not scorable | not scorable |
| #### Bn-scaff_16647_1-p34484 C-genome specific (napus-oleracea) | 0.9808612    | 0.6679586    | 0.9922481    | 0.7444168    | not scorable | not scorable |
| #### Bn-scaff_16647_1-p34570 C-genome specific (napus-oleracea) | 0.9784689    | 0.7734898    | 0.9844961    | 0.8392927    | not scorable | not scorable |
| #### Bn-scaff_16647_1-p34581 C-genome specific (napus-oleracea) | 0.9784689    | 0.7854093    | 0.9844961    | 0.8108268    | not scorable | not scorable |
| #### Bn-scaff_16647_1-p34631 C-genome specific (napus-oleracea) | 0.9856459    | 0.7531385    | 1            | 0.8255857    | not scorable | not scorable |
| #### Bn-scaff_16647_1-p34736 C-genome specific (napus-oleracea) | 0.9880383    | 0.7870815    | 0.9689922    | 0.8550338    | not scorable | not scorable |
| #### Bn-scaff_16647_1-p39842 genome unspecific (all in)         | 0.9976076    | 0.5743197    | 1            | 0.786476     | 0.9917355    | 0.7111152    |
| #### Bn-scaff_16647_1-p42917 C-genome specific (napus-oleracea) | 0.9712918    | 0.7714038    | 1            | 0.7748593    | not scorable | not scorable |
| #### Bn-scaff_16647_1-p43116 C-genome specific (napus-oleracea) | 0.9569378    | 0.7803071    | 1            | 0.7214259    | not scorable | not scorable |
| #### Bn-scaff_16647_1-p43117 C-genome specific (napus-oleracea) | 0.9641148    | 0.874016     | 0.9844961    | 0.8319658    | not scorable | not scorable |
| #### Bn-scaff_16647_1-p43305 C-genome specific (napus-oleracea) | 0.9593301    | 0.8563551    | 0.9922481    | 0.8440034    | not scorable | not scorable |
| #### Bn-scaff_16647_1-p43315 C-genome specific (napus-oleracea) | 0.9736842    | 0.8842033    | 0.9844961    | 0.8613347    | not scorable | not scorable |
| #### Bn-scaff_16647_1-p43496 C-genome specific (napus-oleracea) | 0.9760765    | 0.6468848    | 1            | 0.5767988    | not scorable | not scorable |
| #### Bn-scaff_16647_1-p43787 C-genome specific (napus-oleracea) | 0.9808612    | 0.6951948    | 0.9767442    | 0.7009743    | not scorable | not scorable |
| #### Bn-scaff_16647_1-p43801 C-genome specific (napus-oleracea) | 0.9641148    | 0.5627385    | 0.9922481    | 0.5578802    | not scorable | not scorable |
| #### Bn-scaff_16647_1-p46045 C-genome specific (napus-oleracea) | 0.9784689    | 0.7727791    | 0.9922481    | 0.7656941    | not scorable | not scorable |
| #### Bn-scaff_16647_1-p46265 C-genome specific (napus-oleracea) | 0.9688995    | 0.7094194    | 0.9689922    | 0.6674573    | not scorable | not scorable |
| #### Bn-scaff_16647_1-p46427 genome unspecific (all in)         | 0.9401914    | 0.7103973    | 1            | 0.7733645    | 1            | 0.8784371    |
| #### Bn-scaff_16647_1-p48600 genome unspecific (all in)         | 0.930622     | 0.4028307    | 0.9689922    | 0.6928406    | 1            | 0.8371332    |
| #### Bn-scaff_16647_1-p49587 C-genome specific (napus-oleracea) | 0.9688995    | 0.764158     | 0.9767442    | 0.822281     | not scorable | not scorable |
| #### Bn-scaff_16647_1-p49992 C-genome specific (napus-oleracea) | 0.9617225    | 0.7659726    | 0.9767442    | 0.7683074    | not scorable | not scorable |
| #### Bn-scaff_16647_1-p67654 genome unspecific (all in)         | 0.9545454    | 0.3204422    | 0.9767442    | 0.7120263    | 1            | 0.8088613    |
| #### Bn-scaff_16647_1-p75362 C-genome specific (napus-oleracea) | 1            | 0.8113768    | 1            | 0.7508937    | not scorable | not scorable |
| #### Bn-scaff_16656_1-p17164 C-genome specific (oleracea only)  | not scorable | not scorable | 1            | 0.668423     | not scorable | not scorable |
| #### Bn-scaff_16665_1-p12708 C-genome specific (oleracea only)  | not scorable | not scorable | 0.9922481    | 0.7394317    | not scorable | not scorable |
| #### Bn-scaff_16665_1-p12745 genome unspecific (oleracea-rapa)  | not scorable | not scorable | 1            | 0.734324     | 1            | 0.8156006    |
| #### Bn-scaff_16665_1-p12819 C-genome specific (napus-oleracea) | 0.9952153    | 0.7853137    | 1            | 0.8388846    | not scorable | not scorable |
| #### Bn-scaff_16665_1-p14058 A-genome specific (rapa only)      | not scorable | not scorable | not scorable | not scorable | 1            | 0.7012402    |
| #### Bn-scaff_16665_1-p14105 genome unspecific (oleracea-rapa)  | not scorable | not scorable | 0.9767442    | 0.2170083    | 1            | 0.9205657    |
| #### Bn-scaff_16665_1-p15833 C-genome specific (napus-oleracea) | 0.9784689    | 0.6710505    | 0.9767442    | 0.5789377    | not scorable | not scorable |
| #### Bn-scaff_16665_1-p15846 C-genome specific (napus-oleracea) | 0.9856459    | 0.754831     | 1            | 0.727248     | not scorable | not scorable |
| #### Bn-scaff_16665_1-p16906 C-genome specific (napus-oleracea) | 0.9808612    | 0.7816716    | 1            | 0.7420732    | not scorable | not scorable |
| #### Bn-scaff_16665_1-p18860 C-genome specific (napus-oleracea) | 0.9832536    | 0.7827041    | 0.9534883    | 0.7453454    | not scorable | not scorable |

|                                                                 |              |              |              |              |              |              |
|-----------------------------------------------------------------|--------------|--------------|--------------|--------------|--------------|--------------|
| #### Bn-scaff_16665_1-p19120 C-genome specific (napus-oleracea) | 0.9832536    | 0.7907069    | 1            | 0.8161508    | not scorable | not scorable |
| #### Bn-scaff_16665_1-p19276 all not scorable                   | not scorable | not scorable | not scorable | not scorable | not scorable | not scorable |
| #### Bn-scaff_16665_1-p19823 C-genome specific (napus-oleracea) | 0.9880383    | 0.8001868    | 1            | 0.8118536    | not scorable | not scorable |
| #### Bn-scaff_16665_1-p19830 C-genome specific (napus-oleracea) | 0.9856459    | 0.7990389    | 1            | 0.8837097    | not scorable | not scorable |
| #### Bn-scaff_16665_1-p19836 C-genome specific (napus-oleracea) | 0.9856459    | 0.7894804    | 0.9922481    | 0.8101123    | not scorable | not scorable |
| #### Bn-scaff_16665_1-p19838 C-genome specific (napus-oleracea) | 0.9760765    | 0.7032619    | 1            | 0.82846      | not scorable | not scorable |
| #### Bn-scaff_16665_1-p19913 C-genome specific (napus-oleracea) | 0.9760765    | 0.7711772    | 0.9922481    | 0.7439626    | not scorable | not scorable |
| #### Bn-scaff_16665_1-p19919 C-genome specific (napus-oleracea) | 0.9808612    | 0.6865904    | 0.9844961    | 0.589131     | not scorable | not scorable |
| #### Bn-scaff_16665_1-p19930 C-genome specific (napus-oleracea) | 0.9904306    | 0.7905059    | 1            | 0.7920906    | not scorable | not scorable |
| #### Bn-scaff_16665_1-p19942 C-genome specific (napus-oleracea) | 0.9880383    | 0.7964792    | 0.9922481    | 0.7429827    | not scorable | not scorable |
| #### Bn-scaff_16665_1-p20026 C-genome specific (napus-oleracea) | 0.9928229    | 0.7985911    | 0.9922481    | 0.7800918    | not scorable | not scorable |
| #### Bn-scaff_16665_1-p20050 C-genome specific (napus-oleracea) | 0.9808612    | 0.5881197    | 1            | 0.5558812    | not scorable | not scorable |
| #### Bn-scaff_16665_1-p21370 C-genome specific (oleracea only)  | not scorable | not scorable | 0.9379845    | 0.7870945    | not scorable | not scorable |
| #### Bn-scaff_16665_1-p48540 C-genome specific (napus-oleracea) | 0.9880383    | 0.7545192    | 0.9922481    | 0.8184478    | not scorable | not scorable |
| #### Bn-scaff_16665_1-p48591 C-genome specific (napus-oleracea) | 0.9952153    | 0.7898132    | 1            | 0.8451269    | not scorable | not scorable |
| #### Bn-scaff_16665_1-p48662 C-genome specific (napus-oleracea) | 0.9880383    | 0.7908686    | 1            | 0.7837917    | not scorable | not scorable |
| #### Bn-scaff_16665_1-p49793 C-genome specific (napus-oleracea) | 0.9808612    | 0.7865211    | 0.9922481    | 0.7325546    | not scorable | not scorable |
| #### Bn-scaff_16665_1-p50022 C-genome specific (napus-oleracea) | 0.9856459    | 0.7852212    | 1            | 0.816614     | not scorable | not scorable |
| #### Bn-scaff_16665_1-p50289 C-genome specific (napus-oleracea) | 0.9545454    | 0.8047304    | 1            | 0.6165369    | not scorable | not scorable |
| #### Bn-scaff_16665_1-p54637 C-genome specific (napus-oleracea) | 0.9736842    | 0.6954564    | 0.9844961    | 0.6782457    | not scorable | not scorable |
| #### Bn-scaff_16665_1-p64877 C-genome specific (napus-oleracea) | 0.9665072    | 0.7383806    | 0.9302326    | 0.8780883    | not scorable | not scorable |
| #### Bn-scaff_16665_1-p68800 genome unspecific (all in)         | 0.9545454    | 0.5796343    | 1            | 0.7322695    | 0.9917355    | 0.9131197    |
| #### Bn-scaff_16665_1-p70139 napus specific                     | 0.7416268    | 0.8716665    | not scorable | not scorable | not scorable | not scorable |
| #### Bn-scaff_16665_1-p97129 C-genome specific (napus-oleracea) | 0.9784689    | 0.7752258    | 1            | 0.8716044    | not scorable | not scorable |
| #### Bn-scaff_16665_1-p98764 C-genome specific (napus-oleracea) | 0.9593301    | 0.8193877    | 0.9844961    | 0.8262559    | not scorable | not scorable |
| #### Bn-scaff_16665_1-p99874 C-genome specific (napus-oleracea) | 0.9856459    | 0.7923322    | 1            | 0.8401484    | not scorable | not scorable |
| #### Bn-scaff_16670_1-p16709 C-genome specific (napus-oleracea) | 0.9856459    | 0.7028295    | 0.9922481    | 0.9021157    | not scorable | not scorable |
| #### Bn-scaff_16670_1-p17922 C-genome specific (napus-oleracea) | 0.9952153    | 0.8790657    | 0.9844961    | 0.7885205    | not scorable | not scorable |
| #### Bn-scaff_16670_1-p22109 C-genome specific (napus-oleracea) | 1            | 0.8840305    | 0.9922481    | 0.7774942    | not scorable | not scorable |
| #### Bn-scaff_16670_1-p22231 C-genome specific (napus-oleracea) | 0.9952153    | 0.8829985    | 0.9612403    | 0.8097379    | not scorable | not scorable |
| #### Bn-scaff_16670_1-p33235 C-genome specific (napus-oleracea) | 0.9976076    | 0.7525319    | 0.9689922    | 0.6868476    | not scorable | not scorable |
| #### Bn-scaff_16670_1-p33356 C-genome specific (napus-oleracea) | 0.9976076    | 0.9187561    | 0.9689922    | 0.8389751    | not scorable | not scorable |
| #### Bn-scaff_16670_1-p33649 C-genome specific (napus-oleracea) | 0.9952153    | 0.8332565    | 0.9689922    | 0.776087     | not scorable | not scorable |

|                                                                 |              |              |              |              |              |              |
|-----------------------------------------------------------------|--------------|--------------|--------------|--------------|--------------|--------------|
| #### Bn-scaff_16670_1-p3793C C-genome specific (napus-oleracea) | 0.9928229    | 0.8376599    | 0.9922481    | 0.6970779    | not scorable | not scorable |
| #### Bn-scaff_16670_1-p3802E all not scorable                   | not scorable | not scorable | not scorable | not scorable | not scorable | not scorable |
| #### Bn-scaff_16670_1-p4019E C-genome specific (napus-oleracea) | 0.9952153    | 0.9022918    | 0.9844961    | 0.7623578    | not scorable | not scorable |
| #### Bn-scaff_16670_1-p4032E C-genome specific (napus-oleracea) | 1            | 0.8796625    | 1            | 0.8227878    | not scorable | not scorable |
| #### Bn-scaff_16670_1-p4039C C-genome specific (napus-oleracea) | 0.9976076    | 0.8528543    | 0.9922481    | 0.8173844    | not scorable | not scorable |
| #### Bn-scaff_16670_1-p5196I genome unspecific (all in)         | 1            | 0.5593933    | 0.9844961    | 0.7027104    | 1            | 0.9095823    |
| #### Bn-scaff_16676_1-p1497C C-genome specific (napus-oleracea) | 0.9760765    | 0.7853373    | 0.9844961    | 0.7364717    | not scorable | not scorable |
| #### Bn-scaff_16676_1-p6894 genome unspecific (all in)          | 0.930622     | 0.4486817    | 1            | 0.8013542    | 1            | 0.8809894    |
| #### Bn-scaff_16677_1-p10164 genome unspecific (all in)         | 0.9545454    | 0.3646858    | 1            | 0.8087357    | 1            | 0.7036788    |
| #### Bn-scaff_16677_1-p1027I genome unspecific (all in)         | 0.9545454    | 0.4306701    | 1            | 0.8893648    | 1            | 0.7758539    |
| #### Bn-scaff_16677_1-p1237 C-genome specific (napus-oleracea)  | 0.9617225    | 0.9157553    | 0.9689922    | 0.8467301    | not scorable | not scorable |
| #### Bn-scaff_16677_1-p20827 genome unspecific (all in)         | 0.9688995    | 0.5190787    | 1            | 0.8143752    | 1            | 0.9169406    |
| #### Bn-scaff_16677_1-p2898E C-genome specific (napus-oleracea) | 0.9880383    | 0.8049707    | 1            | 0.9328135    | not scorable | not scorable |
| #### Bn-scaff_16677_1-p2910E C-genome specific (napus-oleracea) | 0.9904306    | 0.8472966    | 1            | 0.9205657    | not scorable | not scorable |
| #### Bn-scaff_16677_1-p2969I C-genome specific (napus-oleracea) | 0.9928229    | 0.7445911    | 1            | 0.8845097    | not scorable | not scorable |
| #### Bn-scaff_16677_1-p3077C C-genome specific (napus-oleracea) | 0.9904306    | 0.7723398    | 1            | 0.9205657    | not scorable | not scorable |
| #### Bn-scaff_16677_1-p3107A A-genome specific (napus-rapa)     | 0.9784689    | 0.4914107    | not scorable | not scorable | 1            | 0.8654126    |
| #### Bn-scaff_16677_1-p3212C C-genome specific (napus-oleracea) | 0.9904306    | 0.7758433    | 1            | 0.9234088    | not scorable | not scorable |
| #### Bn-scaff_16677_1-p32894 C-genome specific (napus-oleracea) | 0.9880383    | 0.7285852    | 1            | 0.8975458    | not scorable | not scorable |
| #### Bn-scaff_16677_1-p33357 C-genome specific (napus-oleracea) | 0.9880383    | 0.683702     | 1            | 0.813785     | not scorable | not scorable |
| #### Bn-scaff_16688_1-p2345E genome unspecific (all in)         | 1            | 0.8575249    | 1            | 0.855103     | 0.9917355    | 0.9394348    |
| #### Bn-scaff_16688_1-p2939 genome unspecific (all in)          | 1            | 0.4052936    | 1            | 0.8173693    | 1            | 0.9057964    |
| #### Bn-scaff_16688_1-p5925 C-genome specific (napus-oleracea)  | 0.9952153    | 0.8043917    | 1            | 0.7686747    | not scorable | not scorable |
| #### Bn-scaff_16691_1-p1008E C-genome specific (napus-oleracea) | 0.9665072    | 0.4315163    | 0.9612403    | 0.2879123    | not scorable | not scorable |
| #### Bn-scaff_16691_1-p1014E C-genome specific (napus-oleracea) | 0.9784689    | 0.8640894    | 0.9922481    | 0.7450245    | not scorable | not scorable |
| #### Bn-scaff_16691_1-p1014E genome unspecific (all in)         | 0.9808612    | 0.6243827    | 0.9922481    | 0.751904     | 0.9917355    | 0.7412566    |
| #### Bn-scaff_16691_1-p1015C C-genome specific (napus-oleracea) | 0.9641148    | 0.63166      | 1            | 0.6600185    | not scorable | not scorable |
| #### Bn-scaff_16691_1-p1015E C-genome specific (napus-oleracea) | 0.9736842    | 0.6869335    | 1            | 0.7272967    | not scorable | not scorable |
| #### Bn-scaff_16691_1-p1015E C-genome specific (napus-oleracea) | 0.9760765    | 0.6870284    | 1            | 0.750596     | not scorable | not scorable |
| #### Bn-scaff_16691_1-p1018C genome unspecific (oleracea-rapa)  | not scorable | not scorable | 1            | 0.6263087    | 1            | 0.7656383    |
| #### Bn-scaff_16691_1-p11022 genome unspecific (all in)         | 1            | 0.7252899    | 1            | 0.7395847    | 1            | 0.7770717    |
| #### Bn-scaff_16691_1-p1102E C-genome specific (napus-oleracea) | 0.9712918    | 0.8103756    | 1            | 0.8272216    | not scorable | not scorable |
| #### Bn-scaff_16691_1-p1104E C-genome specific (oleracea only)  | not scorable | not scorable | 1            | 0.658865     | not scorable | not scorable |

|                                                                 |              |              |              |              |              |              |
|-----------------------------------------------------------------|--------------|--------------|--------------|--------------|--------------|--------------|
| #### Bn-scaff_16691_1-p11052 C-genome specific (oleracea only)  | not scorable | not scorable | 1            | 0.7993551    | not scorable | not scorable |
| #### Bn-scaff_16691_1-p11066 C-genome specific (oleracea only)  | not scorable | not scorable | 0.9922481    | 0.7286038    | not scorable | not scorable |
| #### Bn-scaff_16691_1-p11073 genome unspecific (all in)         | 0.9641148    | 0.3377727    | 0.9224806    | 0.1978156    | 0.9834711    | 0.9175813    |
| #### Bn-scaff_16691_1-p11076 C-genome specific (oleracea only)  | not scorable | not scorable | 1            | 0.6757389    | not scorable | not scorable |
| #### Bn-scaff_16691_1-p11079 C-genome specific (oleracea only)  | not scorable | not scorable | 1            | 0.7520847    | not scorable | not scorable |
| #### Bn-scaff_16691_1-p11079 C-genome specific (oleracea only)  | not scorable | not scorable | 1            | 0.7512311    | not scorable | not scorable |
| #### Bn-scaff_16691_1-p11085 C-genome specific (oleracea only)  | not scorable | not scorable | 1            | 0.7007676    | not scorable | not scorable |
| #### Bn-scaff_16691_1-p12337 genome unspecific (all in)         | 1            | 0.5632644    | 0.9922481    | 0.6390606    | 0.9338843    | 0.8463348    |
| #### Bn-scaff_16691_1-p13321 C-genome specific (napus-oleracea) | 0.9401914    | 0.5200548    | 0.751938     | 0.8902425    | not scorable | not scorable |
| #### Bn-scaff_16691_1-p13500 genome unspecific (all in)         | 0.9569378    | 0.2927498    | 1            | 0.7739488    | 0.9834711    | 0.6223785    |
| #### Bn-scaff_16691_1-p14001 C-genome specific (oleracea only)  | not scorable | not scorable | 1            | 0.890211     | not scorable | not scorable |
| #### Bn-scaff_16691_1-p14022 genome unspecific (all in)         | 0.8947368    | 0.3396811    | 0.9457364    | 0.8047141    | 0.9834711    | 0.6729477    |
| #### Bn-scaff_16691_1-p14097 genome unspecific (oleracea-rapa)  | not scorable | not scorable | 0.9767442    | 0.7156159    | 0.9917355    | 0.6709609    |
| #### Bn-scaff_16691_1-p14228 genome unspecific (all in)         | 0.9593301    | 0.6663658    | 0.9767442    | 0.7514989    | 1            | 0.9516512    |
| #### Bn-scaff_16691_1-p14348 C-genome specific (napus-oleracea) | 0.6578947    | 0.7492815    | 0.9922481    | 0.8153516    | not scorable | not scorable |
| #### Bn-scaff_16691_1-p14412 all not scorable                   | not scorable | not scorable | not scorable | not scorable | not scorable | not scorable |
| #### Bn-scaff_16691_1-p14471 C-genome specific (napus-oleracea) | 0.9808612    | 0.7278371    | 0.9922481    | 0.6961837    | not scorable | not scorable |
| #### Bn-scaff_16691_1-p14596 genome unspecific (oleracea-rapa)  | not scorable | not scorable | 0.9844961    | 0.5851665    | 1            | 0.8886123    |
| #### Bn-scaff_16691_1-p14707 genome unspecific (oleracea-rapa)  | not scorable | not scorable | 0.9844961    | 0.8129773    | 0.9752066    | 0.9096656    |
| #### Bn-scaff_16691_1-p14762 genome unspecific (oleracea-rapa)  | not scorable | not scorable | 0.8992248    | 0.570491     | 1            | 0.7901157    |
| #### Bn-scaff_16691_1-p14795 A-genome specific (napus-rapa)     | 0.9952153    | 0.5613743    | not scorable | not scorable | 0.9917355    | 0.8963032    |
| #### Bn-scaff_16691_1-p24453 genome unspecific (all in)         | 1            | 0.2971408    | 1            | 0.786476     | 1            | 0.6564192    |
| #### Bn-scaff_16691_1-p24571 C-genome specific (napus-oleracea) | 0.9784689    | 0.8374279    | 1            | 0.7594246    | not scorable | not scorable |
| #### Bn-scaff_16691_1-p27882 genome unspecific (oleracea-rapa)  | not scorable | not scorable | 1            | 0.7846828    | 1            | 0.7886362    |
| #### Bn-scaff_16691_1-p31126 C-genome specific (napus-oleracea) | 0.9880383    | 0.7683113    | 0.9844961    | 0.7456536    | not scorable | not scorable |
| #### Bn-scaff_16691_1-p43083 genome unspecific (all in)         | 1            | 0.5324681    | 1            | 0.5156748    | 0.9834711    | 0.7954316    |
| #### Bn-scaff_16691_1-p48309 genome unspecific (all in)         | 0.9952153    | 0.7666087    | 1            | 0.7461041    | 1            | 0.8589397    |
| #### Bn-scaff_16691_1-p50579 C-genome specific (napus-oleracea) | 0.9760765    | 0.5310277    | 0.9534883    | 0.3901287    | not scorable | not scorable |
| #### Bn-scaff_16691_1-p51554 C-genome specific (napus-oleracea) | 0.9808612    | 0.6807808    | 0.9844961    | 0.6547788    | not scorable | not scorable |
| #### Bn-scaff_16691_1-p51650 C-genome specific (napus-oleracea) | 0.9856459    | 0.8287919    | 0.9922481    | 0.7638304    | not scorable | not scorable |
| #### Bn-scaff_16691_1-p54421 C-genome specific (napus-oleracea) | 0.9856459    | 0.5829572    | 0.9922481    | 0.6449382    | not scorable | not scorable |
| #### Bn-scaff_16691_1-p56532 C-genome specific (napus-oleracea) | 0.9808612    | 0.7538327    | 0.9922481    | 0.6920999    | not scorable | not scorable |
| #### Bn-scaff_16691_1-p57269 C-genome specific (napus-oleracea) | 0.9832536    | 0.7880116    | 0.9922481    | 0.8773268    | not scorable | not scorable |

|                                                                 |              |              |           |           |              |              |
|-----------------------------------------------------------------|--------------|--------------|-----------|-----------|--------------|--------------|
| #### Bn-scaff_16691_1-p57278 C-genome specific (napus-oleracea) | 0.9784689    | 0.7818891    | 0.9844961 | 0.743366  | not scorable | not scorable |
| #### Bn-scaff_16691_1-p57287 genome unspecific (all in)         | 0.9832536    | 0.7889074    | 0.9922481 | 0.8485569 | 1            | 0.9081637    |
| #### Bn-scaff_16691_1-p57601 C-genome specific (napus-oleracea) | 0.9641148    | 0.6138849    | 0.9844961 | 0.7093799 | not scorable | not scorable |
| #### Bn-scaff_16691_1-p57627 C-genome specific (napus-oleracea) | 0.9641148    | 0.8223873    | 0.9844961 | 0.7825799 | not scorable | not scorable |
| #### Bn-scaff_16691_1-p60130 C-genome specific (napus-oleracea) | 0.9832536    | 0.8252481    | 1         | 0.755722  | not scorable | not scorable |
| #### Bn-scaff_16691_1-p60192 C-genome specific (napus-oleracea) | 0.9043062    | 0.6904306    | 0.9922481 | 0.68573   | not scorable | not scorable |
| #### Bn-scaff_16691_1-p61463 genome unspecific (all in)         | 0.9832536    | 0.5421906    | 0.9922481 | 0.6874186 | 1            | 0.8473146    |
| #### Bn-scaff_16691_1-p62278 C-genome specific (napus-oleracea) | 0.9712918    | 0.8777412    | 1         | 0.7194898 | not scorable | not scorable |
| #### Bn-scaff_16691_1-p63508 C-genome specific (napus-oleracea) | 0.9808612    | 0.6888669    | 0.9922481 | 0.7096214 | not scorable | not scorable |
| #### Bn-scaff_16691_1-p63529 C-genome specific (napus-oleracea) | 0.9760765    | 0.7640912    | 0.9922481 | 0.7270628 | not scorable | not scorable |
| #### Bn-scaff_16691_1-p63531 C-genome specific (napus-oleracea) | 0.9688995    | 0.7674156    | 0.9922481 | 0.7705819 | not scorable | not scorable |
| #### Bn-scaff_16691_1-p63561 C-genome specific (napus-oleracea) | 0.9712918    | 0.7220829    | 0.9922481 | 0.6826266 | not scorable | not scorable |
| #### Bn-scaff_16691_1-p63590 C-genome specific (napus-oleracea) | 0.9760765    | 0.7574784    | 0.9844961 | 0.7262751 | not scorable | not scorable |
| #### Bn-scaff_16691_1-p63611 C-genome specific (napus-oleracea) | 0.9832536    | 0.7797557    | 1         | 0.7902721 | not scorable | not scorable |
| #### Bn-scaff_16691_1-p63616 C-genome specific (napus-oleracea) | 0.9712918    | 0.7404763    | 1         | 0.7218642 | not scorable | not scorable |
| #### Bn-scaff_16691_1-p63781 C-genome specific (napus-oleracea) | 0.9784689    | 0.7268615    | 0.9922481 | 0.6974906 | not scorable | not scorable |
| #### Bn-scaff_16691_1-p63822 C-genome specific (oleracea only)  | not scorable | not scorable | 0.9069768 | 0.7031621 | not scorable | not scorable |
| #### Bn-scaff_16691_1-p63912 C-genome specific (napus-oleracea) | 0.9545454    | 0.7200693    | 1         | 0.7570446 | not scorable | not scorable |
| #### Bn-scaff_16691_1-p63922 genome unspecific (all in)         | 0.9569378    | 0.4811521    | 1         | 0.7192455 | 1            | 0.8877543    |
| #### Bn-scaff_16691_1-p64040 C-genome specific (napus-oleracea) | 0.9593301    | 0.5658207    | 0.9767442 | 0.4567624 | not scorable | not scorable |
| #### Bn-scaff_16691_1-p64103 C-genome specific (napus-oleracea) | 0.9856459    | 0.7724913    | 1         | 0.7655583 | not scorable | not scorable |
| #### Bn-scaff_16691_1-p64236 C-genome specific (napus-oleracea) | 0.9832536    | 0.7993588    | 0.9844961 | 0.7459704 | not scorable | not scorable |
| #### Bn-scaff_16691_1-p64248 C-genome specific (napus-oleracea) | 0.9665072    | 0.8087383    | 0.9844961 | 0.6821117 | not scorable | not scorable |
| #### Bn-scaff_16691_1-p64272 C-genome specific (napus-oleracea) | 0.9593301    | 0.8247703    | 0.9844961 | 0.8558366 | not scorable | not scorable |
| #### Bn-scaff_16691_1-p64292 C-genome specific (napus-oleracea) | 0.9904306    | 0.8526646    | 1         | 0.7411316 | not scorable | not scorable |
| #### Bn-scaff_16691_1-p64338 C-genome specific (napus-oleracea) | 0.9832536    | 0.8486626    | 1         | 0.8688225 | not scorable | not scorable |
| #### Bn-scaff_16691_1-p64348 C-genome specific (napus-oleracea) | 0.9688995    | 0.7731881    | 1         | 0.7908329 | not scorable | not scorable |
| #### Bn-scaff_16691_1-p64360 C-genome specific (napus-oleracea) | 0.9760765    | 0.7740784    | 1         | 0.8310424 | not scorable | not scorable |
| #### Bn-scaff_16691_1-p64375 C-genome specific (napus-oleracea) | 0.9569378    | 0.7246906    | 0.9844961 | 0.7917908 | not scorable | not scorable |
| #### Bn-scaff_16691_1-p64476 C-genome specific (napus-oleracea) | 0.9665072    | 0.6921086    | 0.9844961 | 0.9416503 | not scorable | not scorable |
| #### Bn-scaff_16691_1-p65086 genome unspecific (all in)         | 0.9688995    | 0.6699883    | 0.9922481 | 0.6935551 | 1            | 0.9179249    |
| #### Bn-scaff_16691_1-p65609 C-genome specific (napus-oleracea) | 0.9712918    | 0.7837765    | 0.9689922 | 0.7099808 | not scorable | not scorable |
| #### Bn-scaff_16691_1-p65722 C-genome specific (napus-oleracea) | 0.9808612    | 0.7904834    | 0.9922481 | 0.8412022 | not scorable | not scorable |

|                                                                 |              |              |           |           |              |              |
|-----------------------------------------------------------------|--------------|--------------|-----------|-----------|--------------|--------------|
| #### Bn-scaff_16691_1-p65844 C-genome specific (napus-oleracea) | 0.9784689    | 0.692642     | 0.9922481 | 0.6700054 | not scorable | not scorable |
| #### Bn-scaff_16691_1-p65866 C-genome specific (napus-oleracea) | 0.9808612    | 0.6902151    | 0.9922481 | 0.7644212 | not scorable | not scorable |
| #### Bn-scaff_16691_1-p65891 C-genome specific (napus-oleracea) | 0.9736842    | 0.8017091    | 0.9844961 | 0.7099959 | not scorable | not scorable |
| #### Bn-scaff_16691_1-p65959 C-genome specific (napus-oleracea) | 0.9832536    | 0.7617891    | 0.9922481 | 0.8370932 | not scorable | not scorable |
| #### Bn-scaff_16691_1-p65964 C-genome specific (napus-oleracea) | 0.9760765    | 0.7561214    | 1         | 0.8242815 | not scorable | not scorable |
| #### Bn-scaff_16691_1-p66007 C-genome specific (napus-oleracea) | 0.9808612    | 0.7974666    | 0.9844961 | 0.7988796 | not scorable | not scorable |
| #### Bn-scaff_16691_1-p66346 C-genome specific (napus-oleracea) | 0.9760765    | 0.7671227    | 0.9689922 | 0.8090347 | not scorable | not scorable |
| #### Bn-scaff_16691_1-p66352 C-genome specific (napus-oleracea) | 0.9784689    | 0.6270505    | 1         | 0.598375  | not scorable | not scorable |
| #### Bn-scaff_16691_1-p67092 C-genome specific (napus-oleracea) | 0.9808612    | 0.7647321    | 1         | 0.7210514 | not scorable | not scorable |
| #### Bn-scaff_16691_1-p67150 C-genome specific (napus-oleracea) | 0.9784689    | 0.8194394    | 1         | 0.7347764 | not scorable | not scorable |
| #### Bn-scaff_16691_1-p67156 C-genome specific (napus-oleracea) | 0.9832536    | 0.6832129    | 1         | 0.7342013 | not scorable | not scorable |
| #### Bn-scaff_16691_1-p67157 C-genome specific (napus-oleracea) | 0.9736842    | 0.8809314    | 0.9922481 | 0.7115886 | not scorable | not scorable |
| #### Bn-scaff_16691_1-p67574 genome unspecific (all in)         | 1            | 0.3307729    | 1         | 0.7468255 | 0.9917355    | 0.6580724    |
| #### Bn-scaff_16691_1-p67683 C-genome specific (oleracea only)  | not scorable | not scorable | 1         | 0.7952425 | not scorable | not scorable |
| #### Bn-scaff_16691_1-p67840 C-genome specific (napus-oleracea) | 0.9736842    | 0.6914548    | 1         | 0.6823043 | not scorable | not scorable |
| #### Bn-scaff_16691_1-p69710 C-genome specific (napus-oleracea) | 0.9617225    | 0.6575361    | 0.9922481 | 0.4859668 | not scorable | not scorable |
| #### Bn-scaff_16691_1-p69751 C-genome specific (napus-oleracea) | 0.9760765    | 0.7687824    | 1         | 0.7994626 | not scorable | not scorable |
| #### Bn-scaff_16691_1-p70868 C-genome specific (oleracea only)  | not scorable | not scorable | 0.9302326 | 0.5488989 | not scorable | not scorable |
| #### Bn-scaff_16691_1-p73104 C-genome specific (napus-oleracea) | 0.9401914    | 0.8708745    | 0.9922481 | 0.7441415 | not scorable | not scorable |
| #### Bn-scaff_16691_1-p73136 genome unspecific (all in)         | 0.9784689    | 0.4320345    | 1         | 0.7103868 | 1            | 0.9042053    |
| #### Bn-scaff_16691_1-p74181 C-genome specific (napus-oleracea) | 0.9688995    | 0.4710573    | 0.9457364 | 0.4848556 | not scorable | not scorable |
| #### Bn-scaff_16691_1-p75304 genome unspecific (all in)         | 0.9545454    | 0.5164638    | 0.7674419 | 0.5296006 | 1            | 0.9380578    |
| #### Bn-scaff_16691_1-p75604 C-genome specific (napus-oleracea) | 0.9521531    | 0.8922017    | 0.8837209 | 0.7314435 | not scorable | not scorable |
| #### Bn-scaff_16691_1-p75625 C-genome specific (oleracea only)  | not scorable | not scorable | 0.8914729 | 0.8254094 | not scorable | not scorable |
| #### Bn-scaff_16691_1-p75667 C-genome specific (napus-oleracea) | 0.9641148    | 0.7448818    | 0.8914729 | 0.7782356 | not scorable | not scorable |
| #### Bn-scaff_16691_1-p75700 C-genome specific (napus-oleracea) | 0.9617225    | 0.8668216    | 0.8992248 | 0.7508786 | not scorable | not scorable |
| #### Bn-scaff_16691_1-p75774 C-genome specific (oleracea only)  | not scorable | not scorable | 0.8992248 | 0.798973  | not scorable | not scorable |
| #### Bn-scaff_16691_1-p75834 C-genome specific (napus-oleracea) | 0.9641148    | 0.7973248    | 0.8992248 | 0.6710331 | not scorable | not scorable |
| #### Bn-scaff_16691_1-p75854 C-genome specific (napus-oleracea) | 0.9736842    | 0.8584325    | 0.8837209 | 0.8166847 | not scorable | not scorable |
| #### Bn-scaff_16691_1-p75923 C-genome specific (napus-oleracea) | 0.9712918    | 0.7217731    | 0.8837209 | 0.689275  | not scorable | not scorable |
| #### Bn-scaff_16691_1-p75952 C-genome specific (napus-oleracea) | 0.9593301    | 0.7517472    | 0.8914729 | 0.7208519 | not scorable | not scorable |
| #### Bn-scaff_16691_1-p75978 C-genome specific (napus-oleracea) | 0.9760765    | 0.6740323    | 0.8992248 | 0.7057471 | not scorable | not scorable |
| #### Bn-scaff_16691_1-p75984 C-genome specific (napus-oleracea) | 0.9760765    | 0.8103907    | 0.8992248 | 0.7078192 | not scorable | not scorable |



|                                                                 |              |              |           |           |              |              |
|-----------------------------------------------------------------|--------------|--------------|-----------|-----------|--------------|--------------|
| #### Bn-scaff_16691_1-p7619 genome unspecific (oleracea-rapa)   | not scorable | not scorable | 1         | 0.4226659 | 1            | 0.6885806    |
| #### Bn-scaff_16691_1-p76404 C-genome specific (napus-oleracea) | 0.9617225    | 0.7870847    | 0.8914729 | 0.6447164 | not scorable | not scorable |
| #### Bn-scaff_16691_1-p76455 C-genome specific (napus-oleracea) | 0.9617225    | 0.8473739    | 0.875969  | 0.7439968 | not scorable | not scorable |
| #### Bn-scaff_16691_1-p76470 C-genome specific (napus-oleracea) | 0.9665072    | 0.7948294    | 0.875969  | 0.82242   | not scorable | not scorable |
| #### Bn-scaff_16691_1-p76509 C-genome specific (napus-oleracea) | 0.9665072    | 0.8922637    | 0.875969  | 0.8474209 | not scorable | not scorable |
| #### Bn-scaff_16691_1-p76542 C-genome specific (napus-oleracea) | 0.9712918    | 0.892792     | 0.8682171 | 0.7609918 | not scorable | not scorable |
| #### Bn-scaff_16691_1-p76632 C-genome specific (napus-oleracea) | 0.9712918    | 0.6838505    | 0.8992248 | 0.6803629 | not scorable | not scorable |
| #### Bn-scaff_16691_1-p76681 C-genome specific (napus-oleracea) | 0.9545454    | 0.6563854    | 0.875969  | 0.6281708 | not scorable | not scorable |
| #### Bn-scaff_16691_1-p76693 C-genome specific (napus-oleracea) | 0.9641148    | 0.8606768    | 0.8992248 | 0.8664947 | not scorable | not scorable |
| #### Bn-scaff_16691_1-p76916 C-genome specific (napus-oleracea) | 0.9688995    | 0.9322149    | 0.8837209 | 0.7335368 | not scorable | not scorable |
| #### Bn-scaff_16691_1-p77306 C-genome specific (napus-oleracea) | 0.9784689    | 0.6067114    | 0.9844961 | 0.6290373 | not scorable | not scorable |
| #### Bn-scaff_16691_1-p77459 C-genome specific (napus-oleracea) | 0.9856459    | 0.6961922    | 0.8992248 | 0.6984441 | not scorable | not scorable |
| #### Bn-scaff_16691_1-p77642 C-genome specific (napus-oleracea) | 0.9760765    | 0.7605022    | 0.8914729 | 0.8459345 | not scorable | not scorable |
| #### Bn-scaff_16691_1-p78160 C-genome specific (napus-oleracea) | 0.9497608    | 0.6244856    | 0.8992248 | 0.7620743 | not scorable | not scorable |
| #### Bn-scaff_16691_1-p78193 C-genome specific (napus-oleracea) | 0.923445     | 0.7274135    | 0.5503876 | 0.8079745 | not scorable | not scorable |
| #### Bn-scaff_16691_1-p78200 C-genome specific (napus-oleracea) | 0.9641148    | 0.7098486    | 0.8992248 | 0.7678356 | not scorable | not scorable |
| #### Bn-scaff_16691_1-p78211 C-genome specific (napus-oleracea) | 0.9138756    | 0.6887308    | 0.8914729 | 0.7531115 | not scorable | not scorable |
| #### Bn-scaff_16691_1-p78574 C-genome specific (napus-oleracea) | 0.9401914    | 0.670213     | 0.9224806 | 0.8861008 | not scorable | not scorable |
| #### Bn-scaff_16691_1-p78921 genome unspecific (all in)         | 0.9282297    | 0.6183525    | 0.8992248 | 0.6741338 | 1            | 0.7110602    |
| #### Bn-scaff_16691_1-p79065 C-genome specific (napus-oleracea) | 0.9760765    | 0.754696     | 0.8914729 | 0.7573285 | not scorable | not scorable |
| #### Bn-scaff_16691_1-p79111 C-genome specific (napus-oleracea) | 0.9688995    | 0.7855812    | 0.8992248 | 0.8224491 | not scorable | not scorable |
| #### Bn-scaff_16691_1-p79205 C-genome specific (napus-oleracea) | 0.9784689    | 0.7681203    | 0.8914729 | 0.8311485 | not scorable | not scorable |
| #### Bn-scaff_16691_1-p79221 C-genome specific (napus-oleracea) | 0.9736842    | 0.7537804    | 0.8914729 | 0.800145  | not scorable | not scorable |
| #### Bn-scaff_16691_1-p79240 C-genome specific (napus-oleracea) | 0.9760765    | 0.7607067    | 0.8914729 | 0.7510813 | not scorable | not scorable |
| #### Bn-scaff_16691_1-p79272 C-genome specific (napus-oleracea) | 0.9521531    | 0.8190108    | 0.8992248 | 0.7533373 | not scorable | not scorable |
| #### Bn-scaff_16691_1-p79297 C-genome specific (napus-oleracea) | 0.9521531    | 0.6210276    | 0.8914729 | 0.6659193 | not scorable | not scorable |
| #### Bn-scaff_16691_1-p79307 C-genome specific (napus-oleracea) | 0.9736842    | 0.7998083    | 0.8992248 | 0.749437  | not scorable | not scorable |
| #### Bn-scaff_16691_1-p79335 C-genome specific (napus-oleracea) | 0.9688995    | 0.914996     | 0.8992248 | 0.8694004 | not scorable | not scorable |
| #### Bn-scaff_16691_1-p79956 C-genome specific (napus-oleracea) | 0.9665072    | 0.8670852    | 0.8992248 | 0.7721674 | not scorable | not scorable |
| #### Bn-scaff_16691_1-p79995 C-genome specific (napus-oleracea) | 0.9688995    | 0.8508849    | 0.875969  | 0.7525958 | not scorable | not scorable |
| #### Bn-scaff_16691_1-p80089 C-genome specific (napus-oleracea) | 0.9641148    | 0.8346234    | 0.8837209 | 0.74488   | not scorable | not scorable |
| #### Bn-scaff_16691_1-p80193 C-genome specific (napus-oleracea) | 0.9114832    | 0.6234695    | 0.8992248 | 0.6249649 | not scorable | not scorable |
| #### Bn-scaff_16691_1-p80430 C-genome specific (napus-oleracea) | 0.9569378    | 0.5292993    | 0.875969  | 0.498163  | not scorable | not scorable |

|                                                                 |              |              |              |              |              |              |
|-----------------------------------------------------------------|--------------|--------------|--------------|--------------|--------------|--------------|
| #### Bn-scaff_16691_1-p80472 C-genome specific (napus-oleracea) | 0.9784689    | 0.7598026    | 0.8992248    | 0.8429878    | not scorable | not scorable |
| #### Bn-scaff_16691_1-p80695 A-genome specific (rapa only)      | not scorable | not scorable | not scorable | not scorable | 1            | 0.8193163    |
| #### Bn-scaff_16691_1-p81541 C-genome specific (napus-oleracea) | 0.9784689    | 0.7788653    | 0.8992248    | 0.8745732    | not scorable | not scorable |
| #### Bn-scaff_16691_1-p81556 C-genome specific (napus-oleracea) | 0.9641148    | 0.6808655    | 0.8992248    | 0.6238706    | not scorable | not scorable |
| #### Bn-scaff_16691_1-p81582 C-genome specific (napus-oleracea) | 0.9688995    | 0.7630774    | 0.8992248    | 0.7875218    | not scorable | not scorable |
| #### Bn-scaff_16691_1-p81591 C-genome specific (oleracea only)  | not scorable | not scorable | 0.8449612    | 0.7009581    | not scorable | not scorable |
| #### Bn-scaff_16691_1-p81611 C-genome specific (napus-oleracea) | 0.9688995    | 0.7206721    | 0.8992248    | 0.7696543    | not scorable | not scorable |
| #### Bn-scaff_16691_1-p81839 C-genome specific (napus-oleracea) | 0.9832536    | 0.7676715    | 0.8914729    | 0.822229     | not scorable | not scorable |
| #### Bn-scaff_16691_1-p81851 C-genome specific (napus-oleracea) | 0.9808612    | 0.7675009    | 0.8837209    | 0.7776573    | not scorable | not scorable |
| #### Bn-scaff_16691_1-p82262 C-genome specific (oleracea only)  | not scorable | not scorable | 0.8914729    | 0.7971691    | not scorable | not scorable |
| #### Bn-scaff_16691_1-p82305 C-genome specific (napus-oleracea) | 0.9665072    | 0.8900412    | 0.8837209    | 0.734897     | not scorable | not scorable |
| #### Bn-scaff_16691_1-p82393 C-genome specific (napus-oleracea) | 0.9736842    | 0.7823678    | 0.8992248    | 0.7059603    | not scorable | not scorable |
| #### Bn-scaff_16691_1-p82407 C-genome specific (napus-oleracea) | 0.9688995    | 0.7914228    | 0.8837209    | 0.6957653    | not scorable | not scorable |
| #### Bn-scaff_16691_1-p82412 C-genome specific (napus-oleracea) | 0.9593301    | 0.8643894    | 0.8992248    | 0.7440076    | not scorable | not scorable |
| #### Bn-scaff_16691_1-p83601 C-genome specific (napus-oleracea) | 0.923445     | 0.8125928    | 0.8914729    | 0.7260302    | not scorable | not scorable |
| #### Bn-scaff_16691_1-p83993 C-genome specific (napus-oleracea) | 0.9688995    | 0.8914403    | 0.8914729    | 0.7682251    | not scorable | not scorable |
| #### Bn-scaff_16691_1-p84005 C-genome specific (napus-oleracea) | 0.9712918    | 0.8819573    | 0.8837209    | 0.7670333    | not scorable | not scorable |
| #### Bn-scaff_16691_1-p84551 C-genome specific (napus-oleracea) | 0.9665072    | 0.7884697    | 1            | 0.7296106    | not scorable | not scorable |
| #### Bn-scaff_16691_1-p84637 C-genome specific (napus-oleracea) | 0.9736842    | 0.7533373    | 0.9457364    | 0.7062419    | not scorable | not scorable |
| #### Bn-scaff_16691_1-p84661 C-genome specific (oleracea only)  | not scorable | not scorable | 0.9457364    | 0.6400788    | not scorable | not scorable |
| #### Bn-scaff_16691_1-p85159 C-genome specific (napus-oleracea) | 0.9066986    | 0.4160321    | 0.8914729    | 0.3622673    | not scorable | not scorable |
| #### Bn-scaff_16691_1-p85278 C-genome specific (napus-oleracea) | 0.9665072    | 0.8435848    | 0.8914729    | 0.8146697    | not scorable | not scorable |
| #### Bn-scaff_16691_1-p85371 C-genome specific (napus-oleracea) | 0.9688995    | 0.8825256    | 0.8992248    | 0.8393649    | not scorable | not scorable |
| #### Bn-scaff_16691_1-p85380 C-genome specific (napus-oleracea) | 0.9545454    | 0.864177     | 0.8914729    | 0.8414361    | not scorable | not scorable |
| #### Bn-scaff_16691_1-p85418 C-genome specific (napus-oleracea) | 0.9688995    | 0.7884844    | 0.8992248    | 0.7303562    | not scorable | not scorable |
| #### Bn-scaff_16691_1-p85430 C-genome specific (napus-oleracea) | 0.9712918    | 0.6963507    | 0.8992248    | 0.6194394    | not scorable | not scorable |
| #### Bn-scaff_16691_1-p85439 C-genome specific (napus-oleracea) | 0.9545454    | 0.6949533    | 0.8992248    | 0.821025     | not scorable | not scorable |
| #### Bn-scaff_16691_1-p85619 C-genome specific (napus-oleracea) | 0.9808612    | 0.6878925    | 0.8837209    | 0.7163034    | not scorable | not scorable |
| #### Bn-scaff_16691_1-p85641 C-genome specific (napus-oleracea) | 0.9569378    | 0.7080389    | 0.8992248    | 0.7958185    | not scorable | not scorable |
| #### Bn-scaff_16691_1-p85664 C-genome specific (napus-oleracea) | 0.9712918    | 0.7586005    | 0.8992248    | 0.7733318    | not scorable | not scorable |
| #### Bn-scaff_16691_1-p85683 C-genome specific (napus-oleracea) | 0.9760765    | 0.6795797    | 0.8992248    | 0.7304225    | not scorable | not scorable |
| #### Bn-scaff_16691_1-p85699 C-genome specific (napus-oleracea) | 0.9808612    | 0.6703045    | 0.8914729    | 0.6931905    | not scorable | not scorable |
| #### Bn-scaff_16691_1-p85786 C-genome specific (napus-oleracea) | 0.9760765    | 0.7307647    | 0.8992248    | 0.8313024    | not scorable | not scorable |

|                                                                 |              |              |           |           |              |              |
|-----------------------------------------------------------------|--------------|--------------|-----------|-----------|--------------|--------------|
| #### Bn-scaff_16691_1-p86488 C-genome specific (napus-oleracea) | 0.9760765    | 0.6387597    | 0.8914729 | 0.6017725 | not scorable | not scorable |
| #### Bn-scaff_16691_1-p86613 C-genome specific (napus-oleracea) | 0.9712918    | 0.7863335    | 0.8992248 | 0.7780159 | not scorable | not scorable |
| #### Bn-scaff_16691_1-p86656 C-genome specific (napus-oleracea) | 0.9736842    | 0.7555608    | 0.8992248 | 0.8673975 | not scorable | not scorable |
| #### Bn-scaff_16691_1-p86657 C-genome specific (napus-oleracea) | 0.9760765    | 0.7502582    | 0.8992248 | 0.8447677 | not scorable | not scorable |
| #### Bn-scaff_16691_1-p87306 C-genome specific (napus-oleracea) | 0.9688995    | 0.8478789    | 0.8837209 | 0.7891228 | not scorable | not scorable |
| #### Bn-scaff_16691_1-p87339 C-genome specific (napus-oleracea) | 0.9641148    | 0.8096607    | 0.8914729 | 0.711635  | not scorable | not scorable |
| #### Bn-scaff_16691_1-p87400 C-genome specific (napus-oleracea) | 0.9641148    | 0.8310543    | 0.8992248 | 0.6877309 | not scorable | not scorable |
| #### Bn-scaff_16691_1-p87411 C-genome specific (napus-oleracea) | 0.9760765    | 0.7865745    | 0.8992248 | 0.7563345 | not scorable | not scorable |
| #### Bn-scaff_16691_1-p87441 C-genome specific (napus-oleracea) | 0.9569378    | 0.7544461    | 0.875969  | 0.593986  | not scorable | not scorable |
| #### Bn-scaff_16691_1-p87458 C-genome specific (napus-oleracea) | 0.9712918    | 0.8637608    | 0.875969  | 0.8925893 | not scorable | not scorable |
| #### Bn-scaff_16691_1-p87477 C-genome specific (napus-oleracea) | 0.9760765    | 0.8974147    | 0.8914729 | 0.793891  | not scorable | not scorable |
| #### Bn-scaff_16691_1-p87542 C-genome specific (napus-oleracea) | 0.9688995    | 0.6508276    | 0.8992248 | 0.6742919 | not scorable | not scorable |
| #### Bn-scaff_16691_1-p87581 C-genome specific (napus-oleracea) | 0.9808612    | 0.7074893    | 0.8992248 | 0.8336055 | not scorable | not scorable |
| #### Bn-scaff_16691_1-p87581 C-genome specific (napus-oleracea) | 0.9712918    | 0.716865     | 0.8992248 | 0.8297059 | not scorable | not scorable |
| #### Bn-scaff_16691_1-p87607 C-genome specific (napus-oleracea) | 0.9784689    | 0.659363     | 0.8992248 | 0.6618006 | not scorable | not scorable |
| #### Bn-scaff_16691_1-p87617 C-genome specific (napus-oleracea) | 0.9688995    | 0.6603267    | 0.8914729 | 0.6208204 | not scorable | not scorable |
| #### Bn-scaff_16691_1-p87708 C-genome specific (oleracea only)  | not scorable | not scorable | 0.7751938 | 0.3051714 | not scorable | not scorable |
| #### Bn-scaff_16691_1-p87790 C-genome specific (napus-oleracea) | 0.9186603    | 0.8733574    | 0.8837209 | 0.8540802 | not scorable | not scorable |
| #### Bn-scaff_16691_1-p88109 C-genome specific (napus-oleracea) | 0.9521531    | 0.6597927    | 0.875969  | 0.5822864 | not scorable | not scorable |
| #### Bn-scaff_16691_1-p88147 genome unspecific (oleracea-rapa)  | not scorable | not scorable | 0.8992248 | 0.786476  | 0.9917355    | 0.6884277    |
| #### Bn-scaff_16691_1-p91394 C-genome specific (napus-oleracea) | 0.9473684    | 0.5776936    | 0.9689922 | 0.5858156 | not scorable | not scorable |
| #### Bn-scaff_16691_1-p91403 C-genome specific (napus-oleracea) | 0.9736842    | 0.8597609    | 0.9612403 | 0.781727  | not scorable | not scorable |
| #### Bn-scaff_16691_1-p91843 C-genome specific (napus-oleracea) | 0.9736842    | 0.4256021    | 0.9844961 | 0.3626039 | not scorable | not scorable |
| #### Bn-scaff_16691_1-p91854 genome unspecific (all in)         | 0.9569378    | 0.4787615    | 0.9612403 | 0.4150758 | 1            | 0.8662155    |
| #### Bn-scaff_16691_1-p95433 C-genome specific (napus-oleracea) | 0.8995215    | 0.260039     | 0.9069768 | 0.1895195 | not scorable | not scorable |
| #### Bn-scaff_16691_1-p96359 C-genome specific (napus-oleracea) | 0.9545454    | 0.485287     | 0.9534883 | 0.3558388 | not scorable | not scorable |
| #### Bn-scaff_16691_1-p96598 C-genome specific (napus-oleracea) | 0.9736842    | 0.7347876    | 1         | 0.6990505 | not scorable | not scorable |
| #### Bn-scaff_16691_1-p96637 C-genome specific (napus-oleracea) | 0.9665072    | 0.7476726    | 1         | 0.8229161 | not scorable | not scorable |
| #### Bn-scaff_16691_1-p96639 C-genome specific (napus-oleracea) | 0.9856459    | 0.752484     | 0.9922481 | 0.7971029 | not scorable | not scorable |
| #### Bn-scaff_16691_1-p96712 C-genome specific (napus-oleracea) | 0.9784689    | 0.7908109    | 0.9922481 | 0.8006486 | not scorable | not scorable |
| #### Bn-scaff_16691_1-p96727 C-genome specific (napus-oleracea) | 0.9856459    | 0.7693331    | 0.9922481 | 0.8537922 | not scorable | not scorable |
| #### Bn-scaff_16691_1-p96756 C-genome specific (napus-oleracea) | 0.9688995    | 0.7897424    | 0.9922481 | 0.758867  | not scorable | not scorable |
| #### Bn-scaff_16691_1-p96768 C-genome specific (napus-oleracea) | 0.9617225    | 0.8956642    | 0.9922481 | 0.8494231 | not scorable | not scorable |





|                                                                 |              |              |           |           |              |              |
|-----------------------------------------------------------------|--------------|--------------|-----------|-----------|--------------|--------------|
| #### Bn-scaff_16704_1-p19142 C-genome specific (oleracea only)  | not scorable | not scorable | 0.9534883 | 0.5723447 | not scorable | not scorable |
| #### Bn-scaff_16704_1-p21714 C-genome specific (napus-oleracea) | 0.9665072    | 0.8881713    | 1         | 0.9272014 | not scorable | not scorable |
| #### Bn-scaff_16704_1-p21847 C-genome specific (napus-oleracea) | 0.9593301    | 0.9014748    | 1         | 0.9272014 | not scorable | not scorable |
| #### Bn-scaff_16704_1-p23763 C-genome specific (napus-oleracea) | 0.9832536    | 0.7637846    | 0.8992248 | 0.6927558 | not scorable | not scorable |
| #### Bn-scaff_16704_1-p26282 C-genome specific (napus-oleracea) | 0.9569378    | 0.8511205    | 1         | 0.8081508 | not scorable | not scorable |
| #### Bn-scaff_16704_1-p26804 C-genome specific (napus-oleracea) | 0.9593301    | 0.8470219    | 1         | 0.7208376 | not scorable | not scorable |
| #### Bn-scaff_16704_1-p26816 C-genome specific (napus-oleracea) | 0.9593301    | 0.9166812    | 1         | 0.790839  | not scorable | not scorable |
| #### Bn-scaff_16704_1-p26827 C-genome specific (napus-oleracea) | 0.9545454    | 0.8947825    | 1         | 0.8575153 | not scorable | not scorable |
| #### Bn-scaff_16704_1-p26975 C-genome specific (napus-oleracea) | 0.930622     | 0.8680245    | 1         | 0.7108423 | not scorable | not scorable |
| #### Bn-scaff_16704_1-p27261 C-genome specific (napus-oleracea) | 0.9569378    | 0.7682905    | 1         | 0.6995957 | not scorable | not scorable |
| #### Bn-scaff_16704_1-p27267 C-genome specific (napus-oleracea) | 0.9569378    | 0.802227     | 1         | 0.6977757 | not scorable | not scorable |
| #### Bn-scaff_16704_1-p27290 C-genome specific (napus-oleracea) | 1            | 0.9205657    | 1         | 0.9205657 | not scorable | not scorable |
| #### Bn-scaff_16704_1-p32825 C-genome specific (napus-oleracea) | 0.9497608    | 0.9004087    | 1         | 0.4300846 | not scorable | not scorable |
| #### Bn-scaff_16704_1-p33088 genome unspecific (oleracea-rapa)  | not scorable | not scorable | 0.9922481 | 0.6560438 | 1            | 0.8944166    |
| #### Bn-scaff_16704_1-p34839 C-genome specific (napus-oleracea) | 0.9641148    | 0.8681158    | 0.9612403 | 0.5645139 | not scorable | not scorable |
| #### Bn-scaff_16704_1-p34905 C-genome specific (napus-oleracea) | 0.9712918    | 0.7273034    | 0.9922481 | 0.8793069 | not scorable | not scorable |
| #### Bn-scaff_16704_1-p35353 C-genome specific (napus-oleracea) | 0.9497608    | 0.8198374    | 0.9922481 | 0.8100178 | not scorable | not scorable |
| #### Bn-scaff_16704_1-p37522 C-genome specific (napus-oleracea) | 0.9688995    | 0.8273367    | 0.9922481 | 0.9076412 | not scorable | not scorable |
| #### Bn-scaff_16704_1-p38552 C-genome specific (napus-oleracea) | 0.9497608    | 0.8958742    | 0.9689922 | 0.5423272 | not scorable | not scorable |
| #### Bn-scaff_16704_1-p39037 C-genome specific (napus-oleracea) | 0.9617225    | 0.5919289    | 1         | 0.6682169 | not scorable | not scorable |
| #### Bn-scaff_16704_1-p39253 C-genome specific (napus-oleracea) | 0.9569378    | 0.9447014    | 1         | 0.8693159 | not scorable | not scorable |
| #### Bn-scaff_16704_1-p40838 genome unspecific (all in)         | 0.9784689    | 0.6096521    | 1         | 0.757225  | 0.9917355    | 0.927498     |
| #### Bn-scaff_16704_1-p45487 genome unspecific (oleracea-rapa)  | not scorable | not scorable | 0.5581396 | 0.7954725 | 0.9008265    | 0.9172918    |
| #### Bn-scaff_16704_1-p45965 C-genome specific (napus-oleracea) | 0.9688995    | 0.9096512    | 1         | 0.7152818 | not scorable | not scorable |
| #### Bn-scaff_16704_1-p46072 C-genome specific (napus-oleracea) | 0.9545454    | 0.9308972    | 1         | 0.8815182 | not scorable | not scorable |
| #### Bn-scaff_16704_1-p46100 C-genome specific (napus-oleracea) | 0.9617225    | 0.9119151    | 0.9922481 | 0.9095823 | not scorable | not scorable |
| #### Bn-scaff_16704_1-p46111 C-genome specific (napus-oleracea) | 0.9569378    | 0.913288     | 1         | 0.9205657 | not scorable | not scorable |
| #### Bn-scaff_16704_1-p46241 C-genome specific (napus-oleracea) | 0.9617225    | 0.8347629    | 1         | 0.7553121 | not scorable | not scorable |
| #### Bn-scaff_16704_1-p46275 C-genome specific (oleracea only)  | not scorable | not scorable | 1         | 0.8495469 | not scorable | not scorable |
| #### Bn-scaff_16704_1-p50395 genome unspecific (all in)         | 0.9497608    | 0.5567266    | 1         | 0.8670278 | 1            | 0.9221465    |
| #### Bn-scaff_16708_1-p14187 C-genome specific (napus-oleracea) | 0.9138756    | 0.8782045    | 0.9147287 | 0.6946934 | not scorable | not scorable |
| #### Bn-scaff_16712_1-p33885 genome unspecific (oleracea-rapa)  | not scorable | not scorable | 1         | 0.4999213 | 0.9752066    | 0.699458     |
| #### Bn-scaff_16712_1-p33920 C-genome specific (napus-oleracea) | 0.8732057    | 0.7835336    | 0.9922481 | 0.8376257 | not scorable | not scorable |

|                                                                |              |              |           |           |              |              |
|----------------------------------------------------------------|--------------|--------------|-----------|-----------|--------------|--------------|
| #### Bn-scaff_16712_1-p53301C-genome specific (napus-oleracea) | 0.8803828    | 0.8868996    | 1         | 0.7365185 | not scorable | not scorable |
| #### Bn-scaff_16714_1-p10484C-genome specific (napus-oleracea) | 0.9856459    | 0.9120983    | 1         | 0.773866  | not scorable | not scorable |
| #### Bn-scaff_16714_1-p11073C-genome specific (napus-oleracea) | 0.9952153    | 0.721926     | 1         | 0.656391  | not scorable | not scorable |
| #### Bn-scaff_16714_1-p11182C-genome specific (napus-oleracea) | 0.9952153    | 0.7562694    | 1         | 0.8257229 | not scorable | not scorable |
| #### Bn-scaff_16714_1-p11244genome unspecific (oleracea-rapa)  | not scorable | not scorable | 0.7209302 | 0.7778548 | 1            | 0.8200538    |
| #### Bn-scaff_16714_1-p12757C-genome specific (napus-oleracea) | 0.9569378    | 0.9331539    | 1         | 0.8523223 | not scorable | not scorable |
| #### Bn-scaff_16714_1-p14150C-genome specific (napus-oleracea) | 0.9976076    | 0.6910375    | 0.9534883 | 0.6625258 | not scorable | not scorable |
| #### Bn-scaff_16714_1-p17170genome unspecific (all in)         | 0.9856459    | 0.7562755    | 0.9922481 | 0.7652525 | 1            | 0.9465767    |
| #### Bn-scaff_16714_1-p17228genome unspecific (all in)         | 0.9090909    | 0.3558131    | 0.9844961 | 0.2540236 | 1            | 0.8906947    |
| #### Bn-scaff_16714_1-p19614C-genome specific (napus-oleracea) | 0.9354067    | 0.9224073    | 0.9379845 | 0.7755951 | not scorable | not scorable |
| #### Bn-scaff_16714_1-p21524genome unspecific (all in)         | 0.9665072    | 0.7375467    | 0.9922481 | 0.70389   | 1            | 0.7902186    |
| #### Bn-scaff_16714_1-p22053C-genome specific (oleracea only)  | not scorable | not scorable | 0.9767442 | 0.7082418 | not scorable | not scorable |
| #### Bn-scaff_16714_1-p22505genome unspecific (all in)         | 0.9545454    | 0.6980661    | 0.9922481 | 0.7064739 | 0.9669421    | 0.687986     |
| #### Bn-scaff_16714_1-p22506C-genome specific (napus-oleracea) | 0.9928229    | 0.7428297    | 1         | 0.7094453 | not scorable | not scorable |
| #### Bn-scaff_16714_1-p22992genome unspecific (oleracea-rapa)  | not scorable | not scorable | 0.9844961 | 0.643998  | 1            | 0.9056897    |
| #### Bn-scaff_16714_1-p23021C-genome specific (napus-oleracea) | 0.9569378    | 0.7392804    | 1         | 0.6476205 | not scorable | not scorable |
| #### Bn-scaff_16714_1-p23188C-genome specific (napus-oleracea) | 0.9952153    | 0.7017436    | 1         | 0.8532292 | not scorable | not scorable |
| #### Bn-scaff_16714_1-p23198C-genome specific (napus-oleracea) | 0.9712918    | 0.8031996    | 1         | 0.7079511 | not scorable | not scorable |
| #### Bn-scaff_16714_1-p23269genome unspecific (all in)         | 0.9760765    | 0.7082179    | 0.9689922 | 0.737868  | 1            | 0.9398974    |
| #### Bn-scaff_16714_1-p23274C-genome specific (napus-oleracea) | 0.9712918    | 0.8661035    | 1         | 0.9175608 | not scorable | not scorable |
| #### Bn-scaff_16714_1-p23325C-genome specific (napus-oleracea) | 0.9952153    | 0.6731265    | 1         | 0.688207  | not scorable | not scorable |
| #### Bn-scaff_16714_1-p23381C-genome specific (napus-oleracea) | 0.9832536    | 0.7819968    | 1         | 0.6762888 | not scorable | not scorable |
| #### Bn-scaff_16714_1-p24450C-genome specific (napus-oleracea) | 0.9736842    | 0.8802205    | 1         | 0.7824756 | not scorable | not scorable |
| #### Bn-scaff_16714_1-p24630C-genome specific (napus-oleracea) | 0.9473684    | 0.9113218    | 1         | 0.7068456 | not scorable | not scorable |
| #### Bn-scaff_16714_1-p24673C-genome specific (napus-oleracea) | 0.9832536    | 0.7602054    | 1         | 0.7606743 | not scorable | not scorable |
| #### Bn-scaff_16714_1-p24724C-genome specific (napus-oleracea) | 0.9688995    | 0.8559189    | 0.9922481 | 0.5309003 | not scorable | not scorable |
| #### Bn-scaff_16714_1-p24878C-genome specific (napus-oleracea) | 0.9784689    | 0.8774751    | 0.9922481 | 0.7870952 | not scorable | not scorable |
| #### Bn-scaff_16714_1-p24889C-genome specific (napus-oleracea) | 0.9736842    | 0.6705669    | 1         | 0.5801204 | not scorable | not scorable |
| #### Bn-scaff_16714_1-p24943C-genome specific (napus-oleracea) | 0.9760765    | 0.7631356    | 1         | 0.6461573 | not scorable | not scorable |
| #### Bn-scaff_16714_1-p25223C-genome specific (napus-oleracea) | 0.9473684    | 0.7772273    | 1         | 0.7797564 | not scorable | not scorable |
| #### Bn-scaff_16714_1-p25282genome unspecific (all in)         | 0.923445     | 0.9422292    | 1         | 0.8557482 | 0.9834711    | 0.8908409    |
| #### Bn-scaff_16714_1-p29032C-genome specific (napus-oleracea) | 0.9928229    | 0.835614     | 1         | 0.7570291 | not scorable | not scorable |
| #### Bn-scaff_16714_1-p29078C-genome specific (napus-oleracea) | 0.9736842    | 0.8940206    | 0.9844961 | 0.8508136 | not scorable | not scorable |

|                                                                 |              |              |           |           |              |              |
|-----------------------------------------------------------------|--------------|--------------|-----------|-----------|--------------|--------------|
| #### Bn-scaff_16714_1-p29882 C-genome specific (napus-oleracea) | 0.9138756    | 0.9000801    | 0.9922481 | 0.8325946 | not scorable | not scorable |
| #### Bn-scaff_16714_1-p32915 C-genome specific (napus-oleracea) | 0.9784689    | 0.7338651    | 0.9922481 | 0.7882017 | not scorable | not scorable |
| #### Bn-scaff_16714_1-p32946 C-genome specific (napus-oleracea) | 0.9545454    | 0.7635757    | 1         | 0.7257228 | not scorable | not scorable |
| #### Bn-scaff_16714_1-p34297 C-genome specific (napus-oleracea) | 0.9856459    | 0.7690444    | 0.9844961 | 0.7627895 | not scorable | not scorable |
| #### Bn-scaff_16714_1-p34353 genome unspecific (all in)         | 0.9880383    | 0.4112346    | 1         | 0.786476  | 0.9917355    | 0.7609268    |
| #### Bn-scaff_16714_1-p34634 C-genome specific (napus-oleracea) | 0.9401914    | 0.8290023    | 1         | 0.8286136 | not scorable | not scorable |
| #### Bn-scaff_16714_1-p34894 C-genome specific (napus-oleracea) | 0.9425837    | 0.816075     | 1         | 0.8615644 | not scorable | not scorable |
| #### Bn-scaff_16714_1-p37553 C-genome specific (oleracea only)  | not scorable | not scorable | 0.9922481 | 0.5189202 | not scorable | not scorable |
| #### Bn-scaff_16714_1-p3998 C-genome specific (napus-oleracea)  | 0.9736842    | 0.6130612    | 1         | 0.6362785 | not scorable | not scorable |
| #### Bn-scaff_16714_1-p40238 C-genome specific (napus-oleracea) | 0.9856459    | 0.8716624    | 0.9844961 | 0.7474042 | not scorable | not scorable |
| #### Bn-scaff_16714_1-p40265 C-genome specific (napus-oleracea) | 0.9282297    | 0.8879409    | 0.9844961 | 0.8135572 | not scorable | not scorable |
| #### Bn-scaff_16714_1-p40267 C-genome specific (napus-oleracea) | 0.9114832    | 0.8378017    | 1         | 0.6966842 | not scorable | not scorable |
| #### Bn-scaff_16714_1-p40438 C-genome specific (napus-oleracea) | 0.9282297    | 0.8057517    | 0.7596899 | 0.7102615 | not scorable | not scorable |
| #### Bn-scaff_16714_1-p40602 C-genome specific (napus-oleracea) | 0.9856459    | 0.850296     | 0.9922481 | 0.8100545 | not scorable | not scorable |
| #### Bn-scaff_16714_1-p40758 C-genome specific (napus-oleracea) | 0.9569378    | 0.8797575    | 0.9922481 | 0.8512919 | not scorable | not scorable |
| #### Bn-scaff_16714_1-p41647 C-genome specific (napus-oleracea) | 0.9736842    | 0.9348571    | 1         | 0.8675472 | not scorable | not scorable |
| #### Bn-scaff_16714_1-p41988 C-genome specific (napus-oleracea) | 0.9425837    | 0.8381549    | 1         | 0.7228608 | not scorable | not scorable |
| #### Bn-scaff_16714_1-p42902 C-genome specific (oleracea only)  | not scorable | not scorable | 0.6899225 | 0.9262191 | not scorable | not scorable |
| #### Bn-scaff_16714_1-p44205 C-genome specific (napus-oleracea) | 0.9904306    | 0.8694858    | 1         | 0.8495252 | not scorable | not scorable |
| #### Bn-scaff_16714_1-p55649 C-genome specific (napus-oleracea) | 0.9928229    | 0.8477142    | 1         | 0.7293744 | not scorable | not scorable |
| #### Bn-scaff_16714_1-p60194 C-genome specific (napus-oleracea) | 0.9665072    | 0.8524649    | 1         | 0.7686118 | not scorable | not scorable |
| #### Bn-scaff_16714_1-p63750 C-genome specific (napus-oleracea) | 0.9904306    | 0.7524833    | 0.9922481 | 0.7576999 | not scorable | not scorable |
| #### Bn-scaff_16714_1-p74009 C-genome specific (napus-oleracea) | 0.9928229    | 0.9239665    | 0.9844961 | 0.8439386 | not scorable | not scorable |
| #### Bn-scaff_16714_1-p9223 C-genome specific (napus-oleracea)  | 0.9760765    | 0.7832963    | 1         | 0.8992224 | not scorable | not scorable |
| #### Bn-scaff_16714_1-p98921 C-genome specific (napus-oleracea) | 0.9952153    | 0.766187     | 0.9922481 | 0.8177654 | not scorable | not scorable |
| #### Bn-scaff_16721_1-p10201 C-genome specific (napus-oleracea) | 0.9880383    | 0.5705897    | 0.9302326 | 0.7776275 | not scorable | not scorable |
| #### Bn-scaff_16721_1-p10326 genome unspecific (all in)         | 1            | 0.7413667    | 1         | 0.764693  | 0.7851239    | 0.9367169    |
| #### Bn-scaff_16721_1-p10349 C-genome specific (napus-oleracea) | 1            | 0.8065201    | 0.9922481 | 0.7823036 | not scorable | not scorable |
| #### Bn-scaff_16721_1-p10350 C-genome specific (napus-oleracea) | 1            | 0.777869     | 0.9844961 | 0.6201832 | not scorable | not scorable |
| #### Bn-scaff_16721_1-p10353 C-genome specific (napus-oleracea) | 1            | 0.9203253    | 0.9922481 | 0.8480624 | not scorable | not scorable |
| #### Bn-scaff_16721_1-p10359 C-genome specific (oleracea only)  | not scorable | not scorable | 0.4341085 | 0.8296266 | not scorable | not scorable |
| #### Bn-scaff_16721_1-p10436 C-genome specific (napus-oleracea) | 1            | 0.9118372    | 1         | 0.7420776 | not scorable | not scorable |
| #### Bn-scaff_16721_1-p10445 C-genome specific (napus-oleracea) | 1            | 0.8539713    | 1         | 0.9175813 | not scorable | not scorable |



|                                                                 |              |              |           |           |              |              |
|-----------------------------------------------------------------|--------------|--------------|-----------|-----------|--------------|--------------|
| #### Bn-scaff_16721_1-p10559 C-genome specific (oleracea only)  | not scorable | not scorable | 0.9689922 | 0.7065288 | not scorable | not scorable |
| #### Bn-scaff_16721_1-p10602 C-genome specific (napus-oleracea) | 0.9976076    | 0.9362358    | 0.9844961 | 0.7988065 | not scorable | not scorable |
| #### Bn-scaff_16721_1-p10743 C-genome specific (napus-oleracea) | 1            | 0.61148      | 1         | 0.9243281 | not scorable | not scorable |
| #### Bn-scaff_16721_1-p11633 C-genome specific (napus-oleracea) | 1            | 0.7734861    | 0.9922481 | 0.6366632 | not scorable | not scorable |
| #### Bn-scaff_16721_1-p11646 C-genome specific (napus-oleracea) | 1            | 0.9279663    | 0.9922481 | 0.7730817 | not scorable | not scorable |
| #### Bn-scaff_16721_1-p11649 C-genome specific (napus-oleracea) | 1            | 0.7338356    | 0.9922481 | 0.6094614 | not scorable | not scorable |
| #### Bn-scaff_16721_1-p11651 C-genome specific (napus-oleracea) | 1            | 0.7353786    | 0.9844961 | 0.6271141 | not scorable | not scorable |
| #### Bn-scaff_16721_1-p11655 C-genome specific (napus-oleracea) | 1            | 0.77314      | 0.9922481 | 0.7055672 | not scorable | not scorable |
| #### Bn-scaff_16721_1-p11656 C-genome specific (napus-oleracea) | 1            | 0.9235566    | 0.9922481 | 0.7398171 | not scorable | not scorable |
| #### Bn-scaff_16721_1-p11664 C-genome specific (napus-oleracea) | 1            | 0.8439617    | 1         | 0.7300134 | not scorable | not scorable |
| #### Bn-scaff_16721_1-p11704 C-genome specific (napus-oleracea) | 1            | 0.9191598    | 1         | 0.9095651 | not scorable | not scorable |
| #### Bn-scaff_16721_1-p11730 genome unspecific (all in)         | 0.9952153    | 0.3797464    | 1         | 0.9153357 | 1            | 0.9217702    |
| #### Bn-scaff_16721_1-p11747 C-genome specific (napus-oleracea) | 0.9952153    | 0.9310723    | 0.7209302 | 0.9493775 | not scorable | not scorable |
| #### Bn-scaff_16721_1-p11755 C-genome specific (napus-oleracea) | 1            | 0.7043132    | 1         | 0.818179  | not scorable | not scorable |
| #### Bn-scaff_16721_1-p11828 C-genome specific (napus-oleracea) | 0.9952153    | 0.9113716    | 0.8604651 | 0.8948976 | not scorable | not scorable |
| #### Bn-scaff_16721_1-p11838 C-genome specific (napus-oleracea) | 0.9952153    | 0.9072987    | 0.8527132 | 0.9168783 | not scorable | not scorable |
| #### Bn-scaff_16721_1-p11842 C-genome specific (napus-oleracea) | 0.9952153    | 0.9278169    | 0.8449612 | 0.9166443 | not scorable | not scorable |
| #### Bn-scaff_16721_1-p11852 C-genome specific (napus-oleracea) | 0.9928229    | 0.7679093    | 0.8139535 | 0.7840713 | not scorable | not scorable |
| #### Bn-scaff_16721_1-p11863 C-genome specific (napus-oleracea) | 0.9952153    | 0.7590672    | 0.8139535 | 0.7403281 | not scorable | not scorable |
| #### Bn-scaff_16721_1-p11876 C-genome specific (napus-oleracea) | 0.9952153    | 0.7709031    | 0.8294573 | 0.8004208 | not scorable | not scorable |
| #### Bn-scaff_16721_1-p11882 C-genome specific (napus-oleracea) | 0.9880383    | 0.7676256    | 0.8294573 | 0.9123023 | not scorable | not scorable |
| #### Bn-scaff_16721_1-p11904 C-genome specific (napus-oleracea) | 0.9952153    | 0.9086586    | 0.8294573 | 0.8864394 | not scorable | not scorable |
| #### Bn-scaff_16721_1-p11927 C-genome specific (napus-oleracea) | 0.9928229    | 0.8651758    | 0.8527132 | 0.82772   | not scorable | not scorable |
| #### Bn-scaff_16721_1-p11941 C-genome specific (napus-oleracea) | 0.9904306    | 0.9179916    | 0.9457364 | 0.9116279 | not scorable | not scorable |
| #### Bn-scaff_16721_1-p12438 C-genome specific (napus-oleracea) | 1            | 0.9364775    | 0.9844961 | 0.8853858 | not scorable | not scorable |
| #### Bn-scaff_16721_1-p12485 genome unspecific (all in)         | 0.9976076    | 0.4978599    | 1         | 0.7494321 | 1            | 0.7879078    |
| #### Bn-scaff_16721_1-p12510 C-genome specific (napus-oleracea) | 0.9952153    | 0.8815448    | 0.8449612 | 0.902979  | not scorable | not scorable |
| #### Bn-scaff_16721_1-p12537 C-genome specific (napus-oleracea) | 0.9330143    | 0.9095823    | 0.8527132 | 0.8777419 | not scorable | not scorable |
| #### Bn-scaff_16721_1-p12545 C-genome specific (napus-oleracea) | 0.9952153    | 0.8487188    | 0.8682171 | 0.9095557 | not scorable | not scorable |
| #### Bn-scaff_16721_1-p12546 C-genome specific (napus-oleracea) | 0.9952153    | 0.86804      | 0.8139535 | 0.8350836 | not scorable | not scorable |
| #### Bn-scaff_16721_1-p12557 C-genome specific (napus-oleracea) | 0.9952153    | 0.8813967    | 0.8682171 | 0.9175813 | not scorable | not scorable |
| #### Bn-scaff_16721_1-p12557 C-genome specific (napus-oleracea) | 0.9952153    | 0.7611665    | 0.8527132 | 0.838909  | not scorable | not scorable |
| #### Bn-scaff_16721_1-p12558 C-genome specific (napus-oleracea) | 0.9928229    | 0.852343     | 0.8139535 | 0.8218588 | not scorable | not scorable |

|                                                                |           |           |              |              |              |              |
|----------------------------------------------------------------|-----------|-----------|--------------|--------------|--------------|--------------|
| #### Bn-scaff_16721_1-p12561C-genome specific (napus-oleracea) | 0.9928229 | 0.9097083 | 0.8527132    | 0.8640498    | not scorable | not scorable |
| #### Bn-scaff_16721_1-p12563C-genome specific (napus-oleracea) | 0.9952153 | 0.7671751 | 0.8604651    | 0.7884539    | not scorable | not scorable |
| #### Bn-scaff_16721_1-p12573C-genome specific (napus-oleracea) | 0.9952153 | 0.8979545 | 0.875969     | 0.9095823    | not scorable | not scorable |
| #### Bn-scaff_16721_1-p12576C-genome specific (napus-oleracea) | 0.9952153 | 0.9292029 | 0.8682171    | 0.9175449    | not scorable | not scorable |
| #### Bn-scaff_16721_1-p12631C-genome specific (napus-oleracea) | 0.9928229 | 0.8630546 | 0.8837209    | 0.9060887    | not scorable | not scorable |
| #### Bn-scaff_16721_1-p12636C-genome specific (napus-oleracea) | 0.9928229 | 0.8179536 | 0.8139535    | 0.8375293    | not scorable | not scorable |
| #### Bn-scaff_16721_1-p12642C-genome specific (napus-oleracea) | 0.9928229 | 0.9005175 | 0.8372093    | 0.8792233    | not scorable | not scorable |
| #### Bn-scaff_16721_1-p12650C-genome specific (napus-oleracea) | 0.9928229 | 0.7997956 | 0.8449612    | 0.8351831    | not scorable | not scorable |
| #### Bn-scaff_16721_1-p12653C-genome specific (napus-oleracea) | 0.9928229 | 0.7988203 | 0.8062016    | 0.8163754    | not scorable | not scorable |
| #### Bn-scaff_16721_1-p12721C-genome specific (napus-oleracea) | 0.9928229 | 0.6770393 | 0.8527132    | 0.7227655    | not scorable | not scorable |
| #### Bn-scaff_16721_1-p12728C-genome specific (napus-oleracea) | 0.9904306 | 0.7738369 | 0.8527132    | 0.7972026    | not scorable | not scorable |
| #### Bn-scaff_16721_1-p12746C-genome specific (napus-oleracea) | 0.9928229 | 0.9080922 | 0.8604651    | 0.9092703    | not scorable | not scorable |
| #### Bn-scaff_16721_1-p12749C-genome specific (napus-oleracea) | 0.9952153 | 0.8799148 | 0.8682171    | 0.9272014    | not scorable | not scorable |
| #### Bn-scaff_16721_1-p12754C-genome specific (napus-oleracea) | 0.9952153 | 0.8392624 | 0.8682171    | 0.8816881    | not scorable | not scorable |
| #### Bn-scaff_16721_1-p12757C-genome specific (napus-oleracea) | 0.9952153 | 0.9070551 | 0.8139535    | 0.8935089    | not scorable | not scorable |
| #### Bn-scaff_16721_1-p12767genome unspecific (all in)         | 1         | 0.8076577 | 1            | 0.9042501    | 0.9834711    | 0.9287989    |
| #### Bn-scaff_16721_1-p12772C-genome specific (napus-oleracea) | 0.9952153 | 0.9286593 | 0.8372093    | 0.9059977    | not scorable | not scorable |
| #### Bn-scaff_16721_1-p12865C-genome specific (napus-oleracea) | 0.9904306 | 0.8206907 | 0.8217054    | 0.94888      | not scorable | not scorable |
| #### Bn-scaff_16721_1-p12868C-genome specific (napus-oleracea) | 0.9928229 | 0.8806384 | 0.8372093    | 0.9272014    | not scorable | not scorable |
| #### Bn-scaff_16721_1-p12872C-genome specific (napus-oleracea) | 0.9928229 | 0.7178392 | 0.8139535    | 0.798646     | not scorable | not scorable |
| #### Bn-scaff_16721_1-p12879C-genome specific (napus-oleracea) | 0.9928229 | 0.926942  | 0.8604651    | 0.9170197    | not scorable | not scorable |
| #### Bn-scaff_16721_1-p13016C-genome specific (napus-oleracea) | 1         | 0.6308182 | 0.9844961    | 0.5929432    | not scorable | not scorable |
| #### Bn-scaff_16721_1-p13021C-genome specific (napus-oleracea) | 1         | 0.7228403 | 0.9844961    | 0.6479595    | not scorable | not scorable |
| #### Bn-scaff_16721_1-p13055C-genome specific (napus-oleracea) | 0.9952153 | 0.7004741 | 0.875969     | 0.711467     | not scorable | not scorable |
| #### Bn-scaff_16721_1-p13060C-genome specific (napus-oleracea) | 0.9952153 | 0.8312439 | 0.8527132    | 0.8248394    | not scorable | not scorable |
| #### Bn-scaff_16721_1-p13062napus specific                     | 0.9952153 | 0.9269742 | not scorable | not scorable | not scorable | not scorable |
| #### Bn-scaff_16721_1-p13065C-genome specific (napus-oleracea) | 0.9952153 | 0.8513011 | 0.8139535    | 0.732422     | not scorable | not scorable |
| #### Bn-scaff_16721_1-p13274C-genome specific (napus-oleracea) | 0.9976076 | 0.8784878 | 0.9922481    | 0.7479779    | not scorable | not scorable |
| #### Bn-scaff_16721_1-p13354C-genome specific (napus-oleracea) | 0.9976076 | 0.900207  | 1            | 0.8948976    | not scorable | not scorable |
| #### Bn-scaff_16721_1-p13358C-genome specific (napus-oleracea) | 0.9976076 | 0.8320104 | 0.9922481    | 0.9213884    | not scorable | not scorable |
| #### Bn-scaff_16721_1-p13477genome unspecific (all in)         | 0.9952153 | 0.5268059 | 0.9922481    | 0.6952202    | 0.9752066    | 0.9175516    |
| #### Bn-scaff_16721_1-p13957C-genome specific (napus-oleracea) | 1         | 0.7138237 | 0.9844961    | 0.6325815    | not scorable | not scorable |
| #### Bn-scaff_16721_1-p13997C-genome specific (napus-oleracea) | 1         | 0.8568234 | 1            | 0.7470065    | not scorable | not scorable |

|                                                                 |              |              |           |           |              |              |
|-----------------------------------------------------------------|--------------|--------------|-----------|-----------|--------------|--------------|
| #### Bn-scaff_16721_1-p14002 C-genome specific (napus-oleracea) | 1            | 0.9143857    | 1         | 0.7533693 | not scorable | not scorable |
| #### Bn-scaff_16721_1-p14008 C-genome specific (napus-oleracea) | 0.9976076    | 0.7550079    | 0.9534883 | 0.6560127 | not scorable | not scorable |
| #### Bn-scaff_16721_1-p14013 C-genome specific (napus-oleracea) | 1            | 0.7863787    | 0.9922481 | 0.6693734 | not scorable | not scorable |
| #### Bn-scaff_16721_1-p14049 genome unspecific (oleracea-rapa)  | not scorable | not scorable | 1         | 0.9095823 | 0.9917355    | 0.9045529    |
| #### Bn-scaff_16721_1-p14076 genome unspecific (all in)         | 1            | 0.7603542    | 0.9844961 | 0.7655954 | 0.9504132    | 0.9543265    |
| #### Bn-scaff_16721_1-p14931 C-genome specific (oleracea only)  | not scorable | not scorable | 0.9767442 | 0.7118626 | not scorable | not scorable |
| #### Bn-scaff_16721_1-p14938 genome unspecific (all in)         | 0.9425837    | 0.3185785    | 0.9612403 | 0.5115833 | 1            | 0.9175813    |
| #### Bn-scaff_16721_1-p15048 genome unspecific (all in)         | 0.9617225    | 0.588999     | 1         | 0.7863787 | 0.9834711    | 0.7617172    |
| #### Bn-scaff_16721_1-p15212 C-genome specific (napus-oleracea) | 1            | 0.8863602    | 0.9844961 | 0.8087259 | not scorable | not scorable |
| #### Bn-scaff_16721_1-p15284 C-genome specific (oleracea only)  | not scorable | not scorable | 0.8682171 | 0.703477  | not scorable | not scorable |
| #### Bn-scaff_16721_1-p15326 genome unspecific (all in)         | 0.9641148    | 0.3360719    | 1         | 0.8003919 | 0.9834711    | 0.6912176    |
| #### Bn-scaff_16721_1-p15410 C-genome specific (napus-oleracea) | 1            | 0.9124478    | 0.9922481 | 0.8113694 | not scorable | not scorable |
| #### Bn-scaff_16721_1-p15454 C-genome specific (napus-oleracea) | 1            | 0.8304105    | 0.9922481 | 0.7292163 | not scorable | not scorable |
| #### Bn-scaff_16721_1-p15456 C-genome specific (napus-oleracea) | 1            | 0.7630112    | 0.9922481 | 0.6909264 | not scorable | not scorable |
| #### Bn-scaff_16721_1-p15461 C-genome specific (napus-oleracea) | 1            | 0.9205548    | 0.9767442 | 0.8311751 | not scorable | not scorable |
| #### Bn-scaff_16721_1-p15477 genome unspecific (all in)         | 1            | 0.8358586    | 0.9844961 | 0.7791079 | 0.9338843    | 0.6299205    |
| #### Bn-scaff_16721_1-p15512 C-genome specific (napus-oleracea) | 0.9665072    | 0.3819631    | 1         | 0.6976079 | not scorable | not scorable |
| #### Bn-scaff_16721_1-p15516 C-genome specific (napus-oleracea) | 1            | 0.8818476    | 0.9844961 | 0.7052234 | not scorable | not scorable |
| #### Bn-scaff_16721_1-p15602 C-genome specific (napus-oleracea) | 1            | 0.9146661    | 0.9922481 | 0.8186613 | not scorable | not scorable |
| #### Bn-scaff_16721_1-p15636 C-genome specific (napus-oleracea) | 0.9976076    | 0.8937168    | 0.9844961 | 0.726871  | not scorable | not scorable |
| #### Bn-scaff_16721_1-p15645 C-genome specific (napus-oleracea) | 1            | 0.9377072    | 1         | 0.7178542 | not scorable | not scorable |
| #### Bn-scaff_16721_1-p15826 genome unspecific (all in)         | 1            | 0.4289116    | 0.9922481 | 0.7034211 | 1            | 0.8003181    |
| #### Bn-scaff_16721_1-p15854 genome unspecific (all in)         | 0.9928229    | 0.4406357    | 0.9844961 | 0.5647972 | 1            | 0.9093858    |
| #### Bn-scaff_16721_1-p16126 C-genome specific (napus-oleracea) | 1            | 0.9047834    | 0.9844961 | 0.7419831 | not scorable | not scorable |
| #### Bn-scaff_16721_1-p16171 C-genome specific (napus-oleracea) | 1            | 0.928543     | 0.9922481 | 0.8177654 | not scorable | not scorable |
| #### Bn-scaff_16721_1-p16175 C-genome specific (napus-oleracea) | 1            | 0.9443281    | 0.9844961 | 0.8171462 | not scorable | not scorable |
| #### Bn-scaff_16721_1-p16176 C-genome specific (napus-oleracea) | 1            | 0.9424971    | 0.9844961 | 0.8496289 | not scorable | not scorable |
| #### Bn-scaff_16721_1-p16187 C-genome specific (napus-oleracea) | 1            | 0.8498636    | 1         | 0.8135551 | not scorable | not scorable |
| #### Bn-scaff_16721_1-p16198 C-genome specific (napus-oleracea) | 0.9976076    | 0.9011935    | 0.9922481 | 0.8180174 | not scorable | not scorable |
| #### Bn-scaff_16721_1-p16198 C-genome specific (napus-oleracea) | 1            | 0.8479544    | 1         | 0.8521535 | not scorable | not scorable |
| #### Bn-scaff_16721_1-p16240 C-genome specific (napus-oleracea) | 1            | 0.9403667    | 1         | 0.9272014 | not scorable | not scorable |
| #### Bn-scaff_16721_1-p16426 C-genome specific (napus-oleracea) | 0.9976076    | 0.7838205    | 1         | 0.8123932 | not scorable | not scorable |
| #### Bn-scaff_16721_1-p16546 C-genome specific (napus-oleracea) | 0.9976076    | 0.8564314    | 1         | 0.8851566 | not scorable | not scorable |

|                                                                |              |              |           |           |              |              |
|----------------------------------------------------------------|--------------|--------------|-----------|-----------|--------------|--------------|
| #### Bn-scaff_16721_1-p16582genome unspecific (all in)         | 1            | 0.6021644    | 1         | 0.9032381 | 0.9834711    | 0.4899909    |
| #### Bn-scaff_16721_1-p16583C-genome specific (napus-oleracea) | 0.9856459    | 0.7287621    | 0.9922481 | 0.8446543 | not scorable | not scorable |
| #### Bn-scaff_16721_1-p16674C-genome specific (napus-oleracea) | 0.9976076    | 0.5558174    | 1         | 0.872586  | not scorable | not scorable |
| #### Bn-scaff_16721_1-p16680C-genome specific (napus-oleracea) | 1            | 0.8670443    | 0.9844961 | 0.8259006 | not scorable | not scorable |
| #### Bn-scaff_16721_1-p16683C-genome specific (napus-oleracea) | 0.9928229    | 0.8997614    | 0.9844961 | 0.7546726 | not scorable | not scorable |
| #### Bn-scaff_16721_1-p16903genome unspecific (oleracea-rapa)  | not scorable | not scorable | 1         | 0.7210994 | 0.9834711    | 0.7109082    |
| #### Bn-scaff_16721_1-p16943C-genome specific (napus-oleracea) | 1            | 0.9382725    | 0.9922481 | 0.7635253 | not scorable | not scorable |
| #### Bn-scaff_16721_1-p16958C-genome specific (napus-oleracea) | 1            | 0.6483815    | 0.9689922 | 0.5906546 | not scorable | not scorable |
| #### Bn-scaff_16721_1-p17012C-genome specific (napus-oleracea) | 1            | 0.7797861    | 0.9922481 | 0.6386147 | not scorable | not scorable |
| #### Bn-scaff_16721_1-p17048genome unspecific (all in)         | 0.9952153    | 0.2852367    | 0.9767442 | 0.2278933 | 1            | 0.7462659    |
| #### Bn-scaff_16721_1-p17076genome unspecific (all in)         | 0.9712918    | 0.2274694    | 0.9844961 | 0.3733158 | 1            | 0.9095823    |
| #### Bn-scaff_16721_1-p17107C-genome specific (napus-oleracea) | 1            | 0.8543575    | 1         | 0.9095823 | not scorable | not scorable |
| #### Bn-scaff_16721_1-p17236C-genome specific (napus-oleracea) | 0.9976076    | 0.9087147    | 0.9844961 | 0.8740044 | not scorable | not scorable |
| #### Bn-scaff_16721_1-p17249C-genome specific (napus-oleracea) | 0.9928229    | 0.906306     | 0.9844961 | 0.8110628 | not scorable | not scorable |
| #### Bn-scaff_16721_1-p17305C-genome specific (napus-oleracea) | 1            | 0.7361982    | 1         | 0.6723958 | not scorable | not scorable |
| #### Bn-scaff_16721_1-p17364C-genome specific (napus-oleracea) | 1            | 0.888263     | 0.9767442 | 0.7772021 | not scorable | not scorable |
| #### Bn-scaff_16721_1-p17450C-genome specific (napus-oleracea) | 0.9928229    | 0.5856464    | 1         | 0.5113615 | not scorable | not scorable |
| #### Bn-scaff_16721_1-p17699C-genome specific (napus-oleracea) | 0.9976076    | 0.9030976    | 0.9922481 | 0.8393649 | not scorable | not scorable |
| #### Bn-scaff_16721_1-p17700C-genome specific (napus-oleracea) | 1            | 0.939033     | 0.9922481 | 0.8773268 | not scorable | not scorable |
| #### Bn-scaff_16721_1-p17702C-genome specific (napus-oleracea) | 1            | 0.9191598    | 1         | 0.8197978 | not scorable | not scorable |
| #### Bn-scaff_16721_1-p17704C-genome specific (napus-oleracea) | 1            | 0.9376312    | 0.9922481 | 0.8632445 | not scorable | not scorable |
| #### Bn-scaff_16721_1-p17719C-genome specific (napus-oleracea) | 1            | 0.8654556    | 0.9922481 | 0.8272642 | not scorable | not scorable |
| #### Bn-scaff_16721_1-p17726C-genome specific (napus-oleracea) | 1            | 0.9524971    | 0.9922481 | 0.8185687 | not scorable | not scorable |
| #### Bn-scaff_16721_1-p17730C-genome specific (napus-oleracea) | 1            | 0.9230189    | 0.9922481 | 0.7559297 | not scorable | not scorable |
| #### Bn-scaff_16721_1-p17730C-genome specific (napus-oleracea) | 1            | 0.8570008    | 0.9922481 | 0.7627673 | not scorable | not scorable |
| #### Bn-scaff_16721_1-p17733C-genome specific (napus-oleracea) | 1            | 0.7598398    | 0.9922481 | 0.6861758 | not scorable | not scorable |
| #### Bn-scaff_16721_1-p17734C-genome specific (napus-oleracea) | 1            | 0.7092093    | 1         | 0.5862646 | not scorable | not scorable |
| #### Bn-scaff_16721_1-p17734C-genome specific (napus-oleracea) | 1            | 0.8287525    | 0.9922481 | 0.7545189 | not scorable | not scorable |
| #### Bn-scaff_16721_1-p17741C-genome specific (napus-oleracea) | 1            | 0.7323507    | 0.9922481 | 0.6628189 | not scorable | not scorable |
| #### Bn-scaff_16721_1-p17743C-genome specific (napus-oleracea) | 1            | 0.8870218    | 1         | 0.9175813 | not scorable | not scorable |
| #### Bn-scaff_16721_1-p17751C-genome specific (napus-oleracea) | 1            | 0.8067369    | 0.9922481 | 0.7277114 | not scorable | not scorable |
| #### Bn-scaff_16721_1-p17760C-genome specific (napus-oleracea) | 1            | 0.8345406    | 0.9922481 | 0.7906559 | not scorable | not scorable |
| #### Bn-scaff_16721_1-p17830C-genome specific (napus-oleracea) | 1            | 0.8239664    | 0.9844961 | 0.7647758 | not scorable | not scorable |

|                                                                 |           |           |           |           |              |              |
|-----------------------------------------------------------------|-----------|-----------|-----------|-----------|--------------|--------------|
| #### Bn-scaff_16721_1-p17902 C-genome specific (napus-oleracea) | 1         | 0.8637284 | 1         | 0.7928134 | not scorable | not scorable |
| #### Bn-scaff_16721_1-p17903 C-genome specific (napus-oleracea) | 1         | 0.9074346 | 1         | 0.9175813 | not scorable | not scorable |
| #### Bn-scaff_16721_1-p17910 C-genome specific (napus-oleracea) | 0.9976076 | 0.9276959 | 1         | 0.8559774 | not scorable | not scorable |
| #### Bn-scaff_16721_1-p17928 C-genome specific (napus-oleracea) | 1         | 0.8343616 | 0.9922481 | 0.6786841 | not scorable | not scorable |
| #### Bn-scaff_16721_1-p18059 genome unspecific (all in)         | 0.9832536 | 0.3266112 | 1         | 0.8912995 | 1            | 0.7759826    |
| #### Bn-scaff_16721_1-p18136 C-genome specific (napus-oleracea) | 1         | 0.9262425 | 0.9844961 | 0.8446579 | not scorable | not scorable |
| #### Bn-scaff_16721_1-p18203 C-genome specific (napus-oleracea) | 1         | 0.8147662 | 1         | 0.6835984 | not scorable | not scorable |
| #### Bn-scaff_16721_1-p18257 C-genome specific (napus-oleracea) | 1         | 0.909427  | 1         | 0.8136061 | not scorable | not scorable |
| #### Bn-scaff_16721_1-p18261 C-genome specific (napus-oleracea) | 1         | 0.8006082 | 0.9844961 | 0.7058029 | not scorable | not scorable |
| #### Bn-scaff_16721_1-p18261 C-genome specific (napus-oleracea) | 1         | 0.9313454 | 0.9844961 | 0.8270501 | not scorable | not scorable |
| #### Bn-scaff_16721_1-p18263 C-genome specific (napus-oleracea) | 1         | 0.937249  | 0.9844961 | 0.8684929 | not scorable | not scorable |
| #### Bn-scaff_16721_1-p18264 C-genome specific (napus-oleracea) | 1         | 0.9510231 | 0.9844961 | 0.8086622 | not scorable | not scorable |
| #### Bn-scaff_16721_1-p18400 C-genome specific (napus-oleracea) | 0.9952153 | 0.8645213 | 0.9689922 | 0.7104402 | not scorable | not scorable |
| #### Bn-scaff_16721_1-p18437 C-genome specific (napus-oleracea) | 0.9976076 | 0.9213641 | 0.9922481 | 0.7754679 | not scorable | not scorable |
| #### Bn-scaff_16721_1-p18456 C-genome specific (napus-oleracea) | 0.9904306 | 0.8793821 | 0.9844961 | 0.790546  | not scorable | not scorable |
| #### Bn-scaff_16721_1-p18456 C-genome specific (napus-oleracea) | 0.9976076 | 0.9420037 | 0.9689922 | 0.7702873 | not scorable | not scorable |
| #### Bn-scaff_16721_1-p18459 C-genome specific (napus-oleracea) | 1         | 0.9331914 | 0.9922481 | 0.8295782 | not scorable | not scorable |
| #### Bn-scaff_16721_1-p18469 C-genome specific (napus-oleracea) | 1         | 0.8918266 | 0.9922481 | 0.8245896 | not scorable | not scorable |
| #### Bn-scaff_16721_1-p18471 C-genome specific (napus-oleracea) | 1         | 0.9478683 | 0.9922481 | 0.8440511 | not scorable | not scorable |
| #### Bn-scaff_16721_1-p19012 C-genome specific (napus-oleracea) | 0.9928229 | 0.5641994 | 0.9844961 | 0.4707703 | not scorable | not scorable |
| #### Bn-scaff_16721_1-p19012 C-genome specific (napus-oleracea) | 1         | 0.8005927 | 0.9844961 | 0.7244006 | not scorable | not scorable |
| #### Bn-scaff_16721_1-p19014 C-genome specific (napus-oleracea) | 0.9976076 | 0.8494773 | 0.9922481 | 0.722411  | not scorable | not scorable |
| #### Bn-scaff_16721_1-p19018 C-genome specific (napus-oleracea) | 1         | 0.8011951 | 0.9922481 | 0.6979609 | not scorable | not scorable |
| #### Bn-scaff_16721_1-p19031 C-genome specific (napus-oleracea) | 1         | 0.7874316 | 0.9922481 | 0.7363164 | not scorable | not scorable |
| #### Bn-scaff_16721_1-p19123 C-genome specific (napus-oleracea) | 1         | 0.9394302 | 0.9844961 | 0.8719602 | not scorable | not scorable |
| #### Bn-scaff_16721_1-p19134 C-genome specific (napus-oleracea) | 1         | 0.7979285 | 0.9844961 | 0.7286335 | not scorable | not scorable |
| #### Bn-scaff_16721_1-p19242 C-genome specific (napus-oleracea) | 1         | 0.8889825 | 0.9844961 | 0.7942055 | not scorable | not scorable |
| #### Bn-scaff_16721_1-p19267 C-genome specific (napus-oleracea) | 1         | 0.766911  | 0.9767442 | 0.6695426 | not scorable | not scorable |
| #### Bn-scaff_16721_1-p19270 C-genome specific (napus-oleracea) | 1         | 0.8005927 | 0.9767442 | 0.7333157 | not scorable | not scorable |
| #### Bn-scaff_16721_1-p19305 C-genome specific (napus-oleracea) | 1         | 0.838007  | 0.9844961 | 0.7476108 | not scorable | not scorable |
| #### Bn-scaff_16721_1-p19306 C-genome specific (napus-oleracea) | 1         | 0.9095823 | 0.9844961 | 0.8029865 | not scorable | not scorable |
| #### Bn-scaff_16721_1-p19306 C-genome specific (napus-oleracea) | 1         | 0.9344034 | 0.9767442 | 0.8001667 | not scorable | not scorable |
| #### Bn-scaff_16721_1-p19316 C-genome specific (napus-oleracea) | 0.9976076 | 0.8520333 | 0.9689922 | 0.7372329 | not scorable | not scorable |

|                                                                |           |           |           |           |              |              |
|----------------------------------------------------------------|-----------|-----------|-----------|-----------|--------------|--------------|
| #### Bn-scaff_16721_1-p19321C-genome specific (napus-oleracea) | 0.9952153 | 0.7203018 | 0.9922481 | 0.6526144 | not scorable | not scorable |
| #### Bn-scaff_16721_1-p19322C-genome specific (napus-oleracea) | 0.9976076 | 0.9179356 | 0.9922481 | 0.8208725 | not scorable | not scorable |
| #### Bn-scaff_16721_1-p19395C-genome specific (napus-oleracea) | 1         | 0.9539831 | 0.9844961 | 0.8477979 | not scorable | not scorable |
| #### Bn-scaff_16721_1-p19417genome unspecific (all in)         | 0.9928229 | 0.5332491 | 0.9922481 | 0.736789  | 1            | 0.9118272    |
| #### Bn-scaff_16721_1-p19420genome unspecific (all in)         | 1         | 0.6202898 | 0.9844961 | 0.8389751 | 1            | 0.9347479    |
| #### Bn-scaff_16721_1-p19429C-genome specific (napus-oleracea) | 1         | 0.471054  | 0.9922481 | 0.6434846 | not scorable | not scorable |
| #### Bn-scaff_16721_1-p19451C-genome specific (napus-oleracea) | 1         | 0.8478311 | 0.9922481 | 0.7458607 | not scorable | not scorable |
| #### Bn-scaff_16721_1-p19451C-genome specific (napus-oleracea) | 1         | 0.7126414 | 0.9922481 | 0.5907683 | not scorable | not scorable |
| #### Bn-scaff_16721_1-p19452C-genome specific (napus-oleracea) | 1         | 0.9319342 | 0.9922481 | 0.8601974 | not scorable | not scorable |
| #### Bn-scaff_16721_1-p19461C-genome specific (napus-oleracea) | 1         | 0.8526753 | 0.9844961 | 0.777955  | not scorable | not scorable |
| #### Bn-scaff_16721_1-p19464C-genome specific (napus-oleracea) | 1         | 0.7823744 | 0.9922481 | 0.6468039 | not scorable | not scorable |
| #### Bn-scaff_16721_1-p19473C-genome specific (napus-oleracea) | 1         | 0.758602  | 0.9922481 | 0.6477931 | not scorable | not scorable |
| #### Bn-scaff_16721_1-p19587C-genome specific (napus-oleracea) | 1         | 0.770798  | 0.9922481 | 0.670136  | not scorable | not scorable |
| #### Bn-scaff_16721_1-p19668C-genome specific (napus-oleracea) | 1         | 0.8688765 | 1         | 0.7798683 | not scorable | not scorable |
| #### Bn-scaff_16721_1-p19744C-genome specific (napus-oleracea) | 1         | 0.917867  | 0.9534883 | 0.8412272 | not scorable | not scorable |
| #### Bn-scaff_16721_1-p19794C-genome specific (napus-oleracea) | 1         | 0.8612844 | 0.9612403 | 0.7755372 | not scorable | not scorable |
| #### Bn-scaff_16721_1-p19795C-genome specific (napus-oleracea) | 1         | 0.8890964 | 0.9612403 | 0.7859095 | not scorable | not scorable |
| #### Bn-scaff_16721_1-p19948genome unspecific (all in)         | 1         | 0.8232735 | 0.9922481 | 0.801413  | 1            | 0.8909742    |
| #### Bn-scaff_16721_1-p19954C-genome specific (napus-oleracea) | 1         | 0.8158085 | 0.9767442 | 0.6747913 | not scorable | not scorable |
| #### Bn-scaff_16721_1-p19955C-genome specific (napus-oleracea) | 1         | 0.9319342 | 0.9689922 | 0.8351377 | not scorable | not scorable |
| #### Bn-scaff_16721_1-p19957C-genome specific (napus-oleracea) | 1         | 0.7773587 | 0.9689922 | 0.696892  | not scorable | not scorable |
| #### Bn-scaff_16721_1-p19959C-genome specific (napus-oleracea) | 1         | 0.9389927 | 0.9612403 | 0.8351377 | not scorable | not scorable |
| #### Bn-scaff_16721_1-p19963C-genome specific (napus-oleracea) | 1         | 0.8929795 | 0.9767442 | 0.8078863 | not scorable | not scorable |
| #### Bn-scaff_16721_1-p19964C-genome specific (napus-oleracea) | 1         | 0.9058486 | 0.9767442 | 0.7819741 | not scorable | not scorable |
| #### Bn-scaff_16721_1-p19969C-genome specific (napus-oleracea) | 1         | 0.7692145 | 0.9844961 | 0.6726981 | not scorable | not scorable |
| #### Bn-scaff_16721_1-p19971C-genome specific (napus-oleracea) | 1         | 0.8214626 | 0.9767442 | 0.7526832 | not scorable | not scorable |
| #### Bn-scaff_16721_1-p19973C-genome specific (napus-oleracea) | 1         | 0.7949587 | 0.9844961 | 0.7029747 | not scorable | not scorable |
| #### Bn-scaff_16721_1-p19973C-genome specific (napus-oleracea) | 1         | 0.8491129 | 0.9767442 | 0.7456815 | not scorable | not scorable |
| #### Bn-scaff_16721_1-p19974C-genome specific (napus-oleracea) | 1         | 0.7254781 | 0.9767442 | 0.6322919 | not scorable | not scorable |
| #### Bn-scaff_16721_1-p19977C-genome specific (napus-oleracea) | 1         | 0.9104456 | 0.9767442 | 0.7626141 | not scorable | not scorable |
| #### Bn-scaff_16721_1-p19978C-genome specific (napus-oleracea) | 1         | 0.8077469 | 0.9844961 | 0.6522436 | not scorable | not scorable |
| #### Bn-scaff_16721_1-p20026C-genome specific (napus-oleracea) | 1         | 0.942239  | 0.9922481 | 0.8495935 | not scorable | not scorable |
| #### Bn-scaff_16721_1-p20087C-genome specific (napus-oleracea) | 0.9976076 | 0.9437901 | 0.9844961 | 0.8685753 | not scorable | not scorable |

|                                                                 |              |              |           |           |              |              |
|-----------------------------------------------------------------|--------------|--------------|-----------|-----------|--------------|--------------|
| #### Bn-scaff_16721_1-p20106 C-genome specific (napus-oleracea) | 1            | 0.9371831    | 0.9922481 | 0.8360763 | not scorable | not scorable |
| #### Bn-scaff_16721_1-p20107 C-genome specific (napus-oleracea) | 1            | 0.9413311    | 0.9844961 | 0.8376549 | not scorable | not scorable |
| #### Bn-scaff_16721_1-p20114 C-genome specific (napus-oleracea) | 1            | 0.9183211    | 0.9844961 | 0.8313939 | not scorable | not scorable |
| #### Bn-scaff_16721_1-p20155 genome unspecific (all in)         | 1            | 0.6066966    | 0.9844961 | 0.5751516 | 0.9917355    | 0.7234974    |
| #### Bn-scaff_16721_1-p20174 C-genome specific (napus-oleracea) | 1            | 0.4303693    | 0.9922481 | 0.3474253 | not scorable | not scorable |
| #### Bn-scaff_16721_1-p20297 C-genome specific (napus-oleracea) | 1            | 0.8889825    | 0.9844961 | 0.7969387 | not scorable | not scorable |
| #### Bn-scaff_16721_1-p20297 C-genome specific (napus-oleracea) | 0.9952153    | 0.9249828    | 0.9844961 | 0.7739077 | not scorable | not scorable |
| #### Bn-scaff_16721_1-p20299 C-genome specific (napus-oleracea) | 1            | 0.9151131    | 0.9922481 | 0.818635  | not scorable | not scorable |
| #### Bn-scaff_16721_1-p20302 C-genome specific (napus-oleracea) | 1            | 0.7054703    | 0.9767442 | 0.6293546 | not scorable | not scorable |
| #### Bn-scaff_16721_1-p20462 C-genome specific (napus-oleracea) | 1            | 0.9260089    | 0.9922481 | 0.796994  | not scorable | not scorable |
| #### Bn-scaff_16721_1-p20536 C-genome specific (napus-oleracea) | 1            | 0.8429176    | 0.9922481 | 0.7551146 | not scorable | not scorable |
| #### Bn-scaff_16721_1-p20570 C-genome specific (napus-oleracea) | 1            | 0.9074494    | 0.9922481 | 0.8333688 | not scorable | not scorable |
| #### Bn-scaff_16721_1-p20572 C-genome specific (napus-oleracea) | 1            | 0.8510503    | 0.9922481 | 0.7621888 | not scorable | not scorable |
| #### Bn-scaff_16721_1-p20577 C-genome specific (napus-oleracea) | 0.9976076    | 0.8508663    | 0.9844961 | 0.8656013 | not scorable | not scorable |
| #### Bn-scaff_16721_1-p20578 C-genome specific (napus-oleracea) | 0.9976076    | 0.8772414    | 0.9922481 | 0.7881075 | not scorable | not scorable |
| #### Bn-scaff_16721_1-p20582 C-genome specific (napus-oleracea) | 0.9976076    | 0.892981     | 0.9844961 | 0.8727968 | not scorable | not scorable |
| #### Bn-scaff_16721_1-p20584 C-genome specific (napus-oleracea) | 1            | 0.9122601    | 0.9767442 | 0.8238291 | not scorable | not scorable |
| #### Bn-scaff_16721_1-p20589 C-genome specific (napus-oleracea) | 1            | 0.8968284    | 1         | 0.84183   | not scorable | not scorable |
| #### Bn-scaff_16721_1-p20590 C-genome specific (napus-oleracea) | 1            | 0.8817765    | 0.9844961 | 0.7605394 | not scorable | not scorable |
| #### Bn-scaff_16721_1-p20594 C-genome specific (napus-oleracea) | 1            | 0.5851383    | 0.9844961 | 0.6857125 | not scorable | not scorable |
| #### Bn-scaff_16721_1-p20896 C-genome specific (napus-oleracea) | 1            | 0.9340851    | 0.9922481 | 0.8293875 | not scorable | not scorable |
| #### Bn-scaff_16721_1-p20979 C-genome specific (napus-oleracea) | 1            | 0.7284333    | 0.9844961 | 0.6866108 | not scorable | not scorable |
| #### Bn-scaff_16721_1-p21024 C-genome specific (napus-oleracea) | 1            | 0.827378     | 0.9844961 | 0.7740144 | not scorable | not scorable |
| #### Bn-scaff_16721_1-p21024 genome unspecific (all in)         | 1            | 0.6824785    | 1         | 0.6950222 | 0.9752066    | 0.8369665    |
| #### Bn-scaff_16721_1-p21036 C-genome specific (napus-oleracea) | 1            | 0.8968058    | 0.9844961 | 0.8195001 | not scorable | not scorable |
| #### Bn-scaff_16721_1-p21044 C-genome specific (napus-oleracea) | 1            | 0.9244944    | 0.9922481 | 0.7909546 | not scorable | not scorable |
| #### Bn-scaff_16721_1-p21044 C-genome specific (napus-oleracea) | 1            | 0.8793105    | 0.9612403 | 0.7406196 | not scorable | not scorable |
| #### Bn-scaff_16721_1-p21099 C-genome specific (napus-oleracea) | 1            | 0.9405468    | 0.9689922 | 0.7326626 | not scorable | not scorable |
| #### Bn-scaff_16721_1-p21140 C-genome specific (napus-oleracea) | 0.9976076    | 0.9407256    | 0.9767442 | 0.8120183 | not scorable | not scorable |
| #### Bn-scaff_16721_1-p21185 genome unspecific (oleracea-rapa)  | not scorable | not scorable | 0.9844961 | 0.4635336 | 1            | 0.7328241    |
| #### Bn-scaff_16721_1-p21273 genome unspecific (all in)         | 1            | 0.6033282    | 1         | 0.6007478 | 0.8677686    | 0.8054958    |
| #### Bn-scaff_16721_1-p21342 C-genome specific (napus-oleracea) | 1            | 0.8319969    | 1         | 0.7378784 | not scorable | not scorable |
| #### Bn-scaff_16721_1-p21365 genome unspecific (all in)         | 1            | 0.9095823    | 1         | 0.9175813 | 1            | 0.9175813    |

|                                                                 |              |              |           |           |              |              |
|-----------------------------------------------------------------|--------------|--------------|-----------|-----------|--------------|--------------|
| #### Bn-scaff_16721_1-p21559 C-genome specific (napus-oleracea) | 0.8803828    | 0.7627483    | 1         | 0.904702  | not scorable | not scorable |
| #### Bn-scaff_16721_1-p21573 C-genome specific (napus-oleracea) | 0.9952153    | 0.8312039    | 0.9767442 | 0.7248582 | not scorable | not scorable |
| #### Bn-scaff_16721_1-p21711 genome unspecific (all in)         | 0.9425837    | 0.4662755    | 1         | 0.9293141 | 1            | 0.8215532    |
| #### Bn-scaff_16721_1-p21805 C-genome specific (napus-oleracea) | 1            | 0.7960202    | 0.9612403 | 0.801626  | not scorable | not scorable |
| #### Bn-scaff_16721_1-p21835 genome unspecific (oleracea-rapa)  | not scorable | not scorable | 0.9612403 | 0.7628164 | 0.9917355    | 0.8804751    |
| #### Bn-scaff_16721_1-p21894 C-genome specific (napus-oleracea) | 1            | 0.8222626    | 0.9689922 | 0.7346287 | not scorable | not scorable |
| #### Bn-scaff_16721_1-p21901 C-genome specific (napus-oleracea) | 1            | 0.732547     | 0.9767442 | 0.631849  | not scorable | not scorable |
| #### Bn-scaff_16721_1-p22127 C-genome specific (napus-oleracea) | 0.9976076    | 0.9058126    | 0.9612403 | 0.7082108 | not scorable | not scorable |
| #### Bn-scaff_16721_1-p22133 C-genome specific (napus-oleracea) | 1            | 0.9293141    | 0.9689922 | 0.7838854 | not scorable | not scorable |
| #### Bn-scaff_16721_1-p23079 C-genome specific (napus-oleracea) | 0.9976076    | 0.8477122    | 0.9379845 | 0.7511495 | not scorable | not scorable |
| #### Bn-scaff_16721_1-p23353 C-genome specific (napus-oleracea) | 0.9952153    | 0.8371295    | 0.9689922 | 0.7167363 | not scorable | not scorable |
| #### Bn-scaff_16721_1-p23477 C-genome specific (napus-oleracea) | 0.9952153    | 0.9655954    | 0.9844961 | 0.269488  | not scorable | not scorable |
| #### Bn-scaff_16721_1-p23517 C-genome specific (napus-oleracea) | 0.9976076    | 0.8634813    | 0.9767442 | 0.7364676 | not scorable | not scorable |
| #### Bn-scaff_16721_1-p24118 C-genome specific (napus-oleracea) | 0.9976076    | 0.8874702    | 0.9844961 | 0.7776369 | not scorable | not scorable |
| #### Bn-scaff_16721_1-p24134 C-genome specific (napus-oleracea) | 0.9976076    | 0.7711656    | 0.9922481 | 0.7563224 | not scorable | not scorable |
| #### Bn-scaff_16721_1-p24158 C-genome specific (napus-oleracea) | 1            | 0.673371     | 0.9767442 | 0.5692192 | not scorable | not scorable |
| #### Bn-scaff_16721_1-p24215 C-genome specific (napus-oleracea) | 0.9976076    | 0.9095069    | 0.9922481 | 0.773522  | not scorable | not scorable |
| #### Bn-scaff_16721_1-p24241 C-genome specific (napus-oleracea) | 0.9976076    | 0.793803     | 1         | 0.6885198 | not scorable | not scorable |
| #### Bn-scaff_16721_1-p24306 C-genome specific (napus-oleracea) | 0.9976076    | 0.8514739    | 0.9922481 | 0.7821831 | not scorable | not scorable |
| #### Bn-scaff_16721_1-p24327 C-genome specific (napus-oleracea) | 1            | 0.7265747    | 0.9767442 | 0.68712   | not scorable | not scorable |
| #### Bn-scaff_16721_1-p24338 C-genome specific (napus-oleracea) | 0.9952153    | 0.9154415    | 0.9844961 | 0.8087731 | not scorable | not scorable |
| #### Bn-scaff_16721_1-p24679 C-genome specific (napus-oleracea) | 1            | 0.8031       | 1         | 0.6796627 | not scorable | not scorable |
| #### Bn-scaff_16721_1-p25103 C-genome specific (napus-oleracea) | 1            | 0.9319342    | 0.9922481 | 0.8686258 | not scorable | not scorable |
| #### Bn-scaff_16721_1-p25525 C-genome specific (napus-oleracea) | 1            | 0.8403366    | 0.9844961 | 0.7645748 | not scorable | not scorable |
| #### Bn-scaff_16721_1-p25917 C-genome specific (napus-oleracea) | 1            | 0.8957419    | 0.9922481 | 0.8097865 | not scorable | not scorable |
| #### Bn-scaff_16721_1-p26076 C-genome specific (napus-oleracea) | 0.9952153    | 0.8120102    | 0.9922481 | 0.685403  | not scorable | not scorable |
| #### Bn-scaff_16721_1-p26550 C-genome specific (napus-oleracea) | 0.9976076    | 0.7801016    | 0.9922481 | 0.7941874 | not scorable | not scorable |
| #### Bn-scaff_16721_1-p26592 C-genome specific (napus-oleracea) | 1            | 0.9528917    | 0.9612403 | 0.7700052 | not scorable | not scorable |
| #### Bn-scaff_16721_1-p26642 C-genome specific (napus-oleracea) | 1            | 0.8144658    | 0.9844961 | 0.8096872 | not scorable | not scorable |
| #### Bn-scaff_16721_1-p28079 C-genome specific (napus-oleracea) | 1            | 0.9393278    | 0.9922481 | 0.7999929 | not scorable | not scorable |
| #### Bn-scaff_16721_1-p28155 C-genome specific (napus-oleracea) | 0.9976076    | 0.7513949    | 0.9922481 | 0.6683341 | not scorable | not scorable |
| #### Bn-scaff_16721_1-p282 C-genome specific (napus-oleracea)   | 1            | 0.6709876    | 0.9844961 | 0.5593904 | not scorable | not scorable |
| #### Bn-scaff_16721_1-p28311 C-genome specific (napus-oleracea) | 0.9976076    | 0.7706251    | 0.9922481 | 0.7134058 | not scorable | not scorable |



|                                                                |              |              |           |           |              |              |
|----------------------------------------------------------------|--------------|--------------|-----------|-----------|--------------|--------------|
| #### Bn-scaff_16721_1-p29171C-genome specific (napus-oleracea) | 1            | 0.8663906    | 0.9922481 | 0.7757076 | not scorable | not scorable |
| #### Bn-scaff_16721_1-p29403C-genome specific (napus-oleracea) | 1            | 0.8321731    | 0.9922481 | 0.6883712 | not scorable | not scorable |
| #### Bn-scaff_16721_1-p31612C-genome specific (napus-oleracea) | 1            | 0.9214445    | 1         | 0.7648256 | not scorable | not scorable |
| #### Bn-scaff_16721_1-p31628C-genome specific (napus-oleracea) | 1            | 0.8204247    | 0.9922481 | 0.6593828 | not scorable | not scorable |
| #### Bn-scaff_16721_1-p31640C-genome specific (napus-oleracea) | 1            | 0.795231     | 0.9922481 | 0.6981403 | not scorable | not scorable |
| #### Bn-scaff_16721_1-p31663C-genome specific (napus-oleracea) | 1            | 0.7605278    | 0.9844961 | 0.8225504 | not scorable | not scorable |
| #### Bn-scaff_16721_1-p32343C-genome specific (napus-oleracea) | 0.9976076    | 0.8202555    | 1         | 0.7414125 | not scorable | not scorable |
| #### Bn-scaff_16721_1-p32357C-genome specific (napus-oleracea) | 0.9976076    | 0.764649     | 1         | 0.7273525 | not scorable | not scorable |
| #### Bn-scaff_16721_1-p32366C-genome specific (napus-oleracea) | 0.9976076    | 0.7950751    | 1         | 0.7533694 | not scorable | not scorable |
| #### Bn-scaff_16721_1-p32368C-genome specific (napus-oleracea) | 0.9976076    | 0.7461262    | 1         | 0.6296892 | not scorable | not scorable |
| #### Bn-scaff_16721_1-p32374C-genome specific (napus-oleracea) | 0.9976076    | 0.7855768    | 1         | 0.6691172 | not scorable | not scorable |
| #### Bn-scaff_16721_1-p32377C-genome specific (napus-oleracea) | 0.9976076    | 0.7900486    | 1         | 0.6632721 | not scorable | not scorable |
| #### Bn-scaff_16721_1-p32395C-genome specific (napus-oleracea) | 0.9976076    | 0.7819406    | 1         | 0.7170536 | not scorable | not scorable |
| #### Bn-scaff_16721_1-p32430C-genome specific (napus-oleracea) | 0.9976076    | 0.8822883    | 0.9844961 | 0.7955251 | not scorable | not scorable |
| #### Bn-scaff_16721_1-p32516C-genome specific (napus-oleracea) | 0.9976076    | 0.7989469    | 1         | 0.6791692 | not scorable | not scorable |
| #### Bn-scaff_16721_1-p32539C-genome specific (napus-oleracea) | 0.9952153    | 0.6843253    | 1         | 0.585052  | not scorable | not scorable |
| #### Bn-scaff_16721_1-p32540C-genome specific (napus-oleracea) | 0.9952153    | 0.7644546    | 0.9767442 | 0.5937868 | not scorable | not scorable |
| #### Bn-scaff_16721_1-p32565C-genome specific (napus-oleracea) | 0.9928229    | 0.7567868    | 1         | 0.7353424 | not scorable | not scorable |
| #### Bn-scaff_16721_1-p33060C-genome specific (napus-oleracea) | 0.9976076    | 0.7341098    | 0.9844961 | 0.7707755 | not scorable | not scorable |
| #### Bn-scaff_16721_1-p33131C-genome specific (oleracea only)  | not scorable | not scorable | 0.9922481 | 0.6844504 | not scorable | not scorable |
| #### Bn-scaff_16721_1-p33171C-genome specific (napus-oleracea) | 1            | 0.9070195    | 0.9922481 | 0.77539   | not scorable | not scorable |
| #### Bn-scaff_16721_1-p33178genome unspecific (oleracea-rapa)  | not scorable | not scorable | 0.9612403 | 0.7784982 | 0.661157     | 0.830686     |
| #### Bn-scaff_16721_1-p36063genome unspecific (all in)         | 0.9976076    | 0.5073043    | 1         | 0.2427301 | 1            | 0.6599184    |
| #### Bn-scaff_16721_1-p36068genome unspecific (all in)         | 0.9569378    | 0.2194875    | 0.9767442 | 0.6723838 | 1            | 0.8147262    |
| #### Bn-scaff_16721_1-p36196genome unspecific (oleracea-rapa)  | not scorable | not scorable | 0.9612403 | 0.2293573 | 1            | 0.7884539    |
| #### Bn-scaff_16721_1-p36747C-genome specific (oleracea only)  | not scorable | not scorable | 0.9844961 | 0.4947498 | not scorable | not scorable |
| #### Bn-scaff_16721_1-p36889C-genome specific (napus-oleracea) | 0.9952153    | 0.6271201    | 0.9457364 | 0.6646243 | not scorable | not scorable |
| #### Bn-scaff_16721_1-p37774C-genome specific (napus-oleracea) | 1            | 0.907208     | 0.9922481 | 0.8474768 | not scorable | not scorable |
| #### Bn-scaff_16721_1-p40157C-genome specific (napus-oleracea) | 1            | 0.9235849    | 0.9922481 | 0.8458923 | not scorable | not scorable |
| #### Bn-scaff_16721_1-p40176C-genome specific (napus-oleracea) | 0.9138756    | 0.8125779    | 0.3643411 | 0.916856  | not scorable | not scorable |
| #### Bn-scaff_16721_1-p40639C-genome specific (napus-oleracea) | 1            | 0.7186543    | 1         | 0.3200045 | not scorable | not scorable |
| #### Bn-scaff_16721_1-p40656C-genome specific (napus-oleracea) | 1            | 0.9221406    | 0.9922481 | 0.8338223 | not scorable | not scorable |
| #### Bn-scaff_16721_1-p43851C-genome specific (napus-oleracea) | 1            | 0.7930637    | 0.9844961 | 0.7182315 | not scorable | not scorable |

|                                                                 |              |              |              |              |              |              |
|-----------------------------------------------------------------|--------------|--------------|--------------|--------------|--------------|--------------|
| #### Bn-scaff_16721_1-p44037 C-genome specific (napus-oleracea) | 1            | 0.7280874    | 0.9922481    | 0.6202848    | not scorable | not scorable |
| #### Bn-scaff_16721_1-p44070 C-genome specific (napus-oleracea) | 1            | 0.7930637    | 0.9922481    | 0.6795362    | not scorable | not scorable |
| #### Bn-scaff_16721_1-p45275 C-genome specific (napus-oleracea) | 1            | 0.690262     | 0.9922481    | 0.6196613    | not scorable | not scorable |
| #### Bn-scaff_16721_1-p45293 C-genome specific (napus-oleracea) | 1            | 0.8154216    | 1            | 0.7473454    | not scorable | not scorable |
| #### Bn-scaff_16721_1-p45790 C-genome specific (napus-oleracea) | 1            | 0.8107639    | 1            | 0.6683435    | not scorable | not scorable |
| #### Bn-scaff_16721_1-p45796 C-genome specific (napus-oleracea) | 1            | 0.813673     | 0.9922481    | 0.5465395    | not scorable | not scorable |
| #### Bn-scaff_16721_1-p46254 C-genome specific (napus-oleracea) | 1            | 0.8578347    | 0.9922481    | 0.8252234    | not scorable | not scorable |
| #### Bn-scaff_16721_1-p4674 genome unspecific (all in)          | 0.9952153    | 0.3520786    | 1            | 0.2190192    | 1            | 0.831119     |
| #### Bn-scaff_16721_1-p4809 genome unspecific (all in)          | 0.9952153    | 0.3721261    | 0.9379845    | 0.3546408    | 1            | 0.9205657    |
| #### Bn-scaff_16721_1-p49412 C-genome specific (napus-oleracea) | 1            | 0.8151536    | 0.9844961    | 0.7270305    | not scorable | not scorable |
| #### Bn-scaff_16721_1-p49558 C-genome specific (napus-oleracea) | 0.9952153    | 0.7214773    | 0.9534883    | 0.8678525    | not scorable | not scorable |
| #### Bn-scaff_16721_1-p49605 C-genome specific (napus-oleracea) | 1            | 0.8332043    | 1            | 0.7583019    | not scorable | not scorable |
| #### Bn-scaff_16721_1-p51053 genome unspecific (all in)         | 0.9952153    | 0.4037693    | 0.8217054    | 0.8426755    | 1            | 0.9205657    |
| #### Bn-scaff_16721_1-p54070 C-genome specific (napus-oleracea) | 0.9976076    | 0.9258512    | 0.9922481    | 0.8519303    | not scorable | not scorable |
| #### Bn-scaff_16721_1-p55550 genome unspecific (all in)         | 0.9952153    | 0.6957899    | 0.9922481    | 0.7629164    | 1            | 0.8979173    |
| #### Bn-scaff_16721_1-p57126 napus specific                     | 0.9856459    | 0.7161865    | not scorable | not scorable | not scorable | not scorable |
| #### Bn-scaff_16721_1-p66046 C-genome specific (napus-oleracea) | 0.9904306    | 0.8112827    | 0.9922481    | 0.6878927    | not scorable | not scorable |
| #### Bn-scaff_16721_1-p66476 C-genome specific (napus-oleracea) | 0.9976076    | 0.8087779    | 1            | 0.3449622    | not scorable | not scorable |
| #### Bn-scaff_16721_1-p673 C-genome specific (napus-oleracea)   | 1            | 0.7027889    | 0.9922481    | 0.6061572    | not scorable | not scorable |
| #### Bn-scaff_16721_1-p744 genome unspecific (all in)           | 1            | 0.7692214    | 0.9612403    | 0.7078053    | 1            | 0.909388     |
| #### Bn-scaff_16721_1-p74461 C-genome specific (napus-oleracea) | 1            | 0.940101     | 0.9922481    | 0.8078629    | not scorable | not scorable |
| #### Bn-scaff_16721_1-p7795 genome unspecific (oleracea-rapa)   | not scorable | not scorable | 0.9534883    | 0.7060302    | 1            | 0.9169833    |
| #### Bn-scaff_16721_1-p79139 C-genome specific (napus-oleracea) | 1            | 0.9204668    | 0.9922481    | 0.8502966    | not scorable | not scorable |
| #### Bn-scaff_16721_1-p825 C-genome specific (napus-oleracea)   | 1            | 0.8094452    | 0.9922481    | 0.79119      | not scorable | not scorable |
| #### Bn-scaff_16721_1-p82553 C-genome specific (oleracea only)  | not scorable | not scorable | 0.9922481    | 0.7355274    | not scorable | not scorable |
| #### Bn-scaff_16721_1-p827 C-genome specific (napus-oleracea)   | 0.9976076    | 0.7457469    | 0.9922481    | 0.6897036    | not scorable | not scorable |
| #### Bn-scaff_16755_1-p10000 C-genome specific (oleracea only)  | not scorable | not scorable | 0.7674419    | 0.7518313    | not scorable | not scorable |
| #### Bn-scaff_16755_1-p10085 C-genome specific (napus-oleracea) | 0.9808612    | 0.7711241    | 0.9767442    | 0.7941723    | not scorable | not scorable |
| #### Bn-scaff_16755_1-p11124 genome unspecific (all in)         | 0.9856459    | 0.3449465    | 1            | 0.7297207    | 0.9752066    | 0.6961668    |
| #### Bn-scaff_16755_1-p11125 genome unspecific (all in)         | 0.9784689    | 0.3930841    | 1            | 0.7348429    | 0.9917355    | 0.6929698    |
| #### Bn-scaff_16755_1-p11495 C-genome specific (napus-oleracea) | 0.937799     | 0.8232982    | 1            | 0.7131667    | not scorable | not scorable |
| #### Bn-scaff_16755_1-p11642 genome unspecific (all in)         | 0.9665072    | 0.5189557    | 1            | 0.6809629    | 1            | 0.9349055    |
| #### Bn-scaff_16755_1-p11742 C-genome specific (napus-oleracea) | 0.9569378    | 0.6974068    | 1            | 0.6498278    | not scorable | not scorable |

|                                                                  |              |              |           |           |              |              |
|------------------------------------------------------------------|--------------|--------------|-----------|-----------|--------------|--------------|
| ##### Bn-scaff_16755_1-p11845 C-genome specific (napus-oleracea) | 0.9641148    | 0.7184268    | 0.875969  | 0.7994906 | not scorable | not scorable |
| ##### Bn-scaff_16755_1-p11911 C-genome specific (napus-oleracea) | 0.9593301    | 0.5200401    | 0.8992248 | 0.6117042 | not scorable | not scorable |
| ##### Bn-scaff_16755_1-p11940 C-genome specific (napus-oleracea) | 0.9808612    | 0.7581604    | 0.9844961 | 0.7666249 | not scorable | not scorable |
| ##### Bn-scaff_16755_1-p11951 C-genome specific (napus-oleracea) | 0.9641148    | 0.7269546    | 0.9457364 | 0.8443902 | not scorable | not scorable |
| ##### Bn-scaff_16755_1-p12014 C-genome specific (napus-oleracea) | 0.9760765    | 0.7357629    | 0.9844961 | 0.775675  | not scorable | not scorable |
| ##### Bn-scaff_16755_1-p12081 C-genome specific (napus-oleracea) | 0.9736842    | 0.6829339    | 1         | 0.7174329 | not scorable | not scorable |
| ##### Bn-scaff_16755_1-p12092 C-genome specific (napus-oleracea) | 0.9688995    | 0.7705978    | 0.7286822 | 0.7620176 | not scorable | not scorable |
| ##### Bn-scaff_16755_1-p12097 C-genome specific (napus-oleracea) | 0.9712918    | 0.7601281    | 0.7364341 | 0.7967455 | not scorable | not scorable |
| ##### Bn-scaff_16755_1-p12541 C-genome specific (napus-oleracea) | 0.9904306    | 0.6958655    | 0.9922481 | 0.634003  | not scorable | not scorable |
| ##### Bn-scaff_16755_1-p12783 C-genome specific (napus-oleracea) | 0.9473684    | 0.7597549    | 0.8914729 | 0.7607021 | not scorable | not scorable |
| ##### Bn-scaff_16755_1-p12810 C-genome specific (napus-oleracea) | 0.9449761    | 0.7496845    | 0.8914729 | 0.6752092 | not scorable | not scorable |
| ##### Bn-scaff_16755_1-p12903 C-genome specific (napus-oleracea) | 0.9736842    | 0.6824485    | 0.9844961 | 0.7051915 | not scorable | not scorable |
| ##### Bn-scaff_16755_1-p12906 C-genome specific (oleracea only)  | not scorable | not scorable | 0.5193799 | 0.7220269 | not scorable | not scorable |
| ##### Bn-scaff_16755_1-p12916 C-genome specific (napus-oleracea) | 0.9808612    | 0.8476468    | 0.9844961 | 0.8096758 | not scorable | not scorable |
| ##### Bn-scaff_16755_1-p13279 C-genome specific (napus-oleracea) | 0.9497608    | 0.9459876    | 0.9844961 | 0.8278784 | not scorable | not scorable |
| ##### Bn-scaff_16755_1-p13394 C-genome specific (napus-oleracea) | 0.9688995    | 0.9196455    | 0.9689922 | 0.6971505 | not scorable | not scorable |
| ##### Bn-scaff_16755_1-p13394 C-genome specific (napus-oleracea) | 0.9449761    | 0.8197644    | 0.9844961 | 0.8327913 | not scorable | not scorable |
| ##### Bn-scaff_16755_1-p13577 C-genome specific (napus-oleracea) | 0.9904306    | 0.7325507    | 0.9689922 | 0.7389652 | not scorable | not scorable |
| ##### Bn-scaff_16755_1-p13643 C-genome specific (napus-oleracea) | 0.9760765    | 0.7623844    | 0.7596899 | 0.74724   | not scorable | not scorable |
| ##### Bn-scaff_16755_1-p13967 C-genome specific (napus-oleracea) | 0.9641148    | 0.6617181    | 0.9844961 | 0.7944069 | not scorable | not scorable |
| ##### Bn-scaff_16755_1-p13976 C-genome specific (napus-oleracea) | 0.9760765    | 0.7350998    | 1         | 0.7405041 | not scorable | not scorable |
| ##### Bn-scaff_16755_1-p14269 genome unspecific (all in)         | 0.9545454    | 0.4519817    | 0.9689922 | 0.5070447 | 1            | 0.7622204    |
| ##### Bn-scaff_16755_1-p14271 genome unspecific (oleracea-rapa)  | not scorable | not scorable | 1         | 0.7474777 | 0.9669421    | 0.7848199    |
| ##### Bn-scaff_16755_1-p14276 C-genome specific (napus-oleracea) | 0.9880383    | 0.6982375    | 1         | 0.732067  | not scorable | not scorable |
| ##### Bn-scaff_16755_1-p14280 C-genome specific (napus-oleracea) | 0.9928229    | 0.7395666    | 1         | 0.7331335 | not scorable | not scorable |
| ##### Bn-scaff_16755_1-p14599 C-genome specific (napus-oleracea) | 0.9880383    | 0.6694728    | 0.9844961 | 0.6625077 | not scorable | not scorable |
| ##### Bn-scaff_16755_1-p14609 C-genome specific (napus-oleracea) | 0.9880383    | 0.8235722    | 0.9844961 | 0.8100438 | not scorable | not scorable |
| ##### Bn-scaff_16755_1-p14613 C-genome specific (napus-oleracea) | 0.9832536    | 0.7535704    | 0.9689922 | 0.7482599 | not scorable | not scorable |
| ##### Bn-scaff_16755_1-p14682 C-genome specific (napus-oleracea) | 0.9880383    | 0.8129013    | 1         | 0.7387908 | not scorable | not scorable |
| ##### Bn-scaff_16755_1-p14690 C-genome specific (napus-oleracea) | 0.9832536    | 0.8148937    | 0.9767442 | 0.6821043 | not scorable | not scorable |
| ##### Bn-scaff_16755_1-p14739 C-genome specific (napus-oleracea) | 0.9736842    | 0.7480546    | 0.9224806 | 0.747416  | not scorable | not scorable |
| ##### Bn-scaff_16755_1-p14744 C-genome specific (napus-oleracea) | 0.9784689    | 0.7268353    | 0.9302326 | 0.703626  | not scorable | not scorable |
| ##### Bn-scaff_16755_1-p14753 C-genome specific (napus-oleracea) | 0.9808612    | 0.7716931    | 0.9379845 | 0.707836  | not scorable | not scorable |

|                                                                 |           |           |           |           |              |              |
|-----------------------------------------------------------------|-----------|-----------|-----------|-----------|--------------|--------------|
| #### Bn-scaff_16755_1-p14755 C-genome specific (napus-oleracea) | 0.9784689 | 0.7886342 | 0.9302326 | 0.8051243 | not scorable | not scorable |
| #### Bn-scaff_16755_1-p14756 C-genome specific (napus-oleracea) | 0.9856459 | 0.7697269 | 0.9302326 | 0.7555234 | not scorable | not scorable |
| #### Bn-scaff_16755_1-p14758 C-genome specific (napus-oleracea) | 0.9832536 | 0.8085127 | 0.9379845 | 0.7919896 | not scorable | not scorable |
| #### Bn-scaff_16755_1-p14764 C-genome specific (napus-oleracea) | 0.9784689 | 0.7708535 | 0.9457364 | 0.8092235 | not scorable | not scorable |
| #### Bn-scaff_16755_1-p14765 C-genome specific (napus-oleracea) | 0.9760765 | 0.7126055 | 0.9224806 | 0.7115049 | not scorable | not scorable |
| #### Bn-scaff_16755_1-p14776 C-genome specific (napus-oleracea) | 0.9784689 | 0.7934932 | 0.9302326 | 0.7607112 | not scorable | not scorable |
| #### Bn-scaff_16755_1-p14778 C-genome specific (napus-oleracea) | 0.9736842 | 0.7401819 | 0.9457364 | 0.7114244 | not scorable | not scorable |
| #### Bn-scaff_16755_1-p14779 C-genome specific (napus-oleracea) | 0.9856459 | 0.8116584 | 0.9302326 | 0.8110844 | not scorable | not scorable |
| #### Bn-scaff_16755_1-p14780 C-genome specific (napus-oleracea) | 0.9784689 | 0.8115088 | 0.9534883 | 0.7593343 | not scorable | not scorable |
| #### Bn-scaff_16755_1-p14781 C-genome specific (napus-oleracea) | 0.9832536 | 0.8243482 | 0.9457364 | 0.7409698 | not scorable | not scorable |
| #### Bn-scaff_16755_1-p14784 C-genome specific (napus-oleracea) | 0.9832536 | 0.8073032 | 0.9534883 | 0.7052697 | not scorable | not scorable |
| #### Bn-scaff_16755_1-p14785 C-genome specific (napus-oleracea) | 0.9760765 | 0.6880682 | 0.9457364 | 0.6503857 | not scorable | not scorable |
| #### Bn-scaff_16755_1-p14812 C-genome specific (napus-oleracea) | 0.9760765 | 0.801289  | 0.9457364 | 0.6977261 | not scorable | not scorable |
| #### Bn-scaff_16755_1-p14825 C-genome specific (napus-oleracea) | 0.9832536 | 0.7997573 | 0.9379845 | 0.7812218 | not scorable | not scorable |
| #### Bn-scaff_16755_1-p14826 C-genome specific (napus-oleracea) | 0.9784689 | 0.827228  | 0.9457364 | 0.7688704 | not scorable | not scorable |
| #### Bn-scaff_16755_1-p14829 C-genome specific (napus-oleracea) | 0.9784689 | 0.746644  | 0.9302326 | 0.7148256 | not scorable | not scorable |
| #### Bn-scaff_16755_1-p14830 C-genome specific (napus-oleracea) | 0.9688995 | 0.7133534 | 0.9379845 | 0.6287056 | not scorable | not scorable |
| #### Bn-scaff_16755_1-p14888 C-genome specific (napus-oleracea) | 0.9880383 | 0.4284097 | 0.9302326 | 0.3484938 | not scorable | not scorable |
| #### Bn-scaff_16755_1-p14939 C-genome specific (napus-oleracea) | 0.9832536 | 0.8825033 | 0.9844961 | 0.8316163 | not scorable | not scorable |
| #### Bn-scaff_16755_1-p14948 genome unspecific (all in)         | 0.9832536 | 0.3156615 | 0.9689922 | 0.636486  | 1            | 0.821676     |
| #### Bn-scaff_16755_1-p14971 genome unspecific (all in)         | 0.9545454 | 0.2895739 | 0.9922481 | 0.6575348 | 1            | 0.8004208    |
| #### Bn-scaff_16755_1-p14989 C-genome specific (napus-oleracea) | 0.9928229 | 0.8009736 | 1         | 0.7934946 | not scorable | not scorable |
| #### Bn-scaff_16755_1-p15035 C-genome specific (napus-oleracea) | 0.9928229 | 0.726624  | 0.875969  | 0.8198946 | not scorable | not scorable |
| #### Bn-scaff_16755_1-p15046 C-genome specific (napus-oleracea) | 0.9904306 | 0.7022437 | 0.9922481 | 0.7765536 | not scorable | not scorable |
| #### Bn-scaff_16755_1-p15095 C-genome specific (napus-oleracea) | 0.9808612 | 0.7101992 | 1         | 0.7537807 | not scorable | not scorable |
| #### Bn-scaff_16755_1-p22382 genome unspecific (all in)         | 0.9808612 | 0.504523  | 1         | 0.823379  | 1            | 0.823379     |
| #### Bn-scaff_16755_1-p25252 genome unspecific (all in)         | 0.9449761 | 0.4464973 | 1         | 0.8171366 | 1            | 0.9244215    |
| #### Bn-scaff_16755_1-p32587 genome unspecific (all in)         | 0.9904306 | 0.3433606 | 0.9922481 | 0.7094772 | 1            | 0.6784759    |
| #### Bn-scaff_16755_1-p32706 C-genome specific (napus-oleracea) | 0.9497608 | 0.1731137 | 1         | 0.8942884 | not scorable | not scorable |
| #### Bn-scaff_16755_1-p35287 C-genome specific (napus-oleracea) | 0.9760765 | 0.8286107 | 1         | 0.8079847 | not scorable | not scorable |
| #### Bn-scaff_16755_1-p41191 genome unspecific (all in)         | 0.9736842 | 0.299141  | 1         | 0.847023  | 1            | 0.8396052    |
| #### Bn-scaff_16755_1-p41836 C-genome specific (napus-oleracea) | 0.9641148 | 0.8685877 | 0.9689922 | 0.7258075 | not scorable | not scorable |
| #### Bn-scaff_16755_1-p43628 genome unspecific (all in)         | 0.9665072 | 0.6237724 | 0.9844961 | 0.6871734 | 1            | 0.9337679    |

|                                                                 |              |              |              |              |              |              |
|-----------------------------------------------------------------|--------------|--------------|--------------|--------------|--------------|--------------|
| #### Bn-scaff_16755_1-p43939 genome unspecific (oleracea-rapa)  | not scorable | not scorable | 0.8992248    | 0.5352881    | 1            | 0.8786194    |
| #### Bn-scaff_16755_1-p50207 genome unspecific (all in)         | 1            | 0.6133477    | 1            | 0.6186296    | 0.9669421    | 0.6622344    |
| #### Bn-scaff_16755_1-p51538 A-genome specific (rapa only)      | not scorable | not scorable | not scorable | not scorable | 0.9834711    | 0.6626808    |
| #### Bn-scaff_16755_1-p51580 genome unspecific (all in)         | 0.9976076    | 0.4960856    | 1            | 0.7825814    | 0.9917355    | 0.5028047    |
| #### Bn-scaff_16755_1-p61464 A-genome specific (napus-rapa)     | 0.9593301    | 0.7876596    | not scorable | not scorable | 0.9752066    | 0.6168979    |
| #### Bn-scaff_16755_1-p87263 genome unspecific (all in)         | 0.9521531    | 0.4765352    | 0.9767442    | 0.7591442    | 1            | 0.9304601    |
| #### Bn-scaff_16755_1-p87800 C-genome specific (napus-oleracea) | 0.9521531    | 0.9328267    | 0.9922481    | 0.6731968    | not scorable | not scorable |
| #### Bn-scaff_16755_1-p89474 C-genome specific (napus-oleracea) | 0.9760765    | 0.8633798    | 0.9767442    | 0.7332517    | not scorable | not scorable |
| #### Bn-scaff_16755_1-p90297 C-genome specific (napus-oleracea) | 0.9688995    | 0.4860076    | 1            | 0.4926687    | not scorable | not scorable |
| #### Bn-scaff_16755_1-p90335 C-genome specific (napus-oleracea) | 0.9784689    | 0.7787132    | 0.9844961    | 0.7353762    | not scorable | not scorable |
| #### Bn-scaff_16755_1-p90371 C-genome specific (napus-oleracea) | 0.9880383    | 0.7547901    | 0.9844961    | 0.7832583    | not scorable | not scorable |
| #### Bn-scaff_16755_1-p91083 C-genome specific (napus-oleracea) | 0.9712918    | 0.4987831    | 0.9844961    | 0.3795902    | not scorable | not scorable |
| #### Bn-scaff_16755_1-p92715 C-genome specific (napus-oleracea) | 0.9569378    | 0.8245624    | 0.9534883    | 0.7413538    | not scorable | not scorable |
| #### Bn-scaff_16755_1-p92792 C-genome specific (napus-oleracea) | 0.9569378    | 0.8708031    | 0.9767442    | 0.7248673    | not scorable | not scorable |
| #### Bn-scaff_16755_1-p93426 C-genome specific (napus-oleracea) | 0.9712918    | 0.8869727    | 0.9922481    | 0.8525339    | not scorable | not scorable |
| #### Bn-scaff_16755_1-p94695 all not scorable                   | not scorable | not scorable | not scorable | not scorable | not scorable | not scorable |
| #### Bn-scaff_16755_1-p94858 C-genome specific (napus-oleracea) | 0.9712918    | 0.7683073    | 0.9612403    | 0.7210039    | not scorable | not scorable |
| #### Bn-scaff_16755_1-p95305 C-genome specific (napus-oleracea) | 0.9617225    | 0.8361616    | 0.9534883    | 0.670136     | not scorable | not scorable |
| #### Bn-scaff_16755_1-p95398 C-genome specific (napus-oleracea) | 0.9760765    | 0.844144     | 0.9922481    | 0.7348029    | not scorable | not scorable |
| #### Bn-scaff_16755_1-p95626 C-genome specific (napus-oleracea) | 0.9545454    | 0.8232625    | 0.9922481    | 0.653056     | not scorable | not scorable |
| #### Bn-scaff_16755_1-p95632 C-genome specific (napus-oleracea) | 0.9808612    | 0.6648694    | 0.9922481    | 0.6914364    | not scorable | not scorable |
| #### Bn-scaff_16755_1-p96632 C-genome specific (napus-oleracea) | 0.9808612    | 0.7660123    | 0.9767442    | 0.7191017    | not scorable | not scorable |
| #### Bn-scaff_16755_1-p97037 C-genome specific (napus-oleracea) | 0.9856459    | 0.7518371    | 0.9922481    | 0.7992289    | not scorable | not scorable |
| #### Bn-scaff_16755_1-p97046 C-genome specific (napus-oleracea) | 0.9760765    | 0.7433205    | 0.9767442    | 0.7951839    | not scorable | not scorable |
| #### Bn-scaff_16755_1-p97477 C-genome specific (napus-oleracea) | 0.9784689    | 0.7351919    | 0.9844961    | 0.8023971    | not scorable | not scorable |
| #### Bn-scaff_16755_1-p98043 C-genome specific (napus-oleracea) | 0.9904306    | 0.7659664    | 0.9844961    | 0.8059768    | not scorable | not scorable |
| #### Bn-scaff_16755_1-p98209 C-genome specific (napus-oleracea) | 0.9928229    | 0.7728848    | 0.9844961    | 0.7296075    | not scorable | not scorable |
| #### Bn-scaff_16759_1-p26481 genome unspecific (all in)         | 0.9976076    | 0.4049509    | 1            | 0.8234124    | 1            | 0.9224059    |
| #### Bn-scaff_16759_1-p28657 A-genome specific (napus-rapa)     | 0.8947368    | 0.2971088    | not scorable | not scorable | 1            | 0.8020393    |
| #### Bn-scaff_16759_1-p40609 C-genome specific (napus-oleracea) | 0.9952153    | 0.8620287    | 0.9922481    | 0.7269011    | not scorable | not scorable |
| #### Bn-scaff_16759_1-p40613 C-genome specific (napus-oleracea) | 0.9856459    | 0.7333034    | 1            | 0.9175813    | not scorable | not scorable |
| #### Bn-scaff_16759_1-p58467 C-genome specific (napus-oleracea) | 0.9904306    | 0.6038188    | 1            | 0.690158     | not scorable | not scorable |
| #### Bn-scaff_16766_1-p10128 C-genome specific (napus-oleracea) | 0.9880383    | 0.6839325    | 0.9922481    | 0.7596488    | not scorable | not scorable |

|                                                                |              |              |              |              |              |              |
|----------------------------------------------------------------|--------------|--------------|--------------|--------------|--------------|--------------|
| #### Bn-scaff_16766_1-p11981C-genome specific (napus-oleracea) | 0.6842105    | 0.8062898    | 0.2713178    | 0.7793885    | not scorable | not scorable |
| #### Bn-scaff_16766_1-p13667genome unspecific (oleracea-rapa)  | not scorable | not scorable | 0.9922481    | 0.2501231    | 0.9834711    | 0.79373      |
| #### Bn-scaff_16766_1-p15059genome unspecific (all in)         | 0.9808612    | 0.3604026    | 0.9922481    | 0.5600658    | 1            | 0.6281739    |
| #### Bn-scaff_16766_1-p17048C-genome specific (napus-oleracea) | 0.9880383    | 0.7444198    | 0.9922481    | 0.8403341    | not scorable | not scorable |
| #### Bn-scaff_16766_1-p17827C-genome specific (napus-oleracea) | 1            | 0.3546486    | 1            | 0.860727     | not scorable | not scorable |
| #### Bn-scaff_16766_1-p17906C-genome specific (napus-oleracea) | 0.9856459    | 0.2942551    | 0.9922481    | 0.3958864    | not scorable | not scorable |
| #### Bn-scaff_16766_1-p19987C-genome specific (napus-oleracea) | 0.9712918    | 0.7627175    | 1            | 0.7997485    | not scorable | not scorable |
| #### Bn-scaff_16766_1-p20550C-genome specific (napus-oleracea) | 0.9928229    | 0.7882499    | 0.9844961    | 0.759288     | not scorable | not scorable |
| #### Bn-scaff_16766_1-p21187C-genome specific (napus-oleracea) | 0.9760765    | 0.688965     | 0.9689922    | 0.7031907    | not scorable | not scorable |
| #### Bn-scaff_16766_1-p22452C-genome specific (napus-oleracea) | 0.9808612    | 0.7165812    | 0.9922481    | 0.755881     | not scorable | not scorable |
| #### Bn-scaff_16766_1-p28912genome unspecific (all in)         | 0.9880383    | 0.2726385    | 1            | 0.6269584    | 0.9917355    | 0.4094705    |
| #### Bn-scaff_16766_1-p3301 C-genome specific (napus-oleracea) | 0.9784689    | 0.6968609    | 1            | 0.6977694    | not scorable | not scorable |
| #### Bn-scaff_16766_1-p3371 C-genome specific (napus-oleracea) | 0.9856459    | 0.6199782    | 1            | 0.5883998    | not scorable | not scorable |
| #### Bn-scaff_16766_1-p41988C-genome specific (oleracea only)  | not scorable | not scorable | 0.9844961    | 0.6419102    | not scorable | not scorable |
| #### Bn-scaff_16766_1-p52386C-genome specific (napus-oleracea) | 1            | 0.7065035    | 0.9844961    | 0.6404186    | not scorable | not scorable |
| #### Bn-scaff_16766_1-p54751C-genome specific (napus-oleracea) | 1            | 0.5279351    | 1            | 0.6161742    | not scorable | not scorable |
| #### Bn-scaff_16766_1-p57407genome unspecific (all in)         | 0.9976076    | 0.3679114    | 1            | 0.6937867    | 1            | 0.865738     |
| #### Bn-scaff_16766_1-p59101C-genome specific (napus-oleracea) | 0.9712918    | 0.7211807    | 1            | 0.5725058    | not scorable | not scorable |
| #### Bn-scaff_16766_1-p67896C-genome specific (napus-oleracea) | 0.9952153    | 0.8999865    | 0.9922481    | 0.7816378    | not scorable | not scorable |
| #### Bn-scaff_16766_1-p80939C-genome specific (napus-oleracea) | 0.9880383    | 0.2604622    | 1            | 0.9311776    | not scorable | not scorable |
| #### Bn-scaff_16766_1-p98465C-genome specific (napus-oleracea) | 0.9712918    | 0.5645787    | 0.9767442    | 0.6301531    | not scorable | not scorable |
| #### Bn-scaff_16770_1-p10786C-genome specific (napus-oleracea) | 0.9832536    | 0.8086042    | 0.9302326    | 0.7077768    | not scorable | not scorable |
| #### Bn-scaff_16770_1-p11374C-genome specific (napus-oleracea) | 1            | 0.7811325    | 0.9922481    | 0.8297359    | not scorable | not scorable |
| #### Bn-scaff_16770_1-p13030C-genome specific (napus-oleracea) | 0.9976076    | 0.7059719    | 0.9069768    | 0.7972026    | not scorable | not scorable |
| #### Bn-scaff_16770_1-p13578C-genome specific (napus-oleracea) | 0.9952153    | 0.8016458    | 1            | 0.7536213    | not scorable | not scorable |
| #### Bn-scaff_16770_1-p15785C-genome specific (napus-oleracea) | 0.9832536    | 0.2485503    | 0.9922481    | 0.231273     | not scorable | not scorable |
| #### Bn-scaff_16770_1-p17465genome unspecific (all in)         | 0.9976076    | 0.5367829    | 0.9767442    | 0.7346556    | 1            | 0.9104338    |
| #### Bn-scaff_16770_1-p19248C-genome specific (napus-oleracea) | 0.9952153    | 0.8813428    | 0.9922481    | 0.8262134    | not scorable | not scorable |
| #### Bn-scaff_16770_1-p19693genome unspecific (all in)         | 0.9928229    | 0.3425235    | 1            | 0.906221     | 0.9917355    | 0.8527707    |
| #### Bn-scaff_16770_1-p20826genome unspecific (all in)         | 1            | 0.4713161    | 0.9922481    | 0.7013776    | 1            | 0.9175809    |
| #### Bn-scaff_16770_1-p21283C-genome specific (napus-oleracea) | 0.9521531    | 0.2325859    | 0.9612403    | 0.2200569    | not scorable | not scorable |
| #### Bn-scaff_16770_1-p21766C-genome specific (napus-oleracea) | 0.9808612    | 0.7019084    | 0.8139535    | 0.6487055    | not scorable | not scorable |
| #### Bn-scaff_16770_1-p21823napus specific                     | 0.9832536    | 0.6885161    | not scorable | not scorable | not scorable | not scorable |

|                                                                 |              |              |              |              |              |              |
|-----------------------------------------------------------------|--------------|--------------|--------------|--------------|--------------|--------------|
| #### Bn-scaff_16770_1-p22170 genome unspecific (all in)         | 0.9976076    | 0.3866644    | 0.9767442    | 0.8101153    | 1            | 0.8891289    |
| #### Bn-scaff_16770_1-p22337 genome unspecific (all in)         | 1            | 0.4909359    | 0.9922481    | 0.847589     | 0.9917355    | 0.7677914    |
| #### Bn-scaff_16770_1-p23253 genome unspecific (all in)         | 1            | 0.6764519    | 1            | 0.6206321    | 1            | 0.6822037    |
| #### Bn-scaff_16770_1-p25779 genome unspecific (all in)         | 1            | 0.4432534    | 1            | 0.8259578    | 0.9586777    | 0.6452828    |
| #### Bn-scaff_16770_1-p27237 C-genome specific (napus-oleracea) | 0.9928229    | 0.774334     | 0.9844961    | 0.8433619    | not scorable | not scorable |
| #### Bn-scaff_16770_1-p27239 C-genome specific (napus-oleracea) | 0.9976076    | 0.7507437    | 0.9844961    | 0.7955032    | not scorable | not scorable |
| #### Bn-scaff_16770_1-p27276 genome unspecific (all in)         | 0.9617225    | 0.5700739    | 0.9767442    | 0.5980583    | 1            | 0.931825     |
| #### Bn-scaff_16770_1-p27425 C-genome specific (napus-oleracea) | 0.9928229    | 0.6077471    | 0.9767442    | 0.737264     | not scorable | not scorable |
| #### Bn-scaff_16770_1-p27440 C-genome specific (napus-oleracea) | 0.9904306    | 0.8186485    | 0.9767442    | 0.797069     | not scorable | not scorable |
| #### Bn-scaff_16770_1-p27899 genome unspecific (all in)         | 0.9976076    | 0.9167094    | 0.8682171    | 0.7407597    | 1            | 0.947129     |
| #### Bn-scaff_16770_1-p27952 C-genome specific (napus-oleracea) | 0.8755981    | 0.6551495    | 0.9922481    | 0.722212     | not scorable | not scorable |
| #### Bn-scaff_16770_1-p28037 genome unspecific (all in)         | 1            | 0.5057336    | 1            | 0.8886954    | 1            | 0.8394074    |
| #### Bn-scaff_16770_1-p28052 C-genome specific (napus-oleracea) | 0.9904306    | 0.7901372    | 0.9844961    | 0.7125539    | not scorable | not scorable |
| #### Bn-scaff_16770_1-p28186 genome unspecific (all in)         | 0.9904306    | 0.3395817    | 0.9922481    | 0.8014906    | 1            | 0.8645355    |
| #### Bn-scaff_16770_1-p28187 C-genome specific (napus-oleracea) | 0.9976076    | 0.5885116    | 0.9922481    | 0.8338217    | not scorable | not scorable |
| #### Bn-scaff_16770_1-p28188 genome unspecific (oleracea-rapa)  | not scorable | not scorable | 1            | 0.7627774    | 1            | 0.7995756    |
| #### Bn-scaff_16770_1-p28612 C-genome specific (napus-oleracea) | 0.9066986    | 0.7471811    | 0.9767442    | 0.7932267    | not scorable | not scorable |
| #### Bn-scaff_16770_1-p28614 C-genome specific (napus-oleracea) | 0.9043062    | 0.793625     | 0.9844961    | 0.7828959    | not scorable | not scorable |
| #### Bn-scaff_16770_1-p29093 genome unspecific (all in)         | 0.9928229    | 0.3227303    | 0.9767442    | 0.5764547    | 1            | 0.7376376    |
| #### Bn-scaff_16770_1-p29466 C-genome specific (napus-oleracea) | 0.9521531    | 0.7171817    | 0.9844961    | 0.6985081    | not scorable | not scorable |
| #### Bn-scaff_16770_1-p29485 C-genome specific (napus-oleracea) | 0.9856459    | 0.67458      | 1            | 0.6205772    | not scorable | not scorable |
| #### Bn-scaff_16770_1-p29768 C-genome specific (napus-oleracea) | 0.9904306    | 0.8185683    | 1            | 0.9088816    | not scorable | not scorable |
| #### Bn-scaff_16770_1-p29796 C-genome specific (napus-oleracea) | 0.9880383    | 0.7155916    | 0.8914729    | 0.9175862    | not scorable | not scorable |
| #### Bn-scaff_16770_1-p29831 napus specific                     | 0.9952153    | 0.833743     | not scorable | not scorable | not scorable | not scorable |
| #### Bn-scaff_16770_1-p29849 C-genome specific (napus-oleracea) | 0.9880383    | 0.7624856    | 0.9379845    | 0.7369454    | not scorable | not scorable |
| #### Bn-scaff_16770_1-p29852 C-genome specific (napus-oleracea) | 0.9928229    | 0.7160924    | 0.9922481    | 0.7177193    | not scorable | not scorable |
| #### Bn-scaff_16770_1-p29854 C-genome specific (napus-oleracea) | 0.9808612    | 0.7325492    | 0.9922481    | 0.7504494    | not scorable | not scorable |
| #### Bn-scaff_16770_1-p29855 C-genome specific (napus-oleracea) | 0.9856459    | 0.7785572    | 0.9922481    | 0.874188     | not scorable | not scorable |
| #### Bn-scaff_16770_1-p29860 C-genome specific (napus-oleracea) | 0.9952153    | 0.7631294    | 1            | 0.7199972    | not scorable | not scorable |
| #### Bn-scaff_16770_1-p29863 C-genome specific (napus-oleracea) | 0.9952153    | 0.7875097    | 0.9767442    | 0.7440875    | not scorable | not scorable |
| #### Bn-scaff_16770_1-p29882 genome unspecific (all in)         | 0.9521531    | 0.3899806    | 1            | 0.7659914    | 1            | 0.4476578    |
| #### Bn-scaff_16770_1-p29892 C-genome specific (napus-oleracea) | 0.9928229    | 0.8092622    | 0.9922481    | 0.7587295    | not scorable | not scorable |
| #### Bn-scaff_16770_1-p29924 C-genome specific (napus-oleracea) | 0.9904306    | 0.7360992    | 0.9922481    | 0.8632445    | not scorable | not scorable |

|                                                                 |              |              |           |           |              |              |
|-----------------------------------------------------------------|--------------|--------------|-----------|-----------|--------------|--------------|
| #### Bn-scaff_16770_1-p29950 C-genome specific (napus-oleracea) | 0.9928229    | 0.8207017    | 0.9922481 | 0.8566433 | not scorable | not scorable |
| #### Bn-scaff_16770_1-p29957 C-genome specific (napus-oleracea) | 0.9856459    | 0.5310589    | 0.9922481 | 0.5873021 | not scorable | not scorable |
| #### Bn-scaff_16770_1-p30096 C-genome specific (napus-oleracea) | 1            | 0.5414369    | 1         | 0.705704  | not scorable | not scorable |
| #### Bn-scaff_16770_1-p30096 C-genome specific (napus-oleracea) | 0.9976076    | 0.7356952    | 1         | 0.7389055 | not scorable | not scorable |
| #### Bn-scaff_16770_1-p30132 C-genome specific (napus-oleracea) | 0.9952153    | 0.6491885    | 0.9767442 | 0.6341816 | not scorable | not scorable |
| #### Bn-scaff_16770_1-p30133 C-genome specific (napus-oleracea) | 0.9976076    | 0.6435147    | 0.9767442 | 0.5448968 | not scorable | not scorable |
| #### Bn-scaff_16770_1-p30293 C-genome specific (napus-oleracea) | 0.9928229    | 0.7650701    | 0.9922481 | 0.7659569 | not scorable | not scorable |
| #### Bn-scaff_16770_1-p30344 C-genome specific (oleracea only)  | not scorable | not scorable | 0.7054263 | 0.7770717 | not scorable | not scorable |
| #### Bn-scaff_16770_1-p30507 genome unspecific (oleracea-rapa)  | not scorable | not scorable | 1         | 0.7367962 | 0.9834711    | 0.6315225    |
| #### Bn-scaff_16770_1-p30509 C-genome specific (napus-oleracea) | 0.9952153    | 0.7313822    | 0.9689922 | 0.8053111 | not scorable | not scorable |
| #### Bn-scaff_16770_1-p30522 genome unspecific (all in)         | 1            | 0.393915     | 1         | 0.9018224 | 1            | 0.8132856    |
| #### Bn-scaff_16770_1-p30563 C-genome specific (napus-oleracea) | 1            | 0.7174104    | 0.9922481 | 0.6508884 | not scorable | not scorable |
| #### Bn-scaff_16770_1-p30627 C-genome specific (napus-oleracea) | 0.9976076    | 0.7751578    | 0.9844961 | 0.6518629 | not scorable | not scorable |
| #### Bn-scaff_16770_1-p31102 genome unspecific (all in)         | 0.9976076    | 0.6201372    | 1         | 0.6390437 | 0.8595041    | 0.9525799    |
| #### Bn-scaff_16770_1-p31216 genome unspecific (all in)         | 1            | 0.4321184    | 1         | 0.7198815 | 0.9752066    | 0.7797832    |
| #### Bn-scaff_16770_1-p31294 C-genome specific (napus-oleracea) | 0.9952153    | 0.8534385    | 1         | 0.7528924 | not scorable | not scorable |
| #### Bn-scaff_16770_1-p31421 genome unspecific (all in)         | 0.9928229    | 0.2999752    | 1         | 0.7514572 | 0.9917355    | 0.7681295    |
| #### Bn-scaff_16770_1-p31448 C-genome specific (napus-oleracea) | 0.9808612    | 0.7769051    | 1         | 0.7606955 | not scorable | not scorable |
| #### Bn-scaff_16770_1-p31763 genome unspecific (all in)         | 0.9952153    | 0.2355297    | 1         | 0.5335919 | 1            | 0.6653401    |
| #### Bn-scaff_16770_1-p31979 genome unspecific (all in)         | 1            | 0.55376      | 0.9767442 | 0.7343255 | 1            | 0.863471     |
| #### Bn-scaff_16770_1-p31984 C-genome specific (napus-oleracea) | 0.9976076    | 0.7315096    | 0.9922481 | 0.7625527 | not scorable | not scorable |
| #### Bn-scaff_16770_1-p32199 C-genome specific (napus-oleracea) | 0.9928229    | 0.8035052    | 0.9922481 | 0.7729034 | not scorable | not scorable |
| #### Bn-scaff_16770_1-p32452 genome unspecific (all in)         | 0.9952153    | 0.3342898    | 1         | 0.8196277 | 1            | 0.733798     |
| #### Bn-scaff_16770_1-p33212 genome unspecific (all in)         | 0.9760765    | 0.3042747    | 1         | 0.7641606 | 0.9834711    | 0.5822602    |
| #### Bn-scaff_16770_1-p33895 C-genome specific (napus-oleracea) | 0.9976076    | 0.8123168    | 1         | 0.8004208 | not scorable | not scorable |
| #### Bn-scaff_16770_1-p37544 genome unspecific (all in)         | 0.9856459    | 0.3111685    | 0.9767442 | 0.4569207 | 0.9752066    | 0.9080027    |
| #### Bn-scaff_16770_1-p37544 C-genome specific (napus-oleracea) | 0.9880383    | 0.3036772    | 0.9922481 | 0.5311553 | not scorable | not scorable |
| #### Bn-scaff_16770_1-p39309 C-genome specific (napus-oleracea) | 1            | 0.8932224    | 1         | 0.8589013 | not scorable | not scorable |
| #### Bn-scaff_16770_1-p39437 genome unspecific (all in)         | 1            | 0.6611099    | 0.9922481 | 0.8225839 | 0.9669421    | 0.6978099    |
| #### Bn-scaff_16770_1-p39668 C-genome specific (napus-oleracea) | 0.9928229    | 0.7909557    | 0.9767442 | 0.7601395 | not scorable | not scorable |
| #### Bn-scaff_16770_1-p40356 C-genome specific (napus-oleracea) | 0.9928229    | 0.8042585    | 0.9922481 | 0.87318   | not scorable | not scorable |
| #### Bn-scaff_16770_1-p40358 C-genome specific (napus-oleracea) | 0.9808612    | 0.7736552    | 0.9922481 | 0.8023599 | not scorable | not scorable |
| #### Bn-scaff_16770_1-p40359 C-genome specific (napus-oleracea) | 0.9880383    | 0.6555367    | 0.9767442 | 0.7050431 | not scorable | not scorable |



|                                                                 |              |              |           |           |              |              |
|-----------------------------------------------------------------|--------------|--------------|-----------|-----------|--------------|--------------|
| #### Bn-scaff_16770_1-p4036C C-genome specific (napus-oleracea) | 0.9832536    | 0.7640166    | 0.9844961 | 0.7763584 | not scorable | not scorable |
| #### Bn-scaff_16770_1-p4054C C-genome specific (napus-oleracea) | 0.9904306    | 0.7827734    | 1         | 0.8551307 | not scorable | not scorable |
| #### Bn-scaff_16770_1-p4054C C-genome specific (napus-oleracea) | 0.9880383    | 0.726731     | 1         | 0.8124242 | not scorable | not scorable |
| #### Bn-scaff_16770_1-p4068C C-genome specific (napus-oleracea) | 0.9832536    | 0.6696472    | 0.9767442 | 0.7731258 | not scorable | not scorable |
| #### Bn-scaff_16770_1-p4071C C-genome specific (napus-oleracea) | 0.9928229    | 0.7977083    | 0.9844961 | 0.8425303 | not scorable | not scorable |
| #### Bn-scaff_16770_1-p4097C C-genome specific (napus-oleracea) | 0.9832536    | 0.7836478    | 0.9767442 | 0.8162887 | not scorable | not scorable |
| #### Bn-scaff_16770_1-p4188C C-genome specific (napus-oleracea) | 0.9952153    | 0.7530093    | 1         | 0.6865982 | not scorable | not scorable |
| #### Bn-scaff_16770_1-p4204 genome unspecific (all in)          | 0.9952153    | 0.4243481    | 1         | 0.7158995 | 1            | 0.8005425    |
| #### Bn-scaff_16770_1-p4206C C-genome specific (napus-oleracea) | 0.9904306    | 0.6775535    | 0.9922481 | 0.7311841 | not scorable | not scorable |
| #### Bn-scaff_16770_1-p4206C C-genome specific (napus-oleracea) | 0.9952153    | 0.7914733    | 1         | 0.8185117 | not scorable | not scorable |
| #### Bn-scaff_16770_1-p4219 genome unspecific (all in)          | 0.9736842    | 0.5142202    | 0.9922481 | 0.6832238 | 0.9586777    | 0.6107882    |
| #### Bn-scaff_16770_1-p4223 genome unspecific (all in)          | 0.9832536    | 0.6093345    | 1         | 0.7887745 | 1            | 0.9465883    |
| #### Bn-scaff_16770_1-p4231C C-genome specific (napus-oleracea) | 0.9904306    | 0.8180879    | 0.9844961 | 0.8000497 | not scorable | not scorable |
| #### Bn-scaff_16770_1-p4235C C-genome specific (napus-oleracea) | 0.9904306    | 0.8313049    | 0.9844961 | 0.8636913 | not scorable | not scorable |
| #### Bn-scaff_16770_1-p4246 genome unspecific (all in)          | 0.9976076    | 0.2930193    | 1         | 0.6560376 | 1            | 0.8207097    |
| #### Bn-scaff_16770_1-p4247 genome unspecific (all in)          | 0.9976076    | 0.2711934    | 1         | 0.6577742 | 1            | 0.648475     |
| #### Bn-scaff_16770_1-p4253C C-genome specific (napus-oleracea) | 0.9904306    | 0.8041514    | 0.9922481 | 0.7854211 | not scorable | not scorable |
| #### Bn-scaff_16770_1-p4261C C-genome specific (napus-oleracea) | 0.9856459    | 0.7681434    | 1         | 0.739889  | not scorable | not scorable |
| #### Bn-scaff_16770_1-p4273C C-genome specific (napus-oleracea) | 0.9904306    | 0.6695762    | 1         | 0.5010183 | not scorable | not scorable |
| #### Bn-scaff_16770_1-p4273C C-genome specific (napus-oleracea) | 0.9784689    | 0.7063027    | 0.9689922 | 0.6091276 | not scorable | not scorable |
| #### Bn-scaff_16770_1-p4273C C-genome specific (napus-oleracea) | 0.9928229    | 0.7574746    | 0.9922481 | 0.7081435 | not scorable | not scorable |
| #### Bn-scaff_16770_1-p4273C C-genome specific (napus-oleracea) | 0.9856459    | 0.7325788    | 1         | 0.5683835 | not scorable | not scorable |
| #### Bn-scaff_16770_1-p4273C C-genome specific (napus-oleracea) | 0.9856459    | 0.6418034    | 0.9767442 | 0.6182253 | not scorable | not scorable |
| #### Bn-scaff_16770_1-p4279C C-genome specific (napus-oleracea) | 0.9904306    | 0.772363     | 0.9922481 | 0.6979262 | not scorable | not scorable |
| #### Bn-scaff_16770_1-p4283 genome unspecific (all in)          | 0.9880383    | 0.3718291    | 0.9922481 | 0.7535639 | 1            | 0.9092578    |
| #### Bn-scaff_16770_1-p4287C C-genome specific (oleracea only)  | not scorable | not scorable | 0.5658914 | 0.6119071 | not scorable | not scorable |
| #### Bn-scaff_16770_1-p4296C C-genome specific (napus-oleracea) | 0.9976076    | 0.795998     | 0.9922481 | 0.7697172 | not scorable | not scorable |
| #### Bn-scaff_16770_1-p4296C C-genome specific (napus-oleracea) | 0.8923445    | 0.7616463    | 0.8992248 | 0.8485615 | not scorable | not scorable |
| #### Bn-scaff_16770_1-p4331 genome unspecific (all in)          | 0.9976076    | 0.6802559    | 1         | 0.7245917 | 1            | 0.7821428    |
| #### Bn-scaff_16770_1-p4338 genome unspecific (all in)          | 0.9880383    | 0.4556175    | 0.9767442 | 0.5184965 | 0.9752066    | 0.821011     |
| #### Bn-scaff_16770_1-p4352 genome unspecific (all in)          | 0.9569378    | 0.2914893    | 0.9922481 | 0.74726   | 0.9917355    | 0.7739488    |
| #### Bn-scaff_16770_1-p4353C C-genome specific (napus-oleracea) | 0.9019139    | 0.7692811    | 0.9922481 | 0.8765289 | not scorable | not scorable |
| #### Bn-scaff_16770_1-p4353C C-genome specific (napus-oleracea) | 0.9784689    | 0.7876251    | 0.9767442 | 0.7757709 | not scorable | not scorable |

|                                                                 |              |              |           |           |              |              |
|-----------------------------------------------------------------|--------------|--------------|-----------|-----------|--------------|--------------|
| #### Bn-scaff_16770_1-p43537 genome unspecific (all in)         | 0.9712918    | 0.367252     | 0.9534883 | 0.8197612 | 1            | 0.9095823    |
| #### Bn-scaff_16770_1-p43748 genome unspecific (all in)         | 0.9928229    | 0.4680976    | 0.9922481 | 0.8247543 | 0.9752066    | 0.9039531    |
| #### Bn-scaff_16770_1-p43752 C-genome specific (napus-oleracea) | 0.9808612    | 0.7573243    | 0.9922481 | 0.7587562 | not scorable | not scorable |
| #### Bn-scaff_16770_1-p43756 C-genome specific (napus-oleracea) | 0.9928229    | 0.7480459    | 1         | 0.7419553 | not scorable | not scorable |
| #### Bn-scaff_16770_1-p43759 genome unspecific (all in)         | 0.9952153    | 0.2355869    | 1         | 0.4045815 | 1            | 0.9173167    |
| #### Bn-scaff_16770_1-p43760 C-genome specific (napus-oleracea) | 0.9043062    | 0.7987092    | 0.9922481 | 0.891988  | not scorable | not scorable |
| #### Bn-scaff_16770_1-p43838 C-genome specific (napus-oleracea) | 0.9904306    | 0.7318113    | 0.9922481 | 0.7283329 | not scorable | not scorable |
| #### Bn-scaff_16770_1-p43908 C-genome specific (napus-oleracea) | 0.9928229    | 0.6992846    | 1         | 0.7038373 | not scorable | not scorable |
| #### Bn-scaff_16770_1-p57928 genome unspecific (oleracea-rapa)  | not scorable | not scorable | 1         | 0.7180864 | 1            | 0.8329107    |
| #### Bn-scaff_16770_1-p61517 C-genome specific (napus-oleracea) | 0.9784689    | 0.7948491    | 0.503876  | 0.8940827 | not scorable | not scorable |
| #### Bn-scaff_16770_1-p61727 C-genome specific (napus-oleracea) | 0.9928229    | 0.7458012    | 1         | 0.762795  | not scorable | not scorable |
| #### Bn-scaff_16770_1-p65546 C-genome specific (napus-oleracea) | 0.9952153    | 0.835429     | 1         | 0.884313  | not scorable | not scorable |
| #### Bn-scaff_16770_1-p65799 C-genome specific (napus-oleracea) | 0.9928229    | 0.546701     | 1         | 0.8432104 | not scorable | not scorable |
| #### Bn-scaff_16770_1-p67715 genome unspecific (all in)         | 1            | 0.7494321    | 1         | 0.7462659 | 1            | 0.7252899    |
| #### Bn-scaff_16770_1-p68463 genome unspecific (all in)         | 1            | 0.6565716    | 0.9767442 | 0.7768924 | 1            | 0.8177505    |
| #### Bn-scaff_16770_1-p77845 C-genome specific (napus-oleracea) | 0.3110048    | 0.7702872    | 0.5736434 | 0.7367758 | not scorable | not scorable |
| #### Bn-scaff_16770_1-p98279 genome unspecific (all in)         | 0.9904306    | 0.8420494    | 0.875969  | 0.7010842 | 0.9917355    | 0.8331742    |
| #### Bn-scaff_16792_1-p21096 C-genome specific (napus-oleracea) | 0.9952153    | 0.8257531    | 0.9844961 | 0.7668706 | not scorable | not scorable |
| #### Bn-scaff_16792_1-p21478 C-genome specific (napus-oleracea) | 0.9904306    | 0.8023478    | 0.9844961 | 0.7873538 | not scorable | not scorable |
| #### Bn-scaff_16792_1-p21595 C-genome specific (napus-oleracea) | 0.9976076    | 0.7404906    | 0.9767442 | 0.7610732 | not scorable | not scorable |
| #### Bn-scaff_16792_1-p21956 C-genome specific (napus-oleracea) | 0.9952153    | 0.7098543    | 0.9612403 | 0.6269242 | not scorable | not scorable |
| #### Bn-scaff_16792_1-p22894 C-genome specific (napus-oleracea) | 0.9904306    | 0.7806962    | 0.9612403 | 0.6977609 | not scorable | not scorable |
| #### Bn-scaff_16792_1-p23509 C-genome specific (napus-oleracea) | 0.9784689    | 0.8190737    | 0.9844961 | 0.7331275 | not scorable | not scorable |
| #### Bn-scaff_16792_1-p24255 C-genome specific (napus-oleracea) | 0.9832536    | 0.7707299    | 0.9844961 | 0.7486057 | not scorable | not scorable |
| #### Bn-scaff_16792_1-p24639 C-genome specific (napus-oleracea) | 0.9856459    | 0.687251     | 1         | 0.6447324 | not scorable | not scorable |
| #### Bn-scaff_16792_1-p25635 C-genome specific (napus-oleracea) | 0.9856459    | 0.7505503    | 0.9922481 | 0.6587934 | not scorable | not scorable |
| #### Bn-scaff_16792_1-p26399 C-genome specific (napus-oleracea) | 0.9880383    | 0.8148925    | 0.9922481 | 0.6142432 | not scorable | not scorable |
| #### Bn-scaff_16792_1-p26474 C-genome specific (napus-oleracea) | 0.9976076    | 0.7890748    | 0.9767442 | 0.6849843 | not scorable | not scorable |
| #### Bn-scaff_16792_1-p26742 C-genome specific (napus-oleracea) | 0.9904306    | 0.8238752    | 0.9922481 | 0.6561828 | not scorable | not scorable |
| #### Bn-scaff_16792_1-p26947 C-genome specific (napus-oleracea) | 0.9880383    | 0.6738692    | 1         | 0.7622204 | not scorable | not scorable |
| #### Bn-scaff_16792_1-p27067 C-genome specific (napus-oleracea) | 0.9928229    | 0.7924223    | 1         | 0.8204792 | not scorable | not scorable |
| #### Bn-scaff_16792_1-p27149 C-genome specific (napus-oleracea) | 0.9928229    | 0.6833251    | 0.9767442 | 0.6268106 | not scorable | not scorable |
| #### Bn-scaff_16792_1-p31038 C-genome specific (napus-oleracea) | 0.9784689    | 0.6898825    | 0.9922481 | 0.7320339 | not scorable | not scorable |

|                                                                |           |           |           |           |              |              |
|----------------------------------------------------------------|-----------|-----------|-----------|-----------|--------------|--------------|
| #### Bn-scaff_16792_1-p31091C-genome specific (napus-oleracea) | 0.9976076 | 0.8315864 | 0.9844961 | 0.7988994 | not scorable | not scorable |
| #### Bn-scaff_16792_1-p31655C-genome specific (napus-oleracea) | 0.9976076 | 0.7736471 | 0.9689922 | 0.8417375 | not scorable | not scorable |
| #### Bn-scaff_16792_1-p34468C-genome specific (napus-oleracea) | 0.9952153 | 0.7855294 | 1         | 0.7645553 | not scorable | not scorable |
| #### Bn-scaff_16792_1-p34528C-genome specific (napus-oleracea) | 0.9928229 | 0.4915794 | 1         | 0.5424427 | not scorable | not scorable |
| #### Bn-scaff_16792_1-p34579C-genome specific (napus-oleracea) | 0.9928229 | 0.6952689 | 0.9844961 | 0.6843678 | not scorable | not scorable |
| #### Bn-scaff_16792_1-p34725C-genome specific (napus-oleracea) | 0.9952153 | 0.8338813 | 0.9922481 | 0.8108028 | not scorable | not scorable |
| #### Bn-scaff_16792_1-p35017genome unspecific (all in)         | 0.9976076 | 0.5755066 | 0.9767442 | 0.7924896 | 0.9834711    | 0.9427261    |
| #### Bn-scaff_16792_1-p35077C-genome specific (napus-oleracea) | 0.9952153 | 0.7455506 | 0.9689922 | 0.7930965 | not scorable | not scorable |
| #### Bn-scaff_16792_1-p54796C-genome specific (napus-oleracea) | 0.9976076 | 0.7359403 | 0.9922481 | 0.667609  | not scorable | not scorable |
| #### Bn-scaff_16792_1-p71246C-genome specific (napus-oleracea) | 0.9856459 | 0.6459377 | 0.9922481 | 0.7152185 | not scorable | not scorable |
| #### Bn-scaff_16793_1-p10163C-genome specific (napus-oleracea) | 0.9952153 | 0.6348585 | 1         | 0.9075842 | not scorable | not scorable |
| #### Bn-scaff_16793_1-p10642C-genome specific (napus-oleracea) | 0.9976076 | 0.4970955 | 1         | 0.7227655 | not scorable | not scorable |
| #### Bn-scaff_16793_1-p14367genome unspecific (all in)         | 1         | 0.6186296 | 1         | 0.5908332 | 1            | 0.825962     |
| #### Bn-scaff_16793_1-p14806genome unspecific (all in)         | 1         | 0.3496452 | 1         | 0.8085203 | 1            | 0.8423175    |
| #### Bn-scaff_16793_1-p54753C-genome specific (napus-oleracea) | 0.9976076 | 0.7876215 | 1         | 0.8358237 | not scorable | not scorable |
| #### Bn-scaff_16793_1-p82145genome unspecific (all in)         | 0.9976076 | 0.4613736 | 1         | 0.8276696 | 0.9834711    | 0.8543781    |
| #### Bn-scaff_16804_1-p17814C-genome specific (napus-oleracea) | 0.9258373 | 0.8044876 | 0.9922481 | 0.776394  | not scorable | not scorable |
| #### Bn-scaff_16804_1-p18202C-genome specific (napus-oleracea) | 0.9210526 | 0.8627091 | 1         | 0.7492234 | not scorable | not scorable |
| #### Bn-scaff_16804_1-p20351C-genome specific (napus-oleracea) | 0.9210526 | 0.8048496 | 0.9844961 | 0.6573682 | not scorable | not scorable |
| #### Bn-scaff_16804_1-p25482C-genome specific (napus-oleracea) | 0.9258373 | 0.8134501 | 0.9922481 | 0.7131074 | not scorable | not scorable |
| #### Bn-scaff_16804_1-p34730C-genome specific (napus-oleracea) | 0.9138756 | 0.7266586 | 0.9922481 | 0.6998428 | not scorable | not scorable |
| #### Bn-scaff_16804_1-p38327genome unspecific (all in)         | 0.9952153 | 0.4248748 | 1         | 0.9251141 | 0.9586777    | 0.7701403    |
| #### Bn-scaff_16804_1-p44253C-genome specific (napus-oleracea) | 0.9138756 | 0.8125048 | 0.9922481 | 0.8054749 | not scorable | not scorable |
| #### Bn-scaff_16804_1-p53969C-genome specific (napus-oleracea) | 0.9210526 | 0.7943718 | 1         | 0.6586629 | not scorable | not scorable |
| #### Bn-scaff_16804_1-p56033C-genome specific (napus-oleracea) | 0.9186603 | 0.7401199 | 1         | 0.6766195 | not scorable | not scorable |
| #### Bn-scaff_16804_1-p57292C-genome specific (napus-oleracea) | 0.9210526 | 0.7826872 | 1         | 0.6437547 | not scorable | not scorable |
| #### Bn-scaff_16804_1-p63598genome unspecific (all in)         | 0.9808612 | 0.7422734 | 0.9922481 | 0.6948919 | 0.892562     | 0.8633691    |
| #### Bn-scaff_16804_1-p64080genome unspecific (all in)         | 0.9162679 | 0.5093121 | 1         | 0.7691256 | 0.9586777    | 0.7967111    |
| #### Bn-scaff_16804_1-p65323genome unspecific (all in)         | 0.9928229 | 0.3257603 | 0.9689922 | 0.5783545 | 1            | 0.8499697    |
| #### Bn-scaff_16804_1-p66704C-genome specific (napus-oleracea) | 0.9928229 | 0.8393595 | 0.9922481 | 0.8093725 | not scorable | not scorable |
| #### Bn-scaff_16804_1-p67037C-genome specific (napus-oleracea) | 0.9928229 | 0.8439683 | 0.9922481 | 0.7029014 | not scorable | not scorable |
| #### Bn-scaff_16804_1-p67202C-genome specific (napus-oleracea) | 0.9952153 | 0.6214306 | 1         | 0.7259805 | not scorable | not scorable |
| #### Bn-scaff_16804_1-p67410C-genome specific (napus-oleracea) | 0.9928229 | 0.7181895 | 0.9844961 | 0.6851012 | not scorable | not scorable |

|                                                                  |           |           |           |           |              |              |
|------------------------------------------------------------------|-----------|-----------|-----------|-----------|--------------|--------------|
| ##### Bn-scaff_16804_1-p6798ϵ C-genome specific (napus-oleracea) | 0.9928229 | 0.7750357 | 1         | 0.8476607 | not scorable | not scorable |
| ##### Bn-scaff_16804_1-p6799ϩ C-genome specific (napus-oleracea) | 0.9928229 | 0.7517876 | 0.9844961 | 0.6487858 | not scorable | not scorable |
| ##### Bn-scaff_16804_1-p68001 C-genome specific (napus-oleracea) | 0.9976076 | 0.7185114 | 1         | 0.6870009 | not scorable | not scorable |
| ##### Bn-scaff_16804_1-p6800ϵ C-genome specific (napus-oleracea) | 0.9904306 | 0.7771164 | 0.9844961 | 0.6800957 | not scorable | not scorable |
| ##### Bn-scaff_16804_1-p6861ϵ C-genome specific (napus-oleracea) | 0.9904306 | 0.763114  | 1         | 0.8126812 | not scorable | not scorable |
| ##### Bn-scaff_16804_1-p68651 C-genome specific (napus-oleracea) | 0.9928229 | 0.6964217 | 0.9922481 | 0.6810137 | not scorable | not scorable |
| ##### Bn-scaff_16804_1-p68774 C-genome specific (napus-oleracea) | 0.9904306 | 0.5741132 | 0.9534883 | 0.7995454 | not scorable | not scorable |
| ##### Bn-scaff_16804_1-p68874 C-genome specific (napus-oleracea) | 0.9904306 | 0.6726524 | 0.9922481 | 0.7416658 | not scorable | not scorable |
| ##### Bn-scaff_16804_1-p6928ϩ C-genome specific (napus-oleracea) | 0.9904306 | 0.704466  | 0.9922481 | 0.6563553 | not scorable | not scorable |
| ##### Bn-scaff_16804_1-p6951ϵ C-genome specific (napus-oleracea) | 0.9832536 | 0.8242606 | 0.9844961 | 0.7351328 | not scorable | not scorable |
| ##### Bn-scaff_16804_1-p6959ϵ C-genome specific (napus-oleracea) | 0.9856459 | 0.6978346 | 0.9922481 | 0.7178554 | not scorable | not scorable |
| ##### Bn-scaff_16804_1-p6959ϵ C-genome specific (napus-oleracea) | 0.9880383 | 0.8140298 | 0.9922481 | 0.8083033 | not scorable | not scorable |
| ##### Bn-scaff_16804_1-p6961ϵ C-genome specific (napus-oleracea) | 0.9880383 | 0.8450494 | 0.9922481 | 0.7923766 | not scorable | not scorable |
| ##### Bn-scaff_16804_1-p69697 C-genome specific (napus-oleracea) | 0.9976076 | 0.8121073 | 1         | 0.7866871 | not scorable | not scorable |
| ##### Bn-scaff_16804_1-p69907 C-genome specific (napus-oleracea) | 0.9928229 | 0.8409845 | 0.9844961 | 0.8154362 | not scorable | not scorable |
| ##### Bn-scaff_16804_1-p6992ϵ C-genome specific (napus-oleracea) | 0.9976076 | 0.7239857 | 0.9844961 | 0.7487322 | not scorable | not scorable |
| ##### Bn-scaff_16804_1-p70401 C-genome specific (napus-oleracea) | 0.9904306 | 0.8293434 | 0.9922481 | 0.7971118 | not scorable | not scorable |
| ##### Bn-scaff_16804_1-p7049ϵ C-genome specific (napus-oleracea) | 0.9952153 | 0.6281778 | 0.9922481 | 0.6102922 | not scorable | not scorable |
| ##### Bn-scaff_16804_1-p7064ϵ C-genome specific (napus-oleracea) | 0.9904306 | 0.7887233 | 0.9922481 | 0.8033488 | not scorable | not scorable |
| ##### Bn-scaff_16804_1-p7172ϩ C-genome specific (napus-oleracea) | 1         | 0.7068813 | 0.9922481 | 0.6386566 | not scorable | not scorable |
| ##### Bn-scaff_16804_1-p7220ϵ C-genome specific (napus-oleracea) | 0.9952153 | 0.724765  | 0.9767442 | 0.6461785 | not scorable | not scorable |
| ##### Bn-scaff_16804_1-p7223ϵ C-genome specific (napus-oleracea) | 0.9832536 | 0.6276436 | 1         | 0.708894  | not scorable | not scorable |
| ##### Bn-scaff_16804_1-p7225ϵ C-genome specific (napus-oleracea) | 0.9952153 | 0.7330266 | 1         | 0.6828477 | not scorable | not scorable |
| ##### Bn-scaff_16804_1-p7227ϵ C-genome specific (napus-oleracea) | 0.9904306 | 0.6375602 | 1         | 0.6796184 | not scorable | not scorable |
| ##### Bn-scaff_16804_1-p7228ϵ C-genome specific (napus-oleracea) | 0.9617225 | 0.5823315 | 0.9612403 | 0.6526463 | not scorable | not scorable |
| ##### Bn-scaff_16804_1-p72367 C-genome specific (napus-oleracea) | 0.9928229 | 0.701344  | 0.9844961 | 0.5907683 | not scorable | not scorable |
| ##### Bn-scaff_16804_1-p7237ϩ C-genome specific (napus-oleracea) | 0.9928229 | 0.6997401 | 0.9922481 | 0.6191102 | not scorable | not scorable |
| ##### Bn-scaff_16804_1-p72572 C-genome specific (napus-oleracea) | 0.9904306 | 0.7295732 | 0.9844961 | 0.7334998 | not scorable | not scorable |
| ##### Bn-scaff_16804_1-p72771 C-genome specific (napus-oleracea) | 0.9952153 | 0.7973625 | 0.9689922 | 0.7074534 | not scorable | not scorable |
| ##### Bn-scaff_16804_1-p75571 C-genome specific (napus-oleracea) | 1         | 0.7824216 | 1         | 0.7697189 | not scorable | not scorable |
| ##### Bn-scaff_16804_1-p7672ϵ C-genome specific (napus-oleracea) | 0.9856459 | 0.6804768 | 0.9844961 | 0.7155751 | not scorable | not scorable |
| ##### Bn-scaff_16804_1-p7730ϩ C-genome specific (napus-oleracea) | 0.9952153 | 0.7988159 | 0.9922481 | 0.7417046 | not scorable | not scorable |
| ##### Bn-scaff_16804_1-p7945ϵ genome unspecific (all in)         | 0.9904306 | 0.5161695 | 0.9922481 | 0.8376434 | 0.9834711    | 0.8117543    |

|                                                                  |              |              |              |              |              |              |
|------------------------------------------------------------------|--------------|--------------|--------------|--------------|--------------|--------------|
| ##### Bn-scaff_16804_1-p79569 C-genome specific (napus-oleracea) | 1            | 0.7896671    | 0.9922481    | 0.753926     | not scorable | not scorable |
| ##### Bn-scaff_16804_1-p79619 genome unspecific (oleracea-rapa)  | not scorable | not scorable | 1            | 0.6788055    | 0.9752066    | 0.4847361    |
| ##### Bn-scaff_16804_2-p15335 C-genome specific (napus-oleracea) | 1            | 0.5566268    | 0.9922481    | 0.5641214    | not scorable | not scorable |
| ##### Bn-scaff_16804_2-p15623 genome unspecific (all in)         | 1            | 0.3395609    | 0.9922481    | 0.6954826    | 1            | 0.7637143    |
| ##### Bn-scaff_16804_2-p15792 genome unspecific (all in)         | 1            | 0.4010573    | 1            | 0.6531228    | 0.9752066    | 0.5904173    |
| ##### Bn-scaff_16804_2-p16575 genome unspecific (all in)         | 0.9904306    | 0.2373807    | 0.9922481    | 0.6500669    | 1            | 0.6963792    |
| ##### Bn-scaff_16804_2-p16644 genome unspecific (all in)         | 1            | 0.734862     | 1            | 0.835909     | 0.9834711    | 0.7525005    |
| ##### Bn-scaff_16804_2-p16701 C-genome specific (napus-oleracea) | 0.8133971    | 0.7043135    | 0.9534883    | 0.8534614    | not scorable | not scorable |
| ##### Bn-scaff_16804_2-p19555 genome unspecific (all in)         | 0.9760765    | 0.4821661    | 0.9689922    | 0.5701388    | 1            | 0.9087932    |
| ##### Bn-scaff_16804_2-p21055 genome unspecific (all in)         | 0.9832536    | 0.4529341    | 1            | 0.6349056    | 1            | 0.8927833    |
| ##### Bn-scaff_16804_2-p21113 genome unspecific (all in)         | 0.9856459    | 0.5021743    | 0.9767442    | 0.616106     | 1            | 0.9291536    |
| ##### Bn-scaff_16804_2-p25557 A-genome specific (napus-rapa)     | 0.9928229    | 0.2458474    | not scorable | not scorable | 0.9834711    | 0.6878964    |
| ##### Bn-scaff_16804_2-p26172 C-genome specific (napus-oleracea) | 0.9928229    | 0.7357891    | 1            | 0.7136334    | not scorable | not scorable |
| ##### Bn-scaff_16804_2-p27407 C-genome specific (napus-oleracea) | 0.9210526    | 0.8016024    | 0.5271318    | 0.7843565    | not scorable | not scorable |
| ##### Bn-scaff_16804_2-p28358 C-genome specific (napus-oleracea) | 0.9976076    | 0.7820387    | 1            | 0.8989604    | not scorable | not scorable |
| ##### Bn-scaff_16804_2-p28440 C-genome specific (napus-oleracea) | 0.9928229    | 0.7905169    | 0.9922481    | 0.7882693    | not scorable | not scorable |
| ##### Bn-scaff_16804_2-p29860 napus specific                     | 0.9928229    | 0.7938001    | not scorable | not scorable | not scorable | not scorable |
| ##### Bn-scaff_16804_2-p40981 genome unspecific (all in)         | 0.9952153    | 0.3970438    | 1            | 0.7907276    | 1            | 0.6646082    |
| ##### Bn-scaff_16804_2-p63611 genome unspecific (all in)         | 0.4688995    | 0.6870416    | 1            | 0.8690277    | 0.8677686    | 0.7570973    |
| ##### Bn-scaff_16804_3-p12914 C-genome specific (napus-oleracea) | 0.9976076    | 0.8272343    | 1            | 0.809182     | not scorable | not scorable |
| ##### Bn-scaff_16804_3-p29132 C-genome specific (napus-oleracea) | 0.9928229    | 0.7092791    | 1            | 0.8384913    | not scorable | not scorable |
| ##### Bn-scaff_16804_3-p5186 C-genome specific (napus-oleracea)  | 0.8971292    | 0.7395071    | 0.9767442    | 0.6329269    | not scorable | not scorable |
| ##### Bn-scaff_16804_4-p10753 genome unspecific (all in)         | 0.9162679    | 0.7593343    | 0.9612403    | 0.8019632    | 0.9173554    | 0.9072468    |
| ##### Bn-scaff_16804_4-p11168 C-genome specific (napus-oleracea) | 0.9090909    | 0.7523941    | 0.9612403    | 0.8594449    | not scorable | not scorable |
| ##### Bn-scaff_16804_4-p11213 genome unspecific (all in)         | 0.9066986    | 0.7538594    | 0.9612403    | 0.6464041    | 0.8842975    | 0.8398026    |
| ##### Bn-scaff_16804_4-p16133 genome unspecific (oleracea-rapa)  | not scorable | not scorable | 0.9612403    | 0.527594     | 1            | 0.6317197    |
| ##### Bn-scaff_16804_4-p16183 C-genome specific (napus-oleracea) | 0.9186603    | 0.759923     | 1            | 0.7343488    | not scorable | not scorable |
| ##### Bn-scaff_16804_4-p24997 genome unspecific (oleracea-rapa)  | not scorable | not scorable | 0.9689922    | 0.7113665    | 1            | 0.9297348    |
| ##### Bn-scaff_16804_4-p26676 C-genome specific (napus-oleracea) | 0.9019139    | 0.7276307    | 0.5813953    | 0.5536215    | not scorable | not scorable |
| ##### Bn-scaff_16804_4-p27228 A-genome specific (rapa only)      | not scorable | not scorable | not scorable | not scorable | 0.9917355    | 0.7352138    |
| ##### Bn-scaff_16804_4-p29243 genome unspecific (all in)         | 0.9976076    | 0.7779718    | 1            | 0.7573081    | 0.9504132    | 0.7551064    |
| ##### Bn-scaff_16804_4-p61900 A-genome specific (rapa only)      | not scorable | not scorable | not scorable | not scorable | 0.9504132    | 0.794045     |
| ##### Bn-scaff_16809_1-p21714 C-genome specific (napus-oleracea) | 0.9808612    | 0.7973968    | 1            | 0.7310036    | not scorable | not scorable |

|                                                                 |              |              |              |              |              |              |
|-----------------------------------------------------------------|--------------|--------------|--------------|--------------|--------------|--------------|
| #### Bn-scaff_16809_1-p2209ϵ C-genome specific (napus-oleracea) | 0.9784689    | 0.7891373    | 1            | 0.7035257    | not scorable | not scorable |
| #### Bn-scaff_16809_1-p3423ϵ C-genome specific (napus-oleracea) | 0.9665072    | 0.676767     | 0.9922481    | 0.8543566    | not scorable | not scorable |
| #### Bn-scaff_16809_1-p3444ϵ C-genome specific (napus-oleracea) | 0.9904306    | 0.7601346    | 1            | 0.7952424    | not scorable | not scorable |
| #### Bn-scaff_16809_1-p3872ϵ C-genome specific (oleracea only)  | not scorable | not scorable | 0.9844961    | 0.7179831    | not scorable | not scorable |
| #### Bn-scaff_16809_1-p43861 C-genome specific (napus-oleracea) | 0.9784689    | 0.7792532    | 0.9922481    | 0.7327098    | not scorable | not scorable |
| #### Bn-scaff_16809_1-p4622ϵ C-genome specific (napus-oleracea) | 0.9808612    | 0.7504103    | 1            | 0.6815903    | not scorable | not scorable |
| #### Bn-scaff_16809_1-p54602 C-genome specific (napus-oleracea) | 0.9736842    | 0.8050008    | 0.7906977    | 0.8903782    | not scorable | not scorable |
| #### Bn-scaff_16809_1-p55357 C-genome specific (napus-oleracea) | 0.9760765    | 0.7384071    | 1            | 0.7079775    | not scorable | not scorable |
| #### Bn-scaff_16809_1-p55782 C-genome specific (napus-oleracea) | 0.9760765    | 0.6504554    | 1            | 0.779552     | not scorable | not scorable |
| #### Bn-scaff_16809_1-p56352 C-genome specific (napus-oleracea) | 0.9736842    | 0.6380448    | 0.9689922    | 0.7010351    | not scorable | not scorable |
| #### Bn-scaff_16809_1-p6056ϵ C-genome specific (napus-oleracea) | 0.9856459    | 0.7918257    | 1            | 0.8376074    | not scorable | not scorable |
| #### Bn-scaff_16809_1-p6669ϵ C-genome specific (napus-oleracea) | 0.9808612    | 0.7375196    | 1            | 0.7170268    | not scorable | not scorable |
| #### Bn-scaff_16809_1-p6672ϵ C-genome specific (napus-oleracea) | 0.9808612    | 0.7942362    | 1            | 0.7540005    | not scorable | not scorable |
| #### Bn-scaff_16809_1-p69403 C-genome specific (napus-oleracea) | 0.9784689    | 0.7321891    | 0.9844961    | 0.7450969    | not scorable | not scorable |
| #### Bn-scaff_16809_1-p69483 C-genome specific (napus-oleracea) | 0.9593301    | 0.6995331    | 0.9844961    | 0.7880524    | not scorable | not scorable |
| #### Bn-scaff_16809_1-p69491 C-genome specific (napus-oleracea) | 0.9832536    | 0.6069681    | 0.9767442    | 0.7534261    | not scorable | not scorable |
| #### Bn-scaff_16809_1-p69934 C-genome specific (napus-oleracea) | 0.9760765    | 0.7127482    | 0.9922481    | 0.750256     | not scorable | not scorable |
| #### Bn-scaff_16809_1-p7031ϵ C-genome specific (napus-oleracea) | 0.9784689    | 0.7397175    | 0.9844961    | 0.7930391    | not scorable | not scorable |
| #### Bn-scaff_16809_1-p8236ϵ C-genome specific (napus-oleracea) | 0.9808612    | 0.7658486    | 1            | 0.7023463    | not scorable | not scorable |
| #### Bn-scaff_16810_1-p83893 C-genome specific (oleracea only)  | not scorable | not scorable | 0.6511628    | 0.9042624    | not scorable | not scorable |
| #### Bn-scaff_16813_1-p4919ϵ A-genome specific (napus-rapa)     | 1            | 0.4122455    | not scorable | not scorable | 0.9917355    | 0.8723656    |
| #### Bn-scaff_16818_1-p22283 genome unspecific (all in)         | 0.9665072    | 0.3440784    | 1            | 0.7217701    | 1            | 0.826781     |
| #### Bn-scaff_16818_1-p28332 C-genome specific (napus-oleracea) | 1            | 0.7237127    | 0.9844961    | 0.6859714    | not scorable | not scorable |
| #### Bn-scaff_16818_1-p37043 C-genome specific (napus-oleracea) | 0.9976076    | 0.4990351    | 1            | 0.5909944    | not scorable | not scorable |
| #### Bn-scaff_16818_1-p5839ϵ genome unspecific (all in)         | 1            | 0.6510961    | 1            | 0.6512255    | 1            | 0.9095823    |
| #### Bn-scaff_16818_2-p14057 C-genome specific (napus-oleracea) | 0.9952153    | 0.5534817    | 0.9534883    | 0.6957337    | not scorable | not scorable |
| #### Bn-scaff_16818_2-p3540 genome unspecific (oleracea-rapa)   | not scorable | not scorable | 1            | 0.7315037    | 0.9834711    | 0.9099789    |
| #### Bn-scaff_16818_2-p4788 C-genome specific (napus-oleracea)  | 0.9952153    | 0.7785435    | 1            | 0.7130669    | not scorable | not scorable |
| #### Bn-scaff_16818_2-p7342 C-genome specific (napus-oleracea)  | 0.9976076    | 0.6930199    | 0.9922481    | 0.711878     | not scorable | not scorable |
| #### Bn-scaff_16818_3-p1038ϵ genome unspecific (oleracea-rapa)  | not scorable | not scorable | 0.9689922    | 0.6270393    | 1            | 0.8652104    |
| #### Bn-scaff_16818_3-p5427 genome unspecific (all in)          | 1            | 0.6160312    | 1            | 0.6160312    | 1            | 0.681638     |
| #### Bn-scaff_16822_1-p1081ϵ C-genome specific (napus-oleracea) | 0.930622     | 0.8028546    | 1            | 0.7931297    | not scorable | not scorable |
| #### Bn-scaff_16822_1-p1082ϵ C-genome specific (napus-oleracea) | 0.9162679    | 0.7402409    | 1            | 0.7103582    | not scorable | not scorable |

|                                                                 |              |              |              |              |              |              |
|-----------------------------------------------------------------|--------------|--------------|--------------|--------------|--------------|--------------|
| #### Bn-scaff_16822_1-p11022 C-genome specific (napus-oleracea) | 0.9282297    | 0.758492     | 1            | 0.7533212    | not scorable | not scorable |
| #### Bn-scaff_16822_1-p13747 C-genome specific (oleracea only)  | not scorable | not scorable | 1            | 0.7510253    | not scorable | not scorable |
| #### Bn-scaff_16822_1-p13943 C-genome specific (napus-oleracea) | 0.9976076    | 0.7639204    | 1            | 0.7643735    | not scorable | not scorable |
| #### Bn-scaff_16822_1-p28461 genome unspecific (all in)         | 0.9976076    | 0.5167527    | 0.9844961    | 0.5881272    | 1            | 0.9205657    |
| #### Bn-scaff_16822_1-p56747 C-genome specific (napus-oleracea) | 0.9688995    | 0.726532     | 0.875969     | 0.7272499    | not scorable | not scorable |
| #### Bn-scaff_16822_1-p59416 C-genome specific (napus-oleracea) | 0.9712918    | 0.4341483    | 0.9767442    | 0.3301545    | not scorable | not scorable |
| #### Bn-scaff_16822_1-p92796 C-genome specific (napus-oleracea) | 0.930622     | 0.6256639    | 1            | 0.7095615    | not scorable | not scorable |
| #### Bn-scaff_16822_1-p92872 C-genome specific (napus-oleracea) | 0.9330143    | 0.7272993    | 1            | 0.6869907    | not scorable | not scorable |
| #### Bn-scaff_16822_1-p95800 C-genome specific (napus-oleracea) | 0.937799     | 0.8023584    | 1            | 0.8163199    | not scorable | not scorable |
| #### Bn-scaff_16822_1-p96057 C-genome specific (napus-oleracea) | 0.930622     | 0.7753927    | 1            | 0.7583471    | not scorable | not scorable |
| #### Bn-scaff_16822_1-p96591 C-genome specific (napus-oleracea) | 0.923445     | 0.6172999    | 1            | 0.6742689    | not scorable | not scorable |
| #### Bn-scaff_16822_1-p96861 C-genome specific (napus-oleracea) | 0.930622     | 0.7782669    | 1            | 0.7783599    | not scorable | not scorable |
| #### Bn-scaff_16825_1-p10339 C-genome specific (napus-oleracea) | 0.9043062    | 0.7361429    | 1            | 0.7348142    | not scorable | not scorable |
| #### Bn-scaff_16825_1-p10363 C-genome specific (napus-oleracea) | 0.9186603    | 0.7839475    | 0.9922481    | 0.8253688    | not scorable | not scorable |
| #### Bn-scaff_16825_1-p10425 C-genome specific (napus-oleracea) | 0.9186603    | 0.7810828    | 1            | 0.8209217    | not scorable | not scorable |
| #### Bn-scaff_16825_1-p10429 C-genome specific (napus-oleracea) | 0.715311     | 0.8469492    | 0.9302326    | 0.8167985    | not scorable | not scorable |
| #### Bn-scaff_16825_1-p10477 C-genome specific (napus-oleracea) | 0.9138756    | 0.799468     | 1            | 0.8168501    | not scorable | not scorable |
| #### Bn-scaff_16825_1-p10490 C-genome specific (napus-oleracea) | 0.9114832    | 0.767709     | 1            | 0.6230125    | not scorable | not scorable |
| #### Bn-scaff_16825_1-p56159 C-genome specific (napus-oleracea) | 0.9114832    | 0.7388744    | 0.9922481    | 0.6919265    | not scorable | not scorable |
| #### Bn-scaff_16825_1-p63375 C-genome specific (napus-oleracea) | 0.9162679    | 0.7861733    | 0.8139535    | 0.6768236    | not scorable | not scorable |
| #### Bn-scaff_16825_1-p94370 C-genome specific (napus-oleracea) | 0.9521531    | 0.7412253    | 1            | 0.6420525    | not scorable | not scorable |
| #### Bn-scaff_16825_1-p95545 genome unspecific (oleracea-rapa)  | not scorable | not scorable | 0.8527132    | 0.9060583    | 0.9090909    | 0.6870904    |
| #### Bn-scaff_16864_1-p11368 genome unspecific (oleracea-rapa)  | not scorable | not scorable | 1            | 0.7837458    | 1            | 0.8253189    |
| #### Bn-scaff_16864_1-p12729 genome unspecific (all in)         | 0.9736842    | 0.3660145    | 0.8837209    | 0.7972026    | 1            | 0.7770717    |
| #### Bn-scaff_16864_1-p22602 C-genome specific (napus-oleracea) | 0.9282297    | 0.7430322    | 0.9844961    | 0.7287726    | not scorable | not scorable |
| #### Bn-scaff_16864_1-p22764 genome unspecific (all in)         | 0.9976076    | 0.2824126    | 0.9844961    | 0.5898275    | 1            | 0.7622204    |
| #### Bn-scaff_16865_1-p11054 all not scorable                   | not scorable | not scorable | not scorable | not scorable | not scorable | not scorable |
| #### Bn-scaff_16865_1-p11230 C-genome specific (napus-oleracea) | 0.9162679    | 0.7646773    | 0.9922481    | 0.781039     | not scorable | not scorable |
| #### Bn-scaff_16865_1-p11279 C-genome specific (napus-oleracea) | 0.9210526    | 0.7670793    | 0.9922481    | 0.8283817    | not scorable | not scorable |
| #### Bn-scaff_16865_1-p11425 C-genome specific (napus-oleracea) | 0.9162679    | 0.7664756    | 1            | 0.5032902    | not scorable | not scorable |
| #### Bn-scaff_16865_1-p13415 C-genome specific (napus-oleracea) | 0.9090909    | 0.7358322    | 1            | 0.5363339    | not scorable | not scorable |
| #### Bn-scaff_16865_1-p16443 napus specific                     | 0.9760765    | 0.8079129    | not scorable | not scorable | not scorable | not scorable |
| #### Bn-scaff_16865_1-p22117 genome unspecific (oleracea-rapa)  | not scorable | not scorable | 1            | 0.7741615    | 0.9917355    | 0.8519766    |

|                                                                 |              |              |              |              |              |              |
|-----------------------------------------------------------------|--------------|--------------|--------------|--------------|--------------|--------------|
| #### Bn-scaff_16865_1-p22368 genome unspecific (all in)         | 1            | 0.4921715    | 1            | 0.8296554    | 1            | 0.8103046    |
| #### Bn-scaff_16865_1-p40832 C-genome specific (napus-oleracea) | 0.9090909    | 0.7133934    | 1            | 0.6848523    | not scorable | not scorable |
| #### Bn-scaff_16865_1-p92472 C-genome specific (napus-oleracea) | 0.9162679    | 0.7367107    | 1            | 0.7707298    | not scorable | not scorable |
| #### Bn-scaff_16865_1-p92624 all not scorable                   | not scorable | not scorable | not scorable | not scorable | not scorable | not scorable |
| #### Bn-scaff_16865_1-p94727 C-genome specific (napus-oleracea) | 0.8971292    | 0.6097856    | 0.9767442    | 0.7392817    | not scorable | not scorable |
| #### Bn-scaff_16865_1-p95084 C-genome specific (napus-oleracea) | 0.9138756    | 0.7715238    | 1            | 0.7597842    | not scorable | not scorable |
| #### Bn-scaff_16865_1-p95751 C-genome specific (napus-oleracea) | 0.9043062    | 0.746356     | 0.9922481    | 0.7147707    | not scorable | not scorable |
| #### Bn-scaff_16874_1-p17244 C-genome specific (napus-oleracea) | 0.9258373    | 0.7943429    | 1            | 0.7615515    | not scorable | not scorable |
| #### Bn-scaff_16874_1-p17286 C-genome specific (napus-oleracea) | 0.9210526    | 0.7858801    | 1            | 0.7449217    | not scorable | not scorable |
| #### Bn-scaff_16874_1-p17331 C-genome specific (napus-oleracea) | 0.9162679    | 0.7559355    | 1            | 0.7500022    | not scorable | not scorable |
| #### Bn-scaff_16874_1-p17354 C-genome specific (napus-oleracea) | 0.9186603    | 0.7327273    | 1            | 0.826744     | not scorable | not scorable |
| #### Bn-scaff_16874_1-p26940 C-genome specific (napus-oleracea) | 0.9186603    | 0.7687696    | 0.9844961    | 0.7927272    | not scorable | not scorable |
| #### Bn-scaff_16874_1-p27824 C-genome specific (oleracea only)  | not scorable | not scorable | 0.9612403    | 0.7540624    | not scorable | not scorable |
| #### Bn-scaff_16874_1-p28516 genome unspecific (all in)         | 0.9688995    | 0.3267383    | 1            | 0.694496     | 1            | 0.9175813    |
| #### Bn-scaff_16874_1-p29206 C-genome specific (napus-oleracea) | 0.9043062    | 0.7794423    | 0.9922481    | 0.7305103    | not scorable | not scorable |
| #### Bn-scaff_16874_1-p32533 C-genome specific (napus-oleracea) | 0.4760765    | 0.7679853    | 0.9922481    | 0.7949913    | not scorable | not scorable |
| #### Bn-scaff_16874_1-p32563 C-genome specific (napus-oleracea) | 0.9186603    | 0.7877951    | 0.9922481    | 0.2863779    | not scorable | not scorable |
| #### Bn-scaff_16874_1-p32637 C-genome specific (napus-oleracea) | 0.9210526    | 0.7261959    | 1            | 0.7105036    | not scorable | not scorable |
| #### Bn-scaff_16874_1-p32769 genome unspecific (all in)         | 0.9736842    | 0.4035605    | 1            | 0.4943679    | 1            | 0.8242617    |
| #### Bn-scaff_16874_1-p34299 C-genome specific (napus-oleracea) | 0.9066986    | 0.7330039    | 1            | 0.5330685    | not scorable | not scorable |
| #### Bn-scaff_16874_1-p41159 C-genome specific (napus-oleracea) | 0.8899522    | 0.7226248    | 1            | 0.5963876    | not scorable | not scorable |
| #### Bn-scaff_16874_1-p41770 C-genome specific (napus-oleracea) | 0.9066986    | 0.6682126    | 1            | 0.5988833    | not scorable | not scorable |
| #### Bn-scaff_16874_1-p42337 genome unspecific (all in)         | 1            | 0.9244458    | 1            | 0.7547552    | 0.9917355    | 0.9507654    |
| #### Bn-scaff_16874_1-p42540 genome unspecific (all in)         | 0.9904306    | 0.4908758    | 1            | 0.7267979    | 1            | 0.9194944    |
| #### Bn-scaff_16874_1-p61691 genome unspecific (all in)         | 0.9712918    | 0.335198     | 1            | 0.7641216    | 1            | 0.7965425    |
| #### Bn-scaff_16874_1-p61722 genome unspecific (oleracea-rapa)  | not scorable | not scorable | 0.9844961    | 0.5482295    | 1            | 0.9080707    |
| #### Bn-scaff_16874_1-p63090 C-genome specific (napus-oleracea) | 0.9138756    | 0.6976044    | 0.9844961    | 0.7260817    | not scorable | not scorable |
| #### Bn-scaff_16874_1-p64241 genome unspecific (all in)         | 0.9808612    | 0.2416453    | 1            | 0.7901037    | 1            | 0.8111574    |
| #### Bn-scaff_16874_1-p64278 genome unspecific (all in)         | 0.9736842    | 0.2985535    | 1            | 0.7574378    | 1            | 0.8798158    |
| #### Bn-scaff_16874_1-p64345 C-genome specific (napus-oleracea) | 0.9186603    | 0.7867975    | 0.9922481    | 0.6625648    | not scorable | not scorable |
| #### Bn-scaff_16874_1-p64453 C-genome specific (napus-oleracea) | 0.9090909    | 0.7750325    | 0.9922481    | 0.675275     | not scorable | not scorable |
| #### Bn-scaff_16874_1-p64483 napus specific                     | 0.8062201    | 0.7915058    | not scorable | not scorable | not scorable | not scorable |
| #### Bn-scaff_16874_2-p15643 genome unspecific (oleracea-rapa)  | not scorable | not scorable | 1            | 0.7344522    | 1            | 0.752191     |



|                                                                 |              |              |              |              |              |              |
|-----------------------------------------------------------------|--------------|--------------|--------------|--------------|--------------|--------------|
| #### Bn-scaff_16874_2-p15658 C-genome specific (napus-oleracea) | 0.9090909    | 0.2197721    | 0.9767442    | 0.8135634    | not scorable | not scorable |
| #### Bn-scaff_16874_2-p15768 genome unspecific (all in)         | 0.9760765    | 0.2322243    | 1            | 0.8640938    | 0.9834711    | 0.8368766    |
| #### Bn-scaff_16874_2-p21768 genome unspecific (all in)         | 1            | 0.2148127    | 1            | 0.7000087    | 1            | 0.715579     |
| #### Bn-scaff_16874_2-p29251 C-genome specific (napus-oleracea) | 0.9784689    | 0.7595029    | 0.9844961    | 0.6966125    | not scorable | not scorable |
| #### Bn-scaff_16874_2-p85853 C-genome specific (napus-oleracea) | 1            | 0.4793633    | 1            | 0.5535324    | not scorable | not scorable |
| #### Bn-scaff_16876_1-p10139 genome unspecific (all in)         | 0.9880383    | 0.5234026    | 0.9922481    | 0.6189756    | 0.9669421    | 0.9036061    |
| #### Bn-scaff_16876_1-p10169 C-genome specific (napus-oleracea) | 0.9880383    | 0.794801     | 0.9379845    | 0.7403966    | not scorable | not scorable |
| #### Bn-scaff_16876_1-p10170 C-genome specific (napus-oleracea) | 0.9952153    | 0.7126542    | 0.9457364    | 0.7051241    | not scorable | not scorable |
| #### Bn-scaff_16876_1-p10172 C-genome specific (napus-oleracea) | 0.9952153    | 0.7122549    | 0.7674419    | 0.6797984    | not scorable | not scorable |
| #### Bn-scaff_16876_1-p10381 C-genome specific (napus-oleracea) | 0.9688995    | 0.6754318    | 0.7751938    | 0.6507476    | not scorable | not scorable |
| #### Bn-scaff_16876_1-p10543 C-genome specific (napus-oleracea) | 0.9688995    | 0.5995339    | 0.9844961    | 0.5872568    | not scorable | not scorable |
| #### Bn-scaff_16876_1-p10563 C-genome specific (oleracea only)  | not scorable | not scorable | 0.9224806    | 0.7069758    | not scorable | not scorable |
| #### Bn-scaff_16876_1-p10616 C-genome specific (napus-oleracea) | 0.9904306    | 0.4786936    | 1            | 0.5805074    | not scorable | not scorable |
| #### Bn-scaff_16876_1-p10617 C-genome specific (napus-oleracea) | 0.9952153    | 0.7848721    | 0.9922481    | 0.7459277    | not scorable | not scorable |
| #### Bn-scaff_16876_1-p10649 A-genome specific (napus-rapa)     | 1            | 0.8168936    | not scorable | not scorable | 1            | 0.8850119    |
| #### Bn-scaff_16876_1-p10652 C-genome specific (napus-oleracea) | 0.9880383    | 0.7723995    | 0.9922481    | 0.8412778    | not scorable | not scorable |
| #### Bn-scaff_16876_1-p10663 C-genome specific (napus-oleracea) | 0.9952153    | 0.7075554    | 0.9844961    | 0.6841851    | not scorable | not scorable |
| #### Bn-scaff_16876_1-p10683 C-genome specific (napus-oleracea) | 0.9832536    | 0.7772627    | 1            | 0.7027336    | not scorable | not scorable |
| #### Bn-scaff_16876_1-p10808 C-genome specific (napus-oleracea) | 0.9760765    | 0.6972955    | 0.9457364    | 0.6951239    | not scorable | not scorable |
| #### Bn-scaff_16876_1-p10900 C-genome specific (napus-oleracea) | 0.9569378    | 0.7568554    | 0.9844961    | 0.6648868    | not scorable | not scorable |
| #### Bn-scaff_16876_1-p10927 C-genome specific (napus-oleracea) | 0.9952153    | 0.8045451    | 1            | 0.793394     | not scorable | not scorable |
| #### Bn-scaff_16876_1-p10932 genome unspecific (all in)         | 0.9712918    | 0.251761     | 0.9379845    | 0.7476323    | 1            | 0.8988617    |
| #### Bn-scaff_16876_1-p11004 C-genome specific (napus-oleracea) | 0.9808612    | 0.7501342    | 0.9844961    | 0.7407783    | not scorable | not scorable |
| #### Bn-scaff_16876_1-p11132 C-genome specific (oleracea only)  | not scorable | not scorable | 0.9379845    | 0.7799808    | not scorable | not scorable |
| #### Bn-scaff_16876_1-p11133 C-genome specific (napus-oleracea) | 0.9545454    | 0.6475254    | 1            | 0.6405407    | not scorable | not scorable |
| #### Bn-scaff_16876_1-p11149 C-genome specific (napus-oleracea) | 0.9760765    | 0.7572423    | 0.9922481    | 0.7080384    | not scorable | not scorable |
| #### Bn-scaff_16876_1-p11165 C-genome specific (napus-oleracea) | 0.9784689    | 0.6628937    | 0.9844961    | 0.5892599    | not scorable | not scorable |
| #### Bn-scaff_16876_1-p11168 C-genome specific (napus-oleracea) | 0.9832536    | 0.7603302    | 0.9844961    | 0.7760351    | not scorable | not scorable |
| #### Bn-scaff_16876_1-p11625 C-genome specific (napus-oleracea) | 0.9880383    | 0.6975088    | 0.9844961    | 0.6948772    | not scorable | not scorable |
| #### Bn-scaff_16876_1-p11783 C-genome specific (napus-oleracea) | 0.9952153    | 0.8258597    | 0.9922481    | 0.8332821    | not scorable | not scorable |
| #### Bn-scaff_16876_1-p11791 C-genome specific (napus-oleracea) | 1            | 0.6509509    | 1            | 0.6439791    | not scorable | not scorable |
| #### Bn-scaff_16876_1-p11792 C-genome specific (napus-oleracea) | 0.9976076    | 0.7973481    | 0.9922481    | 0.774516     | not scorable | not scorable |
| #### Bn-scaff_16876_1-p11794 C-genome specific (napus-oleracea) | 0.9928229    | 0.6871996    | 1            | 0.5928553    | not scorable | not scorable |



|                                                                 |              |              |              |              |              |              |
|-----------------------------------------------------------------|--------------|--------------|--------------|--------------|--------------|--------------|
| #### Bn-scaff_16876_1-p32977 C-genome specific (napus-oleracea) | 0.9904306    | 0.7265653    | 0.9922481    | 0.7154533    | not scorable | not scorable |
| #### Bn-scaff_16876_1-p33016 C-genome specific (napus-oleracea) | 0.9904306    | 0.7663617    | 1            | 0.781979     | not scorable | not scorable |
| #### Bn-scaff_16876_1-p33060 C-genome specific (napus-oleracea) | 0.9952153    | 0.7970411    | 0.9767442    | 0.7595749    | not scorable | not scorable |
| #### Bn-scaff_16876_1-p35163 all not scorable                   | not scorable | not scorable | not scorable | not scorable | not scorable | not scorable |
| #### Bn-scaff_16876_1-p36793 C-genome specific (napus-oleracea) | 0.9904306    | 0.761637     | 0.9844961    | 0.7840836    | not scorable | not scorable |
| #### Bn-scaff_16876_1-p37292 genome unspecific (all in)         | 0.9904306    | 0.4240418    | 1            | 0.786476     | 1            | 0.7770717    |
| #### Bn-scaff_16876_1-p37877 genome unspecific (all in)         | 0.9904306    | 0.5229111    | 1            | 0.547616     | 1            | 0.9122459    |
| #### Bn-scaff_16876_1-p37889 C-genome specific (napus-oleracea) | 0.9880383    | 0.5221261    | 1            | 0.8005996    | not scorable | not scorable |
| #### Bn-scaff_16876_1-p39008 C-genome specific (napus-oleracea) | 0.9856459    | 0.5843252    | 1            | 0.5206581    | not scorable | not scorable |
| #### Bn-scaff_16876_1-p39742 C-genome specific (napus-oleracea) | 0.7105263    | 0.711957     | 0.9457364    | 0.7677965    | not scorable | not scorable |
| #### Bn-scaff_16876_1-p41386 C-genome specific (napus-oleracea) | 0.9832536    | 0.4915789    | 0.9922481    | 0.6883498    | not scorable | not scorable |
| #### Bn-scaff_16876_1-p41427 C-genome specific (napus-oleracea) | 0.9976076    | 0.5336996    | 1            | 0.9175813    | not scorable | not scorable |
| #### Bn-scaff_16876_1-p41694 C-genome specific (napus-oleracea) | 0.9856459    | 0.6945366    | 0.9767442    | 0.7258273    | not scorable | not scorable |
| #### Bn-scaff_16876_1-p44469 genome unspecific (all in)         | 0.9856459    | 0.6582572    | 1            | 0.6362857    | 0.8347107    | 0.8530207    |
| #### Bn-scaff_16876_1-p46585 C-genome specific (napus-oleracea) | 0.9976076    | 0.7642798    | 0.9767442    | 0.790042     | not scorable | not scorable |
| #### Bn-scaff_16876_1-p46596 C-genome specific (napus-oleracea) | 0.9952153    | 0.7995017    | 0.9767442    | 0.8080688    | not scorable | not scorable |
| #### Bn-scaff_16876_1-p46633 C-genome specific (napus-oleracea) | 0.9952153    | 0.8039695    | 0.9922481    | 0.7102889    | not scorable | not scorable |
| #### Bn-scaff_16876_1-p46655 C-genome specific (napus-oleracea) | 0.9928229    | 0.7896731    | 0.9844961    | 0.8106355    | not scorable | not scorable |
| #### Bn-scaff_16876_1-p46675 C-genome specific (napus-oleracea) | 0.9928229    | 0.7888166    | 0.9922481    | 0.7678717    | not scorable | not scorable |
| #### Bn-scaff_16876_1-p46688 C-genome specific (napus-oleracea) | 0.9976076    | 0.7899684    | 1            | 0.7663179    | not scorable | not scorable |
| #### Bn-scaff_16876_1-p46695 C-genome specific (napus-oleracea) | 0.9880383    | 0.7686422    | 0.9922481    | 0.7195956    | not scorable | not scorable |
| #### Bn-scaff_16876_1-p46711 C-genome specific (napus-oleracea) | 0.9928229    | 0.6304922    | 0.9922481    | 0.728198     | not scorable | not scorable |
| #### Bn-scaff_16876_1-p47942 genome unspecific (oleracea-rapa)  | not scorable | not scorable | 0.9767442    | 0.2254551    | 0.9917355    | 0.9580556    |
| #### Bn-scaff_16876_1-p48577 C-genome specific (napus-oleracea) | 0.9856459    | 0.7162722    | 1            | 0.5731878    | not scorable | not scorable |
| #### Bn-scaff_16876_1-p52763 C-genome specific (napus-oleracea) | 0.9904306    | 0.707122     | 1            | 0.7364743    | not scorable | not scorable |
| #### Bn-scaff_16876_1-p57130 napus specific                     | 0.9880383    | 0.2337532    | not scorable | not scorable | not scorable | not scorable |
| #### Bn-scaff_16876_1-p57459 genome unspecific (all in)         | 0.9904306    | 0.5566626    | 0.9844961    | 0.727371     | 1            | 0.8792465    |
| #### Bn-scaff_16876_1-p57939 genome unspecific (all in)         | 1            | 0.8618709    | 0.9922481    | 0.8653011    | 1            | 0.7321899    |
| #### Bn-scaff_16876_1-p59874 C-genome specific (napus-oleracea) | 0.9904306    | 0.8193672    | 0.9689922    | 0.6923064    | not scorable | not scorable |
| #### Bn-scaff_16876_1-p60160 C-genome specific (napus-oleracea) | 0.9976076    | 0.8543575    | 1            | 0.8487188    | not scorable | not scorable |
| #### Bn-scaff_16876_1-p60384 C-genome specific (napus-oleracea) | 0.9928229    | 0.7144998    | 0.875969     | 0.6578426    | not scorable | not scorable |
| #### Bn-scaff_16876_1-p62109 C-genome specific (napus-oleracea) | 0.9808612    | 0.5225946    | 0.9767442    | 0.3750306    | not scorable | not scorable |
| #### Bn-scaff_16876_1-p62145 C-genome specific (napus-oleracea) | 0.9928229    | 0.5451098    | 0.9922481    | 0.7349374    | not scorable | not scorable |

|                                                                  |              |              |              |              |              |              |
|------------------------------------------------------------------|--------------|--------------|--------------|--------------|--------------|--------------|
| #### Bn-scaff_16876_1-p6225C C-genome specific (oleracea only)   | not scorable | not scorable | 0.9534883    | 0.5687214    | not scorable | not scorable |
| #### Bn-scaff_16876_1-p6273E C-genome specific (napus-oleracea)  | 0.9808612    | 0.667318     | 1            | 0.9316278    | not scorable | not scorable |
| #### Bn-scaff_16876_1-p6304J genome unspecific (all in)          | 1            | 0.6115596    | 0.9379845    | 0.2294471    | 0.9917355    | 0.8242939    |
| #### Bn-scaff_16876_1-p6499C C-genome specific (napus-oleracea)  | 0.9832536    | 0.7439365    | 0.9844961    | 0.6623705    | not scorable | not scorable |
| #### Bn-scaff_16876_1-p6534C C-genome specific (napus-oleracea)  | 0.9976076    | 0.7283543    | 0.9922481    | 0.7658518    | not scorable | not scorable |
| #### Bn-scaff_16876_1-p6539E C-genome specific (napus-oleracea)  | 0.9976076    | 0.766727     | 0.9922481    | 0.7913507    | not scorable | not scorable |
| #### Bn-scaff_16876_1-p6544E C-genome specific (napus-oleracea)  | 0.9928229    | 0.773483     | 1            | 0.6705891    | not scorable | not scorable |
| #### Bn-scaff_16876_1-p6580E C-genome specific (napus-oleracea)  | 0.9473684    | 0.8016427    | 0.9767442    | 0.8327488    | not scorable | not scorable |
| #### Bn-scaff_16876_1-p6580E C-genome specific (napus-oleracea)  | 0.9497608    | 0.7950413    | 0.9844961    | 0.767768     | not scorable | not scorable |
| #### Bn-scaff_16876_1-p6609E C-genome specific (napus-oleracea)  | 0.9952153    | 0.6679035    | 0.9922481    | 0.751667     | not scorable | not scorable |
| #### Bn-scaff_16876_1-p6616E C-genome specific (napus-oleracea)  | 0.9976076    | 0.7994732    | 0.9922481    | 0.7661741    | not scorable | not scorable |
| #### Bn-scaff_16876_1-p66191C C-genome specific (napus-oleracea) | 0.9976076    | 0.7460079    | 1            | 0.6947696    | not scorable | not scorable |
| #### Bn-scaff_16876_1-p6624E C-genome specific (napus-oleracea)  | 0.9880383    | 0.6766063    | 1            | 0.6435434    | not scorable | not scorable |
| #### Bn-scaff_16876_1-p6637C C-genome specific (napus-oleracea)  | 0.9976076    | 0.7894491    | 1            | 0.7391121    | not scorable | not scorable |
| #### Bn-scaff_16876_1-p66404C C-genome specific (napus-oleracea) | 0.9832536    | 0.714995     | 0.9922481    | 0.7727948    | not scorable | not scorable |
| #### Bn-scaff_16876_1-p6646E C-genome specific (napus-oleracea)  | 1            | 0.547552     | 0.9922481    | 0.7956669    | not scorable | not scorable |
| #### Bn-scaff_16876_1-p6685E C-genome specific (napus-oleracea)  | 0.8229665    | 0.8064042    | 0.8914729    | 0.6537394    | not scorable | not scorable |
| #### Bn-scaff_16876_1-p6701E C-genome specific (napus-oleracea)  | 0.9904306    | 0.7095216    | 0.9922481    | 0.8592697    | not scorable | not scorable |
| #### Bn-scaff_16876_1-p6770E C-genome specific (napus-oleracea)  | 0.9521531    | 0.7484463    | 0.9689922    | 0.8140584    | not scorable | not scorable |
| #### Bn-scaff_16876_1-p6773E C-genome specific (napus-oleracea)  | 0.9545454    | 0.7382321    | 0.9844961    | 0.681666     | not scorable | not scorable |
| #### Bn-scaff_16876_1-p6778C C-genome specific (napus-oleracea)  | 0.9449761    | 0.7812436    | 0.9767442    | 0.6819846    | not scorable | not scorable |
| #### Bn-scaff_16876_1-p6809E C-genome specific (napus-oleracea)  | 0.937799     | 0.6954533    | 0.9689922    | 0.6988469    | not scorable | not scorable |
| #### Bn-scaff_16876_1-p68107C C-genome specific (napus-oleracea) | 0.937799     | 0.8569506    | 0.9534883    | 0.7209599    | not scorable | not scorable |
| #### Bn-scaff_16876_1-p6912E C-genome specific (napus-oleracea)  | 0.9545454    | 0.6990145    | 0.9612403    | 0.8048622    | not scorable | not scorable |
| #### Bn-scaff_16876_1-p70921C C-genome specific (napus-oleracea) | 0.9425837    | 0.7596454    | 0.9767442    | 0.6842329    | not scorable | not scorable |
| #### Bn-scaff_16876_1-p7128C C-genome specific (napus-oleracea)  | 0.9904306    | 0.6687774    | 0.9922481    | 0.6569963    | not scorable | not scorable |
| #### Bn-scaff_16876_1-p71291C C-genome specific (napus-oleracea) | 0.9808612    | 0.7777108    | 0.9922481    | 0.745981     | not scorable | not scorable |
| #### Bn-scaff_16876_1-p71367C C-genome specific (napus-oleracea) | 0.9952153    | 0.7766278    | 1            | 0.681008     | not scorable | not scorable |
| #### Bn-scaff_16876_1-p73297C C-genome specific (napus-oleracea) | 1            | 0.9018686    | 1            | 0.9095823    | not scorable | not scorable |
| #### Bn-scaff_16876_1-p73312C C-genome specific (napus-oleracea) | 0.9952153    | 0.74705      | 1            | 0.3681211    | not scorable | not scorable |
| #### Bn-scaff_16876_1-p7359 genome unspecific (all in)           | 0.9952153    | 0.4942477    | 1            | 0.8079615    | 1            | 0.781025     |
| #### Bn-scaff_16876_1-p85012C C-genome specific (napus-oleracea) | 0.9976076    | 0.8514623    | 1            | 0.854221     | not scorable | not scorable |
| #### Bn-scaff_16876_1-p85134 napus specific                      | 0.9952153    | 0.33595      | not scorable | not scorable | not scorable | not scorable |

|                                                                |              |              |              |   |              |              |              |              |
|----------------------------------------------------------------|--------------|--------------|--------------|---|--------------|--------------|--------------|--------------|
| #### Bn-scaff_16876_1-p86384genome unspecific (all in)         | 0.9856459    | 0.7513385    |              | 1 | 0.9142652    |              | 1            | 0.8244895    |
| #### Bn-scaff_16876_1-p86585C-genome specific (oleracea only)  | not scorable | not scorable |              | 1 | 0.8946623    | not scorable | not scorable |              |
| #### Bn-scaff_16876_1-p86865genome unspecific (oleracea-rapa)  | not scorable | not scorable |              | 1 | 0.7874147    | 0.9917355    | 0.7767157    |              |
| #### Bn-scaff_16876_1-p87321C-genome specific (napus-oleracea) | 0.9880383    | 0.5752358    | 0.9844961    |   | 0.6866689    | not scorable | not scorable |              |
| #### Bn-scaff_16876_1-p87406C-genome specific (napus-oleracea) | 0.9784689    | 0.4757836    | 0.9844961    |   | 0.7564821    | not scorable | not scorable |              |
| #### Bn-scaff_16876_1-p8795 genome unspecific (all in)         |              | 1            | 0.4107721    |   | 1            | 0.8967146    |              | 1 0.8074133  |
| #### Bn-scaff_16876_1-p87971all not scorable                   | not scorable | not scorable | not scorable |   | not scorable | not scorable | not scorable |              |
| #### Bn-scaff_16876_1-p88011C-genome specific (napus-oleracea) | 0.9904306    | 0.7327176    |              | 1 | 0.8108458    | not scorable | not scorable |              |
| #### Bn-scaff_16876_1-p9086C-genome specific (napus-oleracea)  | 0.9976076    | 0.8094081    | 0.9922481    |   | 0.7793068    | not scorable | not scorable |              |
| #### Bn-scaff_16876_1-p92162C-genome specific (napus-oleracea) | 0.9904306    | 0.6137479    | 0.9689922    |   | 0.5959661    | not scorable | not scorable |              |
| #### Bn-scaff_16876_1-p92965 napus specific                    | 0.9162679    | 0.5974721    | not scorable |   | not scorable | not scorable | not scorable |              |
| #### Bn-scaff_16876_1-p93444C-genome specific (napus-oleracea) | 0.9928229    | 0.6907907    | 0.9844961    |   | 0.6661952    | not scorable | not scorable |              |
| #### Bn-scaff_16876_1-p94807C-genome specific (napus-oleracea) |              | 1            | 0.8191638    |   | 1            | 0.8792368    | not scorable | not scorable |
| #### Bn-scaff_16876_1-p96395C-genome specific (napus-oleracea) | 0.9952153    | 0.7513886    | 0.8527132    |   | 0.7316971    | not scorable | not scorable |              |
| #### Bn-scaff_16876_1-p96463C-genome specific (napus-oleracea) | 0.9928229    | 0.7647475    | 0.8527132    |   | 0.557034     | not scorable | not scorable |              |
| #### Bn-scaff_16876_1-p97846C-genome specific (napus-oleracea) | 0.9976076    | 0.813392     | 0.9612403    |   | 0.8171728    | not scorable | not scorable |              |
| #### Bn-scaff_16876_1-p98188C-genome specific (napus-oleracea) | 0.9976076    | 0.7632224    | 0.9844961    |   | 0.8350887    | not scorable | not scorable |              |
| #### Bn-scaff_16876_1-p99193C-genome specific (napus-oleracea) |              | 1            | 0.6924579    |   | 0.9922481    | 0.7352082    | not scorable | not scorable |
| #### Bn-scaff_16888_1-p10016C-genome specific (napus-oleracea) | 0.7822967    | 0.8458788    | 0.9922481    |   | 0.8099191    | not scorable | not scorable |              |
| #### Bn-scaff_16888_1-p10108genome unspecific (all in)         | 0.9928229    | 0.4559299    | 0.9922481    |   | 0.7310637    | 0.9917355    | 0.8977053    |              |
| #### Bn-scaff_16888_1-p10118C-genome specific (napus-oleracea) | 0.9880383    | 0.7914778    | 0.9922481    |   | 0.8221706    | not scorable | not scorable |              |
| #### Bn-scaff_16888_1-p10235genome unspecific (all in)         | 0.9976076    | 0.2847238    |              | 1 | 0.9175813    |              | 1 0.8313473  |              |
| #### Bn-scaff_16888_1-p10313genome unspecific (all in)         | 0.9952153    | 0.3649892    |              | 1 | 0.8137532    |              | 1 0.7137349  |              |
| #### Bn-scaff_16888_1-p10362C-genome specific (napus-oleracea) | 0.9760765    | 0.7511484    | 0.9302326    |   | 0.7831354    | not scorable | not scorable |              |
| #### Bn-scaff_16888_1-p1037C-genome unspecific (all in)        | 0.9976076    | 0.3651483    |              | 1 | 0.7477533    |              | 1 0.8127159  |              |
| #### Bn-scaff_16888_1-p10379C-genome specific (napus-oleracea) | 0.9880383    | 0.878936     | 0.9922481    |   | 0.8219877    | not scorable | not scorable |              |
| #### Bn-scaff_16888_1-p10433genome unspecific (all in)         | 0.9976076    | 0.4538415    | 0.9534883    |   | 0.432358     |              | 1 0.5685357  |              |
| #### Bn-scaff_16888_1-p10488C-genome specific (napus-oleracea) | 0.9617225    | 0.5617918    | 0.9922481    |   | 0.7036191    | not scorable | not scorable |              |
| #### Bn-scaff_16888_1-p10557C-genome specific (napus-oleracea) | 0.784689     | 0.7835604    | 0.9922481    |   | 0.7851946    | not scorable | not scorable |              |
| #### Bn-scaff_16888_1-p10591C-genome specific (oleracea only)  | not scorable | not scorable | 0.9767442    |   | 0.9072273    | not scorable | not scorable |              |
| #### Bn-scaff_16888_1-p10704genome unspecific (all in)         | 0.9354067    | 0.3813946    |              | 1 | 0.7064043    | 0.9669421    | 0.5554928    |              |
| #### Bn-scaff_16888_1-p10857genome unspecific (all in)         | 0.9641148    | 0.6350799    | 0.9922481    |   | 0.7990592    |              | 1 0.9514513  |              |
| #### Bn-scaff_16888_1-p10926C-genome specific (oleracea only)  | not scorable | not scorable |              | 1 | 0.7158203    | not scorable | not scorable |              |

|                                                                 |              |              |              |              |              |              |              |
|-----------------------------------------------------------------|--------------|--------------|--------------|--------------|--------------|--------------|--------------|
| #### Bn-scaff_16888_1-p10978 C-genome specific (oleracea only)  | not scorable | not scorable |              | 1            | 0.7213937    | not scorable | not scorable |
| #### Bn-scaff_16888_1-p11026 C-genome specific (napus-oleracea) | 0.9832536    | 0.8031533    |              | 1            | 0.8359812    | not scorable | not scorable |
| #### Bn-scaff_16888_1-p11047 C-genome specific (napus-oleracea) | 0.9832536    | 0.7947641    |              | 1            | 0.7553751    | not scorable | not scorable |
| #### Bn-scaff_16888_1-p11130 C-genome specific (napus-oleracea) | 0.9808612    | 0.6624989    | 0.9844961    |              | 0.5919692    | not scorable | not scorable |
| #### Bn-scaff_16888_1-p11401 C-genome specific (napus-oleracea) | 0.9928229    | 0.7659581    |              | 1            | 0.3342167    | not scorable | not scorable |
| #### Bn-scaff_16888_1-p11422 C-genome specific (napus-oleracea) | 0.9856459    | 0.7695497    | 0.9922481    |              | 0.7703507    | not scorable | not scorable |
| #### Bn-scaff_16888_1-p11425 C-genome specific (napus-oleracea) | 0.9880383    | 0.7223248    | 0.9922481    |              | 0.7704138    | not scorable | not scorable |
| #### Bn-scaff_16888_1-p11680 C-genome specific (napus-oleracea) | 0.9880383    | 0.6630253    |              | 1            | 0.6789452    | not scorable | not scorable |
| #### Bn-scaff_16888_1-p11690 C-genome specific (napus-oleracea) | 0.9832536    | 0.7799408    |              | 1            | 0.7814448    | not scorable | not scorable |
| #### Bn-scaff_16888_1-p11691 C-genome specific (napus-oleracea) | 0.9856459    | 0.7462142    | 0.9922481    |              | 0.6726866    | not scorable | not scorable |
| #### Bn-scaff_16888_1-p11701 C-genome specific (napus-oleracea) | 0.9880383    | 0.7687884    |              | 1            | 0.7314261    | not scorable | not scorable |
| #### Bn-scaff_16888_1-p11713 C-genome specific (napus-oleracea) | 0.9856459    | 0.7507814    |              | 1            | 0.7486244    | not scorable | not scorable |
| #### Bn-scaff_16888_1-p11734 C-genome specific (napus-oleracea) | 0.9832536    | 0.799863     |              | 1            | 0.7416169    | not scorable | not scorable |
| #### Bn-scaff_16888_1-p11757 C-genome specific (napus-oleracea) | 0.9904306    | 0.7501997    |              | 1            | 0.2893161    | not scorable | not scorable |
| #### Bn-scaff_16888_1-p11764 C-genome specific (napus-oleracea) | 0.9856459    | 0.7031844    | 0.9922481    |              | 0.6671848    | not scorable | not scorable |
| #### Bn-scaff_16888_1-p11765 genome unspecific (all in)         | 0.9880383    | 0.5918851    |              | 1            | 0.6880175    | 0.9752066    | 0.920251     |
| #### Bn-scaff_16888_1-p11844 C-genome specific (napus-oleracea) | 0.8038278    | 0.7719293    |              | 1            | 0.5780925    | not scorable | not scorable |
| #### Bn-scaff_16888_1-p11918 C-genome specific (napus-oleracea) | 0.7990431    | 0.8393477    |              | 1            | 0.7693627    | not scorable | not scorable |
| #### Bn-scaff_16888_1-p11938 genome unspecific (all in)         | 0.9952153    | 0.4225272    | 0.9922481    |              | 0.7033053    | 1            | 0.8162848    |
| #### Bn-scaff_16888_1-p11949 C-genome specific (napus-oleracea) | 0.9976076    | 0.5497664    |              | 1            | 0.762084     | not scorable | not scorable |
| #### Bn-scaff_16888_1-p12044 C-genome specific (napus-oleracea) | 0.7751196    | 0.7986311    |              | 1            | 0.6657485    | not scorable | not scorable |
| #### Bn-scaff_16888_1-p12061 C-genome specific (napus-oleracea) | 0.9952153    | 0.7167121    |              | 1            | 0.8717089    | not scorable | not scorable |
| #### Bn-scaff_16888_1-p12168 C-genome specific (oleracea only)  | not scorable | not scorable |              | 1            | 0.7704166    | not scorable | not scorable |
| #### Bn-scaff_16888_1-p12213 all not scorable                   | not scorable | not scorable | not scorable | not scorable | not scorable | not scorable | not scorable |
| #### Bn-scaff_16888_1-p12219 A-genome specific (rapa only)      | not scorable | not scorable | not scorable | not scorable | not scorable | 1            | 0.9135712    |
| #### Bn-scaff_16888_1-p12221 genome unspecific (oleracea-rapa)  | not scorable | not scorable | 0.9844961    |              | 0.2435473    | 1            | 0.6666121    |
| #### Bn-scaff_16888_1-p12221 C-genome specific (napus-oleracea) | 0.9880383    | 0.2821248    |              | 1            | 0.3809286    | not scorable | not scorable |
| #### Bn-scaff_16888_1-p12227 all not scorable                   | not scorable | not scorable | not scorable | not scorable | not scorable | not scorable | not scorable |
| #### Bn-scaff_16888_1-p12736 genome unspecific (all in)         | 0.9354067    | 0.3119345    |              | 1            | 0.8004208    | 0.9917355    | 0.7344397    |
| #### Bn-scaff_16888_1-p12810 genome unspecific (all in)         | 0.9928229    | 0.6838416    | 0.9922481    |              | 0.7565049    | 0.6280992    | 0.6345917    |
| #### Bn-scaff_16888_1-p13015 C-genome specific (napus-oleracea) | 0.9976076    | 0.7708716    | 0.9922481    |              | 0.8337511    | not scorable | not scorable |
| #### Bn-scaff_16888_1-p13063 C-genome specific (napus-oleracea) | 0.9904306    | 0.7936976    |              | 1            | 0.6813377    | not scorable | not scorable |
| #### Bn-scaff_16888_1-p13113 C-genome specific (napus-oleracea) | 0.9856459    | 0.7835542    | 0.9922481    |              | 0.8051633    | not scorable | not scorable |

|                                                                |              |              |           |           |              |              |
|----------------------------------------------------------------|--------------|--------------|-----------|-----------|--------------|--------------|
| #### Bn-scaff_16888_1-p13377genome unspecific (all in)         | 1            | 0.3837086    | 1         | 0.357859  | 1            | 0.8118256    |
| #### Bn-scaff_16888_1-p13411C-genome specific (napus-oleracea) | 0.9976076    | 0.8172743    | 0.9922481 | 0.8387783 | not scorable | not scorable |
| #### Bn-scaff_16888_1-p13444C-genome specific (napus-oleracea) | 0.9904306    | 0.857259     | 0.8914729 | 0.7583389 | not scorable | not scorable |
| #### Bn-scaff_16888_1-p13473C-genome specific (napus-oleracea) | 0.9904306    | 0.6844234    | 1         | 0.7218482 | not scorable | not scorable |
| #### Bn-scaff_16888_1-p13473C-genome specific (napus-oleracea) | 0.9976076    | 0.6824094    | 0.9612403 | 0.7231134 | not scorable | not scorable |
| #### Bn-scaff_16888_1-p13647genome unspecific (oleracea-rapa)  | not scorable | not scorable | 1         | 0.8296796 | 0.9834711    | 0.9068847    |
| #### Bn-scaff_16888_1-p13824C-genome specific (napus-oleracea) | 0.9952153    | 0.7628896    | 1         | 0.7934078 | not scorable | not scorable |
| #### Bn-scaff_16888_1-p14004genome unspecific (oleracea-rapa)  | not scorable | not scorable | 1         | 0.7548996 | 1            | 0.568415     |
| #### Bn-scaff_16888_1-p14162C-genome specific (napus-oleracea) | 0.9976076    | 0.7271974    | 0.9844961 | 0.7434746 | not scorable | not scorable |
| #### Bn-scaff_16888_1-p14164C-genome specific (napus-oleracea) | 0.9832536    | 0.731735     | 0.9534883 | 0.7901278 | not scorable | not scorable |
| #### Bn-scaff_16888_1-p14168C-genome specific (napus-oleracea) | 0.9952153    | 0.7081106    | 0.9689922 | 0.8193359 | not scorable | not scorable |
| #### Bn-scaff_16888_1-p14169C-genome specific (napus-oleracea) | 0.9928229    | 0.6291859    | 0.9689922 | 0.6895205 | not scorable | not scorable |
| #### Bn-scaff_16888_1-p14192C-genome specific (napus-oleracea) | 0.9928229    | 0.6943008    | 0.9767442 | 0.7248943 | not scorable | not scorable |
| #### Bn-scaff_16888_1-p14196C-genome specific (napus-oleracea) | 0.9808612    | 0.7544378    | 0.5658914 | 0.8097734 | not scorable | not scorable |
| #### Bn-scaff_16888_1-p14261C-genome specific (napus-oleracea) | 0.9784689    | 0.7805629    | 1         | 0.3589854 | not scorable | not scorable |
| #### Bn-scaff_16888_1-p14312genome unspecific (all in)         | 1            | 0.4644635    | 1         | 0.826812  | 0.9752066    | 0.6938348    |
| #### Bn-scaff_16888_1-p14354genome unspecific (all in)         | 0.9904306    | 0.5689809    | 0.9767442 | 0.8491631 | 1            | 0.9325012    |
| #### Bn-scaff_16888_1-p14506C-genome specific (napus-oleracea) | 0.9976076    | 0.8091827    | 0.9922481 | 0.6541916 | not scorable | not scorable |
| #### Bn-scaff_16888_1-p14523C-genome specific (napus-oleracea) | 0.9952153    | 0.7950177    | 0.9844961 | 0.8458923 | not scorable | not scorable |
| #### Bn-scaff_16888_1-p14547C-genome specific (napus-oleracea) | 0.9952153    | 0.766717     | 0.9922481 | 0.7846883 | not scorable | not scorable |
| #### Bn-scaff_16888_1-p14587genome unspecific (all in)         | 0.9952153    | 0.2898701    | 1         | 0.6907942 | 1            | 0.8249244    |
| #### Bn-scaff_16888_1-p14847C-genome specific (napus-oleracea) | 0.9952153    | 0.5247092    | 0.9767442 | 0.5833511 | not scorable | not scorable |
| #### Bn-scaff_16888_1-p15384C-genome specific (napus-oleracea) | 0.9808612    | 0.7763349    | 0.9922481 | 0.7134393 | not scorable | not scorable |
| #### Bn-scaff_16888_1-p15545genome unspecific (all in)         | 0.9856459    | 0.368472     | 0.9844961 | 0.7800604 | 1            | 0.9388269    |
| #### Bn-scaff_16888_1-p15613C-genome specific (napus-oleracea) | 0.9784689    | 0.7815926    | 0.9767442 | 0.8057614 | not scorable | not scorable |
| #### Bn-scaff_16888_1-p15614C-genome specific (napus-oleracea) | 0.9784689    | 0.7863711    | 0.9922481 | 0.8104405 | not scorable | not scorable |
| #### Bn-scaff_16888_1-p15878genome unspecific (all in)         | 0.9784689    | 0.310535     | 1         | 0.6394386 | 0.9917355    | 0.6287634    |
| #### Bn-scaff_16888_1-p16377genome unspecific (all in)         | 0.7703349    | 0.5716655    | 0.9844961 | 0.5647874 | 1            | 0.9230721    |
| #### Bn-scaff_16888_1-p16849C-genome specific (napus-oleracea) | 0.9856459    | 0.7973794    | 0.9922481 | 0.8569614 | not scorable | not scorable |
| #### Bn-scaff_16888_1-p17381C-genome specific (napus-oleracea) | 0.8014354    | 0.8255987    | 1         | 0.776952  | not scorable | not scorable |
| #### Bn-scaff_16888_1-p17702C-genome specific (napus-oleracea) | 0.8038278    | 0.8283313    | 1         | 0.7432671 | not scorable | not scorable |
| #### Bn-scaff_16888_1-p17861C-genome specific (napus-oleracea) | 0.9928229    | 0.764845     | 0.9689922 | 0.6934282 | not scorable | not scorable |
| #### Bn-scaff_16888_1-p17864C-genome specific (napus-oleracea) | 0.9952153    | 0.7558952    | 1         | 0.7785437 | not scorable | not scorable |

|                                                                 |              |              |              |              |              |              |
|-----------------------------------------------------------------|--------------|--------------|--------------|--------------|--------------|--------------|
| #### Bn-scaff_16888_1-p17868 C-genome specific (napus-oleracea) | 0.9928229    | 0.7779851    | 0.9689922    | 0.6949023    | not scorable | not scorable |
| #### Bn-scaff_16888_1-p17909 C-genome specific (napus-oleracea) | 0.9976076    | 0.7252331    | 0.9844961    | 0.7306334    | not scorable | not scorable |
| #### Bn-scaff_16888_1-p17964 genome unspecific (all in)         | 0.9880383    | 0.4161423    | 1            | 0.6764538    | 1            | 0.7622204    |
| #### Bn-scaff_16888_1-p17967 genome unspecific (all in)         | 0.9976076    | 0.2956913    | 1            | 0.8003787    | 1            | 0.8206942    |
| #### Bn-scaff_16888_1-p18034 genome unspecific (all in)         | 0.9976076    | 0.7289729    | 0.9922481    | 0.7458228    | 1            | 0.9508413    |
| #### Bn-scaff_16888_1-p18039 C-genome specific (napus-oleracea) | 1            | 0.2245704    | 0.9922481    | 0.4381       | not scorable | not scorable |
| #### Bn-scaff_16888_1-p18041 genome unspecific (all in)         | 0.9904306    | 0.5348856    | 1            | 0.5625151    | 1            | 0.8839182    |
| #### Bn-scaff_16888_1-p18044 genome unspecific (all in)         | 1            | 0.4618188    | 1            | 0.7739488    | 1            | 0.711467     |
| #### Bn-scaff_16888_1-p18054 C-genome specific (napus-oleracea) | 0.9952153    | 0.7508138    | 1            | 0.6579867    | not scorable | not scorable |
| #### Bn-scaff_16888_1-p18055 genome unspecific (all in)         | 0.9904306    | 0.3399894    | 0.9922481    | 0.6310912    | 0.9917355    | 0.7500769    |
| #### Bn-scaff_16888_1-p18156 C-genome specific (napus-oleracea) | 0.9904306    | 0.8272508    | 0.9922481    | 0.8289666    | not scorable | not scorable |
| #### Bn-scaff_16888_1-p18162 C-genome specific (napus-oleracea) | 0.9688995    | 0.672498     | 0.9922481    | 0.7402339    | not scorable | not scorable |
| #### Bn-scaff_16888_1-p18174 genome unspecific (all in)         | 0.9880383    | 0.4369033    | 0.9922481    | 0.7498011    | 1            | 0.8890619    |
| #### Bn-scaff_16888_1-p18243 genome unspecific (all in)         | 1            | 0.7859385    | 0.9844961    | 0.731972     | 1            | 0.9322411    |
| #### Bn-scaff_16888_1-p18245 C-genome specific (napus-oleracea) | 0.7966507    | 0.8552374    | 1            | 0.7830075    | not scorable | not scorable |
| #### Bn-scaff_16888_1-p18341 genome unspecific (oleracea-rapa)  | not scorable | not scorable | 0.8604651    | 0.7572094    | 1            | 0.8948976    |
| #### Bn-scaff_16888_1-p18553 C-genome specific (napus-oleracea) | 0.9928229    | 0.7161486    | 0.9844961    | 0.6688378    | not scorable | not scorable |
| #### Bn-scaff_16888_1-p18558 genome unspecific (all in)         | 0.9856459    | 0.7584948    | 0.9612403    | 0.7545272    | 0.7520661    | 0.7135602    |
| #### Bn-scaff_16888_1-p18566 C-genome specific (napus-oleracea) | 0.9904306    | 0.7629814    | 1            | 0.7816607    | not scorable | not scorable |
| #### Bn-scaff_16888_1-p18567 C-genome specific (napus-oleracea) | 0.9928229    | 0.770438     | 1            | 0.8010864    | not scorable | not scorable |
| #### Bn-scaff_16888_1-p18571 C-genome specific (napus-oleracea) | 0.9856459    | 0.7455147    | 0.9612403    | 0.7899807    | not scorable | not scorable |
| #### Bn-scaff_16888_1-p18572 C-genome specific (napus-oleracea) | 0.9856459    | 0.7640613    | 0.9922481    | 0.7678578    | not scorable | not scorable |
| #### Bn-scaff_16888_1-p18573 C-genome specific (napus-oleracea) | 0.9928229    | 0.7748803    | 0.9689922    | 0.825829     | not scorable | not scorable |
| #### Bn-scaff_16888_1-p18641 C-genome specific (napus-oleracea) | 0.9904306    | 0.765415     | 1            | 0.7135856    | not scorable | not scorable |
| #### Bn-scaff_16888_1-p18647 genome unspecific (all in)         | 0.9760765    | 0.8566945    | 0.8682171    | 0.8793069    | 0.9834711    | 0.8792619    |
| #### Bn-scaff_16888_1-p18657 genome unspecific (all in)         | 0.9808612    | 0.5334976    | 0.9767442    | 0.5982338    | 1            | 0.9205657    |
| #### Bn-scaff_16888_1-p18662 C-genome specific (napus-oleracea) | 0.9976076    | 0.7483344    | 0.9689922    | 0.7046467    | not scorable | not scorable |
| #### Bn-scaff_16888_1-p18665 C-genome specific (napus-oleracea) | 0.9832536    | 0.7895411    | 0.9922481    | 0.7961       | not scorable | not scorable |
| #### Bn-scaff_16888_1-p18673 genome unspecific (all in)         | 0.9521531    | 0.233323     | 1            | 0.6619086    | 1            | 0.9124148    |
| #### Bn-scaff_16888_1-p18675 genome unspecific (all in)         | 0.9976076    | 0.4220315    | 1            | 0.664139     | 0.9834711    | 0.6095613    |
| #### Bn-scaff_16888_1-p18926 A-genome specific (rapa only)      | not scorable | not scorable | not scorable | not scorable | 0.9752066    | 0.7019104    |
| #### Bn-scaff_16888_1-p18958 genome unspecific (oleracea-rapa)  | not scorable | not scorable | 0.9689922    | 0.449912     | 1            | 0.7538962    |
| #### Bn-scaff_16888_1-p19310 genome unspecific (all in)         | 0.9976076    | 0.501842     | 1            | 0.7570768    | 0.9752066    | 0.8018328    |



|                                                                 |              |              |              |              |              |              |
|-----------------------------------------------------------------|--------------|--------------|--------------|--------------|--------------|--------------|
| #### Bn-scaff_16888_1-p19327 C-genome specific (napus-oleracea) | 0.8038278    | 0.7549446    | 0.9922481    | 0.6468199    | not scorable | not scorable |
| #### Bn-scaff_16888_1-p21234 C-genome specific (napus-oleracea) | 0.8038278    | 0.7844641    | 1            | 0.7155414    | not scorable | not scorable |
| #### Bn-scaff_16888_1-p21538 C-genome specific (napus-oleracea) | 0.9808612    | 0.5335151    | 0.9844961    | 0.8391924    | not scorable | not scorable |
| #### Bn-scaff_16888_1-p21834 C-genome specific (napus-oleracea) | 0.8062201    | 0.8357838    | 0.8294573    | 0.8574234    | not scorable | not scorable |
| #### Bn-scaff_16888_1-p22400 all not scorable                   | not scorable | not scorable | not scorable | not scorable | not scorable | not scorable |
| #### Bn-scaff_16888_1-p24281 C-genome specific (napus-oleracea) | 0.9880383    | 0.546429     | 1            | 0.8639974    | not scorable | not scorable |
| #### Bn-scaff_16888_1-p26101 C-genome specific (napus-oleracea) | 0.9880383    | 0.7441028    | 0.9844961    | 0.8311843    | not scorable | not scorable |
| #### Bn-scaff_16888_1-p26477 C-genome specific (napus-oleracea) | 0.9832536    | 0.7585973    | 0.9767442    | 0.7962033    | not scorable | not scorable |
| #### Bn-scaff_16888_1-p27262 C-genome specific (napus-oleracea) | 0.4784689    | 0.8585252    | 0.9379845    | 0.7894533    | not scorable | not scorable |
| #### Bn-scaff_16888_1-p28645 C-genome specific (napus-oleracea) | 0.9904306    | 0.7735092    | 1            | 0.7719246    | not scorable | not scorable |
| #### Bn-scaff_16888_1-p28894 C-genome specific (napus-oleracea) | 0.9808612    | 0.748891     | 0.9844961    | 0.733812     | not scorable | not scorable |
| #### Bn-scaff_16888_1-p31219 C-genome specific (napus-oleracea) | 0.9808612    | 0.7685836    | 0.9844961    | 0.7395695    | not scorable | not scorable |
| #### Bn-scaff_16888_1-p31402 C-genome specific (napus-oleracea) | 0.4952153    | 0.7662532    | 1            | 0.74742      | not scorable | not scorable |
| #### Bn-scaff_16888_1-p32031 C-genome specific (oleracea only)  | not scorable | not scorable | 0.9612403    | 0.3612082    | not scorable | not scorable |
| #### Bn-scaff_16888_1-p38441 C-genome specific (napus-oleracea) | 0.492823     | 0.8803545    | 1            | 0.7325413    | not scorable | not scorable |
| #### Bn-scaff_16888_1-p38458 C-genome specific (napus-oleracea) | 0.4976076    | 0.7993362    | 0.9767442    | 0.7512085    | not scorable | not scorable |
| #### Bn-scaff_16888_1-p39044 C-genome specific (napus-oleracea) | 0.9832536    | 0.7925207    | 1            | 0.7850928    | not scorable | not scorable |
| #### Bn-scaff_16888_1-p39310 C-genome specific (napus-oleracea) | 0.9784689    | 0.6949571    | 1            | 0.690039     | not scorable | not scorable |
| #### Bn-scaff_16888_1-p39909 C-genome specific (napus-oleracea) | 0.9904306    | 0.7862678    | 1            | 0.7431848    | not scorable | not scorable |
| #### Bn-scaff_16888_1-p42865 genome unspecific (all in)         | 0.9880383    | 0.3050833    | 1            | 0.7811406    | 1            | 0.9437429    |
| #### Bn-scaff_16888_1-p44284 C-genome specific (napus-oleracea) | 1            | 0.3423674    | 1            | 0.7204767    | not scorable | not scorable |
| #### Bn-scaff_16888_1-p44641 C-genome specific (napus-oleracea) | 0.9617225    | 0.7911474    | 0.9612403    | 0.754506     | not scorable | not scorable |
| #### Bn-scaff_16888_1-p45513 C-genome specific (napus-oleracea) | 0.9808612    | 0.6967414    | 0.9767442    | 0.7196999    | not scorable | not scorable |
| #### Bn-scaff_16888_1-p45860 C-genome specific (napus-oleracea) | 0.9760765    | 0.6932496    | 1            | 0.6692914    | not scorable | not scorable |
| #### Bn-scaff_16888_1-p46913 genome unspecific (oleracea-rapa)  | not scorable | not scorable | 1            | 0.9088521    | 0.9834711    | 0.7524735    |
| #### Bn-scaff_16888_1-p51672 C-genome specific (oleracea only)  | not scorable | not scorable | 1            | 0.6870061    | not scorable | not scorable |
| #### Bn-scaff_16888_1-p55579 C-genome specific (napus-oleracea) | 0.9952153    | 0.7054288    | 0.9612403    | 0.9175813    | not scorable | not scorable |
| #### Bn-scaff_16888_1-p56225 C-genome specific (napus-oleracea) | 0.4569378    | 0.8679866    | 0.9612403    | 0.6124527    | not scorable | not scorable |
| #### Bn-scaff_16888_1-p56940 C-genome specific (napus-oleracea) | 0.4665072    | 0.8623584    | 0.9302326    | 0.7142202    | not scorable | not scorable |
| #### Bn-scaff_16888_1-p56964 C-genome specific (napus-oleracea) | 0.4808612    | 0.6302429    | 0.9147287    | 0.6253476    | not scorable | not scorable |
| #### Bn-scaff_16888_1-p56974 C-genome specific (napus-oleracea) | 0.4688995    | 0.7023852    | 0.9147287    | 0.7136272    | not scorable | not scorable |
| #### Bn-scaff_16888_1-p57005 C-genome specific (napus-oleracea) | 0.4665072    | 0.9037744    | 0.9612403    | 0.7479522    | not scorable | not scorable |
| #### Bn-scaff_16888_1-p57042 C-genome specific (napus-oleracea) | 0.4688995    | 0.7130777    | 0.9922481    | 0.8020355    | not scorable | not scorable |

|                                                                |              |              |              |              |              |              |
|----------------------------------------------------------------|--------------|--------------|--------------|--------------|--------------|--------------|
| #### Bn-scaff_16888_1-p57061C-genome specific (napus-oleracea) | 0.4736842    | 0.7247153    | 0.9844961    | 0.7322586    | not scorable | not scorable |
| #### Bn-scaff_16888_1-p59297C-genome specific (napus-oleracea) | 0.9880383    | 0.8484903    | 1            | 0.7194257    | not scorable | not scorable |
| #### Bn-scaff_16888_1-p63775genome unspecific (all in)         | 1            | 0.3955622    | 0.9844961    | 0.6077121    | 1            | 0.835289     |
| #### Bn-scaff_16888_1-p65462C-genome specific (napus-oleracea) | 0.4641148    | 0.6909035    | 0.9689922    | 0.7085846    | not scorable | not scorable |
| #### Bn-scaff_16888_1-p7132 genome unspecific (oleracea-rapa)  | not scorable | not scorable | 1            | 0.6020203    | 1            | 0.9175813    |
| #### Bn-scaff_16888_1-p73688genome unspecific (all in)         | 0.9928229    | 0.4172992    | 0.9767442    | 0.4565471    | 0.9669421    | 0.6931843    |
| #### Bn-scaff_16888_1-p74643genome unspecific (all in)         | 0.9880383    | 0.2715461    | 0.9844961    | 0.782368     | 1            | 0.8263714    |
| #### Bn-scaff_16888_1-p74782genome unspecific (all in)         | 0.9952153    | 0.2919384    | 0.9922481    | 0.8351151    | 1            | 0.8962372    |
| #### Bn-scaff_16888_1-p74804genome unspecific (all in)         | 1            | 0.7114417    | 1            | 0.8102555    | 1            | 0.8724613    |
| #### Bn-scaff_16888_1-p74810genome unspecific (all in)         | 0.9976076    | 0.4811443    | 0.9922481    | 0.7493476    | 1            | 0.7389818    |
| #### Bn-scaff_16888_1-p76352genome unspecific (all in)         | 0.9593301    | 0.2447558    | 1            | 0.9109124    | 1            | 0.8487548    |
| #### Bn-scaff_16888_1-p76404genome unspecific (all in)         | 0.9832536    | 0.6888696    | 0.9767442    | 0.7453942    | 0.9917355    | 0.9200031    |
| #### Bn-scaff_16888_1-p77474C-genome specific (oleracea only)  | not scorable | not scorable | 1            | 0.7363463    | not scorable | not scorable |
| #### Bn-scaff_16888_1-p80216C-genome specific (napus-oleracea) | 0.9760765    | 0.748315     | 1            | 0.6575296    | not scorable | not scorable |
| #### Bn-scaff_16888_1-p80455C-genome specific (napus-oleracea) | 0.9952153    | 0.8056371    | 0.9612403    | 0.7910362    | not scorable | not scorable |
| #### Bn-scaff_16888_1-p83052A-genome specific (napus-rapa)     | 1            | 0.5095742    | not scorable | not scorable | 1            | 0.771246     |
| #### Bn-scaff_16888_1-p83063C-genome specific (napus-oleracea) | 1            | 0.5442026    | 1            | 0.5932571    | not scorable | not scorable |
| #### Bn-scaff_16888_1-p83075C-genome specific (oleracea only)  | not scorable | not scorable | 0.8914729    | 0.1470887    | not scorable | not scorable |
| #### Bn-scaff_16888_1-p88359C-genome specific (napus-oleracea) | 0.791866     | 0.7832263    | 0.9922481    | 0.7502103    | not scorable | not scorable |
| #### Bn-scaff_16888_1-p89441genome unspecific (all in)         | 1            | 0.4512319    | 1            | 0.7025532    | 1            | 0.9348927    |
| #### Bn-scaff_16888_1-p89978genome unspecific (all in)         | 1            | 0.7246202    | 1            | 0.8135551    | 1            | 0.6936254    |
| #### Bn-scaff_16888_1-p93901C-genome specific (napus-oleracea) | 0.9090909    | 0.7660269    | 0.7054263    | 0.7834324    | not scorable | not scorable |
| #### Bn-scaff_16893_1-p37613genome unspecific (all in)         | 0.9880383    | 0.3059915    | 1            | 0.8097595    | 1            | 0.7863083    |
| #### Bn-scaff_16893_1-p69538genome unspecific (all in)         | 0.9880383    | 0.7605756    | 0.8449612    | 0.8200384    | 1            | 0.7389421    |
| #### Bn-scaff_16903_1-p10749C-genome specific (napus-oleracea) | 1            | 0.6986263    | 1            | 0.7134259    | not scorable | not scorable |
| #### Bn-scaff_16903_1-p16885A-genome specific (rapa only)      | not scorable | not scorable | not scorable | not scorable | 1            | 0.7264662    |
| #### Bn-scaff_16903_1-p16894A-genome specific (rapa only)      | not scorable | not scorable | not scorable | not scorable | 1            | 0.8996143    |
| #### Bn-scaff_16903_1-p19783genome unspecific (all in)         | 0.9952153    | 0.4041453    | 1            | 0.8060282    | 1            | 0.8206414    |
| #### Bn-scaff_16903_1-p22422genome unspecific (all in)         | 1            | 0.2288043    | 0.9147287    | 0.3231309    | 1            | 0.8429852    |
| #### Bn-scaff_16903_1-p23013C-genome specific (napus-oleracea) | 0.9832536    | 0.8022701    | 1            | 0.7950035    | not scorable | not scorable |
| #### Bn-scaff_16903_1-p24980A-genome specific (napus-rapa)     | 0.9976076    | 0.5541744    | not scorable | not scorable | 1            | 0.7414846    |
| #### Bn-scaff_16903_1-p33261genome unspecific (all in)         | 0.9736842    | 0.2576267    | 1            | 0.4967662    | 1            | 0.786653     |
| #### Bn-scaff_16903_1-p34282genome unspecific (all in)         | 0.9688995    | 0.437636     | 1            | 0.8085203    | 1            | 0.5497575    |

|                                                                |              |              |           |           |              |              |
|----------------------------------------------------------------|--------------|--------------|-----------|-----------|--------------|--------------|
| #### Bn-scaff_16903_1-p36581genome unspecific (oleracea-rapa)  | not scorable | not scorable | 0.9844961 | 0.6675715 | 1            | 0.894955     |
| #### Bn-scaff_16903_1-p36905genome unspecific (all in)         | 0.9832536    | 0.4197048    | 1         | 0.9293141 | 0.9917355    | 0.8265052    |
| #### Bn-scaff_16903_1-p39819genome unspecific (all in)         | 0.9904306    | 0.6460413    | 1         | 0.8031049 | 1            | 0.9019395    |
| #### Bn-scaff_16903_1-p39833genome unspecific (all in)         | 0.9928229    | 0.5147532    | 1         | 0.8613118 | 1            | 0.8653011    |
| #### Bn-scaff_16903_1-p41297genome unspecific (all in)         | 0.9976076    | 0.4180802    | 1         | 0.869311  | 1            | 0.8236176    |
| #### Bn-scaff_16903_1-p42432C-genome specific (napus-oleracea) | 0.9904306    | 0.7696346    | 1         | 0.7758591 | not scorable | not scorable |
| #### Bn-scaff_16903_1-p46074C-genome specific (napus-oleracea) | 0.9880383    | 0.7551574    | 1         | 0.7178316 | not scorable | not scorable |
| #### Bn-scaff_16903_1-p46104C-genome specific (napus-oleracea) | 0.9928229    | 0.7263357    | 0.9844961 | 0.7212376 | not scorable | not scorable |
| #### Bn-scaff_16903_1-p46158C-genome specific (napus-oleracea) | 0.9880383    | 0.7592481    | 1         | 0.8371828 | not scorable | not scorable |
| #### Bn-scaff_16903_1-p47188C-genome specific (napus-oleracea) | 0.9880383    | 0.6497278    | 0.9844961 | 0.7358886 | not scorable | not scorable |
| #### Bn-scaff_16903_1-p49977C-genome specific (napus-oleracea) | 0.9665072    | 0.6696283    | 1         | 0.7884539 | not scorable | not scorable |
| #### Bn-scaff_16903_2-p30507genome unspecific (all in)         | 0.930622     | 0.3824802    | 0.9844961 | 0.7137482 | 1            | 0.9000472    |
| #### Bn-scaff_16903_3-p65171genome unspecific (all in)         | 1            | 0.602145     | 0.9844961 | 0.5119069 | 1            | 0.8431134    |
| #### Bn-scaff_16903_3-p66180C-genome specific (napus-oleracea) | 0.9593301    | 0.5180306    | 0.9302326 | 0.3383018 | not scorable | not scorable |
| #### Bn-scaff_16912_1-p10962C-genome specific (napus-oleracea) | 0.8062201    | 0.9221562    | 0.9922481 | 0.8630555 | not scorable | not scorable |
| #### Bn-scaff_16912_1-p11026C-genome specific (napus-oleracea) | 0.9090909    | 0.8364042    | 1         | 0.7463869 | not scorable | not scorable |
| #### Bn-scaff_16912_1-p11079C-genome specific (napus-oleracea) | 0.9186603    | 0.7707489    | 1         | 0.7408474 | not scorable | not scorable |
| #### Bn-scaff_16912_1-p11256C-genome specific (napus-oleracea) | 0.8995215    | 0.8121299    | 1         | 0.6937134 | not scorable | not scorable |
| #### Bn-scaff_16912_1-p11786C-genome specific (napus-oleracea) | 0.8755981    | 0.6451827    | 0.9534883 | 0.7267305 | not scorable | not scorable |
| #### Bn-scaff_16912_1-p11805C-genome specific (napus-oleracea) | 0.8995215    | 0.7662517    | 1         | 0.7536783 | not scorable | not scorable |
| #### Bn-scaff_16912_1-p12040C-genome specific (napus-oleracea) | 0.9210526    | 0.8293543    | 0.9922481 | 0.6043963 | not scorable | not scorable |
| #### Bn-scaff_16912_1-p13193C-genome specific (napus-oleracea) | 0.9162679    | 0.7573019    | 1         | 0.804974  | not scorable | not scorable |
| #### Bn-scaff_16912_1-p17874C-genome specific (napus-oleracea) | 0.9090909    | 0.8708434    | 1         | 0.7531453 | not scorable | not scorable |
| #### Bn-scaff_16912_1-p17890C-genome specific (napus-oleracea) | 0.923445     | 0.7664112    | 0.9844961 | 0.7166107 | not scorable | not scorable |
| #### Bn-scaff_16912_1-p18232C-genome specific (napus-oleracea) | 0.8971292    | 0.8389003    | 1         | 0.7377404 | not scorable | not scorable |
| #### Bn-scaff_16912_1-p18676C-genome specific (oleracea only)  | not scorable | not scorable | 0.9844961 | 0.8711074 | not scorable | not scorable |
| #### Bn-scaff_16912_1-p18749C-genome specific (napus-oleracea) | 0.9186603    | 0.8129138    | 1         | 0.7153281 | not scorable | not scorable |
| #### Bn-scaff_16912_1-p19029C-genome specific (napus-oleracea) | 0.9186603    | 0.7418458    | 1         | 0.7096013 | not scorable | not scorable |
| #### Bn-scaff_16912_1-p20115C-genome specific (napus-oleracea) | 0.9880383    | 0.6680074    | 1         | 0.6805574 | not scorable | not scorable |
| #### Bn-scaff_16912_1-p28213genome unspecific (oleracea-rapa)  | not scorable | not scorable | 1         | 0.7411936 | 0.9504132    | 0.7037949    |
| #### Bn-scaff_16912_1-p28404genome unspecific (all in)         | 0.9665072    | 0.5942763    | 1         | 0.5701789 | 0.9834711    | 0.515728     |
| #### Bn-scaff_16912_1-p30216C-genome specific (napus-oleracea) | 0.9138756    | 0.6801433    | 1         | 0.6008782 | not scorable | not scorable |
| #### Bn-scaff_16912_1-p30270C-genome specific (napus-oleracea) | 0.9138756    | 0.7938721    | 1         | 0.7542418 | not scorable | not scorable |

|                                                                 |              |              |              |              |              |              |
|-----------------------------------------------------------------|--------------|--------------|--------------|--------------|--------------|--------------|
| #### Bn-scaff_16912_1-p40755 C-genome specific (napus-oleracea) | 0.9138756    | 0.7953969    | 1            | 0.7833746    | not scorable | not scorable |
| #### Bn-scaff_16912_1-p49714 C-genome specific (oleracea only)  | not scorable | not scorable | 0.9922481    | 0.4448506    | not scorable | not scorable |
| #### Bn-scaff_16912_1-p59416 C-genome specific (napus-oleracea) | 0.9090909    | 0.804996     | 1            | 0.8059236    | not scorable | not scorable |
| #### Bn-scaff_16912_1-p60017 C-genome specific (napus-oleracea) | 0.9090909    | 0.8193734    | 1            | 0.7943637    | not scorable | not scorable |
| #### Bn-scaff_16912_1-p64298 C-genome specific (napus-oleracea) | 0.9162679    | 0.7812795    | 1            | 0.7677317    | not scorable | not scorable |
| #### Bn-scaff_16912_1-p83219 genome unspecific (all in)         | 0.9736842    | 0.309631     | 1            | 0.2478901    | 1            | 0.7349294    |
| #### Bn-scaff_16912_1-p93290 C-genome specific (napus-oleracea) | 0.9138756    | 0.5686088    | 1            | 0.6344768    | not scorable | not scorable |
| #### Bn-scaff_16912_1-p93554 C-genome specific (napus-oleracea) | 0.9210526    | 0.8200297    | 1            | 0.7988679    | not scorable | not scorable |
| #### Bn-scaff_16912_1-p93881 C-genome specific (napus-oleracea) | 0.9114832    | 0.8138842    | 0.9922481    | 0.7515481    | not scorable | not scorable |
| #### Bn-scaff_16912_1-p94309 C-genome specific (napus-oleracea) | 0.9784689    | 0.5021966    | 1            | 0.679622     | not scorable | not scorable |
| #### Bn-scaff_16912_1-p96004 C-genome specific (napus-oleracea) | 0.9186603    | 0.7034214    | 1            | 0.7111284    | not scorable | not scorable |
| #### Bn-scaff_16912_1-p98998 C-genome specific (napus-oleracea) | 0.9138756    | 0.8071682    | 0.9844961    | 0.6336656    | not scorable | not scorable |
| #### Bn-scaff_16912_1-p99561 C-genome specific (napus-oleracea) | 0.9162679    | 0.76316      | 1            | 0.7309546    | not scorable | not scorable |
| #### Bn-scaff_16916_1-p14943 A-genome specific (napus-rapa)     | 0.9976076    | 0.5267993    | not scorable | not scorable | 1            | 0.8004208    |
| #### Bn-scaff_16923_1-p34465 C-genome specific (napus-oleracea) | 0.9617225    | 0.4263994    | 1            | 0.8653011    | not scorable | not scorable |
| #### Bn-scaff_16925_1-p10218 C-genome specific (napus-oleracea) | 1            | 0.7087766    | 0.9844961    | 0.8404533    | not scorable | not scorable |
| #### Bn-scaff_16925_1-p10513 C-genome specific (napus-oleracea) | 0.9928229    | 0.7587046    | 0.9844961    | 0.8405322    | not scorable | not scorable |
| #### Bn-scaff_16925_1-p11472 C-genome specific (napus-oleracea) | 0.9856459    | 0.7629164    | 1            | 0.76095      | not scorable | not scorable |
| #### Bn-scaff_16925_1-p11503 C-genome specific (napus-oleracea) | 0.9856459    | 0.6261065    | 0.9844961    | 0.6643068    | not scorable | not scorable |
| #### Bn-scaff_16925_1-p11562 C-genome specific (napus-oleracea) | 0.9976076    | 0.8099797    | 0.9767442    | 0.7874124    | not scorable | not scorable |
| #### Bn-scaff_16925_1-p12912 genome unspecific (all in)         | 0.9832536    | 0.5990684    | 0.9844961    | 0.6638865    | 0.8842975    | 0.7870198    |
| #### Bn-scaff_16925_1-p15024 genome unspecific (all in)         | 0.9856459    | 0.5148332    | 0.9922481    | 0.6744213    | 0.9752066    | 0.8658203    |
| #### Bn-scaff_16925_1-p16876 C-genome specific (napus-oleracea) | 0.9904306    | 0.8030873    | 1            | 0.7077312    | not scorable | not scorable |
| #### Bn-scaff_16925_1-p18217 C-genome specific (napus-oleracea) | 0.9904306    | 0.6782055    | 0.8604651    | 0.7800249    | not scorable | not scorable |
| #### Bn-scaff_16925_1-p18224 C-genome specific (napus-oleracea) | 1            | 0.7072628    | 1            | 0.7425615    | not scorable | not scorable |
| #### Bn-scaff_16925_1-p18247 C-genome specific (napus-oleracea) | 1            | 0.8106109    | 0.9767442    | 0.745191     | not scorable | not scorable |
| #### Bn-scaff_16925_1-p18312 C-genome specific (napus-oleracea) | 0.9952153    | 0.7685571    | 0.9767442    | 0.7374279    | not scorable | not scorable |
| #### Bn-scaff_16925_1-p18362 genome unspecific (all in)         | 0.9856459    | 0.3064819    | 0.9922481    | 0.4865694    | 1            | 0.8603804    |
| #### Bn-scaff_16925_1-p19631 C-genome specific (oleracea only)  | not scorable | not scorable | 0.8139535    | 0.5186642    | not scorable | not scorable |
| #### Bn-scaff_16925_1-p20768 C-genome specific (oleracea only)  | not scorable | not scorable | 0.9069768    | 0.5825694    | not scorable | not scorable |
| #### Bn-scaff_16925_1-p21603 C-genome specific (napus-oleracea) | 0.9904306    | 0.8650105    | 0.9922481    | 0.8284803    | not scorable | not scorable |
| #### Bn-scaff_16925_1-p22755 genome unspecific (all in)         | 0.9952153    | 0.4831204    | 0.9922481    | 0.8137556    | 0.9917355    | 0.9272014    |
| #### Bn-scaff_16925_1-p23110 C-genome specific (napus-oleracea) | 0.9976076    | 0.7287347    | 1            | 0.7569981    | not scorable | not scorable |

|                                                                 |              |              |           |           |              |              |
|-----------------------------------------------------------------|--------------|--------------|-----------|-----------|--------------|--------------|
| #### Bn-scaff_16925_1-p2356 genome unspecific (all in)          | 0.9928229    | 0.4051959    | 1         | 0.8627933 | 0.9917355    | 0.8781497    |
| #### Bn-scaff_16925_1-p24708 C-genome specific (napus-oleracea) | 0.9928229    | 0.6922006    | 0.9922481 | 0.8248255 | not scorable | not scorable |
| #### Bn-scaff_16925_1-p24983 C-genome specific (napus-oleracea) | 0.9952153    | 0.8669507    | 1         | 0.8507984 | not scorable | not scorable |
| #### Bn-scaff_16925_1-p24994 C-genome specific (napus-oleracea) | 1            | 0.6463199    | 1         | 0.6381572 | not scorable | not scorable |
| #### Bn-scaff_16925_1-p25008 C-genome specific (napus-oleracea) | 0.9856459    | 0.717572     | 0.9534883 | 0.7833571 | not scorable | not scorable |
| #### Bn-scaff_16925_1-p26127 C-genome specific (napus-oleracea) | 0.9976076    | 0.7431157    | 1         | 0.7505305 | not scorable | not scorable |
| #### Bn-scaff_16925_1-p28216 C-genome specific (napus-oleracea) | 0.9928229    | 0.7140447    | 0.9922481 | 0.6021541 | not scorable | not scorable |
| #### Bn-scaff_16925_1-p29103 C-genome specific (oleracea only)  | not scorable | not scorable | 0.9302326 | 0.8035549 | not scorable | not scorable |
| #### Bn-scaff_16925_1-p34282 C-genome specific (napus-oleracea) | 0.9712918    | 0.8624022    | 0.5891473 | 0.8389613 | not scorable | not scorable |
| #### Bn-scaff_16925_1-p34346 C-genome specific (oleracea only)  | not scorable | not scorable | 1         | 0.6888206 | not scorable | not scorable |
| #### Bn-scaff_16925_1-p34354 C-genome specific (napus-oleracea) | 0.9712918    | 0.6869708    | 0.9844961 | 0.5160227 | not scorable | not scorable |
| #### Bn-scaff_16925_1-p34972 C-genome specific (napus-oleracea) | 0.9880383    | 0.7238926    | 0.9147287 | 0.8014797 | not scorable | not scorable |
| #### Bn-scaff_16925_1-p87032 C-genome specific (napus-oleracea) | 0.9976076    | 0.8054101    | 0.9922481 | 0.7227261 | not scorable | not scorable |
| #### Bn-scaff_16925_1-p95901 C-genome specific (napus-oleracea) | 0.9952153    | 0.7777653    | 0.9302326 | 0.7896671 | not scorable | not scorable |
| #### Bn-scaff_16926_1-p9295 genome unspecific (oleracea-rapa)   | not scorable | not scorable | 1         | 0.5867797 | 1            | 0.8527437    |
| #### Bn-scaff_16929_1-p10260 C-genome specific (napus-oleracea) | 0.9928229    | 0.8797068    | 1         | 0.8803084 | not scorable | not scorable |
| #### Bn-scaff_16929_1-p10345 C-genome specific (napus-oleracea) | 0.9952153    | 0.7055984    | 1         | 0.9039466 | not scorable | not scorable |
| #### Bn-scaff_16929_1-p15212 C-genome specific (napus-oleracea) | 0.9019139    | 0.6351281    | 0.9922481 | 0.6112636 | not scorable | not scorable |
| #### Bn-scaff_16929_1-p15244 C-genome specific (napus-oleracea) | 0.9832536    | 0.7680824    | 1         | 0.772427  | not scorable | not scorable |
| #### Bn-scaff_16929_1-p15451 genome unspecific (all in)         | 0.9856459    | 0.3957111    | 1         | 0.8216845 | 0.9834711    | 0.690413     |
| #### Bn-scaff_16929_1-p15510 genome unspecific (oleracea-rapa)  | not scorable | not scorable | 0.9844961 | 0.77146   | 0.9586777    | 0.7105886    |
| #### Bn-scaff_16929_1-p17598 genome unspecific (all in)         | 0.9856459    | 0.5711043    | 1         | 0.7087855 | 1            | 0.9195159    |
| #### Bn-scaff_16929_1-p19523 C-genome specific (napus-oleracea) | 0.9760765    | 0.7229367    | 0.9922481 | 0.7847124 | not scorable | not scorable |
| #### Bn-scaff_16929_1-p27037 C-genome specific (napus-oleracea) | 0.9736842    | 0.6608821    | 0.9457364 | 0.6500025 | not scorable | not scorable |
| #### Bn-scaff_16929_1-p27211 C-genome specific (napus-oleracea) | 0.9641148    | 0.6860912    | 0.9534883 | 0.7135848 | not scorable | not scorable |
| #### Bn-scaff_16929_1-p27849 C-genome specific (napus-oleracea) | 0.9760765    | 0.7626158    | 1         | 0.7387842 | not scorable | not scorable |
| #### Bn-scaff_16929_1-p28444 C-genome specific (napus-oleracea) | 0.9665072    | 0.7889708    | 0.8449612 | 0.7536431 | not scorable | not scorable |
| #### Bn-scaff_16929_1-p28699 C-genome specific (napus-oleracea) | 0.9688995    | 0.7878885    | 0.9844961 | 0.7554435 | not scorable | not scorable |
| #### Bn-scaff_16929_1-p28742 C-genome specific (napus-oleracea) | 0.9880383    | 0.6633229    | 0.9922481 | 0.7344695 | not scorable | not scorable |
| #### Bn-scaff_16929_1-p28755 C-genome specific (napus-oleracea) | 0.9880383    | 0.6982324    | 0.9922481 | 0.6938202 | not scorable | not scorable |
| #### Bn-scaff_16929_1-p28933 C-genome specific (napus-oleracea) | 0.9760765    | 0.7793944    | 0.9922481 | 0.7367874 | not scorable | not scorable |
| #### Bn-scaff_16929_1-p29470 genome unspecific (all in)         | 0.9736842    | 0.548854     | 0.9922481 | 0.853879  | 0.9917355    | 0.9111863    |
| #### Bn-scaff_16929_1-p31014 C-genome specific (napus-oleracea) | 0.9856459    | 0.7736275    | 0.9922481 | 0.8382055 | not scorable | not scorable |

|                                                                 |           |           |           |           |              |              |
|-----------------------------------------------------------------|-----------|-----------|-----------|-----------|--------------|--------------|
| #### Bn-scaff_16929_1-p31663 C-genome specific (napus-oleracea) | 0.9760765 | 0.7727497 | 1         | 0.7630523 | not scorable | not scorable |
| #### Bn-scaff_16929_1-p37842 genome unspecific (all in)         | 1         | 0.3266014 | 1         | 0.702597  | 1            | 0.6462108    |
| #### Bn-scaff_16929_1-p38317 genome unspecific (all in)         | 1         | 0.4893445 | 1         | 0.855626  | 1            | 0.6769465    |
| #### Bn-scaff_16929_1-p47925 C-genome specific (napus-oleracea) | 0.9904306 | 0.7370886 | 1         | 0.8486626 | not scorable | not scorable |
| #### Bn-scaff_16929_1-p49573 genome unspecific (all in)         | 0.9473684 | 0.5039774 | 1         | 0.7722343 | 1            | 0.8573304    |
| #### Bn-scaff_16929_1-p49716 genome unspecific (all in)         | 0.9952153 | 0.4431546 | 1         | 0.8812884 | 0.9752066    | 0.8365349    |
| #### Bn-scaff_16929_1-p52209 C-genome specific (napus-oleracea) | 0.9808612 | 0.7838194 | 1         | 0.7507973 | not scorable | not scorable |
| #### Bn-scaff_16929_1-p55342 C-genome specific (napus-oleracea) | 0.9760765 | 0.7450804 | 1         | 0.7829322 | not scorable | not scorable |
| #### Bn-scaff_16929_1-p56099 C-genome specific (napus-oleracea) | 0.9784689 | 0.4772444 | 0.9844961 | 0.6675458 | not scorable | not scorable |
| #### Bn-scaff_16929_1-p56116 C-genome specific (napus-oleracea) | 0.9904306 | 0.7754679 | 1         | 0.7723381 | not scorable | not scorable |
| #### Bn-scaff_16929_1-p56475 C-genome specific (napus-oleracea) | 0.9736842 | 0.743655  | 0.9922481 | 0.7405589 | not scorable | not scorable |
| #### Bn-scaff_16929_1-p56838 C-genome specific (napus-oleracea) | 0.8875598 | 0.7286076 | 0.8217054 | 0.7245975 | not scorable | not scorable |
| #### Bn-scaff_16929_1-p57663 C-genome specific (napus-oleracea) | 0.9832536 | 0.721506  | 0.9922481 | 0.7629861 | not scorable | not scorable |
| #### Bn-scaff_16929_1-p57824 C-genome specific (napus-oleracea) | 0.9760765 | 0.7657947 | 1         | 0.7024043 | not scorable | not scorable |
| #### Bn-scaff_16929_1-p62619 genome unspecific (all in)         | 0.9736842 | 0.4315899 | 1         | 0.662809  | 1            | 0.8809426    |
| #### Bn-scaff_16929_1-p68162 C-genome specific (napus-oleracea) | 0.9593301 | 0.619051  | 1         | 0.5804715 | not scorable | not scorable |
| #### Bn-scaff_16929_1-p68166 C-genome specific (napus-oleracea) | 0.9688995 | 0.6867504 | 0.9922481 | 0.6877309 | not scorable | not scorable |
| #### Bn-scaff_16929_1-p68175 C-genome specific (napus-oleracea) | 0.9617225 | 0.7492104 | 0.9922481 | 0.7571354 | not scorable | not scorable |
| #### Bn-scaff_16929_1-p71928 C-genome specific (napus-oleracea) | 0.9760765 | 0.7855632 | 0.9922481 | 0.7678581 | not scorable | not scorable |
| #### Bn-scaff_16929_1-p71948 C-genome specific (napus-oleracea) | 0.9593301 | 0.683026  | 1         | 0.6985639 | not scorable | not scorable |
| #### Bn-scaff_16929_1-p72008 C-genome specific (napus-oleracea) | 0.9880383 | 0.7696524 | 0.9922481 | 0.77927   | not scorable | not scorable |
| #### Bn-scaff_16929_1-p72557 C-genome specific (napus-oleracea) | 0.9880383 | 0.7117872 | 1         | 0.6725802 | not scorable | not scorable |
| #### Bn-scaff_16929_1-p75193 C-genome specific (napus-oleracea) | 0.9808612 | 0.8299209 | 0.9922481 | 0.7837785 | not scorable | not scorable |
| #### Bn-scaff_16929_1-p79709 genome unspecific (all in)         | 0.9952153 | 0.2912303 | 1         | 0.9175813 | 1            | 0.9095823    |
| #### Bn-scaff_16929_1-p81051 C-genome specific (napus-oleracea) | 0.9904306 | 0.753424  | 1         | 0.4222349 | not scorable | not scorable |
| #### Bn-scaff_16929_1-p84165 genome unspecific (all in)         | 0.9832536 | 0.2793364 | 1         | 0.7090648 | 0.9834711    | 0.2442646    |
| #### Bn-scaff_16929_1-p84207 genome unspecific (all in)         | 0.9808612 | 0.3425674 | 1         | 0.6225318 | 0.9834711    | 0.6435984    |
| #### Bn-scaff_16929_1-p85470 genome unspecific (all in)         | 0.9952153 | 0.747279  | 1         | 0.8178402 | 0.9669421    | 0.7007029    |
| #### Bn-scaff_16929_1-p88626 genome unspecific (all in)         | 0.9976076 | 0.394292  | 0.9844961 | 0.7654232 | 1            | 0.8971424    |
| #### Bn-scaff_16929_1-p88640 genome unspecific (all in)         | 1         | 0.3347054 | 0.9922481 | 0.7603455 | 1            | 0.914898     |
| #### Bn-scaff_16929_1-p88751 genome unspecific (all in)         | 0.9736842 | 0.2432543 | 1         | 0.8669    | 0.9752066    | 0.766509     |
| #### Bn-scaff_16929_1-p88772 genome unspecific (all in)         | 0.9736842 | 0.1779628 | 1         | 0.8004208 | 1            | 0.6772465    |
| #### Bn-scaff_16929_1-p8893 genome unspecific (all in)          | 1         | 0.5409952 | 1         | 0.5302483 | 1            | 0.7310628    |

|                                                                |           |           |           |           |              |              |
|----------------------------------------------------------------|-----------|-----------|-----------|-----------|--------------|--------------|
| #### Bn-scaff_16929_1-p94721C-genome specific (napus-oleracea) | 0.9928229 | 0.7684891 | 0.9844961 | 0.7765391 | not scorable | not scorable |
| #### Bn-scaff_16934_1-p14407C-genome specific (napus-oleracea) | 0.8995215 | 0.7565046 | 0.8914729 | 0.789687  | not scorable | not scorable |
| #### Bn-scaff_16934_1-p14599C-genome specific (napus-oleracea) | 0.9162679 | 0.7832986 | 1         | 0.8844562 | not scorable | not scorable |
| #### Bn-scaff_16934_1-p14652C-genome specific (napus-oleracea) | 0.9138756 | 0.769724  | 1         | 0.8580176 | not scorable | not scorable |
| #### Bn-scaff_16934_1-p14832C-genome specific (napus-oleracea) | 0.9043062 | 0.8114972 | 0.9224806 | 0.8645374 | not scorable | not scorable |
| #### Bn-scaff_16934_1-p14833C-genome specific (napus-oleracea) | 0.8995215 | 0.7977759 | 0.9224806 | 0.7898132 | not scorable | not scorable |
| #### Bn-scaff_16934_1-p16704C-genome specific (napus-oleracea) | 0.9712918 | 0.6548781 | 0.9922481 | 0.9140078 | not scorable | not scorable |
| #### Bn-scaff_16934_1-p21164C-genome specific (napus-oleracea) | 0.9090909 | 0.7420871 | 1         | 0.9477988 | not scorable | not scorable |
| #### Bn-scaff_16934_1-p21242C-genome specific (napus-oleracea) | 0.9162679 | 0.762279  | 1         | 0.7004891 | not scorable | not scorable |
| #### Bn-scaff_16934_1-p23718C-genome specific (napus-oleracea) | 0.9090909 | 0.7272967 | 1         | 0.9215311 | not scorable | not scorable |
| #### Bn-scaff_16934_1-p24950C-genome specific (napus-oleracea) | 0.9114832 | 0.7398224 | 1         | 0.7677037 | not scorable | not scorable |
| #### Bn-scaff_16934_1-p29608C-genome specific (napus-oleracea) | 0.9043062 | 0.7543182 | 1         | 0.6602747 | not scorable | not scorable |
| #### Bn-scaff_16934_1-p29622C-genome specific (napus-oleracea) | 0.9114832 | 0.7682751 | 1         | 0.7349356 | not scorable | not scorable |
| #### Bn-scaff_16934_1-p29632C-genome specific (napus-oleracea) | 0.9138756 | 0.78678   | 0.9922481 | 0.6569669 | not scorable | not scorable |
| #### Bn-scaff_16934_1-p29652C-genome specific (napus-oleracea) | 0.9090909 | 0.7933236 | 1         | 0.7577205 | not scorable | not scorable |
| #### Bn-scaff_16934_1-p29669C-genome specific (napus-oleracea) | 0.9019139 | 0.7604378 | 0.9767442 | 0.8044571 | not scorable | not scorable |
| #### Bn-scaff_16934_1-p29676C-genome specific (napus-oleracea) | 0.9090909 | 0.7753911 | 0.9922481 | 0.7923236 | not scorable | not scorable |
| #### Bn-scaff_16934_1-p29686C-genome specific (napus-oleracea) | 0.9066986 | 0.8283818 | 0.9922481 | 0.8314698 | not scorable | not scorable |
| #### Bn-scaff_16934_1-p29699C-genome specific (napus-oleracea) | 0.9090909 | 0.8294529 | 1         | 0.8543566 | not scorable | not scorable |
| #### Bn-scaff_16934_1-p29725C-genome specific (napus-oleracea) | 0.9019139 | 0.7647585 | 1         | 0.8566455 | not scorable | not scorable |
| #### Bn-scaff_16934_1-p29753C-genome specific (napus-oleracea) | 0.9066986 | 0.7756744 | 0.9922481 | 0.764318  | not scorable | not scorable |
| #### Bn-scaff_16934_1-p29876C-genome specific (napus-oleracea) | 0.9090909 | 0.787214  | 0.9767442 | 0.8443965 | not scorable | not scorable |
| #### Bn-scaff_16934_1-p29937C-genome specific (napus-oleracea) | 0.8995215 | 0.7042211 | 0.9767442 | 0.8269146 | not scorable | not scorable |
| #### Bn-scaff_16934_1-p30163C-genome specific (napus-oleracea) | 0.8995215 | 0.8272983 | 0.9922481 | 0.816967  | not scorable | not scorable |
| #### Bn-scaff_16934_1-p30170C-genome specific (napus-oleracea) | 0.9114832 | 0.8376271 | 1         | 0.7572631 | not scorable | not scorable |
| #### Bn-scaff_16934_1-p30405C-genome specific (napus-oleracea) | 0.8995215 | 0.7341979 | 0.9922481 | 0.7677768 | not scorable | not scorable |
| #### Bn-scaff_16934_1-p30990C-genome specific (napus-oleracea) | 0.9019139 | 0.7068847 | 0.7131783 | 0.7736434 | not scorable | not scorable |
| #### Bn-scaff_16934_1-p32297C-genome specific (napus-oleracea) | 0.9114832 | 0.7434819 | 0.9922481 | 0.6680009 | not scorable | not scorable |
| #### Bn-scaff_16934_1-p32314C-genome specific (napus-oleracea) | 0.9043062 | 0.775486  | 1         | 0.7865741 | not scorable | not scorable |
| #### Bn-scaff_16934_1-p32366C-genome specific (napus-oleracea) | 0.9090909 | 0.7424827 | 0.9922481 | 0.7000403 | not scorable | not scorable |
| #### Bn-scaff_16934_1-p32389C-genome specific (napus-oleracea) | 0.9066986 | 0.7829849 | 0.9922481 | 0.7448571 | not scorable | not scorable |
| #### Bn-scaff_16934_1-p33225C-genome specific (napus-oleracea) | 0.9066986 | 0.7754392 | 0.9922481 | 0.7622678 | not scorable | not scorable |
| #### Bn-scaff_16934_1-p34622C-genome specific (napus-oleracea) | 0.9019139 | 0.7766502 | 1         | 0.8147027 | not scorable | not scorable |

|                                                                 |              |              |           |           |              |              |
|-----------------------------------------------------------------|--------------|--------------|-----------|-----------|--------------|--------------|
| #### Bn-scaff_16934_1-p34665 C-genome specific (napus-oleracea) | 0.9019139    | 0.750291     | 0.8992248 | 0.8245552 | not scorable | not scorable |
| #### Bn-scaff_16934_1-p35207 C-genome specific (napus-oleracea) | 0.9043062    | 0.7419598    | 0.8992248 | 0.8289865 | not scorable | not scorable |
| #### Bn-scaff_16934_1-p35269 C-genome specific (napus-oleracea) | 0.9066986    | 0.7725097    | 0.8992248 | 0.7905434 | not scorable | not scorable |
| #### Bn-scaff_16934_1-p40910 C-genome specific (napus-oleracea) | 0.9019139    | 0.7410401    | 1         | 0.7381299 | not scorable | not scorable |
| #### Bn-scaff_16934_1-p41136 C-genome specific (napus-oleracea) | 0.9090909    | 0.739682     | 0.9922481 | 0.8572755 | not scorable | not scorable |
| #### Bn-scaff_16934_1-p42198 C-genome specific (napus-oleracea) | 0.6291866    | 0.8214749    | 0.875969  | 0.8115303 | not scorable | not scorable |
| #### Bn-scaff_16934_1-p42222 C-genome specific (napus-oleracea) | 0.8971292    | 0.37994      | 1         | 0.4897087 | not scorable | not scorable |
| #### Bn-scaff_16934_1-p42228 C-genome specific (napus-oleracea) | 0.9043062    | 0.7461638    | 1         | 0.7799318 | not scorable | not scorable |
| #### Bn-scaff_16934_1-p42251 C-genome specific (napus-oleracea) | 0.9019139    | 0.7166564    | 1         | 0.649362  | not scorable | not scorable |
| #### Bn-scaff_16934_1-p42258 C-genome specific (napus-oleracea) | 0.9090909    | 0.6479043    | 1         | 0.7992254 | not scorable | not scorable |
| #### Bn-scaff_16934_1-p42599 C-genome specific (napus-oleracea) | 0.9066986    | 0.7616881    | 1         | 0.7665157 | not scorable | not scorable |
| #### Bn-scaff_16934_1-p42600 C-genome specific (napus-oleracea) | 0.8684211    | 0.7419347    | 1         | 0.6009816 | not scorable | not scorable |
| #### Bn-scaff_16934_1-p42881 genome unspecific (all in)         | 0.9784689    | 0.60987      | 1         | 0.8149852 | 0.9917355    | 0.8516636    |
| #### Bn-scaff_16934_1-p43201 C-genome specific (napus-oleracea) | 0.9090909    | 0.5490524    | 0.9922481 | 0.6064189 | not scorable | not scorable |
| #### Bn-scaff_16934_1-p93003 genome unspecific (oleracea-rapa)  | not scorable | not scorable | 0.9612403 | 0.6794469 | 1            | 0.9189712    |
| #### Bn-scaff_16934_1-p93882 C-genome specific (napus-oleracea) | 0.9066986    | 0.7450962    | 0.9922481 | 0.7256031 | not scorable | not scorable |
| #### Bn-scaff_16934_1-p98107 C-genome specific (napus-oleracea) | 0.9162679    | 0.8162916    | 0.9922481 | 0.6944486 | not scorable | not scorable |
| #### Bn-scaff_16935_1-p10207 C-genome specific (napus-oleracea) | 0.9258373    | 0.7777259    | 0.9689922 | 0.7716225 | not scorable | not scorable |
| #### Bn-scaff_16935_1-p11613 C-genome specific (napus-oleracea) | 0.923445     | 0.7520248    | 0.9922481 | 0.6583429 | not scorable | not scorable |
| #### Bn-scaff_16935_1-p11670 genome unspecific (all in)         | 0.9904306    | 0.3560258    | 0.9767442 | 0.5623054 | 1            | 0.6727278    |
| #### Bn-scaff_16935_1-p16307 C-genome specific (napus-oleracea) | 0.8971292    | 0.6090404    | 1         | 0.6048372 | not scorable | not scorable |
| #### Bn-scaff_16935_1-p22083 C-genome specific (napus-oleracea) | 0.9258373    | 0.7086738    | 1         | 0.6903374 | not scorable | not scorable |
| #### Bn-scaff_16935_1-p22279 C-genome specific (napus-oleracea) | 0.9162679    | 0.7774475    | 0.9922481 | 0.7901149 | not scorable | not scorable |
| #### Bn-scaff_16935_1-p23683 C-genome specific (napus-oleracea) | 0.9210526    | 0.7864234    | 1         | 0.863204  | not scorable | not scorable |
| #### Bn-scaff_16935_1-p31229 C-genome specific (oleracea only)  | not scorable | not scorable | 0.9379845 | 0.4632154 | not scorable | not scorable |
| #### Bn-scaff_16935_1-p69744 C-genome specific (napus-oleracea) | 0.9210526    | 0.6584362    | 1         | 0.604233  | not scorable | not scorable |
| #### Bn-scaff_16935_1-p93509 C-genome specific (oleracea only)  | not scorable | not scorable | 0.9534883 | 0.7687636 | not scorable | not scorable |
| #### Bn-scaff_16935_1-p98166 C-genome specific (napus-oleracea) | 0.9114832    | 0.780134     | 0.9922481 | 0.8418717 | not scorable | not scorable |
| #### Bn-scaff_16935_1-p99442 C-genome specific (napus-oleracea) | 0.923445     | 0.711753     | 1         | 0.8524848 | not scorable | not scorable |
| #### Bn-scaff_16962_1-p17444 C-genome specific (napus-oleracea) | 1            | 0.7328157    | 1         | 0.7457526 | not scorable | not scorable |
| #### Bn-scaff_16962_1-p18214 C-genome specific (napus-oleracea) | 1            | 0.7045199    | 1         | 0.7641606 | not scorable | not scorable |
| #### Bn-scaff_16962_1-p19195 C-genome specific (napus-oleracea) | 0.9976076    | 0.6996865    | 1         | 0.8089268 | not scorable | not scorable |
| #### Bn-scaff_16962_1-p21325 C-genome specific (napus-oleracea) | 0.9952153    | 0.8726761    | 1         | 0.903581  | not scorable | not scorable |



|                                                                |              |              |           |           |              |              |
|----------------------------------------------------------------|--------------|--------------|-----------|-----------|--------------|--------------|
| #### Bn-scaff_16962_1-p21683genome unspecific (all in)         | 1            | 0.7007138    | 1         | 0.7462659 | 1            | 0.7555907    |
| #### Bn-scaff_16962_1-p22050C-genome specific (napus-oleracea) | 1            | 0.7241598    | 1         | 0.8004208 | not scorable | not scorable |
| #### Bn-scaff_16962_1-p35191genome unspecific (all in)         | 0.9712918    | 0.5007799    | 0.9922481 | 0.9205657 | 1            | 0.9424217    |
| #### Bn-scaff_16962_1-p35904C-genome specific (napus-oleracea) | 0.9904306    | 0.78798      | 0.9922481 | 0.8224367 | not scorable | not scorable |
| #### Bn-scaff_16962_1-p37638C-genome specific (napus-oleracea) | 0.9784689    | 0.6850733    | 0.9612403 | 0.6954212 | not scorable | not scorable |
| #### Bn-scaff_16962_1-p37803C-genome specific (napus-oleracea) | 0.9976076    | 0.8139036    | 0.9922481 | 0.8153542 | not scorable | not scorable |
| #### Bn-scaff_16962_1-p41003C-genome specific (oleracea only)  | not scorable | not scorable | 0.9689922 | 0.3539215 | not scorable | not scorable |
| #### Bn-scaff_16962_1-p42671genome unspecific (oleracea-rapa)  | not scorable | not scorable | 0.9224806 | 0.3250529 | 1            | 0.5885907    |
| #### Bn-scaff_16962_1-p43276C-genome specific (napus-oleracea) | 0.9760765    | 0.6771354    | 0.8062016 | 0.6892272 | not scorable | not scorable |
| #### Bn-scaff_16962_1-p44113C-genome specific (napus-oleracea) | 0.9904306    | 0.8267437    | 0.8527132 | 0.7632086 | not scorable | not scorable |
| #### Bn-scaff_16962_1-p44938genome unspecific (all in)         | 0.9832536    | 0.3915777    | 1         | 0.6846933 | 1            | 0.752191     |
| #### Bn-scaff_16962_1-p45444genome unspecific (all in)         | 0.9904306    | 0.4926098    | 0.9844961 | 0.8383463 | 1            | 0.9105295    |
| #### Bn-scaff_16962_1-p47384genome unspecific (oleracea-rapa)  | not scorable | not scorable | 1         | 0.8341425 | 0.9917355    | 0.9400104    |
| #### Bn-scaff_16962_1-p49423genome unspecific (oleracea-rapa)  | not scorable | not scorable | 1         | 0.7162696 | 0.9834711    | 0.9468964    |
| #### Bn-scaff_16962_1-p49434C-genome specific (napus-oleracea) | 0.9952153    | 0.7602602    | 0.9844961 | 0.8006766 | not scorable | not scorable |
| #### Bn-scaff_16962_1-p50480C-genome specific (napus-oleracea) | 0.9904306    | 0.8165728    | 1         | 0.6914564 | not scorable | not scorable |
| #### Bn-scaff_16962_1-p50694genome unspecific (all in)         | 0.9880383    | 0.5048058    | 1         | 0.7618066 | 1            | 0.922929     |
| #### Bn-scaff_16962_1-p51667C-genome specific (napus-oleracea) | 0.9928229    | 0.56673      | 1         | 0.5681919 | not scorable | not scorable |
| #### Bn-scaff_16962_1-p51914C-genome specific (napus-oleracea) | 0.9808612    | 0.5856882    | 0.9844961 | 0.5783163 | not scorable | not scorable |
| #### Bn-scaff_16962_1-p54281C-genome specific (napus-oleracea) | 0.9904306    | 0.7771302    | 0.9922481 | 0.8440034 | not scorable | not scorable |
| #### Bn-scaff_16962_1-p54349C-genome specific (napus-oleracea) | 0.9904306    | 0.8180755    | 0.9922481 | 0.8051406 | not scorable | not scorable |
| #### Bn-scaff_16962_1-p55441C-genome specific (napus-oleracea) | 0.9832536    | 0.6361489    | 1         | 0.7621771 | not scorable | not scorable |
| #### Bn-scaff_16962_1-p55504genome unspecific (all in)         | 0.9952153    | 0.6625077    | 0.9922481 | 0.7199915 | 1            | 0.924609     |
| #### Bn-scaff_16962_1-p55675genome unspecific (all in)         | 0.9880383    | 0.4124579    | 0.9922481 | 0.8140302 | 1            | 0.9078764    |
| #### Bn-scaff_16962_1-p56507C-genome specific (napus-oleracea) | 0.9976076    | 0.7459936    | 0.9767442 | 0.7545441 | not scorable | not scorable |
| #### Bn-scaff_16962_1-p57843genome unspecific (all in)         | 0.9521531    | 0.3162462    | 1         | 0.6799725 | 1            | 0.7914145    |
| #### Bn-scaff_16962_1-p65572C-genome specific (napus-oleracea) | 0.9688995    | 0.6745176    | 0.5891473 | 0.6984553 | not scorable | not scorable |
| #### Bn-scaff_16962_1-p93829C-genome specific (napus-oleracea) | 1            | 0.6426485    | 1         | 0.6516411 | not scorable | not scorable |
| #### Bn-scaff_16975_1-p10084C-genome specific (napus-oleracea) | 0.9976076    | 0.5341244    | 1         | 0.5637103 | not scorable | not scorable |
| #### Bn-scaff_16975_1-p10125C-genome specific (napus-oleracea) | 1            | 0.5260164    | 0.9844961 | 0.5043193 | not scorable | not scorable |
| #### Bn-scaff_16975_1-p10171C-genome specific (napus-oleracea) | 0.8827751    | 0.5272961    | 0.9844961 | 0.5065198 | not scorable | not scorable |
| #### Bn-scaff_16975_1-p10246C-genome specific (napus-oleracea) | 0.8803828    | 0.2657866    | 1         | 0.538463  | not scorable | not scorable |
| #### Bn-scaff_16975_1-p10274genome unspecific (all in)         | 1            | 0.4790091    | 0.9844961 | 0.4369357 | 0.9917355    | 0.786476     |

|                                                                 |              |              |           |           |              |              |
|-----------------------------------------------------------------|--------------|--------------|-----------|-----------|--------------|--------------|
| #### Bn-scaff_16975_1-p10325 C-genome specific (napus-oleracea) | 0.9665072    | 0.5003028    | 0.9844961 | 0.5546672 | not scorable | not scorable |
| #### Bn-scaff_16975_1-p10375 C-genome specific (napus-oleracea) | 0.9760765    | 0.51492      | 0.9224806 | 0.5068525 | not scorable | not scorable |
| #### Bn-scaff_16975_1-p10385 C-genome specific (napus-oleracea) | 1            | 0.6172797    | 0.9922481 | 0.7352657 | not scorable | not scorable |
| #### Bn-scaff_16975_1-p11144 C-genome specific (napus-oleracea) | 0.9976076    | 0.7430073    | 1         | 0.6932319 | not scorable | not scorable |
| #### Bn-scaff_16975_1-p11202 C-genome specific (napus-oleracea) | 0.9976076    | 0.7312813    | 0.9922481 | 0.7462972 | not scorable | not scorable |
| #### Bn-scaff_16975_1-p11300 C-genome specific (napus-oleracea) | 0.9976076    | 0.8253258    | 1         | 0.73404   | not scorable | not scorable |
| #### Bn-scaff_16975_1-p11315 C-genome specific (napus-oleracea) | 0.9976076    | 0.8134812    | 1         | 0.7965506 | not scorable | not scorable |
| #### Bn-scaff_16975_1-p11333 C-genome specific (napus-oleracea) | 0.9354067    | 0.7140503    | 0.9302326 | 0.6660557 | not scorable | not scorable |
| #### Bn-scaff_16975_1-p11452 C-genome specific (napus-oleracea) | 0.9976076    | 0.8126341    | 0.9922481 | 0.8723608 | not scorable | not scorable |
| #### Bn-scaff_16975_1-p12236 genome unspecific (all in)         | 0.9952153    | 0.4719794    | 1         | 0.5050716 | 1            | 0.7246037    |
| #### Bn-scaff_16975_1-p12878 C-genome specific (napus-oleracea) | 1            | 0.7598017    | 1         | 0.8474721 | not scorable | not scorable |
| #### Bn-scaff_16975_1-p12888 C-genome specific (napus-oleracea) | 1            | 0.7239       | 1         | 0.7218419 | not scorable | not scorable |
| #### Bn-scaff_16975_1-p12972 C-genome specific (napus-oleracea) | 1            | 0.7973179    | 0.9922481 | 0.7908163 | not scorable | not scorable |
| #### Bn-scaff_16975_1-p12988 C-genome specific (napus-oleracea) | 1            | 0.7612011    | 1         | 0.7658518 | not scorable | not scorable |
| #### Bn-scaff_16975_1-p13115 C-genome specific (napus-oleracea) | 1            | 0.6773329    | 0.9922481 | 0.7899575 | not scorable | not scorable |
| #### Bn-scaff_16975_1-p13135 genome unspecific (all in)         | 1            | 0.6015608    | 0.9922481 | 0.7519978 | 1            | 0.9247422    |
| #### Bn-scaff_16975_1-p17460 genome unspecific (all in)         | 1            | 0.7086542    | 0.9922481 | 0.6927312 | 1            | 0.916353     |
| #### Bn-scaff_16975_1-p17716 genome unspecific (all in)         | 1            | 0.4780542    | 1         | 0.7215191 | 1            | 0.9095823    |
| #### Bn-scaff_16975_1-p19170 C-genome specific (napus-oleracea) | 1            | 0.7275484    | 1         | 0.660307  | not scorable | not scorable |
| #### Bn-scaff_16975_1-p19701 genome unspecific (all in)         | 1            | 0.5770498    | 1         | 0.5770498 | 1            | 0.5123092    |
| #### Bn-scaff_16975_1-p21114 C-genome specific (napus-oleracea) | 0.9330143    | 0.7688707    | 0.9457364 | 0.7596366 | not scorable | not scorable |
| #### Bn-scaff_16975_1-p21256 C-genome specific (oleracea only)  | not scorable | not scorable | 0.9534883 | 0.3859076 | not scorable | not scorable |
| #### Bn-scaff_16975_1-p21418 C-genome specific (napus-oleracea) | 1            | 0.3933111    | 0.9922481 | 0.5810672 | not scorable | not scorable |
| #### Bn-scaff_16975_1-p23051 C-genome specific (napus-oleracea) | 0.9976076    | 0.563385     | 1         | 0.9175813 | not scorable | not scorable |
| #### Bn-scaff_16975_1-p24198 genome unspecific (oleracea-rapa)  | not scorable | not scorable | 0.9767442 | 0.2823394 | 0.9917355    | 0.6816461    |
| #### Bn-scaff_16975_1-p25276 C-genome specific (napus-oleracea) | 1            | 0.3842835    | 0.9612403 | 0.3215212 | not scorable | not scorable |
| #### Bn-scaff_16975_1-p32799 C-genome specific (napus-oleracea) | 1            | 0.7931855    | 1         | 0.7626683 | not scorable | not scorable |
| #### Bn-scaff_16975_1-p6371 genome unspecific (all in)          | 0.9976076    | 0.3792266    | 0.9922481 | 0.7870392 | 1            | 0.9283754    |
| #### Bn-scaff_16975_1-p64263 genome unspecific (all in)         | 1            | 0.423084     | 0.9844961 | 0.7049508 | 1            | 0.8978607    |
| #### Bn-scaff_16975_1-p72188 genome unspecific (all in)         | 1            | 0.3654795    | 0.9689922 | 0.4815978 | 1            | 0.6104437    |
| #### Bn-scaff_16975_1-p95169 C-genome specific (napus-oleracea) | 1            | 0.7841381    | 1         | 0.7732919 | not scorable | not scorable |
| #### Bn-scaff_16976_1-p12018 C-genome specific (oleracea only)  | not scorable | not scorable | 0.9844961 | 0.9269823 | not scorable | not scorable |
| #### Bn-scaff_16976_1-p24933 genome unspecific (all in)         | 0.9904306    | 0.4250802    | 0.9844961 | 0.6590627 | 1            | 0.9203122    |

|                                                                 |              |              |           |           |              |              |
|-----------------------------------------------------------------|--------------|--------------|-----------|-----------|--------------|--------------|
| #### Bn-scaff_16976_1-p6292 genome unspecific (all in)          | 1            | 0.7601026    | 0.9844961 | 0.8092397 | 0.9834711    | 0.8808372    |
| #### Bn-scaff_16984_1-p11593 C-genome specific (napus-oleracea) | 0.9856459    | 0.785358     | 0.9767442 | 0.7764561 | not scorable | not scorable |
| #### Bn-scaff_16984_1-p12135 C-genome specific (napus-oleracea) | 0.9760765    | 0.7544473    | 0.9922481 | 0.7716305 | not scorable | not scorable |
| #### Bn-scaff_16984_1-p12657 C-genome specific (napus-oleracea) | 0.9904306    | 0.7007411    | 0.9922481 | 0.7726802 | not scorable | not scorable |
| #### Bn-scaff_16984_1-p12992 C-genome specific (napus-oleracea) | 0.9808612    | 0.7854932    | 1         | 0.8574758 | not scorable | not scorable |
| #### Bn-scaff_16984_1-p13067 C-genome specific (napus-oleracea) | 0.9880383    | 0.6672899    | 1         | 0.6857461 | not scorable | not scorable |
| #### Bn-scaff_16984_1-p13070 C-genome specific (napus-oleracea) | 0.9808612    | 0.7425672    | 1         | 0.7076744 | not scorable | not scorable |
| #### Bn-scaff_16984_1-p13874 C-genome specific (napus-oleracea) | 0.9856459    | 0.7972337    | 0.8837209 | 0.7072317 | not scorable | not scorable |
| #### Bn-scaff_16984_1-p13880 C-genome specific (napus-oleracea) | 0.9856459    | 0.7541212    | 0.8992248 | 0.6856557 | not scorable | not scorable |
| #### Bn-scaff_16984_1-p13892 C-genome specific (napus-oleracea) | 0.9712918    | 0.8009467    | 0.9069768 | 0.8458923 | not scorable | not scorable |
| #### Bn-scaff_16984_1-p14013 C-genome specific (napus-oleracea) | 0.9808612    | 0.741705     | 0.9069768 | 0.7286171 | not scorable | not scorable |
| #### Bn-scaff_16984_1-p14022 C-genome specific (napus-oleracea) | 0.9832536    | 0.7751873    | 0.8682171 | 0.7758917 | not scorable | not scorable |
| #### Bn-scaff_16984_1-p14086 C-genome specific (napus-oleracea) | 0.9736842    | 0.7557417    | 0.9069768 | 0.7038212 | not scorable | not scorable |
| #### Bn-scaff_16984_1-p14510 C-genome specific (napus-oleracea) | 0.9904306    | 0.781979     | 0.9767442 | 0.8046679 | not scorable | not scorable |
| #### Bn-scaff_16984_1-p15545 C-genome specific (napus-oleracea) | 0.9856459    | 0.7573373    | 1         | 0.7651395 | not scorable | not scorable |
| #### Bn-scaff_16984_1-p15880 C-genome specific (napus-oleracea) | 0.9928229    | 0.7824748    | 0.9689922 | 0.7044314 | not scorable | not scorable |
| #### Bn-scaff_16984_1-p16138 C-genome specific (napus-oleracea) | 0.9760765    | 0.7827839    | 0.9922481 | 0.8001781 | not scorable | not scorable |
| #### Bn-scaff_16984_1-p17199 C-genome specific (napus-oleracea) | 0.9569378    | 0.711615     | 0.9844961 | 0.9180624 | not scorable | not scorable |
| #### Bn-scaff_16984_1-p17838 genome unspecific (all in)         | 0.9712918    | 0.5381943    | 0.9922481 | 0.8225098 | 0.9586777    | 0.693258     |
| #### Bn-scaff_16984_1-p18737 C-genome specific (napus-oleracea) | 0.9904306    | 0.7813255    | 0.9922481 | 0.8294483 | not scorable | not scorable |
| #### Bn-scaff_16984_1-p18816 C-genome specific (napus-oleracea) | 0.9808612    | 0.7640769    | 1         | 0.8681164 | not scorable | not scorable |
| #### Bn-scaff_16984_1-p20054 C-genome specific (napus-oleracea) | 0.9976076    | 0.7096533    | 1         | 0.2669096 | not scorable | not scorable |
| #### Bn-scaff_16984_1-p20454 C-genome specific (napus-oleracea) | 0.9928229    | 0.769961     | 0.9767442 | 0.7212121 | not scorable | not scorable |
| #### Bn-scaff_16984_1-p21003 C-genome specific (napus-oleracea) | 0.9976076    | 0.7919592    | 1         | 0.5350911 | not scorable | not scorable |
| #### Bn-scaff_16984_1-p21869 C-genome specific (napus-oleracea) | 0.9904306    | 0.7690917    | 0.9922481 | 0.7145399 | not scorable | not scorable |
| #### Bn-scaff_16984_1-p22326 C-genome specific (napus-oleracea) | 0.9760765    | 0.7057649    | 0.9922481 | 0.6910558 | not scorable | not scorable |
| #### Bn-scaff_16984_1-p22381 C-genome specific (napus-oleracea) | 0.9856459    | 0.7456662    | 1         | 0.6446703 | not scorable | not scorable |
| #### Bn-scaff_16984_1-p22409 C-genome specific (napus-oleracea) | 0.9904306    | 0.8090409    | 0.9767442 | 0.7226741 | not scorable | not scorable |
| #### Bn-scaff_16984_1-p22475 C-genome specific (napus-oleracea) | 0.9832536    | 0.7883927    | 0.9767442 | 0.7470369 | not scorable | not scorable |
| #### Bn-scaff_16984_1-p22685 C-genome specific (oleracea only)  | not scorable | not scorable | 1         | 0.881878  | not scorable | not scorable |
| #### Bn-scaff_16984_1-p24250 C-genome specific (napus-oleracea) | 0.9856459    | 0.7635363    | 1         | 0.739518  | not scorable | not scorable |
| #### Bn-scaff_16984_1-p24367 C-genome specific (napus-oleracea) | 0.9952153    | 0.7131941    | 1         | 0.7986925 | not scorable | not scorable |
| #### Bn-scaff_16984_1-p24513 genome unspecific (all in)         | 0.9976076    | 0.813284     | 1         | 0.5200537 | 0.9752066    | 0.9244192    |

|                                                                |              |              |              |              |              |              |
|----------------------------------------------------------------|--------------|--------------|--------------|--------------|--------------|--------------|
| #### Bn-scaff_16984_1-p24521C-genome specific (napus-oleracea) | 0.9952153    | 0.6688978    | 1            | 0.6394074    | not scorable | not scorable |
| #### Bn-scaff_16984_1-p24558C-genome specific (napus-oleracea) | 0.9832536    | 0.6276907    | 1            | 0.3284157    | not scorable | not scorable |
| #### Bn-scaff_16984_1-p24857C-genome specific (napus-oleracea) | 0.9904306    | 0.7682695    | 0.9922481    | 0.7206954    | not scorable | not scorable |
| #### Bn-scaff_16984_1-p25684C-genome specific (napus-oleracea) | 0.9928229    | 0.8248639    | 1            | 0.4510066    | not scorable | not scorable |
| #### Bn-scaff_16984_1-p26038C-genome specific (napus-oleracea) | 0.9808612    | 0.7146232    | 0.9922481    | 0.7979683    | not scorable | not scorable |
| #### Bn-scaff_16984_1-p28779genome unspecific (all in)         | 0.9712918    | 0.4719765    | 1            | 0.7993811    | 0.9834711    | 0.6800556    |
| #### Bn-scaff_16984_1-p29457C-genome specific (napus-oleracea) | 0.9784689    | 0.6883005    | 0.9302326    | 0.7305635    | not scorable | not scorable |
| #### Bn-scaff_16984_1-p29908C-genome specific (napus-oleracea) | 0.9856459    | 0.8074093    | 0.9922481    | 0.7814477    | not scorable | not scorable |
| #### Bn-scaff_16984_1-p29922C-genome specific (napus-oleracea) | 0.9904306    | 0.7192561    | 0.9844961    | 0.8057279    | not scorable | not scorable |
| #### Bn-scaff_16984_1-p31121C-genome specific (napus-oleracea) | 0.9928229    | 0.7617553    | 0.9844961    | 0.7912044    | not scorable | not scorable |
| #### Bn-scaff_16984_1-p31216C-genome specific (napus-oleracea) | 0.9856459    | 0.6824558    | 0.9922481    | 0.8095191    | not scorable | not scorable |
| #### Bn-scaff_16984_1-p32467genome unspecific (all in)         | 0.9856459    | 0.6524946    | 0.9844961    | 0.6865104    | 1            | 0.9288514    |
| #### Bn-scaff_16984_1-p33232C-genome specific (napus-oleracea) | 0.9808612    | 0.6673064    | 0.9922481    | 0.6959948    | not scorable | not scorable |
| #### Bn-scaff_16984_1-p33288C-genome specific (oleracea only)  | not scorable | not scorable | 0.9534883    | 0.8056514    | not scorable | not scorable |
| #### Bn-scaff_16984_1-p34089C-genome specific (napus-oleracea) | 0.9928229    | 0.8163701    | 1            | 0.8095888    | not scorable | not scorable |
| #### Bn-scaff_16984_1-p34944C-genome specific (napus-oleracea) | 0.9976076    | 0.7751872    | 0.9922481    | 0.7658048    | not scorable | not scorable |
| #### Bn-scaff_16984_1-p35155C-genome specific (napus-oleracea) | 0.9928229    | 0.7830929    | 1            | 0.7681945    | not scorable | not scorable |
| #### Bn-scaff_16984_1-p35301genome unspecific (all in)         | 0.9808612    | 0.2426683    | 1            | 0.555693     | 1            | 0.6733703    |
| #### Bn-scaff_16984_1-p35351genome unspecific (all in)         | 0.9760765    | 0.4784218    | 1            | 0.8500293    | 0.9752066    | 0.8135514    |
| #### Bn-scaff_16984_1-p35357genome unspecific (all in)         | 0.9904306    | 0.2677445    | 1            | 0.8031301    | 1            | 0.7657271    |
| #### Bn-scaff_16984_1-p55002genome unspecific (all in)         | 0.9641148    | 0.2839851    | 0.9844961    | 0.4755542    | 1            | 0.8135551    |
| #### Bn-scaff_16996_1-p23077genome unspecific (all in)         | 0.9976076    | 0.7646723    | 1            | 0.7240682    | 0.9917355    | 0.8257204    |
| #### Bn-scaff_16996_1-p28328genome unspecific (all in)         | 0.9976076    | 0.5085191    | 1            | 0.5357605    | 1            | 0.873201     |
| #### Bn-scaff_16996_1-p33514genome unspecific (all in)         | 0.9736842    | 0.2472251    | 1            | 0.8926574    | 1            | 0.8072979    |
| #### Bn-scaff_17004_1-p28695C-genome specific (napus-oleracea) | 1            | 0.6295235    | 1            | 0.655766     | not scorable | not scorable |
| #### Bn-scaff_17004_1-p53034genome unspecific (all in)         | 1            | 0.6444352    | 1            | 0.6089343    | 1            | 0.8617613    |
| #### Bn-scaff_17004_1-p57157C-genome specific (napus-oleracea) | 0.9880383    | 0.3006827    | 1            | 0.9037509    | not scorable | not scorable |
| #### Bn-scaff_17004_1-p85965genome unspecific (all in)         | 1            | 0.6714815    | 1            | 0.681638     | 1            | 0.711467     |
| #### Bn-scaff_17028_1-p13405genome unspecific (all in)         | 1            | 0.9205657    | 1            | 0.9175813    | 1            | 0.9345016    |
| #### Bn-scaff_17028_1-p16154genome unspecific (all in)         | 0.9976076    | 0.4261672    | 1            | 0.9087429    | 1            | 0.9274707    |
| #### Bn-scaff_17028_1-p16627genome unspecific (all in)         | 1            | 0.6525947    | 1            | 0.4507808    | 0.9752066    | 0.6355132    |
| #### Bn-scaff_17028_1-p16830C-genome specific (oleracea only)  | not scorable | not scorable | 1            | 0.8097372    | not scorable | not scorable |
| #### Bn-scaff_17028_1-p1940 A-genome specific (rapa only)      | not scorable | not scorable | not scorable | not scorable | 0.9917355    | 0.8047661    |

|                                                                 |              |              |              |              |              |              |
|-----------------------------------------------------------------|--------------|--------------|--------------|--------------|--------------|--------------|
| #### Bn-scaff_17028_1-p20958 all not scorable                   | not scorable | not scorable | not scorable | not scorable | not scorable | not scorable |
| #### Bn-scaff_17028_1-p27766 C-genome specific (napus-oleracea) | 0.9688995    | 0.7695497    | 0.8914729    | 0.733716     | not scorable | not scorable |
| #### Bn-scaff_17028_1-p27982 C-genome specific (oleracea only)  | not scorable | not scorable | 0.9922481    | 0.4195922    | not scorable | not scorable |
| #### Bn-scaff_17028_1-p28142 C-genome specific (napus-oleracea) | 0.9641148    | 0.7727495    | 0.8837209    | 0.7790921    | not scorable | not scorable |
| #### Bn-scaff_17028_1-p28272 C-genome specific (napus-oleracea) | 0.9712918    | 0.7752085    | 0.8837209    | 0.699262     | not scorable | not scorable |
| #### Bn-scaff_17028_1-p28300 C-genome specific (napus-oleracea) | 0.9904306    | 0.4641724    | 0.8914729    | 0.5742518    | not scorable | not scorable |
| #### Bn-scaff_17028_1-p28337 C-genome specific (napus-oleracea) | 0.9928229    | 0.517745     | 0.8914729    | 0.7082588    | not scorable | not scorable |
| #### Bn-scaff_17028_1-p39687 C-genome specific (napus-oleracea) | 0.9856459    | 0.8470905    | 0.9844961    | 0.7078417    | not scorable | not scorable |
| #### Bn-scaff_17028_1-p43198 C-genome specific (napus-oleracea) | 0.9904306    | 0.7216879    | 1            | 0.9205657    | not scorable | not scorable |
| #### Bn-scaff_17028_1-p43200 C-genome specific (napus-oleracea) | 0.9832536    | 0.8370553    | 1            | 0.6598909    | not scorable | not scorable |
| #### Bn-scaff_17028_1-p43270 C-genome specific (napus-oleracea) | 0.9928229    | 0.8155334    | 0.9922481    | 0.7628826    | not scorable | not scorable |
| #### Bn-scaff_17028_1-p44435 genome unspecific (all in)         | 0.9808612    | 0.3931889    | 1            | 0.7862603    | 1            | 0.9143137    |
| #### Bn-scaff_17028_1-p44445 C-genome specific (napus-oleracea) | 0.9784689    | 0.2769506    | 1            | 0.735496     | not scorable | not scorable |
| #### Bn-scaff_17028_1-p45057 C-genome specific (napus-oleracea) | 0.9832536    | 0.7015076    | 1            | 0.7422467    | not scorable | not scorable |
| #### Bn-scaff_17028_1-p9587 C-genome specific (napus-oleracea)  | 0.9952153    | 0.7043721    | 1            | 0.7655549    | not scorable | not scorable |
| #### Bn-scaff_17036_1-p10442 C-genome specific (napus-oleracea) | 0.9832536    | 0.7764653    | 0.9922481    | 0.9117104    | not scorable | not scorable |
| #### Bn-scaff_17036_1-p15724 genome unspecific (all in)         | 0.9928229    | 0.5232667    | 1            | 0.801375     | 1            | 0.8636148    |
| #### Bn-scaff_17036_1-p16266 C-genome specific (napus-oleracea) | 0.9832536    | 0.6701869    | 0.9612403    | 0.7330639    | not scorable | not scorable |
| #### Bn-scaff_17036_1-p17139 C-genome specific (napus-oleracea) | 0.9808612    | 0.7664731    | 0.9922481    | 0.7240263    | not scorable | not scorable |
| #### Bn-scaff_17036_1-p17886 C-genome specific (napus-oleracea) | 0.9330143    | 0.7149106    | 0.9302326    | 0.9431134    | not scorable | not scorable |
| #### Bn-scaff_17036_1-p17977 C-genome specific (napus-oleracea) | 0.9760765    | 0.7613775    | 0.9922481    | 0.8209546    | not scorable | not scorable |
| #### Bn-scaff_17036_1-p18002 C-genome specific (napus-oleracea) | 0.9832536    | 0.7369583    | 1            | 0.7375286    | not scorable | not scorable |
| #### Bn-scaff_17036_1-p19202 genome unspecific (all in)         | 0.9665072    | 0.704636     | 0.9457364    | 0.7882931    | 0.8760331    | 0.9511855    |
| #### Bn-scaff_17036_1-p21770 C-genome specific (napus-oleracea) | 0.9856459    | 0.6965355    | 0.9922481    | 0.6778275    | not scorable | not scorable |
| #### Bn-scaff_17036_1-p2905 C-genome specific (napus-oleracea)  | 0.9880383    | 0.7009217    | 0.9147287    | 0.4321357    | not scorable | not scorable |
| #### Bn-scaff_17036_1-p4953 C-genome specific (napus-oleracea)  | 0.9832536    | 0.682829     | 0.9224806    | 0.8135551    | not scorable | not scorable |
| #### Bn-scaff_17036_1-p91726 genome unspecific (all in)         | 0.9736842    | 0.4420048    | 0.9922481    | 0.7334788    | 0.892562     | 0.9035622    |
| #### Bn-scaff_17036_1-p94786 genome unspecific (all in)         | 0.9952153    | 0.534243     | 1            | 0.9039531    | 0.9834711    | 0.7551272    |
| #### Bn-scaff_17042_1-p14711 C-genome specific (napus-oleracea) | 0.9808612    | 0.5841564    | 0.9689922    | 0.5932817    | not scorable | not scorable |
| #### Bn-scaff_17042_1-p14715 C-genome specific (oleracea only)  | not scorable | not scorable | 0.379845     | 0.6963828    | not scorable | not scorable |
| #### Bn-scaff_17042_1-p14824 C-genome specific (napus-oleracea) | 0.9952153    | 0.8019168    | 0.9844961    | 0.7546591    | not scorable | not scorable |
| #### Bn-scaff_17042_1-p14943 C-genome specific (napus-oleracea) | 0.9952153    | 0.800157     | 1            | 0.7600924    | not scorable | not scorable |
| #### Bn-scaff_17042_1-p15113 C-genome specific (napus-oleracea) | 0.9880383    | 0.7828919    | 0.9689922    | 0.7225507    | not scorable | not scorable |

|                                                                 |              |              |           |           |              |              |
|-----------------------------------------------------------------|--------------|--------------|-----------|-----------|--------------|--------------|
| #### Bn-scaff_17042_1-p15502 C-genome specific (napus-oleracea) | 0.9952153    | 0.7259973    | 1         | 0.8056329 | not scorable | not scorable |
| #### Bn-scaff_17042_1-p16358 C-genome specific (napus-oleracea) | 0.9952153    | 0.6998354    | 0.9922481 | 0.7749254 | not scorable | not scorable |
| #### Bn-scaff_17042_1-p18024 C-genome specific (napus-oleracea) | 0.9904306    | 0.8264208    | 1         | 0.740371  | not scorable | not scorable |
| #### Bn-scaff_17042_1-p18039 C-genome specific (napus-oleracea) | 0.9928229    | 0.6565796    | 0.9767442 | 0.7259732 | not scorable | not scorable |
| #### Bn-scaff_17042_1-p2407 C-genome specific (napus-oleracea)  | 0.9880383    | 0.7295504    | 0.9922481 | 0.7346815 | not scorable | not scorable |
| #### Bn-scaff_17042_1-p26960 C-genome specific (napus-oleracea) | 0.9976076    | 0.7688957    | 1         | 0.6481875 | not scorable | not scorable |
| #### Bn-scaff_17042_1-p27064 C-genome specific (napus-oleracea) | 0.9976076    | 0.7761122    | 0.9922481 | 0.7379296 | not scorable | not scorable |
| #### Bn-scaff_17042_1-p27369 C-genome specific (napus-oleracea) | 0.9952153    | 0.7973511    | 0.9922481 | 0.7446926 | not scorable | not scorable |
| #### Bn-scaff_17042_1-p29609 C-genome specific (napus-oleracea) | 0.9904306    | 0.7706215    | 1         | 0.7420439 | not scorable | not scorable |
| #### Bn-scaff_17042_1-p2982 C-genome specific (napus-oleracea)  | 0.9928229    | 0.7811919    | 0.9147287 | 0.7302131 | not scorable | not scorable |
| #### Bn-scaff_17042_1-p29861 C-genome specific (napus-oleracea) | 0.8301435    | 0.8035659    | 0.3333333 | 0.8560267 | not scorable | not scorable |
| #### Bn-scaff_17042_1-p3035 C-genome specific (napus-oleracea)  | 0.9952153    | 0.8016948    | 0.9922481 | 0.8084915 | not scorable | not scorable |
| #### Bn-scaff_17042_1-p30668 C-genome specific (napus-oleracea) | 0.9952153    | 0.7814096    | 1         | 0.8225051 | not scorable | not scorable |
| #### Bn-scaff_17042_1-p31941 genome unspecific (all in)         | 0.9808612    | 0.4781104    | 1         | 0.9175813 | 1            | 0.9175813    |
| #### Bn-scaff_17042_1-p3467 C-genome specific (napus-oleracea)  | 0.9952153    | 0.7178883    | 0.9922481 | 0.7927062 | not scorable | not scorable |
| #### Bn-scaff_17042_1-p35973 genome unspecific (all in)         | 1            | 0.3969438    | 1         | 0.7521437 | 1            | 0.7111406    |
| #### Bn-scaff_17042_1-p35977 C-genome specific (napus-oleracea) | 0.9976076    | 0.4403458    | 1         | 0.8612007 | not scorable | not scorable |
| #### Bn-scaff_17042_1-p36107 genome unspecific (all in)         | 0.9880383    | 0.3979907    | 1         | 0.7543982 | 1            | 0.9151152    |
| #### Bn-scaff_17042_1-p41859 genome unspecific (all in)         | 0.9784689    | 0.4487885    | 1         | 0.8269244 | 1            | 0.9175813    |
| #### Bn-scaff_17042_1-p45658 genome unspecific (all in)         | 0.9473684    | 0.206532     | 1         | 0.6118953 | 0.9917355    | 0.6724718    |
| #### Bn-scaff_17042_1-p45860 genome unspecific (all in)         | 0.9641148    | 0.3325522    | 0.9922481 | 0.7863874 | 0.9917355    | 0.7993927    |
| #### Bn-scaff_17042_1-p45866 genome unspecific (oleracea-rapa)  | not scorable | not scorable | 0.9922481 | 0.8179242 | 0.9917355    | 0.9165421    |
| #### Bn-scaff_17042_1-p46878 C-genome specific (napus-oleracea) | 0.9952153    | 0.7584804    | 0.9844961 | 0.798117  | not scorable | not scorable |
| #### Bn-scaff_17042_1-p47762 C-genome specific (napus-oleracea) | 0.9952153    | 0.7303197    | 0.9689922 | 0.6966468 | not scorable | not scorable |
| #### Bn-scaff_17042_1-p47861 C-genome specific (oleracea only)  | not scorable | not scorable | 0.9224806 | 0.4166955 | not scorable | not scorable |
| #### Bn-scaff_17042_1-p48424 C-genome specific (napus-oleracea) | 1            | 0.8158318    | 0.9767442 | 0.8135673 | not scorable | not scorable |
| #### Bn-scaff_17042_1-p48522 C-genome specific (napus-oleracea) | 0.9856459    | 0.7285444    | 0.9767442 | 0.7611691 | not scorable | not scorable |
| #### Bn-scaff_17042_1-p49330 C-genome specific (napus-oleracea) | 0.9928229    | 0.797066     | 1         | 0.7590037 | not scorable | not scorable |
| #### Bn-scaff_17042_1-p50022 C-genome specific (napus-oleracea) | 0.9928229    | 0.8067278    | 0.9922481 | 0.8168129 | not scorable | not scorable |
| #### Bn-scaff_17042_1-p50777 C-genome specific (napus-oleracea) | 0.9952153    | 0.7567083    | 0.9922481 | 0.7355938 | not scorable | not scorable |
| #### Bn-scaff_17042_1-p51114 C-genome specific (napus-oleracea) | 0.9928229    | 0.8447738    | 1         | 0.7677682 | not scorable | not scorable |
| #### Bn-scaff_17042_1-p51118 C-genome specific (napus-oleracea) | 0.9904306    | 0.8876941    | 1         | 0.7368925 | not scorable | not scorable |
| #### Bn-scaff_17042_1-p51193 C-genome specific (napus-oleracea) | 0.9736842    | 0.8100281    | 0.9379845 | 0.6879672 | not scorable | not scorable |

|                                                                 |              |              |              |              |              |              |
|-----------------------------------------------------------------|--------------|--------------|--------------|--------------|--------------|--------------|
| #### Bn-scaff_17042_1-p51248 C-genome specific (napus-oleracea) | 0.9808612    | 0.8024615    | 0.9379845    | 0.7574182    | not scorable | not scorable |
| #### Bn-scaff_17042_1-p51665 C-genome specific (napus-oleracea) | 0.9856459    | 0.7592214    | 0.9379845    | 0.7558695    | not scorable | not scorable |
| #### Bn-scaff_17042_1-p51685 C-genome specific (napus-oleracea) | 0.9952153    | 0.7548326    | 1            | 0.6932999    | not scorable | not scorable |
| #### Bn-scaff_17042_1-p51722 C-genome specific (napus-oleracea) | 0.9928229    | 0.8272697    | 1            | 0.7321649    | not scorable | not scorable |
| #### Bn-scaff_17042_1-p52695 C-genome specific (napus-oleracea) | 0.9928229    | 0.7075154    | 0.9379845    | 0.639447     | not scorable | not scorable |
| #### Bn-scaff_17042_1-p5844 C-genome specific (napus-oleracea)  | 0.9904306    | 0.768849     | 0.9922481    | 0.7537062    | not scorable | not scorable |
| #### Bn-scaff_17042_1-p5853 C-genome specific (napus-oleracea)  | 0.9952153    | 0.7750053    | 0.9844961    | 0.7420206    | not scorable | not scorable |
| #### Bn-scaff_17042_1-p6026 C-genome specific (napus-oleracea)  | 0.9904306    | 0.7466811    | 0.9922481    | 0.6845098    | not scorable | not scorable |
| #### Bn-scaff_17042_1-p63629 C-genome specific (napus-oleracea) | 0.9904306    | 0.732692     | 0.9767442    | 0.7080901    | not scorable | not scorable |
| #### Bn-scaff_17042_1-p63701 C-genome specific (napus-oleracea) | 0.9880383    | 0.731873     | 0.9844961    | 0.6971465    | not scorable | not scorable |
| #### Bn-scaff_17042_1-p64231 C-genome specific (napus-oleracea) | 1            | 0.8003138    | 1            | 0.6728658    | not scorable | not scorable |
| #### Bn-scaff_17042_1-p69438 C-genome specific (napus-oleracea) | 0.8492823    | 0.7769963    | 1            | 0.8351765    | not scorable | not scorable |
| #### Bn-scaff_17042_1-p69630 C-genome specific (napus-oleracea) | 0.9952153    | 0.815896     | 0.9844961    | 0.7580045    | not scorable | not scorable |
| #### Bn-scaff_17042_1-p70155 all not scorable                   | not scorable | not scorable | not scorable | not scorable | not scorable | not scorable |
| #### Bn-scaff_17042_1-p70726 genome unspecific (all in)         | 0.9952153    | 0.5146776    | 1            | 0.7595616    | 1            | 0.8931487    |
| #### Bn-scaff_17042_1-p71180 C-genome specific (napus-oleracea) | 0.9880383    | 0.7909248    | 0.9689922    | 0.7758079    | not scorable | not scorable |
| #### Bn-scaff_17044_1-p31088 genome unspecific (all in)         | 1            | 0.2848132    | 1            | 0.7914145    | 1            | 0.623754     |
| #### Bn-scaff_17044_1-p46274 C-genome specific (napus-oleracea) | 0.9952153    | 0.7231866    | 0.9689922    | 0.6721842    | not scorable | not scorable |
| #### Bn-scaff_17044_1-p52134 genome unspecific (all in)         | 0.9760765    | 0.3193808    | 1            | 0.7972026    | 0.9752066    | 0.6565789    |
| #### Bn-scaff_17044_1-p52280 C-genome specific (napus-oleracea) | 0.9880383    | 0.7053646    | 0.9767442    | 0.700622     | not scorable | not scorable |
| #### Bn-scaff_17044_1-p52572 genome unspecific (all in)         | 0.9688995    | 0.4973555    | 0.9844961    | 0.750341     | 1            | 0.8247039    |
| #### Bn-scaff_17044_1-p52621 C-genome specific (napus-oleracea) | 0.9784689    | 0.7675339    | 0.9922481    | 0.7007058    | not scorable | not scorable |
| #### Bn-scaff_17044_1-p52953 C-genome specific (napus-oleracea) | 0.9928229    | 0.6756767    | 1            | 0.6880202    | not scorable | not scorable |
| #### Bn-scaff_17044_1-p53162 C-genome specific (napus-oleracea) | 0.9904306    | 0.7604135    | 1            | 0.7533805    | not scorable | not scorable |
| #### Bn-scaff_17044_1-p54533 C-genome specific (napus-oleracea) | 1            | 0.7462057    | 1            | 0.6618809    | not scorable | not scorable |
| #### Bn-scaff_17044_1-p56003 A-genome specific (rapa only)      | not scorable | not scorable | not scorable | not scorable | 0.7603306    | 0.5931676    |
| #### Bn-scaff_17044_1-p57048 napus specific                     | 0.9736842    | 0.7201577    | not scorable | not scorable | not scorable | not scorable |
| #### Bn-scaff_17044_1-p59412 genome unspecific (all in)         | 0.9952153    | 0.6217239    | 1            | 0.7169762    | 0.9917355    | 0.7560911    |
| #### Bn-scaff_17044_1-p61275 genome unspecific (oleracea-rapa)  | not scorable | not scorable | 0.9767442    | 0.259464     | 0.9834711    | 0.7745064    |
| #### Bn-scaff_17044_1-p61445 genome unspecific (all in)         | 1            | 0.8152335    | 1            | 0.7914145    | 1            | 0.7770717    |
| #### Bn-scaff_17044_1-p61447 C-genome specific (napus-oleracea) | 1            | 0.3699779    | 0.9767442    | 0.4824787    | not scorable | not scorable |
| #### Bn-scaff_17044_1-p61453 genome unspecific (oleracea-rapa)  | not scorable | not scorable | 0.9922481    | 0.3078904    | 1            | 0.8259072    |
| #### Bn-scaff_17044_1-p63064 C-genome specific (oleracea only)  | not scorable | not scorable | 1            | 0.8378905    | not scorable | not scorable |

|                                                                 |              |              |           |           |              |              |
|-----------------------------------------------------------------|--------------|--------------|-----------|-----------|--------------|--------------|
| #### Bn-scaff_17044_1-p63105 genome unspecific (all in)         | 0.9880383    | 0.3843285    | 0.9922481 | 0.6845782 | 1            | 0.7912033    |
| #### Bn-scaff_17048_1-p10521 genome unspecific (oleracea-rapa)  | not scorable | not scorable | 1         | 0.5229921 | 1            | 0.9105785    |
| #### Bn-scaff_17048_1-p13102 C-genome specific (napus-oleracea) | 1            | 0.568415     | 1         | 0.5976474 | not scorable | not scorable |
| #### Bn-scaff_17048_1-p13154 C-genome specific (oleracea only)  | not scorable | not scorable | 0.9534883 | 0.4314436 | not scorable | not scorable |
| #### Bn-scaff_17048_1-p20650 C-genome specific (napus-oleracea) | 0.9856459    | 0.7939101    | 0.9922481 | 0.813976  | not scorable | not scorable |
| #### Bn-scaff_17048_1-p20974 C-genome specific (napus-oleracea) | 0.9976076    | 0.8959069    | 1         | 0.8950142 | not scorable | not scorable |
| #### Bn-scaff_17048_1-p21619 C-genome specific (napus-oleracea) | 0.9832536    | 0.6941298    | 1         | 0.69509   | not scorable | not scorable |
| #### Bn-scaff_17048_1-p24308 C-genome specific (napus-oleracea) | 0.9952153    | 0.6592019    | 1         | 0.5984283 | not scorable | not scorable |
| #### Bn-scaff_17048_1-p27539 C-genome specific (napus-oleracea) | 0.9808612    | 0.6931905    | 0.7131783 | 0.9020258 | not scorable | not scorable |
| #### Bn-scaff_17048_1-p28145 C-genome specific (napus-oleracea) | 0.9760765    | 0.4410472    | 0.9534883 | 0.5277326 | not scorable | not scorable |
| #### Bn-scaff_17048_1-p29499 C-genome specific (napus-oleracea) | 0.9784689    | 0.5426688    | 0.9922481 | 0.7476596 | not scorable | not scorable |
| #### Bn-scaff_17048_1-p29526 C-genome specific (napus-oleracea) | 0.9880383    | 0.6930982    | 0.9767442 | 0.6439459 | not scorable | not scorable |
| #### Bn-scaff_17048_1-p29558 C-genome specific (napus-oleracea) | 0.9904306    | 0.7256486    | 0.9767442 | 0.8152937 | not scorable | not scorable |
| #### Bn-scaff_17048_1-p29958 genome unspecific (all in)         | 0.9593301    | 0.4841321    | 1         | 0.8010016 | 1            | 0.9095112    |
| #### Bn-scaff_17048_1-p33757 genome unspecific (all in)         | 0.9880383    | 0.4336706    | 1         | 0.9093176 | 0.9173554    | 0.9086473    |
| #### Bn-scaff_17048_1-p33856 genome unspecific (oleracea-rapa)  | not scorable | not scorable | 0.9612403 | 0.7839735 | 0.9008265    | 0.7768097    |
| #### Bn-scaff_17067_1-p10182 C-genome specific (napus-oleracea) | 0.8397129    | 0.8806896    | 0.5736434 | 0.7637592 | not scorable | not scorable |
| #### Bn-scaff_17067_1-p10239 C-genome specific (napus-oleracea) | 0.9856459    | 0.6694319    | 0.9844961 | 0.7712346 | not scorable | not scorable |
| #### Bn-scaff_17067_1-p10252 C-genome specific (napus-oleracea) | 0.9904306    | 0.7362393    | 0.9767442 | 0.679065  | not scorable | not scorable |
| #### Bn-scaff_17067_1-p10284 C-genome specific (napus-oleracea) | 0.9856459    | 0.6579076    | 1         | 0.8206459 | not scorable | not scorable |
| #### Bn-scaff_17067_1-p10285 C-genome specific (napus-oleracea) | 0.9904306    | 0.6533757    | 0.9457364 | 0.6779448 | not scorable | not scorable |
| #### Bn-scaff_17067_1-p10337 C-genome specific (napus-oleracea) | 0.9808612    | 0.7737576    | 0.9147287 | 0.7460073 | not scorable | not scorable |
| #### Bn-scaff_17067_1-p10343 C-genome specific (napus-oleracea) | 0.9952153    | 0.747075     | 1         | 0.6871295 | not scorable | not scorable |
| #### Bn-scaff_17067_1-p10344 C-genome specific (napus-oleracea) | 0.9952153    | 0.7822973    | 1         | 0.7356759 | not scorable | not scorable |
| #### Bn-scaff_17067_1-p10386 C-genome specific (napus-oleracea) | 0.9952153    | 0.6997149    | 0.9922481 | 0.6370483 | not scorable | not scorable |
| #### Bn-scaff_17067_1-p10505 C-genome specific (napus-oleracea) | 0.9856459    | 0.8861536    | 0.7906977 | 0.9206254 | not scorable | not scorable |
| #### Bn-scaff_17067_1-p10511 C-genome specific (napus-oleracea) | 0.9928229    | 0.5802953    | 0.9767442 | 0.5775777 | not scorable | not scorable |
| #### Bn-scaff_17067_1-p10513 C-genome specific (napus-oleracea) | 0.9832536    | 0.6565269    | 0.7906977 | 0.5093182 | not scorable | not scorable |
| #### Bn-scaff_17067_1-p10521 C-genome specific (napus-oleracea) | 0.9832536    | 0.7256827    | 0.7829458 | 0.8852948 | not scorable | not scorable |
| #### Bn-scaff_17067_1-p10521 C-genome specific (napus-oleracea) | 0.9784689    | 0.6726429    | 0.7829458 | 0.6528179 | not scorable | not scorable |
| #### Bn-scaff_17067_1-p10621 C-genome specific (napus-oleracea) | 0.9904306    | 0.6385995    | 1         | 0.6641929 | not scorable | not scorable |
| #### Bn-scaff_17067_1-p10633 C-genome specific (napus-oleracea) | 0.9952153    | 0.7792221    | 1         | 0.7599966 | not scorable | not scorable |
| #### Bn-scaff_17067_1-p10848 C-genome specific (napus-oleracea) | 0.9928229    | 0.7703583    | 1         | 0.6643792 | not scorable | not scorable |



|                                                                 |           |           |              |              |              |              |
|-----------------------------------------------------------------|-----------|-----------|--------------|--------------|--------------|--------------|
| #### Bn-scaff_17067_1-p11139 C-genome specific (napus-oleracea) | 0.9832536 | 0.6946073 | 0.9147287    | 0.7025448    | not scorable | not scorable |
| #### Bn-scaff_17067_1-p11175 genome unspecific (all in)         | 0.9784689 | 0.4643052 | 0.9922481    | 0.4174218    | 1            | 0.802569     |
| #### Bn-scaff_17067_1-p11293 C-genome specific (napus-oleracea) | 0.9904306 | 0.6102959 | 0.9922481    | 0.6618158    | not scorable | not scorable |
| #### Bn-scaff_17067_1-p11296 C-genome specific (napus-oleracea) | 0.9880383 | 0.6155602 | 1            | 0.7199351    | not scorable | not scorable |
| #### Bn-scaff_17067_1-p11492 C-genome specific (napus-oleracea) | 0.9952153 | 0.7909267 | 0.9922481    | 0.745426     | not scorable | not scorable |
| #### Bn-scaff_17067_1-p11613 C-genome specific (napus-oleracea) | 0.9904306 | 0.8145744 | 1            | 0.8267251    | not scorable | not scorable |
| #### Bn-scaff_17067_1-p11756 C-genome specific (napus-oleracea) | 0.9928229 | 0.8049514 | 1            | 0.6906403    | not scorable | not scorable |
| #### Bn-scaff_17067_1-p11757 C-genome specific (napus-oleracea) | 0.9856459 | 0.7227835 | 1            | 0.7213592    | not scorable | not scorable |
| #### Bn-scaff_17067_1-p11842 napus specific                     | 0.9043062 | 0.6004904 | not scorable | not scorable | not scorable | not scorable |
| #### Bn-scaff_17067_1-p11846 C-genome specific (napus-oleracea) | 0.9856459 | 0.8745258 | 1            | 0.8377192    | not scorable | not scorable |
| #### Bn-scaff_17067_1-p12010 C-genome specific (napus-oleracea) | 0.9928229 | 0.7727717 | 1            | 0.8603663    | not scorable | not scorable |
| #### Bn-scaff_17067_1-p12587 C-genome specific (napus-oleracea) | 0.9976076 | 0.7076257 | 0.9922481    | 0.7929298    | not scorable | not scorable |
| #### Bn-scaff_17067_1-p12718 C-genome specific (napus-oleracea) | 0.9952153 | 0.6956034 | 0.9922481    | 0.590957     | not scorable | not scorable |
| #### Bn-scaff_17067_1-p13175 genome unspecific (all in)         | 0.9976076 | 0.5266165 | 1            | 0.679547     | 1            | 0.8521883    |
| #### Bn-scaff_17067_1-p13344 C-genome specific (napus-oleracea) | 0.9880383 | 0.728884  | 0.9922481    | 0.6572412    | not scorable | not scorable |
| #### Bn-scaff_17067_1-p15482 C-genome specific (napus-oleracea) | 0.9712918 | 0.7661349 | 0.5736434    | 0.6855341    | not scorable | not scorable |
| #### Bn-scaff_17067_1-p16138 C-genome specific (napus-oleracea) | 0.9928229 | 0.8855222 | 1            | 0.7239683    | not scorable | not scorable |
| #### Bn-scaff_17067_1-p16823 C-genome specific (napus-oleracea) | 0.9904306 | 0.7572865 | 0.9922481    | 0.7561342    | not scorable | not scorable |
| #### Bn-scaff_17067_1-p16938 C-genome specific (napus-oleracea) | 0.9808612 | 0.6589749 | 1            | 0.74487      | not scorable | not scorable |
| #### Bn-scaff_17067_1-p17220 C-genome specific (napus-oleracea) | 0.9928229 | 0.878218  | 1            | 0.781137     | not scorable | not scorable |
| #### Bn-scaff_17067_1-p17261 C-genome specific (napus-oleracea) | 0.9928229 | 0.8514807 | 1            | 0.7915999    | not scorable | not scorable |
| #### Bn-scaff_17067_1-p17320 C-genome specific (napus-oleracea) | 0.9928229 | 0.7966532 | 1            | 0.8186202    | not scorable | not scorable |
| #### Bn-scaff_17067_1-p17367 C-genome specific (napus-oleracea) | 0.9856459 | 0.8682898 | 0.9147287    | 0.7531244    | not scorable | not scorable |
| #### Bn-scaff_17067_1-p17491 C-genome specific (napus-oleracea) | 0.9904306 | 0.749532  | 1            | 0.7731522    | not scorable | not scorable |
| #### Bn-scaff_17067_1-p17536 C-genome specific (napus-oleracea) | 0.9952153 | 0.7265657 | 1            | 0.9272014    | not scorable | not scorable |
| #### Bn-scaff_17067_1-p17545 C-genome specific (napus-oleracea) | 0.9928229 | 0.8156459 | 1            | 0.7259912    | not scorable | not scorable |
| #### Bn-scaff_17067_1-p17697 C-genome specific (napus-oleracea) | 0.9880383 | 0.7069739 | 1            | 0.6639565    | not scorable | not scorable |
| #### Bn-scaff_17067_1-p18409 C-genome specific (napus-oleracea) | 0.9880383 | 0.2762365 | 1            | 0.2843032    | not scorable | not scorable |
| #### Bn-scaff_17067_1-p19325 C-genome specific (napus-oleracea) | 0.9928229 | 0.6558575 | 1            | 0.6528231    | not scorable | not scorable |
| #### Bn-scaff_17067_1-p19400 C-genome specific (napus-oleracea) | 0.9952153 | 0.7283552 | 0.9922481    | 0.8214206    | not scorable | not scorable |
| #### Bn-scaff_17067_1-p21169 C-genome specific (napus-oleracea) | 0.9928229 | 0.8209156 | 1            | 0.8113402    | not scorable | not scorable |
| #### Bn-scaff_17067_1-p22725 C-genome specific (napus-oleracea) | 0.9928229 | 0.5535448 | 0.9224806    | 0.5675849    | not scorable | not scorable |
| #### Bn-scaff_17067_1-p22767 C-genome specific (napus-oleracea) | 0.9856459 | 0.6425757 | 0.9147287    | 0.7113478    | not scorable | not scorable |

|                                                                 |              |              |           |           |              |              |
|-----------------------------------------------------------------|--------------|--------------|-----------|-----------|--------------|--------------|
| #### Bn-scaff_17067_1-p23346 C-genome specific (napus-oleracea) | 0.9904306    | 0.6947065    | 0.9922481 | 0.785087  | not scorable | not scorable |
| #### Bn-scaff_17067_1-p23751 C-genome specific (napus-oleracea) | 0.9880383    | 0.7535214    | 1         | 0.5868066 | not scorable | not scorable |
| #### Bn-scaff_17067_1-p24954 genome unspecific (oleracea-rapa)  | not scorable | not scorable | 0.9844961 | 0.5263005 | 1            | 0.7785077    |
| #### Bn-scaff_17067_1-p29257 genome unspecific (all in)         | 1            | 0.5601621    | 1         | 0.5417941 | 0.9834711    | 0.7928881    |
| #### Bn-scaff_17067_1-p31272 genome unspecific (all in)         | 1            | 0.7976658    | 1         | 0.7809811 | 1            | 0.8948976    |
| #### Bn-scaff_17067_1-p32360 C-genome specific (napus-oleracea) | 0.9904306    | 0.7854757    | 1         | 0.6465157 | not scorable | not scorable |
| #### Bn-scaff_17067_1-p36111 genome unspecific (all in)         | 0.9904306    | 0.5531679    | 0.9069768 | 0.5545892 | 0.9752066    | 0.8829765    |
| #### Bn-scaff_17067_1-p37561 C-genome specific (napus-oleracea) | 0.9856459    | 0.8535165    | 0.9147287 | 0.7420809 | not scorable | not scorable |
| #### Bn-scaff_17067_1-p37940 C-genome specific (napus-oleracea) | 0.9832536    | 0.6954529    | 0.9147287 | 0.7735092 | not scorable | not scorable |
| #### Bn-scaff_17067_1-p38588 C-genome specific (napus-oleracea) | 0.9856459    | 0.7094772    | 0.9224806 | 0.6570152 | not scorable | not scorable |
| #### Bn-scaff_17067_1-p38939 C-genome specific (napus-oleracea) | 0.9856459    | 0.8648083    | 1         | 0.800547  | not scorable | not scorable |
| #### Bn-scaff_17067_1-p39436 C-genome specific (napus-oleracea) | 0.9712918    | 0.7065312    | 0.5968992 | 0.6411043 | not scorable | not scorable |
| #### Bn-scaff_17067_1-p40249 C-genome specific (napus-oleracea) | 0.9641148    | 0.8392587    | 0.5736434 | 0.7783231 | not scorable | not scorable |
| #### Bn-scaff_17067_1-p40980 C-genome specific (napus-oleracea) | 0.9856459    | 0.6766177    | 1         | 0.6204952 | not scorable | not scorable |
| #### Bn-scaff_17067_1-p42034 C-genome specific (napus-oleracea) | 0.9832536    | 0.6502775    | 0.9147287 | 0.6134343 | not scorable | not scorable |
| #### Bn-scaff_17067_1-p42718 C-genome specific (napus-oleracea) | 0.9928229    | 0.5620164    | 1         | 0.589122  | not scorable | not scorable |
| #### Bn-scaff_17067_1-p42769 C-genome specific (napus-oleracea) | 0.9904306    | 0.6866189    | 0.9922481 | 0.7067506 | not scorable | not scorable |
| #### Bn-scaff_17067_1-p43777 C-genome specific (napus-oleracea) | 0.9712918    | 0.7755142    | 0.5736434 | 0.7728464 | not scorable | not scorable |
| #### Bn-scaff_17067_1-p43968 C-genome specific (napus-oleracea) | 0.9952153    | 0.5562999    | 1         | 0.7957191 | not scorable | not scorable |
| #### Bn-scaff_17067_1-p44821 C-genome specific (napus-oleracea) | 0.9856459    | 0.7564455    | 0.9224806 | 0.7787027 | not scorable | not scorable |
| #### Bn-scaff_17067_1-p44831 C-genome specific (napus-oleracea) | 0.9904306    | 0.7610667    | 1         | 0.7140203 | not scorable | not scorable |
| #### Bn-scaff_17067_1-p44840 C-genome specific (napus-oleracea) | 0.9952153    | 0.6916041    | 1         | 0.6273587 | not scorable | not scorable |
| #### Bn-scaff_17067_1-p48650 C-genome specific (napus-oleracea) | 0.9928229    | 0.7596586    | 1         | 0.8663419 | not scorable | not scorable |
| #### Bn-scaff_17067_1-p48763 C-genome specific (napus-oleracea) | 0.9928229    | 0.7491687    | 1         | 0.7513605 | not scorable | not scorable |
| #### Bn-scaff_17067_1-p48812 C-genome specific (napus-oleracea) | 0.9904306    | 0.6911396    | 0.9844961 | 0.7919934 | not scorable | not scorable |
| #### Bn-scaff_17067_1-p48865 C-genome specific (napus-oleracea) | 0.9952153    | 0.7353447    | 0.9844961 | 0.7736173 | not scorable | not scorable |
| #### Bn-scaff_17067_1-p48873 C-genome specific (napus-oleracea) | 0.9928229    | 0.794278     | 1         | 0.8044361 | not scorable | not scorable |
| #### Bn-scaff_17067_1-p49953 C-genome specific (oleracea only)  | not scorable | not scorable | 1         | 0.7300764 | not scorable | not scorable |
| #### Bn-scaff_17067_1-p50783 genome unspecific (all in)         | 0.9976076    | 0.6136472    | 1         | 0.6435696 | 1            | 0.9503494    |
| #### Bn-scaff_17067_1-p50974 C-genome specific (napus-oleracea) | 0.9880383    | 0.7924223    | 0.7906977 | 0.7472904 | not scorable | not scorable |
| #### Bn-scaff_17067_1-p50996 C-genome specific (oleracea only)  | not scorable | not scorable | 1         | 0.8439981 | not scorable | not scorable |
| #### Bn-scaff_17067_1-p51564 C-genome specific (napus-oleracea) | 0.9904306    | 0.7095767    | 0.9612403 | 0.7629595 | not scorable | not scorable |
| #### Bn-scaff_17067_1-p53014 C-genome specific (napus-oleracea) | 0.9832536    | 0.6736774    | 0.9147287 | 0.6773748 | not scorable | not scorable |

|                                                                 |              |              |              |              |              |              |
|-----------------------------------------------------------------|--------------|--------------|--------------|--------------|--------------|--------------|
| #### Bn-scaff_17067_1-p53638 C-genome specific (napus-oleracea) | 0.9952153    | 0.8011042    | 1            | 0.7348228    | not scorable | not scorable |
| #### Bn-scaff_17067_1-p54568 C-genome specific (napus-oleracea) | 0.9904306    | 0.5689332    | 0.9534883    | 0.5853468    | not scorable | not scorable |
| #### Bn-scaff_17067_1-p54637 napus specific                     | 0.9952153    | 0.7171209    | not scorable | not scorable | not scorable | not scorable |
| #### Bn-scaff_17067_1-p54830 C-genome specific (napus-oleracea) | 0.9856459    | 0.7530208    | 0.7906977    | 0.7388687    | not scorable | not scorable |
| #### Bn-scaff_17067_1-p56380 C-genome specific (napus-oleracea) | 0.9952153    | 0.7638702    | 1            | 0.6653726    | not scorable | not scorable |
| #### Bn-scaff_17067_1-p57066 C-genome specific (napus-oleracea) | 0.9904306    | 0.8424348    | 1            | 0.6583494    | not scorable | not scorable |
| #### Bn-scaff_17067_1-p5767 C-genome specific (napus-oleracea)  | 0.9665072    | 0.7500505    | 0.8992248    | 0.6952905    | not scorable | not scorable |
| #### Bn-scaff_17067_1-p57680 C-genome specific (napus-oleracea) | 0.9880383    | 0.6540581    | 0.9767442    | 0.5382591    | not scorable | not scorable |
| #### Bn-scaff_17067_1-p58235 C-genome specific (oleracea only)  | not scorable | not scorable | 0.9844961    | 0.5490195    | not scorable | not scorable |
| #### Bn-scaff_17067_1-p58362 C-genome specific (napus-oleracea) | 0.9880383    | 0.7540938    | 0.9844961    | 0.6684689    | not scorable | not scorable |
| #### Bn-scaff_17067_1-p58528 all not scorable                   | not scorable | not scorable | not scorable | not scorable | not scorable | not scorable |
| #### Bn-scaff_17067_1-p59885 C-genome specific (napus-oleracea) | 0.9904306    | 0.6174616    | 0.9922481    | 0.6519223    | not scorable | not scorable |
| #### Bn-scaff_17067_1-p60111 C-genome specific (napus-oleracea) | 0.9928229    | 0.678041     | 1            | 0.7099465    | not scorable | not scorable |
| #### Bn-scaff_17067_1-p60112 C-genome specific (napus-oleracea) | 0.9952153    | 0.9145071    | 1            | 0.9007978    | not scorable | not scorable |
| #### Bn-scaff_17067_1-p62313 genome unspecific (all in)         | 0.9880383    | 0.285759     | 0.9767442    | 0.3499605    | 1            | 0.9241668    |
| #### Bn-scaff_17067_1-p65216 C-genome specific (napus-oleracea) | 1            | 0.6738126    | 0.9689922    | 0.7292923    | not scorable | not scorable |
| #### Bn-scaff_17067_1-p65398 C-genome specific (napus-oleracea) | 0.9928229    | 0.7013612    | 0.9922481    | 0.7103199    | not scorable | not scorable |
| #### Bn-scaff_17067_1-p66227 C-genome specific (napus-oleracea) | 1            | 0.6806238    | 0.9922481    | 0.7526563    | not scorable | not scorable |
| #### Bn-scaff_17067_1-p66941 C-genome specific (oleracea only)  | not scorable | not scorable | 0.9844961    | 0.8059765    | not scorable | not scorable |
| #### Bn-scaff_17067_1-p67101 C-genome specific (napus-oleracea) | 0.9832536    | 0.3548233    | 0.9689922    | 0.7340155    | not scorable | not scorable |
| #### Bn-scaff_17067_1-p67515 C-genome specific (oleracea only)  | not scorable | not scorable | 0.8992248    | 0.6725717    | not scorable | not scorable |
| #### Bn-scaff_17067_1-p68290 C-genome specific (napus-oleracea) | 0.9904306    | 0.4892488    | 0.9922481    | 0.5028594    | not scorable | not scorable |
| #### Bn-scaff_17067_1-p68573 genome unspecific (all in)         | 1            | 0.5857258    | 1            | 0.5445434    | 1            | 0.6171831    |
| #### Bn-scaff_17067_1-p70222 C-genome specific (napus-oleracea) | 0.9928229    | 0.5944344    | 1            | 0.5976756    | not scorable | not scorable |
| #### Bn-scaff_17067_1-p70921 C-genome specific (napus-oleracea) | 0.9856459    | 0.7744535    | 1            | 0.8076841    | not scorable | not scorable |
| #### Bn-scaff_17067_1-p71672 C-genome specific (napus-oleracea) | 0.9880383    | 0.769271     | 0.9379845    | 0.6791295    | not scorable | not scorable |
| #### Bn-scaff_17067_1-p77157 C-genome specific (napus-oleracea) | 0.9880383    | 0.8211511    | 0.9922481    | 0.7818289    | not scorable | not scorable |
| #### Bn-scaff_17067_1-p83431 C-genome specific (napus-oleracea) | 0.9808612    | 0.8819333    | 0.7906977    | 0.7652181    | not scorable | not scorable |
| #### Bn-scaff_17067_1-p83730 C-genome specific (napus-oleracea) | 0.9856459    | 0.6255491    | 0.9767442    | 0.5725105    | not scorable | not scorable |
| #### Bn-scaff_17067_1-p84677 C-genome specific (napus-oleracea) | 0.9904306    | 0.6896096    | 0.9457364    | 0.6803967    | not scorable | not scorable |
| #### Bn-scaff_17067_1-p90289 C-genome specific (napus-oleracea) | 0.9832536    | 0.7760067    | 0.9224806    | 0.7516008    | not scorable | not scorable |
| #### Bn-scaff_17067_1-p90338 C-genome specific (napus-oleracea) | 0.9832536    | 0.8308539    | 0.9069768    | 0.6274397    | not scorable | not scorable |
| #### Bn-scaff_17067_1-p90375 C-genome specific (napus-oleracea) | 0.9808612    | 0.8947484    | 0.9069768    | 0.787617     | not scorable | not scorable |

|                                                                 |              |              |              |              |              |              |
|-----------------------------------------------------------------|--------------|--------------|--------------|--------------|--------------|--------------|
| #### Bn-scaff_17067_1-p90903 genome unspecific (all in)         | 0.9808612    | 0.2587113    | 1            | 0.6007478    | 1            | 0.7777957    |
| #### Bn-scaff_17067_1-p91372 C-genome specific (napus-oleracea) | 0.9976076    | 0.652457     | 1            | 0.6413355    | not scorable | not scorable |
| #### Bn-scaff_17067_1-p92244 napus specific                     | 0.9952153    | 0.277873     | not scorable | not scorable | not scorable | not scorable |
| #### Bn-scaff_17067_1-p93739 C-genome specific (napus-oleracea) | 0.9904306    | 0.7812166    | 1            | 0.7995142    | not scorable | not scorable |
| #### Bn-scaff_17067_1-p99027 C-genome specific (napus-oleracea) | 0.9784689    | 0.7577254    | 0.9069768    | 0.9175813    | not scorable | not scorable |
| #### Bn-scaff_17077_1-p10575 C-genome specific (napus-oleracea) | 0.9928229    | 0.6914294    | 0.9922481    | 0.7497823    | not scorable | not scorable |
| #### Bn-scaff_17077_1-p12562 C-genome specific (napus-oleracea) | 0.9808612    | 0.6356681    | 0.9767442    | 0.7275639    | not scorable | not scorable |
| #### Bn-scaff_17077_1-p14953 C-genome specific (napus-oleracea) | 0.9760765    | 0.6048735    | 1            | 0.709207     | not scorable | not scorable |
| #### Bn-scaff_17077_1-p19956 C-genome specific (napus-oleracea) | 0.9497608    | 0.7253513    | 0.9844961    | 0.6950371    | not scorable | not scorable |
| #### Bn-scaff_17077_1-p20022 C-genome specific (oleracea only)  | not scorable | not scorable | 1            | 0.6862456    | not scorable | not scorable |
| #### Bn-scaff_17077_1-p20103 C-genome specific (oleracea only)  | not scorable | not scorable | 0.9767442    | 0.728219     | not scorable | not scorable |
| #### Bn-scaff_17077_1-p20273 C-genome specific (napus-oleracea) | 0.9712918    | 0.5699258    | 1            | 0.3160193    | not scorable | not scorable |
| #### Bn-scaff_17077_1-p20384 genome unspecific (oleracea-rapa)  | not scorable | not scorable | 0.9922481    | 0.5981981    | 0.7520661    | 0.7704166    |
| #### Bn-scaff_17077_1-p31888 C-genome specific (napus-oleracea) | 0.9880383    | 0.8477188    | 0.9922481    | 0.8155995    | not scorable | not scorable |
| #### Bn-scaff_17077_1-p32996 genome unspecific (all in)         | 0.9928229    | 0.4873102    | 1            | 0.7259414    | 1            | 0.8815182    |
| #### Bn-scaff_17077_1-p54157 C-genome specific (napus-oleracea) | 0.9856459    | 0.7820554    | 1            | 0.755104     | not scorable | not scorable |
| #### Bn-scaff_17077_1-p55828 C-genome specific (napus-oleracea) | 0.9880383    | 0.6612644    | 0.9844961    | 0.5995316    | not scorable | not scorable |
| #### Bn-scaff_17077_1-p58857 genome unspecific (all in)         | 1            | 0.691924     | 1            | 0.8015504    | 1            | 0.8210431    |
| #### Bn-scaff_17077_1-p58908 genome unspecific (oleracea-rapa)  | not scorable | not scorable | 1            | 0.5868977    | 0.9917355    | 0.5775228    |
| #### Bn-scaff_17079_1-p10262 genome unspecific (all in)         | 0.9808612    | 0.323451     | 1            | 0.7114339    | 0.9917355    | 0.8011903    |
| #### Bn-scaff_17079_1-p14120 C-genome specific (napus-oleracea) | 0.5550239    | 0.8601611    | 0.7209302    | 0.9107445    | not scorable | not scorable |
| #### Bn-scaff_17079_1-p14445 C-genome specific (napus-oleracea) | 0.9736842    | 0.7681458    | 1            | 0.7388391    | not scorable | not scorable |
| #### Bn-scaff_17079_1-p14447 C-genome specific (napus-oleracea) | 0.9665072    | 0.6994514    | 0.9922481    | 0.7656856    | not scorable | not scorable |
| #### Bn-scaff_17079_1-p14475 C-genome specific (napus-oleracea) | 0.9617225    | 0.8255559    | 1            | 0.7957688    | not scorable | not scorable |
| #### Bn-scaff_17079_1-p14491 C-genome specific (napus-oleracea) | 0.9641148    | 0.7768412    | 1            | 0.8618599    | not scorable | not scorable |
| #### Bn-scaff_17079_1-p14574 C-genome specific (napus-oleracea) | 0.9712918    | 0.658536     | 0.9922481    | 0.6290665    | not scorable | not scorable |
| #### Bn-scaff_17079_1-p14604 C-genome specific (napus-oleracea) | 0.9641148    | 0.7730624    | 1            | 0.8506978    | not scorable | not scorable |
| #### Bn-scaff_17079_1-p21658 C-genome specific (napus-oleracea) | 0.9521531    | 0.8029693    | 0.9922481    | 0.8098131    | not scorable | not scorable |
| #### Bn-scaff_17079_1-p21817 C-genome specific (napus-oleracea) | 0.9449761    | 0.8055834    | 0.9302326    | 0.868535     | not scorable | not scorable |
| #### Bn-scaff_17079_1-p28593 C-genome specific (napus-oleracea) | 0.9641148    | 0.7964608    | 0.9379845    | 0.7318225    | not scorable | not scorable |
| #### Bn-scaff_17079_1-p39397 C-genome specific (napus-oleracea) | 0.9569378    | 0.8132631    | 1            | 0.7962463    | not scorable | not scorable |
| #### Bn-scaff_17079_1-p49204 C-genome specific (napus-oleracea) | 0.9688995    | 0.6900374    | 1            | 0.6986808    | not scorable | not scorable |
| #### Bn-scaff_17079_1-p79663 C-genome specific (napus-oleracea) | 0.9665072    | 0.7812728    | 1            | 0.749606     | not scorable | not scorable |

|                                                                |              |              |              |              |              |              |
|----------------------------------------------------------------|--------------|--------------|--------------|--------------|--------------|--------------|
| #### Bn-scaff_17084_1-p11672genome unspecific (all in)         | 1            | 0.6662924    | 1            | 0.626896     | 1            | 0.8434243    |
| #### Bn-scaff_17084_1-p16174C-genome specific (napus-oleracea) | 0.9976076    | 0.7692471    | 1            | 0.7546834    | not scorable | not scorable |
| #### Bn-scaff_17084_1-p23485C-genome specific (napus-oleracea) | 0.9976076    | 0.7350485    | 1            | 0.6672967    | not scorable | not scorable |
| #### Bn-scaff_17084_1-p25695all not scorable                   | not scorable | not scorable | not scorable | not scorable | not scorable | not scorable |
| #### Bn-scaff_17084_1-p25743C-genome specific (oleracea only)  | not scorable | not scorable | 0.9767442    | 0.7277114    | not scorable | not scorable |
| #### Bn-scaff_17084_1-p34128genome unspecific (all in)         | 0.9617225    | 0.3838901    | 1            | 0.8649582    | 0.9669421    | 0.6890065    |
| #### Bn-scaff_17084_1-p76054C-genome specific (napus-oleracea) | 0.9162679    | 0.9544149    | 0.9612403    | 0.8050162    | not scorable | not scorable |
| #### Bn-scaff_17084_1-p76059C-genome specific (napus-oleracea) | 0.9090909    | 0.7906918    | 0.9844961    | 0.7915186    | not scorable | not scorable |
| #### Bn-scaff_17084_1-p81792C-genome specific (napus-oleracea) | 0.9712918    | 0.3984161    | 0.9147287    | 0.4273621    | not scorable | not scorable |
| #### Bn-scaff_17084_1-p85094genome unspecific (all in)         | 1            | 0.4272074    | 1            | 0.6211326    | 0.9917355    | 0.6186333    |
| #### Bn-scaff_17084_1-p85112genome unspecific (all in)         | 0.9760765    | 0.4604828    | 1            | 0.8173906    | 1            | 0.8851647    |
| #### Bn-scaff_17084_1-p89672A-genome specific (napus-rapa)     | 0.9856459    | 0.2519212    | not scorable | not scorable | 1            | 0.727636     |
| #### Bn-scaff_17084_1-p95503A-genome specific (napus-rapa)     | 0.9976076    | 0.5345051    | not scorable | not scorable | 0.9834711    | 0.8465853    |
| #### Bn-scaff_17084_1-p99652genome unspecific (all in)         | 0.9928229    | 0.2834857    | 0.8837209    | 0.2813031    | 1            | 0.7134259    |
| #### Bn-scaff_17084_1-p99773genome unspecific (all in)         | 1            | 0.8293141    | 1            | 0.8293141    | 1            | 0.8293141    |
| #### Bn-scaff_17088_1-p12134C-genome specific (napus-oleracea) | 0.9736842    | 0.8435641    | 0.9534883    | 0.7412314    | not scorable | not scorable |
| #### Bn-scaff_17088_1-p14656C-genome specific (napus-oleracea) | 1            | 0.6555578    | 0.9689922    | 0.6687664    | not scorable | not scorable |
| #### Bn-scaff_17088_1-p23973genome unspecific (all in)         | 1            | 0.5894028    | 1            | 0.9175939    | 0.9917355    | 0.8809455    |
| #### Bn-scaff_17088_1-p24003genome unspecific (all in)         | 1            | 0.4456599    | 1            | 0.8597109    | 0.9917355    | 0.8509623    |
| #### Bn-scaff_17088_1-p24550genome unspecific (all in)         | 0.9880383    | 0.3511012    | 1            | 0.8881662    | 1            | 0.8014372    |
| #### Bn-scaff_17088_1-p32706genome unspecific (all in)         | 1            | 0.4568953    | 1            | 0.8154362    | 1            | 0.9197081    |
| #### Bn-scaff_17088_1-p33756genome unspecific (oleracea-rapa)  | not scorable | not scorable | 0.9844961    | 0.6047509    | 1            | 0.6528108    |
| #### Bn-scaff_17088_1-p35376genome unspecific (all in)         | 0.9641148    | 0.3967519    | 1            | 0.7805174    | 0.9752066    | 0.7555033    |
| #### Bn-scaff_17088_1-p4312 C-genome specific (napus-oleracea) | 0.9617225    | 0.6368737    | 0.9534883    | 0.6636251    | not scorable | not scorable |
| #### Bn-scaff_17088_1-p44491C-genome specific (oleracea only)  | not scorable | not scorable | 1            | 0.7546833    | not scorable | not scorable |
| #### Bn-scaff_17088_1-p44572genome unspecific (all in)         | 0.9784689    | 0.3359442    | 1            | 0.8204271    | 0.9917355    | 0.6832322    |
| #### Bn-scaff_17088_1-p45518C-genome specific (napus-oleracea) | 0.9976076    | 0.7819999    | 1            | 0.7138584    | not scorable | not scorable |
| #### Bn-scaff_17088_2-p11734C-genome specific (napus-oleracea) | 0.9952153    | 0.7898132    | 0.9922481    | 0.7711571    | not scorable | not scorable |
| #### Bn-scaff_17088_2-p11999C-genome specific (napus-oleracea) | 0.9784689    | 0.8155382    | 0.9922481    | 0.7213485    | not scorable | not scorable |
| #### Bn-scaff_17088_2-p11999C-genome specific (napus-oleracea) | 0.9880383    | 0.7870611    | 0.9612403    | 0.7032638    | not scorable | not scorable |
| #### Bn-scaff_17088_2-p12241C-genome specific (napus-oleracea) | 0.9688995    | 0.8013204    | 0.9922481    | 0.852631     | not scorable | not scorable |
| #### Bn-scaff_17088_2-p12274C-genome specific (napus-oleracea) | 0.9688995    | 0.6262681    | 1            | 0.660642     | not scorable | not scorable |
| #### Bn-scaff_17088_2-p12458C-genome specific (napus-oleracea) | 0.9856459    | 0.726582     | 0.9767442    | 0.7420235    | not scorable | not scorable |

|                                                                 |              |              |              |              |              |              |
|-----------------------------------------------------------------|--------------|--------------|--------------|--------------|--------------|--------------|
| #### Bn-scaff_17088_2-p1249C C-genome specific (napus-oleracea) | 0.9688995    | 0.5371795    | 0.9922481    | 0.7258117    | not scorable | not scorable |
| #### Bn-scaff_17088_2-p1269E genome unspecific (all in)         | 0.9760765    | 0.3271211    | 0.9922481    | 0.7863565    | 1            | 0.9175813    |
| #### Bn-scaff_17088_2-p12957 C-genome specific (napus-oleracea) | 0.9832536    | 0.7654199    | 0.9844961    | 0.8014193    | not scorable | not scorable |
| #### Bn-scaff_17088_2-p14834 C-genome specific (napus-oleracea) | 0.9808612    | 0.8078535    | 0.9844961    | 0.7956132    | not scorable | not scorable |
| #### Bn-scaff_17088_2-p1628E C-genome specific (napus-oleracea) | 0.9880383    | 0.7830077    | 0.9922481    | 0.7317145    | not scorable | not scorable |
| #### Bn-scaff_17088_2-p16337 napus specific                     | 0.9712918    | 0.7276536    | not scorable | not scorable | not scorable | not scorable |
| #### Bn-scaff_17088_2-p1657E C-genome specific (napus-oleracea) | 0.9904306    | 0.7326973    | 0.9922481    | 0.787617     | not scorable | not scorable |
| #### Bn-scaff_17088_2-p1658E C-genome specific (napus-oleracea) | 0.9832536    | 0.759818     | 0.9844961    | 0.7575837    | not scorable | not scorable |
| #### Bn-scaff_17088_2-p1668E C-genome specific (napus-oleracea) | 0.9904306    | 0.7977809    | 1            | 0.7464932    | not scorable | not scorable |
| #### Bn-scaff_17088_2-p16784 C-genome specific (napus-oleracea) | 0.9928229    | 0.7779791    | 0.9922481    | 0.7896242    | not scorable | not scorable |
| #### Bn-scaff_17088_2-p23294 genome unspecific (all in)         | 0.9856459    | 0.4196705    | 0.9922481    | 0.8166406    | 1            | 0.8494017    |
| #### Bn-scaff_17088_2-p23591 genome unspecific (all in)         | 0.9976076    | 0.4477559    | 1            | 0.8081926    | 1            | 0.855782     |
| #### Bn-scaff_17088_2-p23661 genome unspecific (all in)         | 0.9976076    | 0.3055359    | 1            | 0.4903407    | 0.9669421    | 0.5184785    |
| #### Bn-scaff_17088_2-p9064E napus specific                     | 0.923445     | 0.3873524    | not scorable | not scorable | not scorable | not scorable |
| #### Bn-scaff_17088_3-p1172E genome unspecific (all in)         | 0.9856459    | 0.3605747    | 1            | 0.8997312    | 1            | 0.8414051    |
| #### Bn-scaff_17088_3-p12362 genome unspecific (oleracea-rapa)  | not scorable | not scorable | 0.9922481    | 0.4841619    | 0.9421487    | 0.5633791    |
| #### Bn-scaff_17088_3-p2418C genome unspecific (oleracea-rapa)  | not scorable | not scorable | 1            | 0.69893      | 1            | 0.7827776    |
| #### Bn-scaff_17088_3-p2424C C-genome specific (napus-oleracea) | 1            | 0.7889512    | 0.9844961    | 0.7112033    | not scorable | not scorable |
| #### Bn-scaff_17088_3-p2754E C-genome specific (napus-oleracea) | 0.9952153    | 0.6990769    | 0.9689922    | 0.6767613    | not scorable | not scorable |
| #### Bn-scaff_17088_3-p6123C genome unspecific (all in)         | 0.9856459    | 0.3196938    | 1            | 0.796396     | 1            | 0.9175813    |
| #### Bn-scaff_17092_1-p1375E C-genome specific (napus-oleracea) | 0.9976076    | 0.8385684    | 0.9844961    | 0.8128456    | not scorable | not scorable |
| #### Bn-scaff_17092_1-p1634E C-genome specific (napus-oleracea) | 0.9904306    | 0.5463678    | 1            | 0.7681195    | not scorable | not scorable |
| #### Bn-scaff_17092_1-p4262C genome unspecific (all in)         | 0.9569378    | 0.3316595    | 1            | 0.6277843    | 1            | 0.7973902    |
| #### Bn-scaff_17109_1-p1044E C-genome specific (napus-oleracea) | 0.9880383    | 0.8161048    | 1            | 0.8575273    | not scorable | not scorable |
| #### Bn-scaff_17109_1-p1044E genome unspecific (oleracea-rapa)  | not scorable | not scorable | 1            | 0.9055403    | 0.9917355    | 0.7991082    |
| #### Bn-scaff_17109_1-p10444 genome unspecific (oleracea-rapa)  | not scorable | not scorable | 1            | 0.7102445    | 1            | 0.8022716    |
| #### Bn-scaff_17109_1-p1058E C-genome specific (napus-oleracea) | 0.9880383    | 0.865112     | 1            | 0.8761579    | not scorable | not scorable |
| #### Bn-scaff_17109_1-p1096C genome unspecific (oleracea-rapa)  | not scorable | not scorable | 0.9379845    | 0.4926426    | 1            | 0.5569506    |
| #### Bn-scaff_17109_1-p1144E C-genome specific (napus-oleracea) | 0.9904306    | 0.6179045    | 1            | 0.7007138    | not scorable | not scorable |
| #### Bn-scaff_17109_1-p1145E napus specific                     | 0.9952153    | 0.5612168    | not scorable | not scorable | not scorable | not scorable |
| #### Bn-scaff_17109_1-p1148E C-genome specific (napus-oleracea) | 0.9832536    | 0.7871007    | 1            | 0.9039531    | not scorable | not scorable |
| #### Bn-scaff_17109_1-p1167E napus specific                     | 0.9760765    | 0.3136828    | not scorable | not scorable | not scorable | not scorable |
| #### Bn-scaff_17109_1-p1659E C-genome specific (napus-oleracea) | 0.9976076    | 0.7688701    | 1            | 0.9139168    | not scorable | not scorable |

|                                                                 |              |              |              |              |              |              |
|-----------------------------------------------------------------|--------------|--------------|--------------|--------------|--------------|--------------|
| #### Bn-scaff_17109_1-p16949 genome unspecific (all in)         | 1            | 0.7500344    | 1            | 0.8207097    | 1            | 0.8004208    |
| #### Bn-scaff_17109_1-p17238 C-genome specific (napus-oleracea) | 0.9952153    | 0.7535816    | 1            | 0.9140192    | not scorable | not scorable |
| #### Bn-scaff_17109_1-p17670 C-genome specific (napus-oleracea) | 0.9952153    | 0.7880319    | 0.9922481    | 0.7271893    | not scorable | not scorable |
| #### Bn-scaff_17109_1-p17682 C-genome specific (oleracea only)  | not scorable | not scorable | 1            | 0.9072408    | not scorable | not scorable |
| #### Bn-scaff_17109_1-p18619 C-genome specific (napus-oleracea) | 0.9952153    | 0.7696276    | 0.9922481    | 0.7388067    | not scorable | not scorable |
| #### Bn-scaff_17109_1-p18687 genome unspecific (all in)         | 0.9162679    | 0.3110246    | 1            | 0.5858629    | 0.9504132    | 0.4936685    |
| #### Bn-scaff_17109_1-p19300 C-genome specific (napus-oleracea) | 0.9952153    | 0.7764443    | 0.9922481    | 0.6977824    | not scorable | not scorable |
| #### Bn-scaff_17109_1-p19366 napus specific                     | 0.9952153    | 0.7651565    | not scorable | not scorable | not scorable | not scorable |
| #### Bn-scaff_17109_1-p19447 C-genome specific (napus-oleracea) | 0.9952153    | 0.735887     | 0.9767442    | 0.6854206    | not scorable | not scorable |
| #### Bn-scaff_17109_1-p19449 C-genome specific (napus-oleracea) | 0.9952153    | 0.7506815    | 0.9534883    | 0.7254725    | not scorable | not scorable |
| #### Bn-scaff_17109_1-p19457 all not scorable                   | not scorable | not scorable | not scorable | not scorable | not scorable | not scorable |
| #### Bn-scaff_17109_1-p19475 C-genome specific (napus-oleracea) | 0.9952153    | 0.741241     | 0.9922481    | 0.8119997    | not scorable | not scorable |
| #### Bn-scaff_17109_1-p19476 C-genome specific (napus-oleracea) | 0.9928229    | 0.7994745    | 0.9844961    | 0.8015463    | not scorable | not scorable |
| #### Bn-scaff_17109_1-p19489 C-genome specific (napus-oleracea) | 0.9976076    | 0.5822191    | 1            | 0.806761     | not scorable | not scorable |
| #### Bn-scaff_17109_1-p19599 C-genome specific (napus-oleracea) | 0.9952153    | 0.7531484    | 0.9844961    | 0.741614     | not scorable | not scorable |
| #### Bn-scaff_17109_1-p20046 C-genome specific (oleracea only)  | not scorable | not scorable | 1            | 0.565666     | not scorable | not scorable |
| #### Bn-scaff_17109_1-p21307 genome unspecific (all in)         | 0.9425837    | 0.5843914    | 1            | 0.840756     | 0.9834711    | 0.7876695    |
| #### Bn-scaff_17109_1-p21729 C-genome specific (oleracea only)  | not scorable | not scorable | 0.9224806    | 0.3691747    | not scorable | not scorable |
| #### Bn-scaff_17109_1-p21745 genome unspecific (all in)         | 1            | 0.5784184    | 0.9922481    | 0.5692675    | 0.9834711    | 0.5417086    |
| #### Bn-scaff_17109_1-p22029 genome unspecific (all in)         | 0.9736842    | 0.4933831    | 1            | 0.8013431    | 1            | 0.9138051    |
| #### Bn-scaff_17109_1-p28002 genome unspecific (all in)         | 0.9712918    | 0.346633     | 1            | 0.6208834    | 0.9752066    | 0.6472772    |
| #### Bn-scaff_17109_1-p37377 C-genome specific (napus-oleracea) | 0.9138756    | 0.8018077    | 0.9922481    | 0.7321957    | not scorable | not scorable |
| #### Bn-scaff_17109_1-p38718 genome unspecific (oleracea-rapa)  | not scorable | not scorable | 0.9844961    | 0.72118      | 0.9834711    | 0.2786419    |
| #### Bn-scaff_17109_1-p40609 C-genome specific (napus-oleracea) | 0.8971292    | 0.6680174    | 1            | 0.684298     | not scorable | not scorable |
| #### Bn-scaff_17109_1-p42494 C-genome specific (napus-oleracea) | 1            | 0.9095823    | 1            | 0.9175813    | not scorable | not scorable |
| #### Bn-scaff_17109_1-p42861 C-genome specific (napus-oleracea) | 0.9784689    | 0.7476929    | 1            | 0.8653011    | not scorable | not scorable |
| #### Bn-scaff_17109_1-p49807 genome unspecific (oleracea-rapa)  | not scorable | not scorable | 0.9767442    | 0.7277936    | 1            | 0.8723401    |
| #### Bn-scaff_17109_1-p50873 C-genome specific (napus-oleracea) | 0.937799     | 0.7317044    | 0.9922481    | 0.7221534    | not scorable | not scorable |
| #### Bn-scaff_17109_1-p50971 C-genome specific (napus-oleracea) | 0.9569378    | 0.4025861    | 1            | 0.4272688    | not scorable | not scorable |
| #### Bn-scaff_17109_1-p51113 C-genome specific (napus-oleracea) | 0.9641148    | 0.7126513    | 1            | 0.7312953    | not scorable | not scorable |
| #### Bn-scaff_17109_1-p51136 C-genome specific (napus-oleracea) | 0.8301435    | 0.7383136    | 1            | 0.6783931    | not scorable | not scorable |
| #### Bn-scaff_17109_1-p51315 C-genome specific (napus-oleracea) | 0.9521531    | 0.574296     | 1            | 0.6244196    | not scorable | not scorable |
| #### Bn-scaff_17109_1-p54864 C-genome specific (napus-oleracea) | 0.9354067    | 0.7231017    | 0.9379845    | 0.6592058    | not scorable | not scorable |

|                                                                 |              |              |              |              |              |              |
|-----------------------------------------------------------------|--------------|--------------|--------------|--------------|--------------|--------------|
| #### Bn-scaff_17109_1-p54899 C-genome specific (napus-oleracea) | 0.937799     | 0.7081566    | 0.9534883    | 0.771803     | not scorable | not scorable |
| #### Bn-scaff_17109_1-p55664 genome unspecific (all in)         | 0.9688995    | 0.2752671    | 0.9922481    | 0.783501     | 1            | 0.9384881    |
| #### Bn-scaff_17109_1-p55716 C-genome specific (napus-oleracea) | 0.9330143    | 0.6758095    | 1            | 0.6956896    | not scorable | not scorable |
| #### Bn-scaff_17109_1-p55745 C-genome specific (napus-oleracea) | 0.9641148    | 0.7197177    | 1            | 0.8632445    | not scorable | not scorable |
| #### Bn-scaff_17109_1-p55756 C-genome specific (napus-oleracea) | 0.9593301    | 0.6427692    | 1            | 0.75961      | not scorable | not scorable |
| #### Bn-scaff_17109_1-p55785 C-genome specific (napus-oleracea) | 0.9521531    | 0.7247962    | 1            | 0.8158038    | not scorable | not scorable |
| #### Bn-scaff_17109_1-p56945 genome unspecific (all in)         | 0.9258373    | 0.3596879    | 1            | 0.8543575    | 0.9917355    | 0.7449366    |
| #### Bn-scaff_17109_1-p57635 genome unspecific (all in)         | 0.9808612    | 0.4403335    | 1            | 0.8004208    | 1            | 0.9175813    |
| #### Bn-scaff_17109_1-p59301 C-genome specific (napus-oleracea) | 0.9617225    | 0.7744309    | 0.9922481    | 0.8506546    | not scorable | not scorable |
| #### Bn-scaff_17109_1-p59759 C-genome specific (napus-oleracea) | 0.9330143    | 0.6757759    | 0.9922481    | 0.406894     | not scorable | not scorable |
| #### Bn-scaff_17109_1-p59942 C-genome specific (napus-oleracea) | 0.9760765    | 0.7746738    | 0.9922481    | 0.8055989    | not scorable | not scorable |
| #### Bn-scaff_17109_1-p62228 genome unspecific (all in)         | 0.9545454    | 0.6663945    | 1            | 0.8025589    | 0.9834711    | 0.7820854    |
| #### Bn-scaff_17109_1-p62657 C-genome specific (napus-oleracea) | 0.9832536    | 0.7652236    | 1            | 0.8679898    | not scorable | not scorable |
| #### Bn-scaff_17109_1-p65380 C-genome specific (napus-oleracea) | 0.9784689    | 0.7361552    | 1            | 0.8828672    | not scorable | not scorable |
| #### Bn-scaff_17109_1-p66723 C-genome specific (napus-oleracea) | 0.937799     | 0.690415     | 0.9922481    | 0.7666874    | not scorable | not scorable |
| #### Bn-scaff_17109_1-p67577 C-genome specific (napus-oleracea) | 0.9545454    | 0.7324193    | 0.9844961    | 0.8338013    | not scorable | not scorable |
| #### Bn-scaff_17109_1-p68227 C-genome specific (napus-oleracea) | 0.6770335    | 0.7021827    | 0.9767442    | 0.6537956    | not scorable | not scorable |
| #### Bn-scaff_17109_1-p68310 C-genome specific (napus-oleracea) | 0.9784689    | 0.55129      | 0.9844961    | 0.4730212    | not scorable | not scorable |
| #### Bn-scaff_17109_1-p68340 C-genome specific (napus-oleracea) | 0.9617225    | 0.6798263    | 0.9844961    | 0.6730861    | not scorable | not scorable |
| #### Bn-scaff_17109_1-p68531 C-genome specific (napus-oleracea) | 0.9808612    | 0.7543218    | 0.9689922    | 0.6492896    | not scorable | not scorable |
| #### Bn-scaff_17109_1-p68701 C-genome specific (napus-oleracea) | 0.9880383    | 0.4632294    | 1            | 0.7362306    | not scorable | not scorable |
| #### Bn-scaff_17109_1-p69081 C-genome specific (napus-oleracea) | 0.8397129    | 0.4653561    | 1            | 0.7068173    | not scorable | not scorable |
| #### Bn-scaff_17109_1-p69127 genome unspecific (all in)         | 0.9593301    | 0.5081106    | 1            | 0.8775992    | 0.661157     | 0.815671     |
| #### Bn-scaff_17109_1-p69173 C-genome specific (oleracea only)  | not scorable | not scorable | 0.9844961    | 0.7526563    | not scorable | not scorable |
| #### Bn-scaff_17109_1-p69178 C-genome specific (oleracea only)  | not scorable | not scorable | 1            | 0.8125691    | not scorable | not scorable |
| #### Bn-scaff_17109_1-p69184 C-genome specific (napus-oleracea) | 0.9688995    | 0.7065729    | 1            | 0.6568978    | not scorable | not scorable |
| #### Bn-scaff_17109_1-p71578 A-genome specific (napus-rapa)     | 0.9138756    | 0.7901783    | not scorable | not scorable | 0.9834711    | 0.7727006    |
| #### Bn-scaff_17109_1-p77031 C-genome specific (napus-oleracea) | 0.9641148    | 0.6725361    | 0.7906977    | 0.6345747    | not scorable | not scorable |
| #### Bn-scaff_17109_1-p78761 genome unspecific (all in)         | 1            | 0.7140274    | 1            | 0.9095823    | 0.9752066    | 0.7629106    |
| #### Bn-scaff_17109_1-p79646 C-genome specific (napus-oleracea) | 0.9832536    | 0.7343642    | 1            | 0.681638     | not scorable | not scorable |
| #### Bn-scaff_17109_1-p79685 genome unspecific (all in)         | 0.9545454    | 0.5052594    | 1            | 0.7813892    | 0.9752066    | 0.6604372    |
| #### Bn-scaff_17109_1-p82395 genome unspecific (all in)         | 1            | 0.5370017    | 0.9767442    | 0.5705255    | 0.9917355    | 0.7698042    |
| #### Bn-scaff_17109_1-p82731 C-genome specific (napus-oleracea) | 1            | 0.5633861    | 0.9922481    | 0.4199088    | not scorable | not scorable |



|                                                                 |              |              |              |              |              |              |
|-----------------------------------------------------------------|--------------|--------------|--------------|--------------|--------------|--------------|
| #### Bn-scaff_17109_1-p83277 C-genome specific (napus-oleracea) | 0.9760765    | 0.7433434    | 0.9844961    | 0.7146629    | not scorable | not scorable |
| #### Bn-scaff_17109_1-p83385 C-genome specific (napus-oleracea) | 0.9401914    | 0.6550475    | 1            | 0.9148536    | not scorable | not scorable |
| #### Bn-scaff_17109_1-p83767 C-genome specific (napus-oleracea) | 0.9832536    | 0.5672778    | 1            | 0.6973833    | not scorable | not scorable |
| #### Bn-scaff_17109_1-p85764 C-genome specific (napus-oleracea) | 0.9856459    | 0.7887514    | 1            | 0.8470026    | not scorable | not scorable |
| #### Bn-scaff_17109_1-p85984 C-genome specific (napus-oleracea) | 0.9808612    | 0.8202719    | 1            | 0.7310894    | not scorable | not scorable |
| #### Bn-scaff_17109_1-p86798 genome unspecific (all in)         | 0.9904306    | 0.2600912    | 1            | 0.8769706    | 1            | 0.9101029    |
| #### Bn-scaff_17109_1-p86807 genome unspecific (all in)         | 0.9712918    | 0.339452     | 0.9922481    | 0.3969209    | 1            | 0.7227655    |
| #### Bn-scaff_17109_1-p86866 genome unspecific (all in)         | 0.9952153    | 0.4756908    | 1            | 0.7014238    | 1            | 0.78886      |
| #### Bn-scaff_17109_1-p88976 C-genome specific (napus-oleracea) | 0.9712918    | 0.7884567    | 0.9612403    | 0.3773102    | not scorable | not scorable |
| #### Bn-scaff_17109_1-p89938 genome unspecific (all in)         | 0.9593301    | 0.2926731    | 0.9844961    | 0.4791636    | 1            | 0.7770717    |
| #### Bn-scaff_17109_1-p91079 C-genome specific (napus-oleracea) | 0.9688995    | 0.7090475    | 1            | 0.7311283    | not scorable | not scorable |
| #### Bn-scaff_17109_1-p91081 C-genome specific (napus-oleracea) | 0.9736842    | 0.7606944    | 1            | 0.7681499    | not scorable | not scorable |
| #### Bn-scaff_17109_1-p92980 napus specific                     | 0.930622     | 0.6637381    | not scorable | not scorable | not scorable | not scorable |
| #### Bn-scaff_17109_1-p93020 C-genome specific (napus-oleracea) | 0.9665072    | 0.746237     | 1            | 0.873818     | not scorable | not scorable |
| #### Bn-scaff_17109_1-p93223 C-genome specific (napus-oleracea) | 0.9712918    | 0.7496989    | 0.9612403    | 0.7277477    | not scorable | not scorable |
| #### Bn-scaff_17109_1-p93330 C-genome specific (napus-oleracea) | 0.9712918    | 0.7555014    | 0.9612403    | 0.8044953    | not scorable | not scorable |
| #### Bn-scaff_17109_1-p93344 C-genome specific (napus-oleracea) | 0.9545454    | 0.7128428    | 0.9457364    | 0.8391631    | not scorable | not scorable |
| #### Bn-scaff_17109_1-p93352 C-genome specific (napus-oleracea) | 0.9641148    | 0.7405623    | 0.9534883    | 0.7539012    | not scorable | not scorable |
| #### Bn-scaff_17109_1-p94182 C-genome specific (napus-oleracea) | 0.9569378    | 0.6512337    | 0.9379845    | 0.8118644    | not scorable | not scorable |
| #### Bn-scaff_17109_1-p94319 napus specific                     | 0.9665072    | 0.7476378    | not scorable | not scorable | not scorable | not scorable |
| #### Bn-scaff_17109_1-p94342 C-genome specific (napus-oleracea) | 0.9712918    | 0.7762803    | 0.9612403    | 0.7076027    | not scorable | not scorable |
| #### Bn-scaff_17109_1-p94404 C-genome specific (napus-oleracea) | 0.9641148    | 0.6541398    | 0.9534883    | 0.5528554    | not scorable | not scorable |
| #### Bn-scaff_17109_1-p94447 C-genome specific (napus-oleracea) | 0.9784689    | 0.7587318    | 0.9612403    | 0.7507682    | not scorable | not scorable |
| #### Bn-scaff_17109_1-p94573 C-genome specific (napus-oleracea) | 0.9856459    | 0.2442193    | 0.9612403    | 0.3186408    | not scorable | not scorable |
| #### Bn-scaff_17109_1-p94574 all not scorable                   | not scorable | not scorable | not scorable | not scorable | not scorable | not scorable |
| #### Bn-scaff_17109_1-p94590 C-genome specific (napus-oleracea) | 0.9952153    | 0.3163113    | 0.9844961    | 0.3852461    | not scorable | not scorable |
| #### Bn-scaff_17109_1-p94911 C-genome specific (napus-oleracea) | 0.9832536    | 0.7151814    | 0.9922481    | 0.7208876    | not scorable | not scorable |
| #### Bn-scaff_17109_1-p94986 C-genome specific (napus-oleracea) | 0.9401914    | 0.7547022    | 0.9844961    | 0.8195142    | not scorable | not scorable |
| #### Bn-scaff_17109_1-p95024 C-genome specific (napus-oleracea) | 0.9545454    | 0.6310654    | 0.9224806    | 0.6464618    | not scorable | not scorable |
| #### Bn-scaff_17109_1-p98227 genome unspecific (all in)         | 0.9712918    | 0.2276914    | 1            | 0.4495919    | 1            | 0.711467     |
| #### Bn-scaff_17109_1-p98233 genome unspecific (all in)         | 1            | 0.5212957    | 0.9844961    | 0.8206767    | 1            | 0.8879254    |
| #### Bn-scaff_17109_1-p99023 C-genome specific (napus-oleracea) | 0.9712918    | 0.7446572    | 1            | 0.8236018    | not scorable | not scorable |
| #### Bn-scaff_17109_1-p99717 C-genome specific (napus-oleracea) | 0.9569378    | 0.6379371    | 1            | 0.4449024    | not scorable | not scorable |

|                                                                 |              |              |              |              |              |              |
|-----------------------------------------------------------------|--------------|--------------|--------------|--------------|--------------|--------------|
| #### Bn-scaff_17109_1-p99806 C-genome specific (napus-oleracea) | 0.9617225    | 0.7273053    | 1            | 0.8643236    | not scorable | not scorable |
| #### Bn-scaff_17109_1-p99812 C-genome specific (napus-oleracea) | 0.9688995    | 0.7071588    | 1            | 0.9066764    | not scorable | not scorable |
| #### Bn-scaff_17109_2-p15025 genome unspecific (all in)         | 0.9976076    | 0.3636862    | 1            | 0.7800093    | 0.9752066    | 0.8209523    |
| #### Bn-scaff_17109_2-p15029 genome unspecific (all in)         | 0.9928229    | 0.4701847    | 1            | 0.8116089    | 0.9917355    | 0.8154362    |
| #### Bn-scaff_17109_2-p18801 genome unspecific (all in)         | 0.9665072    | 0.2648613    | 1            | 0.7972026    | 0.9834711    | 0.4789021    |
| #### Bn-scaff_17109_2-p19094 genome unspecific (all in)         | 0.9928229    | 0.3462334    | 1            | 0.8687926    | 1            | 0.7783126    |
| #### Bn-scaff_17109_2-p20500 genome unspecific (all in)         | 0.9976076    | 0.3439412    | 1            | 0.7366618    | 1            | 0.7111512    |
| #### Bn-scaff_17109_2-p20690 genome unspecific (all in)         | 1            | 0.3146345    | 1            | 0.8379418    | 1            | 0.8095888    |
| #### Bn-scaff_17109_2-p20700 genome unspecific (all in)         | 1            | 0.3148869    | 0.7131783    | 0.7770717    | 0.9669421    | 0.7086368    |
| #### Bn-scaff_17109_2-p31590 genome unspecific (all in)         | 0.9832536    | 0.8128054    | 0.6511628    | 0.8508033    | 0.9586777    | 0.7060648    |
| #### Bn-scaff_17109_2-p31979 genome unspecific (all in)         | 1            | 0.5279068    | 0.8682171    | 0.8138432    | 1            | 0.8848283    |
| #### Bn-scaff_17109_2-p35632 C-genome specific (napus-oleracea) | 0.9880383    | 0.7552097    | 0.8062016    | 0.8431593    | not scorable | not scorable |
| #### Bn-scaff_17109_2-p35652 C-genome specific (napus-oleracea) | 0.9856459    | 0.7961615    | 0.8062016    | 0.5707612    | not scorable | not scorable |
| #### Bn-scaff_17109_2-p36116 C-genome specific (napus-oleracea) | 0.6626794    | 0.827301     | 1            | 0.8085203    | not scorable | not scorable |
| #### Bn-scaff_17109_2-p36400 genome unspecific (all in)         | 0.9952153    | 0.2901666    | 0.9922481    | 0.6846394    | 1            | 0.6541466    |
| #### Bn-scaff_17109_2-p36879 genome unspecific (all in)         | 0.8971292    | 0.5275326    | 0.9069768    | 0.7120826    | 1            | 0.8744595    |
| #### Bn-scaff_17109_2-p37034 C-genome specific (napus-oleracea) | 0.9784689    | 0.7647805    | 0.5658914    | 0.6936063    | not scorable | not scorable |
| #### Bn-scaff_17109_2-p39293 genome unspecific (all in)         | 0.9976076    | 0.3567097    | 1            | 0.8162534    | 0.9752066    | 0.6550542    |
| #### Bn-scaff_17109_2-p40570 A-genome specific (napus-rapa)     | 0.9976076    | 0.5867994    | not scorable | not scorable | 1            | 0.2191683    |
| #### Bn-scaff_17109_2-p40667 genome unspecific (all in)         | 1            | 0.281265     | 0.9922481    | 0.6562256    | 1            | 0.8004208    |
| #### Bn-scaff_17109_2-p41379 C-genome specific (oleracea only)  | not scorable | not scorable | 0.8139535    | 0.7776458    | not scorable | not scorable |
| #### Bn-scaff_17109_2-p42591 genome unspecific (all in)         | 0.9976076    | 0.370691     | 0.9844961    | 0.7802292    | 1            | 0.8948976    |
| #### Bn-scaff_17109_2-p51658 genome unspecific (all in)         | 1            | 0.340209     | 1            | 0.9205657    | 0.9834711    | 0.8047006    |
| #### Bn-scaff_17109_2-p79906 A-genome specific (napus-rapa)     | 0.9904306    | 0.6664672    | not scorable | not scorable | 0.9917355    | 0.7466293    |
| #### Bn-scaff_17109_4-p10174 C-genome specific (napus-oleracea) | 0.9880383    | 0.7642468    | 0.9767442    | 0.7381821    | not scorable | not scorable |
| #### Bn-scaff_17109_4-p11192 C-genome specific (napus-oleracea) | 0.9856459    | 0.7798391    | 0.9844961    | 0.833448     | not scorable | not scorable |
| #### Bn-scaff_17109_4-p11475 C-genome specific (napus-oleracea) | 0.9712918    | 0.7755706    | 0.9844961    | 0.7682448    | not scorable | not scorable |
| #### Bn-scaff_17109_4-p11482 C-genome specific (napus-oleracea) | 0.9425837    | 0.5270615    | 0.9612403    | 0.3467946    | not scorable | not scorable |
| #### Bn-scaff_17109_4-p12867 C-genome specific (napus-oleracea) | 0.9880383    | 0.3243746    | 0.9224806    | 0.8662452    | not scorable | not scorable |
| #### Bn-scaff_17109_4-p12872 C-genome specific (oleracea only)  | not scorable | not scorable | 0.8294573    | 0.8058597    | not scorable | not scorable |
| #### Bn-scaff_17109_4-p14714 C-genome specific (napus-oleracea) | 0.9784689    | 0.7393099    | 1            | 0.8364416    | not scorable | not scorable |
| #### Bn-scaff_17109_4-p15095 C-genome specific (napus-oleracea) | 0.9688995    | 0.7007904    | 1            | 0.7742704    | not scorable | not scorable |
| #### Bn-scaff_17109_4-p15390 C-genome specific (napus-oleracea) | 0.9760765    | 0.7683227    | 1            | 0.7992558    | not scorable | not scorable |

|                                                                |              |              |           |           |              |              |
|----------------------------------------------------------------|--------------|--------------|-----------|-----------|--------------|--------------|
| #### Bn-scaff_17109_4-p15921C-genome specific (napus-oleracea) | 0.9832536    | 0.6640647    | 1         | 0.7266969 | not scorable | not scorable |
| #### Bn-scaff_17109_4-p16945C-genome specific (napus-oleracea) | 0.9473684    | 0.6750019    | 0.9844961 | 0.6025738 | not scorable | not scorable |
| #### Bn-scaff_17109_4-p18721C-genome specific (napus-oleracea) | 0.9497608    | 0.7548825    | 1         | 0.6719862 | not scorable | not scorable |
| #### Bn-scaff_17109_4-p28304C-genome specific (napus-oleracea) | 0.9593301    | 0.7020963    | 0.9844961 | 0.7270326 | not scorable | not scorable |
| #### Bn-scaff_17109_4-p29883C-genome specific (napus-oleracea) | 0.9521531    | 0.7578587    | 0.9844961 | 0.806723  | not scorable | not scorable |
| #### Bn-scaff_17109_4-p30031C-genome specific (napus-oleracea) | 0.9569378    | 0.7840836    | 1         | 0.9175225 | not scorable | not scorable |
| #### Bn-scaff_17109_4-p30214C-genome specific (napus-oleracea) | 0.9425837    | 0.7567032    | 0.9844961 | 0.8119268 | not scorable | not scorable |
| #### Bn-scaff_17109_4-p30229C-genome specific (napus-oleracea) | 0.9617225    | 0.7872086    | 1         | 0.8702594 | not scorable | not scorable |
| #### Bn-scaff_17109_4-p30434C-genome specific (napus-oleracea) | 0.9545454    | 0.734628     | 0.9689922 | 0.7727827 | not scorable | not scorable |
| #### Bn-scaff_17109_4-p30488C-genome specific (napus-oleracea) | 0.9449761    | 0.7233612    | 0.9922481 | 0.5810375 | not scorable | not scorable |
| #### Bn-scaff_17109_4-p30507C-genome specific (napus-oleracea) | 0.9569378    | 0.7691943    | 1         | 0.6946577 | not scorable | not scorable |
| #### Bn-scaff_17109_4-p30717C-genome specific (napus-oleracea) | 0.9545454    | 0.7575221    | 0.9922481 | 0.7706623 | not scorable | not scorable |
| #### Bn-scaff_17109_4-p30727C-genome specific (napus-oleracea) | 0.9569378    | 0.7272357    | 1         | 0.8667588 | not scorable | not scorable |
| #### Bn-scaff_17109_4-p95949genome unspecific (all in)         | 0.9904306    | 0.3309613    | 1         | 0.3759576 | 0.9669421    | 0.6026422    |
| #### Bn-scaff_17109_4-p9639C genome unspecific (all in)        | 0.9976076    | 0.2490628    | 1         | 0.250807  | 0.9669421    | 0.3076092    |
| #### Bn-scaff_17109_4-p9741C genome unspecific (all in)        | 0.9976076    | 0.1547708    | 1         | 0.2552091 | 1            | 0.5454642    |
| #### Bn-scaff_17112_1-p3557 C-genome specific (napus-oleracea) | 0.9688995    | 0.6955978    | 1         | 0.7708208 | not scorable | not scorable |
| #### Bn-scaff_17112_1-p3928 C-genome specific (napus-oleracea) | 0.9521531    | 0.6905956    | 0.9689922 | 0.7135643 | not scorable | not scorable |
| #### Bn-scaff_17119_1-p10352C-genome specific (napus-oleracea) | 1            | 0.8015182    | 1         | 0.7898499 | not scorable | not scorable |
| #### Bn-scaff_17119_1-p10362C-genome specific (napus-oleracea) | 0.9928229    | 0.7561309    | 0.9922481 | 0.7003229 | not scorable | not scorable |
| #### Bn-scaff_17119_1-p11419C-genome specific (napus-oleracea) | 0.8971292    | 0.273091     | 0.9147287 | 0.7251967 | not scorable | not scorable |
| #### Bn-scaff_17119_1-p11444genome unspecific (all in)         | 1            | 0.383047     | 1         | 0.9272014 | 0.661157     | 0.7323298    |
| #### Bn-scaff_17119_1-p11489genome unspecific (all in)         | 0.9784689    | 0.4022413    | 1         | 0.8045645 | 0.9834711    | 0.7562051    |
| #### Bn-scaff_17119_1-p11521genome unspecific (all in)         | 0.9880383    | 0.4257852    | 1         | 0.7930105 | 1            | 0.7974061    |
| #### Bn-scaff_17119_1-p14889C-genome specific (napus-oleracea) | 0.9736842    | 0.6608821    | 0.9767442 | 0.7124454 | not scorable | not scorable |
| #### Bn-scaff_17119_1-p17252genome unspecific (all in)         | 0.9736842    | 0.2391604    | 1         | 0.7516124 | 0.9752066    | 0.3880581    |
| #### Bn-scaff_17119_1-p18371C-genome specific (napus-oleracea) | 0.9952153    | 0.7555291    | 1         | 0.8433465 | not scorable | not scorable |
| #### Bn-scaff_17119_1-p23543C-genome specific (napus-oleracea) | 0.9904306    | 0.6694621    | 0.9612403 | 0.7177196 | not scorable | not scorable |
| #### Bn-scaff_17119_1-p23553C-genome specific (napus-oleracea) | 0.9928229    | 0.7461914    | 0.9689922 | 0.7607968 | not scorable | not scorable |
| #### Bn-scaff_17119_1-p2357C-genome specific (oleracea only)   | not scorable | not scorable | 0.5658914 | 0.8071358 | not scorable | not scorable |
| #### Bn-scaff_17119_1-p24799C-genome specific (napus-oleracea) | 0.7177033    | 0.7709452    | 0.9612403 | 0.7470652 | not scorable | not scorable |
| #### Bn-scaff_17119_1-p25113C-genome specific (napus-oleracea) | 0.9856459    | 0.6749067    | 0.9922481 | 0.7316492 | not scorable | not scorable |
| #### Bn-scaff_17119_1-p27301genome unspecific (oleracea-rapa)  | not scorable | not scorable | 0.9767442 | 0.5459577 | 0.9586777    | 0.7134259    |

|                                                                |              |              |              |              |              |              |
|----------------------------------------------------------------|--------------|--------------|--------------|--------------|--------------|--------------|
| #### Bn-scaff_17119_1-p28631C-genome specific (napus-oleracea) | 0.9641148    | 0.7791676    | 0.9302326    | 0.7545711    | not scorable | not scorable |
| #### Bn-scaff_17119_1-p28828C-genome specific (napus-oleracea) | 0.9521531    | 0.6601548    | 0.9379845    | 0.6610352    | not scorable | not scorable |
| #### Bn-scaff_17119_1-p29855C-genome specific (napus-oleracea) | 0.9760765    | 0.7568642    | 0.9379845    | 0.6862138    | not scorable | not scorable |
| #### Bn-scaff_17119_1-p29886C-genome specific (napus-oleracea) | 0.9641148    | 0.7977713    | 0.9379845    | 0.7917112    | not scorable | not scorable |
| #### Bn-scaff_17119_1-p29906C-genome specific (napus-oleracea) | 0.9808612    | 0.7620049    | 0.9379845    | 0.8315192    | not scorable | not scorable |
| #### Bn-scaff_17119_1-p30060C-genome specific (napus-oleracea) | 0.9641148    | 0.6569089    | 0.9379845    | 0.5855897    | not scorable | not scorable |
| #### Bn-scaff_17119_1-p31963C-genome specific (oleracea only)  | not scorable | not scorable | 0.9689922    | 0.3197077    | not scorable | not scorable |
| #### Bn-scaff_17119_1-p31973C-genome specific (napus-oleracea) | 0.4545455    | 0.6092727    | 0.7751938    | 0.6394818    | not scorable | not scorable |
| #### Bn-scaff_17119_1-p32398C-genome specific (napus-oleracea) | 0.9688995    | 0.7874232    | 0.9379845    | 0.82846      | not scorable | not scorable |
| #### Bn-scaff_17119_1-p34962C-genome specific (napus-oleracea) | 0.9688995    | 0.7073668    | 1            | 0.7685573    | not scorable | not scorable |
| #### Bn-scaff_17119_1-p34968C-genome specific (napus-oleracea) | 0.9712918    | 0.7431845    | 1            | 0.7476039    | not scorable | not scorable |
| #### Bn-scaff_17119_1-p35548C-genome specific (napus-oleracea) | 0.9808612    | 0.6744905    | 0.9922481    | 0.6003464    | not scorable | not scorable |
| #### Bn-scaff_17119_1-p35620C-genome specific (napus-oleracea) | 0.9688995    | 0.7415621    | 1            | 0.7463961    | not scorable | not scorable |
| #### Bn-scaff_17119_1-p35910C-genome specific (napus-oleracea) | 0.9712918    | 0.7889942    | 1            | 0.7635069    | not scorable | not scorable |
| #### Bn-scaff_17119_1-p36043C-genome specific (napus-oleracea) | 0.9808612    | 0.7602732    | 0.9922481    | 0.8050914    | not scorable | not scorable |
| #### Bn-scaff_17119_1-p36119C-genome specific (napus-oleracea) | 0.9856459    | 0.7690682    | 1            | 0.7186466    | not scorable | not scorable |
| #### Bn-scaff_17119_1-p36672C-genome specific (napus-oleracea) | 0.9856459    | 0.7291302    | 0.9844961    | 0.7748913    | not scorable | not scorable |
| #### Bn-scaff_17119_1-p37459A-genome specific (rapa only)      | not scorable | not scorable | not scorable | not scorable | 1            | 0.8967443    |
| #### Bn-scaff_17119_1-p38697C-genome specific (napus-oleracea) | 0.9760765    | 0.7674762    | 0.9302326    | 0.6652575    | not scorable | not scorable |
| #### Bn-scaff_17119_1-p38829C-genome specific (napus-oleracea) | 0.9593301    | 0.7681945    | 0.9844961    | 0.8273398    | not scorable | not scorable |
| #### Bn-scaff_17119_1-p38851C-genome specific (napus-oleracea) | 0.9736842    | 0.6686366    | 0.9534883    | 0.6761603    | not scorable | not scorable |
| #### Bn-scaff_17119_1-p39309C-genome specific (napus-oleracea) | 0.9880383    | 0.7521057    | 1            | 0.7227182    | not scorable | not scorable |
| #### Bn-scaff_17119_1-p39316C-genome specific (napus-oleracea) | 0.9688995    | 0.7603763    | 1            | 0.592804     | not scorable | not scorable |
| #### Bn-scaff_17119_1-p39541C-genome specific (napus-oleracea) | 0.9712918    | 0.6528011    | 1            | 0.6457232    | not scorable | not scorable |
| #### Bn-scaff_17119_1-p41057C-genome specific (napus-oleracea) | 0.9880383    | 0.8060148    | 0.9844961    | 0.7241975    | not scorable | not scorable |
| #### Bn-scaff_17119_1-p41077genome unspecific (all in)         | 0.9784689    | 0.6276941    | 0.9767442    | 0.7658582    | 1            | 0.8924071    |
| #### Bn-scaff_17119_1-p41324C-genome specific (napus-oleracea) | 0.9808612    | 0.6141324    | 1            | 0.5926813    | not scorable | not scorable |
| #### Bn-scaff_17119_1-p41347C-genome specific (napus-oleracea) | 0.9712918    | 0.5939952    | 0.9767442    | 0.6249425    | not scorable | not scorable |
| #### Bn-scaff_17119_1-p41407C-genome specific (napus-oleracea) | 0.9952153    | 0.7616984    | 0.9922481    | 0.7399373    | not scorable | not scorable |
| #### Bn-scaff_17119_1-p41413C-genome specific (napus-oleracea) | 0.6818182    | 0.5111784    | 0.751938     | 0.6244869    | not scorable | not scorable |
| #### Bn-scaff_17119_1-p41414C-genome specific (napus-oleracea) | 0.9880383    | 0.7071137    | 1            | 0.7217599    | not scorable | not scorable |
| #### Bn-scaff_17119_1-p41763C-genome specific (napus-oleracea) | 0.9928229    | 0.6779465    | 0.9767442    | 0.6399083    | not scorable | not scorable |
| #### Bn-scaff_17119_1-p41787napus specific                     | 0.6770335    | 0.650088     | not scorable | not scorable | not scorable | not scorable |

|                                                                 |              |              |              |              |              |              |
|-----------------------------------------------------------------|--------------|--------------|--------------|--------------|--------------|--------------|
| #### Bn-scaff_17119_1-p45635 C-genome specific (napus-oleracea) | 0.9665072    | 0.4524935    | 1            | 0.7620459    | not scorable | not scorable |
| #### Bn-scaff_17119_1-p69237 genome unspecific (all in)         | 0.9832536    | 0.3201744    | 1            | 0.7291675    | 0.9917355    | 0.7066179    |
| #### Bn-scaff_17119_1-p84986 genome unspecific (oleracea-rapa)  | not scorable | not scorable | 1            | 0.8417928    | 0.9834711    | 0.6873183    |
| #### Bn-scaff_17119_1-p85292 A-genome specific (napus-rapa)     | 0.8779904    | 0.6719031    | not scorable | not scorable | 0.9586777    | 0.6236613    |
| #### Bn-scaff_17122_1-p1008 C-genome specific (napus-oleracea)  | 0.9904306    | 0.7238623    | 0.9922481    | 0.730084     | not scorable | not scorable |
| #### Bn-scaff_17144_1-p2400 C-genome specific (napus-oleracea)  | 1            | 0.6033072    | 0.9689922    | 0.710208     | not scorable | not scorable |
| #### Bn-scaff_17163_1-p19806 C-genome specific (napus-oleracea) | 0.5837321    | 0.7935715    | 0.8992248    | 0.8011035    | not scorable | not scorable |
| #### Bn-scaff_17163_1-p22132 C-genome specific (oleracea only)  | not scorable | not scorable | 1            | 0.9267221    | not scorable | not scorable |
| #### Bn-scaff_17163_1-p22299 C-genome specific (oleracea only)  | not scorable | not scorable | 0.9844961    | 0.8693689    | not scorable | not scorable |
| #### Bn-scaff_17163_1-p22319 C-genome specific (oleracea only)  | not scorable | not scorable | 0.9689922    | 0.7652926    | not scorable | not scorable |
| #### Bn-scaff_17163_1-p22337 C-genome specific (oleracea only)  | not scorable | not scorable | 1            | 0.7949834    | not scorable | not scorable |
| #### Bn-scaff_17163_1-p22351 C-genome specific (oleracea only)  | not scorable | not scorable | 0.9922481    | 0.8101802    | not scorable | not scorable |
| #### Bn-scaff_17163_1-p29627 genome unspecific (all in)         | 0.9904306    | 0.3960497    | 0.9689922    | 0.8505042    | 1            | 0.5571416    |
| #### Bn-scaff_17163_1-p42534 genome unspecific (oleracea-rapa)  | not scorable | not scorable | 1            | 0.840618     | 1            | 0.7515734    |
| #### Bn-scaff_17166_1-p5527 C-genome specific (napus-oleracea)  | 1            | 0.7252899    | 1            | 0.7469873    | not scorable | not scorable |
| #### Bn-scaff_17168_1-p13527 genome unspecific (all in)         | 1            | 0.7641606    | 1            | 0.7591171    | 1            | 0.925826     |
| #### Bn-scaff_17168_1-p53199 C-genome specific (napus-oleracea) | 1            | 0.7372279    | 0.9922481    | 0.7998044    | not scorable | not scorable |
| #### Bn-scaff_17168_1-p8028 C-genome specific (napus-oleracea)  | 0.9880383    | 0.6229278    | 0.7751938    | 0.9175813    | not scorable | not scorable |
| #### Bn-scaff_17174_1-p11422 genome unspecific (all in)         | 0.9856459    | 0.4459923    | 1            | 0.6632723    | 1            | 0.8600494    |
| #### Bn-scaff_17174_1-p15643 C-genome specific (napus-oleracea) | 0.9138756    | 0.7589659    | 0.9922481    | 0.8031629    | not scorable | not scorable |
| #### Bn-scaff_17174_1-p17355 C-genome specific (napus-oleracea) | 0.9114832    | 0.7578971    | 0.9844961    | 0.6543378    | not scorable | not scorable |
| #### Bn-scaff_17174_1-p21622 C-genome specific (napus-oleracea) | 0.9138756    | 0.5314905    | 1            | 0.6793439    | not scorable | not scorable |
| #### Bn-scaff_17174_1-p22229 C-genome specific (napus-oleracea) | 0.9114832    | 0.6902791    | 0.9922481    | 0.6793889    | not scorable | not scorable |
| #### Bn-scaff_17174_1-p22246 C-genome specific (oleracea only)  | not scorable | not scorable | 1            | 0.5469199    | not scorable | not scorable |
| #### Bn-scaff_17174_1-p22555 C-genome specific (napus-oleracea) | 0.9138756    | 0.7854255    | 1            | 0.8215568    | not scorable | not scorable |
| #### Bn-scaff_17174_1-p25132 C-genome specific (napus-oleracea) | 0.9066986    | 0.7631757    | 1            | 0.7053385    | not scorable | not scorable |
| #### Bn-scaff_17174_1-p25862 genome unspecific (all in)         | 0.9688995    | 0.3088727    | 1            | 0.6520861    | 0.9917355    | 0.70679      |
| #### Bn-scaff_17174_1-p25944 C-genome specific (napus-oleracea) | 0.9043062    | 0.6894016    | 1            | 0.7114125    | not scorable | not scorable |
| #### Bn-scaff_17174_1-p26138 C-genome specific (oleracea only)  | not scorable | not scorable | 0.9689922    | 0.9037547    | not scorable | not scorable |
| #### Bn-scaff_17174_1-p27148 C-genome specific (napus-oleracea) | 0.9186603    | 0.7750362    | 1            | 0.7952282    | not scorable | not scorable |
| #### Bn-scaff_17174_1-p27208 C-genome specific (napus-oleracea) | 0.8995215    | 0.7100275    | 1            | 0.7348305    | not scorable | not scorable |
| #### Bn-scaff_17174_1-p27682 C-genome specific (napus-oleracea) | 0.9210526    | 0.7606095    | 1            | 0.8177654    | not scorable | not scorable |
| #### Bn-scaff_17174_1-p27683 C-genome specific (napus-oleracea) | 0.9138756    | 0.8330227    | 1            | 0.7407581    | not scorable | not scorable |

|                                                                  |              |              |              |              |              |              |
|------------------------------------------------------------------|--------------|--------------|--------------|--------------|--------------|--------------|
| ##### Bn-scaff_17174_1-p27803 C-genome specific (napus-oleracea) | 0.8971292    | 0.7680451    | 0.9922481    | 0.5290926    | not scorable | not scorable |
| ##### Bn-scaff_17174_1-p28400 C-genome specific (napus-oleracea) | 0.9186603    | 0.7675225    | 0.9767442    | 0.7674533    | not scorable | not scorable |
| ##### Bn-scaff_17174_1-p28589 napus specific                     | 0.9186603    | 0.6868073    | not scorable | not scorable | not scorable | not scorable |
| ##### Bn-scaff_17174_1-p28676 C-genome specific (napus-oleracea) | 0.9473684    | 0.6957533    | 1            | 0.6217949    | not scorable | not scorable |
| ##### Bn-scaff_17174_1-p28821 C-genome specific (napus-oleracea) | 0.9138756    | 0.7519565    | 1            | 0.8369361    | not scorable | not scorable |
| ##### Bn-scaff_17174_1-p29158 C-genome specific (napus-oleracea) | 0.9210526    | 0.7900141    | 1            | 0.7496902    | not scorable | not scorable |
| ##### Bn-scaff_17174_1-p32189 C-genome specific (napus-oleracea) | 0.9138756    | 0.856636     | 0.9922481    | 0.8260969    | not scorable | not scorable |
| ##### Bn-scaff_17174_1-p35945 C-genome specific (napus-oleracea) | 1            | 0.6350477    | 1            | 0.6239599    | not scorable | not scorable |
| ##### Bn-scaff_17174_1-p37586 genome unspecific (all in)         | 0.9928229    | 0.3117862    | 1            | 0.7057996    | 1            | 0.8114859    |
| ##### Bn-scaff_17174_1-p38610 genome unspecific (all in)         | 0.9760765    | 0.4737224    | 1            | 0.7218966    | 1            | 0.8520119    |
| ##### Bn-scaff_17174_1-p38864 napus specific                     | 0.9688995    | 0.889972     | not scorable | not scorable | not scorable | not scorable |
| ##### Bn-scaff_17174_1-p40019 genome unspecific (all in)         | 0.9354067    | 0.4115795    | 1            | 0.7447388    | 0.9917355    | 0.8018513    |
| ##### Bn-scaff_17174_1-p40330 C-genome specific (napus-oleracea) | 0.8851675    | 0.8179389    | 0.9922481    | 0.844342     | not scorable | not scorable |
| ##### Bn-scaff_17174_1-p41873 C-genome specific (napus-oleracea) | 0.9186603    | 0.8253623    | 0.9922481    | 0.7450069    | not scorable | not scorable |
| ##### Bn-scaff_17174_1-p46327 C-genome specific (napus-oleracea) | 0.9186603    | 0.7372217    | 0.9922481    | 0.6229825    | not scorable | not scorable |
| ##### Bn-scaff_17174_1-p46417 C-genome specific (napus-oleracea) | 0.9162679    | 0.7949128    | 1            | 0.8038856    | not scorable | not scorable |
| ##### Bn-scaff_17174_1-p48962 C-genome specific (napus-oleracea) | 0.9569378    | 0.63232      | 1            | 0.6587981    | not scorable | not scorable |
| ##### Bn-scaff_17174_1-p50368 C-genome specific (napus-oleracea) | 0.9210526    | 0.799559     | 1            | 0.7707633    | not scorable | not scorable |
| ##### Bn-scaff_17174_1-p62030 genome unspecific (all in)         | 0.9976076    | 0.2638859    | 1            | 0.7932359    | 1            | 0.8839529    |
| ##### Bn-scaff_17174_1-p62104 A-genome specific (rapa only)      | not scorable | not scorable | not scorable | not scorable | 1            | 0.8948976    |
| ##### Bn-scaff_17174_1-p64383 genome unspecific (all in)         | 0.9473684    | 0.2968873    | 0.9922481    | 0.2697899    | 1            | 0.7349294    |
| ##### Bn-scaff_17174_1-p88911 genome unspecific (all in)         | 0.9712918    | 0.3066523    | 0.9922481    | 0.3539243    | 1            | 0.7376376    |
| ##### Bn-scaff_17177_1-p10581 genome unspecific (all in)         | 0.9569378    | 0.3436003    | 1            | 0.8944932    | 0.9834711    | 0.7230145    |
| ##### Bn-scaff_17177_1-p13133 genome unspecific (oleracea-rapa)  | not scorable | not scorable | 0.9147287    | 0.9124075    | 1            | 0.8068484    |
| ##### Bn-scaff_17177_1-p15667 A-genome specific (rapa only)      | not scorable | not scorable | not scorable | not scorable | 0.9917355    | 0.7098565    |
| ##### Bn-scaff_17177_1-p16116 genome unspecific (oleracea-rapa)  | not scorable | not scorable | 1            | 0.5588962    | 1            | 0.7714313    |
| ##### Bn-scaff_17177_1-p24842 genome unspecific (all in)         | 1            | 0.498448     | 0.9922481    | 0.9173866    | 1            | 0.724456     |
| ##### Bn-scaff_17177_1-p28011 C-genome specific (oleracea only)  | not scorable | not scorable | 1            | 0.8804997    | not scorable | not scorable |
| ##### Bn-scaff_17177_1-p36526 C-genome specific (napus-oleracea) | 0.9760765    | 0.5768911    | 0.9922481    | 0.5858423    | not scorable | not scorable |
| ##### Bn-scaff_17177_1-p38122 C-genome specific (napus-oleracea) | 0.9569378    | 0.7028658    | 0.9767442    | 0.6436566    | not scorable | not scorable |
| ##### Bn-scaff_17177_1-p38542 genome unspecific (all in)         | 0.9976076    | 0.3864732    | 1            | 0.83348      | 1            | 0.9293141    |
| ##### Bn-scaff_17177_1-p40999 genome unspecific (all in)         | 1            | 0.3329925    | 1            | 0.9146216    | 0.9834711    | 0.6570157    |
| ##### Bn-scaff_17177_1-p44198 C-genome specific (napus-oleracea) | 0.9569378    | 0.8184322    | 0.620155     | 0.7599793    | not scorable | not scorable |

|                                                                 |              |              |              |              |              |              |
|-----------------------------------------------------------------|--------------|--------------|--------------|--------------|--------------|--------------|
| #### Bn-scaff_17177_1-p46278 genome unspecific (all in)         | 0.9784689    | 0.3525742    | 1            | 0.7555864    | 0.9917355    | 0.7196156    |
| #### Bn-scaff_17177_1-p46384 genome unspecific (all in)         | 0.9688995    | 0.3966251    | 1            | 0.752191     | 1            | 0.6930624    |
| #### Bn-scaff_17177_1-p50408 C-genome specific (oleracea only)  | not scorable | not scorable | 0.9922481    | 0.636191     | not scorable | not scorable |
| #### Bn-scaff_17177_1-p50873 C-genome specific (napus-oleracea) | 0.9569378    | 0.6261083    | 0.9767442    | 0.7603835    | not scorable | not scorable |
| #### Bn-scaff_17177_1-p53252 C-genome specific (napus-oleracea) | 0.9688995    | 0.6958089    | 0.9302326    | 0.6864084    | not scorable | not scorable |
| #### Bn-scaff_17177_1-p54618 C-genome specific (napus-oleracea) | 0.9712918    | 0.7322173    | 0.9922481    | 0.7488893    | not scorable | not scorable |
| #### Bn-scaff_17177_1-p59354 genome unspecific (all in)         | 1            | 0.420159     | 1            | 0.9175246    | 1            | 0.7926515    |
| #### Bn-scaff_17177_1-p66743 genome unspecific (all in)         | 0.9808612    | 0.4235277    | 1            | 0.840284     | 1            | 0.7786633    |
| #### Bn-scaff_17177_1-p66793 genome unspecific (oleracea-rapa)  | not scorable | not scorable | 1            | 0.7285279    | 0.9917355    | 0.7095364    |
| #### Bn-scaff_17177_1-p73145 genome unspecific (all in)         | 0.9569378    | 0.2199265    | 0.9767442    | 0.4181305    | 1            | 0.7770717    |
| #### Bn-scaff_17177_1-p77210 C-genome specific (napus-oleracea) | 0.9856459    | 0.7879662    | 0.9147287    | 0.7816716    | not scorable | not scorable |
| #### Bn-scaff_17177_1-p77392 C-genome specific (napus-oleracea) | 0.9784689    | 0.6826206    | 0.9224806    | 0.6410185    | not scorable | not scorable |
| #### Bn-scaff_17177_1-p77571 C-genome specific (napus-oleracea) | 0.9617225    | 0.7845644    | 0.9844961    | 0.7201878    | not scorable | not scorable |
| #### Bn-scaff_17177_1-p81000 C-genome specific (napus-oleracea) | 1            | 0.5536273    | 1            | 0.6362335    | not scorable | not scorable |
| #### Bn-scaff_17177_1-p83603 C-genome specific (napus-oleracea) | 0.9186603    | 0.6911548    | 0.9534883    | 0.5914273    | not scorable | not scorable |
| #### Bn-scaff_17177_1-p83612 C-genome specific (napus-oleracea) | 0.9760765    | 0.6504825    | 0.9689922    | 0.6146809    | not scorable | not scorable |
| #### Bn-scaff_17177_1-p93589 C-genome specific (napus-oleracea) | 0.9736842    | 0.7507034    | 0.8837209    | 0.6958491    | not scorable | not scorable |
| #### Bn-scaff_17177_1-p94707 C-genome specific (napus-oleracea) | 0.9641148    | 0.7780796    | 0.8914729    | 0.7722343    | not scorable | not scorable |
| #### Bn-scaff_17177_1-p95149 C-genome specific (napus-oleracea) | 0.9712918    | 0.7241445    | 0.8992248    | 0.6704297    | not scorable | not scorable |
| #### Bn-scaff_17177_1-p95173 C-genome specific (napus-oleracea) | 0.9736842    | 0.6783       | 0.8992248    | 0.6789042    | not scorable | not scorable |
| #### Bn-scaff_17177_1-p95457 C-genome specific (napus-oleracea) | 0.9832536    | 0.7382618    | 0.8992248    | 0.6856967    | not scorable | not scorable |
| #### Bn-scaff_17180_1-p14566 C-genome specific (napus-oleracea) | 0.9928229    | 0.8092768    | 1            | 0.7245196    | not scorable | not scorable |
| #### Bn-scaff_17180_1-p15333 C-genome specific (napus-oleracea) | 1            | 0.2643923    | 1            | 0.7134259    | not scorable | not scorable |
| #### Bn-scaff_17180_1-p17820 C-genome specific (napus-oleracea) | 0.9976076    | 0.7362129    | 1            | 0.6394504    | not scorable | not scorable |
| #### Bn-scaff_17180_1-p25371 genome unspecific (all in)         | 0.9856459    | 0.2603027    | 1            | 0.7552993    | 1            | 0.8210083    |
| #### Bn-scaff_17180_1-p26303 genome unspecific (all in)         | 0.9688995    | 0.2157958    | 0.7364341    | 0.3405058    | 0.9834711    | 0.7549925    |
| #### Bn-scaff_17180_1-p26322 C-genome specific (napus-oleracea) | 1            | 0.2727392    | 0.9844961    | 0.3078922    | not scorable | not scorable |
| #### Bn-scaff_17180_1-p33343 C-genome specific (napus-oleracea) | 0.9976076    | 0.7885315    | 0.9922481    | 0.9320942    | not scorable | not scorable |
| #### Bn-scaff_17180_1-p43135 genome unspecific (all in)         | 0.9593301    | 0.2852925    | 0.8837209    | 0.1894961    | 1            | 0.8017164    |
| #### Bn-scaff_17180_1-p47142 genome unspecific (all in)         | 0.9832536    | 0.2303246    | 1            | 0.8004208    | 1            | 0.7884539    |
| #### Bn-scaff_17180_1-p49098 napus specific                     | 0.9976076    | 0.3583516    | not scorable | not scorable | not scorable | not scorable |
| #### Bn-scaff_17180_1-p55546 C-genome specific (napus-oleracea) | 0.9832536    | 0.5617642    | 0.8837209    | 0.6089551    | not scorable | not scorable |
| #### Bn-scaff_17180_1-p59560 C-genome specific (napus-oleracea) | 0.9976076    | 0.804655     | 0.9224806    | 0.7613936    | not scorable | not scorable |

|                                                                 |              |              |              |              |              |              |              |
|-----------------------------------------------------------------|--------------|--------------|--------------|--------------|--------------|--------------|--------------|
| #### Bn-scaff_17180_1-p62409 C-genome specific (napus-oleracea) | 1            | 0.7714349    |              | 1            | 0.9222751    | not scorable | not scorable |
| #### Bn-scaff_17180_1-p6766 C-genome specific (napus-oleracea)  | 0.9976076    | 0.7793415    |              | 1            | 0.8251064    | not scorable | not scorable |
| #### Bn-scaff_17180_1-p72890 C-genome specific (napus-oleracea) | 0.9976076    | 0.7281033    | 0.9844961    |              | 0.6885066    | not scorable | not scorable |
| #### Bn-scaff_17180_1-p85281 C-genome specific (napus-oleracea) | 0.9880383    | 0.7756358    | 0.9922481    |              | 0.8168224    | not scorable | not scorable |
| #### Bn-scaff_17190_1-p11164 genome unspecific (all in)         | 0.9808612    | 0.2886745    | 0.9922481    |              | 0.6954883    | 1            | 0.7641606    |
| #### Bn-scaff_17190_1-p11194 genome unspecific (all in)         | 0.9401914    | 0.6469366    |              | 1            | 0.7656959    | 1            | 0.9095823    |
| #### Bn-scaff_17190_1-p11198 C-genome specific (napus-oleracea) | 0.8875598    | 0.722107     | 0.9844961    |              | 0.7396197    | not scorable | not scorable |
| #### Bn-scaff_17190_1-p11342 C-genome specific (napus-oleracea) | 0.8995215    | 0.8081769    | 0.9922481    |              | 0.794131     | not scorable | not scorable |
| #### Bn-scaff_17190_1-p18409 napus specific                     | 0.9425837    | 0.7793182    | not scorable | not scorable | not scorable | not scorable | not scorable |
| #### Bn-scaff_17190_1-p19350 A-genome specific (napus-rapa)     | 0.9641148    | 0.3529522    | not scorable | not scorable |              | 1            | 0.8369069    |
| #### Bn-scaff_17190_1-p23747 genome unspecific (oleracea-rapa)  | not scorable | not scorable |              | 1            | 0.837247     | 0.9834711    | 0.7707101    |
| #### Bn-scaff_17190_1-p23794 genome unspecific (all in)         | 0.8708134    | 0.3315457    | 0.9922481    |              | 0.8033108    | 1            | 0.8949563    |
| #### Bn-scaff_17190_1-p23845 genome unspecific (all in)         | 1            | 0.8742366    |              | 1            | 0.8776996    | 1            | 0.8705451    |
| #### Bn-scaff_17190_1-p42543 genome unspecific (all in)         | 1            | 0.6019612    |              | 1            | 0.5743468    | 1            | 0.6835383    |
| #### Bn-scaff_17190_1-p42556 A-genome specific (napus-rapa)     | 1            | 0.3287504    | not scorable | not scorable |              | 1            | 0.7704166    |
| #### Bn-scaff_17190_1-p49567 genome unspecific (all in)         | 0.9856459    | 0.3331858    | 0.9612403    |              | 0.3065623    | 0.9917355    | 0.7719382    |
| #### Bn-scaff_17190_1-p66088 C-genome specific (napus-oleracea) | 0.9019139    | 0.6542021    |              | 1            | 0.6092218    | not scorable | not scorable |
| #### Bn-scaff_17190_1-p9206 C-genome specific (napus-oleracea)  | 0.8995215    | 0.7582443    | 0.9224806    |              | 0.7392099    | not scorable | not scorable |
| #### Bn-scaff_17203_1-p31529 genome unspecific (all in)         | 0.9736842    | 0.4308175    |              | 1            | 0.3420849    | 1            | 0.8145003    |
| #### Bn-scaff_17203_1-p31827 C-genome specific (napus-oleracea) | 0.8205742    | 0.668772     |              | 1            | 0.6482191    | not scorable | not scorable |
| #### Bn-scaff_17203_1-p36880 A-genome specific (napus-rapa)     | 1            | 0.5436898    | not scorable | not scorable |              | 1            | 0.5991307    |
| #### Bn-scaff_17203_1-p53461 genome unspecific (all in)         | 0.9952153    | 0.3807304    |              | 1            | 0.7098855    | 0.9917355    | 0.7324426    |
| #### Bn-scaff_17203_1-p54448 C-genome specific (napus-oleracea) | 0.7894737    | 0.7478362    |              | 1            | 0.7237343    | not scorable | not scorable |
| #### Bn-scaff_17203_1-p55112 C-genome specific (napus-oleracea) | 0.777512     | 0.4800033    |              | 1            | 0.4415784    | not scorable | not scorable |
| #### Bn-scaff_17217_1-p4769 C-genome specific (napus-oleracea)  | 0.9497608    | 0.3878774    |              | 1            | 0.7977457    | not scorable | not scorable |
| #### Bn-scaff_17227_1-p11012 genome unspecific (all in)         | 1            | 0.4910999    |              | 1            | 0.8581532    | 1            | 0.8574865    |
| #### Bn-scaff_17227_1-p13807 genome unspecific (all in)         | 1            | 0.3280592    | 0.9612403    |              | 0.3836919    | 1            | 0.9064377    |
| #### Bn-scaff_17227_1-p13911 C-genome specific (napus-oleracea) | 0.9880383    | 0.7502323    | 0.7131783    |              | 0.7433345    | not scorable | not scorable |
| #### Bn-scaff_17227_1-p15434 C-genome specific (napus-oleracea) | 0.9928229    | 0.5310152    |              | 1            | 0.9068478    | not scorable | not scorable |
| #### Bn-scaff_17227_1-p25351 C-genome specific (napus-oleracea) | 0.9928229    | 0.9255158    | 0.9767442    |              | 0.9137309    | not scorable | not scorable |
| #### Bn-scaff_17227_1-p29995 C-genome specific (napus-oleracea) | 0.9856459    | 0.4645348    |              | 1            | 0.8085203    | not scorable | not scorable |
| #### Bn-scaff_17227_1-p62693 C-genome specific (napus-oleracea) | 0.9952153    | 0.7481866    | 0.9069768    |              | 0.8102917    | not scorable | not scorable |
| #### Bn-scaff_17227_1-p66558 genome unspecific (all in)         | 1            | 0.8321105    |              | 1            | 0.796697     | 1            | 0.9152392    |



|                                                                |              |              |              |              |              |              |
|----------------------------------------------------------------|--------------|--------------|--------------|--------------|--------------|--------------|
| #### Bn-scaff_17227_1-p69741genome unspecific (all in)         | 0.9521531    | 0.431002     | 1            | 0.9309155    | 1            | 0.7484974    |
| #### Bn-scaff_17227_1-p69771A-genome specific (rapa only)      | not scorable | not scorable | not scorable | not scorable | 1            | 0.9175813    |
| #### Bn-scaff_17227_1-p69972genome unspecific (oleracea-rapa)  | not scorable | not scorable | 0.7906977    | 0.8192975    | 1            | 0.9085913    |
| #### Bn-scaff_17227_1-p69981genome unspecific (oleracea-rapa)  | not scorable | not scorable | 1            | 0.7671043    | 1            | 0.7543041    |
| #### Bn-scaff_17227_1-p70024genome unspecific (all in)         | 1            | 0.3714519    | 0.8139535    | 0.7924657    | 1            | 0.8508259    |
| #### Bn-scaff_17227_1-p70165A-genome specific (napus-rapa)     | 0.9976076    | 0.250102     | not scorable | not scorable | 1            | 0.798951     |
| #### Bn-scaff_17227_1-p81786A-genome specific (napus-rapa)     | 1            | 0.7741535    | not scorable | not scorable | 1            | 0.917558     |
| #### Bn-scaff_17227_1-p88196C-genome specific (napus-oleracea) | 0.9976076    | 0.6509478    | 0.9844961    | 0.3096306    | not scorable | not scorable |
| #### Bn-scaff_17227_1-p89588C-genome specific (napus-oleracea) | 1            | 0.2258315    | 1            | 0.7252899    | not scorable | not scorable |
| #### Bn-scaff_17227_1-p90925C-genome specific (napus-oleracea) | 0.9952153    | 0.8467728    | 0.9922481    | 0.7905113    | not scorable | not scorable |
| #### Bn-scaff_17227_1-p92741C-genome specific (napus-oleracea) | 0.9712918    | 0.7661989    | 0.8682171    | 0.8147714    | not scorable | not scorable |
| #### Bn-scaff_17227_1-p92769C-genome specific (napus-oleracea) | 0.9784689    | 0.7407634    | 0.8682171    | 0.4225779    | not scorable | not scorable |
| #### Bn-scaff_17227_1-p92788C-genome specific (napus-oleracea) | 0.9856459    | 0.694732     | 0.8527132    | 0.7828019    | not scorable | not scorable |
| #### Bn-scaff_17227_1-p95322C-genome specific (napus-oleracea) | 0.9952153    | 0.6920196    | 1            | 0.7154657    | not scorable | not scorable |
| #### Bn-scaff_17227_1-p95852C-genome specific (napus-oleracea) | 0.9952153    | 0.7834992    | 1            | 0.8086234    | not scorable | not scorable |
| #### Bn-scaff_17227_1-p95887C-genome specific (napus-oleracea) | 0.9832536    | 0.7231928    | 0.9767442    | 0.8182338    | not scorable | not scorable |
| #### Bn-scaff_17227_1-p96256C-genome specific (napus-oleracea) | 0.9880383    | 0.7983206    | 0.9922481    | 0.4818804    | not scorable | not scorable |
| #### Bn-scaff_17227_1-p98452C-genome specific (oleracea only)  | not scorable | not scorable | 0.9302326    | 0.6887516    | not scorable | not scorable |
| #### Bn-scaff_17227_1-p99172genome unspecific (all in)         | 0.9880383    | 0.2425719    | 1            | 0.8010209    | 1            | 0.8546289    |
| #### Bn-scaff_17227_1-p99266C-genome specific (napus-oleracea) | 0.9904306    | 0.7748151    | 0.9844961    | 0.7138681    | not scorable | not scorable |
| #### Bn-scaff_17233_1-p19952C-genome specific (napus-oleracea) | 0.9473684    | 0.7627952    | 0.9922481    | 0.7774823    | not scorable | not scorable |
| #### Bn-scaff_17233_1-p35444C-genome specific (napus-oleracea) | 0.9354067    | 0.5871119    | 1            | 0.9362096    | not scorable | not scorable |
| #### Bn-scaff_17233_1-p7157C-genome specific (napus-oleracea)  | 0.9880383    | 0.7126893    | 1            | 0.8135551    | not scorable | not scorable |
| #### Bn-scaff_17233_1-p9290 genome unspecific (all in)         | 0.9880383    | 0.5176657    | 1            | 0.706347     | 1            | 0.8443965    |
| #### Bn-scaff_17249_1-p10426genome unspecific (all in)         | 0.9808612    | 0.2937562    | 1            | 0.754179     | 0.9834711    | 0.4954247    |
| #### Bn-scaff_17249_1-p10544genome unspecific (all in)         | 0.9880383    | 0.3137122    | 1            | 0.7524353    | 1            | 0.7364288    |
| #### Bn-scaff_17249_1-p10947genome unspecific (all in)         | 0.9976076    | 0.2855553    | 1            | 0.8013071    | 1            | 0.9205275    |
| #### Bn-scaff_17249_1-p12452C-genome specific (napus-oleracea) | 1            | 0.6863819    | 1            | 0.7280735    | not scorable | not scorable |
| #### Bn-scaff_17249_1-p12483C-genome specific (napus-oleracea) | 0.9976076    | 0.8217158    | 1            | 0.7603921    | not scorable | not scorable |
| #### Bn-scaff_17249_1-p12561C-genome specific (napus-oleracea) | 0.9976076    | 0.681946     | 0.9844961    | 0.7869124    | not scorable | not scorable |
| #### Bn-scaff_17249_1-p12593C-genome specific (napus-oleracea) | 0.9928229    | 0.8023503    | 0.9922481    | 0.7869036    | not scorable | not scorable |
| #### Bn-scaff_17249_1-p12673C-genome specific (napus-oleracea) | 0.9904306    | 0.6812571    | 1            | 0.7082052    | not scorable | not scorable |
| #### Bn-scaff_17249_1-p12959C-genome specific (napus-oleracea) | 0.9976076    | 0.6846514    | 1            | 0.6286242    | not scorable | not scorable |

|                                                                 |              |              |              |              |              |              |
|-----------------------------------------------------------------|--------------|--------------|--------------|--------------|--------------|--------------|
| #### Bn-scaff_17249_1-p13185 C-genome specific (napus-oleracea) | 0.9952153    | 0.730595     | 0.9922481    | 0.5856445    | not scorable | not scorable |
| #### Bn-scaff_17249_1-p13187 C-genome specific (napus-oleracea) | 0.9952153    | 0.6980968    | 1            | 0.6484337    | not scorable | not scorable |
| #### Bn-scaff_17249_1-p13187 C-genome specific (napus-oleracea) | 0.9952153    | 0.7726737    | 1            | 0.6738076    | not scorable | not scorable |
| #### Bn-scaff_17249_1-p13196 C-genome specific (napus-oleracea) | 0.9928229    | 0.6623059    | 1            | 0.6864313    | not scorable | not scorable |
| #### Bn-scaff_17249_1-p13203 C-genome specific (napus-oleracea) | 0.9928229    | 0.7544615    | 1            | 0.7082227    | not scorable | not scorable |
| #### Bn-scaff_17249_1-p13207 C-genome specific (napus-oleracea) | 0.9928229    | 0.6428842    | 0.9844961    | 0.6244566    | not scorable | not scorable |
| #### Bn-scaff_17249_1-p13208 C-genome specific (napus-oleracea) | 0.9904306    | 0.6087635    | 1            | 0.6094779    | not scorable | not scorable |
| #### Bn-scaff_17249_1-p13219 C-genome specific (napus-oleracea) | 0.9952153    | 0.6791       | 1            | 0.6670291    | not scorable | not scorable |
| #### Bn-scaff_17249_1-p13225 C-genome specific (napus-oleracea) | 0.9952153    | 0.68628      | 1            | 0.6602913    | not scorable | not scorable |
| #### Bn-scaff_17249_1-p30040 C-genome specific (napus-oleracea) | 1            | 0.6405861    | 0.9922481    | 0.764156     | not scorable | not scorable |
| #### Bn-scaff_17249_1-p51310 genome unspecific (oleracea-rapa)  | not scorable | not scorable | 0.9844961    | 0.6950745    | 0.9917355    | 0.904682     |
| #### Bn-scaff_17249_1-p54826 A-genome specific (napus-rapa)     | 1            | 0.5149947    | not scorable | not scorable | 1            | 0.8733254    |
| #### Bn-scaff_17249_1-p56488 C-genome specific (napus-oleracea) | 0.9904306    | 0.6977181    | 1            | 0.8021066    | not scorable | not scorable |
| #### Bn-scaff_17249_1-p57336 C-genome specific (oleracea only)  | not scorable | not scorable | 0.9844961    | 0.7436959    | not scorable | not scorable |
| #### Bn-scaff_17249_1-p63244 C-genome specific (napus-oleracea) | 0.9952153    | 0.7552952    | 1            | 0.7509688    | not scorable | not scorable |
| #### Bn-scaff_17249_1-p63338 C-genome specific (napus-oleracea) | 0.9952153    | 0.6871282    | 1            | 0.9175848    | not scorable | not scorable |
| #### Bn-scaff_17249_1-p73710 C-genome specific (napus-oleracea) | 0.9928229    | 0.7730068    | 1            | 0.940719     | not scorable | not scorable |
| #### Bn-scaff_17249_1-p74928 C-genome specific (napus-oleracea) | 0.9545454    | 0.6077997    | 1            | 0.9060045    | not scorable | not scorable |
| #### Bn-scaff_17249_1-p98599 genome unspecific (all in)         | 1            | 0.627624     | 1            | 0.681638     | 1            | 0.6547505    |
| #### Bn-scaff_17257_1-p15416 C-genome specific (napus-oleracea) | 0.9856459    | 0.739666     | 0.9922481    | 0.7961311    | not scorable | not scorable |
| #### Bn-scaff_17257_1-p97933 genome unspecific (all in)         | 1            | 0.3740631    | 1            | 0.7206012    | 1            | 0.7908412    |
| #### Bn-scaff_17257_1-p98421 genome unspecific (all in)         | 1            | 0.3375181    | 1            | 0.8954121    | 0.9917355    | 0.8211774    |
| #### Bn-scaff_17257_1-p98652 C-genome specific (napus-oleracea) | 0.9880383    | 0.7893972    | 1            | 0.7738426    | not scorable | not scorable |
| #### Bn-scaff_17268_1-p58590 genome unspecific (all in)         | 1            | 0.6309767    | 1            | 0.6438361    | 1            | 0.8317904    |
| #### Bn-scaff_17275_1-p34341 C-genome specific (napus-oleracea) | 0.9976076    | 0.7080543    | 1            | 0.9136624    | not scorable | not scorable |
| #### Bn-scaff_17275_1-p66596 C-genome specific (napus-oleracea) | 0.9808612    | 0.5718756    | 0.9922481    | 0.6583972    | not scorable | not scorable |
| #### Bn-scaff_17289_1-p11852 C-genome specific (napus-oleracea) | 0.8588517    | 0.7015598    | 0.9224806    | 0.6869836    | not scorable | not scorable |
| #### Bn-scaff_17289_1-p18657 genome unspecific (all in)         | 1            | 0.5029481    | 0.9767442    | 0.6376782    | 1            | 0.864739     |
| #### Bn-scaff_17289_1-p44244 C-genome specific (napus-oleracea) | 0.9545454    | 0.5138964    | 1            | 0.7201586    | not scorable | not scorable |
| #### Bn-scaff_17289_1-p45854 C-genome specific (napus-oleracea) | 0.9688995    | 0.7584652    | 0.9844961    | 0.7234921    | not scorable | not scorable |
| #### Bn-scaff_17289_1-p46084 genome unspecific (all in)         | 0.9832536    | 0.3982722    | 1            | 0.8085203    | 1            | 0.6862206    |
| #### Bn-scaff_17289_1-p46153 C-genome specific (napus-oleracea) | 0.9545454    | 0.6849546    | 0.9922481    | 0.6834892    | not scorable | not scorable |
| #### Bn-scaff_17289_1-p62720 genome unspecific (all in)         | 1            | 0.3616402    | 1            | 0.8022748    | 0.9917355    | 0.6977852    |

|                                                                 |              |              |           |           |              |              |
|-----------------------------------------------------------------|--------------|--------------|-----------|-----------|--------------|--------------|
| #### Bn-scaff_17289_1-p65570 C-genome specific (napus-oleracea) | 0.9856459    | 0.7476938    | 1         | 0.6966146 | not scorable | not scorable |
| #### Bn-scaff_17289_1-p67494 C-genome specific (napus-oleracea) | 0.9904306    | 0.8116179    | 0.9844961 | 0.850344  | not scorable | not scorable |
| #### Bn-scaff_17289_1-p78006 genome unspecific (all in)         | 0.9928229    | 0.7771927    | 1         | 0.9454979 | 1            | 0.789126     |
| #### Bn-scaff_17289_1-p80783 genome unspecific (all in)         | 0.9832536    | 0.274808     | 0.9767442 | 0.7088114 | 0.9834711    | 0.8916824    |
| #### Bn-scaff_17289_1-p80829 C-genome specific (napus-oleracea) | 0.9880383    | 0.8468845    | 0.9767442 | 0.7910088 | not scorable | not scorable |
| #### Bn-scaff_17289_1-p80842 genome unspecific (all in)         | 1            | 0.3619811    | 0.9844961 | 0.8151569 | 1            | 0.8794961    |
| #### Bn-scaff_17289_1-p80855 genome unspecific (all in)         | 0.9952153    | 0.2781068    | 1         | 0.7598515 | 1            | 0.8722122    |
| #### Bn-scaff_17289_1-p88294 C-genome specific (oleracea only)  | not scorable | not scorable | 1         | 0.8121859 | not scorable | not scorable |
| #### Bn-scaff_17291_1-p10133 genome unspecific (all in)         | 0.9497608    | 0.5351654    | 0.9922481 | 0.4875353 | 0.9421487    | 0.8663045    |
| #### Bn-scaff_17291_1-p13190 genome unspecific (all in)         | 1            | 0.6781771    | 1         | 0.7770717 | 1            | 0.8848283    |
| #### Bn-scaff_17291_1-p15252 C-genome specific (napus-oleracea) | 0.9856459    | 0.7871871    | 0.9767442 | 0.7385005 | not scorable | not scorable |
| #### Bn-scaff_17291_1-p15280 C-genome specific (napus-oleracea) | 0.9880383    | 0.7109438    | 0.9922481 | 0.6333377 | not scorable | not scorable |
| #### Bn-scaff_17291_1-p15334 C-genome specific (napus-oleracea) | 0.9784689    | 0.6043491    | 0.9922481 | 0.5878417 | not scorable | not scorable |
| #### Bn-scaff_17291_1-p15338 C-genome specific (napus-oleracea) | 0.9856459    | 0.7275669    | 0.9767442 | 0.754097  | not scorable | not scorable |
| #### Bn-scaff_17291_1-p15344 C-genome specific (napus-oleracea) | 0.9904306    | 0.7272084    | 0.9612403 | 0.7204551 | not scorable | not scorable |
| #### Bn-scaff_17291_1-p15361 C-genome specific (napus-oleracea) | 0.9832536    | 0.6883005    | 0.9844961 | 0.7729363 | not scorable | not scorable |
| #### Bn-scaff_17291_1-p15395 C-genome specific (napus-oleracea) | 0.9784689    | 0.7394906    | 0.9922481 | 0.8113836 | not scorable | not scorable |
| #### Bn-scaff_17291_1-p15553 C-genome specific (napus-oleracea) | 0.9880383    | 0.7770954    | 0.9922481 | 0.7365441 | not scorable | not scorable |
| #### Bn-scaff_17291_1-p18801 C-genome specific (napus-oleracea) | 0.9904306    | 0.7485799    | 0.9069768 | 0.8019294 | not scorable | not scorable |
| #### Bn-scaff_17291_1-p19041 C-genome specific (napus-oleracea) | 0.9928229    | 0.7335718    | 0.9767442 | 0.7312141 | not scorable | not scorable |
| #### Bn-scaff_17291_1-p19219 C-genome specific (napus-oleracea) | 0.9904306    | 0.5486832    | 0.9689922 | 0.6539296 | not scorable | not scorable |
| #### Bn-scaff_17291_1-p19236 C-genome specific (napus-oleracea) | 0.9904306    | 0.744672     | 1         | 0.7485565 | not scorable | not scorable |
| #### Bn-scaff_17291_1-p21225 C-genome specific (napus-oleracea) | 0.9856459    | 0.7692649    | 0.9922481 | 0.7728357 | not scorable | not scorable |
| #### Bn-scaff_17291_1-p21615 genome unspecific (all in)         | 0.9497608    | 0.2801081    | 0.9844961 | 0.6613142 | 1            | 0.752191     |
| #### Bn-scaff_17291_1-p22307 genome unspecific (all in)         | 0.9976076    | 0.4559836    | 0.9844961 | 0.3530191 | 0.9669421    | 0.3113866    |
| #### Bn-scaff_17291_1-p22621 genome unspecific (all in)         | 0.9760765    | 0.496019     | 0.9534883 | 0.5648798 | 1            | 0.8710244    |
| #### Bn-scaff_17291_1-p23955 C-genome specific (napus-oleracea) | 0.7272727    | 0.8215399    | 0.9767442 | 0.3317018 | not scorable | not scorable |
| #### Bn-scaff_17291_1-p24962 C-genome specific (napus-oleracea) | 0.9928229    | 0.7948783    | 1         | 0.754847  | not scorable | not scorable |
| #### Bn-scaff_17291_1-p25044 C-genome specific (napus-oleracea) | 0.9976076    | 0.8036951    | 1         | 0.7532983 | not scorable | not scorable |
| #### Bn-scaff_17291_1-p25349 C-genome specific (napus-oleracea) | 0.9808612    | 0.7115499    | 0.9922481 | 0.6905077 | not scorable | not scorable |
| #### Bn-scaff_17291_1-p27103 genome unspecific (oleracea-rapa)  | not scorable | not scorable | 1         | 0.7672076 | 1            | 0.8635404    |
| #### Bn-scaff_17291_1-p30329 C-genome specific (napus-oleracea) | 0.6339713    | 0.6925263    | 0.9379845 | 0.7974169 | not scorable | not scorable |
| #### Bn-scaff_17291_1-p30527 genome unspecific (all in)         | 0.9856459    | 0.2815741    | 1         | 0.8168858 | 1            | 0.8419065    |

|                                                                |              |              |           |           |              |              |
|----------------------------------------------------------------|--------------|--------------|-----------|-----------|--------------|--------------|
| #### Bn-scaff_17291_1-p30561genome unspecific (all in)         | 0.9760765    | 0.3393552    | 1         | 0.9013032 | 0.9752066    | 0.6657993    |
| #### Bn-scaff_17291_1-p32537C-genome specific (napus-oleracea) | 0.9808612    | 0.841368     | 1         | 0.8387725 | not scorable | not scorable |
| #### Bn-scaff_17291_1-p33131C-genome specific (oleracea only)  | not scorable | not scorable | 0.9302326 | 0.7566676 | not scorable | not scorable |
| #### Bn-scaff_17291_1-p33355C-genome specific (napus-oleracea) | 0.9904306    | 0.7937827    | 0.9922481 | 0.8430646 | not scorable | not scorable |
| #### Bn-scaff_17291_1-p34050genome unspecific (all in)         | 0.9784689    | 0.3274873    | 0.9922481 | 0.7079506 | 1            | 0.8780868    |
| #### Bn-scaff_17291_1-p34077genome unspecific (oleracea-rapa)  | not scorable | not scorable | 1         | 0.7036699 | 0.9834711    | 0.6034443    |
| #### Bn-scaff_17291_1-p34520genome unspecific (all in)         | 1            | 0.7723844    | 0.9844961 | 0.8341036 | 0.6033058    | 0.8368974    |
| #### Bn-scaff_17291_1-p35149C-genome specific (napus-oleracea) | 0.9976076    | 0.7746601    | 0.9922481 | 0.8204216 | not scorable | not scorable |
| #### Bn-scaff_17291_1-p35276C-genome specific (napus-oleracea) | 0.9976076    | 0.7477931    | 1         | 0.8224294 | not scorable | not scorable |
| #### Bn-scaff_17291_1-p35563C-genome specific (napus-oleracea) | 0.9952153    | 0.8858663    | 0.7829458 | 0.8513866 | not scorable | not scorable |
| #### Bn-scaff_17291_1-p35836C-genome specific (napus-oleracea) | 0.9976076    | 0.7458538    | 0.9844961 | 0.838433  | not scorable | not scorable |
| #### Bn-scaff_17291_1-p35856C-genome specific (napus-oleracea) | 0.9976076    | 0.4356572    | 0.9922481 | 0.4081112 | not scorable | not scorable |
| #### Bn-scaff_17291_1-p35864C-genome specific (napus-oleracea) | 0.9928229    | 0.7741535    | 0.9922481 | 0.8299929 | not scorable | not scorable |
| #### Bn-scaff_17291_1-p35880C-genome specific (napus-oleracea) | 0.9976076    | 0.7547682    | 1         | 0.7552557 | not scorable | not scorable |
| #### Bn-scaff_17291_1-p35900C-genome specific (napus-oleracea) | 0.9976076    | 0.7580394    | 0.9767442 | 0.8332726 | not scorable | not scorable |
| #### Bn-scaff_17291_1-p36027C-genome specific (napus-oleracea) | 0.9952153    | 0.7397501    | 0.9922481 | 0.6837617 | not scorable | not scorable |
| #### Bn-scaff_17291_1-p36042C-genome specific (napus-oleracea) | 0.9976076    | 0.8050548    | 0.9922481 | 0.7372622 | not scorable | not scorable |
| #### Bn-scaff_17291_1-p36474C-genome specific (napus-oleracea) | 0.9976076    | 0.68007      | 0.9844961 | 0.6698701 | not scorable | not scorable |
| #### Bn-scaff_17291_1-p37591C-genome specific (napus-oleracea) | 1            | 0.6140043    | 1         | 0.5782585 | not scorable | not scorable |
| #### Bn-scaff_17291_1-p39831C-genome specific (napus-oleracea) | 0.9760765    | 0.688093     | 1         | 0.7454541 | not scorable | not scorable |
| #### Bn-scaff_17291_1-p39850C-genome specific (napus-oleracea) | 0.9712918    | 0.7934223    | 1         | 0.7523873 | not scorable | not scorable |
| #### Bn-scaff_17291_1-p40786C-genome specific (napus-oleracea) | 0.9928229    | 0.7072135    | 0.9922481 | 0.691547  | not scorable | not scorable |
| #### Bn-scaff_17291_1-p40937C-genome specific (napus-oleracea) | 0.9808612    | 0.7879686    | 0.9922481 | 0.8291569 | not scorable | not scorable |
| #### Bn-scaff_17291_1-p40967C-genome specific (napus-oleracea) | 0.9784689    | 0.728545     | 0.9922481 | 0.6735864 | not scorable | not scorable |
| #### Bn-scaff_17291_1-p40993C-genome specific (napus-oleracea) | 0.9832536    | 0.7880238    | 1         | 0.7286978 | not scorable | not scorable |
| #### Bn-scaff_17291_1-p42393genome unspecific (all in)         | 0.9641148    | 0.2541704    | 1         | 0.7951916 | 1            | 0.8844587    |
| #### Bn-scaff_17291_1-p46695C-genome specific (napus-oleracea) | 0.9856459    | 0.7001886    | 1         | 0.7653633 | not scorable | not scorable |
| #### Bn-scaff_17291_1-p46701C-genome specific (napus-oleracea) | 0.9880383    | 0.7186745    | 0.9922481 | 0.8168814 | not scorable | not scorable |
| #### Bn-scaff_17291_1-p46745C-genome specific (napus-oleracea) | 0.9832536    | 0.7595153    | 1         | 0.9173808 | not scorable | not scorable |
| #### Bn-scaff_17291_1-p46767genome unspecific (all in)         | 0.9832536    | 0.4451768    | 1         | 0.7830412 | 1            | 0.9049708    |
| #### Bn-scaff_17291_1-p47428genome unspecific (all in)         | 0.9832536    | 0.4354814    | 1         | 0.844448  | 1            | 0.8446783    |
| #### Bn-scaff_17291_1-p47597genome unspecific (all in)         | 0.9808612    | 0.2527221    | 1         | 0.9090582 | 1            | 0.8760743    |
| #### Bn-scaff_17291_1-p47622genome unspecific (all in)         | 0.9736842    | 0.6508344    | 0.9922481 | 0.7461881 | 1            | 0.9502588    |

|                                                                |              |              |           |           |              |              |
|----------------------------------------------------------------|--------------|--------------|-----------|-----------|--------------|--------------|
| #### Bn-scaff_17291_1-p4951C-genome specific (napus-oleracea)  | 0.9808612    | 0.7199551    | 0.9534883 | 0.7702548 | not scorable | not scorable |
| #### Bn-scaff_17291_1-p61325C-genome specific (napus-oleracea) | 0.9904306    | 0.6814418    | 0.9922481 | 0.7888168 | not scorable | not scorable |
| #### Bn-scaff_17291_1-p61421C-genome specific (napus-oleracea) | 0.9928229    | 0.7815201    | 0.9922481 | 0.7638209 | not scorable | not scorable |
| #### Bn-scaff_17291_1-p61963C-genome specific (napus-oleracea) | 0.9832536    | 0.7699931    | 1         | 0.7193343 | not scorable | not scorable |
| #### Bn-scaff_17291_1-p63165C-genome specific (napus-oleracea) | 0.9832536    | 0.7845597    | 1         | 0.7758995 | not scorable | not scorable |
| #### Bn-scaff_17291_1-p64448C-genome specific (napus-oleracea) | 0.9880383    | 0.5546058    | 0.9844961 | 0.6259555 | not scorable | not scorable |
| #### Bn-scaff_17291_1-p6446C-genome specific (napus-oleracea)  | 0.9856459    | 0.7799154    | 0.9767442 | 0.820582  | not scorable | not scorable |
| #### Bn-scaff_17291_1-p70596C-genome specific (napus-oleracea) | 0.9976076    | 0.6843694    | 0.9922481 | 0.6787463 | not scorable | not scorable |
| #### Bn-scaff_17291_1-p70607C-genome specific (oleracea only)  | not scorable | not scorable | 1         | 0.6176195 | not scorable | not scorable |
| #### Bn-scaff_17291_1-p70641C-genome specific (oleracea only)  | not scorable | not scorable | 1         | 0.6785703 | not scorable | not scorable |
| #### Bn-scaff_17291_1-p71506C-genome specific (oleracea only)  | not scorable | not scorable | 0.9767442 | 0.7860337 | not scorable | not scorable |
| #### Bn-scaff_17291_1-p71819C-genome specific (napus-oleracea) | 0.9952153    | 0.7301223    | 0.9922481 | 0.8047616 | not scorable | not scorable |
| #### Bn-scaff_17291_1-p72234C-genome specific (napus-oleracea) | 0.9976076    | 0.8313826    | 1         | 0.8653011 | not scorable | not scorable |
| #### Bn-scaff_17291_1-p7323C-genome unspecific (all in)        | 0.9904306    | 0.4787667    | 1         | 0.8390768 | 0.9834711    | 0.7183082    |
| #### Bn-scaff_17291_1-p73238genome unspecific (all in)         | 0.9928229    | 0.3244046    | 1         | 0.863046  | 1            | 0.8312882    |
| #### Bn-scaff_17291_1-p77967genome unspecific (all in)         | 0.9401914    | 0.2873922    | 1         | 0.6407673 | 1            | 0.7739488    |
| #### Bn-scaff_17291_1-p80728C-genome specific (napus-oleracea) | 0.9880383    | 0.7663046    | 1         | 0.8221448 | not scorable | not scorable |
| #### Bn-scaff_17291_1-p81508C-genome specific (napus-oleracea) | 0.9832536    | 0.7566105    | 1         | 0.7533807 | not scorable | not scorable |
| #### Bn-scaff_17291_1-p83716C-genome specific (napus-oleracea) | 0.9808612    | 0.6697926    | 0.9922481 | 0.7025059 | not scorable | not scorable |
| #### Bn-scaff_17291_1-p8374C-genome specific (napus-oleracea)  | 0.9808612    | 0.7628304    | 1         | 0.8740647 | not scorable | not scorable |
| #### Bn-scaff_17291_1-p83759C-genome specific (napus-oleracea) | 0.9976076    | 0.8378905    | 1         | 0.8409751 | not scorable | not scorable |
| #### Bn-scaff_17291_1-p83867C-genome specific (napus-oleracea) | 0.9856459    | 0.7760257    | 0.9922481 | 0.7932255 | not scorable | not scorable |
| #### Bn-scaff_17291_1-p83895C-genome specific (napus-oleracea) | 0.9784689    | 0.7653241    | 1         | 0.7262882 | not scorable | not scorable |
| #### Bn-scaff_17291_1-p84429C-genome specific (napus-oleracea) | 0.9928229    | 0.7469555    | 1         | 0.7390317 | not scorable | not scorable |
| #### Bn-scaff_17291_1-p86764C-genome specific (napus-oleracea) | 0.9904306    | 0.8049505    | 1         | 0.7369114 | not scorable | not scorable |
| #### Bn-scaff_17291_1-p87101genome unspecific (all in)         | 0.9952153    | 0.3439288    | 0.9844961 | 0.7552512 | 1            | 0.8135551    |
| #### Bn-scaff_17297_1-p14311genome unspecific (all in)         | 0.9760765    | 0.4279702    | 1         | 0.7218273 | 1            | 0.8840337    |
| #### Bn-scaff_17297_1-p14985C-genome specific (oleracea only)  | not scorable | not scorable | 0.6356589 | 0.8098936 | not scorable | not scorable |
| #### Bn-scaff_17297_1-p15247C-genome specific (napus-oleracea) | 0.8660287    | 0.6868101    | 0.620155  | 0.8883443 | not scorable | not scorable |
| #### Bn-scaff_17297_1-p2022C-genome unspecific (all in)        | 0.9497608    | 0.3451939    | 1         | 0.8279032 | 0.9256198    | 0.8875402    |
| #### Bn-scaff_17297_1-p21321genome unspecific (all in)         | 0.9712918    | 0.3433593    | 1         | 0.7337679 | 1            | 0.8136435    |
| #### Bn-scaff_17297_1-p21451genome unspecific (all in)         | 0.9928229    | 0.3495416    | 1         | 0.7253291 | 1            | 0.8470441    |
| #### Bn-scaff_17298_1-p10097C-genome specific (napus-oleracea) | 0.9976076    | 0.7247778    | 0.9302326 | 0.7464715 | not scorable | not scorable |

|                                                                |              |              |              |              |              |              |
|----------------------------------------------------------------|--------------|--------------|--------------|--------------|--------------|--------------|
| #### Bn-scaff_17298_1-p10201C-genome specific (napus-oleracea) | 0.9976076    | 0.8557616    | 0.9379845    | 0.7794527    | not scorable | not scorable |
| #### Bn-scaff_17298_1-p1055C genome unspecific (all in)        | 0.9976076    | 0.5102125    | 0.9844961    | 0.7564752    | 1            | 0.9162806    |
| #### Bn-scaff_17298_1-p1058C genome unspecific (all in)        | 1            | 0.9128749    | 1            | 0.8827848    | 1            | 0.9175813    |
| #### Bn-scaff_17298_1-p1064C-genome specific (napus-oleracea)  | 1            | 0.7523798    | 1            | 0.6499187    | not scorable | not scorable |
| #### Bn-scaff_17298_1-p1086C genome unspecific (oleracea-rapa) | not scorable | not scorable | 0.9922481    | 0.2641612    | 1            | 0.7494321    |
| #### Bn-scaff_17298_1-p1087C-genome specific (napus-oleracea)  | 1            | 0.6608821    | 0.9534883    | 0.7668707    | not scorable | not scorable |
| #### Bn-scaff_17298_1-p1092C genome unspecific (all in)        | 0.9952153    | 0.5135321    | 1            | 0.6791727    | 1            | 0.8565183    |
| #### Bn-scaff_17298_1-p1108C-genome specific (napus-oleracea)  | 0.9976076    | 0.7506835    | 1            | 0.817179     | not scorable | not scorable |
| #### Bn-scaff_17298_1-p1108C genome unspecific (all in)        | 0.9856459    | 0.4533492    | 1            | 0.7656969    | 1            | 0.8972833    |
| #### Bn-scaff_17298_1-p11364C-genome specific (napus-oleracea) | 0.9952153    | 0.6402696    | 1            | 0.6506146    | not scorable | not scorable |
| #### Bn-scaff_17298_1-p11584 genome unspecific (all in)        | 0.9976076    | 0.5163324    | 1            | 0.5671215    | 1            | 0.906221     |
| #### Bn-scaff_17298_1-p1159C-genome specific (napus-oleracea)  | 0.84689      | 0.9003737    | 0.8294573    | 0.7425296    | not scorable | not scorable |
| #### Bn-scaff_17298_1-p11707 genome unspecific (all in)        | 0.9928229    | 0.2898647    | 0.9689922    | 0.4673831    | 1            | 0.7372138    |
| #### Bn-scaff_17298_1-p11731C-genome specific (napus-oleracea) | 0.9976076    | 0.7764845    | 1            | 0.7585846    | not scorable | not scorable |
| #### Bn-scaff_17298_1-p1173C-genome specific (napus-oleracea)  | 0.9904306    | 0.2433351    | 1            | 0.769768     | not scorable | not scorable |
| #### Bn-scaff_17298_1-p1173A-genome specific (rapa only)       | not scorable | not scorable | not scorable | not scorable | 1            | 0.6167229    |
| #### Bn-scaff_17298_1-p1174C genome unspecific (all in)        | 0.9880383    | 0.2544468    | 1            | 0.7027119    | 1            | 0.5000001    |
| #### Bn-scaff_17298_1-p1174C-genome specific (napus-oleracea)  | 0.9976076    | 0.7629955    | 1            | 0.8875318    | not scorable | not scorable |
| #### Bn-scaff_17298_1-p11814C-genome specific (napus-oleracea) | 0.9880383    | 0.8015071    | 1            | 0.816835     | not scorable | not scorable |
| #### Bn-scaff_17298_1-p11971 genome unspecific (oleracea-rapa) | not scorable | not scorable | 0.9844961    | 0.7278452    | 1            | 0.8163193    |
| #### Bn-scaff_17298_1-p1218C genome unspecific (all in)        | 0.9784689    | 0.6915351    | 0.9844961    | 0.6494765    | 0.9917355    | 0.9142138    |
| #### Bn-scaff_17298_1-p1249C-genome specific (napus-oleracea)  | 0.9928229    | 0.7534947    | 0.9767442    | 0.7096513    | not scorable | not scorable |
| #### Bn-scaff_17298_1-p1249C-genome specific (napus-oleracea)  | 0.9856459    | 0.7604754    | 1            | 0.70801      | not scorable | not scorable |
| #### Bn-scaff_17298_1-p12511 genome unspecific (all in)        | 0.9856459    | 0.5336944    | 1            | 0.5942274    | 1            | 0.9316893    |
| #### Bn-scaff_17298_1-p12707C-genome specific (napus-oleracea) | 0.9856459    | 0.4780602    | 0.9767442    | 0.5420436    | not scorable | not scorable |
| #### Bn-scaff_17298_1-p1302C-genome specific (napus-oleracea)  | 0.9904306    | 0.7935525    | 1            | 0.325086     | not scorable | not scorable |
| #### Bn-scaff_17298_1-p13175C-genome specific (napus-oleracea) | 0.9832536    | 0.6739919    | 1            | 0.681298     | not scorable | not scorable |
| #### Bn-scaff_17298_1-p1320C genome unspecific (all in)        | 0.9712918    | 0.3095182    | 1            | 0.7971523    | 1            | 0.8848283    |
| #### Bn-scaff_17298_1-p13215 genome unspecific (all in)        | 0.9760765    | 0.305299     | 0.9844961    | 0.6771924    | 0.9917355    | 0.6672529    |
| #### Bn-scaff_17298_1-p13481 genome unspecific (oleracea-rapa) | not scorable | not scorable | 0.9844961    | 0.3617857    | 1            | 0.9087309    |
| #### Bn-scaff_17298_1-p1370C-genome specific (napus-oleracea)  | 0.9760765    | 0.3588943    | 1            | 0.6096005    | not scorable | not scorable |
| #### Bn-scaff_17298_1-p13877C-genome specific (napus-oleracea) | 1            | 0.6229062    | 1            | 0.6541934    | not scorable | not scorable |
| #### Bn-scaff_17298_1-p13882 genome unspecific (all in)        | 0.9952153    | 0.4861243    | 0.9844961    | 0.8054933    | 1            | 0.9120573    |

|                                                                 |              |              |              |              |              |              |
|-----------------------------------------------------------------|--------------|--------------|--------------|--------------|--------------|--------------|
| #### Bn-scaff_17298_1-p13915 C-genome specific (napus-oleracea) | 0.9904306    | 0.6385854    | 0.9922481    | 0.6112018    | not scorable | not scorable |
| #### Bn-scaff_17298_1-p14084 C-genome specific (napus-oleracea) | 0.9952153    | 0.8168859    | 0.9922481    | 0.199197     | not scorable | not scorable |
| #### Bn-scaff_17298_1-p14101 C-genome specific (napus-oleracea) | 0.9928229    | 0.8111158    | 1            | 0.883196     | not scorable | not scorable |
| #### Bn-scaff_17298_1-p14122 C-genome specific (napus-oleracea) | 0.9880383    | 0.8100253    | 1            | 0.7840209    | not scorable | not scorable |
| #### Bn-scaff_17298_1-p14132 C-genome specific (napus-oleracea) | 0.9856459    | 0.7011353    | 1            | 0.6860917    | not scorable | not scorable |
| #### Bn-scaff_17298_1-p14429 C-genome specific (napus-oleracea) | 1            | 0.6719267    | 0.9922481    | 0.7491218    | not scorable | not scorable |
| #### Bn-scaff_17298_1-p14718 genome unspecific (all in)         | 0.9832536    | 0.3596163    | 0.9844961    | 0.5239066    | 1            | 0.8135551    |
| #### Bn-scaff_17298_1-p15204 genome unspecific (all in)         | 0.9712918    | 0.4427636    | 1            | 0.8949711    | 0.9834711    | 0.8210261    |
| #### Bn-scaff_17298_1-p15584 genome unspecific (all in)         | 0.9856459    | 0.5624563    | 0.9922481    | 0.6551411    | 1            | 0.9277737    |
| #### Bn-scaff_17298_1-p17447 napus specific                     | 0.9114832    | 0.7219864    | not scorable | not scorable | not scorable | not scorable |
| #### Bn-scaff_17298_1-p17587 A-genome specific (napus-rapa)     | 0.9952153    | 0.536552     | not scorable | not scorable | 0.9834711    | 0.2847441    |
| #### Bn-scaff_17298_1-p18273 C-genome specific (napus-oleracea) | 0.9952153    | 0.6723971    | 0.9689922    | 0.5082974    | not scorable | not scorable |
| #### Bn-scaff_17298_1-p18531 C-genome specific (napus-oleracea) | 0.9928229    | 0.7561652    | 1            | 0.7292631    | not scorable | not scorable |
| #### Bn-scaff_17298_1-p19642 C-genome specific (napus-oleracea) | 0.9928229    | 0.7967782    | 1            | 0.7478936    | not scorable | not scorable |
| #### Bn-scaff_17298_1-p19724 napus specific                     | 0.4665072    | 0.7555094    | not scorable | not scorable | not scorable | not scorable |
| #### Bn-scaff_17298_1-p20277 C-genome specific (napus-oleracea) | 0.9712918    | 0.4904359    | 1            | 0.5532724    | not scorable | not scorable |
| #### Bn-scaff_17298_1-p20451 C-genome specific (napus-oleracea) | 0.9928229    | 0.7400698    | 0.9844961    | 0.7303321    | not scorable | not scorable |
| #### Bn-scaff_17298_1-p20493 genome unspecific (oleracea-rapa)  | not scorable | not scorable | 0.9922481    | 0.7212366    | 1            | 0.7919821    |
| #### Bn-scaff_17298_1-p20515 C-genome specific (napus-oleracea) | 0.430622     | 0.914667     | 0.8914729    | 0.8230382    | not scorable | not scorable |
| #### Bn-scaff_17298_1-p20962 C-genome specific (napus-oleracea) | 0.9784689    | 0.7822096    | 0.9689922    | 0.8191638    | not scorable | not scorable |
| #### Bn-scaff_17298_1-p20974 C-genome specific (napus-oleracea) | 0.9856459    | 0.7658658    | 0.9689922    | 0.723788     | not scorable | not scorable |
| #### Bn-scaff_17298_1-p21142 genome unspecific (all in)         | 0.9162679    | 0.1719624    | 1            | 0.9094991    | 0.9917355    | 0.8211371    |
| #### Bn-scaff_17298_1-p21143 genome unspecific (oleracea-rapa)  | not scorable | not scorable | 0.9922481    | 0.7353258    | 0.9917355    | 0.911149     |
| #### Bn-scaff_17298_1-p22038 C-genome specific (napus-oleracea) | 0.9976076    | 0.771007     | 1            | 0.8031606    | not scorable | not scorable |
| #### Bn-scaff_17298_1-p23329 C-genome specific (napus-oleracea) | 0.9928229    | 0.7042093    | 1            | 0.6686366    | not scorable | not scorable |
| #### Bn-scaff_17298_1-p23355 C-genome specific (napus-oleracea) | 0.9976076    | 0.7485216    | 0.9922481    | 0.6546281    | not scorable | not scorable |
| #### Bn-scaff_17298_1-p23594 C-genome specific (napus-oleracea) | 0.9736842    | 0.2412756    | 1            | 0.7238852    | not scorable | not scorable |
| #### Bn-scaff_17298_1-p25003 genome unspecific (all in)         | 0.9593301    | 0.6171325    | 1            | 0.6577537    | 1            | 0.9041975    |
| #### Bn-scaff_17298_1-p25691 C-genome specific (napus-oleracea) | 0.9904306    | 0.8480611    | 0.9844961    | 0.7381865    | not scorable | not scorable |
| #### Bn-scaff_17298_1-p25700 C-genome specific (napus-oleracea) | 0.9736842    | 0.748012     | 0.9922481    | 0.7625718    | not scorable | not scorable |
| #### Bn-scaff_17298_1-p26046 C-genome specific (napus-oleracea) | 0.9880383    | 0.6719354    | 1            | 0.5729156    | not scorable | not scorable |
| #### Bn-scaff_17298_1-p26223 C-genome specific (napus-oleracea) | 0.9904306    | 0.7648762    | 0.9844961    | 0.7733753    | not scorable | not scorable |
| #### Bn-scaff_17298_1-p26261 C-genome specific (napus-oleracea) | 0.9832536    | 0.8257034    | 0.9767442    | 0.4333209    | not scorable | not scorable |

|                                                                 |              |              |              |              |              |              |
|-----------------------------------------------------------------|--------------|--------------|--------------|--------------|--------------|--------------|
| #### Bn-scaff_17298_1-p26286 C-genome specific (napus-oleracea) | 0.9832536    | 0.7840705    | 0.9922481    | 0.7954407    | not scorable | not scorable |
| #### Bn-scaff_17298_1-p26325 C-genome specific (napus-oleracea) | 0.9808612    | 0.823872     | 0.9922481    | 0.5209841    | not scorable | not scorable |
| #### Bn-scaff_17298_1-p27762 napus specific                     | 0.9856459    | 0.8029387    | not scorable | not scorable | not scorable | not scorable |
| #### Bn-scaff_17298_1-p28196 C-genome specific (napus-oleracea) | 0.9832536    | 0.7791977    | 0.9922481    | 0.8391924    | not scorable | not scorable |
| #### Bn-scaff_17298_1-p28223 C-genome specific (napus-oleracea) | 0.9856459    | 0.7790676    | 1            | 0.7647061    | not scorable | not scorable |
| #### Bn-scaff_17298_1-p29084 genome unspecific (all in)         | 0.9856459    | 0.2800538    | 1            | 0.8484879    | 1            | 0.8323643    |
| #### Bn-scaff_17298_1-p30244 C-genome specific (napus-oleracea) | 0.9736842    | 0.6813701    | 0.9767442    | 0.5873851    | not scorable | not scorable |
| #### Bn-scaff_17298_1-p30293 C-genome specific (napus-oleracea) | 0.9928229    | 0.7750826    | 0.9922481    | 0.7175828    | not scorable | not scorable |
| #### Bn-scaff_17298_1-p30325 C-genome specific (napus-oleracea) | 0.9808612    | 0.7915234    | 0.9922481    | 0.6581514    | not scorable | not scorable |
| #### Bn-scaff_17298_1-p30507 C-genome specific (napus-oleracea) | 0.9928229    | 0.7960162    | 0.9922481    | 0.6815297    | not scorable | not scorable |
| #### Bn-scaff_17298_1-p30509 C-genome specific (napus-oleracea) | 0.9880383    | 0.7518744    | 0.9922481    | 0.4217175    | not scorable | not scorable |
| #### Bn-scaff_17298_1-p30516 C-genome specific (napus-oleracea) | 0.9928229    | 0.7000149    | 0.9922481    | 0.6857461    | not scorable | not scorable |
| #### Bn-scaff_17298_1-p30619 C-genome specific (napus-oleracea) | 0.9808612    | 0.5983918    | 0.9922481    | 0.485431     | not scorable | not scorable |
| #### Bn-scaff_17298_1-p30633 C-genome specific (napus-oleracea) | 0.9904306    | 0.742376     | 0.9922481    | 0.5469575    | not scorable | not scorable |
| #### Bn-scaff_17298_1-p30644 C-genome specific (napus-oleracea) | 0.9952153    | 0.7607663    | 0.9922481    | 0.6771998    | not scorable | not scorable |
| #### Bn-scaff_17298_1-p30658 C-genome specific (napus-oleracea) | 0.9808612    | 0.7201701    | 0.9922481    | 0.3603587    | not scorable | not scorable |
| #### Bn-scaff_17298_1-p30794 C-genome specific (napus-oleracea) | 0.9904306    | 0.645092     | 0.9922481    | 0.76249      | not scorable | not scorable |
| #### Bn-scaff_17298_1-p31454 A-genome specific (rapa only)      | not scorable | not scorable | not scorable | not scorable | 1            | 0.8059048    |
| #### Bn-scaff_17298_1-p31457 A-genome specific (rapa only)      | not scorable | not scorable | not scorable | not scorable | 0.9917355    | 0.7163069    |
| #### Bn-scaff_17298_1-p31479 A-genome specific (napus-rapa)     | 0.923445     | 0.3750094    | not scorable | not scorable | 1            | 0.9032573    |
| #### Bn-scaff_17298_1-p33495 C-genome specific (napus-oleracea) | 0.9952153    | 0.2965366    | 1            | 0.8445715    | not scorable | not scorable |
| #### Bn-scaff_17298_1-p33512 C-genome specific (napus-oleracea) | 0.9832536    | 0.3937518    | 1            | 0.4671625    | not scorable | not scorable |
| #### Bn-scaff_17298_1-p33519 C-genome specific (napus-oleracea) | 0.9736842    | 0.2749536    | 1            | 0.2974655    | not scorable | not scorable |
| #### Bn-scaff_17298_1-p35170 C-genome specific (napus-oleracea) | 0.9952153    | 0.7703979    | 0.9689922    | 0.842741     | not scorable | not scorable |
| #### Bn-scaff_17298_1-p36103 genome unspecific (all in)         | 0.9760765    | 0.2220172    | 1            | 0.7029347    | 0.8347107    | 0.8920358    |
| #### Bn-scaff_17298_1-p50421 C-genome specific (oleracea only)  | not scorable | not scorable | 1            | 0.5073043    | not scorable | not scorable |
| #### Bn-scaff_17298_1-p52420 C-genome specific (napus-oleracea) | 0.9784689    | 0.8328161    | 1            | 0.8180385    | not scorable | not scorable |
| #### Bn-scaff_17298_1-p52724 C-genome specific (napus-oleracea) | 0.9976076    | 0.8433919    | 0.9767442    | 0.8088477    | not scorable | not scorable |
| #### Bn-scaff_17298_1-p52794 C-genome specific (napus-oleracea) | 0.9880383    | 0.8035746    | 0.9689922    | 0.7559438    | not scorable | not scorable |
| #### Bn-scaff_17298_1-p53041 C-genome specific (napus-oleracea) | 0.9832536    | 0.7944862    | 0.9689922    | 0.648595     | not scorable | not scorable |
| #### Bn-scaff_17298_1-p53074 C-genome specific (napus-oleracea) | 0.9904306    | 0.830658     | 0.9224806    | 0.7659061    | not scorable | not scorable |
| #### Bn-scaff_17298_1-p53565 C-genome specific (napus-oleracea) | 0.9904306    | 0.8080589    | 0.9844961    | 0.6659449    | not scorable | not scorable |
| #### Bn-scaff_17298_1-p53705 C-genome specific (napus-oleracea) | 0.9832536    | 0.8413537    | 0.9767442    | 0.7846847    | not scorable | not scorable |



|                                                                 |           |           |              |              |              |              |
|-----------------------------------------------------------------|-----------|-----------|--------------|--------------|--------------|--------------|
| #### Bn-scaff_17298_1-p54162 C-genome specific (napus-oleracea) | 0.9832536 | 0.7898366 | 0.9844961    | 0.7020003    | not scorable | not scorable |
| #### Bn-scaff_17298_1-p54260 C-genome specific (napus-oleracea) | 0.9880383 | 0.7705734 | 0.9612403    | 0.7681292    | not scorable | not scorable |
| #### Bn-scaff_17298_1-p56424 C-genome specific (napus-oleracea) | 0.9904306 | 0.7371053 | 0.9457364    | 0.8282353    | not scorable | not scorable |
| #### Bn-scaff_17298_1-p58652 C-genome specific (napus-oleracea) | 0.9736842 | 0.6884693 | 0.9922481    | 0.6794655    | not scorable | not scorable |
| #### Bn-scaff_17298_1-p61168 C-genome specific (napus-oleracea) | 0.9808612 | 0.8128242 | 0.9302326    | 0.7875868    | not scorable | not scorable |
| #### Bn-scaff_17298_1-p61238 C-genome specific (napus-oleracea) | 0.9760765 | 0.6705326 | 0.9147287    | 0.6238516    | not scorable | not scorable |
| #### Bn-scaff_17298_1-p62378 C-genome specific (napus-oleracea) | 0.9856459 | 0.8537344 | 0.9302326    | 0.7239244    | not scorable | not scorable |
| #### Bn-scaff_17298_1-p62716 C-genome specific (napus-oleracea) | 0.9952153 | 0.6651582 | 0.9767442    | 0.6736915    | not scorable | not scorable |
| #### Bn-scaff_17298_1-p64021 C-genome specific (napus-oleracea) | 0.9904306 | 0.7155837 | 0.9224806    | 0.6772191    | not scorable | not scorable |
| #### Bn-scaff_17298_1-p64183 C-genome specific (napus-oleracea) | 0.9904306 | 0.7404748 | 0.9612403    | 0.5879859    | not scorable | not scorable |
| #### Bn-scaff_17298_1-p64283 C-genome specific (napus-oleracea) | 0.9904306 | 0.720541  | 0.9689922    | 0.7082736    | not scorable | not scorable |
| #### Bn-scaff_17298_1-p64625 C-genome specific (napus-oleracea) | 0.9880383 | 0.7453783 | 0.9612403    | 0.6541093    | not scorable | not scorable |
| #### Bn-scaff_17298_1-p64791 C-genome specific (napus-oleracea) | 0.9832536 | 0.7917151 | 0.9534883    | 0.7503249    | not scorable | not scorable |
| #### Bn-scaff_17298_1-p64955 genome unspecific (all in)         | 1         | 0.4889562 | 1            | 0.8237615    | 1            | 0.7788749    |
| #### Bn-scaff_17298_1-p66390 genome unspecific (all in)         | 0.9880383 | 0.5206373 | 1            | 0.9096904    | 1            | 0.7975145    |
| #### Bn-scaff_17298_1-p67983 C-genome specific (napus-oleracea) | 0.9808612 | 0.7960132 | 0.875969     | 0.8059558    | not scorable | not scorable |
| #### Bn-scaff_17298_1-p68538 C-genome specific (napus-oleracea) | 1         | 0.7765346 | 0.9922481    | 0.350192     | not scorable | not scorable |
| #### Bn-scaff_17298_1-p68706 genome unspecific (all in)         | 0.9521531 | 0.3442444 | 1            | 0.7566419    | 0.9834711    | 0.7876962    |
| #### Bn-scaff_17298_1-p69949 C-genome specific (napus-oleracea) | 0.9904306 | 0.9040092 | 0.9147287    | 0.8234316    | not scorable | not scorable |
| #### Bn-scaff_17298_1-p70588 genome unspecific (all in)         | 0.9688995 | 0.2921865 | 1            | 0.8208436    | 0.7933884    | 0.8392515    |
| #### Bn-scaff_17298_1-p72048 napus specific                     | 0.9617225 | 0.4421215 | not scorable | not scorable | not scorable | not scorable |
| #### Bn-scaff_17298_1-p75858 C-genome specific (napus-oleracea) | 0.9880383 | 0.7437755 | 0.9379845    | 0.729191     | not scorable | not scorable |
| #### Bn-scaff_17298_1-p76023 C-genome specific (napus-oleracea) | 0.9856459 | 0.682017  | 0.9457364    | 0.6694665    | not scorable | not scorable |
| #### Bn-scaff_17298_1-p76295 C-genome specific (napus-oleracea) | 0.9760765 | 0.747308  | 0.9457364    | 0.6926851    | not scorable | not scorable |
| #### Bn-scaff_17298_1-p76500 C-genome specific (napus-oleracea) | 0.9784689 | 0.7004576 | 0.9457364    | 0.6438926    | not scorable | not scorable |
| #### Bn-scaff_17298_1-p76678 C-genome specific (napus-oleracea) | 0.9928229 | 0.8723478 | 0.9534883    | 0.753131     | not scorable | not scorable |
| #### Bn-scaff_17298_1-p76904 C-genome specific (napus-oleracea) | 0.9880383 | 0.7937123 | 0.9534883    | 0.7250347    | not scorable | not scorable |
| #### Bn-scaff_17298_1-p77224 C-genome specific (napus-oleracea) | 0.9928229 | 0.6738658 | 0.9457364    | 0.6411067    | not scorable | not scorable |
| #### Bn-scaff_17298_1-p77543 C-genome specific (napus-oleracea) | 0.9976076 | 0.6864249 | 0.9922481    | 0.6584362    | not scorable | not scorable |
| #### Bn-scaff_17298_1-p77957 C-genome specific (napus-oleracea) | 1         | 0.7403774 | 0.9922481    | 0.8135551    | not scorable | not scorable |
| #### Bn-scaff_17298_1-p79509 C-genome specific (napus-oleracea) | 0.9090909 | 0.445282  | 1            | 0.9175813    | not scorable | not scorable |
| #### Bn-scaff_17298_1-p81075 C-genome specific (napus-oleracea) | 0.9880383 | 0.7117959 | 0.9689922    | 0.7317032    | not scorable | not scorable |
| #### Bn-scaff_17298_1-p81126 C-genome specific (napus-oleracea) | 0.9880383 | 0.5952214 | 0.9922481    | 0.596226     | not scorable | not scorable |

|                                                                 |              |              |              |              |              |              |
|-----------------------------------------------------------------|--------------|--------------|--------------|--------------|--------------|--------------|
| #### Bn-scaff_17298_1-p81188 C-genome specific (napus-oleracea) | 0.9880383    | 0.6784908    | 0.9922481    | 0.6510468    | not scorable | not scorable |
| #### Bn-scaff_17298_1-p82743 C-genome specific (napus-oleracea) | 0.9976076    | 0.7391533    | 0.9844961    | 0.7165465    | not scorable | not scorable |
| #### Bn-scaff_17298_1-p82787 genome unspecific (all in)         | 0.9976076    | 0.3149851    | 0.9844961    | 0.6681834    | 1            | 0.7395847    |
| #### Bn-scaff_17298_1-p82833 genome unspecific (all in)         | 0.9928229    | 0.741066     | 0.9922481    | 0.6978348    | 0.9834711    | 0.8638101    |
| #### Bn-scaff_17298_1-p84075 napus specific                     | 0.2799043    | 0.6874001    | not scorable | not scorable | not scorable | not scorable |
| #### Bn-scaff_17298_1-p84861 C-genome specific (napus-oleracea) | 0.9976076    | 0.6792608    | 0.9302326    | 0.8148592    | not scorable | not scorable |
| #### Bn-scaff_17298_1-p85377 C-genome specific (napus-oleracea) | 0.9904306    | 0.716596     | 0.9612403    | 0.7709484    | not scorable | not scorable |
| #### Bn-scaff_17298_1-p87638 C-genome specific (napus-oleracea) | 0.9976076    | 0.8227802    | 0.9612403    | 0.8194171    | not scorable | not scorable |
| #### Bn-scaff_17298_1-p88392 C-genome specific (napus-oleracea) | 1            | 0.7388875    | 0.9534883    | 0.812444     | not scorable | not scorable |
| #### Bn-scaff_17298_1-p88654 C-genome specific (napus-oleracea) | 0.9928229    | 0.7884709    | 0.9534883    | 0.8143479    | not scorable | not scorable |
| #### Bn-scaff_17298_1-p89111 C-genome specific (napus-oleracea) | 0.9880383    | 0.793678     | 0.9612403    | 0.7480471    | not scorable | not scorable |
| #### Bn-scaff_17298_1-p90910 C-genome specific (napus-oleracea) | 0.9904306    | 0.8016858    | 1            | 0.7841121    | not scorable | not scorable |
| #### Bn-scaff_17298_1-p92835 genome unspecific (oleracea-rapa)  | not scorable | not scorable | 1            | 0.5564049    | 0.9917355    | 0.6048879    |
| #### Bn-scaff_17298_1-p92841 genome unspecific (all in)         | 0.9641148    | 0.3442442    | 1            | 0.8004663    | 1            | 0.7112986    |
| #### Bn-scaff_17298_1-p93473 C-genome specific (napus-oleracea) | 0.9880383    | 0.7766745    | 1            | 0.7736629    | not scorable | not scorable |
| #### Bn-scaff_17298_1-p93634 C-genome specific (napus-oleracea) | 0.9808612    | 0.7865111    | 0.9922481    | 0.8386273    | not scorable | not scorable |
| #### Bn-scaff_17316_1-p13773 C-genome specific (napus-oleracea) | 0.9928229    | 0.8032515    | 1            | 0.8089221    | not scorable | not scorable |
| #### Bn-scaff_17316_1-p13841 C-genome specific (napus-oleracea) | 0.9976076    | 0.7426133    | 1            | 0.7030711    | not scorable | not scorable |
| #### Bn-scaff_17316_1-p14331 genome unspecific (all in)         | 0.9880383    | 0.5331692    | 1            | 0.7770717    | 1            | 0.8800384    |
| #### Bn-scaff_17316_1-p14906 C-genome specific (napus-oleracea) | 0.9880383    | 0.7722595    | 1            | 0.8389148    | not scorable | not scorable |
| #### Bn-scaff_17316_1-p15765 C-genome specific (napus-oleracea) | 1            | 0.692532     | 1            | 0.6782246    | not scorable | not scorable |
| #### Bn-scaff_17316_1-p17060 C-genome specific (napus-oleracea) | 0.9928229    | 0.7480559    | 1            | 0.8129238    | not scorable | not scorable |
| #### Bn-scaff_17316_1-p3232 C-genome specific (napus-oleracea)  | 0.9928229    | 0.7771861    | 0.9689922    | 0.9092076    | not scorable | not scorable |
| #### Bn-scaff_17316_1-p35218 C-genome specific (napus-oleracea) | 0.9904306    | 0.7988557    | 1            | 0.9175813    | not scorable | not scorable |
| #### Bn-scaff_17316_1-p3537 C-genome specific (napus-oleracea)  | 0.9952153    | 0.7553217    | 0.9689922    | 0.7887998    | not scorable | not scorable |
| #### Bn-scaff_17316_1-p36051 C-genome specific (napus-oleracea) | 0.9832536    | 0.7045814    | 1            | 0.8135551    | not scorable | not scorable |
| #### Bn-scaff_17316_1-p37986 C-genome specific (napus-oleracea) | 0.9928229    | 0.7330017    | 1            | 0.9272014    | not scorable | not scorable |
| #### Bn-scaff_17316_1-p38127 C-genome specific (napus-oleracea) | 1            | 0.7448328    | 0.9922481    | 0.8654341    | not scorable | not scorable |
| #### Bn-scaff_17316_1-p39729 C-genome specific (napus-oleracea) | 0.9976076    | 0.6517181    | 1            | 0.7830434    | not scorable | not scorable |
| #### Bn-scaff_17316_1-p39807 C-genome specific (napus-oleracea) | 0.9904306    | 0.7243326    | 1            | 0.7739488    | not scorable | not scorable |
| #### Bn-scaff_17319_1-p4691 genome unspecific (all in)          | 1            | 0.3964665    | 0.9922481    | 0.3456808    | 1            | 0.9168816    |
| #### Bn-scaff_17319_1-p6719 C-genome specific (napus-oleracea)  | 0.9976076    | 0.6532369    | 0.9922481    | 0.7372329    | not scorable | not scorable |
| #### Bn-scaff_17326_1-p10728 C-genome specific (napus-oleracea) | 0.8923445    | 0.7885957    | 1            | 0.7770717    | not scorable | not scorable |

|                                                                 |              |              |              |              |              |              |
|-----------------------------------------------------------------|--------------|--------------|--------------|--------------|--------------|--------------|
| #### Bn-scaff_17326_1-p24349 C-genome specific (napus-oleracea) | 1            | 0.5286084    | 0.9844961    | 0.5041854    | not scorable | not scorable |
| #### Bn-scaff_17326_1-p25482 C-genome specific (napus-oleracea) | 0.9138756    | 0.2573101    | 1            | 0.5293352    | not scorable | not scorable |
| #### Bn-scaff_17326_1-p35779 genome unspecific (all in)         | 0.9760765    | 0.1904577    | 0.9689922    | 0.4432862    | 0.9917355    | 0.9205657    |
| #### Bn-scaff_17326_1-p49910 C-genome specific (napus-oleracea) | 1            | 0.565666     | 0.9069768    | 0.2564853    | not scorable | not scorable |
| #### Bn-scaff_17326_1-p53651 C-genome specific (napus-oleracea) | 0.9904306    | 0.7016628    | 1            | 0.79882      | not scorable | not scorable |
| #### Bn-scaff_17326_1-p71843 genome unspecific (all in)         | 0.9593301    | 0.2147614    | 1            | 0.6938401    | 0.9669421    | 0.729885     |
| #### Bn-scaff_17326_1-p91161 genome unspecific (all in)         | 0.9688995    | 0.2394439    | 1            | 0.7123568    | 0.9917355    | 0.6385047    |
| #### Bn-scaff_17335_1-p11147 C-genome specific (oleracea only)  | not scorable | not scorable | 0.9844961    | 0.3637114    | not scorable | not scorable |
| #### Bn-scaff_17335_1-p11923 genome unspecific (all in)         | 0.9952153    | 0.3727491    | 1            | 0.7293278    | 1            | 0.8793069    |
| #### Bn-scaff_17335_1-p21944 C-genome specific (napus-oleracea) | 1            | 0.7797875    | 0.9922481    | 0.6768839    | not scorable | not scorable |
| #### Bn-scaff_17339_1-p14543 C-genome specific (napus-oleracea) | 0.9784689    | 0.7736471    | 0.9534883    | 0.7934893    | not scorable | not scorable |
| #### Bn-scaff_17339_1-p16075 C-genome specific (oleracea only)  | not scorable | not scorable | 0.9534883    | 0.6859401    | not scorable | not scorable |
| #### Bn-scaff_17339_1-p16087 C-genome specific (napus-oleracea) | 0.9114832    | 0.4470229    | 0.9534883    | 0.8135551    | not scorable | not scorable |
| #### Bn-scaff_17339_1-p16096 napus specific                     | 0.9832536    | 0.2710349    | not scorable | not scorable | not scorable | not scorable |
| #### Bn-scaff_17339_1-p16109 C-genome specific (oleracea only)  | not scorable | not scorable | 0.9534883    | 0.8085331    | not scorable | not scorable |
| #### Bn-scaff_17339_1-p16298 genome unspecific (all in)         | 0.9569378    | 0.5626681    | 0.9534883    | 0.7884539    | 0.9421487    | 0.9039531    |
| #### Bn-scaff_17339_1-p23654 genome unspecific (all in)         | 0.9808612    | 0.1958579    | 0.9844961    | 0.3217014    | 1            | 0.7252899    |
| #### Bn-scaff_17339_1-p23803 genome unspecific (all in)         | 0.9904306    | 0.5714389    | 1            | 0.6243786    | 1            | 0.8496237    |
| #### Bn-scaff_17339_1-p26278 C-genome specific (napus-oleracea) | 0.9880383    | 0.7404124    | 1            | 0.6638672    | not scorable | not scorable |
| #### Bn-scaff_17339_1-p27463 C-genome specific (napus-oleracea) | 0.9880383    | 0.3192044    | 1            | 0.7330534    | not scorable | not scorable |
| #### Bn-scaff_17339_1-p27579 C-genome specific (napus-oleracea) | 0.9665072    | 0.3983729    | 0.9922481    | 0.9504751    | not scorable | not scorable |
| #### Bn-scaff_17339_1-p27632 genome unspecific (all in)         | 0.9832536    | 0.6006812    | 0.9922481    | 0.9240688    | 1            | 0.9398554    |
| #### Bn-scaff_17339_1-p28230 genome unspecific (all in)         | 0.9976076    | 0.5179922    | 1            | 0.9175813    | 0.9834711    | 0.9373553    |
| #### Bn-scaff_17339_1-p28261 C-genome specific (napus-oleracea) | 0.9904306    | 0.8702896    | 1            | 0.9177445    | not scorable | not scorable |
| #### Bn-scaff_17339_1-p28752 C-genome specific (napus-oleracea) | 0.9856459    | 0.7288644    | 1            | 0.8952653    | not scorable | not scorable |
| #### Bn-scaff_17339_1-p29299 C-genome specific (napus-oleracea) | 0.9186603    | 0.6549847    | 1            | 0.9238335    | not scorable | not scorable |
| #### Bn-scaff_17339_1-p31578 C-genome specific (napus-oleracea) | 0.9904306    | 0.5852709    | 1            | 0.8085203    | not scorable | not scorable |
| #### Bn-scaff_17339_1-p31641 C-genome specific (napus-oleracea) | 0.9880383    | 0.6893473    | 1            | 0.788817     | not scorable | not scorable |
| #### Bn-scaff_17339_1-p38035 C-genome specific (napus-oleracea) | 0.9904306    | 0.8841086    | 0.9922481    | 0.8859915    | not scorable | not scorable |
| #### Bn-scaff_17339_1-p39381 C-genome specific (napus-oleracea) | 0.9186603    | 0.7758434    | 1            | 0.7988475    | not scorable | not scorable |
| #### Bn-scaff_17339_1-p44380 genome unspecific (oleracea-rapa)  | not scorable | not scorable | 1            | 0.8153104    | 1            | 0.9211669    |
| #### Bn-scaff_17346_1-p10082 C-genome specific (napus-oleracea) | 0.9832536    | 0.7382827    | 0.9457364    | 0.7743945    | not scorable | not scorable |
| #### Bn-scaff_17346_1-p10320 genome unspecific (all in)         | 0.9856459    | 0.3911741    | 0.9302326    | 0.7659664    | 1            | 0.8948976    |

|                                                                 |              |              |           |           |              |              |
|-----------------------------------------------------------------|--------------|--------------|-----------|-----------|--------------|--------------|
| #### Bn-scaff_17346_1-p10634 C-genome specific (napus-oleracea) | 0.9904306    | 0.7714858    | 0.9767442 | 0.8048718 | not scorable | not scorable |
| #### Bn-scaff_17346_1-p15489 C-genome specific (napus-oleracea) | 0.6220096    | 0.7539716    | 0.7054263 | 0.8160133 | not scorable | not scorable |
| #### Bn-scaff_17346_1-p75859 C-genome specific (napus-oleracea) | 1            | 0.6829811    | 0.9844961 | 0.6803502 | not scorable | not scorable |
| #### Bn-scaff_17346_1-p99965 genome unspecific (all in)         | 0.9856459    | 0.2567691    | 1         | 0.674928  | 0.9752066    | 0.6967559    |
| #### Bn-scaff_17367_1-p13211 C-genome specific (napus-oleracea) | 0.9928229    | 0.7544396    | 1         | 0.3862918 | not scorable | not scorable |
| #### Bn-scaff_17367_1-p17938 C-genome specific (napus-oleracea) | 0.9521531    | 0.6738448    | 1         | 0.716089  | not scorable | not scorable |
| #### Bn-scaff_17367_1-p18167 C-genome specific (napus-oleracea) | 0.9641148    | 0.7757487    | 0.9612403 | 0.5347149 | not scorable | not scorable |
| #### Bn-scaff_17367_1-p19084 C-genome specific (napus-oleracea) | 0.9784689    | 0.7645193    | 1         | 0.7938867 | not scorable | not scorable |
| #### Bn-scaff_17367_1-p20175 C-genome specific (napus-oleracea) | 0.9784689    | 0.6007427    | 1         | 0.574044  | not scorable | not scorable |
| #### Bn-scaff_17367_1-p20291 C-genome specific (napus-oleracea) | 0.9904306    | 0.7655537    | 1         | 0.83707   | not scorable | not scorable |
| #### Bn-scaff_17367_1-p20483 C-genome specific (napus-oleracea) | 0.9976076    | 0.7848157    | 1         | 0.5048898 | not scorable | not scorable |
| #### Bn-scaff_17367_1-p22515 C-genome specific (oleracea only)  | not scorable | not scorable | 0.9612403 | 0.6543225 | not scorable | not scorable |
| #### Bn-scaff_17367_1-p23121 genome unspecific (all in)         | 0.9712918    | 0.2409593    | 1         | 0.4098522 | 1            | 0.7642221    |
| #### Bn-scaff_17367_1-p23161 genome unspecific (all in)         | 0.9688995    | 0.241394     | 1         | 0.690051  | 1            | 0.7376376    |
| #### Bn-scaff_17367_1-p25228 C-genome specific (napus-oleracea) | 0.9808612    | 0.7711808    | 0.9922481 | 0.7456515 | not scorable | not scorable |
| #### Bn-scaff_17367_1-p25427 C-genome specific (napus-oleracea) | 0.9856459    | 0.7060231    | 1         | 0.5621397 | not scorable | not scorable |
| #### Bn-scaff_17367_1-p25439 C-genome specific (napus-oleracea) | 0.9856459    | 0.7961015    | 1         | 0.2786038 | not scorable | not scorable |
| #### Bn-scaff_17367_1-p25617 C-genome specific (napus-oleracea) | 0.9856459    | 0.6660513    | 1         | 0.4731047 | not scorable | not scorable |
| #### Bn-scaff_17367_1-p27651 C-genome specific (napus-oleracea) | 0.9688995    | 0.7960436    | 0.9922481 | 0.8042249 | not scorable | not scorable |
| #### Bn-scaff_17367_1-p30981 C-genome specific (napus-oleracea) | 0.9880383    | 0.7711177    | 1         | 0.7759107 | not scorable | not scorable |
| #### Bn-scaff_17367_1-p31024 C-genome specific (napus-oleracea) | 0.9808612    | 0.661398     | 0.9922481 | 0.7594156 | not scorable | not scorable |
| #### Bn-scaff_17367_1-p31027 C-genome specific (napus-oleracea) | 0.9880383    | 0.7946461    | 1         | 0.7415872 | not scorable | not scorable |
| #### Bn-scaff_17367_1-p31868 C-genome specific (napus-oleracea) | 0.9784689    | 0.6539655    | 0.9767442 | 0.6906038 | not scorable | not scorable |
| #### Bn-scaff_17367_1-p32061 C-genome specific (napus-oleracea) | 0.9832536    | 0.7953752    | 1         | 0.7541432 | not scorable | not scorable |
| #### Bn-scaff_17367_1-p32351 C-genome specific (napus-oleracea) | 0.9760765    | 0.6927478    | 1         | 0.6808159 | not scorable | not scorable |
| #### Bn-scaff_17367_1-p32374 C-genome specific (napus-oleracea) | 0.9856459    | 0.7916585    | 1         | 0.4319778 | not scorable | not scorable |
| #### Bn-scaff_17367_1-p32391 C-genome specific (napus-oleracea) | 0.9856459    | 0.7509685    | 1         | 0.8949171 | not scorable | not scorable |
| #### Bn-scaff_17367_1-p32403 C-genome specific (napus-oleracea) | 0.9832536    | 0.7773715    | 1         | 0.787734  | not scorable | not scorable |
| #### Bn-scaff_17367_1-p34555 C-genome specific (napus-oleracea) | 0.9856459    | 0.7438815    | 1         | 0.3289801 | not scorable | not scorable |
| #### Bn-scaff_17367_1-p34574 C-genome specific (napus-oleracea) | 0.9856459    | 0.7732376    | 1         | 0.3342373 | not scorable | not scorable |
| #### Bn-scaff_17367_1-p34694 genome unspecific (oleracea-rapa)  | not scorable | not scorable | 1         | 0.8188038 | 0.9917355    | 0.8168268    |
| #### Bn-scaff_17367_1-p34709 genome unspecific (all in)         | 0.9832536    | 0.3004154    | 1         | 0.8130964 | 1            | 0.7305101    |
| #### Bn-scaff_17367_1-p35180 C-genome specific (napus-oleracea) | 0.9808612    | 0.6629764    | 1         | 0.6576464 | not scorable | not scorable |

|                                                                 |              |              |              |              |              |              |
|-----------------------------------------------------------------|--------------|--------------|--------------|--------------|--------------|--------------|
| #### Bn-scaff_17367_1-p35254 C-genome specific (napus-oleracea) | 1            | 0.8450587    | 0.9922481    | 0.7067898    | not scorable | not scorable |
| #### Bn-scaff_17367_1-p35371 C-genome specific (napus-oleracea) | 0.9880383    | 0.7379405    | 1            | 0.7338962    | not scorable | not scorable |
| #### Bn-scaff_17367_1-p35518 C-genome specific (napus-oleracea) | 0.9784689    | 0.6908219    | 0.9922481    | 0.601061     | not scorable | not scorable |
| #### Bn-scaff_17367_1-p35935 C-genome specific (napus-oleracea) | 0.9760765    | 0.6242986    | 0.9922481    | 0.6543855    | not scorable | not scorable |
| #### Bn-scaff_17367_1-p37679 C-genome specific (napus-oleracea) | 0.9856459    | 0.7356313    | 0.9922481    | 0.7802418    | not scorable | not scorable |
| #### Bn-scaff_17367_1-p37839 C-genome specific (napus-oleracea) | 0.9904306    | 0.7672161    | 1            | 0.9071044    | not scorable | not scorable |
| #### Bn-scaff_17367_1-p37858 C-genome specific (napus-oleracea) | 0.9856459    | 0.7449903    | 1            | 0.8948976    | not scorable | not scorable |
| #### Bn-scaff_17367_1-p37884 C-genome specific (napus-oleracea) | 0.9952153    | 0.7285243    | 1            | 0.8224477    | not scorable | not scorable |
| #### Bn-scaff_17367_1-p37885 C-genome specific (napus-oleracea) | 0.9832536    | 0.7865113    | 1            | 0.9175813    | not scorable | not scorable |
| #### Bn-scaff_17367_1-p37998 C-genome specific (napus-oleracea) | 0.9904306    | 0.7484789    | 0.9922481    | 0.8953146    | not scorable | not scorable |
| #### Bn-scaff_17367_1-p38101 C-genome specific (napus-oleracea) | 0.9832536    | 0.7789239    | 1            | 0.7617618    | not scorable | not scorable |
| #### Bn-scaff_17367_1-p41737 C-genome specific (napus-oleracea) | 0.9784689    | 0.6649479    | 1            | 0.786476     | not scorable | not scorable |
| #### Bn-scaff_17367_1-p42800 C-genome specific (napus-oleracea) | 0.9784689    | 0.7672529    | 0.9612403    | 0.7838537    | not scorable | not scorable |
| #### Bn-scaff_17367_1-p42833 C-genome specific (napus-oleracea) | 0.9880383    | 0.7773505    | 1            | 0.8364414    | not scorable | not scorable |
| #### Bn-scaff_17367_1-p43912 C-genome specific (napus-oleracea) | 0.9856459    | 0.7065925    | 1            | 0.541457     | not scorable | not scorable |
| #### Bn-scaff_17367_1-p49576 C-genome specific (napus-oleracea) | 0.9880383    | 0.7087152    | 1            | 0.9025437    | not scorable | not scorable |
| #### Bn-scaff_17367_1-p50277 C-genome specific (napus-oleracea) | 0.9832536    | 0.7545627    | 0.9922481    | 0.9011017    | not scorable | not scorable |
| #### Bn-scaff_17367_1-p50363 C-genome specific (napus-oleracea) | 0.9808612    | 0.7018309    | 1            | 0.7893584    | not scorable | not scorable |
| #### Bn-scaff_17367_1-p55843 genome unspecific (all in)         | 0.9712918    | 0.4995457    | 0.9534883    | 0.8148679    | 1            | 0.9175813    |
| #### Bn-scaff_17367_1-p56072 genome unspecific (all in)         | 0.9760765    | 0.2622615    | 0.9534883    | 0.7359472    | 0.9752066    | 0.6862885    |
| #### Bn-scaff_17367_1-p56072 genome unspecific (oleracea-rapa)  | not scorable | not scorable | 0.9534883    | 0.7116211    | 1            | 0.8064788    |
| #### Bn-scaff_17367_1-p57565 genome unspecific (all in)         | 0.9832536    | 0.2414739    | 1            | 0.7356971    | 1            | 0.9081424    |
| #### Bn-scaff_17367_1-p57614 genome unspecific (all in)         | 0.9712918    | 0.3018284    | 1            | 0.7551183    | 1            | 0.8744954    |
| #### Bn-scaff_17367_1-p57648 genome unspecific (all in)         | 0.9880383    | 0.4185739    | 1            | 0.8004208    | 1            | 0.8354282    |
| #### Bn-scaff_17367_1-p59082 genome unspecific (all in)         | 0.9808612    | 0.4878776    | 1            | 0.7378951    | 1            | 0.6923142    |
| #### Bn-scaff_17367_1-p59093 genome unspecific (all in)         | 1            | 0.7701179    | 1            | 0.9095823    | 1            | 0.9039531    |
| #### Bn-scaff_17367_1-p59098 genome unspecific (all in)         | 0.9928229    | 0.2740232    | 1            | 0.6814315    | 1            | 0.7548488    |
| #### Bn-scaff_17367_1-p60190 napus specific                     | 0.9760765    | 0.4360475    | not scorable | not scorable | not scorable | not scorable |
| #### Bn-scaff_17367_1-p63741 genome unspecific (all in)         | 0.9760765    | 0.3864003    | 1            | 0.4398846    | 1            | 0.9351504    |
| #### Bn-scaff_17367_1-p65066 C-genome specific (napus-oleracea) | 0.9880383    | 0.7596306    | 1            | 0.3518539    | not scorable | not scorable |
| #### Bn-scaff_17367_1-p67748 C-genome specific (napus-oleracea) | 0.9856459    | 0.8092031    | 0.9922481    | 0.862032     | not scorable | not scorable |
| #### Bn-scaff_17367_1-p68403 C-genome specific (napus-oleracea) | 0.9880383    | 0.7692645    | 1            | 0.8349868    | not scorable | not scorable |
| #### Bn-scaff_17367_1-p68781 genome unspecific (all in)         | 0.9904306    | 0.2754717    | 0.9457364    | 0.2539684    | 1            | 0.9175813    |

|                                                                 |              |              |              |              |              |              |
|-----------------------------------------------------------------|--------------|--------------|--------------|--------------|--------------|--------------|
| #### Bn-scaff_17367_1-p69089 C-genome specific (oleracea only)  | not scorable | not scorable | 1            | 0.8490602    | not scorable | not scorable |
| #### Bn-scaff_17367_1-p69664 C-genome specific (napus-oleracea) | 0.9712918    | 0.786508     | 0.9689922    | 0.7394509    | not scorable | not scorable |
| #### Bn-scaff_17367_1-p69670 C-genome specific (napus-oleracea) | 0.9808612    | 0.7362077    | 0.9689922    | 0.7517037    | not scorable | not scorable |
| #### Bn-scaff_17367_1-p70046 C-genome specific (napus-oleracea) | 0.9928229    | 0.7441415    | 0.9922481    | 0.840167     | not scorable | not scorable |
| #### Bn-scaff_17367_1-p70093 C-genome specific (napus-oleracea) | 0.9904306    | 0.7657947    | 1            | 0.7657425    | not scorable | not scorable |
| #### Bn-scaff_17367_1-p70253 C-genome specific (napus-oleracea) | 0.9784689    | 0.7490454    | 0.9844961    | 0.8142078    | not scorable | not scorable |
| #### Bn-scaff_17367_1-p70914 C-genome specific (napus-oleracea) | 0.9880383    | 0.7441415    | 0.9767442    | 0.8460509    | not scorable | not scorable |
| #### Bn-scaff_17367_1-p70956 C-genome specific (napus-oleracea) | 0.9856459    | 0.7669075    | 0.9844961    | 0.8513039    | not scorable | not scorable |
| #### Bn-scaff_17367_1-p73718 C-genome specific (napus-oleracea) | 0.9497608    | 0.6944377    | 0.9689922    | 0.6356049    | not scorable | not scorable |
| #### Bn-scaff_17367_1-p79178 genome unspecific (all in)         | 0.9784689    | 0.2175486    | 0.9689922    | 0.2733902    | 1            | 0.7622204    |
| #### Bn-scaff_17367_1-p85016 C-genome specific (napus-oleracea) | 0.9808612    | 0.7691832    | 1            | 0.7875881    | not scorable | not scorable |
| #### Bn-scaff_17367_1-p86435 genome unspecific (all in)         | 0.9976076    | 0.4926791    | 0.7674419    | 0.8338459    | 0.9917355    | 0.7493592    |
| #### Bn-scaff_17367_1-p86456 A-genome specific (rapa only)      | not scorable | not scorable | not scorable | not scorable | 0.9834711    | 0.7064139    |
| #### Bn-scaff_17367_1-p86610 genome unspecific (all in)         | 0.9641148    | 0.2515547    | 1            | 0.9093296    | 1            | 0.785891     |
| #### Bn-scaff_17367_1-p9887 genome unspecific (all in)          | 0.9712918    | 0.4196526    | 0.9922481    | 0.6615384    | 1            | 0.8940403    |
| #### Bn-scaff_17369_1-p10004 C-genome specific (napus-oleracea) | 0.9760765    | 0.7748269    | 0.9844961    | 0.8067483    | not scorable | not scorable |
| #### Bn-scaff_17369_1-p10007 C-genome specific (napus-oleracea) | 0.9784689    | 0.7669551    | 0.9922481    | 0.838235     | not scorable | not scorable |
| #### Bn-scaff_17369_1-p10034 C-genome specific (napus-oleracea) | 0.9784689    | 0.7613242    | 1            | 0.7823853    | not scorable | not scorable |
| #### Bn-scaff_17369_1-p10050 C-genome specific (napus-oleracea) | 0.9354067    | 0.8279255    | 0.9379845    | 0.6922324    | not scorable | not scorable |
| #### Bn-scaff_17369_1-p10167 C-genome specific (napus-oleracea) | 0.9808612    | 0.7395086    | 1            | 0.7720731    | not scorable | not scorable |
| #### Bn-scaff_17369_1-p10170 C-genome specific (napus-oleracea) | 0.9880383    | 0.6274915    | 1            | 0.7663837    | not scorable | not scorable |
| #### Bn-scaff_17369_1-p10171 genome unspecific (oleracea-rapa)  | not scorable | not scorable | 1            | 0.897328     | 1            | 0.9108951    |
| #### Bn-scaff_17369_1-p10417 C-genome specific (napus-oleracea) | 0.9784689    | 0.8035409    | 1            | 0.7579607    | not scorable | not scorable |
| #### Bn-scaff_17369_1-p10417 C-genome specific (napus-oleracea) | 0.9784689    | 0.7816344    | 1            | 0.770364     | not scorable | not scorable |
| #### Bn-scaff_17369_1-p10529 C-genome specific (napus-oleracea) | 0.9641148    | 0.6096465    | 1            | 0.6091877    | not scorable | not scorable |
| #### Bn-scaff_17369_1-p10547 C-genome specific (napus-oleracea) | 0.9593301    | 0.6899366    | 0.8294573    | 0.6665164    | not scorable | not scorable |
| #### Bn-scaff_17369_1-p10552 C-genome specific (napus-oleracea) | 0.9617225    | 0.7943469    | 0.8294573    | 0.8533262    | not scorable | not scorable |
| #### Bn-scaff_17369_1-p10595 C-genome specific (napus-oleracea) | 0.9712918    | 0.7758434    | 1            | 0.7879306    | not scorable | not scorable |
| #### Bn-scaff_17369_1-p10596 C-genome specific (napus-oleracea) | 0.9832536    | 0.7608948    | 1            | 0.7135131    | not scorable | not scorable |
| #### Bn-scaff_17369_1-p10607 C-genome specific (napus-oleracea) | 0.9880383    | 0.7723348    | 1            | 0.7402919    | not scorable | not scorable |
| #### Bn-scaff_17369_1-p10628 all not scorable                   | not scorable | not scorable | not scorable | not scorable | not scorable | not scorable |
| #### Bn-scaff_17369_1-p10886 C-genome specific (napus-oleracea) | 0.8755981    | 0.7569851    | 0.496124     | 0.7634708    | not scorable | not scorable |
| #### Bn-scaff_17369_1-p10991 C-genome specific (napus-oleracea) | 0.8875598    | 0.8187077    | 0.9767442    | 0.6744188    | not scorable | not scorable |

|                                                                 |              |              |              |              |              |              |
|-----------------------------------------------------------------|--------------|--------------|--------------|--------------|--------------|--------------|
| #### Bn-scaff_17369_1-p11117 C-genome specific (napus-oleracea) | 0.9880383    | 0.7298197    | 0.9922481    | 0.7840528    | not scorable | not scorable |
| #### Bn-scaff_17369_1-p11126 C-genome specific (napus-oleracea) | 0.9856459    | 0.7332162    | 1            | 0.7334812    | not scorable | not scorable |
| #### Bn-scaff_17369_1-p11306 C-genome specific (napus-oleracea) | 0.9641148    | 0.8581714    | 0.5426357    | 0.8036351    | not scorable | not scorable |
| #### Bn-scaff_17369_1-p11308 C-genome specific (napus-oleracea) | 0.9712918    | 0.7660437    | 1            | 0.689308     | not scorable | not scorable |
| #### Bn-scaff_17369_1-p11501 genome unspecific (all in)         | 0.9928229    | 0.5073346    | 0.9922481    | 0.561996     | 1            | 0.7738006    |
| #### Bn-scaff_17369_1-p11502 C-genome specific (napus-oleracea) | 0.9808612    | 0.6985762    | 1            | 0.6517869    | not scorable | not scorable |
| #### Bn-scaff_17369_1-p11503 C-genome specific (napus-oleracea) | 0.9832536    | 0.7354693    | 1            | 0.7725188    | not scorable | not scorable |
| #### Bn-scaff_17369_1-p11519 genome unspecific (all in)         | 0.9760765    | 0.2259518    | 1            | 0.8008119    | 1            | 0.7914145    |
| #### Bn-scaff_17369_1-p11526 genome unspecific (all in)         | 0.9712918    | 0.2686653    | 1            | 0.8919666    | 0.9586777    | 0.755307     |
| #### Bn-scaff_17369_1-p11609 C-genome specific (napus-oleracea) | 0.9904306    | 0.6795769    | 0.9922481    | 0.6070014    | not scorable | not scorable |
| #### Bn-scaff_17369_1-p11905 C-genome specific (napus-oleracea) | 0.9904306    | 0.4249682    | 1            | 0.8505051    | not scorable | not scorable |
| #### Bn-scaff_17369_1-p11991 C-genome specific (napus-oleracea) | 0.9880383    | 0.6385577    | 1            | 0.6848375    | not scorable | not scorable |
| #### Bn-scaff_17369_1-p11999 genome unspecific (all in)         | 0.8827751    | 0.2593328    | 0.9767442    | 0.5422057    | 1            | 0.6144986    |
| #### Bn-scaff_17369_1-p12075 C-genome specific (napus-oleracea) | 0.9712918    | 0.7774242    | 1            | 0.8267025    | not scorable | not scorable |
| #### Bn-scaff_17369_1-p12081 genome unspecific (all in)         | 0.9928229    | 0.3842616    | 0.9922481    | 0.7839687    | 1            | 0.903667     |
| #### Bn-scaff_17369_1-p12250 C-genome specific (napus-oleracea) | 0.9688995    | 0.780124     | 0.620155     | 0.7277306    | not scorable | not scorable |
| #### Bn-scaff_17369_1-p12355 C-genome specific (oleracea only)  | not scorable | not scorable | 1            | 0.7979102    | not scorable | not scorable |
| #### Bn-scaff_17369_1-p12447 napus specific                     | 0.9521531    | 0.6638557    | not scorable | not scorable | not scorable | not scorable |
| #### Bn-scaff_17369_1-p12447 C-genome specific (napus-oleracea) | 0.8755981    | 0.7004717    | 0.8372093    | 0.9087611    | not scorable | not scorable |
| #### Bn-scaff_17369_1-p27116 C-genome specific (napus-oleracea) | 0.9688995    | 0.7744852    | 1            | 0.855713     | not scorable | not scorable |
| #### Bn-scaff_17369_1-p31435 C-genome specific (napus-oleracea) | 0.9736842    | 0.6652231    | 0.9922481    | 0.7626492    | not scorable | not scorable |
| #### Bn-scaff_17369_1-p31863 genome unspecific (all in)         | 1            | 0.7153738    | 1            | 0.7478918    | 1            | 0.7281149    |
| #### Bn-scaff_17369_1-p31947 genome unspecific (all in)         | 0.9976076    | 0.4880963    | 1            | 0.7494954    | 1            | 0.7988947    |
| #### Bn-scaff_17369_1-p32803 C-genome specific (napus-oleracea) | 0.9832536    | 0.6976194    | 1            | 0.7739488    | not scorable | not scorable |
| #### Bn-scaff_17369_1-p3394 C-genome specific (napus-oleracea)  | 0.9617225    | 0.7921415    | 0.9147287    | 0.7844322    | not scorable | not scorable |
| #### Bn-scaff_17369_1-p34268 C-genome specific (napus-oleracea) | 0.9808612    | 0.8168402    | 0.9844961    | 0.5269513    | not scorable | not scorable |
| #### Bn-scaff_17369_1-p35079 C-genome specific (napus-oleracea) | 0.9736842    | 0.7852795    | 0.9767442    | 0.8173156    | not scorable | not scorable |
| #### Bn-scaff_17369_1-p36658 C-genome specific (napus-oleracea) | 0.9808612    | 0.7613791    | 0.6434109    | 0.6832083    | not scorable | not scorable |
| #### Bn-scaff_17369_1-p37492 C-genome specific (napus-oleracea) | 0.9904306    | 0.8195521    | 1            | 0.7747806    | not scorable | not scorable |
| #### Bn-scaff_17369_1-p38657 C-genome specific (napus-oleracea) | 0.9760765    | 0.7529278    | 0.9922481    | 0.4875575    | not scorable | not scorable |
| #### Bn-scaff_17369_1-p55971 C-genome specific (napus-oleracea) | 0.9880383    | 0.7764974    | 0.9922481    | 0.7608257    | not scorable | not scorable |
| #### Bn-scaff_17369_1-p59961 genome unspecific (all in)         | 0.9856459    | 0.4216209    | 1            | 0.7571962    | 1            | 0.8500815    |
| #### Bn-scaff_17369_1-p60687 C-genome specific (napus-oleracea) | 0.9688995    | 0.8135097    | 0.9922481    | 0.7124227    | not scorable | not scorable |

|                                                                 |              |              |              |              |              |              |
|-----------------------------------------------------------------|--------------|--------------|--------------|--------------|--------------|--------------|
| #### Bn-scaff_17369_1-p61735 C-genome specific (oleracea only)  | not scorable | not scorable | 0.9844961    | 0.8912032    | not scorable | not scorable |
| #### Bn-scaff_17369_1-p61772 all not scorable                   | not scorable | not scorable | not scorable | not scorable | not scorable | not scorable |
| #### Bn-scaff_17369_1-p62114 C-genome specific (napus-oleracea) | 0.9880383    | 0.6531122    | 1            | 0.7395847    | not scorable | not scorable |
| #### Bn-scaff_17369_1-p62518 C-genome specific (napus-oleracea) | 0.9760765    | 0.6387089    | 0.9844961    | 0.5887359    | not scorable | not scorable |
| #### Bn-scaff_17369_1-p62735 C-genome specific (napus-oleracea) | 0.9736842    | 0.7718742    | 0.9922481    | 0.7332311    | not scorable | not scorable |
| #### Bn-scaff_17369_1-p63408 C-genome specific (napus-oleracea) | 0.9832536    | 0.7692299    | 0.9922481    | 0.7141521    | not scorable | not scorable |
| #### Bn-scaff_17369_1-p67706 C-genome specific (napus-oleracea) | 0.9736842    | 0.7592232    | 1            | 0.8301256    | not scorable | not scorable |
| #### Bn-scaff_17369_1-p67734 genome unspecific (all in)         | 0.9736842    | 0.5662813    | 0.9767442    | 0.5410635    | 0.9917355    | 0.7560286    |
| #### Bn-scaff_17369_1-p67930 C-genome specific (napus-oleracea) | 0.9688995    | 0.8143011    | 1            | 0.7360603    | not scorable | not scorable |
| #### Bn-scaff_17369_1-p69072 napus specific                     | 0.9760765    | 0.779419     | not scorable | not scorable | not scorable | not scorable |
| #### Bn-scaff_17369_1-p70350 C-genome specific (napus-oleracea) | 0.9928229    | 0.81545      | 1            | 0.8201429    | not scorable | not scorable |
| #### Bn-scaff_17369_1-p73990 genome unspecific (all in)         | 0.9832536    | 0.3856012    | 1            | 0.7103161    | 1            | 0.8445488    |
| #### Bn-scaff_17369_1-p74055 C-genome specific (napus-oleracea) | 0.9760765    | 0.7397305    | 0.9844961    | 0.8434911    | not scorable | not scorable |
| #### Bn-scaff_17369_1-p75743 genome unspecific (all in)         | 1            | 0.6328461    | 1            | 0.7932864    | 0.9834711    | 0.9091039    |
| #### Bn-scaff_17369_1-p76132 C-genome specific (napus-oleracea) | 0.9784689    | 0.7441512    | 0.9844961    | 0.798736     | not scorable | not scorable |
| #### Bn-scaff_17369_1-p78687 C-genome specific (oleracea only)  | not scorable | not scorable | 0.9224806    | 0.845226     | not scorable | not scorable |
| #### Bn-scaff_17369_1-p79414 C-genome specific (napus-oleracea) | 0.9760765    | 0.6871214    | 1            | 0.7340197    | not scorable | not scorable |
| #### Bn-scaff_17369_1-p80163 A-genome specific (napus-rapa)     | 0.9928229    | 0.2454392    | not scorable | not scorable | 1            | 0.7607062    |
| #### Bn-scaff_17369_1-p80225 C-genome specific (napus-oleracea) | 0.9545454    | 0.1955988    | 1            | 0.815387     | not scorable | not scorable |
| #### Bn-scaff_17369_1-p80428 C-genome specific (napus-oleracea) | 0.9760765    | 0.8284786    | 0.9767442    | 0.7366708    | not scorable | not scorable |
| #### Bn-scaff_17369_1-p80527 C-genome specific (napus-oleracea) | 0.9521531    | 0.277588     | 0.9767442    | 0.2387371    | not scorable | not scorable |
| #### Bn-scaff_17369_1-p81003 C-genome specific (napus-oleracea) | 0.7583732    | 0.7461932    | 0.9689922    | 0.6796692    | not scorable | not scorable |
| #### Bn-scaff_17369_1-p81835 C-genome specific (napus-oleracea) | 1            | 0.5919133    | 1            | 0.9095744    | not scorable | not scorable |
| #### Bn-scaff_17369_1-p82944 C-genome specific (napus-oleracea) | 0.9832536    | 0.6234432    | 1            | 0.7991199    | not scorable | not scorable |
| #### Bn-scaff_17369_1-p83617 C-genome specific (napus-oleracea) | 0.9760765    | 0.7161044    | 1            | 0.785089     | not scorable | not scorable |
| #### Bn-scaff_17369_1-p83783 C-genome specific (napus-oleracea) | 0.9808612    | 0.6927007    | 1            | 0.6841838    | not scorable | not scorable |
| #### Bn-scaff_17369_1-p84134 genome unspecific (oleracea-rapa)  | not scorable | not scorable | 1            | 0.9158121    | 1            | 0.7232152    |
| #### Bn-scaff_17369_1-p84137 genome unspecific (all in)         | 0.9545454    | 0.3285259    | 1            | 0.9175184    | 1            | 0.7617743    |
| #### Bn-scaff_17369_1-p84308 C-genome specific (napus-oleracea) | 0.9856459    | 0.8254103    | 1            | 0.4772086    | not scorable | not scorable |
| #### Bn-scaff_17369_1-p84764 C-genome specific (napus-oleracea) | 0.9688995    | 0.8288682    | 0.9922481    | 0.6729705    | not scorable | not scorable |
| #### Bn-scaff_17369_1-p84774 C-genome specific (napus-oleracea) | 0.9808612    | 0.7898132    | 1            | 0.7766054    | not scorable | not scorable |
| #### Bn-scaff_17369_1-p84879 C-genome specific (napus-oleracea) | 0.9784689    | 0.810866     | 1            | 0.6772171    | not scorable | not scorable |
| #### Bn-scaff_17369_1-p85033 C-genome specific (napus-oleracea) | 0.7392344    | 0.8018782    | 0.875969     | 0.7391626    | not scorable | not scorable |



|                                                                 |              |              |              |              |              |              |
|-----------------------------------------------------------------|--------------|--------------|--------------|--------------|--------------|--------------|
| #### Bn-scaff_17369_1-p85109 C-genome specific (oleracea only)  | not scorable | not scorable | 1            | 0.7222061    | not scorable | not scorable |
| #### Bn-scaff_17369_1-p85574 C-genome specific (napus-oleracea) | 0.9712918    | 0.7726586    | 0.9844961    | 0.8035321    | not scorable | not scorable |
| #### Bn-scaff_17369_1-p85825 C-genome specific (napus-oleracea) | 0.9808612    | 0.7730672    | 0.9767442    | 0.7062486    | not scorable | not scorable |
| #### Bn-scaff_17369_1-p88407 genome unspecific (all in)         | 0.9688995    | 0.2903323    | 0.9457364    | 0.5321261    | 0.9669421    | 0.6474506    |
| #### Bn-scaff_17369_1-p90742 all not scorable                   | not scorable | not scorable | not scorable | not scorable | not scorable | not scorable |
| #### Bn-scaff_17369_1-p91719 C-genome specific (napus-oleracea) | 0.9832536    | 0.7867608    | 1            | 0.7436473    | not scorable | not scorable |
| #### Bn-scaff_17369_1-p93350 C-genome specific (napus-oleracea) | 0.9688995    | 0.7608885    | 0.9379845    | 0.693783     | not scorable | not scorable |
| #### Bn-scaff_17369_1-p94129 C-genome specific (napus-oleracea) | 0.9736842    | 0.7538622    | 1            | 0.7674277    | not scorable | not scorable |
| #### Bn-scaff_17369_1-p94251 C-genome specific (napus-oleracea) | 0.9736842    | 0.6209335    | 1            | 0.6636435    | not scorable | not scorable |
| #### Bn-scaff_17369_1-p95299 genome unspecific (all in)         | 0.937799     | 0.5750712    | 0.9922481    | 0.7378951    | 0.9586777    | 0.7455561    |
| #### Bn-scaff_17369_1-p95389 genome unspecific (all in)         | 0.9928229    | 0.5139623    | 1            | 0.7715743    | 1            | 0.7876648    |
| #### Bn-scaff_17369_1-p95438 genome unspecific (all in)         | 0.8421053    | 0.4978141    | 1            | 0.76768      | 0.9917355    | 0.9107847    |
| #### Bn-scaff_17369_1-p96558 C-genome specific (napus-oleracea) | 0.9736842    | 0.7487068    | 1            | 0.6919407    | not scorable | not scorable |
| #### Bn-scaff_17369_1-p97469 C-genome specific (napus-oleracea) | 0.9832536    | 0.8047395    | 1            | 0.8076451    | not scorable | not scorable |
| #### Bn-scaff_17369_1-p98115 C-genome specific (napus-oleracea) | 0.9856459    | 0.5107709    | 0.9379845    | 0.4980611    | not scorable | not scorable |
| #### Bn-scaff_17369_1-p99224 C-genome specific (napus-oleracea) | 0.9736842    | 0.7802735    | 0.6046512    | 0.764156     | not scorable | not scorable |
| #### Bn-scaff_17371_1-p15750 C-genome specific (napus-oleracea) | 0.9856459    | 0.2965016    | 0.9224806    | 0.279705     | not scorable | not scorable |
| #### Bn-scaff_17371_1-p19933 A-genome specific (rapa only)      | not scorable | not scorable | not scorable | not scorable | 0.9504132    | 0.8730541    |
| #### Bn-scaff_17371_1-p19960 genome unspecific (oleracea-rapa)  | not scorable | not scorable | 0.7364341    | 0.7672974    | 0.9504132    | 0.8822168    |
| #### Bn-scaff_17371_1-p28872 genome unspecific (all in)         | 1            | 0.4620859    | 1            | 0.7258724    | 0.9917355    | 0.5105501    |
| #### Bn-scaff_17371_1-p33836 C-genome specific (napus-oleracea) | 0.9976076    | 0.6768907    | 1            | 0.8948976    | not scorable | not scorable |
| #### Bn-scaff_17371_1-p46270 genome unspecific (all in)         | 0.9904306    | 0.4197396    | 1            | 0.7590546    | 0.9917355    | 0.6623479    |
| #### Bn-scaff_17395_1-p19198 genome unspecific (all in)         | 0.9928229    | 0.6925163    | 1            | 0.7501813    | 0.9917355    | 0.9200076    |
| #### Bn-scaff_17395_1-p20236 C-genome specific (napus-oleracea) | 0.8301435    | 0.1897165    | 1            | 0.7844378    | not scorable | not scorable |
| #### Bn-scaff_17395_1-p32420 C-genome specific (napus-oleracea) | 0.9904306    | 0.8029962    | 0.9689922    | 0.7689622    | not scorable | not scorable |
| #### Bn-scaff_17395_1-p43259 C-genome specific (napus-oleracea) | 0.9880383    | 0.760061     | 1            | 0.94025      | not scorable | not scorable |
| #### Bn-scaff_17395_1-p46661 C-genome specific (oleracea only)  | not scorable | not scorable | 0.9844961    | 0.7074189    | not scorable | not scorable |
| #### Bn-scaff_17395_1-p47177 C-genome specific (napus-oleracea) | 0.9904306    | 0.8032972    | 1            | 0.5747355    | not scorable | not scorable |
| #### Bn-scaff_17413_1-p76511 A-genome specific (rapa only)      | not scorable | not scorable | not scorable | not scorable | 0.9917355    | 0.823379     |
| #### Bn-scaff_17416_1-p44885 C-genome specific (napus-oleracea) | 0.9880383    | 0.6744213    | 1            | 0.6978017    | not scorable | not scorable |
| #### Bn-scaff_17416_1-p51727 genome unspecific (all in)         | 0.9760765    | 0.2855951    | 0.9922481    | 0.793625     | 1            | 0.9189879    |
| #### Bn-scaff_17416_1-p5403 genome unspecific (all in)          | 1            | 0.6964778    | 1            | 0.7690409    | 1            | 0.8168532    |
| #### Bn-scaff_17416_1-p54859 C-genome specific (napus-oleracea) | 0.9856459    | 0.6324461    | 0.9612403    | 0.6756806    | not scorable | not scorable |

|                                                                |              |              |              |              |              |              |
|----------------------------------------------------------------|--------------|--------------|--------------|--------------|--------------|--------------|
| #### Bn-scaff_17423_1-p10031genome unspecific (all in)         | 0.9784689    | 0.3429522    | 1            | 0.8695957    | 1            | 0.6975414    |
| #### Bn-scaff_17423_1-p31377C-genome specific (oleracea only)  | not scorable | not scorable | 0.9922481    | 0.3250383    | not scorable | not scorable |
| #### Bn-scaff_17423_1-p31989C-genome specific (napus-oleracea) | 0.9832536    | 0.7798889    | 1            | 0.912868     | not scorable | not scorable |
| #### Bn-scaff_17423_1-p37655C-genome specific (napus-oleracea) | 0.9162679    | 0.6731802    | 1            | 0.6165689    | not scorable | not scorable |
| #### Bn-scaff_17423_1-p54938 napus specific                    | 0.8301435    | 0.2649205    | not scorable | not scorable | not scorable | not scorable |
| #### Bn-scaff_17423_1-p65427C-genome specific (napus-oleracea) | 0.9976076    | 0.6032484    | 1            | 0.6212523    | not scorable | not scorable |
| #### Bn-scaff_17423_1-p65438C-genome specific (napus-oleracea) | 1            | 0.6005999    | 1            | 0.5988201    | not scorable | not scorable |
| #### Bn-scaff_17423_1-p65439 all not scorable                  | not scorable | not scorable | not scorable | not scorable | not scorable | not scorable |
| #### Bn-scaff_17423_1-p72277C-genome specific (napus-oleracea) | 0.9784689    | 0.2410056    | 1            | 0.3091818    | not scorable | not scorable |
| #### Bn-scaff_17423_1-p73703C-genome specific (napus-oleracea) | 0.9593301    | 0.391403     | 1            | 0.904535     | not scorable | not scorable |
| #### Bn-scaff_17423_1-p76038 genome unspecific (all in)        | 0.9880383    | 0.332114     | 1            | 0.7121316    | 1            | 0.784643     |
| #### Bn-scaff_17423_1-p99662 genome unspecific (oleracea-rapa) | not scorable | not scorable | 1            | 0.7914145    | 0.9917355    | 0.6305893    |
| #### Bn-scaff_17436_1-p14546C-genome specific (napus-oleracea) | 0.9066986    | 0.8232304    | 0.7984496    | 0.8069574    | not scorable | not scorable |
| #### Bn-scaff_17436_1-p23936 genome unspecific (all in)        | 1            | 0.8233202    | 1            | 0.9089924    | 1            | 0.9163052    |
| #### Bn-scaff_17436_1-p26077C-genome specific (napus-oleracea) | 0.9090909    | 0.7153039    | 0.9844961    | 0.690313     | not scorable | not scorable |
| #### Bn-scaff_17436_1-p26106 genome unspecific (oleracea-rapa) | not scorable | not scorable | 1            | 0.6140337    | 1            | 0.6106172    |
| #### Bn-scaff_17436_1-p26325C-genome specific (napus-oleracea) | 0.9210526    | 0.7472518    | 0.9534883    | 0.7451807    | not scorable | not scorable |
| #### Bn-scaff_17436_1-p76050 genome unspecific (all in)        | 0.9712918    | 0.2897281    | 1            | 0.7770717    | 0.9669421    | 0.6712852    |
| #### Bn-scaff_17440_1-p10339C-genome specific (napus-oleracea) | 0.9832536    | 0.7532551    | 0.9922481    | 0.8164634    | not scorable | not scorable |
| #### Bn-scaff_17440_1-p10703 napus specific                    | 0.9569378    | 0.6664631    | not scorable | not scorable | not scorable | not scorable |
| #### Bn-scaff_17440_1-p17753C-genome specific (napus-oleracea) | 0.9760765    | 0.7746081    | 0.1937985    | 0.7830564    | not scorable | not scorable |
| #### Bn-scaff_17440_1-p19204C-genome specific (napus-oleracea) | 0.9904306    | 0.6252199    | 1            | 0.2699769    | not scorable | not scorable |
| #### Bn-scaff_17440_1-p20595C-genome specific (napus-oleracea) | 0.9688995    | 0.7324653    | 0.9767442    | 0.8224331    | not scorable | not scorable |
| #### Bn-scaff_17440_1-p24404C-genome specific (napus-oleracea) | 0.9784689    | 0.8182613    | 1            | 0.7717831    | not scorable | not scorable |
| #### Bn-scaff_17440_1-p25813 genome unspecific (all in)        | 1            | 0.4128916    | 1            | 0.8007178    | 1            | 0.9175813    |
| #### Bn-scaff_17440_1-p25854 genome unspecific (all in)        | 0.9808612    | 0.3432355    | 1            | 0.6746064    | 1            | 0.8566731    |
| #### Bn-scaff_17440_1-p26191C-genome specific (napus-oleracea) | 0.9665072    | 0.4636195    | 0.9689922    | 0.483502     | not scorable | not scorable |
| #### Bn-scaff_17440_1-p26897 genome unspecific (all in)        | 0.9856459    | 0.5460492    | 1            | 0.6052713    | 1            | 0.9120808    |
| #### Bn-scaff_17440_1-p28991 genome unspecific (all in)        | 0.9760765    | 0.4308381    | 1            | 0.8284872    | 0.9917355    | 0.8130962    |
| #### Bn-scaff_17440_1-p29907C-genome specific (napus-oleracea) | 0.8708134    | 0.7208005    | 0.9534883    | 0.7732189    | not scorable | not scorable |
| #### Bn-scaff_17440_1-p30653C-genome specific (napus-oleracea) | 0.5813397    | 0.8285906    | 1            | 0.7697129    | not scorable | not scorable |
| #### Bn-scaff_17440_1-p31122C-genome specific (napus-oleracea) | 0.9952153    | 0.7444128    | 1            | 0.7191626    | not scorable | not scorable |
| #### Bn-scaff_17440_1-p31540 genome unspecific (all in)        | 0.9784689    | 0.72118      | 1            | 0.8860152    | 0.7520661    | 0.9351628    |

|                                                                 |              |              |              |              |              |              |
|-----------------------------------------------------------------|--------------|--------------|--------------|--------------|--------------|--------------|
| #### Bn-scaff_17440_1-p31658 C-genome specific (napus-oleracea) | 0.9856459    | 0.7759107    | 1            | 0.8749103    | not scorable | not scorable |
| #### Bn-scaff_17440_1-p31876 genome unspecific (all in)         | 1            | 0.566447     | 1            | 0.7814886    | 0.9752066    | 0.5614029    |
| #### Bn-scaff_17440_1-p36438 C-genome specific (napus-oleracea) | 1            | 0.6803474    | 1            | 0.6588683    | not scorable | not scorable |
| #### Bn-scaff_17440_1-p36447 C-genome specific (napus-oleracea) | 1            | 0.7102285    | 1            | 0.6432602    | not scorable | not scorable |
| #### Bn-scaff_17440_1-p37288 C-genome specific (napus-oleracea) | 0.9928229    | 0.711192     | 1            | 0.5809245    | not scorable | not scorable |
| #### Bn-scaff_17440_1-p41161 genome unspecific (all in)         | 0.9880383    | 0.5139139    | 1            | 0.4587434    | 1            | 0.9149535    |
| #### Bn-scaff_17440_1-p45412 C-genome specific (napus-oleracea) | 0.9880383    | 0.7938629    | 1            | 0.817061     | not scorable | not scorable |
| #### Bn-scaff_17440_1-p47256 C-genome specific (napus-oleracea) | 0.9856459    | 0.6307592    | 1            | 0.5968899    | not scorable | not scorable |
| #### Bn-scaff_17440_1-p50447 C-genome specific (napus-oleracea) | 0.9688995    | 0.7431115    | 0.8992248    | 0.7245873    | not scorable | not scorable |
| #### Bn-scaff_17440_1-p52386 genome unspecific (all in)         | 0.9736842    | 0.5271074    | 1            | 0.8524545    | 1            | 0.9387496    |
| #### Bn-scaff_17440_1-p55287 genome unspecific (all in)         | 0.9880383    | 0.4562861    | 0.9922481    | 0.6720066    | 1            | 0.8890747    |
| #### Bn-scaff_17440_1-p55538 C-genome specific (napus-oleracea) | 0.9904306    | 0.5164431    | 1            | 0.5451033    | not scorable | not scorable |
| #### Bn-scaff_17440_1-p55981 C-genome specific (napus-oleracea) | 0.9904306    | 0.8021483    | 1            | 0.8685852    | not scorable | not scorable |
| #### Bn-scaff_17440_1-p57998 C-genome specific (napus-oleracea) | 0.9880383    | 0.7684957    | 0.9844961    | 0.8075652    | not scorable | not scorable |
| #### Bn-scaff_17440_1-p58772 C-genome specific (napus-oleracea) | 0.9736842    | 0.7077344    | 1            | 0.8299332    | not scorable | not scorable |
| #### Bn-scaff_17440_1-p59066 C-genome specific (napus-oleracea) | 0.9856459    | 0.7741457    | 1            | 0.7432924    | not scorable | not scorable |
| #### Bn-scaff_17440_1-p59284 C-genome specific (napus-oleracea) | 0.9952153    | 0.7905256    | 1            | 0.7827888    | not scorable | not scorable |
| #### Bn-scaff_17440_1-p59357 C-genome specific (napus-oleracea) | 0.9952153    | 0.7520199    | 1            | 0.8045906    | not scorable | not scorable |
| #### Bn-scaff_17440_1-p65969 A-genome specific (napus-rapa)     | 0.9473684    | 0.6351646    | not scorable | not scorable | 0.9917355    | 0.8462604    |
| #### Bn-scaff_17440_1-p68056 C-genome specific (napus-oleracea) | 0.9880383    | 0.7242736    | 1            | 0.6747022    | not scorable | not scorable |
| #### Bn-scaff_17440_1-p70712 napus specific                     | 0.9880383    | 0.2491708    | not scorable | not scorable | not scorable | not scorable |
| #### Bn-scaff_17440_1-p73498 C-genome specific (napus-oleracea) | 0.9952153    | 0.7725504    | 0.9844961    | 0.7494831    | not scorable | not scorable |
| #### Bn-scaff_17440_1-p76198 genome unspecific (all in)         | 0.9952153    | 0.3093135    | 0.9844961    | 0.6639645    | 1            | 0.7711443    |
| #### Bn-scaff_17440_1-p80352 genome unspecific (oleracea-rapa)  | not scorable | not scorable | 0.9844961    | 0.4684773    | 1            | 0.6138771    |
| #### Bn-scaff_17440_1-p81104 C-genome specific (napus-oleracea) | 0.9760765    | 0.6579687    | 0.9767442    | 0.6851012    | not scorable | not scorable |
| #### Bn-scaff_17440_1-p81105 C-genome specific (napus-oleracea) | 0.9688995    | 0.6842071    | 0.9844961    | 0.683749     | not scorable | not scorable |
| #### Bn-scaff_17440_1-p81854 C-genome specific (napus-oleracea) | 0.9904306    | 0.7345477    | 1            | 0.7415137    | not scorable | not scorable |
| #### Bn-scaff_17440_1-p81931 C-genome specific (napus-oleracea) | 0.9832536    | 0.6950458    | 0.9922481    | 0.8956265    | not scorable | not scorable |
| #### Bn-scaff_17440_1-p82717 C-genome specific (napus-oleracea) | 0.9952153    | 0.7957153    | 0.9922481    | 0.5157863    | not scorable | not scorable |
| #### Bn-scaff_17440_1-p82929 C-genome specific (napus-oleracea) | 1            | 0.7230446    | 0.9922481    | 0.828447     | not scorable | not scorable |
| #### Bn-scaff_17440_1-p83265 genome unspecific (all in)         | 0.9880383    | 0.4480866    | 1            | 0.7252899    | 1            | 0.6733619    |
| #### Bn-scaff_17440_1-p86800 C-genome specific (napus-oleracea) | 0.9856459    | 0.6753896    | 1            | 0.6626276    | not scorable | not scorable |
| #### Bn-scaff_17440_1-p87164 genome unspecific (oleracea-rapa)  | not scorable | not scorable | 1            | 0.7956303    | 0.9917355    | 0.6261472    |

|                                                                 |              |              |              |              |              |              |
|-----------------------------------------------------------------|--------------|--------------|--------------|--------------|--------------|--------------|
| #### Bn-scaff_17440_1-p93808 C-genome specific (napus-oleracea) | 0.2607656    | 0.7209221    | 0.9844961    | 0.7185401    | not scorable | not scorable |
| #### Bn-scaff_17440_1-p93847 C-genome specific (napus-oleracea) | 1            | 0.7754679    | 1            | 0.7343785    | not scorable | not scorable |
| #### Bn-scaff_17440_1-p93854 C-genome specific (napus-oleracea) | 0.9856459    | 0.7563751    | 0.9844961    | 0.8635888    | not scorable | not scorable |
| #### Bn-scaff_17440_1-p94415 C-genome specific (oleracea only)  | not scorable | not scorable | 1            | 0.7494321    | not scorable | not scorable |
| #### Bn-scaff_17440_1-p94526 genome unspecific (all in)         | 0.9760765    | 0.4046687    | 1            | 0.6375784    | 1            | 0.9071662    |
| #### Bn-scaff_17440_1-p95866 C-genome specific (napus-oleracea) | 0.9952153    | 0.7513865    | 1            | 0.8190148    | not scorable | not scorable |
| #### Bn-scaff_17441_1-p10112 C-genome specific (napus-oleracea) | 0.9760765    | 0.6772486    | 0.9922481    | 0.7478536    | not scorable | not scorable |
| #### Bn-scaff_17441_1-p10115 C-genome specific (napus-oleracea) | 0.9760765    | 0.3821716    | 1            | 0.7179687    | not scorable | not scorable |
| #### Bn-scaff_17441_1-p10181 C-genome specific (napus-oleracea) | 0.9760765    | 0.8733953    | 0.9767442    | 0.7589146    | not scorable | not scorable |
| #### Bn-scaff_17441_1-p10188 C-genome specific (napus-oleracea) | 0.9760765    | 0.7811588    | 1            | 0.7665296    | not scorable | not scorable |
| #### Bn-scaff_17441_1-p10189 C-genome specific (napus-oleracea) | 0.9736842    | 0.802269     | 0.9922481    | 0.7788746    | not scorable | not scorable |
| #### Bn-scaff_17441_1-p10260 C-genome specific (napus-oleracea) | 0.9784689    | 0.7731628    | 0.9922481    | 0.7667931    | not scorable | not scorable |
| #### Bn-scaff_17441_1-p10378 C-genome specific (napus-oleracea) | 0.9712918    | 0.7794798    | 1            | 0.7785707    | not scorable | not scorable |
| #### Bn-scaff_17441_1-p10399 C-genome specific (napus-oleracea) | 0.9712918    | 0.7804071    | 1            | 0.7682532    | not scorable | not scorable |
| #### Bn-scaff_17441_1-p10450 C-genome specific (napus-oleracea) | 0.9784689    | 0.7708381    | 0.9844961    | 0.669279     | not scorable | not scorable |
| #### Bn-scaff_17441_1-p10946 C-genome specific (napus-oleracea) | 0.9712918    | 0.6894388    | 0.9069768    | 0.7120811    | not scorable | not scorable |
| #### Bn-scaff_17441_1-p11400 C-genome specific (napus-oleracea) | 0.9665072    | 0.8097467    | 0.9922481    | 0.7316092    | not scorable | not scorable |
| #### Bn-scaff_17441_1-p11423 genome unspecific (all in)         | 0.9832536    | 0.2178422    | 0.9922481    | 0.6027177    | 1            | 0.8054173    |
| #### Bn-scaff_17441_1-p11464 C-genome specific (napus-oleracea) | 0.9258373    | 0.7167652    | 0.9612403    | 0.7102973    | not scorable | not scorable |
| #### Bn-scaff_17441_1-p11464 C-genome specific (napus-oleracea) | 0.9210526    | 0.7384606    | 0.9302326    | 0.5986176    | not scorable | not scorable |
| #### Bn-scaff_17441_1-p11826 genome unspecific (oleracea-rapa)  | not scorable | not scorable | 1            | 0.6553984    | 0.9917355    | 0.6601005    |
| #### Bn-scaff_17441_1-p11977 napus specific                     | 0.9760765    | 0.7565367    | not scorable | not scorable | not scorable | not scorable |
| #### Bn-scaff_17441_1-p12116 C-genome specific (napus-oleracea) | 0.9712918    | 0.7388479    | 0.9689922    | 0.654524     | not scorable | not scorable |
| #### Bn-scaff_17441_1-p26955 genome unspecific (all in)         | 0.9760765    | 0.774127     | 1            | 0.8471361    | 0.8760331    | 0.8382967    |
| #### Bn-scaff_17441_1-p33691 napus specific                     | 0.9593301    | 0.7383564    | not scorable | not scorable | not scorable | not scorable |
| #### Bn-scaff_17441_1-p34881 A-genome specific (napus-rapa)     | 0.9497608    | 0.2691345    | not scorable | not scorable | 0.9917355    | 0.7539896    |
| #### Bn-scaff_17441_1-p34902 genome unspecific (all in)         | 1            | 0.2713178    | 1            | 0.6855631    | 0.9917355    | 0.5642062    |
| #### Bn-scaff_17441_1-p34918 C-genome specific (napus-oleracea) | 0.9904306    | 0.7676491    | 1            | 0.9272014    | not scorable | not scorable |
| #### Bn-scaff_17441_1-p34953 C-genome specific (napus-oleracea) | 0.9808612    | 0.9166645    | 0.7984496    | 0.89055      | not scorable | not scorable |
| #### Bn-scaff_17441_1-p35757 genome unspecific (oleracea-rapa)  | not scorable | not scorable | 0.8217054    | 0.7635936    | 0.9752066    | 0.8207097    |
| #### Bn-scaff_17441_1-p36913 C-genome specific (oleracea only)  | not scorable | not scorable | 1            | 0.7928194    | not scorable | not scorable |
| #### Bn-scaff_17441_1-p36917 genome unspecific (oleracea-rapa)  | not scorable | not scorable | 1            | 0.6523454    | 1            | 0.7612541    |
| #### Bn-scaff_17441_1-p37068 genome unspecific (oleracea-rapa)  | not scorable | not scorable | 1            | 0.7581735    | 1            | 0.7914079    |

|                                                                |              |              |           |           |              |              |
|----------------------------------------------------------------|--------------|--------------|-----------|-----------|--------------|--------------|
| #### Bn-scaff_17441_1-p38843genome unspecific (all in)         | 0.9904306    | 0.2875535    | 1         | 0.9175813 | 0.9669421    | 0.6236423    |
| #### Bn-scaff_17441_1-p38867genome unspecific (all in)         | 0.9904306    | 0.1947417    | 0.9302326 | 0.7239645 | 1            | 0.7798977    |
| #### Bn-scaff_17441_1-p40075C-genome specific (napus-oleracea) | 0.9880383    | 0.6091886    | 1         | 0.8114662 | not scorable | not scorable |
| #### Bn-scaff_17441_1-p55885C-genome specific (napus-oleracea) | 0.9425837    | 0.8025886    | 1         | 0.8329477 | not scorable | not scorable |
| #### Bn-scaff_17441_1-p56069C-genome specific (napus-oleracea) | 0.5095694    | 0.8794263    | 1         | 0.8662431 | not scorable | not scorable |
| #### Bn-scaff_17441_1-p56987genome unspecific (all in)         | 0.9880383    | 0.3982307    | 1         | 0.8400149 | 1            | 0.8896335    |
| #### Bn-scaff_17441_1-p57361C-genome specific (napus-oleracea) | 0.9641148    | 0.7393443    | 1         | 0.7469159 | not scorable | not scorable |
| #### Bn-scaff_17441_1-p57503C-genome specific (napus-oleracea) | 0.9473684    | 0.7579553    | 0.6511628 | 0.8065696 | not scorable | not scorable |
| #### Bn-scaff_17441_1-p67127genome unspecific (oleracea-rapa)  | not scorable | not scorable | 1         | 0.6990505 | 0.9917355    | 0.7144225    |
| #### Bn-scaff_17441_1-p67178genome unspecific (oleracea-rapa)  | not scorable | not scorable | 1         | 0.7784547 | 0.9504132    | 0.7563846    |
| #### Bn-scaff_17441_1-p69224C-genome specific (napus-oleracea) | 0.9976076    | 0.7232714    | 1         | 0.8135551 | not scorable | not scorable |
| #### Bn-scaff_17441_1-p69303genome unspecific (all in)         | 1            | 0.829519     | 1         | 0.8537716 | 1            | 0.8793069    |
| #### Bn-scaff_17441_1-p69304genome unspecific (all in)         | 0.9784689    | 0.8997149    | 1         | 0.882507  | 1            | 0.9455671    |
| #### Bn-scaff_17441_1-p72023genome unspecific (all in)         | 1            | 0.2895746    | 0.9922481 | 0.3256512 | 1            | 0.8241717    |
| #### Bn-scaff_17441_1-p72040genome unspecific (all in)         | 1            | 0.427576     | 0.9922481 | 0.6062246 | 1            | 0.8368569    |
| #### Bn-scaff_17441_1-p73107genome unspecific (all in)         | 0.9952153    | 0.3660764    | 1         | 0.5997809 | 1            | 0.8535612    |
| #### Bn-scaff_17441_1-p75417genome unspecific (oleracea-rapa)  | not scorable | not scorable | 0.9767442 | 0.2806908 | 1            | 0.8004208    |
| #### Bn-scaff_17441_1-p76310genome unspecific (oleracea-rapa)  | not scorable | not scorable | 0.8914729 | 0.2916058 | 0.9586777    | 0.6408242    |
| #### Bn-scaff_17441_1-p83101C-genome specific (napus-oleracea) | 0.9665072    | 0.7133161    | 1         | 0.6668572 | not scorable | not scorable |
| #### Bn-scaff_17441_1-p90068C-genome specific (napus-oleracea) | 0.9593301    | 0.8250727    | 0.9457364 | 0.7335613 | not scorable | not scorable |
| #### Bn-scaff_17441_1-p94913C-genome specific (oleracea only)  | not scorable | not scorable | 0.9844961 | 0.5335522 | not scorable | not scorable |
| #### Bn-scaff_17441_1-p95004genome unspecific (all in)         | 0.9904306    | 0.3099324    | 0.9922481 | 0.3200755 | 1            | 0.8771903    |
| #### Bn-scaff_17441_1-p95034C-genome specific (oleracea only)  | not scorable | not scorable | 1         | 0.4915591 | not scorable | not scorable |
| #### Bn-scaff_17441_1-p95834C-genome specific (napus-oleracea) | 0.9784689    | 0.6704924    | 0.9534883 | 0.670435  | not scorable | not scorable |
| #### Bn-scaff_17441_1-p95841genome unspecific (all in)         | 0.9976076    | 0.3306581    | 1         | 0.6825576 | 1            | 0.7641606    |
| #### Bn-scaff_17441_1-p96879C-genome specific (napus-oleracea) | 0.9712918    | 0.81396      | 1         | 0.7654794 | not scorable | not scorable |
| #### Bn-scaff_17441_1-p97419C-genome specific (napus-oleracea) | 0.9688995    | 0.6008887    | 0.8527132 | 0.5918514 | not scorable | not scorable |
| #### Bn-scaff_17441_1-p97470C-genome specific (napus-oleracea) | 0.9760765    | 0.7628251    | 1         | 0.6821043 | not scorable | not scorable |
| #### Bn-scaff_17441_1-p97487C-genome specific (napus-oleracea) | 0.9760765    | 0.8371943    | 0.9922481 | 0.8454834 | not scorable | not scorable |
| #### Bn-scaff_17441_1-p97704C-genome specific (napus-oleracea) | 0.9760765    | 0.7005919    | 0.9922481 | 0.7576272 | not scorable | not scorable |
| #### Bn-scaff_17441_1-p98229genome unspecific (all in)         | 0.9784689    | 0.6830655    | 1         | 0.7643546 | 1            | 0.9484888    |
| #### Bn-scaff_17441_1-p98324C-genome specific (napus-oleracea) | 0.9784689    | 0.9389312    | 1         | 0.7313302 | not scorable | not scorable |
| #### Bn-scaff_17441_1-p98690C-genome specific (napus-oleracea) | 0.9736842    | 0.8187077    | 1         | 0.7599939 | not scorable | not scorable |

|                                                                 |              |              |              |              |              |              |
|-----------------------------------------------------------------|--------------|--------------|--------------|--------------|--------------|--------------|
| #### Bn-scaff_17441_1-p98697 C-genome specific (napus-oleracea) | 0.9736842    | 0.7709844    | 1            | 0.7431254    | not scorable | not scorable |
| #### Bn-scaff_17441_1-p98777 C-genome specific (napus-oleracea) | 0.9784689    | 0.7674133    | 1            | 0.7567674    | not scorable | not scorable |
| #### Bn-scaff_17441_1-p98864 C-genome specific (napus-oleracea) | 0.9784689    | 0.7743463    | 1            | 0.7349609    | not scorable | not scorable |
| #### Bn-scaff_17441_1-p99470 C-genome specific (napus-oleracea) | 0.9736842    | 0.6450229    | 1            | 0.5994416    | not scorable | not scorable |
| #### Bn-scaff_17441_1-p99604 C-genome specific (napus-oleracea) | 0.9760765    | 0.7088237    | 1            | 0.7261119    | not scorable | not scorable |
| #### Bn-scaff_17441_1-p99723 C-genome specific (napus-oleracea) | 0.9760765    | 0.8839007    | 1            | 0.7753424    | not scorable | not scorable |
| #### Bn-scaff_17441_1-p99753 C-genome specific (napus-oleracea) | 0.9688995    | 0.6317643    | 0.9922481    | 0.75648      | not scorable | not scorable |
| #### Bn-scaff_17441_3-p14409 C-genome specific (napus-oleracea) | 0.9784689    | 0.8406339    | 0.9922481    | 0.7669485    | not scorable | not scorable |
| #### Bn-scaff_17441_3-p14725 C-genome specific (napus-oleracea) | 0.9593301    | 0.8046218    | 0.9922481    | 0.7518805    | not scorable | not scorable |
| #### Bn-scaff_17441_3-p15403 C-genome specific (napus-oleracea) | 0.9784689    | 0.7541276    | 0.9844961    | 0.7897688    | not scorable | not scorable |
| #### Bn-scaff_17441_3-p15669 C-genome specific (napus-oleracea) | 0.9665072    | 0.791609     | 0.9922481    | 0.849345     | not scorable | not scorable |
| #### Bn-scaff_17441_3-p16165 C-genome specific (napus-oleracea) | 0.9808612    | 0.6189       | 0.9767442    | 0.6002974    | not scorable | not scorable |
| #### Bn-scaff_17441_3-p16595 C-genome specific (napus-oleracea) | 0.9641148    | 0.8996857    | 0.9922481    | 0.8617461    | not scorable | not scorable |
| #### Bn-scaff_17441_3-p17389 genome unspecific (all in)         | 0.9688995    | 0.8228288    | 0.9922481    | 0.7965729    | 1            | 0.9030142    |
| #### Bn-scaff_17441_3-p17452 genome unspecific (all in)         | 1            | 0.3621968    | 0.9922481    | 0.4887818    | 1            | 0.8683461    |
| #### Bn-scaff_17441_3-p18316 genome unspecific (all in)         | 0.9736842    | 0.3587366    | 0.9922481    | 0.7309741    | 1            | 0.8095111    |
| #### Bn-scaff_17441_3-p21324 C-genome specific (napus-oleracea) | 0.9808612    | 0.8168909    | 0.9922481    | 0.7490966    | not scorable | not scorable |
| #### Bn-scaff_17441_3-p28950 C-genome specific (napus-oleracea) | 0.9808612    | 0.4938532    | 1            | 0.7146232    | not scorable | not scorable |
| #### Bn-scaff_17441_3-p31296 C-genome specific (napus-oleracea) | 0.9569378    | 0.7507518    | 0.4573644    | 0.7449107    | not scorable | not scorable |
| #### Bn-scaff_17441_3-p32560 C-genome specific (napus-oleracea) | 0.9952153    | 0.8553945    | 1            | 0.7616231    | not scorable | not scorable |
| #### Bn-scaff_17441_3-p36756 genome unspecific (all in)         | 1            | 0.3159281    | 1            | 0.9175813    | 0.9917355    | 0.7561249    |
| #### Bn-scaff_17441_3-p37334 C-genome specific (napus-oleracea) | 0.9760765    | 0.84337      | 1            | 0.7513741    | not scorable | not scorable |
| #### Bn-scaff_17441_3-p39875 C-genome specific (napus-oleracea) | 0.9784689    | 0.8123071    | 0.9922481    | 0.7940953    | not scorable | not scorable |
| #### Bn-scaff_17441_3-p54565 C-genome specific (napus-oleracea) | 0.9688995    | 0.6638887    | 0.9922481    | 0.6259105    | not scorable | not scorable |
| #### Bn-scaff_17441_3-p54682 C-genome specific (napus-oleracea) | 0.9712918    | 0.7937884    | 1            | 0.8050936    | not scorable | not scorable |
| #### Bn-scaff_17441_3-p55613 C-genome specific (oleracea only)  | not scorable | not scorable | 0.9302326    | 0.8154362    | not scorable | not scorable |
| #### Bn-scaff_17441_3-p55733 C-genome specific (napus-oleracea) | 0.9688995    | 0.7544529    | 0.9922481    | 0.8026333    | not scorable | not scorable |
| #### Bn-scaff_17441_3-p56937 C-genome specific (napus-oleracea) | 0.9736842    | 0.6884753    | 1            | 0.6553452    | not scorable | not scorable |
| #### Bn-scaff_17441_3-p66396 genome unspecific (oleracea-rapa)  | not scorable | not scorable | 0.9844961    | 0.2818003    | 1            | 0.8381056    |
| #### Bn-scaff_17441_3-p68051 napus specific                     | 0.9688995    | 0.608341     | not scorable | not scorable | not scorable | not scorable |
| #### Bn-scaff_17441_3-p91213 C-genome specific (napus-oleracea) | 0.9736842    | 0.757448     | 1            | 0.7611737    | not scorable | not scorable |
| #### Bn-scaff_17441_3-p91321 genome unspecific (all in)         | 1            | 0.4680473    | 0.9844961    | 0.6819744    | 1            | 0.9007995    |
| #### Bn-scaff_17454_1-p19025 C-genome specific (napus-oleracea) | 1            | 0.7884902    | 1            | 0.7524565    | not scorable | not scorable |

|                                                                 |              |              |              |              |              |              |
|-----------------------------------------------------------------|--------------|--------------|--------------|--------------|--------------|--------------|
| #### Bn-scaff_17454_1-p22509 C-genome specific (napus-oleracea) | 1            | 0.7383674    | 1            | 0.8132084    | not scorable | not scorable |
| #### Bn-scaff_17454_1-p25429 C-genome specific (napus-oleracea) | 1            | 0.7832633    | 1            | 0.8150769    | not scorable | not scorable |
| #### Bn-scaff_17454_1-p27133 C-genome specific (napus-oleracea) | 0.9952153    | 0.5853537    | 0.9844961    | 0.6294215    | not scorable | not scorable |
| #### Bn-scaff_17454_1-p27139 C-genome specific (napus-oleracea) | 0.9952153    | 0.7754251    | 0.9767442    | 0.6788282    | not scorable | not scorable |
| #### Bn-scaff_17454_1-p27150 C-genome specific (napus-oleracea) | 0.9952153    | 0.7655466    | 0.9767442    | 0.7070299    | not scorable | not scorable |
| #### Bn-scaff_17454_1-p27202 C-genome specific (napus-oleracea) | 0.9952153    | 0.7730813    | 0.9689922    | 0.6604223    | not scorable | not scorable |
| #### Bn-scaff_17454_1-p27224 C-genome specific (napus-oleracea) | 1            | 0.8342371    | 0.9844961    | 0.7920076    | not scorable | not scorable |
| #### Bn-scaff_17454_1-p27661 C-genome specific (napus-oleracea) | 0.9952153    | 0.7239187    | 0.9612403    | 0.7756345    | not scorable | not scorable |
| #### Bn-scaff_17454_1-p34862 C-genome specific (napus-oleracea) | 1            | 0.8580054    | 0.9922481    | 0.6970744    | not scorable | not scorable |
| #### Bn-scaff_17454_1-p41653 all not scorable                   | not scorable | not scorable | not scorable | not scorable | not scorable | not scorable |
| #### Bn-scaff_17454_1-p87022 genome unspecific (oleracea-rapa)  | not scorable | not scorable | 0.9922481    | 0.6692175    | 1            | 0.8948976    |
| #### Bn-scaff_17457_1-p11465 C-genome specific (napus-oleracea) | 0.9952153    | 0.7574821    | 0.9922481    | 0.5205202    | not scorable | not scorable |
| #### Bn-scaff_17457_1-p12659 C-genome specific (napus-oleracea) | 0.8755981    | 0.7714986    | 0.8527132    | 0.7118186    | not scorable | not scorable |
| #### Bn-scaff_17457_1-p12974 C-genome specific (napus-oleracea) | 0.9808612    | 0.7400886    | 0.9922481    | 0.8683847    | not scorable | not scorable |
| #### Bn-scaff_17457_1-p13114 C-genome specific (napus-oleracea) | 0.9736842    | 0.5333437    | 1            | 0.6571752    | not scorable | not scorable |
| #### Bn-scaff_17457_1-p13926 C-genome specific (napus-oleracea) | 0.9832536    | 0.7114142    | 1            | 0.7936309    | not scorable | not scorable |
| #### Bn-scaff_17457_1-p14785 C-genome specific (napus-oleracea) | 0.9665072    | 0.7290348    | 0.9844961    | 0.8187125    | not scorable | not scorable |
| #### Bn-scaff_17457_1-p15090 C-genome specific (napus-oleracea) | 0.9928229    | 0.7682191    | 1            | 0.7558334    | not scorable | not scorable |
| #### Bn-scaff_17457_1-p15138 C-genome specific (napus-oleracea) | 0.9880383    | 0.7208577    | 1            | 0.7994489    | not scorable | not scorable |
| #### Bn-scaff_17457_1-p15149 C-genome specific (napus-oleracea) | 0.9904306    | 0.7508863    | 0.9922481    | 0.8566455    | not scorable | not scorable |
| #### Bn-scaff_17457_1-p15163 C-genome specific (napus-oleracea) | 0.9808612    | 0.6646509    | 0.9922481    | 0.8021848    | not scorable | not scorable |
| #### Bn-scaff_17457_1-p17666 C-genome specific (napus-oleracea) | 0.9856459    | 0.6127247    | 1            | 0.5862784    | not scorable | not scorable |
| #### Bn-scaff_17457_1-p17756 C-genome specific (napus-oleracea) | 0.9976076    | 0.6896561    | 0.9922481    | 0.7409972    | not scorable | not scorable |
| #### Bn-scaff_17457_1-p17829 C-genome specific (napus-oleracea) | 0.9688995    | 0.655068     | 1            | 0.6642035    | not scorable | not scorable |
| #### Bn-scaff_17457_1-p17835 C-genome specific (napus-oleracea) | 0.9976076    | 0.8531216    | 1            | 0.7981842    | not scorable | not scorable |
| #### Bn-scaff_17457_1-p17846 C-genome specific (napus-oleracea) | 0.9976076    | 0.8370645    | 1            | 0.785125     | not scorable | not scorable |
| #### Bn-scaff_17457_1-p17857 C-genome specific (napus-oleracea) | 1            | 0.7718073    | 1            | 0.6806073    | not scorable | not scorable |
| #### Bn-scaff_17457_1-p18350 C-genome specific (napus-oleracea) | 0.9976076    | 0.8318305    | 0.9844961    | 0.8494941    | not scorable | not scorable |
| #### Bn-scaff_17457_1-p18402 C-genome specific (napus-oleracea) | 0.9736842    | 0.5505481    | 0.9457364    | 0.5607322    | not scorable | not scorable |
| #### Bn-scaff_17457_1-p18402 C-genome specific (napus-oleracea) | 0.9976076    | 0.8039003    | 0.9922481    | 0.7710782    | not scorable | not scorable |
| #### Bn-scaff_17457_1-p18429 C-genome specific (napus-oleracea) | 0.9928229    | 0.8133648    | 0.9922481    | 0.8039128    | not scorable | not scorable |
| #### Bn-scaff_17457_1-p18482 C-genome specific (napus-oleracea) | 0.9928229    | 0.7773226    | 0.9922481    | 0.6615945    | not scorable | not scorable |
| #### Bn-scaff_17457_1-p18488 C-genome specific (napus-oleracea) | 0.9928229    | 0.7012494    | 0.9922481    | 0.728947     | not scorable | not scorable |

|                                                                 |              |              |              |              |              |              |
|-----------------------------------------------------------------|--------------|--------------|--------------|--------------|--------------|--------------|
| #### Bn-scaff_17457_1-p18494 C-genome specific (napus-oleracea) | 0.9976076    | 0.8681115    | 0.9922481    | 0.7723091    | not scorable | not scorable |
| #### Bn-scaff_17457_1-p18560 C-genome specific (napus-oleracea) | 0.9976076    | 0.7794729    | 0.9844961    | 0.7764187    | not scorable | not scorable |
| #### Bn-scaff_17457_1-p18731 C-genome specific (napus-oleracea) | 0.9904306    | 0.7255803    | 0.9922481    | 0.7345469    | not scorable | not scorable |
| #### Bn-scaff_17457_1-p18733 C-genome specific (napus-oleracea) | 0.9976076    | 0.6998956    | 0.9689922    | 0.7885169    | not scorable | not scorable |
| #### Bn-scaff_17457_1-p18881 C-genome specific (oleracea only)  | not scorable | not scorable | 0.9767442    | 0.7418306    | not scorable | not scorable |
| #### Bn-scaff_17457_1-p18894 C-genome specific (napus-oleracea) | 0.9904306    | 0.8150849    | 0.9922481    | 0.8172381    | not scorable | not scorable |
| #### Bn-scaff_17457_1-p18944 C-genome specific (napus-oleracea) | 0.9880383    | 0.8010817    | 0.9922481    | 0.7481788    | not scorable | not scorable |
| #### Bn-scaff_17457_1-p19055 C-genome specific (napus-oleracea) | 0.9832536    | 0.6676003    | 0.9844961    | 0.6999449    | not scorable | not scorable |
| #### Bn-scaff_17457_1-p19079 C-genome specific (napus-oleracea) | 0.9856459    | 0.4342052    | 0.9844961    | 0.4952829    | not scorable | not scorable |
| #### Bn-scaff_17457_1-p19139 C-genome specific (napus-oleracea) | 0.9952153    | 0.4199152    | 0.9922481    | 0.7057385    | not scorable | not scorable |
| #### Bn-scaff_17457_1-p19634 C-genome specific (napus-oleracea) | 0.9952153    | 0.7506824    | 0.9844961    | 0.7400947    | not scorable | not scorable |
| #### Bn-scaff_17457_1-p20674 C-genome specific (napus-oleracea) | 0.9952153    | 0.8077162    | 1            | 0.7500345    | not scorable | not scorable |
| #### Bn-scaff_17457_1-p20686 C-genome specific (napus-oleracea) | 0.9976076    | 0.8612596    | 1            | 0.8114628    | not scorable | not scorable |
| #### Bn-scaff_17457_1-p20705 C-genome specific (napus-oleracea) | 0.9952153    | 0.8508818    | 1            | 0.7423341    | not scorable | not scorable |
| #### Bn-scaff_17457_1-p20765 C-genome specific (napus-oleracea) | 0.9976076    | 0.8654566    | 0.9922481    | 0.7189659    | not scorable | not scorable |
| #### Bn-scaff_17457_1-p22577 C-genome specific (napus-oleracea) | 0.9976076    | 0.8249723    | 0.9844961    | 0.7889018    | not scorable | not scorable |
| #### Bn-scaff_17457_1-p22623 C-genome specific (napus-oleracea) | 0.9952153    | 0.8126721    | 1            | 0.7682251    | not scorable | not scorable |
| #### Bn-scaff_17457_1-p24452 C-genome specific (napus-oleracea) | 0.9856459    | 0.8387743    | 0.9534883    | 0.7564378    | not scorable | not scorable |
| #### Bn-scaff_17457_1-p24532 C-genome specific (napus-oleracea) | 0.9784689    | 0.7731234    | 0.9767442    | 0.7805519    | not scorable | not scorable |
| #### Bn-scaff_17457_1-p25025 C-genome specific (napus-oleracea) | 0.9593301    | 0.7019295    | 0.9767442    | 0.7825461    | not scorable | not scorable |
| #### Bn-scaff_17457_1-p25382 C-genome specific (napus-oleracea) | 0.9593301    | 0.7286816    | 1            | 0.7722343    | not scorable | not scorable |
| #### Bn-scaff_17457_1-p25416 napus specific                     | 0.9712918    | 0.7672767    | not scorable | not scorable | not scorable | not scorable |
| #### Bn-scaff_17457_1-p28293 C-genome specific (napus-oleracea) | 0.9976076    | 0.8251725    | 0.9922481    | 0.8384306    | not scorable | not scorable |
| #### Bn-scaff_17457_1-p28314 C-genome specific (napus-oleracea) | 0.9952153    | 0.7352049    | 1            | 0.7740884    | not scorable | not scorable |
| #### Bn-scaff_17457_1-p29043 C-genome specific (napus-oleracea) | 0.9928229    | 0.7629435    | 0.9689922    | 0.7017738    | not scorable | not scorable |
| #### Bn-scaff_17457_1-p38931 napus specific                     | 0.9521531    | 0.7496342    | not scorable | not scorable | not scorable | not scorable |
| #### Bn-scaff_17457_1-p39014 napus specific                     | 0.9521531    | 0.8620736    | not scorable | not scorable | not scorable | not scorable |
| #### Bn-scaff_17457_1-p39040 napus specific                     | 0.9425837    | 0.4459143    | not scorable | not scorable | not scorable | not scorable |
| #### Bn-scaff_17457_1-p39062 napus specific                     | 0.9521531    | 0.796882     | not scorable | not scorable | not scorable | not scorable |
| #### Bn-scaff_17457_1-p39069 napus specific                     | 0.9521531    | 0.7266237    | not scorable | not scorable | not scorable | not scorable |
| #### Bn-scaff_17457_1-p39092 napus specific                     | 0.9521531    | 0.878613     | not scorable | not scorable | not scorable | not scorable |
| #### Bn-scaff_17457_1-p49397 C-genome specific (napus-oleracea) | 0.9976076    | 0.7709633    | 0.9689922    | 0.7675719    | not scorable | not scorable |
| #### Bn-scaff_17457_1-p50549 C-genome specific (napus-oleracea) | 0.9928229    | 0.8293604    | 0.9922481    | 0.7974405    | not scorable | not scorable |



|                                                                 |              |              |              |              |              |              |
|-----------------------------------------------------------------|--------------|--------------|--------------|--------------|--------------|--------------|
| #### Bn-scaff_17457_1-p63628 C-genome specific (napus-oleracea) | 0.9784689    | 0.6622898    | 1            | 0.7231269    | not scorable | not scorable |
| #### Bn-scaff_17457_1-p65395 C-genome specific (napus-oleracea) | 0.9952153    | 0.7460309    | 1            | 0.7274082    | not scorable | not scorable |
| #### Bn-scaff_17457_1-p81967 C-genome specific (napus-oleracea) | 0.9760765    | 0.737422     | 1            | 0.7949582    | not scorable | not scorable |
| #### Bn-scaff_17457_1-p82363 C-genome specific (napus-oleracea) | 0.9928229    | 0.7022585    | 1            | 0.6870221    | not scorable | not scorable |
| #### Bn-scaff_17457_1-p82523 C-genome specific (napus-oleracea) | 0.9688995    | 0.7472576    | 1            | 0.7746842    | not scorable | not scorable |
| #### Bn-scaff_17457_1-p82664 C-genome specific (napus-oleracea) | 0.9736842    | 0.7209489    | 1            | 0.8614079    | not scorable | not scorable |
| #### Bn-scaff_17457_1-p85083 C-genome specific (napus-oleracea) | 0.9760765    | 0.7693276    | 1            | 0.7770374    | not scorable | not scorable |
| #### Bn-scaff_17457_1-p85663 C-genome specific (napus-oleracea) | 0.9832536    | 0.767553     | 1            | 0.710103     | not scorable | not scorable |
| #### Bn-scaff_17457_1-p88808 C-genome specific (napus-oleracea) | 0.9593301    | 0.6972435    | 1            | 0.7287012    | not scorable | not scorable |
| #### Bn-scaff_17457_1-p89239 C-genome specific (napus-oleracea) | 0.9641148    | 0.7793059    | 1            | 0.9272014    | not scorable | not scorable |
| #### Bn-scaff_17457_1-p89732 C-genome specific (napus-oleracea) | 1            | 0.7504566    | 1            | 0.7679691    | not scorable | not scorable |
| #### Bn-scaff_17457_1-p90116 C-genome specific (napus-oleracea) | 0.9736842    | 0.7813734    | 1            | 0.7741278    | not scorable | not scorable |
| #### Bn-scaff_17460_1-p8272 genome unspecific (all in)          | 0.9641148    | 0.5569844    | 0.9922481    | 0.8291255    | 1            | 0.950561     |
| #### Bn-scaff_17461_1-p10339 C-genome specific (napus-oleracea) | 1            | 0.7796276    | 0.9922481    | 0.7164242    | not scorable | not scorable |
| #### Bn-scaff_17461_1-p10397 C-genome specific (napus-oleracea) | 1            | 0.69315      | 1            | 0.6621817    | not scorable | not scorable |
| #### Bn-scaff_17461_1-p11858 napus specific                     | 0.9617225    | 0.3137017    | not scorable | not scorable | not scorable | not scorable |
| #### Bn-scaff_17461_1-p11937 C-genome specific (napus-oleracea) | 0.9904306    | 0.6011752    | 1            | 0.7160736    | not scorable | not scorable |
| #### Bn-scaff_17461_1-p12542 C-genome specific (napus-oleracea) | 1            | 0.7179495    | 1            | 0.6591689    | not scorable | not scorable |
| #### Bn-scaff_17461_1-p15221 genome unspecific (all in)         | 0.9880383    | 0.4317776    | 1            | 0.8806465    | 0.9917355    | 0.8258078    |
| #### Bn-scaff_17461_1-p15516 genome unspecific (all in)         | 0.9808612    | 0.2776222    | 1            | 0.6653468    | 0.9917355    | 0.6962907    |
| #### Bn-scaff_17461_1-p15846 genome unspecific (all in)         | 1            | 0.681638     | 1            | 0.6921083    | 1            | 0.6394386    |
| #### Bn-scaff_17461_1-p17536 genome unspecific (oleracea-rapa)  | not scorable | not scorable | 1            | 0.7351697    | 1            | 0.8099461    |
| #### Bn-scaff_17461_1-p17771 genome unspecific (all in)         | 0.9832536    | 0.334821     | 1            | 0.8207097    | 0.9917355    | 0.7202916    |
| #### Bn-scaff_17461_1-p19979 genome unspecific (all in)         | 1            | 0.3263262    | 0.9922481    | 0.8117447    | 1            | 0.8303932    |
| #### Bn-scaff_17461_1-p20901 genome unspecific (all in)         | 0.9976076    | 0.4851286    | 0.9844961    | 0.8254198    | 0.9834711    | 0.89691      |
| #### Bn-scaff_17461_1-p31056 C-genome specific (napus-oleracea) | 0.9976076    | 0.7652524    | 1            | 0.9175813    | not scorable | not scorable |
| #### Bn-scaff_17461_1-p35786 C-genome specific (napus-oleracea) | 0.9928229    | 0.6538241    | 1            | 0.6214275    | not scorable | not scorable |
| #### Bn-scaff_17461_1-p36909 C-genome specific (oleracea only)  | not scorable | not scorable | 0.8992248    | 0.887685     | not scorable | not scorable |
| #### Bn-scaff_17461_1-p38704 C-genome specific (napus-oleracea) | 0.9952153    | 0.8323718    | 0.9922481    | 0.8452013    | not scorable | not scorable |
| #### Bn-scaff_17461_1-p39220 C-genome specific (napus-oleracea) | 1            | 0.8906748    | 1            | 0.3580564    | not scorable | not scorable |
| #### Bn-scaff_17461_1-p42324 C-genome specific (napus-oleracea) | 0.9976076    | 0.7639498    | 0.9612403    | 0.7252899    | not scorable | not scorable |
| #### Bn-scaff_17461_1-p42917 C-genome specific (napus-oleracea) | 1            | 0.7552503    | 1            | 0.7118943    | not scorable | not scorable |
| #### Bn-scaff_17461_1-p47395 C-genome specific (napus-oleracea) | 0.9952153    | 0.7551959    | 1            | 0.8604155    | not scorable | not scorable |

|                                                                 |              |              |              |              |              |              |
|-----------------------------------------------------------------|--------------|--------------|--------------|--------------|--------------|--------------|
| #### Bn-scaff_17461_1-p47458 C-genome specific (napus-oleracea) | 0.9976076    | 0.7335829    | 1            | 0.7265013    | not scorable | not scorable |
| #### Bn-scaff_17461_1-p47497 C-genome specific (napus-oleracea) | 0.9928229    | 0.7738136    | 0.9922481    | 0.772591     | not scorable | not scorable |
| #### Bn-scaff_17461_1-p47911 C-genome specific (napus-oleracea) | 0.930622     | 0.7291861    | 0.9844961    | 0.8552511    | not scorable | not scorable |
| #### Bn-scaff_17461_1-p48077 C-genome specific (napus-oleracea) | 1            | 0.6923664    | 1            | 0.5013383    | not scorable | not scorable |
| #### Bn-scaff_17461_1-p48104 C-genome specific (napus-oleracea) | 0.9976076    | 0.6790519    | 1            | 0.4815105    | not scorable | not scorable |
| #### Bn-scaff_17461_1-p62663 C-genome specific (napus-oleracea) | 0.9928229    | 0.8935621    | 1            | 0.7857458    | not scorable | not scorable |
| #### Bn-scaff_17461_1-p63011 C-genome specific (napus-oleracea) | 0.9952153    | 0.78589      | 0.9922481    | 0.8196205    | not scorable | not scorable |
| #### Bn-scaff_17461_1-p63089 C-genome specific (napus-oleracea) | 1            | 0.789683     | 1            | 0.7404652    | not scorable | not scorable |
| #### Bn-scaff_17461_1-p66420 C-genome specific (oleracea only)  | not scorable | not scorable | 0.875969     | 0.9312089    | not scorable | not scorable |
| #### Bn-scaff_17461_1-p66530 C-genome specific (napus-oleracea) | 0.9976076    | 0.7415373    | 1            | 0.7768729    | not scorable | not scorable |
| #### Bn-scaff_17461_1-p66565 C-genome specific (napus-oleracea) | 0.9952153    | 0.8353349    | 0.9844961    | 0.8241265    | not scorable | not scorable |
| #### Bn-scaff_17461_1-p66566 C-genome specific (napus-oleracea) | 0.9976076    | 0.7873759    | 1            | 0.9283645    | not scorable | not scorable |
| #### Bn-scaff_17461_1-p66697 C-genome specific (napus-oleracea) | 0.9976076    | 0.7568316    | 1            | 0.6883864    | not scorable | not scorable |
| #### Bn-scaff_17461_1-p66795 C-genome specific (napus-oleracea) | 0.9952153    | 0.6716505    | 0.9844961    | 0.638303     | not scorable | not scorable |
| #### Bn-scaff_17461_1-p67572 C-genome specific (napus-oleracea) | 1            | 0.7804206    | 1            | 0.4432876    | not scorable | not scorable |
| #### Bn-scaff_17461_1-p67736 C-genome specific (napus-oleracea) | 0.9976076    | 0.803971     | 1            | 0.7902774    | not scorable | not scorable |
| #### Bn-scaff_17461_1-p74725 C-genome specific (napus-oleracea) | 0.923445     | 0.7660109    | 0.8992248    | 0.7705598    | not scorable | not scorable |
| #### Bn-scaff_17461_1-p79892 C-genome specific (napus-oleracea) | 1            | 0.7870821    | 0.9922481    | 0.7064587    | not scorable | not scorable |
| #### Bn-scaff_17461_1-p80172 C-genome specific (napus-oleracea) | 0.9976076    | 0.8112285    | 1            | 0.6965944    | not scorable | not scorable |
| #### Bn-scaff_17461_1-p80820 C-genome specific (napus-oleracea) | 1            | 0.7676245    | 0.9922481    | 0.7281987    | not scorable | not scorable |
| #### Bn-scaff_17461_1-p90482 C-genome specific (napus-oleracea) | 0.9952153    | 0.7513679    | 1            | 0.3951021    | not scorable | not scorable |
| #### Bn-scaff_17461_1-p91014 genome unspecific (all in)         | 1            | 0.7168132    | 1            | 0.4990815    | 0.9834711    | 0.922098     |
| #### Bn-scaff_17461_1-p91531 genome unspecific (all in)         | 0.9952153    | 0.734962     | 0.9922481    | 0.731616     | 0.9586777    | 0.7553526    |
| #### Bn-scaff_17461_1-p93293 C-genome specific (napus-oleracea) | 1            | 0.6706635    | 1            | 0.6451152    | not scorable | not scorable |
| #### Bn-scaff_17461_1-p94677 C-genome specific (napus-oleracea) | 1            | 0.7884688    | 1            | 0.7262948    | not scorable | not scorable |
| #### Bn-scaff_17461_1-p98246 C-genome specific (napus-oleracea) | 1            | 0.5625401    | 1            | 0.5249787    | not scorable | not scorable |
| #### Bn-scaff_17461_1-p98584 C-genome specific (napus-oleracea) | 1            | 0.5285149    | 1            | 0.5286912    | not scorable | not scorable |
| #### Bn-scaff_17480_1-p585 genome unspecific (all in)           | 1            | 0.9217328    | 1            | 0.9079872    | 1            | 0.9073557    |
| #### Bn-scaff_17482_1-p6632 C-genome specific (napus-oleracea)  | 0.9138756    | 0.5570421    | 0.9922481    | 0.2584971    | not scorable | not scorable |
| #### Bn-scaff_17482_1-p6769 C-genome specific (napus-oleracea)  | 0.9880383    | 0.7160877    | 0.9612403    | 0.4863965    | not scorable | not scorable |
| #### Bn-scaff_17482_1-p7299 A-genome specific (napus-rapa)      | 0.9808612    | 0.547366     | not scorable | not scorable | 1            | 0.6713775    |
| #### Bn-scaff_17482_1-p9837 genome unspecific (all in)          | 0.9880383    | 0.2183218    | 1            | 0.6681485    | 1            | 0.857733     |
| #### Bn-scaff_17484_1-p12803 C-genome specific (napus-oleracea) | 1            | 0.7847776    | 0.9922481    | 0.766296     | not scorable | not scorable |

|                                                                 |              |              |              |              |              |              |
|-----------------------------------------------------------------|--------------|--------------|--------------|--------------|--------------|--------------|
| #### Bn-scaff_17484_1-p12809 C-genome specific (napus-oleracea) | 1            | 0.6885087    | 0.9844961    | 0.6830944    | not scorable | not scorable |
| #### Bn-scaff_17484_1-p12868 C-genome specific (napus-oleracea) | 1            | 0.785692     | 0.9922481    | 0.8166432    | not scorable | not scorable |
| #### Bn-scaff_17484_1-p12879 C-genome specific (napus-oleracea) | 0.9976076    | 0.687667     | 0.9844961    | 0.6872114    | not scorable | not scorable |
| #### Bn-scaff_17484_1-p12927 C-genome specific (napus-oleracea) | 1            | 0.7872002    | 0.9922481    | 0.7820613    | not scorable | not scorable |
| #### Bn-scaff_17484_1-p12965 C-genome specific (napus-oleracea) | 1            | 0.7594786    | 0.9844961    | 0.7862444    | not scorable | not scorable |
| #### Bn-scaff_17484_1-p12976 C-genome specific (napus-oleracea) | 1            | 0.8056936    | 0.9922481    | 0.7708716    | not scorable | not scorable |
| #### Bn-scaff_17484_1-p12985 C-genome specific (napus-oleracea) | 0.9952153    | 0.7392264    | 0.9922481    | 0.7985319    | not scorable | not scorable |
| #### Bn-scaff_17484_1-p13018 C-genome specific (napus-oleracea) | 0.9976076    | 0.6177715    | 1            | 0.7792954    | not scorable | not scorable |
| #### Bn-scaff_17484_1-p13054 C-genome specific (napus-oleracea) | 1            | 0.7543488    | 1            | 0.7216662    | not scorable | not scorable |
| #### Bn-scaff_17484_1-p13065 C-genome specific (napus-oleracea) | 1            | 0.7800958    | 1            | 0.6976425    | not scorable | not scorable |
| #### Bn-scaff_17484_1-p13140 C-genome specific (napus-oleracea) | 0.9952153    | 0.4046195    | 0.9844961    | 0.6537985    | not scorable | not scorable |
| #### Bn-scaff_17484_1-p13230 C-genome specific (napus-oleracea) | 1            | 0.7730502    | 0.9767442    | 0.6619202    | not scorable | not scorable |
| #### Bn-scaff_17484_1-p13290 C-genome specific (napus-oleracea) | 0.9976076    | 0.782055     | 0.9844961    | 0.6452151    | not scorable | not scorable |
| #### Bn-scaff_17484_1-p13297 C-genome specific (napus-oleracea) | 1            | 0.7178384    | 1            | 0.7285249    | not scorable | not scorable |
| #### Bn-scaff_17484_1-p13314 C-genome specific (napus-oleracea) | 1            | 0.6894016    | 0.9689922    | 0.7221633    | not scorable | not scorable |
| #### Bn-scaff_17484_1-p13322 C-genome specific (napus-oleracea) | 1            | 0.7270203    | 0.9844961    | 0.7778845    | not scorable | not scorable |
| #### Bn-scaff_17484_1-p13418 C-genome specific (napus-oleracea) | 1            | 0.7613231    | 0.9922481    | 0.7771668    | not scorable | not scorable |
| #### Bn-scaff_17484_1-p13454 C-genome specific (napus-oleracea) | 1            | 0.7838104    | 1            | 0.4682159    | not scorable | not scorable |
| #### Bn-scaff_17484_1-p13456 C-genome specific (napus-oleracea) | 1            | 0.6775413    | 0.9844961    | 0.6784372    | not scorable | not scorable |
| #### Bn-scaff_17484_1-p37746 genome unspecific (all in)         | 1            | 0.757983     | 1            | 0.6603343    | 1            | 0.8775992    |
| #### Bn-scaff_17484_1-p41186 C-genome specific (napus-oleracea) | 0.9976076    | 0.799542     | 0.9922481    | 0.7200118    | not scorable | not scorable |
| #### Bn-scaff_17487_1-p12449 genome unspecific (oleracea-rapa)  | not scorable | not scorable | 1            | 0.6071444    | 1            | 0.5702917    |
| #### Bn-scaff_17487_1-p12582 napus specific                     | 0.8636364    | 0.7269707    | not scorable | not scorable | not scorable | not scorable |
| #### Bn-scaff_17487_1-p12836 genome unspecific (oleracea-rapa)  | not scorable | not scorable | 0.9844961    | 0.2795389    | 0.9917355    | 0.8869938    |
| #### Bn-scaff_17487_1-p12837 napus specific                     | 0.9832536    | 0.2802511    | not scorable | not scorable | not scorable | not scorable |
| #### Bn-scaff_17487_1-p13711A-genome specific (rapa only)       | not scorable | not scorable | not scorable | not scorable | 1            | 0.4888397    |
| #### Bn-scaff_17487_1-p13713 C-genome specific (oleracea only)  | not scorable | not scorable | 0.9922481    | 0.3488016    | not scorable | not scorable |
| #### Bn-scaff_17487_1-p13724 genome unspecific (oleracea-rapa)  | not scorable | not scorable | 0.7286822    | 0.9491687    | 1            | 0.6927572    |
| #### Bn-scaff_17487_1-p13772 genome unspecific (all in)         | 0.9712918    | 0.1866892    | 0.7829458    | 0.9175813    | 0.9090909    | 0.6873536    |
| #### Bn-scaff_17487_1-p14903 C-genome specific (napus-oleracea) | 0.9808612    | 0.2213022    | 1            | 0.7583615    | not scorable | not scorable |
| #### Bn-scaff_17487_1-p15732 genome unspecific (oleracea-rapa)  | not scorable | not scorable | 1            | 0.7770717    | 1            | 0.7064533    |
| #### Bn-scaff_17487_1-p16080 genome unspecific (all in)         | 0.9712918    | 0.2858223    | 1            | 0.7376376    | 0.9669421    | 0.5999096    |
| #### Bn-scaff_17487_1-p16092 genome unspecific (oleracea-rapa)  | not scorable | not scorable | 1            | 0.642653     | 1            | 0.8782002    |

|                                                                |              |              |           |           |              |              |
|----------------------------------------------------------------|--------------|--------------|-----------|-----------|--------------|--------------|
| #### Bn-scaff_17487_1-p1609 genome unspecific (all in)         | 0.9856459    | 0.2671308    | 0.9844961 | 0.2935573 | 1            | 0.7445813    |
| #### Bn-scaff_17487_1-p1614 genome unspecific (all in)         | 0.9641148    | 0.2253772    | 1         | 0.7739488 | 0.9917355    | 0.7100877    |
| #### Bn-scaff_17487_1-p1782 C-genome specific (napus-oleracea) | 0.9138756    | 0.7729827    | 0.9922481 | 0.7286923 | not scorable | not scorable |
| #### Bn-scaff_17487_1-p1782 genome unspecific (all in)         | 0.9521531    | 0.390183     | 1         | 0.7104885 | 1            | 0.8004208    |
| #### Bn-scaff_17487_1-p1888 C-genome specific (napus-oleracea) | 0.9114832    | 0.6941374    | 0.9922481 | 0.6833251 | not scorable | not scorable |
| #### Bn-scaff_17487_1-p1890 C-genome specific (napus-oleracea) | 0.9928229    | 0.7826632    | 0.9844961 | 0.8661726 | not scorable | not scorable |
| #### Bn-scaff_17487_1-p1900 C-genome specific (napus-oleracea) | 0.9019139    | 0.7816473    | 0.9922481 | 0.8008007 | not scorable | not scorable |
| #### Bn-scaff_17487_1-p1909 C-genome specific (napus-oleracea) | 0.9162679    | 0.723444     | 1         | 0.6639406 | not scorable | not scorable |
| #### Bn-scaff_17487_1-p1911 C-genome specific (napus-oleracea) | 0.9066986    | 0.7785611    | 0.9844961 | 0.7593343 | not scorable | not scorable |
| #### Bn-scaff_17487_1-p1912 C-genome specific (napus-oleracea) | 0.9138756    | 0.7816478    | 0.9767442 | 0.7440347 | not scorable | not scorable |
| #### Bn-scaff_17487_1-p1927 C-genome specific (napus-oleracea) | 0.9186603    | 0.7936957    | 0.9922481 | 0.7581567 | not scorable | not scorable |
| #### Bn-scaff_17487_1-p1938 C-genome specific (napus-oleracea) | 0.8779904    | 0.7213613    | 0.9844961 | 0.7274054 | not scorable | not scorable |
| #### Bn-scaff_17487_1-p1938 C-genome specific (napus-oleracea) | 0.9162679    | 0.7772273    | 1         | 0.8340922 | not scorable | not scorable |
| #### Bn-scaff_17487_1-p1959 genome unspecific (all in)         | 0.9641148    | 0.26415      | 1         | 0.6661699 | 1            | 0.8004208    |
| #### Bn-scaff_17487_1-p1959 genome unspecific (all in)         | 0.9712918    | 0.2597893    | 1         | 0.6972542 | 1            | 0.8782333    |
| #### Bn-scaff_17487_1-p2008 genome unspecific (all in)         | 1            | 0.5305944    | 0.9922481 | 0.5866733 | 0.9917355    | 0.709211     |
| #### Bn-scaff_17487_1-p2351 C-genome specific (napus-oleracea) | 0.9880383    | 0.3975713    | 1         | 0.7641606 | not scorable | not scorable |
| #### Bn-scaff_17487_1-p2531 C-genome specific (oleracea only)  | not scorable | not scorable | 0.9922481 | 0.8740039 | not scorable | not scorable |
| #### Bn-scaff_17487_1-p3031 genome unspecific (oleracea-rapa)  | not scorable | not scorable | 1         | 0.8113853 | 0.9834711    | 0.7033941    |
| #### Bn-scaff_17487_1-p3768 genome unspecific (all in)         | 0.9258373    | 0.2058413    | 0.9922481 | 0.2493275 | 0.9834711    | 0.781688     |
| #### Bn-scaff_17487_1-p3816 C-genome specific (napus-oleracea) | 0.8947368    | 0.80874      | 0.9767442 | 0.7770135 | not scorable | not scorable |
| #### Bn-scaff_17487_1-p3823 C-genome specific (napus-oleracea) | 0.9043062    | 0.7753089    | 0.8527132 | 0.7816215 | not scorable | not scorable |
| #### Bn-scaff_17487_1-p3831 C-genome specific (napus-oleracea) | 0.8803828    | 0.7927915    | 0.8217054 | 0.8328356 | not scorable | not scorable |
| #### Bn-scaff_17487_1-p3848 C-genome specific (napus-oleracea) | 0.8995215    | 0.6603142    | 0.8449612 | 0.6242338 | not scorable | not scorable |
| #### Bn-scaff_17487_1-p4040 C-genome specific (napus-oleracea) | 0.9162679    | 0.7762495    | 0.9922481 | 0.7285661 | not scorable | not scorable |
| #### Bn-scaff_17487_1-p4157 C-genome specific (napus-oleracea) | 0.9019139    | 0.7212652    | 1         | 0.568448  | not scorable | not scorable |
| #### Bn-scaff_17487_1-p4162 C-genome specific (napus-oleracea) | 0.8875598    | 0.796074     | 1         | 0.8207923 | not scorable | not scorable |
| #### Bn-scaff_17487_1-p4163 C-genome specific (napus-oleracea) | 0.9114832    | 0.7649793    | 1         | 0.7973582 | not scorable | not scorable |
| #### Bn-scaff_17487_1-p4216 C-genome specific (napus-oleracea) | 0.9258373    | 0.6877161    | 0.9922481 | 0.7858429 | not scorable | not scorable |
| #### Bn-scaff_17487_1-p4245 C-genome specific (napus-oleracea) | 0.8971292    | 0.7995685    | 1         | 0.8318138 | not scorable | not scorable |
| #### Bn-scaff_17487_1-p4416 C-genome specific (napus-oleracea) | 0.9114832    | 0.7977108    | 1         | 0.6938504 | not scorable | not scorable |
| #### Bn-scaff_17487_1-p4645 C-genome specific (napus-oleracea) | 0.8971292    | 0.7776598    | 1         | 0.7209007 | not scorable | not scorable |
| #### Bn-scaff_17487_1-p4756 C-genome specific (oleracea only)  | not scorable | not scorable | 0.9922481 | 0.7943786 | not scorable | not scorable |

|                                                                 |           |           |              |              |              |              |
|-----------------------------------------------------------------|-----------|-----------|--------------|--------------|--------------|--------------|
| #### Bn-scaff_17487_1-p48783 C-genome specific (napus-oleracea) | 0.8923445 | 0.7423598 | 0.9069768    | 0.7900146    | not scorable | not scorable |
| #### Bn-scaff_17487_1-p48889 C-genome specific (napus-oleracea) | 0.9019139 | 0.6826754 | 0.9922481    | 0.72118      | not scorable | not scorable |
| #### Bn-scaff_17487_1-p49103 C-genome specific (napus-oleracea) | 0.8421053 | 0.6841055 | 1            | 0.7837734    | not scorable | not scorable |
| #### Bn-scaff_17487_1-p51159 C-genome specific (napus-oleracea) | 0.9043062 | 0.7845291 | 0.9767442    | 0.8058429    | not scorable | not scorable |
| #### Bn-scaff_17487_1-p51253 C-genome specific (napus-oleracea) | 0.9186603 | 0.6809666 | 0.9922481    | 0.6562966    | not scorable | not scorable |
| #### Bn-scaff_17487_1-p52738 C-genome specific (napus-oleracea) | 0.9138756 | 0.7876789 | 1            | 0.6873185    | not scorable | not scorable |
| #### Bn-scaff_17487_1-p54530 C-genome specific (napus-oleracea) | 0.9186603 | 0.7670529 | 1            | 0.8260669    | not scorable | not scorable |
| #### Bn-scaff_17487_1-p55727 C-genome specific (napus-oleracea) | 0.7464115 | 0.8073282 | 0.8139535    | 0.8226281    | not scorable | not scorable |
| #### Bn-scaff_17487_1-p56029 C-genome specific (napus-oleracea) | 0.7464115 | 0.8168671 | 0.8139535    | 0.7824244    | not scorable | not scorable |
| #### Bn-scaff_17487_1-p56044 genome unspecific (all in)         | 0.7488039 | 0.6627564 | 0.8139535    | 0.6834239    | 1            | 0.7475847    |
| #### Bn-scaff_17487_1-p56137 C-genome specific (napus-oleracea) | 0.7511961 | 0.7959566 | 0.8139535    | 0.6807437    | not scorable | not scorable |
| #### Bn-scaff_17487_1-p56159 A-genome specific (napus-rapa)     | 0.9617225 | 0.6199428 | not scorable | not scorable | 0.9834711    | 0.9400423    |
| #### Bn-scaff_17487_1-p56572 C-genome specific (napus-oleracea) | 0.7177033 | 0.8172746 | 0.8139535    | 0.7849214    | not scorable | not scorable |
| #### Bn-scaff_17487_1-p60329 C-genome specific (napus-oleracea) | 0.7799043 | 0.7248269 | 0.9069768    | 0.4937491    | not scorable | not scorable |
| #### Bn-scaff_17487_1-p61134 genome unspecific (all in)         | 0.9976076 | 0.5573323 | 1            | 0.5314716    | 1            | 0.9094549    |
| #### Bn-scaff_17487_1-p61506 C-genome specific (napus-oleracea) | 0.8995215 | 0.6760947 | 1            | 0.8373905    | not scorable | not scorable |
| #### Bn-scaff_17487_1-p61691 genome unspecific (all in)         | 0.9928229 | 0.4363624 | 1            | 0.818529     | 1            | 0.9039372    |
| #### Bn-scaff_17487_1-p64558 C-genome specific (napus-oleracea) | 0.9066986 | 0.7340807 | 1            | 0.6888348    | not scorable | not scorable |
| #### Bn-scaff_17487_1-p64603 C-genome specific (napus-oleracea) | 0.9162679 | 0.7420136 | 1            | 0.6995379    | not scorable | not scorable |
| #### Bn-scaff_17487_1-p64765 C-genome specific (napus-oleracea) | 0.8995215 | 0.7595634 | 0.8837209    | 0.7312775    | not scorable | not scorable |
| #### Bn-scaff_17487_1-p68269 genome unspecific (all in)         | 0.9736842 | 0.2407293 | 1            | 0.5270858    | 0.9752066    | 0.7036794    |
| #### Bn-scaff_17487_1-p72316 genome unspecific (all in)         | 0.9617225 | 0.3234033 | 1            | 0.6913778    | 0.9834711    | 0.6750146    |
| #### Bn-scaff_17487_1-p72325 genome unspecific (all in)         | 0.9641148 | 0.3379167 | 0.9844961    | 0.6949651    | 1            | 0.7349294    |
| #### Bn-scaff_17487_1-p74837 A-genome specific (napus-rapa)     | 1         | 0.579408  | not scorable | not scorable | 1            | 0.907032     |
| #### Bn-scaff_17487_1-p78121 genome unspecific (all in)         | 0.9952153 | 0.2768334 | 1            | 0.6088996    | 1            | 0.7440022    |
| #### Bn-scaff_17487_1-p81214 C-genome specific (napus-oleracea) | 0.9210526 | 0.6891299 | 0.9922481    | 0.6305295    | not scorable | not scorable |
| #### Bn-scaff_17487_1-p81215 genome unspecific (all in)         | 0.9904306 | 0.5869144 | 0.9689922    | 0.6700429    | 1            | 0.6852099    |
| #### Bn-scaff_17487_1-p93286 C-genome specific (napus-oleracea) | 0.8875598 | 0.7645307 | 1            | 0.9200199    | not scorable | not scorable |
| #### Bn-scaff_17515_1-p10642 C-genome specific (napus-oleracea) | 0.9856459 | 0.7450015 | 1            | 0.695757     | not scorable | not scorable |
| #### Bn-scaff_17515_1-p10832 C-genome specific (napus-oleracea) | 0.9784689 | 0.7599296 | 0.9922481    | 0.8246186    | not scorable | not scorable |
| #### Bn-scaff_17515_1-p10924 C-genome specific (napus-oleracea) | 0.9880383 | 0.7818289 | 1            | 0.8177654    | not scorable | not scorable |
| #### Bn-scaff_17515_1-p10935 C-genome specific (napus-oleracea) | 0.9784689 | 0.7534031 | 1            | 0.800707     | not scorable | not scorable |
| #### Bn-scaff_17515_1-p11055 C-genome specific (napus-oleracea) | 0.9760765 | 0.7834184 | 0.9302326    | 0.8099224    | not scorable | not scorable |

|                                                                  |              |              |              |              |              |              |
|------------------------------------------------------------------|--------------|--------------|--------------|--------------|--------------|--------------|
| ##### Bn-scaff_17515_1-p11065 C-genome specific (napus-oleracea) | 0.9712918    | 0.6619504    | 0.9147287    | 0.6557028    | not scorable | not scorable |
| ##### Bn-scaff_17515_1-p11112 C-genome specific (napus-oleracea) | 0.9688995    | 0.7594247    | 0.8372093    | 0.7340143    | not scorable | not scorable |
| ##### Bn-scaff_17515_1-p11144 C-genome specific (napus-oleracea) | 0.9712918    | 0.7738836    | 0.9922481    | 0.7645372    | not scorable | not scorable |
| ##### Bn-scaff_17515_1-p11176 C-genome specific (napus-oleracea) | 0.9688995    | 0.738704     | 0.9922481    | 0.8022274    | not scorable | not scorable |
| ##### Bn-scaff_17515_1-p11182 C-genome specific (napus-oleracea) | 0.9808612    | 0.7812998    | 0.9922481    | 0.7234524    | not scorable | not scorable |
| ##### Bn-scaff_17515_1-p11361 C-genome specific (napus-oleracea) | 0.9784689    | 0.6438892    | 0.9844961    | 0.6908737    | not scorable | not scorable |
| ##### Bn-scaff_17515_1-p11408 C-genome specific (napus-oleracea) | 0.9784689    | 0.7948542    | 0.9922481    | 0.7089125    | not scorable | not scorable |
| ##### Bn-scaff_17515_1-p11528 C-genome specific (napus-oleracea) | 0.9760765    | 0.7768067    | 0.9922481    | 0.6733396    | not scorable | not scorable |
| ##### Bn-scaff_17515_1-p12851 C-genome specific (napus-oleracea) | 0.9808612    | 0.7816337    | 0.9922481    | 0.8146118    | not scorable | not scorable |
| ##### Bn-scaff_17515_1-p17003 C-genome specific (napus-oleracea) | 0.9712918    | 0.6784402    | 1            | 0.6859407    | not scorable | not scorable |
| ##### Bn-scaff_17515_1-p18967 C-genome specific (napus-oleracea) | 0.9832536    | 0.7551357    | 1            | 0.7910555    | not scorable | not scorable |
| ##### Bn-scaff_17515_1-p18973 C-genome specific (napus-oleracea) | 0.9712918    | 0.8147029    | 1            | 0.7975124    | not scorable | not scorable |
| ##### Bn-scaff_17515_1-p18975 C-genome specific (napus-oleracea) | 0.9808612    | 0.7854503    | 1            | 0.6427177    | not scorable | not scorable |
| ##### Bn-scaff_17515_1-p19421 C-genome specific (napus-oleracea) | 0.9736842    | 0.7903876    | 1            | 0.679231     | not scorable | not scorable |
| ##### Bn-scaff_17515_1-p19495 C-genome specific (napus-oleracea) | 0.9784689    | 0.7212745    | 1            | 0.6857851    | not scorable | not scorable |
| ##### Bn-scaff_17515_1-p19495 C-genome specific (napus-oleracea) | 0.9856459    | 0.7073827    | 1            | 0.62927      | not scorable | not scorable |
| ##### Bn-scaff_17515_1-p19506 C-genome specific (napus-oleracea) | 0.9808612    | 0.7777585    | 1            | 0.7908437    | not scorable | not scorable |
| ##### Bn-scaff_17515_1-p19514 C-genome specific (napus-oleracea) | 0.9784689    | 0.7830079    | 1            | 0.7241445    | not scorable | not scorable |
| ##### Bn-scaff_17515_1-p19764 C-genome specific (napus-oleracea) | 0.9832536    | 0.6945755    | 0.8527132    | 0.6764334    | not scorable | not scorable |
| ##### Bn-scaff_17515_1-p19808 C-genome specific (napus-oleracea) | 0.9760765    | 0.7292564    | 0.8682171    | 0.6471758    | not scorable | not scorable |
| ##### Bn-scaff_17515_1-p19891 C-genome specific (napus-oleracea) | 0.9808612    | 0.7678063    | 0.9379845    | 0.7646505    | not scorable | not scorable |
| ##### Bn-scaff_17515_1-p20256 all not scorable                   | not scorable | not scorable | not scorable | not scorable | not scorable | not scorable |
| ##### Bn-scaff_17515_1-p20325 C-genome specific (napus-oleracea) | 0.9832536    | 0.770589     | 1            | 0.790797     | not scorable | not scorable |
| ##### Bn-scaff_17515_1-p21721 C-genome specific (napus-oleracea) | 0.9760765    | 0.7764651    | 1            | 0.7030462    | not scorable | not scorable |
| ##### Bn-scaff_17515_1-p22033 C-genome specific (napus-oleracea) | 0.9808612    | 0.7126175    | 1            | 0.7580945    | not scorable | not scorable |
| ##### Bn-scaff_17515_1-p24368 C-genome specific (napus-oleracea) | 0.9784689    | 0.7831801    | 0.9612403    | 0.7771805    | not scorable | not scorable |
| ##### Bn-scaff_17515_1-p24377 C-genome specific (napus-oleracea) | 0.9832536    | 0.6887749    | 0.9612403    | 0.6076601    | not scorable | not scorable |
| ##### Bn-scaff_17515_1-p24386 C-genome specific (napus-oleracea) | 0.9880383    | 0.7739859    | 0.9612403    | 0.7234337    | not scorable | not scorable |
| ##### Bn-scaff_17515_1-p24450 C-genome specific (napus-oleracea) | 0.9832536    | 0.7678857    | 1            | 0.7270705    | not scorable | not scorable |
| ##### Bn-scaff_17515_1-p24471 C-genome specific (napus-oleracea) | 0.9784689    | 0.7649956    | 1            | 0.8773268    | not scorable | not scorable |
| ##### Bn-scaff_17515_1-p24480 C-genome specific (napus-oleracea) | 0.9760765    | 0.7370281    | 0.9922481    | 0.8500844    | not scorable | not scorable |
| ##### Bn-scaff_17515_1-p24495 C-genome specific (napus-oleracea) | 0.9784689    | 0.7404954    | 0.9922481    | 0.8618163    | not scorable | not scorable |
| ##### Bn-scaff_17515_1-p24506 C-genome specific (napus-oleracea) | 0.9641148    | 0.6267842    | 1            | 0.7490044    | not scorable | not scorable |

|                                                                |              |              |              |              |              |              |
|----------------------------------------------------------------|--------------|--------------|--------------|--------------|--------------|--------------|
| #### Bn-scaff_17515_1-p24551C-genome specific (napus-oleracea) | 0.9736842    | 0.6974945    | 1            | 0.8179882    | not scorable | not scorable |
| #### Bn-scaff_17515_1-p24776genome unspecific (oleracea-rapa)  | not scorable | not scorable | 1            | 0.6580261    | 1            | 0.7947671    |
| #### Bn-scaff_17515_1-p25003C-genome specific (napus-oleracea) | 0.9712918    | 0.6480842    | 1            | 0.7414703    | not scorable | not scorable |
| #### Bn-scaff_17515_1-p25174C-genome specific (napus-oleracea) | 0.9808612    | 0.6857362    | 1            | 0.6803176    | not scorable | not scorable |
| #### Bn-scaff_17515_1-p25701genome unspecific (all in)         | 0.9976076    | 0.4547631    | 1            | 0.6251416    | 0.9834711    | 0.6973578    |
| #### Bn-scaff_17515_1-p26116C-genome specific (napus-oleracea) | 0.9808612    | 0.7741535    | 1            | 0.800548     | not scorable | not scorable |
| #### Bn-scaff_17515_1-p26671C-genome specific (napus-oleracea) | 0.9760765    | 0.7179691    | 0.9767442    | 0.7641207    | not scorable | not scorable |
| #### Bn-scaff_17515_1-p27159C-genome specific (napus-oleracea) | 0.9784689    | 0.7879505    | 1            | 0.9166254    | not scorable | not scorable |
| #### Bn-scaff_17515_1-p29001genome unspecific (all in)         | 1            | 0.7048635    | 1            | 0.6605194    | 1            | 0.8108414    |
| #### Bn-scaff_17515_1-p30105C-genome specific (napus-oleracea) | 0.6411483    | 0.8145208    | 0.8837209    | 0.7820827    | not scorable | not scorable |
| #### Bn-scaff_17515_1-p30219C-genome specific (oleracea only)  | not scorable | not scorable | 0.7674419    | 0.8646218    | not scorable | not scorable |
| #### Bn-scaff_17515_1-p30251C-genome specific (napus-oleracea) | 0.65311      | 0.7604221    | 0.8914729    | 0.7020374    | not scorable | not scorable |
| #### Bn-scaff_17515_1-p30261C-genome specific (napus-oleracea) | 0.65311      | 0.7695177    | 0.8992248    | 0.7406051    | not scorable | not scorable |
| #### Bn-scaff_17515_1-p30477C-genome specific (napus-oleracea) | 0.6555024    | 0.845739     | 0.8992248    | 0.8092866    | not scorable | not scorable |
| #### Bn-scaff_17515_1-p31155C-genome specific (napus-oleracea) | 0.6435407    | 0.8210707    | 0.8992248    | 0.8331258    | not scorable | not scorable |
| #### Bn-scaff_17515_1-p31707C-genome specific (napus-oleracea) | 0.9808612    | 0.6082623    | 1            | 0.6793439    | not scorable | not scorable |
| #### Bn-scaff_17515_1-p31713napus specific                     | 0.7464115    | 0.7121454    | not scorable | not scorable | not scorable | not scorable |
| #### Bn-scaff_17515_1-p31995C-genome specific (napus-oleracea) | 0.9665072    | 0.7632334    | 1            | 0.7971373    | not scorable | not scorable |
| #### Bn-scaff_17515_1-p34947C-genome specific (napus-oleracea) | 0.9784689    | 0.7789679    | 0.9922481    | 0.6948312    | not scorable | not scorable |
| #### Bn-scaff_17515_1-p37692C-genome specific (napus-oleracea) | 0.9736842    | 0.7182745    | 1            | 0.756219     | not scorable | not scorable |
| #### Bn-scaff_17515_1-p37740C-genome specific (napus-oleracea) | 0.9736842    | 0.7240365    | 0.9689922    | 0.8207097    | not scorable | not scorable |
| #### Bn-scaff_17515_1-p38420genome unspecific (all in)         | 0.9688995    | 0.2536404    | 0.9689922    | 0.4852574    | 0.8512397    | 0.7534218    |
| #### Bn-scaff_17515_1-p38691C-genome specific (napus-oleracea) | 0.9593301    | 0.6731002    | 1            | 0.9491963    | not scorable | not scorable |
| #### Bn-scaff_17515_1-p38836C-genome specific (napus-oleracea) | 0.9688995    | 0.8096741    | 1            | 0.7740619    | not scorable | not scorable |
| #### Bn-scaff_17515_1-p38858C-genome specific (napus-oleracea) | 0.9832536    | 0.802984     | 0.9922481    | 0.7773334    | not scorable | not scorable |
| #### Bn-scaff_17515_1-p38870C-genome specific (napus-oleracea) | 0.9665072    | 0.8056934    | 1            | 0.7468449    | not scorable | not scorable |
| #### Bn-scaff_17515_1-p39060C-genome specific (napus-oleracea) | 0.9832536    | 0.8030491    | 1            | 0.8393766    | not scorable | not scorable |
| #### Bn-scaff_17515_1-p39077C-genome specific (napus-oleracea) | 0.9760765    | 0.7023293    | 1            | 0.8135551    | not scorable | not scorable |
| #### Bn-scaff_17515_1-p39145C-genome specific (napus-oleracea) | 0.9736842    | 0.805517     | 0.9612403    | 0.7072435    | not scorable | not scorable |
| #### Bn-scaff_17515_1-p39226C-genome specific (napus-oleracea) | 0.9569378    | 0.7453603    | 0.9689922    | 0.7044893    | not scorable | not scorable |
| #### Bn-scaff_17515_1-p39238C-genome specific (napus-oleracea) | 0.9712918    | 0.7705956    | 0.9612403    | 0.699784     | not scorable | not scorable |
| #### Bn-scaff_17515_1-p39683C-genome specific (napus-oleracea) | 0.9880383    | 0.7956706    | 1            | 0.6814371    | not scorable | not scorable |
| #### Bn-scaff_17515_1-p40489C-genome specific (napus-oleracea) | 0.9736842    | 0.7997682    | 0.9922481    | 0.9099232    | not scorable | not scorable |

|                                                                 |              |              |              |              |              |              |              |
|-----------------------------------------------------------------|--------------|--------------|--------------|--------------|--------------|--------------|--------------|
| #### Bn-scaff_17515_1-p40779 C-genome specific (napus-oleracea) | 0.9856459    | 0.8066152    |              | 1            | 0.6932437    | not scorable | not scorable |
| #### Bn-scaff_17515_1-p41131 C-genome specific (napus-oleracea) | 0.7583732    | 0.6731002    | 0.8604651    |              | 0.8159724    | not scorable | not scorable |
| #### Bn-scaff_17515_1-p48323 C-genome specific (oleracea only)  | not scorable | not scorable |              | 1            | 0.7130898    | not scorable | not scorable |
| #### Bn-scaff_17515_1-p50038 C-genome specific (napus-oleracea) | 0.9808612    | 0.8073326    | 0.8914729    |              | 0.8994197    | not scorable | not scorable |
| #### Bn-scaff_17515_1-p51302 genome unspecific (all in)         | 0.9330143    | 0.2634738    |              | 1            | 0.855731     | 0.9917355    | 0.7352715    |
| #### Bn-scaff_17515_1-p53314 genome unspecific (all in)         | 0.9784689    | 0.7810041    |              | 1            | 0.859125     | 0.9917355    | 0.8949721    |
| #### Bn-scaff_17515_1-p53353 C-genome specific (napus-oleracea) | 0.9784689    | 0.7732294    |              | 1            | 0.8948976    | not scorable | not scorable |
| #### Bn-scaff_17515_1-p53452 C-genome specific (napus-oleracea) | 0.9760765    | 0.8260075    |              | 1            | 0.7932476    | not scorable | not scorable |
| #### Bn-scaff_17515_1-p54514 C-genome specific (napus-oleracea) | 0.9712918    | 0.7279915    | 0.9689922    |              | 0.8177749    | not scorable | not scorable |
| #### Bn-scaff_17515_1-p55762 genome unspecific (all in)         | 0.9617225    | 0.6314372    |              | 1            | 0.7102274    |              | 1 0.8824204  |
| #### Bn-scaff_17515_1-p55925 C-genome specific (napus-oleracea) | 0.9617225    | 0.6719004    | 0.9922481    |              | 0.7067682    | not scorable | not scorable |
| #### Bn-scaff_17515_1-p56058 C-genome specific (napus-oleracea) | 0.715311     | 0.6926226    | 0.620155     |              | 0.8284822    | not scorable | not scorable |
| #### Bn-scaff_17515_1-p56269 C-genome specific (oleracea only)  | not scorable | not scorable |              | 1            | 0.6953765    | not scorable | not scorable |
| #### Bn-scaff_17515_1-p56347 genome unspecific (all in)         | 0.9928229    | 0.35394      |              | 1            | 0.6829073    | 0.9834711    | 0.6911813    |
| #### Bn-scaff_17515_1-p56354 genome unspecific (oleracea-rapa)  | not scorable | not scorable | 0.9302326    |              | 0.617955     | 0.9834711    | 0.5683277    |
| #### Bn-scaff_17515_1-p57669 genome unspecific (all in)         | 0.9784689    | 0.5983855    |              | 1            | 0.2952723    | 0.9917355    | 0.6924322    |
| #### Bn-scaff_17515_1-p58301 genome unspecific (all in)         | 0.9593301    | 0.4632961    | 0.9922481    |              | 0.9174272    |              | 1 0.9175813  |
| #### Bn-scaff_17515_1-p58456 A-genome specific (rapa only)      | not scorable | not scorable | not scorable | not scorable |              |              | 1 0.8937413  |
| #### Bn-scaff_17515_1-p58889 C-genome specific (napus-oleracea) | 0.9808612    | 0.7441415    |              | 1            | 0.8232018    | not scorable | not scorable |
| #### Bn-scaff_17515_1-p62442 C-genome specific (napus-oleracea) | 0.9665072    | 0.8013514    |              | 1            | 0.8352595    | not scorable | not scorable |
| #### Bn-scaff_17515_1-p63435 genome unspecific (oleracea-rapa)  | not scorable | not scorable |              | 1            | 0.7517628    | 0.9586777    | 0.7147436    |
| #### Bn-scaff_17515_1-p63544 genome unspecific (all in)         | 0.9856459    | 0.5527737    |              | 1            | 0.9071531    |              | 1 0.9249396  |
| #### Bn-scaff_17515_1-p68544 C-genome specific (napus-oleracea) | 0.9736842    | 0.8067883    |              | 1            | 0.8481174    | not scorable | not scorable |
| #### Bn-scaff_17515_1-p74291 genome unspecific (all in)         | 0.9736842    | 0.4191276    |              | 1            | 0.7182053    |              | 1 0.916476   |
| #### Bn-scaff_17515_1-p74966 C-genome specific (napus-oleracea) | 0.9808612    | 0.6176195    | 0.9922481    |              | 0.6958358    | not scorable | not scorable |
| #### Bn-scaff_17515_1-p78099 genome unspecific (oleracea-rapa)  | not scorable | not scorable |              | 1            | 0.5481173    | 0.9752066    | 0.5140531    |
| #### Bn-scaff_17517_1-p10104 napus specific                     | 0.6363636    | 0.323453     | not scorable | not scorable | not scorable | not scorable | not scorable |
| #### Bn-scaff_17517_1-p11108 C-genome specific (napus-oleracea) | 0.9904306    | 0.3707986    |              | 1            | 0.9015235    | not scorable | not scorable |
| #### Bn-scaff_17517_1-p12836 C-genome specific (napus-oleracea) | 0.9330143    | 0.3147705    | 0.6046512    |              | 0.5957198    | not scorable | not scorable |
| #### Bn-scaff_17517_1-p24005 C-genome specific (napus-oleracea) | 0.9186603    | 0.6682875    | 0.7829458    |              | 0.7127941    | not scorable | not scorable |
| #### Bn-scaff_17517_1-p28499 genome unspecific (all in)         | 0.9904306    | 0.5742734    |              | 1            | 0.6392438    |              | 1 0.9039108  |
| #### Bn-scaff_17517_1-p28660 C-genome specific (napus-oleracea) | 0.9928229    | 0.6710612    | 0.9922481    |              | 0.7740625    | not scorable | not scorable |
| #### Bn-scaff_17517_1-p28768 C-genome specific (napus-oleracea) | 0.430622     | 0.7423165    | 0.9689922    |              | 0.5699408    | not scorable | not scorable |



|                                                                  |              |              |           |           |              |              |
|------------------------------------------------------------------|--------------|--------------|-----------|-----------|--------------|--------------|
| ##### Bn-scaff_17517_1-p29835 C-genome specific (napus-oleracea) | 0.9856459    | 0.6954404    | 0.9379845 | 0.8499858 | not scorable | not scorable |
| ##### Bn-scaff_17517_1-p32189 C-genome specific (napus-oleracea) | 0.9665072    | 0.659376     | 0.9457364 | 0.6825181 | not scorable | not scorable |
| ##### Bn-scaff_17517_1-p32277 C-genome specific (napus-oleracea) | 0.9904306    | 0.8178299    | 0.9612403 | 0.71356   | not scorable | not scorable |
| ##### Bn-scaff_17517_1-p32443 C-genome specific (napus-oleracea) | 0.9665072    | 0.7356684    | 1         | 0.7773305 | not scorable | not scorable |
| ##### Bn-scaff_17517_1-p32904 C-genome specific (napus-oleracea) | 0.9760765    | 0.79818      | 1         | 0.7554718 | not scorable | not scorable |
| ##### Bn-scaff_17517_1-p33021 C-genome specific (napus-oleracea) | 0.9856459    | 0.8637457    | 1         | 0.8133842 | not scorable | not scorable |
| ##### Bn-scaff_17517_1-p33055 C-genome specific (napus-oleracea) | 0.9904306    | 0.7194498    | 0.9844961 | 0.6632536 | not scorable | not scorable |
| ##### Bn-scaff_17517_1-p33062 C-genome specific (napus-oleracea) | 0.9808612    | 0.7959376    | 1         | 0.7751076 | not scorable | not scorable |
| ##### Bn-scaff_17517_1-p33246 C-genome specific (napus-oleracea) | 0.9904306    | 0.7847912    | 1         | 0.7742413 | not scorable | not scorable |
| ##### Bn-scaff_17517_1-p35325 genome unspecific (all in)         | 0.9928229    | 0.6495229    | 0.9844961 | 0.6888189 | 1            | 0.9431227    |
| ##### Bn-scaff_17517_1-p35339 C-genome specific (napus-oleracea) | 0.9928229    | 0.8055053    | 1         | 0.772395  | not scorable | not scorable |
| ##### Bn-scaff_17517_1-p35424 C-genome specific (napus-oleracea) | 0.9880383    | 0.8029163    | 0.9922481 | 0.7215634 | not scorable | not scorable |
| ##### Bn-scaff_17517_1-p35448 C-genome specific (napus-oleracea) | 0.9688995    | 0.815767     | 1         | 0.8047201 | not scorable | not scorable |
| ##### Bn-scaff_17517_1-p35452 C-genome specific (napus-oleracea) | 0.9856459    | 0.7825078    | 1         | 0.8324307 | not scorable | not scorable |
| ##### Bn-scaff_17517_1-p35458 C-genome specific (napus-oleracea) | 0.9784689    | 0.7791247    | 1         | 0.7935109 | not scorable | not scorable |
| ##### Bn-scaff_17517_1-p35577 C-genome specific (napus-oleracea) | 0.9760765    | 0.7991757    | 1         | 0.7644483 | not scorable | not scorable |
| ##### Bn-scaff_17517_1-p35583 C-genome specific (napus-oleracea) | 0.9784689    | 0.7025555    | 1         | 0.731114  | not scorable | not scorable |
| ##### Bn-scaff_17517_1-p36091 C-genome specific (napus-oleracea) | 0.9736842    | 0.7064852    | 1         | 0.69359   | not scorable | not scorable |
| ##### Bn-scaff_17517_1-p36105 C-genome specific (napus-oleracea) | 0.9641148    | 0.7566919    | 1         | 0.7664164 | not scorable | not scorable |
| ##### Bn-scaff_17517_1-p36158 genome unspecific (oleracea-rapa)  | not scorable | not scorable | 0.9922481 | 0.3278502 | 1            | 0.4669538    |
| ##### Bn-scaff_17517_1-p36163 genome unspecific (oleracea-rapa)  | not scorable | not scorable | 1         | 0.501802  | 1            | 0.5089336    |
| ##### Bn-scaff_17517_1-p37782 genome unspecific (all in)         | 0.9952153    | 0.1735242    | 0.9147287 | 0.2604274 | 1            | 0.8340549    |
| ##### Bn-scaff_17517_1-p37792 genome unspecific (all in)         | 0.9736842    | 0.2400777    | 0.9379845 | 0.2887386 | 1            | 0.7022799    |
| ##### Bn-scaff_17517_1-p41565 C-genome specific (napus-oleracea) | 0.9712918    | 0.795348     | 0.9922481 | 0.7764274 | not scorable | not scorable |
| ##### Bn-scaff_17517_1-p41893 genome unspecific (oleracea-rapa)  | not scorable | not scorable | 1         | 0.7140749 | 1            | 0.8023856    |
| ##### Bn-scaff_17517_1-p41999 C-genome specific (napus-oleracea) | 0.9545454    | 0.340638     | 1         | 0.7705992 | not scorable | not scorable |
| ##### Bn-scaff_17517_1-p42048 genome unspecific (all in)         | 0.9712918    | 0.3135471    | 0.9922481 | 0.8321731 | 0.9917355    | 0.8229061    |
| ##### Bn-scaff_17517_1-p42063 genome unspecific (all in)         | 0.9617225    | 0.2980047    | 1         | 0.7911427 | 1            | 0.7587318    |
| ##### Bn-scaff_17517_1-p48732 C-genome specific (napus-oleracea) | 0.9617225    | 0.7441187    | 0.6666667 | 0.8409098 | not scorable | not scorable |
| ##### Bn-scaff_17517_1-p49353 C-genome specific (napus-oleracea) | 0.9712918    | 0.6793928    | 0.8449612 | 0.6776555 | not scorable | not scorable |
| ##### Bn-scaff_17517_1-p49393 C-genome specific (napus-oleracea) | 0.9688995    | 0.7967863    | 0.8527132 | 0.7020704 | not scorable | not scorable |
| ##### Bn-scaff_17517_1-p49417 C-genome specific (napus-oleracea) | 0.9617225    | 0.6553712    | 0.8527132 | 0.6398013 | not scorable | not scorable |
| ##### Bn-scaff_17517_1-p49500 C-genome specific (napus-oleracea) | 0.9688995    | 0.7138289    | 0.8527132 | 0.7579084 | not scorable | not scorable |

|                                                                 |              |              |              |              |              |              |
|-----------------------------------------------------------------|--------------|--------------|--------------|--------------|--------------|--------------|
| #### Bn-scaff_17517_1-p49508 C-genome specific (napus-oleracea) | 0.9688995    | 0.590395     | 0.8527132    | 0.6253963    | not scorable | not scorable |
| #### Bn-scaff_17517_1-p49524 C-genome specific (napus-oleracea) | 0.9736842    | 0.6583794    | 0.8527132    | 0.796442     | not scorable | not scorable |
| #### Bn-scaff_17517_1-p49589 C-genome specific (napus-oleracea) | 0.9760765    | 0.6495408    | 0.8527132    | 0.6220453    | not scorable | not scorable |
| #### Bn-scaff_17517_1-p49592 C-genome specific (napus-oleracea) | 0.9521531    | 0.7476429    | 0.8449612    | 0.6836351    | not scorable | not scorable |
| #### Bn-scaff_17517_1-p49605 C-genome specific (napus-oleracea) | 0.9832536    | 0.8153855    | 0.9844961    | 0.7299882    | not scorable | not scorable |
| #### Bn-scaff_17517_1-p49637 C-genome specific (napus-oleracea) | 0.9760765    | 0.7815266    | 0.9844961    | 0.7424665    | not scorable | not scorable |
| #### Bn-scaff_17517_1-p49655 C-genome specific (napus-oleracea) | 0.9665072    | 0.7085361    | 0.9844961    | 0.6919711    | not scorable | not scorable |
| #### Bn-scaff_17517_1-p49743 C-genome specific (napus-oleracea) | 0.9712918    | 0.7936941    | 0.9844961    | 0.7446919    | not scorable | not scorable |
| #### Bn-scaff_17517_1-p50224 C-genome specific (napus-oleracea) | 0.9832536    | 0.6919264    | 1            | 0.9175813    | not scorable | not scorable |
| #### Bn-scaff_17517_1-p53627 C-genome specific (napus-oleracea) | 0.9736842    | 0.6465626    | 1            | 0.4792691    | not scorable | not scorable |
| #### Bn-scaff_17517_1-p53632 C-genome specific (napus-oleracea) | 0.9665072    | 0.6118834    | 0.9844961    | 0.4745414    | not scorable | not scorable |
| #### Bn-scaff_17517_1-p53648 C-genome specific (napus-oleracea) | 0.9736842    | 0.7432919    | 1            | 0.4982681    | not scorable | not scorable |
| #### Bn-scaff_17517_1-p53919 napus specific                     | 0.9641148    | 0.7856534    | not scorable | not scorable | not scorable | not scorable |
| #### Bn-scaff_17517_1-p54447 genome unspecific (all in)         | 0.9904306    | 0.3171296    | 0.9844961    | 0.4038443    | 1            | 0.9561644    |
| #### Bn-scaff_17517_1-p56486 C-genome specific (napus-oleracea) | 0.9832536    | 0.7957777    | 1            | 0.7578312    | not scorable | not scorable |
| #### Bn-scaff_17517_1-p60009 C-genome specific (napus-oleracea) | 0.9856459    | 0.8032613    | 1            | 0.5281926    | not scorable | not scorable |
| #### Bn-scaff_17517_1-p60087 C-genome specific (napus-oleracea) | 0.9784689    | 0.721408     | 1            | 0.5459423    | not scorable | not scorable |
| #### Bn-scaff_17517_1-p64252 genome unspecific (all in)         | 0.9593301    | 0.3957273    | 1            | 0.5228792    | 0.9256198    | 0.5236148    |
| #### Bn-scaff_17517_1-p66249 C-genome specific (oleracea only)  | not scorable | not scorable | 1            | 0.821676     | not scorable | not scorable |
| #### Bn-scaff_17517_1-p68079 C-genome specific (napus-oleracea) | 0.9736842    | 0.7878886    | 1            | 0.5063509    | not scorable | not scorable |
| #### Bn-scaff_17517_1-p68096 C-genome specific (napus-oleracea) | 0.9832536    | 0.7589022    | 1            | 0.8003716    | not scorable | not scorable |
| #### Bn-scaff_17517_1-p68108 C-genome specific (napus-oleracea) | 0.9736842    | 0.8138175    | 1            | 0.7610853    | not scorable | not scorable |
| #### Bn-scaff_17517_1-p68162 C-genome specific (napus-oleracea) | 0.9856459    | 0.8266603    | 1            | 0.8234601    | not scorable | not scorable |
| #### Bn-scaff_17517_1-p68180 C-genome specific (napus-oleracea) | 0.9904306    | 0.7953868    | 1            | 0.7501439    | not scorable | not scorable |
| #### Bn-scaff_17517_1-p68186 genome unspecific (all in)         | 0.9784689    | 0.6109011    | 1            | 0.8979033    | 1            | 0.9366158    |
| #### Bn-scaff_17517_1-p68191 genome unspecific (all in)         | 0.9617225    | 0.6326734    | 1            | 0.8825989    | 1            | 0.7691472    |
| #### Bn-scaff_17517_1-p68216 C-genome specific (napus-oleracea) | 0.9712918    | 0.8011951    | 1            | 0.8697687    | not scorable | not scorable |
| #### Bn-scaff_17517_1-p68301 C-genome specific (napus-oleracea) | 0.9593301    | 0.7015619    | 1            | 0.8024133    | not scorable | not scorable |
| #### Bn-scaff_17517_1-p68378 C-genome specific (napus-oleracea) | 0.9760765    | 0.83867      | 1            | 0.8760813    | not scorable | not scorable |
| #### Bn-scaff_17517_1-p68727 C-genome specific (napus-oleracea) | 0.9856459    | 0.7760763    | 1            | 0.6221247    | not scorable | not scorable |
| #### Bn-scaff_17517_1-p73046 C-genome specific (napus-oleracea) | 0.9784689    | 0.7338119    | 1            | 0.7223517    | not scorable | not scorable |
| #### Bn-scaff_17517_1-p73529 C-genome specific (napus-oleracea) | 0.9712918    | 0.7880906    | 1            | 0.7574429    | not scorable | not scorable |
| #### Bn-scaff_17517_1-p77472 C-genome specific (napus-oleracea) | 0.9808612    | 0.7611484    | 1            | 0.7542038    | not scorable | not scorable |

|                                                                 |              |              |              |              |              |              |
|-----------------------------------------------------------------|--------------|--------------|--------------|--------------|--------------|--------------|
| #### Bn-scaff_17517_1-p78219 C-genome specific (napus-oleracea) | 0.9808612    | 0.7821319    | 0.9922481    | 0.839972     | not scorable | not scorable |
| #### Bn-scaff_17517_1-p78352 C-genome specific (napus-oleracea) | 0.9808612    | 0.7740086    | 0.9922481    | 0.8471301    | not scorable | not scorable |
| #### Bn-scaff_17517_1-p78363 C-genome specific (napus-oleracea) | 0.9928229    | 0.5642044    | 1            | 0.5243825    | not scorable | not scorable |
| #### Bn-scaff_17517_1-p79829 C-genome specific (napus-oleracea) | 0.9760765    | 0.7449903    | 1            | 0.8397793    | not scorable | not scorable |
| #### Bn-scaff_17517_1-p80248 C-genome specific (napus-oleracea) | 0.9688995    | 0.8082989    | 1            | 0.8475156    | not scorable | not scorable |
| #### Bn-scaff_17517_1-p80289 C-genome specific (napus-oleracea) | 0.9880383    | 0.7747972    | 1            | 0.6115127    | not scorable | not scorable |
| #### Bn-scaff_17517_1-p81680 C-genome specific (napus-oleracea) | 0.9784689    | 0.7718312    | 1            | 0.759829     | not scorable | not scorable |
| #### Bn-scaff_17517_1-p81737 C-genome specific (napus-oleracea) | 0.9760765    | 0.8025399    | 1            | 0.7517852    | not scorable | not scorable |
| #### Bn-scaff_17517_1-p85966 C-genome specific (napus-oleracea) | 0.9832536    | 0.7768247    | 0.9922481    | 0.8190545    | not scorable | not scorable |
| #### Bn-scaff_17517_1-p96266 C-genome specific (oleracea only)  | not scorable | not scorable | 1            | 0.7927154    | not scorable | not scorable |
| #### Bn-scaff_17517_1-p98093 C-genome specific (napus-oleracea) | 0.6363636    | 0.7748541    | 0.3565891    | 0.7456834    | not scorable | not scorable |
| #### Bn-scaff_17521_1-p10252 genome unspecific (all in)         | 0.9952153    | 0.4844021    | 1            | 0.7870412    | 0.9917355    | 0.8051195    |
| #### Bn-scaff_17521_1-p10505 C-genome specific (napus-oleracea) | 1            | 0.2542528    | 1            | 0.752191     | not scorable | not scorable |
| #### Bn-scaff_17521_1-p10507 C-genome specific (napus-oleracea) | 0.9617225    | 0.9071409    | 0.627907     | 0.9115826    | not scorable | not scorable |
| #### Bn-scaff_17521_1-p10524 C-genome specific (oleracea only)  | not scorable | not scorable | 0.9922481    | 0.7207105    | not scorable | not scorable |
| #### Bn-scaff_17521_1-p10528 C-genome specific (napus-oleracea) | 0.9976076    | 0.4964797    | 0.9922481    | 0.7981923    | not scorable | not scorable |
| #### Bn-scaff_17521_1-p10542 C-genome specific (napus-oleracea) | 0.9832536    | 0.5364192    | 1            | 0.9175813    | not scorable | not scorable |
| #### Bn-scaff_17521_1-p11549 all not scorable                   | not scorable | not scorable | not scorable | not scorable | not scorable | not scorable |
| #### Bn-scaff_17521_1-p11669 genome unspecific (all in)         | 0.9928229    | 0.2887661    | 1            | 0.8022719    | 0.9917355    | 0.6718094    |
| #### Bn-scaff_17521_1-p11673 genome unspecific (all in)         | 0.9928229    | 0.446274     | 1            | 0.6625454    | 0.9917355    | 0.7133333    |
| #### Bn-scaff_17521_1-p12145 C-genome specific (napus-oleracea) | 0.9736842    | 0.3702412    | 1            | 0.8101726    | not scorable | not scorable |
| #### Bn-scaff_17521_1-p12517 genome unspecific (all in)         | 0.9641148    | 0.4371001    | 1            | 0.9105343    | 1            | 0.9119525    |
| #### Bn-scaff_17521_1-p12698 genome unspecific (all in)         | 0.9976076    | 0.2612671    | 1            | 0.9205657    | 1            | 0.9266067    |
| #### Bn-scaff_17521_1-p13272 genome unspecific (all in)         | 0.9784689    | 0.3199569    | 1            | 0.786476     | 1            | 0.7462974    |
| #### Bn-scaff_17521_1-p1335 napus specific                      | 0.9904306    | 0.7509801    | not scorable | not scorable | not scorable | not scorable |
| #### Bn-scaff_17521_1-p13384 A-genome specific (napus-rapa)     | 0.9449761    | 0.2771041    | not scorable | not scorable | 0.9752066    | 0.6338487    |
| #### Bn-scaff_17521_1-p13506 C-genome specific (oleracea only)  | not scorable | not scorable | 0.6046512    | 0.923879     | not scorable | not scorable |
| #### Bn-scaff_17521_1-p13547 C-genome specific (napus-oleracea) | 0.9784689    | 0.7541754    | 0.7984496    | 0.6974347    | not scorable | not scorable |
| #### Bn-scaff_17521_1-p13548 C-genome specific (napus-oleracea) | 0.9832536    | 0.8209259    | 0.8062016    | 0.7805286    | not scorable | not scorable |
| #### Bn-scaff_17521_1-p13553 genome unspecific (all in)         | 0.9856459    | 0.4814101    | 0.9534883    | 0.5120139    | 1            | 0.9072468    |
| #### Bn-scaff_17521_1-p13554 C-genome specific (napus-oleracea) | 0.9976076    | 0.8243178    | 0.9844961    | 0.7290379    | not scorable | not scorable |
| #### Bn-scaff_17521_1-p13701 genome unspecific (all in)         | 0.9928229    | 0.4562203    | 0.9922481    | 0.7364019    | 1            | 0.820298     |
| #### Bn-scaff_17521_1-p13852 C-genome specific (napus-oleracea) | 0.9736842    | 0.7221961    | 0.9767442    | 0.7490385    | not scorable | not scorable |

|                                                                 |              |              |              |              |              |              |
|-----------------------------------------------------------------|--------------|--------------|--------------|--------------|--------------|--------------|
| #### Bn-scaff_17521_1-p13854 C-genome specific (napus-oleracea) | 0.9904306    | 0.7832933    | 1            | 0.8138374    | not scorable | not scorable |
| #### Bn-scaff_17521_1-p1390 C-genome specific (napus-oleracea)  | 0.9904306    | 0.7168078    | 0.9224806    | 0.3093204    | not scorable | not scorable |
| #### Bn-scaff_17521_1-p1390 C-genome specific (napus-oleracea)  | 0.9904306    | 0.7569824    | 1            | 0.8175144    | not scorable | not scorable |
| #### Bn-scaff_17521_1-p1394 genome unspecific (all in)          | not scorable | not scorable | not scorable | not scorable | not scorable | not scorable |
| #### Bn-scaff_17521_1-p1398 C-genome specific (napus-oleracea)  | 0.9952153    | 0.8119674    | 0.9922481    | 0.7820738    | not scorable | not scorable |
| #### Bn-scaff_17521_1-p1400 genome unspecific (all in)          | 0.9569378    | 0.2491445    | 1            | 0.7252899    | 0.9586777    | 0.7445948    |
| #### Bn-scaff_17521_1-p1401 C-genome specific (napus-oleracea)  | 0.9904306    | 0.8011243    | 1            | 0.7615792    | not scorable | not scorable |
| #### Bn-scaff_17521_1-p16202 A-genome specific (napus-olera)    | 1            | 0.5290589    | not scorable | not scorable | 0.9504132    | 0.6812919    |
| #### Bn-scaff_17521_1-p16674 C-genome specific (napus-oleracea) | 0.9928229    | 0.8044565    | 0.9844961    | 0.9267194    | not scorable | not scorable |
| #### Bn-scaff_17521_1-p1747 genome unspecific (all in)          | 1            | 0.5681983    | 0.9767442    | 0.3080818    | 0.9917355    | 0.6383266    |
| #### Bn-scaff_17521_1-p1748 genome unspecific (oleracea-olera)  | not scorable | not scorable | 1            | 0.1760033    | 0.9834711    | 0.7412475    |
| #### Bn-scaff_17521_1-p19367 C-genome specific (napus-oleracea) | 0.9976076    | 0.8001525    | 1            | 0.5686468    | not scorable | not scorable |
| #### Bn-scaff_17521_1-p19471 all not scorable                   | not scorable | not scorable | not scorable | not scorable | not scorable | not scorable |
| #### Bn-scaff_17521_1-p2469 genome unspecific (all in)          | 0.9784689    | 0.3497531    | 1            | 0.9181088    | 1            | 0.8300631    |
| #### Bn-scaff_17521_1-p2861 genome unspecific (all in)          | 0.9952153    | 0.5237926    | 0.9922481    | 0.6959144    | 1            | 0.9095823    |
| #### Bn-scaff_17521_1-p2890 C-genome specific (napus-oleracea)  | 1            | 0.674539     | 0.9922481    | 0.7154514    | not scorable | not scorable |
| #### Bn-scaff_17521_1-p28917 C-genome specific (napus-oleracea) | 0.9880383    | 0.7565986    | 0.503876     | 0.8342221    | not scorable | not scorable |
| #### Bn-scaff_17521_1-p2900 C-genome specific (napus-oleracea)  | 0.9976076    | 0.7987344    | 1            | 0.8560401    | not scorable | not scorable |
| #### Bn-scaff_17521_1-p29925 C-genome specific (napus-oleracea) | 0.8588517    | 0.7638864    | 0.9844961    | 0.7002611    | not scorable | not scorable |
| #### Bn-scaff_17521_1-p29951 C-genome specific (napus-oleracea) | 0.9976076    | 0.8249155    | 1            | 0.8511966    | not scorable | not scorable |
| #### Bn-scaff_17521_1-p30247 C-genome specific (napus-oleracea) | 1            | 0.780559     | 0.9922481    | 0.8090907    | not scorable | not scorable |
| #### Bn-scaff_17521_1-p35312 genome unspecific (all in)         | 0.9473684    | 0.2194917    | 0.9922481    | 0.2063331    | 1            | 0.7954443    |
| #### Bn-scaff_17521_1-p37024 genome unspecific (all in)         | 0.9928229    | 0.5916794    | 0.9922481    | 0.6896374    | 1            | 0.7023863    |
| #### Bn-scaff_17521_1-p3816 C-genome specific (oleracea only)   | not scorable | not scorable | 0.9689922    | 0.6735706    | not scorable | not scorable |
| #### Bn-scaff_17521_1-p3876 C-genome specific (oleracea only)   | not scorable | not scorable | 0.9844961    | 0.7528932    | not scorable | not scorable |
| #### Bn-scaff_17521_1-p3935 C-genome specific (napus-oleracea)  | 0.9880383    | 0.7553771    | 1            | 0.801043     | not scorable | not scorable |
| #### Bn-scaff_17521_1-p40394 genome unspecific (all in)         | 0.9521531    | 0.5851166    | 0.9844961    | 0.7692038    | 1            | 0.888243     |
| #### Bn-scaff_17521_1-p40427 C-genome specific (napus-oleracea) | 0.9641148    | 0.8106543    | 1            | 0.7729094    | not scorable | not scorable |
| #### Bn-scaff_17521_1-p40465 C-genome specific (napus-oleracea) | 0.9760765    | 0.7796504    | 1            | 0.8400776    | not scorable | not scorable |
| #### Bn-scaff_17521_1-p40503 genome unspecific (all in)         | 0.9330143    | 0.2310776    | 0.9767442    | 0.2747002    | 1            | 0.786476     |
| #### Bn-scaff_17521_1-p40784 C-genome specific (napus-oleracea) | 0.9928229    | 0.6641929    | 1            | 0.7327344    | not scorable | not scorable |
| #### Bn-scaff_17521_1-p4153 C-genome specific (napus-oleracea)  | 0.9904306    | 0.7790875    | 1            | 0.6666985    | not scorable | not scorable |
| #### Bn-scaff_17521_1-p4171 C-genome specific (napus-oleracea)  | 0.9712918    | 0.7381018    | 0.9612403    | 0.7804852    | not scorable | not scorable |

|                                                                 |              |              |              |              |              |              |
|-----------------------------------------------------------------|--------------|--------------|--------------|--------------|--------------|--------------|
| #### Bn-scaff_17521_1-p41723 C-genome specific (napus-oleracea) | 0.9808612    | 0.7086707    | 0.9767442    | 0.7861348    | not scorable | not scorable |
| #### Bn-scaff_17521_1-p41868 C-genome specific (napus-oleracea) | 0.9856459    | 0.6793936    | 0.9844961    | 0.7424586    | not scorable | not scorable |
| #### Bn-scaff_17521_1-p41925 C-genome specific (napus-oleracea) | 0.9808612    | 0.7836149    | 0.9844961    | 0.7197341    | not scorable | not scorable |
| #### Bn-scaff_17521_1-p41949 C-genome specific (napus-oleracea) | 0.9641148    | 0.6175084    | 0.9844961    | 0.6089575    | not scorable | not scorable |
| #### Bn-scaff_17521_1-p46087 genome unspecific (all in)         | 0.9784689    | 0.1958056    | 1            | 0.867978     | 0.9834711    | 0.8220723    |
| #### Bn-scaff_17521_1-p46093 genome unspecific (all in)         | 0.9904306    | 0.5529029    | 0.9922481    | 0.7975944    | 1            | 0.9095823    |
| #### Bn-scaff_17521_1-p46484 genome unspecific (all in)         | 0.9928229    | 0.5510884    | 0.9922481    | 0.6944311    | 0.9917355    | 0.7838483    |
| #### Bn-scaff_17521_1-p48193 C-genome specific (napus-oleracea) | 0.9904306    | 0.768405     | 0.9922481    | 0.8124242    | not scorable | not scorable |
| #### Bn-scaff_17521_1-p50574 C-genome specific (napus-oleracea) | 0.9928229    | 0.7947631    | 0.9922481    | 0.761369     | not scorable | not scorable |
| #### Bn-scaff_17521_1-p50605 C-genome specific (napus-oleracea) | 0.9976076    | 0.7898788    | 1            | 0.6918023    | not scorable | not scorable |
| #### Bn-scaff_17521_1-p50891 C-genome specific (oleracea only)  | not scorable | not scorable | 1            | 0.5147843    | not scorable | not scorable |
| #### Bn-scaff_17521_1-p51105 C-genome specific (napus-oleracea) | 0.9712918    | 0.7286421    | 0.9844961    | 0.7381655    | not scorable | not scorable |
| #### Bn-scaff_17521_1-p51122 C-genome specific (napus-oleracea) | 0.9760765    | 0.8066893    | 0.7054263    | 0.7337022    | not scorable | not scorable |
| #### Bn-scaff_17521_1-p54869 C-genome specific (napus-oleracea) | 0.7727273    | 0.74448      | 0.9689922    | 0.7280098    | not scorable | not scorable |
| #### Bn-scaff_17521_1-p55041 genome unspecific (oleracea-rapa)  | not scorable | not scorable | 1            | 0.8839279    | 1            | 0.5739081    |
| #### Bn-scaff_17521_1-p55576 genome unspecific (all in)         | 0.9832536    | 0.609423     | 1            | 0.6830283    | 1            | 0.9015149    |
| #### Bn-scaff_17521_1-p56156 C-genome specific (napus-oleracea) | 0.9904306    | 0.803251     | 1            | 0.7666321    | not scorable | not scorable |
| #### Bn-scaff_17521_1-p56310 C-genome specific (napus-oleracea) | 0.9904306    | 0.7571256    | 1            | 0.7174385    | not scorable | not scorable |
| #### Bn-scaff_17521_1-p56351 C-genome specific (napus-oleracea) | 0.9808612    | 0.8204309    | 1            | 0.6821409    | not scorable | not scorable |
| #### Bn-scaff_17521_1-p57983 genome unspecific (all in)         | 0.9760765    | 0.5541448    | 0.9922481    | 0.7794546    | 1            | 0.9152251    |
| #### Bn-scaff_17521_1-p58429 C-genome specific (napus-oleracea) | 0.9808612    | 0.6993055    | 0.9922481    | 0.6722645    | not scorable | not scorable |
| #### Bn-scaff_17521_1-p58500 genome unspecific (all in)         | 0.9856459    | 0.4078884    | 0.9844961    | 0.7137978    | 1            | 0.9039531    |
| #### Bn-scaff_17521_1-p59657 A-genome specific (napus-rapa)     | 0.9186603    | 0.1530782    | not scorable | not scorable | 1            | 0.8213316    |
| #### Bn-scaff_17521_1-p59666 genome unspecific (all in)         | 0.9952153    | 0.5797178    | 0.9844961    | 0.7829781    | 0.9834711    | 0.8415974    |
| #### Bn-scaff_17521_1-p62218 genome unspecific (oleracea-rapa)  | not scorable | not scorable | 0.9922481    | 0.8205088    | 1            | 0.8638137    |
| #### Bn-scaff_17521_1-p64479 C-genome specific (napus-oleracea) | 0.9760765    | 0.6791533    | 1            | 0.6549688    | not scorable | not scorable |
| #### Bn-scaff_17521_1-p64735 genome unspecific (all in)         | 0.9712918    | 0.3477921    | 0.9922481    | 0.6805183    | 1            | 0.8638459    |
| #### Bn-scaff_17521_1-p65131 C-genome specific (napus-oleracea) | 0.9808612    | 0.7674992    | 0.9922481    | 0.7360647    | not scorable | not scorable |
| #### Bn-scaff_17521_1-p65684 C-genome specific (napus-oleracea) | 0.9736842    | 0.7431864    | 0.9767442    | 0.7371341    | not scorable | not scorable |
| #### Bn-scaff_17521_1-p65703 C-genome specific (napus-oleracea) | 0.9880383    | 0.713353     | 0.9767442    | 0.701698     | not scorable | not scorable |
| #### Bn-scaff_17521_1-p65707 C-genome specific (napus-oleracea) | 0.9425837    | 0.692939     | 0.9457364    | 0.7390257    | not scorable | not scorable |
| #### Bn-scaff_17521_1-p66349 genome unspecific (oleracea-rapa)  | not scorable | not scorable | 1            | 0.6571672    | 1            | 0.7641606    |
| #### Bn-scaff_17521_1-p67394 C-genome specific (napus-oleracea) | 0.9784689    | 0.7662728    | 1            | 0.7432803    | not scorable | not scorable |

|                                                                |              |              |              |              |              |              |
|----------------------------------------------------------------|--------------|--------------|--------------|--------------|--------------|--------------|
| #### Bn-scaff_17521_1-p6740C-genome specific (napus-oleracea)  | 0.9832536    | 0.7671608    | 1            | 0.6888351    | not scorable | not scorable |
| #### Bn-scaff_17521_1-p6826C-genome unspecific (oleracea-rapa) | not scorable | not scorable | 0.9612403    | 0.2987138    | 1            | 0.928639     |
| #### Bn-scaff_17521_1-p6932C-genome specific (napus-oleracea)  | 0.9665072    | 0.7860069    | 0.9457364    | 0.6804203    | not scorable | not scorable |
| #### Bn-scaff_17521_1-p71512genome unspecific (all in)         | 0.9856459    | 0.7619544    | 0.9844961    | 0.8406065    | 0.9090909    | 0.8953735    |
| #### Bn-scaff_17521_1-p71562C-genome specific (napus-oleracea) | 0.9832536    | 0.7307603    | 1            | 0.6862425    | not scorable | not scorable |
| #### Bn-scaff_17521_1-p7421A-genome specific (napus-rapa)      | 0.9976076    | 0.3564114    | not scorable | not scorable | 0.9834711    | 0.5989408    |
| #### Bn-scaff_17521_1-p7492C-genome specific (napus-oleracea)  | 0.9928229    | 0.8301571    | 1            | 0.5509209    | not scorable | not scorable |
| #### Bn-scaff_17521_1-p74931C-genome specific (oleracea only)  | not scorable | not scorable | 0.9844961    | 0.9251727    | not scorable | not scorable |
| #### Bn-scaff_17521_1-p75911genome unspecific (all in)         | 0.9928229    | 0.5274849    | 1            | 0.5058464    | 1            | 0.8894996    |
| #### Bn-scaff_17521_1-p79107C-genome specific (napus-oleracea) | 0.9904306    | 0.7214333    | 0.8992248    | 0.6798792    | not scorable | not scorable |
| #### Bn-scaff_17521_1-p80433C-genome specific (napus-oleracea) | 0.9832536    | 0.8000914    | 1            | 0.7674254    | not scorable | not scorable |
| #### Bn-scaff_17521_1-p8053C-genome specific (napus-oleracea)  | 0.9641148    | 0.8018174    | 0.9922481    | 0.6686773    | not scorable | not scorable |
| #### Bn-scaff_17521_1-p80761genome unspecific (all in)         | 0.9832536    | 0.3309809    | 0.9767442    | 0.5570915    | 1            | 0.7739503    |
| #### Bn-scaff_17521_1-p81191genome unspecific (all in)         | 1            | 0.6303487    | 1            | 0.6214259    | 1            | 0.6663657    |
| #### Bn-scaff_17521_1-p83779genome unspecific (all in)         | 0.9856459    | 0.2880034    | 1            | 0.348178     | 0.9586777    | 0.2925007    |
| #### Bn-scaff_17521_1-p8429C-genome specific (napus-oleracea)  | 1            | 0.8138771    | 1            | 0.6806829    | not scorable | not scorable |
| #### Bn-scaff_17521_1-p84345C-genome specific (napus-oleracea) | 0.9856459    | 0.7109478    | 1            | 0.6745327    | not scorable | not scorable |
| #### Bn-scaff_17521_1-p86938C-genome specific (oleracea only)  | not scorable | not scorable | 1            | 0.8380592    | not scorable | not scorable |
| #### Bn-scaff_17521_1-p88281genome unspecific (all in)         | 0.9808612    | 0.527413     | 1            | 0.7951051    | 1            | 0.8938062    |
| #### Bn-scaff_17521_1-p91737C-genome specific (napus-oleracea) | 0.9928229    | 0.7636365    | 0.9922481    | 0.8517616    | not scorable | not scorable |
| #### Bn-scaff_17521_1-p9489C-genome specific (napus-oleracea)  | 0.9330143    | 0.6790624    | 0.8837209    | 0.7114843    | not scorable | not scorable |
| #### Bn-scaff_17521_1-p94953C-genome specific (napus-oleracea) | 0.9449761    | 0.724764     | 0.8914729    | 0.6769251    | not scorable | not scorable |
| #### Bn-scaff_17521_1-p9528C-genome unspecific (oleracea-rapa) | not scorable | not scorable | 0.9612403    | 0.8211915    | 1            | 0.8079056    |
| #### Bn-scaff_17521_1-p96971C-genome specific (napus-oleracea) | 0.9928229    | 0.7352505    | 0.9767442    | 0.8366583    | not scorable | not scorable |
| #### Bn-scaff_17521_1-p97033genome unspecific (all in)         | 0.9736842    | 0.4342031    | 1            | 0.6519793    | 0.9834711    | 0.6955847    |
| #### Bn-scaff_17521_1-p98821genome unspecific (all in)         | 1            | 0.2754486    | 1            | 0.7739488    | 1            | 0.724615     |
| #### Bn-scaff_17521_1-p99217genome unspecific (all in)         | 1            | 0.59211      | 1            | 0.8169558    | 1            | 0.879307     |
| #### Bn-scaff_17521_1-p99749genome unspecific (all in)         | 0.9688995    | 0.2148429    | 1            | 0.8565972    | 1            | 0.6472194    |
| #### Bn-scaff_17522_1-p11678C-genome specific (napus-oleracea) | 1            | 0.568415     | 1            | 0.6066825    | not scorable | not scorable |
| #### Bn-scaff_17522_1-p11845genome unspecific (oleracea-rapa)  | not scorable | not scorable | 0.7286822    | 0.3158675    | 0.9834711    | 0.5317495    |
| #### Bn-scaff_17522_1-p12344genome unspecific (all in)         | 0.9904306    | 0.7290812    | 1            | 0.9025436    | 1            | 0.859884     |
| #### Bn-scaff_17522_1-p1247C-genome specific (napus-oleracea)  | 0.8181818    | 0.7386271    | 0.9922481    | 0.7637704    | not scorable | not scorable |
| #### Bn-scaff_17522_1-p1309C-genome specific (napus-oleracea)  | 0.8421053    | 0.7320504    | 0.9767442    | 0.7595797    | not scorable | not scorable |

|                                                                 |              |              |              |              |              |              |
|-----------------------------------------------------------------|--------------|--------------|--------------|--------------|--------------|--------------|
| #### Bn-scaff_17522_1-p13619 genome unspecific (all in)         | 0.9784689    | 0.2233338    | 1            | 0.9253774    | 1            | 0.7471171    |
| #### Bn-scaff_17522_1-p13940 genome unspecific (all in)         | 0.9856459    | 0.4533336    | 0.8372093    | 0.9112505    | 1            | 0.9118583    |
| #### Bn-scaff_17522_1-p14492 napus specific                     | 0.562201     | 0.8135551    | not scorable | not scorable | not scorable | not scorable |
| #### Bn-scaff_17522_1-p14545 C-genome specific (oleracea only)  | not scorable | not scorable | 0.9922481    | 0.9082161    | not scorable | not scorable |
| #### Bn-scaff_17522_1-p14598 C-genome specific (napus-oleracea) | 0.8564593    | 0.6824138    | 0.9922481    | 0.7461821    | not scorable | not scorable |
| #### Bn-scaff_17522_1-p14692 genome unspecific (all in)         | 0.9808612    | 0.3378122    | 1            | 0.9272014    | 0.9752066    | 0.8004194    |
| #### Bn-scaff_17522_1-p14694 genome unspecific (all in)         | 1            | 0.3482371    | 1            | 0.9181061    | 1            | 0.7434233    |
| #### Bn-scaff_17522_1-p14833 C-genome specific (napus-oleracea) | 0.9210526    | 0.6983348    | 1            | 0.6525951    | not scorable | not scorable |
| #### Bn-scaff_17522_1-p14970 C-genome specific (napus-oleracea) | 0.9066986    | 0.7864074    | 0.6666667    | 0.760353     | not scorable | not scorable |
| #### Bn-scaff_17522_1-p15124 genome unspecific (oleracea-rapa)  | not scorable | not scorable | 1            | 0.5634651    | 0.9917355    | 0.6690205    |
| #### Bn-scaff_17522_1-p15805 C-genome specific (oleracea only)  | not scorable | not scorable | 1            | 0.7356122    | not scorable | not scorable |
| #### Bn-scaff_17522_1-p15909 C-genome specific (napus-oleracea) | 0.7057416    | 0.6764843    | 0.9379845    | 0.9155903    | not scorable | not scorable |
| #### Bn-scaff_17522_1-p16071 genome unspecific (all in)         | 0.9808612    | 0.4152329    | 0.9844961    | 0.6135269    | 1            | 0.8267738    |
| #### Bn-scaff_17522_1-p16485 C-genome specific (napus-oleracea) | 0.4832536    | 0.8096637    | 0.9922481    | 0.683964     | not scorable | not scorable |
| #### Bn-scaff_17522_1-p17020 C-genome specific (napus-oleracea) | 0.4832536    | 0.7550347    | 1            | 0.8074949    | not scorable | not scorable |
| #### Bn-scaff_17522_1-p17241 genome unspecific (all in)         | 0.9952153    | 0.428144     | 0.9922481    | 0.728646     | 1            | 0.8356679    |
| #### Bn-scaff_17522_1-p18185 genome unspecific (oleracea-rapa)  | not scorable | not scorable | 0.9922481    | 0.5519121    | 1            | 0.4613511    |
| #### Bn-scaff_17522_1-p18372 genome unspecific (oleracea-rapa)  | not scorable | not scorable | 0.9767442    | 0.8276569    | 0.9752066    | 0.7823702    |
| #### Bn-scaff_17522_1-p18377 genome unspecific (oleracea-rapa)  | not scorable | not scorable | 0.9689922    | 0.6462975    | 0.9917355    | 0.6119086    |
| #### Bn-scaff_17522_1-p19191 C-genome specific (oleracea only)  | not scorable | not scorable | 1            | 0.7534951    | not scorable | not scorable |
| #### Bn-scaff_17522_1-p22495 C-genome specific (napus-oleracea) | 0.861244     | 0.760951     | 0.9922481    | 0.7630468    | not scorable | not scorable |
| #### Bn-scaff_17522_1-p22568 C-genome specific (napus-oleracea) | 0.854067     | 0.6975393    | 0.9922481    | 0.6670499    | not scorable | not scorable |
| #### Bn-scaff_17522_1-p22822 C-genome specific (napus-oleracea) | 0.8516746    | 0.6795205    | 0.9844961    | 0.8111239    | not scorable | not scorable |
| #### Bn-scaff_17522_1-p22969 C-genome specific (napus-oleracea) | 0.854067     | 0.7118933    | 0.9767442    | 0.6464709    | not scorable | not scorable |
| #### Bn-scaff_17522_1-p22982 C-genome specific (napus-oleracea) | 0.8636364    | 0.7564855    | 0.9767442    | 0.8200612    | not scorable | not scorable |
| #### Bn-scaff_17522_1-p23229 C-genome specific (napus-oleracea) | 0.8588517    | 0.7289478    | 1            | 0.7864437    | not scorable | not scorable |
| #### Bn-scaff_17522_1-p23477 C-genome specific (napus-oleracea) | 0.8229665    | 0.6196166    | 1            | 0.548801     | not scorable | not scorable |
| #### Bn-scaff_17522_1-p24269 C-genome specific (napus-oleracea) | 0.9593301    | 0.7693331    | 1            | 0.7651865    | not scorable | not scorable |
| #### Bn-scaff_17522_1-p24270 C-genome specific (napus-oleracea) | 0.9114832    | 0.7621614    | 1            | 0.802054     | not scorable | not scorable |
| #### Bn-scaff_17522_1-p25864 C-genome specific (napus-oleracea) | 0.8660287    | 0.7692328    | 0.7209302    | 0.7903254    | not scorable | not scorable |
| #### Bn-scaff_17522_1-p27500 genome unspecific (oleracea-rapa)  | not scorable | not scorable | 0.9922481    | 0.5156534    | 1            | 0.9187701    |
| #### Bn-scaff_17522_1-p37117 genome unspecific (all in)         | 0.9665072    | 0.3754618    | 1            | 0.6543328    | 1            | 0.9028615    |
| #### Bn-scaff_17522_1-p39313 genome unspecific (oleracea-rapa)  | not scorable | not scorable | 1            | 0.7017887    | 1            | 0.786476     |

|                                                                 |              |              |              |              |              |              |
|-----------------------------------------------------------------|--------------|--------------|--------------|--------------|--------------|--------------|
| #### Bn-scaff_17522_1-p39767 C-genome specific (napus-oleracea) | 0.84689      | 0.5763419    | 0.9844961    | 0.6104051    | not scorable | not scorable |
| #### Bn-scaff_17522_1-p40668 C-genome specific (napus-oleracea) | 0.8660287    | 0.8340095    | 0.9922481    | 0.7400934    | not scorable | not scorable |
| #### Bn-scaff_17522_1-p42755 napus specific                     | 0.8038278    | 0.6983183    | not scorable | not scorable | not scorable | not scorable |
| #### Bn-scaff_17522_1-p45629 C-genome specific (napus-oleracea) | 0.5717703    | 0.8658491    | 0.7751938    | 0.8051513    | not scorable | not scorable |
| #### Bn-scaff_17522_1-p46296 C-genome specific (napus-oleracea) | 0.8588517    | 0.7855303    | 0.9922481    | 0.7514657    | not scorable | not scorable |
| #### Bn-scaff_17522_1-p46344 C-genome specific (napus-oleracea) | 0.9043062    | 0.6696969    | 1            | 0.6864245    | not scorable | not scorable |
| #### Bn-scaff_17522_1-p46364 all not scorable                   | not scorable | not scorable | not scorable | not scorable | not scorable | not scorable |
| #### Bn-scaff_17522_1-p47061 C-genome specific (napus-oleracea) | 0.5885168    | 0.7161579    | 0.9922481    | 0.6152932    | not scorable | not scorable |
| #### Bn-scaff_17522_1-p47081 C-genome specific (napus-oleracea) | 0.5813397    | 0.6914887    | 0.9922481    | 0.7417492    | not scorable | not scorable |
| #### Bn-scaff_17522_1-p47101 C-genome specific (napus-oleracea) | 0.5885168    | 0.7749273    | 0.9922481    | 0.7000605    | not scorable | not scorable |
| #### Bn-scaff_17522_1-p47875 all not scorable                   | not scorable | not scorable | not scorable | not scorable | not scorable | not scorable |
| #### Bn-scaff_17522_1-p47918 C-genome specific (oleracea only)  | not scorable | not scorable | 0.9922481    | 0.7305819    | not scorable | not scorable |
| #### Bn-scaff_17522_1-p48107 C-genome specific (napus-oleracea) | 0.9019139    | 0.7526153    | 1            | 0.7450384    | not scorable | not scorable |
| #### Bn-scaff_17522_1-p49083 genome unspecific (oleracea-rapa)  | not scorable | not scorable | 1            | 0.7472379    | 0.9504132    | 0.8924211    |
| #### Bn-scaff_17522_1-p50533 C-genome specific (napus-oleracea) | 0.861244     | 0.7445693    | 1            | 0.6633693    | not scorable | not scorable |
| #### Bn-scaff_17522_1-p51750 napus specific                     | 0.8444976    | 0.6922608    | not scorable | not scorable | not scorable | not scorable |
| #### Bn-scaff_17522_1-p54147 C-genome specific (napus-oleracea) | 0.8564593    | 0.6781538    | 0.9922481    | 0.6977205    | not scorable | not scorable |
| #### Bn-scaff_17522_1-p57652 C-genome specific (napus-oleracea) | 0.5741627    | 0.7935129    | 0.7906977    | 0.8606652    | not scorable | not scorable |
| #### Bn-scaff_17522_1-p60662 C-genome specific (napus-oleracea) | 0.9138756    | 0.7756751    | 0.9922481    | 0.7923387    | not scorable | not scorable |
| #### Bn-scaff_17522_1-p60776 C-genome specific (napus-oleracea) | 0.9186603    | 0.7299812    | 1            | 0.6781737    | not scorable | not scorable |
| #### Bn-scaff_17522_1-p61402 C-genome specific (napus-oleracea) | 0.5478469    | 0.7960526    | 0.7984496    | 0.7828156    | not scorable | not scorable |
| #### Bn-scaff_17522_1-p61884 C-genome specific (napus-oleracea) | 0.923445     | 0.721891     | 1            | 0.6882331    | not scorable | not scorable |
| #### Bn-scaff_17522_1-p62364 C-genome specific (napus-oleracea) | 0.9808612    | 0.7417064    | 0.744186     | 0.8060245    | not scorable | not scorable |
| #### Bn-scaff_17522_1-p62497 C-genome specific (napus-oleracea) | 0.8492823    | 0.7067898    | 1            | 0.7228059    | not scorable | not scorable |
| #### Bn-scaff_17522_1-p62530 genome unspecific (oleracea-rapa)  | not scorable | not scorable | 1            | 0.8357518    | 1            | 0.882396     |
| #### Bn-scaff_17522_1-p65096 C-genome specific (napus-oleracea) | 0.8516746    | 0.7889431    | 1            | 0.7155306    | not scorable | not scorable |
| #### Bn-scaff_17522_1-p65123 C-genome specific (napus-oleracea) | 0.8444976    | 0.7759989    | 0.9844961    | 0.7243367    | not scorable | not scorable |
| #### Bn-scaff_17522_1-p65130 C-genome specific (napus-oleracea) | 0.8421053    | 0.7819268    | 1            | 0.744056     | not scorable | not scorable |
| #### Bn-scaff_17522_1-p65151 C-genome specific (napus-oleracea) | 0.8684211    | 0.7549355    | 0.9844961    | 0.7135317    | not scorable | not scorable |
| #### Bn-scaff_17522_1-p65238 C-genome specific (napus-oleracea) | 0.8636364    | 0.7508978    | 1            | 0.6212357    | not scorable | not scorable |
| #### Bn-scaff_17522_1-p65332 C-genome specific (napus-oleracea) | 0.8684211    | 0.7594575    | 0.9844961    | 0.7201262    | not scorable | not scorable |
| #### Bn-scaff_17522_1-p65354 C-genome specific (napus-oleracea) | 0.8636364    | 0.7996665    | 1            | 0.7542921    | not scorable | not scorable |
| #### Bn-scaff_17522_1-p65432 C-genome specific (napus-oleracea) | 0.8636364    | 0.7840652    | 1            | 0.7111285    | not scorable | not scorable |



|                                                                 |              |              |              |              |              |              |
|-----------------------------------------------------------------|--------------|--------------|--------------|--------------|--------------|--------------|
| #### Bn-scaff_17522_1-p66415 C-genome specific (napus-oleracea) | 0.8373206    | 0.686775     | 0.9922481    | 0.6637074    | not scorable | not scorable |
| #### Bn-scaff_17522_1-p66421 C-genome specific (napus-oleracea) | 0.8397129    | 0.7541754    | 1            | 0.7493286    | not scorable | not scorable |
| #### Bn-scaff_17522_1-p67815 genome unspecific (all in)         | 0.9808612    | 0.2939738    | 1            | 0.6698986    | 1            | 0.9070647    |
| #### Bn-scaff_17522_1-p67880 C-genome specific (napus-oleracea) | 0.8421053    | 0.7962141    | 1            | 0.7898132    | not scorable | not scorable |
| #### Bn-scaff_17522_1-p68100 C-genome specific (napus-oleracea) | 0.8349282    | 0.7713519    | 0.9844961    | 0.7466737    | not scorable | not scorable |
| #### Bn-scaff_17522_1-p68290 C-genome specific (napus-oleracea) | 0.8373206    | 0.6694599    | 0.9922481    | 0.7564536    | not scorable | not scorable |
| #### Bn-scaff_17522_1-p68990 C-genome specific (napus-oleracea) | 0.8636364    | 0.6983405    | 0.9844961    | 0.6932459    | not scorable | not scorable |
| #### Bn-scaff_17522_1-p70480 C-genome specific (napus-oleracea) | 0.861244     | 0.7354953    | 1            | 0.7722075    | not scorable | not scorable |
| #### Bn-scaff_17522_1-p71440 C-genome specific (oleracea only)  | not scorable | not scorable | 1            | 0.7609816    | not scorable | not scorable |
| #### Bn-scaff_17522_1-p73724 all not scorable                   | not scorable | not scorable | not scorable | not scorable | not scorable | not scorable |
| #### Bn-scaff_17522_1-p74612 C-genome specific (napus-oleracea) | 0.8421053    | 0.7935672    | 0.9302326    | 0.7994263    | not scorable | not scorable |
| #### Bn-scaff_17522_1-p77164 C-genome specific (napus-oleracea) | 0.8660287    | 0.6589328    | 0.9844961    | 0.6660182    | not scorable | not scorable |
| #### Bn-scaff_17522_1-p77294 all not scorable                   | not scorable | not scorable | not scorable | not scorable | not scorable | not scorable |
| #### Bn-scaff_17522_1-p77415 genome unspecific (all in)         | 0.9832536    | 0.5602041    | 0.9689922    | 0.6278881    | 1            | 0.9238622    |
| #### Bn-scaff_17522_1-p77470 all not scorable                   | not scorable | not scorable | not scorable | not scorable | not scorable | not scorable |
| #### Bn-scaff_17522_1-p77677 C-genome specific (napus-oleracea) | 0.8421053    | 0.675611     | 0.8604651    | 0.6770979    | not scorable | not scorable |
| #### Bn-scaff_17522_1-p77702 C-genome specific (napus-oleracea) | 0.84689      | 0.7761331    | 0.8527132    | 0.8207058    | not scorable | not scorable |
| #### Bn-scaff_17522_1-p77720 genome unspecific (all in)         | 0.9665072    | 0.5165713    | 0.9534883    | 0.6176923    | 1            | 0.901732     |
| #### Bn-scaff_17522_1-p78480 genome unspecific (all in)         | 0.9856459    | 0.6770758    | 1            | 0.7987206    | 0.9917355    | 0.9183013    |
| #### Bn-scaff_17522_1-p88130 genome unspecific (all in)         | 0.9976076    | 0.5123827    | 0.8217054    | 0.7972672    | 0.9834711    | 0.7352082    |
| #### Bn-scaff_17522_1-p90820 C-genome specific (napus-oleracea) | 0.8708134    | 0.7061445    | 1            | 0.715087     | not scorable | not scorable |
| #### Bn-scaff_17525_1-p11700 C-genome specific (napus-oleracea) | 0.9784689    | 0.7394365    | 0.9689922    | 0.7293993    | not scorable | not scorable |
| #### Bn-scaff_17525_1-p12590 genome unspecific (all in)         | 1            | 0.8878438    | 1            | 0.8338857    | 1            | 0.8388302    |
| #### Bn-scaff_17525_1-p12690 genome unspecific (all in)         | 1            | 0.5601621    | 0.9922481    | 0.3565803    | 1            | 0.7134259    |
| #### Bn-scaff_17525_1-p24670 genome unspecific (oleracea-rapa)  | not scorable | not scorable | 0.9844961    | 0.3009718    | 0.9752066    | 0.8683435    |
| #### Bn-scaff_17525_1-p24714 C-genome specific (napus-oleracea) | 0.9641148    | 0.2349325    | 0.9922481    | 0.3127717    | not scorable | not scorable |
| #### Bn-scaff_17525_1-p26620 C-genome specific (napus-oleracea) | 0.9952153    | 0.7546787    | 0.9689922    | 0.7346492    | not scorable | not scorable |
| #### Bn-scaff_17525_1-p26750 C-genome specific (napus-oleracea) | 0.9904306    | 0.7329976    | 0.9844961    | 0.6869836    | not scorable | not scorable |
| #### Bn-scaff_17525_1-p27240 genome unspecific (oleracea-rapa)  | not scorable | not scorable | 1            | 0.2963451    | 0.9504132    | 0.2609291    |
| #### Bn-scaff_17525_1-p27254 genome unspecific (all in)         | 0.9712918    | 0.2752247    | 1            | 0.799529     | 0.9917355    | 0.7559523    |
| #### Bn-scaff_17525_1-p30210 genome unspecific (all in)         | 0.9449761    | 0.2140011    | 1            | 0.8171261    | 1            | 0.7510651    |
| #### Bn-scaff_17525_1-p35070 all not scorable                   | not scorable | not scorable | not scorable | not scorable | not scorable | not scorable |
| #### Bn-scaff_17525_1-p40830 genome unspecific (all in)         | 1            | 0.9249413    | 1            | 0.910639     | 1            | 0.8362802    |

|                                                                 |              |              |           |           |              |              |
|-----------------------------------------------------------------|--------------|--------------|-----------|-----------|--------------|--------------|
| #### Bn-scaff_17525_1-p50309 genome unspecific (all in)         | 0.9928229    | 0.4858728    | 1         | 0.8019392 | 1            | 0.6545942    |
| #### Bn-scaff_17525_1-p54895 C-genome specific (napus-oleracea) | 0.9832536    | 0.3398762    | 0.9457364 | 0.2933055 | not scorable | not scorable |
| #### Bn-scaff_17525_1-p60207 C-genome specific (napus-oleracea) | 1            | 0.6912169    | 0.9844961 | 0.6931016 | not scorable | not scorable |
| #### Bn-scaff_17525_1-p66373 genome unspecific (all in)         | 1            | 0.8271306    | 1         | 0.8936712 | 1            | 0.9175813    |
| #### Bn-scaff_17525_1-p66525 genome unspecific (all in)         | 1            | 0.7641606    | 1         | 0.7884539 | 1            | 0.7770717    |
| #### Bn-scaff_17525_1-p66542 genome unspecific (all in)         | 1            | 0.9170895    | 1         | 0.9091365 | 1            | 0.9175813    |
| #### Bn-scaff_17525_1-p66558 genome unspecific (oleracea-rapa)  | not scorable | not scorable | 1         | 0.7457469 | 1            | 0.8390344    |
| #### Bn-scaff_17525_1-p66562 genome unspecific (oleracea-rapa)  | not scorable | not scorable | 1         | 0.7905928 | 1            | 0.7914145    |
| #### Bn-scaff_17525_1-p66643 genome unspecific (all in)         | 0.9880383    | 0.2180303    | 1         | 0.8115864 | 0.9917355    | 0.666556     |
| #### Bn-scaff_17525_1-p66650 C-genome specific (napus-oleracea) | 0.9832536    | 0.3954312    | 1         | 0.9198841 | not scorable | not scorable |
| #### Bn-scaff_17526_1-p10053 genome unspecific (all in)         | 0.9449761    | 0.3891108    | 0.9922481 | 0.5816916 | 1            | 0.8247063    |
| #### Bn-scaff_17526_1-p10147 C-genome specific (napus-oleracea) | 0.8803828    | 0.7620248    | 1         | 0.6927698 | not scorable | not scorable |
| #### Bn-scaff_17526_1-p10639 genome unspecific (all in)         | 0.8684211    | 0.7124668    | 1         | 0.6930552 | 0.8760331    | 0.7936044    |
| #### Bn-scaff_17526_1-p10662 C-genome specific (napus-oleracea) | 0.8062201    | 0.736763     | 1         | 0.7876296 | not scorable | not scorable |
| #### Bn-scaff_17526_1-p10833 C-genome specific (napus-oleracea) | 0.7894737    | 0.6686849    | 0.9224806 | 0.6869836 | not scorable | not scorable |
| #### Bn-scaff_17526_1-p10860 C-genome specific (napus-oleracea) | 0.8133971    | 0.7709333    | 1         | 0.8001463 | not scorable | not scorable |
| #### Bn-scaff_17526_1-p10901 C-genome specific (napus-oleracea) | 0.8110048    | 0.7419816    | 0.9689922 | 0.7401185 | not scorable | not scorable |
| #### Bn-scaff_17526_1-p10910 C-genome specific (napus-oleracea) | 0.7942584    | 0.708723     | 0.9147287 | 0.9024838 | not scorable | not scorable |
| #### Bn-scaff_17526_1-p11021 genome unspecific (oleracea-rapa)  | not scorable | not scorable | 1         | 0.6856372 | 1            | 0.9175813    |
| #### Bn-scaff_17526_1-p11405 genome unspecific (oleracea-rapa)  | not scorable | not scorable | 1         | 0.6624879 | 0.9834711    | 0.8195204    |
| #### Bn-scaff_17526_1-p11437 C-genome specific (napus-oleracea) | 0.8253589    | 0.8453214    | 1         | 0.8401738 | not scorable | not scorable |
| #### Bn-scaff_17526_1-p11479 C-genome specific (oleracea only)  | not scorable | not scorable | 0.9612403 | 0.3793148 | not scorable | not scorable |
| #### Bn-scaff_17526_1-p12257 C-genome specific (napus-oleracea) | 0.8205742    | 0.7534125    | 0.9922481 | 0.8007795 | not scorable | not scorable |
| #### Bn-scaff_17526_1-p12357 C-genome specific (napus-oleracea) | 0.8205742    | 0.8076262    | 1         | 0.7275109 | not scorable | not scorable |
| #### Bn-scaff_17526_1-p12644 C-genome specific (napus-oleracea) | 0.8181818    | 0.8331373    | 0.9922481 | 0.7933734 | not scorable | not scorable |
| #### Bn-scaff_17526_1-p12795 genome unspecific (all in)         | 0.9832536    | 0.4115815    | 1         | 0.8739938 | 1            | 0.773836     |
| #### Bn-scaff_17526_1-p13488 genome unspecific (oleracea-rapa)  | not scorable | not scorable | 1         | 0.6261194 | 0.9752066    | 0.6477118    |
| #### Bn-scaff_17526_1-p13489 genome unspecific (oleracea-rapa)  | not scorable | not scorable | 1         | 0.6010699 | 1            | 0.5450221    |
| #### Bn-scaff_17526_1-p13494 genome unspecific (all in)         | 0.9904306    | 0.2584048    | 0.9844961 | 0.2809331 | 1            | 0.5054326    |
| #### Bn-scaff_17526_1-p14693 C-genome specific (napus-oleracea) | 0.8110048    | 0.8777952    | 1         | 0.7701377 | not scorable | not scorable |
| #### Bn-scaff_17526_1-p14700 C-genome specific (napus-oleracea) | 0.8110048    | 0.7515081    | 0.9922481 | 0.716699  | not scorable | not scorable |
| #### Bn-scaff_17526_1-p14749 C-genome specific (napus-oleracea) | 0.9665072    | 0.5223203    | 0.9612403 | 0.7466624 | not scorable | not scorable |
| #### Bn-scaff_17526_1-p15042 genome unspecific (all in)         | 1            | 0.5503433    | 1         | 0.7376376 | 0.9917355    | 0.640556     |

|                                                                 |              |              |              |              |              |              |
|-----------------------------------------------------------------|--------------|--------------|--------------|--------------|--------------|--------------|
| #### Bn-scaff_17526_1-p16498 C-genome specific (napus-oleracea) | 0.8110048    | 0.8397911    | 1            | 0.8550429    | not scorable | not scorable |
| #### Bn-scaff_17526_1-p16672 genome unspecific (all in)         | 0.9928229    | 0.3363356    | 0.9844961    | 0.3612943    | 1            | 0.5754953    |
| #### Bn-scaff_17526_1-p16927 C-genome specific (oleracea only)  | not scorable | not scorable | 1            | 0.7497799    | not scorable | not scorable |
| #### Bn-scaff_17526_1-p17183 genome unspecific (all in)         | 0.8038278    | 0.66954      | 0.9767442    | 0.7622204    | 0.9834711    | 0.8487093    |
| #### Bn-scaff_17526_1-p17263 C-genome specific (napus-oleracea) | 0.9760765    | 0.6776073    | 0.7984496    | 0.752191     | not scorable | not scorable |
| #### Bn-scaff_17526_1-p17735 all not scorable                   | not scorable | not scorable | not scorable | not scorable | not scorable | not scorable |
| #### Bn-scaff_17526_1-p17738 all not scorable                   | not scorable | not scorable | not scorable | not scorable | not scorable | not scorable |
| #### Bn-scaff_17526_1-p17798 C-genome specific (napus-oleracea) | 0.7990431    | 0.8417321    | 1            | 0.5376678    | not scorable | not scorable |
| #### Bn-scaff_17526_1-p18269 genome unspecific (oleracea-rapa)  | not scorable | not scorable | 0.9844961    | 0.8632445    | 0.9586777    | 0.9175813    |
| #### Bn-scaff_17526_1-p18275 C-genome specific (napus-oleracea) | 0.7966507    | 0.8176661    | 0.9767442    | 0.7138222    | not scorable | not scorable |
| #### Bn-scaff_17526_1-p18276 C-genome specific (napus-oleracea) | 0.8157895    | 0.7329232    | 1            | 0.7413396    | not scorable | not scorable |
| #### Bn-scaff_17526_1-p18280 C-genome specific (napus-oleracea) | 0.8588517    | 0.8450499    | 0.9922481    | 0.8490286    | not scorable | not scorable |
| #### Bn-scaff_17526_1-p18290 C-genome specific (napus-oleracea) | 0.791866     | 0.6886157    | 0.9844961    | 0.6967687    | not scorable | not scorable |
| #### Bn-scaff_17526_1-p18297 C-genome specific (napus-oleracea) | 0.8181818    | 0.64772      | 1            | 0.7884539    | not scorable | not scorable |
| #### Bn-scaff_17526_1-p18302 C-genome specific (napus-oleracea) | 0.7942584    | 0.8054051    | 1            | 0.8004208    | not scorable | not scorable |
| #### Bn-scaff_17526_1-p18305 C-genome specific (napus-oleracea) | 0.854067     | 0.6769141    | 0.9379845    | 0.8085203    | not scorable | not scorable |
| #### Bn-scaff_17526_1-p18318 C-genome specific (napus-oleracea) | 0.8181818    | 0.6703256    | 1            | 0.8487744    | not scorable | not scorable |
| #### Bn-scaff_17526_1-p18343 C-genome specific (napus-oleracea) | 0.7870814    | 0.683825     | 0.8914729    | 0.7420502    | not scorable | not scorable |
| #### Bn-scaff_17526_1-p19072 C-genome specific (napus-oleracea) | 0.7870814    | 0.8400373    | 1            | 0.7434668    | not scorable | not scorable |
| #### Bn-scaff_17526_1-p19101 C-genome specific (napus-oleracea) | 0.7942584    | 0.736397     | 1            | 0.6341392    | not scorable | not scorable |
| #### Bn-scaff_17526_1-p19122 C-genome specific (napus-oleracea) | 0.8253589    | 0.6965226    | 1            | 0.6501432    | not scorable | not scorable |
| #### Bn-scaff_17526_1-p19163 C-genome specific (napus-oleracea) | 0.8157895    | 0.773262     | 0.8604651    | 0.8330645    | not scorable | not scorable |
| #### Bn-scaff_17526_1-p21779 genome unspecific (oleracea-rapa)  | not scorable | not scorable | 1            | 0.6713912    | 1            | 0.6759525    |
| #### Bn-scaff_17526_1-p21786 genome unspecific (oleracea-rapa)  | not scorable | not scorable | 1            | 0.8507352    | 1            | 0.8317724    |
| #### Bn-scaff_17526_1-p21791 genome unspecific (all in)         | 0.9712918    | 0.3318016    | 1            | 0.6777889    | 1            | 0.7494321    |
| #### Bn-scaff_17526_1-p22005 C-genome specific (oleracea only)  | not scorable | not scorable | 1            | 0.4727882    | not scorable | not scorable |
| #### Bn-scaff_17526_1-p22064 genome unspecific (all in)         | 0.9784689    | 0.4624803    | 1            | 0.7270226    | 0.9917355    | 0.6451659    |
| #### Bn-scaff_17526_1-p22081 genome unspecific (all in)         | 0.9832536    | 0.355471     | 1            | 0.8135551    | 1            | 0.7087483    |
| #### Bn-scaff_17526_1-p22081 genome unspecific (all in)         | 0.9401914    | 0.2652149    | 1            | 0.5327882    | 1            | 0.6921083    |
| #### Bn-scaff_17526_1-p22157 genome unspecific (all in)         | 0.9617225    | 0.2587549    | 1            | 0.5236221    | 1            | 0.5771576    |
| #### Bn-scaff_17526_1-p22401 genome unspecific (oleracea-rapa)  | not scorable | not scorable | 1            | 0.8008148    | 1            | 0.9175813    |
| #### Bn-scaff_17526_1-p25645 genome unspecific (all in)         | 0.9952153    | 0.2415786    | 0.9922481    | 0.311072     | 1            | 0.77314      |
| #### Bn-scaff_17526_1-p30078 genome unspecific (oleracea-rapa)  | not scorable | not scorable | 1            | 0.7500678    | 0.9834711    | 0.6200042    |

|                                                                |              |              |              |              |              |              |
|----------------------------------------------------------------|--------------|--------------|--------------|--------------|--------------|--------------|
| #### Bn-scaff_17526_1-p30112genome unspecific (all in)         | 0.9784689    | 0.338387     | 1            | 0.7681476    | 1            | 0.6481722    |
| #### Bn-scaff_17526_1-p41241all not scorable                   | not scorable | not scorable | not scorable | not scorable | not scorable | not scorable |
| #### Bn-scaff_17526_1-p46339genome unspecific (oleracea-rapa)  | not scorable | not scorable | 1            | 0.8052104    | 0.9752066    | 0.7713467    |
| #### Bn-scaff_17526_1-p48065A-genome specific (rapa only)      | not scorable | not scorable | not scorable | not scorable | 0.9752066    | 0.7224838    |
| #### Bn-scaff_17526_1-p60245C-genome specific (oleracea only)  | not scorable | not scorable | 1            | 0.7809221    | not scorable | not scorable |
| #### Bn-scaff_17526_1-p72875C-genome specific (oleracea only)  | not scorable | not scorable | 1            | 0.7351387    | not scorable | not scorable |
| #### Bn-scaff_17526_1-p72902genome unspecific (oleracea-rapa)  | not scorable | not scorable | 0.9767442    | 0.2691114    | 1            | 0.8004208    |
| #### Bn-scaff_17526_1-p77616C-genome specific (oleracea only)  | not scorable | not scorable | 1            | 0.9175766    | not scorable | not scorable |
| #### Bn-scaff_17526_1-p77906C-genome specific (oleracea only)  | not scorable | not scorable | 0.875969     | 0.7520992    | not scorable | not scorable |
| #### Bn-scaff_17526_1-p86045C-genome specific (napus-oleracea) | 0.8516746    | 0.6246972    | 1            | 0.8077518    | not scorable | not scorable |
| #### Bn-scaff_17526_1-p86050C-genome specific (napus-oleracea) | 0.8851675    | 0.7007946    | 0.9069768    | 0.6449412    | not scorable | not scorable |
| #### Bn-scaff_17526_1-p87903C-genome specific (napus-oleracea) | 0.8755981    | 0.6900225    | 1            | 0.6286701    | not scorable | not scorable |
| #### Bn-scaff_17526_1-p91234C-genome specific (napus-oleracea) | 0.8899522    | 0.7273626    | 1            | 0.7895322    | not scorable | not scorable |
| #### Bn-scaff_17526_1-p93869C-genome specific (oleracea only)  | not scorable | not scorable | 0.9844961    | 0.8091292    | not scorable | not scorable |
| #### Bn-scaff_17526_1-p95192C-genome specific (napus-oleracea) | 0.8803828    | 0.9205657    | 0.9069768    | 0.8826197    | not scorable | not scorable |
| #### Bn-scaff_17526_1-p95261C-genome specific (napus-oleracea) | 0.9688995    | 0.5496237    | 1            | 0.7571661    | not scorable | not scorable |
| #### Bn-scaff_17526_1-p96947C-genome specific (napus-oleracea) | 0.8995215    | 0.6772393    | 1            | 0.6595951    | not scorable | not scorable |
| #### Bn-scaff_17526_1-p97273C-genome specific (napus-oleracea) | 0.8995215    | 0.6849335    | 1            | 0.6281049    | not scorable | not scorable |
| #### Bn-scaff_17526_1-p97577C-genome specific (napus-oleracea) | 0.7990431    | 0.8123006    | 0.2093023    | 0.9282917    | not scorable | not scorable |
| #### Bn-scaff_17554_1-p19888C-genome specific (napus-oleracea) | 0.9808612    | 0.6358795    | 1            | 0.5659567    | not scorable | not scorable |
| #### Bn-scaff_17554_1-p21274C-genome specific (napus-oleracea) | 0.9712918    | 0.7321506    | 0.9844961    | 0.7511988    | not scorable | not scorable |
| #### Bn-scaff_17554_1-p28732C-genome specific (napus-oleracea) | 0.9760765    | 0.6610751    | 0.9844961    | 0.6113829    | not scorable | not scorable |
| #### Bn-scaff_17565_1-p6212 C-genome specific (napus-oleracea) | 0.9210526    | 0.7444891    | 0.7829458    | 0.8193225    | not scorable | not scorable |
| #### Bn-scaff_17566_1-p10982C-genome specific (napus-oleracea) | 0.9712918    | 0.8037989    | 1            | 0.724741     | not scorable | not scorable |
| #### Bn-scaff_17566_1-p11505C-genome specific (napus-oleracea) | 0.9832536    | 0.6613637    | 0.9922481    | 0.6646247    | not scorable | not scorable |
| #### Bn-scaff_17566_1-p11519C-genome specific (napus-oleracea) | 0.9880383    | 0.772476     | 1            | 0.7034867    | not scorable | not scorable |
| #### Bn-scaff_17566_1-p13661C-genome specific (napus-oleracea) | 0.9784689    | 0.3966051    | 1            | 0.7844371    | not scorable | not scorable |
| #### Bn-scaff_17566_1-p13882C-genome specific (napus-oleracea) | 0.9856459    | 0.8529991    | 0.9922481    | 0.8286028    | not scorable | not scorable |
| #### Bn-scaff_17566_1-p14042C-genome specific (napus-oleracea) | 0.9760765    | 0.7042057    | 0.9767442    | 0.6240063    | not scorable | not scorable |
| #### Bn-scaff_17566_1-p14127C-genome specific (napus-oleracea) | 0.9880383    | 0.8494539    | 1            | 0.8586479    | not scorable | not scorable |
| #### Bn-scaff_17566_1-p15015C-genome specific (napus-oleracea) | 0.9808612    | 0.7836312    | 0.9922481    | 0.8415254    | not scorable | not scorable |
| #### Bn-scaff_17566_1-p21523genome unspecific (all in)         | 0.9641148    | 0.6644617    | 1            | 0.7682924    | 0.9917355    | 0.6541455    |
| #### Bn-scaff_17566_1-p2227 C-genome specific (napus-oleracea) | 0.9712918    | 0.6473781    | 0.9457364    | 0.6595465    | not scorable | not scorable |

|                                                                 |              |              |              |   |              |              |              |
|-----------------------------------------------------------------|--------------|--------------|--------------|---|--------------|--------------|--------------|
| #### Bn-scaff_17566_1-p26371C-genome specific (napus-oleracea)  | 0.9832536    | 0.7299747    |              | 1 | 0.7797213    | not scorable | not scorable |
| #### Bn-scaff_17566_1-p27025 genome unspecific (all in)         | 0.9880383    | 0.4943592    |              | 1 | 0.8223446    |              | 1 0.9387658  |
| #### Bn-scaff_17566_1-p28328 genome unspecific (all in)         | 0.9832536    | 0.3417242    | 0.9922481    |   | 0.8296022    |              | 1 0.8948976  |
| #### Bn-scaff_17566_1-p46318 A-genome specific (napus-rapa)     |              | 1 0.4993314  | not scorable |   | not scorable | 0.9917355    | 0.2274885    |
| #### Bn-scaff_17566_1-p49120 C-genome specific (napus-oleracea) | 0.9880383    | 0.6516953    |              | 1 | 0.7227655    | not scorable | not scorable |
| #### Bn-scaff_17566_1-p50138 genome unspecific (all in)         | 0.9665072    | 0.2493511    | 0.9767442    |   | 0.3909002    |              | 1 0.8176851  |
| #### Bn-scaff_17566_1-p71938 C-genome specific (napus-oleracea) | 0.9784689    | 0.7466959    | 0.9922481    |   | 0.8043978    | not scorable | not scorable |
| #### Bn-scaff_17566_1-p73719 C-genome specific (napus-oleracea) | 0.9736842    | 0.6929056    | 0.9689922    |   | 0.6156681    | not scorable | not scorable |
| #### Bn-scaff_17566_1-p76755 C-genome specific (napus-oleracea) | 0.9832536    | 0.7322616    |              | 1 | 0.8044738    | not scorable | not scorable |
| #### Bn-scaff_17566_1-p87878 C-genome specific (napus-oleracea) | 0.9904306    | 0.6283528    |              | 1 | 0.7119003    | not scorable | not scorable |
| #### Bn-scaff_17566_1-p87930 C-genome specific (napus-oleracea) | 0.9856459    | 0.7292896    | 0.9767442    |   | 0.6960069    | not scorable | not scorable |
| #### Bn-scaff_17566_1-p88771 C-genome specific (napus-oleracea) | 0.9880383    | 0.6251042    | 0.9922481    |   | 0.7225286    | not scorable | not scorable |
| #### Bn-scaff_17573_1-p41354 genome unspecific (all in)         | 0.9928229    | 0.2233227    |              | 1 | 0.8135551    |              | 1 0.8135551  |
| #### Bn-scaff_17573_1-p48638 all not scorable                   | not scorable | not scorable | not scorable |   | not scorable | not scorable | not scorable |
| #### Bn-scaff_17573_1-p49159 genome unspecific (all in)         |              | 1 0.700076   |              | 1 | 0.8349144    |              | 1 0.8169647  |
| #### Bn-scaff_17573_1-p95384 genome unspecific (all in)         | 0.9856459    | 0.4919438    |              | 1 | 0.7009773    |              | 1 0.8254822  |
| #### Bn-scaff_17580_1-p16024 genome unspecific (all in)         | 0.9665072    | 0.3168883    |              | 1 | 0.9087212    | 0.9917355    | 0.8204395    |
| #### Bn-scaff_17580_1-p19428 genome unspecific (all in)         | 0.9784689    | 0.3004068    |              | 1 | 0.8212507    | 0.9752066    | 0.7599012    |
| #### Bn-scaff_17580_1-p28105 genome unspecific (all in)         |              | 1 0.550276   |              | 1 | 0.5612706    |              | 1 0.7978957  |
| #### Bn-scaff_17580_1-p28133 genome unspecific (all in)         | 0.9976076    | 0.5639798    | 0.9689922    |   | 0.6090693    |              | 1 0.8947306  |
| #### Bn-scaff_17580_1-p51543 genome unspecific (oleracea-rapa)  | not scorable | not scorable | 0.9844961    |   | 0.4303495    | 0.9256198    | 0.8369111    |
| #### Bn-scaff_17580_1-p70475 genome unspecific (all in)         | 0.9952153    | 0.777721     |              | 1 | 0.8512111    | 0.9917355    | 0.8008351    |
| #### Bn-scaff_17580_1-p83128 C-genome specific (napus-oleracea) |              | 1 0.7797272  |              | 1 | 0.4735471    | not scorable | not scorable |
| #### Bn-scaff_17584_1-p10917 genome unspecific (all in)         | 0.930622     | 0.2609058    |              | 1 | 0.8935147    | 0.9834711    | 0.2790696    |
| #### Bn-scaff_17584_1-p22373 genome unspecific (all in)         | 0.9952153    | 0.3468123    |              | 1 | 0.6763397    |              | 1 0.592586   |
| #### Bn-scaff_17584_1-p26865 C-genome specific (napus-oleracea) | 0.9976076    | 0.7487106    |              | 1 | 0.8914299    | not scorable | not scorable |
| #### Bn-scaff_17584_1-p42840 C-genome specific (napus-oleracea) | 0.9904306    | 0.8367413    | 0.8139535    |   | 0.9107006    | not scorable | not scorable |
| #### Bn-scaff_17584_1-p48789 C-genome specific (napus-oleracea) | 0.9904306    | 0.7544761    | 0.9302326    |   | 0.9039531    | not scorable | not scorable |
| #### Bn-scaff_17584_1-p52281 genome unspecific (all in)         |              | 1 0.5709352  |              | 1 | 0.5788181    |              | 1 0.5857258  |
| #### Bn-scaff_17584_1-p68287 genome unspecific (oleracea-rapa)  | not scorable | not scorable |              | 1 | 0.7177673    |              | 1 0.8851928  |
| #### Bn-scaff_17584_1-p68326 genome unspecific (all in)         | 0.9617225    | 0.3261963    |              | 1 | 0.6610581    | 0.9834711    | 0.674027     |
| #### Bn-scaff_17584_1-p68327 genome unspecific (all in)         | 0.9760765    | 0.3617827    |              | 1 | 0.8135641    | 0.9917355    | 0.6825163    |
| #### Bn-scaff_17591_1-p15317 C-genome specific (napus-oleracea) | 0.9952153    | 0.6976562    | 0.9844961    |   | 0.6920076    | not scorable | not scorable |

|                                                                 |              |              |              |              |              |              |
|-----------------------------------------------------------------|--------------|--------------|--------------|--------------|--------------|--------------|
| #### Bn-scaff_17591_1-p33449 genome unspecific (all in)         | 1            | 0.6296077    | 1            | 0.693633     | 1            | 0.702597     |
| #### Bn-scaff_17591_1-p43112 C-genome specific (napus-oleracea) | 1            | 0.6094505    | 1            | 0.5714908    | not scorable | not scorable |
| #### Bn-scaff_17591_1-p46152 C-genome specific (napus-oleracea) | 0.9976076    | 0.6821546    | 1            | 0.6400286    | not scorable | not scorable |
| #### Bn-scaff_17591_1-p56853 C-genome specific (napus-oleracea) | 1            | 0.7763924    | 1            | 0.6472003    | not scorable | not scorable |
| #### Bn-scaff_17591_1-p57827 genome unspecific (all in)         | 0.9976076    | 0.5181984    | 1            | 0.9063823    | 1            | 0.7111437    |
| #### Bn-scaff_17591_1-p61811 C-genome specific (napus-oleracea) | 0.9976076    | 0.8626572    | 0.9922481    | 0.7672322    | not scorable | not scorable |
| #### Bn-scaff_17591_1-p75807 C-genome specific (napus-oleracea) | 0.9952153    | 0.7816008    | 1            | 0.7197951    | not scorable | not scorable |
| #### Bn-scaff_17591_1-p75901 C-genome specific (napus-oleracea) | 1            | 0.3579286    | 0.9922481    | 0.2207464    | not scorable | not scorable |
| #### Bn-scaff_17591_1-p85044 C-genome specific (napus-oleracea) | 0.9976076    | 0.7130823    | 0.9844961    | 0.681476     | not scorable | not scorable |
| #### Bn-scaff_17592_1-p26774 genome unspecific (all in)         | 0.9808612    | 0.2511613    | 1            | 0.7863787    | 1            | 0.7958855    |
| #### Bn-scaff_17592_1-p29531 genome unspecific (oleracea-rapa)  | not scorable | not scorable | 1            | 0.9054652    | 1            | 0.8476182    |
| #### Bn-scaff_17592_1-p36152 genome unspecific (all in)         | 0.9904306    | 0.4198178    | 1            | 0.752191     | 1            | 0.7046596    |
| #### Bn-scaff_17592_1-p38645 C-genome specific (napus-oleracea) | 0.9736842    | 0.1976655    | 0.9922481    | 0.7849486    | not scorable | not scorable |
| #### Bn-scaff_17592_1-p48585 genome unspecific (all in)         | 1            | 0.4626383    | 0.9922481    | 0.7777814    | 1            | 0.9072468    |
| #### Bn-scaff_17592_1-p50033 C-genome specific (napus-oleracea) | 0.9976076    | 0.3188683    | 0.9534883    | 0.2454874    | not scorable | not scorable |
| #### Bn-scaff_17592_1-p50146 napus specific                     | 0.9617225    | 0.4593709    | not scorable | not scorable | not scorable | not scorable |
| #### Bn-scaff_17592_1-p50641 C-genome specific (napus-oleracea) | 0.9904306    | 0.7119306    | 0.9689922    | 0.6735815    | not scorable | not scorable |
| #### Bn-scaff_17592_1-p53070 C-genome specific (napus-oleracea) | 0.9904306    | 0.5733889    | 0.9767442    | 0.624798     | not scorable | not scorable |
| #### Bn-scaff_17592_1-p53118 C-genome specific (napus-oleracea) | 0.9880383    | 0.7254019    | 0.9767442    | 0.742929     | not scorable | not scorable |
| #### Bn-scaff_17592_1-p53511 genome unspecific (all in)         | 1            | 0.311986     | 1            | 0.8734161    | 0.9917355    | 0.8253082    |
| #### Bn-scaff_17592_1-p53517 A-genome specific (napus-rapa)     | 1            | 0.5330311    | not scorable | not scorable | 1            | 0.7534218    |
| #### Bn-scaff_17592_1-p54344 C-genome specific (napus-oleracea) | 0.9856459    | 0.7870605    | 1            | 0.807747     | not scorable | not scorable |
| #### Bn-scaff_17592_1-p54611 A-genome specific (napus-rapa)     | 1            | 0.2749558    | not scorable | not scorable | 1            | 0.8243666    |
| #### Bn-scaff_17592_1-p54858 C-genome specific (napus-oleracea) | 0.9904306    | 0.5847118    | 1            | 0.751678     | not scorable | not scorable |
| #### Bn-scaff_17592_1-p55163 genome unspecific (all in)         | 0.9880383    | 0.7292108    | 0.9844961    | 0.6448947    | 0.8264463    | 0.8793069    |
| #### Bn-scaff_17592_1-p58873 genome unspecific (all in)         | 1            | 0.5095696    | 0.9844961    | 0.5924712    | 1            | 0.7928195    |
| #### Bn-scaff_17592_1-p60375 genome unspecific (all in)         | 1            | 0.3071416    | 1            | 0.6165515    | 0.9917355    | 0.7611889    |
| #### Bn-scaff_17592_1-p61189 C-genome specific (napus-oleracea) | 0.9832536    | 0.7380774    | 1            | 0.7022258    | not scorable | not scorable |
| #### Bn-scaff_17592_1-p61209 C-genome specific (napus-oleracea) | 0.9832536    | 0.6953667    | 1            | 0.7238413    | not scorable | not scorable |
| #### Bn-scaff_17592_1-p61218 C-genome specific (napus-oleracea) | 0.9784689    | 0.7434054    | 0.9922481    | 0.7459788    | not scorable | not scorable |
| #### Bn-scaff_17592_1-p61305 C-genome specific (napus-oleracea) | 0.9449761    | 0.6691323    | 0.9767442    | 0.6963664    | not scorable | not scorable |
| #### Bn-scaff_17592_1-p64068 C-genome specific (napus-oleracea) | 0.9880383    | 0.7562755    | 1            | 0.7293236    | not scorable | not scorable |
| #### Bn-scaff_17592_1-p64075 C-genome specific (napus-oleracea) | 0.9712918    | 0.7735437    | 0.9922481    | 0.838353     | not scorable | not scorable |

|                                                                 |              |              |              |              |              |              |
|-----------------------------------------------------------------|--------------|--------------|--------------|--------------|--------------|--------------|
| #### Bn-scaff_17592_1-p64214 C-genome specific (napus-oleracea) | 0.9808612    | 0.785297     | 0.9844961    | 0.8331425    | not scorable | not scorable |
| #### Bn-scaff_17592_1-p64250 C-genome specific (napus-oleracea) | 0.9736842    | 0.8055734    | 1            | 0.9562591    | not scorable | not scorable |
| #### Bn-scaff_17592_1-p65456 C-genome specific (napus-oleracea) | 0.9712918    | 0.690932     | 1            | 0.7846761    | not scorable | not scorable |
| #### Bn-scaff_17592_1-p68092 napus specific                     | 0.9497608    | 0.2679506    | not scorable | not scorable | not scorable | not scorable |
| #### Bn-scaff_17592_1-p68376 napus specific                     | 0.9665072    | 0.7718478    | not scorable | not scorable | not scorable | not scorable |
| #### Bn-scaff_17592_1-p68516 C-genome specific (napus-oleracea) | 0.9712918    | 0.7981002    | 0.6511628    | 0.8106603    | not scorable | not scorable |
| #### Bn-scaff_17592_1-p68924 C-genome specific (napus-oleracea) | 0.9688995    | 0.7807738    | 0.6744186    | 0.8183716    | not scorable | not scorable |
| #### Bn-scaff_17592_1-p71461 genome unspecific (all in)         | 1            | 0.6834667    | 1            | 0.8004208    | 1            | 0.786476     |
| #### Bn-scaff_17592_1-p71772 C-genome specific (napus-oleracea) | 0.9904306    | 0.2310401    | 0.9612403    | 0.6989961    | not scorable | not scorable |
| #### Bn-scaff_17592_1-p72569 genome unspecific (all in)         | 0.9712918    | 0.3098845    | 1            | 0.7249707    | 1            | 0.786476     |
| #### Bn-scaff_17592_1-p72791 genome unspecific (all in)         | 0.937799     | 0.2404871    | 1            | 0.6762607    | 1            | 0.719701     |
| #### Bn-scaff_17592_1-p73504 C-genome specific (napus-oleracea) | 0.9904306    | 0.7916561    | 1            | 0.7693914    | not scorable | not scorable |
| #### Bn-scaff_17592_1-p73920 genome unspecific (all in)         | 0.9904306    | 0.756286     | 1            | 0.6381521    | 0.9752066    | 0.8288787    |
| #### Bn-scaff_17592_1-p76418 genome unspecific (all in)         | 0.9928229    | 0.403416     | 0.9534883    | 0.3343355    | 1            | 0.8948976    |
| #### Bn-scaff_17592_1-p77587 C-genome specific (napus-oleracea) | 0.9641148    | 0.7627835    | 0.9534883    | 0.6762429    | not scorable | not scorable |
| #### Bn-scaff_17592_1-p78125 C-genome specific (napus-oleracea) | 0.9473684    | 0.4557872    | 0.9069768    | 0.7408654    | not scorable | not scorable |
| #### Bn-scaff_17592_1-p78144 C-genome specific (napus-oleracea) | 0.9473684    | 0.3286732    | 0.8992248    | 0.7466076    | not scorable | not scorable |
| #### Bn-scaff_17592_1-p78154 C-genome specific (napus-oleracea) | 0.9425837    | 0.3989613    | 0.8682171    | 0.6849005    | not scorable | not scorable |
| #### Bn-scaff_17592_1-p78307 C-genome specific (napus-oleracea) | 0.7727273    | 0.6149043    | 0.9069768    | 0.6949425    | not scorable | not scorable |
| #### Bn-scaff_17592_1-p78331 C-genome specific (oleracea only)  | not scorable | not scorable | 0.9069768    | 0.7814212    | not scorable | not scorable |
| #### Bn-scaff_17592_1-p78363 C-genome specific (oleracea only)  | not scorable | not scorable | 0.9069768    | 0.8355051    | not scorable | not scorable |
| #### Bn-scaff_17592_1-p78377 C-genome specific (napus-oleracea) | 0.7727273    | 0.850124     | 0.8992248    | 0.761494     | not scorable | not scorable |
| #### Bn-scaff_17592_1-p78660 C-genome specific (napus-oleracea) | 0.7679426    | 0.8409083    | 0.8914729    | 0.7822746    | not scorable | not scorable |
| #### Bn-scaff_17592_1-p78683 C-genome specific (napus-oleracea) | 0.9856459    | 0.8110384    | 1            | 0.7560639    | not scorable | not scorable |
| #### Bn-scaff_17592_1-p79180 C-genome specific (napus-oleracea) | 0.9808612    | 0.7734897    | 1            | 0.7799988    | not scorable | not scorable |
| #### Bn-scaff_17592_1-p79326 genome unspecific (all in)         | 0.9928229    | 0.2816168    | 1            | 0.7713333    | 1            | 0.8844768    |
| #### Bn-scaff_17592_1-p79476 C-genome specific (napus-oleracea) | 0.9736842    | 0.8229095    | 0.9844961    | 0.7512715    | not scorable | not scorable |
| #### Bn-scaff_17592_1-p79480 C-genome specific (napus-oleracea) | 0.9784689    | 0.7649958    | 0.9922481    | 0.8432495    | not scorable | not scorable |
| #### Bn-scaff_17592_1-p79517 C-genome specific (napus-oleracea) | 0.9593301    | 0.7733217    | 0.9922481    | 0.8390914    | not scorable | not scorable |
| #### Bn-scaff_17592_1-p79549 C-genome specific (napus-oleracea) | 0.9808612    | 0.8521827    | 0.9922481    | 0.8311011    | not scorable | not scorable |
| #### Bn-scaff_17592_1-p79558 C-genome specific (napus-oleracea) | 0.9712918    | 0.8014604    | 0.9922481    | 0.823853     | not scorable | not scorable |
| #### Bn-scaff_17592_1-p79579 C-genome specific (napus-oleracea) | 0.9784689    | 0.869059     | 0.9922481    | 0.7961335    | not scorable | not scorable |
| #### Bn-scaff_17592_1-p79588 C-genome specific (napus-oleracea) | 0.9760765    | 0.7891294    | 0.9069768    | 0.8105352    | not scorable | not scorable |

|                                                                 |              |              |           |           |              |              |
|-----------------------------------------------------------------|--------------|--------------|-----------|-----------|--------------|--------------|
| #### Bn-scaff_17592_1-p79629 C-genome specific (napus-oleracea) | 0.9593301    | 0.8140294    | 0.8604651 | 0.8358518 | not scorable | not scorable |
| #### Bn-scaff_17592_1-p79688 C-genome specific (oleracea only)  | not scorable | not scorable | 0.7751938 | 0.8004208 | not scorable | not scorable |
| #### Bn-scaff_17592_1-p79879 C-genome specific (napus-oleracea) | 0.9880383    | 0.792271     | 1         | 0.6900605 | not scorable | not scorable |
| #### Bn-scaff_17592_1-p79906 C-genome specific (napus-oleracea) | 0.9856459    | 0.7876436    | 0.9922481 | 0.6400425 | not scorable | not scorable |
| #### Bn-scaff_17592_1-p85789 C-genome specific (napus-oleracea) | 0.9928229    | 0.8030101    | 1         | 0.7317814 | not scorable | not scorable |
| #### Bn-scaff_17592_1-p86974 C-genome specific (napus-oleracea) | 0.9928229    | 0.6948282    | 0.9844961 | 0.6800895 | not scorable | not scorable |
| #### Bn-scaff_17592_1-p88261 C-genome specific (napus-oleracea) | 0.9904306    | 0.7788088    | 0.9922481 | 0.8401048 | not scorable | not scorable |
| #### Bn-scaff_17592_1-p88812 C-genome specific (napus-oleracea) | 0.9904306    | 0.7940161    | 0.9844961 | 0.744151  | not scorable | not scorable |
| #### Bn-scaff_17623_1-p10066 C-genome specific (napus-oleracea) | 0.9928229    | 0.739255     | 1         | 0.7557402 | not scorable | not scorable |
| #### Bn-scaff_17623_1-p10131 C-genome specific (napus-oleracea) | 0.7464115    | 0.8220332    | 0.7906977 | 0.8853549 | not scorable | not scorable |
| #### Bn-scaff_17623_1-p10132 genome unspecific (all in)         | 0.9904306    | 0.4987683    | 1         | 0.6553391 | 0.9834711    | 0.8379005    |
| #### Bn-scaff_17623_1-p11933 C-genome specific (napus-oleracea) | 0.9736842    | 0.7509519    | 1         | 0.697182  | not scorable | not scorable |
| #### Bn-scaff_17623_1-p12068 genome unspecific (all in)         | 0.9449761    | 0.3135349    | 1         | 0.8948976 | 0.9421487    | 0.4559575    |
| #### Bn-scaff_17623_1-p12074 genome unspecific (all in)         | 0.9641148    | 0.283262     | 1         | 0.6650112 | 1            | 0.792694     |
| #### Bn-scaff_17623_1-p14172 C-genome specific (napus-oleracea) | 0.9641148    | 0.7607772    | 0.9922481 | 0.8031629 | not scorable | not scorable |
| #### Bn-scaff_17623_1-p16527 C-genome specific (napus-oleracea) | 0.9832536    | 0.7049858    | 0.9844961 | 0.7696137 | not scorable | not scorable |
| #### Bn-scaff_17623_1-p17264 C-genome specific (napus-oleracea) | 0.9832536    | 0.7824951    | 1         | 0.7243138 | not scorable | not scorable |
| #### Bn-scaff_17623_1-p17722 genome unspecific (all in)         | 1            | 0.6045818    | 1         | 0.6033282 | 1            | 0.7591656    |
| #### Bn-scaff_17623_1-p19797 C-genome specific (napus-oleracea) | 0.9808612    | 0.7753859    | 1         | 0.6919273 | not scorable | not scorable |
| #### Bn-scaff_17623_1-p19812 C-genome specific (napus-oleracea) | 0.9760765    | 0.7515445    | 1         | 0.8482559 | not scorable | not scorable |
| #### Bn-scaff_17623_1-p20009 C-genome specific (napus-oleracea) | 0.9569378    | 0.7212727    | 1         | 0.796255  | not scorable | not scorable |
| #### Bn-scaff_17623_1-p21375 C-genome specific (napus-oleracea) | 0.9712918    | 0.7405292    | 1         | 0.8569662 | not scorable | not scorable |
| #### Bn-scaff_17623_1-p21424 C-genome specific (napus-oleracea) | 0.9784689    | 0.7325844    | 1         | 0.7631521 | not scorable | not scorable |
| #### Bn-scaff_17623_1-p21449 C-genome specific (napus-oleracea) | 0.9688995    | 0.7436513    | 1         | 0.7771861 | not scorable | not scorable |
| #### Bn-scaff_17623_1-p21701 C-genome specific (napus-oleracea) | 0.9712918    | 0.7802184    | 0.9922481 | 0.7378733 | not scorable | not scorable |
| #### Bn-scaff_17623_1-p22770 C-genome specific (napus-oleracea) | 0.9808612    | 0.7093744    | 0.9922481 | 0.7342428 | not scorable | not scorable |
| #### Bn-scaff_17623_1-p23425 C-genome specific (napus-oleracea) | 0.9760765    | 0.666222     | 1         | 0.645568  | not scorable | not scorable |
| #### Bn-scaff_17623_1-p24010 C-genome specific (napus-oleracea) | 0.9712918    | 0.7813346    | 0.9767442 | 0.8234682 | not scorable | not scorable |
| #### Bn-scaff_17623_1-p24318 C-genome specific (napus-oleracea) | 0.9832536    | 0.7893643    | 1         | 0.8140981 | not scorable | not scorable |
| #### Bn-scaff_17623_1-p24910 C-genome specific (napus-oleracea) | 0.9760765    | 0.7776257    | 1         | 0.8393649 | not scorable | not scorable |
| #### Bn-scaff_17623_1-p24927 C-genome specific (napus-oleracea) | 0.9736842    | 0.7668974    | 1         | 0.6410145 | not scorable | not scorable |
| #### Bn-scaff_17623_1-p25245 C-genome specific (napus-oleracea) | 0.9880383    | 0.7024059    | 0.9922481 | 0.7716305 | not scorable | not scorable |
| #### Bn-scaff_17623_1-p25411 C-genome specific (napus-oleracea) | 0.9808612    | 0.6845133    | 1         | 0.6308534 | not scorable | not scorable |



|                                                                 |              |              |              |              |              |              |
|-----------------------------------------------------------------|--------------|--------------|--------------|--------------|--------------|--------------|
| #### Bn-scaff_17623_1-p25462 C-genome specific (napus-oleracea) | 0.9808612    | 0.715728     | 0.9767442    | 0.7635936    | not scorable | not scorable |
| #### Bn-scaff_17623_1-p25469 C-genome specific (napus-oleracea) | 0.9808612    | 0.7972808    | 1            | 0.7189837    | not scorable | not scorable |
| #### Bn-scaff_17623_1-p25476 C-genome specific (napus-oleracea) | 0.9832536    | 0.6798792    | 0.9922481    | 0.6638261    | not scorable | not scorable |
| #### Bn-scaff_17623_1-p25507 all not scorable                   | not scorable | not scorable | not scorable | not scorable | not scorable | not scorable |
| #### Bn-scaff_17623_1-p25514 C-genome specific (napus-oleracea) | 0.9688995    | 0.6555569    | 0.9767442    | 0.6008137    | not scorable | not scorable |
| #### Bn-scaff_17623_1-p25538 all not scorable                   | not scorable | not scorable | not scorable | not scorable | not scorable | not scorable |
| #### Bn-scaff_17623_1-p25571 C-genome specific (napus-oleracea) | 0.9665072    | 0.7418767    | 0.9844961    | 0.7709963    | not scorable | not scorable |
| #### Bn-scaff_17623_1-p25659 C-genome specific (napus-oleracea) | 0.9808612    | 0.6365722    | 0.9457364    | 0.6918573    | not scorable | not scorable |
| #### Bn-scaff_17623_1-p25699 C-genome specific (napus-oleracea) | 0.9832536    | 0.7593327    | 0.9922481    | 0.7580018    | not scorable | not scorable |
| #### Bn-scaff_17623_1-p32036 genome unspecific (all in)         | 0.9808612    | 0.4289471    | 0.9534883    | 0.9125698    | 1            | 0.9377264    |
| #### Bn-scaff_17623_1-p46473 genome unspecific (oleracea-rapa)  | not scorable | not scorable | 1            | 0.77314      | 1            | 0.8535824    |
| #### Bn-scaff_17623_1-p47244 genome unspecific (all in)         | 0.9736842    | 0.6010506    | 0.7131783    | 0.9175813    | 0.9669421    | 0.788736     |
| #### Bn-scaff_17623_1-p54665 C-genome specific (napus-oleracea) | 0.9808612    | 0.7517628    | 0.8449612    | 0.7610793    | not scorable | not scorable |
| #### Bn-scaff_17623_1-p56987 C-genome specific (oleracea only)  | not scorable | not scorable | 0.6976744    | 0.76104      | not scorable | not scorable |
| #### Bn-scaff_17623_1-p59906 C-genome specific (napus-oleracea) | 0.9904306    | 0.7982777    | 0.8837209    | 0.7374157    | not scorable | not scorable |
| #### Bn-scaff_17623_1-p64823 A-genome specific (napus-rapa)     | 0.9521531    | 0.5645089    | not scorable | not scorable | 1            | 0.5970284    |
| #### Bn-scaff_17623_1-p65723 C-genome specific (napus-oleracea) | 0.9641148    | 0.586046     | 0.9534883    | 0.7510444    | not scorable | not scorable |
| #### Bn-scaff_17623_1-p66247 C-genome specific (napus-oleracea) | 0.9832536    | 0.8155652    | 0.9844961    | 0.7872742    | not scorable | not scorable |
| #### Bn-scaff_17623_1-p66267 C-genome specific (napus-oleracea) | 0.9784689    | 0.7580442    | 0.9844961    | 0.7187847    | not scorable | not scorable |
| #### Bn-scaff_17623_1-p66360 C-genome specific (napus-oleracea) | 0.9593301    | 0.6553284    | 0.9689922    | 0.6007717    | not scorable | not scorable |
| #### Bn-scaff_17623_1-p66377 C-genome specific (napus-oleracea) | 0.9688995    | 0.6266003    | 0.9767442    | 0.5843576    | not scorable | not scorable |
| #### Bn-scaff_17623_1-p66383 C-genome specific (napus-oleracea) | 0.9880383    | 0.7738006    | 0.9844961    | 0.7636791    | not scorable | not scorable |
| #### Bn-scaff_17623_1-p66432 C-genome specific (napus-oleracea) | 0.9808612    | 0.7988253    | 0.9844961    | 0.7829278    | not scorable | not scorable |
| #### Bn-scaff_17623_1-p66439 C-genome specific (napus-oleracea) | 0.9808612    | 0.6901393    | 0.9767442    | 0.7094578    | not scorable | not scorable |
| #### Bn-scaff_17623_1-p66657 C-genome specific (napus-oleracea) | 0.9641148    | 0.6985424    | 0.9689922    | 0.6594964    | not scorable | not scorable |
| #### Bn-scaff_17623_1-p66704 C-genome specific (napus-oleracea) | 0.9736842    | 0.7410511    | 0.9767442    | 0.7041024    | not scorable | not scorable |
| #### Bn-scaff_17623_1-p68836 C-genome specific (napus-oleracea) | 0.9880383    | 0.787518     | 1            | 0.8843592    | not scorable | not scorable |
| #### Bn-scaff_17623_1-p69648 C-genome specific (napus-oleracea) | 0.9880383    | 0.8392055    | 1            | 0.8141432    | not scorable | not scorable |
| #### Bn-scaff_17623_1-p69712 C-genome specific (napus-oleracea) | 0.9904306    | 0.7042041    | 1            | 0.8207097    | not scorable | not scorable |
| #### Bn-scaff_17623_1-p69724 C-genome specific (napus-oleracea) | 0.9880383    | 0.7430947    | 1            | 0.756127     | not scorable | not scorable |
| #### Bn-scaff_17623_1-p70150 C-genome specific (napus-oleracea) | 0.9832536    | 0.8605984    | 1            | 0.9175698    | not scorable | not scorable |
| #### Bn-scaff_17623_1-p70167 C-genome specific (napus-oleracea) | 0.9832536    | 0.8675101    | 0.9922481    | 0.8306249    | not scorable | not scorable |
| #### Bn-scaff_17623_1-p70610 C-genome specific (napus-oleracea) | 0.9928229    | 0.8708078    | 0.9844961    | 0.6924227    | not scorable | not scorable |

|                                                                 |              |              |              |              |              |              |
|-----------------------------------------------------------------|--------------|--------------|--------------|--------------|--------------|--------------|
| #### Bn-scaff_17623_1-p71045 C-genome specific (napus-oleracea) | 0.9760765    | 0.7970117    | 0.9844961    | 0.6658505    | not scorable | not scorable |
| #### Bn-scaff_17623_1-p71246 C-genome specific (napus-oleracea) | 0.9784689    | 0.6998478    | 1            | 0.6758826    | not scorable | not scorable |
| #### Bn-scaff_17623_1-p71432 C-genome specific (napus-oleracea) | 0.9832536    | 0.8032445    | 1            | 0.7094837    | not scorable | not scorable |
| #### Bn-scaff_17623_1-p71591 C-genome specific (napus-oleracea) | 0.9928229    | 0.724425     | 0.9612403    | 0.6378621    | not scorable | not scorable |
| #### Bn-scaff_17623_1-p73661 C-genome specific (napus-oleracea) | 0.9712918    | 0.5989668    | 1            | 0.5636892    | not scorable | not scorable |
| #### Bn-scaff_17623_1-p73886 C-genome specific (napus-oleracea) | 0.9904306    | 0.8294233    | 0.9922481    | 0.6287622    | not scorable | not scorable |
| #### Bn-scaff_17623_1-p79775 C-genome specific (napus-oleracea) | 0.9736842    | 0.5668746    | 0.9689922    | 0.8400837    | not scorable | not scorable |
| #### Bn-scaff_17623_1-p81620 C-genome specific (napus-oleracea) | 0.9808612    | 0.2084936    | 1            | 0.693224     | not scorable | not scorable |
| #### Bn-scaff_17623_1-p83761 C-genome specific (napus-oleracea) | 0.9880383    | 0.8273389    | 0.9922481    | 0.8322391    | not scorable | not scorable |
| #### Bn-scaff_17623_1-p89439 C-genome specific (napus-oleracea) | 0.9808612    | 0.8970493    | 0.7364341    | 0.7928945    | not scorable | not scorable |
| #### Bn-scaff_17623_1-p89593 C-genome specific (napus-oleracea) | 0.9736842    | 0.8240823    | 0.7286822    | 0.7132768    | not scorable | not scorable |
| #### Bn-scaff_17623_1-p92767 A-genome specific (napus-rapa)     | 0.9593301    | 0.1916905    | not scorable | not scorable | 1            | 0.9000227    |
| #### Bn-scaff_17623_1-p92783 A-genome specific (napus-rapa)     | 0.930622     | 0.3520192    | not scorable | not scorable | 1            | 0.7980386    |
| #### Bn-scaff_17623_1-p95600 genome unspecific (all in)         | 0.9928229    | 0.6610653    | 1            | 0.4752632    | 0.9834711    | 0.6684827    |
| #### Bn-scaff_17623_1-p96680 C-genome specific (napus-oleracea) | 0.9880383    | 0.797061     | 0.9844961    | 0.7020041    | not scorable | not scorable |
| #### Bn-scaff_17623_1-p96687 C-genome specific (napus-oleracea) | 0.9856459    | 0.7123575    | 0.9922481    | 0.7577605    | not scorable | not scorable |
| #### Bn-scaff_17623_1-p99030 C-genome specific (napus-oleracea) | 0.9880383    | 0.380055     | 0.9612403    | 0.7826416    | not scorable | not scorable |
| #### Bn-scaff_17623_1-p99062 A-genome specific (rapa only)      | not scorable | not scorable | not scorable | not scorable | 0.9256198    | 0.7739942    |
| #### Bn-scaff_17636_1-p3673 C-genome specific (napus-oleracea)  | 0.9401914    | 0.5561611    | 0.9922481    | 0.5278929    | not scorable | not scorable |
| #### Bn-scaff_17637_1-p10744 C-genome specific (napus-oleracea) | 0.9617225    | 0.7752461    | 0.4651163    | 0.8269862    | not scorable | not scorable |
| #### Bn-scaff_17637_1-p11230 C-genome specific (napus-oleracea) | 0.8110048    | 0.7772273    | 0.1860465    | 0.8241546    | not scorable | not scorable |
| #### Bn-scaff_17637_1-p11479 C-genome specific (oleracea only)  | not scorable | not scorable | 0.9844961    | 0.6351842    | not scorable | not scorable |
| #### Bn-scaff_17637_1-p12671 C-genome specific (napus-oleracea) | 0.9904306    | 0.7535537    | 1            | 0.666571     | not scorable | not scorable |
| #### Bn-scaff_17637_1-p12751 C-genome specific (napus-oleracea) | 0.9641148    | 0.8063196    | 0.4651163    | 0.7462457    | not scorable | not scorable |
| #### Bn-scaff_17637_1-p14091 genome unspecific (all in)         | 0.9904306    | 0.4512995    | 0.9767442    | 0.5535301    | 1            | 0.8529496    |
| #### Bn-scaff_17637_1-p14145 C-genome specific (napus-oleracea) | 0.9760765    | 0.8086273    | 0.9922481    | 0.772724     | not scorable | not scorable |
| #### Bn-scaff_17637_1-p14165 napus specific                     | 0.9665072    | 0.7113906    | not scorable | not scorable | not scorable | not scorable |
| #### Bn-scaff_17637_1-p14460 C-genome specific (napus-oleracea) | 0.9569378    | 0.8115466    | 1            | 0.5568853    | not scorable | not scorable |
| #### Bn-scaff_17637_1-p16137 C-genome specific (napus-oleracea) | 0.9712918    | 0.6859579    | 0.9922481    | 0.6427803    | not scorable | not scorable |
| #### Bn-scaff_17637_1-p17003 genome unspecific (all in)         | 0.9856459    | 0.3010699    | 0.9612403    | 0.4423583    | 1            | 0.8551629    |
| #### Bn-scaff_17637_1-p17775 C-genome specific (napus-oleracea) | 0.9904306    | 0.8221246    | 0.9922481    | 0.7884546    | not scorable | not scorable |
| #### Bn-scaff_17637_1-p17851 C-genome specific (napus-oleracea) | 0.9784689    | 0.6263191    | 1            | 0.6132361    | not scorable | not scorable |
| #### Bn-scaff_17637_1-p18217 C-genome specific (napus-oleracea) | 0.9784689    | 0.7919555    | 1            | 0.6869938    | not scorable | not scorable |

|                                                                 |              |              |              |              |              |              |
|-----------------------------------------------------------------|--------------|--------------|--------------|--------------|--------------|--------------|
| #### Bn-scaff_17637_1-p18236 genome unspecific (oleracea-rapa)  | not scorable | not scorable | 0.9922481    | 0.2688823    | 1            | 0.9145945    |
| #### Bn-scaff_17637_1-p18765 C-genome specific (napus-oleracea) | 1            | 0.8343507    | 1            | 0.8652952    | not scorable | not scorable |
| #### Bn-scaff_17637_1-p18777 C-genome specific (napus-oleracea) | 0.9760765    | 0.8031142    | 0.5581396    | 0.8034475    | not scorable | not scorable |
| #### Bn-scaff_17637_1-p18815 C-genome specific (napus-oleracea) | 0.9928229    | 0.7959693    | 1            | 0.7907942    | not scorable | not scorable |
| #### Bn-scaff_17637_1-p18877 C-genome specific (napus-oleracea) | 0.9880383    | 0.7943801    | 1            | 0.7711571    | not scorable | not scorable |
| #### Bn-scaff_17637_1-p20443 A-genome specific (rapa only)      | not scorable | not scorable | not scorable | not scorable | 0.9917355    | 0.755564     |
| #### Bn-scaff_17637_1-p20600 A-genome specific (napus-rapa)     | 0.9880383    | 0.2088226    | not scorable | not scorable | 0.9917355    | 0.7494321    |
| #### Bn-scaff_17637_1-p21947 A-genome specific (napus-rapa)     | 1            | 0.6140003    | not scorable | not scorable | 1            | 0.5390943    |
| #### Bn-scaff_17637_1-p22884 C-genome specific (napus-oleracea) | 0.9736842    | 0.8152645    | 0.9922481    | 0.8660495    | not scorable | not scorable |
| #### Bn-scaff_17637_1-p23061 C-genome specific (napus-oleracea) | 0.9856459    | 0.6552619    | 1            | 0.6416169    | not scorable | not scorable |
| #### Bn-scaff_17637_1-p23636 C-genome specific (napus-oleracea) | 0.9808612    | 0.6898537    | 0.9922481    | 0.7529227    | not scorable | not scorable |
| #### Bn-scaff_17637_1-p23647 C-genome specific (napus-oleracea) | 0.9928229    | 0.729284     | 0.9612403    | 0.7123927    | not scorable | not scorable |
| #### Bn-scaff_17637_1-p34079 C-genome specific (napus-oleracea) | 0.9904306    | 0.7886084    | 1            | 0.6997308    | not scorable | not scorable |
| #### Bn-scaff_17637_1-p4231 genome unspecific (all in)          | 1            | 0.5073043    | 1            | 0.7770717    | 1            | 0.4797348    |
| #### Bn-scaff_17637_1-p68165 C-genome specific (napus-oleracea) | 0.9521531    | 0.67355      | 0.4806201    | 0.6122758    | not scorable | not scorable |
| #### Bn-scaff_17637_1-p80370 C-genome specific (napus-oleracea) | 0.9665072    | 0.790612     | 0.8372093    | 0.7670307    | not scorable | not scorable |
| #### Bn-scaff_17637_1-p84569 C-genome specific (napus-oleracea) | 0.9904306    | 0.7934076    | 0.9922481    | 0.7689899    | not scorable | not scorable |
| #### Bn-scaff_17637_1-p84671 C-genome specific (napus-oleracea) | 0.9712918    | 0.7378438    | 0.4806201    | 0.7894358    | not scorable | not scorable |
| #### Bn-scaff_17637_1-p88876 genome unspecific (all in)         | 1            | 0.4480736    | 1            | 0.5195962    | 1            | 0.6493671    |
| #### Bn-scaff_17645_1-p317 genome unspecific (all in)           | 1            | 0.4357498    | 1            | 0.3957796    | 1            | 0.713516     |
| #### Bn-scaff_17647_1-p6629 C-genome specific (napus-oleracea)  | 0.9880383    | 0.7209214    | 0.9922481    | 0.6819157    | not scorable | not scorable |
| #### Bn-scaff_17658_1-p13669 C-genome specific (napus-oleracea) | 0.9904306    | 0.7891853    | 0.9689922    | 0.7311476    | not scorable | not scorable |
| #### Bn-scaff_17658_1-p25183 genome unspecific (all in)         | 1            | 0.3448898    | 1            | 0.8710205    | 0.9917355    | 0.8053012    |
| #### Bn-scaff_17658_1-p25628 genome unspecific (all in)         | 0.9880383    | 0.3481878    | 0.9844961    | 0.7631778    | 1            | 0.761795     |
| #### Bn-scaff_17658_1-p25655 genome unspecific (all in)         | 1            | 0.521916     | 1            | 0.3303766    | 1            | 0.6440336    |
| #### Bn-scaff_17658_1-p32459 C-genome specific (napus-oleracea) | 0.9832536    | 0.7564855    | 0.9844961    | 0.8349624    | not scorable | not scorable |
| #### Bn-scaff_17658_1-p32639 C-genome specific (napus-oleracea) | 0.9784689    | 0.6864616    | 0.9147287    | 0.761168     | not scorable | not scorable |
| #### Bn-scaff_17658_1-p32982 C-genome specific (napus-oleracea) | 0.9880383    | 0.7662096    | 1            | 0.7860672    | not scorable | not scorable |
| #### Bn-scaff_17658_1-p33033 C-genome specific (napus-oleracea) | 0.9832536    | 0.7197486    | 1            | 0.6293355    | not scorable | not scorable |
| #### Bn-scaff_17658_1-p33239 C-genome specific (napus-oleracea) | 0.9952153    | 0.7169778    | 1            | 0.701267     | not scorable | not scorable |
| #### Bn-scaff_17658_1-p33407 C-genome specific (napus-oleracea) | 0.9784689    | 0.7630935    | 0.9302326    | 0.7543289    | not scorable | not scorable |
| #### Bn-scaff_17658_1-p33559 C-genome specific (napus-oleracea) | 0.9736842    | 0.7981407    | 1            | 0.7896172    | not scorable | not scorable |
| #### Bn-scaff_17658_1-p34463 C-genome specific (napus-oleracea) | 0.9736842    | 0.789399     | 0.9922481    | 0.7816112    | not scorable | not scorable |

|                                                                 |              |              |           |           |              |              |
|-----------------------------------------------------------------|--------------|--------------|-----------|-----------|--------------|--------------|
| #### Bn-scaff_17668_1-p3205 genome unspecific (all in)          | 0.9760765    | 0.3087214    | 0.9844961 | 0.6138335 | 1            | 0.7157332    |
| #### Bn-scaff_17668_1-p419 C-genome specific (napus-oleracea)   | 0.8516746    | 0.7911166    | 0.8837209 | 0.7099808 | not scorable | not scorable |
| #### Bn-scaff_17668_1-p705 C-genome specific (napus-oleracea)   | 0.7559808    | 0.752953     | 0.8682171 | 0.7643318 | not scorable | not scorable |
| #### Bn-scaff_17683_1-p16440 genome unspecific (all in)         | 0.9712918    | 0.3741507    | 1         | 0.3115097 | 1            | 0.7921463    |
| #### Bn-scaff_17683_1-p28023 genome unspecific (all in)         | 0.9832536    | 0.3021585    | 1         | 0.8207097 | 1            | 0.6739166    |
| #### Bn-scaff_17683_1-p28029 genome unspecific (all in)         | 0.9712918    | 0.5042198    | 1         | 0.8580856 | 1            | 0.7392647    |
| #### Bn-scaff_17683_1-p28646 genome unspecific (oleracea-rapa)  | not scorable | not scorable | 0.9922481 | 0.5290953 | 1            | 0.6320699    |
| #### Bn-scaff_17683_1-p28746 genome unspecific (all in)         | 0.930622     | 0.3615248    | 1         | 0.7082759 | 1            | 0.8545453    |
| #### Bn-scaff_17683_1-p31133 genome unspecific (oleracea-rapa)  | not scorable | not scorable | 1         | 0.9169175 | 0.9917355    | 0.6993921    |
| #### Bn-scaff_17683_1-p31303 genome unspecific (all in)         | 0.9186603    | 0.907354     | 1         | 0.7768692 | 1            | 0.8353565    |
| #### Bn-scaff_17683_1-p31382 C-genome specific (napus-oleracea) | 1            | 0.823379     | 1         | 0.8207097 | not scorable | not scorable |
| #### Bn-scaff_17685_1-p11437 C-genome specific (oleracea only)  | not scorable | not scorable | 0.9689922 | 0.536439  | not scorable | not scorable |
| #### Bn-scaff_17685_1-p11814 C-genome specific (napus-oleracea) | 0.9186603    | 0.2718053    | 1         | 0.2394247 | not scorable | not scorable |
| #### Bn-scaff_17685_1-p15832 C-genome specific (napus-oleracea) | 0.9736842    | 0.6812137    | 1         | 0.7646528 | not scorable | not scorable |
| #### Bn-scaff_17685_1-p15887 C-genome specific (napus-oleracea) | 0.9784689    | 0.694454     | 1         | 0.6544734 | not scorable | not scorable |
| #### Bn-scaff_17685_1-p15908 C-genome specific (napus-oleracea) | 0.9784689    | 0.7073017    | 0.9922481 | 0.7520435 | not scorable | not scorable |
| #### Bn-scaff_17685_1-p15918 C-genome specific (napus-oleracea) | 0.9784689    | 0.7594367    | 1         | 0.8165039 | not scorable | not scorable |
| #### Bn-scaff_17685_1-p16397 C-genome specific (napus-oleracea) | 0.9808612    | 0.7509255    | 1         | 0.7228109 | not scorable | not scorable |
| #### Bn-scaff_17685_1-p16555 C-genome specific (napus-oleracea) | 0.9808612    | 0.6975864    | 0.9922481 | 0.6846259 | not scorable | not scorable |
| #### Bn-scaff_17685_1-p17182 C-genome specific (napus-oleracea) | 0.9832536    | 0.7169039    | 1         | 0.8402185 | not scorable | not scorable |
| #### Bn-scaff_17685_1-p17515 C-genome specific (napus-oleracea) | 0.9832536    | 0.7896828    | 0.9922481 | 0.7055298 | not scorable | not scorable |
| #### Bn-scaff_17685_1-p17653 C-genome specific (napus-oleracea) | 0.9832536    | 0.7628102    | 1         | 0.7101774 | not scorable | not scorable |
| #### Bn-scaff_17685_1-p17671 C-genome specific (napus-oleracea) | 0.9856459    | 0.7962762    | 1         | 0.7857135 | not scorable | not scorable |
| #### Bn-scaff_17685_1-p17685 C-genome specific (napus-oleracea) | 0.9904306    | 0.738608     | 0.9922481 | 0.6978582 | not scorable | not scorable |
| #### Bn-scaff_17685_1-p1877 C-genome specific (napus-oleracea)  | 0.9808612    | 0.8077062    | 1         | 0.8884936 | not scorable | not scorable |
| #### Bn-scaff_17685_1-p22511 C-genome specific (napus-oleracea) | 0.9856459    | 0.6761311    | 0.9844961 | 0.6939557 | not scorable | not scorable |
| #### Bn-scaff_17685_1-p22971 C-genome specific (napus-oleracea) | 0.2727273    | 0.7657777    | 0.744186  | 0.7751687 | not scorable | not scorable |
| #### Bn-scaff_17685_1-p24182 C-genome specific (napus-oleracea) | 0.9880383    | 0.790922     | 1         | 0.8223445 | not scorable | not scorable |
| #### Bn-scaff_17685_1-p24472 C-genome specific (oleracea only)  | not scorable | not scorable | 0.7131783 | 0.8304299 | not scorable | not scorable |
| #### Bn-scaff_17685_1-p24678 C-genome specific (napus-oleracea) | 0.9880383    | 0.7049042    | 0.9922481 | 0.6863196 | not scorable | not scorable |
| #### Bn-scaff_17685_1-p25525 C-genome specific (napus-oleracea) | 0.9712918    | 0.7083859    | 0.9922481 | 0.6800501 | not scorable | not scorable |
| #### Bn-scaff_17685_1-p3241 C-genome specific (napus-oleracea)  | 0.9808612    | 0.7758898    | 1         | 0.6660259 | not scorable | not scorable |
| #### Bn-scaff_17685_1-p3496 C-genome specific (napus-oleracea)  | 0.9736842    | 0.6263152    | 0.9922481 | 0.734406  | not scorable | not scorable |

|                                                                 |              |              |              |              |              |              |
|-----------------------------------------------------------------|--------------|--------------|--------------|--------------|--------------|--------------|
| #### Bn-scaff_17685_1-p3831 C-genome specific (napus-oleracea)  | 0.9784689    | 0.7652493    | 1            | 0.8018398    | not scorable | not scorable |
| #### Bn-scaff_17685_1-p49982 C-genome specific (napus-oleracea) | 0.9808612    | 0.8079534    | 0.9922481    | 0.826096     | not scorable | not scorable |
| #### Bn-scaff_17685_1-p51535 C-genome specific (napus-oleracea) | 0.9880383    | 0.6011777    | 0.9922481    | 0.678717     | not scorable | not scorable |
| #### Bn-scaff_17685_1-p51562 C-genome specific (napus-oleracea) | 0.9856459    | 0.6339833    | 0.9844961    | 0.655784     | not scorable | not scorable |
| #### Bn-scaff_17685_1-p57079 C-genome specific (napus-oleracea) | 0.9880383    | 0.7909244    | 1            | 0.8382262    | not scorable | not scorable |
| #### Bn-scaff_17685_1-p57763 C-genome specific (napus-oleracea) | 0.9736842    | 0.7960568    | 1            | 0.9023381    | not scorable | not scorable |
| #### Bn-scaff_17685_1-p57887 C-genome specific (napus-oleracea) | 0.9832536    | 0.730862     | 1            | 0.6547782    | not scorable | not scorable |
| #### Bn-scaff_17685_1-p61198 C-genome specific (napus-oleracea) | 0.9856459    | 0.7610479    | 1            | 0.8332821    | not scorable | not scorable |
| #### Bn-scaff_17686_1-p10509 C-genome specific (napus-oleracea) | 0.9952153    | 0.6190601    | 0.6976744    | 0.7758792    | not scorable | not scorable |
| #### Bn-scaff_17686_1-p11252 C-genome specific (napus-oleracea) | 0.9952153    | 0.6092339    | 0.6511628    | 0.7015526    | not scorable | not scorable |
| #### Bn-scaff_17686_1-p23755 C-genome specific (oleracea only)  | not scorable | not scorable | 1            | 0.7261563    | not scorable | not scorable |
| #### Bn-scaff_17708_1-p10391 genome unspecific (all in)         | 1            | 0.8603255    | 1            | 0.8011231    | 1            | 0.8682774    |
| #### Bn-scaff_17708_1-p10395 genome unspecific (all in)         | 1            | 0.5959508    | 1            | 0.5383334    | 0.9917355    | 0.5791867    |
| #### Bn-scaff_17708_1-p14790 C-genome specific (napus-oleracea) | 1            | 0.7719246    | 1            | 0.7497028    | not scorable | not scorable |
| #### Bn-scaff_17708_1-p14926 C-genome specific (napus-oleracea) | 1            | 0.7955341    | 1            | 0.7617902    | not scorable | not scorable |
| #### Bn-scaff_17708_1-p15115 C-genome specific (napus-oleracea) | 1            | 0.7641982    | 1            | 0.7275404    | not scorable | not scorable |
| #### Bn-scaff_17708_1-p15759 C-genome specific (napus-oleracea) | 0.9904306    | 0.4069194    | 0.9069768    | 0.4288416    | not scorable | not scorable |
| #### Bn-scaff_17708_1-p15792 C-genome specific (napus-oleracea) | 1            | 0.4694569    | 1            | 0.5077023    | not scorable | not scorable |
| #### Bn-scaff_17708_1-p16968 genome unspecific (all in)         | 0.9784689    | 0.3991694    | 1            | 0.9293141    | 0.9752066    | 0.7245184    |
| #### Bn-scaff_17708_1-p18305 C-genome specific (napus-oleracea) | 1            | 0.9175813    | 1            | 0.9175813    | not scorable | not scorable |
| #### Bn-scaff_17708_1-p23816 genome unspecific (all in)         | 1            | 0.5445434    | 1            | 0.5576342    | 1            | 0.6716551    |
| #### Bn-scaff_17708_1-p24428 all not scorable                   | not scorable | not scorable | not scorable | not scorable | not scorable | not scorable |
| #### Bn-scaff_17708_1-p32570 genome unspecific (all in)         | 0.9904306    | 0.4571252    | 0.9147287    | 0.3970408    | 1            | 0.8282334    |
| #### Bn-scaff_17708_1-p32634 genome unspecific (all in)         | 0.9952153    | 0.622966     | 0.8372093    | 0.2615956    | 1            | 0.6287634    |
| #### Bn-scaff_17708_1-p32659 napus specific                     | 1            | 0.6161206    | not scorable | not scorable | not scorable | not scorable |
| #### Bn-scaff_17708_1-p61566 napus specific                     | 0.9784689    | 0.642697     | not scorable | not scorable | not scorable | not scorable |
| #### Bn-scaff_17708_1-p65021 genome unspecific (all in)         | 1            | 0.7744523    | 1            | 0.5613276    | 1            | 0.8642296    |
| #### Bn-scaff_17708_1-p74282 genome unspecific (all in)         | 1            | 0.8975709    | 0.9922481    | 0.8311427    | 0.9917355    | 0.9129395    |
| #### Bn-scaff_17708_1-p82135 genome unspecific (all in)         | 1            | 0.8169624    | 1            | 0.8650085    | 1            | 0.7296494    |
| #### Bn-scaff_17708_1-p82511 C-genome specific (napus-oleracea) | 1            | 0.7773736    | 1            | 0.7940202    | not scorable | not scorable |
| #### Bn-scaff_17708_1-p86240 C-genome specific (napus-oleracea) | 0.9832536    | 0.708764     | 0.9844961    | 0.9239118    | not scorable | not scorable |
| #### Bn-scaff_17712_1-p59419 C-genome specific (napus-oleracea) | 0.9186603    | 0.7736745    | 1            | 0.7816003    | not scorable | not scorable |
| #### Bn-scaff_17712_1-p78048 C-genome specific (napus-oleracea) | 0.9138756    | 0.7987851    | 1            | 0.7972798    | not scorable | not scorable |

|                                                                 |              |              |              |              |              |              |
|-----------------------------------------------------------------|--------------|--------------|--------------|--------------|--------------|--------------|
| #### Bn-scaff_17717_1-p32694 C-genome specific (napus-oleracea) | 1            | 0.7889612    | 1            | 0.7739488    | not scorable | not scorable |
| #### Bn-scaff_17721_1-p17546 C-genome specific (napus-oleracea) | 0.9784689    | 0.8026987    | 1            | 0.8329229    | not scorable | not scorable |
| #### Bn-scaff_17721_1-p17593 C-genome specific (napus-oleracea) | 0.9688995    | 0.6879769    | 0.2093023    | 0.7329232    | not scorable | not scorable |
| #### Bn-scaff_17721_1-p18800 C-genome specific (napus-oleracea) | 0.9688995    | 0.6108521    | 1            | 0.6121389    | not scorable | not scorable |
| #### Bn-scaff_17721_1-p18836 C-genome specific (napus-oleracea) | 0.9665072    | 0.7995563    | 1            | 0.7596713    | not scorable | not scorable |
| #### Bn-scaff_17721_1-p18983 C-genome specific (napus-oleracea) | 0.9617225    | 0.309426     | 0.9922481    | 0.8186453    | not scorable | not scorable |
| #### Bn-scaff_17721_1-p18993 C-genome specific (napus-oleracea) | 0.9736842    | 0.7633406    | 1            | 0.7183708    | not scorable | not scorable |
| #### Bn-scaff_17721_1-p19242 C-genome specific (napus-oleracea) | 0.9354067    | 0.7753931    | 0.9844961    | 0.619193     | not scorable | not scorable |
| #### Bn-scaff_17721_1-p19260 C-genome specific (napus-oleracea) | 0.9784689    | 0.6731002    | 1            | 0.7533373    | not scorable | not scorable |
| #### Bn-scaff_17721_1-p20281 C-genome specific (napus-oleracea) | 0.9928229    | 0.7658431    | 1            | 0.8286073    | not scorable | not scorable |
| #### Bn-scaff_17721_1-p20379 C-genome specific (napus-oleracea) | 0.9641148    | 0.6544634    | 0.9767442    | 0.5825612    | not scorable | not scorable |
| #### Bn-scaff_17721_1-p21203 C-genome specific (napus-oleracea) | 0.9641148    | 0.6636746    | 0.9922481    | 0.8391998    | not scorable | not scorable |
| #### Bn-scaff_17721_1-p22110 genome unspecific (all in)         | 0.9904306    | 0.3001862    | 1            | 0.9081452    | 0.9669421    | 0.7705043    |
| #### Bn-scaff_17721_1-p22154 genome unspecific (all in)         | 0.9521531    | 0.3932853    | 1            | 0.6318246    | 1            | 0.8249593    |
| #### Bn-scaff_17721_1-p23212 C-genome specific (napus-oleracea) | 0.9641148    | 0.6893759    | 0.2248062    | 0.651716     | not scorable | not scorable |
| #### Bn-scaff_17721_1-p23227 C-genome specific (napus-oleracea) | 0.9617225    | 0.7758846    | 0.2170543    | 0.7844962    | not scorable | not scorable |
| #### Bn-scaff_17721_1-p23466 C-genome specific (napus-oleracea) | 0.9641148    | 0.7692793    | 0.2170543    | 0.8124859    | not scorable | not scorable |
| #### Bn-scaff_17721_1-p25109 C-genome specific (napus-oleracea) | 0.9688995    | 0.7280985    | 1            | 0.794267     | not scorable | not scorable |
| #### Bn-scaff_17721_1-p26395 C-genome specific (napus-oleracea) | 0.9688995    | 0.6918497    | 0.7751938    | 0.7536918    | not scorable | not scorable |
| #### Bn-scaff_17721_1-p27143 C-genome specific (napus-oleracea) | 0.9617225    | 0.7663386    | 1            | 0.7791821    | not scorable | not scorable |
| #### Bn-scaff_17721_1-p27224 C-genome specific (napus-oleracea) | 0.9665072    | 0.7726899    | 1            | 0.7765012    | not scorable | not scorable |
| #### Bn-scaff_17721_1-p27376 C-genome specific (napus-oleracea) | 0.9808612    | 0.7903963    | 0.9457364    | 0.7577696    | not scorable | not scorable |
| #### Bn-scaff_17721_1-p29733 C-genome specific (napus-oleracea) | 0.923445     | 0.2241433    | 0.9844961    | 0.4896562    | not scorable | not scorable |
| #### Bn-scaff_17721_1-p29931 C-genome specific (oleracea only)  | not scorable | not scorable | 0.9302326    | 0.8204241    | not scorable | not scorable |
| #### Bn-scaff_17721_1-p30913 C-genome specific (napus-oleracea) | 0.9808612    | 0.7935444    | 0.9844961    | 0.718327     | not scorable | not scorable |
| #### Bn-scaff_17721_1-p33040 C-genome specific (napus-oleracea) | 0.9832536    | 0.7838422    | 1            | 0.7985043    | not scorable | not scorable |
| #### Bn-scaff_17721_1-p33048 C-genome specific (napus-oleracea) | 0.5574163    | 0.7159786    | 0.9457364    | 0.7033015    | not scorable | not scorable |
| #### Bn-scaff_17721_1-p33267 C-genome specific (napus-oleracea) | 0.9760765    | 0.7799975    | 1            | 0.8475225    | not scorable | not scorable |
| #### Bn-scaff_17721_1-p33314 all not scorable                   | not scorable | not scorable | not scorable | not scorable | not scorable | not scorable |
| #### Bn-scaff_17721_1-p33733 C-genome specific (napus-oleracea) | 0.9569378    | 0.7874464    | 0.9922481    | 0.7233396    | not scorable | not scorable |
| #### Bn-scaff_17721_1-p34755 C-genome specific (napus-oleracea) | 0.9808612    | 0.7490802    | 1            | 0.7712566    | not scorable | not scorable |
| #### Bn-scaff_17721_1-p35224 C-genome specific (napus-oleracea) | 0.9784689    | 0.8285605    | 1            | 0.8165222    | not scorable | not scorable |
| #### Bn-scaff_17721_1-p36960 C-genome specific (napus-oleracea) | 0.9904306    | 0.7680019    | 0.9922481    | 0.8270687    | not scorable | not scorable |

|                                                                |              |              |           |           |              |              |
|----------------------------------------------------------------|--------------|--------------|-----------|-----------|--------------|--------------|
| #### Bn-scaff_17721_1-p37271C-genome specific (napus-oleracea) | 0.9856459    | 0.7900103    | 0.9844961 | 0.7568351 | not scorable | not scorable |
| #### Bn-scaff_17721_1-p38122C-genome specific (napus-oleracea) | 0.9880383    | 0.7968209    | 0.9922481 | 0.8916573 | not scorable | not scorable |
| #### Bn-scaff_17721_1-p39186 genome unspecific (oleracea-rapa) | not scorable | not scorable | 0.9922481 | 0.8374273 | 1            | 0.7603327    |
| #### Bn-scaff_17721_1-p40446 genome unspecific (all in)        | 0.9593301    | 0.3178573    | 0.9922481 | 0.4996552 | 1            | 0.9023406    |
| #### Bn-scaff_17721_1-p42220C-genome specific (napus-oleracea) | 0.9712918    | 0.7778955    | 1         | 0.8829094 | not scorable | not scorable |
| #### Bn-scaff_17721_1-p45399 genome unspecific (all in)        | 0.9928229    | 0.5544226    | 1         | 0.7267293 | 1            | 0.883655     |
| #### Bn-scaff_17721_1-p49987C-genome specific (napus-oleracea) | 0.9832536    | 0.7574238    | 0.9844961 | 0.7424752 | not scorable | not scorable |
| #### Bn-scaff_17721_1-p50204C-genome specific (napus-oleracea) | 0.9880383    | 0.7580825    | 0.9922481 | 0.8351308 | not scorable | not scorable |
| #### Bn-scaff_17721_1-p50954C-genome specific (napus-oleracea) | 0.9760765    | 0.8130504    | 0.9922481 | 0.708618  | not scorable | not scorable |
| #### Bn-scaff_17721_1-p53180C-genome specific (napus-oleracea) | 0.9521531    | 0.6822557    | 0.7829458 | 0.8805629 | not scorable | not scorable |
| #### Bn-scaff_17721_1-p57451C-genome specific (napus-oleracea) | 0.9976076    | 0.5168989    | 0.9457364 | 0.3619901 | not scorable | not scorable |
| #### Bn-scaff_17721_1-p58139C-genome specific (napus-oleracea) | 0.9760765    | 0.6744144    | 0.9844961 | 0.573216  | not scorable | not scorable |
| #### Bn-scaff_17721_1-p60404C-genome specific (napus-oleracea) | 0.9641148    | 0.6723114    | 0.8139535 | 0.8073786 | not scorable | not scorable |
| #### Bn-scaff_17721_1-p62328C-genome specific (napus-oleracea) | 0.9784689    | 0.7511966    | 0.8837209 | 0.6921998 | not scorable | not scorable |
| #### Bn-scaff_17721_1-p62888C-genome specific (napus-oleracea) | 0.9688995    | 0.641961     | 0.7674419 | 0.668808  | not scorable | not scorable |
| #### Bn-scaff_17721_1-p63863C-genome specific (napus-oleracea) | 0.9712918    | 0.7639468    | 0.7674419 | 0.7225857 | not scorable | not scorable |
| #### Bn-scaff_17721_1-p64486C-genome specific (napus-oleracea) | 0.9688995    | 0.7504959    | 0.9922481 | 0.7479813 | not scorable | not scorable |
| #### Bn-scaff_17721_1-p64858 genome unspecific (all in)        | 0.9736842    | 0.4226427    | 1         | 0.9084461 | 0.9917355    | 0.8535453    |
| #### Bn-scaff_17721_1-p67562C-genome specific (napus-oleracea) | 0.9784689    | 0.7878655    | 1         | 0.7898555 | not scorable | not scorable |
| #### Bn-scaff_17721_1-p67608C-genome specific (napus-oleracea) | 0.9784689    | 0.7934228    | 0.9922481 | 0.7025077 | not scorable | not scorable |
| #### Bn-scaff_17721_1-p67638C-genome specific (napus-oleracea) | 0.9784689    | 0.7812827    | 0.9922481 | 0.7912464 | not scorable | not scorable |
| #### Bn-scaff_17721_1-p67732C-genome specific (napus-oleracea) | 0.9784689    | 0.7488938    | 1         | 0.7073712 | not scorable | not scorable |
| #### Bn-scaff_17721_1-p75876C-genome specific (napus-oleracea) | 0.9665072    | 0.6923039    | 0.9844961 | 0.7502843 | not scorable | not scorable |
| #### Bn-scaff_17721_1-p76781C-genome specific (napus-oleracea) | 0.9593301    | 0.7767372    | 0.9922481 | 0.8098239 | not scorable | not scorable |
| #### Bn-scaff_17721_1-p79241C-genome specific (napus-oleracea) | 0.9665072    | 0.5862949    | 0.9844961 | 0.5656651 | not scorable | not scorable |
| #### Bn-scaff_17721_1-p79361C-genome specific (napus-oleracea) | 0.4066986    | 0.8109312    | 0.7596899 | 0.8144853 | not scorable | not scorable |
| #### Bn-scaff_17721_1-p79403C-genome specific (napus-oleracea) | 0.9808612    | 0.8369817    | 1         | 0.7371971 | not scorable | not scorable |
| #### Bn-scaff_17721_1-p79427C-genome specific (napus-oleracea) | 0.9904306    | 0.7088834    | 0.9922481 | 0.7071024 | not scorable | not scorable |
| #### Bn-scaff_17721_1-p79544C-genome specific (napus-oleracea) | 0.9569378    | 0.7768307    | 0.9922481 | 0.8131424 | not scorable | not scorable |
| #### Bn-scaff_17721_1-p81188C-genome specific (napus-oleracea) | 0.9784689    | 0.6991131    | 1         | 0.5937027 | not scorable | not scorable |
| #### Bn-scaff_17721_1-p83192C-genome specific (napus-oleracea) | 0.9856459    | 0.7912507    | 1         | 0.7488824 | not scorable | not scorable |
| #### Bn-scaff_17721_1-p83200C-genome specific (napus-oleracea) | 0.9712918    | 0.8141175    | 1         | 0.8690522 | not scorable | not scorable |
| #### Bn-scaff_17721_1-p83420C-genome specific (napus-oleracea) | 0.8588517    | 0.7349845    | 1         | 0.8085616 | not scorable | not scorable |

|                                                                 |              |              |              |              |              |              |
|-----------------------------------------------------------------|--------------|--------------|--------------|--------------|--------------|--------------|
| #### Bn-scaff_17721_1-p84188 C-genome specific (napus-oleracea) | 0.9665072    | 0.8006566    | 1            | 0.7290065    | not scorable | not scorable |
| #### Bn-scaff_17721_1-p84925 C-genome specific (napus-oleracea) | 0.9856459    | 0.4523357    | 1            | 0.4161603    | not scorable | not scorable |
| #### Bn-scaff_17721_1-p88408 C-genome specific (napus-oleracea) | 0.9952153    | 0.306965     | 1            | 0.8652154    | not scorable | not scorable |
| #### Bn-scaff_17721_1-p90635 C-genome specific (napus-oleracea) | 0.9712918    | 0.6483144    | 1            | 0.3416135    | not scorable | not scorable |
| #### Bn-scaff_17721_1-p90977 C-genome specific (napus-oleracea) | 0.9641148    | 0.8135322    | 1            | 0.5165849    | not scorable | not scorable |
| #### Bn-scaff_17721_1-p90984 C-genome specific (napus-oleracea) | 0.9784689    | 0.7907655    | 1            | 0.7956669    | not scorable | not scorable |
| #### Bn-scaff_17721_1-p91394 C-genome specific (napus-oleracea) | 0.9712918    | 0.8134788    | 0.9922481    | 0.7278648    | not scorable | not scorable |
| #### Bn-scaff_17725_1-p10350 C-genome specific (napus-oleracea) | 0.9928229    | 0.7158232    | 0.9844961    | 0.6481208    | not scorable | not scorable |
| #### Bn-scaff_17725_1-p11578 C-genome specific (napus-oleracea) | 0.9856459    | 0.7327098    | 0.9844961    | 0.6867491    | not scorable | not scorable |
| #### Bn-scaff_17725_1-p11595 C-genome specific (napus-oleracea) | 0.9928229    | 0.7955374    | 1            | 0.7241462    | not scorable | not scorable |
| #### Bn-scaff_17725_1-p11664 C-genome specific (napus-oleracea) | 0.9832536    | 0.6815501    | 0.9922481    | 0.6142201    | not scorable | not scorable |
| #### Bn-scaff_17725_1-p13087 C-genome specific (napus-oleracea) | 0.9880383    | 0.7971578    | 0.9844961    | 0.7547042    | not scorable | not scorable |
| #### Bn-scaff_17725_1-p16921 C-genome specific (napus-oleracea) | 0.9928229    | 0.7663763    | 0.9922481    | 0.81336      | not scorable | not scorable |
| #### Bn-scaff_17725_1-p18663 genome unspecific (all in)         | 0.9904306    | 0.6283322    | 1            | 0.6734886    | 1            | 0.9142528    |
| #### Bn-scaff_17725_1-p18866 C-genome specific (napus-oleracea) | 0.9904306    | 0.7536798    | 1            | 0.7535166    | not scorable | not scorable |
| #### Bn-scaff_17725_1-p18987 C-genome specific (napus-oleracea) | 0.9928229    | 0.7722171    | 1            | 0.7508382    | not scorable | not scorable |
| #### Bn-scaff_17725_1-p19008 C-genome specific (napus-oleracea) | 0.9928229    | 0.797905     | 1            | 0.7513537    | not scorable | not scorable |
| #### Bn-scaff_17725_1-p19063 C-genome specific (napus-oleracea) | 0.9928229    | 0.7934229    | 1            | 0.7802522    | not scorable | not scorable |
| #### Bn-scaff_17725_1-p19816 C-genome specific (napus-oleracea) | 0.9856459    | 0.862799     | 1            | 0.8663384    | not scorable | not scorable |
| #### Bn-scaff_17725_1-p19985 C-genome specific (napus-oleracea) | 0.9928229    | 0.7614057    | 1            | 0.8517222    | not scorable | not scorable |
| #### Bn-scaff_17725_1-p20171 genome unspecific (all in)         | 1            | 0.1905941    | 0.9767442    | 0.2620217    | 1            | 0.7545086    |
| #### Bn-scaff_17725_1-p22664 genome unspecific (all in)         | 1            | 0.7660249    | 1            | 0.8257481    | 1            | 0.9296857    |
| #### Bn-scaff_17725_1-p43098 genome unspecific (all in)         | 0.9545454    | 0.4314512    | 1            | 0.8276909    | 1            | 0.7579986    |
| #### Bn-scaff_17725_1-p43123 C-genome specific (napus-oleracea) | 0.9641148    | 0.7505831    | 1            | 0.6829622    | not scorable | not scorable |
| #### Bn-scaff_17725_1-p43156 C-genome specific (napus-oleracea) | 0.9784689    | 0.7859859    | 0.9922481    | 0.8077363    | not scorable | not scorable |
| #### Bn-scaff_17725_1-p50521 C-genome specific (napus-oleracea) | 0.9880383    | 0.4488176    | 1            | 0.9272014    | not scorable | not scorable |
| #### Bn-scaff_17725_1-p51039 C-genome specific (oleracea only)  | not scorable | not scorable | 0.9224806    | 0.6999854    | not scorable | not scorable |
| #### Bn-scaff_17725_1-p51326 C-genome specific (napus-oleracea) | 0.9114832    | 0.6980593    | 0.9302326    | 0.4139798    | not scorable | not scorable |
| #### Bn-scaff_17725_1-p51455 genome unspecific (all in)         | 0.9617225    | 0.2850742    | 0.9689922    | 0.4446282    | 1            | 0.9272739    |
| #### Bn-scaff_17725_1-p51475 A-genome specific (napus-rapa)     | 0.9832536    | 0.6711877    | not scorable | not scorable | 0.9834711    | 0.7207842    |
| #### Bn-scaff_17725_1-p51718 C-genome specific (napus-oleracea) | 0.9688995    | 0.7771575    | 1            | 0.7920511    | not scorable | not scorable |
| #### Bn-scaff_17725_1-p90700 C-genome specific (napus-oleracea) | 0.9880383    | 0.7768776    | 0.9844961    | 0.7903636    | not scorable | not scorable |
| #### Bn-scaff_17725_1-p99310 C-genome specific (napus-oleracea) | 0.9904306    | 0.7279893    | 0.9922481    | 0.7490881    | not scorable | not scorable |



|                                                                |              |              |              |              |              |                           |
|----------------------------------------------------------------|--------------|--------------|--------------|--------------|--------------|---------------------------|
| #### Bn-scaff_17726_1-p28732A-genome specific (napus-rapa)     | 1            | 0.5715643    | not scorable | not scorable | 1            | 0.7494321                 |
| #### Bn-scaff_17726_1-p3298C-genome unspecific (oleracea-rapa) | not scorable | not scorable |              | 1            | 0.7138557    | 1 0.532066                |
| #### Bn-scaff_17726_1-p46071A-genome specific (napus-rapa)     | 1            | 0.3243027    | not scorable | not scorable | 1            | 0.9272014                 |
| #### Bn-scaff_17731_1-p10022C-genome specific (napus-oleracea) | 0.9808612    | 0.7033445    |              | 1            | 0.6545152    | not scorable not scorable |
| #### Bn-scaff_17731_1-p10028C-genome specific (napus-oleracea) | 0.9665072    | 0.7567258    | 0.9922481    | 0.6472751    | not scorable | not scorable              |
| #### Bn-scaff_17731_1-p10034C-genome specific (napus-oleracea) | 0.9665072    | 0.7396003    | 0.9767442    | 0.5942535    | not scorable | not scorable              |
| #### Bn-scaff_17731_1-p10078C-genome specific (napus-oleracea) | 0.9736842    | 0.7705256    | 0.9922481    | 0.8216134    | not scorable | not scorable              |
| #### Bn-scaff_17731_1-p10084C-genome specific (napus-oleracea) | 0.9808612    | 0.6958781    |              | 1            | 0.7168652    | not scorable not scorable |
| #### Bn-scaff_17731_1-p10087C-genome specific (napus-oleracea) | 0.9832536    | 0.7139785    |              | 1            | 0.7490984    | not scorable not scorable |
| #### Bn-scaff_17731_1-p10172C-genome specific (napus-oleracea) | 0.9712918    | 0.7737268    | 0.9922481    | 0.7548181    | not scorable | not scorable              |
| #### Bn-scaff_17731_1-p10540C-genome specific (napus-oleracea) | 0.9808612    | 0.4036402    | 0.9922481    | 0.7617759    | not scorable | not scorable              |
| #### Bn-scaff_17731_1-p10596genome unspecific (oleracea-rapa)  | not scorable | not scorable | 0.9922481    | 0.7959498    | 0.9917355    | 0.7298398                 |
| #### Bn-scaff_17731_1-p14247all not scorable                   | not scorable | not scorable | not scorable | not scorable | not scorable | not scorable              |
| #### Bn-scaff_17731_1-p15462genome unspecific (oleracea-rapa)  | not scorable | not scorable |              | 1            | 0.8789334    | 1 0.8757988               |
| #### Bn-scaff_17731_1-p15587genome unspecific (all in)         | 0.9808612    | 0.2968626    | 0.9844961    | 0.6447368    | 0.9917355    | 0.7139598                 |
| #### Bn-scaff_17731_1-p15997genome unspecific (all in)         | 0.9856459    | 0.2841783    | 0.7829458    | 0.9175813    | 0.9834711    | 0.9272014                 |
| #### Bn-scaff_17731_1-p16580genome unspecific (all in)         | 0.9832536    | 0.4106821    |              | 1            | 0.747554     | 1 0.9007044               |
| #### Bn-scaff_17731_1-p16695C-genome specific (napus-oleracea) | 0.9712918    | 0.7700166    |              | 1            | 0.8581804    | not scorable not scorable |
| #### Bn-scaff_17731_1-p23180C-genome specific (napus-oleracea) | 0.9880383    | 0.7787823    |              | 1            | 0.7763346    | not scorable not scorable |
| #### Bn-scaff_17731_1-p24071C-genome specific (napus-oleracea) | 0.9856459    | 0.7853557    |              | 1            | 0.6513909    | not scorable not scorable |
| #### Bn-scaff_17731_1-p24094C-genome specific (napus-oleracea) | 0.9928229    | 0.6930037    | 0.9844961    | 0.6204625    | not scorable | not scorable              |
| #### Bn-scaff_17731_1-p24121C-genome specific (napus-oleracea) | 0.02631579   | 0.8130717    | 0.620155     | 0.7580967    | not scorable | not scorable              |
| #### Bn-scaff_17731_1-p24142napus specific                     | 0.9928229    | 0.6351367    | not scorable | not scorable | not scorable | not scorable              |
| #### Bn-scaff_17731_1-p24775C-genome specific (napus-oleracea) | 0.9856459    | 0.8211735    | 0.9922481    | 0.8004663    | not scorable | not scorable              |
| #### Bn-scaff_17731_1-p25317C-genome specific (napus-oleracea) | 0.9928229    | 0.802188     | 0.9922481    | 0.7804224    | not scorable | not scorable              |
| #### Bn-scaff_17731_1-p25338C-genome specific (napus-oleracea) | 0.9832536    | 0.7916473    |              | 1            | 0.8134746    | not scorable not scorable |
| #### Bn-scaff_17731_1-p25431C-genome specific (napus-oleracea) | 0.9880383    | 0.7657947    | 0.9844961    | 0.7777582    | not scorable | not scorable              |
| #### Bn-scaff_17731_1-p25544C-genome specific (napus-oleracea) | 0.9904306    | 0.6728771    | 0.9767442    | 0.7599719    | not scorable | not scorable              |
| #### Bn-scaff_17731_1-p25585C-genome specific (napus-oleracea) | 0.645933     | 0.6668748    | 0.7209302    | 0.7657352    | not scorable | not scorable              |
| #### Bn-scaff_17731_1-p25649C-genome specific (napus-oleracea) | 0.6602871    | 0.6934869    | 0.6899225    | 0.7773243    | not scorable | not scorable              |
| #### Bn-scaff_17731_1-p25892C-genome specific (napus-oleracea) | 0.9928229    | 0.7684752    | 0.9922481    | 0.8675738    | not scorable | not scorable              |
| #### Bn-scaff_17731_1-p25985C-genome specific (napus-oleracea) | 0.9928229    | 0.6890153    | 0.9922481    | 0.8463581    | not scorable | not scorable              |
| #### Bn-scaff_17731_1-p26022C-genome specific (napus-oleracea) | 0.9928229    | 0.7632121    | 0.9922481    | 0.7353255    | not scorable | not scorable              |

|                                                                 |           |           |              |              |              |              |
|-----------------------------------------------------------------|-----------|-----------|--------------|--------------|--------------|--------------|
| #### Bn-scaff_17731_1-p26164 C-genome specific (napus-oleracea) | 0.9904306 | 0.6049598 | 0.9922481    | 0.8039267    | not scorable | not scorable |
| #### Bn-scaff_17731_1-p26244 C-genome specific (napus-oleracea) | 0.9928229 | 0.7576883 | 1            | 0.7501891    | not scorable | not scorable |
| #### Bn-scaff_17731_1-p26254 C-genome specific (napus-oleracea) | 0.9928229 | 0.736394  | 0.9922481    | 0.6999858    | not scorable | not scorable |
| #### Bn-scaff_17731_1-p26665 C-genome specific (napus-oleracea) | 0.9832536 | 0.7811884 | 0.9844961    | 0.6841279    | not scorable | not scorable |
| #### Bn-scaff_17731_1-p26668 C-genome specific (napus-oleracea) | 0.9712918 | 0.7355796 | 1            | 0.718504     | not scorable | not scorable |
| #### Bn-scaff_17731_1-p26685 C-genome specific (napus-oleracea) | 0.9928229 | 0.6665472 | 1            | 0.7203456    | not scorable | not scorable |
| #### Bn-scaff_17731_1-p26691 C-genome specific (napus-oleracea) | 0.9928229 | 0.621568  | 0.9922481    | 0.6768265    | not scorable | not scorable |
| #### Bn-scaff_17731_1-p26714 C-genome specific (napus-oleracea) | 0.9928229 | 0.7206545 | 1            | 0.7254547    | not scorable | not scorable |
| #### Bn-scaff_17731_1-p26757 C-genome specific (napus-oleracea) | 0.9928229 | 0.7690171 | 1            | 0.8028349    | not scorable | not scorable |
| #### Bn-scaff_17731_1-p27505 C-genome specific (napus-oleracea) | 0.9952153 | 0.792064  | 0.9922481    | 0.7433274    | not scorable | not scorable |
| #### Bn-scaff_17731_1-p28584 C-genome specific (napus-oleracea) | 0.9665072 | 0.6958732 | 0.8062016    | 0.6900551    | not scorable | not scorable |
| #### Bn-scaff_17731_1-p28592 C-genome specific (napus-oleracea) | 0.9736842 | 0.7744187 | 0.4573644    | 0.8940672    | not scorable | not scorable |
| #### Bn-scaff_17731_1-p28854 C-genome specific (napus-oleracea) | 0.9880383 | 0.8093446 | 1            | 0.6908117    | not scorable | not scorable |
| #### Bn-scaff_17731_1-p30879 C-genome specific (napus-oleracea) | 0.9928229 | 0.6223189 | 1            | 0.755008     | not scorable | not scorable |
| #### Bn-scaff_17731_1-p30894 C-genome specific (napus-oleracea) | 0.9808612 | 0.7929487 | 1            | 0.7681423    | not scorable | not scorable |
| #### Bn-scaff_17731_1-p31046 C-genome specific (napus-oleracea) | 0.9928229 | 0.8133698 | 1            | 0.6647344    | not scorable | not scorable |
| #### Bn-scaff_17731_1-p31095 C-genome specific (napus-oleracea) | 0.9880383 | 0.6906203 | 1            | 0.7297751    | not scorable | not scorable |
| #### Bn-scaff_17731_1-p31224 C-genome specific (napus-oleracea) | 0.9928229 | 0.6402268 | 0.9844961    | 0.8232435    | not scorable | not scorable |
| #### Bn-scaff_17731_1-p32840 C-genome specific (napus-oleracea) | 0.9928229 | 0.7799253 | 1            | 0.7418224    | not scorable | not scorable |
| #### Bn-scaff_17731_1-p32856 C-genome specific (napus-oleracea) | 0.9880383 | 0.8080781 | 1            | 0.8424196    | not scorable | not scorable |
| #### Bn-scaff_17731_1-p32870 C-genome specific (napus-oleracea) | 0.9928229 | 0.7171239 | 1            | 0.7485015    | not scorable | not scorable |
| #### Bn-scaff_17731_1-p32903 C-genome specific (napus-oleracea) | 0.9904306 | 0.6768829 | 1            | 0.764073     | not scorable | not scorable |
| #### Bn-scaff_17731_1-p35871 C-genome specific (napus-oleracea) | 0.9856459 | 0.7791632 | 1            | 0.7438738    | not scorable | not scorable |
| #### Bn-scaff_17731_1-p37058 C-genome specific (napus-oleracea) | 0.9760765 | 0.6490051 | 0.9767442    | 0.70071      | not scorable | not scorable |
| #### Bn-scaff_17731_1-p38535 C-genome specific (napus-oleracea) | 0.9952153 | 0.3143626 | 1            | 0.747813     | not scorable | not scorable |
| #### Bn-scaff_17731_1-p38687 napus specific                     | 0.9784689 | 0.6648157 | not scorable | not scorable | not scorable | not scorable |
| #### Bn-scaff_17731_1-p40125 C-genome specific (napus-oleracea) | 0.9928229 | 0.703334  | 1            | 0.8299473    | not scorable | not scorable |
| #### Bn-scaff_17731_1-p42966 C-genome specific (napus-oleracea) | 0.9784689 | 0.7501503 | 0.9922481    | 0.7556439    | not scorable | not scorable |
| #### Bn-scaff_17731_1-p43130 genome unspecific (all in)         | 0.9473684 | 0.3976035 | 1            | 0.5905396    | 1            | 0.6400457    |
| #### Bn-scaff_17731_1-p45413 C-genome specific (napus-oleracea) | 0.9808612 | 0.7531437 | 0.9922481    | 0.9312794    | not scorable | not scorable |
| #### Bn-scaff_17731_1-p46858 C-genome specific (napus-oleracea) | 0.9784689 | 0.6691726 | 0.9844961    | 0.8533674    | not scorable | not scorable |
| #### Bn-scaff_17731_1-p47483 C-genome specific (napus-oleracea) | 0.9832536 | 0.7595835 | 0.9922481    | 0.8673867    | not scorable | not scorable |
| #### Bn-scaff_17731_1-p47897 C-genome specific (napus-oleracea) | 0.9808612 | 0.6813324 | 1            | 0.7034208    | not scorable | not scorable |

|                                                                 |              |              |              |              |              |              |
|-----------------------------------------------------------------|--------------|--------------|--------------|--------------|--------------|--------------|
| #### Bn-scaff_17731_1-p47913 C-genome specific (napus-oleracea) | 0.9712918    | 0.7286109    | 1            | 0.4603564    | not scorable | not scorable |
| #### Bn-scaff_17731_1-p48282 C-genome specific (napus-oleracea) | 0.9593301    | 0.7025908    | 0.6666667    | 0.6425768    | not scorable | not scorable |
| #### Bn-scaff_17731_1-p53285 C-genome specific (napus-oleracea) | 0.9736842    | 0.7554282    | 1            | 0.7985211    | not scorable | not scorable |
| #### Bn-scaff_17731_1-p53660 C-genome specific (napus-oleracea) | 0.9856459    | 0.7525675    | 0.9922481    | 0.8040179    | not scorable | not scorable |
| #### Bn-scaff_17731_1-p53673 C-genome specific (napus-oleracea) | 0.9808612    | 0.7274653    | 0.9922481    | 0.6813662    | not scorable | not scorable |
| #### Bn-scaff_17731_1-p53678 C-genome specific (napus-oleracea) | 0.9736842    | 0.7406828    | 0.9922481    | 0.8426623    | not scorable | not scorable |
| #### Bn-scaff_17731_1-p53701 C-genome specific (napus-oleracea) | 0.9832536    | 0.6552807    | 0.9689922    | 0.73641      | not scorable | not scorable |
| #### Bn-scaff_17731_1-p53711 C-genome specific (napus-oleracea) | 0.9760765    | 0.6992143    | 0.9922481    | 0.7216677    | not scorable | not scorable |
| #### Bn-scaff_17731_1-p53762 all not scorable                   | not scorable | not scorable | not scorable | not scorable | not scorable | not scorable |
| #### Bn-scaff_17731_1-p53789 C-genome specific (napus-oleracea) | 0.9665072    | 0.6627467    | 1            | 0.7258367    | not scorable | not scorable |
| #### Bn-scaff_17731_1-p53861 C-genome specific (napus-oleracea) | 0.9784689    | 0.7778209    | 0.9844961    | 0.7349311    | not scorable | not scorable |
| #### Bn-scaff_17731_1-p56948 C-genome specific (napus-oleracea) | 0.9904306    | 0.7645167    | 0.9844961    | 0.8503804    | not scorable | not scorable |
| #### Bn-scaff_17731_1-p56948 C-genome specific (napus-oleracea) | 0.9856459    | 0.7430102    | 1            | 0.7924355    | not scorable | not scorable |
| #### Bn-scaff_17731_1-p59077 genome unspecific (all in)         | 0.9808612    | 0.5283998    | 1            | 0.6592214    | 1            | 0.9175813    |
| #### Bn-scaff_17731_1-p60165 C-genome specific (napus-oleracea) | 0.9760765    | 0.5484101    | 0.9302326    | 0.437266     | not scorable | not scorable |
| #### Bn-scaff_17731_1-p72146 C-genome specific (napus-oleracea) | 0.9832536    | 0.7215056    | 1            | 0.8006674    | not scorable | not scorable |
| #### Bn-scaff_17731_1-p72155 C-genome specific (napus-oleracea) | 0.9832536    | 0.6720924    | 1            | 0.8004208    | not scorable | not scorable |
| #### Bn-scaff_17731_1-p74679 C-genome specific (napus-oleracea) | 0.9880383    | 0.7911573    | 0.9922481    | 0.7770573    | not scorable | not scorable |
| #### Bn-scaff_17731_1-p74841 C-genome specific (napus-oleracea) | 0.9808612    | 0.7866066    | 1            | 0.8060002    | not scorable | not scorable |
| #### Bn-scaff_17731_1-p74851 C-genome specific (napus-oleracea) | 0.9760765    | 0.719753     | 0.8217054    | 0.7358274    | not scorable | not scorable |
| #### Bn-scaff_17731_1-p74852 C-genome specific (napus-oleracea) | 0.9808612    | 0.7516619    | 0.9844961    | 0.3288002    | not scorable | not scorable |
| #### Bn-scaff_17731_1-p74876 C-genome specific (napus-oleracea) | 0.9808612    | 0.6292946    | 0.9922481    | 0.6198596    | not scorable | not scorable |
| #### Bn-scaff_17731_1-p74925 C-genome specific (napus-oleracea) | 0.9784689    | 0.7716941    | 0.9844961    | 0.8049691    | not scorable | not scorable |
| #### Bn-scaff_17731_1-p74945 C-genome specific (napus-oleracea) | 0.9856459    | 0.7067938    | 1            | 0.7784467    | not scorable | not scorable |
| #### Bn-scaff_17731_1-p74951 C-genome specific (napus-oleracea) | 0.9712918    | 0.7539992    | 0.9922481    | 0.6384999    | not scorable | not scorable |
| #### Bn-scaff_17731_1-p74991 C-genome specific (napus-oleracea) | 0.9808612    | 0.7042989    | 0.9844961    | 0.6104084    | not scorable | not scorable |
| #### Bn-scaff_17731_1-p75542 C-genome specific (napus-oleracea) | 0.9880383    | 0.8008791    | 1            | 0.8578119    | not scorable | not scorable |
| #### Bn-scaff_17731_1-p75543 C-genome specific (napus-oleracea) | 0.9784689    | 0.6342289    | 1            | 0.6156913    | not scorable | not scorable |
| #### Bn-scaff_17731_1-p75684 C-genome specific (napus-oleracea) | 0.9856459    | 0.7597906    | 0.9069768    | 0.8378632    | not scorable | not scorable |
| #### Bn-scaff_17731_1-p75694 C-genome specific (napus-oleracea) | 0.9784689    | 0.8060583    | 0.9069768    | 0.7621217    | not scorable | not scorable |
| #### Bn-scaff_17731_1-p75766 C-genome specific (napus-oleracea) | 0.9808612    | 0.8033556    | 0.9844961    | 0.7463388    | not scorable | not scorable |
| #### Bn-scaff_17731_1-p81265 C-genome specific (napus-oleracea) | 0.9856459    | 0.8039243    | 1            | 0.757025     | not scorable | not scorable |
| #### Bn-scaff_17731_1-p82498 genome unspecific (all in)         | 0.9784689    | 0.2256056    | 0.9922481    | 0.6007424    | 1            | 0.7622204    |

|                                                                 |              |              |           |           |              |              |
|-----------------------------------------------------------------|--------------|--------------|-----------|-----------|--------------|--------------|
| #### Bn-scaff_17731_1-p82657 C-genome specific (napus-oleracea) | 0.9832536    | 0.642754     | 1         | 0.65619   | not scorable | not scorable |
| #### Bn-scaff_17731_1-p83292 genome unspecific (oleracea-rapa)  | not scorable | not scorable | 0.9922481 | 0.6931728 | 1            | 0.9092454    |
| #### Bn-scaff_17731_1-p84213 genome unspecific (oleracea-rapa)  | not scorable | not scorable | 1         | 0.7076877 | 1            | 0.7130157    |
| #### Bn-scaff_17731_1-p86396 C-genome specific (napus-oleracea) | 0.9880383    | 0.7778115    | 0.9534883 | 0.8673827 | not scorable | not scorable |
| #### Bn-scaff_17731_1-p88573 C-genome specific (napus-oleracea) | 0.9832536    | 0.7297736    | 1         | 0.7288616 | not scorable | not scorable |
| #### Bn-scaff_17731_1-p88986 C-genome specific (napus-oleracea) | 0.9880383    | 0.7663476    | 1         | 0.7683864 | not scorable | not scorable |
| #### Bn-scaff_17731_1-p89288 genome unspecific (oleracea-rapa)  | not scorable | not scorable | 1         | 0.3295021 | 0.9669421    | 0.2294265    |
| #### Bn-scaff_17731_1-p89555 genome unspecific (all in)         | 0.9808612    | 0.7920627    | 1         | 0.8415254 | 0.9090909    | 0.939575     |
| #### Bn-scaff_17731_1-p91074 C-genome specific (napus-oleracea) | 0.9760765    | 0.644478     | 0.9922481 | 0.6398442 | not scorable | not scorable |
| #### Bn-scaff_17731_1-p91475 C-genome specific (oleracea only)  | not scorable | not scorable | 0.8837209 | 0.8837249 | not scorable | not scorable |
| #### Bn-scaff_17731_1-p92491 C-genome specific (napus-oleracea) | 0.9760765    | 0.8308359    | 0.9612403 | 0.7758853 | not scorable | not scorable |
| #### Bn-scaff_17731_1-p92504 C-genome specific (napus-oleracea) | 0.9880383    | 0.7199885    | 0.9689922 | 0.7818626 | not scorable | not scorable |
| #### Bn-scaff_17731_1-p92528 C-genome specific (napus-oleracea) | 0.9760765    | 0.7659342    | 0.9689922 | 0.887541  | not scorable | not scorable |
| #### Bn-scaff_17731_1-p92540 C-genome specific (napus-oleracea) | 0.9545454    | 0.7541886    | 0.9689922 | 0.8541599 | not scorable | not scorable |
| #### Bn-scaff_17731_1-p92548 C-genome specific (napus-oleracea) | 0.9904306    | 0.8106268    | 0.9612403 | 0.6436414 | not scorable | not scorable |
| #### Bn-scaff_17731_1-p92558 C-genome specific (napus-oleracea) | 0.9641148    | 0.6279262    | 0.9534883 | 0.693823  | not scorable | not scorable |
| #### Bn-scaff_17731_1-p97951 C-genome specific (napus-oleracea) | 0.9808612    | 0.816736     | 0.9922481 | 0.7512661 | not scorable | not scorable |
| #### Bn-scaff_17740_1-p10077 C-genome specific (napus-oleracea) | 0.9856459    | 0.5590301    | 0.9534883 | 0.5267356 | not scorable | not scorable |
| #### Bn-scaff_17740_1-p10078 C-genome specific (napus-oleracea) | 0.9832536    | 0.6730143    | 0.9767442 | 0.6166959 | not scorable | not scorable |
| #### Bn-scaff_17740_1-p10079 C-genome specific (napus-oleracea) | 0.9856459    | 0.4515492    | 0.9767442 | 0.7107647 | not scorable | not scorable |
| #### Bn-scaff_17740_1-p10079 C-genome specific (napus-oleracea) | 0.9832536    | 0.6527258    | 0.9689922 | 0.6399331 | not scorable | not scorable |
| #### Bn-scaff_17740_1-p10082 C-genome specific (napus-oleracea) | 0.9904306    | 0.6840203    | 0.9612403 | 0.6880202 | not scorable | not scorable |
| #### Bn-scaff_17740_1-p10084 C-genome specific (napus-oleracea) | 0.9904306    | 0.7329373    | 0.9612403 | 0.7415183 | not scorable | not scorable |
| #### Bn-scaff_17740_1-p10095 C-genome specific (napus-oleracea) | 0.9832536    | 0.5949962    | 0.9922481 | 0.6143078 | not scorable | not scorable |
| #### Bn-scaff_17740_1-p10097 C-genome specific (napus-oleracea) | 0.9904306    | 0.7737257    | 0.9922481 | 0.6781774 | not scorable | not scorable |
| #### Bn-scaff_17740_1-p10110 C-genome specific (napus-oleracea) | 0.9856459    | 0.8088002    | 0.9689922 | 0.7606095 | not scorable | not scorable |
| #### Bn-scaff_17740_1-p10114 C-genome specific (napus-oleracea) | 0.9856459    | 0.7560881    | 0.9689922 | 0.7584158 | not scorable | not scorable |
| #### Bn-scaff_17740_1-p10123 C-genome specific (napus-oleracea) | 0.9904306    | 0.7232612    | 0.9767442 | 0.7635147 | not scorable | not scorable |
| #### Bn-scaff_17740_1-p10127 C-genome specific (napus-oleracea) | 0.9808612    | 0.7215467    | 0.9689922 | 0.7304225 | not scorable | not scorable |
| #### Bn-scaff_17740_1-p10128 C-genome specific (napus-oleracea) | 0.9832536    | 0.769406     | 0.9767442 | 0.8350168 | not scorable | not scorable |
| #### Bn-scaff_17740_1-p10133 C-genome specific (napus-oleracea) | 0.9832536    | 0.6838572    | 0.9689922 | 0.6650368 | not scorable | not scorable |
| #### Bn-scaff_17740_1-p10168 C-genome specific (napus-oleracea) | 0.9880383    | 0.793319     | 0.9379845 | 0.7213481 | not scorable | not scorable |
| #### Bn-scaff_17740_1-p10174 C-genome specific (napus-oleracea) | 0.9832536    | 0.7665215    | 0.9379845 | 0.7628053 | not scorable | not scorable |

|                                                                 |              |              |              |              |              |              |
|-----------------------------------------------------------------|--------------|--------------|--------------|--------------|--------------|--------------|
| #### Bn-scaff_17740_1-p10178 C-genome specific (napus-oleracea) | 0.9784689    | 0.7693964    | 0.9224806    | 0.6973324    | not scorable | not scorable |
| #### Bn-scaff_17740_1-p41105 genome unspecific (all in)         | 0.9976076    | 0.5391474    | 1            | 0.5378139    | 0.9504132    | 0.3182112    |
| #### Bn-scaff_17740_1-p41179 genome unspecific (all in)         | 0.9976076    | 0.25014      | 1            | 0.7972026    | 1            | 0.8606563    |
| #### Bn-scaff_17740_1-p44099 C-genome specific (napus-oleracea) | 0.9952153    | 0.8898129    | 0.9844961    | 0.8299757    | not scorable | not scorable |
| #### Bn-scaff_17740_1-p48969 A-genome specific (rapa only)      | not scorable | not scorable | not scorable | not scorable | 1            | 0.8391591    |
| #### Bn-scaff_17740_1-p55515 C-genome specific (oleracea only)  | not scorable | not scorable | 0.9457364    | 0.7416236    | not scorable | not scorable |
| #### Bn-scaff_17740_1-p55527 C-genome specific (napus-oleracea) | 0.9880383    | 0.8206152    | 1            | 0.7533869    | not scorable | not scorable |
| #### Bn-scaff_17740_1-p55547 C-genome specific (napus-oleracea) | 0.9784689    | 0.7138434    | 0.9922481    | 0.7235296    | not scorable | not scorable |
| #### Bn-scaff_17740_1-p67650 genome unspecific (all in)         | 0.9832536    | 0.2909612    | 0.9767442    | 0.8280547    | 1            | 0.7385979    |
| #### Bn-scaff_17740_1-p75809 napus specific                     | 0.9760765    | 0.7597939    | not scorable | not scorable | not scorable | not scorable |
| #### Bn-scaff_17740_1-p75885 C-genome specific (napus-oleracea) | 0.9952153    | 0.8139352    | 1            | 0.9205657    | not scorable | not scorable |
| #### Bn-scaff_17740_1-p78326 C-genome specific (napus-oleracea) | 0.9952153    | 0.8537946    | 0.9922481    | 0.7810718    | not scorable | not scorable |
| #### Bn-scaff_17740_1-p78682 C-genome specific (napus-oleracea) | 0.9832536    | 0.7672228    | 1            | 0.6478148    | not scorable | not scorable |
| #### Bn-scaff_17740_1-p79088 napus specific                     | 0.9688995    | 0.7160958    | not scorable | not scorable | not scorable | not scorable |
| #### Bn-scaff_17740_1-p79330 C-genome specific (napus-oleracea) | 0.9904306    | 0.8017381    | 1            | 0.7718596    | not scorable | not scorable |
| #### Bn-scaff_17740_1-p79976 genome unspecific (all in)         | 0.9904306    | 0.3452438    | 0.9922481    | 0.636757     | 0.9834711    | 0.6980284    |
| #### Bn-scaff_17740_1-p81077 C-genome specific (napus-oleracea) | 0.9928229    | 0.7932121    | 1            | 0.7969696    | not scorable | not scorable |
| #### Bn-scaff_17740_1-p81463 genome unspecific (all in)         | 1            | 0.7828975    | 1            | 0.7679893    | 0.9421487    | 0.9058614    |
| #### Bn-scaff_17740_1-p81483 C-genome specific (napus-oleracea) | 0.9952153    | 0.7996887    | 1            | 0.8368877    | not scorable | not scorable |
| #### Bn-scaff_17740_1-p81513 C-genome specific (napus-oleracea) | 0.9880383    | 0.704389     | 0.9922481    | 0.6751995    | not scorable | not scorable |
| #### Bn-scaff_17740_1-p81626 genome unspecific (oleracea-rapa)  | not scorable | not scorable | 0.9767442    | 0.5273912    | 1            | 0.9507924    |
| #### Bn-scaff_17740_1-p81631 C-genome specific (napus-oleracea) | 0.9952153    | 0.6455376    | 0.9689922    | 0.7698343    | not scorable | not scorable |
| #### Bn-scaff_17740_1-p82748 C-genome specific (napus-oleracea) | 0.9952153    | 0.8026987    | 1            | 0.7384024    | not scorable | not scorable |
| #### Bn-scaff_17740_1-p82875 C-genome specific (napus-oleracea) | 0.9952153    | 0.8495182    | 1            | 0.7408383    | not scorable | not scorable |
| #### Bn-scaff_17740_1-p82917 C-genome specific (napus-oleracea) | 0.9880383    | 0.7087644    | 1            | 0.6820111    | not scorable | not scorable |
| #### Bn-scaff_17740_1-p83099 C-genome specific (napus-oleracea) | 0.9928229    | 0.8337657    | 0.9767442    | 0.7933361    | not scorable | not scorable |
| #### Bn-scaff_17740_1-p83412 C-genome specific (napus-oleracea) | 0.9832536    | 0.7290152    | 0.6046512    | 0.7462972    | not scorable | not scorable |
| #### Bn-scaff_17740_1-p83901 C-genome specific (napus-oleracea) | 0.9593301    | 0.7441927    | 0.9147287    | 0.7142914    | not scorable | not scorable |
| #### Bn-scaff_17740_1-p83929 C-genome specific (napus-oleracea) | 0.9880383    | 0.7238792    | 0.9457364    | 0.7818203    | not scorable | not scorable |
| #### Bn-scaff_17740_1-p84488 C-genome specific (napus-oleracea) | 0.9760765    | 0.7061793    | 0.496124     | 0.7104266    | not scorable | not scorable |
| #### Bn-scaff_17740_1-p84501 C-genome specific (napus-oleracea) | 0.9665072    | 0.6769752    | 0.496124     | 0.6781164    | not scorable | not scorable |
| #### Bn-scaff_17740_1-p84526 C-genome specific (napus-oleracea) | 0.9521531    | 0.7060561    | 0.8062016    | 0.7765451    | not scorable | not scorable |
| #### Bn-scaff_17740_1-p84640 C-genome specific (napus-oleracea) | 0.9401914    | 0.6044805    | 0.496124     | 0.6673359    | not scorable | not scorable |



|                                                                |              |              |              |              |              |              |
|----------------------------------------------------------------|--------------|--------------|--------------|--------------|--------------|--------------|
| #### Bn-scaff_17750_1-p16061genome unspecific (all in)         | 0.9832536    | 0.3025243    | 1            | 0.9175813    | 0.7933884    | 0.9215805    |
| #### Bn-scaff_17750_1-p16156genome unspecific (oleracea-rapa)  | not scorable | not scorable | 0.9922481    | 0.8450494    | 1            | 0.9175813    |
| #### Bn-scaff_17750_1-p16207genome unspecific (oleracea-rapa)  | not scorable | not scorable | 0.9922481    | 0.810416     | 1            | 0.9380213    |
| #### Bn-scaff_17750_1-p16212genome unspecific (all in)         | 0.9904306    | 0.3401862    | 0.9767442    | 0.6292288    | 1            | 0.8207097    |
| #### Bn-scaff_17750_1-p16212genome unspecific (all in)         | 0.9952153    | 0.3138568    | 0.9922481    | 0.5791009    | 0.9338843    | 0.6717429    |
| #### Bn-scaff_17750_1-p16257genome unspecific (all in)         | 1            | 0.4773739    | 0.9844961    | 0.7091959    | 1            | 0.829236     |
| #### Bn-scaff_17750_1-p16617A-genome specific (rapa only)      | not scorable | not scorable | not scorable | not scorable | 1            | 0.7890711    |
| #### Bn-scaff_17750_1-p16924napus specific                     | 1            | 0.5165945    | not scorable | not scorable | not scorable | not scorable |
| #### Bn-scaff_17750_1-p16924genome unspecific (all in)         | 0.9904306    | 0.2762533    | 1            | 0.8085203    | 0.9917355    | 0.7460788    |
| #### Bn-scaff_17750_1-p17358C-genome specific (napus-oleracea) | 0.9880383    | 0.7460063    | 0.9922481    | 0.6656297    | not scorable | not scorable |
| #### Bn-scaff_17750_1-p18019genome unspecific (all in)         | 0.9952153    | 0.5355778    | 0.5968992    | 0.751089     | 1            | 0.9072468    |
| #### Bn-scaff_17750_1-p18032genome unspecific (oleracea-rapa)  | not scorable | not scorable | 1            | 0.7701377    | 0.9917355    | 0.7710108    |
| #### Bn-scaff_17750_1-p18107C-genome specific (napus-oleracea) | 0.9928229    | 0.8134757    | 0.9922481    | 0.8072487    | not scorable | not scorable |
| #### Bn-scaff_17750_1-p18108C-genome specific (napus-oleracea) | 0.9904306    | 0.7423881    | 0.9767442    | 0.7092333    | not scorable | not scorable |
| #### Bn-scaff_17750_1-p18114C-genome specific (napus-oleracea) | 0.9760765    | 0.7380325    | 0.9922481    | 0.7392483    | not scorable | not scorable |
| #### Bn-scaff_17750_1-p18127C-genome specific (napus-oleracea) | 0.9928229    | 0.699632     | 0.9612403    | 0.9087607    | not scorable | not scorable |
| #### Bn-scaff_17750_1-p18394C-genome specific (napus-oleracea) | 0.9928229    | 0.843088     | 1            | 0.7148762    | not scorable | not scorable |
| #### Bn-scaff_17750_1-p18484genome unspecific (all in)         | 0.9952153    | 0.3453456    | 1            | 0.8236659    | 1            | 0.6792982    |
| #### Bn-scaff_17750_1-p18696C-genome specific (napus-oleracea) | 0.9976076    | 0.6150187    | 1            | 0.6647208    | not scorable | not scorable |
| #### Bn-scaff_17750_1-p18718genome unspecific (all in)         | 0.9832536    | 0.5480631    | 0.9767442    | 0.770879     | 0.9917355    | 0.7261859    |
| #### Bn-scaff_17750_1-p19052A-genome specific (rapa only)      | not scorable | not scorable | not scorable | not scorable | 0.9834711    | 0.6236798    |
| #### Bn-scaff_17750_1-p19231C-genome specific (napus-oleracea) | 0.9952153    | 0.7367629    | 0.9844961    | 0.815695     | not scorable | not scorable |
| #### Bn-scaff_17750_1-p19815genome unspecific (all in)         | 0.9952153    | 0.3412146    | 0.9922481    | 0.6550323    | 1            | 0.70307      |
| #### Bn-scaff_17750_1-p20076genome unspecific (all in)         | 0.9928229    | 0.6458226    | 1            | 0.770458     | 0.9834711    | 0.7135992    |
| #### Bn-scaff_17750_1-p20187genome unspecific (all in)         | 1            | 0.4311337    | 1            | 0.9182831    | 1            | 0.8548815    |
| #### Bn-scaff_17750_1-p20824C-genome specific (napus-oleracea) | 0.9880383    | 0.7494112    | 0.9147287    | 0.8176157    | not scorable | not scorable |
| #### Bn-scaff_17750_1-p26149genome unspecific (all in)         | 0.9928229    | 0.4817827    | 0.9922481    | 0.8165051    | 1            | 0.8740061    |
| #### Bn-scaff_17750_1-p27477genome unspecific (all in)         | 1            | 0.7350085    | 1            | 0.8078579    | 1            | 0.8651001    |
| #### Bn-scaff_17750_1-p27491genome unspecific (all in)         | 1            | 0.5138649    | 0.9922481    | 0.8658969    | 1            | 0.9150735    |
| #### Bn-scaff_17750_1-p38992C-genome specific (napus-oleracea) | 0.9904306    | 0.7449666    | 1            | 0.7975782    | not scorable | not scorable |
| #### Bn-scaff_17750_1-p40827C-genome specific (oleracea only)  | not scorable | not scorable | 0.7286822    | 0.9095823    | not scorable | not scorable |
| #### Bn-scaff_17750_1-p40840C-genome specific (napus-oleracea) | 0.9928229    | 0.7663164    | 0.9922481    | 0.7605884    | not scorable | not scorable |
| #### Bn-scaff_17750_1-p40859C-genome specific (oleracea only)  | not scorable | not scorable | 0.372093     | 0.8757482    | not scorable | not scorable |

|                                                                 |              |              |           |           |              |              |
|-----------------------------------------------------------------|--------------|--------------|-----------|-----------|--------------|--------------|
| #### Bn-scaff_17750_1-p40985 genome unspecific (all in)         | 0.9808612    | 0.1916509    | 1         | 0.5757495 | 0.9917355    | 0.4456693    |
| #### Bn-scaff_17750_1-p41310 C-genome specific (napus-oleracea) | 0.9928229    | 0.8472679    | 1         | 0.6490349 | not scorable | not scorable |
| #### Bn-scaff_17750_1-p43540 C-genome specific (napus-oleracea) | 0.9904306    | 0.805824     | 0.9844961 | 0.7228019 | not scorable | not scorable |
| #### Bn-scaff_17750_1-p43652 C-genome specific (napus-oleracea) | 0.9832536    | 0.6777889    | 0.9922481 | 0.5679201 | not scorable | not scorable |
| #### Bn-scaff_17750_1-p44815 C-genome specific (napus-oleracea) | 0.9904306    | 0.728927     | 1         | 0.7178071 | not scorable | not scorable |
| #### Bn-scaff_17750_1-p45957 genome unspecific (all in)         | 1            | 0.6047406    | 1         | 0.6910813 | 0.9834711    | 0.6930842    |
| #### Bn-scaff_17750_1-p50963 C-genome specific (napus-oleracea) | 0.9952153    | 0.7819692    | 0.9844961 | 0.744728  | not scorable | not scorable |
| #### Bn-scaff_17750_1-p55567 C-genome specific (napus-oleracea) | 0.9808612    | 0.7813621    | 1         | 0.7631848 | not scorable | not scorable |
| #### Bn-scaff_17750_1-p57769 genome unspecific (all in)         | 1            | 0.4374474    | 1         | 0.6934617 | 1            | 0.9272014    |
| #### Bn-scaff_17750_1-p58734 C-genome specific (napus-oleracea) | 0.9976076    | 0.7351032    | 1         | 0.8091978 | not scorable | not scorable |
| #### Bn-scaff_17750_1-p59713 C-genome specific (napus-oleracea) | 0.9928229    | 0.6832293    | 0.3953488 | 0.7367682 | not scorable | not scorable |
| #### Bn-scaff_17750_1-p60292 C-genome specific (napus-oleracea) | 0.9952153    | 0.7563159    | 0.9922481 | 0.8056367 | not scorable | not scorable |
| #### Bn-scaff_17750_1-p61043 C-genome specific (napus-oleracea) | 0.9832536    | 0.7268338    | 0.9612403 | 0.7066717 | not scorable | not scorable |
| #### Bn-scaff_17750_1-p62129 C-genome specific (napus-oleracea) | 0.9808612    | 0.859163     | 0.9922481 | 0.748432  | not scorable | not scorable |
| #### Bn-scaff_17750_1-p63273 C-genome specific (napus-oleracea) | 0.9928229    | 0.7913671    | 1         | 0.740226  | not scorable | not scorable |
| #### Bn-scaff_17750_1-p63279 C-genome specific (napus-oleracea) | 0.7799043    | 0.7635774    | 1         | 0.7428032 | not scorable | not scorable |
| #### Bn-scaff_17750_1-p63445 C-genome specific (napus-oleracea) | 0.9952153    | 0.8374329    | 0.9612403 | 0.7257838 | not scorable | not scorable |
| #### Bn-scaff_17750_1-p63639 C-genome specific (napus-oleracea) | 0.9928229    | 0.7502195    | 0.9922481 | 0.7474976 | not scorable | not scorable |
| #### Bn-scaff_17750_1-p63647 C-genome specific (napus-oleracea) | 0.9976076    | 0.7705365    | 1         | 0.7083104 | not scorable | not scorable |
| #### Bn-scaff_17750_1-p63706 C-genome specific (napus-oleracea) | 0.9880383    | 0.7105615    | 0.9612403 | 0.6942567 | not scorable | not scorable |
| #### Bn-scaff_17750_1-p66311 C-genome specific (napus-oleracea) | 0.9952153    | 0.7970539    | 0.9922481 | 0.7738999 | not scorable | not scorable |
| #### Bn-scaff_17750_1-p66663 C-genome specific (napus-oleracea) | 0.9928229    | 0.8623169    | 1         | 0.7205017 | not scorable | not scorable |
| #### Bn-scaff_17750_1-p66949 C-genome specific (napus-oleracea) | 0.9952153    | 0.7729372    | 1         | 0.8379771 | not scorable | not scorable |
| #### Bn-scaff_17750_1-p68475 genome unspecific (all in)         | 0.9952153    | 0.648939     | 0.9922481 | 0.5563326 | 1            | 0.8456061    |
| #### Bn-scaff_17750_1-p74080 C-genome specific (oleracea only)  | not scorable | not scorable | 1         | 0.8207097 | not scorable | not scorable |
| #### Bn-scaff_17750_1-p74086 C-genome specific (oleracea only)  | not scorable | not scorable | 1         | 0.9054497 | not scorable | not scorable |
| #### Bn-scaff_17750_1-p77045 C-genome specific (oleracea only)  | not scorable | not scorable | 0.7209302 | 0.8966092 | not scorable | not scorable |
| #### Bn-scaff_17750_1-p77932 C-genome specific (napus-oleracea) | 0.9976076    | 0.7084627    | 0.9844961 | 0.6413159 | not scorable | not scorable |
| #### Bn-scaff_17750_1-p82317 genome unspecific (oleracea-rapa)  | not scorable | not scorable | 1         | 0.9095755 | 1            | 0.767073     |
| #### Bn-scaff_17750_1-p89271 C-genome specific (napus-oleracea) | 0.9880383    | 0.7520177    | 1         | 0.7927454 | not scorable | not scorable |
| #### Bn-scaff_17750_1-p91782 C-genome specific (napus-oleracea) | 0.9880383    | 0.8115302    | 0.9922481 | 0.7751406 | not scorable | not scorable |
| #### Bn-scaff_17750_1-p92404 C-genome specific (napus-oleracea) | 0.9880383    | 0.8043798    | 1         | 0.7088029 | not scorable | not scorable |
| #### Bn-scaff_17750_1-p92540 C-genome specific (napus-oleracea) | 0.9856459    | 0.5692298    | 0.9689922 | 0.5638326 | not scorable | not scorable |



|                                                                 |              |              |              |              |              |              |
|-----------------------------------------------------------------|--------------|--------------|--------------|--------------|--------------|--------------|
| #### Bn-scaff_17750_1-p93263 C-genome specific (napus-oleracea) | 0.9784689    | 0.7529289    | 0.9922481    | 0.9272014    | not scorable | not scorable |
| #### Bn-scaff_17750_1-p95210 C-genome specific (napus-oleracea) | 0.9856459    | 0.6695452    | 0.9844961    | 0.6683772    | not scorable | not scorable |
| #### Bn-scaff_17750_1-p96904 genome unspecific (all in)         | 0.9856459    | 0.5748159    | 0.9922481    | 0.7943866    | 1            | 0.8928344    |
| #### Bn-scaff_17752_1-p11177 C-genome specific (napus-oleracea) | 0.8971292    | 0.8613314    | 0.7906977    | 0.7895063    | not scorable | not scorable |
| #### Bn-scaff_17752_1-p12834 C-genome specific (napus-oleracea) | 0.9043062    | 0.7997895    | 1            | 0.7114034    | not scorable | not scorable |
| #### Bn-scaff_17752_1-p73834 C-genome specific (napus-oleracea) | 0.8803828    | 0.7948816    | 0.5968992    | 0.7246231    | not scorable | not scorable |
| #### Bn-scaff_17752_1-p76499 C-genome specific (napus-oleracea) | 0.9090909    | 0.7611356    | 0.9922481    | 0.6498048    | not scorable | not scorable |
| #### Bn-scaff_17759_1-p12468 genome unspecific (all in)         | 0.9832536    | 0.7390597    | 0.9767442    | 0.7216931    | 0.9669421    | 0.9240721    |
| #### Bn-scaff_17759_1-p1272 C-genome specific (napus-oleracea)  | 0.9688995    | 0.6744639    | 0.9767442    | 0.6868071    | not scorable | not scorable |
| #### Bn-scaff_17759_1-p18366 C-genome specific (napus-oleracea) | 0.9976076    | 0.7795557    | 0.9767442    | 0.7963439    | not scorable | not scorable |
| #### Bn-scaff_17759_1-p18397 C-genome specific (napus-oleracea) | 0.9952153    | 0.739637     | 1            | 0.7743257    | not scorable | not scorable |
| #### Bn-scaff_17759_1-p4662 C-genome specific (napus-oleracea)  | 0.9808612    | 0.7834741    | 0.9767442    | 0.7274379    | not scorable | not scorable |
| #### Bn-scaff_17759_1-p5496 C-genome specific (oleracea only)   | not scorable | not scorable | 0.7209302    | 0.8130242    | not scorable | not scorable |
| #### Bn-scaff_17759_1-p718 C-genome specific (napus-oleracea)   | 0.9880383    | 0.6651887    | 0.9689922    | 0.5820765    | not scorable | not scorable |
| #### Bn-scaff_17763_1-p2889 C-genome specific (napus-oleracea)  | 0.9928229    | 0.7952618    | 1            | 0.7468751    | not scorable | not scorable |
| #### Bn-scaff_17799_1-p10534 genome unspecific (all in)         | 0.9880383    | 0.3257049    | 1            | 0.8800021    | 0.9917355    | 0.8017468    |
| #### Bn-scaff_17799_1-p10705 napus specific                     | 0.9138756    | 0.6513289    | not scorable | not scorable | not scorable | not scorable |
| #### Bn-scaff_17799_1-p10823 C-genome specific (napus-oleracea) | 0.9138756    | 0.7695048    | 0.9224806    | 0.8260934    | not scorable | not scorable |
| #### Bn-scaff_17799_1-p10916 C-genome specific (napus-oleracea) | 0.9138756    | 0.7931236    | 1            | 0.7310935    | not scorable | not scorable |
| #### Bn-scaff_17799_1-p11529 C-genome specific (napus-oleracea) | 0.9043062    | 0.8983188    | 0.9922481    | 0.8336558    | not scorable | not scorable |
| #### Bn-scaff_17799_1-p11652 C-genome specific (napus-oleracea) | 0.9114832    | 0.8643276    | 0.9844961    | 0.8056808    | not scorable | not scorable |
| #### Bn-scaff_17799_1-p11783 C-genome specific (napus-oleracea) | 0.9114832    | 0.7987968    | 0.9069768    | 0.7128901    | not scorable | not scorable |
| #### Bn-scaff_17799_1-p11791 C-genome specific (oleracea only)  | not scorable | not scorable | 0.9224806    | 0.8207097    | not scorable | not scorable |
| #### Bn-scaff_17799_1-p11809 C-genome specific (napus-oleracea) | 0.9043062    | 0.7470889    | 0.875969     | 0.7259058    | not scorable | not scorable |
| #### Bn-scaff_17799_1-p12142 C-genome specific (napus-oleracea) | 0.9066986    | 0.8263411    | 1            | 0.732156     | not scorable | not scorable |
| #### Bn-scaff_17799_1-p12233 genome unspecific (all in)         | 0.9712918    | 0.1939306    | 0.9689922    | 0.2650189    | 1            | 0.7349294    |
| #### Bn-scaff_17799_1-p12351 genome unspecific (oleracea-rapa)  | not scorable | not scorable | 1            | 0.4855635    | 1            | 0.6993035    |
| #### Bn-scaff_17799_1-p12786 C-genome specific (napus-oleracea) | 0.9138756    | 0.7856202    | 0.9922481    | 0.7451853    | not scorable | not scorable |
| #### Bn-scaff_17799_1-p12931 genome unspecific (all in)         | 0.9976076    | 0.6103712    | 0.9767442    | 0.7812764    | 1            | 0.9183249    |
| #### Bn-scaff_17799_1-p13089 C-genome specific (napus-oleracea) | 0.9090909    | 0.8075022    | 1            | 0.8242297    | not scorable | not scorable |
| #### Bn-scaff_17799_1-p13226 C-genome specific (napus-oleracea) | 0.9043062    | 0.8297614    | 0.9379845    | 0.7309546    | not scorable | not scorable |
| #### Bn-scaff_17799_1-p13312 genome unspecific (all in)         | 0.9976076    | 0.5812439    | 0.9689922    | 0.7991942    | 1            | 0.770234     |
| #### Bn-scaff_17799_1-p13344 genome unspecific (oleracea-rapa)  | not scorable | not scorable | 0.9922481    | 0.7423147    | 1            | 0.9267737    |

|                                                                |              |              |           |           |              |              |
|----------------------------------------------------------------|--------------|--------------|-----------|-----------|--------------|--------------|
| #### Bn-scaff_17799_1-p1344 genome unspecific (all in)         | 0.9665072    | 0.2777726    | 1         | 0.6224437 | 1            | 0.6430467    |
| #### Bn-scaff_17799_1-p1367 genome unspecific (all in)         | 0.9760765    | 0.6608127    | 0.9844961 | 0.7477181 | 0.9669421    | 0.6701791    |
| #### Bn-scaff_17799_1-p13991 genome unspecific (all in)        | 0.9641148    | 0.8104565    | 0.9844961 | 0.7289358 | 0.9504132    | 0.8955503    |
| #### Bn-scaff_17799_1-p1428 C-genome specific (napus-oleracea) | 0.9138756    | 0.7797192    | 0.9612403 | 0.7326914 | not scorable | not scorable |
| #### Bn-scaff_17799_1-p1435 C-genome specific (napus-oleracea) | 0.9090909    | 0.747883     | 0.9922481 | 0.7171727 | not scorable | not scorable |
| #### Bn-scaff_17799_1-p1435 C-genome specific (napus-oleracea) | 0.9090909    | 0.6079342    | 1         | 0.5316818 | not scorable | not scorable |
| #### Bn-scaff_17799_1-p1436 C-genome specific (napus-oleracea) | 0.5263158    | 0.8160377    | 0.9922481 | 0.6910558 | not scorable | not scorable |
| #### Bn-scaff_17799_1-p1478 C-genome specific (oleracea only)  | not scorable | not scorable | 0.9767442 | 0.3964006 | not scorable | not scorable |
| #### Bn-scaff_17799_1-p1478 C-genome specific (oleracea only)  | not scorable | not scorable | 0.9612403 | 0.3440117 | not scorable | not scorable |
| #### Bn-scaff_17799_1-p1489 C-genome specific (napus-oleracea) | 0.8995215    | 0.7102787    | 0.9922481 | 0.7191827 | not scorable | not scorable |
| #### Bn-scaff_17799_1-p1491 C-genome specific (napus-oleracea) | 0.8995215    | 0.7644909    | 1         | 0.8118854 | not scorable | not scorable |
| #### Bn-scaff_17799_1-p1495 C-genome specific (napus-oleracea) | 0.8947368    | 0.7939256    | 0.9844961 | 0.7477685 | not scorable | not scorable |
| #### Bn-scaff_17799_1-p1497 C-genome specific (napus-oleracea) | 0.8923445    | 0.790644     | 1         | 0.800707  | not scorable | not scorable |
| #### Bn-scaff_17799_1-p1504 genome unspecific (all in)         | 1            | 0.4229991    | 1         | 0.9167658 | 0.9917355    | 0.8662131    |
| #### Bn-scaff_17799_1-p1520 genome unspecific (oleracea-rapa)  | not scorable | not scorable | 1         | 0.842998  | 0.9834711    | 0.7575006    |
| #### Bn-scaff_17799_1-p1552 C-genome specific (napus-oleracea) | 0.6052632    | 0.7404706    | 0.9689922 | 0.7415183 | not scorable | not scorable |
| #### Bn-scaff_17799_1-p1556 C-genome specific (napus-oleracea) | 0.9449761    | 0.5860615    | 0.9612403 | 0.6308948 | not scorable | not scorable |
| #### Bn-scaff_17799_1-p1564 C-genome specific (napus-oleracea) | 0.9090909    | 0.7817544    | 0.9922481 | 0.8315274 | not scorable | not scorable |
| #### Bn-scaff_17799_1-p15774 genome unspecific (all in)        | 0.9880383    | 0.3290678    | 1         | 0.6871793 | 1            | 0.8890457    |
| #### Bn-scaff_17799_1-p1627 genome unspecific (all in)         | 0.9641148    | 0.5447806    | 1         | 0.920522  | 1            | 0.7361605    |
| #### Bn-scaff_17799_1-p1629 C-genome specific (napus-oleracea) | 0.9593301    | 0.7064492    | 0.9922481 | 0.6833032 | not scorable | not scorable |
| #### Bn-scaff_17799_1-p1658 C-genome specific (napus-oleracea) | 0.9066986    | 0.7955971    | 1         | 0.7597526 | not scorable | not scorable |
| #### Bn-scaff_17799_1-p1658 C-genome specific (napus-oleracea) | 0.9019139    | 0.7785353    | 1         | 0.770637  | not scorable | not scorable |
| #### Bn-scaff_17799_1-p1662 C-genome specific (napus-oleracea) | 0.8492823    | 0.6375113    | 1         | 0.7509328 | not scorable | not scorable |
| #### Bn-scaff_17799_1-p1683 C-genome specific (napus-oleracea) | 0.9019139    | 0.7799903    | 0.9922481 | 0.7506769 | not scorable | not scorable |
| #### Bn-scaff_17799_1-p1687 C-genome specific (napus-oleracea) | 0.9090909    | 0.7472379    | 1         | 0.7349131 | not scorable | not scorable |
| #### Bn-scaff_17799_1-p1916 genome unspecific (all in)         | 0.9952153    | 0.4521563    | 0.9922481 | 0.8637835 | 1            | 0.9044742    |
| #### Bn-scaff_17799_1-p19174 genome unspecific (all in)        | 1            | 0.7395847    | 1         | 0.7252899 | 1            | 0.7252899    |
| #### Bn-scaff_17799_1-p19175 genome unspecific (all in)        | 0.9928229    | 0.3505815    | 1         | 0.7625802 | 1            | 0.846885     |
| #### Bn-scaff_17799_1-p1946 C-genome specific (napus-oleracea) | 0.9210526    | 0.8340697    | 0.9922481 | 0.7372329 | not scorable | not scorable |
| #### Bn-scaff_17799_1-p1946 C-genome specific (napus-oleracea) | 0.9186603    | 0.7088194    | 1         | 0.7270132 | not scorable | not scorable |
| #### Bn-scaff_17799_1-p1946 C-genome specific (napus-oleracea) | 0.9210526    | 0.7913722    | 0.9844961 | 0.7299225 | not scorable | not scorable |
| #### Bn-scaff_17799_1-p1947 C-genome specific (napus-oleracea) | 0.923445     | 0.8772672    | 0.9922481 | 0.8082263 | not scorable | not scorable |



|                                                                |              |              |              |              |              |              |
|----------------------------------------------------------------|--------------|--------------|--------------|--------------|--------------|--------------|
| #### Bn-scaff_17799_1-p22841C-genome specific (napus-oleracea) | 0.9043062    | 0.788793     | 0.9844961    | 0.8497643    | not scorable | not scorable |
| #### Bn-scaff_17799_1-p22842C-genome specific (napus-oleracea) | 0.9114832    | 0.7760924    | 0.9922481    | 0.780856     | not scorable | not scorable |
| #### Bn-scaff_17799_1-p22937genome unspecific (oleracea-rapa)  | not scorable | not scorable | 1            | 0.7893544    | 0.9752066    | 0.7276718    |
| #### Bn-scaff_17799_1-p23007C-genome specific (napus-oleracea) | 0.9090909    | 0.7906245    | 1            | 0.734373     | not scorable | not scorable |
| #### Bn-scaff_17799_1-p23011C-genome specific (napus-oleracea) | 0.9665072    | 0.8252047    | 0.9922481    | 0.6851828    | not scorable | not scorable |
| #### Bn-scaff_17799_1-p23349genome unspecific (all in)         | 0.9832536    | 0.3002803    | 0.9922481    | 0.6004092    | 1            | 0.8581787    |
| #### Bn-scaff_17799_1-p23441C-genome specific (napus-oleracea) | 0.9162679    | 0.7637123    | 1            | 0.7736173    | not scorable | not scorable |
| #### Bn-scaff_17799_1-p23464C-genome specific (napus-oleracea) | 0.9090909    | 0.7654794    | 1            | 0.7544709    | not scorable | not scorable |
| #### Bn-scaff_17799_1-p23467C-genome specific (napus-oleracea) | 0.9114832    | 0.7152818    | 1            | 0.7871521    | not scorable | not scorable |
| #### Bn-scaff_17799_1-p23567genome unspecific (oleracea-rapa)  | not scorable | not scorable | 0.9922481    | 0.7479481    | 0.9917355    | 0.9240721    |
| #### Bn-scaff_17799_1-p23578C-genome specific (napus-oleracea) | 0.9066986    | 0.7325322    | 0.9922481    | 0.8432841    | not scorable | not scorable |
| #### Bn-scaff_17799_1-p23588C-genome specific (napus-oleracea) | 0.9019139    | 0.6999552    | 1            | 0.7713683    | not scorable | not scorable |
| #### Bn-scaff_17799_1-p23632C-genome specific (napus-oleracea) | 0.9066986    | 0.7736542    | 0.9844961    | 0.8291445    | not scorable | not scorable |
| #### Bn-scaff_17799_1-p23635C-genome specific (oleracea only)  | not scorable | not scorable | 0.9302326    | 0.9287989    | not scorable | not scorable |
| #### Bn-scaff_17799_1-p23702C-genome specific (napus-oleracea) | 0.9090909    | 0.8066455    | 1            | 0.792456     | not scorable | not scorable |
| #### Bn-scaff_17799_1-p23755C-genome specific (napus-oleracea) | 0.8708134    | 0.7020374    | 1            | 0.8336643    | not scorable | not scorable |
| #### Bn-scaff_17799_1-p23807napus specific                     | 0.9090909    | 0.7889169    | not scorable | not scorable | not scorable | not scorable |
| #### Bn-scaff_17799_1-p23808C-genome specific (napus-oleracea) | 0.9090909    | 0.7914557    | 0.9612403    | 0.7379788    | not scorable | not scorable |
| #### Bn-scaff_17799_1-p23911C-genome specific (napus-oleracea) | 0.9114832    | 0.7657959    | 0.9922481    | 0.8318309    | not scorable | not scorable |
| #### Bn-scaff_17799_1-p23912C-genome specific (napus-oleracea) | 0.9114832    | 0.7984239    | 0.9844961    | 0.7381947    | not scorable | not scorable |
| #### Bn-scaff_17799_1-p24268genome unspecific (oleracea-rapa)  | not scorable | not scorable | 1            | 0.9154667    | 0.9834711    | 0.7414261    |
| #### Bn-scaff_17799_1-p24268genome unspecific (all in)         | 0.9856459    | 0.5197974    | 1            | 0.7204551    | 1            | 0.9175813    |
| #### Bn-scaff_17799_1-p24561C-genome specific (napus-oleracea) | 0.8995215    | 0.6736885    | 1            | 0.6806137    | not scorable | not scorable |
| #### Bn-scaff_17799_1-p24671genome unspecific (all in)         | 0.9952153    | 0.3773942    | 1            | 0.831409     | 1            | 0.9044503    |
| #### Bn-scaff_17799_1-p24811C-genome specific (oleracea only)  | not scorable | not scorable | 0.9922481    | 0.8181175    | not scorable | not scorable |
| #### Bn-scaff_17799_1-p24948C-genome specific (napus-oleracea) | 0.9019139    | 0.768379     | 1            | 0.7298943    | not scorable | not scorable |
| #### Bn-scaff_17799_1-p24956genome unspecific (all in)         | 0.9545454    | 0.6292063    | 0.9767442    | 0.7905719    | 1            | 0.8709515    |
| #### Bn-scaff_17799_1-p24970C-genome specific (napus-oleracea) | 0.8995215    | 0.7504822    | 0.9844961    | 0.8068419    | not scorable | not scorable |
| #### Bn-scaff_17799_1-p25411C-genome specific (napus-oleracea) | 0.8899522    | 0.7829034    | 0.9302326    | 0.7942055    | not scorable | not scorable |
| #### Bn-scaff_17799_1-p25489C-genome specific (napus-oleracea) | 0.9066986    | 0.799238     | 0.9922481    | 0.8245482    | not scorable | not scorable |
| #### Bn-scaff_17799_1-p25773C-genome specific (napus-oleracea) | 0.9617225    | 0.3118378    | 0.9844961    | 0.4449646    | not scorable | not scorable |
| #### Bn-scaff_17799_1-p26115C-genome specific (napus-oleracea) | 0.9952153    | 0.6832494    | 0.8062016    | 0.7477623    | not scorable | not scorable |
| #### Bn-scaff_17799_1-p26473C-genome specific (napus-oleracea) | 0.9928229    | 0.6226519    | 1            | 0.6183125    | not scorable | not scorable |

|                                                                 |           |           |           |           |              |              |
|-----------------------------------------------------------------|-----------|-----------|-----------|-----------|--------------|--------------|
| #### Bn-scaff_17799_1-p26684 genome unspecific (all in)         | 0.9952153 | 0.3439659 | 0.9922481 | 0.6987814 | 1            | 0.9371744    |
| #### Bn-scaff_17799_1-p26770 C-genome specific (napus-oleracea) | 0.9928229 | 0.5195131 | 1         | 0.9145847 | not scorable | not scorable |
| #### Bn-scaff_17799_1-p26853 C-genome specific (napus-oleracea) | 1         | 0.6515852 | 1         | 0.6285746 | not scorable | not scorable |
| #### Bn-scaff_17799_1-p26905 genome unspecific (all in)         | 1         | 0.5755081 | 1         | 0.6362335 | 1            | 0.8116314    |
| #### Bn-scaff_17799_1-p27478 C-genome specific (napus-oleracea) | 1         | 0.7118511 | 0.9457364 | 0.7719045 | not scorable | not scorable |
| #### Bn-scaff_17799_1-p27498 C-genome specific (napus-oleracea) | 0.9976076 | 0.7919711 | 0.9457364 | 0.7448691 | not scorable | not scorable |
| #### Bn-scaff_17799_1-p27633 C-genome specific (napus-oleracea) | 1         | 0.7079257 | 0.9922481 | 0.7590439 | not scorable | not scorable |
| #### Bn-scaff_17799_1-p27638 C-genome specific (napus-oleracea) | 0.9976076 | 0.7803772 | 0.9922481 | 0.7379601 | not scorable | not scorable |
| #### Bn-scaff_17799_1-p27647 C-genome specific (napus-oleracea) | 1         | 0.7178821 | 0.9922481 | 0.7479207 | not scorable | not scorable |
| #### Bn-scaff_17799_1-p27734 C-genome specific (napus-oleracea) | 0.9976076 | 0.6704551 | 1         | 0.6539714 | not scorable | not scorable |
| #### Bn-scaff_17799_1-p27739 C-genome specific (napus-oleracea) | 1         | 0.7389657 | 1         | 0.6673133 | not scorable | not scorable |
| #### Bn-scaff_17799_1-p27743 C-genome specific (napus-oleracea) | 0.9976076 | 0.6840711 | 0.9922481 | 0.6405059 | not scorable | not scorable |
| #### Bn-scaff_17799_1-p27754 C-genome specific (napus-oleracea) | 0.9904306 | 0.8330646 | 0.9844961 | 0.7869338 | not scorable | not scorable |
| #### Bn-scaff_17799_1-p27755 C-genome specific (napus-oleracea) | 0.9928229 | 0.7034166 | 0.9844961 | 0.803908  | not scorable | not scorable |
| #### Bn-scaff_17799_1-p27756 C-genome specific (napus-oleracea) | 1         | 0.7475176 | 0.9922481 | 0.7038233 | not scorable | not scorable |
| #### Bn-scaff_17799_1-p27851 C-genome specific (napus-oleracea) | 0.9928229 | 0.8046756 | 0.9922481 | 0.7894883 | not scorable | not scorable |
| #### Bn-scaff_17799_1-p28213 C-genome specific (napus-oleracea) | 0.9904306 | 0.6885363 | 0.9922481 | 0.6523729 | not scorable | not scorable |
| #### Bn-scaff_17799_1-p28222 C-genome specific (napus-oleracea) | 0.9904306 | 0.7851253 | 0.9844961 | 0.6649362 | not scorable | not scorable |
| #### Bn-scaff_17799_1-p28222 C-genome specific (napus-oleracea) | 0.9928229 | 0.7947842 | 0.9922481 | 0.6351367 | not scorable | not scorable |
| #### Bn-scaff_17799_1-p28229 C-genome specific (napus-oleracea) | 0.9928229 | 0.65271   | 0.9922481 | 0.8200917 | not scorable | not scorable |
| #### Bn-scaff_17799_1-p28231 C-genome specific (napus-oleracea) | 0.9904306 | 0.7091061 | 1         | 0.7341247 | not scorable | not scorable |
| #### Bn-scaff_17799_1-p28237 C-genome specific (napus-oleracea) | 0.9928229 | 0.8222839 | 0.9922481 | 0.8367779 | not scorable | not scorable |
| #### Bn-scaff_17799_1-p28239 C-genome specific (napus-oleracea) | 0.9976076 | 0.8055264 | 1         | 0.7957637 | not scorable | not scorable |
| #### Bn-scaff_17799_1-p28252 C-genome specific (napus-oleracea) | 0.9904306 | 0.716219  | 1         | 0.6024956 | not scorable | not scorable |
| #### Bn-scaff_17799_1-p28254 C-genome specific (napus-oleracea) | 0.9904306 | 0.7980184 | 0.9922481 | 0.8193912 | not scorable | not scorable |
| #### Bn-scaff_17799_1-p28295 C-genome specific (napus-oleracea) | 0.9952153 | 0.6908416 | 0.9767442 | 0.7559571 | not scorable | not scorable |
| #### Bn-scaff_17799_1-p28340 C-genome specific (napus-oleracea) | 0.9952153 | 0.212749  | 0.9844961 | 0.662584  | not scorable | not scorable |
| #### Bn-scaff_17799_1-p28386 C-genome specific (napus-oleracea) | 0.9880383 | 0.7741938 | 1         | 0.8372513 | not scorable | not scorable |
| #### Bn-scaff_17799_1-p28408 C-genome specific (napus-oleracea) | 0.9688995 | 0.833436  | 1         | 0.7830911 | not scorable | not scorable |
| #### Bn-scaff_17799_1-p28416 C-genome specific (napus-oleracea) | 0.9832536 | 0.8377429 | 1         | 0.7964873 | not scorable | not scorable |
| #### Bn-scaff_17799_1-p28433 C-genome specific (napus-oleracea) | 0.9832536 | 0.7917253 | 1         | 0.8168483 | not scorable | not scorable |
| #### Bn-scaff_17799_1-p28564 C-genome specific (napus-oleracea) | 0.9760765 | 0.8446331 | 1         | 0.7087119 | not scorable | not scorable |
| #### Bn-scaff_17799_1-p28589 C-genome specific (napus-oleracea) | 0.9904306 | 0.7516383 | 0.9689922 | 0.7613564 | not scorable | not scorable |

|                                                                 |              |              |              |              |              |              |
|-----------------------------------------------------------------|--------------|--------------|--------------|--------------|--------------|--------------|
| #### Bn-scaff_17799_1-p28693 C-genome specific (napus-oleracea) | 0.9904306    | 0.5090688    | 0.9922481    | 0.5793415    | not scorable | not scorable |
| #### Bn-scaff_17799_1-p28852 C-genome specific (napus-oleracea) | 0.9928229    | 0.6825263    | 1            | 0.6388423    | not scorable | not scorable |
| #### Bn-scaff_17799_1-p28860 C-genome specific (oleracea only)  | not scorable | not scorable | 0.8682171    | 0.899044     | not scorable | not scorable |
| #### Bn-scaff_17799_1-p29178 C-genome specific (napus-oleracea) | 0.9832536    | 0.6894265    | 1            | 0.798973     | not scorable | not scorable |
| #### Bn-scaff_17799_1-p29279 A-genome specific (napus-rapa)     | 0.9593301    | 0.2904369    | not scorable | not scorable | 1            | 0.8848049    |
| #### Bn-scaff_17799_1-p29324 A-genome specific (napus-rapa)     | 0.9090909    | 0.3435441    | not scorable | not scorable | 1            | 0.9490778    |
| #### Bn-scaff_17799_1-p29377 genome unspecific (all in)         | 0.9880383    | 0.3161222    | 1            | 0.7310598    | 1            | 0.9095823    |
| #### Bn-scaff_17799_1-p29879 C-genome specific (napus-oleracea) | 0.9760765    | 0.6683721    | 0.9767442    | 0.6916672    | not scorable | not scorable |
| #### Bn-scaff_17799_1-p29902 genome unspecific (all in)         | 0.9928229    | 0.3874068    | 1            | 0.7351906    | 1            | 0.9114806    |
| #### Bn-scaff_17799_1-p29934 C-genome specific (napus-oleracea) | 0.9856459    | 0.811419     | 0.9922481    | 0.6891034    | not scorable | not scorable |
| #### Bn-scaff_17799_1-p29939 C-genome specific (napus-oleracea) | 0.9952153    | 0.7923077    | 0.9922481    | 0.7699658    | not scorable | not scorable |
| #### Bn-scaff_17799_1-p29946 genome unspecific (all in)         | 0.9928229    | 0.5190625    | 1            | 0.7354125    | 1            | 0.9205657    |
| #### Bn-scaff_17799_1-p29946 genome unspecific (all in)         | 0.9856459    | 0.5337676    | 1            | 0.7209408    | 1            | 0.870653     |
| #### Bn-scaff_17799_1-p30023 C-genome specific (napus-oleracea) | 0.9641148    | 0.7665519    | 0.6976744    | 0.7231686    | not scorable | not scorable |
| #### Bn-scaff_17799_1-p30069 C-genome specific (napus-oleracea) | 0.9928229    | 0.8092656    | 0.7131783    | 0.779397     | not scorable | not scorable |
| #### Bn-scaff_17799_1-p30094 C-genome specific (napus-oleracea) | 0.9138756    | 0.7716814    | 0.9922481    | 0.8113184    | not scorable | not scorable |
| #### Bn-scaff_17799_1-p30108 C-genome specific (napus-oleracea) | 0.9832536    | 0.7439385    | 1            | 0.7784554    | not scorable | not scorable |
| #### Bn-scaff_17799_1-p30148 C-genome specific (napus-oleracea) | 0.9856459    | 0.7238413    | 1            | 0.6862206    | not scorable | not scorable |
| #### Bn-scaff_17799_1-p30155 C-genome specific (oleracea only)  | not scorable | not scorable | 1            | 0.7589495    | not scorable | not scorable |
| #### Bn-scaff_17799_1-p30157 C-genome specific (oleracea only)  | not scorable | not scorable | 1            | 0.5577151    | not scorable | not scorable |
| #### Bn-scaff_17799_1-p30160 C-genome specific (oleracea only)  | not scorable | not scorable | 1            | 0.6450936    | not scorable | not scorable |
| #### Bn-scaff_17799_1-p30226 C-genome specific (napus-oleracea) | 0.9880383    | 0.7974597    | 0.9844961    | 0.8394955    | not scorable | not scorable |
| #### Bn-scaff_17799_1-p30297 C-genome specific (napus-oleracea) | 0.9928229    | 0.8193051    | 1            | 0.8421966    | not scorable | not scorable |
| #### Bn-scaff_17799_1-p30414 genome unspecific (all in)         | 0.9904306    | 0.4398371    | 1            | 0.7831784    | 1            | 0.929086     |
| #### Bn-scaff_17799_1-p30497 C-genome specific (napus-oleracea) | 0.9856459    | 0.7800768    | 1            | 0.8477142    | not scorable | not scorable |
| #### Bn-scaff_17799_1-p30499 C-genome specific (napus-oleracea) | 0.9856459    | 0.7482079    | 1            | 0.754338     | not scorable | not scorable |
| #### Bn-scaff_17799_1-p30500 C-genome specific (napus-oleracea) | 0.9952153    | 0.4703393    | 1            | 0.4786003    | not scorable | not scorable |
| #### Bn-scaff_17799_1-p30503 C-genome specific (napus-oleracea) | 0.9856459    | 0.8127625    | 1            | 0.7735092    | not scorable | not scorable |
| #### Bn-scaff_17799_1-p30506 C-genome specific (napus-oleracea) | 0.9976076    | 0.5320941    | 0.9767442    | 0.5550501    | not scorable | not scorable |
| #### Bn-scaff_17799_1-p39372 C-genome specific (napus-oleracea) | 0.9545454    | 0.2938173    | 1            | 0.7778927    | not scorable | not scorable |
| #### Bn-scaff_17799_1-p39727 genome unspecific (all in)         | 0.9952153    | 0.3564915    | 0.9844961    | 0.3910058    | 1            | 0.8637059    |
| #### Bn-scaff_17799_1-p40145 C-genome specific (napus-oleracea) | 0.9090909    | 0.7498962    | 0.7984496    | 0.8594815    | not scorable | not scorable |
| #### Bn-scaff_17799_1-p45818 C-genome specific (napus-oleracea) | 0.8995215    | 0.7860779    | 0.9689922    | 0.7765799    | not scorable | not scorable |

|                                                                |              |              |              |              |              |              |
|----------------------------------------------------------------|--------------|--------------|--------------|--------------|--------------|--------------|
| #### Bn-scaff_17799_1-p45931C-genome specific (napus-oleracea) | 0.9712918    | 0.7032244    | 0.9922481    | 0.8090347    | not scorable | not scorable |
| #### Bn-scaff_17799_1-p46262C-genome specific (napus-oleracea) | 0.9019139    | 0.8336098    | 1            | 0.8482381    | not scorable | not scorable |
| #### Bn-scaff_17799_1-p46262C-genome specific (napus-oleracea) | 0.9019139    | 0.757008     | 0.9922481    | 0.7873616    | not scorable | not scorable |
| #### Bn-scaff_17799_1-p50784A-genome specific (napus-rapa)     | 0.9736842    | 0.7953089    | not scorable | not scorable | 0.9752066    | 0.7635936    |
| #### Bn-scaff_17799_1-p57017genome unspecific (oleracea-rapa)  | not scorable | not scorable | 1            | 0.903258     | 0.9834711    | 0.7842557    |
| #### Bn-scaff_17799_1-p66878genome unspecific (oleracea-rapa)  | not scorable | not scorable | 1            | 0.7381998    | 0.9917355    | 0.4977122    |
| #### Bn-scaff_17799_1-p67006A-genome specific (napus-rapa)     | 0.9952153    | 0.3439211    | not scorable | not scorable | 1            | 0.8293141    |
| #### Bn-scaff_17799_1-p67812C-genome specific (oleracea only)  | not scorable | not scorable | 1            | 0.6218399    | not scorable | not scorable |
| #### Bn-scaff_17799_1-p71782C-genome specific (napus-oleracea) | 0.9090909    | 0.8491455    | 1            | 0.8289795    | not scorable | not scorable |
| #### Bn-scaff_17799_1-p74395genome unspecific (all in)         | 0.9952153    | 0.3382936    | 0.9922481    | 0.8496376    | 0.9834711    | 0.7981931    |
| #### Bn-scaff_17799_1-p74419genome unspecific (oleracea-rapa)  | not scorable | not scorable | 0.4031008    | 0.7449794    | 1            | 0.8146118    |
| #### Bn-scaff_17799_1-p83344genome unspecific (all in)         | 0.9665072    | 0.3202011    | 0.9844961    | 0.8112721    | 1            | 0.8789392    |
| #### Bn-scaff_17799_1-p83691C-genome specific (napus-oleracea) | 0.9043062    | 0.8014864    | 1            | 0.8060375    | not scorable | not scorable |
| #### Bn-scaff_17799_1-p84035C-genome specific (napus-oleracea) | 0.9138756    | 0.7446461    | 0.9922481    | 0.7943478    | not scorable | not scorable |
| #### Bn-scaff_17799_1-p84181C-genome specific (napus-oleracea) | 0.9066986    | 0.726081     | 1            | 0.8103961    | not scorable | not scorable |
| #### Bn-scaff_17799_1-p85356C-genome specific (napus-oleracea) | 0.8947368    | 0.6683721    | 0.9844961    | 0.7607561    | not scorable | not scorable |
| #### Bn-scaff_17799_1-p85934C-genome specific (napus-oleracea) | 0.8995215    | 0.7440394    | 0.9844961    | 0.66834      | not scorable | not scorable |
| #### Bn-scaff_17799_1-p85983C-genome specific (napus-oleracea) | 0.8971292    | 0.7565614    | 1            | 0.6840949    | not scorable | not scorable |
| #### Bn-scaff_17799_1-p86378C-genome specific (napus-oleracea) | 0.9066986    | 0.7244076    | 1            | 0.7753921    | not scorable | not scorable |
| #### Bn-scaff_17799_1-p87763C-genome specific (napus-oleracea) | 0.8971292    | 0.7606884    | 1            | 0.8634765    | not scorable | not scorable |
| #### Bn-scaff_17799_1-p88487C-genome specific (napus-oleracea) | 0.9019139    | 0.63903      | 0.9767442    | 0.4116861    | not scorable | not scorable |
| #### Bn-scaff_17799_1-p90467C-genome specific (napus-oleracea) | 0.8971292    | 0.7388744    | 0.8294573    | 0.7724286    | not scorable | not scorable |
| #### Bn-scaff_17799_1-p90469C-genome specific (napus-oleracea) | 0.9114832    | 0.8768139    | 1            | 0.8266522    | not scorable | not scorable |
| #### Bn-scaff_17799_1-p90534C-genome specific (napus-oleracea) | 0.9473684    | 0.7786232    | 1            | 0.7698053    | not scorable | not scorable |
| #### Bn-scaff_17799_1-p92528C-genome specific (napus-oleracea) | 0.9162679    | 0.9188736    | 0.9922481    | 0.7584774    | not scorable | not scorable |
| #### Bn-scaff_17799_1-p94528genome unspecific (all in)         | 1            | 0.3336113    | 1            | 0.751201     | 1            | 0.8592229    |
| #### Bn-scaff_17801_1-p17792C-genome specific (napus-oleracea) | 0.8875598    | 0.7411273    | 0.7906977    | 0.7266333    | not scorable | not scorable |
| #### Bn-scaff_17801_1-p17805C-genome specific (napus-oleracea) | 0.9521531    | 0.6938307    | 0.8139535    | 0.7474469    | not scorable | not scorable |
| #### Bn-scaff_17801_1-p17988C-genome specific (napus-oleracea) | 0.9090909    | 0.7660553    | 0.8217054    | 0.7641238    | not scorable | not scorable |
| #### Bn-scaff_17801_1-p18056C-genome specific (napus-oleracea) | 0.9162679    | 0.7900847    | 1            | 0.7959775    | not scorable | not scorable |
| #### Bn-scaff_17801_1-p18507C-genome specific (napus-oleracea) | 0.9162679    | 0.7526077    | 1            | 0.7777513    | not scorable | not scorable |
| #### Bn-scaff_17801_1-p18973C-genome specific (napus-oleracea) | 0.9066986    | 0.7483922    | 0.9922481    | 0.7562119    | not scorable | not scorable |
| #### Bn-scaff_17801_1-p18998C-genome specific (napus-oleracea) | 0.9138756    | 0.7455629    | 0.9922481    | 0.7633793    | not scorable | not scorable |

|                                                                 |              |              |              |   |              |              |              |
|-----------------------------------------------------------------|--------------|--------------|--------------|---|--------------|--------------|--------------|
| #### Bn-scaff_17801_1-p19005 C-genome specific (napus-oleracea) | 0.9138756    | 0.7889614    |              | 1 | 0.867171     | not scorable | not scorable |
| #### Bn-scaff_17801_1-p19135 C-genome specific (napus-oleracea) | 0.9090909    | 0.8247428    |              | 1 | 0.8110232    | not scorable | not scorable |
| #### Bn-scaff_17801_1-p19143 C-genome specific (napus-oleracea) | 0.9162679    | 0.7875435    | 0.9922481    |   | 0.8119262    | not scorable | not scorable |
| #### Bn-scaff_17801_1-p19845 C-genome specific (napus-oleracea) | 0.9162679    | 0.7823972    |              | 1 | 0.7738624    | not scorable | not scorable |
| #### Bn-scaff_17801_1-p20059 C-genome specific (napus-oleracea) | 0.9090909    | 0.7884721    |              | 1 | 0.8115303    | not scorable | not scorable |
| #### Bn-scaff_17801_1-p20305 C-genome specific (napus-oleracea) | 0.9186603    | 0.6787214    |              | 1 | 0.7309546    | not scorable | not scorable |
| #### Bn-scaff_17801_1-p22080 C-genome specific (napus-oleracea) | 0.9784689    | 0.71972      |              | 1 | 0.7621902    | not scorable | not scorable |
| #### Bn-scaff_17801_1-p22087 C-genome specific (napus-oleracea) | 0.9569378    | 0.7780905    |              | 1 | 0.730406     | not scorable | not scorable |
| #### Bn-scaff_17801_1-p22099 C-genome specific (napus-oleracea) | 0.9138756    | 0.7181084    |              | 1 | 0.8134121    | not scorable | not scorable |
| #### Bn-scaff_17801_1-p22894 C-genome specific (napus-oleracea) | 0.9138756    | 0.7395269    | 0.9612403    |   | 0.8395084    | not scorable | not scorable |
| #### Bn-scaff_17801_1-p22967 C-genome specific (napus-oleracea) | 0.9162679    | 0.7329159    | 0.9844961    |   | 0.6593135    | not scorable | not scorable |
| #### Bn-scaff_17801_1-p23013 C-genome specific (napus-oleracea) | 0.9138756    | 0.7314316    | 0.9767442    |   | 0.6753237    | not scorable | not scorable |
| #### Bn-scaff_17801_1-p23224 C-genome specific (napus-oleracea) | 0.9114832    | 0.8083807    | 0.9922481    |   | 0.7453801    | not scorable | not scorable |
| #### Bn-scaff_17801_1-p23242 C-genome specific (napus-oleracea) | 0.9066986    | 0.7663167    |              | 1 | 0.8529311    | not scorable | not scorable |
| #### Bn-scaff_17801_1-p23331 C-genome specific (napus-oleracea) | 0.9210526    | 0.6841009    |              | 1 | 0.6970863    | not scorable | not scorable |
| #### Bn-scaff_17801_1-p23357 C-genome specific (napus-oleracea) | 0.9162679    | 0.5978459    | 0.9844961    |   | 0.5202986    | not scorable | not scorable |
| #### Bn-scaff_17801_1-p31482 genome unspecific (all in)         | 0.9832536    | 0.2988009    |              | 1 | 0.7570747    | 1            | 0.8263901    |
| #### Bn-scaff_17807_1-p10985 genome unspecific (all in)         | 1            | 0.7442623    |              | 1 | 0.7641606    | 1            | 0.825252     |
| #### Bn-scaff_17807_1-p12286 A-genome specific (napus-rapa)     | 0.9952153    | 0.6039186    | not scorable |   | not scorable | 1            | 0.9277161    |
| #### Bn-scaff_17807_1-p16467 genome unspecific (all in)         | 1            | 0.5003921    |              | 1 | 0.7641622    | 1            | 0.8948976    |
| #### Bn-scaff_17807_1-p19205 C-genome specific (napus-oleracea) | 0.9617225    | 0.715536     | 0.8527132    |   | 0.7969221    | not scorable | not scorable |
| #### Bn-scaff_17807_1-p29447 genome unspecific (all in)         | 1            | 0.5151787    | 0.9612403    |   | 0.2058288    | 1            | 0.6963184    |
| #### Bn-scaff_17807_1-p36457 genome unspecific (all in)         | 0.9928229    | 0.633327     |              | 1 | 0.8385166    | 1            | 0.9200076    |
| #### Bn-scaff_17807_1-p46127 genome unspecific (all in)         | 0.9712918    | 0.4314775    | 0.9844961    |   | 0.9065024    | 0.9834711    | 0.6811854    |
| #### Bn-scaff_17807_1-p46182 genome unspecific (oleracea-rapa)  | not scorable | not scorable |              | 1 | 0.8175796    | 1            | 0.5770498    |
| #### Bn-scaff_17807_1-p46200 genome unspecific (all in)         | 0.9808612    | 0.4197607    |              | 1 | 0.6212282    | 1            | 0.7399446    |
| #### Bn-scaff_17807_1-p46285 genome unspecific (all in)         | 0.9904306    | 0.3463301    | 0.9922481    |   | 0.3397625    | 1            | 0.8686824    |
| #### Bn-scaff_17807_1-p50312 C-genome specific (napus-oleracea) | 1            | 0.5467409    |              | 1 | 0.8085203    | not scorable | not scorable |
| #### Bn-scaff_17807_1-p50349 A-genome specific (rapa only)      | not scorable | not scorable | not scorable |   | not scorable | 1            | 0.7156166    |
| #### Bn-scaff_17807_1-p53751 C-genome specific (napus-oleracea) | 0.9904306    | 0.7840836    |              | 1 | 0.5910789    | not scorable | not scorable |
| #### Bn-scaff_17807_1-p79939 genome unspecific (oleracea-rapa)  | not scorable | not scorable |              | 1 | 0.9203181    | 0.9669421    | 0.683126     |
| #### Bn-scaff_17807_1-p98331 genome unspecific (all in)         | 0.9712918    | 0.3325283    |              | 1 | 0.8321881    | 0.9669421    | 0.7957016    |
| #### Bn-scaff_17807_2-p7170 C-genome specific (napus-oleracea)  | 1            | 0.5324681    |              | 1 | 0.5003932    | not scorable | not scorable |



|                                                                |              |              |              |              |              |              |
|----------------------------------------------------------------|--------------|--------------|--------------|--------------|--------------|--------------|
| #### Bn-scaff_17821_1-p11931genome unspecific (all in)         | 0.9904306    | 0.737573     | 0.9767442    | 0.8287821    | 1            | 0.7205667    |
| #### Bn-scaff_17821_1-p12725genome unspecific (all in)         | 0.9162679    | 0.5195759    | 0.9922481    | 0.505981     | 1            | 0.8469343    |
| #### Bn-scaff_17821_1-p13119C-genome specific (napus-oleracea) | 0.9832536    | 0.8723682    | 0.9922481    | 0.7973735    | not scorable | not scorable |
| #### Bn-scaff_17821_1-p13194C-genome specific (napus-oleracea) | 0.9952153    | 0.7825384    | 1            | 0.7813278    | not scorable | not scorable |
| #### Bn-scaff_17821_1-p13223C-genome specific (napus-oleracea) | 0.9952153    | 0.7332062    | 1            | 0.8833053    | not scorable | not scorable |
| #### Bn-scaff_17821_1-p13229C-genome specific (napus-oleracea) | 0.9808612    | 0.8307734    | 1            | 0.8343565    | not scorable | not scorable |
| #### Bn-scaff_17821_1-p13837C-genome specific (oleracea only)  | not scorable | not scorable | 0.8682171    | 0.8631251    | not scorable | not scorable |
| #### Bn-scaff_17821_1-p13845C-genome specific (napus-oleracea) | 0.9928229    | 0.7545448    | 1            | 0.7383564    | not scorable | not scorable |
| #### Bn-scaff_17821_1-p21053C-genome specific (napus-oleracea) | 0.9952153    | 0.789691     | 1            | 0.8437496    | not scorable | not scorable |
| #### Bn-scaff_17821_1-p24101C-genome specific (napus-oleracea) | 0.9736842    | 0.8051122    | 0.9069768    | 0.7698644    | not scorable | not scorable |
| #### Bn-scaff_17821_1-p30329C-genome specific (napus-oleracea) | 0.9641148    | 0.8254326    | 0.9767442    | 0.7854755    | not scorable | not scorable |
| #### Bn-scaff_17821_1-p30801C-genome specific (napus-oleracea) | 0.9808612    | 0.7635099    | 0.9767442    | 0.6286279    | not scorable | not scorable |
| #### Bn-scaff_17821_1-p45086C-genome specific (oleracea only)  | not scorable | not scorable | 0.9922481    | 0.7879706    | not scorable | not scorable |
| #### Bn-scaff_17827_1-p10110C-genome specific (napus-oleracea) | 0.9712918    | 0.7868544    | 0.6356589    | 0.86713      | not scorable | not scorable |
| #### Bn-scaff_17827_1-p10207genome unspecific (all in)         | 0.9904306    | 0.297956     | 0.9844961    | 0.4265824    | 1            | 0.6588402    |
| #### Bn-scaff_17827_1-p10254C-genome specific (napus-oleracea) | 0.9856459    | 0.7961559    | 0.9612403    | 0.846628     | not scorable | not scorable |
| #### Bn-scaff_17827_1-p10268C-genome specific (napus-oleracea) | 0.9880383    | 0.7413831    | 0.9302326    | 0.6665729    | not scorable | not scorable |
| #### Bn-scaff_17827_1-p10275C-genome specific (napus-oleracea) | 0.9856459    | 0.7834362    | 0.9612403    | 0.8076599    | not scorable | not scorable |
| #### Bn-scaff_17827_1-p10284C-genome specific (napus-oleracea) | 0.9880383    | 0.8109726    | 0.9612403    | 0.8387825    | not scorable | not scorable |
| #### Bn-scaff_17827_1-p10383C-genome specific (napus-oleracea) | 0.9856459    | 0.8088062    | 0.7984496    | 0.8295056    | not scorable | not scorable |
| #### Bn-scaff_17827_1-p11110C-genome specific (napus-oleracea) | 0.9832536    | 0.6770353    | 0.9922481    | 0.7126641    | not scorable | not scorable |
| #### Bn-scaff_17827_1-p11120C-genome specific (napus-oleracea) | 0.9856459    | 0.7828533    | 0.9922481    | 0.7626071    | not scorable | not scorable |
| #### Bn-scaff_17827_1-p11192C-genome specific (napus-oleracea) | 0.9808612    | 0.7979419    | 0.9922481    | 0.7614163    | not scorable | not scorable |
| #### Bn-scaff_17827_1-p19795A-genome specific (napus-rapa)     | 0.5885168    | 0.7419909    | not scorable | not scorable | 0.892562     | 0.6698397    |
| #### Bn-scaff_17827_1-p20213C-genome specific (napus-oleracea) | 0.9832536    | 0.7669564    | 0.9844961    | 0.8391924    | not scorable | not scorable |
| #### Bn-scaff_17827_1-p2478 genome unspecific (all in)         | 0.9736842    | 0.4187272    | 1            | 0.7483085    | 1            | 0.9273128    |
| #### Bn-scaff_17827_1-p27197genome unspecific (all in)         | 0.9641148    | 0.4684354    | 0.9922481    | 0.7492533    | 1            | 0.8520441    |
| #### Bn-scaff_17827_1-p32996genome unspecific (all in)         | 0.9856459    | 0.2825013    | 0.9922481    | 0.752191     | 0.9917355    | 0.6783729    |
| #### Bn-scaff_17827_1-p36744C-genome specific (napus-oleracea) | 0.9880383    | 0.7816777    | 1            | 0.7699344    | not scorable | not scorable |
| #### Bn-scaff_17827_1-p37276C-genome specific (napus-oleracea) | 0.9808612    | 0.7693297    | 0.8682171    | 0.7526702    | not scorable | not scorable |
| #### Bn-scaff_17827_1-p37387C-genome specific (napus-oleracea) | 0.9617225    | 0.704096     | 0.9767442    | 0.7569488    | not scorable | not scorable |
| #### Bn-scaff_17827_1-p42736C-genome specific (napus-oleracea) | 0.9784689    | 0.7167615    | 0.9767442    | 0.8204296    | not scorable | not scorable |
| #### Bn-scaff_17827_1-p43101C-genome specific (oleracea only)  | not scorable | not scorable | 0.9844961    | 0.2792362    | not scorable | not scorable |

|                                                                 |              |              |              |              |              |              |
|-----------------------------------------------------------------|--------------|--------------|--------------|--------------|--------------|--------------|
| #### Bn-scaff_17827_1-p49625 A-genome specific (napus-rapa)     | 0.9736842    | 0.7235652    | not scorable | not scorable | 1            | 0.7907979    |
| #### Bn-scaff_17827_1-p52311 genome unspecific (oleracea-rapa)  | not scorable | not scorable | 0.9612403    | 0.3797788    | 1            | 0.7638845    |
| #### Bn-scaff_17827_1-p58604 genome unspecific (all in)         | 1            | 0.5801879    | 0.9922481    | 0.8439063    | 1            | 0.9314102    |
| #### Bn-scaff_17827_1-p58611 C-genome specific (napus-oleracea) | 0.9808612    | 0.6617288    | 0.9922481    | 0.710373     | not scorable | not scorable |
| #### Bn-scaff_17827_1-p60003 C-genome specific (napus-oleracea) | 0.9856459    | 0.748161     | 1            | 0.7352715    | not scorable | not scorable |
| #### Bn-scaff_17827_1-p61341 C-genome specific (napus-oleracea) | 0.9880383    | 0.8443561    | 0.9922481    | 0.8204395    | not scorable | not scorable |
| #### Bn-scaff_17827_1-p61347 genome unspecific (all in)         | 0.9808612    | 0.6254081    | 0.9844961    | 0.6093273    | 1            | 0.6863768    |
| #### Bn-scaff_17827_1-p62197 C-genome specific (napus-oleracea) | 0.9832536    | 0.7884789    | 1            | 0.7518371    | not scorable | not scorable |
| #### Bn-scaff_17827_1-p62215 C-genome specific (napus-oleracea) | 0.8947368    | 0.7163478    | 1            | 0.6512227    | not scorable | not scorable |
| #### Bn-scaff_17827_1-p62220 C-genome specific (napus-oleracea) | 0.9856459    | 0.7225362    | 1            | 0.778048     | not scorable | not scorable |
| #### Bn-scaff_17827_1-p62256 C-genome specific (napus-oleracea) | 0.9856459    | 0.7214938    | 1            | 0.7867978    | not scorable | not scorable |
| #### Bn-scaff_17827_1-p62334 C-genome specific (napus-oleracea) | 0.9665072    | 0.8309591    | 0.9844961    | 0.7741976    | not scorable | not scorable |
| #### Bn-scaff_17827_1-p62337 C-genome specific (napus-oleracea) | 0.9808612    | 0.7194113    | 0.9922481    | 0.7319118    | not scorable | not scorable |
| #### Bn-scaff_17827_1-p62870 C-genome specific (napus-oleracea) | 0.9880383    | 0.8351899    | 0.9922481    | 0.7939938    | not scorable | not scorable |
| #### Bn-scaff_17827_1-p62908 C-genome specific (napus-oleracea) | 0.9880383    | 0.7959908    | 1            | 0.7396225    | not scorable | not scorable |
| #### Bn-scaff_17827_1-p62935 genome unspecific (all in)         | 0.9976076    | 0.3476197    | 1            | 0.8286396    | 0.9752066    | 0.7792715    |
| #### Bn-scaff_17827_1-p63410 C-genome specific (napus-oleracea) | 0.9473684    | 0.333685     | 0.6511628    | 0.8382434    | not scorable | not scorable |
| #### Bn-scaff_17827_1-p64279 C-genome specific (napus-oleracea) | 0.9712918    | 0.8232183    | 0.9689922    | 0.7510871    | not scorable | not scorable |
| #### Bn-scaff_17827_1-p64321 C-genome specific (napus-oleracea) | 0.9784689    | 0.8198271    | 0.9612403    | 0.8059955    | not scorable | not scorable |
| #### Bn-scaff_17827_1-p64614 C-genome specific (napus-oleracea) | 0.9904306    | 0.8456046    | 1            | 0.7212471    | not scorable | not scorable |
| #### Bn-scaff_17827_1-p64855 C-genome specific (napus-oleracea) | 0.9808612    | 0.8020868    | 0.9922481    | 0.8647583    | not scorable | not scorable |
| #### Bn-scaff_17827_1-p65387 genome unspecific (all in)         | 0.9808612    | 0.4317307    | 1            | 0.4992054    | 1            | 0.8551211    |
| #### Bn-scaff_17827_1-p65425 genome unspecific (all in)         | 0.9856459    | 0.2066161    | 0.9844961    | 0.8115273    | 1            | 0.8984931    |
| #### Bn-scaff_17827_1-p65788 C-genome specific (napus-oleracea) | 0.9856459    | 0.8093027    | 1            | 0.7330238    | not scorable | not scorable |
| #### Bn-scaff_17827_1-p65886 C-genome specific (napus-oleracea) | 0.9808612    | 0.691934     | 1            | 0.6717428    | not scorable | not scorable |
| #### Bn-scaff_17827_1-p69361 C-genome specific (napus-oleracea) | 0.9736842    | 0.7592906    | 1            | 0.5762358    | not scorable | not scorable |
| #### Bn-scaff_17827_1-p69618 C-genome specific (napus-oleracea) | 0.9856459    | 0.7848616    | 1            | 0.8599152    | not scorable | not scorable |
| #### Bn-scaff_17827_1-p70433 C-genome specific (napus-oleracea) | 0.9665072    | 0.7324644    | 0.9922481    | 0.7789953    | not scorable | not scorable |
| #### Bn-scaff_17827_1-p74792 C-genome specific (napus-oleracea) | 0.9712918    | 0.7473148    | 0.9922481    | 0.5877864    | not scorable | not scorable |
| #### Bn-scaff_17827_1-p75665 C-genome specific (napus-oleracea) | 1            | 0.6353266    | 1            | 0.6333033    | not scorable | not scorable |
| #### Bn-scaff_17827_1-p76019 C-genome specific (napus-oleracea) | 0.9760765    | 0.7697878    | 0.9689922    | 0.8060668    | not scorable | not scorable |
| #### Bn-scaff_17827_1-p77234 C-genome specific (napus-oleracea) | 0.9712918    | 0.827482     | 0.9922481    | 0.8244671    | not scorable | not scorable |
| #### Bn-scaff_17827_1-p78289 C-genome specific (napus-oleracea) | 0.9784689    | 0.7580209    | 0.9922481    | 0.8042552    | not scorable | not scorable |

|                                                                 |              |              |           |           |              |              |
|-----------------------------------------------------------------|--------------|--------------|-----------|-----------|--------------|--------------|
| #### Bn-scaff_17827_1-p78594 C-genome specific (napus-oleracea) | 0.9521531    | 0.6924042    | 0.9612403 | 0.6858176 | not scorable | not scorable |
| #### Bn-scaff_17827_1-p78730 C-genome specific (napus-oleracea) | 0.9832536    | 0.7840836    | 1         | 0.7725472 | not scorable | not scorable |
| #### Bn-scaff_17827_1-p78922 C-genome specific (oleracea only)  | not scorable | not scorable | 0.8449612 | 0.9029028 | not scorable | not scorable |
| #### Bn-scaff_17827_1-p81771 C-genome specific (napus-oleracea) | 0.9760765    | 0.7755691    | 1         | 0.7346202 | not scorable | not scorable |
| #### Bn-scaff_17827_1-p83692 C-genome specific (napus-oleracea) | 0.4856459    | 0.8145828    | 0.9534883 | 0.7598739 | not scorable | not scorable |
| #### Bn-scaff_17827_1-p84980 C-genome specific (napus-oleracea) | 0.9784689    | 0.6875165    | 1         | 0.8681163 | not scorable | not scorable |
| #### Bn-scaff_17827_1-p86351 C-genome specific (napus-oleracea) | 0.9880383    | 0.7081762    | 1         | 0.753892  | not scorable | not scorable |
| #### Bn-scaff_17827_1-p86583 C-genome specific (napus-oleracea) | 0.9832536    | 0.7546204    | 0.9844961 | 0.764835  | not scorable | not scorable |
| #### Bn-scaff_17827_1-p86685 C-genome specific (napus-oleracea) | 0.9784689    | 0.7496582    | 1         | 0.7375938 | not scorable | not scorable |
| #### Bn-scaff_17827_1-p89734 genome unspecific (all in)         | 0.9928229    | 0.6194646    | 1         | 0.8858944 | 1            | 0.9323567    |
| #### Bn-scaff_17827_1-p93652 C-genome specific (napus-oleracea) | 0.9760765    | 0.795989     | 1         | 0.8041578 | not scorable | not scorable |
| #### Bn-scaff_17827_1-p94350 C-genome specific (oleracea only)  | not scorable | not scorable | 0.7674419 | 0.8947728 | not scorable | not scorable |
| #### Bn-scaff_17827_1-p95371 C-genome specific (napus-oleracea) | 0.9880383    | 0.712654     | 0.9767442 | 0.6841851 | not scorable | not scorable |
| #### Bn-scaff_17827_1-p95390 C-genome specific (napus-oleracea) | 0.9904306    | 0.7690423    | 0.9844961 | 0.680039  | not scorable | not scorable |
| #### Bn-scaff_17827_1-p96358 C-genome specific (napus-oleracea) | 0.9784689    | 0.7753932    | 1         | 0.7477115 | not scorable | not scorable |
| #### Bn-scaff_17827_1-p97267 C-genome specific (napus-oleracea) | 0.9880383    | 0.8222532    | 1         | 0.766779  | not scorable | not scorable |
| #### Bn-scaff_17827_1-p99673 genome unspecific (all in)         | 1            | 0.5952768    | 1         | 0.5943319 | 1            | 0.6741632    |
| #### Bn-scaff_17831_1-p11447 genome unspecific (all in)         | 0.9784689    | 0.6517146    | 1         | 0.8835199 | 0.9834711    | 0.9479218    |
| #### Bn-scaff_17831_1-p11495 C-genome specific (napus-oleracea) | 0.937799     | 0.8025947    | 0.9922481 | 0.774087  | not scorable | not scorable |
| #### Bn-scaff_17831_1-p11501 C-genome specific (napus-oleracea) | 0.9545454    | 0.7843503    | 1         | 0.8192588 | not scorable | not scorable |
| #### Bn-scaff_17831_1-p11548 C-genome specific (napus-oleracea) | 0.9593301    | 0.7182913    | 1         | 0.7771454 | not scorable | not scorable |
| #### Bn-scaff_17831_1-p11593 C-genome specific (napus-oleracea) | 0.9521531    | 0.740122     | 0.9922481 | 0.6840716 | not scorable | not scorable |
| #### Bn-scaff_17831_1-p11742 C-genome specific (napus-oleracea) | 0.9545454    | 0.6352782    | 1         | 0.620105  | not scorable | not scorable |
| #### Bn-scaff_17831_1-p11761 C-genome specific (napus-oleracea) | 0.9593301    | 0.75621      | 0.9844961 | 0.6673359 | not scorable | not scorable |
| #### Bn-scaff_17831_1-p11823 C-genome specific (napus-oleracea) | 0.9473684    | 0.6527258    | 0.9612403 | 0.6173588 | not scorable | not scorable |
| #### Bn-scaff_17831_1-p11838 C-genome specific (napus-oleracea) | 0.9569378    | 0.8168695    | 0.9612403 | 0.7863333 | not scorable | not scorable |
| #### Bn-scaff_17831_1-p11865 C-genome specific (napus-oleracea) | 0.9569378    | 0.8027236    | 1         | 0.7830427 | not scorable | not scorable |
| #### Bn-scaff_17831_1-p11922 C-genome specific (napus-oleracea) | 0.9569378    | 0.7073752    | 1         | 0.6616878 | not scorable | not scorable |
| #### Bn-scaff_17831_1-p12131 C-genome specific (napus-oleracea) | 0.9354067    | 0.8205767    | 1         | 0.7861512 | not scorable | not scorable |
| #### Bn-scaff_17831_1-p12137 C-genome specific (napus-oleracea) | 0.9449761    | 0.804011     | 1         | 0.7320136 | not scorable | not scorable |
| #### Bn-scaff_17831_1-p12513 C-genome specific (napus-oleracea) | 0.9521531    | 0.8208058    | 1         | 0.8477142 | not scorable | not scorable |
| #### Bn-scaff_17831_1-p12522 C-genome specific (napus-oleracea) | 0.9425837    | 0.7929436    | 1         | 0.749288  | not scorable | not scorable |
| #### Bn-scaff_17831_1-p12532 C-genome specific (napus-oleracea) | 0.9521531    | 0.7614801    | 1         | 0.7003531 | not scorable | not scorable |

|                                                                 |              |              |              |              |              |              |
|-----------------------------------------------------------------|--------------|--------------|--------------|--------------|--------------|--------------|
| #### Bn-scaff_17831_1-p13254 all not scorable                   | not scorable | not scorable | not scorable | not scorable | not scorable | not scorable |
| #### Bn-scaff_17831_1-p13265 C-genome specific (napus-oleracea) | 0.9354067    | 0.7945035    | 0.9534883    | 0.7724101    | not scorable | not scorable |
| #### Bn-scaff_17831_1-p13266 C-genome specific (napus-oleracea) | 0.9401914    | 0.7953935    | 0.9689922    | 0.7949319    | not scorable | not scorable |
| #### Bn-scaff_17831_1-p13384 C-genome specific (napus-oleracea) | 0.9497608    | 0.774188     | 0.9922481    | 0.8310266    | not scorable | not scorable |
| #### Bn-scaff_17831_1-p13545 C-genome specific (napus-oleracea) | 0.930622     | 0.8151882    | 0.9922481    | 0.8017877    | not scorable | not scorable |
| #### Bn-scaff_17831_1-p13725 C-genome specific (napus-oleracea) | 0.9449761    | 0.8010436    | 0.9612403    | 0.8936738    | not scorable | not scorable |
| #### Bn-scaff_17831_1-p13801 C-genome specific (napus-oleracea) | 0.9449761    | 0.8020179    | 0.9922481    | 0.7072154    | not scorable | not scorable |
| #### Bn-scaff_17831_1-p15628 C-genome specific (napus-oleracea) | 0.9449761    | 0.8515562    | 0.9457364    | 0.8007278    | not scorable | not scorable |
| #### Bn-scaff_17831_1-p16077 C-genome specific (napus-oleracea) | 0.9425837    | 0.7290546    | 0.9612403    | 0.8004208    | not scorable | not scorable |
| #### Bn-scaff_17831_1-p16101 C-genome specific (napus-oleracea) | 0.9449761    | 0.7423757    | 0.9689922    | 0.6914714    | not scorable | not scorable |
| #### Bn-scaff_17831_1-p16741 C-genome specific (napus-oleracea) | 0.9497608    | 0.7502452    | 0.9689922    | 0.7652974    | not scorable | not scorable |
| #### Bn-scaff_17831_1-p17352 C-genome specific (napus-oleracea) | 0.9545454    | 0.8510453    | 0.9922481    | 0.8250192    | not scorable | not scorable |
| #### Bn-scaff_17831_1-p19335 C-genome specific (napus-oleracea) | 0.9593301    | 0.7567309    | 0.9922481    | 0.7980217    | not scorable | not scorable |
| #### Bn-scaff_17831_1-p19899 C-genome specific (napus-oleracea) | 0.9449761    | 0.8344545    | 0.9844961    | 0.7964503    | not scorable | not scorable |
| #### Bn-scaff_17831_1-p20561 C-genome specific (napus-oleracea) | 0.9856459    | 0.7260051    | 0.9922481    | 0.6711731    | not scorable | not scorable |
| #### Bn-scaff_17831_1-p20610 C-genome specific (napus-oleracea) | 0.9521531    | 0.7146232    | 1            | 0.9175813    | not scorable | not scorable |
| #### Bn-scaff_17831_1-p20615 all not scorable                   | not scorable | not scorable | not scorable | not scorable | not scorable | not scorable |
| #### Bn-scaff_17831_1-p21112 C-genome specific (napus-oleracea) | 0.9593301    | 0.7710248    | 0.9844961    | 0.7816384    | not scorable | not scorable |
| #### Bn-scaff_17831_1-p21271 C-genome specific (oleracea only)  | not scorable | not scorable | 0.4806201    | 0.5880201    | not scorable | not scorable |
| #### Bn-scaff_17831_1-p21535 genome unspecific (all in)         | 0.9952153    | 0.5239338    | 0.9922481    | 0.8267339    | 1            | 0.94082      |
| #### Bn-scaff_17831_1-p21561 C-genome specific (napus-oleracea) | 0.9617225    | 0.8099471    | 0.9844961    | 0.7597577    | not scorable | not scorable |
| #### Bn-scaff_17831_1-p21929 C-genome specific (napus-oleracea) | 0.9354067    | 0.8047392    | 0.9922481    | 0.7753038    | not scorable | not scorable |
| #### Bn-scaff_17831_1-p27264 C-genome specific (napus-oleracea) | 0.937799     | 0.6755672    | 0.9612403    | 0.7188844    | not scorable | not scorable |
| #### Bn-scaff_17831_1-p27270 C-genome specific (napus-oleracea) | 0.923445     | 0.7115107    | 0.8604651    | 0.7103745    | not scorable | not scorable |
| #### Bn-scaff_17831_1-p27357 C-genome specific (napus-oleracea) | 0.9425837    | 0.6767857    | 0.9922481    | 0.803789     | not scorable | not scorable |
| #### Bn-scaff_17831_1-p27396 C-genome specific (napus-oleracea) | 0.9521531    | 0.7408442    | 1            | 0.809029     | not scorable | not scorable |
| #### Bn-scaff_17831_1-p27424 C-genome specific (napus-oleracea) | 0.9354067    | 0.6689259    | 1            | 0.7298188    | not scorable | not scorable |
| #### Bn-scaff_17831_1-p27465 C-genome specific (napus-oleracea) | 0.9497608    | 0.7702351    | 0.9922481    | 0.8524833    | not scorable | not scorable |
| #### Bn-scaff_17831_1-p28513 C-genome specific (napus-oleracea) | 0.9425837    | 0.6732516    | 0.9922481    | 0.7693327    | not scorable | not scorable |
| #### Bn-scaff_17831_1-p28849 C-genome specific (napus-oleracea) | 0.937799     | 0.763114     | 0.9922481    | 0.8752829    | not scorable | not scorable |
| #### Bn-scaff_17831_1-p29137 C-genome specific (napus-oleracea) | 0.9641148    | 0.7241544    | 0.9844961    | 0.847919     | not scorable | not scorable |
| #### Bn-scaff_17831_1-p29186 genome unspecific (all in)         | 0.9832536    | 0.6372321    | 0.9844961    | 0.7573579    | 1            | 0.9443469    |
| #### Bn-scaff_17831_1-p29258 genome unspecific (all in)         | 0.9784689    | 0.7275394    | 1            | 0.6822716    | 1            | 0.8861066    |

|                                                                 |              |              |              |              |              |              |
|-----------------------------------------------------------------|--------------|--------------|--------------|--------------|--------------|--------------|
| #### Bn-scaff_17831_1-p32310 C-genome specific (napus-oleracea) | 0.9760765    | 0.7317755    | 0.9844961    | 0.8177654    | not scorable | not scorable |
| #### Bn-scaff_17831_1-p35300 C-genome specific (napus-oleracea) | 0.9593301    | 0.7715653    | 1            | 0.817288     | not scorable | not scorable |
| #### Bn-scaff_17831_1-p35308 C-genome specific (napus-oleracea) | 0.9641148    | 0.7133825    | 1            | 0.7467059    | not scorable | not scorable |
| #### Bn-scaff_17831_1-p39555 genome unspecific (all in)         | 0.9712918    | 0.3290344    | 0.9689922    | 0.2016686    | 1            | 0.8004208    |
| #### Bn-scaff_17831_1-p57261 C-genome specific (napus-oleracea) | 0.9330143    | 0.8262433    | 0.9844961    | 0.7728471    | not scorable | not scorable |
| #### Bn-scaff_17831_1-p58849 C-genome specific (napus-oleracea) | 0.9497608    | 0.6916338    | 0.9922481    | 0.7624629    | not scorable | not scorable |
| #### Bn-scaff_17831_1-p59273 C-genome specific (napus-oleracea) | 0.9425837    | 0.7800821    | 0.9844961    | 0.7448331    | not scorable | not scorable |
| #### Bn-scaff_17831_1-p69182 A-genome specific (napus-rapa)     | 0.9521531    | 0.2319331    | not scorable | not scorable | 1            | 0.5377829    |
| #### Bn-scaff_17831_1-p71618 C-genome specific (napus-oleracea) | 0.9569378    | 0.7772104    | 0.9844961    | 0.8109058    | not scorable | not scorable |
| #### Bn-scaff_17831_1-p71804 C-genome specific (napus-oleracea) | 0.9497608    | 0.8302386    | 1            | 0.7956939    | not scorable | not scorable |
| #### Bn-scaff_17831_1-p72823 C-genome specific (napus-oleracea) | 0.9545454    | 0.728783     | 1            | 0.6230647    | not scorable | not scorable |
| #### Bn-scaff_17831_1-p72837 C-genome specific (napus-oleracea) | 0.9497608    | 0.7383951    | 1            | 0.7129645    | not scorable | not scorable |
| #### Bn-scaff_17831_1-p73594 C-genome specific (napus-oleracea) | 0.9617225    | 0.7790524    | 0.9922481    | 0.8125647    | not scorable | not scorable |
| #### Bn-scaff_17831_1-p73858 C-genome specific (napus-oleracea) | 0.9521531    | 0.7173515    | 0.9844961    | 0.6850112    | not scorable | not scorable |
| #### Bn-scaff_17831_1-p74394 C-genome specific (napus-oleracea) | 0.9521531    | 0.7385278    | 0.9922481    | 0.6977572    | not scorable | not scorable |
| #### Bn-scaff_17831_1-p74494 C-genome specific (napus-oleracea) | 0.9545454    | 0.7234285    | 0.9844961    | 0.6904847    | not scorable | not scorable |
| #### Bn-scaff_17831_1-p74903 C-genome specific (napus-oleracea) | 0.9425837    | 0.7402967    | 1            | 0.7200617    | not scorable | not scorable |
| #### Bn-scaff_17831_1-p74968 C-genome specific (napus-oleracea) | 0.9545454    | 0.7504147    | 1            | 0.7354022    | not scorable | not scorable |
| #### Bn-scaff_17854_1-p11838 C-genome specific (napus-oleracea) | 0.9832536    | 0.7830309    | 0.9767442    | 0.7380081    | not scorable | not scorable |
| #### Bn-scaff_17854_1-p12273 genome unspecific (all in)         | 0.9880383    | 0.6351029    | 0.9767442    | 0.7383769    | 1            | 0.8969846    |
| #### Bn-scaff_17854_1-p15709 all not scorable                   | not scorable | not scorable | not scorable | not scorable | not scorable | not scorable |
| #### Bn-scaff_17854_1-p61268 C-genome specific (napus-oleracea) | 0.9282297    | 0.5640877    | 1            | 0.8515862    | not scorable | not scorable |
| #### Bn-scaff_17858_1-p5763 genome unspecific (oleracea-rapa)   | not scorable | not scorable | 0.9844961    | 0.2655773    | 0.9917355    | 0.8544759    |
| #### Bn-scaff_17867_1-p10215 C-genome specific (napus-oleracea) | 0.9688995    | 0.7380369    | 0.9767442    | 0.714296     | not scorable | not scorable |
| #### Bn-scaff_17867_1-p20379 C-genome specific (oleracea only)  | not scorable | not scorable | 0.8992248    | 0.6793034    | not scorable | not scorable |
| #### Bn-scaff_17867_1-p27331 C-genome specific (napus-oleracea) | 0.9880383    | 0.7110965    | 0.9922481    | 0.8138468    | not scorable | not scorable |
| #### Bn-scaff_17867_1-p33023 C-genome specific (napus-oleracea) | 0.9880383    | 0.6809629    | 0.9922481    | 0.8236495    | not scorable | not scorable |
| #### Bn-scaff_17867_1-p33786 C-genome specific (napus-oleracea) | 0.9976076    | 0.7333516    | 0.9922481    | 0.7799455    | not scorable | not scorable |
| #### Bn-scaff_17867_1-p34126 C-genome specific (napus-oleracea) | 0.9880383    | 0.7793387    | 0.9922481    | 0.8323389    | not scorable | not scorable |
| #### Bn-scaff_17867_1-p34178 C-genome specific (napus-oleracea) | 0.9904306    | 0.7983996    | 0.9844961    | 0.86249      | not scorable | not scorable |
| #### Bn-scaff_17867_1-p34578 C-genome specific (napus-oleracea) | 0.9832536    | 0.7231379    | 0.9922481    | 0.6996784    | not scorable | not scorable |
| #### Bn-scaff_17867_1-p35871 C-genome specific (napus-oleracea) | 0.9760765    | 0.6103386    | 0.9612403    | 0.7112341    | not scorable | not scorable |
| #### Bn-scaff_17867_1-p36867 C-genome specific (napus-oleracea) | 0.9880383    | 0.8232808    | 0.9922481    | 0.7363567    | not scorable | not scorable |

|                                                                 |           |           |              |              |              |              |
|-----------------------------------------------------------------|-----------|-----------|--------------|--------------|--------------|--------------|
| #### Bn-scaff_17867_1-p37179 C-genome specific (napus-oleracea) | 1         | 0.8261091 | 1            | 0.8723133    | not scorable | not scorable |
| #### Bn-scaff_17867_1-p37447 C-genome specific (napus-oleracea) | 0.9712918 | 0.7335434 | 0.9612403    | 0.7074599    | not scorable | not scorable |
| #### Bn-scaff_17867_1-p38051 C-genome specific (napus-oleracea) | 0.9593301 | 0.6668433 | 0.8527132    | 0.7958583    | not scorable | not scorable |
| #### Bn-scaff_17867_1-p38463 C-genome specific (napus-oleracea) | 0.9904306 | 0.7506447 | 1            | 0.8047553    | not scorable | not scorable |
| #### Bn-scaff_17867_1-p38568 C-genome specific (napus-oleracea) | 0.9856459 | 0.76998   | 0.9844961    | 0.806761     | not scorable | not scorable |
| #### Bn-scaff_17867_1-p40518 C-genome specific (napus-oleracea) | 0.9928229 | 0.7794305 | 0.9922481    | 0.8376549    | not scorable | not scorable |
| #### Bn-scaff_17867_1-p40575 C-genome specific (napus-oleracea) | 0.9808612 | 0.6931722 | 1            | 0.7740884    | not scorable | not scorable |
| #### Bn-scaff_17867_1-p41216 C-genome specific (napus-oleracea) | 0.9784689 | 0.7289186 | 0.9534883    | 0.7063186    | not scorable | not scorable |
| #### Bn-scaff_17867_1-p41281 C-genome specific (napus-oleracea) | 0.9808612 | 0.6567792 | 0.9302326    | 0.7148648    | not scorable | not scorable |
| #### Bn-scaff_17867_1-p41842 C-genome specific (napus-oleracea) | 0.9856459 | 0.70705   | 0.9844961    | 0.7448919    | not scorable | not scorable |
| #### Bn-scaff_17867_1-p49210 C-genome specific (napus-oleracea) | 0.9880383 | 0.7779689 | 0.9922481    | 0.8232196    | not scorable | not scorable |
| #### Bn-scaff_17867_1-p50785 C-genome specific (napus-oleracea) | 0.9880383 | 0.7481768 | 0.9767442    | 0.7341333    | not scorable | not scorable |
| #### Bn-scaff_17867_1-p54106 C-genome specific (napus-oleracea) | 0.9952153 | 0.8330096 | 0.9922481    | 0.7799476    | not scorable | not scorable |
| #### Bn-scaff_17867_1-p54619 C-genome specific (napus-oleracea) | 0.9976076 | 0.8277627 | 0.9922481    | 0.8473476    | not scorable | not scorable |
| #### Bn-scaff_17867_1-p56480 C-genome specific (napus-oleracea) | 0.9856459 | 0.740881  | 0.9612403    | 0.7891605    | not scorable | not scorable |
| #### Bn-scaff_17867_1-p58994 C-genome specific (napus-oleracea) | 0.9856459 | 0.7349448 | 0.9844961    | 0.7550614    | not scorable | not scorable |
| #### Bn-scaff_17867_1-p65627 C-genome specific (napus-oleracea) | 1         | 0.8438829 | 1            | 0.8712193    | not scorable | not scorable |
| #### Bn-scaff_17867_1-p66050 C-genome specific (napus-oleracea) | 0.9784689 | 0.705448  | 0.9534883    | 0.6709674    | not scorable | not scorable |
| #### Bn-scaff_17867_1-p69453 C-genome specific (napus-oleracea) | 0.9904306 | 0.798217  | 1            | 0.7600523    | not scorable | not scorable |
| #### Bn-scaff_17867_1-p70307 C-genome specific (napus-oleracea) | 0.9784689 | 0.7325627 | 1            | 0.6468949    | not scorable | not scorable |
| #### Bn-scaff_17867_1-p71951 C-genome specific (napus-oleracea) | 0.9832536 | 0.8219345 | 1            | 0.7410916    | not scorable | not scorable |
| #### Bn-scaff_17867_1-p72215 C-genome specific (napus-oleracea) | 0.9808612 | 0.7531348 | 1            | 0.7197951    | not scorable | not scorable |
| #### Bn-scaff_17867_1-p72572 C-genome specific (napus-oleracea) | 0.9760765 | 0.5717228 | 0.9767442    | 0.6812412    | not scorable | not scorable |
| #### Bn-scaff_17867_1-p72812 C-genome specific (napus-oleracea) | 0.9880383 | 0.7086574 | 1            | 0.6954415    | not scorable | not scorable |
| #### Bn-scaff_17867_1-p73100 C-genome specific (napus-oleracea) | 0.9928229 | 0.7929317 | 0.9922481    | 0.7608401    | not scorable | not scorable |
| #### Bn-scaff_17867_1-p8265 C-genome specific (napus-oleracea)  | 0.9832536 | 0.7977638 | 0.9534883    | 0.730967     | not scorable | not scorable |
| #### Bn-scaff_17867_1-p8781 C-genome specific (napus-oleracea)  | 0.9808612 | 0.7713605 | 0.8682171    | 0.7246794    | not scorable | not scorable |
| #### Bn-scaff_17869_1-p10013 C-genome specific (napus-oleracea) | 0.9952153 | 0.780674  | 1            | 0.8259132    | not scorable | not scorable |
| #### Bn-scaff_17869_1-p10014 C-genome specific (napus-oleracea) | 0.9904306 | 0.8039041 | 1            | 0.7542214    | not scorable | not scorable |
| #### Bn-scaff_17869_1-p10015 C-genome specific (napus-oleracea) | 1         | 0.7592441 | 1            | 0.799929     | not scorable | not scorable |
| #### Bn-scaff_17869_1-p10311 C-genome specific (napus-oleracea) | 0.9856459 | 0.8067089 | 0.9922481    | 0.8013715    | not scorable | not scorable |
| #### Bn-scaff_17869_1-p10312 C-genome specific (napus-oleracea) | 0.9904306 | 0.797233  | 0.9844961    | 0.874188     | not scorable | not scorable |
| #### Bn-scaff_17869_1-p10315 A-genome specific (napus-rapa)     | 0.9976076 | 0.4562362 | not scorable | not scorable | 1            | 0.6909861    |

|                                                                 |              |              |              |              |              |              |
|-----------------------------------------------------------------|--------------|--------------|--------------|--------------|--------------|--------------|
| #### Bn-scaff_17869_1-p10316 genome unspecific (all in)         | 0.9952153    | 0.5363545    | 1            | 0.5413315    | 1            | 0.8290784    |
| #### Bn-scaff_17869_1-p10320 C-genome specific (napus-oleracea) | 0.9808612    | 0.834942     | 0.9922481    | 0.8125359    | not scorable | not scorable |
| #### Bn-scaff_17869_1-p10423 C-genome specific (napus-oleracea) | 1            | 0.7931578    | 1            | 0.7725154    | not scorable | not scorable |
| #### Bn-scaff_17869_1-p10424 C-genome specific (napus-oleracea) | 0.9976076    | 0.8129156    | 0.9922481    | 0.8614138    | not scorable | not scorable |
| #### Bn-scaff_17869_1-p10565 C-genome specific (napus-oleracea) | 1            | 0.7670919    | 1            | 0.7851553    | not scorable | not scorable |
| #### Bn-scaff_17869_1-p10569 genome unspecific (all in)         | 0.9976076    | 0.292081     | 1            | 0.7165428    | 1            | 0.8085203    |
| #### Bn-scaff_17869_1-p10586 C-genome specific (napus-oleracea) | 0.9760765    | 0.8282205    | 1            | 0.7670076    | not scorable | not scorable |
| #### Bn-scaff_17869_1-p10676 C-genome specific (napus-oleracea) | 0.9904306    | 0.7784755    | 1            | 0.7380875    | not scorable | not scorable |
| #### Bn-scaff_17869_1-p10797 C-genome specific (napus-oleracea) | 0.9976076    | 0.7906814    | 1            | 0.7610399    | not scorable | not scorable |
| #### Bn-scaff_17869_1-p11037 genome unspecific (all in)         | 0.9808612    | 0.528728     | 0.9689922    | 0.7007593    | 1            | 0.9175813    |
| #### Bn-scaff_17869_1-p11185 C-genome specific (napus-oleracea) | 0.9808612    | 0.8005268    | 0.3100775    | 0.8119105    | not scorable | not scorable |
| #### Bn-scaff_17869_1-p11572 C-genome specific (napus-oleracea) | 0.9832536    | 0.9303446    | 0.9302326    | 0.9249969    | not scorable | not scorable |
| #### Bn-scaff_17869_1-p11579 C-genome specific (napus-oleracea) | 0.9569378    | 0.8110525    | 0.9224806    | 0.8401772    | not scorable | not scorable |
| #### Bn-scaff_17869_1-p12101 C-genome specific (oleracea only)  | not scorable | not scorable | 0.9534883    | 0.8114662    | not scorable | not scorable |
| #### Bn-scaff_17869_1-p12103 C-genome specific (oleracea only)  | not scorable | not scorable | 0.9767442    | 0.8087819    | not scorable | not scorable |
| #### Bn-scaff_17869_1-p12119 C-genome specific (oleracea only)  | not scorable | not scorable | 0.9844961    | 0.8207097    | not scorable | not scorable |
| #### Bn-scaff_17869_1-p12125 C-genome specific (oleracea only)  | not scorable | not scorable | 0.9534883    | 0.8207097    | not scorable | not scorable |
| #### Bn-scaff_17869_1-p12182 C-genome specific (napus-oleracea) | 0.9904306    | 0.7032824    | 0.9922481    | 0.6445189    | not scorable | not scorable |
| #### Bn-scaff_17869_1-p12714 genome unspecific (all in)         | 0.9928229    | 0.4755261    | 1            | 0.7704166    | 1            | 0.737417     |
| #### Bn-scaff_17869_1-p12725 genome unspecific (all in)         | 1            | 0.5393455    | 0.9922481    | 0.5839453    | 1            | 0.7038999    |
| #### Bn-scaff_17869_1-p12727 genome unspecific (all in)         | 1            | 0.4579558    | 1            | 0.7252899    | 0.9917355    | 0.685405     |
| #### Bn-scaff_17869_1-p13595 C-genome specific (napus-oleracea) | 0.9808612    | 0.7136018    | 1            | 0.6996543    | not scorable | not scorable |
| #### Bn-scaff_17869_1-p16846 C-genome specific (napus-oleracea) | 0.9928229    | 0.8119572    | 0.9922481    | 0.7769123    | not scorable | not scorable |
| #### Bn-scaff_17869_1-p17441 C-genome specific (napus-oleracea) | 0.9832536    | 0.7452354    | 1            | 0.7699341    | not scorable | not scorable |
| #### Bn-scaff_17869_1-p17448 genome unspecific (all in)         | 0.9856459    | 0.7717543    | 1            | 0.8693944    | 0.9421487    | 0.9340969    |
| #### Bn-scaff_17869_1-p20752 C-genome specific (napus-oleracea) | 0.9928229    | 0.8129106    | 0.9922481    | 0.84563      | not scorable | not scorable |
| #### Bn-scaff_17869_1-p23629 genome unspecific (oleracea-rapa)  | not scorable | not scorable | 1            | 0.8521519    | 1            | 0.9293141    |
| #### Bn-scaff_17869_1-p33183 genome unspecific (all in)         | 1            | 0.6261137    | 1            | 0.3400516    | 1            | 0.8415478    |
| #### Bn-scaff_17869_1-p33226 genome unspecific (all in)         | 1            | 0.7101165    | 1            | 0.7884539    | 0.9586777    | 0.8352891    |
| #### Bn-scaff_17869_1-p33331 C-genome specific (oleracea only)  | not scorable | not scorable | 0.9922481    | 0.8375981    | not scorable | not scorable |
| #### Bn-scaff_17869_1-p33334 C-genome specific (napus-oleracea) | 1            | 0.4063645    | 1            | 0.7446468    | not scorable | not scorable |
| #### Bn-scaff_17869_1-p36225 all not scorable                   | not scorable | not scorable | not scorable | not scorable | not scorable | not scorable |
| #### Bn-scaff_17869_1-p41125 genome unspecific (all in)         | 0.9976076    | 0.5787615    | 0.9922481    | 0.7625657    | 1            | 0.9076388    |

|                                                                 |              |              |              |              |              |              |
|-----------------------------------------------------------------|--------------|--------------|--------------|--------------|--------------|--------------|
| #### Bn-scaff_17869_1-p41605 genome unspecific (all in)         | 0.9736842    | 0.5188137    | 0.9844961    | 0.5522282    | 1            | 0.935155     |
| #### Bn-scaff_17869_1-p41631 C-genome specific (napus-oleracea) | 0.8923445    | 0.6865102    | 1            | 0.7296076    | not scorable | not scorable |
| #### Bn-scaff_17869_1-p41643 C-genome specific (napus-oleracea) | 0.8995215    | 0.7889932    | 0.9844961    | 0.7964877    | not scorable | not scorable |
| #### Bn-scaff_17869_1-p48340 C-genome specific (napus-oleracea) | 1            | 0.7791553    | 1            | 0.7945074    | not scorable | not scorable |
| #### Bn-scaff_17869_1-p59284 C-genome specific (napus-oleracea) | 0.9114832    | 0.1874972    | 1            | 0.9141408    | not scorable | not scorable |
| #### Bn-scaff_17869_1-p59351 genome unspecific (all in)         | 0.9784689    | 0.3789535    | 1            | 0.8891181    | 1            | 0.8064043    |
| #### Bn-scaff_17869_1-p59382 genome unspecific (oleracea-rapa)  | not scorable | not scorable | 1            | 0.7373192    | 0.9752066    | 0.9095823    |
| #### Bn-scaff_17869_1-p60385 genome unspecific (oleracea-rapa)  | not scorable | not scorable | 0.9922481    | 0.4291369    | 1            | 0.8114662    |
| #### Bn-scaff_17869_1-p62411 C-genome specific (napus-oleracea) | 0.9976076    | 0.7035037    | 1            | 0.7996386    | not scorable | not scorable |
| #### Bn-scaff_17869_1-p66107 C-genome specific (napus-oleracea) | 0.9856459    | 0.7277972    | 0.9844961    | 0.7679092    | not scorable | not scorable |
| #### Bn-scaff_17869_1-p70914 genome unspecific (all in)         | 0.9904306    | 0.2375287    | 1            | 0.8702704    | 0.9917355    | 0.75585      |
| #### Bn-scaff_17869_1-p80257 C-genome specific (napus-oleracea) | 0.9880383    | 0.6560534    | 0.6046512    | 0.8037766    | not scorable | not scorable |
| #### Bn-scaff_17869_1-p81122 C-genome specific (napus-oleracea) | 0.9928229    | 0.7488546    | 0.9922481    | 0.8389748    | not scorable | not scorable |
| #### Bn-scaff_17869_1-p81329 C-genome specific (napus-oleracea) | 0.9928229    | 0.7603469    | 1            | 0.7825954    | not scorable | not scorable |
| #### Bn-scaff_17869_1-p81389 C-genome specific (napus-oleracea) | 0.9928229    | 0.6719865    | 1            | 0.6774447    | not scorable | not scorable |
| #### Bn-scaff_17869_1-p81432 genome unspecific (all in)         | 0.9976076    | 0.6256158    | 0.9922481    | 0.7223171    | 1            | 0.7520625    |
| #### Bn-scaff_17869_1-p81440 C-genome specific (napus-oleracea) | 0.9976076    | 0.8388367    | 0.9844961    | 0.7675493    | not scorable | not scorable |
| #### Bn-scaff_17869_1-p81509 C-genome specific (napus-oleracea) | 0.9952153    | 0.7068847    | 0.9922481    | 0.7004061    | not scorable | not scorable |
| #### Bn-scaff_17869_1-p81745 C-genome specific (napus-oleracea) | 0.9928229    | 0.7633752    | 1            | 0.7666222    | not scorable | not scorable |
| #### Bn-scaff_17869_1-p82011 C-genome specific (napus-oleracea) | 0.9928229    | 0.8182151    | 1            | 0.7996354    | not scorable | not scorable |
| #### Bn-scaff_17869_1-p83334 genome unspecific (all in)         | 0.9952153    | 0.6771144    | 1            | 0.6526303    | 0.9834711    | 0.9035117    |
| #### Bn-scaff_17869_1-p83418 C-genome specific (napus-oleracea) | 0.9976076    | 0.6357737    | 1            | 0.6460914    | not scorable | not scorable |
| #### Bn-scaff_17869_1-p84375 C-genome specific (napus-oleracea) | 1            | 0.6111982    | 1            | 0.8441013    | not scorable | not scorable |
| #### Bn-scaff_17869_1-p92672 C-genome specific (napus-oleracea) | 0.9976076    | 0.7714677    | 0.9844961    | 0.7935627    | not scorable | not scorable |
| #### Bn-scaff_17869_1-p93045 C-genome specific (napus-oleracea) | 0.9952153    | 0.8539612    | 1            | 0.9083058    | not scorable | not scorable |
| #### Bn-scaff_17869_1-p94794 C-genome specific (napus-oleracea) | 0.9928229    | 0.7941768    | 1            | 0.7779296    | not scorable | not scorable |
| #### Bn-scaff_17869_1-p97274 C-genome specific (napus-oleracea) | 0.9952153    | 0.6999009    | 1            | 0.6926226    | not scorable | not scorable |
| #### Bn-scaff_17869_1-p97525 C-genome specific (napus-oleracea) | 0.9952153    | 0.7193376    | 0.9844961    | 0.8177654    | not scorable | not scorable |
| #### Bn-scaff_17869_1-p98275 C-genome specific (napus-oleracea) | 0.9952153    | 0.7064849    | 1            | 0.7291312    | not scorable | not scorable |
| #### Bn-scaff_17882_1-p12474 A-genome specific (napus-rapa)     | 0.9856459    | 0.2908356    | not scorable | not scorable | 1            | 0.7036811    |
| #### Bn-scaff_17882_1-p14688 C-genome specific (napus-oleracea) | 1            | 0.7340827    | 1            | 0.8895044    | not scorable | not scorable |
| #### Bn-scaff_17882_1-p20385 C-genome specific (napus-oleracea) | 1            | 0.7417415    | 1            | 0.832126     | not scorable | not scorable |
| #### Bn-scaff_17882_1-p21938 C-genome specific (napus-oleracea) | 1            | 0.8040962    | 1            | 0.90723      | not scorable | not scorable |



|                                                                 |              |              |           |           |              |              |
|-----------------------------------------------------------------|--------------|--------------|-----------|-----------|--------------|--------------|
| #### Bn-scaff_17882_1-p22070 C-genome specific (napus-oleracea) | 1            | 0.7185522    | 1         | 0.6972286 | not scorable | not scorable |
| #### Bn-scaff_17882_1-p74497 genome unspecific (all in)         | 0.9569378    | 0.4803003    | 1         | 0.9293141 | 1            | 0.8123222    |
| #### Bn-scaff_17882_1-p75280 genome unspecific (all in)         | 0.9880383    | 0.3449638    | 0.9922481 | 0.7504151 | 1            | 0.811376     |
| #### Bn-scaff_17882_1-p86972 C-genome specific (napus-oleracea) | 1            | 0.7543041    | 1         | 0.8169995 | not scorable | not scorable |
| #### Bn-scaff_17882_1-p89451 genome unspecific (oleracea-rapa)  | not scorable | not scorable | 1         | 0.6564804 | 0.9669421    | 0.6405819    |
| #### Bn-scaff_17882_1-p89557 genome unspecific (all in)         | 1            | 0.2924233    | 0.9922481 | 0.6270433 | 1            | 0.7577516    |
| #### Bn-scaff_17882_1-p91047 genome unspecific (all in)         | 0.9880383    | 0.3728171    | 1         | 0.9234591 | 1            | 0.8442238    |
| #### Bn-scaff_17882_1-p91274 C-genome specific (oleracea only)  | not scorable | not scorable | 1         | 0.92513   | not scorable | not scorable |
| #### Bn-scaff_17882_1-p91894 genome unspecific (all in)         | 0.9688995    | 0.3203855    | 1         | 0.7382147 | 0.9834711    | 0.6519489    |
| #### Bn-scaff_17888_1-p15667 C-genome specific (napus-oleracea) | 0.6148325    | 0.6680168    | 0.751938  | 0.8150376 | not scorable | not scorable |
| #### Bn-scaff_17888_1-p17010 C-genome specific (napus-oleracea) | 0.6148325    | 0.8130665    | 0.8217054 | 0.7878767 | not scorable | not scorable |
| #### Bn-scaff_17888_1-p17019 C-genome specific (napus-oleracea) | 0.8803828    | 0.7610904    | 0.9844961 | 0.7450968 | not scorable | not scorable |
| #### Bn-scaff_17888_1-p17347 C-genome specific (napus-oleracea) | 0.9114832    | 0.748367     | 0.9922481 | 0.7788447 | not scorable | not scorable |
| #### Bn-scaff_17888_1-p18340 C-genome specific (napus-oleracea) | 0.9330143    | 0.7607374    | 0.9844961 | 0.8165248 | not scorable | not scorable |
| #### Bn-scaff_17888_1-p18923 C-genome specific (oleracea only)  | not scorable | not scorable | 0.9844961 | 0.7471136 | not scorable | not scorable |
| #### Bn-scaff_17888_1-p19156 C-genome specific (napus-oleracea) | 0.9282297    | 0.7512004    | 0.9689922 | 0.8136722 | not scorable | not scorable |
| #### Bn-scaff_17888_1-p19436 C-genome specific (napus-oleracea) | 0.9210526    | 0.7774823    | 0.9922481 | 0.7776185 | not scorable | not scorable |
| #### Bn-scaff_17888_1-p19449 C-genome specific (napus-oleracea) | 0.9282297    | 0.8220265    | 0.9147287 | 0.7707358 | not scorable | not scorable |
| #### Bn-scaff_17888_1-p19459 C-genome specific (napus-oleracea) | 0.9043062    | 0.8516394    | 0.9767442 | 0.7933394 | not scorable | not scorable |
| #### Bn-scaff_17888_1-p19986 C-genome specific (oleracea only)  | not scorable | not scorable | 1         | 0.700622  | not scorable | not scorable |
| #### Bn-scaff_17888_1-p20111 C-genome specific (oleracea only)  | not scorable | not scorable | 1         | 0.814622  | not scorable | not scorable |
| #### Bn-scaff_17888_1-p22204 C-genome specific (napus-oleracea) | 0.9138756    | 0.5477821    | 0.9767442 | 0.5641674 | not scorable | not scorable |
| #### Bn-scaff_17888_1-p22873 C-genome specific (napus-oleracea) | 0.8971292    | 0.7016855    | 0.9922481 | 0.7247584 | not scorable | not scorable |
| #### Bn-scaff_17888_1-p23178 genome unspecific (all in)         | 0.9928229    | 0.3374782    | 0.9689922 | 0.3970802 | 1            | 0.9078916    |
| #### Bn-scaff_17888_1-p23460 genome unspecific (oleracea-rapa)  | not scorable | not scorable | 1         | 0.8219411 | 0.9917355    | 0.7923313    |
| #### Bn-scaff_17888_1-p23638 C-genome specific (napus-oleracea) | 0.9138756    | 0.787881     | 0.9844961 | 0.7866509 | not scorable | not scorable |
| #### Bn-scaff_17888_1-p24193 C-genome specific (napus-oleracea) | 0.8995215    | 0.6229227    | 1         | 0.5627925 | not scorable | not scorable |
| #### Bn-scaff_17888_1-p24424 C-genome specific (napus-oleracea) | 0.8899522    | 0.601061     | 0.9922481 | 0.5780953 | not scorable | not scorable |
| #### Bn-scaff_17888_1-p26005 C-genome specific (napus-oleracea) | 0.9090909    | 0.705142     | 1         | 0.6924549 | not scorable | not scorable |
| #### Bn-scaff_17888_1-p26157 C-genome specific (napus-oleracea) | 0.9090909    | 0.7031206    | 1         | 0.725991  | not scorable | not scorable |
| #### Bn-scaff_17888_1-p32163 genome unspecific (all in)         | 0.8899522    | 0.3773399    | 1         | 0.7716309 | 1            | 0.9272014    |
| #### Bn-scaff_17888_1-p35270 C-genome specific (napus-oleracea) | 0.8899522    | 0.6138018    | 0.9844961 | 0.6552706 | not scorable | not scorable |
| #### Bn-scaff_17888_1-p37862 C-genome specific (napus-oleracea) | 0.9162679    | 0.791415     | 0.9922481 | 0.732668  | not scorable | not scorable |

|                                                                 |           |           |           |           |              |              |
|-----------------------------------------------------------------|-----------|-----------|-----------|-----------|--------------|--------------|
| #### Bn-scaff_17888_1-p39065 C-genome specific (napus-oleracea) | 0.9138756 | 0.6572844 | 0.9922481 | 0.5131159 | not scorable | not scorable |
| #### Bn-scaff_17888_1-p39776 C-genome specific (napus-oleracea) | 0.9138756 | 0.7595564 | 0.9922481 | 0.7894822 | not scorable | not scorable |
| #### Bn-scaff_17888_1-p43530 genome unspecific (all in)         | 0.9904306 | 0.1884501 | 1         | 0.6724718 | 1            | 0.6687586    |
| #### Bn-scaff_17888_1-p43775 C-genome specific (napus-oleracea) | 0.8827751 | 0.7629671 | 0.9922481 | 0.735149  | not scorable | not scorable |
| #### Bn-scaff_17888_1-p65372 genome unspecific (all in)         | 0.9784689 | 0.2541657 | 0.9844961 | 0.3844987 | 0.9752066    | 0.4574703    |
| #### Bn-scaff_17888_1-p8897 C-genome specific (napus-oleracea)  | 0.8899522 | 0.6740639 | 1         | 0.7365072 | not scorable | not scorable |
| #### Bn-scaff_17910_1-p12678 C-genome specific (napus-oleracea) | 0.9808612 | 0.7549643 | 0.7131783 | 0.7159678 | not scorable | not scorable |
| #### Bn-scaff_17910_1-p13243 genome unspecific (all in)         | 0.9808612 | 0.6025762 | 1         | 0.6761463 | 1            | 0.8958603    |
| #### Bn-scaff_17910_1-p13468 genome unspecific (all in)         | 0.9856459 | 0.2999953 | 1         | 0.8940008 | 0.9917355    | 0.821386     |
| #### Bn-scaff_17910_1-p13576 genome unspecific (all in)         | 0.9593301 | 0.2666417 | 1         | 0.7641606 | 0.9917355    | 0.6013939    |
| #### Bn-scaff_17910_1-p13586 genome unspecific (all in)         | 0.9976076 | 0.4288281 | 1         | 0.8938463 | 1            | 0.8197757    |
| #### Bn-scaff_17910_1-p48926 C-genome specific (napus-oleracea) | 0.9712918 | 0.8051093 | 0.9689922 | 0.8239254 | not scorable | not scorable |
| #### Bn-scaff_17910_1-p79832 C-genome specific (napus-oleracea) | 0.9784689 | 0.7309912 | 1         | 0.8815182 | not scorable | not scorable |
| #### Bn-scaff_17910_1-p95397 C-genome specific (napus-oleracea) | 0.9688995 | 0.6324359 | 0.744186  | 0.6334294 | not scorable | not scorable |
| #### Bn-scaff_17910_2-p8412 C-genome specific (napus-oleracea)  | 0.9880383 | 0.7741535 | 1         | 0.8182366 | not scorable | not scorable |
| #### Bn-scaff_17910_2-p9166 C-genome specific (napus-oleracea)  | 0.9856459 | 0.7403441 | 0.9922481 | 0.7433638 | not scorable | not scorable |
| #### Bn-scaff_17913_1-p3315 genome unspecific (all in)          | 1         | 0.6679053 | 1         | 0.6276974 | 0.9917355    | 0.8530217    |
| #### Bn-scaff_17917_1-p10266 C-genome specific (napus-oleracea) | 0.9928229 | 0.7358471 | 1         | 0.853503  | not scorable | not scorable |
| #### Bn-scaff_17917_1-p10341 C-genome specific (napus-oleracea) | 0.9928229 | 0.8119947 | 0.9922481 | 0.8234416 | not scorable | not scorable |
| #### Bn-scaff_17917_1-p10694 C-genome specific (napus-oleracea) | 0.7990431 | 0.8278743 | 0.7984496 | 0.6868559 | not scorable | not scorable |
| #### Bn-scaff_17917_1-p10868 genome unspecific (all in)         | 0.9736842 | 0.2093783 | 1         | 0.8027979 | 1            | 0.9071734    |
| #### Bn-scaff_17917_1-p11708 C-genome specific (napus-oleracea) | 0.9712918 | 0.7285446 | 0.9922481 | 0.8149551 | not scorable | not scorable |
| #### Bn-scaff_17917_1-p13263 C-genome specific (napus-oleracea) | 0.9952153 | 0.7929422 | 1         | 0.8503646 | not scorable | not scorable |
| #### Bn-scaff_17917_1-p13798 C-genome specific (napus-oleracea) | 0.9904306 | 0.7943537 | 1         | 0.7870977 | not scorable | not scorable |
| #### Bn-scaff_17917_1-p13901 genome unspecific (all in)         | 1         | 0.5854493 | 1         | 0.6364519 | 1            | 0.7760932    |
| #### Bn-scaff_17917_1-p17134 C-genome specific (napus-oleracea) | 0.9904306 | 0.7815613 | 1         | 0.7611872 | not scorable | not scorable |
| #### Bn-scaff_17917_1-p18729 C-genome specific (napus-oleracea) | 0.9880383 | 0.7971166 | 1         | 0.6750615 | not scorable | not scorable |
| #### Bn-scaff_17917_1-p18854 C-genome specific (napus-oleracea) | 0.9976076 | 0.8196452 | 1         | 0.8483137 | not scorable | not scorable |
| #### Bn-scaff_17917_1-p19045 C-genome specific (napus-oleracea) | 0.9712918 | 0.6919881 | 0.9922481 | 0.6944501 | not scorable | not scorable |
| #### Bn-scaff_17917_1-p19148 C-genome specific (napus-oleracea) | 0.9928229 | 0.8062435 | 1         | 0.7877402 | not scorable | not scorable |
| #### Bn-scaff_17917_1-p67000 C-genome specific (napus-oleracea) | 0.9952153 | 0.8197284 | 1         | 0.8062994 | not scorable | not scorable |
| #### Bn-scaff_17917_1-p67098 C-genome specific (napus-oleracea) | 0.9880383 | 0.7728726 | 0.9689922 | 0.7528068 | not scorable | not scorable |
| #### Bn-scaff_17917_1-p72773 C-genome specific (napus-oleracea) | 0.9880383 | 0.700622  | 0.9922481 | 0.709501  | not scorable | not scorable |

|                                                                 |              |              |              |   |              |              |              |
|-----------------------------------------------------------------|--------------|--------------|--------------|---|--------------|--------------|--------------|
| #### Bn-scaff_17917_1-p72925 C-genome specific (napus-oleracea) | 0.9976076    | 0.7935879    |              | 1 | 0.7167819    | not scorable | not scorable |
| #### Bn-scaff_17917_1-p73110 C-genome specific (napus-oleracea) | 0.9904306    | 0.7730162    |              | 1 | 0.9175813    | not scorable | not scorable |
| #### Bn-scaff_17917_1-p76822 C-genome specific (napus-oleracea) | 0.9760765    | 0.6533204    | 0.9612403    |   | 0.8100379    | not scorable | not scorable |
| #### Bn-scaff_17917_1-p77244 C-genome specific (napus-oleracea) | 0.9784689    | 0.6756388    | 0.9844961    |   | 0.7823473    | not scorable | not scorable |
| #### Bn-scaff_17917_1-p77314 C-genome specific (napus-oleracea) | 0.9928229    | 0.772404     | 0.9922481    |   | 0.8171631    | not scorable | not scorable |
| #### Bn-scaff_17917_1-p93511 C-genome specific (napus-oleracea) | 1            | 0.8055766    |              | 1 | 0.8282908    | not scorable | not scorable |
| #### Bn-scaff_17917_1-p97057 C-genome specific (napus-oleracea) | 0.9904306    | 0.547478     |              | 1 | 0.6736619    | not scorable | not scorable |
| #### Bn-scaff_17919_1-p12831 genome unspecific (all in)         | 0.9976076    | 0.5012746    |              | 1 | 0.7483997    | 0.9834711    | 0.8674788    |
| #### Bn-scaff_17919_1-p12901 genome unspecific (all in)         | 0.9641148    | 0.4066279    |              | 1 | 0.7062102    | 0.9917355    | 0.8575346    |
| #### Bn-scaff_17919_1-p17459 all not scorable                   | not scorable | not scorable | not scorable |   | not scorable | not scorable | not scorable |
| #### Bn-scaff_17919_1-p17501 C-genome specific (napus-oleracea) | 1            | 0.8068023    |              | 1 | 0.8508033    | not scorable | not scorable |
| #### Bn-scaff_17919_1-p17773 C-genome specific (napus-oleracea) | 0.9880383    | 0.2310421    |              | 1 | 0.8781526    | not scorable | not scorable |
| #### Bn-scaff_17919_1-p26305 genome unspecific (all in)         | 1            | 0.6714815    |              | 1 | 0.6916012    | 1            | 0.7442251    |
| #### Bn-scaff_17919_1-p26393 genome unspecific (all in)         | 0.9856459    | 0.2776168    |              | 1 | 0.8169826    | 1            | 0.759338     |
| #### Bn-scaff_17919_1-p26405 genome unspecific (oleracea-rapa)  | not scorable | not scorable |              | 1 | 0.7961717    | 1            | 0.9434946    |
| #### Bn-scaff_17919_1-p28083 C-genome specific (napus-oleracea) | 0.9832536    | 0.8021568    |              | 1 | 0.9199027    | not scorable | not scorable |
| #### Bn-scaff_17919_1-p28206 genome unspecific (oleracea-rapa)  | not scorable | not scorable | 0.9379845    |   | 0.302824     | 1            | 0.8499487    |
| #### Bn-scaff_17919_1-p38258 C-genome specific (oleracea only)  | not scorable | not scorable |              | 1 | 0.711467     | not scorable | not scorable |
| #### Bn-scaff_17919_1-p94319 C-genome specific (napus-oleracea) | 0.9760765    | 0.3713199    | 0.8992248    |   | 0.7830434    | not scorable | not scorable |
| #### Bn-scaff_17919_1-p94976 C-genome specific (oleracea only)  | not scorable | not scorable | 0.8914729    |   | 0.610152     | not scorable | not scorable |
| #### Bn-scaff_17919_1-p95405 C-genome specific (oleracea only)  | not scorable | not scorable | 0.9302326    |   | 0.6872547    | not scorable | not scorable |
| #### Bn-scaff_17919_1-p97553 genome unspecific (all in)         | 0.9784689    | 0.6201116    |              | 1 | 0.8220695    | 0.9421487    | 0.9245201    |
| #### Bn-scaff_17927_1-p409 C-genome specific (napus-oleracea)   | 0.9736842    | 0.827538     |              | 1 | 0.7799249    | not scorable | not scorable |
| #### Bn-scaff_17942_1-p61731 C-genome specific (napus-oleracea) | 0.9952153    | 0.8002763    | 0.9302326    |   | 0.9041777    | not scorable | not scorable |
| #### Bn-scaff_17942_1-p64218 C-genome specific (napus-oleracea) | 0.9712918    | 0.5556229    |              | 1 | 0.7591171    | not scorable | not scorable |
| #### Bn-scaff_17959_1-p12362 C-genome specific (napus-oleracea) | 0.9736842    | 0.7589565    | 0.9922481    |   | 0.7177776    | not scorable | not scorable |
| #### Bn-scaff_17959_1-p12366 C-genome specific (napus-oleracea) | 0.9856459    | 0.7370257    | 0.9922481    |   | 0.7128769    | not scorable | not scorable |
| #### Bn-scaff_17959_1-p13617 C-genome specific (napus-oleracea) | 0.9880383    | 0.7083432    | 0.9922481    |   | 0.6469875    | not scorable | not scorable |
| #### Bn-scaff_17959_1-p13636 C-genome specific (napus-oleracea) | 0.9808612    | 0.7277054    | 0.9922481    |   | 0.7444708    | not scorable | not scorable |
| #### Bn-scaff_17959_1-p13834 C-genome specific (napus-oleracea) | 0.9808612    | 0.7715854    | 0.9844961    |   | 0.7633806    | not scorable | not scorable |
| #### Bn-scaff_17959_1-p13966 C-genome specific (napus-oleracea) | 0.9760765    | 0.5734566    | 0.9922481    |   | 0.5385314    | not scorable | not scorable |
| #### Bn-scaff_17959_1-p14169 C-genome specific (napus-oleracea) | 0.9712918    | 0.7811391    | 0.9612403    |   | 0.6955599    | not scorable | not scorable |
| #### Bn-scaff_17959_1-p14536 C-genome specific (napus-oleracea) | 0.9641148    | 0.6217483    | 0.9457364    |   | 0.5224282    | not scorable | not scorable |

|                                                                |           |           |           |           |              |              |
|----------------------------------------------------------------|-----------|-----------|-----------|-----------|--------------|--------------|
| #### Bn-scaff_17959_1-p17241C-genome specific (napus-oleracea) | 0.9856459 | 0.7727686 | 0.9922481 | 0.7657589 | not scorable | not scorable |
| #### Bn-scaff_17959_1-p19838C-genome specific (napus-oleracea) | 0.9736842 | 0.7972897 | 0.9922481 | 0.7592161 | not scorable | not scorable |
| #### Bn-scaff_17959_1-p23299C-genome specific (napus-oleracea) | 0.9808612 | 0.7827821 | 0.9922481 | 0.7515882 | not scorable | not scorable |
| #### Bn-scaff_17959_1-p23508C-genome specific (napus-oleracea) | 0.9736842 | 0.5924712 | 0.9844961 | 0.5736644 | not scorable | not scorable |
| #### Bn-scaff_17959_1-p24276C-genome specific (napus-oleracea) | 0.9832536 | 0.7558695 | 0.9922481 | 0.8091053 | not scorable | not scorable |
| #### Bn-scaff_17959_1-p25794C-genome specific (napus-oleracea) | 0.9784689 | 0.8047219 | 0.9922481 | 0.7940103 | not scorable | not scorable |
| #### Bn-scaff_17959_1-p25971genome unspecific (all in)         | 0.9856459 | 0.7190429 | 0.9844961 | 0.6980733 | 0.9669421    | 0.8475716    |
| #### Bn-scaff_17959_1-p25977genome unspecific (all in)         | 0.9688995 | 0.6355824 | 0.9922481 | 0.6435884 | 0.9752066    | 0.5877153    |
| #### Bn-scaff_17959_1-p26850C-genome specific (napus-oleracea) | 0.9856459 | 0.7706556 | 0.9922481 | 0.7700837 | not scorable | not scorable |
| #### Bn-scaff_17959_1-p26957C-genome specific (napus-oleracea) | 0.9808612 | 0.6717374 | 0.9922481 | 0.7096606 | not scorable | not scorable |
| #### Bn-scaff_17959_1-p26999C-genome specific (napus-oleracea) | 0.9904306 | 0.8130253 | 0.9767442 | 0.847961  | not scorable | not scorable |
| #### Bn-scaff_17959_1-p27108C-genome specific (napus-oleracea) | 0.9904306 | 0.7730309 | 0.9922481 | 0.7427518 | not scorable | not scorable |
| #### Bn-scaff_17959_1-p28421genome unspecific (all in)         | 1         | 0.4832132 | 0.9922481 | 0.8229381 | 0.9834711    | 0.7104487    |
| #### Bn-scaff_17959_1-p31336C-genome specific (napus-oleracea) | 0.9688995 | 0.6912407 | 1         | 0.7162475 | not scorable | not scorable |
| #### Bn-scaff_17959_1-p32975C-genome specific (napus-oleracea) | 0.9856459 | 0.7920464 | 1         | 0.7155818 | not scorable | not scorable |
| #### Bn-scaff_17959_1-p32981C-genome specific (napus-oleracea) | 0.9832536 | 0.7803175 | 0.9922481 | 0.7857491 | not scorable | not scorable |
| #### Bn-scaff_17959_1-p33104C-genome specific (napus-oleracea) | 0.9880383 | 0.7649807 | 1         | 0.8048068 | not scorable | not scorable |
| #### Bn-scaff_17959_1-p33610C-genome specific (napus-oleracea) | 0.9856459 | 0.7382601 | 0.9922481 | 0.7560083 | not scorable | not scorable |
| #### Bn-scaff_17959_1-p34085genome unspecific (all in)         | 0.9784689 | 0.2421602 | 0.9844961 | 0.4445371 | 1            | 0.8868808    |
| #### Bn-scaff_17959_1-p34695C-genome specific (napus-oleracea) | 0.9784689 | 0.7737939 | 1         | 0.7745755 | not scorable | not scorable |
| #### Bn-scaff_17959_1-p35732C-genome specific (napus-oleracea) | 0.9856459 | 0.7559376 | 1         | 0.7384024 | not scorable | not scorable |
| #### Bn-scaff_17959_1-p36200C-genome specific (napus-oleracea) | 0.9641148 | 0.535329  | 0.9922481 | 0.574799  | not scorable | not scorable |
| #### Bn-scaff_17959_1-p40127C-genome specific (napus-oleracea) | 0.9784689 | 0.7742238 | 1         | 0.6992775 | not scorable | not scorable |
| #### Bn-scaff_17959_1-p40395C-genome specific (napus-oleracea) | 0.9904306 | 0.7710757 | 1         | 0.8358084 | not scorable | not scorable |
| #### Bn-scaff_17959_1-p42179C-genome specific (napus-oleracea) | 0.9760765 | 0.7911752 | 1         | 0.7006098 | not scorable | not scorable |
| #### Bn-scaff_17959_1-p42381C-genome specific (napus-oleracea) | 0.9880383 | 0.738502  | 1         | 0.775812  | not scorable | not scorable |
| #### Bn-scaff_17959_1-p42391C-genome specific (napus-oleracea) | 0.9808612 | 0.6877157 | 1         | 0.7931995 | not scorable | not scorable |
| #### Bn-scaff_17959_1-p42469C-genome specific (napus-oleracea) | 0.9832536 | 0.7117873 | 0.9379845 | 0.881524  | not scorable | not scorable |
| #### Bn-scaff_17959_1-p42945C-genome specific (napus-oleracea) | 0.9784689 | 0.7460151 | 0.9612403 | 0.7952555 | not scorable | not scorable |
| #### Bn-scaff_17959_1-p45628C-genome specific (napus-oleracea) | 0.9617225 | 0.674674  | 0.9922481 | 0.8184515 | not scorable | not scorable |
| #### Bn-scaff_17959_1-p47459C-genome specific (napus-oleracea) | 0.9808612 | 0.7339892 | 1         | 0.7173977 | not scorable | not scorable |
| #### Bn-scaff_17959_1-p48502C-genome specific (napus-oleracea) | 0.9736842 | 0.7689636 | 1         | 0.8478938 | not scorable | not scorable |
| #### Bn-scaff_17959_1-p48941C-genome specific (napus-oleracea) | 0.9760765 | 0.6458914 | 0.9612403 | 0.65308   | not scorable | not scorable |

|                                                                 |              |              |           |           |              |              |
|-----------------------------------------------------------------|--------------|--------------|-----------|-----------|--------------|--------------|
| #### Bn-scaff_17959_1-p4996€ C-genome specific (napus-oleracea) | 0.9784689    | 0.8028964    | 1         | 0.7819484 | not scorable | not scorable |
| #### Bn-scaff_17959_1-p51032 C-genome specific (napus-oleracea) | 0.9904306    | 0.5497344    | 1         | 0.8238398 | not scorable | not scorable |
| #### Bn-scaff_17959_1-p5169€ C-genome specific (napus-oleracea) | 0.9856459    | 0.8054028    | 1         | 0.8401525 | not scorable | not scorable |
| #### Bn-scaff_17959_1-p51704 C-genome specific (napus-oleracea) | 0.9856459    | 0.7948261    | 1         | 0.8105906 | not scorable | not scorable |
| #### Bn-scaff_17959_1-p51719 C-genome specific (napus-oleracea) | 0.9808612    | 0.7201635    | 0.9922481 | 0.7686638 | not scorable | not scorable |
| #### Bn-scaff_17959_1-p52167 C-genome specific (napus-oleracea) | 0.9760765    | 0.6709005    | 0.9844961 | 0.6759783 | not scorable | not scorable |
| #### Bn-scaff_17959_1-p5433€ genome unspecific (all in)         | 0.9952153    | 0.6103653    | 1         | 0.6907793 | 1            | 0.8239545    |
| #### Bn-scaff_17959_1-p54612 genome unspecific (all in)         | 0.9904306    | 0.3993473    | 1         | 0.7623752 | 1            | 0.9160259    |
| #### Bn-scaff_17959_1-p56787 C-genome specific (napus-oleracea) | 0.9808612    | 0.7900629    | 0.9922481 | 0.7784562 | not scorable | not scorable |
| #### Bn-scaff_17959_1-p5687€ C-genome specific (napus-oleracea) | 0.9856459    | 0.79691      | 0.9922481 | 0.8125157 | not scorable | not scorable |
| #### Bn-scaff_17959_1-p56889 C-genome specific (napus-oleracea) | 0.9904306    | 0.7729316    | 0.9922481 | 0.6511654 | not scorable | not scorable |
| #### Bn-scaff_17959_1-p5716€ C-genome specific (napus-oleracea) | 0.9832536    | 0.7971586    | 1         | 0.8649501 | not scorable | not scorable |
| #### Bn-scaff_17959_1-p5827€ C-genome specific (napus-oleracea) | 0.9808612    | 0.6658794    | 0.9922481 | 0.6342866 | not scorable | not scorable |
| #### Bn-scaff_17959_1-p58311 C-genome specific (napus-oleracea) | 0.9856459    | 0.8062738    | 1         | 0.7791002 | not scorable | not scorable |
| #### Bn-scaff_17959_1-p59842 C-genome specific (napus-oleracea) | 0.9928229    | 0.7265826    | 1         | 0.6667749 | not scorable | not scorable |
| #### Bn-scaff_17959_1-p6013 C-genome specific (napus-oleracea)  | 0.9736842    | 0.7360595    | 0.9922481 | 0.6683546 | not scorable | not scorable |
| #### Bn-scaff_17959_1-p61382 C-genome specific (napus-oleracea) | 0.9832536    | 0.8005126    | 1         | 0.78168   | not scorable | not scorable |
| #### Bn-scaff_17959_1-p61577 C-genome specific (napus-oleracea) | 0.9808612    | 0.7784874    | 1         | 0.7283044 | not scorable | not scorable |
| #### Bn-scaff_17959_1-p65375 C-genome specific (napus-oleracea) | 0.2822967    | 0.6631199    | 0.744186  | 0.6703582 | not scorable | not scorable |
| #### Bn-scaff_17959_1-p66845 C-genome specific (napus-oleracea) | 0.9784689    | 0.8014385    | 1         | 0.8208871 | not scorable | not scorable |
| #### Bn-scaff_17959_1-p75322 C-genome specific (napus-oleracea) | 0.9880383    | 0.7426746    | 0.9922481 | 0.6645685 | not scorable | not scorable |
| #### Bn-scaff_17959_1-p75903 C-genome specific (napus-oleracea) | 0.9808612    | 0.7856822    | 0.9922481 | 0.7320267 | not scorable | not scorable |
| #### Bn-scaff_17959_1-p76427 C-genome specific (napus-oleracea) | 0.9856459    | 0.7903892    | 0.9922481 | 0.7448855 | not scorable | not scorable |
| #### Bn-scaff_17959_1-p76589 C-genome specific (napus-oleracea) | 0.9736842    | 0.7816545    | 0.9922481 | 0.6810819 | not scorable | not scorable |
| #### Bn-scaff_17959_1-p77103 C-genome specific (napus-oleracea) | 0.9880383    | 0.7736471    | 0.9922481 | 0.7290031 | not scorable | not scorable |
| #### Bn-scaff_17959_1-p8301€ C-genome specific (napus-oleracea) | 0.9688995    | 0.6341141    | 0.9844961 | 0.5613576 | not scorable | not scorable |
| #### Bn-scaff_17959_1-p92649 C-genome specific (napus-oleracea) | 0.9856459    | 0.7784895    | 0.9922481 | 0.8477142 | not scorable | not scorable |
| #### Bn-scaff_17959_1-p95559 C-genome specific (napus-oleracea) | 0.9784689    | 0.7151514    | 0.9922481 | 0.671856  | not scorable | not scorable |
| #### Bn-scaff_17959_1-p9558 C-genome specific (napus-oleracea)  | 0.9856459    | 0.7702869    | 0.9922481 | 0.7848704 | not scorable | not scorable |
| #### Bn-scaff_17969_1-p2047 genome unspecific (oleracea-rapa)   | not scorable | not scorable | 0.8372093 | 0.4406    | 0.9256198    | 0.5513566    |
| #### Bn-scaff_17972_1-p1130€ genome unspecific (all in)         | 0.9760765    | 0.2638668    | 1         | 0.8085203 | 1            | 0.6893321    |
| #### Bn-scaff_17972_1-p14623 genome unspecific (all in)         | 0.9952153    | 0.348634     | 0.9689922 | 0.6847571 | 0.9504132    | 0.8161988    |
| #### Bn-scaff_17972_1-p14623 C-genome specific (napus-oleracea) | 0.9928229    | 0.689104     | 0.9922481 | 0.6563957 | not scorable | not scorable |

|                                                                 |              |              |              |              |              |              |
|-----------------------------------------------------------------|--------------|--------------|--------------|--------------|--------------|--------------|
| #### Bn-scaff_17972_1-p14828 C-genome specific (napus-oleracea) | 0.9952153    | 0.7737529    | 0.9922481    | 0.819826     | not scorable | not scorable |
| #### Bn-scaff_17972_1-p17207 genome unspecific (all in)         | 1            | 0.7202377    | 1            | 0.7758291    | 1            | 0.842319     |
| #### Bn-scaff_17972_1-p18376 genome unspecific (all in)         | 0.9617225    | 0.2934065    | 1            | 0.899968     | 1            | 0.7483585    |
| #### Bn-scaff_17972_1-p24906 C-genome specific (napus-oleracea) | 0.9928229    | 0.7638636    | 0.9922481    | 0.8537236    | not scorable | not scorable |
| #### Bn-scaff_17972_1-p27922 C-genome specific (napus-oleracea) | 0.9976076    | 0.7062829    | 1            | 0.7814335    | not scorable | not scorable |
| #### Bn-scaff_17972_1-p29905 genome unspecific (all in)         | 0.9976076    | 0.2925423    | 1            | 0.6824341    | 0.9669421    | 0.6718375    |
| #### Bn-scaff_17972_1-p36191 C-genome specific (napus-oleracea) | 0.9688995    | 0.7240055    | 1            | 0.7797475    | not scorable | not scorable |
| #### Bn-scaff_17972_1-p37923 all not scorable                   | not scorable | not scorable | not scorable | not scorable | not scorable | not scorable |
| #### Bn-scaff_17972_1-p40007 napus specific                     | 0.9688995    | 0.1988728    | not scorable | not scorable | not scorable | not scorable |
| #### Bn-scaff_17972_1-p40108 C-genome specific (napus-oleracea) | 0.9808612    | 0.8228664    | 0.9767442    | 0.7994717    | not scorable | not scorable |
| #### Bn-scaff_17972_1-p42155 C-genome specific (napus-oleracea) | 0.9928229    | 0.7950703    | 0.9844961    | 0.8000258    | not scorable | not scorable |
| #### Bn-scaff_17972_1-p42435 genome unspecific (all in)         | 0.9928229    | 0.329883     | 0.9922481    | 0.6334726    | 1            | 0.7264252    |
| #### Bn-scaff_17972_1-p42467 genome unspecific (all in)         | 0.9808612    | 0.2227052    | 0.9922481    | 0.7836002    | 1            | 0.8157307    |
| #### Bn-scaff_17972_1-p42488 genome unspecific (all in)         | 0.9784689    | 0.522748     | 1            | 0.7326576    | 1            | 0.8194438    |
| #### Bn-scaff_17972_1-p42517 genome unspecific (all in)         | 0.9928229    | 0.4318279    | 1            | 0.7565694    | 1            | 0.8221629    |
| #### Bn-scaff_17972_1-p42527 C-genome specific (napus-oleracea) | 0.9928229    | 0.8283641    | 0.9767442    | 0.7856601    | not scorable | not scorable |
| #### Bn-scaff_17972_1-p42558 genome unspecific (all in)         | 0.9928229    | 0.3210803    | 0.9767442    | 0.7876956    | 1            | 0.8640726    |
| #### Bn-scaff_17972_1-p42576 C-genome specific (napus-oleracea) | 0.9808612    | 0.8075446    | 0.9844961    | 0.7643157    | not scorable | not scorable |
| #### Bn-scaff_17972_1-p42606 genome unspecific (all in)         | 0.9808612    | 0.4152206    | 0.9767442    | 0.7175685    | 1            | 0.9205657    |
| #### Bn-scaff_17972_1-p42626 genome unspecific (oleracea-rapa)  | not scorable | not scorable | 0.9844961    | 0.516257     | 1            | 0.5673674    |
| #### Bn-scaff_17972_1-p42629 A-genome specific (rapa only)      | not scorable | not scorable | not scorable | not scorable | 1            | 0.6928419    |
| #### Bn-scaff_17972_1-p42713 C-genome specific (napus-oleracea) | 0.9784689    | 0.7886276    | 0.9844961    | 0.7419171    | not scorable | not scorable |
| #### Bn-scaff_17972_1-p47704 C-genome specific (napus-oleracea) | 0.9760765    | 0.7395127    | 0.9844961    | 0.7245589    | not scorable | not scorable |
| #### Bn-scaff_17972_1-p47774 C-genome specific (napus-oleracea) | 0.9904306    | 0.7321096    | 1            | 0.7722311    | not scorable | not scorable |
| #### Bn-scaff_17972_1-p47844 C-genome specific (napus-oleracea) | 0.9928229    | 0.7350991    | 0.9922481    | 0.8219877    | not scorable | not scorable |
| #### Bn-scaff_17972_1-p47949 C-genome specific (napus-oleracea) | 0.9880383    | 0.8068582    | 0.9922481    | 0.7965508    | not scorable | not scorable |
| #### Bn-scaff_17972_1-p47991 C-genome specific (napus-oleracea) | 0.9976076    | 0.7792104    | 0.9844961    | 0.8208925    | not scorable | not scorable |
| #### Bn-scaff_17972_1-p48611 C-genome specific (napus-oleracea) | 0.9832536    | 0.7645935    | 1            | 0.7419741    | not scorable | not scorable |
| #### Bn-scaff_17972_1-p49961 C-genome specific (napus-oleracea) | 0.9784689    | 0.7235977    | 1            | 0.7240292    | not scorable | not scorable |
| #### Bn-scaff_17972_1-p49978 C-genome specific (napus-oleracea) | 0.9808612    | 0.6426196    | 0.9922481    | 0.7979237    | not scorable | not scorable |
| #### Bn-scaff_17972_1-p52621 C-genome specific (napus-oleracea) | 0.9856459    | 0.8082731    | 0.9922481    | 0.7491981    | not scorable | not scorable |
| #### Bn-scaff_17972_1-p57041 genome unspecific (all in)         | 0.9856459    | 0.5385035    | 1            | 0.827515     | 1            | 0.9446293    |
| #### Bn-scaff_17972_1-p58157 genome unspecific (all in)         | 1            | 0.4762188    | 1            | 0.8191038    | 1            | 0.9175813    |

|                                                                 |              |              |              |              |              |                           |
|-----------------------------------------------------------------|--------------|--------------|--------------|--------------|--------------|---------------------------|
| #### Bn-scaff_17972_1-p59873 A-genome specific (rapa only)      | not scorable | not scorable | not scorable | not scorable | 1            | 0.8540261                 |
| #### Bn-scaff_17972_1-p59924 C-genome specific (oleracea only)  | not scorable | not scorable |              | 1            | 0.3972422    | not scorable not scorable |
| #### Bn-scaff_17972_1-p61014 C-genome specific (napus-oleracea) | 0.9282297    | 0.2672354    | 0.9844961    | 0.6819846    | not scorable | not scorable              |
| #### Bn-scaff_17972_1-p61683 C-genome specific (oleracea only)  | not scorable | not scorable | 0.9689922    | 0.9512764    | not scorable | not scorable              |
| #### Bn-scaff_17972_1-p68614 A-genome specific (rapa only)      | not scorable | not scorable | not scorable | not scorable | 0.9917355    | 0.6056893                 |
| #### Bn-scaff_17972_1-p68665 C-genome specific (oleracea only)  | not scorable | not scorable | 0.9922481    | 0.6525951    | not scorable | not scorable              |
| #### Bn-scaff_17972_1-p69160 genome unspecific (oleracea-rapa)  | not scorable | not scorable | 0.7209302    | 0.7157561    | 0.9752066    | 0.6611159                 |
| #### Bn-scaff_17977_1-p14691 C-genome specific (napus-oleracea) |              | 1            | 0.7084923    | 0.9922481    | 0.7456536    | not scorable not scorable |
| #### Bn-scaff_17977_1-p82729 genome unspecific (all in)         |              | 1            | 0.7383132    |              | 1            | 0.9175813 1 0.9175813     |
| #### Bn-scaff_17978_1-p14070 C-genome specific (napus-oleracea) | 0.9712918    | 0.7430994    |              | 1            | 0.8264733    | not scorable not scorable |
| #### Bn-scaff_17978_1-p22148 genome unspecific (all in)         | 0.9880383    | 0.2324271    | 0.9302326    | 0.2537836    |              | 1 0.7952903               |
| #### Bn-scaff_17978_1-p22513 C-genome specific (napus-oleracea) | 0.9904306    | 0.7747617    | 0.9922481    | 0.7956751    | not scorable | not scorable              |
| #### Bn-scaff_17978_1-p22899 genome unspecific (all in)         | 0.9904306    | 0.6179997    | 0.9922481    | 0.8370682    |              | 1 0.9179671               |
| #### Bn-scaff_17978_1-p23142 C-genome specific (napus-oleracea) | 0.9760765    | 0.7881709    | 0.9922481    | 0.7886962    | not scorable | not scorable              |
| #### Bn-scaff_17978_1-p23158 C-genome specific (oleracea only)  | not scorable | not scorable | 0.9922481    | 0.5891491    | not scorable | not scorable              |
| #### Bn-scaff_17978_1-p23608 genome unspecific (all in)         | 0.9760765    | 0.247107     | 0.9767442    | 0.4699713    |              | 1 0.725578                |
| #### Bn-scaff_17978_1-p23955 C-genome specific (napus-oleracea) | 0.9784689    | 0.775807     | 0.9922481    | 0.7929422    | not scorable | not scorable              |
| #### Bn-scaff_17978_1-p32956 genome unspecific (all in)         | 0.9952153    | 0.3337544    |              | 1            | 0.8798206    | 0.9834711 0.6624102       |
| #### Bn-scaff_17978_1-p44254 C-genome specific (oleracea only)  | not scorable | not scorable |              | 1            | 0.6571033    | not scorable not scorable |
| #### Bn-scaff_17978_1-p47592 C-genome specific (napus-oleracea) | 0.9688995    | 0.7905658    | 0.9767442    | 0.8418668    | not scorable | not scorable              |
| #### Bn-scaff_17978_1-p52413 C-genome specific (napus-oleracea) | 0.9808612    | 0.7177417    |              | 1            | 0.506394     | not scorable not scorable |
| #### Bn-scaff_17978_1-p52856 C-genome specific (napus-oleracea) | 0.9712918    | 0.7067927    |              | 1            | 0.7743359    | not scorable not scorable |
| #### Bn-scaff_17982_1-p41689 C-genome specific (napus-oleracea) | 0.9808612    | 0.7430434    |              | 1            | 0.915113     | not scorable not scorable |
| #### Bn-scaff_17983_1-p34290 C-genome specific (oleracea only)  | not scorable | not scorable | 0.5813953    | 0.9175813    | not scorable | not scorable              |
| #### Bn-scaff_17983_1-p34358 C-genome specific (oleracea only)  | not scorable | not scorable | 0.5581396    | 0.8653011    | not scorable | not scorable              |
| #### Bn-scaff_17983_1-p52117 C-genome specific (napus-oleracea) | 0.9904306    | 0.753154     |              | 1            | 0.8011191    | not scorable not scorable |
| #### Bn-scaff_17983_1-p52946 C-genome specific (napus-oleracea) | 0.9784689    | 0.7667955    | 0.9224806    | 0.4646621    | not scorable | not scorable              |
| #### Bn-scaff_17983_1-p54630 C-genome specific (napus-oleracea) | 0.9784689    | 0.7803661    | 0.9302326    | 0.8355644    | not scorable | not scorable              |
| #### Bn-scaff_17983_1-p71628 C-genome specific (napus-oleracea) | 0.9808612    | 0.708177     | 0.9147287    | 0.7088679    | not scorable | not scorable              |
| #### Bn-scaff_17984_1-p10768 C-genome specific (napus-oleracea) | 0.9976076    | 0.7375915    |              | 1            | 0.7167556    | not scorable not scorable |
| #### Bn-scaff_17984_1-p11741 genome unspecific (all in)         |              | 1            | 0.7395976    |              | 1            | 0.6879954 1 0.5791867     |
| #### Bn-scaff_17984_1-p12173 C-genome specific (napus-oleracea) | 0.9952153    | 0.5894384    |              | 1            | 0.7619019    | not scorable not scorable |
| #### Bn-scaff_17984_1-p12198 genome unspecific (all in)         | 0.9952153    | 0.3346069    |              | 1            | 0.7527651    | 1 0.8015219               |

|                                                                |              |              |           |           |              |              |
|----------------------------------------------------------------|--------------|--------------|-----------|-----------|--------------|--------------|
| #### Bn-scaff_17984_1-p12282genome unspecific (all in)         | 0.9952153    | 0.4592448    | 1         | 0.6886812 | 0.9917355    | 0.8177275    |
| #### Bn-scaff_17984_1-p12391C-genome specific (oleracea only)  | not scorable | not scorable | 1         | 0.5443519 | not scorable | not scorable |
| #### Bn-scaff_17984_1-p21242C-genome specific (napus-oleracea) | 0.8971292    | 0.7614406    | 1         | 0.6852852 | not scorable | not scorable |
| #### Bn-scaff_17984_1-p22227genome unspecific (all in)         | 0.9928229    | 0.3446146    | 1         | 0.6416408 | 1            | 0.7770717    |
| #### Bn-scaff_17984_1-p22295genome unspecific (all in)         | 1            | 0.4262211    | 0.9922481 | 0.6740808 | 1            | 0.8004208    |
| #### Bn-scaff_17984_1-p31787genome unspecific (all in)         | 0.9976076    | 0.3178309    | 1         | 0.9095823 | 1            | 0.7935495    |
| #### Bn-scaff_17984_1-p31796genome unspecific (all in)         | 0.9976076    | 0.4410127    | 1         | 0.894797  | 1            | 0.73263      |
| #### Bn-scaff_17984_1-p32214genome unspecific (all in)         | 0.9928229    | 0.7290074    | 0.875969  | 0.6989784 | 0.9421487    | 0.7989172    |
| #### Bn-scaff_17984_1-p35238genome unspecific (oleracea-rapa)  | not scorable | not scorable | 0.9457364 | 0.2933604 | 1            | 0.6992897    |
| #### Bn-scaff_17984_1-p35249genome unspecific (all in)         | 0.9712918    | 0.2119861    | 0.9689922 | 0.3587457 | 1            | 0.7770717    |
| #### Bn-scaff_17984_1-p37329C-genome specific (napus-oleracea) | 1            | 0.6849002    | 1         | 0.8088477 | not scorable | not scorable |
| #### Bn-scaff_17984_1-p48750genome unspecific (all in)         | 1            | 0.6205731    | 1         | 0.602145  | 1            | 0.8120733    |
| #### Bn-scaff_17984_1-p49419C-genome specific (napus-oleracea) | 1            | 0.7892583    | 1         | 0.9002127 | not scorable | not scorable |
| #### Bn-scaff_17984_1-p51769C-genome specific (napus-oleracea) | 1            | 0.7938403    | 0.9922481 | 0.705412  | not scorable | not scorable |
| #### Bn-scaff_17984_1-p55244C-genome specific (napus-oleracea) | 1            | 0.8024045    | 1         | 0.7775917 | not scorable | not scorable |
| #### Bn-scaff_17984_1-p64106C-genome specific (napus-oleracea) | 1            | 0.6714046    | 1         | 0.6060418 | not scorable | not scorable |
| #### Bn-scaff_17984_1-p73858genome unspecific (all in)         | 1            | 0.7078155    | 1         | 0.6461097 | 1            | 0.9635739    |
| #### Bn-scaff_17984_1-p73888C-genome specific (napus-oleracea) | 1            | 0.7309657    | 1         | 0.8394473 | not scorable | not scorable |
| #### Bn-scaff_17984_1-p79251genome unspecific (all in)         | 1            | 0.5879986    | 1         | 0.7591171 | 1            | 0.8572639    |
| #### Bn-scaff_17984_1-p79988C-genome specific (napus-oleracea) | 1            | 0.6341928    | 1         | 0.6154342 | not scorable | not scorable |
| #### Bn-scaff_17984_1-p84238C-genome specific (napus-oleracea) | 1            | 0.6599194    | 0.9922481 | 0.6262468 | not scorable | not scorable |
| #### Bn-scaff_17984_1-p88754C-genome specific (napus-oleracea) | 1            | 0.6448818    | 1         | 0.7282419 | not scorable | not scorable |
| #### Bn-scaff_17984_1-p90965C-genome specific (napus-oleracea) | 0.9617225    | 0.5147618    | 0.9844961 | 0.5334692 | not scorable | not scorable |
| #### Bn-scaff_17984_1-p91017C-genome specific (napus-oleracea) | 0.9976076    | 0.4195547    | 0.9457364 | 0.4907596 | not scorable | not scorable |
| #### Bn-scaff_17984_1-p91022C-genome specific (oleracea only)  | not scorable | not scorable | 1         | 0.7196847 | not scorable | not scorable |
| #### Bn-scaff_17984_1-p91046C-genome specific (napus-oleracea) | 0.9976076    | 0.7288572    | 0.9534883 | 0.7603163 | not scorable | not scorable |
| #### Bn-scaff_17984_1-p91071C-genome specific (napus-oleracea) | 0.9976076    | 0.768642     | 0.9534883 | 0.8190235 | not scorable | not scorable |
| #### Bn-scaff_17984_1-p91088C-genome specific (napus-oleracea) | 0.9952153    | 0.6990682    | 0.9534883 | 0.6625243 | not scorable | not scorable |
| #### Bn-scaff_17984_1-p94282C-genome specific (napus-oleracea) | 1            | 0.563744     | 0.9767442 | 0.6057319 | not scorable | not scorable |
| #### Bn-scaff_17996_1-p16482C-genome specific (napus-oleracea) | 0.8875598    | 0.7213867    | 0.9844961 | 0.8395287 | not scorable | not scorable |
| #### Bn-scaff_17996_1-p19906C-genome specific (napus-oleracea) | 0.8779904    | 0.7889208    | 0.9767442 | 0.7675322 | not scorable | not scorable |
| #### Bn-scaff_17996_1-p20442C-genome specific (napus-oleracea) | 0.9162679    | 0.7334529    | 0.9922481 | 0.8213602 | not scorable | not scorable |
| #### Bn-scaff_17996_1-p20522C-genome specific (napus-oleracea) | 0.9162679    | 0.7688148    | 1         | 0.7528204 | not scorable | not scorable |



|                                                                 |           |           |           |           |              |              |
|-----------------------------------------------------------------|-----------|-----------|-----------|-----------|--------------|--------------|
| #### Bn-scaff_17996_1-p20618 C-genome specific (napus-oleracea) | 0.9114832 | 0.7267103 | 1         | 0.8317963 | not scorable | not scorable |
| #### Bn-scaff_17996_1-p22988 genome unspecific (all in)         | 0.9545454 | 0.6097122 | 0.9844961 | 0.8032632 | 0.9669421    | 0.9012108    |
| #### Bn-scaff_17996_1-p32471 genome unspecific (all in)         | 1         | 0.6133477 | 1         | 0.6133477 | 1            | 0.6405856    |
| #### Bn-scaff_17996_1-p33672 C-genome specific (napus-oleracea) | 0.8899522 | 0.7536915 | 0.9767442 | 0.7295258 | not scorable | not scorable |
| #### Bn-scaff_17996_1-p33756 C-genome specific (napus-oleracea) | 0.8971292 | 0.7876441 | 0.9844961 | 0.7975124 | not scorable | not scorable |
| #### Bn-scaff_17996_1-p40095 C-genome specific (napus-oleracea) | 0.8971292 | 0.7482175 | 0.9922481 | 0.7851723 | not scorable | not scorable |
| #### Bn-scaff_17996_1-p40618 C-genome specific (napus-oleracea) | 0.9019139 | 0.7097445 | 0.9922481 | 0.6495172 | not scorable | not scorable |
| #### Bn-scaff_17996_1-p41497 C-genome specific (napus-oleracea) | 0.9019139 | 0.7503897 | 0.9922481 | 0.7800804 | not scorable | not scorable |
| #### Bn-scaff_17996_1-p43416 C-genome specific (napus-oleracea) | 0.9066986 | 0.7385646 | 0.9922481 | 0.7586177 | not scorable | not scorable |
| #### Bn-scaff_17996_1-p44346 C-genome specific (napus-oleracea) | 0.8827751 | 0.7227189 | 0.7596899 | 0.7602021 | not scorable | not scorable |
| #### Bn-scaff_17996_1-p46573 C-genome specific (napus-oleracea) | 0.9090909 | 0.7008428 | 0.9844961 | 0.8432364 | not scorable | not scorable |
| #### Bn-scaff_17996_1-p46758 C-genome specific (napus-oleracea) | 0.9090909 | 0.7210768 | 1         | 0.6314738 | not scorable | not scorable |
| #### Bn-scaff_17996_1-p60445 C-genome specific (napus-oleracea) | 0.8803828 | 0.7707133 | 0.9922481 | 0.7004326 | not scorable | not scorable |
| #### Bn-scaff_17996_1-p90674 C-genome specific (napus-oleracea) | 0.9066986 | 0.7533814 | 0.9922481 | 0.7988121 | not scorable | not scorable |
| #### Bn-scaff_18002_1-p11677 C-genome specific (napus-oleracea) | 0.9856459 | 0.7944487 | 1         | 0.6922979 | not scorable | not scorable |
| #### Bn-scaff_18002_1-p12322 C-genome specific (napus-oleracea) | 0.9952153 | 0.7581379 | 0.9844961 | 0.8098773 | not scorable | not scorable |
| #### Bn-scaff_18002_1-p12932 C-genome specific (napus-oleracea) | 0.9904306 | 0.6402889 | 1         | 0.9175813 | not scorable | not scorable |
| #### Bn-scaff_18002_1-p13953 C-genome specific (napus-oleracea) | 0.9880383 | 0.6178277 | 1         | 0.9245512 | not scorable | not scorable |
| #### Bn-scaff_18002_1-p15675 C-genome specific (napus-oleracea) | 1         | 0.780129  | 1         | 0.8362881 | not scorable | not scorable |
| #### Bn-scaff_18002_1-p16606 C-genome specific (napus-oleracea) | 0.9856459 | 0.7686396 | 0.9844961 | 0.754073  | not scorable | not scorable |
| #### Bn-scaff_18002_1-p16885 C-genome specific (napus-oleracea) | 0.9904306 | 0.7322378 | 0.9844961 | 0.7185535 | not scorable | not scorable |
| #### Bn-scaff_18002_1-p16893 C-genome specific (napus-oleracea) | 0.9904306 | 0.6105843 | 0.9612403 | 0.6585783 | not scorable | not scorable |
| #### Bn-scaff_18002_1-p16997 C-genome specific (napus-oleracea) | 1         | 0.7893741 | 1         | 0.786476  | not scorable | not scorable |
| #### Bn-scaff_18002_1-p20594 C-genome specific (napus-oleracea) | 0.9928229 | 0.7956652 | 0.9922481 | 0.9239874 | not scorable | not scorable |
| #### Bn-scaff_18002_1-p22247 C-genome specific (napus-oleracea) | 0.9952153 | 0.7824882 | 0.9844961 | 0.7305514 | not scorable | not scorable |
| #### Bn-scaff_18002_1-p24084 genome unspecific (all in)         | 0.9688995 | 0.2851688 | 1         | 0.8393616 | 0.9917355    | 0.8770125    |
| #### Bn-scaff_18002_1-p24161 C-genome specific (napus-oleracea) | 0.9712918 | 0.7645915 | 0.9069768 | 0.7764004 | not scorable | not scorable |
| #### Bn-scaff_18002_1-p25362 C-genome specific (napus-oleracea) | 0.9952153 | 0.804183  | 0.9689922 | 0.7551168 | not scorable | not scorable |
| #### Bn-scaff_18002_1-p26808 C-genome specific (napus-oleracea) | 0.9880383 | 0.7856366 | 0.9302326 | 0.705891  | not scorable | not scorable |
| #### Bn-scaff_18002_1-p27117 C-genome specific (napus-oleracea) | 0.9808612 | 0.7959018 | 0.9844961 | 0.8159224 | not scorable | not scorable |
| #### Bn-scaff_18002_1-p29854 C-genome specific (napus-oleracea) | 0.9928229 | 0.6696538 | 0.9844961 | 0.7047658 | not scorable | not scorable |
| #### Bn-scaff_18002_1-p30288 genome unspecific (all in)         | 0.9856459 | 0.6347989 | 0.9767442 | 0.688242  | 1            | 0.9186451    |
| #### Bn-scaff_18002_1-p94815 C-genome specific (napus-oleracea) | 0.9928229 | 0.7020856 | 0.9922481 | 0.7390981 | not scorable | not scorable |

|                                                                 |           |           |              |              |              |              |
|-----------------------------------------------------------------|-----------|-----------|--------------|--------------|--------------|--------------|
| #### Bn-scaff_18013_1-p19477genome unspecific (all in)          | 0.9904306 | 0.2403556 | 1            | 0.7757466    | 1            | 0.8135551    |
| #### Bn-scaff_18013_1-p20874C-genome specific (napus-oleracea)  | 0.9856459 | 0.4046377 | 1            | 0.8866533    | not scorable | not scorable |
| #### Bn-scaff_18013_1-p74295C-genome specific (napus-oleracea)  | 1         | 0.7373737 | 1            | 0.8122171    | not scorable | not scorable |
| #### Bn-scaff_18013_1-p86704genome unspecific (all in)          | 0.9976076 | 0.8135551 | 1            | 0.8135551    | 0.9917355    | 0.8819247    |
| #### Bn-scaff_18013_1-p91368C-genome specific (napus-oleracea)  | 0.9976076 | 0.8114662 | 0.9844961    | 0.8004208    | not scorable | not scorable |
| #### Bn-scaff_18022_1-p991 genome unspecific (all in)           | 0.9952153 | 0.553103  | 0.9844961    | 0.4679013    | 1            | 0.9012778    |
| #### Bn-scaff_18032_1-p1336C napus specific                     | 0.9928229 | 0.7898796 | not scorable | not scorable | not scorable | not scorable |
| #### Bn-scaff_18034_1-p365 C-genome specific (napus-oleracea)   | 0.9760765 | 0.8221795 | 0.9767442    | 0.7826884    | not scorable | not scorable |
| #### Bn-scaff_18039_1-p10392C-genome specific (napus-oleracea)  | 0.9856459 | 0.7128754 | 1            | 0.696176     | not scorable | not scorable |
| #### Bn-scaff_18039_1-p1668C C-genome specific (napus-oleracea) | 0.9760765 | 0.7630371 | 1            | 0.736097     | not scorable | not scorable |
| #### Bn-scaff_18039_1-p17615C-genome specific (napus-oleracea)  | 0.9688995 | 0.7801171 | 0.9922481    | 0.7403231    | not scorable | not scorable |
| #### Bn-scaff_18039_1-p18322C-genome specific (napus-oleracea)  | 0.9760765 | 0.7421049 | 1            | 0.740733     | not scorable | not scorable |
| #### Bn-scaff_18039_1-p18323C-genome specific (napus-oleracea)  | 0.9808612 | 0.6517753 | 1            | 0.6282153    | not scorable | not scorable |
| #### Bn-scaff_18039_1-p1893C C-genome specific (napus-oleracea) | 0.9760765 | 0.7229297 | 0.9922481    | 0.6465689    | not scorable | not scorable |
| #### Bn-scaff_18039_1-p19036C-genome specific (napus-oleracea)  | 0.9808612 | 0.7625951 | 1            | 0.7272848    | not scorable | not scorable |
| #### Bn-scaff_18039_1-p19085C-genome specific (napus-oleracea)  | 0.9760765 | 0.7204381 | 1            | 0.6961465    | not scorable | not scorable |
| #### Bn-scaff_18039_1-p19089C-genome specific (napus-oleracea)  | 0.9736842 | 0.7619582 | 1            | 0.8227718    | not scorable | not scorable |
| #### Bn-scaff_18039_1-p19099C-genome specific (napus-oleracea)  | 0.9665072 | 0.7234179 | 1            | 0.6930602    | not scorable | not scorable |
| #### Bn-scaff_18039_1-p19109C-genome specific (napus-oleracea)  | 0.9832536 | 0.7757317 | 1            | 0.7524463    | not scorable | not scorable |
| #### Bn-scaff_18039_1-p20087C-genome specific (napus-oleracea)  | 0.9617225 | 0.6350791 | 1            | 0.7411394    | not scorable | not scorable |
| #### Bn-scaff_18039_1-p20096C-genome specific (napus-oleracea)  | 0.9904306 | 0.8413282 | 0.9922481    | 0.7395847    | not scorable | not scorable |
| #### Bn-scaff_18039_1-p20315C-genome specific (napus-oleracea)  | 0.9832536 | 0.7706954 | 0.9922481    | 0.7871754    | not scorable | not scorable |
| #### Bn-scaff_18039_1-p20604C-genome specific (napus-oleracea)  | 0.9617225 | 0.668896  | 1            | 0.7698023    | not scorable | not scorable |
| #### Bn-scaff_18039_1-p20613C-genome specific (napus-oleracea)  | 0.9760765 | 0.6231655 | 1            | 0.6350489    | not scorable | not scorable |
| #### Bn-scaff_18039_1-p20659C-genome specific (napus-oleracea)  | 0.9784689 | 0.6812874 | 0.9844961    | 0.7459204    | not scorable | not scorable |
| #### Bn-scaff_18039_1-p21922C-genome specific (napus-oleracea)  | 0.9760765 | 0.708227  | 1            | 0.7020553    | not scorable | not scorable |
| #### Bn-scaff_18039_1-p22006C-genome specific (napus-oleracea)  | 0.9856459 | 0.7867507 | 1            | 0.7907223    | not scorable | not scorable |
| #### Bn-scaff_18039_1-p22015C-genome specific (napus-oleracea)  | 0.9784689 | 0.7910911 | 1            | 0.780166     | not scorable | not scorable |
| #### Bn-scaff_18039_1-p22194genome unspecific (all in)          | 0.9688995 | 0.6263193 | 1            | 0.628474     | 1            | 0.9101978    |
| #### Bn-scaff_18039_1-p22386genome unspecific (all in)          | 0.9760765 | 0.5666325 | 1            | 0.8651324    | 1            | 0.9357158    |
| #### Bn-scaff_18039_1-p23731C-genome specific (napus-oleracea)  | 0.9688995 | 0.7694964 | 0.9922481    | 0.7796475    | not scorable | not scorable |
| #### Bn-scaff_18039_1-p24003C-genome specific (napus-oleracea)  | 0.9593301 | 0.6799667 | 0.9767442    | 0.6425393    | not scorable | not scorable |
| #### Bn-scaff_18039_1-p2467C C-genome specific (napus-oleracea) | 0.9784689 | 0.7628673 | 0.9922481    | 0.8507549    | not scorable | not scorable |

|                                                                 |           |           |              |              |              |              |
|-----------------------------------------------------------------|-----------|-----------|--------------|--------------|--------------|--------------|
| #### Bn-scaff_18039_1-p26577 C-genome specific (napus-oleracea) | 0.9832536 | 0.7803797 | 1            | 0.8717142    | not scorable | not scorable |
| #### Bn-scaff_18039_1-p6868 genome unspecific (all in)          | 1         | 0.6444474 | 1            | 0.6102158    | 1            | 0.8143899    |
| #### Bn-scaff_18045_1-p989 A-genome specific (napus-rapa)       | 1         | 0.5228557 | not scorable | not scorable | 1            | 0.7755052    |
| #### Bn-scaff_18062_1-p11455 C-genome specific (napus-oleracea) | 0.9665072 | 0.2927605 | 1            | 0.4305988    | not scorable | not scorable |
| #### Bn-scaff_18062_1-p12175 genome unspecific (all in)         | 0.9760765 | 0.3927616 | 1            | 0.7830287    | 1            | 0.9175813    |
| #### Bn-scaff_18062_1-p13388 C-genome specific (napus-oleracea) | 0.9808612 | 0.6751094 | 1            | 0.6569709    | not scorable | not scorable |
| #### Bn-scaff_18062_1-p13945 C-genome specific (napus-oleracea) | 0.9641148 | 0.6120632 | 0.5348837    | 0.615298     | not scorable | not scorable |
| #### Bn-scaff_18062_1-p14709 C-genome specific (napus-oleracea) | 0.9832536 | 0.8101604 | 0.9922481    | 0.7668583    | not scorable | not scorable |
| #### Bn-scaff_18062_1-p14851 C-genome specific (napus-oleracea) | 0.9665072 | 0.6911575 | 0.9844961    | 0.6216695    | not scorable | not scorable |
| #### Bn-scaff_18062_1-p14884 C-genome specific (napus-oleracea) | 0.9593301 | 0.6378492 | 1            | 0.6572357    | not scorable | not scorable |
| #### Bn-scaff_18062_1-p15010 C-genome specific (napus-oleracea) | 0.9736842 | 0.666627  | 1            | 0.6481088    | not scorable | not scorable |
| #### Bn-scaff_18062_1-p15046 C-genome specific (napus-oleracea) | 0.9665072 | 0.6561119 | 0.9922481    | 0.6290514    | not scorable | not scorable |
| #### Bn-scaff_18062_1-p1597 genome unspecific (all in)          | 0.9976076 | 0.3729622 | 0.9844961    | 0.4665771    | 1            | 0.9293231    |
| #### Bn-scaff_18062_1-p18247 C-genome specific (napus-oleracea) | 0.9904306 | 0.7805189 | 0.9922481    | 0.7496441    | not scorable | not scorable |
| #### Bn-scaff_18062_1-p18447 C-genome specific (napus-oleracea) | 0.9928229 | 0.7830628 | 1            | 0.7273117    | not scorable | not scorable |
| #### Bn-scaff_18062_1-p18839 C-genome specific (napus-oleracea) | 0.9928229 | 0.8131449 | 1            | 0.8291489    | not scorable | not scorable |
| #### Bn-scaff_18062_1-p21377 C-genome specific (napus-oleracea) | 0.9832536 | 0.8008495 | 0.9922481    | 0.8401536    | not scorable | not scorable |
| #### Bn-scaff_18062_1-p21438 C-genome specific (napus-oleracea) | 0.9784689 | 0.7462159 | 0.9069768    | 0.780412     | not scorable | not scorable |
| #### Bn-scaff_18062_1-p21466 C-genome specific (napus-oleracea) | 0.9784689 | 0.6793889 | 1            | 0.7165275    | not scorable | not scorable |
| #### Bn-scaff_18062_1-p21688 C-genome specific (napus-oleracea) | 0.9760765 | 0.7092291 | 0.9767442    | 0.6991884    | not scorable | not scorable |
| #### Bn-scaff_18062_1-p21830 C-genome specific (napus-oleracea) | 0.9784689 | 0.7851431 | 0.8372093    | 0.6629116    | not scorable | not scorable |
| #### Bn-scaff_18062_1-p21841 C-genome specific (napus-oleracea) | 0.9856459 | 0.7027261 | 0.8294573    | 0.6930674    | not scorable | not scorable |
| #### Bn-scaff_18062_1-p21934 C-genome specific (napus-oleracea) | 0.9856459 | 0.7295278 | 1            | 0.6725802    | not scorable | not scorable |
| #### Bn-scaff_18062_1-p21978 C-genome specific (napus-oleracea) | 0.9832536 | 0.8128794 | 0.9844961    | 0.7958385    | not scorable | not scorable |
| #### Bn-scaff_18062_1-p22023 C-genome specific (napus-oleracea) | 0.9856459 | 0.8161048 | 0.9922481    | 0.8416888    | not scorable | not scorable |
| #### Bn-scaff_18062_1-p22029 C-genome specific (napus-oleracea) | 0.9784689 | 0.7772371 | 0.9844961    | 0.7263673    | not scorable | not scorable |
| #### Bn-scaff_18062_1-p22032 C-genome specific (napus-oleracea) | 0.9856459 | 0.7972814 | 0.9767442    | 0.7775561    | not scorable | not scorable |
| #### Bn-scaff_18062_1-p22037 C-genome specific (napus-oleracea) | 0.9976076 | 0.7977455 | 0.9844961    | 0.7846152    | not scorable | not scorable |
| #### Bn-scaff_18062_1-p22998 C-genome specific (napus-oleracea) | 0.9808612 | 0.716642  | 0.9534883    | 0.7402457    | not scorable | not scorable |
| #### Bn-scaff_18062_1-p23362 C-genome specific (napus-oleracea) | 0.9904306 | 0.7053285 | 0.9457364    | 0.7255942    | not scorable | not scorable |
| #### Bn-scaff_18062_1-p24298 napus specific                     | 0.9736842 | 0.4045074 | not scorable | not scorable | not scorable | not scorable |
| #### Bn-scaff_18062_1-p24426 C-genome specific (napus-oleracea) | 0.9593301 | 0.6131873 | 0.9457364    | 0.7849239    | not scorable | not scorable |
| #### Bn-scaff_18062_1-p24529 C-genome specific (napus-oleracea) | 0.9784689 | 0.7508628 | 0.9534883    | 0.7960055    | not scorable | not scorable |

|                                                                  |           |           |           |           |              |              |
|------------------------------------------------------------------|-----------|-----------|-----------|-----------|--------------|--------------|
| #### Bn-scaff_18062_1-p2461ϵ C-genome specific (napus-oleracea)  | 0.9856459 | 0.7465026 | 0.9534883 | 0.7155979 | not scorable | not scorable |
| #### Bn-scaff_18062_1-p25361ϵ C-genome specific (napus-oleracea) | 0.9928229 | 0.7785845 | 0.9534883 | 0.8178423 | not scorable | not scorable |
| #### Bn-scaff_18062_1-p25380ϵ C-genome specific (napus-oleracea) | 0.9856459 | 0.809572  | 0.9844961 | 0.7647911 | not scorable | not scorable |
| #### Bn-scaff_18062_1-p2573ϵ C-genome specific (napus-oleracea)  | 0.9856459 | 0.7875203 | 1         | 0.9076387 | not scorable | not scorable |
| #### Bn-scaff_18062_1-p25777ϵ C-genome specific (napus-oleracea) | 0.9904306 | 0.6897973 | 1         | 0.5959629 | not scorable | not scorable |
| #### Bn-scaff_18062_1-p28171ϵ C-genome specific (napus-oleracea) | 0.9832536 | 0.6856065 | 1         | 0.6300185 | not scorable | not scorable |
| #### Bn-scaff_18062_1-p31472 genome unspecific (all in)          | 0.9832536 | 0.4152724 | 1         | 0.6565107 | 1            | 0.8947776    |
| #### Bn-scaff_18062_1-p31502ϵ C-genome specific (napus-oleracea) | 0.9952153 | 0.7776656 | 1         | 0.6478099 | not scorable | not scorable |
| #### Bn-scaff_18062_1-p31567ϵ C-genome specific (napus-oleracea) | 0.9976076 | 0.8031517 | 1         | 0.7284996 | not scorable | not scorable |
| #### Bn-scaff_18062_1-p31723ϵ C-genome specific (napus-oleracea) | 0.9904306 | 0.800755  | 0.9689922 | 0.7573923 | not scorable | not scorable |
| #### Bn-scaff_18062_1-p3179ϵ C-genome specific (napus-oleracea)  | 0.9808612 | 0.8096855 | 0.9844961 | 0.8145618 | not scorable | not scorable |
| #### Bn-scaff_18062_1-p32007ϵ C-genome specific (napus-oleracea) | 0.9760765 | 0.660257  | 1         | 0.7241126 | not scorable | not scorable |
| #### Bn-scaff_18062_1-p32392ϵ C-genome specific (napus-oleracea) | 0.9856459 | 0.7970518 | 0.9922481 | 0.6945419 | not scorable | not scorable |
| #### Bn-scaff_18062_1-p33301ϵ C-genome specific (napus-oleracea) | 0.9928229 | 0.8008305 | 1         | 0.7168462 | not scorable | not scorable |
| #### Bn-scaff_18062_1-p3379ϵ C-genome specific (napus-oleracea)  | 0.9760765 | 0.6642115 | 0.9844961 | 0.6028546 | not scorable | not scorable |
| #### Bn-scaff_18062_1-p3379ϵ C-genome specific (napus-oleracea)  | 0.9832536 | 0.7025468 | 0.9302326 | 0.6851546 | not scorable | not scorable |
| #### Bn-scaff_18062_1-p33804ϵ C-genome specific (napus-oleracea) | 0.9832536 | 0.6900799 | 0.9844961 | 0.5673839 | not scorable | not scorable |
| #### Bn-scaff_18062_1-p45782ϵ C-genome specific (napus-oleracea) | 0.9952153 | 0.7527447 | 0.8372093 | 0.7899991 | not scorable | not scorable |
| #### Bn-scaff_18062_1-p6860ϵ C-genome specific (napus-oleracea)  | 0.9569378 | 0.7328403 | 1         | 0.7380162 | not scorable | not scorable |
| #### Bn-scaff_18095_1-p758 genome unspecific (all in)            | 0.9808612 | 0.2495485 | 1         | 0.8004208 | 0.9752066    | 0.6987265    |
| #### Bn-scaff_18096_1-p30025 genome unspecific (all in)          | 0.9760765 | 0.3620481 | 1         | 0.6828985 | 0.9752066    | 0.811895     |
| #### Bn-scaff_18098_1-p2666 C-genome specific (napus-oleracea)   | 0.9928229 | 0.8322171 | 1         | 0.8023311 | not scorable | not scorable |
| #### Bn-scaff_18098_1-p3827 C-genome specific (napus-oleracea)   | 1         | 0.7556512 | 1         | 0.9095823 | not scorable | not scorable |
| #### Bn-scaff_18098_1-p4622 C-genome specific (napus-oleracea)   | 0.9976076 | 0.7862324 | 1         | 0.9097573 | not scorable | not scorable |
| #### Bn-scaff_18098_1-p4696 C-genome specific (napus-oleracea)   | 0.9952153 | 0.7904828 | 1         | 0.7551738 | not scorable | not scorable |
| #### Bn-scaff_18098_1-p5093 C-genome specific (napus-oleracea)   | 0.9952153 | 0.8265922 | 1         | 0.8439607 | not scorable | not scorable |
| #### Bn-scaff_18098_1-p5598 C-genome specific (napus-oleracea)   | 1         | 0.8220807 | 1         | 0.8704887 | not scorable | not scorable |
| #### Bn-scaff_18098_1-p5685 C-genome specific (napus-oleracea)   | 0.9952153 | 0.7698299 | 1         | 0.9095823 | not scorable | not scorable |
| #### Bn-scaff_18098_1-p6003 C-genome specific (napus-oleracea)   | 0.9952153 | 0.78539   | 1         | 0.9175813 | not scorable | not scorable |
| #### Bn-scaff_18100_1-p1084ϵ C-genome specific (napus-oleracea)  | 0.8971292 | 0.7483304 | 1         | 0.7280845 | not scorable | not scorable |
| #### Bn-scaff_18100_1-p1121ϵ C-genome specific (napus-oleracea)  | 0.9162679 | 0.7979924 | 1         | 0.7875696 | not scorable | not scorable |
| #### Bn-scaff_18100_1-p11237ϵ C-genome specific (napus-oleracea) | 0.9043062 | 0.7886439 | 1         | 0.766489  | not scorable | not scorable |
| #### Bn-scaff_18100_1-p11248 genome unspecific (all in)          | 1         | 0.3912911 | 1         | 0.8477018 | 1            | 0.7992345    |

|                                                                 |              |              |           |           |              |              |
|-----------------------------------------------------------------|--------------|--------------|-----------|-----------|--------------|--------------|
| #### Bn-scaff_18100_1-p11429 C-genome specific (napus-oleracea) | 0.9138756    | 0.6841382    | 0.9612403 | 0.7110421 | not scorable | not scorable |
| #### Bn-scaff_18100_1-p11433 C-genome specific (napus-oleracea) | 0.9114832    | 0.7655106    | 0.9689922 | 0.9048559 | not scorable | not scorable |
| #### Bn-scaff_18100_1-p11437 C-genome specific (napus-oleracea) | 0.9066986    | 0.8016749    | 0.9534883 | 0.7750766 | not scorable | not scorable |
| #### Bn-scaff_18100_1-p11437 C-genome specific (napus-oleracea) | 0.9617225    | 0.6617739    | 0.9689922 | 0.816595  | not scorable | not scorable |
| #### Bn-scaff_18100_1-p11438 C-genome specific (napus-oleracea) | 0.8971292    | 0.8112267    | 0.9612403 | 0.8309349 | not scorable | not scorable |
| #### Bn-scaff_18100_1-p11464 C-genome specific (oleracea only)  | not scorable | not scorable | 0.744186  | 0.909553  | not scorable | not scorable |
| #### Bn-scaff_18100_1-p11474 C-genome specific (napus-oleracea) | 0.9090909    | 0.8172084    | 0.9922481 | 0.7246809 | not scorable | not scorable |
| #### Bn-scaff_18100_1-p11493 C-genome specific (napus-oleracea) | 0.9162679    | 0.7817771    | 0.9922481 | 0.8377294 | not scorable | not scorable |
| #### Bn-scaff_18100_1-p11506 C-genome specific (napus-oleracea) | 0.9066986    | 0.779121     | 1         | 0.8774673 | not scorable | not scorable |
| #### Bn-scaff_18100_1-p11513 C-genome specific (napus-oleracea) | 0.9043062    | 0.781773     | 1         | 0.8716633 | not scorable | not scorable |
| #### Bn-scaff_18100_1-p11514 C-genome specific (napus-oleracea) | 0.9090909    | 0.7583094    | 1         | 0.8324734 | not scorable | not scorable |
| #### Bn-scaff_18100_1-p11516 C-genome specific (napus-oleracea) | 0.9210526    | 0.7864074    | 0.9922481 | 0.8022506 | not scorable | not scorable |
| #### Bn-scaff_18100_1-p11517 C-genome specific (napus-oleracea) | 0.9066986    | 0.73179      | 1         | 0.6734823 | not scorable | not scorable |
| #### Bn-scaff_18100_1-p11525 C-genome specific (napus-oleracea) | 0.9138756    | 0.724627     | 1         | 0.6967076 | not scorable | not scorable |
| #### Bn-scaff_18100_1-p11543 C-genome specific (napus-oleracea) | 0.9090909    | 0.6723504    | 0.8837209 | 0.604233  | not scorable | not scorable |
| #### Bn-scaff_18100_1-p11544 C-genome specific (napus-oleracea) | 0.8947368    | 0.6593528    | 0.8914729 | 0.6306599 | not scorable | not scorable |
| #### Bn-scaff_18100_1-p11549 C-genome specific (napus-oleracea) | 0.9138756    | 0.7321816    | 0.8837209 | 0.6821043 | not scorable | not scorable |
| #### Bn-scaff_18100_1-p11551 C-genome specific (napus-oleracea) | 0.9090909    | 0.6192314    | 0.8914729 | 0.5942379 | not scorable | not scorable |
| #### Bn-scaff_18100_1-p11559 C-genome specific (napus-oleracea) | 0.9114832    | 0.6777459    | 0.9379845 | 0.7357612 | not scorable | not scorable |
| #### Bn-scaff_18100_1-p11561 C-genome specific (napus-oleracea) | 0.9186603    | 0.8069764    | 1         | 0.7458071 | not scorable | not scorable |
| #### Bn-scaff_18100_1-p11563 C-genome specific (napus-oleracea) | 0.9210526    | 0.7379545    | 1         | 0.6523249 | not scorable | not scorable |
| #### Bn-scaff_18100_1-p11653 C-genome specific (napus-oleracea) | 0.8971292    | 0.6774554    | 0.9844961 | 0.778633  | not scorable | not scorable |
| #### Bn-scaff_18100_1-p11662 C-genome specific (napus-oleracea) | 0.9043062    | 0.7602882    | 1         | 0.7791562 | not scorable | not scorable |
| #### Bn-scaff_18100_1-p11684 C-genome specific (napus-oleracea) | 0.8995215    | 0.8133466    | 0.9922481 | 0.760783  | not scorable | not scorable |
| #### Bn-scaff_18100_1-p11709 C-genome specific (napus-oleracea) | 0.9760765    | 0.6789928    | 1         | 0.7547435 | not scorable | not scorable |
| #### Bn-scaff_18100_1-p11854 C-genome specific (napus-oleracea) | 0.9210526    | 0.5755716    | 0.6899225 | 0.6628394 | not scorable | not scorable |
| #### Bn-scaff_18100_1-p11909 C-genome specific (oleracea only)  | not scorable | not scorable | 0.9147287 | 0.6348242 | not scorable | not scorable |
| #### Bn-scaff_18100_1-p12094 C-genome specific (napus-oleracea) | 0.9354067    | 0.7119408    | 1         | 0.6878074 | not scorable | not scorable |
| #### Bn-scaff_18100_1-p12123 C-genome specific (napus-oleracea) | 0.9904306    | 0.4845089    | 0.9767442 | 0.565857  | not scorable | not scorable |
| #### Bn-scaff_18100_1-p12144 C-genome specific (napus-oleracea) | 0.9066986    | 0.7767897    | 0.9922481 | 0.8343857 | not scorable | not scorable |
| #### Bn-scaff_18100_1-p12146 C-genome specific (napus-oleracea) | 0.8995215    | 0.811646     | 1         | 0.7701755 | not scorable | not scorable |
| #### Bn-scaff_18100_1-p12157 C-genome specific (napus-oleracea) | 0.9066986    | 0.8221163    | 1         | 0.8730868 | not scorable | not scorable |
| #### Bn-scaff_18100_1-p12223 C-genome specific (napus-oleracea) | 0.9090909    | 0.8066781    | 1         | 0.7956058 | not scorable | not scorable |

|                                                                 |           |           |              |              |              |              |
|-----------------------------------------------------------------|-----------|-----------|--------------|--------------|--------------|--------------|
| #### Bn-scaff_18100_1-p12278 C-genome specific (napus-oleracea) | 0.9043062 | 0.7784899 | 1            | 0.7509936    | not scorable | not scorable |
| #### Bn-scaff_18100_1-p12279 C-genome specific (napus-oleracea) | 0.8803828 | 0.7679058 | 0.9922481    | 0.8129684    | not scorable | not scorable |
| #### Bn-scaff_18100_1-p12284 C-genome specific (napus-oleracea) | 0.9210526 | 0.7704513 | 1            | 0.8455332    | not scorable | not scorable |
| #### Bn-scaff_18100_1-p12295 C-genome specific (napus-oleracea) | 0.9043062 | 0.7936128 | 1            | 0.8843162    | not scorable | not scorable |
| #### Bn-scaff_18100_1-p12348 napus specific                     | 1         | 0.4087988 | not scorable | not scorable | not scorable | not scorable |
| #### Bn-scaff_18100_1-p12349 genome unspecific (all in)         | 0.9976076 | 0.2571167 | 1            | 0.6658474    | 0.9256198    | 0.6201501    |
| #### Bn-scaff_18100_1-p12406 C-genome specific (napus-oleracea) | 0.8875598 | 0.7729244 | 0.9922481    | 0.789532     | not scorable | not scorable |
| #### Bn-scaff_18100_1-p12412 C-genome specific (napus-oleracea) | 0.9043062 | 0.6718459 | 0.9922481    | 0.842554     | not scorable | not scorable |
| #### Bn-scaff_18100_1-p12440 C-genome specific (napus-oleracea) | 0.9138756 | 0.8021641 | 1            | 0.9216745    | not scorable | not scorable |
| #### Bn-scaff_18100_1-p12458 C-genome specific (napus-oleracea) | 0.9043062 | 0.7595155 | 1            | 0.7334024    | not scorable | not scorable |
| #### Bn-scaff_18100_1-p12550 C-genome specific (napus-oleracea) | 0.9043062 | 0.6665641 | 1            | 0.6222523    | not scorable | not scorable |
| #### Bn-scaff_18100_1-p12551 C-genome specific (napus-oleracea) | 0.9090909 | 0.7739985 | 1            | 0.7473043    | not scorable | not scorable |
| #### Bn-scaff_18100_1-p12554 C-genome specific (napus-oleracea) | 0.9162679 | 0.7955168 | 1            | 0.7404978    | not scorable | not scorable |
| #### Bn-scaff_18100_1-p12555 C-genome specific (napus-oleracea) | 0.9138756 | 0.7802052 | 1            | 0.8943027    | not scorable | not scorable |
| #### Bn-scaff_18100_1-p12556 C-genome specific (napus-oleracea) | 0.9162679 | 0.7775928 | 1            | 0.6736414    | not scorable | not scorable |
| #### Bn-scaff_18100_1-p12558 C-genome specific (napus-oleracea) | 0.9114832 | 0.7645949 | 1            | 0.826114     | not scorable | not scorable |
| #### Bn-scaff_18100_1-p12558 C-genome specific (napus-oleracea) | 0.8923445 | 0.7027365 | 0.9922481    | 0.6617471    | not scorable | not scorable |
| #### Bn-scaff_18100_1-p12564 C-genome specific (napus-oleracea) | 0.9138756 | 0.7532213 | 1            | 0.6333817    | not scorable | not scorable |
| #### Bn-scaff_18100_1-p12565 C-genome specific (napus-oleracea) | 0.9114832 | 0.7529385 | 1            | 0.6781774    | not scorable | not scorable |
| #### Bn-scaff_18100_1-p12574 C-genome specific (napus-oleracea) | 0.9090909 | 0.7855921 | 1            | 0.6964355    | not scorable | not scorable |
| #### Bn-scaff_18100_1-p12575 C-genome specific (napus-oleracea) | 0.9090909 | 0.8269637 | 1            | 0.8776339    | not scorable | not scorable |
| #### Bn-scaff_18100_1-p12579 C-genome specific (napus-oleracea) | 0.9090909 | 0.7275881 | 1            | 0.7144012    | not scorable | not scorable |
| #### Bn-scaff_18100_1-p12641 C-genome specific (napus-oleracea) | 0.8899522 | 0.718091  | 1            | 0.8378914    | not scorable | not scorable |
| #### Bn-scaff_18100_1-p12645 C-genome specific (napus-oleracea) | 0.9019139 | 0.5874903 | 0.9922481    | 0.5590194    | not scorable | not scorable |
| #### Bn-scaff_18100_1-p12831 C-genome specific (napus-oleracea) | 0.9162679 | 0.7658952 | 1            | 0.8424531    | not scorable | not scorable |
| #### Bn-scaff_18100_1-p12853 C-genome specific (napus-oleracea) | 0.9019139 | 0.7238413 | 0.9767442    | 0.7788935    | not scorable | not scorable |
| #### Bn-scaff_18100_1-p13101 genome unspecific (all in)         | 0.9449761 | 0.2985029 | 1            | 0.6153713    | 1            | 0.8653011    |
| #### Bn-scaff_18100_1-p13115 genome unspecific (all in)         | 0.9784689 | 0.6219448 | 1            | 0.8004208    | 1            | 0.8979713    |
| #### Bn-scaff_18100_1-p13122 C-genome specific (napus-oleracea) | 0.8995215 | 0.5800447 | 1            | 0.8960442    | not scorable | not scorable |
| #### Bn-scaff_18100_1-p13252 C-genome specific (napus-oleracea) | 0.8803828 | 0.6973618 | 1            | 0.9558365    | not scorable | not scorable |
| #### Bn-scaff_18100_1-p13252 C-genome specific (napus-oleracea) | 0.8827751 | 0.6699799 | 1            | 0.9257982    | not scorable | not scorable |
| #### Bn-scaff_18100_1-p13358 C-genome specific (napus-oleracea) | 0.9114832 | 0.7552952 | 1            | 0.7210913    | not scorable | not scorable |
| #### Bn-scaff_18100_1-p13358 C-genome specific (napus-oleracea) | 0.9066986 | 0.7246376 | 1            | 0.7991297    | not scorable | not scorable |

|                                                                 |              |              |              |              |              |              |
|-----------------------------------------------------------------|--------------|--------------|--------------|--------------|--------------|--------------|
| #### Bn-scaff_18100_1-p13359 C-genome specific (napus-oleracea) | 0.9090909    | 0.7767791    | 1            | 0.7996346    | not scorable | not scorable |
| #### Bn-scaff_18100_1-p13368 C-genome specific (napus-oleracea) | 0.9043062    | 0.7420236    | 1            | 0.689396     | not scorable | not scorable |
| #### Bn-scaff_18100_1-p13377 C-genome specific (napus-oleracea) | 0.8971292    | 0.6966391    | 0.9922481    | 0.8347169    | not scorable | not scorable |
| #### Bn-scaff_18100_1-p13459 genome unspecific (all in)         | 0.9138756    | 0.7841524    | 1            | 0.7701352    | 0.9917355    | 0.9387949    |
| #### Bn-scaff_18100_1-p13640 genome unspecific (all in)         | 0.9521531    | 0.3696477    | 1            | 0.8490318    | 1            | 0.9060088    |
| #### Bn-scaff_18100_1-p13718 C-genome specific (napus-oleracea) | 0.9186603    | 0.7840337    | 0.9767442    | 0.6462777    | not scorable | not scorable |
| #### Bn-scaff_18100_1-p13763 all not scorable                   | not scorable | not scorable | not scorable | not scorable | not scorable | not scorable |
| #### Bn-scaff_18100_1-p14223 C-genome specific (napus-oleracea) | 0.923445     | 0.8204754    | 1            | 0.8016434    | not scorable | not scorable |
| #### Bn-scaff_18100_1-p16943 genome unspecific (oleracea-rapa)  | not scorable | not scorable | 1            | 0.7838153    | 1            | 0.8013431    |
| #### Bn-scaff_18100_1-p17939 C-genome specific (napus-oleracea) | 0.9186603    | 0.7791016    | 0.9302326    | 0.6183447    | not scorable | not scorable |
| #### Bn-scaff_18100_1-p19435 genome unspecific (all in)         | 0.9449761    | 0.2943515    | 0.8062016    | 0.2654454    | 0.892562     | 0.9056212    |
| #### Bn-scaff_18100_1-p21083 C-genome specific (napus-oleracea) | 0.8062201    | 0.7711267    | 0.744186     | 0.8871905    | not scorable | not scorable |
| #### Bn-scaff_18100_1-p22207 C-genome specific (napus-oleracea) | 0.9210526    | 0.7722837    | 0.9922481    | 0.7786193    | not scorable | not scorable |
| #### Bn-scaff_18100_1-p22403 C-genome specific (napus-oleracea) | 0.9210526    | 0.7569817    | 1            | 0.639549     | not scorable | not scorable |
| #### Bn-scaff_18100_1-p23214 genome unspecific (all in)         | 0.9976076    | 0.3622112    | 1            | 0.8004208    | 0.9669421    | 0.7254087    |
| #### Bn-scaff_18100_1-p23228 genome unspecific (all in)         | 0.9952153    | 0.2657712    | 0.9922481    | 0.7014926    | 0.9917355    | 0.4969527    |
| #### Bn-scaff_18100_1-p23278 genome unspecific (all in)         | 0.9760765    | 0.4438144    | 1            | 0.8238603    | 1            | 0.8255792    |
| #### Bn-scaff_18100_1-p23484 genome unspecific (all in)         | 0.9354067    | 0.483169     | 1            | 0.6638204    | 1            | 0.8505096    |
| #### Bn-scaff_18100_1-p27129 C-genome specific (napus-oleracea) | 0.8923445    | 0.6983367    | 0.9534883    | 0.7961286    | not scorable | not scorable |
| #### Bn-scaff_18100_1-p27529 C-genome specific (napus-oleracea) | 0.9090909    | 0.7552908    | 1            | 0.7349147    | not scorable | not scorable |
| #### Bn-scaff_18100_1-p27563 C-genome specific (napus-oleracea) | 0.8995215    | 0.7716453    | 1            | 0.694665     | not scorable | not scorable |
| #### Bn-scaff_18100_1-p29287 C-genome specific (napus-oleracea) | 0.5669857    | 0.7695321    | 0.9922481    | 0.6745331    | not scorable | not scorable |
| #### Bn-scaff_18100_1-p31176 genome unspecific (all in)         | 0.9904306    | 0.4630619    | 0.9922481    | 0.5684175    | 1            | 0.8268808    |
| #### Bn-scaff_18100_1-p33217 C-genome specific (napus-oleracea) | 0.9593301    | 0.7268263    | 1            | 0.7248694    | not scorable | not scorable |
| #### Bn-scaff_18100_1-p34465 C-genome specific (napus-oleracea) | 0.9688995    | 0.6654677    | 1            | 0.8043058    | not scorable | not scorable |
| #### Bn-scaff_18100_1-p44618 genome unspecific (oleracea-rapa)  | not scorable | not scorable | 1            | 0.8288651    | 0.9917355    | 0.7099501    |
| #### Bn-scaff_18100_1-p50512 C-genome specific (napus-oleracea) | 0.9186603    | 0.693831     | 1            | 0.6425679    | not scorable | not scorable |
| #### Bn-scaff_18100_1-p51275 C-genome specific (napus-oleracea) | 0.9114832    | 0.7628468    | 1            | 0.7977413    | not scorable | not scorable |
| #### Bn-scaff_18100_1-p51292 C-genome specific (napus-oleracea) | 0.9114832    | 0.766957     | 1            | 0.7273913    | not scorable | not scorable |
| #### Bn-scaff_18100_1-p51319 C-genome specific (napus-oleracea) | 0.9138756    | 0.6584706    | 1            | 0.6376249    | not scorable | not scorable |
| #### Bn-scaff_18100_1-p54104 C-genome specific (napus-oleracea) | 0.9043062    | 0.7966723    | 1            | 0.7594367    | not scorable | not scorable |
| #### Bn-scaff_18100_1-p54443 C-genome specific (napus-oleracea) | 0.9114832    | 0.6664383    | 0.9767442    | 0.7348074    | not scorable | not scorable |
| #### Bn-scaff_18100_1-p54657 genome unspecific (all in)         | 0.9282297    | 0.6073579    | 0.9844961    | 0.7930756    | 1            | 0.8758853    |

|                                                                 |              |              |           |           |              |              |
|-----------------------------------------------------------------|--------------|--------------|-----------|-----------|--------------|--------------|
| #### Bn-scaff_18100_1-p54706 C-genome specific (napus-oleracea) | 0.8708134    | 0.7500474    | 1         | 0.7116986 | not scorable | not scorable |
| #### Bn-scaff_18100_1-p54951 genome unspecific (oleracea-rapa)  | not scorable | not scorable | 1         | 0.8948964 | 1            | 0.7479278    |
| #### Bn-scaff_18100_1-p55955 C-genome specific (napus-oleracea) | 0.5191388    | 0.8316867    | 0.5581396 | 0.8338829 | not scorable | not scorable |
| #### Bn-scaff_18100_1-p56886 genome unspecific (all in)         | 0.9904306    | 0.4447713    | 1         | 0.6800721 | 1            | 0.9175813    |
| #### Bn-scaff_18100_1-p57709 C-genome specific (napus-oleracea) | 0.8803828    | 0.7678413    | 0.9767442 | 0.7065629 | not scorable | not scorable |
| #### Bn-scaff_18100_1-p59399 genome unspecific (all in)         | 0.9736842    | 0.3865517    | 1         | 0.822413  | 0.9752066    | 0.6855573    |
| #### Bn-scaff_18100_1-p59716 C-genome specific (napus-oleracea) | 0.8827751    | 0.7470968    | 0.7596899 | 0.7961472 | not scorable | not scorable |
| #### Bn-scaff_18100_1-p68477 genome unspecific (all in)         | 0.9880383    | 0.3086191    | 1         | 0.8440326 | 0.9752066    | 0.7817016    |
| #### Bn-scaff_18100_1-p69205 genome unspecific (oleracea-rapa)  | not scorable | not scorable | 0.9612403 | 0.8134178 | 0.9917355    | 0.7080842    |
| #### Bn-scaff_18100_1-p69979 C-genome specific (napus-oleracea) | 0.9043062    | 0.6952462    | 1         | 0.7273252 | not scorable | not scorable |
| #### Bn-scaff_18100_1-p69985 C-genome specific (napus-oleracea) | 0.9186603    | 0.7793123    | 1         | 0.8117809 | not scorable | not scorable |
| #### Bn-scaff_18100_1-p70100 genome unspecific (all in)         | 0.9138756    | 0.7762507    | 1         | 0.737639  | 0.8264463    | 0.8349356    |
| #### Bn-scaff_18100_1-p70120 C-genome specific (napus-oleracea) | 0.9090909    | 0.6487134    | 0.9689922 | 0.6687424 | not scorable | not scorable |
| #### Bn-scaff_18100_1-p70170 C-genome specific (napus-oleracea) | 0.9066986    | 0.5806871    | 1         | 0.7874691 | not scorable | not scorable |
| #### Bn-scaff_18100_1-p70224 C-genome specific (napus-oleracea) | 0.9114832    | 0.7071927    | 0.9922481 | 0.6944444 | not scorable | not scorable |
| #### Bn-scaff_18100_1-p70269 C-genome specific (napus-oleracea) | 0.9114832    | 0.7555721    | 1         | 0.7404012 | not scorable | not scorable |
| #### Bn-scaff_18100_1-p75094 C-genome specific (napus-oleracea) | 0.9043062    | 0.6609691    | 1         | 0.6653245 | not scorable | not scorable |
| #### Bn-scaff_18100_1-p76143 C-genome specific (napus-oleracea) | 0.9162679    | 0.7581605    | 1         | 0.7063186 | not scorable | not scorable |
| #### Bn-scaff_18100_1-p76238 C-genome specific (napus-oleracea) | 0.8827751    | 0.7383564    | 0.627907  | 0.7921066 | not scorable | not scorable |
| #### Bn-scaff_18100_1-p76261 genome unspecific (all in)         | 1            | 0.3782175    | 1         | 0.9095823 | 1            | 0.9039531    |
| #### Bn-scaff_18100_1-p76308 genome unspecific (all in)         | 0.9736842    | 0.2809494    | 1         | 0.7085131 | 0.9669421    | 0.7922202    |
| #### Bn-scaff_18100_1-p78578 genome unspecific (oleracea-rapa)  | not scorable | not scorable | 1         | 0.8224867 | 1            | 0.8080764    |
| #### Bn-scaff_18100_1-p78778 genome unspecific (oleracea-rapa)  | not scorable | not scorable | 0.9844961 | 0.4945666 | 1            | 0.9175134    |
| #### Bn-scaff_18100_1-p96955 C-genome specific (napus-oleracea) | 0.9043062    | 0.7409961    | 0.9922481 | 0.6154826 | not scorable | not scorable |
| #### Bn-scaff_18100_1-p98719 C-genome specific (napus-oleracea) | 0.9162679    | 0.7754554    | 0.9767442 | 0.8134722 | not scorable | not scorable |
| #### Bn-scaff_18102_1-p6171 genome unspecific (oleracea-rapa)   | not scorable | not scorable | 0.9534883 | 0.3549056 | 0.9917355    | 0.7532836    |
| #### Bn-scaff_18125_1-p33315 C-genome specific (napus-oleracea) | 0.9090909    | 0.6454582    | 1         | 0.5704526 | not scorable | not scorable |
| #### Bn-scaff_18125_1-p37317 genome unspecific (all in)         | 0.9712918    | 0.6127663    | 0.9922481 | 0.799747  | 0.9917355    | 0.654952     |
| #### Bn-scaff_18140_1-p17947 genome unspecific (all in)         | 0.9880383    | 0.54895      | 0.9922481 | 0.7855049 | 1            | 0.8948911    |
| #### Bn-scaff_18140_1-p18386 genome unspecific (all in)         | 0.9904306    | 0.3631066    | 0.9457364 | 0.3775024 | 1            | 0.918766     |
| #### Bn-scaff_18140_1-p21922 C-genome specific (napus-oleracea) | 0.8875598    | 0.6944176    | 0.6666667 | 0.6514682 | not scorable | not scorable |
| #### Bn-scaff_18140_1-p27613 C-genome specific (napus-oleracea) | 0.9401914    | 0.584937     | 1         | 0.7730985 | not scorable | not scorable |
| #### Bn-scaff_18140_1-p27928 C-genome specific (napus-oleracea) | 0.9856459    | 0.7091519    | 1         | 0.7814127 | not scorable | not scorable |



|                                                                 |           |           |           |           |              |              |
|-----------------------------------------------------------------|-----------|-----------|-----------|-----------|--------------|--------------|
| #### Bn-scaff_18140_1-p2906 genome unspecific (all in)          | 1         | 0.2998441 | 0.9844961 | 0.2611205 | 1            | 0.7575205    |
| #### Bn-scaff_18140_1-p33557 C-genome specific (napus-oleracea) | 1         | 0.6681873 | 1         | 0.5722786 | not scorable | not scorable |
| #### Bn-scaff_18140_1-p38564 C-genome specific (napus-oleracea) | 0.9688995 | 0.3084925 | 1         | 0.7770717 | not scorable | not scorable |
| #### Bn-scaff_18140_1-p38572 C-genome specific (napus-oleracea) | 0.9928229 | 0.4734537 | 1         | 0.7610816 | not scorable | not scorable |
| #### Bn-scaff_18140_1-p39519 C-genome specific (napus-oleracea) | 0.9832536 | 0.7901043 | 1         | 0.7464932 | not scorable | not scorable |
| #### Bn-scaff_18140_1-p43091 genome unspecific (all in)         | 0.9210526 | 0.3998075 | 0.9069768 | 0.4845964 | 0.8016529    | 0.5590478    |
| #### Bn-scaff_18140_1-p46460 C-genome specific (napus-oleracea) | 1         | 0.4694569 | 1         | 0.4357498 | not scorable | not scorable |
| #### Bn-scaff_18140_1-p49896 C-genome specific (napus-oleracea) | 1         | 0.7080621 | 0.9612403 | 0.7326576 | not scorable | not scorable |
| #### Bn-scaff_18140_1-p53632 genome unspecific (all in)         | 0.9210526 | 0.4161417 | 1         | 0.8207097 | 0.9917355    | 0.6433778    |
| #### Bn-scaff_18140_1-p59689 C-genome specific (napus-oleracea) | 0.9952153 | 0.8771276 | 0.9069768 | 0.7365273 | not scorable | not scorable |
| #### Bn-scaff_18140_1-p59981 C-genome specific (napus-oleracea) | 1         | 0.7877401 | 0.9922481 | 0.819208  | not scorable | not scorable |
| #### Bn-scaff_18140_1-p74967 C-genome specific (napus-oleracea) | 0.9880383 | 0.7279915 | 0.9689922 | 0.6660688 | not scorable | not scorable |
| #### Bn-scaff_18140_1-p76783 C-genome specific (napus-oleracea) | 0.9976076 | 0.6728691 | 0.9767442 | 0.7864699 | not scorable | not scorable |
| #### Bn-scaff_18140_1-p77144 C-genome specific (napus-oleracea) | 0.9976076 | 0.8386646 | 1         | 0.8398135 | not scorable | not scorable |
| #### Bn-scaff_18140_1-p77796 C-genome specific (napus-oleracea) | 1         | 0.7870905 | 0.9844961 | 0.7843676 | not scorable | not scorable |
| #### Bn-scaff_18140_1-p77867 genome unspecific (all in)         | 0.9976076 | 0.7034956 | 0.9922481 | 0.7362229 | 0.9256198    | 0.7978769    |
| #### Bn-scaff_18140_1-p78039 genome unspecific (all in)         | 0.9952153 | 0.6184787 | 0.9844961 | 0.6806947 | 1            | 0.9175813    |
| #### Bn-scaff_18140_1-p79469 C-genome specific (napus-oleracea) | 1         | 0.6754764 | 0.9844961 | 0.7788661 | not scorable | not scorable |
| #### Bn-scaff_18140_1-p79673 C-genome specific (napus-oleracea) | 0.9976076 | 0.7862607 | 0.9767442 | 0.8395118 | not scorable | not scorable |
| #### Bn-scaff_18140_1-p79914 C-genome specific (napus-oleracea) | 1         | 0.7698053 | 1         | 0.8233526 | not scorable | not scorable |
| #### Bn-scaff_18140_1-p80073 C-genome specific (napus-oleracea) | 0.9904306 | 0.811582  | 0.9767442 | 0.8104565 | not scorable | not scorable |
| #### Bn-scaff_18140_1-p81537 genome unspecific (all in)         | 0.9784689 | 0.448061  | 0.9457364 | 0.7953966 | 1            | 0.8948976    |
| #### Bn-scaff_18140_1-p81634 C-genome specific (napus-oleracea) | 0.9976076 | 0.9409653 | 0.9922481 | 0.8381386 | not scorable | not scorable |
| #### Bn-scaff_18140_1-p81650 genome unspecific (all in)         | 0.9928229 | 0.6532345 | 0.9844961 | 0.673705  | 0.9917355    | 0.9357368    |
| #### Bn-scaff_18140_1-p81679 C-genome specific (napus-oleracea) | 1         | 0.7374153 | 0.9922481 | 0.6063964 | not scorable | not scorable |
| #### Bn-scaff_18140_1-p8199 genome unspecific (all in)          | 0.9784689 | 0.4556942 | 0.9922481 | 0.802352  | 0.9917355    | 0.9243289    |
| #### Bn-scaff_18140_1-p82189 genome unspecific (all in)         | 0.9952153 | 0.5624186 | 1         | 0.5735273 | 1            | 0.9151664    |
| #### Bn-scaff_18140_1-p82284 C-genome specific (napus-oleracea) | 1         | 0.7333608 | 1         | 0.6948906 | not scorable | not scorable |
| #### Bn-scaff_18140_1-p82304 C-genome specific (napus-oleracea) | 1         | 0.7408583 | 1         | 0.8234416 | not scorable | not scorable |
| #### Bn-scaff_18140_1-p82318 C-genome specific (napus-oleracea) | 1         | 0.5645433 | 1         | 0.5860035 | not scorable | not scorable |
| #### Bn-scaff_18140_1-p82323 C-genome specific (napus-oleracea) | 0.9976076 | 0.6969816 | 1         | 0.6705382 | not scorable | not scorable |
| #### Bn-scaff_18140_1-p82741 genome unspecific (all in)         | 0.9976076 | 0.7531388 | 0.9922481 | 0.8553072 | 1            | 0.846218     |
| #### Bn-scaff_18140_1-p82751 C-genome specific (napus-oleracea) | 0.9928229 | 0.7930107 | 0.9767442 | 0.7893298 | not scorable | not scorable |

|                                                                 |              |              |              |              |              |              |
|-----------------------------------------------------------------|--------------|--------------|--------------|--------------|--------------|--------------|
| #### Bn-scaff_18140_1-p84159 C-genome specific (napus-oleracea) | 1            | 0.6747835    | 0.9922481    | 0.7203063    | not scorable | not scorable |
| #### Bn-scaff_18140_1-p94701 C-genome specific (napus-oleracea) | 0.9952153    | 0.8366377    | 0.9922481    | 0.7715113    | not scorable | not scorable |
| #### Bn-scaff_18147_1-p15922 C-genome specific (napus-oleracea) | 0.9976076    | 0.7987078    | 0.9922481    | 0.8282231    | not scorable | not scorable |
| #### Bn-scaff_18147_1-p18617 C-genome specific (napus-oleracea) | 0.9784689    | 0.7704735    | 0.5968992    | 0.836549     | not scorable | not scorable |
| #### Bn-scaff_18181_1-p11392 C-genome specific (napus-oleracea) | 1            | 0.7447472    | 0.9457364    | 0.7705891    | not scorable | not scorable |
| #### Bn-scaff_18181_1-p1150 genome unspecific (all in)          | 0.9210526    | 0.3923329    | 1            | 0.8172474    | 1            | 0.7354692    |
| #### Bn-scaff_18181_1-p1150 genome unspecific (all in)          | 0.9736842    | 0.2761538    | 1            | 0.9090461    | 1            | 0.7171897    |
| #### Bn-scaff_18181_1-p11752 genome unspecific (all in)         | 1            | 0.5799511    | 1            | 0.6929265    | 1            | 0.6804142    |
| #### Bn-scaff_18181_1-p12316 C-genome specific (oleracea only)  | not scorable | not scorable | 0.9767442    | 0.4918576    | not scorable | not scorable |
| #### Bn-scaff_18181_1-p12644 genome unspecific (all in)         | 0.9617225    | 0.3434248    | 0.9457364    | 0.344957     | 0.9338843    | 0.939393     |
| #### Bn-scaff_18181_1-p12646 genome unspecific (all in)         | 1            | 0.789017     | 1            | 0.7743309    | 1            | 0.6945846    |
| #### Bn-scaff_18181_1-p12657 C-genome specific (napus-oleracea) | 0.9736842    | 0.2987043    | 0.9457364    | 0.3072444    | not scorable | not scorable |
| #### Bn-scaff_18181_1-p12667 A-genome specific (napus-rapa)     | 1            | 0.5493351    | not scorable | not scorable | 1            | 0.8070216    |
| #### Bn-scaff_18181_1-p12678 A-genome specific (rapa only)      | not scorable | not scorable | not scorable | not scorable | 0.9586777    | 0.6820722    |
| #### Bn-scaff_18181_1-p1286 C-genome specific (napus-oleracea)  | 0.9976076    | 0.6980889    | 0.9922481    | 0.8135551    | not scorable | not scorable |
| #### Bn-scaff_18181_1-p12889 napus specific                     | 0.9976076    | 0.2970939    | not scorable | not scorable | not scorable | not scorable |
| #### Bn-scaff_18181_1-p12896 C-genome specific (napus-oleracea) | 1            | 0.8594028    | 1            | 0.8155805    | not scorable | not scorable |
| #### Bn-scaff_18181_1-p13411 all not scorable                   | not scorable | not scorable | not scorable | not scorable | not scorable | not scorable |
| #### Bn-scaff_18181_1-p13425 genome unspecific (all in)         | 0.9928229    | 0.4327097    | 1            | 0.8426728    | 1            | 0.7149279    |
| #### Bn-scaff_18181_1-p14022 C-genome specific (napus-oleracea) | 0.9784689    | 0.7687972    | 0.9922481    | 0.7021086    | not scorable | not scorable |
| #### Bn-scaff_18181_1-p14076 C-genome specific (napus-oleracea) | 0.9784689    | 0.7789081    | 0.9844961    | 0.7428838    | not scorable | not scorable |
| #### Bn-scaff_18181_1-p14076 genome unspecific (oleracea-rapa)  | not scorable | not scorable | 0.9844961    | 0.7569554    | 1            | 0.8156835    |
| #### Bn-scaff_18181_1-p14126 genome unspecific (all in)         | 1            | 0.8004208    | 1            | 0.8004208    | 1            | 0.7489464    |
| #### Bn-scaff_18181_1-p14403 C-genome specific (napus-oleracea) | 0.9425837    | 0.7798659    | 0.9844961    | 0.7418485    | not scorable | not scorable |
| #### Bn-scaff_18181_1-p14407 C-genome specific (napus-oleracea) | 0.9832536    | 0.8181074    | 1            | 0.8664871    | not scorable | not scorable |
| #### Bn-scaff_18181_1-p14408 C-genome specific (napus-oleracea) | 0.9784689    | 0.7896485    | 1            | 0.757229     | not scorable | not scorable |
| #### Bn-scaff_18181_1-p14410 C-genome specific (napus-oleracea) | 0.9736842    | 0.7999539    | 1            | 0.7871816    | not scorable | not scorable |
| #### Bn-scaff_18181_1-p14441 C-genome specific (napus-oleracea) | 0.9880383    | 0.7613397    | 1            | 0.8733184    | not scorable | not scorable |
| #### Bn-scaff_18181_1-p14513 C-genome specific (napus-oleracea) | 0.9904306    | 0.7299608    | 1            | 0.6626025    | not scorable | not scorable |
| #### Bn-scaff_18181_1-p14811 A-genome specific (napus-rapa)     | 0.8492823    | 0.1669513    | not scorable | not scorable | 0.9586777    | 0.866165     |
| #### Bn-scaff_18181_1-p15901 C-genome specific (napus-oleracea) | 0.9880383    | 0.7562883    | 0.9844961    | 0.7473242    | not scorable | not scorable |
| #### Bn-scaff_18181_1-p16031 A-genome specific (napus-rapa)     | 0.9665072    | 0.2304226    | not scorable | not scorable | 0.9917355    | 0.5367128    |
| #### Bn-scaff_18181_1-p16038 C-genome specific (napus-oleracea) | 0.9760765    | 0.8118717    | 0.9922481    | 0.8088208    | not scorable | not scorable |

|                                                                 |              |              |           |           |              |              |
|-----------------------------------------------------------------|--------------|--------------|-----------|-----------|--------------|--------------|
| #### Bn-scaff_18181_1-p16124 C-genome specific (napus-oleracea) | 0.8253589    | 0.7942597    | 0.2403101 | 0.8206219 | not scorable | not scorable |
| #### Bn-scaff_18181_1-p16150 C-genome specific (napus-oleracea) | 0.9688995    | 0.7957343    | 1         | 0.8643773 | not scorable | not scorable |
| #### Bn-scaff_18181_1-p16319 C-genome specific (napus-oleracea) | 0.9808612    | 0.8098557    | 0.9922481 | 0.8087181 | not scorable | not scorable |
| #### Bn-scaff_18181_1-p16643 C-genome specific (napus-oleracea) | 0.9808612    | 0.7339664    | 0.9689922 | 0.776219  | not scorable | not scorable |
| #### Bn-scaff_18181_1-p16911 genome unspecific (all in)         | 0.9665072    | 0.3321643    | 0.9767442 | 0.5938168 | 1            | 0.3820828    |
| #### Bn-scaff_18181_1-p16912 genome unspecific (all in)         | 0.9617225    | 0.5186186    | 1         | 0.6510156 | 1            | 0.8406901    |
| #### Bn-scaff_18181_1-p16918 genome unspecific (all in)         | 0.9760765    | 0.3155983    | 0.9612403 | 0.5400518 | 1            | 0.7356905    |
| #### Bn-scaff_18181_1-p17074 genome unspecific (all in)         | 0.9856459    | 0.5300787    | 1         | 0.7694841 | 0.9752066    | 0.933366     |
| #### Bn-scaff_18181_1-p17454 C-genome specific (napus-oleracea) | 0.9904306    | 0.7708528    | 1         | 0.7525028 | not scorable | not scorable |
| #### Bn-scaff_18181_1-p17618 C-genome specific (napus-oleracea) | 0.9928229    | 0.7095964    | 0.9922481 | 0.6582115 | not scorable | not scorable |
| #### Bn-scaff_18181_1-p17744 C-genome specific (napus-oleracea) | 0.6267943    | 0.7052035    | 0.8062016 | 0.8085203 | not scorable | not scorable |
| #### Bn-scaff_18181_1-p17979 genome unspecific (all in)         | 0.9665072    | 0.4567452    | 1         | 0.9272014 | 0.9834711    | 0.7790921    |
| #### Bn-scaff_18181_1-p18220 genome unspecific (all in)         | 1            | 0.598816     | 1         | 0.7091359 | 1            | 0.5544047    |
| #### Bn-scaff_18181_1-p18492 genome unspecific (all in)         | 0.9784689    | 0.4356413    | 1         | 0.8275504 | 1            | 0.7884539    |
| #### Bn-scaff_18181_1-p19554 genome unspecific (all in)         | 0.9832536    | 0.3258837    | 1         | 0.8004208 | 1            | 0.7887598    |
| #### Bn-scaff_18181_1-p21780 genome unspecific (all in)         | 0.9976076    | 0.4663119    | 1         | 0.7399902 | 1            | 0.6904827    |
| #### Bn-scaff_18181_1-p51999 C-genome specific (napus-oleracea) | 0.9904306    | 0.7838961    | 1         | 0.7367067 | not scorable | not scorable |
| #### Bn-scaff_18181_1-p52107 C-genome specific (napus-oleracea) | 0.9760765    | 0.6808144    | 0.9922481 | 0.7139701 | not scorable | not scorable |
| #### Bn-scaff_18181_1-p52145 C-genome specific (napus-oleracea) | 0.9808612    | 0.7110186    | 1         | 0.80437   | not scorable | not scorable |
| #### Bn-scaff_18181_1-p52200 C-genome specific (oleracea only)  | not scorable | not scorable | 0.8992248 | 0.906221  | not scorable | not scorable |
| #### Bn-scaff_18181_1-p52205 C-genome specific (napus-oleracea) | 0.9904306    | 0.7691525    | 1         | 0.6676164 | not scorable | not scorable |
| #### Bn-scaff_18181_1-p52217 C-genome specific (napus-oleracea) | 0.9688995    | 0.6172962    | 0.9767442 | 0.5955719 | not scorable | not scorable |
| #### Bn-scaff_18181_1-p52237 C-genome specific (napus-oleracea) | 0.9952153    | 0.7049952    | 0.9922481 | 0.7592066 | not scorable | not scorable |
| #### Bn-scaff_18181_1-p52252 C-genome specific (napus-oleracea) | 0.9880383    | 0.6295274    | 0.9922481 | 0.6429662 | not scorable | not scorable |
| #### Bn-scaff_18181_1-p52270 C-genome specific (napus-oleracea) | 0.9880383    | 0.7950085    | 0.9922481 | 0.8578918 | not scorable | not scorable |
| #### Bn-scaff_18181_1-p52958 C-genome specific (napus-oleracea) | 0.9880383    | 0.754775     | 0.9922481 | 0.7443065 | not scorable | not scorable |
| #### Bn-scaff_18181_1-p52963 C-genome specific (napus-oleracea) | 0.9808612    | 0.7441925    | 1         | 0.8903564 | not scorable | not scorable |
| #### Bn-scaff_18181_1-p52972 C-genome specific (napus-oleracea) | 0.9832536    | 0.7980796    | 0.9844961 | 0.8105352 | not scorable | not scorable |
| #### Bn-scaff_18181_1-p52973 C-genome specific (napus-oleracea) | 0.9832536    | 0.7603302    | 0.9844961 | 0.8143569 | not scorable | not scorable |
| #### Bn-scaff_18181_1-p52984 C-genome specific (napus-oleracea) | 0.9665072    | 0.670908     | 1         | 0.8265604 | not scorable | not scorable |
| #### Bn-scaff_18181_1-p53038 C-genome specific (napus-oleracea) | 0.9832536    | 0.7517288    | 0.9922481 | 0.7952873 | not scorable | not scorable |
| #### Bn-scaff_18181_1-p57291 C-genome specific (napus-oleracea) | 0.9784689    | 0.8021431    | 0.9844961 | 0.7807426 | not scorable | not scorable |
| #### Bn-scaff_18181_1-p57355 genome unspecific (oleracea-rapa)  | not scorable | not scorable | 0.9922481 | 0.7977526 | 0.9917355    | 0.9175813    |

|                                                                |              |              |              |              |              |              |
|----------------------------------------------------------------|--------------|--------------|--------------|--------------|--------------|--------------|
| #### Bn-scaff_18181_1-p61689genome unspecific (all in)         | 0.9976076    | 0.3304489    | 1            | 0.3633642    | 1            | 0.8839049    |
| #### Bn-scaff_18181_1-p62071C-genome specific (napus-oleracea) | 0.9928229    | 0.7691125    | 1            | 0.775812     | not scorable | not scorable |
| #### Bn-scaff_18181_1-p62225C-genome specific (napus-oleracea) | 0.9952153    | 0.8197725    | 0.9844961    | 0.7947062    | not scorable | not scorable |
| #### Bn-scaff_18181_1-p62603genome unspecific (all in)         | 0.9856459    | 0.4558769    | 1            | 0.7968971    | 1            | 0.8340757    |
| #### Bn-scaff_18181_1-p63007napus specific                     | 0.8899522    | 0.6706002    | not scorable | not scorable | not scorable | not scorable |
| #### Bn-scaff_18181_1-p67494C-genome specific (napus-oleracea) | 0.9712918    | 0.6237947    | 0.4496124    | 0.6589157    | not scorable | not scorable |
| #### Bn-scaff_18181_1-p69799A-genome specific (napus-rapa)     | 0.9665072    | 0.1866892    | not scorable | not scorable | 1            | 0.9174833    |
| #### Bn-scaff_18181_1-p81420C-genome specific (napus-oleracea) | 0.9688995    | 0.7525331    | 1            | 0.7815678    | not scorable | not scorable |
| #### Bn-scaff_18181_1-p91763genome unspecific (oleracea-rapa)  | not scorable | not scorable | 1            | 0.7951524    | 1            | 0.8313934    |
| #### Bn-scaff_18181_1-p94632genome unspecific (all in)         | 1            | 0.5879042    | 0.9922481    | 0.8024647    | 1            | 0.9039339    |
| #### Bn-scaff_18181_1-p94888C-genome specific (napus-oleracea) | 0.9617225    | 0.5313264    | 0.9922481    | 0.7713612    | not scorable | not scorable |
| #### Bn-scaff_18181_1-p95207C-genome specific (napus-oleracea) | 0.8947368    | 0.8056613    | 0.9922481    | 0.8199528    | not scorable | not scorable |
| #### Bn-scaff_18181_1-p95327genome unspecific (all in)         | 0.9808612    | 0.456532     | 1            | 0.8448058    | 0.9008265    | 0.8136975    |
| #### Bn-scaff_18181_1-p95416C-genome specific (napus-oleracea) | 0.9832536    | 0.7102696    | 0.9302326    | 0.7439682    | not scorable | not scorable |
| #### Bn-scaff_18181_1-p95719C-genome specific (napus-oleracea) | 0.9856459    | 0.7375946    | 0.9534883    | 0.6915517    | not scorable | not scorable |
| #### Bn-scaff_18181_1-p96022C-genome specific (napus-oleracea) | 0.9569378    | 0.392956     | 0.9844961    | 0.4687119    | not scorable | not scorable |
| #### Bn-scaff_18181_1-p96202C-genome specific (napus-oleracea) | 0.9952153    | 0.7791904    | 1            | 0.720181     | not scorable | not scorable |
| #### Bn-scaff_18189_1-p15074napus specific                     | 0.9641148    | 0.4970599    | not scorable | not scorable | not scorable | not scorable |
| #### Bn-scaff_18189_1-p19117genome unspecific (all in)         | 0.9976076    | 0.2844104    | 1            | 0.681638     | 0.9917355    | 0.6207541    |
| #### Bn-scaff_18189_1-p30181genome unspecific (all in)         | 0.9593301    | 0.2907047    | 1            | 0.8482834    | 1            | 0.8259758    |
| #### Bn-scaff_18199_1-p10252C-genome specific (napus-oleracea) | 0.9904306    | 0.6653885    | 0.9922481    | 0.6727682    | not scorable | not scorable |
| #### Bn-scaff_18199_1-p10253C-genome specific (napus-oleracea) | 0.9928229    | 0.7424067    | 1            | 0.7064901    | not scorable | not scorable |
| #### Bn-scaff_18199_1-p10273C-genome specific (napus-oleracea) | 0.9952153    | 0.7046363    | 1            | 0.6851012    | not scorable | not scorable |
| #### Bn-scaff_18199_1-p10892C-genome specific (napus-oleracea) | 0.9952153    | 0.7823544    | 1            | 0.7094804    | not scorable | not scorable |
| #### Bn-scaff_18199_1-p10950C-genome specific (napus-oleracea) | 0.9904306    | 0.6402645    | 1            | 0.6504936    | not scorable | not scorable |
| #### Bn-scaff_18199_1-p11295C-genome specific (napus-oleracea) | 0.9928229    | 0.7340889    | 1            | 0.6665803    | not scorable | not scorable |
| #### Bn-scaff_18199_1-p12060C-genome specific (napus-oleracea) | 0.9904306    | 0.7115725    | 1            | 0.6637293    | not scorable | not scorable |
| #### Bn-scaff_18199_1-p12083C-genome specific (napus-oleracea) | 0.9928229    | 0.729183     | 1            | 0.6545506    | not scorable | not scorable |
| #### Bn-scaff_18199_1-p12101C-genome specific (napus-oleracea) | 0.9904306    | 0.8957128    | 1            | 0.7499062    | not scorable | not scorable |
| #### Bn-scaff_18199_1-p12185C-genome specific (napus-oleracea) | 0.9928229    | 0.7951045    | 0.9922481    | 0.7386327    | not scorable | not scorable |
| #### Bn-scaff_18199_1-p12502C-genome specific (napus-oleracea) | 0.9880383    | 0.7921074    | 1            | 0.751239     | not scorable | not scorable |
| #### Bn-scaff_18199_1-p13286C-genome specific (napus-oleracea) | 0.9952153    | 0.6676838    | 0.9844961    | 0.7719946    | not scorable | not scorable |
| #### Bn-scaff_18199_1-p13309C-genome specific (napus-oleracea) | 0.9808612    | 0.6650138    | 1            | 0.7135514    | not scorable | not scorable |

|                                                                 |              |              |              |              |              |              |
|-----------------------------------------------------------------|--------------|--------------|--------------|--------------|--------------|--------------|
| #### Bn-scaff_18199_1-p14513 C-genome specific (napus-oleracea) | 0.9952153    | 0.7526994    | 0.9844961    | 0.7459167    | not scorable | not scorable |
| #### Bn-scaff_18199_1-p16118 C-genome specific (napus-oleracea) | 0.9952153    | 0.7397335    | 1            | 0.7478032    | not scorable | not scorable |
| #### Bn-scaff_18199_1-p19090 C-genome specific (oleracea only)  | not scorable | not scorable | 1            | 0.7907763    | not scorable | not scorable |
| #### Bn-scaff_18199_1-p20408 C-genome specific (napus-oleracea) | 0.9832536    | 0.758252     | 0.9612403    | 0.6973686    | not scorable | not scorable |
| #### Bn-scaff_18199_1-p20419 C-genome specific (napus-oleracea) | 0.9880383    | 0.7847364    | 0.9767442    | 0.8306848    | not scorable | not scorable |
| #### Bn-scaff_18199_1-p20453 all not scorable                   | not scorable | not scorable | not scorable | not scorable | not scorable | not scorable |
| #### Bn-scaff_18199_1-p20458 C-genome specific (napus-oleracea) | 0.9904306    | 0.7598017    | 0.9844961    | 0.8160838    | not scorable | not scorable |
| #### Bn-scaff_18199_1-p20479 C-genome specific (napus-oleracea) | 0.9928229    | 0.6995609    | 1            | 0.7189479    | not scorable | not scorable |
| #### Bn-scaff_18199_1-p20482 C-genome specific (napus-oleracea) | 0.9928229    | 0.7647306    | 0.9922481    | 0.7178627    | not scorable | not scorable |
| #### Bn-scaff_18199_1-p20514 C-genome specific (napus-oleracea) | 0.9952153    | 0.9009272    | 0.9844961    | 0.7302083    | not scorable | not scorable |
| #### Bn-scaff_18199_1-p23448 C-genome specific (napus-oleracea) | 0.9952153    | 0.7583674    | 0.9922481    | 0.7101735    | not scorable | not scorable |
| #### Bn-scaff_18199_1-p23498 genome unspecific (all in)         | 0.9952153    | 0.6131575    | 0.9922481    | 0.7874349    | 1            | 0.9265216    |
| #### Bn-scaff_18199_1-p24758 C-genome specific (napus-oleracea) | 0.9904306    | 0.7391613    | 0.9922481    | 0.6852272    | not scorable | not scorable |
| #### Bn-scaff_18199_1-p25663 C-genome specific (oleracea only)  | not scorable | not scorable | 0.9922481    | 0.7430145    | not scorable | not scorable |
| #### Bn-scaff_18199_1-p25844 C-genome specific (napus-oleracea) | 0.9952153    | 0.738672     | 0.9844961    | 0.6871555    | not scorable | not scorable |
| #### Bn-scaff_18199_1-p26627 C-genome specific (napus-oleracea) | 0.9904306    | 0.7445144    | 0.9844961    | 0.7279502    | not scorable | not scorable |
| #### Bn-scaff_18199_1-p27182 C-genome specific (napus-oleracea) | 0.9952153    | 0.882838     | 0.9844961    | 0.7174363    | not scorable | not scorable |
| #### Bn-scaff_18199_1-p27219 C-genome specific (napus-oleracea) | 0.9928229    | 0.6114823    | 1            | 0.6339967    | not scorable | not scorable |
| #### Bn-scaff_18199_1-p27283 C-genome specific (napus-oleracea) | 0.9904306    | 0.8166558    | 0.9922481    | 0.7517515    | not scorable | not scorable |
| #### Bn-scaff_18199_1-p27284 C-genome specific (napus-oleracea) | 0.9856459    | 0.75749      | 0.9612403    | 0.8369272    | not scorable | not scorable |
| #### Bn-scaff_18199_1-p28582 C-genome specific (napus-oleracea) | 0.9880383    | 0.7576864    | 0.9767442    | 0.8155332    | not scorable | not scorable |
| #### Bn-scaff_18199_1-p28625 C-genome specific (napus-oleracea) | 0.9832536    | 0.7998888    | 0.9767442    | 0.8776855    | not scorable | not scorable |
| #### Bn-scaff_18199_1-p29455 C-genome specific (napus-oleracea) | 0.9856459    | 0.6508462    | 0.9844961    | 0.7183584    | not scorable | not scorable |
| #### Bn-scaff_18199_1-p31046 C-genome specific (napus-oleracea) | 0.9952153    | 0.7211257    | 0.9922481    | 0.6713557    | not scorable | not scorable |
| #### Bn-scaff_18199_1-p31502 C-genome specific (napus-oleracea) | 0.9952153    | 0.7811616    | 0.9922481    | 0.7291429    | not scorable | not scorable |
| #### Bn-scaff_18199_1-p31511 C-genome specific (napus-oleracea) | 0.9904306    | 0.7844671    | 0.9922481    | 0.7587727    | not scorable | not scorable |
| #### Bn-scaff_18199_1-p31524 C-genome specific (napus-oleracea) | 0.9904306    | 0.7446515    | 1            | 0.765146     | not scorable | not scorable |
| #### Bn-scaff_18199_1-p32461 C-genome specific (napus-oleracea) | 0.9928229    | 0.81695      | 0.9844961    | 0.7207334    | not scorable | not scorable |
| #### Bn-scaff_18199_1-p32519 C-genome specific (napus-oleracea) | 0.9904306    | 0.6798867    | 0.9922481    | 0.69127      | not scorable | not scorable |
| #### Bn-scaff_18199_1-p32588 C-genome specific (napus-oleracea) | 0.9928229    | 0.7855341    | 0.9844961    | 0.7307902    | not scorable | not scorable |
| #### Bn-scaff_18199_1-p32603 C-genome specific (napus-oleracea) | 0.9928229    | 0.8802134    | 0.9922481    | 0.8051057    | not scorable | not scorable |
| #### Bn-scaff_18199_1-p32614 C-genome specific (napus-oleracea) | 0.9952153    | 0.7570395    | 0.9922481    | 0.5088778    | not scorable | not scorable |
| #### Bn-scaff_18199_1-p32616 C-genome specific (napus-oleracea) | 0.9904306    | 0.8355023    | 1            | 0.831391     | not scorable | not scorable |

|                                                                 |              |              |           |           |              |              |
|-----------------------------------------------------------------|--------------|--------------|-----------|-----------|--------------|--------------|
| #### Bn-scaff_18199_1-p32662 C-genome specific (napus-oleracea) | 0.9952153    | 0.8075722    | 1         | 0.8370683 | not scorable | not scorable |
| #### Bn-scaff_18199_1-p34109 C-genome specific (napus-oleracea) | 0.9856459    | 0.8018872    | 0.9612403 | 0.6661816 | not scorable | not scorable |
| #### Bn-scaff_18199_1-p35517 C-genome specific (napus-oleracea) | 0.9952153    | 0.6895844    | 0.9922481 | 0.8732634 | not scorable | not scorable |
| #### Bn-scaff_18199_1-p36136 C-genome specific (napus-oleracea) | 0.9976076    | 0.8548818    | 0.9844961 | 0.7622541 | not scorable | not scorable |
| #### Bn-scaff_18199_1-p36166 C-genome specific (napus-oleracea) | 0.9952153    | 0.7101523    | 1         | 0.804377  | not scorable | not scorable |
| #### Bn-scaff_18199_1-p37773 C-genome specific (napus-oleracea) | 0.9904306    | 0.7668204    | 1         | 0.843586  | not scorable | not scorable |
| #### Bn-scaff_18199_1-p37793 C-genome specific (napus-oleracea) | 0.9880383    | 0.7932193    | 0.9922481 | 0.8564991 | not scorable | not scorable |
| #### Bn-scaff_18199_1-p37819 C-genome specific (napus-oleracea) | 0.9952153    | 0.8143458    | 0.9922481 | 0.7583926 | not scorable | not scorable |
| #### Bn-scaff_18199_1-p37839 C-genome specific (napus-oleracea) | 0.9808612    | 0.7430915    | 0.7286822 | 0.7104374 | not scorable | not scorable |
| #### Bn-scaff_18199_1-p37855 C-genome specific (napus-oleracea) | 0.9952153    | 0.8047888    | 0.9922481 | 0.8332821 | not scorable | not scorable |
| #### Bn-scaff_18199_1-p37919 C-genome specific (napus-oleracea) | 0.9976076    | 0.8026987    | 0.9844961 | 0.8029473 | not scorable | not scorable |
| #### Bn-scaff_18199_1-p4350 genome unspecific (all in)          | 0.9952153    | 0.6905265    | 0.9844961 | 0.7446451 | 1            | 0.9043263    |
| #### Bn-scaff_18199_1-p44831 C-genome specific (napus-oleracea) | 0.9880383    | 0.6750171    | 0.9844961 | 0.6905015 | not scorable | not scorable |
| #### Bn-scaff_18199_1-p52472 genome unspecific (oleracea-rapa)  | not scorable | not scorable | 1         | 0.6236057 | 0.9917355    | 0.7493887    |
| #### Bn-scaff_18202_1-p10175 C-genome specific (napus-oleracea) | 0.9832536    | 0.6231705    | 0.7751938 | 0.6743347 | not scorable | not scorable |
| #### Bn-scaff_18202_1-p10886 C-genome specific (napus-oleracea) | 1            | 0.6953064    | 0.9922481 | 0.6901347 | not scorable | not scorable |
| #### Bn-scaff_18202_1-p10886 C-genome specific (napus-oleracea) | 0.9952153    | 0.7688471    | 0.9767442 | 0.7144065 | not scorable | not scorable |
| #### Bn-scaff_18202_1-p11599 genome unspecific (all in)         | 0.9976076    | 0.3951802    | 1         | 0.7125971 | 0.9917355    | 0.7029703    |
| #### Bn-scaff_18202_1-p11644 C-genome specific (napus-oleracea) | 0.9928229    | 0.6999236    | 0.9922481 | 0.6032218 | not scorable | not scorable |
| #### Bn-scaff_18202_1-p11736 C-genome specific (napus-oleracea) | 0.9976076    | 0.7923661    | 1         | 0.8437496 | not scorable | not scorable |
| #### Bn-scaff_18202_1-p12497 C-genome specific (napus-oleracea) | 0.9832536    | 0.7042379    | 0.9767442 | 0.8094265 | not scorable | not scorable |
| #### Bn-scaff_18202_1-p12508 C-genome specific (napus-oleracea) | 0.8397129    | 0.7710187    | 0.9922481 | 0.8239077 | not scorable | not scorable |
| #### Bn-scaff_18202_1-p13463 C-genome specific (napus-oleracea) | 0.9952153    | 0.7836983    | 0.9844961 | 0.7941531 | not scorable | not scorable |
| #### Bn-scaff_18202_1-p13636 genome unspecific (all in)         | 0.9976076    | 0.382354     | 1         | 0.8130572 | 1            | 0.9178023    |
| #### Bn-scaff_18202_1-p13658 C-genome specific (napus-oleracea) | 0.9856459    | 0.8190729    | 0.9844961 | 0.7945769 | not scorable | not scorable |
| #### Bn-scaff_18202_1-p13797 C-genome specific (napus-oleracea) | 1            | 0.8153957    | 0.9844961 | 0.6986119 | not scorable | not scorable |
| #### Bn-scaff_18202_1-p13804 C-genome specific (napus-oleracea) | 0.9976076    | 0.7262988    | 0.9844961 | 0.7422033 | not scorable | not scorable |
| #### Bn-scaff_18202_1-p13830 C-genome specific (napus-oleracea) | 1            | 0.8050262    | 0.9844961 | 0.8042438 | not scorable | not scorable |
| #### Bn-scaff_18202_1-p14023 C-genome specific (napus-oleracea) | 0.9856459    | 0.7624856    | 0.9922481 | 0.720054  | not scorable | not scorable |
| #### Bn-scaff_18202_1-p14079 C-genome specific (napus-oleracea) | 0.9928229    | 0.7485518    | 0.9922481 | 0.7698743 | not scorable | not scorable |
| #### Bn-scaff_18202_1-p14276 genome unspecific (all in)         | 0.9784689    | 0.2958134    | 1         | 0.7733284 | 0.9090909    | 0.755245     |
| #### Bn-scaff_18202_1-p14573 genome unspecific (all in)         | 1            | 0.5732226    | 1         | 0.555096  | 1            | 0.8295015    |
| #### Bn-scaff_18202_1-p14689 C-genome specific (napus-oleracea) | 0.9880383    | 0.6382322    | 0.9922481 | 0.7704566 | not scorable | not scorable |

|                                                                |              |              |           |           |              |              |
|----------------------------------------------------------------|--------------|--------------|-----------|-----------|--------------|--------------|
| #### Bn-scaff_18202_1-p14812genome unspecific (all in)         | 0.9808612    | 0.4292392    | 1         | 0.7613246 | 1            | 0.8623204    |
| #### Bn-scaff_18202_1-p14919C-genome specific (napus-oleracea) | 1            | 0.8579279    | 1         | 0.7503659 | not scorable | not scorable |
| #### Bn-scaff_18202_1-p15030C-genome specific (napus-oleracea) | 0.9880383    | 0.7125461    | 0.9922481 | 0.3589094 | not scorable | not scorable |
| #### Bn-scaff_18202_1-p15364C-genome specific (napus-oleracea) | 0.9760765    | 0.7048085    | 1         | 0.8119385 | not scorable | not scorable |
| #### Bn-scaff_18202_1-p15515C-genome specific (napus-oleracea) | 0.9904306    | 0.8169755    | 0.9922481 | 0.7354562 | not scorable | not scorable |
| #### Bn-scaff_18202_1-p15687C-genome specific (napus-oleracea) | 0.9832536    | 0.7097213    | 1         | 0.7501116 | not scorable | not scorable |
| #### Bn-scaff_18202_1-p16061C-genome specific (napus-oleracea) | 0.9880383    | 0.7018707    | 1         | 0.7310675 | not scorable | not scorable |
| #### Bn-scaff_18202_1-p16063genome unspecific (all in)         | 0.9832536    | 0.6329269    | 0.9767442 | 0.5901116 | 0.7851239    | 0.6046621    |
| #### Bn-scaff_18202_1-p16089C-genome specific (napus-oleracea) | 0.9808612    | 0.7616145    | 0.9922481 | 0.7174382 | not scorable | not scorable |
| #### Bn-scaff_18202_1-p16143C-genome specific (napus-oleracea) | 0.9952153    | 0.7988733    | 0.9922481 | 0.7178882 | not scorable | not scorable |
| #### Bn-scaff_18202_1-p16154C-genome specific (napus-oleracea) | 0.9856459    | 0.5541393    | 0.9534883 | 0.5344494 | not scorable | not scorable |
| #### Bn-scaff_18202_1-p16154C-genome specific (napus-oleracea) | 0.9928229    | 0.736508     | 0.9922481 | 0.7265058 | not scorable | not scorable |
| #### Bn-scaff_18202_1-p16317genome unspecific (all in)         | 0.9928229    | 0.538538     | 0.9922481 | 0.7702346 | 1            | 0.9181755    |
| #### Bn-scaff_18202_1-p16529C-genome specific (napus-oleracea) | 0.9665072    | 0.8090278    | 1         | 0.8524621 | not scorable | not scorable |
| #### Bn-scaff_18202_1-p16585C-genome specific (napus-oleracea) | 0.9880383    | 0.7795539    | 0.9922481 | 0.8196601 | not scorable | not scorable |
| #### Bn-scaff_18202_1-p16593C-genome specific (napus-oleracea) | 0.9641148    | 0.7382703    | 0.9612403 | 0.6834764 | not scorable | not scorable |
| #### Bn-scaff_18202_1-p16652C-genome specific (napus-oleracea) | 0.9904306    | 0.8053033    | 0.9844961 | 0.5516118 | not scorable | not scorable |
| #### Bn-scaff_18202_1-p16655C-genome specific (napus-oleracea) | 0.9976076    | 0.6926226    | 0.9844961 | 0.6919012 | not scorable | not scorable |
| #### Bn-scaff_18202_1-p16833C-genome specific (napus-oleracea) | 0.9856459    | 0.7750105    | 0.9844961 | 0.8653395 | not scorable | not scorable |
| #### Bn-scaff_18202_1-p17057genome unspecific (all in)         | 0.9904306    | 0.5700981    | 0.5736434 | 0.852478  | 1            | 0.937381     |
| #### Bn-scaff_18202_1-p17627C-genome specific (napus-oleracea) | 0.9928229    | 0.7502096    | 1         | 0.8370881 | not scorable | not scorable |
| #### Bn-scaff_18202_1-p18263genome unspecific (all in)         | 0.9832536    | 0.4618061    | 1         | 0.8838183 | 1            | 0.9290059    |
| #### Bn-scaff_18202_1-p20376C-genome specific (napus-oleracea) | 0.9880383    | 0.8304778    | 0.9767442 | 0.7039266 | not scorable | not scorable |
| #### Bn-scaff_18202_1-p20575C-genome specific (napus-oleracea) | 0.9928229    | 0.7976328    | 0.9767442 | 0.6259845 | not scorable | not scorable |
| #### Bn-scaff_18202_1-p20598C-genome specific (napus-oleracea) | 0.9856459    | 0.7327098    | 0.9922481 | 0.5992344 | not scorable | not scorable |
| #### Bn-scaff_18202_1-p20658C-genome specific (napus-oleracea) | 0.9832536    | 0.8001502    | 0.9922481 | 0.6720425 | not scorable | not scorable |
| #### Bn-scaff_18202_1-p21593C-genome specific (napus-oleracea) | 0.9856459    | 0.6737572    | 0.9767442 | 0.6687322 | not scorable | not scorable |
| #### Bn-scaff_18202_1-p21604C-genome specific (napus-oleracea) | 0.9856459    | 0.8101488    | 0.9922481 | 0.7445058 | not scorable | not scorable |
| #### Bn-scaff_18202_1-p21644C-genome specific (oleracea only)  | not scorable | not scorable | 0.875969  | 0.8476738 | not scorable | not scorable |
| #### Bn-scaff_18202_1-p21693C-genome specific (napus-oleracea) | 0.9880383    | 0.7943302    | 0.9844961 | 0.402056  | not scorable | not scorable |
| #### Bn-scaff_18202_1-p23012C-genome specific (napus-oleracea) | 0.9928229    | 0.7745094    | 0.9844961 | 0.6220703 | not scorable | not scorable |
| #### Bn-scaff_18202_1-p25288C-genome specific (napus-oleracea) | 0.9880383    | 0.806067     | 0.9922481 | 0.793421  | not scorable | not scorable |
| #### Bn-scaff_18202_1-p27614C-genome specific (napus-oleracea) | 0.9904306    | 0.7171532    | 0.9844961 | 0.4466875 | not scorable | not scorable |

|                                                                 |           |           |           |           |              |              |
|-----------------------------------------------------------------|-----------|-----------|-----------|-----------|--------------|--------------|
| #### Bn-scaff_18202_1-p28015 genome unspecific (all in)         | 0.9928229 | 0.6838638 | 1         | 0.739969  | 1            | 0.9325987    |
| #### Bn-scaff_18202_1-p30472 C-genome specific (napus-oleracea) | 0.9832536 | 0.7544486 | 1         | 0.8721337 | not scorable | not scorable |
| #### Bn-scaff_18202_1-p30913 C-genome specific (napus-oleracea) | 0.854067  | 0.8008282 | 1         | 0.8647583 | not scorable | not scorable |
| #### Bn-scaff_18202_1-p31167 C-genome specific (napus-oleracea) | 0.9856459 | 0.8599721 | 1         | 0.8526646 | not scorable | not scorable |
| #### Bn-scaff_18202_1-p31253 C-genome specific (napus-oleracea) | 0.854067  | 0.77413   | 1         | 0.8577976 | not scorable | not scorable |
| #### Bn-scaff_18202_1-p32169 C-genome specific (napus-oleracea) | 0.9904306 | 0.8085401 | 1         | 0.8409067 | not scorable | not scorable |
| #### Bn-scaff_18202_1-p32253 C-genome specific (napus-oleracea) | 0.9928229 | 0.7789188 | 1         | 0.7603163 | not scorable | not scorable |
| #### Bn-scaff_18202_1-p32258 C-genome specific (napus-oleracea) | 0.9928229 | 0.8360183 | 1         | 0.7425432 | not scorable | not scorable |
| #### Bn-scaff_18202_1-p32475 C-genome specific (napus-oleracea) | 0.9928229 | 0.65229   | 1         | 0.7235608 | not scorable | not scorable |
| #### Bn-scaff_18202_1-p32532 C-genome specific (napus-oleracea) | 0.9856459 | 0.7229    | 1         | 0.7470142 | not scorable | not scorable |
| #### Bn-scaff_18202_1-p32707 C-genome specific (napus-oleracea) | 0.9952153 | 0.7629147 | 1         | 0.7984955 | not scorable | not scorable |
| #### Bn-scaff_18202_1-p35608 genome unspecific (all in)         | 0.9976076 | 0.321396  | 0.9922481 | 0.8131756 | 1            | 0.9205657    |
| #### Bn-scaff_18202_1-p35869 C-genome specific (napus-oleracea) | 0.9952153 | 0.7724272 | 1         | 0.8922476 | not scorable | not scorable |
| #### Bn-scaff_18202_1-p35905 C-genome specific (napus-oleracea) | 0.9904306 | 0.6479847 | 1         | 0.7263936 | not scorable | not scorable |
| #### Bn-scaff_18202_1-p35915 C-genome specific (napus-oleracea) | 0.9928229 | 0.6996849 | 1         | 0.7392804 | not scorable | not scorable |
| #### Bn-scaff_18202_1-p36389 C-genome specific (napus-oleracea) | 0.9928229 | 0.8792551 | 1         | 0.8533713 | not scorable | not scorable |
| #### Bn-scaff_18202_1-p37785 C-genome specific (napus-oleracea) | 0.9904306 | 0.8220164 | 1         | 0.8240418 | not scorable | not scorable |
| #### Bn-scaff_18202_1-p37967 C-genome specific (napus-oleracea) | 0.9928229 | 0.8416634 | 0.9922481 | 0.7612608 | not scorable | not scorable |
| #### Bn-scaff_18202_1-p39999 C-genome specific (napus-oleracea) | 0.9976076 | 0.771007  | 0.9922481 | 0.8075986 | not scorable | not scorable |
| #### Bn-scaff_18202_1-p40731 C-genome specific (napus-oleracea) | 0.9976076 | 0.7693331 | 0.9922481 | 0.8357903 | not scorable | not scorable |
| #### Bn-scaff_18202_1-p49010 C-genome specific (napus-oleracea) | 0.9976076 | 0.7958118 | 1         | 0.5584087 | not scorable | not scorable |
| #### Bn-scaff_18202_1-p50513 C-genome specific (napus-oleracea) | 0.9976076 | 0.7927768 | 0.9922481 | 0.3588614 | not scorable | not scorable |
| #### Bn-scaff_18202_1-p56059 C-genome specific (napus-oleracea) | 0.9928229 | 0.820318  | 0.9767442 | 0.4265704 | not scorable | not scorable |
| #### Bn-scaff_18202_1-p56913 C-genome specific (napus-oleracea) | 1         | 0.6957254 | 1         | 0.7117373 | not scorable | not scorable |
| #### Bn-scaff_18202_1-p71965 C-genome specific (napus-oleracea) | 0.9976076 | 0.777539  | 0.9844961 | 0.7560046 | not scorable | not scorable |
| #### Bn-scaff_18202_1-p82594 C-genome specific (napus-oleracea) | 0.9952153 | 0.7677336 | 1         | 0.6753186 | not scorable | not scorable |
| #### Bn-scaff_18202_1-p84637 C-genome specific (napus-oleracea) | 0.9976076 | 0.7928756 | 1         | 0.8684155 | not scorable | not scorable |
| #### Bn-scaff_18202_1-p87066 C-genome specific (napus-oleracea) | 0.9928229 | 0.747011  | 0.9922481 | 0.7209949 | not scorable | not scorable |
| #### Bn-scaff_18202_1-p87083 C-genome specific (napus-oleracea) | 0.9904306 | 0.5984283 | 0.9767442 | 0.6210802 | not scorable | not scorable |
| #### Bn-scaff_18202_1-p87120 C-genome specific (napus-oleracea) | 0.9904306 | 0.846486  | 0.9844961 | 0.8248603 | not scorable | not scorable |
| #### Bn-scaff_18202_1-p87122 C-genome specific (napus-oleracea) | 0.9904306 | 0.6136379 | 1         | 0.6927337 | not scorable | not scorable |
| #### Bn-scaff_18202_1-p87141 C-genome specific (napus-oleracea) | 0.9880383 | 0.7635339 | 0.9844961 | 0.8118338 | not scorable | not scorable |
| #### Bn-scaff_18202_1-p97698 C-genome specific (napus-oleracea) | 0.9928229 | 0.8319459 | 1         | 0.8401462 | not scorable | not scorable |



|                                                                |              |              |              |              |              |              |
|----------------------------------------------------------------|--------------|--------------|--------------|--------------|--------------|--------------|
| #### Bn-scaff_18202_1-p98621C-genome specific (napus-oleracea) | 0.9928229    | 0.8599561    | 1            | 0.7679935    | not scorable | not scorable |
| #### Bn-scaff_18202_1-p99762C-genome specific (oleracea only)  | not scorable | not scorable | 0.9922481    | 0.8475839    | not scorable | not scorable |
| #### Bn-scaff_18206_1-p11541C-genome specific (napus-oleracea) | 0.9832536    | 0.7722343    | 0.9922481    | 0.8192506    | not scorable | not scorable |
| #### Bn-scaff_18206_1-p14286 genome unspecific (all in)        | 1            | 0.2980312    | 1            | 0.2454762    | 0.9338843    | 0.9077215    |
| #### Bn-scaff_18206_1-p14924C-genome specific (napus-oleracea) | 0.9928229    | 0.7482821    | 0.9922481    | 0.720063     | not scorable | not scorable |
| #### Bn-scaff_18206_1-p18617C-genome specific (napus-oleracea) | 0.9928229    | 0.733615     | 0.9922481    | 0.8345298    | not scorable | not scorable |
| #### Bn-scaff_18206_1-p18650C-genome specific (napus-oleracea) | 0.9928229    | 0.7112685    | 1            | 0.6938608    | not scorable | not scorable |
| #### Bn-scaff_18206_1-p28026 genome unspecific (all in)        | 0.9736842    | 0.4743313    | 1            | 0.8216761    | 1            | 0.8687926    |
| #### Bn-scaff_18206_1-p43571C-genome specific (napus-oleracea) | 0.9928229    | 0.7307698    | 1            | 0.6963865    | not scorable | not scorable |
| #### Bn-scaff_18206_1-p43592C-genome specific (napus-oleracea) | 0.9832536    | 0.6957151    | 1            | 0.804135     | not scorable | not scorable |
| #### Bn-scaff_18206_1-p45371C-genome specific (napus-oleracea) | 0.9976076    | 0.7746943    | 0.9922481    | 0.8702264    | not scorable | not scorable |
| #### Bn-scaff_18206_1-p45405C-genome specific (napus-oleracea) | 0.9856459    | 0.7367678    | 1            | 0.7883928    | not scorable | not scorable |
| #### Bn-scaff_18206_1-p45570C-genome specific (napus-oleracea) | 0.9760765    | 0.7656668    | 0.9844961    | 0.8505921    | not scorable | not scorable |
| #### Bn-scaff_18206_1-p45762C-genome specific (napus-oleracea) | 0.9760765    | 0.5542504    | 0.9922481    | 0.8426019    | not scorable | not scorable |
| #### Bn-scaff_18206_1-p47393C-genome specific (oleracea only)  | not scorable | not scorable | 1            | 0.3556424    | not scorable | not scorable |
| #### Bn-scaff_18206_1-p47538C-genome specific (napus-oleracea) | 0.9880383    | 0.7781911    | 0.8682171    | 0.8115194    | not scorable | not scorable |
| #### Bn-scaff_18206_1-p47543C-genome specific (napus-oleracea) | 0.9904306    | 0.8450763    | 0.9922481    | 0.8337868    | not scorable | not scorable |
| #### Bn-scaff_18206_1-p47591C-genome specific (napus-oleracea) | 0.9904306    | 0.8024523    | 0.9922481    | 0.8537922    | not scorable | not scorable |
| #### Bn-scaff_18206_1-p47607C-genome specific (napus-oleracea) | 0.9904306    | 0.7562661    | 0.9689922    | 0.6772395    | not scorable | not scorable |
| #### Bn-scaff_18206_1-p47643 napus specific                    | 0.9976076    | 0.7621082    | not scorable | not scorable | not scorable | not scorable |
| #### Bn-scaff_18206_1-p47649 napus specific                    | 0.9952153    | 0.7835151    | not scorable | not scorable | not scorable | not scorable |
| #### Bn-scaff_18206_1-p47927C-genome specific (napus-oleracea) | 0.9928229    | 0.7874601    | 0.9922481    | 0.7785607    | not scorable | not scorable |
| #### Bn-scaff_18206_1-p48395C-genome specific (napus-oleracea) | 0.9880383    | 0.798238     | 1            | 0.732254     | not scorable | not scorable |
| #### Bn-scaff_18206_1-p48456C-genome specific (napus-oleracea) | 0.9880383    | 0.8124145    | 0.9922481    | 0.7605677    | not scorable | not scorable |
| #### Bn-scaff_18206_1-p50462C-genome specific (napus-oleracea) | 0.9904306    | 0.8035969    | 0.9844961    | 0.8046354    | not scorable | not scorable |
| #### Bn-scaff_18206_1-p50504C-genome specific (napus-oleracea) | 0.9904306    | 0.7916809    | 0.9844961    | 0.7454644    | not scorable | not scorable |
| #### Bn-scaff_18206_1-p50525C-genome specific (napus-oleracea) | 0.9976076    | 0.7049301    | 1            | 0.8299549    | not scorable | not scorable |
| #### Bn-scaff_18206_1-p50871C-genome specific (napus-oleracea) | 0.9928229    | 0.8035092    | 0.9844961    | 0.801636     | not scorable | not scorable |
| #### Bn-scaff_18206_1-p51083 genome unspecific (all in)        | 0.9904306    | 0.6002002    | 0.9767442    | 0.6549926    | 0.9834711    | 0.7610291    |
| #### Bn-scaff_18206_1-p51441C-genome specific (napus-oleracea) | 0.9928229    | 0.8305722    | 0.9922481    | 0.8720818    | not scorable | not scorable |
| #### Bn-scaff_18206_1-p51471C-genome specific (napus-oleracea) | 0.9952153    | 0.7614751    | 0.9767442    | 0.7773098    | not scorable | not scorable |
| #### Bn-scaff_18206_1-p53812C-genome specific (napus-oleracea) | 0.9952153    | 0.8106387    | 0.9922481    | 0.7548395    | not scorable | not scorable |
| #### Bn-scaff_18206_1-p53819C-genome specific (napus-oleracea) | 1            | 0.7500393    | 1            | 0.7071274    | not scorable | not scorable |

|                                                                |              |              |              |              |              |              |
|----------------------------------------------------------------|--------------|--------------|--------------|--------------|--------------|--------------|
| #### Bn-scaff_18206_1-p53991C-genome specific (napus-oleracea) | 0.9976076    | 0.8309772    | 1            | 0.8028364    | not scorable | not scorable |
| #### Bn-scaff_18206_1-p62235 genome unspecific (all in)        | 0.9880383    | 0.7157182    | 0.9922481    | 0.6909932    | 1            | 0.588558     |
| #### Bn-scaff_18206_2-p11411C-genome specific (napus-oleracea) | 0.9976076    | 0.8321111    | 1            | 0.7631329    | not scorable | not scorable |
| #### Bn-scaff_18206_2-p11419C-genome specific (napus-oleracea) | 0.9976076    | 0.8615397    | 1            | 0.8197011    | not scorable | not scorable |
| #### Bn-scaff_18206_2-p11828C-genome specific (napus-oleracea) | 0.9952153    | 0.8103003    | 1            | 0.8702217    | not scorable | not scorable |
| #### Bn-scaff_18206_2-p11838C-genome specific (napus-oleracea) | 0.9904306    | 0.7367973    | 1            | 0.8643967    | not scorable | not scorable |
| #### Bn-scaff_18206_2-p13151C-genome specific (napus-oleracea) | 0.9856459    | 0.7815425    | 1            | 0.7389079    | not scorable | not scorable |
| #### Bn-scaff_18206_2-p32123 napus specific                    | 0.9760765    | 0.7697898    | not scorable | not scorable | not scorable | not scorable |
| #### Bn-scaff_18206_2-p33548C-genome specific (napus-oleracea) | 1            | 0.753105     | 0.9844961    | 0.7806151    | not scorable | not scorable |
| #### Bn-scaff_18206_3-p1040 genome unspecific (oleracea-rapa)  | not scorable | not scorable | 1            | 0.3810686    | 0.9752066    | 0.2752402    |
| #### Bn-scaff_18206_3-p2969C-genome specific (napus-oleracea)  | 0.9976076    | 0.7624741    | 1            | 0.6745954    | not scorable | not scorable |
| #### Bn-scaff_18206_3-p31053 genome unspecific (all in)        | 1            | 0.5826328    | 0.9844961    | 0.5518052    | 1            | 0.7957168    |
| #### Bn-scaff_18206_3-p4233C-genome specific (oleracea only)   | not scorable | not scorable | 0.9302326    | 0.8858532    | not scorable | not scorable |
| #### Bn-scaff_18206_3-p49133C-genome specific (napus-oleracea) | 0.9952153    | 0.8408386    | 0.9379845    | 0.8693936    | not scorable | not scorable |
| #### Bn-scaff_18206_3-p4931C-genome specific (napus-oleracea)  | 1            | 0.571981     | 0.9534883    | 0.6473888    | not scorable | not scorable |
| #### Bn-scaff_18206_3-p49787C-genome specific (napus-oleracea) | 1            | 0.8602813    | 1            | 0.5728771    | not scorable | not scorable |
| #### Bn-scaff_18206_3-p50641 genome unspecific (all in)        | 0.9880383    | 0.5058757    | 1            | 0.7401136    | 1            | 0.8710828    |
| #### Bn-scaff_18206_3-p53695 genome unspecific (all in)        | 0.9736842    | 0.7607628    | 0.6434109    | 0.675738     | 1            | 0.6337562    |
| #### Bn-scaff_18206_3-p60105C-genome specific (napus-oleracea) | 1            | 0.7236923    | 1            | 0.7233093    | not scorable | not scorable |
| #### Bn-scaff_18206_3-p60243C-genome specific (napus-oleracea) | 0.9880383    | 0.7948524    | 1            | 0.7120435    | not scorable | not scorable |
| #### Bn-scaff_18206_3-p60673C-genome specific (napus-oleracea) | 0.9904306    | 0.7823418    | 1            | 0.7535814    | not scorable | not scorable |
| #### Bn-scaff_18206_3-p60811C-genome specific (napus-oleracea) | 0.9928229    | 0.6629262    | 1            | 0.6850914    | not scorable | not scorable |
| #### Bn-scaff_18206_3-p61973C-genome specific (napus-oleracea) | 0.9976076    | 0.7700992    | 1            | 0.7552266    | not scorable | not scorable |
| #### Bn-scaff_18206_3-p62582C-genome specific (napus-oleracea) | 0.9904306    | 0.777514     | 1            | 0.7771507    | not scorable | not scorable |
| #### Bn-scaff_18206_3-p62755C-genome specific (napus-oleracea) | 0.9904306    | 0.7125401    | 0.9844961    | 0.7341371    | not scorable | not scorable |
| #### Bn-scaff_18206_3-p69368C-genome specific (napus-oleracea) | 0.9928229    | 0.8135562    | 1            | 0.9110721    | not scorable | not scorable |
| #### Bn-scaff_18206_3-p72042 genome unspecific (all in)        | 1            | 0.6071225    | 0.9457364    | 0.2346786    | 1            | 0.8207097    |
| #### Bn-scaff_18206_3-p7214C-genome specific (napus-oleracea)  | 0.9976076    | 0.7703301    | 1            | 0.8854845    | not scorable | not scorable |
| #### Bn-scaff_18206_3-p74036C-genome specific (napus-oleracea) | 1            | 0.8079887    | 1            | 0.6253374    | not scorable | not scorable |
| #### Bn-scaff_18206_3-p79549C-genome specific (napus-oleracea) | 0.9952153    | 0.7509559    | 1            | 0.8382369    | not scorable | not scorable |
| #### Bn-scaff_18206_3-p92215 genome unspecific (oleracea-rapa) | not scorable | not scorable | 0.3488372    | 0.7578775    | 0.9834711    | 0.8357541    |
| #### Bn-scaff_18206_3-p92333 genome unspecific (all in)        | 0.9952153    | 0.3362188    | 0.3488372    | 0.7229961    | 1            | 0.7770717    |
| #### Bn-scaff_18206_3-p93489C-genome specific (napus-oleracea) | 0.9856459    | 0.7942024    | 0.3100775    | 0.7230567    | not scorable | not scorable |

|                                                                 |           |           |           |           |              |              |
|-----------------------------------------------------------------|-----------|-----------|-----------|-----------|--------------|--------------|
| #### Bn-scaff_18206_3-p99562 C-genome specific (napus-oleracea) | 1         | 0.8886735 | 1         | 0.7678414 | not scorable | not scorable |
| #### Bn-scaff_18206_3-p99647 C-genome specific (napus-oleracea) | 0.9976076 | 0.4698578 | 1         | 0.45517   | not scorable | not scorable |
| #### Bn-scaff_18206_3-p99696 C-genome specific (napus-oleracea) | 0.9880383 | 0.43656   | 1         | 0.6715398 | not scorable | not scorable |
| #### Bn-scaff_18206_3-p99826 C-genome specific (napus-oleracea) | 0.9952153 | 0.7909468 | 1         | 0.8704511 | not scorable | not scorable |
| #### Bn-scaff_18222_1-p5478 genome unspecific (all in)          | 1         | 0.6390147 | 1         | 0.6143199 | 1            | 0.8553508    |
| #### Bn-scaff_18245_1-p11898 C-genome specific (napus-oleracea) | 0.9904306 | 0.6514595 | 0.9689922 | 0.6502588 | not scorable | not scorable |
| #### Bn-scaff_18245_1-p11965 C-genome specific (napus-oleracea) | 0.9952153 | 0.5615515 | 0.9922481 | 0.658857  | not scorable | not scorable |
| #### Bn-scaff_18245_1-p12049 C-genome specific (napus-oleracea) | 0.9952153 | 0.7721422 | 0.9922481 | 0.8284011 | not scorable | not scorable |
| #### Bn-scaff_18245_1-p16324 C-genome specific (napus-oleracea) | 0.9736842 | 0.773307  | 0.5736434 | 0.8532546 | not scorable | not scorable |
| #### Bn-scaff_18245_1-p16348 C-genome specific (napus-oleracea) | 0.9641148 | 0.7683006 | 0.5891473 | 0.771386  | not scorable | not scorable |
| #### Bn-scaff_18245_1-p16398 C-genome specific (napus-oleracea) | 0.9784689 | 0.7226521 | 0.7751938 | 0.7692109 | not scorable | not scorable |
| #### Bn-scaff_18245_1-p17164 C-genome specific (napus-oleracea) | 0.9856459 | 0.782329  | 0.7751938 | 0.8166477 | not scorable | not scorable |
| #### Bn-scaff_18245_1-p17618 C-genome specific (napus-oleracea) | 0.9928229 | 0.7750105 | 0.9922481 | 0.8242514 | not scorable | not scorable |
| #### Bn-scaff_18245_1-p17692 C-genome specific (napus-oleracea) | 0.9904306 | 0.6869938 | 0.9922481 | 0.699797  | not scorable | not scorable |
| #### Bn-scaff_18245_1-p18409 C-genome specific (napus-oleracea) | 0.9976076 | 0.5205494 | 1         | 0.7668508 | not scorable | not scorable |
| #### Bn-scaff_18245_1-p20085 genome unspecific (all in)         | 0.9880383 | 0.2706227 | 0.9844961 | 0.3162939 | 1            | 0.914018     |
| #### Bn-scaff_18245_1-p21472 C-genome specific (napus-oleracea) | 0.9784689 | 0.7672719 | 0.9069768 | 0.81241   | not scorable | not scorable |
| #### Bn-scaff_18245_1-p2166 C-genome specific (napus-oleracea)  | 0.9832536 | 0.6111167 | 1         | 0.6058801 | not scorable | not scorable |
| #### Bn-scaff_18245_1-p21935 genome unspecific (all in)         | 0.9712918 | 0.3276415 | 0.9767442 | 0.2955767 | 1            | 0.9039948    |
| #### Bn-scaff_18245_1-p23164 C-genome specific (napus-oleracea) | 0.9904306 | 0.3787375 | 0.9767442 | 0.3860176 | not scorable | not scorable |
| #### Bn-scaff_18245_1-p55244 C-genome specific (napus-oleracea) | 0.9760765 | 0.6636032 | 0.620155  | 0.7057733 | not scorable | not scorable |
| #### Bn-scaff_18245_1-p55837 C-genome specific (napus-oleracea) | 0.9784689 | 0.7017375 | 0.620155  | 0.6629755 | not scorable | not scorable |
| #### Bn-scaff_18245_1-p56472 C-genome specific (napus-oleracea) | 0.9952153 | 0.7555009 | 0.7906977 | 0.7600883 | not scorable | not scorable |
| #### Bn-scaff_18245_1-p56750 C-genome specific (napus-oleracea) | 0.9832536 | 0.7350513 | 0.5891473 | 0.8599715 | not scorable | not scorable |
| #### Bn-scaff_18245_1-p71056 C-genome specific (napus-oleracea) | 0.9904306 | 0.3632554 | 0.9689922 | 0.3367885 | not scorable | not scorable |
| #### Bn-scaff_18245_1-p84866 C-genome specific (napus-oleracea) | 0.9952153 | 0.7943588 | 0.9767442 | 0.8676745 | not scorable | not scorable |
| #### Bn-scaff_18245_1-p98642 C-genome specific (napus-oleracea) | 0.9952153 | 0.8036575 | 1         | 0.7818695 | not scorable | not scorable |
| #### Bn-scaff_18245_1-p99167 genome unspecific (all in)         | 0.9952153 | 0.5472874 | 0.9844961 | 0.6232042 | 1            | 0.917612     |
| #### Bn-scaff_18245_1-p99219 C-genome specific (napus-oleracea) | 0.9784689 | 0.7507866 | 0.8992248 | 0.68604   | not scorable | not scorable |
| #### Bn-scaff_18263_1-p93982 C-genome specific (napus-oleracea) | 0.9880383 | 0.8304893 | 0.8527132 | 0.6003216 | not scorable | not scorable |
| #### Bn-scaff_18275_1-p10677 C-genome specific (napus-oleracea) | 0.9880383 | 0.7450698 | 1         | 0.7548714 | not scorable | not scorable |
| #### Bn-scaff_18275_1-p11735 C-genome specific (napus-oleracea) | 0.9832536 | 0.7822833 | 0.9767442 | 0.8238845 | not scorable | not scorable |
| #### Bn-scaff_18275_1-p12028 genome unspecific (all in)         | 0.9066986 | 0.4806602 | 0.9767442 | 0.4880114 | 1            | 0.9283792    |

|                                                                 |              |              |              |              |              |              |
|-----------------------------------------------------------------|--------------|--------------|--------------|--------------|--------------|--------------|
| #### Bn-scaff_18275_1-p12105 C-genome specific (napus-oleracea) | 0.9808612    | 0.6821624    | 0.9922481    | 0.6469179    | not scorable | not scorable |
| #### Bn-scaff_18275_1-p12285 C-genome specific (oleracea only)  | not scorable | not scorable | 0.9379845    | 0.7555558    | not scorable | not scorable |
| #### Bn-scaff_18275_1-p12780 C-genome specific (napus-oleracea) | 0.9976076    | 0.6465       | 1            | 0.6556016    | not scorable | not scorable |
| #### Bn-scaff_18275_1-p12858 genome unspecific (all in)         | 1            | 0.3790644    | 1            | 0.6722962    | 0.9834711    | 0.6064451    |
| #### Bn-scaff_18275_1-p13200 genome unspecific (all in)         | 0.9880383    | 0.7680753    | 0.9922481    | 0.7642018    | 0.9917355    | 0.8112072    |
| #### Bn-scaff_18275_1-p13587 C-genome specific (napus-oleracea) | 0.9904306    | 0.8487768    | 0.9844961    | 0.4836976    | not scorable | not scorable |
| #### Bn-scaff_18275_1-p13642 napus specific                     | 0.9928229    | 0.7381051    | not scorable | not scorable | not scorable | not scorable |
| #### Bn-scaff_18275_1-p13721 C-genome specific (napus-oleracea) | 0.9784689    | 0.8381049    | 0.9767442    | 0.7754597    | not scorable | not scorable |
| #### Bn-scaff_18275_1-p13780 C-genome specific (napus-oleracea) | 0.9736842    | 0.7701591    | 0.8992248    | 0.8638684    | not scorable | not scorable |
| #### Bn-scaff_18275_1-p13785 C-genome specific (napus-oleracea) | 0.9880383    | 0.8121492    | 0.8139535    | 0.8296499    | not scorable | not scorable |
| #### Bn-scaff_18275_1-p13794 C-genome specific (napus-oleracea) | 0.9760765    | 0.8558398    | 0.9767442    | 0.7771439    | not scorable | not scorable |
| #### Bn-scaff_18275_1-p13795 C-genome specific (napus-oleracea) | 0.9952153    | 0.7592264    | 1            | 0.7678106    | not scorable | not scorable |
| #### Bn-scaff_18275_1-p16543 C-genome specific (napus-oleracea) | 1            | 0.7203749    | 0.9922481    | 0.7643352    | not scorable | not scorable |
| #### Bn-scaff_18275_1-p26945 C-genome specific (napus-oleracea) | 0.9808612    | 0.708645     | 0.9922481    | 0.709143     | not scorable | not scorable |
| #### Bn-scaff_18275_1-p26962 C-genome specific (napus-oleracea) | 0.9760765    | 0.6740673    | 0.9767442    | 0.7050429    | not scorable | not scorable |
| #### Bn-scaff_18275_1-p47707 genome unspecific (oleracea-rapa)  | not scorable | not scorable | 1            | 0.5654476    | 0.9834711    | 0.6255079    |
| #### Bn-scaff_18275_1-p75186 C-genome specific (napus-oleracea) | 0.9952153    | 0.5531986    | 0.9922481    | 0.639854     | not scorable | not scorable |
| #### Bn-scaff_18279_1-p10124 C-genome specific (napus-oleracea) | 0.9976076    | 0.7327881    | 0.9767442    | 0.8303179    | not scorable | not scorable |
| #### Bn-scaff_18295_1-p189 genome unspecific (all in)           | 0.9904306    | 0.4973105    | 1            | 0.8390878    | 1            | 0.9358068    |
| #### Bn-scaff_18310_1-p10120 C-genome specific (napus-oleracea) | 0.9928229    | 0.7938075    | 0.9922481    | 0.7498774    | not scorable | not scorable |
| #### Bn-scaff_18310_1-p10380 genome unspecific (all in)         | 1            | 0.3474601    | 1            | 0.6325286    | 0.9917355    | 0.6587906    |
| #### Bn-scaff_18310_1-p10493 C-genome specific (napus-oleracea) | 0.9760765    | 0.6946406    | 0.9689922    | 0.7053481    | not scorable | not scorable |
| #### Bn-scaff_18310_1-p10588 C-genome specific (napus-oleracea) | 0.9712918    | 0.7871913    | 1            | 0.8289399    | not scorable | not scorable |
| #### Bn-scaff_18310_1-p10677 C-genome specific (napus-oleracea) | 1            | 0.8038477    | 1            | 0.7852471    | not scorable | not scorable |
| #### Bn-scaff_18310_1-p10678 C-genome specific (napus-oleracea) | 0.9880383    | 0.7846841    | 0.9922481    | 0.7626569    | not scorable | not scorable |
| #### Bn-scaff_18310_1-p10699 C-genome specific (napus-oleracea) | 0.9880383    | 0.7771342    | 1            | 0.8566455    | not scorable | not scorable |
| #### Bn-scaff_18310_1-p10756 C-genome specific (napus-oleracea) | 0.9856459    | 0.8073689    | 1            | 0.8548314    | not scorable | not scorable |
| #### Bn-scaff_18310_1-p10793 C-genome specific (napus-oleracea) | 0.9712918    | 0.6507969    | 1            | 0.6429706    | not scorable | not scorable |
| #### Bn-scaff_18310_1-p11117 C-genome specific (napus-oleracea) | 0.9736842    | 0.6837204    | 0.9767442    | 0.7352715    | not scorable | not scorable |
| #### Bn-scaff_18310_1-p11206 A-genome specific (napus-rapa)     | 0.9497608    | 0.4798014    | not scorable | not scorable | 1            | 0.6907511    |
| #### Bn-scaff_18310_1-p11248 C-genome specific (napus-oleracea) | 0.9856459    | 0.776418     | 1            | 0.7450505    | not scorable | not scorable |
| #### Bn-scaff_18310_1-p11484 C-genome specific (napus-oleracea) | 0.9832536    | 0.6833796    | 1            | 0.7267395    | not scorable | not scorable |
| #### Bn-scaff_18310_1-p11510 C-genome specific (napus-oleracea) | 0.9617225    | 0.7783126    | 0.9922481    | 0.8035191    | not scorable | not scorable |

|                                                                 |              |              |           |           |              |              |
|-----------------------------------------------------------------|--------------|--------------|-----------|-----------|--------------|--------------|
| #### Bn-scaff_18310_1-p11580 C-genome specific (napus-oleracea) | 0.9832536    | 0.7624536    | 1         | 0.7588108 | not scorable | not scorable |
| #### Bn-scaff_18310_1-p11581 C-genome specific (napus-oleracea) | 0.9904306    | 0.6729969    | 0.9767442 | 0.7165766 | not scorable | not scorable |
| #### Bn-scaff_18310_1-p11593 C-genome specific (napus-oleracea) | 0.9928229    | 0.7740405    | 0.9612403 | 0.73245   | not scorable | not scorable |
| #### Bn-scaff_18310_1-p11595 C-genome specific (napus-oleracea) | 0.9928229    | 0.8062238    | 0.9534883 | 0.7665823 | not scorable | not scorable |
| #### Bn-scaff_18310_1-p11613 C-genome specific (napus-oleracea) | 0.9712918    | 0.7593343    | 0.9612403 | 0.8269487 | not scorable | not scorable |
| #### Bn-scaff_18310_1-p11717 C-genome specific (napus-oleracea) | 0.9880383    | 0.7808668    | 0.9612403 | 0.6494837 | not scorable | not scorable |
| #### Bn-scaff_18310_1-p11744 C-genome specific (napus-oleracea) | 0.9736842    | 0.7719407    | 1         | 0.8301277 | not scorable | not scorable |
| #### Bn-scaff_18310_1-p11747 C-genome specific (oleracea only)  | not scorable | not scorable | 0.9457364 | 0.7565627 | not scorable | not scorable |
| #### Bn-scaff_18310_1-p11875 C-genome specific (napus-oleracea) | 0.9904306    | 0.7963603    | 1         | 0.8062075 | not scorable | not scorable |
| #### Bn-scaff_18310_1-p11876 C-genome specific (napus-oleracea) | 0.9976076    | 0.7938031    | 1         | 0.7789385 | not scorable | not scorable |
| #### Bn-scaff_18310_1-p11876 C-genome specific (napus-oleracea) | 0.9808612    | 0.6580238    | 1         | 0.6769271 | not scorable | not scorable |
| #### Bn-scaff_18310_1-p12014 C-genome specific (napus-oleracea) | 0.9880383    | 0.7401675    | 1         | 0.7524387 | not scorable | not scorable |
| #### Bn-scaff_18310_1-p12054 C-genome specific (napus-oleracea) | 0.9832536    | 0.7678284    | 1         | 0.8404939 | not scorable | not scorable |
| #### Bn-scaff_18310_1-p12333 genome unspecific (all in)         | 0.9880383    | 0.724534     | 1         | 0.7065966 | 1            | 0.9375453    |
| #### Bn-scaff_18310_1-p12562 C-genome specific (napus-oleracea) | 0.9808612    | 0.7800717    | 0.9689922 | 0.8651567 | not scorable | not scorable |
| #### Bn-scaff_18310_1-p12654 C-genome specific (oleracea only)  | not scorable | not scorable | 1         | 0.7140323 | not scorable | not scorable |
| #### Bn-scaff_18310_1-p12662 C-genome specific (oleracea only)  | not scorable | not scorable | 0.9922481 | 0.6715211 | not scorable | not scorable |
| #### Bn-scaff_18310_1-p12811 C-genome specific (napus-oleracea) | 0.9641148    | 0.5506189    | 0.9534883 | 0.5861821 | not scorable | not scorable |
| #### Bn-scaff_18310_1-p12829 C-genome specific (napus-oleracea) | 0.9736842    | 0.75362      | 0.9069768 | 0.6894385 | not scorable | not scorable |
| #### Bn-scaff_18310_1-p12830 C-genome specific (napus-oleracea) | 0.9712918    | 0.6929201    | 0.9689922 | 0.7033386 | not scorable | not scorable |
| #### Bn-scaff_18310_1-p12862 C-genome specific (napus-oleracea) | 0.9952153    | 0.7115153    | 1         | 0.7478755 | not scorable | not scorable |
| #### Bn-scaff_18310_1-p12864 C-genome specific (napus-oleracea) | 0.9856459    | 0.6749946    | 1         | 0.6877584 | not scorable | not scorable |
| #### Bn-scaff_18310_1-p12877 C-genome specific (napus-oleracea) | 0.9928229    | 0.7976086    | 1         | 0.7331378 | not scorable | not scorable |
| #### Bn-scaff_18310_1-p13380 C-genome specific (napus-oleracea) | 0.9904306    | 0.7699869    | 1         | 0.7624332 | not scorable | not scorable |
| #### Bn-scaff_18310_1-p13664 C-genome specific (napus-oleracea) | 0.9880383    | 0.8035449    | 1         | 0.7949962 | not scorable | not scorable |
| #### Bn-scaff_18310_1-p13740 C-genome specific (napus-oleracea) | 0.9736842    | 0.6132345    | 1         | 0.5764218 | not scorable | not scorable |
| #### Bn-scaff_18310_1-p13876 C-genome specific (napus-oleracea) | 0.9904306    | 0.7453436    | 1         | 0.7355394 | not scorable | not scorable |
| #### Bn-scaff_18310_1-p13886 C-genome specific (napus-oleracea) | 0.9569378    | 0.7173359    | 0.9689922 | 0.7906662 | not scorable | not scorable |
| #### Bn-scaff_18310_1-p13900 C-genome specific (napus-oleracea) | 0.9593301    | 0.725216     | 0.9844961 | 0.7324277 | not scorable | not scorable |
| #### Bn-scaff_18310_1-p14137 C-genome specific (napus-oleracea) | 0.9880383    | 0.7262776    | 0.9689922 | 0.8825166 | not scorable | not scorable |
| #### Bn-scaff_18310_1-p14218 C-genome specific (napus-oleracea) | 0.9856459    | 0.7785236    | 0.9922481 | 0.7503625 | not scorable | not scorable |
| #### Bn-scaff_18310_1-p14220 C-genome specific (napus-oleracea) | 0.9976076    | 0.80092      | 1         | 0.7703189 | not scorable | not scorable |
| #### Bn-scaff_18310_1-p14231 C-genome specific (napus-oleracea) | 0.9928229    | 0.7675347    | 1         | 0.7849017 | not scorable | not scorable |

|                                                                 |           |           |           |           |              |              |
|-----------------------------------------------------------------|-----------|-----------|-----------|-----------|--------------|--------------|
| #### Bn-scaff_18310_1-p14237 C-genome specific (napus-oleracea) | 0.9904306 | 0.7711571 | 1         | 0.8497543 | not scorable | not scorable |
| #### Bn-scaff_18310_1-p14546 C-genome specific (napus-oleracea) | 0.9976076 | 0.8077478 | 1         | 0.8489475 | not scorable | not scorable |
| #### Bn-scaff_18310_1-p14565 C-genome specific (napus-oleracea) | 0.9760765 | 0.7316953 | 1         | 0.823114  | not scorable | not scorable |
| #### Bn-scaff_18310_1-p14616 C-genome specific (napus-oleracea) | 0.9904306 | 0.7705176 | 1         | 0.8415254 | not scorable | not scorable |
| #### Bn-scaff_18310_1-p14654 C-genome specific (napus-oleracea) | 0.9880383 | 0.7691694 | 1         | 0.8413503 | not scorable | not scorable |
| #### Bn-scaff_18310_1-p14690 C-genome specific (napus-oleracea) | 0.9952153 | 0.7757748 | 1         | 0.843761  | not scorable | not scorable |
| #### Bn-scaff_18310_1-p14697 C-genome specific (napus-oleracea) | 0.9928229 | 0.7977611 | 1         | 0.8043613 | not scorable | not scorable |
| #### Bn-scaff_18310_1-p15186 C-genome specific (napus-oleracea) | 0.9832536 | 0.7793968 | 1         | 0.8822421 | not scorable | not scorable |
| #### Bn-scaff_18310_1-p15194 C-genome specific (napus-oleracea) | 0.9808612 | 0.7969136 | 1         | 0.8793151 | not scorable | not scorable |
| #### Bn-scaff_18310_1-p15204 C-genome specific (napus-oleracea) | 0.9736842 | 0.799973  | 1         | 0.8594449 | not scorable | not scorable |
| #### Bn-scaff_18310_1-p15672 C-genome specific (napus-oleracea) | 0.9928229 | 0.7457855 | 1         | 0.8694858 | not scorable | not scorable |
| #### Bn-scaff_18310_1-p16579 C-genome specific (napus-oleracea) | 0.9880383 | 0.7610266 | 1         | 0.862032  | not scorable | not scorable |
| #### Bn-scaff_18310_1-p16596 C-genome specific (napus-oleracea) | 0.9712918 | 0.7680887 | 1         | 0.8603969 | not scorable | not scorable |
| #### Bn-scaff_18310_1-p16598 C-genome specific (napus-oleracea) | 0.9856459 | 0.7619992 | 1         | 0.8444518 | not scorable | not scorable |
| #### Bn-scaff_18310_1-p16625 C-genome specific (napus-oleracea) | 0.9688995 | 0.7021301 | 1         | 0.804076  | not scorable | not scorable |
| #### Bn-scaff_18310_1-p16872 C-genome specific (napus-oleracea) | 0.9808612 | 0.759694  | 1         | 0.8554037 | not scorable | not scorable |
| #### Bn-scaff_18310_1-p16910 C-genome specific (napus-oleracea) | 0.9808612 | 0.7393259 | 1         | 0.7899916 | not scorable | not scorable |
| #### Bn-scaff_18310_1-p16933 C-genome specific (napus-oleracea) | 0.9808612 | 0.7567202 | 1         | 0.841429  | not scorable | not scorable |
| #### Bn-scaff_18310_1-p26608 C-genome specific (napus-oleracea) | 0.9928229 | 0.6881834 | 1         | 0.7232156 | not scorable | not scorable |
| #### Bn-scaff_18310_1-p27959 C-genome specific (napus-oleracea) | 0.9856459 | 0.7631927 | 1         | 0.8653742 | not scorable | not scorable |
| #### Bn-scaff_18310_1-p28001 C-genome specific (napus-oleracea) | 0.9832536 | 0.6935403 | 1         | 0.6510831 | not scorable | not scorable |
| #### Bn-scaff_18310_1-p28024 C-genome specific (napus-oleracea) | 0.9736842 | 0.7654528 | 1         | 0.8585649 | not scorable | not scorable |
| #### Bn-scaff_18310_1-p28170 C-genome specific (napus-oleracea) | 0.9736842 | 0.6775612 | 1         | 0.6781372 | not scorable | not scorable |
| #### Bn-scaff_18310_1-p28208 C-genome specific (napus-oleracea) | 0.9832536 | 0.7631814 | 1         | 0.8942415 | not scorable | not scorable |
| #### Bn-scaff_18310_1-p28394 C-genome specific (napus-oleracea) | 0.9784689 | 0.7434443 | 1         | 0.7789664 | not scorable | not scorable |
| #### Bn-scaff_18310_1-p28479 C-genome specific (napus-oleracea) | 0.9880383 | 0.7969525 | 1         | 0.843599  | not scorable | not scorable |
| #### Bn-scaff_18310_1-p28500 C-genome specific (napus-oleracea) | 0.9928229 | 0.7130197 | 1         | 0.7294715 | not scorable | not scorable |
| #### Bn-scaff_18310_1-p28680 C-genome specific (napus-oleracea) | 0.9856459 | 0.7916656 | 1         | 0.8128328 | not scorable | not scorable |
| #### Bn-scaff_18310_1-p28816 C-genome specific (napus-oleracea) | 0.9641148 | 0.689573  | 1         | 0.6712979 | not scorable | not scorable |
| #### Bn-scaff_18310_1-p28874 C-genome specific (napus-oleracea) | 0.9856459 | 0.7793483 | 1         | 0.782526  | not scorable | not scorable |
| #### Bn-scaff_18310_1-p31765 C-genome specific (napus-oleracea) | 0.9856459 | 0.7792941 | 0.9689922 | 0.3330946 | not scorable | not scorable |
| #### Bn-scaff_18310_1-p31772 C-genome specific (napus-oleracea) | 0.9641148 | 0.4360905 | 0.8527132 | 0.3461059 | not scorable | not scorable |
| #### Bn-scaff_18310_1-p32008 C-genome specific (napus-oleracea) | 0.9760765 | 0.7792481 | 0.9689922 | 0.9167598 | not scorable | not scorable |

|                                                                 |              |              |           |           |              |              |
|-----------------------------------------------------------------|--------------|--------------|-----------|-----------|--------------|--------------|
| #### Bn-scaff_18310_1-p33224 C-genome specific (napus-oleracea) | 0.9928229    | 0.8018959    | 1         | 0.7678491 | not scorable | not scorable |
| #### Bn-scaff_18310_1-p33283 C-genome specific (napus-oleracea) | 0.9880383    | 0.5606277    | 0.9922481 | 0.6386123 | not scorable | not scorable |
| #### Bn-scaff_18310_1-p40116 C-genome specific (napus-oleracea) | 0.9928229    | 0.7717928    | 1         | 0.7390075 | not scorable | not scorable |
| #### Bn-scaff_18310_1-p42028 C-genome specific (napus-oleracea) | 0.9880383    | 0.7985465    | 1         | 0.7882995 | not scorable | not scorable |
| #### Bn-scaff_18310_1-p45395 C-genome specific (napus-oleracea) | 0.9760765    | 0.6974023    | 1         | 0.7373186 | not scorable | not scorable |
| #### Bn-scaff_18310_1-p45537 C-genome specific (napus-oleracea) | 0.9904306    | 0.7981686    | 1         | 0.8395501 | not scorable | not scorable |
| #### Bn-scaff_18310_1-p45671 C-genome specific (napus-oleracea) | 0.9856459    | 0.7885096    | 1         | 0.7874544 | not scorable | not scorable |
| #### Bn-scaff_18310_1-p45833 C-genome specific (napus-oleracea) | 0.9880383    | 0.8018312    | 1         | 0.7870622 | not scorable | not scorable |
| #### Bn-scaff_18310_1-p46374 C-genome specific (napus-oleracea) | 0.9904306    | 0.7805397    | 1         | 0.8869168 | not scorable | not scorable |
| #### Bn-scaff_18310_1-p49851 C-genome specific (napus-oleracea) | 0.9856459    | 0.4452645    | 1         | 0.552045  | not scorable | not scorable |
| #### Bn-scaff_18310_1-p50449 genome unspecific (all in)         | 0.9617225    | 0.5694276    | 1         | 0.7601424 | 1            | 0.9175813    |
| #### Bn-scaff_18310_1-p50957 C-genome specific (napus-oleracea) | 0.9880383    | 0.7770984    | 1         | 0.8625532 | not scorable | not scorable |
| #### Bn-scaff_18310_1-p51555 C-genome specific (napus-oleracea) | 0.9665072    | 0.6757478    | 1         | 0.748614  | not scorable | not scorable |
| #### Bn-scaff_18310_1-p51644 C-genome specific (napus-oleracea) | 0.9928229    | 0.7328129    | 1         | 0.7246202 | not scorable | not scorable |
| #### Bn-scaff_18310_1-p51724 C-genome specific (napus-oleracea) | 0.9952153    | 0.7093       | 1         | 0.7825311 | not scorable | not scorable |
| #### Bn-scaff_18310_1-p51774 C-genome specific (napus-oleracea) | 0.9832536    | 0.6439114    | 1         | 0.6928367 | not scorable | not scorable |
| #### Bn-scaff_18310_1-p52065 C-genome specific (napus-oleracea) | 0.9952153    | 0.7684444    | 1         | 0.7676008 | not scorable | not scorable |
| #### Bn-scaff_18310_1-p52496 C-genome specific (napus-oleracea) | 0.9856459    | 0.7723045    | 1         | 0.8647583 | not scorable | not scorable |
| #### Bn-scaff_18310_1-p52764 C-genome specific (napus-oleracea) | 0.9808612    | 0.7861466    | 1         | 0.8409495 | not scorable | not scorable |
| #### Bn-scaff_18310_1-p52772 C-genome specific (napus-oleracea) | 0.9904306    | 0.7751198    | 1         | 0.8922718 | not scorable | not scorable |
| #### Bn-scaff_18310_1-p52787 C-genome specific (napus-oleracea) | 0.9784689    | 0.7681826    | 1         | 0.8518053 | not scorable | not scorable |
| #### Bn-scaff_18310_1-p54577 C-genome specific (napus-oleracea) | 0.9808612    | 0.8142765    | 1         | 0.906329  | not scorable | not scorable |
| #### Bn-scaff_18310_1-p55363 C-genome specific (napus-oleracea) | 0.9617225    | 0.5532759    | 1         | 0.801526  | not scorable | not scorable |
| #### Bn-scaff_18310_1-p55373 C-genome specific (napus-oleracea) | 0.9784689    | 0.752264     | 1         | 0.7830687 | not scorable | not scorable |
| #### Bn-scaff_18310_1-p55801 C-genome specific (napus-oleracea) | 0.9832536    | 0.7832753    | 1         | 0.8623342 | not scorable | not scorable |
| #### Bn-scaff_18310_1-p55815 C-genome specific (napus-oleracea) | 0.9880383    | 0.7313195    | 1         | 0.7801983 | not scorable | not scorable |
| #### Bn-scaff_18310_1-p55831 C-genome specific (napus-oleracea) | 1            | 0.7383178    | 1         | 0.7862811 | not scorable | not scorable |
| #### Bn-scaff_18310_1-p55843 C-genome specific (napus-oleracea) | 0.9856459    | 0.6860893    | 1         | 0.6658801 | not scorable | not scorable |
| #### Bn-scaff_18310_1-p55963 C-genome specific (napus-oleracea) | 0.9856459    | 0.7836412    | 0.9922481 | 0.7678414 | not scorable | not scorable |
| #### Bn-scaff_18310_1-p55963 C-genome specific (napus-oleracea) | 0.9856459    | 0.795431     | 1         | 0.7801193 | not scorable | not scorable |
| #### Bn-scaff_18310_1-p55975 C-genome specific (napus-oleracea) | 0.9880383    | 0.7818131    | 1         | 0.8496742 | not scorable | not scorable |
| #### Bn-scaff_18310_1-p56100 genome unspecific (oleracea-rapa)  | not scorable | not scorable | 1         | 0.8495021 | 1            | 0.9205657    |
| #### Bn-scaff_18310_1-p57012 C-genome specific (napus-oleracea) | 0.9784689    | 0.8101262    | 1         | 0.8654777 | not scorable | not scorable |

|                                                                 |              |              |           |           |              |              |
|-----------------------------------------------------------------|--------------|--------------|-----------|-----------|--------------|--------------|
| #### Bn-scaff_18310_1-p57017 C-genome specific (napus-oleracea) | 0.9760765    | 0.8120314    | 1         | 0.8656043 | not scorable | not scorable |
| #### Bn-scaff_18310_1-p57042 C-genome specific (napus-oleracea) | 0.9665072    | 0.7768022    | 0.9922481 | 0.8497778 | not scorable | not scorable |
| #### Bn-scaff_18310_1-p57109 C-genome specific (napus-oleracea) | 0.9569378    | 0.7652924    | 0.9844961 | 0.8276497 | not scorable | not scorable |
| #### Bn-scaff_18310_1-p57173 C-genome specific (napus-oleracea) | 0.9904306    | 0.7828768    | 1         | 0.739738  | not scorable | not scorable |
| #### Bn-scaff_18310_1-p57793 C-genome specific (napus-oleracea) | 0.9880383    | 0.8051937    | 1         | 0.8305307 | not scorable | not scorable |
| #### Bn-scaff_18310_1-p58711 C-genome specific (napus-oleracea) | 0.9760765    | 0.6561689    | 0.9922481 | 0.6613883 | not scorable | not scorable |
| #### Bn-scaff_18310_1-p60303 C-genome specific (napus-oleracea) | 0.9760765    | 0.814613     | 0.9844961 | 0.8803031 | not scorable | not scorable |
| #### Bn-scaff_18310_1-p61674 C-genome specific (napus-oleracea) | 0.9904306    | 0.808495     | 0.9844961 | 0.8266262 | not scorable | not scorable |
| #### Bn-scaff_18310_1-p61677 C-genome specific (napus-oleracea) | 0.9736842    | 0.7765707    | 0.9922481 | 0.8116255 | not scorable | not scorable |
| #### Bn-scaff_18310_1-p61796 C-genome specific (napus-oleracea) | 0.9880383    | 0.7795695    | 1         | 0.8339189 | not scorable | not scorable |
| #### Bn-scaff_18310_1-p61949 C-genome specific (napus-oleracea) | 0.9736842    | 0.7646555    | 1         | 0.805798  | not scorable | not scorable |
| #### Bn-scaff_18310_1-p6200 C-genome specific (napus-oleracea)  | 0.9856459    | 0.7391954    | 0.9922481 | 0.8461379 | not scorable | not scorable |
| #### Bn-scaff_18310_1-p63217 C-genome specific (napus-oleracea) | 0.9569378    | 0.7425368    | 1         | 0.8004133 | not scorable | not scorable |
| #### Bn-scaff_18310_1-p63531 C-genome specific (napus-oleracea) | 0.9712918    | 0.8159164    | 0.9922481 | 0.8555552 | not scorable | not scorable |
| #### Bn-scaff_18310_1-p63537 C-genome specific (napus-oleracea) | 0.9688995    | 0.6844301    | 1         | 0.8537064 | not scorable | not scorable |
| #### Bn-scaff_18310_1-p63570 C-genome specific (oleracea only)  | not scorable | not scorable | 1         | 0.6926352 | not scorable | not scorable |
| #### Bn-scaff_18310_1-p63752 C-genome specific (napus-oleracea) | 0.9856459    | 0.7763357    | 0.9922481 | 0.8519445 | not scorable | not scorable |
| #### Bn-scaff_18310_1-p67340 C-genome specific (napus-oleracea) | 0.9808612    | 0.6888029    | 0.9767442 | 0.8337827 | not scorable | not scorable |
| #### Bn-scaff_18310_1-p67378 C-genome specific (napus-oleracea) | 0.9114832    | 0.344633     | 0.9767442 | 0.4021066 | not scorable | not scorable |
| #### Bn-scaff_18310_1-p67474 C-genome specific (napus-oleracea) | 0.9617225    | 0.7908435    | 0.9844961 | 0.7540395 | not scorable | not scorable |
| #### Bn-scaff_18310_1-p69225 C-genome specific (napus-oleracea) | 0.9688995    | 0.660228     | 1         | 0.5603885 | not scorable | not scorable |
| #### Bn-scaff_18310_1-p70519 C-genome specific (napus-oleracea) | 0.9904306    | 0.7191351    | 1         | 0.5976675 | not scorable | not scorable |
| #### Bn-scaff_18310_1-p70563 C-genome specific (napus-oleracea) | 0.9904306    | 0.7202552    | 1         | 0.8733649 | not scorable | not scorable |
| #### Bn-scaff_18310_1-p71919 C-genome specific (napus-oleracea) | 0.9784689    | 0.7542085    | 0.9922481 | 0.8270944 | not scorable | not scorable |
| #### Bn-scaff_18310_1-p73678 C-genome specific (napus-oleracea) | 0.9904306    | 0.6843457    | 1         | 0.6749174 | not scorable | not scorable |
| #### Bn-scaff_18310_1-p74869 genome unspecific (all in)         | 1            | 0.5820231    | 0.9922481 | 0.2677557 | 1            | 0.7770717    |
| #### Bn-scaff_18310_1-p84163 C-genome specific (napus-oleracea) | 0.9832536    | 0.7738447    | 1         | 0.7323602 | not scorable | not scorable |
| #### Bn-scaff_18310_1-p85472 C-genome specific (napus-oleracea) | 0.9904306    | 0.798401     | 1         | 0.7965612 | not scorable | not scorable |
| #### Bn-scaff_18310_1-p86522 C-genome specific (napus-oleracea) | 0.9928229    | 0.6999953    | 1         | 0.750604  | not scorable | not scorable |
| #### Bn-scaff_18310_1-p86687 C-genome specific (napus-oleracea) | 0.9880383    | 0.8043046    | 0.9844961 | 0.8606986 | not scorable | not scorable |
| #### Bn-scaff_18310_1-p86735 C-genome specific (napus-oleracea) | 0.9712918    | 0.7568772    | 1         | 0.687777  | not scorable | not scorable |
| #### Bn-scaff_18310_1-p86808 C-genome specific (napus-oleracea) | 0.9832536    | 0.6385577    | 1         | 0.666181  | not scorable | not scorable |
| #### Bn-scaff_18310_1-p86815 C-genome specific (napus-oleracea) | 0.9712918    | 0.5901791    | 1         | 0.7000631 | not scorable | not scorable |



|                                                                 |              |              |              |              |              |              |
|-----------------------------------------------------------------|--------------|--------------|--------------|--------------|--------------|--------------|
| #### Bn-scaff_18310_1-p86828 C-genome specific (napus-oleracea) | 0.9784689    | 0.6431108    | 1            | 0.6382148    | not scorable | not scorable |
| #### Bn-scaff_18310_1-p94211 C-genome specific (napus-oleracea) | 0.9904306    | 0.6872132    | 1            | 0.7388928    | not scorable | not scorable |
| #### Bn-scaff_18310_1-p94965 C-genome specific (napus-oleracea) | 0.9832536    | 0.7857126    | 1            | 0.8123596    | not scorable | not scorable |
| #### Bn-scaff_18310_1-p95287 C-genome specific (napus-oleracea) | 0.9856459    | 0.7566314    | 1            | 0.7789855    | not scorable | not scorable |
| #### Bn-scaff_18310_1-p95327 C-genome specific (napus-oleracea) | 0.9784689    | 0.7937717    | 1            | 0.8455698    | not scorable | not scorable |
| #### Bn-scaff_18310_1-p95366 C-genome specific (napus-oleracea) | 0.9856459    | 0.6466147    | 1            | 0.6322179    | not scorable | not scorable |
| #### Bn-scaff_18310_1-p95665 C-genome specific (napus-oleracea) | 0.9952153    | 0.7551144    | 0.9689922    | 0.8883853    | not scorable | not scorable |
| #### Bn-scaff_18310_1-p95671 C-genome specific (napus-oleracea) | 0.9665072    | 0.7644095    | 1            | 0.888122     | not scorable | not scorable |
| #### Bn-scaff_18310_1-p96162 C-genome specific (oleracea only)  | not scorable | not scorable | 1            | 0.6783493    | not scorable | not scorable |
| #### Bn-scaff_18310_1-p96168 C-genome specific (napus-oleracea) | 0.9784689    | 0.7520164    | 0.9922481    | 0.724788     | not scorable | not scorable |
| #### Bn-scaff_18310_1-p96455 C-genome specific (napus-oleracea) | 0.9832536    | 0.8066847    | 1            | 0.81248      | not scorable | not scorable |
| #### Bn-scaff_18310_1-p96485 C-genome specific (napus-oleracea) | 0.9856459    | 0.6983463    | 0.9844961    | 0.6777608    | not scorable | not scorable |
| #### Bn-scaff_18310_1-p98028 C-genome specific (napus-oleracea) | 0.9784689    | 0.7629017    | 0.9689922    | 0.9179669    | not scorable | not scorable |
| #### Bn-scaff_18310_1-p98775 C-genome specific (napus-oleracea) | 0.9832536    | 0.6648768    | 1            | 0.7181654    | not scorable | not scorable |
| #### Bn-scaff_18310_1-p99113 C-genome specific (napus-oleracea) | 0.9736842    | 0.7754762    | 1            | 0.739518     | not scorable | not scorable |
| #### Bn-scaff_18310_1-p99927 C-genome specific (napus-oleracea) | 0.9808612    | 0.8054385    | 1            | 0.7871478    | not scorable | not scorable |
| #### Bn-scaff_18310_1-p9997 genome unspecific (all in)          | 1            | 0.3827254    | 1            | 0.6363696    | 0.9752066    | 0.7333465    |
| #### Bn-scaff_18321_1-p10357 C-genome specific (napus-oleracea) | 0.8995215    | 0.7204118    | 0.9844961    | 0.8274619    | not scorable | not scorable |
| #### Bn-scaff_18321_1-p10876 genome unspecific (oleracea-rapa)  | not scorable | not scorable | 1            | 0.8659931    | 1            | 0.9169692    |
| #### Bn-scaff_18321_1-p11461 C-genome specific (napus-oleracea) | 0.8995215    | 0.7341289    | 0.9922481    | 0.8429689    | not scorable | not scorable |
| #### Bn-scaff_18321_1-p11662 C-genome specific (napus-oleracea) | 0.9019139    | 0.8035747    | 1            | 0.7909661    | not scorable | not scorable |
| #### Bn-scaff_18321_1-p11790 genome unspecific (oleracea-rapa)  | not scorable | not scorable | 1            | 0.5958543    | 1            | 0.9322148    |
| #### Bn-scaff_18321_1-p12269 C-genome specific (napus-oleracea) | 0.8971292    | 0.6447735    | 1            | 0.8601768    | not scorable | not scorable |
| #### Bn-scaff_18321_1-p12917 C-genome specific (napus-oleracea) | 0.8971292    | 0.7148523    | 1            | 0.8639126    | not scorable | not scorable |
| #### Bn-scaff_18321_1-p13710 genome unspecific (oleracea-rapa)  | not scorable | not scorable | 1            | 0.7240155    | 1            | 0.9346439    |
| #### Bn-scaff_18321_1-p16954 genome unspecific (all in)         | 0.9880383    | 0.4579911    | 1            | 0.7588659    | 1            | 0.7808673    |
| #### Bn-scaff_18321_1-p17029 genome unspecific (all in)         | 0.9856459    | 0.2347028    | 0.9844961    | 0.709735     | 1            | 0.7884539    |
| #### Bn-scaff_18321_1-p18584 C-genome specific (oleracea only)  | not scorable | not scorable | 0.9844961    | 0.8234208    | not scorable | not scorable |
| #### Bn-scaff_18321_1-p20321 napus specific                     | 0.6985646    | 0.5792931    | not scorable | not scorable | not scorable | not scorable |
| #### Bn-scaff_18321_1-p21561 C-genome specific (napus-oleracea) | 0.6985646    | 0.8405325    | 0.6511628    | 0.351471     | not scorable | not scorable |
| #### Bn-scaff_18321_1-p29016 genome unspecific (all in)         | 0.9832536    | 0.4946831    | 1            | 0.7932276    | 1            | 0.7451063    |
| #### Bn-scaff_18321_1-p30360 genome unspecific (oleracea-rapa)  | not scorable | not scorable | 1            | 0.680276     | 1            | 0.6595868    |
| #### Bn-scaff_18322_1-p10045 C-genome specific (napus-oleracea) | 0.777512     | 0.8042502    | 0.9922481    | 0.7631518    | not scorable | not scorable |

|                                                                 |              |              |              |              |              |              |              |
|-----------------------------------------------------------------|--------------|--------------|--------------|--------------|--------------|--------------|--------------|
| #### Bn-scaff_18322_1-p10243 genome unspecific (all in)         | 0.7727273    | 0.7807925    |              | 1            | 0.8799738    | 0.8677686    | 0.8186342    |
| #### Bn-scaff_18322_1-p10368 genome unspecific (oleracea-rapa)  | not scorable | not scorable |              | 1            | 0.8439842    | 0.9669421    | 0.9079782    |
| #### Bn-scaff_18322_1-p10436 genome unspecific (all in)         | 0.9665072    | 0.3251121    | 0.9922481    |              | 0.7124063    | 1            | 0.8656378    |
| #### Bn-scaff_18322_1-p10439 C-genome specific (napus-oleracea) | 0.7511961    | 0.7750935    |              | 1            | 0.8632445    | not scorable | not scorable |
| #### Bn-scaff_18322_1-p10442 C-genome specific (napus-oleracea) | 0.7655503    | 0.7976461    |              | 1            | 0.7398506    | not scorable | not scorable |
| #### Bn-scaff_18322_1-p10447 genome unspecific (oleracea-rapa)  | not scorable | not scorable |              | 1            | 0.8309256    | 0.9834711    | 0.8948976    |
| #### Bn-scaff_18322_1-p10467 C-genome specific (napus-oleracea) | 0.7535885    | 0.7947079    |              | 1            | 0.8869611    | not scorable | not scorable |
| #### Bn-scaff_18322_1-p10470 C-genome specific (napus-oleracea) | 0.7631579    | 0.699481     | 0.9922481    |              | 0.713192     | not scorable | not scorable |
| #### Bn-scaff_18322_1-p10471 C-genome specific (napus-oleracea) | 0.7607656    | 0.6679955    |              | 1            | 0.7489443    | not scorable | not scorable |
| #### Bn-scaff_18322_1-p10974 C-genome specific (napus-oleracea) | 0.777512     | 0.770232     |              | 1            | 0.8296216    | not scorable | not scorable |
| #### Bn-scaff_18322_1-p10978 C-genome specific (napus-oleracea) | 0.777512     | 0.7533376    | 0.9922481    |              | 0.7273511    | not scorable | not scorable |
| #### Bn-scaff_18322_1-p10982 napus specific                     | 0.6555024    | 0.8473592    | not scorable | not scorable | not scorable | not scorable | not scorable |
| #### Bn-scaff_18322_1-p10985 C-genome specific (napus-oleracea) | 0.777512     | 0.7900079    | 0.9922481    |              | 0.8233259    | not scorable | not scorable |
| #### Bn-scaff_18322_1-p10991 C-genome specific (napus-oleracea) | 0.7703349    | 0.77837      | 0.9922481    |              | 0.7450788    | not scorable | not scorable |
| #### Bn-scaff_18322_1-p11035 C-genome specific (napus-oleracea) | 0.7583732    | 0.7838514    | 0.9844961    |              | 0.7790192    | not scorable | not scorable |
| #### Bn-scaff_18322_1-p11036 C-genome specific (napus-oleracea) | 0.7703349    | 0.7190549    | 0.9922481    |              | 0.7754083    | not scorable | not scorable |
| #### Bn-scaff_18322_1-p11220 C-genome specific (napus-oleracea) | 0.7799043    | 0.7552391    |              | 1            | 0.8492109    | not scorable | not scorable |
| #### Bn-scaff_18322_1-p11236 genome unspecific (all in)         | 0.9880383    | 0.4409783    |              | 1            | 0.7097864    | 1            | 0.5721136    |
| #### Bn-scaff_18322_1-p11803 genome unspecific (all in)         | 0.9258373    | 0.3913966    | 0.8139535    |              | 0.6631678    | 0.9834711    | 0.8147261    |
| #### Bn-scaff_18322_1-p12197 C-genome specific (napus-oleracea) | 0.7751196    | 0.7466615    | 0.9534883    |              | 0.8567652    | not scorable | not scorable |
| #### Bn-scaff_18322_1-p12203 C-genome specific (napus-oleracea) | 0.7703349    | 0.7480966    | 0.9922481    |              | 0.7368765    | not scorable | not scorable |
| #### Bn-scaff_18322_1-p12263 C-genome specific (napus-oleracea) | 0.7703349    | 0.5073354    | 0.9612403    |              | 0.7966078    | not scorable | not scorable |
| #### Bn-scaff_18322_1-p12293 C-genome specific (napus-oleracea) | 0.7799043    | 0.8272757    |              | 1            | 0.8612386    | not scorable | not scorable |
| #### Bn-scaff_18322_1-p12300 C-genome specific (napus-oleracea) | 0.7703349    | 0.7970252    | 0.5891473    |              | 0.7259201    | not scorable | not scorable |
| #### Bn-scaff_18322_1-p12312 C-genome specific (napus-oleracea) | 0.7607656    | 0.6686773    | 0.9844961    |              | 0.7743361    | not scorable | not scorable |
| #### Bn-scaff_18322_1-p12381 C-genome specific (napus-oleracea) | 0.7799043    | 0.8255548    | 0.9844961    |              | 0.8670086    | not scorable | not scorable |
| #### Bn-scaff_18322_1-p12407 C-genome specific (napus-oleracea) | 0.7727273    | 0.7275651    | 0.9922481    |              | 0.4328911    | not scorable | not scorable |
| #### Bn-scaff_18322_1-p13155 genome unspecific (all in)         | 0.9832536    | 0.5780094    | 0.9922481    |              | 0.5885487    | 1            | 0.909384     |
| #### Bn-scaff_18322_1-p13376 C-genome specific (napus-oleracea) | 0.7392344    | 0.7693111    | 0.9147287    |              | 0.8263903    | not scorable | not scorable |
| #### Bn-scaff_18322_1-p13401 C-genome specific (napus-oleracea) | 0.7464115    | 0.7679635    | 0.9302326    |              | 0.5810432    | not scorable | not scorable |
| #### Bn-scaff_18322_1-p13516 C-genome specific (napus-oleracea) | 0.7679426    | 0.7529671    |              | 1            | 0.8003071    | not scorable | not scorable |
| #### Bn-scaff_18322_1-p13615 C-genome specific (napus-oleracea) | 0.7631579    | 0.7202824    |              | 1            | 0.7344397    | not scorable | not scorable |
| #### Bn-scaff_18322_1-p13643 C-genome specific (napus-oleracea) | 0.7607656    | 0.6633693    | 0.9922481    |              | 0.7637789    | not scorable | not scorable |

|                                                                |              |              |           |           |              |              |
|----------------------------------------------------------------|--------------|--------------|-----------|-----------|--------------|--------------|
| #### Bn-scaff_18322_1-p13651genome unspecific (all in)         | 0.937799     | 0.5574489    | 0.9922481 | 0.8035778 | 1            | 0.9171332    |
| #### Bn-scaff_18322_1-p13688genome unspecific (oleracea-rapa)  | not scorable | not scorable | 0.8449612 | 0.9234595 | 0.9834711    | 0.8023478    |
| #### Bn-scaff_18322_1-p13713C-genome specific (napus-oleracea) | 0.7488039    | 0.7908917    | 0.9844961 | 0.8079987 | not scorable | not scorable |
| #### Bn-scaff_18322_1-p13799C-genome specific (napus-oleracea) | 0.6794258    | 0.9303012    | 0.9302326 | 0.6188428 | not scorable | not scorable |
| #### Bn-scaff_18322_1-p13907genome unspecific (all in)         | 0.9880383    | 0.6246563    | 1         | 0.7276393 | 0.9752066    | 0.7902161    |
| #### Bn-scaff_18322_1-p13909C-genome specific (napus-oleracea) | 0.7727273    | 0.7291835    | 0.9844961 | 0.7582935 | not scorable | not scorable |
| #### Bn-scaff_18322_1-p13919C-genome specific (napus-oleracea) | 0.7751196    | 0.8219149    | 0.9844961 | 0.7591444 | not scorable | not scorable |
| #### Bn-scaff_18322_1-p14031C-genome specific (napus-oleracea) | 0.7751196    | 0.8286639    | 1         | 0.8526646 | not scorable | not scorable |
| #### Bn-scaff_18322_1-p14036C-genome specific (napus-oleracea) | 0.7703349    | 0.8154502    | 1         | 0.8851258 | not scorable | not scorable |
| #### Bn-scaff_18322_1-p14036C-genome specific (napus-oleracea) | 0.7727273    | 0.8204246    | 1         | 0.8476673 | not scorable | not scorable |
| #### Bn-scaff_18322_1-p14085C-genome specific (napus-oleracea) | 0.7751196    | 0.814939     | 1         | 0.8551928 | not scorable | not scorable |
| #### Bn-scaff_18322_1-p14127C-genome specific (napus-oleracea) | 0.7703349    | 0.8208959    | 1         | 0.7949839 | not scorable | not scorable |
| #### Bn-scaff_18322_1-p14174C-genome specific (napus-oleracea) | 0.777512     | 0.7918119    | 0.9922481 | 0.8200751 | not scorable | not scorable |
| #### Bn-scaff_18322_1-p14247C-genome specific (napus-oleracea) | 0.7727273    | 0.7775298    | 1         | 0.5635232 | not scorable | not scorable |
| #### Bn-scaff_18322_1-p14264C-genome specific (napus-oleracea) | 0.7727273    | 0.8020701    | 1         | 0.8026921 | not scorable | not scorable |
| #### Bn-scaff_18322_1-p14478C-genome specific (napus-oleracea) | 0.6770335    | 0.9177263    | 0.9379845 | 0.834121  | not scorable | not scorable |
| #### Bn-scaff_18322_1-p14678C-genome specific (napus-oleracea) | 0.7607656    | 0.6745836    | 0.9844961 | 0.9393161 | not scorable | not scorable |
| #### Bn-scaff_18322_1-p14684C-genome specific (napus-oleracea) | 0.7703349    | 0.8076925    | 0.9844961 | 0.8068658 | not scorable | not scorable |
| #### Bn-scaff_18322_1-p14693C-genome specific (napus-oleracea) | 0.7751196    | 0.8269058    | 0.9844961 | 0.8132254 | not scorable | not scorable |
| #### Bn-scaff_18322_1-p14706C-genome specific (napus-oleracea) | 0.7368421    | 0.7816362    | 0.9689922 | 0.8200819 | not scorable | not scorable |
| #### Bn-scaff_18322_1-p14717C-genome specific (oleracea only)  | not scorable | not scorable | 0.9689922 | 0.6708236 | not scorable | not scorable |
| #### Bn-scaff_18322_1-p14734C-genome specific (oleracea only)  | not scorable | not scorable | 0.6046512 | 0.8776446 | not scorable | not scorable |
| #### Bn-scaff_18322_1-p14736C-genome specific (napus-oleracea) | 0.7655503    | 0.6775082    | 0.9689922 | 0.769191  | not scorable | not scorable |
| #### Bn-scaff_18322_1-p14736C-genome specific (napus-oleracea) | 0.7631579    | 0.795444     | 0.9767442 | 0.6645389 | not scorable | not scorable |
| #### Bn-scaff_18322_1-p14738C-genome specific (napus-oleracea) | 0.7703349    | 0.7296762    | 0.9612403 | 0.8441003 | not scorable | not scorable |
| #### Bn-scaff_18322_1-p14755C-genome specific (oleracea only)  | not scorable | not scorable | 0.9612403 | 0.6150223 | not scorable | not scorable |
| #### Bn-scaff_18322_1-p14758C-genome specific (napus-oleracea) | 0.7727273    | 0.7294452    | 0.9689922 | 0.9254298 | not scorable | not scorable |
| #### Bn-scaff_18322_1-p14763C-genome specific (napus-oleracea) | 0.7703349    | 0.8420658    | 0.9689922 | 0.7899777 | not scorable | not scorable |
| #### Bn-scaff_18322_1-p14769C-genome specific (napus-oleracea) | 0.7607656    | 0.6804031    | 0.9844961 | 0.6314096 | not scorable | not scorable |
| #### Bn-scaff_18322_1-p14778C-genome specific (napus-oleracea) | 0.7751196    | 0.8169731    | 0.9844961 | 0.7891831 | not scorable | not scorable |
| #### Bn-scaff_18322_1-p14781C-genome specific (napus-oleracea) | 0.7679426    | 0.8167305    | 0.9689922 | 0.7475851 | not scorable | not scorable |
| #### Bn-scaff_18322_1-p14783C-genome specific (napus-oleracea) | 0.7751196    | 0.8414331    | 0.9844961 | 0.8363777 | not scorable | not scorable |
| #### Bn-scaff_18322_1-p14785C-genome specific (napus-oleracea) | 0.7703349    | 0.7746556    | 0.9844961 | 0.7736629 | not scorable | not scorable |

|                                                                 |              |              |           |           |              |              |
|-----------------------------------------------------------------|--------------|--------------|-----------|-----------|--------------|--------------|
| #### Bn-scaff_18322_1-p14788 C-genome specific (napus-oleracea) | 0.7727273    | 0.7464533    | 0.9844961 | 0.7258724 | not scorable | not scorable |
| #### Bn-scaff_18322_1-p14794 C-genome specific (napus-oleracea) | 0.7703349    | 0.6361443    | 0.9689922 | 0.6757295 | not scorable | not scorable |
| #### Bn-scaff_18322_1-p14811 C-genome specific (napus-oleracea) | 0.7751196    | 0.7971342    | 1         | 0.8703306 | not scorable | not scorable |
| #### Bn-scaff_18322_1-p14814 C-genome specific (napus-oleracea) | 0.7703349    | 0.6987569    | 0.9457364 | 0.8554815 | not scorable | not scorable |
| #### Bn-scaff_18322_1-p14815 C-genome specific (napus-oleracea) | 0.7727273    | 0.75383      | 0.9844961 | 0.7425357 | not scorable | not scorable |
| #### Bn-scaff_18322_1-p14816 C-genome specific (napus-oleracea) | 0.7727273    | 0.7001532    | 0.9844961 | 0.6743492 | not scorable | not scorable |
| #### Bn-scaff_18322_1-p14827 C-genome specific (napus-oleracea) | 0.7703349    | 0.825235     | 0.9844961 | 0.84306   | not scorable | not scorable |
| #### Bn-scaff_18322_1-p14852 C-genome specific (napus-oleracea) | 0.7727273    | 0.8179522    | 1         | 0.7673514 | not scorable | not scorable |
| #### Bn-scaff_18322_1-p14869 C-genome specific (napus-oleracea) | 0.7727273    | 0.8261036    | 1         | 0.7305416 | not scorable | not scorable |
| #### Bn-scaff_18322_1-p14871 C-genome specific (napus-oleracea) | 0.7631579    | 0.8095911    | 0.9767442 | 0.8249698 | not scorable | not scorable |
| #### Bn-scaff_18322_1-p14873 C-genome specific (napus-oleracea) | 0.777512     | 0.7063236    | 1         | 0.7024438 | not scorable | not scorable |
| #### Bn-scaff_18322_1-p14875 C-genome specific (napus-oleracea) | 0.7751196    | 0.6665661    | 0.9689922 | 0.6854751 | not scorable | not scorable |
| #### Bn-scaff_18322_1-p14901 C-genome specific (napus-oleracea) | 0.7751196    | 0.7966909    | 0.9922481 | 0.8254672 | not scorable | not scorable |
| #### Bn-scaff_18322_1-p14907 C-genome specific (napus-oleracea) | 0.7679426    | 0.8004949    | 0.9844961 | 0.6954809 | not scorable | not scorable |
| #### Bn-scaff_18322_1-p14908 C-genome specific (napus-oleracea) | 0.7751196    | 0.8035778    | 1         | 0.8209164 | not scorable | not scorable |
| #### Bn-scaff_18322_1-p14909 C-genome specific (napus-oleracea) | 0.7751196    | 0.843608     | 1         | 0.8019759 | not scorable | not scorable |
| #### Bn-scaff_18322_1-p15096 C-genome specific (napus-oleracea) | 0.7703349    | 0.8544749    | 0.6356589 | 0.840395  | not scorable | not scorable |
| #### Bn-scaff_18322_1-p15097 C-genome specific (napus-oleracea) | 0.7607656    | 0.8047985    | 0.6589147 | 0.8007174 | not scorable | not scorable |
| #### Bn-scaff_18322_1-p15098 C-genome specific (napus-oleracea) | 0.7703349    | 0.8046068    | 0.6511628 | 0.7307606 | not scorable | not scorable |
| #### Bn-scaff_18322_1-p15103 C-genome specific (napus-oleracea) | 0.7679426    | 0.7628973    | 0.6589147 | 0.7313014 | not scorable | not scorable |
| #### Bn-scaff_18322_1-p15116 C-genome specific (napus-oleracea) | 0.7751196    | 0.875089     | 0.9844961 | 0.835026  | not scorable | not scorable |
| #### Bn-scaff_18322_1-p15162 genome unspecific (all in)         | 0.9736842    | 0.2685646    | 1         | 0.6254654 | 0.9669421    | 0.5471852    |
| #### Bn-scaff_18322_1-p15397 C-genome specific (napus-oleracea) | 0.7727273    | 0.8477549    | 1         | 0.8435366 | not scorable | not scorable |
| #### Bn-scaff_18322_1-p15402 C-genome specific (napus-oleracea) | 0.7751196    | 0.798066     | 0.9844961 | 0.7469245 | not scorable | not scorable |
| #### Bn-scaff_18322_1-p15468 C-genome specific (napus-oleracea) | 0.7799043    | 0.6411488    | 0.9844961 | 0.7289321 | not scorable | not scorable |
| #### Bn-scaff_18322_1-p15470 genome unspecific (oleracea-rapa)  | not scorable | not scorable | 0.9844961 | 0.8403376 | 1            | 0.9347313    |
| #### Bn-scaff_18322_1-p15520 genome unspecific (all in)         | 0.9904306    | 0.4261746    | 0.9922481 | 0.7326374 | 1            | 0.8777029    |
| #### Bn-scaff_18322_1-p15529 C-genome specific (napus-oleracea) | 0.9641148    | 0.5988635    | 1         | 0.734964  | not scorable | not scorable |
| #### Bn-scaff_18322_1-p15533 C-genome specific (napus-oleracea) | 0.7703349    | 0.6883775    | 1         | 0.7490847 | not scorable | not scorable |
| #### Bn-scaff_18322_1-p15663 C-genome specific (napus-oleracea) | 0.7679426    | 0.8316013    | 0.9302326 | 0.7405313 | not scorable | not scorable |
| #### Bn-scaff_18322_1-p16129 C-genome specific (napus-oleracea) | 0.7703349    | 0.8619571    | 0.9844961 | 0.8228017 | not scorable | not scorable |
| #### Bn-scaff_18322_1-p16153 C-genome specific (napus-oleracea) | 0.7703349    | 0.8256571    | 0.627907  | 0.8781998 | not scorable | not scorable |
| #### Bn-scaff_18322_1-p16220 C-genome specific (napus-oleracea) | 0.7751196    | 0.735868     | 0.9922481 | 0.7245917 | not scorable | not scorable |

|                                                                |              |              |           |           |              |              |
|----------------------------------------------------------------|--------------|--------------|-----------|-----------|--------------|--------------|
| #### Bn-scaff_18322_1-p16327genome unspecific (all in)         | 0.9904306    | 0.4955381    | 1         | 0.8799761 | 1            | 0.9039738    |
| #### Bn-scaff_18322_1-p16555C-genome specific (napus-oleracea) | 0.7822967    | 0.8150431    | 1         | 0.5588354 | not scorable | not scorable |
| #### Bn-scaff_18322_1-p16804C-genome specific (napus-oleracea) | 0.9258373    | 0.7638927    | 0.9612403 | 0.5766421 | not scorable | not scorable |
| #### Bn-scaff_18322_1-p17162C-genome specific (napus-oleracea) | 0.9784689    | 0.6592958    | 0.9922481 | 0.6829654 | not scorable | not scorable |
| #### Bn-scaff_18322_1-p17173C-genome specific (napus-oleracea) | 0.777512     | 0.7242771    | 1         | 0.752601  | not scorable | not scorable |
| #### Bn-scaff_18322_1-p17285C-genome specific (napus-oleracea) | 0.7727273    | 0.7903211    | 0.9767442 | 0.8259702 | not scorable | not scorable |
| #### Bn-scaff_18322_1-p17516C-genome specific (napus-oleracea) | 0.7703349    | 0.8208033    | 1         | 0.8809075 | not scorable | not scorable |
| #### Bn-scaff_18322_1-p17632C-genome specific (napus-oleracea) | 0.7703349    | 0.7030914    | 0.9922481 | 0.7115262 | not scorable | not scorable |
| #### Bn-scaff_18322_1-p17660genome unspecific (oleracea-rapa)  | not scorable | not scorable | 1         | 0.7681932 | 0.9917355    | 0.557118     |
| #### Bn-scaff_18322_1-p17947genome unspecific (all in)         | 0.9856459    | 0.3539789    | 0.9767442 | 0.7024612 | 0.8760331    | 0.8170117    |
| #### Bn-scaff_18322_1-p18358genome unspecific (all in)         | 0.9952153    | 0.8165743    | 0.9922481 | 0.9520251 | 1            | 0.9075478    |
| #### Bn-scaff_18322_1-p18432C-genome specific (napus-oleracea) | 0.7679426    | 0.7734596    | 1         | 0.7336275 | not scorable | not scorable |
| #### Bn-scaff_18322_1-p18450C-genome specific (napus-oleracea) | 0.7727273    | 0.7800167    | 0.9922481 | 0.7568373 | not scorable | not scorable |
| #### Bn-scaff_18322_1-p18460C-genome specific (napus-oleracea) | 0.7488039    | 0.6204292    | 0.9767442 | 0.6975821 | not scorable | not scorable |
| #### Bn-scaff_18322_1-p18462C-genome specific (napus-oleracea) | 0.9186603    | 0.7062309    | 1         | 0.760457  | not scorable | not scorable |
| #### Bn-scaff_18322_1-p18502C-genome specific (napus-oleracea) | 0.7727273    | 0.7550545    | 0.9767442 | 0.7553966 | not scorable | not scorable |
| #### Bn-scaff_18322_1-p18516C-genome specific (napus-oleracea) | 0.9186603    | 0.6318833    | 1         | 0.459978  | not scorable | not scorable |
| #### Bn-scaff_18322_1-p18547C-genome specific (napus-oleracea) | 0.7727273    | 0.8197946    | 0.9922481 | 0.7531994 | not scorable | not scorable |
| #### Bn-scaff_18322_1-p18549C-genome specific (napus-oleracea) | 0.7679426    | 0.7925115    | 0.9844961 | 0.7415366 | not scorable | not scorable |
| #### Bn-scaff_18322_1-p18552C-genome specific (napus-oleracea) | 0.7655503    | 0.7725388    | 1         | 0.8149938 | not scorable | not scorable |
| #### Bn-scaff_18322_1-p18567C-genome specific (napus-oleracea) | 0.7679426    | 0.6292591    | 1         | 0.7679282 | not scorable | not scorable |
| #### Bn-scaff_18322_1-p18569C-genome specific (napus-oleracea) | 0.7703349    | 0.8488436    | 1         | 0.8675472 | not scorable | not scorable |
| #### Bn-scaff_18322_1-p18665C-genome specific (napus-oleracea) | 0.7559808    | 0.6398997    | 1         | 0.7099876 | not scorable | not scorable |
| #### Bn-scaff_18322_1-p18736genome unspecific (oleracea-rapa)  | not scorable | not scorable | 0.9844961 | 0.5465167 | 1            | 0.7544718    |
| #### Bn-scaff_18322_1-p19086C-genome specific (napus-oleracea) | 0.7703349    | 0.8118527    | 0.9922481 | 0.7762688 | not scorable | not scorable |
| #### Bn-scaff_18322_1-p19103genome unspecific (all in)         | 0.9760765    | 0.5023546    | 0.9922481 | 0.5619923 | 1            | 0.8868086    |
| #### Bn-scaff_18322_1-p19148C-genome specific (napus-oleracea) | 0.777512     | 0.7029958    | 0.9689922 | 0.6975948 | not scorable | not scorable |
| #### Bn-scaff_18322_1-p19503C-genome specific (napus-oleracea) | 0.7440192    | 0.6042355    | 1         | 0.7825701 | not scorable | not scorable |
| #### Bn-scaff_18322_1-p19522C-genome specific (napus-oleracea) | 0.7727273    | 0.8141258    | 1         | 0.7756329 | not scorable | not scorable |
| #### Bn-scaff_18322_1-p19636genome unspecific (all in)         | 1            | 0.3592268    | 1         | 0.7816476 | 1            | 0.7290489    |
| #### Bn-scaff_18322_1-p19954C-genome specific (napus-oleracea) | 0.7583732    | 0.6956459    | 0.9922481 | 0.7959445 | not scorable | not scorable |
| #### Bn-scaff_18322_1-p20001C-genome specific (napus-oleracea) | 0.7655503    | 0.7020041    | 0.9922481 | 0.7509385 | not scorable | not scorable |
| #### Bn-scaff_18322_1-p20075C-genome specific (napus-oleracea) | 0.7679426    | 0.8087217    | 0.9922481 | 0.8479573 | not scorable | not scorable |

|                                                                 |              |              |              |              |              |              |
|-----------------------------------------------------------------|--------------|--------------|--------------|--------------|--------------|--------------|
| #### Bn-scaff_18322_1-p20079 C-genome specific (napus-oleracea) | 0.7703349    | 0.8352386    | 1            | 0.7534001    | not scorable | not scorable |
| #### Bn-scaff_18322_1-p20097 C-genome specific (napus-oleracea) | 0.9928229    | 0.5082248    | 0.8372093    | 0.8358644    | not scorable | not scorable |
| #### Bn-scaff_18322_1-p20159 C-genome specific (napus-oleracea) | 0.8325359    | 0.6848482    | 1            | 0.7037539    | not scorable | not scorable |
| #### Bn-scaff_18322_1-p20187 genome unspecific (oleracea-rapa)  | not scorable | not scorable | 1            | 0.8014221    | 1            | 0.8503417    |
| #### Bn-scaff_18322_1-p20284 genome unspecific (all in)         | 0.9976076    | 0.4438583    | 0.9689922    | 0.7935657    | 0.9173554    | 0.8105904    |
| #### Bn-scaff_18322_1-p20610 C-genome specific (napus-oleracea) | 0.7751196    | 0.7692425    | 0.9844961    | 0.7072919    | not scorable | not scorable |
| #### Bn-scaff_18322_1-p20615 C-genome specific (napus-oleracea) | 0.7655503    | 0.7231898    | 0.9922481    | 0.705839     | not scorable | not scorable |
| #### Bn-scaff_18322_1-p20670 C-genome specific (napus-oleracea) | 0.7559808    | 0.7557631    | 0.9844961    | 0.8464237    | not scorable | not scorable |
| #### Bn-scaff_18322_1-p20672 C-genome specific (napus-oleracea) | 0.7655503    | 0.8021144    | 0.9922481    | 0.7567704    | not scorable | not scorable |
| #### Bn-scaff_18322_1-p20832 C-genome specific (oleracea only)  | not scorable | not scorable | 0.9379845    | 0.5849071    | not scorable | not scorable |
| #### Bn-scaff_18322_1-p20847 C-genome specific (napus-oleracea) | 0.7488039    | 0.8072558    | 0.9767442    | 0.7152841    | not scorable | not scorable |
| #### Bn-scaff_18322_1-p20862 C-genome specific (napus-oleracea) | 0.7703349    | 0.7845006    | 0.9922481    | 0.8222665    | not scorable | not scorable |
| #### Bn-scaff_18322_1-p20968 genome unspecific (all in)         | 0.9904306    | 0.394832     | 1            | 0.7363248    | 1            | 0.7855273    |
| #### Bn-scaff_18322_1-p21012 C-genome specific (napus-oleracea) | 0.7631579    | 0.7769839    | 0.9922481    | 0.8130786    | not scorable | not scorable |
| #### Bn-scaff_18322_1-p21212 C-genome specific (napus-oleracea) | 0.7703349    | 0.7428369    | 1            | 0.8070691    | not scorable | not scorable |
| #### Bn-scaff_18322_1-p21214 C-genome specific (napus-oleracea) | 0.7464115    | 0.7621599    | 1            | 0.839119     | not scorable | not scorable |
| #### Bn-scaff_18322_1-p21216 C-genome specific (napus-oleracea) | 0.7679426    | 0.7695274    | 1            | 0.8258739    | not scorable | not scorable |
| #### Bn-scaff_18322_1-p21219 C-genome specific (napus-oleracea) | 0.7631579    | 0.7730749    | 0.9922481    | 0.8311083    | not scorable | not scorable |
| #### Bn-scaff_18322_1-p21329 C-genome specific (napus-oleracea) | 0.7559808    | 0.7802062    | 0.9922481    | 0.8241991    | not scorable | not scorable |
| #### Bn-scaff_18322_1-p21335 C-genome specific (napus-oleracea) | 0.7799043    | 0.7344987    | 0.9922481    | 0.7917184    | not scorable | not scorable |
| #### Bn-scaff_18322_1-p21471 genome unspecific (all in)         | 0.9904306    | 0.4632749    | 0.9844961    | 0.7319027    | 1            | 0.9338718    |
| #### Bn-scaff_18322_1-p21490 genome unspecific (all in)         | 0.9832536    | 0.5649995    | 0.9612403    | 0.6464618    | 1            | 0.9269956    |
| #### Bn-scaff_18322_1-p21504 A-genome specific (napus-rapa)     | 0.4760765    | 0.7006897    | not scorable | not scorable | 0.9834711    | 0.7445503    |
| #### Bn-scaff_18322_1-p21507 C-genome specific (napus-oleracea) | 0.7631579    | 0.7798045    | 0.9767442    | 0.8053093    | not scorable | not scorable |
| #### Bn-scaff_18322_1-p21511 C-genome specific (napus-oleracea) | 0.7655503    | 0.7937888    | 0.9922481    | 0.8041515    | not scorable | not scorable |
| #### Bn-scaff_18322_1-p21550 C-genome specific (napus-oleracea) | 0.7727273    | 0.6746047    | 0.9922481    | 0.6946223    | not scorable | not scorable |
| #### Bn-scaff_18322_1-p21556 C-genome specific (napus-oleracea) | 0.7751196    | 0.7675519    | 1            | 0.7543419    | not scorable | not scorable |
| #### Bn-scaff_18322_1-p21880 napus specific                     | 0.5239235    | 0.650346     | not scorable | not scorable | not scorable | not scorable |
| #### Bn-scaff_18322_1-p21895 C-genome specific (napus-oleracea) | 0.7559808    | 0.6869886    | 0.6666667    | 0.8202972    | not scorable | not scorable |
| #### Bn-scaff_18322_1-p21898 C-genome specific (napus-oleracea) | 0.7679426    | 0.7795891    | 0.6744186    | 0.7161461    | not scorable | not scorable |
| #### Bn-scaff_18322_1-p21902 C-genome specific (napus-oleracea) | 0.7631579    | 0.7460604    | 0.6744186    | 0.8006582    | not scorable | not scorable |
| #### Bn-scaff_18322_1-p21904 C-genome specific (napus-oleracea) | 0.9617225    | 0.5922157    | 0.9224806    | 0.5534408    | not scorable | not scorable |
| #### Bn-scaff_18322_1-p21904 C-genome specific (napus-oleracea) | 0.7583732    | 0.7866718    | 0.6666667    | 0.8256284    | not scorable | not scorable |

|                                                               |              |              |           |           |              |              |
|---------------------------------------------------------------|--------------|--------------|-----------|-----------|--------------|--------------|
| #### Bn-scaff_18322_1-p2190C-genome specific (napus-oleracea) | 0.7727273    | 0.7584506    | 0.6744186 | 0.8627251 | not scorable | not scorable |
| #### Bn-scaff_18322_1-p2191C-genome specific (napus-oleracea) | 0.7727273    | 0.7361606    | 0.6744186 | 0.7836741 | not scorable | not scorable |
| #### Bn-scaff_18322_1-p2194C-genome specific (napus-oleracea) | 0.9641148    | 0.6967269    | 0.9457364 | 0.6208809 | not scorable | not scorable |
| #### Bn-scaff_18322_1-p2194C-genome specific (oleracea only)  | not scorable | not scorable | 0.9147287 | 0.6994977 | not scorable | not scorable |
| #### Bn-scaff_18322_1-p2194C-genome specific (napus-oleracea) | 0.7703349    | 0.7986745    | 0.6744186 | 0.8066242 | not scorable | not scorable |
| #### Bn-scaff_18322_1-p2195C-genome specific (napus-oleracea) | 0.7751196    | 0.7693331    | 0.6744186 | 0.8752587 | not scorable | not scorable |
| #### Bn-scaff_18322_1-p2204C-genome specific (oleracea only)  | not scorable | not scorable | 0.8682171 | 0.8777936 | not scorable | not scorable |
| #### Bn-scaff_18322_1-p2205C-genome specific (napus-oleracea) | 0.7583732    | 0.7458389    | 1         | 0.7018767 | not scorable | not scorable |
| #### Bn-scaff_18322_1-p2206C-genome specific (napus-oleracea) | 0.7607656    | 0.7476034    | 1         | 0.8234621 | not scorable | not scorable |
| #### Bn-scaff_18322_1-p2207C-genome specific (napus-oleracea) | 0.7727273    | 0.7689155    | 0.9767442 | 0.7062554 | not scorable | not scorable |
| #### Bn-scaff_18322_1-p2208C-genome specific (napus-oleracea) | 0.7703349    | 0.7353442    | 0.9922481 | 0.6659421 | not scorable | not scorable |
| #### Bn-scaff_18322_1-p2227genome unspecific (all in)         | 0.9712918    | 0.2568097    | 1         | 0.4955976 | 1            | 0.8135794    |
| #### Bn-scaff_18322_1-p2231genome unspecific (all in)         | 0.9976076    | 0.5760629    | 0.9844961 | 0.8234008 | 1            | 0.9350256    |
| #### Bn-scaff_18322_1-p2238C-genome specific (oleracea only)  | not scorable | not scorable | 1         | 0.745654  | not scorable | not scorable |
| #### Bn-scaff_18322_1-p2250genome unspecific (all in)         | 0.9976076    | 0.3406588    | 1         | 0.791968  | 1            | 0.8925602    |
| #### Bn-scaff_18322_1-p2266C-genome specific (napus-oleracea) | 0.7679426    | 0.7957774    | 1         | 0.8704344 | not scorable | not scorable |
| #### Bn-scaff_18322_1-p2266genome unspecific (all in)         | 0.9473684    | 0.2780035    | 0.9612403 | 0.5505527 | 1            | 0.9093923    |
| #### Bn-scaff_18322_1-p2297C-genome specific (napus-oleracea) | 0.7631579    | 0.7726793    | 0.9844961 | 0.8186098 | not scorable | not scorable |
| #### Bn-scaff_18322_1-p2299C-genome specific (napus-oleracea) | 0.7703349    | 0.4935972    | 0.9689922 | 0.4502257 | not scorable | not scorable |
| #### Bn-scaff_18322_1-p2299C-genome specific (napus-oleracea) | 0.7631579    | 0.7614583    | 1         | 0.8192506 | not scorable | not scorable |
| #### Bn-scaff_18322_1-p2299C-genome specific (napus-oleracea) | 0.7703349    | 0.7946272    | 1         | 0.8246623 | not scorable | not scorable |
| #### Bn-scaff_18322_1-p2300C-genome specific (napus-oleracea) | 0.7679426    | 0.7511872    | 0.9689922 | 0.758837  | not scorable | not scorable |
| #### Bn-scaff_18322_1-p2322genome unspecific (all in)         | 0.9497608    | 0.3612891    | 1         | 0.8353806 | 0.9917355    | 0.700138     |
| #### Bn-scaff_18322_1-p2327C-genome specific (napus-oleracea) | 0.7631579    | 0.7917044    | 0.9844961 | 0.8393649 | not scorable | not scorable |
| #### Bn-scaff_18322_1-p2357C-genome specific (napus-oleracea) | 0.7559808    | 0.6526463    | 0.9844961 | 0.7570485 | not scorable | not scorable |
| #### Bn-scaff_18322_1-p2360C-genome specific (napus-oleracea) | 0.7583732    | 0.774584     | 1         | 0.7842571 | not scorable | not scorable |
| #### Bn-scaff_18322_1-p2378genome unspecific (all in)         | 0.9712918    | 0.5737149    | 1         | 0.7834394 | 1            | 0.9439858    |
| #### Bn-scaff_18322_1-p2382C-genome specific (napus-oleracea) | 0.7727273    | 0.6835021    | 0.9922481 | 0.6775849 | not scorable | not scorable |
| #### Bn-scaff_18322_1-p2382C-genome specific (napus-oleracea) | 0.7703349    | 0.7680652    | 1         | 0.7096272 | not scorable | not scorable |
| #### Bn-scaff_18322_1-p2385C-genome specific (napus-oleracea) | 0.7535885    | 0.7827606    | 0.9302326 | 0.6477076 | not scorable | not scorable |
| #### Bn-scaff_18322_1-p2398C-genome specific (napus-oleracea) | 0.7727273    | 0.7833033    | 1         | 0.8021023 | not scorable | not scorable |
| #### Bn-scaff_18322_1-p2406C-genome specific (napus-oleracea) | 0.7559808    | 0.7817854    | 1         | 0.8014797 | not scorable | not scorable |
| #### Bn-scaff_18322_1-p2432C-genome specific (napus-oleracea) | 0.9688995    | 0.2549881    | 0.9844961 | 0.4512502 | not scorable | not scorable |

|                                                                 |              |              |              |              |              |              |
|-----------------------------------------------------------------|--------------|--------------|--------------|--------------|--------------|--------------|
| #### Bn-scaff_18322_1-p24428 C-genome specific (napus-oleracea) | 1            | 0.5416482    | 0.9922481    | 0.547778     | not scorable | not scorable |
| #### Bn-scaff_18322_1-p24431 genome unspecific (all in)         | 1            | 0.2383365    | 0.9922481    | 0.3246939    | 1            | 0.727636     |
| #### Bn-scaff_18322_1-p24874 C-genome specific (napus-oleracea) | 0.7631579    | 0.7612404    | 1            | 0.8340197    | not scorable | not scorable |
| #### Bn-scaff_18322_1-p24990 C-genome specific (napus-oleracea) | 0.7703349    | 0.7585118    | 1            | 0.8304881    | not scorable | not scorable |
| #### Bn-scaff_18322_1-p25085 C-genome specific (napus-oleracea) | 0.291866     | 0.7205462    | 0.8294573    | 0.8515397    | not scorable | not scorable |
| #### Bn-scaff_18322_1-p25091 C-genome specific (napus-oleracea) | 0.7631579    | 0.7636845    | 0.9844961    | 0.8268861    | not scorable | not scorable |
| #### Bn-scaff_18322_1-p25095 C-genome specific (napus-oleracea) | 0.7655503    | 0.6046152    | 0.875969     | 0.7236834    | not scorable | not scorable |
| #### Bn-scaff_18322_1-p25100 C-genome specific (napus-oleracea) | 0.7631579    | 0.7766675    | 0.8992248    | 0.7840526    | not scorable | not scorable |
| #### Bn-scaff_18322_1-p25100 C-genome specific (napus-oleracea) | 0.7583732    | 0.7434449    | 0.8914729    | 0.7779768    | not scorable | not scorable |
| #### Bn-scaff_18322_1-p25102 C-genome specific (napus-oleracea) | 0.7583732    | 0.797858     | 0.8914729    | 0.8347561    | not scorable | not scorable |
| #### Bn-scaff_18322_1-p25119 C-genome specific (napus-oleracea) | 0.7607656    | 0.7754927    | 0.9922481    | 0.8081589    | not scorable | not scorable |
| #### Bn-scaff_18322_1-p25121 C-genome specific (napus-oleracea) | 0.7488039    | 0.7681205    | 0.9689922    | 0.7449445    | not scorable | not scorable |
| #### Bn-scaff_18322_1-p25125 C-genome specific (napus-oleracea) | 0.7559808    | 0.7783       | 0.9844961    | 0.7755976    | not scorable | not scorable |
| #### Bn-scaff_18322_1-p25140 C-genome specific (napus-oleracea) | 0.7607656    | 0.806013     | 0.9922481    | 0.8137621    | not scorable | not scorable |
| #### Bn-scaff_18322_1-p25142 C-genome specific (napus-oleracea) | 0.7655503    | 0.8222504    | 1            | 0.8220317    | not scorable | not scorable |
| #### Bn-scaff_18322_1-p25147 C-genome specific (napus-oleracea) | 0.7655503    | 0.6871214    | 0.9844961    | 0.7234803    | not scorable | not scorable |
| #### Bn-scaff_18322_1-p25155 C-genome specific (napus-oleracea) | 0.7655503    | 0.7486576    | 1            | 0.6929782    | not scorable | not scorable |
| #### Bn-scaff_18322_1-p25181 genome unspecific (all in)         | 0.9904306    | 0.4460532    | 0.9689922    | 0.7077144    | 1            | 0.9163123    |
| #### Bn-scaff_18322_1-p25379 genome unspecific (all in)         | 0.7535885    | 0.613128     | 0.9767442    | 0.7368928    | 1            | 0.8520551    |
| #### Bn-scaff_18322_1-p25608 genome unspecific (all in)         | 0.9665072    | 0.2299249    | 0.9689922    | 0.394534     | 1            | 0.8442112    |
| #### Bn-scaff_18322_1-p25831 C-genome specific (napus-oleracea) | 0.7488039    | 0.8024963    | 0.9767442    | 0.7296693    | not scorable | not scorable |
| #### Bn-scaff_18322_1-p25884 C-genome specific (napus-oleracea) | 0.777512     | 0.7804708    | 0.9689922    | 0.5110677    | not scorable | not scorable |
| #### Bn-scaff_18322_1-p26027 C-genome specific (napus-oleracea) | 0.7559808    | 0.6867391    | 0.9767442    | 0.8006794    | not scorable | not scorable |
| #### Bn-scaff_18322_1-p26236 napus specific                     | 0.6339713    | 0.7429861    | not scorable | not scorable | not scorable | not scorable |
| #### Bn-scaff_18322_1-p26335 C-genome specific (napus-oleracea) | 0.7607656    | 0.5678663    | 0.9922481    | 0.5601843    | not scorable | not scorable |
| #### Bn-scaff_18322_1-p26464 genome unspecific (all in)         | 0.9952153    | 0.5987048    | 1            | 0.8494952    | 1            | 0.906221     |
| #### Bn-scaff_18322_1-p26472 genome unspecific (all in)         | 0.9928229    | 0.5672635    | 0.9922481    | 0.8190148    | 1            | 0.8264968    |
| #### Bn-scaff_18322_1-p26821 C-genome specific (napus-oleracea) | 0.7583732    | 0.6856094    | 0.7364341    | 0.854561     | not scorable | not scorable |
| #### Bn-scaff_18322_1-p26920 C-genome specific (napus-oleracea) | 0.7559808    | 0.7090015    | 0.751938     | 0.7956918    | not scorable | not scorable |
| #### Bn-scaff_18322_1-p27310 genome unspecific (all in)         | 0.9952153    | 0.4323449    | 1            | 0.8375056    | 1            | 0.8333293    |
| #### Bn-scaff_18322_1-p32043 genome unspecific (all in)         | 0.9593301    | 0.3356252    | 0.8914729    | 0.7054505    | 0.9421487    | 0.7431917    |
| #### Bn-scaff_18322_1-p36146 C-genome specific (napus-oleracea) | 0.9043062    | 0.7697101    | 0.875969     | 0.9127755    | not scorable | not scorable |
| #### Bn-scaff_18322_1-p42485 genome unspecific (oleracea-rapa)  | not scorable | not scorable | 1            | 0.7848712    | 0.9917355    | 0.8000314    |



|                                                                 |              |              |           |           |              |              |
|-----------------------------------------------------------------|--------------|--------------|-----------|-----------|--------------|--------------|
| #### Bn-scaff_18322_1-p45395 genome unspecific (all in)         | 0.9712918    | 0.6792606    | 1         | 0.7348783 | 1            | 0.8221813    |
| #### Bn-scaff_18322_1-p47504 genome unspecific (all in)         | 0.9760765    | 0.3829652    | 1         | 0.7302285 | 1            | 0.8140547    |
| #### Bn-scaff_18322_1-p47640 C-genome specific (napus-oleracea) | 0.9186603    | 0.7506338    | 0.9302326 | 0.7498659 | not scorable | not scorable |
| #### Bn-scaff_18322_1-p47679 C-genome specific (napus-oleracea) | 0.9186603    | 0.6670283    | 1         | 0.7169247 | not scorable | not scorable |
| #### Bn-scaff_18322_1-p47968 C-genome specific (napus-oleracea) | 0.9904306    | 0.7349927    | 1         | 0.7303997 | not scorable | not scorable |
| #### Bn-scaff_18322_1-p48383 genome unspecific (all in)         | 0.9904306    | 0.3729863    | 0.9844961 | 0.8495021 | 0.9834711    | 0.9085669    |
| #### Bn-scaff_18322_1-p49749 C-genome specific (napus-oleracea) | 0.7248804    | 0.8044624    | 0.744186  | 0.9158567 | not scorable | not scorable |
| #### Bn-scaff_18322_1-p49803 genome unspecific (all in)         | 0.9497608    | 0.4879814    | 0.9922481 | 0.829589  | 1            | 0.9187927    |
| #### Bn-scaff_18322_1-p51120 genome unspecific (oleracea-rapa)  | not scorable | not scorable | 1         | 0.793096  | 0.9834711    | 0.7634757    |
| #### Bn-scaff_18322_1-p59014 genome unspecific (oleracea-rapa)  | not scorable | not scorable | 0.9922481 | 0.690017  | 1            | 0.7024454    |
| #### Bn-scaff_18322_1-p60046 C-genome specific (napus-oleracea) | 0.9282297    | 0.8014652    | 0.9922481 | 0.7117054 | not scorable | not scorable |
| #### Bn-scaff_18322_1-p62284 C-genome specific (napus-oleracea) | 0.9401914    | 0.6728497    | 1         | 0.7852964 | not scorable | not scorable |
| #### Bn-scaff_18322_1-p62529 C-genome specific (napus-oleracea) | 0.8899522    | 0.7979226    | 0.9612403 | 0.7947085 | not scorable | not scorable |
| #### Bn-scaff_18322_1-p63916 C-genome specific (napus-oleracea) | 0.9282297    | 0.7416735    | 0.9767442 | 0.8267338 | not scorable | not scorable |
| #### Bn-scaff_18322_1-p64493 C-genome specific (napus-oleracea) | 0.7799043    | 0.8061401    | 0.9767442 | 0.794589  | not scorable | not scorable |
| #### Bn-scaff_18322_1-p64581 C-genome specific (napus-oleracea) | 0.7751196    | 0.6950679    | 0.9457364 | 0.8496853 | not scorable | not scorable |
| #### Bn-scaff_18322_1-p64915 C-genome specific (napus-oleracea) | 0.7703349    | 0.7992346    | 0.9689922 | 0.7762458 | not scorable | not scorable |
| #### Bn-scaff_18322_1-p65056 C-genome specific (napus-oleracea) | 0.7751196    | 0.7553195    | 0.9689922 | 0.8400829 | not scorable | not scorable |
| #### Bn-scaff_18322_1-p65114 C-genome specific (napus-oleracea) | 0.777512     | 0.8070838    | 0.9767442 | 0.8541599 | not scorable | not scorable |
| #### Bn-scaff_18322_1-p66064 C-genome specific (napus-oleracea) | 0.777512     | 0.7430891    | 1         | 0.6980746 | not scorable | not scorable |
| #### Bn-scaff_18322_1-p66117 C-genome specific (napus-oleracea) | 0.7799043    | 0.8149266    | 1         | 0.7663746 | not scorable | not scorable |
| #### Bn-scaff_18322_1-p67758 C-genome specific (napus-oleracea) | 0.7751196    | 0.7348804    | 0.9767442 | 0.8199607 | not scorable | not scorable |
| #### Bn-scaff_18322_1-p67926 C-genome specific (napus-oleracea) | 0.7822967    | 0.6591324    | 1         | 0.8220472 | not scorable | not scorable |
| #### Bn-scaff_18322_1-p73699 C-genome specific (napus-oleracea) | 0.777512     | 0.7967939    | 1         | 0.7113465 | not scorable | not scorable |
| #### Bn-scaff_18322_1-p74411 C-genome specific (napus-oleracea) | 0.7679426    | 0.6557179    | 0.9844961 | 0.7236335 | not scorable | not scorable |
| #### Bn-scaff_18322_1-p75803 C-genome specific (napus-oleracea) | 0.7511961    | 0.6585529    | 0.9844961 | 0.8246648 | not scorable | not scorable |
| #### Bn-scaff_18322_1-p76077 C-genome specific (oleracea only)  | not scorable | not scorable | 0.7674419 | 0.820438  | not scorable | not scorable |
| #### Bn-scaff_18322_1-p76131 C-genome specific (napus-oleracea) | 0.7655503    | 0.7282923    | 0.9767442 | 0.7810234 | not scorable | not scorable |
| #### Bn-scaff_18322_1-p76620 C-genome specific (napus-oleracea) | 0.7535885    | 0.7156066    | 0.9612403 | 0.8228878 | not scorable | not scorable |
| #### Bn-scaff_18322_1-p76759 C-genome specific (napus-oleracea) | 0.7655503    | 0.7670138    | 1         | 0.8461093 | not scorable | not scorable |
| #### Bn-scaff_18322_1-p76772 C-genome specific (napus-oleracea) | 0.7751196    | 0.7667494    | 0.9767442 | 0.7377147 | not scorable | not scorable |
| #### Bn-scaff_18322_1-p76827 C-genome specific (napus-oleracea) | 0.7679426    | 0.7415872    | 0.9922481 | 0.7981274 | not scorable | not scorable |
| #### Bn-scaff_18322_1-p76886 C-genome specific (napus-oleracea) | 0.7631579    | 0.6781253    | 0.9922481 | 0.8038617 | not scorable | not scorable |

|                              |                                    |              |              |              |              |              |              |
|------------------------------|------------------------------------|--------------|--------------|--------------|--------------|--------------|--------------|
| #### Bn-scaff_18322_1-p77108 | all not scorable                   | not scorable | not scorable | not scorable | not scorable | not scorable | not scorable |
| #### Bn-scaff_18322_1-p79616 | C-genome specific (napus-oleracea) | 0.923445     | 0.7346839    | 1            | 0.7424354    | not scorable | not scorable |
| #### Bn-scaff_18322_1-p80142 | C-genome specific (napus-oleracea) | 0.9043062    | 0.6184093    | 1            | 0.6337515    | not scorable | not scorable |
| #### Bn-scaff_18322_1-p80264 | C-genome specific (napus-oleracea) | 0.6722488    | 0.6536622    | 0.9844961    | 0.7677315    | not scorable | not scorable |
| #### Bn-scaff_18322_1-p80310 | C-genome specific (napus-oleracea) | 0.9928229    | 0.6045977    | 0.9922481    | 0.644606     | not scorable | not scorable |
| #### Bn-scaff_18322_1-p80353 | C-genome specific (napus-oleracea) | 0.9258373    | 0.7669291    | 0.9767442    | 0.7116859    | not scorable | not scorable |
| #### Bn-scaff_18322_1-p80458 | C-genome specific (napus-oleracea) | 0.9186603    | 0.7516732    | 0.9147287    | 0.8038195    | not scorable | not scorable |
| #### Bn-scaff_18322_1-p80505 | C-genome specific (napus-oleracea) | 0.9043062    | 0.6849646    | 0.9922481    | 0.674292     | not scorable | not scorable |
| #### Bn-scaff_18322_1-p80521 | C-genome specific (napus-oleracea) | 0.9258373    | 0.820233     | 0.9922481    | 0.7787217    | not scorable | not scorable |
| #### Bn-scaff_18322_1-p80553 | C-genome specific (napus-oleracea) | 0.9138756    | 0.7793686    | 1            | 0.8304037    | not scorable | not scorable |
| #### Bn-scaff_18322_1-p80607 | C-genome specific (napus-oleracea) | 0.9186603    | 0.6670837    | 1            | 0.7779229    | not scorable | not scorable |
| #### Bn-scaff_18322_1-p81174 | C-genome specific (napus-oleracea) | 0.9282297    | 0.7831672    | 1            | 0.8600504    | not scorable | not scorable |
| #### Bn-scaff_18322_1-p81345 | C-genome specific (napus-oleracea) | 0.9138756    | 0.5192281    | 0.9922481    | 0.6032123    | not scorable | not scorable |
| #### Bn-scaff_18322_1-p81779 | C-genome specific (napus-oleracea) | 0.930622     | 0.7856605    | 0.9767442    | 0.621622     | not scorable | not scorable |
| #### Bn-scaff_18322_1-p81790 | C-genome specific (napus-oleracea) | 0.930622     | 0.8295674    | 0.9767442    | 0.6690523    | not scorable | not scorable |
| #### Bn-scaff_18322_1-p81826 | C-genome specific (napus-oleracea) | 0.9162679    | 0.7532774    | 0.9379845    | 0.72668      | not scorable | not scorable |
| #### Bn-scaff_18322_1-p82042 | C-genome specific (napus-oleracea) | 0.9162679    | 0.6717989    | 0.9379845    | 0.4037395    | not scorable | not scorable |
| #### Bn-scaff_18322_1-p82148 | C-genome specific (napus-oleracea) | 0.9186603    | 0.704142     | 0.9689922    | 0.7054868    | not scorable | not scorable |
| #### Bn-scaff_18322_1-p82157 | C-genome specific (napus-oleracea) | 0.9258373    | 0.8184679    | 1            | 0.8019686    | not scorable | not scorable |
| #### Bn-scaff_18322_1-p82678 | C-genome specific (napus-oleracea) | 0.7583732    | 0.7603042    | 0.9922481    | 0.8145056    | not scorable | not scorable |
| #### Bn-scaff_18322_1-p83187 | C-genome specific (napus-oleracea) | 0.7464115    | 0.7758757    | 0.9922481    | 0.8361646    | not scorable | not scorable |
| #### Bn-scaff_18322_1-p83200 | C-genome specific (napus-oleracea) | 0.7511961    | 0.7828095    | 0.9922481    | 0.8197755    | not scorable | not scorable |
| #### Bn-scaff_18322_1-p88184 | C-genome specific (napus-oleracea) | 0.7511961    | 0.7591127    | 0.9922481    | 0.770191     | not scorable | not scorable |
| #### Bn-scaff_18322_1-p88605 | C-genome specific (napus-oleracea) | 0.7440192    | 0.7504173    | 0.9922481    | 0.8206284    | not scorable | not scorable |
| #### Bn-scaff_18322_1-p90376 | C-genome specific (napus-oleracea) | 0.7703349    | 0.7879651    | 1            | 0.8541096    | not scorable | not scorable |
| #### Bn-scaff_18322_1-p90859 | C-genome specific (napus-oleracea) | 0.7511961    | 0.7846673    | 1            | 0.8661014    | not scorable | not scorable |
| #### Bn-scaff_18322_1-p91803 | genome unspecific (all in)         | 1            | 0.7278953    | 1            | 0.7385818    | 1            | 0.786476     |
| #### Bn-scaff_18322_1-p91819 | genome unspecific (all in)         | 0.9593301    | 0.2989839    | 1            | 0.2630066    | 0.9834711    | 0.7277986    |
| #### Bn-scaff_18322_1-p91871 | genome unspecific (all in)         | 0.9617225    | 0.5452969    | 1            | 0.7678996    | 1            | 0.9203618    |
| #### Bn-scaff_18322_1-p92057 | C-genome specific (napus-oleracea) | 0.7679426    | 0.7609591    | 0.9922481    | 0.8117411    | not scorable | not scorable |
| #### Bn-scaff_18322_1-p95049 | C-genome specific (oleracea only)  | not scorable | not scorable | 0.3565891    | 0.7517698    | not scorable | not scorable |
| #### Bn-scaff_18322_1-p95926 | C-genome specific (napus-oleracea) | 0.777512     | 0.8327693    | 1            | 0.8783947    | not scorable | not scorable |
| #### Bn-scaff_18322_1-p96951 | C-genome specific (napus-oleracea) | 0.7751196    | 0.8423585    | 0.9379845    | 0.8572959    | not scorable | not scorable |

|                                                                 |           |           |              |              |              |              |
|-----------------------------------------------------------------|-----------|-----------|--------------|--------------|--------------|--------------|
| #### Bn-scaff_18322_1-p96958 C-genome specific (napus-oleracea) | 0.777512  | 0.8417292 | 1            | 0.7825757    | not scorable | not scorable |
| #### Bn-scaff_18322_1-p96979 C-genome specific (napus-oleracea) | 0.7559808 | 0.7005182 | 0.9534883    | 0.7959318    | not scorable | not scorable |
| #### Bn-scaff_18322_1-p96999 C-genome specific (napus-oleracea) | 0.777512  | 0.7440457 | 1            | 0.8387767    | not scorable | not scorable |
| #### Bn-scaff_18322_1-p97451 C-genome specific (napus-oleracea) | 0.7799043 | 0.8887054 | 1            | 0.880768     | not scorable | not scorable |
| #### Bn-scaff_18322_1-p97459 C-genome specific (napus-oleracea) | 0.7799043 | 0.8191313 | 1            | 0.7964966    | not scorable | not scorable |
| #### Bn-scaff_18322_1-p97525 C-genome specific (napus-oleracea) | 0.777512  | 0.7998065 | 1            | 0.7508932    | not scorable | not scorable |
| #### Bn-scaff_18322_1-p97854 C-genome specific (napus-oleracea) | 0.7727273 | 0.8322129 | 1            | 0.8037569    | not scorable | not scorable |
| #### Bn-scaff_18322_1-p98245 C-genome specific (napus-oleracea) | 0.7751196 | 0.7950755 | 1            | 0.8947228    | not scorable | not scorable |
| #### Bn-scaff_18323_1-p12315 C-genome specific (napus-oleracea) | 0.9928229 | 0.8159    | 0.9147287    | 0.8089612    | not scorable | not scorable |
| #### Bn-scaff_18323_1-p12512 genome unspecific (all in)         | 0.9904306 | 0.25701   | 1            | 0.3246354    | 1            | 0.6497978    |
| #### Bn-scaff_18323_1-p14870 genome unspecific (all in)         | 0.9952153 | 0.2238372 | 0.9612403    | 0.3314024    | 1            | 0.7830434    |
| #### Bn-scaff_18323_1-p15024 C-genome specific (napus-oleracea) | 0.9952153 | 0.6946259 | 0.6124031    | 0.6865999    | not scorable | not scorable |
| #### Bn-scaff_18323_1-p16975 C-genome specific (napus-oleracea) | 0.9832536 | 0.7616578 | 0.6434109    | 0.7850844    | not scorable | not scorable |
| #### Bn-scaff_18323_1-p25723 C-genome specific (napus-oleracea) | 0.9856459 | 0.6870419 | 0.9069768    | 0.6842484    | not scorable | not scorable |
| #### Bn-scaff_18323_1-p25766 C-genome specific (napus-oleracea) | 0.9928229 | 0.6509954 | 1            | 0.7325726    | not scorable | not scorable |
| #### Bn-scaff_18323_1-p25797 C-genome specific (napus-oleracea) | 0.9952153 | 0.6298622 | 0.9844961    | 0.7125723    | not scorable | not scorable |
| #### Bn-scaff_18323_1-p26966 C-genome specific (napus-oleracea) | 0.9928229 | 0.6486678 | 1            | 0.7291675    | not scorable | not scorable |
| #### Bn-scaff_18323_1-p27185 genome unspecific (all in)         | 0.9880383 | 0.2848555 | 0.9922481    | 0.222026     | 0.9917355    | 0.7816539    |
| #### Bn-scaff_18323_1-p29616 napus specific                     | 0.9904306 | 0.7496902 | not scorable | not scorable | not scorable | not scorable |
| #### Bn-scaff_18323_1-p29770 C-genome specific (napus-oleracea) | 0.9952153 | 0.6693262 | 0.9844961    | 0.702767     | not scorable | not scorable |
| #### Bn-scaff_18323_1-p29774 C-genome specific (napus-oleracea) | 0.9928229 | 0.7394415 | 1            | 0.727273     | not scorable | not scorable |
| #### Bn-scaff_18323_1-p30563 genome unspecific (all in)         | 0.9760765 | 0.523289  | 0.9844961    | 0.6139765    | 1            | 0.9276882    |
| #### Bn-scaff_18323_1-p30745 C-genome specific (napus-oleracea) | 0.9904306 | 0.7922783 | 0.9844961    | 0.7428718    | not scorable | not scorable |
| #### Bn-scaff_18323_1-p53017 C-genome specific (napus-oleracea) | 0.9880383 | 0.8009333 | 0.9922481    | 0.7589815    | not scorable | not scorable |
| #### Bn-scaff_18323_1-p54601 C-genome specific (napus-oleracea) | 0.9808612 | 0.8466783 | 0.8992248    | 0.7456743    | not scorable | not scorable |
| #### Bn-scaff_18326_1-p10223 C-genome specific (napus-oleracea) | 1         | 0.8116325 | 1            | 0.8970639    | not scorable | not scorable |
| #### Bn-scaff_18326_1-p10335 genome unspecific (all in)         | 1         | 0.6322888 | 1            | 0.612144     | 1            | 0.7093799    |
| #### Bn-scaff_18326_1-p11445 genome unspecific (all in)         | 0.9784689 | 0.6161295 | 1            | 0.8336029    | 0.9834711    | 0.9244215    |
| #### Bn-scaff_18326_1-p12148 genome unspecific (all in)         | 1         | 0.5833611 | 1            | 0.6713557    | 1            | 0.7164873    |
| #### Bn-scaff_18326_1-p17848 genome unspecific (all in)         | 1         | 0.5820231 | 1            | 0.5883571    | 1            | 0.7109966    |
| #### Bn-scaff_18326_1-p28224 genome unspecific (all in)         | 1         | 0.3929011 | 0.9147287    | 0.407385     | 0.9917355    | 0.761264     |
| #### Bn-scaff_18326_1-p31178 genome unspecific (all in)         | 1         | 0.3902364 | 1            | 0.3825544    | 0.9834711    | 0.4520651    |
| #### Bn-scaff_18326_1-p32452 genome unspecific (all in)         | 0.9832536 | 0.3403302 | 1            | 0.7314131    | 0.9834711    | 0.6930743    |

|                                                                 |              |              |              |              |              |              |
|-----------------------------------------------------------------|--------------|--------------|--------------|--------------|--------------|--------------|
| #### Bn-scaff_18326_1-p40635 genome unspecific (all in)         | 0.9976076    | 0.2969218    | 0.9612403    | 0.318883     | 1            | 0.8033861    |
| #### Bn-scaff_18326_1-p40855 C-genome specific (napus-oleracea) | 1            | 0.9001167    | 1            | 0.8171967    | not scorable | not scorable |
| #### Bn-scaff_18326_1-p40858 C-genome specific (oleracea only)  | not scorable | not scorable | 0.9534883    | 0.2836253    | not scorable | not scorable |
| #### Bn-scaff_18326_1-p42239 C-genome specific (napus-oleracea) | 0.9976076    | 0.3841625    | 1            | 0.4552679    | not scorable | not scorable |
| #### Bn-scaff_18326_1-p6839 genome unspecific (oleracea-rapa)   | not scorable | not scorable | 0.9689922    | 0.3093908    | 1            | 0.8866386    |
| #### Bn-scaff_18326_1-p6907 genome unspecific (all in)          | 1            | 0.3785053    | 0.9922481    | 0.3928086    | 1            | 0.9091573    |
| #### Bn-scaff_18326_1-p85478 genome unspecific (all in)         | 1            | 0.7699124    | 1            | 0.6824396    | 1            | 0.7770717    |
| #### Bn-scaff_18338_1-p10732 napus specific                     | 0.8732057    | 0.2133596    | not scorable | not scorable | not scorable | not scorable |
| #### Bn-scaff_18338_1-p10801 genome unspecific (all in)         | 0.9976076    | 0.4447908    | 0.9767442    | 0.4033984    | 0.9917355    | 0.5643116    |
| #### Bn-scaff_18338_1-p10803 genome unspecific (oleracea-rapa)  | not scorable | not scorable | 1            | 0.4289854    | 1            | 0.7770717    |
| #### Bn-scaff_18338_1-p11559 genome unspecific (all in)         | 1            | 0.3946453    | 1            | 0.7250873    | 0.9834711    | 0.6612405    |
| #### Bn-scaff_18338_1-p15353 C-genome specific (napus-oleracea) | 0.9832536    | 0.3314792    | 1            | 0.5347855    | not scorable | not scorable |
| #### Bn-scaff_18338_1-p24423 C-genome specific (napus-oleracea) | 0.9976076    | 0.7510752    | 1            | 0.4746743    | not scorable | not scorable |
| #### Bn-scaff_18338_1-p30168 genome unspecific (oleracea-rapa)  | not scorable | not scorable | 1            | 0.2640024    | 1            | 0.9272014    |
| #### Bn-scaff_18338_1-p32293 napus specific                     | 0.9688995    | 0.7542015    | not scorable | not scorable | not scorable | not scorable |
| #### Bn-scaff_18338_1-p34251 C-genome specific (napus-oleracea) | 0.9617225    | 0.3402704    | 1            | 0.5840747    | not scorable | not scorable |
| #### Bn-scaff_18338_1-p34578 genome unspecific (oleracea-rapa)  | not scorable | not scorable | 0.8139535    | 0.8513827    | 0.9669421    | 0.7726352    |
| #### Bn-scaff_18338_1-p73987 C-genome specific (oleracea only)  | not scorable | not scorable | 0.9612403    | 0.3234227    | not scorable | not scorable |
| #### Bn-scaff_18338_1-p80746 genome unspecific (all in)         | 1            | 0.2882437    | 1            | 0.6052334    | 1            | 0.5932064    |
| #### Bn-scaff_18338_1-p87145 C-genome specific (napus-oleracea) | 0.9952153    | 0.3408183    | 0.9922481    | 0.3211993    | not scorable | not scorable |
| #### Bn-scaff_18338_1-p89113 C-genome specific (napus-oleracea) | 1            | 0.7730658    | 1            | 0.793542     | not scorable | not scorable |
| #### Bn-scaff_18338_1-p91175 genome unspecific (all in)         | 0.9952153    | 0.4216663    | 1            | 0.8244568    | 0.9834711    | 0.7079309    |
| #### Bn-scaff_18338_1-p91263 C-genome specific (oleracea only)  | not scorable | not scorable | 1            | 0.8438205    | not scorable | not scorable |
| #### Bn-scaff_18338_1-p92045 genome unspecific (all in)         | 0.9928229    | 0.325831     | 1            | 0.8848799    | 1            | 0.7629606    |
| #### Bn-scaff_18338_1-p98414 genome unspecific (all in)         | 1            | 0.5115362    | 1            | 0.5936595    | 0.9917355    | 0.8100909    |
| #### Bn-scaff_18338_1-p98473 genome unspecific (all in)         | 1            | 0.8490329    | 1            | 0.9182356    | 1            | 0.876205     |
| #### Bn-scaff_18344_1-p11931 C-genome specific (napus-oleracea) | 0.9976076    | 0.7844417    | 0.9844961    | 0.7236066    | not scorable | not scorable |
| #### Bn-scaff_18344_1-p14788 C-genome specific (napus-oleracea) | 1            | 0.7679802    | 1            | 0.7776285    | not scorable | not scorable |
| #### Bn-scaff_18344_1-p14841 C-genome specific (napus-oleracea) | 0.9976076    | 0.7456536    | 1            | 0.6927592    | not scorable | not scorable |
| #### Bn-scaff_18344_1-p14886 C-genome specific (napus-oleracea) | 0.9976076    | 0.7277262    | 1            | 0.759436     | not scorable | not scorable |
| #### Bn-scaff_18344_1-p14907 C-genome specific (napus-oleracea) | 1            | 0.8130599    | 1            | 0.7587556    | not scorable | not scorable |
| #### Bn-scaff_18344_1-p22700 C-genome specific (napus-oleracea) | 0.7679426    | 0.7565891    | 0.5426357    | 0.8664041    | not scorable | not scorable |
| #### Bn-scaff_18344_1-p23694 C-genome specific (napus-oleracea) | 0.9497608    | 0.4749343    | 0.8992248    | 0.3936962    | not scorable | not scorable |

|                                                                  |              |              |              |              |              |              |
|------------------------------------------------------------------|--------------|--------------|--------------|--------------|--------------|--------------|
| #### Bn-scaff_18344_1-p2379€ C-genome specific (napus-oleracea)  | 0.6961722    | 0.7408823    | 0.8992248    | 0.7006794    | not scorable | not scorable |
| #### Bn-scaff_18344_1-p24879€ C-genome specific (napus-oleracea) | 0.9808612    | 0.7898305    | 1            | 0.8146751    | not scorable | not scorable |
| #### Bn-scaff_18344_1-p29147€ C-genome specific (napus-oleracea) | 0.9928229    | 0.7852031    | 1            | 0.865151     | not scorable | not scorable |
| #### Bn-scaff_18344_1-p3414€ C-genome specific (napus-oleracea)  | 0.9401914    | 0.8237209    | 0.9689922    | 0.6694707    | not scorable | not scorable |
| #### Bn-scaff_18344_1-p34161€ C-genome specific (napus-oleracea) | 0.9976076    | 0.6950854    | 1            | 0.730368     | not scorable | not scorable |
| #### Bn-scaff_18344_1-p38424€ C-genome specific (napus-oleracea) | 0.9593301    | 0.7805788    | 0.379845     | 0.8408388    | not scorable | not scorable |
| #### Bn-scaff_18344_1-p38654 napus specific                      | 0.9784689    | 0.7890291    | not scorable | not scorable | not scorable | not scorable |
| #### Bn-scaff_18344_1-p38665 napus specific                      | 0.9760765    | 0.8040773    | not scorable | not scorable | not scorable | not scorable |
| #### Bn-scaff_18344_1-p38672 napus specific                      | 0.9808612    | 0.8864482    | not scorable | not scorable | not scorable | not scorable |
| #### Bn-scaff_18344_1-p38724 napus specific                      | 0.9665072    | 0.7750683    | not scorable | not scorable | not scorable | not scorable |
| #### Bn-scaff_18344_1-p38794 napus specific                      | 0.9688995    | 0.7715663    | not scorable | not scorable | not scorable | not scorable |
| #### Bn-scaff_18344_1-p38835 napus specific                      | 0.9712918    | 0.7700977    | not scorable | not scorable | not scorable | not scorable |
| #### Bn-scaff_18344_1-p38902 napus specific                      | 0.9545454    | 0.7348048    | not scorable | not scorable | not scorable | not scorable |
| #### Bn-scaff_18344_1-p39069 napus specific                      | 0.9641148    | 0.7743351    | not scorable | not scorable | not scorable | not scorable |
| #### Bn-scaff_18344_1-p39162 napus specific                      | 0.9712918    | 0.7754679    | not scorable | not scorable | not scorable | not scorable |
| #### Bn-scaff_18344_1-p39165 napus specific                      | 0.9593301    | 0.7342686    | not scorable | not scorable | not scorable | not scorable |
| #### Bn-scaff_18344_1-p39702 napus specific                      | 0.9736842    | 0.701946     | not scorable | not scorable | not scorable | not scorable |
| #### Bn-scaff_18344_1-p3978€ napus specific                      | 0.9688995    | 0.7698866    | not scorable | not scorable | not scorable | not scorable |
| #### Bn-scaff_18344_1-p39814 napus specific                      | 0.9736842    | 0.7707911    | not scorable | not scorable | not scorable | not scorable |
| #### Bn-scaff_18344_1-p39887 genome unspecific (all in)          | 0.9928229    | 0.3687676    | 0.9844961    | 0.697495     | 0.9834711    | 0.6884585    |
| #### Bn-scaff_18344_1-p4940€ napus specific                      | 0.9665072    | 0.7016073    | not scorable | not scorable | not scorable | not scorable |
| #### Bn-scaff_18344_1-p50021 napus specific                      | 0.9593301    | 0.7413694    | not scorable | not scorable | not scorable | not scorable |
| #### Bn-scaff_18344_1-p51229 napus specific                      | 0.9736842    | 0.7204914    | not scorable | not scorable | not scorable | not scorable |
| #### Bn-scaff_18344_1-p52345 genome unspecific (oleracea-rapa)   | not scorable | not scorable | 1            | 0.7945312    | 1            | 0.8884189    |
| #### Bn-scaff_18344_1-p6664€ C-genome specific (napus-oleracea)  | 0.9952153    | 0.81378      | 0.9844961    | 0.7499322    | not scorable | not scorable |
| #### Bn-scaff_18344_1-p6796€ genome unspecific (all in)          | 0.9952153    | 0.280737     | 0.9767442    | 0.727214     | 1            | 0.7844154    |
| #### Bn-scaff_18344_1-p89409€ C-genome specific (napus-oleracea) | 0.9928229    | 0.5256724    | 0.9922481    | 0.7749371    | not scorable | not scorable |
| #### Bn-scaff_18344_1-p99525€ C-genome specific (napus-oleracea) | 0.9354067    | 0.7149408    | 0.9767442    | 0.8432449    | not scorable | not scorable |
| #### Bn-scaff_18356_1-p11622 genome unspecific (all in)          | 0.9952153    | 0.5814254    | 1            | 0.7823263    | 0.9669421    | 0.7162569    |
| #### Bn-scaff_18356_1-p1816€ C-genome specific (napus-oleracea)  | 0.7296651    | 0.728611     | 0.7674419    | 0.6798093    | not scorable | not scorable |
| #### Bn-scaff_18356_1-p21873 genome unspecific (all in)          | 0.9808612    | 0.2680256    | 0.9922481    | 0.5495278    | 1            | 0.5319791    |
| #### Bn-scaff_18356_1-p21892 genome unspecific (all in)          | 0.9808612    | 0.360721     | 1            | 0.8786543    | 1            | 0.9175813    |
| #### Bn-scaff_18356_1-p22031 C-genome specific (napus-oleracea)  | 0.9808612    | 0.3802431    | 1            | 0.698303     | not scorable | not scorable |

|                                                                 |              |              |              |              |              |              |
|-----------------------------------------------------------------|--------------|--------------|--------------|--------------|--------------|--------------|
| #### Bn-scaff_18356_1-p22616 C-genome specific (napus-oleracea) | 0.9904306    | 0.782533     | 0.9922481    | 0.8147326    | not scorable | not scorable |
| #### Bn-scaff_18356_1-p23117 C-genome specific (napus-oleracea) | 0.9928229    | 0.5416719    | 1            | 0.6273769    | not scorable | not scorable |
| #### Bn-scaff_18356_1-p27220 C-genome specific (napus-oleracea) | 0.9736842    | 0.7660239    | 1            | 0.7211152    | not scorable | not scorable |
| #### Bn-scaff_18356_1-p29296 C-genome specific (napus-oleracea) | 0.9736842    | 0.5527988    | 1            | 0.4013906    | not scorable | not scorable |
| #### Bn-scaff_18356_1-p29306 C-genome specific (napus-oleracea) | 0.9688995    | 0.7699628    | 1            | 0.746033     | not scorable | not scorable |
| #### Bn-scaff_18356_1-p29515 genome unspecific (all in)         | 0.9880383    | 0.6873261    | 0.9302326    | 0.7691472    | 0.9256198    | 0.9163362    |
| #### Bn-scaff_18356_1-p30988 genome unspecific (all in)         | 0.9425837    | 0.3408313    | 1            | 0.8604937    | 0.9834711    | 0.6875042    |
| #### Bn-scaff_18356_1-p31198 genome unspecific (all in)         | 0.861244     | 0.2578577    | 1            | 0.7884473    | 1            | 0.7067565    |
| #### Bn-scaff_18356_1-p34974 genome unspecific (all in)         | 1            | 0.3832462    | 1            | 0.8135586    | 1            | 0.9175813    |
| #### Bn-scaff_18356_1-p39463 genome unspecific (all in)         | 0.9784689    | 0.404081     | 0.9922481    | 0.8223446    | 1            | 0.90874      |
| #### Bn-scaff_18356_1-p41271 C-genome specific (napus-oleracea) | 0.9856459    | 0.7627974    | 0.7054263    | 0.704429     | not scorable | not scorable |
| #### Bn-scaff_18356_1-p41383 C-genome specific (napus-oleracea) | 0.9904306    | 0.7737409    | 0.6899225    | 0.762834     | not scorable | not scorable |
| #### Bn-scaff_18356_1-p43272 C-genome specific (napus-oleracea) | 0.9880383    | 0.7139198    | 0.7209302    | 0.8282901    | not scorable | not scorable |
| #### Bn-scaff_18356_1-p43628 C-genome specific (napus-oleracea) | 0.9832536    | 0.7353705    | 0.7286822    | 0.6803035    | not scorable | not scorable |
| #### Bn-scaff_18356_1-p54569 C-genome specific (oleracea only)  | not scorable | not scorable | 0.9767442    | 0.2663598    | not scorable | not scorable |
| #### Bn-scaff_18356_1-p54891 C-genome specific (napus-oleracea) | 0.9904306    | 0.730275     | 1            | 0.7615252    | not scorable | not scorable |
| #### Bn-scaff_18360_1-p10174 C-genome specific (napus-oleracea) | 0.9712918    | 0.7205957    | 1            | 0.3864051    | not scorable | not scorable |
| #### Bn-scaff_18360_1-p11385 napus specific                     | 0.784689     | 0.7423673    | not scorable | not scorable | not scorable | not scorable |
| #### Bn-scaff_18360_1-p12962 genome unspecific (all in)         | 0.9976076    | 0.419514     | 1            | 0.7468503    | 0.9586777    | 0.6822808    |
| #### Bn-scaff_18360_1-p12972 C-genome specific (napus-oleracea) | 0.9952153    | 0.3793008    | 1            | 0.7251219    | not scorable | not scorable |
| #### Bn-scaff_18360_1-p13419 C-genome specific (napus-oleracea) | 0.8899522    | 0.763765     | 0.3255814    | 0.7446334    | not scorable | not scorable |
| #### Bn-scaff_18360_1-p15171 genome unspecific (all in)         | 1            | 0.3907458    | 1            | 0.9200644    | 1            | 0.8823236    |
| #### Bn-scaff_18360_1-p15187 genome unspecific (all in)         | 0.9976076    | 0.5707465    | 0.9767442    | 0.6092284    | 1            | 0.9114701    |
| #### Bn-scaff_18360_1-p16418 C-genome specific (napus-oleracea) | 0.9808612    | 0.7214677    | 0.9922481    | 0.6805801    | not scorable | not scorable |
| #### Bn-scaff_18360_1-p19772 C-genome specific (napus-oleracea) | 0.9928229    | 0.6643068    | 0.9844961    | 0.685981     | not scorable | not scorable |
| #### Bn-scaff_18360_1-p20707 C-genome specific (napus-oleracea) | 0.9904306    | 0.8346245    | 1            | 0.9185835    | not scorable | not scorable |
| #### Bn-scaff_18360_1-p20711 C-genome specific (napus-oleracea) | 0.9928229    | 0.7253634    | 1            | 0.6990549    | not scorable | not scorable |
| #### Bn-scaff_18360_1-p20740 C-genome specific (napus-oleracea) | 0.9880383    | 0.7255381    | 1            | 0.7408963    | not scorable | not scorable |
| #### Bn-scaff_18360_1-p22700 C-genome specific (napus-oleracea) | 0.9904306    | 0.8746858    | 1            | 0.8641562    | not scorable | not scorable |
| #### Bn-scaff_18360_1-p22773 C-genome specific (napus-oleracea) | 0.9904306    | 0.7672529    | 1            | 0.7396324    | not scorable | not scorable |
| #### Bn-scaff_18360_1-p22780 C-genome specific (napus-oleracea) | 0.9904306    | 0.7205415    | 1            | 0.6837185    | not scorable | not scorable |
| #### Bn-scaff_18360_1-p22836 C-genome specific (napus-oleracea) | 0.9856459    | 0.5260053    | 0.9844961    | 0.8070272    | not scorable | not scorable |
| #### Bn-scaff_18360_1-p22972 C-genome specific (napus-oleracea) | 0.9808612    | 0.5323331    | 1            | 0.5002842    | not scorable | not scorable |

|                                                                 |              |              |           |           |              |              |
|-----------------------------------------------------------------|--------------|--------------|-----------|-----------|--------------|--------------|
| #### Bn-scaff_18360_1-p23242 C-genome specific (napus-oleracea) | 0.9928229    | 0.9181998    | 1         | 0.7536304 | not scorable | not scorable |
| #### Bn-scaff_18360_1-p23775 C-genome specific (napus-oleracea) | 0.9928229    | 0.7580043    | 1         | 0.4591119 | not scorable | not scorable |
| #### Bn-scaff_18360_1-p25181 C-genome specific (napus-oleracea) | 0.9832536    | 0.7307469    | 0.9922481 | 0.7670287 | not scorable | not scorable |
| #### Bn-scaff_18360_1-p28870 C-genome specific (napus-oleracea) | 0.9784689    | 0.3391387    | 1         | 0.3066814 | not scorable | not scorable |
| #### Bn-scaff_18360_1-p31167 genome unspecific (all in)         | 0.9904306    | 0.741938     | 0.9922481 | 0.781882  | 1            | 0.8761382    |
| #### Bn-scaff_18360_1-p31172 C-genome specific (napus-oleracea) | 0.9904306    | 0.6963558    | 1         | 0.5313812 | not scorable | not scorable |
| #### Bn-scaff_18360_1-p31184 C-genome specific (napus-oleracea) | 0.9928229    | 0.7458774    | 1         | 0.8031231 | not scorable | not scorable |
| #### Bn-scaff_18360_1-p31334 C-genome specific (napus-oleracea) | 0.9880383    | 0.7145466    | 1         | 0.6962016 | not scorable | not scorable |
| #### Bn-scaff_18360_1-p32537 C-genome specific (napus-oleracea) | 0.9904306    | 0.8809752    | 0.9612403 | 0.7944048 | not scorable | not scorable |
| #### Bn-scaff_18360_1-p32632 C-genome specific (napus-oleracea) | 0.9904306    | 0.7300357    | 0.9922481 | 0.6543937 | not scorable | not scorable |
| #### Bn-scaff_18360_1-p33238 C-genome specific (napus-oleracea) | 0.9928229    | 0.7643178    | 0.9922481 | 0.822216  | not scorable | not scorable |
| #### Bn-scaff_18360_1-p35474 C-genome specific (napus-oleracea) | 0.9904306    | 0.7203396    | 1         | 0.7394976 | not scorable | not scorable |
| #### Bn-scaff_18360_1-p35838 C-genome specific (napus-oleracea) | 0.9832536    | 0.6566874    | 0.9767442 | 0.6977034 | not scorable | not scorable |
| #### Bn-scaff_18360_1-p35847 C-genome specific (napus-oleracea) | 0.9904306    | 0.789974     | 0.9922481 | 0.7264439 | not scorable | not scorable |
| #### Bn-scaff_18360_1-p35855 C-genome specific (napus-oleracea) | 0.9928229    | 0.6611872    | 0.9922481 | 0.6429456 | not scorable | not scorable |
| #### Bn-scaff_18360_1-p35866 C-genome specific (napus-oleracea) | 0.9904306    | 0.6550609    | 1         | 0.7071918 | not scorable | not scorable |
| #### Bn-scaff_18360_1-p35886 C-genome specific (napus-oleracea) | 0.9928229    | 0.7899976    | 1         | 0.7673756 | not scorable | not scorable |
| #### Bn-scaff_18360_1-p35989 C-genome specific (napus-oleracea) | 0.9904306    | 0.7794725    | 0.9922481 | 0.7442602 | not scorable | not scorable |
| #### Bn-scaff_18360_1-p36013 C-genome specific (napus-oleracea) | 0.9904306    | 0.6979907    | 0.9767442 | 0.6909121 | not scorable | not scorable |
| #### Bn-scaff_18360_1-p36021 C-genome specific (napus-oleracea) | 0.9880383    | 0.6997558    | 1         | 0.7275497 | not scorable | not scorable |
| #### Bn-scaff_18360_1-p36034 C-genome specific (napus-oleracea) | 0.9736842    | 0.5578008    | 0.9844961 | 0.7596783 | not scorable | not scorable |
| #### Bn-scaff_18360_1-p36043 genome unspecific (all in)         | 0.9904306    | 0.7753703    | 0.9844961 | 0.7233093 | 0.9090909    | 0.5596045    |
| #### Bn-scaff_18360_1-p36049 C-genome specific (napus-oleracea) | 0.9880383    | 0.8616484    | 0.9922481 | 0.7485839 | not scorable | not scorable |
| #### Bn-scaff_18360_1-p36077 C-genome specific (napus-oleracea) | 0.9904306    | 0.7526425    | 1         | 0.8312183 | not scorable | not scorable |
| #### Bn-scaff_18360_1-p36100 C-genome specific (napus-oleracea) | 0.9928229    | 0.6048401    | 0.9922481 | 0.6115242 | not scorable | not scorable |
| #### Bn-scaff_18360_1-p36411 C-genome specific (napus-oleracea) | 0.9856459    | 0.4504854    | 0.9147287 | 0.4990704 | not scorable | not scorable |
| #### Bn-scaff_18360_1-p36706 C-genome specific (oleracea only)  | not scorable | not scorable | 1         | 0.8083736 | not scorable | not scorable |
| #### Bn-scaff_18360_1-p36794 C-genome specific (napus-oleracea) | 0.9952153    | 0.6251686    | 1         | 0.6589679 | not scorable | not scorable |
| #### Bn-scaff_18360_1-p37017 genome unspecific (all in)         | 0.9880383    | 0.7526332    | 0.9922481 | 0.7371507 | 1            | 0.8462604    |
| #### Bn-scaff_18360_1-p37546 C-genome specific (napus-oleracea) | 0.9928229    | 0.6872071    | 0.9922481 | 0.7036281 | not scorable | not scorable |
| #### Bn-scaff_18360_1-p38207 genome unspecific (all in)         | 0.9497608    | 0.3251172    | 1         | 0.6755459 | 1            | 0.7238737    |
| #### Bn-scaff_18360_1-p38508 C-genome specific (napus-oleracea) | 0.9904306    | 0.629602     | 0.9844961 | 0.6287122 | not scorable | not scorable |
| #### Bn-scaff_18360_1-p39400 C-genome specific (napus-oleracea) | 0.9880383    | 0.6693157    | 0.9922481 | 0.6816733 | not scorable | not scorable |

|                                                                 |              |              |              |              |              |              |
|-----------------------------------------------------------------|--------------|--------------|--------------|--------------|--------------|--------------|
| #### Bn-scaff_18360_1-p39765 C-genome specific (napus-oleracea) | 0.9832536    | 0.7046354    | 1            | 0.7229961    | not scorable | not scorable |
| #### Bn-scaff_18360_1-p40056 C-genome specific (napus-oleracea) | 0.9904306    | 0.735784     | 1            | 0.6681738    | not scorable | not scorable |
| #### Bn-scaff_18360_1-p4195 C-genome specific (napus-oleracea)  | 0.9928229    | 0.732203     | 1            | 0.777049     | not scorable | not scorable |
| #### Bn-scaff_18360_1-p45199 C-genome specific (napus-oleracea) | 0.9856459    | 0.7784342    | 1            | 0.9099785    | not scorable | not scorable |
| #### Bn-scaff_18360_1-p45300 genome unspecific (all in)         | 0.9832536    | 0.7516776    | 1            | 0.8349764    | 0.7603306    | 0.8009781    |
| #### Bn-scaff_18360_1-p45953 genome unspecific (oleracea-rapa)  | not scorable | not scorable | 0.9767442    | 0.3906035    | 0.9834711    | 0.5313225    |
| #### Bn-scaff_18360_1-p46088 genome unspecific (all in)         | 0.9736842    | 0.2302894    | 1            | 0.6287634    | 1            | 0.6129675    |
| #### Bn-scaff_18360_1-p57025 genome unspecific (all in)         | 0.9976076    | 0.6700673    | 0.3875969    | 0.804449     | 0.9917355    | 0.8207867    |
| #### Bn-scaff_18360_1-p63075 C-genome specific (napus-oleracea) | 0.9904306    | 0.5928795    | 1            | 0.6906477    | not scorable | not scorable |
| #### Bn-scaff_18360_1-p72351 A-genome specific (rapa only)      | not scorable | not scorable | not scorable | not scorable | 1            | 0.6905958    |
| #### Bn-scaff_18360_1-p85825 C-genome specific (napus-oleracea) | 0.9904306    | 0.7862313    | 1            | 0.8646256    | not scorable | not scorable |
| #### Bn-scaff_18360_1-p87053 genome unspecific (all in)         | 0.9952153    | 0.5513974    | 1            | 0.8499145    | 1            | 0.9272516    |
| #### Bn-scaff_18360_1-p87376 genome unspecific (all in)         | 0.9880383    | 0.3950395    | 0.9844961    | 0.7291979    | 1            | 0.8943118    |
| #### Bn-scaff_18360_1-p90014 A-genome specific (napus-rapa)     | 0.9952153    | 0.7482249    | not scorable | not scorable | 1            | 0.9144508    |
| #### Bn-scaff_18360_1-p91556 A-genome specific (napus-rapa)     | 0.9736842    | 0.8580923    | not scorable | not scorable | 0.6859504    | 0.7220263    |
| #### Bn-scaff_18360_1-p91594 C-genome specific (napus-oleracea) | 0.9760765    | 0.7041047    | 0.3565891    | 0.8572724    | not scorable | not scorable |
| #### Bn-scaff_18360_1-p95015 genome unspecific (all in)         | 0.8397129    | 0.4448074    | 1            | 0.7431066    | 0.8760331    | 0.7294485    |
| #### Bn-scaff_18362_1-p10690 C-genome specific (napus-oleracea) | 0.9665072    | 0.513983     | 1            | 0.726869     | not scorable | not scorable |
| #### Bn-scaff_18362_1-p28939 C-genome specific (napus-oleracea) | 0.9784689    | 0.4588514    | 0.9767442    | 0.8086175    | not scorable | not scorable |
| #### Bn-scaff_18362_1-p90481 C-genome specific (napus-oleracea) | 0.9856459    | 0.7812825    | 0.9689922    | 0.7935168    | not scorable | not scorable |
| #### Bn-scaff_18371_1-p11540 C-genome specific (napus-oleracea) | 0.9928229    | 0.2739001    | 1            | 0.5850483    | not scorable | not scorable |
| #### Bn-scaff_18371_1-p11555 C-genome specific (napus-oleracea) | 0.9928229    | 0.7376775    | 1            | 0.4154784    | not scorable | not scorable |
| #### Bn-scaff_18371_1-p22707 napus specific                     | 0.9760765    | 0.7932953    | not scorable | not scorable | not scorable | not scorable |
| #### Bn-scaff_18371_1-p30008 C-genome specific (napus-oleracea) | 1            | 0.5780199    | 1            | 0.5158002    | not scorable | not scorable |
| #### Bn-scaff_18371_1-p61285 C-genome specific (oleracea only)  | not scorable | not scorable | 0.9844961    | 0.3865395    | not scorable | not scorable |
| #### Bn-scaff_18371_1-p66587 C-genome specific (napus-oleracea) | 0.8851675    | 0.3604149    | 1            | 0.855564     | not scorable | not scorable |
| #### Bn-scaff_18371_1-p77708 C-genome specific (napus-oleracea) | 0.9976076    | 0.6667088    | 1            | 0.6886268    | not scorable | not scorable |
| #### Bn-scaff_18371_1-p78722 C-genome specific (napus-oleracea) | 1            | 0.572809     | 1            | 0.6154503    | not scorable | not scorable |
| #### Bn-scaff_18371_1-p96235 genome unspecific (all in)         | 0.9976076    | 0.5354707    | 1            | 0.6058444    | 1            | 0.5302483    |
| #### Bn-scaff_18374_1-p23965 C-genome specific (napus-oleracea) | 0.9114832    | 0.7473049    | 0.9612403    | 0.6916008    | not scorable | not scorable |
| #### Bn-scaff_18396_1-p834 C-genome specific (napus-oleracea)   | 0.9736842    | 0.7873083    | 0.9844961    | 0.8034744    | not scorable | not scorable |
| #### Bn-scaff_18401_1-p1222 genome unspecific (all in)          | 1            | 0.6360826    | 1            | 0.6090614    | 1            | 0.8664473    |
| #### Bn-scaff_18406_1-p11703 C-genome specific (napus-oleracea) | 0.9808612    | 0.6582673    | 0.7674419    | 0.7827725    | not scorable | not scorable |



|                                                                 |           |           |           |           |              |              |
|-----------------------------------------------------------------|-----------|-----------|-----------|-----------|--------------|--------------|
| #### Bn-scaff_18406_1-p12755 C-genome specific (napus-oleracea) | 0.9880383 | 0.7332569 | 0.7674419 | 0.8463393 | not scorable | not scorable |
| #### Bn-scaff_18406_1-p15790 C-genome specific (napus-oleracea) | 0.9976076 | 0.4768209 | 0.9922481 | 0.5115329 | not scorable | not scorable |
| #### Bn-scaff_18406_1-p18366 C-genome specific (napus-oleracea) | 0.9832536 | 0.8018368 | 0.875969  | 0.7526554 | not scorable | not scorable |
| #### Bn-scaff_18406_1-p18731 C-genome specific (napus-oleracea) | 0.9808612 | 0.6880643 | 0.9069768 | 0.6993699 | not scorable | not scorable |
| #### Bn-scaff_18406_1-p18772 C-genome specific (napus-oleracea) | 0.9856459 | 0.7317441 | 0.9922481 | 0.7440571 | not scorable | not scorable |
| #### Bn-scaff_18406_1-p19212 C-genome specific (napus-oleracea) | 0.9928229 | 0.7483473 | 1         | 0.8462088 | not scorable | not scorable |
| #### Bn-scaff_18406_1-p19260 genome unspecific (all in)         | 0.9952153 | 0.4314682 | 1         | 0.5941496 | 1            | 0.8824884    |
| #### Bn-scaff_18406_1-p23112 C-genome specific (napus-oleracea) | 0.9880383 | 0.6397326 | 0.9689922 | 0.6820021 | not scorable | not scorable |
| #### Bn-scaff_18406_1-p23671 C-genome specific (napus-oleracea) | 0.9856459 | 0.7631629 | 0.9224806 | 0.7617144 | not scorable | not scorable |
| #### Bn-scaff_18406_1-p25658 C-genome specific (napus-oleracea) | 0.9904306 | 0.634256  | 0.9922481 | 0.7203152 | not scorable | not scorable |
| #### Bn-scaff_18406_1-p25874 C-genome specific (napus-oleracea) | 0.9856459 | 0.7840694 | 0.9069768 | 0.745304  | not scorable | not scorable |
| #### Bn-scaff_18406_1-p26602 C-genome specific (napus-oleracea) | 0.9904306 | 0.7616116 | 0.9379845 | 0.6865823 | not scorable | not scorable |
| #### Bn-scaff_18406_1-p26635 C-genome specific (napus-oleracea) | 0.9904306 | 0.7881757 | 0.9457364 | 0.8216126 | not scorable | not scorable |
| #### Bn-scaff_18406_1-p27225 C-genome specific (napus-oleracea) | 0.9976076 | 0.2751451 | 0.9922481 | 0.3403055 | not scorable | not scorable |
| #### Bn-scaff_18406_1-p32052 C-genome specific (napus-oleracea) | 0.9880383 | 0.7536979 | 0.7906977 | 0.8568868 | not scorable | not scorable |
| #### Bn-scaff_18406_1-p32067 C-genome specific (napus-oleracea) | 0.9832536 | 0.7638175 | 0.7674419 | 0.92855   | not scorable | not scorable |
| #### Bn-scaff_18406_1-p32311 genome unspecific (all in)         | 0.8851675 | 0.7280434 | 0.7906977 | 0.8442134 | 1            | 0.8967744    |
| #### Bn-scaff_18406_1-p32364 C-genome specific (napus-oleracea) | 0.9808612 | 0.7641307 | 0.7906977 | 0.8987185 | not scorable | not scorable |
| #### Bn-scaff_18406_1-p32405 C-genome specific (napus-oleracea) | 0.9736842 | 0.8543127 | 0.5968992 | 0.8785674 | not scorable | not scorable |
| #### Bn-scaff_18406_1-p32505 C-genome specific (napus-oleracea) | 0.9736842 | 0.737043  | 0.5891473 | 0.8943996 | not scorable | not scorable |
| #### Bn-scaff_18406_1-p32518 C-genome specific (napus-oleracea) | 0.9832536 | 0.7499572 | 0.7906977 | 0.7967812 | not scorable | not scorable |
| #### Bn-scaff_18406_1-p32564 C-genome specific (napus-oleracea) | 0.9832536 | 0.7497312 | 0.7906977 | 0.9061456 | not scorable | not scorable |
| #### Bn-scaff_18406_1-p32844 C-genome specific (napus-oleracea) | 0.9832536 | 0.7087539 | 0.7906977 | 0.8412997 | not scorable | not scorable |
| #### Bn-scaff_18406_1-p32883 C-genome specific (napus-oleracea) | 0.9784689 | 0.8329195 | 0.7906977 | 0.7764386 | not scorable | not scorable |
| #### Bn-scaff_18406_1-p32906 C-genome specific (napus-oleracea) | 0.9808612 | 0.7462252 | 0.7906977 | 0.77652   | not scorable | not scorable |
| #### Bn-scaff_18406_1-p32920 C-genome specific (napus-oleracea) | 0.9808612 | 0.6871123 | 0.7906977 | 0.7738369 | not scorable | not scorable |
| #### Bn-scaff_18406_1-p32939 C-genome specific (napus-oleracea) | 0.9832536 | 0.7556196 | 0.7906977 | 0.804206  | not scorable | not scorable |
| #### Bn-scaff_18406_1-p32957 C-genome specific (napus-oleracea) | 0.9808612 | 0.7413456 | 0.7906977 | 0.8027052 | not scorable | not scorable |
| #### Bn-scaff_18406_1-p32973 C-genome specific (napus-oleracea) | 0.9832536 | 0.6936092 | 0.7906977 | 0.786476  | not scorable | not scorable |
| #### Bn-scaff_18406_1-p33045 C-genome specific (napus-oleracea) | 0.9808612 | 0.6384345 | 0.7906977 | 0.7513949 | not scorable | not scorable |
| #### Bn-scaff_18406_1-p33119 C-genome specific (napus-oleracea) | 0.9784689 | 0.7887149 | 0.7906977 | 0.8433191 | not scorable | not scorable |
| #### Bn-scaff_18406_1-p33128 C-genome specific (napus-oleracea) | 0.9808612 | 0.664087  | 0.7751938 | 0.7497477 | not scorable | not scorable |
| #### Bn-scaff_18406_1-p35016 C-genome specific (napus-oleracea) | 0.9808612 | 0.7777449 | 0.6821706 | 0.7018324 | not scorable | not scorable |

|                                                                  |           |           |           |           |              |              |
|------------------------------------------------------------------|-----------|-----------|-----------|-----------|--------------|--------------|
| ##### Bn-scaff_18406_1-p35633 C-genome specific (napus-oleracea) | 0.9928229 | 0.5624489 | 0.9767442 | 0.5701592 | not scorable | not scorable |
| ##### Bn-scaff_18406_1-p35922 C-genome specific (napus-oleracea) | 0.9856459 | 0.890166  | 0.8527132 | 0.7693698 | not scorable | not scorable |
| ##### Bn-scaff_18406_1-p35939 C-genome specific (napus-oleracea) | 0.9808612 | 0.8936363 | 0.8527132 | 0.781515  | not scorable | not scorable |
| ##### Bn-scaff_18406_1-p35979 C-genome specific (napus-oleracea) | 0.9856459 | 0.7671427 | 0.8449612 | 0.7331172 | not scorable | not scorable |
| ##### Bn-scaff_18406_1-p36785 C-genome specific (napus-oleracea) | 0.9736842 | 0.7743942 | 0.5968992 | 0.8382391 | not scorable | not scorable |
| ##### Bn-scaff_18406_1-p36822 C-genome specific (napus-oleracea) | 0.9712918 | 0.8257587 | 0.5968992 | 0.9074001 | not scorable | not scorable |
| ##### Bn-scaff_18406_1-p36995 C-genome specific (napus-oleracea) | 0.9760765 | 0.7420481 | 0.5968992 | 0.7818624 | not scorable | not scorable |
| ##### Bn-scaff_18406_1-p37043 C-genome specific (napus-oleracea) | 0.9712918 | 0.7474738 | 0.5968992 | 0.8917583 | not scorable | not scorable |
| ##### Bn-scaff_18406_1-p37101 C-genome specific (napus-oleracea) | 0.9712918 | 0.8085044 | 0.5968992 | 0.8864124 | not scorable | not scorable |
| ##### Bn-scaff_18406_1-p37110 C-genome specific (napus-oleracea) | 0.9712918 | 0.7310205 | 0.5968992 | 0.7500437 | not scorable | not scorable |
| ##### Bn-scaff_18406_1-p37118 C-genome specific (napus-oleracea) | 0.9688995 | 0.7402548 | 0.5968992 | 0.8032638 | not scorable | not scorable |
| ##### Bn-scaff_18406_1-p37129 C-genome specific (napus-oleracea) | 0.9712918 | 0.7466761 | 0.5968992 | 0.7679271 | not scorable | not scorable |
| ##### Bn-scaff_18406_1-p37144 C-genome specific (napus-oleracea) | 0.9760765 | 0.6576604 | 0.5891473 | 0.7251989 | not scorable | not scorable |
| ##### Bn-scaff_18406_1-p37165 C-genome specific (napus-oleracea) | 0.9712918 | 0.5650458 | 0.5968992 | 0.6415901 | not scorable | not scorable |
| ##### Bn-scaff_18406_1-p37223 C-genome specific (napus-oleracea) | 0.9808612 | 0.793702  | 0.8914729 | 0.7972952 | not scorable | not scorable |
| ##### Bn-scaff_18406_1-p39053 C-genome specific (napus-oleracea) | 0.9760765 | 0.8113367 | 0.7906977 | 0.9148835 | not scorable | not scorable |
| ##### Bn-scaff_18406_1-p39429 C-genome specific (napus-oleracea) | 0.9832536 | 0.7515206 | 0.7751938 | 0.7605632 | not scorable | not scorable |
| ##### Bn-scaff_18406_1-p40014 C-genome specific (napus-oleracea) | 0.9880383 | 0.9210451 | 1         | 0.774719  | not scorable | not scorable |
| ##### Bn-scaff_18406_1-p40054 C-genome specific (napus-oleracea) | 0.9880383 | 0.7091818 | 1         | 0.7405888 | not scorable | not scorable |
| ##### Bn-scaff_18406_1-p41179 C-genome specific (napus-oleracea) | 0.9856459 | 0.9175478 | 1         | 0.8121795 | not scorable | not scorable |
| ##### Bn-scaff_18406_1-p44542 C-genome specific (napus-oleracea) | 0.9880383 | 0.7503882 | 0.9922481 | 0.7232497 | not scorable | not scorable |
| ##### Bn-scaff_18406_1-p44613 C-genome specific (napus-oleracea) | 0.9904306 | 0.7248978 | 0.9922481 | 0.6408218 | not scorable | not scorable |
| ##### Bn-scaff_18406_1-p45163 C-genome specific (napus-oleracea) | 0.9928229 | 0.6695371 | 0.9767442 | 0.6843115 | not scorable | not scorable |
| ##### Bn-scaff_18406_1-p45222 C-genome specific (napus-oleracea) | 0.9904306 | 0.8101383 | 1         | 0.7635213 | not scorable | not scorable |
| ##### Bn-scaff_18406_1-p45228 C-genome specific (napus-oleracea) | 0.9952153 | 0.5804561 | 1         | 0.6634616 | not scorable | not scorable |
| ##### Bn-scaff_18406_1-p45320 C-genome specific (napus-oleracea) | 0.9904306 | 0.8891038 | 1         | 0.7882147 | not scorable | not scorable |
| ##### Bn-scaff_18406_1-p46453 C-genome specific (napus-oleracea) | 0.9832536 | 0.8346304 | 0.8837209 | 0.7135343 | not scorable | not scorable |
| ##### Bn-scaff_18406_1-p46588 C-genome specific (napus-oleracea) | 0.9952153 | 0.6865802 | 1         | 0.6934996 | not scorable | not scorable |
| ##### Bn-scaff_18406_1-p46745 C-genome specific (napus-oleracea) | 0.9928229 | 0.7090229 | 0.9457364 | 0.7161378 | not scorable | not scorable |
| ##### Bn-scaff_18406_1-p54428 genome unspecific (all in)         | 0.9976076 | 0.4796678 | 0.9922481 | 0.8145137 | 1            | 0.9302754    |
| ##### Bn-scaff_18406_1-p56260 C-genome specific (napus-oleracea) | 0.9928229 | 0.6706471 | 1         | 0.6611735 | not scorable | not scorable |
| ##### Bn-scaff_18406_1-p58077 C-genome specific (napus-oleracea) | 0.9712918 | 0.7876328 | 0.5736434 | 0.8593102 | not scorable | not scorable |
| ##### Bn-scaff_18406_1-p59191 C-genome specific (napus-oleracea) | 0.9880383 | 0.7981488 | 0.9844961 | 0.7927088 | not scorable | not scorable |

|                                                                 |              |              |           |           |              |              |
|-----------------------------------------------------------------|--------------|--------------|-----------|-----------|--------------|--------------|
| #### Bn-scaff_18406_1-p6082 genome unspecific (oleracea-rapa)   | not scorable | not scorable | 0.9922481 | 0.5856362 | 1            | 0.8923709    |
| #### Bn-scaff_18406_1-p6109 C-genome specific (napus-oleracea)  | 0.9617225    | 0.5637619    | 0.9379845 | 0.7414871 | not scorable | not scorable |
| #### Bn-scaff_18406_1-p63911 C-genome specific (napus-oleracea) | 0.9784689    | 0.7136098    | 0.8914729 | 0.8095235 | not scorable | not scorable |
| #### Bn-scaff_18406_1-p6748 C-genome specific (oleracea only)   | not scorable | not scorable | 0.9612403 | 0.7070822 | not scorable | not scorable |
| #### Bn-scaff_18406_1-p6749 C-genome specific (oleracea only)   | not scorable | not scorable | 0.9844961 | 0.7206408 | not scorable | not scorable |
| #### Bn-scaff_18406_1-p67572 C-genome specific (oleracea only)  | not scorable | not scorable | 1         | 0.7990947 | not scorable | not scorable |
| #### Bn-scaff_18406_1-p68874 C-genome specific (napus-oleracea) | 0.9712918    | 0.8705486    | 0.5968992 | 0.8439842 | not scorable | not scorable |
| #### Bn-scaff_18406_1-p6990 C-genome specific (napus-oleracea)  | 0.9880383    | 0.7423738    | 0.9457364 | 0.7348929 | not scorable | not scorable |
| #### Bn-scaff_18406_1-p70631 C-genome specific (napus-oleracea) | 0.9928229    | 0.7355981    | 0.8604651 | 0.7843562 | not scorable | not scorable |
| #### Bn-scaff_18406_1-p72301 C-genome specific (napus-oleracea) | 0.9880383    | 0.793806     | 0.9224806 | 0.8646487 | not scorable | not scorable |
| #### Bn-scaff_18406_1-p7248 C-genome specific (napus-oleracea)  | 0.9856459    | 0.7068396    | 0.9069768 | 0.6817818 | not scorable | not scorable |
| #### Bn-scaff_18406_1-p74007 C-genome specific (napus-oleracea) | 0.9880383    | 0.764293     | 0.9379845 | 0.83837   | not scorable | not scorable |
| #### Bn-scaff_18406_1-p9731 C-genome specific (napus-oleracea)  | 0.9880383    | 0.7085828    | 0.7674419 | 0.6958557 | not scorable | not scorable |
| #### Bn-scaff_18406_1-p9791 C-genome specific (napus-oleracea)  | 0.9856459    | 0.7126217    | 0.7751938 | 0.8242567 | not scorable | not scorable |
| #### Bn-scaff_18412_1-p2578 genome unspecific (oleracea-rapa)   | not scorable | not scorable | 1         | 0.9406106 | 1            | 0.9272014    |
| #### Bn-scaff_18412_1-p2801 genome unspecific (oleracea-rapa)   | not scorable | not scorable | 0.7054263 | 0.7766307 | 0.9752066    | 0.6571326    |
| #### Bn-scaff_18412_1-p2836 genome unspecific (all in)          | 1            | 0.8142555    | 1         | 0.7345867 | 1            | 0.8815182    |
| #### Bn-scaff_18412_1-p28374 C-genome specific (napus-oleracea) | 0.9808612    | 0.3307764    | 1         | 0.7509941 | not scorable | not scorable |
| #### Bn-scaff_18412_1-p2977 C-genome specific (napus-oleracea)  | 0.9497608    | 0.2061554    | 1         | 0.5652714 | not scorable | not scorable |
| #### Bn-scaff_18412_1-p38571 C-genome specific (napus-oleracea) | 1            | 0.8004208    | 1         | 0.7046775 | not scorable | not scorable |
| #### Bn-scaff_18412_1-p3874 genome unspecific (all in)          | 1            | 0.4453022    | 1         | 0.6734324 | 1            | 0.7641606    |
| #### Bn-scaff_18412_1-p3876 genome unspecific (oleracea-rapa)   | not scorable | not scorable | 1         | 0.7369736 | 0.9917355    | 0.7646763    |
| #### Bn-scaff_18424_1-p4111 genome unspecific (all in)          | 0.9880383    | 0.2884813    | 1         | 0.725233  | 1            | 0.7798315    |
| #### Bn-scaff_18424_1-p50971 C-genome specific (napus-oleracea) | 0.9186603    | 0.759236     | 1         | 0.9203336 | not scorable | not scorable |
| #### Bn-scaff_18424_1-p5345 C-genome specific (napus-oleracea)  | 0.923445     | 0.7669602    | 0.9767442 | 0.7212504 | not scorable | not scorable |
| #### Bn-scaff_18424_1-p5878 C-genome specific (napus-oleracea)  | 0.9138756    | 0.8367523    | 0.9922481 | 0.6637324 | not scorable | not scorable |
| #### Bn-scaff_18424_1-p6726 genome unspecific (oleracea-rapa)   | not scorable | not scorable | 0.9922481 | 0.6579863 | 0.9917355    | 0.6962211    |
| #### Bn-scaff_18424_1-p8484 genome unspecific (all in)          | 1            | 0.681638     | 1         | 0.690158  | 1            | 0.7376376    |
| #### Bn-scaff_18424_1-p8788 C-genome specific (napus-oleracea)  | 0.9210526    | 0.8211884    | 1         | 0.7832066 | not scorable | not scorable |
| #### Bn-scaff_18424_1-p8854 C-genome specific (napus-oleracea)  | 0.9952153    | 0.6594648    | 0.9922481 | 0.8549323 | not scorable | not scorable |
| #### Bn-scaff_18424_1-p8877 genome unspecific (all in)          | 1            | 0.5954536    | 1         | 0.5417086 | 0.9752066    | 0.6948751    |
| #### Bn-scaff_18424_1-p9021 genome unspecific (oleracea-rapa)   | not scorable | not scorable | 0.9767442 | 0.3303766 | 1            | 0.7739488    |
| #### Bn-scaff_18426_1-p1809 C-genome specific (napus-oleracea)  | 0.9688995    | 0.2878197    | 1         | 0.6870725 | not scorable | not scorable |

|                                                                 |           |           |              |              |              |              |
|-----------------------------------------------------------------|-----------|-----------|--------------|--------------|--------------|--------------|
| #### Bn-scaff_18439_1-p10134 C-genome specific (napus-oleracea) | 0.9904306 | 0.754442  | 1            | 0.8206836    | not scorable | not scorable |
| #### Bn-scaff_18439_1-p10144 C-genome specific (napus-oleracea) | 0.9784689 | 0.777288  | 0.9844961    | 0.7816063    | not scorable | not scorable |
| #### Bn-scaff_18439_1-p10623 genome unspecific (all in)         | 1         | 0.3461304 | 1            | 0.8537671    | 0.9834711    | 0.725308     |
| #### Bn-scaff_18439_1-p10624 genome unspecific (all in)         | 0.9952153 | 0.3339771 | 1            | 0.6476358    | 0.9917355    | 0.7783843    |
| #### Bn-scaff_18439_1-p10638 genome unspecific (all in)         | 1         | 0.3637202 | 1            | 0.8269677    | 1            | 0.7183215    |
| #### Bn-scaff_18439_1-p11209 genome unspecific (all in)         | 0.9808612 | 0.5147151 | 1            | 0.8791298    | 1            | 0.9242041    |
| #### Bn-scaff_18439_1-p12413 genome unspecific (all in)         | 1         | 0.5830583 | 1            | 0.5519121    | 1            | 0.603048     |
| #### Bn-scaff_18439_1-p12721 genome unspecific (all in)         | 0.9952153 | 0.4679434 | 1            | 0.8608136    | 1            | 0.8793069    |
| #### Bn-scaff_18439_1-p17298 genome unspecific (all in)         | 1         | 0.5643374 | 1            | 0.5714095    | 1            | 0.8695636    |
| #### Bn-scaff_18439_1-p20355 C-genome specific (napus-oleracea) | 0.9928229 | 0.7951115 | 1            | 0.932852     | not scorable | not scorable |
| #### Bn-scaff_18439_1-p20845 C-genome specific (napus-oleracea) | 0.8444976 | 0.7876627 | 0.9767442    | 0.9183146    | not scorable | not scorable |
| #### Bn-scaff_18439_1-p20854 C-genome specific (napus-oleracea) | 0.9952153 | 0.7775205 | 1            | 0.8337471    | not scorable | not scorable |
| #### Bn-scaff_18439_1-p21982 C-genome specific (napus-oleracea) | 0.9808612 | 0.7951742 | 1            | 0.7887608    | not scorable | not scorable |
| #### Bn-scaff_18439_1-p23794 C-genome specific (napus-oleracea) | 0.9952153 | 0.8102477 | 1            | 0.7758068    | not scorable | not scorable |
| #### Bn-scaff_18439_1-p23896 C-genome specific (napus-oleracea) | 0.9904306 | 0.8166397 | 1            | 0.8473469    | not scorable | not scorable |
| #### Bn-scaff_18439_1-p26205 napus specific                     | 0.9784689 | 0.7854803 | not scorable | not scorable | not scorable | not scorable |
| #### Bn-scaff_18439_1-p26808 C-genome specific (napus-oleracea) | 0.9928229 | 0.799592  | 0.9612403    | 0.8136021    | not scorable | not scorable |
| #### Bn-scaff_18439_1-p27724 C-genome specific (napus-oleracea) | 0.9760765 | 0.6693379 | 0.9844961    | 0.6969489    | not scorable | not scorable |
| #### Bn-scaff_18439_1-p27793 C-genome specific (napus-oleracea) | 0.9880383 | 0.7888992 | 0.9844961    | 0.8456071    | not scorable | not scorable |
| #### Bn-scaff_18439_1-p29975 C-genome specific (napus-oleracea) | 0.9784689 | 0.7662434 | 0.9534883    | 0.6988441    | not scorable | not scorable |
| #### Bn-scaff_18439_1-p30422 C-genome specific (napus-oleracea) | 0.937799  | 0.7601471 | 0.751938     | 0.9037468    | not scorable | not scorable |
| #### Bn-scaff_18439_1-p31218 C-genome specific (napus-oleracea) | 0.9784689 | 0.6966454 | 0.9767442    | 0.7684956    | not scorable | not scorable |
| #### Bn-scaff_18439_1-p31226 C-genome specific (napus-oleracea) | 0.9641148 | 0.665429  | 0.9767442    | 0.8039392    | not scorable | not scorable |
| #### Bn-scaff_18439_1-p31318 C-genome specific (napus-oleracea) | 0.9665072 | 0.7281514 | 0.9922481    | 0.7671731    | not scorable | not scorable |
| #### Bn-scaff_18439_1-p31402 C-genome specific (napus-oleracea) | 0.9784689 | 0.8019571 | 0.9767442    | 0.7682714    | not scorable | not scorable |
| #### Bn-scaff_18439_1-p31458 C-genome specific (napus-oleracea) | 0.9928229 | 0.7905645 | 0.9844961    | 0.8290661    | not scorable | not scorable |
| #### Bn-scaff_18439_1-p31554 C-genome specific (napus-oleracea) | 0.9856459 | 0.7968823 | 1            | 0.8177421    | not scorable | not scorable |
| #### Bn-scaff_18439_1-p31562 C-genome specific (napus-oleracea) | 0.9904306 | 0.80165   | 0.9844961    | 0.7949843    | not scorable | not scorable |
| #### Bn-scaff_18439_1-p31566 C-genome specific (napus-oleracea) | 0.9880383 | 0.7781605 | 0.9922481    | 0.709143     | not scorable | not scorable |
| #### Bn-scaff_18439_1-p31586 C-genome specific (napus-oleracea) | 0.9712918 | 0.7539938 | 0.9844961    | 0.8247626    | not scorable | not scorable |
| #### Bn-scaff_18439_1-p31601 C-genome specific (napus-oleracea) | 0.9880383 | 0.7568279 | 0.9844961    | 0.7744676    | not scorable | not scorable |
| #### Bn-scaff_18439_1-p31711 C-genome specific (napus-oleracea) | 0.9856459 | 0.794054  | 0.9922481    | 0.789075     | not scorable | not scorable |
| #### Bn-scaff_18439_1-p32920 C-genome specific (napus-oleracea) | 0.9880383 | 0.5610161 | 0.9922481    | 0.7435375    | not scorable | not scorable |

|                                                                 |              |              |           |           |              |              |
|-----------------------------------------------------------------|--------------|--------------|-----------|-----------|--------------|--------------|
| #### Bn-scaff_18439_1-p33084 C-genome specific (napus-oleracea) | 0.9688995    | 0.8026763    | 0.9922481 | 0.8158818 | not scorable | not scorable |
| #### Bn-scaff_18439_1-p37673 C-genome specific (napus-oleracea) | 0.9976076    | 0.7076661    | 1         | 0.7151299 | not scorable | not scorable |
| #### Bn-scaff_18439_1-p38246 C-genome specific (napus-oleracea) | 0.9784689    | 0.7948737    | 0.9534883 | 0.7890549 | not scorable | not scorable |
| #### Bn-scaff_18439_1-p42085 C-genome specific (napus-oleracea) | 1            | 0.7780878    | 0.9922481 | 0.7248978 | not scorable | not scorable |
| #### Bn-scaff_18439_1-p49815 genome unspecific (all in)         | 0.9712918    | 0.3059145    | 1         | 0.7614885 | 1            | 0.750863     |
| #### Bn-scaff_18439_1-p51165 C-genome specific (napus-oleracea) | 0.9856459    | 0.7960632    | 0.9689922 | 0.8821169 | not scorable | not scorable |
| #### Bn-scaff_18439_1-p51515 genome unspecific (oleracea-rapa)  | not scorable | not scorable | 0.9767442 | 0.3218232 | 0.9917355    | 0.8762076    |
| #### Bn-scaff_18439_1-p52033 C-genome specific (napus-oleracea) | 0.9880383    | 0.7733029    | 0.9689922 | 0.837552  | not scorable | not scorable |
| #### Bn-scaff_18439_1-p55591 C-genome specific (napus-oleracea) | 0.9832536    | 0.7812788    | 0.9612403 | 0.7742381 | not scorable | not scorable |
| #### Bn-scaff_18439_1-p57495 C-genome specific (napus-oleracea) | 0.9952153    | 0.7106691    | 0.9767442 | 0.7289358 | not scorable | not scorable |
| #### Bn-scaff_18439_1-p59071 C-genome specific (napus-oleracea) | 0.9976076    | 0.721473     | 0.9922481 | 0.7117163 | not scorable | not scorable |
| #### Bn-scaff_18439_1-p62742 C-genome specific (napus-oleracea) | 1            | 0.6047101    | 0.9767442 | 0.7128176 | not scorable | not scorable |
| #### Bn-scaff_18439_1-p62807 C-genome specific (napus-oleracea) | 0.9976076    | 0.7290313    | 0.9844961 | 0.6622108 | not scorable | not scorable |
| #### Bn-scaff_18439_1-p62838 C-genome specific (napus-oleracea) | 1            | 0.5936815    | 1         | 0.645348  | not scorable | not scorable |
| #### Bn-scaff_18439_1-p62873 C-genome specific (napus-oleracea) | 0.9976076    | 0.6841851    | 0.9844961 | 0.6511568 | not scorable | not scorable |
| #### Bn-scaff_18439_1-p63185 C-genome specific (napus-oleracea) | 1            | 0.5865753    | 0.9534883 | 0.6087115 | not scorable | not scorable |
| #### Bn-scaff_18439_1-p63274 C-genome specific (napus-oleracea) | 0.9952153    | 0.714362     | 0.9922481 | 0.7475849 | not scorable | not scorable |
| #### Bn-scaff_18439_1-p63344 C-genome specific (napus-oleracea) | 1            | 0.743336     | 1         | 0.6834044 | not scorable | not scorable |
| #### Bn-scaff_18439_1-p63350 C-genome specific (napus-oleracea) | 1            | 0.7914699    | 1         | 0.8060488 | not scorable | not scorable |
| #### Bn-scaff_18439_1-p63397 C-genome specific (napus-oleracea) | 1            | 0.774188     | 0.9922481 | 0.7895214 | not scorable | not scorable |
| #### Bn-scaff_18439_1-p63965 C-genome specific (napus-oleracea) | 1            | 0.7722744    | 1         | 0.8304442 | not scorable | not scorable |
| #### Bn-scaff_18439_1-p64375 C-genome specific (napus-oleracea) | 1            | 0.7321706    | 1         | 0.6975267 | not scorable | not scorable |
| #### Bn-scaff_18439_1-p64725 C-genome specific (oleracea only)  | not scorable | not scorable | 0.8062016 | 0.6794582 | not scorable | not scorable |
| #### Bn-scaff_18439_1-p64757 C-genome specific (napus-oleracea) | 0.9976076    | 0.7705795    | 0.9844961 | 0.8260461 | not scorable | not scorable |
| #### Bn-scaff_18439_1-p65872 C-genome specific (napus-oleracea) | 1            | 0.7857567    | 1         | 0.7166358 | not scorable | not scorable |
| #### Bn-scaff_18439_1-p65907 genome unspecific (all in)         | 0.9569378    | 0.3476555    | 0.9922481 | 0.8297517 | 1            | 0.8910396    |
| #### Bn-scaff_18439_1-p65912 C-genome specific (napus-oleracea) | 0.9832536    | 0.7811959    | 0.9844961 | 0.7895789 | not scorable | not scorable |
| #### Bn-scaff_18439_1-p67530 genome unspecific (all in)         | 0.9760765    | 0.5755018    | 0.9844961 | 0.7331789 | 1            | 0.9175813    |
| #### Bn-scaff_18439_1-p70656 C-genome specific (napus-oleracea) | 0.5550239    | 0.7951677    | 0.744186  | 0.764202  | not scorable | not scorable |
| #### Bn-scaff_18439_1-p71985 genome unspecific (oleracea-rapa)  | not scorable | not scorable | 0.9689922 | 0.3719567 | 0.9173554    | 0.8580837    |
| #### Bn-scaff_18439_1-p72125 C-genome specific (napus-oleracea) | 0.9545454    | 0.233359     | 0.9767442 | 0.2162727 | not scorable | not scorable |
| #### Bn-scaff_18439_1-p78617 C-genome specific (napus-oleracea) | 1            | 0.7371591    | 0.9457364 | 0.8948323 | not scorable | not scorable |
| #### Bn-scaff_18439_1-p79427 C-genome specific (napus-oleracea) | 0.9784689    | 0.3161248    | 1         | 0.7360975 | not scorable | not scorable |

|                                                                 |              |              |              |              |              |              |
|-----------------------------------------------------------------|--------------|--------------|--------------|--------------|--------------|--------------|
| #### Bn-scaff_18439_1-p79804 genome unspecific (all in)         | 0.9688995    | 0.2295225    | 1            | 0.7139587    | 1            | 0.8004208    |
| #### Bn-scaff_18439_1-p79875 genome unspecific (all in)         | 0.9641148    | 0.4471284    | 0.9767442    | 0.8536763    | 1            | 0.8937365    |
| #### Bn-scaff_18439_1-p79905 genome unspecific (all in)         | 1            | 0.8530089    | 1            | 0.8879292    | 1            | 0.8945668    |
| #### Bn-scaff_18439_1-p81756 C-genome specific (napus-oleracea) | 0.9952153    | 0.7899557    | 0.9922481    | 0.7567778    | not scorable | not scorable |
| #### Bn-scaff_18439_1-p85732 C-genome specific (napus-oleracea) | 0.9952153    | 0.7960383    | 1            | 0.8154598    | not scorable | not scorable |
| #### Bn-scaff_18439_1-p95222 C-genome specific (napus-oleracea) | 0.9952153    | 0.7663476    | 0.9922481    | 0.8021083    | not scorable | not scorable |
| #### Bn-scaff_18439_1-p95329 C-genome specific (napus-oleracea) | 1            | 0.7897298    | 0.9922481    | 0.7482285    | not scorable | not scorable |
| #### Bn-scaff_18439_1-p95360 C-genome specific (napus-oleracea) | 0.9832536    | 0.7396983    | 0.9922481    | 0.849865     | not scorable | not scorable |
| #### Bn-scaff_18439_1-p95441 C-genome specific (napus-oleracea) | 0.9976076    | 0.7669901    | 1            | 0.7540507    | not scorable | not scorable |
| #### Bn-scaff_18439_1-p95478 C-genome specific (napus-oleracea) | 0.9832536    | 0.7621226    | 0.9767442    | 0.7953719    | not scorable | not scorable |
| #### Bn-scaff_18439_1-p95564 C-genome specific (napus-oleracea) | 0.9856459    | 0.7708716    | 0.9689922    | 0.8119859    | not scorable | not scorable |
| #### Bn-scaff_18439_1-p96183 C-genome specific (napus-oleracea) | 0.9952153    | 0.3123825    | 0.9922481    | 0.5115278    | not scorable | not scorable |
| #### Bn-scaff_18439_1-p96218 C-genome specific (napus-oleracea) | 0.9545454    | 0.2794134    | 0.8682171    | 0.3030173    | not scorable | not scorable |
| #### Bn-scaff_18439_1-p96243 A-genome specific (rapa only)      | not scorable | not scorable | not scorable | not scorable | 0.9917355    | 0.8258262    |
| #### Bn-scaff_18439_1-p96245 genome unspecific (oleracea-rapa)  | not scorable | not scorable | 0.620155     | 0.3690172    | 0.9917355    | 0.8802583    |
| #### Bn-scaff_18439_1-p96359 C-genome specific (napus-oleracea) | 0.9856459    | 0.7730136    | 1            | 0.8429542    | not scorable | not scorable |
| #### Bn-scaff_18439_1-p97423 C-genome specific (napus-oleracea) | 0.9784689    | 0.7499822    | 0.9922481    | 0.7167248    | not scorable | not scorable |
| #### Bn-scaff_18439_1-p97890 C-genome specific (napus-oleracea) | 0.9784689    | 0.7607502    | 0.9922481    | 0.7802536    | not scorable | not scorable |
| #### Bn-scaff_18439_1-p98328 C-genome specific (napus-oleracea) | 0.9784689    | 0.8112293    | 0.9844961    | 0.8126996    | not scorable | not scorable |
| #### Bn-scaff_18439_1-p98356 C-genome specific (napus-oleracea) | 0.9808612    | 0.7637599    | 0.9844961    | 0.8216213    | not scorable | not scorable |
| #### Bn-scaff_18439_1-p98733 C-genome specific (napus-oleracea) | 0.9760765    | 0.8153089    | 0.9612403    | 0.7966768    | not scorable | not scorable |
| #### Bn-scaff_18439_1-p99729 C-genome specific (napus-oleracea) | 0.9712918    | 0.6646489    | 0.9534883    | 0.8427088    | not scorable | not scorable |
| #### Bn-scaff_18439_1-p99829 C-genome specific (napus-oleracea) | 0.9880383    | 0.807823     | 0.9922481    | 0.810429     | not scorable | not scorable |
| #### Bn-scaff_18439_1-p99888 C-genome specific (napus-oleracea) | 0.9832536    | 0.8098193    | 0.9922481    | 0.8067607    | not scorable | not scorable |
| #### Bn-scaff_18439_1-p99905 C-genome specific (napus-oleracea) | 0.9856459    | 0.7873483    | 0.9922481    | 0.8057826    | not scorable | not scorable |
| #### Bn-scaff_18440_1-p13233 A-genome specific (napus-rapa)     | 1            | 0.7796065    | not scorable | not scorable | 0.9917355    | 0.7812572    |
| #### Bn-scaff_18440_1-p13613 C-genome specific (napus-oleracea) | 0.9641148    | 0.8180231    | 0.9457364    | 0.7275035    | not scorable | not scorable |
| #### Bn-scaff_18440_1-p77767 C-genome specific (napus-oleracea) | 0.9952153    | 0.7553074    | 1            | 0.8191119    | not scorable | not scorable |
| #### Bn-scaff_18461_1-p25071 C-genome specific (napus-oleracea) | 0.9904306    | 0.6683936    | 0.9922481    | 0.8194789    | not scorable | not scorable |
| #### Bn-scaff_18461_1-p27389 genome unspecific (all in)         | 1            | 0.6148382    | 1            | 0.5329129    | 1            | 0.6605194    |
| #### Bn-scaff_18461_1-p27458 genome unspecific (all in)         | 1            | 0.6461406    | 1            | 0.6564732    | 1            | 0.7227655    |
| #### Bn-scaff_18464_1-p1985 C-genome specific (napus-oleracea)  | 1            | 0.7886234    | 1            | 0.8205456    | not scorable | not scorable |
| #### Bn-scaff_18464_1-p2370 C-genome specific (napus-oleracea)  | 0.9976076    | 0.6762964    | 0.9922481    | 0.8066313    | not scorable | not scorable |

|                                                                 |              |              |              |              |              |              |
|-----------------------------------------------------------------|--------------|--------------|--------------|--------------|--------------|--------------|
| #### Bn-scaff_18464_1-p2513 C-genome specific (napus-oleracea)  | 1            | 0.8176963    | 1            | 0.7016803    | not scorable | not scorable |
| #### Bn-scaff_18464_1-p2880 C-genome specific (napus-oleracea)  | 1            | 0.7752204    | 1            | 0.8246793    | not scorable | not scorable |
| #### Bn-scaff_18464_1-p3239 C-genome specific (napus-oleracea)  | 1            | 0.8115861    | 0.9922481    | 0.861376     | not scorable | not scorable |
| #### Bn-scaff_18464_1-p5547 C-genome specific (napus-oleracea)  | 1            | 0.6465995    | 0.9767442    | 0.8770324    | not scorable | not scorable |
| #### Bn-scaff_18482_1-p13809 C-genome specific (napus-oleracea) | 1            | 0.7997325    | 0.9767442    | 0.7142811    | not scorable | not scorable |
| #### Bn-scaff_18482_1-p20019 A-genome specific (napus-rapa)     | 0.9784689    | 0.4576861    | not scorable | not scorable | 1            | 0.786476     |
| #### Bn-scaff_18482_1-p20416 C-genome specific (napus-oleracea) | 0.9952153    | 0.7585115    | 1            | 0.5927126    | not scorable | not scorable |
| #### Bn-scaff_18482_1-p24640 genome unspecific (all in)         | 0.9952153    | 0.3350943    | 0.9922481    | 0.7017218    | 1            | 0.8085203    |
| #### Bn-scaff_18482_1-p24694 A-genome specific (napus-rapa)     | 0.9186603    | 0.2724579    | not scorable | not scorable | 1            | 0.585574     |
| #### Bn-scaff_18482_1-p26856 genome unspecific (all in)         | 1            | 0.3991697    | 1            | 0.7428377    | 1            | 0.8998148    |
| #### Bn-scaff_18482_1-p30076 C-genome specific (napus-oleracea) | 0.9976076    | 0.6723893    | 0.9844961    | 0.6415467    | not scorable | not scorable |
| #### Bn-scaff_18482_1-p30853 genome unspecific (all in)         | 1            | 0.5107878    | 1            | 0.7069691    | 1            | 0.9095415    |
| #### Bn-scaff_18482_1-p32228 genome unspecific (all in)         | 0.9976076    | 0.4712504    | 1            | 0.9244895    | 0.9917355    | 0.865733     |
| #### Bn-scaff_18482_1-p43794 genome unspecific (all in)         | 0.9401914    | 0.5487303    | 1            | 0.6886214    | 0.9917355    | 0.9180158    |
| #### Bn-scaff_18482_1-p43811 C-genome specific (oleracea only)  | not scorable | not scorable | 1            | 0.8306998    | not scorable | not scorable |
| #### Bn-scaff_18482_1-p44493 genome unspecific (all in)         | 0.9976076    | 0.2612132    | 0.9922481    | 0.8551714    | 1            | 0.7406029    |
| #### Bn-scaff_18482_1-p44520 C-genome specific (napus-oleracea) | 0.9856459    | 0.7867824    | 0.9844961    | 0.7143887    | not scorable | not scorable |
| #### Bn-scaff_18482_1-p44703 genome unspecific (all in)         | 0.9976076    | 0.3218476    | 1            | 0.7542303    | 0.9834711    | 0.6816263    |
| #### Bn-scaff_18482_1-p44969 C-genome specific (napus-oleracea) | 1            | 0.753048     | 1            | 0.6608407    | not scorable | not scorable |
| #### Bn-scaff_18482_1-p51720 C-genome specific (napus-oleracea) | 1            | 0.7708959    | 0.9689922    | 0.7982372    | not scorable | not scorable |
| #### Bn-scaff_18482_1-p51755 genome unspecific (all in)         | 1            | 0.5289777    | 0.9922481    | 0.7170934    | 1            | 0.8136209    |
| #### Bn-scaff_18482_1-p52401 genome unspecific (all in)         | 1            | 0.312915     | 1            | 0.7449733    | 1            | 0.9162169    |
| #### Bn-scaff_18482_1-p53420 A-genome specific (napus-rapa)     | 1            | 0.8331093    | not scorable | not scorable | 1            | 0.8409869    |
| #### Bn-scaff_18482_1-p53423 C-genome specific (napus-oleracea) | 0.9976076    | 0.779207     | 1            | 0.8247016    | not scorable | not scorable |
| #### Bn-scaff_18482_1-p62784 C-genome specific (oleracea only)  | not scorable | not scorable | 0.9379845    | 0.7417767    | not scorable | not scorable |
| #### Bn-scaff_18482_1-p64688 C-genome specific (napus-oleracea) | 1            | 0.9544798    | 1            | 0.7678414    | not scorable | not scorable |
| #### Bn-scaff_18482_1-p65207 C-genome specific (napus-oleracea) | 0.9880383    | 0.8207304    | 1            | 0.8492628    | not scorable | not scorable |
| #### Bn-scaff_18482_1-p65456 C-genome specific (napus-oleracea) | 0.9928229    | 0.7542465    | 1            | 0.7630112    | not scorable | not scorable |
| #### Bn-scaff_18482_1-p65518 C-genome specific (napus-oleracea) | 0.9808612    | 0.5841523    | 0.9922481    | 0.5896351    | not scorable | not scorable |
| #### Bn-scaff_18482_1-p65524 C-genome specific (napus-oleracea) | 0.9880383    | 0.7288284    | 1            | 0.7249707    | not scorable | not scorable |
| #### Bn-scaff_18482_1-p65553 genome unspecific (all in)         | 0.9952153    | 0.4752966    | 0.9922481    | 0.6407457    | 1            | 0.545985     |
| #### Bn-scaff_18482_1-p65732 C-genome specific (napus-oleracea) | 0.9904306    | 0.7648477    | 1            | 0.7567778    | not scorable | not scorable |
| #### Bn-scaff_18482_1-p65738 C-genome specific (napus-oleracea) | 0.9904306    | 0.7824216    | 1            | 0.8393047    | not scorable | not scorable |

|                                                                 |              |              |              |              |              |              |
|-----------------------------------------------------------------|--------------|--------------|--------------|--------------|--------------|--------------|
| #### Bn-scaff_18482_1-p6574C C-genome specific (napus-oleracea) | 0.9904306    | 0.7922781    | 1            | 0.884536     | not scorable | not scorable |
| #### Bn-scaff_18482_1-p6574C C-genome specific (napus-oleracea) | 0.9856459    | 0.6179405    | 1            | 0.6245596    | not scorable | not scorable |
| #### Bn-scaff_18482_1-p6632C C-genome specific (napus-oleracea) | 0.9784689    | 0.7669739    | 1            | 0.8442286    | not scorable | not scorable |
| #### Bn-scaff_18482_1-p6637E C-genome specific (napus-oleracea) | 0.9952153    | 0.8038299    | 0.9922481    | 0.8283635    | not scorable | not scorable |
| #### Bn-scaff_18482_1-p6638E C-genome specific (napus-oleracea) | 0.9880383    | 0.8327757    | 0.9922481    | 0.8279464    | not scorable | not scorable |
| #### Bn-scaff_18482_1-p6654E C-genome specific (napus-oleracea) | 0.9976076    | 0.6405989    | 0.9689922    | 0.7591993    | not scorable | not scorable |
| #### Bn-scaff_18482_1-p6725E C-genome specific (napus-oleracea) | 0.8803828    | 0.8036791    | 0.8527132    | 0.6929351    | not scorable | not scorable |
| #### Bn-scaff_18482_1-p6772E genome unspecific (all in)         | 0.9904306    | 0.3288903    | 1            | 0.6369037    | 1            | 0.6760246    |
| #### Bn-scaff_18482_1-p6806E napus specific                     | 0.9569378    | 0.5669137    | not scorable | not scorable | not scorable | not scorable |
| #### Bn-scaff_18482_1-p6842E genome unspecific (all in)         | 0.9784689    | 0.5048994    | 1            | 0.838914     | 1            | 0.8949181    |
| #### Bn-scaff_18482_1-p6988E genome unspecific (all in)         | 0.9832536    | 0.2703992    | 1            | 0.6253521    | 0.9917355    | 0.7202268    |
| #### Bn-scaff_18482_1-p6991E C-genome specific (napus-oleracea) | 0.9712918    | 0.6613944    | 0.9612403    | 0.7088114    | not scorable | not scorable |
| #### Bn-scaff_18482_1-p6996E C-genome specific (napus-oleracea) | 0.9808612    | 0.5775093    | 0.9767442    | 0.5937523    | not scorable | not scorable |
| #### Bn-scaff_18482_1-p7100E genome unspecific (oleracea-rapa)  | not scorable | not scorable | 0.9844961    | 0.6745101    | 0.9917355    | 0.3740493    |
| #### Bn-scaff_18482_1-p7391E C-genome specific (napus-oleracea) | 0.9808612    | 0.8145419    | 0.7906977    | 0.9292224    | not scorable | not scorable |
| #### Bn-scaff_18482_1-p7391E C-genome specific (napus-oleracea) | 0.9784689    | 0.7480267    | 0.9612403    | 0.7965269    | not scorable | not scorable |
| #### Bn-scaff_18482_1-p8165C A-genome specific (napus-rapa)     | 1            | 0.2241433    | not scorable | not scorable | 0.9917355    | 0.9190125    |
| #### Bn-scaff_18482_1-p9098E genome unspecific (all in)         | 0.9880383    | 0.2688317    | 0.9844961    | 0.7992573    | 1            | 0.8687926    |
| #### Bn-scaff_18490_1-p12404 genome unspecific (all in)         | 0.9976076    | 0.7770907    | 0.744186     | 0.6717954    | 1            | 0.7739488    |
| #### Bn-scaff_18501_1-p10072 genome unspecific (all in)         | 0.9856459    | 0.4197563    | 0.9844961    | 0.855868     | 1            | 0.8956826    |
| #### Bn-scaff_18501_1-p1141E C-genome specific (napus-oleracea) | 1            | 0.813495     | 0.9844961    | 0.8456472    | not scorable | not scorable |
| #### Bn-scaff_18501_1-p11441 genome unspecific (all in)         | 0.9593301    | 0.2315509    | 1            | 0.7966481    | 0.9090909    | 0.2578369    |
| #### Bn-scaff_18501_1-p1159E C-genome specific (napus-oleracea) | 0.9928229    | 0.6576207    | 0.9457364    | 0.909485     | not scorable | not scorable |
| #### Bn-scaff_18501_1-p1222E C-genome specific (napus-oleracea) | 1            | 0.7211579    | 1            | 0.6923841    | not scorable | not scorable |
| #### Bn-scaff_18501_1-p1311E C-genome specific (napus-oleracea) | 0.9808612    | 0.7532711    | 1            | 0.7808941    | not scorable | not scorable |
| #### Bn-scaff_18501_1-p1312E C-genome specific (napus-oleracea) | 0.9976076    | 0.6146384    | 0.9844961    | 0.6765473    | not scorable | not scorable |
| #### Bn-scaff_18501_1-p1314E C-genome specific (napus-oleracea) | 1            | 0.6849335    | 1            | 0.6809569    | not scorable | not scorable |
| #### Bn-scaff_18501_1-p1563E C-genome specific (napus-oleracea) | 1            | 0.5108044    | 1            | 0.4894781    | not scorable | not scorable |
| #### Bn-scaff_18501_1-p1698E A-genome specific (napus-rapa)     | 0.9904306    | 0.5062089    | not scorable | not scorable | 0.9504132    | 0.8291929    |
| #### Bn-scaff_18501_1-p2647C C-genome specific (napus-oleracea) | 0.9904306    | 0.8244799    | 1            | 0.7930776    | not scorable | not scorable |
| #### Bn-scaff_18501_1-p33614 C-genome specific (napus-oleracea) | 0.9904306    | 0.8013873    | 1            | 0.7893243    | not scorable | not scorable |
| #### Bn-scaff_18501_1-p3363E C-genome specific (napus-oleracea) | 0.9832536    | 0.7831643    | 1            | 0.8358467    | not scorable | not scorable |
| #### Bn-scaff_18501_1-p33661 C-genome specific (napus-oleracea) | 0.9856459    | 0.7871528    | 1            | 0.8390432    | not scorable | not scorable |



|                                                                  |           |           |           |           |              |              |
|------------------------------------------------------------------|-----------|-----------|-----------|-----------|--------------|--------------|
| ##### Bn-scaff_18501_1-p34588 C-genome specific (napus-oleracea) | 0.9712918 | 0.7950183 | 0.6046512 | 0.8752785 | not scorable | not scorable |
| ##### Bn-scaff_18501_1-p36933 C-genome specific (napus-oleracea) | 0.9617225 | 0.8025743 | 0.6046512 | 0.8973873 | not scorable | not scorable |
| ##### Bn-scaff_18501_1-p42171 C-genome specific (napus-oleracea) | 0.9928229 | 0.7244781 | 0.9844961 | 0.6974594 | not scorable | not scorable |
| ##### Bn-scaff_18501_1-p42424 C-genome specific (napus-oleracea) | 1         | 0.7630502 | 1         | 0.8005717 | not scorable | not scorable |
| ##### Bn-scaff_18501_1-p42639 C-genome specific (napus-oleracea) | 0.9904306 | 0.7854217 | 1         | 0.7827775 | not scorable | not scorable |
| ##### Bn-scaff_18501_1-p42949 C-genome specific (napus-oleracea) | 0.9832536 | 0.6253963 | 1         | 0.6854919 | not scorable | not scorable |
| ##### Bn-scaff_18501_1-p43534 C-genome specific (napus-oleracea) | 0.9808612 | 0.760715  | 0.875969  | 0.7945222 | not scorable | not scorable |
| ##### Bn-scaff_18501_1-p46214 genome unspecific (all in)         | 0.9904306 | 0.4773635 | 1         | 0.7408434 | 1            | 0.9220542    |
| ##### Bn-scaff_18501_1-p46444 C-genome specific (napus-oleracea) | 0.9832536 | 0.7136071 | 0.9922481 | 0.7152752 | not scorable | not scorable |
| ##### Bn-scaff_18501_1-p46565 C-genome specific (napus-oleracea) | 0.9952153 | 0.710339  | 1         | 0.7431066 | not scorable | not scorable |
| ##### Bn-scaff_18501_1-p47003 C-genome specific (napus-oleracea) | 0.9856459 | 0.6244635 | 0.9922481 | 0.7372363 | not scorable | not scorable |
| ##### Bn-scaff_18501_1-p47151 genome unspecific (all in)         | 1         | 0.5065178 | 1         | 0.7588993 | 0.9917355    | 0.79784      |
| ##### Bn-scaff_18501_1-p47232 C-genome specific (napus-oleracea) | 0.9928229 | 0.7706004 | 1         | 0.8902728 | not scorable | not scorable |
| ##### Bn-scaff_18501_1-p47867 genome unspecific (all in)         | 1         | 0.5290589 | 1         | 0.5378139 | 0.9917355    | 0.589        |
| ##### Bn-scaff_18501_1-p53067 genome unspecific (all in)         | 0.9784689 | 0.7509731 | 1         | 0.8632082 | 0.768595     | 0.8901399    |
| ##### Bn-scaff_18501_1-p55858 C-genome specific (napus-oleracea) | 0.9880383 | 0.7754552 | 1         | 0.8955976 | not scorable | not scorable |
| ##### Bn-scaff_18501_1-p56059 C-genome specific (napus-oleracea) | 0.9617225 | 0.6840137 | 0.620155  | 0.8082446 | not scorable | not scorable |
| ##### Bn-scaff_18501_1-p60455 C-genome specific (napus-oleracea) | 0.9904306 | 0.6930636 | 0.9612403 | 0.7519601 | not scorable | not scorable |
| ##### Bn-scaff_18501_1-p61907 C-genome specific (napus-oleracea) | 0.9856459 | 0.4489734 | 1         | 0.7432536 | not scorable | not scorable |
| ##### Bn-scaff_18501_1-p65431 genome unspecific (all in)         | 0.9976076 | 0.553258  | 1         | 0.7536883 | 1            | 0.8508033    |
| ##### Bn-scaff_18501_1-p65640 C-genome specific (napus-oleracea) | 0.9880383 | 0.7055368 | 1         | 0.7398821 | not scorable | not scorable |
| ##### Bn-scaff_18501_1-p65965 C-genome specific (napus-oleracea) | 0.9856459 | 0.6846387 | 1         | 0.7169021 | not scorable | not scorable |
| ##### Bn-scaff_18501_1-p66599 C-genome specific (napus-oleracea) | 0.9856459 | 0.6865842 | 1         | 0.7807878 | not scorable | not scorable |
| ##### Bn-scaff_18501_1-p67627 C-genome specific (napus-oleracea) | 0.9784689 | 0.6705187 | 0.9844961 | 0.7978334 | not scorable | not scorable |
| ##### Bn-scaff_18501_1-p70315 C-genome specific (napus-oleracea) | 0.9736842 | 0.7423341 | 0.9922481 | 0.8523747 | not scorable | not scorable |
| ##### Bn-scaff_18501_1-p70330 C-genome specific (napus-oleracea) | 0.9688995 | 0.7250303 | 0.9922481 | 0.6591402 | not scorable | not scorable |
| ##### Bn-scaff_18501_1-p70332 C-genome specific (napus-oleracea) | 0.9880383 | 0.7765662 | 0.9922481 | 0.8901224 | not scorable | not scorable |
| ##### Bn-scaff_18501_1-p73891 C-genome specific (napus-oleracea) | 0.9808612 | 0.6344735 | 0.9844961 | 0.6626806 | not scorable | not scorable |
| ##### Bn-scaff_18501_1-p73911 C-genome specific (napus-oleracea) | 0.9832536 | 0.7676257 | 1         | 0.7789664 | not scorable | not scorable |
| ##### Bn-scaff_18501_1-p76857 C-genome specific (napus-oleracea) | 0.9856459 | 0.7437096 | 0.9922481 | 0.8430519 | not scorable | not scorable |
| ##### Bn-scaff_18501_1-p78071 C-genome specific (napus-oleracea) | 0.9880383 | 0.7453454 | 0.8294573 | 0.8593476 | not scorable | not scorable |
| ##### Bn-scaff_18501_1-p78079 C-genome specific (napus-oleracea) | 0.9832536 | 0.7517628 | 0.9922481 | 0.8105859 | not scorable | not scorable |
| ##### Bn-scaff_18501_1-p78097 C-genome specific (napus-oleracea) | 0.9641148 | 0.7764561 | 0.751938  | 0.8616812 | not scorable | not scorable |

|                                                                 |              |              |           |           |              |              |
|-----------------------------------------------------------------|--------------|--------------|-----------|-----------|--------------|--------------|
| #### Bn-scaff_18501_1-p78233 C-genome specific (napus-oleracea) | 0.9856459    | 0.7781574    | 1         | 0.7512841 | not scorable | not scorable |
| #### Bn-scaff_18501_1-p78249 C-genome specific (napus-oleracea) | 0.9593301    | 0.7748332    | 0.9922481 | 0.8071615 | not scorable | not scorable |
| #### Bn-scaff_18501_1-p78979 C-genome specific (napus-oleracea) | 0.9832536    | 0.6783445    | 0.9844961 | 0.7117373 | not scorable | not scorable |
| #### Bn-scaff_18501_1-p78994 C-genome specific (napus-oleracea) | 0.9880383    | 0.7259058    | 1         | 0.8036633 | not scorable | not scorable |
| #### Bn-scaff_18501_1-p79083 C-genome specific (napus-oleracea) | 0.9784689    | 0.7513378    | 0.9922481 | 0.8396023 | not scorable | not scorable |
| #### Bn-scaff_18501_1-p79189 C-genome specific (napus-oleracea) | 0.9880383    | 0.698058     | 0.9767442 | 0.9044769 | not scorable | not scorable |
| #### Bn-scaff_18501_1-p79522 C-genome specific (napus-oleracea) | 0.9856459    | 0.6493901    | 1         | 0.7005928 | not scorable | not scorable |
| #### Bn-scaff_18501_1-p81032 C-genome specific (napus-oleracea) | 0.9593301    | 0.6655524    | 0.7596899 | 0.7602386 | not scorable | not scorable |
| #### Bn-scaff_18501_1-p81105 C-genome specific (napus-oleracea) | 0.9688995    | 0.6603262    | 0.9767442 | 0.8368488 | not scorable | not scorable |
| #### Bn-scaff_18501_1-p83791 C-genome specific (napus-oleracea) | 0.9832536    | 0.7665665    | 0.9922481 | 0.7236361 | not scorable | not scorable |
| #### Bn-scaff_18501_1-p83798 C-genome specific (napus-oleracea) | 0.9736842    | 0.7758807    | 0.9922481 | 0.8175917 | not scorable | not scorable |
| #### Bn-scaff_18501_1-p83829 C-genome specific (napus-oleracea) | 0.9665072    | 0.7500338    | 0.9457364 | 0.7221925 | not scorable | not scorable |
| #### Bn-scaff_18501_1-p83909 C-genome specific (napus-oleracea) | 0.9736842    | 0.6605353    | 1         | 0.7763559 | not scorable | not scorable |
| #### Bn-scaff_18501_1-p84969 C-genome specific (napus-oleracea) | 0.9856459    | 0.7579082    | 1         | 0.8361892 | not scorable | not scorable |
| #### Bn-scaff_18501_1-p84976 C-genome specific (napus-oleracea) | 0.9712918    | 0.6935344    | 1         | 0.7042676 | not scorable | not scorable |
| #### Bn-scaff_18501_1-p85055 C-genome specific (napus-oleracea) | 0.9760765    | 0.6752962    | 0.9844961 | 0.6164406 | not scorable | not scorable |
| #### Bn-scaff_18501_1-p87907 C-genome specific (napus-oleracea) | 0.9856459    | 0.753222     | 1         | 0.7966874 | not scorable | not scorable |
| #### Bn-scaff_18501_1-p90049 C-genome specific (napus-oleracea) | 0.9760765    | 0.7846653    | 1         | 0.7053849 | not scorable | not scorable |
| #### Bn-scaff_18501_1-p93959 C-genome specific (napus-oleracea) | 0.9832536    | 0.7570324    | 0.9922481 | 0.8600919 | not scorable | not scorable |
| #### Bn-scaff_18501_1-p94263 C-genome specific (napus-oleracea) | 0.9904306    | 0.6908029    | 1         | 0.788797  | not scorable | not scorable |
| #### Bn-scaff_18501_1-p94270 C-genome specific (napus-oleracea) | 0.9928229    | 0.7425524    | 0.9922481 | 0.7017218 | not scorable | not scorable |
| #### Bn-scaff_18501_1-p94334 C-genome specific (oleracea only)  | not scorable | not scorable | 0.9844961 | 0.9072437 | not scorable | not scorable |
| #### Bn-scaff_18501_1-p95056 C-genome specific (napus-oleracea) | 0.9712918    | 0.7781096    | 1         | 0.8626803 | not scorable | not scorable |
| #### Bn-scaff_18501_1-p95071 C-genome specific (napus-oleracea) | 0.9832536    | 0.7338748    | 1         | 0.8042127 | not scorable | not scorable |
| #### Bn-scaff_18501_1-p95071 C-genome specific (napus-oleracea) | 0.9617225    | 0.7774305    | 1         | 0.8060912 | not scorable | not scorable |
| #### Bn-scaff_18501_1-p95107 C-genome specific (napus-oleracea) | 0.8038278    | 0.6067492    | 0.4108527 | 0.774357  | not scorable | not scorable |
| #### Bn-scaff_18501_1-p95428 genome unspecific (all in)         | 1            | 0.5904691    | 1         | 0.4578512 | 1            | 0.6288817    |
| #### Bn-scaff_18501_1-p95970 C-genome specific (napus-oleracea) | 0.9880383    | 0.7538499    | 1         | 0.7555434 | not scorable | not scorable |
| #### Bn-scaff_18501_1-p96360 C-genome specific (napus-oleracea) | 0.9880383    | 0.7655771    | 1         | 0.7830637 | not scorable | not scorable |
| #### Bn-scaff_18501_1-p98036 C-genome specific (napus-oleracea) | 0.9665072    | 0.6832775    | 0.9767442 | 0.7950104 | not scorable | not scorable |
| #### Bn-scaff_18501_1-p98249 C-genome specific (napus-oleracea) | 0.9856459    | 0.7718998    | 1         | 0.602963  | not scorable | not scorable |
| #### Bn-scaff_18501_1-p98317 C-genome specific (napus-oleracea) | 0.9880383    | 0.783345     | 1         | 0.8613561 | not scorable | not scorable |
| #### Bn-scaff_18501_1-p99587 C-genome specific (napus-oleracea) | 0.9760765    | 0.7190016    | 0.9922481 | 0.86957   | not scorable | not scorable |

|                                                                 |              |              |              |              |              |              |
|-----------------------------------------------------------------|--------------|--------------|--------------|--------------|--------------|--------------|
| #### Bn-scaff_18503_1-p11837A-genome specific (napus-rapa)      | 0.9688995    | 0.3312816    | not scorable | not scorable | 0.9834711    | 0.9021241    |
| #### Bn-scaff_18503_1-p14556 genome unspecific (all in)         | 1            | 0.4353596    |              | 1            | 0.7194548    | 1            |
| #### Bn-scaff_18503_1-p17982 napus specific                     | 0.8755981    | 0.1587554    | not scorable | not scorable | not scorable | not scorable |
| #### Bn-scaff_18503_1-p28501 genome unspecific (all in)         | 1            | 0.7522263    |              | 1            | 0.5228792    | 1            |
| #### Bn-scaff_18503_1-p30074 all not scorable                   | not scorable | not scorable | not scorable | not scorable | not scorable | not scorable |
| #### Bn-scaff_18505_1-p12467 C-genome specific (napus-oleracea) | 0.9976076    | 0.7855765    |              | 1            | 0.7515043    | not scorable |
| #### Bn-scaff_18505_1-p13311 genome unspecific (all in)         | 0.9904306    | 0.3644406    | 0.9922481    |              | 0.7253323    | 1            |
| #### Bn-scaff_18505_1-p15744 C-genome specific (napus-oleracea) | 0.9976076    | 0.7811423    | 0.9844961    |              | 0.8498428    | not scorable |
| #### Bn-scaff_18505_1-p16118 C-genome specific (napus-oleracea) | 0.9928229    | 0.7649956    |              | 1            | 0.8504198    | not scorable |
| #### Bn-scaff_18505_1-p16704 C-genome specific (napus-oleracea) | 0.9952153    | 0.7881399    |              | 1            | 0.747383     | not scorable |
| #### Bn-scaff_18505_1-p19343 C-genome specific (napus-oleracea) | 0.9808612    | 0.6837959    | 0.9844961    |              | 0.617792     | not scorable |
| #### Bn-scaff_18505_1-p21644 C-genome specific (napus-oleracea) | 0.9904306    | 0.7843778    |              | 1            | 0.6690842    | not scorable |
| #### Bn-scaff_18505_1-p21692 C-genome specific (napus-oleracea) | 0.9808612    | 0.2308947    | 0.9767442    |              | 0.6338776    | not scorable |
| #### Bn-scaff_18505_1-p21911 C-genome specific (napus-oleracea) | 0.9856459    | 0.7711862    |              | 1            | 0.725722     | not scorable |
| #### Bn-scaff_18505_1-p25457 genome unspecific (all in)         | 0.9832536    | 0.2496393    |              | 1            | 0.5309198    | 0.9669421    |
| #### Bn-scaff_18505_1-p26664 C-genome specific (napus-oleracea) | 0.9880383    | 0.757611     |              | 1            | 0.8238257    | not scorable |
| #### Bn-scaff_18505_1-p26720 C-genome specific (napus-oleracea) | 0.9832536    | 0.8160283    | 0.9844961    |              | 0.8537922    | not scorable |
| #### Bn-scaff_18505_1-p27123 C-genome specific (napus-oleracea) | 0.9617225    | 0.7376452    | 0.9844961    |              | 0.69127      | not scorable |
| #### Bn-scaff_18505_1-p28804 genome unspecific (all in)         | 0.9880383    | 0.6998379    | 0.9844961    |              | 0.68695      | 0.9173554    |
| #### Bn-scaff_18505_1-p28820 C-genome specific (napus-oleracea) | 0.9904306    | 0.7734735    | 0.9844961    |              | 0.8185435    | not scorable |
| #### Bn-scaff_18505_1-p28844 C-genome specific (napus-oleracea) | 0.9880383    | 0.7923167    | 0.9844961    |              | 0.7794313    | not scorable |
| #### Bn-scaff_18505_1-p28857 C-genome specific (napus-oleracea) | 0.9832536    | 0.6902008    | 0.9689922    |              | 0.7014977    | not scorable |
| #### Bn-scaff_18505_1-p28884 C-genome specific (napus-oleracea) | 0.9832536    | 0.8448175    | 0.9922481    |              | 0.7847597    | not scorable |
| #### Bn-scaff_18505_1-p29440 C-genome specific (napus-oleracea) | 0.9880383    | 0.7897231    |              | 1            | 0.8001747    | not scorable |
| #### Bn-scaff_18505_1-p29553 genome unspecific (all in)         | 0.9760765    | 0.2870776    | 0.9844961    |              | 0.7256076    | 1            |
| #### Bn-scaff_18505_1-p29904 C-genome specific (napus-oleracea) | 0.9784689    | 0.7748339    | 0.9457364    |              | 0.7921731    | not scorable |
| #### Bn-scaff_18505_1-p44913 C-genome specific (napus-oleracea) | 0.9832536    | 0.7048493    | 0.9844961    |              | 0.8087379    | not scorable |
| #### Bn-scaff_18505_1-p69669 C-genome specific (napus-oleracea) | 0.9904306    | 0.7566963    | 0.9844961    |              | 0.8217824    | not scorable |
| #### Bn-scaff_18505_1-p69761 C-genome specific (napus-oleracea) | 0.9712918    | 0.7224137    | 0.9844961    |              | 0.7571846    | not scorable |
| #### Bn-scaff_18505_1-p75828 genome unspecific (all in)         | 0.9880383    | 0.5569366    | 0.9844961    |              | 0.8177392    | 1            |
| #### Bn-scaff_18505_1-p76461 C-genome specific (napus-oleracea) | 0.9952153    | 0.6753336    | 0.9844961    |              | 0.8436556    | not scorable |
| #### Bn-scaff_18505_1-p85179 C-genome specific (napus-oleracea) | 0.9832536    | 0.5086322    | 0.9922481    |              | 0.6344162    | not scorable |
| #### Bn-scaff_18505_1-p85945 C-genome specific (napus-oleracea) | 0.9928229    | 0.7551608    | 0.9844961    |              | 0.8092705    | not scorable |

|                                                                 |           |           |              |              |              |              |
|-----------------------------------------------------------------|-----------|-----------|--------------|--------------|--------------|--------------|
| #### Bn-scaff_18505_1-p89348 C-genome specific (napus-oleracea) | 0.9928229 | 0.7452558 | 0.9844961    | 0.7592781    | not scorable | not scorable |
| #### Bn-scaff_18505_1-p90828 C-genome specific (napus-oleracea) | 0.9880383 | 0.7575039 | 0.9767442    | 0.7027053    | not scorable | not scorable |
| #### Bn-scaff_18505_1-p91467 C-genome specific (napus-oleracea) | 0.9928229 | 0.7573137 | 0.9922481    | 0.7995172    | not scorable | not scorable |
| #### Bn-scaff_18507_1-p10151 C-genome specific (napus-oleracea) | 0.9856459 | 0.8085228 | 0.9767442    | 0.816222     | not scorable | not scorable |
| #### Bn-scaff_18507_1-p10166 C-genome specific (napus-oleracea) | 0.9928229 | 0.7198882 | 1            | 0.7614449    | not scorable | not scorable |
| #### Bn-scaff_18507_1-p10174 C-genome specific (napus-oleracea) | 0.9928229 | 0.8082939 | 1            | 0.8193238    | not scorable | not scorable |
| #### Bn-scaff_18507_1-p10194 C-genome specific (napus-oleracea) | 0.9928229 | 0.7926022 | 1            | 0.8924836    | not scorable | not scorable |
| #### Bn-scaff_18507_1-p10196 C-genome specific (napus-oleracea) | 0.9928229 | 0.7153985 | 1            | 0.8186406    | not scorable | not scorable |
| #### Bn-scaff_18507_1-p10208 C-genome specific (napus-oleracea) | 0.9928229 | 0.7910625 | 0.9844961    | 0.791251     | not scorable | not scorable |
| #### Bn-scaff_18507_1-p10220 C-genome specific (napus-oleracea) | 1         | 0.5395544 | 1            | 0.5819726    | not scorable | not scorable |
| #### Bn-scaff_18507_1-p10277 C-genome specific (napus-oleracea) | 0.9976076 | 0.7735943 | 1            | 0.8013002    | not scorable | not scorable |
| #### Bn-scaff_18507_1-p10350 C-genome specific (napus-oleracea) | 0.9904306 | 0.8830121 | 0.9922481    | 0.8401393    | not scorable | not scorable |
| #### Bn-scaff_18507_1-p10357 C-genome specific (napus-oleracea) | 0.9928229 | 0.73997   | 1            | 0.8223057    | not scorable | not scorable |
| #### Bn-scaff_18507_1-p10398 C-genome specific (napus-oleracea) | 0.9952153 | 0.7674373 | 1            | 0.8709566    | not scorable | not scorable |
| #### Bn-scaff_18507_1-p10419 C-genome specific (napus-oleracea) | 0.9904306 | 0.6959209 | 1            | 0.8346194    | not scorable | not scorable |
| #### Bn-scaff_18507_1-p10458 C-genome specific (napus-oleracea) | 0.215311  | 0.7380579 | 0.9689922    | 0.7538163    | not scorable | not scorable |
| #### Bn-scaff_18507_1-p10460 C-genome specific (napus-oleracea) | 0.9952153 | 0.8820516 | 0.9689922    | 0.8489755    | not scorable | not scorable |
| #### Bn-scaff_18507_1-p10489 C-genome specific (napus-oleracea) | 0.9928229 | 0.6971439 | 1            | 0.7392492    | not scorable | not scorable |
| #### Bn-scaff_18507_1-p10544 C-genome specific (napus-oleracea) | 0.9952153 | 0.7669557 | 0.9767442    | 0.7516875    | not scorable | not scorable |
| #### Bn-scaff_18507_1-p10622 C-genome specific (napus-oleracea) | 0.9952153 | 0.8833449 | 0.9767442    | 0.85657      | not scorable | not scorable |
| #### Bn-scaff_18507_1-p10627 C-genome specific (napus-oleracea) | 0.9952153 | 0.7743472 | 0.9922481    | 0.7609731    | not scorable | not scorable |
| #### Bn-scaff_18507_1-p10638 C-genome specific (napus-oleracea) | 0.9904306 | 0.8109104 | 1            | 0.8583339    | not scorable | not scorable |
| #### Bn-scaff_18507_1-p10638 C-genome specific (napus-oleracea) | 0.9928229 | 0.7646031 | 1            | 0.8039013    | not scorable | not scorable |
| #### Bn-scaff_18507_1-p10913 napus specific                     | 0.9760765 | 0.7895462 | not scorable | not scorable | not scorable | not scorable |
| #### Bn-scaff_18507_1-p10990 C-genome specific (napus-oleracea) | 0.9904306 | 0.8996318 | 0.9922481    | 0.8405854    | not scorable | not scorable |
| #### Bn-scaff_18507_1-p11021 C-genome specific (napus-oleracea) | 0.9904306 | 0.8551324 | 1            | 0.7327542    | not scorable | not scorable |
| #### Bn-scaff_18507_1-p11029 C-genome specific (napus-oleracea) | 0.9904306 | 0.8414212 | 1            | 0.8173706    | not scorable | not scorable |
| #### Bn-scaff_18507_1-p11044 C-genome specific (napus-oleracea) | 0.9904306 | 0.8823364 | 1            | 0.7835358    | not scorable | not scorable |
| #### Bn-scaff_18507_1-p11110 C-genome specific (napus-oleracea) | 0.9928229 | 0.8627091 | 1            | 0.8408632    | not scorable | not scorable |
| #### Bn-scaff_18507_1-p11128 C-genome specific (napus-oleracea) | 0.9928229 | 0.8016084 | 0.9922481    | 0.7138455    | not scorable | not scorable |
| #### Bn-scaff_18507_1-p11161 C-genome specific (napus-oleracea) | 0.9928229 | 0.7924162 | 0.9922481    | 0.7335162    | not scorable | not scorable |
| #### Bn-scaff_18507_1-p11420 C-genome specific (napus-oleracea) | 0.9928229 | 0.7599064 | 1            | 0.8996865    | not scorable | not scorable |
| #### Bn-scaff_18507_1-p11421 C-genome specific (napus-oleracea) | 0.9904306 | 0.6954714 | 1            | 0.881279     | not scorable | not scorable |

|                                                                 |           |           |              |              |              |              |
|-----------------------------------------------------------------|-----------|-----------|--------------|--------------|--------------|--------------|
| #### Bn-scaff_18507_1-p11428 C-genome specific (napus-oleracea) | 0.9952153 | 0.7748975 | 1            | 0.8131424    | not scorable | not scorable |
| #### Bn-scaff_18507_1-p11439 genome unspecific (all in)         | 1         | 0.5149947 | 1            | 0.5980029    | 0.9834711    | 0.7193563    |
| #### Bn-scaff_18507_1-p11484 C-genome specific (napus-oleracea) | 0.9928229 | 0.7566532 | 1            | 0.7313932    | not scorable | not scorable |
| #### Bn-scaff_18507_1-p11576 C-genome specific (napus-oleracea) | 0.9952153 | 0.744619  | 1            | 0.8331933    | not scorable | not scorable |
| #### Bn-scaff_18507_1-p11583 C-genome specific (napus-oleracea) | 0.9928229 | 0.7086278 | 1            | 0.6743492    | not scorable | not scorable |
| #### Bn-scaff_18507_1-p11611 napus specific                     | 0.9784689 | 0.769666  | not scorable | not scorable | not scorable | not scorable |
| #### Bn-scaff_18507_1-p11640 C-genome specific (napus-oleracea) | 0.9904306 | 0.7358178 | 1            | 0.8482612    | not scorable | not scorable |
| #### Bn-scaff_18507_1-p11673 C-genome specific (napus-oleracea) | 0.9928229 | 0.7635582 | 1            | 0.8212687    | not scorable | not scorable |
| #### Bn-scaff_18507_1-p11676 C-genome specific (napus-oleracea) | 0.9952153 | 0.7621556 | 1            | 0.7425367    | not scorable | not scorable |
| #### Bn-scaff_18507_1-p11681 C-genome specific (napus-oleracea) | 0.9856459 | 0.7219039 | 1            | 0.7601622    | not scorable | not scorable |
| #### Bn-scaff_18507_1-p11687 C-genome specific (napus-oleracea) | 0.9904306 | 0.6728255 | 1            | 0.7699648    | not scorable | not scorable |
| #### Bn-scaff_18507_1-p11688 C-genome specific (napus-oleracea) | 0.9904306 | 0.6582575 | 1            | 0.7977843    | not scorable | not scorable |
| #### Bn-scaff_18507_1-p11703 C-genome specific (napus-oleracea) | 0.9928229 | 0.7175934 | 1            | 0.7444665    | not scorable | not scorable |
| #### Bn-scaff_18507_1-p11703 C-genome specific (napus-oleracea) | 0.9928229 | 0.6890536 | 1            | 0.6839622    | not scorable | not scorable |
| #### Bn-scaff_18507_1-p11704 C-genome specific (napus-oleracea) | 0.9952153 | 0.7599018 | 1            | 0.7726496    | not scorable | not scorable |
| #### Bn-scaff_18507_1-p11710 C-genome specific (napus-oleracea) | 0.9904306 | 0.6566525 | 1            | 0.6982666    | not scorable | not scorable |
| #### Bn-scaff_18507_1-p11743 C-genome specific (napus-oleracea) | 0.9736842 | 0.7326241 | 0.2713178    | 0.7351102    | not scorable | not scorable |
| #### Bn-scaff_18507_1-p11780 C-genome specific (napus-oleracea) | 0.9952153 | 0.7877393 | 1            | 0.6922192    | not scorable | not scorable |
| #### Bn-scaff_18507_1-p11783 C-genome specific (napus-oleracea) | 0.9928229 | 0.7598072 | 1            | 0.7260538    | not scorable | not scorable |
| #### Bn-scaff_18507_1-p11785 C-genome specific (napus-oleracea) | 0.9928229 | 0.7732701 | 1            | 0.8546489    | not scorable | not scorable |
| #### Bn-scaff_18507_1-p11786 C-genome specific (napus-oleracea) | 0.9928229 | 0.7607296 | 1            | 0.7481396    | not scorable | not scorable |
| #### Bn-scaff_18507_1-p11789 C-genome specific (napus-oleracea) | 0.9928229 | 0.7367176 | 1            | 0.6946335    | not scorable | not scorable |
| #### Bn-scaff_18507_1-p11792 C-genome specific (napus-oleracea) | 0.9928229 | 0.807503  | 1            | 0.7530718    | not scorable | not scorable |
| #### Bn-scaff_18507_1-p11792 C-genome specific (napus-oleracea) | 0.9880383 | 0.6879753 | 1            | 0.6627825    | not scorable | not scorable |
| #### Bn-scaff_18507_1-p11794 C-genome specific (napus-oleracea) | 0.9904306 | 0.6922776 | 1            | 0.6695817    | not scorable | not scorable |
| #### Bn-scaff_18507_1-p11805 napus specific                     | 0.9449761 | 0.7543167 | not scorable | not scorable | not scorable | not scorable |
| #### Bn-scaff_18507_1-p11809 C-genome specific (napus-oleracea) | 0.9760765 | 0.8979014 | 0.2713178    | 0.7720295    | not scorable | not scorable |
| #### Bn-scaff_18507_1-p11810 C-genome specific (napus-oleracea) | 0.9784689 | 0.769774  | 0.2713178    | 0.793295     | not scorable | not scorable |
| #### Bn-scaff_18507_1-p11895 C-genome specific (napus-oleracea) | 0.1889952 | 0.8170301 | 0.1395349    | 0.7506108    | not scorable | not scorable |
| #### Bn-scaff_18507_1-p11901 C-genome specific (napus-oleracea) | 0.9928229 | 0.7370924 | 1            | 0.6715006    | not scorable | not scorable |
| #### Bn-scaff_18507_1-p11902 C-genome specific (napus-oleracea) | 0.9928229 | 0.8277788 | 1            | 0.7833797    | not scorable | not scorable |
| #### Bn-scaff_18507_1-p11906 C-genome specific (napus-oleracea) | 0.9928229 | 0.7595832 | 1            | 0.7911711    | not scorable | not scorable |
| #### Bn-scaff_18507_1-p11915 C-genome specific (napus-oleracea) | 0.9928229 | 0.7941719 | 1            | 0.7603302    | not scorable | not scorable |

|                                                                 |           |           |           |           |              |              |
|-----------------------------------------------------------------|-----------|-----------|-----------|-----------|--------------|--------------|
| #### Bn-scaff_18507_1-p11915 C-genome specific (napus-oleracea) | 0.9952153 | 0.7570907 | 0.9922481 | 0.6942456 | not scorable | not scorable |
| #### Bn-scaff_18507_1-p11935 C-genome specific (napus-oleracea) | 0.9928229 | 0.7278614 | 1         | 0.6813985 | not scorable | not scorable |
| #### Bn-scaff_18507_1-p11936 C-genome specific (napus-oleracea) | 0.9928229 | 0.8439959 | 1         | 0.7609215 | not scorable | not scorable |
| #### Bn-scaff_18507_1-p11938 C-genome specific (napus-oleracea) | 0.9928229 | 0.714537  | 1         | 0.6930666 | not scorable | not scorable |
| #### Bn-scaff_18507_1-p11941 C-genome specific (napus-oleracea) | 0.9880383 | 0.6727778 | 1         | 0.7983814 | not scorable | not scorable |
| #### Bn-scaff_18507_1-p11942 C-genome specific (napus-oleracea) | 0.9952153 | 0.6834819 | 0.9922481 | 0.6759525 | not scorable | not scorable |
| #### Bn-scaff_18507_1-p11951 C-genome specific (napus-oleracea) | 0.9928229 | 0.6970456 | 0.9534883 | 0.6906533 | not scorable | not scorable |
| #### Bn-scaff_18507_1-p11954 C-genome specific (napus-oleracea) | 0.9928229 | 0.875686  | 1         | 0.8485919 | not scorable | not scorable |
| #### Bn-scaff_18507_1-p11955 C-genome specific (napus-oleracea) | 0.9928229 | 0.8825317 | 0.9844961 | 0.9020022 | not scorable | not scorable |
| #### Bn-scaff_18507_1-p11956 C-genome specific (napus-oleracea) | 0.9928229 | 0.8819757 | 1         | 0.829007  | not scorable | not scorable |
| #### Bn-scaff_18507_1-p11967 C-genome specific (napus-oleracea) | 0.9952153 | 0.7223659 | 1         | 0.8340472 | not scorable | not scorable |
| #### Bn-scaff_18507_1-p11977 C-genome specific (napus-oleracea) | 0.9952153 | 0.7729505 | 1         | 0.7391005 | not scorable | not scorable |
| #### Bn-scaff_18507_1-p11979 C-genome specific (napus-oleracea) | 0.9904306 | 0.6594627 | 1         | 0.6686118 | not scorable | not scorable |
| #### Bn-scaff_18507_1-p11981 C-genome specific (napus-oleracea) | 0.9928229 | 0.7305346 | 1         | 0.7248732 | not scorable | not scorable |
| #### Bn-scaff_18507_1-p11984 C-genome specific (napus-oleracea) | 0.9952153 | 0.7210752 | 1         | 0.738918  | not scorable | not scorable |
| #### Bn-scaff_18507_1-p11986 C-genome specific (napus-oleracea) | 0.9904306 | 0.6947621 | 1         | 0.6773587 | not scorable | not scorable |
| #### Bn-scaff_18507_1-p11987 C-genome specific (napus-oleracea) | 0.9928229 | 0.6665403 | 1         | 0.6881834 | not scorable | not scorable |
| #### Bn-scaff_18507_1-p11989 C-genome specific (napus-oleracea) | 0.9928229 | 0.7381005 | 1         | 0.7204124 | not scorable | not scorable |
| #### Bn-scaff_18507_1-p11991 C-genome specific (napus-oleracea) | 0.9904306 | 0.6490314 | 1         | 0.650184  | not scorable | not scorable |
| #### Bn-scaff_18507_1-p11991 C-genome specific (napus-oleracea) | 0.9928229 | 0.8938019 | 1         | 0.8317294 | not scorable | not scorable |
| #### Bn-scaff_18507_1-p11992 C-genome specific (napus-oleracea) | 0.9952153 | 0.8911481 | 1         | 0.7589418 | not scorable | not scorable |
| #### Bn-scaff_18507_1-p11992 C-genome specific (napus-oleracea) | 0.9952153 | 0.7892653 | 1         | 0.7686118 | not scorable | not scorable |
| #### Bn-scaff_18507_1-p11994 C-genome specific (napus-oleracea) | 0.9928229 | 0.82614   | 1         | 0.7686527 | not scorable | not scorable |
| #### Bn-scaff_18507_1-p11997 C-genome specific (napus-oleracea) | 0.9880383 | 0.8870643 | 1         | 0.755477  | not scorable | not scorable |
| #### Bn-scaff_18507_1-p11999 C-genome specific (napus-oleracea) | 0.9832536 | 0.7993016 | 1         | 0.7832873 | not scorable | not scorable |
| #### Bn-scaff_18507_1-p12045 C-genome specific (napus-oleracea) | 0.9928229 | 0.7177627 | 0.9922481 | 0.7325248 | not scorable | not scorable |
| #### Bn-scaff_18507_1-p12046 C-genome specific (napus-oleracea) | 0.9904306 | 0.7197818 | 1         | 0.7094619 | not scorable | not scorable |
| #### Bn-scaff_18507_1-p12054 C-genome specific (napus-oleracea) | 0.9952153 | 0.7723706 | 1         | 0.7675579 | not scorable | not scorable |
| #### Bn-scaff_18507_1-p12058 C-genome specific (napus-oleracea) | 0.9952153 | 0.7769417 | 1         | 0.7379262 | not scorable | not scorable |
| #### Bn-scaff_18507_1-p12060 C-genome specific (napus-oleracea) | 0.9952153 | 0.7104108 | 1         | 0.711917  | not scorable | not scorable |
| #### Bn-scaff_18507_1-p12062 C-genome specific (napus-oleracea) | 0.9952153 | 0.7826021 | 1         | 0.7739688 | not scorable | not scorable |
| #### Bn-scaff_18507_1-p12064 C-genome specific (napus-oleracea) | 0.9904306 | 0.8034687 | 1         | 0.80817   | not scorable | not scorable |
| #### Bn-scaff_18507_1-p12065 C-genome specific (napus-oleracea) | 0.9928229 | 0.712284  | 1         | 0.6761603 | not scorable | not scorable |

|                                                                 |              |              |              |   |              |              |              |
|-----------------------------------------------------------------|--------------|--------------|--------------|---|--------------|--------------|--------------|
| #### Bn-scaff_18507_1-p12068 C-genome specific (napus-oleracea) | 0.9928229    | 0.671755     |              | 1 | 0.6874186    | not scorable | not scorable |
| #### Bn-scaff_18507_1-p12069 C-genome specific (napus-oleracea) | 0.9928229    | 0.7459551    |              | 1 | 0.7537649    | not scorable | not scorable |
| #### Bn-scaff_18507_1-p12070 C-genome specific (napus-oleracea) | 0.9928229    | 0.788204     | 0.9922481    |   | 0.7318887    | not scorable | not scorable |
| #### Bn-scaff_18507_1-p12072 C-genome specific (napus-oleracea) | 0.9952153    | 0.7909557    |              | 1 | 0.6603123    | not scorable | not scorable |
| #### Bn-scaff_18507_1-p12073 C-genome specific (napus-oleracea) | 0.9880383    | 0.708451     |              | 1 | 0.6892397    | not scorable | not scorable |
| #### Bn-scaff_18507_1-p12077 C-genome specific (napus-oleracea) | 0.9904306    | 0.8547308    |              | 1 | 0.6936669    | not scorable | not scorable |
| #### Bn-scaff_18507_1-p12080 C-genome specific (napus-oleracea) | 0.9904306    | 0.6928278    |              | 1 | 0.6885763    | not scorable | not scorable |
| #### Bn-scaff_18507_1-p12081 C-genome specific (napus-oleracea) | 0.9952153    | 0.5706735    |              | 1 | 0.6721582    | not scorable | not scorable |
| #### Bn-scaff_18507_1-p12081 C-genome specific (napus-oleracea) | 0.9952153    | 0.7724255    |              | 1 | 0.6972542    | not scorable | not scorable |
| #### Bn-scaff_18507_1-p12083 C-genome specific (napus-oleracea) | 0.9928229    | 0.6955039    |              | 1 | 0.6869836    | not scorable | not scorable |
| #### Bn-scaff_18507_1-p12085 genome unspecific (all in)         | 0.9880383    | 0.6329269    |              | 1 | 0.5745143    |              | 1 0.8630329  |
| #### Bn-scaff_18507_1-p12085 C-genome specific (napus-oleracea) | 0.9952153    | 0.6208268    | 0.9922481    |   | 0.6153667    | not scorable | not scorable |
| #### Bn-scaff_18507_1-p12086 napus specific                     | 0.1937799    | 0.7688453    | not scorable |   | not scorable | not scorable | not scorable |
| #### Bn-scaff_18507_1-p12088 C-genome specific (napus-oleracea) | 0.9904306    | 0.798098     |              | 1 | 0.7054639    | not scorable | not scorable |
| #### Bn-scaff_18507_1-p12089 C-genome specific (napus-oleracea) | 0.9928229    | 0.663013     |              | 1 | 0.6745806    | not scorable | not scorable |
| #### Bn-scaff_18507_1-p12092 C-genome specific (napus-oleracea) | 0.9928229    | 0.748258     | 0.9844961    |   | 0.677747     | not scorable | not scorable |
| #### Bn-scaff_18507_1-p12093 C-genome specific (napus-oleracea) | 0.9928229    | 0.8404841    |              | 1 | 0.7340623    | not scorable | not scorable |
| #### Bn-scaff_18507_1-p12097 C-genome specific (napus-oleracea) | 0.9928229    | 0.7501008    |              | 1 | 0.710255     | not scorable | not scorable |
| #### Bn-scaff_18507_1-p12098 C-genome specific (napus-oleracea) | 0.9952153    | 0.6143968    |              | 1 | 0.6476653    | not scorable | not scorable |
| #### Bn-scaff_18507_1-p12099 C-genome specific (napus-oleracea) | 0.9952153    | 0.8586408    |              | 1 | 0.7209258    | not scorable | not scorable |
| #### Bn-scaff_18507_1-p12104 C-genome specific (napus-oleracea) | 0.9952153    | 0.8872129    |              | 1 | 0.7374907    | not scorable | not scorable |
| #### Bn-scaff_18507_1-p12104 C-genome specific (napus-oleracea) | 0.9904306    | 0.740715     |              | 1 | 0.7750661    | not scorable | not scorable |
| #### Bn-scaff_18507_1-p12106 C-genome specific (napus-oleracea) | 0.9904306    | 0.7124919    |              | 1 | 0.6869836    | not scorable | not scorable |
| #### Bn-scaff_18507_1-p12115 C-genome specific (napus-oleracea) | 0.9928229    | 0.6707788    |              | 1 | 0.682037     | not scorable | not scorable |
| #### Bn-scaff_18507_1-p12115 C-genome specific (napus-oleracea) | 0.9952153    | 0.685313     |              | 1 | 0.686942     | not scorable | not scorable |
| #### Bn-scaff_18507_1-p12116 C-genome specific (napus-oleracea) | 0.9928229    | 0.7099244    |              | 1 | 0.7278678    | not scorable | not scorable |
| #### Bn-scaff_18507_1-p12162 C-genome specific (napus-oleracea) | 0.9784689    | 0.7871784    | 0.2170543    |   | 0.8025216    | not scorable | not scorable |
| #### Bn-scaff_18507_1-p12242 C-genome specific (oleracea only)  | not scorable | not scorable | 0.9612403    |   | 0.6990497    | not scorable | not scorable |
| #### Bn-scaff_18507_1-p12243 C-genome specific (napus-oleracea) | 0.9856459    | 0.8120862    |              | 1 | 0.7309994    | not scorable | not scorable |
| #### Bn-scaff_18507_1-p12283 C-genome specific (napus-oleracea) | 0.9904306    | 0.8124167    | 0.9767442    |   | 0.8102933    | not scorable | not scorable |
| #### Bn-scaff_18507_1-p12295 C-genome specific (napus-oleracea) | 0.9880383    | 0.9326724    | 0.9922481    |   | 0.7320153    | not scorable | not scorable |
| #### Bn-scaff_18507_1-p12307 C-genome specific (napus-oleracea) | 0.9952153    | 0.8816231    |              | 1 | 0.7704409    | not scorable | not scorable |
| #### Bn-scaff_18507_1-p12308 C-genome specific (napus-oleracea) | 0.9928229    | 0.7299071    |              | 1 | 0.6924579    | not scorable | not scorable |

|                                                                |           |           |           |           |              |              |
|----------------------------------------------------------------|-----------|-----------|-----------|-----------|--------------|--------------|
| #### Bn-scaff_18507_1-p12371C-genome specific (napus-oleracea) | 0.9904306 | 0.784331  | 0.9922481 | 0.7585668 | not scorable | not scorable |
| #### Bn-scaff_18507_1-p12371C-genome specific (napus-oleracea) | 0.9904306 | 0.8702402 | 1         | 0.7167479 | not scorable | not scorable |
| #### Bn-scaff_18507_1-p12372C-genome specific (napus-oleracea) | 0.9928229 | 0.8266441 | 1         | 0.8019858 | not scorable | not scorable |
| #### Bn-scaff_18507_1-p12373C-genome specific (napus-oleracea) | 0.9928229 | 0.7199882 | 1         | 0.7963473 | not scorable | not scorable |
| #### Bn-scaff_18507_1-p12375C-genome specific (napus-oleracea) | 0.9904306 | 0.7848054 | 1         | 0.7695048 | not scorable | not scorable |
| #### Bn-scaff_18507_1-p12401C-genome specific (napus-oleracea) | 0.9928229 | 0.741816  | 1         | 0.8481374 | not scorable | not scorable |
| #### Bn-scaff_18507_1-p12403C-genome specific (napus-oleracea) | 0.9928229 | 0.778906  | 0.9767442 | 0.7698547 | not scorable | not scorable |
| #### Bn-scaff_18507_1-p12403C-genome specific (napus-oleracea) | 1         | 0.6309711 | 0.9689922 | 0.7383154 | not scorable | not scorable |
| #### Bn-scaff_18507_1-p12412C-genome specific (napus-oleracea) | 0.215311  | 0.681413  | 0.9689922 | 0.7736471 | not scorable | not scorable |
| #### Bn-scaff_18507_1-p12416C-genome specific (napus-oleracea) | 1         | 0.6985219 | 1         | 0.7780794 | not scorable | not scorable |
| #### Bn-scaff_18507_1-p12417C-genome specific (napus-oleracea) | 0.9952153 | 0.7846684 | 1         | 0.8241706 | not scorable | not scorable |
| #### Bn-scaff_18507_1-p12420C-genome specific (napus-oleracea) | 0.9952153 | 0.8183693 | 0.9922481 | 0.7410269 | not scorable | not scorable |
| #### Bn-scaff_18507_1-p12423C-genome specific (napus-oleracea) | 0.9952153 | 0.827673  | 1         | 0.770398  | not scorable | not scorable |
| #### Bn-scaff_18507_1-p12427C-genome specific (napus-oleracea) | 0.9904306 | 0.8142278 | 1         | 0.8486626 | not scorable | not scorable |
| #### Bn-scaff_18507_1-p12431C-genome specific (napus-oleracea) | 0.9904306 | 0.7724792 | 1         | 0.686681  | not scorable | not scorable |
| #### Bn-scaff_18507_1-p12434C-genome specific (napus-oleracea) | 0.9952153 | 0.8237441 | 1         | 0.7538508 | not scorable | not scorable |
| #### Bn-scaff_18507_1-p12434C-genome specific (napus-oleracea) | 0.9952153 | 0.796491  | 1         | 0.726796  | not scorable | not scorable |
| #### Bn-scaff_18507_1-p12434C-genome specific (napus-oleracea) | 0.9641148 | 0.3969381 | 1         | 0.6708727 | not scorable | not scorable |
| #### Bn-scaff_18507_1-p12435C-genome specific (napus-oleracea) | 0.9928229 | 0.7829585 | 1         | 0.7138879 | not scorable | not scorable |
| #### Bn-scaff_18507_1-p12435C-genome specific (napus-oleracea) | 0.9928229 | 0.6267607 | 0.9922481 | 0.5980548 | not scorable | not scorable |
| #### Bn-scaff_18507_1-p12436C-genome specific (napus-oleracea) | 0.9952153 | 0.7820811 | 1         | 0.7160277 | not scorable | not scorable |
| #### Bn-scaff_18507_1-p12438C-genome specific (napus-oleracea) | 0.9904306 | 0.6989886 | 1         | 0.8535636 | not scorable | not scorable |
| #### Bn-scaff_18507_1-p12443C-genome specific (napus-oleracea) | 0.9952153 | 0.7606173 | 0.9844961 | 0.7417544 | not scorable | not scorable |
| #### Bn-scaff_18507_1-p12443C-genome specific (napus-oleracea) | 0.9928229 | 0.6716869 | 1         | 0.7018531 | not scorable | not scorable |
| #### Bn-scaff_18507_1-p12444C-genome specific (napus-oleracea) | 0.9904306 | 0.7021865 | 1         | 0.6809367 | not scorable | not scorable |
| #### Bn-scaff_18507_1-p12506C-genome specific (napus-oleracea) | 0.9760765 | 0.8666235 | 0.2248062 | 0.789126  | not scorable | not scorable |
| #### Bn-scaff_18507_1-p12520 genome unspecific (all in)        | 0.9880383 | 0.2732484 | 0.9844961 | 0.7000839 | 1            | 0.8004208    |
| #### Bn-scaff_18507_1-p12566C-genome specific (napus-oleracea) | 0.9760765 | 0.8690605 | 0.2248062 | 0.7760698 | not scorable | not scorable |
| #### Bn-scaff_18507_1-p12655C-genome specific (napus-oleracea) | 0.9952153 | 0.4766555 | 1         | 0.7168773 | not scorable | not scorable |
| #### Bn-scaff_18507_1-p12766 genome unspecific (all in)        | 0.9736842 | 0.314914  | 0.9922481 | 0.6844746 | 0.9834711    | 0.7767459    |
| #### Bn-scaff_18507_1-p12789C-genome specific (napus-oleracea) | 0.9952153 | 0.4554876 | 1         | 0.6533062 | not scorable | not scorable |
| #### Bn-scaff_18507_1-p12800C-genome specific (napus-oleracea) | 0.9952153 | 0.7647229 | 1         | 0.7635652 | not scorable | not scorable |
| #### Bn-scaff_18507_1-p12804C-genome specific (napus-oleracea) | 0.9928229 | 0.8837846 | 1         | 0.8038731 | not scorable | not scorable |



|                                                                 |              |              |              |              |              |              |
|-----------------------------------------------------------------|--------------|--------------|--------------|--------------|--------------|--------------|
| #### Bn-scaff_18507_1-p12804 C-genome specific (napus-oleracea) | 0.9904306    | 0.6971025    | 1            | 0.711405     | not scorable | not scorable |
| #### Bn-scaff_18507_1-p12805 C-genome specific (napus-oleracea) | 0.9928229    | 0.8893797    | 1            | 0.939469     | not scorable | not scorable |
| #### Bn-scaff_18507_1-p12806 C-genome specific (napus-oleracea) | 0.9904306    | 0.7210149    | 1            | 0.8182366    | not scorable | not scorable |
| #### Bn-scaff_18507_1-p12815 C-genome specific (napus-oleracea) | 0.9952153    | 0.7807698    | 0.9922481    | 0.6841862    | not scorable | not scorable |
| #### Bn-scaff_18507_1-p12892 C-genome specific (napus-oleracea) | 0.9904306    | 0.7551893    | 1            | 0.7510195    | not scorable | not scorable |
| #### Bn-scaff_18507_1-p12912 C-genome specific (napus-oleracea) | 0.9928229    | 0.8181731    | 0.9922481    | 0.8899606    | not scorable | not scorable |
| #### Bn-scaff_18507_1-p12964 C-genome specific (napus-oleracea) | 0.9760765    | 0.6798016    | 0.2248062    | 0.6933484    | not scorable | not scorable |
| #### Bn-scaff_18507_1-p12992 C-genome specific (napus-oleracea) | 0.9952153    | 0.7000275    | 1            | 0.7199502    | not scorable | not scorable |
| #### Bn-scaff_18507_1-p13016 C-genome specific (napus-oleracea) | 0.9976076    | 0.7026858    | 0.9922481    | 0.688006     | not scorable | not scorable |
| #### Bn-scaff_18507_1-p13017 genome unspecific (all in)         | 0.9976076    | 0.7030661    | 1            | 0.8545843    | 0.9752066    | 0.9454339    |
| #### Bn-scaff_18507_1-p13017 C-genome specific (napus-oleracea) | 0.9904306    | 0.7965038    | 1            | 0.731012     | not scorable | not scorable |
| #### Bn-scaff_18507_1-p13056 C-genome specific (napus-oleracea) | 0.9928229    | 0.7832692    | 1            | 0.7869623    | not scorable | not scorable |
| #### Bn-scaff_18507_1-p13070 C-genome specific (napus-oleracea) | 0.9928229    | 0.5764471    | 1            | 0.6045203    | not scorable | not scorable |
| #### Bn-scaff_18507_1-p13071 C-genome specific (napus-oleracea) | 0.9904306    | 0.6863196    | 1            | 0.6393375    | not scorable | not scorable |
| #### Bn-scaff_18507_1-p13072 C-genome specific (napus-oleracea) | 0.9880383    | 0.604336     | 1            | 0.6248023    | not scorable | not scorable |
| #### Bn-scaff_18507_1-p13083 C-genome specific (napus-oleracea) | 0.9928229    | 0.8334522    | 1            | 0.6804547    | not scorable | not scorable |
| #### Bn-scaff_18507_1-p13086 C-genome specific (napus-oleracea) | 0.9928229    | 0.6463173    | 1            | 0.6180646    | not scorable | not scorable |
| #### Bn-scaff_18507_1-p13087 C-genome specific (napus-oleracea) | 0.9928229    | 0.5694237    | 1            | 0.5745514    | not scorable | not scorable |
| #### Bn-scaff_18507_1-p13118 C-genome specific (napus-oleracea) | 0.9952153    | 0.8126486    | 0.9922481    | 0.8346812    | not scorable | not scorable |
| #### Bn-scaff_18507_1-p13134 C-genome specific (napus-oleracea) | 0.9880383    | 0.7870933    | 0.9844961    | 0.7707093    | not scorable | not scorable |
| #### Bn-scaff_18507_1-p13250 C-genome specific (napus-oleracea) | 0.9952153    | 0.7932998    | 1            | 0.7571012    | not scorable | not scorable |
| #### Bn-scaff_18507_1-p13252 C-genome specific (napus-oleracea) | 0.9928229    | 0.7969198    | 1            | 0.7343479    | not scorable | not scorable |
| #### Bn-scaff_18507_1-p13257 C-genome specific (napus-oleracea) | 0.9904306    | 0.8112096    | 1            | 0.8180337    | not scorable | not scorable |
| #### Bn-scaff_18507_1-p13273 C-genome specific (napus-oleracea) | 0.9952153    | 0.6842329    | 1            | 0.8480415    | not scorable | not scorable |
| #### Bn-scaff_18507_1-p13538 napus specific                     | 1            | 0.4984884    | not scorable | not scorable | not scorable | not scorable |
| #### Bn-scaff_18507_1-p13629 napus specific                     | 0.9880383    | 0.5192838    | not scorable | not scorable | not scorable | not scorable |
| #### Bn-scaff_18507_1-p13836 C-genome specific (napus-oleracea) | 0.9904306    | 0.8781769    | 1            | 0.7230718    | not scorable | not scorable |
| #### Bn-scaff_18507_1-p13938 napus specific                     | 0.9784689    | 0.80422      | not scorable | not scorable | not scorable | not scorable |
| #### Bn-scaff_18507_1-p14212 C-genome specific (napus-oleracea) | 0.9928229    | 0.7393432    | 1            | 0.7519162    | not scorable | not scorable |
| #### Bn-scaff_18507_1-p14215 C-genome specific (napus-oleracea) | 0.9928229    | 0.7613126    | 1            | 0.7170574    | not scorable | not scorable |
| #### Bn-scaff_18507_1-p14215 C-genome specific (napus-oleracea) | 0.9952153    | 0.8950983    | 1            | 0.7721331    | not scorable | not scorable |
| #### Bn-scaff_18507_1-p14219 C-genome specific (oleracea only)  | not scorable | not scorable | 1            | 0.7810848    | not scorable | not scorable |
| #### Bn-scaff_18507_1-p14220 C-genome specific (napus-oleracea) | 0.9952153    | 0.7201653    | 1            | 0.6729705    | not scorable | not scorable |

|                                                                 |           |           |           |           |              |              |
|-----------------------------------------------------------------|-----------|-----------|-----------|-----------|--------------|--------------|
| #### Bn-scaff_18507_1-p14220 C-genome specific (napus-oleracea) | 0.9928229 | 0.7933326 | 1         | 0.7939444 | not scorable | not scorable |
| #### Bn-scaff_18507_1-p14225 C-genome specific (napus-oleracea) | 0.9856459 | 0.5644022 | 1         | 0.5937991 | not scorable | not scorable |
| #### Bn-scaff_18507_1-p14236 C-genome specific (napus-oleracea) | 0.9880383 | 0.7696604 | 1         | 0.7687672 | not scorable | not scorable |
| #### Bn-scaff_18507_1-p14238 C-genome specific (napus-oleracea) | 0.9856459 | 0.7804505 | 0.9922481 | 0.8807632 | not scorable | not scorable |
| #### Bn-scaff_18507_1-p14238 C-genome specific (napus-oleracea) | 0.9880383 | 0.7669133 | 0.9922481 | 0.7672513 | not scorable | not scorable |
| #### Bn-scaff_18507_1-p14238 C-genome specific (napus-oleracea) | 0.9880383 | 0.7836708 | 0.9844961 | 0.7764738 | not scorable | not scorable |
| #### Bn-scaff_18507_1-p14243 C-genome specific (napus-oleracea) | 0.9952153 | 0.6998956 | 0.9922481 | 0.7209538 | not scorable | not scorable |
| #### Bn-scaff_18507_1-p14246 C-genome specific (napus-oleracea) | 0.9880383 | 0.8768037 | 1         | 0.7533373 | not scorable | not scorable |
| #### Bn-scaff_18507_1-p14247 C-genome specific (napus-oleracea) | 0.9904306 | 0.6971302 | 1         | 0.7152179 | not scorable | not scorable |
| #### Bn-scaff_18507_1-p14248 C-genome specific (napus-oleracea) | 0.9952153 | 0.7936574 | 1         | 0.729049  | not scorable | not scorable |
| #### Bn-scaff_18507_1-p14249 C-genome specific (napus-oleracea) | 0.9904306 | 0.7280554 | 1         | 0.8483602 | not scorable | not scorable |
| #### Bn-scaff_18507_1-p14250 C-genome specific (napus-oleracea) | 0.9928229 | 0.8034275 | 1         | 0.8530724 | not scorable | not scorable |
| #### Bn-scaff_18507_1-p14251 C-genome specific (napus-oleracea) | 0.9952153 | 0.7435995 | 0.9922481 | 0.7772273 | not scorable | not scorable |
| #### Bn-scaff_18507_1-p14253 C-genome specific (napus-oleracea) | 0.9880383 | 0.7610016 | 1         | 0.7541575 | not scorable | not scorable |
| #### Bn-scaff_18507_1-p14292 C-genome specific (napus-oleracea) | 0.9928229 | 0.8264821 | 0.9767442 | 0.7081215 | not scorable | not scorable |
| #### Bn-scaff_18507_1-p14298 C-genome specific (napus-oleracea) | 0.9952153 | 0.7175396 | 0.9922481 | 0.7806471 | not scorable | not scorable |
| #### Bn-scaff_18507_1-p14302 C-genome specific (napus-oleracea) | 0.9952153 | 0.7717976 | 1         | 0.798973  | not scorable | not scorable |
| #### Bn-scaff_18507_1-p14322 C-genome specific (napus-oleracea) | 0.9856459 | 0.69893   | 0.9844961 | 0.8050868 | not scorable | not scorable |
| #### Bn-scaff_18507_1-p14322 C-genome specific (napus-oleracea) | 0.9880383 | 0.7895032 | 1         | 0.7582803 | not scorable | not scorable |
| #### Bn-scaff_18507_1-p14323 C-genome specific (napus-oleracea) | 0.9952153 | 0.7465109 | 0.9844961 | 0.825487  | not scorable | not scorable |
| #### Bn-scaff_18507_1-p14327 C-genome specific (napus-oleracea) | 0.9928229 | 0.7916852 | 1         | 0.7505612 | not scorable | not scorable |
| #### Bn-scaff_18507_1-p14327 C-genome specific (napus-oleracea) | 0.9928229 | 0.7352656 | 1         | 0.715601  | not scorable | not scorable |
| #### Bn-scaff_18507_1-p14328 C-genome specific (napus-oleracea) | 0.9952153 | 0.7541156 | 1         | 0.7060084 | not scorable | not scorable |
| #### Bn-scaff_18507_1-p14330 C-genome specific (napus-oleracea) | 0.9904306 | 0.8944391 | 1         | 0.786806  | not scorable | not scorable |
| #### Bn-scaff_18507_1-p14334 C-genome specific (napus-oleracea) | 0.9952153 | 0.712487  | 1         | 0.7338982 | not scorable | not scorable |
| #### Bn-scaff_18507_1-p16613 C-genome specific (napus-oleracea) | 0.9808612 | 0.7033546 | 0.2170543 | 0.8059788 | not scorable | not scorable |
| #### Bn-scaff_18507_1-p17776 C-genome specific (napus-oleracea) | 0.9712918 | 0.6059301 | 0.2170543 | 0.7720413 | not scorable | not scorable |
| #### Bn-scaff_18507_1-p17831 C-genome specific (napus-oleracea) | 0.9760765 | 0.7507916 | 0.2248062 | 0.7896349 | not scorable | not scorable |
| #### Bn-scaff_18507_1-p17997 C-genome specific (napus-oleracea) | 0.9760765 | 0.7530243 | 0.2170543 | 0.6999024 | not scorable | not scorable |
| #### Bn-scaff_18507_1-p18405 C-genome specific (napus-oleracea) | 0.9760765 | 0.6997057 | 0.2170543 | 0.7284085 | not scorable | not scorable |
| #### Bn-scaff_18507_1-p18675 C-genome specific (napus-oleracea) | 0.9808612 | 0.7295386 | 0.2170543 | 0.7103289 | not scorable | not scorable |
| #### Bn-scaff_18507_1-p18935 C-genome specific (napus-oleracea) | 0.9712918 | 0.809159  | 0.2170543 | 0.8547449 | not scorable | not scorable |
| #### Bn-scaff_18507_1-p19143 C-genome specific (napus-oleracea) | 0.2105263 | 0.8709252 | 0.9147287 | 0.8562046 | not scorable | not scorable |

|                                                                 |              |              |           |           |              |              |
|-----------------------------------------------------------------|--------------|--------------|-----------|-----------|--------------|--------------|
| #### Bn-scaff_18507_1-p19689 C-genome specific (napus-oleracea) | 0.9808612    | 0.6730723    | 0.2170543 | 0.6812129 | not scorable | not scorable |
| #### Bn-scaff_18507_1-p20197 C-genome specific (napus-oleracea) | 0.9784689    | 0.8508198    | 0.2170543 | 0.7816069 | not scorable | not scorable |
| #### Bn-scaff_18507_1-p20390 C-genome specific (napus-oleracea) | 0.9904306    | 0.805365     | 0.9844961 | 0.6968669 | not scorable | not scorable |
| #### Bn-scaff_18507_1-p20464 C-genome specific (napus-oleracea) | 0.9593301    | 0.7376214    | 0.2170543 | 0.7838812 | not scorable | not scorable |
| #### Bn-scaff_18507_1-p24681 C-genome specific (napus-oleracea) | 0.9952153    | 0.7243688    | 0.9922481 | 0.693138  | not scorable | not scorable |
| #### Bn-scaff_18507_1-p24694 C-genome specific (napus-oleracea) | 0.9904306    | 0.7419639    | 0.9922481 | 0.7441021 | not scorable | not scorable |
| #### Bn-scaff_18507_1-p24807 C-genome specific (napus-oleracea) | 0.9952153    | 0.6986661    | 0.9922481 | 0.7973285 | not scorable | not scorable |
| #### Bn-scaff_18507_1-p25148 C-genome specific (napus-oleracea) | 0.9808612    | 0.6223946    | 0.9922481 | 0.7290846 | not scorable | not scorable |
| #### Bn-scaff_18507_1-p26524 C-genome specific (napus-oleracea) | 0.9928229    | 0.7846701    | 1         | 0.7716225 | not scorable | not scorable |
| #### Bn-scaff_18507_1-p27112 C-genome specific (oleracea only)  | not scorable | not scorable | 1         | 0.8033993 | not scorable | not scorable |
| #### Bn-scaff_18507_1-p29032 C-genome specific (napus-oleracea) | 0.9904306    | 0.8117489    | 1         | 0.7924657 | not scorable | not scorable |
| #### Bn-scaff_18507_1-p29171 C-genome specific (napus-oleracea) | 0.9904306    | 0.9098473    | 1         | 0.7830929 | not scorable | not scorable |
| #### Bn-scaff_18507_1-p29178 C-genome specific (napus-oleracea) | 0.9928229    | 0.6024886    | 1         | 0.69587   | not scorable | not scorable |
| #### Bn-scaff_18507_1-p29187 C-genome specific (napus-oleracea) | 0.9928229    | 0.8664871    | 1         | 0.7714815 | not scorable | not scorable |
| #### Bn-scaff_18507_1-p29427 C-genome specific (napus-oleracea) | 0.9928229    | 0.7898394    | 0.9922481 | 0.6675923 | not scorable | not scorable |
| #### Bn-scaff_18507_1-p29754 C-genome specific (napus-oleracea) | 0.9904306    | 0.8700416    | 0.9922481 | 0.7861073 | not scorable | not scorable |
| #### Bn-scaff_18507_1-p29767 C-genome specific (napus-oleracea) | 0.9808612    | 0.7976243    | 0.2790698 | 0.905179  | not scorable | not scorable |
| #### Bn-scaff_18507_1-p29769 C-genome specific (napus-oleracea) | 0.9928229    | 0.8269599    | 1         | 0.8172881 | not scorable | not scorable |
| #### Bn-scaff_18507_1-p29790 C-genome specific (napus-oleracea) | 0.9904306    | 0.7991222    | 0.9922481 | 0.9215278 | not scorable | not scorable |
| #### Bn-scaff_18507_1-p29827 C-genome specific (napus-oleracea) | 0.9808612    | 0.8302302    | 0.2790698 | 0.7901962 | not scorable | not scorable |
| #### Bn-scaff_18507_1-p29959 C-genome specific (napus-oleracea) | 0.9952153    | 0.7085027    | 0.9922481 | 0.7411996 | not scorable | not scorable |
| #### Bn-scaff_18507_1-p35014 C-genome specific (napus-oleracea) | 0.9736842    | 0.5598246    | 1         | 0.5975878 | not scorable | not scorable |
| #### Bn-scaff_18507_1-p35216 C-genome specific (napus-oleracea) | 0.9760765    | 0.9176091    | 0.2790698 | 0.7947861 | not scorable | not scorable |
| #### Bn-scaff_18507_1-p35405 C-genome specific (napus-oleracea) | 0.9784689    | 0.8461883    | 0.2790698 | 0.8146836 | not scorable | not scorable |
| #### Bn-scaff_18507_1-p35452 C-genome specific (napus-oleracea) | 0.9760765    | 0.8984281    | 0.3100775 | 0.8883853 | not scorable | not scorable |
| #### Bn-scaff_18507_1-p35496 C-genome specific (napus-oleracea) | 0.9832536    | 0.5789703    | 0.8992248 | 0.6213855 | not scorable | not scorable |
| #### Bn-scaff_18507_1-p35508 C-genome specific (napus-oleracea) | 0.9784689    | 0.735989     | 0.2868217 | 0.8614864 | not scorable | not scorable |
| #### Bn-scaff_18507_1-p37079 genome unspecific (all in)         | 0.9952153    | 0.4415181    | 1         | 0.6873773 | 1            | 0.9095823    |
| #### Bn-scaff_18507_1-p37133 C-genome specific (napus-oleracea) | 0.9904306    | 0.681878     | 0.9922481 | 0.7199915 | not scorable | not scorable |
| #### Bn-scaff_18507_1-p37882 C-genome specific (napus-oleracea) | 0.9928229    | 0.6938957    | 1         | 0.7178495 | not scorable | not scorable |
| #### Bn-scaff_18507_1-p37920 C-genome specific (napus-oleracea) | 0.9952153    | 0.8636929    | 1         | 0.853552  | not scorable | not scorable |
| #### Bn-scaff_18507_1-p39522 genome unspecific (all in)         | 0.9952153    | 0.7011535    | 1         | 0.777989  | 0.9752066    | 0.935405     |
| #### Bn-scaff_18507_1-p39688 genome unspecific (all in)         | 0.9976076    | 0.5309341    | 1         | 0.8884721 | 1            | 0.9174305    |

|                                                                 |              |              |           |           |              |              |
|-----------------------------------------------------------------|--------------|--------------|-----------|-----------|--------------|--------------|
| #### Bn-scaff_18507_1-p3976 genome unspecific (oleracea-rapa)   | not scorable | not scorable | 1         | 0.7840836 | 1            | 0.8983727    |
| #### Bn-scaff_18507_1-p3989 genome unspecific (all in)          | 0.9976076    | 0.3500895    | 1         | 0.7897688 | 1            | 0.9120173    |
| #### Bn-scaff_18507_1-p4062 C-genome specific (napus-oleracea)  | 0.9952153    | 0.599541     | 0.9922481 | 0.6486312 | not scorable | not scorable |
| #### Bn-scaff_18507_1-p4066 C-genome specific (napus-oleracea)  | 0.9904306    | 0.8637359    | 1         | 0.6845227 | not scorable | not scorable |
| #### Bn-scaff_18507_1-p40734 C-genome specific (napus-oleracea) | 0.9856459    | 0.8254134    | 1         | 0.753154  | not scorable | not scorable |
| #### Bn-scaff_18507_1-p40822 C-genome specific (napus-oleracea) | 0.9928229    | 0.8541873    | 0.9922481 | 0.7593167 | not scorable | not scorable |
| #### Bn-scaff_18507_1-p4106 C-genome specific (napus-oleracea)  | 0.9952153    | 0.7672765    | 1         | 0.7579653 | not scorable | not scorable |
| #### Bn-scaff_18507_1-p41073 C-genome specific (napus-oleracea) | 0.9952153    | 0.7958809    | 1         | 0.7921424 | not scorable | not scorable |
| #### Bn-scaff_18507_1-p4111 C-genome specific (napus-oleracea)  | 0.9904306    | 0.9055177    | 1         | 0.7913169 | not scorable | not scorable |
| #### Bn-scaff_18507_1-p4112 C-genome specific (napus-oleracea)  | 0.9952153    | 0.7888772    | 0.9922481 | 0.8516971 | not scorable | not scorable |
| #### Bn-scaff_18507_1-p41163 C-genome specific (napus-oleracea) | 0.9952153    | 0.7855091    | 1         | 0.7823592 | not scorable | not scorable |
| #### Bn-scaff_18507_1-p4118 C-genome specific (napus-oleracea)  | 0.9952153    | 0.6826469    | 1         | 0.7734675 | not scorable | not scorable |
| #### Bn-scaff_18507_1-p4118 C-genome specific (napus-oleracea)  | 0.9952153    | 0.7088198    | 1         | 0.7781911 | not scorable | not scorable |
| #### Bn-scaff_18507_1-p41187 C-genome specific (napus-oleracea) | 0.9952153    | 0.6307719    | 1         | 0.7421591 | not scorable | not scorable |
| #### Bn-scaff_18507_1-p4123 C-genome specific (napus-oleracea)  | 0.9880383    | 0.8424475    | 1         | 0.7795539 | not scorable | not scorable |
| #### Bn-scaff_18507_1-p4124 genome unspecific (all in)          | 0.9952153    | 0.6199782    | 1         | 0.5894414 | 1            | 0.9309939    |
| #### Bn-scaff_18507_1-p4174 C-genome specific (napus-oleracea)  | 0.9952153    | 0.6333929    | 1         | 0.7407037 | not scorable | not scorable |
| #### Bn-scaff_18507_1-p44604 genome unspecific (oleracea-rapa)  | not scorable | not scorable | 1         | 0.5656786 | 0.9917355    | 0.5567296    |
| #### Bn-scaff_18507_1-p46514 C-genome specific (napus-oleracea) | 0.9952153    | 0.7731532    | 1         | 0.7603765 | not scorable | not scorable |
| #### Bn-scaff_18507_1-p4664 C-genome specific (napus-oleracea)  | 0.9928229    | 0.6848632    | 1         | 0.672336  | not scorable | not scorable |
| #### Bn-scaff_18507_1-p46647 C-genome specific (napus-oleracea) | 0.9904306    | 0.7260366    | 0.9922481 | 0.6766202 | not scorable | not scorable |
| #### Bn-scaff_18507_1-p46671 C-genome specific (napus-oleracea) | 0.9952153    | 0.7171559    | 0.9922481 | 0.7203045 | not scorable | not scorable |
| #### Bn-scaff_18507_1-p46678 C-genome specific (napus-oleracea) | 0.9928229    | 0.7167502    | 1         | 0.6830207 | not scorable | not scorable |
| #### Bn-scaff_18507_1-p46771 C-genome specific (napus-oleracea) | 0.9952153    | 0.7238708    | 1         | 0.6403241 | not scorable | not scorable |
| #### Bn-scaff_18507_1-p5513 C-genome specific (napus-oleracea)  | 0.9880383    | 0.6458812    | 0.9844961 | 0.6604707 | not scorable | not scorable |
| #### Bn-scaff_18507_1-p5538 C-genome specific (napus-oleracea)  | 0.9904306    | 0.8745759    | 0.9922481 | 0.805427  | not scorable | not scorable |
| #### Bn-scaff_18507_1-p55891 C-genome specific (napus-oleracea) | 0.9952153    | 0.7492214    | 1         | 0.7393247 | not scorable | not scorable |
| #### Bn-scaff_18507_1-p5620 C-genome specific (napus-oleracea)  | 0.9928229    | 0.8304192    | 1         | 0.7483193 | not scorable | not scorable |
| #### Bn-scaff_18507_1-p5646 C-genome specific (napus-oleracea)  | 0.9928229    | 0.6682836    | 1         | 0.6806947 | not scorable | not scorable |
| #### Bn-scaff_18507_1-p5657 C-genome specific (napus-oleracea)  | 0.9952153    | 0.765784     | 1         | 0.7181031 | not scorable | not scorable |
| #### Bn-scaff_18507_1-p56954 C-genome specific (napus-oleracea) | 0.9952153    | 0.7694383    | 0.9922481 | 0.6960583 | not scorable | not scorable |
| #### Bn-scaff_18507_1-p57191 C-genome specific (napus-oleracea) | 0.9952153    | 0.7577403    | 1         | 0.7014856 | not scorable | not scorable |
| #### Bn-scaff_18507_1-p57473 C-genome specific (napus-oleracea) | 0.9952153    | 0.7351181    | 0.9922481 | 0.7830523 | not scorable | not scorable |

|                                                                 |              |              |              |              |              |              |
|-----------------------------------------------------------------|--------------|--------------|--------------|--------------|--------------|--------------|
| #### Bn-scaff_18507_1-p58987 C-genome specific (napus-oleracea) | 0.9952153    | 0.6230681    | 1            | 0.5993218    | not scorable | not scorable |
| #### Bn-scaff_18507_1-p59131 C-genome specific (napus-oleracea) | 0.9928229    | 0.8881741    | 1            | 0.855684     | not scorable | not scorable |
| #### Bn-scaff_18507_1-p59136 C-genome specific (napus-oleracea) | 0.9928229    | 0.8387746    | 1            | 0.7930338    | not scorable | not scorable |
| #### Bn-scaff_18507_1-p59341 C-genome specific (napus-oleracea) | 0.9928229    | 0.8675472    | 1            | 0.7974049    | not scorable | not scorable |
| #### Bn-scaff_18507_1-p59376 C-genome specific (napus-oleracea) | 0.9904306    | 0.8677401    | 1            | 0.7850747    | not scorable | not scorable |
| #### Bn-scaff_18507_1-p59483 C-genome specific (napus-oleracea) | 0.9952153    | 0.881908     | 0.9922481    | 0.778622     | not scorable | not scorable |
| #### Bn-scaff_18507_1-p61382 C-genome specific (napus-oleracea) | 0.9904306    | 0.7276768    | 0.9767442    | 0.7542531    | not scorable | not scorable |
| #### Bn-scaff_18507_1-p63272 C-genome specific (napus-oleracea) | 0.9928229    | 0.88401      | 1            | 0.8010182    | not scorable | not scorable |
| #### Bn-scaff_18507_1-p64960 C-genome specific (napus-oleracea) | 0.9928229    | 0.6234816    | 1            | 0.6829953    | not scorable | not scorable |
| #### Bn-scaff_18507_1-p65562 C-genome specific (napus-oleracea) | 0.9928229    | 0.7142897    | 0.9844961    | 0.7112183    | not scorable | not scorable |
| #### Bn-scaff_18507_1-p65688 C-genome specific (napus-oleracea) | 0.9952153    | 0.7983534    | 1            | 0.7000307    | not scorable | not scorable |
| #### Bn-scaff_18507_1-p67202 C-genome specific (napus-oleracea) | 0.9904306    | 0.8911976    | 1            | 0.79768      | not scorable | not scorable |
| #### Bn-scaff_18507_1-p67211 C-genome specific (napus-oleracea) | 0.9904306    | 0.7865548    | 1            | 0.7208324    | not scorable | not scorable |
| #### Bn-scaff_18507_1-p68027 C-genome specific (napus-oleracea) | 0.9904306    | 0.8941537    | 1            | 0.8085953    | not scorable | not scorable |
| #### Bn-scaff_18507_1-p6970 genome unspecific (all in)          | 0.8971292    | 0.431022     | 1            | 0.5922619    | 0.9669421    | 0.7699286    |
| #### Bn-scaff_18507_1-p71030 C-genome specific (napus-oleracea) | 0.9952153    | 0.8086034    | 1            | 0.7550013    | not scorable | not scorable |
| #### Bn-scaff_18507_1-p71859 genome unspecific (all in)         | 1            | 0.5443887    | 1            | 0.8380358    | 1            | 0.9094733    |
| #### Bn-scaff_18507_1-p73567 C-genome specific (napus-oleracea) | 0.9976076    | 0.7135053    | 1            | 0.7201517    | not scorable | not scorable |
| #### Bn-scaff_18507_1-p73706 C-genome specific (oleracea only)  | not scorable | not scorable | 1            | 0.8234581    | not scorable | not scorable |
| #### Bn-scaff_18507_1-p75859 C-genome specific (napus-oleracea) | 0.9904306    | 0.8140697    | 1            | 0.7450931    | not scorable | not scorable |
| #### Bn-scaff_18507_1-p75872 C-genome specific (napus-oleracea) | 0.9904306    | 0.7620483    | 1            | 0.8744599    | not scorable | not scorable |
| #### Bn-scaff_18507_1-p75985 C-genome specific (napus-oleracea) | 0.9952153    | 0.7679734    | 0.9922481    | 0.7147067    | not scorable | not scorable |
| #### Bn-scaff_18507_1-p76741 C-genome specific (napus-oleracea) | 0.9784689    | 0.5687689    | 0.2945736    | 0.614565     | not scorable | not scorable |
| #### Bn-scaff_18507_1-p76799 C-genome specific (napus-oleracea) | 0.9665072    | 0.8351634    | 0.2790698    | 0.7855611    | not scorable | not scorable |
| #### Bn-scaff_18507_1-p77025 C-genome specific (napus-oleracea) | 0.9712918    | 0.781043     | 0.2713178    | 0.7411944    | not scorable | not scorable |
| #### Bn-scaff_18507_1-p77470 C-genome specific (napus-oleracea) | 0.9928229    | 0.788036     | 0.9922481    | 0.8054933    | not scorable | not scorable |
| #### Bn-scaff_18507_1-p77689 C-genome specific (napus-oleracea) | 0.9856459    | 0.7690362    | 0.9922481    | 0.6908838    | not scorable | not scorable |
| #### Bn-scaff_18507_1-p77739 A-genome specific (rapa only)      | not scorable | not scorable | not scorable | not scorable | 1            | 0.7021696    |
| #### Bn-scaff_18507_1-p77814 C-genome specific (napus-oleracea) | 0.9856459    | 0.8747431    | 0.9922481    | 0.6911917    | not scorable | not scorable |
| #### Bn-scaff_18507_1-p77928 C-genome specific (napus-oleracea) | 0.9880383    | 0.7365487    | 0.9844961    | 0.6881289    | not scorable | not scorable |
| #### Bn-scaff_18507_1-p77984 C-genome specific (napus-oleracea) | 0.9904306    | 0.7582935    | 1            | 0.7125625    | not scorable | not scorable |
| #### Bn-scaff_18507_1-p78049 C-genome specific (napus-oleracea) | 0.9928229    | 0.6784413    | 1            | 0.5716435    | not scorable | not scorable |
| #### Bn-scaff_18507_1-p78075 C-genome specific (napus-oleracea) | 0.9952153    | 0.7824756    | 1            | 0.7377073    | not scorable | not scorable |

|                                                                 |              |              |              |              |              |              |              |
|-----------------------------------------------------------------|--------------|--------------|--------------|--------------|--------------|--------------|--------------|
| #### Bn-scaff_18507_1-p78082 C-genome specific (napus-oleracea) | 0.9928229    | 0.7631583    |              | 1            | 0.6655804    | not scorable | not scorable |
| #### Bn-scaff_18507_1-p78095 C-genome specific (napus-oleracea) | 0.9904306    | 0.7656381    | 0.9922481    |              | 0.7682838    | not scorable | not scorable |
| #### Bn-scaff_18507_1-p78104 C-genome specific (napus-oleracea) | 0.9928229    | 0.725513     |              | 1            | 0.6527947    | not scorable | not scorable |
| #### Bn-scaff_18507_1-p78329 genome unspecific (all in)         | 1            | 0.3732005    | 0.9844961    |              | 0.7328664    | 1            | 0.8948976    |
| #### Bn-scaff_18507_1-p79247 genome unspecific (all in)         | 1            | 0.5490819    |              | 1            | 0.5656227    | 1            | 0.7853344    |
| #### Bn-scaff_18507_1-p79326 C-genome specific (napus-oleracea) | 0.9880383    | 0.5590496    | 0.9844961    |              | 0.6250784    | not scorable | not scorable |
| #### Bn-scaff_18507_1-p84695 napus specific                     | 0.9880383    | 0.7013057    | not scorable | not scorable | not scorable | not scorable | not scorable |
| #### Bn-scaff_18507_1-p84895 C-genome specific (napus-oleracea) | 0.9784689    | 0.8143673    | 0.3023256    |              | 0.7472811    | not scorable | not scorable |
| #### Bn-scaff_18507_1-p85013 C-genome specific (napus-oleracea) | 0.9736842    | 0.7503055    | 0.2713178    |              | 0.7265131    | not scorable | not scorable |
| #### Bn-scaff_18507_1-p85506 C-genome specific (napus-oleracea) | 0.9976076    | 0.6831111    |              | 1            | 0.568415     | not scorable | not scorable |
| #### Bn-scaff_18507_1-p85710 C-genome specific (napus-oleracea) | 0.9952153    | 0.9386705    |              | 1            | 0.673371     | not scorable | not scorable |
| #### Bn-scaff_18507_1-p86080 C-genome specific (napus-oleracea) | 0.9904306    | 0.8144261    | 0.9844961    |              | 0.7586014    | not scorable | not scorable |
| #### Bn-scaff_18507_1-p86125 C-genome specific (napus-oleracea) | 0.9880383    | 0.6699298    | 0.9922481    |              | 0.685254     | not scorable | not scorable |
| #### Bn-scaff_18507_1-p86539 C-genome specific (napus-oleracea) | 0.9832536    | 0.7685171    | 0.9767442    |              | 0.6233475    | not scorable | not scorable |
| #### Bn-scaff_18507_1-p86578 C-genome specific (napus-oleracea) | 0.9856459    | 0.8353194    |              | 1            | 0.7840218    | not scorable | not scorable |
| #### Bn-scaff_18507_1-p86677 genome unspecific (all in)         | 0.9952153    | 0.6043949    |              | 1            | 0.7222247    | 1            | 0.9095826    |
| #### Bn-scaff_18507_1-p86741 C-genome specific (napus-oleracea) | 0.9832536    | 0.8671666    |              | 1            | 0.7318069    | not scorable | not scorable |
| #### Bn-scaff_18507_1-p86750 genome unspecific (all in)         | 0.9928229    | 0.7695086    |              | 1            | 0.7045743    | 0.7024794    | 0.846914     |
| #### Bn-scaff_18507_1-p86767 C-genome specific (napus-oleracea) | 0.9880383    | 0.7375293    |              | 1            | 0.641188     | not scorable | not scorable |
| #### Bn-scaff_18507_1-p86866 C-genome specific (napus-oleracea) | 0.9880383    | 0.7820364    |              | 1            | 0.770708     | not scorable | not scorable |
| #### Bn-scaff_18507_1-p86869 C-genome specific (napus-oleracea) | 0.9904306    | 0.6888592    |              | 1            | 0.5571714    | not scorable | not scorable |
| #### Bn-scaff_18507_1-p88102 C-genome specific (napus-oleracea) | 0.9952153    | 0.8230585    | 0.9844961    |              | 0.7536556    | not scorable | not scorable |
| #### Bn-scaff_18507_1-p88164 C-genome specific (napus-oleracea) | 0.9952153    | 0.7911144    |              | 1            | 0.7432729    | not scorable | not scorable |
| #### Bn-scaff_18507_1-p88270 C-genome specific (napus-oleracea) | 0.9952153    | 0.801829     |              | 1            | 0.8012182    | not scorable | not scorable |
| #### Bn-scaff_18507_1-p88329 C-genome specific (napus-oleracea) | 0.9952153    | 0.7665191    |              | 1            | 0.7780551    | not scorable | not scorable |
| #### Bn-scaff_18507_1-p88484 C-genome specific (napus-oleracea) | 0.9928229    | 0.6290483    | 0.9922481    |              | 0.5932388    | not scorable | not scorable |
| #### Bn-scaff_18507_1-p88775 genome unspecific (all in)         | 0.9832536    | 0.3026374    |              | 1            | 0.7937135    | 0.9917355    | 0.8085204    |
| #### Bn-scaff_18507_1-p88907 C-genome specific (oleracea only)  | not scorable | not scorable |              | 1            | 0.7990189    | not scorable | not scorable |
| #### Bn-scaff_18507_1-p88992 genome unspecific (all in)         | 0.9856459    | 0.5254995    |              | 1            | 0.739889     | 1            | 0.9027535    |
| #### Bn-scaff_18507_1-p89064 C-genome specific (oleracea only)  | not scorable | not scorable |              | 1            | 0.4915701    | not scorable | not scorable |
| #### Bn-scaff_18507_1-p9039 C-genome specific (napus-oleracea)  | 0.9904306    | 0.7857677    | 0.9767442    |              | 0.6664944    | not scorable | not scorable |
| #### Bn-scaff_18507_1-p91884 C-genome specific (napus-oleracea) | 0.9904306    | 0.6981347    | 0.9612403    |              | 0.7012939    | not scorable | not scorable |
| #### Bn-scaff_18507_1-p92245 genome unspecific (all in)         | 0.9952153    | 0.3372913    | 0.9922481    |              | 0.7350883    | 0.9752066    | 0.7757466    |

|                                                                  |              |              |           |           |              |              |
|------------------------------------------------------------------|--------------|--------------|-----------|-----------|--------------|--------------|
| ##### Bn-scaff_18507_1-p92315 C-genome specific (napus-oleracea) | 0.9952153    | 0.6680075    | 1         | 0.7332639 | not scorable | not scorable |
| ##### Bn-scaff_18507_1-p92381 C-genome specific (napus-oleracea) | 0.9952153    | 0.7634003    | 1         | 0.6795061 | not scorable | not scorable |
| ##### Bn-scaff_18507_1-p92387 C-genome specific (napus-oleracea) | 0.9928229    | 0.7148188    | 1         | 0.6655582 | not scorable | not scorable |
| ##### Bn-scaff_18507_1-p92415 C-genome specific (napus-oleracea) | 0.9928229    | 0.9168361    | 1         | 0.7297064 | not scorable | not scorable |
| ##### Bn-scaff_18507_1-p92437 C-genome specific (napus-oleracea) | 0.9904306    | 0.7645962    | 1         | 0.7070511 | not scorable | not scorable |
| ##### Bn-scaff_18507_1-p92620 C-genome specific (napus-oleracea) | 0.9904306    | 0.8294272    | 0.9922481 | 0.7059212 | not scorable | not scorable |
| ##### Bn-scaff_18507_1-p92632 C-genome specific (napus-oleracea) | 0.9904306    | 0.7456878    | 1         | 0.6862029 | not scorable | not scorable |
| ##### Bn-scaff_18507_1-p92655 C-genome specific (napus-oleracea) | 0.9904306    | 0.8836641    | 1         | 0.6980124 | not scorable | not scorable |
| ##### Bn-scaff_18507_1-p92726 C-genome specific (napus-oleracea) | 0.9952153    | 0.7940393    | 0.9922481 | 0.8503542 | not scorable | not scorable |
| ##### Bn-scaff_18507_1-p92741 C-genome specific (napus-oleracea) | 0.9880383    | 0.8693895    | 0.9922481 | 0.8848003 | not scorable | not scorable |
| ##### Bn-scaff_18507_1-p93225 C-genome specific (napus-oleracea) | 0.9904306    | 0.7287883    | 0.9922481 | 0.7994229 | not scorable | not scorable |
| ##### Bn-scaff_18507_1-p93296 C-genome specific (napus-oleracea) | 0.9952153    | 0.8382725    | 0.9922481 | 0.7502018 | not scorable | not scorable |
| ##### Bn-scaff_18507_1-p93323 C-genome specific (napus-oleracea) | 0.9784689    | 0.5317427    | 1         | 0.6853206 | not scorable | not scorable |
| ##### Bn-scaff_18507_1-p94168 C-genome specific (napus-oleracea) | 0.9904306    | 0.7669851    | 1         | 0.704466  | not scorable | not scorable |
| ##### Bn-scaff_18507_1-p94548 C-genome specific (napus-oleracea) | 0.9928229    | 0.8006592    | 0.9922481 | 0.7700035 | not scorable | not scorable |
| ##### Bn-scaff_18507_1-p94576 C-genome specific (napus-oleracea) | 0.9904306    | 0.8925671    | 1         | 0.7848603 | not scorable | not scorable |
| ##### Bn-scaff_18507_1-p94707 C-genome specific (napus-oleracea) | 0.9952153    | 0.7128273    | 1         | 0.6410185 | not scorable | not scorable |
| ##### Bn-scaff_18507_1-p94722 C-genome specific (napus-oleracea) | 0.9952153    | 0.7745151    | 0.9922481 | 0.7829438 | not scorable | not scorable |
| ##### Bn-scaff_18507_1-p94741 C-genome specific (napus-oleracea) | 0.9808612    | 0.4403683    | 1         | 0.6866729 | not scorable | not scorable |
| ##### Bn-scaff_18507_1-p94750 C-genome specific (napus-oleracea) | 0.9904306    | 0.7150612    | 1         | 0.6336848 | not scorable | not scorable |
| ##### Bn-scaff_18507_1-p94789 genome unspecific (all in)         | 0.9952153    | 0.5003282    | 1         | 0.712481  | 1            | 0.8194429    |
| ##### Bn-scaff_18507_1-p94976 C-genome specific (napus-oleracea) | 0.9904306    | 0.84698      | 0.9922481 | 0.7975577 | not scorable | not scorable |
| ##### Bn-scaff_18507_1-p95006 C-genome specific (napus-oleracea) | 0.9904306    | 0.7340409    | 1         | 0.7551455 | not scorable | not scorable |
| ##### Bn-scaff_18507_1-p95136 C-genome specific (napus-oleracea) | 0.9904306    | 0.8079342    | 1         | 0.8011668 | not scorable | not scorable |
| ##### Bn-scaff_18507_1-p95669 C-genome specific (napus-oleracea) | 0.9808612    | 0.8342162    | 0.9922481 | 0.8379921 | not scorable | not scorable |
| ##### Bn-scaff_18507_1-p9570 C-genome specific (napus-oleracea)  | 0.9928229    | 0.8758054    | 0.9767442 | 0.7924425 | not scorable | not scorable |
| ##### Bn-scaff_18507_1-p95758 genome unspecific (oleracea-rapa)  | not scorable | not scorable | 1         | 0.6838472 | 0.9834711    | 0.7749993    |
| ##### Bn-scaff_18507_1-p95766 C-genome specific (napus-oleracea) | 0.9904306    | 0.8194981    | 1         | 0.6890174 | not scorable | not scorable |
| ##### Bn-scaff_18507_1-p96014 C-genome specific (napus-oleracea) | 0.9928229    | 0.727933     | 0.9922481 | 0.7391387 | not scorable | not scorable |
| ##### Bn-scaff_18507_1-p98136 C-genome specific (napus-oleracea) | 0.9880383    | 0.9038507    | 0.9844961 | 0.7790248 | not scorable | not scorable |
| ##### Bn-scaff_18507_1-p98170 C-genome specific (napus-oleracea) | 0.9832536    | 0.8938102    | 0.9922481 | 0.8136138 | not scorable | not scorable |
| ##### Bn-scaff_18507_1-p98236 C-genome specific (napus-oleracea) | 0.9880383    | 0.7531792    | 0.9844961 | 0.8318138 | not scorable | not scorable |
| ##### Bn-scaff_18507_1-p98246 C-genome specific (napus-oleracea) | 0.9856459    | 0.7178149    | 0.9844961 | 0.825227  | not scorable | not scorable |

|                                                                |              |              |              |              |              |              |
|----------------------------------------------------------------|--------------|--------------|--------------|--------------|--------------|--------------|
| #### Bn-scaff_18507_1-p9841C-genome specific (napus-oleracea)  | 0.9856459    | 0.7934596    | 0.9922481    | 0.8317052    | not scorable | not scorable |
| #### Bn-scaff_18507_1-p98515C-genome specific (napus-oleracea) | 0.9856459    | 0.798973     | 0.9922481    | 0.8293523    | not scorable | not scorable |
| #### Bn-scaff_18507_1-p98566C-genome specific (napus-oleracea) | 0.9880383    | 0.7660361    | 0.9922481    | 0.7111658    | not scorable | not scorable |
| #### Bn-scaff_18507_1-p98581C-genome specific (napus-oleracea) | 0.9832536    | 0.8450703    | 0.9922481    | 0.7731881    | not scorable | not scorable |
| #### Bn-scaff_18507_1-p98616C-genome specific (napus-oleracea) | 0.9832536    | 0.8375779    | 0.9922481    | 0.7289493    | not scorable | not scorable |
| #### Bn-scaff_18507_1-p99415C-genome specific (oleracea only)  | not scorable | not scorable | 0.9534883    | 0.667237     | not scorable | not scorable |
| #### Bn-scaff_18514_1-p12862genome unspecific (oleracea-rapa)  | not scorable | not scorable | 1            | 0.8343182    | 0.9917355    | 0.7569547    |
| #### Bn-scaff_18514_1-p27257genome unspecific (all in)         | 0.9880383    | 0.5079718    | 0.9844961    | 0.7047265    | 1            | 0.8714963    |
| #### Bn-scaff_18514_1-p28001C-genome specific (napus-oleracea) | 0.9760765    | 0.6334982    | 1            | 0.7826253    | not scorable | not scorable |
| #### Bn-scaff_18514_1-p40088C-genome specific (napus-oleracea) | 0.9162679    | 0.718065     | 0.9767442    | 0.6859793    | not scorable | not scorable |
| #### Bn-scaff_18514_1-p74327genome unspecific (all in)         | 0.9952153    | 0.5553345    | 1            | 0.7411091    | 1            | 0.9175813    |
| #### Bn-scaff_18514_1-p77519C-genome specific (napus-oleracea) | 0.9090909    | 0.8238609    | 0.9767442    | 0.8050555    | not scorable | not scorable |
| #### Bn-scaff_18514_1-p81468C-genome specific (napus-oleracea) | 0.9114832    | 0.7943265    | 0.9767442    | 0.7877542    | not scorable | not scorable |
| #### Bn-scaff_18520_1-p11761C-genome specific (napus-oleracea) | 0.9856459    | 0.8222374    | 0.9922481    | 0.79781      | not scorable | not scorable |
| #### Bn-scaff_18520_1-p11823C-genome specific (napus-oleracea) | 0.9449761    | 0.779696     | 0.5736434    | 0.7797557    | not scorable | not scorable |
| #### Bn-scaff_18520_1-p11848C-genome specific (napus-oleracea) | 0.9593301    | 0.7164961    | 0.8372093    | 0.7013956    | not scorable | not scorable |
| #### Bn-scaff_18520_1-p12086C-genome specific (napus-oleracea) | 0.9712918    | 0.7674411    | 1            | 0.7558324    | not scorable | not scorable |
| #### Bn-scaff_18520_1-p14167C-genome specific (napus-oleracea) | 0.9760765    | 0.6441295    | 1            | 0.7684287    | not scorable | not scorable |
| #### Bn-scaff_18520_1-p15858C-genome specific (napus-oleracea) | 0.9617225    | 0.7498656    | 1            | 0.8324712    | not scorable | not scorable |
| #### Bn-scaff_18520_1-p17716C-genome specific (napus-oleracea) | 0.9688995    | 0.6023826    | 0.9767442    | 0.7004704    | not scorable | not scorable |
| #### Bn-scaff_18520_1-p17824napus specific                     | 0.9617225    | 0.7991627    | not scorable | not scorable | not scorable | not scorable |
| #### Bn-scaff_18520_1-p17937napus specific                     | 0.9449761    | 0.6341577    | not scorable | not scorable | not scorable | not scorable |
| #### Bn-scaff_18520_1-p17964A-genome specific (napus-rapa)     | 0.9545454    | 0.7155924    | not scorable | not scorable | 0.8016529    | 0.816412     |
| #### Bn-scaff_18520_1-p18284napus specific                     | 0.9617225    | 0.7218487    | not scorable | not scorable | not scorable | not scorable |
| #### Bn-scaff_18520_1-p19144C-genome specific (napus-oleracea) | 0.9808612    | 0.5735836    | 1            | 0.6577117    | not scorable | not scorable |
| #### Bn-scaff_18520_1-p1922 genome unspecific (all in)         | 0.9641148    | 0.3994711    | 0.9922481    | 0.8501747    | 1            | 0.9172875    |
| #### Bn-scaff_18520_1-p19868C-genome specific (napus-oleracea) | 0.9856459    | 0.6808566    | 1            | 0.730203     | not scorable | not scorable |
| #### Bn-scaff_18520_1-p20216C-genome specific (napus-oleracea) | 0.9736842    | 0.7488649    | 0.9922481    | 0.7919136    | not scorable | not scorable |
| #### Bn-scaff_18520_1-p21743genome unspecific (all in)         | 1            | 0.4396816    | 1            | 0.7707094    | 1            | 0.9095823    |
| #### Bn-scaff_18520_1-p25235genome unspecific (all in)         | 0.9976076    | 0.5269083    | 1            | 0.7137402    | 1            | 0.917568     |
| #### Bn-scaff_18520_1-p26821C-genome specific (napus-oleracea) | 0.9880383    | 0.7598017    | 1            | 0.8291255    | not scorable | not scorable |
| #### Bn-scaff_18520_1-p28068C-genome specific (napus-oleracea) | 0.9976076    | 0.814608     | 1            | 0.7007399    | not scorable | not scorable |
| #### Bn-scaff_18520_1-p28076C-genome specific (napus-oleracea) | 0.9952153    | 0.8395848    | 1            | 0.7661742    | not scorable | not scorable |



|                                                                  |              |              |              |              |              |              |                           |
|------------------------------------------------------------------|--------------|--------------|--------------|--------------|--------------|--------------|---------------------------|
| ##### Bn-scaff_18520_1-p28099 C-genome specific (napus-oleracea) | 0.9952153    | 0.7866389    |              | 1            | 0.7340149    | not scorable | not scorable              |
| ##### Bn-scaff_18520_1-p28119 C-genome specific (napus-oleracea) | 0.9976076    | 0.7034166    |              | 1            | 0.7584783    | not scorable | not scorable              |
| ##### Bn-scaff_18520_1-p30124 C-genome specific (napus-oleracea) |              | 1            | 0.7136505    | 0.9922481    | 0.716031     | not scorable | not scorable              |
| ##### Bn-scaff_18520_1-p31210 C-genome specific (napus-oleracea) | 0.9688995    | 0.7039886    |              | 0.9612403    | 0.6832199    | not scorable | not scorable              |
| ##### Bn-scaff_18520_1-p32423 C-genome specific (napus-oleracea) | 0.9880383    | 0.4293241    |              | 1            | 0.6389163    | not scorable | not scorable              |
| ##### Bn-scaff_18520_1-p33057 C-genome specific (napus-oleracea) | 0.9688995    | 0.7057055    |              | 0.9767442    | 0.7608755    | not scorable | not scorable              |
| ##### Bn-scaff_18520_1-p34700 A-genome specific (napus-rapa)     | 0.9904306    | 0.3030865    | not scorable | not scorable |              | 1            | 0.7170541                 |
| ##### Bn-scaff_18520_1-p34766 C-genome specific (napus-oleracea) | 0.9976076    | 0.8084678    |              | 1            | 0.755494     | not scorable | not scorable              |
| ##### Bn-scaff_18520_1-p34821 C-genome specific (napus-oleracea) | 0.9808612    | 0.7420797    |              | 0.9844961    | 0.7970998    | not scorable | not scorable              |
| ##### Bn-scaff_18520_1-p35109 C-genome specific (napus-oleracea) | 0.9880383    | 0.7714236    |              | 0.9844961    | 0.7816169    | not scorable | not scorable              |
| ##### Bn-scaff_18520_1-p36238 genome unspecific (all in)         | 0.9784689    | 0.2102568    |              | 1            | 0.7690512    | 0.9917355    | 0.6997658                 |
| ##### Bn-scaff_18520_1-p36241 C-genome specific (napus-oleracea) | 0.9688995    | 0.3118781    |              | 1            | 0.7315933    | not scorable | not scorable              |
| ##### Bn-scaff_18520_1-p36339 genome unspecific (all in)         | 0.9832536    | 0.440149     |              | 0.9844961    | 0.5157858    | 0.9917355    | 0.8092009                 |
| ##### Bn-scaff_18520_1-p40496 genome unspecific (all in)         | 0.9976076    | 0.4396337    |              | 0.9922481    | 0.7735158    |              | 1 0.8917887               |
| ##### Bn-scaff_18520_1-p40560 C-genome specific (napus-oleracea) |              | 1            | 0.7444344    |              | 1            | 0.7431162    | not scorable not scorable |
| ##### Bn-scaff_18520_1-p41456 C-genome specific (napus-oleracea) |              | 1            | 0.7296054    |              | 1            | 0.7155832    | not scorable not scorable |
| ##### Bn-scaff_18520_1-p41465 genome unspecific (all in)         | 0.9952153    | 0.4483519    |              | 1            | 0.6929367    |              | 1 0.8042303               |
| ##### Bn-scaff_18520_1-p41774 C-genome specific (napus-oleracea) | 0.9425837    | 0.7920935    |              | 1            | 0.6980894    | not scorable | not scorable              |
| ##### Bn-scaff_18520_1-p41781 C-genome specific (napus-oleracea) | 0.9282297    | 0.7651234    |              | 1            | 0.767981     | not scorable | not scorable              |
| ##### Bn-scaff_18520_1-p42601 C-genome specific (napus-oleracea) | 0.9760765    | 0.6633294    |              | 0.9922481    | 0.7481197    | not scorable | not scorable              |
| ##### Bn-scaff_18520_1-p43082 C-genome specific (napus-oleracea) | 0.9760765    | 0.7040772    |              | 1            | 0.7025828    | not scorable | not scorable              |
| ##### Bn-scaff_18520_1-p45092 C-genome specific (napus-oleracea) | 0.9808612    | 0.7378014    |              | 1            | 0.7623689    | not scorable | not scorable              |
| ##### Bn-scaff_18520_1-p45551 C-genome specific (napus-oleracea) | 0.9760765    | 0.781054     |              | 1            | 0.750026     | not scorable | not scorable              |
| ##### Bn-scaff_18520_1-p45643 C-genome specific (napus-oleracea) | 0.9784689    | 0.7269881    |              | 1            | 0.7068456    | not scorable | not scorable              |
| ##### Bn-scaff_18520_1-p47673 genome unspecific (all in)         | 0.9330143    | 0.3485967    |              | 0.9844961    | 0.6390141    |              | 1 0.9264906               |
| ##### Bn-scaff_18520_1-p47704 genome unspecific (oleracea-rapa)  | not scorable | not scorable |              | 0.9922481    | 0.6209076    |              | 1 0.7367962               |
| ##### Bn-scaff_18520_1-p48604 genome unspecific (all in)         | 0.9952153    | 0.3834765    |              | 1            | 0.6852627    | 0.9834711    | 0.7159793                 |
| ##### Bn-scaff_18520_1-p48633 C-genome specific (napus-oleracea) | 0.9808612    | 0.689316     |              | 1            | 0.7102109    | not scorable | not scorable              |
| ##### Bn-scaff_18520_1-p48644 genome unspecific (all in)         | 0.9856459    | 0.3586225    |              | 1            | 0.7465046    |              | 1 0.9175813               |
| ##### Bn-scaff_18520_1-p48656 napus specific                     | 0.9760765    | 0.7375573    | not scorable | not scorable | not scorable | not scorable | not scorable              |
| ##### Bn-scaff_18520_1-p48864 A-genome specific (napus-rapa)     | 0.9641148    | 0.3231833    | not scorable | not scorable |              |              | 1 0.842517                |
| ##### Bn-scaff_18520_1-p48956 A-genome specific (rapa only)      | not scorable | not scorable | not scorable | not scorable | not scorable | 0.9834711    | 0.6047025                 |
| ##### Bn-scaff_18520_1-p49118 genome unspecific (all in)         | 0.9976076    | 0.2423624    |              | 1            | 0.7347343    |              | 1 0.7884539               |

|                                                                 |              |              |              |              |              |              |
|-----------------------------------------------------------------|--------------|--------------|--------------|--------------|--------------|--------------|
| #### Bn-scaff_18520_1-p49281A-genome specific (napus-rapa)      | 0.9832536    | 0.7084823    | not scorable | not scorable | 0.9586777    | 0.823379     |
| #### Bn-scaff_18520_1-p5072C-genome specific (napus-oleracea)   | 0.9952153    | 0.6940126    | 0.9844961    | 0.612455     | not scorable | not scorable |
| #### Bn-scaff_18520_1-p56907C-genome specific (napus-oleracea)  | 0.9808612    | 0.6257318    | 1            | 0.7877939    | not scorable | not scorable |
| #### Bn-scaff_18520_1-p60356 napus specific                     | 0.9952153    | 0.5949962    | not scorable | not scorable | not scorable | not scorable |
| #### Bn-scaff_18520_1-p60551C-genome specific (napus-oleracea)  | 0.9162679    | 0.5651193    | 1            | 0.7135291    | not scorable | not scorable |
| #### Bn-scaff_18520_1-p61255C-genome specific (napus-oleracea)  | 0.9976076    | 0.8078583    | 1            | 0.8077634    | not scorable | not scorable |
| #### Bn-scaff_18520_1-p62041genome unspecific (all in)          | 0.9952153    | 0.8272216    | 1            | 0.8361999    | 0.9917355    | 0.8490717    |
| #### Bn-scaff_18520_1-p62117C-genome specific (napus-oleracea)  | 0.9976076    | 0.7918344    | 0.9922481    | 0.7495399    | not scorable | not scorable |
| #### Bn-scaff_18520_1-p62199 genome unspecific (all in)         | 0.9808612    | 0.2982474    | 1            | 0.8101604    | 0.9917355    | 0.9240721    |
| #### Bn-scaff_18520_1-p62229 genome unspecific (all in)         | 1            | 0.5209524    | 1            | 0.7239935    | 0.9834711    | 0.7763785    |
| #### Bn-scaff_18520_1-p63057C-genome specific (napus-oleracea)  | 1            | 0.8817903    | 1            | 0.8208135    | not scorable | not scorable |
| #### Bn-scaff_18520_1-p63349C-genome specific (oleracea only)   | not scorable | not scorable | 0.7751938    | 0.7905059    | not scorable | not scorable |
| #### Bn-scaff_18520_1-p67561genome unspecific (oleracea-rapa)   | not scorable | not scorable | 0.9767442    | 0.7721368    | 0.9834711    | 0.772078     |
| #### Bn-scaff_18520_1-p67596C-genome specific (napus-oleracea)  | 0.7344497    | 0.6662194    | 0.9457364    | 0.6255523    | not scorable | not scorable |
| #### Bn-scaff_18520_1-p68805C-genome specific (napus-oleracea)  | 0.9808612    | 0.728954     | 0.9844961    | 0.6500411    | not scorable | not scorable |
| #### Bn-scaff_18520_1-p7051C C-genome specific (napus-oleracea) | 0.9928229    | 0.7523595    | 0.9922481    | 0.7277477    | not scorable | not scorable |
| #### Bn-scaff_18520_1-p72046C-genome specific (napus-oleracea)  | 0.9617225    | 0.6349214    | 1            | 0.707876     | not scorable | not scorable |
| #### Bn-scaff_18520_1-p74201genome unspecific (all in)          | 0.9856459    | 0.7776114    | 1            | 0.7608226    | 0.9421487    | 0.784588     |
| #### Bn-scaff_18520_1-p76211C-genome specific (napus-oleracea)  | 0.9952153    | 0.8346084    | 0.9922481    | 0.7752945    | not scorable | not scorable |
| #### Bn-scaff_18520_1-p76865C-genome specific (napus-oleracea)  | 0.9712918    | 0.8064173    | 0.9922481    | 0.8114231    | not scorable | not scorable |
| #### Bn-scaff_18520_1-p79059C-genome specific (napus-oleracea)  | 0.9880383    | 0.6615017    | 0.9922481    | 0.8271054    | not scorable | not scorable |
| #### Bn-scaff_18520_1-p79072genome unspecific (all in)          | 0.9976076    | 0.9514975    | 1            | 0.7849017    | 1            | 0.9178236    |
| #### Bn-scaff_18520_1-p79515C-genome specific (napus-oleracea)  | 0.9856459    | 0.7803431    | 1            | 0.6980519    | not scorable | not scorable |
| #### Bn-scaff_18520_1-p79805C-genome specific (napus-oleracea)  | 0.9904306    | 0.7574182    | 1            | 0.8500873    | not scorable | not scorable |
| #### Bn-scaff_18520_1-p79809C-genome specific (napus-oleracea)  | 0.9904306    | 0.7784227    | 1            | 0.885622     | not scorable | not scorable |
| #### Bn-scaff_18520_1-p80565C-genome specific (napus-oleracea)  | 0.9736842    | 0.6441742    | 1            | 0.7865949    | not scorable | not scorable |
| #### Bn-scaff_18520_1-p80749 genome unspecific (all in)         | 0.9904306    | 0.3068601    | 1            | 0.7512247    | 1            | 0.8486258    |
| #### Bn-scaff_18520_1-p80862 genome unspecific (all in)         | 0.9569378    | 0.5343845    | 1            | 0.7075664    | 0.9669421    | 0.7770717    |
| #### Bn-scaff_18520_1-p8136C C-genome specific (napus-oleracea) | 0.3492823    | 0.7859704    | 0.255814     | 0.8207386    | not scorable | not scorable |
| #### Bn-scaff_18520_1-p81403C-genome specific (napus-oleracea)  | 0.3468899    | 0.7753789    | 0.2325581    | 0.7468153    | not scorable | not scorable |
| #### Bn-scaff_18520_1-p81429A-genome specific (napus-rapa)      | 0.65311      | 0.619422     | not scorable | not scorable | 1            | 0.8772919    |
| #### Bn-scaff_18520_1-p81734genome unspecific (all in)          | 0.9712918    | 0.3236651    | 0.9844961    | 0.7002734    | 1            | 0.8085203    |
| #### Bn-scaff_18520_1-p81761genome unspecific (all in)          | 0.9880383    | 0.4787806    | 0.9922481    | 0.5063998    | 1            | 0.8847278    |

|                                                                  |              |              |              |              |              |              |
|------------------------------------------------------------------|--------------|--------------|--------------|--------------|--------------|--------------|
| #### Bn-scaff_18520_1-p9114C C-genome specific (napus-oleracea)  | 0.9641148    | 0.5692075    | 0.9922481    | 0.8201014    | not scorable | not scorable |
| #### Bn-scaff_18523_1-p438 A-genome specific (napus-rapa)        | 0.9784689    | 0.8183728    | not scorable | not scorable | 0.9752066    | 0.7257575    |
| #### Bn-scaff_18549_1-p1120C C-genome specific (napus-oleracea)  | 0.9904306    | 0.6898537    | 0.9844961    | 0.6450031    | not scorable | not scorable |
| #### Bn-scaff_18549_1-p1149C C-genome specific (napus-oleracea)  | 0.9928229    | 0.7822914    | 0.9922481    | 0.733902     | not scorable | not scorable |
| #### Bn-scaff_18549_1-p12174C C-genome specific (napus-oleracea) | 0.9856459    | 0.8355845    | 0.9844961    | 0.8480937    | not scorable | not scorable |
| #### Bn-scaff_18549_1-p12567C C-genome specific (napus-oleracea) | 0.9952153    | 0.6716355    | 1            | 0.6629262    | not scorable | not scorable |
| #### Bn-scaff_18549_1-p12907C C-genome specific (napus-oleracea) | 0.9976076    | 0.6711587    | 0.9767442    | 0.6947921    | not scorable | not scorable |
| #### Bn-scaff_18549_1-p1423C genome unspecific (oleracea-rapa)   | not scorable | not scorable | 1            | 0.6978582    | 1            | 0.9056442    |
| #### Bn-scaff_18549_1-p1817C C-genome specific (napus-oleracea)  | 0.9832536    | 0.7025203    | 1            | 0.6788507    | not scorable | not scorable |
| #### Bn-scaff_18549_1-p20487C C-genome specific (napus-oleracea) | 0.9928229    | 0.6465585    | 0.9844961    | 0.5733519    | not scorable | not scorable |
| #### Bn-scaff_18549_1-p2520C C-genome specific (napus-oleracea)  | 0.9952153    | 0.8344557    | 0.9844961    | 0.8129421    | not scorable | not scorable |
| #### Bn-scaff_18549_1-p3646C C-genome specific (napus-oleracea)  | 0.9641148    | 0.2982818    | 0.9922481    | 0.7941079    | not scorable | not scorable |
| #### Bn-scaff_18549_1-p37161A-genome specific (rapa only)        | not scorable | not scorable | not scorable | not scorable | 0.9834711    | 0.923613     |
| #### Bn-scaff_18549_1-p3716C napus specific                      | 1            | 0.8954863    | not scorable | not scorable | not scorable | not scorable |
| #### Bn-scaff_18549_1-p4037C A-genome specific (napus-rapa)      | 1            | 0.5976474    | not scorable | not scorable | 1            | 0.9039531    |
| #### Bn-scaff_18549_1-p4517C C-genome specific (napus-oleracea)  | 0.9784689    | 0.6115867    | 1            | 0.5581291    | not scorable | not scorable |
| #### Bn-scaff_18549_1-p60067C C-genome specific (napus-oleracea) | 0.9665072    | 0.7374798    | 0.9147287    | 0.6629816    | not scorable | not scorable |
| #### Bn-scaff_18549_1-p6007C C-genome specific (napus-oleracea)  | 1            | 0.8207097    | 1            | 0.6990497    | not scorable | not scorable |
| #### Bn-scaff_18549_1-p60351C C-genome specific (napus-oleracea) | 0.9976076    | 0.9202327    | 1            | 0.7187538    | not scorable | not scorable |
| #### Bn-scaff_18549_1-p93687C C-genome specific (napus-oleracea) | 0.9904306    | 0.6914223    | 0.9922481    | 0.6836169    | not scorable | not scorable |
| #### Bn-scaff_18549_1-p9400C C-genome specific (napus-oleracea)  | 0.9952153    | 0.6754791    | 0.9922481    | 0.6338897    | not scorable | not scorable |
| #### Bn-scaff_18549_1-p95191C C-genome specific (napus-oleracea) | 0.9760765    | 0.7276933    | 0.9922481    | 0.6979806    | not scorable | not scorable |
| #### Bn-scaff_18549_1-p95501C C-genome specific (napus-oleracea) | 0.9880383    | 0.7009722    | 0.9922481    | 0.6674338    | not scorable | not scorable |
| #### Bn-scaff_18549_1-p96084C C-genome specific (napus-oleracea) | 0.9880383    | 0.7201417    | 0.9922481    | 0.7248117    | not scorable | not scorable |
| #### Bn-scaff_18557_1-p2150 genome unspecific (oleracea-rapa)    | not scorable | not scorable | 1            | 0.8924579    | 1            | 0.912403     |
| #### Bn-scaff_18557_1-p4278C genome unspecific (all in)          | 0.9760765    | 0.3591056    | 0.9844961    | 0.8318369    | 1            | 0.9145784    |
| #### Bn-scaff_18557_1-p6103C C-genome specific (oleracea only)   | not scorable | not scorable | 0.6046512    | 0.6071299    | not scorable | not scorable |
| #### Bn-scaff_18559_1-p1259C C-genome specific (napus-oleracea)  | 0.9832536    | 0.6789258    | 0.9922481    | 0.7546005    | not scorable | not scorable |
| #### Bn-scaff_18559_1-p1264C C-genome specific (napus-oleracea)  | 0.9808612    | 0.6394419    | 0.9922481    | 0.6208386    | not scorable | not scorable |
| #### Bn-scaff_18559_1-p1577C C-genome specific (napus-oleracea)  | 0.9856459    | 0.6748751    | 1            | 0.7713875    | not scorable | not scorable |
| #### Bn-scaff_18559_1-p16152C C-genome specific (napus-oleracea) | 0.9736842    | 0.5830178    | 0.9922481    | 0.578823     | not scorable | not scorable |
| #### Bn-scaff_18559_1-p16307C C-genome specific (napus-oleracea) | 0.9904306    | 0.7611467    | 0.9922481    | 0.6800216    | not scorable | not scorable |
| #### Bn-scaff_18559_1-p1633C C-genome specific (napus-oleracea)  | 0.9808612    | 0.765444     | 0.9844961    | 0.7202421    | not scorable | not scorable |

|                                                                 |              |              |              |              |              |              |
|-----------------------------------------------------------------|--------------|--------------|--------------|--------------|--------------|--------------|
| #### Bn-scaff_18559_1-p16594 C-genome specific (napus-oleracea) | 0.9760765    | 0.6902166    | 1            | 0.700622     | not scorable | not scorable |
| #### Bn-scaff_18559_1-p16600 C-genome specific (napus-oleracea) | 0.9904306    | 0.7266338    | 1            | 0.7668505    | not scorable | not scorable |
| #### Bn-scaff_18559_1-p16639 C-genome specific (napus-oleracea) | 0.9832536    | 0.7461428    | 1            | 0.8049087    | not scorable | not scorable |
| #### Bn-scaff_18559_1-p17092 napus specific                     | 0.6244019    | 0.8829737    | not scorable | not scorable | not scorable | not scorable |
| #### Bn-scaff_18559_1-p17562 C-genome specific (napus-oleracea) | 0.9856459    | 0.7187183    | 0.9844961    | 0.7798609    | not scorable | not scorable |
| #### Bn-scaff_18559_1-p17754 C-genome specific (oleracea only)  | not scorable | not scorable | 0.9612403    | 0.8353851    | not scorable | not scorable |
| #### Bn-scaff_18559_1-p19111 genome unspecific (oleracea-rapa)  | not scorable | not scorable | 0.9534883    | 0.4672059    | 0.9917355    | 0.7752723    |
| #### Bn-scaff_18559_1-p19116 genome unspecific (all in)         | 0.9784689    | 0.4769729    | 0.9457364    | 0.5666499    | 1            | 0.866581     |
| #### Bn-scaff_18559_1-p23939 C-genome specific (napus-oleracea) | 0.9856459    | 0.753399     | 1            | 0.6773576    | not scorable | not scorable |
| #### Bn-scaff_18559_1-p24823 genome unspecific (all in)         | 0.9928229    | 0.2569811    | 1            | 0.7735827    | 0.9834711    | 0.6508515    |
| #### Bn-scaff_18559_1-p53429 C-genome specific (napus-oleracea) | 0.9665072    | 0.6854783    | 0.9922481    | 0.7262939    | not scorable | not scorable |
| #### Bn-scaff_18559_1-p77372 genome unspecific (all in)         | 0.9904306    | 0.2274913    | 1            | 0.8108631    | 0.9752066    | 0.7618499    |
| #### Bn-scaff_18559_1-p77834 genome unspecific (all in)         | 0.9976076    | 0.3833652    | 1            | 0.8757754    | 0.9834711    | 0.8003721    |
| #### Bn-scaff_18559_1-p86130 C-genome specific (oleracea only)  | not scorable | not scorable | 1            | 0.7116008    | not scorable | not scorable |
| #### Bn-scaff_18559_1-p87030 C-genome specific (napus-oleracea) | 0.9880383    | 0.7605482    | 0.9922481    | 0.8207003    | not scorable | not scorable |
| #### Bn-scaff_18559_1-p87085 C-genome specific (napus-oleracea) | 0.9880383    | 0.7690383    | 1            | 0.7959908    | not scorable | not scorable |
| #### Bn-scaff_18559_1-p90969 C-genome specific (napus-oleracea) | 0.9904306    | 0.7598017    | 1            | 0.8440034    | not scorable | not scorable |
| #### Bn-scaff_18559_1-p93260 C-genome specific (napus-oleracea) | 0.9760765    | 0.7157568    | 0.9922481    | 0.6889725    | not scorable | not scorable |
| #### Bn-scaff_18559_1-p93500 C-genome specific (napus-oleracea) | 0.9880383    | 0.7472867    | 0.9922481    | 0.8669888    | not scorable | not scorable |
| #### Bn-scaff_18559_1-p93723 C-genome specific (napus-oleracea) | 0.9856459    | 0.7445976    | 1            | 0.7818678    | not scorable | not scorable |
| #### Bn-scaff_18559_1-p96095 C-genome specific (napus-oleracea) | 0.9665072    | 0.6825153    | 1            | 0.7980763    | not scorable | not scorable |
| #### Bn-scaff_18559_1-p96281 C-genome specific (napus-oleracea) | 0.9904306    | 0.7311564    | 1            | 0.7937761    | not scorable | not scorable |
| #### Bn-scaff_18559_2-p10059 C-genome specific (napus-oleracea) | 0.9904306    | 0.772043     | 1            | 0.6998145    | not scorable | not scorable |
| #### Bn-scaff_18559_2-p10071 C-genome specific (napus-oleracea) | 0.9928229    | 0.8096952    | 0.9922481    | 0.7676158    | not scorable | not scorable |
| #### Bn-scaff_18559_2-p10085 C-genome specific (napus-oleracea) | 0.9904306    | 0.7927271    | 1            | 0.7649168    | not scorable | not scorable |
| #### Bn-scaff_18559_2-p10161 C-genome specific (napus-oleracea) | 0.9808612    | 0.7595029    | 1            | 0.7827526    | not scorable | not scorable |
| #### Bn-scaff_18559_2-p10171 C-genome specific (napus-oleracea) | 0.9808612    | 0.6778682    | 1            | 0.6904147    | not scorable | not scorable |
| #### Bn-scaff_18559_2-p10580 C-genome specific (napus-oleracea) | 0.9904306    | 0.7414405    | 0.9922481    | 0.8422427    | not scorable | not scorable |
| #### Bn-scaff_18559_2-p12901 C-genome specific (napus-oleracea) | 0.9856459    | 0.7712182    | 1            | 0.7234737    | not scorable | not scorable |
| #### Bn-scaff_18559_2-p13055 C-genome specific (napus-oleracea) | 0.9856459    | 0.7877958    | 1            | 0.8020488    | not scorable | not scorable |
| #### Bn-scaff_18559_2-p13248 C-genome specific (napus-oleracea) | 0.9808612    | 0.7831703    | 1            | 0.8108957    | not scorable | not scorable |
| #### Bn-scaff_18559_2-p13282 C-genome specific (napus-oleracea) | 0.9712918    | 0.7617399    | 1            | 0.741938     | not scorable | not scorable |
| #### Bn-scaff_18559_2-p13785 C-genome specific (napus-oleracea) | 0.9880383    | 0.7372947    | 1            | 0.7917594    | not scorable | not scorable |

|                                                                 |              |              |              |              |              |              |
|-----------------------------------------------------------------|--------------|--------------|--------------|--------------|--------------|--------------|
| #### Bn-scaff_18559_2-p14719 C-genome specific (napus-oleracea) | 0.9880383    | 0.7623614    | 1            | 0.7870926    | not scorable | not scorable |
| #### Bn-scaff_18559_2-p15142 C-genome specific (napus-oleracea) | 0.9832536    | 0.756202     | 0.9844961    | 0.7676136    | not scorable | not scorable |
| #### Bn-scaff_18559_2-p15348 C-genome specific (napus-oleracea) | 0.9832536    | 0.8029221    | 1            | 0.7920033    | not scorable | not scorable |
| #### Bn-scaff_18559_2-p16000 C-genome specific (napus-oleracea) | 0.9832536    | 0.7621159    | 1            | 0.7147347    | not scorable | not scorable |
| #### Bn-scaff_18559_2-p17191 C-genome specific (napus-oleracea) | 0.9736842    | 0.6733443    | 0.9767442    | 0.7220941    | not scorable | not scorable |
| #### Bn-scaff_18559_2-p17332 C-genome specific (napus-oleracea) | 0.9641148    | 0.5951163    | 1            | 0.6029178    | not scorable | not scorable |
| #### Bn-scaff_18559_2-p19534 C-genome specific (napus-oleracea) | 0.9808612    | 0.7684064    | 0.9922481    | 0.8742243    | not scorable | not scorable |
| #### Bn-scaff_18559_2-p22615 napus specific                     | 0.9760765    | 0.6096675    | not scorable | not scorable | not scorable | not scorable |
| #### Bn-scaff_18559_2-p23941 C-genome specific (napus-oleracea) | 0.9784689    | 0.7746768    | 0.9922481    | 0.781038     | not scorable | not scorable |
| #### Bn-scaff_18559_2-p24165 C-genome specific (napus-oleracea) | 0.9856459    | 0.7574182    | 1            | 0.8546489    | not scorable | not scorable |
| #### Bn-scaff_18559_2-p24224 C-genome specific (napus-oleracea) | 0.9832536    | 0.6260942    | 1            | 0.7227858    | not scorable | not scorable |
| #### Bn-scaff_18559_2-p25714 C-genome specific (napus-oleracea) | 0.9904306    | 0.7336574    | 0.9767442    | 0.6358728    | not scorable | not scorable |
| #### Bn-scaff_18559_2-p25769 C-genome specific (napus-oleracea) | 0.9856459    | 0.7796102    | 1            | 0.7544396    | not scorable | not scorable |
| #### Bn-scaff_18559_2-p26496 genome unspecific (all in)         | 0.9784689    | 0.6125999    | 1            | 0.679929     | 1            | 0.9454155    |
| #### Bn-scaff_18559_2-p26806 C-genome specific (napus-oleracea) | 0.9808612    | 0.5570295    | 0.9844961    | 0.7277114    | not scorable | not scorable |
| #### Bn-scaff_18559_2-p26806 C-genome specific (napus-oleracea) | 0.9880383    | 0.6772313    | 0.9922481    | 0.6650835    | not scorable | not scorable |
| #### Bn-scaff_18559_2-p28388 C-genome specific (napus-oleracea) | 0.9760765    | 0.7402184    | 0.9922481    | 0.8020515    | not scorable | not scorable |
| #### Bn-scaff_18559_2-p29727 C-genome specific (napus-oleracea) | 0.9808612    | 0.7860694    | 1            | 0.6349393    | not scorable | not scorable |
| #### Bn-scaff_18559_2-p29981 C-genome specific (napus-oleracea) | 0.9880383    | 0.6266814    | 0.9922481    | 0.6151581    | not scorable | not scorable |
| #### Bn-scaff_18559_2-p30893 genome unspecific (all in)         | 0.9665072    | 0.487074     | 0.9922481    | 0.7725056    | 1            | 0.8246562    |
| #### Bn-scaff_18559_2-p34603 C-genome specific (napus-oleracea) | 0.9832536    | 0.7595061    | 0.9844961    | 0.7214056    | not scorable | not scorable |
| #### Bn-scaff_18559_2-p34999 C-genome specific (napus-oleracea) | 0.9880383    | 0.7131107    | 1            | 0.7196091    | not scorable | not scorable |
| #### Bn-scaff_18559_2-p35177 C-genome specific (napus-oleracea) | 0.9760765    | 0.7366887    | 1            | 0.7944636    | not scorable | not scorable |
| #### Bn-scaff_18559_2-p36659 C-genome specific (napus-oleracea) | 0.9880383    | 0.7722085    | 1            | 0.7724282    | not scorable | not scorable |
| #### Bn-scaff_18559_2-p38905 C-genome specific (napus-oleracea) | 0.9856459    | 0.8099694    | 1            | 0.7491127    | not scorable | not scorable |
| #### Bn-scaff_18559_2-p39127 C-genome specific (napus-oleracea) | 0.9856459    | 0.7253534    | 1            | 0.7086056    | not scorable | not scorable |
| #### Bn-scaff_18559_2-p575 A-genome specific (napus-rapa)       | 0.9090909    | 0.1455758    | not scorable | not scorable | 1            | 0.9338344    |
| #### Bn-scaff_18559_2-p59192 C-genome specific (napus-oleracea) | 0.9425837    | 0.7825384    | 0.9767442    | 0.7981288    | not scorable | not scorable |
| #### Bn-scaff_18559_2-p59259 C-genome specific (napus-oleracea) | 0.930622     | 0.6623936    | 0.9689922    | 0.8197608    | not scorable | not scorable |
| #### Bn-scaff_18559_2-p59659 C-genome specific (napus-oleracea) | 0.9354067    | 0.6856626    | 0.9689922    | 0.6625258    | not scorable | not scorable |
| #### Bn-scaff_18559_2-p60336 genome unspecific (all in)         | 0.9497608    | 0.7800637    | 0.9767442    | 0.8039021    | 0.8677686    | 0.9095823    |
| #### Bn-scaff_18559_2-p86226 C-genome specific (napus-oleracea) | 0.9760765    | 0.6711774    | 0.9457364    | 0.7664112    | not scorable | not scorable |
| #### Bn-scaff_18559_2-p87152 C-genome specific (oleracea only)  | not scorable | not scorable | 0.9534883    | 0.7591733    | not scorable | not scorable |

|                                                                 |              |              |              |              |              |              |
|-----------------------------------------------------------------|--------------|--------------|--------------|--------------|--------------|--------------|
| #### Bn-scaff_18562_1-p37458 C-genome specific (napus-oleracea) | 0.9904306    | 0.7650134    | 1            | 0.8078349    | not scorable | not scorable |
| #### Bn-scaff_18562_1-p38284 C-genome specific (napus-oleracea) | 0.9808612    | 0.6471207    | 0.9844961    | 0.6658475    | not scorable | not scorable |
| #### Bn-scaff_18562_1-p40474 C-genome specific (napus-oleracea) | 0.9952153    | 0.7562088    | 1            | 0.7836159    | not scorable | not scorable |
| #### Bn-scaff_18562_1-p41630 C-genome specific (napus-oleracea) | 0.9808612    | 0.6051397    | 0.9844961    | 0.6668497    | not scorable | not scorable |
| #### Bn-scaff_18562_1-p48854 C-genome specific (napus-oleracea) | 0.9688995    | 0.6678575    | 1            | 0.6581514    | not scorable | not scorable |
| #### Bn-scaff_18562_1-p56223 C-genome specific (napus-oleracea) | 0.9808612    | 0.7568519    | 0.9922481    | 0.6751928    | not scorable | not scorable |
| #### Bn-scaff_18562_1-p64186 C-genome specific (napus-oleracea) | 0.9928229    | 0.7019104    | 1            | 0.7425045    | not scorable | not scorable |
| #### Bn-scaff_18562_1-p64651 C-genome specific (napus-oleracea) | 0.9808612    | 0.6734377    | 0.9922481    | 0.7136731    | not scorable | not scorable |
| #### Bn-scaff_18562_1-p64748 C-genome specific (napus-oleracea) | 0.9808612    | 0.6729487    | 0.9922481    | 0.7651413    | not scorable | not scorable |
| #### Bn-scaff_18562_1-p64836 C-genome specific (napus-oleracea) | 0.9928229    | 0.69282      | 1            | 0.784594     | not scorable | not scorable |
| #### Bn-scaff_18562_1-p80598 C-genome specific (napus-oleracea) | 0.9784689    | 0.6023729    | 1            | 0.842924     | not scorable | not scorable |
| #### Bn-scaff_18562_1-p81233 C-genome specific (napus-oleracea) | 0.9928229    | 0.7732548    | 1            | 0.7701452    | not scorable | not scorable |
| #### Bn-scaff_18562_1-p82036 C-genome specific (napus-oleracea) | 0.9928229    | 0.6911299    | 1            | 0.6536031    | not scorable | not scorable |
| #### Bn-scaff_18562_1-p82069 C-genome specific (napus-oleracea) | 0.9928229    | 0.7937158    | 1            | 0.738554     | not scorable | not scorable |
| #### Bn-scaff_18562_1-p82174 C-genome specific (napus-oleracea) | 0.9952153    | 0.7681615    | 1            | 0.7681527    | not scorable | not scorable |
| #### Bn-scaff_18562_1-p82286 C-genome specific (napus-oleracea) | 0.9952153    | 0.8067168    | 1            | 0.8112466    | not scorable | not scorable |
| #### Bn-scaff_18584_1-p18675 all not scorable                   | not scorable | not scorable | not scorable | not scorable | not scorable | not scorable |
| #### Bn-scaff_18589_1-p12667 genome unspecific (all in)         | 1            | 0.450244     | 1            | 0.6382744    | 0.9917355    | 0.7454758    |
| #### Bn-scaff_18589_1-p12744 genome unspecific (all in)         | 1            | 0.4584518    | 1            | 0.8129296    | 1            | 0.7516597    |
| #### Bn-scaff_18589_1-p74692 genome unspecific (all in)         | 0.9784689    | 0.2268346    | 1            | 0.7556838    | 1            | 0.6582266    |
| #### Bn-scaff_18589_1-p76811 genome unspecific (all in)         | 1            | 0.561545     | 0.9844961    | 0.7568001    | 0.7272727    | 0.9262368    |
| #### Bn-scaff_18589_1-p94879 C-genome specific (napus-oleracea) | 1            | 0.70766      | 1            | 0.6919271    | not scorable | not scorable |
| #### Bn-scaff_18602_1-p10015 C-genome specific (napus-oleracea) | 1            | 0.7841945    | 1            | 0.7689547    | not scorable | not scorable |
| #### Bn-scaff_18602_1-p10994 C-genome specific (napus-oleracea) | 0.9760765    | 0.810592     | 1            | 0.7732804    | not scorable | not scorable |
| #### Bn-scaff_18602_1-p11309 C-genome specific (napus-oleracea) | 0.9856459    | 0.6891326    | 0.9689922    | 0.4573678    | not scorable | not scorable |
| #### Bn-scaff_18602_1-p11376 C-genome specific (napus-oleracea) | 0.9952153    | 0.7826845    | 0.9922481    | 0.7698785    | not scorable | not scorable |
| #### Bn-scaff_18602_1-p13058 genome unspecific (all in)         | 0.9784689    | 0.3667183    | 1            | 0.6864926    | 1            | 0.8231207    |
| #### Bn-scaff_18602_1-p13125 C-genome specific (napus-oleracea) | 0.9952153    | 0.8367413    | 0.9844961    | 0.8222196    | not scorable | not scorable |
| #### Bn-scaff_18602_1-p13131 C-genome specific (napus-oleracea) | 0.9952153    | 0.8183479    | 1            | 0.8199899    | not scorable | not scorable |
| #### Bn-scaff_18602_1-p13912 C-genome specific (napus-oleracea) | 0.9904306    | 0.7830164    | 1            | 0.7374018    | not scorable | not scorable |
| #### Bn-scaff_18602_1-p13938 C-genome specific (napus-oleracea) | 0.9856459    | 0.8013431    | 1            | 0.7643237    | not scorable | not scorable |
| #### Bn-scaff_18602_1-p14261 C-genome specific (napus-oleracea) | 0.9545454    | 0.3730893    | 0.9922481    | 0.568574     | not scorable | not scorable |
| #### Bn-scaff_18602_1-p20593 C-genome specific (napus-oleracea) | 0.9832536    | 0.7174531    | 1            | 0.7610266    | not scorable | not scorable |

|                                                                 |              |              |              |              |              |              |
|-----------------------------------------------------------------|--------------|--------------|--------------|--------------|--------------|--------------|
| #### Bn-scaff_18602_1-p21398 C-genome specific (napus-oleracea) | 0.9641148    | 0.7292556    | 0.9922481    | 0.7447062    | not scorable | not scorable |
| #### Bn-scaff_18602_1-p24004 C-genome specific (napus-oleracea) | 0.9880383    | 0.7889014    | 1            | 0.7752007    | not scorable | not scorable |
| #### Bn-scaff_18602_1-p24122 C-genome specific (napus-oleracea) | 0.9473684    | 0.692802     | 1            | 0.6137288    | not scorable | not scorable |
| #### Bn-scaff_18602_1-p24405 C-genome specific (napus-oleracea) | 0.9808612    | 0.6817005    | 1            | 0.6706148    | not scorable | not scorable |
| #### Bn-scaff_18602_1-p24410 genome unspecific (all in)         | 0.9736842    | 0.3361531    | 1            | 0.6487821    | 1            | 0.8209458    |
| #### Bn-scaff_18602_1-p24478 A-genome specific (napus-rapa)     | 0.9856459    | 0.2876067    | not scorable | not scorable | 0.9917355    | 0.8064331    |
| #### Bn-scaff_18602_1-p24484 A-genome specific (napus-rapa)     | 0.9880383    | 0.3574326    | not scorable | not scorable | 0.9834711    | 0.7876953    |
| #### Bn-scaff_18602_1-p25819 C-genome specific (napus-oleracea) | 0.9880383    | 0.6911647    | 1            | 0.7211823    | not scorable | not scorable |
| #### Bn-scaff_18602_1-p25948 napus specific                     | 0.9904306    | 0.3030675    | not scorable | not scorable | not scorable | not scorable |
| #### Bn-scaff_18602_1-p26130 C-genome specific (napus-oleracea) | 0.9952153    | 0.8002264    | 0.9844961    | 0.8184873    | not scorable | not scorable |
| #### Bn-scaff_18602_1-p26183 C-genome specific (napus-oleracea) | 0.9880383    | 0.827274     | 0.9767442    | 0.7874205    | not scorable | not scorable |
| #### Bn-scaff_18602_1-p26200 C-genome specific (napus-oleracea) | 0.9832536    | 0.6226261    | 1            | 0.6433784    | not scorable | not scorable |
| #### Bn-scaff_18602_1-p26218 C-genome specific (napus-oleracea) | 0.9904306    | 0.8015764    | 0.9612403    | 0.7221051    | not scorable | not scorable |
| #### Bn-scaff_18602_1-p26292 C-genome specific (napus-oleracea) | 0.9856459    | 0.6219516    | 0.9844961    | 0.6337001    | not scorable | not scorable |
| #### Bn-scaff_18602_1-p26320 C-genome specific (napus-oleracea) | 0.9808612    | 0.5567973    | 0.9612403    | 0.647144     | not scorable | not scorable |
| #### Bn-scaff_18602_1-p27018 C-genome specific (oleracea only)  | not scorable | not scorable | 0.9612403    | 0.7510331    | not scorable | not scorable |
| #### Bn-scaff_18602_1-p27642 genome unspecific (all in)         | 1            | 0.7511361    | 1            | 0.6956301    | 1            | 0.7622204    |
| #### Bn-scaff_18602_1-p27701 genome unspecific (all in)         | 1            | 0.2850351    | 0.9302326    | 0.2581306    | 1            | 0.752191     |
| #### Bn-scaff_18602_1-p27862 A-genome specific (napus-rapa)     | 1            | 0.5473591    | not scorable | not scorable | 1            | 0.5747949    |
| #### Bn-scaff_18602_1-p27969 A-genome specific (napus-rapa)     | 1            | 0.5170562    | not scorable | not scorable | 1            | 0.7963377    |
| #### Bn-scaff_18602_1-p28008 napus specific                     | 1            | 0.5370233    | not scorable | not scorable | not scorable | not scorable |
| #### Bn-scaff_18602_1-p28009 A-genome specific (napus-rapa)     | 1            | 0.9154796    | not scorable | not scorable | 1            | 0.8452305    |
| #### Bn-scaff_18602_1-p28918 genome unspecific (oleracea-rapa)  | not scorable | not scorable | 1            | 0.6665571    | 1            | 0.827751     |
| #### Bn-scaff_18602_1-p46083 C-genome specific (napus-oleracea) | 0.9904306    | 0.7975243    | 1            | 0.7797366    | not scorable | not scorable |
| #### Bn-scaff_18602_1-p54504 C-genome specific (napus-oleracea) | 0.9880383    | 0.7152269    | 0.9767442    | 0.8224205    | not scorable | not scorable |
| #### Bn-scaff_18602_1-p89074 C-genome specific (napus-oleracea) | 0.9760765    | 0.6903157    | 0.9767442    | 0.7482613    | not scorable | not scorable |
| #### Bn-scaff_18602_1-p95505 C-genome specific (napus-oleracea) | 0.9928229    | 0.7740884    | 0.9922481    | 0.7713026    | not scorable | not scorable |
| #### Bn-scaff_18607_1-p24441 C-genome specific (napus-oleracea) | 1            | 0.3748531    | 0.875969     | 0.5020941    | not scorable | not scorable |
| #### Bn-scaff_18607_1-p24546 genome unspecific (all in)         | 0.9784689    | 0.5869503    | 1            | 0.8989622    | 0.9752066    | 0.8645889    |
| #### Bn-scaff_18607_1-p28326 C-genome specific (napus-oleracea) | 0.9928229    | 0.7091781    | 1            | 0.7596285    | not scorable | not scorable |
| #### Bn-scaff_18607_1-p34952 C-genome specific (napus-oleracea) | 0.9521531    | 0.2344432    | 1            | 0.7388571    | not scorable | not scorable |
| #### Bn-scaff_18621_1-p13313 C-genome specific (oleracea only)  | not scorable | not scorable | 0.9922481    | 0.7081541    | not scorable | not scorable |
| #### Bn-scaff_18621_1-p13722 C-genome specific (oleracea only)  | not scorable | not scorable | 0.9689922    | 0.7997831    | not scorable | not scorable |

|                                                                 |              |              |              |              |              |              |
|-----------------------------------------------------------------|--------------|--------------|--------------|--------------|--------------|--------------|
| #### Bn-scaff_18621_1-p13756 C-genome specific (oleracea only)  | not scorable | not scorable | 0.9689922    | 0.8595787    | not scorable | not scorable |
| #### Bn-scaff_18621_1-p13793 genome unspecific (all in)         | 1            | 0.7622204    | 1            | 0.6476418    | 1            | 0.752191     |
| #### Bn-scaff_18621_1-p18379 C-genome specific (napus-oleracea) | 0.9784689    | 0.3790385    | 1            | 0.8614381    | not scorable | not scorable |
| #### Bn-scaff_18621_1-p22676 C-genome specific (napus-oleracea) | 0.5909091    | 0.7786703    | 0.9844961    | 0.7512314    | not scorable | not scorable |
| #### Bn-scaff_18621_1-p36377 genome unspecific (all in)         | 0.9760765    | 0.4260336    | 1            | 0.577747     | 1            | 0.8009827    |
| #### Bn-scaff_18621_1-p42658 genome unspecific (oleracea-rapa)  | not scorable | not scorable | 1            | 0.7957146    | 1            | 0.9205657    |
| #### Bn-scaff_18621_1-p85309 C-genome specific (napus-oleracea) | 0.6507177    | 0.7409858    | 1            | 0.7103052    | not scorable | not scorable |
| #### Bn-scaff_18628_1-p15768 genome unspecific (all in)         | 0.9808612    | 0.221528     | 1            | 0.6490251    | 1            | 0.5560235    |
| #### Bn-scaff_18636_1-p10218 genome unspecific (all in)         | 1            | 0.5250992    | 1            | 0.5376333    | 1            | 0.5204965    |
| #### Bn-scaff_18636_1-p11498 genome unspecific (all in)         | 0.9688995    | 0.4437504    | 1            | 0.7383485    | 0.9917355    | 0.72592      |
| #### Bn-scaff_18636_1-p17733 genome unspecific (all in)         | 0.9712918    | 0.1816231    | 1            | 0.6812571    | 0.9752066    | 0.6630346    |
| #### Bn-scaff_18636_1-p2660 genome unspecific (all in)          | 0.9952153    | 0.9420143    | 1            | 0.8232014    | 0.8512397    | 0.9395691    |
| #### Bn-scaff_18636_1-p3310 genome unspecific (oleracea-rapa)   | not scorable | not scorable | 1            | 0.6811977    | 1            | 0.3043766    |
| #### Bn-scaff_18636_1-p34871 C-genome specific (oleracea only)  | not scorable | not scorable | 0.9612403    | 0.3919427    | not scorable | not scorable |
| #### Bn-scaff_18636_1-p41731 genome unspecific (oleracea-rapa)  | not scorable | not scorable | 1            | 0.7399979    | 0.9834711    | 0.7180176    |
| #### Bn-scaff_18636_1-p51263 C-genome specific (napus-oleracea) | 0.9712918    | 0.7487803    | 1            | 0.7234698    | not scorable | not scorable |
| #### Bn-scaff_18645_1-p423 A-genome specific (napus-rapa)       | 1            | 0.5222159    | not scorable | not scorable | 1            | 0.6029963    |
| #### Bn-scaff_18656_1-p12837 genome unspecific (all in)         | 0.9832536    | 0.5942951    | 1            | 0.7991191    | 1            | 0.9118385    |
| #### Bn-scaff_18656_1-p22362 C-genome specific (napus-oleracea) | 0.9856459    | 0.677782     | 1            | 0.701395     | not scorable | not scorable |
| #### Bn-scaff_18656_1-p22363 C-genome specific (napus-oleracea) | 0.9904306    | 0.6993677    | 1            | 0.6888559    | not scorable | not scorable |
| #### Bn-scaff_18656_1-p36077 genome unspecific (all in)         | 0.9569378    | 0.6485364    | 0.9922481    | 0.7529269    | 0.9917355    | 0.8350867    |
| #### Bn-scaff_18656_1-p38343 C-genome specific (napus-oleracea) | 0.9832536    | 0.6456197    | 1            | 0.5881822    | not scorable | not scorable |
| #### Bn-scaff_18656_1-p43235 C-genome specific (napus-oleracea) | 0.9904306    | 0.6947631    | 0.9922481    | 0.7697723    | not scorable | not scorable |
| #### Bn-scaff_18656_1-p44737 C-genome specific (napus-oleracea) | 0.9832536    | 0.6863397    | 0.9922481    | 0.7655395    | not scorable | not scorable |
| #### Bn-scaff_18656_1-p4894 C-genome specific (napus-oleracea)  | 0.9928229    | 0.7777941    | 0.9767442    | 0.7506407    | not scorable | not scorable |
| #### Bn-scaff_18656_1-p53047 genome unspecific (all in)         | 0.9712918    | 0.2646634    | 0.9922481    | 0.3616255    | 1            | 0.3858046    |
| #### Bn-scaff_18656_1-p54366 genome unspecific (all in)         | 0.9904306    | 0.3735976    | 1            | 0.8306308    | 1            | 0.8340978    |
| #### Bn-scaff_18656_1-p54679 genome unspecific (all in)         | 1            | 0.3721637    | 1            | 0.7627715    | 0.9917355    | 0.7779581    |
| #### Bn-scaff_18656_1-p757 C-genome specific (napus-oleracea)   | 0.9880383    | 0.7723844    | 1            | 0.7871959    | not scorable | not scorable |
| #### Bn-scaff_18656_1-p8003 genome unspecific (all in)          | 0.9880383    | 0.5459306    | 1            | 0.5777629    | 0.8347107    | 0.9135903    |
| #### Bn-scaff_18669_1-p16438 C-genome specific (napus-oleracea) | 0.9976076    | 0.8305696    | 0.9922481    | 0.790618     | not scorable | not scorable |
| #### Bn-scaff_18669_1-p17393 C-genome specific (napus-oleracea) | 0.9928229    | 0.7392287    | 0.9922481    | 0.6420694    | not scorable | not scorable |
| #### Bn-scaff_18669_1-p31736 C-genome specific (napus-oleracea) | 0.9856459    | 0.6461943    | 0.9922481    | 0.6407468    | not scorable | not scorable |



|                                                                |              |              |              |              |              |              |
|----------------------------------------------------------------|--------------|--------------|--------------|--------------|--------------|--------------|
| #### Bn-scaff_18669_1-p33971C-genome specific (napus-oleracea) | 0.9904306    | 0.6315991    | 0.9922481    | 0.6531627    | not scorable | not scorable |
| #### Bn-scaff_18669_1-p41786C-genome specific (napus-oleracea) | 1            | 0.7670333    | 1            | 0.7777616    | not scorable | not scorable |
| #### Bn-scaff_18669_1-p41890C-genome specific (napus-oleracea) | 0.9928229    | 0.7693365    | 1            | 0.8218313    | not scorable | not scorable |
| #### Bn-scaff_18669_1-p41959C-genome specific (napus-oleracea) | 0.9880383    | 0.8025602    | 1            | 0.780709     | not scorable | not scorable |
| #### Bn-scaff_18672_1-p11117genome unspecific (all in)         | 0.9593301    | 0.6636133    | 0.9922481    | 0.839543     | 1            | 0.9408135    |
| #### Bn-scaff_18672_1-p11426C-genome specific (napus-oleracea) | 0.9688995    | 0.7552787    | 1            | 0.8586712    | not scorable | not scorable |
| #### Bn-scaff_18672_1-p11431C-genome specific (napus-oleracea) | 0.9545454    | 0.7908065    | 1            | 0.7503489    | not scorable | not scorable |
| #### Bn-scaff_18672_1-p12271genome unspecific (all in)         | 1            | 0.9205657    | 1            | 0.7615036    | 1            | 0.9175813    |
| #### Bn-scaff_18672_1-p13972genome unspecific (all in)         | 0.9880383    | 0.3684882    | 1            | 0.6016936    | 1            | 0.7582461    |
| #### Bn-scaff_18672_1-p14078genome unspecific (all in)         | 0.9904306    | 0.7688578    | 0.9844961    | 0.8221362    | 0.9586777    | 0.7613237    |
| #### Bn-scaff_18672_1-p16874C-genome specific (napus-oleracea) | 0.9665072    | 0.6723971    | 0.9844961    | 0.7789527    | not scorable | not scorable |
| #### Bn-scaff_18672_1-p16975C-genome specific (napus-oleracea) | 0.9784689    | 0.7864173    | 0.9922481    | 0.6919232    | not scorable | not scorable |
| #### Bn-scaff_18672_1-p16999C-genome specific (napus-oleracea) | 0.9808612    | 0.7696739    | 1            | 0.8981178    | not scorable | not scorable |
| #### Bn-scaff_18672_1-p17020C-genome specific (napus-oleracea) | 0.9736842    | 0.6877889    | 0.9922481    | 0.7245917    | not scorable | not scorable |
| #### Bn-scaff_18672_1-p17125C-genome specific (napus-oleracea) | 0.9784689    | 0.7327412    | 1            | 0.8144229    | not scorable | not scorable |
| #### Bn-scaff_18672_1-p17147C-genome specific (napus-oleracea) | 0.9784689    | 0.8178771    | 0.9844961    | 0.7829777    | not scorable | not scorable |
| #### Bn-scaff_18672_1-p17186C-genome specific (napus-oleracea) | 0.9784689    | 0.7917311    | 0.9922481    | 0.8536542    | not scorable | not scorable |
| #### Bn-scaff_18672_1-p17517C-genome specific (napus-oleracea) | 0.9760765    | 0.7894769    | 0.9767442    | 0.7942811    | not scorable | not scorable |
| #### Bn-scaff_18672_1-p17876genome unspecific (oleracea-rapa)  | not scorable | not scorable | 0.9844961    | 0.7462776    | 0.9338843    | 0.8001826    |
| #### Bn-scaff_18672_1-p22279C-genome specific (napus-oleracea) | 0.9808612    | 0.7640613    | 1            | 0.825215     | not scorable | not scorable |
| #### Bn-scaff_18672_1-p88213C-genome specific (oleracea only)  | not scorable | not scorable | 1            | 0.700666     | not scorable | not scorable |
| #### Bn-scaff_18675_1-p10684C-genome specific (napus-oleracea) | 0.9928229    | 0.8584996    | 1            | 0.7611688    | not scorable | not scorable |
| #### Bn-scaff_18675_1-p10977C-genome specific (napus-oleracea) | 0.9928229    | 0.6889697    | 0.8604651    | 0.6902748    | not scorable | not scorable |
| #### Bn-scaff_18675_1-p17425genome unspecific (all in)         | 1            | 0.5954378    | 1            | 0.815598     | 1            | 0.9039531    |
| #### Bn-scaff_18675_1-p21754C-genome specific (oleracea only)  | not scorable | not scorable | 0.9922481    | 0.7610977    | not scorable | not scorable |
| #### Bn-scaff_18675_1-p22092C-genome specific (napus-oleracea) | 1            | 0.6743401    | 1            | 0.7224885    | not scorable | not scorable |
| #### Bn-scaff_18675_1-p23071C-genome specific (napus-oleracea) | 0.9952153    | 0.745723     | 1            | 0.7510743    | not scorable | not scorable |
| #### Bn-scaff_18675_1-p26402C-genome specific (napus-oleracea) | 0.9952153    | 0.7538784    | 1            | 0.8245745    | not scorable | not scorable |
| #### Bn-scaff_18675_1-p31331napus specific                     | 0.5502392    | 0.6545236    | not scorable | not scorable | not scorable | not scorable |
| #### Bn-scaff_18675_1-p34778genome unspecific (all in)         | 0.9665072    | 0.5246531    | 1            | 0.6992968    | 1            | 0.9093556    |
| #### Bn-scaff_18675_1-p37419C-genome specific (napus-oleracea) | 0.9952153    | 0.7315224    | 1            | 0.8486784    | not scorable | not scorable |
| #### Bn-scaff_18675_1-p38103all not scorable                   | not scorable | not scorable | not scorable | not scorable | not scorable | not scorable |
| #### Bn-scaff_18675_1-p38730C-genome specific (napus-oleracea) | 0.9952153    | 0.7243455    | 1            | 0.7518814    | not scorable | not scorable |

|                                                                 |              |              |              |              |              |              |
|-----------------------------------------------------------------|--------------|--------------|--------------|--------------|--------------|--------------|
| #### Bn-scaff_18675_1-p39243 C-genome specific (napus-oleracea) | 0.9928229    | 0.7465469    | 1            | 0.8352604    | not scorable | not scorable |
| #### Bn-scaff_18675_1-p39318 C-genome specific (napus-oleracea) | 0.9952153    | 0.780268     | 1            | 0.705276     | not scorable | not scorable |
| #### Bn-scaff_18675_1-p39478 C-genome specific (napus-oleracea) | 0.9904306    | 0.5687408    | 1            | 0.6905509    | not scorable | not scorable |
| #### Bn-scaff_18675_1-p39560 napus specific                     | 0.9808612    | 0.7785203    | not scorable | not scorable | not scorable | not scorable |
| #### Bn-scaff_18675_1-p39663 C-genome specific (napus-oleracea) | 0.9928229    | 0.5963769    | 0.9922481    | 0.8966416    | not scorable | not scorable |
| #### Bn-scaff_18675_1-p40209 all not scorable                   | not scorable | not scorable | not scorable | not scorable | not scorable | not scorable |
| #### Bn-scaff_18675_1-p41101 A-genome specific (napus-rapa)     | 0.9904306    | 0.4822249    | not scorable | not scorable | 0.9752066    | 0.7058436    |
| #### Bn-scaff_18675_1-p41556 napus specific                     | 0.9928229    | 0.6516739    | not scorable | not scorable | not scorable | not scorable |
| #### Bn-scaff_18675_1-p42123 C-genome specific (napus-oleracea) | 0.9928229    | 0.7451485    | 1            | 0.8456066    | not scorable | not scorable |
| #### Bn-scaff_18675_1-p42192 genome unspecific (all in)         | 1            | 0.5218694    | 1            | 0.4688011    | 1            | 0.9170265    |
| #### Bn-scaff_18675_1-p42197 C-genome specific (napus-oleracea) | 1            | 0.6017496    | 1            | 0.5736827    | not scorable | not scorable |
| #### Bn-scaff_18675_1-p42318 C-genome specific (napus-oleracea) | 0.9928229    | 0.6760591    | 1            | 0.707635     | not scorable | not scorable |
| #### Bn-scaff_18675_1-p42683 C-genome specific (napus-oleracea) | 0.9928229    | 0.8502406    | 1            | 0.7179648    | not scorable | not scorable |
| #### Bn-scaff_18675_1-p43112 C-genome specific (napus-oleracea) | 0.9952153    | 0.7780268    | 0.9922481    | 0.7188326    | not scorable | not scorable |
| #### Bn-scaff_18675_1-p44525 genome unspecific (all in)         | 1            | 0.6968186    | 1            | 0.6562966    | 1            | 0.7252899    |
| #### Bn-scaff_18675_1-p46626 C-genome specific (napus-oleracea) | 0.9641148    | 0.6131986    | 0.9922481    | 0.7296085    | not scorable | not scorable |
| #### Bn-scaff_18675_1-p46887 C-genome specific (napus-oleracea) | 0.9641148    | 0.6854088    | 1            | 0.6916013    | not scorable | not scorable |
| #### Bn-scaff_18675_1-p49294 C-genome specific (napus-oleracea) | 0.9952153    | 0.8323078    | 1            | 0.7502247    | not scorable | not scorable |
| #### Bn-scaff_18675_1-p51487 genome unspecific (oleracea-rapa)  | not scorable | not scorable | 1            | 0.7646254    | 0.8595041    | 0.9256722    |
| #### Bn-scaff_18675_1-p52785 C-genome specific (napus-oleracea) | 0.9928229    | 0.7259414    | 1            | 0.8944228    | not scorable | not scorable |
| #### Bn-scaff_18675_1-p54933 C-genome specific (napus-oleracea) | 0.9928229    | 0.6673982    | 1            | 0.8080364    | not scorable | not scorable |
| #### Bn-scaff_18675_1-p56156 C-genome specific (napus-oleracea) | 0.9904306    | 0.6268524    | 1            | 0.7868685    | not scorable | not scorable |
| #### Bn-scaff_18675_1-p57602 C-genome specific (napus-oleracea) | 0.9928229    | 0.8096758    | 1            | 0.9221261    | not scorable | not scorable |
| #### Bn-scaff_18675_1-p57827 C-genome specific (napus-oleracea) | 0.9928229    | 0.7800226    | 1            | 0.8182012    | not scorable | not scorable |
| #### Bn-scaff_18675_1-p57840 C-genome specific (napus-oleracea) | 0.9952153    | 0.4801139    | 1            | 0.6890169    | not scorable | not scorable |
| #### Bn-scaff_18675_1-p59111 C-genome specific (napus-oleracea) | 0.9952153    | 0.3963307    | 1            | 0.859445     | not scorable | not scorable |
| #### Bn-scaff_18675_1-p59141 C-genome specific (napus-oleracea) | 0.9928229    | 0.8458923    | 1            | 0.7683372    | not scorable | not scorable |
| #### Bn-scaff_18675_1-p59166 C-genome specific (napus-oleracea) | 0.9952153    | 0.7249324    | 1            | 0.7825934    | not scorable | not scorable |
| #### Bn-scaff_18675_1-p59168 C-genome specific (napus-oleracea) | 0.9952153    | 0.8476215    | 1            | 0.8211564    | not scorable | not scorable |
| #### Bn-scaff_18675_1-p59185 C-genome specific (napus-oleracea) | 0.9952153    | 0.845151     | 1            | 0.8168147    | not scorable | not scorable |
| #### Bn-scaff_18675_1-p59496 C-genome specific (napus-oleracea) | 0.9952153    | 0.7094566    | 1            | 0.7035388    | not scorable | not scorable |
| #### Bn-scaff_18675_1-p60125 C-genome specific (napus-oleracea) | 0.9904306    | 0.7127698    | 1            | 0.6716903    | not scorable | not scorable |
| #### Bn-scaff_18675_1-p60534 C-genome specific (napus-oleracea) | 0.9928229    | 0.6543458    | 1            | 0.824303     | not scorable | not scorable |

|                                                                 |              |              |              |              |              |              |
|-----------------------------------------------------------------|--------------|--------------|--------------|--------------|--------------|--------------|
| #### Bn-scaff_18675_1-p60926 C-genome specific (napus-oleracea) | 0.9952153    | 0.9299858    | 1            | 0.7771388    | not scorable | not scorable |
| #### Bn-scaff_18675_1-p60942 C-genome specific (napus-oleracea) | 0.9928229    | 0.7955097    | 1            | 0.6371521    | not scorable | not scorable |
| #### Bn-scaff_18675_1-p60977 C-genome specific (napus-oleracea) | 0.9928229    | 0.6787712    | 1            | 0.662568     | not scorable | not scorable |
| #### Bn-scaff_18675_1-p61000 C-genome specific (napus-oleracea) | 0.9952153    | 0.7834532    | 1            | 0.6808956    | not scorable | not scorable |
| #### Bn-scaff_18675_1-p62320 C-genome specific (napus-oleracea) | 0.9928229    | 0.6532232    | 0.9922481    | 0.7727088    | not scorable | not scorable |
| #### Bn-scaff_18675_1-p62361 C-genome specific (napus-oleracea) | 0.9952153    | 0.8023478    | 1            | 0.7740549    | not scorable | not scorable |
| #### Bn-scaff_18675_1-p67285 C-genome specific (napus-oleracea) | 0.9928229    | 0.9147072    | 1            | 0.7993006    | not scorable | not scorable |
| #### Bn-scaff_18675_1-p67535 C-genome specific (napus-oleracea) | 0.9928229    | 0.6798408    | 1            | 0.7782519    | not scorable | not scorable |
| #### Bn-scaff_18675_1-p78477 genome unspecific (all in)         | 1            | 0.8861768    | 1            | 0.7492775    | 1            | 0.7847599    |
| #### Bn-scaff_18675_1-p78607 genome unspecific (oleracea-rapa)  | not scorable | not scorable | 0.8372093    | 0.3076604    | 1            | 0.7645116    |
| #### Bn-scaff_18675_1-p78693 genome unspecific (all in)         | 1            | 0.6230366    | 0.7596899    | 0.2616915    | 0.9834711    | 0.5890335    |
| #### Bn-scaff_18675_1-p81204 C-genome specific (napus-oleracea) | 0.9904306    | 0.7467126    | 1            | 0.7182841    | not scorable | not scorable |
| #### Bn-scaff_18675_1-p82128 C-genome specific (napus-oleracea) | 0.9952153    | 0.626096     | 1            | 0.6838172    | not scorable | not scorable |
| #### Bn-scaff_18675_1-p82592 C-genome specific (oleracea only)  | not scorable | not scorable | 1            | 0.6823445    | not scorable | not scorable |
| #### Bn-scaff_18675_1-p8309 genome unspecific (all in)          | 0.9928229    | 0.5911586    | 1            | 0.7545719    | 1            | 0.8973749    |
| #### Bn-scaff_18675_1-p85245 C-genome specific (napus-oleracea) | 0.9952153    | 0.7774996    | 1            | 0.7356162    | not scorable | not scorable |
| #### Bn-scaff_18675_1-p88436 C-genome specific (napus-oleracea) | 0.9952153    | 0.7937259    | 1            | 0.7337467    | not scorable | not scorable |
| #### Bn-scaff_18675_1-p91942 genome unspecific (all in)         | 0.9904306    | 0.7415923    | 1            | 0.7458911    | 0.7851239    | 0.8135551    |
| #### Bn-scaff_18675_1-p95593 genome unspecific (all in)         | 0.9976076    | 0.3838226    | 1            | 0.7789082    | 0.9834711    | 0.7738263    |
| #### Bn-scaff_18675_1-p95631 C-genome specific (napus-oleracea) | 0.9928229    | 0.7067898    | 1            | 0.7230459    | not scorable | not scorable |
| #### Bn-scaff_18675_1-p95888 genome unspecific (all in)         | 1            | 0.8703095    | 1            | 0.8364106    | 1            | 0.9205657    |
| #### Bn-scaff_18675_1-p96024 A-genome specific (napus-rapa)     | 0.9976076    | 0.8130077    | not scorable | not scorable | 1            | 0.8114662    |
| #### Bn-scaff_18675_1-p98033 genome unspecific (all in)         | 0.9569378    | 0.264958     | 1            | 0.6538664    | 0.9917355    | 0.6140317    |
| #### Bn-scaff_18679_1-p71 genome unspecific (all in)            | 1            | 0.6040532    | 1            | 0.6733309    | 1            | 0.5611419    |
| #### Bn-scaff_18702_1-p13388 C-genome specific (napus-oleracea) | 0.9880383    | 0.8248448    | 1            | 0.7656729    | not scorable | not scorable |
| #### Bn-scaff_18702_1-p15817 C-genome specific (napus-oleracea) | 0.9832536    | 0.7980354    | 0.9689922    | 0.7509492    | not scorable | not scorable |
| #### Bn-scaff_18702_1-p18118 C-genome specific (napus-oleracea) | 0.9856459    | 0.8118685    | 0.8372093    | 0.8145494    | not scorable | not scorable |
| #### Bn-scaff_18702_1-p18507 genome unspecific (oleracea-rapa)  | not scorable | not scorable | 0.9922481    | 0.7654959    | 1            | 0.739505     |
| #### Bn-scaff_18702_1-p20150 C-genome specific (napus-oleracea) | 0.9736842    | 0.6886401    | 1            | 0.6150149    | not scorable | not scorable |
| #### Bn-scaff_18702_1-p21765 genome unspecific (all in)         | 0.9904306    | 0.4611011    | 1            | 0.6872401    | 1            | 0.6428955    |
| #### Bn-scaff_18702_1-p22426 A-genome specific (rapa only)      | not scorable | not scorable | not scorable | not scorable | 1            | 0.702597     |
| #### Bn-scaff_18702_1-p22547 C-genome specific (napus-oleracea) | 0.9593301    | 0.7821587    | 0.875969     | 0.7474581    | not scorable | not scorable |
| #### Bn-scaff_18702_1-p22965 C-genome specific (napus-oleracea) | 0.9832536    | 0.7395563    | 1            | 0.7596048    | not scorable | not scorable |

|                                                                 |              |              |              |              |              |              |
|-----------------------------------------------------------------|--------------|--------------|--------------|--------------|--------------|--------------|
| #### Bn-scaff_18702_1-p23153 C-genome specific (napus-oleracea) | 0.9832536    | 0.8428534    | 1            | 0.7713767    | not scorable | not scorable |
| #### Bn-scaff_18702_1-p23210 C-genome specific (napus-oleracea) | 0.9856459    | 0.7422643    | 1            | 0.7408151    | not scorable | not scorable |
| #### Bn-scaff_18702_1-p23260 C-genome specific (napus-oleracea) | 0.9688995    | 0.7723534    | 1            | 0.6742697    | not scorable | not scorable |
| #### Bn-scaff_18702_1-p23385 C-genome specific (napus-oleracea) | 0.9832536    | 0.8373944    | 1            | 0.7892162    | not scorable | not scorable |
| #### Bn-scaff_18702_1-p24347 C-genome specific (napus-oleracea) | 0.9856459    | 0.7442328    | 0.9922481    | 0.7649184    | not scorable | not scorable |
| #### Bn-scaff_18702_1-p24367 C-genome specific (napus-oleracea) | 0.9832536    | 0.6223478    | 1            | 0.6748962    | not scorable | not scorable |
| #### Bn-scaff_18702_1-p25245 C-genome specific (napus-oleracea) | 0.9760765    | 0.7046214    | 0.9922481    | 0.7641       | not scorable | not scorable |
| #### Bn-scaff_18702_1-p25709 C-genome specific (napus-oleracea) | 0.9832536    | 0.7859535    | 0.9922481    | 0.7904682    | not scorable | not scorable |
| #### Bn-scaff_18702_1-p25777 C-genome specific (napus-oleracea) | 0.9832536    | 0.7464111    | 1            | 0.7987042    | not scorable | not scorable |
| #### Bn-scaff_18702_1-p26073 C-genome specific (napus-oleracea) | 0.9808612    | 0.6786433    | 1            | 0.6954014    | not scorable | not scorable |
| #### Bn-scaff_18702_1-p26295 C-genome specific (napus-oleracea) | 0.9808612    | 0.7401044    | 0.9534883    | 0.7232896    | not scorable | not scorable |
| #### Bn-scaff_18702_1-p26399 C-genome specific (napus-oleracea) | 0.9832536    | 0.6375698    | 0.9767442    | 0.6807389    | not scorable | not scorable |
| #### Bn-scaff_18702_1-p27019 genome unspecific (all in)         | 0.9856459    | 0.5534427    | 1            | 0.7644212    | 1            | 0.9027085    |
| #### Bn-scaff_18702_1-p27604 C-genome specific (napus-oleracea) | 0.9808612    | 0.812103     | 1            | 0.7126193    | not scorable | not scorable |
| #### Bn-scaff_18702_1-p27628 C-genome specific (napus-oleracea) | 0.9832536    | 0.8551835    | 1            | 0.7989908    | not scorable | not scorable |
| #### Bn-scaff_18702_1-p27635 C-genome specific (napus-oleracea) | 0.9856459    | 0.8439434    | 0.9922481    | 0.7319806    | not scorable | not scorable |
| #### Bn-scaff_18702_1-p27931 C-genome specific (napus-oleracea) | 0.9856459    | 0.7526832    | 0.9844961    | 0.7704856    | not scorable | not scorable |
| #### Bn-scaff_18702_1-p28357 genome unspecific (all in)         | 1            | 0.7823172    | 1            | 0.6943619    | 1            | 0.9192992    |
| #### Bn-scaff_18702_1-p28521 genome unspecific (all in)         | 0.9928229    | 0.4194177    | 1            | 0.7948714    | 1            | 0.9017928    |
| #### Bn-scaff_18702_1-p28873 C-genome specific (napus-oleracea) | 0.9688995    | 0.711184     | 0.9844961    | 0.7713367    | not scorable | not scorable |
| #### Bn-scaff_18702_1-p28924 C-genome specific (napus-oleracea) | 0.9736842    | 0.806685     | 0.9922481    | 0.8415254    | not scorable | not scorable |
| #### Bn-scaff_18702_1-p28962 napus specific                     | 0.9665072    | 0.6681834    | not scorable | not scorable | not scorable | not scorable |
| #### Bn-scaff_18702_1-p29111 C-genome specific (napus-oleracea) | 0.9832536    | 0.7847141    | 1            | 0.7833486    | not scorable | not scorable |
| #### Bn-scaff_18702_1-p31576 C-genome specific (napus-oleracea) | 0.9784689    | 0.7824431    | 1            | 0.8079915    | not scorable | not scorable |
| #### Bn-scaff_18702_1-p31685 genome unspecific (all in)         | 0.9928229    | 0.4737988    | 0.9922481    | 0.7619086    | 1            | 0.8769482    |
| #### Bn-scaff_18702_1-p31973 C-genome specific (napus-oleracea) | 0.9832536    | 0.810941     | 1            | 0.7462528    | not scorable | not scorable |
| #### Bn-scaff_18702_1-p32336 C-genome specific (napus-oleracea) | 0.9736842    | 0.8103571    | 0.9922481    | 0.7941557    | not scorable | not scorable |
| #### Bn-scaff_18702_1-p32698 C-genome specific (napus-oleracea) | 0.9808612    | 0.7469001    | 0.9844961    | 0.7682679    | not scorable | not scorable |
| #### Bn-scaff_18702_1-p32813 C-genome specific (napus-oleracea) | 0.9641148    | 0.8188905    | 0.9922481    | 0.8182366    | not scorable | not scorable |
| #### Bn-scaff_18702_1-p32932 C-genome specific (napus-oleracea) | 0.9808612    | 0.7155727    | 0.875969     | 0.7410153    | not scorable | not scorable |
| #### Bn-scaff_18702_1-p33360 C-genome specific (oleracea only)  | not scorable | not scorable | 0.9844961    | 0.7075428    | not scorable | not scorable |
| #### Bn-scaff_18702_1-p33540 C-genome specific (napus-oleracea) | 0.9808612    | 0.8036896    | 1            | 0.7332784    | not scorable | not scorable |
| #### Bn-scaff_18702_1-p35832 C-genome specific (napus-oleracea) | 0.9617225    | 0.8056015    | 1            | 0.7869874    | not scorable | not scorable |

|                                                                 |              |              |              |              |              |              |
|-----------------------------------------------------------------|--------------|--------------|--------------|--------------|--------------|--------------|
| #### Bn-scaff_18702_1-p35904 C-genome specific (napus-oleracea) | 0.9832536    | 0.7603872    | 1            | 0.81657      | not scorable | not scorable |
| #### Bn-scaff_18702_1-p36123 genome unspecific (all in)         | 0.9904306    | 0.5737149    | 1            | 0.6910697    | 1            | 0.9309444    |
| #### Bn-scaff_18702_1-p36518 C-genome specific (napus-oleracea) | 0.9808612    | 0.6426898    | 1            | 0.8059768    | not scorable | not scorable |
| #### Bn-scaff_18702_1-p36537 C-genome specific (napus-oleracea) | 0.9784689    | 0.7844353    | 1            | 0.8411095    | not scorable | not scorable |
| #### Bn-scaff_18702_1-p36583 C-genome specific (napus-oleracea) | 0.9712918    | 0.6957254    | 0.9689922    | 0.6983409    | not scorable | not scorable |
| #### Bn-scaff_18702_1-p36718 C-genome specific (napus-oleracea) | 0.9832536    | 0.7505665    | 1            | 0.7912874    | not scorable | not scorable |
| #### Bn-scaff_18702_1-p36753 C-genome specific (napus-oleracea) | 0.9784689    | 0.8039218    | 1            | 0.7945005    | not scorable | not scorable |
| #### Bn-scaff_18702_1-p36788 C-genome specific (napus-oleracea) | 0.9784689    | 0.8323468    | 0.9922481    | 0.8011191    | not scorable | not scorable |
| #### Bn-scaff_18702_1-p36798 C-genome specific (napus-oleracea) | 0.9808612    | 0.705593     | 0.9844961    | 0.7711263    | not scorable | not scorable |
| #### Bn-scaff_18702_1-p37005 C-genome specific (napus-oleracea) | 0.9712918    | 0.8037136    | 0.9844961    | 0.8027412    | not scorable | not scorable |
| #### Bn-scaff_18702_1-p37072 C-genome specific (napus-oleracea) | 0.9832536    | 0.7619861    | 1            | 0.7236024    | not scorable | not scorable |
| #### Bn-scaff_18702_1-p37091 C-genome specific (napus-oleracea) | 0.9760765    | 0.7340579    | 0.9689922    | 0.6797703    | not scorable | not scorable |
| #### Bn-scaff_18702_1-p38443 genome unspecific (all in)         | 0.9880383    | 0.5216673    | 1            | 0.6189968    | 1            | 0.8589997    |
| #### Bn-scaff_18702_1-p44088 C-genome specific (napus-oleracea) | 0.9856459    | 0.7255254    | 0.9767442    | 0.784013     | not scorable | not scorable |
| #### Bn-scaff_18702_1-p45381 C-genome specific (napus-oleracea) | 0.9880383    | 0.7407519    | 1            | 0.6845148    | not scorable | not scorable |
| #### Bn-scaff_18702_1-p46286 C-genome specific (napus-oleracea) | 0.9760765    | 0.8139291    | 1            | 0.8417949    | not scorable | not scorable |
| #### Bn-scaff_18702_1-p49726 C-genome specific (napus-oleracea) | 0.9736842    | 0.7461544    | 0.9922481    | 0.774342     | not scorable | not scorable |
| #### Bn-scaff_18702_1-p52386 genome unspecific (all in)         | 0.9832536    | 0.4385031    | 1            | 0.7362941    | 1            | 0.9048641    |
| #### Bn-scaff_18702_1-p58681 genome unspecific (all in)         | 0.9952153    | 0.4402644    | 0.9922481    | 0.7162015    | 1            | 0.9249566    |
| #### Bn-scaff_18702_1-p58958 C-genome specific (napus-oleracea) | 0.9856459    | 0.7646059    | 1            | 0.7623414    | not scorable | not scorable |
| #### Bn-scaff_18702_1-p60314 genome unspecific (all in)         | 1            | 0.2910144    | 0.9534883    | 0.3022053    | 1            | 0.78441      |
| #### Bn-scaff_18702_1-p61195 C-genome specific (napus-oleracea) | 0.9712918    | 0.7876648    | 0.5116279    | 0.7846122    | not scorable | not scorable |
| #### Bn-scaff_18702_1-p61295 genome unspecific (all in)         | 0.9904306    | 0.4899136    | 1            | 0.8057688    | 0.9917355    | 0.9510957    |
| #### Bn-scaff_18702_1-p64151 C-genome specific (napus-oleracea) | 0.9904306    | 0.8083844    | 1            | 0.5530982    | not scorable | not scorable |
| #### Bn-scaff_18702_1-p80445 C-genome specific (napus-oleracea) | 0.9952153    | 0.5083775    | 1            | 0.4245502    | not scorable | not scorable |
| #### Bn-scaff_18712_1-p11692 C-genome specific (oleracea only)  | not scorable | not scorable | 1            | 0.521245     | not scorable | not scorable |
| #### Bn-scaff_18712_1-p32644 C-genome specific (napus-oleracea) | 0.9952153    | 0.7464922    | 1            | 0.7436236    | not scorable | not scorable |
| #### Bn-scaff_18712_1-p32669 genome unspecific (all in)         | 1            | 0.3154691    | 1            | 0.8400296    | 1            | 0.7896993    |
| #### Bn-scaff_18712_1-p32875 napus specific                     | 0.6889952    | 0.7012234    | not scorable | not scorable | not scorable | not scorable |
| #### Bn-scaff_18712_1-p32974 napus specific                     | 0.708134     | 0.7970411    | not scorable | not scorable | not scorable | not scorable |
| #### Bn-scaff_18712_1-p42103 C-genome specific (napus-oleracea) | 0.9832536    | 0.7639281    | 1            | 0.8219877    | not scorable | not scorable |
| #### Bn-scaff_18712_1-p42557 C-genome specific (napus-oleracea) | 0.9401914    | 0.2966386    | 0.9922481    | 0.2403584    | not scorable | not scorable |
| #### Bn-scaff_18712_1-p42900 C-genome specific (napus-oleracea) | 0.9928229    | 0.6995849    | 1            | 0.8205767    | not scorable | not scorable |

|                                                                 |              |              |              |              |              |              |
|-----------------------------------------------------------------|--------------|--------------|--------------|--------------|--------------|--------------|
| #### Bn-scaff_18712_1-p42958 C-genome specific (napus-oleracea) | 0.9784689    | 0.7113311    | 0.9922481    | 0.6739506    | not scorable | not scorable |
| #### Bn-scaff_18712_1-p43171 genome unspecific (all in)         | 0.9904306    | 0.4788779    | 0.9922481    | 0.7935826    | 1            | 0.9175813    |
| #### Bn-scaff_18712_1-p43356 C-genome specific (napus-oleracea) | 0.9880383    | 0.7905163    | 0.9922481    | 0.7923006    | not scorable | not scorable |
| #### Bn-scaff_18712_1-p43471 genome unspecific (all in)         | 0.9688995    | 0.6351423    | 0.9844961    | 0.792676     | 0.9173554    | 0.9199751    |
| #### Bn-scaff_18712_1-p43649 C-genome specific (napus-oleracea) | 0.9760765    | 0.4246965    | 0.9224806    | 0.4808121    | not scorable | not scorable |
| #### Bn-scaff_18712_1-p43714 C-genome specific (napus-oleracea) | 0.9760765    | 0.3017396    | 0.8139535    | 0.2965744    | not scorable | not scorable |
| #### Bn-scaff_18712_1-p44122 C-genome specific (napus-oleracea) | 0.9904306    | 0.7771817    | 0.9922481    | 0.7294922    | not scorable | not scorable |
| #### Bn-scaff_18712_1-p44130 C-genome specific (napus-oleracea) | 0.9928229    | 0.7560734    | 1            | 0.6966912    | not scorable | not scorable |
| #### Bn-scaff_18712_1-p44161 C-genome specific (napus-oleracea) | 0.9880383    | 0.7123882    | 0.9922481    | 0.6635108    | not scorable | not scorable |
| #### Bn-scaff_18712_1-p44171 C-genome specific (napus-oleracea) | 0.9880383    | 0.66967      | 0.9922481    | 0.6691985    | not scorable | not scorable |
| #### Bn-scaff_18712_1-p44241 C-genome specific (napus-oleracea) | 0.9856459    | 0.7203242    | 0.9689922    | 0.7770344    | not scorable | not scorable |
| #### Bn-scaff_18712_1-p44241 C-genome specific (napus-oleracea) | 0.9832536    | 0.8071287    | 0.9767442    | 0.7658105    | not scorable | not scorable |
| #### Bn-scaff_18712_1-p44306 C-genome specific (napus-oleracea) | 0.9880383    | 0.7776408    | 1            | 0.7754465    | not scorable | not scorable |
| #### Bn-scaff_18712_1-p48211 C-genome specific (oleracea only)  | not scorable | not scorable | 0.9147287    | 0.1625516    | not scorable | not scorable |
| #### Bn-scaff_18712_1-p48260 C-genome specific (napus-oleracea) | 1            | 0.6360008    | 0.9844961    | 0.6059096    | not scorable | not scorable |
| #### Bn-scaff_18712_1-p51367 C-genome specific (napus-oleracea) | 1            | 0.7544396    | 0.9922481    | 0.7658781    | not scorable | not scorable |
| #### Bn-scaff_18712_1-p52055 C-genome specific (napus-oleracea) | 0.9832536    | 0.5664746    | 0.9922481    | 0.5328157    | not scorable | not scorable |
| #### Bn-scaff_18712_1-p52742 C-genome specific (napus-oleracea) | 0.9976076    | 0.7760283    | 0.9922481    | 0.7391015    | not scorable | not scorable |
| #### Bn-scaff_18712_1-p52914 C-genome specific (napus-oleracea) | 0.9952153    | 0.7727523    | 0.9844961    | 0.8031728    | not scorable | not scorable |
| #### Bn-scaff_18712_1-p55658 genome unspecific (all in)         | 1            | 0.296766     | 0.9844961    | 0.8060756    | 1            | 0.6636233    |
| #### Bn-scaff_18712_1-p57205 C-genome specific (napus-oleracea) | 0.9976076    | 0.8149973    | 1            | 0.7769732    | not scorable | not scorable |
| #### Bn-scaff_18712_1-p60215 C-genome specific (napus-oleracea) | 0.9976076    | 0.6646903    | 0.9922481    | 0.642644     | not scorable | not scorable |
| #### Bn-scaff_18712_1-p60262 genome unspecific (oleracea-rapa)  | not scorable | not scorable | 1            | 0.5701226    | 1            | 0.8004208    |
| #### Bn-scaff_18712_1-p62189 genome unspecific (all in)         | 0.9904306    | 0.5344329    | 1            | 0.8406462    | 1            | 0.9205657    |
| #### Bn-scaff_18712_1-p62611 C-genome specific (napus-oleracea) | 0.9976076    | 0.8566455    | 0.9844961    | 0.7602754    | not scorable | not scorable |
| #### Bn-scaff_18712_1-p62685 C-genome specific (napus-oleracea) | 1            | 0.7610988    | 1            | 0.6775374    | not scorable | not scorable |
| #### Bn-scaff_18712_1-p62737 C-genome specific (napus-oleracea) | 0.9976076    | 0.6951095    | 1            | 0.6861849    | not scorable | not scorable |
| #### Bn-scaff_18712_1-p62767 C-genome specific (napus-oleracea) | 0.9952153    | 0.6245149    | 0.9844961    | 0.5698414    | not scorable | not scorable |
| #### Bn-scaff_18712_1-p62793 C-genome specific (napus-oleracea) | 0.9952153    | 0.789126     | 0.9767442    | 0.8057548    | not scorable | not scorable |
| #### Bn-scaff_18712_1-p62803 C-genome specific (napus-oleracea) | 0.9976076    | 0.723832     | 0.9844961    | 0.6988118    | not scorable | not scorable |
| #### Bn-scaff_18712_1-p62889 C-genome specific (napus-oleracea) | 1            | 0.8469661    | 0.9922481    | 0.7007411    | not scorable | not scorable |
| #### Bn-scaff_18712_1-p87308 napus specific                     | 0.9832536    | 0.8378905    | not scorable | not scorable | not scorable | not scorable |
| #### Bn-scaff_18712_1-p95379 genome unspecific (all in)         | 1            | 0.2926703    | 1            | 0.789063     | 0.9752066    | 0.6715416    |

|                                                                 |           |           |              |              |              |              |              |
|-----------------------------------------------------------------|-----------|-----------|--------------|--------------|--------------|--------------|--------------|
| #### Bn-scaff_18754_1-p13853 C-genome specific (napus-oleracea) | 0.9904306 | 0.7535491 |              | 1            | 0.8901026    | not scorable | not scorable |
| #### Bn-scaff_18754_1-p13861 C-genome specific (napus-oleracea) | 0.9952153 | 0.8156576 |              | 1            | 0.8045585    | not scorable | not scorable |
| #### Bn-scaff_18754_1-p13864 C-genome specific (napus-oleracea) | 0.9904306 | 0.760996  | 0.9844961    |              | 0.7464952    | not scorable | not scorable |
| #### Bn-scaff_18754_1-p13892 C-genome specific (napus-oleracea) | 0.9952153 | 0.8513204 | 0.9922481    |              | 0.7210125    | not scorable | not scorable |
| #### Bn-scaff_18754_1-p18962 C-genome specific (napus-oleracea) | 0.9162679 | 0.6473423 | 0.9689922    |              | 0.7431253    | not scorable | not scorable |
| #### Bn-scaff_18754_1-p19548 C-genome specific (napus-oleracea) | 0.9928229 | 0.8028641 | 0.9457364    |              | 0.7296993    | not scorable | not scorable |
| #### Bn-scaff_18754_1-p20318 C-genome specific (napus-oleracea) | 0.9904306 | 0.7455369 | 0.9379845    |              | 0.7176316    | not scorable | not scorable |
| #### Bn-scaff_18754_1-p20783 C-genome specific (napus-oleracea) | 0.9880383 | 0.8066422 |              | 1            | 0.7624793    | not scorable | not scorable |
| #### Bn-scaff_18754_1-p21086 C-genome specific (napus-oleracea) | 0.9880383 | 0.8239264 |              | 1            | 0.7603662    | not scorable | not scorable |
| #### Bn-scaff_18754_1-p21969 C-genome specific (napus-oleracea) | 0.9928229 | 0.8043327 |              | 1            | 0.8172321    | not scorable | not scorable |
| #### Bn-scaff_18754_1-p21982 C-genome specific (napus-oleracea) | 0.9880383 | 0.7417967 | 0.9457364    |              | 0.8164328    | not scorable | not scorable |
| #### Bn-scaff_18754_1-p23366 genome unspecific (all in)         | 0.9976076 | 0.6432559 |              | 1            | 0.7626473    |              | 1 0.9387253  |
| #### Bn-scaff_18754_1-p28090 C-genome specific (napus-oleracea) | 0.9952153 | 0.565143  | 0.9534883    |              | 0.5885171    | not scorable | not scorable |
| #### Bn-scaff_18754_1-p64441 napus specific                     | 0.9712918 | 0.5217777 | not scorable | not scorable | not scorable | not scorable | not scorable |
| #### Bn-scaff_18762_1-p59746 C-genome specific (napus-oleracea) | 0.9832536 | 0.6799686 | 0.8682171    |              | 0.7290749    | not scorable | not scorable |
| #### Bn-scaff_18762_1-p73478 C-genome specific (napus-oleracea) | 0.9784689 | 0.7784107 | 0.9457364    |              | 0.7390322    | not scorable | not scorable |
| #### Bn-scaff_18776_1-p14433 C-genome specific (napus-oleracea) | 1         | 0.7820596 | 0.9767442    |              | 0.79997      | not scorable | not scorable |
| #### Bn-scaff_18776_1-p18005 C-genome specific (napus-oleracea) | 0.9952153 | 0.9048071 |              | 1            | 0.7476411    | not scorable | not scorable |
| #### Bn-scaff_18776_1-p24645 C-genome specific (napus-oleracea) | 0.9760765 | 0.7751647 | 0.9534883    |              | 0.6986661    | not scorable | not scorable |
| #### Bn-scaff_18776_1-p26333 C-genome specific (napus-oleracea) | 0.9784689 | 0.6950834 | 0.9922481    |              | 0.760864     | not scorable | not scorable |
| #### Bn-scaff_18776_1-p26837 C-genome specific (napus-oleracea) | 0.9832536 | 0.7532827 | 0.9844961    |              | 0.7802152    | not scorable | not scorable |
| #### Bn-scaff_18776_1-p26851 C-genome specific (napus-oleracea) | 0.9928229 | 0.7551357 | 0.9922481    |              | 0.79784      | not scorable | not scorable |
| #### Bn-scaff_18776_1-p26918 C-genome specific (napus-oleracea) | 0.9952153 | 0.7744937 | 0.9844961    |              | 0.7586879    | not scorable | not scorable |
| #### Bn-scaff_18776_1-p27524 C-genome specific (napus-oleracea) | 0.9784689 | 0.6847113 | 0.9844961    |              | 0.6605828    | not scorable | not scorable |
| #### Bn-scaff_18776_1-p27529 C-genome specific (napus-oleracea) | 0.9736842 | 0.7454129 | 0.9767442    |              | 0.7766021    | not scorable | not scorable |
| #### Bn-scaff_18776_1-p27538 C-genome specific (napus-oleracea) | 0.9832536 | 0.8080443 |              | 1            | 0.8012166    | not scorable | not scorable |
| #### Bn-scaff_18776_1-p27586 genome unspecific (all in)         | 0.9401914 | 0.358631  | 0.9689922    |              | 0.5765661    |              | 1 0.7510049  |
| #### Bn-scaff_18776_1-p27593 C-genome specific (napus-oleracea) | 0.9880383 | 0.7543813 |              | 1            | 0.8190506    | not scorable | not scorable |
| #### Bn-scaff_18776_1-p27640 C-genome specific (napus-oleracea) | 0.9688995 | 0.7862018 | 0.9922481    |              | 0.7497774    | not scorable | not scorable |
| #### Bn-scaff_18776_1-p31856 C-genome specific (napus-oleracea) | 1         | 0.7893074 |              | 1            | 0.7993303    | not scorable | not scorable |
| #### Bn-scaff_18776_1-p32882 C-genome specific (napus-oleracea) | 0.9976076 | 0.7642079 | 0.9922481    |              | 0.7749062    | not scorable | not scorable |
| #### Bn-scaff_18776_1-p33105 C-genome specific (napus-oleracea) | 1         | 0.7578558 | 0.9922481    |              | 0.769743     | not scorable | not scorable |
| #### Bn-scaff_18776_1-p33140 C-genome specific (napus-oleracea) | 0.9760765 | 0.5163255 |              | 1            | 0.8263631    | not scorable | not scorable |

|                                                                 |              |              |              |              |              |              |
|-----------------------------------------------------------------|--------------|--------------|--------------|--------------|--------------|--------------|
| #### Bn-scaff_18776_1-p33555 C-genome specific (napus-oleracea) | 0.9976076    | 0.7519498    | 0.9922481    | 0.8546489    | not scorable | not scorable |
| #### Bn-scaff_18776_1-p34556 genome unspecific (all in)         | 1            | 0.7283726    | 1            | 0.7609616    | 1            | 0.9398393    |
| #### Bn-scaff_18776_1-p36364 C-genome specific (napus-oleracea) | 1            | 0.7513843    | 0.9922481    | 0.8220952    | not scorable | not scorable |
| #### Bn-scaff_18776_1-p36455 C-genome specific (napus-oleracea) | 0.9952153    | 0.7563194    | 0.9844961    | 0.7352082    | not scorable | not scorable |
| #### Bn-scaff_18776_1-p50876 C-genome specific (napus-oleracea) | 0.9665072    | 0.2723054    | 0.6744186    | 0.3268061    | not scorable | not scorable |
| #### Bn-scaff_18776_1-p51213 C-genome specific (napus-oleracea) | 1            | 0.7263904    | 0.9302326    | 0.5475438    | not scorable | not scorable |
| #### Bn-scaff_18776_1-p52390 all not scorable                   | not scorable | not scorable | not scorable | not scorable | not scorable | not scorable |
| #### Bn-scaff_18776_1-p53923 C-genome specific (napus-oleracea) | 0.9976076    | 0.8023822    | 0.9844961    | 0.8248581    | not scorable | not scorable |
| #### Bn-scaff_18776_1-p62815 C-genome specific (napus-oleracea) | 0.9952153    | 0.7712082    | 1            | 0.7010086    | not scorable | not scorable |
| #### Bn-scaff_18776_1-p62883 C-genome specific (napus-oleracea) | 0.9928229    | 0.7126753    | 0.9767442    | 0.6376819    | not scorable | not scorable |
| #### Bn-scaff_18776_1-p64756 C-genome specific (napus-oleracea) | 0.9976076    | 0.7916397    | 0.9922481    | 0.6595158    | not scorable | not scorable |
| #### Bn-scaff_18776_1-p6748 C-genome specific (napus-oleracea)  | 0.7464115    | 0.8613353    | 0.7984496    | 0.7368501    | not scorable | not scorable |
| #### Bn-scaff_18776_1-p69965 C-genome specific (napus-oleracea) | 0.9928229    | 0.7519903    | 0.9302326    | 0.7759107    | not scorable | not scorable |
| #### Bn-scaff_18776_1-p72140 C-genome specific (napus-oleracea) | 0.9976076    | 0.7612038    | 0.9844961    | 0.7255598    | not scorable | not scorable |
| #### Bn-scaff_18776_1-p80214 C-genome specific (napus-oleracea) | 1            | 0.7680824    | 0.9844961    | 0.845268     | not scorable | not scorable |
| #### Bn-scaff_18776_1-p81905 C-genome specific (napus-oleracea) | 1            | 0.7210782    | 0.9922481    | 0.7442303    | not scorable | not scorable |
| #### Bn-scaff_18776_1-p861 genome unspecific (all in)           | 0.7488039    | 0.7555544    | 0.7984496    | 0.6705382    | 0.9256198    | 0.7884539    |
| #### Bn-scaff_18784_1-p12894 C-genome specific (napus-oleracea) | 0.9832536    | 0.6963933    | 0.9612403    | 0.8032295    | not scorable | not scorable |
| #### Bn-scaff_18784_1-p14540 genome unspecific (all in)         | 0.9976076    | 0.3563694    | 1            | 0.8021094    | 0.9752066    | 0.8049092    |
| #### Bn-scaff_18784_1-p16668 genome unspecific (all in)         | 1            | 0.53551      | 1            | 0.7017669    | 1            | 0.7694687    |
| #### Bn-scaff_18784_1-p17312 genome unspecific (all in)         | 1            | 0.7135291    | 1            | 0.6370244    | 1            | 0.702597     |
| #### Bn-scaff_18784_1-p38529 all not scorable                   | not scorable | not scorable | not scorable | not scorable | not scorable | not scorable |
| #### Bn-scaff_18784_1-p79221 C-genome specific (napus-oleracea) | 0.9688995    | 0.6165081    | 0.9147287    | 0.5864317    | not scorable | not scorable |
| #### Bn-scaff_18795_1-p8136 C-genome specific (napus-oleracea)  | 0.9688995    | 0.7552781    | 0.6899225    | 0.7227591    | not scorable | not scorable |
| #### Bn-scaff_18806_1-p17692 C-genome specific (napus-oleracea) | 1            | 0.803207     | 1            | 0.7801087    | not scorable | not scorable |
| #### Bn-scaff_18806_1-p24878 napus specific                     | 0.9808612    | 0.8378407    | not scorable | not scorable | not scorable | not scorable |
| #### Bn-scaff_18806_1-p32378 genome unspecific (all in)         | 0.9736842    | 0.240548     | 0.9767442    | 0.2885805    | 1            | 0.8251305    |
| #### Bn-scaff_18806_1-p36772 genome unspecific (all in)         | 0.9688995    | 0.3021222    | 1            | 0.7905735    | 0.9586777    | 0.3365325    |
| #### Bn-scaff_18806_1-p38749 genome unspecific (all in)         | 0.9784689    | 0.2528197    | 1            | 0.8677561    | 1            | 0.7739488    |
| #### Bn-scaff_18806_1-p57698 genome unspecific (oleracea-rapa)  | not scorable | not scorable | 1            | 0.7009867    | 1            | 0.6905116    |
| #### Bn-scaff_18807_1-p13001 C-genome specific (napus-oleracea) | 0.9138756    | 0.7966229    | 0.9844961    | 0.7725337    | not scorable | not scorable |
| #### Bn-scaff_18807_1-p13506 C-genome specific (napus-oleracea) | 0.9090909    | 0.7571409    | 0.9922481    | 0.71047      | not scorable | not scorable |
| #### Bn-scaff_18807_1-p13955 C-genome specific (napus-oleracea) | 0.9090909    | 0.7471089    | 1            | 0.7508979    | not scorable | not scorable |



|                                                                 |              |              |              |              |              |              |
|-----------------------------------------------------------------|--------------|--------------|--------------|--------------|--------------|--------------|
| #### Bn-scaff_18807_1-p15018 C-genome specific (napus-oleracea) | 0.9066986    | 0.6961385    | 1            | 0.7517151    | not scorable | not scorable |
| #### Bn-scaff_18807_1-p15124 genome unspecific (all in)         | 0.9808612    | 0.2149105    | 0.9922481    | 0.3702486    | 1            | 0.8162624    |
| #### Bn-scaff_18807_1-p15348 genome unspecific (oleracea-rapa)  | not scorable | not scorable | 1            | 0.8044979    | 1            | 0.7542019    |
| #### Bn-scaff_18807_1-p15428 genome unspecific (oleracea-rapa)  | not scorable | not scorable | 1            | 0.6797932    | 0.9917355    | 0.6990256    |
| #### Bn-scaff_18807_1-p15479 genome unspecific (all in)         | 1            | 0.8142247    | 0.9612403    | 0.7135321    | 1            | 0.8248894    |
| #### Bn-scaff_18807_1-p15493 genome unspecific (all in)         | 0.9258373    | 0.2441645    | 0.9922481    | 0.7766413    | 1            | 0.8062924    |
| #### Bn-scaff_18807_1-p15514 A-genome specific (napus-rapa)     | 0.9641148    | 0.2580693    | not scorable | not scorable | 0.9917355    | 0.6005951    |
| #### Bn-scaff_18807_1-p15531 genome unspecific (oleracea-rapa)  | not scorable | not scorable | 1            | 0.7110054    | 0.9917355    | 0.8408701    |
| #### Bn-scaff_18807_1-p15552 genome unspecific (all in)         | 1            | 0.9205657    | 1            | 0.8661726    | 1            | 0.915225     |
| #### Bn-scaff_18807_1-p16904 C-genome specific (napus-oleracea) | 0.9043062    | 0.7763601    | 0.9922481    | 0.7651859    | not scorable | not scorable |
| #### Bn-scaff_18807_1-p17061 C-genome specific (napus-oleracea) | 0.9114832    | 0.7845947    | 0.9922481    | 0.843977     | not scorable | not scorable |
| #### Bn-scaff_18807_1-p19626 C-genome specific (napus-oleracea) | 0.9162679    | 0.7249368    | 0.9922481    | 0.6801504    | not scorable | not scorable |
| #### Bn-scaff_18807_1-p19724 C-genome specific (napus-oleracea) | 0.9114832    | 0.7289409    | 0.9922481    | 0.6999794    | not scorable | not scorable |
| #### Bn-scaff_18807_1-p19941 C-genome specific (napus-oleracea) | 0.9210526    | 0.7301943    | 1            | 0.7297996    | not scorable | not scorable |
| #### Bn-scaff_18807_1-p20028 C-genome specific (napus-oleracea) | 0.923445     | 0.8047005    | 0.9922481    | 0.8100719    | not scorable | not scorable |
| #### Bn-scaff_18807_1-p20052 C-genome specific (napus-oleracea) | 0.9186603    | 0.7817217    | 0.9612403    | 0.6494743    | not scorable | not scorable |
| #### Bn-scaff_18807_1-p20075 C-genome specific (napus-oleracea) | 0.9186603    | 0.7585122    | 0.9534883    | 0.72794      | not scorable | not scorable |
| #### Bn-scaff_18807_1-p20110 C-genome specific (napus-oleracea) | 0.9138756    | 0.7162453    | 0.9612403    | 0.6893434    | not scorable | not scorable |
| #### Bn-scaff_18807_1-p20147 C-genome specific (napus-oleracea) | 0.9138756    | 0.7758988    | 0.9612403    | 0.7124709    | not scorable | not scorable |
| #### Bn-scaff_18807_1-p20174 C-genome specific (napus-oleracea) | 0.9138756    | 0.7551482    | 0.9534883    | 0.7499411    | not scorable | not scorable |
| #### Bn-scaff_18807_1-p20671 C-genome specific (napus-oleracea) | 0.9138756    | 0.7448657    | 0.9767442    | 0.7062998    | not scorable | not scorable |
| #### Bn-scaff_18807_1-p20874 C-genome specific (napus-oleracea) | 0.9162679    | 0.7439797    | 1            | 0.7853137    | not scorable | not scorable |
| #### Bn-scaff_18807_1-p22496 C-genome specific (napus-oleracea) | 0.9210526    | 0.8062221    | 1            | 0.7256638    | not scorable | not scorable |
| #### Bn-scaff_18807_1-p22548 C-genome specific (napus-oleracea) | 0.9090909    | 0.73211      | 0.9844961    | 0.7065805    | not scorable | not scorable |
| #### Bn-scaff_18807_1-p23084 C-genome specific (napus-oleracea) | 0.9162679    | 0.7329832    | 0.9844961    | 0.795816     | not scorable | not scorable |
| #### Bn-scaff_18807_1-p28133 genome unspecific (all in)         | 0.9880383    | 0.4519576    | 1            | 0.7621746    | 1            | 0.9396136    |
| #### Bn-scaff_18807_1-p35148 C-genome specific (napus-oleracea) | 0.9043062    | 0.6883005    | 1            | 0.7692178    | not scorable | not scorable |
| #### Bn-scaff_18807_1-p35883 C-genome specific (napus-oleracea) | 0.8779904    | 0.696777     | 1            | 0.7595993    | not scorable | not scorable |
| #### Bn-scaff_18807_1-p36336 C-genome specific (napus-oleracea) | 0.9138756    | 0.7430454    | 1            | 0.7589848    | not scorable | not scorable |
| #### Bn-scaff_18807_1-p36375 C-genome specific (napus-oleracea) | 0.9114832    | 0.7361606    | 0.9224806    | 0.7023633    | not scorable | not scorable |
| #### Bn-scaff_18807_1-p37301 C-genome specific (napus-oleracea) | 0.9162679    | 0.5871119    | 0.9844961    | 0.6740808    | not scorable | not scorable |
| #### Bn-scaff_18807_1-p37408 C-genome specific (napus-oleracea) | 0.9186603    | 0.7615435    | 1            | 0.8210099    | not scorable | not scorable |
| #### Bn-scaff_18807_1-p48073 C-genome specific (napus-oleracea) | 0.9114832    | 0.8040769    | 0.9922481    | 0.7727296    | not scorable | not scorable |

|                                                                 |              |              |              |              |              |              |
|-----------------------------------------------------------------|--------------|--------------|--------------|--------------|--------------|--------------|
| #### Bn-scaff_18807_1-p48556 C-genome specific (napus-oleracea) | 0.923445     | 0.7775616    | 0.9922481    | 0.8279639    | not scorable | not scorable |
| #### Bn-scaff_18807_1-p49875 genome unspecific (all in)         | 0.9976076    | 0.4517621    | 0.9922481    | 0.6453189    | 1            | 0.9079961    |
| #### Bn-scaff_18807_1-p49899 genome unspecific (all in)         | 0.9449761    | 0.3406324    | 0.9922481    | 0.6688481    | 1            | 0.8167824    |
| #### Bn-scaff_18807_1-p49946 C-genome specific (napus-oleracea) | 0.9090909    | 0.7418841    | 0.9922481    | 0.7155414    | not scorable | not scorable |
| #### Bn-scaff_18807_1-p50407 C-genome specific (napus-oleracea) | 0.9114832    | 0.7707326    | 1            | 0.6832172    | not scorable | not scorable |
| #### Bn-scaff_18807_1-p51163 C-genome specific (napus-oleracea) | 0.7296651    | 0.6797203    | 0.9612403    | 0.6780397    | not scorable | not scorable |
| #### Bn-scaff_18807_1-p51363 napus specific                     | 0.9043062    | 0.679031     | not scorable | not scorable | not scorable | not scorable |
| #### Bn-scaff_18807_1-p51368 C-genome specific (napus-oleracea) | 0.9186603    | 0.8057651    | 0.9689922    | 0.6902775    | not scorable | not scorable |
| #### Bn-scaff_18807_1-p51962 C-genome specific (napus-oleracea) | 0.9138756    | 0.712139     | 0.8449612    | 0.7520462    | not scorable | not scorable |
| #### Bn-scaff_18807_1-p52901 genome unspecific (oleracea-rapa)  | not scorable | not scorable | 1            | 0.71975      | 1            | 0.7079205    |
| #### Bn-scaff_18807_1-p52959 C-genome specific (napus-oleracea) | 0.9162679    | 0.6999109    | 0.9922481    | 0.7538036    | not scorable | not scorable |
| #### Bn-scaff_18807_1-p52989 genome unspecific (oleracea-rapa)  | not scorable | not scorable | 0.9844961    | 0.3066172    | 1            | 0.8932543    |
| #### Bn-scaff_18807_1-p53957 C-genome specific (napus-oleracea) | 0.9138756    | 0.7681699    | 1            | 0.7959576    | not scorable | not scorable |
| #### Bn-scaff_18807_1-p53984 C-genome specific (napus-oleracea) | 0.9162679    | 0.7937827    | 0.9922481    | 0.7708501    | not scorable | not scorable |
| #### Bn-scaff_18807_1-p61160 C-genome specific (napus-oleracea) | 0.9090909    | 0.7425686    | 0.9844961    | 0.7738166    | not scorable | not scorable |
| #### Bn-scaff_18807_1-p61602 C-genome specific (napus-oleracea) | 0.9760765    | 0.8059005    | 0.9922481    | 0.8002506    | not scorable | not scorable |
| #### Bn-scaff_18807_1-p61803 C-genome specific (oleracea only)  | not scorable | not scorable | 0.6899225    | 0.7529556    | not scorable | not scorable |
| #### Bn-scaff_18807_1-p61843 C-genome specific (napus-oleracea) | 0.9186603    | 0.7436609    | 1            | 0.7384036    | not scorable | not scorable |
| #### Bn-scaff_18807_1-p61866 C-genome specific (napus-oleracea) | 0.8851675    | 0.5880166    | 1            | 0.6321831    | not scorable | not scorable |
| #### Bn-scaff_18807_1-p61938 C-genome specific (napus-oleracea) | 0.9090909    | 0.7584453    | 1            | 0.7832593    | not scorable | not scorable |
| #### Bn-scaff_18807_1-p64635 genome unspecific (oleracea-rapa)  | not scorable | not scorable | 0.9612403    | 0.7154664    | 0.9917355    | 0.8289927    |
| #### Bn-scaff_18807_1-p64831 genome unspecific (all in)         | 0.9641148    | 0.5229648    | 0.9844961    | 0.7653498    | 1            | 0.9098027    |
| #### Bn-scaff_18807_1-p65885 genome unspecific (all in)         | 0.9617225    | 0.2796162    | 0.9844961    | 0.3008044    | 1            | 0.6551506    |
| #### Bn-scaff_18807_1-p67822 C-genome specific (napus-oleracea) | 0.9186603    | 0.6759306    | 0.9612403    | 0.7283607    | not scorable | not scorable |
| #### Bn-scaff_18807_1-p67838 C-genome specific (napus-oleracea) | 0.9186603    | 0.788873     | 0.9922481    | 0.7172675    | not scorable | not scorable |
| #### Bn-scaff_18807_1-p67868 C-genome specific (napus-oleracea) | 0.9090909    | 0.7746029    | 0.9922481    | 0.8112797    | not scorable | not scorable |
| #### Bn-scaff_18807_1-p69469 genome unspecific (oleracea-rapa)  | not scorable | not scorable | 1            | 0.6607563    | 0.9834711    | 0.5407       |
| #### Bn-scaff_18807_1-p69494 genome unspecific (oleracea-rapa)  | not scorable | not scorable | 0.9767442    | 0.6609666    | 0.9834711    | 0.6423961    |
| #### Bn-scaff_18807_1-p72646 C-genome specific (napus-oleracea) | 0.9569378    | 0.7218202    | 0.9922481    | 0.7429012    | not scorable | not scorable |
| #### Bn-scaff_18807_1-p72678 C-genome specific (napus-oleracea) | 0.9210526    | 0.7062998    | 0.9844961    | 0.7272619    | not scorable | not scorable |
| #### Bn-scaff_18807_1-p72686 C-genome specific (oleracea only)  | not scorable | not scorable | 0.9612403    | 0.7198339    | not scorable | not scorable |
| #### Bn-scaff_18807_1-p72974 C-genome specific (napus-oleracea) | 0.9138756    | 0.7522876    | 0.9844961    | 0.8236364    | not scorable | not scorable |
| #### Bn-scaff_18807_1-p73328 genome unspecific (all in)         | 0.9808612    | 0.1771263    | 0.9922481    | 0.2467555    | 1            | 0.9061005    |

|                                                                 |              |              |              |              |              |              |
|-----------------------------------------------------------------|--------------|--------------|--------------|--------------|--------------|--------------|
| #### Bn-scaff_18807_1-p73739 C-genome specific (napus-oleracea) | 0.9162679    | 0.7926753    | 0.9922481    | 0.8567469    | not scorable | not scorable |
| #### Bn-scaff_18807_1-p73745 C-genome specific (napus-oleracea) | 0.9162679    | 0.7075517    | 0.9922481    | 0.7255959    | not scorable | not scorable |
| #### Bn-scaff_18807_1-p73774 C-genome specific (oleracea only)  | not scorable | not scorable | 0.9457364    | 0.7831568    | not scorable | not scorable |
| #### Bn-scaff_18807_1-p73779 C-genome specific (napus-oleracea) | 0.9066986    | 0.744013     | 0.9844961    | 0.7328307    | not scorable | not scorable |
| #### Bn-scaff_18807_1-p74499 C-genome specific (napus-oleracea) | 0.9162679    | 0.6993666    | 0.9922481    | 0.7844414    | not scorable | not scorable |
| #### Bn-scaff_18807_1-p74701 C-genome specific (napus-oleracea) | 0.9138756    | 0.7792628    | 0.9844961    | 0.8162295    | not scorable | not scorable |
| #### Bn-scaff_18807_1-p74703 C-genome specific (napus-oleracea) | 0.9210526    | 0.7550838    | 1            | 0.7400342    | not scorable | not scorable |
| #### Bn-scaff_18807_1-p74791 C-genome specific (napus-oleracea) | 0.9090909    | 0.7414799    | 0.9922481    | 0.8044602    | not scorable | not scorable |
| #### Bn-scaff_18807_1-p74800 C-genome specific (napus-oleracea) | 0.9066986    | 0.7182168    | 1            | 0.6759176    | not scorable | not scorable |
| #### Bn-scaff_18807_1-p75282 C-genome specific (napus-oleracea) | 0.9210526    | 0.7113808    | 1            | 0.6760979    | not scorable | not scorable |
| #### Bn-scaff_18807_1-p75386 C-genome specific (napus-oleracea) | 0.9138756    | 0.717549     | 1            | 0.6984416    | not scorable | not scorable |
| #### Bn-scaff_18807_1-p75621 C-genome specific (napus-oleracea) | 0.923445     | 0.8096842    | 0.9922481    | 0.8296571    | not scorable | not scorable |
| #### Bn-scaff_18817_1-p13974 C-genome specific (napus-oleracea) | 0.9880383    | 0.7592623    | 1            | 0.7237473    | not scorable | not scorable |
| #### Bn-scaff_18817_1-p20803 A-genome specific (napus-rapa)     | 0.9521531    | 0.584087     | not scorable | not scorable | 0.9752066    | 0.6691086    |
| #### Bn-scaff_18817_1-p29976 genome unspecific (all in)         | 0.9760765    | 0.6026444    | 0.9922481    | 0.7030711    | 1            | 0.9257522    |
| #### Bn-scaff_18817_1-p31981 genome unspecific (all in)         | 0.9856459    | 0.6104723    | 0.9767442    | 0.8019929    | 0.9834711    | 0.7820476    |
| #### Bn-scaff_18823_1-p27399 A-genome specific (napus-rapa)     | 0.9784689    | 0.1866892    | not scorable | not scorable | 1            | 0.8661433    |
| #### Bn-scaff_18823_1-p65822 genome unspecific (all in)         | 0.9832536    | 0.3166922    | 1            | 0.6999473    | 1            | 0.7932682    |
| #### Bn-scaff_18826_1-p10006 genome unspecific (all in)         | 0.9976076    | 0.3780928    | 0.9844961    | 0.4580554    | 0.9669421    | 0.6991274    |
| #### Bn-scaff_18826_1-p10294 genome unspecific (oleracea-rapa)  | not scorable | not scorable | 1            | 0.7723179    | 0.9917355    | 0.7850993    |
| #### Bn-scaff_18826_1-p10379 C-genome specific (napus-oleracea) | 0.9928229    | 0.7300626    | 0.9922481    | 0.856598     | not scorable | not scorable |
| #### Bn-scaff_18826_1-p10469 genome unspecific (all in)         | 0.9904306    | 0.3798301    | 1            | 0.6910558    | 0.9669421    | 0.5983737    |
| #### Bn-scaff_18826_1-p11116 genome unspecific (all in)         | 1            | 0.5709352    | 1            | 0.5705255    | 0.9917355    | 0.4896562    |
| #### Bn-scaff_18826_1-p15530 C-genome specific (napus-oleracea) | 1            | 0.5446512    | 1            | 0.5374205    | not scorable | not scorable |
| #### Bn-scaff_18826_1-p15563 genome unspecific (all in)         | 1            | 0.7853832    | 0.9922481    | 0.740293     | 1            | 0.7912072    |
| #### Bn-scaff_18826_1-p15860 genome unspecific (all in)         | 1            | 0.8745745    | 1            | 0.7599706    | 1            | 0.8948976    |
| #### Bn-scaff_18826_1-p17445 C-genome specific (napus-oleracea) | 0.9712918    | 0.8339986    | 0.9224806    | 0.3766245    | not scorable | not scorable |
| #### Bn-scaff_18826_1-p23257 genome unspecific (all in)         | 0.9784689    | 0.554702     | 0.9844961    | 0.6806829    | 1            | 0.9083179    |
| #### Bn-scaff_18826_1-p26461 C-genome specific (napus-oleracea) | 0.9784689    | 0.7197977    | 0.9922481    | 0.7843533    | not scorable | not scorable |
| #### Bn-scaff_18826_1-p30013 C-genome specific (napus-oleracea) | 0.9928229    | 0.787374     | 1            | 0.7125625    | not scorable | not scorable |
| #### Bn-scaff_18826_1-p32401 genome unspecific (all in)         | 0.9952153    | 0.4826092    | 1            | 0.6899508    | 1            | 0.8687926    |
| #### Bn-scaff_18826_1-p32687 C-genome specific (napus-oleracea) | 0.9354067    | 0.3254519    | 1            | 0.7511192    | not scorable | not scorable |
| #### Bn-scaff_18826_1-p32697 genome unspecific (all in)         | 0.9760765    | 0.4613031    | 0.9922481    | 0.7416141    | 1            | 0.8947276    |

|                                                                 |              |              |              |              |              |              |              |
|-----------------------------------------------------------------|--------------|--------------|--------------|--------------|--------------|--------------|--------------|
| #### Bn-scaff_18826_1-p3556 genome unspecific (all in)          | 0.9736842    | 0.266178     |              | 1            | 0.8613154    | 0.9917355    | 0.7152413    |
| #### Bn-scaff_18826_1-p3571 genome unspecific (all in)          | 0.9808612    | 0.3824311    |              | 1            | 0.8730026    | 0.9917355    | 0.7669734    |
| #### Bn-scaff_18826_1-p3710 C-genome specific (napus-oleracea)  | 0.9976076    | 0.7786222    |              | 1            | 0.7556416    | not scorable | not scorable |
| #### Bn-scaff_18826_1-p4567 genome unspecific (all in)          |              | 1            | 0.5943319    | 1            | 0.5919799    | 1            | 0.585574     |
| #### Bn-scaff_18826_1-p46301 A-genome specific (rapa only)      | not scorable | not scorable | not scorable | not scorable |              | 1            | 0.9095823    |
| #### Bn-scaff_18826_1-p4700 genome unspecific (all in)          |              | 1            | 0.3696282    | 1            | 0.8959586    | 1            | 0.8057268    |
| #### Bn-scaff_18826_1-p47237 C-genome specific (napus-oleracea) | 0.9976076    | 0.905366     |              | 1            | 0.7833134    | not scorable | not scorable |
| #### Bn-scaff_18826_1-p4727 genome unspecific (all in)          | 0.9425837    | 0.5783903    |              | 1            | 0.7463777    | 1            | 0.9242101    |
| #### Bn-scaff_18826_1-p5485 genome unspecific (all in)          | 0.9545454    | 0.2320774    | 0.9689922    |              | 0.7033063    | 1            | 0.8098852    |
| #### Bn-scaff_18826_1-p5617 napus specific                      | 0.9976076    | 0.2318508    | not scorable | not scorable | not scorable | not scorable | not scorable |
| #### Bn-scaff_18826_1-p63291 C-genome specific (napus-oleracea) | 0.9832536    | 0.4241475    | 0.9302326    |              | 0.7476215    | not scorable | not scorable |
| #### Bn-scaff_18826_1-p6334 genome unspecific (all in)          | 0.9688995    | 0.5092856    | 0.9302326    |              | 0.6179301    | 0.9669421    | 0.5934911    |
| #### Bn-scaff_18826_1-p75232 genome unspecific (all in)         | 0.9641148    | 0.2704353    |              | 1            | 0.7818141    | 1            | 0.8768306    |
| #### Bn-scaff_18826_1-p7589 C-genome specific (napus-oleracea)  | 0.9617225    | 0.6650205    |              | 1            | 0.7526505    | not scorable | not scorable |
| #### Bn-scaff_18826_1-p7601 genome unspecific (all in)          | 0.9569378    | 0.2770621    |              | 1            | 0.6585783    | 0.9917355    | 0.7084631    |
| #### Bn-scaff_18826_1-p76492 genome unspecific (oleracea-rapa)  | not scorable | not scorable | 0.9922481    |              | 0.8002816    | 1            | 0.9366658    |
| #### Bn-scaff_18826_1-p7769 C-genome specific (napus-oleracea)  | 0.9832536    | 0.7511303    | 0.9534883    |              | 0.7566232    | not scorable | not scorable |
| #### Bn-scaff_18826_1-p78131 C-genome specific (napus-oleracea) | 0.9904306    | 0.8066702    | 0.9534883    |              | 0.756986     | not scorable | not scorable |
| #### Bn-scaff_18826_1-p8088 C-genome specific (napus-oleracea)  | 0.9928229    | 0.8391584    |              | 1            | 0.7164441    | not scorable | not scorable |
| #### Bn-scaff_18826_1-p80921 C-genome specific (napus-oleracea) | 0.9856459    | 0.7394803    | 0.9069768    |              | 0.7791497    | not scorable | not scorable |
| #### Bn-scaff_18826_1-p81132 all not scorable                   | not scorable | not scorable | not scorable | not scorable | not scorable | not scorable | not scorable |
| #### Bn-scaff_18826_1-p8115 all not scorable                    | not scorable | not scorable | not scorable | not scorable | not scorable | not scorable | not scorable |
| #### Bn-scaff_18826_1-p8116 all not scorable                    | not scorable | not scorable | not scorable | not scorable | not scorable | not scorable | not scorable |
| #### Bn-scaff_18826_1-p8120 C-genome specific (oleracea only)   | not scorable | not scorable | 0.875969     |              | 0.6694304    | not scorable | not scorable |
| #### Bn-scaff_18826_1-p81282 C-genome specific (oleracea only)  | not scorable | not scorable | 0.7751938    |              | 0.734723     | not scorable | not scorable |
| #### Bn-scaff_18826_1-p81344 C-genome specific (oleracea only)  | not scorable | not scorable | 0.8527132    |              | 0.7378728    | not scorable | not scorable |
| #### Bn-scaff_18826_1-p81395 all not scorable                   | not scorable | not scorable | not scorable | not scorable | not scorable | not scorable | not scorable |
| #### Bn-scaff_18826_1-p81824 C-genome specific (napus-oleracea) | 0.9952153    | 0.8190327    |              | 1            | 0.778282     | not scorable | not scorable |
| #### Bn-scaff_18826_1-p82274 C-genome specific (napus-oleracea) | 0.9928229    | 0.8061422    |              | 1            | 0.7895493    | not scorable | not scorable |
| #### Bn-scaff_18826_1-p82508 C-genome specific (napus-oleracea) | 0.9976076    | 0.7874232    |              | 1            | 0.8265314    | not scorable | not scorable |
| #### Bn-scaff_18826_1-p82571 C-genome specific (napus-oleracea) | 0.9928229    | 0.8114336    | 0.9922481    |              | 0.7948642    | not scorable | not scorable |
| #### Bn-scaff_18826_1-p82605 C-genome specific (napus-oleracea) | 0.9928229    | 0.8067071    |              | 1            | 0.8364351    | not scorable | not scorable |
| #### Bn-scaff_18826_1-p82682 C-genome specific (napus-oleracea) | 0.9856459    | 0.6960928    |              | 1            | 0.7798161    | not scorable | not scorable |

|                                                                 |              |              |              |              |              |              |
|-----------------------------------------------------------------|--------------|--------------|--------------|--------------|--------------|--------------|
| #### Bn-scaff_18826_1-p82926 C-genome specific (napus-oleracea) | 0.9952153    | 0.8057141    | 0.9922481    | 0.8031494    | not scorable | not scorable |
| #### Bn-scaff_18826_1-p83702 genome unspecific (all in)         | 0.9832536    | 0.3282541    | 0.9302326    | 0.25557      | 1            | 0.8543575    |
| #### Bn-scaff_18826_1-p83775 genome unspecific (oleracea-rapa)  | not scorable | not scorable | 0.9379845    | 0.2785958    | 0.9917355    | 0.6025085    |
| #### Bn-scaff_18826_1-p83790 genome unspecific (all in)         | 0.9832536    | 0.6260051    | 1            | 0.7548013    | 1            | 0.9281266    |
| #### Bn-scaff_18826_1-p85125 genome unspecific (all in)         | 0.9880383    | 0.417541     | 1            | 0.6711317    | 1            | 0.7470145    |
| #### Bn-scaff_18826_1-p85715 genome unspecific (all in)         | 0.9952153    | 0.3141877    | 1            | 0.506361     | 1            | 0.702597     |
| #### Bn-scaff_18826_1-p85741 C-genome specific (napus-oleracea) | 0.9952153    | 0.8280473    | 1            | 0.7465258    | not scorable | not scorable |
| #### Bn-scaff_18826_1-p86243 genome unspecific (all in)         | 0.9928229    | 0.3706206    | 1            | 0.8208038    | 1            | 0.8936574    |
| #### Bn-scaff_18826_1-p89020 genome unspecific (all in)         | 1            | 0.4559844    | 1            | 0.8273405    | 1            | 0.8281098    |
| #### Bn-scaff_18826_1-p96686 genome unspecific (all in)         | 0.9856459    | 0.288852     | 1            | 0.7668501    | 1            | 0.712826     |
| #### Bn-scaff_18826_1-p97796 genome unspecific (all in)         | 0.9449761    | 0.3321177    | 0.9534883    | 0.5314905    | 1            | 0.782461     |
| #### Bn-scaff_18826_1-p98081 C-genome specific (napus-oleracea) | 0.9688995    | 0.2411411    | 0.9302326    | 0.7061687    | not scorable | not scorable |
| #### Bn-scaff_18834_1-p9294 C-genome specific (napus-oleracea)  | 1            | 0.6799275    | 1            | 0.6413683    | not scorable | not scorable |
| #### Bn-scaff_18839_1-p10753 genome unspecific (oleracea-rapa)  | not scorable | not scorable | 0.9922481    | 0.3808089    | 0.9834711    | 0.2953404    |
| #### Bn-scaff_18839_1-p10928 genome unspecific (all in)         | 0.9210526    | 0.3040884    | 1            | 0.795845     | 1            | 0.9175813    |
| #### Bn-scaff_18839_1-p10929 genome unspecific (all in)         | 0.9928229    | 0.6593698    | 0.9767442    | 0.7674227    | 1            | 0.9546012    |
| #### Bn-scaff_18839_1-p12460 C-genome specific (napus-oleracea) | 0.9976076    | 0.518387     | 1            | 0.8462806    | not scorable | not scorable |
| #### Bn-scaff_18839_1-p13851 C-genome specific (napus-oleracea) | 0.9832536    | 0.7441721    | 0.9147287    | 0.7701252    | not scorable | not scorable |
| #### Bn-scaff_18839_1-p13861 all not scorable                   | not scorable | not scorable | not scorable | not scorable | not scorable | not scorable |
| #### Bn-scaff_18839_1-p19844 C-genome specific (napus-oleracea) | 0.9904306    | 0.4122792    | 0.9844961    | 0.4528885    | not scorable | not scorable |
| #### Bn-scaff_18839_1-p19905 genome unspecific (all in)         | 0.9760765    | 0.1692839    | 0.9922481    | 0.6947718    | 1            | 0.7770717    |
| #### Bn-scaff_18839_1-p2517 C-genome specific (napus-oleracea)  | 0.9832536    | 0.7375696    | 0.9612403    | 0.7978698    | not scorable | not scorable |
| #### Bn-scaff_18839_1-p34332 genome unspecific (all in)         | 0.9832536    | 0.2718182    | 0.9922481    | 0.7168185    | 1            | 0.6436247    |
| #### Bn-scaff_18839_1-p50311 C-genome specific (napus-oleracea) | 1            | 0.719479     | 1            | 0.7099588    | not scorable | not scorable |
| #### Bn-scaff_18839_1-p97421 genome unspecific (oleracea-rapa)  | not scorable | not scorable | 1            | 0.7409878    | 0.9917355    | 0.6890224    |
| #### Bn-scaff_18849_1-p10190 C-genome specific (napus-oleracea) | 0.9856459    | 0.7672179    | 0.9844961    | 0.7722383    | not scorable | not scorable |
| #### Bn-scaff_18849_1-p10643 napus specific                     | 0.9880383    | 0.7620249    | not scorable | not scorable | not scorable | not scorable |
| #### Bn-scaff_18849_1-p13679 C-genome specific (napus-oleracea) | 0.9928229    | 0.692535     | 1            | 0.7476737    | not scorable | not scorable |
| #### Bn-scaff_18849_1-p14369 genome unspecific (all in)         | 0.9784689    | 0.3841318    | 1            | 0.7063671    | 1            | 0.7914145    |
| #### Bn-scaff_18849_1-p14573 genome unspecific (all in)         | 0.9784689    | 0.4686853    | 0.9922481    | 0.8018992    | 1            | 0.9182899    |
| #### Bn-scaff_18849_1-p17994 napus specific                     | 0.9832536    | 0.6396263    | not scorable | not scorable | not scorable | not scorable |
| #### Bn-scaff_18849_1-p18227 genome unspecific (all in)         | 1            | 0.6621514    | 1            | 0.602804     | 1            | 0.7015468    |
| #### Bn-scaff_18849_1-p18916 C-genome specific (napus-oleracea) | 0.9784689    | 0.7813311    | 0.4186046    | 0.7129185    | not scorable | not scorable |

|                                                                  |              |              |              |              |              |              |
|------------------------------------------------------------------|--------------|--------------|--------------|--------------|--------------|--------------|
| ##### Bn-scaff_18849_1-p18935 C-genome specific (napus-oleracea) | 0.9832536    | 0.7574495    | 0.4496124    | 0.8297637    | not scorable | not scorable |
| ##### Bn-scaff_18849_1-p18942 C-genome specific (napus-oleracea) | 0.9784689    | 0.750302     | 0.4728682    | 0.8655019    | not scorable | not scorable |
| ##### Bn-scaff_18849_1-p18953 C-genome specific (napus-oleracea) | 0.9808612    | 0.7354753    | 0.4573644    | 0.6886142    | not scorable | not scorable |
| ##### Bn-scaff_18849_1-p19116 C-genome specific (napus-oleracea) | 0.9760765    | 0.7763963    | 0.4573644    | 0.7819055    | not scorable | not scorable |
| ##### Bn-scaff_18849_1-p19180 C-genome specific (napus-oleracea) | 0.9784689    | 0.7908492    | 0.4186046    | 0.7772373    | not scorable | not scorable |
| ##### Bn-scaff_18849_1-p19224 C-genome specific (napus-oleracea) | 0.9832536    | 0.6517471    | 0.4186046    | 0.6084728    | not scorable | not scorable |
| ##### Bn-scaff_18849_1-p19356 C-genome specific (napus-oleracea) | 0.9784689    | 0.7773088    | 0.4263566    | 0.7906469    | not scorable | not scorable |
| ##### Bn-scaff_18849_1-p19370 C-genome specific (napus-oleracea) | 0.9808612    | 0.7650688    | 0.4573644    | 0.8360416    | not scorable | not scorable |
| ##### Bn-scaff_18849_1-p19402 C-genome specific (napus-oleracea) | 0.9784689    | 0.6990144    | 0.4418605    | 0.6949265    | not scorable | not scorable |
| ##### Bn-scaff_18849_1-p19411 C-genome specific (napus-oleracea) | 0.9784689    | 0.6465065    | 0.4186046    | 0.6713194    | not scorable | not scorable |
| ##### Bn-scaff_18849_1-p20643 C-genome specific (napus-oleracea) | 0.9952153    | 0.7253508    | 0.9224806    | 0.6209434    | not scorable | not scorable |
| ##### Bn-scaff_18849_1-p20912 C-genome specific (napus-oleracea) | 0.9952153    | 0.6861972    | 0.9922481    | 0.7228339    | not scorable | not scorable |
| ##### Bn-scaff_18849_1-p20969 C-genome specific (napus-oleracea) | 0.9976076    | 0.7474777    | 1            | 0.8035537    | not scorable | not scorable |
| ##### Bn-scaff_18849_1-p21174 C-genome specific (oleracea only)  | not scorable | not scorable | 1            | 0.7092642    | not scorable | not scorable |
| ##### Bn-scaff_18849_1-p22568 C-genome specific (napus-oleracea) | 0.9832536    | 0.764742     | 0.9922481    | 0.8321632    | not scorable | not scorable |
| ##### Bn-scaff_18849_1-p22996 genome unspecific (oleracea-rapa)  | not scorable | not scorable | 1            | 0.4646441    | 1            | 0.8939758    |
| ##### Bn-scaff_18849_1-p23008 genome unspecific (all in)         | 1            | 0.3349018    | 1            | 0.5637203    | 1            | 0.6809505    |
| ##### Bn-scaff_18849_1-p23013 genome unspecific (all in)         | 0.9976076    | 0.2796857    | 0.9922481    | 0.6489697    | 1            | 0.7155698    |
| ##### Bn-scaff_18849_1-p23052 C-genome specific (napus-oleracea) | 1            | 0.6208723    | 0.9844961    | 0.6331825    | not scorable | not scorable |
| ##### Bn-scaff_18849_1-p23054 C-genome specific (napus-oleracea) | 1            | 0.7974952    | 0.9922481    | 0.7302015    | not scorable | not scorable |
| ##### Bn-scaff_18849_1-p23304 genome unspecific (all in)         | 0.9186603    | 0.197847     | 1            | 0.658442     | 1            | 0.702597     |
| ##### Bn-scaff_18849_1-p30714 C-genome specific (napus-oleracea) | 0.9545454    | 0.4862196    | 0.9922481    | 0.5274264    | not scorable | not scorable |
| ##### Bn-scaff_18849_1-p35049 C-genome specific (napus-oleracea) | 0.9976076    | 0.7670629    | 0.9922481    | 0.7404655    | not scorable | not scorable |
| ##### Bn-scaff_18849_1-p50013 all not scorable                   | not scorable | not scorable | not scorable | not scorable | not scorable | not scorable |
| ##### Bn-scaff_18849_1-p50067 all not scorable                   | not scorable | not scorable | not scorable | not scorable | not scorable | not scorable |
| ##### Bn-scaff_18849_1-p54816 C-genome specific (napus-oleracea) | 0.9952153    | 0.5078176    | 1            | 0.5359363    | not scorable | not scorable |
| ##### Bn-scaff_18849_1-p73612 C-genome specific (napus-oleracea) | 0.9784689    | 0.7587397    | 0.5891473    | 0.7273818    | not scorable | not scorable |
| ##### Bn-scaff_18849_1-p96301 C-genome specific (napus-oleracea) | 0.9880383    | 0.6096749    | 1            | 0.6659412    | not scorable | not scorable |
| ##### Bn-scaff_18855_1-p10932 C-genome specific (napus-oleracea) | 1            | 0.7227275    | 1            | 0.6838019    | not scorable | not scorable |
| ##### Bn-scaff_18855_1-p11200 C-genome specific (napus-oleracea) | 0.9904306    | 0.7920204    | 1            | 0.6999464    | not scorable | not scorable |
| ##### Bn-scaff_18855_1-p13857 C-genome specific (napus-oleracea) | 0.9976076    | 0.792588     | 1            | 0.7411756    | not scorable | not scorable |
| ##### Bn-scaff_18855_1-p13916 C-genome specific (napus-oleracea) | 0.9952153    | 0.7951427    | 0.9844961    | 0.7567801    | not scorable | not scorable |
| ##### Bn-scaff_18855_1-p14242 genome unspecific (all in)         | 0.9952153    | 0.5610209    | 0.9922481    | 0.7596357    | 1            | 0.9202127    |

|                                                                 |              |              |              |              |              |              |
|-----------------------------------------------------------------|--------------|--------------|--------------|--------------|--------------|--------------|
| #### Bn-scaff_18855_1-p14263 C-genome specific (napus-oleracea) | 0.9976076    | 0.6085619    | 0.9844961    | 0.6108043    | not scorable | not scorable |
| #### Bn-scaff_18855_1-p14346 C-genome specific (napus-oleracea) | 0.8971292    | 0.7799774    | 0.8527132    | 0.842795     | not scorable | not scorable |
| #### Bn-scaff_18855_1-p14349 C-genome specific (oleracea only)  | not scorable | not scorable | 0.8449612    | 0.7318989    | not scorable | not scorable |
| #### Bn-scaff_18855_1-p14373 C-genome specific (napus-oleracea) | 0.9976076    | 0.79974      | 0.9922481    | 0.7112363    | not scorable | not scorable |
| #### Bn-scaff_18855_1-p14469 C-genome specific (oleracea only)  | not scorable | not scorable | 0.8914729    | 0.6532074    | not scorable | not scorable |
| #### Bn-scaff_18855_1-p14494 C-genome specific (napus-oleracea) | 0.2607656    | 0.8863942    | 0.8992248    | 0.8111658    | not scorable | not scorable |
| #### Bn-scaff_18855_1-p14496 C-genome specific (napus-oleracea) | 0.2607656    | 0.7994863    | 0.9147287    | 0.6772339    | not scorable | not scorable |
| #### Bn-scaff_18855_1-p14502 C-genome specific (napus-oleracea) | 0.2607656    | 0.9433576    | 0.9147287    | 0.7758036    | not scorable | not scorable |
| #### Bn-scaff_18855_1-p14510 all not scorable                   | not scorable | not scorable | not scorable | not scorable | not scorable | not scorable |
| #### Bn-scaff_18855_1-p14921 genome unspecific (all in)         | 0.9880383    | 0.5670592    | 1            | 0.6386509    | 1            | 0.864838     |
| #### Bn-scaff_18855_1-p16596 C-genome specific (napus-oleracea) | 0.9976076    | 0.8111455    | 1            | 0.7364814    | not scorable | not scorable |
| #### Bn-scaff_18855_1-p16870 C-genome specific (napus-oleracea) | 0.9904306    | 0.7396178    | 0.9922481    | 0.6440836    | not scorable | not scorable |
| #### Bn-scaff_18855_1-p17715 C-genome specific (napus-oleracea) | 0.9976076    | 0.7774982    | 0.9844961    | 0.8019474    | not scorable | not scorable |
| #### Bn-scaff_18855_1-p17914 genome unspecific (all in)         | 0.9976076    | 0.3933395    | 0.9844961    | 0.4788491    | 0.9834711    | 0.8065609    |
| #### Bn-scaff_18855_1-p18377 genome unspecific (all in)         | 0.9904306    | 0.2912462    | 0.9147287    | 0.3568014    | 0.9338843    | 0.6854448    |
| #### Bn-scaff_18855_1-p18433 C-genome specific (napus-oleracea) | 0.9784689    | 0.4710861    | 0.9767442    | 0.3643133    | not scorable | not scorable |
| #### Bn-scaff_18855_1-p18472 C-genome specific (napus-oleracea) | 0.9976076    | 0.81976      | 1            | 0.7925919    | not scorable | not scorable |
| #### Bn-scaff_18855_1-p18490 C-genome specific (napus-oleracea) | 0.9904306    | 0.7727019    | 0.9922481    | 0.7775871    | not scorable | not scorable |
| #### Bn-scaff_18855_1-p18559 C-genome specific (napus-oleracea) | 0.9976076    | 0.8012137    | 0.9844961    | 0.8080531    | not scorable | not scorable |
| #### Bn-scaff_18855_1-p24676 napus specific                     | 0.9928229    | 0.6468646    | not scorable | not scorable | not scorable | not scorable |
| #### Bn-scaff_18855_1-p25397 C-genome specific (napus-oleracea) | 0.9904306    | 0.7301586    | 1            | 0.7484116    | not scorable | not scorable |
| #### Bn-scaff_18855_1-p25630 C-genome specific (napus-oleracea) | 0.9952153    | 0.7890031    | 0.9922481    | 0.7708575    | not scorable | not scorable |
| #### Bn-scaff_18855_1-p30948 genome unspecific (all in)         | 0.9593301    | 0.2425613    | 0.9922481    | 0.7572696    | 1            | 0.9175813    |
| #### Bn-scaff_18855_1-p30973 genome unspecific (oleracea-rapa)  | not scorable | not scorable | 1            | 0.6453311    | 1            | 0.709211     |
| #### Bn-scaff_18855_1-p33236 C-genome specific (napus-oleracea) | 0.9880383    | 0.8131675    | 0.9844961    | 0.8018486    | not scorable | not scorable |
| #### Bn-scaff_18855_1-p38454 C-genome specific (napus-oleracea) | 0.9928229    | 0.8140374    | 0.9689922    | 0.8175511    | not scorable | not scorable |
| #### Bn-scaff_18855_1-p40435 C-genome specific (napus-oleracea) | 0.9976076    | 0.6737402    | 0.9922481    | 0.6635771    | not scorable | not scorable |
| #### Bn-scaff_18855_1-p40508 genome unspecific (all in)         | 0.9904306    | 0.6664051    | 0.9844961    | 0.7860811    | 1            | 0.6865117    |
| #### Bn-scaff_18855_1-p40550 C-genome specific (napus-oleracea) | 0.9449761    | 0.5543486    | 0.7906977    | 0.3876599    | not scorable | not scorable |
| #### Bn-scaff_18855_1-p46617 genome unspecific (oleracea-rapa)  | not scorable | not scorable | 0.9922481    | 0.7618352    | 0.9338843    | 0.9460675    |
| #### Bn-scaff_18855_1-p48040 genome unspecific (all in)         | 0.9712918    | 0.4197683    | 0.9922481    | 0.7493378    | 1            | 0.9034982    |
| #### Bn-scaff_18855_1-p48133 genome unspecific (oleracea-rapa)  | not scorable | not scorable | 1            | 0.4621734    | 1            | 0.7959242    |
| #### Bn-scaff_18855_1-p54081 C-genome specific (napus-oleracea) | 0.9952153    | 0.8168323    | 1            | 0.8192679    | not scorable | not scorable |

|                                                                 |              |              |              |              |              |              |
|-----------------------------------------------------------------|--------------|--------------|--------------|--------------|--------------|--------------|
| #### Bn-scaff_18855_1-p5518C-genome specific (napus-oleracea)   | 0.9976076    | 0.6972429    | 1            | 0.6518601    | not scorable | not scorable |
| #### Bn-scaff_18855_1-p6838E-genome unspecific (all in)         | 0.930622     | 0.1742588    | 0.9534883    | 0.2508763    | 0.9917355    | 0.8153       |
| #### Bn-scaff_18855_1-p7954E-genome unspecific (all in)         | 0.9401914    | 0.6660629    | 0.9922481    | 0.7046956    | 1            | 0.9181859    |
| #### Bn-scaff_18855_1-p83104-genome unspecific (all in)         | 0.9784689    | 0.3604819    | 1            | 0.8202539    | 0.9834711    | 0.8142957    |
| #### Bn-scaff_18855_1-p84064-genome unspecific (all in)         | 0.9904306    | 0.3633375    | 1            | 0.7777853    | 1            | 0.8220273    |
| #### Bn-scaff_18855_1-p8407C-genome unspecific (oleracea-rapa)  | not scorable | not scorable | 0.9224806    | 0.5083395    | 1            | 0.9005575    |
| #### Bn-scaff_18855_1-p84071C-genome specific (oleracea only)   | not scorable | not scorable | 0.9379845    | 0.3891031    | not scorable | not scorable |
| #### Bn-scaff_18855_1-p8409E C-genome specific (napus-oleracea) | 0.9880383    | 0.3548344    | 0.9844961    | 0.2695311    | not scorable | not scorable |
| #### Bn-scaff_18901_1-p13731napus specific                      | 0.9617225    | 0.2732391    | not scorable | not scorable | not scorable | not scorable |
| #### Bn-scaff_18901_1-p1973E A-genome specific (napus-rapa)     | 0.9856459    | 0.2787987    | not scorable | not scorable | 1            | 0.7579808    |
| #### Bn-scaff_18901_1-p8633E genome unspecific (oleracea-rapa)  | not scorable | not scorable | 1            | 0.6445444    | 0.9834711    | 0.7591171    |
| #### Bn-scaff_18903_1-p10027C-genome specific (napus-oleracea)  | 0.9904306    | 0.7849266    | 1            | 0.8379123    | not scorable | not scorable |
| #### Bn-scaff_18903_1-p1010E C-genome specific (napus-oleracea) | 0.9952153    | 0.4414899    | 0.9302326    | 0.4739084    | not scorable | not scorable |
| #### Bn-scaff_18903_1-p1279E napus specific                     | 0.9736842    | 0.816434     | not scorable | not scorable | not scorable | not scorable |
| #### Bn-scaff_18903_1-p1371C C-genome specific (napus-oleracea) | 0.9760765    | 0.7047251    | 1            | 0.8272852    | not scorable | not scorable |
| #### Bn-scaff_18903_1-p15877C-genome specific (napus-oleracea)  | 0.9808612    | 0.7771587    | 1            | 0.7879849    | not scorable | not scorable |
| #### Bn-scaff_18903_1-p18387C-genome specific (oleracea only)   | not scorable | not scorable | 1            | 0.6797823    | not scorable | not scorable |
| #### Bn-scaff_18903_1-p2083E C-genome specific (napus-oleracea) | 0.9832536    | 0.8013583    | 1            | 0.8178158    | not scorable | not scorable |
| #### Bn-scaff_18903_1-p21161C-genome specific (napus-oleracea)  | 0.9952153    | 0.7426113    | 0.9922481    | 0.8587967    | not scorable | not scorable |
| #### Bn-scaff_18903_1-p2562C C-genome specific (napus-oleracea) | 0.9832536    | 0.7786837    | 1            | 0.7756515    | not scorable | not scorable |
| #### Bn-scaff_18903_1-p2653E genome unspecific (all in)         | 1            | 0.7609816    | 0.9922481    | 0.6891768    | 1            | 0.7504648    |
| #### Bn-scaff_18903_1-p2852C C-genome specific (napus-oleracea) | 0.9880383    | 0.7540795    | 0.9922481    | 0.8349407    | not scorable | not scorable |
| #### Bn-scaff_18903_1-p28737C-genome specific (napus-oleracea)  | 0.9880383    | 0.7516088    | 0.9844961    | 0.7296093    | not scorable | not scorable |
| #### Bn-scaff_18903_1-p2883E C-genome specific (napus-oleracea) | 0.9952153    | 0.7077401    | 0.9922481    | 0.6549372    | not scorable | not scorable |
| #### Bn-scaff_18903_1-p32911C-genome specific (napus-oleracea)  | 0.9928229    | 0.7741914    | 0.9922481    | 0.7651865    | not scorable | not scorable |
| #### Bn-scaff_18903_1-p3507E C-genome specific (napus-oleracea) | 0.9330143    | 0.5853926    | 0.7751938    | 0.7514607    | not scorable | not scorable |
| #### Bn-scaff_18903_1-p3516E C-genome specific (napus-oleracea) | 0.576555     | 0.808472     | 0.7054263    | 0.7293075    | not scorable | not scorable |
| #### Bn-scaff_18903_1-p3715E C-genome specific (napus-oleracea) | 0.9856459    | 0.7086799    | 1            | 0.7048222    | not scorable | not scorable |
| #### Bn-scaff_18903_1-p3839E C-genome specific (napus-oleracea) | 0.9952153    | 0.7374144    | 0.9922481    | 0.8044817    | not scorable | not scorable |
| #### Bn-scaff_18903_1-p4030C C-genome specific (oleracea only)  | not scorable | not scorable | 0.6434109    | 0.7248814    | not scorable | not scorable |
| #### Bn-scaff_18903_1-p4043C C-genome specific (napus-oleracea) | 0.9904306    | 0.7608882    | 1            | 0.8398616    | not scorable | not scorable |
| #### Bn-scaff_18903_1-p4324E C-genome specific (napus-oleracea) | 0.9832536    | 0.7322308    | 0.9767442    | 0.6813864    | not scorable | not scorable |
| #### Bn-scaff_18903_1-p4377E C-genome specific (napus-oleracea) | 0.9952153    | 0.8360882    | 0.9922481    | 0.7160916    | not scorable | not scorable |



|                                                                 |              |              |           |           |              |              |
|-----------------------------------------------------------------|--------------|--------------|-----------|-----------|--------------|--------------|
| #### Bn-scaff_18903_1-p46020 C-genome specific (napus-oleracea) | 0.9904306    | 0.7286838    | 1         | 0.6926323 | not scorable | not scorable |
| #### Bn-scaff_18903_1-p46037 C-genome specific (napus-oleracea) | 0.9808612    | 0.8013234    | 1         | 0.7906755 | not scorable | not scorable |
| #### Bn-scaff_18903_1-p46251 C-genome specific (napus-oleracea) | 0.9856459    | 0.7997203    | 0.9922481 | 0.8632445 | not scorable | not scorable |
| #### Bn-scaff_18903_1-p46357 C-genome specific (napus-oleracea) | 0.9856459    | 0.7833594    | 1         | 0.8554575 | not scorable | not scorable |
| #### Bn-scaff_18903_1-p46465 C-genome specific (napus-oleracea) | 0.9928229    | 0.7756299    | 0.9922481 | 0.8186453 | not scorable | not scorable |
| #### Bn-scaff_18903_1-p47193 genome unspecific (all in)         | 1            | 0.4828535    | 1         | 0.7274742 | 1            | 0.8004208    |
| #### Bn-scaff_18903_1-p47239 C-genome specific (napus-oleracea) | 0.9473684    | 0.6565447    | 0.9612403 | 0.6958087 | not scorable | not scorable |
| #### Bn-scaff_18903_1-p47714 C-genome specific (napus-oleracea) | 0.9880383    | 0.7543544    | 0.9922481 | 0.6843119 | not scorable | not scorable |
| #### Bn-scaff_18903_1-p48953 genome unspecific (all in)         | 0.9712918    | 0.4338565    | 1         | 0.7894853 | 1            | 0.9045919    |
| #### Bn-scaff_18903_1-p48976 C-genome specific (napus-oleracea) | 0.9880383    | 0.7870595    | 1         | 0.7923813 | not scorable | not scorable |
| #### Bn-scaff_18903_1-p49128 C-genome specific (napus-oleracea) | 0.9856459    | 0.7125444    | 1         | 0.7443041 | not scorable | not scorable |
| #### Bn-scaff_18903_1-p49356 C-genome specific (napus-oleracea) | 0.9928229    | 0.6897746    | 0.9922481 | 0.7682148 | not scorable | not scorable |
| #### Bn-scaff_18903_1-p49731 C-genome specific (napus-oleracea) | 0.9928229    | 0.7173789    | 1         | 0.6828183 | not scorable | not scorable |
| #### Bn-scaff_18903_1-p49776 C-genome specific (napus-oleracea) | 0.9952153    | 0.5726768    | 0.9922481 | 0.5923272 | not scorable | not scorable |
| #### Bn-scaff_18903_1-p49780 C-genome specific (napus-oleracea) | 0.9952153    | 0.8012775    | 0.9922481 | 0.7855902 | not scorable | not scorable |
| #### Bn-scaff_18903_1-p49969 C-genome specific (napus-oleracea) | 0.9856459    | 0.7924407    | 1         | 0.6866398 | not scorable | not scorable |
| #### Bn-scaff_18903_1-p51176 C-genome specific (napus-oleracea) | 0.9880383    | 0.7618169    | 0.9844961 | 0.8071435 | not scorable | not scorable |
| #### Bn-scaff_18903_1-p51400 C-genome specific (napus-oleracea) | 0.9904306    | 0.7279129    | 1         | 0.7190984 | not scorable | not scorable |
| #### Bn-scaff_18903_1-p53550 genome unspecific (oleracea-rapa)  | not scorable | not scorable | 0.9689922 | 0.2524926 | 0.9917355    | 0.4792112    |
| #### Bn-scaff_18903_1-p54228 C-genome specific (napus-oleracea) | 0.9952153    | 0.7900675    | 0.9922481 | 0.7502622 | not scorable | not scorable |
| #### Bn-scaff_18903_1-p54314 genome unspecific (all in)         | 0.9880383    | 0.4363342    | 1         | 0.8635299 | 0.9752066    | 0.825868     |
| #### Bn-scaff_18903_1-p55633 C-genome specific (napus-oleracea) | 0.9952153    | 0.7420583    | 0.9844961 | 0.3126006 | not scorable | not scorable |
| #### Bn-scaff_18903_1-p55692 C-genome specific (napus-oleracea) | 0.9736842    | 0.6844451    | 0.2868217 | 0.7360603 | not scorable | not scorable |
| #### Bn-scaff_18903_1-p55707 C-genome specific (napus-oleracea) | 0.9760765    | 0.6737181    | 0.3100775 | 0.7678355 | not scorable | not scorable |
| #### Bn-scaff_18903_1-p56447 C-genome specific (napus-oleracea) | 0.9473684    | 0.7885649    | 0.9844961 | 0.7006437 | not scorable | not scorable |
| #### Bn-scaff_18903_1-p56600 C-genome specific (napus-oleracea) | 0.9928229    | 0.8318138    | 0.9922481 | 0.8177654 | not scorable | not scorable |
| #### Bn-scaff_18903_1-p56844 C-genome specific (napus-oleracea) | 0.9832536    | 0.7786227    | 1         | 0.8562111 | not scorable | not scorable |
| #### Bn-scaff_18903_1-p57716 C-genome specific (oleracea only)  | not scorable | not scorable | 0.9767442 | 0.7877688 | not scorable | not scorable |
| #### Bn-scaff_18903_1-p57999 C-genome specific (napus-oleracea) | 0.9928229    | 0.8092792    | 0.9922481 | 0.771007  | not scorable | not scorable |
| #### Bn-scaff_18903_1-p58452 C-genome specific (oleracea only)  | not scorable | not scorable | 0.9922481 | 0.6480736 | not scorable | not scorable |
| #### Bn-scaff_18903_1-p60291 C-genome specific (napus-oleracea) | 0.9952153    | 0.7934107    | 0.9767442 | 0.6244166 | not scorable | not scorable |
| #### Bn-scaff_18903_1-p62869 C-genome specific (napus-oleracea) | 0.9856459    | 0.749827     | 0.9379845 | 0.7254944 | not scorable | not scorable |
| #### Bn-scaff_18903_1-p62929 C-genome specific (napus-oleracea) | 0.9808612    | 0.8029613    | 0.9457364 | 0.8061767 | not scorable | not scorable |

|                                                                 |           |           |              |              |              |              |
|-----------------------------------------------------------------|-----------|-----------|--------------|--------------|--------------|--------------|
| #### Bn-scaff_18903_1-p62936 C-genome specific (napus-oleracea) | 0.9880383 | 0.8194672 | 0.9534883    | 0.6958615    | not scorable | not scorable |
| #### Bn-scaff_18903_1-p64324 genome unspecific (all in)         | 0.9952153 | 0.4721209 | 1            | 0.7886819    | 1            | 0.9205657    |
| #### Bn-scaff_18903_1-p66984 C-genome specific (napus-oleracea) | 0.9904306 | 0.7731871 | 1            | 0.7954292    | not scorable | not scorable |
| #### Bn-scaff_18903_1-p68689 C-genome specific (napus-oleracea) | 0.9545454 | 0.7044402 | 0.875969     | 0.7468075    | not scorable | not scorable |
| #### Bn-scaff_18903_1-p69092 C-genome specific (napus-oleracea) | 0.9832536 | 0.7678613 | 1            | 0.8185498    | not scorable | not scorable |
| #### Bn-scaff_18903_1-p73582 C-genome specific (napus-oleracea) | 0.9784689 | 0.7791377 | 1            | 0.7559751    | not scorable | not scorable |
| #### Bn-scaff_18903_1-p74832 genome unspecific (all in)         | 1         | 0.5907528 | 0.9844961    | 0.3097089    | 1            | 0.837733     |
| #### Bn-scaff_18903_1-p75524 C-genome specific (napus-oleracea) | 0.9832536 | 0.4680868 | 1            | 0.7389885    | not scorable | not scorable |
| #### Bn-scaff_18903_1-p75763 C-genome specific (napus-oleracea) | 0.9641148 | 0.5722558 | 0.875969     | 0.748777     | not scorable | not scorable |
| #### Bn-scaff_18903_1-p82359 genome unspecific (all in)         | 0.9808612 | 0.229576  | 1            | 0.7766405    | 0.9669421    | 0.8096206    |
| #### Bn-scaff_18903_1-p84805 genome unspecific (all in)         | 0.9856459 | 0.3999698 | 1            | 0.7599296    | 1            | 0.9331608    |
| #### Bn-scaff_18903_1-p85636 genome unspecific (all in)         | 0.9928229 | 0.283973  | 1            | 0.812063     | 1            | 0.8146533    |
| #### Bn-scaff_18903_1-p89392 C-genome specific (napus-oleracea) | 0.9832536 | 0.7885851 | 1            | 0.766629     | not scorable | not scorable |
| #### Bn-scaff_18903_1-p89736 C-genome specific (napus-oleracea) | 0.9880383 | 0.7842612 | 0.9767442    | 0.7838958    | not scorable | not scorable |
| #### Bn-scaff_18903_1-p89737 C-genome specific (napus-oleracea) | 0.9760765 | 0.7658269 | 0.9922481    | 0.6274307    | not scorable | not scorable |
| #### Bn-scaff_18903_1-p99414 C-genome specific (napus-oleracea) | 1         | 0.2584538 | 1            | 0.5085555    | not scorable | not scorable |
| #### Bn-scaff_18903_1-p99562 genome unspecific (all in)         | 0.9808612 | 0.4197855 | 0.9922481    | 0.5981573    | 0.9834711    | 0.598461     |
| #### Bn-scaff_18903_1-p99889 genome unspecific (all in)         | 0.9904306 | 0.2635361 | 1            | 0.8960986    | 1            | 0.9148771    |
| #### Bn-scaff_18917_1-p10032 genome unspecific (all in)         | 0.9928229 | 0.5021411 | 1            | 0.7488272    | 1            | 0.6618508    |
| #### Bn-scaff_18917_1-p23235 C-genome specific (napus-oleracea) | 1         | 0.7030076 | 1            | 0.6763147    | not scorable | not scorable |
| #### Bn-scaff_18917_1-p23538 genome unspecific (all in)         | 1         | 0.9095823 | 1            | 0.7793753    | 0.9008265    | 0.9175813    |
| #### Bn-scaff_18917_1-p23604 genome unspecific (all in)         | 0.9976076 | 0.8368585 | 1            | 0.8698316    | 0.9752066    | 0.8716152    |
| #### Bn-scaff_18917_1-p26517 C-genome specific (napus-oleracea) | 0.9832536 | 0.7820437 | 1            | 0.79012      | not scorable | not scorable |
| #### Bn-scaff_18917_1-p26579 C-genome specific (napus-oleracea) | 0.9880383 | 0.7484673 | 1            | 0.852949     | not scorable | not scorable |
| #### Bn-scaff_18917_1-p26740 C-genome specific (napus-oleracea) | 0.9880383 | 0.7752856 | 1            | 0.7749441    | not scorable | not scorable |
| #### Bn-scaff_18917_1-p28266 C-genome specific (napus-oleracea) | 0.9976076 | 0.8197652 | 1            | 0.7871076    | not scorable | not scorable |
| #### Bn-scaff_18917_1-p28659 genome unspecific (all in)         | 1         | 0.8620605 | 1            | 0.693668     | 1            | 0.9284527    |
| #### Bn-scaff_18917_1-p28690 genome unspecific (all in)         | 0.9952153 | 0.3965692 | 1            | 0.8137748    | 1            | 0.7252115    |
| #### Bn-scaff_18917_1-p29993 genome unspecific (all in)         | 1         | 0.5313998 | 0.9922481    | 0.381147     | 0.9834711    | 0.6546515    |
| #### Bn-scaff_18917_1-p32028 genome unspecific (all in)         | 0.9928229 | 0.3092296 | 1            | 0.7175117    | 1            | 0.7905912    |
| #### Bn-scaff_18917_1-p32050 A-genome specific (napus-rapa)     | 0.9952153 | 0.5423722 | not scorable | not scorable | 0.9586777    | 0.5297583    |
| #### Bn-scaff_18917_1-p35800 genome unspecific (all in)         | 0.9976076 | 0.2873873 | 0.9922481    | 0.3688833    | 1            | 0.783044     |
| #### Bn-scaff_18917_1-p43079 C-genome specific (napus-oleracea) | 1         | 0.7429087 | 0.9767442    | 0.7905059    | not scorable | not scorable |

|                                                                 |              |              |              |              |              |              |
|-----------------------------------------------------------------|--------------|--------------|--------------|--------------|--------------|--------------|
| #### Bn-scaff_18917_1-p43357 C-genome specific (napus-oleracea) | 0.9904306    | 0.81023      | 1            | 0.7927456    | not scorable | not scorable |
| #### Bn-scaff_18917_1-p44195 C-genome specific (napus-oleracea) | 0.9880383    | 0.5932086    | 1            | 0.6326202    | not scorable | not scorable |
| #### Bn-scaff_18917_1-p44200 C-genome specific (napus-oleracea) | 0.9904306    | 0.7138329    | 1            | 0.7245228    | not scorable | not scorable |
| #### Bn-scaff_18917_1-p44409 C-genome specific (napus-oleracea) | 0.9856459    | 0.819275     | 0.9922481    | 0.8124812    | not scorable | not scorable |
| #### Bn-scaff_18917_1-p44434 genome unspecific (all in)         | 0.9880383    | 0.4884653    | 0.9922481    | 0.7507219    | 1            | 0.8912995    |
| #### Bn-scaff_18917_1-p44488 C-genome specific (napus-oleracea) | 0.9880383    | 0.7655971    | 1            | 0.8795649    | not scorable | not scorable |
| #### Bn-scaff_18917_1-p46455 C-genome specific (napus-oleracea) | 0.9832536    | 0.791597     | 0.8837209    | 0.7338048    | not scorable | not scorable |
| #### Bn-scaff_18917_1-p46458 C-genome specific (napus-oleracea) | 0.9832536    | 0.6642798    | 0.8682171    | 0.6741401    | not scorable | not scorable |
| #### Bn-scaff_18917_1-p47262 C-genome specific (napus-oleracea) | 0.9952153    | 0.5578567    | 0.9767442    | 0.7831695    | not scorable | not scorable |
| #### Bn-scaff_18917_1-p48933 all not scorable                   | not scorable | not scorable | not scorable | not scorable | not scorable | not scorable |
| #### Bn-scaff_18917_1-p49267 C-genome specific (napus-oleracea) | 1            | 0.8167588    | 0.9922481    | 0.7225758    | not scorable | not scorable |
| #### Bn-scaff_18917_1-p51405 C-genome specific (napus-oleracea) | 1            | 0.7153806    | 0.9612403    | 0.7865227    | not scorable | not scorable |
| #### Bn-scaff_18917_1-p51453 C-genome specific (napus-oleracea) | 0.9976076    | 0.7990641    | 0.9612403    | 0.7706338    | not scorable | not scorable |
| #### Bn-scaff_18917_1-p52554 C-genome specific (napus-oleracea) | 1            | 0.7843162    | 1            | 0.8003433    | not scorable | not scorable |
| #### Bn-scaff_18917_1-p53349 C-genome specific (napus-oleracea) | 1            | 0.7931976    | 1            | 0.7562165    | not scorable | not scorable |
| #### Bn-scaff_18917_1-p53650 C-genome specific (oleracea only)  | not scorable | not scorable | 0.9844961    | 0.8143286    | not scorable | not scorable |
| #### Bn-scaff_18917_1-p53658 C-genome specific (napus-oleracea) | 0.9952153    | 0.6917667    | 0.9767442    | 0.7977526    | not scorable | not scorable |
| #### Bn-scaff_18917_1-p53671 C-genome specific (napus-oleracea) | 0.9976076    | 0.794938     | 1            | 0.8543274    | not scorable | not scorable |
| #### Bn-scaff_18917_1-p54220 C-genome specific (napus-oleracea) | 1            | 0.7036324    | 0.9922481    | 0.7533373    | not scorable | not scorable |
| #### Bn-scaff_18917_1-p54849 C-genome specific (napus-oleracea) | 1            | 0.7360393    | 1            | 0.6923657    | not scorable | not scorable |
| #### Bn-scaff_18917_1-p55164 genome unspecific (all in)         | 1            | 0.4644848    | 1            | 0.7762168    | 0.9917355    | 0.9193738    |
| #### Bn-scaff_18917_1-p59517 C-genome specific (napus-oleracea) | 1            | 0.8113036    | 1            | 0.8277064    | not scorable | not scorable |
| #### Bn-scaff_18917_1-p60369 C-genome specific (napus-oleracea) | 1            | 0.7064304    | 1            | 0.7837573    | not scorable | not scorable |
| #### Bn-scaff_18917_1-p60379 C-genome specific (napus-oleracea) | 1            | 0.5855445    | 1            | 0.5770537    | not scorable | not scorable |
| #### Bn-scaff_18917_1-p61897 C-genome specific (napus-oleracea) | 1            | 0.6861264    | 1            | 0.7204625    | not scorable | not scorable |
| #### Bn-scaff_18917_1-p62098 C-genome specific (oleracea only)  | not scorable | not scorable | 0.9922481    | 0.6778703    | not scorable | not scorable |
| #### Bn-scaff_18917_1-p62244 C-genome specific (napus-oleracea) | 1            | 0.6071694    | 1            | 0.5623093    | not scorable | not scorable |
| #### Bn-scaff_18917_1-p62274 C-genome specific (napus-oleracea) | 1            | 0.6938862    | 1            | 0.6562256    | not scorable | not scorable |
| #### Bn-scaff_18917_1-p65274 C-genome specific (napus-oleracea) | 1            | 0.7090336    | 0.9844961    | 0.6921855    | not scorable | not scorable |
| #### Bn-scaff_18917_1-p65335 C-genome specific (napus-oleracea) | 1            | 0.7841853    | 0.9922481    | 0.8416019    | not scorable | not scorable |
| #### Bn-scaff_18917_1-p65399 C-genome specific (napus-oleracea) | 0.9952153    | 0.5347129    | 1            | 0.2389523    | not scorable | not scorable |
| #### Bn-scaff_18917_1-p65510 C-genome specific (napus-oleracea) | 1            | 0.7158874    | 1            | 0.7462016    | not scorable | not scorable |
| #### Bn-scaff_18917_1-p65755 C-genome specific (napus-oleracea) | 1            | 0.7338559    | 0.9922481    | 0.8923354    | not scorable | not scorable |

|                                                                 |              |              |           |           |              |              |
|-----------------------------------------------------------------|--------------|--------------|-----------|-----------|--------------|--------------|
| #### Bn-scaff_18917_1-p65795 C-genome specific (napus-oleracea) | 0.9808612    | 0.811357     | 0.7054263 | 0.9392836 | not scorable | not scorable |
| #### Bn-scaff_18917_1-p65837 C-genome specific (napus-oleracea) | 0.9952153    | 0.7164778    | 0.7596899 | 0.8097231 | not scorable | not scorable |
| #### Bn-scaff_18917_1-p66720 C-genome specific (napus-oleracea) | 1            | 0.7944232    | 1         | 0.7540363 | not scorable | not scorable |
| #### Bn-scaff_18917_1-p68946 C-genome specific (napus-oleracea) | 1            | 0.7898124    | 1         | 0.4054439 | not scorable | not scorable |
| #### Bn-scaff_18917_1-p68972 C-genome specific (napus-oleracea) | 1            | 0.7600501    | 1         | 0.4331805 | not scorable | not scorable |
| #### Bn-scaff_18917_1-p72002 C-genome specific (napus-oleracea) | 0.9928229    | 0.8103232    | 0.8682171 | 0.7433903 | not scorable | not scorable |
| #### Bn-scaff_18917_1-p74143 C-genome specific (napus-oleracea) | 0.9928229    | 0.8185524    | 0.9379845 | 0.6591585 | not scorable | not scorable |
| #### Bn-scaff_18917_1-p74319 C-genome specific (napus-oleracea) | 1            | 0.7869937    | 1         | 0.7477065 | not scorable | not scorable |
| #### Bn-scaff_18917_1-p74435 C-genome specific (napus-oleracea) | 0.9712918    | 0.8003395    | 0.2790698 | 0.7818774 | not scorable | not scorable |
| #### Bn-scaff_18917_1-p80736 C-genome specific (napus-oleracea) | 1            | 0.703943     | 1         | 0.7265896 | not scorable | not scorable |
| #### Bn-scaff_18917_1-p81725 C-genome specific (napus-oleracea) | 1            | 0.7979811    | 1         | 0.6969391 | not scorable | not scorable |
| #### Bn-scaff_18917_1-p83911 C-genome specific (napus-oleracea) | 0.9952153    | 0.6909885    | 1         | 0.7748106 | not scorable | not scorable |
| #### Bn-scaff_18917_1-p85713 C-genome specific (napus-oleracea) | 1            | 0.6230125    | 1         | 0.6287239 | not scorable | not scorable |
| #### Bn-scaff_18917_1-p86535 C-genome specific (napus-oleracea) | 0.9928229    | 0.7801826    | 0.9612403 | 0.6734349 | not scorable | not scorable |
| #### Bn-scaff_18917_1-p87523 C-genome specific (napus-oleracea) | 0.9880383    | 0.8017725    | 0.9534883 | 0.7572616 | not scorable | not scorable |
| #### Bn-scaff_18917_1-p89428 C-genome specific (napus-oleracea) | 0.9736842    | 0.827906     | 0.9689922 | 0.6994105 | not scorable | not scorable |
| #### Bn-scaff_18917_1-p89681 C-genome specific (napus-oleracea) | 0.9904306    | 0.7496983    | 0.9922481 | 0.7541033 | not scorable | not scorable |
| #### Bn-scaff_18917_1-p90711 genome unspecific (all in)         | 0.9904306    | 0.5657559    | 0.8217054 | 0.7845222 | 0.9834711    | 0.9428151    |
| #### Bn-scaff_18917_1-p90882 C-genome specific (napus-oleracea) | 0.9904306    | 0.7935676    | 0.9844961 | 0.6985962 | not scorable | not scorable |
| #### Bn-scaff_18917_1-p91001 genome unspecific (all in)         | 0.9880383    | 0.5059114    | 0.9922481 | 0.8503579 | 0.9834711    | 0.9012028    |
| #### Bn-scaff_18917_1-p92137 C-genome specific (napus-oleracea) | 1            | 0.9205657    | 1         | 0.8906229 | not scorable | not scorable |
| #### Bn-scaff_18917_1-p93712 C-genome specific (napus-oleracea) | 0.9856459    | 0.7736471    | 0.9457364 | 0.7409646 | not scorable | not scorable |
| #### Bn-scaff_18917_1-p94227 C-genome specific (napus-oleracea) | 0.9880383    | 0.7733645    | 0.9457364 | 0.816196  | not scorable | not scorable |
| #### Bn-scaff_18917_1-p94607 C-genome specific (napus-oleracea) | 0.9952153    | 0.7159557    | 0.9457364 | 0.6710662 | not scorable | not scorable |
| #### Bn-scaff_18917_1-p94883 genome unspecific (all in)         | 0.9976076    | 0.6938334    | 1         | 0.6214275 | 1            | 0.9372013    |
| #### Bn-scaff_18917_1-p97693 C-genome specific (napus-oleracea) | 0.9904306    | 0.7236325    | 1         | 0.7336119 | not scorable | not scorable |
| #### Bn-scaff_18917_1-p99406 C-genome specific (napus-oleracea) | 1            | 0.7654952    | 1         | 0.7347474 | not scorable | not scorable |
| #### Bn-scaff_18935_1-p25523 C-genome specific (napus-oleracea) | 0.9976076    | 0.7802446    | 1         | 0.7846712 | not scorable | not scorable |
| #### Bn-scaff_18935_1-p25545 C-genome specific (napus-oleracea) | 0.9928229    | 0.8651913    | 1         | 0.7717611 | not scorable | not scorable |
| #### Bn-scaff_18936_1-p10213 C-genome specific (oleracea only)  | not scorable | not scorable | 0.6976744 | 0.7709913 | not scorable | not scorable |
| #### Bn-scaff_18936_1-p10275 C-genome specific (napus-oleracea) | 0.8851675    | 0.7895239    | 0.4573644 | 0.8377925 | not scorable | not scorable |
| #### Bn-scaff_18936_1-p10660 genome unspecific (all in)         | 0.9712918    | 0.4638247    | 1         | 0.7097618 | 1            | 0.8004208    |
| #### Bn-scaff_18936_1-p10725 C-genome specific (napus-oleracea) | 0.7535885    | 0.7630063    | 1         | 0.8454435 | not scorable | not scorable |

|                                                                 |              |              |              |              |              |              |
|-----------------------------------------------------------------|--------------|--------------|--------------|--------------|--------------|--------------|
| #### Bn-scaff_18936_1-p10739 C-genome specific (napus-oleracea) | 0.7511961    | 0.7561342    | 0.9457364    | 0.7193217    | not scorable | not scorable |
| #### Bn-scaff_18936_1-p10750 C-genome specific (napus-oleracea) | 0.7679426    | 0.5986039    | 0.9767442    | 0.586472     | not scorable | not scorable |
| #### Bn-scaff_18936_1-p11241 genome unspecific (oleracea-rapa)  | not scorable | not scorable | 1            | 0.7304476    | 1            | 0.8090606    |
| #### Bn-scaff_18936_1-p11282 C-genome specific (napus-oleracea) | 0.9976076    | 0.870293     | 1            | 0.7419868    | not scorable | not scorable |
| #### Bn-scaff_18936_1-p11639 all not scorable                   | not scorable | not scorable | not scorable | not scorable | not scorable | not scorable |
| #### Bn-scaff_18936_1-p12654 napus specific                     | 0.9928229    | 0.7844566    | not scorable | not scorable | not scorable | not scorable |
| #### Bn-scaff_18936_1-p13494 genome unspecific (oleracea-rapa)  | not scorable | not scorable | 1            | 0.6892272    | 0.9917355    | 0.3608931    |
| #### Bn-scaff_18936_1-p14035 C-genome specific (napus-oleracea) | 0.9976076    | 0.5044162    | 0.6821706    | 0.7516322    | not scorable | not scorable |
| #### Bn-scaff_18936_1-p15210 C-genome specific (napus-oleracea) | 0.9952153    | 0.7305964    | 1            | 0.7896757    | not scorable | not scorable |
| #### Bn-scaff_18936_1-p15215 C-genome specific (napus-oleracea) | 0.9952153    | 0.7630165    | 0.9922481    | 0.7658847    | not scorable | not scorable |
| #### Bn-scaff_18936_1-p15423 C-genome specific (napus-oleracea) | 0.9880383    | 0.7285444    | 0.9767442    | 0.7782596    | not scorable | not scorable |
| #### Bn-scaff_18936_1-p15508 genome unspecific (all in)         | 0.9856459    | 0.2251028    | 0.8604651    | 0.6748803    | 1            | 0.9272014    |
| #### Bn-scaff_18936_1-p15513 C-genome specific (napus-oleracea) | 0.277512     | 0.8224812    | 0.8914729    | 0.8122463    | not scorable | not scorable |
| #### Bn-scaff_18936_1-p15538 C-genome specific (napus-oleracea) | 0.9976076    | 0.8401561    | 0.9767442    | 0.8291618    | not scorable | not scorable |
| #### Bn-scaff_18936_1-p15553 C-genome specific (napus-oleracea) | 0.9952153    | 0.7796245    | 0.9844961    | 0.733564     | not scorable | not scorable |
| #### Bn-scaff_18936_1-p15559 C-genome specific (napus-oleracea) | 0.9952153    | 0.756946     | 0.9844961    | 0.8055108    | not scorable | not scorable |
| #### Bn-scaff_18936_1-p15563 C-genome specific (napus-oleracea) | 0.9760765    | 0.7901915    | 0.9844961    | 0.781814     | not scorable | not scorable |
| #### Bn-scaff_18936_1-p15564 C-genome specific (oleracea only)  | not scorable | not scorable | 0.9069768    | 0.8157347    | not scorable | not scorable |
| #### Bn-scaff_18936_1-p15564 C-genome specific (napus-oleracea) | 0.9952153    | 0.8174789    | 0.9689922    | 0.776149     | not scorable | not scorable |
| #### Bn-scaff_18936_1-p15567 C-genome specific (napus-oleracea) | 0.9976076    | 0.3110212    | 0.9689922    | 0.4319549    | not scorable | not scorable |
| #### Bn-scaff_18936_1-p15571 C-genome specific (napus-oleracea) | 0.9904306    | 0.7975683    | 0.9534883    | 0.7914778    | not scorable | not scorable |
| #### Bn-scaff_18936_1-p15615 C-genome specific (napus-oleracea) | 0.9928229    | 0.8033535    | 0.9767442    | 0.7726581    | not scorable | not scorable |
| #### Bn-scaff_18936_1-p15720 C-genome specific (napus-oleracea) | 0.9976076    | 0.8147843    | 0.9767442    | 0.8197181    | not scorable | not scorable |
| #### Bn-scaff_18936_1-p15722 C-genome specific (napus-oleracea) | 0.9928229    | 0.7700975    | 0.9767442    | 0.7940474    | not scorable | not scorable |
| #### Bn-scaff_18936_1-p15787 C-genome specific (napus-oleracea) | 0.9952153    | 0.788924     | 0.9689922    | 0.7537693    | not scorable | not scorable |
| #### Bn-scaff_18936_1-p15793 C-genome specific (napus-oleracea) | 0.9904306    | 0.6954458    | 0.9767442    | 0.684759     | not scorable | not scorable |
| #### Bn-scaff_18936_1-p15832 C-genome specific (napus-oleracea) | 0.9856459    | 0.778053     | 0.9844961    | 0.8229336    | not scorable | not scorable |
| #### Bn-scaff_18936_1-p15922 C-genome specific (napus-oleracea) | 0.9904306    | 0.6755589    | 0.6744186    | 0.6517568    | not scorable | not scorable |
| #### Bn-scaff_18936_1-p15949 C-genome specific (napus-oleracea) | 0.9904306    | 0.7268119    | 0.6821706    | 0.7026444    | not scorable | not scorable |
| #### Bn-scaff_18936_1-p15958 C-genome specific (napus-oleracea) | 0.9952153    | 0.7949533    | 0.6976744    | 0.8356396    | not scorable | not scorable |
| #### Bn-scaff_18936_1-p15967 C-genome specific (napus-oleracea) | 0.9904306    | 0.7838435    | 0.6899225    | 0.7242756    | not scorable | not scorable |
| #### Bn-scaff_18936_1-p16028 C-genome specific (napus-oleracea) | 0.9904306    | 0.8491603    | 0.7054263    | 0.8182266    | not scorable | not scorable |
| #### Bn-scaff_18936_1-p16101 C-genome specific (napus-oleracea) | 0.9880383    | 0.7789082    | 0.8372093    | 0.7705795    | not scorable | not scorable |

|                                                                 |              |              |           |           |              |              |
|-----------------------------------------------------------------|--------------|--------------|-----------|-----------|--------------|--------------|
| #### Bn-scaff_18936_1-p16185 C-genome specific (napus-oleracea) | 0.9856459    | 0.7976111    | 0.7054263 | 0.7924223 | not scorable | not scorable |
| #### Bn-scaff_18936_1-p16246 C-genome specific (napus-oleracea) | 0.9880383    | 0.6973282    | 0.7596899 | 0.7869333 | not scorable | not scorable |
| #### Bn-scaff_18936_1-p16754 C-genome specific (napus-oleracea) | 0.9904306    | 0.7899265    | 1         | 0.7741423 | not scorable | not scorable |
| #### Bn-scaff_18936_1-p16875 C-genome specific (napus-oleracea) | 0.9952153    | 0.7674304    | 1         | 0.6994759 | not scorable | not scorable |
| #### Bn-scaff_18936_1-p17067 C-genome specific (napus-oleracea) | 0.9904306    | 0.7959908    | 0.9612403 | 0.8220532 | not scorable | not scorable |
| #### Bn-scaff_18936_1-p17326 C-genome specific (napus-oleracea) | 0.9880383    | 0.6219549    | 1         | 0.6514108 | not scorable | not scorable |
| #### Bn-scaff_18936_1-p17470 C-genome specific (napus-oleracea) | 0.9808612    | 0.7855805    | 0.9302326 | 0.7463886 | not scorable | not scorable |
| #### Bn-scaff_18936_1-p17589 C-genome specific (napus-oleracea) | 0.9952153    | 0.769321     | 1         | 0.7409464 | not scorable | not scorable |
| #### Bn-scaff_18936_1-p17599 C-genome specific (napus-oleracea) | 0.9904306    | 0.6889714    | 0.9922481 | 0.6941089 | not scorable | not scorable |
| #### Bn-scaff_18936_1-p17769 genome unspecific (all in)         | 1            | 0.2746175    | 1         | 0.8260038 | 0.9917355    | 0.8188503    |
| #### Bn-scaff_18936_1-p18576 genome unspecific (all in)         | 0.9665072    | 0.4364359    | 0.9922481 | 0.7747249 | 1            | 0.7597415    |
| #### Bn-scaff_18936_1-p18889 genome unspecific (all in)         | 0.9521531    | 0.351861     | 0.9457364 | 0.2487403 | 1            | 0.8796763    |
| #### Bn-scaff_18936_1-p19316 C-genome specific (napus-oleracea) | 0.9904306    | 0.7791462    | 0.9767442 | 0.8092792 | not scorable | not scorable |
| #### Bn-scaff_18936_1-p19328 C-genome specific (napus-oleracea) | 0.9904306    | 0.7690574    | 0.9922481 | 0.7648321 | not scorable | not scorable |
| #### Bn-scaff_18936_1-p19572 C-genome specific (napus-oleracea) | 0.9952153    | 0.7931529    | 1         | 0.657172  | not scorable | not scorable |
| #### Bn-scaff_18936_1-p20207 genome unspecific (all in)         | 0.9928229    | 0.6640639    | 1         | 0.8383107 | 0.9917355    | 0.9274547    |
| #### Bn-scaff_18936_1-p20262 C-genome specific (napus-oleracea) | 0.9880383    | 0.7306104    | 1         | 0.7794521 | not scorable | not scorable |
| #### Bn-scaff_18936_1-p20274 C-genome specific (napus-oleracea) | 0.9952153    | 0.7570763    | 0.9922481 | 0.8175144 | not scorable | not scorable |
| #### Bn-scaff_18936_1-p20300 C-genome specific (napus-oleracea) | 0.9808612    | 0.7510822    | 0.9922481 | 0.7923877 | not scorable | not scorable |
| #### Bn-scaff_18936_1-p20371 C-genome specific (napus-oleracea) | 0.9784689    | 0.193221     | 1         | 0.6908428 | not scorable | not scorable |
| #### Bn-scaff_18936_1-p20430 C-genome specific (napus-oleracea) | 0.9952153    | 0.7156421    | 0.9767442 | 0.8095888 | not scorable | not scorable |
| #### Bn-scaff_18936_1-p20521 C-genome specific (napus-oleracea) | 0.9952153    | 0.7748291    | 0.9922481 | 0.7883609 | not scorable | not scorable |
| #### Bn-scaff_18936_1-p20546 C-genome specific (napus-oleracea) | 0.9904306    | 0.7615713    | 0.9767442 | 0.7586371 | not scorable | not scorable |
| #### Bn-scaff_18936_1-p20559 C-genome specific (napus-oleracea) | 0.9904306    | 0.6727684    | 0.9767442 | 0.6657411 | not scorable | not scorable |
| #### Bn-scaff_18936_1-p20901 genome unspecific (all in)         | 0.9928229    | 0.6009951    | 1         | 0.8883382 | 0.9752066    | 0.9368992    |
| #### Bn-scaff_18936_1-p21078 genome unspecific (oleracea-rapa)  | not scorable | not scorable | 1         | 0.8711357 | 1            | 0.8282633    |
| #### Bn-scaff_18936_1-p24067 C-genome specific (napus-oleracea) | 0.8947368    | 0.7407426    | 0.9224806 | 0.738165  | not scorable | not scorable |
| #### Bn-scaff_18936_1-p26915 C-genome specific (napus-oleracea) | 0.9138756    | 0.7002686    | 1         | 0.7033076 | not scorable | not scorable |
| #### Bn-scaff_18936_1-p27413 C-genome specific (napus-oleracea) | 0.9114832    | 0.7960572    | 1         | 0.6924981 | not scorable | not scorable |
| #### Bn-scaff_18936_1-p27751 C-genome specific (napus-oleracea) | 0.9066986    | 0.7444695    | 1         | 0.6939041 | not scorable | not scorable |
| #### Bn-scaff_18936_1-p29775 C-genome specific (napus-oleracea) | 0.9114832    | 0.7069101    | 1         | 0.6866058 | not scorable | not scorable |
| #### Bn-scaff_18936_1-p29791 C-genome specific (napus-oleracea) | 0.9186603    | 0.7033029    | 0.9922481 | 0.6932532 | not scorable | not scorable |
| #### Bn-scaff_18936_1-p29855 C-genome specific (napus-oleracea) | 0.9186603    | 0.7901188    | 1         | 0.7259986 | not scorable | not scorable |

|                                                                 |              |              |              |              |              |              |
|-----------------------------------------------------------------|--------------|--------------|--------------|--------------|--------------|--------------|
| #### Bn-scaff_18936_1-p32527 C-genome specific (napus-oleracea) | 0.9066986    | 0.7140012    | 0.9844961    | 0.6563247    | not scorable | not scorable |
| #### Bn-scaff_18936_1-p32712 C-genome specific (napus-oleracea) | 0.9114832    | 0.78017      | 1            | 0.7768079    | not scorable | not scorable |
| #### Bn-scaff_18936_1-p33354 genome unspecific (all in)         | 0.9808612    | 0.2392055    | 1            | 0.807492     | 1            | 0.8494506    |
| #### Bn-scaff_18936_1-p35882 genome unspecific (all in)         | 0.9880383    | 0.4384086    | 0.9922481    | 0.697485     | 0.9752066    | 0.6573635    |
| #### Bn-scaff_18936_1-p38473 C-genome specific (napus-oleracea) | 0.9114832    | 0.8233688    | 1            | 0.7657004    | not scorable | not scorable |
| #### Bn-scaff_18936_1-p43937 C-genome specific (napus-oleracea) | 0.9114832    | 0.8133439    | 0.9922481    | 0.7857019    | not scorable | not scorable |
| #### Bn-scaff_18936_1-p44061 C-genome specific (napus-oleracea) | 0.9138756    | 0.8219497    | 1            | 0.781839     | not scorable | not scorable |
| #### Bn-scaff_18936_1-p44502 C-genome specific (oleracea only)  | not scorable | not scorable | 0.9379845    | 0.8289831    | not scorable | not scorable |
| #### Bn-scaff_18936_1-p47235 C-genome specific (napus-oleracea) | 0.9138756    | 0.7370266    | 0.9767442    | 0.7314004    | not scorable | not scorable |
| #### Bn-scaff_18936_1-p54032 genome unspecific (all in)         | 0.9808612    | 0.5354471    | 0.9922481    | 0.7055047    | 1            | 0.8741153    |
| #### Bn-scaff_18936_1-p55079 genome unspecific (oleracea-rapa)  | not scorable | not scorable | 0.9689922    | 0.7918927    | 1            | 0.7122349    |
| #### Bn-scaff_18936_1-p55949 C-genome specific (napus-oleracea) | 0.9641148    | 0.7168077    | 0.9922481    | 0.6822506    | not scorable | not scorable |
| #### Bn-scaff_18936_1-p56302 genome unspecific (all in)         | 0.9354067    | 0.3460668    | 0.9922481    | 0.6469098    | 1            | 0.7870055    |
| #### Bn-scaff_18936_1-p58285 genome unspecific (all in)         | 1            | 0.3960471    | 1            | 0.6419731    | 0.9669421    | 0.7240413    |
| #### Bn-scaff_18936_1-p61054 C-genome specific (napus-oleracea) | 0.9162679    | 0.7783445    | 1            | 0.8282663    | not scorable | not scorable |
| #### Bn-scaff_18936_1-p61181 C-genome specific (napus-oleracea) | 0.9114832    | 0.7375872    | 1            | 0.787281     | not scorable | not scorable |
| #### Bn-scaff_18936_1-p61552 C-genome specific (napus-oleracea) | 0.9090909    | 0.7291524    | 0.9379845    | 0.658536     | not scorable | not scorable |
| #### Bn-scaff_18936_1-p61837 C-genome specific (napus-oleracea) | 0.9043062    | 0.8330442    | 0.8992248    | 0.6699767    | not scorable | not scorable |
| #### Bn-scaff_18936_1-p62254 C-genome specific (napus-oleracea) | 0.9114832    | 0.8061413    | 0.9302326    | 0.8738825    | not scorable | not scorable |
| #### Bn-scaff_18936_1-p64399 C-genome specific (napus-oleracea) | 0.9043062    | 0.7905771    | 0.8527132    | 0.8289795    | not scorable | not scorable |
| #### Bn-scaff_18936_1-p72585 A-genome specific (napus-rapa)     | 0.9808612    | 0.7789415    | not scorable | not scorable | 0.9834711    | 0.8524848    |
| #### Bn-scaff_18936_1-p72593 napus specific                     | 1            | 0.4680236    | not scorable | not scorable | not scorable | not scorable |
| #### Bn-scaff_18936_1-p74447 napus specific                     | 0.8229665    | 0.6143078    | not scorable | not scorable | not scorable | not scorable |
| #### Bn-scaff_18936_1-p74454 C-genome specific (napus-oleracea) | 0.9401914    | 0.7753526    | 1            | 0.7934015    | not scorable | not scorable |
| #### Bn-scaff_18936_1-p75132 A-genome specific (napus-rapa)     | 0.9473684    | 0.6903936    | not scorable | not scorable | 1            | 0.7032297    |
| #### Bn-scaff_18936_1-p75730 C-genome specific (napus-oleracea) | 0.937799     | 0.6899542    | 0.9922481    | 0.7098398    | not scorable | not scorable |
| #### Bn-scaff_18936_1-p75794 C-genome specific (napus-oleracea) | 0.9425837    | 0.8077599    | 0.9922481    | 0.7706004    | not scorable | not scorable |
| #### Bn-scaff_18936_1-p75829 C-genome specific (napus-oleracea) | 0.937799     | 0.6980571    | 1            | 0.6817463    | not scorable | not scorable |
| #### Bn-scaff_18936_1-p77573 genome unspecific (all in)         | 0.9354067    | 0.4100972    | 0.9379845    | 0.4590179    | 1            | 0.8135551    |
| #### Bn-scaff_18936_1-p80896 C-genome specific (napus-oleracea) | 0.9904306    | 0.7125754    | 0.9922481    | 0.7957557    | not scorable | not scorable |
| #### Bn-scaff_18936_1-p84967 genome unspecific (all in)         | 1            | 0.6394386    | 1            | 0.6295377    | 1            | 0.6471065    |
| #### Bn-scaff_18936_1-p85505 C-genome specific (napus-oleracea) | 0.9425837    | 0.6895122    | 1            | 0.6629262    | not scorable | not scorable |
| #### Bn-scaff_18936_1-p86142 genome unspecific (all in)         | 0.9832536    | 0.4809868    | 1            | 0.8170195    | 1            | 0.8518773    |

|                                                                 |              |              |           |           |              |              |
|-----------------------------------------------------------------|--------------|--------------|-----------|-----------|--------------|--------------|
| #### Bn-scaff_18936_1-p86415 genome unspecific (all in)         | 0.9760765    | 0.2217603    | 0.9922481 | 0.5581418 | 1            | 0.6375723    |
| #### Bn-scaff_18936_1-p86660 C-genome specific (napus-oleracea) | 0.9282297    | 0.7980679    | 0.9844961 | 0.7457933 | not scorable | not scorable |
| #### Bn-scaff_18936_1-p86739 C-genome specific (napus-oleracea) | 0.9401914    | 0.7606587    | 0.9844961 | 0.8140124 | not scorable | not scorable |
| #### Bn-scaff_18936_1-p88193 C-genome specific (napus-oleracea) | 0.7655503    | 0.8026977    | 0.9922481 | 0.8676285 | not scorable | not scorable |
| #### Bn-scaff_18936_1-p88374 C-genome specific (napus-oleracea) | 0.7535885    | 0.7163135    | 0.9224806 | 0.7124016 | not scorable | not scorable |
| #### Bn-scaff_18936_1-p88745 C-genome specific (napus-oleracea) | 0.7607656    | 0.7173622    | 1         | 0.7557753 | not scorable | not scorable |
| #### Bn-scaff_18936_1-p89003 C-genome specific (napus-oleracea) | 0.7607656    | 0.808913     | 0.9767442 | 0.8351377 | not scorable | not scorable |
| #### Bn-scaff_18936_1-p89028 C-genome specific (napus-oleracea) | 0.7703349    | 0.7511795    | 0.9689922 | 0.8197309 | not scorable | not scorable |
| #### Bn-scaff_18936_1-p91857 C-genome specific (napus-oleracea) | 0.7607656    | 0.7142223    | 1         | 0.6738732 | not scorable | not scorable |
| #### Bn-scaff_18936_1-p92039 C-genome specific (napus-oleracea) | 0.7631579    | 0.790783     | 1         | 0.8781248 | not scorable | not scorable |
| #### Bn-scaff_18936_1-p92170 C-genome specific (napus-oleracea) | 0.9784689    | 0.6248809    | 1         | 0.6117212 | not scorable | not scorable |
| #### Bn-scaff_18936_1-p92242 C-genome specific (napus-oleracea) | 0.7703349    | 0.7097503    | 1         | 0.6844174 | not scorable | not scorable |
| #### Bn-scaff_18936_1-p92314 C-genome specific (napus-oleracea) | 0.7703349    | 0.7179714    | 1         | 0.7302121 | not scorable | not scorable |
| #### Bn-scaff_18936_1-p92415 C-genome specific (napus-oleracea) | 0.7607656    | 0.8091667    | 1         | 0.7930465 | not scorable | not scorable |
| #### Bn-scaff_18936_1-p92542 C-genome specific (napus-oleracea) | 0.7607656    | 0.7469874    | 0.751938  | 0.7248582 | not scorable | not scorable |
| #### Bn-scaff_18936_1-p92554 C-genome specific (napus-oleracea) | 0.7607656    | 0.7494086    | 0.7286822 | 0.7337911 | not scorable | not scorable |
| #### Bn-scaff_18936_1-p92607 C-genome specific (napus-oleracea) | 0.7559808    | 0.6772876    | 0.7596899 | 0.6796762 | not scorable | not scorable |
| #### Bn-scaff_18936_1-p92612 C-genome specific (napus-oleracea) | 0.7559808    | 0.664464     | 0.7209302 | 0.7487952 | not scorable | not scorable |
| #### Bn-scaff_18936_1-p92623 C-genome specific (napus-oleracea) | 0.7464115    | 0.801018     | 0.6744186 | 0.6762284 | not scorable | not scorable |
| #### Bn-scaff_18936_1-p92625 C-genome specific (napus-oleracea) | 0.7583732    | 0.7241247    | 0.751938  | 0.7316726 | not scorable | not scorable |
| #### Bn-scaff_18936_1-p92769 C-genome specific (napus-oleracea) | 0.7535885    | 0.8032523    | 1         | 0.7360595 | not scorable | not scorable |
| #### Bn-scaff_18936_1-p92781 C-genome specific (napus-oleracea) | 0.7488039    | 0.7686849    | 0.9922481 | 0.8032385 | not scorable | not scorable |
| #### Bn-scaff_18936_1-p93346 C-genome specific (napus-oleracea) | 0.7511961    | 0.77201      | 0.9844961 | 0.8154362 | not scorable | not scorable |
| #### Bn-scaff_18936_1-p93604 C-genome specific (napus-oleracea) | 0.7607656    | 0.8029392    | 0.9767442 | 0.7159064 | not scorable | not scorable |
| #### Bn-scaff_18936_1-p93643 C-genome specific (napus-oleracea) | 0.8899522    | 0.7942169    | 1         | 0.839282  | not scorable | not scorable |
| #### Bn-scaff_18936_1-p97644 C-genome specific (napus-oleracea) | 0.8899522    | 0.7850465    | 0.7054263 | 0.6243768 | not scorable | not scorable |
| #### Bn-scaff_18936_1-p98105 genome unspecific (all in)         | 0.9832536    | 0.2401543    | 0.7131783 | 0.7812654 | 1            | 0.741909     |
| #### Bn-scaff_18944_1-p35896 genome unspecific (all in)         | 0.9880383    | 0.2202231    | 1         | 0.6334033 | 0.9834711    | 0.6915966    |
| #### Bn-scaff_18944_1-p39426 genome unspecific (all in)         | 0.9258373    | 0.2600611    | 1         | 0.5886952 | 1            | 0.7794412    |
| #### Bn-scaff_18944_1-p47995 genome unspecific (all in)         | 1            | 0.7770717    | 1         | 0.6922784 | 1            | 0.7770717    |
| #### Bn-scaff_18944_1-p53634 C-genome specific (oleracea only)  | not scorable | not scorable | 1         | 0.4465411 | not scorable | not scorable |
| #### Bn-scaff_18944_1-p56671 C-genome specific (napus-oleracea) | 0.9952153    | 0.786476     | 1         | 0.7004576 | not scorable | not scorable |
| #### Bn-scaff_18999_1-p4380 C-genome specific (napus-oleracea)  | 1            | 0.6080307    | 0.9922481 | 0.5226777 | not scorable | not scorable |



|                                                                |           |           |           |           |              |              |
|----------------------------------------------------------------|-----------|-----------|-----------|-----------|--------------|--------------|
| #### Bn-scaff_19010_1-p149 C-genome specific (napus-oleracea)  | 0.9712918 | 0.7116829 | 0.9767442 | 0.6296556 | not scorable | not scorable |
| #### Bn-scaff_19026_1-p10121genome unspecific (all in)         | 0.9114832 | 0.1713822 | 0.9534883 | 0.2173215 | 0.9917355    | 0.8709938    |
| #### Bn-scaff_19026_1-p10268C-genome specific (napus-oleracea) | 0.9665072 | 0.738803  | 1         | 0.8587967 | not scorable | not scorable |
| #### Bn-scaff_19026_1-p10356C-genome specific (napus-oleracea) | 0.9856459 | 0.8074709 | 1         | 0.7588953 | not scorable | not scorable |
| #### Bn-scaff_19026_1-p10579genome unspecific (all in)         | 0.9928229 | 0.7404457 | 0.9844961 | 0.7825954 | 0.892562     | 0.8994805    |
| #### Bn-scaff_19026_1-p13778C-genome specific (napus-oleracea) | 0.9880383 | 0.683312  | 1         | 0.7191164 | not scorable | not scorable |
| #### Bn-scaff_19026_1-p18484genome unspecific (all in)         | 0.9569378 | 0.469977  | 0.9379845 | 0.6393375 | 1            | 0.7157084    |
| #### Bn-scaff_19026_1-p18782C-genome specific (napus-oleracea) | 0.9880383 | 0.7672023 | 0.9922481 | 0.808946  | not scorable | not scorable |
| #### Bn-scaff_19026_1-p18792C-genome specific (napus-oleracea) | 0.9904306 | 0.8005764 | 1         | 0.7783861 | not scorable | not scorable |
| #### Bn-scaff_19026_1-p18834C-genome specific (napus-oleracea) | 0.9808612 | 0.7785902 | 0.9922481 | 0.8390868 | not scorable | not scorable |
| #### Bn-scaff_19026_1-p18933C-genome specific (napus-oleracea) | 0.9712918 | 0.7428662 | 1         | 0.8144698 | not scorable | not scorable |
| #### Bn-scaff_19026_1-p18945C-genome specific (napus-oleracea) | 0.9928229 | 0.764905  | 0.9302326 | 0.7406024 | not scorable | not scorable |
| #### Bn-scaff_19026_1-p18964C-genome specific (napus-oleracea) | 0.9880383 | 0.7308184 | 0.9767442 | 0.8324059 | not scorable | not scorable |
| #### Bn-scaff_19026_1-p18966C-genome specific (napus-oleracea) | 0.9784689 | 0.686327  | 0.9922481 | 0.7970583 | not scorable | not scorable |
| #### Bn-scaff_19026_1-p18979C-genome specific (napus-oleracea) | 0.9856459 | 0.6539999 | 0.9844961 | 0.816468  | not scorable | not scorable |
| #### Bn-scaff_19026_1-p18988C-genome specific (napus-oleracea) | 0.9856459 | 0.687184  | 0.9612403 | 0.6806523 | not scorable | not scorable |
| #### Bn-scaff_19026_1-p19080C-genome specific (napus-oleracea) | 0.9856459 | 0.7771989 | 0.9767442 | 0.8050262 | not scorable | not scorable |
| #### Bn-scaff_19026_1-p19132genome unspecific (all in)         | 0.9856459 | 0.4632574 | 1         | 0.7771861 | 1            | 0.9197155    |
| #### Bn-scaff_19026_1-p19153C-genome specific (napus-oleracea) | 0.9928229 | 0.637548  | 0.9922481 | 0.7301342 | not scorable | not scorable |
| #### Bn-scaff_19026_1-p19228C-genome specific (napus-oleracea) | 0.9880383 | 0.7638705 | 0.9922481 | 0.6192634 | not scorable | not scorable |
| #### Bn-scaff_19026_1-p19235C-genome specific (napus-oleracea) | 0.9808612 | 0.7491735 | 0.9534883 | 0.7414696 | not scorable | not scorable |
| #### Bn-scaff_19026_1-p19241C-genome specific (napus-oleracea) | 0.9784689 | 0.8075716 | 0.9767442 | 0.7823641 | not scorable | not scorable |
| #### Bn-scaff_19026_1-p19345C-genome specific (napus-oleracea) | 0.9832536 | 0.6944496 | 1         | 0.701405  | not scorable | not scorable |
| #### Bn-scaff_19026_1-p19458C-genome specific (napus-oleracea) | 0.9928229 | 0.6396756 | 0.9922481 | 0.658492  | not scorable | not scorable |
| #### Bn-scaff_19026_1-p20089C-genome specific (napus-oleracea) | 0.9952153 | 0.7532151 | 1         | 0.7728349 | not scorable | not scorable |
| #### Bn-scaff_19026_1-p20172C-genome specific (napus-oleracea) | 0.9928229 | 0.7058917 | 0.9844961 | 0.7349601 | not scorable | not scorable |
| #### Bn-scaff_19026_1-p20201C-genome specific (napus-oleracea) | 0.9928229 | 0.6586966 | 0.9844961 | 0.7278525 | not scorable | not scorable |
| #### Bn-scaff_19026_1-p20235C-genome specific (napus-oleracea) | 0.9760765 | 0.7795532 | 0.9922481 | 0.8056205 | not scorable | not scorable |
| #### Bn-scaff_19026_1-p20267C-genome specific (napus-oleracea) | 0.9904306 | 0.7493724 | 0.9844961 | 0.7844194 | not scorable | not scorable |
| #### Bn-scaff_19026_1-p20277C-genome specific (napus-oleracea) | 0.9880383 | 0.6754138 | 0.9922481 | 0.6553006 | not scorable | not scorable |
| #### Bn-scaff_19026_1-p20309C-genome specific (napus-oleracea) | 0.9880383 | 0.6803481 | 1         | 0.7282969 | not scorable | not scorable |
| #### Bn-scaff_19026_1-p20564C-genome specific (napus-oleracea) | 0.9808612 | 0.7393512 | 0.9069768 | 0.8021834 | not scorable | not scorable |
| #### Bn-scaff_19026_1-p21291C-genome specific (napus-oleracea) | 0.9832536 | 0.7023551 | 1         | 0.6858218 | not scorable | not scorable |

|                                                                 |              |              |              |              |              |              |
|-----------------------------------------------------------------|--------------|--------------|--------------|--------------|--------------|--------------|
| #### Bn-scaff_19026_1-p2131C genome unspecific (all in)         | 0.9904306    | 0.5503648    | 0.9844961    | 0.5474027    | 0.9917355    | 0.8917658    |
| #### Bn-scaff_19026_1-p2137C C-genome specific (napus-oleracea) | 0.9832536    | 0.7145978    | 0.9844961    | 0.6288959    | not scorable | not scorable |
| #### Bn-scaff_19026_1-p2157C C-genome specific (napus-oleracea) | 0.9712918    | 0.7473723    | 1            | 0.7594525    | not scorable | not scorable |
| #### Bn-scaff_19026_1-p2159C C-genome specific (napus-oleracea) | 0.9928229    | 0.7867321    | 1            | 0.7028667    | not scorable | not scorable |
| #### Bn-scaff_19026_1-p2192C C-genome specific (napus-oleracea) | 0.9928229    | 0.7579179    | 1            | 0.7877911    | not scorable | not scorable |
| #### Bn-scaff_19026_1-p2192C C-genome specific (napus-oleracea) | 0.9928229    | 0.8089882    | 0.9922481    | 0.798973     | not scorable | not scorable |
| #### Bn-scaff_19026_1-p2193C C-genome specific (napus-oleracea) | 0.9856459    | 0.7799943    | 0.9689922    | 0.8326298    | not scorable | not scorable |
| #### Bn-scaff_19026_1-p2254C genome unspecific (all in)         | 0.9952153    | 0.5613401    | 0.9922481    | 0.755106     | 1            | 0.9120412    |
| #### Bn-scaff_19026_1-p2265C C-genome specific (napus-oleracea) | 0.9880383    | 0.7528123    | 0.9922481    | 0.7675724    | not scorable | not scorable |
| #### Bn-scaff_19026_1-p2271C C-genome specific (napus-oleracea) | 0.9784689    | 0.748715     | 0.9922481    | 0.7866854    | not scorable | not scorable |
| #### Bn-scaff_19026_1-p2282C C-genome specific (napus-oleracea) | 0.9904306    | 0.7120531    | 1            | 0.7432355    | not scorable | not scorable |
| #### Bn-scaff_19026_1-p2311C C-genome specific (oleracea only)  | not scorable | not scorable | 0.9922481    | 0.7831923    | not scorable | not scorable |
| #### Bn-scaff_19026_1-p2322C C-genome specific (napus-oleracea) | 0.9880383    | 0.7681009    | 1            | 0.7903157    | not scorable | not scorable |
| #### Bn-scaff_19026_1-p2457C C-genome specific (napus-oleracea) | 0.9760765    | 0.6953552    | 1            | 0.715156     | not scorable | not scorable |
| #### Bn-scaff_19026_1-p2494C genome unspecific (all in)         | 0.9952153    | 0.7718289    | 1            | 0.7716078    | 0.9752066    | 0.8566925    |
| #### Bn-scaff_19026_1-p2540C C-genome specific (napus-oleracea) | 0.9832536    | 0.6922452    | 0.9922481    | 0.7176418    | not scorable | not scorable |
| #### Bn-scaff_19026_1-p2569C C-genome specific (napus-oleracea) | 0.9904306    | 0.6799362    | 0.9689922    | 0.6958748    | not scorable | not scorable |
| #### Bn-scaff_19026_1-p2776C genome unspecific (all in)         | 0.9712918    | 0.5730031    | 0.9844961    | 0.6385011    | 1            | 0.9453433    |
| #### Bn-scaff_19026_1-p2827C C-genome specific (napus-oleracea) | 0.9952153    | 0.6381261    | 0.9767442    | 0.7098845    | not scorable | not scorable |
| #### Bn-scaff_19026_1-p2923C genome unspecific (all in)         | 0.9952153    | 0.3490193    | 1            | 0.809966     | 1            | 0.9200372    |
| #### Bn-scaff_19026_1-p3040C C-genome specific (napus-oleracea) | 0.9928229    | 0.7306687    | 1            | 0.7516703    | not scorable | not scorable |
| #### Bn-scaff_19026_1-p3129C C-genome specific (napus-oleracea) | 0.9258373    | 0.5930771    | 0.9844961    | 0.8147632    | not scorable | not scorable |
| #### Bn-scaff_19026_1-p3161C C-genome specific (napus-oleracea) | 0.9952153    | 0.7234933    | 0.9922481    | 0.7608863    | not scorable | not scorable |
| #### Bn-scaff_19026_1-p3247C C-genome specific (napus-oleracea) | 0.9760765    | 0.7840147    | 1            | 0.8318305    | not scorable | not scorable |
| #### Bn-scaff_19026_1-p3687C C-genome specific (napus-oleracea) | 0.9832536    | 0.7348804    | 0.9147287    | 0.728611     | not scorable | not scorable |
| #### Bn-scaff_19026_1-p3691C C-genome specific (napus-oleracea) | 0.9928229    | 0.8323969    | 1            | 0.7632838    | not scorable | not scorable |
| #### Bn-scaff_19026_1-p4530 all not scorable                    | not scorable | not scorable | not scorable | not scorable | not scorable | not scorable |
| #### Bn-scaff_19026_1-p5571C C-genome specific (napus-oleracea) | 0.9497608    | 0.7343898    | 0.4108527    | 0.8818445    | not scorable | not scorable |
| #### Bn-scaff_19026_1-p8439C C-genome specific (napus-oleracea) | 0.9760765    | 0.7588586    | 1            | 0.7715068    | not scorable | not scorable |
| #### Bn-scaff_19043_1-p1274C C-genome specific (napus-oleracea) | 0.9904306    | 0.7864265    | 0.9689922    | 0.7460829    | not scorable | not scorable |
| #### Bn-scaff_19043_1-p1742 all not scorable                    | not scorable | not scorable | not scorable | not scorable | not scorable | not scorable |
| #### Bn-scaff_19043_1-p1808C C-genome specific (napus-oleracea) | 0.9976076    | 0.7500445    | 0.9767442    | 0.7781593    | not scorable | not scorable |
| #### Bn-scaff_19043_1-p1817C C-genome specific (napus-oleracea) | 0.9928229    | 0.7461726    | 0.9767442    | 0.8334858    | not scorable | not scorable |

|                                                                 |              |              |              |              |              |              |
|-----------------------------------------------------------------|--------------|--------------|--------------|--------------|--------------|--------------|
| #### Bn-scaff_19043_1-p19820 C-genome specific (napus-oleracea) | 1            | 0.5852618    | 0.9534883    | 0.4953155    | not scorable | not scorable |
| #### Bn-scaff_19043_1-p22356 C-genome specific (napus-oleracea) | 0.9880383    | 0.7298917    | 0.9844961    | 0.8309543    | not scorable | not scorable |
| #### Bn-scaff_19043_1-p24351 C-genome specific (napus-oleracea) | 0.9952153    | 0.6879769    | 1            | 0.8317721    | not scorable | not scorable |
| #### Bn-scaff_19043_1-p24790 C-genome specific (napus-oleracea) | 0.9832536    | 0.7486846    | 0.6976744    | 0.8069838    | not scorable | not scorable |
| #### Bn-scaff_19043_1-p27924 A-genome specific (napus-rapa)     | 1            | 0.5505166    | not scorable | not scorable | 1            | 0.9098586    |
| #### Bn-scaff_19043_1-p33303 C-genome specific (napus-oleracea) | 0.9760765    | 0.6644602    | 0.9767442    | 0.7022258    | not scorable | not scorable |
| #### Bn-scaff_19043_1-p37234 C-genome specific (napus-oleracea) | 0.9952153    | 0.7672179    | 1            | 0.8484629    | not scorable | not scorable |
| #### Bn-scaff_19043_1-p38975 genome unspecific (all in)         | 0.9617225    | 0.2640987    | 1            | 0.7536421    | 0.9834711    | 0.5715231    |
| #### Bn-scaff_19043_1-p41557 C-genome specific (napus-oleracea) | 0.9784689    | 0.7995481    | 1            | 0.8142452    | not scorable | not scorable |
| #### Bn-scaff_19043_1-p41562 C-genome specific (napus-oleracea) | 0.9904306    | 0.7788497    | 0.9767442    | 0.8083621    | not scorable | not scorable |
| #### Bn-scaff_19043_1-p43120 C-genome specific (napus-oleracea) | 0.9473684    | 0.7138609    | 0.9379845    | 0.6687294    | not scorable | not scorable |
| #### Bn-scaff_19043_1-p44083 C-genome specific (napus-oleracea) | 0.9904306    | 0.7679686    | 1            | 0.772881     | not scorable | not scorable |
| #### Bn-scaff_19043_1-p50175 C-genome specific (napus-oleracea) | 0.9880383    | 0.7815173    | 0.9767442    | 0.7459612    | not scorable | not scorable |
| #### Bn-scaff_19043_1-p51461 C-genome specific (napus-oleracea) | 0.9904306    | 0.7038041    | 0.9844961    | 0.7545548    | not scorable | not scorable |
| #### Bn-scaff_19043_1-p51554 C-genome specific (napus-oleracea) | 0.9952153    | 0.8096709    | 0.9767442    | 0.7236276    | not scorable | not scorable |
| #### Bn-scaff_19043_1-p52253 C-genome specific (napus-oleracea) | 0.9928229    | 0.7226251    | 0.9689922    | 0.8481253    | not scorable | not scorable |
| #### Bn-scaff_19043_1-p53467 C-genome specific (napus-oleracea) | 0.9976076    | 0.7580777    | 1            | 0.7871038    | not scorable | not scorable |
| #### Bn-scaff_19043_1-p53629 C-genome specific (napus-oleracea) | 0.9976076    | 0.7926992    | 1            | 0.8497643    | not scorable | not scorable |
| #### Bn-scaff_19043_1-p53637 C-genome specific (napus-oleracea) | 0.9976076    | 0.7374794    | 1            | 0.774851     | not scorable | not scorable |
| #### Bn-scaff_19043_1-p54147 C-genome specific (napus-oleracea) | 0.9856459    | 0.7493955    | 0.9922481    | 0.8051868    | not scorable | not scorable |
| #### Bn-scaff_19043_1-p77359 genome unspecific (all in)         | 1            | 0.7933807    | 1            | 0.7145624    | 1            | 0.8254854    |
| #### Bn-scaff_19043_1-p83155 genome unspecific (all in)         | 1            | 0.4016377    | 0.9844961    | 0.8006607    | 1            | 0.9189187    |
| #### Bn-scaff_19043_1-p83566 genome unspecific (oleracea-rapa)  | not scorable | not scorable | 0.9844961    | 0.8228521    | 0.9917355    | 0.8013493    |
| #### Bn-scaff_19043_1-p84738 C-genome specific (napus-oleracea) | 0.9856459    | 0.3534036    | 0.9457364    | 0.6831111    | not scorable | not scorable |
| #### Bn-scaff_19043_1-p97247 C-genome specific (napus-oleracea) | 0.9976076    | 0.495367     | 1            | 0.5332807    | not scorable | not scorable |
| #### Bn-scaff_19044_1-p9802 C-genome specific (napus-oleracea)  | 1            | 0.7980734    | 1            | 0.6448191    | not scorable | not scorable |
| #### Bn-scaff_19047_1-p10848 C-genome specific (napus-oleracea) | 0.9856459    | 0.6942174    | 0.9844961    | 0.7845258    | not scorable | not scorable |
| #### Bn-scaff_19047_1-p11003 C-genome specific (napus-oleracea) | 0.9952153    | 0.7109119    | 0.8914729    | 0.7056882    | not scorable | not scorable |
| #### Bn-scaff_19047_1-p11288 C-genome specific (napus-oleracea) | 0.9880383    | 0.7548539    | 0.9302326    | 0.7798847    | not scorable | not scorable |
| #### Bn-scaff_19047_1-p11422 C-genome specific (napus-oleracea) | 0.9952153    | 0.7177927    | 0.9844961    | 0.6963406    | not scorable | not scorable |
| #### Bn-scaff_19047_1-p11499 C-genome specific (napus-oleracea) | 0.9904306    | 0.7597925    | 0.8914729    | 0.8039736    | not scorable | not scorable |
| #### Bn-scaff_19047_1-p12232 C-genome specific (napus-oleracea) | 0.9976076    | 0.7559544    | 0.8992248    | 0.7839757    | not scorable | not scorable |
| #### Bn-scaff_19047_1-p12619 C-genome specific (napus-oleracea) | 0.9904306    | 0.6040096    | 1            | 0.7112054    | not scorable | not scorable |

|                                                                 |              |              |              |   |              |              |              |
|-----------------------------------------------------------------|--------------|--------------|--------------|---|--------------|--------------|--------------|
| #### Bn-scaff_19047_1-p15937 C-genome specific (napus-oleracea) | 0.9928229    | 0.61861      |              | 1 | 0.7112358    | not scorable | not scorable |
| #### Bn-scaff_19047_1-p16370 C-genome specific (oleracea only)  | not scorable | not scorable |              | 1 | 0.6304904    | not scorable | not scorable |
| #### Bn-scaff_19047_1-p16452 genome unspecific (all in)         | 0.9784689    | 0.7718477    | 0.9844961    |   | 0.7774838    | 0.9917355    | 0.936917     |
| #### Bn-scaff_19047_1-p16919 C-genome specific (napus-oleracea) | 0.9856459    | 0.7789363    |              | 1 | 0.7777448    | not scorable | not scorable |
| #### Bn-scaff_19047_1-p17549 C-genome specific (oleracea only)  | not scorable | not scorable | 0.627907     |   | 0.7504907    | not scorable | not scorable |
| #### Bn-scaff_19047_1-p18073 C-genome specific (napus-oleracea) | 0.9760765    | 0.7072327    | 0.9922481    |   | 0.7538969    | not scorable | not scorable |
| #### Bn-scaff_19047_1-p19163 genome unspecific (all in)         | 0.9928229    | 0.445681     |              | 1 | 0.7741253    |              | 1 0.9175813  |
| #### Bn-scaff_19047_1-p19638 C-genome specific (napus-oleracea) | 0.9760765    | 0.7863969    | 0.9844961    |   | 0.7862894    | not scorable | not scorable |
| #### Bn-scaff_19047_1-p22439 C-genome specific (napus-oleracea) | 0.9856459    | 0.7746284    |              | 1 | 0.7573304    | not scorable | not scorable |
| #### Bn-scaff_19047_1-p22553 all not scorable                   | not scorable | not scorable | not scorable |   | not scorable | not scorable | not scorable |
| #### Bn-scaff_19047_1-p22553 C-genome specific (napus-oleracea) | 0.9784689    | 0.6780497    |              | 1 | 0.6826469    | not scorable | not scorable |
| #### Bn-scaff_19047_1-p22772 C-genome specific (napus-oleracea) | 0.9856459    | 0.748661     |              | 1 | 0.7070751    | not scorable | not scorable |
| #### Bn-scaff_19047_1-p22877 C-genome specific (napus-oleracea) | 0.9904306    | 0.7702883    |              | 1 | 0.6884728    | not scorable | not scorable |
| #### Bn-scaff_19047_1-p26313 C-genome specific (napus-oleracea) | 0.9904306    | 0.7860547    |              | 1 | 0.8307055    | not scorable | not scorable |
| #### Bn-scaff_19047_1-p28502 C-genome specific (napus-oleracea) | 0.9856459    | 0.7512275    | 0.7906977    |   | 0.7685452    | not scorable | not scorable |
| #### Bn-scaff_19047_1-p29046 C-genome specific (napus-oleracea) | 0.9808612    | 0.6678448    | 0.9767442    |   | 0.7484707    | not scorable | not scorable |
| #### Bn-scaff_19047_1-p29298 C-genome specific (napus-oleracea) | 0.9832536    | 0.7895929    | 0.9922481    |   | 0.797959     | not scorable | not scorable |
| #### Bn-scaff_19047_1-p29351 C-genome specific (napus-oleracea) | 0.9904306    | 0.6927708    |              | 1 | 0.693056     | not scorable | not scorable |
| #### Bn-scaff_19047_1-p29414 C-genome specific (napus-oleracea) | 0.9856459    | 0.6211397    |              | 1 | 0.7836417    | not scorable | not scorable |
| #### Bn-scaff_19047_1-p29478 C-genome specific (napus-oleracea) | 0.9760765    | 0.7681084    |              | 1 | 0.8273389    | not scorable | not scorable |
| #### Bn-scaff_19047_1-p29510 C-genome specific (napus-oleracea) | 0.9904306    | 0.678828     |              | 1 | 0.7056383    | not scorable | not scorable |
| #### Bn-scaff_19047_1-p29537 C-genome specific (napus-oleracea) | 0.9784689    | 0.6701607    |              | 1 | 0.7161742    | not scorable | not scorable |
| #### Bn-scaff_19047_1-p29719 C-genome specific (napus-oleracea) | 0.9784689    | 0.6376874    |              | 1 | 0.6567498    | not scorable | not scorable |
| #### Bn-scaff_19047_1-p3384 C-genome specific (napus-oleracea)  | 0.9880383    | 0.7537938    | 0.9457364    |   | 0.8220968    | not scorable | not scorable |
| #### Bn-scaff_19047_1-p3443 C-genome specific (napus-oleracea)  | 0.9904306    | 0.7576739    | 0.9457364    |   | 0.6946316    | not scorable | not scorable |
| #### Bn-scaff_19047_1-p37351 C-genome specific (napus-oleracea) | 0.9952153    | 0.7161852    |              | 1 | 0.8146394    | not scorable | not scorable |
| #### Bn-scaff_19047_1-p38653 C-genome specific (napus-oleracea) | 0.9521531    | 0.678169     | 0.9534883    |   | 0.6964929    | not scorable | not scorable |
| #### Bn-scaff_19047_1-p38756 C-genome specific (napus-oleracea) | 0.9688995    | 0.7157974    |              | 1 | 0.7267952    | not scorable | not scorable |
| #### Bn-scaff_19047_1-p3920 C-genome specific (napus-oleracea)  | 0.9880383    | 0.7883726    | 0.9379845    |   | 0.7763071    | not scorable | not scorable |
| #### Bn-scaff_19047_1-p5357 C-genome specific (napus-oleracea)  | 0.9904306    | 0.6896733    | 0.8837209    |   | 0.7068547    | not scorable | not scorable |
| #### Bn-scaff_19049_1-p16383 C-genome specific (napus-oleracea) |              | 1 0.6042088  |              | 1 | 0.5811347    | not scorable | not scorable |
| #### Bn-scaff_19101_1-p10495 C-genome specific (napus-oleracea) | 0.9712918    | 0.7356511    | 0.9224806    |   | 0.8028397    | not scorable | not scorable |
| #### Bn-scaff_19101_1-p13013 C-genome specific (napus-oleracea) | 0.9641148    | 0.6368275    | 0.9147287    |   | 0.6442376    | not scorable | not scorable |

|                                                                 |              |              |           |           |              |              |
|-----------------------------------------------------------------|--------------|--------------|-----------|-----------|--------------|--------------|
| #### Bn-scaff_19101_1-p15803 C-genome specific (napus-oleracea) | 0.9856459    | 0.7406513    | 0.9689922 | 0.8392678 | not scorable | not scorable |
| #### Bn-scaff_19101_1-p16263 C-genome specific (napus-oleracea) | 0.9832536    | 0.7405785    | 0.9767442 | 0.7544709 | not scorable | not scorable |
| #### Bn-scaff_19101_1-p20325 C-genome specific (napus-oleracea) | 0.9736842    | 0.7020211    | 0.9689922 | 0.7586094 | not scorable | not scorable |
| #### Bn-scaff_19101_1-p20551 C-genome specific (napus-oleracea) | 0.9641148    | 0.7258247    | 0.9612403 | 0.7854903 | not scorable | not scorable |
| #### Bn-scaff_19104_1-p30488 genome unspecific (all in)         | 1            | 0.3875349    | 1         | 0.8191972 | 1            | 0.8915408    |
| #### Bn-scaff_19104_1-p54943 C-genome specific (napus-oleracea) | 0.9928229    | 0.7736898    | 0.9612403 | 0.799323  | not scorable | not scorable |
| #### Bn-scaff_19104_1-p65540 C-genome specific (napus-oleracea) | 0.9832536    | 0.7145717    | 0.9922481 | 0.7290791 | not scorable | not scorable |
| #### Bn-scaff_19104_1-p65674 C-genome specific (napus-oleracea) | 0.9928229    | 0.7882113    | 0.9922481 | 0.8149942 | not scorable | not scorable |
| #### Bn-scaff_19104_1-p66262 C-genome specific (napus-oleracea) | 0.9856459    | 0.715751     | 0.9844961 | 0.8177654 | not scorable | not scorable |
| #### Bn-scaff_19106_1-p1018 C-genome specific (napus-oleracea)  | 0.9856459    | 0.7753193    | 0.9922481 | 0.7256144 | not scorable | not scorable |
| #### Bn-scaff_19106_1-p17604 C-genome specific (napus-oleracea) | 0.9712918    | 0.7160136    | 1         | 0.6900564 | not scorable | not scorable |
| #### Bn-scaff_19106_1-p20607 C-genome specific (napus-oleracea) | 0.9784689    | 0.7638407    | 1         | 0.8691639 | not scorable | not scorable |
| #### Bn-scaff_19106_1-p27975 C-genome specific (napus-oleracea) | 0.9832536    | 0.7647014    | 1         | 0.7940437 | not scorable | not scorable |
| #### Bn-scaff_19106_1-p30400 C-genome specific (napus-oleracea) | 0.9856459    | 0.786258     | 1         | 0.7334961 | not scorable | not scorable |
| #### Bn-scaff_19106_1-p30714 C-genome specific (napus-oleracea) | 1            | 0.80316      | 0.9767442 | 0.6784567 | not scorable | not scorable |
| #### Bn-scaff_19106_1-p31072 C-genome specific (napus-oleracea) | 0.9808612    | 0.7956121    | 1         | 0.783363  | not scorable | not scorable |
| #### Bn-scaff_19106_1-p31077 C-genome specific (napus-oleracea) | 0.9617225    | 0.7564953    | 1         | 0.7231178 | not scorable | not scorable |
| #### Bn-scaff_19106_1-p32412 C-genome specific (oleracea only)  | not scorable | not scorable | 0.9147287 | 0.214606  | not scorable | not scorable |
| #### Bn-scaff_19106_1-p38435 C-genome specific (napus-oleracea) | 0.9712918    | 0.6926676    | 1         | 0.8025834 | not scorable | not scorable |
| #### Bn-scaff_19106_1-p41977 C-genome specific (oleracea only)  | not scorable | not scorable | 1         | 0.7071003 | not scorable | not scorable |
| #### Bn-scaff_19106_1-p42662 genome unspecific (all in)         | 0.9904306    | 0.3625987    | 1         | 0.7828946 | 0.9752066    | 0.7019822    |
| #### Bn-scaff_19106_1-p42770 genome unspecific (all in)         | 0.9808612    | 0.4017357    | 1         | 0.8013854 | 1            | 0.6551002    |
| #### Bn-scaff_19106_1-p44031 C-genome specific (napus-oleracea) | 0.9976076    | 0.7714814    | 0.9767442 | 0.783676  | not scorable | not scorable |
| #### Bn-scaff_19106_1-p46304 C-genome specific (napus-oleracea) | 0.9976076    | 0.6967869    | 0.9922481 | 0.7752646 | not scorable | not scorable |
| #### Bn-scaff_19106_1-p47058 C-genome specific (napus-oleracea) | 0.9928229    | 0.7867643    | 0.9844961 | 0.7798463 | not scorable | not scorable |
| #### Bn-scaff_19106_1-p56231 C-genome specific (napus-oleracea) | 0.9808612    | 0.7146457    | 0.9689922 | 0.7312071 | not scorable | not scorable |
| #### Bn-scaff_19106_1-p56261 C-genome specific (napus-oleracea) | 0.6626794    | 0.670739     | 0.8914729 | 0.7068063 | not scorable | not scorable |
| #### Bn-scaff_19106_1-p56855 C-genome specific (napus-oleracea) | 0.9904306    | 0.7677509    | 0.9689922 | 0.8052292 | not scorable | not scorable |
| #### Bn-scaff_19106_1-p56875 C-genome specific (napus-oleracea) | 0.6626794    | 0.9027363    | 0.875969  | 0.819926  | not scorable | not scorable |
| #### Bn-scaff_19106_1-p58776 C-genome specific (napus-oleracea) | 0.9952153    | 0.7633793    | 0.9767442 | 0.755307  | not scorable | not scorable |
| #### Bn-scaff_19106_1-p59341 C-genome specific (napus-oleracea) | 0.9832536    | 0.8004724    | 0.9844961 | 0.7638034 | not scorable | not scorable |
| #### Bn-scaff_19106_1-p60538 C-genome specific (napus-oleracea) | 0.9928229    | 0.7513251    | 0.9844961 | 0.8043797 | not scorable | not scorable |
| #### Bn-scaff_19106_1-p69367 genome unspecific (all in)         | 0.9808612    | 0.5293944    | 0.9844961 | 0.7583714 | 1            | 0.8906778    |

|                                                                 |              |              |           |           |              |              |
|-----------------------------------------------------------------|--------------|--------------|-----------|-----------|--------------|--------------|
| #### Bn-scaff_19106_1-p7596 genome unspecific (all in)          | 1            | 0.8080764    | 1         | 0.647849  | 0.9917355    | 0.6760623    |
| #### Bn-scaff_19106_1-p76331 C-genome specific (napus-oleracea) | 0.9904306    | 0.7242322    | 0.9922481 | 0.7127941 | not scorable | not scorable |
| #### Bn-scaff_19109_1-p22283 C-genome specific (napus-oleracea) | 0.9952153    | 0.7366145    | 0.9922481 | 0.7544227 | not scorable | not scorable |
| #### Bn-scaff_19109_1-p24726 C-genome specific (napus-oleracea) | 0.9712918    | 0.6564654    | 1         | 0.6596108 | not scorable | not scorable |
| #### Bn-scaff_19109_1-p30884 C-genome specific (napus-oleracea) | 0.9784689    | 0.6633987    | 1         | 0.649892  | not scorable | not scorable |
| #### Bn-scaff_19109_1-p33306 C-genome specific (napus-oleracea) | 0.9976076    | 0.7646175    | 1         | 0.7584996 | not scorable | not scorable |
| #### Bn-scaff_19109_1-p33401 genome unspecific (all in)         | 0.9760765    | 0.7631092    | 1         | 0.7818289 | 1            | 0.9371242    |
| #### Bn-scaff_19111_1-p13862 genome unspecific (all in)         | 0.9928229    | 0.2727915    | 1         | 0.779897  | 0.9834711    | 0.7818353    |
| #### Bn-scaff_19111_1-p14051 genome unspecific (all in)         | 0.9808612    | 0.4258776    | 1         | 0.6573836 | 0.9834711    | 0.5347732    |
| #### Bn-scaff_19111_1-p16186 C-genome specific (napus-oleracea) | 0.9282297    | 0.7820959    | 0.9922481 | 0.7678688 | not scorable | not scorable |
| #### Bn-scaff_19111_1-p16215 genome unspecific (all in)         | 0.8444976    | 0.7249461    | 1         | 0.7859904 | 1            | 0.7366022    |
| #### Bn-scaff_19111_1-p16257 genome unspecific (all in)         | 1            | 0.6916012    | 1         | 0.6625553 | 1            | 0.681638     |
| #### Bn-scaff_19111_1-p16315 C-genome specific (napus-oleracea) | 0.9258373    | 0.8095526    | 1         | 0.8118719 | not scorable | not scorable |
| #### Bn-scaff_19111_1-p17022 C-genome specific (napus-oleracea) | 0.923445     | 0.8149026    | 0.9922481 | 0.6893224 | not scorable | not scorable |
| #### Bn-scaff_19111_1-p17041 C-genome specific (oleracea only)  | not scorable | not scorable | 0.9922481 | 0.7686435 | not scorable | not scorable |
| #### Bn-scaff_19111_1-p17058 C-genome specific (oleracea only)  | not scorable | not scorable | 0.8294573 | 0.6890876 | not scorable | not scorable |
| #### Bn-scaff_19111_1-p17099 C-genome specific (napus-oleracea) | 0.9162679    | 0.7150986    | 0.9922481 | 0.7153027 | not scorable | not scorable |
| #### Bn-scaff_19111_1-p17124 C-genome specific (napus-oleracea) | 0.9258373    | 0.7105204    | 1         | 0.7098325 | not scorable | not scorable |
| #### Bn-scaff_19111_1-p17173 C-genome specific (napus-oleracea) | 0.923445     | 0.7144552    | 0.9922481 | 0.7052513 | not scorable | not scorable |
| #### Bn-scaff_19111_1-p17288 C-genome specific (napus-oleracea) | 0.9186603    | 0.7143931    | 1         | 0.7543822 | not scorable | not scorable |
| #### Bn-scaff_19111_1-p17334 C-genome specific (napus-oleracea) | 0.9186603    | 0.7364475    | 1         | 0.8572619 | not scorable | not scorable |
| #### Bn-scaff_19111_1-p17734 C-genome specific (napus-oleracea) | 0.9210526    | 0.657437     | 0.9922481 | 0.6832218 | not scorable | not scorable |
| #### Bn-scaff_19111_1-p17767 C-genome specific (napus-oleracea) | 0.9784689    | 0.7004692    | 0.9922481 | 0.703123  | not scorable | not scorable |
| #### Bn-scaff_19111_1-p18019 C-genome specific (napus-oleracea) | 0.923445     | 0.7574399    | 1         | 0.7620466 | not scorable | not scorable |
| #### Bn-scaff_19111_1-p19860 genome unspecific (all in)         | 0.930622     | 0.761556     | 0.9767442 | 0.7324197 | 0.8429752    | 0.9499338    |
| #### Bn-scaff_19111_1-p21708 C-genome specific (napus-oleracea) | 0.9210526    | 0.7563629    | 1         | 0.7557439 | not scorable | not scorable |
| #### Bn-scaff_19111_1-p21712 C-genome specific (napus-oleracea) | 0.9114832    | 0.7114567    | 0.9922481 | 0.6589703 | not scorable | not scorable |
| #### Bn-scaff_19111_1-p22850 C-genome specific (napus-oleracea) | 0.8971292    | 0.6634734    | 0.9922481 | 0.7734481 | not scorable | not scorable |
| #### Bn-scaff_19111_1-p22946 C-genome specific (napus-oleracea) | 0.9043062    | 0.7298608    | 1         | 0.7364251 | not scorable | not scorable |
| #### Bn-scaff_19111_1-p23151 C-genome specific (napus-oleracea) | 0.8971292    | 0.6869799    | 1         | 0.6613716 | not scorable | not scorable |
| #### Bn-scaff_19111_1-p24505 C-genome specific (napus-oleracea) | 0.9760765    | 0.6994658    | 0.9922481 | 0.7840822 | not scorable | not scorable |
| #### Bn-scaff_19111_1-p25819 genome unspecific (all in)         | 0.9688995    | 0.250339     | 1         | 0.6833032 | 0.9917355    | 0.6879507    |
| #### Bn-scaff_19111_1-p25853 C-genome specific (napus-oleracea) | 0.9258373    | 0.8010239    | 1         | 0.6918842 | not scorable | not scorable |

|                                                                 |           |           |              |              |              |              |
|-----------------------------------------------------------------|-----------|-----------|--------------|--------------|--------------|--------------|
| #### Bn-scaff_19111_1-p31268 genome unspecific (all in)         | 1         | 0.4852823 | 1            | 0.7989477    | 1            | 0.9031855    |
| #### Bn-scaff_19111_1-p32513 C-genome specific (napus-oleracea) | 0.8708134 | 0.6291847 | 1            | 0.6241577    | not scorable | not scorable |
| #### Bn-scaff_19111_1-p36336 genome unspecific (all in)         | 0.8803828 | 0.2237885 | 0.9302326    | 0.3309252    | 0.9834711    | 0.7818663    |
| #### Bn-scaff_19134_1-p3309 C-genome specific (napus-oleracea)  | 0.9832536 | 0.7496476 | 1            | 0.7644913    | not scorable | not scorable |
| #### Bn-scaff_19154_1-p172 C-genome specific (napus-oleracea)   | 0.9688995 | 0.4757937 | 1            | 0.7314245    | not scorable | not scorable |
| #### Bn-scaff_19168_1-p10972 genome unspecific (all in)         | 0.9617225 | 0.2384694 | 1            | 0.8145934    | 1            | 0.8404729    |
| #### Bn-scaff_19168_1-p12305 C-genome specific (napus-oleracea) | 0.9856459 | 0.9182436 | 1            | 0.7932255    | not scorable | not scorable |
| #### Bn-scaff_19168_1-p13064 napus specific                     | 0.9617225 | 0.8079585 | not scorable | not scorable | not scorable | not scorable |
| #### Bn-scaff_19168_1-p15958 C-genome specific (napus-oleracea) | 0.9784689 | 0.7529737 | 1            | 0.7645956    | not scorable | not scorable |
| #### Bn-scaff_19168_1-p26783 C-genome specific (napus-oleracea) | 0.9784689 | 0.7497076 | 1            | 0.7708873    | not scorable | not scorable |
| #### Bn-scaff_19168_1-p26943 C-genome specific (napus-oleracea) | 0.9736842 | 0.8509654 | 1            | 0.7567283    | not scorable | not scorable |
| #### Bn-scaff_19168_1-p27982 C-genome specific (napus-oleracea) | 0.9808612 | 0.6812061 | 1            | 0.8123947    | not scorable | not scorable |
| #### Bn-scaff_19168_1-p29925 C-genome specific (napus-oleracea) | 0.9832536 | 0.7917311 | 1            | 0.802374     | not scorable | not scorable |
| #### Bn-scaff_19168_1-p30868 C-genome specific (napus-oleracea) | 0.9760765 | 0.8489617 | 1            | 0.8175433    | not scorable | not scorable |
| #### Bn-scaff_19168_1-p31612 C-genome specific (napus-oleracea) | 0.9784689 | 0.6965749 | 1            | 0.7355374    | not scorable | not scorable |
| #### Bn-scaff_19168_1-p6425 C-genome specific (napus-oleracea)  | 0.9569378 | 0.6150089 | 0.9922481    | 0.571189     | not scorable | not scorable |
| #### Bn-scaff_19168_1-p6595 C-genome specific (napus-oleracea)  | 0.9688995 | 0.7499072 | 0.9844961    | 0.6995957    | not scorable | not scorable |
| #### Bn-scaff_19168_1-p67993 C-genome specific (napus-oleracea) | 0.9712918 | 0.7925888 | 1            | 0.7869965    | not scorable | not scorable |
| #### Bn-scaff_19168_1-p81144 C-genome specific (napus-oleracea) | 0.9641148 | 0.6865312 | 0.9922481    | 0.6809868    | not scorable | not scorable |
| #### Bn-scaff_19168_1-p8213 C-genome specific (napus-oleracea)  | 0.9760765 | 0.7861096 | 1            | 0.7890977    | not scorable | not scorable |
| #### Bn-scaff_19168_1-p8575 genome unspecific (all in)          | 0.9904306 | 0.4938557 | 1            | 0.802088     | 0.9917355    | 0.918102     |
| #### Bn-scaff_19168_1-p87977 C-genome specific (napus-oleracea) | 0.9617225 | 0.7556512 | 0.9922481    | 0.8092792    | not scorable | not scorable |
| #### Bn-scaff_19168_1-p9620 C-genome specific (napus-oleracea)  | 0.9665072 | 0.6435884 | 1            | 0.7059718    | not scorable | not scorable |
| #### Bn-scaff_19168_1-p9913 C-genome specific (napus-oleracea)  | 0.9784689 | 0.7818304 | 1            | 0.6960192    | not scorable | not scorable |
| #### Bn-scaff_19170_1-p10040 C-genome specific (napus-oleracea) | 0.9856459 | 0.7827943 | 1            | 0.7917088    | not scorable | not scorable |
| #### Bn-scaff_19170_1-p10042 C-genome specific (napus-oleracea) | 0.9665072 | 0.6869532 | 1            | 0.7082259    | not scorable | not scorable |
| #### Bn-scaff_19170_1-p10081 C-genome specific (napus-oleracea) | 0.9976076 | 0.5085713 | 1            | 0.5873021    | not scorable | not scorable |
| #### Bn-scaff_19170_1-p10284 C-genome specific (napus-oleracea) | 0.9904306 | 0.7585765 | 1            | 0.804107     | not scorable | not scorable |
| #### Bn-scaff_19170_1-p10287 C-genome specific (napus-oleracea) | 0.9952153 | 0.7444506 | 1            | 0.7976134    | not scorable | not scorable |
| #### Bn-scaff_19170_1-p10319 C-genome specific (napus-oleracea) | 0.9808612 | 0.7084937 | 1            | 0.8526392    | not scorable | not scorable |
| #### Bn-scaff_19170_1-p10320 C-genome specific (napus-oleracea) | 0.9976076 | 0.7057264 | 1            | 0.7702836    | not scorable | not scorable |
| #### Bn-scaff_19170_1-p10322 C-genome specific (napus-oleracea) | 0.9952153 | 0.7064638 | 1            | 0.6738741    | not scorable | not scorable |
| #### Bn-scaff_19170_1-p10328 C-genome specific (napus-oleracea) | 0.9784689 | 0.6689136 | 1            | 0.7243621    | not scorable | not scorable |

|                                                                 |           |           |           |   |           |              |              |
|-----------------------------------------------------------------|-----------|-----------|-----------|---|-----------|--------------|--------------|
| #### Bn-scaff_19170_1-p10349 C-genome specific (napus-oleracea) | 0.9880383 | 0.731616  |           | 1 | 0.7792931 | not scorable | not scorable |
| #### Bn-scaff_19170_1-p10375 C-genome specific (napus-oleracea) | 0.9904306 | 0.758535  |           | 1 | 0.7852405 | not scorable | not scorable |
| #### Bn-scaff_19170_1-p10394 C-genome specific (napus-oleracea) | 0.9856459 | 0.7143227 |           | 1 | 0.7605905 | not scorable | not scorable |
| #### Bn-scaff_19170_1-p10436 C-genome specific (napus-oleracea) | 0.9856459 | 0.6450031 |           | 1 | 0.8055396 | not scorable | not scorable |
| #### Bn-scaff_19170_1-p10436 C-genome specific (napus-oleracea) | 0.9952153 | 0.6908798 |           | 1 | 0.7482089 | not scorable | not scorable |
| #### Bn-scaff_19170_1-p10440 C-genome specific (napus-oleracea) | 0.9952153 | 0.7172467 |           | 1 | 0.7603819 | not scorable | not scorable |
| #### Bn-scaff_19170_1-p10445 C-genome specific (napus-oleracea) | 0.9904306 | 0.7599018 |           | 1 | 0.7554805 | not scorable | not scorable |
| #### Bn-scaff_19170_1-p10590 C-genome specific (napus-oleracea) | 0.9952153 | 0.6960353 | 0.9844961 |   | 0.6850718 | not scorable | not scorable |
| #### Bn-scaff_19170_1-p10657 C-genome specific (napus-oleracea) | 0.9952153 | 0.7464512 |           | 1 | 0.7595294 | not scorable | not scorable |
| #### Bn-scaff_19170_1-p10674 C-genome specific (napus-oleracea) | 0.9952153 | 0.7618259 |           | 1 | 0.8076095 | not scorable | not scorable |
| #### Bn-scaff_19170_1-p10772 C-genome specific (napus-oleracea) | 0.9784689 | 0.7713251 |           | 1 | 0.6863167 | not scorable | not scorable |
| #### Bn-scaff_19170_1-p10785 C-genome specific (napus-oleracea) | 0.9928229 | 0.7749629 |           | 1 | 0.8290577 | not scorable | not scorable |
| #### Bn-scaff_19170_1-p10789 C-genome specific (napus-oleracea) | 0.9880383 | 0.7614942 |           | 1 | 0.7666056 | not scorable | not scorable |
| #### Bn-scaff_19170_1-p10794 C-genome specific (napus-oleracea) | 0.9904306 | 0.7392262 |           | 1 | 0.8216379 | not scorable | not scorable |
| #### Bn-scaff_19170_1-p10798 C-genome specific (napus-oleracea) | 0.9952153 | 0.6978383 |           | 1 | 0.6832132 | not scorable | not scorable |
| #### Bn-scaff_19170_1-p10801 C-genome specific (napus-oleracea) | 0.9928229 | 0.7384384 |           | 1 | 0.6974169 | not scorable | not scorable |
| #### Bn-scaff_19170_1-p10809 C-genome specific (napus-oleracea) | 0.9928229 | 0.7454041 |           | 1 | 0.8632551 | not scorable | not scorable |
| #### Bn-scaff_19170_1-p10811 C-genome specific (napus-oleracea) | 0.9976076 | 0.7748208 |           | 1 | 0.8200256 | not scorable | not scorable |
| #### Bn-scaff_19170_1-p10877 C-genome specific (napus-oleracea) | 0.9880383 | 0.6643068 |           | 1 | 0.6712646 | not scorable | not scorable |
| #### Bn-scaff_19170_1-p10878 C-genome specific (napus-oleracea) | 0.9856459 | 0.7189534 |           | 1 | 0.6628226 | not scorable | not scorable |
| #### Bn-scaff_19170_1-p10885 C-genome specific (napus-oleracea) | 0.9617225 | 0.6870366 |           | 1 | 0.6966231 | not scorable | not scorable |
| #### Bn-scaff_19170_1-p10888 C-genome specific (napus-oleracea) | 0.9952153 | 0.7064996 |           | 1 | 0.7889168 | not scorable | not scorable |
| #### Bn-scaff_19170_1-p10899 C-genome specific (napus-oleracea) | 0.9928229 | 0.7452021 |           | 1 | 0.8129686 | not scorable | not scorable |
| #### Bn-scaff_19170_1-p10900 C-genome specific (napus-oleracea) | 0.9880383 | 0.7691006 |           | 1 | 0.6987051 | not scorable | not scorable |
| #### Bn-scaff_19170_1-p10901 C-genome specific (napus-oleracea) | 0.9928229 | 0.7848763 |           | 1 | 0.8520757 | not scorable | not scorable |
| #### Bn-scaff_19170_1-p10902 C-genome specific (napus-oleracea) | 0.9904306 | 0.7544396 |           | 1 | 0.7425021 | not scorable | not scorable |
| #### Bn-scaff_19170_1-p10911 C-genome specific (napus-oleracea) | 0.9736842 | 0.6715232 |           | 1 | 0.7783151 | not scorable | not scorable |
| #### Bn-scaff_19170_1-p10912 C-genome specific (napus-oleracea) | 0.9856459 | 0.69947   | 0.9922481 |   | 0.7590077 | not scorable | not scorable |
| #### Bn-scaff_19170_1-p10912 C-genome specific (napus-oleracea) | 0.9832536 | 0.7839403 |           | 1 | 0.6944774 | not scorable | not scorable |
| #### Bn-scaff_19170_1-p10913 C-genome specific (napus-oleracea) | 0.9928229 | 0.7532428 |           | 1 | 0.795282  | not scorable | not scorable |
| #### Bn-scaff_19170_1-p10957 C-genome specific (napus-oleracea) | 0.9928229 | 0.7735944 |           | 1 | 0.8254118 | not scorable | not scorable |
| #### Bn-scaff_19170_1-p10970 C-genome specific (napus-oleracea) | 0.9904306 | 0.7550203 |           | 1 | 0.7934553 | not scorable | not scorable |
| #### Bn-scaff_19170_1-p10975 C-genome specific (napus-oleracea) | 0.9736842 | 0.7353799 |           | 1 | 0.7614783 | not scorable | not scorable |



|                                                                 |              |              |           |   |           |              |              |
|-----------------------------------------------------------------|--------------|--------------|-----------|---|-----------|--------------|--------------|
| #### Bn-scaff_19170_1-p10976 C-genome specific (napus-oleracea) | 0.9928229    | 0.7019104    |           | 1 | 0.6443968 | not scorable | not scorable |
| #### Bn-scaff_19170_1-p10989 C-genome specific (napus-oleracea) | 0.9856459    | 0.7993885    |           | 1 | 0.7928571 | not scorable | not scorable |
| #### Bn-scaff_19170_1-p11035 C-genome specific (napus-oleracea) | 0.9880383    | 0.6845268    | 0.9922481 |   | 0.7133246 | not scorable | not scorable |
| #### Bn-scaff_19170_1-p11036 C-genome specific (napus-oleracea) | 0.9880383    | 0.7555852    |           | 1 | 0.783686  | not scorable | not scorable |
| #### Bn-scaff_19170_1-p11039 C-genome specific (napus-oleracea) | 0.9880383    | 0.698786     |           | 1 | 0.82599   | not scorable | not scorable |
| #### Bn-scaff_19170_1-p11053 genome unspecific (all in)         | 0.9808612    | 0.202423     |           | 1 | 0.794158  |              | 1 0.8307192  |
| #### Bn-scaff_19170_1-p11076 C-genome specific (napus-oleracea) | 0.9641148    | 0.6384546    |           | 1 | 0.7050755 | not scorable | not scorable |
| #### Bn-scaff_19170_1-p11084 C-genome specific (napus-oleracea) | 0.9904306    | 0.6025825    |           | 1 | 0.6194165 | not scorable | not scorable |
| #### Bn-scaff_19170_1-p11183 C-genome specific (napus-oleracea) | 0.9952153    | 0.6924549    |           | 1 | 0.7561356 | not scorable | not scorable |
| #### Bn-scaff_19170_1-p11188 C-genome specific (napus-oleracea) | 0.9880383    | 0.7619828    |           | 1 | 0.7169015 | not scorable | not scorable |
| #### Bn-scaff_19170_1-p11258 C-genome specific (napus-oleracea) | 0.9904306    | 0.7682251    |           | 1 | 0.8019395 | not scorable | not scorable |
| #### Bn-scaff_19170_1-p11260 C-genome specific (napus-oleracea) | 0.9928229    | 0.7633759    | 0.9922481 |   | 0.8702416 | not scorable | not scorable |
| #### Bn-scaff_19170_1-p11272 C-genome specific (napus-oleracea) | 0.9808612    | 0.6917461    | 0.9922481 |   | 0.7258978 | not scorable | not scorable |
| #### Bn-scaff_19170_1-p11299 C-genome specific (napus-oleracea) | 0.9928229    | 0.7578319    |           | 1 | 0.7861562 | not scorable | not scorable |
| #### Bn-scaff_19170_1-p11301 C-genome specific (napus-oleracea) | 0.9856459    | 0.6949728    |           | 1 | 0.800522  | not scorable | not scorable |
| #### Bn-scaff_19170_1-p11302 C-genome specific (napus-oleracea) | 0.9760765    | 0.6495233    | 0.9922481 |   | 0.7187743 | not scorable | not scorable |
| #### Bn-scaff_19170_1-p11310 C-genome specific (napus-oleracea) | 0.9784689    | 0.6533638    | 0.9922481 |   | 0.8251486 | not scorable | not scorable |
| #### Bn-scaff_19170_1-p11319 C-genome specific (oleracea only)  | not scorable | not scorable | 0.9612403 |   | 0.7524425 | not scorable | not scorable |
| #### Bn-scaff_19170_1-p11322 C-genome specific (napus-oleracea) | 0.9976076    | 0.7619352    |           | 1 | 0.7489746 | not scorable | not scorable |
| #### Bn-scaff_19170_1-p11352 C-genome specific (napus-oleracea) | 0.9928229    | 0.7618266    |           | 1 | 0.7914728 | not scorable | not scorable |
| #### Bn-scaff_19170_1-p11400 C-genome specific (napus-oleracea) | 0.9904306    | 0.7541797    |           | 1 | 0.7772983 | not scorable | not scorable |
| #### Bn-scaff_19170_1-p11423 C-genome specific (napus-oleracea) | 0.9976076    | 0.7500296    |           | 1 | 0.7447007 | not scorable | not scorable |
| #### Bn-scaff_19170_1-p11439 C-genome specific (napus-oleracea) | 0.9952153    | 0.8289669    |           | 1 | 0.7311285 | not scorable | not scorable |
| #### Bn-scaff_19170_1-p11448 C-genome specific (napus-oleracea) | 0.9928229    | 0.6311425    |           | 1 | 0.683812  | not scorable | not scorable |
| #### Bn-scaff_19170_1-p11476 C-genome specific (napus-oleracea) | 0.9952153    | 0.7808074    |           | 1 | 0.7388402 | not scorable | not scorable |
| #### Bn-scaff_19170_1-p11481 C-genome specific (napus-oleracea) | 0.9880383    | 0.6487134    |           | 1 | 0.6298472 | not scorable | not scorable |
| #### Bn-scaff_19170_1-p11492 C-genome specific (napus-oleracea) | 0.9976076    | 0.7028652    |           | 1 | 0.8252219 | not scorable | not scorable |
| #### Bn-scaff_19170_1-p11497 C-genome specific (napus-oleracea) | 0.9928229    | 0.7827266    |           | 1 | 0.7457092 | not scorable | not scorable |
| #### Bn-scaff_19170_1-p11768 C-genome specific (napus-oleracea) | 0.9856459    | 0.734562     |           | 1 | 0.7547272 | not scorable | not scorable |
| #### Bn-scaff_19170_1-p11770 C-genome specific (napus-oleracea) | 0.9760765    | 0.7106566    |           | 1 | 0.7975035 | not scorable | not scorable |
| #### Bn-scaff_19170_1-p11776 C-genome specific (napus-oleracea) | 0.9928229    | 0.7834277    | 0.9922481 |   | 0.6918564 | not scorable | not scorable |
| #### Bn-scaff_19170_1-p11803 C-genome specific (napus-oleracea) | 0.9952153    | 0.4942166    | 0.9767442 |   | 0.625115  | not scorable | not scorable |
| #### Bn-scaff_19170_1-p11810 C-genome specific (napus-oleracea) | 0.9976076    | 0.8004227    |           | 1 | 0.8619094 | not scorable | not scorable |

|                                                                 |           |           |              |              |              |              |
|-----------------------------------------------------------------|-----------|-----------|--------------|--------------|--------------|--------------|
| #### Bn-scaff_19170_1-p11814 C-genome specific (napus-oleracea) | 0.9928229 | 0.7429815 | 0.9922481    | 0.7818696    | not scorable | not scorable |
| #### Bn-scaff_19170_1-p11818 C-genome specific (napus-oleracea) | 0.9976076 | 0.7882827 | 1            | 0.8122982    | not scorable | not scorable |
| #### Bn-scaff_19170_1-p11822 C-genome specific (napus-oleracea) | 0.9712918 | 0.6729409 | 0.9844961    | 0.7542778    | not scorable | not scorable |
| #### Bn-scaff_19170_1-p11823 C-genome specific (napus-oleracea) | 0.9832536 | 0.7076793 | 1            | 0.7584547    | not scorable | not scorable |
| #### Bn-scaff_19170_1-p11825 C-genome specific (napus-oleracea) | 0.9808612 | 0.6436703 | 1            | 0.6705554    | not scorable | not scorable |
| #### Bn-scaff_19170_1-p11830 C-genome specific (napus-oleracea) | 0.9904306 | 0.7598017 | 1            | 0.8308942    | not scorable | not scorable |
| #### Bn-scaff_19170_1-p11831 C-genome specific (napus-oleracea) | 0.9258373 | 0.748358  | 1            | 0.7912783    | not scorable | not scorable |
| #### Bn-scaff_19170_1-p11836 C-genome specific (napus-oleracea) | 0.9808612 | 0.8258395 | 1            | 0.8063427    | not scorable | not scorable |
| #### Bn-scaff_19170_1-p11871 C-genome specific (napus-oleracea) | 0.9832536 | 0.7573765 | 0.9922481    | 0.8228981    | not scorable | not scorable |
| #### Bn-scaff_19170_1-p13107 genome unspecific (all in)         | 1         | 0.5732226 | 1            | 0.5680376    | 0.9917355    | 0.3984167    |
| #### Bn-scaff_19170_1-p22650 C-genome specific (napus-oleracea) | 0.9952153 | 0.7545778 | 1            | 0.7962609    | not scorable | not scorable |
| #### Bn-scaff_19170_1-p38825 C-genome specific (napus-oleracea) | 0.9904306 | 0.7815726 | 1            | 0.7972901    | not scorable | not scorable |
| #### Bn-scaff_19170_1-p39117 C-genome specific (napus-oleracea) | 0.9856459 | 0.7722283 | 1            | 0.8602116    | not scorable | not scorable |
| #### Bn-scaff_19170_1-p39186 C-genome specific (napus-oleracea) | 0.9880383 | 0.670836  | 1            | 0.7641366    | not scorable | not scorable |
| #### Bn-scaff_19170_1-p39738 C-genome specific (napus-oleracea) | 0.9952153 | 0.7720374 | 1            | 0.7420204    | not scorable | not scorable |
| #### Bn-scaff_19170_1-p39957 C-genome specific (napus-oleracea) | 0.9856459 | 0.6571633 | 1            | 0.713066     | not scorable | not scorable |
| #### Bn-scaff_19170_1-p40032 napus specific                     | 0.9856459 | 0.7442698 | not scorable | not scorable | not scorable | not scorable |
| #### Bn-scaff_19170_1-p40115 napus specific                     | 1         | 0.6873076 | not scorable | not scorable | not scorable | not scorable |
| #### Bn-scaff_19170_1-p40353 napus specific                     | 0.9928229 | 0.8095816 | not scorable | not scorable | not scorable | not scorable |
| #### Bn-scaff_19170_1-p40529 C-genome specific (napus-oleracea) | 0.9904306 | 0.7851832 | 1            | 0.8146873    | not scorable | not scorable |
| #### Bn-scaff_19170_1-p40616 C-genome specific (napus-oleracea) | 0.9856459 | 0.7344889 | 1            | 0.7553547    | not scorable | not scorable |
| #### Bn-scaff_19170_1-p40931 C-genome specific (napus-oleracea) | 0.9904306 | 0.7431419 | 1            | 0.7148693    | not scorable | not scorable |
| #### Bn-scaff_19170_1-p41497 genome unspecific (all in)         | 0.9904306 | 0.5600159 | 0.9922481    | 0.6555529    | 0.9669421    | 0.9344515    |
| #### Bn-scaff_19170_1-p41637 C-genome specific (napus-oleracea) | 0.9760765 | 0.6714574 | 1            | 0.5973836    | not scorable | not scorable |
| #### Bn-scaff_19170_1-p42857 C-genome specific (napus-oleracea) | 0.9593301 | 0.358389  | 0.9147287    | 0.2532254    | not scorable | not scorable |
| #### Bn-scaff_19170_1-p43557 C-genome specific (napus-oleracea) | 0.9952153 | 0.7095038 | 0.9922481    | 0.6819311    | not scorable | not scorable |
| #### Bn-scaff_19170_1-p43861 C-genome specific (napus-oleracea) | 0.9976076 | 0.7902774 | 1            | 0.7609816    | not scorable | not scorable |
| #### Bn-scaff_19170_1-p43876 C-genome specific (napus-oleracea) | 0.9904306 | 0.7713269 | 1            | 0.7734596    | not scorable | not scorable |
| #### Bn-scaff_19170_1-p43907 C-genome specific (napus-oleracea) | 0.9856459 | 0.7387135 | 1            | 0.7761303    | not scorable | not scorable |
| #### Bn-scaff_19170_1-p44015 C-genome specific (napus-oleracea) | 0.9856459 | 0.7416379 | 1            | 0.7710726    | not scorable | not scorable |
| #### Bn-scaff_19170_1-p44195 C-genome specific (napus-oleracea) | 0.9976076 | 0.7280499 | 0.9844961    | 0.7875881    | not scorable | not scorable |
| #### Bn-scaff_19170_1-p44203 C-genome specific (napus-oleracea) | 0.9880383 | 0.7708716 | 1            | 0.8177156    | not scorable | not scorable |
| #### Bn-scaff_19170_1-p44217 C-genome specific (napus-oleracea) | 0.9904306 | 0.7647003 | 1            | 0.7439968    | not scorable | not scorable |

|                                                                 |           |           |              |              |              |              |
|-----------------------------------------------------------------|-----------|-----------|--------------|--------------|--------------|--------------|
| #### Bn-scaff_19170_1-p44265 C-genome specific (napus-oleracea) | 0.9904306 | 0.7082239 | 1            | 0.7380404    | not scorable | not scorable |
| #### Bn-scaff_19170_1-p44296 C-genome specific (napus-oleracea) | 0.9856459 | 0.7048867 | 1            | 0.7689317    | not scorable | not scorable |
| #### Bn-scaff_19170_1-p44578 C-genome specific (napus-oleracea) | 0.9904306 | 0.5743321 | 1            | 0.7341191    | not scorable | not scorable |
| #### Bn-scaff_19170_1-p44710 C-genome specific (napus-oleracea) | 0.9952153 | 0.7695757 | 1            | 0.8269612    | not scorable | not scorable |
| #### Bn-scaff_19170_1-p44795 C-genome specific (napus-oleracea) | 0.9952153 | 0.7559544 | 1            | 0.8731067    | not scorable | not scorable |
| #### Bn-scaff_19170_1-p44818 C-genome specific (napus-oleracea) | 0.9904306 | 0.7326943 | 1            | 0.8254097    | not scorable | not scorable |
| #### Bn-scaff_19170_1-p44828 C-genome specific (napus-oleracea) | 0.9904306 | 0.6833032 | 1            | 0.6713064    | not scorable | not scorable |
| #### Bn-scaff_19170_1-p45335 C-genome specific (napus-oleracea) | 0.9784689 | 0.7134092 | 0.9767442    | 0.6868592    | not scorable | not scorable |
| #### Bn-scaff_19170_1-p45464 C-genome specific (napus-oleracea) | 0.9808612 | 0.6176935 | 1            | 0.7708046    | not scorable | not scorable |
| #### Bn-scaff_19170_1-p46159 C-genome specific (napus-oleracea) | 0.9976076 | 0.7339534 | 1            | 0.7970782    | not scorable | not scorable |
| #### Bn-scaff_19170_1-p46477 C-genome specific (napus-oleracea) | 0.9904306 | 0.6880352 | 1            | 0.6860555    | not scorable | not scorable |
| #### Bn-scaff_19170_1-p46484 C-genome specific (napus-oleracea) | 0.9952153 | 0.6969171 | 1            | 0.7086983    | not scorable | not scorable |
| #### Bn-scaff_19170_1-p46955 C-genome specific (napus-oleracea) | 0.9832536 | 0.6984695 | 1            | 0.8013743    | not scorable | not scorable |
| #### Bn-scaff_19170_1-p46965 C-genome specific (napus-oleracea) | 0.9784689 | 0.6669439 | 1            | 0.8721845    | not scorable | not scorable |
| #### Bn-scaff_19170_1-p46971 napus specific                     | 0.9976076 | 0.7842525 | not scorable | not scorable | not scorable | not scorable |
| #### Bn-scaff_19170_1-p47013 C-genome specific (napus-oleracea) | 0.9904306 | 0.6645601 | 0.9922481    | 0.8306398    | not scorable | not scorable |
| #### Bn-scaff_19170_1-p47271 napus specific                     | 0.9976076 | 0.7270102 | not scorable | not scorable | not scorable | not scorable |
| #### Bn-scaff_19170_1-p47307 napus specific                     | 0.9904306 | 0.693662  | not scorable | not scorable | not scorable | not scorable |
| #### Bn-scaff_19170_1-p47459 napus specific                     | 0.9808612 | 0.5744161 | not scorable | not scorable | not scorable | not scorable |
| #### Bn-scaff_19170_1-p47549 C-genome specific (napus-oleracea) | 0.9784689 | 0.6585529 | 0.9922481    | 0.7972122    | not scorable | not scorable |
| #### Bn-scaff_19170_1-p48341 napus specific                     | 0.9856459 | 0.8308899 | not scorable | not scorable | not scorable | not scorable |
| #### Bn-scaff_19170_1-p48663 C-genome specific (napus-oleracea) | 0.9784689 | 0.6608978 | 1            | 0.771144     | not scorable | not scorable |
| #### Bn-scaff_19170_1-p48692 napus specific                     | 0.9976076 | 0.7363988 | not scorable | not scorable | not scorable | not scorable |
| #### Bn-scaff_19170_1-p48701 C-genome specific (napus-oleracea) | 0.9952153 | 0.7704287 | 1            | 0.7157118    | not scorable | not scorable |
| #### Bn-scaff_19170_1-p48711 napus specific                     | 0.9904306 | 0.7580947 | not scorable | not scorable | not scorable | not scorable |
| #### Bn-scaff_19170_1-p48734 C-genome specific (napus-oleracea) | 0.9904306 | 0.6155406 | 1            | 0.6394619    | not scorable | not scorable |
| #### Bn-scaff_19170_1-p48755 napus specific                     | 0.9784689 | 0.6587648 | not scorable | not scorable | not scorable | not scorable |
| #### Bn-scaff_19170_1-p48780 napus specific                     | 0.9928229 | 0.6165801 | not scorable | not scorable | not scorable | not scorable |
| #### Bn-scaff_19170_1-p48810 napus specific                     | 0.9952153 | 0.7726395 | not scorable | not scorable | not scorable | not scorable |
| #### Bn-scaff_19170_1-p49537 napus specific                     | 0.9880383 | 0.791927  | not scorable | not scorable | not scorable | not scorable |
| #### Bn-scaff_19170_1-p50125 napus specific                     | 0.9952153 | 0.7453464 | not scorable | not scorable | not scorable | not scorable |
| #### Bn-scaff_19170_1-p50134 napus specific                     | 0.9904306 | 0.7679532 | not scorable | not scorable | not scorable | not scorable |
| #### Bn-scaff_19170_1-p50179 C-genome specific (napus-oleracea) | 0.9928229 | 0.7449526 | 1            | 0.7863301    | not scorable | not scorable |

|                                                                 |              |              |              |              |              |              |
|-----------------------------------------------------------------|--------------|--------------|--------------|--------------|--------------|--------------|
| #### Bn-scaff_19170_1-p50187 C-genome specific (napus-oleracea) | 0.9880383    | 0.779055     | 1            | 0.7744309    | not scorable | not scorable |
| #### Bn-scaff_19170_1-p50217 C-genome specific (napus-oleracea) | 0.9928229    | 0.7618843    | 1            | 0.7546343    | not scorable | not scorable |
| #### Bn-scaff_19170_1-p50229 napus specific                     | 0.9880383    | 0.7203605    | not scorable | not scorable | not scorable | not scorable |
| #### Bn-scaff_19170_1-p50792 napus specific                     | 0.9928229    | 0.7464932    | not scorable | not scorable | not scorable | not scorable |
| #### Bn-scaff_19170_1-p50820 napus specific                     | 0.5956938    | 0.775918     | not scorable | not scorable | not scorable | not scorable |
| #### Bn-scaff_19170_1-p50917 napus specific                     | 0.9976076    | 0.7952063    | not scorable | not scorable | not scorable | not scorable |
| #### Bn-scaff_19170_1-p51349 napus specific                     | 0.9976076    | 0.6918663    | not scorable | not scorable | not scorable | not scorable |
| #### Bn-scaff_19170_1-p51794 napus specific                     | 0.9904306    | 0.7206698    | not scorable | not scorable | not scorable | not scorable |
| #### Bn-scaff_19170_1-p51879 napus specific                     | 0.9928229    | 0.7761601    | not scorable | not scorable | not scorable | not scorable |
| #### Bn-scaff_19170_1-p51889 napus specific                     | 0.9928229    | 0.7398666    | not scorable | not scorable | not scorable | not scorable |
| #### Bn-scaff_19170_1-p52071 napus specific                     | 0.9880383    | 0.7088283    | not scorable | not scorable | not scorable | not scorable |
| #### Bn-scaff_19170_1-p52093 napus specific                     | 0.9856459    | 0.7647975    | not scorable | not scorable | not scorable | not scorable |
| #### Bn-scaff_19170_1-p52106 napus specific                     | 0.9880383    | 0.6995368    | not scorable | not scorable | not scorable | not scorable |
| #### Bn-scaff_19170_1-p52167 all not scorable                   | not scorable | not scorable | not scorable | not scorable | not scorable | not scorable |
| #### Bn-scaff_19170_1-p52179 napus specific                     | 0.9952153    | 0.7900841    | not scorable | not scorable | not scorable | not scorable |
| #### Bn-scaff_19170_1-p52203 napus specific                     | 0.9904306    | 0.7885971    | not scorable | not scorable | not scorable | not scorable |
| #### Bn-scaff_19170_1-p52248 C-genome specific (napus-oleracea) | 0.9952153    | 0.8086624    | 1            | 0.9094384    | not scorable | not scorable |
| #### Bn-scaff_19170_1-p52374 C-genome specific (napus-oleracea) | 0.9976076    | 0.7982694    | 1            | 0.8093413    | not scorable | not scorable |
| #### Bn-scaff_19170_1-p52495 C-genome specific (napus-oleracea) | 0.9976076    | 0.759761     | 1            | 0.8032602    | not scorable | not scorable |
| #### Bn-scaff_19170_1-p52572 C-genome specific (napus-oleracea) | 0.9904306    | 0.7311265    | 1            | 0.8751874    | not scorable | not scorable |
| #### Bn-scaff_19170_1-p52579 C-genome specific (napus-oleracea) | 0.9928229    | 0.7545232    | 1            | 0.8119202    | not scorable | not scorable |
| #### Bn-scaff_19170_1-p52580 C-genome specific (napus-oleracea) | 0.9928229    | 0.8035136    | 1            | 0.7822236    | not scorable | not scorable |
| #### Bn-scaff_19170_1-p53013 C-genome specific (napus-oleracea) | 0.9928229    | 0.7350981    | 1            | 0.7145267    | not scorable | not scorable |
| #### Bn-scaff_19170_1-p53019 C-genome specific (napus-oleracea) | 0.9760765    | 0.8230785    | 1            | 0.725911     | not scorable | not scorable |
| #### Bn-scaff_19170_1-p53036 C-genome specific (napus-oleracea) | 0.9880383    | 0.742565     | 1            | 0.7568191    | not scorable | not scorable |
| #### Bn-scaff_19170_1-p53251 C-genome specific (napus-oleracea) | 0.9880383    | 0.7751428    | 1            | 0.8260681    | not scorable | not scorable |
| #### Bn-scaff_19170_1-p53318 C-genome specific (napus-oleracea) | 0.9928229    | 0.7643146    | 1            | 0.7545759    | not scorable | not scorable |
| #### Bn-scaff_19170_1-p53495 C-genome specific (napus-oleracea) | 0.9904306    | 0.7820959    | 1            | 0.7060969    | not scorable | not scorable |
| #### Bn-scaff_19170_1-p54815 C-genome specific (napus-oleracea) | 0.9952153    | 0.7508892    | 1            | 0.7666177    | not scorable | not scorable |
| #### Bn-scaff_19170_1-p55001 genome unspecific (all in)         | 0.9952153    | 0.5159587    | 1            | 0.8869461    | 1            | 0.9246307    |
| #### Bn-scaff_19170_1-p55916 C-genome specific (napus-oleracea) | 0.9784689    | 0.7301301    | 0.9922481    | 0.2679085    | not scorable | not scorable |
| #### Bn-scaff_19170_1-p56064 C-genome specific (napus-oleracea) | 0.9856459    | 0.729334     | 1            | 0.7570397    | not scorable | not scorable |
| #### Bn-scaff_19170_1-p56083 C-genome specific (napus-oleracea) | 0.9952153    | 0.7096794    | 1            | 0.7646528    | not scorable | not scorable |

|                                                                |              |              |              |   |              |              |              |
|----------------------------------------------------------------|--------------|--------------|--------------|---|--------------|--------------|--------------|
| #### Bn-scaff_19170_1-p5609 C-genome specific (napus-oleracea) | 0.9952153    | 0.6664214    |              | 1 | 0.4869202    | not scorable | not scorable |
| #### Bn-scaff_19170_1-p5635 C-genome specific (napus-oleracea) | 0.9856459    | 0.6531073    |              | 1 | 0.700334     | not scorable | not scorable |
| #### Bn-scaff_19170_1-p5744 C-genome specific (napus-oleracea) | 0.9928229    | 0.8171089    |              | 1 | 0.8553514    | not scorable | not scorable |
| #### Bn-scaff_19170_1-p5838 C-genome specific (napus-oleracea) | 0.9880383    | 0.7549732    |              | 1 | 0.7707421    | not scorable | not scorable |
| #### Bn-scaff_19170_1-p5864 genome unspecific (oleracea-rapa)  | not scorable | not scorable |              | 1 | 0.7889868    | 1            | 0.9021314    |
| #### Bn-scaff_19170_1-p5865 C-genome specific (napus-oleracea) | 0.9904306    | 0.6649485    |              | 1 | 0.7381322    | not scorable | not scorable |
| #### Bn-scaff_19170_1-p5883 C-genome specific (napus-oleracea) | 0.9688995    | 0.7164537    | 0.9844961    |   | 0.8140697    | not scorable | not scorable |
| #### Bn-scaff_19170_1-p5898 C-genome specific (napus-oleracea) | 0.9880383    | 0.7788853    |              | 1 | 0.7954643    | not scorable | not scorable |
| #### Bn-scaff_19170_1-p5908 C-genome specific (napus-oleracea) | 0.9952153    | 0.7011971    |              | 1 | 0.837104     | not scorable | not scorable |
| #### Bn-scaff_19170_1-p5908 C-genome specific (napus-oleracea) | 0.9904306    | 0.7903672    |              | 1 | 0.7495844    | not scorable | not scorable |
| #### Bn-scaff_19170_1-p5942 C-genome specific (napus-oleracea) | 0.9808612    | 0.711243     | 0.9922481    |   | 0.7593917    | not scorable | not scorable |
| #### Bn-scaff_19170_1-p6060 C-genome specific (napus-oleracea) | 0.9880383    | 0.7017951    |              | 1 | 0.6872754    | not scorable | not scorable |
| #### Bn-scaff_19170_1-p6331 C-genome specific (napus-oleracea) | 0.9952153    | 0.6851346    |              | 1 | 0.7920462    | not scorable | not scorable |
| #### Bn-scaff_19170_1-p6348 A-genome specific (rapa only)      | not scorable | not scorable | not scorable |   | not scorable | 0.9752066    | 0.906221     |
| #### Bn-scaff_19170_1-p6354 C-genome specific (napus-oleracea) | 0.9976076    | 0.7247533    |              | 1 | 0.825682     | not scorable | not scorable |
| #### Bn-scaff_19170_1-p6355 C-genome specific (napus-oleracea) | 0.9952153    | 0.6736537    |              | 1 | 0.7888798    | not scorable | not scorable |
| #### Bn-scaff_19170_1-p6360 C-genome specific (napus-oleracea) | 0.9976076    | 0.7671329    |              | 1 | 0.8261329    | not scorable | not scorable |
| #### Bn-scaff_19170_1-p6483 C-genome specific (napus-oleracea) | 0.9856459    | 0.7491764    |              | 1 | 0.7440848    | not scorable | not scorable |
| #### Bn-scaff_19170_1-p6489 C-genome specific (napus-oleracea) | 0.9808612    | 0.7175404    |              | 1 | 0.8153991    | not scorable | not scorable |
| #### Bn-scaff_19170_1-p6549 C-genome specific (napus-oleracea) | 0.9880383    | 0.6549479    |              | 1 | 0.6821043    | not scorable | not scorable |
| #### Bn-scaff_19170_1-p6560 C-genome specific (napus-oleracea) | 0.9928229    | 0.7696645    |              | 1 | 0.8601335    | not scorable | not scorable |
| #### Bn-scaff_19170_1-p6574 C-genome specific (napus-oleracea) | 0.9904306    | 0.698706     |              | 1 | 0.7577822    | not scorable | not scorable |
| #### Bn-scaff_19170_1-p7066 C-genome specific (napus-oleracea) | 0.9904306    | 0.5628069    |              | 1 | 0.6114153    | not scorable | not scorable |
| #### Bn-scaff_19170_1-p7450 C-genome specific (napus-oleracea) | 0.9904306    | 0.810784     |              | 1 | 0.7641369    | not scorable | not scorable |
| #### Bn-scaff_19170_1-p7675 genome unspecific (all in)         | 0.9808612    | 0.5944148    | 0.9534883    |   | 0.6567574    | 1            | 0.9078601    |
| #### Bn-scaff_19170_1-p7904 C-genome specific (napus-oleracea) | 0.9808612    | 0.5108741    | 0.9457364    |   | 0.5806777    | not scorable | not scorable |
| #### Bn-scaff_19170_1-p7975 C-genome specific (napus-oleracea) | 0.9904306    | 0.2779695    |              | 1 | 0.5679645    | not scorable | not scorable |
| #### Bn-scaff_19170_1-p8069 C-genome specific (napus-oleracea) | 0.9952153    | 0.7567087    |              | 1 | 0.7730665    | not scorable | not scorable |
| #### Bn-scaff_19170_1-p8160 C-genome specific (napus-oleracea) | 0.9904306    | 0.7518119    |              | 1 | 0.7977447    | not scorable | not scorable |
| #### Bn-scaff_19170_1-p8169 C-genome specific (napus-oleracea) | 0.9880383    | 0.7258163    | 0.9922481    |   | 0.7938048    | not scorable | not scorable |
| #### Bn-scaff_19170_1-p8179 C-genome specific (napus-oleracea) | 0.9928229    | 0.7906492    |              | 1 | 0.8967357    | not scorable | not scorable |
| #### Bn-scaff_19170_1-p8182 C-genome specific (napus-oleracea) | 0.9952153    | 0.7162169    |              | 1 | 0.812583     | not scorable | not scorable |
| #### Bn-scaff_19170_1-p8189 genome unspecific (all in)         | 0.9952153    | 0.4089319    |              | 1 | 0.8632445    | 1            | 0.9424396    |

|                                                                 |           |           |              |              |              |              |
|-----------------------------------------------------------------|-----------|-----------|--------------|--------------|--------------|--------------|
| #### Bn-scaff_19170_1-p82070 C-genome specific (napus-oleracea) | 0.9808612 | 0.6644747 | 1            | 0.8821728    | not scorable | not scorable |
| #### Bn-scaff_19170_1-p82908 C-genome specific (napus-oleracea) | 0.9880383 | 0.771726  | 0.9922481    | 0.8642375    | not scorable | not scorable |
| #### Bn-scaff_19170_1-p8456 C-genome specific (napus-oleracea)  | 0.9952153 | 0.6719178 | 1            | 0.780415     | not scorable | not scorable |
| #### Bn-scaff_19170_1-p84647 C-genome specific (napus-oleracea) | 0.9880383 | 0.7771361 | 1            | 0.8579426    | not scorable | not scorable |
| #### Bn-scaff_19170_1-p86843 C-genome specific (napus-oleracea) | 0.9928229 | 0.7229815 | 1            | 0.6850602    | not scorable | not scorable |
| #### Bn-scaff_19170_1-p88683 C-genome specific (napus-oleracea) | 0.9928229 | 0.6876423 | 1            | 0.7435297    | not scorable | not scorable |
| #### Bn-scaff_19170_1-p88918 C-genome specific (napus-oleracea) | 0.9952153 | 0.7771325 | 1            | 0.7833977    | not scorable | not scorable |
| #### Bn-scaff_19170_1-p89116 C-genome specific (napus-oleracea) | 0.9760765 | 0.7081458 | 1            | 0.7867026    | not scorable | not scorable |
| #### Bn-scaff_19170_1-p89948 C-genome specific (napus-oleracea) | 0.9928229 | 0.7595068 | 1            | 0.7292784    | not scorable | not scorable |
| #### Bn-scaff_19170_1-p89967 C-genome specific (napus-oleracea) | 1         | 0.7763718 | 1            | 0.856598     | not scorable | not scorable |
| #### Bn-scaff_19170_1-p89974 C-genome specific (napus-oleracea) | 0.9904306 | 0.6610833 | 0.9844961    | 0.7277114    | not scorable | not scorable |
| #### Bn-scaff_19170_1-p90342 C-genome specific (napus-oleracea) | 0.9880383 | 0.7366648 | 1            | 0.8096428    | not scorable | not scorable |
| #### Bn-scaff_19170_1-p90354 C-genome specific (napus-oleracea) | 0.9976076 | 0.7596896 | 1            | 0.8348127    | not scorable | not scorable |
| #### Bn-scaff_19170_1-p90428 C-genome specific (napus-oleracea) | 1         | 0.7216293 | 1            | 0.8019958    | not scorable | not scorable |
| #### Bn-scaff_19170_1-p93289 C-genome specific (napus-oleracea) | 0.9928229 | 0.6999236 | 0.9922481    | 0.7395847    | not scorable | not scorable |
| #### Bn-scaff_19170_1-p93533 C-genome specific (napus-oleracea) | 0.9784689 | 0.7047333 | 1            | 0.8167424    | not scorable | not scorable |
| #### Bn-scaff_19170_1-p95875 C-genome specific (napus-oleracea) | 0.9928229 | 0.7434633 | 1            | 0.8607275    | not scorable | not scorable |
| #### Bn-scaff_19170_1-p97065 C-genome specific (napus-oleracea) | 0.9952153 | 0.7648656 | 1            | 0.8153303    | not scorable | not scorable |
| #### Bn-scaff_19170_1-p97165 C-genome specific (napus-oleracea) | 0.9880383 | 0.7021362 | 1            | 0.8262113    | not scorable | not scorable |
| #### Bn-scaff_19170_1-p97981 C-genome specific (napus-oleracea) | 0.9904306 | 0.7823769 | 1            | 0.8250512    | not scorable | not scorable |
| #### Bn-scaff_19170_1-p98017 C-genome specific (napus-oleracea) | 0.9808612 | 0.6893498 | 1            | 0.8546489    | not scorable | not scorable |
| #### Bn-scaff_19170_1-p98034 C-genome specific (napus-oleracea) | 0.9952153 | 0.6971439 | 1            | 0.6774858    | not scorable | not scorable |
| #### Bn-scaff_19170_1-p98126 genome unspecific (all in)         | 0.9952153 | 0.747131  | 1            | 0.8244733    | 0.9421487    | 0.9175808    |
| #### Bn-scaff_19170_1-p98163 C-genome specific (napus-oleracea) | 0.9928229 | 0.7806829 | 1            | 0.7852053    | not scorable | not scorable |
| #### Bn-scaff_19170_1-p98175 genome unspecific (all in)         | 0.9976076 | 0.7355708 | 1            | 0.7837778    | 0.9173554    | 0.8960785    |
| #### Bn-scaff_19170_1-p98182 napus specific                     | 0.9856459 | 0.7483782 | not scorable | not scorable | not scorable | not scorable |
| #### Bn-scaff_19170_1-p99094 napus specific                     | 0.9904306 | 0.6778653 | not scorable | not scorable | not scorable | not scorable |
| #### Bn-scaff_19170_1-p99296 A-genome specific (napus-rapa)     | 0.9784689 | 0.4621734 | not scorable | not scorable | 1            | 0.841437     |
| #### Bn-scaff_19170_1-p99539 genome unspecific (all in)         | 0.9856459 | 0.7826734 | 1            | 0.9238729    | 0.9338843    | 0.9175813    |
| #### Bn-scaff_19183_1-p10049 C-genome specific (napus-oleracea) | 0.9688995 | 0.6587718 | 0.9922481    | 0.7532002    | not scorable | not scorable |
| #### Bn-scaff_19183_1-p10430 C-genome specific (napus-oleracea) | 0.9880383 | 0.7551748 | 1            | 0.8372506    | not scorable | not scorable |
| #### Bn-scaff_19183_1-p11759 C-genome specific (napus-oleracea) | 0.9808612 | 0.7377033 | 1            | 0.753502     | not scorable | not scorable |
| #### Bn-scaff_19183_1-p11945 C-genome specific (napus-oleracea) | 0.9832536 | 0.7632079 | 0.9922481    | 0.7228214    | not scorable | not scorable |

|                                                                 |           |           |           |           |              |              |
|-----------------------------------------------------------------|-----------|-----------|-----------|-----------|--------------|--------------|
| #### Bn-scaff_19183_1-p11952 C-genome specific (napus-oleracea) | 0.9401914 | 0.6849628 | 0.9689922 | 0.688965  | not scorable | not scorable |
| #### Bn-scaff_19183_1-p11991 C-genome specific (napus-oleracea) | 0.9880383 | 0.753154  | 1         | 0.8602021 | not scorable | not scorable |
| #### Bn-scaff_19183_1-p12148 C-genome specific (napus-oleracea) | 0.9736842 | 0.7789637 | 1         | 0.800919  | not scorable | not scorable |
| #### Bn-scaff_19183_1-p12302 C-genome specific (napus-oleracea) | 0.9808612 | 0.6813956 | 1         | 0.7471786 | not scorable | not scorable |
| #### Bn-scaff_19183_1-p13013 C-genome specific (napus-oleracea) | 0.930622  | 0.6415835 | 0.9767442 | 0.7115611 | not scorable | not scorable |
| #### Bn-scaff_19183_1-p13087 C-genome specific (napus-oleracea) | 0.9784689 | 0.7652885 | 0.9922481 | 0.8840439 | not scorable | not scorable |
| #### Bn-scaff_19183_1-p13983 C-genome specific (napus-oleracea) | 0.9712918 | 0.8005848 | 1         | 0.8478473 | not scorable | not scorable |
| #### Bn-scaff_19183_1-p14022 C-genome specific (napus-oleracea) | 0.9760765 | 0.7774948 | 0.9922481 | 0.7164491 | not scorable | not scorable |
| #### Bn-scaff_19183_1-p14033 C-genome specific (napus-oleracea) | 0.9856459 | 0.6377183 | 0.9922481 | 0.5981426 | not scorable | not scorable |
| #### Bn-scaff_19183_1-p14053 C-genome specific (napus-oleracea) | 0.9736842 | 0.7759927 | 0.9922481 | 0.7639747 | not scorable | not scorable |
| #### Bn-scaff_19183_1-p14075 C-genome specific (napus-oleracea) | 0.9808612 | 0.7534977 | 0.9922481 | 0.7554678 | not scorable | not scorable |
| #### Bn-scaff_19183_1-p14197 C-genome specific (napus-oleracea) | 0.9808612 | 0.7573262 | 0.9767442 | 0.8115841 | not scorable | not scorable |
| #### Bn-scaff_19183_1-p14524 C-genome specific (napus-oleracea) | 0.9760765 | 0.6772577 | 1         | 0.737451  | not scorable | not scorable |
| #### Bn-scaff_19183_1-p14538 C-genome specific (napus-oleracea) | 0.9784689 | 0.4500768 | 0.9922481 | 0.5824735 | not scorable | not scorable |
| #### Bn-scaff_19183_1-p14551 C-genome specific (napus-oleracea) | 0.9784689 | 0.6785541 | 0.9844961 | 0.7036875 | not scorable | not scorable |
| #### Bn-scaff_19183_1-p14567 C-genome specific (napus-oleracea) | 0.9784689 | 0.6671454 | 0.9922481 | 0.6507969 | not scorable | not scorable |
| #### Bn-scaff_19183_1-p15180 C-genome specific (napus-oleracea) | 0.9880383 | 0.7661829 | 1         | 0.7083567 | not scorable | not scorable |
| #### Bn-scaff_19183_1-p15202 C-genome specific (napus-oleracea) | 0.9784689 | 0.6814201 | 1         | 0.7028263 | not scorable | not scorable |
| #### Bn-scaff_19183_1-p15500 C-genome specific (napus-oleracea) | 0.9904306 | 0.7292545 | 0.9922481 | 0.6912863 | not scorable | not scorable |
| #### Bn-scaff_19183_1-p15534 C-genome specific (napus-oleracea) | 0.9808612 | 0.7017547 | 1         | 0.7150407 | not scorable | not scorable |
| #### Bn-scaff_19183_1-p15592 C-genome specific (napus-oleracea) | 0.9760765 | 0.7741753 | 1         | 0.8618963 | not scorable | not scorable |
| #### Bn-scaff_19183_1-p15656 C-genome specific (napus-oleracea) | 0.9808612 | 0.6875694 | 1         | 0.6791566 | not scorable | not scorable |
| #### Bn-scaff_19183_1-p16299 C-genome specific (napus-oleracea) | 0.9354067 | 0.7656604 | 0.9922481 | 0.6641303 | not scorable | not scorable |
| #### Bn-scaff_19183_1-p16320 C-genome specific (napus-oleracea) | 0.9401914 | 0.7746152 | 1         | 0.7254809 | not scorable | not scorable |
| #### Bn-scaff_19183_1-p16362 C-genome specific (napus-oleracea) | 0.9354067 | 0.7701043 | 1         | 0.7074448 | not scorable | not scorable |
| #### Bn-scaff_19183_1-p16368 C-genome specific (napus-oleracea) | 0.9282297 | 0.6896666 | 1         | 0.6836169 | not scorable | not scorable |
| #### Bn-scaff_19183_1-p16382 C-genome specific (napus-oleracea) | 0.930622  | 0.7937513 | 1         | 0.8853533 | not scorable | not scorable |
| #### Bn-scaff_19183_1-p16414 C-genome specific (napus-oleracea) | 0.9354067 | 0.7489491 | 0.9922481 | 0.7531976 | not scorable | not scorable |
| #### Bn-scaff_19183_1-p16437 C-genome specific (napus-oleracea) | 0.9354067 | 0.789157  | 1         | 0.7359045 | not scorable | not scorable |
| #### Bn-scaff_19183_1-p16448 C-genome specific (napus-oleracea) | 0.9354067 | 0.6770405 | 0.9767442 | 0.7021894 | not scorable | not scorable |
| #### Bn-scaff_19183_1-p16568 C-genome specific (napus-oleracea) | 0.9354067 | 0.7175674 | 1         | 0.6790286 | not scorable | not scorable |
| #### Bn-scaff_19183_1-p17490 C-genome specific (napus-oleracea) | 0.9856459 | 0.7828916 | 1         | 0.82543   | not scorable | not scorable |
| #### Bn-scaff_19183_1-p17964 C-genome specific (napus-oleracea) | 0.9712918 | 0.7906561 | 0.9922481 | 0.7933552 | not scorable | not scorable |

|                                                                |              |              |           |           |              |              |
|----------------------------------------------------------------|--------------|--------------|-----------|-----------|--------------|--------------|
| #### Bn-scaff_19183_1-p1799C-genome specific (napus-oleracea)  | 0.9856459    | 0.7457275    | 1         | 0.7889431 | not scorable | not scorable |
| #### Bn-scaff_19183_1-p18012C-genome specific (napus-oleracea) | 0.9784689    | 0.7483228    | 1         | 0.7508348 | not scorable | not scorable |
| #### Bn-scaff_19183_1-p18019C-genome specific (napus-oleracea) | 0.9736842    | 0.7595236    | 1         | 0.8854622 | not scorable | not scorable |
| #### Bn-scaff_19183_1-p18054C-genome specific (napus-oleracea) | 0.9760765    | 0.683888     | 1         | 0.8249528 | not scorable | not scorable |
| #### Bn-scaff_19183_1-p18085C-genome specific (napus-oleracea) | 0.9760765    | 0.7696816    | 1         | 0.8104258 | not scorable | not scorable |
| #### Bn-scaff_19183_1-p18149C-genome specific (napus-oleracea) | 0.9880383    | 0.7246414    | 1         | 0.6935323 | not scorable | not scorable |
| #### Bn-scaff_19183_1-p18298C-genome specific (napus-oleracea) | 0.9808612    | 0.7919191    | 1         | 0.7641816 | not scorable | not scorable |
| #### Bn-scaff_19183_1-p1836C-genome specific (napus-oleracea)  | 0.9760765    | 0.6793829    | 1         | 0.6770922 | not scorable | not scorable |
| #### Bn-scaff_19183_1-p1837C-genome specific (napus-oleracea)  | 0.9784689    | 0.767189     | 1         | 0.8236552 | not scorable | not scorable |
| #### Bn-scaff_19183_1-p18483C-genome specific (napus-oleracea) | 0.9736842    | 0.632987     | 1         | 0.6978059 | not scorable | not scorable |
| #### Bn-scaff_19183_1-p18513C-genome specific (napus-oleracea) | 0.9688995    | 0.7521244    | 1         | 0.7195358 | not scorable | not scorable |
| #### Bn-scaff_19183_1-p18555C-genome specific (napus-oleracea) | 0.9880383    | 0.7318652    | 0.9844961 | 0.7386993 | not scorable | not scorable |
| #### Bn-scaff_19183_1-p18569C-genome specific (napus-oleracea) | 0.9856459    | 0.7185764    | 0.9844961 | 0.7525612 | not scorable | not scorable |
| #### Bn-scaff_19183_1-p18578C-genome specific (napus-oleracea) | 0.9736842    | 0.6537046    | 0.9922481 | 0.6440667 | not scorable | not scorable |
| #### Bn-scaff_19183_1-p18736C-genome specific (napus-oleracea) | 0.9832536    | 0.6570092    | 0.9844961 | 0.6824055 | not scorable | not scorable |
| #### Bn-scaff_19183_1-p18753C-genome specific (napus-oleracea) | 0.9784689    | 0.5564574    | 0.9844961 | 0.5589237 | not scorable | not scorable |
| #### Bn-scaff_19183_1-p18832C-genome specific (napus-oleracea) | 0.9760765    | 0.7568328    | 1         | 0.7330981 | not scorable | not scorable |
| #### Bn-scaff_19183_1-p19106C-genome specific (napus-oleracea) | 0.9736842    | 0.6938725    | 1         | 0.7244349 | not scorable | not scorable |
| #### Bn-scaff_19183_1-p19772C-genome specific (napus-oleracea) | 0.9904306    | 0.7618123    | 0.9922481 | 0.7413081 | not scorable | not scorable |
| #### Bn-scaff_19183_1-p19864C-genome specific (napus-oleracea) | 0.9712918    | 0.6981925    | 1         | 0.6812254 | not scorable | not scorable |
| #### Bn-scaff_19183_1-p19938C-genome specific (oleracea only)  | not scorable | not scorable | 0.5891473 | 0.7006682 | not scorable | not scorable |
| #### Bn-scaff_19183_1-p20987C-genome specific (napus-oleracea) | 0.9856459    | 0.7630731    | 0.9922481 | 0.8475963 | not scorable | not scorable |
| #### Bn-scaff_19183_1-p20992C-genome specific (napus-oleracea) | 0.9760765    | 0.6915644    | 0.9922481 | 0.6939355 | not scorable | not scorable |
| #### Bn-scaff_19183_1-p22914C-genome specific (napus-oleracea) | 0.9808612    | 0.6935971    | 1         | 0.8416762 | not scorable | not scorable |
| #### Bn-scaff_19183_1-p22919C-genome specific (napus-oleracea) | 0.9808612    | 0.7827889    | 0.9922481 | 0.7878034 | not scorable | not scorable |
| #### Bn-scaff_19183_1-p22926C-genome specific (napus-oleracea) | 0.9880383    | 0.7399741    | 0.9922481 | 0.790102  | not scorable | not scorable |
| #### Bn-scaff_19183_1-p24251C-genome specific (napus-oleracea) | 0.9784689    | 0.7465522    | 1         | 0.7908078 | not scorable | not scorable |
| #### Bn-scaff_19183_1-p24362genome unspecific (all in)         | 0.9808612    | 0.3334628    | 1         | 0.7062397 | 1            | 0.8979349    |
| #### Bn-scaff_19183_1-p24457genome unspecific (all in)         | 0.9712918    | 0.5898198    | 1         | 0.8034433 | 1            | 0.7277528    |
| #### Bn-scaff_19183_1-p24941C-genome specific (napus-oleracea) | 0.9856459    | 0.6893963    | 0.8992248 | 0.6773681 | not scorable | not scorable |
| #### Bn-scaff_19183_1-p2529C-genome specific (napus-oleracea)  | 0.9545454    | 0.5697501    | 1         | 0.6250058 | not scorable | not scorable |
| #### Bn-scaff_19183_1-p25373C-genome specific (napus-oleracea) | 0.9832536    | 0.8354352    | 0.9844961 | 0.8566455 | not scorable | not scorable |
| #### Bn-scaff_19183_1-p2546C-genome specific (napus-oleracea)  | 0.9808612    | 0.7737564    | 1         | 0.7744082 | not scorable | not scorable |



|                                                                |           |           |           |   |           |              |              |
|----------------------------------------------------------------|-----------|-----------|-----------|---|-----------|--------------|--------------|
| #### Bn-scaff_19183_1-p25461C-genome specific (napus-oleracea) | 0.9856459 | 0.756457  |           | 1 | 0.8542061 | not scorable | not scorable |
| #### Bn-scaff_19183_1-p25520C-genome specific (napus-oleracea) | 0.9856459 | 0.7859697 |           | 1 | 0.8590593 | not scorable | not scorable |
| #### Bn-scaff_19183_1-p25532C-genome specific (napus-oleracea) | 0.9880383 | 0.7344853 | 0.9922481 |   | 0.8165222 | not scorable | not scorable |
| #### Bn-scaff_19183_1-p26496C-genome specific (napus-oleracea) | 0.9856459 | 0.7707917 |           | 1 | 0.759263  | not scorable | not scorable |
| #### Bn-scaff_19183_1-p26602C-genome specific (napus-oleracea) | 0.9784689 | 0.7260006 | 0.9922481 |   | 0.8127277 | not scorable | not scorable |
| #### Bn-scaff_19183_1-p26654C-genome specific (napus-oleracea) | 0.9808612 | 0.7980992 |           | 1 | 0.72013   | not scorable | not scorable |
| #### Bn-scaff_19183_1-p26915C-genome specific (napus-oleracea) | 0.9808612 | 0.7915211 |           | 1 | 0.8132356 | not scorable | not scorable |
| #### Bn-scaff_19183_1-p26995C-genome specific (napus-oleracea) | 0.9832536 | 0.7558919 |           | 1 | 0.8437505 | not scorable | not scorable |
| #### Bn-scaff_19183_1-p27369C-genome specific (napus-oleracea) | 0.9784689 | 0.6493767 |           | 1 | 0.6518909 | not scorable | not scorable |
| #### Bn-scaff_19183_1-p27480C-genome specific (napus-oleracea) | 0.9784689 | 0.767693  |           | 1 | 0.797171  | not scorable | not scorable |
| #### Bn-scaff_19183_1-p27639C-genome specific (napus-oleracea) | 0.9688995 | 0.7329767 | 0.9922481 |   | 0.7883926 | not scorable | not scorable |
| #### Bn-scaff_19183_1-p28084C-genome specific (napus-oleracea) | 0.9736842 | 0.8115861 |           | 1 | 0.8797633 | not scorable | not scorable |
| #### Bn-scaff_19183_1-p28545C-genome specific (napus-oleracea) | 0.9784689 | 0.752137  |           | 1 | 0.8664871 | not scorable | not scorable |
| #### Bn-scaff_19183_1-p28650C-genome specific (napus-oleracea) | 0.9880383 | 0.7580826 |           | 1 | 0.8384997 | not scorable | not scorable |
| #### Bn-scaff_19183_1-p28924C-genome specific (napus-oleracea) | 0.9784689 | 0.2946863 | 0.9844961 |   | 0.3586414 | not scorable | not scorable |
| #### Bn-scaff_19183_1-p29345C-genome specific (napus-oleracea) | 0.9736842 | 0.7463624 |           | 1 | 0.7499919 | not scorable | not scorable |
| #### Bn-scaff_19183_1-p31040C-genome specific (napus-oleracea) | 0.9832536 | 0.7475923 |           | 1 | 0.7763872 | not scorable | not scorable |
| #### Bn-scaff_19183_1-p31126C-genome specific (napus-oleracea) | 0.9808612 | 0.7838565 |           | 1 | 0.8534346 | not scorable | not scorable |
| #### Bn-scaff_19183_1-p31152C-genome specific (napus-oleracea) | 0.9832536 | 0.7794537 |           | 1 | 0.8897865 | not scorable | not scorable |
| #### Bn-scaff_19183_1-p31159C-genome specific (napus-oleracea) | 0.9832536 | 0.7680824 |           | 1 | 0.8806949 | not scorable | not scorable |
| #### Bn-scaff_19183_1-p31176C-genome specific (napus-oleracea) | 0.9904306 | 0.7771258 |           | 1 | 0.8800518 | not scorable | not scorable |
| #### Bn-scaff_19183_1-p31185C-genome specific (napus-oleracea) | 0.9760765 | 0.686516  |           | 1 | 0.7468837 | not scorable | not scorable |
| #### Bn-scaff_19183_1-p31460C-genome specific (napus-oleracea) | 0.9856459 | 0.777905  | 0.9302326 |   | 0.7398298 | not scorable | not scorable |
| #### Bn-scaff_19183_1-p31563C-genome specific (napus-oleracea) | 0.9784689 | 0.7159536 | 0.9922481 |   | 0.7011525 | not scorable | not scorable |
| #### Bn-scaff_19183_1-p31605C-genome specific (napus-oleracea) | 0.9832536 | 0.7568957 |           | 1 | 0.7314316 | not scorable | not scorable |
| #### Bn-scaff_19183_1-p31614C-genome specific (napus-oleracea) | 0.9784689 | 0.7912588 |           | 1 | 0.7529556 | not scorable | not scorable |
| #### Bn-scaff_19183_1-p31668C-genome specific (napus-oleracea) | 0.9736842 | 0.7765365 |           | 1 | 0.8528498 | not scorable | not scorable |
| #### Bn-scaff_19183_1-p31703C-genome specific (napus-oleracea) | 0.9736842 | 0.7664862 |           | 1 | 0.8863177 | not scorable | not scorable |
| #### Bn-scaff_19183_1-p31710C-genome specific (napus-oleracea) | 0.9832536 | 0.7922037 |           | 1 | 0.8486626 | not scorable | not scorable |
| #### Bn-scaff_19183_1-p31710C-genome specific (napus-oleracea) | 0.9688995 | 0.5211722 |           | 1 | 0.673218  | not scorable | not scorable |
| #### Bn-scaff_19183_1-p31725C-genome specific (napus-oleracea) | 0.9712918 | 0.7073572 |           | 1 | 0.7026415 | not scorable | not scorable |
| #### Bn-scaff_19183_1-p31800C-genome specific (napus-oleracea) | 0.9784689 | 0.8101155 |           | 1 | 0.8461056 | not scorable | not scorable |
| #### Bn-scaff_19183_1-p31832C-genome specific (napus-oleracea) | 0.9784689 | 0.6956824 |           | 1 | 0.6931054 | not scorable | not scorable |

|                                                                |           |           |              |              |              |              |              |
|----------------------------------------------------------------|-----------|-----------|--------------|--------------|--------------|--------------|--------------|
| #### Bn-scaff_19183_1-p32941C-genome specific (napus-oleracea) | 0.923445  | 0.8051319 |              | 1            | 0.7995543    | not scorable | not scorable |
| #### Bn-scaff_19183_1-p32995C-genome specific (napus-oleracea) | 0.9736842 | 0.6602796 |              | 1            | 0.6638831    | not scorable | not scorable |
| #### Bn-scaff_19183_1-p33046C-genome specific (napus-oleracea) | 0.9808612 | 0.7759716 | 0.9922481    |              | 0.7518008    | not scorable | not scorable |
| #### Bn-scaff_19183_1-p35329C-genome specific (napus-oleracea) | 0.9784689 | 0.4073958 | 0.9767442    |              | 0.5273464    | not scorable | not scorable |
| #### Bn-scaff_19183_1-p35525C-genome specific (napus-oleracea) | 0.9760765 | 0.8143074 |              | 1            | 0.8408352    | not scorable | not scorable |
| #### Bn-scaff_19183_1-p35634C-genome specific (napus-oleracea) | 0.9712918 | 0.6606724 | 0.9922481    |              | 0.675139     | not scorable | not scorable |
| #### Bn-scaff_19183_1-p35688C-genome specific (napus-oleracea) | 0.9880383 | 0.7557698 |              | 1            | 0.8389803    | not scorable | not scorable |
| #### Bn-scaff_19183_1-p35947genome unspecific (all in)         | 0.9641148 | 0.7573653 |              | 1            | 0.8324264    | 1            | 0.9400851    |
| #### Bn-scaff_19183_1-p36397C-genome specific (napus-oleracea) | 0.9688995 | 0.7621914 |              | 1            | 0.8631905    | not scorable | not scorable |
| #### Bn-scaff_19183_1-p36784C-genome specific (napus-oleracea) | 0.9688995 | 0.714801  |              | 1            | 0.7904034    | not scorable | not scorable |
| #### Bn-scaff_19183_1-p36948C-genome specific (napus-oleracea) | 0.9760765 | 0.732035  | 0.9922481    |              | 0.6629956    | not scorable | not scorable |
| #### Bn-scaff_19183_1-p36959C-genome specific (napus-oleracea) | 0.9832536 | 0.3135453 | 0.9844961    |              | 0.4304885    | not scorable | not scorable |
| #### Bn-scaff_19183_1-p36964C-genome specific (napus-oleracea) | 0.9808612 | 0.6909204 |              | 1            | 0.6400024    | not scorable | not scorable |
| #### Bn-scaff_19183_1-p37006C-genome specific (napus-oleracea) | 0.9808612 | 0.7743318 |              | 1            | 0.8869883    | not scorable | not scorable |
| #### Bn-scaff_19183_1-p37043C-genome specific (napus-oleracea) | 0.9832536 | 0.7760335 | 0.9922481    |              | 0.84165      | not scorable | not scorable |
| #### Bn-scaff_19183_1-p37066C-genome specific (napus-oleracea) | 0.9856459 | 0.7897528 |              | 1            | 0.8010578    | not scorable | not scorable |
| #### Bn-scaff_19183_1-p37139C-genome specific (napus-oleracea) | 0.9832536 | 0.5907575 | 0.9922481    |              | 0.709207     | not scorable | not scorable |
| #### Bn-scaff_19183_1-p37473C-genome specific (napus-oleracea) | 0.9856459 | 0.7431324 |              | 1            | 0.7865512    | not scorable | not scorable |
| #### Bn-scaff_19183_1-p37556C-genome specific (napus-oleracea) | 0.9904306 | 0.7722343 | 0.9922481    |              | 0.8097162    | not scorable | not scorable |
| #### Bn-scaff_19183_1-p39159C-genome specific (napus-oleracea) | 0.9736842 | 0.7301731 | 0.9922481    |              | 0.8305573    | not scorable | not scorable |
| #### Bn-scaff_19183_1-p39784napus specific                     | 0.9688995 | 0.7897995 | not scorable | not scorable | not scorable | not scorable | not scorable |
| #### Bn-scaff_19183_1-p40192C-genome specific (napus-oleracea) | 0.9832536 | 0.7961088 |              | 1            | 0.7825384    | not scorable | not scorable |
| #### Bn-scaff_19183_1-p40779C-genome specific (napus-oleracea) | 0.9712918 | 0.6390907 |              | 1            | 0.6273066    | not scorable | not scorable |
| #### Bn-scaff_19183_1-p40803C-genome specific (napus-oleracea) | 0.9808612 | 0.7448583 |              | 1            | 0.7395885    | not scorable | not scorable |
| #### Bn-scaff_19183_1-p41245C-genome specific (napus-oleracea) | 0.9808612 | 0.4814944 | 0.9922481    |              | 0.4703113    | not scorable | not scorable |
| #### Bn-scaff_19183_1-p42015C-genome specific (napus-oleracea) | 0.9760765 | 0.7450736 |              | 1            | 0.6725802    | not scorable | not scorable |
| #### Bn-scaff_19183_1-p42065C-genome specific (napus-oleracea) | 0.9880383 | 0.7685573 |              | 1            | 0.758045     | not scorable | not scorable |
| #### Bn-scaff_19183_1-p42123C-genome specific (napus-oleracea) | 0.9760765 | 0.7183731 | 0.9922481    |              | 0.7114491    | not scorable | not scorable |
| #### Bn-scaff_19183_1-p42191C-genome specific (napus-oleracea) | 0.9760765 | 0.6782869 |              | 1            | 0.6392438    | not scorable | not scorable |
| #### Bn-scaff_19183_1-p42202C-genome specific (napus-oleracea) | 0.9832536 | 0.6736414 | 0.9922481    |              | 0.7502218    | not scorable | not scorable |
| #### Bn-scaff_19183_1-p42211C-genome specific (napus-oleracea) | 0.9760765 | 0.6089111 |              | 1            | 0.5640762    | not scorable | not scorable |
| #### Bn-scaff_19183_1-p42312C-genome specific (napus-oleracea) | 0.9808612 | 0.7277738 |              | 1            | 0.7495229    | not scorable | not scorable |
| #### Bn-scaff_19183_1-p42338C-genome specific (napus-oleracea) | 0.9856459 | 0.6954756 |              | 1            | 0.6533305    | not scorable | not scorable |

|                                                                 |              |              |           |   |           |              |              |
|-----------------------------------------------------------------|--------------|--------------|-----------|---|-----------|--------------|--------------|
| #### Bn-scaff_19183_1-p42392 C-genome specific (napus-oleracea) | 0.9856459    | 0.7399325    |           | 1 | 0.7066328 | not scorable | not scorable |
| #### Bn-scaff_19183_1-p42520 C-genome specific (napus-oleracea) | 0.9832536    | 0.7594427    |           | 1 | 0.682023  | not scorable | not scorable |
| #### Bn-scaff_19183_1-p45122 C-genome specific (napus-oleracea) | 0.9593301    | 0.6198328    |           | 1 | 0.5928323 | not scorable | not scorable |
| #### Bn-scaff_19183_1-p45128 genome unspecific (all in)         | 0.9593301    | 0.586199     | 0.9922481 |   | 0.6078299 |              | 1 0.8966053  |
| #### Bn-scaff_19183_1-p45296 C-genome specific (napus-oleracea) | 0.9856459    | 0.7738905    |           | 1 | 0.8675668 | not scorable | not scorable |
| #### Bn-scaff_19183_1-p45461 C-genome specific (napus-oleracea) | 0.9880383    | 0.7547847    |           | 1 | 0.8666766 | not scorable | not scorable |
| #### Bn-scaff_19183_1-p45482 C-genome specific (napus-oleracea) | 0.9832536    | 0.7619962    |           | 1 | 0.9060507 | not scorable | not scorable |
| #### Bn-scaff_19183_1-p46510 C-genome specific (napus-oleracea) | 0.9880383    | 0.7243904    |           | 1 | 0.6641342 | not scorable | not scorable |
| #### Bn-scaff_19183_1-p46960 C-genome specific (napus-oleracea) | 0.9736842    | 0.6719702    | 0.9767442 |   | 0.7181795 | not scorable | not scorable |
| #### Bn-scaff_19183_1-p47848 C-genome specific (napus-oleracea) | 0.9808612    | 0.7677875    |           | 1 | 0.7741905 | not scorable | not scorable |
| #### Bn-scaff_19183_1-p52939 C-genome specific (napus-oleracea) | 0.9808612    | 0.6856064    |           | 1 | 0.7091495 | not scorable | not scorable |
| #### Bn-scaff_19183_1-p54785 C-genome specific (napus-oleracea) | 0.9856459    | 0.7567807    |           | 1 | 0.7127978 | not scorable | not scorable |
| #### Bn-scaff_19183_1-p61322 C-genome specific (napus-oleracea) | 0.9736842    | 0.7340258    | 0.9844961 |   | 0.7924223 | not scorable | not scorable |
| #### Bn-scaff_19183_1-p69685 C-genome specific (napus-oleracea) | 0.9832536    | 0.7325353    | 0.9922481 |   | 0.6720147 | not scorable | not scorable |
| #### Bn-scaff_19183_1-p78329 C-genome specific (napus-oleracea) | 0.9880383    | 0.7607422    | 0.9922481 |   | 0.8487145 | not scorable | not scorable |
| #### Bn-scaff_19183_1-p81733 C-genome specific (napus-oleracea) | 0.9832536    | 0.7053812    | 0.9844961 |   | 0.6971408 | not scorable | not scorable |
| #### Bn-scaff_19183_1-p96772 genome unspecific (oleracea-rapa)  | not scorable | not scorable | 0.9612403 |   | 0.3941993 |              | 1 0.9175813  |
| #### Bn-scaff_19186_1-p46645 genome unspecific (all in)         | 0.9712918    | 0.4163144    |           | 1 | 0.755145  | 0.9917355    | 0.6860624    |
| #### Bn-scaff_19186_1-p82493 C-genome specific (napus-oleracea) | 0.9952153    | 0.3852819    | 0.9457364 |   | 0.3896197 | not scorable | not scorable |
| #### Bn-scaff_19186_1-p84723 C-genome specific (napus-oleracea) | 1            | 0.7303955    |           | 1 | 0.7060688 | not scorable | not scorable |
| #### Bn-scaff_19186_1-p85014 genome unspecific (all in)         | 1            | 0.393342     | 0.9767442 |   | 0.3778321 |              | 1 0.8207097  |
| #### Bn-scaff_19186_1-p85081 genome unspecific (all in)         | 1            | 0.7770717    |           | 1 | 0.6945927 | 0.9917355    | 0.7177196    |
| #### Bn-scaff_19186_1-p85198 C-genome specific (napus-oleracea) | 1            | 0.7863751    | 0.9612403 |   | 0.8079005 | not scorable | not scorable |
| #### Bn-scaff_19193_1-p10061 C-genome specific (napus-oleracea) | 0.9736842    | 0.6656118    |           | 1 | 0.7534781 | not scorable | not scorable |
| #### Bn-scaff_19193_1-p11894 C-genome specific (napus-oleracea) | 0.9808612    | 0.7616116    | 0.9689922 |   | 0.8996505 | not scorable | not scorable |
| #### Bn-scaff_19193_1-p11919 C-genome specific (napus-oleracea) | 0.9832536    | 0.7585191    | 0.9844961 |   | 0.8485919 | not scorable | not scorable |
| #### Bn-scaff_19193_1-p12153 C-genome specific (napus-oleracea) | 0.8516746    | 0.8260029    | 0.8682171 |   | 0.8353273 | not scorable | not scorable |
| #### Bn-scaff_19193_1-p12501 C-genome specific (napus-oleracea) | 0.9665072    | 0.8048824    | 0.9844961 |   | 0.7300798 | not scorable | not scorable |
| #### Bn-scaff_19193_1-p12529 C-genome specific (napus-oleracea) | 0.8708134    | 0.8645591    | 0.8139535 |   | 0.7961674 | not scorable | not scorable |
| #### Bn-scaff_19193_1-p12675 C-genome specific (napus-oleracea) | 0.9712918    | 0.7567089    | 0.9612403 |   | 0.8128291 | not scorable | not scorable |
| #### Bn-scaff_19193_1-p12691 C-genome specific (oleracea only)  | not scorable | not scorable | 0.8837209 |   | 0.5970473 | not scorable | not scorable |
| #### Bn-scaff_19193_1-p12721 C-genome specific (napus-oleracea) | 0.9665072    | 0.7416242    |           | 1 | 0.7431705 | not scorable | not scorable |
| #### Bn-scaff_19193_1-p12791 C-genome specific (napus-oleracea) | 0.9808612    | 0.8892788    | 0.9069768 |   | 0.8015107 | not scorable | not scorable |

|                                                                 |              |              |           |           |              |              |
|-----------------------------------------------------------------|--------------|--------------|-----------|-----------|--------------|--------------|
| #### Bn-scaff_19193_1-p12885 C-genome specific (napus-oleracea) | 0.9832536    | 0.7266386    | 0.9922481 | 0.8086844 | not scorable | not scorable |
| #### Bn-scaff_19193_1-p12904 C-genome specific (napus-oleracea) | 0.9784689    | 0.7493577    | 1         | 0.8546489 | not scorable | not scorable |
| #### Bn-scaff_19193_1-p13195 C-genome specific (napus-oleracea) | 0.9760765    | 0.74481      | 1         | 0.8102356 | not scorable | not scorable |
| #### Bn-scaff_19193_1-p13361 C-genome specific (napus-oleracea) | 0.9832536    | 0.6820567    | 1         | 0.7349157 | not scorable | not scorable |
| #### Bn-scaff_19193_1-p13475 C-genome specific (oleracea only)  | not scorable | not scorable | 1         | 0.7565606 | not scorable | not scorable |
| #### Bn-scaff_19193_1-p14149 C-genome specific (napus-oleracea) | 0.9641148    | 0.7068826    | 1         | 0.8542098 | not scorable | not scorable |
| #### Bn-scaff_19193_1-p19846 C-genome specific (napus-oleracea) | 0.9832536    | 0.7746229    | 1         | 0.7813255 | not scorable | not scorable |
| #### Bn-scaff_19193_1-p22903 C-genome specific (napus-oleracea) | 0.708134     | 0.820866     | 0.4341085 | 0.9046208 | not scorable | not scorable |
| #### Bn-scaff_19193_1-p31398 C-genome specific (oleracea only)  | not scorable | not scorable | 0.9922481 | 0.6968403 | not scorable | not scorable |
| #### Bn-scaff_19193_1-p34568 genome unspecific (all in)         | 0.9880383    | 0.3282537    | 1         | 0.8017329 | 1            | 0.8008977    |
| #### Bn-scaff_19193_1-p35652 C-genome specific (napus-oleracea) | 0.9856459    | 0.7459005    | 0.9922481 | 0.8116186 | not scorable | not scorable |
| #### Bn-scaff_19193_1-p39906 genome unspecific (all in)         | 0.9784689    | 0.7629486    | 0.9922481 | 0.7269257 | 0.9917355    | 0.8060163    |
| #### Bn-scaff_19193_1-p39952 C-genome specific (napus-oleracea) | 0.9808612    | 0.7726669    | 1         | 0.7607852 | not scorable | not scorable |
| #### Bn-scaff_19193_1-p40810 C-genome specific (napus-oleracea) | 0.9808612    | 0.7791492    | 1         | 0.6612097 | not scorable | not scorable |
| #### Bn-scaff_19193_1-p41665 genome unspecific (oleracea-rapa)  | not scorable | not scorable | 0.8914729 | 0.563536  | 0.9834711    | 0.7461177    |
| #### Bn-scaff_19193_1-p47062 C-genome specific (napus-oleracea) | 0.9832536    | 0.7758067    | 0.9922481 | 0.8380865 | not scorable | not scorable |
| #### Bn-scaff_19193_1-p48813 C-genome specific (napus-oleracea) | 0.9832536    | 0.7654794    | 0.9534883 | 0.7940242 | not scorable | not scorable |
| #### Bn-scaff_19193_1-p49105 genome unspecific (all in)         | 1            | 0.287825     | 1         | 0.5052129 | 1            | 0.7494321    |
| #### Bn-scaff_19193_1-p49185 genome unspecific (all in)         | 0.9904306    | 0.2963926    | 1         | 0.7419406 | 1            | 0.8590679    |
| #### Bn-scaff_19193_1-p52759 C-genome specific (napus-oleracea) | 0.9760765    | 0.3533278    | 0.9302326 | 0.3192827 | not scorable | not scorable |
| #### Bn-scaff_19193_1-p56194 genome unspecific (oleracea-rapa)  | not scorable | not scorable | 1         | 0.7790158 | 1            | 0.8004208    |
| #### Bn-scaff_19193_1-p56544 C-genome specific (napus-oleracea) | 0.9928229    | 0.7548511    | 1         | 0.7550989 | not scorable | not scorable |
| #### Bn-scaff_19193_1-p56723 genome unspecific (all in)         | 0.9976076    | 0.4811234    | 1         | 0.6652421 | 0.9917355    | 0.6841851    |
| #### Bn-scaff_19193_1-p60313 genome unspecific (all in)         | 0.9928229    | 0.5372604    | 1         | 0.8908206 | 1            | 0.9178737    |
| #### Bn-scaff_19193_1-p61889 genome unspecific (all in)         | 0.9712918    | 0.4576394    | 1         | 0.7743363 | 0.9917355    | 0.7942212    |
| #### Bn-scaff_19193_1-p65737 genome unspecific (all in)         | 0.9832536    | 0.3596569    | 1         | 0.7159328 | 1            | 0.746485     |
| #### Bn-scaff_19193_1-p65799 C-genome specific (napus-oleracea) | 0.9736842    | 0.4289705    | 1         | 0.7163374 | not scorable | not scorable |
| #### Bn-scaff_19193_1-p65805 C-genome specific (napus-oleracea) | 0.9545454    | 0.4213545    | 1         | 0.7504236 | not scorable | not scorable |
| #### Bn-scaff_19193_1-p6789 C-genome specific (napus-oleracea)  | 0.9832536    | 0.7634267    | 1         | 0.9042891 | not scorable | not scorable |
| #### Bn-scaff_19193_1-p70401 genome unspecific (oleracea-rapa)  | not scorable | not scorable | 1         | 0.7877401 | 1            | 0.9070398    |
| #### Bn-scaff_19193_1-p70467 genome unspecific (all in)         | 0.9976076    | 0.3582468    | 1         | 0.7639663 | 1            | 0.8886743    |
| #### Bn-scaff_19193_1-p70869 genome unspecific (all in)         | 1            | 0.4911949    | 0.9844961 | 0.7660607 | 1            | 0.9305063    |
| #### Bn-scaff_19193_1-p71192 C-genome specific (napus-oleracea) | 0.9904306    | 0.8142811    | 1         | 0.8077837 | not scorable | not scorable |

|                                                                |              |              |              |              |              |              |
|----------------------------------------------------------------|--------------|--------------|--------------|--------------|--------------|--------------|
| #### Bn-scaff_19193_1-p72542genome unspecific (all in)         | 1            | 0.5344022    | 1            | 0.5816146    | 1            | 0.8859996    |
| #### Bn-scaff_19193_1-p72573genome unspecific (all in)         | 0.9952153    | 0.3896153    | 0.9922481    | 0.6700705    | 1            | 0.6970283    |
| #### Bn-scaff_19193_1-p79440C-genome specific (napus-oleracea) | 0.9784689    | 0.242438     | 1            | 0.7610818    | not scorable | not scorable |
| #### Bn-scaff_19193_1-p83219C-genome specific (napus-oleracea) | 0.9162679    | 0.2600181    | 1            | 0.8494389    | not scorable | not scorable |
| #### Bn-scaff_19193_1-p85460genome unspecific (oleracea-rapa)  | not scorable | not scorable | 0.9922481    | 0.5571321    | 1            | 0.8562511    |
| #### Bn-scaff_19193_1-p86427C-genome specific (napus-oleracea) | 0.9760765    | 0.7398841    | 1            | 0.7455561    | not scorable | not scorable |
| #### Bn-scaff_19193_1-p87588C-genome specific (napus-oleracea) | 0.9736842    | 0.7065198    | 0.9922481    | 0.7916672    | not scorable | not scorable |
| #### Bn-scaff_19193_1-p91671C-genome specific (napus-oleracea) | 0.9736842    | 0.6770747    | 1            | 0.7312736    | not scorable | not scorable |
| #### Bn-scaff_19193_1-p92796C-genome specific (napus-oleracea) | 0.9712918    | 0.7779183    | 1            | 0.8771265    | not scorable | not scorable |
| #### Bn-scaff_19208_1-p12435C-genome specific (napus-oleracea) | 0.9952153    | 0.7535976    | 1            | 0.739969     | not scorable | not scorable |
| #### Bn-scaff_19208_1-p12460C-genome specific (napus-oleracea) | 0.9952153    | 0.6619628    | 0.9844961    | 0.652329     | not scorable | not scorable |
| #### Bn-scaff_19208_1-p12467C-genome specific (napus-oleracea) | 0.9880383    | 0.5914504    | 0.9844961    | 0.6696945    | not scorable | not scorable |
| #### Bn-scaff_19208_1-p13023C-genome specific (napus-oleracea) | 0.9976076    | 0.7816563    | 1            | 0.9072774    | not scorable | not scorable |
| #### Bn-scaff_19208_1-p17837C-genome specific (napus-oleracea) | 0.9904306    | 0.783596     | 0.9922481    | 0.7939845    | not scorable | not scorable |
| #### Bn-scaff_19208_1-p18413C-genome specific (napus-oleracea) | 0.9880383    | 0.6839544    | 0.9612403    | 0.7475772    | not scorable | not scorable |
| #### Bn-scaff_19208_1-p18480C-genome specific (napus-oleracea) | 0.9952153    | 0.6909725    | 0.9689922    | 0.6735736    | not scorable | not scorable |
| #### Bn-scaff_19208_1-p20105C-genome specific (napus-oleracea) | 0.9784689    | 0.8033138    | 0.8914729    | 0.7827854    | not scorable | not scorable |
| #### Bn-scaff_19208_1-p20119C-genome specific (napus-oleracea) | 0.9832536    | 0.7301382    | 0.9069768    | 0.6871102    | not scorable | not scorable |
| #### Bn-scaff_19208_1-p20156C-genome specific (napus-oleracea) | 0.9808612    | 0.7380543    | 0.8992248    | 0.7580658    | not scorable | not scorable |
| #### Bn-scaff_19208_1-p20213C-genome specific (napus-oleracea) | 0.9856459    | 0.7732979    | 0.9147287    | 0.7649183    | not scorable | not scorable |
| #### Bn-scaff_19208_1-p20236C-genome specific (napus-oleracea) | 0.9856459    | 0.7699859    | 0.9147287    | 0.7797557    | not scorable | not scorable |
| #### Bn-scaff_19208_1-p20276C-genome specific (napus-oleracea) | 0.9617225    | 0.7176601    | 0.8914729    | 0.6768937    | not scorable | not scorable |
| #### Bn-scaff_19208_1-p20490C-genome specific (napus-oleracea) | 0.9880383    | 0.7651865    | 0.9224806    | 0.8255597    | not scorable | not scorable |
| #### Bn-scaff_19208_1-p23304C-genome specific (napus-oleracea) | 0.9880383    | 0.7519675    | 0.8449612    | 0.7544323    | not scorable | not scorable |
| #### Bn-scaff_19208_1-p24289all not scorable                   | not scorable | not scorable | not scorable | not scorable | not scorable | not scorable |
| #### Bn-scaff_19208_1-p24655all not scorable                   | not scorable | not scorable | not scorable | not scorable | not scorable | not scorable |
| #### Bn-scaff_19208_1-p24674C-genome specific (oleracea only)  | not scorable | not scorable | 0.751938     | 0.8105069    | not scorable | not scorable |
| #### Bn-scaff_19208_1-p25047C-genome specific (napus-oleracea) | 0.9904306    | 0.7489164    | 0.9224806    | 0.7004921    | not scorable | not scorable |
| #### Bn-scaff_19208_1-p25106C-genome specific (napus-oleracea) | 0.9928229    | 0.7877748    | 0.9844961    | 0.8050555    | not scorable | not scorable |
| #### Bn-scaff_19208_1-p25112C-genome specific (napus-oleracea) | 0.9880383    | 0.7870206    | 0.875969     | 0.8142083    | not scorable | not scorable |
| #### Bn-scaff_19208_1-p27892genome unspecific (all in)         | 0.9808612    | 0.4331323    | 0.875969     | 0.6473424    | 0.9917355    | 0.8769096    |
| #### Bn-scaff_19208_1-p29284C-genome specific (napus-oleracea) | 0.9952153    | 0.7580227    | 0.9767442    | 0.8380542    | not scorable | not scorable |
| #### Bn-scaff_19208_1-p29375C-genome specific (napus-oleracea) | 0.9904306    | 0.7446892    | 0.9767442    | 0.7594969    | not scorable | not scorable |

|                                                                 |              |              |           |           |              |              |
|-----------------------------------------------------------------|--------------|--------------|-----------|-----------|--------------|--------------|
| #### Bn-scaff_19208_1-p29589 C-genome specific (napus-oleracea) | 0.9808612    | 0.7665379    | 0.8837209 | 0.7597603 | not scorable | not scorable |
| #### Bn-scaff_19208_1-p30928 C-genome specific (napus-oleracea) | 0.9880383    | 0.8196735    | 0.9922481 | 0.710197  | not scorable | not scorable |
| #### Bn-scaff_19208_1-p32459 genome unspecific (all in)         | 0.9760765    | 0.4303808    | 0.9534883 | 0.77363   | 1            | 0.9204296    |
| #### Bn-scaff_19208_1-p34689 C-genome specific (napus-oleracea) | 0.9952153    | 0.7916238    | 1         | 0.8219877 | not scorable | not scorable |
| #### Bn-scaff_19208_1-p43173 genome unspecific (all in)         | 1            | 0.628806     | 0.9612403 | 0.7010924 | 1            | 0.9038997    |
| #### Bn-scaff_19208_1-p44202 C-genome specific (napus-oleracea) | 0.9880383    | 0.8102754    | 0.9922481 | 0.8165359 | not scorable | not scorable |
| #### Bn-scaff_19208_1-p47684 genome unspecific (all in)         | 0.9617225    | 0.3147912    | 0.9379845 | 0.3818327 | 1            | 0.8136394    |
| #### Bn-scaff_19208_1-p48931 C-genome specific (napus-oleracea) | 0.9880383    | 0.8017074    | 1         | 0.8422593 | not scorable | not scorable |
| #### Bn-scaff_19208_1-p49007 C-genome specific (napus-oleracea) | 0.9952153    | 0.8183663    | 0.9922481 | 0.8001171 | not scorable | not scorable |
| #### Bn-scaff_19208_1-p49036 C-genome specific (napus-oleracea) | 0.9736842    | 0.7861663    | 1         | 0.8856748 | not scorable | not scorable |
| #### Bn-scaff_19208_1-p49044 C-genome specific (napus-oleracea) | 0.9928229    | 0.7807423    | 0.9922481 | 0.7849337 | not scorable | not scorable |
| #### Bn-scaff_19208_1-p51968 C-genome specific (napus-oleracea) | 0.9928229    | 0.8487764    | 0.9922481 | 0.8419491 | not scorable | not scorable |
| #### Bn-scaff_19208_1-p52427 C-genome specific (napus-oleracea) | 0.9952153    | 0.6849987    | 1         | 0.7403231 | not scorable | not scorable |
| #### Bn-scaff_19208_1-p52719 C-genome specific (napus-oleracea) | 0.9928229    | 0.7430697    | 0.9534883 | 0.8191159 | not scorable | not scorable |
| #### Bn-scaff_19208_1-p59244 genome unspecific (all in)         | 1            | 0.3705444    | 1         | 0.8478299 | 0.9917355    | 0.7950765    |
| #### Bn-scaff_19208_1-p78898 C-genome specific (napus-oleracea) | 0.9952153    | 0.7247815    | 0.9844961 | 0.7138681 | not scorable | not scorable |
| #### Bn-scaff_19208_1-p79737 C-genome specific (napus-oleracea) | 0.9952153    | 0.7734939    | 0.9612403 | 0.7744083 | not scorable | not scorable |
| #### Bn-scaff_19208_1-p79746 C-genome specific (napus-oleracea) | 0.9928229    | 0.7203673    | 0.9922481 | 0.7963594 | not scorable | not scorable |
| #### Bn-scaff_19208_1-p80655 C-genome specific (napus-oleracea) | 0.9928229    | 0.7712513    | 0.9844961 | 0.7535707 | not scorable | not scorable |
| #### Bn-scaff_19208_1-p82535 C-genome specific (napus-oleracea) | 0.9856459    | 0.8042824    | 0.9844961 | 0.8057281 | not scorable | not scorable |
| #### Bn-scaff_19208_1-p93814 C-genome specific (napus-oleracea) | 0.9880383    | 0.7330406    | 0.9922481 | 0.7555544 | not scorable | not scorable |
| #### Bn-scaff_19208_1-p94498 C-genome specific (napus-oleracea) | 0.9832536    | 0.8195398    | 0.9767442 | 0.6996496 | not scorable | not scorable |
| #### Bn-scaff_19208_1-p94501 genome unspecific (all in)         | 0.9856459    | 0.5627381    | 0.9844961 | 0.8509774 | 1            | 0.949598     |
| #### Bn-scaff_19208_1-p94553 C-genome specific (napus-oleracea) | 0.9928229    | 0.7953645    | 0.9922481 | 0.8142636 | not scorable | not scorable |
| #### Bn-scaff_19208_1-p95562 C-genome specific (napus-oleracea) | 0.9856459    | 0.7714853    | 0.9922481 | 0.8369152 | not scorable | not scorable |
| #### Bn-scaff_19213_1-p10082 C-genome specific (oleracea only)  | not scorable | not scorable | 0.5736434 | 0.7915887 | not scorable | not scorable |
| #### Bn-scaff_19213_1-p12991 genome unspecific (all in)         | 1            | 0.6682348    | 1         | 0.6186296 | 1            | 0.6659463    |
| #### Bn-scaff_19213_1-p22269 genome unspecific (all in)         | 1            | 0.5954536    | 1         | 0.5715545 | 1            | 0.7534218    |
| #### Bn-scaff_19213_1-p2912 genome unspecific (all in)          | 1            | 0.6247367    | 1         | 0.5800531 | 1            | 0.6201955    |
| #### Bn-scaff_19224_1-p29613 genome unspecific (all in)         | 1            | 0.4048119    | 1         | 0.6958796 | 1            | 0.8301838    |
| #### Bn-scaff_19224_1-p29858 genome unspecific (all in)         | 1            | 0.5658621    | 1         | 0.6002162 | 1            | 0.7494321    |
| #### Bn-scaff_19224_1-p30859 genome unspecific (all in)         | 1            | 0.6995825    | 1         | 0.7240023 | 1            | 0.8898582    |
| #### Bn-scaff_19242_1-p39010 C-genome specific (napus-oleracea) | 0.9665072    | 0.6795166    | 0.9457364 | 0.8704344 | not scorable | not scorable |

|                                                                 |              |              |              |              |              |              |
|-----------------------------------------------------------------|--------------|--------------|--------------|--------------|--------------|--------------|
| #### Bn-scaff_19242_1-p41824 C-genome specific (napus-oleracea) | 0.9760765    | 0.3308766    | 0.9844961    | 0.6849817    | not scorable | not scorable |
| #### Bn-scaff_19242_1-p42133 C-genome specific (napus-oleracea) | 0.9928229    | 0.7480964    | 0.9767442    | 0.7063171    | not scorable | not scorable |
| #### Bn-scaff_19242_1-p56238 C-genome specific (oleracea only)  | not scorable | not scorable | 0.9302326    | 0.7850642    | not scorable | not scorable |
| #### Bn-scaff_19244_1-p12085 C-genome specific (oleracea only)  | not scorable | not scorable | 0.9844961    | 0.6720487    | not scorable | not scorable |
| #### Bn-scaff_19244_1-p12314 C-genome specific (napus-oleracea) | 0.9258373    | 0.7679611    | 1            | 0.7967356    | not scorable | not scorable |
| #### Bn-scaff_19244_1-p18809 C-genome specific (napus-oleracea) | 0.923445     | 0.794374     | 0.9922481    | 0.839282     | not scorable | not scorable |
| #### Bn-scaff_19244_1-p18976 C-genome specific (napus-oleracea) | 0.9019139    | 0.7702219    | 1            | 0.8226365    | not scorable | not scorable |
| #### Bn-scaff_19244_1-p19351 genome unspecific (all in)         | 0.9617225    | 0.3764423    | 1            | 0.8165517    | 1            | 0.8074086    |
| #### Bn-scaff_19244_1-p19663 genome unspecific (all in)         | 0.9760765    | 0.503482     | 0.9922481    | 0.783252     | 1            | 0.9175813    |
| #### Bn-scaff_19244_1-p20708 C-genome specific (napus-oleracea) | 0.9162679    | 0.7023084    | 1            | 0.8116645    | not scorable | not scorable |
| #### Bn-scaff_19244_1-p20820 C-genome specific (napus-oleracea) | 0.9162679    | 0.7949151    | 0.9844961    | 0.8361979    | not scorable | not scorable |
| #### Bn-scaff_19244_1-p20872 C-genome specific (napus-oleracea) | 0.9186603    | 0.8168269    | 1            | 0.8084781    | not scorable | not scorable |
| #### Bn-scaff_19244_1-p21065 all not scorable                   | not scorable | not scorable | not scorable | not scorable | not scorable | not scorable |
| #### Bn-scaff_19244_1-p23111 C-genome specific (napus-oleracea) | 0.923445     | 0.7752333    | 0.9922481    | 0.7390317    | not scorable | not scorable |
| #### Bn-scaff_19244_1-p23487 C-genome specific (napus-oleracea) | 0.9162679    | 0.788584     | 0.9922481    | 0.7416215    | not scorable | not scorable |
| #### Bn-scaff_19244_1-p24117 C-genome specific (napus-oleracea) | 0.9186603    | 0.7885851    | 1            | 0.8062776    | not scorable | not scorable |
| #### Bn-scaff_19244_1-p25041 C-genome specific (napus-oleracea) | 0.9210526    | 0.7658575    | 1            | 0.7913767    | not scorable | not scorable |
| #### Bn-scaff_19244_1-p26099 C-genome specific (napus-oleracea) | 0.9138756    | 0.7499375    | 1            | 0.6779906    | not scorable | not scorable |
| #### Bn-scaff_19244_1-p27059 genome unspecific (all in)         | 0.9545454    | 0.421904     | 0.620155     | 0.6752141    | 1            | 0.8948976    |
| #### Bn-scaff_19244_1-p28327 C-genome specific (napus-oleracea) | 0.9114832    | 0.7691114    | 1            | 0.81444      | not scorable | not scorable |
| #### Bn-scaff_19244_1-p30499 C-genome specific (napus-oleracea) | 0.9210526    | 0.7669793    | 1            | 0.7245009    | not scorable | not scorable |
| #### Bn-scaff_19244_1-p31388 C-genome specific (napus-oleracea) | 0.9186603    | 0.7005525    | 1            | 0.8299467    | not scorable | not scorable |
| #### Bn-scaff_19244_1-p32881 genome unspecific (all in)         | 0.9593301    | 0.6804671    | 1            | 0.6351758    | 1            | 0.9162516    |
| #### Bn-scaff_19244_1-p35258 C-genome specific (napus-oleracea) | 0.8899522    | 0.6871123    | 0.9844961    | 0.6960305    | not scorable | not scorable |
| #### Bn-scaff_19244_1-p35586 genome unspecific (all in)         | 1            | 0.3299359    | 1            | 0.782878     | 0.9917355    | 0.8139121    |
| #### Bn-scaff_19244_1-p38085 C-genome specific (napus-oleracea) | 0.8923445    | 0.7560947    | 0.9767442    | 0.7941597    | not scorable | not scorable |
| #### Bn-scaff_19244_1-p38879 C-genome specific (napus-oleracea) | 0.9114832    | 0.6916374    | 1            | 0.6621479    | not scorable | not scorable |
| #### Bn-scaff_19244_1-p40548 C-genome specific (napus-oleracea) | 0.9090909    | 0.7342231    | 0.9844961    | 0.8397301    | not scorable | not scorable |
| #### Bn-scaff_19244_1-p40804 C-genome specific (napus-oleracea) | 0.8971292    | 0.7750995    | 0.9767442    | 0.7657789    | not scorable | not scorable |
| #### Bn-scaff_19244_1-p42120 C-genome specific (napus-oleracea) | 0.923445     | 0.7636043    | 1            | 0.8141961    | not scorable | not scorable |
| #### Bn-scaff_19244_1-p43362 C-genome specific (napus-oleracea) | 0.9138756    | 0.8022723    | 0.9922481    | 0.8777055    | not scorable | not scorable |
| #### Bn-scaff_19244_1-p43804 C-genome specific (oleracea only)  | not scorable | not scorable | 0.9767442    | 0.8171381    | not scorable | not scorable |
| #### Bn-scaff_19244_1-p44173 genome unspecific (all in)         | 0.9593301    | 0.3997172    | 1            | 0.7660434    | 0.9669421    | 0.8567205    |

|                                                                 |           |           |           |           |              |              |
|-----------------------------------------------------------------|-----------|-----------|-----------|-----------|--------------|--------------|
| #### Bn-scaff_19244_1-p44338 C-genome specific (napus-oleracea) | 0.9043062 | 0.7778673 | 1         | 0.8787419 | not scorable | not scorable |
| #### Bn-scaff_19244_1-p44433 C-genome specific (napus-oleracea) | 0.9282297 | 0.6736741 | 1         | 0.6261424 | not scorable | not scorable |
| #### Bn-scaff_19244_1-p45174 C-genome specific (napus-oleracea) | 0.9186603 | 0.743056  | 1         | 0.7336566 | not scorable | not scorable |
| #### Bn-scaff_19244_1-p47303 C-genome specific (napus-oleracea) | 0.923445  | 0.7908677 | 0.9379845 | 0.7554476 | not scorable | not scorable |
| #### Bn-scaff_19244_1-p47998 C-genome specific (napus-oleracea) | 0.9138756 | 0.7523186 | 1         | 0.9135298 | not scorable | not scorable |
| #### Bn-scaff_19244_1-p51712 C-genome specific (napus-oleracea) | 0.9162679 | 0.7905334 | 0.9689922 | 0.7341723 | not scorable | not scorable |
| #### Bn-scaff_19244_1-p53159 C-genome specific (napus-oleracea) | 0.6124402 | 0.6461428 | 0.9844961 | 0.7590263 | not scorable | not scorable |
| #### Bn-scaff_19244_1-p55116 C-genome specific (napus-oleracea) | 0.9186603 | 0.806523  | 1         | 0.7764549 | not scorable | not scorable |
| #### Bn-scaff_19244_1-p57764 C-genome specific (napus-oleracea) | 0.9210526 | 0.7693021 | 1         | 0.8394079 | not scorable | not scorable |
| #### Bn-scaff_19244_1-p57909 C-genome specific (napus-oleracea) | 0.9210526 | 0.7736207 | 0.9844961 | 0.786745  | not scorable | not scorable |
| #### Bn-scaff_19244_1-p58117 C-genome specific (napus-oleracea) | 0.9162679 | 0.7612621 | 1         | 0.7922006 | not scorable | not scorable |
| #### Bn-scaff_19244_1-p58649 C-genome specific (napus-oleracea) | 0.9138756 | 0.728124  | 0.9922481 | 0.698265  | not scorable | not scorable |
| #### Bn-scaff_19244_1-p59013 C-genome specific (napus-oleracea) | 0.9138756 | 0.7873254 | 1         | 0.8272209 | not scorable | not scorable |
| #### Bn-scaff_19244_1-p60326 C-genome specific (napus-oleracea) | 0.9162679 | 0.7934806 | 1         | 0.8545206 | not scorable | not scorable |
| #### Bn-scaff_19244_1-p60429 C-genome specific (napus-oleracea) | 0.9162679 | 0.7930908 | 1         | 0.6258276 | not scorable | not scorable |
| #### Bn-scaff_19244_1-p60796 C-genome specific (napus-oleracea) | 0.9090909 | 0.7695048 | 0.9844961 | 0.8477142 | not scorable | not scorable |
| #### Bn-scaff_19244_1-p60948 C-genome specific (napus-oleracea) | 0.9186603 | 0.7324523 | 0.9844961 | 0.8359371 | not scorable | not scorable |
| #### Bn-scaff_19244_1-p61195 C-genome specific (napus-oleracea) | 0.9043062 | 0.7922496 | 1         | 0.8628413 | not scorable | not scorable |
| #### Bn-scaff_19244_1-p62008 C-genome specific (napus-oleracea) | 0.930622  | 0.7407815 | 0.9922481 | 0.7541097 | not scorable | not scorable |
| #### Bn-scaff_19244_1-p62080 C-genome specific (napus-oleracea) | 0.9114832 | 0.7941173 | 0.9844961 | 0.8136466 | not scorable | not scorable |
| #### Bn-scaff_19244_1-p62956 C-genome specific (napus-oleracea) | 0.8995215 | 0.8103619 | 0.9844961 | 0.7394973 | not scorable | not scorable |
| #### Bn-scaff_19244_1-p63297 C-genome specific (napus-oleracea) | 0.923445  | 0.7924549 | 1         | 0.6994089 | not scorable | not scorable |
| #### Bn-scaff_19244_1-p64433 C-genome specific (napus-oleracea) | 0.9066986 | 0.7796261 | 0.9379845 | 0.7538763 | not scorable | not scorable |
| #### Bn-scaff_19244_1-p65215 C-genome specific (napus-oleracea) | 0.9066986 | 0.7096757 | 0.9224806 | 0.8400083 | not scorable | not scorable |
| #### Bn-scaff_19244_1-p65656 genome unspecific (all in)         | 1         | 0.5987751 | 1         | 0.5582112 | 1            | 0.5830583    |
| #### Bn-scaff_19244_1-p65791 C-genome specific (napus-oleracea) | 0.9019139 | 0.7758881 | 0.9379845 | 0.7894793 | not scorable | not scorable |
| #### Bn-scaff_19244_1-p67075 C-genome specific (napus-oleracea) | 0.9043062 | 0.6677918 | 1         | 0.7219861 | not scorable | not scorable |
| #### Bn-scaff_19244_1-p67993 C-genome specific (napus-oleracea) | 0.9090909 | 0.6363158 | 1         | 0.647252  | not scorable | not scorable |
| #### Bn-scaff_19244_1-p68043 C-genome specific (napus-oleracea) | 0.9186603 | 0.7212068 | 1         | 0.7020647 | not scorable | not scorable |
| #### Bn-scaff_19244_1-p68353 C-genome specific (napus-oleracea) | 0.9114832 | 0.7928633 | 1         | 0.7589998 | not scorable | not scorable |
| #### Bn-scaff_19244_1-p69050 C-genome specific (napus-oleracea) | 0.9210526 | 0.7651867 | 0.9922481 | 0.8246441 | not scorable | not scorable |
| #### Bn-scaff_19244_1-p69299 C-genome specific (napus-oleracea) | 0.9090909 | 0.7723475 | 1         | 0.8203883 | not scorable | not scorable |
| #### Bn-scaff_19244_1-p69377 C-genome specific (napus-oleracea) | 0.9210526 | 0.7680535 | 0.9922481 | 0.7984019 | not scorable | not scorable |



|                                                                |              |              |              |              |              |              |
|----------------------------------------------------------------|--------------|--------------|--------------|--------------|--------------|--------------|
| #### Bn-scaff_19244_1-p69881genome unspecific (oleracea-rapa)  | not scorable | not scorable | 1            | 0.7471772    | 0.9256198    | 0.5152976    |
| #### Bn-scaff_19244_1-p69931C-genome specific (napus-oleracea) | 0.9114832    | 0.6040654    | 0.9922481    | 0.8539068    | not scorable | not scorable |
| #### Bn-scaff_19244_1-p73424genome unspecific (all in)         | 0.9784689    | 0.4598528    | 1            | 0.8589982    | 1            | 0.9243305    |
| #### Bn-scaff_19244_1-p73851genome unspecific (all in)         | 0.9138756    | 0.7130472    | 0.9922481    | 0.6735977    | 0.9421487    | 0.8620964    |
| #### Bn-scaff_19244_1-p74142C-genome specific (napus-oleracea) | 0.8995215    | 0.7706619    | 0.9922481    | 0.771953     | not scorable | not scorable |
| #### Bn-scaff_19244_1-p74153C-genome specific (napus-oleracea) | 0.9114832    | 0.747834     | 0.9922481    | 0.7783281    | not scorable | not scorable |
| #### Bn-scaff_19244_1-p75507C-genome specific (napus-oleracea) | 0.9114832    | 0.7101545    | 1            | 0.7125028    | not scorable | not scorable |
| #### Bn-scaff_19244_1-p75643C-genome specific (napus-oleracea) | 0.9138756    | 0.7374231    | 1            | 0.7735735    | not scorable | not scorable |
| #### Bn-scaff_19244_1-p81634genome unspecific (all in)         | 0.9688995    | 0.3629895    | 0.9922481    | 0.7474216    | 1            | 0.8931871    |
| #### Bn-scaff_19244_1-p84361A-genome specific (napus-rapa)     | 0.84689      | 0.7946841    | not scorable | not scorable | 0.9008265    | 0.7801839    |
| #### Bn-scaff_19248_1-p12704C-genome specific (napus-oleracea) | 0.9784689    | 0.8182271    | 0.9922481    | 0.7386636    | not scorable | not scorable |
| #### Bn-scaff_19248_1-p15517all not scorable                   | not scorable | not scorable | not scorable | not scorable | not scorable | not scorable |
| #### Bn-scaff_19248_1-p16634genome unspecific (all in)         | 0.9832536    | 0.3806373    | 1            | 0.8565428    | 0.9586777    | 0.5936679    |
| #### Bn-scaff_19248_1-p18776C-genome specific (napus-oleracea) | 0.9880383    | 0.8208396    | 0.9922481    | 0.8641804    | not scorable | not scorable |
| #### Bn-scaff_19248_1-p19716C-genome specific (napus-oleracea) | 0.9904306    | 0.8155321    | 0.9922481    | 0.770289     | not scorable | not scorable |
| #### Bn-scaff_19248_1-p20629napus specific                     | 0.9736842    | 0.8003362    | not scorable | not scorable | not scorable | not scorable |
| #### Bn-scaff_19248_1-p20714C-genome specific (napus-oleracea) | 0.861244     | 0.757967     | 0.9922481    | 0.7566652    | not scorable | not scorable |
| #### Bn-scaff_19248_1-p20898C-genome specific (napus-oleracea) | 0.9952153    | 0.6898763    | 1            | 0.8132219    | not scorable | not scorable |
| #### Bn-scaff_19248_1-p21114genome unspecific (all in)         | 0.9904306    | 0.5557207    | 1            | 0.711804     | 1            | 0.8761382    |
| #### Bn-scaff_19248_1-p21259C-genome specific (napus-oleracea) | 0.9928229    | 0.8128895    | 0.9612403    | 0.7907387    | not scorable | not scorable |
| #### Bn-scaff_19248_1-p22355C-genome specific (napus-oleracea) | 0.9904306    | 0.7443948    | 0.9922481    | 0.8212643    | not scorable | not scorable |
| #### Bn-scaff_19248_1-p23332C-genome specific (napus-oleracea) | 0.9904306    | 0.6626261    | 1            | 0.6853529    | not scorable | not scorable |
| #### Bn-scaff_19248_1-p23585C-genome specific (napus-oleracea) | 0.8062201    | 0.814801     | 1            | 0.7904034    | not scorable | not scorable |
| #### Bn-scaff_19248_1-p26964C-genome specific (napus-oleracea) | 0.9952153    | 0.8332334    | 0.9844961    | 0.7542337    | not scorable | not scorable |
| #### Bn-scaff_19248_1-p31358C-genome specific (napus-oleracea) | 0.9880383    | 0.7004069    | 0.9302326    | 0.7355412    | not scorable | not scorable |
| #### Bn-scaff_19248_1-p31908C-genome specific (napus-oleracea) | 0.9688995    | 0.7010347    | 0.7984496    | 0.8451197    | not scorable | not scorable |
| #### Bn-scaff_19248_1-p35719genome unspecific (all in)         | 0.9856459    | 0.2291385    | 1            | 0.7209936    | 0.9586777    | 0.4123734    |
| #### Bn-scaff_19248_1-p48952genome unspecific (all in)         | 0.9928229    | 0.2808653    | 1            | 0.8030875    | 1            | 0.8503625    |
| #### Bn-scaff_19248_1-p49431genome unspecific (all in)         | 0.9114832    | 0.1763782    | 1            | 0.852897     | 0.9669421    | 0.7843015    |
| #### Bn-scaff_19248_1-p52309genome unspecific (all in)         | 0.9138756    | 0.171116     | 1            | 0.9134432    | 0.9917355    | 0.8476158    |
| #### Bn-scaff_19248_1-p5520 C-genome specific (napus-oleracea) | 0.9880383    | 0.7400482    | 1            | 0.8293025    | not scorable | not scorable |
| #### Bn-scaff_19248_1-p57521C-genome specific (napus-oleracea) | 0.9952153    | 0.7864791    | 0.9922481    | 0.8279715    | not scorable | not scorable |
| #### Bn-scaff_19248_1-p57760C-genome specific (napus-oleracea) | 0.5287082    | 0.7816328    | 0.9844961    | 0.7882465    | not scorable | not scorable |

|                                                                 |              |              |              |              |              |              |
|-----------------------------------------------------------------|--------------|--------------|--------------|--------------|--------------|--------------|
| #### Bn-scaff_19248_1-p58173 C-genome specific (napus-oleracea) | 0.9904306    | 0.7719298    | 1            | 0.7656881    | not scorable | not scorable |
| #### Bn-scaff_19248_1-p64918 C-genome specific (napus-oleracea) | 0.9904306    | 0.7741356    | 1            | 0.8746349    | not scorable | not scorable |
| #### Bn-scaff_19248_1-p66490 C-genome specific (napus-oleracea) | 0.9832536    | 0.7811422    | 1            | 0.7649549    | not scorable | not scorable |
| #### Bn-scaff_19248_1-p66592 C-genome specific (napus-oleracea) | 0.9832536    | 0.8056098    | 0.9922481    | 0.8763305    | not scorable | not scorable |
| #### Bn-scaff_19248_1-p73640 C-genome specific (napus-oleracea) | 0.9688995    | 0.7940712    | 1            | 0.7508534    | not scorable | not scorable |
| #### Bn-scaff_19248_1-p73988 C-genome specific (napus-oleracea) | 0.9760765    | 0.6950193    | 1            | 0.80102      | not scorable | not scorable |
| #### Bn-scaff_19248_1-p78932 C-genome specific (napus-oleracea) | 0.9928229    | 0.6782216    | 0.9302326    | 0.6543773    | not scorable | not scorable |
| #### Bn-scaff_19253_1-p10235 C-genome specific (napus-oleracea) | 0.9856459    | 0.6134337    | 0.9922481    | 0.6016658    | not scorable | not scorable |
| #### Bn-scaff_19253_1-p10706 A-genome specific (napus-rapa)     | 0.9952153    | 0.2796955    | not scorable | not scorable | 1            | 0.756613     |
| #### Bn-scaff_19253_1-p11135 C-genome specific (napus-oleracea) | 0.9952153    | 0.6314116    | 0.9767442    | 0.7818891    | not scorable | not scorable |
| #### Bn-scaff_19253_1-p11149 C-genome specific (napus-oleracea) | 0.8588517    | 0.7822704    | 0.9844961    | 0.7073465    | not scorable | not scorable |
| #### Bn-scaff_19253_1-p11208 C-genome specific (napus-oleracea) | 0.9928229    | 0.773491     | 1            | 0.6679975    | not scorable | not scorable |
| #### Bn-scaff_19253_1-p11221 C-genome specific (napus-oleracea) | 0.9808612    | 0.6613555    | 1            | 0.6084151    | not scorable | not scorable |
| #### Bn-scaff_19253_1-p11270 C-genome specific (napus-oleracea) | 0.9928229    | 0.7806745    | 0.9922481    | 0.7824847    | not scorable | not scorable |
| #### Bn-scaff_19253_1-p11278 C-genome specific (napus-oleracea) | 0.9976076    | 0.7491977    | 0.9922481    | 0.79689      | not scorable | not scorable |
| #### Bn-scaff_19253_1-p11302 C-genome specific (napus-oleracea) | 0.9904306    | 0.7574591    | 1            | 0.5502803    | not scorable | not scorable |
| #### Bn-scaff_19253_1-p11323 C-genome specific (napus-oleracea) | 0.9952153    | 0.7717348    | 1            | 0.7315802    | not scorable | not scorable |
| #### Bn-scaff_19253_1-p11612 C-genome specific (napus-oleracea) | 0.9928229    | 0.7693331    | 0.9922481    | 0.8278692    | not scorable | not scorable |
| #### Bn-scaff_19253_1-p11796 C-genome specific (napus-oleracea) | 0.9928229    | 0.7689065    | 0.9922481    | 0.7675037    | not scorable | not scorable |
| #### Bn-scaff_19253_1-p11906 C-genome specific (napus-oleracea) | 0.9856459    | 0.7847708    | 0.9922481    | 0.8335571    | not scorable | not scorable |
| #### Bn-scaff_19253_1-p12218 C-genome specific (napus-oleracea) | 0.9952153    | 0.8051609    | 0.9922481    | 0.7607414    | not scorable | not scorable |
| #### Bn-scaff_19253_1-p12251 C-genome specific (napus-oleracea) | 0.9928229    | 0.7096379    | 0.9922481    | 0.6432496    | not scorable | not scorable |
| #### Bn-scaff_19253_1-p12400 all not scorable                   | not scorable | not scorable | not scorable | not scorable | not scorable | not scorable |
| #### Bn-scaff_19253_1-p12437 C-genome specific (napus-oleracea) | 0.9952153    | 0.811128     | 0.9922481    | 0.8830775    | not scorable | not scorable |
| #### Bn-scaff_19253_1-p12491 C-genome specific (napus-oleracea) | 0.9880383    | 0.7176942    | 0.8682171    | 0.6695246    | not scorable | not scorable |
| #### Bn-scaff_19253_1-p12504 C-genome specific (napus-oleracea) | 0.9952153    | 0.7383122    | 1            | 0.7225745    | not scorable | not scorable |
| #### Bn-scaff_19253_1-p12517 C-genome specific (napus-oleracea) | 0.9928229    | 0.7984665    | 1            | 0.7704329    | not scorable | not scorable |
| #### Bn-scaff_19253_1-p12533 C-genome specific (napus-oleracea) | 0.9976076    | 0.6716869    | 1            | 0.6905265    | not scorable | not scorable |
| #### Bn-scaff_19253_1-p12548 C-genome specific (napus-oleracea) | 0.9928229    | 0.7174071    | 0.9922481    | 0.7389485    | not scorable | not scorable |
| #### Bn-scaff_19253_1-p12600 C-genome specific (napus-oleracea) | 0.9928229    | 0.7966523    | 1            | 0.8224113    | not scorable | not scorable |
| #### Bn-scaff_19253_1-p12621 C-genome specific (napus-oleracea) | 0.9952153    | 0.6826479    | 0.9922481    | 0.699869     | not scorable | not scorable |
| #### Bn-scaff_19253_1-p13236 C-genome specific (napus-oleracea) | 0.9928229    | 0.7412419    | 0.9844961    | 0.6625768    | not scorable | not scorable |
| #### Bn-scaff_19253_1-p13243 C-genome specific (napus-oleracea) | 0.9904306    | 0.7625811    | 0.9922481    | 0.7315466    | not scorable | not scorable |

|                                                                 |           |           |              |              |              |              |
|-----------------------------------------------------------------|-----------|-----------|--------------|--------------|--------------|--------------|
| #### Bn-scaff_19253_1-p13250 C-genome specific (napus-oleracea) | 0.7631579 | 0.8325009 | 0.875969     | 0.708443     | not scorable | not scorable |
| #### Bn-scaff_19253_1-p13317 C-genome specific (napus-oleracea) | 0.9904306 | 0.8067722 | 0.8682171    | 0.8357929    | not scorable | not scorable |
| #### Bn-scaff_19253_1-p13853 C-genome specific (napus-oleracea) | 0.9880383 | 0.6797867 | 1            | 0.7403231    | not scorable | not scorable |
| #### Bn-scaff_19253_1-p14007 C-genome specific (napus-oleracea) | 0.9904306 | 0.7624596 | 1            | 0.7796298    | not scorable | not scorable |
| #### Bn-scaff_19253_1-p14217 C-genome specific (napus-oleracea) | 0.9952153 | 0.7382352 | 0.9922481    | 0.8254118    | not scorable | not scorable |
| #### Bn-scaff_19253_1-p14241 C-genome specific (napus-oleracea) | 0.9952153 | 0.7749913 | 0.9844961    | 0.842146     | not scorable | not scorable |
| #### Bn-scaff_19253_1-p14250 C-genome specific (napus-oleracea) | 0.9976076 | 0.7716804 | 0.9922481    | 0.8317913    | not scorable | not scorable |
| #### Bn-scaff_19253_1-p14513 C-genome specific (napus-oleracea) | 0.9880383 | 0.6753609 | 0.9224806    | 0.7120794    | not scorable | not scorable |
| #### Bn-scaff_19253_1-p14545 C-genome specific (napus-oleracea) | 0.9928229 | 0.7806789 | 1            | 0.8361087    | not scorable | not scorable |
| #### Bn-scaff_19253_1-p15204 C-genome specific (napus-oleracea) | 0.9856459 | 0.7096242 | 0.9534883    | 0.7094836    | not scorable | not scorable |
| #### Bn-scaff_19253_1-p16200 C-genome specific (napus-oleracea) | 0.9976076 | 0.7161251 | 1            | 0.6688465    | not scorable | not scorable |
| #### Bn-scaff_19253_1-p16209 C-genome specific (napus-oleracea) | 0.9880383 | 0.7126215 | 0.9844961    | 0.723729     | not scorable | not scorable |
| #### Bn-scaff_19253_1-p16223 C-genome specific (napus-oleracea) | 0.9760765 | 0.7994815 | 1            | 0.8107347    | not scorable | not scorable |
| #### Bn-scaff_19253_1-p16278 C-genome specific (napus-oleracea) | 0.9880383 | 0.6137387 | 0.9922481    | 0.6662629    | not scorable | not scorable |
| #### Bn-scaff_19253_1-p16308 C-genome specific (napus-oleracea) | 0.9928229 | 0.7093172 | 0.9844961    | 0.6608995    | not scorable | not scorable |
| #### Bn-scaff_19253_1-p16314 C-genome specific (napus-oleracea) | 0.9928229 | 0.7498394 | 0.9922481    | 0.7361636    | not scorable | not scorable |
| #### Bn-scaff_19253_1-p16325 C-genome specific (napus-oleracea) | 0.9976076 | 0.6953322 | 0.9844961    | 0.7495229    | not scorable | not scorable |
| #### Bn-scaff_19253_1-p16332 C-genome specific (napus-oleracea) | 0.9928229 | 0.647025  | 0.9922481    | 0.6225061    | not scorable | not scorable |
| #### Bn-scaff_19253_1-p16343 C-genome specific (napus-oleracea) | 0.9904306 | 0.6709488 | 0.9922481    | 0.6490875    | not scorable | not scorable |
| #### Bn-scaff_19253_1-p16743 genome unspecific (all in)         | 0.9952153 | 0.2226025 | 0.8294573    | 0.3142121    | 1            | 0.9033508    |
| #### Bn-scaff_19253_1-p16812 C-genome specific (napus-oleracea) | 0.9808612 | 0.5451252 | 1            | 0.8314662    | not scorable | not scorable |
| #### Bn-scaff_19253_1-p17064 C-genome specific (napus-oleracea) | 0.9880383 | 0.743978  | 0.9922481    | 0.7484528    | not scorable | not scorable |
| #### Bn-scaff_19253_1-p17098 C-genome specific (napus-oleracea) | 0.9760765 | 0.7209912 | 1            | 0.6402147    | not scorable | not scorable |
| #### Bn-scaff_19253_1-p17124 C-genome specific (napus-oleracea) | 0.9880383 | 0.6383058 | 1            | 0.7466142    | not scorable | not scorable |
| #### Bn-scaff_19253_1-p18050 C-genome specific (napus-oleracea) | 0.9665072 | 0.5797887 | 0.9922481    | 0.7214716    | not scorable | not scorable |
| #### Bn-scaff_19253_1-p19503 C-genome specific (napus-oleracea) | 0.3923445 | 0.8477759 | 0.5658914    | 0.7575459    | not scorable | not scorable |
| #### Bn-scaff_19253_1-p19565 C-genome specific (napus-oleracea) | 0.9904306 | 0.6789526 | 1            | 0.5978462    | not scorable | not scorable |
| #### Bn-scaff_19253_1-p19741 napus specific                     | 0.9904306 | 0.4122773 | not scorable | not scorable | not scorable | not scorable |
| #### Bn-scaff_19253_1-p20012 C-genome specific (napus-oleracea) | 0.9760765 | 0.769401  | 0.9922481    | 0.7010061    | not scorable | not scorable |
| #### Bn-scaff_19253_1-p20058 C-genome specific (napus-oleracea) | 0.9856459 | 0.7932267 | 1            | 0.8261852    | not scorable | not scorable |
| #### Bn-scaff_19253_1-p20197 C-genome specific (napus-oleracea) | 0.9856459 | 0.772094  | 1            | 0.8521454    | not scorable | not scorable |
| #### Bn-scaff_19253_1-p21370 genome unspecific (all in)         | 1         | 0.7191465 | 0.9922481    | 0.6752846    | 1            | 0.8146031    |
| #### Bn-scaff_19253_1-p22395 C-genome specific (napus-oleracea) | 0.9952153 | 0.7490181 | 1            | 0.7669778    | not scorable | not scorable |

|                                                                 |              |              |              |              |              |              |
|-----------------------------------------------------------------|--------------|--------------|--------------|--------------|--------------|--------------|
| #### Bn-scaff_19253_1-p22493 C-genome specific (napus-oleracea) | 1            | 0.7451807    | 0.9612403    | 0.7113906    | not scorable | not scorable |
| #### Bn-scaff_19253_1-p22518 C-genome specific (napus-oleracea) | 0.9952153    | 0.7277477    | 0.9922481    | 0.6762346    | not scorable | not scorable |
| #### Bn-scaff_19253_1-p22827 genome unspecific (all in)         | 0.9880383    | 0.5395986    | 0.9922481    | 0.7025477    | 1            | 0.9175813    |
| #### Bn-scaff_19253_1-p22856 genome unspecific (all in)         | 0.9904306    | 0.4127474    | 0.9922481    | 0.6557972    | 1            | 0.7912063    |
| #### Bn-scaff_19253_1-p22857 all not scorable                   | not scorable | not scorable | not scorable | not scorable | not scorable | not scorable |
| #### Bn-scaff_19253_1-p23781 C-genome specific (napus-oleracea) | 0.9976076    | 0.7708716    | 1            | 0.8384798    | not scorable | not scorable |
| #### Bn-scaff_19253_1-p24494 C-genome specific (napus-oleracea) | 0.9928229    | 0.7804801    | 1            | 0.7587031    | not scorable | not scorable |
| #### Bn-scaff_19253_1-p24802 C-genome specific (napus-oleracea) | 0.9952153    | 0.8021492    | 0.9844961    | 0.8148091    | not scorable | not scorable |
| #### Bn-scaff_19253_1-p24887 C-genome specific (napus-oleracea) | 0.9880383    | 0.7598217    | 1            | 0.7786473    | not scorable | not scorable |
| #### Bn-scaff_19253_1-p25315 genome unspecific (all in)         | 0.9856459    | 0.4739408    | 1            | 0.7409673    | 1            | 0.8912995    |
| #### Bn-scaff_19253_1-p25504 C-genome specific (napus-oleracea) | 0.9856459    | 0.6861501    | 0.9922481    | 0.6369713    | not scorable | not scorable |
| #### Bn-scaff_19253_1-p25672 genome unspecific (all in)         | 0.9688995    | 0.3630067    | 1            | 0.9017293    | 1            | 0.6827424    |
| #### Bn-scaff_19253_1-p25722 C-genome specific (napus-oleracea) | 0.9904306    | 0.7443504    | 1            | 0.8213872    | not scorable | not scorable |
| #### Bn-scaff_19253_1-p25881 C-genome specific (napus-oleracea) | 0.9856459    | 0.6030089    | 0.9844961    | 0.578985     | not scorable | not scorable |
| #### Bn-scaff_19253_1-p25898 C-genome specific (napus-oleracea) | 0.9904306    | 0.6197847    | 1            | 0.5927334    | not scorable | not scorable |
| #### Bn-scaff_19253_1-p25920 C-genome specific (napus-oleracea) | 1            | 0.6890152    | 1            | 0.6482345    | not scorable | not scorable |
| #### Bn-scaff_19253_1-p25939 C-genome specific (napus-oleracea) | 0.9928229    | 0.679038     | 1            | 0.6567578    | not scorable | not scorable |
| #### Bn-scaff_19253_1-p26030 C-genome specific (napus-oleracea) | 0.9856459    | 0.6052404    | 0.9844961    | 0.6122934    | not scorable | not scorable |
| #### Bn-scaff_19253_1-p26637 C-genome specific (napus-oleracea) | 0.9832536    | 0.712642     | 1            | 0.7419604    | not scorable | not scorable |
| #### Bn-scaff_19253_1-p2678 C-genome specific (napus-oleracea)  | 0.9904306    | 0.7062702    | 0.9922481    | 0.7568001    | not scorable | not scorable |
| #### Bn-scaff_19253_1-p26923 C-genome specific (napus-oleracea) | 0.9832536    | 0.790392     | 1            | 0.8147428    | not scorable | not scorable |
| #### Bn-scaff_19253_1-p27735 C-genome specific (napus-oleracea) | 0.9497608    | 0.6789971    | 0.9767442    | 0.8124745    | not scorable | not scorable |
| #### Bn-scaff_19253_1-p28540 C-genome specific (napus-oleracea) | 0.9808612    | 0.7646713    | 0.9922481    | 0.7342401    | not scorable | not scorable |
| #### Bn-scaff_19253_1-p29063 C-genome specific (napus-oleracea) | 0.9880383    | 0.7658979    | 1            | 0.8093424    | not scorable | not scorable |
| #### Bn-scaff_19253_1-p29179 C-genome specific (napus-oleracea) | 0.9928229    | 0.7543038    | 1            | 0.793373     | not scorable | not scorable |
| #### Bn-scaff_19253_1-p30095 C-genome specific (napus-oleracea) | 0.9904306    | 0.7866645    | 1            | 0.7788526    | not scorable | not scorable |
| #### Bn-scaff_19253_1-p30153 C-genome specific (napus-oleracea) | 0.9832536    | 0.7562795    | 0.9844961    | 0.7129645    | not scorable | not scorable |
| #### Bn-scaff_19253_1-p30405 C-genome specific (napus-oleracea) | 0.9712918    | 0.7405334    | 1            | 0.6760703    | not scorable | not scorable |
| #### Bn-scaff_19253_1-p31161 C-genome specific (napus-oleracea) | 0.9856459    | 0.4915498    | 0.9922481    | 0.6059588    | not scorable | not scorable |
| #### Bn-scaff_19253_1-p31253 C-genome specific (napus-oleracea) | 0.9904306    | 0.7478368    | 1            | 0.7060347    | not scorable | not scorable |
| #### Bn-scaff_19253_1-p31721 C-genome specific (napus-oleracea) | 0.9952153    | 0.7027311    | 0.9922481    | 0.6802497    | not scorable | not scorable |
| #### Bn-scaff_19253_1-p31936 C-genome specific (napus-oleracea) | 0.9832536    | 0.5656345    | 0.9844961    | 0.5877925    | not scorable | not scorable |
| #### Bn-scaff_19253_1-p32044 C-genome specific (napus-oleracea) | 0.9808612    | 0.691767     | 0.9922481    | 0.6464787    | not scorable | not scorable |

|                                                                 |           |           |           |           |              |              |
|-----------------------------------------------------------------|-----------|-----------|-----------|-----------|--------------|--------------|
| #### Bn-scaff_19253_1-p32074 C-genome specific (napus-oleracea) | 0.9736842 | 0.5775093 | 0.9922481 | 0.5545892 | not scorable | not scorable |
| #### Bn-scaff_19253_1-p33324 C-genome specific (napus-oleracea) | 0.9928229 | 0.6806862 | 0.9922481 | 0.6526463 | not scorable | not scorable |
| #### Bn-scaff_19253_1-p33365 C-genome specific (napus-oleracea) | 0.9976076 | 0.7654535 | 0.9922481 | 0.8036606 | not scorable | not scorable |
| #### Bn-scaff_19253_1-p33411 C-genome specific (napus-oleracea) | 0.9904306 | 0.7981007 | 0.9922481 | 0.8395461 | not scorable | not scorable |
| #### Bn-scaff_19253_1-p34416 C-genome specific (napus-oleracea) | 0.9808612 | 0.7827153 | 0.9922481 | 0.8069562 | not scorable | not scorable |
| #### Bn-scaff_19253_1-p34429 C-genome specific (napus-oleracea) | 0.9760765 | 0.7681009 | 0.9922481 | 0.8676384 | not scorable | not scorable |
| #### Bn-scaff_19253_1-p34435 C-genome specific (napus-oleracea) | 0.9880383 | 0.6835605 | 0.9922481 | 0.757094  | not scorable | not scorable |
| #### Bn-scaff_19253_1-p35493 C-genome specific (napus-oleracea) | 0.9856459 | 0.6962101 | 0.9844961 | 0.7646013 | not scorable | not scorable |
| #### Bn-scaff_19253_1-p36516 C-genome specific (napus-oleracea) | 1         | 0.7718852 | 0.9922481 | 0.7105358 | not scorable | not scorable |
| #### Bn-scaff_19253_1-p37320 C-genome specific (napus-oleracea) | 1         | 0.7178788 | 0.9844961 | 0.7093671 | not scorable | not scorable |
| #### Bn-scaff_19253_1-p37376 C-genome specific (napus-oleracea) | 0.9976076 | 0.7404869 | 0.9689922 | 0.6967734 | not scorable | not scorable |
| #### Bn-scaff_19253_1-p37470 C-genome specific (napus-oleracea) | 0.9976076 | 0.6935821 | 0.9922481 | 0.6272326 | not scorable | not scorable |
| #### Bn-scaff_19253_1-p38719 C-genome specific (napus-oleracea) | 1         | 0.7870747 | 0.9922481 | 0.7175342 | not scorable | not scorable |
| #### Bn-scaff_19253_1-p38754 C-genome specific (napus-oleracea) | 1         | 0.6704058 | 1         | 0.71899   | not scorable | not scorable |
| #### Bn-scaff_19253_1-p38870 C-genome specific (napus-oleracea) | 1         | 0.7841367 | 0.9922481 | 0.7847617 | not scorable | not scorable |
| #### Bn-scaff_19253_1-p38914 C-genome specific (napus-oleracea) | 1         | 0.7000346 | 0.9844961 | 0.6119522 | not scorable | not scorable |
| #### Bn-scaff_19253_1-p41650 genome unspecific (all in)         | 1         | 0.3191947 | 0.9767442 | 0.2833319 | 1            | 0.8521883    |
| #### Bn-scaff_19253_1-p43342 C-genome specific (napus-oleracea) | 0.9904306 | 0.7276849 | 1         | 0.7717022 | not scorable | not scorable |
| #### Bn-scaff_19253_1-p43437 genome unspecific (all in)         | 1         | 0.6501491 | 1         | 0.657463  | 1            | 0.9299496    |
| #### Bn-scaff_19253_1-p43649 C-genome specific (napus-oleracea) | 0.9928229 | 0.7703006 | 0.8914729 | 0.8280144 | not scorable | not scorable |
| #### Bn-scaff_19253_1-p43752 C-genome specific (napus-oleracea) | 0.9712918 | 0.6913501 | 0.8992248 | 0.7199561 | not scorable | not scorable |
| #### Bn-scaff_19253_1-p44603 C-genome specific (napus-oleracea) | 0.9952153 | 0.7988222 | 1         | 0.751121  | not scorable | not scorable |
| #### Bn-scaff_19253_1-p45420 genome unspecific (all in)         | 0.9976076 | 0.4720757 | 1         | 0.7022464 | 1            | 0.9083838    |
| #### Bn-scaff_19253_1-p46249 C-genome specific (napus-oleracea) | 0.9928229 | 0.6786791 | 0.9922481 | 0.7014435 | not scorable | not scorable |
| #### Bn-scaff_19253_1-p47405 C-genome specific (napus-oleracea) | 0.9880383 | 0.5871595 | 1         | 0.7438669 | not scorable | not scorable |
| #### Bn-scaff_19253_1-p47803 C-genome specific (napus-oleracea) | 0.9904306 | 0.7815368 | 0.9844961 | 0.6868901 | not scorable | not scorable |
| #### Bn-scaff_19253_1-p49032 C-genome specific (napus-oleracea) | 0.9904306 | 0.6561296 | 1         | 0.603496  | not scorable | not scorable |
| #### Bn-scaff_19253_1-p49059 C-genome specific (napus-oleracea) | 0.9952153 | 0.7587126 | 1         | 0.6120741 | not scorable | not scorable |
| #### Bn-scaff_19253_1-p49066 C-genome specific (napus-oleracea) | 0.9880383 | 0.5922989 | 1         | 0.5445873 | not scorable | not scorable |
| #### Bn-scaff_19253_1-p49095 genome unspecific (all in)         | 0.9952153 | 0.7217057 | 1         | 0.7062608 | 0.9504132    | 0.8192344    |
| #### Bn-scaff_19253_1-p49138 C-genome specific (napus-oleracea) | 0.9976076 | 0.8051729 | 1         | 0.7099695 | not scorable | not scorable |
| #### Bn-scaff_19253_1-p49141 C-genome specific (napus-oleracea) | 0.9952153 | 0.674518  | 1         | 0.5866004 | not scorable | not scorable |
| #### Bn-scaff_19253_1-p50253 C-genome specific (napus-oleracea) | 1         | 0.8140243 | 1         | 0.793973  | not scorable | not scorable |

|                                                                  |           |           |           |           |              |              |
|------------------------------------------------------------------|-----------|-----------|-----------|-----------|--------------|--------------|
| ##### Bn-scaff_19253_1-p50256 C-genome specific (napus-oleracea) | 0.9904306 | 0.7112475 | 0.9844961 | 0.6574142 | not scorable | not scorable |
| ##### Bn-scaff_19253_1-p50803 C-genome specific (napus-oleracea) | 0.9976076 | 0.6776122 | 1         | 0.435333  | not scorable | not scorable |
| ##### Bn-scaff_19253_1-p50804 C-genome specific (napus-oleracea) | 0.9952153 | 0.7653865 | 1         | 0.5968127 | not scorable | not scorable |
| ##### Bn-scaff_19253_1-p50898 C-genome specific (napus-oleracea) | 0.9880383 | 0.7198427 | 1         | 0.7154657 | not scorable | not scorable |
| ##### Bn-scaff_19253_1-p50902 C-genome specific (napus-oleracea) | 0.9928229 | 0.6902621 | 1         | 0.6137564 | not scorable | not scorable |
| ##### Bn-scaff_19253_1-p51268 C-genome specific (napus-oleracea) | 1         | 0.7442303 | 1         | 0.7278001 | not scorable | not scorable |
| ##### Bn-scaff_19253_1-p51302 C-genome specific (napus-oleracea) | 0.9952153 | 0.7914778 | 1         | 0.9087511 | not scorable | not scorable |
| ##### Bn-scaff_19253_1-p51310 C-genome specific (napus-oleracea) | 0.9976076 | 0.7952917 | 1         | 0.7664376 | not scorable | not scorable |
| ##### Bn-scaff_19253_1-p51337 C-genome specific (napus-oleracea) | 0.9952153 | 0.785143  | 1         | 0.8485919 | not scorable | not scorable |
| ##### Bn-scaff_19253_1-p51378 C-genome specific (napus-oleracea) | 0.9928229 | 0.8153284 | 1         | 0.6953278 | not scorable | not scorable |
| ##### Bn-scaff_19253_1-p51390 C-genome specific (napus-oleracea) | 0.9952153 | 0.5428596 | 1         | 0.7250431 | not scorable | not scorable |
| ##### Bn-scaff_19253_1-p51404 C-genome specific (napus-oleracea) | 0.9904306 | 0.8034126 | 1         | 0.7380071 | not scorable | not scorable |
| ##### Bn-scaff_19253_1-p51405 C-genome specific (napus-oleracea) | 0.9904306 | 0.8363513 | 1         | 0.6585821 | not scorable | not scorable |
| ##### Bn-scaff_19253_1-p51455 C-genome specific (napus-oleracea) | 0.9976076 | 0.7642837 | 1         | 0.7610075 | not scorable | not scorable |
| ##### Bn-scaff_19253_1-p51460 genome unspecific (all in)         | 0.9976076 | 0.4867905 | 1         | 0.686318  | 1            | 0.9335358    |
| ##### Bn-scaff_19253_1-p51504 C-genome specific (napus-oleracea) | 0.9904306 | 0.7704034 | 1         | 0.8083602 | not scorable | not scorable |
| ##### Bn-scaff_19253_1-p51672 C-genome specific (napus-oleracea) | 0.9976076 | 0.6696551 | 1         | 0.6302835 | not scorable | not scorable |
| ##### Bn-scaff_19253_1-p52287 genome unspecific (all in)         | 0.9952153 | 0.7390647 | 1         | 0.6640854 | 1            | 0.8948833    |
| ##### Bn-scaff_19253_1-p52437 C-genome specific (napus-oleracea) | 0.9976076 | 0.7054345 | 1         | 0.798533  | not scorable | not scorable |
| ##### Bn-scaff_19253_1-p52452 C-genome specific (napus-oleracea) | 0.9904306 | 0.7723182 | 1         | 0.7653606 | not scorable | not scorable |
| ##### Bn-scaff_19253_1-p52480 C-genome specific (napus-oleracea) | 0.9928229 | 0.7813451 | 1         | 0.7997956 | not scorable | not scorable |
| ##### Bn-scaff_19253_1-p52489 C-genome specific (napus-oleracea) | 0.9976076 | 0.7563182 | 1         | 0.8601297 | not scorable | not scorable |
| ##### Bn-scaff_19253_1-p52596 C-genome specific (napus-oleracea) | 0.9904306 | 0.75588   | 1         | 0.8499862 | not scorable | not scorable |
| ##### Bn-scaff_19253_1-p52627 C-genome specific (napus-oleracea) | 0.9976076 | 0.7174346 | 1         | 0.7413431 | not scorable | not scorable |
| ##### Bn-scaff_19253_1-p52628 C-genome specific (napus-oleracea) | 0.9976076 | 0.8026818 | 1         | 0.753359  | not scorable | not scorable |
| ##### Bn-scaff_19253_1-p53180 C-genome specific (napus-oleracea) | 0.9928229 | 0.7354159 | 1         | 0.8543572 | not scorable | not scorable |
| ##### Bn-scaff_19253_1-p53183 C-genome specific (napus-oleracea) | 0.9928229 | 0.7234554 | 1         | 0.7915585 | not scorable | not scorable |
| ##### Bn-scaff_19253_1-p53220 C-genome specific (napus-oleracea) | 1         | 0.7993419 | 1         | 0.8306495 | not scorable | not scorable |
| ##### Bn-scaff_19253_1-p53328 C-genome specific (napus-oleracea) | 0.9952153 | 0.6927978 | 1         | 0.7720551 | not scorable | not scorable |
| ##### Bn-scaff_19253_1-p53354 C-genome specific (napus-oleracea) | 0.9880383 | 0.7505211 | 1         | 0.6561891 | not scorable | not scorable |
| ##### Bn-scaff_19253_1-p53500 C-genome specific (napus-oleracea) | 0.9904306 | 0.7772204 | 1         | 0.7746065 | not scorable | not scorable |
| ##### Bn-scaff_19253_1-p536 C-genome specific (napus-oleracea)   | 0.9808612 | 0.7314068 | 0.9844961 | 0.7456087 | not scorable | not scorable |
| ##### Bn-scaff_19253_1-p54263 C-genome specific (napus-oleracea) | 0.9952153 | 0.7711212 | 1         | 0.6152536 | not scorable | not scorable |

|                                                                 |           |           |           |           |              |              |
|-----------------------------------------------------------------|-----------|-----------|-----------|-----------|--------------|--------------|
| #### Bn-scaff_19253_1-p54270 C-genome specific (napus-oleracea) | 0.9880383 | 0.8534179 | 1         | 0.6217741 | not scorable | not scorable |
| #### Bn-scaff_19253_1-p54301 C-genome specific (napus-oleracea) | 0.9928229 | 0.7870917 | 1         | 0.7300048 | not scorable | not scorable |
| #### Bn-scaff_19253_1-p54315 C-genome specific (napus-oleracea) | 0.9952153 | 0.7459505 | 1         | 0.6791783 | not scorable | not scorable |
| #### Bn-scaff_19253_1-p54334 genome unspecific (all in)         | 0.9904306 | 0.4494584 | 0.9689922 | 0.6166301 | 1            | 0.6866683    |
| #### Bn-scaff_19253_1-p54985 C-genome specific (napus-oleracea) | 0.9928229 | 0.770266  | 1         | 0.8520669 | not scorable | not scorable |
| #### Bn-scaff_19253_1-p55384 C-genome specific (napus-oleracea) | 0.9952153 | 0.7071035 | 0.9534883 | 0.8091418 | not scorable | not scorable |
| #### Bn-scaff_19253_1-p55480 C-genome specific (napus-oleracea) | 0.9952153 | 0.6821707 | 1         | 0.8531306 | not scorable | not scorable |
| #### Bn-scaff_19253_1-p55547 C-genome specific (napus-oleracea) | 0.9880383 | 0.5812362 | 0.9922481 | 0.6932703 | not scorable | not scorable |
| #### Bn-scaff_19253_1-p55551 C-genome specific (napus-oleracea) | 0.9808612 | 0.6818768 | 1         | 0.7401361 | not scorable | not scorable |
| #### Bn-scaff_19253_1-p55689 C-genome specific (napus-oleracea) | 0.9904306 | 0.8030524 | 1         | 0.7422581 | not scorable | not scorable |
| #### Bn-scaff_19253_1-p55823 C-genome specific (napus-oleracea) | 0.9832536 | 0.6601675 | 1         | 0.7040231 | not scorable | not scorable |
| #### Bn-scaff_19253_1-p55985 C-genome specific (napus-oleracea) | 0.9952153 | 0.6860968 | 1         | 0.6424688 | not scorable | not scorable |
| #### Bn-scaff_19253_1-p56004 C-genome specific (napus-oleracea) | 0.9952153 | 0.7433303 | 1         | 0.718002  | not scorable | not scorable |
| #### Bn-scaff_19253_1-p56048 C-genome specific (napus-oleracea) | 0.9904306 | 0.6441295 | 1         | 0.5947474 | not scorable | not scorable |
| #### Bn-scaff_19253_1-p56136 C-genome specific (napus-oleracea) | 1         | 0.8150373 | 1         | 0.7736216 | not scorable | not scorable |
| #### Bn-scaff_19253_1-p56138 C-genome specific (napus-oleracea) | 0.9928229 | 0.7907973 | 1         | 0.7104396 | not scorable | not scorable |
| #### Bn-scaff_19253_1-p56141 C-genome specific (napus-oleracea) | 0.9808612 | 0.7574019 | 1         | 0.7712645 | not scorable | not scorable |
| #### Bn-scaff_19253_1-p56215 C-genome specific (napus-oleracea) | 0.9928229 | 0.8044976 | 1         | 0.7390137 | not scorable | not scorable |
| #### Bn-scaff_19253_1-p56292 C-genome specific (napus-oleracea) | 0.9928229 | 0.5961884 | 1         | 0.583234  | not scorable | not scorable |
| #### Bn-scaff_19253_1-p56426 C-genome specific (napus-oleracea) | 0.9976076 | 0.7939091 | 1         | 0.6252969 | not scorable | not scorable |
| #### Bn-scaff_19253_1-p56432 C-genome specific (napus-oleracea) | 0.9952153 | 0.8038763 | 0.9922481 | 0.843675  | not scorable | not scorable |
| #### Bn-scaff_19253_1-p56473 C-genome specific (napus-oleracea) | 0.9928229 | 0.8087577 | 1         | 0.6800635 | not scorable | not scorable |
| #### Bn-scaff_19253_1-p56550 C-genome specific (napus-oleracea) | 0.9928229 | 0.7991884 | 1         | 0.6374314 | not scorable | not scorable |
| #### Bn-scaff_19253_1-p56559 C-genome specific (napus-oleracea) | 1         | 0.7677854 | 1         | 0.7967095 | not scorable | not scorable |
| #### Bn-scaff_19253_1-p56616 C-genome specific (napus-oleracea) | 0.9928229 | 0.7052586 | 0.9922481 | 0.7230237 | not scorable | not scorable |
| #### Bn-scaff_19253_1-p56621 C-genome specific (napus-oleracea) | 0.9856459 | 0.7283307 | 0.9922481 | 0.7356846 | not scorable | not scorable |
| #### Bn-scaff_19253_1-p56624 C-genome specific (napus-oleracea) | 0.9904306 | 0.7215932 | 0.9922481 | 0.7198613 | not scorable | not scorable |
| #### Bn-scaff_19253_1-p56717 C-genome specific (napus-oleracea) | 0.9976076 | 0.7292877 | 1         | 0.7618066 | not scorable | not scorable |
| #### Bn-scaff_19253_1-p56723 C-genome specific (napus-oleracea) | 0.9904306 | 0.4387325 | 1         | 0.744984  | not scorable | not scorable |
| #### Bn-scaff_19253_1-p56749 C-genome specific (napus-oleracea) | 0.9832536 | 0.6051928 | 0.9767442 | 0.6563179 | not scorable | not scorable |
| #### Bn-scaff_19253_1-p56749 C-genome specific (napus-oleracea) | 0.9976076 | 0.737338  | 1         | 0.5688466 | not scorable | not scorable |
| #### Bn-scaff_19253_1-p57378 C-genome specific (napus-oleracea) | 0.9904306 | 0.7892768 | 1         | 0.742485  | not scorable | not scorable |
| #### Bn-scaff_19253_1-p57436 C-genome specific (napus-oleracea) | 0.9928229 | 0.6686913 | 1         | 0.6977265 | not scorable | not scorable |

|                                                                |              |              |              |              |              |              |
|----------------------------------------------------------------|--------------|--------------|--------------|--------------|--------------|--------------|
| #### Bn-scaff_19253_1-p57461C-genome specific (napus-oleracea) | 0.9928229    | 0.7008349    | 1            | 0.6882392    | not scorable | not scorable |
| #### Bn-scaff_19253_1-p58354C-genome specific (napus-oleracea) | 0.9856459    | 0.7400684    | 1            | 0.7789064    | not scorable | not scorable |
| #### Bn-scaff_19253_1-p58636C-genome specific (napus-oleracea) | 0.9832536    | 0.7175893    | 1            | 0.7208912    | not scorable | not scorable |
| #### Bn-scaff_19253_1-p58714C-genome specific (napus-oleracea) | 0.9976076    | 0.8045242    | 1            | 0.7818837    | not scorable | not scorable |
| #### Bn-scaff_19253_1-p59348C-genome specific (napus-oleracea) | 1            | 0.7505965    | 0.9922481    | 0.7990642    | not scorable | not scorable |
| #### Bn-scaff_19253_1-p59398C-genome specific (napus-oleracea) | 0.9904306    | 0.7045796    | 1            | 0.7415976    | not scorable | not scorable |
| #### Bn-scaff_19253_1-p59418C-genome specific (napus-oleracea) | 0.9928229    | 0.8097732    | 1            | 0.863622     | not scorable | not scorable |
| #### Bn-scaff_19253_1-p59436C-genome specific (napus-oleracea) | 0.9880383    | 0.7954539    | 1            | 0.8222069    | not scorable | not scorable |
| #### Bn-scaff_19253_1-p59694C-genome specific (napus-oleracea) | 0.9976076    | 0.7255999    | 1            | 0.796506     | not scorable | not scorable |
| #### Bn-scaff_19253_1-p59789C-genome specific (napus-oleracea) | 0.9928229    | 0.7043588    | 1            | 0.7530466    | not scorable | not scorable |
| #### Bn-scaff_19253_1-p59948C-genome specific (napus-oleracea) | 0.9928229    | 0.748099     | 1            | 0.735344     | not scorable | not scorable |
| #### Bn-scaff_19253_1-p60074C-genome specific (napus-oleracea) | 0.9976076    | 0.6597287    | 0.9844961    | 0.7194141    | not scorable | not scorable |
| #### Bn-scaff_19253_1-p60114C-genome specific (napus-oleracea) | 0.9928229    | 0.816813     | 1            | 0.7991837    | not scorable | not scorable |
| #### Bn-scaff_19253_1-p60123C-genome specific (napus-oleracea) | 0.9928229    | 0.7314464    | 0.9844961    | 0.7266231    | not scorable | not scorable |
| #### Bn-scaff_19253_1-p61101C-genome specific (napus-oleracea) | 0.9976076    | 0.7600507    | 1            | 0.8774913    | not scorable | not scorable |
| #### Bn-scaff_19253_1-p61415genome unspecific (all in)         | 0.9952153    | 0.4771002    | 1            | 0.8897666    | 0.8347107    | 0.9175417    |
| #### Bn-scaff_19253_1-p61714all not scorable                   | not scorable | not scorable | not scorable | not scorable | not scorable | not scorable |
| #### Bn-scaff_19253_1-p62787C-genome specific (napus-oleracea) | 0.9880383    | 0.7268205    | 1            | 0.7446014    | not scorable | not scorable |
| #### Bn-scaff_19253_1-p62982C-genome specific (napus-oleracea) | 0.9904306    | 0.6459176    | 1            | 0.7089088    | not scorable | not scorable |
| #### Bn-scaff_19253_1-p63012C-genome specific (napus-oleracea) | 0.9976076    | 0.7027461    | 1            | 0.7488887    | not scorable | not scorable |
| #### Bn-scaff_19253_1-p63035C-genome specific (napus-oleracea) | 0.9928229    | 0.683966     | 1            | 0.7537651    | not scorable | not scorable |
| #### Bn-scaff_19253_1-p63062C-genome specific (napus-oleracea) | 0.9880383    | 0.7626497    | 1            | 0.8093426    | not scorable | not scorable |
| #### Bn-scaff_19253_1-p75285C-genome specific (napus-oleracea) | 0.9904306    | 0.6752694    | 0.9844961    | 0.7386137    | not scorable | not scorable |
| #### Bn-scaff_19253_1-p82507C-genome specific (napus-oleracea) | 0.9880383    | 0.578335     | 0.9844961    | 0.6667088    | not scorable | not scorable |
| #### Bn-scaff_19253_1-p91871C-genome specific (napus-oleracea) | 0.9904306    | 0.4751272    | 0.9922481    | 0.8371418    | not scorable | not scorable |
| #### Bn-scaff_19253_1-p93586C-genome specific (napus-oleracea) | 0.9952153    | 0.7681533    | 0.9922481    | 0.6933798    | not scorable | not scorable |
| #### Bn-scaff_19253_1-p94993C-genome specific (napus-oleracea) | 0.9928229    | 0.708757     | 1            | 0.7508937    | not scorable | not scorable |
| #### Bn-scaff_19253_1-p95446C-genome specific (napus-oleracea) | 0.9976076    | 0.7991624    | 0.9922481    | 0.8095681    | not scorable | not scorable |
| #### Bn-scaff_19271_1-p11377C-genome specific (napus-oleracea) | 0.9928229    | 0.2748331    | 1            | 0.677487     | not scorable | not scorable |
| #### Bn-scaff_19272_1-p78 C-genome specific (napus-oleracea)   | 0.9330143    | 0.3541189    | 0.9612403    | 0.3653595    | not scorable | not scorable |
| #### Bn-scaff_19290_1-p70753genome unspecific (all in)         | 1            | 0.6733703    | 1            | 0.6817572    | 1            | 0.681638     |
| #### Bn-scaff_19310_1-p11655C-genome specific (napus-oleracea) | 0.9976076    | 0.5494755    | 1            | 0.6685128    | not scorable | not scorable |
| #### Bn-scaff_19310_1-p12435C-genome specific (napus-oleracea) | 0.9952153    | 0.7843596    | 1            | 0.7577791    | not scorable | not scorable |



|                                                                 |              |              |           |           |              |              |
|-----------------------------------------------------------------|--------------|--------------|-----------|-----------|--------------|--------------|
| #### Bn-scaff_19310_1-p20243 genome unspecific (all in)         | 0.9904306    | 0.4263276    | 1         | 0.8225714 | 1            | 0.8543575    |
| #### Bn-scaff_19310_1-p20919 C-genome specific (napus-oleracea) | 0.9928229    | 0.8095569    | 1         | 0.7847265 | not scorable | not scorable |
| #### Bn-scaff_19310_1-p24733 genome unspecific (all in)         | 0.9880383    | 0.2732867    | 1         | 0.7926114 | 0.9834711    | 0.7680373    |
| #### Bn-scaff_19310_1-p25409 C-genome specific (napus-oleracea) | 0.9856459    | 0.6965533    | 0.9922481 | 0.7497174 | not scorable | not scorable |
| #### Bn-scaff_19310_1-p27604 C-genome specific (napus-oleracea) | 0.9904306    | 0.8109998    | 1         | 0.7226984 | not scorable | not scorable |
| #### Bn-scaff_19310_1-p27654 genome unspecific (all in)         | 0.9784689    | 0.3092755    | 1         | 0.6556601 | 1            | 0.7395847    |
| #### Bn-scaff_19310_1-p27986 genome unspecific (all in)         | 0.9928229    | 0.5282391    | 1         | 0.6449751 | 1            | 0.9000877    |
| #### Bn-scaff_19310_1-p35118 C-genome specific (napus-oleracea) | 0.3779904    | 0.651063     | 0.9922481 | 0.8124242 | not scorable | not scorable |
| #### Bn-scaff_19310_1-p35250 C-genome specific (napus-oleracea) | 0.9880383    | 0.7123927    | 0.9689922 | 0.7540817 | not scorable | not scorable |
| #### Bn-scaff_19310_1-p36194 C-genome specific (napus-oleracea) | 0.9808612    | 0.6663367    | 1         | 0.4081226 | not scorable | not scorable |
| #### Bn-scaff_19310_1-p36400 genome unspecific (all in)         | 0.9928229    | 0.4332508    | 1         | 0.8376556 | 1            | 0.903953     |
| #### Bn-scaff_19310_1-p37026 C-genome specific (napus-oleracea) | 0.9904306    | 0.7814881    | 1         | 0.7409858 | not scorable | not scorable |
| #### Bn-scaff_19310_1-p37363 C-genome specific (napus-oleracea) | 1            | 0.7587267    | 0.9922481 | 0.8415946 | not scorable | not scorable |
| #### Bn-scaff_19310_1-p37674 genome unspecific (all in)         | 0.9832536    | 0.6113194    | 1         | 0.7481788 | 0.9834711    | 0.7871841    |
| #### Bn-scaff_19310_1-p39039 C-genome specific (napus-oleracea) | 0.9904306    | 0.7458271    | 1         | 0.8117753 | not scorable | not scorable |
| #### Bn-scaff_19310_1-p39045 C-genome specific (napus-oleracea) | 0.9952153    | 0.765305     | 1         | 0.7864025 | not scorable | not scorable |
| #### Bn-scaff_19310_1-p42931 genome unspecific (oleracea-rapa)  | not scorable | not scorable | 1         | 0.6923664 | 1            | 0.8914562    |
| #### Bn-scaff_19310_1-p43271 C-genome specific (napus-oleracea) | 0.9952153    | 0.7814219    | 0.9922481 | 0.7753345 | not scorable | not scorable |
| #### Bn-scaff_19310_1-p43277 C-genome specific (napus-oleracea) | 0.9928229    | 0.7001563    | 1         | 0.6937376 | not scorable | not scorable |
| #### Bn-scaff_19310_1-p43277 C-genome specific (napus-oleracea) | 0.9976076    | 0.8180839    | 1         | 0.8026106 | not scorable | not scorable |
| #### Bn-scaff_19310_1-p43351 C-genome specific (napus-oleracea) | 0.9880383    | 0.5836828    | 0.9922481 | 0.6199564 | not scorable | not scorable |
| #### Bn-scaff_19310_1-p43408 genome unspecific (all in)         | 0.9880383    | 0.4353576    | 1         | 0.6620963 | 1            | 0.9047568    |
| #### Bn-scaff_19310_1-p44686 genome unspecific (oleracea-rapa)  | not scorable | not scorable | 1         | 0.9004992 | 1            | 0.9334111    |
| #### Bn-scaff_19310_1-p48404 C-genome specific (napus-oleracea) | 0.9856459    | 0.2400248    | 0.9224806 | 0.3562972 | not scorable | not scorable |
| #### Bn-scaff_19310_1-p50120 C-genome specific (napus-oleracea) | 0.9928229    | 0.7496438    | 0.9844961 | 0.7314487 | not scorable | not scorable |
| #### Bn-scaff_19310_1-p50197 C-genome specific (napus-oleracea) | 0.9904306    | 0.7269011    | 0.9767442 | 0.7573276 | not scorable | not scorable |
| #### Bn-scaff_19310_1-p50222 C-genome specific (napus-oleracea) | 0.9928229    | 0.7853703    | 0.9922481 | 0.8083398 | not scorable | not scorable |
| #### Bn-scaff_19310_1-p50231 C-genome specific (napus-oleracea) | 0.9904306    | 0.7521662    | 1         | 0.7295333 | not scorable | not scorable |
| #### Bn-scaff_19310_1-p50965 C-genome specific (napus-oleracea) | 0.9617225    | 0.7636154    | 0.9224806 | 0.7772975 | not scorable | not scorable |
| #### Bn-scaff_19310_1-p51178 C-genome specific (napus-oleracea) | 0.9952153    | 0.7529008    | 0.9844961 | 0.7254837 | not scorable | not scorable |
| #### Bn-scaff_19310_1-p51215 C-genome specific (napus-oleracea) | 0.9928229    | 0.8007197    | 1         | 0.81306   | not scorable | not scorable |
| #### Bn-scaff_19310_1-p53119 C-genome specific (napus-oleracea) | 0.9904306    | 0.7447109    | 1         | 0.7297381 | not scorable | not scorable |
| #### Bn-scaff_19310_1-p53140 C-genome specific (napus-oleracea) | 0.9952153    | 0.8404339    | 1         | 0.7492576 | not scorable | not scorable |

|                                                                 |              |              |              |              |              |              |
|-----------------------------------------------------------------|--------------|--------------|--------------|--------------|--------------|--------------|
| #### Bn-scaff_19310_1-p53647 C-genome specific (napus-oleracea) | 0.3899522    | 0.9410233    | 0.9844961    | 0.7880779    | not scorable | not scorable |
| #### Bn-scaff_19310_1-p56210 C-genome specific (napus-oleracea) | 0.9952153    | 0.636616     | 1            | 0.6273731    | not scorable | not scorable |
| #### Bn-scaff_19310_1-p56264 C-genome specific (napus-oleracea) | 0.9880383    | 0.8460627    | 1            | 0.7905645    | not scorable | not scorable |
| #### Bn-scaff_19310_1-p56271 C-genome specific (napus-oleracea) | 0.9880383    | 0.7996386    | 1            | 0.7998049    | not scorable | not scorable |
| #### Bn-scaff_19310_1-p56349 C-genome specific (napus-oleracea) | 0.9976076    | 0.6792775    | 0.9922481    | 0.683925     | not scorable | not scorable |
| #### Bn-scaff_19310_1-p56406 C-genome specific (napus-oleracea) | 0.9928229    | 0.8149207    | 0.9844961    | 0.7191108    | not scorable | not scorable |
| #### Bn-scaff_19310_1-p59501 C-genome specific (napus-oleracea) | 0.9832536    | 0.7188293    | 1            | 0.7209599    | not scorable | not scorable |
| #### Bn-scaff_19310_1-p62686 A-genome specific (napus-rapa)     | 1            | 0.4673266    | not scorable | not scorable | 1            | 0.5302581    |
| #### Bn-scaff_19310_1-p62824 C-genome specific (napus-oleracea) | 0.9856459    | 0.5708375    | 0.9844961    | 0.725184     | not scorable | not scorable |
| #### Bn-scaff_19310_1-p63162 C-genome specific (napus-oleracea) | 0.9904306    | 0.8161389    | 0.9844961    | 0.7170214    | not scorable | not scorable |
| #### Bn-scaff_19310_1-p64459 C-genome specific (napus-oleracea) | 0.9880383    | 0.8144829    | 1            | 0.7241815    | not scorable | not scorable |
| #### Bn-scaff_19310_1-p64468 C-genome specific (napus-oleracea) | 0.9880383    | 0.7238685    | 0.9844961    | 0.7249847    | not scorable | not scorable |
| #### Bn-scaff_19310_1-p66830 C-genome specific (napus-oleracea) | 0.9952153    | 0.7029194    | 0.9767442    | 0.6060262    | not scorable | not scorable |
| #### Bn-scaff_19310_1-p73626 C-genome specific (napus-oleracea) | 0.9880383    | 0.7623103    | 0.9922481    | 0.7350811    | not scorable | not scorable |
| #### Bn-scaff_19310_1-p75214 C-genome specific (napus-oleracea) | 0.9952153    | 0.8243456    | 0.9689922    | 0.7537705    | not scorable | not scorable |
| #### Bn-scaff_19310_1-p75767 C-genome specific (oleracea only)  | not scorable | not scorable | 0.9689922    | 0.2231407    | not scorable | not scorable |
| #### Bn-scaff_19310_1-p76145 C-genome specific (napus-oleracea) | 0.9904306    | 0.7965978    | 0.9922481    | 0.8166363    | not scorable | not scorable |
| #### Bn-scaff_19310_1-p79258 C-genome specific (napus-oleracea) | 0.9952153    | 0.7748303    | 0.9689922    | 0.7100436    | not scorable | not scorable |
| #### Bn-scaff_19310_1-p86941 C-genome specific (napus-oleracea) | 0.9904306    | 0.7482876    | 0.9922481    | 0.7251219    | not scorable | not scorable |
| #### Bn-scaff_19310_1-p95508 C-genome specific (napus-oleracea) | 0.9952153    | 0.8071417    | 0.9767442    | 0.790817     | not scorable | not scorable |
| #### Bn-scaff_19318_1-p167 C-genome specific (napus-oleracea)   | 1            | 0.324424     | 1            | 0.5003932    | not scorable | not scorable |
| #### Bn-scaff_19364_1-p10540 C-genome specific (napus-oleracea) | 0.9808612    | 0.7447636    | 1            | 0.8212238    | not scorable | not scorable |
| #### Bn-scaff_19364_1-p14279 C-genome specific (napus-oleracea) | 0.9784689    | 0.7575124    | 1            | 0.8300133    | not scorable | not scorable |
| #### Bn-scaff_19364_1-p15088 C-genome specific (napus-oleracea) | 0.9808612    | 0.7698734    | 1            | 0.7070284    | not scorable | not scorable |
| #### Bn-scaff_19364_1-p15141 C-genome specific (napus-oleracea) | 0.9736842    | 0.6719982    | 1            | 0.6521873    | not scorable | not scorable |
| #### Bn-scaff_19364_1-p15143 C-genome specific (napus-oleracea) | 0.9880383    | 0.7541389    | 1            | 0.7560734    | not scorable | not scorable |
| #### Bn-scaff_19364_1-p15161 C-genome specific (napus-oleracea) | 0.9736842    | 0.6886694    | 1            | 0.7571656    | not scorable | not scorable |
| #### Bn-scaff_19364_1-p15172 C-genome specific (napus-oleracea) | 0.9784689    | 0.6247563    | 1            | 0.6955034    | not scorable | not scorable |
| #### Bn-scaff_19364_1-p15203 C-genome specific (napus-oleracea) | 0.9856459    | 0.8071098    | 0.9922481    | 0.8225335    | not scorable | not scorable |
| #### Bn-scaff_19364_1-p15224 C-genome specific (napus-oleracea) | 0.9641148    | 0.7009909    | 0.9844961    | 0.7015526    | not scorable | not scorable |
| #### Bn-scaff_19364_1-p15235 C-genome specific (napus-oleracea) | 0.9784689    | 0.7316089    | 1            | 0.783022     | not scorable | not scorable |
| #### Bn-scaff_19364_1-p16574 C-genome specific (napus-oleracea) | 0.9880383    | 0.7275307    | 1            | 0.706888     | not scorable | not scorable |
| #### Bn-scaff_19364_1-p16758 C-genome specific (napus-oleracea) | 0.9832536    | 0.7595798    | 1            | 0.7544256    | not scorable | not scorable |

|                                                                  |           |           |           |           |              |              |
|------------------------------------------------------------------|-----------|-----------|-----------|-----------|--------------|--------------|
| ##### Bn-scaff_19364_1-p17577 C-genome specific (napus-oleracea) | 0.9617225 | 0.693398  | 0.9612403 | 0.6500648 | not scorable | not scorable |
| ##### Bn-scaff_19364_1-p17591 C-genome specific (napus-oleracea) | 0.9880383 | 0.752934  | 1         | 0.7294719 | not scorable | not scorable |
| ##### Bn-scaff_19364_1-p18442 C-genome specific (napus-oleracea) | 0.9856459 | 0.7825384 | 0.9922481 | 0.8134344 | not scorable | not scorable |
| ##### Bn-scaff_19364_1-p21165 C-genome specific (napus-oleracea) | 0.9784689 | 0.7178127 | 1         | 0.7200566 | not scorable | not scorable |
| ##### Bn-scaff_19364_1-p21188 C-genome specific (napus-oleracea) | 0.9832536 | 0.7904919 | 1         | 0.8006197 | not scorable | not scorable |
| ##### Bn-scaff_19364_1-p21275 C-genome specific (napus-oleracea) | 0.9808612 | 0.7487774 | 1         | 0.66752   | not scorable | not scorable |
| ##### Bn-scaff_19364_1-p21739 C-genome specific (napus-oleracea) | 0.9736842 | 0.7660812 | 0.9922481 | 0.7783965 | not scorable | not scorable |
| ##### Bn-scaff_19364_1-p22181 C-genome specific (napus-oleracea) | 0.9856459 | 0.7459515 | 0.9922481 | 0.7818675 | not scorable | not scorable |
| ##### Bn-scaff_19364_1-p22196 C-genome specific (napus-oleracea) | 0.9832536 | 0.7700309 | 1         | 0.8482069 | not scorable | not scorable |
| ##### Bn-scaff_19364_1-p22217 C-genome specific (napus-oleracea) | 0.9832536 | 0.7810735 | 1         | 0.7476895 | not scorable | not scorable |
| ##### Bn-scaff_19364_1-p22406 C-genome specific (napus-oleracea) | 0.9688995 | 0.636597  | 1         | 0.5714562 | not scorable | not scorable |
| ##### Bn-scaff_19364_1-p22406 C-genome specific (napus-oleracea) | 0.9904306 | 0.8099014 | 0.9922481 | 0.8437161 | not scorable | not scorable |
| ##### Bn-scaff_19364_1-p22427 C-genome specific (napus-oleracea) | 0.9832536 | 0.6989091 | 0.9689922 | 0.7938986 | not scorable | not scorable |
| ##### Bn-scaff_19364_1-p22435 C-genome specific (napus-oleracea) | 0.9856459 | 0.6783856 | 0.9922481 | 0.6773611 | not scorable | not scorable |
| ##### Bn-scaff_19364_1-p22445 C-genome specific (napus-oleracea) | 0.9808612 | 0.7612543 | 1         | 0.8003138 | not scorable | not scorable |
| ##### Bn-scaff_19364_1-p22624 C-genome specific (napus-oleracea) | 0.9808612 | 0.7481857 | 1         | 0.7296665 | not scorable | not scorable |
| ##### Bn-scaff_19364_1-p22679 C-genome specific (napus-oleracea) | 0.9808612 | 0.6643117 | 0.9922481 | 0.6752259 | not scorable | not scorable |
| ##### Bn-scaff_19364_1-p22831 C-genome specific (napus-oleracea) | 0.9712918 | 0.6438868 | 1         | 0.6584362 | not scorable | not scorable |
| ##### Bn-scaff_19364_1-p23072 genome unspecific (all in)         | 0.9904306 | 0.4787229 | 0.9767442 | 0.5581395 | 1            | 0.9201384    |
| ##### Bn-scaff_19364_1-p25070 C-genome specific (napus-oleracea) | 0.9808612 | 0.6574108 | 0.9922481 | 0.6003628 | not scorable | not scorable |
| ##### Bn-scaff_19364_1-p25101 C-genome specific (napus-oleracea) | 0.9760765 | 0.7621198 | 1         | 0.8623441 | not scorable | not scorable |
| ##### Bn-scaff_19364_1-p25225 C-genome specific (napus-oleracea) | 0.9760765 | 0.791144  | 1         | 0.8022676 | not scorable | not scorable |
| ##### Bn-scaff_19364_1-p25304 C-genome specific (napus-oleracea) | 0.9904306 | 0.7626474 | 1         | 0.710364  | not scorable | not scorable |
| ##### Bn-scaff_19364_1-p26932 C-genome specific (napus-oleracea) | 0.9641148 | 0.190524  | 0.9767442 | 0.304655  | not scorable | not scorable |
| ##### Bn-scaff_19364_1-p26933 C-genome specific (napus-oleracea) | 0.8205742 | 0.3815594 | 0.9224806 | 0.5927861 | not scorable | not scorable |
| ##### Bn-scaff_19364_1-p29268 C-genome specific (napus-oleracea) | 0.9832536 | 0.7877389 | 0.9922481 | 0.7285206 | not scorable | not scorable |
| ##### Bn-scaff_19364_1-p29282 C-genome specific (napus-oleracea) | 0.9760765 | 0.6936215 | 0.9922481 | 0.7367456 | not scorable | not scorable |
| ##### Bn-scaff_19364_1-p29996 C-genome specific (napus-oleracea) | 0.9784689 | 0.6397095 | 1         | 0.6137803 | not scorable | not scorable |
| ##### Bn-scaff_19364_1-p30080 C-genome specific (napus-oleracea) | 0.9401914 | 0.7532126 | 1         | 0.728243  | not scorable | not scorable |
| ##### Bn-scaff_19364_1-p30110 C-genome specific (napus-oleracea) | 0.9808612 | 0.7696726 | 1         | 0.8354757 | not scorable | not scorable |
| ##### Bn-scaff_19364_1-p30463 genome unspecific (all in)         | 0.9880383 | 0.5175522 | 1         | 0.7715093 | 1            | 0.9072468    |
| ##### Bn-scaff_19364_1-p30735 C-genome specific (napus-oleracea) | 0.9880383 | 0.7809424 | 1         | 0.8062782 | not scorable | not scorable |
| ##### Bn-scaff_19364_1-p31151 C-genome specific (napus-oleracea) | 0.9856459 | 0.2620001 | 0.9844961 | 0.6029083 | not scorable | not scorable |

|                                                                 |           |           |           |   |           |              |              |
|-----------------------------------------------------------------|-----------|-----------|-----------|---|-----------|--------------|--------------|
| #### Bn-scaff_19364_1-p31266 C-genome specific (napus-oleracea) | 0.9856459 | 0.6322866 |           | 1 | 0.5861474 | not scorable | not scorable |
| #### Bn-scaff_19364_1-p33848 C-genome specific (napus-oleracea) | 0.9856459 | 0.7589314 |           | 1 | 0.8387337 | not scorable | not scorable |
| #### Bn-scaff_19364_1-p33868 C-genome specific (napus-oleracea) | 0.9880383 | 0.7438738 |           | 1 | 0.7237797 | not scorable | not scorable |
| #### Bn-scaff_19364_1-p33942 C-genome specific (napus-oleracea) | 0.9856459 | 0.7511567 | 0.9922481 |   | 0.8471763 | not scorable | not scorable |
| #### Bn-scaff_19364_1-p34130 C-genome specific (napus-oleracea) | 0.9712918 | 0.6983283 | 0.9689922 |   | 0.7908983 | not scorable | not scorable |
| #### Bn-scaff_19364_1-p35705 C-genome specific (napus-oleracea) | 0.9880383 | 0.7699264 |           | 1 | 0.7750217 | not scorable | not scorable |
| #### Bn-scaff_19364_1-p36143 C-genome specific (napus-oleracea) | 0.9904306 | 0.7925311 |           | 1 | 0.7571565 | not scorable | not scorable |
| #### Bn-scaff_19364_1-p36183 C-genome specific (napus-oleracea) | 0.9832536 | 0.7574182 |           | 1 | 0.7823868 | not scorable | not scorable |
| #### Bn-scaff_19364_1-p36204 C-genome specific (napus-oleracea) | 0.9832536 | 0.7806422 | 0.9844961 |   | 0.739682  | not scorable | not scorable |
| #### Bn-scaff_19364_1-p36206 C-genome specific (napus-oleracea) | 0.9784689 | 0.7429042 | 0.9844961 |   | 0.7315413 | not scorable | not scorable |
| #### Bn-scaff_19364_1-p36218 C-genome specific (napus-oleracea) | 0.9856459 | 0.7579653 | 0.9922481 |   | 0.7901309 | not scorable | not scorable |
| #### Bn-scaff_19364_1-p36334 C-genome specific (napus-oleracea) | 0.9760765 | 0.7184992 | 0.9767442 |   | 0.7822439 | not scorable | not scorable |
| #### Bn-scaff_19364_1-p36387 C-genome specific (napus-oleracea) | 0.9856459 | 0.7789082 |           | 1 | 0.8695345 | not scorable | not scorable |
| #### Bn-scaff_19364_1-p37604 C-genome specific (napus-oleracea) | 0.9856459 | 0.4087182 | 0.9922481 |   | 0.5517302 | not scorable | not scorable |
| #### Bn-scaff_19364_1-p37631 C-genome specific (napus-oleracea) | 0.9832536 | 0.7388111 |           | 1 | 0.8461939 | not scorable | not scorable |
| #### Bn-scaff_19364_1-p37893 C-genome specific (napus-oleracea) | 0.9425837 | 0.7807638 |           | 1 | 0.7201366 | not scorable | not scorable |
| #### Bn-scaff_19364_1-p38064 C-genome specific (napus-oleracea) | 0.9736842 | 0.6063052 | 0.9922481 |   | 0.5919799 | not scorable | not scorable |
| #### Bn-scaff_19364_1-p38091 C-genome specific (napus-oleracea) | 0.9354067 | 0.7020378 |           | 1 | 0.6574759 | not scorable | not scorable |
| #### Bn-scaff_19364_1-p38152 C-genome specific (napus-oleracea) | 0.9330143 | 0.670435  | 0.9922481 |   | 0.8140291 | not scorable | not scorable |
| #### Bn-scaff_19364_1-p38856 C-genome specific (napus-oleracea) | 0.9712918 | 0.7564757 |           | 1 | 0.7052856 | not scorable | not scorable |
| #### Bn-scaff_19364_1-p38858 C-genome specific (napus-oleracea) | 0.9832536 | 0.7265298 | 0.9767442 |   | 0.8452166 | not scorable | not scorable |
| #### Bn-scaff_19364_1-p38879 C-genome specific (napus-oleracea) | 0.9760765 | 0.6412789 |           | 1 | 0.5758318 | not scorable | not scorable |
| #### Bn-scaff_19364_1-p38901 C-genome specific (napus-oleracea) | 0.9832536 | 0.7879536 |           | 1 | 0.7990401 | not scorable | not scorable |
| #### Bn-scaff_19364_1-p38906 C-genome specific (napus-oleracea) | 0.9736842 | 0.598734  | 0.9922481 |   | 0.5911586 | not scorable | not scorable |
| #### Bn-scaff_19364_1-p38931 C-genome specific (napus-oleracea) | 0.9832536 | 0.7643898 |           | 1 | 0.7578725 | not scorable | not scorable |
| #### Bn-scaff_19364_1-p38945 C-genome specific (napus-oleracea) | 0.9832536 | 0.6799334 | 0.9922481 |   | 0.6762181 | not scorable | not scorable |
| #### Bn-scaff_19364_1-p38965 C-genome specific (napus-oleracea) | 0.9784689 | 0.6643739 |           | 1 | 0.6325735 | not scorable | not scorable |
| #### Bn-scaff_19364_1-p38981 C-genome specific (napus-oleracea) | 0.9880383 | 0.7774591 |           | 1 | 0.7754679 | not scorable | not scorable |
| #### Bn-scaff_19364_1-p39390 genome unspecific (all in)         | 1         | 0.6080307 |           | 1 | 0.5914472 | 0.9917355    | 0.2693564    |
| #### Bn-scaff_19364_1-p41767 genome unspecific (all in)         | 1         | 0.7669629 |           | 1 | 0.7183435 |              | 1 0.7770717  |
| #### Bn-scaff_19364_1-p42361 C-genome specific (napus-oleracea) | 0.9784689 | 0.7065288 | 0.9922481 |   | 0.6778345 | not scorable | not scorable |
| #### Bn-scaff_19364_1-p44314 C-genome specific (napus-oleracea) | 0.9856459 | 0.7313838 |           | 1 | 0.7900683 | not scorable | not scorable |
| #### Bn-scaff_19364_1-p44376 C-genome specific (napus-oleracea) | 0.9832536 | 0.775883  |           | 1 | 0.8551714 | not scorable | not scorable |

|                                                                  |           |           |           |           |              |              |
|------------------------------------------------------------------|-----------|-----------|-----------|-----------|--------------|--------------|
| ##### Bn-scaff_19364_1-p44424 C-genome specific (napus-oleracea) | 0.9760765 | 0.6870425 | 0.9844961 | 0.8166372 | not scorable | not scorable |
| ##### Bn-scaff_19364_1-p45341 C-genome specific (napus-oleracea) | 0.9880383 | 0.762878  | 1         | 0.8051162 | not scorable | not scorable |
| ##### Bn-scaff_19364_1-p45552 C-genome specific (napus-oleracea) | 0.9784689 | 0.7018467 | 0.9767442 | 0.7689317 | not scorable | not scorable |
| ##### Bn-scaff_19364_1-p45588 C-genome specific (napus-oleracea) | 0.9760765 | 0.7503148 | 1         | 0.7271675 | not scorable | not scorable |
| ##### Bn-scaff_19364_1-p45996 C-genome specific (napus-oleracea) | 0.9904306 | 0.7690871 | 1         | 0.8087118 | not scorable | not scorable |
| ##### Bn-scaff_19364_1-p46102 C-genome specific (napus-oleracea) | 0.9808612 | 0.7532398 | 1         | 0.8018759 | not scorable | not scorable |
| ##### Bn-scaff_19364_1-p46128 C-genome specific (napus-oleracea) | 0.9856459 | 0.7862554 | 1         | 0.7817386 | not scorable | not scorable |
| ##### Bn-scaff_19364_1-p46213 C-genome specific (napus-oleracea) | 0.9856459 | 0.7882555 | 1         | 0.8687133 | not scorable | not scorable |
| ##### Bn-scaff_19364_1-p46214 C-genome specific (napus-oleracea) | 0.9856459 | 0.7382374 | 1         | 0.8626823 | not scorable | not scorable |
| ##### Bn-scaff_19364_1-p46219 C-genome specific (napus-oleracea) | 0.9808612 | 0.7102945 | 1         | 0.8502268 | not scorable | not scorable |
| ##### Bn-scaff_19364_1-p46262 C-genome specific (napus-oleracea) | 0.9808612 | 0.7700214 | 1         | 0.8675472 | not scorable | not scorable |
| ##### Bn-scaff_19364_1-p46326 C-genome specific (napus-oleracea) | 0.9832536 | 0.7012748 | 0.9767442 | 0.7876384 | not scorable | not scorable |
| ##### Bn-scaff_19364_1-p46582 C-genome specific (napus-oleracea) | 0.9880383 | 0.8010873 | 1         | 0.7706035 | not scorable | not scorable |
| ##### Bn-scaff_19364_1-p46620 C-genome specific (napus-oleracea) | 0.9832536 | 0.8120973 | 0.9922481 | 0.7937965 | not scorable | not scorable |
| ##### Bn-scaff_19364_1-p46664 C-genome specific (napus-oleracea) | 0.9832536 | 0.7339582 | 1         | 0.7636549 | not scorable | not scorable |
| ##### Bn-scaff_19364_1-p46673 C-genome specific (napus-oleracea) | 0.9832536 | 0.7320966 | 0.9844961 | 0.7919824 | not scorable | not scorable |
| ##### Bn-scaff_19364_1-p46701 C-genome specific (napus-oleracea) | 0.9808612 | 0.7687209 | 0.9844961 | 0.7601376 | not scorable | not scorable |
| ##### Bn-scaff_19364_1-p46713 C-genome specific (napus-oleracea) | 0.9904306 | 0.7485499 | 1         | 0.6717944 | not scorable | not scorable |
| ##### Bn-scaff_19364_1-p46722 C-genome specific (napus-oleracea) | 0.9856459 | 0.807457  | 1         | 0.8687445 | not scorable | not scorable |
| ##### Bn-scaff_19364_1-p46818 C-genome specific (napus-oleracea) | 0.9856459 | 0.7216465 | 1         | 0.6674224 | not scorable | not scorable |
| ##### Bn-scaff_19364_1-p46864 C-genome specific (napus-oleracea) | 0.9784689 | 0.7968882 | 1         | 0.8471092 | not scorable | not scorable |
| ##### Bn-scaff_19364_1-p46898 C-genome specific (napus-oleracea) | 0.9736842 | 0.821954  | 1         | 0.8444566 | not scorable | not scorable |
| ##### Bn-scaff_19364_1-p46956 C-genome specific (napus-oleracea) | 0.9880383 | 0.5842498 | 0.9922481 | 0.5895603 | not scorable | not scorable |
| ##### Bn-scaff_19364_1-p50932 C-genome specific (napus-oleracea) | 0.9856459 | 0.7592106 | 1         | 0.8597069 | not scorable | not scorable |
| ##### Bn-scaff_19364_1-p52406 C-genome specific (napus-oleracea) | 0.9832536 | 0.678169  | 0.9922481 | 0.8342433 | not scorable | not scorable |
| ##### Bn-scaff_19364_1-p52441 C-genome specific (napus-oleracea) | 0.9784689 | 0.6436035 | 1         | 0.8689882 | not scorable | not scorable |
| ##### Bn-scaff_19364_1-p52469 C-genome specific (napus-oleracea) | 0.9688995 | 0.7758945 | 0.9922481 | 0.8476384 | not scorable | not scorable |
| ##### Bn-scaff_19364_1-p52625 C-genome specific (napus-oleracea) | 0.9760765 | 0.7905791 | 1         | 0.7779294 | not scorable | not scorable |
| ##### Bn-scaff_19364_1-p52636 C-genome specific (napus-oleracea) | 0.9808612 | 0.6683623 | 1         | 0.7651557 | not scorable | not scorable |
| ##### Bn-scaff_19364_1-p52652 C-genome specific (napus-oleracea) | 0.9808612 | 0.7852606 | 1         | 0.8108952 | not scorable | not scorable |
| ##### Bn-scaff_19364_1-p53710 C-genome specific (napus-oleracea) | 0.9760765 | 0.7494179 | 0.9689922 | 0.6933662 | not scorable | not scorable |
| ##### Bn-scaff_19364_1-p55894 genome unspecific (all in)         | 0.9784689 | 0.7310368 | 0.9922481 | 0.7429872 | 0.9834711    | 0.8241526    |
| ##### Bn-scaff_19364_1-p56198 C-genome specific (napus-oleracea) | 0.9808612 | 0.7013171 | 0.9844961 | 0.7855644 | not scorable | not scorable |

|                                                                 |              |              |           |           |              |              |
|-----------------------------------------------------------------|--------------|--------------|-----------|-----------|--------------|--------------|
| #### Bn-scaff_19364_1-p56779 C-genome specific (napus-oleracea) | 0.9784689    | 0.7482323    | 0.9922481 | 0.7616959 | not scorable | not scorable |
| #### Bn-scaff_19364_1-p56965 C-genome specific (napus-oleracea) | 0.9760765    | 0.6629687    | 1         | 0.7102159 | not scorable | not scorable |
| #### Bn-scaff_19364_1-p57395 genome unspecific (oleracea-rapa)  | not scorable | not scorable | 0.9844961 | 0.5863362 | 1            | 0.5085788    |
| #### Bn-scaff_19364_1-p57527 C-genome specific (napus-oleracea) | 0.9928229    | 0.6811045    | 0.9922481 | 0.6855908 | not scorable | not scorable |
| #### Bn-scaff_19364_1-p57780 C-genome specific (napus-oleracea) | 0.9784689    | 0.7865915    | 0.9922481 | 0.8819358 | not scorable | not scorable |
| #### Bn-scaff_19364_1-p60066 genome unspecific (all in)         | 0.9736842    | 0.222652     | 0.9069768 | 0.3468036 | 0.9669421    | 0.2397278    |
| #### Bn-scaff_19364_1-p60078 genome unspecific (all in)         | 1            | 0.7126007    | 0.9767442 | 0.6248474 | 1            | 0.9202917    |
| #### Bn-scaff_19364_1-p63174 C-genome specific (napus-oleracea) | 1            | 0.6410876    | 1         | 0.7647817 | not scorable | not scorable |
| #### Bn-scaff_19364_1-p63207 genome unspecific (all in)         | 1            | 0.925387     | 1         | 0.8841406 | 1            | 0.9240721    |
| #### Bn-scaff_19364_1-p65071 C-genome specific (napus-oleracea) | 0.9856459    | 0.7605818    | 1         | 0.795999  | not scorable | not scorable |
| #### Bn-scaff_19364_1-p66349 genome unspecific (all in)         | 1            | 0.4578826    | 1         | 0.3448376 | 1            | 0.5474075    |
| #### Bn-scaff_19364_1-p75762 C-genome specific (oleracea only)  | not scorable | not scorable | 0.8682171 | 0.2126693 | not scorable | not scorable |
| #### Bn-scaff_19364_1-p75993 C-genome specific (napus-oleracea) | 0.9856459    | 0.6392438    | 0.9922481 | 0.6723188 | not scorable | not scorable |
| #### Bn-scaff_19364_1-p77175 C-genome specific (napus-oleracea) | 0.9856459    | 0.7477299    | 1         | 0.7549597 | not scorable | not scorable |
| #### Bn-scaff_19364_1-p83500 C-genome specific (napus-oleracea) | 0.9808612    | 0.7235779    | 1         | 0.6738482 | not scorable | not scorable |
| #### Bn-scaff_19372_1-p26232 C-genome specific (napus-oleracea) | 0.9880383    | 0.8355858    | 1         | 0.7617467 | not scorable | not scorable |
| #### Bn-scaff_19372_1-p3915 C-genome specific (napus-oleracea)  | 1            | 0.2853436    | 0.9844961 | 0.800915  | not scorable | not scorable |
| #### Bn-scaff_19372_1-p7611 C-genome specific (oleracea only)   | not scorable | not scorable | 1         | 0.7242215 | not scorable | not scorable |
| #### Bn-scaff_19372_1-p867 C-genome specific (oleracea only)    | not scorable | not scorable | 1         | 0.5293448 | not scorable | not scorable |
| #### Bn-scaff_19392_1-p14147 C-genome specific (napus-oleracea) | 0.9952153    | 0.7566881    | 1         | 0.7736048 | not scorable | not scorable |
| #### Bn-scaff_19436_1-p22481 genome unspecific (all in)         | 0.9928229    | 0.3529015    | 0.9922481 | 0.8357406 | 1            | 0.906221     |
| #### Bn-scaff_19436_1-p23126 genome unspecific (oleracea-rapa)  | not scorable | not scorable | 1         | 0.7501188 | 1            | 0.9244863    |
| #### Bn-scaff_19436_1-p23613 C-genome specific (napus-oleracea) | 0.9019139    | 0.8005461    | 1         | 0.8106355 | not scorable | not scorable |
| #### Bn-scaff_19436_1-p68840 genome unspecific (oleracea-rapa)  | not scorable | not scorable | 1         | 0.7918129 | 1            | 0.8804815    |
| #### Bn-scaff_19458_1-p7894 C-genome specific (oleracea only)   | not scorable | not scorable | 0.9767442 | 0.6117212 | not scorable | not scorable |
| #### Bn-scaff_19458_1-p8019 C-genome specific (napus-oleracea)  | 0.9856459    | 0.6978334    | 0.9922481 | 0.6775352 | not scorable | not scorable |
| #### Bn-scaff_19467_1-p26963 genome unspecific (all in)         | 0.9832536    | 0.3884072    | 0.9922481 | 0.8131076 | 1            | 0.8378905    |
| #### Bn-scaff_19467_1-p31373 C-genome specific (napus-oleracea) | 0.9210526    | 0.6638742    | 0.9922481 | 0.6131817 | not scorable | not scorable |
| #### Bn-scaff_19472_1-p47 genome unspecific (all in)            | 0.9928229    | 0.3542348    | 0.9612403 | 0.3011342 | 0.9834711    | 0.9022775    |
| #### Bn-scaff_19483_1-p12187 C-genome specific (napus-oleracea) | 0.9808612    | 0.7675297    | 1         | 0.8117906 | not scorable | not scorable |
| #### Bn-scaff_19483_1-p95805 genome unspecific (all in)         | 1            | 0.3309664    | 1         | 0.7077879 | 0.9834711    | 0.6443819    |
| #### Bn-scaff_19490_1-p11915 genome unspecific (all in)         | 0.9928229    | 0.3495977    | 1         | 0.7657614 | 0.9917355    | 0.727734     |
| #### Bn-scaff_19490_1-p35288 C-genome specific (napus-oleracea) | 1            | 0.6804962    | 1         | 0.7900305 | not scorable | not scorable |

|                                                                 |              |              |              |              |              |              |
|-----------------------------------------------------------------|--------------|--------------|--------------|--------------|--------------|--------------|
| #### Bn-scaff_19523_1-p14392 C-genome specific (napus-oleracea) | 0.9976076    | 0.6967604    | 1            | 0.6718804    | not scorable | not scorable |
| #### Bn-scaff_19523_1-p149 C-genome specific (napus-oleracea)   | 0.9952153    | 0.7089358    | 0.9767442    | 0.7775313    | not scorable | not scorable |
| #### Bn-scaff_19523_1-p1600 genome unspecific (oleracea-rapa)   | not scorable | not scorable | 0.9922481    | 0.6981127    | 0.9917355    | 0.786476     |
| #### Bn-scaff_19523_1-p18865 C-genome specific (napus-oleracea) | 0.84689      | 0.68083      | 0.9922481    | 0.5698885    | not scorable | not scorable |
| #### Bn-scaff_19523_1-p216 C-genome specific (napus-oleracea)   | 0.9976076    | 0.8140061    | 1            | 0.7065022    | not scorable | not scorable |
| #### Bn-scaff_19523_1-p23202 C-genome specific (napus-oleracea) | 0.9952153    | 0.7204966    | 0.9922481    | 0.7932507    | not scorable | not scorable |
| #### Bn-scaff_19523_1-p26162 C-genome specific (napus-oleracea) | 0.9904306    | 0.7785604    | 0.9844961    | 0.7635737    | not scorable | not scorable |
| #### Bn-scaff_19523_1-p28969 C-genome specific (napus-oleracea) | 1            | 0.7501686    | 1            | 0.8536156    | not scorable | not scorable |
| #### Bn-scaff_19523_1-p311 C-genome specific (napus-oleracea)   | 0.9952153    | 0.808454     | 1            | 0.8497643    | not scorable | not scorable |
| #### Bn-scaff_19523_1-p3416 genome unspecific (all in)          | 0.9976076    | 0.2793466    | 1            | 0.6835679    | 1            | 0.8004208    |
| #### Bn-scaff_19523_1-p3662 genome unspecific (all in)          | 0.9784689    | 0.3337377    | 1            | 0.7174937    | 1            | 0.7748242    |
| #### Bn-scaff_19523_1-p42584 genome unspecific (all in)         | 0.9928229    | 0.4319494    | 1            | 0.7708716    | 1            | 0.7558774    |
| #### Bn-scaff_19523_1-p42734 C-genome specific (napus-oleracea) | 0.9952153    | 0.4452561    | 1            | 0.8627425    | not scorable | not scorable |
| #### Bn-scaff_19523_1-p42812 C-genome specific (napus-oleracea) | 0.8851675    | 0.5811366    | 1            | 0.7146183    | not scorable | not scorable |
| #### Bn-scaff_19523_1-p5459 genome unspecific (all in)          | 0.9712918    | 0.4941941    | not scorable | not scorable | not scorable | not scorable |
| #### Bn-scaff_19523_1-p60964 genome unspecific (all in)         | 1            | 0.3360686    | 1            | 0.8891005    | 0.9917355    | 0.7805383    |
| #### Bn-scaff_19523_1-p62233 genome unspecific (all in)         | 0.9712918    | 0.2319367    | 1            | 0.5424299    | 0.9834711    | 0.5164127    |
| #### Bn-scaff_19523_1-p62387 genome unspecific (all in)         | 1            | 0.6129675    | 1            | 0.5673186    | 1            | 0.6469957    |
| #### Bn-scaff_19523_1-p62479 genome unspecific (all in)         | 1            | 0.4689997    | 1            | 0.5045267    | 0.9917355    | 0.5705255    |
| #### Bn-scaff_19523_1-p82022 C-genome specific (napus-oleracea) | 0.9593301    | 0.2553503    | 1            | 0.6182216    | not scorable | not scorable |
| #### Bn-scaff_19523_1-p86934 genome unspecific (all in)         | 0.9832536    | 0.1894342    | 0.9844961    | 0.5674939    | 0.9752066    | 0.6728333    |
| #### Bn-scaff_19526_1-p67 C-genome specific (oleracea only)     | not scorable | not scorable | 1            | 0.785232     | not scorable | not scorable |
| #### Bn-scaff_19535_1-p5303 C-genome specific (napus-oleracea)  | 0.9904306    | 0.4939516    | 0.8914729    | 0.2985222    | not scorable | not scorable |
| #### Bn-scaff_19551_1-p24484 C-genome specific (napus-oleracea) | 0.9952153    | 0.7150059    | 0.875969     | 0.6922199    | not scorable | not scorable |
| #### Bn-scaff_19560_1-p50816 genome unspecific (all in)         | 1            | 0.3329048    | 1            | 0.843882     | 1            | 0.7725653    |
| #### Bn-scaff_19560_1-p51121 C-genome specific (napus-oleracea) | 0.9928229    | 0.8884304    | 0.4806201    | 0.8265887    | not scorable | not scorable |
| #### Bn-scaff_19564_1-p17934 C-genome specific (napus-oleracea) | 0.9760765    | 0.7899928    | 1            | 0.8090007    | not scorable | not scorable |
| #### Bn-scaff_19569_1-p2814 napus specific                      | 0.6220096    | 0.8008445    | not scorable | not scorable | not scorable | not scorable |
| #### Bn-scaff_19569_1-p41924 napus specific                     | 1            | 0.4847097    | not scorable | not scorable | not scorable | not scorable |
| #### Bn-scaff_19575_1-p14855 C-genome specific (napus-oleracea) | 0.9976076    | 0.7624856    | 0.9922481    | 0.7094526    | not scorable | not scorable |
| #### Bn-scaff_19575_1-p14951 C-genome specific (napus-oleracea) | 0.9928229    | 0.2351815    | 1            | 0.7806138    | not scorable | not scorable |
| #### Bn-scaff_19575_1-p15829 C-genome specific (napus-oleracea) | 0.9952153    | 0.8013356    | 0.9922481    | 0.7849492    | not scorable | not scorable |
| #### Bn-scaff_19575_1-p16108 C-genome specific (napus-oleracea) | 0.9952153    | 0.8104375    | 1            | 0.8766546    | not scorable | not scorable |

|                                                                 |              |              |              |              |              |              |
|-----------------------------------------------------------------|--------------|--------------|--------------|--------------|--------------|--------------|
| #### Bn-scaff_19575_1-p16125 C-genome specific (napus-oleracea) | 0.9904306    | 0.7632076    | 1            | 0.7629164    | not scorable | not scorable |
| #### Bn-scaff_19575_1-p16280 C-genome specific (napus-oleracea) | 0.9688995    | 0.7146222    | 1            | 0.6974514    | not scorable | not scorable |
| #### Bn-scaff_19575_1-p16577 C-genome specific (napus-oleracea) | 0.9856459    | 0.7622852    | 1            | 0.6869137    | not scorable | not scorable |
| #### Bn-scaff_19575_1-p16630 napus specific                     | 0.9856459    | 0.4135653    | not scorable | not scorable | not scorable | not scorable |
| #### Bn-scaff_19575_1-p17519 C-genome specific (napus-oleracea) | 0.9928229    | 0.772607     | 0.9922481    | 0.8635142    | not scorable | not scorable |
| #### Bn-scaff_19575_1-p17617 C-genome specific (napus-oleracea) | 0.9952153    | 0.7843549    | 1            | 0.880275     | not scorable | not scorable |
| #### Bn-scaff_19575_1-p17685 C-genome specific (napus-oleracea) | 0.9976076    | 0.7016526    | 1            | 0.7709292    | not scorable | not scorable |
| #### Bn-scaff_19575_1-p17717 C-genome specific (napus-oleracea) | 0.9904306    | 0.617096     | 1            | 0.7459092    | not scorable | not scorable |
| #### Bn-scaff_19575_1-p17726 C-genome specific (napus-oleracea) | 0.9808612    | 0.7635227    | 1            | 0.8136061    | not scorable | not scorable |
| #### Bn-scaff_19575_1-p17779 genome unspecific (all in)         | 0.9976076    | 0.2937916    | 1            | 0.7783567    | 1            | 0.8378479    |
| #### Bn-scaff_19575_1-p18430 C-genome specific (napus-oleracea) | 0.9928229    | 0.6857892    | 1            | 0.6439834    | not scorable | not scorable |
| #### Bn-scaff_19575_1-p20074 C-genome specific (napus-oleracea) | 0.9976076    | 0.7538812    | 1            | 0.7689078    | not scorable | not scorable |
| #### Bn-scaff_19575_1-p20106 C-genome specific (napus-oleracea) | 0.9952153    | 0.8225588    | 1            | 0.8069199    | not scorable | not scorable |
| #### Bn-scaff_19575_1-p20184 C-genome specific (napus-oleracea) | 0.9904306    | 0.5915856    | 1            | 0.5771246    | not scorable | not scorable |
| #### Bn-scaff_19575_1-p20211 C-genome specific (napus-oleracea) | 0.9976076    | 0.7972447    | 1            | 0.8234538    | not scorable | not scorable |
| #### Bn-scaff_19575_1-p20256 C-genome specific (napus-oleracea) | 0.9880383    | 0.7329419    | 0.9922481    | 0.7348682    | not scorable | not scorable |
| #### Bn-scaff_19575_1-p20265 C-genome specific (napus-oleracea) | 0.9928229    | 0.7418929    | 1            | 0.7165154    | not scorable | not scorable |
| #### Bn-scaff_19575_1-p20319 C-genome specific (napus-oleracea) | 0.9952153    | 0.8059775    | 1            | 0.8233953    | not scorable | not scorable |
| #### Bn-scaff_19575_1-p20353 C-genome specific (napus-oleracea) | 0.9856459    | 0.8264517    | 1            | 0.688202     | not scorable | not scorable |
| #### Bn-scaff_19575_1-p20397 C-genome specific (napus-oleracea) | 1            | 0.8887956    | 1            | 0.7245676    | not scorable | not scorable |
| #### Bn-scaff_19575_1-p20463 C-genome specific (napus-oleracea) | 0.9904306    | 0.8146932    | 1            | 0.8508488    | not scorable | not scorable |
| #### Bn-scaff_19575_1-p20475 C-genome specific (napus-oleracea) | 0.9952153    | 0.8264947    | 1            | 0.7367941    | not scorable | not scorable |
| #### Bn-scaff_19575_1-p20527 C-genome specific (napus-oleracea) | 0.9952153    | 0.6877468    | 1            | 0.7714166    | not scorable | not scorable |
| #### Bn-scaff_19575_1-p20617 C-genome specific (napus-oleracea) | 0.9928229    | 0.6776339    | 1            | 0.7903565    | not scorable | not scorable |
| #### Bn-scaff_19575_1-p20832 C-genome specific (napus-oleracea) | 0.9784689    | 0.830364     | 0.9922481    | 0.7496545    | not scorable | not scorable |
| #### Bn-scaff_19575_1-p20840 C-genome specific (napus-oleracea) | 0.9952153    | 0.787617     | 1            | 0.6731167    | not scorable | not scorable |
| #### Bn-scaff_19575_1-p20846 C-genome specific (oleracea only)  | not scorable | not scorable | 0.9612403    | 0.6791383    | not scorable | not scorable |
| #### Bn-scaff_19575_1-p21004 C-genome specific (napus-oleracea) | 0.9952153    | 0.7779482    | 0.9922481    | 0.6511156    | not scorable | not scorable |
| #### Bn-scaff_19575_1-p21306 C-genome specific (napus-oleracea) | 0.9880383    | 0.7549533    | 1            | 0.8132198    | not scorable | not scorable |
| #### Bn-scaff_19575_1-p21432 C-genome specific (napus-oleracea) | 0.9952153    | 0.7887678    | 1            | 0.7752572    | not scorable | not scorable |
| #### Bn-scaff_19575_1-p21476 C-genome specific (napus-oleracea) | 0.9880383    | 0.7048574    | 0.9922481    | 0.7557421    | not scorable | not scorable |
| #### Bn-scaff_19575_1-p21488 C-genome specific (napus-oleracea) | 0.9952153    | 0.764437     | 1            | 0.9551564    | not scorable | not scorable |
| #### Bn-scaff_19575_1-p21612 C-genome specific (napus-oleracea) | 0.9880383    | 0.803517     | 1            | 0.7719527    | not scorable | not scorable |



|                                                                  |              |              |              |              |              |              |
|------------------------------------------------------------------|--------------|--------------|--------------|--------------|--------------|--------------|
| ##### Bn-scaff_19575_1-p21625 C-genome specific (napus-oleracea) | 0.9880383    | 0.7710894    | 1            | 0.7956136    | not scorable | not scorable |
| ##### Bn-scaff_19575_1-p21739 C-genome specific (napus-oleracea) | 0.9856459    | 0.6141633    | 1            | 0.5370017    | not scorable | not scorable |
| ##### Bn-scaff_19575_1-p21762 C-genome specific (napus-oleracea) | 0.9952153    | 0.812671     | 1            | 0.8712691    | not scorable | not scorable |
| ##### Bn-scaff_19575_1-p21831 C-genome specific (napus-oleracea) | 0.9976076    | 0.7020566    | 1            | 0.6914522    | not scorable | not scorable |
| ##### Bn-scaff_19575_1-p22584 C-genome specific (napus-oleracea) | 0.9928229    | 0.6128874    | 0.9844961    | 0.719955     | not scorable | not scorable |
| ##### Bn-scaff_19575_1-p22590 C-genome specific (napus-oleracea) | 0.9904306    | 0.7587454    | 0.9844961    | 0.7586538    | not scorable | not scorable |
| ##### Bn-scaff_19575_1-p22655 C-genome specific (napus-oleracea) | 0.9832536    | 0.6423964    | 1            | 0.7472282    | not scorable | not scorable |
| ##### Bn-scaff_19575_1-p22657 C-genome specific (napus-oleracea) | 0.9904306    | 0.6968184    | 1            | 0.8208724    | not scorable | not scorable |
| ##### Bn-scaff_19575_1-p22676 C-genome specific (napus-oleracea) | 0.9928229    | 0.8048835    | 0.9844961    | 0.6981617    | not scorable | not scorable |
| ##### Bn-scaff_19575_1-p22755 C-genome specific (napus-oleracea) | 0.9952153    | 0.7569352    | 1            | 0.755771     | not scorable | not scorable |
| ##### Bn-scaff_19575_1-p22773 C-genome specific (napus-oleracea) | 0.9952153    | 0.7824216    | 1            | 0.8357701    | not scorable | not scorable |
| ##### Bn-scaff_19575_1-p22790 C-genome specific (napus-oleracea) | 0.9952153    | 0.7959278    | 1            | 0.7866265    | not scorable | not scorable |
| ##### Bn-scaff_19575_1-p22810 C-genome specific (napus-oleracea) | 0.9928229    | 0.7811325    | 1            | 0.7733419    | not scorable | not scorable |
| ##### Bn-scaff_19575_1-p22818 C-genome specific (napus-oleracea) | 0.9856459    | 0.517144     | 1            | 0.6966605    | not scorable | not scorable |
| ##### Bn-scaff_19575_1-p22835 C-genome specific (napus-oleracea) | 1            | 0.6732779    | 1            | 0.7594352    | not scorable | not scorable |
| ##### Bn-scaff_19575_1-p22917 C-genome specific (napus-oleracea) | 0.9976076    | 0.7907488    | 1            | 0.7957571    | not scorable | not scorable |
| ##### Bn-scaff_19575_1-p22962 C-genome specific (napus-oleracea) | 0.9904306    | 0.7676504    | 1            | 0.8033323    | not scorable | not scorable |
| ##### Bn-scaff_19575_1-p23039 C-genome specific (napus-oleracea) | 0.9952153    | 0.5883998    | 1            | 0.5926127    | not scorable | not scorable |
| ##### Bn-scaff_19575_1-p23363 C-genome specific (napus-oleracea) | 0.9928229    | 0.7923562    | 0.9922481    | 0.8537922    | not scorable | not scorable |
| ##### Bn-scaff_19575_1-p23393 C-genome specific (oleracea only)  | not scorable | not scorable | 1            | 0.6465423    | not scorable | not scorable |
| ##### Bn-scaff_19575_1-p23440 C-genome specific (napus-oleracea) | 0.9856459    | 0.6814332    | 1            | 0.7437273    | not scorable | not scorable |
| ##### Bn-scaff_19575_1-p23476 C-genome specific (napus-oleracea) | 0.9952153    | 0.7412711    | 1            | 0.7394366    | not scorable | not scorable |
| ##### Bn-scaff_19575_1-p23591 C-genome specific (napus-oleracea) | 0.9952153    | 0.586051     | 1            | 0.788505     | not scorable | not scorable |
| ##### Bn-scaff_19575_1-p23645 C-genome specific (napus-oleracea) | 0.9928229    | 0.7678503    | 1            | 0.8660011    | not scorable | not scorable |
| ##### Bn-scaff_19575_1-p23759 C-genome specific (napus-oleracea) | 0.9976076    | 0.8000168    | 1            | 0.820862     | not scorable | not scorable |
| ##### Bn-scaff_19575_1-p25412 C-genome specific (napus-oleracea) | 0.9904306    | 0.70793      | 0.9767442    | 0.7873951    | not scorable | not scorable |
| ##### Bn-scaff_19575_1-p26038 C-genome specific (napus-oleracea) | 0.9928229    | 0.7636304    | 1            | 0.7710962    | not scorable | not scorable |
| ##### Bn-scaff_19575_1-p26045 C-genome specific (napus-oleracea) | 0.9976076    | 0.3369063    | 1            | 0.718252     | not scorable | not scorable |
| ##### Bn-scaff_19575_1-p26052 C-genome specific (napus-oleracea) | 0.9904306    | 0.4939153    | 1            | 0.7797899    | not scorable | not scorable |
| ##### Bn-scaff_19575_1-p26060 C-genome specific (napus-oleracea) | 0.9952153    | 0.7624885    | 1            | 0.7334444    | not scorable | not scorable |
| ##### Bn-scaff_19575_1-p26809 all not scorable                   | not scorable | not scorable | not scorable | not scorable | not scorable | not scorable |
| ##### Bn-scaff_19575_1-p27625 C-genome specific (napus-oleracea) | 0.9832536    | 0.7098795    | 1            | 0.774309     | not scorable | not scorable |
| ##### Bn-scaff_19575_1-p30096 C-genome specific (napus-oleracea) | 0.9856459    | 0.6288164    | 1            | 0.6621754    | not scorable | not scorable |

|                                                                 |           |           |              |              |              |              |
|-----------------------------------------------------------------|-----------|-----------|--------------|--------------|--------------|--------------|
| #### Bn-scaff_19575_1-p31177 C-genome specific (napus-oleracea) | 0.9928229 | 0.7574143 | 1            | 0.78672      | not scorable | not scorable |
| #### Bn-scaff_19575_1-p31317 C-genome specific (napus-oleracea) | 0.9976076 | 0.7789843 | 1            | 0.7587483    | not scorable | not scorable |
| #### Bn-scaff_19575_1-p31657 C-genome specific (napus-oleracea) | 0.9856459 | 0.5858942 | 1            | 0.8291255    | not scorable | not scorable |
| #### Bn-scaff_19575_1-p32334 C-genome specific (napus-oleracea) | 0.9856459 | 0.7978435 | 1            | 0.7152672    | not scorable | not scorable |
| #### Bn-scaff_19575_1-p32717 C-genome specific (napus-oleracea) | 0.9952153 | 0.7679148 | 0.9922481    | 0.8064236    | not scorable | not scorable |
| #### Bn-scaff_19575_1-p32729 C-genome specific (napus-oleracea) | 0.9928229 | 0.6324359 | 1            | 0.6667518    | not scorable | not scorable |
| #### Bn-scaff_19575_1-p32754 C-genome specific (napus-oleracea) | 0.9904306 | 0.6355734 | 1            | 0.5897805    | not scorable | not scorable |
| #### Bn-scaff_19575_1-p32937 C-genome specific (napus-oleracea) | 0.9976076 | 0.7503324 | 1            | 0.7516831    | not scorable | not scorable |
| #### Bn-scaff_19575_1-p33470 C-genome specific (napus-oleracea) | 0.9928229 | 0.7382678 | 1            | 0.8089886    | not scorable | not scorable |
| #### Bn-scaff_19575_1-p33517 C-genome specific (napus-oleracea) | 0.9952153 | 0.7766923 | 1            | 0.8165057    | not scorable | not scorable |
| #### Bn-scaff_19575_1-p33997 C-genome specific (napus-oleracea) | 0.9952153 | 0.6887018 | 1            | 0.7255891    | not scorable | not scorable |
| #### Bn-scaff_19575_1-p34007 C-genome specific (napus-oleracea) | 0.9952153 | 0.759033  | 1            | 0.8312626    | not scorable | not scorable |
| #### Bn-scaff_19575_1-p34296 C-genome specific (napus-oleracea) | 0.9952153 | 0.6627852 | 0.9922481    | 0.738472     | not scorable | not scorable |
| #### Bn-scaff_19575_1-p34304 C-genome specific (napus-oleracea) | 0.9832536 | 0.6274941 | 0.9922481    | 0.6619086    | not scorable | not scorable |
| #### Bn-scaff_19575_1-p34717 C-genome specific (napus-oleracea) | 0.9952153 | 0.707766  | 1            | 0.8401216    | not scorable | not scorable |
| #### Bn-scaff_19575_1-p34808 C-genome specific (napus-oleracea) | 0.9904306 | 0.7254764 | 1            | 0.6928382    | not scorable | not scorable |
| #### Bn-scaff_19575_1-p34835 C-genome specific (napus-oleracea) | 1         | 0.6832152 | 1            | 0.7258548    | not scorable | not scorable |
| #### Bn-scaff_19575_1-p35910 C-genome specific (napus-oleracea) | 0.9904306 | 0.8242525 | 1            | 0.7980219    | not scorable | not scorable |
| #### Bn-scaff_19575_1-p36020 C-genome specific (napus-oleracea) | 0.9928229 | 0.7837316 | 1            | 0.7252508    | not scorable | not scorable |
| #### Bn-scaff_19575_1-p38683 C-genome specific (napus-oleracea) | 0.9856459 | 0.7406207 | 0.9767442    | 0.6729       | not scorable | not scorable |
| #### Bn-scaff_19575_1-p41508 C-genome specific (napus-oleracea) | 0.9856459 | 0.8000643 | 1            | 0.7826436    | not scorable | not scorable |
| #### Bn-scaff_19575_1-p42732 C-genome specific (napus-oleracea) | 0.9880383 | 0.7624433 | 1            | 0.9077093    | not scorable | not scorable |
| #### Bn-scaff_19575_1-p42734 C-genome specific (napus-oleracea) | 0.9904306 | 0.7997479 | 1            | 0.8376065    | not scorable | not scorable |
| #### Bn-scaff_19575_1-p42740 C-genome specific (napus-oleracea) | 0.9952153 | 0.7670901 | 1            | 0.6571653    | not scorable | not scorable |
| #### Bn-scaff_19575_1-p43566 C-genome specific (napus-oleracea) | 0.9952153 | 0.5945657 | 1            | 0.7606195    | not scorable | not scorable |
| #### Bn-scaff_19575_1-p43571 C-genome specific (napus-oleracea) | 0.9952153 | 0.6563644 | 0.9922481    | 0.6925656    | not scorable | not scorable |
| #### Bn-scaff_19575_1-p43605 C-genome specific (napus-oleracea) | 0.9952153 | 0.7964475 | 1            | 0.7902985    | not scorable | not scorable |
| #### Bn-scaff_19575_1-p44334 C-genome specific (napus-oleracea) | 0.9928229 | 0.7186925 | 1            | 0.6480918    | not scorable | not scorable |
| #### Bn-scaff_19575_1-p45510 C-genome specific (napus-oleracea) | 0.9880383 | 0.7051601 | 1            | 0.6800501    | not scorable | not scorable |
| #### Bn-scaff_19575_1-p47180 C-genome specific (napus-oleracea) | 0.9904306 | 0.7078901 | 0.9922481    | 0.7054887    | not scorable | not scorable |
| #### Bn-scaff_19575_1-p47256 C-genome specific (napus-oleracea) | 0.9928229 | 0.710345  | 1            | 0.8509771    | not scorable | not scorable |
| #### Bn-scaff_19575_1-p47949 genome unspecific (all in)         | 0.9856459 | 0.2342421 | 1            | 0.4504721    | 1            | 0.8004208    |
| #### Bn-scaff_19575_1-p49239 napus specific                     | 0.9688995 | 0.5894992 | not scorable | not scorable | not scorable | not scorable |

|                                                                 |           |           |           |           |              |              |
|-----------------------------------------------------------------|-----------|-----------|-----------|-----------|--------------|--------------|
| #### Bn-scaff_19575_1-p50395 C-genome specific (napus-oleracea) | 0.9832536 | 0.7610049 | 1         | 0.7736525 | not scorable | not scorable |
| #### Bn-scaff_19575_1-p52886 C-genome specific (napus-oleracea) | 0.9976076 | 0.8003834 | 1         | 0.6659005 | not scorable | not scorable |
| #### Bn-scaff_19575_1-p52903 C-genome specific (napus-oleracea) | 0.9976076 | 0.7234554 | 1         | 0.7159622 | not scorable | not scorable |
| #### Bn-scaff_19575_1-p52914 C-genome specific (napus-oleracea) | 0.9808612 | 0.5803142 | 1         | 0.6521499 | not scorable | not scorable |
| #### Bn-scaff_19575_1-p53083 C-genome specific (napus-oleracea) | 0.9856459 | 0.777766  | 0.9922481 | 0.6610458 | not scorable | not scorable |
| #### Bn-scaff_19575_1-p53209 C-genome specific (napus-oleracea) | 0.9808612 | 0.6050472 | 1         | 0.5737945 | not scorable | not scorable |
| #### Bn-scaff_19575_1-p53276 C-genome specific (napus-oleracea) | 0.9904306 | 0.7906508 | 1         | 0.7960756 | not scorable | not scorable |
| #### Bn-scaff_19575_1-p53986 C-genome specific (napus-oleracea) | 0.9904306 | 0.7381335 | 1         | 0.7326576 | not scorable | not scorable |
| #### Bn-scaff_19575_1-p54029 C-genome specific (napus-oleracea) | 0.9808612 | 0.6657229 | 1         | 0.7790431 | not scorable | not scorable |
| #### Bn-scaff_19575_1-p57166 genome unspecific (all in)         | 1         | 0.7841938 | 1         | 0.7096557 | 0.9834711    | 0.8802583    |
| #### Bn-scaff_19575_1-p61332 C-genome specific (napus-oleracea) | 0.9210526 | 0.7292008 | 1         | 0.8259227 | not scorable | not scorable |
| #### Bn-scaff_19575_1-p61470 C-genome specific (napus-oleracea) | 0.923445  | 0.7029245 | 0.9922481 | 0.6648887 | not scorable | not scorable |
| #### Bn-scaff_19575_1-p61637 C-genome specific (napus-oleracea) | 0.9258373 | 0.7760929 | 1         | 0.6959568 | not scorable | not scorable |
| #### Bn-scaff_19575_1-p61673 C-genome specific (napus-oleracea) | 0.9162679 | 0.7053841 | 1         | 0.7076328 | not scorable | not scorable |
| #### Bn-scaff_19575_1-p61789 C-genome specific (napus-oleracea) | 0.9186603 | 0.7853498 | 1         | 0.7779944 | not scorable | not scorable |
| #### Bn-scaff_19575_1-p62882 C-genome specific (napus-oleracea) | 0.9593301 | 0.5030557 | 0.9767442 | 0.5460018 | not scorable | not scorable |
| #### Bn-scaff_19575_1-p63184 C-genome specific (napus-oleracea) | 0.9952153 | 0.7033035 | 1         | 0.8489822 | not scorable | not scorable |
| #### Bn-scaff_19575_1-p63488 C-genome specific (napus-oleracea) | 0.9952153 | 0.8219346 | 1         | 0.8311687 | not scorable | not scorable |
| #### Bn-scaff_19575_1-p63567 C-genome specific (napus-oleracea) | 0.9952153 | 0.6910558 | 0.9922481 | 0.811647  | not scorable | not scorable |
| #### Bn-scaff_19575_1-p64001 C-genome specific (napus-oleracea) | 0.9904306 | 0.7481999 | 1         | 0.8126419 | not scorable | not scorable |
| #### Bn-scaff_19575_1-p64031 C-genome specific (napus-oleracea) | 0.9856459 | 0.7785248 | 0.9922481 | 0.7919464 | not scorable | not scorable |
| #### Bn-scaff_19575_1-p64064 C-genome specific (napus-oleracea) | 0.9976076 | 0.7904549 | 1         | 0.7699984 | not scorable | not scorable |
| #### Bn-scaff_19575_1-p64104 C-genome specific (napus-oleracea) | 0.9928229 | 0.7684846 | 1         | 0.9213602 | not scorable | not scorable |
| #### Bn-scaff_19575_1-p64237 C-genome specific (napus-oleracea) | 0.9928229 | 0.7990511 | 1         | 0.7528183 | not scorable | not scorable |
| #### Bn-scaff_19575_1-p64318 C-genome specific (napus-oleracea) | 0.9880383 | 0.6839622 | 0.9922481 | 0.7401865 | not scorable | not scorable |
| #### Bn-scaff_19575_1-p64352 C-genome specific (napus-oleracea) | 0.9952153 | 0.7796356 | 1         | 0.6539595 | not scorable | not scorable |
| #### Bn-scaff_19575_1-p66183 C-genome specific (napus-oleracea) | 0.9880383 | 0.667352  | 1         | 0.650265  | not scorable | not scorable |
| #### Bn-scaff_19575_1-p66188 C-genome specific (napus-oleracea) | 0.9880383 | 0.5935651 | 1         | 0.673088  | not scorable | not scorable |
| #### Bn-scaff_19575_1-p66439 C-genome specific (napus-oleracea) | 0.9976076 | 0.7617224 | 0.9844961 | 0.7776622 | not scorable | not scorable |
| #### Bn-scaff_19575_1-p66474 C-genome specific (napus-oleracea) | 0.9904306 | 0.7276905 | 1         | 0.7967102 | not scorable | not scorable |
| #### Bn-scaff_19575_1-p66537 C-genome specific (napus-oleracea) | 0.9808612 | 0.6912472 | 1         | 0.7080887 | not scorable | not scorable |
| #### Bn-scaff_19575_1-p67896 C-genome specific (napus-oleracea) | 0.9904306 | 0.7414595 | 1         | 0.6830654 | not scorable | not scorable |
| #### Bn-scaff_19575_1-p67934 genome unspecific (all in)         | 0.9928229 | 0.5400689 | 1         | 0.8512086 | 1            | 0.9175813    |

|                                                                |              |              |              |              |              |              |
|----------------------------------------------------------------|--------------|--------------|--------------|--------------|--------------|--------------|
| #### Bn-scaff_19575_1-p68851genome unspecific (all in)         | 0.9976076    | 0.3441861    | 0.9922481    | 0.6846625    | 1            | 0.9082176    |
| #### Bn-scaff_19575_1-p68958C-genome specific (napus-oleracea) | 0.9928229    | 0.2283286    | 1            | 0.8526835    | not scorable | not scorable |
| #### Bn-scaff_19575_1-p69192C-genome specific (napus-oleracea) | 0.9928229    | 0.7878073    | 1            | 0.7896167    | not scorable | not scorable |
| #### Bn-scaff_19575_1-p70972A-genome specific (rapa only)      | not scorable | not scorable | not scorable | not scorable | 1            | 0.900736     |
| #### Bn-scaff_19575_1-p71932C-genome specific (napus-oleracea) | 1            | 0.773083     | 1            | 0.7659725    | not scorable | not scorable |
| #### Bn-scaff_19575_1-p71951C-genome specific (napus-oleracea) | 0.9928229    | 0.7041489    | 1            | 0.7856584    | not scorable | not scorable |
| #### Bn-scaff_19575_1-p71956C-genome specific (napus-oleracea) | 0.9976076    | 0.7369972    | 1            | 0.7048504    | not scorable | not scorable |
| #### Bn-scaff_19575_1-p71970C-genome specific (napus-oleracea) | 0.9832536    | 0.6720978    | 1            | 0.7174767    | not scorable | not scorable |
| #### Bn-scaff_19575_1-p72331C-genome specific (napus-oleracea) | 0.9760765    | 0.7209591    | 1            | 0.7517904    | not scorable | not scorable |
| #### Bn-scaff_19575_1-p73162genome unspecific (all in)         | 0.9928229    | 0.5656616    | 1            | 0.7331883    | 0.9917355    | 0.9489986    |
| #### Bn-scaff_19575_1-p73886C-genome specific (napus-oleracea) | 0.9928229    | 0.7042862    | 1            | 0.7719024    | not scorable | not scorable |
| #### Bn-scaff_19575_1-p74068C-genome specific (napus-oleracea) | 0.9976076    | 0.7825094    | 1            | 0.7171004    | not scorable | not scorable |
| #### Bn-scaff_19575_1-p74115C-genome specific (napus-oleracea) | 0.9856459    | 0.5324395    | 0.9844961    | 0.5337656    | not scorable | not scorable |
| #### Bn-scaff_19575_1-p75408genome unspecific (all in)         | 0.9593301    | 0.5283616    | 0.9844961    | 0.4772389    | 1            | 0.848999     |
| #### Bn-scaff_19575_1-p75460C-genome specific (napus-oleracea) | 0.9856459    | 0.2342421    | 1            | 0.9063494    | not scorable | not scorable |
| #### Bn-scaff_19575_1-p77184genome unspecific (all in)         | 1            | 0.7567188    | 1            | 0.7785625    | 1            | 0.7542003    |
| #### Bn-scaff_19575_1-p77749C-genome specific (napus-oleracea) | 0.9760765    | 0.6707703    | 0.9922481    | 0.6808585    | not scorable | not scorable |
| #### Bn-scaff_19575_1-p77882C-genome specific (napus-oleracea) | 0.9952153    | 0.7790209    | 1            | 0.8021991    | not scorable | not scorable |
| #### Bn-scaff_19575_1-p78714C-genome specific (napus-oleracea) | 0.9928229    | 0.8002959    | 1            | 0.5259479    | not scorable | not scorable |
| #### Bn-scaff_19575_1-p78813A-genome specific (rapa only)      | not scorable | not scorable | not scorable | not scorable | 1            | 0.8319266    |
| #### Bn-scaff_19575_1-p79273C-genome specific (napus-oleracea) | 0.9976076    | 0.7799073    | 1            | 0.7244675    | not scorable | not scorable |
| #### Bn-scaff_19575_1-p79320C-genome specific (napus-oleracea) | 0.9952153    | 0.7252399    | 0.9922481    | 0.6550123    | not scorable | not scorable |
| #### Bn-scaff_19575_1-p79479C-genome specific (napus-oleracea) | 0.9976076    | 0.6915965    | 1            | 0.7615486    | not scorable | not scorable |
| #### Bn-scaff_19575_1-p79492C-genome specific (napus-oleracea) | 0.9976076    | 0.7850507    | 1            | 0.6191128    | not scorable | not scorable |
| #### Bn-scaff_19575_1-p83609C-genome specific (napus-oleracea) | 0.9928229    | 0.6898091    | 1            | 0.7390171    | not scorable | not scorable |
| #### Bn-scaff_19575_1-p86807C-genome specific (napus-oleracea) | 0.9856459    | 0.7962962    | 1            | 0.7406759    | not scorable | not scorable |
| #### Bn-scaff_19575_1-p87486C-genome specific (napus-oleracea) | 0.9976076    | 0.8109776    | 1            | 0.9107524    | not scorable | not scorable |
| #### Bn-scaff_19575_1-p87732C-genome specific (napus-oleracea) | 0.9976076    | 0.8251055    | 1            | 0.7862833    | not scorable | not scorable |
| #### Bn-scaff_19575_1-p88445C-genome specific (napus-oleracea) | 0.9880383    | 0.6092465    | 1            | 0.7621927    | not scorable | not scorable |
| #### Bn-scaff_19575_1-p88718C-genome specific (napus-oleracea) | 0.9952153    | 0.7393234    | 1            | 0.7809241    | not scorable | not scorable |
| #### Bn-scaff_19575_1-p89013C-genome specific (napus-oleracea) | 0.9952153    | 0.8196703    | 1            | 0.8622605    | not scorable | not scorable |
| #### Bn-scaff_19575_1-p89370C-genome specific (napus-oleracea) | 0.9928229    | 0.8127933    | 1            | 0.7159495    | not scorable | not scorable |
| #### Bn-scaff_19575_1-p89747genome unspecific (all in)         | 1            | 0.4934742    | 1            | 0.5140452    | 1            | 0.480114     |

|                                                                 |              |              |           |           |              |              |
|-----------------------------------------------------------------|--------------|--------------|-----------|-----------|--------------|--------------|
| #### Bn-scaff_19575_1-p89776 genome unspecific (all in)         | 1            | 0.549558     | 1         | 0.5332154 | 1            | 0.7770717    |
| #### Bn-scaff_19575_1-p90626 C-genome specific (napus-oleracea) | 0.9832536    | 0.703288     | 1         | 0.8276255 | not scorable | not scorable |
| #### Bn-scaff_19575_1-p92966 C-genome specific (napus-oleracea) | 0.9880383    | 0.773175     | 1         | 0.7585018 | not scorable | not scorable |
| #### Bn-scaff_19575_1-p93146 C-genome specific (napus-oleracea) | 0.9976076    | 0.749243     | 1         | 0.8482699 | not scorable | not scorable |
| #### Bn-scaff_19575_1-p93167 C-genome specific (napus-oleracea) | 0.9928229    | 0.8192372    | 1         | 0.9579665 | not scorable | not scorable |
| #### Bn-scaff_19575_1-p93311 C-genome specific (napus-oleracea) | 0.9904306    | 0.7143856    | 1         | 0.7447397 | not scorable | not scorable |
| #### Bn-scaff_19575_1-p94294 C-genome specific (napus-oleracea) | 0.9736842    | 0.8157637    | 1         | 0.9366331 | not scorable | not scorable |
| #### Bn-scaff_19575_1-p94397 C-genome specific (napus-oleracea) | 0.9904306    | 0.7880116    | 0.9844961 | 0.7636549 | not scorable | not scorable |
| #### Bn-scaff_19575_1-p95231 C-genome specific (oleracea only)  | not scorable | not scorable | 1         | 0.6474326 | not scorable | not scorable |
| #### Bn-scaff_19575_1-p95695 C-genome specific (napus-oleracea) | 0.9904306    | 0.5587918    | 1         | 0.6643655 | not scorable | not scorable |
| #### Bn-scaff_19579_1-p7261 C-genome specific (oleracea only)   | not scorable | not scorable | 0.9767442 | 0.5080484 | not scorable | not scorable |
| #### Bn-scaff_19614_1-p10617 genome unspecific (all in)         | 0.9593301    | 0.3289975    | 1         | 0.7263815 | 0.9752066    | 0.654028     |
| #### Bn-scaff_19614_1-p11935 genome unspecific (all in)         | 0.9760765    | 0.1831795    | 0.9534883 | 0.3383957 | 1            | 0.9070156    |
| #### Bn-scaff_19614_1-p20277 C-genome specific (oleracea only)  | not scorable | not scorable | 0.9844961 | 0.3333438 | not scorable | not scorable |
| #### Bn-scaff_19614_1-p25847 C-genome specific (napus-oleracea) | 0.9736842    | 0.7575371    | 0.6046512 | 0.8158134 | not scorable | not scorable |
| #### Bn-scaff_19614_1-p26995 C-genome specific (napus-oleracea) | 0.9688995    | 0.7061878    | 0.8682171 | 0.7567455 | not scorable | not scorable |
| #### Bn-scaff_19614_1-p29250 C-genome specific (napus-oleracea) | 0.9856459    | 0.770422     | 0.9844961 | 0.805303  | not scorable | not scorable |
| #### Bn-scaff_19614_1-p29278 C-genome specific (napus-oleracea) | 0.9760765    | 0.7649272    | 0.9844961 | 0.8627531 | not scorable | not scorable |
| #### Bn-scaff_19614_1-p29284 C-genome specific (napus-oleracea) | 0.9784689    | 0.7898393    | 0.9844961 | 0.7944502 | not scorable | not scorable |
| #### Bn-scaff_19614_1-p29327 C-genome specific (napus-oleracea) | 0.9760765    | 0.765389     | 0.9844961 | 0.8018049 | not scorable | not scorable |
| #### Bn-scaff_19614_1-p29347 C-genome specific (napus-oleracea) | 0.9736842    | 0.7717326    | 0.9844961 | 0.801807  | not scorable | not scorable |
| #### Bn-scaff_19614_1-p29355 C-genome specific (napus-oleracea) | 0.9808612    | 0.7819488    | 0.9844961 | 0.7482706 | not scorable | not scorable |
| #### Bn-scaff_19614_1-p29632 C-genome specific (napus-oleracea) | 0.9880383    | 0.6514044    | 0.9689922 | 0.8017244 | not scorable | not scorable |
| #### Bn-scaff_19614_1-p30076 C-genome specific (oleracea only)  | not scorable | not scorable | 0.9689922 | 0.7303177 | not scorable | not scorable |
| #### Bn-scaff_19614_1-p30558 genome unspecific (all in)         | 0.9880383    | 0.2854384    | 1         | 0.5893708 | 1            | 0.6201955    |
| #### Bn-scaff_19614_1-p31585 genome unspecific (all in)         | 0.9856459    | 0.5728542    | 1         | 0.7662006 | 0.9669421    | 0.7029173    |
| #### Bn-scaff_19614_1-p32570 C-genome specific (napus-oleracea) | 0.9904306    | 0.6715155    | 0.9922481 | 0.7930601 | not scorable | not scorable |
| #### Bn-scaff_19614_1-p34367 genome unspecific (all in)         | 1            | 0.7597139    | 1         | 0.7487718 | 1            | 0.7931992    |
| #### Bn-scaff_19614_1-p36023 C-genome specific (napus-oleracea) | 0.9784689    | 0.7164188    | 0.9767442 | 0.6896035 | not scorable | not scorable |
| #### Bn-scaff_19614_1-p53484 C-genome specific (napus-oleracea) | 0.9425837    | 0.8070591    | 0.9922481 | 0.8467891 | not scorable | not scorable |
| #### Bn-scaff_19614_1-p98680 C-genome specific (napus-oleracea) | 0.9880383    | 0.7278348    | 0.8139535 | 0.6387082 | not scorable | not scorable |
| #### Bn-scaff_19619_1-p39510 genome unspecific (all in)         | 0.9952153    | 0.4659174    | 1         | 0.8096203 | 1            | 0.9175813    |
| #### Bn-scaff_19641_1-p10032 genome unspecific (oleracea-rapa)  | not scorable | not scorable | 1         | 0.5900415 | 1            | 0.5794674    |

|                                                                 |              |              |           |           |              |              |
|-----------------------------------------------------------------|--------------|--------------|-----------|-----------|--------------|--------------|
| #### Bn-scaff_19641_1-p17020 C-genome specific (napus-oleracea) | 1            | 0.6752138    | 1         | 0.5722501 | not scorable | not scorable |
| #### Bn-scaff_19641_1-p18723 C-genome specific (oleracea only)  | not scorable | not scorable | 0.751938  | 0.7293873 | not scorable | not scorable |
| #### Bn-scaff_19641_1-p18803 C-genome specific (napus-oleracea) | 0.9952153    | 0.8221367    | 1         | 0.721301  | not scorable | not scorable |
| #### Bn-scaff_19641_1-p20689 C-genome specific (napus-oleracea) | 0.9928229    | 0.7241574    | 1         | 0.7075858 | not scorable | not scorable |
| #### Bn-scaff_19641_1-p20863 C-genome specific (napus-oleracea) | 0.9904306    | 0.8357791    | 0.9844961 | 0.7316009 | not scorable | not scorable |
| #### Bn-scaff_19641_1-p21622 C-genome specific (napus-oleracea) | 1            | 0.8265952    | 1         | 0.7733233 | not scorable | not scorable |
| #### Bn-scaff_19641_1-p22212 C-genome specific (napus-oleracea) | 1            | 0.7733645    | 0.9922481 | 0.774141  | not scorable | not scorable |
| #### Bn-scaff_19641_1-p81937 genome unspecific (all in)         | 1            | 0.2992505    | 1         | 0.8720989 | 0.9586777    | 0.2682783    |
| #### Bn-scaff_19641_1-p82357 genome unspecific (oleracea-rapa)  | not scorable | not scorable | 1         | 0.5316477 | 1            | 0.7417051    |
| #### Bn-scaff_19646_1-p410 C-genome specific (napus-oleracea)   | 0.9593301    | 0.7215649    | 0.9844961 | 0.7900607 | not scorable | not scorable |
| #### Bn-scaff_19661_1-p16582 C-genome specific (napus-oleracea) | 0.9880383    | 0.7117724    | 1         | 0.7650104 | not scorable | not scorable |
| #### Bn-scaff_19661_1-p17454 genome unspecific (all in)         | 0.9712918    | 0.2905544    | 0.5968992 | 0.8060528 | 0.9834711    | 0.8347576    |
| #### Bn-scaff_19661_1-p89174 C-genome specific (napus-oleracea) | 1            | 0.5452152    | 1         | 0.5259286 | not scorable | not scorable |
| #### Bn-scaff_19673_1-p11357 C-genome specific (napus-oleracea) | 0.9019139    | 0.6798976    | 0.7829458 | 0.6834869 | not scorable | not scorable |
| #### Bn-scaff_19676_1-p2428 C-genome specific (napus-oleracea)  | 1            | 0.7726738    | 0.9844961 | 0.8121926 | not scorable | not scorable |
| #### Bn-scaff_19691_1-p10553 C-genome specific (napus-oleracea) | 0.923445     | 0.6794223    | 1         | 0.6893227 | not scorable | not scorable |
| #### Bn-scaff_19691_1-p20446 C-genome specific (napus-oleracea) | 0.9760765    | 0.3531868    | 0.9922481 | 0.7622717 | not scorable | not scorable |
| #### Bn-scaff_19692_1-p343 C-genome specific (napus-oleracea)   | 0.8971292    | 0.4839149    | 0.9844961 | 0.7444358 | not scorable | not scorable |
| #### Bn-scaff_19702_1-p18203 C-genome specific (napus-oleracea) | 1            | 0.7914145    | 1         | 0.7178071 | not scorable | not scorable |
| #### Bn-scaff_19702_1-p20487 C-genome specific (napus-oleracea) | 0.9976076    | 0.7509688    | 0.9767442 | 0.7671337 | not scorable | not scorable |
| #### Bn-scaff_19702_1-p29496 genome unspecific (all in)         | 1            | 0.2779695    | 1         | 0.450169  | 0.9917355    | 0.5640581    |
| #### Bn-scaff_19702_1-p31449 genome unspecific (all in)         | 1            | 0.3184238    | 0.9534883 | 0.3062119 | 1            | 0.8948976    |
| #### Bn-scaff_19702_1-p48130 genome unspecific (all in)         | 1            | 0.6912064    | 1         | 0.7442899 | 1            | 0.7748324    |
| #### Bn-scaff_19702_1-p61645 C-genome specific (napus-oleracea) | 0.8803828    | 0.7746764    | 0.6589147 | 0.8183312 | not scorable | not scorable |
| #### Bn-scaff_19724_1-p16618 C-genome specific (napus-oleracea) | 0.9808612    | 0.7948261    | 0.9689922 | 0.8195276 | not scorable | not scorable |
| #### Bn-scaff_19724_1-p16635 C-genome specific (napus-oleracea) | 0.9521531    | 0.7045497    | 0.9689922 | 0.7275865 | not scorable | not scorable |
| #### Bn-scaff_19724_1-p16764 C-genome specific (napus-oleracea) | 0.9856459    | 0.7598858    | 0.9922481 | 0.7757801 | not scorable | not scorable |
| #### Bn-scaff_19724_1-p19013 C-genome specific (napus-oleracea) | 0.9808612    | 0.7689437    | 1         | 0.8384011 | not scorable | not scorable |
| #### Bn-scaff_19724_1-p19673 C-genome specific (napus-oleracea) | 0.9952153    | 0.9164276    | 1         | 0.7202734 | not scorable | not scorable |
| #### Bn-scaff_19724_1-p20285 C-genome specific (napus-oleracea) | 0.9665072    | 0.2703757    | 1         | 0.7300143 | not scorable | not scorable |
| #### Bn-scaff_19724_1-p21639 C-genome specific (napus-oleracea) | 0.9760765    | 0.6833395    | 0.9689922 | 0.7068456 | not scorable | not scorable |
| #### Bn-scaff_19724_1-p22344 C-genome specific (napus-oleracea) | 0.9832536    | 0.7682341    | 0.9767442 | 0.7924657 | not scorable | not scorable |
| #### Bn-scaff_19724_1-p24978 genome unspecific (all in)         | 0.9712918    | 0.3325357    | 0.9844961 | 0.7393869 | 1            | 0.8942062    |

|                                                                 |              |              |              |              |              |                     |
|-----------------------------------------------------------------|--------------|--------------|--------------|--------------|--------------|---------------------|
| #### Bn-scaff_19724_1-p30339 A-genome specific (napus-rapa)     | 1            | 0.5933156    | not scorable | not scorable | 1            | 0.7783315           |
| #### Bn-scaff_19724_1-p31482 C-genome specific (napus-oleracea) | 1            | 0.7656385    |              | 1            | 0.7252879    | not scorable        |
| #### Bn-scaff_19724_1-p36706 all not scorable                   | not scorable | not scorable | not scorable | not scorable | not scorable | not scorable        |
| #### Bn-scaff_19724_1-p46226 C-genome specific (napus-oleracea) | 1            | 0.6785228    |              | 1            | 0.6284197    | not scorable        |
| #### Bn-scaff_19724_1-p46781 genome unspecific (all in)         | 0.9808612    | 0.2995184    |              | 1            | 0.7703386    | 1 0.8068526         |
| #### Bn-scaff_19724_1-p48444 genome unspecific (all in)         | 1            | 0.690158     | 0.9689922    | 0.6874502    | 1            | 0.6697234           |
| #### Bn-scaff_19724_1-p52222 genome unspecific (oleracea-rapa)  | not scorable | not scorable | 0.9767442    | 0.447861     | 0.9917355    | 0.5886242           |
| #### Bn-scaff_19724_1-p55761 C-genome specific (napus-oleracea) | 0.9856459    | 0.7356875    | 0.9922481    | 0.7861979    | not scorable | not scorable        |
| #### Bn-scaff_19724_1-p65991 genome unspecific (all in)         | 0.9641148    | 0.2871653    | 0.8062016    | 0.7018548    | 1            | 0.7742175           |
| #### Bn-scaff_19724_1-p71618 C-genome specific (napus-oleracea) | 0.9760765    | 0.7877427    | 0.9844961    | 0.8060756    | not scorable | not scorable        |
| #### Bn-scaff_19724_1-p74925 genome unspecific (all in)         | 1            | 0.3909736    |              | 1            | 0.7651469    | 0.9752066 0.8674484 |
| #### Bn-scaff_19740_1-p10538 C-genome specific (napus-oleracea) | 0.9976076    | 0.757763     | 0.9844961    | 0.7566369    | not scorable | not scorable        |
| #### Bn-scaff_19740_1-p10551 C-genome specific (napus-oleracea) | 0.9832536    | 0.7804332    | 0.9844961    | 0.7099304    | not scorable | not scorable        |
| #### Bn-scaff_19740_1-p10978 C-genome specific (napus-oleracea) | 0.9832536    | 0.6686625    |              | 1            | 0.5471747    | not scorable        |
| #### Bn-scaff_19740_1-p11265 C-genome specific (napus-oleracea) | 0.9952153    | 0.7777965    | 0.9844961    | 0.8032004    | not scorable | not scorable        |
| #### Bn-scaff_19740_1-p11419 C-genome specific (oleracea only)  | not scorable | not scorable | 0.9922481    | 0.8214092    | not scorable | not scorable        |
| #### Bn-scaff_19740_1-p13024 C-genome specific (napus-oleracea) | 0.9904306    | 0.4645501    | 0.8527132    | 0.7906673    | not scorable | not scorable        |
| #### Bn-scaff_19740_1-p1378 all not scorable                    | not scorable | not scorable | not scorable | not scorable | not scorable | not scorable        |
| #### Bn-scaff_19740_1-p16202 C-genome specific (napus-oleracea) | 1            | 0.7296359    | 0.9457364    | 0.8040433    | not scorable | not scorable        |
| #### Bn-scaff_19740_1-p19210 napus specific                     | 1            | 0.2862253    | not scorable | not scorable | not scorable | not scorable        |
| #### Bn-scaff_19740_1-p19210 C-genome specific (napus-oleracea) | 0.9880383    | 0.2793809    | 0.9612403    | 0.2363453    | not scorable | not scorable        |
| #### Bn-scaff_19740_1-p20393 C-genome specific (napus-oleracea) | 0.9976076    | 0.7200787    |              | 1            | 0.8468556    | not scorable        |
| #### Bn-scaff_19740_1-p23604 genome unspecific (all in)         | 0.9832536    | 0.3343897    |              | 1            | 0.8323174    | 0.9669421 0.834699  |
| #### Bn-scaff_19740_1-p26551 C-genome specific (napus-oleracea) | 0.9976076    | 0.8039139    |              | 1            | 0.8149741    | not scorable        |
| #### Bn-scaff_19740_1-p35978 C-genome specific (napus-oleracea) | 0.9976076    | 0.7550631    |              | 1            | 0.7457579    | not scorable        |
| #### Bn-scaff_19740_1-p36568 C-genome specific (napus-oleracea) | 0.9880383    | 0.631785     | 0.9767442    | 0.6778319    | not scorable | not scorable        |
| #### Bn-scaff_19740_1-p45553 C-genome specific (napus-oleracea) | 0.9880383    | 0.8024442    |              | 1            | 0.7916608    | not scorable        |
| #### Bn-scaff_19740_1-p59649 C-genome specific (napus-oleracea) | 0.9856459    | 0.7628941    |              | 1            | 0.7855649    | not scorable        |
| #### Bn-scaff_19740_1-p6264 A-genome specific (rapa only)       | not scorable | not scorable | not scorable | not scorable |              | 1 0.8085203         |
| #### Bn-scaff_19740_1-p6315 genome unspecific (all in)          | 1            | 0.3990285    |              | 1            | 0.4913147    | 0.9917355 0.4691428 |
| #### Bn-scaff_19740_1-p66841 C-genome specific (napus-oleracea) | 0.9952153    | 0.8053567    |              | 1            | 0.7789307    | not scorable        |
| #### Bn-scaff_19740_1-p67158 C-genome specific (napus-oleracea) | 0.9928229    | 0.7871183    |              | 1            | 0.6952329    | not scorable        |
| #### Bn-scaff_19740_1-p67802 C-genome specific (napus-oleracea) | 0.9904306    | 0.7497804    | 0.9922481    | 0.7908203    | not scorable | not scorable        |

|                                                                 |              |              |              |              |              |              |
|-----------------------------------------------------------------|--------------|--------------|--------------|--------------|--------------|--------------|
| #### Bn-scaff_19740_1-p91253 C-genome specific (napus-oleracea) | 0.9880383    | 0.4353527    | 0.9844961    | 0.4935736    | not scorable | not scorable |
| #### Bn-scaff_19740_1-p9200 C-genome specific (napus-oleracea)  | 0.9808612    | 0.8354272    | 0.9844961    | 0.7847905    | not scorable | not scorable |
| #### Bn-scaff_19740_1-p96323 napus specific                     | 0.9784689    | 0.2843661    | not scorable | not scorable | not scorable | not scorable |
| #### Bn-scaff_19740_1-p98443 C-genome specific (napus-oleracea) | 0.9736842    | 0.2817284    | 1            | 0.3283681    | not scorable | not scorable |
| #### Bn-scaff_19757_1-p22787 genome unspecific (all in)         | 0.9928229    | 0.3142193    | 1            | 0.6989672    | 0.9917355    | 0.7175007    |
| #### Bn-scaff_19757_1-p24032 genome unspecific (oleracea-rapa)  | not scorable | not scorable | 0.6744186    | 0.7365305    | 0.9834711    | 0.9080027    |
| #### Bn-scaff_19769_1-p103 napus specific                       | 0.9880383    | 0.6482629    | not scorable | not scorable | not scorable | not scorable |
| #### Bn-scaff_19773_1-p11210 C-genome specific (napus-oleracea) | 0.9928229    | 0.7888263    | 0.9844961    | 0.7347501    | not scorable | not scorable |
| #### Bn-scaff_19773_1-p13780 C-genome specific (napus-oleracea) | 0.9904306    | 0.6217883    | 0.9844961    | 0.6247721    | not scorable | not scorable |
| #### Bn-scaff_19773_1-p20821 C-genome specific (napus-oleracea) | 0.9832536    | 0.6676868    | 0.9922481    | 0.7498696    | not scorable | not scorable |
| #### Bn-scaff_19773_1-p4298 C-genome specific (oleracea only)   | not scorable | not scorable | 0.9689922    | 0.6862082    | not scorable | not scorable |
| #### Bn-scaff_19773_1-p5224 all not scorable                    | not scorable | not scorable | not scorable | not scorable | not scorable | not scorable |
| #### Bn-scaff_19780_1-p16388 C-genome specific (napus-oleracea) | 1            | 0.5788181    | 1            | 0.4816257    | not scorable | not scorable |
| #### Bn-scaff_19780_1-p39972 C-genome specific (napus-oleracea) | 0.9808612    | 0.2167366    | 0.9224806    | 0.2703541    | not scorable | not scorable |
| #### Bn-scaff_19783_1-p10556 genome unspecific (oleracea-rapa)  | not scorable | not scorable | 0.9922481    | 0.5496485    | 1            | 0.7395847    |
| #### Bn-scaff_19783_1-p10601 genome unspecific (all in)         | 0.9736842    | 0.42064      | 1            | 0.7886055    | 1            | 0.8448846    |
| #### Bn-scaff_19783_1-p10612 all not scorable                   | not scorable | not scorable | not scorable | not scorable | not scorable | not scorable |
| #### Bn-scaff_19783_1-p10614 genome unspecific (all in)         | 1            | 0.7252899    | 1            | 0.6862456    | 1            | 0.6706561    |
| #### Bn-scaff_19783_1-p10620 genome unspecific (oleracea-rapa)  | not scorable | not scorable | 1            | 0.4195975    | 1            | 0.5562285    |
| #### Bn-scaff_19783_1-p13590 genome unspecific (oleracea-rapa)  | not scorable | not scorable | 1            | 0.5915304    | 0.9586777    | 0.2840881    |
| #### Bn-scaff_19783_1-p27929 C-genome specific (napus-oleracea) | 0.8971292    | 0.7639432    | 1            | 0.6494652    | not scorable | not scorable |
| #### Bn-scaff_19783_1-p32712 C-genome specific (napus-oleracea) | 0.8971292    | 0.7335781    | 1            | 0.6690914    | not scorable | not scorable |
| #### Bn-scaff_19783_1-p32777 C-genome specific (napus-oleracea) | 0.9282297    | 0.7886688    | 1            | 0.7678523    | not scorable | not scorable |
| #### Bn-scaff_19783_1-p37908 genome unspecific (all in)         | 0.9736842    | 0.6159186    | 1            | 0.7056608    | 1            | 0.9159136    |
| #### Bn-scaff_19783_1-p38444 A-genome specific (napus-rapa)     | 0.8277512    | 0.4642611    | not scorable | not scorable | 1            | 0.8176145    |
| #### Bn-scaff_19783_1-p42323 genome unspecific (all in)         | 0.9497608    | 0.4320933    | 1            | 0.6687152    | 1            | 0.8331847    |
| #### Bn-scaff_19783_1-p47290 all not scorable                   | not scorable | not scorable | not scorable | not scorable | not scorable | not scorable |
| #### Bn-scaff_19783_1-p52772 C-genome specific (oleracea only)  | not scorable | not scorable | 0.9069768    | 0.3543435    | not scorable | not scorable |
| #### Bn-scaff_19783_1-p71479 genome unspecific (all in)         | 0.9712918    | 0.2379207    | 1            | 0.8019504    | 1            | 0.7972762    |
| #### Bn-scaff_19783_1-p92226 C-genome specific (napus-oleracea) | 0.8995215    | 0.833194     | 1            | 0.7143449    | not scorable | not scorable |
| #### Bn-scaff_19783_1-p92592 C-genome specific (napus-oleracea) | 0.9043062    | 0.9305106    | 1            | 0.8474663    | not scorable | not scorable |
| #### Bn-scaff_19783_1-p94967 C-genome specific (napus-oleracea) | 0.9282297    | 0.9175813    | 0.9767442    | 0.7217317    | not scorable | not scorable |
| #### Bn-scaff_19784_1-p68 C-genome specific (napus-oleracea)    | 0.9760765    | 0.4987801    | 1            | 0.7216412    | not scorable | not scorable |



|                                                                 |              |              |              |              |              |              |
|-----------------------------------------------------------------|--------------|--------------|--------------|--------------|--------------|--------------|
| #### Bn-scaff_19799_1-p323 napus specific                       | 0.9210526    | 0.2557754    | not scorable | not scorable | not scorable | not scorable |
| #### Bn-scaff_19803_1-p221 C-genome specific (napus-oleracea)   | 0.8803828    | 0.9175813    | 0.9689922    | 0.7670014    | not scorable | not scorable |
| #### Bn-scaff_19821_1-p21800 C-genome specific (napus-oleracea) | 0.9952153    | 0.769283     | 1            | 0.7062409    | not scorable | not scorable |
| #### Bn-scaff_19821_1-p23788 C-genome specific (napus-oleracea) | 0.9928229    | 0.779766     | 0.9767442    | 0.7575099    | not scorable | not scorable |
| #### Bn-scaff_19821_1-p26218 C-genome specific (napus-oleracea) | 0.9976076    | 0.6957014    | 1            | 0.6562288    | not scorable | not scorable |
| #### Bn-scaff_19821_1-p26771 C-genome specific (napus-oleracea) | 0.9952153    | 0.7696341    | 1            | 0.76533      | not scorable | not scorable |
| #### Bn-scaff_19821_1-p26809 C-genome specific (napus-oleracea) | 0.9952153    | 0.7682148    | 1            | 0.7732919    | not scorable | not scorable |
| #### Bn-scaff_19821_1-p26834 C-genome specific (napus-oleracea) | 0.9928229    | 0.7976675    | 1            | 0.7363253    | not scorable | not scorable |
| #### Bn-scaff_19821_1-p27240 C-genome specific (napus-oleracea) | 0.9784689    | 0.7206655    | 0.9689922    | 0.8007197    | not scorable | not scorable |
| #### Bn-scaff_19821_1-p29206 C-genome specific (napus-oleracea) | 0.9976076    | 0.7732621    | 0.9612403    | 0.7966691    | not scorable | not scorable |
| #### Bn-scaff_19821_1-p29223 C-genome specific (napus-oleracea) | 0.9856459    | 0.7295465    | 0.9689922    | 0.7800428    | not scorable | not scorable |
| #### Bn-scaff_19821_1-p29228 C-genome specific (napus-oleracea) | 0.9904306    | 0.8020285    | 0.9767442    | 0.7326914    | not scorable | not scorable |
| #### Bn-scaff_19821_1-p29296 C-genome specific (napus-oleracea) | 0.9832536    | 0.7056328    | 0.9534883    | 0.6462592    | not scorable | not scorable |
| #### Bn-scaff_19821_1-p29441 C-genome specific (napus-oleracea) | 0.9856459    | 0.8028314    | 0.9767442    | 0.7080966    | not scorable | not scorable |
| #### Bn-scaff_19821_1-p29450 C-genome specific (napus-oleracea) | 0.9904306    | 0.7722343    | 0.9689922    | 0.747672     | not scorable | not scorable |
| #### Bn-scaff_19821_1-p32316 C-genome specific (napus-oleracea) | 0.9928229    | 0.7628844    | 0.9612403    | 0.7651234    | not scorable | not scorable |
| #### Bn-scaff_19821_1-p32448 C-genome specific (napus-oleracea) | 0.9880383    | 0.7618541    | 0.9767442    | 0.7530902    | not scorable | not scorable |
| #### Bn-scaff_19821_1-p32721 C-genome specific (napus-oleracea) | 0.9904306    | 0.7796345    | 0.9767442    | 0.7502125    | not scorable | not scorable |
| #### Bn-scaff_19821_1-p33740 C-genome specific (napus-oleracea) | 0.9928229    | 0.8033559    | 0.9689922    | 0.7989635    | not scorable | not scorable |
| #### Bn-scaff_19821_1-p33753 C-genome specific (napus-oleracea) | 0.9832536    | 0.7837979    | 0.9767442    | 0.7666186    | not scorable | not scorable |
| #### Bn-scaff_19821_1-p34409 C-genome specific (napus-oleracea) | 0.9952153    | 0.7905959    | 0.9767442    | 0.7824224    | not scorable | not scorable |
| #### Bn-scaff_19821_1-p35904 C-genome specific (napus-oleracea) | 0.9976076    | 0.7781911    | 1            | 0.7705562    | not scorable | not scorable |
| #### Bn-scaff_19821_1-p35945 C-genome specific (napus-oleracea) | 0.9784689    | 0.6791909    | 1            | 0.6954607    | not scorable | not scorable |
| #### Bn-scaff_19821_1-p38845 C-genome specific (napus-oleracea) | 0.9856459    | 0.7752358    | 0.9767442    | 0.8291878    | not scorable | not scorable |
| #### Bn-scaff_19821_1-p39515 C-genome specific (napus-oleracea) | 0.9688995    | 0.7333347    | 0.9844961    | 0.6836851    | not scorable | not scorable |
| #### Bn-scaff_19821_1-p39733 C-genome specific (napus-oleracea) | 0.9856459    | 0.7352601    | 0.9844961    | 0.797469     | not scorable | not scorable |
| #### Bn-scaff_19821_1-p39968 C-genome specific (napus-oleracea) | 0.9712918    | 0.7234313    | 0.9767442    | 0.7065464    | not scorable | not scorable |
| #### Bn-scaff_19821_1-p54826 genome unspecific (all in)         | 0.9880383    | 0.350781     | 1            | 0.6845406    | 1            | 0.7271595    |
| #### Bn-scaff_19821_1-p96192 genome unspecific (all in)         | 0.9856459    | 0.3254717    | 1            | 0.6861051    | 1            | 0.803269     |
| #### Bn-scaff_19847_1-p21999 genome unspecific (all in)         | 0.9808612    | 0.4963737    | 1            | 0.6033765    | 1            | 0.9173795    |
| #### Bn-scaff_19892_1-p21853 C-genome specific (napus-oleracea) | 0.9760765    | 0.2058869    | 1            | 0.5168663    | not scorable | not scorable |
| #### Bn-scaff_19892_1-p27814 genome unspecific (all in)         | 1            | 0.2560492    | 1            | 0.703249     | 0.9752066    | 0.7745062    |
| #### Bn-scaff_19892_1-p33569 genome unspecific (oleracea-rapa)  | not scorable | not scorable | 0.9844961    | 0.513873     | 0.9504132    | 0.8839048    |

|                                                                 |              |              |              |              |              |              |
|-----------------------------------------------------------------|--------------|--------------|--------------|--------------|--------------|--------------|
| #### Bn-scaff_19899_1-p12334 C-genome specific (napus-oleracea) | 0.9832536    | 0.7606095    | 0.9922481    | 0.7915573    | not scorable | not scorable |
| #### Bn-scaff_19899_1-p12992 C-genome specific (napus-oleracea) | 0.9880383    | 0.6774447    | 0.9457364    | 0.6543075    | not scorable | not scorable |
| #### Bn-scaff_19899_1-p16013 genome unspecific (all in)         | 0.9880383    | 0.7837644    | 1            | 0.7321464    | 0.8512397    | 0.9039531    |
| #### Bn-scaff_19899_1-p17895 genome unspecific (all in)         | 0.9641148    | 0.3782834    | 1            | 0.7156245    | 1            | 0.8923199    |
| #### Bn-scaff_19899_1-p20341 genome unspecific (all in)         | 0.9952153    | 0.3072073    | 1            | 0.7766578    | 1            | 0.8033201    |
| #### Bn-scaff_19899_1-p20361 C-genome specific (napus-oleracea) | 0.9976076    | 0.2749428    | 1            | 0.6985399    | not scorable | not scorable |
| #### Bn-scaff_19899_1-p28318 C-genome specific (napus-oleracea) | 0.9880383    | 0.7380121    | 0.9922481    | 0.8525947    | not scorable | not scorable |
| #### Bn-scaff_19899_1-p30361 genome unspecific (all in)         | 1            | 0.8895749    | 1            | 0.7567555    | 1            | 0.8948424    |
| #### Bn-scaff_19899_1-p34734 genome unspecific (all in)         | 0.9856459    | 0.7862609    | 0.9922481    | 0.8747332    | 0.8512397    | 0.9335102    |
| #### Bn-scaff_19899_1-p35662 C-genome specific (napus-oleracea) | 0.9952153    | 0.8637689    | 1            | 0.8952819    | not scorable | not scorable |
| #### Bn-scaff_19899_1-p35698 genome unspecific (all in)         | 0.9712918    | 0.2976309    | 1            | 0.7746669    | 1            | 0.8007084    |
| #### Bn-scaff_19899_1-p35719 genome unspecific (all in)         | 0.9617225    | 0.2774099    | 1            | 0.904539     | 1            | 0.8001212    |
| #### Bn-scaff_19899_1-p35767 genome unspecific (all in)         | 0.9832536    | 0.3239705    | 1            | 0.9106572    | 1            | 0.6761603    |
| #### Bn-scaff_19899_1-p35809 genome unspecific (all in)         | 0.9976076    | 0.3191862    | 1            | 0.7803059    | 1            | 0.8848283    |
| #### Bn-scaff_19899_1-p46550 genome unspecific (all in)         | 1            | 0.4499067    | 1            | 0.729857     | 1            | 0.8208305    |
| #### Bn-scaff_19899_1-p46561 C-genome specific (napus-oleracea) | 1            | 0.8829201    | 1            | 0.717665     | not scorable | not scorable |
| #### Bn-scaff_19899_1-p46699 genome unspecific (all in)         | 0.9952153    | 0.2674089    | 0.9922481    | 0.5821547    | 0.9917355    | 0.5852528    |
| #### Bn-scaff_19899_1-p52383 C-genome specific (napus-oleracea) | 1            | 0.7279868    | 1            | 0.7808293    | not scorable | not scorable |
| #### Bn-scaff_19899_1-p55918 C-genome specific (napus-oleracea) | 1            | 0.7941366    | 0.9922481    | 0.7850451    | not scorable | not scorable |
| #### Bn-scaff_19899_1-p62154 genome unspecific (all in)         | 0.9952153    | 0.3158191    | 0.9922481    | 0.7367573    | 1            | 0.8194528    |
| #### Bn-scaff_19899_1-p62187 genome unspecific (all in)         | 0.9617225    | 0.2174906    | 0.9922481    | 0.8675371    | 1            | 0.9249377    |
| #### Bn-scaff_19899_1-p62325 genome unspecific (all in)         | 0.9760765    | 0.3180185    | 0.9844961    | 0.8006104    | 1            | 0.908817     |
| #### Bn-scaff_19899_1-p63996 C-genome specific (napus-oleracea) | 0.9641148    | 0.3692039    | 0.9922481    | 0.6650782    | not scorable | not scorable |
| #### Bn-scaff_19899_1-p65159 napus specific                     | 0.9808612    | 0.7139354    | not scorable | not scorable | not scorable | not scorable |
| #### Bn-scaff_19899_1-p65205 C-genome specific (napus-oleracea) | 1            | 0.7652551    | 1            | 0.7567874    | not scorable | not scorable |
| #### Bn-scaff_19899_1-p65271 C-genome specific (oleracea only)  | not scorable | not scorable | 0.9922481    | 0.7069583    | not scorable | not scorable |
| #### Bn-scaff_19899_1-p65353 all not scorable                   | not scorable | not scorable | not scorable | not scorable | not scorable | not scorable |
| #### Bn-scaff_19899_1-p65780 genome unspecific (all in)         | 0.9736842    | 0.4977708    | 1            | 0.7516108    | 1            | 0.9077093    |
| #### Bn-scaff_19899_1-p65790 C-genome specific (napus-oleracea) | 0.9808612    | 0.5736644    | 0.9922481    | 0.6412095    | not scorable | not scorable |
| #### Bn-scaff_19899_1-p65833 C-genome specific (napus-oleracea) | 0.9928229    | 0.750963     | 1            | 0.7928978    | not scorable | not scorable |
| #### Bn-scaff_19899_1-p68460 genome unspecific (all in)         | 0.9760765    | 0.6543688    | 1            | 0.8385004    | 1            | 0.9362696    |
| #### Bn-scaff_19899_1-p70175 C-genome specific (napus-oleracea) | 0.9808612    | 0.770266     | 1            | 0.8384785    | not scorable | not scorable |
| #### Bn-scaff_19899_1-p70915 genome unspecific (all in)         | 0.9760765    | 0.2463981    | 1            | 0.7475585    | 1            | 0.7322357    |

|                                                                 |              |              |           |           |              |              |
|-----------------------------------------------------------------|--------------|--------------|-----------|-----------|--------------|--------------|
| #### Bn-scaff_19899_1-p71972 C-genome specific (napus-oleracea) | 0.9904306    | 0.7778311    | 1         | 0.6929292 | not scorable | not scorable |
| #### Bn-scaff_19899_1-p71987 C-genome specific (napus-oleracea) | 0.9808612    | 0.7159724    | 0.9922481 | 0.7599545 | not scorable | not scorable |
| #### Bn-scaff_19899_1-p86432 genome unspecific (all in)         | 0.9832536    | 0.773837     | 1         | 0.7510251 | 0.9752066    | 0.9175813    |
| #### Bn-scaff_19904_1-p10383 genome unspecific (all in)         | 0.9928229    | 0.3669108    | 1         | 0.7972808 | 0.9586777    | 0.7179218    |
| #### Bn-scaff_19911_1-p23886 genome unspecific (all in)         | 0.9808612    | 0.3299931    | 0.9922481 | 0.8274619 | 1            | 0.8886057    |
| #### Bn-scaff_19911_1-p28042 C-genome specific (napus-oleracea) | 0.9952153    | 0.715967     | 0.9844961 | 0.7519045 | not scorable | not scorable |
| #### Bn-scaff_19911_1-p30966 C-genome specific (napus-oleracea) | 0.9880383    | 0.7424175    | 0.9844961 | 0.6585034 | not scorable | not scorable |
| #### Bn-scaff_19911_1-p31068 C-genome specific (napus-oleracea) | 0.9904306    | 0.8076131    | 1         | 0.7467001 | not scorable | not scorable |
| #### Bn-scaff_19911_1-p42676 genome unspecific (all in)         | 1            | 0.2468983    | 0.9379845 | 0.2174845 | 1            | 0.7710974    |
| #### Bn-scaff_19911_1-p47746 C-genome specific (napus-oleracea) | 0.9976076    | 0.7867897    | 0.9922481 | 0.7709392 | not scorable | not scorable |
| #### Bn-scaff_19911_1-p49010 C-genome specific (napus-oleracea) | 0.9808612    | 0.7853472    | 0.9457364 | 0.7682652 | not scorable | not scorable |
| #### Bn-scaff_19911_1-p54072 genome unspecific (all in)         | 0.9808612    | 0.2057824    | 0.9844961 | 0.5969076 | 0.9834711    | 0.5804667    |
| #### Bn-scaff_19911_1-p59151 C-genome specific (napus-oleracea) | 0.9976076    | 0.595965     | 0.9844961 | 0.6137564 | not scorable | not scorable |
| #### Bn-scaff_19911_1-p79273 C-genome specific (napus-oleracea) | 0.9904306    | 0.8011788    | 0.9224806 | 0.7817208 | not scorable | not scorable |
| #### Bn-scaff_19911_1-p84036 C-genome specific (napus-oleracea) | 0.9976076    | 0.8620908    | 0.9767442 | 0.8086351 | not scorable | not scorable |
| #### Bn-scaff_19911_1-p84276 C-genome specific (napus-oleracea) | 1            | 0.7540987    | 0.9922481 | 0.7127162 | not scorable | not scorable |
| #### Bn-scaff_19911_1-p85693 C-genome specific (napus-oleracea) | 0.9976076    | 0.7172435    | 0.9922481 | 0.8144082 | not scorable | not scorable |
| #### Bn-scaff_19911_1-p92644 C-genome specific (napus-oleracea) | 0.9808612    | 0.7127285    | 0.9767442 | 0.7725458 | not scorable | not scorable |
| #### Bn-scaff_19911_1-p92720 C-genome specific (napus-oleracea) | 0.9856459    | 0.688059     | 0.9844961 | 0.8593516 | not scorable | not scorable |
| #### Bn-scaff_19911_1-p93145 C-genome specific (napus-oleracea) | 0.9832536    | 0.6605805    | 0.9922481 | 0.7335206 | not scorable | not scorable |
| #### Bn-scaff_19911_1-p93379 C-genome specific (napus-oleracea) | 0.8110048    | 0.7205205    | 0.7984496 | 0.8704186 | not scorable | not scorable |
| #### Bn-scaff_19911_1-p93408 C-genome specific (napus-oleracea) | 0.9928229    | 0.7425246    | 1         | 0.7600486 | not scorable | not scorable |
| #### Bn-scaff_19911_1-p98995 C-genome specific (napus-oleracea) | 0.9928229    | 0.7462757    | 0.9922481 | 0.786372  | not scorable | not scorable |
| #### Bn-scaff_19927_1-p24167 C-genome specific (napus-oleracea) | 0.708134     | 0.6972969    | 0.9689922 | 0.7420748 | not scorable | not scorable |
| #### Bn-scaff_19927_1-p24375 C-genome specific (napus-oleracea) | 0.7009569    | 0.7051783    | 0.9922481 | 0.6505639 | not scorable | not scorable |
| #### Bn-scaff_19929_1-p16387 C-genome specific (napus-oleracea) | 0.9880383    | 0.506754     | 0.9922481 | 0.7552432 | not scorable | not scorable |
| #### Bn-scaff_19929_1-p1877 genome unspecific (oleracea-rapa)   | not scorable | not scorable | 0.8914729 | 0.354962  | 1            | 0.8710507    |
| #### Bn-scaff_19929_1-p19468 C-genome specific (napus-oleracea) | 0.9856459    | 0.7414937    | 0.9922481 | 0.6374045 | not scorable | not scorable |
| #### Bn-scaff_19929_1-p19561 C-genome specific (napus-oleracea) | 1            | 0.6909535    | 0.9844961 | 0.8166102 | not scorable | not scorable |
| #### Bn-scaff_19929_1-p36004 C-genome specific (napus-oleracea) | 0.9904306    | 0.7623678    | 0.9844961 | 0.7544184 | not scorable | not scorable |
| #### Bn-scaff_19929_1-p42926 C-genome specific (napus-oleracea) | 0.9952153    | 0.8073834    | 0.9844961 | 0.7710673 | not scorable | not scorable |
| #### Bn-scaff_19929_1-p57787 C-genome specific (napus-oleracea) | 0.9928229    | 0.7350959    | 1         | 0.7458274 | not scorable | not scorable |
| #### Bn-scaff_19929_1-p59044 C-genome specific (napus-oleracea) | 0.9832536    | 0.6884764    | 1         | 0.7659398 | not scorable | not scorable |

|                                                                 |              |              |              |              |              |              |
|-----------------------------------------------------------------|--------------|--------------|--------------|--------------|--------------|--------------|
| #### Bn-scaff_19929_1-p59133 C-genome specific (napus-oleracea) | 0.9904306    | 0.7936693    | 1            | 0.7524688    | not scorable | not scorable |
| #### Bn-scaff_19929_1-p59215 C-genome specific (napus-oleracea) | 0.9928229    | 0.754217     | 0.9844961    | 0.7032002    | not scorable | not scorable |
| #### Bn-scaff_19929_1-p59705 C-genome specific (napus-oleracea) | 0.9928229    | 0.7752545    | 1            | 0.7050719    | not scorable | not scorable |
| #### Bn-scaff_19929_1-p66166 C-genome specific (napus-oleracea) | 0.9976076    | 0.6972772    | 0.9844961    | 0.6373684    | not scorable | not scorable |
| #### Bn-scaff_19929_1-p66171 C-genome specific (napus-oleracea) | 1            | 0.791793     | 0.9922481    | 0.7371953    | not scorable | not scorable |
| #### Bn-scaff_19929_1-p66343 C-genome specific (napus-oleracea) | 0.9976076    | 0.6917101    | 0.9844961    | 0.6269807    | not scorable | not scorable |
| #### Bn-scaff_19937_1-p10703 C-genome specific (napus-oleracea) | 0.9952153    | 0.9123214    | 0.9922481    | 0.7569191    | not scorable | not scorable |
| #### Bn-scaff_19937_1-p19550 C-genome specific (napus-oleracea) | 0.9162679    | 0.7669856    | 1            | 0.7964087    | not scorable | not scorable |
| #### Bn-scaff_19937_1-p20028 genome unspecific (all in)         | 0.9712918    | 0.3053811    | 1            | 0.8327719    | 0.9834711    | 0.6964283    |
| #### Bn-scaff_19937_1-p28874 C-genome specific (napus-oleracea) | 0.9090909    | 0.7592317    | 0.9612403    | 0.7812095    | not scorable | not scorable |
| #### Bn-scaff_19937_1-p39959 C-genome specific (napus-oleracea) | 0.9162679    | 0.7731155    | 0.9922481    | 0.7655718    | not scorable | not scorable |
| #### Bn-scaff_19937_1-p50824 C-genome specific (napus-oleracea) | 0.8923445    | 0.2332537    | 0.9767442    | 0.7313802    | not scorable | not scorable |
| #### Bn-scaff_19937_1-p51016 C-genome specific (napus-oleracea) | 0.9832536    | 0.2695569    | 0.9767442    | 0.8513158    | not scorable | not scorable |
| #### Bn-scaff_19937_1-p9125 C-genome specific (oleracea only)   | not scorable | not scorable | 0.8992248    | 0.823335     | not scorable | not scorable |
| #### Bn-scaff_19965_1-p22501 C-genome specific (napus-oleracea) | 0.9976076    | 0.790493     | 1            | 0.7728827    | not scorable | not scorable |
| #### Bn-scaff_19965_1-p72464 C-genome specific (napus-oleracea) | 0.9976076    | 0.6377741    | 1            | 0.7492898    | not scorable | not scorable |
| #### Bn-scaff_19975_1-p14174 C-genome specific (napus-oleracea) | 0.9952153    | 0.6309832    | 0.8372093    | 0.6961395    | not scorable | not scorable |
| #### Bn-scaff_19990_1-p35410 all not scorable                   | not scorable | not scorable | not scorable | not scorable | not scorable | not scorable |
| #### Bn-scaff_19990_1-p44526 C-genome specific (oleracea only)  | not scorable | not scorable | 0.8992248    | 0.2584835    | not scorable | not scorable |
| #### Bn-scaff_19990_1-p5659 C-genome specific (napus-oleracea)  | 0.9904306    | 0.7195077    | 0.9767442    | 0.6903467    | not scorable | not scorable |
| #### Bn-scaff_19995_1-p11896 genome unspecific (all in)         | 0.9976076    | 0.3250154    | 1            | 0.6274198    | 0.9834711    | 0.6558004    |
| #### Bn-scaff_19995_1-p12647 genome unspecific (oleracea-rapa)  | not scorable | not scorable | 1            | 0.7401165    | 1            | 0.9095823    |
| #### Bn-scaff_19995_1-p20624 genome unspecific (all in)         | 0.9808612    | 0.3249817    | 1            | 0.5773365    | 0.9917355    | 0.6159589    |
| #### Bn-scaff_19995_1-p33414 C-genome specific (napus-oleracea) | 0.9593301    | 0.2952514    | 1            | 0.7694299    | not scorable | not scorable |
| #### Bn-scaff_19995_1-p91321 genome unspecific (all in)         | 1            | 0.5422733    | 1            | 0.5611349    | 0.9917355    | 0.5320435    |
| #### Bn-scaff_20026_1-p35907 genome unspecific (all in)         | 1            | 0.4889443    | 1            | 0.4899909    | 1            | 0.5160784    |
| #### Bn-scaff_20041_1-p99 genome unspecific (all in)            | 0.8971292    | 0.168288     | 0.9379845    | 0.1573919    | 1            | 0.9272014    |
| #### Bn-scaff_20042_1-p10474 C-genome specific (napus-oleracea) | 0.9952153    | 0.8223041    | 1            | 0.8429241    | not scorable | not scorable |
| #### Bn-scaff_20042_1-p12033 C-genome specific (napus-oleracea) | 0.9976076    | 0.8295594    | 1            | 0.8773964    | not scorable | not scorable |
| #### Bn-scaff_20042_1-p13087 C-genome specific (napus-oleracea) | 1            | 0.7199803    | 0.9844961    | 0.6960173    | not scorable | not scorable |
| #### Bn-scaff_20042_1-p15041 C-genome specific (napus-oleracea) | 0.9976076    | 0.7427064    | 1            | 0.7086763    | not scorable | not scorable |
| #### Bn-scaff_20042_1-p1582 C-genome specific (napus-oleracea)  | 0.9904306    | 0.7193174    | 0.9922481    | 0.7381238    | not scorable | not scorable |
| #### Bn-scaff_20042_1-p22468 C-genome specific (napus-oleracea) | 0.9976076    | 0.7412554    | 1            | 0.7591952    | not scorable | not scorable |

|                                                                 |              |              |              |              |              |              |
|-----------------------------------------------------------------|--------------|--------------|--------------|--------------|--------------|--------------|
| #### Bn-scaff_20042_1-p22589 C-genome specific (napus-oleracea) | 0.9976076    | 0.7859325    | 1            | 0.7463158    | not scorable | not scorable |
| #### Bn-scaff_20042_1-p22766 all not scorable                   | not scorable | not scorable | not scorable | not scorable | not scorable | not scorable |
| #### Bn-scaff_20042_1-p22783 C-genome specific (napus-oleracea) | 0.9952153    | 0.7803692    | 1            | 0.8235154    | not scorable | not scorable |
| #### Bn-scaff_20042_1-p23328 C-genome specific (napus-oleracea) | 0.9904306    | 0.7740192    | 1            | 0.7923925    | not scorable | not scorable |
| #### Bn-scaff_20042_1-p23706 C-genome specific (napus-oleracea) | 0.9832536    | 0.7904705    | 1            | 0.8070554    | not scorable | not scorable |
| #### Bn-scaff_20042_1-p25627 C-genome specific (napus-oleracea) | 0.9952153    | 0.6531678    | 1            | 0.7116969    | not scorable | not scorable |
| #### Bn-scaff_20042_1-p31616 C-genome specific (napus-oleracea) | 0.9976076    | 0.6239328    | 0.9922481    | 0.6079464    | not scorable | not scorable |
| #### Bn-scaff_20042_1-p3263 C-genome specific (napus-oleracea)  | 0.9928229    | 0.7610377    | 1            | 0.674746     | not scorable | not scorable |
| #### Bn-scaff_20042_1-p38478 C-genome specific (napus-oleracea) | 0.9976076    | 0.7613509    | 1            | 0.7922513    | not scorable | not scorable |
| #### Bn-scaff_20042_1-p38603 C-genome specific (napus-oleracea) | 0.9928229    | 0.6954831    | 1            | 0.644836     | not scorable | not scorable |
| #### Bn-scaff_20042_1-p39005 C-genome specific (napus-oleracea) | 0.9928229    | 0.7045109    | 1            | 0.6935323    | not scorable | not scorable |
| #### Bn-scaff_20042_1-p58414 C-genome specific (napus-oleracea) | 1            | 0.7058157    | 0.9922481    | 0.8168041    | not scorable | not scorable |
| #### Bn-scaff_20042_1-p59399 C-genome specific (oleracea only)  | not scorable | not scorable | 0.9922481    | 0.7094836    | not scorable | not scorable |
| #### Bn-scaff_20042_1-p60070 C-genome specific (napus-oleracea) | 0.9928229    | 0.6596832    | 1            | 0.9078097    | not scorable | not scorable |
| #### Bn-scaff_20042_1-p62815 C-genome specific (napus-oleracea) | 0.9952153    | 0.7990023    | 1            | 0.8247306    | not scorable | not scorable |
| #### Bn-scaff_20042_1-p63662 C-genome specific (oleracea only)  | not scorable | not scorable | 0.9922481    | 0.8624737    | not scorable | not scorable |
| #### Bn-scaff_20042_1-p67923 C-genome specific (napus-oleracea) | 0.9904306    | 0.6911618    | 0.9922481    | 0.7904244    | not scorable | not scorable |
| #### Bn-scaff_20042_1-p70919 C-genome specific (napus-oleracea) | 0.9928229    | 0.7098213    | 1            | 0.6873076    | not scorable | not scorable |
| #### Bn-scaff_20042_1-p71932 C-genome specific (napus-oleracea) | 0.9904306    | 0.6784018    | 1            | 0.7323328    | not scorable | not scorable |
| #### Bn-scaff_20042_1-p72343 C-genome specific (napus-oleracea) | 0.9976076    | 0.8187729    | 1            | 0.8182613    | not scorable | not scorable |
| #### Bn-scaff_20042_1-p74312 C-genome specific (napus-oleracea) | 0.9952153    | 0.7836674    | 1            | 0.7823088    | not scorable | not scorable |
| #### Bn-scaff_20042_1-p83175 C-genome specific (napus-oleracea) | 0.9904306    | 0.7830742    | 1            | 0.7395398    | not scorable | not scorable |
| #### Bn-scaff_20042_1-p84111 C-genome specific (napus-oleracea) | 0.9928229    | 0.7712101    | 1            | 0.7941422    | not scorable | not scorable |
| #### Bn-scaff_20063_1-p13531 C-genome specific (napus-oleracea) | 0.9976076    | 0.7831873    | 0.9844961    | 0.7955579    | not scorable | not scorable |
| #### Bn-scaff_20063_1-p13672 all not scorable                   | not scorable | not scorable | not scorable | not scorable | not scorable | not scorable |
| #### Bn-scaff_20063_1-p25913 C-genome specific (napus-oleracea) | 1            | 0.5670565    | 0.9922481    | 0.548788     | not scorable | not scorable |
| #### Bn-scaff_20074_1-p266 napus specific                       | 0.208134     | 0.8958784    | not scorable | not scorable | not scorable | not scorable |
| #### Bn-scaff_20079_1-p17049 genome unspecific (all in)         | 0.9856459    | 0.3704547    | 0.9844961    | 0.672376     | 1            | 0.8781261    |
| #### Bn-scaff_20079_1-p20029 genome unspecific (all in)         | 0.9880383    | 0.4967376    | 1            | 0.7277596    | 0.9917355    | 0.8708224    |
| #### Bn-scaff_20079_1-p21999 genome unspecific (all in)         | 0.9736842    | 0.6870265    | 1            | 0.6584161    | 0.9752066    | 0.7737862    |
| #### Bn-scaff_20079_1-p28950 C-genome specific (napus-oleracea) | 0.9976076    | 0.7109792    | 0.9689922    | 0.6775374    | not scorable | not scorable |
| #### Bn-scaff_20079_1-p46589 genome unspecific (all in)         | 0.9976076    | 0.7098342    | 0.9922481    | 0.745302     | 0.9834711    | 0.7505574    |
| #### Bn-scaff_20079_1-p48935 genome unspecific (all in)         | 0.9784689    | 0.2599542    | 0.9922481    | 0.8445666    | 1            | 0.9175813    |

|                                                                 |              |              |              |              |              |              |                           |
|-----------------------------------------------------------------|--------------|--------------|--------------|--------------|--------------|--------------|---------------------------|
| #### Bn-scaff_20079_1-p4926C C-genome specific (napus-oleracea) | 0.9976076    | 0.7028103    |              | 1            | 0.8512001    | not scorable | not scorable              |
| #### Bn-scaff_20079_1-p4927C C-genome specific (oleracea only)  | not scorable | not scorable |              | 1            | 0.7031017    | not scorable | not scorable              |
| #### Bn-scaff_20079_1-p49434 genome unspecific (all in)         |              | 1            | 0.8459277    | 1            | 0.7280217    |              | 1 0.8723244               |
| #### Bn-scaff_20079_1-p49644 C-genome specific (napus-oleracea) | 0.9928229    | 0.5631042    | 0.9689922    |              | 0.8450801    | not scorable | not scorable              |
| #### Bn-scaff_20079_1-p5025C C-genome specific (napus-oleracea) | 0.9976076    | 0.7937532    |              | 1            | 0.7886944    | not scorable | not scorable              |
| #### Bn-scaff_20079_1-p5073C C-genome specific (napus-oleracea) | 0.9976076    | 0.7971988    |              | 1            | 0.7768891    | not scorable | not scorable              |
| #### Bn-scaff_20079_1-p5163C genome unspecific (oleracea-rapa)  | not scorable | not scorable | 0.9224806    |              | 0.7862367    | 0.9256198    | 0.6873762                 |
| #### Bn-scaff_20079_1-p5167C C-genome specific (napus-oleracea) | 0.9952153    | 0.3153663    | 0.9224806    |              | 0.8442279    | not scorable | not scorable              |
| #### Bn-scaff_20079_1-p5170 genome unspecific (all in)          | 0.9904306    | 0.3025826    | 0.9224806    |              | 0.7584602    | 0.9256198    | 0.403751                  |
| #### Bn-scaff_20079_1-p5899 genome unspecific (all in)          | 0.9904306    | 0.379543     |              | 1            | 0.7205367    |              | 1 0.7195418               |
| #### Bn-scaff_20079_1-p6007 napus specific                      | 0.9736842    | 0.8654345    | not scorable |              | not scorable | not scorable | not scorable              |
| #### Bn-scaff_20079_1-p6238C C-genome specific (napus-oleracea) | 0.9976076    | 0.7985917    |              | 1            | 0.7174177    | not scorable | not scorable              |
| #### Bn-scaff_20079_1-p6495C C-genome specific (oleracea only)  | not scorable | not scorable | 0.9922481    |              | 0.727832     | not scorable | not scorable              |
| #### Bn-scaff_20079_1-p65404 C-genome specific (napus-oleracea) | 0.9760765    | 0.7370862    | 0.4573644    |              | 0.7511736    | not scorable | not scorable              |
| #### Bn-scaff_20079_1-p6588C C-genome specific (oleracea only)  | not scorable | not scorable | 0.8449612    |              | 0.7637056    | not scorable | not scorable              |
| #### Bn-scaff_20079_1-p6612C C-genome specific (napus-oleracea) | 0.9928229    | 0.7889063    | 0.9922481    |              | 0.6168507    | not scorable | not scorable              |
| #### Bn-scaff_20079_1-p6636C C-genome specific (napus-oleracea) | 0.9928229    | 0.8403348    |              | 1            | 0.6845414    | not scorable | not scorable              |
| #### Bn-scaff_20079_1-p6850C C-genome specific (napus-oleracea) | 0.9832536    | 0.3927276    | 0.8449612    |              | 0.7757742    | not scorable | not scorable              |
| #### Bn-scaff_20079_1-p69594 A-genome specific (napus-rapa)     |              | 1            | 0.3748611    | not scorable | not scorable |              | 1 0.8700668               |
| #### Bn-scaff_20079_1-p7214C genome unspecific (all in)         | 0.9904306    | 0.45415      |              | 1            | 0.7008322    | 0.9586777    | 0.7680711                 |
| #### Bn-scaff_20084_1-p10454 C-genome specific (napus-oleracea) | 0.9952153    | 0.7940485    | 0.9922481    |              | 0.8323928    | not scorable | not scorable              |
| #### Bn-scaff_20084_1-p1065C C-genome specific (napus-oleracea) | 0.9880383    | 0.4476879    | 0.7364341    |              | 0.6450031    | not scorable | not scorable              |
| #### Bn-scaff_20084_1-p16337 genome unspecific (all in)         |              | 1            | 0.5436898    |              | 1            | 0.4781032    | 0.9834711 0.6479784       |
| #### Bn-scaff_20084_1-p17637 genome unspecific (all in)         | 0.9712918    | 0.2350471    |              | 1            | 0.6990272    | 0.9917355    | 0.5770795                 |
| #### Bn-scaff_20084_1-p1880C C-genome specific (napus-oleracea) |              | 1            | 0.7436441    |              | 1            | 0.7150552    | not scorable not scorable |
| #### Bn-scaff_20084_1-p1881C C-genome specific (napus-oleracea) |              | 1            | 0.819527     | 0.9689922    |              | 0.7373297    | not scorable not scorable |
| #### Bn-scaff_20084_1-p18824 C-genome specific (napus-oleracea) |              | 1            | 0.6424459    | 0.9844961    |              | 0.7497326    | not scorable not scorable |
| #### Bn-scaff_20084_1-p1884C C-genome specific (napus-oleracea) |              | 1            | 0.6793889    | 0.9844961    |              | 0.6459444    | not scorable not scorable |
| #### Bn-scaff_20084_1-p1896C C-genome specific (napus-oleracea) | 0.9904306    | 0.7015561    |              | 1            | 0.6594964    | not scorable | not scorable              |
| #### Bn-scaff_20084_1-p1897C C-genome specific (napus-oleracea) | 0.9904306    | 0.8339834    | 0.9922481    |              | 0.7326443    | not scorable | not scorable              |
| #### Bn-scaff_20084_1-p1977C genome unspecific (all in)         |              | 1            | 0.7622204    |              | 1            | 0.6852541    |                           |
| #### Bn-scaff_20084_1-p2328C C-genome specific (napus-oleracea) |              | 1            | 0.6559145    |              | 1            | 0.7068392    | not scorable not scorable |
| #### Bn-scaff_20084_1-p28834 all not scorable                   | not scorable | not scorable | not scorable |              | not scorable | not scorable | not scorable              |

|                                                                 |              |              |              |              |              |              |
|-----------------------------------------------------------------|--------------|--------------|--------------|--------------|--------------|--------------|
| #### Bn-scaff_20084_1-p31186 C-genome specific (napus-oleracea) | 1            | 0.8304325    | 0.9844961    | 0.6954411    | not scorable | not scorable |
| #### Bn-scaff_20084_1-p31258 C-genome specific (napus-oleracea) | 1            | 0.7586471    | 0.9844961    | 0.738028     | not scorable | not scorable |
| #### Bn-scaff_20084_1-p32531 genome unspecific (all in)         | 0.9952153    | 0.3535662    | 0.9922481    | 0.7746716    | 1            | 0.8004208    |
| #### Bn-scaff_20084_1-p33409 C-genome specific (napus-oleracea) | 1            | 0.6577806    | 0.9844961    | 0.7676476    | not scorable | not scorable |
| #### Bn-scaff_20084_1-p34448 C-genome specific (napus-oleracea) | 0.9976076    | 0.7642534    | 0.9844961    | 0.6917394    | not scorable | not scorable |
| #### Bn-scaff_20084_1-p34495 C-genome specific (napus-oleracea) | 0.9976076    | 0.5984836    | 0.9844961    | 0.7370055    | not scorable | not scorable |
| #### Bn-scaff_20084_1-p39270 genome unspecific (all in)         | 1            | 0.3106732    | 1            | 0.7102357    | 1            | 0.9072468    |
| #### Bn-scaff_20084_1-p39936 C-genome specific (napus-oleracea) | 1            | 0.6218033    | 1            | 0.7635074    | not scorable | not scorable |
| #### Bn-scaff_20084_1-p39976 C-genome specific (napus-oleracea) | 1            | 0.7844185    | 0.9922481    | 0.8200203    | not scorable | not scorable |
| #### Bn-scaff_20084_1-p40121 C-genome specific (napus-oleracea) | 1            | 0.7253764    | 0.9767442    | 0.7642632    | not scorable | not scorable |
| #### Bn-scaff_20084_1-p41136 A-genome specific (rapa only)      | not scorable | not scorable | not scorable | not scorable | 1            | 0.9061625    |
| #### Bn-scaff_20084_1-p44718 genome unspecific (all in)         | 1            | 0.5918733    | 1            | 0.5477588    | 1            | 0.8870399    |
| #### Bn-scaff_20084_1-p45598 C-genome specific (oleracea only)  | not scorable | not scorable | 0.9302326    | 0.7234554    | not scorable | not scorable |
| #### Bn-scaff_20084_1-p50711 C-genome specific (napus-oleracea) | 0.9904306    | 0.7357842    | 0.9922481    | 0.6977826    | not scorable | not scorable |
| #### Bn-scaff_20084_1-p52807 C-genome specific (oleracea only)  | not scorable | not scorable | 1            | 0.6658646    | not scorable | not scorable |
| #### Bn-scaff_20084_1-p82863 C-genome specific (oleracea only)  | not scorable | not scorable | 1            | 0.7138222    | not scorable | not scorable |
| #### Bn-scaff_20084_1-p86150 C-genome specific (napus-oleracea) | 1            | 0.6629262    | 0.9922481    | 0.7003256    | not scorable | not scorable |
| #### Bn-scaff_20084_1-p97161 C-genome specific (napus-oleracea) | 1            | 0.8100206    | 1            | 0.7548835    | not scorable | not scorable |
| #### Bn-scaff_20086_1-p576 C-genome specific (napus-oleracea)   | 0.6913875    | 0.8137102    | 0.9922481    | 0.7773626    | not scorable | not scorable |
| #### Bn-scaff_20103_1-p13333 C-genome specific (napus-oleracea) | 0.9880383    | 0.7258879    | 1            | 0.7579942    | not scorable | not scorable |
| #### Bn-scaff_20103_1-p14256 genome unspecific (oleracea-rapa)  | not scorable | not scorable | 0.9457364    | 0.641133     | 1            | 0.5967128    |
| #### Bn-scaff_20103_1-p14279 genome unspecific (all in)         | 0.9952153    | 0.2870757    | 1            | 0.7648991    | 0.9669421    | 0.5691057    |
| #### Bn-scaff_20103_1-p24795 C-genome specific (napus-oleracea) | 0.9952153    | 0.6495414    | 0.9612403    | 0.6609622    | not scorable | not scorable |
| #### Bn-scaff_20103_1-p29803 C-genome specific (napus-oleracea) | 1            | 0.8817273    | 1            | 0.8014102    | not scorable | not scorable |
| #### Bn-scaff_20103_1-p30812 genome unspecific (all in)         | 1            | 0.312562     | 1            | 0.7667024    | 1            | 0.9175813    |
| #### Bn-scaff_20103_1-p30949 C-genome specific (napus-oleracea) | 0.9976076    | 0.7940378    | 0.9612403    | 0.7205205    | not scorable | not scorable |
| #### Bn-scaff_20103_1-p36450 C-genome specific (napus-oleracea) | 0.9904306    | 0.8177839    | 1            | 0.7794558    | not scorable | not scorable |
| #### Bn-scaff_20103_1-p37902 C-genome specific (napus-oleracea) | 0.9904306    | 0.7922705    | 0.9922481    | 0.7415923    | not scorable | not scorable |
| #### Bn-scaff_20103_1-p38179 C-genome specific (napus-oleracea) | 0.9736842    | 0.812893     | 0.9534883    | 0.7579805    | not scorable | not scorable |
| #### Bn-scaff_20103_1-p43021 C-genome specific (napus-oleracea) | 0.9928229    | 0.679038     | 0.8139535    | 0.6944501    | not scorable | not scorable |
| #### Bn-scaff_20103_1-p45747 C-genome specific (napus-oleracea) | 0.9880383    | 0.7631802    | 1            | 0.741823     | not scorable | not scorable |
| #### Bn-scaff_20103_1-p50745 genome unspecific (all in)         | 0.9928229    | 0.2330675    | 1            | 0.4406138    | 1            | 0.7914145    |
| #### Bn-scaff_20103_1-p56475 genome unspecific (all in)         | 0.9976076    | 0.4880565    | 1            | 0.7608538    | 0.9917355    | 0.5312876    |

|                                                                 |              |              |              |   |              |              |              |
|-----------------------------------------------------------------|--------------|--------------|--------------|---|--------------|--------------|--------------|
| #### Bn-scaff_20103_1-p82288 C-genome specific (napus-oleracea) | 0.9043062    | 0.6308846    |              | 1 | 0.7004061    | not scorable | not scorable |
| #### Bn-scaff_20103_1-p89772 C-genome specific (napus-oleracea) | 0.9856459    | 0.6826283    |              | 1 | 0.8439665    | not scorable | not scorable |
| #### Bn-scaff_20125_1-p1071 C-genome specific (napus-oleracea)  | 0.9904306    | 0.6668433    | 0.8449612    |   | 0.678452     | not scorable | not scorable |
| #### Bn-scaff_20125_1-p11030 C-genome specific (napus-oleracea) | 0.9928229    | 0.6753237    | 0.9922481    |   | 0.7977611    | not scorable | not scorable |
| #### Bn-scaff_20125_1-p11048 C-genome specific (napus-oleracea) | 0.9952153    | 0.7638286    |              | 1 | 0.7828001    | not scorable | not scorable |
| #### Bn-scaff_20125_1-p11483 C-genome specific (napus-oleracea) | 0.9904306    | 0.6773866    | 0.9922481    |   | 0.7936627    | not scorable | not scorable |
| #### Bn-scaff_20125_1-p11643 C-genome specific (napus-oleracea) | 0.9880383    | 0.7565853    |              | 1 | 0.8318305    | not scorable | not scorable |
| #### Bn-scaff_20125_1-p12360 C-genome specific (napus-oleracea) | 0.9856459    | 0.7063897    | 0.9844961    |   | 0.7646964    | not scorable | not scorable |
| #### Bn-scaff_20125_1-p12442 C-genome specific (napus-oleracea) | 0.9856459    | 0.6957624    | 0.9844961    |   | 0.7557957    | not scorable | not scorable |
| #### Bn-scaff_20125_1-p12815 C-genome specific (napus-oleracea) | 0.9832536    | 0.726667     | 0.9922481    |   | 0.6555664    | not scorable | not scorable |
| #### Bn-scaff_20125_1-p13848 C-genome specific (napus-oleracea) | 0.9904306    | 0.7647003    | 0.9922481    |   | 0.844577     | not scorable | not scorable |
| #### Bn-scaff_20125_1-p13951 C-genome specific (oleracea only)  | not scorable | not scorable | 0.9534883    |   | 0.74168      | not scorable | not scorable |
| #### Bn-scaff_20125_1-p15074 genome unspecific (all in)         | 0.9688995    | 0.6441373    | 0.9922481    |   | 0.8242514    | 0.7024794    | 0.925918     |
| #### Bn-scaff_20125_1-p15139 genome unspecific (all in)         | 0.9832536    | 0.2460106    |              | 1 | 0.3920264    |              | 1 0.9003921  |
| #### Bn-scaff_20125_1-p15265 genome unspecific (all in)         | 0.9784689    | 0.3378635    | 0.9922481    |   | 0.8655635    |              | 1 0.9072887  |
| #### Bn-scaff_20125_1-p16415 genome unspecific (all in)         | 0.9665072    | 0.573827     |              | 1 | 0.701961     |              | 1 0.8974569  |
| #### Bn-scaff_20125_1-p16692 genome unspecific (all in)         | 0.9784689    | 0.4609561    |              | 1 | 0.6688862    |              | 1 0.8948976  |
| #### Bn-scaff_20125_1-p16792 C-genome specific (napus-oleracea) | 0.9856459    | 0.7724568    |              | 1 | 0.8163227    | not scorable | not scorable |
| #### Bn-scaff_20125_1-p17187 all not scorable                   | not scorable | not scorable | not scorable |   | not scorable | not scorable | not scorable |
| #### Bn-scaff_20125_1-p17365 C-genome specific (napus-oleracea) | 0.9928229    | 0.699289     | 0.9612403    |   | 0.7114246    | not scorable | not scorable |
| #### Bn-scaff_20125_1-p17717 C-genome specific (napus-oleracea) | 0.9880383    | 0.7866559    | 0.9844961    |   | 0.7749662    | not scorable | not scorable |
| #### Bn-scaff_20125_1-p18043 C-genome specific (napus-oleracea) | 0.9641148    | 0.6656554    |              | 1 | 0.6831263    | not scorable | not scorable |
| #### Bn-scaff_20125_1-p18276 C-genome specific (napus-oleracea) | 0.9856459    | 0.75978      | 0.9767442    |   | 0.7760335    | not scorable | not scorable |
| #### Bn-scaff_20125_1-p19888 C-genome specific (napus-oleracea) | 0.9760765    | 0.7539714    | 0.9844961    |   | 0.8129998    | not scorable | not scorable |
| #### Bn-scaff_20125_1-p20045 genome unspecific (all in)         | 0.9952153    | 0.5057385    |              | 1 | 0.8198187    |              | 1 0.9442465  |
| #### Bn-scaff_20125_1-p20084 C-genome specific (napus-oleracea) | 0.9928229    | 0.6672847    | 0.9844961    |   | 0.7780279    | not scorable | not scorable |
| #### Bn-scaff_20125_1-p22704 C-genome specific (napus-oleracea) | 0.9832536    | 0.781321     | 0.9922481    |   | 0.8920031    | not scorable | not scorable |
| #### Bn-scaff_20125_1-p22773 C-genome specific (napus-oleracea) | 0.9904306    | 0.6985542    | 0.9844961    |   | 0.6503949    | not scorable | not scorable |
| #### Bn-scaff_20125_1-p22898 C-genome specific (napus-oleracea) | 0.9832536    | 0.8073722    | 0.9922481    |   | 0.7725372    | not scorable | not scorable |
| #### Bn-scaff_20125_1-p22978 C-genome specific (napus-oleracea) | 0.9832536    | 0.802339     |              | 1 | 0.7618235    | not scorable | not scorable |
| #### Bn-scaff_20125_1-p23008 C-genome specific (napus-oleracea) | 0.9952153    | 0.8008307    |              | 1 | 0.8060644    | not scorable | not scorable |
| #### Bn-scaff_20125_1-p23362 C-genome specific (napus-oleracea) | 0.9928229    | 0.6894885    | 0.9922481    |   | 0.6898957    | not scorable | not scorable |
| #### Bn-scaff_20125_1-p23371 C-genome specific (napus-oleracea) | 0.9928229    | 0.7246604    |              | 1 | 0.8088477    | not scorable | not scorable |



|                                                                 |              |              |           |           |              |              |
|-----------------------------------------------------------------|--------------|--------------|-----------|-----------|--------------|--------------|
| #### Bn-scaff_20125_1-p26073 C-genome specific (napus-oleracea) | 0.9904306    | 0.7774823    | 1         | 0.7678378 | not scorable | not scorable |
| #### Bn-scaff_20125_1-p2716 C-genome specific (napus-oleracea)  | 0.9808612    | 0.6754177    | 0.8449612 | 0.6631168 | not scorable | not scorable |
| #### Bn-scaff_20125_1-p27671 C-genome specific (napus-oleracea) | 0.9808612    | 0.7313476    | 0.9844961 | 0.6919711 | not scorable | not scorable |
| #### Bn-scaff_20125_1-p27683 C-genome specific (napus-oleracea) | 0.9856459    | 0.6872752    | 0.9922481 | 0.6760703 | not scorable | not scorable |
| #### Bn-scaff_20125_1-p27725 C-genome specific (napus-oleracea) | 0.9856459    | 0.7113417    | 0.9922481 | 0.6490251 | not scorable | not scorable |
| #### Bn-scaff_20125_1-p27743 C-genome specific (napus-oleracea) | 0.9904306    | 0.8000107    | 1         | 0.7697357 | not scorable | not scorable |
| #### Bn-scaff_20125_1-p27937 C-genome specific (napus-oleracea) | 0.9928229    | 0.7095167    | 0.9922481 | 0.6249449 | not scorable | not scorable |
| #### Bn-scaff_20125_1-p2925 C-genome specific (napus-oleracea)  | 0.9928229    | 0.7002038    | 0.8527132 | 0.7587447 | not scorable | not scorable |
| #### Bn-scaff_20125_1-p29468 C-genome specific (napus-oleracea) | 0.9569378    | 0.7771461    | 0.8992248 | 0.7542779 | not scorable | not scorable |
| #### Bn-scaff_20125_1-p30141 C-genome specific (napus-oleracea) | 0.9138756    | 0.7892913    | 0.8837209 | 0.7269271 | not scorable | not scorable |
| #### Bn-scaff_20125_1-p30618 genome unspecific (all in)         | 0.9665072    | 0.559428     | 1         | 0.5359689 | 1            | 0.9160361    |
| #### Bn-scaff_20125_1-p32217 C-genome specific (napus-oleracea) | 0.9904306    | 0.7736509    | 1         | 0.7092649 | not scorable | not scorable |
| #### Bn-scaff_20125_1-p34479 C-genome specific (napus-oleracea) | 0.9928229    | 0.6800601    | 1         | 0.7635494 | not scorable | not scorable |
| #### Bn-scaff_20125_1-p35072 C-genome specific (napus-oleracea) | 0.9856459    | 0.7276255    | 1         | 0.7102898 | not scorable | not scorable |
| #### Bn-scaff_20125_1-p35085 C-genome specific (napus-oleracea) | 0.9952153    | 0.6039531    | 1         | 0.6034235 | not scorable | not scorable |
| #### Bn-scaff_20125_1-p35184 C-genome specific (napus-oleracea) | 0.9880383    | 0.8070379    | 1         | 0.7633441 | not scorable | not scorable |
| #### Bn-scaff_20125_1-p35203 C-genome specific (napus-oleracea) | 0.9904306    | 0.7763787    | 1         | 0.7301388 | not scorable | not scorable |
| #### Bn-scaff_20125_1-p35242 C-genome specific (napus-oleracea) | 0.9808612    | 0.7688071    | 0.9922481 | 0.8222919 | not scorable | not scorable |
| #### Bn-scaff_20125_1-p36249 C-genome specific (napus-oleracea) | 0.9880383    | 0.7592868    | 1         | 0.8268536 | not scorable | not scorable |
| #### Bn-scaff_20125_1-p36360 C-genome specific (napus-oleracea) | 0.9904306    | 0.8095074    | 1         | 0.7129025 | not scorable | not scorable |
| #### Bn-scaff_20125_1-p36843 genome unspecific (all in)         | 0.9904306    | 0.617964     | 0.9922481 | 0.7133912 | 1            | 0.6721746    |
| #### Bn-scaff_20125_1-p37008 C-genome specific (napus-oleracea) | 0.9928229    | 0.8161048    | 0.9922481 | 0.7653776 | not scorable | not scorable |
| #### Bn-scaff_20125_1-p37874 C-genome specific (napus-oleracea) | 0.9904306    | 0.783269     | 1         | 0.7586393 | not scorable | not scorable |
| #### Bn-scaff_20125_1-p37983 genome unspecific (all in)         | 0.8803828    | 0.1901616    | 1         | 0.7588123 | 0.9917355    | 0.6669226    |
| #### Bn-scaff_20125_1-p42691 C-genome specific (napus-oleracea) | 0.9832536    | 0.7493294    | 1         | 0.8263305 | not scorable | not scorable |
| #### Bn-scaff_20125_1-p42826 genome unspecific (all in)         | 0.9832536    | 0.5022416    | 1         | 0.7531596 | 1            | 0.7020393    |
| #### Bn-scaff_20125_1-p52223 genome unspecific (all in)         | 0.9880383    | 0.4728595    | 1         | 0.676352  | 0.9917355    | 0.8180336    |
| #### Bn-scaff_20125_1-p53319 C-genome specific (napus-oleracea) | 0.9880383    | 0.1944775    | 1         | 0.7766077 | not scorable | not scorable |
| #### Bn-scaff_20125_1-p54888 genome unspecific (all in)         | 0.9425837    | 0.3055578    | 1         | 0.7426152 | 0.9834711    | 0.761092     |
| #### Bn-scaff_20125_1-p55286 C-genome specific (napus-oleracea) | 0.9880383    | 0.7044096    | 1         | 0.677259  | not scorable | not scorable |
| #### Bn-scaff_20125_1-p55604 C-genome specific (oleracea only)  | not scorable | not scorable | 0.3255814 | 0.6148571 | not scorable | not scorable |
| #### Bn-scaff_20125_1-p56646 C-genome specific (napus-oleracea) | 0.9904306    | 0.7234212    | 1         | 0.6999747 | not scorable | not scorable |
| #### Bn-scaff_20125_1-p56749 C-genome specific (napus-oleracea) | 0.9928229    | 0.7997271    | 0.9922481 | 0.8190148 | not scorable | not scorable |

|                                                                |              |              |              |              |              |              |
|----------------------------------------------------------------|--------------|--------------|--------------|--------------|--------------|--------------|
| #### Bn-scaff_20125_1-p57171C-genome specific (napus-oleracea) | 0.9856459    | 0.6375732    | 1            | 0.6885253    | not scorable | not scorable |
| #### Bn-scaff_20125_1-p58685C-genome specific (napus-oleracea) | 0.9928229    | 0.7972632    | 0.9922481    | 0.8652361    | not scorable | not scorable |
| #### Bn-scaff_20125_1-p60390C-genome specific (napus-oleracea) | 0.9904306    | 0.7914778    | 1            | 0.8675472    | not scorable | not scorable |
| #### Bn-scaff_20125_1-p6139 C-genome specific (napus-oleracea) | 0.9832536    | 0.7617067    | 0.8372093    | 0.8890947    | not scorable | not scorable |
| #### Bn-scaff_20125_1-p6177 C-genome specific (napus-oleracea) | 0.9832536    | 0.7551075    | 0.8372093    | 0.7498145    | not scorable | not scorable |
| #### Bn-scaff_20125_1-p6258 C-genome specific (napus-oleracea) | 0.9904306    | 0.7874824    | 0.8372093    | 0.739682     | not scorable | not scorable |
| #### Bn-scaff_20125_1-p63386C-genome specific (napus-oleracea) | 0.9952153    | 0.7562683    | 1            | 0.766733     | not scorable | not scorable |
| #### Bn-scaff_20125_1-p63532C-genome specific (oleracea only)  | not scorable | not scorable | 0.5968992    | 0.7642097    | not scorable | not scorable |
| #### Bn-scaff_20125_1-p64030C-genome specific (napus-oleracea) | 0.9880383    | 0.7838288    | 1            | 0.7093867    | not scorable | not scorable |
| #### Bn-scaff_20125_1-p64616C-genome specific (napus-oleracea) | 0.9856459    | 0.7664104    | 0.9612403    | 0.7334224    | not scorable | not scorable |
| #### Bn-scaff_20125_1-p65004C-genome specific (napus-oleracea) | 0.9880383    | 0.702976     | 0.9457364    | 0.6943159    | not scorable | not scorable |
| #### Bn-scaff_20125_1-p65165C-genome specific (napus-oleracea) | 0.9832536    | 0.6433131    | 0.9457364    | 0.6358169    | not scorable | not scorable |
| #### Bn-scaff_20125_1-p65730C-genome specific (napus-oleracea) | 0.9904306    | 0.7757102    | 1            | 0.7912726    | not scorable | not scorable |
| #### Bn-scaff_20125_1-p65867C-genome specific (napus-oleracea) | 0.9808612    | 0.7075686    | 0.9922481    | 0.6629972    | not scorable | not scorable |
| #### Bn-scaff_20125_1-p66372C-genome specific (napus-oleracea) | 0.9904306    | 0.7795792    | 0.9844961    | 0.8177198    | not scorable | not scorable |
| #### Bn-scaff_20125_1-p66398C-genome specific (napus-oleracea) | 0.9880383    | 0.784192     | 1            | 0.7830056    | not scorable | not scorable |
| #### Bn-scaff_20125_1-p66442C-genome specific (napus-oleracea) | 0.9952153    | 0.6862231    | 0.9922481    | 0.6828405    | not scorable | not scorable |
| #### Bn-scaff_20125_1-p66690C-genome specific (napus-oleracea) | 0.9808612    | 0.7198803    | 0.9922481    | 0.7923762    | not scorable | not scorable |
| #### Bn-scaff_20125_1-p67021C-genome specific (napus-oleracea) | 0.9904306    | 0.6579056    | 0.9922481    | 0.6350998    | not scorable | not scorable |
| #### Bn-scaff_20125_1-p67552C-genome specific (napus-oleracea) | 0.9904306    | 0.7885638    | 1            | 0.754098     | not scorable | not scorable |
| #### Bn-scaff_20125_1-p68622C-genome specific (napus-oleracea) | 0.9904306    | 0.77614      | 1            | 0.7048329    | not scorable | not scorable |
| #### Bn-scaff_20125_1-p68707C-genome specific (napus-oleracea) | 0.9832536    | 0.6895469    | 1            | 0.7441303    | not scorable | not scorable |
| #### Bn-scaff_20125_1-p71272genome unspecific (all in)         | 0.9641148    | 0.6894069    | 0.9922481    | 0.798456     | 1            | 0.9319068    |
| #### Bn-scaff_20125_1-p863 C-genome specific (napus-oleracea)  | 0.9880383    | 0.6618539    | 0.8294573    | 0.6626276    | not scorable | not scorable |
| #### Bn-scaff_20125_1-p86621C-genome specific (napus-oleracea) | 0.9808612    | 0.6885334    | 0.9457364    | 0.6812571    | not scorable | not scorable |
| #### Bn-scaff_20125_1-p87224C-genome specific (napus-oleracea) | 0.9114832    | 0.7845454    | 0.8914729    | 0.701883     | not scorable | not scorable |
| #### Bn-scaff_20125_1-p88092C-genome specific (napus-oleracea) | 0.9904306    | 0.7571035    | 1            | 0.8210621    | not scorable | not scorable |
| #### Bn-scaff_20125_1-p88305C-genome specific (napus-oleracea) | 0.9760765    | 0.639645     | 0.9612403    | 0.6019546    | not scorable | not scorable |
| #### Bn-scaff_20125_1-p88370C-genome specific (napus-oleracea) | 0.9880383    | 0.7407109    | 0.9612403    | 0.7389584    | not scorable | not scorable |
| #### Bn-scaff_20125_1-p88815C-genome specific (napus-oleracea) | 0.9928229    | 0.6716062    | 0.9767442    | 0.7002256    | not scorable | not scorable |
| #### Bn-scaff_20126_1-p457 C-genome specific (napus-oleracea)  | 0.9832536    | 0.3973764    | 1            | 0.8059384    | not scorable | not scorable |
| #### Bn-scaff_20127_1-p10281all not scorable                   | not scorable | not scorable | not scorable | not scorable | not scorable | not scorable |
| #### Bn-scaff_20131_1-p73163C-genome specific (napus-oleracea) | 0.3660287    | 0.764895     | 1            | 0.727672     | not scorable | not scorable |

|                                                                 |              |              |              |              |              |              |
|-----------------------------------------------------------------|--------------|--------------|--------------|--------------|--------------|--------------|
| #### Bn-scaff_20131_1-p7662 C-genome specific (napus-oleracea)  | 0.3636364    | 0.7731575    | 0.9844961    | 0.724878     | not scorable | not scorable |
| #### Bn-scaff_20155_1-p16727 C-genome specific (napus-oleracea) | 0.9832536    | 0.7978832    | 0.7209302    | 0.7756076    | not scorable | not scorable |
| #### Bn-scaff_20155_1-p4287 napus specific                      | 0.9688995    | 0.6811854    | not scorable | not scorable | not scorable | not scorable |
| #### Bn-scaff_20168_1-p10808 C-genome specific (napus-oleracea) | 0.9114832    | 0.7692649    | 0.9922481    | 0.819433     | not scorable | not scorable |
| #### Bn-scaff_20168_1-p11030 C-genome specific (napus-oleracea) | 0.9138756    | 0.8019731    | 1            | 0.7964112    | not scorable | not scorable |
| #### Bn-scaff_20168_1-p11649 C-genome specific (napus-oleracea) | 0.9090909    | 0.6620572    | 0.8992248    | 0.6009035    | not scorable | not scorable |
| #### Bn-scaff_20168_1-p12226 C-genome specific (napus-oleracea) | 0.9162679    | 0.7784908    | 0.9922481    | 0.7222301    | not scorable | not scorable |
| #### Bn-scaff_20168_1-p20354 C-genome specific (napus-oleracea) | 0.9019139    | 0.754097     | 0.9922481    | 0.7378899    | not scorable | not scorable |
| #### Bn-scaff_20168_1-p6747 C-genome specific (napus-oleracea)  | 0.9808612    | 0.6315085    | 0.9689922    | 0.7258633    | not scorable | not scorable |
| #### Bn-scaff_20191_1-p10335 C-genome specific (napus-oleracea) | 0.9928229    | 0.6837347    | 0.8837209    | 0.6848227    | not scorable | not scorable |
| #### Bn-scaff_20191_1-p13055 C-genome specific (napus-oleracea) | 1            | 0.7456445    | 0.9922481    | 0.6131917    | not scorable | not scorable |
| #### Bn-scaff_20191_1-p13094 C-genome specific (napus-oleracea) | 0.9952153    | 0.6426185    | 0.9844961    | 0.6421565    | not scorable | not scorable |
| #### Bn-scaff_20191_1-p13647 genome unspecific (all in)         | 0.9928229    | 0.4063627    | 0.9767442    | 0.7756733    | 1            | 0.8848283    |
| #### Bn-scaff_20191_1-p14334 C-genome specific (napus-oleracea) | 0.9641148    | 0.2928237    | 1            | 0.778489     | not scorable | not scorable |
| #### Bn-scaff_20191_1-p14665 C-genome specific (napus-oleracea) | 0.9928229    | 0.5966368    | 0.9844961    | 0.6859884    | not scorable | not scorable |
| #### Bn-scaff_20191_1-p15781 C-genome specific (napus-oleracea) | 0.9832536    | 0.7947941    | 1            | 0.8496013    | not scorable | not scorable |
| #### Bn-scaff_20191_1-p20432 C-genome specific (oleracea only)  | not scorable | not scorable | 0.8837209    | 0.2615562    | not scorable | not scorable |
| #### Bn-scaff_20191_1-p63120 C-genome specific (napus-oleracea) | 1            | 0.7441384    | 1            | 0.7467147    | not scorable | not scorable |
| #### Bn-scaff_20191_1-p97264 C-genome specific (napus-oleracea) | 0.9976076    | 0.7088764    | 1            | 0.6265047    | not scorable | not scorable |
| #### Bn-scaff_20202_1-p13859 genome unspecific (all in)         | 0.9880383    | 0.3867235    | 0.9767442    | 0.8306848    | 1            | 0.9053665    |
| #### Bn-scaff_20202_1-p14298 C-genome specific (napus-oleracea) | 0.9043062    | 0.7613397    | 0.9922481    | 0.7437716    | not scorable | not scorable |
| #### Bn-scaff_20202_1-p14307 C-genome specific (napus-oleracea) | 0.9114832    | 0.7581198    | 1            | 0.7683552    | not scorable | not scorable |
| #### Bn-scaff_20202_1-p14340 C-genome specific (napus-oleracea) | 0.9186603    | 0.7735034    | 0.9922481    | 0.738821     | not scorable | not scorable |
| #### Bn-scaff_20202_1-p14350 C-genome specific (napus-oleracea) | 0.9043062    | 0.7936648    | 0.9689922    | 0.7123845    | not scorable | not scorable |
| #### Bn-scaff_20202_1-p14367 C-genome specific (napus-oleracea) | 0.8947368    | 0.7568766    | 0.9534883    | 0.8215827    | not scorable | not scorable |
| #### Bn-scaff_20202_1-p14388 C-genome specific (napus-oleracea) | 0.8971292    | 0.7769808    | 0.9689922    | 0.7541033    | not scorable | not scorable |
| #### Bn-scaff_20202_1-p14427 C-genome specific (napus-oleracea) | 0.9832536    | 0.670741     | 0.8837209    | 0.6664383    | not scorable | not scorable |
| #### Bn-scaff_20202_1-p14497 C-genome specific (napus-oleracea) | 0.8899522    | 0.7393831    | 0.9689922    | 0.7239466    | not scorable | not scorable |
| #### Bn-scaff_20202_1-p14809 C-genome specific (napus-oleracea) | 0.9019139    | 0.7774305    | 0.6046512    | 0.7809427    | not scorable | not scorable |
| #### Bn-scaff_20202_1-p15090 C-genome specific (napus-oleracea) | 0.8875598    | 0.7743126    | 0.7829458    | 0.7664562    | not scorable | not scorable |
| #### Bn-scaff_20202_1-p15096 C-genome specific (napus-oleracea) | 0.9114832    | 0.7654794    | 0.7906977    | 0.8012128    | not scorable | not scorable |
| #### Bn-scaff_20202_1-p15744 C-genome specific (napus-oleracea) | 0.9066986    | 0.7809738    | 0.875969     | 0.8327969    | not scorable | not scorable |
| #### Bn-scaff_20202_1-p15750 C-genome specific (napus-oleracea) | 0.8995215    | 0.7508786    | 0.8837209    | 0.7338805    | not scorable | not scorable |

|                                                                 |              |              |              |              |              |              |
|-----------------------------------------------------------------|--------------|--------------|--------------|--------------|--------------|--------------|
| #### Bn-scaff_20202_1-p17933 C-genome specific (napus-oleracea) | 0.8899522    | 0.6073571    | 0.9224806    | 0.5823484    | not scorable | not scorable |
| #### Bn-scaff_20202_1-p17950 C-genome specific (napus-oleracea) | 0.9090909    | 0.7238192    | 1            | 0.6785764    | not scorable | not scorable |
| #### Bn-scaff_20202_1-p17988 C-genome specific (napus-oleracea) | 0.9019139    | 0.7612763    | 1            | 0.8104736    | not scorable | not scorable |
| #### Bn-scaff_20202_1-p18051 C-genome specific (napus-oleracea) | 0.9090909    | 0.7378007    | 0.9922481    | 0.834075     | not scorable | not scorable |
| #### Bn-scaff_20202_1-p18159 C-genome specific (napus-oleracea) | 0.9066986    | 0.688175     | 0.9922481    | 0.6912593    | not scorable | not scorable |
| #### Bn-scaff_20202_1-p18248 C-genome specific (napus-oleracea) | 0.9114832    | 0.7809715    | 1            | 0.7638476    | not scorable | not scorable |
| #### Bn-scaff_20202_1-p18309 C-genome specific (napus-oleracea) | 0.9114832    | 0.7861957    | 1            | 0.7124087    | not scorable | not scorable |
| #### Bn-scaff_20202_1-p18324 C-genome specific (napus-oleracea) | 0.9138756    | 0.7627859    | 1            | 0.7139924    | not scorable | not scorable |
| #### Bn-scaff_20202_1-p18357 C-genome specific (napus-oleracea) | 0.9066986    | 0.5718176    | 0.9922481    | 0.566737     | not scorable | not scorable |
| #### Bn-scaff_20202_1-p18364 C-genome specific (napus-oleracea) | 0.9019139    | 0.6943116    | 0.9922481    | 0.7291726    | not scorable | not scorable |
| #### Bn-scaff_20202_1-p18983 C-genome specific (napus-oleracea) | 0.8971292    | 0.7374919    | 0.9922481    | 0.8485613    | not scorable | not scorable |
| #### Bn-scaff_20202_1-p19022 C-genome specific (napus-oleracea) | 0.8851675    | 0.7169955    | 1            | 0.8233698    | not scorable | not scorable |
| #### Bn-scaff_20202_1-p21098 C-genome specific (napus-oleracea) | 0.9019139    | 0.7464294    | 1            | 0.8132403    | not scorable | not scorable |
| #### Bn-scaff_20210_1-p10148 A-genome specific (napus-rapa)     | 1            | 0.4986034    | not scorable | not scorable | 1            | 0.5202945    |
| #### Bn-scaff_20210_1-p11110 genome unspecific (all in)         | 0.9952153    | 0.3400494    | 0.9379845    | 0.5407894    | 1            | 0.8819097    |
| #### Bn-scaff_20210_1-p11125 C-genome specific (oleracea only)  | not scorable | not scorable | 1            | 0.6208737    | not scorable | not scorable |
| #### Bn-scaff_20210_1-p11201 genome unspecific (oleracea-rapa)  | not scorable | not scorable | 1            | 0.6906603    | 1            | 0.7641606    |
| #### Bn-scaff_20210_1-p11217 genome unspecific (oleracea-rapa)  | not scorable | not scorable | 1            | 0.7626464    | 1            | 0.7329777    |
| #### Bn-scaff_20210_1-p11276 genome unspecific (all in)         | 0.9808612    | 0.335665     | 1            | 0.6752586    | 1            | 0.7622204    |
| #### Bn-scaff_20210_1-p11401 genome unspecific (all in)         | 1            | 0.6725013    | 1            | 0.642917     | 1            | 0.7402389    |
| #### Bn-scaff_20210_1-p12383 A-genome specific (rapa only)      | not scorable | not scorable | not scorable | not scorable | 0.9834711    | 0.7659255    |
| #### Bn-scaff_20210_1-p12428 C-genome specific (napus-oleracea) | 0.9521531    | 0.3521869    | 1            | 0.8524756    | not scorable | not scorable |
| #### Bn-scaff_20210_1-p13686 genome unspecific (all in)         | 0.9976076    | 0.8157061    | 1            | 0.8003713    | 0.9008265    | 0.9050309    |
| #### Bn-scaff_20210_1-p13694 genome unspecific (all in)         | 0.9976076    | 0.3194022    | 1            | 0.8118105    | 0.9834711    | 0.6121101    |
| #### Bn-scaff_20210_1-p15451 C-genome specific (napus-oleracea) | 0.9808612    | 0.7735179    | 0.9844961    | 0.8147027    | not scorable | not scorable |
| #### Bn-scaff_20210_1-p16197 C-genome specific (napus-oleracea) | 0.9808612    | 0.7445254    | 1            | 0.7754767    | not scorable | not scorable |
| #### Bn-scaff_20210_1-p16211 C-genome specific (napus-oleracea) | 0.9736842    | 0.7014285    | 0.9844961    | 0.7164019    | not scorable | not scorable |
| #### Bn-scaff_20210_1-p16359 C-genome specific (napus-oleracea) | 0.9712918    | 0.6981928    | 0.9922481    | 0.7096455    | not scorable | not scorable |
| #### Bn-scaff_20210_1-p16601 genome unspecific (all in)         | 0.9880383    | 0.3197908    | 0.9844961    | 0.7847419    | 1            | 0.664595     |
| #### Bn-scaff_20210_1-p17161 C-genome specific (napus-oleracea) | 0.9760765    | 0.7468829    | 0.9844961    | 0.7796419    | not scorable | not scorable |
| #### Bn-scaff_20210_1-p17739 C-genome specific (napus-oleracea) | 0.9665072    | 0.578654     | 0.9844961    | 0.5453809    | not scorable | not scorable |
| #### Bn-scaff_20210_1-p17747 genome unspecific (all in)         | 0.9832536    | 0.5312641    | 0.9922481    | 0.7165337    | 1            | 0.9039518    |
| #### Bn-scaff_20210_1-p24608 C-genome specific (napus-oleracea) | 0.9641148    | 0.7813665    | 1            | 0.7221233    | not scorable | not scorable |

|                                                                 |              |              |              |              |              |              |
|-----------------------------------------------------------------|--------------|--------------|--------------|--------------|--------------|--------------|
| #### Bn-scaff_20210_1-p2674C C-genome specific (napus-oleracea) | 0.9856459    | 0.812937     | 1            | 0.7553474    | not scorable | not scorable |
| #### Bn-scaff_20210_1-p27673 C-genome specific (napus-oleracea) | 0.9760765    | 0.3977171    | 1            | 0.685697     | not scorable | not scorable |
| #### Bn-scaff_20210_1-p2769 genome unspecific (all in)          | 0.9880383    | 0.2589812    | 1            | 0.8489012    | 1            | 0.8081958    |
| #### Bn-scaff_20210_1-p2845 C-genome specific (napus-oleracea)  | 0.9880383    | 0.6846098    | 1            | 0.8235463    | not scorable | not scorable |
| #### Bn-scaff_20210_1-p3108 C-genome specific (napus-oleracea)  | 0.9880383    | 0.710315     | 1            | 0.8192797    | not scorable | not scorable |
| #### Bn-scaff_20210_1-p34641 C-genome specific (napus-oleracea) | 0.9856459    | 0.7995849    | 0.9922481    | 0.7261711    | not scorable | not scorable |
| #### Bn-scaff_20210_1-p38237 C-genome specific (napus-oleracea) | 0.9856459    | 0.7266333    | 0.9612403    | 0.699459     | not scorable | not scorable |
| #### Bn-scaff_20210_1-p38252 C-genome specific (napus-oleracea) | 0.9784689    | 0.6933467    | 0.9767442    | 0.7344769    | not scorable | not scorable |
| #### Bn-scaff_20210_1-p3831 C-genome specific (napus-oleracea)  | 0.9904306    | 0.7776224    | 1            | 0.8675109    | not scorable | not scorable |
| #### Bn-scaff_20210_1-p3843 C-genome specific (napus-oleracea)  | 0.9880383    | 0.4980039    | 1            | 0.5380219    | not scorable | not scorable |
| #### Bn-scaff_20210_1-p4448 C-genome specific (napus-oleracea)  | 0.9736842    | 0.8056617    | 0.7829458    | 0.8483176    | not scorable | not scorable |
| #### Bn-scaff_20210_1-p44867 C-genome specific (napus-oleracea) | 0.9880383    | 0.7814358    | 0.9844961    | 0.8219877    | not scorable | not scorable |
| #### Bn-scaff_20210_1-p4492 C-genome specific (napus-oleracea)  | 0.9880383    | 0.775866     | 1            | 0.7077016    | not scorable | not scorable |
| #### Bn-scaff_20210_1-p4571 genome unspecific (all in)          | 0.9976076    | 0.5074306    | 0.9767442    | 0.5983165    | 1            | 0.935782     |
| #### Bn-scaff_20210_1-p4689 genome unspecific (oleracea-rapa)   | not scorable | not scorable | 0.9379845    | 0.7442625    | 1            | 0.4835531    |
| #### Bn-scaff_20210_1-p5096 A-genome specific (napus-rapa)      | 0.9880383    | 0.2561224    | not scorable | not scorable | 0.8347107    | 0.9645393    |
| #### Bn-scaff_20210_1-p5098 all not scorable                    | not scorable | not scorable | not scorable | not scorable | not scorable | not scorable |
| #### Bn-scaff_20210_1-p5447 A-genome specific (napus-rapa)      | 1            | 0.5535324    | not scorable | not scorable | 1            | 0.6764519    |
| #### Bn-scaff_20210_1-p9485 A-genome specific (napus-rapa)      | 0.9952153    | 0.5807484    | not scorable | not scorable | 1            | 0.6879954    |
| #### Bn-scaff_20219_1-p12811 C-genome specific (napus-oleracea) | 0.9760765    | 0.7714787    | 1            | 0.7284595    | not scorable | not scorable |
| #### Bn-scaff_20219_1-p1435 C-genome specific (napus-oleracea)  | 0.9856459    | 0.752407     | 0.9922481    | 0.8088477    | not scorable | not scorable |
| #### Bn-scaff_20219_1-p1484 genome unspecific (all in)          | 0.9712918    | 0.5344291    | 1            | 0.6999747    | 1            | 0.9205657    |
| #### Bn-scaff_20219_1-p1485 C-genome specific (napus-oleracea)  | 0.9832536    | 0.7076216    | 0.9922481    | 0.699805     | not scorable | not scorable |
| #### Bn-scaff_20219_1-p1489 genome unspecific (oleracea-rapa)   | not scorable | not scorable | 0.9767442    | 0.6392193    | 0.9834711    | 0.7675471    |
| #### Bn-scaff_20219_1-p1507 C-genome specific (napus-oleracea)  | 0.9856459    | 0.8043236    | 1            | 0.9048954    | not scorable | not scorable |
| #### Bn-scaff_20219_1-p15281 C-genome specific (napus-oleracea) | 0.9808612    | 0.7205533    | 0.9844961    | 0.636027     | not scorable | not scorable |
| #### Bn-scaff_20219_1-p1640 genome unspecific (oleracea-rapa)   | not scorable | not scorable | 1            | 0.5934213    | 0.9834711    | 0.6510961    |
| #### Bn-scaff_20219_1-p1885 C-genome specific (napus-oleracea)  | 0.9856459    | 0.7914716    | 1            | 0.8008044    | not scorable | not scorable |
| #### Bn-scaff_20219_1-p19357 C-genome specific (napus-oleracea) | 0.9856459    | 0.7139063    | 1            | 0.6815501    | not scorable | not scorable |
| #### Bn-scaff_20219_1-p1998 C-genome specific (oleracea only)   | not scorable | not scorable | 0.9224806    | 0.7947394    | not scorable | not scorable |
| #### Bn-scaff_20219_1-p20042 C-genome specific (napus-oleracea) | 0.9880383    | 0.8026186    | 1            | 0.8343484    | not scorable | not scorable |
| #### Bn-scaff_20219_1-p2057 genome unspecific (all in)          | 0.9880383    | 0.4097514    | 1            | 0.8404284    | 1            | 0.9069722    |
| #### Bn-scaff_20219_1-p2202 C-genome specific (napus-oleracea)  | 0.9904306    | 0.8725874    | 0.9922481    | 0.817729     | not scorable | not scorable |

|                                                                 |              |              |              |              |              |                           |
|-----------------------------------------------------------------|--------------|--------------|--------------|--------------|--------------|---------------------------|
| #### Bn-scaff_20219_1-p27594 napus specific                     | 1            | 0.8037754    | not scorable | not scorable | not scorable | not scorable              |
| #### Bn-scaff_20219_1-p29032 genome unspecific (all in)         | 1            | 0.270395     |              | 1            | 0.7843921    | 1 0.8348971               |
| #### Bn-scaff_20219_1-p29096 C-genome specific (napus-oleracea) | 0.9928229    | 0.7535361    |              | 1            | 0.6998349    | not scorable not scorable |
| #### Bn-scaff_20219_1-p29799 C-genome specific (napus-oleracea) | 0.9856459    | 0.7569573    | 0.9922481    |              | 0.7259626    | not scorable not scorable |
| #### Bn-scaff_20219_1-p30565 C-genome specific (napus-oleracea) | 0.9593301    | 0.6991484    |              | 1            | 0.7008032    | not scorable not scorable |
| #### Bn-scaff_20219_1-p30832 genome unspecific (all in)         | 0.9712918    | 0.3314265    |              | 1            | 0.7867668    | 1 0.7819794               |
| #### Bn-scaff_20219_1-p31205 genome unspecific (oleracea-rapa)  | not scorable | not scorable |              | 1            | 0.3206772    | 0.9586777 0.5629981       |
| #### Bn-scaff_20219_1-p33699 C-genome specific (napus-oleracea) | 0.9856459    | 0.7838623    |              | 1            | 0.7590268    | not scorable not scorable |
| #### Bn-scaff_20219_1-p34315 C-genome specific (napus-oleracea) | 0.9856459    | 0.7357048    | 0.8914729    |              | 0.6764957    | not scorable not scorable |
| #### Bn-scaff_20219_1-p34862 genome unspecific (all in)         | 0.9688995    | 0.456483     |              | 1            | 0.7361559    | 1 0.8361774               |
| #### Bn-scaff_20219_1-p35051 C-genome specific (napus-oleracea) | 0.9784689    | 0.6630769    |              | 1            | 0.6323001    | not scorable not scorable |
| #### Bn-scaff_20219_1-p36181 genome unspecific (all in)         | 0.9808612    | 0.3304294    |              | 1            | 0.6764854    | 1 0.8098793               |
| #### Bn-scaff_20219_1-p38583 C-genome specific (napus-oleracea) | 0.9808612    | 0.7448059    |              | 1            | 0.8012349    | not scorable not scorable |
| #### Bn-scaff_20219_1-p50731 C-genome specific (napus-oleracea) | 0.9976076    | 0.9238191    |              | 1            | 0.8016934    | not scorable not scorable |
| #### Bn-scaff_20219_1-p50816 C-genome specific (napus-oleracea) | 0.9928229    | 0.7938298    |              | 1            | 0.8702466    | not scorable not scorable |
| #### Bn-scaff_20219_1-p52642 C-genome specific (napus-oleracea) | 0.9832536    | 0.6853701    |              | 1            | 0.9026277    | not scorable not scorable |
| #### Bn-scaff_20219_1-p53873 genome unspecific (all in)         | 0.9952153    | 0.6470313    |              | 1            | 0.7990963    | 1 0.9497979               |
| #### Bn-scaff_20221_1-p10603 C-genome specific (napus-oleracea) | 0.9928229    | 0.8054895    | 0.9689922    |              | 0.8148932    | not scorable not scorable |
| #### Bn-scaff_20221_1-p11938 genome unspecific (all in)         | 1            | 0.4155755    |              | 1            | 0.7981372    | 0.9917355 0.705044        |
| #### Bn-scaff_20221_1-p11989 genome unspecific (all in)         | 0.9832536    | 0.3214256    |              | 1            | 0.9178881    | 0.9917355 0.7148414       |
| #### Bn-scaff_20221_1-p12465 napus specific                     | 0.9832536    | 0.4303903    | not scorable | not scorable | not scorable | not scorable              |
| #### Bn-scaff_20221_1-p13109 C-genome specific (napus-oleracea) | 0.9880383    | 0.9315183    |              | 1            | 0.7503625    | not scorable not scorable |
| #### Bn-scaff_20221_1-p13220 genome unspecific (all in)         | 0.9976076    | 0.5852521    |              | 1            | 0.6820676    | 1 0.906221                |
| #### Bn-scaff_20221_1-p16200 genome unspecific (all in)         | 0.9952153    | 0.4771578    |              | 1            | 0.8527335    | 0.9421487 0.8005717       |
| #### Bn-scaff_20221_1-p18087 A-genome specific (napus-rapa)     | 0.9904306    | 0.7724546    | not scorable | not scorable | 0.7520661    | 0.8300819                 |
| #### Bn-scaff_20221_1-p19185 napus specific                     | 0.9760765    | 0.7327377    | not scorable | not scorable | not scorable | not scorable              |
| #### Bn-scaff_20221_1-p28220 genome unspecific (all in)         | 0.9641148    | 0.3629249    | 0.8837209    |              | 0.2969928    | 0.9917355 0.7211774       |
| #### Bn-scaff_20221_1-p43849 C-genome specific (napus-oleracea) | 0.9928229    | 0.7632396    |              | 1            | 0.5949876    | not scorable not scorable |
| #### Bn-scaff_20221_1-p44460 C-genome specific (napus-oleracea) | 0.9928229    | 0.6998784    |              | 1            | 0.7290032    | not scorable not scorable |
| #### Bn-scaff_20221_1-p45036 C-genome specific (napus-oleracea) | 0.9928229    | 0.5644239    |              | 1            | 0.7778218    | not scorable not scorable |
| #### Bn-scaff_20221_1-p48200 C-genome specific (napus-oleracea) | 0.9952153    | 0.7012734    |              | 1            | 0.8314608    | not scorable not scorable |
| #### Bn-scaff_20221_1-p49276 C-genome specific (napus-oleracea) | 0.9928229    | 0.7502218    |              | 1            | 0.6951095    | not scorable not scorable |
| #### Bn-scaff_20221_1-p64321 C-genome specific (napus-oleracea) | 0.9880383    | 0.8614305    |              | 1            | 0.7579862    | not scorable not scorable |

|                                                                 |              |              |              |              |              |              |
|-----------------------------------------------------------------|--------------|--------------|--------------|--------------|--------------|--------------|
| #### Bn-scaff_20221_1-p64342 C-genome specific (napus-oleracea) | 0.9880383    | 0.7403492    | 1            | 0.7066       | not scorable | not scorable |
| #### Bn-scaff_20221_1-p64489 C-genome specific (napus-oleracea) | 0.9880383    | 0.7116703    | 1            | 0.6439492    | not scorable | not scorable |
| #### Bn-scaff_20221_1-p64925 C-genome specific (napus-oleracea) | 0.9904306    | 0.8800518    | 1            | 0.7997872    | not scorable | not scorable |
| #### Bn-scaff_20221_1-p64981 C-genome specific (napus-oleracea) | 0.9928229    | 0.8436592    | 0.9922481    | 0.7123927    | not scorable | not scorable |
| #### Bn-scaff_20221_1-p65077 C-genome specific (napus-oleracea) | 0.9904306    | 0.8197246    | 0.9922481    | 0.7454547    | not scorable | not scorable |
| #### Bn-scaff_20221_1-p65440 C-genome specific (napus-oleracea) | 0.9928229    | 0.8524398    | 1            | 0.7657051    | not scorable | not scorable |
| #### Bn-scaff_20221_1-p67938 C-genome specific (napus-oleracea) | 0.9928229    | 0.8410676    | 1            | 0.7465526    | not scorable | not scorable |
| #### Bn-scaff_20221_1-p67945 C-genome specific (napus-oleracea) | 0.9904306    | 0.9400939    | 1            | 0.7826428    | not scorable | not scorable |
| #### Bn-scaff_20221_1-p68431 C-genome specific (napus-oleracea) | 0.9928229    | 0.8960769    | 0.9922481    | 0.7902138    | not scorable | not scorable |
| #### Bn-scaff_20221_1-p74227 C-genome specific (napus-oleracea) | 0.9784689    | 0.6692935    | 0.9922481    | 0.7303765    | not scorable | not scorable |
| #### Bn-scaff_20221_1-p75074 C-genome specific (napus-oleracea) | 0.9928229    | 0.879275     | 0.9922481    | 0.8561443    | not scorable | not scorable |
| #### Bn-scaff_20221_1-p75490 C-genome specific (napus-oleracea) | 0.9904306    | 0.868979     | 1            | 0.835198     | not scorable | not scorable |
| #### Bn-scaff_20221_1-p82651 C-genome specific (napus-oleracea) | 0.9928229    | 0.8794017    | 0.9922481    | 0.8284472    | not scorable | not scorable |
| #### Bn-scaff_20221_1-p84347 C-genome specific (oleracea only)  | not scorable | not scorable | 0.8914729    | 0.6493686    | not scorable | not scorable |
| #### Bn-scaff_20221_1-p84872 C-genome specific (napus-oleracea) | 0.9904306    | 0.6089708    | 0.9612403    | 0.5594633    | not scorable | not scorable |
| #### Bn-scaff_20221_1-p98034 C-genome specific (napus-oleracea) | 0.9808612    | 0.7679873    | 0.9922481    | 0.7642041    | not scorable | not scorable |
| #### Bn-scaff_20246_1-p1276 C-genome specific (oleracea only)   | not scorable | not scorable | 1            | 0.7308185    | not scorable | not scorable |
| #### Bn-scaff_20250_1-p14867 all not scorable                   | not scorable | not scorable | not scorable | not scorable | not scorable | not scorable |
| #### Bn-scaff_20250_1-p16497 C-genome specific (napus-oleracea) | 0.9952153    | 0.7605954    | 1            | 0.7345592    | not scorable | not scorable |
| #### Bn-scaff_20250_1-p19024 genome unspecific (all in)         | 0.9952153    | 0.3206411    | 1            | 0.6346214    | 1            | 0.7299036    |
| #### Bn-scaff_20250_1-p19095 genome unspecific (all in)         | 0.9736842    | 0.3459637    | 1            | 0.7553368    | 1            | 0.8169687    |
| #### Bn-scaff_20250_1-p19256 C-genome specific (napus-oleracea) | 0.9880383    | 0.4451459    | 1            | 0.6466297    | not scorable | not scorable |
| #### Bn-scaff_20250_1-p19384 C-genome specific (oleracea only)  | not scorable | not scorable | 1            | 0.4841667    | not scorable | not scorable |
| #### Bn-scaff_20250_1-p21337 C-genome specific (napus-oleracea) | 0.9712918    | 0.7777068    | 1            | 0.7503461    | not scorable | not scorable |
| #### Bn-scaff_20250_1-p21366 C-genome specific (napus-oleracea) | 0.9736842    | 0.6449456    | 0.9922481    | 0.6079043    | not scorable | not scorable |
| #### Bn-scaff_20250_1-p21374 genome unspecific (oleracea-rapa)  | not scorable | not scorable | 0.9612403    | 0.4833663    | 0.9917355    | 0.5073043    |
| #### Bn-scaff_20250_1-p24001 genome unspecific (all in)         | 0.9904306    | 0.2055216    | 1            | 0.7192602    | 1            | 0.9272014    |
| #### Bn-scaff_20250_1-p25251 genome unspecific (all in)         | 0.9904306    | 0.6299857    | 1            | 0.7803554    | 1            | 0.7968627    |
| #### Bn-scaff_20250_1-p25269 C-genome specific (napus-oleracea) | 0.9832536    | 0.8202487    | 1            | 0.8694115    | not scorable | not scorable |
| #### Bn-scaff_20250_1-p25271 C-genome specific (napus-oleracea) | 0.9832536    | 0.8285783    | 1            | 0.817282     | not scorable | not scorable |
| #### Bn-scaff_20250_1-p27634 C-genome specific (napus-oleracea) | 0.9856459    | 0.7334638    | 1            | 0.834062     | not scorable | not scorable |
| #### Bn-scaff_20250_1-p31042 C-genome specific (napus-oleracea) | 0.9688995    | 0.6914333    | 0.9922481    | 0.6397684    | not scorable | not scorable |
| #### Bn-scaff_20250_1-p32061 C-genome specific (napus-oleracea) | 0.8444976    | 0.6241911    | 0.9922481    | 0.5361411    | not scorable | not scorable |

|                                                                 |              |              |              |              |              |              |
|-----------------------------------------------------------------|--------------|--------------|--------------|--------------|--------------|--------------|
| #### Bn-scaff_20250_1-p3296 genome unspecific (all in)          | 0.9856459    | 0.4307007    | 1            | 0.5859513    | 1            | 0.810436     |
| #### Bn-scaff_20250_1-p33419 C-genome specific (napus-oleracea) | 0.9665072    | 0.741445     | 1            | 0.6468673    | not scorable | not scorable |
| #### Bn-scaff_20250_1-p33647 C-genome specific (napus-oleracea) | 0.9665072    | 0.6939331    | 1            | 0.6918558    | not scorable | not scorable |
| #### Bn-scaff_20250_1-p34892 C-genome specific (napus-oleracea) | 0.9330143    | 0.7066516    | 1            | 0.6559587    | not scorable | not scorable |
| #### Bn-scaff_20250_1-p3870 C-genome specific (napus-oleracea)  | 0.9736842    | 0.7949057    | 1            | 0.8098149    | not scorable | not scorable |
| #### Bn-scaff_20250_1-p38852 C-genome specific (napus-oleracea) | 0.9736842    | 0.774992     | 1            | 0.7838458    | not scorable | not scorable |
| #### Bn-scaff_20250_1-p3940 C-genome specific (napus-oleracea)  | 0.9521531    | 0.7927812    | 0.9379845    | 0.6561643    | not scorable | not scorable |
| #### Bn-scaff_20250_1-p39526 C-genome specific (napus-oleracea) | 0.9880383    | 0.6716676    | 0.9922481    | 0.6341668    | not scorable | not scorable |
| #### Bn-scaff_20250_1-p4021 C-genome specific (napus-oleracea)  | 0.9832536    | 0.7265761    | 0.9844961    | 0.6940535    | not scorable | not scorable |
| #### Bn-scaff_20250_1-p40215 C-genome specific (napus-oleracea) | 0.9832536    | 0.8039351    | 0.9922481    | 0.7237852    | not scorable | not scorable |
| #### Bn-scaff_20250_1-p40249 C-genome specific (napus-oleracea) | 0.9904306    | 0.8367751    | 0.9922481    | 0.8422567    | not scorable | not scorable |
| #### Bn-scaff_20250_1-p42469 A-genome specific (rapa only)      | not scorable | not scorable | not scorable | not scorable | 0.9752066    | 0.7446861    |
| #### Bn-scaff_20250_1-p42978 C-genome specific (napus-oleracea) | 0.9856459    | 0.7874956    | 0.9844961    | 0.8172321    | not scorable | not scorable |
| #### Bn-scaff_20250_1-p4351 C-genome specific (napus-oleracea)  | 0.9856459    | 0.7812728    | 0.9612403    | 0.7265273    | not scorable | not scorable |
| #### Bn-scaff_20250_1-p43628 genome unspecific (all in)         | 0.9808612    | 0.2627763    | 0.9689922    | 0.4489895    | 1            | 0.9272014    |
| #### Bn-scaff_20250_1-p44193 C-genome specific (napus-oleracea) | 0.9712918    | 0.74481      | 0.9534883    | 0.856515     | not scorable | not scorable |
| #### Bn-scaff_20250_1-p44201 C-genome specific (napus-oleracea) | 0.9736842    | 0.7880133    | 0.9612403    | 0.8124424    | not scorable | not scorable |
| #### Bn-scaff_20250_1-p44433 C-genome specific (napus-oleracea) | 0.9760765    | 0.6688801    | 0.9612403    | 0.691256     | not scorable | not scorable |
| #### Bn-scaff_20250_1-p44437 C-genome specific (napus-oleracea) | 0.9712918    | 0.6771392    | 0.9612403    | 0.6674338    | not scorable | not scorable |
| #### Bn-scaff_20250_1-p82478 C-genome specific (napus-oleracea) | 0.9569378    | 0.7321739    | 0.8914729    | 0.7553049    | not scorable | not scorable |
| #### Bn-scaff_20250_1-p95469 C-genome specific (napus-oleracea) | 0.9736842    | 0.7574001    | 0.9224806    | 0.7050819    | not scorable | not scorable |
| #### Bn-scaff_20250_2-p1201 C-genome specific (napus-oleracea)  | 0.9688995    | 0.7850302    | 1            | 0.8243724    | not scorable | not scorable |
| #### Bn-scaff_20250_2-p12065 C-genome specific (napus-oleracea) | 0.9641148    | 0.6546512    | 0.9922481    | 0.7282653    | not scorable | not scorable |
| #### Bn-scaff_20250_2-p1247 C-genome specific (napus-oleracea)  | 0.9784689    | 0.7092709    | 0.9922481    | 0.7006611    | not scorable | not scorable |
| #### Bn-scaff_20250_2-p12556 C-genome specific (napus-oleracea) | 0.9760765    | 0.7961603    | 0.9922481    | 0.7905136    | not scorable | not scorable |
| #### Bn-scaff_20250_2-p12794 genome unspecific (all in)         | 0.9808612    | 0.4229227    | 0.9922481    | 0.5830723    | 1            | 0.9175813    |
| #### Bn-scaff_20250_2-p12942 genome unspecific (all in)         | 0.9425837    | 0.456104     | 1            | 0.6803078    | 1            | 0.8225068    |
| #### Bn-scaff_20250_2-p14715 C-genome specific (napus-oleracea) | 0.923445     | 0.6841387    | 0.9922481    | 0.7884678    | not scorable | not scorable |
| #### Bn-scaff_20250_2-p14756 genome unspecific (all in)         | 0.9856459    | 0.3651741    | 1            | 0.6898416    | 1            | 0.8844658    |
| #### Bn-scaff_20250_2-p16209 C-genome specific (napus-oleracea) | 0.9880383    | 0.6648868    | 0.9922481    | 0.8158038    | not scorable | not scorable |
| #### Bn-scaff_20250_2-p17705 napus specific                     | 1            | 0.552564     | not scorable | not scorable | not scorable | not scorable |
| #### Bn-scaff_20250_2-p20248 C-genome specific (napus-oleracea) | 0.9593301    | 0.8056185    | 1            | 0.8242501    | not scorable | not scorable |
| #### Bn-scaff_20250_2-p20585 C-genome specific (napus-oleracea) | 0.9856459    | 0.790215     | 1            | 0.8480213    | not scorable | not scorable |



|                                                                 |              |              |           |           |              |              |
|-----------------------------------------------------------------|--------------|--------------|-----------|-----------|--------------|--------------|
| #### Bn-scaff_20250_2-p20676 C-genome specific (napus-oleracea) | 0.9808612    | 0.7054875    | 1         | 0.7811896 | not scorable | not scorable |
| #### Bn-scaff_20250_2-p20827 C-genome specific (napus-oleracea) | 0.9736842    | 0.8029628    | 0.9922481 | 0.8007172 | not scorable | not scorable |
| #### Bn-scaff_20250_2-p20841 C-genome specific (napus-oleracea) | 0.9736842    | 0.6833765    | 1         | 0.7581077 | not scorable | not scorable |
| #### Bn-scaff_20250_2-p23288 C-genome specific (napus-oleracea) | 0.9665072    | 0.6147286    | 1         | 0.5477394 | not scorable | not scorable |
| #### Bn-scaff_20250_2-p24112 C-genome specific (napus-oleracea) | 0.9712918    | 0.7891619    | 0.9844961 | 0.7918997 | not scorable | not scorable |
| #### Bn-scaff_20250_2-p25530 genome unspecific (all in)         | 0.9904306    | 0.4368461    | 1         | 0.8289054 | 1            | 0.8545249    |
| #### Bn-scaff_20250_2-p25576 genome unspecific (all in)         | 0.9904306    | 0.2920207    | 1         | 0.8097414 | 1            | 0.6189446    |
| #### Bn-scaff_20250_2-p53786 C-genome specific (napus-oleracea) | 0.9856459    | 0.7681932    | 1         | 0.8288711 | not scorable | not scorable |
| #### Bn-scaff_20250_2-p54488 C-genome specific (napus-oleracea) | 0.9712918    | 0.8022457    | 1         | 0.8316675 | not scorable | not scorable |
| #### Bn-scaff_20250_2-p65223 C-genome specific (napus-oleracea) | 0.9736842    | 0.7779292    | 1         | 0.7960071 | not scorable | not scorable |
| #### Bn-scaff_20250_2-p67464 C-genome specific (napus-oleracea) | 0.9784689    | 0.7890645    | 1         | 0.7711925 | not scorable | not scorable |
| #### Bn-scaff_20250_2-p68803 C-genome specific (napus-oleracea) | 0.9784689    | 0.7324966    | 1         | 0.754338  | not scorable | not scorable |
| #### Bn-scaff_20250_2-p68864 C-genome specific (napus-oleracea) | 0.9736842    | 0.6693791    | 1         | 0.6529684 | not scorable | not scorable |
| #### Bn-scaff_20250_2-p69836 C-genome specific (napus-oleracea) | 0.9832536    | 0.7567643    | 0.9922481 | 0.7720703 | not scorable | not scorable |
| #### Bn-scaff_20250_2-p69993 C-genome specific (napus-oleracea) | 0.9665072    | 0.696699     | 0.9922481 | 0.8301414 | not scorable | not scorable |
| #### Bn-scaff_20250_2-p70504 C-genome specific (napus-oleracea) | 0.9760765    | 0.7832525    | 1         | 0.811307  | not scorable | not scorable |
| #### Bn-scaff_20250_2-p70720 C-genome specific (napus-oleracea) | 0.9808612    | 0.7232882    | 0.9689922 | 0.6784018 | not scorable | not scorable |
| #### Bn-scaff_20250_2-p71083 C-genome specific (napus-oleracea) | 0.9784689    | 0.7878959    | 1         | 0.8229938 | not scorable | not scorable |
| #### Bn-scaff_20250_2-p71233 C-genome specific (napus-oleracea) | 0.9760765    | 0.6982164    | 1         | 0.7590795 | not scorable | not scorable |
| #### Bn-scaff_20250_2-p82495 C-genome specific (napus-oleracea) | 0.9784689    | 0.7811701    | 1         | 0.7710258 | not scorable | not scorable |
| #### Bn-scaff_20250_2-p85794 C-genome specific (napus-oleracea) | 0.9497608    | 0.7904571    | 1         | 0.858529  | not scorable | not scorable |
| #### Bn-scaff_20261_1-p7378 genome unspecific (all in)          | 1            | 0.5932571    | 0.9767442 | 0.5741108 | 1            | 0.5031126    |
| #### Bn-scaff_20270_1-p10063 C-genome specific (napus-oleracea) | 0.9760765    | 0.7261093    | 0.9302326 | 0.7206949 | not scorable | not scorable |
| #### Bn-scaff_20270_1-p10131 C-genome specific (napus-oleracea) | 0.9904306    | 0.7144592    | 0.9767442 | 0.7179219 | not scorable | not scorable |
| #### Bn-scaff_20270_1-p10430 C-genome specific (napus-oleracea) | 0.9784689    | 0.7700267    | 0.9922481 | 0.8825257 | not scorable | not scorable |
| #### Bn-scaff_20270_1-p10483 genome unspecific (all in)         | 0.9976076    | 0.2670335    | 1         | 0.6639015 | 1            | 0.7622204    |
| #### Bn-scaff_20270_1-p10486 C-genome specific (napus-oleracea) | 0.9832536    | 0.7585436    | 0.9922481 | 0.7628368 | not scorable | not scorable |
| #### Bn-scaff_20270_1-p10540 C-genome specific (napus-oleracea) | 0.9784689    | 0.7638822    | 1         | 0.7482366 | not scorable | not scorable |
| #### Bn-scaff_20270_1-p10549 C-genome specific (napus-oleracea) | 0.9736842    | 0.6957269    | 1         | 0.8524051 | not scorable | not scorable |
| #### Bn-scaff_20270_1-p10610 C-genome specific (oleracea only)  | not scorable | not scorable | 0.9457364 | 0.7749733 | not scorable | not scorable |
| #### Bn-scaff_20270_1-p10667 C-genome specific (oleracea only)  | not scorable | not scorable | 1         | 0.8030953 | not scorable | not scorable |
| #### Bn-scaff_20270_1-p10702 C-genome specific (napus-oleracea) | 0.9760765    | 0.764339     | 1         | 0.7149333 | not scorable | not scorable |
| #### Bn-scaff_20270_1-p10923 genome unspecific (all in)         | 1            | 0.8948976    | 1         | 0.8708732 | 1            | 0.8842725    |

|                                                                 |              |              |           |           |              |              |
|-----------------------------------------------------------------|--------------|--------------|-----------|-----------|--------------|--------------|
| #### Bn-scaff_20270_1-p10959 C-genome specific (oleracea only)  | not scorable | not scorable | 1         | 0.8229404 | not scorable | not scorable |
| #### Bn-scaff_20270_1-p10979 C-genome specific (oleracea only)  | not scorable | not scorable | 1         | 0.7597421 | not scorable | not scorable |
| #### Bn-scaff_20270_1-p10996 genome unspecific (oleracea-rapa)  | not scorable | not scorable | 1         | 0.7786232 | 1            | 0.925377     |
| #### Bn-scaff_20270_1-p11001 C-genome specific (oleracea only)  | not scorable | not scorable | 0.9922481 | 0.6694599 | not scorable | not scorable |
| #### Bn-scaff_20270_1-p11065 C-genome specific (oleracea only)  | not scorable | not scorable | 0.9689922 | 0.58604   | not scorable | not scorable |
| #### Bn-scaff_20270_1-p11080 C-genome specific (oleracea only)  | not scorable | not scorable | 0.9922481 | 0.7344949 | not scorable | not scorable |
| #### Bn-scaff_20270_1-p11100 C-genome specific (oleracea only)  | not scorable | not scorable | 0.9922481 | 0.7507795 | not scorable | not scorable |
| #### Bn-scaff_20270_1-p11203 C-genome specific (oleracea only)  | not scorable | not scorable | 1         | 0.7838888 | not scorable | not scorable |
| #### Bn-scaff_20270_1-p11720 genome unspecific (oleracea-rapa)  | not scorable | not scorable | 0.9922481 | 0.8115821 | 1            | 0.9175813    |
| #### Bn-scaff_20270_1-p11999 C-genome specific (napus-oleracea) | 0.9784689    | 0.7961853    | 0.9922481 | 0.8047553 | not scorable | not scorable |
| #### Bn-scaff_20270_1-p12082 C-genome specific (napus-oleracea) | 0.9760765    | 0.7324331    | 0.9767442 | 0.834285  | not scorable | not scorable |
| #### Bn-scaff_20270_1-p12102 C-genome specific (oleracea only)  | not scorable | not scorable | 0.9689922 | 0.779623  | not scorable | not scorable |
| #### Bn-scaff_20270_1-p12114 C-genome specific (napus-oleracea) | 0.9641148    | 0.602788     | 0.9922481 | 0.6619665 | not scorable | not scorable |
| #### Bn-scaff_20270_1-p12116 C-genome specific (napus-oleracea) | 0.9856459    | 0.8076088    | 1         | 0.7346283 | not scorable | not scorable |
| #### Bn-scaff_20270_1-p12472 C-genome specific (napus-oleracea) | 0.9832536    | 0.7067409    | 1         | 0.7642546 | not scorable | not scorable |
| #### Bn-scaff_20270_1-p12494 C-genome specific (napus-oleracea) | 0.9832536    | 0.7481914    | 0.9922481 | 0.7552942 | not scorable | not scorable |
| #### Bn-scaff_20270_1-p12594 C-genome specific (napus-oleracea) | 0.9832536    | 0.7849174    | 1         | 0.7883346 | not scorable | not scorable |
| #### Bn-scaff_20270_1-p12594 C-genome specific (napus-oleracea) | 0.9856459    | 0.8207752    | 1         | 0.7764562 | not scorable | not scorable |
| #### Bn-scaff_20270_1-p12935 C-genome specific (napus-oleracea) | 0.9856459    | 0.8006806    | 1         | 0.7138222 | not scorable | not scorable |
| #### Bn-scaff_20270_1-p12999 genome unspecific (oleracea-rapa)  | not scorable | not scorable | 1         | 0.7544611 | 1            | 0.77201      |
| #### Bn-scaff_20270_1-p13008 C-genome specific (oleracea only)  | not scorable | not scorable | 0.620155  | 0.7971895 | not scorable | not scorable |
| #### Bn-scaff_20270_1-p13142 C-genome specific (oleracea only)  | not scorable | not scorable | 0.5116279 | 0.8412076 | not scorable | not scorable |
| #### Bn-scaff_20270_1-p13230 C-genome specific (oleracea only)  | not scorable | not scorable | 0.9922481 | 0.8185435 | not scorable | not scorable |
| #### Bn-scaff_20270_1-p13232 C-genome specific (napus-oleracea) | 0.9808612    | 0.7486442    | 1         | 0.7695362 | not scorable | not scorable |
| #### Bn-scaff_20270_1-p13238 C-genome specific (napus-oleracea) | 0.9880383    | 0.7567227    | 1         | 0.7126282 | not scorable | not scorable |
| #### Bn-scaff_20270_1-p13242 C-genome specific (napus-oleracea) | 0.9856459    | 0.7819189    | 1         | 0.6812924 | not scorable | not scorable |
| #### Bn-scaff_20270_1-p13243 C-genome specific (oleracea only)  | not scorable | not scorable | 1         | 0.8831785 | not scorable | not scorable |
| #### Bn-scaff_20270_1-p13243 C-genome specific (napus-oleracea) | 0.9808612    | 0.7967804    | 1         | 0.7977147 | not scorable | not scorable |
| #### Bn-scaff_20270_1-p13244 C-genome specific (napus-oleracea) | 0.9904306    | 0.7596914    | 1         | 0.7209201 | not scorable | not scorable |
| #### Bn-scaff_20270_1-p13244 C-genome specific (napus-oleracea) | 0.9832536    | 0.7087227    | 0.8604651 | 0.2931581 | not scorable | not scorable |
| #### Bn-scaff_20270_1-p13324 C-genome specific (napus-oleracea) | 0.9832536    | 0.7902344    | 0.9922481 | 0.895863  | not scorable | not scorable |
| #### Bn-scaff_20270_1-p13325 C-genome specific (napus-oleracea) | 0.9832536    | 0.7719436    | 1         | 0.9038315 | not scorable | not scorable |
| #### Bn-scaff_20270_1-p13335 C-genome specific (napus-oleracea) | 0.9880383    | 0.7789822    | 0.9922481 | 0.8306848 | not scorable | not scorable |

|                                                                 |              |              |              |              |              |              |
|-----------------------------------------------------------------|--------------|--------------|--------------|--------------|--------------|--------------|
| #### Bn-scaff_20270_1-p13335 C-genome specific (napus-oleracea) | 0.9832536    | 0.7701377    | 0.9844961    | 0.8249891    | not scorable | not scorable |
| #### Bn-scaff_20270_1-p13443 genome unspecific (all in)         | 1            | 0.3166765    | 1            | 0.502319     | 1            | 0.7442243    |
| #### Bn-scaff_20270_1-p13831 genome unspecific (all in)         | 0.9593301    | 0.1799442    | 1            | 0.7276233    | 1            | 0.7197543    |
| #### Bn-scaff_20270_1-p14343 C-genome specific (napus-oleracea) | 0.9832536    | 0.7447704    | 1            | 0.6854266    | not scorable | not scorable |
| #### Bn-scaff_20270_1-p14409 genome unspecific (all in)         | 0.9832536    | 0.6238195    | 0.9844961    | 0.6754814    | 1            | 0.8456494    |
| #### Bn-scaff_20270_1-p14461 genome unspecific (all in)         | 0.9904306    | 0.2440201    | 0.9922481    | 0.7351715    | 1            | 0.8863711    |
| #### Bn-scaff_20270_1-p14774 C-genome specific (napus-oleracea) | 0.9904306    | 0.7711563    | 1            | 0.7739173    | not scorable | not scorable |
| #### Bn-scaff_20270_1-p16532 genome unspecific (all in)         | 0.9928229    | 0.2601694    | 1            | 0.8115649    | 1            | 0.8595592    |
| #### Bn-scaff_20270_1-p16689 genome unspecific (all in)         | 0.9808612    | 0.3092604    | 1            | 0.7281514    | 0.9917355    | 0.6278748    |
| #### Bn-scaff_20270_1-p16774 C-genome specific (napus-oleracea) | 0.9904306    | 0.7471361    | 0.5813953    | 0.8574646    | not scorable | not scorable |
| #### Bn-scaff_20270_1-p17399 genome unspecific (oleracea-rapa)  | not scorable | not scorable | 1            | 0.7336609    | 0.892562     | 0.8809366    |
| #### Bn-scaff_20270_1-p17445 genome unspecific (all in)         | 0.9832536    | 0.3363163    | 0.9844961    | 0.8336643    | 1            | 0.9012448    |
| #### Bn-scaff_20270_1-p19465 genome unspecific (all in)         | 0.9952153    | 0.2311144    | 0.9922481    | 0.6479963    | 0.9917355    | 0.7762759    |
| #### Bn-scaff_20270_1-p21077 genome unspecific (all in)         | 0.9688995    | 0.4634957    | 1            | 0.7275798    | 0.9834711    | 0.7731552    |
| #### Bn-scaff_20270_1-p21222 genome unspecific (oleracea-rapa)  | not scorable | not scorable | 0.9844961    | 0.7119704    | 1            | 0.9093874    |
| #### Bn-scaff_20270_1-p22487 C-genome specific (napus-oleracea) | 0.9784689    | 0.4676758    | 1            | 0.893414     | not scorable | not scorable |
| #### Bn-scaff_20270_1-p22802 genome unspecific (all in)         | 0.9976076    | 0.3337884    | 1            | 0.8459377    | 1            | 0.6933411    |
| #### Bn-scaff_20270_1-p23598 C-genome specific (napus-oleracea) | 0.9952153    | 0.7103772    | 0.9379845    | 0.7550278    | not scorable | not scorable |
| #### Bn-scaff_20270_1-p29592 genome unspecific (all in)         | 0.9880383    | 0.2999583    | 0.9457364    | 0.576641     | 1            | 0.7349294    |
| #### Bn-scaff_20270_1-p33169 genome unspecific (all in)         | 0.9808612    | 0.3258731    | 1            | 0.662568     | 1            | 0.6833251    |
| #### Bn-scaff_20270_1-p33210 C-genome specific (napus-oleracea) | 0.9832536    | 0.7890758    | 0.9689922    | 0.8082005    | not scorable | not scorable |
| #### Bn-scaff_20270_1-p33924 C-genome specific (napus-oleracea) | 0.9928229    | 0.7676092    | 1            | 0.7019593    | not scorable | not scorable |
| #### Bn-scaff_20270_1-p36939 C-genome specific (napus-oleracea) | 0.9401914    | 0.6774079    | 0.9767442    | 0.6648079    | not scorable | not scorable |
| #### Bn-scaff_20270_1-p38091 C-genome specific (napus-oleracea) | 0.9952153    | 0.8932207    | 1            | 0.7666519    | not scorable | not scorable |
| #### Bn-scaff_20270_1-p39400 C-genome specific (napus-oleracea) | 0.9641148    | 0.7035089    | 1            | 0.7231398    | not scorable | not scorable |
| #### Bn-scaff_20270_1-p39619 C-genome specific (napus-oleracea) | 0.9736842    | 0.6898537    | 0.9922481    | 0.8277643    | not scorable | not scorable |
| #### Bn-scaff_20270_1-p43027 napus specific                     | 0.9784689    | 0.6974632    | not scorable | not scorable | not scorable | not scorable |
| #### Bn-scaff_20270_1-p45620 genome unspecific (all in)         | 0.9856459    | 0.7209294    | 1            | 0.7939541    | 0.9834711    | 0.9573511    |
| #### Bn-scaff_20270_1-p48716 genome unspecific (all in)         | 0.9976076    | 0.3323354    | 0.9922481    | 0.6557369    | 0.9834711    | 0.7435102    |
| #### Bn-scaff_20270_1-p48789 genome unspecific (all in)         | 0.9928229    | 0.4604567    | 0.9844961    | 0.8528856    | 1            | 0.9175773    |
| #### Bn-scaff_20270_1-p54645 genome unspecific (all in)         | 0.9832536    | 0.4070467    | 1            | 0.7626968    | 1            | 0.7578878    |
| #### Bn-scaff_20270_1-p61986 genome unspecific (all in)         | 0.9976076    | 0.2897281    | 1            | 0.4810314    | 1            | 0.9039531    |
| #### Bn-scaff_20270_1-p62040 C-genome specific (oleracea only)  | not scorable | not scorable | 0.9844961    | 0.7882781    | not scorable | not scorable |

|                                                                 |              |              |              |              |              |              |
|-----------------------------------------------------------------|--------------|--------------|--------------|--------------|--------------|--------------|
| #### Bn-scaff_20270_1-p62716 A-genome specific (rapa only)      | not scorable | not scorable | not scorable | not scorable | 1            | 0.5630223    |
| #### Bn-scaff_20270_1-p63228 genome unspecific (all in)         | 0.9856459    | 0.4415621    | 1            | 0.757282     | 1            | 0.7315439    |
| #### Bn-scaff_20270_1-p63960 genome unspecific (all in)         | 0.9760765    | 0.7421905    | 0.8914729    | 0.8172361    | 0.9834711    | 0.7413145    |
| #### Bn-scaff_20270_1-p65649 C-genome specific (napus-oleracea) | 0.9880383    | 0.7975924    | 1            | 0.7277477    | not scorable | not scorable |
| #### Bn-scaff_20270_1-p66943 C-genome specific (napus-oleracea) | 0.9856459    | 0.7518042    | 1            | 0.8318305    | not scorable | not scorable |
| #### Bn-scaff_20270_1-p67006 C-genome specific (oleracea only)  | not scorable | not scorable | 0.9922481    | 0.9016387    | not scorable | not scorable |
| #### Bn-scaff_20270_1-p67029 C-genome specific (napus-oleracea) | 0.9760765    | 0.7426366    | 0.9844961    | 0.6643656    | not scorable | not scorable |
| #### Bn-scaff_20270_1-p67041 C-genome specific (napus-oleracea) | 0.9928229    | 0.7501094    | 0.9922481    | 0.7090436    | not scorable | not scorable |
| #### Bn-scaff_20270_1-p67163 C-genome specific (napus-oleracea) | 0.9688995    | 0.6838948    | 1            | 0.7974839    | not scorable | not scorable |
| #### Bn-scaff_20270_1-p67172 C-genome specific (napus-oleracea) | 0.9904306    | 0.7651413    | 1            | 0.7827452    | not scorable | not scorable |
| #### Bn-scaff_20270_1-p67542 C-genome specific (napus-oleracea) | 0.9617225    | 0.5279685    | 0.9922481    | 0.5229608    | not scorable | not scorable |
| #### Bn-scaff_20270_1-p68556 C-genome specific (napus-oleracea) | 0.9569378    | 0.7349606    | 0.7674419    | 0.81015      | not scorable | not scorable |
| #### Bn-scaff_20270_1-p68562 C-genome specific (napus-oleracea) | 0.9569378    | 0.6896147    | 0.9689922    | 0.6090026    | not scorable | not scorable |
| #### Bn-scaff_20270_1-p68713 C-genome specific (napus-oleracea) | 0.9617225    | 0.6708079    | 0.9767442    | 0.8683366    | not scorable | not scorable |
| #### Bn-scaff_20270_1-p71550 genome unspecific (all in)         | 0.9712918    | 0.6126958    | 0.9922481    | 0.7720731    | 1            | 0.906221     |
| #### Bn-scaff_20270_1-p71859 C-genome specific (napus-oleracea) | 0.9832536    | 0.7203942    | 1            | 0.7957608    | not scorable | not scorable |
| #### Bn-scaff_20270_1-p72101 genome unspecific (all in)         | 0.9712918    | 0.2288653    | 0.9069768    | 0.2581452    | 1            | 0.8004208    |
| #### Bn-scaff_20270_1-p73558 genome unspecific (all in)         | 1            | 0.5894975    | 0.9922481    | 0.8032815    | 0.9917355    | 0.8938099    |
| #### Bn-scaff_20270_1-p78149 genome unspecific (all in)         | 0.9904306    | 0.4662703    | 0.9922481    | 0.776476     | 1            | 0.9166761    |
| #### Bn-scaff_20270_1-p79247 genome unspecific (all in)         | 0.9569378    | 0.3527666    | 1            | 0.8414338    | 1            | 0.7403231    |
| #### Bn-scaff_20270_1-p84912 C-genome specific (napus-oleracea) | 0.9808612    | 0.692532     | 0.9922481    | 0.7023922    | not scorable | not scorable |
| #### Bn-scaff_20270_1-p85018 C-genome specific (napus-oleracea) | 0.9880383    | 0.7962691    | 0.9922481    | 0.7476599    | not scorable | not scorable |
| #### Bn-scaff_20270_1-p86809 C-genome specific (napus-oleracea) | 0.9784689    | 0.7687413    | 0.9689922    | 0.6844504    | not scorable | not scorable |
| #### Bn-scaff_20270_1-p88139 C-genome specific (napus-oleracea) | 0.9856459    | 0.7835566    | 0.9922481    | 0.6937026    | not scorable | not scorable |
| #### Bn-scaff_20288_1-p17090 C-genome specific (napus-oleracea) | 1            | 0.859016     | 1            | 0.6745518    | not scorable | not scorable |
| #### Bn-scaff_20288_1-p28192 genome unspecific (all in)         | 0.9976076    | 0.4425113    | 1            | 0.7758045    | 1            | 0.8793069    |
| #### Bn-scaff_20288_1-p28376 genome unspecific (all in)         | 1            | 0.4398078    | 0.9844961    | 0.73276      | 1            | 0.8183472    |
| #### Bn-scaff_20288_1-p29573 C-genome specific (oleracea only)  | not scorable | not scorable | 0.9767442    | 0.7745886    | not scorable | not scorable |
| #### Bn-scaff_20288_1-p34410 C-genome specific (napus-oleracea) | 1            | 0.8676481    | 0.9922481    | 0.767427     | not scorable | not scorable |
| #### Bn-scaff_20288_1-p34426 C-genome specific (napus-oleracea) | 1            | 0.602721     | 0.9844961    | 0.593912     | not scorable | not scorable |
| #### Bn-scaff_20288_1-p39901 genome unspecific (all in)         | 0.9976076    | 0.5437666    | 0.9922481    | 0.7355274    | 1            | 0.8980267    |
| #### Bn-scaff_20288_1-p45746 genome unspecific (oleracea-rapa)  | not scorable | not scorable | 1            | 0.7988467    | 1            | 0.8653011    |
| #### Bn-scaff_20288_1-p48229 genome unspecific (all in)         | 0.9976076    | 0.4793308    | 1            | 0.8004573    | 1            | 0.9081516    |

|                                                                 |              |              |              |              |              |              |
|-----------------------------------------------------------------|--------------|--------------|--------------|--------------|--------------|--------------|
| #### Bn-scaff_20288_1-p4831C C-genome specific (napus-oleracea) | 1            | 0.7852437    | 0.9922481    | 0.8396734    | not scorable | not scorable |
| #### Bn-scaff_20288_1-p4834E C-genome specific (napus-oleracea) | 1            | 0.8345043    | 1            | 0.7579792    | not scorable | not scorable |
| #### Bn-scaff_20288_1-p51471 genome unspecific (all in)         | 1            | 0.221804     | 1            | 0.6931905    | 1            | 0.5922323    |
| #### Bn-scaff_20288_1-p5552E C-genome specific (napus-oleracea) | 1            | 0.6933065    | 0.9844961    | 0.7251414    | not scorable | not scorable |
| #### Bn-scaff_20288_1-p5895E C-genome specific (napus-oleracea) | 1            | 0.6376448    | 0.9689922    | 0.7547367    | not scorable | not scorable |
| #### Bn-scaff_20294_1-p1770E C-genome specific (napus-oleracea) | 0.9952153    | 0.3051178    | 1            | 0.692532     | not scorable | not scorable |
| #### Bn-scaff_20294_1-p2350C C-genome specific (napus-oleracea) | 0.9066986    | 0.7770178    | 0.9844961    | 0.7653911    | not scorable | not scorable |
| #### Bn-scaff_20294_1-p23621 genome unspecific (all in)         | 0.9832536    | 0.4973301    | 0.9922481    | 0.7281454    | 1            | 0.903388     |
| #### Bn-scaff_20294_1-p25051 genome unspecific (all in)         | 0.9736842    | 0.677916     | 0.9922481    | 0.8361881    | 1            | 0.9259368    |
| #### Bn-scaff_20294_1-p2506E genome unspecific (all in)         | 0.9880383    | 0.3179992    | 1            | 0.7408692    | 0.9834711    | 0.7972654    |
| #### Bn-scaff_20294_1-p26894 C-genome specific (napus-oleracea) | 0.9258373    | 0.7414641    | 1            | 0.8752148    | not scorable | not scorable |
| #### Bn-scaff_20294_1-p26901 C-genome specific (napus-oleracea) | 0.9760765    | 0.5751222    | 1            | 0.8564774    | not scorable | not scorable |
| #### Bn-scaff_20294_1-p26924 genome unspecific (all in)         | 0.9210526    | 0.1937422    | 1            | 0.5341325    | 1            | 0.7843046    |
| #### Bn-scaff_20294_1-p26974 A-genome specific (rapa only)      | not scorable | not scorable | not scorable | not scorable | 0.9834711    | 0.4568809    |
| #### Bn-scaff_20294_1-p27347 genome unspecific (all in)         | 0.9880383    | 0.4799656    | 1            | 0.8477979    | 1            | 0.7503537    |
| #### Bn-scaff_20294_1-p30161 C-genome specific (napus-oleracea) | 0.8971292    | 0.7655033    | 0.9922481    | 0.7257497    | not scorable | not scorable |
| #### Bn-scaff_20294_1-p30341 C-genome specific (napus-oleracea) | 0.9066986    | 0.7426764    | 0.8914729    | 0.7483068    | not scorable | not scorable |
| #### Bn-scaff_20294_1-p35584 C-genome specific (napus-oleracea) | 0.8995215    | 0.7067659    | 1            | 0.7625163    | not scorable | not scorable |
| #### Bn-scaff_20294_1-p3781E C-genome specific (napus-oleracea) | 0.9162679    | 0.7338629    | 1            | 0.7683381    | not scorable | not scorable |
| #### Bn-scaff_20294_1-p3814E C-genome specific (napus-oleracea) | 0.9114832    | 0.7851033    | 0.4728682    | 0.8308654    | not scorable | not scorable |
| #### Bn-scaff_20294_1-p3825E C-genome specific (napus-oleracea) | 0.9090909    | 0.6746562    | 0.9844961    | 0.764693     | not scorable | not scorable |
| #### Bn-scaff_20294_1-p39514 C-genome specific (napus-oleracea) | 0.9138756    | 0.7763345    | 0.9767442    | 0.6610716    | not scorable | not scorable |
| #### Bn-scaff_20294_1-p3951E C-genome specific (napus-oleracea) | 0.9043062    | 0.6633734    | 0.9844961    | 0.7756281    | not scorable | not scorable |
| #### Bn-scaff_20294_1-p42171 genome unspecific (oleracea-rapa)  | not scorable | not scorable | 1            | 0.6938243    | 1            | 0.7194836    |
| #### Bn-scaff_20294_1-p42172 C-genome specific (napus-oleracea) | 0.9952153    | 0.5601133    | 1            | 0.7404514    | not scorable | not scorable |
| #### Bn-scaff_20294_1-p42241 C-genome specific (napus-oleracea) | 0.9258373    | 0.8948976    | 1            | 0.8528629    | not scorable | not scorable |
| #### Bn-scaff_20294_1-p4248E genome unspecific (all in)         | 1            | 0.8652245    | 1            | 0.7912233    | 1            | 0.9037395    |
| #### Bn-scaff_20294_1-p4382E C-genome specific (napus-oleracea) | 0.9090909    | 0.7734685    | 1            | 0.8036307    | not scorable | not scorable |
| #### Bn-scaff_20294_1-p4434E genome unspecific (all in)         | 0.9665072    | 0.5763516    | 1            | 0.6797693    | 1            | 0.7555247    |
| #### Bn-scaff_20294_1-p66327 C-genome specific (napus-oleracea) | 0.9425837    | 0.7167257    | 0.9069768    | 0.7589924    | not scorable | not scorable |
| #### Bn-scaff_20320_1-p24757 C-genome specific (napus-oleracea) | 0.6411483    | 0.6507969    | 0.8217054    | 0.5562143    | not scorable | not scorable |
| #### Bn-scaff_20320_1-p52767 napus specific                     | 0.9090909    | 0.6988469    | not scorable | not scorable | not scorable | not scorable |
| #### Bn-scaff_20320_1-p57532 C-genome specific (napus-oleracea) | 0.9186603    | 0.7572132    | 0.9922481    | 0.8692966    | not scorable | not scorable |

|                                                                 |              |              |              |              |              |              |
|-----------------------------------------------------------------|--------------|--------------|--------------|--------------|--------------|--------------|
| #### Bn-scaff_20320_1-p7597 genome unspecific (all in)          | 0.9760765    | 0.6801008    | 0.9147287    | 0.7255618    | 1            | 0.9116196    |
| #### Bn-scaff_20320_1-p82662 C-genome specific (napus-oleracea) | 0.9186603    | 0.7444175    | 0.9922481    | 0.7299567    | not scorable | not scorable |
| #### Bn-scaff_20320_1-p83433 C-genome specific (napus-oleracea) | 0.9258373    | 0.7306775    | 1            | 0.6968184    | not scorable | not scorable |
| #### Bn-scaff_20323_1-p32498 C-genome specific (napus-oleracea) | 0.9832536    | 0.7439709    | 1            | 0.8423497    | not scorable | not scorable |
| #### Bn-scaff_20323_1-p39980 C-genome specific (napus-oleracea) | 0.9856459    | 0.7261047    | 0.9922481    | 0.8138603    | not scorable | not scorable |
| #### Bn-scaff_20329_1-p10737 C-genome specific (napus-oleracea) | 1            | 0.7879575    | 0.9922481    | 0.7108454    | not scorable | not scorable |
| #### Bn-scaff_20329_1-p10956 C-genome specific (napus-oleracea) | 1            | 0.7677417    | 0.9922481    | 0.7482076    | not scorable | not scorable |
| #### Bn-scaff_20329_1-p11043 C-genome specific (oleracea only)  | not scorable | not scorable | 0.9844961    | 0.6982617    | not scorable | not scorable |
| #### Bn-scaff_20329_1-p20588 C-genome specific (napus-oleracea) | 1            | 0.7390923    | 1            | 0.8028318    | not scorable | not scorable |
| #### Bn-scaff_20329_1-p25537 C-genome specific (napus-oleracea) | 1            | 0.7854789    | 0.9844961    | 0.8064715    | not scorable | not scorable |
| #### Bn-scaff_20329_1-p25556 C-genome specific (napus-oleracea) | 1            | 0.8111381    | 1            | 0.8624926    | not scorable | not scorable |
| #### Bn-scaff_20329_1-p71477 C-genome specific (napus-oleracea) | 0.9976076    | 0.7988436    | 0.9922481    | 0.773439     | not scorable | not scorable |
| #### Bn-scaff_20354_1-p17945 C-genome specific (napus-oleracea) | 0.9162679    | 0.71361      | 1            | 0.6848707    | not scorable | not scorable |
| #### Bn-scaff_20354_1-p21185 genome unspecific (all in)         | 0.9760765    | 0.3428552    | 1            | 0.5983918    | 0.9090909    | 0.8083797    |
| #### Bn-scaff_20354_1-p53124 genome unspecific (all in)         | 1            | 0.8135551    | 1            | 0.8576394    | 1            | 0.8004208    |
| #### Bn-scaff_20365_1-p53 C-genome specific (napus-oleracea)    | 0.9856459    | 0.7573501    | 1            | 0.737891     | not scorable | not scorable |
| #### Bn-scaff_20376_1-p12179 genome unspecific (all in)         | 0.9952153    | 0.3569958    | 1            | 0.7880769    | 1            | 0.7126278    |
| #### Bn-scaff_20376_1-p16883 C-genome specific (napus-oleracea) | 0.9808612    | 0.7278607    | 0.9534883    | 0.6601165    | not scorable | not scorable |
| #### Bn-scaff_20376_1-p21841 genome unspecific (all in)         | 0.9976076    | 0.5339177    | 1            | 0.685769     | 1            | 0.7859435    |
| #### Bn-scaff_20376_1-p28160 A-genome specific (rapa only)      | not scorable | not scorable | not scorable | not scorable | 0.9917355    | 0.5282539    |
| #### Bn-scaff_20376_1-p33660 C-genome specific (napus-oleracea) | 0.9665072    | 0.7821231    | 1            | 0.7456253    | not scorable | not scorable |
| #### Bn-scaff_20376_1-p33911 napus specific                     | 0.9090909    | 0.7366813    | not scorable | not scorable | not scorable | not scorable |
| #### Bn-scaff_20376_1-p36132 C-genome specific (napus-oleracea) | 0.9832536    | 0.7488032    | 0.9379845    | 0.7643523    | not scorable | not scorable |
| #### Bn-scaff_20376_1-p36283 C-genome specific (napus-oleracea) | 0.9760765    | 0.7071024    | 0.7984496    | 0.8300651    | not scorable | not scorable |
| #### Bn-scaff_20376_1-p36305 C-genome specific (napus-oleracea) | 0.9760765    | 0.8042381    | 0.7751938    | 0.712704     | not scorable | not scorable |
| #### Bn-scaff_20428_1-p10680 genome unspecific (all in)         | 1            | 0.7184966    | 0.9612403    | 0.8476256    | 1            | 0.9239855    |
| #### Bn-scaff_20428_1-p13308 genome unspecific (all in)         | 0.9808612    | 0.3347886    | 1            | 0.8525301    | 1            | 0.7074033    |
| #### Bn-scaff_20428_1-p25605 C-genome specific (napus-oleracea) | 0.8732057    | 0.8425418    | 0.8139535    | 0.7932159    | not scorable | not scorable |
| #### Bn-scaff_20428_1-p28241 A-genome specific (rapa only)      | not scorable | not scorable | not scorable | not scorable | 0.9752066    | 0.836046     |
| #### Bn-scaff_20428_1-p28477 genome unspecific (oleracea-rapa)  | not scorable | not scorable | 1            | 0.7182324    | 0.8181818    | 0.8521643    |
| #### Bn-scaff_20428_1-p31266 C-genome specific (napus-oleracea) | 0.9138756    | 0.7475371    | 1            | 0.6709135    | not scorable | not scorable |
| #### Bn-scaff_20428_1-p32191 C-genome specific (napus-oleracea) | 0.9138756    | 0.7724515    | 0.9922481    | 0.8511479    | not scorable | not scorable |
| #### Bn-scaff_20428_1-p33383 genome unspecific (all in)         | 0.9832536    | 0.3016851    | 0.9922481    | 0.8599479    | 1            | 0.8859131    |

|                                                                |              |              |              |              |              |              |
|----------------------------------------------------------------|--------------|--------------|--------------|--------------|--------------|--------------|
| #### Bn-scaff_20428_1-p33402genome unspecific (oleracea-rapa)  | not scorable | not scorable | 1            | 0.7849478    | 1            | 0.8205731    |
| #### Bn-scaff_20428_1-p33886genome unspecific (all in)         | 0.9976076    | 0.6664035    | 0.9922481    | 0.7452213    | 1            | 0.9301208    |
| #### Bn-scaff_20428_1-p36065genome unspecific (oleracea-rapa)  | not scorable | not scorable | 0.9534883    | 0.2684846    | 0.9917355    | 0.7543368    |
| #### Bn-scaff_20428_1-p43094C-genome specific (napus-oleracea) | 0.9066986    | 0.7685465    | 0.9767442    | 0.6761439    | not scorable | not scorable |
| #### Bn-scaff_20428_1-p43111C-genome specific (napus-oleracea) | 0.8325359    | 0.7089261    | 0.9534883    | 0.7490168    | not scorable | not scorable |
| #### Bn-scaff_20452_1-p11488C-genome specific (napus-oleracea) | 0.9808612    | 0.7555363    | 1            | 0.8855912    | not scorable | not scorable |
| #### Bn-scaff_20452_1-p12737genome unspecific (all in)         | 0.9784689    | 0.2342653    | 1            | 0.3459342    | 0.9586777    | 0.5835949    |
| #### Bn-scaff_20452_1-p14645C-genome specific (napus-oleracea) | 0.9832536    | 0.593228     | 1            | 0.6390272    | not scorable | not scorable |
| #### Bn-scaff_20452_1-p20150genome unspecific (all in)         | 1            | 0.4351944    | 1            | 0.7258915    | 0.9834711    | 0.7610486    |
| #### Bn-scaff_20452_1-p20707C-genome specific (napus-oleracea) | 0.9856459    | 0.681948     | 1            | 0.6627809    | not scorable | not scorable |
| #### Bn-scaff_20452_1-p22707C-genome specific (napus-oleracea) | 0.9808612    | 0.7777475    | 0.8837209    | 0.728797     | not scorable | not scorable |
| #### Bn-scaff_20452_1-p23461C-genome specific (napus-oleracea) | 0.9760765    | 0.7750871    | 0.8837209    | 0.7270856    | not scorable | not scorable |
| #### Bn-scaff_20452_1-p23632C-genome specific (napus-oleracea) | 0.9760765    | 0.7640168    | 0.8837209    | 0.7686023    | not scorable | not scorable |
| #### Bn-scaff_20452_1-p27612C-genome specific (napus-oleracea) | 0.9784689    | 0.7647003    | 0.8837209    | 0.7802292    | not scorable | not scorable |
| #### Bn-scaff_20452_1-p28140C-genome specific (napus-oleracea) | 0.9832536    | 0.7180969    | 0.8837209    | 0.5927342    | not scorable | not scorable |
| #### Bn-scaff_20452_1-p28846C-genome specific (napus-oleracea) | 0.9736842    | 0.7882321    | 1            | 0.833157     | not scorable | not scorable |
| #### Bn-scaff_20452_1-p30649genome unspecific (all in)         | 0.9976076    | 0.6169784    | 1            | 0.525265     | 1            | 0.786476     |
| #### Bn-scaff_20452_1-p30791C-genome specific (napus-oleracea) | 0.9904306    | 0.8948667    | 0.9767442    | 0.719794     | not scorable | not scorable |
| #### Bn-scaff_20452_1-p33118genome unspecific (all in)         | 1            | 0.7155698    | 1            | 0.6120371    | 1            | 0.7373328    |
| #### Bn-scaff_20452_1-p38737C-genome specific (napus-oleracea) | 0.9832536    | 0.7353022    | 0.9689922    | 0.7548444    | not scorable | not scorable |
| #### Bn-scaff_20452_1-p38952A-genome specific (napus-rapa)     | 0.9928229    | 0.9020745    | not scorable | not scorable | 1            | 0.7660683    |
| #### Bn-scaff_20452_1-p40417C-genome specific (napus-oleracea) | 0.9712918    | 0.7413433    | 1            | 0.6905131    | not scorable | not scorable |
| #### Bn-scaff_20452_1-p40441C-genome specific (napus-oleracea) | 0.9904306    | 0.8224404    | 1            | 0.7245347    | not scorable | not scorable |
| #### Bn-scaff_20452_1-p42189C-genome specific (napus-oleracea) | 0.9832536    | 0.7455705    | 1            | 0.8704703    | not scorable | not scorable |
| #### Bn-scaff_20452_1-p82116C-genome specific (napus-oleracea) | 0.9808612    | 0.76512      | 1            | 0.8534176    | not scorable | not scorable |
| #### Bn-scaff_20452_1-p86850genome unspecific (all in)         | 0.9856459    | 0.3202703    | 1            | 0.6165801    | 1            | 0.8703091    |
| #### Bn-scaff_20455_1-p42268genome unspecific (all in)         | 0.9952153    | 0.2785522    | 0.9922481    | 0.3013548    | 1            | 0.864228     |
| #### Bn-scaff_20459_1-p12055genome unspecific (all in)         | 0.9976076    | 0.2178542    | 1            | 0.5804904    | 0.9586777    | 0.6435927    |
| #### Bn-scaff_20461_1-p11003C-genome specific (napus-oleracea) | 0.9928229    | 0.7677085    | 1            | 0.7102627    | not scorable | not scorable |
| #### Bn-scaff_20461_1-p11649C-genome specific (napus-oleracea) | 0.9808612    | 0.851411     | 0.7209302    | 0.8046269    | not scorable | not scorable |
| #### Bn-scaff_20461_1-p11958C-genome specific (napus-oleracea) | 0.9904306    | 0.7313721    | 0.9302326    | 0.7501154    | not scorable | not scorable |
| #### Bn-scaff_20461_1-p11981C-genome specific (napus-oleracea) | 0.9808612    | 0.7663039    | 0.7209302    | 0.8132364    | not scorable | not scorable |
| #### Bn-scaff_20461_1-p12123C-genome specific (napus-oleracea) | 0.9832536    | 0.7826685    | 0.9844961    | 0.687184     | not scorable | not scorable |

|                                                                 |              |              |              |              |              |              |
|-----------------------------------------------------------------|--------------|--------------|--------------|--------------|--------------|--------------|
| #### Bn-scaff_20461_1-p12158 C-genome specific (napus-oleracea) | 0.9808612    | 0.8249488    | 0.7131783    | 0.8782719    | not scorable | not scorable |
| #### Bn-scaff_20461_1-p12165 C-genome specific (napus-oleracea) | 0.9593301    | 0.6012743    | 0.6976744    | 0.7075291    | not scorable | not scorable |
| #### Bn-scaff_20461_1-p16789 C-genome specific (napus-oleracea) | 0.9904306    | 0.851225     | 1            | 0.7697529    | not scorable | not scorable |
| #### Bn-scaff_20461_1-p16932 napus specific                     | 0.9617225    | 0.7351127    | not scorable | not scorable | not scorable | not scorable |
| #### Bn-scaff_20461_1-p17003 C-genome specific (napus-oleracea) | 0.9712918    | 0.8147515    | 0.9147287    | 0.6863397    | not scorable | not scorable |
| #### Bn-scaff_20461_1-p17842 genome unspecific (all in)         | 0.9904306    | 0.3634513    | 1            | 0.8171189    | 1            | 0.8927839    |
| #### Bn-scaff_20461_1-p19965 C-genome specific (napus-oleracea) | 0.9880383    | 0.8062146    | 1            | 0.833666     | not scorable | not scorable |
| #### Bn-scaff_20461_1-p20864 C-genome specific (napus-oleracea) | 0.9880383    | 0.7945593    | 0.9922481    | 0.7216369    | not scorable | not scorable |
| #### Bn-scaff_20461_1-p21370 genome unspecific (all in)         | 1            | 0.6547505    | 1            | 0.6562352    | 1            | 0.6154503    |
| #### Bn-scaff_20461_1-p22020 C-genome specific (napus-oleracea) | 0.9856459    | 0.8084905    | 0.9922481    | 0.7871023    | not scorable | not scorable |
| #### Bn-scaff_20461_1-p22182 C-genome specific (napus-oleracea) | 0.9808612    | 0.6541916    | 1            | 0.6502638    | not scorable | not scorable |
| #### Bn-scaff_20461_1-p22854 C-genome specific (napus-oleracea) | 0.9880383    | 0.5898075    | 0.9922481    | 0.5829262    | not scorable | not scorable |
| #### Bn-scaff_20461_1-p23269 C-genome specific (napus-oleracea) | 0.9856459    | 0.8719155    | 1            | 0.688818     | not scorable | not scorable |
| #### Bn-scaff_20461_1-p23805 genome unspecific (all in)         | 0.9928229    | 0.3464394    | 1            | 0.5226799    | 1            | 0.9174947    |
| #### Bn-scaff_20461_1-p23821 genome unspecific (all in)         | 1            | 0.8490673    | 1            | 0.7308531    | 1            | 0.9393656    |
| #### Bn-scaff_20461_1-p23955 genome unspecific (all in)         | 0.8779904    | 0.2459628    | 0.9922481    | 0.3944405    | 1            | 0.8200019    |
| #### Bn-scaff_20461_1-p24997 C-genome specific (napus-oleracea) | 0.9904306    | 0.6279877    | 1            | 0.681004     | not scorable | not scorable |
| #### Bn-scaff_20461_1-p26340 C-genome specific (napus-oleracea) | 0.9880383    | 0.7919082    | 1            | 0.7256545    | not scorable | not scorable |
| #### Bn-scaff_20461_1-p27670 C-genome specific (napus-oleracea) | 0.9904306    | 0.8175144    | 1            | 0.8007197    | not scorable | not scorable |
| #### Bn-scaff_20461_1-p29032 genome unspecific (oleracea-rapa)  | not scorable | not scorable | 1            | 0.7850879    | 1            | 0.8950254    |
| #### Bn-scaff_20461_1-p31419 genome unspecific (all in)         | 0.9688995    | 0.3564573    | 1            | 0.7446374    | 1            | 0.9175813    |
| #### Bn-scaff_20461_1-p32176 C-genome specific (napus-oleracea) | 0.9545454    | 0.8893498    | 0.7829458    | 0.7232125    | not scorable | not scorable |
| #### Bn-scaff_20461_1-p32246 C-genome specific (napus-oleracea) | 0.9880383    | 0.8439299    | 0.9922481    | 0.7594709    | not scorable | not scorable |
| #### Bn-scaff_20461_1-p32493 genome unspecific (all in)         | 0.9976076    | 0.3179997    | 0.9922481    | 0.7951622    | 1            | 0.9272014    |
| #### Bn-scaff_20461_1-p50533 C-genome specific (napus-oleracea) | 0.9928229    | 0.7495788    | 0.9224806    | 0.4755429    | not scorable | not scorable |
| #### Bn-scaff_20461_1-p99520 C-genome specific (napus-oleracea) | 0.9880383    | 0.8019302    | 1            | 0.6990497    | not scorable | not scorable |
| #### Bn-scaff_20461_1-p99646 C-genome specific (napus-oleracea) | 0.9880383    | 0.6316309    | 0.9922481    | 0.5938137    | not scorable | not scorable |
| #### Bn-scaff_20462_1-p27589 C-genome specific (oleracea only)  | not scorable | not scorable | 0.751938     | 0.8894698    | not scorable | not scorable |
| #### Bn-scaff_20478_1-p10345 C-genome specific (napus-oleracea) | 0.9832536    | 0.7897417    | 1            | 0.8223078    | not scorable | not scorable |
| #### Bn-scaff_20478_1-p12330 C-genome specific (napus-oleracea) | 0.9808612    | 0.7616012    | 1            | 0.835702     | not scorable | not scorable |
| #### Bn-scaff_20478_1-p13510 C-genome specific (napus-oleracea) | 0.9760765    | 0.7754322    | 1            | 0.8064597    | not scorable | not scorable |
| #### Bn-scaff_20478_1-p14320 C-genome specific (napus-oleracea) | 0.9736842    | 0.7551547    | 1            | 0.7998551    | not scorable | not scorable |
| #### Bn-scaff_20478_1-p14331 C-genome specific (napus-oleracea) | 0.9736842    | 0.7735092    | 1            | 0.7731866    | not scorable | not scorable |



|                                                                |           |           |              |              |              |              |
|----------------------------------------------------------------|-----------|-----------|--------------|--------------|--------------|--------------|
| #### Bn-scaff_20478_1-p1437C-genome specific (napus-oleracea)  | 0.9856459 | 0.732784  | 1            | 0.7314312    | not scorable | not scorable |
| #### Bn-scaff_20478_1-p1439C-genome specific (napus-oleracea)  | 0.9760765 | 0.7022889 | 1            | 0.66085      | not scorable | not scorable |
| #### Bn-scaff_20478_1-p1442C-genome specific (napus-oleracea)  | 0.9736842 | 0.7547563 | 1            | 0.6744497    | not scorable | not scorable |
| #### Bn-scaff_20478_1-p14421C-genome specific (napus-oleracea) | 0.9545454 | 0.6074773 | 1            | 0.8003547    | not scorable | not scorable |
| #### Bn-scaff_20478_1-p1454C-genome specific (napus-oleracea)  | 0.9688995 | 0.5892607 | 1            | 0.6459275    | not scorable | not scorable |
| #### Bn-scaff_20478_1-p1459C-genome specific (napus-oleracea)  | 0.9665072 | 0.6613363 | 1            | 0.6846367    | not scorable | not scorable |
| #### Bn-scaff_20478_1-p1462C-genome specific (napus-oleracea)  | 0.9736842 | 0.7391835 | 1            | 0.7558536    | not scorable | not scorable |
| #### Bn-scaff_20478_1-p1493genome unspecific (all in)          | 0.9712918 | 0.3557673 | 1            | 0.7269011    | 1            | 0.8259937    |
| #### Bn-scaff_20478_1-p1499C-genome specific (napus-oleracea)  | 0.9784689 | 0.7723844 | 1            | 0.7283037    | not scorable | not scorable |
| #### Bn-scaff_20478_1-p33494napus specific                     | 0.8492823 | 0.8404303 | not scorable | not scorable | not scorable | not scorable |
| #### Bn-scaff_20478_1-p3539C-genome specific (napus-oleracea)  | 0.9784689 | 0.768021  | 1            | 0.716006     | not scorable | not scorable |
| #### Bn-scaff_20478_1-p35971C-genome specific (napus-oleracea) | 0.9808612 | 0.7678313 | 1            | 0.7266952    | not scorable | not scorable |
| #### Bn-scaff_20478_1-p3637C-genome specific (napus-oleracea)  | 0.9712918 | 0.7587152 | 1            | 0.7797557    | not scorable | not scorable |
| #### Bn-scaff_20478_1-p3676A-genome specific (napus-rapa)      | 0.9736842 | 0.5123838 | not scorable | not scorable | 0.9669421    | 0.8754072    |
| #### Bn-scaff_20478_1-p5443C-genome specific (napus-oleracea)  | 0.9521531 | 0.5645909 | 0.9922481    | 0.6928313    | not scorable | not scorable |
| #### Bn-scaff_20478_1-p6101C-genome specific (napus-oleracea)  | 0.9760765 | 0.7822011 | 1            | 0.8278177    | not scorable | not scorable |
| #### Bn-scaff_20478_1-p61364C-genome specific (napus-oleracea) | 0.9808612 | 0.7249166 | 1            | 0.6692157    | not scorable | not scorable |
| #### Bn-scaff_20478_1-p6328C-genome specific (napus-oleracea)  | 0.9736842 | 0.7760335 | 1            | 0.7700197    | not scorable | not scorable |
| #### Bn-scaff_20497_1-p1078C-genome specific (napus-oleracea)  | 0.9832536 | 0.665499  | 0.9147287    | 0.7756132    | not scorable | not scorable |
| #### Bn-scaff_20497_1-p1165genome unspecific (all in)          | 0.9712918 | 0.3791344 | 1            | 0.7175982    | 1            | 0.8948976    |
| #### Bn-scaff_20497_1-p1186C-genome specific (napus-oleracea)  | 0.9904306 | 0.7608854 | 1            | 0.7344964    | not scorable | not scorable |
| #### Bn-scaff_20497_1-p3613C-genome specific (napus-oleracea)  | 0.9760765 | 0.7935303 | 0.9689922    | 0.7560967    | not scorable | not scorable |
| #### Bn-scaff_20497_1-p3759C-genome specific (napus-oleracea)  | 0.9856459 | 0.704466  | 0.9922481    | 0.7527875    | not scorable | not scorable |
| #### Bn-scaff_20497_1-p3906C-genome specific (napus-oleracea)  | 0.9904306 | 0.7135608 | 0.9922481    | 0.7597178    | not scorable | not scorable |
| #### Bn-scaff_20497_1-p4369C-genome specific (napus-oleracea)  | 0.9952153 | 0.8068477 | 1            | 0.7691673    | not scorable | not scorable |
| #### Bn-scaff_20497_1-p5093A-genome specific (napus-rapa)      | 0.9712918 | 0.6734718 | not scorable | not scorable | 0.9504132    | 0.7146574    |
| #### Bn-scaff_20497_1-p6701C-genome specific (napus-oleracea)  | 0.9832536 | 0.7379335 | not scorable | not scorable | not scorable | not scorable |
| #### Bn-scaff_20497_1-p7159C-genome specific (napus-oleracea)  | 0.9856459 | 0.7964836 | 1            | 0.7678847    | not scorable | not scorable |
| #### Bn-scaff_20497_1-p7175C-genome specific (napus-oleracea)  | 0.9904306 | 0.7294095 | 0.9844961    | 0.7004576    | not scorable | not scorable |
| #### Bn-scaff_20497_1-p8995C-genome specific (napus-oleracea)  | 0.9952153 | 0.6718945 | 0.9612403    | 0.7768509    | not scorable | not scorable |
| #### Bn-scaff_20497_1-p9000genome unspecific (all in)          | 0.9665072 | 0.5611444 | 0.9689922    | 0.6647103    | 1            | 0.8957006    |
| #### Bn-scaff_20497_1-p9107C-genome specific (napus-oleracea)  | 0.9904306 | 0.6811628 | 1            | 0.6531529    | not scorable | not scorable |
| #### Bn-scaff_20497_1-p9546C-genome specific (napus-oleracea)  | 0.9880383 | 0.7179182 | 1            | 0.6887488    | not scorable | not scorable |

|                                                                 |           |           |           |           |              |              |
|-----------------------------------------------------------------|-----------|-----------|-----------|-----------|--------------|--------------|
| #### Bn-scaff_20530_1-p15477 C-genome specific (napus-oleracea) | 0.9928229 | 0.8392233 | 1         | 0.8388436 | not scorable | not scorable |
| #### Bn-scaff_20554_1-p57885 C-genome specific (napus-oleracea) | 0.9066986 | 0.6894885 | 1         | 0.7745105 | not scorable | not scorable |
| #### Bn-scaff_20563_1-p11145 C-genome specific (napus-oleracea) | 0.9760765 | 0.8031524 | 1         | 0.8387043 | not scorable | not scorable |
| #### Bn-scaff_20563_1-p1200 C-genome specific (napus-oleracea)  | 0.9904306 | 0.7018343 | 0.9922481 | 0.697707  | not scorable | not scorable |
| #### Bn-scaff_20563_1-p1677 C-genome specific (napus-oleracea)  | 0.9952153 | 0.7980432 | 1         | 0.8126617 | not scorable | not scorable |
| #### Bn-scaff_20563_1-p778 C-genome specific (napus-oleracea)   | 0.9904306 | 0.7324933 | 1         | 0.6545361 | not scorable | not scorable |
| #### Bn-scaff_20567_1-p23471 C-genome specific (napus-oleracea) | 0.9736842 | 0.6720017 | 0.9844961 | 0.6696985 | not scorable | not scorable |
| #### Bn-scaff_20567_1-p23528 C-genome specific (napus-oleracea) | 0.9952153 | 0.7195644 | 1         | 0.7504022 | not scorable | not scorable |
| #### Bn-scaff_20567_1-p32030 genome unspecific (all in)         | 0.9976076 | 0.7007138 | 1         | 0.5743144 | 1            | 0.7494321    |
| #### Bn-scaff_20567_1-p32722 C-genome specific (napus-oleracea) | 0.9736842 | 0.3397688 | 1         | 0.5145356 | not scorable | not scorable |
| #### Bn-scaff_20567_1-p33697 C-genome specific (napus-oleracea) | 0.9832536 | 0.7297251 | 0.9922481 | 0.6982762 | not scorable | not scorable |
| #### Bn-scaff_20567_1-p34703 C-genome specific (napus-oleracea) | 0.9832536 | 0.7783666 | 0.9922481 | 0.7287681 | not scorable | not scorable |
| #### Bn-scaff_20567_1-p35836 C-genome specific (napus-oleracea) | 0.9832536 | 0.500605  | 0.9844961 | 0.6225592 | not scorable | not scorable |
| #### Bn-scaff_20567_1-p64644 C-genome specific (napus-oleracea) | 0.9808612 | 0.3884585 | 0.9922481 | 0.5325026 | not scorable | not scorable |
| #### Bn-scaff_20567_1-p65677 C-genome specific (napus-oleracea) | 0.9832536 | 0.7781138 | 1         | 0.6820064 | not scorable | not scorable |
| #### Bn-scaff_20567_1-p68192 C-genome specific (napus-oleracea) | 0.9473684 | 0.6818191 | 0.9767442 | 0.7875881 | not scorable | not scorable |
| #### Bn-scaff_20567_1-p68406 C-genome specific (napus-oleracea) | 0.9856459 | 0.767096  | 0.9689922 | 0.7209285 | not scorable | not scorable |
| #### Bn-scaff_20571_1-p10192 genome unspecific (all in)         | 1         | 0.6907756 | 1         | 0.6746545 | 1            | 0.6370028    |
| #### Bn-scaff_20589_1-p19844 C-genome specific (napus-oleracea) | 0.9784689 | 0.7582259 | 1         | 0.665565  | not scorable | not scorable |
| #### Bn-scaff_20619_1-p11287 C-genome specific (napus-oleracea) | 0.9904306 | 0.7562369 | 0.9844961 | 0.7098562 | not scorable | not scorable |
| #### Bn-scaff_20619_1-p13477 C-genome specific (napus-oleracea) | 0.9856459 | 0.7750174 | 1         | 0.7459687 | not scorable | not scorable |
| #### Bn-scaff_20619_1-p13600 C-genome specific (napus-oleracea) | 0.9880383 | 0.7056473 | 0.9844961 | 0.7573579 | not scorable | not scorable |
| #### Bn-scaff_20619_1-p13610 C-genome specific (napus-oleracea) | 0.9880383 | 0.7741914 | 0.9844961 | 0.8476815 | not scorable | not scorable |
| #### Bn-scaff_20619_1-p13722 C-genome specific (napus-oleracea) | 0.9976076 | 0.7655221 | 1         | 0.8883853 | not scorable | not scorable |
| #### Bn-scaff_20619_1-p14476 C-genome specific (napus-oleracea) | 0.9760765 | 0.7505924 | 1         | 0.8200977 | not scorable | not scorable |
| #### Bn-scaff_20619_1-p15609 C-genome specific (napus-oleracea) | 0.9856459 | 0.7770742 | 0.9922481 | 0.8786372 | not scorable | not scorable |
| #### Bn-scaff_20619_1-p15797 C-genome specific (napus-oleracea) | 0.9856459 | 0.7523403 | 1         | 0.7943537 | not scorable | not scorable |
| #### Bn-scaff_20619_1-p15927 C-genome specific (napus-oleracea) | 0.9880383 | 0.7563117 | 0.9922481 | 0.8467761 | not scorable | not scorable |
| #### Bn-scaff_20619_1-p16415 C-genome specific (napus-oleracea) | 0.9952153 | 0.7927728 | 0.9922481 | 0.8138363 | not scorable | not scorable |
| #### Bn-scaff_20619_1-p16688 C-genome specific (napus-oleracea) | 0.9784689 | 0.581996  | 0.9922481 | 0.591882  | not scorable | not scorable |
| #### Bn-scaff_20619_1-p16746 C-genome specific (napus-oleracea) | 0.9880383 | 0.775014  | 1         | 0.8129637 | not scorable | not scorable |
| #### Bn-scaff_20619_1-p16760 C-genome specific (napus-oleracea) | 0.9880383 | 0.7629272 | 1         | 0.6683677 | not scorable | not scorable |
| #### Bn-scaff_20619_1-p16764 C-genome specific (napus-oleracea) | 0.9832536 | 0.7741647 | 1         | 0.7587156 | not scorable | not scorable |

|                                                                  |           |           |           |           |              |              |
|------------------------------------------------------------------|-----------|-----------|-----------|-----------|--------------|--------------|
| ##### Bn-scaff_20619_1-p16788 C-genome specific (napus-oleracea) | 0.9808612 | 0.7502373 | 0.9844961 | 0.6789412 | not scorable | not scorable |
| ##### Bn-scaff_20619_1-p16868 C-genome specific (napus-oleracea) | 0.9688995 | 0.606396  | 1         | 0.6010432 | not scorable | not scorable |
| ##### Bn-scaff_20619_1-p16909 C-genome specific (napus-oleracea) | 0.9880383 | 0.7709581 | 0.9844961 | 0.7599983 | not scorable | not scorable |
| ##### Bn-scaff_20619_1-p17156 C-genome specific (napus-oleracea) | 0.9712918 | 0.7332226 | 0.9689922 | 0.8076823 | not scorable | not scorable |
| ##### Bn-scaff_20619_1-p20300 C-genome specific (napus-oleracea) | 0.9904306 | 0.6792815 | 0.9767442 | 0.5755882 | not scorable | not scorable |
| ##### Bn-scaff_20619_1-p21047 genome unspecific (all in)         | 1         | 0.8135551 | 1         | 0.7131979 | 1            | 0.8114662    |
| ##### Bn-scaff_20619_1-p21059 genome unspecific (all in)         | 0.9784689 | 0.2773487 | 0.9844961 | 0.8511947 | 1            | 0.8595544    |
| ##### Bn-scaff_20619_1-p21127 genome unspecific (all in)         | 0.9665072 | 0.486201  | 1         | 0.6733475 | 1            | 0.8907545    |
| ##### Bn-scaff_20619_1-p21128 C-genome specific (napus-oleracea) | 0.9808612 | 0.7600651 | 0.9844961 | 0.6741078 | not scorable | not scorable |
| ##### Bn-scaff_20619_1-p21235 genome unspecific (all in)         | 0.9808612 | 0.5372402 | 1         | 0.6764546 | 1            | 0.8815182    |
| ##### Bn-scaff_20619_1-p21244 C-genome specific (napus-oleracea) | 0.9832536 | 0.4508423 | 1         | 0.5616689 | not scorable | not scorable |
| ##### Bn-scaff_20619_1-p23126 C-genome specific (napus-oleracea) | 0.9808612 | 0.7490708 | 0.9922481 | 0.7183613 | not scorable | not scorable |
| ##### Bn-scaff_20619_1-p23273 C-genome specific (napus-oleracea) | 0.9856459 | 0.8065329 | 0.9922481 | 0.8137041 | not scorable | not scorable |
| ##### Bn-scaff_20619_1-p23452 C-genome specific (napus-oleracea) | 0.9808612 | 0.6886834 | 1         | 0.6673638 | not scorable | not scorable |
| ##### Bn-scaff_20619_1-p23480 C-genome specific (napus-oleracea) | 0.9808612 | 0.7821648 | 0.9767442 | 0.8224843 | not scorable | not scorable |
| ##### Bn-scaff_20619_1-p23516 C-genome specific (napus-oleracea) | 0.9904306 | 0.7706444 | 0.9844961 | 0.8231627 | not scorable | not scorable |
| ##### Bn-scaff_20619_1-p23861 C-genome specific (napus-oleracea) | 0.9808612 | 0.7777029 | 1         | 0.7392781 | not scorable | not scorable |
| ##### Bn-scaff_20619_1-p24731 C-genome specific (napus-oleracea) | 0.9832536 | 0.7308912 | 1         | 0.8559834 | not scorable | not scorable |
| ##### Bn-scaff_20619_1-p30693 genome unspecific (all in)         | 0.9712918 | 0.4395901 | 0.9922481 | 0.602504  | 1            | 0.7954443    |
| ##### Bn-scaff_20619_1-p31604 genome unspecific (all in)         | 0.9904306 | 0.3907925 | 1         | 0.8837006 | 0.9917355    | 0.7276528    |
| ##### Bn-scaff_20619_1-p34402 C-genome specific (napus-oleracea) | 0.9976076 | 0.7206841 | 0.9767442 | 0.7878034 | not scorable | not scorable |
| ##### Bn-scaff_20619_1-p41993 C-genome specific (napus-oleracea) | 0.9904306 | 0.7407045 | 1         | 0.8683004 | not scorable | not scorable |
| ##### Bn-scaff_20619_1-p45114 C-genome specific (napus-oleracea) | 0.9736842 | 0.7759134 | 0.9457364 | 0.8132531 | not scorable | not scorable |
| ##### Bn-scaff_20619_1-p45673 C-genome specific (napus-oleracea) | 0.9760765 | 0.6838872 | 1         | 0.7622696 | not scorable | not scorable |
| ##### Bn-scaff_20619_1-p45705 C-genome specific (napus-oleracea) | 0.9784689 | 0.6750175 | 1         | 0.6414041 | not scorable | not scorable |
| ##### Bn-scaff_20619_1-p46305 C-genome specific (napus-oleracea) | 0.9904306 | 0.7232693 | 0.9767442 | 0.8213136 | not scorable | not scorable |
| ##### Bn-scaff_20619_1-p46720 C-genome specific (napus-oleracea) | 1         | 0.5445434 | 1         | 0.5859422 | not scorable | not scorable |
| ##### Bn-scaff_20619_1-p48906 genome unspecific (all in)         | 1         | 0.6039654 | 1         | 0.5293466 | 1            | 0.908039     |
| ##### Bn-scaff_20619_1-p48981 genome unspecific (all in)         | 1         | 0.6963184 | 1         | 0.5700902 | 1            | 0.9251214    |
| ##### Bn-scaff_20619_1-p52076 C-genome specific (napus-oleracea) | 0.9928229 | 0.8033288 | 1         | 0.7972738 | not scorable | not scorable |
| ##### Bn-scaff_20619_1-p52397 genome unspecific (all in)         | 0.9904306 | 0.3770735 | 0.9844961 | 0.8217285 | 1            | 0.8155727    |
| ##### Bn-scaff_20619_1-p52801 C-genome specific (napus-oleracea) | 0.9736842 | 0.7099069 | 0.9457364 | 0.8370768 | not scorable | not scorable |
| ##### Bn-scaff_20619_1-p53299 C-genome specific (napus-oleracea) | 0.9760765 | 0.2504514 | 1         | 0.4455086 | not scorable | not scorable |

|                                                                 |              |              |              |              |              |              |
|-----------------------------------------------------------------|--------------|--------------|--------------|--------------|--------------|--------------|
| #### Bn-scaff_20619_1-p5361 genome unspecific (all in)          | 0.9808612    | 0.4353015    | 0.9922481    | 0.7558808    | 0.9834711    | 0.7235711    |
| #### Bn-scaff_20619_1-p5668 C-genome specific (napus-oleracea)  | 0.9665072    | 0.7287261    | 0.9844961    | 0.7491269    | not scorable | not scorable |
| #### Bn-scaff_20619_1-p5831 genome unspecific (all in)          | 0.9856459    | 0.3561478    | 1            | 0.8095319    | 0.9834711    | 0.7977687    |
| #### Bn-scaff_20619_1-p6937 C-genome specific (napus-oleracea)  | 1            | 0.6938925    | 1            | 0.7176846    | not scorable | not scorable |
| #### Bn-scaff_20619_1-p8449 C-genome specific (oleracea only)   | not scorable | not scorable | 0.9844961    | 0.8726963    | not scorable | not scorable |
| #### Bn-scaff_20638_1-p1163 genome unspecific (all in)          | 1            | 0.3528903    | 0.9457364    | 0.720049     | 0.9834711    | 0.8592275    |
| #### Bn-scaff_20638_1-p1165 C-genome specific (napus-oleracea)  | 0.9904306    | 0.6674224    | 0.9922481    | 0.6594964    | not scorable | not scorable |
| #### Bn-scaff_20638_1-p1423 genome unspecific (all in)          | 0.9808612    | 0.3483972    | 1            | 0.7897928    | 0.9834711    | 0.7683533    |
| #### Bn-scaff_20638_1-p1507 C-genome specific (napus-oleracea)  | 0.9808612    | 0.6636746    | 1            | 0.6802276    | not scorable | not scorable |
| #### Bn-scaff_20638_1-p8241 genome unspecific (all in)          | 0.9904306    | 0.3749639    | 0.9844961    | 0.6955292    | 1            | 0.9175813    |
| #### Bn-scaff_20640_1-p2483 genome unspecific (oleracea-rapa)   | not scorable | not scorable | 1            | 0.8159453    | 0.9669421    | 0.8563172    |
| #### Bn-scaff_20640_1-p34337 all not scorable                   | not scorable | not scorable | not scorable | not scorable | not scorable | not scorable |
| #### Bn-scaff_20646_1-p10294 C-genome specific (napus-oleracea) | 0.9856459    | 0.7836804    | 0.9767442    | 0.6910633    | not scorable | not scorable |
| #### Bn-scaff_20646_1-p1065 genome unspecific (all in)          | 0.9880383    | 0.364842     | 0.9922481    | 0.7270966    | 1            | 0.8194607    |
| #### Bn-scaff_20646_1-p1066 genome unspecific (all in)          | 0.9904306    | 0.7090956    | 0.9922481    | 0.7777083    | 1            | 0.9174342    |
| #### Bn-scaff_20646_1-p10752 C-genome specific (napus-oleracea) | 0.9832536    | 0.7737154    | 1            | 0.7088416    | not scorable | not scorable |
| #### Bn-scaff_20646_1-p1077 genome unspecific (all in)          | 0.9760765    | 0.2774049    | 1            | 0.6912393    | 1            | 0.9175245    |
| #### Bn-scaff_20646_1-p1111 genome unspecific (all in)          | 0.9976076    | 0.2479621    | 1            | 0.7352229    | 1            | 0.9175813    |
| #### Bn-scaff_20646_1-p12491 all not scorable                   | not scorable | not scorable | not scorable | not scorable | not scorable | not scorable |
| #### Bn-scaff_20646_1-p1254 genome unspecific (all in)          | 0.9928229    | 0.3699895    | 0.9922481    | 0.7761899    | 1            | 0.9175813    |
| #### Bn-scaff_20646_1-p13282 genome unspecific (all in)         | 0.9808612    | 0.265126     | 1            | 0.6743946    | 1            | 0.785809     |
| #### Bn-scaff_20646_1-p1386 genome unspecific (all in)          | 0.9736842    | 0.5291221    | 0.9922481    | 0.6975864    | 1            | 0.9508494    |
| #### Bn-scaff_20646_1-p1442 C-genome specific (napus-oleracea)  | 0.9784689    | 0.7936302    | 0.9922481    | 0.5411828    | not scorable | not scorable |
| #### Bn-scaff_20646_1-p1444 C-genome specific (napus-oleracea)  | 0.9904306    | 0.7179371    | 0.9844961    | 0.6330527    | not scorable | not scorable |
| #### Bn-scaff_20646_1-p1444 C-genome specific (napus-oleracea)  | 0.9688995    | 0.6534204    | 0.9922481    | 0.8068079    | not scorable | not scorable |
| #### Bn-scaff_20646_1-p17104 C-genome specific (napus-oleracea) | 0.9808612    | 0.8067622    | 0.9922481    | 0.8311912    | not scorable | not scorable |
| #### Bn-scaff_20646_1-p1826 genome unspecific (all in)          | 0.9832536    | 0.4325648    | 0.9922481    | 0.7073357    | 1            | 0.9426574    |
| #### Bn-scaff_20646_1-p2072 C-genome specific (napus-oleracea)  | 0.9617225    | 0.701037     | 0.9922481    | 0.7534304    | not scorable | not scorable |
| #### Bn-scaff_20646_1-p2080 C-genome specific (napus-oleracea)  | 0.9784689    | 0.7867293    | 0.9302326    | 0.7253093    | not scorable | not scorable |
| #### Bn-scaff_20646_1-p2103 C-genome specific (napus-oleracea)  | 0.9976076    | 0.7840276    | 0.9457364    | 0.7808188    | not scorable | not scorable |
| #### Bn-scaff_20646_1-p21867 C-genome specific (napus-oleracea) | 0.9856459    | 0.7916409    | 0.9922481    | 0.7648808    | not scorable | not scorable |
| #### Bn-scaff_20646_1-p2187 all not scorable                    | not scorable | not scorable | not scorable | not scorable | not scorable | not scorable |
| #### Bn-scaff_20646_1-p2254 C-genome specific (napus-oleracea)  | 0.9808612    | 0.7715257    | 0.8527132    | 0.7809191    | not scorable | not scorable |

|                                                                 |           |           |           |           |              |              |
|-----------------------------------------------------------------|-----------|-----------|-----------|-----------|--------------|--------------|
| #### Bn-scaff_20646_1-p22651 C-genome specific (napus-oleracea) | 0.9928229 | 0.718069  | 0.8372093 | 0.6668433 | not scorable | not scorable |
| #### Bn-scaff_20646_1-p22662 C-genome specific (napus-oleracea) | 0.9856459 | 0.805602  | 0.8604651 | 0.7525675 | not scorable | not scorable |
| #### Bn-scaff_20646_1-p22685 C-genome specific (napus-oleracea) | 0.9832536 | 0.7512371 | 0.8604651 | 0.6750746 | not scorable | not scorable |
| #### Bn-scaff_20646_1-p22690 C-genome specific (napus-oleracea) | 0.9808612 | 0.7448484 | 0.8527132 | 0.7257054 | not scorable | not scorable |
| #### Bn-scaff_20646_1-p23796 C-genome specific (napus-oleracea) | 0.9784689 | 0.7765799 | 0.8449612 | 0.9373511 | not scorable | not scorable |
| #### Bn-scaff_20646_1-p23838 C-genome specific (napus-oleracea) | 0.9641148 | 0.6551712 | 0.9844961 | 0.6358662 | not scorable | not scorable |
| #### Bn-scaff_20646_1-p23867 C-genome specific (napus-oleracea) | 0.9688995 | 0.7678121 | 0.8139535 | 0.7200373 | not scorable | not scorable |
| #### Bn-scaff_20646_1-p24172 C-genome specific (napus-oleracea) | 0.9808612 | 0.7726803 | 0.8527132 | 0.7939941 | not scorable | not scorable |
| #### Bn-scaff_20646_1-p24621 C-genome specific (napus-oleracea) | 0.9641148 | 0.6924579 | 0.8449612 | 0.6002924 | not scorable | not scorable |
| #### Bn-scaff_20646_1-p24697 C-genome specific (napus-oleracea) | 0.9593301 | 0.73545   | 0.8449612 | 0.7952163 | not scorable | not scorable |
| #### Bn-scaff_20646_1-p24783 C-genome specific (napus-oleracea) | 0.9808612 | 0.7660028 | 0.8527132 | 0.7798546 | not scorable | not scorable |
| #### Bn-scaff_20646_1-p24785 C-genome specific (napus-oleracea) | 0.9665072 | 0.7254027 | 0.8527132 | 0.7953582 | not scorable | not scorable |
| #### Bn-scaff_20646_1-p24807 C-genome specific (napus-oleracea) | 0.9856459 | 0.7840836 | 0.8604651 | 0.8912894 | not scorable | not scorable |
| #### Bn-scaff_20646_1-p25284 genome unspecific (all in)         | 0.930622  | 0.5548218 | 0.8992248 | 0.5712703 | 1            | 0.9374999    |
| #### Bn-scaff_20646_1-p25289 genome unspecific (all in)         | 0.8947368 | 0.6163635 | 0.9922481 | 0.4899164 | 1            | 0.9333225    |
| #### Bn-scaff_20646_1-p25744 C-genome specific (napus-oleracea) | 0.9736842 | 0.7363731 | 0.8294573 | 0.7454044 | not scorable | not scorable |
| #### Bn-scaff_20646_1-p26406 C-genome specific (napus-oleracea) | 0.9760765 | 0.6874363 | 0.8062016 | 0.7453101 | not scorable | not scorable |
| #### Bn-scaff_20646_1-p27505 C-genome specific (napus-oleracea) | 0.9784689 | 0.6938092 | 0.9844961 | 0.6779687 | not scorable | not scorable |
| #### Bn-scaff_20646_1-p27700 C-genome specific (napus-oleracea) | 0.9832536 | 0.515938  | 1         | 0.6596369 | not scorable | not scorable |
| #### Bn-scaff_20646_1-p29057 C-genome specific (napus-oleracea) | 0.9976076 | 0.8438708 | 1         | 0.8110649 | not scorable | not scorable |
| #### Bn-scaff_20646_1-p29273 C-genome specific (napus-oleracea) | 0.9904306 | 0.6689908 | 0.9844961 | 0.7751093 | not scorable | not scorable |
| #### Bn-scaff_20646_1-p29323 C-genome specific (napus-oleracea) | 0.9760765 | 0.541608  | 0.9922481 | 0.8139626 | not scorable | not scorable |
| #### Bn-scaff_20646_1-p29357 C-genome specific (napus-oleracea) | 0.9904306 | 0.7499809 | 0.9922481 | 0.758327  | not scorable | not scorable |
| #### Bn-scaff_20646_1-p29771 C-genome specific (napus-oleracea) | 0.9928229 | 0.810416  | 0.9844961 | 0.8097031 | not scorable | not scorable |
| #### Bn-scaff_20646_1-p29977 C-genome specific (napus-oleracea) | 0.9904306 | 0.6783887 | 0.9844961 | 0.7732969 | not scorable | not scorable |
| #### Bn-scaff_20646_1-p29989 genome unspecific (all in)         | 0.9856459 | 0.4091394 | 1         | 0.6919649 | 1            | 0.8813809    |
| #### Bn-scaff_20646_1-p30008 C-genome specific (napus-oleracea) | 0.9808612 | 0.5879483 | 1         | 0.7574841 | not scorable | not scorable |
| #### Bn-scaff_20646_1-p30027 C-genome specific (napus-oleracea) | 0.9784689 | 0.7784725 | 0.9922481 | 0.7882232 | not scorable | not scorable |
| #### Bn-scaff_20646_1-p30953 C-genome specific (napus-oleracea) | 0.9952153 | 0.7226013 | 0.9844961 | 0.7591431 | not scorable | not scorable |
| #### Bn-scaff_20646_1-p31286 C-genome specific (napus-oleracea) | 0.9736842 | 0.7492878 | 0.9844961 | 0.8368075 | not scorable | not scorable |
| #### Bn-scaff_20646_1-p31766 genome unspecific (all in)         | 0.9856459 | 0.2197572 | 0.9534883 | 0.3282382 | 1            | 0.8236241    |
| #### Bn-scaff_20646_1-p34886 C-genome specific (napus-oleracea) | 0.9880383 | 0.7344852 | 1         | 0.8255409 | not scorable | not scorable |
| #### Bn-scaff_20646_1-p35855 C-genome specific (napus-oleracea) | 0.9880383 | 0.7000757 | 0.9922481 | 0.7887527 | not scorable | not scorable |

|                                                                  |              |              |              |              |              |              |
|------------------------------------------------------------------|--------------|--------------|--------------|--------------|--------------|--------------|
| ##### Bn-scaff_20646_1-p37745 C-genome specific (napus-oleracea) | 0.9856459    | 0.7159622    | 0.9767442    | 0.6276183    | not scorable | not scorable |
| ##### Bn-scaff_20646_1-p37760 C-genome specific (napus-oleracea) | 0.9928229    | 0.7958735    | 1            | 0.7567309    | not scorable | not scorable |
| ##### Bn-scaff_20646_1-p37857 C-genome specific (napus-oleracea) | 0.9760765    | 0.4125712    | 1            | 0.7052004    | not scorable | not scorable |
| ##### Bn-scaff_20646_1-p37870 C-genome specific (napus-oleracea) | 0.9880383    | 0.3547903    | 0.9689922    | 0.4044134    | not scorable | not scorable |
| ##### Bn-scaff_20646_1-p39249 genome unspecific (all in)         | 0.9832536    | 0.2701864    | 0.9922481    | 0.8185979    | 1            | 0.9007645    |
| ##### Bn-scaff_20646_1-p39734 C-genome specific (napus-oleracea) | 0.9760765    | 0.7807193    | 1            | 0.6933912    | not scorable | not scorable |
| ##### Bn-scaff_20646_1-p41601 C-genome specific (napus-oleracea) | 0.9760765    | 0.7493012    | 0.9534883    | 0.7470096    | not scorable | not scorable |
| ##### Bn-scaff_20646_1-p42150 all not scorable                   | not scorable | not scorable | not scorable | not scorable | not scorable | not scorable |
| ##### Bn-scaff_20646_1-p42214 C-genome specific (napus-oleracea) | 0.9712918    | 0.7833348    | 1            | 0.7840974    | not scorable | not scorable |
| ##### Bn-scaff_20646_1-p42612 C-genome specific (napus-oleracea) | 0.9832536    | 0.3803496    | 1            | 0.7475363    | not scorable | not scorable |
| ##### Bn-scaff_20646_1-p42647 C-genome specific (napus-oleracea) | 0.9904306    | 0.7430649    | 1            | 0.7327852    | not scorable | not scorable |
| ##### Bn-scaff_20646_1-p42658 C-genome specific (napus-oleracea) | 0.9808612    | 0.6483416    | 1            | 0.6283956    | not scorable | not scorable |
| ##### Bn-scaff_20646_1-p42741 C-genome specific (napus-oleracea) | 0.9688995    | 0.7274482    | 0.9922481    | 0.6453362    | not scorable | not scorable |
| ##### Bn-scaff_20646_1-p42747 C-genome specific (napus-oleracea) | 0.9712918    | 0.6817999    | 0.9922481    | 0.7303068    | not scorable | not scorable |
| ##### Bn-scaff_20646_1-p42938 C-genome specific (napus-oleracea) | 0.9880383    | 0.7442474    | 1            | 0.6768451    | not scorable | not scorable |
| ##### Bn-scaff_20646_1-p43129 C-genome specific (napus-oleracea) | 0.9760765    | 0.741263     | 1            | 0.7504521    | not scorable | not scorable |
| ##### Bn-scaff_20646_1-p43222 C-genome specific (napus-oleracea) | 0.9784689    | 0.748126     | 1            | 0.7778986    | not scorable | not scorable |
| ##### Bn-scaff_20646_1-p43794 C-genome specific (napus-oleracea) | 0.9928229    | 0.7776801    | 1            | 0.8128836    | not scorable | not scorable |
| ##### Bn-scaff_20646_1-p46389 C-genome specific (napus-oleracea) | 0.9641148    | 0.7064801    | 0.9147287    | 0.7172675    | not scorable | not scorable |
| ##### Bn-scaff_20646_1-p46402 C-genome specific (napus-oleracea) | 0.9138756    | 0.7123927    | 0.9922481    | 0.6437094    | not scorable | not scorable |
| ##### Bn-scaff_20646_1-p47093 C-genome specific (napus-oleracea) | 0.9784689    | 0.7183467    | 0.9457364    | 0.7770321    | not scorable | not scorable |
| ##### Bn-scaff_20646_1-p47104 C-genome specific (napus-oleracea) | 0.9832536    | 0.7628904    | 0.9302326    | 0.7634739    | not scorable | not scorable |
| ##### Bn-scaff_20646_1-p47131 C-genome specific (napus-oleracea) | 0.9784689    | 0.7737412    | 0.9379845    | 0.7898833    | not scorable | not scorable |
| ##### Bn-scaff_20646_1-p47183 C-genome specific (napus-oleracea) | 0.9784689    | 0.7457513    | 0.9457364    | 0.6587098    | not scorable | not scorable |
| ##### Bn-scaff_20646_1-p47249 C-genome specific (napus-oleracea) | 0.8947368    | 0.7291258    | 0.9224806    | 0.7529803    | not scorable | not scorable |
| ##### Bn-scaff_20646_1-p48932 C-genome specific (napus-oleracea) | 0.9784689    | 0.7852985    | 1            | 0.6729827    | not scorable | not scorable |
| ##### Bn-scaff_20646_1-p49238 C-genome specific (napus-oleracea) | 0.9688995    | 0.6809624    | 0.9922481    | 0.7417953    | not scorable | not scorable |
| ##### Bn-scaff_20646_1-p49428 C-genome specific (napus-oleracea) | 0.9808612    | 0.7910758    | 1            | 0.7308161    | not scorable | not scorable |
| ##### Bn-scaff_20646_1-p49503 genome unspecific (all in)         | 0.9832536    | 0.2452838    | 1            | 0.6892446    | 1            | 0.905828     |
| ##### Bn-scaff_20646_1-p49839 genome unspecific (all in)         | 0.9904306    | 0.3924793    | 1            | 0.7142209    | 1            | 0.8574906    |
| ##### Bn-scaff_20646_1-p54396 C-genome specific (napus-oleracea) | 0.9928229    | 0.7935396    | 0.9302326    | 0.7716336    | not scorable | not scorable |
| ##### Bn-scaff_20646_1-p56434 C-genome specific (napus-oleracea) | 0.9760765    | 0.7756068    | 0.9922481    | 0.654407     | not scorable | not scorable |
| ##### Bn-scaff_20646_1-p58031 C-genome specific (napus-oleracea) | 1            | 0.5576342    | 1            | 0.5348043    | not scorable | not scorable |

|                                                                 |           |           |           |           |              |              |
|-----------------------------------------------------------------|-----------|-----------|-----------|-----------|--------------|--------------|
| #### Bn-scaff_20646_1-p58392 C-genome specific (napus-oleracea) | 0.9928229 | 0.745531  | 0.9922481 | 0.6843472 | not scorable | not scorable |
| #### Bn-scaff_20646_1-p58449 C-genome specific (napus-oleracea) | 0.9880383 | 0.7767949 | 1         | 0.7624744 | not scorable | not scorable |
| #### Bn-scaff_20646_1-p58600 C-genome specific (napus-oleracea) | 0.9784689 | 0.7442841 | 1         | 0.6844181 | not scorable | not scorable |
| #### Bn-scaff_20646_1-p58659 C-genome specific (napus-oleracea) | 0.9545454 | 0.4492728 | 1         | 0.6509013 | not scorable | not scorable |
| #### Bn-scaff_20646_1-p58692 C-genome specific (napus-oleracea) | 0.9904306 | 0.795492  | 1         | 0.6705694 | not scorable | not scorable |
| #### Bn-scaff_20646_1-p59750 C-genome specific (napus-oleracea) | 0.9808612 | 0.6447164 | 0.9767442 | 0.7506737 | not scorable | not scorable |
| #### Bn-scaff_20646_1-p60061 C-genome specific (napus-oleracea) | 0.9856459 | 0.7790666 | 0.9922481 | 0.8080642 | not scorable | not scorable |
| #### Bn-scaff_20646_1-p60086 genome unspecific (all in)         | 0.9856459 | 0.4068231 | 1         | 0.8093489 | 0.9834711    | 0.779015     |
| #### Bn-scaff_20646_1-p60898 C-genome specific (napus-oleracea) | 0.9880383 | 0.7735092 | 1         | 0.683524  | not scorable | not scorable |
| #### Bn-scaff_20646_1-p63400 C-genome specific (napus-oleracea) | 0.9880383 | 0.7743804 | 0.9922481 | 0.6824203 | not scorable | not scorable |
| #### Bn-scaff_20646_1-p63431 C-genome specific (napus-oleracea) | 0.9736842 | 0.7852675 | 0.7984496 | 0.7626926 | not scorable | not scorable |
| #### Bn-scaff_20646_1-p63441 C-genome specific (napus-oleracea) | 0.9904306 | 0.7575901 | 0.9844961 | 0.7866627 | not scorable | not scorable |
| #### Bn-scaff_20646_1-p63502 C-genome specific (napus-oleracea) | 0.8564593 | 0.78117   | 0.7131783 | 0.7522975 | not scorable | not scorable |
| #### Bn-scaff_20646_1-p63508 C-genome specific (napus-oleracea) | 0.854067  | 0.7276036 | 0.7054263 | 0.6389615 | not scorable | not scorable |
| #### Bn-scaff_20646_1-p63526 C-genome specific (napus-oleracea) | 0.9856459 | 0.6023015 | 0.9767442 | 0.6584307 | not scorable | not scorable |
| #### Bn-scaff_20646_1-p63532 C-genome specific (napus-oleracea) | 0.9832536 | 0.7649432 | 1         | 0.8067511 | not scorable | not scorable |
| #### Bn-scaff_20646_1-p63970 genome unspecific (all in)         | 0.9641148 | 0.2887872 | 0.9922481 | 0.674531  | 1            | 0.6882842    |
| #### Bn-scaff_20646_1-p63977 genome unspecific (all in)         | 0.9569378 | 0.4652803 | 0.9922481 | 0.6209076 | 1            | 0.7400019    |
| #### Bn-scaff_20646_1-p63986 genome unspecific (all in)         | 0.9832536 | 0.386719  | 1         | 0.6611715 | 1            | 0.8004208    |
| #### Bn-scaff_20646_1-p64491 C-genome specific (napus-oleracea) | 0.9976076 | 0.773191  | 1         | 0.8088507 | not scorable | not scorable |
| #### Bn-scaff_20646_1-p65157 C-genome specific (napus-oleracea) | 0.9832536 | 0.8186003 | 1         | 0.7955962 | not scorable | not scorable |
| #### Bn-scaff_20646_1-p65182 C-genome specific (napus-oleracea) | 0.9736842 | 0.7668011 | 1         | 0.7754058 | not scorable | not scorable |
| #### Bn-scaff_20646_1-p66120 C-genome specific (napus-oleracea) | 0.9856459 | 0.3103848 | 1         | 0.813266  | not scorable | not scorable |
| #### Bn-scaff_20646_1-p66830 genome unspecific (all in)         | 0.930622  | 0.4048707 | 0.9844961 | 0.5005254 | 0.8595041    | 0.8948976    |
| #### Bn-scaff_20646_1-p67040 C-genome specific (napus-oleracea) | 0.9688995 | 0.7098339 | 0.9844961 | 0.720181  | not scorable | not scorable |
| #### Bn-scaff_20646_1-p67379 C-genome specific (napus-oleracea) | 0.9641148 | 0.6252593 | 0.9612403 | 0.7486708 | not scorable | not scorable |
| #### Bn-scaff_20646_1-p67532 C-genome specific (napus-oleracea) | 0.9832536 | 0.7277283 | 0.9844961 | 0.7413021 | not scorable | not scorable |
| #### Bn-scaff_20646_1-p67550 genome unspecific (all in)         | 0.9449761 | 0.2349525 | 0.9922481 | 0.2549434 | 1            | 0.702597     |
| #### Bn-scaff_20646_1-p67702 genome unspecific (all in)         | 1         | 0.3550477 | 1         | 0.7236227 | 0.9917355    | 0.8031754    |
| #### Bn-scaff_20646_1-p67729 genome unspecific (all in)         | 0.9712918 | 0.4991563 | 1         | 0.6507223 | 0.9917355    | 0.7226944    |
| #### Bn-scaff_20646_1-p67847 C-genome specific (napus-oleracea) | 0.9928229 | 0.7516122 | 0.9844961 | 0.8046129 | not scorable | not scorable |
| #### Bn-scaff_20646_1-p67956 C-genome specific (napus-oleracea) | 0.9880383 | 0.7598535 | 1         | 0.790215  | not scorable | not scorable |
| #### Bn-scaff_20646_1-p68042 C-genome specific (napus-oleracea) | 0.9856459 | 0.8260376 | 0.9922481 | 0.7914978 | not scorable | not scorable |

|                                                                 |              |              |           |           |              |              |
|-----------------------------------------------------------------|--------------|--------------|-----------|-----------|--------------|--------------|
| #### Bn-scaff_20646_1-p70200 C-genome specific (napus-oleracea) | 0.9760765    | 0.6290359    | 1         | 0.6191128 | not scorable | not scorable |
| #### Bn-scaff_20646_1-p70540 C-genome specific (napus-oleracea) | 0.9736842    | 0.6720938    | 0.9844961 | 0.7622365 | not scorable | not scorable |
| #### Bn-scaff_20646_1-p70558 C-genome specific (napus-oleracea) | 0.9856459    | 0.5570151    | 1         | 0.4273052 | not scorable | not scorable |
| #### Bn-scaff_20646_1-p70776 C-genome specific (napus-oleracea) | 0.9617225    | 0.6946576    | 1         | 0.7347668 | not scorable | not scorable |
| #### Bn-scaff_20646_1-p71499 C-genome specific (napus-oleracea) | 0.9808612    | 0.7335674    | 0.9844961 | 0.7534141 | not scorable | not scorable |
| #### Bn-scaff_20646_1-p71536 C-genome specific (napus-oleracea) | 0.9832536    | 0.7829047    | 1         | 0.746463  | not scorable | not scorable |
| #### Bn-scaff_20646_1-p71784 C-genome specific (oleracea only)  | not scorable | not scorable | 0.9844961 | 0.8219149 | not scorable | not scorable |
| #### Bn-scaff_20646_1-p73084 C-genome specific (napus-oleracea) | 0.9617225    | 0.7155627    | 1         | 0.6786706 | not scorable | not scorable |
| #### Bn-scaff_20646_1-p73533 C-genome specific (napus-oleracea) | 0.9760765    | 0.7894195    | 1         | 0.7574182 | not scorable | not scorable |
| #### Bn-scaff_20646_1-p74477 C-genome specific (napus-oleracea) | 0.9712918    | 0.69311      | 0.9612403 | 0.6544482 | not scorable | not scorable |
| #### Bn-scaff_20646_1-p74486 C-genome specific (napus-oleracea) | 0.9952153    | 0.7435608    | 1         | 0.7747217 | not scorable | not scorable |
| #### Bn-scaff_20646_1-p74859 C-genome specific (napus-oleracea) | 0.9760765    | 0.7661861    | 1         | 0.7901084 | not scorable | not scorable |
| #### Bn-scaff_20646_1-p76367 C-genome specific (napus-oleracea) | 0.9904306    | 0.7345674    | 0.9844961 | 0.748565  | not scorable | not scorable |
| #### Bn-scaff_20646_1-p76484 C-genome specific (napus-oleracea) | 0.9760765    | 0.6725802    | 0.9689922 | 0.778465  | not scorable | not scorable |
| #### Bn-scaff_20646_1-p80099 C-genome specific (napus-oleracea) | 0.9856459    | 0.7033724    | 1         | 0.7318952 | not scorable | not scorable |
| #### Bn-scaff_20646_1-p80157 C-genome specific (napus-oleracea) | 0.9808612    | 0.7151843    | 0.9922481 | 0.8547314 | not scorable | not scorable |
| #### Bn-scaff_20646_1-p80533 C-genome specific (napus-oleracea) | 0.9808612    | 0.6877577    | 0.9767442 | 0.7487885 | not scorable | not scorable |
| #### Bn-scaff_20646_1-p81075 C-genome specific (napus-oleracea) | 0.9760765    | 0.7043008    | 0.9689922 | 0.7477551 | not scorable | not scorable |
| #### Bn-scaff_20646_1-p83256 C-genome specific (napus-oleracea) | 0.9712918    | 0.7480031    | 0.9922481 | 0.8056173 | not scorable | not scorable |
| #### Bn-scaff_20646_1-p83282 C-genome specific (napus-oleracea) | 0.9760765    | 0.724121     | 0.9844961 | 0.7618081 | not scorable | not scorable |
| #### Bn-scaff_20646_1-p83852 C-genome specific (napus-oleracea) | 0.9808612    | 0.7610288    | 0.9534883 | 0.7810026 | not scorable | not scorable |
| #### Bn-scaff_20646_1-p83859 C-genome specific (napus-oleracea) | 0.9856459    | 0.7995627    | 0.9922481 | 0.7805063 | not scorable | not scorable |
| #### Bn-scaff_20646_1-p83971 genome unspecific (all in)         | 0.9808612    | 0.6710011    | 1         | 0.694982  | 0.9834711    | 0.641195     |
| #### Bn-scaff_20646_1-p85029 C-genome specific (napus-oleracea) | 0.9617225    | 0.500599     | 0.9922481 | 0.5216673 | not scorable | not scorable |
| #### Bn-scaff_20646_1-p86074 C-genome specific (napus-oleracea) | 0.9784689    | 0.7460472    | 0.9922481 | 0.8503051 | not scorable | not scorable |
| #### Bn-scaff_20646_1-p86835 C-genome specific (napus-oleracea) | 0.9832536    | 0.7236627    | 1         | 0.8247427 | not scorable | not scorable |
| #### Bn-scaff_20646_1-p86912 C-genome specific (napus-oleracea) | 0.9856459    | 0.7771568    | 0.9922481 | 0.8252143 | not scorable | not scorable |
| #### Bn-scaff_20646_1-p86976 C-genome specific (napus-oleracea) | 0.9808612    | 0.76673      | 1         | 0.8146057 | not scorable | not scorable |
| #### Bn-scaff_20646_1-p91436 C-genome specific (napus-oleracea) | 0.9736842    | 0.7422188    | 1         | 0.8052866 | not scorable | not scorable |
| #### Bn-scaff_20646_1-p91544 C-genome specific (napus-oleracea) | 0.9904306    | 0.7177908    | 1         | 0.7726406 | not scorable | not scorable |
| #### Bn-scaff_20646_1-p91552 C-genome specific (napus-oleracea) | 0.9760765    | 0.7782492    | 0.9922481 | 0.8121544 | not scorable | not scorable |
| #### Bn-scaff_20646_1-p91563 C-genome specific (napus-oleracea) | 0.9784689    | 0.7599305    | 0.9922481 | 0.7136537 | not scorable | not scorable |
| #### Bn-scaff_20646_1-p91739 C-genome specific (napus-oleracea) | 0.9832536    | 0.6558104    | 0.9922481 | 0.7423656 | not scorable | not scorable |



|                                                                |              |              |              |              |              |              |
|----------------------------------------------------------------|--------------|--------------|--------------|--------------|--------------|--------------|
| #### Bn-scaff_20646_1-p91781C-genome specific (napus-oleracea) | 0.9688995    | 0.7754031    | 0.9844961    | 0.8118844    | not scorable | not scorable |
| #### Bn-scaff_20646_1-p91819C-genome specific (napus-oleracea) | 0.9856459    | 0.7456849    | 1            | 0.815909     | not scorable | not scorable |
| #### Bn-scaff_20646_1-p91820C-genome specific (napus-oleracea) | 0.9928229    | 0.7844937    | 1            | 0.6713224    | not scorable | not scorable |
| #### Bn-scaff_20646_1-p91826C-genome specific (napus-oleracea) | 0.9784689    | 0.7537394    | 0.9922481    | 0.7517481    | not scorable | not scorable |
| #### Bn-scaff_20646_1-p91830C-genome specific (napus-oleracea) | 0.9760765    | 0.7087411    | 0.9922481    | 0.7096635    | not scorable | not scorable |
| #### Bn-scaff_20646_1-p91912C-genome specific (napus-oleracea) | 0.9904306    | 0.7418728    | 0.9922481    | 0.8190148    | not scorable | not scorable |
| #### Bn-scaff_20646_1-p91976C-genome specific (napus-oleracea) | 0.9880383    | 0.7516405    | 1            | 0.7512195    | not scorable | not scorable |
| #### Bn-scaff_20646_1-p91977C-genome specific (napus-oleracea) | 0.9808612    | 0.7559544    | 1            | 0.8458923    | not scorable | not scorable |
| #### Bn-scaff_20646_1-p92031C-genome specific (napus-oleracea) | 0.9808612    | 0.786548     | 1            | 0.7383209    | not scorable | not scorable |
| #### Bn-scaff_20646_1-p92040C-genome specific (napus-oleracea) | 0.9856459    | 0.7453125    | 1            | 0.741387     | not scorable | not scorable |
| #### Bn-scaff_20646_1-p92610genome unspecific (all in)         | 0.9688995    | 0.3064146    | 0.9922481    | 0.7732645    | 1            | 0.884115     |
| #### Bn-scaff_20646_1-p93062genome unspecific (all in)         | 1            | 0.7316417    | 1            | 0.7104629    | 1            | 0.817992     |
| #### Bn-scaff_20666_1-p54157C-genome specific (napus-oleracea) | 1            | 0.7285066    | 1            | 0.7697013    | not scorable | not scorable |
| #### Bn-scaff_20666_1-p76653genome unspecific (all in)         | 0.9976076    | 0.7744579    | 0.9534883    | 0.7281514    | 0.7603306    | 0.9358074    |
| #### Bn-scaff_20666_1-p92140C-genome specific (napus-oleracea) | 0.9952153    | 0.6765485    | 1            | 0.759145     | not scorable | not scorable |
| #### Bn-scaff_20675_1-p14913C-genome specific (napus-oleracea) | 0.9832536    | 0.8119226    | 0.9767442    | 0.7036644    | not scorable | not scorable |
| #### Bn-scaff_20675_1-p15366genome unspecific (all in)         | 0.9856459    | 0.3752373    | 1            | 0.7638113    | 1            | 0.8848283    |
| #### Bn-scaff_20675_1-p15546C-genome specific (napus-oleracea) | 0.9688995    | 0.7564984    | 0.9922481    | 0.76816      | not scorable | not scorable |
| #### Bn-scaff_20675_1-p15616genome unspecific (all in)         | 0.9832536    | 0.4177595    | 1            | 0.8598376    | 1            | 0.9085504    |
| #### Bn-scaff_20675_1-p15990genome unspecific (all in)         | 0.9928229    | 0.2075236    | 0.9689922    | 0.4670657    | 1            | 0.903243     |
| #### Bn-scaff_20675_1-p16000A-genome specific (rapa only)      | not scorable | not scorable | not scorable | not scorable | 1            | 0.9192649    |
| #### Bn-scaff_20675_1-p26970C-genome specific (napus-oleracea) | 0.9760765    | 0.6628509    | 1            | 0.739782     | not scorable | not scorable |
| #### Bn-scaff_20675_1-p32025C-genome specific (napus-oleracea) | 0.9760765    | 0.6951388    | 0.9224806    | 0.6865292    | not scorable | not scorable |
| #### Bn-scaff_20675_1-p32364C-genome specific (napus-oleracea) | 0.9808612    | 0.7465802    | 1            | 0.6926206    | not scorable | not scorable |
| #### Bn-scaff_20675_1-p52417C-genome specific (napus-oleracea) | 0.9665072    | 0.7051259    | 1            | 0.7084575    | not scorable | not scorable |
| #### Bn-scaff_20675_1-p61871C-genome specific (napus-oleracea) | 0.9832536    | 0.7309457    | 1            | 0.7656333    | not scorable | not scorable |
| #### Bn-scaff_20675_1-p93956genome unspecific (all in)         | 1            | 0.5472004    | 1            | 0.7859079    | 1            | 0.7702658    |
| #### Bn-scaff_20675_1-p94476genome unspecific (all in)         | 0.9880383    | 0.2695612    | 1            | 0.6988648    | 1            | 0.7252911    |
| #### Bn-scaff_20675_1-p94966genome unspecific (all in)         | 0.9856459    | 0.358431     | 1            | 0.7813796    | 1            | 0.7518349    |
| #### Bn-scaff_20675_1-p95063C-genome specific (napus-oleracea) | 0.9784689    | 0.7646744    | 1            | 0.8271053    | not scorable | not scorable |
| #### Bn-scaff_20675_1-p98663genome unspecific (all in)         | 0.9952153    | 0.3702428    | 1            | 0.7350847    | 0.9834711    | 0.7639285    |
| #### Bn-scaff_20676_1-p18901genome unspecific (all in)         | 1            | 0.555096     | 1            | 0.6013294    | 1            | 0.8047727    |
| #### Bn-scaff_20676_1-p18909genome unspecific (all in)         | 1            | 0.6239599    | 1            | 0.5685058    | 1            | 0.759446     |

|                                                                 |              |              |              |              |              |              |
|-----------------------------------------------------------------|--------------|--------------|--------------|--------------|--------------|--------------|
| #### Bn-scaff_20676_1-p1895C genome unspecific (all in)         | 1            | 0.7007138    | 1            | 0.6372049    | 1            | 0.8004208    |
| #### Bn-scaff_20676_1-p43552 genome unspecific (all in)         | 0.9904306    | 0.313571     | 1            | 0.8503386    | 1            | 0.7068038    |
| #### Bn-scaff_20732_1-p10029 C-genome specific (napus-oleracea) | 0.9904306    | 0.7193207    | 1            | 0.6568245    | not scorable | not scorable |
| #### Bn-scaff_20732_1-p10047 C-genome specific (napus-oleracea) | 0.9880383    | 0.749472     | 1            | 0.670786     | not scorable | not scorable |
| #### Bn-scaff_20732_1-p10088 C-genome specific (napus-oleracea) | 0.9928229    | 0.7869572    | 1            | 0.7521467    | not scorable | not scorable |
| #### Bn-scaff_20732_1-p10132 C-genome specific (napus-oleracea) | 0.9928229    | 0.7544835    | 1            | 0.8183059    | not scorable | not scorable |
| #### Bn-scaff_20732_1-p10417 genome unspecific (all in)         | 0.9976076    | 0.7053979    | 0.9302326    | 0.7956095    | 1            | 0.8824204    |
| #### Bn-scaff_20732_1-p12626 C-genome specific (napus-oleracea) | 0.9952153    | 0.7180452    | 0.9922481    | 0.7575313    | not scorable | not scorable |
| #### Bn-scaff_20732_1-p12674 C-genome specific (napus-oleracea) | 0.9952153    | 0.8044519    | 0.9922481    | 0.7692649    | not scorable | not scorable |
| #### Bn-scaff_20732_1-p17332 C-genome specific (napus-oleracea) | 0.9904306    | 0.7697794    | 1            | 0.7385151    | not scorable | not scorable |
| #### Bn-scaff_20732_1-p18685 genome unspecific (all in)         | 1            | 0.5481735    | 1            | 0.554952     | 1            | 0.5309913    |
| #### Bn-scaff_20732_1-p21339 C-genome specific (napus-oleracea) | 0.9928229    | 0.6338953    | 0.9922481    | 0.6851293    | not scorable | not scorable |
| #### Bn-scaff_20732_1-p21359 C-genome specific (napus-oleracea) | 0.9928229    | 0.6421751    | 1            | 0.6363729    | not scorable | not scorable |
| #### Bn-scaff_20732_1-p22059 C-genome specific (napus-oleracea) | 0.9880383    | 0.6663738    | 0.9689922    | 0.6373415    | not scorable | not scorable |
| #### Bn-scaff_20732_1-p47754 C-genome specific (napus-oleracea) | 0.9712918    | 0.709734     | 0.6124031    | 0.7682258    | not scorable | not scorable |
| #### Bn-scaff_20732_1-p9422 C-genome specific (napus-oleracea)  | 0.9928229    | 0.8002533    | 1            | 0.8476778    | not scorable | not scorable |
| #### Bn-scaff_20732_1-p9483 C-genome specific (napus-oleracea)  | 0.9976076    | 0.5336117    | 0.9922481    | 0.5453047    | not scorable | not scorable |
| #### Bn-scaff_20732_1-p97173 C-genome specific (napus-oleracea) | 0.9856459    | 0.7476039    | 0.9612403    | 0.8190148    | not scorable | not scorable |
| #### Bn-scaff_20732_1-p99853 C-genome specific (napus-oleracea) | 0.9904306    | 0.7794338    | 0.9457364    | 0.7753277    | not scorable | not scorable |
| #### Bn-scaff_20735_1-p10055 genome unspecific (all in)         | 0.9880383    | 0.3524017    | 0.8449612    | 0.7953503    | 1            | 0.9244437    |
| #### Bn-scaff_20735_1-p22571 C-genome specific (oleracea only)  | not scorable | not scorable | 0.8217054    | 0.74997      | not scorable | not scorable |
| #### Bn-scaff_20735_1-p42779 genome unspecific (all in)         | 0.9952153    | 0.4798114    | 1            | 0.7824952    | 1            | 0.9083053    |
| #### Bn-scaff_20735_1-p44002 C-genome specific (napus-oleracea) | 0.9976076    | 0.6921863    | 0.9922481    | 0.7932702    | not scorable | not scorable |
| #### Bn-scaff_20735_1-p44052 C-genome specific (napus-oleracea) | 0.9856459    | 0.6671855    | 0.9922481    | 0.7045955    | not scorable | not scorable |
| #### Bn-scaff_20735_1-p4627 genome unspecific (all in)          | 0.9497608    | 0.2068371    | 1            | 0.6951061    | 0.9917355    | 0.705943     |
| #### Bn-scaff_20741_1-p14523 C-genome specific (napus-oleracea) | 0.9952153    | 0.6377404    | 0.9689922    | 0.6244743    | not scorable | not scorable |
| #### Bn-scaff_20741_1-p16076 C-genome specific (napus-oleracea) | 0.9880383    | 0.8069137    | 0.9922481    | 0.7381845    | not scorable | not scorable |
| #### Bn-scaff_20741_1-p20543 genome unspecific (all in)         | 0.9832536    | 0.3076642    | 1            | 0.7931273    | 1            | 0.764025     |
| #### Bn-scaff_20741_1-p20982 genome unspecific (all in)         | 0.9880383    | 0.3904069    | 1            | 0.8226816    | 1            | 0.7488827    |
| #### Bn-scaff_20741_1-p40404 napus specific                     | 0.8923445    | 0.2701139    | not scorable | not scorable | not scorable | not scorable |
| #### Bn-scaff_20741_1-p63208 C-genome specific (napus-oleracea) | 0.9832536    | 0.7941877    | 0.9844961    | 0.7765043    | not scorable | not scorable |
| #### Bn-scaff_20764_1-p2534 C-genome specific (napus-oleracea)  | 0.9760765    | 0.7648871    | 1            | 0.8223064    | not scorable | not scorable |
| #### Bn-scaff_20773_1-p12105 C-genome specific (napus-oleracea) | 0.9760765    | 0.7419553    | 0.9612403    | 0.730866     | not scorable | not scorable |

|                                                                 |              |              |           |           |              |              |
|-----------------------------------------------------------------|--------------|--------------|-----------|-----------|--------------|--------------|
| #### Bn-scaff_20773_1-p12334 C-genome specific (napus-oleracea) | 0.9832536    | 0.7659664    | 0.9922481 | 0.7806754 | not scorable | not scorable |
| #### Bn-scaff_20773_1-p15310 C-genome specific (napus-oleracea) | 0.9856459    | 0.7253698    | 0.6744186 | 0.6610055 | not scorable | not scorable |
| #### Bn-scaff_20773_1-p15517 genome unspecific (all in)         | 1            | 0.6484769    | 1         | 0.6783646 | 1            | 0.7993643    |
| #### Bn-scaff_20773_1-p33294 C-genome specific (napus-oleracea) | 0.9904306    | 0.6881312    | 1         | 0.6719759 | not scorable | not scorable |
| #### Bn-scaff_20773_1-p33970 C-genome specific (napus-oleracea) | 0.9760765    | 0.372077     | 0.9767442 | 0.7457933 | not scorable | not scorable |
| #### Bn-scaff_20773_1-p34086 C-genome specific (napus-oleracea) | 0.9976076    | 0.7632224    | 0.9767442 | 0.7737016 | not scorable | not scorable |
| #### Bn-scaff_20773_1-p34896 C-genome specific (napus-oleracea) | 0.9856459    | 0.7817958    | 0.9922481 | 0.7675356 | not scorable | not scorable |
| #### Bn-scaff_20773_1-p34956 C-genome specific (napus-oleracea) | 0.9928229    | 0.7530097    | 0.9844961 | 0.793625  | not scorable | not scorable |
| #### Bn-scaff_20773_1-p38600 C-genome specific (napus-oleracea) | 0.9784689    | 0.7517628    | 0.9457364 | 0.8123479 | not scorable | not scorable |
| #### Bn-scaff_20773_1-p40167 C-genome specific (napus-oleracea) | 0.9760765    | 0.7612655    | 0.9224806 | 0.7443145 | not scorable | not scorable |
| #### Bn-scaff_20773_1-p40178 C-genome specific (napus-oleracea) | 0.9760765    | 0.7448737    | 0.9379845 | 0.7554043 | not scorable | not scorable |
| #### Bn-scaff_20773_1-p41265 C-genome specific (napus-oleracea) | 0.9784689    | 0.6541916    | 0.8992248 | 0.6415408 | not scorable | not scorable |
| #### Bn-scaff_20773_1-p42469 C-genome specific (napus-oleracea) | 0.9784689    | 0.7695094    | 0.8914729 | 0.7524028 | not scorable | not scorable |
| #### Bn-scaff_20773_1-p43126 C-genome specific (napus-oleracea) | 0.9976076    | 0.785696     | 0.9922481 | 0.6954328 | not scorable | not scorable |
| #### Bn-scaff_20773_1-p44506 C-genome specific (napus-oleracea) | 0.9641148    | 0.7486226    | 1         | 0.8576625 | not scorable | not scorable |
| #### Bn-scaff_20773_1-p44600 C-genome specific (napus-oleracea) | 0.9688995    | 0.7377836    | 0.9844961 | 0.8274619 | not scorable | not scorable |
| #### Bn-scaff_20773_1-p44651 C-genome specific (napus-oleracea) | 0.9808612    | 0.7559701    | 1         | 0.7502279 | not scorable | not scorable |
| #### Bn-scaff_20773_1-p46217 C-genome specific (napus-oleracea) | 0.9880383    | 0.7680173    | 1         | 0.8320746 | not scorable | not scorable |
| #### Bn-scaff_20773_1-p46309 C-genome specific (napus-oleracea) | 0.9976076    | 0.7353275    | 0.9844961 | 0.7623602 | not scorable | not scorable |
| #### Bn-scaff_20773_1-p46354 C-genome specific (napus-oleracea) | 0.9952153    | 0.7385682    | 1         | 0.7681412 | not scorable | not scorable |
| #### Bn-scaff_20773_1-p46359 C-genome specific (napus-oleracea) | 0.9952153    | 0.7612394    | 1         | 0.8072274 | not scorable | not scorable |
| #### Bn-scaff_20773_1-p46362 C-genome specific (napus-oleracea) | 0.9832536    | 0.6679538    | 1         | 0.7650157 | not scorable | not scorable |
| #### Bn-scaff_20773_1-p46446 C-genome specific (napus-oleracea) | 0.9904306    | 0.7722442    | 1         | 0.811146  | not scorable | not scorable |
| #### Bn-scaff_20773_1-p46458 C-genome specific (napus-oleracea) | 0.9952153    | 0.7372548    | 0.9922481 | 0.8104241 | not scorable | not scorable |
| #### Bn-scaff_20773_1-p47222 C-genome specific (napus-oleracea) | 0.9880383    | 0.7947664    | 0.9922481 | 0.8266603 | not scorable | not scorable |
| #### Bn-scaff_20773_1-p48124 C-genome specific (napus-oleracea) | 0.9904306    | 0.7723844    | 1         | 0.7376232 | not scorable | not scorable |
| #### Bn-scaff_20773_1-p50604 C-genome specific (napus-oleracea) | 0.9904306    | 0.7232565    | 1         | 0.7588794 | not scorable | not scorable |
| #### Bn-scaff_20773_1-p53881 C-genome specific (napus-oleracea) | 0.9952153    | 0.6732516    | 0.9922481 | 0.7082456 | not scorable | not scorable |
| #### Bn-scaff_20773_1-p56617 genome unspecific (all in)         | 0.9497608    | 0.7275082    | 1         | 0.8092512 | 1            | 0.8648942    |
| #### Bn-scaff_20773_1-p57111 C-genome specific (napus-oleracea) | 0.9808612    | 0.7453801    | 0.9224806 | 0.7522857 | not scorable | not scorable |
| #### Bn-scaff_20773_1-p57544 C-genome specific (napus-oleracea) | 0.9808612    | 0.7045411    | 0.9922481 | 0.645142  | not scorable | not scorable |
| #### Bn-scaff_20773_1-p59137 C-genome specific (napus-oleracea) | 0.9976076    | 0.6735119    | 0.9922481 | 0.6435326 | not scorable | not scorable |
| #### Bn-scaff_20773_1-p59190 C-genome specific (oleracea only)  | not scorable | not scorable | 0.9767442 | 0.768128  | not scorable | not scorable |

|                                                                 |              |              |              |              |              |              |
|-----------------------------------------------------------------|--------------|--------------|--------------|--------------|--------------|--------------|
| #### Bn-scaff_20773_1-p59439 C-genome specific (napus-oleracea) | 0.9952153    | 0.772193     | 0.9844961    | 0.7639776    | not scorable | not scorable |
| #### Bn-scaff_20773_1-p62196 C-genome specific (napus-oleracea) | 0.9760765    | 0.7455184    | 1            | 0.7722343    | not scorable | not scorable |
| #### Bn-scaff_20773_1-p62265 C-genome specific (napus-oleracea) | 1            | 0.7514777    | 0.9922481    | 0.6560643    | not scorable | not scorable |
| #### Bn-scaff_20773_1-p62296 C-genome specific (napus-oleracea) | 0.9976076    | 0.769477     | 1            | 0.7536525    | not scorable | not scorable |
| #### Bn-scaff_20790_1-p10231 genome unspecific (all in)         | 1            | 0.7269301    | 0.9767442    | 0.6586192    | 1            | 0.836841     |
| #### Bn-scaff_20790_1-p10255 genome unspecific (oleracea-rapa)  | not scorable | not scorable | 0.9844961    | 0.6716328    | 1            | 0.9422916    |
| #### Bn-scaff_20790_1-p10352 C-genome specific (napus-oleracea) | 0.9880383    | 0.9293141    | 0.875969     | 0.8069056    | not scorable | not scorable |
| #### Bn-scaff_20790_1-p25992 genome unspecific (all in)         | 1            | 0.6419217    | 0.9379845    | 0.678266     | 0.9917355    | 0.8260158    |
| #### Bn-scaff_20790_1-p25999 genome unspecific (all in)         | 1            | 0.2855012    | 1            | 0.6772465    | 0.9834711    | 0.7118658    |
| #### Bn-scaff_20790_1-p26124 genome unspecific (all in)         | 1            | 0.4936715    | 1            | 0.8972596    | 1            | 0.8831       |
| #### Bn-scaff_20790_1-p26441 genome unspecific (all in)         | 0.9928229    | 0.2854336    | 1            | 0.8217835    | 0.9917355    | 0.7109401    |
| #### Bn-scaff_20790_1-p26840 genome unspecific (all in)         | 0.9928229    | 0.3654397    | 1            | 0.6864075    | 1            | 0.7112484    |
| #### Bn-scaff_20790_1-p28195 all not scorable                   | not scorable | not scorable | not scorable | not scorable | not scorable | not scorable |
| #### Bn-scaff_20790_1-p28206 genome unspecific (all in)         | 1            | 0.5240027    | 1            | 0.5353205    | 1            | 0.6066825    |
| #### Bn-scaff_20790_1-p28389 C-genome specific (napus-oleracea) | 0.9928229    | 0.3992567    | 0.9147287    | 0.6924974    | not scorable | not scorable |
| #### Bn-scaff_20790_1-p28446 napus specific                     | 0.923445     | 0.2087457    | not scorable | not scorable | not scorable | not scorable |
| #### Bn-scaff_20790_1-p3436 C-genome specific (napus-oleracea)  | 0.9952153    | 0.6537524    | 0.9147287    | 0.6869048    | not scorable | not scorable |
| #### Bn-scaff_20796_1-p13739 genome unspecific (oleracea-rapa)  | not scorable | not scorable | 1            | 0.7671236    | 0.9752066    | 0.5559425    |
| #### Bn-scaff_20796_1-p14816 C-genome specific (napus-oleracea) | 0.9784689    | 0.5323271    | 1            | 0.8192506    | not scorable | not scorable |
| #### Bn-scaff_20796_1-p34573 C-genome specific (napus-oleracea) | 0.9832536    | 0.908396     | 0.751938     | 0.8646256    | not scorable | not scorable |
| #### Bn-scaff_20796_1-p69576 genome unspecific (all in)         | 0.9976076    | 0.2516153    | 1            | 0.7703472    | 0.9917355    | 0.7063852    |
| #### Bn-scaff_20804_1-p10803 C-genome specific (napus-oleracea) | 0.9784689    | 0.7824718    | 0.9689922    | 0.8466014    | not scorable | not scorable |
| #### Bn-scaff_20804_1-p10877 C-genome specific (napus-oleracea) | 0.9784689    | 0.7476573    | 0.9922481    | 0.6627376    | not scorable | not scorable |
| #### Bn-scaff_20804_1-p11198 C-genome specific (napus-oleracea) | 0.9641148    | 0.7626514    | 0.9922481    | 0.8070927    | not scorable | not scorable |
| #### Bn-scaff_20804_1-p11526 C-genome specific (oleracea only)  | not scorable | not scorable | 0.9922481    | 0.7265711    | not scorable | not scorable |
| #### Bn-scaff_20804_1-p11576 genome unspecific (all in)         | 0.9712918    | 0.3518019    | 0.9689922    | 0.6445417    | 1            | 0.7778274    |
| #### Bn-scaff_20804_1-p11680 genome unspecific (all in)         | 0.9952153    | 0.7465       | 0.9922481    | 0.9225474    | 1            | 0.8320498    |
| #### Bn-scaff_20804_1-p17825 genome unspecific (all in)         | 0.9904306    | 0.3383389    | 0.9767442    | 0.4582325    | 1            | 0.8948976    |
| #### Bn-scaff_20804_1-p18022 C-genome specific (napus-oleracea) | 0.9952153    | 0.774591     | 0.9844961    | 0.7394931    | not scorable | not scorable |
| #### Bn-scaff_20804_1-p18072 C-genome specific (napus-oleracea) | 0.9952153    | 0.7458073    | 0.9844961    | 0.8246284    | not scorable | not scorable |
| #### Bn-scaff_20804_1-p18095 C-genome specific (napus-oleracea) | 0.9976076    | 0.6130484    | 0.9767442    | 0.6607333    | not scorable | not scorable |
| #### Bn-scaff_20804_1-p18102 C-genome specific (napus-oleracea) | 0.9856459    | 0.6981095    | 0.9534883    | 0.7518598    | not scorable | not scorable |
| #### Bn-scaff_20804_1-p29987 C-genome specific (napus-oleracea) | 0.9712918    | 0.3972138    | 0.9224806    | 0.4323252    | not scorable | not scorable |

|                                                                 |              |              |           |           |              |              |
|-----------------------------------------------------------------|--------------|--------------|-----------|-----------|--------------|--------------|
| #### Bn-scaff_20804_1-p33693 genome unspecific (all in)         | 0.9712918    | 0.5597618    | 0.9844961 | 0.7391168 | 0.9917355    | 0.9243563    |
| #### Bn-scaff_20804_1-p3564 C-genome specific (napus-oleracea)  | 0.9808612    | 0.7042887    | 0.9612403 | 0.670786  | not scorable | not scorable |
| #### Bn-scaff_20804_1-p36918 C-genome specific (napus-oleracea) | 0.9832536    | 0.7967933    | 1         | 0.7497485 | not scorable | not scorable |
| #### Bn-scaff_20804_1-p37594 C-genome specific (napus-oleracea) | 0.9784689    | 0.7922801    | 0.9844961 | 0.7747871 | not scorable | not scorable |
| #### Bn-scaff_20804_1-p38997 C-genome specific (napus-oleracea) | 0.9856459    | 0.7607651    | 0.9922481 | 0.6758011 | not scorable | not scorable |
| #### Bn-scaff_20804_1-p3926 C-genome specific (napus-oleracea)  | 0.9593301    | 0.7139778    | 0.9689922 | 0.6650228 | not scorable | not scorable |
| #### Bn-scaff_20804_1-p43582 genome unspecific (all in)         | 0.9712918    | 0.1799623    | 0.9689922 | 0.30323   | 1            | 0.8487188    |
| #### Bn-scaff_20804_1-p4723 genome unspecific (all in)          | 0.9808612    | 0.6720752    | 0.9922481 | 0.8740647 | 0.9669421    | 0.754338     |
| #### Bn-scaff_20804_1-p4840 C-genome specific (napus-oleracea)  | 0.9832536    | 0.6677466    | 0.9922481 | 0.6205822 | not scorable | not scorable |
| #### Bn-scaff_20804_1-p5701 C-genome specific (napus-oleracea)  | 0.9736842    | 0.7815611    | 0.9922481 | 0.8313343 | not scorable | not scorable |
| #### Bn-scaff_20804_1-p5943 C-genome specific (napus-oleracea)  | 0.9784689    | 0.803366     | 1         | 0.8343857 | not scorable | not scorable |
| #### Bn-scaff_20804_1-p6006 C-genome specific (napus-oleracea)  | 0.9832536    | 0.7970674    | 0.9922481 | 0.8488216 | not scorable | not scorable |
| #### Bn-scaff_20804_1-p60629 C-genome specific (napus-oleracea) | 0.9856459    | 0.757777     | 1         | 0.8033221 | not scorable | not scorable |
| #### Bn-scaff_20804_1-p6686 C-genome specific (napus-oleracea)  | 0.9928229    | 0.8071121    | 1         | 0.8257011 | not scorable | not scorable |
| #### Bn-scaff_20804_1-p7840 C-genome specific (napus-oleracea)  | 0.9760765    | 0.709572     | 0.9844961 | 0.6892186 | not scorable | not scorable |
| #### Bn-scaff_20804_1-p84419 C-genome specific (napus-oleracea) | 0.9856459    | 0.7021694    | 0.9922481 | 0.7302695 | not scorable | not scorable |
| #### Bn-scaff_20804_1-p84899 C-genome specific (napus-oleracea) | 0.9880383    | 0.719787     | 0.9844961 | 0.7734926 | not scorable | not scorable |
| #### Bn-scaff_20804_1-p85446 genome unspecific (all in)         | 0.9856459    | 0.6128718    | 0.9844961 | 0.7058615 | 1            | 0.8882838    |
| #### Bn-scaff_20804_1-p9294 C-genome specific (napus-oleracea)  | 0.9760765    | 0.4624332    | 0.9922481 | 0.5435365 | not scorable | not scorable |
| #### Bn-scaff_20807_1-p10454 genome unspecific (all in)         | 0.9928229    | 0.2843717    | 1         | 0.7646528 | 0.9917355    | 0.8106654    |
| #### Bn-scaff_20807_1-p74298 genome unspecific (all in)         | 0.9952153    | 0.9095823    | 0.8217054 | 0.8089013 | 1            | 0.9244215    |
| #### Bn-scaff_20809_1-p11558 C-genome specific (napus-oleracea) | 0.8492823    | 0.7638249    | 0.5193799 | 0.7052473 | not scorable | not scorable |
| #### Bn-scaff_20809_1-p11677 C-genome specific (oleracea only)  | not scorable | not scorable | 0.9689922 | 0.6936312 | not scorable | not scorable |
| #### Bn-scaff_20809_1-p16380 genome unspecific (all in)         | 0.9665072    | 0.2746892    | 0.9612403 | 0.251132  | 1            | 0.735769     |
| #### Bn-scaff_20809_1-p16423 genome unspecific (all in)         | 0.9976076    | 0.6148821    | 1         | 0.7011082 | 0.9917355    | 0.7491645    |
| #### Bn-scaff_20809_1-p16425 genome unspecific (all in)         | 1            | 0.6323957    | 1         | 0.5516378 | 1            | 0.9095823    |
| #### Bn-scaff_20809_1-p16431 C-genome specific (napus-oleracea) | 0.7870814    | 0.1720553    | 0.9844961 | 0.6709935 | not scorable | not scorable |
| #### Bn-scaff_20809_1-p47064 genome unspecific (oleracea-rapa)  | not scorable | not scorable | 0.9922481 | 0.8331373 | 0.9586777    | 0.8038357    |
| #### Bn-scaff_20809_1-p48762 genome unspecific (oleracea-rapa)  | not scorable | not scorable | 1         | 0.6016257 | 0.9752066    | 0.5344975    |
| #### Bn-scaff_20809_1-p64287 C-genome specific (napus-oleracea) | 0.9282297    | 0.6020592    | 1         | 0.6054615 | not scorable | not scorable |
| #### Bn-scaff_20809_1-p74433 genome unspecific (all in)         | 0.9808612    | 0.3076473    | 1         | 0.7838756 | 1            | 0.8937975    |
| #### Bn-scaff_20814_1-p16441 genome unspecific (all in)         | 0.9952153    | 0.5099999    | 1         | 0.7598107 | 1            | 0.8906736    |
| #### Bn-scaff_20814_1-p24438 genome unspecific (all in)         | 0.9976076    | 0.2987689    | 1         | 0.8745771 | 0.9669421    | 0.8379195    |

|                                                                |              |              |              |              |              |              |
|----------------------------------------------------------------|--------------|--------------|--------------|--------------|--------------|--------------|
| #### Bn-scaff_20814_1-p2488C-genome specific (napus-oleracea)  | 0.9880383    | 0.7634059    | 0.9844961    | 0.8249574    | not scorable | not scorable |
| #### Bn-scaff_20814_1-p2499C-genome specific (napus-oleracea)  | 0.9904306    | 0.7200248    | 1            | 0.6990042    | not scorable | not scorable |
| #### Bn-scaff_20814_1-p25081C-genome specific (napus-oleracea) | 0.9856459    | 0.8016893    | 1            | 0.8240206    | not scorable | not scorable |
| #### Bn-scaff_20814_1-p25084C-genome specific (napus-oleracea) | 0.9904306    | 0.7889531    | 1            | 0.7171535    | not scorable | not scorable |
| #### Bn-scaff_20814_1-p2518 genome unspecific (all in)         | 0.9856459    | 0.3458655    | 1            | 0.8338741    | 0.9752066    | 0.7677596    |
| #### Bn-scaff_20814_1-p25581C-genome specific (napus-oleracea) | 0.9928229    | 0.7505905    | 0.9844961    | 0.7999392    | not scorable | not scorable |
| #### Bn-scaff_20814_1-p2626 genome unspecific (all in)         | 0.9712918    | 0.4041094    | 0.9767442    | 0.4458174    | 0.9917355    | 0.8269126    |
| #### Bn-scaff_20814_1-p26337C-genome specific (napus-oleracea) | 0.9856459    | 0.8008142    | 0.9922481    | 0.8415254    | not scorable | not scorable |
| #### Bn-scaff_20814_1-p2651C-genome specific (napus-oleracea)  | 0.9880383    | 0.7662151    | 1            | 0.7849017    | not scorable | not scorable |
| #### Bn-scaff_20814_1-p3778 genome unspecific (all in)         | 1            | 0.549558     | 1            | 0.5508541    | 1            | 0.5630519    |
| #### Bn-scaff_20817_1-p1378 all not scorable                   | not scorable | not scorable | not scorable | not scorable | not scorable | not scorable |
| #### Bn-scaff_20817_1-p1379 all not scorable                   | not scorable | not scorable | not scorable | not scorable | not scorable | not scorable |
| #### Bn-scaff_20817_1-p1382 all not scorable                   | not scorable | not scorable | not scorable | not scorable | not scorable | not scorable |
| #### Bn-scaff_20817_1-p1552 genome unspecific (all in)         | 0.9880383    | 0.6414748    | 0.9844961    | 0.8163074    | 0.9752066    | 0.8253478    |
| #### Bn-scaff_20817_1-p1719 genome unspecific (all in)         | 0.9784689    | 0.271816     | 0.9922481    | 0.7851321    | 1            | 0.9072468    |
| #### Bn-scaff_20817_1-p5024 genome unspecific (all in)         | 0.9760765    | 0.50701      | 0.9844961    | 0.5788167    | 0.9834711    | 0.6523826    |
| #### Bn-scaff_20817_1-p51382C-genome specific (napus-oleracea) | 0.9856459    | 0.7341422    | 0.9612403    | 0.6717374    | not scorable | not scorable |
| #### Bn-scaff_20817_1-p5668C-genome specific (napus-oleracea)  | 0.9880383    | 0.7902684    | 0.9767442    | 0.8161885    | not scorable | not scorable |
| #### Bn-scaff_20817_1-p6057C-genome specific (napus-oleracea)  | 0.9760765    | 0.6690205    | 0.9844961    | 0.6550958    | not scorable | not scorable |
| #### Bn-scaff_20819_1-p3631 genome unspecific (oleracea-rapa)  | not scorable | not scorable | 0.8449612    | 0.7691039    | 0.9834711    | 0.9264271    |
| #### Bn-scaff_20830_1-p13192C-genome specific (napus-oleracea) | 1            | 0.9096215    | 0.9922481    | 0.8304658    | not scorable | not scorable |
| #### Bn-scaff_20830_1-p1337C-genome specific (oleracea only)   | not scorable | not scorable | 0.9922481    | 0.5367051    | not scorable | not scorable |
| #### Bn-scaff_20830_1-p1833C all not scorable                  | not scorable | not scorable | not scorable | not scorable | not scorable | not scorable |
| #### Bn-scaff_20830_1-p36222C-genome specific (napus-oleracea) | 1            | 0.6638536    | 1            | 0.6952789    | not scorable | not scorable |
| #### Bn-scaff_20830_1-p41132C-genome specific (napus-oleracea) | 1            | 0.7790784    | 1            | 0.7928805    | not scorable | not scorable |
| #### Bn-scaff_20830_1-p6002C-genome specific (napus-oleracea)  | 0.9976076    | 0.6885662    | 1            | 0.7274577    | not scorable | not scorable |
| #### Bn-scaff_20830_1-p6113C-genome specific (napus-oleracea)  | 1            | 0.7693212    | 1            | 0.7242321    | not scorable | not scorable |
| #### Bn-scaff_20830_1-p8261C-genome specific (napus-oleracea)  | 0.9976076    | 0.6394087    | 1            | 0.6263467    | not scorable | not scorable |
| #### Bn-scaff_20835_1-p2147 genome unspecific (all in)         | 0.9688995    | 0.2964421    | 1            | 0.8154992    | 0.9752066    | 0.7230538    |
| #### Bn-scaff_20835_1-p7749 genome unspecific (all in)         | 0.9712918    | 0.3496982    | 1            | 0.8522031    | 0.9834711    | 0.7360423    |
| #### Bn-scaff_20836_1-p10541C-genome specific (napus-oleracea) | 0.8995215    | 0.7737123    | 1            | 0.7888584    | not scorable | not scorable |
| #### Bn-scaff_20836_1-p12562C-genome specific (napus-oleracea) | 0.9138756    | 0.7531515    | 0.9767442    | 0.8070186    | not scorable | not scorable |
| #### Bn-scaff_20836_1-p1284C-genome specific (napus-oleracea)  | 0.9066986    | 0.7391581    | 1            | 0.7905542    | not scorable | not scorable |

|                                                                 |              |              |              |              |              |              |
|-----------------------------------------------------------------|--------------|--------------|--------------|--------------|--------------|--------------|
| #### Bn-scaff_20836_1-p13445 C-genome specific (napus-oleracea) | 0.9760765    | 0.7831809    | 1            | 0.7316027    | not scorable | not scorable |
| #### Bn-scaff_20836_1-p13468 C-genome specific (napus-oleracea) | 0.9593301    | 0.6015217    | 0.9922481    | 0.8329294    | not scorable | not scorable |
| #### Bn-scaff_20836_1-p14274 all not scorable                   | not scorable | not scorable | not scorable | not scorable | not scorable | not scorable |
| #### Bn-scaff_20836_1-p19306 C-genome specific (napus-oleracea) | 0.9210526    | 0.7664423    | 1            | 0.7603438    | not scorable | not scorable |
| #### Bn-scaff_20836_1-p19660 C-genome specific (napus-oleracea) | 0.9162679    | 0.7692007    | 0.9922481    | 0.7608151    | not scorable | not scorable |
| #### Bn-scaff_20836_1-p19738 C-genome specific (napus-oleracea) | 0.9090909    | 0.7680711    | 1            | 0.7728514    | not scorable | not scorable |
| #### Bn-scaff_20836_1-p19794 C-genome specific (napus-oleracea) | 0.9952153    | 0.4881579    | 1            | 0.4745165    | not scorable | not scorable |
| #### Bn-scaff_20836_1-p19839 C-genome specific (napus-oleracea) | 0.9066986    | 0.7198291    | 1            | 0.6904959    | not scorable | not scorable |
| #### Bn-scaff_20836_1-p19880 C-genome specific (napus-oleracea) | 0.9138756    | 0.726205     | 1            | 0.7249829    | not scorable | not scorable |
| #### Bn-scaff_20836_1-p19986 C-genome specific (napus-oleracea) | 0.9186603    | 0.4971088    | 0.9922481    | 0.5707654    | not scorable | not scorable |
| #### Bn-scaff_20836_1-p26047 A-genome specific (rapa only)      | not scorable | not scorable | not scorable | not scorable | 0.8677686    | 0.8105202    |
| #### Bn-scaff_20836_1-p26157 genome unspecific (all in)         | 0.9736842    | 0.3012301    | 1            | 0.668497     | 1            | 0.8004208    |
| #### Bn-scaff_20836_1-p30574 genome unspecific (all in)         | 1            | 0.6364519    | 1            | 0.6212095    | 1            | 0.6457144    |
| #### Bn-scaff_20836_1-p66891 C-genome specific (napus-oleracea) | 0.8995215    | 0.7659461    | 1            | 0.7256595    | not scorable | not scorable |
| #### Bn-scaff_20836_1-p68057 C-genome specific (napus-oleracea) | 0.9090909    | 0.7479001    | 1            | 0.7458417    | not scorable | not scorable |
| #### Bn-scaff_20838_1-p21504 genome unspecific (oleracea-rapa)  | not scorable | not scorable | 1            | 0.7029433    | 1            | 0.868809     |
| #### Bn-scaff_20838_1-p22109 A-genome specific (rapa only)      | not scorable | not scorable | not scorable | not scorable | 0.9917355    | 0.7655357    |
| #### Bn-scaff_20845_1-p200 genome unspecific (all in)           | 1            | 0.8327417    | 1            | 0.8689432    | 1            | 0.8882414    |
| #### Bn-scaff_20866_1-p10821 genome unspecific (all in)         | 0.9880383    | 0.4107285    | 0.9922481    | 0.6387383    | 1            | 0.9072468    |
| #### Bn-scaff_20866_1-p11178 C-genome specific (napus-oleracea) | 0.9832536    | 0.7651941    | 1            | 0.7708572    | not scorable | not scorable |
| #### Bn-scaff_20866_1-p11268 C-genome specific (napus-oleracea) | 1            | 0.9175813    | 1            | 0.8544505    | not scorable | not scorable |
| #### Bn-scaff_20866_1-p15182 A-genome specific (rapa only)      | not scorable | not scorable | not scorable | not scorable | 0.9338843    | 0.7023147    |
| #### Bn-scaff_20866_1-p58663 C-genome specific (napus-oleracea) | 0.9976076    | 0.8286849    | 0.9844961    | 0.7178832    | not scorable | not scorable |
| #### Bn-scaff_20866_1-p60626 C-genome specific (napus-oleracea) | 0.9832536    | 0.735927     | 0.7751938    | 0.6794362    | not scorable | not scorable |
| #### Bn-scaff_20867_1-p28958 all not scorable                   | not scorable | not scorable | not scorable | not scorable | not scorable | not scorable |
| #### Bn-scaff_20881_1-p11760 genome unspecific (oleracea-rapa)  | not scorable | not scorable | 1            | 0.5598221    | 1            | 0.82829      |
| #### Bn-scaff_20881_1-p19298 C-genome specific (napus-oleracea) | 1            | 0.7601674    | 0.9922481    | 0.8168032    | not scorable | not scorable |
| #### Bn-scaff_20890_1-p43595 genome unspecific (all in)         | 1            | 0.786476     | 1            | 0.688857     | 1            | 0.7972026    |
| #### Bn-scaff_20901_1-p10887 genome unspecific (all in)         | 0.9904306    | 0.3902686    | 1            | 0.7703774    | 1            | 0.8270996    |
| #### Bn-scaff_20901_1-p11028 C-genome specific (napus-oleracea) | 0.9808612    | 0.6437808    | 0.9922481    | 0.7374497    | not scorable | not scorable |
| #### Bn-scaff_20901_1-p11032 C-genome specific (napus-oleracea) | 0.9904306    | 0.695567     | 1            | 0.7053689    | not scorable | not scorable |
| #### Bn-scaff_20901_1-p11102 C-genome specific (napus-oleracea) | 0.9952153    | 0.7733678    | 1            | 0.6759589    | not scorable | not scorable |
| #### Bn-scaff_20901_1-p11241 C-genome specific (oleracea only)  | not scorable | not scorable | 0.8449612    | 0.8947284    | not scorable | not scorable |

|                                                                |              |              |              |              |              |              |
|----------------------------------------------------------------|--------------|--------------|--------------|--------------|--------------|--------------|
| #### Bn-scaff_20901_1-p11982genome unspecific (all in)         | 1            | 0.6425948    | 0.9689922    | 0.6206473    | 1            | 0.7964694    |
| #### Bn-scaff_20901_1-p12108C-genome specific (oleracea only)  | not scorable | not scorable | 1            | 0.677426     | not scorable | not scorable |
| #### Bn-scaff_20901_1-p12209C-genome specific (napus-oleracea) | 0.9976076    | 0.9233187    | 1            | 0.7561573    | not scorable | not scorable |
| #### Bn-scaff_20901_1-p12464C-genome specific (napus-oleracea) | 0.9952153    | 0.8232458    | 1            | 0.7335254    | not scorable | not scorable |
| #### Bn-scaff_20901_1-p12474C-genome specific (napus-oleracea) | 0.9952153    | 0.7672976    | 1            | 0.7838159    | not scorable | not scorable |
| #### Bn-scaff_20901_1-p12796C-genome specific (napus-oleracea) | 0.9928229    | 0.8232797    | 0.9844961    | 0.8298393    | not scorable | not scorable |
| #### Bn-scaff_20901_1-p12932C-genome specific (napus-oleracea) | 0.9617225    | 0.7651854    | 1            | 0.789126     | not scorable | not scorable |
| #### Bn-scaff_20901_1-p12933C-genome specific (napus-oleracea) | 0.9928229    | 0.7655216    | 1            | 0.7551047    | not scorable | not scorable |
| #### Bn-scaff_20901_1-p13009genome unspecific (all in)         | 0.9760765    | 0.5390777    | 1            | 0.6205184    | 1            | 0.8223428    |
| #### Bn-scaff_20901_1-p13101C-genome specific (napus-oleracea) | 0.9808612    | 0.6192138    | 0.9922481    | 0.6122371    | not scorable | not scorable |
| #### Bn-scaff_20901_1-p13112C-genome specific (napus-oleracea) | 0.9808612    | 0.7322522    | 0.9922481    | 0.7756199    | not scorable | not scorable |
| #### Bn-scaff_20901_1-p14881all not scorable                   | not scorable | not scorable | not scorable | not scorable | not scorable | not scorable |
| #### Bn-scaff_20901_1-p15028C-genome specific (napus-oleracea) | 0.9976076    | 0.7479022    | 0.9844961    | 0.8270501    | not scorable | not scorable |
| #### Bn-scaff_20901_1-p15050genome unspecific (all in)         | 0.9928229    | 0.4038977    | 0.9844961    | 0.8211426    | 1            | 0.9104459    |
| #### Bn-scaff_20901_1-p15055genome unspecific (all in)         | 0.9928229    | 0.7739446    | 1            | 0.6818476    | 0.9669421    | 0.8687596    |
| #### Bn-scaff_20901_1-p15061genome unspecific (oleracea-rapa)  | not scorable | not scorable | 0.9379845    | 0.401159     | 1            | 0.8433921    |
| #### Bn-scaff_20901_1-p15099genome unspecific (all in)         | 0.9736842    | 0.3511845    | 1            | 0.7354653    | 1            | 0.9116826    |
| #### Bn-scaff_20901_1-p15102C-genome specific (napus-oleracea) | 0.9904306    | 0.7991852    | 1            | 0.70286      | not scorable | not scorable |
| #### Bn-scaff_20901_1-p15102genome unspecific (all in)         | 0.9760765    | 0.2539194    | 1            | 0.717028     | 1            | 0.8453729    |
| #### Bn-scaff_20901_1-p15379napus specific                     | 0.9545454    | 0.7791005    | not scorable | not scorable | not scorable | not scorable |
| #### Bn-scaff_20901_1-p15427C-genome specific (napus-oleracea) | 0.9856459    | 0.6884212    | 1            | 0.6780593    | not scorable | not scorable |
| #### Bn-scaff_20901_1-p15773genome unspecific (all in)         | 1            | 0.3536917    | 1            | 0.7328606    | 0.9834711    | 0.6795428    |
| #### Bn-scaff_20901_1-p15870genome unspecific (oleracea-rapa)  | not scorable | not scorable | 1            | 0.6659235    | 1            | 0.642917     |
| #### Bn-scaff_20901_1-p15896C-genome specific (napus-oleracea) | 0.9976076    | 0.7597998    | 0.9922481    | 0.74481      | not scorable | not scorable |
| #### Bn-scaff_20901_1-p15908C-genome specific (napus-oleracea) | 1            | 0.618601     | 1            | 0.6635263    | not scorable | not scorable |
| #### Bn-scaff_20901_1-p15982C-genome specific (napus-oleracea) | 0.9760765    | 0.7504134    | 0.9922481    | 0.733533     | not scorable | not scorable |
| #### Bn-scaff_20901_1-p16063genome unspecific (all in)         | 0.9617225    | 0.5436015    | 0.9922481    | 0.6128944    | 0.9586777    | 0.7054393    |
| #### Bn-scaff_20901_1-p16064C-genome specific (napus-oleracea) | 0.9904306    | 0.7749988    | 0.9922481    | 0.6994426    | not scorable | not scorable |
| #### Bn-scaff_20901_1-p16138C-genome specific (napus-oleracea) | 0.9856459    | 0.7451862    | 0.9922481    | 0.7849835    | not scorable | not scorable |
| #### Bn-scaff_20901_1-p16216genome unspecific (all in)         | 0.9856459    | 0.5533078    | 0.9922481    | 0.756627     | 1            | 0.9067279    |
| #### Bn-scaff_20901_1-p16412C-genome specific (napus-oleracea) | 0.9928229    | 0.7839657    | 0.9844961    | 0.7111437    | not scorable | not scorable |
| #### Bn-scaff_20901_1-p16743genome unspecific (all in)         | 1            | 0.7120423    | 1            | 0.576468     | 1            | 0.7283736    |
| #### Bn-scaff_20901_1-p16813C-genome specific (napus-oleracea) | 0.9904306    | 0.7597395    | 0.9922481    | 0.7135632    | not scorable | not scorable |



|                                                                 |           |           |              |              |              |              |
|-----------------------------------------------------------------|-----------|-----------|--------------|--------------|--------------|--------------|
| #### Bn-scaff_20901_1-p17055 C-genome specific (napus-oleracea) | 0.9784689 | 0.7376385 | 0.9922481    | 0.7165808    | not scorable | not scorable |
| #### Bn-scaff_20901_1-p17193 genome unspecific (all in)         | 0.9808612 | 0.6325513 | 1            | 0.650753     | 1            | 0.9355843    |
| #### Bn-scaff_20901_1-p17362 genome unspecific (all in)         | 0.9760765 | 0.5985535 | 1            | 0.7123353    | 1            | 0.8942072    |
| #### Bn-scaff_20901_1-p17435 genome unspecific (all in)         | 0.9904306 | 0.3399972 | 1            | 0.6366681    | 0.9752066    | 0.5677708    |
| #### Bn-scaff_20901_1-p17605 C-genome specific (napus-oleracea) | 0.9736842 | 0.7767574 | 0.7906977    | 0.7693461    | not scorable | not scorable |
| #### Bn-scaff_20901_1-p17619 C-genome specific (napus-oleracea) | 0.9952153 | 0.7998264 | 1            | 0.7431207    | not scorable | not scorable |
| #### Bn-scaff_20901_1-p17655 genome unspecific (all in)         | 1         | 0.5743468 | 1            | 0.5133914    | 1            | 0.651347     |
| #### Bn-scaff_20901_1-p17830 C-genome specific (napus-oleracea) | 1         | 0.6699126 | 1            | 0.6605374    | not scorable | not scorable |
| #### Bn-scaff_20901_1-p17833 genome unspecific (all in)         | 0.9952153 | 0.6185864 | 1            | 0.7720731    | 0.9917355    | 0.6073185    |
| #### Bn-scaff_20901_1-p17836 C-genome specific (napus-oleracea) | 1         | 0.8360988 | 0.9922481    | 0.7763525    | not scorable | not scorable |
| #### Bn-scaff_20901_1-p18813 genome unspecific (all in)         | 0.9952153 | 0.4594541 | 1            | 0.7861562    | 0.9917355    | 0.784695     |
| #### Bn-scaff_20901_1-p18925 genome unspecific (all in)         | 0.9880383 | 0.2620056 | 0.9612403    | 0.7267357    | 1            | 0.6731301    |
| #### Bn-scaff_20901_1-p20135 C-genome specific (napus-oleracea) | 0.9832536 | 0.764182  | 0.9224806    | 0.8336718    | not scorable | not scorable |
| #### Bn-scaff_20901_1-p20153 C-genome specific (napus-oleracea) | 0.9928229 | 0.7966691 | 0.9069768    | 0.764631     | not scorable | not scorable |
| #### Bn-scaff_20901_1-p20183 genome unspecific (all in)         | 1         | 0.8327661 | 1            | 0.7824795    | 0.9917355    | 0.8485781    |
| #### Bn-scaff_20901_1-p20195 genome unspecific (all in)         | 0.9880383 | 0.4655673 | 0.9689922    | 0.4232875    | 1            | 0.8974723    |
| #### Bn-scaff_20901_1-p20282 C-genome specific (napus-oleracea) | 1         | 0.7102098 | 0.9922481    | 0.6351158    | not scorable | not scorable |
| #### Bn-scaff_20901_1-p20296 C-genome specific (napus-oleracea) | 0.9880383 | 0.7538896 | 0.9844961    | 0.8770598    | not scorable | not scorable |
| #### Bn-scaff_20901_1-p20396 C-genome specific (napus-oleracea) | 0.9928229 | 0.601926  | 0.9689922    | 0.6281049    | not scorable | not scorable |
| #### Bn-scaff_20901_1-p20402 C-genome specific (napus-oleracea) | 0.9904306 | 0.7001027 | 0.9767442    | 0.6820546    | not scorable | not scorable |
| #### Bn-scaff_20901_1-p20667 C-genome specific (napus-oleracea) | 0.6052632 | 0.9132755 | 0.8604651    | 0.6642871    | not scorable | not scorable |
| #### Bn-scaff_20901_1-p20784 C-genome specific (napus-oleracea) | 0.6052632 | 0.6698157 | 0.8604651    | 0.6977262    | not scorable | not scorable |
| #### Bn-scaff_20901_1-p20818 A-genome specific (napus-rapa)     | 0.9688995 | 0.2423152 | not scorable | not scorable | 1            | 0.7641606    |
| #### Bn-scaff_20901_1-p20946 C-genome specific (napus-oleracea) | 0.9736842 | 0.6854145 | 0.9844961    | 0.7156942    | not scorable | not scorable |
| #### Bn-scaff_20901_1-p20963 C-genome specific (napus-oleracea) | 0.9856459 | 0.6491383 | 0.9767442    | 0.7186128    | not scorable | not scorable |
| #### Bn-scaff_20901_1-p21169 C-genome specific (napus-oleracea) | 0.9928229 | 0.7530786 | 1            | 0.6667518    | not scorable | not scorable |
| #### Bn-scaff_20901_1-p21253 C-genome specific (napus-oleracea) | 0.9952153 | 0.7924657 | 0.9922481    | 0.8083651    | not scorable | not scorable |
| #### Bn-scaff_20901_1-p21551 C-genome specific (napus-oleracea) | 0.9976076 | 0.8391924 | 1            | 0.8174179    | not scorable | not scorable |
| #### Bn-scaff_20901_1-p21598 C-genome specific (napus-oleracea) | 0.9928229 | 0.8306274 | 1            | 0.7495975    | not scorable | not scorable |
| #### Bn-scaff_20901_1-p21601 C-genome specific (napus-oleracea) | 0.9952153 | 0.7416366 | 1            | 0.7615252    | not scorable | not scorable |
| #### Bn-scaff_20901_1-p22038 C-genome specific (napus-oleracea) | 0.9736842 | 0.7805295 | 1            | 0.705564     | not scorable | not scorable |
| #### Bn-scaff_20901_1-p24626 C-genome specific (napus-oleracea) | 0.9952153 | 0.9205657 | 0.9689922    | 0.8578107    | not scorable | not scorable |
| #### Bn-scaff_20901_1-p24968 C-genome specific (napus-oleracea) | 0.9976076 | 0.6895843 | 0.9922481    | 0.6495157    | not scorable | not scorable |

|                                                                |              |              |              |              |              |              |
|----------------------------------------------------------------|--------------|--------------|--------------|--------------|--------------|--------------|
| #### Bn-scaff_20901_1-p25031C-genome specific (napus-oleracea) | 1            | 0.7400641    | 0.9767442    | 0.8210014    | not scorable | not scorable |
| #### Bn-scaff_20901_1-p25302C-genome specific (oleracea only)  | not scorable | not scorable | 0.8914729    | 0.7907909    | not scorable | not scorable |
| #### Bn-scaff_20901_1-p27638C-genome specific (napus-oleracea) | 0.9904306    | 0.4795782    | 0.9844961    | 0.5235084    | not scorable | not scorable |
| #### Bn-scaff_20901_1-p28781genome unspecific (all in)         | 1            | 0.3388164    | 1            | 0.648076     | 0.9917355    | 0.7128333    |
| #### Bn-scaff_20901_1-p29881napus specific                     | 0.9808612    | 0.7441044    | not scorable | not scorable | not scorable | not scorable |
| #### Bn-scaff_20901_1-p29965C-genome specific (napus-oleracea) | 0.9976076    | 0.647849     | 0.9922481    | 0.7168652    | not scorable | not scorable |
| #### Bn-scaff_20901_1-p30194C-genome specific (napus-oleracea) | 0.9976076    | 0.7108586    | 1            | 0.6677831    | not scorable | not scorable |
| #### Bn-scaff_20901_1-p33587C-genome specific (napus-oleracea) | 0.9976076    | 0.6250679    | 1            | 0.7264969    | not scorable | not scorable |
| #### Bn-scaff_20901_1-p34531C-genome specific (napus-oleracea) | 1            | 0.744381     | 0.9922481    | 0.8227785    | not scorable | not scorable |
| #### Bn-scaff_20901_1-p34824C-genome specific (napus-oleracea) | 1            | 0.6938753    | 1            | 0.7655987    | not scorable | not scorable |
| #### Bn-scaff_20901_1-p36503C-genome specific (napus-oleracea) | 0.9976076    | 0.7017024    | 0.9922481    | 0.6832952    | not scorable | not scorable |
| #### Bn-scaff_20901_1-p36901C-genome specific (napus-oleracea) | 0.9976076    | 0.7372333    | 0.9922481    | 0.849916     | not scorable | not scorable |
| #### Bn-scaff_20901_1-p37576C-genome specific (napus-oleracea) | 0.9258373    | 0.7640152    | 0.9922481    | 0.7114865    | not scorable | not scorable |
| #### Bn-scaff_20901_1-p37589C-genome specific (napus-oleracea) | 0.9808612    | 0.8323923    | 1            | 0.8242514    | not scorable | not scorable |
| #### Bn-scaff_20901_1-p38064C-genome specific (napus-oleracea) | 0.9784689    | 0.8070496    | 1            | 0.8419064    | not scorable | not scorable |
| #### Bn-scaff_20901_1-p38607all not scorable                   | not scorable | not scorable | not scorable | not scorable | not scorable | not scorable |
| #### Bn-scaff_20901_1-p40376C-genome specific (napus-oleracea) | 0.9880383    | 0.665759     | 1            | 0.6489927    | not scorable | not scorable |
| #### Bn-scaff_20901_1-p44921C-genome specific (napus-oleracea) | 0.9976076    | 0.8289338    | 1            | 0.8752536    | not scorable | not scorable |
| #### Bn-scaff_20901_1-p44988C-genome specific (napus-oleracea) | 1            | 0.5132108    | 1            | 0.5924665    | not scorable | not scorable |
| #### Bn-scaff_20901_1-p56691genome unspecific (all in)         | 0.9856459    | 0.4403947    | 1            | 0.8053452    | 0.9752066    | 0.787383     |
| #### Bn-scaff_20901_1-p58039C-genome specific (oleracea only)  | not scorable | not scorable | 0.8604651    | 0.8463475    | not scorable | not scorable |
| #### Bn-scaff_20901_1-p58099genome unspecific (all in)         | 1            | 0.5707267    | 1            | 0.7041362    | 0.9834711    | 0.7231797    |
| #### Bn-scaff_20901_1-p58343C-genome specific (napus-oleracea) | 0.9928229    | 0.7629681    | 1            | 0.7148552    | not scorable | not scorable |
| #### Bn-scaff_20901_1-p58670genome unspecific (all in)         | 0.9952153    | 0.3710793    | 1            | 0.7738965    | 1            | 0.8735298    |
| #### Bn-scaff_20901_1-p59547C-genome specific (napus-oleracea) | 0.9928229    | 0.7637195    | 1            | 0.8280367    | not scorable | not scorable |
| #### Bn-scaff_20901_1-p59747C-genome specific (napus-oleracea) | 0.9904306    | 0.6941054    | 0.9844961    | 0.7043232    | not scorable | not scorable |
| #### Bn-scaff_20901_1-p64727C-genome specific (napus-oleracea) | 0.9832536    | 0.7736894    | 1            | 0.7316726    | not scorable | not scorable |
| #### Bn-scaff_20901_1-p65337genome unspecific (all in)         | 0.9736842    | 0.4141377    | 1            | 0.6587611    | 1            | 0.8088829    |
| #### Bn-scaff_20901_1-p65349C-genome specific (napus-oleracea) | 0.9928229    | 0.7366749    | 1            | 0.6739688    | not scorable | not scorable |
| #### Bn-scaff_20901_1-p65647C-genome specific (napus-oleracea) | 0.9736842    | 0.5351222    | 0.9922481    | 0.6897464    | not scorable | not scorable |
| #### Bn-scaff_20901_1-p66034C-genome specific (napus-oleracea) | 0.9736842    | 0.4241782    | 0.9844961    | 0.5399823    | not scorable | not scorable |
| #### Bn-scaff_20901_1-p66052C-genome specific (napus-oleracea) | 0.9832536    | 0.7751957    | 0.9922481    | 0.7711223    | not scorable | not scorable |
| #### Bn-scaff_20901_1-p66061C-genome specific (napus-oleracea) | 0.9760765    | 0.8115861    | 1            | 0.7660907    | not scorable | not scorable |

|                                                                 |              |              |              |              |              |              |
|-----------------------------------------------------------------|--------------|--------------|--------------|--------------|--------------|--------------|
| #### Bn-scaff_20901_1-p85467 C-genome specific (napus-oleracea) | 0.9928229    | 0.832171     | 0.9844961    | 0.6131488    | not scorable | not scorable |
| #### Bn-scaff_20901_1-p85733 C-genome specific (napus-oleracea) | 0.9904306    | 0.7535069    | 0.9922481    | 0.6712427    | not scorable | not scorable |
| #### Bn-scaff_20901_1-p85884 genome unspecific (oleracea-rapa)  | not scorable | not scorable | 0.9379845    | 0.2960916    | 0.9504132    | 0.91136      |
| #### Bn-scaff_20901_1-p85931 C-genome specific (napus-oleracea) | 0.9976076    | 0.2533508    | 1            | 0.421393     | not scorable | not scorable |
| #### Bn-scaff_20901_1-p87058 A-genome specific (napus-rapa)     | 0.9760765    | 0.2297603    | not scorable | not scorable | 1            | 0.5320534    |
| #### Bn-scaff_20901_1-p87526 genome unspecific (all in)         | 0.9736842    | 0.3723539    | 1            | 0.7838334    | 1            | 0.6322637    |
| #### Bn-scaff_20901_1-p87936 C-genome specific (napus-oleracea) | 0.9952153    | 0.8380368    | 0.9922481    | 0.8059025    | not scorable | not scorable |
| #### Bn-scaff_20901_1-p88082 C-genome specific (napus-oleracea) | 0.9880383    | 0.7693477    | 0.9844961    | 0.7576342    | not scorable | not scorable |
| #### Bn-scaff_20901_1-p88213 C-genome specific (napus-oleracea) | 0.9928229    | 0.8087496    | 1            | 0.8248241    | not scorable | not scorable |
| #### Bn-scaff_20901_1-p88487 genome unspecific (all in)         | 0.8588517    | 0.2185796    | 1            | 0.4875811    | 1            | 0.5235622    |
| #### Bn-scaff_20901_1-p89095 C-genome specific (napus-oleracea) | 0.9904306    | 0.7763143    | 1            | 0.8219877    | not scorable | not scorable |
| #### Bn-scaff_20901_1-p89434 C-genome specific (napus-oleracea) | 0.9904306    | 0.7672179    | 1            | 0.7597397    | not scorable | not scorable |
| #### Bn-scaff_20901_1-p90029 C-genome specific (napus-oleracea) | 0.9449761    | 0.7937389    | 0.4883721    | 0.7369743    | not scorable | not scorable |
| #### Bn-scaff_20901_1-p90175 C-genome specific (napus-oleracea) | 0.9401914    | 0.7609875    | 0.503876     | 0.8004827    | not scorable | not scorable |
| #### Bn-scaff_20901_1-p91159 C-genome specific (napus-oleracea) | 0.9066986    | 0.7076693    | 0.8372093    | 0.7683972    | not scorable | not scorable |
| #### Bn-scaff_20901_1-p92022 C-genome specific (napus-oleracea) | 0.9856459    | 0.707799     | 0.9844961    | 0.8343484    | not scorable | not scorable |
| #### Bn-scaff_20901_1-p92053 C-genome specific (napus-oleracea) | 0.9832536    | 0.7719929    | 0.9689922    | 0.8218815    | not scorable | not scorable |
| #### Bn-scaff_20901_1-p92079 C-genome specific (napus-oleracea) | 0.9880383    | 0.6693003    | 1            | 0.6928391    | not scorable | not scorable |
| #### Bn-scaff_20901_1-p92094 C-genome specific (napus-oleracea) | 0.8444976    | 0.6801125    | 0.9457364    | 0.6139894    | not scorable | not scorable |
| #### Bn-scaff_20901_1-p92123 C-genome specific (napus-oleracea) | 0.9928229    | 0.6662356    | 1            | 0.7214598    | not scorable | not scorable |
| #### Bn-scaff_20901_1-p92148 C-genome specific (napus-oleracea) | 0.9760765    | 0.7781911    | 1            | 0.802175     | not scorable | not scorable |
| #### Bn-scaff_20901_1-p92155 C-genome specific (napus-oleracea) | 0.9904306    | 0.7780797    | 0.9844961    | 0.8611996    | not scorable | not scorable |
| #### Bn-scaff_20901_1-p93462 C-genome specific (napus-oleracea) | 0.8325359    | 0.8293141    | 0.7286822    | 0.6787554    | not scorable | not scorable |
| #### Bn-scaff_20901_1-p93471 C-genome specific (napus-oleracea) | 0.9856459    | 0.7685838    | 0.9844961    | 0.8047169    | not scorable | not scorable |
| #### Bn-scaff_20901_1-p94581 C-genome specific (napus-oleracea) | 0.9760765    | 0.737794     | 0.9689922    | 0.7042567    | not scorable | not scorable |
| #### Bn-scaff_20901_1-p94805 C-genome specific (napus-oleracea) | 0.9880383    | 0.8130794    | 0.9534883    | 0.8905531    | not scorable | not scorable |
| #### Bn-scaff_20901_1-p94837 C-genome specific (napus-oleracea) | 0.9976076    | 0.8386187    | 1            | 0.6836637    | not scorable | not scorable |
| #### Bn-scaff_20901_1-p95053 genome unspecific (oleracea-rapa)  | not scorable | not scorable | 0.9302326    | 0.4558484    | 1            | 0.8653011    |
| #### Bn-scaff_20901_1-p95060 genome unspecific (all in)         | 0.9808612    | 0.25143      | 0.9612403    | 0.4732849    | 1            | 0.7770717    |
| #### Bn-scaff_20901_1-p95101 genome unspecific (all in)         | 1            | 0.368872     | 1            | 0.712685     | 1            | 0.8887821    |
| #### Bn-scaff_20901_1-p95136 genome unspecific (all in)         | 0.9449761    | 0.3034075    | 1            | 0.7249781    | 0.9752066    | 0.7120681    |
| #### Bn-scaff_20901_1-p99013 C-genome specific (napus-oleracea) | 0.9904306    | 0.7575099    | 1            | 0.7496845    | not scorable | not scorable |
| #### Bn-scaff_20903_1-p26467 C-genome specific (napus-oleracea) | 0.8875598    | 0.7478269    | 1            | 0.778579     | not scorable | not scorable |

|                                                                 |              |              |              |              |              |              |
|-----------------------------------------------------------------|--------------|--------------|--------------|--------------|--------------|--------------|
| #### Bn-scaff_20903_1-p27547 C-genome specific (napus-oleracea) | 0.8684211    | 0.7031115    | 0.9534883    | 0.7134958    | not scorable | not scorable |
| #### Bn-scaff_20903_1-p27902 napus specific                     | 0.9856459    | 0.3664538    | not scorable | not scorable | not scorable | not scorable |
| #### Bn-scaff_20903_1-p30081 genome unspecific (all in)         | 0.9928229    | 0.274455     | 0.9922481    | 0.7679203    | 1            | 0.8815182    |
| #### Bn-scaff_20903_1-p31026 C-genome specific (napus-oleracea) | 0.9138756    | 0.6964929    | 0.9767442    | 0.7547669    | not scorable | not scorable |
| #### Bn-scaff_20903_1-p32170 C-genome specific (napus-oleracea) | 0.9066986    | 0.6661784    | 0.9612403    | 0.7916296    | not scorable | not scorable |
| #### Bn-scaff_20903_1-p34144 C-genome specific (napus-oleracea) | 0.9066986    | 0.7187083    | 0.9922481    | 0.8046511    | not scorable | not scorable |
| #### Bn-scaff_20903_1-p35108 C-genome specific (napus-oleracea) | 0.8899522    | 0.6532316    | 1            | 0.7709502    | not scorable | not scorable |
| #### Bn-scaff_20903_1-p36144 C-genome specific (oleracea only)  | not scorable | not scorable | 0.7054263    | 0.7532372    | not scorable | not scorable |
| #### Bn-scaff_20903_1-p37404 genome unspecific (all in)         | 1            | 0.8960273    | 0.9922481    | 0.7840207    | 1            | 0.8678525    |
| #### Bn-scaff_20903_1-p37907 C-genome specific (napus-oleracea) | 0.9162679    | 0.7897314    | 0.9767442    | 0.7234621    | not scorable | not scorable |
| #### Bn-scaff_20903_1-p38065 genome unspecific (all in)         | 0.9688995    | 0.6834987    | 1            | 0.718108     | 1            | 0.925627     |
| #### Bn-scaff_20903_1-p38574 C-genome specific (napus-oleracea) | 0.8947368    | 0.652227     | 0.7829458    | 0.6014239    | not scorable | not scorable |
| #### Bn-scaff_20903_1-p39889 genome unspecific (all in)         | 0.9880383    | 0.30423      | 1            | 0.7904114    | 0.9917355    | 0.8000057    |
| #### Bn-scaff_20903_1-p40173 C-genome specific (napus-oleracea) | 0.9019139    | 0.6888211    | 0.9844961    | 0.8115303    | not scorable | not scorable |
| #### Bn-scaff_20903_1-p41772 C-genome specific (napus-oleracea) | 0.8923445    | 0.6913501    | 0.8992248    | 0.7341567    | not scorable | not scorable |
| #### Bn-scaff_20903_1-p42136 all not scorable                   | not scorable | not scorable | not scorable | not scorable | not scorable | not scorable |
| #### Bn-scaff_20903_1-p42455 C-genome specific (oleracea only)  | not scorable | not scorable | 0.9302326    | 0.8018759    | not scorable | not scorable |
| #### Bn-scaff_20903_1-p45355 C-genome specific (napus-oleracea) | 0.8875598    | 0.6744812    | 0.9689922    | 0.7191871    | not scorable | not scorable |
| #### Bn-scaff_20903_1-p45553 C-genome specific (napus-oleracea) | 0.8971292    | 0.7291861    | 0.9224806    | 0.814373     | not scorable | not scorable |
| #### Bn-scaff_20903_1-p45655 C-genome specific (napus-oleracea) | 0.8947368    | 0.6685599    | 0.9224806    | 0.8140981    | not scorable | not scorable |
| #### Bn-scaff_20903_1-p47043 C-genome specific (napus-oleracea) | 0.8971292    | 0.7240025    | 0.9922481    | 0.7775454    | not scorable | not scorable |
| #### Bn-scaff_20903_1-p47073 C-genome specific (napus-oleracea) | 0.9043062    | 0.690038     | 0.9612403    | 0.7489935    | not scorable | not scorable |
| #### Bn-scaff_20903_1-p48572 C-genome specific (napus-oleracea) | 0.8421053    | 0.7067898    | 0.875969     | 0.7891023    | not scorable | not scorable |
| #### Bn-scaff_20903_1-p51720 genome unspecific (all in)         | 0.9569378    | 0.5343438    | 0.9922481    | 0.7815119    | 1            | 0.8269961    |
| #### Bn-scaff_20908_1-p6153 genome unspecific (oleracea-rapa)   | not scorable | not scorable | 1            | 0.7522086    | 1            | 0.549558     |
| #### Bn-scaff_20942_1-p10934 C-genome specific (napus-oleracea) | 0.9904306    | 0.9110949    | 1            | 0.7771382    | not scorable | not scorable |
| #### Bn-scaff_20942_1-p12193 C-genome specific (napus-oleracea) | 0.9784689    | 0.7175389    | 0.9844961    | 0.7516456    | not scorable | not scorable |
| #### Bn-scaff_20942_1-p12512 C-genome specific (napus-oleracea) | 0.9784689    | 0.689692     | 1            | 0.6703264    | not scorable | not scorable |
| #### Bn-scaff_20942_1-p14117 C-genome specific (napus-oleracea) | 0.9784689    | 0.7632224    | 1            | 0.8589336    | not scorable | not scorable |
| #### Bn-scaff_20942_1-p14920 genome unspecific (all in)         | 0.9712918    | 0.3255872    | 1            | 0.8396381    | 0.9752066    | 0.7964792    |
| #### Bn-scaff_20942_1-p15224 C-genome specific (napus-oleracea) | 0.9808612    | 0.7511106    | 0.9922481    | 0.8727376    | not scorable | not scorable |
| #### Bn-scaff_20942_1-p15382 C-genome specific (napus-oleracea) | 0.6435407    | 0.6671629    | 0.9922481    | 0.7329004    | not scorable | not scorable |
| #### Bn-scaff_20942_1-p15391 C-genome specific (napus-oleracea) | 0.645933     | 0.7740005    | 0.9922481    | 0.6976181    | not scorable | not scorable |

|                                                                 |              |              |              |              |              |              |
|-----------------------------------------------------------------|--------------|--------------|--------------|--------------|--------------|--------------|
| #### Bn-scaff_20942_1-p15504 C-genome specific (oleracea only)  | not scorable | not scorable | 0.9844961    | 0.7420515    | not scorable | not scorable |
| #### Bn-scaff_20942_1-p15740 genome unspecific (oleracea-rapa)  | not scorable | not scorable | 1            | 0.7883255    | 0.9917355    | 0.8974569    |
| #### Bn-scaff_20942_1-p16554 C-genome specific (napus-oleracea) | 0.6483254    | 0.8324237    | 1            | 0.80906      | not scorable | not scorable |
| #### Bn-scaff_20942_1-p17019 all not scorable                   | not scorable | not scorable | not scorable | not scorable | not scorable | not scorable |
| #### Bn-scaff_20942_1-p17930 C-genome specific (napus-oleracea) | 0.6483254    | 0.7413193    | 1            | 0.8396743    | not scorable | not scorable |
| #### Bn-scaff_20942_1-p18027 C-genome specific (napus-oleracea) | 0.6411483    | 0.7021128    | 0.9922481    | 0.7902774    | not scorable | not scorable |
| #### Bn-scaff_20942_1-p18038 C-genome specific (napus-oleracea) | 0.6483254    | 0.7369497    | 1            | 0.8389751    | not scorable | not scorable |
| #### Bn-scaff_20942_1-p18087 C-genome specific (napus-oleracea) | 0.6507177    | 0.4367632    | 1            | 0.7436334    | not scorable | not scorable |
| #### Bn-scaff_20942_1-p18096 C-genome specific (napus-oleracea) | 0.638756     | 0.7970411    | 0.9922481    | 0.8496019    | not scorable | not scorable |
| #### Bn-scaff_20942_1-p18101 C-genome specific (napus-oleracea) | 0.638756     | 0.6398788    | 1            | 0.7956627    | not scorable | not scorable |
| #### Bn-scaff_20942_1-p18461 genome unspecific (all in)         | 0.6961722    | 0.6833326    | 0.9922481    | 0.713495     | 0.9834711    | 0.8438923    |
| #### Bn-scaff_20942_1-p18526 genome unspecific (oleracea-rapa)  | not scorable | not scorable | 1            | 0.7027261    | 1            | 0.8815182    |
| #### Bn-scaff_20942_1-p21122 C-genome specific (napus-oleracea) | 0.9904306    | 0.8903058    | 1            | 0.7790921    | not scorable | not scorable |
| #### Bn-scaff_20942_1-p22268 genome unspecific (all in)         | 0.6267943    | 0.4995376    | 0.9922481    | 0.5743943    | 0.9917355    | 0.6046559    |
| #### Bn-scaff_20942_1-p22694 genome unspecific (all in)         | 0.6076555    | 0.5202415    | 1            | 0.5916254    | 1            | 0.9258212    |
| #### Bn-scaff_20942_1-p23428 C-genome specific (napus-oleracea) | 0.9904306    | 0.9331539    | 1            | 0.8306848    | not scorable | not scorable |
| #### Bn-scaff_20942_1-p23436 C-genome specific (napus-oleracea) | 0.9808612    | 0.8028776    | 0.8837209    | 0.7269293    | not scorable | not scorable |
| #### Bn-scaff_20942_1-p23487 C-genome specific (napus-oleracea) | 0.9904306    | 0.6133399    | 1            | 0.6093923    | not scorable | not scorable |
| #### Bn-scaff_20942_1-p24376 C-genome specific (napus-oleracea) | 0.9808612    | 0.7825536    | 1            | 0.735859     | not scorable | not scorable |
| #### Bn-scaff_20942_1-p24469 C-genome specific (napus-oleracea) | 0.9904306    | 0.7964504    | 1            | 0.772759     | not scorable | not scorable |
| #### Bn-scaff_20942_1-p24480 genome unspecific (all in)         | 0.9928229    | 0.4836944    | 1            | 0.7304901    | 1            | 0.9065311    |
| #### Bn-scaff_20942_1-p24541 genome unspecific (all in)         | 0.9928229    | 0.5978126    | 0.9844961    | 0.7790939    | 1            | 0.9175813    |
| #### Bn-scaff_20942_1-p24565 C-genome specific (napus-oleracea) | 0.9856459    | 0.670435     | 0.9922481    | 0.8282957    | not scorable | not scorable |
| #### Bn-scaff_20942_1-p24657 C-genome specific (napus-oleracea) | 0.9904306    | 0.6576771    | 1            | 0.5841192    | not scorable | not scorable |
| #### Bn-scaff_20942_1-p24691 C-genome specific (napus-oleracea) | 0.9856459    | 0.7658357    | 1            | 0.7844557    | not scorable | not scorable |
| #### Bn-scaff_20942_1-p24772 C-genome specific (napus-oleracea) | 0.9904306    | 0.6211048    | 1            | 0.5723318    | not scorable | not scorable |
| #### Bn-scaff_20942_1-p25252 genome unspecific (all in)         | 0.9856459    | 0.4014067    | 1            | 0.7916479    | 1            | 0.9120241    |
| #### Bn-scaff_20942_1-p26299 C-genome specific (napus-oleracea) | 0.9593301    | 0.6425536    | 0.9922481    | 0.8414277    | not scorable | not scorable |
| #### Bn-scaff_20942_1-p30228 C-genome specific (napus-oleracea) | 0.9928229    | 0.800185     | 1            | 0.7236518    | not scorable | not scorable |
| #### Bn-scaff_20942_1-p30263 C-genome specific (napus-oleracea) | 0.9928229    | 0.8672584    | 1            | 0.7941552    | not scorable | not scorable |
| #### Bn-scaff_20942_1-p30718 C-genome specific (napus-oleracea) | 0.9928229    | 0.76482      | 1            | 0.7242233    | not scorable | not scorable |
| #### Bn-scaff_20942_1-p30958 genome unspecific (all in)         | 0.9904306    | 0.4112427    | 0.9922481    | 0.6280308    | 1            | 0.8037614    |
| #### Bn-scaff_20942_1-p31126 genome unspecific (all in)         | 0.9976076    | 0.7139354    | 1            | 0.6287718    | 1            | 0.881658     |

|                                                                |              |              |              |              |              |              |              |
|----------------------------------------------------------------|--------------|--------------|--------------|--------------|--------------|--------------|--------------|
| #### Bn-scaff_20942_1-p32387genome unspecific (oleracea-rapa)  | not scorable | not scorable |              | 1            | 0.7437963    | 0.9917355    | 0.8709932    |
| #### Bn-scaff_20942_1-p32962genome unspecific (all in)         | 0.9952153    | 0.3020988    |              | 1            | 0.701458     |              | 1 0.7522059  |
| #### Bn-scaff_20942_1-p34454genome unspecific (all in)         | 0.9808612    | 0.3453194    |              | 1            | 0.6329269    |              | 1 0.8947248  |
| #### Bn-scaff_20942_1-p34658C-genome specific (napus-oleracea) | 0.9880383    | 0.7018091    |              | 1            | 0.7802307    | not scorable | not scorable |
| #### Bn-scaff_20942_1-p34918genome unspecific (all in)         | 0.9808612    | 0.2893172    |              | 1            | 0.6601341    |              | 1 0.8674895  |
| #### Bn-scaff_20942_1-p35149C-genome specific (napus-oleracea) | 0.9904306    | 0.8762647    |              | 1            | 0.7498291    | not scorable | not scorable |
| #### Bn-scaff_20942_1-p35198C-genome specific (napus-oleracea) | 0.9808612    | 0.7807194    |              | 1            | 0.7428752    | not scorable | not scorable |
| #### Bn-scaff_20942_1-p35374C-genome specific (napus-oleracea) | 0.6339713    | 0.6579687    | 0.9844961    |              | 0.7064683    | not scorable | not scorable |
| #### Bn-scaff_20942_1-p35654C-genome specific (napus-oleracea) | 0.9162679    | 0.1941983    |              | 1            | 0.5263855    | not scorable | not scorable |
| #### Bn-scaff_20942_1-p37153C-genome specific (napus-oleracea) | 0.9880383    | 0.8430077    |              | 1            | 0.7344469    | not scorable | not scorable |
| #### Bn-scaff_20942_1-p38471genome unspecific (all in)         | 0.9856459    | 0.2957534    |              | 1            | 0.7621539    | 0.9338843    | 0.6914982    |
| #### Bn-scaff_20942_1-p39353C-genome specific (napus-oleracea) | 0.9712918    | 0.6786841    |              | 1            | 0.721461     | not scorable | not scorable |
| #### Bn-scaff_20942_1-p40220C-genome specific (napus-oleracea) | 0.9904306    | 0.6825839    | 0.9922481    |              | 0.7489922    | not scorable | not scorable |
| #### Bn-scaff_20942_1-p41291C-genome specific (napus-oleracea) | 0.9712918    | 0.7753935    | 0.9922481    |              | 0.7013158    | not scorable | not scorable |
| #### Bn-scaff_20942_1-p41298C-genome specific (napus-oleracea) | 0.9880383    | 0.738843     | 0.9922481    |              | 0.6839868    | not scorable | not scorable |
| #### Bn-scaff_20942_1-p41689C-genome specific (napus-oleracea) | 0.9928229    | 0.7760185    | 0.9922481    |              | 0.7509859    | not scorable | not scorable |
| #### Bn-scaff_20942_1-p41731napus specific                     | 0.9760765    | 0.2645037    | not scorable | not scorable | not scorable | not scorable | not scorable |
| #### Bn-scaff_20942_1-p42217C-genome specific (napus-oleracea) | 0.9760765    | 0.718706     | 0.9767442    |              | 0.6803868    | not scorable | not scorable |
| #### Bn-scaff_20942_1-p42240C-genome specific (napus-oleracea) | 0.9832536    | 0.8143069    | 0.9767442    |              | 0.7537001    | not scorable | not scorable |
| #### Bn-scaff_20942_1-p42248C-genome specific (napus-oleracea) | 0.9904306    | 0.6347953    | 0.9922481    |              | 0.7125703    | not scorable | not scorable |
| #### Bn-scaff_20942_1-p42273C-genome specific (napus-oleracea) | 0.9712918    | 0.6897746    | 0.9612403    |              | 0.7170948    | not scorable | not scorable |
| #### Bn-scaff_20942_1-p43154C-genome specific (napus-oleracea) | 0.9856459    | 0.7419224    | 0.9844961    |              | 0.7706292    | not scorable | not scorable |
| #### Bn-scaff_20942_1-p43182C-genome specific (napus-oleracea) | 0.9928229    | 0.7978549    |              | 1            | 0.7213055    | not scorable | not scorable |
| #### Bn-scaff_20942_1-p43265C-genome specific (napus-oleracea) | 0.9856459    | 0.6931905    | 0.9922481    |              | 0.7468105    | not scorable | not scorable |
| #### Bn-scaff_20942_1-p43465C-genome specific (napus-oleracea) | 0.9712918    | 0.6861849    | 0.9844961    |              | 0.7104478    | not scorable | not scorable |
| #### Bn-scaff_20942_1-p43698C-genome specific (napus-oleracea) | 0.9904306    | 0.7266333    |              | 1            | 0.7526528    | not scorable | not scorable |
| #### Bn-scaff_20942_1-p43952C-genome specific (napus-oleracea) | 0.9904306    | 0.6813408    |              | 1            | 0.630639     | not scorable | not scorable |
| #### Bn-scaff_20942_1-p43961genome unspecific (all in)         | 0.923445     | 0.5499443    | 0.9922481    |              | 0.825152     | 0.9752066    | 0.7906627    |
| #### Bn-scaff_20942_1-p44010C-genome specific (napus-oleracea) | 0.9760765    | 0.5602873    | 0.9922481    |              | 0.5741737    | not scorable | not scorable |
| #### Bn-scaff_20942_1-p44245C-genome specific (napus-oleracea) | 0.9736842    | 0.7811325    | 0.9922481    |              | 0.7807575    | not scorable | not scorable |
| #### Bn-scaff_20942_1-p44610genome unspecific (all in)         | 0.9904306    | 0.355016     |              | 1            | 0.746576     | 0.9752066    | 0.6181197    |
| #### Bn-scaff_20942_1-p45307genome unspecific (all in)         | 0.9736842    | 0.2033988    |              | 1            | 0.7132905    |              | 1 0.8756038  |
| #### Bn-scaff_20942_1-p46031genome unspecific (all in)         | 0.9832536    | 0.2984708    |              | 1            | 0.5575688    |              | 1 0.702597   |

|                                                                 |              |              |              |              |              |              |
|-----------------------------------------------------------------|--------------|--------------|--------------|--------------|--------------|--------------|
| #### Bn-scaff_20942_1-p46594 C-genome specific (napus-oleracea) | 0.8708134    | 0.6672648    | 0.9844961    | 0.8011191    | not scorable | not scorable |
| #### Bn-scaff_20942_1-p49196 C-genome specific (napus-oleracea) | 0.9712918    | 0.8120126    | 0.9922481    | 0.8058987    | not scorable | not scorable |
| #### Bn-scaff_20942_1-p51500 napus specific                     | 0.9330143    | 0.4385276    | not scorable | not scorable | not scorable | not scorable |
| #### Bn-scaff_20942_1-p51623 C-genome specific (napus-oleracea) | 0.9952153    | 0.5184931    | 0.9302326    | 0.7400231    | not scorable | not scorable |
| #### Bn-scaff_20942_1-p52095 C-genome specific (napus-oleracea) | 0.9808612    | 0.6327299    | 0.9844961    | 0.7413167    | not scorable | not scorable |
| #### Bn-scaff_20942_1-p52365 C-genome specific (napus-oleracea) | 0.9856459    | 0.7574241    | 1            | 0.6628361    | not scorable | not scorable |
| #### Bn-scaff_20942_1-p52674 genome unspecific (all in)         | 0.9665072    | 0.3178781    | 1            | 0.7342371    | 0.9917355    | 0.6047301    |
| #### Bn-scaff_20942_1-p60495 C-genome specific (napus-oleracea) | 0.9928229    | 0.6639966    | 1            | 0.7201113    | not scorable | not scorable |
| #### Bn-scaff_20942_1-p60739 genome unspecific (all in)         | 0.9904306    | 0.5078489    | 1            | 0.8472893    | 1            | 0.9003522    |
| #### Bn-scaff_20942_1-p62677 C-genome specific (napus-oleracea) | 0.9712918    | 0.4262533    | 1            | 0.4157726    | not scorable | not scorable |
| #### Bn-scaff_20942_1-p63614 C-genome specific (napus-oleracea) | 0.8875598    | 0.633924     | 0.9689922    | 0.764601     | not scorable | not scorable |
| #### Bn-scaff_20942_1-p63711 C-genome specific (napus-oleracea) | 0.8923445    | 0.6265454    | 1            | 0.5931082    | not scorable | not scorable |
| #### Bn-scaff_20942_1-p63722 C-genome specific (napus-oleracea) | 0.9186603    | 0.8918202    | 1            | 0.7277786    | not scorable | not scorable |
| #### Bn-scaff_20942_1-p65567 genome unspecific (all in)         | 0.9880383    | 0.3160097    | 1            | 0.6598888    | 1            | 0.7313685    |
| #### Bn-scaff_20942_1-p67283 genome unspecific (all in)         | 0.9665072    | 0.2899693    | 1            | 0.8229622    | 1            | 0.8891956    |
| #### Bn-scaff_20942_1-p68856 C-genome specific (napus-oleracea) | 0.9808612    | 0.7531455    | 1            | 0.7617759    | not scorable | not scorable |
| #### Bn-scaff_20942_1-p68888 C-genome specific (napus-oleracea) | 0.9784689    | 0.7460604    | 1            | 0.7380809    | not scorable | not scorable |
| #### Bn-scaff_20942_1-p68925 genome unspecific (oleracea-rapa)  | not scorable | not scorable | 1            | 0.727107     | 0.9752066    | 0.8302926    |
| #### Bn-scaff_20942_1-p68949 genome unspecific (all in)         | 0.9832536    | 0.3329105    | 1            | 0.7597923    | 0.9917355    | 0.8589789    |
| #### Bn-scaff_20942_1-p69218 genome unspecific (oleracea-rapa)  | not scorable | not scorable | 1            | 0.795013     | 0.9421487    | 0.9421357    |
| #### Bn-scaff_20942_1-p69453 genome unspecific (all in)         | 0.9976076    | 0.4153767    | 1            | 0.5894254    | 1            | 0.9205657    |
| #### Bn-scaff_20942_1-p69491 genome unspecific (all in)         | 0.9928229    | 0.3421021    | 1            | 0.8376349    | 1            | 0.8938774    |
| #### Bn-scaff_20942_1-p69551 genome unspecific (all in)         | 0.9856459    | 0.5195469    | 1            | 0.8106565    | 1            | 0.8525352    |
| #### Bn-scaff_20942_1-p71890 C-genome specific (napus-oleracea) | 0.9904306    | 0.626107     | 1            | 0.6340447    | not scorable | not scorable |
| #### Bn-scaff_20942_1-p73483 C-genome specific (napus-oleracea) | 0.9928229    | 0.7201115    | 1            | 0.7488207    | not scorable | not scorable |
| #### Bn-scaff_20942_1-p88716 C-genome specific (napus-oleracea) | 1            | 0.7893741    | 1            | 0.7397362    | not scorable | not scorable |
| #### Bn-scaff_20942_1-p88720 C-genome specific (napus-oleracea) | 1            | 0.6757633    | 1            | 0.6527258    | not scorable | not scorable |
| #### Bn-scaff_20947_1-p12745 C-genome specific (napus-oleracea) | 0.9760765    | 0.7155325    | 0.9689922    | 0.686828     | not scorable | not scorable |
| #### Bn-scaff_20947_1-p13782 C-genome specific (napus-oleracea) | 0.9688995    | 0.719894     | 0.9767442    | 0.8630826    | not scorable | not scorable |
| #### Bn-scaff_20947_1-p13909 C-genome specific (napus-oleracea) | 0.9688995    | 0.7634307    | 1            | 0.7750375    | not scorable | not scorable |
| #### Bn-scaff_20947_1-p14314 C-genome specific (napus-oleracea) | 0.9641148    | 0.7581196    | 0.9689922    | 0.698232     | not scorable | not scorable |
| #### Bn-scaff_20947_1-p14637 C-genome specific (napus-oleracea) | 0.9760765    | 0.6846656    | 0.9844961    | 0.7282501    | not scorable | not scorable |
| #### Bn-scaff_20947_1-p14678 C-genome specific (napus-oleracea) | 0.9617225    | 0.7504657    | 0.9767442    | 0.8087305    | not scorable | not scorable |

|                                                                 |              |              |              |              |              |              |
|-----------------------------------------------------------------|--------------|--------------|--------------|--------------|--------------|--------------|
| #### Bn-scaff_20947_1-p1469 C-genome specific (oleracea only)   | not scorable | not scorable | 0.8527132    | 0.9148942    | not scorable | not scorable |
| #### Bn-scaff_20947_1-p1975 all not scorable                    | not scorable | not scorable | not scorable | not scorable | not scorable | not scorable |
| #### Bn-scaff_20947_1-p29907 C-genome specific (napus-oleracea) | 0.8947368    | 0.7345132    | 1            | 0.7604538    | not scorable | not scorable |
| #### Bn-scaff_20947_1-p3007 C-genome specific (napus-oleracea)  | 0.9066986    | 0.7096455    | 0.9147287    | 0.8704891    | not scorable | not scorable |
| #### Bn-scaff_20947_1-p3008 C-genome specific (napus-oleracea)  | 0.8899522    | 0.7433547    | 0.9379845    | 0.8474625    | not scorable | not scorable |
| #### Bn-scaff_20947_1-p3008 C-genome specific (napus-oleracea)  | 0.8923445    | 0.7474923    | 0.9224806    | 0.8270501    | not scorable | not scorable |
| #### Bn-scaff_20947_1-p32721 C-genome specific (napus-oleracea) | 0.9066986    | 0.6622867    | 1            | 0.6978582    | not scorable | not scorable |
| #### Bn-scaff_20947_1-p89554 C-genome specific (napus-oleracea) | 0.9832536    | 0.5504575    | 1            | 0.5967325    | not scorable | not scorable |
| #### Bn-scaff_20947_1-p9332 C-genome specific (napus-oleracea)  | 0.9665072    | 0.7710499    | 0.9767442    | 0.7996386    | not scorable | not scorable |
| #### Bn-scaff_20947_1-p9337 C-genome specific (napus-oleracea)  | 0.9688995    | 0.6871814    | 0.9689922    | 0.8004155    | not scorable | not scorable |
| #### Bn-scaff_20972_1-p10021 genome unspecific (all in)         | 1            | 0.6963184    | 0.9922481    | 0.7332528    | 1            | 0.8912995    |
| #### Bn-scaff_20972_1-p10772 C-genome specific (napus-oleracea) | 0.9880383    | 0.7696989    | 1            | 0.7516214    | not scorable | not scorable |
| #### Bn-scaff_20972_1-p16062 genome unspecific (all in)         | 0.9688995    | 0.2045285    | 0.9379845    | 0.2380811    | 1            | 0.8378905    |
| #### Bn-scaff_20972_1-p1606 genome unspecific (all in)          | 0.9832536    | 0.1808584    | 0.9689922    | 0.3481354    | 1            | 0.4652957    |
| #### Bn-scaff_20972_1-p1639 C-genome specific (napus-oleracea)  | 0.9832536    | 0.6685285    | 1            | 0.6703526    | not scorable | not scorable |
| #### Bn-scaff_20972_1-p2112 genome unspecific (oleracea-rapa)   | not scorable | not scorable | 0.9922481    | 0.76048      | 0.9752066    | 0.7013079    |
| #### Bn-scaff_20972_1-p3042 C-genome specific (napus-oleracea)  | 0.9880383    | 0.1949476    | 0.9844961    | 0.2493163    | not scorable | not scorable |
| #### Bn-scaff_20972_1-p3096 all not scorable                    | not scorable | not scorable | not scorable | not scorable | not scorable | not scorable |
| #### Bn-scaff_20972_1-p92557 genome unspecific (all in)         | 0.9928229    | 0.3535016    | 0.7596899    | 0.7755086    | 1            | 0.9147004    |
| #### Bn-scaff_20972_1-p9826 C-genome specific (napus-oleracea)  | 0.9928229    | 0.7498192    | 1            | 0.8526254    | not scorable | not scorable |
| #### Bn-scaff_20972_1-p9860 C-genome specific (napus-oleracea)  | 0.9952153    | 0.7923407    | 0.9844961    | 0.6582533    | not scorable | not scorable |
| #### Bn-scaff_20979_1-p15322 C-genome specific (napus-oleracea) | 0.9784689    | 0.7703004    | 1            | 0.7535825    | not scorable | not scorable |
| #### Bn-scaff_20979_1-p25617 genome unspecific (all in)         | 1            | 0.7252899    | 0.9922481    | 0.6598221    | 1            | 0.7395847    |
| #### Bn-scaff_20979_1-p3098 C-genome specific (napus-oleracea)  | 0.5645933    | 0.6935953    | 1            | 0.6651253    | not scorable | not scorable |
| #### Bn-scaff_20979_1-p3115 C-genome specific (napus-oleracea)  | 0.9330143    | 0.7782911    | 1            | 0.8213561    | not scorable | not scorable |
| #### Bn-scaff_20979_1-p4564 C-genome specific (napus-oleracea)  | 0.9904306    | 0.6609161    | 1            | 0.6630746    | not scorable | not scorable |
| #### Bn-scaff_20979_1-p4982 C-genome specific (napus-oleracea)  | 0.9904306    | 0.6982566    | 0.9922481    | 0.8455026    | not scorable | not scorable |
| #### Bn-scaff_20979_1-p56064 genome unspecific (all in)         | 0.9928229    | 0.4504375    | 1            | 0.7865403    | 1            | 0.9205657    |
| #### Bn-scaff_20979_1-p59067 C-genome specific (napus-oleracea) | 0.9688995    | 0.6787636    | 0.9844961    | 0.8325301    | not scorable | not scorable |
| #### Bn-scaff_20979_1-p6242 genome unspecific (all in)          | 0.9832536    | 0.3955303    | 1            | 0.7865075    | 1            | 0.8943867    |
| #### Bn-scaff_20979_1-p81081 genome unspecific (all in)         | 0.9952153    | 0.3313201    | 0.9922481    | 0.7498881    | 0.9917355    | 0.7913751    |
| #### Bn-scaff_20979_1-p83011 genome unspecific (all in)         | 0.937799     | 0.5412319    | 1            | 0.8445184    | 0.9586777    | 0.6525952    |
| #### Bn-scaff_21000_1-p120 C-genome specific (napus-oleracea)   | 0.9473684    | 0.6132885    | 0.9612403    | 0.632297     | not scorable | not scorable |



|                                                                 |              |              |           |           |              |              |
|-----------------------------------------------------------------|--------------|--------------|-----------|-----------|--------------|--------------|
| #### Bn-scaff_21003_1-p13139 C-genome specific (napus-oleracea) | 0.9952153    | 0.7550816    | 1         | 0.8753    | not scorable | not scorable |
| #### Bn-scaff_21003_1-p15875 C-genome specific (napus-oleracea) | 0.9952153    | 0.7748271    | 1         | 0.9158211 | not scorable | not scorable |
| #### Bn-scaff_21003_1-p16340 C-genome specific (napus-oleracea) | 0.9856459    | 0.7824681    | 1         | 0.8092518 | not scorable | not scorable |
| #### Bn-scaff_21003_1-p17446 C-genome specific (napus-oleracea) | 0.9928229    | 0.7706661    | 1         | 0.9235381 | not scorable | not scorable |
| #### Bn-scaff_21003_1-p17891 C-genome specific (napus-oleracea) | 0.9952153    | 0.7556623    | 1         | 0.79865   | not scorable | not scorable |
| #### Bn-scaff_21003_1-p19505 C-genome specific (napus-oleracea) | 0.9832536    | 0.6046101    | 1         | 0.7148119 | not scorable | not scorable |
| #### Bn-scaff_21003_1-p19538 C-genome specific (napus-oleracea) | 0.9856459    | 0.7083933    | 1         | 0.6507379 | not scorable | not scorable |
| #### Bn-scaff_21003_1-p19724 C-genome specific (napus-oleracea) | 0.9928229    | 0.7873741    | 1         | 0.7218305 | not scorable | not scorable |
| #### Bn-scaff_21003_1-p19758 C-genome specific (napus-oleracea) | 0.9928229    | 0.7407398    | 1         | 0.7155169 | not scorable | not scorable |
| #### Bn-scaff_21003_1-p22964 C-genome specific (napus-oleracea) | 0.9976076    | 0.7765635    | 1         | 0.907739  | not scorable | not scorable |
| #### Bn-scaff_21003_1-p23091 C-genome specific (napus-oleracea) | 0.9952153    | 0.7671635    | 0.9922481 | 0.7761303 | not scorable | not scorable |
| #### Bn-scaff_21003_1-p23870 C-genome specific (napus-oleracea) | 0.9976076    | 0.8068526    | 1         | 0.8739571 | not scorable | not scorable |
| #### Bn-scaff_21003_1-p24481 C-genome specific (napus-oleracea) | 0.9928229    | 0.7158746    | 1         | 0.7278786 | not scorable | not scorable |
| #### Bn-scaff_21003_1-p24496 C-genome specific (napus-oleracea) | 1            | 0.7033847    | 0.9767442 | 0.717656  | not scorable | not scorable |
| #### Bn-scaff_21003_1-p28546 genome unspecific (all in)         | 0.9880383    | 0.3458849    | 1         | 0.5782495 | 1            | 0.9139057    |
| #### Bn-scaff_21003_1-p30786 C-genome specific (napus-oleracea) | 0.9928229    | 0.7783423    | 1         | 0.770266  | not scorable | not scorable |
| #### Bn-scaff_21003_1-p31826 C-genome specific (napus-oleracea) | 0.9904306    | 0.66356      | 0.9844961 | 0.8057863 | not scorable | not scorable |
| #### Bn-scaff_21003_1-p32010 C-genome specific (napus-oleracea) | 0.9928229    | 0.7924223    | 1         | 0.78264   | not scorable | not scorable |
| #### Bn-scaff_21003_1-p32635 C-genome specific (napus-oleracea) | 1            | 0.7808447    | 1         | 0.8523329 | not scorable | not scorable |
| #### Bn-scaff_21003_1-p34084 C-genome specific (napus-oleracea) | 0.9952153    | 0.7784169    | 1         | 0.7620913 | not scorable | not scorable |
| #### Bn-scaff_21003_1-p43229 C-genome specific (napus-oleracea) | 0.9904306    | 0.7737368    | 0.9767442 | 0.5763929 | not scorable | not scorable |
| #### Bn-scaff_21003_1-p43545 C-genome specific (napus-oleracea) | 0.9952153    | 0.7833164    | 1         | 0.8693944 | not scorable | not scorable |
| #### Bn-scaff_21003_1-p43573 C-genome specific (napus-oleracea) | 0.9880383    | 0.7816984    | 1         | 0.8770694 | not scorable | not scorable |
| #### Bn-scaff_21003_1-p44746 genome unspecific (all in)         | 0.9904306    | 0.5770816    | 1         | 0.8688473 | 1            | 0.931782     |
| #### Bn-scaff_21003_1-p45712 genome unspecific (all in)         | 0.9760765    | 0.3246773    | 1         | 0.7952559 | 1            | 0.6951048    |
| #### Bn-scaff_21003_1-p45772 genome unspecific (all in)         | 0.9928229    | 0.2984041    | 0.9844961 | 0.7105326 | 1            | 0.8135551    |
| #### Bn-scaff_21003_1-p46383 genome unspecific (all in)         | 0.9569378    | 0.6748194    | 0.7984496 | 0.7865303 | 0.768595     | 0.9013284    |
| #### Bn-scaff_21003_1-p56737 genome unspecific (oleracea-rapa)  | not scorable | not scorable | 1         | 0.5114863 | 1            | 0.8135551    |
| #### Bn-scaff_21003_1-p63112 C-genome specific (napus-oleracea) | 0.937799     | 0.7030499    | 1         | 0.7135509 | not scorable | not scorable |
| #### Bn-scaff_21003_1-p63214 C-genome specific (napus-oleracea) | 0.9928229    | 0.7864437    | 1         | 0.863204  | not scorable | not scorable |
| #### Bn-scaff_21003_1-p63673 C-genome specific (napus-oleracea) | 0.9928229    | 0.80076      | 1         | 0.7582187 | not scorable | not scorable |
| #### Bn-scaff_21003_1-p64522 C-genome specific (napus-oleracea) | 0.9976076    | 0.789126     | 1         | 0.8124008 | not scorable | not scorable |
| #### Bn-scaff_21003_1-p64611 C-genome specific (napus-oleracea) | 0.9952153    | 0.7717472    | 1         | 0.7696198 | not scorable | not scorable |

|                                                                 |           |           |           |           |              |              |
|-----------------------------------------------------------------|-----------|-----------|-----------|-----------|--------------|--------------|
| #### Bn-scaff_21003_1-p64709 C-genome specific (napus-oleracea) | 0.9952153 | 0.7800426 | 1         | 0.6961019 | not scorable | not scorable |
| #### Bn-scaff_21003_1-p64772 C-genome specific (napus-oleracea) | 0.9928229 | 0.7369253 | 1         | 0.7510198 | not scorable | not scorable |
| #### Bn-scaff_21003_1-p65012 C-genome specific (napus-oleracea) | 0.9952153 | 0.7667603 | 1         | 0.8359247 | not scorable | not scorable |
| #### Bn-scaff_21003_1-p65024 C-genome specific (napus-oleracea) | 0.9928229 | 0.7731172 | 0.9922481 | 0.7168235 | not scorable | not scorable |
| #### Bn-scaff_21003_1-p65029 C-genome specific (napus-oleracea) | 0.9904306 | 0.787617  | 0.9922481 | 0.8477142 | not scorable | not scorable |
| #### Bn-scaff_21003_1-p65091 C-genome specific (napus-oleracea) | 0.9904306 | 0.7799722 | 0.9922481 | 0.8368584 | not scorable | not scorable |
| #### Bn-scaff_21003_1-p65376 C-genome specific (napus-oleracea) | 0.9976076 | 0.7837756 | 1         | 0.7721094 | not scorable | not scorable |
| #### Bn-scaff_21003_1-p65423 C-genome specific (napus-oleracea) | 0.9880383 | 0.6904749 | 1         | 0.8301635 | not scorable | not scorable |
| #### Bn-scaff_21003_1-p65428 C-genome specific (napus-oleracea) | 0.9952153 | 0.6910747 | 0.9844961 | 0.7794166 | not scorable | not scorable |
| #### Bn-scaff_21003_1-p65463 C-genome specific (napus-oleracea) | 0.9952153 | 0.7606047 | 0.9922481 | 0.8069967 | not scorable | not scorable |
| #### Bn-scaff_21003_1-p65476 C-genome specific (napus-oleracea) | 0.9976076 | 0.7905771 | 1         | 0.7778046 | not scorable | not scorable |
| #### Bn-scaff_21003_1-p65537 C-genome specific (napus-oleracea) | 0.9904306 | 0.7905937 | 1         | 0.8761953 | not scorable | not scorable |
| #### Bn-scaff_21003_1-p65558 C-genome specific (napus-oleracea) | 0.9808612 | 0.7472492 | 0.6744186 | 0.6932987 | not scorable | not scorable |
| #### Bn-scaff_21003_1-p65596 C-genome specific (napus-oleracea) | 0.9904306 | 0.6875767 | 1         | 0.7722555 | not scorable | not scorable |
| #### Bn-scaff_21003_1-p65972 C-genome specific (napus-oleracea) | 0.9904306 | 0.7379712 | 1         | 0.8020081 | not scorable | not scorable |
| #### Bn-scaff_21003_1-p68538 C-genome specific (napus-oleracea) | 0.9928229 | 0.7790121 | 0.9922481 | 0.7147782 | not scorable | not scorable |
| #### Bn-scaff_21003_1-p68539 C-genome specific (napus-oleracea) | 0.9952153 | 0.7797512 | 1         | 0.8923354 | not scorable | not scorable |
| #### Bn-scaff_21003_1-p68597 C-genome specific (napus-oleracea) | 0.9928229 | 0.721797  | 1         | 0.7905261 | not scorable | not scorable |
| #### Bn-scaff_21003_1-p68697 C-genome specific (napus-oleracea) | 0.9904306 | 0.776156  | 1         | 0.8706551 | not scorable | not scorable |
| #### Bn-scaff_21003_1-p70336 genome unspecific (all in)         | 1         | 0.8135551 | 1         | 0.8287975 | 1            | 0.8114662    |
| #### Bn-scaff_21003_1-p72304 genome unspecific (all in)         | 1         | 0.7007138 | 1         | 0.5636716 | 1            | 0.6528106    |
| #### Bn-scaff_21003_1-p73355 C-genome specific (napus-oleracea) | 0.9976076 | 0.7814116 | 0.9922481 | 0.7998011 | not scorable | not scorable |
| #### Bn-scaff_21003_1-p73366 C-genome specific (napus-oleracea) | 0.9952153 | 0.6843218 | 1         | 0.6745558 | not scorable | not scorable |
| #### Bn-scaff_21003_1-p73516 C-genome specific (napus-oleracea) | 0.9928229 | 0.7896671 | 1         | 0.8870798 | not scorable | not scorable |
| #### Bn-scaff_21015_1-p34786 C-genome specific (napus-oleracea) | 0.9688995 | 0.4453849 | 0.8139535 | 0.7079863 | not scorable | not scorable |
| #### Bn-scaff_21015_1-p89425 genome unspecific (all in)         | 0.9904306 | 0.3305541 | 1         | 0.6981307 | 0.9504132    | 0.3244997    |
| #### Bn-scaff_21016_1-p1898 genome unspecific (all in)          | 0.9832536 | 0.269902  | 0.5736434 | 0.6963905 | 0.8264463    | 0.7924503    |
| #### Bn-scaff_21018_1-p13854 C-genome specific (napus-oleracea) | 0.8373206 | 0.7178386 | 0.8914729 | 0.687721  | not scorable | not scorable |
| #### Bn-scaff_21018_1-p24333 C-genome specific (napus-oleracea) | 0.8947368 | 0.7492481 | 0.9922481 | 0.6745708 | not scorable | not scorable |
| #### Bn-scaff_21018_1-p83035 genome unspecific (all in)         | 0.9760765 | 0.2332889 | 1         | 0.8078748 | 1            | 0.9064443    |
| #### Bn-scaff_21018_1-p83089 C-genome specific (napus-oleracea) | 0.8899522 | 0.714402  | 1         | 0.6888922 | not scorable | not scorable |
| #### Bn-scaff_21018_1-p83153 C-genome specific (napus-oleracea) | 0.8708134 | 0.554915  | 0.9922481 | 0.4778222 | not scorable | not scorable |
| #### Bn-scaff_21018_1-p83682 C-genome specific (napus-oleracea) | 0.8827751 | 0.760308  | 0.9844961 | 0.7970553 | not scorable | not scorable |

|                                                                |           |           |           |           |              |              |
|----------------------------------------------------------------|-----------|-----------|-----------|-----------|--------------|--------------|
| #### Bn-scaff_21018_1-p83931C-genome specific (napus-oleracea) | 0.8851675 | 0.7793478 | 1         | 0.7591846 | not scorable | not scorable |
| #### Bn-scaff_21018_1-p86419C-genome specific (napus-oleracea) | 0.8947368 | 0.6501704 | 0.9922481 | 0.6064523 | not scorable | not scorable |
| #### Bn-scaff_21018_1-p94428C-genome specific (napus-oleracea) | 0.8923445 | 0.7505186 | 0.9922481 | 0.7606238 | not scorable | not scorable |
| #### Bn-scaff_21034_1-p10697genome unspecific (all in)         | 0.9904306 | 0.2927082 | 0.8527132 | 0.6626276 | 0.9752066    | 0.7884539    |
| #### Bn-scaff_21034_1-p41433C-genome specific (napus-oleracea) | 0.9904306 | 0.7447444 | 0.9844961 | 0.7706176 | not scorable | not scorable |
| #### Bn-scaff_21124_1-p13739C-genome specific (napus-oleracea) | 0.9928229 | 0.7647766 | 1         | 0.7828699 | not scorable | not scorable |
| #### Bn-scaff_21124_1-p14283genome unspecific (all in)         | 0.9904306 | 0.6638281 | 0.9922481 | 0.7337369 | 1            | 0.917933     |
| #### Bn-scaff_21124_1-p17494C-genome specific (napus-oleracea) | 0.9904306 | 0.7782995 | 0.9844961 | 0.7893991 | not scorable | not scorable |
| #### Bn-scaff_21124_1-p17500C-genome specific (napus-oleracea) | 0.9856459 | 0.6670197 | 0.9922481 | 0.6408983 | not scorable | not scorable |
| #### Bn-scaff_21124_1-p21288genome unspecific (all in)         | 0.9880383 | 0.4437777 | 0.9844961 | 0.6556076 | 1            | 0.9175813    |
| #### Bn-scaff_21124_1-p21598genome unspecific (all in)         | 0.9808612 | 0.5502961 | 0.9922481 | 0.7277775 | 1            | 0.9188185    |
| #### Bn-scaff_21124_1-p21651genome unspecific (all in)         | 0.9665072 | 0.3513908 | 0.9767442 | 0.692532  | 1            | 0.8912396    |
| #### Bn-scaff_21124_1-p21688C-genome specific (napus-oleracea) | 0.9856459 | 0.7906719 | 0.9767442 | 0.7102318 | not scorable | not scorable |
| #### Bn-scaff_21124_1-p22012C-genome specific (napus-oleracea) | 0.7631579 | 0.7349672 | 0.744186  | 0.7442302 | not scorable | not scorable |
| #### Bn-scaff_21124_1-p22374C-genome specific (napus-oleracea) | 0.9832536 | 0.8063728 | 0.9922481 | 0.7228479 | not scorable | not scorable |
| #### Bn-scaff_21124_1-p24254C-genome specific (napus-oleracea) | 0.9856459 | 0.7205855 | 0.9844961 | 0.6780166 | not scorable | not scorable |
| #### Bn-scaff_21124_1-p24260C-genome specific (napus-oleracea) | 0.9832536 | 0.7702463 | 1         | 0.7910483 | not scorable | not scorable |
| #### Bn-scaff_21124_1-p24271C-genome specific (napus-oleracea) | 0.9928229 | 0.7279945 | 0.9922481 | 0.7123554 | not scorable | not scorable |
| #### Bn-scaff_21124_1-p25049C-genome specific (napus-oleracea) | 0.7679426 | 0.7442046 | 0.7829458 | 0.7094048 | not scorable | not scorable |
| #### Bn-scaff_21124_1-p25249C-genome specific (napus-oleracea) | 0.7679426 | 0.7757334 | 0.7364341 | 0.924567  | not scorable | not scorable |
| #### Bn-scaff_21124_1-p25396C-genome specific (napus-oleracea) | 0.777512  | 0.6842071 | 0.9612403 | 0.7224329 | not scorable | not scorable |
| #### Bn-scaff_21124_1-p25410C-genome specific (napus-oleracea) | 0.7751196 | 0.69016   | 0.8372093 | 0.668288  | not scorable | not scorable |
| #### Bn-scaff_21124_1-p29813C-genome specific (napus-oleracea) | 0.9928229 | 0.7950271 | 1         | 0.825132  | not scorable | not scorable |
| #### Bn-scaff_21124_1-p30125C-genome specific (napus-oleracea) | 0.9784689 | 0.6300669 | 0.9689922 | 0.6524383 | not scorable | not scorable |
| #### Bn-scaff_21124_1-p30215C-genome specific (napus-oleracea) | 0.9736842 | 0.6671055 | 0.9922481 | 0.7085013 | not scorable | not scorable |
| #### Bn-scaff_21124_1-p30289C-genome specific (napus-oleracea) | 0.9712918 | 0.7385295 | 0.9612403 | 0.6340655 | not scorable | not scorable |
| #### Bn-scaff_21124_1-p30446C-genome specific (napus-oleracea) | 0.9832536 | 0.7668228 | 0.9689922 | 0.8415254 | not scorable | not scorable |
| #### Bn-scaff_21124_1-p30452C-genome specific (napus-oleracea) | 0.9760765 | 0.7910513 | 0.9767442 | 0.860832  | not scorable | not scorable |
| #### Bn-scaff_21124_1-p30500C-genome specific (napus-oleracea) | 0.9856459 | 0.7264317 | 0.9689922 | 0.7627373 | not scorable | not scorable |
| #### Bn-scaff_21124_1-p30695C-genome specific (napus-oleracea) | 0.9856459 | 0.7133964 | 0.9689922 | 0.7456143 | not scorable | not scorable |
| #### Bn-scaff_21124_1-p30970C-genome specific (napus-oleracea) | 0.9856459 | 0.7591875 | 0.9767442 | 0.8693979 | not scorable | not scorable |
| #### Bn-scaff_21124_1-p32421C-genome specific (napus-oleracea) | 0.9880383 | 0.6973653 | 0.9767442 | 0.6142484 | not scorable | not scorable |
| #### Bn-scaff_21124_1-p34299C-genome specific (napus-oleracea) | 0.9808612 | 0.7270721 | 0.9767442 | 0.6735685 | not scorable | not scorable |

|                                                                 |              |              |              |              |              |              |
|-----------------------------------------------------------------|--------------|--------------|--------------|--------------|--------------|--------------|
| #### Bn-scaff_21124_1-p34327 C-genome specific (napus-oleracea) | 0.9784689    | 0.8047447    | 0.9767442    | 0.7772108    | not scorable | not scorable |
| #### Bn-scaff_21124_1-p36587 C-genome specific (napus-oleracea) | 0.9880383    | 0.8026494    | 0.9767442    | 0.7693331    | not scorable | not scorable |
| #### Bn-scaff_21124_1-p36647 C-genome specific (napus-oleracea) | 0.9712918    | 0.8078783    | 0.9689922    | 0.7483212    | not scorable | not scorable |
| #### Bn-scaff_21124_1-p37012 C-genome specific (napus-oleracea) | 0.9856459    | 0.7574131    | 0.9767442    | 0.8859873    | not scorable | not scorable |
| #### Bn-scaff_21124_1-p37036 C-genome specific (napus-oleracea) | 0.9784689    | 0.804269     | 0.9767442    | 0.7468586    | not scorable | not scorable |
| #### Bn-scaff_21124_1-p37092 C-genome specific (napus-oleracea) | 0.9832536    | 0.7773541    | 0.9767442    | 0.821808     | not scorable | not scorable |
| #### Bn-scaff_21124_1-p37574 C-genome specific (napus-oleracea) | 0.9856459    | 0.7441936    | 0.9767442    | 0.6744574    | not scorable | not scorable |
| #### Bn-scaff_21124_1-p38465 napus specific                     | 0.9832536    | 0.4660992    | not scorable | not scorable | not scorable | not scorable |
| #### Bn-scaff_21124_1-p39244 C-genome specific (napus-oleracea) | 0.9976076    | 0.7072037    | 1            | 0.6859224    | not scorable | not scorable |
| #### Bn-scaff_21124_1-p42202 genome unspecific (all in)         | 1            | 0.2883627    | 0.9457364    | 0.2686829    | 1            | 0.7739488    |
| #### Bn-scaff_21131_1-p13059 genome unspecific (all in)         | 0.9976076    | 0.2444979    | 1            | 0.8310567    | 0.7438017    | 0.899516     |
| #### Bn-scaff_21131_1-p14985 C-genome specific (napus-oleracea) | 0.9952153    | 0.8416241    | 1            | 0.7745075    | not scorable | not scorable |
| #### Bn-scaff_21131_1-p15484 napus specific                     | 0.8899522    | 0.9072468    | not scorable | not scorable | not scorable | not scorable |
| #### Bn-scaff_21131_1-p16525 C-genome specific (napus-oleracea) | 0.9928229    | 0.8675472    | 1            | 0.8188552    | not scorable | not scorable |
| #### Bn-scaff_21131_1-p16532 C-genome specific (napus-oleracea) | 0.9928229    | 0.7999535    | 1            | 0.6924579    | not scorable | not scorable |
| #### Bn-scaff_21131_1-p16741 C-genome specific (napus-oleracea) | 0.9904306    | 0.8457969    | 1            | 0.7802593    | not scorable | not scorable |
| #### Bn-scaff_21131_1-p16768 C-genome specific (napus-oleracea) | 0.930622     | 0.738757     | 0.9147287    | 0.8433968    | not scorable | not scorable |
| #### Bn-scaff_21131_1-p17686 C-genome specific (napus-oleracea) | 0.9952153    | 0.85662      | 1            | 0.7591439    | not scorable | not scorable |
| #### Bn-scaff_21131_1-p24563 A-genome specific (rapa only)      | not scorable | not scorable | not scorable | not scorable | 0.9917355    | 0.6834592    |
| #### Bn-scaff_21131_1-p25173 C-genome specific (napus-oleracea) | 0.9904306    | 0.7863811    | 1            | 0.7423134    | not scorable | not scorable |
| #### Bn-scaff_21131_1-p25180 C-genome specific (napus-oleracea) | 0.9880383    | 0.6152077    | 1            | 0.7301067    | not scorable | not scorable |
| #### Bn-scaff_21131_1-p25204 C-genome specific (napus-oleracea) | 0.9952153    | 0.7050459    | 1            | 0.8279355    | not scorable | not scorable |
| #### Bn-scaff_21131_1-p25249 C-genome specific (napus-oleracea) | 0.9928229    | 0.7184647    | 1            | 0.7723482    | not scorable | not scorable |
| #### Bn-scaff_21131_1-p26410 C-genome specific (napus-oleracea) | 0.9904306    | 0.7559701    | 0.8294573    | 0.7513253    | not scorable | not scorable |
| #### Bn-scaff_21131_1-p26470 napus specific                     | 0.9736842    | 0.6810666    | not scorable | not scorable | not scorable | not scorable |
| #### Bn-scaff_21131_1-p26541 C-genome specific (napus-oleracea) | 0.9880383    | 0.8304625    | 0.7829458    | 0.7496447    | not scorable | not scorable |
| #### Bn-scaff_21131_1-p26573 C-genome specific (napus-oleracea) | 0.9928229    | 0.7939256    | 0.7751938    | 0.790005     | not scorable | not scorable |
| #### Bn-scaff_21131_1-p26615 C-genome specific (napus-oleracea) | 0.9856459    | 0.7490451    | 0.7751938    | 0.6919881    | not scorable | not scorable |
| #### Bn-scaff_21131_1-p26623 C-genome specific (napus-oleracea) | 0.9904306    | 0.6805814    | 0.7751938    | 0.698265     | not scorable | not scorable |
| #### Bn-scaff_21131_1-p28040 C-genome specific (napus-oleracea) | 0.9736842    | 0.6580776    | 0.7131783    | 0.8066394    | not scorable | not scorable |
| #### Bn-scaff_21131_1-p28132 C-genome specific (napus-oleracea) | 0.9904306    | 0.8442286    | 0.7751938    | 0.7943537    | not scorable | not scorable |
| #### Bn-scaff_21131_1-p28404 C-genome specific (napus-oleracea) | 0.9880383    | 0.7096577    | 0.751938     | 0.7796566    | not scorable | not scorable |
| #### Bn-scaff_21131_1-p28605 C-genome specific (napus-oleracea) | 0.9904306    | 0.8442286    | 0.8217054    | 0.7926096    | not scorable | not scorable |

|                                                                 |              |              |           |           |              |              |
|-----------------------------------------------------------------|--------------|--------------|-----------|-----------|--------------|--------------|
| #### Bn-scaff_21131_1-p28646 C-genome specific (napus-oleracea) | 0.9952153    | 0.7979181    | 0.8217054 | 0.7691544 | not scorable | not scorable |
| #### Bn-scaff_21131_1-p31806 C-genome specific (napus-oleracea) | 0.9928229    | 0.7365927    | 1         | 0.8069934 | not scorable | not scorable |
| #### Bn-scaff_21131_1-p32404 C-genome specific (napus-oleracea) | 0.9928229    | 0.8210213    | 1         | 0.7784936 | not scorable | not scorable |
| #### Bn-scaff_21131_1-p33739 C-genome specific (napus-oleracea) | 0.9928229    | 0.77393      | 1         | 0.7533875 | not scorable | not scorable |
| #### Bn-scaff_21131_1-p33813 C-genome specific (napus-oleracea) | 0.9928229    | 0.6737552    | 1         | 0.6022791 | not scorable | not scorable |
| #### Bn-scaff_21131_1-p33888 C-genome specific (napus-oleracea) | 0.9904306    | 0.7156002    | 1         | 0.7096217 | not scorable | not scorable |
| #### Bn-scaff_21131_1-p49530 C-genome specific (napus-oleracea) | 0.9928229    | 0.7236682    | 1         | 0.6822935 | not scorable | not scorable |
| #### Bn-scaff_21131_1-p95520 genome unspecific (all in)         | 0.9952153    | 0.2404142    | 1         | 0.6807152 | 0.7603306    | 0.7249529    |
| #### Bn-scaff_21138_1-p15767 C-genome specific (napus-oleracea) | 0.9928229    | 0.69509      | 0.9922481 | 0.8228293 | not scorable | not scorable |
| #### Bn-scaff_21138_1-p17277 C-genome specific (napus-oleracea) | 0.9928229    | 0.6771429    | 0.9922481 | 0.6872754 | not scorable | not scorable |
| #### Bn-scaff_21138_1-p18415 genome unspecific (all in)         | 0.9952153    | 0.7662485    | 1         | 0.7623333 | 0.9256198    | 0.9347832    |
| #### Bn-scaff_21138_1-p22752 C-genome specific (napus-oleracea) | 0.9880383    | 0.6958025    | 1         | 0.750735  | not scorable | not scorable |
| #### Bn-scaff_21138_1-p23502 C-genome specific (napus-oleracea) | 0.9880383    | 0.7642499    | 1         | 0.898687  | not scorable | not scorable |
| #### Bn-scaff_21138_1-p28778 C-genome specific (napus-oleracea) | 0.9832536    | 0.659381     | 1         | 0.7055272 | not scorable | not scorable |
| #### Bn-scaff_21138_1-p35153 C-genome specific (napus-oleracea) | 0.9856459    | 0.7019103    | 1         | 0.7751692 | not scorable | not scorable |
| #### Bn-scaff_21138_1-p35894 C-genome specific (napus-oleracea) | 0.9784689    | 0.7352762    | 0.9922481 | 0.690236  | not scorable | not scorable |
| #### Bn-scaff_21138_1-p36092 C-genome specific (napus-oleracea) | 0.9928229    | 0.735256     | 1         | 0.7499153 | not scorable | not scorable |
| #### Bn-scaff_21138_1-p36279 C-genome specific (napus-oleracea) | 0.9593301    | 0.6567341    | 1         | 0.6472462 | not scorable | not scorable |
| #### Bn-scaff_21138_1-p38853 C-genome specific (napus-oleracea) | 0.9784689    | 0.7178205    | 0.9922481 | 0.6577335 | not scorable | not scorable |
| #### Bn-scaff_21138_1-p39268 C-genome specific (napus-oleracea) | 0.9832536    | 0.7224576    | 1         | 0.869087  | not scorable | not scorable |
| #### Bn-scaff_21138_1-p40760 C-genome specific (napus-oleracea) | 0.9904306    | 0.7971026    | 0.9767442 | 0.8472467 | not scorable | not scorable |
| #### Bn-scaff_21138_1-p6491 C-genome specific (napus-oleracea)  | 0.9856459    | 0.7552881    | 0.9922481 | 0.6497687 | not scorable | not scorable |
| #### Bn-scaff_21138_1-p9632 C-genome specific (napus-oleracea)  | 0.9904306    | 0.7782084    | 1         | 0.6969047 | not scorable | not scorable |
| #### Bn-scaff_21139_1-p181 genome unspecific (oleracea-rapa)    | not scorable | not scorable | 1         | 0.7714588 | 0.8264463    | 0.9095823    |
| #### Bn-scaff_21163_1-p1838 C-genome specific (napus-oleracea)  | 0.9736842    | 0.7827681    | 1         | 0.7754574 | not scorable | not scorable |
| #### Bn-scaff_21163_1-p3558 C-genome specific (napus-oleracea)  | 0.9784689    | 0.7875368    | 1         | 0.80374   | not scorable | not scorable |
| #### Bn-scaff_21163_1-p4255 genome unspecific (all in)          | 0.9521531    | 0.5587918    | 0.9922481 | 0.6900374 | 1            | 0.8882328    |
| #### Bn-scaff_21176_1-p1255 C-genome specific (napus-oleracea)  | 0.9832536    | 0.742894     | 0.9767442 | 0.8255547 | not scorable | not scorable |
| #### Bn-scaff_21176_1-p2498 C-genome specific (napus-oleracea)  | 0.9832536    | 0.7523517    | 0.9922481 | 0.8277064 | not scorable | not scorable |
| #### Bn-scaff_21182_1-p26632 C-genome specific (napus-oleracea) | 1            | 0.5834897    | 1         | 0.5580502 | not scorable | not scorable |
| #### Bn-scaff_21182_1-p42780 C-genome specific (napus-oleracea) | 0.9928229    | 0.7046309    | 0.9922481 | 0.4813908 | not scorable | not scorable |
| #### Bn-scaff_21182_1-p62124 C-genome specific (napus-oleracea) | 0.9928229    | 0.7930886    | 0.9844961 | 0.8052138 | not scorable | not scorable |
| #### Bn-scaff_21182_1-p66519 C-genome specific (napus-oleracea) | 0.9976076    | 0.8276426    | 1         | 0.8104076 | not scorable | not scorable |

|                                                                |              |              |              |              |              |              |
|----------------------------------------------------------------|--------------|--------------|--------------|--------------|--------------|--------------|
| #### Bn-scaff_21186_1-p13231genome unspecific (all in)         | 0.9952153    | 0.2600127    | 1            | 0.7415354    | 0.9669421    | 0.6923195    |
| #### Bn-scaff_21186_1-p15319genome unspecific (all in)         | 0.9784689    | 0.4191247    | 1            | 0.8438103    | 0.9669421    | 0.7869781    |
| #### Bn-scaff_21186_1-p15352genome unspecific (all in)         | 1            | 0.3624871    | 1            | 0.4433453    | 1            | 0.8155951    |
| #### Bn-scaff_21186_1-p15389A-genome specific (napus-rapa)     | 0.9330143    | 0.4297044    | not scorable | not scorable | 1            | 0.8325323    |
| #### Bn-scaff_21186_1-p17027C-genome specific (napus-oleracea) | 0.9330143    | 0.7104788    | 0.9922481    | 0.7821375    | not scorable | not scorable |
| #### Bn-scaff_21186_1-p17723genome unspecific (all in)         | 0.9976076    | 0.5350312    | 0.9922481    | 0.7869309    | 1            | 0.9126728    |
| #### Bn-scaff_21186_1-p21432napus specific                     | 0.9354067    | 0.9042724    | not scorable | not scorable | not scorable | not scorable |
| #### Bn-scaff_21186_1-p21634C-genome specific (napus-oleracea) | 0.9330143    | 0.6812571    | 0.9922481    | 0.6670571    | not scorable | not scorable |
| #### Bn-scaff_21186_1-p22037genome unspecific (all in)         | 0.9617225    | 0.3150699    | 0.9922481    | 0.4381779    | 1            | 0.7704166    |
| #### Bn-scaff_21186_1-p22045C-genome specific (napus-oleracea) | 0.9904306    | 0.8860161    | 0.8914729    | 0.8502452    | not scorable | not scorable |
| #### Bn-scaff_21186_1-p22599napus specific                     | 0.9354067    | 0.7914897    | not scorable | not scorable | not scorable | not scorable |
| #### Bn-scaff_21186_1-p22679C-genome specific (napus-oleracea) | 0.9354067    | 0.7225099    | 0.9844961    | 0.6917024    | not scorable | not scorable |
| #### Bn-scaff_21186_1-p23031C-genome specific (napus-oleracea) | 0.9354067    | 0.7651803    | 0.9922481    | 0.6599389    | not scorable | not scorable |
| #### Bn-scaff_21186_1-p24606C-genome specific (napus-oleracea) | 0.9354067    | 0.918255     | 0.9767442    | 0.7272977    | not scorable | not scorable |
| #### Bn-scaff_21186_1-p24657napus specific                     | 0.9330143    | 0.8902686    | not scorable | not scorable | not scorable | not scorable |
| #### Bn-scaff_21186_1-p25106C-genome specific (napus-oleracea) | 0.9354067    | 0.6762187    | 0.9922481    | 0.6462073    | not scorable | not scorable |
| #### Bn-scaff_21186_1-p36313C-genome specific (napus-oleracea) | 0.9976076    | 0.7531342    | 0.9922481    | 0.8243957    | not scorable | not scorable |
| #### Bn-scaff_21186_1-p54820genome unspecific (all in)         | 1            | 0.5166896    | 0.9922481    | 0.8542447    | 1            | 0.9269078    |
| #### Bn-scaff_21188_1-p10781C-genome specific (oleracea only)  | not scorable | not scorable | 1            | 0.6119594    | not scorable | not scorable |
| #### Bn-scaff_21188_1-p10848genome unspecific (all in)         | 1            | 0.3680172    | 1            | 0.8613572    | 0.9917355    | 0.519677     |
| #### Bn-scaff_21188_1-p1142 A-genome specific (napus-rapa)     | 0.9569378    | 0.4382974    | not scorable | not scorable | 0.9834711    | 0.9046753    |
| #### Bn-scaff_21188_1-p1514 C-genome specific (napus-oleracea) | 0.9712918    | 0.8280367    | 1            | 0.8375612    | not scorable | not scorable |
| #### Bn-scaff_21188_1-p6903 all not scorable                   | not scorable | not scorable | not scorable | not scorable | not scorable | not scorable |
| #### Bn-scaff_21188_1-p719 C-genome specific (napus-oleracea)  | 0.9736842    | 0.7078524    | 1            | 0.8108261    | not scorable | not scorable |
| #### Bn-scaff_21188_1-p9203 genome unspecific (all in)         | 0.9760765    | 0.4618423    | 1            | 0.836506     | 1            | 0.9257517    |
| #### Bn-scaff_21197_1-p224 all not scorable                    | not scorable | not scorable | not scorable | not scorable | not scorable | not scorable |
| #### Bn-scaff_21198_1-p10339napus specific                     | 1            | 0.421369     | not scorable | not scorable | not scorable | not scorable |
| #### Bn-scaff_21198_1-p10413C-genome specific (napus-oleracea) | 1            | 0.7686929    | 1            | 0.736294     | not scorable | not scorable |
| #### Bn-scaff_21198_1-p15551genome unspecific (all in)         | 1            | 0.5690083    | 1            | 0.6042383    | 1            | 0.9243322    |
| #### Bn-scaff_21198_1-p16130genome unspecific (all in)         | 0.9760765    | 0.2369062    | 1            | 0.7398485    | 1            | 0.7602661    |
| #### Bn-scaff_21198_1-p20164genome unspecific (all in)         | 1            | 0.6687586    | 1            | 0.6081295    | 1            | 0.8135551    |
| #### Bn-scaff_21198_1-p22005genome unspecific (all in)         | 1            | 0.3877136    | 1            | 0.8024307    | 1            | 0.8255218    |
| #### Bn-scaff_21198_1-p22042genome unspecific (all in)         | 1            | 0.2950039    | 1            | 0.6872754    | 1            | 0.7641606    |

|                                                                 |              |              |              |              |              |              |
|-----------------------------------------------------------------|--------------|--------------|--------------|--------------|--------------|--------------|
| #### Bn-scaff_21198_1-p22939 genome unspecific (all in)         | 1            | 0.7620834    | 1            | 0.6820374    | 1            | 0.8185562    |
| #### Bn-scaff_21198_1-p23101 C-genome specific (napus-oleracea) | 0.9976076    | 0.501044     | 1            | 0.6911444    | not scorable | not scorable |
| #### Bn-scaff_21198_1-p23329 genome unspecific (oleracea-rapa)  | not scorable | not scorable | 1            | 0.8246725    | 1            | 0.7877155    |
| #### Bn-scaff_21198_1-p23343 genome unspecific (all in)         | 0.9928229    | 0.3354311    | 1            | 0.8022155    | 1            | 0.7695178    |
| #### Bn-scaff_21198_1-p23513 A-genome specific (rapa only)      | not scorable | not scorable | not scorable | not scorable | 0.9834711    | 0.8576565    |
| #### Bn-scaff_21198_1-p23871 C-genome specific (napus-oleracea) | 0.9832536    | 0.3243698    | 0.9689922    | 0.7997971    | not scorable | not scorable |
| #### Bn-scaff_21198_1-p23873 genome unspecific (all in)         | 0.9832536    | 0.3191227    | 0.9922481    | 0.8022189    | 0.9917355    | 0.8209984    |
| #### Bn-scaff_21198_1-p24520 genome unspecific (oleracea-rapa)  | not scorable | not scorable | 0.9922481    | 0.5192318    | 1            | 0.744247     |
| #### Bn-scaff_21198_1-p32988 genome unspecific (all in)         | 1            | 0.6117677    | 1            | 0.5534881    | 0.8842975    | 0.7918691    |
| #### Bn-scaff_21198_1-p34568 C-genome specific (napus-oleracea) | 1            | 0.9057292    | 1            | 0.7857956    | not scorable | not scorable |
| #### Bn-scaff_21198_1-p64964 genome unspecific (all in)         | 1            | 0.2828645    | 1            | 0.4127799    | 1            | 0.7268791    |
| #### Bn-scaff_21203_1-p1192 C-genome specific (napus-oleracea)  | 0.9928229    | 0.7753105    | 1            | 0.8317437    | not scorable | not scorable |
| #### Bn-scaff_21203_1-p1646 C-genome specific (napus-oleracea)  | 0.9808612    | 0.7903136    | 0.9844961    | 0.7757722    | not scorable | not scorable |
| #### Bn-scaff_21203_1-p2034 C-genome specific (napus-oleracea)  | 0.9856459    | 0.7666416    | 0.9767442    | 0.7208876    | not scorable | not scorable |
| #### Bn-scaff_21203_1-p2593 C-genome specific (napus-oleracea)  | 0.9856459    | 0.7363261    | 1            | 0.7350889    | not scorable | not scorable |
| #### Bn-scaff_21203_1-p2768 C-genome specific (napus-oleracea)  | 0.9952153    | 0.8086624    | 1            | 0.9611824    | not scorable | not scorable |
| #### Bn-scaff_21203_1-p2911 C-genome specific (napus-oleracea)  | 0.9928229    | 0.8224473    | 1            | 0.7647473    | not scorable | not scorable |
| #### Bn-scaff_21203_1-p3367 C-genome specific (napus-oleracea)  | 0.9904306    | 0.79044      | 1            | 0.8538275    | not scorable | not scorable |
| #### Bn-scaff_21203_1-p4010 C-genome specific (napus-oleracea)  | 0.9856459    | 0.6660112    | 1            | 0.8075564    | not scorable | not scorable |
| #### Bn-scaff_21203_1-p4425 C-genome specific (napus-oleracea)  | 0.9928229    | 0.7251477    | 1            | 0.7776573    | not scorable | not scorable |
| #### Bn-scaff_21203_1-p5045 C-genome specific (napus-oleracea)  | 0.9880383    | 0.6536691    | 1            | 0.6966978    | not scorable | not scorable |
| #### Bn-scaff_21203_1-p6123 genome unspecific (all in)          | 1            | 0.5547176    | 1            | 0.6541093    | 1            | 0.5302584    |
| #### Bn-scaff_21214_1-p323 C-genome specific (oleracea only)    | not scorable | not scorable | 1            | 0.7233894    | not scorable | not scorable |
| #### Bn-scaff_21224_1-p11475 genome unspecific (all in)         | 1            | 0.5103428    | 1            | 0.8603758    | 1            | 0.9175813    |
| #### Bn-scaff_21224_1-p19581 C-genome specific (napus-oleracea) | 0.9904306    | 0.869378     | 1            | 0.7826288    | not scorable | not scorable |
| #### Bn-scaff_21224_1-p37994 C-genome specific (napus-oleracea) | 0.9904306    | 0.8811437    | 0.9767442    | 0.8023478    | not scorable | not scorable |
| #### Bn-scaff_21224_1-p42937 C-genome specific (napus-oleracea) | 0.9904306    | 0.782703     | 1            | 0.7117879    | not scorable | not scorable |
| #### Bn-scaff_21224_1-p43013 C-genome specific (napus-oleracea) | 0.9928229    | 0.6263671    | 1            | 0.7227579    | not scorable | not scorable |
| #### Bn-scaff_21224_1-p45271 C-genome specific (napus-oleracea) | 0.9856459    | 0.7965641    | 0.9767442    | 0.816856     | not scorable | not scorable |
| #### Bn-scaff_21224_1-p45303 C-genome specific (napus-oleracea) | 0.9904306    | 0.7441766    | 0.9844961    | 0.7750296    | not scorable | not scorable |
| #### Bn-scaff_21224_1-p46833 C-genome specific (napus-oleracea) | 0.9904306    | 0.7200373    | 0.9844961    | 0.721589     | not scorable | not scorable |
| #### Bn-scaff_21224_1-p56294 genome unspecific (all in)         | 0.9976076    | 0.6026717    | 1            | 0.8019849    | 1            | 0.8793069    |
| #### Bn-scaff_21224_1-p56966 C-genome specific (napus-oleracea) | 0.9856459    | 0.7324699    | 1            | 0.7898129    | not scorable | not scorable |

|                                                                  |              |              |              |              |              |              |
|------------------------------------------------------------------|--------------|--------------|--------------|--------------|--------------|--------------|
| ##### Bn-scaff_21224_1-p57955 C-genome specific (napus-oleracea) | 0.9928229    | 0.7694454    | 1            | 0.8264678    | not scorable | not scorable |
| ##### Bn-scaff_21224_1-p61539 C-genome specific (napus-oleracea) | 0.9904306    | 0.8058432    | 0.9922481    | 0.7704727    | not scorable | not scorable |
| ##### Bn-scaff_21224_1-p69022 C-genome specific (napus-oleracea) | 0.9928229    | 0.8318105    | 1            | 0.8796315    | not scorable | not scorable |
| ##### Bn-scaff_21224_1-p82554 C-genome specific (napus-oleracea) | 0.9856459    | 0.736945     | 0.9922481    | 0.7413487    | not scorable | not scorable |
| ##### Bn-scaff_21224_1-p82607 C-genome specific (napus-oleracea) | 1            | 0.5259452    | 1            | 0.5134922    | not scorable | not scorable |
| ##### Bn-scaff_21224_1-p99003 C-genome specific (napus-oleracea) | 0.9808612    | 0.6111667    | 0.9534883    | 0.8025319    | not scorable | not scorable |
| ##### Bn-scaff_21224_1-p998 C-genome specific (napus-oleracea)   | 1            | 0.5801054    | 0.9844961    | 0.7531117    | not scorable | not scorable |
| ##### Bn-scaff_21225_1-p10481 C-genome specific (napus-oleracea) | 0.9904306    | 0.7851961    | 0.9922481    | 0.692777     | not scorable | not scorable |
| ##### Bn-scaff_21225_1-p11061 C-genome specific (napus-oleracea) | 0.9856459    | 0.8066576    | 1            | 0.7947475    | not scorable | not scorable |
| ##### Bn-scaff_21225_1-p13619 C-genome specific (napus-oleracea) | 0.9641148    | 0.7006551    | 0.8294573    | 0.8250163    | not scorable | not scorable |
| ##### Bn-scaff_21225_1-p14443 C-genome specific (napus-oleracea) | 0.9880383    | 0.5323277    | 1            | 0.412876     | not scorable | not scorable |
| ##### Bn-scaff_21225_1-p53803 genome unspecific (oleracea-rapa)  | not scorable | not scorable | 0.9922481    | 0.3506998    | 0.9669421    | 0.2750268    |
| ##### Bn-scaff_21225_1-p74961 C-genome specific (napus-oleracea) | 0.9808612    | 0.7248158    | 0.8139535    | 0.6821972    | not scorable | not scorable |
| ##### Bn-scaff_21225_1-p82192 genome unspecific (all in)         | 0.9928229    | 0.2355036    | 0.9922481    | 0.8680537    | 1            | 0.8948976    |
| ##### Bn-scaff_21236_1-p438 C-genome specific (napus-oleracea)   | 0.9856459    | 0.7671068    | 0.9922481    | 0.7977585    | not scorable | not scorable |
| ##### Bn-scaff_21236_1-p771 C-genome specific (napus-oleracea)   | 0.9880383    | 0.7565001    | 1            | 0.5726511    | not scorable | not scorable |
| ##### Bn-scaff_21250_1-p11696 C-genome specific (napus-oleracea) | 0.9784689    | 0.7454581    | 0.9147287    | 0.7903211    | not scorable | not scorable |
| ##### Bn-scaff_21250_1-p16488 C-genome specific (napus-oleracea) | 0.9760765    | 0.5013431    | 1            | 0.6995872    | not scorable | not scorable |
| ##### Bn-scaff_21250_1-p21259 A-genome specific (napus-rapa)     | 1            | 0.5452152    | not scorable | not scorable | 0.9917355    | 0.7281584    |
| ##### Bn-scaff_21250_1-p27010 C-genome specific (napus-oleracea) | 0.9832536    | 0.6744105    | 1            | 0.6884933    | not scorable | not scorable |
| ##### Bn-scaff_21250_1-p28141 A-genome specific (napus-rapa)     | 0.9593301    | 0.5639954    | not scorable | not scorable | 1            | 0.7408172    |
| ##### Bn-scaff_21250_1-p41073 genome unspecific (all in)         | 0.9736842    | 0.2778022    | 1            | 0.8294981    | 0.9834711    | 0.7120996    |
| ##### Bn-scaff_21250_1-p41281 C-genome specific (napus-oleracea) | 0.9856459    | 0.721166     | 0.9302326    | 0.8996451    | not scorable | not scorable |
| ##### Bn-scaff_21250_1-p44892 C-genome specific (napus-oleracea) | 0.9832536    | 0.7230777    | 0.9612403    | 0.8334084    | not scorable | not scorable |
| ##### Bn-scaff_21250_1-p45238 genome unspecific (all in)         | 1            | 0.7770717    | 1            | 0.6896573    | 1            | 0.7770717    |
| ##### Bn-scaff_21250_1-p45397 C-genome specific (napus-oleracea) | 0.9688995    | 0.7562513    | 0.9457364    | 0.7201812    | not scorable | not scorable |
| ##### Bn-scaff_21250_1-p46785 C-genome specific (napus-oleracea) | 0.9880383    | 0.7618744    | 1            | 0.7532361    | not scorable | not scorable |
| ##### Bn-scaff_21250_1-p50080 all not scorable                   | not scorable | not scorable | not scorable | not scorable | not scorable | not scorable |
| ##### Bn-scaff_21250_1-p59158 genome unspecific (oleracea-rapa)  | not scorable | not scorable | 1            | 0.734057     | 0.9504132    | 0.7969111    |
| ##### Bn-scaff_21250_1-p7148 C-genome specific (napus-oleracea)  | 0.9832536    | 0.7749386    | 0.9147287    | 0.8714736    | not scorable | not scorable |
| ##### Bn-scaff_21250_1-p7436 C-genome specific (napus-oleracea)  | 0.9832536    | 0.7656536    | 0.9147287    | 0.8530033    | not scorable | not scorable |
| ##### Bn-scaff_21250_1-p8196 C-genome specific (napus-oleracea)  | 0.9808612    | 0.6699126    | 0.9147287    | 0.7641256    | not scorable | not scorable |
| ##### Bn-scaff_21250_1-p84347 genome unspecific (all in)         | 0.9880383    | 0.767916     | 1            | 0.7951083    | 0.9917355    | 0.9177166    |



|                                                                 |              |              |              |   |              |              |              |              |
|-----------------------------------------------------------------|--------------|--------------|--------------|---|--------------|--------------|--------------|--------------|
| #### Bn-scaff_21261_1-p1170 genome unspecific (all in)          | 0.9880383    | 0.1841277    |              | 1 | 0.7134227    | 0.9917355    | 0.3505026    |              |
| #### Bn-scaff_21261_1-p4699 genome unspecific (oleracea-rapa)   | not scorable | not scorable |              | 1 | 0.5250583    |              | 0.8185204    |              |
| #### Bn-scaff_21261_1-p9838 genome unspecific (all in)          | 0.9976076    | 0.4967324    | 0.8837209    |   | 0.7397875    | 1            | 0.8415818    |              |
| #### Bn-scaff_21262_1-p7144 genome unspecific (all in)          | 0.9880383    | 0.5525524    | 0.9844961    |   | 0.7478834    | 0.9917355    | 0.8949363    |              |
| #### Bn-scaff_21268_1-p10241 C-genome specific (napus-oleracea) | 0.9832536    | 0.7375915    | 0.9922481    |   | 0.7732597    | not scorable | not scorable |              |
| #### Bn-scaff_21268_1-p10647 C-genome specific (napus-oleracea) | 0.9856459    | 0.6679342    |              | 1 | 0.7473792    | not scorable | not scorable |              |
| #### Bn-scaff_21268_1-p1218 C-genome specific (napus-oleracea)  | 0.9928229    | 0.6993605    |              | 1 | 0.7011682    | not scorable | not scorable |              |
| #### Bn-scaff_21268_1-p1220 C-genome specific (napus-oleracea)  | 0.9904306    | 0.7396989    |              | 1 | 0.7198238    | not scorable | not scorable |              |
| #### Bn-scaff_21268_1-p1356 C-genome specific (napus-oleracea)  | 0.9976076    | 0.6409329    | 0.9922481    |   | 0.6939216    | not scorable | not scorable |              |
| #### Bn-scaff_21268_1-p1934 genome unspecific (all in)          | 0.9832536    | 0.3638227    |              | 1 | 0.7846437    | 1            | 0.7050979    |              |
| #### Bn-scaff_21268_1-p7045 C-genome specific (napus-oleracea)  | 0.9856459    | 0.467046     |              | 1 | 0.5017444    | not scorable | not scorable |              |
| #### Bn-scaff_21269_1-p11894 genome unspecific (all in)         | 0.9760765    | 0.6329975    |              | 1 | 0.7980301    | 0.9752066    | 0.7878262    |              |
| #### Bn-scaff_21269_1-p1208 genome unspecific (oleracea-rapa)   | not scorable | not scorable |              | 1 | 0.6117135    | 0.9586777    | 0.7698758    |              |
| #### Bn-scaff_21269_1-p1213 genome unspecific (all in)          | 0.9952153    | 0.5267515    |              | 1 | 0.5777375    | 1            | 0.681638     |              |
| #### Bn-scaff_21269_1-p1213 genome unspecific (all in)          |              | 1            | 0.4681794    |   | 1            | 0.6991149    | 1            | 0.6398013    |
| #### Bn-scaff_21269_1-p1224 genome unspecific (all in)          | 0.9880383    | 0.347461     |              | 1 | 0.786373     | 0.9834711    | 0.9140136    |              |
| #### Bn-scaff_21269_1-p1235 C-genome specific (napus-oleracea)  | 0.9736842    | 0.7765372    |              | 1 | 0.7820255    | not scorable | not scorable |              |
| #### Bn-scaff_21269_1-p1336 C-genome specific (napus-oleracea)  | 0.9569378    | 0.6085828    | 0.9844961    |   | 0.6600095    | not scorable | not scorable |              |
| #### Bn-scaff_21269_1-p1356 all not scorable                    | not scorable | not scorable | not scorable |   | not scorable | not scorable | not scorable |              |
| #### Bn-scaff_21269_1-p1404 C-genome specific (napus-oleracea)  | 0.9688995    | 0.774052     | 0.9922481    |   | 0.7400833    | not scorable | not scorable |              |
| #### Bn-scaff_21269_1-p1431 C-genome specific (napus-oleracea)  | 0.9688995    | 0.7698311    | 0.9767442    |   | 0.788694     | not scorable | not scorable |              |
| #### Bn-scaff_21269_1-p1431 C-genome specific (napus-oleracea)  | 0.9688995    | 0.7101226    |              | 1 | 0.6924549    | not scorable | not scorable |              |
| #### Bn-scaff_21269_1-p1438 C-genome specific (napus-oleracea)  | 0.9736842    | 0.7606015    |              | 1 | 0.8047763    | not scorable | not scorable |              |
| #### Bn-scaff_21269_1-p1583 genome unspecific (all in)          | 0.9569378    | 0.5705938    | 0.9844961    |   | 0.7975371    | 1            | 0.9361601    |              |
| #### Bn-scaff_21269_1-p1795 C-genome specific (napus-oleracea)  |              | 1            | 0.4926042    |   | 1            | 0.5270854    | not scorable | not scorable |
| #### Bn-scaff_21269_1-p2048 genome unspecific (all in)          | 0.9976076    | 0.3871156    |              | 1 | 0.8190071    | 1            | 0.8887639    |              |
| #### Bn-scaff_21269_1-p2468 C-genome specific (napus-oleracea)  | 0.9354067    | 0.729579     | 0.7751938    |   | 0.7171257    | not scorable | not scorable |              |
| #### Bn-scaff_21269_1-p2709 C-genome specific (oleracea only)   | not scorable | not scorable | 0.9844961    |   | 0.6423273    | not scorable | not scorable |              |
| #### Bn-scaff_21269_1-p2855 genome unspecific (all in)          | 0.8971292    | 0.7208457    |              | 1 | 0.7067614    | 0.9256198    | 0.7793634    |              |
| #### Bn-scaff_21269_1-p2950 genome unspecific (oleracea-rapa)   | not scorable | not scorable |              | 1 | 0.8298423    | 1            | 0.9067467    |              |
| #### Bn-scaff_21269_1-p2950 genome unspecific (all in)          | 0.9904306    | 0.5698138    | 0.9612403    |   | 0.6602219    | 1            | 0.7290323    |              |
| #### Bn-scaff_21269_1-p2955 genome unspecific (all in)          | 0.9832536    | 0.2475595    |              | 1 | 0.7796727    | 0.9669421    | 0.3616731    |              |
| #### Bn-scaff_21269_1-p3060 C-genome specific (napus-oleracea)  | 0.9641148    | 0.7175422    |              | 1 | 0.6833251    | not scorable | not scorable |              |

|                                                                 |              |              |              |              |              |              |
|-----------------------------------------------------------------|--------------|--------------|--------------|--------------|--------------|--------------|
| #### Bn-scaff_21269_1-p30956 C-genome specific (napus-oleracea) | 0.9760765    | 0.7262938    | 0.9689922    | 0.7183732    | not scorable | not scorable |
| #### Bn-scaff_21269_1-p31116 C-genome specific (napus-oleracea) | 0.9569378    | 0.2870398    | 0.9689922    | 0.3864309    | not scorable | not scorable |
| #### Bn-scaff_21269_1-p31358 C-genome specific (napus-oleracea) | 0.9808612    | 0.7472867    | 0.9922481    | 0.8056338    | not scorable | not scorable |
| #### Bn-scaff_21269_1-p35584 genome unspecific (all in)         | 0.9976076    | 0.2367282    | 1            | 0.7648793    | 0.9752066    | 0.6441641    |
| #### Bn-scaff_21269_1-p36240 A-genome specific (napus-rapa)     | 1            | 0.2474077    | not scorable | not scorable | 0.9917355    | 0.7590019    |
| #### Bn-scaff_21269_1-p83142 genome unspecific (all in)         | 0.9736842    | 0.3307888    | 0.9534883    | 0.5768752    | 1            | 0.7494321    |
| #### Bn-scaff_21269_1-p83280 genome unspecific (all in)         | 0.9808612    | 0.3836897    | 1            | 0.6971816    | 1            | 0.6587358    |
| #### Bn-scaff_21271_1-p17516 genome unspecific (all in)         | 0.9712918    | 0.3658662    | 1            | 0.6297483    | 0.9752066    | 0.5627925    |
| #### Bn-scaff_21276_1-p18186 C-genome specific (napus-oleracea) | 0.9784689    | 0.6743363    | 1            | 0.6703128    | not scorable | not scorable |
| #### Bn-scaff_21276_1-p18275 C-genome specific (napus-oleracea) | 0.9856459    | 0.775031     | 1            | 0.80931      | not scorable | not scorable |
| #### Bn-scaff_21276_1-p18827 C-genome specific (napus-oleracea) | 0.9569378    | 0.6845276    | 0.9767442    | 0.7309983    | not scorable | not scorable |
| #### Bn-scaff_21276_1-p20410 C-genome specific (napus-oleracea) | 0.9928229    | 0.7933221    | 1            | 0.7880429    | not scorable | not scorable |
| #### Bn-scaff_21276_1-p29277 C-genome specific (napus-oleracea) | 0.9712918    | 0.7992895    | 1            | 0.8824459    | not scorable | not scorable |
| #### Bn-scaff_21276_1-p30239 genome unspecific (all in)         | 0.9904306    | 0.503527     | 0.9922481    | 0.5793791    | 1            | 0.854426     |
| #### Bn-scaff_21276_1-p30367 C-genome specific (napus-oleracea) | 0.9832536    | 0.7523092    | 1            | 0.822418     | not scorable | not scorable |
| #### Bn-scaff_21276_1-p34508 C-genome specific (napus-oleracea) | 0.9808612    | 0.6245636    | 1            | 0.702719     | not scorable | not scorable |
| #### Bn-scaff_21276_1-p34530 genome unspecific (all in)         | 0.9880383    | 0.4312486    | 1            | 0.7377195    | 1            | 0.638247     |
| #### Bn-scaff_21276_1-p35489 C-genome specific (napus-oleracea) | 0.9856459    | 0.7508666    | 0.9922481    | 0.8600724    | not scorable | not scorable |
| #### Bn-scaff_21276_1-p37824 genome unspecific (all in)         | 0.9641148    | 0.2775517    | 0.9922481    | 0.7022583    | 1            | 0.6642756    |
| #### Bn-scaff_21276_1-p39288 C-genome specific (napus-oleracea) | 0.9904306    | 0.7914279    | 1            | 0.8468009    | not scorable | not scorable |
| #### Bn-scaff_21276_1-p50421 genome unspecific (all in)         | 0.9784689    | 0.3087372    | 1            | 0.793114     | 1            | 0.9095823    |
| #### Bn-scaff_21276_1-p52442 C-genome specific (napus-oleracea) | 0.9880383    | 0.8011925    | 1            | 0.7031404    | not scorable | not scorable |
| #### Bn-scaff_21276_1-p57413 genome unspecific (all in)         | 0.9952153    | 0.3118401    | 1            | 0.7898703    | 0.9834711    | 0.7418591    |
| #### Bn-scaff_21276_1-p64333 A-genome specific (rapa only)      | not scorable | not scorable | not scorable | not scorable | 1            | 0.8353119    |
| #### Bn-scaff_21305_1-p13647 C-genome specific (napus-oleracea) | 0.9928229    | 0.7218007    | 1            | 0.7338457    | not scorable | not scorable |
| #### Bn-scaff_21311_1-p20912 C-genome specific (napus-oleracea) | 0.9760765    | 0.5672703    | 0.9922481    | 0.6991282    | not scorable | not scorable |
| #### Bn-scaff_21311_1-p30919 A-genome specific (napus-rapa)     | 0.9354067    | 0.6219806    | not scorable | not scorable | 0.9834711    | 0.8114307    |
| #### Bn-scaff_21311_1-p38653 C-genome specific (napus-oleracea) | 0.9688995    | 0.7585191    | 0.5581396    | 0.9078842    | not scorable | not scorable |
| #### Bn-scaff_21311_1-p48896 C-genome specific (napus-oleracea) | 0.9665072    | 0.7564147    | 0.4186046    | 0.7130981    | not scorable | not scorable |
| #### Bn-scaff_21312_1-p10248 C-genome specific (napus-oleracea) | 0.9210526    | 0.7637641    | 1            | 0.7959431    | not scorable | not scorable |
| #### Bn-scaff_21312_1-p11117 genome unspecific (all in)         | 0.9784689    | 0.390988     | 1            | 0.7849017    | 1            | 0.8203765    |
| #### Bn-scaff_21312_1-p11567 genome unspecific (all in)         | 0.9473684    | 0.5239745    | 1            | 0.804975     | 0.9917355    | 0.7753419    |
| #### Bn-scaff_21312_1-p12066 C-genome specific (napus-oleracea) | 0.9904306    | 0.7771263    | 1            | 0.8101133    | not scorable | not scorable |

|                                                                 |              |              |              |              |              |              |
|-----------------------------------------------------------------|--------------|--------------|--------------|--------------|--------------|--------------|
| #### Bn-scaff_21312_1-p13054 C-genome specific (napus-oleracea) | 0.9066986    | 0.7342197    | 0.7596899    | 0.7523946    | not scorable | not scorable |
| #### Bn-scaff_21312_1-p13058 C-genome specific (napus-oleracea) | 0.9066986    | 0.7884621    | 0.8217054    | 0.7551768    | not scorable | not scorable |
| #### Bn-scaff_21312_1-p13061 C-genome specific (napus-oleracea) | 0.9210526    | 0.7627773    | 1            | 0.6716482    | not scorable | not scorable |
| #### Bn-scaff_21312_1-p13096 C-genome specific (napus-oleracea) | 0.9114832    | 0.7695819    | 0.8992248    | 0.6974633    | not scorable | not scorable |
| #### Bn-scaff_21312_1-p13320 C-genome specific (napus-oleracea) | 0.9258373    | 0.8114497    | 0.9922481    | 0.7563697    | not scorable | not scorable |
| #### Bn-scaff_21312_1-p13419 genome unspecific (all in)         | 0.9904306    | 0.3200569    | 1            | 0.8473596    | 0.9917355    | 0.7703758    |
| #### Bn-scaff_21312_1-p13430 genome unspecific (all in)         | 0.9952153    | 0.3286103    | 0.9457364    | 0.7826706    | 0.9917355    | 0.8033617    |
| #### Bn-scaff_21312_1-p13430 C-genome specific (napus-oleracea) | 0.9138756    | 0.7832235    | 0.9689922    | 0.8207464    | not scorable | not scorable |
| #### Bn-scaff_21312_1-p13766 C-genome specific (napus-oleracea) | 0.9210526    | 0.679994     | 1            | 0.7662339    | not scorable | not scorable |
| #### Bn-scaff_21312_1-p14181 genome unspecific (all in)         | 0.9832536    | 0.2647448    | 0.9534883    | 0.8742138    | 0.9917355    | 0.7234554    |
| #### Bn-scaff_21312_1-p16120 C-genome specific (napus-oleracea) | 0.9162679    | 0.7431469    | 1            | 0.8286006    | not scorable | not scorable |
| #### Bn-scaff_21312_1-p16990 C-genome specific (napus-oleracea) | 0.9186603    | 0.6919091    | 1            | 0.7654775    | not scorable | not scorable |
| #### Bn-scaff_21312_1-p19808 C-genome specific (napus-oleracea) | 0.9712918    | 0.6458824    | 0.9922481    | 0.7892068    | not scorable | not scorable |
| #### Bn-scaff_21312_1-p19892 C-genome specific (napus-oleracea) | 0.9138756    | 0.7039872    | 1            | 0.7590626    | not scorable | not scorable |
| #### Bn-scaff_21312_1-p20645 C-genome specific (napus-oleracea) | 0.9258373    | 0.7663669    | 1            | 0.6834247    | not scorable | not scorable |
| #### Bn-scaff_21312_1-p21379 C-genome specific (napus-oleracea) | 0.9162679    | 0.6994125    | 1            | 0.8351377    | not scorable | not scorable |
| #### Bn-scaff_21312_1-p21381 C-genome specific (napus-oleracea) | 0.9162679    | 0.6965455    | 1            | 0.7458485    | not scorable | not scorable |
| #### Bn-scaff_21312_1-p28800 C-genome specific (napus-oleracea) | 0.930622     | 0.7787628    | 1            | 0.8099766    | not scorable | not scorable |
| #### Bn-scaff_21312_1-p29711 genome unspecific (oleracea-rapa)  | not scorable | not scorable | 0.9767442    | 0.7707278    | 0.9834711    | 0.6297129    |
| #### Bn-scaff_21312_1-p31391 C-genome specific (napus-oleracea) | 0.9210526    | 0.6634573    | 1            | 0.6260363    | not scorable | not scorable |
| #### Bn-scaff_21312_1-p32185 genome unspecific (all in)         | 0.9904306    | 0.2157063    | 1            | 0.6655524    | 1            | 0.8004208    |
| #### Bn-scaff_21312_1-p32330 genome unspecific (oleracea-rapa)  | not scorable | not scorable | 1            | 0.6691979    | 0.9917355    | 0.7520862    |
| #### Bn-scaff_21312_1-p53844 genome unspecific (all in)         | 0.9784689    | 0.6787859    | 0.9922481    | 0.7168652    | 0.9090909    | 0.9353517    |
| #### Bn-scaff_21312_1-p54651 C-genome specific (napus-oleracea) | 0.9712918    | 0.7085628    | 1            | 0.7794489    | not scorable | not scorable |
| #### Bn-scaff_21312_1-p66279 genome unspecific (oleracea-rapa)  | not scorable | not scorable | 0.9844961    | 0.6836261    | 1            | 0.6393754    |
| #### Bn-scaff_21312_1-p68169 C-genome specific (napus-oleracea) | 0.9066986    | 0.747604     | 0.9922481    | 0.8092792    | not scorable | not scorable |
| #### Bn-scaff_21312_1-p69450 genome unspecific (all in)         | 0.9688995    | 0.2465304    | 0.9689922    | 0.565663     | 1            | 0.8948975    |
| #### Bn-scaff_21312_1-p89532 genome unspecific (all in)         | 0.9736842    | 0.4846063    | 1            | 0.7346496    | 0.9917355    | 0.9389238    |
| #### Bn-scaff_21312_1-p90644 genome unspecific (all in)         | 0.9497608    | 0.5267591    | 0.9844961    | 0.5959895    | 1            | 0.8844621    |
| #### Bn-scaff_21312_1-p93270 napus specific                     | 0.4760765    | 0.746883     | not scorable | not scorable | not scorable | not scorable |
| #### Bn-scaff_21313_1-p1951 C-genome specific (napus-oleracea)  | 0.9784689    | 0.6953241    | 1            | 0.7446533    | not scorable | not scorable |
| #### Bn-scaff_21313_1-p2300 C-genome specific (napus-oleracea)  | 0.9760765    | 0.3078609    | 0.9689922    | 0.2885846    | not scorable | not scorable |
| #### Bn-scaff_21330_1-p25753 C-genome specific (napus-oleracea) | 0.9952153    | 0.6685202    | 1            | 0.7600434    | not scorable | not scorable |

|                                                                 |              |              |              |              |              |              |
|-----------------------------------------------------------------|--------------|--------------|--------------|--------------|--------------|--------------|
| #### Bn-scaff_21330_1-p25769 C-genome specific (oleracea only)  | not scorable | not scorable | 0.9224806    | 0.3027564    | not scorable | not scorable |
| #### Bn-scaff_21330_1-p25848 C-genome specific (napus-oleracea) | 1            | 0.9072308    | 1            | 0.729725     | not scorable | not scorable |
| #### Bn-scaff_21330_1-p25931 C-genome specific (napus-oleracea) | 0.7751196    | 0.6117212    | 0.9922481    | 0.7286386    | not scorable | not scorable |
| #### Bn-scaff_21330_1-p27292 genome unspecific (all in)         | 1            | 0.7190304    | 1            | 0.7158812    | 1            | 0.702597     |
| #### Bn-scaff_21330_1-p29181 C-genome specific (napus-oleracea) | 0.9928229    | 0.7788504    | 1            | 0.7779177    | not scorable | not scorable |
| #### Bn-scaff_21330_1-p32655 C-genome specific (napus-oleracea) | 0.9928229    | 0.5631902    | 1            | 0.7672191    | not scorable | not scorable |
| #### Bn-scaff_21330_1-p34378 genome unspecific (all in)         | 1            | 0.6622245    | 1            | 0.5866876    | 1            | 0.693633     |
| #### Bn-scaff_21330_1-p34492 genome unspecific (all in)         | 0.9976076    | 0.602145     | 1            | 0.5446155    | 1            | 0.8326707    |
| #### Bn-scaff_21330_1-p35297 all not scorable                   | not scorable | not scorable | not scorable | not scorable | not scorable | not scorable |
| #### Bn-scaff_21330_1-p35297 C-genome specific (napus-oleracea) | 0.9976076    | 0.6922022    | 1            | 0.6643733    | not scorable | not scorable |
| #### Bn-scaff_21338_1-p10371 C-genome specific (napus-oleracea) | 0.9880383    | 0.7472867    | 0.9922481    | 0.8177906    | not scorable | not scorable |
| #### Bn-scaff_21338_1-p10391 C-genome specific (napus-oleracea) | 0.9808612    | 0.7267305    | 1            | 0.8026839    | not scorable | not scorable |
| #### Bn-scaff_21338_1-p10406 C-genome specific (napus-oleracea) | 0.9665072    | 0.2149423    | 0.9922481    | 0.7268486    | not scorable | not scorable |
| #### Bn-scaff_21338_1-p10417 C-genome specific (napus-oleracea) | 0.9808612    | 0.5614742    | 0.9922481    | 0.8317807    | not scorable | not scorable |
| #### Bn-scaff_21338_1-p10482 genome unspecific (all in)         | 0.9880383    | 0.2572982    | 1            | 0.5710193    | 1            | 0.8974569    |
| #### Bn-scaff_21338_1-p10530 C-genome specific (napus-oleracea) | 0.9856459    | 0.7088671    | 1            | 0.7642598    | not scorable | not scorable |
| #### Bn-scaff_21338_1-p10533 C-genome specific (napus-oleracea) | 0.9784689    | 0.743635     | 0.9922481    | 0.8233495    | not scorable | not scorable |
| #### Bn-scaff_21338_1-p10571 C-genome specific (napus-oleracea) | 0.9784689    | 0.6788436    | 1            | 0.7792832    | not scorable | not scorable |
| #### Bn-scaff_21338_1-p10585 C-genome specific (napus-oleracea) | 0.9856459    | 0.7535892    | 0.9922481    | 0.8567174    | not scorable | not scorable |
| #### Bn-scaff_21338_1-p10587 C-genome specific (napus-oleracea) | 0.9784689    | 0.5475969    | 1            | 0.7143461    | not scorable | not scorable |
| #### Bn-scaff_21338_1-p10595 C-genome specific (napus-oleracea) | 0.9880383    | 0.6826543    | 0.9922481    | 0.6721295    | not scorable | not scorable |
| #### Bn-scaff_21338_1-p10599 C-genome specific (napus-oleracea) | 0.9880383    | 0.7132101    | 0.9844961    | 0.7440204    | not scorable | not scorable |
| #### Bn-scaff_21338_1-p10600 C-genome specific (napus-oleracea) | 0.9928229    | 0.6628361    | 1            | 0.8911211    | not scorable | not scorable |
| #### Bn-scaff_21338_1-p10602 C-genome specific (napus-oleracea) | 0.9808612    | 0.6600329    | 1            | 0.6577117    | not scorable | not scorable |
| #### Bn-scaff_21338_1-p10603 C-genome specific (napus-oleracea) | 0.9904306    | 0.6831208    | 1            | 0.7234979    | not scorable | not scorable |
| #### Bn-scaff_21338_1-p10604 C-genome specific (napus-oleracea) | 0.9784689    | 0.7480737    | 1            | 0.8847041    | not scorable | not scorable |
| #### Bn-scaff_21338_1-p10605 C-genome specific (napus-oleracea) | 1            | 0.8031697    | 1            | 0.7255222    | not scorable | not scorable |
| #### Bn-scaff_21338_1-p10605 C-genome specific (napus-oleracea) | 0.9808612    | 0.6760012    | 1            | 0.6893218    | not scorable | not scorable |
| #### Bn-scaff_21338_1-p10606 C-genome specific (napus-oleracea) | 0.9904306    | 0.7072557    | 1            | 0.6819919    | not scorable | not scorable |
| #### Bn-scaff_21338_1-p10606 C-genome specific (napus-oleracea) | 0.9832536    | 0.6926218    | 0.9922481    | 0.6873577    | not scorable | not scorable |
| #### Bn-scaff_21338_1-p10613 C-genome specific (napus-oleracea) | 0.9928229    | 0.6720837    | 0.9767442    | 0.7093671    | not scorable | not scorable |
| #### Bn-scaff_21338_1-p10615 C-genome specific (napus-oleracea) | 0.9904306    | 0.6945025    | 1            | 0.6894233    | not scorable | not scorable |
| #### Bn-scaff_21338_1-p10616 C-genome specific (napus-oleracea) | 0.9904306    | 0.674994     | 1            | 0.6900374    | not scorable | not scorable |

|                                                                 |              |              |              |   |              |              |              |
|-----------------------------------------------------------------|--------------|--------------|--------------|---|--------------|--------------|--------------|
| #### Bn-scaff_21338_1-p10625 C-genome specific (napus-oleracea) | 0.9736842    | 0.5891261    |              | 1 | 0.5970427    | not scorable | not scorable |
| #### Bn-scaff_21338_1-p10628 C-genome specific (napus-oleracea) | 0.9832536    | 0.7689521    | 0.9922481    |   | 0.8772034    | not scorable | not scorable |
| #### Bn-scaff_21338_1-p10628 C-genome specific (napus-oleracea) | 0.9832536    | 0.7596122    | 0.9844961    |   | 0.7536114    | not scorable | not scorable |
| #### Bn-scaff_21338_1-p10634 C-genome specific (napus-oleracea) | 0.9856459    | 0.725815     |              | 1 | 0.8908079    | not scorable | not scorable |
| #### Bn-scaff_21338_1-p10646 C-genome specific (napus-oleracea) | 0.9928229    | 0.6958318    |              | 1 | 0.7149029    | not scorable | not scorable |
| #### Bn-scaff_21338_1-p10789 C-genome specific (napus-oleracea) | 0.9808612    | 0.7413061    |              | 1 | 0.7727524    | not scorable | not scorable |
| #### Bn-scaff_21338_1-p10806 C-genome specific (napus-oleracea) | 0.9856459    | 0.7521899    |              | 1 | 0.8683237    | not scorable | not scorable |
| #### Bn-scaff_21338_1-p10810 C-genome specific (napus-oleracea) | 0.9904306    | 0.7518371    |              | 1 | 0.773        | not scorable | not scorable |
| #### Bn-scaff_21338_1-p10853 C-genome specific (napus-oleracea) | 0.9784689    | 0.6746677    |              | 1 | 0.831505     | not scorable | not scorable |
| #### Bn-scaff_21338_1-p10856 C-genome specific (napus-oleracea) | 0.9712918    | 0.5567552    |              | 1 | 0.7064304    | not scorable | not scorable |
| #### Bn-scaff_21338_1-p11149 napus specific                     | 0.9569378    | 0.2932109    | not scorable |   | not scorable | not scorable | not scorable |
| #### Bn-scaff_21338_1-p11200 C-genome specific (napus-oleracea) | 0.9856459    | 0.7387005    | 0.9922481    |   | 0.8767959    | not scorable | not scorable |
| #### Bn-scaff_21338_1-p11201 C-genome specific (napus-oleracea) | 0.9928229    | 0.7494768    | 0.9922481    |   | 0.7899654    | not scorable | not scorable |
| #### Bn-scaff_21338_1-p11203 C-genome specific (napus-oleracea) | 0.9880383    | 0.7771364    |              | 1 | 0.8677253    | not scorable | not scorable |
| #### Bn-scaff_21338_1-p11357 genome unspecific (all in)         | 0.9688995    | 0.3172988    |              | 1 | 0.6560418    | 1            | 0.7252899    |
| #### Bn-scaff_21338_1-p11539 C-genome specific (napus-oleracea) | 0.9880383    | 0.7681111    | 0.9922481    |   | 0.8502306    | not scorable | not scorable |
| #### Bn-scaff_21338_1-p11542 genome unspecific (all in)         | 0.9832536    | 0.2681292    | 0.9844961    |   | 0.3776124    | 1            | 0.8002967    |
| #### Bn-scaff_21338_1-p11934 C-genome specific (napus-oleracea) | 0.9856459    | 0.6693352    | 0.9922481    |   | 0.6463253    | not scorable | not scorable |
| #### Bn-scaff_21338_1-p11935 C-genome specific (napus-oleracea) | 0.9928229    | 0.7417307    | 0.9922481    |   | 0.6855394    | not scorable | not scorable |
| #### Bn-scaff_21338_1-p11936 C-genome specific (napus-oleracea) | 0.9904306    | 0.6889776    | 0.9922481    |   | 0.7501517    | not scorable | not scorable |
| #### Bn-scaff_21338_1-p11973 genome unspecific (all in)         | 0.9832536    | 0.6958028    |              | 1 | 0.6940453    | 1            | 0.8793069    |
| #### Bn-scaff_21338_1-p11974 C-genome specific (napus-oleracea) | 0.9904306    | 0.7658518    |              | 1 | 0.7704264    | not scorable | not scorable |
| #### Bn-scaff_21338_1-p11975 genome unspecific (all in)         | 0.9712918    | 0.3416262    |              | 1 | 0.8462426    | 1            | 0.9293141    |
| #### Bn-scaff_21338_1-p11993 C-genome specific (napus-oleracea) | 0.9808612    | 0.7046671    | 0.9379845    |   | 0.7263455    | not scorable | not scorable |
| #### Bn-scaff_21338_1-p12051 C-genome specific (napus-oleracea) | 0.9688995    | 0.5076149    | 0.9689922    |   | 0.5488463    | not scorable | not scorable |
| #### Bn-scaff_21338_1-p12161 genome unspecific (all in)         | 0.9521531    | 0.3280883    |              | 1 | 0.7927473    | 1            | 0.8295752    |
| #### Bn-scaff_21338_1-p12356 C-genome specific (napus-oleracea) | 0.9880383    | 0.7476679    | 0.9844961    |   | 0.8099653    | not scorable | not scorable |
| #### Bn-scaff_21338_1-p13898 C-genome specific (napus-oleracea) | 0.9904306    | 0.7536704    | 0.9844961    |   | 0.7784312    | not scorable | not scorable |
| #### Bn-scaff_21338_1-p13911 C-genome specific (napus-oleracea) | 0.9880383    | 0.6768082    | 0.9612403    |   | 0.7097618    | not scorable | not scorable |
| #### Bn-scaff_21338_1-p14797 genome unspecific (oleracea-rapa)  | not scorable | not scorable | 0.9767442    |   | 0.7068456    | 1            | 0.9289024    |
| #### Bn-scaff_21338_1-p15128 C-genome specific (napus-oleracea) | 0.9808612    | 0.7952031    | 0.9534883    |   | 0.8525288    | not scorable | not scorable |
| #### Bn-scaff_21338_1-p15693 C-genome specific (napus-oleracea) | 0.9832536    | 0.7871521    |              | 1 | 0.7880116    | not scorable | not scorable |
| #### Bn-scaff_21338_1-p18825 C-genome specific (napus-oleracea) | 0.9952153    | 0.503378     | 0.9767442    |   | 0.6580956    | not scorable | not scorable |

|                                                                 |           |           |              |              |              |              |
|-----------------------------------------------------------------|-----------|-----------|--------------|--------------|--------------|--------------|
| #### Bn-scaff_21338_1-p19483 C-genome specific (napus-oleracea) | 0.9904306 | 0.6932868 | 1            | 0.8287146    | not scorable | not scorable |
| #### Bn-scaff_21338_1-p21549 genome unspecific (all in)         | 1         | 0.2890317 | 0.9069768    | 0.2877534    | 1            | 0.814394     |
| #### Bn-scaff_21338_1-p22459 C-genome specific (napus-oleracea) | 0.9928229 | 0.8063843 | 1            | 0.8189364    | not scorable | not scorable |
| #### Bn-scaff_21338_1-p22879 C-genome specific (napus-oleracea) | 0.9880383 | 0.7332321 | 1            | 0.7074823    | not scorable | not scorable |
| #### Bn-scaff_21338_1-p29652 C-genome specific (napus-oleracea) | 0.9856459 | 0.7337123 | 0.9844961    | 0.6615495    | not scorable | not scorable |
| #### Bn-scaff_21338_1-p29903 C-genome specific (napus-oleracea) | 1         | 0.7819161 | 1            | 0.6152315    | not scorable | not scorable |
| #### Bn-scaff_21338_1-p30565 napus specific                     | 0.9856459 | 0.4762608 | not scorable | not scorable | not scorable | not scorable |
| #### Bn-scaff_21338_1-p34074 napus specific                     | 1         | 0.5053036 | not scorable | not scorable | not scorable | not scorable |
| #### Bn-scaff_21338_1-p35939 genome unspecific (all in)         | 0.9976076 | 0.3131079 | 1            | 0.7366102    | 0.9669421    | 0.7072737    |
| #### Bn-scaff_21338_1-p35970 genome unspecific (all in)         | 0.9952153 | 0.3207842 | 1            | 0.7632717    | 0.9834711    | 0.540113     |
| #### Bn-scaff_21338_1-p36356 genome unspecific (all in)         | 0.9976076 | 0.5236148 | 1            | 0.7101899    | 1            | 0.8942988    |
| #### Bn-scaff_21338_1-p46791 C-genome specific (napus-oleracea) | 0.9928229 | 0.7629114 | 1            | 0.8175608    | not scorable | not scorable |
| #### Bn-scaff_21338_1-p47011 genome unspecific (all in)         | 0.9928229 | 0.5396562 | 1            | 0.7920272    | 0.9504132    | 0.7769675    |
| #### Bn-scaff_21338_1-p48350 C-genome specific (napus-oleracea) | 0.9976076 | 0.763381  | 1            | 0.7698647    | not scorable | not scorable |
| #### Bn-scaff_21338_1-p49166 C-genome specific (napus-oleracea) | 1         | 0.7078092 | 1            | 0.7429645    | not scorable | not scorable |
| #### Bn-scaff_21338_1-p49192 C-genome specific (napus-oleracea) | 1         | 0.7614452 | 1            | 0.8085684    | not scorable | not scorable |
| #### Bn-scaff_21338_1-p49258 C-genome specific (napus-oleracea) | 1         | 0.6653003 | 0.9534883    | 0.6065874    | not scorable | not scorable |
| #### Bn-scaff_21338_1-p49281 C-genome specific (napus-oleracea) | 1         | 0.6880717 | 1            | 0.6996737    | not scorable | not scorable |
| #### Bn-scaff_21338_1-p49312 C-genome specific (napus-oleracea) | 1         | 0.787819  | 1            | 0.7207771    | not scorable | not scorable |
| #### Bn-scaff_21338_1-p49357 C-genome specific (napus-oleracea) | 1         | 0.7825465 | 1            | 0.7891042    | not scorable | not scorable |
| #### Bn-scaff_21338_1-p49374 C-genome specific (napus-oleracea) | 1         | 0.7839187 | 1            | 0.6930746    | not scorable | not scorable |
| #### Bn-scaff_21338_1-p49382 C-genome specific (napus-oleracea) | 0.9976076 | 0.7630751 | 1            | 0.7116977    | not scorable | not scorable |
| #### Bn-scaff_21338_1-p49389 C-genome specific (napus-oleracea) | 1         | 0.6139109 | 1            | 0.6399304    | not scorable | not scorable |
| #### Bn-scaff_21338_1-p49479 genome unspecific (all in)         | 1         | 0.72917   | 1            | 0.7988689    | 0.768595     | 0.8986375    |
| #### Bn-scaff_21338_1-p49514 C-genome specific (napus-oleracea) | 0.9976076 | 0.853923  | 1            | 0.7030903    | not scorable | not scorable |
| #### Bn-scaff_21338_1-p49535 C-genome specific (napus-oleracea) | 1         | 0.6875088 | 1            | 0.6576464    | not scorable | not scorable |
| #### Bn-scaff_21338_1-p50974 C-genome specific (napus-oleracea) | 0.9880383 | 0.7951295 | 0.9922481    | 0.7850796    | not scorable | not scorable |
| #### Bn-scaff_21338_1-p51399 C-genome specific (napus-oleracea) | 0.9976076 | 0.7883763 | 0.9224806    | 0.8566784    | not scorable | not scorable |
| #### Bn-scaff_21338_1-p51411 C-genome specific (napus-oleracea) | 0.9976076 | 0.7973794 | 0.9224806    | 0.7951674    | not scorable | not scorable |
| #### Bn-scaff_21338_1-p51413 C-genome specific (napus-oleracea) | 0.9952153 | 0.8292289 | 0.9224806    | 0.7400509    | not scorable | not scorable |
| #### Bn-scaff_21338_1-p51441 C-genome specific (napus-oleracea) | 0.9952153 | 0.6986431 | 0.9224806    | 0.8497241    | not scorable | not scorable |
| #### Bn-scaff_21338_1-p51451 C-genome specific (napus-oleracea) | 0.9952153 | 0.7660562 | 0.9224806    | 0.7248582    | not scorable | not scorable |
| #### Bn-scaff_21338_1-p51716 C-genome specific (napus-oleracea) | 1         | 0.7941753 | 0.9844961    | 0.7631381    | not scorable | not scorable |

|                                                                 |           |           |           |           |              |              |
|-----------------------------------------------------------------|-----------|-----------|-----------|-----------|--------------|--------------|
| #### Bn-scaff_21338_1-p51768 C-genome specific (napus-oleracea) | 1         | 0.8235092 | 1         | 0.7428409 | not scorable | not scorable |
| #### Bn-scaff_21338_1-p51768 C-genome specific (napus-oleracea) | 1         | 0.7862567 | 0.9922481 | 0.8065742 | not scorable | not scorable |
| #### Bn-scaff_21338_1-p51789 C-genome specific (napus-oleracea) | 1         | 0.7585118 | 0.9922481 | 0.6887437 | not scorable | not scorable |
| #### Bn-scaff_21338_1-p51791 C-genome specific (napus-oleracea) | 1         | 0.7523562 | 0.9922481 | 0.8176704 | not scorable | not scorable |
| #### Bn-scaff_21338_1-p51797 C-genome specific (napus-oleracea) | 1         | 0.7544709 | 0.9922481 | 0.7335605 | not scorable | not scorable |
| #### Bn-scaff_21338_1-p52332 C-genome specific (napus-oleracea) | 1         | 0.7658626 | 1         | 0.7563136 | not scorable | not scorable |
| #### Bn-scaff_21338_1-p53838 C-genome specific (napus-oleracea) | 1         | 0.855646  | 1         | 0.9450834 | not scorable | not scorable |
| #### Bn-scaff_21338_1-p53853 C-genome specific (napus-oleracea) | 0.9976076 | 0.7659664 | 0.9767442 | 0.6230199 | not scorable | not scorable |
| #### Bn-scaff_21338_1-p54053 C-genome specific (napus-oleracea) | 1         | 0.7630372 | 1         | 0.8190598 | not scorable | not scorable |
| #### Bn-scaff_21338_1-p54077 C-genome specific (napus-oleracea) | 1         | 0.740698  | 0.9767442 | 0.7912887 | not scorable | not scorable |
| #### Bn-scaff_21338_1-p54144 C-genome specific (napus-oleracea) | 1         | 0.7287567 | 0.9922481 | 0.8006236 | not scorable | not scorable |
| #### Bn-scaff_21338_1-p54190 C-genome specific (napus-oleracea) | 0.9976076 | 0.6701869 | 0.9767442 | 0.657427  | not scorable | not scorable |
| #### Bn-scaff_21338_1-p54201 C-genome specific (napus-oleracea) | 1         | 0.7673253 | 0.9922481 | 0.8446479 | not scorable | not scorable |
| #### Bn-scaff_21338_1-p54677 C-genome specific (napus-oleracea) | 1         | 0.7914019 | 1         | 0.8267726 | not scorable | not scorable |
| #### Bn-scaff_21338_1-p55449 genome unspecific (all in)         | 1         | 0.7331962 | 1         | 0.6234866 | 1            | 0.8229413    |
| #### Bn-scaff_21338_1-p55551 C-genome specific (napus-oleracea) | 0.9976076 | 0.6962199 | 0.9767442 | 0.8237576 | not scorable | not scorable |
| #### Bn-scaff_21338_1-p56679 C-genome specific (napus-oleracea) | 1         | 0.7514763 | 1         | 0.7146609 | not scorable | not scorable |
| #### Bn-scaff_21338_1-p56781 C-genome specific (napus-oleracea) | 1         | 0.6692967 | 1         | 0.8105607 | not scorable | not scorable |
| #### Bn-scaff_21338_1-p60492 C-genome specific (napus-oleracea) | 1         | 0.7409562 | 1         | 0.8067051 | not scorable | not scorable |
| #### Bn-scaff_21338_1-p60537 C-genome specific (napus-oleracea) | 1         | 0.7448555 | 1         | 0.7627373 | not scorable | not scorable |
| #### Bn-scaff_21338_1-p60584 C-genome specific (napus-oleracea) | 1         | 0.7705699 | 0.9922481 | 0.827772  | not scorable | not scorable |
| #### Bn-scaff_21338_1-p60599 C-genome specific (napus-oleracea) | 0.9904306 | 0.7286617 | 0.9922481 | 0.8530576 | not scorable | not scorable |
| #### Bn-scaff_21338_1-p60611 C-genome specific (napus-oleracea) | 1         | 0.736769  | 1         | 0.777056  | not scorable | not scorable |
| #### Bn-scaff_21338_1-p60644 C-genome specific (napus-oleracea) | 1         | 0.7234591 | 1         | 0.8647863 | not scorable | not scorable |
| #### Bn-scaff_21338_1-p60653 C-genome specific (napus-oleracea) | 0.9976076 | 0.7262957 | 1         | 0.9011838 | not scorable | not scorable |
| #### Bn-scaff_21338_1-p60762 genome unspecific (all in)         | 1         | 0.3361778 | 1         | 0.3776484 | 1            | 0.8108987    |
| #### Bn-scaff_21338_1-p60787 C-genome specific (napus-oleracea) | 1         | 0.7532716 | 1         | 0.8063135 | not scorable | not scorable |
| #### Bn-scaff_21338_1-p61217 C-genome specific (napus-oleracea) | 0.9928229 | 0.7457821 | 0.9844961 | 0.7835132 | not scorable | not scorable |
| #### Bn-scaff_21338_1-p61252 C-genome specific (napus-oleracea) | 1         | 0.7630799 | 1         | 0.7638136 | not scorable | not scorable |
| #### Bn-scaff_21338_1-p61353 C-genome specific (napus-oleracea) | 1         | 0.6610643 | 0.9922481 | 0.7924535 | not scorable | not scorable |
| #### Bn-scaff_21338_1-p6152 C-genome specific (napus-oleracea)  | 0.9952153 | 0.7875432 | 0.9534883 | 0.718959  | not scorable | not scorable |
| #### Bn-scaff_21338_1-p61552 C-genome specific (napus-oleracea) | 1         | 0.6844837 | 1         | 0.7560911 | not scorable | not scorable |
| #### Bn-scaff_21338_1-p6167 C-genome specific (napus-oleracea)  | 0.9880383 | 0.7303197 | 0.9689922 | 0.7824469 | not scorable | not scorable |

|                                                                 |              |              |           |           |              |              |
|-----------------------------------------------------------------|--------------|--------------|-----------|-----------|--------------|--------------|
| #### Bn-scaff_21338_1-p62065 C-genome specific (napus-oleracea) | 1            | 0.7276222    | 1         | 0.8479741 | not scorable | not scorable |
| #### Bn-scaff_21338_1-p62074 C-genome specific (napus-oleracea) | 1            | 0.8208857    | 1         | 0.8273389 | not scorable | not scorable |
| #### Bn-scaff_21338_1-p62081 C-genome specific (napus-oleracea) | 1            | 0.5650325    | 0.9767442 | 0.5562474 | not scorable | not scorable |
| #### Bn-scaff_21338_1-p62199 C-genome specific (napus-oleracea) | 1            | 0.7636475    | 1         | 0.806761  | not scorable | not scorable |
| #### Bn-scaff_21338_1-p63613 C-genome specific (oleracea only)  | not scorable | not scorable | 0.9379845 | 0.7355374 | not scorable | not scorable |
| #### Bn-scaff_21338_1-p63624 C-genome specific (napus-oleracea) | 0.9808612    | 0.7816865    | 0.8604651 | 0.8742876 | not scorable | not scorable |
| #### Bn-scaff_21338_1-p63630 C-genome specific (napus-oleracea) | 1            | 0.6696963    | 1         | 0.8518847 | not scorable | not scorable |
| #### Bn-scaff_21338_1-p63633 C-genome specific (napus-oleracea) | 1            | 0.7430487    | 1         | 0.8932458 | not scorable | not scorable |
| #### Bn-scaff_21338_1-p64259 C-genome specific (napus-oleracea) | 1            | 0.7457412    | 0.9922481 | 0.8391622 | not scorable | not scorable |
| #### Bn-scaff_21338_1-p65329 C-genome specific (oleracea only)  | not scorable | not scorable | 0.9767442 | 0.7298661 | not scorable | not scorable |
| #### Bn-scaff_21338_1-p66728 C-genome specific (napus-oleracea) | 0.9976076    | 0.7017174    | 1         | 0.8011671 | not scorable | not scorable |
| #### Bn-scaff_21338_1-p66922 genome unspecific (all in)         | 1            | 0.3881117    | 1         | 0.7410579 | 1            | 0.7423638    |
| #### Bn-scaff_21338_1-p66963 C-genome specific (oleracea only)  | not scorable | not scorable | 0.9379845 | 0.8180808 | not scorable | not scorable |
| #### Bn-scaff_21338_1-p67250 C-genome specific (napus-oleracea) | 1            | 0.739882     | 1         | 0.6897384 | not scorable | not scorable |
| #### Bn-scaff_21338_1-p67288 C-genome specific (napus-oleracea) | 0.9808612    | 0.7509112    | 1         | 0.729908  | not scorable | not scorable |
| #### Bn-scaff_21338_1-p68373 C-genome specific (napus-oleracea) | 0.9952153    | 0.7555393    | 0.9457364 | 0.7849017 | not scorable | not scorable |
| #### Bn-scaff_21338_1-p68425 C-genome specific (napus-oleracea) | 1            | 0.829334     | 1         | 0.8004113 | not scorable | not scorable |
| #### Bn-scaff_21338_1-p68460 C-genome specific (napus-oleracea) | 0.9952153    | 0.7142344    | 1         | 0.7153114 | not scorable | not scorable |
| #### Bn-scaff_21338_1-p68735 C-genome specific (napus-oleracea) | 1            | 0.7680218    | 1         | 0.7741914 | not scorable | not scorable |
| #### Bn-scaff_21338_1-p71034 C-genome specific (napus-oleracea) | 0.9928229    | 0.7458786    | 0.9844961 | 0.7376961 | not scorable | not scorable |
| #### Bn-scaff_21338_1-p71093 C-genome specific (napus-oleracea) | 0.9952153    | 0.834826     | 0.9844961 | 0.8032405 | not scorable | not scorable |
| #### Bn-scaff_21338_1-p71950 C-genome specific (napus-oleracea) | 0.9856459    | 0.7997164    | 1         | 0.8084045 | not scorable | not scorable |
| #### Bn-scaff_21338_1-p72345 C-genome specific (napus-oleracea) | 0.9856459    | 0.7971967    | 1         | 0.7456115 | not scorable | not scorable |
| #### Bn-scaff_21338_1-p72824 C-genome specific (napus-oleracea) | 0.9976076    | 0.8083357    | 1         | 0.7656923 | not scorable | not scorable |
| #### Bn-scaff_21338_1-p75166 C-genome specific (oleracea only)  | not scorable | not scorable | 0.9922481 | 0.7532299 | not scorable | not scorable |
| #### Bn-scaff_21338_1-p76025 C-genome specific (napus-oleracea) | 0.9904306    | 0.7789082    | 1         | 0.7781911 | not scorable | not scorable |
| #### Bn-scaff_21338_1-p78213 C-genome specific (napus-oleracea) | 0.9880383    | 0.7807876    | 0.9922481 | 0.770112  | not scorable | not scorable |
| #### Bn-scaff_21338_1-p81032 C-genome specific (napus-oleracea) | 0.9784689    | 0.7016569    | 0.9689922 | 0.7366468 | not scorable | not scorable |
| #### Bn-scaff_21338_1-p83264 C-genome specific (napus-oleracea) | 0.9976076    | 0.6114454    | 0.9767442 | 0.6923511 | not scorable | not scorable |
| #### Bn-scaff_21338_1-p83281 C-genome specific (napus-oleracea) | 0.9952153    | 0.6849309    | 1         | 0.7723996 | not scorable | not scorable |
| #### Bn-scaff_21338_1-p83289 genome unspecific (all in)         | 1            | 0.5901775    | 1         | 0.7683872 | 0.9834711    | 0.8295016    |
| #### Bn-scaff_21338_1-p83838 C-genome specific (napus-oleracea) | 0.9952153    | 0.7711056    | 0.9844961 | 0.8070654 | not scorable | not scorable |
| #### Bn-scaff_21338_1-p8681 C-genome specific (napus-oleracea)  | 0.9928229    | 0.7722623    | 0.9844961 | 0.6746584 | not scorable | not scorable |



|                                                                |              |              |              |              |              |              |
|----------------------------------------------------------------|--------------|--------------|--------------|--------------|--------------|--------------|
| #### Bn-scaff_21338_1-p87617genome unspecific (all in)         | 0.9976076    | 0.3010406    | 1            | 0.6401494    | 1            | 0.8708752    |
| #### Bn-scaff_21338_1-p88705genome unspecific (all in)         | 0.9928229    | 0.3202688    | 1            | 0.7079194    | 0.9917355    | 0.7603152    |
| #### Bn-scaff_21338_1-p91849C-genome specific (napus-oleracea) | 1            | 0.8230956    | 1            | 0.8417466    | not scorable | not scorable |
| #### Bn-scaff_21338_1-p92137C-genome specific (napus-oleracea) | 0.9928229    | 0.7753361    | 1            | 0.8365679    | not scorable | not scorable |
| #### Bn-scaff_21338_1-p97205genome unspecific (all in)         | 1            | 0.2685865    | 1            | 0.849381     | 0.9917355    | 0.8130028    |
| #### Bn-scaff_21352_1-p11096genome unspecific (all in)         | 1            | 0.5643941    | 0.9922481    | 0.5710735    | 1            | 0.6251532    |
| #### Bn-scaff_21352_1-p11809C-genome specific (napus-oleracea) | 0.9784689    | 0.5671073    | 0.9534883    | 0.5478847    | not scorable | not scorable |
| #### Bn-scaff_21352_1-p11810C-genome specific (napus-oleracea) | 1            | 0.7898132    | 0.9844961    | 0.8243338    | not scorable | not scorable |
| #### Bn-scaff_21352_1-p11990C-genome specific (napus-oleracea) | 0.9784689    | 0.505277     | 0.9224806    | 0.7400105    | not scorable | not scorable |
| #### Bn-scaff_21352_1-p12351C-genome specific (napus-oleracea) | 0.9928229    | 0.8122763    | 0.9922481    | 0.7421687    | not scorable | not scorable |
| #### Bn-scaff_21352_1-p15889genome unspecific (all in)         | 0.9880383    | 0.5687618    | 0.9612403    | 0.5866695    | 1            | 0.8559335    |
| #### Bn-scaff_21352_1-p17006genome unspecific (all in)         | 1            | 0.8114662    | 1            | 0.7435102    | 1            | 0.8004208    |
| #### Bn-scaff_21352_1-p17726C-genome specific (napus-oleracea) | 0.9736842    | 0.7361328    | 0.9689922    | 0.666169     | not scorable | not scorable |
| #### Bn-scaff_21352_1-p18559C-genome specific (napus-oleracea) | 0.9928229    | 0.8050527    | 0.9844961    | 0.7852951    | not scorable | not scorable |
| #### Bn-scaff_21352_1-p21628genome unspecific (all in)         | 0.9880383    | 0.6611806    | 0.9689922    | 0.6715102    | 0.9917355    | 0.671979     |
| #### Bn-scaff_21352_1-p22222genome unspecific (all in)         | 1            | 0.3705094    | 1            | 0.8433392    | 0.9834711    | 0.8006898    |
| #### Bn-scaff_21352_1-p25741C-genome specific (napus-oleracea) | 0.9521531    | 0.6153923    | 0.8372093    | 0.642842     | not scorable | not scorable |
| #### Bn-scaff_21352_1-p25879C-genome specific (napus-oleracea) | 0.9880383    | 0.7283639    | 0.9922481    | 0.8264429    | not scorable | not scorable |
| #### Bn-scaff_21352_1-p25928C-genome specific (napus-oleracea) | 0.9688995    | 0.5576693    | 0.9844961    | 0.4967948    | not scorable | not scorable |
| #### Bn-scaff_21352_1-p26389C-genome specific (napus-oleracea) | 0.9760765    | 0.7104412    | 0.8682171    | 0.800674     | not scorable | not scorable |
| #### Bn-scaff_21352_1-p81801C-genome specific (napus-oleracea) | 0.9880383    | 0.7348117    | 0.875969     | 0.728611     | not scorable | not scorable |
| #### Bn-scaff_21352_1-p95137A-genome specific (napus-rapa)     | 0.9473684    | 0.2913024    | not scorable | not scorable | 1            | 0.6179368    |
| #### Bn-scaff_21359_1-p222 genome unspecific (oleracea-rapa)   | not scorable | not scorable | 0.8372093    | 0.5126569    | 0.8842975    | 0.6999859    |
| #### Bn-scaff_21367_1-p13007C-genome specific (napus-oleracea) | 0.9688995    | 0.3420457    | 1            | 0.7206949    | not scorable | not scorable |
| #### Bn-scaff_21369_1-p10287C-genome specific (napus-oleracea) | 0.9808612    | 0.8032397    | 0.6356589    | 0.8931699    | not scorable | not scorable |
| #### Bn-scaff_21369_1-p10534genome unspecific (all in)         | 0.9904306    | 0.3019862    | 1            | 0.7444665    | 0.9752066    | 0.9141611    |
| #### Bn-scaff_21369_1-p10616C-genome specific (oleracea only)  | not scorable | not scorable | 1            | 0.8048926    | not scorable | not scorable |
| #### Bn-scaff_21369_1-p10874genome unspecific (all in)         | 0.9617225    | 0.306315     | 1            | 0.786163     | 0.9752066    | 0.7373757    |
| #### Bn-scaff_21369_1-p11110genome unspecific (oleracea-rapa)  | not scorable | not scorable | 1            | 0.7067985    | 1            | 0.6851025    |
| #### Bn-scaff_21369_1-p11673genome unspecific (all in)         | 0.9736842    | 0.5326416    | 1            | 0.6809286    | 1            | 0.9095823    |
| #### Bn-scaff_21369_1-p11938genome unspecific (all in)         | 0.9808612    | 0.3993582    | 1            | 0.7000787    | 1            | 0.8004208    |
| #### Bn-scaff_21369_1-p12117C-genome specific (napus-oleracea) | 0.9808612    | 0.7751198    | 1            | 0.7188068    | not scorable | not scorable |
| #### Bn-scaff_21369_1-p12129C-genome specific (napus-oleracea) | 0.9904306    | 0.741658     | 1            | 0.7750766    | not scorable | not scorable |

|                                                                 |              |              |              |              |              |              |
|-----------------------------------------------------------------|--------------|--------------|--------------|--------------|--------------|--------------|
| #### Bn-scaff_21369_1-p12368 C-genome specific (napus-oleracea) | 0.9856459    | 0.7410097    | 1            | 0.8096024    | not scorable | not scorable |
| #### Bn-scaff_21369_1-p12371 C-genome specific (napus-oleracea) | 0.9880383    | 0.6854421    | 0.9767442    | 0.7609277    | not scorable | not scorable |
| #### Bn-scaff_21369_1-p12500 genome unspecific (all in)         | 0.9904306    | 0.3585865    | 1            | 0.7896288    | 1            | 0.7646515    |
| #### Bn-scaff_21369_1-p12516 genome unspecific (all in)         | 0.9665072    | 0.2547265    | 1            | 0.6176605    | 1            | 0.7770717    |
| #### Bn-scaff_21369_1-p12630 C-genome specific (napus-oleracea) | 0.9784689    | 0.6933274    | 0.9844961    | 0.6705557    | not scorable | not scorable |
| #### Bn-scaff_21369_1-p12632 C-genome specific (napus-oleracea) | 0.9856459    | 0.8067282    | 0.9844961    | 0.7780011    | not scorable | not scorable |
| #### Bn-scaff_21369_1-p12635 C-genome specific (napus-oleracea) | 0.9904306    | 0.7592495    | 0.9844961    | 0.7245682    | not scorable | not scorable |
| #### Bn-scaff_21369_1-p12668 C-genome specific (napus-oleracea) | 0.9928229    | 0.7621944    | 0.9844961    | 0.7913918    | not scorable | not scorable |
| #### Bn-scaff_21369_1-p12677 C-genome specific (napus-oleracea) | 0.9880383    | 0.7668986    | 0.9844961    | 0.8104992    | not scorable | not scorable |
| #### Bn-scaff_21369_1-p19063 C-genome specific (napus-oleracea) | 0.937799     | 0.3559376    | 0.9689922    | 0.7915609    | not scorable | not scorable |
| #### Bn-scaff_21369_1-p20469 C-genome specific (napus-oleracea) | 0.9904306    | 0.5004032    | 1            | 0.8800722    | not scorable | not scorable |
| #### Bn-scaff_21369_1-p20540 genome unspecific (all in)         | 1            | 0.80316      | 1            | 0.7316346    | 1            | 0.8004208    |
| #### Bn-scaff_21369_1-p23544 genome unspecific (oleracea-rapa)  | not scorable | not scorable | 0.9922481    | 0.7978648    | 1            | 0.9193616    |
| #### Bn-scaff_21369_1-p23929 genome unspecific (all in)         | 0.9856459    | 0.3310556    | 1            | 0.681087     | 1            | 0.6897447    |
| #### Bn-scaff_21369_1-p26078 genome unspecific (all in)         | 0.9617225    | 0.2331549    | 1            | 0.785527     | 0.9917355    | 0.7272464    |
| #### Bn-scaff_21369_1-p37818 genome unspecific (all in)         | 0.9688995    | 0.3637259    | 1            | 0.7060443    | 1            | 0.8754691    |
| #### Bn-scaff_21369_1-p38088 genome unspecific (all in)         | 0.9593301    | 0.3757824    | 0.9922481    | 0.7280542    | 1            | 0.8543575    |
| #### Bn-scaff_21369_1-p38122 genome unspecific (all in)         | 0.9856459    | 0.3042529    | 1            | 0.687396     | 0.9917355    | 0.7252899    |
| #### Bn-scaff_21369_1-p40672 C-genome specific (napus-oleracea) | 0.9688995    | 0.7697844    | 0.9767442    | 0.9090806    | not scorable | not scorable |
| #### Bn-scaff_21369_1-p45600 C-genome specific (napus-oleracea) | 0.9904306    | 0.5454859    | 0.8449612    | 0.4128699    | not scorable | not scorable |
| #### Bn-scaff_21369_1-p47004 C-genome specific (napus-oleracea) | 1            | 0.8524423    | 0.9767442    | 0.8119355    | not scorable | not scorable |
| #### Bn-scaff_21369_1-p48537 C-genome specific (oleracea only)  | not scorable | not scorable | 0.9767442    | 0.726256     | not scorable | not scorable |
| #### Bn-scaff_21369_1-p52221 napus specific                     | 0.9952153    | 0.3096316    | not scorable | not scorable | not scorable | not scorable |
| #### Bn-scaff_21369_1-p62895 C-genome specific (oleracea only)  | not scorable | not scorable | 1            | 0.7080696    | not scorable | not scorable |
| #### Bn-scaff_21369_1-p62937 genome unspecific (oleracea-rapa)  | not scorable | not scorable | 1            | 0.8031524    | 0.9752066    | 0.4868115    |
| #### Bn-scaff_21369_1-p65358 genome unspecific (oleracea-rapa)  | not scorable | not scorable | 1            | 0.5269421    | 0.9917355    | 0.690903     |
| #### Bn-scaff_21369_1-p82563 C-genome specific (oleracea only)  | not scorable | not scorable | 0.8837209    | 0.6910558    | not scorable | not scorable |
| #### Bn-scaff_21369_1-p82581 A-genome specific (rapa only)      | not scorable | not scorable | not scorable | not scorable | 1            | 0.7954656    |
| #### Bn-scaff_21369_1-p87125 napus specific                     | 0.9593301    | 0.2513835    | not scorable | not scorable | not scorable | not scorable |
| #### Bn-scaff_21369_1-p91227 genome unspecific (all in)         | 0.9976076    | 0.338812     | 1            | 0.7983429    | 1            | 0.7694611    |
| #### Bn-scaff_21383_1-p125 napus specific                       | 0.9856459    | 0.3191313    | not scorable | not scorable | not scorable | not scorable |
| #### Bn-scaff_21386_1-p17291 C-genome specific (napus-oleracea) | 0.9880383    | 0.7219493    | 1            | 0.767073     | not scorable | not scorable |
| #### Bn-scaff_21386_1-p17474 C-genome specific (napus-oleracea) | 0.9832536    | 0.5906283    | 0.9844961    | 0.5750204    | not scorable | not scorable |

|                                                                 |           |           |              |              |              |              |
|-----------------------------------------------------------------|-----------|-----------|--------------|--------------|--------------|--------------|
| #### Bn-scaff_21386_1-p26868 C-genome specific (napus-oleracea) | 0.9904306 | 0.7930671 | 0.9922481    | 0.7856688    | not scorable | not scorable |
| #### Bn-scaff_21386_1-p27085 C-genome specific (napus-oleracea) | 0.9952153 | 0.7098274 | 0.9922481    | 0.6443156    | not scorable | not scorable |
| #### Bn-scaff_21386_1-p29359 C-genome specific (napus-oleracea) | 0.9880383 | 0.7905059 | 1            | 0.7902534    | not scorable | not scorable |
| #### Bn-scaff_21386_1-p30267 C-genome specific (napus-oleracea) | 0.9856459 | 0.8266603 | 0.9922481    | 0.8298179    | not scorable | not scorable |
| #### Bn-scaff_21386_1-p35498 C-genome specific (napus-oleracea) | 0.9928229 | 0.6204805 | 1            | 0.5585453    | not scorable | not scorable |
| #### Bn-scaff_21386_1-p35560 C-genome specific (napus-oleracea) | 0.9976076 | 0.83337   | 0.9922481    | 0.8073635    | not scorable | not scorable |
| #### Bn-scaff_21386_1-p35636 C-genome specific (napus-oleracea) | 1         | 0.7798521 | 0.9922481    | 0.7026556    | not scorable | not scorable |
| #### Bn-scaff_21386_1-p35701 C-genome specific (napus-oleracea) | 0.9952153 | 0.7477282 | 0.9922481    | 0.7678042    | not scorable | not scorable |
| #### Bn-scaff_21386_1-p35918 C-genome specific (napus-oleracea) | 0.9904306 | 0.5072435 | 1            | 0.4330454    | not scorable | not scorable |
| #### Bn-scaff_21386_1-p36155 C-genome specific (napus-oleracea) | 0.9976076 | 0.7804697 | 0.9922481    | 0.6513084    | not scorable | not scorable |
| #### Bn-scaff_21386_1-p36891 C-genome specific (napus-oleracea) | 0.9952153 | 0.8109068 | 0.9922481    | 0.7252578    | not scorable | not scorable |
| #### Bn-scaff_21386_1-p37139 C-genome specific (napus-oleracea) | 0.9904306 | 0.8000154 | 1            | 0.8314562    | not scorable | not scorable |
| #### Bn-scaff_21386_1-p39383 C-genome specific (napus-oleracea) | 0.9904306 | 0.7164975 | 1            | 0.7075881    | not scorable | not scorable |
| #### Bn-scaff_21386_1-p39609 genome unspecific (all in)         | 0.9856459 | 0.7667484 | 1            | 0.682853     | 1            | 0.7204565    |
| #### Bn-scaff_21392_1-p175 C-genome specific (napus-oleracea)   | 0.9880383 | 0.7407516 | 0.9302326    | 0.7972498    | not scorable | not scorable |
| #### Bn-scaff_21432_1-p6117 napus specific                      | 0.8157895 | 0.3439982 | not scorable | not scorable | not scorable | not scorable |
| #### Bn-scaff_21450_1-p68078 genome unspecific (all in)         | 1         | 0.5373363 | 0.9379845    | 0.4287346    | 1            | 0.8611264    |
| #### Bn-scaff_21450_1-p68242 C-genome specific (napus-oleracea) | 0.9952153 | 0.954983  | 0.9922481    | 0.7262804    | not scorable | not scorable |
| #### Bn-scaff_21450_1-p77567 genome unspecific (all in)         | 0.9736842 | 0.3057704 | 1            | 0.6800129    | 0.9834711    | 0.6960051    |
| #### Bn-scaff_21453_1-p10303 genome unspecific (all in)         | 0.9880383 | 0.2413671 | 1            | 0.7721244    | 0.9834711    | 0.676646     |
| #### Bn-scaff_21453_1-p12844 C-genome specific (napus-oleracea) | 0.9880383 | 0.7909901 | 0.9844961    | 0.7024604    | not scorable | not scorable |
| #### Bn-scaff_21453_1-p13026 C-genome specific (napus-oleracea) | 0.9880383 | 0.8226622 | 0.9922481    | 0.8153608    | not scorable | not scorable |
| #### Bn-scaff_21453_1-p13096 C-genome specific (napus-oleracea) | 0.9760765 | 0.7483079 | 0.9922481    | 0.7474023    | not scorable | not scorable |
| #### Bn-scaff_21453_1-p18203 genome unspecific (all in)         | 0.9832536 | 0.2629911 | 1            | 0.7253056    | 0.9834711    | 0.6489781    |
| #### Bn-scaff_21453_1-p79485 genome unspecific (all in)         | 0.8755981 | 0.4264468 | 1            | 0.7634509    | 1            | 0.7656965    |
| #### Bn-scaff_21496_1-p14017 genome unspecific (all in)         | 1         | 0.5946277 | 1            | 0.7282096    | 1            | 0.8734626    |
| #### Bn-scaff_21496_1-p16556 C-genome specific (napus-oleracea) | 1         | 0.7229871 | 1            | 0.7020714    | not scorable | not scorable |
| #### Bn-scaff_21496_1-p18584 genome unspecific (all in)         | 1         | 0.4517656 | 1            | 0.7124944    | 1            | 0.9024472    |
| #### Bn-scaff_21496_1-p19196 C-genome specific (napus-oleracea) | 0.9784689 | 0.7795768 | 0.9844961    | 0.7781733    | not scorable | not scorable |
| #### Bn-scaff_21496_1-p19377 C-genome specific (napus-oleracea) | 0.9808612 | 0.7268659 | 0.9922481    | 0.7310942    | not scorable | not scorable |
| #### Bn-scaff_21496_1-p21032 genome unspecific (all in)         | 1         | 0.5697773 | 0.9844961    | 0.6490527    | 1            | 0.905968     |
| #### Bn-scaff_21496_1-p21364 C-genome specific (napus-oleracea) | 1         | 0.784735  | 0.9922481    | 0.7313552    | not scorable | not scorable |
| #### Bn-scaff_21496_1-p21612 genome unspecific (all in)         | 0.9952153 | 0.5617204 | 1            | 0.7263905    | 1            | 0.8827186    |

|                                                                 |              |              |              |              |              |              |
|-----------------------------------------------------------------|--------------|--------------|--------------|--------------|--------------|--------------|
| #### Bn-scaff_21496_1-p30223 C-genome specific (napus-oleracea) | 1            | 0.5791555    | 1            | 0.5458179    | not scorable | not scorable |
| #### Bn-scaff_21496_1-p30410 C-genome specific (napus-oleracea) | 1            | 0.6937472    | 1            | 0.6570896    | not scorable | not scorable |
| #### Bn-scaff_21496_1-p30411 C-genome specific (napus-oleracea) | 1            | 0.6096503    | 1            | 0.6032841    | not scorable | not scorable |
| #### Bn-scaff_21496_1-p32079 C-genome specific (napus-oleracea) | 1            | 0.7818499    | 1            | 0.7403442    | not scorable | not scorable |
| #### Bn-scaff_21496_1-p32384 C-genome specific (napus-oleracea) | 1            | 0.4703813    | 1            | 0.6487084    | not scorable | not scorable |
| #### Bn-scaff_21496_1-p32479 C-genome specific (napus-oleracea) | 1            | 0.7331577    | 1            | 0.6717076    | not scorable | not scorable |
| #### Bn-scaff_21496_1-p33215 C-genome specific (napus-oleracea) | 0.9976076    | 0.7678726    | 1            | 0.6908471    | not scorable | not scorable |
| #### Bn-scaff_21496_1-p33530 genome unspecific (oleracea-rapa)  | not scorable | not scorable | 0.9922481    | 0.7407435    | 0.8181818    | 0.8253691    |
| #### Bn-scaff_21496_1-p34584 genome unspecific (all in)         | 1            | 0.5315235    | 1            | 0.790215     | 1            | 0.9042972    |
| #### Bn-scaff_21496_1-p35318 C-genome specific (oleracea only)  | not scorable | not scorable | 0.9612403    | 0.4288795    | not scorable | not scorable |
| #### Bn-scaff_21496_1-p35365 napus specific                     | 0.9617225    | 0.2677793    | not scorable | not scorable | not scorable | not scorable |
| #### Bn-scaff_21496_1-p35945 A-genome specific (napus-rapa)     | 0.9928229    | 0.3210803    | not scorable | not scorable | 0.9669421    | 0.7132096    |
| #### Bn-scaff_21496_1-p37279 napus specific                     | 0.9665072    | 0.2833222    | not scorable | not scorable | not scorable | not scorable |
| #### Bn-scaff_21496_1-p38238 genome unspecific (all in)         | 0.9904306    | 0.2303224    | 1            | 0.7202568    | 1            | 0.7169337    |
| #### Bn-scaff_21496_1-p41993 genome unspecific (all in)         | 1            | 0.2381045    | 0.9689922    | 0.5183434    | 1            | 0.7376376    |
| #### Bn-scaff_21496_1-p43345 C-genome specific (napus-oleracea) | 0.9617225    | 0.6317576    | 0.9844961    | 0.7112024    | not scorable | not scorable |
| #### Bn-scaff_21496_1-p43358 C-genome specific (napus-oleracea) | 0.9856459    | 0.7689503    | 0.9922481    | 0.842635     | not scorable | not scorable |
| #### Bn-scaff_21496_1-p44009 C-genome specific (napus-oleracea) | 0.9784689    | 0.7281901    | 1            | 0.7671781    | not scorable | not scorable |
| #### Bn-scaff_21496_1-p44018 C-genome specific (napus-oleracea) | 0.9784689    | 0.7244801    | 0.9767442    | 0.7591577    | not scorable | not scorable |
| #### Bn-scaff_21496_1-p44241 C-genome specific (napus-oleracea) | 0.9904306    | 0.7485307    | 1            | 0.7559376    | not scorable | not scorable |
| #### Bn-scaff_21496_1-p44333 all not scorable                   | not scorable | not scorable | not scorable | not scorable | not scorable | not scorable |
| #### Bn-scaff_21496_1-p44348 C-genome specific (napus-oleracea) | 0.9832536    | 0.6858289    | 1            | 0.7129022    | not scorable | not scorable |
| #### Bn-scaff_21496_1-p44425 C-genome specific (napus-oleracea) | 0.9856459    | 0.7735092    | 1            | 0.7769208    | not scorable | not scorable |
| #### Bn-scaff_21496_1-p44677 C-genome specific (napus-oleracea) | 0.9832536    | 0.68269      | 0.9844961    | 0.7630262    | not scorable | not scorable |
| #### Bn-scaff_21496_1-p45378 C-genome specific (napus-oleracea) | 0.9736842    | 0.7120904    | 0.8217054    | 0.7224854    | not scorable | not scorable |
| #### Bn-scaff_21496_1-p45733 genome unspecific (all in)         | 0.9617225    | 0.5341192    | 0.9844961    | 0.6877331    | 1            | 0.9175813    |
| #### Bn-scaff_21496_1-p91737 C-genome specific (napus-oleracea) | 0.9856459    | 0.7742988    | 1            | 0.6941606    | not scorable | not scorable |
| #### Bn-scaff_21517_1-p16669 genome unspecific (all in)         | 0.9808612    | 0.6518824    | 1            | 0.7668514    | 0.9834711    | 0.7576269    |
| #### Bn-scaff_21538_1-p878 C-genome specific (napus-oleracea)   | 0.9521531    | 0.8387285    | 1            | 0.8165452    | not scorable | not scorable |
| #### Bn-scaff_21542_1-p12789 C-genome specific (napus-oleracea) | 0.9497608    | 0.2323264    | 0.9224806    | 0.1834315    | not scorable | not scorable |
| #### Bn-scaff_21552_1-p17328 C-genome specific (napus-oleracea) | 0.9904306    | 0.8422567    | 0.9922481    | 0.7942212    | not scorable | not scorable |
| #### Bn-scaff_21566_1-p109 C-genome specific (napus-oleracea)   | 0.9952153    | 0.7620664    | 0.8837209    | 0.779808     | not scorable | not scorable |
| #### Bn-scaff_21566_1-p13541 C-genome specific (napus-oleracea) | 0.9976076    | 0.7919584    | 1            | 0.7669505    | not scorable | not scorable |

|                                                                 |              |              |              |              |              |              |
|-----------------------------------------------------------------|--------------|--------------|--------------|--------------|--------------|--------------|
| #### Bn-scaff_21566_1-p13624 C-genome specific (napus-oleracea) | 0.9976076    | 0.7892534    | 0.9612403    | 0.8385801    | not scorable | not scorable |
| #### Bn-scaff_21566_1-p181 C-genome specific (napus-oleracea)   | 0.9952153    | 0.7880369    | 0.8837209    | 0.8658769    | not scorable | not scorable |
| #### Bn-scaff_21566_1-p4760 C-genome specific (napus-oleracea)  | 1            | 0.8939944    | 0.9612403    | 0.7875881    | not scorable | not scorable |
| #### Bn-scaff_21566_1-p4813 C-genome specific (napus-oleracea)  | 0.9952153    | 0.8916035    | 0.9767442    | 0.8165103    | not scorable | not scorable |
| #### Bn-scaff_21566_1-p4980 C-genome specific (napus-oleracea)  | 0.9952153    | 0.7843596    | 0.9689922    | 0.7855174    | not scorable | not scorable |
| #### Bn-scaff_21566_1-p5088 C-genome specific (napus-oleracea)  | 0.9976076    | 0.9027085    | 0.9767442    | 0.8662957    | not scorable | not scorable |
| #### Bn-scaff_21566_1-p5301 C-genome specific (napus-oleracea)  | 0.9976076    | 0.7391472    | 0.9767442    | 0.8658329    | not scorable | not scorable |
| #### Bn-scaff_21566_1-p8844 C-genome specific (napus-oleracea)  | 0.9976076    | 0.7193236    | 0.875969     | 0.6147045    | not scorable | not scorable |
| #### Bn-scaff_21607_1-p43454 genome unspecific (all in)         | 0.9880383    | 0.7152623    | 1            | 0.8343771    | 0.9752066    | 0.7865194    |
| #### Bn-scaff_21607_1-p66467 C-genome specific (napus-oleracea) | 0.9712918    | 0.7878217    | 0.7209302    | 0.7732189    | not scorable | not scorable |
| #### Bn-scaff_21607_1-p72180 C-genome specific (napus-oleracea) | 0.9593301    | 0.7258672    | 1            | 0.7716945    | not scorable | not scorable |
| #### Bn-scaff_21634_1-p13833 A-genome specific (rapa only)      | not scorable | not scorable | not scorable | not scorable | 1            | 0.5753938    |
| #### Bn-scaff_21634_1-p19901 C-genome specific (napus-oleracea) | 0.9832536    | 0.7700607    | 1            | 0.6726258    | not scorable | not scorable |
| #### Bn-scaff_21634_1-p20207 C-genome specific (napus-oleracea) | 0.9593301    | 0.6422324    | 0.9767442    | 0.7248164    | not scorable | not scorable |
| #### Bn-scaff_21634_1-p25966 genome unspecific (all in)         | 0.9952153    | 0.2648359    | 1            | 0.7634217    | 1            | 0.905166     |
| #### Bn-scaff_21634_1-p61428 C-genome specific (napus-oleracea) | 0.9736842    | 0.766481     | 1            | 0.7645308    | not scorable | not scorable |
| #### Bn-scaff_21634_1-p62623 C-genome specific (napus-oleracea) | 0.9593301    | 0.70263      | 0.9844961    | 0.8394179    | not scorable | not scorable |
| #### Bn-scaff_21636_1-p11843 genome unspecific (all in)         | 1            | 0.3201208    | 1            | 0.7799938    | 0.9834711    | 0.8876085    |
| #### Bn-scaff_21636_1-p11860 genome unspecific (oleracea-rapa)  | not scorable | not scorable | 0.9922481    | 0.8233523    | 1            | 0.8469633    |
| #### Bn-scaff_21636_1-p11917 genome unspecific (all in)         | 0.9952153    | 0.5941638    | 0.9922481    | 0.6709957    | 0.9917355    | 0.9152556    |
| #### Bn-scaff_21636_1-p12486 genome unspecific (all in)         | 0.9712918    | 0.3328544    | 1            | 0.7852075    | 1            | 0.9272014    |
| #### Bn-scaff_21636_1-p13726 C-genome specific (napus-oleracea) | 0.9880383    | 0.8495735    | 0.9534883    | 0.8620566    | not scorable | not scorable |
| #### Bn-scaff_21636_1-p13734 genome unspecific (all in)         | 0.9928229    | 0.2820169    | 1            | 0.6920351    | 1            | 0.5904291    |
| #### Bn-scaff_21636_1-p13740 genome unspecific (oleracea-rapa)  | not scorable | not scorable | 0.9534883    | 0.8903319    | 0.9752066    | 0.8260833    |
| #### Bn-scaff_21636_1-p13749 genome unspecific (all in)         | 0.9928229    | 0.3610234    | 0.9922481    | 0.703477     | 0.9669421    | 0.6391523    |
| #### Bn-scaff_21636_1-p13795 genome unspecific (all in)         | 0.9952153    | 0.4534989    | 1            | 0.7913499    | 0.9917355    | 0.7305046    |
| #### Bn-scaff_21636_1-p13796 C-genome specific (oleracea only)  | not scorable | not scorable | 0.9534883    | 0.7760702    | not scorable | not scorable |
| #### Bn-scaff_21636_1-p13895 genome unspecific (all in)         | 0.9952153    | 0.3949802    | 1            | 0.7636786    | 1            | 0.8037336    |
| #### Bn-scaff_21636_1-p15905 genome unspecific (all in)         | 0.9976076    | 0.2357021    | 0.7286822    | 0.6924503    | 1            | 0.8207204    |
| #### Bn-scaff_21636_1-p15908 genome unspecific (all in)         | 0.9952153    | 0.2638077    | 0.9922481    | 0.8464592    | 1            | 0.8461007    |
| #### Bn-scaff_21636_1-p17372 C-genome specific (napus-oleracea) | 0.9784689    | 0.7649716    | 0.8992248    | 0.8374124    | not scorable | not scorable |
| #### Bn-scaff_21636_1-p22350 genome unspecific (all in)         | 0.9976076    | 0.548532     | 0.9844961    | 0.7871816    | 1            | 0.8880495    |
| #### Bn-scaff_21636_1-p22644 genome unspecific (all in)         | 0.9928229    | 0.4795417    | 1            | 0.8403441    | 1            | 0.9072468    |

|                                                                 |              |              |              |              |              |              |
|-----------------------------------------------------------------|--------------|--------------|--------------|--------------|--------------|--------------|
| #### Bn-scaff_21636_1-p22705 genome unspecific (all in)         | 0.9904306    | 0.4703276    | 0.9922481    | 0.6638175    | 1            | 0.7641606    |
| #### Bn-scaff_21636_1-p22812 genome unspecific (all in)         | 1            | 0.2920742    | 0.9922481    | 0.7236731    | 1            | 0.8054586    |
| #### Bn-scaff_21636_1-p23895 genome unspecific (all in)         | 0.9665072    | 0.4066171    | 0.9767442    | 0.4988162    | 1            | 0.9175813    |
| #### Bn-scaff_21636_1-p24300 genome unspecific (all in)         | 1            | 0.8524978    | 1            | 0.8059412    | 1            | 0.9070569    |
| #### Bn-scaff_21636_1-p24364 A-genome specific (rapa only)      | not scorable | not scorable | not scorable | not scorable | 1            | 0.7145063    |
| #### Bn-scaff_21636_1-p27820 genome unspecific (all in)         | 1            | 0.3865021    | 1            | 0.7797301    | 1            | 0.9095823    |
| #### Bn-scaff_21636_1-p39137 C-genome specific (napus-oleracea) | 0.9760765    | 0.495122     | 0.8604651    | 0.7669792    | not scorable | not scorable |
| #### Bn-scaff_21636_1-p49703 C-genome specific (napus-oleracea) | 0.9832536    | 0.7224017    | 1            | 0.8444592    | not scorable | not scorable |
| #### Bn-scaff_21636_1-p7184 C-genome specific (napus-oleracea)  | 0.9880383    | 0.3482567    | 0.9767442    | 0.6842209    | not scorable | not scorable |
| #### Bn-scaff_21636_1-p73699 napus specific                     | 0.7416268    | 0.7323612    | not scorable | not scorable | not scorable | not scorable |
| #### Bn-scaff_21656_1-p10938 C-genome specific (napus-oleracea) | 0.9138756    | 0.9046798    | 1            | 0.9005479    | not scorable | not scorable |
| #### Bn-scaff_21656_1-p18965 C-genome specific (napus-oleracea) | 0.9665072    | 0.2562781    | 1            | 0.7893038    | not scorable | not scorable |
| #### Bn-scaff_21656_1-p31265 genome unspecific (all in)         | 0.9545454    | 0.2564226    | 1            | 0.2369524    | 1            | 0.8135551    |
| #### Bn-scaff_21705_1-p11929 C-genome specific (napus-oleracea) | 0.9904306    | 0.8011558    | 1            | 0.8340439    | not scorable | not scorable |
| #### Bn-scaff_21705_1-p11966 genome unspecific (all in)         | 0.9952153    | 0.6172365    | 0.9844961    | 0.7494823    | 1            | 0.9121793    |
| #### Bn-scaff_21705_1-p14931 genome unspecific (oleracea-rapa)  | not scorable | not scorable | 1            | 0.7190007    | 0.9917355    | 0.9068887    |
| #### Bn-scaff_21705_1-p14937 C-genome specific (napus-oleracea) | 0.9904306    | 0.7531526    | 0.9767442    | 0.661314     | not scorable | not scorable |
| #### Bn-scaff_21705_1-p17309 C-genome specific (napus-oleracea) | 0.9760765    | 0.6780497    | 0.9689922    | 0.6932015    | not scorable | not scorable |
| #### Bn-scaff_21705_1-p17472 C-genome specific (napus-oleracea) | 0.9617225    | 0.6300351    | 1            | 0.6893014    | not scorable | not scorable |
| #### Bn-scaff_21705_1-p17501 C-genome specific (napus-oleracea) | 0.9808612    | 0.6910675    | 1            | 0.6595951    | not scorable | not scorable |
| #### Bn-scaff_21705_1-p20395 C-genome specific (napus-oleracea) | 0.9712918    | 0.7258204    | 0.5116279    | 0.7681226    | not scorable | not scorable |
| #### Bn-scaff_21705_1-p20580 C-genome specific (oleracea only)  | not scorable | not scorable | 0.9689922    | 0.4699318    | not scorable | not scorable |
| #### Bn-scaff_21705_1-p20611 C-genome specific (napus-oleracea) | 0.9712918    | 0.7486177    | 0.5116279    | 0.7373427    | not scorable | not scorable |
| #### Bn-scaff_21705_1-p20679 C-genome specific (napus-oleracea) | 0.9808612    | 0.7654259    | 0.6976744    | 0.9026518    | not scorable | not scorable |
| #### Bn-scaff_21705_1-p20734 C-genome specific (napus-oleracea) | 0.9760765    | 0.6875045    | 0.6899225    | 0.6832986    | not scorable | not scorable |
| #### Bn-scaff_21705_1-p20775 C-genome specific (napus-oleracea) | 0.9760765    | 0.7688214    | 0.6899225    | 0.8456029    | not scorable | not scorable |
| #### Bn-scaff_21705_1-p21379 C-genome specific (napus-oleracea) | 0.9688995    | 0.7119941    | 0.7131783    | 0.6798112    | not scorable | not scorable |
| #### Bn-scaff_21705_1-p21583 C-genome specific (oleracea only)  | not scorable | not scorable | 0.5503876    | 0.7895559    | not scorable | not scorable |
| #### Bn-scaff_21705_1-p21660 C-genome specific (napus-oleracea) | 0.9760765    | 0.6840426    | 0.6511628    | 0.6919443    | not scorable | not scorable |
| #### Bn-scaff_21705_1-p22429 C-genome specific (napus-oleracea) | 0.937799     | 0.5613556    | 0.6511628    | 0.7591015    | not scorable | not scorable |
| #### Bn-scaff_21705_1-p22455 C-genome specific (oleracea only)  | not scorable | not scorable | 0.6666667    | 0.7694908    | not scorable | not scorable |
| #### Bn-scaff_21705_1-p22480 C-genome specific (oleracea only)  | not scorable | not scorable | 0.6511628    | 0.6651152    | not scorable | not scorable |
| #### Bn-scaff_21705_1-p22932 C-genome specific (napus-oleracea) | 0.9688995    | 0.6477318    | 0.6511628    | 0.70086      | not scorable | not scorable |

|                                                                 |              |              |              |              |              |              |
|-----------------------------------------------------------------|--------------|--------------|--------------|--------------|--------------|--------------|
| #### Bn-scaff_21705_1-p22955 A-genome specific (napus-rapa)     | 0.9186603    | 0.4772543    | not scorable | not scorable | 1            | 0.7788506    |
| #### Bn-scaff_21705_1-p22967 C-genome specific (napus-oleracea) | 0.9688995    | 0.7662304    | 0.6511628    | 0.8726231    | not scorable | not scorable |
| #### Bn-scaff_21705_1-p22988 C-genome specific (napus-oleracea) | 0.9641148    | 0.5346307    | 0.6511628    | 0.5599623    | not scorable | not scorable |
| #### Bn-scaff_21705_1-p23065 C-genome specific (napus-oleracea) | 0.9784689    | 0.6885029    | 0.6511628    | 0.7447929    | not scorable | not scorable |
| #### Bn-scaff_21705_1-p23067 C-genome specific (napus-oleracea) | 0.9736842    | 0.6641497    | 0.6511628    | 0.7131888    | not scorable | not scorable |
| #### Bn-scaff_21705_1-p23089 C-genome specific (napus-oleracea) | 0.9736842    | 0.6713377    | 0.6589147    | 0.6714134    | not scorable | not scorable |
| #### Bn-scaff_21705_1-p23096 genome unspecific (all in)         | 0.9856459    | 0.3073529    | 0.751938     | 0.6730143    | 0.9338843    | 0.7756919    |
| #### Bn-scaff_21705_1-p23143 C-genome specific (napus-oleracea) | 0.9736842    | 0.693692     | 0.6899225    | 0.758989     | not scorable | not scorable |
| #### Bn-scaff_21705_1-p23163 C-genome specific (napus-oleracea) | 0.9760765    | 0.7465193    | 0.6899225    | 0.7902831    | not scorable | not scorable |
| #### Bn-scaff_21705_1-p23178 C-genome specific (napus-oleracea) | 0.9665072    | 0.7411283    | 0.6899225    | 0.8785728    | not scorable | not scorable |
| #### Bn-scaff_21705_1-p23179 C-genome specific (napus-oleracea) | 0.9760765    | 0.678        | 0.6899225    | 0.6913017    | not scorable | not scorable |
| #### Bn-scaff_21705_1-p23190 C-genome specific (napus-oleracea) | 0.9736842    | 0.7544709    | 0.6899225    | 0.7822165    | not scorable | not scorable |
| #### Bn-scaff_21705_1-p23248 C-genome specific (napus-oleracea) | 0.9712918    | 0.6571341    | 0.6899225    | 0.7137998    | not scorable | not scorable |
| #### Bn-scaff_21705_1-p23294 C-genome specific (napus-oleracea) | 0.9665072    | 0.706329     | 0.7054263    | 0.7721577    | not scorable | not scorable |
| #### Bn-scaff_21705_1-p23302 C-genome specific (napus-oleracea) | 0.9712918    | 0.7414007    | 0.7054263    | 0.8414277    | not scorable | not scorable |
| #### Bn-scaff_21705_1-p23315 C-genome specific (napus-oleracea) | 0.9736842    | 0.6908928    | 0.6899225    | 0.6939048    | not scorable | not scorable |
| #### Bn-scaff_21705_1-p23318 C-genome specific (napus-oleracea) | 0.9784689    | 0.7220067    | 0.6899225    | 0.7432891    | not scorable | not scorable |
| #### Bn-scaff_21705_1-p23326 C-genome specific (napus-oleracea) | 0.9712918    | 0.6685913    | 0.6899225    | 0.6904595    | not scorable | not scorable |
| #### Bn-scaff_21705_1-p23348 C-genome specific (napus-oleracea) | 0.9569378    | 0.7114744    | 0.6899225    | 0.7956513    | not scorable | not scorable |
| #### Bn-scaff_21705_1-p23407 C-genome specific (napus-oleracea) | 0.9665072    | 0.6817994    | 0.6899225    | 0.8745115    | not scorable | not scorable |
| #### Bn-scaff_21705_1-p23430 C-genome specific (napus-oleracea) | 0.9760765    | 0.7465038    | 0.7054263    | 0.8819333    | not scorable | not scorable |
| #### Bn-scaff_21705_1-p23434 C-genome specific (napus-oleracea) | 0.9784689    | 0.7707696    | 0.6899225    | 0.8183414    | not scorable | not scorable |
| #### Bn-scaff_21705_1-p23446 C-genome specific (napus-oleracea) | 0.9665072    | 0.7603014    | 0.6899225    | 0.8350743    | not scorable | not scorable |
| #### Bn-scaff_21705_1-p23452 C-genome specific (napus-oleracea) | 0.9760765    | 0.7546516    | 0.7209302    | 0.8133437    | not scorable | not scorable |
| #### Bn-scaff_21705_1-p23484 C-genome specific (napus-oleracea) | 0.9760765    | 0.7414007    | 0.6899225    | 0.7448707    | not scorable | not scorable |
| #### Bn-scaff_21705_1-p23494 C-genome specific (napus-oleracea) | 0.9736842    | 0.7667654    | 0.6899225    | 0.8321515    | not scorable | not scorable |
| #### Bn-scaff_21705_1-p27620 C-genome specific (oleracea only)  | not scorable | not scorable | 0.9147287    | 0.7251785    | not scorable | not scorable |
| #### Bn-scaff_21705_1-p27816 C-genome specific (napus-oleracea) | 0.9856459    | 0.6903801    | 0.9844961    | 0.7463928    | not scorable | not scorable |
| #### Bn-scaff_21705_1-p28997 genome unspecific (oleracea-rapa)  | not scorable | not scorable | 0.9767442    | 0.7032292    | 1            | 0.6673297    |
| #### Bn-scaff_21705_1-p31355 C-genome specific (napus-oleracea) | 0.9808612    | 0.7628142    | 1            | 0.8630871    | not scorable | not scorable |
| #### Bn-scaff_21705_1-p31359 C-genome specific (napus-oleracea) | 0.9688995    | 0.7333648    | 1            | 0.7294778    | not scorable | not scorable |
| #### Bn-scaff_21705_1-p31523 C-genome specific (napus-oleracea) | 0.9784689    | 0.6873726    | 0.9922481    | 0.6291847    | not scorable | not scorable |
| #### Bn-scaff_21705_1-p31564 C-genome specific (napus-oleracea) | 0.9688995    | 0.7785019    | 1            | 0.7746013    | not scorable | not scorable |

|                                                                 |              |              |              |              |              |              |
|-----------------------------------------------------------------|--------------|--------------|--------------|--------------|--------------|--------------|
| #### Bn-scaff_21705_1-p31585 C-genome specific (napus-oleracea) | 0.9760765    | 0.7639099    | 0.9844961    | 0.8130509    | not scorable | not scorable |
| #### Bn-scaff_21705_1-p31627 C-genome specific (napus-oleracea) | 0.9832536    | 0.7020764    | 1            | 0.6593491    | not scorable | not scorable |
| #### Bn-scaff_21705_1-p32187 C-genome specific (napus-oleracea) | 0.9545454    | 0.6881862    | 0.9922481    | 0.7133166    | not scorable | not scorable |
| #### Bn-scaff_21705_1-p32738 C-genome specific (napus-oleracea) | 0.9617225    | 0.2923373    | 0.9302326    | 0.3334312    | not scorable | not scorable |
| #### Bn-scaff_21705_1-p36107 genome unspecific (all in)         | 1            | 0.4893315    | 1            | 0.4955976    | 1            | 0.752248     |
| #### Bn-scaff_21705_1-p36661 C-genome specific (napus-oleracea) | 0.9617225    | 0.6300359    | 0.9922481    | 0.7973161    | not scorable | not scorable |
| #### Bn-scaff_21705_1-p37193 C-genome specific (napus-oleracea) | 0.9760765    | 0.7497788    | 1            | 0.8376806    | not scorable | not scorable |
| #### Bn-scaff_21705_1-p37322 C-genome specific (napus-oleracea) | 0.9736842    | 0.7144638    | 0.9224806    | 0.7403556    | not scorable | not scorable |
| #### Bn-scaff_21705_1-p37406 C-genome specific (napus-oleracea) | 0.9712918    | 0.6561475    | 0.9767442    | 0.7163602    | not scorable | not scorable |
| #### Bn-scaff_21705_1-p37584 C-genome specific (napus-oleracea) | 0.9545454    | 0.6268714    | 1            | 0.7227444    | not scorable | not scorable |
| #### Bn-scaff_21705_1-p40039 all not scorable                   | not scorable | not scorable | not scorable | not scorable | not scorable | not scorable |
| #### Bn-scaff_21705_1-p41834 C-genome specific (napus-oleracea) | 0.9736842    | 0.6424443    | 0.9922481    | 0.7449129    | not scorable | not scorable |
| #### Bn-scaff_21705_1-p43110 C-genome specific (napus-oleracea) | 0.9808612    | 0.7521467    | 0.9922481    | 0.8288961    | not scorable | not scorable |
| #### Bn-scaff_21705_1-p43509 genome unspecific (all in)         | 0.9449761    | 0.2699657    | 0.9224806    | 0.1746574    | 1            | 0.7134259    |
| #### Bn-scaff_21705_1-p43543 A-genome specific (rapa only)      | not scorable | not scorable | not scorable | not scorable | 1            | 0.8318849    |
| #### Bn-scaff_21705_1-p43732 C-genome specific (napus-oleracea) | 0.9760765    | 0.6808144    | 0.9922481    | 0.6846144    | not scorable | not scorable |
| #### Bn-scaff_21705_1-p46094 C-genome specific (napus-oleracea) | 0.9784689    | 0.5667593    | 0.9922481    | 0.6320144    | not scorable | not scorable |
| #### Bn-scaff_21705_1-p47058 C-genome specific (napus-oleracea) | 0.9665072    | 0.6502183    | 1            | 0.7770057    | not scorable | not scorable |
| #### Bn-scaff_21705_1-p47200 genome unspecific (all in)         | 0.9808612    | 0.6163291    | 1            | 0.7489612    | 1            | 0.9087195    |
| #### Bn-scaff_21705_1-p47472 C-genome specific (napus-oleracea) | 0.9545454    | 0.7757486    | 0.9767442    | 0.7779981    | not scorable | not scorable |
| #### Bn-scaff_21705_1-p48136 C-genome specific (napus-oleracea) | 0.9760765    | 0.7923331    | 1            | 0.7451653    | not scorable | not scorable |
| #### Bn-scaff_21705_1-p48216 C-genome specific (napus-oleracea) | 0.9712918    | 0.763765     | 0.9922481    | 0.7992073    | not scorable | not scorable |
| #### Bn-scaff_21705_1-p48230 C-genome specific (napus-oleracea) | 0.9641148    | 0.6576397    | 0.9689922    | 0.7758431    | not scorable | not scorable |
| #### Bn-scaff_21705_1-p48392 C-genome specific (napus-oleracea) | 0.9688995    | 0.7246901    | 0.9689922    | 0.8497643    | not scorable | not scorable |
| #### Bn-scaff_21705_1-p48889 C-genome specific (napus-oleracea) | 0.9880383    | 0.784547     | 0.9689922    | 0.7257692    | not scorable | not scorable |
| #### Bn-scaff_21705_1-p49030 C-genome specific (oleracea only)  | not scorable | not scorable | 0.6434109    | 0.8216528    | not scorable | not scorable |
| #### Bn-scaff_21705_1-p49352 C-genome specific (napus-oleracea) | 0.9856459    | 0.782925     | 0.9922481    | 0.8296398    | not scorable | not scorable |
| #### Bn-scaff_21705_1-p49389 C-genome specific (napus-oleracea) | 0.9832536    | 0.6677713    | 0.9844961    | 0.7018245    | not scorable | not scorable |
| #### Bn-scaff_21705_1-p49421 C-genome specific (napus-oleracea) | 0.9688995    | 0.7882616    | 0.9922481    | 0.7883424    | not scorable | not scorable |
| #### Bn-scaff_21705_1-p49425 C-genome specific (napus-oleracea) | 0.9832536    | 0.7683262    | 0.9922481    | 0.8219877    | not scorable | not scorable |
| #### Bn-scaff_21705_1-p49455 C-genome specific (napus-oleracea) | 0.9736842    | 0.780557     | 0.9534883    | 0.8141999    | not scorable | not scorable |
| #### Bn-scaff_21705_1-p49793 genome unspecific (all in)         | 0.9880383    | 0.522161     | 0.9922481    | 0.8106078    | 1            | 0.9038864    |
| #### Bn-scaff_21705_1-p50068 C-genome specific (napus-oleracea) | 0.9760765    | 0.7896124    | 0.9922481    | 0.854708     | not scorable | not scorable |



|                                                                 |              |              |              |              |              |              |
|-----------------------------------------------------------------|--------------|--------------|--------------|--------------|--------------|--------------|
| #### Bn-scaff_21705_1-p50230 C-genome specific (napus-oleracea) | 0.9712918    | 0.7683458    | 1            | 0.7595439    | not scorable | not scorable |
| #### Bn-scaff_21705_1-p50321 C-genome specific (napus-oleracea) | 0.9856459    | 0.752134     | 0.9922481    | 0.7596009    | not scorable | not scorable |
| #### Bn-scaff_21705_1-p50370 C-genome specific (napus-oleracea) | 0.9712918    | 0.8005292    | 1            | 0.69455      | not scorable | not scorable |
| #### Bn-scaff_21705_1-p50386 C-genome specific (napus-oleracea) | 0.9760765    | 0.3356       | 0.9689922    | 0.4722419    | not scorable | not scorable |
| #### Bn-scaff_21705_1-p50410 C-genome specific (napus-oleracea) | 0.9880383    | 0.7460604    | 0.9922481    | 0.8629373    | not scorable | not scorable |
| #### Bn-scaff_21705_1-p50431 C-genome specific (napus-oleracea) | 0.9784689    | 0.7199534    | 0.9844961    | 0.7622999    | not scorable | not scorable |
| #### Bn-scaff_21705_1-p50587 C-genome specific (napus-oleracea) | 0.9904306    | 0.6792493    | 0.9844961    | 0.6379159    | not scorable | not scorable |
| #### Bn-scaff_21705_1-p50595 C-genome specific (napus-oleracea) | 0.9784689    | 0.7211621    | 1            | 0.7082456    | not scorable | not scorable |
| #### Bn-scaff_21705_1-p51000 A-genome specific (rapa only)      | not scorable | not scorable | not scorable | not scorable | 0.9421487    | 0.9175813    |
| #### Bn-scaff_21705_1-p51863 C-genome specific (napus-oleracea) | 0.9904306    | 0.7066033    | 0.9689922    | 0.7254981    | not scorable | not scorable |
| #### Bn-scaff_21705_1-p52088 C-genome specific (napus-oleracea) | 0.9784689    | 0.660195     | 1            | 0.7266597    | not scorable | not scorable |
| #### Bn-scaff_21705_1-p54153 C-genome specific (napus-oleracea) | 0.9641148    | 0.6568269    | 0.9844961    | 0.7111371    | not scorable | not scorable |
| #### Bn-scaff_21705_1-p54703 C-genome specific (napus-oleracea) | 0.9832536    | 0.7109653    | 1            | 0.7656881    | not scorable | not scorable |
| #### Bn-scaff_21705_1-p55975 genome unspecific (all in)         | 0.9641148    | 0.2535033    | 0.9767442    | 0.2465531    | 1            | 0.7634133    |
| #### Bn-scaff_21705_1-p56415 genome unspecific (all in)         | 0.9736842    | 0.6331666    | 1            | 0.6641342    | 1            | 0.9262034    |
| #### Bn-scaff_21705_1-p56416 C-genome specific (napus-oleracea) | 0.9808612    | 0.753014     | 0.9922481    | 0.6400218    | not scorable | not scorable |
| #### Bn-scaff_21705_1-p57182 C-genome specific (napus-oleracea) | 0.9760765    | 0.6785399    | 1            | 0.8632928    | not scorable | not scorable |
| #### Bn-scaff_21705_1-p57637 C-genome specific (napus-oleracea) | 0.9832536    | 0.7684063    | 0.9844961    | 0.7601799    | not scorable | not scorable |
| #### Bn-scaff_21705_1-p58710 C-genome specific (napus-oleracea) | 0.9736842    | 0.6569536    | 0.9922481    | 0.6959602    | not scorable | not scorable |
| #### Bn-scaff_21705_1-p58710 C-genome specific (napus-oleracea) | 0.9760765    | 0.660195     | 0.9922481    | 0.708764     | not scorable | not scorable |
| #### Bn-scaff_21705_1-p59000 C-genome specific (napus-oleracea) | 0.9712918    | 0.7646145    | 1            | 0.80194      | not scorable | not scorable |
| #### Bn-scaff_21705_1-p59046 C-genome specific (napus-oleracea) | 0.9760765    | 0.7055764    | 0.9844961    | 0.7900439    | not scorable | not scorable |
| #### Bn-scaff_21705_1-p59052 C-genome specific (napus-oleracea) | 0.9808612    | 0.72126      | 0.9922481    | 0.7744675    | not scorable | not scorable |
| #### Bn-scaff_21705_1-p59662 C-genome specific (napus-oleracea) | 0.9617225    | 0.6234167    | 0.9922481    | 0.561906     | not scorable | not scorable |
| #### Bn-scaff_21705_1-p59735 C-genome specific (napus-oleracea) | 0.9808612    | 0.7221558    | 0.9844961    | 0.7723778    | not scorable | not scorable |
| #### Bn-scaff_21705_1-p59741 C-genome specific (napus-oleracea) | 0.9832536    | 0.7678471    | 0.9689922    | 0.8270285    | not scorable | not scorable |
| #### Bn-scaff_21705_1-p59748 C-genome specific (napus-oleracea) | 0.9832536    | 0.7200358    | 0.9767442    | 0.7919419    | not scorable | not scorable |
| #### Bn-scaff_21705_1-p59765 C-genome specific (napus-oleracea) | 0.9688995    | 0.666197     | 1            | 0.6582654    | not scorable | not scorable |
| #### Bn-scaff_21705_1-p60467 C-genome specific (napus-oleracea) | 0.9808612    | 0.761945     | 0.9922481    | 0.807723     | not scorable | not scorable |
| #### Bn-scaff_21705_1-p60778 C-genome specific (napus-oleracea) | 0.9856459    | 0.7225643    | 0.9922481    | 0.8300656    | not scorable | not scorable |
| #### Bn-scaff_21705_1-p60810 C-genome specific (napus-oleracea) | 0.9784689    | 0.7608608    | 0.9612403    | 0.8419399    | not scorable | not scorable |
| #### Bn-scaff_21705_1-p60864 C-genome specific (napus-oleracea) | 0.9784689    | 0.7232932    | 0.9922481    | 0.8314309    | not scorable | not scorable |
| #### Bn-scaff_21705_1-p60895 C-genome specific (oleracea only)  | not scorable | not scorable | 0.9922481    | 0.8141395    | not scorable | not scorable |

|                                                                 |              |              |              |              |              |              |
|-----------------------------------------------------------------|--------------|--------------|--------------|--------------|--------------|--------------|
| #### Bn-scaff_21705_1-p60948 C-genome specific (napus-oleracea) | 0.9784689    | 0.7555259    | 0.9767442    | 0.8150378    | not scorable | not scorable |
| #### Bn-scaff_21705_1-p60993 all not scorable                   | not scorable | not scorable | not scorable | not scorable | not scorable | not scorable |
| #### Bn-scaff_21705_1-p60995 C-genome specific (oleracea only)  | not scorable | not scorable | 0.9922481    | 0.7697111    | not scorable | not scorable |
| #### Bn-scaff_21705_1-p61263 genome unspecific (all in)         | 0.9688995    | 0.6980197    | 0.9922481    | 0.8033358    | 0.9917355    | 0.9178637    |
| #### Bn-scaff_21705_1-p62748 genome unspecific (all in)         | 0.9665072    | 0.4215853    | 0.9844961    | 0.8167428    | 1            | 0.8938746    |
| #### Bn-scaff_21711_1-p12893 C-genome specific (napus-oleracea) | 0.9808612    | 0.7142494    | 1            | 0.6231498    | not scorable | not scorable |
| #### Bn-scaff_21711_1-p13060 C-genome specific (napus-oleracea) | 0.9832536    | 0.7620544    | 0.9922481    | 0.787549     | not scorable | not scorable |
| #### Bn-scaff_21711_1-p13626 genome unspecific (all in)         | 0.9784689    | 0.7724181    | 1            | 0.7465909    | 0.9586777    | 0.7770717    |
| #### Bn-scaff_21711_1-p18343 C-genome specific (napus-oleracea) | 0.9832536    | 0.7513593    | 1            | 0.8237711    | not scorable | not scorable |
| #### Bn-scaff_21711_1-p26276 C-genome specific (napus-oleracea) | 0.9808612    | 0.7325857    | 0.9922481    | 0.8133067    | not scorable | not scorable |
| #### Bn-scaff_21711_1-p27299 C-genome specific (napus-oleracea) | 0.9760765    | 0.7561924    | 1            | 0.7532428    | not scorable | not scorable |
| #### Bn-scaff_21711_1-p28431 C-genome specific (napus-oleracea) | 0.9784689    | 0.7864706    | 0.9844961    | 0.8157132    | not scorable | not scorable |
| #### Bn-scaff_21711_1-p34083 C-genome specific (napus-oleracea) | 0.9425837    | 0.7945954    | 0.7209302    | 0.833248     | not scorable | not scorable |
| #### Bn-scaff_21711_1-p34288 C-genome specific (napus-oleracea) | 0.9449761    | 0.765204     | 0.7286822    | 0.7579725    | not scorable | not scorable |
| #### Bn-scaff_21711_1-p34999 C-genome specific (napus-oleracea) | 0.923445     | 0.6598377    | 0.9844961    | 0.6913489    | not scorable | not scorable |
| #### Bn-scaff_21711_1-p35589 C-genome specific (napus-oleracea) | 0.9712918    | 0.5900466    | 0.9844961    | 0.6390675    | not scorable | not scorable |
| #### Bn-scaff_21711_1-p36523 A-genome specific (napus-rapa)     | 0.9665072    | 0.3234131    | not scorable | not scorable | 1            | 0.9225726    |
| #### Bn-scaff_21711_1-p39478 C-genome specific (napus-oleracea) | 0.9712918    | 0.6738976    | 1            | 0.6626276    | not scorable | not scorable |
| #### Bn-scaff_21711_1-p54607 genome unspecific (all in)         | 0.9688995    | 0.6188554    | 1            | 0.792101     | 1            | 0.9195941    |
| #### Bn-scaff_21711_1-p75853 genome unspecific (all in)         | 0.9856459    | 0.3342421    | 1            | 0.7617463    | 0.9917355    | 0.6239282    |
| #### Bn-scaff_21711_1-p76752 genome unspecific (all in)         | 0.9617225    | 0.5489991    | 0.9767442    | 0.5822431    | 1            | 0.910136     |
| #### Bn-scaff_21711_1-p79864 genome unspecific (all in)         | 0.9808612    | 0.3957289    | 0.9844961    | 0.6964788    | 1            | 0.8511626    |
| #### Bn-scaff_21727_1-p2714 C-genome specific (napus-oleracea)  | 0.9880383    | 0.6358369    | 0.620155     | 0.6629921    | not scorable | not scorable |
| #### Bn-scaff_21744_1-p14615 C-genome specific (napus-oleracea) | 0.9880383    | 0.5470572    | 0.9922481    | 0.810084     | not scorable | not scorable |
| #### Bn-scaff_21744_1-p17282 C-genome specific (napus-oleracea) | 0.9880383    | 0.8151813    | 0.9922481    | 0.8632445    | not scorable | not scorable |
| #### Bn-scaff_21744_1-p25410 C-genome specific (napus-oleracea) | 0.9808612    | 0.815285     | 0.5891473    | 0.6701869    | not scorable | not scorable |
| #### Bn-scaff_21744_1-p6436 C-genome specific (napus-oleracea)  | 0.9904306    | 0.7815559    | 1            | 0.8245744    | not scorable | not scorable |
| #### Bn-scaff_21778_1-p13765 genome unspecific (all in)         | 0.9880383    | 0.5173944    | 1            | 0.5639923    | 1            | 0.9175311    |
| #### Bn-scaff_21778_1-p14914 C-genome specific (napus-oleracea) | 0.7679426    | 0.6977108    | 1            | 0.7011174    | not scorable | not scorable |
| #### Bn-scaff_21778_1-p15452 C-genome specific (napus-oleracea) | 0.7535885    | 0.7300981    | 1            | 0.8380342    | not scorable | not scorable |
| #### Bn-scaff_21778_1-p16088 genome unspecific (oleracea-rapa)  | not scorable | not scorable | 0.9844961    | 0.4064023    | 0.9917355    | 0.4826978    |
| #### Bn-scaff_21778_1-p16342 genome unspecific (all in)         | 0.9904306    | 0.3397668    | 1            | 0.8544337    | 1            | 0.7729505    |
| #### Bn-scaff_21778_1-p17712 C-genome specific (napus-oleracea) | 0.7703349    | 0.7593208    | 1            | 0.7739068    | not scorable | not scorable |

|                                                                |              |              |           |           |              |              |
|----------------------------------------------------------------|--------------|--------------|-----------|-----------|--------------|--------------|
| #### Bn-scaff_21778_1-p18432genome unspecific (all in)         | 0.9425837    | 0.4107046    | 1         | 0.7824855 | 1            | 0.9095823    |
| #### Bn-scaff_21778_1-p1942 genome unspecific (all in)         | 0.9545454    | 0.4802897    | 1         | 0.7866855 | 1            | 0.7905771    |
| #### Bn-scaff_21778_1-p21163C-genome specific (napus-oleracea) | 0.7631579    | 0.7598017    | 0.875969  | 0.7744296 | not scorable | not scorable |
| #### Bn-scaff_21778_1-p21555genome unspecific (all in)         | 0.9880383    | 0.2874224    | 0.9922481 | 0.5869496 | 1            | 0.5011711    |
| #### Bn-scaff_21778_1-p21763genome unspecific (all in)         | 0.9904306    | 0.3803874    | 1         | 0.8461397 | 1            | 0.8878943    |
| #### Bn-scaff_21778_1-p22216genome unspecific (all in)         | 1            | 0.925954     | 1         | 0.8992252 | 1            | 0.9260827    |
| #### Bn-scaff_21778_1-p22267C-genome specific (napus-oleracea) | 0.7727273    | 0.7732701    | 0.9612403 | 0.8049796 | not scorable | not scorable |
| #### Bn-scaff_21778_1-p22299C-genome specific (napus-oleracea) | 0.777512     | 0.7768527    | 0.9534883 | 0.8750221 | not scorable | not scorable |
| #### Bn-scaff_21778_1-p22374C-genome specific (napus-oleracea) | 0.7607656    | 0.6732228    | 0.9922481 | 0.7088342 | not scorable | not scorable |
| #### Bn-scaff_21778_1-p23602genome unspecific (all in)         | 0.9712918    | 0.2087361    | 0.9844961 | 0.2825052 | 0.9669421    | 0.9072468    |
| #### Bn-scaff_21778_1-p23691C-genome specific (napus-oleracea) | 0.7583732    | 0.6057126    | 0.9302326 | 0.5682442 | not scorable | not scorable |
| #### Bn-scaff_21778_1-p26183genome unspecific (all in)         | 1            | 0.3135472    | 0.9844961 | 0.7957308 | 1            | 0.6786937    |
| #### Bn-scaff_21778_1-p26213C-genome specific (napus-oleracea) | 0.777512     | 0.8018565    | 1         | 0.7380702 | not scorable | not scorable |
| #### Bn-scaff_21778_1-p26963C-genome specific (napus-oleracea) | 0.7727273    | 0.7854515    | 1         | 0.7684995 | not scorable | not scorable |
| #### Bn-scaff_21778_1-p26975C-genome specific (napus-oleracea) | 0.7727273    | 0.7482145    | 1         | 0.7343994 | not scorable | not scorable |
| #### Bn-scaff_21778_1-p28706C-genome specific (napus-oleracea) | 0.7559808    | 0.7727678    | 1         | 0.8609652 | not scorable | not scorable |
| #### Bn-scaff_21778_1-p28747C-genome specific (napus-oleracea) | 0.7511961    | 0.6646751    | 0.9922481 | 0.663013  | not scorable | not scorable |
| #### Bn-scaff_21778_1-p29058C-genome specific (napus-oleracea) | 0.9497608    | 0.290502     | 0.9379845 | 0.2552538 | not scorable | not scorable |
| #### Bn-scaff_21778_1-p30770C-genome specific (napus-oleracea) | 0.7583732    | 0.7837809    | 0.7209302 | 0.8175021 | not scorable | not scorable |
| #### Bn-scaff_21778_1-p30914C-genome specific (oleracea only)  | not scorable | not scorable | 0.9922481 | 0.8065124 | not scorable | not scorable |
| #### Bn-scaff_21778_1-p31218C-genome specific (napus-oleracea) | 0.7655503    | 0.6622007    | 0.9844961 | 0.6678758 | not scorable | not scorable |
| #### Bn-scaff_21778_1-p31936C-genome specific (napus-oleracea) | 0.7583732    | 0.7832835    | 0.9844961 | 0.8687443 | not scorable | not scorable |
| #### Bn-scaff_21778_1-p32612C-genome specific (napus-oleracea) | 0.7679426    | 0.7561873    | 0.9922481 | 0.8159413 | not scorable | not scorable |
| #### Bn-scaff_21778_1-p34545C-genome specific (napus-oleracea) | 0.7751196    | 0.7669898    | 1         | 0.8783022 | not scorable | not scorable |
| #### Bn-scaff_21778_1-p35603C-genome specific (napus-oleracea) | 0.7799043    | 0.8059676    | 1         | 0.7962536 | not scorable | not scorable |
| #### Bn-scaff_21778_1-p36317C-genome specific (napus-oleracea) | 0.7727273    | 0.7648455    | 1         | 0.8816486 | not scorable | not scorable |
| #### Bn-scaff_21778_1-p36455C-genome specific (napus-oleracea) | 0.7751196    | 0.773433     | 0.627907  | 0.8984423 | not scorable | not scorable |
| #### Bn-scaff_21778_1-p38252C-genome specific (napus-oleracea) | 0.777512     | 0.7833661    | 1         | 0.7680384 | not scorable | not scorable |
| #### Bn-scaff_21778_1-p38807C-genome specific (oleracea only)  | not scorable | not scorable | 0.9922481 | 0.78188   | not scorable | not scorable |
| #### Bn-scaff_21778_1-p43125C-genome specific (oleracea only)  | not scorable | not scorable | 0.6356589 | 0.7905459 | not scorable | not scorable |
| #### Bn-scaff_21778_1-p68265genome unspecific (all in)         | 0.9808612    | 0.2846742    | 0.9612403 | 0.4679615 | 0.9834711    | 0.7207718    |
| #### Bn-scaff_21778_1-p75811C-genome specific (napus-oleracea) | 0.7655503    | 0.7371054    | 0.9767442 | 0.8323389 | not scorable | not scorable |
| #### Bn-scaff_21778_1-p76142C-genome specific (napus-oleracea) | 0.7511961    | 0.6942471    | 0.9612403 | 0.7900986 | not scorable | not scorable |

|                                                                 |              |              |              |              |              |              |
|-----------------------------------------------------------------|--------------|--------------|--------------|--------------|--------------|--------------|
| #### Bn-scaff_21778_1-p77298 C-genome specific (napus-oleracea) | 0.7655503    | 0.7665132    | 0.6976744    | 0.7951558    | not scorable | not scorable |
| #### Bn-scaff_21778_1-p78638 C-genome specific (napus-oleracea) | 0.7727273    | 0.7605222    | 1            | 0.7159967    | not scorable | not scorable |
| #### Bn-scaff_21778_1-p80189 A-genome specific (napus-rapa)     | 0.9952153    | 0.4622706    | not scorable | not scorable | 1            | 0.9272014    |
| #### Bn-scaff_21778_1-p8688 C-genome specific (napus-oleracea)  | 0.7751196    | 0.8357921    | 1            | 0.7413102    | not scorable | not scorable |
| #### Bn-scaff_21786_1-p11131 genome unspecific (all in)         | 0.9736842    | 0.5813562    | 0.9922481    | 0.7190411    | 0.9834711    | 0.9260464    |
| #### Bn-scaff_21786_1-p12735 genome unspecific (all in)         | 0.9521531    | 0.6354253    | 1            | 0.858138     | 1            | 0.9306651    |
| #### Bn-scaff_21786_1-p12797 genome unspecific (all in)         | 0.9880383    | 0.2591044    | 1            | 0.5424073    | 1            | 0.9095823    |
| #### Bn-scaff_21786_1-p12823 genome unspecific (all in)         | 1            | 0.3012248    | 0.9922481    | 0.5308351    | 1            | 0.8238606    |
| #### Bn-scaff_21786_1-p12846 genome unspecific (all in)         | 0.9952153    | 0.8615255    | 1            | 0.6858091    | 0.892562     | 0.6843218    |
| #### Bn-scaff_21786_1-p12848 genome unspecific (oleracea-rapa)  | not scorable | not scorable | 1            | 0.8602682    | 1            | 0.9095823    |
| #### Bn-scaff_21786_1-p14189 C-genome specific (oleracea only)  | not scorable | not scorable | 1            | 0.6638103    | not scorable | not scorable |
| #### Bn-scaff_21786_1-p14933 C-genome specific (napus-oleracea) | 0.9760765    | 0.7552456    | 0.9922481    | 0.8249457    | not scorable | not scorable |
| #### Bn-scaff_21786_1-p15810 C-genome specific (napus-oleracea) | 0.9760765    | 0.7212954    | 0.7286822    | 0.8903645    | not scorable | not scorable |
| #### Bn-scaff_21786_1-p16047 genome unspecific (all in)         | 0.9688995    | 0.6709825    | 0.9224806    | 0.7135817    | 1            | 0.9398392    |
| #### Bn-scaff_21786_1-p16182 C-genome specific (napus-oleracea) | 0.9593301    | 0.6220642    | 0.9534883    | 0.7237884    | not scorable | not scorable |
| #### Bn-scaff_21786_1-p52446 genome unspecific (all in)         | 0.9784689    | 0.2880414    | 1            | 0.8043761    | 1            | 0.7922174    |
| #### Bn-scaff_21786_1-p52917 genome unspecific (all in)         | 0.9712918    | 0.4005978    | 0.7209302    | 0.7629219    | 0.9752066    | 0.7891216    |
| #### Bn-scaff_21791_1-p338 A-genome specific (napus-rapa)       | 0.9976076    | 0.2886799    | not scorable | not scorable | 0.9338843    | 0.8135297    |
| #### Bn-scaff_21820_1-p10063 C-genome specific (napus-oleracea) | 0.9736842    | 0.7682483    | 0.9922481    | 0.7858182    | not scorable | not scorable |
| #### Bn-scaff_21820_1-p10111 C-genome specific (napus-oleracea) | 0.9665072    | 0.6880555    | 0.9844961    | 0.8011935    | not scorable | not scorable |
| #### Bn-scaff_21820_1-p10117 C-genome specific (napus-oleracea) | 0.9401914    | 0.7604336    | 1            | 0.8063273    | not scorable | not scorable |
| #### Bn-scaff_21820_1-p10169 C-genome specific (napus-oleracea) | 0.9736842    | 0.7344103    | 0.9844961    | 0.8099745    | not scorable | not scorable |
| #### Bn-scaff_21820_1-p10170 C-genome specific (napus-oleracea) | 0.9760765    | 0.7131979    | 1            | 0.8230984    | not scorable | not scorable |
| #### Bn-scaff_21820_1-p10176 C-genome specific (napus-oleracea) | 0.9856459    | 0.7485439    | 0.9922481    | 0.837826     | not scorable | not scorable |
| #### Bn-scaff_21820_1-p10186 C-genome specific (napus-oleracea) | 0.9688995    | 0.7151588    | 0.9922481    | 0.7550027    | not scorable | not scorable |
| #### Bn-scaff_21820_1-p10195 C-genome specific (oleracea only)  | not scorable | not scorable | 0.9689922    | 0.7999526    | not scorable | not scorable |
| #### Bn-scaff_21820_1-p10200 C-genome specific (napus-oleracea) | 0.9760765    | 0.6822371    | 0.9844961    | 0.798952     | not scorable | not scorable |
| #### Bn-scaff_21820_1-p10210 C-genome specific (napus-oleracea) | 0.9736842    | 0.6956159    | 1            | 0.7631656    | not scorable | not scorable |
| #### Bn-scaff_21820_1-p10212 C-genome specific (napus-oleracea) | 0.9760765    | 0.741492     | 1            | 0.668704     | not scorable | not scorable |
| #### Bn-scaff_21820_1-p10214 C-genome specific (napus-oleracea) | 0.9808612    | 0.7202989    | 1            | 0.721976     | not scorable | not scorable |
| #### Bn-scaff_21820_1-p10283 C-genome specific (napus-oleracea) | 0.9784689    | 0.8343062    | 1            | 0.8145145    | not scorable | not scorable |
| #### Bn-scaff_21820_1-p10295 C-genome specific (napus-oleracea) | 0.9688995    | 0.6248027    | 1            | 0.5658265    | not scorable | not scorable |
| #### Bn-scaff_21820_1-p10299 C-genome specific (napus-oleracea) | 0.9856459    | 0.7811325    | 1            | 0.861743     | not scorable | not scorable |

|                                                                 |           |           |           |           |              |              |
|-----------------------------------------------------------------|-----------|-----------|-----------|-----------|--------------|--------------|
| #### Bn-scaff_21820_1-p10304 C-genome specific (napus-oleracea) | 0.9784689 | 0.6731155 | 0.9922481 | 0.7989448 | not scorable | not scorable |
| #### Bn-scaff_21820_1-p10312 C-genome specific (napus-oleracea) | 0.9688995 | 0.6569536 | 0.9689922 | 0.734451  | not scorable | not scorable |
| #### Bn-scaff_21820_1-p10693 C-genome specific (napus-oleracea) | 0.9736842 | 0.6889895 | 0.8914729 | 0.6925532 | not scorable | not scorable |
| #### Bn-scaff_21820_1-p10698 C-genome specific (napus-oleracea) | 0.9688995 | 0.7279641 | 0.9534883 | 0.7167464 | not scorable | not scorable |
| #### Bn-scaff_21820_1-p10713 C-genome specific (napus-oleracea) | 0.9808612 | 0.7603937 | 1         | 0.8112243 | not scorable | not scorable |
| #### Bn-scaff_21820_1-p10720 C-genome specific (napus-oleracea) | 0.9808612 | 0.723545  | 1         | 0.6833665 | not scorable | not scorable |
| #### Bn-scaff_21820_1-p10739 C-genome specific (napus-oleracea) | 0.9928229 | 0.4940972 | 0.9689922 | 0.4376892 | not scorable | not scorable |
| #### Bn-scaff_21820_1-p10799 C-genome specific (napus-oleracea) | 0.9736842 | 0.7606979 | 1         | 0.6962335 | not scorable | not scorable |
| #### Bn-scaff_21820_1-p10911 C-genome specific (napus-oleracea) | 0.9880383 | 0.7811325 | 1         | 0.7760681 | not scorable | not scorable |
| #### Bn-scaff_21820_1-p10925 C-genome specific (napus-oleracea) | 0.9856459 | 0.7622024 | 1         | 0.7776102 | not scorable | not scorable |
| #### Bn-scaff_21820_1-p11496 C-genome specific (napus-oleracea) | 0.9832536 | 0.7450079 | 1         | 0.7671781 | not scorable | not scorable |
| #### Bn-scaff_21820_1-p11547 C-genome specific (napus-oleracea) | 0.9665072 | 0.4876226 | 0.9689922 | 0.6744532 | not scorable | not scorable |
| #### Bn-scaff_21820_1-p12395 C-genome specific (napus-oleracea) | 0.9784689 | 0.7462789 | 1         | 0.7898132 | not scorable | not scorable |
| #### Bn-scaff_21820_1-p12581 C-genome specific (napus-oleracea) | 0.9784689 | 0.7006638 | 1         | 0.7556917 | not scorable | not scorable |
| #### Bn-scaff_21820_1-p12889 C-genome specific (napus-oleracea) | 0.9808612 | 0.7523217 | 1         | 0.7956101 | not scorable | not scorable |
| #### Bn-scaff_21820_1-p12896 C-genome specific (napus-oleracea) | 0.9688995 | 0.7183471 | 0.9922481 | 0.8053117 | not scorable | not scorable |
| #### Bn-scaff_21820_1-p12915 genome unspecific (all in)         | 0.9904306 | 0.4725131 | 0.9922481 | 0.8216213 | 1            | 0.9158806    |
| #### Bn-scaff_21820_1-p13090 C-genome specific (napus-oleracea) | 0.9712918 | 0.5989205 | 0.9922481 | 0.7282695 | not scorable | not scorable |
| #### Bn-scaff_21820_1-p13283 C-genome specific (napus-oleracea) | 0.9832536 | 0.764693  | 1         | 0.8244051 | not scorable | not scorable |
| #### Bn-scaff_21820_1-p13289 C-genome specific (napus-oleracea) | 0.9904306 | 0.7736661 | 1         | 0.8718579 | not scorable | not scorable |
| #### Bn-scaff_21820_1-p13315 C-genome specific (napus-oleracea) | 0.9760765 | 0.7157316 | 1         | 0.7629525 | not scorable | not scorable |
| #### Bn-scaff_21820_1-p13424 C-genome specific (napus-oleracea) | 0.9832536 | 0.4739341 | 0.9922481 | 0.4766543 | not scorable | not scorable |
| #### Bn-scaff_21820_1-p13545 C-genome specific (napus-oleracea) | 0.9688995 | 0.7104565 | 1         | 0.7407632 | not scorable | not scorable |
| #### Bn-scaff_21820_1-p13616 C-genome specific (napus-oleracea) | 0.9784689 | 0.7325938 | 0.9844961 | 0.7613281 | not scorable | not scorable |
| #### Bn-scaff_21820_1-p13700 C-genome specific (napus-oleracea) | 0.9856459 | 0.7768624 | 1         | 0.7834167 | not scorable | not scorable |
| #### Bn-scaff_21820_1-p13703 C-genome specific (napus-oleracea) | 0.9784689 | 0.6508946 | 0.9844961 | 0.6026035 | not scorable | not scorable |
| #### Bn-scaff_21820_1-p13822 C-genome specific (napus-oleracea) | 0.9784689 | 0.7352946 | 1         | 0.7608361 | not scorable | not scorable |
| #### Bn-scaff_21820_1-p13833 C-genome specific (napus-oleracea) | 0.9832536 | 0.8261359 | 0.9922481 | 0.8289795 | not scorable | not scorable |
| #### Bn-scaff_21820_1-p14388 C-genome specific (napus-oleracea) | 0.9832536 | 0.7702387 | 1         | 0.7641916 | not scorable | not scorable |
| #### Bn-scaff_21820_1-p14414 C-genome specific (napus-oleracea) | 0.9856459 | 0.7573813 | 1         | 0.8460021 | not scorable | not scorable |
| #### Bn-scaff_21820_1-p14446 genome unspecific (all in)         | 0.9808612 | 0.4278066 | 1         | 0.7598116 | 1            | 0.9175813    |
| #### Bn-scaff_21820_1-p14472 C-genome specific (napus-oleracea) | 0.9760765 | 0.7337276 | 1         | 0.666508  | not scorable | not scorable |
| #### Bn-scaff_21820_1-p14479 C-genome specific (napus-oleracea) | 0.9760765 | 0.6532701 | 1         | 0.6456751 | not scorable | not scorable |

|                                                                 |              |              |              |              |              |              |
|-----------------------------------------------------------------|--------------|--------------|--------------|--------------|--------------|--------------|
| #### Bn-scaff_21820_1-p14519 C-genome specific (napus-oleracea) | 0.9760765    | 0.7214955    | 0.9922481    | 0.673386     | not scorable | not scorable |
| #### Bn-scaff_21820_1-p14841 all not scorable                   | not scorable | not scorable | not scorable | not scorable | not scorable | not scorable |
| #### Bn-scaff_21820_1-p15367 C-genome specific (napus-oleracea) | 0.9784689    | 0.3125474    | 0.9767442    | 0.3358121    | not scorable | not scorable |
| #### Bn-scaff_21820_1-p16118 C-genome specific (napus-oleracea) | 0.9617225    | 0.6796762    | 0.9844961    | 0.7082736    | not scorable | not scorable |
| #### Bn-scaff_21820_1-p16911 genome unspecific (oleracea-rapa)  | not scorable | not scorable | 1            | 0.7053689    | 1            | 0.7739488    |
| #### Bn-scaff_21820_1-p16924 genome unspecific (all in)         | 0.9665072    | 0.4695599    | 1            | 0.7532842    | 1            | 0.7838537    |
| #### Bn-scaff_21820_1-p16978 genome unspecific (all in)         | 0.9952153    | 0.2766487    | 1            | 0.7402402    | 0.9917355    | 0.738691     |
| #### Bn-scaff_21820_1-p16993 genome unspecific (all in)         | 0.9976076    | 0.4887005    | 1            | 0.9059386    | 1            | 0.8292585    |
| #### Bn-scaff_21820_1-p17085 genome unspecific (all in)         | 1            | 0.7692998    | 1            | 0.6265909    | 1            | 0.7007138    |
| #### Bn-scaff_21820_1-p17381 genome unspecific (all in)         | 0.9976076    | 0.325086     | 1            | 0.6968094    | 0.9917355    | 0.628118     |
| #### Bn-scaff_21820_1-p17449 genome unspecific (all in)         | 0.9952153    | 0.3097279    | 1            | 0.7778072    | 0.9917355    | 0.7247143    |
| #### Bn-scaff_21820_1-p17963 C-genome specific (napus-oleracea) | 0.9880383    | 0.7642406    | 1            | 0.7040821    | not scorable | not scorable |
| #### Bn-scaff_21820_1-p19651 C-genome specific (napus-oleracea) | 0.9832536    | 0.7599011    | 0.9922481    | 0.7499042    | not scorable | not scorable |
| #### Bn-scaff_21820_1-p19707 C-genome specific (napus-oleracea) | 0.9712918    | 0.7677419    | 0.9922481    | 0.6968934    | not scorable | not scorable |
| #### Bn-scaff_21820_1-p20047 C-genome specific (napus-oleracea) | 0.9784689    | 0.7678319    | 0.9922481    | 0.790933     | not scorable | not scorable |
| #### Bn-scaff_21820_1-p20233 C-genome specific (napus-oleracea) | 0.9784689    | 0.6309603    | 0.9922481    | 0.5613368    | not scorable | not scorable |
| #### Bn-scaff_21820_1-p20915 C-genome specific (napus-oleracea) | 0.9832536    | 0.799459     | 1            | 0.7024764    | not scorable | not scorable |
| #### Bn-scaff_21820_1-p20959 C-genome specific (napus-oleracea) | 0.9712918    | 0.6267164    | 1            | 0.6567498    | not scorable | not scorable |
| #### Bn-scaff_21820_1-p21083 genome unspecific (all in)         | 0.9808612    | 0.4876247    | 0.9612403    | 0.5941708    | 0.9752066    | 0.7263725    |
| #### Bn-scaff_21820_1-p21088 genome unspecific (all in)         | 0.9545454    | 0.6237823    | 1            | 0.6517312    | 0.9504132    | 0.5945331    |
| #### Bn-scaff_21820_1-p21090 C-genome specific (napus-oleracea) | 0.9880383    | 0.789121     | 1            | 0.7986689    | not scorable | not scorable |
| #### Bn-scaff_21820_1-p21096 C-genome specific (napus-oleracea) | 0.9832536    | 0.7620206    | 0.9844961    | 0.8134563    | not scorable | not scorable |
| #### Bn-scaff_21820_1-p21935 genome unspecific (all in)         | 0.9641148    | 0.2417074    | 1            | 0.8182572    | 0.9752066    | 0.7843916    |
| #### Bn-scaff_21820_1-p22281 C-genome specific (napus-oleracea) | 0.9712918    | 0.7483069    | 1            | 0.8496929    | not scorable | not scorable |
| #### Bn-scaff_21820_1-p22302 C-genome specific (napus-oleracea) | 0.9784689    | 0.720266     | 0.9844961    | 0.8144814    | not scorable | not scorable |
| #### Bn-scaff_21820_1-p22314 C-genome specific (napus-oleracea) | 0.9784689    | 0.7398087    | 0.9689922    | 0.8108891    | not scorable | not scorable |
| #### Bn-scaff_21820_1-p22347 C-genome specific (napus-oleracea) | 0.9832536    | 0.6863681    | 0.9767442    | 0.6520984    | not scorable | not scorable |
| #### Bn-scaff_21820_1-p22388 C-genome specific (napus-oleracea) | 0.9736842    | 0.7150458    | 1            | 0.8391866    | not scorable | not scorable |
| #### Bn-scaff_21820_1-p22404 C-genome specific (napus-oleracea) | 0.9832536    | 0.7684059    | 1            | 0.8441675    | not scorable | not scorable |
| #### Bn-scaff_21820_1-p22493 C-genome specific (napus-oleracea) | 0.9736842    | 0.6609998    | 1            | 0.701279     | not scorable | not scorable |
| #### Bn-scaff_21820_1-p22543 C-genome specific (napus-oleracea) | 0.9856459    | 0.642042     | 0.9844961    | 0.6373954    | not scorable | not scorable |
| #### Bn-scaff_21820_1-p22576 C-genome specific (napus-oleracea) | 0.9808612    | 0.7223445    | 1            | 0.7004061    | not scorable | not scorable |
| #### Bn-scaff_21820_1-p22646 C-genome specific (napus-oleracea) | 0.9712918    | 0.775986     | 0.9612403    | 0.7986946    | not scorable | not scorable |

|                                                                 |              |              |              |              |              |              |
|-----------------------------------------------------------------|--------------|--------------|--------------|--------------|--------------|--------------|
| #### Bn-scaff_21820_1-p22720 C-genome specific (napus-oleracea) | 0.9784689    | 0.7204668    | 0.9922481    | 0.7459989    | not scorable | not scorable |
| #### Bn-scaff_21820_1-p22871 C-genome specific (napus-oleracea) | 0.9928229    | 0.7505201    | 0.9922481    | 0.7830779    | not scorable | not scorable |
| #### Bn-scaff_21820_1-p23042 C-genome specific (napus-oleracea) | 0.9736842    | 0.7417957    | 0.9922481    | 0.8270501    | not scorable | not scorable |
| #### Bn-scaff_21820_1-p23246 C-genome specific (napus-oleracea) | 0.9784689    | 0.6613098    | 0.9922481    | 0.6818932    | not scorable | not scorable |
| #### Bn-scaff_21820_1-p23274 C-genome specific (napus-oleracea) | 0.9856459    | 0.7510253    | 0.9844961    | 0.7159317    | not scorable | not scorable |
| #### Bn-scaff_21820_1-p23581 C-genome specific (napus-oleracea) | 0.9736842    | 0.7461451    | 0.9922481    | 0.6907315    | not scorable | not scorable |
| #### Bn-scaff_21820_1-p23871 C-genome specific (oleracea only)  | not scorable | not scorable | 0.9534883    | 0.2859286    | not scorable | not scorable |
| #### Bn-scaff_21820_1-p24556 C-genome specific (napus-oleracea) | 0.9688995    | 0.7112312    | 1            | 0.6952109    | not scorable | not scorable |
| #### Bn-scaff_21820_1-p24628 C-genome specific (napus-oleracea) | 0.9784689    | 0.7593343    | 1            | 0.8320041    | not scorable | not scorable |
| #### Bn-scaff_21820_1-p24663 C-genome specific (napus-oleracea) | 0.9760765    | 0.6836892    | 1            | 0.7253199    | not scorable | not scorable |
| #### Bn-scaff_21820_1-p24678 C-genome specific (napus-oleracea) | 0.9784689    | 0.6854571    | 1            | 0.7033386    | not scorable | not scorable |
| #### Bn-scaff_21820_1-p24684 C-genome specific (napus-oleracea) | 0.9808612    | 0.7195683    | 1            | 0.7360116    | not scorable | not scorable |
| #### Bn-scaff_21820_1-p24750 C-genome specific (napus-oleracea) | 0.9784689    | 0.2751034    | 0.9612403    | 0.3667314    | not scorable | not scorable |
| #### Bn-scaff_21820_1-p24757 C-genome specific (napus-oleracea) | 0.9808612    | 0.4449646    | 0.9689922    | 0.3131807    | not scorable | not scorable |
| #### Bn-scaff_21820_1-p24807 C-genome specific (napus-oleracea) | 0.9904306    | 0.7544892    | 1            | 0.723876     | not scorable | not scorable |
| #### Bn-scaff_21820_1-p24821 C-genome specific (napus-oleracea) | 0.9880383    | 0.7256222    | 0.9922481    | 0.720181     | not scorable | not scorable |
| #### Bn-scaff_21820_1-p24859 C-genome specific (napus-oleracea) | 0.9880383    | 0.7270865    | 0.9922481    | 0.7331263    | not scorable | not scorable |
| #### Bn-scaff_21820_1-p24862 C-genome specific (napus-oleracea) | 0.9808612    | 0.7846937    | 1            | 0.7319342    | not scorable | not scorable |
| #### Bn-scaff_21820_1-p24890 C-genome specific (napus-oleracea) | 0.9856459    | 0.7074472    | 1            | 0.811647     | not scorable | not scorable |
| #### Bn-scaff_21820_1-p25066 C-genome specific (napus-oleracea) | 0.9832536    | 0.762227     | 1            | 0.7976379    | not scorable | not scorable |
| #### Bn-scaff_21820_1-p25174 C-genome specific (napus-oleracea) | 0.9784689    | 0.7048067    | 1            | 0.656108     | not scorable | not scorable |
| #### Bn-scaff_21820_1-p25968 C-genome specific (napus-oleracea) | 0.9808612    | 0.7715302    | 0.9844961    | 0.6209535    | not scorable | not scorable |
| #### Bn-scaff_21820_1-p26029 C-genome specific (napus-oleracea) | 0.9808612    | 0.786865     | 1            | 0.8424709    | not scorable | not scorable |
| #### Bn-scaff_21820_1-p27082 genome unspecific (all in)         | 0.9928229    | 0.5087073    | 1            | 0.7661395    | 1            | 0.7552105    |
| #### Bn-scaff_21820_1-p27919 C-genome specific (oleracea only)  | not scorable | not scorable | 1            | 0.61116      | not scorable | not scorable |
| #### Bn-scaff_21820_1-p27989 C-genome specific (napus-oleracea) | 0.9832536    | 0.7725453    | 0.9922481    | 0.7707198    | not scorable | not scorable |
| #### Bn-scaff_21820_1-p28077 genome unspecific (all in)         | 0.9760765    | 0.3098804    | 1            | 0.700622     | 0.9752066    | 0.5709352    |
| #### Bn-scaff_21820_1-p29429 C-genome specific (napus-oleracea) | 0.9880383    | 0.7415783    | 1            | 0.6653731    | not scorable | not scorable |
| #### Bn-scaff_21820_1-p29546 genome unspecific (all in)         | 0.9952153    | 0.4697931    | 0.9922481    | 0.7778179    | 1            | 0.9175131    |
| #### Bn-scaff_21820_1-p32308 all not scorable                   | not scorable | not scorable | not scorable | not scorable | not scorable | not scorable |
| #### Bn-scaff_21820_1-p32348 genome unspecific (all in)         | 0.9928229    | 0.510249     | 1            | 0.7772794    | 1            | 0.9098155    |
| #### Bn-scaff_21820_1-p32480 C-genome specific (napus-oleracea) | 0.9712918    | 0.7051302    | 0.9844961    | 0.7984657    | not scorable | not scorable |
| #### Bn-scaff_21820_1-p32498 C-genome specific (napus-oleracea) | 0.9880383    | 0.696271     | 0.9922481    | 0.7152185    | not scorable | not scorable |

|                                                                 |              |              |              |              |              |              |
|-----------------------------------------------------------------|--------------|--------------|--------------|--------------|--------------|--------------|
| #### Bn-scaff_21820_1-p32562 C-genome specific (napus-oleracea) | 0.9808612    | 0.7012737    | 1            | 0.7355274    | not scorable | not scorable |
| #### Bn-scaff_21820_1-p32629 C-genome specific (napus-oleracea) | 0.9688995    | 0.7546735    | 0.9922481    | 0.7684308    | not scorable | not scorable |
| #### Bn-scaff_21820_1-p33343 C-genome specific (napus-oleracea) | 0.9449761    | 0.5816928    | 0.9922481    | 0.6105525    | not scorable | not scorable |
| #### Bn-scaff_21820_1-p33425 C-genome specific (napus-oleracea) | 0.9808612    | 0.684427     | 0.9767442    | 0.7783347    | not scorable | not scorable |
| #### Bn-scaff_21820_1-p33464 C-genome specific (napus-oleracea) | 0.9784689    | 0.6992497    | 0.9922481    | 0.7539767    | not scorable | not scorable |
| #### Bn-scaff_21820_1-p33664 genome unspecific (all in)         | 0.9904306    | 0.4661413    | 0.9767442    | 0.5180506    | 1            | 0.824533     |
| #### Bn-scaff_21820_1-p33698 C-genome specific (napus-oleracea) | 0.9760765    | 0.7242135    | 0.9767442    | 0.6881125    | not scorable | not scorable |
| #### Bn-scaff_21820_1-p33877 genome unspecific (all in)         | 0.9880383    | 0.6873763    | 0.9922481    | 0.7088397    | 0.9917355    | 0.8910559    |
| #### Bn-scaff_21820_1-p34037 C-genome specific (napus-oleracea) | 0.9760765    | 0.7542223    | 1            | 0.8535593    | not scorable | not scorable |
| #### Bn-scaff_21820_1-p34191 C-genome specific (napus-oleracea) | 0.9688995    | 0.7190734    | 0.9922481    | 0.7416603    | not scorable | not scorable |
| #### Bn-scaff_21820_1-p36814 genome unspecific (all in)         | 0.9832536    | 0.7643482    | 1            | 0.8319868    | 0.9752066    | 0.9076553    |
| #### Bn-scaff_21820_1-p36856 C-genome specific (napus-oleracea) | 0.9856459    | 0.7909203    | 0.9922481    | 0.8365846    | not scorable | not scorable |
| #### Bn-scaff_21820_1-p37081 C-genome specific (napus-oleracea) | 0.9904306    | 0.7584066    | 1            | 0.8005021    | not scorable | not scorable |
| #### Bn-scaff_21820_1-p37117 C-genome specific (napus-oleracea) | 0.9736842    | 0.7214943    | 0.9844961    | 0.823186     | not scorable | not scorable |
| #### Bn-scaff_21820_1-p37165 C-genome specific (napus-oleracea) | 0.9952153    | 0.5992986    | 0.9844961    | 0.7779406    | not scorable | not scorable |
| #### Bn-scaff_21820_1-p37785 all not scorable                   | not scorable | not scorable | not scorable | not scorable | not scorable | not scorable |
| #### Bn-scaff_21820_1-p37806 C-genome specific (napus-oleracea) | 0.9880383    | 0.7416868    | 1            | 0.7522224    | not scorable | not scorable |
| #### Bn-scaff_21820_1-p37820 C-genome specific (napus-oleracea) | 0.9784689    | 0.7495235    | 1            | 0.8320791    | not scorable | not scorable |
| #### Bn-scaff_21820_1-p40855 C-genome specific (napus-oleracea) | 0.9784689    | 0.7765799    | 1            | 0.8570696    | not scorable | not scorable |
| #### Bn-scaff_21820_1-p41211 C-genome specific (napus-oleracea) | 0.9832536    | 0.7664458    | 1            | 0.8320417    | not scorable | not scorable |
| #### Bn-scaff_21820_1-p42033 C-genome specific (napus-oleracea) | 0.9832536    | 0.7165087    | 1            | 0.8115542    | not scorable | not scorable |
| #### Bn-scaff_21820_1-p42104 C-genome specific (napus-oleracea) | 0.9736842    | 0.7177218    | 0.9844961    | 0.8050231    | not scorable | not scorable |
| #### Bn-scaff_21820_1-p42224 C-genome specific (napus-oleracea) | 0.9832536    | 0.7148688    | 0.9844961    | 0.7152415    | not scorable | not scorable |
| #### Bn-scaff_21820_1-p42317 C-genome specific (napus-oleracea) | 0.9808612    | 0.46931      | 0.9689922    | 0.6863622    | not scorable | not scorable |
| #### Bn-scaff_21820_1-p42618 C-genome specific (napus-oleracea) | 0.9856459    | 0.7737824    | 0.9922481    | 0.8588529    | not scorable | not scorable |
| #### Bn-scaff_21820_1-p42624 C-genome specific (napus-oleracea) | 0.9880383    | 0.7589157    | 1            | 0.8228766    | not scorable | not scorable |
| #### Bn-scaff_21820_1-p42746 C-genome specific (napus-oleracea) | 0.9808612    | 0.7806964    | 1            | 0.8441197    | not scorable | not scorable |
| #### Bn-scaff_21820_1-p46440 C-genome specific (napus-oleracea) | 0.9808612    | 0.7630546    | 1            | 0.8060067    | not scorable | not scorable |
| #### Bn-scaff_21820_1-p46446 C-genome specific (napus-oleracea) | 0.9832536    | 0.758953     | 1            | 0.827831     | not scorable | not scorable |
| #### Bn-scaff_21820_1-p46458 C-genome specific (napus-oleracea) | 0.9808612    | 0.7755417    | 1            | 0.7886539    | not scorable | not scorable |
| #### Bn-scaff_21820_1-p46461 C-genome specific (napus-oleracea) | 0.9808612    | 0.7609097    | 1            | 0.8373155    | not scorable | not scorable |
| #### Bn-scaff_21820_1-p47614 C-genome specific (napus-oleracea) | 0.9904306    | 0.7119723    | 0.9922481    | 0.7163467    | not scorable | not scorable |
| #### Bn-scaff_21820_1-p47681 C-genome specific (napus-oleracea) | 0.9904306    | 0.7122816    | 1            | 0.6931211    | not scorable | not scorable |



|                                                                 |              |              |           |           |              |              |
|-----------------------------------------------------------------|--------------|--------------|-----------|-----------|--------------|--------------|
| #### Bn-scaff_21820_1-p47694 C-genome specific (napus-oleracea) | 0.9736842    | 0.690748     | 0.9922481 | 0.7243509 | not scorable | not scorable |
| #### Bn-scaff_21820_1-p47713 C-genome specific (napus-oleracea) | 0.9736842    | 0.6890618    | 1         | 0.6756883 | not scorable | not scorable |
| #### Bn-scaff_21820_1-p47719 C-genome specific (napus-oleracea) | 0.9880383    | 0.6545152    | 1         | 0.7332829 | not scorable | not scorable |
| #### Bn-scaff_21820_1-p49050 C-genome specific (napus-oleracea) | 0.9856459    | 0.6483994    | 1         | 0.7269693 | not scorable | not scorable |
| #### Bn-scaff_21820_1-p49903 C-genome specific (napus-oleracea) | 0.9712918    | 0.6916223    | 0.9612403 | 0.653089  | not scorable | not scorable |
| #### Bn-scaff_21820_1-p49949 C-genome specific (napus-oleracea) | 0.9784689    | 0.667318     | 0.9922481 | 0.8508198 | not scorable | not scorable |
| #### Bn-scaff_21820_1-p50095 C-genome specific (napus-oleracea) | 0.9856459    | 0.7554193    | 0.9922481 | 0.8573759 | not scorable | not scorable |
| #### Bn-scaff_21820_1-p50379 C-genome specific (napus-oleracea) | 0.9784689    | 0.7706004    | 1         | 0.8078672 | not scorable | not scorable |
| #### Bn-scaff_21820_1-p50893 C-genome specific (napus-oleracea) | 0.9688995    | 0.6356472    | 1         | 0.7124471 | not scorable | not scorable |
| #### Bn-scaff_21820_1-p50937 C-genome specific (napus-oleracea) | 0.9808612    | 0.8194901    | 1         | 0.6978375 | not scorable | not scorable |
| #### Bn-scaff_21820_1-p51000 C-genome specific (napus-oleracea) | 0.9617225    | 0.8373366    | 0.9922481 | 0.6611706 | not scorable | not scorable |
| #### Bn-scaff_21820_1-p51087 C-genome specific (napus-oleracea) | 0.9665072    | 0.7160295    | 1         | 0.6017916 | not scorable | not scorable |
| #### Bn-scaff_21820_1-p53095 genome unspecific (all in)         | 0.9760765    | 0.3727398    | 1         | 0.7529159 | 1            | 0.8358345    |
| #### Bn-scaff_21820_1-p53334 C-genome specific (napus-oleracea) | 0.9808612    | 0.7354827    | 1         | 0.787617  | not scorable | not scorable |
| #### Bn-scaff_21820_1-p53668 C-genome specific (napus-oleracea) | 0.9856459    | 0.3292853    | 0.9457364 | 0.3218347 | not scorable | not scorable |
| #### Bn-scaff_21820_1-p53730 C-genome specific (napus-oleracea) | 0.9712918    | 0.5941136    | 0.9689922 | 0.4653492 | not scorable | not scorable |
| #### Bn-scaff_21820_1-p54377 genome unspecific (all in)         | 0.9641148    | 0.6145173    | 0.9922481 | 0.7150996 | 1            | 0.9101306    |
| #### Bn-scaff_21820_1-p54541 C-genome specific (napus-oleracea) | 0.9665072    | 0.7836352    | 0.8217054 | 0.6772811 | not scorable | not scorable |
| #### Bn-scaff_21820_1-p54696 C-genome specific (oleracea only)  | not scorable | not scorable | 0.9534883 | 0.660733  | not scorable | not scorable |
| #### Bn-scaff_21820_1-p54716 C-genome specific (napus-oleracea) | 0.9760765    | 0.4019027    | 1         | 0.4142089 | not scorable | not scorable |
| #### Bn-scaff_21820_1-p54719 C-genome specific (napus-oleracea) | 0.9880383    | 0.5402785    | 0.9844961 | 0.5103034 | not scorable | not scorable |
| #### Bn-scaff_21820_1-p55319 C-genome specific (napus-oleracea) | 0.9856459    | 0.7651234    | 1         | 0.7431273 | not scorable | not scorable |
| #### Bn-scaff_21820_1-p55390 C-genome specific (napus-oleracea) | 0.9928229    | 0.7558695    | 0.9922481 | 0.7804426 | not scorable | not scorable |
| #### Bn-scaff_21820_1-p55398 C-genome specific (napus-oleracea) | 0.9760765    | 0.7750597    | 0.9922481 | 0.7523312 | not scorable | not scorable |
| #### Bn-scaff_21820_1-p56703 C-genome specific (napus-oleracea) | 0.9736842    | 0.7966092    | 1         | 0.7862513 | not scorable | not scorable |
| #### Bn-scaff_21820_1-p56720 C-genome specific (napus-oleracea) | 0.9712918    | 0.6891294    | 1         | 0.6896321 | not scorable | not scorable |
| #### Bn-scaff_21820_1-p56729 C-genome specific (napus-oleracea) | 0.9688995    | 0.808254     | 1         | 0.757777  | not scorable | not scorable |
| #### Bn-scaff_21820_1-p56745 C-genome specific (napus-oleracea) | 0.9856459    | 0.7648516    | 0.9844961 | 0.809791  | not scorable | not scorable |
| #### Bn-scaff_21820_1-p56836 C-genome specific (napus-oleracea) | 0.9712918    | 0.6893472    | 1         | 0.6025598 | not scorable | not scorable |
| #### Bn-scaff_21820_1-p56860 C-genome specific (napus-oleracea) | 0.9736842    | 0.6303325    | 0.9922481 | 0.6342829 | not scorable | not scorable |
| #### Bn-scaff_21820_1-p56916 C-genome specific (napus-oleracea) | 0.9832536    | 0.783964     | 1         | 0.8471338 | not scorable | not scorable |
| #### Bn-scaff_21820_1-p56935 C-genome specific (napus-oleracea) | 0.9617225    | 0.7204025    | 1         | 0.645013  | not scorable | not scorable |
| #### Bn-scaff_21820_1-p57021 C-genome specific (napus-oleracea) | 0.9760765    | 0.7898555    | 1         | 0.7369063 | not scorable | not scorable |

|                                                                 |           |           |              |              |              |              |
|-----------------------------------------------------------------|-----------|-----------|--------------|--------------|--------------|--------------|
| #### Bn-scaff_21820_1-p57194 C-genome specific (napus-oleracea) | 0.9928229 | 0.7873964 | 1            | 0.712292     | not scorable | not scorable |
| #### Bn-scaff_21820_1-p57314 C-genome specific (napus-oleracea) | 0.9617225 | 0.76235   | 1            | 0.7456979    | not scorable | not scorable |
| #### Bn-scaff_21820_1-p57424 C-genome specific (napus-oleracea) | 0.9784689 | 0.773487  | 0.9922481    | 0.8467509    | not scorable | not scorable |
| #### Bn-scaff_21820_1-p57484 C-genome specific (napus-oleracea) | 0.9832536 | 0.7752248 | 1            | 0.7938142    | not scorable | not scorable |
| #### Bn-scaff_21820_1-p57509 C-genome specific (napus-oleracea) | 0.9736842 | 0.7990643 | 0.9844961    | 0.7372329    | not scorable | not scorable |
| #### Bn-scaff_21820_1-p57604 C-genome specific (napus-oleracea) | 0.9880383 | 0.7704648 | 1            | 0.7455525    | not scorable | not scorable |
| #### Bn-scaff_21820_1-p57624 C-genome specific (napus-oleracea) | 0.9856459 | 0.7745124 | 1            | 0.7674299    | not scorable | not scorable |
| #### Bn-scaff_21820_1-p57633 C-genome specific (napus-oleracea) | 0.9784689 | 0.6153122 | 1            | 0.5668756    | not scorable | not scorable |
| #### Bn-scaff_21820_1-p57652 C-genome specific (napus-oleracea) | 0.9760765 | 0.7480676 | 1            | 0.8801268    | not scorable | not scorable |
| #### Bn-scaff_21820_1-p57688 C-genome specific (napus-oleracea) | 0.9832536 | 0.7746943 | 1            | 0.8121907    | not scorable | not scorable |
| #### Bn-scaff_21820_1-p57727 C-genome specific (napus-oleracea) | 0.9784689 | 0.6657466 | 1            | 0.665654     | not scorable | not scorable |
| #### Bn-scaff_21820_1-p57753 C-genome specific (napus-oleracea) | 0.9760765 | 0.7372872 | 1            | 0.739269     | not scorable | not scorable |
| #### Bn-scaff_21820_1-p57782 C-genome specific (napus-oleracea) | 0.9760765 | 0.6986715 | 0.9922481    | 0.7355698    | not scorable | not scorable |
| #### Bn-scaff_21820_1-p57808 C-genome specific (napus-oleracea) | 0.9832536 | 0.7731829 | 0.9922481    | 0.7441897    | not scorable | not scorable |
| #### Bn-scaff_21820_1-p57836 C-genome specific (napus-oleracea) | 0.9832536 | 0.6529352 | 1            | 0.6195616    | not scorable | not scorable |
| #### Bn-scaff_21820_1-p57902 C-genome specific (napus-oleracea) | 0.9832536 | 0.7749386 | 1            | 0.7785599    | not scorable | not scorable |
| #### Bn-scaff_21820_1-p57926 C-genome specific (napus-oleracea) | 0.9808612 | 0.6573315 | 0.9922481    | 0.6012498    | not scorable | not scorable |
| #### Bn-scaff_21820_1-p57964 C-genome specific (napus-oleracea) | 0.9832536 | 0.7233323 | 1            | 0.7698766    | not scorable | not scorable |
| #### Bn-scaff_21820_1-p58128 C-genome specific (napus-oleracea) | 0.9856459 | 0.7728195 | 1            | 0.8154948    | not scorable | not scorable |
| #### Bn-scaff_21820_1-p58184 C-genome specific (napus-oleracea) | 0.9784689 | 0.7593908 | 1            | 0.8388718    | not scorable | not scorable |
| #### Bn-scaff_21820_1-p58220 napus specific                     | 0.8373206 | 0.9343305 | not scorable | not scorable | not scorable | not scorable |
| #### Bn-scaff_21820_1-p58253 C-genome specific (napus-oleracea) | 0.9856459 | 0.782219  | 1            | 0.8376549    | not scorable | not scorable |
| #### Bn-scaff_21820_1-p58275 C-genome specific (napus-oleracea) | 0.9832536 | 0.7585157 | 1            | 0.7160598    | not scorable | not scorable |
| #### Bn-scaff_21820_1-p58277 C-genome specific (napus-oleracea) | 0.9808612 | 0.773638  | 1            | 0.7018313    | not scorable | not scorable |
| #### Bn-scaff_21820_1-p58302 C-genome specific (napus-oleracea) | 0.9688995 | 0.6862019 | 1            | 0.6628853    | not scorable | not scorable |
| #### Bn-scaff_21820_1-p58387 C-genome specific (napus-oleracea) | 0.9832536 | 0.7898555 | 1            | 0.876556     | not scorable | not scorable |
| #### Bn-scaff_21820_1-p58542 C-genome specific (napus-oleracea) | 0.9832536 | 0.7660667 | 1            | 0.8011102    | not scorable | not scorable |
| #### Bn-scaff_21820_1-p58664 C-genome specific (napus-oleracea) | 0.9808612 | 0.6631506 | 0.9922481    | 0.7053248    | not scorable | not scorable |
| #### Bn-scaff_21820_1-p58708 C-genome specific (napus-oleracea) | 0.9736842 | 0.7560781 | 1            | 0.7712067    | not scorable | not scorable |
| #### Bn-scaff_21820_1-p58753 C-genome specific (napus-oleracea) | 0.9808612 | 0.6938853 | 1            | 0.6947101    | not scorable | not scorable |
| #### Bn-scaff_21820_1-p58760 C-genome specific (napus-oleracea) | 0.9736842 | 0.7326857 | 1            | 0.7363441    | not scorable | not scorable |
| #### Bn-scaff_21820_1-p58871 C-genome specific (napus-oleracea) | 0.9856459 | 0.7375839 | 0.9922481    | 0.7625336    | not scorable | not scorable |
| #### Bn-scaff_21820_1-p58986 genome unspecific (all in)         | 0.9832536 | 0.7497693 | 0.9922481    | 0.736926     | 1            | 0.9281476    |

|                                                                 |              |              |              |              |              |              |
|-----------------------------------------------------------------|--------------|--------------|--------------|--------------|--------------|--------------|
| #### Bn-scaff_21820_1-p59129 C-genome specific (napus-oleracea) | 0.8636364    | 0.9175178    | 0.7674419    | 0.7689952    | not scorable | not scorable |
| #### Bn-scaff_21820_1-p60071 napus specific                     | 0.9665072    | 0.5790302    | not scorable | not scorable | not scorable | not scorable |
| #### Bn-scaff_21820_1-p61122 C-genome specific (oleracea only)  | not scorable | not scorable | 1            | 0.668653     | not scorable | not scorable |
| #### Bn-scaff_21820_1-p73779 genome unspecific (all in)         | 1            | 0.727636     | 1            | 0.6443173    | 1            | 0.6885806    |
| #### Bn-scaff_21820_1-p75923 C-genome specific (napus-oleracea) | 0.9736842    | 0.5015088    | 1            | 0.7955925    | not scorable | not scorable |
| #### Bn-scaff_21820_1-p76442 C-genome specific (napus-oleracea) | 0.9784689    | 0.6264004    | 0.9767442    | 0.6245251    | not scorable | not scorable |
| #### Bn-scaff_21820_1-p76534 C-genome specific (napus-oleracea) | 0.9617225    | 0.5323899    | 0.9612403    | 0.4730024    | not scorable | not scorable |
| #### Bn-scaff_21820_1-p83230 C-genome specific (napus-oleracea) | 0.9760765    | 0.7780761    | 1            | 0.8228006    | not scorable | not scorable |
| #### Bn-scaff_21820_1-p84849 genome unspecific (oleracea-rapa)  | not scorable | not scorable | 1            | 0.4711255    | 0.9917355    | 0.5489998    |
| #### Bn-scaff_21820_1-p86941 C-genome specific (napus-oleracea) | 0.9569378    | 0.7798508    | 1            | 0.6555113    | not scorable | not scorable |
| #### Bn-scaff_21820_1-p86985 C-genome specific (napus-oleracea) | 0.9688995    | 0.7803321    | 1            | 0.7549106    | not scorable | not scorable |
| #### Bn-scaff_21820_1-p87263 C-genome specific (napus-oleracea) | 0.9545454    | 0.4346521    | 0.9224806    | 0.4201002    | not scorable | not scorable |
| #### Bn-scaff_21820_1-p88704 genome unspecific (all in)         | 1            | 0.7972026    | 1            | 0.6536514    | 1            | 0.8207097    |
| #### Bn-scaff_21820_1-p92429 C-genome specific (napus-oleracea) | 0.9617225    | 0.9232363    | 1            | 0.8093407    | not scorable | not scorable |
| #### Bn-scaff_21820_1-p93158 C-genome specific (napus-oleracea) | 0.2511962    | 0.6763759    | 0.620155     | 0.6025206    | not scorable | not scorable |
| #### Bn-scaff_21820_1-p93342 genome unspecific (all in)         | 1            | 0.5952256    | 0.9844961    | 0.5712246    | 1            | 0.5904691    |
| #### Bn-scaff_21820_1-p93390 genome unspecific (all in)         | 1            | 0.711467     | 1            | 0.6584871    | 1            | 0.7252899    |
| #### Bn-scaff_21820_1-p94777 C-genome specific (napus-oleracea) | 0.9880383    | 0.6844704    | 0.9844961    | 0.6468633    | not scorable | not scorable |
| #### Bn-scaff_21820_1-p94956 C-genome specific (napus-oleracea) | 0.9856459    | 0.7612188    | 1            | 0.7478724    | not scorable | not scorable |
| #### Bn-scaff_21820_1-p95616 C-genome specific (napus-oleracea) | 0.9832536    | 0.7637708    | 1            | 0.8777302    | not scorable | not scorable |
| #### Bn-scaff_21820_1-p95694 C-genome specific (napus-oleracea) | 0.9641148    | 0.6424146    | 0.9844961    | 0.8197361    | not scorable | not scorable |
| #### Bn-scaff_21820_1-p95794 C-genome specific (napus-oleracea) | 0.9736842    | 0.6867652    | 0.9922481    | 0.6606381    | not scorable | not scorable |
| #### Bn-scaff_21820_1-p95835 C-genome specific (napus-oleracea) | 0.9688995    | 0.6506859    | 0.9922481    | 0.6896119    | not scorable | not scorable |
| #### Bn-scaff_21820_1-p96548 C-genome specific (napus-oleracea) | 0.9832536    | 0.7793452    | 1            | 0.7901335    | not scorable | not scorable |
| #### Bn-scaff_21820_1-p96959 genome unspecific (oleracea-rapa)  | not scorable | not scorable | 0.9844961    | 0.6719415    | 1            | 0.7637394    |
| #### Bn-scaff_21820_1-p97653 genome unspecific (all in)         | 0.9856459    | 0.6511555    | 1            | 0.7736495    | 1            | 0.9269029    |
| #### Bn-scaff_21820_1-p97709 genome unspecific (all in)         | 0.9665072    | 0.4757857    | 0.9922481    | 0.5184311    | 1            | 0.8957536    |
| #### Bn-scaff_21820_1-p98112 C-genome specific (napus-oleracea) | 0.9760765    | 0.7126133    | 0.9922481    | 0.6563362    | not scorable | not scorable |
| #### Bn-scaff_21820_1-p98639 C-genome specific (napus-oleracea) | 0.9784689    | 0.7742043    | 1            | 0.8187593    | not scorable | not scorable |
| #### Bn-scaff_21820_1-p98673 C-genome specific (napus-oleracea) | 0.9856459    | 0.7858396    | 1            | 0.8292724    | not scorable | not scorable |
| #### Bn-scaff_21820_1-p98847 C-genome specific (napus-oleracea) | 0.9784689    | 0.6626194    | 1            | 0.7281287    | not scorable | not scorable |
| #### Bn-scaff_21820_1-p98854 C-genome specific (napus-oleracea) | 0.937799     | 0.6567209    | 1            | 0.632392     | not scorable | not scorable |
| #### Bn-scaff_21820_1-p99217 genome unspecific (all in)         | 0.9593301    | 0.5864475    | 0.9922481    | 0.7858947    | 1            | 0.9457057    |

|                                                                 |              |              |           |           |              |              |
|-----------------------------------------------------------------|--------------|--------------|-----------|-----------|--------------|--------------|
| #### Bn-scaff_21820_1-p99314 C-genome specific (napus-oleracea) | 0.9593301    | 0.570767     | 0.9922481 | 0.6915193 | not scorable | not scorable |
| #### Bn-scaff_21820_1-p99870 genome unspecific (all in)         | 0.9617225    | 0.6353527    | 0.9689922 | 0.6160164 | 1            | 0.7921845    |
| #### Bn-scaff_21821_1-p10333 C-genome specific (napus-oleracea) | 0.9880383    | 0.8566455    | 0.9844961 | 0.8224724 | not scorable | not scorable |
| #### Bn-scaff_21821_1-p10387 C-genome specific (napus-oleracea) | 0.9952153    | 0.7816914    | 0.9844961 | 0.626982  | not scorable | not scorable |
| #### Bn-scaff_21821_1-p11061 genome unspecific (all in)         | 0.9808612    | 0.68449      | 0.9767442 | 0.8336272 | 0.9917355    | 0.9079036    |
| #### Bn-scaff_21821_1-p11172 C-genome specific (napus-oleracea) | 0.9712918    | 0.7435141    | 0.9922481 | 0.720181  | not scorable | not scorable |
| #### Bn-scaff_21821_1-p11245 C-genome specific (napus-oleracea) | 0.9952153    | 0.7927806    | 0.9844961 | 0.7743639 | not scorable | not scorable |
| #### Bn-scaff_21821_1-p11287 C-genome specific (napus-oleracea) | 0.9856459    | 0.7758924    | 0.9689922 | 0.7787974 | not scorable | not scorable |
| #### Bn-scaff_21821_1-p12105 C-genome specific (oleracea only)  | not scorable | not scorable | 0.620155  | 0.7625333 | not scorable | not scorable |
| #### Bn-scaff_21821_1-p12116 C-genome specific (napus-oleracea) | 0.9976076    | 0.7668096    | 0.9844961 | 0.8243118 | not scorable | not scorable |
| #### Bn-scaff_21821_1-p12123 C-genome specific (napus-oleracea) | 0.9928229    | 0.7442046    | 1         | 0.7784432 | not scorable | not scorable |
| #### Bn-scaff_21821_1-p12225 C-genome specific (napus-oleracea) | 0.9904306    | 0.7682832    | 1         | 0.8588617 | not scorable | not scorable |
| #### Bn-scaff_21821_1-p12804 C-genome specific (napus-oleracea) | 0.9760765    | 0.694686     | 0.9922481 | 0.8469996 | not scorable | not scorable |
| #### Bn-scaff_21821_1-p18474 C-genome specific (napus-oleracea) | 0.9952153    | 0.791792     | 0.9922481 | 0.7553102 | not scorable | not scorable |
| #### Bn-scaff_21821_1-p18810 C-genome specific (napus-oleracea) | 0.9928229    | 0.7898651    | 0.9922481 | 0.8443927 | not scorable | not scorable |
| #### Bn-scaff_21821_1-p32954 C-genome specific (napus-oleracea) | 0.9928229    | 0.752079     | 1         | 0.7043482 | not scorable | not scorable |
| #### Bn-scaff_21821_1-p41631 C-genome specific (napus-oleracea) | 0.9904306    | 0.7693763    | 0.9844961 | 0.8336856 | not scorable | not scorable |
| #### Bn-scaff_21821_1-p42611 C-genome specific (napus-oleracea) | 0.9880383    | 0.6563102    | 0.9922481 | 0.6412428 | not scorable | not scorable |
| #### Bn-scaff_21821_1-p55175 C-genome specific (napus-oleracea) | 0.9976076    | 0.80018      | 1         | 0.7844783 | not scorable | not scorable |
| #### Bn-scaff_21821_1-p71840 genome unspecific (all in)         | 0.9808612    | 0.5264542    | 0.9922481 | 0.7641819 | 1            | 0.9344274    |
| #### Bn-scaff_21821_1-p7474 C-genome specific (napus-oleracea)  | 0.9784689    | 0.6576464    | 0.9767442 | 0.6424108 | not scorable | not scorable |
| #### Bn-scaff_21821_1-p7526 C-genome specific (napus-oleracea)  | 0.9784689    | 0.7384523    | 0.9922481 | 0.6966212 | not scorable | not scorable |
| #### Bn-scaff_21821_1-p75538 C-genome specific (napus-oleracea) | 0.9904306    | 0.7446072    | 1         | 0.7877557 | not scorable | not scorable |
| #### Bn-scaff_21821_1-p77819 C-genome specific (napus-oleracea) | 0.9952153    | 0.7460684    | 0.9922481 | 0.7540577 | not scorable | not scorable |
| #### Bn-scaff_21821_1-p8848 genome unspecific (all in)          | 0.9760765    | 0.5297586    | 0.9922481 | 0.7505535 | 1            | 0.7743467    |
| #### Bn-scaff_21821_1-p91441 genome unspecific (all in)         | 0.9784689    | 0.5609578    | 1         | 0.7238023 | 1            | 0.9244325    |
| #### Bn-scaff_21821_1-p93098 C-genome specific (napus-oleracea) | 0.9856459    | 0.7474399    | 0.9922481 | 0.7614228 | not scorable | not scorable |
| #### Bn-scaff_21821_1-p9352 C-genome specific (napus-oleracea)  | 0.9952153    | 0.7554069    | 1         | 0.7241794 | not scorable | not scorable |
| #### Bn-scaff_21838_1-p7785 C-genome specific (napus-oleracea)  | 0.9784689    | 0.5443853    | 1         | 0.774768  | not scorable | not scorable |
| #### Bn-scaff_21841_1-p14415 C-genome specific (napus-oleracea) | 0.9856459    | 0.7801091    | 1         | 0.7955374 | not scorable | not scorable |
| #### Bn-scaff_21841_1-p173 C-genome specific (napus-oleracea)   | 0.9736842    | 0.7770833    | 0.9922481 | 0.7584972 | not scorable | not scorable |
| #### Bn-scaff_21841_1-p17465 genome unspecific (all in)         | 0.9665072    | 0.3129549    | 0.9689922 | 0.7400711 | 0.9917355    | 0.8434716    |
| #### Bn-scaff_21841_1-p18811 C-genome specific (napus-oleracea) | 0.9952153    | 0.7471268    | 0.9922481 | 0.74162   | not scorable | not scorable |

|                                                                 |              |              |              |              |              |              |
|-----------------------------------------------------------------|--------------|--------------|--------------|--------------|--------------|--------------|
| #### Bn-scaff_21841_1-p20816 genome unspecific (all in)         | 1            | 0.3359703    | 1            | 0.6706244    | 1            | 0.722805     |
| #### Bn-scaff_21841_1-p23038 all not scorable                   | not scorable | not scorable | not scorable | not scorable | not scorable | not scorable |
| #### Bn-scaff_21841_1-p26836 C-genome specific (napus-oleracea) | 0.9880383    | 0.7900476    | 0.9922481    | 0.7750904    | not scorable | not scorable |
| #### Bn-scaff_21841_1-p29541 C-genome specific (napus-oleracea) | 0.9760765    | 0.7753868    | 0.9922481    | 0.7716622    | not scorable | not scorable |
| #### Bn-scaff_21841_1-p29725 genome unspecific (all in)         | 0.9665072    | 0.6712099    | 1            | 0.7458077    | 0.9917355    | 0.635298     |
| #### Bn-scaff_21841_1-p30485 napus specific                     | 0.9760765    | 0.7495229    | not scorable | not scorable | not scorable | not scorable |
| #### Bn-scaff_21841_1-p31574 C-genome specific (napus-oleracea) | 0.9808612    | 0.7858903    | 0.9844961    | 0.7900184    | not scorable | not scorable |
| #### Bn-scaff_21841_1-p32947 C-genome specific (napus-oleracea) | 0.9019139    | 0.6825952    | 0.8294573    | 0.7088649    | not scorable | not scorable |
| #### Bn-scaff_21841_1-p32983 C-genome specific (napus-oleracea) | 0.9688995    | 0.6696863    | 0.9767442    | 0.6925398    | not scorable | not scorable |
| #### Bn-scaff_21841_1-p9955 genome unspecific (all in)          | 0.9832536    | 0.2774911    | 1            | 0.3837615    | 1            | 0.7770717    |
| #### Bn-scaff_21851_1-p22022 C-genome specific (napus-oleracea) | 1            | 0.5922611    | 1            | 0.5729679    | not scorable | not scorable |
| #### Bn-scaff_21851_1-p36812 C-genome specific (napus-oleracea) | 1            | 0.700218     | 1            | 0.7817305    | not scorable | not scorable |
| #### Bn-scaff_21851_1-p51032 genome unspecific (all in)         | 1            | 0.5918733    | 1            | 0.5432907    | 0.9917355    | 0.5692675    |
| #### Bn-scaff_21851_1-p92514 genome unspecific (all in)         | 1            | 0.631534     | 1            | 0.5729156    | 1            | 0.8156698    |
| #### Bn-scaff_21857_1-p10047 all not scorable                   | not scorable | not scorable | not scorable | not scorable | not scorable | not scorable |
| #### Bn-scaff_21857_1-p11767 C-genome specific (napus-oleracea) | 0.930622     | 0.6504594    | 0.9844961    | 0.5630761    | not scorable | not scorable |
| #### Bn-scaff_21857_1-p1460 C-genome specific (napus-oleracea)  | 0.9808612    | 0.7183104    | 1            | 0.7097788    | not scorable | not scorable |
| #### Bn-scaff_21857_1-p23182 C-genome specific (napus-oleracea) | 0.9784689    | 0.8807692    | 1            | 0.6581224    | not scorable | not scorable |
| #### Bn-scaff_21857_1-p29337 genome unspecific (all in)         | 1            | 0.3834951    | 1            | 0.7947398    | 1            | 0.9460148    |
| #### Bn-scaff_21857_1-p29580 C-genome specific (napus-oleracea) | 0.9904306    | 0.8440034    | 1            | 0.9660117    | not scorable | not scorable |
| #### Bn-scaff_21857_1-p29805 C-genome specific (napus-oleracea) | 0.9880383    | 0.8804961    | 1            | 0.796028     | not scorable | not scorable |
| #### Bn-scaff_21857_1-p36665 genome unspecific (all in)         | 0.9976076    | 0.6063846    | 1            | 0.5308841    | 1            | 0.8138568    |
| #### Bn-scaff_21857_1-p39303 C-genome specific (oleracea only)  | not scorable | not scorable | 0.503876     | 0.7708201    | not scorable | not scorable |
| #### Bn-scaff_21857_1-p48390 napus specific                     | 0.9688995    | 0.3849857    | not scorable | not scorable | not scorable | not scorable |
| #### Bn-scaff_21861_1-p14684 genome unspecific (all in)         | 0.9832536    | 0.2616193    | 1            | 0.5452029    | 1            | 0.7349294    |
| #### Bn-scaff_21861_1-p17903 C-genome specific (napus-oleracea) | 0.9808612    | 0.7556288    | 0.9922481    | 0.7693807    | not scorable | not scorable |
| #### Bn-scaff_21861_1-p20145 genome unspecific (all in)         | 0.9880383    | 0.2740184    | 0.9612403    | 0.3059862    | 1            | 0.8601238    |
| #### Bn-scaff_21861_1-p33827 genome unspecific (all in)         | 0.9760765    | 0.5483129    | 1            | 0.6848068    | 0.9917355    | 0.9112861    |
| #### Bn-scaff_21861_1-p33892 genome unspecific (all in)         | 0.9760765    | 0.2672548    | 0.9767442    | 0.4124834    | 1            | 0.9072468    |
| #### Bn-scaff_21861_1-p34223 C-genome specific (napus-oleracea) | 0.9904306    | 0.7641606    | 1            | 0.6785291    | not scorable | not scorable |
| #### Bn-scaff_21861_1-p37272 C-genome specific (napus-oleracea) | 0.9712918    | 0.5715715    | 0.9767442    | 0.6110886    | not scorable | not scorable |
| #### Bn-scaff_21861_1-p64738 C-genome specific (napus-oleracea) | 1            | 0.6585889    | 0.9922481    | 0.6017389    | not scorable | not scorable |
| #### Bn-scaff_21864_1-p17089 C-genome specific (napus-oleracea) | 0.9856459    | 0.7736661    | 0.9922481    | 0.7550485    | not scorable | not scorable |

|                                                                 |              |              |              |              |              |              |
|-----------------------------------------------------------------|--------------|--------------|--------------|--------------|--------------|--------------|
| #### Bn-scaff_21864_1-p17335 C-genome specific (napus-oleracea) | 0.9880383    | 0.7764494    | 0.9844961    | 0.7975169    | not scorable | not scorable |
| #### Bn-scaff_21864_1-p447 C-genome specific (napus-oleracea)   | 0.9856459    | 0.7146994    | 1            | 0.8354264    | not scorable | not scorable |
| #### Bn-scaff_21867_1-p15582 genome unspecific (all in)         | 1            | 0.6007231    | 1            | 0.5783802    | 1            | 0.8525068    |
| #### Bn-scaff_21867_1-p30532 genome unspecific (all in)         | 0.9952153    | 0.3730417    | 1            | 0.7543255    | 1            | 0.9169391    |
| #### Bn-scaff_21867_1-p39708 C-genome specific (napus-oleracea) | 1            | 0.8070241    | 1            | 0.6841522    | not scorable | not scorable |
| #### Bn-scaff_21867_1-p49978 C-genome specific (napus-oleracea) | 0.9976076    | 0.9029341    | 0.9922481    | 0.7621008    | not scorable | not scorable |
| #### Bn-scaff_21867_1-p68633 C-genome specific (napus-oleracea) | 1            | 0.8232501    | 1            | 0.6534988    | not scorable | not scorable |
| #### Bn-scaff_21867_1-p69185 C-genome specific (oleracea only)  | not scorable | not scorable | 0.9922481    | 0.5987412    | not scorable | not scorable |
| #### Bn-scaff_21867_1-p72729 C-genome specific (napus-oleracea) | 1            | 0.8442286    | 0.9922481    | 0.8884797    | not scorable | not scorable |
| #### Bn-scaff_21867_1-p80938 genome unspecific (all in)         | 0.930622     | 0.5538608    | 1            | 0.7333451    | 0.9917355    | 0.7225869    |
| #### Bn-scaff_21867_1-p87265 genome unspecific (all in)         | 1            | 0.7827932    | 1            | 0.6793313    | 1            | 0.823379     |
| #### Bn-scaff_21867_1-p87764 C-genome specific (napus-oleracea) | 0.9976076    | 0.2968884    | 1            | 0.4680907    | not scorable | not scorable |
| #### Bn-scaff_21867_1-p87948 genome unspecific (all in)         | 1            | 0.752191     | 1            | 0.8102319    | 1            | 0.7252899    |
| #### Bn-scaff_21884_1-p11016 C-genome specific (napus-oleracea) | 0.9019139    | 0.6157574    | 1            | 0.6622617    | not scorable | not scorable |
| #### Bn-scaff_21884_1-p11313 C-genome specific (oleracea only)  | not scorable | not scorable | 1            | 0.6234277    | not scorable | not scorable |
| #### Bn-scaff_21884_1-p12536 C-genome specific (napus-oleracea) | 0.9593301    | 0.514842     | 1            | 0.8170556    | not scorable | not scorable |
| #### Bn-scaff_21884_1-p15389 C-genome specific (napus-oleracea) | 0.9066986    | 0.6841838    | 1            | 0.7012425    | not scorable | not scorable |
| #### Bn-scaff_21884_1-p15444 C-genome specific (napus-oleracea) | 0.9066986    | 0.6795087    | 1            | 0.6791179    | not scorable | not scorable |
| #### Bn-scaff_21884_1-p15474 C-genome specific (napus-oleracea) | 0.9043062    | 0.6705863    | 0.8837209    | 0.6882693    | not scorable | not scorable |
| #### Bn-scaff_21884_1-p18202 C-genome specific (napus-oleracea) | 0.9138756    | 0.7873951    | 1            | 0.7726572    | not scorable | not scorable |
| #### Bn-scaff_21884_1-p18572 C-genome specific (napus-oleracea) | 0.9114832    | 0.6911086    | 1            | 0.6441295    | not scorable | not scorable |
| #### Bn-scaff_21884_1-p18579 C-genome specific (napus-oleracea) | 0.9019139    | 0.6713064    | 1            | 0.6281254    | not scorable | not scorable |
| #### Bn-scaff_21884_1-p19267 C-genome specific (oleracea only)  | not scorable | not scorable | 1            | 0.684553     | not scorable | not scorable |
| #### Bn-scaff_21884_1-p21986 C-genome specific (napus-oleracea) | 0.9186603    | 0.7479666    | 0.9922481    | 0.7322186    | not scorable | not scorable |
| #### Bn-scaff_21884_1-p22362 C-genome specific (napus-oleracea) | 0.9066986    | 0.7864093    | 0.9689922    | 0.7710893    | not scorable | not scorable |
| #### Bn-scaff_21884_1-p22752 C-genome specific (napus-oleracea) | 0.9617225    | 0.3724792    | 1            | 0.7537518    | not scorable | not scorable |
| #### Bn-scaff_21884_1-p23527 C-genome specific (napus-oleracea) | 0.9856459    | 0.335248     | 0.9534883    | 0.286051     | not scorable | not scorable |
| #### Bn-scaff_21884_1-p24966 C-genome specific (napus-oleracea) | 0.9162679    | 0.6854629    | 0.8992248    | 0.6574079    | not scorable | not scorable |
| #### Bn-scaff_21884_1-p25511 all not scorable                   | not scorable | not scorable | not scorable | not scorable | not scorable | not scorable |
| #### Bn-scaff_21884_1-p25568 C-genome specific (napus-oleracea) | 0.8995215    | 0.7999009    | 1            | 0.8252615    | not scorable | not scorable |
| #### Bn-scaff_21884_1-p28771 genome unspecific (all in)         | 0.9760765    | 0.3565948    | 1            | 0.7868366    | 1            | 0.8434787    |
| #### Bn-scaff_21884_1-p41480 C-genome specific (napus-oleracea) | 0.9976076    | 0.819769     | 1            | 0.8064826    | not scorable | not scorable |
| #### Bn-scaff_21884_1-p60083 genome unspecific (oleracea-rapa)  | not scorable | not scorable | 0.9922481    | 0.4628875    | 1            | 0.7858905    |

|                                                                 |              |              |           |           |              |              |
|-----------------------------------------------------------------|--------------|--------------|-----------|-----------|--------------|--------------|
| #### Bn-scaff_21884_1-p6389C-genome specific (napus-oleracea)   | 0.8397129    | 0.7648102    | 1         | 0.6948514 | not scorable | not scorable |
| #### Bn-scaff_21884_1-p6392E C-genome specific (napus-oleracea) | 0.8397129    | 0.7656114    | 1         | 0.7672179 | not scorable | not scorable |
| #### Bn-scaff_21884_1-p64224 C-genome specific (napus-oleracea) | 0.8373206    | 0.7431967    | 1         | 0.7421    | not scorable | not scorable |
| #### Bn-scaff_21884_1-p6425E C-genome specific (napus-oleracea) | 0.8444976    | 0.6953406    | 1         | 0.6951364 | not scorable | not scorable |
| #### Bn-scaff_21884_1-p6430C C-genome specific (napus-oleracea) | 0.8349282    | 0.7519435    | 1         | 0.7263648 | not scorable | not scorable |
| #### Bn-scaff_21884_1-p64317 C-genome specific (napus-oleracea) | 0.8301435    | 0.7272694    | 1         | 0.644075  | not scorable | not scorable |
| #### Bn-scaff_21884_1-p6441E C-genome specific (napus-oleracea) | 0.8421053    | 0.7426817    | 1         | 0.6050622 | not scorable | not scorable |
| #### Bn-scaff_21884_1-p65061 C-genome specific (napus-oleracea) | 0.8444976    | 0.7579653    | 1         | 0.7414007 | not scorable | not scorable |
| #### Bn-scaff_21884_1-p6513E C-genome specific (napus-oleracea) | 0.8181818    | 0.8061854    | 1         | 0.8024671 | not scorable | not scorable |
| #### Bn-scaff_21884_1-p6641E genome unspecific (oleracea-rapa)  | not scorable | not scorable | 1         | 0.7214465 | 1            | 0.5954536    |
| #### Bn-scaff_21884_1-p68387 C-genome specific (napus-oleracea) | 0.6196172    | 0.7425472    | 0.9844961 | 0.4997579 | not scorable | not scorable |
| #### Bn-scaff_21884_1-p6842E C-genome specific (napus-oleracea) | 0.6411483    | 0.7271036    | 0.9844961 | 0.3108516 | not scorable | not scorable |
| #### Bn-scaff_21884_1-p7132E C-genome specific (napus-oleracea) | 0.8373206    | 0.7830436    | 1         | 0.775974  | not scorable | not scorable |
| #### Bn-scaff_21884_1-p72041 genome unspecific (all in)         | 0.9976076    | 0.274701     | 1         | 0.8831859 | 0.9917355    | 0.8579935    |
| #### Bn-scaff_21884_1-p7290E genome unspecific (all in)         | 0.4784689    | 0.8180243    | 0.875969  | 0.7826325 | 0.9752066    | 0.9178092    |
| #### Bn-scaff_21884_1-p7312E C-genome specific (napus-oleracea) | 0.9043062    | 0.7609373    | 1         | 0.7705912 | not scorable | not scorable |
| #### Bn-scaff_21884_1-p76737 genome unspecific (all in)         | 0.9473684    | 0.413665     | 1         | 0.7830954 | 0.9917355    | 0.7247518    |
| #### Bn-scaff_21884_1-p7680E genome unspecific (all in)         | 0.9976076    | 0.3419724    | 0.9844961 | 0.6098613 | 1            | 0.6584775    |
| #### Bn-scaff_21884_1-p8072E genome unspecific (all in)         | 0.9904306    | 0.3323751    | 1         | 0.758344  | 0.9834711    | 0.7091847    |
| #### Bn-scaff_21884_1-p81034 C-genome specific (napus-oleracea) | 0.708134     | 0.7199893    | 0.620155  | 0.7841977 | not scorable | not scorable |
| #### Bn-scaff_21884_1-p8128C genome unspecific (oleracea-rapa)  | not scorable | not scorable | 0.6511628 | 0.8388522 | 0.8760331    | 0.7621653    |
| #### Bn-scaff_21884_1-p81972 C-genome specific (napus-oleracea) | 0.6842105    | 0.7726542    | 0.6046512 | 0.7859132 | not scorable | not scorable |
| #### Bn-scaff_21884_1-p8199E C-genome specific (napus-oleracea) | 0.6866029    | 0.7904717    | 0.620155  | 0.8493866 | not scorable | not scorable |
| #### Bn-scaff_21884_1-p81997 C-genome specific (napus-oleracea) | 0.7248804    | 0.7411575    | 0.6124031 | 0.7818923 | not scorable | not scorable |
| #### Bn-scaff_21884_1-p82234 C-genome specific (napus-oleracea) | 0.6866029    | 0.806761     | 0.620155  | 0.7698373 | not scorable | not scorable |
| #### Bn-scaff_21884_1-p82252 C-genome specific (napus-oleracea) | 0.6746411    | 0.762996     | 0.6046512 | 0.706299  | not scorable | not scorable |
| #### Bn-scaff_21884_1-p8241E genome unspecific (all in)         | 0.9952153    | 0.7512258    | 0.9534883 | 0.8123128 | 1            | 0.7109044    |
| #### Bn-scaff_21884_1-p8308E C-genome specific (napus-oleracea) | 0.6746411    | 0.7188271    | 0.496124  | 0.7090781 | not scorable | not scorable |
| #### Bn-scaff_21884_1-p84392 C-genome specific (napus-oleracea) | 0.6578947    | 0.7967246    | 0.6356589 | 0.8788276 | not scorable | not scorable |
| #### Bn-scaff_21884_1-p8667E genome unspecific (all in)         | 1            | 0.6853529    | 1         | 0.6416562 | 0.9917355    | 0.7155698    |
| #### Bn-scaff_21884_1-p91407 genome unspecific (oleracea-rapa)  | not scorable | not scorable | 0.9612403 | 0.5322746 | 0.9917355    | 0.8034579    |
| #### Bn-scaff_21884_1-p91472 genome unspecific (all in)         | 0.9976076    | 0.8369911    | 1         | 0.7450458 | 0.9917355    | 0.8705904    |
| #### Bn-scaff_21884_1-p9660E genome unspecific (all in)         | 0.9545454    | 0.3867657    | 1         | 0.8392686 | 1            | 0.9175813    |

|                                                                 |              |              |              |              |              |              |
|-----------------------------------------------------------------|--------------|--------------|--------------|--------------|--------------|--------------|
| #### Bn-scaff_21884_1-p97436 C-genome specific (napus-oleracea) | 0.6842105    | 0.8101986    | 1            | 0.6658434    | not scorable | not scorable |
| #### Bn-scaff_21884_1-p98411A-genome specific (rapa only)       | not scorable | not scorable | not scorable | not scorable | 0.9917355    | 0.6487459    |
| #### Bn-scaff_21894_1-p6693 C-genome specific (napus-oleracea)  | 0.9880383    | 0.6997067    | 1            | 0.7193478    | not scorable | not scorable |
| #### Bn-scaff_21906_1-p3534 genome unspecific (all in)          | 0.9593301    | 0.4172358    | 0.9922481    | 0.8139289    | 0.9834711    | 0.9095159    |
| #### Bn-scaff_21924_1-p14207 genome unspecific (all in)         | 0.9952153    | 0.3970339    | 1            | 0.8447284    | 1            | 0.7499115    |
| #### Bn-scaff_21924_1-p88938 genome unspecific (all in)         | 1            | 0.3349303    | 1            | 0.64249      | 1            | 0.603701     |
| #### Bn-scaff_21925_1-p10037 C-genome specific (napus-oleracea) | 0.9043062    | 0.7600063    | 0.9612403    | 0.764156     | not scorable | not scorable |
| #### Bn-scaff_21925_1-p10410 C-genome specific (napus-oleracea) | 0.9090909    | 0.7438618    | 0.9612403    | 0.741077     | not scorable | not scorable |
| #### Bn-scaff_21925_1-p10733 C-genome specific (napus-oleracea) | 0.923445     | 0.7585191    | 1            | 0.7617868    | not scorable | not scorable |
| #### Bn-scaff_21925_1-p13355 C-genome specific (napus-oleracea) | 0.9019139    | 0.6350699    | 0.9844961    | 0.65522      | not scorable | not scorable |
| #### Bn-scaff_21925_1-p15490 genome unspecific (all in)         | 0.9808612    | 0.4538959    | 1            | 0.7365086    | 1            | 0.8004208    |
| #### Bn-scaff_21925_1-p20015 genome unspecific (all in)         | 0.9330143    | 0.4311337    | 0.9767442    | 0.5275643    | 1            | 0.8817047    |
| #### Bn-scaff_21925_1-p20101 genome unspecific (all in)         | 0.9976076    | 0.4606279    | 0.9844961    | 0.7488424    | 1            | 0.7494321    |
| #### Bn-scaff_21925_1-p55427 genome unspecific (all in)         | 1            | 0.3545841    | 1            | 0.8470503    | 1            | 0.909013     |
| #### Bn-scaff_21925_1-p61702 C-genome specific (napus-oleracea) | 0.9904306    | 0.2230159    | 0.7984496    | 0.7191841    | not scorable | not scorable |
| #### Bn-scaff_21925_1-p86211 C-genome specific (napus-oleracea) | 0.8875598    | 0.633049     | 1            | 0.6042809    | not scorable | not scorable |
| #### Bn-scaff_21925_1-p88165 C-genome specific (napus-oleracea) | 0.8899522    | 0.7574521    | 0.8294573    | 0.8063       | not scorable | not scorable |
| #### Bn-scaff_21927_1-p108 napus specific                       | 0.9760765    | 0.590058     | not scorable | not scorable | not scorable | not scorable |
| #### Bn-scaff_21956_1-p12209 C-genome specific (napus-oleracea) | 0.9952153    | 0.8203345    | 1            | 0.7588196    | not scorable | not scorable |
| #### Bn-scaff_21956_1-p15437 genome unspecific (all in)         | 0.9808612    | 0.3883015    | 1            | 0.7962192    | 0.9917355    | 0.8556907    |
| #### Bn-scaff_21956_1-p16071 C-genome specific (napus-oleracea) | 0.9928229    | 0.7469066    | 1            | 0.7313884    | not scorable | not scorable |
| #### Bn-scaff_21956_1-p18308 C-genome specific (napus-oleracea) | 0.9712918    | 0.5580217    | 0.9767442    | 0.5753226    | not scorable | not scorable |
| #### Bn-scaff_21956_1-p21104 C-genome specific (napus-oleracea) | 0.9808612    | 0.7796466    | 0.9767442    | 0.6835215    | not scorable | not scorable |
| #### Bn-scaff_21956_1-p21364 C-genome specific (napus-oleracea) | 0.9880383    | 0.7621891    | 0.9534883    | 0.7359498    | not scorable | not scorable |
| #### Bn-scaff_21956_1-p21875 genome unspecific (all in)         | 0.9976076    | 0.5102573    | 1            | 0.8109856    | 1            | 0.6390359    |
| #### Bn-scaff_21956_1-p21926 genome unspecific (all in)         | 0.9904306    | 0.5296962    | 1            | 0.7708887    | 1            | 0.8543575    |
| #### Bn-scaff_21956_1-p22025 genome unspecific (all in)         | 0.9880383    | 0.480633     | 1            | 0.7497903    | 1            | 0.8372515    |
| #### Bn-scaff_21956_1-p22465 genome unspecific (all in)         | 0.9856459    | 0.472928     | 0.9922481    | 0.8291255    | 1            | 0.9155238    |
| #### Bn-scaff_21956_1-p22687 C-genome specific (napus-oleracea) | 0.9880383    | 0.8106603    | 0.9922481    | 0.7310453    | not scorable | not scorable |
| #### Bn-scaff_21956_1-p23213 C-genome specific (napus-oleracea) | 0.9856459    | 0.810599     | 0.9922481    | 0.8638873    | not scorable | not scorable |
| #### Bn-scaff_21956_1-p23242 C-genome specific (napus-oleracea) | 0.9952153    | 0.8111753    | 1            | 0.803513     | not scorable | not scorable |
| #### Bn-scaff_21956_1-p25396 genome unspecific (all in)         | 0.9880383    | 0.5751463    | 1            | 0.7754443    | 1            | 0.9169038    |
| #### Bn-scaff_21956_1-p25590 napus specific                     | 0.9641148    | 0.8362972    | not scorable | not scorable | not scorable | not scorable |



|                                                                |              |              |              |              |              |              |
|----------------------------------------------------------------|--------------|--------------|--------------|--------------|--------------|--------------|
| #### Bn-scaff_21956_1-p25703genome unspecific (all in)         | 0.9880383    | 0.613965     | 0.9922481    | 0.761875     | 1            | 0.8952084    |
| #### Bn-scaff_21956_1-p26217genome unspecific (all in)         | 0.9904306    | 0.859494     | 1            | 0.8433065    | 0.9834711    | 0.9175924    |
| #### Bn-scaff_21956_1-p27670C-genome specific (napus-oleracea) | 0.9832536    | 0.7993546    | 1            | 0.7016465    | not scorable | not scorable |
| #### Bn-scaff_21956_1-p27795C-genome specific (napus-oleracea) | 0.9880383    | 0.7898794    | 0.9767442    | 0.8289795    | not scorable | not scorable |
| #### Bn-scaff_21956_1-p28998C-genome specific (napus-oleracea) | 1            | 0.4222849    | 1            | 0.7747781    | not scorable | not scorable |
| #### Bn-scaff_21956_1-p29074C-genome specific (napus-oleracea) | 0.9928229    | 0.1918799    | 1            | 0.6968412    | not scorable | not scorable |
| #### Bn-scaff_21956_1-p29082genome unspecific (all in)         | 1            | 0.2650558    | 1            | 0.7526832    | 0.9586777    | 0.3805321    |
| #### Bn-scaff_21956_1-p29136C-genome specific (napus-oleracea) | 1            | 0.6287634    | 1            | 0.7241634    | not scorable | not scorable |
| #### Bn-scaff_21956_1-p47467C-genome specific (napus-oleracea) | 0.9904306    | 0.8173583    | 0.9457364    | 0.8227723    | not scorable | not scorable |
| #### Bn-scaff_21956_1-p47710C-genome specific (napus-oleracea) | 0.9880383    | 0.7100351    | 0.9612403    | 0.6720487    | not scorable | not scorable |
| #### Bn-scaff_21956_1-p50505genome unspecific (all in)         | 0.9904306    | 0.5770827    | 1            | 0.6716575    | 1            | 0.9175813    |
| #### Bn-scaff_21956_1-p51220C-genome specific (napus-oleracea) | 0.9904306    | 0.881908     | 0.9534883    | 0.8218689    | not scorable | not scorable |
| #### Bn-scaff_21956_1-p95133genome unspecific (all in)         | 0.9641148    | 0.2888682    | 1            | 0.7548218    | 1            | 0.6712735    |
| #### Bn-scaff_21964_1-p14277A-genome specific (napus-rapa)     | 1            | 0.5954536    | not scorable | not scorable | 1            | 0.9010315    |
| #### Bn-scaff_21964_1-p44187napus specific                     | 0.8636364    | 0.2037363    | not scorable | not scorable | not scorable | not scorable |
| #### Bn-scaff_21967_1-p21220C-genome specific (napus-oleracea) | 0.9856459    | 0.8038394    | 0.9922481    | 0.8510836    | not scorable | not scorable |
| #### Bn-scaff_21982_1-p51275C-genome specific (napus-oleracea) | 0.9856459    | 0.7839187    | 0.9922481    | 0.6847202    | not scorable | not scorable |
| #### Bn-scaff_21982_1-p69609C-genome specific (napus-oleracea) | 0.9832536    | 0.6950226    | 1            | 0.6393128    | not scorable | not scorable |
| #### Bn-scaff_21982_1-p69845genome unspecific (all in)         | 0.9617225    | 0.5588392    | 1            | 0.7760509    | 0.9917355    | 0.9135894    |
| #### Bn-scaff_21982_1-p77327C-genome specific (napus-oleracea) | 0.9928229    | 0.7539176    | 0.9922481    | 0.7390006    | not scorable | not scorable |
| #### Bn-scaff_22001_1-p430 C-genome specific (napus-oleracea)  | 0.9832536    | 0.8509076    | 0.9922481    | 0.7434213    | not scorable | not scorable |
| #### Bn-scaff_22002_1-p15527C-genome specific (napus-oleracea) | 1            | 0.7998985    | 1            | 0.858444     | not scorable | not scorable |
| #### Bn-scaff_22002_1-p78733genome unspecific (all in)         | 0.9856459    | 0.6839315    | 0.9689922    | 0.7190372    | 0.9917355    | 0.8427728    |
| #### Bn-scaff_22002_1-p81223genome unspecific (oleracea-rapa)  | not scorable | not scorable | 1            | 0.860317     | 0.9917355    | 0.7144064    |
| #### Bn-scaff_22067_1-p10366C-genome specific (napus-oleracea) | 0.9952153    | 0.7844154    | 0.9844961    | 0.7390944    | not scorable | not scorable |
| #### Bn-scaff_22067_1-p10470C-genome specific (napus-oleracea) | 0.8971292    | 0.7264988    | 0.9457364    | 0.6767473    | not scorable | not scorable |
| #### Bn-scaff_22067_1-p11133genome unspecific (all in)         | 0.9952153    | 0.443224     | 1            | 0.7847462    | 0.8677686    | 0.8849924    |
| #### Bn-scaff_22067_1-p11514C-genome specific (napus-oleracea) | 0.9904306    | 0.8865887    | 0.7131783    | 0.7823871    | not scorable | not scorable |
| #### Bn-scaff_22067_1-p13958C-genome specific (napus-oleracea) | 0.9808612    | 0.7817704    | 1            | 0.8508332    | not scorable | not scorable |
| #### Bn-scaff_22067_1-p14120A-genome specific (napus-rapa)     | 0.9904306    | 0.2641801    | not scorable | not scorable | 1            | 0.8252655    |
| #### Bn-scaff_22067_1-p14213C-genome specific (napus-oleracea) | 0.9856459    | 0.7665898    | 1            | 0.7292743    | not scorable | not scorable |
| #### Bn-scaff_22067_1-p14457C-genome specific (napus-oleracea) | 0.9880383    | 0.7735092    | 0.9689922    | 0.8446741    | not scorable | not scorable |
| #### Bn-scaff_22067_1-p14793C-genome specific (napus-oleracea) | 0.8732057    | 0.7549       | 0.7596899    | 0.776213     | not scorable | not scorable |

|                                                                 |              |              |              |   |              |              |              |
|-----------------------------------------------------------------|--------------|--------------|--------------|---|--------------|--------------|--------------|
| #### Bn-scaff_22067_1-p14988 C-genome specific (napus-oleracea) | 0.9928229    | 0.7630814    |              | 1 | 0.7762899    | not scorable | not scorable |
| #### Bn-scaff_22067_1-p19090 genome unspecific (all in)         | 1            | 0.6853143    |              | 1 | 0.7327578    | 1            | 0.9095578    |
| #### Bn-scaff_22067_1-p20012 genome unspecific (oleracea-rapa)  | not scorable | not scorable |              | 1 | 0.8542681    | 1            | 0.8100366    |
| #### Bn-scaff_22067_1-p20914 C-genome specific (napus-oleracea) | 0.9832536    | 0.8112439    | 0.9612403    |   | 0.7231205    | not scorable | not scorable |
| #### Bn-scaff_22067_1-p21932 C-genome specific (napus-oleracea) | 0.9976076    | 0.810697     | 0.9844961    |   | 0.7257137    | not scorable | not scorable |
| #### Bn-scaff_22067_1-p22595 genome unspecific (all in)         | 0.930622     | 0.199855     |              | 1 | 0.7170097    | 1            | 0.7575689    |
| #### Bn-scaff_22067_1-p22624 A-genome specific (rapa only)      | not scorable | not scorable | not scorable |   | not scorable | 0.9917355    | 0.4861243    |
| #### Bn-scaff_22067_1-p23935 A-genome specific (napus-rapa)     | 0.9856459    | 0.5292222    | not scorable |   | not scorable | 1            | 0.6148697    |
| #### Bn-scaff_22067_1-p70907 genome unspecific (all in)         | 1            | 0.8086618    |              | 1 | 0.8111367    | 1            | 0.8306994    |
| #### Bn-scaff_22067_1-p71973 genome unspecific (all in)         | 1            | 0.7547708    |              | 1 | 0.7604257    | 1            | 0.81222      |
| #### Bn-scaff_22082_1-p11558 genome unspecific (all in)         | 0.9784689    | 0.3340117    |              | 1 | 0.750479     | 0.9834711    | 0.7032136    |
| #### Bn-scaff_22082_1-p25962 genome unspecific (all in)         | 0.9928229    | 0.3147121    |              | 1 | 0.7013036    | 1            | 0.752191     |
| #### Bn-scaff_22082_1-p26247 C-genome specific (napus-oleracea) | 0.9856459    | 0.8884313    |              | 1 | 0.7956669    | not scorable | not scorable |
| #### Bn-scaff_22082_1-p26260 genome unspecific (all in)         | 0.9952153    | 0.781473     |              | 1 | 0.7670392    | 0.9917355    | 0.8794163    |
| #### Bn-scaff_22082_1-p26759 genome unspecific (all in)         | 1            | 0.7590756    |              | 1 | 0.7252794    | 1            | 0.7259503    |
| #### Bn-scaff_22082_1-p27200 genome unspecific (all in)         | 0.9832536    | 0.4236114    | 0.9922481    |   | 0.714532     | 0.9917355    | 0.9337678    |
| #### Bn-scaff_22082_1-p27223 genome unspecific (all in)         | 0.9952153    | 0.3319819    |              | 1 | 0.5928418    | 1            | 0.7637818    |
| #### Bn-scaff_22082_1-p28114 C-genome specific (napus-oleracea) | 0.9928229    | 0.9071552    |              | 1 | 0.8646585    | not scorable | not scorable |
| #### Bn-scaff_22082_1-p29655 C-genome specific (napus-oleracea) | 0.9904306    | 0.7516911    |              | 1 | 0.7170369    | not scorable | not scorable |
| #### Bn-scaff_22082_1-p30178 genome unspecific (all in)         | 1            | 0.5811845    |              | 1 | 0.7731629    | 1            | 0.8983915    |
| #### Bn-scaff_22082_1-p32235 genome unspecific (all in)         | 0.9928229    | 0.4199128    | 0.9922481    |   | 0.7828691    | 1            | 0.9072468    |
| #### Bn-scaff_22082_1-p350 A-genome specific (napus-rapa)       | 1            | 0.4188042    | not scorable |   | not scorable | 1            | 0.7676556    |
| #### Bn-scaff_22082_1-p36768 napus specific                     | 0.5311005    | 0.8628367    | not scorable |   | not scorable | not scorable | not scorable |
| #### Bn-scaff_22082_1-p37018 genome unspecific (all in)         | 1            | 0.748561     |              | 1 | 0.6944802    | 1            | 0.8006689    |
| #### Bn-scaff_22082_1-p37125 genome unspecific (all in)         | 1            | 0.8651659    |              | 1 | 0.9139051    | 1            | 0.9238268    |
| #### Bn-scaff_22082_1-p37194 C-genome specific (napus-oleracea) | 0.9976076    | 0.8036459    | 0.9922481    |   | 0.9006242    | not scorable | not scorable |
| #### Bn-scaff_22082_1-p37262 genome unspecific (all in)         | 0.9976076    | 0.3460035    |              | 1 | 0.6920168    | 1            | 0.7914145    |
| #### Bn-scaff_22082_1-p37284 C-genome specific (napus-oleracea) | 0.9952153    | 0.8597202    |              | 1 | 0.8038132    | not scorable | not scorable |
| #### Bn-scaff_22082_1-p37326 C-genome specific (napus-oleracea) | 0.9952153    | 0.8268861    | 0.9922481    |   | 0.8059732    | not scorable | not scorable |
| #### Bn-scaff_22082_1-p38119 C-genome specific (napus-oleracea) | 0.9832536    | 0.6517768    | 0.9844961    |   | 0.6571237    | not scorable | not scorable |
| #### Bn-scaff_22082_1-p38124 C-genome specific (napus-oleracea) | 0.9904306    | 0.6420485    | 0.9844961    |   | 0.6755087    | not scorable | not scorable |
| #### Bn-scaff_22082_1-p38125 C-genome specific (napus-oleracea) | 0.9904306    | 0.7451807    | 0.9767442    |   | 0.7462506    | not scorable | not scorable |
| #### Bn-scaff_22082_1-p38323 genome unspecific (all in)         | 0.9258373    | 0.2072811    |              | 1 | 0.7355906    | 0.9917355    | 0.7997968    |

|                                                                 |              |              |              |              |              |              |
|-----------------------------------------------------------------|--------------|--------------|--------------|--------------|--------------|--------------|
| #### Bn-scaff_22082_1-p43803 genome unspecific (all in)         | 1            | 0.5917367    | 0.9069768    | 0.7091001    | 0.9834711    | 0.7485244    |
| #### Bn-scaff_22082_1-p43848 genome unspecific (all in)         | 0.9784689    | 0.529295     | 1            | 0.7649832    | 1            | 0.9329847    |
| #### Bn-scaff_22082_1-p43919 genome unspecific (all in)         | 0.9928229    | 0.3419526    | 1            | 0.7604714    | 1            | 0.9079939    |
| #### Bn-scaff_22082_1-p44423 genome unspecific (all in)         | 1            | 0.3507583    | 0.9922481    | 0.5789644    | 1            | 0.9091196    |
| #### Bn-scaff_22082_1-p44750 C-genome specific (napus-oleracea) | 0.9976076    | 0.7954342    | 0.9922481    | 0.7351763    | not scorable | not scorable |
| #### Bn-scaff_22082_1-p90632 genome unspecific (all in)         | 0.9617225    | 0.300508     | 0.9922481    | 0.6529744    | 0.9834711    | 0.6858183    |
| #### Bn-scaff_22091_1-p11747 C-genome specific (oleracea only)  | not scorable | not scorable | 0.9922481    | 0.4817282    | not scorable | not scorable |
| #### Bn-scaff_22091_1-p59803 C-genome specific (napus-oleracea) | 0.9928229    | 0.3817845    | 0.9922481    | 0.5029017    | not scorable | not scorable |
| #### Bn-scaff_22091_1-p88862 A-genome specific (napus-rapa)     | 1            | 0.7419025    | not scorable | not scorable | 0.9669421    | 0.7913506    |
| #### Bn-scaff_22091_1-p89053 genome unspecific (all in)         | 0.9760765    | 0.2551861    | 1            | 0.7478076    | 0.9669421    | 0.7337887    |
| #### Bn-scaff_22091_1-p90799 genome unspecific (all in)         | 1            | 0.886539     | 1            | 0.7565101    | 0.9917355    | 0.9041684    |
| #### Bn-scaff_22093_1-p10191 genome unspecific (all in)         | 0.9928229    | 0.4784307    | 0.8914729    | 0.570618     | 1            | 0.8011938    |
| #### Bn-scaff_22093_1-p10288 C-genome specific (napus-oleracea) | 0.9904306    | 0.7762483    | 0.9922481    | 0.6444717    | not scorable | not scorable |
| #### Bn-scaff_22093_1-p10307 C-genome specific (napus-oleracea) | 0.9928229    | 0.7217996    | 1            | 0.7043632    | not scorable | not scorable |
| #### Bn-scaff_22093_1-p10309 C-genome specific (napus-oleracea) | 0.9880383    | 0.9002705    | 1            | 0.8020395    | not scorable | not scorable |
| #### Bn-scaff_22093_1-p10372 C-genome specific (napus-oleracea) | 0.9880383    | 0.640256     | 1            | 0.588311     | not scorable | not scorable |
| #### Bn-scaff_22093_1-p10379 C-genome specific (napus-oleracea) | 0.9856459    | 0.7665226    | 1            | 0.73276      | not scorable | not scorable |
| #### Bn-scaff_22093_1-p13069 C-genome specific (napus-oleracea) | 1            | 0.5424103    | 0.9922481    | 0.6840866    | not scorable | not scorable |
| #### Bn-scaff_22093_1-p16953 C-genome specific (napus-oleracea) | 0.9856459    | 0.8252299    | 0.9922481    | 0.8399156    | not scorable | not scorable |
| #### Bn-scaff_22093_1-p29840 C-genome specific (napus-oleracea) | 0.9928229    | 0.8494941    | 1            | 0.7979233    | not scorable | not scorable |
| #### Bn-scaff_22093_1-p33169 C-genome specific (napus-oleracea) | 0.9904306    | 0.7342029    | 1            | 0.7052786    | not scorable | not scorable |
| #### Bn-scaff_22093_1-p53055 genome unspecific (oleracea-rapa)  | not scorable | not scorable | 1            | 0.6346371    | 1            | 0.6471065    |
| #### Bn-scaff_22093_1-p93419 genome unspecific (all in)         | 0.9904306    | 0.7771885    | 1            | 0.8569817    | 0.9917355    | 0.6971439    |
| #### Bn-scaff_22093_1-p97166 genome unspecific (all in)         | 0.9976076    | 0.6104627    | 0.8449612    | 0.6567343    | 1            | 0.9206358    |
| #### Bn-scaff_22099_1-p13590 C-genome specific (napus-oleracea) | 0.9330143    | 0.3962227    | 1            | 0.7664965    | not scorable | not scorable |
| #### Bn-scaff_22099_1-p13662 C-genome specific (napus-oleracea) | 0.8803828    | 0.2953035    | 1            | 0.6216122    | not scorable | not scorable |
| #### Bn-scaff_22099_1-p13725 genome unspecific (all in)         | 0.9473684    | 0.2252681    | 0.9457364    | 0.8843926    | 1            | 0.851647     |
| #### Bn-scaff_22099_1-p14660 napus specific                     | 0.9976076    | 0.4235723    | not scorable | not scorable | not scorable | not scorable |
| #### Bn-scaff_22099_1-p21071 C-genome specific (napus-oleracea) | 1            | 0.727636     | 1            | 0.6877334    | not scorable | not scorable |
| #### Bn-scaff_22099_1-p25144 all not scorable                   | not scorable | not scorable | not scorable | not scorable | not scorable | not scorable |
| #### Bn-scaff_22099_1-p25169 genome unspecific (oleracea-rapa)  | not scorable | not scorable | 0.9922481    | 0.6120505    | 0.9917355    | 0.5882793    |
| #### Bn-scaff_22099_1-p25174 genome unspecific (all in)         | 0.9976076    | 0.2927927    | 0.9922481    | 0.6638       | 1            | 0.9025804    |
| #### Bn-scaff_22099_1-p31615 genome unspecific (oleracea-rapa)  | not scorable | not scorable | 1            | 0.8504933    | 0.9834711    | 0.8258524    |

|                                                                 |              |              |              |              |              |              |
|-----------------------------------------------------------------|--------------|--------------|--------------|--------------|--------------|--------------|
| #### Bn-scaff_22099_1-p60859 C-genome specific (napus-oleracea) | 1            | 0.6309915    | 0.9767442    | 0.5807864    | not scorable | not scorable |
| #### Bn-scaff_22115_1-p10551 genome unspecific (all in)         | 1            | 0.6066825    | 0.9922481    | 0.2458293    | 0.9917355    | 0.8085203    |
| #### Bn-scaff_22115_1-p12061 genome unspecific (all in)         | 0.9545454    | 0.3768792    | 0.9922481    | 0.6730344    | 1            | 0.8004208    |
| #### Bn-scaff_22115_1-p15537 genome unspecific (all in)         | 0.9617225    | 0.3073639    | 0.9844961    | 0.5310882    | 0.9752066    | 0.5626011    |
| #### Bn-scaff_22115_1-p18212 C-genome specific (oleracea only)  | not scorable | not scorable | 0.9612403    | 0.7738088    | not scorable | not scorable |
| #### Bn-scaff_22115_1-p23695 all not scorable                   | not scorable | not scorable | not scorable | not scorable | not scorable | not scorable |
| #### Bn-scaff_22115_1-p23890 A-genome specific (napus-rapa)     | 0.9976076    | 0.5341972    | not scorable | not scorable | 0.9586777    | 0.3570246    |
| #### Bn-scaff_22115_1-p24048 genome unspecific (all in)         | 0.9401914    | 0.3888434    | 1            | 0.683312     | 1            | 0.8848283    |
| #### Bn-scaff_22115_1-p24130 C-genome specific (napus-oleracea) | 0.9760765    | 0.7978123    | 1            | 0.8330149    | not scorable | not scorable |
| #### Bn-scaff_22115_1-p82010 genome unspecific (all in)         | 1            | 0.7908388    | 1            | 0.7585436    | 1            | 0.8742553    |
| #### Bn-scaff_22115_1-p86172 genome unspecific (all in)         | 0.9736842    | 0.3903217    | 1            | 0.7206734    | 0.9917355    | 0.7158293    |
| #### Bn-scaff_22124_1-p1950 genome unspecific (all in)          | 1            | 0.5628911    | 1            | 0.5820765    | 1            | 0.5115318    |
| #### Bn-scaff_22126_1-p6637 genome unspecific (all in)          | 0.8947368    | 0.6183503    | 1            | 0.7835118    | 0.9917355    | 0.7895597    |
| #### Bn-scaff_22133_1-p31674 C-genome specific (napus-oleracea) | 0.9904306    | 0.7975221    | 0.9147287    | 0.7919707    | not scorable | not scorable |
| #### Bn-scaff_22133_1-p31920 genome unspecific (all in)         | 0.9976076    | 0.8187459    | 0.9922481    | 0.8132225    | 1            | 0.9095306    |
| #### Bn-scaff_22144_1-p11076 genome unspecific (all in)         | 1            | 0.7894007    | 1            | 0.7025676    | 1            | 0.8749669    |
| #### Bn-scaff_22144_1-p19341 C-genome specific (napus-oleracea) | 0.9856459    | 0.7414722    | 0.9922481    | 0.7422031    | not scorable | not scorable |
| #### Bn-scaff_22144_1-p20784 C-genome specific (napus-oleracea) | 0.9904306    | 0.8277064    | 1            | 0.8126931    | not scorable | not scorable |
| #### Bn-scaff_22144_1-p22356 C-genome specific (napus-oleracea) | 0.9904306    | 0.8632445    | 0.9844961    | 0.8296748    | not scorable | not scorable |
| #### Bn-scaff_22144_1-p22440 C-genome specific (napus-oleracea) | 0.9784689    | 0.6904846    | 1            | 0.696869     | not scorable | not scorable |
| #### Bn-scaff_22144_1-p23754 C-genome specific (napus-oleracea) | 0.9832536    | 0.5971838    | 0.9844961    | 0.5712118    | not scorable | not scorable |
| #### Bn-scaff_22144_1-p24095 all not scorable                   | not scorable | not scorable | not scorable | not scorable | not scorable | not scorable |
| #### Bn-scaff_22144_1-p29003 genome unspecific (all in)         | 0.9617225    | 0.277865     | 0.9767442    | 0.3043779    | 1            | 0.9278488    |
| #### Bn-scaff_22144_1-p89654 C-genome specific (oleracea only)  | not scorable | not scorable | 0.9844961    | 0.4254307    | not scorable | not scorable |
| #### Bn-scaff_22146_1-p14355 A-genome specific (rapa only)      | not scorable | not scorable | not scorable | not scorable | 1            | 0.9085546    |
| #### Bn-scaff_22146_1-p14714 genome unspecific (all in)         | 1            | 0.7669629    | 1            | 0.6951214    | 1            | 0.7641606    |
| #### Bn-scaff_22148_1-p10064 C-genome specific (napus-oleracea) | 0.9976076    | 0.8729342    | 0.9767442    | 0.9174066    | not scorable | not scorable |
| #### Bn-scaff_22148_1-p10364 C-genome specific (napus-oleracea) | 0.9952153    | 0.8668656    | 0.9767442    | 0.8544793    | not scorable | not scorable |
| #### Bn-scaff_22148_1-p10472 C-genome specific (napus-oleracea) | 0.9952153    | 0.8226733    | 0.9922481    | 0.754338     | not scorable | not scorable |
| #### Bn-scaff_22148_1-p10644 C-genome specific (napus-oleracea) | 0.9952153    | 0.8741298    | 0.9922481    | 0.7783974    | not scorable | not scorable |
| #### Bn-scaff_22148_1-p10682 C-genome specific (napus-oleracea) | 1            | 0.8940237    | 1            | 0.7695048    | not scorable | not scorable |
| #### Bn-scaff_22148_1-p10890 C-genome specific (napus-oleracea) | 0.9952153    | 0.815347     | 0.9922481    | 0.8062161    | not scorable | not scorable |
| #### Bn-scaff_22148_1-p10995 genome unspecific (all in)         | 0.9928229    | 0.616019     | 0.9844961    | 0.6732364    | 1            | 0.8908406    |

|                                                                 |              |              |           |           |              |              |
|-----------------------------------------------------------------|--------------|--------------|-----------|-----------|--------------|--------------|
| #### Bn-scaff_22148_1-p11062 C-genome specific (napus-oleracea) | 0.9976076    | 0.8505343    | 0.9844961 | 0.8028241 | not scorable | not scorable |
| #### Bn-scaff_22148_1-p12154 C-genome specific (napus-oleracea) | 0.9952153    | 0.7813212    | 1         | 0.7369288 | not scorable | not scorable |
| #### Bn-scaff_22148_1-p12168 C-genome specific (napus-oleracea) | 0.9952153    | 0.7426091    | 0.9844961 | 0.6665056 | not scorable | not scorable |
| #### Bn-scaff_22148_1-p12196 C-genome specific (napus-oleracea) | 0.9976076    | 0.8298044    | 0.9922481 | 0.7742646 | not scorable | not scorable |
| #### Bn-scaff_22148_1-p12507 C-genome specific (napus-oleracea) | 0.9952153    | 0.7572069    | 0.9844961 | 0.7275497 | not scorable | not scorable |
| #### Bn-scaff_22148_1-p12510 C-genome specific (napus-oleracea) | 0.9952153    | 0.8655866    | 0.9767442 | 0.8227429 | not scorable | not scorable |
| #### Bn-scaff_22148_1-p15647 C-genome specific (napus-oleracea) | 0.9976076    | 0.8825418    | 0.9689922 | 0.7992284 | not scorable | not scorable |
| #### Bn-scaff_22148_1-p15711 C-genome specific (napus-oleracea) | 0.9928229    | 0.8389627    | 0.9844961 | 0.7518343 | not scorable | not scorable |
| #### Bn-scaff_22148_1-p15720 C-genome specific (napus-oleracea) | 0.9904306    | 0.7027376    | 0.9689922 | 0.6719893 | not scorable | not scorable |
| #### Bn-scaff_22148_1-p15748 C-genome specific (napus-oleracea) | 0.9952153    | 0.7543336    | 0.9767442 | 0.7798461 | not scorable | not scorable |
| #### Bn-scaff_22148_1-p15760 C-genome specific (napus-oleracea) | 0.9952153    | 0.6853335    | 0.9612403 | 0.7652541 | not scorable | not scorable |
| #### Bn-scaff_22148_1-p16601 C-genome specific (napus-oleracea) | 0.9904306    | 0.7576302    | 0.9612403 | 0.6902186 | not scorable | not scorable |
| #### Bn-scaff_22148_1-p16682 C-genome specific (napus-oleracea) | 0.9928229    | 0.832809     | 0.9922481 | 0.8610455 | not scorable | not scorable |
| #### Bn-scaff_22148_1-p16717 C-genome specific (napus-oleracea) | 0.9952153    | 0.881908     | 0.9922481 | 0.7954481 | not scorable | not scorable |
| #### Bn-scaff_22148_1-p16729 C-genome specific (napus-oleracea) | 0.9952153    | 0.8935719    | 1         | 0.8783873 | not scorable | not scorable |
| #### Bn-scaff_22148_1-p16813 C-genome specific (napus-oleracea) | 0.9928229    | 0.6759913    | 0.9922481 | 0.5972513 | not scorable | not scorable |
| #### Bn-scaff_22148_1-p16887 C-genome specific (napus-oleracea) | 0.9952153    | 0.7865976    | 1         | 0.7004648 | not scorable | not scorable |
| #### Bn-scaff_22148_1-p16896 C-genome specific (napus-oleracea) | 0.9976076    | 0.8843133    | 0.9922481 | 0.8207114 | not scorable | not scorable |
| #### Bn-scaff_22148_1-p16917 genome unspecific (all in)         | 0.9952153    | 0.5664567    | 1         | 0.7222434 | 1            | 0.9095843    |
| #### Bn-scaff_22148_1-p17018 genome unspecific (all in)         | 0.9928229    | 0.5335483    | 1         | 0.7211747 | 1            | 0.925199     |
| #### Bn-scaff_22148_1-p17201 C-genome specific (napus-oleracea) | 1            | 0.9099384    | 1         | 0.7691898 | not scorable | not scorable |
| #### Bn-scaff_22148_1-p17425 C-genome specific (napus-oleracea) | 0.9928229    | 0.8587967    | 0.9922481 | 0.8715212 | not scorable | not scorable |
| #### Bn-scaff_22148_1-p18145 C-genome specific (napus-oleracea) | 0.9928229    | 0.8741057    | 1         | 0.7637382 | not scorable | not scorable |
| #### Bn-scaff_22148_1-p18748 C-genome specific (napus-oleracea) | 1            | 0.7878269    | 0.9922481 | 0.6906203 | not scorable | not scorable |
| #### Bn-scaff_22148_1-p18854 C-genome specific (napus-oleracea) | 0.9928229    | 0.8901196    | 0.9922481 | 0.7729992 | not scorable | not scorable |
| #### Bn-scaff_22148_1-p18863 C-genome specific (napus-oleracea) | 0.9952153    | 0.9090603    | 1         | 0.8536828 | not scorable | not scorable |
| #### Bn-scaff_22148_1-p18893 C-genome specific (oleracea only)  | not scorable | not scorable | 0.8914729 | 0.6820963 | not scorable | not scorable |
| #### Bn-scaff_22148_1-p20316 genome unspecific (all in)         | 0.9952153    | 0.3504393    | 1         | 0.7367445 | 1            | 0.9038904    |
| #### Bn-scaff_22148_1-p21841 C-genome specific (napus-oleracea) | 0.9952153    | 0.8315123    | 0.9767442 | 0.8253459 | not scorable | not scorable |
| #### Bn-scaff_22148_1-p22705 C-genome specific (napus-oleracea) | 0.9952153    | 0.8175914    | 0.9922481 | 0.7277477 | not scorable | not scorable |
| #### Bn-scaff_22148_1-p23174 C-genome specific (napus-oleracea) | 0.9976076    | 0.9209639    | 0.9844961 | 0.8657826 | not scorable | not scorable |
| #### Bn-scaff_22148_1-p23181 C-genome specific (napus-oleracea) | 0.9928229    | 0.7567776    | 0.9922481 | 0.7039453 | not scorable | not scorable |
| #### Bn-scaff_22148_1-p23267 C-genome specific (napus-oleracea) | 1            | 0.7302566    | 0.9844961 | 0.6852282 | not scorable | not scorable |

|                                                                 |           |           |           |           |              |              |
|-----------------------------------------------------------------|-----------|-----------|-----------|-----------|--------------|--------------|
| #### Bn-scaff_22148_1-p23335 C-genome specific (napus-oleracea) | 0.9928229 | 0.8017896 | 0.9922481 | 0.6983203 | not scorable | not scorable |
| #### Bn-scaff_22148_1-p23351 genome unspecific (all in)         | 0.9808612 | 0.6305456 | 0.9922481 | 0.6281381 | 0.8595041    | 0.8040149    |
| #### Bn-scaff_22148_1-p23424 C-genome specific (napus-oleracea) | 0.9928229 | 0.7766983 | 0.9844961 | 0.7302783 | not scorable | not scorable |
| #### Bn-scaff_22148_1-p23458 C-genome specific (napus-oleracea) | 0.9952153 | 0.778749  | 0.9767442 | 0.8060385 | not scorable | not scorable |
| #### Bn-scaff_22148_1-p23463 C-genome specific (napus-oleracea) | 0.9976076 | 0.7737219 | 0.9922481 | 0.8075799 | not scorable | not scorable |
| #### Bn-scaff_22148_1-p23538 C-genome specific (napus-oleracea) | 1         | 0.7304386 | 0.9922481 | 0.7328861 | not scorable | not scorable |
| #### Bn-scaff_22148_1-p24069 C-genome specific (napus-oleracea) | 0.9856459 | 0.7835266 | 1         | 0.731528  | not scorable | not scorable |
| #### Bn-scaff_22148_1-p24078 C-genome specific (napus-oleracea) | 0.9952153 | 0.8783022 | 0.9922481 | 0.7981367 | not scorable | not scorable |
| #### Bn-scaff_22148_1-p24078 C-genome specific (napus-oleracea) | 0.9976076 | 0.7863094 | 1         | 0.774505  | not scorable | not scorable |
| #### Bn-scaff_22148_1-p24589 C-genome specific (napus-oleracea) | 1         | 0.5793946 | 1         | 0.6086335 | not scorable | not scorable |
| #### Bn-scaff_22148_1-p25077 C-genome specific (napus-oleracea) | 0.9952153 | 0.7068462 | 0.9844961 | 0.659596  | not scorable | not scorable |
| #### Bn-scaff_22148_1-p25084 C-genome specific (napus-oleracea) | 0.9952153 | 0.9171786 | 0.9922481 | 0.7690148 | not scorable | not scorable |
| #### Bn-scaff_22148_1-p25152 C-genome specific (napus-oleracea) | 0.9976076 | 0.8515594 | 0.9844961 | 0.73148   | not scorable | not scorable |
| #### Bn-scaff_22148_1-p25219 C-genome specific (napus-oleracea) | 0.9928229 | 0.8231509 | 0.9844961 | 0.7411559 | not scorable | not scorable |
| #### Bn-scaff_22148_1-p25262 C-genome specific (napus-oleracea) | 1         | 0.8044161 | 0.9922481 | 0.7792291 | not scorable | not scorable |
| #### Bn-scaff_22148_1-p25697 C-genome specific (napus-oleracea) | 1         | 0.7221594 | 1         | 0.7042727 | not scorable | not scorable |
| #### Bn-scaff_22148_1-p26129 C-genome specific (napus-oleracea) | 0.9952153 | 0.8791206 | 0.9922481 | 0.6925778 | not scorable | not scorable |
| #### Bn-scaff_22148_1-p26139 C-genome specific (napus-oleracea) | 0.9976076 | 0.9154205 | 0.9844961 | 0.8140581 | not scorable | not scorable |
| #### Bn-scaff_22148_1-p26700 C-genome specific (napus-oleracea) | 0.9928229 | 0.8789828 | 0.9844961 | 0.8282822 | not scorable | not scorable |
| #### Bn-scaff_22148_1-p26708 C-genome specific (napus-oleracea) | 0.9952153 | 0.8975397 | 0.9922481 | 0.6840549 | not scorable | not scorable |
| #### Bn-scaff_22148_1-p26791 C-genome specific (napus-oleracea) | 0.9952153 | 0.8771528 | 1         | 0.752654  | not scorable | not scorable |
| #### Bn-scaff_22148_1-p26849 C-genome specific (napus-oleracea) | 0.9976076 | 0.857544  | 0.9844961 | 0.8203217 | not scorable | not scorable |
| #### Bn-scaff_22148_1-p26885 C-genome specific (napus-oleracea) | 0.9976076 | 0.8805139 | 0.9844961 | 0.8596988 | not scorable | not scorable |
| #### Bn-scaff_22148_1-p26902 C-genome specific (napus-oleracea) | 0.9952153 | 0.8720951 | 0.9922481 | 0.7497161 | not scorable | not scorable |
| #### Bn-scaff_22148_1-p27158 C-genome specific (napus-oleracea) | 0.9928229 | 0.911194  | 0.9844961 | 0.7687109 | not scorable | not scorable |
| #### Bn-scaff_22148_1-p27271 C-genome specific (napus-oleracea) | 0.9952153 | 0.8953604 | 0.9922481 | 0.8067733 | not scorable | not scorable |
| #### Bn-scaff_22148_1-p27285 C-genome specific (napus-oleracea) | 1         | 0.8060611 | 0.9844961 | 0.8137489 | not scorable | not scorable |
| #### Bn-scaff_22148_1-p27886 C-genome specific (napus-oleracea) | 0.9976076 | 0.8344297 | 0.9767442 | 0.6520143 | not scorable | not scorable |
| #### Bn-scaff_22148_1-p28356 C-genome specific (napus-oleracea) | 0.9952153 | 0.9166144 | 0.9922481 | 0.8211422 | not scorable | not scorable |
| #### Bn-scaff_22148_1-p28862 C-genome specific (napus-oleracea) | 0.9952153 | 0.8246657 | 1         | 0.6657598 | not scorable | not scorable |
| #### Bn-scaff_22148_1-p28888 C-genome specific (napus-oleracea) | 0.9928229 | 0.8752148 | 1         | 0.7970765 | not scorable | not scorable |
| #### Bn-scaff_22148_1-p28897 C-genome specific (napus-oleracea) | 0.9976076 | 0.8978828 | 1         | 0.819433  | not scorable | not scorable |
| #### Bn-scaff_22148_1-p29029 C-genome specific (napus-oleracea) | 1         | 0.7971144 | 0.9844961 | 0.6882495 | not scorable | not scorable |

|                                                                 |              |              |              |              |              |              |
|-----------------------------------------------------------------|--------------|--------------|--------------|--------------|--------------|--------------|
| #### Bn-scaff_22148_1-p29046 C-genome specific (napus-oleracea) | 0.9976076    | 0.9131747    | 0.9922481    | 0.7640172    | not scorable | not scorable |
| #### Bn-scaff_22148_1-p29067 C-genome specific (napus-oleracea) | 0.9928229    | 0.8334072    | 0.9922481    | 0.7414178    | not scorable | not scorable |
| #### Bn-scaff_22148_1-p29074 C-genome specific (napus-oleracea) | 0.9976076    | 0.9260034    | 0.9844961    | 0.8574297    | not scorable | not scorable |
| #### Bn-scaff_22148_1-p29084 C-genome specific (oleracea only)  | not scorable | not scorable | 0.9612403    | 0.677361     | not scorable | not scorable |
| #### Bn-scaff_22148_1-p29197 C-genome specific (napus-oleracea) | 0.9952153    | 0.8624362    | 0.9689922    | 0.759482     | not scorable | not scorable |
| #### Bn-scaff_22148_1-p29224 C-genome specific (napus-oleracea) | 1            | 0.8445376    | 0.9922481    | 0.772687     | not scorable | not scorable |
| #### Bn-scaff_22148_1-p29383 C-genome specific (napus-oleracea) | 0.9928229    | 0.8261998    | 1            | 0.7895349    | not scorable | not scorable |
| #### Bn-scaff_22148_1-p29418 C-genome specific (napus-oleracea) | 0.9976076    | 0.8351974    | 0.9844961    | 0.7518713    | not scorable | not scorable |
| #### Bn-scaff_22148_1-p31775 C-genome specific (napus-oleracea) | 0.9976076    | 0.9104372    | 0.9922481    | 0.7934815    | not scorable | not scorable |
| #### Bn-scaff_22148_1-p32131 C-genome specific (napus-oleracea) | 0.9952153    | 0.8126031    | 1            | 0.7695154    | not scorable | not scorable |
| #### Bn-scaff_22148_1-p32175 C-genome specific (napus-oleracea) | 0.9928229    | 0.8092211    | 1            | 0.4819796    | not scorable | not scorable |
| #### Bn-scaff_22148_1-p32237 C-genome specific (napus-oleracea) | 0.9952153    | 0.7630112    | 1            | 0.6708965    | not scorable | not scorable |
| #### Bn-scaff_22148_1-p32497 C-genome specific (napus-oleracea) | 0.9928229    | 0.9024799    | 0.9844961    | 0.7792283    | not scorable | not scorable |
| #### Bn-scaff_22148_1-p32543 C-genome specific (napus-oleracea) | 0.9928229    | 0.754212     | 0.9844961    | 0.6517566    | not scorable | not scorable |
| #### Bn-scaff_22148_1-p32625 C-genome specific (napus-oleracea) | 0.9952153    | 0.6102643    | 0.9844961    | 0.5677739    | not scorable | not scorable |
| #### Bn-scaff_22148_1-p33514 napus specific                     | 0.9808612    | 0.4446594    | not scorable | not scorable | not scorable | not scorable |
| #### Bn-scaff_22148_1-p35354 C-genome specific (napus-oleracea) | 0.9928229    | 0.8855544    | 1            | 0.7928688    | not scorable | not scorable |
| #### Bn-scaff_22148_1-p35362 C-genome specific (napus-oleracea) | 0.9952153    | 0.8934825    | 1            | 0.7905771    | not scorable | not scorable |
| #### Bn-scaff_22148_1-p35379 C-genome specific (napus-oleracea) | 0.9952153    | 0.8951622    | 1            | 0.762104     | not scorable | not scorable |
| #### Bn-scaff_22148_1-p35394 C-genome specific (napus-oleracea) | 0.9904306    | 0.8558573    | 1            | 0.7308403    | not scorable | not scorable |
| #### Bn-scaff_22148_1-p35519 C-genome specific (napus-oleracea) | 0.9928229    | 0.870845     | 1            | 0.7377257    | not scorable | not scorable |
| #### Bn-scaff_22148_1-p35620 C-genome specific (napus-oleracea) | 0.9952153    | 0.8632739    | 1            | 0.7613304    | not scorable | not scorable |
| #### Bn-scaff_22148_1-p35626 C-genome specific (napus-oleracea) | 0.9904306    | 0.8609226    | 0.9922481    | 0.7359888    | not scorable | not scorable |
| #### Bn-scaff_22148_1-p35628 C-genome specific (napus-oleracea) | 0.9952153    | 0.8842207    | 0.9922481    | 0.7560296    | not scorable | not scorable |
| #### Bn-scaff_22148_1-p38390 C-genome specific (napus-oleracea) | 0.9952153    | 0.7538521    | 0.9922481    | 0.6828966    | not scorable | not scorable |
| #### Bn-scaff_22148_1-p40006 C-genome specific (napus-oleracea) | 0.9952153    | 0.8641101    | 0.9844961    | 0.794356     | not scorable | not scorable |
| #### Bn-scaff_22148_1-p40014 C-genome specific (napus-oleracea) | 0.9952153    | 0.860108     | 0.9844961    | 0.7815871    | not scorable | not scorable |
| #### Bn-scaff_22148_1-p5629 C-genome specific (napus-oleracea)  | 1            | 0.7877156    | 0.9844961    | 0.7440759    | not scorable | not scorable |
| #### Bn-scaff_22148_1-p66564 C-genome specific (napus-oleracea) | 0.9904306    | 0.7235095    | 1            | 0.6947065    | not scorable | not scorable |
| #### Bn-scaff_22148_1-p68211 C-genome specific (napus-oleracea) | 0.9976076    | 0.8886897    | 1            | 0.7249228    | not scorable | not scorable |
| #### Bn-scaff_22148_1-p69860 C-genome specific (napus-oleracea) | 1            | 0.8910325    | 1            | 0.7880116    | not scorable | not scorable |
| #### Bn-scaff_22148_1-p70294 C-genome specific (napus-oleracea) | 0.9976076    | 0.577536     | 0.9922481    | 0.5839838    | not scorable | not scorable |
| #### Bn-scaff_22148_1-p71161 C-genome specific (napus-oleracea) | 0.9976076    | 0.78136      | 1            | 0.6834819    | not scorable | not scorable |

|                                                                 |              |              |              |              |              |              |
|-----------------------------------------------------------------|--------------|--------------|--------------|--------------|--------------|--------------|
| #### Bn-scaff_22148_1-p71406 C-genome specific (napus-oleracea) | 0.9976076    | 0.8207902    | 1            | 0.7578329    | not scorable | not scorable |
| #### Bn-scaff_22148_1-p72416 napus specific                     | 0.9976076    | 0.8494941    | not scorable | not scorable | not scorable | not scorable |
| #### Bn-scaff_22148_1-p76088 C-genome specific (napus-oleracea) | 0.9952153    | 0.8509156    | 0.9767442    | 0.7754329    | not scorable | not scorable |
| #### Bn-scaff_22148_1-p77629 C-genome specific (napus-oleracea) | 0.9928229    | 0.8556687    | 0.9767442    | 0.7616116    | not scorable | not scorable |
| #### Bn-scaff_22148_1-p77754 C-genome specific (napus-oleracea) | 0.9976076    | 0.9038737    | 0.9844961    | 0.8085454    | not scorable | not scorable |
| #### Bn-scaff_22148_1-p77959 C-genome specific (napus-oleracea) | 0.9976076    | 0.8821894    | 0.9844961    | 0.7722343    | not scorable | not scorable |
| #### Bn-scaff_22148_1-p79171 C-genome specific (napus-oleracea) | 1            | 0.9378265    | 0.9844961    | 0.7501547    | not scorable | not scorable |
| #### Bn-scaff_22148_1-p79620 C-genome specific (napus-oleracea) | 0.9952153    | 0.8680512    | 0.9922481    | 0.739617     | not scorable | not scorable |
| #### Bn-scaff_22148_1-p81110 C-genome specific (napus-oleracea) | 0.9976076    | 0.8659114    | 1            | 0.7907451    | not scorable | not scorable |
| #### Bn-scaff_22148_1-p81378 C-genome specific (napus-oleracea) | 0.9641148    | 0.5171924    | 0.9922481    | 0.5627314    | not scorable | not scorable |
| #### Bn-scaff_22148_1-p82731 C-genome specific (napus-oleracea) | 0.9928229    | 0.8402446    | 0.9844961    | 0.712001     | not scorable | not scorable |
| #### Bn-scaff_22148_1-p89133 C-genome specific (napus-oleracea) | 0.9976076    | 0.9050083    | 1            | 0.7923203    | not scorable | not scorable |
| #### Bn-scaff_22148_1-p89134 C-genome specific (napus-oleracea) | 0.9952153    | 0.8474415    | 0.9922481    | 0.8358084    | not scorable | not scorable |
| #### Bn-scaff_22148_1-p89325 C-genome specific (napus-oleracea) | 0.9928229    | 0.8828264    | 0.9689922    | 0.8115303    | not scorable | not scorable |
| #### Bn-scaff_22148_1-p92250 C-genome specific (napus-oleracea) | 0.9976076    | 0.8739369    | 0.9844961    | 0.7922904    | not scorable | not scorable |
| #### Bn-scaff_22148_1-p92305 C-genome specific (napus-oleracea) | 0.9952153    | 0.7546664    | 1            | 0.6370086    | not scorable | not scorable |
| #### Bn-scaff_22148_1-p95826 C-genome specific (napus-oleracea) | 0.9952153    | 0.8374289    | 0.9844961    | 0.7674963    | not scorable | not scorable |
| #### Bn-scaff_22153_1-p744 C-genome specific (oleracea only)    | not scorable | not scorable | 0.9767442    | 0.7991275    | not scorable | not scorable |
| #### Bn-scaff_22183_1-p15967 napus specific                     | 0.9808612    | 0.5961409    | not scorable | not scorable | not scorable | not scorable |
| #### Bn-scaff_22183_1-p16477 C-genome specific (napus-oleracea) | 0.9784689    | 0.8256862    | 0.9922481    | 0.7287149    | not scorable | not scorable |
| #### Bn-scaff_22183_1-p17022 genome unspecific (all in)         | 0.9976076    | 0.5943411    | 0.9922481    | 0.6766509    | 1            | 0.9278581    |
| #### Bn-scaff_22183_1-p17768 genome unspecific (all in)         | 1            | 0.3874311    | 0.9922481    | 0.7415627    | 1            | 0.8687926    |
| #### Bn-scaff_22183_1-p33988 genome unspecific (oleracea-rapa)  | not scorable | not scorable | 0.9612403    | 0.2126372    | 0.7851239    | 0.7933962    |
| #### Bn-scaff_22183_1-p36539 C-genome specific (napus-oleracea) | 1            | 0.9051479    | 0.9922481    | 0.7929175    | not scorable | not scorable |
| #### Bn-scaff_22183_1-p40909 C-genome specific (napus-oleracea) | 1            | 0.8153592    | 0.9922481    | 0.7819644    | not scorable | not scorable |
| #### Bn-scaff_22183_1-p41540 genome unspecific (all in)         | 0.9976076    | 0.3679061    | 1            | 0.7768067    | 1            | 0.8163342    |
| #### Bn-scaff_22183_1-p42212 genome unspecific (all in)         | 0.9688995    | 0.4257964    | 1            | 0.8874475    | 0.9834711    | 0.7784042    |
| #### Bn-scaff_22183_1-p61318 C-genome specific (napus-oleracea) | 0.9880383    | 0.8318305    | 1            | 0.797403     | not scorable | not scorable |
| #### Bn-scaff_22183_1-p62937 C-genome specific (napus-oleracea) | 0.9928229    | 0.7523968    | 0.9922481    | 0.8504857    | not scorable | not scorable |
| #### Bn-scaff_22183_1-p63166 C-genome specific (napus-oleracea) | 0.9952153    | 0.7218836    | 0.9922481    | 0.7094092    | not scorable | not scorable |
| #### Bn-scaff_22183_1-p63217 C-genome specific (napus-oleracea) | 1            | 0.7681311    | 1            | 0.7322381    | not scorable | not scorable |
| #### Bn-scaff_22183_1-p63580 C-genome specific (napus-oleracea) | 0.9760765    | 0.8100752    | 1            | 0.7104613    | not scorable | not scorable |
| #### Bn-scaff_22183_1-p64147 C-genome specific (napus-oleracea) | 0.9952153    | 0.6674338    | 1            | 0.6470015    | not scorable | not scorable |





|                              |                                    |              |              |              |              |              |                           |
|------------------------------|------------------------------------|--------------|--------------|--------------|--------------|--------------|---------------------------|
| #### Bn-scaff_22290_1-p790   | A-genome specific (napus-rapa)     | 1            | 0.5784474    | not scorable | not scorable | 1            | 0.836259                  |
| #### Bn-scaff_22290_1-p943   | genome unspecific (all in)         | 1            | 0.6740878    |              | 1            | 0.6618089    | 1 0.7395847               |
| #### Bn-scaff_22293_1-p2653  | all not scorable                   | not scorable | not scorable | not scorable | not scorable | not scorable | not scorable              |
| #### Bn-scaff_22301_1-p10445 | C-genome specific (napus-oleracea) | 1            | 0.8399767    |              | 1            | 0.8510893    | not scorable not scorable |
| #### Bn-scaff_22301_1-p10595 | C-genome specific (napus-oleracea) | 1            | 0.5894843    |              | 1            | 0.8626822    | not scorable not scorable |
| #### Bn-scaff_22301_1-p13300 | C-genome specific (napus-oleracea) | 1            | 0.8020253    |              | 1            | 0.7092698    | not scorable not scorable |
| #### Bn-scaff_22301_1-p13639 | C-genome specific (napus-oleracea) | 1            | 0.7701445    | 0.9844961    |              | 0.6416405    | not scorable not scorable |
| #### Bn-scaff_22301_1-p13720 | genome unspecific (all in)         | 0.9976076    | 0.5366973    |              | 1            | 0.5676687    | 0.7768595 0.9192224       |
| #### Bn-scaff_22301_1-p15106 | C-genome specific (napus-oleracea) | 1            | 0.6111977    |              | 1            | 0.7409654    | not scorable not scorable |
| #### Bn-scaff_22301_1-p15316 | C-genome specific (napus-oleracea) | 1            | 0.7548541    |              | 1            | 0.713595     | not scorable not scorable |
| #### Bn-scaff_22301_1-p15396 | C-genome specific (napus-oleracea) | 1            | 0.7693463    | 0.9922481    |              | 0.6875988    | not scorable not scorable |
| #### Bn-scaff_22301_1-p16624 | C-genome specific (napus-oleracea) | 0.9856459    | 0.7299046    |              | 1            | 0.719856     | not scorable not scorable |
| #### Bn-scaff_22301_1-p41757 | C-genome specific (napus-oleracea) | 1            | 0.7162288    |              | 1            | 0.683278     | not scorable not scorable |
| #### Bn-scaff_22301_1-p61275 | C-genome specific (napus-oleracea) | 1            | 0.8653213    |              | 1            | 0.7395294    | not scorable not scorable |
| #### Bn-scaff_22301_1-p7514  | C-genome specific (napus-oleracea) | 1            | 0.7073798    |              | 1            | 0.6594529    | not scorable not scorable |
| #### Bn-scaff_22301_1-p8224  | C-genome specific (napus-oleracea) | 1            | 0.8909408    |              | 1            | 0.7960058    | not scorable not scorable |
| #### Bn-scaff_22301_1-p84996 | genome unspecific (all in)         | 0.9688995    | 0.3830342    | 0.9844961    |              | 0.6770467    | 1 0.7914145               |
| #### Bn-scaff_22306_1-p200   | genome unspecific (all in)         | 1            | 0.7713206    |              | 1            | 0.7399211    | 0.9669421 0.8851956       |
| #### Bn-scaff_22310_1-p11550 | C-genome specific (napus-oleracea) | 1            | 0.8960888    | 0.9922481    |              | 0.7610306    | not scorable not scorable |
| #### Bn-scaff_22310_1-p15987 | C-genome specific (napus-oleracea) | 0.6746411    | 0.7975886    | 0.9844961    |              | 0.7254611    | not scorable not scorable |
| #### Bn-scaff_22310_1-p19666 | C-genome specific (napus-oleracea) | 1            | 0.9176469    |              | 1            | 0.7903819    | not scorable not scorable |
| #### Bn-scaff_22310_1-p24357 | C-genome specific (oleracea only)  | not scorable | not scorable | 0.9922481    |              | 0.5460683    | not scorable not scorable |
| #### Bn-scaff_22310_1-p26021 | C-genome specific (napus-oleracea) | 0.9473684    | 0.214871     | 0.9767442    |              | 0.3370184    | not scorable not scorable |
| #### Bn-scaff_22310_1-p31099 | genome unspecific (oleracea-rapa)  | not scorable | not scorable |              | 1            | 0.7379796    | 0.9917355 0.8080764       |
| #### Bn-scaff_22310_1-p31118 | A-genome specific (napus-rapa)     | 0.9856459    | 0.6204455    | not scorable | not scorable | 0.9256198    | 0.7252899                 |
| #### Bn-scaff_22310_1-p32118 | C-genome specific (napus-oleracea) | 0.937799     | 0.7820534    | 0.9534883    |              | 0.7906566    | not scorable not scorable |
| #### Bn-scaff_22310_1-p32993 | genome unspecific (all in)         | 0.9688995    | 0.3841734    |              | 1            | 0.6748396    | 0.9917355 0.6607507       |
| #### Bn-scaff_22310_1-p33595 | C-genome specific (napus-oleracea) | 0.9976076    | 0.9083342    |              | 1            | 0.8561485    | not scorable not scorable |
| #### Bn-scaff_22310_1-p35975 | genome unspecific (all in)         | 0.9904306    | 0.5508108    | 0.9922481    |              | 0.6944932    | 1 0.8687953               |
| #### Bn-scaff_22310_1-p35999 | C-genome specific (napus-oleracea) | 1            | 0.6300399    |              | 1            | 0.6114888    | not scorable not scorable |
| #### Bn-scaff_22310_1-p42421 | C-genome specific (napus-oleracea) | 1            | 0.8794166    |              | 1            | 0.8589619    | not scorable not scorable |
| #### Bn-scaff_22310_1-p43647 | genome unspecific (all in)         | 1            | 0.7265133    | 0.9922481    |              | 0.7762588    | 0.9917355 0.9377596       |
| #### Bn-scaff_22310_1-p47057 | C-genome specific (oleracea only)  | not scorable | not scorable |              | 1            | 0.7689826    | not scorable not scorable |

|                                                                 |              |              |              |              |              |              |
|-----------------------------------------------------------------|--------------|--------------|--------------|--------------|--------------|--------------|
| #### Bn-scaff_22310_1-p47849 C-genome specific (napus-oleracea) | 0.9186603    | 0.6220931    | 0.8914729    | 0.5969991    | not scorable | not scorable |
| #### Bn-scaff_22310_1-p50472 C-genome specific (napus-oleracea) | 1            | 0.7476146    | 0.9922481    | 0.6875441    | not scorable | not scorable |
| #### Bn-scaff_22310_1-p52285 C-genome specific (napus-oleracea) | 0.9976076    | 0.8307636    | 0.9844961    | 0.7491504    | not scorable | not scorable |
| #### Bn-scaff_22310_1-p53297 C-genome specific (napus-oleracea) | 0.9952153    | 0.865518     | 0.7751938    | 0.787453     | not scorable | not scorable |
| #### Bn-scaff_22310_1-p55736 genome unspecific (all in)         | 0.9856459    | 0.3205313    | 1            | 0.6679295    | 0.9586777    | 0.5967289    |
| #### Bn-scaff_22310_1-p56350 C-genome specific (napus-oleracea) | 1            | 0.7924147    | 1            | 0.6528508    | not scorable | not scorable |
| #### Bn-scaff_22310_1-p56805 C-genome specific (napus-oleracea) | 1            | 0.6494992    | 0.9922481    | 0.7200958    | not scorable | not scorable |
| #### Bn-scaff_22310_1-p58915 genome unspecific (oleracea-rapa)  | not scorable | not scorable | 0.9844961    | 0.6349824    | 0.9834711    | 0.7395847    |
| #### Bn-scaff_22310_1-p62608 genome unspecific (all in)         | 0.9976076    | 0.3283681    | 0.9767442    | 0.5699037    | 0.9917355    | 0.690158     |
| #### Bn-scaff_22310_1-p63933 C-genome specific (napus-oleracea) | 1            | 0.8402275    | 0.9922481    | 0.7164738    | not scorable | not scorable |
| #### Bn-scaff_22310_1-p64727 C-genome specific (napus-oleracea) | 1            | 0.9072508    | 0.9922481    | 0.7774618    | not scorable | not scorable |
| #### Bn-scaff_22310_1-p65080 napus specific                     | 0.8755981    | 0.865351     | not scorable | not scorable | not scorable | not scorable |
| #### Bn-scaff_22310_1-p65316 genome unspecific (all in)         | 1            | 0.4793032    | 0.9844961    | 0.7538769    | 1            | 0.8374398    |
| #### Bn-scaff_22310_1-p68525 genome unspecific (all in)         | 1            | 0.6447178    | 0.9922481    | 0.7596039    | 1            | 0.9176142    |
| #### Bn-scaff_22310_1-p71978 C-genome specific (napus-oleracea) | 0.9976076    | 0.752359     | 1            | 0.7088333    | not scorable | not scorable |
| #### Bn-scaff_22310_1-p72364 genome unspecific (all in)         | 1            | 0.6803069    | 0.9922481    | 0.76647      | 1            | 0.9175696    |
| #### Bn-scaff_22310_1-p77314 genome unspecific (all in)         | 1            | 0.3233918    | 1            | 0.5160688    | 1            | 0.5785942    |
| #### Bn-scaff_22310_1-p77498 C-genome specific (napus-oleracea) | 1            | 0.8960598    | 0.9922481    | 0.8345025    | not scorable | not scorable |
| #### Bn-scaff_22310_1-p77935 C-genome specific (oleracea only)  | not scorable | not scorable | 0.9844961    | 0.8123444    | not scorable | not scorable |
| #### Bn-scaff_22310_1-p78511 C-genome specific (napus-oleracea) | 1            | 0.6304083    | 1            | 0.5917403    | not scorable | not scorable |
| #### Bn-scaff_22310_1-p81537 C-genome specific (napus-oleracea) | 0.9784689    | 0.5047215    | 1            | 0.7534066    | not scorable | not scorable |
| #### Bn-scaff_22310_1-p81553 C-genome specific (napus-oleracea) | 0.9736842    | 0.4881388    | 0.9922481    | 0.7440118    | not scorable | not scorable |
| #### Bn-scaff_22310_1-p81744 C-genome specific (napus-oleracea) | 0.9521531    | 0.5104585    | 0.9767442    | 0.8536368    | not scorable | not scorable |
| #### Bn-scaff_22310_1-p81763 C-genome specific (napus-oleracea) | 0.9736842    | 0.3288394    | 0.9612403    | 0.7015997    | not scorable | not scorable |
| #### Bn-scaff_22310_1-p82631 genome unspecific (all in)         | 0.9617225    | 0.3619155    | 1            | 0.8524193    | 1            | 0.7803161    |
| #### Bn-scaff_22310_1-p83525 all not scorable                   | not scorable | not scorable | not scorable | not scorable | not scorable | not scorable |
| #### Bn-scaff_22310_1-p84021 C-genome specific (napus-oleracea) | 1            | 0.8572213    | 1            | 0.9107397    | not scorable | not scorable |
| #### Bn-scaff_22310_1-p85187 genome unspecific (oleracea-rapa)  | not scorable | not scorable | 1            | 0.6669564    | 1            | 0.7494321    |
| #### Bn-scaff_22310_1-p85212 genome unspecific (all in)         | 0.9569378    | 0.2939438    | 1            | 0.7118486    | 0.9917355    | 0.779196     |
| #### Bn-scaff_22310_1-p85290 genome unspecific (all in)         | 0.9928229    | 0.4920197    | 1            | 0.7699252    | 1            | 0.8135551    |
| #### Bn-scaff_22310_1-p86359 genome unspecific (all in)         | 0.9593301    | 0.5740424    | 1            | 0.8672152    | 1            | 0.9082212    |
| #### Bn-scaff_22310_1-p87495 genome unspecific (all in)         | 0.9688995    | 0.276917     | 1            | 0.6610748    | 1            | 0.908188     |
| #### Bn-scaff_22310_1-p89543 genome unspecific (all in)         | 0.9976076    | 0.5982715    | 1            | 0.9218785    | 1            | 0.7738914    |

|                                                                 |              |              |              |              |              |                           |
|-----------------------------------------------------------------|--------------|--------------|--------------|--------------|--------------|---------------------------|
| #### Bn-scaff_22321_1-p12859 all not scorable                   | not scorable | not scorable | not scorable | not scorable | not scorable | not scorable              |
| #### Bn-scaff_22321_1-p13103 genome unspecific (all in)         | 0.9425837    | 0.5127145    |              | 1            | 0.8663234    | 1 0.6821491               |
| #### Bn-scaff_22321_1-p24724 genome unspecific (all in)         | 0.9880383    | 0.3329886    |              | 1            | 0.7455252    | 1 0.7660382               |
| #### Bn-scaff_22321_1-p26634 A-genome specific (rapa only)      | not scorable | not scorable | not scorable | not scorable |              | 1 0.8084773               |
| #### Bn-scaff_22321_1-p33940 C-genome specific (napus-oleracea) | 0.6866029    | 0.7110407    |              | 1            | 0.7640671    | not scorable not scorable |
| #### Bn-scaff_22321_1-p45741 C-genome specific (napus-oleracea) | 0.3373206    | 0.8003951    | 0.9302326    |              | 0.7073866    | not scorable not scorable |
| #### Bn-scaff_22350_1-p24061 C-genome specific (napus-oleracea) | 0.9736842    | 0.4099603    | 0.9689922    |              | 0.7797941    | not scorable not scorable |
| #### Bn-scaff_22350_1-p24201 genome unspecific (oleracea-rapa)  | not scorable | not scorable |              | 1            | 0.8231129    | 1 0.9345833               |
| #### Bn-scaff_22350_1-p80848 C-genome specific (napus-oleracea) | 0.9449761    | 0.6717627    |              | 1            | 0.7458245    | not scorable not scorable |
| #### Bn-scaff_22380_1-p182 C-genome specific (napus-oleracea)   | 0.9808612    | 0.75667      | 0.8604651    |              | 0.7047486    | not scorable not scorable |
| #### Bn-scaff_22380_1-p339 C-genome specific (napus-oleracea)   | 0.9832536    | 0.779583     | 0.875969     |              | 0.7775239    | not scorable not scorable |
| #### Bn-scaff_22395_1-p700 C-genome specific (napus-oleracea)   | 0.4904306    | 0.8139479    | 0.9379845    |              | 0.3229928    | not scorable not scorable |
| #### Bn-scaff_22441_1-p10830 C-genome specific (napus-oleracea) | 0.9976076    | 0.8253585    | 0.9844961    |              | 0.758938     | not scorable not scorable |
| #### Bn-scaff_22441_1-p11276 C-genome specific (napus-oleracea) | 1            | 0.9155516    |              | 1            | 0.7468382    | not scorable not scorable |
| #### Bn-scaff_22441_1-p12949 C-genome specific (napus-oleracea) | 0.9880383    | 0.3101186    | 0.9922481    |              | 0.2929937    | not scorable not scorable |
| #### Bn-scaff_22441_1-p14692 C-genome specific (napus-oleracea) | 0.9952153    | 0.9386396    |              | 1            | 0.7199261    | not scorable not scorable |
| #### Bn-scaff_22441_1-p18148 C-genome specific (oleracea only)  | not scorable | not scorable | 0.9844961    |              | 0.7958933    | not scorable not scorable |
| #### Bn-scaff_22441_1-p23304 C-genome specific (napus-oleracea) | 0.9545454    | 0.7162911    |              | 1            | 0.7396465    | not scorable not scorable |
| #### Bn-scaff_22441_1-p23925 C-genome specific (napus-oleracea) | 1            | 0.8578107    |              | 1            | 0.8863745    | not scorable not scorable |
| #### Bn-scaff_22441_1-p23938 C-genome specific (napus-oleracea) | 0.9976076    | 0.7647251    |              | 1            | 0.6625258    | not scorable not scorable |
| #### Bn-scaff_22441_1-p26128 genome unspecific (all in)         | 1            | 0.5761061    |              | 1            | 0.566107     | 1 0.5878106               |
| #### Bn-scaff_22441_1-p29039 A-genome specific (rapa only)      | not scorable | not scorable | not scorable | not scorable |              | 1 0.8653011               |
| #### Bn-scaff_22441_1-p31553 C-genome specific (napus-oleracea) | 1            | 0.8621511    | 0.9922481    |              | 0.7172272    | not scorable not scorable |
| #### Bn-scaff_22441_1-p33027 C-genome specific (napus-oleracea) | 0.9976076    | 0.6115171    | 0.9922481    |              | 0.5961811    | not scorable not scorable |
| #### Bn-scaff_22441_1-p36733 C-genome specific (napus-oleracea) | 1            | 0.7680252    | 0.9922481    |              | 0.727371     | not scorable not scorable |
| #### Bn-scaff_22441_1-p38046 C-genome specific (napus-oleracea) | 1            | 0.899003     |              | 1            | 0.8566065    | not scorable not scorable |
| #### Bn-scaff_22441_1-p38063 C-genome specific (napus-oleracea) | 1            | 0.7683626    |              | 1            | 0.7273998    | not scorable not scorable |
| #### Bn-scaff_22441_1-p38088 C-genome specific (napus-oleracea) | 1            | 0.8705024    |              | 1            | 0.7414268    | not scorable not scorable |
| #### Bn-scaff_22441_1-p38101 C-genome specific (napus-oleracea) | 1            | 0.7720349    |              | 1            | 0.6314372    | not scorable not scorable |
| #### Bn-scaff_22441_1-p38108 C-genome specific (napus-oleracea) | 1            | 0.7643657    |              | 1            | 0.7276511    | not scorable not scorable |
| #### Bn-scaff_22441_1-p38177 C-genome specific (napus-oleracea) | 1            | 0.7230085    |              | 1            | 0.6662787    | not scorable not scorable |
| #### Bn-scaff_22441_1-p38197 C-genome specific (napus-oleracea) | 1            | 0.9165159    | 0.9922481    |              | 0.8798252    | not scorable not scorable |
| #### Bn-scaff_22441_1-p38258 C-genome specific (napus-oleracea) | 0.9976076    | 0.8621667    |              | 1            | 0.7344398    | not scorable not scorable |

|                                                                 |           |           |              |              |              |              |
|-----------------------------------------------------------------|-----------|-----------|--------------|--------------|--------------|--------------|
| #### Bn-scaff_22441_1-p38344 C-genome specific (napus-oleracea) | 1         | 0.9349107 | 0.9922481    | 0.7998754    | not scorable | not scorable |
| #### Bn-scaff_22441_1-p38457 C-genome specific (napus-oleracea) | 1         | 0.894241  | 0.9844961    | 0.7939259    | not scorable | not scorable |
| #### Bn-scaff_22441_1-p38489 C-genome specific (napus-oleracea) | 1         | 0.8227878 | 0.9922481    | 0.8246344    | not scorable | not scorable |
| #### Bn-scaff_22441_1-p40769 genome unspecific (all in)         | 1         | 0.6816167 | 1            | 0.6733517    | 1            | 0.8899338    |
| #### Bn-scaff_22441_1-p43103 C-genome specific (napus-oleracea) | 0.8660287 | 0.8647583 | 0.7674419    | 0.7670119    | not scorable | not scorable |
| #### Bn-scaff_22441_1-p43209 C-genome specific (napus-oleracea) | 0.9880383 | 0.7674662 | 1            | 0.8167488    | not scorable | not scorable |
| #### Bn-scaff_22441_1-p43796 napus specific                     | 0.9784689 | 0.7183127 | not scorable | not scorable | not scorable | not scorable |
| #### Bn-scaff_22441_1-p44988 C-genome specific (napus-oleracea) | 0.9784689 | 0.6230469 | 0.9922481    | 0.6374263    | not scorable | not scorable |
| #### Bn-scaff_22441_1-p46018 C-genome specific (napus-oleracea) | 0.9688995 | 0.5607421 | 1            | 0.6747574    | not scorable | not scorable |
| #### Bn-scaff_22451_1-p13456 C-genome specific (napus-oleracea) | 0.9952153 | 0.7887033 | 1            | 0.7851929    | not scorable | not scorable |
| #### Bn-scaff_22451_1-p19380 C-genome specific (napus-oleracea) | 0.9784689 | 0.8260202 | 0.9844961    | 0.6619892    | not scorable | not scorable |
| #### Bn-scaff_22451_1-p20023 C-genome specific (napus-oleracea) | 0.9832536 | 0.6671709 | 1            | 0.6389652    | not scorable | not scorable |
| #### Bn-scaff_22451_1-p20264 C-genome specific (napus-oleracea) | 0.9928229 | 0.8734044 | 1            | 0.7881381    | not scorable | not scorable |
| #### Bn-scaff_22451_1-p20816 C-genome specific (napus-oleracea) | 0.9736842 | 0.8109645 | 0.875969     | 0.8031629    | not scorable | not scorable |
| #### Bn-scaff_22451_1-p23872 C-genome specific (napus-oleracea) | 0.9784689 | 0.8145373 | 0.9922481    | 0.8088477    | not scorable | not scorable |
| #### Bn-scaff_22451_1-p26146 C-genome specific (napus-oleracea) | 0.9880383 | 0.8692808 | 1            | 0.8064866    | not scorable | not scorable |
| #### Bn-scaff_22451_1-p26181 C-genome specific (napus-oleracea) | 0.9928229 | 0.8614028 | 1            | 0.8068908    | not scorable | not scorable |
| #### Bn-scaff_22451_1-p26199 C-genome specific (napus-oleracea) | 0.9856459 | 0.7239484 | 1            | 0.5836905    | not scorable | not scorable |
| #### Bn-scaff_22451_1-p26765 C-genome specific (napus-oleracea) | 0.9760765 | 0.6904055 | 1            | 0.6160909    | not scorable | not scorable |
| #### Bn-scaff_22451_1-p30816 C-genome specific (napus-oleracea) | 0.9904306 | 0.8669598 | 1            | 0.7930877    | not scorable | not scorable |
| #### Bn-scaff_22451_2-p11421 C-genome specific (napus-oleracea) | 0.9760765 | 0.8806281 | 0.9922481    | 0.7964355    | not scorable | not scorable |
| #### Bn-scaff_22451_2-p11758 C-genome specific (napus-oleracea) | 0.9784689 | 0.7600937 | 0.9922481    | 0.725991     | not scorable | not scorable |
| #### Bn-scaff_22451_2-p11925 C-genome specific (napus-oleracea) | 0.9880383 | 0.9052672 | 0.9844961    | 0.8565015    | not scorable | not scorable |
| #### Bn-scaff_22451_2-p12123 C-genome specific (napus-oleracea) | 0.9856459 | 0.8234009 | 0.9922481    | 0.7518746    | not scorable | not scorable |
| #### Bn-scaff_22451_2-p16619 genome unspecific (all in)         | 0.9832536 | 0.6029934 | 1            | 0.7836695    | 1            | 0.9376776    |
| #### Bn-scaff_22451_2-p17351 C-genome specific (napus-oleracea) | 0.9832536 | 0.8035785 | 0.9922481    | 0.7865111    | not scorable | not scorable |
| #### Bn-scaff_22451_2-p20582 C-genome specific (napus-oleracea) | 0.9856459 | 0.7078743 | 0.9844961    | 0.6824372    | not scorable | not scorable |
| #### Bn-scaff_22451_2-p22492 C-genome specific (napus-oleracea) | 0.9928229 | 0.8207017 | 1            | 0.7445548    | not scorable | not scorable |
| #### Bn-scaff_22451_2-p25863 C-genome specific (napus-oleracea) | 0.9952153 | 0.8228705 | 1            | 0.7766106    | not scorable | not scorable |
| #### Bn-scaff_22451_2-p29341 C-genome specific (napus-oleracea) | 0.9928229 | 0.7681311 | 0.9922481    | 0.7134826    | not scorable | not scorable |
| #### Bn-scaff_22451_2-p29642 C-genome specific (napus-oleracea) | 0.9928229 | 0.835928  | 1            | 0.8098238    | not scorable | not scorable |
| #### Bn-scaff_22451_2-p30875 C-genome specific (napus-oleracea) | 0.9880383 | 0.7934458 | 0.9922481    | 0.7697504    | not scorable | not scorable |
| #### Bn-scaff_22451_2-p32331 napus specific                     | 0.9880383 | 0.4912345 | not scorable | not scorable | not scorable | not scorable |

|                                                                |              |              |              |              |              |              |
|----------------------------------------------------------------|--------------|--------------|--------------|--------------|--------------|--------------|
| #### Bn-scaff_22451_2-p39801C-genome specific (napus-oleracea) | 0.9952153    | 0.7798617    | 1            | 0.7359191    | not scorable | not scorable |
| #### Bn-scaff_22451_2-p43588C-genome specific (napus-oleracea) | 0.9880383    | 0.785868     | 1            | 0.6968412    | not scorable | not scorable |
| #### Bn-scaff_22451_2-p43877C-genome specific (napus-oleracea) | 0.9665072    | 0.6676207    | 1            | 0.7340384    | not scorable | not scorable |
| #### Bn-scaff_22451_2-p52585C-genome specific (napus-oleracea) | 0.9880383    | 0.7268849    | 0.9767442    | 0.6929954    | not scorable | not scorable |
| #### Bn-scaff_22451_2-p54301A-genome specific (napus-rapa)     | 1            | 0.6001035    | not scorable | not scorable | 1            | 0.7982677    |
| #### Bn-scaff_22451_2-p55421C-genome specific (napus-oleracea) | 0.9808612    | 0.8450485    | 1            | 0.7913831    | not scorable | not scorable |
| #### Bn-scaff_22451_2-p55671C-genome specific (napus-oleracea) | 0.9880383    | 0.88942      | 0.9844961    | 0.6701423    | not scorable | not scorable |
| #### Bn-scaff_22451_2-p68656C-genome specific (napus-oleracea) | 0.9904306    | 0.8429011    | 0.9922481    | 0.78227      | not scorable | not scorable |
| #### Bn-scaff_22451_2-p77323C-genome specific (napus-oleracea) | 0.9928229    | 0.887211     | 0.9922481    | 0.7771342    | not scorable | not scorable |
| #### Bn-scaff_22451_2-p81790C-genome specific (napus-oleracea) | 0.9832536    | 0.8130993    | 0.9922481    | 0.7288191    | not scorable | not scorable |
| #### Bn-scaff_22451_2-p83262C-genome specific (napus-oleracea) | 0.9856459    | 0.7316726    | 0.9922481    | 0.6977799    | not scorable | not scorable |
| #### Bn-scaff_22451_2-p85639C-genome specific (napus-oleracea) | 0.9808612    | 0.8145742    | 0.9922481    | 0.6975237    | not scorable | not scorable |
| #### Bn-scaff_22451_2-p87375C-genome specific (napus-oleracea) | 0.9928229    | 0.7673748    | 0.9922481    | 0.6740983    | not scorable | not scorable |
| #### Bn-scaff_22451_2-p90736C-genome specific (napus-oleracea) | 0.9760765    | 0.8342902    | 0.9767442    | 0.7603397    | not scorable | not scorable |
| #### Bn-scaff_22451_2-p92152C-genome specific (napus-oleracea) | 0.9856459    | 0.8485271    | 0.9767442    | 0.8142419    | not scorable | not scorable |
| #### Bn-scaff_22455_1-p12317genome unspecific (all in)         | 0.9976076    | 0.3763626    | 0.9922481    | 0.6866536    | 1            | 0.8240033    |
| #### Bn-scaff_22461_1-p485 C-genome specific (napus-oleracea)  | 0.9928229    | 0.7111788    | 0.8914729    | 0.7399675    | not scorable | not scorable |
| #### Bn-scaff_22466_1-p10641genome unspecific (all in)         | 0.9856459    | 0.5350465    | 0.9922481    | 0.7427152    | 0.9917355    | 0.7119483    |
| #### Bn-scaff_22466_1-p10962genome unspecific (all in)         | 0.8062201    | 0.7693933    | 0.9922481    | 0.7034166    | 0.9917355    | 0.7834508    |
| #### Bn-scaff_22466_1-p12918genome unspecific (all in)         | 0.9712918    | 0.6387398    | 1            | 0.8413669    | 1            | 0.9398974    |
| #### Bn-scaff_22466_1-p13718C-genome specific (oleracea only)  | not scorable | not scorable | 0.9922481    | 0.8442415    | not scorable | not scorable |
| #### Bn-scaff_22466_1-p13718napus specific                     | 0.9593301    | 0.2805051    | not scorable | not scorable | not scorable | not scorable |
| #### Bn-scaff_22466_1-p14273genome unspecific (all in)         | 0.9760765    | 0.3318868    | 1            | 0.7593057    | 0.9917355    | 0.7570971    |
| #### Bn-scaff_22466_1-p14780C-genome specific (napus-oleracea) | 0.9856459    | 0.8404287    | 0.9767442    | 0.7959908    | not scorable | not scorable |
| #### Bn-scaff_22466_1-p16365A-genome specific (rapa only)      | not scorable | not scorable | not scorable | not scorable | 0.9917355    | 0.7476028    |
| #### Bn-scaff_22466_1-p17075genome unspecific (all in)         | 0.9593301    | 0.4406049    | 1            | 0.8567975    | 1            | 0.8366286    |
| #### Bn-scaff_22466_1-p17231genome unspecific (all in)         | 0.9976076    | 0.5481735    | 1            | 0.6991313    | 1            | 0.6797539    |
| #### Bn-scaff_22466_1-p17317C-genome specific (napus-oleracea) | 0.9808612    | 0.8068461    | 0.8217054    | 0.8307562    | not scorable | not scorable |
| #### Bn-scaff_22466_1-p18213C-genome specific (napus-oleracea) | 0.9760765    | 0.7716341    | 1            | 0.7050494    | not scorable | not scorable |
| #### Bn-scaff_22466_1-p20919genome unspecific (all in)         | 0.9545454    | 0.2547384    | 1            | 0.4789136    | 1            | 0.844887     |
| #### Bn-scaff_22466_1-p20919C-genome specific (napus-oleracea) | 0.9760765    | 0.7505428    | 1            | 0.8145465    | not scorable | not scorable |
| #### Bn-scaff_22466_1-p28609C-genome specific (napus-oleracea) | 1            | 0.8951567    | 1            | 0.8157332    | not scorable | not scorable |
| #### Bn-scaff_22466_1-p30715genome unspecific (all in)         | 0.9928229    | 0.4983025    | 0.8914729    | 0.4251724    | 0.9917355    | 0.9154896    |

|                                                                |              |              |              |              |              |              |
|----------------------------------------------------------------|--------------|--------------|--------------|--------------|--------------|--------------|
| #### Bn-scaff_22466_1-p35537genome unspecific (all in)         | 1            | 0.6910558    | 1            | 0.6924239    | 1            | 0.7739488    |
| #### Bn-scaff_22466_1-p37386C-genome specific (napus-oleracea) | 0.9952153    | 0.8530344    | 1            | 0.7469847    | not scorable | not scorable |
| #### Bn-scaff_22466_1-p38108C-genome specific (napus-oleracea) | 0.9976076    | 0.9299657    | 1            | 0.8513185    | not scorable | not scorable |
| #### Bn-scaff_22466_1-p38470C-genome specific (napus-oleracea) | 1            | 0.8699557    | 0.9922481    | 0.8272757    | not scorable | not scorable |
| #### Bn-scaff_22466_1-p38663C-genome specific (napus-oleracea) | 1            | 0.9046798    | 1            | 0.8637689    | not scorable | not scorable |
| #### Bn-scaff_22466_1-p39446C-genome specific (napus-oleracea) | 0.9976076    | 0.854524     | 1            | 0.8338156    | not scorable | not scorable |
| #### Bn-scaff_22466_1-p49288C-genome specific (napus-oleracea) | 1            | 0.8916263    | 0.9844961    | 0.7878001    | not scorable | not scorable |
| #### Bn-scaff_22466_1-p57494C-genome specific (napus-oleracea) | 1            | 0.7229304    | 0.8914729    | 0.6645343    | not scorable | not scorable |
| #### Bn-scaff_22466_1-p61834genome unspecific (all in)         | 0.9760765    | 0.4135171    | 1            | 0.7438611    | 0.9917355    | 0.7609065    |
| #### Bn-scaff_22466_1-p62447A-genome specific (rapa only)      | not scorable | not scorable | not scorable | not scorable | 0.9834711    | 0.2475199    |
| #### Bn-scaff_22466_1-p65520C-genome specific (napus-oleracea) | 0.9832536    | 0.8473643    | 0.7286822    | 0.8035904    | not scorable | not scorable |
| #### Bn-scaff_22466_1-p66712genome unspecific (all in)         | 0.9904306    | 0.5144391    | 0.7829458    | 0.7326261    | 1            | 0.8604368    |
| #### Bn-scaff_22466_1-p70708C-genome specific (napus-oleracea) | 0.9856459    | 0.9083206    | 0.9302326    | 0.7059122    | not scorable | not scorable |
| #### Bn-scaff_22466_1-p71391C-genome specific (napus-oleracea) | 0.9928229    | 0.8027388    | 0.9224806    | 0.778515     | not scorable | not scorable |
| #### Bn-scaff_22466_1-p72071genome unspecific (all in)         | 0.9425837    | 0.3786959    | 0.9844961    | 0.8092655    | 1            | 0.8250394    |
| #### Bn-scaff_22466_1-p73366genome unspecific (all in)         | 0.9641148    | 0.6632076    | 0.9922481    | 0.6082652    | 1            | 0.9357774    |
| #### Bn-scaff_22466_1-p74614genome unspecific (all in)         | 0.9593301    | 0.4578919    | 0.9922481    | 0.8326319    | 1            | 0.9280922    |
| #### Bn-scaff_22466_1-p74632C-genome specific (napus-oleracea) | 0.9784689    | 0.7761707    | 0.9689922    | 0.7840536    | not scorable | not scorable |
| #### Bn-scaff_22466_1-p74831C-genome specific (napus-oleracea) | 0.9449761    | 0.8170874    | 0.7131783    | 0.882952     | not scorable | not scorable |
| #### Bn-scaff_22466_1-p75425C-genome specific (napus-oleracea) | 0.9928229    | 0.2903692    | 0.9844961    | 0.7216288    | not scorable | not scorable |
| #### Bn-scaff_22466_1-p75448genome unspecific (all in)         | 0.9904306    | 0.6851332    | 0.8294573    | 0.6031008    | 0.768595     | 0.7395847    |
| #### Bn-scaff_22466_1-p77675C-genome specific (napus-oleracea) | 0.9425837    | 0.6416787    | 1            | 0.7869427    | not scorable | not scorable |
| #### Bn-scaff_22466_1-p79847C-genome specific (napus-oleracea) | 0.9784689    | 0.7648247    | 1            | 0.8072546    | not scorable | not scorable |
| #### Bn-scaff_22466_1-p80206C-genome specific (napus-oleracea) | 0.8492823    | 0.8320708    | 0.9379845    | 0.8377294    | not scorable | not scorable |
| #### Bn-scaff_22466_1-p80372C-genome specific (napus-oleracea) | 0.9832536    | 0.7018232    | 1            | 0.7506263    | not scorable | not scorable |
| #### Bn-scaff_22466_1-p80429C-genome specific (napus-oleracea) | 0.9880383    | 0.8031548    | 0.9844961    | 0.78834      | not scorable | not scorable |
| #### Bn-scaff_22466_1-p80570C-genome specific (napus-oleracea) | 0.9784689    | 0.7585614    | 1            | 0.7031802    | not scorable | not scorable |
| #### Bn-scaff_22466_1-p80593C-genome specific (napus-oleracea) | 0.9760765    | 0.7799403    | 0.9922481    | 0.8200008    | not scorable | not scorable |
| #### Bn-scaff_22466_1-p80944genome unspecific (all in)         | 0.9952153    | 0.5159485    | 1            | 0.6821974    | 1            | 0.915926     |
| #### Bn-scaff_22466_1-p84633C-genome specific (napus-oleracea) | 0.9784689    | 0.7179639    | 1            | 0.801937     | not scorable | not scorable |
| #### Bn-scaff_22466_1-p84679genome unspecific (all in)         | 0.9832536    | 0.4485249    | 1            | 0.7930477    | 0.9834711    | 0.8083723    |
| #### Bn-scaff_22466_1-p84764genome unspecific (all in)         | 0.9976076    | 0.391589     | 1            | 0.8821543    | 1            | 0.7250031    |
| #### Bn-scaff_22466_1-p84943C-genome specific (napus-oleracea) | 0.9736842    | 0.7875182    | 0.9922481    | 0.7589176    | not scorable | not scorable |

|                                                                 |           |           |           |   |           |              |              |
|-----------------------------------------------------------------|-----------|-----------|-----------|---|-----------|--------------|--------------|
| #### Bn-scaff_22466_1-p85788 C-genome specific (napus-oleracea) | 0.9521531 | 0.7577809 |           | 1 | 0.8413756 | not scorable | not scorable |
| #### Bn-scaff_22466_1-p85870 C-genome specific (napus-oleracea) | 0.9808612 | 0.7030321 |           | 1 | 0.6838834 | not scorable | not scorable |
| #### Bn-scaff_22466_1-p85878 C-genome specific (napus-oleracea) | 0.9832536 | 0.7239868 | 0.9844961 |   | 0.6577969 | not scorable | not scorable |
| #### Bn-scaff_22466_1-p85911 C-genome specific (napus-oleracea) | 0.9569378 | 0.7351902 | 0.9922481 |   | 0.7201493 | not scorable | not scorable |
| #### Bn-scaff_22466_1-p85920 C-genome specific (napus-oleracea) | 0.9760765 | 0.7534318 |           | 1 | 0.8123645 | not scorable | not scorable |
| #### Bn-scaff_22466_1-p86067 C-genome specific (napus-oleracea) | 0.9784689 | 0.6775374 |           | 1 | 0.7024059 | not scorable | not scorable |
| #### Bn-scaff_22466_1-p86078 C-genome specific (napus-oleracea) | 0.9760765 | 0.6944352 | 0.9922481 |   | 0.7886981 | not scorable | not scorable |
| #### Bn-scaff_22466_1-p86168 C-genome specific (napus-oleracea) | 0.9497608 | 0.7599329 | 0.9922481 |   | 0.7941428 | not scorable | not scorable |
| #### Bn-scaff_22466_1-p86183 C-genome specific (napus-oleracea) | 0.9736842 | 0.7809107 | 0.9767442 |   | 0.775108  | not scorable | not scorable |
| #### Bn-scaff_22466_1-p86205 C-genome specific (napus-oleracea) | 0.9928229 | 0.7495267 |           | 1 | 0.8135251 | not scorable | not scorable |
| #### Bn-scaff_22466_1-p86301 C-genome specific (napus-oleracea) | 0.9569378 | 0.7628859 | 0.9457364 |   | 0.840381  | not scorable | not scorable |
| #### Bn-scaff_22466_1-p86338 C-genome specific (napus-oleracea) | 0.9808612 | 0.7501242 | 0.9379845 |   | 0.8391924 | not scorable | not scorable |
| #### Bn-scaff_22466_1-p88687 C-genome specific (napus-oleracea) | 0.9808612 | 0.7834271 | 0.9689922 |   | 0.7713437 | not scorable | not scorable |
| #### Bn-scaff_22466_1-p89729 C-genome specific (napus-oleracea) | 0.9808612 | 0.7471765 | 0.9922481 |   | 0.7878062 | not scorable | not scorable |
| #### Bn-scaff_22466_1-p90240 C-genome specific (napus-oleracea) | 0.9808612 | 0.6362857 |           | 1 | 0.6556687 | not scorable | not scorable |
| #### Bn-scaff_22466_1-p90317 C-genome specific (napus-oleracea) | 0.9760765 | 0.7041347 | 0.9922481 |   | 0.6602686 | not scorable | not scorable |
| #### Bn-scaff_22466_1-p91843 C-genome specific (napus-oleracea) | 0.9736842 | 0.7637252 | 0.9922481 |   | 0.7751984 | not scorable | not scorable |
| #### Bn-scaff_22466_1-p92194 C-genome specific (napus-oleracea) | 0.9665072 | 0.6851951 |           | 1 | 0.7936121 | not scorable | not scorable |
| #### Bn-scaff_22466_1-p94244 C-genome specific (napus-oleracea) | 0.9808612 | 0.7472503 |           | 1 | 0.7745131 | not scorable | not scorable |
| #### Bn-scaff_22466_1-p94564 C-genome specific (napus-oleracea) | 0.9641148 | 0.6016576 |           | 1 | 0.6224695 | not scorable | not scorable |
| #### Bn-scaff_22466_1-p94576 C-genome specific (napus-oleracea) | 0.9712918 | 0.6615981 | 0.9922481 |   | 0.6591953 | not scorable | not scorable |
| #### Bn-scaff_22466_1-p94592 C-genome specific (napus-oleracea) | 0.8875598 | 0.6982384 | 0.7674419 |   | 0.6720871 | not scorable | not scorable |
| #### Bn-scaff_22466_1-p94599 C-genome specific (napus-oleracea) | 0.9904306 | 0.5973377 | 0.9922481 |   | 0.6014317 | not scorable | not scorable |
| #### Bn-scaff_22466_1-p94660 C-genome specific (napus-oleracea) | 0.9928229 | 0.6790848 |           | 1 | 0.7082195 | not scorable | not scorable |
| #### Bn-scaff_22466_1-p94698 C-genome specific (napus-oleracea) | 0.9904306 | 0.7666056 | 0.9922481 |   | 0.7670426 | not scorable | not scorable |
| #### Bn-scaff_22466_1-p95468 C-genome specific (napus-oleracea) | 0.9688995 | 0.7461561 |           | 1 | 0.8284472 | not scorable | not scorable |
| #### Bn-scaff_22466_1-p95510 C-genome specific (napus-oleracea) | 0.9952153 | 0.8379771 | 0.9922481 |   | 0.7962294 | not scorable | not scorable |
| #### Bn-scaff_22466_1-p95614 C-genome specific (napus-oleracea) | 0.9928229 | 0.6866858 |           | 1 | 0.5795457 | not scorable | not scorable |
| #### Bn-scaff_22466_1-p96087 C-genome specific (napus-oleracea) | 0.9760765 | 0.7465642 | 0.9302326 |   | 0.7291096 | not scorable | not scorable |
| #### Bn-scaff_22466_1-p96457 C-genome specific (napus-oleracea) | 0.9952153 | 0.7633157 |           | 1 | 0.7759622 | not scorable | not scorable |
| #### Bn-scaff_22466_1-p97283 C-genome specific (napus-oleracea) | 0.9808612 | 0.6973413 | 0.9922481 |   | 0.6951095 | not scorable | not scorable |
| #### Bn-scaff_22466_1-p98072 genome unspecific (all in)         | 0.9784689 | 0.3575179 |           | 1 | 0.6969552 |              | 1 0.7821925  |
| #### Bn-scaff_22466_1-p98688 C-genome specific (napus-oleracea) | 0.9688995 | 0.7480555 |           | 1 | 0.7760561 | not scorable | not scorable |



|                                                                 |              |              |              |              |              |              |
|-----------------------------------------------------------------|--------------|--------------|--------------|--------------|--------------|--------------|
| #### Bn-scaff_22466_1-p98752 C-genome specific (napus-oleracea) | 0.9760765    | 0.6491038    | 1            | 0.6209434    | not scorable | not scorable |
| #### Bn-scaff_22466_1-p98818 C-genome specific (napus-oleracea) | 0.9712918    | 0.7590368    | 1            | 0.8176319    | not scorable | not scorable |
| #### Bn-scaff_22466_1-p99361 C-genome specific (napus-oleracea) | 0.9880383    | 0.7222304    | 1            | 0.8460684    | not scorable | not scorable |
| #### Bn-scaff_22466_1-p99427 C-genome specific (napus-oleracea) | 0.9665072    | 0.6979826    | 0.9534883    | 0.6487691    | not scorable | not scorable |
| #### Bn-scaff_22466_1-p99435 C-genome specific (napus-oleracea) | 0.9736842    | 0.7876747    | 0.9922481    | 0.8186453    | not scorable | not scorable |
| #### Bn-scaff_22466_1-p99452 C-genome specific (napus-oleracea) | 0.9856459    | 0.7108775    | 1            | 0.7528707    | not scorable | not scorable |
| #### Bn-scaff_22466_1-p99473 C-genome specific (napus-oleracea) | 0.9904306    | 0.7433745    | 0.9922481    | 0.830789     | not scorable | not scorable |
| #### Bn-scaff_22466_1-p99556 C-genome specific (napus-oleracea) | 0.9880383    | 0.6977334    | 0.9922481    | 0.7638018    | not scorable | not scorable |
| #### Bn-scaff_22466_1-p99564 C-genome specific (napus-oleracea) | 0.9808612    | 0.670203     | 0.9844961    | 0.7008901    | not scorable | not scorable |
| #### Bn-scaff_22466_1-p99590 C-genome specific (napus-oleracea) | 0.9808612    | 0.7360882    | 0.9922481    | 0.7827075    | not scorable | not scorable |
| #### Bn-scaff_22466_1-p99611 C-genome specific (napus-oleracea) | 0.9665072    | 0.666904     | 0.9844961    | 0.6905265    | not scorable | not scorable |
| #### Bn-scaff_22466_1-p99640 C-genome specific (napus-oleracea) | 0.9880383    | 0.7436723    | 0.9922481    | 0.84997      | not scorable | not scorable |
| #### Bn-scaff_22466_1-p99747 C-genome specific (napus-oleracea) | 0.9808612    | 0.7465398    | 0.9922481    | 0.7254361    | not scorable | not scorable |
| #### Bn-scaff_22476_1-p77679 all not scorable                   | not scorable | not scorable | not scorable | not scorable | not scorable | not scorable |
| #### Bn-scaff_22481_1-p14394 genome unspecific (oleracea-rapa)  | not scorable | not scorable | 0.9922481    | 0.8682455    | 1            | 0.9272014    |
| #### Bn-scaff_22481_1-p15210 genome unspecific (oleracea-rapa)  | not scorable | not scorable | 0.9922481    | 0.7647062    | 0.9834711    | 0.777622     |
| #### Bn-scaff_22481_1-p16783 C-genome specific (napus-oleracea) | 0.9832536    | 0.8812379    | 1            | 0.7638532    | not scorable | not scorable |
| #### Bn-scaff_22481_1-p17650 C-genome specific (napus-oleracea) | 0.9784689    | 0.8165222    | 1            | 0.8291076    | not scorable | not scorable |
| #### Bn-scaff_22481_1-p17731 C-genome specific (napus-oleracea) | 0.9880383    | 0.7091796    | 0.9922481    | 0.7168652    | not scorable | not scorable |
| #### Bn-scaff_22481_1-p18903 genome unspecific (all in)         | 1            | 0.5035605    | 1            | 0.705044     | 1            | 0.8004208    |
| #### Bn-scaff_22481_1-p20000 C-genome specific (napus-oleracea) | 0.9617225    | 0.7725424    | 1            | 0.7458635    | not scorable | not scorable |
| #### Bn-scaff_22481_1-p20058 genome unspecific (all in)         | 0.9808612    | 0.5910681    | 0.9922481    | 0.709635     | 1            | 0.8267049    |
| #### Bn-scaff_22481_1-p20127 genome unspecific (oleracea-rapa)  | not scorable | not scorable | 0.9922481    | 0.7605708    | 0.9917355    | 0.9396607    |
| #### Bn-scaff_22481_1-p21076 C-genome specific (napus-oleracea) | 0.9808612    | 0.8365717    | 1            | 0.821568     | not scorable | not scorable |
| #### Bn-scaff_22481_1-p23102 genome unspecific (all in)         | 1            | 0.3327714    | 1            | 0.7292713    | 1            | 0.549558     |
| #### Bn-scaff_22481_1-p24826 C-genome specific (oleracea only)  | not scorable | not scorable | 0.9922481    | 0.5743468    | not scorable | not scorable |
| #### Bn-scaff_22481_1-p27406 C-genome specific (napus-oleracea) | 0.9688995    | 0.821139     | 0.9844961    | 0.8587967    | not scorable | not scorable |
| #### Bn-scaff_22481_1-p27760 C-genome specific (napus-oleracea) | 0.9545454    | 0.7879326    | 0.9844961    | 0.7310765    | not scorable | not scorable |
| #### Bn-scaff_22481_1-p28154 C-genome specific (napus-oleracea) | 0.9856459    | 0.8217567    | 0.9844961    | 0.8013994    | not scorable | not scorable |
| #### Bn-scaff_22481_1-p85265 C-genome specific (napus-oleracea) | 0.9880383    | 0.8600475    | 0.9922481    | 0.7763031    | not scorable | not scorable |
| #### Bn-scaff_22481_1-p85423 C-genome specific (napus-oleracea) | 0.9736842    | 0.9469815    | 0.9922481    | 0.8056468    | not scorable | not scorable |
| #### Bn-scaff_22486_1-p7889 C-genome specific (napus-oleracea)  | 0.9952153    | 0.7941719    | 0.9922481    | 0.8174217    | not scorable | not scorable |
| #### Bn-scaff_22500_1-p32385 A-genome specific (rapa only)      | not scorable | not scorable | not scorable | not scorable | 1            | 0.8060836    |

|                                                                 |              |              |              |              |              |              |
|-----------------------------------------------------------------|--------------|--------------|--------------|--------------|--------------|--------------|
| #### Bn-scaff_22500_1-p32476 A-genome specific (napus-rapa)     | 1            | 0.5092235    | not scorable | not scorable | 0.9669421    | 0.6991091    |
| #### Bn-scaff_22500_1-p71844 C-genome specific (napus-oleracea) | 0.9354067    | 0.2529642    | 0.9457364    | 0.2620817    | not scorable | not scorable |
| #### Bn-scaff_22518_1-p1483 C-genome specific (napus-oleracea)  | 0.9880383    | 0.4349607    | 1            | 0.2548398    | not scorable | not scorable |
| #### Bn-scaff_22523_1-p25484 A-genome specific (napus-rapa)     | 0.3421053    | 0.7977996    | not scorable | not scorable | 0.9752066    | 0.6712966    |
| #### Bn-scaff_22526_1-p99200 C-genome specific (napus-oleracea) | 0.9880383    | 0.7869555    | 0.9844961    | 0.7677276    | not scorable | not scorable |
| #### Bn-scaff_22527_1-p15546 C-genome specific (napus-oleracea) | 0.8803828    | 0.7783401    | 0.9534883    | 0.8075855    | not scorable | not scorable |
| #### Bn-scaff_22527_1-p15552 C-genome specific (napus-oleracea) | 0.9043062    | 0.7533584    | 0.9922481    | 0.7977429    | not scorable | not scorable |
| #### Bn-scaff_22527_1-p15594 C-genome specific (napus-oleracea) | 0.8732057    | 0.6973098    | 0.9844961    | 0.723053     | not scorable | not scorable |
| #### Bn-scaff_22527_1-p15612 C-genome specific (napus-oleracea) | 0.8875598    | 0.7057532    | 0.9612403    | 0.7474636    | not scorable | not scorable |
| #### Bn-scaff_22527_1-p18066 C-genome specific (oleracea only)  | not scorable | not scorable | 1            | 0.8240627    | not scorable | not scorable |
| #### Bn-scaff_22527_1-p18077 genome unspecific (all in)         | 1            | 0.690045     | 1            | 0.6780906    | 1            | 0.7252899    |
| #### Bn-scaff_22527_1-p18320 genome unspecific (oleracea-rapa)  | not scorable | not scorable | 1            | 0.7699714    | 0.9834711    | 0.8068279    |
| #### Bn-scaff_22527_1-p18586 C-genome specific (napus-oleracea) | 0.937799     | 0.6837757    | 0.6589147    | 0.694732     | not scorable | not scorable |
| #### Bn-scaff_22527_1-p27631 C-genome specific (napus-oleracea) | 0.9162679    | 0.770677     | 0.9844961    | 0.7804251    | not scorable | not scorable |
| #### Bn-scaff_22527_1-p27655 C-genome specific (napus-oleracea) | 0.9832536    | 0.4366323    | 1            | 0.7326745    | not scorable | not scorable |
| #### Bn-scaff_22527_1-p33843 A-genome specific (napus-rapa)     | 0.9952153    | 0.5537057    | not scorable | not scorable | 0.9917355    | 0.4114713    |
| #### Bn-scaff_22527_1-p33976 genome unspecific (oleracea-rapa)  | not scorable | not scorable | 1            | 0.7182624    | 1            | 0.6963856    |
| #### Bn-scaff_22527_1-p35058 A-genome specific (rapa only)      | not scorable | not scorable | not scorable | not scorable | 0.9669421    | 0.6720408    |
| #### Bn-scaff_22527_1-p35064 A-genome specific (rapa only)      | not scorable | not scorable | not scorable | not scorable | 1            | 0.5490418    |
| #### Bn-scaff_22527_1-p41284 C-genome specific (napus-oleracea) | 0.8971292    | 0.7823079    | 0.9689922    | 0.7594453    | not scorable | not scorable |
| #### Bn-scaff_22527_1-p41314 genome unspecific (all in)         | 0.9808612    | 0.3369769    | 0.8449612    | 0.6620531    | 0.9669421    | 0.6423765    |
| #### Bn-scaff_22527_1-p43044 A-genome specific (rapa only)      | not scorable | not scorable | not scorable | not scorable | 0.9173554    | 0.9166673    |
| #### Bn-scaff_22527_1-p43117 C-genome specific (napus-oleracea) | 0.9928229    | 0.7245347    | 0.7906977    | 0.6553437    | not scorable | not scorable |
| #### Bn-scaff_22527_1-p61374 napus specific                     | 1            | 0.3247448    | not scorable | not scorable | not scorable | not scorable |
| #### Bn-scaff_22527_1-p88113 C-genome specific (napus-oleracea) | 0.9186603    | 0.6663396    | 0.9922481    | 0.6682964    | not scorable | not scorable |
| #### Bn-scaff_22527_1-p9516 A-genome specific (napus-rapa)      | 1            | 0.491702     | not scorable | not scorable | 0.9834711    | 0.7648812    |
| #### Bn-scaff_22530_1-p56354 C-genome specific (napus-oleracea) | 0.9856459    | 0.662313     | 1            | 0.7053474    | not scorable | not scorable |
| #### Bn-scaff_22530_1-p57372 C-genome specific (napus-oleracea) | 0.9952153    | 0.792056     | 1            | 0.8194051    | not scorable | not scorable |
| #### Bn-scaff_22530_1-p59688 C-genome specific (napus-oleracea) | 0.9952153    | 0.7163269    | 1            | 0.6468149    | not scorable | not scorable |
| #### Bn-scaff_22530_1-p59923 C-genome specific (napus-oleracea) | 0.9976076    | 0.6888624    | 1            | 0.7578797    | not scorable | not scorable |
| #### Bn-scaff_22530_1-p60221 C-genome specific (napus-oleracea) | 0.9928229    | 0.7529314    | 0.9844961    | 0.8335187    | not scorable | not scorable |
| #### Bn-scaff_22530_1-p60651 C-genome specific (napus-oleracea) | 0.9928229    | 0.7642854    | 0.9844961    | 0.7622235    | not scorable | not scorable |
| #### Bn-scaff_22530_1-p61081 C-genome specific (napus-oleracea) | 0.9904306    | 0.7074125    | 0.9767442    | 0.6968232    | not scorable | not scorable |

|                                                                 |              |              |              |              |              |              |
|-----------------------------------------------------------------|--------------|--------------|--------------|--------------|--------------|--------------|
| #### Bn-scaff_22530_1-p61333 C-genome specific (napus-oleracea) | 0.9952153    | 0.6845041    | 1            | 0.8065534    | not scorable | not scorable |
| #### Bn-scaff_22536_1-p16455 genome unspecific (all in)         | 0.9880383    | 0.4373754    | 1            | 0.7674934    | 1            | 0.7755066    |
| #### Bn-scaff_22536_1-p31931 genome unspecific (all in)         | 0.9856459    | 0.5521246    | 1            | 0.8262085    | 1            | 0.9175813    |
| #### Bn-scaff_22536_1-p33913 C-genome specific (napus-oleracea) | 1            | 0.7878901    | 0.9767442    | 0.6971271    | not scorable | not scorable |
| #### Bn-scaff_22536_1-p7771 genome unspecific (all in)          | 0.9976076    | 0.3468411    | 1            | 0.8003326    | 1            | 0.8108927    |
| #### Bn-scaff_22563_1-p10004 C-genome specific (napus-oleracea) | 0.9832536    | 0.7940474    | 1            | 0.7811325    | not scorable | not scorable |
| #### Bn-scaff_22563_1-p10963 all not scorable                   | not scorable | not scorable | not scorable | not scorable | not scorable | not scorable |
| #### Bn-scaff_22563_1-p11184 C-genome specific (napus-oleracea) | 0.9760765    | 0.6732364    | 0.9844961    | 0.6536983    | not scorable | not scorable |
| #### Bn-scaff_22563_1-p11192 C-genome specific (napus-oleracea) | 0.9354067    | 0.6302215    | 1            | 0.5822136    | not scorable | not scorable |
| #### Bn-scaff_22563_1-p11224 C-genome specific (napus-oleracea) | 0.9904306    | 0.8271291    | 1            | 0.8089166    | not scorable | not scorable |
| #### Bn-scaff_22563_1-p11224 C-genome specific (napus-oleracea) | 0.9808612    | 0.7233362    | 1            | 0.6661605    | not scorable | not scorable |
| #### Bn-scaff_22563_1-p11227 C-genome specific (napus-oleracea) | 0.9760765    | 0.7516315    | 1            | 0.7664289    | not scorable | not scorable |
| #### Bn-scaff_22563_1-p11297 C-genome specific (napus-oleracea) | 0.9760765    | 0.7381377    | 1            | 0.750341     | not scorable | not scorable |
| #### Bn-scaff_22563_1-p11318 C-genome specific (napus-oleracea) | 0.9784689    | 0.6639891    | 1            | 0.644894     | not scorable | not scorable |
| #### Bn-scaff_22563_1-p11378 C-genome specific (napus-oleracea) | 0.9928229    | 0.7296771    | 1            | 0.6783708    | not scorable | not scorable |
| #### Bn-scaff_22563_1-p11449 C-genome specific (napus-oleracea) | 0.9665072    | 0.8055037    | 1            | 0.7651352    | not scorable | not scorable |
| #### Bn-scaff_22563_1-p14078 C-genome specific (napus-oleracea) | 0.9641148    | 0.6865132    | 0.9922481    | 0.73593      | not scorable | not scorable |
| #### Bn-scaff_22563_1-p14127 C-genome specific (napus-oleracea) | 0.9712918    | 0.7237254    | 1            | 0.6591169    | not scorable | not scorable |
| #### Bn-scaff_22563_1-p14188 C-genome specific (napus-oleracea) | 0.9712918    | 0.5911586    | 1            | 0.5904099    | not scorable | not scorable |
| #### Bn-scaff_22563_1-p14342 C-genome specific (napus-oleracea) | 0.9808612    | 0.7041828    | 1            | 0.8046734    | not scorable | not scorable |
| #### Bn-scaff_22563_1-p14366 C-genome specific (napus-oleracea) | 0.9808612    | 0.7225636    | 1            | 0.8003281    | not scorable | not scorable |
| #### Bn-scaff_22563_1-p16068 C-genome specific (napus-oleracea) | 0.9784689    | 0.7868192    | 0.9922481    | 0.8426273    | not scorable | not scorable |
| #### Bn-scaff_22563_1-p23133 C-genome specific (napus-oleracea) | 0.9569378    | 0.8426043    | 0.9922481    | 0.8232071    | not scorable | not scorable |
| #### Bn-scaff_22563_1-p24295 C-genome specific (napus-oleracea) | 0.9617225    | 0.8134814    | 0.9922481    | 0.8142446    | not scorable | not scorable |
| #### Bn-scaff_22563_1-p24584 C-genome specific (oleracea only)  | not scorable | not scorable | 0.9844961    | 0.7225332    | not scorable | not scorable |
| #### Bn-scaff_22563_1-p24752 C-genome specific (napus-oleracea) | 0.9665072    | 0.8668167    | 1            | 0.8101314    | not scorable | not scorable |
| #### Bn-scaff_22563_1-p25226 C-genome specific (napus-oleracea) | 0.9712918    | 0.7655725    | 0.9844961    | 0.7523406    | not scorable | not scorable |
| #### Bn-scaff_22563_1-p26139 C-genome specific (napus-oleracea) | 0.9641148    | 0.7906933    | 0.9922481    | 0.7713639    | not scorable | not scorable |
| #### Bn-scaff_22563_1-p26233 C-genome specific (napus-oleracea) | 0.9688995    | 0.7088029    | 0.9922481    | 0.7148775    | not scorable | not scorable |
| #### Bn-scaff_22563_1-p42724 C-genome specific (napus-oleracea) | 0.9736842    | 0.822876     | 1            | 0.7511478    | not scorable | not scorable |
| #### Bn-scaff_22563_1-p44375 C-genome specific (napus-oleracea) | 0.930622     | 0.6994233    | 0.9844961    | 0.6375244    | not scorable | not scorable |
| #### Bn-scaff_22563_1-p44823 C-genome specific (napus-oleracea) | 0.923445     | 0.7050637    | 0.9844961    | 0.7324655    | not scorable | not scorable |
| #### Bn-scaff_22563_1-p44987 C-genome specific (napus-oleracea) | 0.9066986    | 0.6658511    | 0.9922481    | 0.8049195    | not scorable | not scorable |

|                                                                 |              |              |              |              |              |              |
|-----------------------------------------------------------------|--------------|--------------|--------------|--------------|--------------|--------------|
| #### Bn-scaff_22563_1-p45432 C-genome specific (napus-oleracea) | 0.9282297    | 0.6820236    | 0.9922481    | 0.6993239    | not scorable | not scorable |
| #### Bn-scaff_22563_1-p46701 C-genome specific (napus-oleracea) | 0.937799     | 0.690453     | 0.9922481    | 0.7044554    | not scorable | not scorable |
| #### Bn-scaff_22563_1-p46764 C-genome specific (napus-oleracea) | 0.9282297    | 0.6734886    | 0.9922481    | 0.7502218    | not scorable | not scorable |
| #### Bn-scaff_22563_1-p72100 C-genome specific (napus-oleracea) | 0.9712918    | 0.6238672    | 0.9922481    | 0.5496933    | not scorable | not scorable |
| #### Bn-scaff_22563_1-p73016 C-genome specific (napus-oleracea) | 0.9856459    | 0.7690869    | 1            | 0.704016     | not scorable | not scorable |
| #### Bn-scaff_22563_1-p73395 C-genome specific (napus-oleracea) | 0.9617225    | 0.6917569    | 0.9767442    | 0.667479     | not scorable | not scorable |
| #### Bn-scaff_22563_1-p73478 C-genome specific (napus-oleracea) | 0.9784689    | 0.7568829    | 1            | 0.7506835    | not scorable | not scorable |
| #### Bn-scaff_22563_1-p75217 C-genome specific (napus-oleracea) | 0.9665072    | 0.7410237    | 1            | 0.6767626    | not scorable | not scorable |
| #### Bn-scaff_22563_1-p76178 C-genome specific (napus-oleracea) | 0.9569378    | 0.7700647    | 1            | 0.6838869    | not scorable | not scorable |
| #### Bn-scaff_22563_1-p76807 C-genome specific (napus-oleracea) | 0.9736842    | 0.6644362    | 0.9922481    | 0.6521103    | not scorable | not scorable |
| #### Bn-scaff_22563_1-p76947 genome unspecific (all in)         | 0.9665072    | 0.6449454    | 0.9922481    | 0.6809061    | 1            | 0.730171     |
| #### Bn-scaff_22563_1-p76998 genome unspecific (all in)         | 0.9736842    | 0.5969967    | 0.9922481    | 0.5964288    | 0.9669421    | 0.7232928    |
| #### Bn-scaff_22563_1-p85791 genome unspecific (all in)         | 0.9760765    | 0.470463     | 1            | 0.6231655    | 1            | 0.7375415    |
| #### Bn-scaff_22563_1-p86026 C-genome specific (napus-oleracea) | 0.9641148    | 0.7966599    | 1            | 0.7650554    | not scorable | not scorable |
| #### Bn-scaff_22563_1-p86538 genome unspecific (all in)         | 0.9784689    | 0.3144866    | 0.9922481    | 0.6080809    | 1            | 0.7738006    |
| #### Bn-scaff_22563_1-p86667 genome unspecific (all in)         | 0.9760765    | 0.3440027    | 1            | 0.819631     | 1            | 0.870635     |
| #### Bn-scaff_22563_1-p93400 genome unspecific (all in)         | 0.9808612    | 0.2839226    | 0.9612403    | 0.1983282    | 0.9917355    | 0.9175813    |
| #### Bn-scaff_22563_1-p99415 C-genome specific (napus-oleracea) | 0.9736842    | 0.7516446    | 1            | 0.8568738    | not scorable | not scorable |
| #### Bn-scaff_22563_1-p99739 C-genome specific (napus-oleracea) | 0.9712918    | 0.7843264    | 0.9922481    | 0.8339526    | not scorable | not scorable |
| #### Bn-scaff_22564_1-p48151 genome unspecific (all in)         | 0.9090909    | 0.4623805    | 0.9612403    | 0.6630913    | 1            | 0.9188027    |
| #### Bn-scaff_22564_1-p58960 C-genome specific (napus-oleracea) | 0.9880383    | 0.7726238    | 0.9844961    | 0.6870234    | not scorable | not scorable |
| #### Bn-scaff_22668_1-p95 C-genome specific (napus-oleracea)    | 0.9736842    | 0.317231     | 1            | 0.4536752    | not scorable | not scorable |
| #### Bn-scaff_22669_1-p2922 genome unspecific (all in)          | 1            | 0.6326724    | 1            | 0.6271067    | 1            | 0.7914542    |
| #### Bn-scaff_22670_1-p17007 genome unspecific (all in)         | 0.9856459    | 0.5576002    | 1            | 0.744985     | 1            | 0.9175813    |
| #### Bn-scaff_22670_1-p4332 A-genome specific (rapa only)       | not scorable | not scorable | not scorable | not scorable | 0.9917355    | 0.6849132    |
| #### Bn-scaff_22670_1-p87201 genome unspecific (all in)         | 0.9976076    | 0.4725798    | 1            | 0.84364      | 1            | 0.7592824    |
| #### Bn-scaff_22728_1-p10122 genome unspecific (oleracea-rapa)  | not scorable | not scorable | 0.9767442    | 0.7329122    | 0.9917355    | 0.7765876    |
| #### Bn-scaff_22728_1-p10126 C-genome specific (napus-oleracea) | 0.8492823    | 0.7877084    | 1            | 0.8209475    | not scorable | not scorable |
| #### Bn-scaff_22728_1-p10133 genome unspecific (oleracea-rapa)  | not scorable | not scorable | 1            | 0.6992414    | 0.9834711    | 0.6102663    |
| #### Bn-scaff_22728_1-p10180 C-genome specific (napus-oleracea) | 0.6913875    | 0.7512117    | 1            | 0.6407858    | not scorable | not scorable |
| #### Bn-scaff_22728_1-p10248 A-genome specific (napus-rapa)     | 0.9904306    | 0.5616362    | not scorable | not scorable | 1            | 0.9093907    |
| #### Bn-scaff_22728_1-p10471 C-genome specific (napus-oleracea) | 0.7703349    | 0.7425389    | 1            | 0.69552      | not scorable | not scorable |
| #### Bn-scaff_22728_1-p10522 genome unspecific (all in)         | 0.9808612    | 0.5106623    | 1            | 0.721        | 1            | 0.8793069    |

|                                                                |              |              |           |           |              |              |
|----------------------------------------------------------------|--------------|--------------|-----------|-----------|--------------|--------------|
| #### Bn-scaff_22728_1-p10651C-genome specific (napus-oleracea) | 0.7631579    | 0.7815826    | 0.9922481 | 0.7610079 | not scorable | not scorable |
| #### Bn-scaff_22728_1-p10652C-genome specific (napus-oleracea) | 0.7679426    | 0.7664592    | 1         | 0.7528081 | not scorable | not scorable |
| #### Bn-scaff_22728_1-p10809C-genome specific (napus-oleracea) | 0.7679426    | 0.7528051    | 0.5193799 | 0.7897525 | not scorable | not scorable |
| #### Bn-scaff_22728_1-p10936genome unspecific (oleracea-rapa)  | not scorable | not scorable | 1         | 0.789126  | 1            | 0.9272285    |
| #### Bn-scaff_22728_1-p11418C-genome specific (napus-oleracea) | 0.7655503    | 0.757654     | 0.9922481 | 0.7319087 | not scorable | not scorable |
| #### Bn-scaff_22728_1-p11419C-genome specific (napus-oleracea) | 0.7679426    | 0.7731699    | 0.9922481 | 0.8480433 | not scorable | not scorable |
| #### Bn-scaff_22728_1-p11434genome unspecific (all in)         | 0.9665072    | 0.5926809    | 0.9922481 | 0.8654559 | 0.9338843    | 0.9515504    |
| #### Bn-scaff_22728_1-p11484genome unspecific (all in)         | 0.9593301    | 0.6671222    | 0.9844961 | 0.7324179 | 1            | 0.9078653    |
| #### Bn-scaff_22728_1-p11817C-genome specific (napus-oleracea) | 0.930622     | 0.7386691    | 1         | 0.8506492 | not scorable | not scorable |
| #### Bn-scaff_22728_1-p11853genome unspecific (all in)         | 0.9808612    | 0.4644154    | 0.8837209 | 0.6549787 | 1            | 0.9182319    |
| #### Bn-scaff_22728_1-p11868C-genome specific (napus-oleracea) | 0.7344497    | 0.8897946    | 0.4728682 | 0.7680601 | not scorable | not scorable |
| #### Bn-scaff_22728_1-p11973C-genome specific (napus-oleracea) | 0.7631579    | 0.7761559    | 0.9844961 | 0.7349249 | not scorable | not scorable |
| #### Bn-scaff_22728_1-p11975C-genome specific (napus-oleracea) | 0.7703349    | 0.7367081    | 1         | 0.6820153 | not scorable | not scorable |
| #### Bn-scaff_22728_1-p12377genome unspecific (all in)         | 0.9880383    | 0.53193      | 1         | 0.650295  | 1            | 0.8687926    |
| #### Bn-scaff_22728_1-p12488C-genome specific (napus-oleracea) | 0.7703349    | 0.7935088    | 0.9922481 | 0.6967381 | not scorable | not scorable |
| #### Bn-scaff_22728_1-p12499C-genome specific (napus-oleracea) | 0.7751196    | 0.7366303    | 1         | 0.8287013 | not scorable | not scorable |
| #### Bn-scaff_22728_1-p12506C-genome specific (napus-oleracea) | 0.7751196    | 0.8035924    | 0.9767442 | 0.8185863 | not scorable | not scorable |
| #### Bn-scaff_22728_1-p12508genome unspecific (all in)         | 1            | 0.4822408    | 1         | 0.4942989 | 1            | 0.465712     |
| #### Bn-scaff_22728_1-p12562C-genome specific (napus-oleracea) | 0.7751196    | 0.7901289    | 1         | 0.9595698 | not scorable | not scorable |
| #### Bn-scaff_22728_1-p12564C-genome specific (napus-oleracea) | 0.7751196    | 0.8229404    | 1         | 0.8415254 | not scorable | not scorable |
| #### Bn-scaff_22728_1-p12582C-genome specific (napus-oleracea) | 0.7703349    | 0.7898612    | 1         | 0.8045722 | not scorable | not scorable |
| #### Bn-scaff_22728_1-p12585C-genome specific (napus-oleracea) | 0.7727273    | 0.7837935    | 0.9844961 | 0.814975  | not scorable | not scorable |
| #### Bn-scaff_22728_1-p12585C-genome specific (napus-oleracea) | 0.7727273    | 0.7960801    | 1         | 0.7942811 | not scorable | not scorable |
| #### Bn-scaff_22728_1-p12591genome unspecific (all in)         | 0.7822967    | 0.6223059    | 0.9844961 | 0.5633562 | 1            | 0.9198706    |
| #### Bn-scaff_22728_1-p12592genome unspecific (all in)         | 0.9090909    | 0.5840279    | 0.9844961 | 0.5837691 | 1            | 0.9459186    |
| #### Bn-scaff_22728_1-p12617C-genome specific (napus-oleracea) | 0.7727273    | 0.7321724    | 1         | 0.7283592 | not scorable | not scorable |
| #### Bn-scaff_22728_1-p12642genome unspecific (all in)         | 1            | 0.852303     | 1         | 0.7859535 | 1            | 0.9095839    |
| #### Bn-scaff_22728_1-p12653C-genome specific (napus-oleracea) | 0.7703349    | 0.8194804    | 1         | 0.7584161 | not scorable | not scorable |
| #### Bn-scaff_22728_1-p12670genome unspecific (all in)         | 0.9856459    | 0.3139106    | 0.9689922 | 0.5398808 | 1            | 0.8004208    |
| #### Bn-scaff_22728_1-p12935C-genome specific (napus-oleracea) | 0.7679426    | 0.7251512    | 1         | 0.6732364 | not scorable | not scorable |
| #### Bn-scaff_22728_1-p13068C-genome specific (napus-oleracea) | 0.7392344    | 0.9128848    | 1         | 0.8060756 | not scorable | not scorable |
| #### Bn-scaff_22728_1-p13095C-genome specific (napus-oleracea) | 0.777512     | 0.7966334    | 1         | 0.8545113 | not scorable | not scorable |
| #### Bn-scaff_22728_1-p13101C-genome specific (napus-oleracea) | 0.7751196    | 0.6984864    | 0.9844961 | 0.6482485 | not scorable | not scorable |

|                                                                |              |              |              |              |              |              |
|----------------------------------------------------------------|--------------|--------------|--------------|--------------|--------------|--------------|
| #### Bn-scaff_22728_1-p13437genome unspecific (all in)         | 0.7583732    | 0.8662       | 0.9612403    | 0.8042552    | 0.7603306    | 0.656471     |
| #### Bn-scaff_22728_1-p13438C-genome specific (napus-oleracea) | 0.7727273    | 0.795873     | 0.9534883    | 0.769667     | not scorable | not scorable |
| #### Bn-scaff_22728_1-p13564genome unspecific (oleracea-rapa)  | not scorable | not scorable | 0.9922481    | 0.74598      | 0.9752066    | 0.4339217    |
| #### Bn-scaff_22728_1-p13635genome unspecific (all in)         | 0.9856459    | 0.312946     | 0.9922481    | 0.7936006    | 1            | 0.7847029    |
| #### Bn-scaff_22728_1-p13934C-genome specific (napus-oleracea) | 0.7727273    | 0.7407669    | 0.9844961    | 0.7664841    | not scorable | not scorable |
| #### Bn-scaff_22728_1-p13970C-genome specific (napus-oleracea) | 0.7703349    | 0.8079363    | 0.5581396    | 0.8293334    | not scorable | not scorable |
| #### Bn-scaff_22728_1-p13970C-genome specific (napus-oleracea) | 0.7703349    | 0.7922174    | 0.5658914    | 0.8922718    | not scorable | not scorable |
| #### Bn-scaff_22728_1-p13971C-genome specific (napus-oleracea) | 0.7631579    | 0.7933087    | 0.5658914    | 0.8229336    | not scorable | not scorable |
| #### Bn-scaff_22728_1-p13972C-genome specific (napus-oleracea) | 0.7655503    | 0.7928615    | 0.5658914    | 0.8272519    | not scorable | not scorable |
| #### Bn-scaff_22728_1-p13974C-genome specific (napus-oleracea) | 0.7679426    | 0.8115522    | 0.5658914    | 0.8842739    | not scorable | not scorable |
| #### Bn-scaff_22728_1-p13974C-genome specific (napus-oleracea) | 0.7679426    | 0.823274     | 0.5736434    | 0.8715212    | not scorable | not scorable |
| #### Bn-scaff_22728_1-p13975C-genome specific (napus-oleracea) | 0.7655503    | 0.796932     | 0.5658914    | 0.8562889    | not scorable | not scorable |
| #### Bn-scaff_22728_1-p13980C-genome specific (napus-oleracea) | 0.7679426    | 0.7900224    | 0.5658914    | 0.8156151    | not scorable | not scorable |
| #### Bn-scaff_22728_1-p13984C-genome specific (napus-oleracea) | 0.7655503    | 0.7827992    | 0.5658914    | 0.7761663    | not scorable | not scorable |
| #### Bn-scaff_22728_1-p13987C-genome specific (napus-oleracea) | 0.7703349    | 0.8251431    | 0.5658914    | 0.8944901    | not scorable | not scorable |
| #### Bn-scaff_22728_1-p13992C-genome specific (napus-oleracea) | 0.7703349    | 0.7748593    | 0.5658914    | 0.7886506    | not scorable | not scorable |
| #### Bn-scaff_22728_1-p13993C-genome specific (napus-oleracea) | 0.7751196    | 0.7985735    | 0.5813953    | 0.8351377    | not scorable | not scorable |
| #### Bn-scaff_22728_1-p14015napus specific                     | 0.7416268    | 0.8622317    | not scorable | not scorable | not scorable | not scorable |
| #### Bn-scaff_22728_1-p14020C-genome specific (napus-oleracea) | 0.7727273    | 0.837065     | 0.5658914    | 0.829385     | not scorable | not scorable |
| #### Bn-scaff_22728_1-p14022C-genome specific (napus-oleracea) | 0.7727273    | 0.8031266    | 0.5813953    | 0.8458244    | not scorable | not scorable |
| #### Bn-scaff_22728_1-p14022all not scorable                   | not scorable | not scorable | not scorable | not scorable | not scorable | not scorable |
| #### Bn-scaff_22728_1-p14058C-genome specific (napus-oleracea) | 0.7703349    | 0.8027239    | 0.5658914    | 0.7294425    | not scorable | not scorable |
| #### Bn-scaff_22728_1-p14473C-genome specific (napus-oleracea) | 0.7679426    | 0.8254636    | 0.3488372    | 0.6377378    | not scorable | not scorable |
| #### Bn-scaff_22728_1-p14851genome unspecific (oleracea-rapa)  | not scorable | not scorable | 0.5271318    | 0.7518613    | 0.7851239    | 0.9396232    |
| #### Bn-scaff_22728_1-p24041C-genome specific (napus-oleracea) | 0.7631579    | 0.7780338    | 0.9689922    | 0.6859579    | not scorable | not scorable |
| #### Bn-scaff_22728_1-p26317C-genome specific (napus-oleracea) | 0.7655503    | 0.7419891    | 0.8527132    | 0.7217512    | not scorable | not scorable |
| #### Bn-scaff_22728_1-p26331genome unspecific (all in)         | 0.9760765    | 0.3214412    | 1            | 0.8280202    | 1            | 0.9040114    |
| #### Bn-scaff_22728_1-p28391C-genome specific (napus-oleracea) | 0.7679426    | 0.7460206    | 1            | 0.8390381    | not scorable | not scorable |
| #### Bn-scaff_22728_1-p28571genome unspecific (all in)         | 0.9736842    | 0.4980308    | 1            | 0.7960958    | 1            | 0.909456     |
| #### Bn-scaff_22728_1-p30484C-genome specific (napus-oleracea) | 0.7511961    | 0.7838418    | 1            | 0.7748976    | not scorable | not scorable |
| #### Bn-scaff_22728_1-p30495genome unspecific (oleracea-rapa)  | not scorable | not scorable | 0.9612403    | 0.7515365    | 1            | 0.9392766    |
| #### Bn-scaff_22728_1-p30537C-genome specific (napus-oleracea) | 0.7488039    | 0.7306093    | 1            | 0.7698566    | not scorable | not scorable |
| #### Bn-scaff_22728_1-p30831C-genome specific (napus-oleracea) | 0.7583732    | 0.7418394    | 0.9922481    | 0.78951      | not scorable | not scorable |

|                                                                 |              |              |              |              |              |              |
|-----------------------------------------------------------------|--------------|--------------|--------------|--------------|--------------|--------------|
| #### Bn-scaff_22728_1-p31007 C-genome specific (napus-oleracea) | 0.9545454    | 0.5615199    | 1            | 0.7127084    | not scorable | not scorable |
| #### Bn-scaff_22728_1-p31397 genome unspecific (all in)         | 0.9043062    | 0.5331246    | 1            | 0.8478929    | 0.8677686    | 0.8141751    |
| #### Bn-scaff_22728_1-p34420 genome unspecific (all in)         | 0.9856459    | 0.3662557    | 1            | 0.7086218    | 0.9917355    | 0.7236361    |
| #### Bn-scaff_22728_1-p34594 genome unspecific (all in)         | 0.9162679    | 0.3601061    | 0.9844961    | 0.4729373    | 1            | 0.7807216    |
| #### Bn-scaff_22728_1-p34907 C-genome specific (napus-oleracea) | 0.7727273    | 0.7126061    | 0.9922481    | 0.73066      | not scorable | not scorable |
| #### Bn-scaff_22728_1-p35633 genome unspecific (all in)         | 1            | 0.7747091    | 1            | 0.7197998    | 1            | 0.854249     |
| #### Bn-scaff_22728_1-p35778 C-genome specific (napus-oleracea) | 0.7751196    | 0.7670194    | 1            | 0.6955921    | not scorable | not scorable |
| #### Bn-scaff_22728_1-p35965 C-genome specific (napus-oleracea) | 0.7727273    | 0.8092414    | 1            | 0.8628007    | not scorable | not scorable |
| #### Bn-scaff_22728_1-p36026 genome unspecific (all in)         | 0.9952153    | 0.7143722    | 1            | 0.6806869    | 1            | 0.924417     |
| #### Bn-scaff_22728_1-p36079 genome unspecific (all in)         | 0.9880383    | 0.5625384    | 1            | 0.7856623    | 1            | 0.9039531    |
| #### Bn-scaff_22728_1-p39240 C-genome specific (napus-oleracea) | 0.7535885    | 0.7722547    | 0.6124031    | 0.7592783    | not scorable | not scorable |
| #### Bn-scaff_22728_1-p40015 C-genome specific (napus-oleracea) | 0.7631579    | 0.8117436    | 1            | 0.770234     | not scorable | not scorable |
| #### Bn-scaff_22728_1-p40213 C-genome specific (napus-oleracea) | 0.7583732    | 0.7121136    | 1            | 0.711659     | not scorable | not scorable |
| #### Bn-scaff_22728_1-p45818 C-genome specific (napus-oleracea) | 0.7033493    | 0.6869654    | 1            | 0.7614294    | not scorable | not scorable |
| #### Bn-scaff_22728_1-p48893 C-genome specific (napus-oleracea) | 0.7177033    | 0.8056787    | 0.9922481    | 0.748789     | not scorable | not scorable |
| #### Bn-scaff_22728_1-p48921 C-genome specific (napus-oleracea) | 0.708134     | 0.7805434    | 1            | 0.7874246    | not scorable | not scorable |
| #### Bn-scaff_22728_1-p50739 C-genome specific (napus-oleracea) | 0.9641148    | 0.3788444    | 0.9844961    | 0.6732742    | not scorable | not scorable |
| #### Bn-scaff_22728_1-p51336 genome unspecific (all in)         | 0.9808612    | 0.4468341    | 1            | 0.6766156    | 1            | 0.7627919    |
| #### Bn-scaff_22728_1-p51525 C-genome specific (napus-oleracea) | 0.6435407    | 0.6821529    | 0.9922481    | 0.6365644    | not scorable | not scorable |
| #### Bn-scaff_22728_1-p52138 genome unspecific (all in)         | 1            | 0.6053547    | 0.9767442    | 0.6050304    | 1            | 0.8248814    |
| #### Bn-scaff_22728_1-p52570 C-genome specific (napus-oleracea) | 0.5095694    | 0.708362     | 0.7829458    | 0.6529352    | not scorable | not scorable |
| #### Bn-scaff_22728_1-p52643 C-genome specific (napus-oleracea) | 0.6291866    | 0.7105567    | 0.9689922    | 0.6990497    | not scorable | not scorable |
| #### Bn-scaff_22728_1-p54961 C-genome specific (napus-oleracea) | 0.6291866    | 0.7891167    | 1            | 0.7820897    | not scorable | not scorable |
| #### Bn-scaff_22728_1-p57682 genome unspecific (oleracea-rapa)  | not scorable | not scorable | 0.9379845    | 0.2545328    | 0.9834711    | 0.7664449    |
| #### Bn-scaff_22728_1-p57779 napus specific                     | 0.6267943    | 0.7763231    | not scorable | not scorable | not scorable | not scorable |
| #### Bn-scaff_22728_1-p60093 C-genome specific (napus-oleracea) | 0.5263158    | 0.8394766    | 1            | 0.8143303    | not scorable | not scorable |
| #### Bn-scaff_22728_1-p64045 genome unspecific (all in)         | 0.9473684    | 0.5439546    | 1            | 0.8091654    | 1            | 0.9272014    |
| #### Bn-scaff_22728_1-p64671 C-genome specific (napus-oleracea) | 0.6866029    | 0.7487419    | 0.8217054    | 0.7440118    | not scorable | not scorable |
| #### Bn-scaff_22728_1-p66913 C-genome specific (napus-oleracea) | 0.638756     | 0.8213336    | 0.5193799    | 0.8131337    | not scorable | not scorable |
| #### Bn-scaff_22728_1-p68014 C-genome specific (napus-oleracea) | 0.6842105    | 0.7593444    | 0.9922481    | 0.7315281    | not scorable | not scorable |
| #### Bn-scaff_22728_1-p69444 C-genome specific (napus-oleracea) | 0.6004785    | 0.7969919    | 1            | 0.7507533    | not scorable | not scorable |
| #### Bn-scaff_22728_1-p69467 C-genome specific (napus-oleracea) | 0.6722488    | 0.8429953    | 1            | 0.8232586    | not scorable | not scorable |
| #### Bn-scaff_22728_1-p69806 C-genome specific (napus-oleracea) | 0.6746411    | 0.8028696    | 1            | 0.8301901    | not scorable | not scorable |

|                                                                 |              |              |              |              |              |              |              |
|-----------------------------------------------------------------|--------------|--------------|--------------|--------------|--------------|--------------|--------------|
| #### Bn-scaff_22728_1-p70346 C-genome specific (napus-oleracea) | 0.6770335    | 0.7691905    |              | 1            | 0.7677682    | not scorable | not scorable |
| #### Bn-scaff_22728_1-p71803 C-genome specific (napus-oleracea) | 0.6770335    | 0.631412     |              | 1            | 0.6595548    | not scorable | not scorable |
| #### Bn-scaff_22728_1-p73504 C-genome specific (napus-oleracea) | 0.6866029    | 0.7936383    | 0.9844961    |              | 0.8055431    | not scorable | not scorable |
| #### Bn-scaff_22728_1-p73718 C-genome specific (napus-oleracea) | 0.6937799    | 0.6657572    | 0.9844961    |              | 0.6430603    | not scorable | not scorable |
| #### Bn-scaff_22728_1-p73926 C-genome specific (napus-oleracea) | 0.6866029    | 0.764474     |              | 1            | 0.7828259    | not scorable | not scorable |
| #### Bn-scaff_22728_1-p73954 C-genome specific (napus-oleracea) | 0.6794258    | 0.7610246    |              | 1            | 0.6640987    | not scorable | not scorable |
| #### Bn-scaff_22728_1-p74312 genome unspecific (all in)         | 0.9736842    | 0.4805646    | 0.9844961    |              | 0.5646482    | 1            | 0.8024392    |
| #### Bn-scaff_22728_1-p74455 genome unspecific (all in)         | 0.9162679    | 0.7251521    | 0.9689922    |              | 0.8107295    | 0.9752066    | 0.7131827    |
| #### Bn-scaff_22728_1-p74750 C-genome specific (napus-oleracea) | 0.6746411    | 0.7205414    | 0.9922481    |              | 0.836085     | not scorable | not scorable |
| #### Bn-scaff_22728_1-p74930 genome unspecific (all in)         | 0.9952153    | 0.5007527    | 0.9767442    |              | 0.4952175    | 1            | 0.7368142    |
| #### Bn-scaff_22728_1-p75030 A-genome specific (napus-rapa)     | 0.9904306    | 0.7402422    | not scorable | not scorable | 0.9421487    | 0.8168232    |              |
| #### Bn-scaff_22728_1-p75053 C-genome specific (napus-oleracea) | 0.6889952    | 0.784629     |              | 1            | 0.7981623    | not scorable | not scorable |
| #### Bn-scaff_22728_1-p90067 genome unspecific (all in)         | 0.9784689    | 0.4965807    | 0.9922481    |              | 0.7856665    | 0.9917355    | 0.9077197    |
| #### Bn-scaff_22728_1-p92279 genome unspecific (all in)         | 0.9665072    | 0.4811231    | 0.9844961    |              | 0.6245863    | 1            | 0.8793052    |
| #### Bn-scaff_22728_1-p92445 C-genome specific (napus-oleracea) | 0.6889952    | 0.7840836    | 0.9689922    |              | 0.7575594    | not scorable | not scorable |
| #### Bn-scaff_22728_1-p93898 genome unspecific (all in)         | 0.9808612    | 0.2665134    | 0.9922481    |              | 0.754097     | 1            | 0.8955559    |
| #### Bn-scaff_22728_1-p94470 C-genome specific (oleracea only)  | not scorable | not scorable | 0.7674419    |              | 0.3594133    | not scorable | not scorable |
| #### Bn-scaff_22728_1-p94491 C-genome specific (oleracea only)  | not scorable | not scorable | 0.8062016    |              | 0.7052973    | not scorable | not scorable |
| #### Bn-scaff_22728_1-p94549 napus specific                     | 0.791866     | 0.3597852    | not scorable | not scorable | not scorable | not scorable |              |
| #### Bn-scaff_22728_1-p94595 C-genome specific (oleracea only)  | not scorable | not scorable | 0.4573644    |              | 0.7840874    | not scorable | not scorable |
| #### Bn-scaff_22728_1-p94743 C-genome specific (napus-oleracea) | 0.7822967    | 0.659363     | 0.4883721    |              | 0.6605805    | not scorable | not scorable |
| #### Bn-scaff_22728_1-p96753 genome unspecific (all in)         | 0.6578947    | 0.645689     | 0.9922481    |              | 0.8210274    | 0.9173554    | 0.9259452    |
| #### Bn-scaff_22728_1-p96834 C-genome specific (napus-oleracea) | 0.6889952    | 0.8203616    |              | 1            | 0.6675888    | not scorable | not scorable |
| #### Bn-scaff_22728_1-p96883 C-genome specific (napus-oleracea) | 0.6842105    | 0.8478005    |              | 1            | 0.7570074    | not scorable | not scorable |
| #### Bn-scaff_22728_1-p97007 C-genome specific (napus-oleracea) | 0.6746411    | 0.8290105    |              | 1            | 0.7613785    | not scorable | not scorable |
| #### Bn-scaff_22728_1-p97033 C-genome specific (napus-oleracea) | 0.6722488    | 0.816969     | 0.8837209    |              | 0.7185883    | not scorable | not scorable |
| #### Bn-scaff_22728_1-p97323 C-genome specific (napus-oleracea) | 0.6866029    | 0.7438849    | 0.8992248    |              | 0.8510554    | not scorable | not scorable |
| #### Bn-scaff_22746_1-p171 C-genome specific (napus-oleracea)   | 0.9712918    | 0.8267779    | 0.9379845    |              | 0.7052346    | not scorable | not scorable |
| #### Bn-scaff_22749_1-p11346 genome unspecific (oleracea-rapa)  | not scorable | not scorable |              | 1            | 0.7556512    | 0.9917355    | 0.319285     |
| #### Bn-scaff_22749_1-p13622 C-genome specific (napus-oleracea) | 0.9880383    | 0.7668804    | 0.9844961    |              | 0.8367763    | not scorable | not scorable |
| #### Bn-scaff_22749_1-p13796 C-genome specific (napus-oleracea) | 0.9904306    | 0.8578961    | 0.9844961    |              | 0.7371197    | not scorable | not scorable |
| #### Bn-scaff_22749_1-p14420 C-genome specific (napus-oleracea) | 0.9904306    | 0.8629668    |              | 1            | 0.7676813    | not scorable | not scorable |
| #### Bn-scaff_22749_1-p14645 C-genome specific (napus-oleracea) | 0.9904306    | 0.8714235    |              | 1            | 0.8391924    | not scorable | not scorable |



|                                                                 |           |           |           |           |              |              |
|-----------------------------------------------------------------|-----------|-----------|-----------|-----------|--------------|--------------|
| #### Bn-scaff_22749_1-p15169 C-genome specific (napus-oleracea) | 0.9856459 | 0.7249339 | 0.9922481 | 0.6395578 | not scorable | not scorable |
| #### Bn-scaff_22749_1-p15231 C-genome specific (napus-oleracea) | 0.9928229 | 0.7790921 | 1         | 0.7495088 | not scorable | not scorable |
| #### Bn-scaff_22749_1-p15399 C-genome specific (napus-oleracea) | 0.9880383 | 0.7475823 | 0.9922481 | 0.7076991 | not scorable | not scorable |
| #### Bn-scaff_22749_1-p15411 C-genome specific (napus-oleracea) | 0.9928229 | 0.7774163 | 0.9844961 | 0.6785228 | not scorable | not scorable |
| #### Bn-scaff_22749_1-p15476 C-genome specific (napus-oleracea) | 0.9904306 | 0.8235946 | 1         | 0.8035264 | not scorable | not scorable |
| #### Bn-scaff_22749_1-p17385 C-genome specific (napus-oleracea) | 0.9928229 | 0.8606652 | 1         | 0.8192378 | not scorable | not scorable |
| #### Bn-scaff_22749_1-p18113 C-genome specific (napus-oleracea) | 0.9952153 | 0.7489314 | 0.9689922 | 0.728084  | not scorable | not scorable |
| #### Bn-scaff_22749_1-p18264 C-genome specific (napus-oleracea) | 0.9904306 | 0.807098  | 0.9844961 | 0.7097538 | not scorable | not scorable |
| #### Bn-scaff_22749_1-p20228 genome unspecific (all in)         | 0.9928229 | 0.3469143 | 1         | 0.7799449 | 0.9504132    | 0.2621923    |
| #### Bn-scaff_22749_1-p23432 C-genome specific (napus-oleracea) | 0.9952153 | 0.8424123 | 0.9534883 | 0.7098461 | not scorable | not scorable |
| #### Bn-scaff_22749_1-p24074 C-genome specific (napus-oleracea) | 0.9832536 | 0.8880756 | 0.9844961 | 0.7687631 | not scorable | not scorable |
| #### Bn-scaff_22749_1-p25031 genome unspecific (all in)         | 0.9856459 | 0.2625051 | 1         | 0.7017795 | 0.9917355    | 0.6613124    |
| #### Bn-scaff_22749_1-p25532 C-genome specific (napus-oleracea) | 0.9928229 | 0.6966239 | 0.9922481 | 0.6130455 | not scorable | not scorable |
| #### Bn-scaff_22749_1-p25538 C-genome specific (napus-oleracea) | 0.9760765 | 0.8366882 | 0.9922481 | 0.6872752 | not scorable | not scorable |
| #### Bn-scaff_22749_1-p25570 C-genome specific (napus-oleracea) | 0.9952153 | 0.7636795 | 0.9922481 | 0.7822114 | not scorable | not scorable |
| #### Bn-scaff_22749_1-p25581 C-genome specific (napus-oleracea) | 0.9904306 | 0.8453355 | 1         | 0.7088594 | not scorable | not scorable |
| #### Bn-scaff_22749_1-p25624 C-genome specific (napus-oleracea) | 0.9904306 | 0.8995502 | 1         | 0.7589247 | not scorable | not scorable |
| #### Bn-scaff_22749_1-p25645 C-genome specific (napus-oleracea) | 0.9904306 | 0.8000944 | 1         | 0.7656881 | not scorable | not scorable |
| #### Bn-scaff_22749_1-p25717 C-genome specific (napus-oleracea) | 0.9832536 | 0.9600261 | 0.9922481 | 0.7848399 | not scorable | not scorable |
| #### Bn-scaff_22749_1-p25980 C-genome specific (napus-oleracea) | 0.9928229 | 0.7506997 | 0.9922481 | 0.7539887 | not scorable | not scorable |
| #### Bn-scaff_22749_1-p26045 C-genome specific (napus-oleracea) | 0.9904306 | 0.6171792 | 0.9844961 | 0.5699692 | not scorable | not scorable |
| #### Bn-scaff_22749_1-p26197 C-genome specific (napus-oleracea) | 0.9928229 | 0.7585356 | 0.9844961 | 0.7285156 | not scorable | not scorable |
| #### Bn-scaff_22749_1-p26290 C-genome specific (napus-oleracea) | 0.9928229 | 0.7867382 | 1         | 0.6898575 | not scorable | not scorable |
| #### Bn-scaff_22749_1-p26301 C-genome specific (napus-oleracea) | 0.9904306 | 0.868587  | 1         | 0.766063  | not scorable | not scorable |
| #### Bn-scaff_22749_1-p26307 C-genome specific (napus-oleracea) | 0.9904306 | 0.7663468 | 0.9922481 | 0.7666273 | not scorable | not scorable |
| #### Bn-scaff_22749_1-p26309 C-genome specific (napus-oleracea) | 0.9952153 | 0.7132292 | 0.9689922 | 0.6594497 | not scorable | not scorable |
| #### Bn-scaff_22749_1-p26820 C-genome specific (napus-oleracea) | 0.9952153 | 0.7759071 | 0.9922481 | 0.711879  | not scorable | not scorable |
| #### Bn-scaff_22749_1-p26898 C-genome specific (napus-oleracea) | 0.9928229 | 0.7293375 | 0.9922481 | 0.694905  | not scorable | not scorable |
| #### Bn-scaff_22749_1-p26916 C-genome specific (napus-oleracea) | 0.9928229 | 0.8497654 | 1         | 0.7507792 | not scorable | not scorable |
| #### Bn-scaff_22749_1-p26930 C-genome specific (napus-oleracea) | 0.9952153 | 0.7774039 | 0.9844961 | 0.6715794 | not scorable | not scorable |
| #### Bn-scaff_22749_1-p27018 C-genome specific (napus-oleracea) | 0.9904306 | 0.8391485 | 0.9767442 | 0.7103652 | not scorable | not scorable |
| #### Bn-scaff_22749_1-p27050 C-genome specific (napus-oleracea) | 0.9904306 | 0.8047737 | 0.9767442 | 0.7323857 | not scorable | not scorable |
| #### Bn-scaff_22749_1-p27146 C-genome specific (napus-oleracea) | 0.9952153 | 0.8943027 | 1         | 0.7896504 | not scorable | not scorable |

|                                                                 |              |              |              |              |              |              |
|-----------------------------------------------------------------|--------------|--------------|--------------|--------------|--------------|--------------|
| #### Bn-scaff_22749_1-p27317 C-genome specific (napus-oleracea) | 0.9928229    | 0.6867417    | 0.9922481    | 0.5684496    | not scorable | not scorable |
| #### Bn-scaff_22749_1-p27326 C-genome specific (napus-oleracea) | 0.9904306    | 0.7196619    | 1            | 0.6385577    | not scorable | not scorable |
| #### Bn-scaff_22749_1-p27386 all not scorable                   | not scorable | not scorable | not scorable | not scorable | not scorable | not scorable |
| #### Bn-scaff_22749_1-p27400 C-genome specific (napus-oleracea) | 0.9928229    | 0.7342855    | 0.9922481    | 0.7047493    | not scorable | not scorable |
| #### Bn-scaff_22749_1-p31378 C-genome specific (napus-oleracea) | 0.9904306    | 0.893899     | 0.9922481    | 0.8133555    | not scorable | not scorable |
| #### Bn-scaff_22749_1-p31852 napus specific                     | 0.9114832    | 0.76085      | not scorable | not scorable | not scorable | not scorable |
| #### Bn-scaff_22749_1-p31854 napus specific                     | 0.791866     | 0.8365422    | not scorable | not scorable | not scorable | not scorable |
| #### Bn-scaff_22749_1-p38307 genome unspecific (all in)         | 0.9952153    | 0.3646128    | 0.9922481    | 0.8327485    | 1            | 0.8196487    |
| #### Bn-scaff_22749_1-p39273 C-genome specific (napus-oleracea) | 0.9904306    | 0.8711085    | 0.9612403    | 0.8775836    | not scorable | not scorable |
| #### Bn-scaff_22749_1-p40065 C-genome specific (napus-oleracea) | 0.9688995    | 0.7191762    | 0.9844961    | 0.683278     | not scorable | not scorable |
| #### Bn-scaff_22749_1-p43650 genome unspecific (all in)         | 0.9952153    | 0.7310275    | 1            | 0.7462639    | 1            | 0.9395409    |
| #### Bn-scaff_22749_1-p44120 C-genome specific (napus-oleracea) | 0.9952153    | 0.7759955    | 1            | 0.8944397    | not scorable | not scorable |
| #### Bn-scaff_22749_1-p44125 C-genome specific (napus-oleracea) | 0.9904306    | 0.8786219    | 1            | 0.7337734    | not scorable | not scorable |
| #### Bn-scaff_22749_1-p44382 C-genome specific (napus-oleracea) | 0.9928229    | 0.8838113    | 0.9844961    | 0.7252778    | not scorable | not scorable |
| #### Bn-scaff_22749_1-p45845 C-genome specific (napus-oleracea) | 0.9928229    | 0.820658     | 1            | 0.7071902    | not scorable | not scorable |
| #### Bn-scaff_22749_1-p46231 C-genome specific (napus-oleracea) | 0.9952153    | 0.7727721    | 0.9922481    | 0.7154657    | not scorable | not scorable |
| #### Bn-scaff_22749_1-p46252 genome unspecific (all in)         | 0.9880383    | 0.716761     | 0.9922481    | 0.7415183    | 1            | 0.9083265    |
| #### Bn-scaff_22749_1-p46385 C-genome specific (napus-oleracea) | 0.9162679    | 0.7334288    | 0.9689922    | 0.6514205    | not scorable | not scorable |
| #### Bn-scaff_22749_1-p47482 C-genome specific (napus-oleracea) | 0.9186603    | 0.8055365    | 0.9302326    | 0.7831622    | not scorable | not scorable |
| #### Bn-scaff_22749_1-p47501 C-genome specific (napus-oleracea) | 0.9952153    | 0.862032     | 0.9922481    | 0.7965781    | not scorable | not scorable |
| #### Bn-scaff_22749_1-p48863 C-genome specific (napus-oleracea) | 0.9952153    | 0.8352779    | 1            | 0.7529556    | not scorable | not scorable |
| #### Bn-scaff_22749_1-p53036 C-genome specific (napus-oleracea) | 0.9904306    | 0.7519969    | 1            | 0.7326015    | not scorable | not scorable |
| #### Bn-scaff_22749_1-p53182 genome unspecific (all in)         | 0.9928229    | 0.5029826    | 1            | 0.8310806    | 1            | 0.9094508    |
| #### Bn-scaff_22749_1-p54830 C-genome specific (napus-oleracea) | 0.9832536    | 0.2720558    | 0.9922481    | 0.6847418    | not scorable | not scorable |
| #### Bn-scaff_22749_1-p55826 genome unspecific (all in)         | 0.9880383    | 0.4502684    | 1            | 0.7872319    | 0.9917355    | 0.7642274    |
| #### Bn-scaff_22749_1-p57400 C-genome specific (napus-oleracea) | 0.9904306    | 0.7392838    | 0.9844961    | 0.7026496    | not scorable | not scorable |
| #### Bn-scaff_22749_1-p58184 C-genome specific (napus-oleracea) | 0.9904306    | 0.865756     | 1            | 0.8314662    | not scorable | not scorable |
| #### Bn-scaff_22749_1-p58200 C-genome specific (napus-oleracea) | 0.9928229    | 0.8492018    | 0.9922481    | 0.7142818    | not scorable | not scorable |
| #### Bn-scaff_22749_1-p58365 C-genome specific (napus-oleracea) | 0.9928229    | 0.8441191    | 1            | 0.7168652    | not scorable | not scorable |
| #### Bn-scaff_22749_1-p58840 C-genome specific (napus-oleracea) | 0.9856459    | 0.8535544    | 1            | 0.7172548    | not scorable | not scorable |
| #### Bn-scaff_22749_1-p67780 C-genome specific (napus-oleracea) | 0.9952153    | 0.8701106    | 1            | 0.7149133    | not scorable | not scorable |
| #### Bn-scaff_22749_1-p89327 genome unspecific (all in)         | 0.9928229    | 0.4263716    | 0.9922481    | 0.7711571    | 1            | 0.9120898    |
| #### Bn-scaff_22751_1-p13790 genome unspecific (all in)         | 0.9928229    | 0.3027116    | 1            | 0.7255893    | 0.9752066    | 0.7307269    |

|                                                                |              |              |           |           |              |              |
|----------------------------------------------------------------|--------------|--------------|-----------|-----------|--------------|--------------|
| #### Bn-scaff_22751_1-p19884genome unspecific (all in)         | 0.9928229    | 0.506556     | 0.9922481 | 0.8505687 | 1            | 0.904552     |
| #### Bn-scaff_22751_1-p39505genome unspecific (all in)         | 1            | 0.3612072    | 0.9844961 | 0.7088333 | 1            | 0.7739488    |
| #### Bn-scaff_22751_1-p47264genome unspecific (oleracea-rapa)  | not scorable | not scorable | 0.9844961 | 0.7038476 | 1            | 0.8135551    |
| #### Bn-scaff_22765_1-p14852genome unspecific (all in)         | 0.9976076    | 0.5401454    | 0.9922481 | 0.7094473 | 1            | 0.9175094    |
| #### Bn-scaff_22765_1-p50300genome unspecific (all in)         | 1            | 0.8957658    | 0.9922481 | 0.8852311 | 1            | 0.9318311    |
| #### Bn-scaff_22765_1-p82282C-genome specific (napus-oleracea) | 0.9904306    | 0.8232945    | 0.9844961 | 0.7859716 | not scorable | not scorable |
| #### Bn-scaff_22770_1-p19929genome unspecific (oleracea-rapa)  | not scorable | not scorable | 0.7906977 | 0.7508782 | 1            | 0.8409751    |
| #### Bn-scaff_22770_1-p33433genome unspecific (all in)         | 0.9688995    | 0.3126815    | 1         | 0.8136466 | 0.9917355    | 0.8092749    |
| #### Bn-scaff_22770_1-p42306C-genome specific (oleracea only)  | not scorable | not scorable | 0.9922481 | 0.5680563 | not scorable | not scorable |
| #### Bn-scaff_22788_1-p739 C-genome specific (napus-oleracea)  | 0.9904306    | 0.8658363    | 0.9069768 | 0.7563589 | not scorable | not scorable |
| #### Bn-scaff_22790_1-p10109genome unspecific (all in)         | 0.9569378    | 0.661467     | 0.9922481 | 0.8143551 | 1            | 0.8918603    |
| #### Bn-scaff_22790_1-p10122genome unspecific (all in)         | 0.9473684    | 0.7762277    | 0.9922481 | 0.7282501 | 1            | 0.9335362    |
| #### Bn-scaff_22790_1-p10122genome unspecific (all in)         | 0.9569378    | 0.7204329    | 0.9922481 | 0.798265  | 1            | 0.8370862    |
| #### Bn-scaff_22790_1-p10130C-genome specific (napus-oleracea) | 0.9760765    | 0.7836943    | 0.9844961 | 0.8230492 | not scorable | not scorable |
| #### Bn-scaff_22790_1-p10215C-genome specific (napus-oleracea) | 0.9425837    | 0.8360932    | 0.9922481 | 0.7647824 | not scorable | not scorable |
| #### Bn-scaff_22790_1-p10248C-genome specific (napus-oleracea) | 0.9545454    | 0.7402009    | 0.9767442 | 0.7556263 | not scorable | not scorable |
| #### Bn-scaff_22790_1-p10264C-genome specific (napus-oleracea) | 0.9736842    | 0.7559333    | 0.9922481 | 0.7555966 | not scorable | not scorable |
| #### Bn-scaff_22790_1-p10437C-genome specific (napus-oleracea) | 0.9688995    | 0.7587842    | 0.9922481 | 0.8180673 | not scorable | not scorable |
| #### Bn-scaff_22790_1-p10713C-genome specific (napus-oleracea) | 0.9784689    | 0.7489334    | 1         | 0.8392965 | not scorable | not scorable |
| #### Bn-scaff_22790_1-p10917genome unspecific (all in)         | 0.9808612    | 0.5160916    | 1         | 0.8880707 | 1            | 0.9175813    |
| #### Bn-scaff_22790_1-p11152genome unspecific (all in)         | 0.9521531    | 0.424596     | 1         | 0.6849843 | 1            | 0.8730073    |
| #### Bn-scaff_22790_1-p11249C-genome specific (napus-oleracea) | 0.9736842    | 0.7208009    | 0.9922481 | 0.7069764 | not scorable | not scorable |
| #### Bn-scaff_22790_1-p11296C-genome specific (napus-oleracea) | 0.9473684    | 0.6323085    | 0.9844961 | 0.7985336 | not scorable | not scorable |
| #### Bn-scaff_22790_1-p11420C-genome specific (napus-oleracea) | 0.9760765    | 0.7545683    | 1         | 0.819081  | not scorable | not scorable |
| #### Bn-scaff_22790_1-p11553C-genome specific (napus-oleracea) | 0.9641148    | 0.6662551    | 0.9922481 | 0.6924533 | not scorable | not scorable |
| #### Bn-scaff_22790_1-p11695C-genome specific (napus-oleracea) | 0.9617225    | 0.7625855    | 0.9612403 | 0.795049  | not scorable | not scorable |
| #### Bn-scaff_22790_1-p11716C-genome specific (napus-oleracea) | 0.9736842    | 0.7565459    | 1         | 0.8182366 | not scorable | not scorable |
| #### Bn-scaff_22790_1-p12275C-genome specific (napus-oleracea) | 1            | 0.5885347    | 1         | 0.6239341 | not scorable | not scorable |
| #### Bn-scaff_22790_1-p12328C-genome specific (napus-oleracea) | 0.9688995    | 0.6727508    | 1         | 0.7057324 | not scorable | not scorable |
| #### Bn-scaff_22790_1-p12337C-genome specific (napus-oleracea) | 0.9712918    | 0.6776404    | 0.9922481 | 0.7015526 | not scorable | not scorable |
| #### Bn-scaff_22790_1-p12649genome unspecific (all in)         | 0.9497608    | 0.6525672    | 1         | 0.6805596 | 0.9752066    | 0.8489376    |
| #### Bn-scaff_22790_1-p12683genome unspecific (all in)         | 0.9258373    | 0.7176716    | 1         | 0.8382434 | 1            | 0.9090729    |
| #### Bn-scaff_22790_1-p12711genome unspecific (all in)         | 0.9736842    | 0.3106888    | 0.9922481 | 0.7394681 | 1            | 0.805759     |

|                                                                 |              |              |              |              |              |              |
|-----------------------------------------------------------------|--------------|--------------|--------------|--------------|--------------|--------------|
| #### Bn-scaff_22790_1-p12733 C-genome specific (napus-oleracea) | 0.9401914    | 0.4422855    | 0.9922481    | 0.5687631    | not scorable | not scorable |
| #### Bn-scaff_22790_1-p12740 C-genome specific (napus-oleracea) | 0.9521531    | 0.7131075    | 0.9767442    | 0.6147286    | not scorable | not scorable |
| #### Bn-scaff_22790_1-p13173 genome unspecific (all in)         | 1            | 0.4102358    | 1            | 0.8477152    | 0.9917355    | 0.86127      |
| #### Bn-scaff_22790_1-p13351 C-genome specific (napus-oleracea) | 0.9497608    | 0.8087219    | 1            | 0.7427838    | not scorable | not scorable |
| #### Bn-scaff_22790_1-p13408 C-genome specific (napus-oleracea) | 0.9617225    | 0.7663039    | 0.9689922    | 0.6537387    | not scorable | not scorable |
| #### Bn-scaff_22790_1-p13930 C-genome specific (napus-oleracea) | 0.9736842    | 0.7543041    | 0.9844961    | 0.8080299    | not scorable | not scorable |
| #### Bn-scaff_22790_1-p15254 C-genome specific (napus-oleracea) | 0.9808612    | 0.7774801    | 0.9767442    | 0.90695      | not scorable | not scorable |
| #### Bn-scaff_22790_1-p15267 C-genome specific (napus-oleracea) | 0.9665072    | 0.7657346    | 0.9922481    | 0.7531251    | not scorable | not scorable |
| #### Bn-scaff_22790_1-p15286 C-genome specific (napus-oleracea) | 0.8851675    | 0.8976001    | 0.8914729    | 0.6502818    | not scorable | not scorable |
| #### Bn-scaff_22790_1-p15311 C-genome specific (napus-oleracea) | 0.9617225    | 0.7267078    | 0.9922481    | 0.6498069    | not scorable | not scorable |
| #### Bn-scaff_22790_1-p17998 C-genome specific (napus-oleracea) | 0.4210526    | 0.7602603    | 0.5813953    | 0.7815705    | not scorable | not scorable |
| #### Bn-scaff_22790_1-p18220 genome unspecific (all in)         | 0.9641148    | 0.3695932    | 0.9612403    | 0.4690136    | 1            | 0.9058571    |
| #### Bn-scaff_22790_1-p18693 C-genome specific (napus-oleracea) | 0.9545454    | 0.798146     | 0.9922481    | 0.7850801    | not scorable | not scorable |
| #### Bn-scaff_22790_1-p18709 C-genome specific (napus-oleracea) | 0.9449761    | 0.8298897    | 1            | 0.8275991    | not scorable | not scorable |
| #### Bn-scaff_22790_1-p18741 C-genome specific (napus-oleracea) | 0.9569378    | 0.8408492    | 0.9844961    | 0.7700123    | not scorable | not scorable |
| #### Bn-scaff_22790_1-p20666 C-genome specific (napus-oleracea) | 0.9521531    | 0.856342     | 1            | 0.7782484    | not scorable | not scorable |
| #### Bn-scaff_22790_1-p20667 C-genome specific (napus-oleracea) | 0.937799     | 0.6135931    | 0.9922481    | 0.5834089    | not scorable | not scorable |
| #### Bn-scaff_22790_1-p20707 C-genome specific (napus-oleracea) | 0.9617225    | 0.8206154    | 0.9922481    | 0.8603631    | not scorable | not scorable |
| #### Bn-scaff_22790_1-p21970 C-genome specific (napus-oleracea) | 0.9473684    | 0.8023313    | 0.9224806    | 0.7827744    | not scorable | not scorable |
| #### Bn-scaff_22790_1-p22001 C-genome specific (napus-oleracea) | 0.9330143    | 0.9123265    | 0.9302326    | 0.7883263    | not scorable | not scorable |
| #### Bn-scaff_22790_1-p22058 C-genome specific (napus-oleracea) | 0.8875598    | 0.7814931    | 0.8294573    | 0.6920152    | not scorable | not scorable |
| #### Bn-scaff_22790_1-p25026 C-genome specific (napus-oleracea) | 0.8923445    | 0.8420566    | 0.8527132    | 0.8489407    | not scorable | not scorable |
| #### Bn-scaff_22790_1-p26381 all not scorable                   | not scorable | not scorable | not scorable | not scorable | not scorable | not scorable |
| #### Bn-scaff_22790_1-p32380 C-genome specific (napus-oleracea) | 0.9425837    | 0.7057115    | 0.9922481    | 0.7227754    | not scorable | not scorable |
| #### Bn-scaff_22790_1-p33276 C-genome specific (napus-oleracea) | 0.9593301    | 0.7999362    | 0.9922481    | 0.7810277    | not scorable | not scorable |
| #### Bn-scaff_22790_1-p33894 C-genome specific (oleracea only)  | not scorable | not scorable | 0.5271318    | 0.7610266    | not scorable | not scorable |
| #### Bn-scaff_22790_1-p37088 genome unspecific (all in)         | 0.9808612    | 0.4522481    | 1            | 0.6756279    | 1            | 0.8979602    |
| #### Bn-scaff_22790_1-p37341 genome unspecific (all in)         | 0.9784689    | 0.4606559    | 1            | 0.6858731    | 1            | 0.9175813    |
| #### Bn-scaff_22790_1-p37806 C-genome specific (napus-oleracea) | 0.9497608    | 0.6743745    | 0.6821706    | 0.63816      | not scorable | not scorable |
| #### Bn-scaff_22790_1-p40470 C-genome specific (napus-oleracea) | 0.937799     | 0.8629408    | 0.6511628    | 0.7131508    | not scorable | not scorable |
| #### Bn-scaff_22790_1-p43034 C-genome specific (napus-oleracea) | 0.937799     | 0.8077771    | 1            | 0.7907396    | not scorable | not scorable |
| #### Bn-scaff_22790_1-p44882 C-genome specific (napus-oleracea) | 0.9617225    | 0.553642     | 1            | 0.6632196    | not scorable | not scorable |
| #### Bn-scaff_22790_1-p45400 C-genome specific (napus-oleracea) | 0.9569378    | 0.8328796    | 0.9689922    | 0.8124285    | not scorable | not scorable |

|                                                                 |              |              |              |              |              |              |
|-----------------------------------------------------------------|--------------|--------------|--------------|--------------|--------------|--------------|
| #### Bn-scaff_22790_1-p45713 C-genome specific (napus-oleracea) | 0.9593301    | 0.7397879    | 0.9689922    | 0.7776918    | not scorable | not scorable |
| #### Bn-scaff_22790_1-p45751 C-genome specific (napus-oleracea) | 0.9401914    | 0.6452016    | 0.9689922    | 0.5978757    | not scorable | not scorable |
| #### Bn-scaff_22790_1-p45856 genome unspecific (all in)         | 0.9641148    | 0.6929914    | 1            | 0.6987811    | 1            | 0.9244215    |
| #### Bn-scaff_22790_1-p47571 C-genome specific (napus-oleracea) | 0.9880383    | 0.7061093    | 1            | 0.7810889    | not scorable | not scorable |
| #### Bn-scaff_22790_1-p55070 C-genome specific (napus-oleracea) | 0.9114832    | 0.7642452    | 1            | 0.725031     | not scorable | not scorable |
| #### Bn-scaff_22790_1-p61075 C-genome specific (napus-oleracea) | 0.9952153    | 0.5156868    | 0.9457364    | 0.4211662    | not scorable | not scorable |
| #### Bn-scaff_22790_1-p66947 C-genome specific (oleracea only)  | not scorable | not scorable | 0.9767442    | 0.5117785    | not scorable | not scorable |
| #### Bn-scaff_22790_1-p67265 C-genome specific (napus-oleracea) | 0.923445     | 0.7545842    | 0.7364341    | 0.8008188    | not scorable | not scorable |
| #### Bn-scaff_22790_1-p71722 genome unspecific (all in)         | 0.9832536    | 0.39854      | 0.9922481    | 0.7901161    | 1            | 0.7966149    |
| #### Bn-scaff_22790_1-p72913 C-genome specific (napus-oleracea) | 0.9617225    | 0.7698181    | 0.9922481    | 0.7442832    | not scorable | not scorable |
| #### Bn-scaff_22790_1-p75282 C-genome specific (napus-oleracea) | 0.9760765    | 0.7746943    | 1            | 0.8211116    | not scorable | not scorable |
| #### Bn-scaff_22790_1-p77104 C-genome specific (napus-oleracea) | 0.9712918    | 0.7575852    | 0.9922481    | 0.728779     | not scorable | not scorable |
| #### Bn-scaff_22790_1-p77704 genome unspecific (all in)         | 0.9354067    | 0.6170406    | 1            | 0.6448295    | 1            | 0.9244215    |
| #### Bn-scaff_22790_1-p79336 C-genome specific (napus-oleracea) | 0.9736842    | 0.767703     | 0.8372093    | 0.8090347    | not scorable | not scorable |
| #### Bn-scaff_22790_1-p79356 napus specific                     | 0.9688995    | 0.6968184    | not scorable | not scorable | not scorable | not scorable |
| #### Bn-scaff_22790_1-p79378 C-genome specific (napus-oleracea) | 0.9712918    | 0.6848741    | 0.8372093    | 0.7475789    | not scorable | not scorable |
| #### Bn-scaff_22790_1-p80828 C-genome specific (napus-oleracea) | 0.9688995    | 0.7984357    | 1            | 0.8572699    | not scorable | not scorable |
| #### Bn-scaff_22790_1-p80936 C-genome specific (napus-oleracea) | 0.9641148    | 0.7846684    | 0.4883721    | 0.7722711    | not scorable | not scorable |
| #### Bn-scaff_22790_1-p81102 C-genome specific (napus-oleracea) | 0.9688995    | 0.6985381    | 0.5736434    | 0.6838713    | not scorable | not scorable |
| #### Bn-scaff_22790_1-p82076 C-genome specific (napus-oleracea) | 0.9760765    | 0.7611793    | 0.5658914    | 0.7596883    | not scorable | not scorable |
| #### Bn-scaff_22790_1-p82114 C-genome specific (napus-oleracea) | 0.9760765    | 0.7830225    | 0.5968992    | 0.8744187    | not scorable | not scorable |
| #### Bn-scaff_22790_1-p82119 C-genome specific (napus-oleracea) | 0.9856459    | 0.7924259    | 0.5891473    | 0.8123254    | not scorable | not scorable |
| #### Bn-scaff_22790_1-p82132 C-genome specific (napus-oleracea) | 0.9569378    | 0.7454153    | 0.5658914    | 0.7123471    | not scorable | not scorable |
| #### Bn-scaff_22790_1-p82307 C-genome specific (napus-oleracea) | 0.9736842    | 0.7476039    | 0.5813953    | 0.7939495    | not scorable | not scorable |
| #### Bn-scaff_22790_1-p82961 C-genome specific (napus-oleracea) | 0.9617225    | 0.7144015    | 0.9844961    | 0.7488247    | not scorable | not scorable |
| #### Bn-scaff_22790_1-p83398 C-genome specific (napus-oleracea) | 0.923445     | 0.7762312    | 0.9922481    | 0.7105352    | not scorable | not scorable |
| #### Bn-scaff_22790_1-p84023 C-genome specific (napus-oleracea) | 0.9808612    | 0.7252214    | 0.8062016    | 0.7359058    | not scorable | not scorable |
| #### Bn-scaff_22790_1-p87404 C-genome specific (napus-oleracea) | 0.9880383    | 0.7607991    | 1            | 0.7474433    | not scorable | not scorable |
| #### Bn-scaff_22790_1-p87490 C-genome specific (napus-oleracea) | 0.9641148    | 0.7032023    | 1            | 0.7270799    | not scorable | not scorable |
| #### Bn-scaff_22790_1-p87655 C-genome specific (napus-oleracea) | 0.9665072    | 0.7575278    | 0.9767442    | 0.7902116    | not scorable | not scorable |
| #### Bn-scaff_22790_1-p88573 C-genome specific (napus-oleracea) | 0.9425837    | 0.6008987    | 0.9922481    | 0.5826032    | not scorable | not scorable |
| #### Bn-scaff_22790_1-p88633 C-genome specific (napus-oleracea) | 0.9712918    | 0.7863594    | 1            | 0.6422116    | not scorable | not scorable |
| #### Bn-scaff_22790_1-p88729 C-genome specific (napus-oleracea) | 0.9808612    | 0.7047174    | 1            | 0.7323029    | not scorable | not scorable |

|                                                                |           |           |           |           |              |              |
|----------------------------------------------------------------|-----------|-----------|-----------|-----------|--------------|--------------|
| #### Bn-scaff_22790_1-p90271C-genome specific (napus-oleracea) | 0.9760765 | 0.6901485 | 0.8139535 | 0.7388665 | not scorable | not scorable |
| #### Bn-scaff_22790_1-p90887C-genome specific (napus-oleracea) | 0.9760765 | 0.7724664 | 1         | 0.7501242 | not scorable | not scorable |
| #### Bn-scaff_22790_1-p91144C-genome specific (napus-oleracea) | 0.9688995 | 0.7163893 | 1         | 0.7382903 | not scorable | not scorable |
| #### Bn-scaff_22790_1-p91211C-genome specific (napus-oleracea) | 0.9665072 | 0.7532056 | 1         | 0.6946251 | not scorable | not scorable |
| #### Bn-scaff_22790_1-p91288C-genome specific (napus-oleracea) | 0.9784689 | 0.6679955 | 1         | 0.6764334 | not scorable | not scorable |
| #### Bn-scaff_22790_1-p92007C-genome specific (napus-oleracea) | 0.9688995 | 0.7209311 | 1         | 0.7178103 | not scorable | not scorable |
| #### Bn-scaff_22790_1-p94635C-genome specific (napus-oleracea) | 0.9784689 | 0.7976196 | 0.8062016 | 0.7297021 | not scorable | not scorable |
| #### Bn-scaff_22790_1-p95239C-genome specific (napus-oleracea) | 0.9641148 | 0.7141788 | 0.9147287 | 0.7636152 | not scorable | not scorable |
| #### Bn-scaff_22790_1-p95455C-genome specific (napus-oleracea) | 0.9760765 | 0.7797291 | 0.7829458 | 0.8551649 | not scorable | not scorable |
| #### Bn-scaff_22790_1-p98222C-genome specific (napus-oleracea) | 0.9808612 | 0.7412654 | 1         | 0.784873  | not scorable | not scorable |
| #### Bn-scaff_22795_1-p10214C-genome specific (napus-oleracea) | 0.9665072 | 0.7771122 | 0.9844961 | 0.8467719 | not scorable | not scorable |
| #### Bn-scaff_22795_1-p10256genome unspecific (all in)         | 0.9808612 | 0.4570418 | 1         | 0.8494941 | 1            | 0.9317411    |
| #### Bn-scaff_22795_1-p12338genome unspecific (all in)         | 1         | 0.5616809 | 1         | 0.5030417 | 1            | 0.5715545    |
| #### Bn-scaff_22795_1-p12757genome unspecific (all in)         | 1         | 0.5932571 | 0.9844961 | 0.5555986 | 0.9917355    | 0.6193051    |
| #### Bn-scaff_22795_1-p12914genome unspecific (all in)         | 1         | 0.6447604 | 1         | 0.6145472 | 1            | 0.7739488    |
| #### Bn-scaff_22795_1-p14789C-genome specific (napus-oleracea) | 0.9665072 | 0.6140049 | 0.9844961 | 0.5312988 | not scorable | not scorable |
| #### Bn-scaff_22795_1-p17069genome unspecific (all in)         | 1         | 0.6115546 | 1         | 0.6572098 | 1            | 0.7367962    |
| #### Bn-scaff_22795_1-p19562genome unspecific (all in)         | 0.9545454 | 0.4262507 | 0.9767442 | 0.7669024 | 1            | 0.753404     |
| #### Bn-scaff_22795_1-p27716C-genome specific (napus-oleracea) | 0.9712918 | 0.6588888 | 1         | 0.6620353 | not scorable | not scorable |
| #### Bn-scaff_22795_1-p33830C-genome specific (napus-oleracea) | 0.9808612 | 0.7885762 | 1         | 0.6973964 | not scorable | not scorable |
| #### Bn-scaff_22795_1-p34366C-genome specific (napus-oleracea) | 0.9784689 | 0.6987141 | 1         | 0.7859738 | not scorable | not scorable |
| #### Bn-scaff_22795_1-p34672C-genome specific (napus-oleracea) | 0.9736842 | 0.7781911 | 1         | 0.8336328 | not scorable | not scorable |
| #### Bn-scaff_22795_1-p40765C-genome specific (napus-oleracea) | 0.9712918 | 0.7456117 | 1         | 0.751437  | not scorable | not scorable |
| #### Bn-scaff_22795_1-p40768C-genome specific (napus-oleracea) | 0.9784689 | 0.7614408 | 1         | 0.8172321 | not scorable | not scorable |
| #### Bn-scaff_22795_1-p41038C-genome specific (napus-oleracea) | 0.9712918 | 0.8137888 | 0.9922481 | 0.7377006 | not scorable | not scorable |
| #### Bn-scaff_22795_1-p46494C-genome specific (napus-oleracea) | 0.9736842 | 0.8011951 | 1         | 0.8136947 | not scorable | not scorable |
| #### Bn-scaff_22795_1-p46796C-genome specific (napus-oleracea) | 0.9784689 | 0.7201481 | 0.9922481 | 0.6856363 | not scorable | not scorable |
| #### Bn-scaff_22795_1-p46960C-genome specific (napus-oleracea) | 0.9904306 | 0.6636251 | 1         | 0.6562764 | not scorable | not scorable |
| #### Bn-scaff_22795_1-p47239C-genome specific (napus-oleracea) | 0.9641148 | 0.6112729 | 0.9767442 | 0.6577089 | not scorable | not scorable |
| #### Bn-scaff_22795_1-p47453C-genome specific (napus-oleracea) | 0.9760765 | 0.7684032 | 1         | 0.791272  | not scorable | not scorable |
| #### Bn-scaff_22795_1-p47570C-genome specific (napus-oleracea) | 0.9784689 | 0.7595155 | 0.9922481 | 0.8002043 | not scorable | not scorable |
| #### Bn-scaff_22795_1-p61005genome unspecific (all in)         | 1         | 0.610312  | 1         | 0.7178343 | 1            | 0.538463     |
| #### Bn-scaff_22795_1-p87859C-genome specific (napus-oleracea) | 0.9808612 | 0.7641983 | 1         | 0.8439614 | not scorable | not scorable |

|                                                                 |              |              |              |              |              |              |
|-----------------------------------------------------------------|--------------|--------------|--------------|--------------|--------------|--------------|
| #### Bn-scaff_22795_1-p88124 C-genome specific (napus-oleracea) | 0.9354067    | 0.7644914    | 1            | 0.7831022    | not scorable | not scorable |
| #### Bn-scaff_22795_1-p88252 C-genome specific (napus-oleracea) | 0.9760765    | 0.7877676    | 1            | 0.8901407    | not scorable | not scorable |
| #### Bn-scaff_22795_1-p90146 C-genome specific (napus-oleracea) | 0.9832536    | 0.762973     | 1            | 0.8272143    | not scorable | not scorable |
| #### Bn-scaff_22795_1-p90893 C-genome specific (napus-oleracea) | 0.9856459    | 0.7567359    | 1            | 0.7782108    | not scorable | not scorable |
| #### Bn-scaff_22795_1-p90958 C-genome specific (napus-oleracea) | 0.9808612    | 0.7305346    | 1            | 0.7997431    | not scorable | not scorable |
| #### Bn-scaff_22795_1-p91150 C-genome specific (napus-oleracea) | 0.9784689    | 0.7168226    | 0.9922481    | 0.7469789    | not scorable | not scorable |
| #### Bn-scaff_22795_1-p91343 C-genome specific (napus-oleracea) | 0.9760765    | 0.7712823    | 0.9922481    | 0.8622005    | not scorable | not scorable |
| #### Bn-scaff_22795_1-p9915 C-genome specific (napus-oleracea)  | 0.9760765    | 0.6668433    | 1            | 0.7221346    | not scorable | not scorable |
| #### Bn-scaff_22814_1-p10401 genome unspecific (all in)         | 1            | 0.4092114    | 0.9922481    | 0.5459757    | 1            | 0.9175813    |
| #### Bn-scaff_22814_1-p15634 genome unspecific (all in)         | 0.9904306    | 0.5762046    | 1            | 0.594978     | 1            | 0.7695175    |
| #### Bn-scaff_22814_1-p15796 C-genome specific (napus-oleracea) | 0.9976076    | 0.8493702    | 0.9767442    | 0.8300112    | not scorable | not scorable |
| #### Bn-scaff_22814_1-p16699 C-genome specific (napus-oleracea) | 0.9952153    | 0.8752829    | 0.9844961    | 0.8520194    | not scorable | not scorable |
| #### Bn-scaff_22814_1-p16872 C-genome specific (napus-oleracea) | 0.9952153    | 0.7630112    | 0.9844961    | 0.6912813    | not scorable | not scorable |
| #### Bn-scaff_22814_1-p16978 C-genome specific (napus-oleracea) | 0.9928229    | 0.8818415    | 0.9922481    | 0.8333275    | not scorable | not scorable |
| #### Bn-scaff_22814_1-p58657 genome unspecific (all in)         | 0.9904306    | 0.6214995    | 0.9922481    | 0.802048     | 1            | 0.9175813    |
| #### Bn-scaff_22821_1-p13976 genome unspecific (all in)         | 0.9760765    | 0.5257432    | 1            | 0.8186525    | 1            | 0.917579     |
| #### Bn-scaff_22835_1-p16423 C-genome specific (napus-oleracea) | 0.9210526    | 0.8771265    | 1            | 0.7964713    | not scorable | not scorable |
| #### Bn-scaff_22835_1-p21789 A-genome specific (napus-rapa)     | 0.9617225    | 0.3147613    | not scorable | not scorable | 0.9917355    | 0.8784657    |
| #### Bn-scaff_22835_1-p30934 C-genome specific (napus-oleracea) | 0.9784689    | 0.253989     | 0.9922481    | 0.27741      | not scorable | not scorable |
| #### Bn-scaff_22835_1-p31916 C-genome specific (napus-oleracea) | 0.9617225    | 0.3895033    | 0.8527132    | 0.7892128    | not scorable | not scorable |
| #### Bn-scaff_22835_1-p32736 C-genome specific (napus-oleracea) | 0.8995215    | 0.8210762    | 0.8837209    | 0.8053793    | not scorable | not scorable |
| #### Bn-scaff_22835_1-p35837 C-genome specific (napus-oleracea) | 0.8875598    | 0.9233475    | 1            | 0.769792     | not scorable | not scorable |
| #### Bn-scaff_22835_1-p36281 C-genome specific (napus-oleracea) | 0.9162679    | 0.6582533    | 1            | 0.6117916    | not scorable | not scorable |
| #### Bn-scaff_22835_1-p43403 genome unspecific (all in)         | 0.9665072    | 0.4285257    | 0.9844961    | 0.768397     | 0.9917355    | 0.8268808    |
| #### Bn-scaff_22835_1-p52583 C-genome specific (oleracea only)  | not scorable | not scorable | 0.8837209    | 0.8352896    | not scorable | not scorable |
| #### Bn-scaff_22835_1-p52958 C-genome specific (napus-oleracea) | 0.9186603    | 0.8023113    | 0.9922481    | 0.7767487    | not scorable | not scorable |
| #### Bn-scaff_22835_1-p53450 C-genome specific (napus-oleracea) | 0.9210526    | 0.7997325    | 1            | 0.806873     | not scorable | not scorable |
| #### Bn-scaff_22835_1-p53569 genome unspecific (all in)         | 0.9569378    | 0.5929182    | 0.9844961    | 0.8023478    | 1            | 0.9287148    |
| #### Bn-scaff_22835_1-p53707 C-genome specific (napus-oleracea) | 0.9114832    | 0.7664756    | 1            | 0.7689411    | not scorable | not scorable |
| #### Bn-scaff_22835_1-p54754 napus specific                     | 0.9138756    | 0.6974791    | not scorable | not scorable | not scorable | not scorable |
| #### Bn-scaff_22835_1-p56773 C-genome specific (napus-oleracea) | 0.9066986    | 0.8141158    | 0.9379845    | 0.6924549    | not scorable | not scorable |
| #### Bn-scaff_22835_1-p57010 C-genome specific (napus-oleracea) | 0.9162679    | 0.7955035    | 1            | 0.8207017    | not scorable | not scorable |
| #### Bn-scaff_22835_1-p57779 C-genome specific (napus-oleracea) | 0.9210526    | 0.7680064    | 0.9844961    | 0.7842848    | not scorable | not scorable |

|                                                                 |              |              |           |           |              |              |
|-----------------------------------------------------------------|--------------|--------------|-----------|-----------|--------------|--------------|
| #### Bn-scaff_22835_1-p57974 C-genome specific (napus-oleracea) | 0.9401914    | 0.7413375    | 0.9922481 | 0.7974182 | not scorable | not scorable |
| #### Bn-scaff_22835_1-p59982 C-genome specific (napus-oleracea) | 0.9019139    | 0.8569573    | 0.9922481 | 0.7998297 | not scorable | not scorable |
| #### Bn-scaff_22835_1-p61178 C-genome specific (napus-oleracea) | 0.923445     | 0.7166318    | 1         | 0.7206949 | not scorable | not scorable |
| #### Bn-scaff_22835_1-p61983 genome unspecific (all in)         | 0.9090909    | 0.6371121    | 1         | 0.818473  | 1            | 0.927626     |
| #### Bn-scaff_22835_1-p63123 C-genome specific (napus-oleracea) | 0.9186603    | 0.6841556    | 1         | 0.6243452 | not scorable | not scorable |
| #### Bn-scaff_22835_1-p63396 C-genome specific (napus-oleracea) | 0.9162679    | 0.7311464    | 1         | 0.7969111 | not scorable | not scorable |
| #### Bn-scaff_22835_1-p63904 C-genome specific (napus-oleracea) | 0.9258373    | 0.7711915    | 0.9922481 | 0.8476956 | not scorable | not scorable |
| #### Bn-scaff_22835_1-p69012 C-genome specific (napus-oleracea) | 0.9186603    | 0.7582793    | 0.9147287 | 0.7187818 | not scorable | not scorable |
| #### Bn-scaff_22835_1-p71617 C-genome specific (napus-oleracea) | 0.923445     | 0.7379867    | 0.9147287 | 0.7167597 | not scorable | not scorable |
| #### Bn-scaff_22857_1-p17513 genome unspecific (oleracea-rapa)  | not scorable | not scorable | 1         | 0.704722  | 0.9752066    | 0.7207862    |
| #### Bn-scaff_22857_1-p71768 genome unspecific (all in)         | 1            | 0.5692675    | 0.9844961 | 0.607022  | 0.9917355    | 0.3930096    |
| #### Bn-scaff_22933_1-p10917 C-genome specific (napus-oleracea) | 0.8636364    | 0.7657248    | 0.8837209 | 0.7657196 | not scorable | not scorable |
| #### Bn-scaff_22933_1-p11002 genome unspecific (all in)         | 0.8492823    | 0.576245     | 1         | 0.7815194 | 1            | 0.9468636    |
| #### Bn-scaff_22933_1-p62015 genome unspecific (all in)         | 0.9736842    | 0.3040543    | 0.9922481 | 0.7327589 | 1            | 0.7863423    |
| #### Bn-scaff_22933_1-p70880 genome unspecific (all in)         | 0.9688995    | 0.3715862    | 1         | 0.7465817 | 1            | 0.9095823    |
| #### Bn-scaff_22933_1-p76584 C-genome specific (napus-oleracea) | 0.8803828    | 0.7825071    | 0.7131783 | 0.7726346 | not scorable | not scorable |
| #### Bn-scaff_22933_1-p80799 C-genome specific (napus-oleracea) | 0.8899522    | 0.7405528    | 0.9922481 | 0.8283162 | not scorable | not scorable |
| #### Bn-scaff_22933_1-p84310 C-genome specific (napus-oleracea) | 0.8899522    | 0.7462176    | 1         | 0.7500326 | not scorable | not scorable |
| #### Bn-scaff_22933_1-p95702 C-genome specific (napus-oleracea) | 0.8684211    | 0.7408358    | 1         | 0.794899  | not scorable | not scorable |
| #### Bn-scaff_22970_1-p11927 C-genome specific (napus-oleracea) | 0.9019139    | 0.7876446    | 0.9922481 | 0.8234416 | not scorable | not scorable |
| #### Bn-scaff_22970_1-p12476 C-genome specific (napus-oleracea) | 0.9019139    | 0.7814276    | 1         | 0.8697225 | not scorable | not scorable |
| #### Bn-scaff_22970_1-p13609 C-genome specific (napus-oleracea) | 0.9066986    | 0.7794767    | 1         | 0.7600852 | not scorable | not scorable |
| #### Bn-scaff_22970_1-p13620 C-genome specific (napus-oleracea) | 0.9043062    | 0.6430359    | 0.9844961 | 0.608026  | not scorable | not scorable |
| #### Bn-scaff_22970_1-p13666 C-genome specific (napus-oleracea) | 0.9090909    | 0.8153111    | 1         | 0.8249918 | not scorable | not scorable |
| #### Bn-scaff_22970_1-p13700 C-genome specific (napus-oleracea) | 0.9066986    | 0.8426311    | 1         | 0.7984046 | not scorable | not scorable |
| #### Bn-scaff_22970_1-p13725 C-genome specific (napus-oleracea) | 0.8995215    | 0.7813673    | 0.9922481 | 0.8321493 | not scorable | not scorable |
| #### Bn-scaff_22970_1-p13770 C-genome specific (napus-oleracea) | 0.9090909    | 0.7699203    | 0.9922481 | 0.8527662 | not scorable | not scorable |
| #### Bn-scaff_22970_1-p13814 C-genome specific (napus-oleracea) | 0.9066986    | 0.7080383    | 1         | 0.789915  | not scorable | not scorable |
| #### Bn-scaff_22970_1-p13827 C-genome specific (napus-oleracea) | 0.9066986    | 0.7569212    | 1         | 0.7426935 | not scorable | not scorable |
| #### Bn-scaff_22970_1-p14038 C-genome specific (napus-oleracea) | 0.8995215    | 0.8010873    | 0.9069768 | 0.8170781 | not scorable | not scorable |
| #### Bn-scaff_22970_1-p19596 C-genome specific (napus-oleracea) | 0.9066986    | 0.8157274    | 0.9069768 | 0.8594276 | not scorable | not scorable |
| #### Bn-scaff_22970_1-p21380 C-genome specific (napus-oleracea) | 0.9066986    | 0.8029092    | 0.9612403 | 0.704013  | not scorable | not scorable |
| #### Bn-scaff_22970_1-p21855 C-genome specific (napus-oleracea) | 0.9928229    | 0.331037     | 0.9922481 | 0.6606011 | not scorable | not scorable |



|                                                                 |              |              |              |              |              |              |
|-----------------------------------------------------------------|--------------|--------------|--------------|--------------|--------------|--------------|
| #### Bn-scaff_22970_1-p24246 C-genome specific (napus-oleracea) | 0.8708134    | 0.7930493    | 0.8682171    | 0.7523996    | not scorable | not scorable |
| #### Bn-scaff_22970_1-p24259 C-genome specific (napus-oleracea) | 0.8899522    | 0.7701492    | 0.8837209    | 0.7325492    | not scorable | not scorable |
| #### Bn-scaff_22970_1-p24777 genome unspecific (all in)         | 0.9928229    | 0.3173226    | 0.9922481    | 0.7319019    | 1            | 0.7162024    |
| #### Bn-scaff_22970_1-p26401 C-genome specific (napus-oleracea) | 0.8971292    | 0.8423495    | 0.9844961    | 0.8265594    | not scorable | not scorable |
| #### Bn-scaff_22970_1-p26751 C-genome specific (oleracea only)  | not scorable | not scorable | 0.8837209    | 0.8538446    | not scorable | not scorable |
| #### Bn-scaff_22970_1-p27077 C-genome specific (napus-oleracea) | 0.9019139    | 0.7770546    | 0.9844961    | 0.8393649    | not scorable | not scorable |
| #### Bn-scaff_22970_1-p27089 C-genome specific (napus-oleracea) | 0.8947368    | 0.8205392    | 0.9922481    | 0.7256338    | not scorable | not scorable |
| #### Bn-scaff_22970_1-p27730 C-genome specific (napus-oleracea) | 0.8899522    | 0.6759574    | 0.9457364    | 0.6305677    | not scorable | not scorable |
| #### Bn-scaff_22970_1-p28152 C-genome specific (napus-oleracea) | 0.9019139    | 0.7694451    | 1            | 0.664283     | not scorable | not scorable |
| #### Bn-scaff_22970_1-p29050 all not scorable                   | not scorable | not scorable | not scorable | not scorable | not scorable | not scorable |
| #### Bn-scaff_22970_1-p30869 C-genome specific (oleracea only)  | not scorable | not scorable | 0.9457364    | 0.7453266    | not scorable | not scorable |
| #### Bn-scaff_22970_1-p32147 C-genome specific (napus-oleracea) | 0.8588517    | 0.8727455    | 0.7054263    | 0.8666373    | not scorable | not scorable |
| #### Bn-scaff_22970_1-p32371 C-genome specific (napus-oleracea) | 0.9043062    | 0.7745114    | 0.9844961    | 0.7200636    | not scorable | not scorable |
| #### Bn-scaff_22970_1-p32963 genome unspecific (all in)         | 0.937799     | 0.5045362    | 0.9534883    | 0.5610539    | 1            | 0.9293141    |
| #### Bn-scaff_22970_1-p33529 C-genome specific (napus-oleracea) | 0.9066986    | 0.7619962    | 0.9844961    | 0.773747     | not scorable | not scorable |
| #### Bn-scaff_22970_1-p35369 C-genome specific (napus-oleracea) | 0.8923445    | 0.7607424    | 0.9844961    | 0.8188469    | not scorable | not scorable |
| #### Bn-scaff_22970_1-p35496 C-genome specific (napus-oleracea) | 0.6961722    | 0.8636746    | 0.6589147    | 0.7845696    | not scorable | not scorable |
| #### Bn-scaff_22970_1-p36434 C-genome specific (napus-oleracea) | 0.8923445    | 0.6901643    | 0.9844961    | 0.768266     | not scorable | not scorable |
| #### Bn-scaff_22970_1-p36441 C-genome specific (napus-oleracea) | 0.9019139    | 0.7889667    | 0.9767442    | 0.7138222    | not scorable | not scorable |
| #### Bn-scaff_22970_1-p36812 C-genome specific (napus-oleracea) | 0.9090909    | 0.746192     | 0.9922481    | 0.7071024    | not scorable | not scorable |
| #### Bn-scaff_22970_1-p37048 genome unspecific (oleracea-rapa)  | not scorable | not scorable | 0.9844961    | 0.867809     | 1            | 0.9175813    |
| #### Bn-scaff_22970_1-p37263 C-genome specific (napus-oleracea) | 0.9066986    | 0.743374     | 1            | 0.8325914    | not scorable | not scorable |
| #### Bn-scaff_22970_1-p37278 genome unspecific (all in)         | 0.9976076    | 0.3658645    | 1            | 0.5242395    | 1            | 0.8811396    |
| #### Bn-scaff_22970_1-p37293 genome unspecific (all in)         | 0.9856459    | 0.2872163    | 0.9922481    | 0.7963387    | 1            | 0.9096362    |
| #### Bn-scaff_22970_1-p37296 genome unspecific (all in)         | 1            | 0.3521881    | 1            | 0.7614877    | 1            | 0.9205657    |
| #### Bn-scaff_22970_1-p37405 C-genome specific (napus-oleracea) | 0.9090909    | 0.7917188    | 0.9844961    | 0.7249457    | not scorable | not scorable |
| #### Bn-scaff_22970_1-p38457 genome unspecific (all in)         | 0.9736842    | 0.3533179    | 0.9922481    | 0.7368765    | 1            | 0.6937823    |
| #### Bn-scaff_22970_1-p38641 genome unspecific (oleracea-rapa)  | not scorable | not scorable | 1            | 0.6691154    | 1            | 0.7227655    |
| #### Bn-scaff_22970_1-p38655 genome unspecific (all in)         | 0.9736842    | 0.3322472    | 0.9922481    | 0.6568335    | 1            | 0.7518438    |
| #### Bn-scaff_22970_1-p38661 genome unspecific (all in)         | 0.9928229    | 0.3903945    | 0.9922481    | 0.587037     | 1            | 0.7494321    |
| #### Bn-scaff_22970_1-p38668 genome unspecific (all in)         | 0.9952153    | 0.3518318    | 1            | 0.8271676    | 1            | 0.733718     |
| #### Bn-scaff_22970_1-p38705 genome unspecific (all in)         | 0.937799     | 0.4514041    | 1            | 0.7793368    | 1            | 0.7807782    |
| #### Bn-scaff_22970_1-p41695 C-genome specific (napus-oleracea) | 0.8995215    | 0.8896301    | 1            | 0.7414052    | not scorable | not scorable |

|                                                                 |              |              |              |              |              |              |
|-----------------------------------------------------------------|--------------|--------------|--------------|--------------|--------------|--------------|
| #### Bn-scaff_22970_1-p42949 C-genome specific (napus-oleracea) | 0.9019139    | 0.7569574    | 1            | 0.7272239    | not scorable | not scorable |
| #### Bn-scaff_22970_1-p43312 C-genome specific (napus-oleracea) | 0.9856459    | 0.3598257    | 0.9534883    | 0.3085969    | not scorable | not scorable |
| #### Bn-scaff_22970_1-p43912 C-genome specific (napus-oleracea) | 0.9019139    | 0.720477     | 0.9844961    | 0.7472366    | not scorable | not scorable |
| #### Bn-scaff_22970_1-p45812 C-genome specific (napus-oleracea) | 0.8803828    | 0.7556978    | 0.8449612    | 0.8387101    | not scorable | not scorable |
| #### Bn-scaff_22970_1-p47807 C-genome specific (napus-oleracea) | 0.9043062    | 0.7815575    | 1            | 0.7394506    | not scorable | not scorable |
| #### Bn-scaff_22970_1-p49112 C-genome specific (napus-oleracea) | 0.8995215    | 0.7906627    | 1            | 0.8023329    | not scorable | not scorable |
| #### Bn-scaff_22970_1-p49166 genome unspecific (oleracea-rapa)  | not scorable | not scorable | 0.9844961    | 0.728621     | 0.9834711    | 0.9081736    |
| #### Bn-scaff_22970_1-p49169 genome unspecific (all in)         | 0.9880383    | 0.3547245    | 0.9922481    | 0.8142608    | 0.9834711    | 0.9272014    |
| #### Bn-scaff_22970_1-p49329 C-genome specific (napus-oleracea) | 0.8995215    | 0.7924391    | 1            | 0.8458923    | not scorable | not scorable |
| #### Bn-scaff_22970_1-p49983 genome unspecific (all in)         | 0.9976076    | 0.3677264    | 1            | 0.6754791    | 1            | 0.6931472    |
| #### Bn-scaff_22970_1-p50892 genome unspecific (all in)         | 1            | 0.3515418    | 0.9922481    | 0.7540399    | 1            | 0.6766362    |
| #### Bn-scaff_22970_1-p51056 genome unspecific (all in)         | 0.9928229    | 0.3400159    | 0.9689922    | 0.6118301    | 1            | 0.7191346    |
| #### Bn-scaff_22970_1-p58171 genome unspecific (oleracea-rapa)  | not scorable | not scorable | 1            | 0.8862709    | 0.9917355    | 0.8162948    |
| #### Bn-scaff_22970_1-p72276 C-genome specific (napus-oleracea) | 0.9019139    | 0.6995335    | 1            | 0.6700054    | not scorable | not scorable |
| #### Bn-scaff_22976_1-p13039 genome unspecific (all in)         | 0.9976076    | 0.5547176    | 1            | 0.5025004    | 1            | 0.9097542    |
| #### Bn-scaff_22976_1-p23202 C-genome specific (napus-oleracea) | 0.9665072    | 0.7992712    | 0.9922481    | 0.7740815    | not scorable | not scorable |
| #### Bn-scaff_22987_1-p12324 C-genome specific (napus-oleracea) | 0.4282297    | 0.9410939    | 0.9147287    | 0.8870115    | not scorable | not scorable |
| #### Bn-scaff_23015_1-p2066 genome unspecific (oleracea-rapa)   | not scorable | not scorable | 1            | 0.7333965    | 1            | 0.8176157    |
| #### Bn-scaff_23066_1-p3540 A-genome specific (napus-rapa)      | 0.9928229    | 0.5373338    | not scorable | not scorable | 0.9504132    | 0.8934078    |
| #### Bn-scaff_23070_1-p11258 C-genome specific (napus-oleracea) | 0.9688995    | 0.7181879    | 0.9922481    | 0.7418895    | not scorable | not scorable |
| #### Bn-scaff_23079_1-p2564 napus specific                      | 1            | 0.4138569    | not scorable | not scorable | not scorable | not scorable |
| #### Bn-scaff_23096_1-p25701 C-genome specific (napus-oleracea) | 1            | 0.6481414    | 1            | 0.6117394    | not scorable | not scorable |
| #### Bn-scaff_23096_1-p36451 C-genome specific (napus-oleracea) | 1            | 0.8969055    | 1            | 0.7759107    | not scorable | not scorable |
| #### Bn-scaff_23096_1-p43792 genome unspecific (all in)         | 1            | 0.5423722    | 1            | 0.5619261    | 1            | 0.7539427    |
| #### Bn-scaff_23096_1-p44716 genome unspecific (all in)         | 0.9928229    | 0.3213889    | 1            | 0.7048703    | 1            | 0.601807     |
| #### Bn-scaff_23096_1-p54534 genome unspecific (all in)         | 1            | 0.7725455    | 1            | 0.6865987    | 1            | 0.8004208    |
| #### Bn-scaff_23096_1-p54555 genome unspecific (all in)         | 0.9976076    | 0.387598     | 1            | 0.4447195    | 1            | 0.4311375    |
| #### Bn-scaff_23096_1-p54672 genome unspecific (all in)         | 1            | 0.6033282    | 1            | 0.506175     | 1            | 0.7252899    |
| #### Bn-scaff_23096_1-p54706 genome unspecific (all in)         | 1            | 0.4737869    | 1            | 0.5148817    | 1            | 0.4765894    |
| #### Bn-scaff_23096_1-p54808 all not scorable                   | not scorable | not scorable | not scorable | not scorable | not scorable | not scorable |
| #### Bn-scaff_23096_1-p54843 genome unspecific (all in)         | 0.9976076    | 0.6141758    | 1            | 0.5929649    | 0.9834711    | 0.9175813    |
| #### Bn-scaff_23098_1-p10720 napus specific                     | 0.9784689    | 0.582188     | not scorable | not scorable | not scorable | not scorable |
| #### Bn-scaff_23098_1-p11154 genome unspecific (all in)         | 1            | 0.6706561    | 0.9922481    | 0.6328988    | 1            | 0.6706561    |

|                                                                 |              |              |              |              |              |              |
|-----------------------------------------------------------------|--------------|--------------|--------------|--------------|--------------|--------------|
| #### Bn-scaff_23098_1-p12058 C-genome specific (napus-oleracea) | 0.9138756    | 0.7414432    | 0.7131783    | 0.8443624    | not scorable | not scorable |
| #### Bn-scaff_23098_1-p15838 genome unspecific (all in)         | 0.9928229    | 0.2510152    | 1            | 0.7108015    | 0.9917355    | 0.6441332    |
| #### Bn-scaff_23098_1-p20998 genome unspecific (all in)         | 0.9617225    | 0.6089878    | 0.9922481    | 0.7187595    | 1            | 0.6722914    |
| #### Bn-scaff_23098_1-p23298 C-genome specific (napus-oleracea) | 0.9665072    | 0.7595798    | 0.9147287    | 0.7249897    | not scorable | not scorable |
| #### Bn-scaff_23098_1-p25438 genome unspecific (oleracea-rapa)  | not scorable | not scorable | 1            | 0.8460661    | 0.9586777    | 0.6966767    |
| #### Bn-scaff_23098_1-p28107 C-genome specific (oleracea only)  | not scorable | not scorable | 0.9534883    | 0.6939254    | not scorable | not scorable |
| #### Bn-scaff_23098_1-p30424 genome unspecific (all in)         | 0.9760765    | 0.3232958    | 0.9922481    | 0.8175118    | 1            | 0.9000999    |
| #### Bn-scaff_23098_1-p31993 C-genome specific (napus-oleracea) | 0.9928229    | 0.4336798    | 1            | 0.7609258    | not scorable | not scorable |
| #### Bn-scaff_23098_1-p32018 C-genome specific (napus-oleracea) | 0.9784689    | 0.7411747    | 0.9689922    | 0.7520073    | not scorable | not scorable |
| #### Bn-scaff_23098_1-p32490 C-genome specific (napus-oleracea) | 0.8038278    | 0.9155516    | 0.5658914    | 0.8571532    | not scorable | not scorable |
| #### Bn-scaff_23098_1-p33242 C-genome specific (napus-oleracea) | 1            | 0.9094231    | 1            | 0.9071956    | not scorable | not scorable |
| #### Bn-scaff_23098_1-p42538 C-genome specific (napus-oleracea) | 0.9880383    | 0.7775214    | 0.9922481    | 0.800547     | not scorable | not scorable |
| #### Bn-scaff_23098_1-p42762 C-genome specific (napus-oleracea) | 0.9832536    | 0.7674159    | 0.9844961    | 0.8002587    | not scorable | not scorable |
| #### Bn-scaff_23098_1-p90934 genome unspecific (all in)         | 0.9784689    | 0.4220448    | 1            | 0.8524275    | 0.9586777    | 0.8281911    |
| #### Bn-scaff_23103_1-p2186 A-genome specific (napus-rapa)      | 0.9976076    | 0.516803     | not scorable | not scorable | 1            | 0.8207097    |
| #### Bn-scaff_23103_1-p2352 C-genome specific (napus-oleracea)  | 1            | 0.8441594    | 1            | 0.5670916    | not scorable | not scorable |
| #### Bn-scaff_23104_1-p16526 C-genome specific (napus-oleracea) | 0.9569378    | 0.8813632    | 0.3488372    | 0.8338915    | not scorable | not scorable |
| #### Bn-scaff_23104_1-p17063 C-genome specific (napus-oleracea) | 0.9856459    | 0.868897     | 0.9767442    | 0.8127       | not scorable | not scorable |
| #### Bn-scaff_23104_1-p17331 C-genome specific (napus-oleracea) | 0.9880383    | 0.7468917    | 0.9844961    | 0.675311     | not scorable | not scorable |
| #### Bn-scaff_23104_1-p17521 C-genome specific (napus-oleracea) | 0.9952153    | 0.7456714    | 1            | 0.6790068    | not scorable | not scorable |
| #### Bn-scaff_23104_1-p19136 C-genome specific (napus-oleracea) | 0.9976076    | 0.53771      | 0.9612403    | 0.396231     | not scorable | not scorable |
| #### Bn-scaff_23104_1-p19330 C-genome specific (napus-oleracea) | 0.9856459    | 0.2586837    | 0.9922481    | 0.2265576    | not scorable | not scorable |
| #### Bn-scaff_23104_1-p23213 genome unspecific (all in)         | 0.9928229    | 0.4805291    | 0.9534883    | 0.6231599    | 1            | 0.7407693    |
| #### Bn-scaff_23104_1-p26086 C-genome specific (napus-oleracea) | 0.9808612    | 0.7007593    | 0.9457364    | 0.8816308    | not scorable | not scorable |
| #### Bn-scaff_23104_1-p26102 C-genome specific (napus-oleracea) | 0.9832536    | 0.835288     | 0.9457364    | 0.7906598    | not scorable | not scorable |
| #### Bn-scaff_23104_1-p29181 C-genome specific (napus-oleracea) | 0.9928229    | 0.8172321    | 1            | 0.6736807    | not scorable | not scorable |
| #### Bn-scaff_23104_1-p37245 genome unspecific (all in)         | 1            | 0.8788643    | 1            | 0.7105292    | 1            | 0.9095823    |
| #### Bn-scaff_23104_1-p37628 C-genome specific (napus-oleracea) | 0.9832536    | 0.8071571    | 1            | 0.7868012    | not scorable | not scorable |
| #### Bn-scaff_23104_1-p40868 C-genome specific (napus-oleracea) | 0.9904306    | 0.8833648    | 1            | 0.7618734    | not scorable | not scorable |
| #### Bn-scaff_23104_1-p42215 genome unspecific (all in)         | 0.9976076    | 0.3310751    | 0.9922481    | 0.7874548    | 1            | 0.9175813    |
| #### Bn-scaff_23104_1-p43108 genome unspecific (all in)         | 0.9904306    | 0.5563019    | 1            | 0.6837918    | 0.7768595    | 0.9175813    |
| #### Bn-scaff_23104_1-p57224 genome unspecific (all in)         | 1            | 0.6963184    | 0.9922481    | 0.653347     | 1            | 0.7458163    |
| #### Bn-scaff_23104_1-p76481 A-genome specific (rapa only)      | not scorable | not scorable | not scorable | not scorable | 1            | 0.8944175    |

|                                                                |              |              |              |              |              |              |
|----------------------------------------------------------------|--------------|--------------|--------------|--------------|--------------|--------------|
| #### Bn-scaff_23104_1-p94082genome unspecific (all in)         | 0.9593301    | 0.2107009    | 0.9689922    | 0.1893447    | 1            | 0.9134106    |
| #### Bn-scaff_23107_1-p11277C-genome specific (napus-oleracea) | 0.9808612    | 0.6151607    | 0.8604651    | 0.5876176    | not scorable | not scorable |
| #### Bn-scaff_23107_1-p11563genome unspecific (all in)         | 0.9952153    | 0.3887277    | 1            | 0.7739881    | 1            | 0.700332     |
| #### Bn-scaff_23107_1-p13216C-genome specific (napus-oleracea) | 0.9808612    | 0.7327523    | 1            | 0.8411846    | not scorable | not scorable |
| #### Bn-scaff_23107_1-p13995C-genome specific (napus-oleracea) | 0.9832536    | 0.7999163    | 0.9767442    | 0.7977622    | not scorable | not scorable |
| #### Bn-scaff_23107_1-p14008C-genome specific (napus-oleracea) | 0.9784689    | 0.7032499    | 0.9922481    | 0.7630313    | not scorable | not scorable |
| #### Bn-scaff_23107_1-p15817C-genome specific (napus-oleracea) | 0.9856459    | 0.8058044    | 1            | 0.8055605    | not scorable | not scorable |
| #### Bn-scaff_23107_1-p18195C-genome specific (napus-oleracea) | 0.9856459    | 0.6991231    | 1            | 0.7488335    | not scorable | not scorable |
| #### Bn-scaff_23107_1-p47992genome unspecific (all in)         | 0.9904306    | 0.3435246    | 1            | 0.6436852    | 1            | 0.7395847    |
| #### Bn-scaff_23107_1-p48188C-genome specific (napus-oleracea) | 0.9904306    | 0.8305761    | 0.9922481    | 0.8883443    | not scorable | not scorable |
| #### Bn-scaff_23107_1-p74228C-genome specific (napus-oleracea) | 0.9952153    | 0.7973794    | 1            | 0.8239411    | not scorable | not scorable |
| #### Bn-scaff_23107_1-p75011C-genome specific (napus-oleracea) | 0.9976076    | 0.8092792    | 1            | 0.7802093    | not scorable | not scorable |
| #### Bn-scaff_23107_1-p7608 C-genome specific (napus-oleracea) | 0.9856459    | 0.8032358    | 1            | 0.7939734    | not scorable | not scorable |
| #### Bn-scaff_23107_1-p94282C-genome specific (oleracea only)  | not scorable | not scorable | 0.9379845    | 0.3433602    | not scorable | not scorable |
| #### Bn-scaff_23108_1-p10085 napus specific                    | 0.9832536    | 0.7683272    | not scorable | not scorable | not scorable | not scorable |
| #### Bn-scaff_23108_1-p14766C-genome specific (napus-oleracea) | 0.9976076    | 0.506094     | 1            | 0.696474     | not scorable | not scorable |
| #### Bn-scaff_23108_1-p28497C-genome specific (napus-oleracea) | 0.9904306    | 0.737633     | 1            | 0.6391297    | not scorable | not scorable |
| #### Bn-scaff_23108_1-p32357C-genome specific (napus-oleracea) | 0.5526316    | 0.9016051    | 0.8372093    | 0.8007197    | not scorable | not scorable |
| #### Bn-scaff_23108_1-p36293genome unspecific (all in)         | 1            | 0.3734414    | 1            | 0.7985039    | 1            | 0.7832733    |
| #### Bn-scaff_23108_1-p57976A-genome specific (napus-rapa)     | 1            | 0.6080307    | not scorable | not scorable | 1            | 0.894136     |
| #### Bn-scaff_23108_1-p79869genome unspecific (oleracea-rapa)  | not scorable | not scorable | 0.9922481    | 0.6174455    | 1            | 0.7627142    |
| #### Bn-scaff_23140_1-p34812genome unspecific (all in)         | 0.9736842    | 0.3547125    | 0.9224806    | 0.6469692    | 1            | 0.5984891    |
| #### Bn-scaff_23140_1-p456 C-genome specific (napus-oleracea)  | 1            | 0.6201955    | 1            | 0.6403335    | not scorable | not scorable |
| #### Bn-scaff_23140_1-p68699genome unspecific (all in)         | 0.9784689    | 0.3384666    | 1            | 0.6759943    | 1            | 0.711467     |
| #### Bn-scaff_23167_1-p15010C-genome specific (oleracea only)  | not scorable | not scorable | 0.9922481    | 0.683722     | not scorable | not scorable |
| #### Bn-scaff_23167_1-p16206genome unspecific (all in)         | 0.9712918    | 0.450199     | 0.9922481    | 0.8065261    | 1            | 0.9218579    |
| #### Bn-scaff_23167_1-p59288C-genome specific (napus-oleracea) | 0.8875598    | 0.8290374    | 0.9922481    | 0.8376549    | not scorable | not scorable |
| #### Bn-scaff_23176_1-p55098C-genome specific (napus-oleracea) | 0.2535885    | 0.6608328    | 0.9844961    | 0.6693373    | not scorable | not scorable |
| #### Bn-scaff_23176_1-p79652genome unspecific (all in)         | 0.9665072    | 0.417071     | 0.9922481    | 0.7723388    | 1            | 0.9339864    |
| #### Bn-scaff_23186_1-p10109C-genome specific (napus-oleracea) | 0.9856459    | 0.4040543    | 0.9922481    | 0.8306848    | not scorable | not scorable |
| #### Bn-scaff_23186_1-p10138C-genome specific (napus-oleracea) | 0.9736842    | 0.7598728    | 0.9922481    | 0.8154362    | not scorable | not scorable |
| #### Bn-scaff_23186_1-p10219genome unspecific (all in)         | 0.9712918    | 0.2643774    | 0.9844961    | 0.6248382    | 0.9090909    | 0.5962698    |
| #### Bn-scaff_23186_1-p10235C-genome specific (napus-oleracea) | 0.9832536    | 0.7094305    | 1            | 0.6837664    | not scorable | not scorable |

|                                                                 |              |              |              |              |              |              |
|-----------------------------------------------------------------|--------------|--------------|--------------|--------------|--------------|--------------|
| #### Bn-scaff_23186_1-p11111C-genome specific (napus-oleracea)  | 0.9832536    | 0.7075678    | 0.9922481    | 0.7386109    | not scorable | not scorable |
| #### Bn-scaff_23186_1-p1113E C-genome specific (napus-oleracea) | 0.9784689    | 0.8070242    | 1            | 0.8401487    | not scorable | not scorable |
| #### Bn-scaff_23186_1-p1215C C-genome specific (napus-oleracea) | 0.9976076    | 0.7726139    | 0.9922481    | 0.8213658    | not scorable | not scorable |
| #### Bn-scaff_23186_1-p18239C-genome specific (oleracea only)   | not scorable | not scorable | 0.9534883    | 0.7239876    | not scorable | not scorable |
| #### Bn-scaff_23186_1-p18537C-genome specific (napus-oleracea)  | 0.9617225    | 0.709889     | 1            | 0.7334091    | not scorable | not scorable |
| #### Bn-scaff_23186_1-p20037genome unspecific (all in)          | 0.9712918    | 0.3671673    | 1            | 0.8103533    | 0.9917355    | 0.8126941    |
| #### Bn-scaff_23186_1-p2251E genome unspecific (all in)         | 0.9641148    | 0.3682869    | 1            | 0.8008317    | 1            | 0.8033398    |
| #### Bn-scaff_23186_1-p2567E genome unspecific (all in)         | 0.9976076    | 0.499744     | 1            | 0.6768408    | 1            | 0.9083885    |
| #### Bn-scaff_23186_1-p30304A-genome specific (rapa only)       | not scorable | not scorable | not scorable | not scorable | 0.9834711    | 0.5073043    |
| #### Bn-scaff_23186_1-p3032C C-genome specific (napus-oleracea) | 0.9712918    | 0.6818405    | 1            | 0.6570104    | not scorable | not scorable |
| #### Bn-scaff_23186_1-p3312E C-genome specific (napus-oleracea) | 0.9976076    | 0.5999074    | 1            | 0.8122128    | not scorable | not scorable |
| #### Bn-scaff_23186_1-p3402E genome unspecific (all in)         | 0.9880383    | 0.9209586    | 0.9612403    | 0.8280146    | 0.8016529    | 0.9698464    |
| #### Bn-scaff_23186_1-p3406E C-genome specific (napus-oleracea) | 0.9856459    | 0.8501688    | 0.9689922    | 0.7885731    | not scorable | not scorable |
| #### Bn-scaff_23186_1-p3407C genome unspecific (all in)         | 0.9808612    | 0.8649192    | 0.9689922    | 0.8598667    | 0.8016529    | 0.8192344    |
| #### Bn-scaff_23186_1-p3411E genome unspecific (all in)         | 0.9928229    | 0.8922637    | 0.9689922    | 0.7284595    | 0.8016529    | 0.8948976    |
| #### Bn-scaff_23186_1-p4325E genome unspecific (all in)         | 0.9928229    | 0.3734026    | 1            | 0.7330526    | 0.9834711    | 0.7219613    |
| #### Bn-scaff_23186_1-p5266E genome unspecific (all in)         | 0.9832536    | 0.3996957    | 1            | 0.6967292    | 0.9834711    | 0.766614     |
| #### Bn-scaff_23186_1-p7210E genome unspecific (all in)         | 1            | 0.4974685    | 1            | 0.7032495    | 1            | 0.7463923    |
| #### Bn-scaff_23186_1-p8774 C-genome specific (napus-oleracea)  | 0.9832536    | 0.7769942    | 0.9922481    | 0.8525947    | not scorable | not scorable |
| #### Bn-scaff_23195_1-p4763E genome unspecific (all in)         | 1            | 0.6247367    | 1            | 0.5821994    | 0.9917355    | 0.9126778    |
| #### Bn-scaff_23195_1-p70804C-genome specific (napus-oleracea)  | 1            | 0.7785962    | 1            | 0.7332512    | not scorable | not scorable |
| #### Bn-scaff_23195_1-p9954 C-genome specific (napus-oleracea)  | 1            | 0.7967115    | 1            | 0.8056058    | not scorable | not scorable |
| #### Bn-scaff_23199_1-p24961C-genome specific (napus-oleracea)  | 0.9976076    | 0.8431448    | 1            | 0.7618669    | not scorable | not scorable |
| #### Bn-scaff_23199_1-p39784C-genome specific (napus-oleracea)  | 0.9928229    | 0.7465256    | 0.9844961    | 0.6739389    | not scorable | not scorable |
| #### Bn-scaff_23199_1-p4639C genome unspecific (all in)         | 1            | 0.8616986    | 0.9844961    | 0.8631717    | 1            | 0.8795264    |
| #### Bn-scaff_23200_1-p3350 genome unspecific (oleracea-rapa)   | not scorable | not scorable | 1            | 0.7597556    | 0.9917355    | 0.7017977    |
| #### Bn-scaff_23204_1-p7906 genome unspecific (all in)          | 0.9952153    | 0.6862504    | 1            | 0.6334989    | 1            | 0.6865124    |
| #### Bn-scaff_23207_1-p1232E C-genome specific (napus-oleracea) | 0.9019139    | 0.7999393    | 0.9767442    | 0.7218971    | not scorable | not scorable |
| #### Bn-scaff_23207_1-p1536E C-genome specific (napus-oleracea) | 0.8923445    | 0.694648     | 0.5813953    | 0.7645319    | not scorable | not scorable |
| #### Bn-scaff_23207_1-p28497 genome unspecific (oleracea-rapa)  | not scorable | not scorable | 1            | 0.6859301    | 1            | 0.702597     |
| #### Bn-scaff_23207_1-p2859E A-genome specific (rapa only)      | not scorable | not scorable | not scorable | not scorable | 1            | 0.7855176    |
| #### Bn-scaff_23207_1-p3848E A-genome specific (napus-rapa)     | 0.9904306    | 0.8063412    | not scorable | not scorable | 1            | 0.7884539    |
| #### Bn-scaff_23207_1-p38501C-genome specific (oleracea only)   | not scorable | not scorable | 0.9844961    | 0.7145487    | not scorable | not scorable |

|                                                                 |              |              |              |              |              |              |
|-----------------------------------------------------------------|--------------|--------------|--------------|--------------|--------------|--------------|
| #### Bn-scaff_23207_1-p38508 C-genome specific (napus-oleracea) | 0.9210526    | 0.8567547    | 1            | 0.8109218    | not scorable | not scorable |
| #### Bn-scaff_23207_1-p41222 genome unspecific (all in)         | 1            | 0.4893315    | 1            | 0.493813     | 1            | 0.5508585    |
| #### Bn-scaff_23207_1-p47729 genome unspecific (all in)         | 0.9880383    | 0.4828424    | 0.9844961    | 0.2834113    | 0.9173554    | 0.5628684    |
| #### Bn-scaff_23207_1-p47739 genome unspecific (all in)         | 0.9928229    | 0.3191118    | 1            | 0.6307412    | 1            | 0.8391446    |
| #### Bn-scaff_23208_1-p22129 genome unspecific (oleracea-rapa)  | not scorable | not scorable | 0.9922481    | 0.7820376    | 0.9586777    | 0.8954863    |
| #### Bn-scaff_23208_1-p9844 C-genome specific (napus-oleracea)  | 1            | 0.9218006    | 1            | 0.7978212    | not scorable | not scorable |
| #### Bn-scaff_23213_1-p3996 genome unspecific (oleracea-rapa)   | not scorable | not scorable | 0.9767442    | 0.7929488    | 1            | 0.9472638    |
| #### Bn-scaff_23213_1-p5752 C-genome specific (napus-oleracea)  | 0.9760765    | 0.8426948    | 0.9922481    | 0.8689731    | not scorable | not scorable |
| #### Bn-scaff_23229_1-p41596 genome unspecific (all in)         | 0.9976076    | 0.3169089    | 0.9922481    | 0.6862137    | 1            | 0.875493     |
| #### Bn-scaff_23229_1-p55001 genome unspecific (all in)         | 1            | 0.3302782    | 1            | 0.8055573    | 1            | 0.8619835    |
| #### Bn-scaff_23286_1-p3025 C-genome specific (napus-oleracea)  | 0.9952153    | 0.6780505    | 0.9844961    | 0.6642324    | not scorable | not scorable |
| #### Bn-scaff_23291_1-p12653 A-genome specific (napus-rapa)     | 1            | 0.5919799    | not scorable | not scorable | 1            | 0.8004208    |
| #### Bn-scaff_23291_1-p15062 C-genome specific (oleracea only)  | not scorable | not scorable | 0.7674419    | 0.7440118    | not scorable | not scorable |
| #### Bn-scaff_23291_1-p15335 C-genome specific (napus-oleracea) | 0.9760765    | 0.8132883    | 0.9922481    | 0.8786597    | not scorable | not scorable |
| #### Bn-scaff_23291_1-p20877 C-genome specific (oleracea only)  | not scorable | not scorable | 0.9457364    | 0.8612697    | not scorable | not scorable |
| #### Bn-scaff_23291_1-p41752 genome unspecific (all in)         | 1            | 0.6230366    | 0.9844961    | 0.656393     | 0.9917355    | 0.7972556    |
| #### Bn-scaff_23291_1-p45240 genome unspecific (all in)         | 1            | 0.6921083    | 1            | 0.6723316    | 1            | 0.71868      |
| #### Bn-scaff_23291_1-p85817 C-genome specific (napus-oleracea) | 0.9665072    | 0.7513553    | 0.8217054    | 0.8342391    | not scorable | not scorable |
| #### Bn-scaff_23291_1-p90831 C-genome specific (napus-oleracea) | 0.9760765    | 0.7902572    | 0.5813953    | 0.7663556    | not scorable | not scorable |
| #### Bn-scaff_23293_1-p10781 C-genome specific (napus-oleracea) | 0.937799     | 0.6762183    | 1            | 0.7378888    | not scorable | not scorable |
| #### Bn-scaff_23293_1-p14435 C-genome specific (napus-oleracea) | 0.9210526    | 0.7168652    | 1            | 0.7181225    | not scorable | not scorable |
| #### Bn-scaff_23293_1-p14587 C-genome specific (napus-oleracea) | 0.9210526    | 0.8273152    | 1            | 0.7915679    | not scorable | not scorable |
| #### Bn-scaff_23293_1-p17588 C-genome specific (napus-oleracea) | 0.9138756    | 0.8260272    | 1            | 0.762687     | not scorable | not scorable |
| #### Bn-scaff_23293_1-p18825 C-genome specific (napus-oleracea) | 0.9186603    | 0.8504198    | 1            | 0.724461     | not scorable | not scorable |
| #### Bn-scaff_23293_1-p19724 C-genome specific (napus-oleracea) | 0.9114832    | 0.8670846    | 1            | 0.8097596    | not scorable | not scorable |
| #### Bn-scaff_23293_1-p21131 C-genome specific (napus-oleracea) | 0.9138756    | 0.7936966    | 0.9844961    | 0.7522751    | not scorable | not scorable |
| #### Bn-scaff_23293_1-p21432 C-genome specific (napus-oleracea) | 0.9162679    | 0.815907     | 0.9922481    | 0.7998872    | not scorable | not scorable |
| #### Bn-scaff_23293_1-p21522 C-genome specific (napus-oleracea) | 0.923445     | 0.8699047    | 0.9922481    | 0.7597682    | not scorable | not scorable |
| #### Bn-scaff_23293_1-p23919 genome unspecific (all in)         | 0.9904306    | 0.3843225    | 1            | 0.7670011    | 0.9669421    | 0.7780862    |
| #### Bn-scaff_23293_1-p25406 genome unspecific (all in)         | 0.9856459    | 0.4328253    | 1            | 0.6784605    | 0.9917355    | 0.682703     |
| #### Bn-scaff_23305_1-p46201 C-genome specific (napus-oleracea) | 0.9904306    | 0.7635138    | 1            | 0.8249598    | not scorable | not scorable |
| #### Bn-scaff_23347_1-p14634 genome unspecific (all in)         | 1            | 0.6152901    | 0.9922481    | 0.6388538    | 1            | 0.7828768    |
| #### Bn-scaff_23347_1-p15430 C-genome specific (napus-oleracea) | 0.8205742    | 0.7345387    | 0.9922481    | 0.6550688    | not scorable | not scorable |

|                                                                |              |              |              |              |              |              |
|----------------------------------------------------------------|--------------|--------------|--------------|--------------|--------------|--------------|
| #### Bn-scaff_23347_1-p1863 genome unspecific (oleracea-rapa)  | not scorable | not scorable | 0.9922481    | 0.5890863    | 0.7933884    | 0.9517463    |
| #### Bn-scaff_23347_1-p2076 genome unspecific (oleracea-rapa)  | not scorable | not scorable | 1            | 0.7875408    | 0.9917355    | 0.6629504    |
| #### Bn-scaff_23347_1-p3917 genome unspecific (oleracea-rapa)  | not scorable | not scorable | 1            | 0.3972383    | 1            | 0.7914145    |
| #### Bn-scaff_23347_1-p5791 C-genome specific (napus-oleracea) | 0.8325359    | 0.7053769    | 1            | 0.7612439    | not scorable | not scorable |
| #### Bn-scaff_23347_1-p5837 C-genome specific (napus-oleracea) | 0.8277512    | 0.7253188    | 1            | 0.7167687    | not scorable | not scorable |
| #### Bn-scaff_23347_1-p5858 C-genome specific (napus-oleracea) | 0.8349282    | 0.7732152    | 1            | 0.8479081    | not scorable | not scorable |
| #### Bn-scaff_23347_1-p8300 C-genome specific (napus-oleracea) | 0.8325359    | 0.7732399    | 0.9922481    | 0.6591679    | not scorable | not scorable |
| #### Bn-scaff_23347_1-p8323 C-genome specific (napus-oleracea) | 0.8181818    | 0.638386     | 0.9844961    | 0.4765483    | not scorable | not scorable |
| #### Bn-scaff_23347_1-p8337 C-genome specific (napus-oleracea) | 0.8253589    | 0.7647777    | 0.9922481    | 0.7832031    | not scorable | not scorable |
| #### Bn-scaff_23347_1-p8414 C-genome specific (napus-oleracea) | 0.8277512    | 0.7286053    | 0.9922481    | 0.7043824    | not scorable | not scorable |
| #### Bn-scaff_23347_1-p8434 C-genome specific (napus-oleracea) | 0.8229665    | 0.814824     | 0.9767442    | 0.682347     | not scorable | not scorable |
| #### Bn-scaff_23347_1-p9243 genome unspecific (all in)         | 0.8014354    | 0.6975796    | 1            | 0.840882     | 1            | 0.9303657    |
| #### Bn-scaff_23347_1-p9265 C-genome specific (napus-oleracea) | 0.8349282    | 0.7821308    | 1            | 0.7889931    | not scorable | not scorable |
| #### Bn-scaff_23350_1-p1669 C-genome specific (napus-oleracea) | 1            | 0.7532328    | 0.9922481    | 0.8270096    | not scorable | not scorable |
| #### Bn-scaff_23350_1-p2060 genome unspecific (all in)         | 0.9712918    | 0.4040345    | 1            | 0.7727254    | 1            | 0.8482829    |
| #### Bn-scaff_23350_1-p3945 genome unspecific (oleracea-rapa)  | not scorable | not scorable | 1            | 0.7149169    | 1            | 0.8079497    |
| #### Bn-scaff_23350_1-p5941 C-genome specific (napus-oleracea) | 0.9856459    | 0.8058301    | 0.9457364    | 0.8131424    | not scorable | not scorable |
| #### Bn-scaff_23350_1-p6045 C-genome specific (napus-oleracea) | 0.9856459    | 0.7786294    | 0.9844961    | 0.6444615    | not scorable | not scorable |
| #### Bn-scaff_23350_1-p6432 C-genome specific (napus-oleracea) | 0.9976076    | 0.7971185    | 1            | 0.7978211    | not scorable | not scorable |
| #### Bn-scaff_23350_1-p7655 C-genome specific (napus-oleracea) | 0.9856459    | 0.7982768    | 1            | 0.7472962    | not scorable | not scorable |
| #### Bn-scaff_23350_1-p7706 A-genome specific (rapa only)      | not scorable | not scorable | not scorable | not scorable | 0.9669421    | 0.6795503    |
| #### Bn-scaff_23350_1-p8136 genome unspecific (all in)         | 0.9952153    | 0.3773279    | 0.9767442    | 0.3369486    | 1            | 0.9176308    |
| #### Bn-scaff_23350_1-p8305 C-genome specific (napus-oleracea) | 0.9976076    | 0.7810605    | 1            | 0.8780279    | not scorable | not scorable |
| #### Bn-scaff_23350_1-p8515 C-genome specific (napus-oleracea) | 0.9976076    | 0.7911331    | 1            | 0.80385      | not scorable | not scorable |
| #### Bn-scaff_23366_1-p1899 C-genome specific (napus-oleracea) | 1            | 0.5949962    | 1            | 0.5170071    | not scorable | not scorable |
| #### Bn-scaff_23400_1-p1013 C-genome specific (napus-oleracea) | 0.9976076    | 0.8907227    | 1            | 0.8237607    | not scorable | not scorable |
| #### Bn-scaff_23400_1-p1095 napus specific                     | 0.9952153    | 0.7493306    | not scorable | not scorable | not scorable | not scorable |
| #### Bn-scaff_23400_1-p1106 genome unspecific (all in)         | 0.9880383    | 0.5511975    | 0.9922481    | 0.7753937    | 0.9752066    | 0.740544     |
| #### Bn-scaff_23400_1-p1180 C-genome specific (napus-oleracea) | 0.9928229    | 0.802979     | 1            | 0.8965721    | not scorable | not scorable |
| #### Bn-scaff_23400_1-p1205 C-genome specific (napus-oleracea) | 0.9928229    | 0.8523329    | 0.9922481    | 0.7824546    | not scorable | not scorable |
| #### Bn-scaff_23400_1-p1678 genome unspecific (all in)         | 1            | 0.5290589    | 1            | 0.524058     | 1            | 0.5976474    |
| #### Bn-scaff_23400_1-p2495 C-genome specific (napus-oleracea) | 0.9952153    | 0.6698281    | 0.9922481    | 0.6546715    | not scorable | not scorable |
| #### Bn-scaff_23400_1-p2640 C-genome specific (napus-oleracea) | 0.9928229    | 0.7490122    | 1            | 0.6791501    | not scorable | not scorable |

|                                                                 |              |              |           |           |              |              |
|-----------------------------------------------------------------|--------------|--------------|-----------|-----------|--------------|--------------|
| #### Bn-scaff_23400_1-p26517 C-genome specific (napus-oleracea) | 0.9904306    | 0.7033237    | 0.9844961 | 0.7184703 | not scorable | not scorable |
| #### Bn-scaff_23400_1-p29039 C-genome specific (napus-oleracea) | 0.9856459    | 0.856333     | 1         | 0.5589049 | not scorable | not scorable |
| #### Bn-scaff_23400_1-p32203 C-genome specific (napus-oleracea) | 0.9832536    | 0.6499636    | 1         | 0.7512429 | not scorable | not scorable |
| #### Bn-scaff_23400_1-p33356 C-genome specific (napus-oleracea) | 0.9832536    | 0.8714361    | 0.9922481 | 0.6700559 | not scorable | not scorable |
| #### Bn-scaff_23400_1-p35185 C-genome specific (napus-oleracea) | 0.9976076    | 0.7736672    | 0.9844961 | 0.6961529 | not scorable | not scorable |
| #### Bn-scaff_23400_1-p38125 C-genome specific (napus-oleracea) | 0.9904306    | 0.8983551    | 0.9844961 | 0.7829943 | not scorable | not scorable |
| #### Bn-scaff_23400_1-p39981 C-genome specific (napus-oleracea) | 0.9880383    | 0.9066366    | 0.9922481 | 0.8366918 | not scorable | not scorable |
| #### Bn-scaff_23400_1-p45106 C-genome specific (napus-oleracea) | 0.9976076    | 0.8099543    | 1         | 0.7149602 | not scorable | not scorable |
| #### Bn-scaff_23400_1-p45421 genome unspecific (oleracea-rapa)  | not scorable | not scorable | 0.9612403 | 0.8086064 | 1            | 0.9175813    |
| #### Bn-scaff_23400_1-p50865 C-genome specific (napus-oleracea) | 0.9976076    | 0.7661493    | 1         | 0.7431131 | not scorable | not scorable |
| #### Bn-scaff_23400_1-p55600 C-genome specific (napus-oleracea) | 0.9952153    | 0.6973944    | 1         | 0.6385608 | not scorable | not scorable |
| #### Bn-scaff_23400_1-p55634 C-genome specific (napus-oleracea) | 0.9928229    | 0.7020856    | 1         | 0.8318705 | not scorable | not scorable |
| #### Bn-scaff_23400_1-p57185 C-genome specific (napus-oleracea) | 0.9880383    | 0.815884     | 1         | 0.8566455 | not scorable | not scorable |
| #### Bn-scaff_23400_1-p58259 C-genome specific (napus-oleracea) | 0.9952153    | 0.8599896    | 0.9922481 | 0.8033479 | not scorable | not scorable |
| #### Bn-scaff_23400_1-p60858 C-genome specific (napus-oleracea) | 0.9641148    | 0.7861252    | 0.9922481 | 0.7151147 | not scorable | not scorable |
| #### Bn-scaff_23400_1-p61356 genome unspecific (all in)         | 0.9593301    | 0.4697795    | 1         | 0.7257417 | 1            | 0.9128745    |
| #### Bn-scaff_23400_1-p65305 C-genome specific (napus-oleracea) | 0.9593301    | 0.8928913    | 0.9844961 | 0.8079147 | not scorable | not scorable |
| #### Bn-scaff_23401_1-p13179 genome unspecific (all in)         | 1            | 0.6241862    | 1         | 0.6042672 | 1            | 0.572157     |
| #### Bn-scaff_23401_1-p13212 C-genome specific (napus-oleracea) | 0.9880383    | 0.8749103    | 0.9767442 | 0.7814443 | not scorable | not scorable |
| #### Bn-scaff_23401_1-p13220 C-genome specific (napus-oleracea) | 0.9904306    | 0.8893222    | 0.9767442 | 0.7960851 | not scorable | not scorable |
| #### Bn-scaff_23401_1-p13632 C-genome specific (napus-oleracea) | 0.9904306    | 0.8544483    | 0.9689922 | 0.8751893 | not scorable | not scorable |
| #### Bn-scaff_23401_1-p13718 C-genome specific (napus-oleracea) | 0.9880383    | 0.8616297    | 0.9767442 | 0.8123115 | not scorable | not scorable |
| #### Bn-scaff_23401_1-p13844 C-genome specific (napus-oleracea) | 0.9856459    | 0.8584552    | 0.9767442 | 0.7350113 | not scorable | not scorable |
| #### Bn-scaff_23401_1-p13884 C-genome specific (napus-oleracea) | 0.9856459    | 0.7518772    | 0.9767442 | 0.6829675 | not scorable | not scorable |
| #### Bn-scaff_23401_1-p14034 C-genome specific (napus-oleracea) | 0.9856459    | 0.8334489    | 0.9767442 | 0.7503737 | not scorable | not scorable |
| #### Bn-scaff_23401_1-p14375 C-genome specific (napus-oleracea) | 0.9904306    | 0.8055909    | 0.9689922 | 0.7744777 | not scorable | not scorable |
| #### Bn-scaff_23401_1-p15223 C-genome specific (napus-oleracea) | 0.9880383    | 0.7922263    | 0.9767442 | 0.7107223 | not scorable | not scorable |
| #### Bn-scaff_23401_1-p16565 genome unspecific (all in)         | 0.9641148    | 0.2594471    | 0.9844961 | 0.7729417 | 1            | 0.907222     |
| #### Bn-scaff_23401_1-p18325 C-genome specific (napus-oleracea) | 0.9928229    | 0.8654736    | 0.9922481 | 0.7676289 | not scorable | not scorable |
| #### Bn-scaff_23401_1-p18345 C-genome specific (napus-oleracea) | 0.9952153    | 0.7691771    | 0.9922481 | 0.7934783 | not scorable | not scorable |
| #### Bn-scaff_23401_1-p18352 C-genome specific (napus-oleracea) | 0.9952153    | 0.7171915    | 0.9922481 | 0.6894841 | not scorable | not scorable |
| #### Bn-scaff_23401_1-p18548 C-genome specific (napus-oleracea) | 0.9928229    | 0.5403808    | 1         | 0.6730869 | not scorable | not scorable |
| #### Bn-scaff_23401_1-p18566 C-genome specific (napus-oleracea) | 0.9952153    | 0.8764606    | 0.9922481 | 0.7276903 | not scorable | not scorable |



|                                                                 |              |              |              |   |              |              |              |
|-----------------------------------------------------------------|--------------|--------------|--------------|---|--------------|--------------|--------------|
| #### Bn-scaff_23401_1-p18708 C-genome specific (napus-oleracea) | 0.9928229    | 0.7529023    |              | 1 | 0.6796762    | not scorable | not scorable |
| #### Bn-scaff_23401_1-p18778 C-genome specific (napus-oleracea) | 0.9928229    | 0.8327477    |              | 1 | 0.6875123    | not scorable | not scorable |
| #### Bn-scaff_23401_1-p18831 C-genome specific (napus-oleracea) | 0.9880383    | 0.788259     |              | 1 | 0.7652192    | not scorable | not scorable |
| #### Bn-scaff_23401_1-p18925 C-genome specific (napus-oleracea) | 0.9952153    | 0.8654689    |              | 1 | 0.7281631    | not scorable | not scorable |
| #### Bn-scaff_23401_1-p19273 C-genome specific (napus-oleracea) | 0.9928229    | 0.766441     |              | 1 | 0.6359661    | not scorable | not scorable |
| #### Bn-scaff_23401_1-p19410 C-genome specific (napus-oleracea) | 0.9880383    | 0.8705543    |              | 1 | 0.7706521    | not scorable | not scorable |
| #### Bn-scaff_23401_1-p19931 all not scorable                   | not scorable | not scorable | not scorable |   | not scorable | not scorable | not scorable |
| #### Bn-scaff_23401_1-p19958 napus specific                     | 0.9952153    | 0.7839079    | not scorable |   | not scorable | not scorable | not scorable |
| #### Bn-scaff_23401_1-p19993 C-genome specific (napus-oleracea) | 0.9952153    | 0.898129     | 0.9922481    |   | 0.8065605    | not scorable | not scorable |
| #### Bn-scaff_23401_1-p20457 C-genome specific (napus-oleracea) | 0.9928229    | 0.8816305    |              | 1 | 0.7251314    | not scorable | not scorable |
| #### Bn-scaff_23401_1-p20476 C-genome specific (napus-oleracea) | 0.9880383    | 0.7835749    |              | 1 | 0.6753323    | not scorable | not scorable |
| #### Bn-scaff_23401_1-p20502 C-genome specific (napus-oleracea) | 0.9928229    | 0.8730058    |              | 1 | 0.8248942    | not scorable | not scorable |
| #### Bn-scaff_23401_1-p20520 C-genome specific (napus-oleracea) | 0.9904306    | 0.8041422    |              | 1 | 0.724786     | not scorable | not scorable |
| #### Bn-scaff_23401_1-p20574 C-genome specific (napus-oleracea) | 0.9904306    | 0.8749796    | 0.9922481    |   | 0.7805395    | not scorable | not scorable |
| #### Bn-scaff_23401_1-p20887 C-genome specific (napus-oleracea) | 0.9856459    | 0.885168     | 0.9767442    |   | 0.7363358    | not scorable | not scorable |
| #### Bn-scaff_23401_1-p21682 C-genome specific (napus-oleracea) | 0.9904306    | 0.9302475    | 0.9689922    |   | 0.6950566    | not scorable | not scorable |
| #### Bn-scaff_23401_1-p22032 C-genome specific (napus-oleracea) | 0.9904306    | 0.8694372    |              | 1 | 0.7225132    | not scorable | not scorable |
| #### Bn-scaff_23401_1-p22214 C-genome specific (napus-oleracea) | 0.9952153    | 0.7533582    |              | 1 | 0.7148477    | not scorable | not scorable |
| #### Bn-scaff_23401_1-p22274 C-genome specific (napus-oleracea) | 0.9928229    | 0.8627091    |              | 1 | 0.7759107    | not scorable | not scorable |
| #### Bn-scaff_23401_1-p22276 C-genome specific (napus-oleracea) | 0.9928229    | 0.8008221    |              | 1 | 0.6717774    | not scorable | not scorable |
| #### Bn-scaff_23401_1-p22282 C-genome specific (napus-oleracea) | 0.9904306    | 0.7399979    |              | 1 | 0.7097784    | not scorable | not scorable |
| #### Bn-scaff_23401_1-p22318 C-genome specific (napus-oleracea) | 0.9928229    | 0.8698713    | 0.9922481    |   | 0.7948249    | not scorable | not scorable |
| #### Bn-scaff_23401_1-p22338 C-genome specific (napus-oleracea) | 0.9928229    | 0.8477346    |              | 1 | 0.8085388    | not scorable | not scorable |
| #### Bn-scaff_23401_1-p22364 C-genome specific (napus-oleracea) | 0.9880383    | 0.8372001    | 0.9922481    |   | 0.7715251    | not scorable | not scorable |
| #### Bn-scaff_23401_1-p23548 C-genome specific (napus-oleracea) | 0.9928229    | 0.8455172    | 0.9922481    |   | 0.7719436    | not scorable | not scorable |
| #### Bn-scaff_23401_1-p30194 C-genome specific (napus-oleracea) | 0.9928229    | 0.9310649    |              | 1 | 0.8163237    | not scorable | not scorable |
| #### Bn-scaff_23401_1-p30374 genome unspecific (all in)         | 0.9928229    | 0.53635      |              | 1 | 0.7238254    | 0.9669421    | 0.9007823    |
| #### Bn-scaff_23401_1-p31642 C-genome specific (napus-oleracea) | 0.9928229    | 0.8433754    | 0.9922481    |   | 0.7736661    | not scorable | not scorable |
| #### Bn-scaff_23401_1-p31780 genome unspecific (all in)         | 0.9832536    | 0.2777705    |              | 1 | 0.890081     | 0.9917355    | 0.7746018    |
| #### Bn-scaff_23401_1-p33300 napus specific                     | 0.9904306    | 0.2996885    | not scorable |   | not scorable | not scorable | not scorable |
| #### Bn-scaff_23401_1-p34941 C-genome specific (napus-oleracea) | 0.9856459    | 0.4913889    | 0.9844961    |   | 0.386262     | not scorable | not scorable |
| #### Bn-scaff_23401_1-p34942 C-genome specific (napus-oleracea) |              | 1            | 0.5709352    |   | 1            | 0.5768884    | not scorable |
| #### Bn-scaff_23401_1-p34954 C-genome specific (oleracea only)  | not scorable | not scorable |              |   | 1            | 0.5565777    | not scorable |

|                                                                 |           |           |           |           |              |              |
|-----------------------------------------------------------------|-----------|-----------|-----------|-----------|--------------|--------------|
| #### Bn-scaff_23401_1-p35009 C-genome specific (napus-oleracea) | 0.9856459 | 0.6411756 | 0.9922481 | 0.6733124 | not scorable | not scorable |
| #### Bn-scaff_23401_1-p36147 genome unspecific (all in)         | 1         | 0.6098663 | 1         | 0.806685  | 1            | 0.945848     |
| #### Bn-scaff_23401_1-p36936 C-genome specific (napus-oleracea) | 0.9880383 | 0.9482607 | 0.9922481 | 0.8405713 | not scorable | not scorable |
| #### Bn-scaff_23401_1-p37026 C-genome specific (napus-oleracea) | 0.9904306 | 0.9428071 | 1         | 0.8320989 | not scorable | not scorable |
| #### Bn-scaff_23401_1-p37033 C-genome specific (napus-oleracea) | 0.9904306 | 0.9374809 | 0.9922481 | 0.751177  | not scorable | not scorable |
| #### Bn-scaff_23401_1-p38601 C-genome specific (napus-oleracea) | 0.9904306 | 0.6949604 | 0.9689922 | 0.6686958 | not scorable | not scorable |
| #### Bn-scaff_23401_1-p38687 C-genome specific (napus-oleracea) | 0.9952153 | 0.8382099 | 1         | 0.7496321 | not scorable | not scorable |
| #### Bn-scaff_23401_1-p38716 C-genome specific (napus-oleracea) | 0.9928229 | 0.8622032 | 0.9922481 | 0.7179773 | not scorable | not scorable |
| #### Bn-scaff_23401_1-p38741 C-genome specific (napus-oleracea) | 0.9880383 | 0.9218233 | 0.9844961 | 0.7211057 | not scorable | not scorable |
| #### Bn-scaff_23401_1-p38747 C-genome specific (napus-oleracea) | 0.9856459 | 0.920171  | 0.9767442 | 0.7330453 | not scorable | not scorable |
| #### Bn-scaff_23401_1-p38837 C-genome specific (napus-oleracea) | 0.9952153 | 0.871597  | 1         | 0.7373413 | not scorable | not scorable |
| #### Bn-scaff_23401_1-p38852 C-genome specific (napus-oleracea) | 0.9904306 | 0.8800518 | 1         | 0.780118  | not scorable | not scorable |
| #### Bn-scaff_23401_1-p38873 C-genome specific (napus-oleracea) | 0.9904306 | 0.7163456 | 0.9767442 | 0.6625109 | not scorable | not scorable |
| #### Bn-scaff_23401_1-p38889 C-genome specific (napus-oleracea) | 0.9928229 | 0.8694151 | 1         | 0.5916391 | not scorable | not scorable |
| #### Bn-scaff_23401_1-p38921 C-genome specific (napus-oleracea) | 0.9904306 | 0.8060738 | 0.9922481 | 0.7183708 | not scorable | not scorable |
| #### Bn-scaff_23401_1-p38921 C-genome specific (napus-oleracea) | 0.9904306 | 0.8413089 | 1         | 0.7836924 | not scorable | not scorable |
| #### Bn-scaff_23401_1-p38929 C-genome specific (napus-oleracea) | 0.9928229 | 0.7775027 | 1         | 0.6801112 | not scorable | not scorable |
| #### Bn-scaff_23401_1-p38938 C-genome specific (napus-oleracea) | 0.9928229 | 0.9100332 | 1         | 0.709216  | not scorable | not scorable |
| #### Bn-scaff_23401_1-p38966 C-genome specific (napus-oleracea) | 0.9904306 | 0.8008447 | 1         | 0.7172866 | not scorable | not scorable |
| #### Bn-scaff_23401_1-p38982 C-genome specific (napus-oleracea) | 0.9856459 | 0.6979712 | 1         | 0.6340447 | not scorable | not scorable |
| #### Bn-scaff_23401_1-p38984 C-genome specific (napus-oleracea) | 0.9856459 | 0.7328261 | 1         | 0.676307  | not scorable | not scorable |
| #### Bn-scaff_23401_1-p38990 C-genome specific (napus-oleracea) | 0.9904306 | 0.7144186 | 1         | 0.6168134 | not scorable | not scorable |
| #### Bn-scaff_23401_1-p39005 C-genome specific (napus-oleracea) | 0.9928229 | 0.8180501 | 1         | 0.7621109 | not scorable | not scorable |
| #### Bn-scaff_23401_1-p39026 genome unspecific (all in)         | 1         | 0.4913614 | 1         | 0.6225069 | 1            | 0.7396265    |
| #### Bn-scaff_23401_1-p39180 C-genome specific (napus-oleracea) | 0.9952153 | 0.7820554 | 1         | 0.6686944 | not scorable | not scorable |
| #### Bn-scaff_23401_1-p39216 C-genome specific (napus-oleracea) | 0.9928229 | 0.5007995 | 0.9844961 | 0.6258321 | not scorable | not scorable |
| #### Bn-scaff_23401_1-p39358 C-genome specific (napus-oleracea) | 0.9904306 | 0.8949182 | 1         | 0.7687622 | not scorable | not scorable |
| #### Bn-scaff_23401_1-p39388 C-genome specific (napus-oleracea) | 0.9976076 | 0.851218  | 0.9922481 | 0.7329401 | not scorable | not scorable |
| #### Bn-scaff_23401_1-p39441 C-genome specific (napus-oleracea) | 0.9928229 | 0.6265277 | 1         | 0.7648687 | not scorable | not scorable |
| #### Bn-scaff_23401_1-p39487 C-genome specific (napus-oleracea) | 0.9928229 | 0.9240721 | 1         | 0.8085093 | not scorable | not scorable |
| #### Bn-scaff_23401_1-p39551 C-genome specific (napus-oleracea) | 0.9880383 | 0.8528878 | 0.9922481 | 0.7838932 | not scorable | not scorable |
| #### Bn-scaff_23401_1-p39577 C-genome specific (napus-oleracea) | 0.9904306 | 0.8734848 | 1         | 0.8092723 | not scorable | not scorable |
| #### Bn-scaff_23401_1-p39648 C-genome specific (napus-oleracea) | 0.9904306 | 0.8735865 | 0.9844961 | 0.7695805 | not scorable | not scorable |

|                                                                |              |              |           |           |              |              |
|----------------------------------------------------------------|--------------|--------------|-----------|-----------|--------------|--------------|
| #### Bn-scaff_23401_1-p3966C-genome specific (napus-oleracea)  | 0.9904306    | 0.8714437    | 1         | 0.7811081 | not scorable | not scorable |
| #### Bn-scaff_23401_1-p3985C-genome specific (napus-oleracea)  | 0.9880383    | 0.4405914    | 1         | 0.5808287 | not scorable | not scorable |
| #### Bn-scaff_23401_1-p39887C-genome specific (napus-oleracea) | 0.9856459    | 0.6949003    | 0.9844961 | 0.7331344 | not scorable | not scorable |
| #### Bn-scaff_23401_1-p39901C-genome specific (napus-oleracea) | 0.9904306    | 0.8972689    | 1         | 0.748951  | not scorable | not scorable |
| #### Bn-scaff_23401_1-p39978genome unspecific (oleracea-rapa)  | not scorable | not scorable | 0.9612403 | 0.676792  | 0.9834711    | 0.7672285    |
| #### Bn-scaff_23401_1-p4003C-genome specific (napus-oleracea)  | 0.9904306    | 0.8943089    | 0.9922481 | 0.7884534 | not scorable | not scorable |
| #### Bn-scaff_23401_1-p4004C-genome specific (napus-oleracea)  | 0.9952153    | 0.7393998    | 1         | 0.5984839 | not scorable | not scorable |
| #### Bn-scaff_23401_1-p40091C-genome specific (napus-oleracea) | 0.9952153    | 0.815662     | 1         | 0.6605083 | not scorable | not scorable |
| #### Bn-scaff_23401_1-p40353C-genome specific (napus-oleracea) | 0.9904306    | 0.7397746    | 1         | 0.7273039 | not scorable | not scorable |
| #### Bn-scaff_23401_1-p4052C-genome specific (napus-oleracea)  | 0.9952153    | 0.8754559    | 1         | 0.7576974 | not scorable | not scorable |
| #### Bn-scaff_23401_1-p42363C-genome specific (napus-oleracea) | 0.9928229    | 0.9400612    | 1         | 0.7767195 | not scorable | not scorable |
| #### Bn-scaff_23401_1-p42693C-genome specific (napus-oleracea) | 0.9784689    | 0.4276496    | 0.9224806 | 0.3180031 | not scorable | not scorable |
| #### Bn-scaff_23401_1-p42822C-genome specific (napus-oleracea) | 0.9808612    | 0.7447942    | 0.9147287 | 0.6804008 | not scorable | not scorable |
| #### Bn-scaff_23401_1-p44703C-genome specific (napus-oleracea) | 0.9880383    | 0.7651644    | 0.9534883 | 0.7277234 | not scorable | not scorable |
| #### Bn-scaff_23401_1-p44763C-genome specific (napus-oleracea) | 0.9952153    | 0.7662116    | 0.9844961 | 0.7191845 | not scorable | not scorable |
| #### Bn-scaff_23401_1-p44775C-genome specific (napus-oleracea) | 0.9928229    | 0.8257622    | 1         | 0.8075426 | not scorable | not scorable |
| #### Bn-scaff_23401_1-p72623C-genome specific (napus-oleracea) | 0.9952153    | 0.7956491    | 0.9767442 | 0.6866537 | not scorable | not scorable |
| #### Bn-scaff_23401_1-p72806C-genome specific (napus-oleracea) | 0.9904306    | 0.9241084    | 0.9844961 | 0.7870341 | not scorable | not scorable |
| #### Bn-scaff_23401_1-p73548C-genome specific (napus-oleracea) | 0.9928229    | 0.9228156    | 0.9844961 | 0.7699351 | not scorable | not scorable |
| #### Bn-scaff_23401_1-p76131C-genome specific (napus-oleracea) | 0.9904306    | 0.7909402    | 0.9844961 | 0.4658819 | not scorable | not scorable |
| #### Bn-scaff_23401_1-p78385C-genome specific (napus-oleracea) | 0.9880383    | 0.8395877    | 1         | 0.7319978 | not scorable | not scorable |
| #### Bn-scaff_23401_1-p78401C-genome specific (napus-oleracea) | 0.9952153    | 0.8199793    | 0.9922481 | 0.8148576 | not scorable | not scorable |
| #### Bn-scaff_23401_1-p83935C-genome specific (napus-oleracea) | 0.9952153    | 0.8151271    | 1         | 0.5237579 | not scorable | not scorable |
| #### Bn-scaff_23401_1-p83992C-genome specific (napus-oleracea) | 0.9928229    | 0.8088505    | 1         | 0.7031018 | not scorable | not scorable |
| #### Bn-scaff_23401_1-p84129C-genome specific (napus-oleracea) | 0.9952153    | 0.8631125    | 0.9767442 | 0.4607658 | not scorable | not scorable |
| #### Bn-scaff_23401_1-p84503C-genome specific (napus-oleracea) | 0.9952153    | 0.8444377    | 1         | 0.8085203 | not scorable | not scorable |
| #### Bn-scaff_23401_1-p85681C-genome specific (napus-oleracea) | 0.9928229    | 0.8485919    | 0.9922481 | 0.8422567 | not scorable | not scorable |
| #### Bn-scaff_23401_1-p86442C-genome specific (napus-oleracea) | 0.9928229    | 0.8613252    | 0.9922481 | 0.7536186 | not scorable | not scorable |
| #### Bn-scaff_23401_1-p87471C-genome specific (napus-oleracea) | 0.9952153    | 0.8924416    | 0.8294573 | 0.8017709 | not scorable | not scorable |
| #### Bn-scaff_23401_1-p8752C-genome specific (napus-oleracea)  | 0.9952153    | 0.8438672    | 1         | 0.8774854 | not scorable | not scorable |
| #### Bn-scaff_23401_1-p87587C-genome specific (napus-oleracea) | 0.9952153    | 0.8349985    | 0.9844961 | 0.7850485 | not scorable | not scorable |
| #### Bn-scaff_23401_1-p87691C-genome specific (napus-oleracea) | 0.9880383    | 0.774083     | 1         | 0.7423793 | not scorable | not scorable |
| #### Bn-scaff_23407_1-p12058genome unspecific (all in)         | 1            | 0.5095646    | 1         | 0.7628546 | 1            | 0.9131743    |

|                                                                |              |              |              |   |              |              |   |              |
|----------------------------------------------------------------|--------------|--------------|--------------|---|--------------|--------------|---|--------------|
| #### Bn-scaff_23407_1-p12507genome unspecific (oleracea-rapa)  | not scorable | not scorable |              | 1 | 0.8273427    |              | 1 | 0.8815182    |
| #### Bn-scaff_23407_1-p12533genome unspecific (all in)         | 0.9784689    | 0.3228507    |              | 1 | 0.7881616    | 0.9917355    |   | 0.5868485    |
| #### Bn-scaff_23407_1-p12805genome unspecific (all in)         | 0.9976076    | 0.4336641    | 0.9922481    |   | 0.5406457    |              | 1 | 0.7843952    |
| #### Bn-scaff_23407_1-p14119genome unspecific (all in)         |              | 1            | 0.7914145    | 1 | 0.7899865    |              | 1 | 0.7181703    |
| #### Bn-scaff_23407_1-p14137C-genome specific (napus-oleracea) |              | 1            | 0.6642034    | 1 | 0.673829     | not scorable |   | not scorable |
| #### Bn-scaff_23407_1-p14143genome unspecific (all in)         | 0.9976076    | 0.5476729    |              | 1 | 0.6256556    |              | 1 | 0.8848283    |
| #### Bn-scaff_23407_1-p14156genome unspecific (all in)         | 0.9976076    | 0.2947122    | 0.9922481    |   | 0.4705238    |              | 1 | 0.689012     |
| #### Bn-scaff_23407_1-p14987genome unspecific (all in)         | 0.9712918    | 0.5578092    | 0.9612403    |   | 0.5676628    |              | 1 | 0.9311552    |
| #### Bn-scaff_23407_1-p23075C-genome specific (napus-oleracea) | 0.9928229    | 0.7809347    | 0.9922481    |   | 0.8422567    | not scorable |   | not scorable |
| #### Bn-scaff_23407_1-p26401C-genome specific (napus-oleracea) | 0.9784689    | 0.5911258    |              | 1 | 0.5637239    | not scorable |   | not scorable |
| #### Bn-scaff_23407_1-p27013genome unspecific (all in)         | 0.9712918    | 0.3614742    | 0.9922481    |   | 0.8021168    |              | 1 | 0.8687926    |
| #### Bn-scaff_23407_1-p27434C-genome specific (napus-oleracea) | 0.9880383    | 0.7408203    | 0.9844961    |   | 0.6731       | not scorable |   | not scorable |
| #### Bn-scaff_23407_1-p35451C-genome specific (napus-oleracea) | 0.9904306    | 0.6927312    |              | 1 | 0.6909444    | not scorable |   | not scorable |
| #### Bn-scaff_23407_1-p35606C-genome specific (napus-oleracea) | 0.9880383    | 0.6455017    |              | 1 | 0.5852702    | not scorable |   | not scorable |
| #### Bn-scaff_23407_1-p36212C-genome specific (napus-oleracea) | 0.9856459    | 0.6855031    |              | 1 | 0.6535844    | not scorable |   | not scorable |
| #### Bn-scaff_23407_1-p61303C-genome specific (napus-oleracea) | 0.9736842    | 0.6662726    |              | 1 | 0.6702281    | not scorable |   | not scorable |
| #### Bn-scaff_23407_1-p61525C-genome specific (napus-oleracea) | 0.9712918    | 0.667856     | 0.8914729    |   | 0.6550958    | not scorable |   | not scorable |
| #### Bn-scaff_23407_1-p83151C-genome specific (napus-oleracea) | 0.9832536    | 0.7879773    |              | 1 | 0.7641219    | not scorable |   | not scorable |
| #### Bn-scaff_23407_1-p83324C-genome specific (napus-oleracea) | 0.9904306    | 0.728408     |              | 1 | 0.7582756    | not scorable |   | not scorable |
| #### Bn-scaff_23407_1-p83423C-genome specific (napus-oleracea) | 0.9880383    | 0.6920045    |              | 1 | 0.6976266    | not scorable |   | not scorable |
| #### Bn-scaff_23407_1-p83498C-genome specific (napus-oleracea) | 0.9808612    | 0.6970574    | 0.9922481    |   | 0.7195178    | not scorable |   | not scorable |
| #### Bn-scaff_23407_1-p83856C-genome specific (napus-oleracea) | 0.9473684    | 0.5988067    | 0.8604651    |   | 0.5548816    | not scorable |   | not scorable |
| #### Bn-scaff_23407_1-p84746C-genome specific (napus-oleracea) | 0.9856459    | 0.6693439    |              | 1 | 0.6412095    | not scorable |   | not scorable |
| #### Bn-scaff_23407_1-p85101C-genome specific (napus-oleracea) | 0.9832536    | 0.6675668    |              | 1 | 0.6263193    | not scorable |   | not scorable |
| #### Bn-scaff_23407_1-p85316C-genome specific (napus-oleracea) | 0.9832536    | 0.7214814    |              | 1 | 0.6951834    | not scorable |   | not scorable |
| #### Bn-scaff_23407_1-p85348C-genome specific (napus-oleracea) | 0.9832536    | 0.684092     |              | 1 | 0.6445932    | not scorable |   | not scorable |
| #### Bn-scaff_23407_1-p86844C-genome specific (napus-oleracea) | 0.9880383    | 0.7170116    |              | 1 | 0.7582187    | not scorable |   | not scorable |
| #### Bn-scaff_23407_1-p87120C-genome specific (napus-oleracea) | 0.9904306    | 0.7771825    |              | 1 | 0.7905956    | not scorable |   | not scorable |
| #### Bn-scaff_23407_1-p87145C-genome specific (napus-oleracea) | 0.9880383    | 0.6908846    |              | 1 | 0.7161875    | not scorable |   | not scorable |
| #### Bn-scaff_23408_1-p10494C-genome specific (napus-oleracea) | 0.9784689    | 0.7558413    |              | 1 | 0.764771     | not scorable |   | not scorable |
| #### Bn-scaff_23408_1-p11247all not scorable                   | not scorable | not scorable | not scorable |   | not scorable | not scorable |   | not scorable |
| #### Bn-scaff_23408_1-p16265genome unspecific (all in)         | 0.9593301    | 0.5877548    |              | 1 | 0.7680718    |              | 1 | 0.9039491    |
| #### Bn-scaff_23408_1-p18675C-genome specific (napus-oleracea) | 0.9736842    | 0.7937812    | 0.9767442    |   | 0.6910116    | not scorable |   | not scorable |

|                                                                 |              |              |              |   |              |              |                     |              |
|-----------------------------------------------------------------|--------------|--------------|--------------|---|--------------|--------------|---------------------|--------------|
| #### Bn-scaff_23408_1-p20276 C-genome specific (napus-oleracea) | 0.9832536    | 0.7154414    |              | 1 | 0.8778694    | not scorable | not scorable        |              |
| #### Bn-scaff_23408_1-p20474 C-genome specific (napus-oleracea) | 0.9952153    | 0.760923     |              | 1 | 0.7244456    | not scorable | not scorable        |              |
| #### Bn-scaff_23408_1-p20474 C-genome specific (napus-oleracea) | 0.9880383    | 0.767768     | 0.9844961    |   | 0.8685957    | not scorable | not scorable        |              |
| #### Bn-scaff_23408_1-p20529 C-genome specific (napus-oleracea) | 0.9784689    | 0.7729448    | 0.9922481    |   | 0.7000583    | not scorable | not scorable        |              |
| #### Bn-scaff_23408_1-p21190 genome unspecific (all in)         |              | 1            | 0.5770498    |   | 1            | 0.5541744    | 0.8595041 0.8325163 |              |
| #### Bn-scaff_23408_1-p21885 genome unspecific (all in)         | 0.9736842    | 0.5328616    | 0.9689922    |   | 0.5921266    |              | 1 0.8381116         |              |
| #### Bn-scaff_23408_1-p24325 C-genome specific (napus-oleracea) | 0.9952153    | 0.6880464    |              | 1 | 0.6875421    | not scorable | not scorable        |              |
| #### Bn-scaff_23408_1-p26022 genome unspecific (all in)         | 0.9712918    | 0.3554412    |              | 1 | 0.7070096    |              | 1 0.8532477         |              |
| #### Bn-scaff_23408_1-p27173 C-genome specific (napus-oleracea) | 0.9856459    | 0.7711915    |              | 1 | 0.8693944    | not scorable | not scorable        |              |
| #### Bn-scaff_23408_1-p27292 genome unspecific (all in)         | 0.9282297    | 0.2388112    |              | 1 | 0.6286804    |              | 1 0.6531543         |              |
| #### Bn-scaff_23408_1-p27367 genome unspecific (all in)         | 0.9688995    | 0.3665922    |              | 1 | 0.7806839    |              | 1 0.9095823         |              |
| #### Bn-scaff_23408_1-p29166 genome unspecific (all in)         | 0.9641148    | 0.5260714    | 0.9612403    |   | 0.6009741    |              | 1 0.9498501         |              |
| #### Bn-scaff_23408_1-p29171 genome unspecific (all in)         | 0.9449761    | 0.3730798    | 0.9922481    |   | 0.5227152    |              | 1 0.94358           |              |
| #### Bn-scaff_23408_1-p29366 C-genome specific (napus-oleracea) | 0.9736842    | 0.763712     |              | 1 | 0.8556277    | not scorable | not scorable        |              |
| #### Bn-scaff_23408_1-p29445 C-genome specific (napus-oleracea) | 0.9904306    | 0.7719246    |              | 1 | 0.7537094    | not scorable | not scorable        |              |
| #### Bn-scaff_23408_1-p29667 C-genome specific (oleracea only)  | not scorable | not scorable | 0.9922481    |   | 0.6269274    | not scorable | not scorable        |              |
| #### Bn-scaff_23408_1-p29737 C-genome specific (napus-oleracea) | 0.9521531    | 0.611098     | 0.9922481    |   | 0.6904411    | not scorable | not scorable        |              |
| #### Bn-scaff_23408_1-p29878 C-genome specific (napus-oleracea) | 0.9880383    | 0.7586371    |              | 1 | 0.7934078    | not scorable | not scorable        |              |
| #### Bn-scaff_23408_1-p29894 C-genome specific (napus-oleracea) | 0.9712918    | 0.7637663    |              | 1 | 0.7621805    | not scorable | not scorable        |              |
| #### Bn-scaff_23408_1-p96806 C-genome specific (napus-oleracea) | 0.9976076    | 0.9221705    |              | 1 | 0.749176     | not scorable | not scorable        |              |
| #### Bn-scaff_23408_1-p96976 C-genome specific (napus-oleracea) | 0.9976076    | 0.9282361    | 0.9767442    |   | 0.8248048    | not scorable | not scorable        |              |
| #### Bn-scaff_23408_1-p97029 C-genome specific (napus-oleracea) | 0.9976076    | 0.8127611    | 0.9844961    |   | 0.8102108    | not scorable | not scorable        |              |
| #### Bn-scaff_23408_1-p97372 C-genome specific (napus-oleracea) | 0.9976076    | 0.810456     |              | 1 | 0.740277     | not scorable | not scorable        |              |
| #### Bn-scaff_23432_1-p10053 all not scorable                   | not scorable | not scorable | not scorable |   | not scorable | not scorable | not scorable        |              |
| #### Bn-scaff_23432_1-p10078 C-genome specific (napus-oleracea) | 0.9784689    | 0.7333324    | 0.9767442    |   | 0.7136378    | not scorable | not scorable        |              |
| #### Bn-scaff_23432_1-p10803 C-genome specific (napus-oleracea) | 0.9784689    | 0.7524175    |              | 1 | 0.7723158    | not scorable | not scorable        |              |
| #### Bn-scaff_23432_1-p10984 C-genome specific (napus-oleracea) | 0.9808612    | 0.6697484    | 0.9767442    |   | 0.6650364    | not scorable | not scorable        |              |
| #### Bn-scaff_23432_1-p11033 C-genome specific (napus-oleracea) | 0.9880383    | 0.6640754    |              | 1 | 0.6774015    | not scorable | not scorable        |              |
| #### Bn-scaff_23432_1-p11884 C-genome specific (napus-oleracea) | 0.9880383    | 0.7324193    |              | 1 | 0.7049902    | not scorable | not scorable        |              |
| #### Bn-scaff_23432_1-p12093 C-genome specific (napus-oleracea) |              | 1            | 0.789614     |   | 1            | 0.7751004    | not scorable        | not scorable |
| #### Bn-scaff_23432_1-p12107 C-genome specific (napus-oleracea) | 0.9952153    | 0.7894757    |              | 1 | 0.8072918    | not scorable | not scorable        |              |
| #### Bn-scaff_23432_1-p12223 C-genome specific (napus-oleracea) |              | 1            | 0.8632445    |   | 1            | 0.5908479    | not scorable        | not scorable |
| #### Bn-scaff_23432_1-p12611 C-genome specific (napus-oleracea) | 0.9976076    | 0.785412     |              | 1 | 0.8586726    | not scorable | not scorable        |              |

|                                                                 |              |              |              |              |              |              |
|-----------------------------------------------------------------|--------------|--------------|--------------|--------------|--------------|--------------|
| #### Bn-scaff_23432_1-p12847 C-genome specific (napus-oleracea) | 0.9856459    | 0.7503873    | 1            | 0.7928829    | not scorable | not scorable |
| #### Bn-scaff_23432_1-p15524 C-genome specific (napus-oleracea) | 0.9688995    | 0.349676     | 0.8449612    | 0.2909152    | not scorable | not scorable |
| #### Bn-scaff_23432_1-p15553 C-genome specific (napus-oleracea) | 0.9856459    | 0.2986437    | 0.8837209    | 0.3900177    | not scorable | not scorable |
| #### Bn-scaff_23432_1-p15580 A-genome specific (rapa only)      | not scorable | not scorable | not scorable | not scorable | 0.8595041    | 0.7462801    |
| #### Bn-scaff_23432_1-p15598 genome unspecific (all in)         | 0.9688995    | 0.2503068    | 0.9767442    | 0.2281368    | 0.8595041    | 0.9032082    |
| #### Bn-scaff_23432_1-p15628 C-genome specific (napus-oleracea) | 1            | 0.496332     | 0.9922481    | 0.5386806    | not scorable | not scorable |
| #### Bn-scaff_23432_1-p15686 genome unspecific (all in)         | 0.9569378    | 0.3120271    | 0.9379845    | 0.4070578    | 0.9586777    | 0.8199544    |
| #### Bn-scaff_23432_1-p16176 C-genome specific (napus-oleracea) | 0.9832536    | 0.7319208    | 1            | 0.684717     | not scorable | not scorable |
| #### Bn-scaff_23432_1-p17576 C-genome specific (napus-oleracea) | 0.9976076    | 0.7564855    | 1            | 0.7634361    | not scorable | not scorable |
| #### Bn-scaff_23432_1-p17586 C-genome specific (napus-oleracea) | 0.9952153    | 0.6786231    | 1            | 0.7824836    | not scorable | not scorable |
| #### Bn-scaff_23432_1-p17586 C-genome specific (napus-oleracea) | 0.9688995    | 0.5985764    | 1            | 0.6685334    | not scorable | not scorable |
| #### Bn-scaff_23432_1-p17618 C-genome specific (napus-oleracea) | 0.9832536    | 0.6836824    | 1            | 0.7560911    | not scorable | not scorable |
| #### Bn-scaff_23432_1-p17688 C-genome specific (napus-oleracea) | 0.9808612    | 0.7397779    | 1            | 0.6142239    | not scorable | not scorable |
| #### Bn-scaff_23432_1-p17696 C-genome specific (napus-oleracea) | 0.9856459    | 0.6932688    | 1            | 0.6424713    | not scorable | not scorable |
| #### Bn-scaff_23432_1-p17716 C-genome specific (napus-oleracea) | 0.9856459    | 0.6349707    | 1            | 0.6813819    | not scorable | not scorable |
| #### Bn-scaff_23432_1-p17746 C-genome specific (napus-oleracea) | 0.9928229    | 0.6717063    | 1            | 0.880801     | not scorable | not scorable |
| #### Bn-scaff_23432_1-p18394 C-genome specific (napus-oleracea) | 0.9904306    | 0.7951612    | 0.9844961    | 0.7392714    | not scorable | not scorable |
| #### Bn-scaff_23432_1-p18402 C-genome specific (napus-oleracea) | 0.9880383    | 0.7986012    | 0.9844961    | 0.823509     | not scorable | not scorable |
| #### Bn-scaff_23432_1-p19261 C-genome specific (napus-oleracea) | 0.9856459    | 0.7088758    | 1            | 0.6741264    | not scorable | not scorable |
| #### Bn-scaff_23432_1-p19801 C-genome specific (napus-oleracea) | 0.9928229    | 0.7444263    | 1            | 0.702597     | not scorable | not scorable |
| #### Bn-scaff_23432_1-p21337 C-genome specific (napus-oleracea) | 0.9880383    | 0.7483119    | 1            | 0.6467561    | not scorable | not scorable |
| #### Bn-scaff_23432_1-p21483 C-genome specific (napus-oleracea) | 0.9856459    | 0.7256421    | 0.9922481    | 0.8542463    | not scorable | not scorable |
| #### Bn-scaff_23432_1-p21614 C-genome specific (napus-oleracea) | 0.9856459    | 0.7399502    | 1            | 0.7858176    | not scorable | not scorable |
| #### Bn-scaff_23432_1-p21781 C-genome specific (napus-oleracea) | 0.9712918    | 0.7736604    | 1            | 0.7462659    | not scorable | not scorable |
| #### Bn-scaff_23432_1-p21783 C-genome specific (napus-oleracea) | 0.9904306    | 0.7472766    | 1            | 0.769098     | not scorable | not scorable |
| #### Bn-scaff_23432_1-p22493 C-genome specific (napus-oleracea) | 0.9928229    | 0.6657826    | 1            | 0.7060736    | not scorable | not scorable |
| #### Bn-scaff_23432_1-p22515 C-genome specific (napus-oleracea) | 0.9928229    | 0.6727869    | 0.9922481    | 0.6819919    | not scorable | not scorable |
| #### Bn-scaff_23432_1-p22762 C-genome specific (napus-oleracea) | 0.9952153    | 0.6942116    | 1            | 0.8175187    | not scorable | not scorable |
| #### Bn-scaff_23432_1-p23238 C-genome specific (napus-oleracea) | 0.9832536    | 0.6678176    | 0.9922481    | 0.7220355    | not scorable | not scorable |
| #### Bn-scaff_23432_1-p23307 C-genome specific (napus-oleracea) | 0.9832536    | 0.6629544    | 1            | 0.7144907    | not scorable | not scorable |
| #### Bn-scaff_23432_1-p25488 C-genome specific (napus-oleracea) | 1            | 0.8427704    | 1            | 0.9302341    | not scorable | not scorable |
| #### Bn-scaff_23432_1-p39139 C-genome specific (napus-oleracea) | 0.9880383    | 0.7474023    | 1            | 0.7825628    | not scorable | not scorable |
| #### Bn-scaff_23432_1-p39254 C-genome specific (napus-oleracea) | 0.9928229    | 0.7950447    | 1            | 0.8879855    | not scorable | not scorable |

|                                                                 |              |              |           |           |              |              |
|-----------------------------------------------------------------|--------------|--------------|-----------|-----------|--------------|--------------|
| #### Bn-scaff_23432_1-p43409 C-genome specific (napus-oleracea) | 0.9904306    | 0.7426013    | 1         | 0.7499121 | not scorable | not scorable |
| #### Bn-scaff_23432_1-p55051 C-genome specific (napus-oleracea) | 0.937799     | 0.8589982    | 0.9922481 | 0.8593771 | not scorable | not scorable |
| #### Bn-scaff_23432_1-p55986 C-genome specific (napus-oleracea) | 0.9928229    | 0.7604382    | 1         | 0.8655385 | not scorable | not scorable |
| #### Bn-scaff_23432_1-p56364 C-genome specific (napus-oleracea) | 0.9808612    | 0.6409599    | 1         | 0.7830434 | not scorable | not scorable |
| #### Bn-scaff_23432_1-p56877 C-genome specific (napus-oleracea) | 0.9928229    | 0.6950718    | 1         | 0.6115191 | not scorable | not scorable |
| #### Bn-scaff_23432_1-p58237 C-genome specific (napus-oleracea) | 0.9904306    | 0.7852896    | 1         | 0.7797587 | not scorable | not scorable |
| #### Bn-scaff_23432_1-p59572 C-genome specific (napus-oleracea) | 0.9784689    | 0.751905     | 1         | 0.8786691 | not scorable | not scorable |
| #### Bn-scaff_23432_1-p62182 C-genome specific (napus-oleracea) | 0.9856459    | 0.6736414    | 1         | 0.6554057 | not scorable | not scorable |
| #### Bn-scaff_23432_1-p62519 C-genome specific (napus-oleracea) | 0.9641148    | 0.7217389    | 0.9922481 | 0.8402702 | not scorable | not scorable |
| #### Bn-scaff_23432_1-p62784 C-genome specific (napus-oleracea) | 0.9976076    | 0.6635547    | 1         | 0.7580681 | not scorable | not scorable |
| #### Bn-scaff_23432_1-p62988 C-genome specific (napus-oleracea) | 0.9928229    | 0.6646687    | 1         | 0.6550958 | not scorable | not scorable |
| #### Bn-scaff_23432_1-p63304 C-genome specific (napus-oleracea) | 0.9928229    | 0.6619086    | 1         | 0.6716869 | not scorable | not scorable |
| #### Bn-scaff_23432_1-p63676 C-genome specific (napus-oleracea) | 0.9952153    | 0.7205191    | 1         | 0.8120504 | not scorable | not scorable |
| #### Bn-scaff_23432_1-p63863 C-genome specific (napus-oleracea) | 0.9832536    | 0.7390449    | 1         | 0.8523499 | not scorable | not scorable |
| #### Bn-scaff_23432_1-p64318 C-genome specific (napus-oleracea) | 0.9832536    | 0.6510228    | 1         | 0.6971321 | not scorable | not scorable |
| #### Bn-scaff_23432_1-p74523 C-genome specific (napus-oleracea) | 0.9832536    | 0.567988     | 1         | 0.7101301 | not scorable | not scorable |
| #### Bn-scaff_23432_1-p94681 C-genome specific (napus-oleracea) | 1            | 0.7861216    | 1         | 0.7784953 | not scorable | not scorable |
| #### Bn-scaff_23432_1-p94802 C-genome specific (napus-oleracea) | 0.9928229    | 0.7314278    | 1         | 0.7513691 | not scorable | not scorable |
| #### Bn-scaff_23432_1-p95082 C-genome specific (napus-oleracea) | 0.9904306    | 0.7611378    | 1         | 0.8898231 | not scorable | not scorable |
| #### Bn-scaff_23432_1-p95118 C-genome specific (napus-oleracea) | 0.9976076    | 0.6744225    | 1         | 0.7001911 | not scorable | not scorable |
| #### Bn-scaff_23432_1-p96283 C-genome specific (napus-oleracea) | 0.9856459    | 0.7680395    | 0.9922481 | 0.7180124 | not scorable | not scorable |
| #### Bn-scaff_23432_1-p96793 C-genome specific (napus-oleracea) | 0.9736842    | 0.6849666    | 1         | 0.7830434 | not scorable | not scorable |
| #### Bn-scaff_23432_1-p98074 C-genome specific (napus-oleracea) | 0.9784689    | 0.7048743    | 1         | 0.8348377 | not scorable | not scorable |
| #### Bn-scaff_23432_1-p99466 C-genome specific (napus-oleracea) | 0.9856459    | 0.6785634    | 1         | 0.7907555 | not scorable | not scorable |
| #### Bn-scaff_23459_1-p4141 C-genome specific (napus-oleracea)  | 0.9856459    | 0.4357498    | 1         | 0.5056787 | not scorable | not scorable |
| #### Bn-scaff_23472_1-p11655 C-genome specific (napus-oleracea) | 0.9784689    | 0.8432261    | 0.9922481 | 0.8097162 | not scorable | not scorable |
| #### Bn-scaff_23472_1-p19183 C-genome specific (napus-oleracea) | 0.9952153    | 0.7801911    | 1         | 0.796903  | not scorable | not scorable |
| #### Bn-scaff_23472_1-p21637 C-genome specific (napus-oleracea) | 0.9976076    | 0.8761548    | 0.9922481 | 0.7646524 | not scorable | not scorable |
| #### Bn-scaff_23472_1-p29382 C-genome specific (napus-oleracea) | 0.9736842    | 0.6874407    | 0.9922481 | 0.8210751 | not scorable | not scorable |
| #### Bn-scaff_23472_1-p42267 genome unspecific (all in)         | 1            | 0.6555788    | 1         | 0.8792226 | 1            | 0.9027105    |
| #### Bn-scaff_23472_1-p44307 C-genome specific (napus-oleracea) | 0.9976076    | 0.8016269    | 0.9922481 | 0.8240709 | not scorable | not scorable |
| #### Bn-scaff_23472_1-p48751 genome unspecific (oleracea-rapa)  | not scorable | not scorable | 0.9689922 | 0.3029588 | 0.9504132    | 0.299927     |
| #### Bn-scaff_23472_1-p52830 C-genome specific (oleracea only)  | not scorable | not scorable | 0.9767442 | 0.7030174 | not scorable | not scorable |

|                                                                  |              |              |           |           |              |              |
|------------------------------------------------------------------|--------------|--------------|-----------|-----------|--------------|--------------|
| ##### Bn-scaff_23472_1-p5609 C-genome specific (napus-oleracea)  | 0.9976076    | 0.7284393    | 0.9922481 | 0.6747755 | not scorable | not scorable |
| ##### Bn-scaff_23472_1-p5727 C-genome specific (napus-oleracea)  | 0.9808612    | 0.6716626    | 0.9844961 | 0.588739  | not scorable | not scorable |
| ##### Bn-scaff_23472_1-p61552 C-genome specific (napus-oleracea) | 0.9904306    | 0.8076818    | 0.9922481 | 0.836699  | not scorable | not scorable |
| ##### Bn-scaff_23534_1-p1159 C-genome specific (napus-oleracea)  | 0.8875598    | 0.7438554    | 1         | 0.8518254 | not scorable | not scorable |
| ##### Bn-scaff_23534_1-p1713 C-genome specific (napus-oleracea)  | 0.9019139    | 0.753271     | 0.9922481 | 0.7452692 | not scorable | not scorable |
| ##### Bn-scaff_23534_1-p1787 C-genome specific (napus-oleracea)  | 0.8947368    | 0.7008397    | 1         | 0.7249871 | not scorable | not scorable |
| ##### Bn-scaff_23534_1-p3668 C-genome specific (napus-oleracea)  | 0.8971292    | 0.7181463    | 0.627907  | 0.6615999 | not scorable | not scorable |
| ##### Bn-scaff_23534_1-p3731 C-genome specific (napus-oleracea)  | 0.8851675    | 0.702326     | 0.6356589 | 0.7872759 | not scorable | not scorable |
| ##### Bn-scaff_23534_1-p3908 C-genome specific (napus-oleracea)  | 0.8851675    | 0.7405781    | 0.6356589 | 0.8563896 | not scorable | not scorable |
| ##### Bn-scaff_23535_1-p1899 C-genome specific (napus-oleracea)  | 0.9976076    | 0.8041942    | 0.9922481 | 0.7542163 | not scorable | not scorable |
| ##### Bn-scaff_23546_1-p1001 C-genome specific (napus-oleracea)  | 1            | 0.4984884    | 1         | 0.5168567 | not scorable | not scorable |
| ##### Bn-scaff_23546_1-p1033 C-genome specific (napus-oleracea)  | 0.9904306    | 0.7577339    | 0.9767442 | 0.6867281 | not scorable | not scorable |
| ##### Bn-scaff_23546_1-p1037 C-genome specific (napus-oleracea)  | 0.9904306    | 0.8798928    | 0.9844961 | 0.7632402 | not scorable | not scorable |
| ##### Bn-scaff_23546_1-p1042 C-genome specific (napus-oleracea)  | 0.9856459    | 0.7972364    | 0.9922481 | 0.7105708 | not scorable | not scorable |
| ##### Bn-scaff_23546_1-p1044 C-genome specific (oleracea only)   | not scorable | not scorable | 0.5348837 | 0.7972639 | not scorable | not scorable |
| ##### Bn-scaff_23546_1-p1122 C-genome specific (napus-oleracea)  | 0.9904306    | 0.9062554    | 0.9767442 | 0.8136389 | not scorable | not scorable |
| ##### Bn-scaff_23546_1-p1237 genome unspecific (all in)          | 1            | 0.5180401    | 1         | 0.5220578 | 0.9752066    | 0.2518383    |
| ##### Bn-scaff_23546_1-p1330 C-genome specific (napus-oleracea)  | 0.9784689    | 0.8447816    | 0.4108527 | 0.6972163 | not scorable | not scorable |
| ##### Bn-scaff_23546_1-p1392 C-genome specific (napus-oleracea)  | 0.9904306    | 0.8685965    | 0.9689922 | 0.7634856 | not scorable | not scorable |
| ##### Bn-scaff_23546_1-p1402 C-genome specific (napus-oleracea)  | 0.9904306    | 0.7387564    | 1         | 0.7230237 | not scorable | not scorable |
| ##### Bn-scaff_23546_1-p1411 C-genome specific (napus-oleracea)  | 0.9904306    | 0.7887319    | 1         | 0.6819669 | not scorable | not scorable |
| ##### Bn-scaff_23546_1-p1467 C-genome specific (napus-oleracea)  | 0.9856459    | 0.8270544    | 0.9689922 | 0.8132181 | not scorable | not scorable |
| ##### Bn-scaff_23546_1-p1485 C-genome specific (napus-oleracea)  | 0.9832536    | 0.8450176    | 0.9844961 | 0.6998192 | not scorable | not scorable |
| ##### Bn-scaff_23546_1-p1538 C-genome specific (napus-oleracea)  | 0.9904306    | 0.8352184    | 0.9844961 | 0.7978323 | not scorable | not scorable |
| ##### Bn-scaff_23546_1-p1567 C-genome specific (napus-oleracea)  | 0.9904306    | 0.935131     | 0.9922481 | 0.8047683 | not scorable | not scorable |
| ##### Bn-scaff_23546_1-p1582 C-genome specific (napus-oleracea)  | 0.9904306    | 0.9390447    | 1         | 0.7478901 | not scorable | not scorable |
| ##### Bn-scaff_23546_1-p1591 C-genome specific (napus-oleracea)  | 0.9784689    | 0.8995466    | 0.9767442 | 0.7525318 | not scorable | not scorable |
| ##### Bn-scaff_23546_1-p1595 C-genome specific (napus-oleracea)  | 0.9904306    | 0.9382318    | 0.9844961 | 0.8370048 | not scorable | not scorable |
| ##### Bn-scaff_23546_1-p1596 C-genome specific (napus-oleracea)  | 0.9904306    | 0.9007148    | 1         | 0.7477685 | not scorable | not scorable |
| ##### Bn-scaff_23546_1-p1602 C-genome specific (napus-oleracea)  | 0.9808612    | 0.8583055    | 0.4108527 | 0.7403799 | not scorable | not scorable |
| ##### Bn-scaff_23546_1-p1606 C-genome specific (napus-oleracea)  | 0.9904306    | 0.9414737    | 0.9922481 | 0.7687087 | not scorable | not scorable |
| ##### Bn-scaff_23546_1-p1624 C-genome specific (napus-oleracea)  | 0.9904306    | 0.8474852    | 0.9767442 | 0.7680835 | not scorable | not scorable |
| ##### Bn-scaff_23546_1-p1687 C-genome specific (napus-oleracea)  | 0.9880383    | 0.7727254    | 0.9922481 | 0.5068514 | not scorable | not scorable |



|                                                                 |              |              |           |           |              |              |
|-----------------------------------------------------------------|--------------|--------------|-----------|-----------|--------------|--------------|
| #### Bn-scaff_23546_1-p16879 C-genome specific (napus-oleracea) | 0.9880383    | 0.7182975    | 1         | 0.5992247 | not scorable | not scorable |
| #### Bn-scaff_23546_1-p16906 C-genome specific (napus-oleracea) | 0.9904306    | 0.8361666    | 1         | 0.6952184 | not scorable | not scorable |
| #### Bn-scaff_23546_1-p16941 C-genome specific (napus-oleracea) | 0.9904306    | 0.7935094    | 1         | 0.6489695 | not scorable | not scorable |
| #### Bn-scaff_23546_1-p17452 C-genome specific (napus-oleracea) | 0.9904306    | 0.8607259    | 1         | 0.7898256 | not scorable | not scorable |
| #### Bn-scaff_23546_1-p17606 C-genome specific (napus-oleracea) | 0.9904306    | 0.849656     | 1         | 0.7234062 | not scorable | not scorable |
| #### Bn-scaff_23546_1-p19308 C-genome specific (napus-oleracea) | 0.9904306    | 0.5333502    | 0.9844961 | 0.417845  | not scorable | not scorable |
| #### Bn-scaff_23546_1-p19500 C-genome specific (napus-oleracea) | 0.8971292    | 0.9595866    | 0.9612403 | 0.6685416 | not scorable | not scorable |
| #### Bn-scaff_23546_1-p19958 C-genome specific (napus-oleracea) | 0.9904306    | 0.901452     | 0.9844961 | 0.7901161 | not scorable | not scorable |
| #### Bn-scaff_23546_1-p20228 C-genome specific (napus-oleracea) | 0.9904306    | 0.9292029    | 1         | 0.8140032 | not scorable | not scorable |
| #### Bn-scaff_23546_1-p20312 C-genome specific (napus-oleracea) | 0.9904306    | 0.9274104    | 1         | 0.8390525 | not scorable | not scorable |
| #### Bn-scaff_23546_1-p20340 C-genome specific (napus-oleracea) | 0.9904306    | 0.9295273    | 1         | 0.769726  | not scorable | not scorable |
| #### Bn-scaff_23546_1-p20414 C-genome specific (napus-oleracea) | 0.9880383    | 0.9281046    | 1         | 0.8102528 | not scorable | not scorable |
| #### Bn-scaff_23546_1-p21060 C-genome specific (napus-oleracea) | 0.9904306    | 0.8977178    | 1         | 0.7410802 | not scorable | not scorable |
| #### Bn-scaff_23546_1-p21106 C-genome specific (napus-oleracea) | 0.9904306    | 0.916968     | 0.9922481 | 0.820031  | not scorable | not scorable |
| #### Bn-scaff_23546_1-p22060 genome unspecific (all in)         | 0.9904306    | 0.5524718    | 0.9689922 | 0.4607485 | 1            | 0.9165835    |
| #### Bn-scaff_23546_1-p22111 genome unspecific (all in)         | 0.9976076    | 0.5466226    | 0.9612403 | 0.5146735 | 1            | 0.8751578    |
| #### Bn-scaff_23546_1-p22244 genome unspecific (oleracea-rapa)  | not scorable | not scorable | 0.9922481 | 0.8101985 | 1            | 0.9328265    |
| #### Bn-scaff_23546_1-p2313 C-genome specific (napus-oleracea)  | 0.9880383    | 0.8518617    | 0.9922481 | 0.629602  | not scorable | not scorable |
| #### Bn-scaff_23546_1-p23775 C-genome specific (napus-oleracea) | 0.9904306    | 0.9267545    | 1         | 0.7802736 | not scorable | not scorable |
| #### Bn-scaff_23546_1-p23875 genome unspecific (all in)         | 0.9904306    | 0.595304     | 1         | 0.6115889 | 0.8595041    | 0.8927721    |
| #### Bn-scaff_23546_1-p24065 C-genome specific (napus-oleracea) | 0.9904306    | 0.8052318    | 1         | 0.7429336 | not scorable | not scorable |
| #### Bn-scaff_23546_1-p24137 C-genome specific (napus-oleracea) | 0.9904306    | 0.9158094    | 1         | 0.7686202 | not scorable | not scorable |
| #### Bn-scaff_23546_1-p24224 C-genome specific (napus-oleracea) | 0.9904306    | 0.7585285    | 1         | 0.6231753 | not scorable | not scorable |
| #### Bn-scaff_23546_1-p24266 C-genome specific (napus-oleracea) | 0.9904306    | 0.7774665    | 1         | 0.712473  | not scorable | not scorable |
| #### Bn-scaff_23546_1-p24566 C-genome specific (napus-oleracea) | 0.9904306    | 0.8855479    | 1         | 0.7994297 | not scorable | not scorable |
| #### Bn-scaff_23546_1-p24843 C-genome specific (napus-oleracea) | 0.9904306    | 0.7819406    | 1         | 0.6465065 | not scorable | not scorable |
| #### Bn-scaff_23546_1-p25027 C-genome specific (napus-oleracea) | 0.9880383    | 0.7780482    | 0.9922481 | 0.664826  | not scorable | not scorable |
| #### Bn-scaff_23546_1-p25044 C-genome specific (napus-oleracea) | 0.9904306    | 0.736385     | 1         | 0.6201832 | not scorable | not scorable |
| #### Bn-scaff_23546_1-p25145 C-genome specific (oleracea only)  | not scorable | not scorable | 0.9379845 | 0.5894964 | not scorable | not scorable |
| #### Bn-scaff_23546_1-p25878 C-genome specific (napus-oleracea) | 0.9976076    | 0.5866203    | 0.9922481 | 0.5776311 | not scorable | not scorable |
| #### Bn-scaff_23546_1-p26652 C-genome specific (napus-oleracea) | 0.9856459    | 0.8285804    | 0.9922481 | 0.7199517 | not scorable | not scorable |
| #### Bn-scaff_23546_1-p27593 C-genome specific (napus-oleracea) | 0.9976076    | 0.8114662    | 1         | 0.8020413 | not scorable | not scorable |
| #### Bn-scaff_23546_1-p27941 C-genome specific (napus-oleracea) | 0.9856459    | 0.8844743    | 0.9844961 | 0.8005517 | not scorable | not scorable |

|                                                                 |              |              |           |           |              |              |
|-----------------------------------------------------------------|--------------|--------------|-----------|-----------|--------------|--------------|
| #### Bn-scaff_23546_1-p28234 C-genome specific (napus-oleracea) | 0.9904306    | 0.9027171    | 0.9922481 | 0.8166779 | not scorable | not scorable |
| #### Bn-scaff_23546_1-p28693 C-genome specific (napus-oleracea) | 0.9904306    | 0.9065831    | 0.9922481 | 0.7814416 | not scorable | not scorable |
| #### Bn-scaff_23546_1-p29147 C-genome specific (napus-oleracea) | 0.9904306    | 0.917042     | 1         | 0.8091262 | not scorable | not scorable |
| #### Bn-scaff_23546_1-p29304 C-genome specific (napus-oleracea) | 0.9904306    | 0.8138781    | 0.9922481 | 0.7231151 | not scorable | not scorable |
| #### Bn-scaff_23546_1-p29559 C-genome specific (napus-oleracea) | 0.9832536    | 0.7585955    | 0.9844961 | 0.6786402 | not scorable | not scorable |
| #### Bn-scaff_23546_1-p32783 C-genome specific (napus-oleracea) | 0.9904306    | 0.9053954    | 0.9844961 | 0.745242  | not scorable | not scorable |
| #### Bn-scaff_23546_1-p34241 C-genome specific (napus-oleracea) | 0.9904306    | 0.8721554    | 0.9689922 | 0.7942212 | not scorable | not scorable |
| #### Bn-scaff_23546_1-p35707 C-genome specific (napus-oleracea) | 0.9952153    | 0.6361126    | 1         | 0.6619884 | not scorable | not scorable |
| #### Bn-scaff_23546_1-p35786 C-genome specific (napus-oleracea) | 0.9952153    | 0.7375726    | 1         | 0.6058849 | not scorable | not scorable |
| #### Bn-scaff_23546_1-p35962 C-genome specific (napus-oleracea) | 0.9856459    | 0.6971604    | 0.9922481 | 0.6425929 | not scorable | not scorable |
| #### Bn-scaff_23546_1-p41100 C-genome specific (napus-oleracea) | 0.9880383    | 0.9274103    | 1         | 0.7423784 | not scorable | not scorable |
| #### Bn-scaff_23546_1-p41248 C-genome specific (napus-oleracea) | 0.9880383    | 0.8365592    | 1         | 0.7360497 | not scorable | not scorable |
| #### Bn-scaff_23546_1-p41616 C-genome specific (oleracea only)  | not scorable | not scorable | 1         | 0.7701765 | not scorable | not scorable |
| #### Bn-scaff_23546_1-p42934 C-genome specific (napus-oleracea) | 0.9904306    | 0.6738482    | 1         | 0.7838569 | not scorable | not scorable |
| #### Bn-scaff_23546_1-p43504 genome unspecific (all in)         | 0.9712918    | 0.5201097    | 1         | 0.6536775 | 1            | 0.5826037    |
| #### Bn-scaff_23546_1-p44190 C-genome specific (napus-oleracea) | 0.9856459    | 0.9525385    | 0.9767442 | 0.7342414 | not scorable | not scorable |
| #### Bn-scaff_23546_1-p50271 C-genome specific (napus-oleracea) | 0.9904306    | 0.7334327    | 1         | 0.7451498 | not scorable | not scorable |
| #### Bn-scaff_23546_1-p52289 C-genome specific (napus-oleracea) | 0.9904306    | 0.8643922    | 0.9922481 | 0.7052241 | not scorable | not scorable |
| #### Bn-scaff_23546_1-p53787 C-genome specific (napus-oleracea) | 0.9904306    | 0.779211     | 1         | 0.691609  | not scorable | not scorable |
| #### Bn-scaff_23546_1-p53834 C-genome specific (napus-oleracea) | 0.9904306    | 0.9028493    | 0.9922481 | 0.7986256 | not scorable | not scorable |
| #### Bn-scaff_23546_1-p53971 C-genome specific (napus-oleracea) | 0.9904306    | 0.8070821    | 0.9922481 | 0.7172196 | not scorable | not scorable |
| #### Bn-scaff_23546_1-p54143 C-genome specific (napus-oleracea) | 0.9904306    | 0.7546132    | 1         | 0.6952439 | not scorable | not scorable |
| #### Bn-scaff_23546_1-p54199 C-genome specific (napus-oleracea) | 0.9904306    | 0.8736563    | 0.9922481 | 0.8218988 | not scorable | not scorable |
| #### Bn-scaff_23546_1-p54541 C-genome specific (napus-oleracea) | 0.9904306    | 0.8808321    | 1         | 0.7443414 | not scorable | not scorable |
| #### Bn-scaff_23546_1-p55201 C-genome specific (napus-oleracea) | 0.9904306    | 0.7319476    | 0.9922481 | 0.6530852 | not scorable | not scorable |
| #### Bn-scaff_23546_1-p55379 C-genome specific (napus-oleracea) | 0.9904306    | 0.8232906    | 0.9922481 | 0.7245347 | not scorable | not scorable |
| #### Bn-scaff_23546_1-p67920 C-genome specific (napus-oleracea) | 0.9904306    | 0.8827681    | 0.9922481 | 0.6966406 | not scorable | not scorable |
| #### Bn-scaff_23546_1-p69422 C-genome specific (napus-oleracea) | 0.9856459    | 0.8724776    | 0.9767442 | 0.7290708 | not scorable | not scorable |
| #### Bn-scaff_23546_1-p72539 C-genome specific (napus-oleracea) | 0.9880383    | 0.8733874    | 0.9922481 | 0.7305083 | not scorable | not scorable |
| #### Bn-scaff_23546_1-p73190 C-genome specific (napus-oleracea) | 0.9904306    | 0.8725838    | 1         | 0.8128226 | not scorable | not scorable |
| #### Bn-scaff_23546_1-p73476 C-genome specific (napus-oleracea) | 0.9880383    | 0.8734955    | 0.9767442 | 0.7209716 | not scorable | not scorable |
| #### Bn-scaff_23546_1-p73598 C-genome specific (napus-oleracea) | 0.9904306    | 0.8736469    | 0.9844961 | 0.8306848 | not scorable | not scorable |
| #### Bn-scaff_23546_1-p74259 C-genome specific (napus-oleracea) | 0.9880383    | 0.7901338    | 0.9767442 | 0.7381091 | not scorable | not scorable |

|                                                                 |              |              |              |              |              |              |
|-----------------------------------------------------------------|--------------|--------------|--------------|--------------|--------------|--------------|
| #### Bn-scaff_23546_1-p76493 C-genome specific (napus-oleracea) | 0.9832536    | 0.9289882    | 0.9689922    | 0.7430681    | not scorable | not scorable |
| #### Bn-scaff_23546_1-p7798 C-genome specific (napus-oleracea)  | 0.9904306    | 0.9099893    | 0.9922481    | 0.7672364    | not scorable | not scorable |
| #### Bn-scaff_23546_1-p82197 genome unspecific (all in)         | 0.9952153    | 0.4685797    | 0.9844961    | 0.7191143    | 1            | 0.7626058    |
| #### Bn-scaff_23546_1-p83585 C-genome specific (napus-oleracea) | 0.9904306    | 0.8478327    | 1            | 0.7641092    | not scorable | not scorable |
| #### Bn-scaff_23546_1-p93359 C-genome specific (napus-oleracea) | 0.9904306    | 0.8585831    | 1            | 0.7991874    | not scorable | not scorable |
| #### Bn-scaff_23546_1-p93838 C-genome specific (napus-oleracea) | 0.9904306    | 0.733767     | 1            | 0.6718804    | not scorable | not scorable |
| #### Bn-scaff_23572_1-p11301 C-genome specific (napus-oleracea) | 0.9760765    | 0.82218      | 1            | 0.7898132    | not scorable | not scorable |
| #### Bn-scaff_23604_1-p90 genome unspecific (all in)            | 1            | 0.3093321    | 1            | 0.7191537    | 1            | 0.8912981    |
| #### Bn-scaff_23613_1-p26112 C-genome specific (napus-oleracea) | 0.9904306    | 0.5118378    | 0.9922481    | 0.7018428    | not scorable | not scorable |
| #### Bn-scaff_23613_1-p26864 C-genome specific (napus-oleracea) | 0.9976076    | 0.7737313    | 1            | 0.7133285    | not scorable | not scorable |
| #### Bn-scaff_23613_1-p26916 C-genome specific (napus-oleracea) | 0.9904306    | 0.75219      | 0.9922481    | 0.7556607    | not scorable | not scorable |
| #### Bn-scaff_23613_1-p35766 genome unspecific (all in)         | 0.9904306    | 0.4324792    | 1            | 0.5886208    | 0.9504132    | 0.7698565    |
| #### Bn-scaff_23613_1-p51738 C-genome specific (napus-oleracea) | 0.9808612    | 0.5517174    | 0.9767442    | 0.6340612    | not scorable | not scorable |
| #### Bn-scaff_23618_1-p12015 C-genome specific (napus-oleracea) | 0.923445     | 0.7650785    | 0.9844961    | 0.6803269    | not scorable | not scorable |
| #### Bn-scaff_23622_1-p3989 C-genome specific (napus-oleracea)  | 0.9928229    | 0.8791451    | 1            | 0.6986149    | not scorable | not scorable |
| #### Bn-scaff_23622_1-p62088 genome unspecific (all in)         | 0.9808612    | 0.2899003    | 1            | 0.5065398    | 0.9752066    | 0.388471     |
| #### Bn-scaff_23628_1-p2873 A-genome specific (rapa only)       | not scorable | not scorable | not scorable | not scorable | 1            | 0.900806     |
| #### Bn-scaff_23628_1-p3843 genome unspecific (oleracea-rapa)   | not scorable | not scorable | 0.7906977    | 0.6629795    | 1            | 0.6399722    |
| #### Bn-scaff_23628_1-p3854 genome unspecific (oleracea-rapa)   | not scorable | not scorable | 0.4651163    | 0.7605597    | 0.9338843    | 0.7057531    |
| #### Bn-scaff_23699_1-p10682 C-genome specific (oleracea only)  | not scorable | not scorable | 1            | 0.6735507    | not scorable | not scorable |
| #### Bn-scaff_23699_1-p15735 genome unspecific (all in)         | 1            | 0.5078604    | 1            | 0.5327067    | 1            | 0.2263071    |
| #### Bn-scaff_23699_1-p16960 C-genome specific (napus-oleracea) | 0.9832536    | 0.663013     | 1            | 0.6905265    | not scorable | not scorable |
| #### Bn-scaff_23699_1-p27204 C-genome specific (napus-oleracea) | 0.9569378    | 0.9371549    | 0.751938     | 0.8458828    | not scorable | not scorable |
| #### Bn-scaff_23699_1-p29601 genome unspecific (oleracea-rapa)  | not scorable | not scorable | 0.9922481    | 0.8443987    | 1            | 0.8707329    |
| #### Bn-scaff_23699_1-p29632 genome unspecific (all in)         | 0.9665072    | 0.5011149    | 0.9922481    | 0.7495306    | 1            | 0.9149813    |
| #### Bn-scaff_23699_1-p29700 genome unspecific (all in)         | 0.937799     | 0.412328     | 1            | 0.8493739    | 1            | 0.8209789    |
| #### Bn-scaff_23699_1-p34263 C-genome specific (napus-oleracea) | 0.9832536    | 0.757057     | 1            | 0.8497543    | not scorable | not scorable |
| #### Bn-scaff_23699_1-p35500 C-genome specific (napus-oleracea) | 0.9784689    | 0.7403877    | 1            | 0.8611407    | not scorable | not scorable |
| #### Bn-scaff_23699_1-p40051 C-genome specific (napus-oleracea) | 0.9952153    | 0.7525488    | 1            | 0.8912604    | not scorable | not scorable |
| #### Bn-scaff_23699_1-p42065 C-genome specific (napus-oleracea) | 0.9569378    | 0.6921167    | 0.9922481    | 0.7895759    | not scorable | not scorable |
| #### Bn-scaff_23699_1-p43515 C-genome specific (napus-oleracea) | 0.9760765    | 0.7652749    | 0.9844961    | 0.7916877    | not scorable | not scorable |
| #### Bn-scaff_23699_1-p43519 C-genome specific (napus-oleracea) | 0.9736842    | 0.6929194    | 0.9922481    | 0.8192832    | not scorable | not scorable |
| #### Bn-scaff_23715_1-p10931 genome unspecific (all in)         | 1            | 0.5374395    | 1            | 0.7736831    | 1            | 0.5007222    |

|                                                                 |              |              |           |           |              |              |
|-----------------------------------------------------------------|--------------|--------------|-----------|-----------|--------------|--------------|
| #### Bn-scaff_23715_1-p28835 C-genome specific (napus-oleracea) | 1            | 0.8197712    | 1         | 0.5969252 | not scorable | not scorable |
| #### Bn-scaff_23719_1-p255 C-genome specific (napus-oleracea)   | 0.9832536    | 0.7355458    | 1         | 0.7690803 | not scorable | not scorable |
| #### Bn-scaff_23720_1-p13275 C-genome specific (napus-oleracea) | 0.9952153    | 0.7404545    | 1         | 0.7188792 | not scorable | not scorable |
| #### Bn-scaff_23756_1-p15596 C-genome specific (napus-oleracea) | 0.9952153    | 0.8060496    | 1         | 0.6921535 | not scorable | not scorable |
| #### Bn-scaff_23756_1-p15771 C-genome specific (napus-oleracea) | 0.9952153    | 0.5463874    | 0.9612403 | 0.5340896 | not scorable | not scorable |
| #### Bn-scaff_23761_1-p24962 genome unspecific (all in)         | 0.9593301    | 0.3312713    | 0.9922481 | 0.7473769 | 1            | 0.8207097    |
| #### Bn-scaff_23761_1-p27239 C-genome specific (napus-oleracea) | 0.9832536    | 0.7276437    | 0.9922481 | 0.7266544 | not scorable | not scorable |
| #### Bn-scaff_23761_1-p28016 C-genome specific (napus-oleracea) | 0.9952153    | 0.789352     | 1         | 0.7734564 | not scorable | not scorable |
| #### Bn-scaff_23761_1-p28160 C-genome specific (napus-oleracea) | 0.9641148    | 0.8382479    | 0.9922481 | 0.7517831 | not scorable | not scorable |
| #### Bn-scaff_23761_1-p28799 C-genome specific (napus-oleracea) | 0.9952153    | 0.8021834    | 1         | 0.7958283 | not scorable | not scorable |
| #### Bn-scaff_23761_1-p32078 C-genome specific (napus-oleracea) | 0.9928229    | 0.8118749    | 1         | 0.8337873 | not scorable | not scorable |
| #### Bn-scaff_23761_1-p32627 genome unspecific (all in)         | 0.9760765    | 0.5218501    | 0.9844961 | 0.7128997 | 1            | 0.7559569    |
| #### Bn-scaff_23761_1-p32636 genome unspecific (all in)         | 0.9521531    | 0.2749796    | 1         | 0.7302026 | 0.9504132    | 0.2843365    |
| #### Bn-scaff_23761_1-p35445 genome unspecific (all in)         | 0.9808612    | 0.3300104    | 1         | 0.7961519 | 0.9834711    | 0.7760866    |
| #### Bn-scaff_23761_1-p38644 C-genome specific (napus-oleracea) | 0.9928229    | 0.7875109    | 0.9922481 | 0.7448737 | not scorable | not scorable |
| #### Bn-scaff_23761_1-p38651 C-genome specific (napus-oleracea) | 0.9952153    | 0.7834002    | 0.9922481 | 0.7231109 | not scorable | not scorable |
| #### Bn-scaff_23761_1-p39207 genome unspecific (all in)         | 0.9688995    | 0.4162307    | 0.9922481 | 0.8071664 | 1            | 0.9343826    |
| #### Bn-scaff_23761_1-p40813 genome unspecific (all in)         | 0.9880383    | 0.7889802    | 0.9844961 | 0.8011947 | 0.9586777    | 0.8945888    |
| #### Bn-scaff_23761_1-p42518 genome unspecific (all in)         | 0.9976076    | 0.3760531    | 1         | 0.7634674 | 1            | 0.7103126    |
| #### Bn-scaff_23761_1-p43490 genome unspecific (all in)         | 0.9832536    | 0.6548056    | 1         | 0.3533901 | 1            | 0.8581976    |
| #### Bn-scaff_23761_1-p44906 C-genome specific (napus-oleracea) | 0.9808612    | 0.7295344    | 1         | 0.7549489 | not scorable | not scorable |
| #### Bn-scaff_23761_1-p53013 genome unspecific (all in)         | 0.9210526    | 0.3469619    | 0.9767442 | 0.4597722 | 1            | 0.9272014    |
| #### Bn-scaff_23761_1-p58133 C-genome specific (napus-oleracea) | 0.9617225    | 0.6856328    | 1         | 0.7310897 | not scorable | not scorable |
| #### Bn-scaff_23761_1-p60431 C-genome specific (napus-oleracea) | 0.9712918    | 0.7738665    | 0.9844961 | 0.793637  | not scorable | not scorable |
| #### Bn-scaff_23761_1-p60438 C-genome specific (napus-oleracea) | 0.9808612    | 0.7921513    | 0.9922481 | 0.8195001 | not scorable | not scorable |
| #### Bn-scaff_23761_1-p62983 C-genome specific (napus-oleracea) | 0.9904306    | 0.7976481    | 1         | 0.8269898 | not scorable | not scorable |
| #### Bn-scaff_23761_1-p66717 C-genome specific (oleracea only)  | not scorable | not scorable | 0.9689922 | 0.693684  | not scorable | not scorable |
| #### Bn-scaff_23761_1-p66783 C-genome specific (napus-oleracea) | 0.9832536    | 0.6661466    | 0.9689922 | 0.7476256 | not scorable | not scorable |
| #### Bn-scaff_23761_1-p67024 C-genome specific (napus-oleracea) | 0.9952153    | 0.7593763    | 0.9922481 | 0.8076038 | not scorable | not scorable |
| #### Bn-scaff_23761_1-p67456 C-genome specific (napus-oleracea) | 0.8086125    | 0.7378899    | 0.9379845 | 0.6659201 | not scorable | not scorable |
| #### Bn-scaff_23761_1-p67585 genome unspecific (all in)         | 0.5311005    | 0.7481583    | 0.9457364 | 0.7048449 | 0.9917355    | 0.87696      |
| #### Bn-scaff_23761_1-p67886 C-genome specific (napus-oleracea) | 0.9976076    | 0.7788138    | 0.9922481 | 0.7129555 | not scorable | not scorable |
| #### Bn-scaff_23761_1-p67909 C-genome specific (napus-oleracea) | 0.9928229    | 0.763114     | 0.9922481 | 0.7944012 | not scorable | not scorable |

|                                                                |              |              |              |              |              |              |
|----------------------------------------------------------------|--------------|--------------|--------------|--------------|--------------|--------------|
| #### Bn-scaff_23761_1-p68251C-genome specific (napus-oleracea) | 0.9808612    | 0.7041216    | 0.9922481    | 0.6623068    | not scorable | not scorable |
| #### Bn-scaff_23761_1-p68510C-genome specific (napus-oleracea) | 0.6291866    | 0.7385685    | 0.7131783    | 0.7663817    | not scorable | not scorable |
| #### Bn-scaff_23761_1-p70426C-genome unspecific (all in)       | 0.9688995    | 0.2800531    | 1            | 0.8874542    | 1            | 0.7396542    |
| #### Bn-scaff_23761_1-p70488C-genome specific (oleracea only)  | not scorable | not scorable | 1            | 0.7016385    | not scorable | not scorable |
| #### Bn-scaff_23761_1-p72119C-genome specific (napus-oleracea) | 0.930622     | 0.5984563    | 0.9689922    | 0.6447806    | not scorable | not scorable |
| #### Bn-scaff_23761_1-p72373C-genome specific (napus-oleracea) | 0.9928229    | 0.7358555    | 1            | 0.7433682    | not scorable | not scorable |
| #### Bn-scaff_23761_1-p72700C-genome specific (napus-oleracea) | 0.9952153    | 0.7863814    | 1            | 0.8151757    | not scorable | not scorable |
| #### Bn-scaff_23761_1-p72847C-genome specific (napus-oleracea) | 0.9928229    | 0.7738451    | 1            | 0.8509378    | not scorable | not scorable |
| #### Bn-scaff_23761_1-p72934C-genome specific (napus-oleracea) | 0.9880383    | 0.6702283    | 1            | 0.6791564    | not scorable | not scorable |
| #### Bn-scaff_23761_1-p73647C-genome specific (napus-oleracea) | 0.9904306    | 0.75883      | 1            | 0.8507215    | not scorable | not scorable |
| #### Bn-scaff_23761_1-p73662C-genome specific (napus-oleracea) | 0.9665072    | 0.7307692    | 0.9922481    | 0.8427406    | not scorable | not scorable |
| #### Bn-scaff_23761_1-p73667C-genome specific (napus-oleracea) | 0.9928229    | 0.7814385    | 1            | 0.7759115    | not scorable | not scorable |
| #### Bn-scaff_23761_1-p73753C-genome specific (napus-oleracea) | 0.9760765    | 0.7694439    | 0.9922481    | 0.8194266    | not scorable | not scorable |
| #### Bn-scaff_23761_1-p73759C-genome specific (napus-oleracea) | 0.9928229    | 0.7422789    | 1            | 0.7291429    | not scorable | not scorable |
| #### Bn-scaff_23761_1-p73799C-genome specific (napus-oleracea) | 0.9880383    | 0.7436888    | 1            | 0.8265594    | not scorable | not scorable |
| #### Bn-scaff_23761_1-p73805C-genome specific (napus-oleracea) | 0.9904306    | 0.7378729    | 1            | 0.8694203    | not scorable | not scorable |
| #### Bn-scaff_23761_1-p73858C-genome specific (napus-oleracea) | 0.9904306    | 0.7883998    | 1            | 0.8274619    | not scorable | not scorable |
| #### Bn-scaff_23761_1-p73858C-genome specific (napus-oleracea) | 0.9904306    | 0.7729709    | 1            | 0.737699     | not scorable | not scorable |
| #### Bn-scaff_23761_1-p74039C-genome specific (napus-oleracea) | 0.9832536    | 0.735422     | 1            | 0.794508     | not scorable | not scorable |
| #### Bn-scaff_23761_1-p74156C-genome specific (napus-oleracea) | 0.9880383    | 0.7574778    | 0.9767442    | 0.6897746    | not scorable | not scorable |
| #### Bn-scaff_23761_1-p76415C-genome specific (napus-oleracea) | 0.9736842    | 0.8104665    | 0.9224806    | 0.8510223    | not scorable | not scorable |
| #### Bn-scaff_23761_1-p76557C-genome specific (napus-oleracea) | 0.9808612    | 0.8171567    | 1            | 0.7540048    | not scorable | not scorable |
| #### Bn-scaff_23761_1-p80034C-genome specific (napus-oleracea) | 0.6244019    | 0.7422585    | 0.3953488    | 0.7879959    | not scorable | not scorable |
| #### Bn-scaff_23765_1-p208 C-genome specific (napus-oleracea)  | 0.9832536    | 0.418124     | 1            | 0.6239599    | not scorable | not scorable |
| #### Bn-scaff_23771_1-p11124napus specific                     | 0.9880383    | 0.4572619    | not scorable | not scorable | not scorable | not scorable |
| #### Bn-scaff_23771_1-p11157C-genome specific (napus-oleracea) | 0.9976076    | 0.9095823    | 0.9922481    | 0.8611493    | not scorable | not scorable |
| #### Bn-scaff_23771_1-p11488C-genome specific (napus-oleracea) | 0.9856459    | 0.7764675    | 0.9922481    | 0.6515907    | not scorable | not scorable |
| #### Bn-scaff_23771_1-p12313C-genome specific (napus-oleracea) | 0.9976076    | 0.8713014    | 0.9922481    | 0.7422031    | not scorable | not scorable |
| #### Bn-scaff_23771_1-p12345C-genome specific (napus-oleracea) | 1            | 0.906221     | 0.9922481    | 0.8008413    | not scorable | not scorable |
| #### Bn-scaff_23771_1-p12366C-genome specific (napus-oleracea) | 0.9952153    | 0.7788324    | 0.9844961    | 0.7044837    | not scorable | not scorable |
| #### Bn-scaff_23771_1-p12445C-genome specific (napus-oleracea) | 0.9976076    | 0.8258469    | 1            | 0.758339     | not scorable | not scorable |
| #### Bn-scaff_23771_1-p14947genome unspecific (all in)         | 1            | 0.366881     | 0.9922481    | 0.8013265    | 0.8595041    | 0.9148874    |
| #### Bn-scaff_23771_1-p15193C-genome specific (napus-oleracea) | 0.9976076    | 0.9667228    | 0.9922481    | 0.8366318    | not scorable | not scorable |

|                                                                 |              |              |              |              |              |              |
|-----------------------------------------------------------------|--------------|--------------|--------------|--------------|--------------|--------------|
| #### Bn-scaff_23771_1-p18058 C-genome specific (napus-oleracea) | 0.9976076    | 0.8283347    | 0.9922481    | 0.7519159    | not scorable | not scorable |
| #### Bn-scaff_23771_1-p19525 genome unspecific (all in)         | 1            | 0.5290589    | 1            | 0.5131294    | 1            | 0.5830583    |
| #### Bn-scaff_23771_1-p23757 genome unspecific (all in)         | 0.9904306    | 0.5155405    | 1            | 0.8135024    | 1            | 0.9175813    |
| #### Bn-scaff_23771_1-p30067 genome unspecific (all in)         | 0.9976076    | 0.6201955    | 0.9922481    | 0.5493351    | 1            | 0.7206639    |
| #### Bn-scaff_23771_1-p30166 genome unspecific (all in)         | 1            | 0.7111537    | 1            | 0.6152509    | 0.9669421    | 0.6651455    |
| #### Bn-scaff_23771_1-p40268 C-genome specific (napus-oleracea) | 0.930622     | 0.5277854    | 0.9922481    | 0.2997183    | not scorable | not scorable |
| #### Bn-scaff_23771_1-p40269 C-genome specific (napus-oleracea) | 1            | 0.354955     | 0.9767442    | 0.3288508    | not scorable | not scorable |
| #### Bn-scaff_23771_1-p45089 C-genome specific (napus-oleracea) | 0.9976076    | 0.5813419    | 0.9844961    | 0.6717428    | not scorable | not scorable |
| #### Bn-scaff_23771_1-p47691 napus specific                     | 0.9904306    | 0.3256541    | not scorable | not scorable | not scorable | not scorable |
| #### Bn-scaff_23771_1-p47715 C-genome specific (napus-oleracea) | 0.9880383    | 0.6141138    | 0.9689922    | 0.6252031    | not scorable | not scorable |
| #### Bn-scaff_23771_1-p47746 genome unspecific (all in)         | 1            | 0.5120278    | 1            | 0.3610968    | 1            | 0.7094615    |
| #### Bn-scaff_23771_1-p50010 genome unspecific (all in)         | 1            | 0.7078101    | 1            | 0.7403094    | 1            | 0.8050677    |
| #### Bn-scaff_23771_1-p50063 genome unspecific (oleracea-rapa)  | not scorable | not scorable | 1            | 0.7550734    | 1            | 0.6428383    |
| #### Bn-scaff_23771_1-p59730 genome unspecific (all in)         | 1            | 0.7827932    | 1            | 0.737541     | 1            | 0.8270474    |
| #### Bn-scaff_23771_1-p88294 C-genome specific (napus-oleracea) | 0.9928229    | 0.6756375    | 0.9922481    | 0.6966587    | not scorable | not scorable |
| #### Bn-scaff_23771_1-p88926 genome unspecific (all in)         | 0.9904306    | 0.7249811    | 0.9922481    | 0.7721635    | 0.9669421    | 0.6785322    |
| #### Bn-scaff_23778_1-p653 napus specific                       | 1            | 0.546526     | not scorable | not scorable | not scorable | not scorable |
| #### Bn-scaff_23785_1-p786 C-genome specific (oleracea only)    | not scorable | not scorable | 0.9767442    | 0.5725569    | not scorable | not scorable |
| #### Bn-scaff_23794_1-p1121 C-genome specific (napus-oleracea)  | 0.9856459    | 0.7482649    | 1            | 0.7344749    | not scorable | not scorable |
| #### Bn-scaff_23794_1-p1917 C-genome specific (napus-oleracea)  | 0.9904306    | 0.7610062    | 1            | 0.7456158    | not scorable | not scorable |
| #### Bn-scaff_23794_1-p2595 C-genome specific (napus-oleracea)  | 0.9856459    | 0.7877187    | 1            | 0.726021     | not scorable | not scorable |
| #### Bn-scaff_23795_1-p19930 C-genome specific (napus-oleracea) | 0.9784689    | 0.8629454    | 1            | 0.8260867    | not scorable | not scorable |
| #### Bn-scaff_23795_1-p20934 C-genome specific (napus-oleracea) | 0.9856459    | 0.6789192    | 0.9844961    | 0.6441416    | not scorable | not scorable |
| #### Bn-scaff_23795_1-p22368 C-genome specific (napus-oleracea) | 0.9641148    | 0.7156169    | 0.9844961    | 0.6282561    | not scorable | not scorable |
| #### Bn-scaff_23795_1-p22378 C-genome specific (napus-oleracea) | 0.9832536    | 0.772984     | 0.9922481    | 0.6795671    | not scorable | not scorable |
| #### Bn-scaff_23795_1-p22401 C-genome specific (napus-oleracea) | 0.9808612    | 0.791818     | 1            | 0.8054584    | not scorable | not scorable |
| #### Bn-scaff_23795_1-p22714 genome unspecific (all in)         | 0.9952153    | 0.2752804    | 1            | 0.8786047    | 1            | 0.9177268    |
| #### Bn-scaff_23795_1-p25626 C-genome specific (napus-oleracea) | 0.9856459    | 0.7084881    | 1            | 0.6734691    | not scorable | not scorable |
| #### Bn-scaff_23795_1-p26980 C-genome specific (oleracea only)  | not scorable | not scorable | 1            | 0.8096942    | not scorable | not scorable |
| #### Bn-scaff_23795_1-p28377 C-genome specific (napus-oleracea) | 0.9808612    | 0.5852063    | 0.9844961    | 0.5840838    | not scorable | not scorable |
| #### Bn-scaff_23795_1-p40344 C-genome specific (napus-oleracea) | 0.9784689    | 0.7471491    | 1            | 0.7557934    | not scorable | not scorable |
| #### Bn-scaff_23795_1-p41266 C-genome specific (napus-oleracea) | 0.9904306    | 0.7924221    | 1            | 0.7353724    | not scorable | not scorable |
| #### Bn-scaff_23795_1-p43818 C-genome specific (napus-oleracea) | 0.9617225    | 0.6041201    | 1            | 0.5609398    | not scorable | not scorable |

|                                                                 |              |              |              |              |              |              |
|-----------------------------------------------------------------|--------------|--------------|--------------|--------------|--------------|--------------|
| #### Bn-scaff_23795_1-p44842 C-genome specific (napus-oleracea) | 0.9545454    | 0.8083518    | 0.9922481    | 0.7244258    | not scorable | not scorable |
| #### Bn-scaff_23795_1-p47126 C-genome specific (napus-oleracea) | 0.9904306    | 0.6665338    | 1            | 0.607886     | not scorable | not scorable |
| #### Bn-scaff_23795_1-p47255 C-genome specific (oleracea only)  | not scorable | not scorable | 0.9767442    | 0.6624797    | not scorable | not scorable |
| #### Bn-scaff_23795_1-p82694 genome unspecific (all in)         | 1            | 0.4805427    | 1            | 0.662414     | 1            | 0.8091388    |
| #### Bn-scaff_23795_1-p82795 C-genome specific (napus-oleracea) | 0.9928229    | 0.8753979    | 1            | 0.8401085    | not scorable | not scorable |
| #### Bn-scaff_23799_1-p1670 C-genome specific (napus-oleracea)  | 0.9880383    | 0.877738     | 1            | 0.6034342    | not scorable | not scorable |
| #### Bn-scaff_23799_1-p21271 C-genome specific (napus-oleracea) | 0.9832536    | 0.7708677    | 1            | 0.7606167    | not scorable | not scorable |
| #### Bn-scaff_23799_1-p51418 C-genome specific (napus-oleracea) | 0.8277512    | 0.7781072    | 1            | 0.7517457    | not scorable | not scorable |
| #### Bn-scaff_23799_1-p62076 genome unspecific (all in)         | 0.9569378    | 0.5555914    | 0.9844961    | 0.644365     | 0.9834711    | 0.6313249    |
| #### Bn-scaff_23799_1-p62437 genome unspecific (oleracea-rapa)  | not scorable | not scorable | 0.9922481    | 0.3700143    | 1            | 0.9392118    |
| #### Bn-scaff_23799_1-p6782 A-genome specific (napus-rapa)      | 0.9880383    | 0.2556899    | not scorable | not scorable | 0.9669421    | 0.8912814    |
| #### Bn-scaff_23799_1-p89287 C-genome specific (napus-oleracea) | 0.8277512    | 0.6905937    | 1            | 0.6057864    | not scorable | not scorable |
| #### Bn-scaff_23799_1-p9079 C-genome specific (napus-oleracea)  | 0.9832536    | 0.7267243    | 1            | 0.6911554    | not scorable | not scorable |
| #### Bn-scaff_23813_1-p15633 C-genome specific (napus-oleracea) | 0.9904306    | 0.8363944    | 1            | 0.7694945    | not scorable | not scorable |
| #### Bn-scaff_23813_1-p16297 C-genome specific (napus-oleracea) | 0.9712918    | 0.8360605    | 0.5891473    | 0.8200216    | not scorable | not scorable |
| #### Bn-scaff_23813_1-p16797 genome unspecific (oleracea-rapa)  | not scorable | not scorable | 0.6434109    | 0.6671755    | 0.9256198    | 0.769405     |
| #### Bn-scaff_23813_1-p17493 C-genome specific (napus-oleracea) | 0.9712918    | 0.7774569    | 0.5116279    | 0.7004464    | not scorable | not scorable |
| #### Bn-scaff_23813_1-p17548 C-genome specific (napus-oleracea) | 0.9856459    | 0.8442266    | 1            | 0.7764061    | not scorable | not scorable |
| #### Bn-scaff_23813_1-p19297 C-genome specific (napus-oleracea) | 0.9593301    | 0.8199286    | 0.4728682    | 0.828574     | not scorable | not scorable |
| #### Bn-scaff_23813_1-p19844 C-genome specific (napus-oleracea) | 0.9856459    | 0.7902115    | 0.8527132    | 0.7598015    | not scorable | not scorable |
| #### Bn-scaff_23813_1-p20894 C-genome specific (napus-oleracea) | 0.9856459    | 0.9037204    | 1            | 0.7680258    | not scorable | not scorable |
| #### Bn-scaff_23813_1-p20912 C-genome specific (napus-oleracea) | 0.9832536    | 0.8805947    | 0.9922481    | 0.74328      | not scorable | not scorable |
| #### Bn-scaff_23813_1-p20920 C-genome specific (napus-oleracea) | 0.9856459    | 0.7807374    | 1            | 0.7707796    | not scorable | not scorable |
| #### Bn-scaff_23813_1-p22281 C-genome specific (napus-oleracea) | 1            | 0.5757747    | 1            | 0.7978417    | not scorable | not scorable |
| #### Bn-scaff_23813_1-p24142 C-genome specific (napus-oleracea) | 0.9952153    | 0.7933808    | 0.7906977    | 0.7386498    | not scorable | not scorable |
| #### Bn-scaff_23813_1-p37430 genome unspecific (all in)         | 0.9808612    | 0.5003399    | 0.9922481    | 0.6453564    | 0.9090909    | 0.685512     |
| #### Bn-scaff_23813_1-p39699 genome unspecific (all in)         | 0.9760765    | 0.3501018    | 1            | 0.7873107    | 1            | 0.658749     |
| #### Bn-scaff_23813_1-p39731 genome unspecific (all in)         | 0.9736842    | 0.3146353    | 1            | 0.6187521    | 1            | 0.6838591    |
| #### Bn-scaff_23813_1-p49508 genome unspecific (all in)         | 0.9617225    | 0.3539884    | 1            | 0.7163444    | 0.9917355    | 0.642134     |
| #### Bn-scaff_23813_1-p52293 C-genome specific (napus-oleracea) | 0.9904306    | 0.7816409    | 1            | 0.7342174    | not scorable | not scorable |
| #### Bn-scaff_23813_1-p53150 genome unspecific (all in)         | 0.9880383    | 0.8115141    | 0.9379845    | 0.7414637    | 0.8512397    | 0.9157297    |
| #### Bn-scaff_23813_1-p54837 C-genome specific (napus-oleracea) | 0.9880383    | 0.7517277    | 0.9689922    | 0.761642     | not scorable | not scorable |
| #### Bn-scaff_23813_1-p55635 C-genome specific (napus-oleracea) | 0.9784689    | 0.7217171    | 0.9457364    | 0.7685738    | not scorable | not scorable |

|                                                                 |              |              |           |           |              |              |
|-----------------------------------------------------------------|--------------|--------------|-----------|-----------|--------------|--------------|
| #### Bn-scaff_23813_1-p5640C-genome specific (napus-oleracea)   | 0.930622     | 0.7152845    | 0.9302326 | 0.7576898 | not scorable | not scorable |
| #### Bn-scaff_23813_1-p5814E genome unspecific (all in)         | 0.9976076    | 0.5776383    | 1         | 0.7278858 | 1            | 0.8024012    |
| #### Bn-scaff_23813_1-p5817E genome unspecific (all in)         | 0.9880383    | 0.4709138    | 1         | 0.6966003 | 0.9834711    | 0.7423958    |
| #### Bn-scaff_23813_1-p58221C-genome specific (napus-oleracea)  | 0.9904306    | 0.8541709    | 1         | 0.7659793 | not scorable | not scorable |
| #### Bn-scaff_23813_1-p5822E C-genome specific (napus-oleracea) | 0.9832536    | 0.7890357    | 1         | 0.8044738 | not scorable | not scorable |
| #### Bn-scaff_23813_1-p5829C genome unspecific (all in)         | 1            | 0.5490052    | 1         | 0.8186969 | 1            | 0.7570931    |
| #### Bn-scaff_23813_1-p59797C-genome specific (napus-oleracea)  | 0.9808612    | 0.7904187    | 1         | 0.7499546 | not scorable | not scorable |
| #### Bn-scaff_23813_1-p6035E C-genome specific (napus-oleracea) | 0.9904306    | 0.884536     | 0.9844961 | 0.8289504 | not scorable | not scorable |
| #### Bn-scaff_23813_1-p64341C-genome specific (napus-oleracea)  | 0.9856459    | 0.8541409    | 1         | 0.6891307 | not scorable | not scorable |
| #### Bn-scaff_23813_1-p6508E C-genome specific (napus-oleracea) | 0.9904306    | 0.8844975    | 1         | 0.7272635 | not scorable | not scorable |
| #### Bn-scaff_23813_1-p6544E C-genome specific (napus-oleracea) | 0.9449761    | 0.7731766    | 0.9689922 | 0.7635807 | not scorable | not scorable |
| #### Bn-scaff_23813_1-p66414C-genome specific (napus-oleracea)  | 0.9952153    | 0.7264177    | 1         | 0.7926781 | not scorable | not scorable |
| #### Bn-scaff_23813_1-p6655E C-genome specific (napus-oleracea) | 0.9904306    | 0.8825585    | 0.9922481 | 0.821103  | not scorable | not scorable |
| #### Bn-scaff_23813_1-p6751E C-genome specific (napus-oleracea) | 0.9808612    | 0.8588259    | 0.9689922 | 0.8148285 | not scorable | not scorable |
| #### Bn-scaff_23813_1-p67547C-genome specific (napus-oleracea)  | 0.9856459    | 0.8379771    | 1         | 0.8136466 | not scorable | not scorable |
| #### Bn-scaff_23813_1-p67554C-genome specific (napus-oleracea)  | 0.9952153    | 0.7792317    | 0.9922481 | 0.7024662 | not scorable | not scorable |
| #### Bn-scaff_23813_1-p6757E C-genome specific (napus-oleracea) | 0.9832536    | 0.8041709    | 1         | 0.6622922 | not scorable | not scorable |
| #### Bn-scaff_23813_1-p67701C-genome specific (napus-oleracea)  | 0.9808612    | 0.8042936    | 0.9844961 | 0.8333058 | not scorable | not scorable |
| #### Bn-scaff_23813_1-p7261 C-genome specific (napus-oleracea)  | 0.9832536    | 0.7627416    | 1         | 0.6774222 | not scorable | not scorable |
| #### Bn-scaff_23813_1-p75017C-genome specific (napus-oleracea)  | 0.9712918    | 0.8439462    | 0.9767442 | 0.7926641 | not scorable | not scorable |
| #### Bn-scaff_23813_1-p76137C-genome specific (napus-oleracea)  | 0.9904306    | 0.8867031    | 0.9922481 | 0.7913917 | not scorable | not scorable |
| #### Bn-scaff_23813_1-p77384C-genome specific (napus-oleracea)  | 0.9904306    | 0.8517185    | 0.9922481 | 0.7757587 | not scorable | not scorable |
| #### Bn-scaff_23813_1-p77852C-genome specific (napus-oleracea)  | 0.9856459    | 0.8910128    | 0.9844961 | 0.821609  | not scorable | not scorable |
| #### Bn-scaff_23813_1-p7785E C-genome specific (napus-oleracea) | 0.9904306    | 0.8952961    | 0.9844961 | 0.824788  | not scorable | not scorable |
| #### Bn-scaff_23813_1-p77877C-genome specific (napus-oleracea)  | 0.9904306    | 0.8410723    | 0.9922481 | 0.8094591 | not scorable | not scorable |
| #### Bn-scaff_23813_1-p7789C C-genome specific (napus-oleracea) | 0.9904306    | 0.8502835    | 0.9922481 | 0.749821  | not scorable | not scorable |
| #### Bn-scaff_23813_1-p77892C-genome specific (napus-oleracea)  | 0.9904306    | 0.8709662    | 0.9844961 | 0.698397  | not scorable | not scorable |
| #### Bn-scaff_23813_1-p7789E C-genome specific (napus-oleracea) | 0.9904306    | 0.9254215    | 1         | 0.8118183 | not scorable | not scorable |
| #### Bn-scaff_23813_1-p7808C C-genome specific (napus-oleracea) | 0.9904306    | 0.6815032    | 0.9922481 | 0.6562043 | not scorable | not scorable |
| #### Bn-scaff_23813_1-p78104C-genome specific (napus-oleracea)  | 0.9904306    | 0.7308974    | 1         | 0.6352142 | not scorable | not scorable |
| #### Bn-scaff_23813_1-p78112C-genome specific (napus-oleracea)  | 0.9904306    | 0.7394311    | 0.9922481 | 0.6411465 | not scorable | not scorable |
| #### Bn-scaff_23813_1-p78412C-genome specific (napus-oleracea)  | 0.9904306    | 0.8800009    | 0.9844961 | 0.789915  | not scorable | not scorable |
| #### Bn-scaff_23813_1-p79494C-genome specific (oleracea only)   | not scorable | not scorable | 0.9767442 | 0.7729757 | not scorable | not scorable |



|                                                                 |              |              |           |           |              |              |
|-----------------------------------------------------------------|--------------|--------------|-----------|-----------|--------------|--------------|
| #### Bn-scaff_23813_1-p79733 C-genome specific (oleracea only)  | not scorable | not scorable | 0.9767442 | 0.8483146 | not scorable | not scorable |
| #### Bn-scaff_23813_1-p79894 C-genome specific (napus-oleracea) | 0.9904306    | 0.8195967    | 0.9922481 | 0.8045455 | not scorable | not scorable |
| #### Bn-scaff_23813_1-p80774 genome unspecific (all in)         | 0.9904306    | 0.5684063    | 0.9844961 | 0.4854332 | 1            | 0.8804421    |
| #### Bn-scaff_23813_1-p80796 C-genome specific (napus-oleracea) | 0.9904306    | 0.7168393    | 0.9844961 | 0.7308882 | not scorable | not scorable |
| #### Bn-scaff_23813_1-p80841 C-genome specific (napus-oleracea) | 0.9904306    | 0.8445646    | 0.9922481 | 0.8386529 | not scorable | not scorable |
| #### Bn-scaff_23813_1-p81297 C-genome specific (napus-oleracea) | 0.9856459    | 0.8608177    | 0.9689922 | 0.8143303 | not scorable | not scorable |
| #### Bn-scaff_23813_1-p93921 C-genome specific (napus-oleracea) | 0.9904306    | 0.8882788    | 1         | 0.6990687 | not scorable | not scorable |
| #### Bn-scaff_23817_1-p83 genome unspecific (all in)            | 0.8803828    | 0.580468     | 0.9844961 | 0.5127962 | 1            | 0.9050567    |
| #### Bn-scaff_23821_1-p12212 C-genome specific (napus-oleracea) | 0.9258373    | 0.8103707    | 1         | 0.8443965 | not scorable | not scorable |
| #### Bn-scaff_23821_1-p12239 C-genome specific (napus-oleracea) | 0.9258373    | 0.7574893    | 1         | 0.743271  | not scorable | not scorable |
| #### Bn-scaff_23821_1-p12323 C-genome specific (napus-oleracea) | 0.9210526    | 0.76463      | 1         | 0.6877309 | not scorable | not scorable |
| #### Bn-scaff_23821_1-p21382 genome unspecific (all in)         | 0.9856459    | 0.2996845    | 1         | 0.6657075 | 0.9504132    | 0.6683809    |
| #### Bn-scaff_23821_1-p21725 C-genome specific (napus-oleracea) | 0.9258373    | 0.8109336    | 1         | 0.7451388 | not scorable | not scorable |
| #### Bn-scaff_23821_1-p22581 C-genome specific (napus-oleracea) | 0.9258373    | 0.7916123    | 0.9922481 | 0.6991996 | not scorable | not scorable |
| #### Bn-scaff_23821_1-p45516 C-genome specific (napus-oleracea) | 0.6291866    | 0.7219151    | 0.5813953 | 0.7872841 | not scorable | not scorable |
| #### Bn-scaff_23821_1-p45612 genome unspecific (all in)         | 0.9736842    | 0.2908264    | 1         | 0.8379771 | 1            | 0.9175813    |
| #### Bn-scaff_23821_1-p45657 C-genome specific (napus-oleracea) | 0.9210526    | 0.6904255    | 1         | 0.7202619 | not scorable | not scorable |
| #### Bn-scaff_23821_1-p49093 C-genome specific (napus-oleracea) | 0.6291866    | 0.8727306    | 0.6511628 | 0.7730398 | not scorable | not scorable |
| #### Bn-scaff_23821_1-p61146 genome unspecific (all in)         | 0.9641148    | 0.3910097    | 0.9767442 | 0.7835416 | 1            | 0.8653011    |
| #### Bn-scaff_23821_1-p61860 C-genome specific (napus-oleracea) | 0.923445     | 0.7988694    | 1         | 0.8538775 | not scorable | not scorable |
| #### Bn-scaff_23821_1-p62074 C-genome specific (napus-oleracea) | 0.9066986    | 0.7581924    | 0.8449612 | 0.8120807 | not scorable | not scorable |
| #### Bn-scaff_23821_1-p62096 C-genome specific (napus-oleracea) | 0.9138756    | 0.7373032    | 0.9844961 | 0.8040193 | not scorable | not scorable |
| #### Bn-scaff_23821_1-p62194 C-genome specific (napus-oleracea) | 0.9090909    | 0.7707459    | 0.9844961 | 0.7821718 | not scorable | not scorable |
| #### Bn-scaff_23821_1-p65006 C-genome specific (napus-oleracea) | 0.9138756    | 0.8173971    | 0.875969  | 0.6892974 | not scorable | not scorable |
| #### Bn-scaff_23821_1-p79518 C-genome specific (napus-oleracea) | 0.9162679    | 0.7927482    | 1         | 0.7561812 | not scorable | not scorable |
| #### Bn-scaff_23821_1-p87496 C-genome specific (napus-oleracea) | 0.9186603    | 0.771365     | 0.9922481 | 0.6839622 | not scorable | not scorable |
| #### Bn-scaff_23821_1-p94162 C-genome specific (napus-oleracea) | 0.923445     | 0.6970537    | 0.8992248 | 0.655806  | not scorable | not scorable |
| #### Bn-scaff_23821_1-p95881 C-genome specific (napus-oleracea) | 0.9210526    | 0.9056525    | 0.9922481 | 0.7416801 | not scorable | not scorable |
| #### Bn-scaff_23821_1-p96039 C-genome specific (napus-oleracea) | 0.9258373    | 0.7860345    | 0.9922481 | 0.8229404 | not scorable | not scorable |
| #### Bn-scaff_23825_1-p530 genome unspecific (oleracea-rapa)    | not scorable | not scorable | 1         | 0.8569149 | 0.9586777    | 0.3566436    |
| #### Bn-scaff_23826_1-p131 genome unspecific (all in)           | 1            | 0.3217014    | 0.8914729 | 0.2219818 | 0.9917355    | 0.6545087    |
| #### Bn-scaff_23839_1-p14452 C-genome specific (napus-oleracea) | 1            | 0.8029754    | 0.9922481 | 0.6655654 | not scorable | not scorable |
| #### Bn-scaff_23839_1-p14889 C-genome specific (napus-oleracea) | 1            | 0.9371949    | 0.9922481 | 0.811474  | not scorable | not scorable |

|                                                                  |              |              |              |              |              |              |
|------------------------------------------------------------------|--------------|--------------|--------------|--------------|--------------|--------------|
| #### Bn-scaff_23839_1-p3162C C-genome specific (napus-oleracea)  | 0.9952153    | 0.900665     | 1            | 0.7540053    | not scorable | not scorable |
| #### Bn-scaff_23903_1-p21341C C-genome specific (napus-oleracea) | 0.9808612    | 0.8027765    | 0.9379845    | 0.8408579    | not scorable | not scorable |
| #### Bn-scaff_23903_1-p21377C C-genome specific (napus-oleracea) | 0.9880383    | 0.7301516    | 1            | 0.7061199    | not scorable | not scorable |
| #### Bn-scaff_23903_1-p31457 genome unspecific (all in)          | 0.9976076    | 0.3516585    | 1            | 0.7715513    | 1            | 0.8921934    |
| #### Bn-scaff_23903_1-p44421C C-genome specific (napus-oleracea) | 0.9904306    | 0.2697285    | 0.7906977    | 0.2816735    | not scorable | not scorable |
| #### Bn-scaff_23903_1-p45147C C-genome specific (napus-oleracea) | 0.9832536    | 0.8424287    | 1            | 0.8058293    | not scorable | not scorable |
| #### Bn-scaff_23907_1-p10224 genome unspecific (all in)          | 1            | 0.2997573    | 0.9767442    | 0.2490092    | 1            | 0.8184872    |
| #### Bn-scaff_23907_1-p10238 genome unspecific (all in)          | 0.9952153    | 0.4723682    | 0.9922481    | 0.4487875    | 0.9917355    | 0.7127116    |
| #### Bn-scaff_23907_1-p10598 C-genome specific (oleracea only)   | not scorable | not scorable | 1            | 0.6655007    | not scorable | not scorable |
| #### Bn-scaff_23907_1-p10822 C-genome specific (oleracea only)   | not scorable | not scorable | 0.9922481    | 0.8181123    | not scorable | not scorable |
| #### Bn-scaff_23907_1-p1137C genome unspecific (all in)          | 0.9641148    | 0.495475     | 0.9922481    | 0.674809     | 1            | 0.8800398    |
| #### Bn-scaff_23907_1-p16039 C-genome specific (napus-oleracea)  | 0.9976076    | 0.8247576    | 0.9922481    | 0.7390967    | not scorable | not scorable |
| #### Bn-scaff_23907_1-p1956C C-genome specific (napus-oleracea)  | 0.9952153    | 0.8025996    | 0.9844961    | 0.6373727    | not scorable | not scorable |
| #### Bn-scaff_23907_1-p19595 C-genome specific (napus-oleracea)  | 0.9976076    | 0.8741704    | 1            | 0.7203079    | not scorable | not scorable |
| #### Bn-scaff_23907_1-p19671C C-genome specific (napus-oleracea) | 1            | 0.7428504    | 0.9922481    | 0.6262561    | not scorable | not scorable |
| #### Bn-scaff_23907_1-p19678 C-genome specific (napus-oleracea)  | 0.2703349    | 0.9012818    | 0.9767442    | 0.7409858    | not scorable | not scorable |
| #### Bn-scaff_23907_1-p19709 C-genome specific (napus-oleracea)  | 0.9090909    | 0.8065711    | 0.9844961    | 0.6926404    | not scorable | not scorable |
| #### Bn-scaff_23907_1-p26123 C-genome specific (napus-oleracea)  | 0.9688995    | 0.5842395    | 1            | 0.7553843    | not scorable | not scorable |
| #### Bn-scaff_23907_1-p29685 napus specific                      | 0.9880383    | 0.2837077    | not scorable | not scorable | not scorable | not scorable |
| #### Bn-scaff_23907_1-p3780 C-genome specific (napus-oleracea)   | 0.9904306    | 0.7789463    | 1            | 0.8054355    | not scorable | not scorable |
| #### Bn-scaff_23907_1-p41677 genome unspecific (all in)          | 0.9569378    | 0.3936916    | 1            | 0.8207484    | 0.9917355    | 0.7596602    |
| #### Bn-scaff_23907_1-p4193 C-genome specific (napus-oleracea)   | 0.9952153    | 0.7589822    | 1            | 0.7892381    | not scorable | not scorable |
| #### Bn-scaff_23907_1-p43301 genome unspecific (all in)          | 0.9928229    | 0.4794781    | 1            | 0.6432827    | 1            | 0.7951989    |
| #### Bn-scaff_23907_1-p43322 genome unspecific (all in)          | 0.9688995    | 0.7131108    | 0.9147287    | 0.7231386    | 1            | 0.9205657    |
| #### Bn-scaff_23907_1-p43419 genome unspecific (all in)          | 0.9880383    | 0.3358164    | 1            | 0.6890675    | 0.9917355    | 0.690439     |
| #### Bn-scaff_23907_1-p49739 genome unspecific (all in)          | 0.9784689    | 0.4231816    | 1            | 0.5943319    | 0.9752066    | 0.4878897    |
| #### Bn-scaff_23907_1-p5016 C-genome specific (napus-oleracea)   | 0.9880383    | 0.7381509    | 1            | 0.8751035    | not scorable | not scorable |
| #### Bn-scaff_23907_1-p5211 C-genome specific (napus-oleracea)   | 0.9952153    | 0.8047025    | 1            | 0.7595345    | not scorable | not scorable |
| #### Bn-scaff_23907_1-p54244 C-genome specific (napus-oleracea)  | 0.9976076    | 0.7537016    | 0.9379845    | 0.6888462    | not scorable | not scorable |
| #### Bn-scaff_23907_1-p54771 genome unspecific (all in)          | 0.9880383    | 0.5008391    | 1            | 0.9010475    | 1            | 0.8776555    |
| #### Bn-scaff_23907_1-p5490C genome unspecific (all in)          | 0.9928229    | 0.6114729    | 1            | 0.8986684    | 1            | 0.941561     |
| #### Bn-scaff_23907_1-p56814 genome unspecific (all in)          | 1            | 0.6420197    | 1            | 0.7700924    | 1            | 0.9244187    |
| #### Bn-scaff_23907_1-p64789 genome unspecific (all in)          | 0.9904306    | 0.494596     | 0.9844961    | 0.8046896    | 1            | 0.8946789    |

|                                                                 |              |              |              |              |              |              |
|-----------------------------------------------------------------|--------------|--------------|--------------|--------------|--------------|--------------|
| #### Bn-scaff_23907_1-p65378 C-genome specific (napus-oleracea) | 0.9880383    | 0.8004113    | 0.9922481    | 0.834099     | not scorable | not scorable |
| #### Bn-scaff_23907_1-p65400 C-genome specific (napus-oleracea) | 0.9856459    | 0.7587919    | 0.9844961    | 0.7602164    | not scorable | not scorable |
| #### Bn-scaff_23907_1-p65475 C-genome specific (napus-oleracea) | 0.9808612    | 0.7227535    | 0.9922481    | 0.7789389    | not scorable | not scorable |
| #### Bn-scaff_23907_1-p65779 C-genome specific (napus-oleracea) | 0.9760765    | 0.773034     | 1            | 0.8303484    | not scorable | not scorable |
| #### Bn-scaff_23907_1-p65805 C-genome specific (napus-oleracea) | 0.9856459    | 0.7804667    | 1            | 0.8368149    | not scorable | not scorable |
| #### Bn-scaff_23907_1-p66480 C-genome specific (napus-oleracea) | 0.9928229    | 0.7700459    | 1            | 0.8663557    | not scorable | not scorable |
| #### Bn-scaff_23907_1-p67172 C-genome specific (napus-oleracea) | 0.9928229    | 0.7816903    | 0.9844961    | 0.8273833    | not scorable | not scorable |
| #### Bn-scaff_23907_1-p67205 C-genome specific (napus-oleracea) | 0.9856459    | 0.7585796    | 0.9689922    | 0.6866325    | not scorable | not scorable |
| #### Bn-scaff_23907_1-p67566 C-genome specific (napus-oleracea) | 0.9904306    | 0.7906694    | 1            | 0.8361871    | not scorable | not scorable |
| #### Bn-scaff_23907_1-p67971 C-genome specific (napus-oleracea) | 0.9928229    | 0.7871201    | 0.9922481    | 0.7870524    | not scorable | not scorable |
| #### Bn-scaff_23907_1-p68621 napus specific                     | 0.9808612    | 0.7580725    | not scorable | not scorable | not scorable | not scorable |
| #### Bn-scaff_23907_1-p68915 C-genome specific (napus-oleracea) | 0.9808612    | 0.8095894    | 0.9922481    | 0.7379436    | not scorable | not scorable |
| #### Bn-scaff_23907_1-p72292 C-genome specific (napus-oleracea) | 0.9569378    | 0.5951539    | 0.9922481    | 0.7384148    | not scorable | not scorable |
| #### Bn-scaff_23907_1-p73711 C-genome specific (napus-oleracea) | 0.9784689    | 0.8320692    | 0.9922481    | 0.8149216    | not scorable | not scorable |
| #### Bn-scaff_23907_1-p74600 C-genome specific (napus-oleracea) | 0.9856459    | 0.8262395    | 0.9922481    | 0.8637689    | not scorable | not scorable |
| #### Bn-scaff_23907_1-p75577 C-genome specific (napus-oleracea) | 0.9880383    | 0.8249155    | 1            | 0.6510002    | not scorable | not scorable |
| #### Bn-scaff_23907_1-p76217 C-genome specific (napus-oleracea) | 0.9952153    | 0.7526247    | 1            | 0.7630878    | not scorable | not scorable |
| #### Bn-scaff_23907_1-p77486 C-genome specific (napus-oleracea) | 0.9976076    | 0.5491662    | 0.8449612    | 0.5666695    | not scorable | not scorable |
| #### Bn-scaff_23907_1-p77486 C-genome specific (oleracea only)  | not scorable | not scorable | 0.9844961    | 0.4054038    | not scorable | not scorable |
| #### Bn-scaff_23907_1-p78081 C-genome specific (napus-oleracea) | 0.9808612    | 0.8082379    | 1            | 0.8266702    | not scorable | not scorable |
| #### Bn-scaff_23907_1-p78823 C-genome specific (napus-oleracea) | 0.9904306    | 0.7154601    | 1            | 0.7470349    | not scorable | not scorable |
| #### Bn-scaff_23907_1-p79310 C-genome specific (napus-oleracea) | 0.9928229    | 0.7656829    | 0.9844961    | 0.7428185    | not scorable | not scorable |
| #### Bn-scaff_23907_1-p80757 C-genome specific (napus-oleracea) | 0.9497608    | 0.8046191    | 1            | 0.7540659    | not scorable | not scorable |
| #### Bn-scaff_23907_1-p81933 C-genome specific (napus-oleracea) | 0.9856459    | 0.792998     | 1            | 0.8065624    | not scorable | not scorable |
| #### Bn-scaff_23907_1-p83395 C-genome specific (napus-oleracea) | 0.9760765    | 0.8023274    | 1            | 0.8569924    | not scorable | not scorable |
| #### Bn-scaff_23907_1-p89656 genome unspecific (all in)         | 1            | 0.5920967    | 1            | 0.5280649    | 1            | 0.9277804    |
| #### Bn-scaff_23907_1-p91579 C-genome specific (napus-oleracea) | 0.9976076    | 0.8149411    | 1            | 0.6931905    | not scorable | not scorable |
| #### Bn-scaff_23907_1-p92174 genome unspecific (all in)         | 1            | 0.5239249    | 1            | 0.4767525    | 1            | 0.9231955    |
| #### Bn-scaff_23907_1-p93018 genome unspecific (all in)         | 0.9976076    | 0.2564786    | 0.9457364    | 0.3292423    | 1            | 0.8465294    |
| #### Bn-scaff_23907_1-p93051 C-genome specific (napus-oleracea) | 0.9976076    | 0.4582957    | 0.8992248    | 0.7277093    | not scorable | not scorable |
| #### Bn-scaff_23907_1-p93060 genome unspecific (all in)         | 0.9904306    | 0.3232468    | 1            | 0.6437199    | 1            | 0.7930286    |
| #### Bn-scaff_23907_1-p93075 C-genome specific (napus-oleracea) | 0.9976076    | 0.349062     | 1            | 0.739518     | not scorable | not scorable |
| #### Bn-scaff_23907_1-p93105 C-genome specific (napus-oleracea) | 1            | 0.8341439    | 0.9922481    | 0.7875267    | not scorable | not scorable |

|                                                                 |              |              |              |              |              |              |
|-----------------------------------------------------------------|--------------|--------------|--------------|--------------|--------------|--------------|
| #### Bn-scaff_23907_1-p93153 C-genome specific (napus-oleracea) | 0.9904306    | 0.6453964    | 0.9922481    | 0.6822738    | not scorable | not scorable |
| #### Bn-scaff_23907_1-p93189 genome unspecific (all in)         | 0.9904306    | 0.4454019    | 1            | 0.7172958    | 1            | 0.8409751    |
| #### Bn-scaff_23907_1-p95539 C-genome specific (napus-oleracea) | 0.9808612    | 0.704721     | 0.9922481    | 0.70705      | not scorable | not scorable |
| #### Bn-scaff_23907_1-p96959 C-genome specific (napus-oleracea) | 0.9784689    | 0.7824216    | 0.9922481    | 0.7864116    | not scorable | not scorable |
| #### Bn-scaff_23907_1-p98052 genome unspecific (all in)         | 0.9784689    | 0.7859288    | 0.8449612    | 0.8105826    | 1            | 0.920532     |
| #### Bn-scaff_23907_1-p98597 genome unspecific (oleracea-rapa)  | not scorable | not scorable | 0.9689922    | 0.2517875    | 1            | 0.4604115    |
| #### Bn-scaff_23937_1-p22809 C-genome specific (napus-oleracea) | 0.9928229    | 0.5142423    | 1            | 0.7599192    | not scorable | not scorable |
| #### Bn-scaff_23937_1-p26440 genome unspecific (all in)         | 0.9976076    | 0.3655791    | 0.9922481    | 0.5944421    | 1            | 0.706907     |
| #### Bn-scaff_23937_1-p36794 genome unspecific (oleracea-rapa)  | not scorable | not scorable | 0.9379845    | 0.3253883    | 1            | 0.8523535    |
| #### Bn-scaff_23946_1-p24221 C-genome specific (napus-oleracea) | 0.9114832    | 0.7583297    | 0.9844961    | 0.7736471    | not scorable | not scorable |
| #### Bn-scaff_23946_1-p25976 C-genome specific (napus-oleracea) | 0.9162679    | 0.7140149    | 0.9844961    | 0.7143887    | not scorable | not scorable |
| #### Bn-scaff_23946_1-p35627 C-genome specific (napus-oleracea) | 0.9258373    | 0.7566857    | 1            | 0.7705081    | not scorable | not scorable |
| #### Bn-scaff_23946_1-p38726 genome unspecific (all in)         | 0.9665072    | 0.4382561    | 0.9922481    | 0.7052537    | 1            | 0.871794     |
| #### Bn-scaff_23946_1-p65251 C-genome specific (napus-oleracea) | 0.930622     | 0.7818289    | 0.9922481    | 0.8154362    | not scorable | not scorable |
| #### Bn-scaff_23946_1-p69210 C-genome specific (napus-oleracea) | 0.5311005    | 0.8236581    | 0.9612403    | 0.8984767    | not scorable | not scorable |
| #### Bn-scaff_23946_1-p74217 napus specific                     | 0.4832536    | 0.8485222    | not scorable | not scorable | not scorable | not scorable |
| #### Bn-scaff_23946_1-p74762 genome unspecific (oleracea-rapa)  | not scorable | not scorable | 0.9922481    | 0.776499     | 0.9834711    | 0.762189     |
| #### Bn-scaff_23948_1-p24713 C-genome specific (napus-oleracea) | 0.9712918    | 0.4918295    | 0.9612403    | 0.382806     | not scorable | not scorable |
| #### Bn-scaff_23948_1-p25851 genome unspecific (all in)         | 0.9736842    | 0.7766796    | 1            | 0.7156494    | 1            | 0.8027227    |
| #### Bn-scaff_23948_1-p35343 C-genome specific (oleracea only)  | not scorable | not scorable | 0.9767442    | 0.7195979    | not scorable | not scorable |
| #### Bn-scaff_23948_1-p36633 C-genome specific (napus-oleracea) | 0.9760765    | 0.8006029    | 0.9844961    | 0.8148026    | not scorable | not scorable |
| #### Bn-scaff_23948_1-p37449 C-genome specific (napus-oleracea) | 0.9736842    | 0.7421896    | 0.9844961    | 0.8411558    | not scorable | not scorable |
| #### Bn-scaff_23954_1-p10389 genome unspecific (oleracea-rapa)  | not scorable | not scorable | 0.8682171    | 0.7248582    | 0.9917355    | 0.7392183    |
| #### Bn-scaff_23954_1-p10455 napus specific                     | 0.6842105    | 0.7515376    | not scorable | not scorable | not scorable | not scorable |
| #### Bn-scaff_23954_1-p10767 C-genome specific (napus-oleracea) | 0.9186603    | 0.7893214    | 1            | 0.8395246    | not scorable | not scorable |
| #### Bn-scaff_23954_1-p10769 C-genome specific (napus-oleracea) | 0.9282297    | 0.7898179    | 1            | 0.7401339    | not scorable | not scorable |
| #### Bn-scaff_23954_1-p10813 genome unspecific (all in)         | 0.9760765    | 0.4889006    | 1            | 0.7403084    | 0.9834711    | 0.7206639    |
| #### Bn-scaff_23954_1-p10837 C-genome specific (napus-oleracea) | 0.9258373    | 0.7719436    | 1            | 0.9058838    | not scorable | not scorable |
| #### Bn-scaff_23954_1-p10838 C-genome specific (napus-oleracea) | 0.9258373    | 0.776334     | 1            | 0.7996117    | not scorable | not scorable |
| #### Bn-scaff_23954_1-p10985 C-genome specific (napus-oleracea) | 0.923445     | 0.6900355    | 1            | 0.8985183    | not scorable | not scorable |
| #### Bn-scaff_23954_1-p11002 genome unspecific (all in)         | 0.9569378    | 0.3874766    | 1            | 0.8253995    | 0.9834711    | 0.5925739    |
| #### Bn-scaff_23954_1-p11070 C-genome specific (napus-oleracea) | 0.9114832    | 0.7858928    | 0.6899225    | 0.8296117    | not scorable | not scorable |
| #### Bn-scaff_23954_1-p11088 genome unspecific (all in)         | 0.9545454    | 0.4981835    | 1            | 0.7689686    | 1            | 0.9230928    |

|                                                                 |           |           |              |              |              |              |              |
|-----------------------------------------------------------------|-----------|-----------|--------------|--------------|--------------|--------------|--------------|
| #### Bn-scaff_23954_1-p11111C-genome specific (napus-oleracea)  | 0.9258373 | 0.3266195 |              | 1            | 0.7785498    | not scorable | not scorable |
| #### Bn-scaff_23954_1-p11126 genome unspecific (all in)         | 0.9712918 | 0.4518091 |              | 1            | 0.6154972    | 1            | 0.9039531    |
| #### Bn-scaff_23954_1-p11277 genome unspecific (all in)         | 0.6866029 | 0.6200581 | 0.9767442    |              | 0.7582254    | 0.7933884    | 0.9051879    |
| #### Bn-scaff_23954_1-p11588 genome unspecific (all in)         | 0.9976076 | 0.5398132 | 0.9922481    |              | 0.6586525    | 1            | 0.9456444    |
| #### Bn-scaff_23954_1-p11944 genome unspecific (all in)         | 0.9760765 | 0.2694756 |              | 1            | 0.7247891    | 0.9834711    | 0.2651629    |
| #### Bn-scaff_23954_1-p13257 C-genome specific (napus-oleracea) | 0.9904306 | 0.7000403 |              | 1            | 0.6341668    | not scorable | not scorable |
| #### Bn-scaff_23954_1-p13556 A-genome specific (napus-rapa)     | 0.9832536 | 0.3401617 | not scorable | not scorable |              | 1            | 0.7770717    |
| #### Bn-scaff_23954_1-p14104 genome unspecific (all in)         | 0.9641148 | 0.3473255 |              | 1            | 0.8237639    | 1            | 0.7556475    |
| #### Bn-scaff_23954_1-p15768 C-genome specific (napus-oleracea) | 0.9736842 | 0.740214  |              | 1            | 0.7650557    | not scorable | not scorable |
| #### Bn-scaff_23954_1-p16972 genome unspecific (all in)         | 0.9545454 | 0.3715688 | 0.7674419    |              | 0.7514567    | 0.9917355    | 0.7577884    |
| #### Bn-scaff_23954_1-p16980 genome unspecific (all in)         | 0.9952153 | 0.3015848 | 0.9844961    |              | 0.8195001    | 1            | 0.9340803    |
| #### Bn-scaff_23954_1-p16997 C-genome specific (napus-oleracea) | 0.9952153 | 0.2843662 |              | 1            | 0.789278     | not scorable | not scorable |
| #### Bn-scaff_23954_1-p19660 C-genome specific (napus-oleracea) | 0.9449761 | 0.2167964 | 0.9922481    |              | 0.7053856    | not scorable | not scorable |
| #### Bn-scaff_23954_1-p19695 genome unspecific (all in)         | 0.9952153 | 0.4072714 |              | 1            | 0.8232119    | 0.9917355    | 0.754038     |
| #### Bn-scaff_23954_1-p20993 C-genome specific (napus-oleracea) | 0.9856459 | 0.6629165 | 0.9844961    |              | 0.5568293    | not scorable | not scorable |
| #### Bn-scaff_23954_1-p22080 C-genome specific (napus-oleracea) | 0.9832536 | 0.7985098 | 0.9922481    |              | 0.7914778    | not scorable | not scorable |
| #### Bn-scaff_23954_1-p22875 genome unspecific (all in)         | 0.9569378 | 0.5497333 |              | 1            | 0.7755845    | 1            | 0.9394312    |
| #### Bn-scaff_23954_1-p23907 genome unspecific (all in)         | 0.9665072 | 0.3398436 |              | 1            | 0.7897905    | 0.9504132    | 0.7149455    |
| #### Bn-scaff_23954_1-p25493 genome unspecific (all in)         | 0.9784689 | 0.5267863 |              | 1            | 0.8403461    | 0.9421487    | 0.7494714    |
| #### Bn-scaff_23954_1-p26931 C-genome specific (napus-oleracea) | 0.9856459 | 0.7300145 |              | 1            | 0.881908     | not scorable | not scorable |
| #### Bn-scaff_23954_1-p27017 C-genome specific (napus-oleracea) | 0.9688995 | 0.6858987 |              | 1            | 0.8219877    | not scorable | not scorable |
| #### Bn-scaff_23954_1-p27035 C-genome specific (napus-oleracea) | 0.9736842 | 0.7576411 | 0.9922481    |              | 0.7544882    | not scorable | not scorable |
| #### Bn-scaff_23954_1-p27074 C-genome specific (napus-oleracea) | 0.9856459 | 0.7787734 |              | 1            | 0.8570464    | not scorable | not scorable |
| #### Bn-scaff_23954_1-p27089 C-genome specific (napus-oleracea) | 0.9880383 | 0.7627987 |              | 1            | 0.7627832    | not scorable | not scorable |
| #### Bn-scaff_23954_1-p27117 C-genome specific (napus-oleracea) | 0.9736842 | 0.6620294 |              | 1            | 0.5576651    | not scorable | not scorable |
| #### Bn-scaff_23954_1-p29207 C-genome specific (napus-oleracea) | 0.9712918 | 0.771374  | 0.9922481    |              | 0.6100544    | not scorable | not scorable |
| #### Bn-scaff_23954_1-p30268 C-genome specific (napus-oleracea) | 0.9784689 | 0.7267154 | 0.9922481    |              | 0.5782569    | not scorable | not scorable |
| #### Bn-scaff_23954_1-p30626 genome unspecific (all in)         | 0.9976076 | 0.3466228 | 0.9922481    |              | 0.775987     | 1            | 0.8758975    |
| #### Bn-scaff_23954_1-p31099 C-genome specific (napus-oleracea) | 0.9497608 | 0.8238124 | 0.9689922    |              | 0.6997913    | not scorable | not scorable |
| #### Bn-scaff_23954_1-p31652 C-genome specific (napus-oleracea) | 0.9976076 | 0.8375074 | 0.9689922    |              | 0.7205752    | not scorable | not scorable |
| #### Bn-scaff_23954_1-p31697 genome unspecific (all in)         | 0.9617225 | 0.5428154 | 0.9689922    |              | 0.5526556    | 0.9834711    | 0.8085203    |
| #### Bn-scaff_23954_1-p36098 C-genome specific (napus-oleracea) | 0.9904306 | 0.7959009 | 0.9922481    |              | 0.7720605    | not scorable | not scorable |
| #### Bn-scaff_23954_1-p36652 napus specific                     | 0.9210526 | 0.3138319 | not scorable | not scorable | not scorable | not scorable | not scorable |

|                                                               |              |              |           |           |              |              |
|---------------------------------------------------------------|--------------|--------------|-----------|-----------|--------------|--------------|
| #### Bn-scaff_23954_1-p3667C-genome specific (oleracea only)  | not scorable | not scorable | 1         | 0.5584717 | not scorable | not scorable |
| #### Bn-scaff_23954_1-p3734C-genome specific (napus-oleracea) | 0.9569378    | 0.7094004    | 0.9922481 | 0.749676  | not scorable | not scorable |
| #### Bn-scaff_23954_1-p4120C-genome specific (napus-oleracea) | 0.6220096    | 0.7442046    | 0.5581396 | 0.6951702 | not scorable | not scorable |
| #### Bn-scaff_23954_1-p4563C-genome specific (napus-oleracea) | 0.9904306    | 0.7745833    | 0.9922481 | 0.7293833 | not scorable | not scorable |
| #### Bn-scaff_23954_1-p4736genome unspecific (all in)         | 0.9856459    | 0.4830351    | 1         | 0.8565666 | 0.9917355    | 0.8457855    |
| #### Bn-scaff_23954_1-p4822C-genome unspecific (all in)       | 0.9832536    | 0.3641307    | 1         | 0.8095888 | 1            | 0.9095823    |
| #### Bn-scaff_23954_1-p4869C-genome specific (napus-oleracea) | 0.9665072    | 0.840425     | 1         | 0.7509512 | not scorable | not scorable |
| #### Bn-scaff_23954_1-p5810genome unspecific (all in)         | 0.9545454    | 0.3883432    | 0.9922481 | 0.5925183 | 1            | 0.8080764    |
| #### Bn-scaff_23954_1-p5835genome unspecific (all in)         | 0.9808612    | 0.3690819    | 1         | 0.8109406 | 1            | 0.9175813    |
| #### Bn-scaff_23954_1-p5849C-genome unspecific (all in)       | 0.9617225    | 0.4182239    | 0.9922481 | 0.7060126 | 1            | 0.7942148    |
| #### Bn-scaff_23954_1-p6226genome unspecific (all in)         | 0.9569378    | 0.3819035    | 1         | 0.7197406 | 0.9917355    | 0.7543824    |
| #### Bn-scaff_23954_1-p6297genome unspecific (all in)         | 0.9425837    | 0.6121441    | 1         | 0.7766843 | 0.8842975    | 0.7523732    |
| #### Bn-scaff_23954_1-p6351C-genome specific (napus-oleracea) | 0.9928229    | 0.7828155    | 1         | 0.8618621 | not scorable | not scorable |
| #### Bn-scaff_23954_1-p6611C-genome specific (napus-oleracea) | 0.9784689    | 0.7661703    | 1         | 0.7848015 | not scorable | not scorable |
| #### Bn-scaff_23954_1-p7243C-genome specific (napus-oleracea) | 0.9641148    | 0.6476824    | 1         | 0.6810508 | not scorable | not scorable |
| #### Bn-scaff_23954_1-p7686C-genome specific (napus-oleracea) | 0.9880383    | 0.7486662    | 1         | 0.6174313 | not scorable | not scorable |
| #### Bn-scaff_23954_1-p7699C-genome specific (napus-oleracea) | 0.9856459    | 0.8448569    | 0.9922481 | 0.8393649 | not scorable | not scorable |
| #### Bn-scaff_23954_1-p8175genome unspecific (all in)         | 0.9641148    | 0.5125688    | 1         | 0.7244409 | 0.9834711    | 0.7251401    |
| #### Bn-scaff_23954_1-p8653C-genome specific (napus-oleracea) | 0.9808612    | 0.7918221    | 1         | 0.7700784 | not scorable | not scorable |
| #### Bn-scaff_23954_1-p8660C-genome specific (napus-oleracea) | 0.9808612    | 0.747605     | 1         | 0.697508  | not scorable | not scorable |
| #### Bn-scaff_23954_1-p8700genome unspecific (oleracea-rapa)  | not scorable | not scorable | 0.9922481 | 0.3675994 | 1            | 0.5991307    |
| #### Bn-scaff_23954_1-p8720C-genome specific (napus-oleracea) | 0.9880383    | 0.7085398    | 1         | 0.6655096 | not scorable | not scorable |
| #### Bn-scaff_23954_1-p8727genome unspecific (all in)         | 1            | 0.3099481    | 1         | 0.7235513 | 0.9752066    | 0.6632774    |
| #### Bn-scaff_23954_1-p8806C-genome specific (oleracea only)  | not scorable | not scorable | 0.9767442 | 0.4936687 | not scorable | not scorable |
| #### Bn-scaff_23954_1-p8826C-genome specific (napus-oleracea) | 0.9880383    | 0.782888     | 1         | 0.7428254 | not scorable | not scorable |
| #### Bn-scaff_23954_1-p9718C-genome specific (napus-oleracea) | 0.9880383    | 0.7610357    | 1         | 0.7478331 | not scorable | not scorable |
| #### Bn-scaff_23954_1-p9768C-genome specific (napus-oleracea) | 0.9784689    | 0.7210422    | 1         | 0.7287328 | not scorable | not scorable |
| #### Bn-scaff_23954_1-p9770C-genome specific (napus-oleracea) | 0.9928229    | 0.7844408    | 0.9922481 | 0.5381019 | not scorable | not scorable |
| #### Bn-scaff_23957_1-p1229genome unspecific (oleracea-rapa)  | not scorable | not scorable | 0.9689922 | 0.2786383 | 1            | 0.6928324    |
| #### Bn-scaff_23957_1-p1231C-genome specific (napus-oleracea) | 0.9210526    | 0.8469076    | 0.9922481 | 0.8531873 | not scorable | not scorable |
| #### Bn-scaff_23957_1-p1232C-genome specific (napus-oleracea) | 0.8971292    | 0.8586644    | 0.9069768 | 0.7613613 | not scorable | not scorable |
| #### Bn-scaff_23957_1-p1233C-genome specific (napus-oleracea) | 0.9210526    | 0.875501     | 0.9922481 | 0.8098733 | not scorable | not scorable |
| #### Bn-scaff_23957_1-p1272C-genome specific (napus-oleracea) | 0.9928229    | 0.4363019    | 1         | 0.8767971 | not scorable | not scorable |

|                                                                |              |              |              |              |              |              |
|----------------------------------------------------------------|--------------|--------------|--------------|--------------|--------------|--------------|
| #### Bn-scaff_23957_1-p1502 genome unspecific (oleracea-rapa)  | not scorable | not scorable | 0.9922481    | 0.7509325    | 1            | 0.9378302    |
| #### Bn-scaff_23957_1-p1502 C-genome specific (oleracea only)  | not scorable | not scorable | 1            | 0.7028973    | not scorable | not scorable |
| #### Bn-scaff_23957_1-p1504 C-genome specific (oleracea only)  | not scorable | not scorable | 1            | 0.8524035    | not scorable | not scorable |
| #### Bn-scaff_23957_1-p1505 genome unspecific (oleracea-rapa)  | not scorable | not scorable | 1            | 0.2627893    | 1            | 0.7914145    |
| #### Bn-scaff_23957_1-p1510 genome unspecific (oleracea-rapa)  | not scorable | not scorable | 1            | 0.8282704    | 0.9917355    | 0.7943593    |
| #### Bn-scaff_23957_1-p1589 C-genome specific (napus-oleracea) | 0.9162679    | 0.3688069    | 0.9534883    | 0.2608648    | not scorable | not scorable |
| #### Bn-scaff_23957_1-p1636 genome unspecific (oleracea-rapa)  | not scorable | not scorable | 1            | 0.7112495    | 0.9917355    | 0.9038222    |
| #### Bn-scaff_23957_1-p1747 genome unspecific (all in)         | 0.9928229    | 0.4671258    | 0.9457364    | 0.2547634    | 0.9917355    | 0.8167554    |
| #### Bn-scaff_23957_1-p1750 genome unspecific (all in)         | 0.9904306    | 0.4140171    | 1            | 0.8539038    | 0.9752066    | 0.7500448    |
| #### Bn-scaff_23957_1-p1999 genome unspecific (all in)         | 1            | 0.6974347    | 1            | 0.8843405    | 1            | 0.9175193    |
| #### Bn-scaff_23957_1-p2428 C-genome specific (napus-oleracea) | 0.9019139    | 0.7996531    | 0.9767442    | 0.7704701    | not scorable | not scorable |
| #### Bn-scaff_23957_1-p2453 C-genome specific (napus-oleracea) | 0.6363636    | 0.87072      | 0.9302326    | 0.7595968    | not scorable | not scorable |
| #### Bn-scaff_23957_1-p2474 C-genome specific (napus-oleracea) | 0.9019139    | 0.7392698    | 1            | 0.7249347    | not scorable | not scorable |
| #### Bn-scaff_23957_1-p2475 C-genome specific (napus-oleracea) | 0.9162679    | 0.7524961    | 1            | 0.8015718    | not scorable | not scorable |
| #### Bn-scaff_23957_1-p2505 C-genome specific (napus-oleracea) | 0.9617225    | 0.5204526    | 0.9767442    | 0.6725875    | not scorable | not scorable |
| #### Bn-scaff_23957_1-p2524 genome unspecific (all in)         | 0.9784689    | 0.3575114    | 1            | 0.6835401    | 1            | 0.800575     |
| #### Bn-scaff_23957_1-p2532 C-genome specific (napus-oleracea) | 0.9210526    | 0.739027     | 0.9767442    | 0.8249918    | not scorable | not scorable |
| #### Bn-scaff_23957_1-p2572 C-genome specific (napus-oleracea) | 0.9090909    | 0.7278702    | 1            | 0.8368063    | not scorable | not scorable |
| #### Bn-scaff_23957_1-p2578 C-genome specific (napus-oleracea) | 0.9210526    | 0.7691627    | 1            | 0.7343956    | not scorable | not scorable |
| #### Bn-scaff_23957_1-p2580 C-genome specific (napus-oleracea) | 0.9210526    | 0.7832189    | 1            | 0.7630578    | not scorable | not scorable |
| #### Bn-scaff_23957_1-p2582 C-genome specific (napus-oleracea) | 0.9162679    | 0.7662218    | 1            | 0.7239187    | not scorable | not scorable |
| #### Bn-scaff_23957_1-p2602 genome unspecific (oleracea-rapa)  | not scorable | not scorable | 1            | 0.7252203    | 1            | 0.9076172    |
| #### Bn-scaff_23957_1-p2693 C-genome specific (napus-oleracea) | 0.9330143    | 0.2914469    | 0.9612403    | 0.3475197    | not scorable | not scorable |
| #### Bn-scaff_23957_1-p2705 napus specific                     | 0.8995215    | 0.7556931    | not scorable | not scorable | not scorable | not scorable |
| #### Bn-scaff_23957_1-p2707 C-genome specific (napus-oleracea) | 0.9090909    | 0.803414     | 1            | 0.8752       | not scorable | not scorable |
| #### Bn-scaff_23957_1-p2715 C-genome specific (napus-oleracea) | 0.9186603    | 0.8103048    | 1            | 0.609043     | not scorable | not scorable |
| #### Bn-scaff_23957_1-p2719 C-genome specific (napus-oleracea) | 0.9090909    | 0.7365677    | 0.9844961    | 0.7488747    | not scorable | not scorable |
| #### Bn-scaff_23957_1-p2725 C-genome specific (napus-oleracea) | 0.9090909    | 0.7204323    | 1            | 0.7744074    | not scorable | not scorable |
| #### Bn-scaff_23957_1-p2722 C-genome specific (napus-oleracea) | 0.9162679    | 0.7706623    | 1            | 0.5519995    | not scorable | not scorable |
| #### Bn-scaff_23957_1-p2729 C-genome specific (napus-oleracea) | 0.9162679    | 0.7596968    | 0.9767442    | 0.6767587    | not scorable | not scorable |
| #### Bn-scaff_23957_1-p2732 C-genome specific (napus-oleracea) | 0.9043062    | 0.7533283    | 1            | 0.8712783    | not scorable | not scorable |
| #### Bn-scaff_23957_1-p2735 C-genome specific (napus-oleracea) | 0.9210526    | 0.716054     | 1            | 0.73975      | not scorable | not scorable |
| #### Bn-scaff_23957_1-p2735 C-genome specific (napus-oleracea) | 0.9210526    | 0.7342498    | 1            | 0.827442     | not scorable | not scorable |

|                                                                 |              |              |              |              |              |              |              |
|-----------------------------------------------------------------|--------------|--------------|--------------|--------------|--------------|--------------|--------------|
| #### Bn-scaff_23957_1-p27377 C-genome specific (napus-oleracea) | 0.9162679    | 0.7352995    |              | 1            | 0.8902897    | not scorable | not scorable |
| #### Bn-scaff_23957_1-p27689 C-genome specific (napus-oleracea) | 0.9066986    | 0.7394318    |              | 1            | 0.6206611    | not scorable | not scorable |
| #### Bn-scaff_23957_1-p28073 genome unspecific (all in)         | 0.9904306    | 0.3098131    | 0.9922481    |              | 0.8325331    | 1            | 0.9000745    |
| #### Bn-scaff_23957_1-p32250 C-genome specific (napus-oleracea) | 0.8971292    | 0.8562968    | 0.9922481    |              | 0.7217669    | not scorable | not scorable |
| #### Bn-scaff_23957_1-p34698 C-genome specific (napus-oleracea) | 0.9138756    | 0.7289984    | 0.9844961    |              | 0.7038211    | not scorable | not scorable |
| #### Bn-scaff_23957_1-p34704 genome unspecific (all in)         | 0.9688995    | 0.5628076    | 0.9844961    |              | 0.7965085    | 0.9917355    | 0.9467975    |
| #### Bn-scaff_23957_1-p36139 C-genome specific (napus-oleracea) | 0.9019139    | 0.7288533    | 0.9689922    |              | 0.7607597    | not scorable | not scorable |
| #### Bn-scaff_23957_1-p36160 genome unspecific (all in)         | 0.9976076    | 0.4046171    |              | 1            | 0.8465361    | 0.9834711    | 0.8114575    |
| #### Bn-scaff_23957_1-p36390 C-genome specific (napus-oleracea) | 0.9114832    | 0.7293456    | 0.9922481    |              | 0.8059117    | not scorable | not scorable |
| #### Bn-scaff_23957_1-p36942 C-genome specific (oleracea only)  | not scorable | not scorable | 0.9844961    |              | 0.7171885    | not scorable | not scorable |
| #### Bn-scaff_23957_1-p37081 genome unspecific (all in)         | 0.9784689    | 0.5098637    |              | 1            | 0.7259634    | 0.9834711    | 0.8101968    |
| #### Bn-scaff_23957_1-p37633 genome unspecific (all in)         | 0.9832536    | 0.5180302    |              | 1            | 0.8141106    | 1            | 0.7765256    |
| #### Bn-scaff_23957_1-p39186 genome unspecific (all in)         | 0.8923445    | 0.5307022    | 0.9844961    |              | 0.72034      | 0.9917355    | 0.8850964    |
| #### Bn-scaff_23957_1-p39352 C-genome specific (napus-oleracea) | 0.9210526    | 0.8924836    |              | 1            | 0.8000022    | not scorable | not scorable |
| #### Bn-scaff_23957_1-p40356 genome unspecific (all in)         | 0.8947368    | 0.6053588    | 0.9922481    |              | 0.6713123    | 0.9669421    | 0.7569416    |
| #### Bn-scaff_23957_1-p41707 C-genome specific (napus-oleracea) | 0.9952153    | 0.7745857    | 0.9922481    |              | 0.8393649    | not scorable | not scorable |
| #### Bn-scaff_23957_1-p41910 genome unspecific (all in)         | 0.9569378    | 0.3326873    | 0.9844961    |              | 0.6857891    | 0.9917355    | 0.8207097    |
| #### Bn-scaff_23957_1-p43281 C-genome specific (napus-oleracea) | 0.9186603    | 0.8031724    |              | 1            | 0.7541744    | not scorable | not scorable |
| #### Bn-scaff_23957_1-p44390 C-genome specific (oleracea only)  | not scorable | not scorable |              | 1            | 0.7256382    | not scorable | not scorable |
| #### Bn-scaff_23957_1-p44854 C-genome specific (napus-oleracea) | 0.9066986    | 0.8290235    | 0.7286822    |              | 0.7267405    | not scorable | not scorable |
| #### Bn-scaff_23957_1-p46490 genome unspecific (all in)         | 0.9545454    | 0.4064703    |              | 1            | 0.7834839    | 0.9752066    | 0.7269976    |
| #### Bn-scaff_23957_1-p48064 C-genome specific (napus-oleracea) | 0.8875598    | 0.7314817    | 0.9224806    |              | 0.8512825    | not scorable | not scorable |
| #### Bn-scaff_23957_1-p48499 genome unspecific (all in)         | 0.9641148    | 0.332016     | 0.7209302    |              | 0.7479524    | 1            | 0.7284179    |
| #### Bn-scaff_23957_1-p48499 genome unspecific (all in)         | 0.9760765    | 0.6462406    | 0.9844961    |              | 0.73276      | 1            | 0.7744777    |
| #### Bn-scaff_23957_1-p48885 C-genome specific (napus-oleracea) | 0.9210526    | 0.791482     | 0.9844961    |              | 0.8062928    | not scorable | not scorable |
| #### Bn-scaff_23957_1-p59400 napus specific                     | 0.8995215    | 0.6951214    | not scorable | not scorable | not scorable | not scorable | not scorable |
| #### Bn-scaff_23957_1-p61484 napus specific                     | 0.9210526    | 0.6326985    | not scorable | not scorable | not scorable | not scorable | not scorable |
| #### Bn-scaff_23957_1-p61655 napus specific                     | 0.9760765    | 0.8451257    | not scorable | not scorable | not scorable | not scorable | not scorable |
| #### Bn-scaff_23957_1-p63395 C-genome specific (napus-oleracea) | 1            | 0.6017081    |              | 1            | 0.6087196    | not scorable | not scorable |
| #### Bn-scaff_23957_1-p63514 genome unspecific (all in)         | 1            | 0.6247367    |              | 1            | 0.6285366    | 0.9917355    | 0.576247     |
| #### Bn-scaff_23957_1-p65826 C-genome specific (napus-oleracea) | 0.923445     | 0.791331     |              | 1            | 0.7637444    | not scorable | not scorable |
| #### Bn-scaff_23957_1-p66585 genome unspecific (all in)         | 0.8325359    | 0.698232     | 0.9922481    |              | 0.7943432    | 1            | 0.9375399    |
| #### Bn-scaff_23957_1-p67655 genome unspecific (all in)         | 0.8421053    | 0.6166033    |              | 1            | 0.8290054    | 1            | 0.9205071    |



|                                                                 |              |              |           |           |              |              |
|-----------------------------------------------------------------|--------------|--------------|-----------|-----------|--------------|--------------|
| #### Bn-scaff_23957_1-p68884 C-genome specific (napus-oleracea) | 0.9258373    | 0.8774691    | 0.9767442 | 0.8056126 | not scorable | not scorable |
| #### Bn-scaff_23957_1-p68999 C-genome specific (napus-oleracea) | 0.9210526    | 0.9217889    | 0.9224806 | 0.7623497 | not scorable | not scorable |
| #### Bn-scaff_23957_1-p69350 C-genome specific (napus-oleracea) | 1            | 0.8676957    | 0.9922481 | 0.746362  | not scorable | not scorable |
| #### Bn-scaff_23957_1-p70401 C-genome specific (napus-oleracea) | 0.7320574    | 0.7804692    | 0.9844961 | 0.7205639 | not scorable | not scorable |
| #### Bn-scaff_23957_1-p91333 genome unspecific (all in)         | 0.9880383    | 0.3184775    | 1         | 0.8682365 | 1            | 0.7885624    |
| #### Bn-scaff_23974_1-p11517 C-genome specific (napus-oleracea) | 0.9186603    | 0.7569147    | 0.9844961 | 0.7455501 | not scorable | not scorable |
| #### Bn-scaff_23974_1-p14812 genome unspecific (all in)         | 0.9784689    | 0.4338709    | 1         | 0.6745521 | 1            | 0.786476     |
| #### Bn-scaff_23974_1-p60219 genome unspecific (all in)         | 0.9186603    | 0.6230687    | 0.9922481 | 0.7169268 | 1            | 0.9243488    |
| #### Bn-scaff_23974_1-p86500 C-genome specific (napus-oleracea) | 0.9090909    | 0.7048604    | 0.9767442 | 0.6841894 | not scorable | not scorable |
| #### Bn-scaff_23979_1-p2150 C-genome specific (napus-oleracea)  | 1            | 0.7185931    | 1         | 0.6136424 | not scorable | not scorable |
| #### Bn-scaff_23979_1-p2708 genome unspecific (all in)          | 1            | 0.5834867    | 1         | 0.5443506 | 1            | 0.8360683    |
| #### Bn-scaff_23983_1-p11909 genome unspecific (all in)         | 1            | 0.5184853    | 0.9922481 | 0.4922473 | 1            | 0.5634651    |
| #### Bn-scaff_23993_1-p10194 genome unspecific (all in)         | 0.9952153    | 0.4346533    | 1         | 0.7500974 | 0.9669421    | 0.8181465    |
| #### Bn-scaff_23993_1-p82034 genome unspecific (all in)         | 0.9976076    | 0.4414189    | 1         | 0.8532587 | 0.768595     | 0.8942581    |
| #### Bn-scaff_24023_1-p13896 genome unspecific (oleracea-rapa)  | not scorable | not scorable | 0.9457364 | 0.477497  | 1            | 0.9256204    |
| #### Bn-scaff_24047_1-p23400 genome unspecific (all in)         | 0.9952153    | 0.2733767    | 1         | 0.7206273 | 0.9917355    | 0.524269     |
| #### Bn-scaff_24057_1-p246 C-genome specific (napus-oleracea)   | 0.9952153    | 0.8337049    | 1         | 0.4291248 | not scorable | not scorable |
| #### Bn-scaff_24104_1-p11131 C-genome specific (napus-oleracea) | 0.8995215    | 0.7613463    | 0.9844961 | 0.7069218 | not scorable | not scorable |
| #### Bn-scaff_24104_1-p11536 genome unspecific (all in)         | 0.9952153    | 0.4141687    | 1         | 0.6348627 | 0.9752066    | 0.7058837    |
| #### Bn-scaff_24104_1-p11698 genome unspecific (oleracea-rapa)  | not scorable | not scorable | 1         | 0.7433904 | 1            | 0.9398974    |
| #### Bn-scaff_24104_1-p13971 C-genome specific (napus-oleracea) | 0.8971292    | 0.7839311    | 1         | 0.7537764 | not scorable | not scorable |
| #### Bn-scaff_24104_1-p14882 C-genome specific (napus-oleracea) | 0.8875598    | 0.7679523    | 0.9767442 | 0.8284324 | not scorable | not scorable |
| #### Bn-scaff_24104_1-p15141 C-genome specific (napus-oleracea) | 0.8827751    | 0.6331018    | 0.9844961 | 0.7300021 | not scorable | not scorable |
| #### Bn-scaff_24104_1-p15340 C-genome specific (napus-oleracea) | 0.8971292    | 0.7492114    | 1         | 0.8417687 | not scorable | not scorable |
| #### Bn-scaff_24104_1-p16338 genome unspecific (all in)         | 1            | 0.793537     | 1         | 0.6952478 | 0.8099173    | 0.8135551    |
| #### Bn-scaff_24104_1-p16442 C-genome specific (napus-oleracea) | 0.8875598    | 0.7664461    | 1         | 0.8250334 | not scorable | not scorable |
| #### Bn-scaff_24104_1-p16758 genome unspecific (all in)         | 0.8947368    | 0.6603338    | 0.9922481 | 0.6990625 | 0.9917355    | 0.7228579    |
| #### Bn-scaff_24104_1-p17016 C-genome specific (napus-oleracea) | 0.9019139    | 0.7725677    | 1         | 0.7414865 | not scorable | not scorable |
| #### Bn-scaff_24104_1-p17369 C-genome specific (napus-oleracea) | 0.9043062    | 0.7742699    | 0.9922481 | 0.6954554 | not scorable | not scorable |
| #### Bn-scaff_24104_1-p19325 genome unspecific (oleracea-rapa)  | not scorable | not scorable | 1         | 0.545907  | 1            | 0.5121738    |
| #### Bn-scaff_24104_1-p20590 genome unspecific (all in)         | 0.9976076    | 0.5358981    | 1         | 0.4812699 | 1            | 0.7091796    |
| #### Bn-scaff_24104_1-p34407 genome unspecific (all in)         | 0.9665072    | 0.2536451    | 1         | 0.8089242 | 1            | 0.8413081    |
| #### Bn-scaff_24104_1-p34509 C-genome specific (napus-oleracea) | 0.9162679    | 0.5650808    | 0.9922481 | 0.8570259 | not scorable | not scorable |

|                                                                 |              |              |              |              |              |              |
|-----------------------------------------------------------------|--------------|--------------|--------------|--------------|--------------|--------------|
| #### Bn-scaff_24104_1-p35933 C-genome specific (napus-oleracea) | 0.9856459    | 0.3655418    | 1            | 0.8753954    | not scorable | not scorable |
| #### Bn-scaff_24104_1-p38670 genome unspecific (all in)         | 0.9593301    | 0.5219848    | 1            | 0.7283011    | 1            | 0.7396039    |
| #### Bn-scaff_24104_1-p54271 C-genome specific (napus-oleracea) | 0.8899522    | 0.7509465    | 0.9922481    | 0.8081701    | not scorable | not scorable |
| #### Bn-scaff_24104_1-p54586 C-genome specific (napus-oleracea) | 0.8803828    | 0.7173064    | 0.9534883    | 0.7531357    | not scorable | not scorable |
| #### Bn-scaff_24104_1-p62732 C-genome specific (napus-oleracea) | 0.5287082    | 0.7209846    | 0.9612403    | 0.8016237    | not scorable | not scorable |
| #### Bn-scaff_24104_1-p65405 C-genome specific (napus-oleracea) | 0.8971292    | 0.7579777    | 0.9844961    | 0.8214672    | not scorable | not scorable |
| #### Bn-scaff_24108_1-p12831 C-genome specific (napus-oleracea) | 0.8516746    | 0.8429307    | 0.8837209    | 0.7199014    | not scorable | not scorable |
| #### Bn-scaff_24108_1-p2548 C-genome specific (napus-oleracea)  | 0.9665072    | 0.7714831    | 1            | 0.7645593    | not scorable | not scorable |
| #### Bn-scaff_24108_1-p28119 C-genome specific (napus-oleracea) | 0.9641148    | 0.7711619    | 0.9922481    | 0.7435601    | not scorable | not scorable |
| #### Bn-scaff_24108_1-p28923 genome unspecific (all in)         | 0.8708134    | 0.7085912    | 1            | 0.8136466    | 1            | 0.7368388    |
| #### Bn-scaff_24108_1-p30403 C-genome specific (napus-oleracea) | 0.9688995    | 0.7727509    | 0.9534883    | 0.756235     | not scorable | not scorable |
| #### Bn-scaff_24108_1-p30418 C-genome specific (napus-oleracea) | 0.9665072    | 0.7974002    | 0.9767442    | 0.7350297    | not scorable | not scorable |
| #### Bn-scaff_24108_1-p30566 C-genome specific (napus-oleracea) | 0.9928229    | 0.6754138    | 0.9844961    | 0.6819017    | not scorable | not scorable |
| #### Bn-scaff_24108_1-p31457 C-genome specific (napus-oleracea) | 0.9904306    | 0.669838     | 0.9379845    | 0.6978939    | not scorable | not scorable |
| #### Bn-scaff_24108_1-p31466 C-genome specific (napus-oleracea) | 0.9904306    | 0.7611486    | 0.9457364    | 0.7124589    | not scorable | not scorable |
| #### Bn-scaff_24108_1-p39499 C-genome specific (napus-oleracea) | 0.9545454    | 0.7455035    | 1            | 0.6823518    | not scorable | not scorable |
| #### Bn-scaff_24108_1-p3989 C-genome specific (napus-oleracea)  | 0.9904306    | 0.7632781    | 1            | 0.7497697    | not scorable | not scorable |
| #### Bn-scaff_24108_1-p41173 genome unspecific (all in)         | 0.9880383    | 0.3564396    | 1            | 0.7409031    | 1            | 0.8939509    |
| #### Bn-scaff_24108_1-p45684 C-genome specific (napus-oleracea) | 0.9856459    | 0.7190374    | 0.6511628    | 0.7687593    | not scorable | not scorable |
| #### Bn-scaff_24108_1-p5452 C-genome specific (napus-oleracea)  | 0.9736842    | 0.7548046    | 1            | 0.7407987    | not scorable | not scorable |
| #### Bn-scaff_24117_1-p20746 genome unspecific (oleracea-rapa)  | not scorable | not scorable | 0.9844961    | 0.8764334    | 0.9917355    | 0.8396464    |
| #### Bn-scaff_24119_1-p1067 A-genome specific (napus-rapa)      | 0.9784689    | 0.445277     | not scorable | not scorable | 0.9917355    | 0.922601     |
| #### Bn-scaff_24119_1-p1380 C-genome specific (napus-oleracea)  | 0.9856459    | 0.7762901    | 0.9844961    | 0.8883904    | not scorable | not scorable |
| #### Bn-scaff_24123_1-p10396 C-genome specific (napus-oleracea) | 0.9928229    | 0.664791     | 1            | 0.6613558    | not scorable | not scorable |
| #### Bn-scaff_24123_1-p10997 C-genome specific (napus-oleracea) | 0.9976076    | 0.7913992    | 1            | 0.7007428    | not scorable | not scorable |
| #### Bn-scaff_24123_1-p33618 C-genome specific (napus-oleracea) | 0.9928229    | 0.7902603    | 0.8372093    | 0.8079874    | not scorable | not scorable |
| #### Bn-scaff_24123_1-p35437 genome unspecific (all in)         | 0.9736842    | 0.6134126    | 0.9922481    | 0.7608736    | 1            | 0.8956574    |
| #### Bn-scaff_24123_1-p6389 C-genome specific (napus-oleracea)  | 0.9928229    | 0.8137426    | 1            | 0.8122421    | not scorable | not scorable |
| #### Bn-scaff_24123_1-p6488 C-genome specific (napus-oleracea)  | 0.9904306    | 0.7975124    | 1            | 0.7353541    | not scorable | not scorable |
| #### Bn-scaff_24123_1-p6612 C-genome specific (napus-oleracea)  | 0.930622     | 0.7639706    | 1            | 0.7762735    | not scorable | not scorable |
| #### Bn-scaff_24123_1-p6990 C-genome specific (napus-oleracea)  | 0.9856459    | 0.5699427    | 1            | 0.551091     | not scorable | not scorable |
| #### Bn-scaff_24123_1-p7231 C-genome specific (napus-oleracea)  | 0.9928229    | 0.7222603    | 1            | 0.6468108    | not scorable | not scorable |
| #### Bn-scaff_24123_1-p9014 C-genome specific (napus-oleracea)  | 0.9952153    | 0.7896758    | 1            | 0.7562367    | not scorable | not scorable |

|                                                                 |              |              |              |              |              |              |
|-----------------------------------------------------------------|--------------|--------------|--------------|--------------|--------------|--------------|
| #### Bn-scaff_24126_1-p13903 C-genome specific (napus-oleracea) | 0.9976076    | 0.7744247    | 1            | 0.7178392    | not scorable | not scorable |
| #### Bn-scaff_24126_1-p34380 genome unspecific (all in)         | 1            | 0.6770065    | 1            | 0.8207097    | 1            | 0.8135551    |
| #### Bn-scaff_24126_1-p89534 C-genome specific (napus-oleracea) | 0.9952153    | 0.4284728    | 0.6434109    | 0.7583615    | not scorable | not scorable |
| #### Bn-scaff_24134_1-p25752 genome unspecific (all in)         | 0.9760765    | 0.4956636    | 1            | 0.8665914    | 1            | 0.9129421    |
| #### Bn-scaff_24145_1-p18507 C-genome specific (napus-oleracea) | 0.9832536    | 0.5940855    | 1            | 0.746848     | not scorable | not scorable |
| #### Bn-scaff_24145_1-p68501 A-genome specific (rapa only)      | not scorable | not scorable | not scorable | not scorable | 0.9834711    | 0.8880957    |
| #### Bn-scaff_24145_1-p92238 C-genome specific (oleracea only)  | not scorable | not scorable | 0.9922481    | 0.4510008    | not scorable | not scorable |
| #### Bn-scaff_24158_1-p427 C-genome specific (napus-oleracea)   | 1            | 0.8116782    | 0.9922481    | 0.7559727    | not scorable | not scorable |
| #### Bn-scaff_24208_1-p74641 genome unspecific (all in)         | 1            | 0.444842     | 1            | 0.7320737    | 1            | 0.8381442    |
| #### Bn-scaff_24236_1-p10737 C-genome specific (napus-oleracea) | 0.9569378    | 0.7916006    | 0.7209302    | 0.8266763    | not scorable | not scorable |
| #### Bn-scaff_24236_1-p11412 C-genome specific (napus-oleracea) | 0.9712918    | 0.7427819    | 1            | 0.7664469    | not scorable | not scorable |
| #### Bn-scaff_24236_1-p19978 C-genome specific (napus-oleracea) | 0.9856459    | 0.7930752    | 0.9922481    | 0.859132     | not scorable | not scorable |
| #### Bn-scaff_24236_1-p20082 C-genome specific (napus-oleracea) | 0.9856459    | 0.784174     | 0.9922481    | 0.8295543    | not scorable | not scorable |
| #### Bn-scaff_24236_1-p23566 C-genome specific (napus-oleracea) | 0.9832536    | 0.762728     | 0.9922481    | 0.7722165    | not scorable | not scorable |
| #### Bn-scaff_24236_1-p23758 C-genome specific (napus-oleracea) | 0.9617225    | 0.6988929    | 1            | 0.7785337    | not scorable | not scorable |
| #### Bn-scaff_24236_1-p24239 C-genome specific (napus-oleracea) | 0.9425837    | 0.6415302    | 0.9844961    | 0.6379281    | not scorable | not scorable |
| #### Bn-scaff_24236_1-p24361 C-genome specific (napus-oleracea) | 0.9712918    | 0.7369519    | 1            | 0.8436345    | not scorable | not scorable |
| #### Bn-scaff_24236_1-p24507 genome unspecific (all in)         | 0.9904306    | 0.6197118    | 1            | 0.8435614    | 1            | 0.9384485    |
| #### Bn-scaff_24236_1-p24570 C-genome specific (napus-oleracea) | 0.9832536    | 0.7272218    | 1            | 0.7175221    | not scorable | not scorable |
| #### Bn-scaff_24236_1-p25853 genome unspecific (all in)         | 0.9665072    | 0.5304924    | 1            | 0.5629973    | 1            | 0.8974569    |
| #### Bn-scaff_24236_1-p26110 C-genome specific (napus-oleracea) | 0.9712918    | 0.7730256    | 1            | 0.8160873    | not scorable | not scorable |
| #### Bn-scaff_24236_1-p26574 C-genome specific (napus-oleracea) | 0.9904306    | 0.6894885    | 1            | 0.6850103    | not scorable | not scorable |
| #### Bn-scaff_24236_1-p27635 C-genome specific (napus-oleracea) | 0.9736842    | 0.671567     | 0.9844961    | 0.7010086    | not scorable | not scorable |
| #### Bn-scaff_24236_1-p27764 C-genome specific (napus-oleracea) | 0.9784689    | 0.7363067    | 1            | 0.7442594    | not scorable | not scorable |
| #### Bn-scaff_24236_1-p27775 C-genome specific (napus-oleracea) | 0.9880383    | 0.7462851    | 0.9922481    | 0.7510175    | not scorable | not scorable |
| #### Bn-scaff_24236_1-p28279 C-genome specific (napus-oleracea) | 0.9760765    | 0.6528467    | 1            | 0.6198558    | not scorable | not scorable |
| #### Bn-scaff_24236_1-p28299 C-genome specific (napus-oleracea) | 0.9808612    | 0.7695048    | 1            | 0.7608516    | not scorable | not scorable |
| #### Bn-scaff_24236_1-p28704 C-genome specific (napus-oleracea) | 0.9736842    | 0.7638677    | 1            | 0.7389745    | not scorable | not scorable |
| #### Bn-scaff_24236_1-p28918 C-genome specific (napus-oleracea) | 0.9712918    | 0.7837925    | 1            | 0.7126895    | not scorable | not scorable |
| #### Bn-scaff_24236_1-p29389 napus specific                     | 0.854067     | 0.8332821    | not scorable | not scorable | not scorable | not scorable |
| #### Bn-scaff_24236_1-p29394 C-genome specific (napus-oleracea) | 0.9856459    | 0.7736661    | 0.9767442    | 0.830528     | not scorable | not scorable |
| #### Bn-scaff_24236_1-p29763 C-genome specific (napus-oleracea) | 0.9904306    | 0.6843129    | 1            | 0.6693233    | not scorable | not scorable |
| #### Bn-scaff_24236_1-p30681 C-genome specific (napus-oleracea) | 0.9736842    | 0.7750825    | 0.9844961    | 0.764156     | not scorable | not scorable |

|                                                                 |              |              |           |           |              |              |
|-----------------------------------------------------------------|--------------|--------------|-----------|-----------|--------------|--------------|
| #### Bn-scaff_24236_1-p30792 C-genome specific (napus-oleracea) | 0.9784689    | 0.7981892    | 1         | 0.7798804 | not scorable | not scorable |
| #### Bn-scaff_24236_1-p31679 C-genome specific (napus-oleracea) | 0.9832536    | 0.7572004    | 1         | 0.8179182 | not scorable | not scorable |
| #### Bn-scaff_24236_1-p33652 C-genome specific (napus-oleracea) | 0.9832536    | 0.6744642    | 1         | 0.6534799 | not scorable | not scorable |
| #### Bn-scaff_24236_1-p33711 C-genome specific (napus-oleracea) | 0.9665072    | 0.7055709    | 0.9922481 | 0.7359238 | not scorable | not scorable |
| #### Bn-scaff_24236_1-p33717 C-genome specific (napus-oleracea) | 0.9712918    | 0.6863397    | 0.9922481 | 0.6388113 | not scorable | not scorable |
| #### Bn-scaff_24236_1-p34376 C-genome specific (napus-oleracea) | 0.9832536    | 0.7951455    | 1         | 0.7654243 | not scorable | not scorable |
| #### Bn-scaff_24236_1-p34393 C-genome specific (napus-oleracea) | 0.9856459    | 0.761063     | 1         | 0.812772  | not scorable | not scorable |
| #### Bn-scaff_24236_1-p34691 C-genome specific (napus-oleracea) | 0.9688995    | 0.8042824    | 1         | 0.7553241 | not scorable | not scorable |
| #### Bn-scaff_24236_1-p34812 genome unspecific (all in)         | 0.9617225    | 0.5344749    | 1         | 0.8028005 | 1            | 0.9176662    |
| #### Bn-scaff_24236_1-p35090 C-genome specific (napus-oleracea) | 0.9760765    | 0.7495431    | 1         | 0.8123071 | not scorable | not scorable |
| #### Bn-scaff_24236_1-p35843 C-genome specific (napus-oleracea) | 0.9880383    | 0.7560894    | 0.9922481 | 0.7009212 | not scorable | not scorable |
| #### Bn-scaff_24236_1-p36669 C-genome specific (napus-oleracea) | 0.9760765    | 0.7629724    | 0.9922481 | 0.6937427 | not scorable | not scorable |
| #### Bn-scaff_24236_1-p37007 C-genome specific (napus-oleracea) | 0.9832536    | 0.7990528    | 1         | 0.7067634 | not scorable | not scorable |
| #### Bn-scaff_24236_1-p37208 C-genome specific (oleracea only)  | not scorable | not scorable | 0.9922481 | 0.6619011 | not scorable | not scorable |
| #### Bn-scaff_24236_1-p37230 C-genome specific (napus-oleracea) | 0.9808612    | 0.7729601    | 1         | 0.7987571 | not scorable | not scorable |
| #### Bn-scaff_24236_1-p37282 genome unspecific (all in)         | 0.9712918    | 0.6930368    | 1         | 0.7353998 | 1            | 0.6592606    |
| #### Bn-scaff_24236_1-p37429 C-genome specific (napus-oleracea) | 0.9880383    | 0.7575673    | 1         | 0.8587203 | not scorable | not scorable |
| #### Bn-scaff_24236_1-p37464 genome unspecific (all in)         | 0.9665072    | 0.5976802    | 0.9844961 | 0.5766352 | 1            | 0.9105293    |
| #### Bn-scaff_24236_1-p37515 genome unspecific (all in)         | 0.9569378    | 0.5922718    | 0.9844961 | 0.5690165 | 0.9586777    | 0.5324218    |
| #### Bn-scaff_24236_1-p39188 C-genome specific (napus-oleracea) | 0.9856459    | 0.7688696    | 1         | 0.8376045 | not scorable | not scorable |
| #### Bn-scaff_24236_1-p39205 C-genome specific (napus-oleracea) | 0.9832536    | 0.7247799    | 1         | 0.7883726 | not scorable | not scorable |
| #### Bn-scaff_24236_1-p39335 C-genome specific (napus-oleracea) | 0.9856459    | 0.7584106    | 1         | 0.8740647 | not scorable | not scorable |
| #### Bn-scaff_24236_1-p39983 C-genome specific (napus-oleracea) | 0.9880383    | 0.7671781    | 1         | 0.8158038 | not scorable | not scorable |
| #### Bn-scaff_24236_1-p41000 C-genome specific (napus-oleracea) | 0.9641148    | 0.735738     | 0.9844961 | 0.6268942 | not scorable | not scorable |
| #### Bn-scaff_24236_1-p42009 C-genome specific (napus-oleracea) | 0.9808612    | 0.7475345    | 1         | 0.839276  | not scorable | not scorable |
| #### Bn-scaff_24236_1-p42364 C-genome specific (napus-oleracea) | 0.9784689    | 0.7629164    | 0.9922481 | 0.7425438 | not scorable | not scorable |
| #### Bn-scaff_24236_1-p42377 C-genome specific (napus-oleracea) | 0.9832536    | 0.7568743    | 1         | 0.7199653 | not scorable | not scorable |
| #### Bn-scaff_24236_1-p42395 C-genome specific (napus-oleracea) | 0.9760765    | 0.7707788    | 1         | 0.7342868 | not scorable | not scorable |
| #### Bn-scaff_24236_1-p42399 C-genome specific (napus-oleracea) | 0.9569378    | 0.8079035    | 0.9457364 | 0.639044  | not scorable | not scorable |
| #### Bn-scaff_24236_1-p42570 C-genome specific (napus-oleracea) | 0.9736842    | 0.739271     | 1         | 0.7770256 | not scorable | not scorable |
| #### Bn-scaff_24236_1-p42603 C-genome specific (napus-oleracea) | 0.9856459    | 0.7678188    | 1         | 0.7365617 | not scorable | not scorable |
| #### Bn-scaff_24236_1-p43071 C-genome specific (napus-oleracea) | 0.9736842    | 0.7994147    | 1         | 0.8033776 | not scorable | not scorable |
| #### Bn-scaff_24236_1-p43082 C-genome specific (napus-oleracea) | 0.9808612    | 0.7689053    | 0.9922481 | 0.7861145 | not scorable | not scorable |

|                                                                 |              |              |           |           |              |              |
|-----------------------------------------------------------------|--------------|--------------|-----------|-----------|--------------|--------------|
| #### Bn-scaff_24236_1-p43167 C-genome specific (napus-oleracea) | 0.9569378    | 0.7650303    | 1         | 0.8195826 | not scorable | not scorable |
| #### Bn-scaff_24236_1-p43204 C-genome specific (napus-oleracea) | 0.9808612    | 0.8042272    | 1         | 0.8314038 | not scorable | not scorable |
| #### Bn-scaff_24236_1-p44692 C-genome specific (napus-oleracea) | 0.9665072    | 0.7698156    | 1         | 0.7574161 | not scorable | not scorable |
| #### Bn-scaff_24236_1-p44700 C-genome specific (napus-oleracea) | 0.9904306    | 0.7871153    | 1         | 0.840355  | not scorable | not scorable |
| #### Bn-scaff_24236_1-p44714 C-genome specific (napus-oleracea) | 0.9712918    | 0.7869983    | 1         | 0.8845457 | not scorable | not scorable |
| #### Bn-scaff_24236_1-p44828 C-genome specific (napus-oleracea) | 0.9712918    | 0.7490067    | 1         | 0.6357675 | not scorable | not scorable |
| #### Bn-scaff_24236_1-p44878 C-genome specific (napus-oleracea) | 0.9712918    | 0.7726792    | 1         | 0.8748878 | not scorable | not scorable |
| #### Bn-scaff_24236_1-p44894 C-genome specific (napus-oleracea) | 0.9712918    | 0.6161465    | 1         | 0.5453809 | not scorable | not scorable |
| #### Bn-scaff_24236_1-p44946 C-genome specific (napus-oleracea) | 0.9641148    | 0.7041825    | 1         | 0.6146809 | not scorable | not scorable |
| #### Bn-scaff_24236_1-p44947 C-genome specific (napus-oleracea) | 0.9856459    | 0.7681009    | 1         | 0.7953969 | not scorable | not scorable |
| #### Bn-scaff_24236_1-p45233 C-genome specific (napus-oleracea) | 0.9808612    | 0.7843897    | 1         | 0.7803137 | not scorable | not scorable |
| #### Bn-scaff_24236_1-p45283 C-genome specific (napus-oleracea) | 0.9784689    | 0.6923039    | 0.9844961 | 0.6876985 | not scorable | not scorable |
| #### Bn-scaff_24236_1-p45297 C-genome specific (napus-oleracea) | 0.9665072    | 0.6469875    | 1         | 0.6165801 | not scorable | not scorable |
| #### Bn-scaff_24236_1-p45355 C-genome specific (napus-oleracea) | 0.9832536    | 0.7905568    | 1         | 0.8586462 | not scorable | not scorable |
| #### Bn-scaff_24236_1-p45468 C-genome specific (napus-oleracea) | 0.9736842    | 0.7187365    | 1         | 0.8303822 | not scorable | not scorable |
| #### Bn-scaff_24236_1-p45508 C-genome specific (napus-oleracea) | 0.9665072    | 0.6872124    | 1         | 0.6575265 | not scorable | not scorable |
| #### Bn-scaff_24236_1-p45518 C-genome specific (napus-oleracea) | 0.9712918    | 0.7758607    | 1         | 0.84304   | not scorable | not scorable |
| #### Bn-scaff_24236_1-p45538 C-genome specific (napus-oleracea) | 0.9856459    | 0.7894884    | 1         | 0.8458647 | not scorable | not scorable |
| #### Bn-scaff_24236_1-p45544 C-genome specific (napus-oleracea) | 0.9665072    | 0.7855083    | 1         | 0.8123239 | not scorable | not scorable |
| #### Bn-scaff_24236_1-p45596 C-genome specific (napus-oleracea) | 0.9904306    | 0.7201462    | 0.9922481 | 0.6704551 | not scorable | not scorable |
| #### Bn-scaff_24236_1-p45704 C-genome specific (napus-oleracea) | 0.9641148    | 0.6157878    | 0.9844961 | 0.5726823 | not scorable | not scorable |
| #### Bn-scaff_24236_1-p45736 C-genome specific (napus-oleracea) | 0.9688995    | 0.7606859    | 1         | 0.7304659 | not scorable | not scorable |
| #### Bn-scaff_24236_1-p45766 C-genome specific (napus-oleracea) | 0.9641148    | 0.8074398    | 1         | 0.6788788 | not scorable | not scorable |
| #### Bn-scaff_24236_1-p45894 C-genome specific (napus-oleracea) | 0.9569378    | 0.5658831    | 0.9922481 | 0.5644442 | not scorable | not scorable |
| #### Bn-scaff_24236_1-p45920 C-genome specific (napus-oleracea) | 0.9904306    | 0.7840836    | 1         | 0.8541178 | not scorable | not scorable |
| #### Bn-scaff_24236_1-p45934 C-genome specific (napus-oleracea) | 0.9784689    | 0.6988232    | 1         | 0.6530887 | not scorable | not scorable |
| #### Bn-scaff_24236_1-p45944 C-genome specific (napus-oleracea) | 0.9808612    | 0.6745495    | 1         | 0.6999747 | not scorable | not scorable |
| #### Bn-scaff_24236_1-p45971 C-genome specific (napus-oleracea) | 0.9832536    | 0.7674983    | 1         | 0.7523479 | not scorable | not scorable |
| #### Bn-scaff_24236_1-p47115 C-genome specific (napus-oleracea) | 0.9808612    | 0.8028957    | 1         | 0.8099027 | not scorable | not scorable |
| #### Bn-scaff_24236_1-p47150 genome unspecific (all in)         | 0.9641148    | 0.4574713    | 1         | 0.5189793 | 1            | 0.8948976    |
| #### Bn-scaff_24236_1-p47164 C-genome specific (oleracea only)  | not scorable | not scorable | 0.8837209 | 0.4473916 | not scorable | not scorable |
| #### Bn-scaff_24236_1-p47319 C-genome specific (napus-oleracea) | 0.9712918    | 0.7652146    | 1         | 0.6642009 | not scorable | not scorable |
| #### Bn-scaff_24236_1-p47365 C-genome specific (napus-oleracea) | 0.9712918    | 0.7915215    | 1         | 0.7452696 | not scorable | not scorable |

|                                                                 |              |              |              |              |              |              |
|-----------------------------------------------------------------|--------------|--------------|--------------|--------------|--------------|--------------|
| #### Bn-scaff_24236_1-p47376 C-genome specific (napus-oleracea) | 0.9712918    | 0.8090986    | 0.9922481    | 0.7459068    | not scorable | not scorable |
| #### Bn-scaff_24236_1-p47803 C-genome specific (napus-oleracea) | 0.9856459    | 0.7749111    | 1            | 0.8131421    | not scorable | not scorable |
| #### Bn-scaff_24236_1-p47847 C-genome specific (napus-oleracea) | 0.9641148    | 0.7265288    | 0.9922481    | 0.722406     | not scorable | not scorable |
| #### Bn-scaff_24236_1-p47968 C-genome specific (napus-oleracea) | 0.9665072    | 0.797955     | 1            | 0.6888604    | not scorable | not scorable |
| #### Bn-scaff_24236_1-p48595 C-genome specific (napus-oleracea) | 0.9784689    | 0.7680824    | 1            | 0.7743813    | not scorable | not scorable |
| #### Bn-scaff_24236_1-p56096 C-genome specific (napus-oleracea) | 0.9808612    | 0.7540577    | 1            | 0.7976881    | not scorable | not scorable |
| #### Bn-scaff_24236_1-p56639 C-genome specific (napus-oleracea) | 0.9760765    | 0.7443096    | 1            | 0.7420161    | not scorable | not scorable |
| #### Bn-scaff_24236_1-p56742 C-genome specific (napus-oleracea) | 0.9784689    | 0.6638098    | 1            | 0.6685732    | not scorable | not scorable |
| #### Bn-scaff_24236_1-p82472 C-genome specific (napus-oleracea) | 0.9808612    | 0.6968527    | 0.9922481    | 0.7025113    | not scorable | not scorable |
| #### Bn-scaff_24236_1-p83184 C-genome specific (napus-oleracea) | 0.9688995    | 0.5333077    | 1            | 0.6444225    | not scorable | not scorable |
| #### Bn-scaff_24236_1-p83245 C-genome specific (napus-oleracea) | 0.9449761    | 0.6501653    | 0.9922481    | 0.6888167    | not scorable | not scorable |
| #### Bn-scaff_24236_1-p90081 genome unspecific (all in)         | 0.9880383    | 0.704793     | 0.9922481    | 0.6516315    | 1            | 0.9050192    |
| #### Bn-scaff_24236_1-p90884 C-genome specific (napus-oleracea) | 0.9641148    | 0.7198322    | 1            | 0.6739184    | not scorable | not scorable |
| #### Bn-scaff_24236_1-p91241 C-genome specific (napus-oleracea) | 0.9665072    | 0.6694005    | 1            | 0.6438237    | not scorable | not scorable |
| #### Bn-scaff_24236_1-p91520 C-genome specific (napus-oleracea) | 0.9856459    | 0.7050983    | 1            | 0.6677091    | not scorable | not scorable |
| #### Bn-scaff_24251_1-p56129 C-genome specific (napus-oleracea) | 0.9449761    | 0.7342879    | 0.9069768    | 0.678225     | not scorable | not scorable |
| #### Bn-scaff_24251_1-p57967 C-genome specific (napus-oleracea) | 0.9617225    | 0.7195538    | 0.9844961    | 0.7469063    | not scorable | not scorable |
| #### Bn-scaff_24251_1-p65315 C-genome specific (napus-oleracea) | 0.9665072    | 0.7659622    | 0.9922481    | 0.7670683    | not scorable | not scorable |
| #### Bn-scaff_24262_1-p1040 C-genome specific (napus-oleracea)  | 1            | 0.9512005    | 1            | 0.7698795    | not scorable | not scorable |
| #### Bn-scaff_24262_1-p2848 all not scorable                    | not scorable | not scorable | not scorable | not scorable | not scorable | not scorable |
| #### Bn-scaff_24262_1-p3177 C-genome specific (napus-oleracea)  | 0.9952153    | 0.8588584    | 1            | 0.8216213    | not scorable | not scorable |
| #### Bn-scaff_24300_1-p1264 C-genome specific (napus-oleracea)  | 0.9760765    | 0.7552019    | 0.6356589    | 0.7542593    | not scorable | not scorable |
| #### Bn-scaff_24300_1-p13018 C-genome specific (napus-oleracea) | 0.9832536    | 0.6754268    | 0.9534883    | 0.687746     | not scorable | not scorable |
| #### Bn-scaff_24378_1-p327 genome unspecific (oleracea-rapa)    | not scorable | not scorable | 0.9844961    | 0.4110017    | 1            | 0.8809559    |
| #### Bn-scaff_24402_1-p50928 C-genome specific (napus-oleracea) | 0.9856459    | 0.7183708    | 0.9844961    | 0.7096927    | not scorable | not scorable |
| #### Bn-scaff_24402_1-p51208 C-genome specific (napus-oleracea) | 0.9760765    | 0.7343308    | 0.9844961    | 0.7027254    | not scorable | not scorable |
| #### Bn-scaff_24402_1-p8022 C-genome specific (napus-oleracea)  | 0.9856459    | 0.7145063    | 0.9844961    | 0.7308294    | not scorable | not scorable |
| #### Bn-scaff_24413_1-p361 C-genome specific (napus-oleracea)   | 0.9832536    | 0.2543046    | 1            | 0.5023826    | not scorable | not scorable |
| #### Bn-scaff_24451_1-p4603 C-genome specific (napus-oleracea)  | 0.9856459    | 0.5653377    | 0.9612403    | 0.5831085    | not scorable | not scorable |
| #### Bn-scaff_24457_1-p1741 C-genome specific (napus-oleracea)  | 0.9904306    | 0.7017295    | 0.9767442    | 0.661314     | not scorable | not scorable |
| #### Bn-scaff_24457_1-p2690 C-genome specific (napus-oleracea)  | 0.9928229    | 0.7777409    | 0.9844961    | 0.770225     | not scorable | not scorable |
| #### Bn-scaff_24457_1-p273 C-genome specific (napus-oleracea)   | 0.9928229    | 0.7383834    | 1            | 0.7089218    | not scorable | not scorable |
| #### Bn-scaff_24457_1-p325 C-genome specific (napus-oleracea)   | 0.9952153    | 0.687761     | 0.9844961    | 0.6851407    | not scorable | not scorable |

|                                                                 |              |              |           |           |              |              |
|-----------------------------------------------------------------|--------------|--------------|-----------|-----------|--------------|--------------|
| #### Bn-scaff_24457_1-p3350 C-genome specific (napus-oleracea)  | 0.9880383    | 0.7597603    | 0.9844961 | 0.7241312 | not scorable | not scorable |
| #### Bn-scaff_24457_1-p3651 C-genome specific (napus-oleracea)  | 0.9952153    | 0.7666874    | 0.9844961 | 0.716894  | not scorable | not scorable |
| #### Bn-scaff_24457_1-p3926 C-genome specific (napus-oleracea)  | 0.9952153    | 0.8054933    | 0.9922481 | 0.805314  | not scorable | not scorable |
| #### Bn-scaff_24457_1-p4062 C-genome specific (napus-oleracea)  | 0.9952153    | 0.7320977    | 1         | 0.6696399 | not scorable | not scorable |
| #### Bn-scaff_24457_1-p4791 C-genome specific (napus-oleracea)  | 0.9856459    | 0.7813346    | 0.9844961 | 0.7466954 | not scorable | not scorable |
| #### Bn-scaff_24457_1-p5341 C-genome specific (napus-oleracea)  | 0.9904306    | 0.6978495    | 0.9922481 | 0.731591  | not scorable | not scorable |
| #### Bn-scaff_24457_1-p5483 C-genome specific (napus-oleracea)  | 0.9928229    | 0.782846     | 0.9922481 | 0.8289795 | not scorable | not scorable |
| #### Bn-scaff_24457_1-p5555 C-genome specific (napus-oleracea)  | 0.9904306    | 0.7697749    | 0.9922481 | 0.8106208 | not scorable | not scorable |
| #### Bn-scaff_24457_1-p5761 C-genome specific (napus-oleracea)  | 0.9928229    | 0.7950211    | 0.9922481 | 0.7944294 | not scorable | not scorable |
| #### Bn-scaff_24457_1-p839 C-genome specific (napus-oleracea)   | 0.9832536    | 0.6673423    | 1         | 0.6256716 | not scorable | not scorable |
| #### Bn-scaff_24459_1-p11374 genome unspecific (all in)         | 0.9760765    | 0.2993503    | 0.9922481 | 0.7271872 | 1            | 0.8034762    |
| #### Bn-scaff_24459_1-p5391 C-genome specific (napus-oleracea)  | 0.9904306    | 0.7087922    | 1         | 0.4879457 | not scorable | not scorable |
| #### Bn-scaff_24466_1-p16327 C-genome specific (napus-oleracea) | 0.9712918    | 0.7842621    | 0.9922481 | 0.7254049 | not scorable | not scorable |
| #### Bn-scaff_24466_1-p1920 genome unspecific (all in)          | 0.9928229    | 0.4023056    | 1         | 0.794342  | 0.9917355    | 0.7919233    |
| #### Bn-scaff_24466_1-p21671 C-genome specific (napus-oleracea) | 0.9688995    | 0.6491758    | 0.9844961 | 0.6483786 | not scorable | not scorable |
| #### Bn-scaff_24466_1-p21917 C-genome specific (napus-oleracea) | 0.9712918    | 0.7729529    | 1         | 0.8330096 | not scorable | not scorable |
| #### Bn-scaff_24466_1-p22615 C-genome specific (napus-oleracea) | 0.9784689    | 0.7744125    | 1         | 0.8062288 | not scorable | not scorable |
| #### Bn-scaff_24466_1-p34557 C-genome specific (napus-oleracea) | 0.9712918    | 0.796483     | 1         | 0.8172441 | not scorable | not scorable |
| #### Bn-scaff_24466_1-p39543 C-genome specific (napus-oleracea) | 0.9665072    | 0.7075434    | 1         | 0.8277293 | not scorable | not scorable |
| #### Bn-scaff_24466_1-p39611 C-genome specific (napus-oleracea) | 0.9712918    | 0.7781911    | 1         | 0.7792807 | not scorable | not scorable |
| #### Bn-scaff_24466_1-p53535 C-genome specific (napus-oleracea) | 0.5645933    | 0.9094825    | 0.9534883 | 0.6181029 | not scorable | not scorable |
| #### Bn-scaff_24466_1-p56745 C-genome specific (napus-oleracea) | 0.9617225    | 0.6664834    | 1         | 0.7140309 | not scorable | not scorable |
| #### Bn-scaff_24466_1-p62254 C-genome specific (napus-oleracea) | 0.9784689    | 0.6659241    | 1         | 0.5840391 | not scorable | not scorable |
| #### Bn-scaff_24466_1-p62701 C-genome specific (napus-oleracea) | 0.5645933    | 0.8567045    | 0.9534883 | 0.7534721 | not scorable | not scorable |
| #### Bn-scaff_24466_1-p63530 C-genome specific (napus-oleracea) | 0.9784689    | 0.6992853    | 0.9922481 | 0.6020434 | not scorable | not scorable |
| #### Bn-scaff_24466_1-p65988 C-genome specific (oleracea only)  | not scorable | not scorable | 0.9922481 | 0.6658198 | not scorable | not scorable |
| #### Bn-scaff_24466_1-p76815 C-genome specific (napus-oleracea) | 0.9617225    | 0.7626048    | 0.9612403 | 0.6998734 | not scorable | not scorable |
| #### Bn-scaff_24466_1-p80707 genome unspecific (all in)         | 1            | 0.7360265    | 1         | 0.6002889 | 1            | 0.9175715    |
| #### Bn-scaff_24466_1-p90524 genome unspecific (all in)         | 1            | 0.549558     | 1         | 0.5217761 | 1            | 0.7940946    |
| #### Bn-scaff_24480_1-p262 C-genome specific (napus-oleracea)   | 1            | 0.6169784    | 1         | 0.5722097 | not scorable | not scorable |
| #### Bn-scaff_24491_1-p10789 C-genome specific (napus-oleracea) | 0.9904306    | 0.8495021    | 1         | 0.7800511 | not scorable | not scorable |
| #### Bn-scaff_24526_1-p88445 genome unspecific (all in)         | 1            | 0.7064696    | 0.9922481 | 0.71345   | 1            | 0.9353382    |
| #### Bn-scaff_24559_1-p418 genome unspecific (all in)           | 1            | 0.5336415    | 1         | 0.6594458 | 1            | 0.7770717    |

|                                                                 |              |              |              |              |              |              |
|-----------------------------------------------------------------|--------------|--------------|--------------|--------------|--------------|--------------|
| #### Bn-scaff_24587_1-p9788 C-genome specific (napus-oleracea)  | 0.9784689    | 0.6661675    | 1            | 0.5691765    | not scorable | not scorable |
| #### Bn-scaff_24602_1-p69684 C-genome specific (napus-oleracea) | 0.9784689    | 0.7881358    | 0.8527132    | 0.7771225    | not scorable | not scorable |
| #### Bn-scaff_24602_1-p80321 genome unspecific (all in)         | 0.9808612    | 0.562986     | 0.9844961    | 0.7501335    | 1            | 0.9285266    |
| #### Bn-scaff_24602_1-p80909 C-genome specific (napus-oleracea) | 0.9904306    | 0.7794643    | 0.9922481    | 0.7265532    | not scorable | not scorable |
| #### Bn-scaff_24602_1-p82503 C-genome specific (napus-oleracea) | 0.9856459    | 0.8570763    | 0.9844961    | 0.7752664    | not scorable | not scorable |
| #### Bn-scaff_24602_1-p83524 C-genome specific (napus-oleracea) | 0.9952153    | 0.7622418    | 1            | 0.7174364    | not scorable | not scorable |
| #### Bn-scaff_24602_1-p83660 C-genome specific (napus-oleracea) | 0.9832536    | 0.7937065    | 0.8527132    | 0.8121482    | not scorable | not scorable |
| #### Bn-scaff_24602_1-p94449 C-genome specific (napus-oleracea) | 0.9880383    | 0.8066458    | 0.8217054    | 0.794137     | not scorable | not scorable |
| #### Bn-scaff_24602_1-p94458 genome unspecific (all in)         | 0.9856459    | 0.5012054    | 0.8294573    | 0.7981527    | 0.9834711    | 0.9354252    |
| #### Bn-scaff_24608_1-p10610 C-genome specific (napus-oleracea) | 0.9856459    | 0.7817922    | 0.8837209    | 0.7214162    | not scorable | not scorable |
| #### Bn-scaff_24608_1-p10616 C-genome specific (napus-oleracea) | 0.9808612    | 0.7593638    | 0.8837209    | 0.7242356    | not scorable | not scorable |
| #### Bn-scaff_24608_1-p13423 C-genome specific (napus-oleracea) | 0.9760765    | 0.7797887    | 1            | 0.7714441    | not scorable | not scorable |
| #### Bn-scaff_24608_1-p14917 C-genome specific (napus-oleracea) | 0.9856459    | 0.7127308    | 1            | 0.8068578    | not scorable | not scorable |
| #### Bn-scaff_24608_1-p15501 C-genome specific (napus-oleracea) | 0.9880383    | 0.770341     | 1            | 0.7939214    | not scorable | not scorable |
| #### Bn-scaff_24608_1-p16381 C-genome specific (napus-oleracea) | 0.9736842    | 0.7370315    | 0.5658914    | 0.738579     | not scorable | not scorable |
| #### Bn-scaff_24608_1-p16538 C-genome specific (napus-oleracea) | 0.9736842    | 0.7321259    | 0.5658914    | 0.819863     | not scorable | not scorable |
| #### Bn-scaff_24608_1-p17111 genome unspecific (all in)         | 0.9880383    | 0.3907202    | 1            | 0.9129279    | 1            | 0.8389747    |
| #### Bn-scaff_24608_1-p21544 genome unspecific (all in)         | 0.9641148    | 0.5209346    | 1            | 0.7045537    | 1            | 0.9175813    |
| #### Bn-scaff_24608_1-p25857 C-genome specific (napus-oleracea) | 0.9497608    | 0.6524002    | 0.5116279    | 0.6659249    | not scorable | not scorable |
| #### Bn-scaff_24608_1-p27682 C-genome specific (napus-oleracea) | 0.9928229    | 0.8700608    | 1            | 0.9224245    | not scorable | not scorable |
| #### Bn-scaff_24608_1-p36841 C-genome specific (napus-oleracea) | 0.9665072    | 0.6354541    | 0.5736434    | 0.595965     | not scorable | not scorable |
| #### Bn-scaff_24608_1-p37019 C-genome specific (napus-oleracea) | 0.9760765    | 0.6750166    | 0.9689922    | 0.6557474    | not scorable | not scorable |
| #### Bn-scaff_24608_1-p95171 genome unspecific (all in)         | 0.9712918    | 0.3508555    | 1            | 0.727371     | 1            | 0.7914145    |
| #### Bn-scaff_24613_1-p1327 napus specific                      | 0.8708134    | 0.6537892    | not scorable | not scorable | not scorable | not scorable |
| #### Bn-scaff_24613_1-p3439 all not scorable                    | not scorable | not scorable | not scorable | not scorable | not scorable | not scorable |
| #### Bn-scaff_24620_1-p3353 C-genome specific (oleracea only)   | not scorable | not scorable | 0.9534883    | 0.3733665    | not scorable | not scorable |
| #### Bn-scaff_24631_1-p10834 C-genome specific (napus-oleracea) | 1            | 0.7183493    | 1            | 0.5944715    | not scorable | not scorable |
| #### Bn-scaff_24631_1-p15037 genome unspecific (all in)         | 1            | 0.7814297    | 1            | 0.8008217    | 1            | 0.774415     |
| #### Bn-scaff_24631_1-p18498 genome unspecific (all in)         | 0.9186603    | 0.537879     | 0.9922481    | 0.4459449    | 1            | 0.6367469    |
| #### Bn-scaff_24631_1-p18731 C-genome specific (napus-oleracea) | 0.9545454    | 0.7049372    | 0.3255814    | 0.751161     | not scorable | not scorable |
| #### Bn-scaff_24631_1-p18899 C-genome specific (napus-oleracea) | 0.9569378    | 0.7053524    | 0.9534883    | 0.7526314    | not scorable | not scorable |
| #### Bn-scaff_24631_1-p21595 genome unspecific (all in)         | 0.9880383    | 0.3047577    | 1            | 0.805608     | 0.9669421    | 0.7287483    |
| #### Bn-scaff_24631_1-p25106 genome unspecific (all in)         | 0.9330143    | 0.4983579    | 0.9689922    | 0.4717865    | 0.9834711    | 0.7431625    |



|                                                                 |              |              |              |              |              |              |
|-----------------------------------------------------------------|--------------|--------------|--------------|--------------|--------------|--------------|
| #### Bn-scaff_24631_1-p25113 C-genome specific (napus-oleracea) | 0.9952153    | 0.7896671    | 0.9922481    | 0.7689518    | not scorable | not scorable |
| #### Bn-scaff_24631_1-p25885 C-genome specific (napus-oleracea) | 0.7942584    | 0.7879589    | 1            | 0.8049314    | not scorable | not scorable |
| #### Bn-scaff_24631_1-p26823 C-genome specific (napus-oleracea) | 0.8181818    | 0.9396831    | 0.7751938    | 0.6671757    | not scorable | not scorable |
| #### Bn-scaff_24631_1-p27154 C-genome specific (napus-oleracea) | 0.9856459    | 0.825118     | 0.9922481    | 0.8701559    | not scorable | not scorable |
| #### Bn-scaff_24631_1-p27601 C-genome specific (napus-oleracea) | 0.9784689    | 0.7524669    | 1            | 0.6939381    | not scorable | not scorable |
| #### Bn-scaff_24631_1-p27651 C-genome specific (napus-oleracea) | 0.9712918    | 0.7214571    | 1            | 0.7020374    | not scorable | not scorable |
| #### Bn-scaff_24631_1-p28876 C-genome specific (napus-oleracea) | 0.9880383    | 0.7966478    | 0.9922481    | 0.7727288    | not scorable | not scorable |
| #### Bn-scaff_24631_1-p28896 C-genome specific (napus-oleracea) | 0.9880383    | 0.7983204    | 0.9922481    | 0.8400959    | not scorable | not scorable |
| #### Bn-scaff_24631_1-p29645 C-genome specific (napus-oleracea) | 0.9928229    | 0.7559198    | 0.9922481    | 0.7885911    | not scorable | not scorable |
| #### Bn-scaff_24631_1-p29730 C-genome specific (napus-oleracea) | 0.9856459    | 0.8147892    | 1            | 0.8679854    | not scorable | not scorable |
| #### Bn-scaff_24631_1-p29927 C-genome specific (napus-oleracea) | 0.9976076    | 0.7847258    | 0.9844961    | 0.8296572    | not scorable | not scorable |
| #### Bn-scaff_24631_1-p29943 C-genome specific (napus-oleracea) | 0.9808612    | 0.7677737    | 1            | 0.8024288    | not scorable | not scorable |
| #### Bn-scaff_24631_1-p31667 C-genome specific (napus-oleracea) | 0.9808612    | 0.8109167    | 1            | 0.7774329    | not scorable | not scorable |
| #### Bn-scaff_24631_1-p33815 C-genome specific (napus-oleracea) | 0.9808612    | 0.753831     | 0.9844961    | 0.7378636    | not scorable | not scorable |
| #### Bn-scaff_24631_1-p34856 C-genome specific (napus-oleracea) | 0.7990431    | 0.714659     | 0.6744186    | 0.7327052    | not scorable | not scorable |
| #### Bn-scaff_24631_1-p37296 C-genome specific (napus-oleracea) | 0.9856459    | 0.7674713    | 0.9302326    | 0.8415946    | not scorable | not scorable |
| #### Bn-scaff_24631_1-p37395 genome unspecific (all in)         | 0.9760765    | 0.6554666    | 1            | 0.6920373    | 1            | 0.7822638    |
| #### Bn-scaff_24631_1-p38334 genome unspecific (all in)         | 0.9928229    | 0.3065207    | 1            | 0.6955309    | 1            | 0.7948518    |
| #### Bn-scaff_24631_1-p38355 genome unspecific (all in)         | 0.9952153    | 0.2916135    | 1            | 0.5311099    | 1            | 0.6388347    |
| #### Bn-scaff_24631_1-p39190 C-genome specific (napus-oleracea) | 0.8110048    | 0.7703816    | 0.875969     | 0.6916432    | not scorable | not scorable |
| #### Bn-scaff_24631_1-p39529 genome unspecific (all in)         | 0.9832536    | 0.3891006    | 1            | 0.8931205    | 0.9834711    | 0.8483489    |
| #### Bn-scaff_24631_1-p40464 A-genome specific (napus-rapa)     | 0.9760765    | 0.3025416    | not scorable | not scorable | 0.9834711    | 0.7591171    |
| #### Bn-scaff_24631_1-p41596 genome unspecific (all in)         | 0.937799     | 0.5503129    | 1            | 0.7835542    | 0.9669421    | 0.697102     |
| #### Bn-scaff_24631_1-p42223 C-genome specific (napus-oleracea) | 0.9784689    | 0.7705795    | 0.9844961    | 0.7519767    | not scorable | not scorable |
| #### Bn-scaff_24631_1-p42237 C-genome specific (napus-oleracea) | 0.9521531    | 0.6197431    | 0.9922481    | 0.6709884    | not scorable | not scorable |
| #### Bn-scaff_24631_1-p42497 C-genome specific (napus-oleracea) | 0.9473684    | 0.7131186    | 0.9767442    | 0.6826239    | not scorable | not scorable |
| #### Bn-scaff_24631_1-p42542 C-genome specific (napus-oleracea) | 0.9760765    | 0.79064      | 0.9922481    | 0.8751893    | not scorable | not scorable |
| #### Bn-scaff_24631_1-p47109 genome unspecific (all in)         | 0.9760765    | 0.3856024    | 1            | 0.8881559    | 1            | 0.7480209    |
| #### Bn-scaff_24631_1-p50117 C-genome specific (napus-oleracea) | 0.9401914    | 0.8601725    | 0.7906977    | 0.8313789    | not scorable | not scorable |
| #### Bn-scaff_24631_1-p52479 A-genome specific (rapa only)      | not scorable | not scorable | not scorable | not scorable | 1            | 0.9471782    |
| #### Bn-scaff_24631_1-p63534 C-genome specific (napus-oleracea) | 1            | 0.8117293    | 0.9147287    | 0.7148792    | not scorable | not scorable |
| #### Bn-scaff_24631_1-p73870 C-genome specific (napus-oleracea) | 0.9712918    | 0.7752119    | 0.8527132    | 0.8137556    | not scorable | not scorable |
| #### Bn-scaff_24631_1-p73946 C-genome specific (napus-oleracea) | 0.9569378    | 0.7341146    | 0.8527132    | 0.8677003    | not scorable | not scorable |

|                                                                 |              |              |              |              |              |              |
|-----------------------------------------------------------------|--------------|--------------|--------------|--------------|--------------|--------------|
| #### Bn-scaff_24631_1-p7395C C-genome specific (napus-oleracea) | 0.9712918    | 0.6619387    | 0.9767442    | 0.8031309    | not scorable | not scorable |
| #### Bn-scaff_24631_1-p7457E genome unspecific (all in)         | 0.9832536    | 0.3167677    | 1            | 0.7664817    | 0.9834711    | 0.7134285    |
| #### Bn-scaff_24631_1-p77314 genome unspecific (oleracea-rapa)  | not scorable | not scorable | 0.8449612    | 0.852065     | 0.9752066    | 0.8830584    |
| #### Bn-scaff_24631_1-p7858C C-genome specific (napus-oleracea) | 0.9712918    | 0.7397923    | 0.8372093    | 0.8345729    | not scorable | not scorable |
| #### Bn-scaff_24631_1-p7858C C-genome specific (napus-oleracea) | 0.9832536    | 0.7252855    | 0.8294573    | 0.7318494    | not scorable | not scorable |
| #### Bn-scaff_24631_1-p8018E napus specific                     | 0.7272727    | 0.7764576    | not scorable | not scorable | not scorable | not scorable |
| #### Bn-scaff_24641_1-p7667E genome unspecific (all in)         | 0.9904306    | 0.4582819    | 1            | 0.7101772    | 1            | 0.8076549    |
| #### Bn-scaff_24680_1-p4016E C-genome specific (napus-oleracea) | 0.9976076    | 0.7549228    | 1            | 0.6661884    | not scorable | not scorable |
| #### Bn-scaff_24680_1-p4502E genome unspecific (all in)         | 0.9784689    | 0.701256     | 0.9379845    | 0.6694691    | 0.9917355    | 0.9148527    |
| #### Bn-scaff_24680_1-p4507E genome unspecific (all in)         | 0.9760765    | 0.5950627    | 0.9844961    | 0.542617     | 1            | 0.9468661    |
| #### Bn-scaff_24680_1-p4690C C-genome specific (napus-oleracea) | 0.9976076    | 0.7026553    | 0.9767442    | 0.6801481    | not scorable | not scorable |
| #### Bn-scaff_24680_1-p5856E C-genome specific (napus-oleracea) | 0.9880383    | 0.8289507    | 1            | 0.7897984    | not scorable | not scorable |
| #### Bn-scaff_24680_1-p6067E C-genome specific (napus-oleracea) | 1            | 0.7327761    | 0.9844961    | 0.7194045    | not scorable | not scorable |
| #### Bn-scaff_24705_1-p95 C-genome specific (napus-oleracea)    | 1            | 0.6186775    | 1            | 0.5991307    | not scorable | not scorable |
| #### Bn-scaff_24721_1-p1052E C-genome specific (napus-oleracea) | 0.9688995    | 0.7377084    | 0.9767442    | 0.8175635    | not scorable | not scorable |
| #### Bn-scaff_24721_1-p1162C C-genome specific (napus-oleracea) | 0.9688995    | 0.7271534    | 1            | 0.8286277    | not scorable | not scorable |
| #### Bn-scaff_24721_1-p1281E genome unspecific (all in)         | 1            | 0.4889545    | 1            | 0.5207194    | 1            | 0.4376381    |
| #### Bn-scaff_24721_1-p1598E genome unspecific (all in)         | 0.9545454    | 0.5756583    | 1            | 0.8575609    | 1            | 0.9187856    |
| #### Bn-scaff_24721_1-p1605C C-genome specific (napus-oleracea) | 0.9808612    | 0.717882     | 0.9922481    | 0.7393713    | not scorable | not scorable |
| #### Bn-scaff_24721_1-p1654E C-genome specific (napus-oleracea) | 0.9832536    | 0.7431305    | 1            | 0.716938     | not scorable | not scorable |
| #### Bn-scaff_24721_1-p2209E C-genome specific (napus-oleracea) | 0.9688995    | 0.6193671    | 0.9922481    | 0.7075976    | not scorable | not scorable |
| #### Bn-scaff_24721_1-p2253C C-genome specific (napus-oleracea) | 0.9736842    | 0.6946872    | 0.9922481    | 0.7057733    | not scorable | not scorable |
| #### Bn-scaff_24721_1-p25771A-genome specific (rapa only)       | not scorable | not scorable | not scorable | not scorable | 0.9917355    | 0.827442     |
| #### Bn-scaff_24721_1-p3270C C-genome specific (napus-oleracea) | 0.9904306    | 0.6489927    | 1            | 0.6939974    | not scorable | not scorable |
| #### Bn-scaff_24721_1-p3413C C-genome specific (napus-oleracea) | 0.9760765    | 0.6844476    | 1            | 0.6242049    | not scorable | not scorable |
| #### Bn-scaff_24721_1-p3531E genome unspecific (all in)         | 0.9736842    | 0.3243596    | 0.9844961    | 0.4995124    | 1            | 0.9397374    |
| #### Bn-scaff_24721_1-p3766E C-genome specific (napus-oleracea) | 0.9665072    | 0.6342145    | 0.9922481    | 0.6798424    | not scorable | not scorable |
| #### Bn-scaff_24721_1-p3843E C-genome specific (napus-oleracea) | 0.9784689    | 0.7139484    | 1            | 0.7140743    | not scorable | not scorable |
| #### Bn-scaff_24721_1-p4873E C-genome specific (napus-oleracea) | 0.9688995    | 0.7712086    | 1            | 0.7698742    | not scorable | not scorable |
| #### Bn-scaff_24721_1-p4936C C-genome specific (napus-oleracea) | 0.9569378    | 0.7382627    | 0.9612403    | 0.7880309    | not scorable | not scorable |
| #### Bn-scaff_24721_1-p5423E C-genome specific (napus-oleracea) | 0.9880383    | 0.7919017    | 0.9844961    | 0.8132904    | not scorable | not scorable |
| #### Bn-scaff_24721_1-p6110E C-genome specific (napus-oleracea) | 0.9760765    | 0.6644549    | 0.9922481    | 0.6355771    | not scorable | not scorable |
| #### Bn-scaff_24721_1-p8220E genome unspecific (oleracea-rapa)  | not scorable | not scorable | 1            | 0.67128      | 1            | 0.7151671    |

|                                                                |              |              |              |              |              |              |
|----------------------------------------------------------------|--------------|--------------|--------------|--------------|--------------|--------------|
| #### Bn-scaff_24721_1-p83101C-genome specific (napus-oleracea) | 0.9880383    | 0.7973974    | 1            | 0.8959013    | not scorable | not scorable |
| #### Bn-scaff_24721_1-p83732C-genome specific (napus-oleracea) | 0.9832536    | 0.7051122    | 1            | 0.7209013    | not scorable | not scorable |
| #### Bn-scaff_24721_1-p83843C-genome specific (napus-oleracea) | 0.9832536    | 0.7754766    | 1            | 0.8187888    | not scorable | not scorable |
| #### Bn-scaff_24721_1-p83949C-genome specific (napus-oleracea) | 0.9808612    | 0.6923777    | 1            | 0.7737236    | not scorable | not scorable |
| #### Bn-scaff_24726_1-p16408C-genome specific (napus-oleracea) | 0.9928229    | 0.7908193    | 1            | 0.8184633    | not scorable | not scorable |
| #### Bn-scaff_24726_1-p26895C-genome specific (napus-oleracea) | 0.854067     | 0.7552096    | 0.7596899    | 0.84088      | not scorable | not scorable |
| #### Bn-scaff_24726_1-p33090genome unspecific (all in)         | 1            | 0.8956332    | 1            | 0.9144873    | 1            | 0.8971323    |
| #### Bn-scaff_24726_1-p33555C-genome specific (napus-oleracea) | 0.9928229    | 0.2535975    | 1            | 0.6367679    | not scorable | not scorable |
| #### Bn-scaff_24726_1-p33634genome unspecific (all in)         | 1            | 0.387598     | 0.9844961    | 0.4763117    | 1            | 0.3957796    |
| #### Bn-scaff_24726_1-p33823genome unspecific (all in)         | 0.9928229    | 0.2671058    | 1            | 0.7453199    | 1            | 0.6195959    |
| #### Bn-scaff_24726_1-p39008genome unspecific (oleracea-rapa)  | not scorable | not scorable | 1            | 0.8195044    | 1            | 0.7864616    |
| #### Bn-scaff_24726_1-p39937C-genome specific (napus-oleracea) | 1            | 0.8566455    | 0.9922481    | 0.8490569    | not scorable | not scorable |
| #### Bn-scaff_24726_1-p7897 C-genome specific (napus-oleracea) | 0.9688995    | 0.2297475    | 0.9689922    | 0.1640747    | not scorable | not scorable |
| #### Bn-scaff_24726_1-p88360C-genome specific (napus-oleracea) | 0.9904306    | 0.7722343    | 0.9767442    | 0.7720623    | not scorable | not scorable |
| #### Bn-scaff_24726_1-p90002C-genome specific (napus-oleracea) | 0.9760765    | 0.8168961    | 0.9844961    | 0.7344038    | not scorable | not scorable |
| #### Bn-scaff_24741_1-p209 genome unspecific (oleracea-rapa)   | not scorable | not scorable | 0.9612403    | 0.8193907    | 0.9752066    | 0.7743356    |
| #### Bn-scaff_24826_1-p238 C-genome specific (napus-oleracea)  | 0.5574163    | 0.7754266    | 1            | 0.8343205    | not scorable | not scorable |
| #### Bn-scaff_24859_1-p42833C-genome specific (napus-oleracea) | 0.7416268    | 0.9031484    | 0.875969     | 0.8823263    | not scorable | not scorable |
| #### Bn-scaff_24859_1-p42987C-genome specific (napus-oleracea) | 0.9043062    | 0.7222906    | 1            | 0.9205657    | not scorable | not scorable |
| #### Bn-scaff_24859_1-p44428C-genome specific (napus-oleracea) | 0.9186603    | 0.6892823    | 0.9922481    | 0.6488835    | not scorable | not scorable |
| #### Bn-scaff_24859_1-p45913genome unspecific (oleracea-rapa)  | not scorable | not scorable | 1            | 0.5688746    | 1            | 0.8948976    |
| #### Bn-scaff_24867_1-p1160 genome unspecific (all in)         | 1            | 0.4984884    | 1            | 0.4234792    | 0.9917355    | 0.4224357    |
| #### Bn-scaff_24867_1-p745 A-genome specific (napus-rapa)      | 1            | 0.4463008    | not scorable | not scorable | 1            | 0.5791867    |
| #### Bn-scaff_24869_1-p10185all not scorable                   | not scorable | not scorable | not scorable | not scorable | not scorable | not scorable |
| #### Bn-scaff_24869_1-p11963C-genome specific (napus-oleracea) | 0.9832536    | 0.725949     | 0.9457364    | 0.7962677    | not scorable | not scorable |
| #### Bn-scaff_24869_1-p14769C-genome specific (napus-oleracea) | 0.9832536    | 0.7283102    | 1            | 0.669808     | not scorable | not scorable |
| #### Bn-scaff_24869_1-p15273C-genome specific (napus-oleracea) | 0.9736842    | 0.7055079    | 1            | 0.7664112    | not scorable | not scorable |
| #### Bn-scaff_24869_1-p16959C-genome specific (napus-oleracea) | 1            | 0.773265     | 1            | 0.7376331    | not scorable | not scorable |
| #### Bn-scaff_24880_1-p29365genome unspecific (oleracea-rapa)  | not scorable | not scorable | 0.9922481    | 0.7794749    | 0.9090909    | 0.7259871    |
| #### Bn-scaff_24887_1-p629 genome unspecific (all in)          | 0.9952153    | 0.6976756    | 1            | 0.7508566    | 1            | 0.7314316    |
| #### Bn-scaff_24947_1-p10365C-genome specific (napus-oleracea) | 0.9856459    | 0.7415137    | 0.9922481    | 0.6371409    | not scorable | not scorable |
| #### Bn-scaff_24947_1-p10681C-genome specific (napus-oleracea) | 0.9760765    | 0.7610798    | 1            | 0.8568057    | not scorable | not scorable |
| #### Bn-scaff_24947_1-p11202C-genome specific (napus-oleracea) | 0.9688995    | 0.7287742    | 1            | 0.7373394    | not scorable | not scorable |

|                                                                 |              |              |           |           |              |              |
|-----------------------------------------------------------------|--------------|--------------|-----------|-----------|--------------|--------------|
| #### Bn-scaff_24947_1-p13145 C-genome specific (napus-oleracea) | 0.9808612    | 0.7825384    | 0.9922481 | 0.8093381 | not scorable | not scorable |
| #### Bn-scaff_24947_1-p22648 C-genome specific (napus-oleracea) | 0.9880383    | 0.7343387    | 0.9689922 | 0.7266355 | not scorable | not scorable |
| #### Bn-scaff_24947_1-p27411 C-genome specific (napus-oleracea) | 0.9880383    | 0.7706782    | 1         | 0.8086402 | not scorable | not scorable |
| #### Bn-scaff_24947_1-p38875 C-genome specific (napus-oleracea) | 0.9784689    | 0.7508348    | 0.9922481 | 0.7525976 | not scorable | not scorable |
| #### Bn-scaff_24947_1-p43615 genome unspecific (all in)         | 0.9593301    | 0.6832248    | 1         | 0.7663277 | 0.9586777    | 0.8403101    |
| #### Bn-scaff_24947_1-p43804 C-genome specific (napus-oleracea) | 0.9832536    | 0.7426034    | 0.9767442 | 0.6327682 | not scorable | not scorable |
| #### Bn-scaff_24947_1-p46084 C-genome specific (napus-oleracea) | 0.9784689    | 0.6851012    | 1         | 0.6735074 | not scorable | not scorable |
| #### Bn-scaff_24947_1-p46224 C-genome specific (napus-oleracea) | 0.9736842    | 0.7550306    | 1         | 0.7707253 | not scorable | not scorable |
| #### Bn-scaff_24947_1-p47012 C-genome specific (napus-oleracea) | 0.9832536    | 0.7035018    | 1         | 0.7780569 | not scorable | not scorable |
| #### Bn-scaff_24947_1-p48773 C-genome specific (napus-oleracea) | 0.9736842    | 0.7307305    | 0.9612403 | 0.7847711 | not scorable | not scorable |
| #### Bn-scaff_24947_1-p7191 C-genome specific (napus-oleracea)  | 0.9808612    | 0.7352218    | 0.9844961 | 0.7173675 | not scorable | not scorable |
| #### Bn-scaff_24947_1-p7916 genome unspecific (all in)          | 0.9856459    | 0.5860164    | 1         | 0.6940843 | 1            | 0.9209546    |
| #### Bn-scaff_24947_1-p83848 C-genome specific (napus-oleracea) | 0.9832536    | 0.7910169    | 1         | 0.8630569 | not scorable | not scorable |
| #### Bn-scaff_24947_1-p84051 C-genome specific (napus-oleracea) | 0.9856459    | 0.6863167    | 1         | 0.7245347 | not scorable | not scorable |
| #### Bn-scaff_24947_1-p86838 C-genome specific (napus-oleracea) | 0.9784689    | 0.6927777    | 1         | 0.6736417 | not scorable | not scorable |
| #### Bn-scaff_24947_1-p87415 C-genome specific (napus-oleracea) | 0.9856459    | 0.7585436    | 1         | 0.8198566 | not scorable | not scorable |
| #### Bn-scaff_24947_1-p87821 C-genome specific (napus-oleracea) | 0.9784689    | 0.7041796    | 0.8139535 | 0.7283592 | not scorable | not scorable |
| #### Bn-scaff_24947_1-p89188 C-genome specific (napus-oleracea) | 0.9282297    | 0.6367692    | 1         | 0.747426  | not scorable | not scorable |
| #### Bn-scaff_24947_1-p89681 C-genome specific (napus-oleracea) | 0.9832536    | 0.7658356    | 1         | 0.8279626 | not scorable | not scorable |
| #### Bn-scaff_24947_1-p89738 C-genome specific (napus-oleracea) | 0.9736842    | 0.767036     | 1         | 0.7898085 | not scorable | not scorable |
| #### Bn-scaff_24947_1-p89885 C-genome specific (napus-oleracea) | 0.9760765    | 0.7571375    | 1         | 0.827772  | not scorable | not scorable |
| #### Bn-scaff_24947_1-p9186 genome unspecific (all in)          | 1            | 0.3890185    | 1         | 0.6345322 | 1            | 0.7013433    |
| #### Bn-scaff_24947_1-p9756 genome unspecific (all in)          | 0.9808612    | 0.5825577    | 0.9844961 | 0.7295489 | 1            | 0.7943971    |
| #### Bn-scaff_24947_1-p98852 C-genome specific (napus-oleracea) | 0.9808612    | 0.7744712    | 0.9922481 | 0.7347599 | not scorable | not scorable |
| #### Bn-scaff_24979_1-p11236 genome unspecific (oleracea-rapa)  | not scorable | not scorable | 0.9922481 | 0.6788368 | 0.9917355    | 0.9240377    |
| #### Bn-scaff_24979_1-p11276 C-genome specific (napus-oleracea) | 0.9856459    | 0.766538     | 0.9612403 | 0.7774246 | not scorable | not scorable |
| #### Bn-scaff_24979_1-p11633 genome unspecific (all in)         | 0.7822967    | 0.3561753    | 0.9922481 | 0.5595184 | 1            | 0.9070536    |
| #### Bn-scaff_24979_1-p13103 C-genome specific (napus-oleracea) | 0.9880383    | 0.6894385    | 0.9767442 | 0.7254539 | not scorable | not scorable |
| #### Bn-scaff_24979_1-p13289 genome unspecific (all in)         | 0.9976076    | 0.7501454    | 1         | 0.6925209 | 0.9917355    | 0.6926302    |
| #### Bn-scaff_24979_1-p13475 genome unspecific (all in)         | 0.9880383    | 0.2589311    | 1         | 0.6164824 | 0.9752066    | 0.5430379    |
| #### Bn-scaff_24979_1-p15191 C-genome specific (napus-oleracea) | 0.9760765    | 0.8257908    | 0.9612403 | 0.787383  | not scorable | not scorable |
| #### Bn-scaff_24979_1-p15198 C-genome specific (napus-oleracea) | 0.9904306    | 0.6356462    | 0.9534883 | 0.5366493 | not scorable | not scorable |
| #### Bn-scaff_24979_1-p15421 C-genome specific (napus-oleracea) | 0.9856459    | 0.7637859    | 0.9302326 | 0.6907109 | not scorable | not scorable |

|                                                                 |              |              |           |           |              |              |
|-----------------------------------------------------------------|--------------|--------------|-----------|-----------|--------------|--------------|
| #### Bn-scaff_24979_1-p16253 C-genome specific (napus-oleracea) | 0.9976076    | 0.744262     | 0.9844961 | 0.6438868 | not scorable | not scorable |
| #### Bn-scaff_24979_1-p16313 C-genome specific (napus-oleracea) | 0.9856459    | 0.821701     | 0.9844961 | 0.8005506 | not scorable | not scorable |
| #### Bn-scaff_24979_1-p16366 C-genome specific (napus-oleracea) | 0.9928229    | 0.7176018    | 0.9844961 | 0.6714162 | not scorable | not scorable |
| #### Bn-scaff_24979_1-p16985 C-genome specific (napus-oleracea) | 1            | 0.7936858    | 1         | 0.7719306 | not scorable | not scorable |
| #### Bn-scaff_24979_1-p17225 C-genome specific (napus-oleracea) | 0.9832536    | 0.8233293    | 0.9922481 | 0.7743479 | not scorable | not scorable |
| #### Bn-scaff_24979_1-p17679 C-genome specific (napus-oleracea) | 0.9976076    | 0.7165311    | 1         | 0.6775374 | not scorable | not scorable |
| #### Bn-scaff_24979_1-p17946 C-genome specific (napus-oleracea) | 0.9856459    | 0.8056254    | 0.9922481 | 0.7548007 | not scorable | not scorable |
| #### Bn-scaff_24979_1-p17954 C-genome specific (napus-oleracea) | 1            | 0.8403689    | 1         | 0.7129379 | not scorable | not scorable |
| #### Bn-scaff_24979_1-p17957 C-genome specific (napus-oleracea) | 0.9976076    | 0.7921154    | 1         | 0.8492295 | not scorable | not scorable |
| #### Bn-scaff_24979_1-p40341 C-genome specific (napus-oleracea) | 0.9976076    | 0.607528     | 0.9767442 | 0.7872866 | not scorable | not scorable |
| #### Bn-scaff_24979_1-p4060 C-genome unspecific (all in)        | 0.9952153    | 0.3743893    | 0.9612403 | 0.4804736 | 1            | 0.6514571    |
| #### Bn-scaff_24979_1-p40845 genome unspecific (all in)         | 0.9784689    | 0.4207586    | 1         | 0.6853328 | 0.9917355    | 0.6782978    |
| #### Bn-scaff_24979_1-p41125 genome unspecific (all in)         | 0.9712918    | 0.3737248    | 0.9922481 | 0.7549255 | 0.9421487    | 0.8800955    |
| #### Bn-scaff_24979_1-p41679 C-genome specific (napus-oleracea) | 0.9904306    | 0.7845432    | 0.9922481 | 0.7610939 | not scorable | not scorable |
| #### Bn-scaff_24979_1-p46544 C-genome specific (napus-oleracea) | 0.9928229    | 0.7973055    | 1         | 0.6413736 | not scorable | not scorable |
| #### Bn-scaff_24979_1-p46937 C-genome specific (napus-oleracea) | 0.9952153    | 0.8044899    | 0.9922481 | 0.7905698 | not scorable | not scorable |
| #### Bn-scaff_24979_1-p54202 genome unspecific (all in)         | 0.9928229    | 0.565609     | 0.9922481 | 0.7721972 | 1            | 0.8927858    |
| #### Bn-scaff_24979_1-p7134 C-genome specific (napus-oleracea)  | 0.9880383    | 0.7330667    | 1         | 0.7982389 | not scorable | not scorable |
| #### Bn-scaff_24979_1-p73839 C-genome specific (oleracea only)  | not scorable | not scorable | 0.9767442 | 0.7690418 | not scorable | not scorable |
| #### Bn-scaff_24979_1-p76402 C-genome specific (oleracea only)  | not scorable | not scorable | 0.9689922 | 0.7025076 | not scorable | not scorable |
| #### Bn-scaff_24979_1-p76891 C-genome specific (napus-oleracea) | 0.9832536    | 0.9104227    | 0.9689922 | 0.7914264 | not scorable | not scorable |
| #### Bn-scaff_24979_1-p78048 C-genome specific (napus-oleracea) | 0.9904306    | 0.789422     | 0.9922481 | 0.6716869 | not scorable | not scorable |
| #### Bn-scaff_24979_1-p78323 C-genome specific (napus-oleracea) | 1            | 0.8064367    | 1         | 0.7971602 | not scorable | not scorable |
| #### Bn-scaff_24979_1-p980 C-genome specific (napus-oleracea)   | 0.9904306    | 0.8004358    | 0.9844961 | 0.817225  | not scorable | not scorable |
| #### Bn-scaff_24979_1-p98998 C-genome specific (napus-oleracea) | 0.9928229    | 0.9318286    | 0.9767442 | 0.8343897 | not scorable | not scorable |
| #### Bn-scaff_24979_1-p99078 C-genome specific (napus-oleracea) | 0.9928229    | 0.7648664    | 0.9844961 | 0.76427   | not scorable | not scorable |
| #### Bn-scaff_24999_1-p32039 C-genome specific (napus-oleracea) | 0.9928229    | 0.6354395    | 0.9534883 | 0.3140032 | not scorable | not scorable |
| #### Bn-scaff_25012_1-p10988 genome unspecific (all in)         | 0.9688995    | 0.5473837    | 1         | 0.8227484 | 1            | 0.907491     |
| #### Bn-scaff_25013_1-p14050 C-genome specific (oleracea only)  | not scorable | not scorable | 0.9767442 | 0.447754  | not scorable | not scorable |
| #### Bn-scaff_25040_1-p24261 genome unspecific (all in)         | 1            | 0.3585505    | 1         | 0.7528087 | 1            | 0.8236178    |
| #### Bn-scaff_25052_1-p15950 C-genome specific (oleracea only)  | not scorable | not scorable | 1         | 0.550276  | not scorable | not scorable |
| #### Bn-scaff_25052_1-p17976 genome unspecific (all in)         | 1            | 0.6307161    | 1         | 0.6754064 | 1            | 0.6395665    |
| #### Bn-scaff_25071_1-p14638 genome unspecific (all in)         | 0.9665072    | 0.2915637    | 1         | 0.7048002 | 1            | 0.842889     |

|                                                                 |              |              |              |              |              |              |
|-----------------------------------------------------------------|--------------|--------------|--------------|--------------|--------------|--------------|
| #### Bn-scaff_25094_1-p11998 C-genome specific (napus-oleracea) | 0.9928229    | 0.7384431    | 0.9922481    | 0.7062947    | not scorable | not scorable |
| #### Bn-scaff_25094_1-p12501 C-genome specific (napus-oleracea) | 0.9904306    | 0.7557186    | 0.9922481    | 0.8058613    | not scorable | not scorable |
| #### Bn-scaff_25094_1-p12658 genome unspecific (all in)         | 0.9904306    | 0.584869     | 0.9922481    | 0.5658651    | 1            | 0.8948976    |
| #### Bn-scaff_25094_1-p13129 C-genome specific (napus-oleracea) | 0.9904306    | 0.8211985    | 1            | 0.7423053    | not scorable | not scorable |
| #### Bn-scaff_25094_1-p13184 C-genome specific (napus-oleracea) | 0.9952153    | 0.6888673    | 1            | 0.6437095    | not scorable | not scorable |
| #### Bn-scaff_25094_1-p13195 C-genome specific (napus-oleracea) | 0.9976076    | 0.7725051    | 0.9844961    | 0.7211687    | not scorable | not scorable |
| #### Bn-scaff_25094_1-p13408 C-genome specific (napus-oleracea) | 0.9928229    | 0.8551714    | 1            | 0.7309338    | not scorable | not scorable |
| #### Bn-scaff_25094_1-p14407 C-genome specific (napus-oleracea) | 0.9952153    | 0.7829107    | 0.9844961    | 0.7025146    | not scorable | not scorable |
| #### Bn-scaff_25094_1-p15386 C-genome specific (napus-oleracea) | 0.9976076    | 0.845736     | 0.9922481    | 0.7524039    | not scorable | not scorable |
| #### Bn-scaff_25094_1-p15424 C-genome specific (napus-oleracea) | 0.9928229    | 0.8675371    | 1            | 0.7466133    | not scorable | not scorable |
| #### Bn-scaff_25094_1-p17205 C-genome specific (napus-oleracea) | 0.9952153    | 0.8533721    | 1            | 0.7735752    | not scorable | not scorable |
| #### Bn-scaff_25094_1-p26060 C-genome specific (napus-oleracea) | 0.9928229    | 0.7491174    | 1            | 0.7849017    | not scorable | not scorable |
| #### Bn-scaff_25094_1-p26342 C-genome specific (napus-oleracea) | 0.9904306    | 0.7138971    | 0.9844961    | 0.6358901    | not scorable | not scorable |
| #### Bn-scaff_25094_1-p26920 genome unspecific (all in)         | 1            | 0.8114662    | 1            | 0.6645222    | 1            | 0.8715127    |
| #### Bn-scaff_25094_1-p27205 C-genome specific (napus-oleracea) | 0.9928229    | 0.7872221    | 1            | 0.7682251    | not scorable | not scorable |
| #### Bn-scaff_25094_1-p29606 genome unspecific (all in)         | 0.9832536    | 0.1410821    | 0.9302326    | 0.3053825    | 1            | 0.9369881    |
| #### Bn-scaff_25094_1-p30597 C-genome specific (napus-oleracea) | 0.9928229    | 0.7937949    | 0.9922481    | 0.8251145    | not scorable | not scorable |
| #### Bn-scaff_25094_1-p31108 C-genome specific (oleracea only)  | not scorable | not scorable | 0.8837209    | 0.8305035    | not scorable | not scorable |
| #### Bn-scaff_25094_1-p31661 C-genome specific (napus-oleracea) | 0.9784689    | 0.6000824    | 0.9922481    | 0.6344112    | not scorable | not scorable |
| #### Bn-scaff_25094_1-p31685 C-genome specific (napus-oleracea) | 0.9760765    | 0.7660224    | 0.9922481    | 0.800707     | not scorable | not scorable |
| #### Bn-scaff_25094_1-p33094 genome unspecific (all in)         | 0.9712918    | 0.3824174    | 0.9922481    | 0.8389307    | 1            | 0.906221     |
| #### Bn-scaff_25094_1-p33688 genome unspecific (all in)         | 0.9425837    | 0.4896907    | 1            | 0.689781     | 1            | 0.8189201    |
| #### Bn-scaff_25094_1-p33963 C-genome specific (napus-oleracea) | 0.9808612    | 0.6872156    | 0.9922481    | 0.671226     | not scorable | not scorable |
| #### Bn-scaff_25094_1-p34503 C-genome specific (napus-oleracea) | 0.9784689    | 0.6795993    | 1            | 0.734248     | not scorable | not scorable |
| #### Bn-scaff_25094_1-p41381 C-genome specific (napus-oleracea) | 0.9880383    | 0.720399     | 0.9612403    | 0.6673359    | not scorable | not scorable |
| #### Bn-scaff_25094_1-p49709 C-genome specific (napus-oleracea) | 0.9904306    | 0.7620367    | 0.9922481    | 0.7687027    | not scorable | not scorable |
| #### Bn-scaff_25094_1-p57177 all not scorable                   | not scorable | not scorable | not scorable | not scorable | not scorable | not scorable |
| #### Bn-scaff_25094_1-p9143 C-genome specific (napus-oleracea)  | 0.9928229    | 0.7945377    | 1            | 0.7410932    | not scorable | not scorable |
| #### Bn-scaff_25094_1-p95988 C-genome specific (napus-oleracea) | 0.9904306    | 0.6892886    | 1            | 0.6400461    | not scorable | not scorable |
| #### Bn-scaff_25094_1-p96503 C-genome specific (napus-oleracea) | 0.9880383    | 0.7612854    | 0.9922481    | 0.8928364    | not scorable | not scorable |
| #### Bn-scaff_25107_1-p17604 C-genome specific (napus-oleracea) | 0.9736842    | 0.6073774    | 1            | 0.5800297    | not scorable | not scorable |
| #### Bn-scaff_25107_1-p20683 C-genome specific (napus-oleracea) | 0.9760765    | 0.7449145    | 0.9844961    | 0.8021787    | not scorable | not scorable |
| #### Bn-scaff_25107_1-p22878 C-genome specific (napus-oleracea) | 0.9832536    | 0.6907083    | 1            | 0.8178443    | not scorable | not scorable |

|                                                                 |              |              |           |           |              |              |
|-----------------------------------------------------------------|--------------|--------------|-----------|-----------|--------------|--------------|
| #### Bn-scaff_25107_1-p22897 C-genome specific (napus-oleracea) | 0.9904306    | 0.7536021    | 0.9922481 | 0.8233705 | not scorable | not scorable |
| #### Bn-scaff_25107_1-p26913 C-genome specific (napus-oleracea) | 0.9808612    | 0.7322158    | 0.9457364 | 0.7339696 | not scorable | not scorable |
| #### Bn-scaff_25107_1-p4106 C-genome specific (napus-oleracea)  | 0.9952153    | 0.7655165    | 0.9922481 | 0.8123243 | not scorable | not scorable |
| #### Bn-scaff_25107_1-p4704 C-genome specific (napus-oleracea)  | 0.9952153    | 0.7542796    | 0.9922481 | 0.8089625 | not scorable | not scorable |
| #### Bn-scaff_25107_1-p5285 C-genome specific (napus-oleracea)  | 0.9928229    | 0.6792613    | 0.8294573 | 0.7630112 | not scorable | not scorable |
| #### Bn-scaff_25139_1-p2069 genome unspecific (all in)          | 0.9569378    | 0.3590038    | 1         | 0.8131194 | 0.9834711    | 0.8152171    |
| #### Bn-scaff_25139_1-p441 genome unspecific (all in)           | 0.9856459    | 0.3081909    | 1         | 0.8047867 | 0.9917355    | 0.4509839    |
| #### Bn-scaff_25139_1-p5705 genome unspecific (all in)          | 0.9976076    | 0.8687847    | 0.9922481 | 0.7789605 | 0.8181818    | 0.9140136    |
| #### Bn-scaff_25149_1-p15397 C-genome specific (napus-oleracea) | 0.9808612    | 0.7360011    | 0.9767442 | 0.7696507 | not scorable | not scorable |
| #### Bn-scaff_25149_1-p15735 C-genome specific (napus-oleracea) | 0.9832536    | 0.7625057    | 0.9922481 | 0.8531092 | not scorable | not scorable |
| #### Bn-scaff_25149_1-p17561 C-genome specific (napus-oleracea) | 0.9425837    | 0.8129097    | 0.9457364 | 0.6744326 | not scorable | not scorable |
| #### Bn-scaff_25149_1-p17569 C-genome specific (napus-oleracea) | 0.9832536    | 0.7398171    | 1         | 0.7339984 | not scorable | not scorable |
| #### Bn-scaff_25149_1-p45585 genome unspecific (all in)         | 0.9808612    | 0.4528006    | 0.9844961 | 0.8227878 | 1            | 0.9095823    |
| #### Bn-scaff_25149_1-p45708 C-genome specific (napus-oleracea) | 0.9808612    | 0.7900484    | 0.9689922 | 0.7844704 | not scorable | not scorable |
| #### Bn-scaff_25149_1-p55004 C-genome specific (napus-oleracea) | 0.9712918    | 0.6306441    | 0.9922481 | 0.6300582 | not scorable | not scorable |
| #### Bn-scaff_25149_1-p55218 C-genome specific (napus-oleracea) | 0.9665072    | 0.8482975    | 0.9844961 | 0.7771693 | not scorable | not scorable |
| #### Bn-scaff_25149_1-p68885 genome unspecific (oleracea-rapa)  | not scorable | not scorable | 0.7751938 | 0.721013  | 1            | 0.7015616    |
| #### Bn-scaff_25149_1-p76377 C-genome specific (napus-oleracea) | 0.9712918    | 0.7492513    | 0.9069768 | 0.8334203 | not scorable | not scorable |
| #### Bn-scaff_25149_1-p79962 C-genome specific (napus-oleracea) | 0.9856459    | 0.5974941    | 1         | 0.7741924 | not scorable | not scorable |
| #### Bn-scaff_25149_1-p90545 genome unspecific (all in)         | 0.9545454    | 0.6342841    | 1         | 0.791908  | 0.9917355    | 0.9374833    |
| #### Bn-scaff_25208_1-p37421 genome unspecific (all in)         | 1            | 0.8580707    | 1         | 0.7660847 | 1            | 0.9108891    |
| #### Bn-scaff_25208_1-p7508 genome unspecific (oleracea-rapa)   | not scorable | not scorable | 1         | 0.5394405 | 1            | 0.6804142    |
| #### Bn-scaff_25208_1-p7758 genome unspecific (all in)          | 1            | 0.5169325    | 1         | 0.5699328 | 1            | 0.6236113    |
| #### Bn-scaff_25208_1-p77601 genome unspecific (all in)         | 1            | 0.5370017    | 1         | 0.5225887 | 1            | 0.711467     |
| #### Bn-scaff_25208_1-p95388 genome unspecific (all in)         | 1            | 0.5070999    | 1         | 0.5174332 | 0.9834711    | 0.750432     |
| #### Bn-scaff_25254_1-p499 genome unspecific (all in)           | 1            | 0.6827499    | 1         | 0.628372  | 0.8842975    | 0.7067187    |
| #### Bn-scaff_25262_1-p11444 genome unspecific (all in)         | 1            | 0.3267125    | 0.8527132 | 0.7123231 | 0.9669421    | 0.8105487    |
| #### Bn-scaff_25262_1-p82072 C-genome specific (oleracea only)  | not scorable | not scorable | 0.8139535 | 0.6703775 | not scorable | not scorable |
| #### Bn-scaff_25262_1-p93978 genome unspecific (oleracea-rapa)  | not scorable | not scorable | 0.8372093 | 0.6981146 | 0.9752066    | 0.7770717    |
| #### Bn-scaff_25311_1-p1307 genome unspecific (all in)          | 1            | 0.32479      | 0.9922481 | 0.708764  | 1            | 0.8207097    |
| #### Bn-scaff_25315_1-p98140 C-genome specific (napus-oleracea) | 0.7440192    | 0.7165028    | 1         | 0.9245876 | not scorable | not scorable |
| #### Bn-scaff_25323_1-p33026 C-genome specific (napus-oleracea) | 0.3588517    | 0.9283867    | 0.9844961 | 0.8282282 | not scorable | not scorable |
| #### Bn-scaff_25323_1-p34067 C-genome specific (napus-oleracea) | 1            | 0.7592598    | 1         | 0.6619043 | not scorable | not scorable |

|                                                                 |              |              |           |           |              |              |
|-----------------------------------------------------------------|--------------|--------------|-----------|-----------|--------------|--------------|
| #### Bn-scaff_25323_1-p36359 C-genome specific (napus-oleracea) | 0.9976076    | 0.3387986    | 1         | 0.7566654 | not scorable | not scorable |
| #### Bn-scaff_25323_1-p6946 C-genome specific (napus-oleracea)  | 0.9952153    | 0.7479523    | 1         | 0.6820265 | not scorable | not scorable |
| #### Bn-scaff_25323_1-p7019 C-genome specific (napus-oleracea)  | 0.9928229    | 0.8932915    | 1         | 0.7082633 | not scorable | not scorable |
| #### Bn-scaff_25323_1-p7608 genome unspecific (all in)          | 0.9808612    | 0.5840636    | 1         | 0.6501432 | 0.9834711    | 0.5586929    |
| #### Bn-scaff_25373_1-p399 C-genome specific (napus-oleracea)   | 0.9712918    | 0.6614882    | 1         | 0.6631386 | not scorable | not scorable |
| #### Bn-scaff_25373_1-p711 C-genome specific (napus-oleracea)   | 0.9641148    | 0.5108506    | 0.9844961 | 0.6008719 | not scorable | not scorable |
| #### Bn-scaff_25410_1-p17848 genome unspecific (all in)         | 0.9928229    | 0.6296189    | 0.9844961 | 0.2973176 | 1            | 0.7641606    |
| #### Bn-scaff_25413_1-p554 C-genome specific (napus-oleracea)   | 0.9808612    | 0.6781538    | 0.4341085 | 0.7733058 | not scorable | not scorable |
| #### Bn-scaff_25422_1-p95222 genome unspecific (all in)         | 0.9952153    | 0.5179033    | 1         | 0.7427565 | 1            | 0.6926108    |
| #### Bn-scaff_25427_1-p16992 C-genome specific (napus-oleracea) | 0.9593301    | 0.7445294    | 0.9922481 | 0.672066  | not scorable | not scorable |
| #### Bn-scaff_25427_1-p17459 genome unspecific (all in)         | 1            | 0.3430364    | 1         | 0.6732364 | 1            | 0.711467     |
| #### Bn-scaff_25427_1-p6503 C-genome specific (napus-oleracea)  | 0.9760765    | 0.7017453    | 0.9844961 | 0.6961647 | not scorable | not scorable |
| #### Bn-scaff_25427_1-p9879 C-genome specific (napus-oleracea)  | 0.9617225    | 0.8370767    | 0.9069768 | 0.6405314 | not scorable | not scorable |
| #### Bn-scaff_25432_1-p16404 C-genome specific (napus-oleracea) | 0.9976076    | 0.7574182    | 0.9767442 | 0.7849637 | not scorable | not scorable |
| #### Bn-scaff_25432_1-p16869 C-genome specific (napus-oleracea) | 0.9928229    | 0.6946601    | 0.9922481 | 0.5570504 | not scorable | not scorable |
| #### Bn-scaff_25432_1-p24804 C-genome specific (napus-oleracea) | 1            | 0.7737752    | 1         | 0.8539366 | not scorable | not scorable |
| #### Bn-scaff_25432_1-p27014 C-genome specific (napus-oleracea) | 1            | 0.8037791    | 0.9922481 | 0.8284472 | not scorable | not scorable |
| #### Bn-scaff_25432_1-p29690 C-genome specific (napus-oleracea) | 0.9904306    | 0.7849653    | 1         | 0.7905771 | not scorable | not scorable |
| #### Bn-scaff_25432_1-p31881 C-genome specific (napus-oleracea) | 0.9904306    | 0.7295735    | 1         | 0.6730671 | not scorable | not scorable |
| #### Bn-scaff_25432_1-p33326 C-genome specific (napus-oleracea) | 0.9976076    | 0.7730798    | 0.9922481 | 0.7313706 | not scorable | not scorable |
| #### Bn-scaff_25432_1-p34031 C-genome specific (napus-oleracea) | 0.9952153    | 0.7911404    | 1         | 0.833666  | not scorable | not scorable |
| #### Bn-scaff_25432_1-p34840 C-genome specific (napus-oleracea) | 0.9856459    | 0.818247     | 0.9767442 | 0.6717142 | not scorable | not scorable |
| #### Bn-scaff_25432_1-p40383 C-genome specific (napus-oleracea) | 0.9736842    | 0.7800612    | 0.9767442 | 0.8536466 | not scorable | not scorable |
| #### Bn-scaff_25432_1-p40426 C-genome specific (napus-oleracea) | 0.9928229    | 0.7717539    | 0.9844961 | 0.8445487 | not scorable | not scorable |
| #### Bn-scaff_25432_1-p42025 C-genome specific (napus-oleracea) | 0.9880383    | 0.8117358    | 1         | 0.8599495 | not scorable | not scorable |
| #### Bn-scaff_25432_1-p42030 C-genome specific (napus-oleracea) | 0.9832536    | 0.7387851    | 0.9844961 | 0.7904034 | not scorable | not scorable |
| #### Bn-scaff_25438_1-p11115 C-genome specific (napus-oleracea) | 0.9784689    | 0.7816414    | 1         | 0.8950453 | not scorable | not scorable |
| #### Bn-scaff_25438_1-p1174 C-genome specific (napus-oleracea)  | 0.9856459    | 0.7469296    | 0.9922481 | 0.6430948 | not scorable | not scorable |
| #### Bn-scaff_25438_1-p583 C-genome specific (napus-oleracea)   | 0.9976076    | 0.7633542    | 1         | 0.7674841 | not scorable | not scorable |
| #### Bn-scaff_25438_1-p740 C-genome specific (napus-oleracea)   | 0.9736842    | 0.7369845    | 0.9922481 | 0.8498762 | not scorable | not scorable |
| #### Bn-scaff_25438_1-p8672 C-genome specific (napus-oleracea)  | 0.9808612    | 0.7540577    | 1         | 0.7335401 | not scorable | not scorable |
| #### Bn-scaff_25457_1-p24414 genome unspecific (oleracea-rapa)  | not scorable | not scorable | 1         | 0.7473059 | 0.9917355    | 0.7243541    |
| #### Bn-scaff_25457_1-p24472 genome unspecific (oleracea-rapa)  | not scorable | not scorable | 1         | 0.8347909 | 1            | 0.9095823    |



|                                                                 |              |              |           |           |              |              |
|-----------------------------------------------------------------|--------------|--------------|-----------|-----------|--------------|--------------|
| #### Bn-scaff_25457_1-p24866 C-genome specific (napus-oleracea) | 0.9856459    | 0.3898258    | 0.9922481 | 0.7680758 | not scorable | not scorable |
| #### Bn-scaff_25457_1-p25809 C-genome specific (napus-oleracea) | 0.9976076    | 0.6590538    | 0.9922481 | 0.6813953 | not scorable | not scorable |
| #### Bn-scaff_25457_1-p26157 C-genome specific (napus-oleracea) | 1            | 0.9224326    | 0.9844961 | 0.8627084 | not scorable | not scorable |
| #### Bn-scaff_25457_1-p26187 C-genome specific (napus-oleracea) | 1            | 0.8841792    | 0.9844961 | 0.754382  | not scorable | not scorable |
| #### Bn-scaff_25457_1-p26713 C-genome specific (napus-oleracea) | 0.9784689    | 0.9523807    | 0.9689922 | 0.7112923 | not scorable | not scorable |
| #### Bn-scaff_25457_1-p27615 C-genome specific (napus-oleracea) | 0.9976076    | 0.8249482    | 0.9922481 | 0.7660049 | not scorable | not scorable |
| #### Bn-scaff_25457_1-p27663 C-genome specific (napus-oleracea) | 1            | 0.8421702    | 0.9844961 | 0.8544986 | not scorable | not scorable |
| #### Bn-scaff_25457_1-p27753 C-genome specific (napus-oleracea) | 0.9952153    | 0.867735     | 0.9844961 | 0.7779561 | not scorable | not scorable |
| #### Bn-scaff_25457_1-p27905 C-genome specific (napus-oleracea) | 0.9976076    | 0.950752     | 0.9922481 | 0.8115303 | not scorable | not scorable |
| #### Bn-scaff_25457_1-p27929 C-genome specific (napus-oleracea) | 0.9952153    | 0.724773     | 0.9922481 | 0.7280032 | not scorable | not scorable |
| #### Bn-scaff_25457_1-p27950 C-genome specific (napus-oleracea) | 0.9976076    | 0.7344022    | 1         | 0.6989577 | not scorable | not scorable |
| #### Bn-scaff_25457_1-p27951 C-genome specific (napus-oleracea) | 0.9952153    | 0.8276893    | 1         | 0.8414567 | not scorable | not scorable |
| #### Bn-scaff_25457_1-p27994 C-genome specific (napus-oleracea) | 0.9976076    | 0.7149763    | 0.9844961 | 0.7077122 | not scorable | not scorable |
| #### Bn-scaff_25457_1-p28039 C-genome specific (napus-oleracea) | 0.9952153    | 0.7404661    | 1         | 0.6839753 | not scorable | not scorable |
| #### Bn-scaff_25457_1-p28223 C-genome specific (napus-oleracea) | 0.9952153    | 0.6759084    | 0.9844961 | 0.6291847 | not scorable | not scorable |
| #### Bn-scaff_25457_1-p28231 C-genome specific (napus-oleracea) | 0.9952153    | 0.6004599    | 0.8682171 | 0.7384725 | not scorable | not scorable |
| #### Bn-scaff_25457_1-p28239 C-genome specific (napus-oleracea) | 0.9952153    | 0.7399979    | 0.9844961 | 0.6757855 | not scorable | not scorable |
| #### Bn-scaff_25457_1-p28263 C-genome specific (napus-oleracea) | 1            | 0.7170197    | 0.9844961 | 0.6880202 | not scorable | not scorable |
| #### Bn-scaff_25457_1-p28339 C-genome specific (napus-oleracea) | 0.9952153    | 0.7512584    | 0.9922481 | 0.6831563 | not scorable | not scorable |
| #### Bn-scaff_25457_1-p28680 C-genome specific (napus-oleracea) | 0.9976076    | 0.9134352    | 0.9922481 | 0.7719235 | not scorable | not scorable |
| #### Bn-scaff_25457_1-p29701 C-genome specific (napus-oleracea) | 0.9976076    | 0.829477     | 1         | 0.7482344 | not scorable | not scorable |
| #### Bn-scaff_25457_1-p29709 genome unspecific (oleracea-rapa)  | not scorable | not scorable | 1         | 0.778749  | 1            | 0.7670193    |
| #### Bn-scaff_25457_1-p29714 C-genome specific (napus-oleracea) | 0.9976076    | 0.7267584    | 0.9844961 | 0.7037884 | not scorable | not scorable |
| #### Bn-scaff_25457_1-p29788 genome unspecific (all in)         | 1            | 0.5662264    | 0.9844961 | 0.7757932 | 1            | 0.9272014    |
| #### Bn-scaff_25457_1-p30497 C-genome specific (napus-oleracea) | 0.9976076    | 0.9082916    | 1         | 0.8175719 | not scorable | not scorable |
| #### Bn-scaff_25457_1-p30602 C-genome specific (napus-oleracea) | 0.9952153    | 0.7299317    | 1         | 0.6889395 | not scorable | not scorable |
| #### Bn-scaff_25457_1-p30625 C-genome specific (napus-oleracea) | 0.9952153    | 0.8395995    | 0.9922481 | 0.7875417 | not scorable | not scorable |
| #### Bn-scaff_25457_1-p30630 C-genome specific (napus-oleracea) | 0.9952153    | 0.7902827    | 0.9844961 | 0.7025381 | not scorable | not scorable |
| #### Bn-scaff_25457_1-p30650 C-genome specific (napus-oleracea) | 0.9976076    | 0.8311345    | 0.9922481 | 0.7860767 | not scorable | not scorable |
| #### Bn-scaff_25457_1-p30655 C-genome specific (napus-oleracea) | 0.9952153    | 0.8422738    | 0.9922481 | 0.8286856 | not scorable | not scorable |
| #### Bn-scaff_25457_1-p30676 C-genome specific (napus-oleracea) | 0.9976076    | 0.9081029    | 0.9922481 | 0.7871521 | not scorable | not scorable |
| #### Bn-scaff_25457_1-p30746 C-genome specific (napus-oleracea) | 1            | 0.8605166    | 0.9922481 | 0.8099235 | not scorable | not scorable |
| #### Bn-scaff_25457_1-p80944 genome unspecific (all in)         | 0.9976076    | 0.6258895    | 1         | 0.6180217 | 0.9669421    | 0.875864     |

|                                                                 |           |           |           |           |              |              |
|-----------------------------------------------------------------|-----------|-----------|-----------|-----------|--------------|--------------|
| #### Bn-scaff_25466_1-p11848 C-genome specific (napus-oleracea) | 0.9258373 | 0.7183031 | 1         | 0.6755565 | not scorable | not scorable |
| #### Bn-scaff_25466_1-p12042 C-genome specific (napus-oleracea) | 0.9138756 | 0.7178476 | 0.9844961 | 0.7371644 | not scorable | not scorable |
| #### Bn-scaff_25466_1-p12578 C-genome specific (napus-oleracea) | 0.923445  | 0.7235802 | 1         | 0.7245917 | not scorable | not scorable |
| #### Bn-scaff_25466_1-p12628 C-genome specific (napus-oleracea) | 0.9258373 | 0.7209759 | 0.9844961 | 0.700622  | not scorable | not scorable |
| #### Bn-scaff_25466_1-p12702 C-genome specific (napus-oleracea) | 0.9186603 | 0.6960069 | 1         | 0.7051241 | not scorable | not scorable |
| #### Bn-scaff_25466_1-p13102 C-genome specific (napus-oleracea) | 0.9210526 | 0.8005517 | 0.9922481 | 0.8432001 | not scorable | not scorable |
| #### Bn-scaff_25466_1-p13157 C-genome specific (napus-oleracea) | 0.9186603 | 0.7958232 | 1         | 0.8186453 | not scorable | not scorable |
| #### Bn-scaff_25466_1-p13426 C-genome specific (napus-oleracea) | 0.9258373 | 0.7823151 | 1         | 0.7919496 | not scorable | not scorable |
| #### Bn-scaff_25466_1-p14024 C-genome specific (napus-oleracea) | 0.9162679 | 0.6725774 | 1         | 0.7087837 | not scorable | not scorable |
| #### Bn-scaff_25466_1-p14104 C-genome specific (napus-oleracea) | 0.9138756 | 0.756235  | 0.9922481 | 0.7840044 | not scorable | not scorable |
| #### Bn-scaff_25466_1-p14178 genome unspecific (all in)         | 0.9114832 | 0.7551002 | 1         | 0.8332412 | 0.8264463    | 0.80316      |
| #### Bn-scaff_25466_1-p14344 genome unspecific (all in)         | 0.8947368 | 0.7625937 | 0.9922481 | 0.7839646 | 0.8099173    | 0.8062617    |
| #### Bn-scaff_25466_1-p14407 C-genome specific (napus-oleracea) | 0.9066986 | 0.7186022 | 1         | 0.6944774 | not scorable | not scorable |
| #### Bn-scaff_25466_1-p14416 C-genome specific (napus-oleracea) | 0.9162679 | 0.6838399 | 0.9922481 | 0.6356696 | not scorable | not scorable |
| #### Bn-scaff_25466_1-p14537 C-genome specific (napus-oleracea) | 0.9066986 | 0.7915118 | 0.9844961 | 0.7788249 | not scorable | not scorable |
| #### Bn-scaff_25466_1-p14563 genome unspecific (all in)         | 0.9138756 | 0.7714831 | 0.9922481 | 0.779701  | 0.8181818    | 0.9429177    |
| #### Bn-scaff_25466_1-p15088 C-genome specific (napus-oleracea) | 0.923445  | 0.6709552 | 1         | 0.6200887 | not scorable | not scorable |
| #### Bn-scaff_25466_1-p15362 C-genome specific (napus-oleracea) | 0.9162679 | 0.7926335 | 0.9844961 | 0.7386057 | not scorable | not scorable |
| #### Bn-scaff_25466_1-p15589 C-genome specific (napus-oleracea) | 0.9138756 | 0.6891277 | 0.9922481 | 0.6041529 | not scorable | not scorable |
| #### Bn-scaff_25466_1-p15597 C-genome specific (napus-oleracea) | 0.9162679 | 0.7599471 | 1         | 0.7928957 | not scorable | not scorable |
| #### Bn-scaff_25466_1-p18979 C-genome specific (napus-oleracea) | 0.923445  | 0.7260773 | 0.9922481 | 0.7411322 | not scorable | not scorable |
| #### Bn-scaff_25466_1-p19017 C-genome specific (napus-oleracea) | 0.9210526 | 0.8590031 | 0.9069768 | 0.7133109 | not scorable | not scorable |
| #### Bn-scaff_25466_1-p19070 C-genome specific (napus-oleracea) | 0.9210526 | 0.8192139 | 1         | 0.7810921 | not scorable | not scorable |
| #### Bn-scaff_25466_1-p19284 genome unspecific (all in)         | 0.930622  | 0.3376363 | 0.8992248 | 0.7342789 | 1            | 0.8543575    |
| #### Bn-scaff_25466_1-p22094 C-genome specific (napus-oleracea) | 0.5       | 0.8820333 | 0.9922481 | 0.7944489 | not scorable | not scorable |
| #### Bn-scaff_25466_1-p22109 C-genome specific (napus-oleracea) | 0.9138756 | 0.758953  | 0.9844961 | 0.8187498 | not scorable | not scorable |
| #### Bn-scaff_25466_1-p23729 C-genome specific (napus-oleracea) | 0.8971292 | 0.7546029 | 0.8449612 | 0.8864059 | not scorable | not scorable |
| #### Bn-scaff_25466_1-p29121 genome unspecific (all in)         | 0.9760765 | 0.5506615 | 0.9844961 | 0.5547815 | 1            | 0.9023463    |
| #### Bn-scaff_25466_1-p29346 C-genome specific (napus-oleracea) | 0.9210526 | 0.7772313 | 1         | 0.8030339 | not scorable | not scorable |
| #### Bn-scaff_25466_1-p33838 C-genome specific (napus-oleracea) | 0.9545454 | 0.6457372 | 0.9612403 | 0.7318962 | not scorable | not scorable |
| #### Bn-scaff_25466_1-p74820 C-genome specific (napus-oleracea) | 0.8660287 | 0.7655485 | 0.9922481 | 0.6717083 | not scorable | not scorable |
| #### Bn-scaff_25466_1-p8800 C-genome specific (napus-oleracea)  | 0.9019139 | 0.8350744 | 0.9689922 | 0.7180122 | not scorable | not scorable |
| #### Bn-scaff_25466_1-p9410 genome unspecific (all in)          | 0.9712918 | 0.7079514 | 0.9922481 | 0.830182  | 0.9834711    | 0.8933609    |

|                                                                 |              |              |              |              |              |              |
|-----------------------------------------------------------------|--------------|--------------|--------------|--------------|--------------|--------------|
| #### Bn-scaff_25491_1-p389 genome unspecific (all in)           | 0.9976076    | 0.6804277    | 0.9612403    | 0.5788916    | 0.9669421    | 0.5855897    |
| #### Bn-scaff_25491_1-p7540 C-genome specific (napus-oleracea)  | 1            | 0.653192     | 0.9689922    | 0.5656865    | not scorable | not scorable |
| #### Bn-scaff_25491_1-p8163 genome unspecific (all in)          | 0.9952153    | 0.5779752    | 1            | 0.6527686    | 1            | 0.9083099    |
| #### Bn-scaff_25516_1-p11997 genome unspecific (all in)         | 0.9928229    | 0.6305527    | 1            | 0.5467952    | 1            | 0.809635     |
| #### Bn-scaff_25516_1-p13240 C-genome specific (napus-oleracea) | 0.9641148    | 0.6073165    | 0.9922481    | 0.5592017    | not scorable | not scorable |
| #### Bn-scaff_25516_1-p14443 C-genome specific (napus-oleracea) | 0.9928229    | 0.7932267    | 0.9844961    | 0.8211176    | not scorable | not scorable |
| #### Bn-scaff_25535_1-p2682 genome unspecific (all in)          | 0.9473684    | 0.2337853    | 0.9612403    | 0.6993101    | 1            | 0.70513      |
| #### Bn-scaff_25535_1-p2855 genome unspecific (all in)          | 1            | 0.6980491    | 0.9302326    | 0.7344461    | 1            | 0.7494321    |
| #### Bn-scaff_25535_1-p416 genome unspecific (all in)           | 0.9521531    | 0.27801      | 0.9689922    | 0.8015544    | 1            | 0.8804972    |
| #### Bn-scaff_25535_1-p574 A-genome specific (napus-rapa)       | 0.9545454    | 0.3644901    | not scorable | not scorable | 1            | 0.8826285    |
| #### Bn-scaff_25543_1-p20075 C-genome specific (oleracea only)  | not scorable | not scorable | 1            | 0.4975076    | not scorable | not scorable |
| #### Bn-scaff_25543_1-p21085 C-genome specific (napus-oleracea) | 0.9904306    | 0.44072      | 1            | 0.8591219    | not scorable | not scorable |
| #### Bn-scaff_25543_1-p56354 genome unspecific (all in)         | 1            | 0.7864944    | 1            | 0.8072273    | 1            | 0.9171332    |
| #### Bn-scaff_25543_1-p6077 C-genome specific (napus-oleracea)  | 0.9952153    | 0.8254969    | 0.9844961    | 0.7247799    | not scorable | not scorable |
| #### Bn-scaff_25545_1-p10968 C-genome specific (napus-oleracea) | 0.9808612    | 0.6562764    | 1            | 0.6794332    | not scorable | not scorable |
| #### Bn-scaff_25545_1-p11627 C-genome specific (napus-oleracea) | 0.9641148    | 0.7856769    | 1            | 0.7932746    | not scorable | not scorable |
| #### Bn-scaff_25545_1-p12404 C-genome specific (napus-oleracea) | 0.9832536    | 0.761391     | 0.9922481    | 0.7951779    | not scorable | not scorable |
| #### Bn-scaff_25545_1-p12590 C-genome specific (napus-oleracea) | 0.9832536    | 0.6849049    | 0.9922481    | 0.6576525    | not scorable | not scorable |
| #### Bn-scaff_25545_1-p12725 C-genome specific (napus-oleracea) | 0.9832536    | 0.7632224    | 1            | 0.7619844    | not scorable | not scorable |
| #### Bn-scaff_25545_1-p12860 C-genome specific (oleracea only)  | not scorable | not scorable | 0.7906977    | 0.5568078    | not scorable | not scorable |
| #### Bn-scaff_25545_1-p14023 C-genome specific (napus-oleracea) | 0.9760765    | 0.7332984    | 0.9612403    | 0.7533373    | not scorable | not scorable |
| #### Bn-scaff_25545_1-p14778 C-genome specific (napus-oleracea) | 0.9736842    | 0.7749913    | 0.9922481    | 0.7946786    | not scorable | not scorable |
| #### Bn-scaff_25545_1-p17190 C-genome specific (napus-oleracea) | 0.9665072    | 0.7527093    | 1            | 0.7524914    | not scorable | not scorable |
| #### Bn-scaff_25595_1-p24167 genome unspecific (all in)         | 0.9521531    | 0.2789629    | 1            | 0.6343148    | 0.9669421    | 0.4042577    |
| #### Bn-scaff_25595_1-p30366 genome unspecific (all in)         | 0.9976076    | 0.6250604    | 1            | 0.8025758    | 1            | 0.9183376    |
| #### Bn-scaff_25595_1-p33199 genome unspecific (all in)         | 0.9760765    | 0.4612715    | 1            | 0.8764044    | 0.9917355    | 0.7141175    |
| #### Bn-scaff_25595_1-p41130 C-genome specific (napus-oleracea) | 0.9928229    | 0.780109     | 1            | 0.7644856    | not scorable | not scorable |
| #### Bn-scaff_25595_1-p41466 genome unspecific (oleracea-rapa)  | not scorable | not scorable | 0.9689922    | 0.2661306    | 0.9917355    | 0.8295695    |
| #### Bn-scaff_25595_1-p41476 genome unspecific (all in)         | 1            | 0.5277463    | 1            | 0.5310478    | 0.9917355    | 0.8219053    |
| #### Bn-scaff_25595_1-p42344 C-genome specific (napus-oleracea) | 0.9712918    | 0.7197118    | 0.8604651    | 0.80773      | not scorable | not scorable |
| #### Bn-scaff_25595_1-p57852 genome unspecific (all in)         | 0.9976076    | 0.4793564    | 1            | 0.4585508    | 0.9917355    | 0.4704902    |
| #### Bn-scaff_25595_1-p57891 genome unspecific (oleracea-rapa)  | not scorable | not scorable | 1            | 0.3861855    | 0.9917355    | 0.5249787    |
| #### Bn-scaff_25628_1-p10601 C-genome specific (oleracea only)  | not scorable | not scorable | 0.9922481    | 0.7367786    | not scorable | not scorable |

|                                                                 |              |              |           |           |              |              |
|-----------------------------------------------------------------|--------------|--------------|-----------|-----------|--------------|--------------|
| #### Bn-scaff_25628_1-p36781C-genome specific (napus-oleracea)  | 1            | 0.6322179    | 1         | 0.7048348 | not scorable | not scorable |
| #### Bn-scaff_25628_1-p3706 genome unspecific (all in)          | 0.9928229    | 0.3221554    | 1         | 0.6965388 | 0.9752066    | 0.6910374    |
| #### Bn-scaff_25628_1-p3726 genome unspecific (all in)          | 0.9688995    | 0.3785248    | 1         | 0.9452002 | 0.9917355    | 0.6470773    |
| #### Bn-scaff_25684_1-p3459 C-genome specific (napus-oleracea)  | 0.9928229    | 0.7075068    | 0.9767442 | 0.7207046 | not scorable | not scorable |
| #### Bn-scaff_25686_1-p7882 genome unspecific (all in)          | 0.9736842    | 0.3190199    | 0.9922481 | 0.6496356 | 1            | 0.7335367    |
| #### Bn-scaff_25686_1-p9156 genome unspecific (all in)          | 0.937799     | 0.4869413    | 0.9922481 | 0.8327829 | 1            | 0.905379     |
| #### Bn-scaff_25690_1-p287 C-genome specific (napus-oleracea)   | 0.9832536    | 0.7985871    | 0.9922481 | 0.7229437 | not scorable | not scorable |
| #### Bn-scaff_25704_1-p13849 C-genome specific (napus-oleracea) | 0.8684211    | 0.9236678    | 1         | 0.8220318 | not scorable | not scorable |
| #### Bn-scaff_25704_1-p13964 C-genome specific (napus-oleracea) | 0.6124402    | 0.7925252    | 0.9922481 | 0.7785188 | not scorable | not scorable |
| #### Bn-scaff_25704_1-p15568 genome unspecific (all in)         | 0.9425837    | 0.5856684    | 1         | 0.7937849 | 1            | 0.9450698    |
| #### Bn-scaff_25704_1-p15581 C-genome specific (napus-oleracea) | 0.6483254    | 0.8406566    | 1         | 0.7738513 | not scorable | not scorable |
| #### Bn-scaff_25704_1-p16835 C-genome specific (napus-oleracea) | 0.6483254    | 0.8778643    | 0.9922481 | 0.7823473 | not scorable | not scorable |
| #### Bn-scaff_25704_1-p19623 genome unspecific (all in)         | 0.645933     | 0.7082921    | 1         | 0.7135619 | 1            | 0.9142675    |
| #### Bn-scaff_25704_1-p20587 C-genome specific (napus-oleracea) | 0.6483254    | 0.7695484    | 1         | 0.6837258 | not scorable | not scorable |
| #### Bn-scaff_25704_1-p34917 C-genome specific (napus-oleracea) | 0.6363636    | 0.7359528    | 0.9922481 | 0.7259961 | not scorable | not scorable |
| #### Bn-scaff_25704_1-p4720 C-genome specific (oleracea only)   | not scorable | not scorable | 0.9922481 | 0.8596618 | not scorable | not scorable |
| #### Bn-scaff_25704_1-p4837 C-genome specific (napus-oleracea)  | 0.6507177    | 0.911436     | 1         | 0.839282  | not scorable | not scorable |
| #### Bn-scaff_25704_1-p4893 C-genome specific (napus-oleracea)  | 0.6507177    | 0.8667976    | 0.9844961 | 0.6864243 | not scorable | not scorable |
| #### Bn-scaff_25704_1-p9158 C-genome specific (napus-oleracea)  | 0.6267943    | 0.8300663    | 0.875969  | 0.6972542 | not scorable | not scorable |
| #### Bn-scaff_25705_1-p10280 C-genome specific (napus-oleracea) | 0.9976076    | 0.7364477    | 1         | 0.7778595 | not scorable | not scorable |
| #### Bn-scaff_25739_1-p2613 genome unspecific (all in)          | 0.9832536    | 0.5199257    | 1         | 0.8775906 | 1            | 0.9151708    |
| #### Bn-scaff_25740_1-p10342 C-genome specific (napus-oleracea) | 0.9760765    | 0.8034807    | 0.8449612 | 0.8935473 | not scorable | not scorable |
| #### Bn-scaff_25750_1-p26267 C-genome specific (napus-oleracea) | 0.9712918    | 0.8024323    | 1         | 0.8438823 | not scorable | not scorable |
| #### Bn-scaff_25754_1-p259 genome unspecific (all in)           | 1            | 0.5628911    | 0.9069768 | 0.1600683 | 1            | 0.8166348    |
| #### Bn-scaff_25766_1-p21259 C-genome specific (napus-oleracea) | 0.9976076    | 0.8793468    | 1         | 0.8451487 | not scorable | not scorable |
| #### Bn-scaff_25766_1-p23436 C-genome specific (napus-oleracea) | 0.9976076    | 0.7972801    | 1         | 0.7274231 | not scorable | not scorable |
| #### Bn-scaff_25833_1-p346 C-genome specific (napus-oleracea)   | 0.9976076    | 0.5977729    | 1         | 0.7108442 | not scorable | not scorable |
| #### Bn-scaff_25869_1-p1017 genome unspecific (all in)          | 0.9880383    | 0.6265938    | 0.9922481 | 0.6948747 | 0.9752066    | 0.7308889    |
| #### Bn-scaff_25869_1-p1568 C-genome specific (napus-oleracea)  | 0.9976076    | 0.8494648    | 1         | 0.7692341 | not scorable | not scorable |
| #### Bn-scaff_25870_1-p48609 C-genome specific (napus-oleracea) | 0.9952153    | 0.3952023    | 0.9689922 | 0.413572  | not scorable | not scorable |
| #### Bn-scaff_25870_1-p80252 genome unspecific (oleracea-rapa)  | not scorable | not scorable | 1         | 0.77039   | 1            | 0.9044098    |
| #### Bn-scaff_25870_1-p81302 C-genome specific (napus-oleracea) | 0.9928229    | 0.3990585    | 1         | 0.7835829 | not scorable | not scorable |
| #### Bn-scaff_25878_1-p13369 C-genome specific (napus-oleracea) | 0.9880383    | 0.8350118    | 1         | 0.7714494 | not scorable | not scorable |

|                                                                |           |           |           |           |              |              |
|----------------------------------------------------------------|-----------|-----------|-----------|-----------|--------------|--------------|
| #### Bn-scaff_25878_1-p13561C-genome specific (napus-oleracea) | 0.9832536 | 0.8736261 | 0.9922481 | 0.7647003 | not scorable | not scorable |
| #### Bn-scaff_25878_1-p16359genome unspecific (all in)         | 1         | 0.5203438 | 1         | 0.4807086 | 0.9834711    | 0.5073346    |
| #### Bn-scaff_25878_1-p1701 C-genome specific (napus-oleracea) | 0.9928229 | 0.7955098 | 0.9767442 | 0.7083131 | not scorable | not scorable |
| #### Bn-scaff_25878_1-p861 C-genome specific (napus-oleracea)  | 0.9641148 | 0.8381448 | 0.9922481 | 0.8229404 | not scorable | not scorable |
| #### Bn-scaff_25878_1-p8784 C-genome specific (napus-oleracea) | 0.9832536 | 0.8290267 | 0.5736434 | 0.8038948 | not scorable | not scorable |
| #### Bn-scaff_25881_1-p1019 C-genome specific (napus-oleracea) | 0.937799  | 0.2139473 | 0.9922481 | 0.3633291 | not scorable | not scorable |
| #### Bn-scaff_25928_1-p546 genome unspecific (all in)          | 1         | 0.6458212 | 1         | 0.686489  | 1            | 0.6622245    |
| #### Bn-scaff_25960_1-p10431C-genome specific (napus-oleracea) | 0.9976076 | 0.7838355 | 1         | 0.6787507 | not scorable | not scorable |
| #### Bn-scaff_25960_1-p10445C-genome specific (napus-oleracea) | 0.9904306 | 0.8045924 | 0.9922481 | 0.7571667 | not scorable | not scorable |
| #### Bn-scaff_25960_1-p11175C-genome specific (napus-oleracea) | 0.9928229 | 0.6818528 | 1         | 0.6948627 | not scorable | not scorable |
| #### Bn-scaff_25960_1-p14036genome unspecific (all in)         | 0.9641148 | 0.6822154 | 0.9767442 | 0.7078774 | 0.9669421    | 0.8682521    |
| #### Bn-scaff_25960_1-p20846genome unspecific (all in)         | 0.9928229 | 0.4225056 | 1         | 0.7297394 | 1            | 0.8516949    |
| #### Bn-scaff_25960_1-p55555C-genome specific (napus-oleracea) | 0.9449761 | 0.2540421 | 1         | 0.7719674 | not scorable | not scorable |
| #### Bn-scaff_25960_1-p76578genome unspecific (all in)         | 0.9928229 | 0.3899018 | 1         | 0.7295761 | 0.9917355    | 0.7609705    |
| #### Bn-scaff_25960_1-p76841genome unspecific (all in)         | 0.9952153 | 0.4827991 | 1         | 0.7454535 | 1            | 0.8471407    |
| #### Bn-scaff_25970_1-p12375C-genome specific (napus-oleracea) | 0.9880383 | 0.8179078 | 0.875969  | 0.6628189 | not scorable | not scorable |
| #### Bn-scaff_25981_1-p11041C-genome specific (napus-oleracea) | 0.9808612 | 0.8678061 | 0.8604651 | 0.7848645 | not scorable | not scorable |
| #### Bn-scaff_25981_1-p13076genome unspecific (all in)         | 1         | 0.5410467 | 1         | 0.5591999 | 1            | 0.4989409    |
| #### Bn-scaff_25981_1-p14441C-genome specific (napus-oleracea) | 0.9928229 | 0.6053608 | 1         | 0.630519  | not scorable | not scorable |
| #### Bn-scaff_25981_1-p15671C-genome specific (napus-oleracea) | 0.9784689 | 0.3067348 | 0.9922481 | 0.2357753 | not scorable | not scorable |
| #### Bn-scaff_25981_1-p18099C-genome specific (napus-oleracea) | 0.9976076 | 0.7862711 | 0.9767442 | 0.365547  | not scorable | not scorable |
| #### Bn-scaff_25981_1-p18329C-genome specific (napus-oleracea) | 0.9952153 | 0.861993  | 0.9922481 | 0.290418  | not scorable | not scorable |
| #### Bn-scaff_25981_1-p18787C-genome specific (napus-oleracea) | 0.9952153 | 0.8510579 | 1         | 0.7125334 | not scorable | not scorable |
| #### Bn-scaff_25981_1-p19174genome unspecific (all in)         | 0.9880383 | 0.7497864 | 1         | 0.6684168 | 0.9917355    | 0.8882838    |
| #### Bn-scaff_25981_1-p20688C-genome specific (napus-oleracea) | 0.9449761 | 0.7187564 | 1         | 0.7963138 | not scorable | not scorable |
| #### Bn-scaff_25981_1-p20957C-genome specific (napus-oleracea) | 0.9832536 | 0.6289717 | 1         | 0.8301444 | not scorable | not scorable |
| #### Bn-scaff_25981_1-p22356C-genome specific (napus-oleracea) | 0.9952153 | 0.7667999 | 1         | 0.8642113 | not scorable | not scorable |
| #### Bn-scaff_25981_1-p22382C-genome specific (napus-oleracea) | 0.9976076 | 0.7127675 | 1         | 0.7621634 | not scorable | not scorable |
| #### Bn-scaff_25981_1-p22435C-genome specific (napus-oleracea) | 0.9952153 | 0.8960832 | 1         | 0.7856213 | not scorable | not scorable |
| #### Bn-scaff_25981_1-p22522C-genome specific (napus-oleracea) | 1         | 0.7813029 | 1         | 0.8352644 | not scorable | not scorable |
| #### Bn-scaff_25981_1-p22608C-genome specific (napus-oleracea) | 1         | 0.8721167 | 1         | 0.919641  | not scorable | not scorable |
| #### Bn-scaff_25981_1-p23367C-genome specific (napus-oleracea) | 0.9354067 | 0.2581623 | 1         | 0.6684164 | not scorable | not scorable |
| #### Bn-scaff_25981_1-p23792C-genome specific (napus-oleracea) | 0.9760765 | 0.2979766 | 0.9379845 | 0.2938892 | not scorable | not scorable |

|                                                                 |              |              |              |              |              |              |
|-----------------------------------------------------------------|--------------|--------------|--------------|--------------|--------------|--------------|
| #### Bn-scaff_25981_1-p24056 C-genome specific (napus-oleracea) | 1            | 0.862555     | 1            | 0.7825954    | not scorable | not scorable |
| #### Bn-scaff_25981_1-p24070 C-genome specific (napus-oleracea) | 0.9856459    | 0.7875397    | 0.8604651    | 0.8037807    | not scorable | not scorable |
| #### Bn-scaff_25981_1-p24095 C-genome specific (napus-oleracea) | 0.9976076    | 0.6764763    | 1            | 0.680517     | not scorable | not scorable |
| #### Bn-scaff_25981_1-p24118 C-genome specific (napus-oleracea) | 1            | 0.7750235    | 1            | 0.9103877    | not scorable | not scorable |
| #### Bn-scaff_25981_1-p28829 C-genome specific (napus-oleracea) | 0.9904306    | 0.8722081    | 1            | 0.9196815    | not scorable | not scorable |
| #### Bn-scaff_25981_1-p29752 C-genome specific (napus-oleracea) | 0.9904306    | 0.8195789    | 1            | 0.8474331    | not scorable | not scorable |
| #### Bn-scaff_25981_1-p31660 C-genome specific (napus-oleracea) | 0.9952153    | 0.8218576    | 0.9922481    | 0.7098398    | not scorable | not scorable |
| #### Bn-scaff_25981_1-p33278 genome unspecific (all in)         | 1            | 0.6316987    | 1            | 0.7391928    | 1            | 0.7884539    |
| #### Bn-scaff_25981_1-p85796 C-genome specific (napus-oleracea) | 0.9928229    | 0.7996503    | 1            | 0.8496954    | not scorable | not scorable |
| #### Bn-scaff_25981_1-p90999 C-genome specific (napus-oleracea) | 1            | 0.7871751    | 1            | 0.822496     | not scorable | not scorable |
| #### Bn-scaff_25991_1-p10385 genome unspecific (all in)         | 0.9880383    | 0.3395002    | 0.9922481    | 0.4039021    | 1            | 0.786476     |
| #### Bn-scaff_25991_1-p10879 A-genome specific (napus-rapa)     | 0.9138756    | 0.2143353    | not scorable | not scorable | 1            | 0.7770717    |
| #### Bn-scaff_26004_1-p96 C-genome specific (napus-oleracea)    | 0.9928229    | 0.7344031    | 0.9302326    | 0.6248262    | not scorable | not scorable |
| #### Bn-scaff_26015_1-p26371 genome unspecific (oleracea-rapa)  | not scorable | not scorable | 0.9379845    | 0.8127086    | 1            | 0.8812959    |
| #### Bn-scaff_26023_1-p10596 C-genome specific (napus-oleracea) | 0.9928229    | 0.5568992    | 0.9922481    | 0.7305953    | not scorable | not scorable |
| #### Bn-scaff_26023_1-p19550 A-genome specific (rapa only)      | not scorable | not scorable | not scorable | not scorable | 0.9917355    | 0.9144379    |
| #### Bn-scaff_26033_1-p11199 C-genome specific (napus-oleracea) | 0.7894737    | 0.7521185    | 0.503876     | 0.6519071    | not scorable | not scorable |
| #### Bn-scaff_26033_1-p11857 C-genome specific (napus-oleracea) | 0.8133971    | 0.7244055    | 0.503876     | 0.8433272    | not scorable | not scorable |
| #### Bn-scaff_26033_1-p11908 C-genome specific (napus-oleracea) | 0.8301435    | 0.7568589    | 0.503876     | 0.7755813    | not scorable | not scorable |
| #### Bn-scaff_26033_1-p26555 C-genome specific (napus-oleracea) | 0.7942584    | 0.7685035    | 0.9922481    | 0.8492769    | not scorable | not scorable |
| #### Bn-scaff_26053_1-p11358 C-genome specific (napus-oleracea) | 0.9425837    | 0.8056243    | 1            | 0.7555544    | not scorable | not scorable |
| #### Bn-scaff_26053_1-p12887 C-genome specific (napus-oleracea) | 0.9832536    | 0.8019947    | 1            | 0.7313254    | not scorable | not scorable |
| #### Bn-scaff_26053_1-p13251 C-genome specific (napus-oleracea) | 0.9832536    | 0.7142578    | 1            | 0.74687      | not scorable | not scorable |
| #### Bn-scaff_26053_1-p13306 C-genome specific (napus-oleracea) | 0.9688995    | 0.6863935    | 0.9922481    | 0.6525966    | not scorable | not scorable |
| #### Bn-scaff_26053_1-p13667 C-genome specific (napus-oleracea) | 0.9880383    | 0.7309626    | 1            | 0.7330409    | not scorable | not scorable |
| #### Bn-scaff_26053_1-p13823 C-genome specific (napus-oleracea) | 0.9952153    | 0.7190657    | 1            | 0.8374494    | not scorable | not scorable |
| #### Bn-scaff_26053_1-p14177 C-genome specific (napus-oleracea) | 0.9856459    | 0.8350324    | 1            | 0.7575074    | not scorable | not scorable |
| #### Bn-scaff_26053_1-p14471 C-genome specific (napus-oleracea) | 0.9928229    | 0.7538481    | 1            | 0.7634535    | not scorable | not scorable |
| #### Bn-scaff_26053_1-p1756 C-genome specific (napus-oleracea)  | 0.9928229    | 0.8037497    | 1            | 0.9084736    | not scorable | not scorable |
| #### Bn-scaff_26053_1-p4397 C-genome specific (napus-oleracea)  | 0.9832536    | 0.8830391    | 1            | 0.7047026    | not scorable | not scorable |
| #### Bn-scaff_26053_1-p4638 C-genome specific (napus-oleracea)  | 0.9928229    | 0.8778374    | 1            | 0.942522     | not scorable | not scorable |
| #### Bn-scaff_26053_1-p5000 C-genome specific (napus-oleracea)  | 0.9760765    | 0.8521783    | 0.9922481    | 0.7800961    | not scorable | not scorable |
| #### Bn-scaff_26053_1-p5059 C-genome specific (napus-oleracea)  | 0.9928229    | 0.801511     | 1            | 0.761642     | not scorable | not scorable |

|                                                                 |              |              |              |   |              |              |              |
|-----------------------------------------------------------------|--------------|--------------|--------------|---|--------------|--------------|--------------|
| #### Bn-scaff_26053_1-p5607 C-genome specific (napus-oleracea)  | 0.9856459    | 0.8586746    |              | 1 | 0.7638397    | not scorable | not scorable |
| #### Bn-scaff_26053_1-p5668 C-genome specific (napus-oleracea)  | 0.9976076    | 0.7527562    |              | 1 | 0.7051809    | not scorable | not scorable |
| #### Bn-scaff_26053_1-p6095 C-genome specific (napus-oleracea)  | 0.9808612    | 0.7838155    | 0.9844961    |   | 0.6970668    | not scorable | not scorable |
| #### Bn-scaff_26053_1-p6487 C-genome specific (napus-oleracea)  | 0.9856459    | 0.800547     |              | 1 | 0.8133097    | not scorable | not scorable |
| #### Bn-scaff_26053_1-p710 C-genome specific (napus-oleracea)   | 0.9952153    | 0.7660083    |              | 1 | 0.7028637    | not scorable | not scorable |
| #### Bn-scaff_26075_1-p11217 genome unspecific (all in)         | 0.9976076    | 0.6129675    |              | 1 | 0.5782619    |              | 1 0.6649741  |
| #### Bn-scaff_26075_1-p20662 napus specific                     | 0.9808612    | 0.7746626    | not scorable |   | not scorable | not scorable | not scorable |
| #### Bn-scaff_26075_1-p53467 C-genome specific (napus-oleracea) |              | 1 0.4615334  | 0.8294573    |   | 0.3976259    | not scorable | not scorable |
| #### Bn-scaff_26075_1-p55570 C-genome specific (napus-oleracea) |              | 1 0.7992164  |              | 1 | 0.6811854    | not scorable | not scorable |
| #### Bn-scaff_26075_1-p57718 genome unspecific (all in)         |              | 1 0.7089862  |              | 1 | 0.8234941    | 0.9834711    | 0.7127191    |
| #### Bn-scaff_26075_1-p83989 C-genome specific (napus-oleracea) |              | 1 0.5759571  |              | 1 | 0.5665928    | not scorable | not scorable |
| #### Bn-scaff_26086_1-p11779 C-genome specific (napus-oleracea) | 0.9066986    | 0.8888069    | 0.9922481    |   | 0.8391924    | not scorable | not scorable |
| #### Bn-scaff_26100_1-p12101 C-genome specific (napus-oleracea) | 0.9808612    | 0.8440034    | 0.9224806    |   | 0.853522     | not scorable | not scorable |
| #### Bn-scaff_26100_1-p12687 C-genome specific (napus-oleracea) | 0.9856459    | 0.9523212    |              | 1 | 0.8764575    | not scorable | not scorable |
| #### Bn-scaff_26100_1-p12756 C-genome specific (napus-oleracea) | 0.9832536    | 0.7552096    | 0.9069768    |   | 0.727371     | not scorable | not scorable |
| #### Bn-scaff_26100_1-p41294 genome unspecific (oleracea-rapa)  | not scorable | not scorable |              | 1 | 0.2779695    |              | 1 0.7472355  |
| #### Bn-scaff_26101_1-p10245 C-genome specific (napus-oleracea) | 0.9497608    | 0.733325     |              | 1 | 0.6667807    | not scorable | not scorable |
| #### Bn-scaff_26101_1-p11278 C-genome specific (napus-oleracea) | 0.9832536    | 0.7742367    | 0.9844961    |   | 0.7942102    | not scorable | not scorable |
| #### Bn-scaff_26101_1-p11286 C-genome specific (napus-oleracea) | 0.9856459    | 0.7594029    | 0.9922481    |   | 0.8677934    | not scorable | not scorable |
| #### Bn-scaff_26101_1-p11397 C-genome specific (napus-oleracea) | 0.9688995    | 0.6826096    | 0.9767442    |   | 0.6836202    | not scorable | not scorable |
| #### Bn-scaff_26101_1-p11403 genome unspecific (oleracea-rapa)  | not scorable | not scorable | 0.9069768    |   | 0.6011433    |              | 1 0.9333565  |
| #### Bn-scaff_26101_1-p11702 C-genome specific (napus-oleracea) | 0.9736842    | 0.843751     | 0.9767442    |   | 0.7499294    | not scorable | not scorable |
| #### Bn-scaff_26101_1-p11758 C-genome specific (napus-oleracea) | 0.9617225    | 0.8913096    | 0.9922481    |   | 0.7992874    | not scorable | not scorable |
| #### Bn-scaff_26101_1-p11818 C-genome specific (napus-oleracea) | 0.9617225    | 0.8362917    | 0.9844961    |   | 0.7131979    | not scorable | not scorable |
| #### Bn-scaff_26101_1-p11843 C-genome specific (napus-oleracea) | 0.9880383    | 0.8132537    |              | 1 | 0.8229404    | not scorable | not scorable |
| #### Bn-scaff_26101_1-p11893 C-genome specific (napus-oleracea) | 0.9760765    | 0.5910538    | 0.9844961    |   | 0.5245405    | not scorable | not scorable |
| #### Bn-scaff_26101_1-p11912 C-genome specific (napus-oleracea) | 0.9688995    | 0.8567331    | 0.9844961    |   | 0.8026057    | not scorable | not scorable |
| #### Bn-scaff_26101_1-p11958 C-genome specific (napus-oleracea) | 0.9856459    | 0.8250198    | 0.9844961    |   | 0.6966766    | not scorable | not scorable |
| #### Bn-scaff_26101_1-p11965 C-genome specific (napus-oleracea) | 0.9856459    | 0.7679416    |              | 1 | 0.7231216    | not scorable | not scorable |
| #### Bn-scaff_26101_1-p11970 C-genome specific (napus-oleracea) | 0.9784689    | 0.8085696    |              | 1 | 0.8191828    | not scorable | not scorable |
| #### Bn-scaff_26101_1-p11986 C-genome specific (napus-oleracea) | 0.9665072    | 0.7909172    |              | 1 | 0.8434498    | not scorable | not scorable |
| #### Bn-scaff_26101_1-p11996 C-genome specific (napus-oleracea) | 0.9736842    | 0.7404088    |              | 1 | 0.7902137    | not scorable | not scorable |
| #### Bn-scaff_26101_1-p12008 C-genome specific (napus-oleracea) | 0.9736842    | 0.8135549    | 0.9922481    |   | 0.7389398    | not scorable | not scorable |

|                                                                 |              |              |              |              |              |              |
|-----------------------------------------------------------------|--------------|--------------|--------------|--------------|--------------|--------------|
| #### Bn-scaff_26101_1-p12055 C-genome specific (napus-oleracea) | 0.9760765    | 0.7940207    | 0.9922481    | 0.8426623    | not scorable | not scorable |
| #### Bn-scaff_26101_1-p13434 genome unspecific (all in)         | 0.9712918    | 0.5804761    | 0.9922481    | 0.7635784    | 0.9752066    | 0.951645     |
| #### Bn-scaff_26101_1-p13600 C-genome specific (napus-oleracea) | 0.8684211    | 0.8793229    | 0.7751938    | 0.9101435    | not scorable | not scorable |
| #### Bn-scaff_26101_1-p13622 C-genome specific (napus-oleracea) | 0.9736842    | 0.7875411    | 0.9922481    | 0.767615     | not scorable | not scorable |
| #### Bn-scaff_26101_1-p13650 C-genome specific (napus-oleracea) | 0.9736842    | 0.7728095    | 1            | 0.7811191    | not scorable | not scorable |
| #### Bn-scaff_26101_1-p13748 C-genome specific (napus-oleracea) | 0.9712918    | 0.7545975    | 1            | 0.7323022    | not scorable | not scorable |
| #### Bn-scaff_26101_1-p13899 C-genome specific (napus-oleracea) | 0.9712918    | 0.8010313    | 1            | 0.8330945    | not scorable | not scorable |
| #### Bn-scaff_26101_1-p13906 C-genome specific (napus-oleracea) | 0.9760765    | 0.8089431    | 0.9844961    | 0.8391924    | not scorable | not scorable |
| #### Bn-scaff_26101_1-p13909 C-genome specific (napus-oleracea) | 0.9832536    | 0.7686468    | 1            | 0.8351377    | not scorable | not scorable |
| #### Bn-scaff_26101_1-p13914 C-genome specific (napus-oleracea) | 0.9641148    | 0.7653273    | 1            | 0.7999029    | not scorable | not scorable |
| #### Bn-scaff_26101_1-p13923 C-genome specific (napus-oleracea) | 0.9784689    | 0.7769985    | 1            | 0.8112668    | not scorable | not scorable |
| #### Bn-scaff_26101_1-p14640 C-genome specific (napus-oleracea) | 0.9736842    | 0.7825444    | 0.9922481    | 0.8010696    | not scorable | not scorable |
| #### Bn-scaff_26101_1-p14691 C-genome specific (napus-oleracea) | 0.9712918    | 0.7908064    | 1            | 0.7117806    | not scorable | not scorable |
| #### Bn-scaff_26101_1-p14698 C-genome specific (napus-oleracea) | 0.9760765    | 0.8128157    | 0.9922481    | 0.7353595    | not scorable | not scorable |
| #### Bn-scaff_26101_1-p14724 C-genome specific (napus-oleracea) | 0.9808612    | 0.7892546    | 0.9922481    | 0.8044534    | not scorable | not scorable |
| #### Bn-scaff_26101_1-p14738 C-genome specific (napus-oleracea) | 0.9784689    | 0.7754314    | 0.9922481    | 0.792703     | not scorable | not scorable |
| #### Bn-scaff_26101_1-p14742 C-genome specific (napus-oleracea) | 0.9760765    | 0.770384     | 1            | 0.8273903    | not scorable | not scorable |
| #### Bn-scaff_26101_1-p17677 all not scorable                   | not scorable | not scorable | not scorable | not scorable | not scorable | not scorable |
| #### Bn-scaff_26101_1-p25388 C-genome specific (napus-oleracea) | 0.9736842    | 0.7960282    | 1            | 0.7425532    | not scorable | not scorable |
| #### Bn-scaff_26101_1-p25897 C-genome specific (napus-oleracea) | 0.9736842    | 0.4253844    | 0.9689922    | 0.5404279    | not scorable | not scorable |
| #### Bn-scaff_26101_1-p76106 C-genome specific (napus-oleracea) | 1            | 0.5650117    | 1            | 0.6107932    | not scorable | not scorable |
| #### Bn-scaff_26101_1-p87214 C-genome specific (napus-oleracea) | 0.9641148    | 0.7076083    | 0.9534883    | 0.5704907    | not scorable | not scorable |
| #### Bn-scaff_26139_1-p10638 genome unspecific (all in)         | 0.9665072    | 0.2094488    | 0.8914729    | 0.1495485    | 0.9752066    | 0.8529496    |
| #### Bn-scaff_26139_1-p10656 genome unspecific (all in)         | 0.9545454    | 0.1644579    | 1            | 0.7770717    | 0.8347107    | 0.9188444    |
| #### Bn-scaff_26139_1-p17173 C-genome specific (napus-oleracea) | 0.9952153    | 0.8762265    | 0.9922481    | 0.6920982    | not scorable | not scorable |
| #### Bn-scaff_26139_1-p20968 genome unspecific (all in)         | 0.9952153    | 0.6754768    | 1            | 0.6887218    | 1            | 0.9059095    |
| #### Bn-scaff_26139_1-p21459 genome unspecific (all in)         | 1            | 0.5531016    | 1            | 0.741762     | 1            | 0.6017483    |
| #### Bn-scaff_26139_1-p26391 C-genome specific (oleracea only)  | not scorable | not scorable | 0.9922481    | 0.7014351    | not scorable | not scorable |
| #### Bn-scaff_26139_1-p26620 C-genome specific (napus-oleracea) | 0.9808612    | 0.7904457    | 0.9767442    | 0.7221353    | not scorable | not scorable |
| #### Bn-scaff_26139_1-p26635 C-genome specific (napus-oleracea) | 0.9593301    | 0.7810714    | 0.9767442    | 0.7331888    | not scorable | not scorable |
| #### Bn-scaff_26139_1-p26870 genome unspecific (all in)         | 1            | 0.727371     | 1            | 0.8269901    | 1            | 0.7667378    |
| #### Bn-scaff_26139_1-p27032 C-genome specific (napus-oleracea) | 0.9856459    | 0.8049286    | 0.9844961    | 0.7486556    | not scorable | not scorable |
| #### Bn-scaff_26139_1-p27787 C-genome specific (napus-oleracea) | 0.9665072    | 0.7956554    | 0.9689922    | 0.7272967    | not scorable | not scorable |



|                                                                 |              |              |              |              |              |              |
|-----------------------------------------------------------------|--------------|--------------|--------------|--------------|--------------|--------------|
| #### Bn-scaff_26139_1-p28312 C-genome specific (napus-oleracea) | 0.9497608    | 0.7655457    | 0.9922481    | 0.7676691    | not scorable | not scorable |
| #### Bn-scaff_26139_1-p28361 C-genome specific (napus-oleracea) | 0.9928229    | 0.7168141    | 1            | 0.6269667    | not scorable | not scorable |
| #### Bn-scaff_26139_1-p28720 C-genome specific (napus-oleracea) | 0.9832536    | 0.7530604    | 0.9922481    | 0.7006691    | not scorable | not scorable |
| #### Bn-scaff_26139_1-p28821 C-genome specific (napus-oleracea) | 0.9808612    | 0.8124248    | 0.9844961    | 0.8340687    | not scorable | not scorable |
| #### Bn-scaff_26139_1-p28839 C-genome specific (napus-oleracea) | 0.9784689    | 0.7710197    | 0.9922481    | 0.8140175    | not scorable | not scorable |
| #### Bn-scaff_26139_1-p28883 C-genome specific (napus-oleracea) | 0.9928229    | 0.7997733    | 0.9844961    | 0.8063989    | not scorable | not scorable |
| #### Bn-scaff_26139_1-p28947 C-genome specific (napus-oleracea) | 0.9856459    | 0.6577289    | 0.9922481    | 0.6743273    | not scorable | not scorable |
| #### Bn-scaff_26139_1-p29016 C-genome specific (napus-oleracea) | 0.9665072    | 0.7184976    | 0.9922481    | 0.8099328    | not scorable | not scorable |
| #### Bn-scaff_26139_1-p29069 C-genome specific (napus-oleracea) | 0.9832536    | 0.772487     | 0.9922481    | 0.7591662    | not scorable | not scorable |
| #### Bn-scaff_26139_1-p29143 C-genome specific (napus-oleracea) | 0.9880383    | 0.7603388    | 1            | 0.8314662    | not scorable | not scorable |
| #### Bn-scaff_26139_1-p29224 C-genome specific (napus-oleracea) | 0.9880383    | 0.7201024    | 0.9844961    | 0.6421911    | not scorable | not scorable |
| #### Bn-scaff_26139_1-p29354 C-genome specific (napus-oleracea) | 0.9904306    | 0.6760857    | 0.9844961    | 0.6476237    | not scorable | not scorable |
| #### Bn-scaff_26139_1-p29437 genome unspecific (all in)         | 0.937799     | 0.5409275    | 1            | 0.666473     | 1            | 0.8934311    |
| #### Bn-scaff_26139_1-p29483 C-genome specific (napus-oleracea) | 0.9784689    | 0.776152     | 0.9922481    | 0.7208198    | not scorable | not scorable |
| #### Bn-scaff_26139_1-p29637 C-genome specific (oleracea only)  | not scorable | not scorable | 0.9767442    | 0.6371897    | not scorable | not scorable |
| #### Bn-scaff_26139_1-p29644 C-genome specific (napus-oleracea) | 0.9712918    | 0.7999494    | 0.8682171    | 0.7443327    | not scorable | not scorable |
| #### Bn-scaff_26139_1-p30135 C-genome specific (oleracea only)  | not scorable | not scorable | 0.9689922    | 0.7947806    | not scorable | not scorable |
| #### Bn-scaff_26139_1-p30154 C-genome specific (oleracea only)  | not scorable | not scorable | 0.9767442    | 0.5762113    | not scorable | not scorable |
| #### Bn-scaff_26139_1-p30473 C-genome specific (napus-oleracea) | 0.9401914    | 0.5298222    | 0.8527132    | 0.4882198    | not scorable | not scorable |
| #### Bn-scaff_26139_1-p30517 C-genome specific (napus-oleracea) | 0.9880383    | 0.7760478    | 0.9922481    | 0.8331153    | not scorable | not scorable |
| #### Bn-scaff_26139_1-p30762 C-genome specific (napus-oleracea) | 0.9880383    | 0.8147885    | 0.9844961    | 0.7524529    | not scorable | not scorable |
| #### Bn-scaff_26139_1-p31265 C-genome specific (napus-oleracea) | 0.9688995    | 0.7704981    | 1            | 0.7275724    | not scorable | not scorable |
| #### Bn-scaff_26139_1-p31336 genome unspecific (oleracea-rapa)  | not scorable | not scorable | 1            | 0.6899226    | 0.9834711    | 0.599426     |
| #### Bn-scaff_26139_1-p31357 genome unspecific (all in)         | 0.9856459    | 0.3413017    | 1            | 0.6359769    | 0.9669421    | 0.6299611    |
| #### Bn-scaff_26139_1-p32232 genome unspecific (all in)         | 0.9569378    | 0.5187911    | 1            | 0.7851131    | 1            | 0.6170024    |
| #### Bn-scaff_26139_1-p33382 C-genome specific (napus-oleracea) | 0.9593301    | 0.7955415    | 1            | 0.8228633    | not scorable | not scorable |
| #### Bn-scaff_26139_1-p34232 C-genome specific (napus-oleracea) | 0.7727273    | 0.8882687    | 0.7751938    | 0.8757489    | not scorable | not scorable |
| #### Bn-scaff_26139_1-p37695 C-genome specific (napus-oleracea) | 0.5263158    | 0.7131299    | 0.5271318    | 0.6517566    | not scorable | not scorable |
| #### Bn-scaff_26139_1-p54494 genome unspecific (all in)         | 0.9976076    | 0.8063747    | 1            | 0.8722339    | 1            | 0.8736361    |
| #### Bn-scaff_26139_1-p95647 genome unspecific (all in)         | 0.9976076    | 0.5498915    | 1            | 0.7747091    | 0.9917355    | 0.7119289    |
| #### Bn-scaff_26156_1-p615 napus specific                       | 0.8660287    | 0.7025985    | not scorable | not scorable | not scorable | not scorable |
| #### Bn-scaff_26157_1-p5238 C-genome specific (napus-oleracea)  | 0.9354067    | 0.3256822    | 0.9457364    | 0.2644734    | not scorable | not scorable |
| #### Bn-scaff_26167_1-p147 genome unspecific (all in)           | 0.9928229    | 0.5270227    | 0.9922481    | 0.5674871    | 1            | 0.6988629    |

|                                                                 |              |              |              |              |              |              |
|-----------------------------------------------------------------|--------------|--------------|--------------|--------------|--------------|--------------|
| #### Bn-scaff_26199_1-p116 C-genome specific (napus-oleracea)   | 0.9760765    | 0.5813559    | 1            | 0.4963388    | not scorable | not scorable |
| #### Bn-scaff_26231_1-p10230 napus specific                     | 0.9210526    | 0.4860806    | not scorable | not scorable | not scorable | not scorable |
| #### Bn-scaff_26293_1-p11728 C-genome specific (napus-oleracea) | 0.9928229    | 0.6946183    | 0.9922481    | 0.7074429    | not scorable | not scorable |
| #### Bn-scaff_26293_1-p11743 C-genome specific (napus-oleracea) | 1            | 0.8630429    | 0.9767442    | 0.8101065    | not scorable | not scorable |
| #### Bn-scaff_26293_1-p13326 C-genome specific (napus-oleracea) | 0.9952153    | 0.788158     | 1            | 0.7520355    | not scorable | not scorable |
| #### Bn-scaff_26293_1-p13544 C-genome specific (napus-oleracea) | 0.9856459    | 0.800547     | 0.9844961    | 0.75056      | not scorable | not scorable |
| #### Bn-scaff_26293_1-p14192 C-genome specific (napus-oleracea) | 1            | 0.7634025    | 1            | 0.7143317    | not scorable | not scorable |
| #### Bn-scaff_26293_1-p14274 C-genome specific (napus-oleracea) | 1            | 0.7577806    | 0.9844961    | 0.6731818    | not scorable | not scorable |
| #### Bn-scaff_26293_1-p14281 C-genome specific (napus-oleracea) | 0.9808612    | 0.6966766    | 1            | 0.6882769    | not scorable | not scorable |
| #### Bn-scaff_26293_1-p15848 genome unspecific (all in)         | 0.9880383    | 0.2689822    | 1            | 0.7099588    | 0.9834711    | 0.6337161    |
| #### Bn-scaff_26293_1-p20306 C-genome specific (napus-oleracea) | 0.9856459    | 0.7683341    | 1            | 0.8194207    | not scorable | not scorable |
| #### Bn-scaff_26293_1-p85946 C-genome specific (napus-oleracea) | 0.9832536    | 0.7711177    | 0.9767442    | 0.8135951    | not scorable | not scorable |
| #### Bn-scaff_26293_1-p89381 genome unspecific (all in)         | 0.9808612    | 0.2867799    | 1            | 0.6088873    | 1            | 0.7395847    |
| #### Bn-scaff_26293_1-p92022 C-genome specific (napus-oleracea) | 0.9808612    | 0.8055372    | 0.9069768    | 0.863204     | not scorable | not scorable |
| #### Bn-scaff_26293_1-p97936 C-genome specific (napus-oleracea) | 0.9856459    | 0.7476975    | 0.9069768    | 0.7449747    | not scorable | not scorable |
| #### Bn-scaff_26297_1-p1200 C-genome specific (napus-oleracea)  | 0.9880383    | 0.8079507    | 0.9844961    | 0.7364725    | not scorable | not scorable |
| #### Bn-scaff_26317_1-p10192 genome unspecific (all in)         | 1            | 0.3421937    | 0.9534883    | 0.2569256    | 1            | 0.8653011    |
| #### Bn-scaff_26317_1-p10475 C-genome specific (napus-oleracea) | 0.9736842    | 0.8811467    | 0.2713178    | 0.7958859    | not scorable | not scorable |
| #### Bn-scaff_26317_1-p10778 genome unspecific (all in)         | 0.9330143    | 0.2033764    | 0.9612403    | 0.2871833    | 0.9917355    | 0.71508      |
| #### Bn-scaff_26317_1-p10882 C-genome specific (napus-oleracea) | 0.9712918    | 0.8583462    | 0.2713178    | 0.8018759    | not scorable | not scorable |
| #### Bn-scaff_26317_1-p10890 C-genome specific (napus-oleracea) | 0.9784689    | 0.8960057    | 0.2790698    | 0.7648305    | not scorable | not scorable |
| #### Bn-scaff_26317_1-p10891 C-genome specific (napus-oleracea) | 0.9736842    | 0.8882217    | 0.2713178    | 0.870121     | not scorable | not scorable |
| #### Bn-scaff_26317_1-p10924 C-genome specific (napus-oleracea) | 0.9784689    | 0.8996865    | 0.2713178    | 0.7651501    | not scorable | not scorable |
| #### Bn-scaff_26317_1-p10939 C-genome specific (napus-oleracea) | 0.9760765    | 0.924903     | 0.2403101    | 0.8688029    | not scorable | not scorable |
| #### Bn-scaff_26317_1-p10956 C-genome specific (napus-oleracea) | 0.9784689    | 0.8567985    | 0.2713178    | 0.7612484    | not scorable | not scorable |
| #### Bn-scaff_26317_1-p11221 C-genome specific (napus-oleracea) | 0.9712918    | 0.8519163    | 0.255814     | 0.7592834    | not scorable | not scorable |
| #### Bn-scaff_26317_1-p11230 C-genome specific (napus-oleracea) | 0.9712918    | 0.7766712    | 0.2713178    | 0.6844036    | not scorable | not scorable |
| #### Bn-scaff_26317_1-p11244 C-genome specific (napus-oleracea) | 0.9736842    | 0.8234662    | 0.2790698    | 0.7521206    | not scorable | not scorable |
| #### Bn-scaff_26317_1-p11250 genome unspecific (all in)         | 0.9952153    | 0.606111     | 0.9844961    | 0.5455433    | 1            | 0.9378756    |
| #### Bn-scaff_26317_1-p11255 C-genome specific (napus-oleracea) | 0.9784689    | 0.7531241    | 0.9922481    | 0.6259825    | not scorable | not scorable |
| #### Bn-scaff_26317_1-p11278 all not scorable                   | not scorable | not scorable | not scorable | not scorable | not scorable | not scorable |
| #### Bn-scaff_26317_1-p11290 C-genome specific (napus-oleracea) | 0.9736842    | 0.8974518    | 0.2713178    | 0.7978785    | not scorable | not scorable |
| #### Bn-scaff_26317_1-p11324 C-genome specific (napus-oleracea) | 0.9736842    | 0.8558696    | 0.2713178    | 0.7271354    | not scorable | not scorable |

|                                                                 |              |              |           |           |              |              |
|-----------------------------------------------------------------|--------------|--------------|-----------|-----------|--------------|--------------|
| #### Bn-scaff_26317_1-p11336 C-genome specific (napus-oleracea) | 0.9736842    | 0.9160452    | 0.2713178 | 0.8019065 | not scorable | not scorable |
| #### Bn-scaff_26317_1-p11346 C-genome specific (napus-oleracea) | 0.9928229    | 0.7560981    | 0.875969  | 0.6179726 | not scorable | not scorable |
| #### Bn-scaff_26317_1-p11363 C-genome specific (napus-oleracea) | 0.9736842    | 0.8696973    | 0.2713178 | 0.8668682 | not scorable | not scorable |
| #### Bn-scaff_26317_1-p11376 C-genome specific (napus-oleracea) | 0.9808612    | 0.7249368    | 0.9922481 | 0.6432108 | not scorable | not scorable |
| #### Bn-scaff_26317_1-p63009 C-genome specific (napus-oleracea) | 0.9952153    | 0.7296839    | 0.9689922 | 0.6866972 | not scorable | not scorable |
| #### Bn-scaff_26317_1-p64899 C-genome specific (napus-oleracea) | 0.9856459    | 0.8710973    | 1         | 0.8227228 | not scorable | not scorable |
| #### Bn-scaff_26317_1-p66736 C-genome specific (napus-oleracea) | 0.9904306    | 0.7046375    | 1         | 0.6629223 | not scorable | not scorable |
| #### Bn-scaff_26317_1-p66967 C-genome specific (napus-oleracea) | 0.9904306    | 0.8096858    | 1         | 0.6816604 | not scorable | not scorable |
| #### Bn-scaff_26317_1-p67420 C-genome specific (napus-oleracea) | 0.9928229    | 0.8317629    | 1         | 0.8554419 | not scorable | not scorable |
| #### Bn-scaff_26317_1-p67938 C-genome specific (napus-oleracea) | 0.9904306    | 0.7670233    | 1         | 0.6920205 | not scorable | not scorable |
| #### Bn-scaff_26317_1-p67975 C-genome specific (napus-oleracea) | 0.9880383    | 0.8773268    | 1         | 0.7453504 | not scorable | not scorable |
| #### Bn-scaff_26317_1-p68346 C-genome specific (napus-oleracea) | 0.9952153    | 0.7624856    | 1         | 0.7068456 | not scorable | not scorable |
| #### Bn-scaff_26317_1-p92299 genome unspecific (all in)         | 0.9928229    | 0.842564     | 1         | 0.7616601 | 0.9669421    | 0.9244215    |
| #### Bn-scaff_26317_1-p97378 C-genome specific (napus-oleracea) | 0.9928229    | 0.7457769    | 1         | 0.7021624 | not scorable | not scorable |
| #### Bn-scaff_26317_1-p97480 C-genome specific (napus-oleracea) | 0.9880383    | 0.8620805    | 1         | 0.845473  | not scorable | not scorable |
| #### Bn-scaff_26317_1-p97724 C-genome specific (napus-oleracea) | 0.9952153    | 0.8824536    | 1         | 0.7374267 | not scorable | not scorable |
| #### Bn-scaff_26317_1-p98422 C-genome specific (napus-oleracea) | 0.9928229    | 0.7888127    | 0.9457364 | 0.6966977 | not scorable | not scorable |
| #### Bn-scaff_26317_1-p98555 C-genome specific (napus-oleracea) | 0.9928229    | 0.9038795    | 1         | 0.7424744 | not scorable | not scorable |
| #### Bn-scaff_26317_1-p99009 C-genome specific (napus-oleracea) | 0.9928229    | 0.8571469    | 1         | 0.79611   | not scorable | not scorable |
| #### Bn-scaff_26320_1-p10912 genome unspecific (oleracea-rapa)  | not scorable | not scorable | 0.9534883 | 0.2417798 | 1            | 0.9012492    |
| #### Bn-scaff_26320_1-p15602 C-genome specific (oleracea only)  | not scorable | not scorable | 0.9147287 | 0.3346506 | not scorable | not scorable |
| #### Bn-scaff_26320_1-p16349 genome unspecific (oleracea-rapa)  | not scorable | not scorable | 0.9767442 | 0.2780219 | 0.7520661    | 0.7404016    |
| #### Bn-scaff_26320_1-p21906 genome unspecific (oleracea-rapa)  | not scorable | not scorable | 0.9922481 | 0.739333  | 1            | 0.9398974    |
| #### Bn-scaff_26320_1-p22042 C-genome specific (napus-oleracea) | 0.9736842    | 0.8075051    | 1         | 0.7790031 | not scorable | not scorable |
| #### Bn-scaff_26320_1-p22046 C-genome specific (napus-oleracea) | 0.9760765    | 0.7825522    | 0.9534883 | 0.743668  | not scorable | not scorable |
| #### Bn-scaff_26320_1-p23553 C-genome specific (napus-oleracea) | 0.9904306    | 0.7520889    | 0.9922481 | 0.7134245 | not scorable | not scorable |
| #### Bn-scaff_26320_1-p23670 genome unspecific (all in)         | 0.9880383    | 0.3426723    | 0.9767442 | 0.3115287 | 1            | 0.8910259    |
| #### Bn-scaff_26320_1-p24280 C-genome specific (napus-oleracea) | 0.9832536    | 0.7362445    | 0.9922481 | 0.7492995 | not scorable | not scorable |
| #### Bn-scaff_26320_1-p25637 C-genome specific (napus-oleracea) | 0.9784689    | 0.7641795    | 0.9922481 | 0.7207811 | not scorable | not scorable |
| #### Bn-scaff_26320_1-p25776 C-genome specific (napus-oleracea) | 0.9880383    | 0.756435     | 0.9767442 | 0.7253731 | not scorable | not scorable |
| #### Bn-scaff_26320_1-p25878 C-genome specific (napus-oleracea) | 0.9569378    | 0.8129818    | 0.9922481 | 0.6750166 | not scorable | not scorable |
| #### Bn-scaff_26320_1-p26945 C-genome specific (napus-oleracea) | 0.9832536    | 0.8031533    | 1         | 0.739436  | not scorable | not scorable |
| #### Bn-scaff_26320_1-p27006 C-genome specific (napus-oleracea) | 0.9856459    | 0.8037636    | 1         | 0.6878737 | not scorable | not scorable |

|                                                                 |              |              |              |              |              |              |
|-----------------------------------------------------------------|--------------|--------------|--------------|--------------|--------------|--------------|
| #### Bn-scaff_26320_1-p27039 C-genome specific (napus-oleracea) | 0.9832536    | 0.6851417    | 1            | 0.5966847    | not scorable | not scorable |
| #### Bn-scaff_26320_1-p27047 C-genome specific (napus-oleracea) | 0.9904306    | 0.7130309    | 0.9922481    | 0.7214768    | not scorable | not scorable |
| #### Bn-scaff_26320_1-p27124 C-genome specific (napus-oleracea) | 0.9904306    | 0.7682105    | 1            | 0.6780209    | not scorable | not scorable |
| #### Bn-scaff_26320_1-p28224 C-genome specific (napus-oleracea) | 0.9760765    | 0.7323918    | 1            | 0.659159     | not scorable | not scorable |
| #### Bn-scaff_26320_1-p28234 C-genome specific (napus-oleracea) | 0.9952153    | 0.7791314    | 1            | 0.8304772    | not scorable | not scorable |
| #### Bn-scaff_26320_1-p29767 genome unspecific (all in)         | 0.9641148    | 0.3478307    | 0.9534883    | 0.4688013    | 0.9586777    | 0.8992506    |
| #### Bn-scaff_26320_1-p29829 C-genome specific (napus-oleracea) | 0.9832536    | 0.7576802    | 0.9379845    | 0.7216877    | not scorable | not scorable |
| #### Bn-scaff_26320_1-p29859 C-genome specific (napus-oleracea) | 0.9617225    | 0.5741929    | 0.9534883    | 0.8167729    | not scorable | not scorable |
| #### Bn-scaff_26320_1-p35454 genome unspecific (all in)         | 1            | 0.3857715    | 1            | 0.7181784    | 0.9421487    | 0.6690159    |
| #### Bn-scaff_26320_1-p35819 genome unspecific (oleracea-rapa)  | not scorable | not scorable | 1            | 0.7020338    | 1            | 0.8209507    |
| #### Bn-scaff_26391_1-p10186 genome unspecific (oleracea-rapa)  | not scorable | not scorable | 0.9767442    | 0.7904323    | 1            | 0.9429709    |
| #### Bn-scaff_26391_1-p10846 C-genome specific (napus-oleracea) | 0.9976076    | 0.8776589    | 1            | 0.7875749    | not scorable | not scorable |
| #### Bn-scaff_26391_1-p19246 genome unspecific (all in)         | 0.9545454    | 0.3250657    | 1            | 0.857331     | 1            | 0.8168066    |
| #### Bn-scaff_26391_1-p26133 C-genome specific (napus-oleracea) | 0.9976076    | 0.6249169    | 1            | 0.5943058    | not scorable | not scorable |
| #### Bn-scaff_26391_1-p27745 C-genome specific (napus-oleracea) | 1            | 0.7194567    | 1            | 0.8033063    | not scorable | not scorable |
| #### Bn-scaff_26391_1-p29241 genome unspecific (all in)         | 0.9354067    | 0.4329444    | 1            | 0.7281514    | 0.9421487    | 0.5186167    |
| #### Bn-scaff_26391_1-p89273 genome unspecific (all in)         | 0.9569378    | 0.2763957    | 1            | 0.7629939    | 1            | 0.7314561    |
| #### Bn-scaff_26407_1-p15743 C-genome specific (napus-oleracea) | 0.9928229    | 0.8158795    | 1            | 0.6886117    | not scorable | not scorable |
| #### Bn-scaff_26407_1-p18761 genome unspecific (all in)         | 1            | 0.6361539    | 1            | 0.3617761    | 1            | 0.7899471    |
| #### Bn-scaff_26407_1-p18766 C-genome specific (napus-oleracea) | 0.9904306    | 0.3990285    | 1            | 0.3646225    | not scorable | not scorable |
| #### Bn-scaff_26407_1-p19015 C-genome specific (napus-oleracea) | 1            | 0.6645543    | 0.9534883    | 0.8408177    | not scorable | not scorable |
| #### Bn-scaff_26407_1-p20924 all not scorable                   | not scorable | not scorable | not scorable | not scorable | not scorable | not scorable |
| #### Bn-scaff_26505_1-p5590 genome unspecific (all in)          | 0.9928229    | 0.3610558    | 1            | 0.8110902    | 1            | 0.9175813    |
| #### Bn-scaff_26505_1-p9374 genome unspecific (oleracea-rapa)   | not scorable | not scorable | 0.9689922    | 0.3183421    | 1            | 0.7455453    |
| #### Bn-scaff_26506_1-p24310 genome unspecific (all in)         | 0.9617225    | 0.509573     | 1            | 0.8095942    | 1            | 0.9293039    |
| #### Bn-scaff_26506_1-p29218 C-genome specific (napus-oleracea) | 0.9904306    | 0.8243644    | 1            | 0.4735571    | not scorable | not scorable |
| #### Bn-scaff_26506_1-p42166 C-genome specific (napus-oleracea) | 0.9904306    | 0.7816511    | 0.9922481    | 0.8139009    | not scorable | not scorable |
| #### Bn-scaff_26618_1-p398 C-genome specific (napus-oleracea)   | 1            | 0.8676726    | 0.9844961    | 0.7544107    | not scorable | not scorable |
| #### Bn-scaff_26642_1-p10236 C-genome specific (oleracea only)  | not scorable | not scorable | 0.9844961    | 0.7669455    | not scorable | not scorable |
| #### Bn-scaff_26642_1-p10444 C-genome specific (napus-oleracea) | 0.9904306    | 0.7303283    | 0.9922481    | 0.7688295    | not scorable | not scorable |
| #### Bn-scaff_26642_1-p10856 C-genome specific (napus-oleracea) | 0.9952153    | 0.6945985    | 0.9922481    | 0.638442     | not scorable | not scorable |
| #### Bn-scaff_26642_1-p10889 C-genome specific (napus-oleracea) | 0.9880383    | 0.7454581    | 0.9922481    | 0.712857     | not scorable | not scorable |
| #### Bn-scaff_26642_1-p10901 C-genome specific (napus-oleracea) | 0.9904306    | 0.769216     | 1            | 0.7341258    | not scorable | not scorable |

|                                                                 |           |           |           |           |              |              |
|-----------------------------------------------------------------|-----------|-----------|-----------|-----------|--------------|--------------|
| #### Bn-scaff_26642_1-p10913 C-genome specific (napus-oleracea) | 0.9880383 | 0.6832876 | 1         | 0.680586  | not scorable | not scorable |
| #### Bn-scaff_26642_1-p10994 C-genome specific (napus-oleracea) | 0.9832536 | 0.7306721 | 0.9069768 | 0.7505669 | not scorable | not scorable |
| #### Bn-scaff_26642_1-p11119 C-genome specific (napus-oleracea) | 0.9808612 | 0.6828869 | 0.9922481 | 0.6824329 | not scorable | not scorable |
| #### Bn-scaff_26642_1-p11156 C-genome specific (napus-oleracea) | 0.9928229 | 0.6745059 | 1         | 0.5773261 | not scorable | not scorable |
| #### Bn-scaff_26642_1-p11164 C-genome specific (napus-oleracea) | 0.9904306 | 0.7287147 | 0.9922481 | 0.7628165 | not scorable | not scorable |
| #### Bn-scaff_26642_1-p11747 C-genome specific (napus-oleracea) | 0.9904306 | 0.7878034 | 0.9922481 | 0.7717927 | not scorable | not scorable |
| #### Bn-scaff_26642_1-p12045 C-genome specific (napus-oleracea) | 0.9976076 | 0.7690921 | 1         | 0.8124108 | not scorable | not scorable |
| #### Bn-scaff_26642_1-p12051 C-genome specific (napus-oleracea) | 0.9928229 | 0.779683  | 0.9922481 | 0.6720464 | not scorable | not scorable |
| #### Bn-scaff_26642_1-p12574 C-genome specific (napus-oleracea) | 0.9976076 | 0.8180435 | 0.9922481 | 0.8097162 | not scorable | not scorable |
| #### Bn-scaff_26642_1-p12896 C-genome specific (napus-oleracea) | 1         | 0.7359552 | 1         | 0.6049989 | not scorable | not scorable |
| #### Bn-scaff_26642_1-p13340 C-genome specific (napus-oleracea) | 0.9904306 | 0.7762337 | 1         | 0.6777586 | not scorable | not scorable |
| #### Bn-scaff_26642_1-p13417 C-genome specific (napus-oleracea) | 0.9904306 | 0.7939878 | 0.9922481 | 0.7409688 | not scorable | not scorable |
| #### Bn-scaff_26642_1-p13491 C-genome specific (napus-oleracea) | 0.9976076 | 0.8028042 | 0.9922481 | 0.8142083 | not scorable | not scorable |
| #### Bn-scaff_26642_1-p13503 C-genome specific (napus-oleracea) | 0.9904306 | 0.790071  | 1         | 0.8115303 | not scorable | not scorable |
| #### Bn-scaff_26642_1-p13650 C-genome specific (napus-oleracea) | 1         | 0.8127    | 1         | 0.8312057 | not scorable | not scorable |
| #### Bn-scaff_26642_1-p13931 C-genome specific (napus-oleracea) | 0.9976076 | 0.7998012 | 0.9922481 | 0.8439613 | not scorable | not scorable |
| #### Bn-scaff_26642_1-p13971 C-genome specific (napus-oleracea) | 0.9952153 | 0.7711048 | 0.9922481 | 0.8092792 | not scorable | not scorable |
| #### Bn-scaff_26642_1-p14040 C-genome specific (napus-oleracea) | 0.9952153 | 0.7905645 | 1         | 0.7884325 | not scorable | not scorable |
| #### Bn-scaff_26642_1-p14150 C-genome specific (napus-oleracea) | 0.9928229 | 0.7402886 | 1         | 0.7441407 | not scorable | not scorable |
| #### Bn-scaff_26642_1-p14488 C-genome specific (napus-oleracea) | 0.9976076 | 0.8152142 | 0.9922481 | 0.8382475 | not scorable | not scorable |
| #### Bn-scaff_26642_1-p19159 C-genome specific (napus-oleracea) | 0.9952153 | 0.7908633 | 0.9922481 | 0.764371  | not scorable | not scorable |
| #### Bn-scaff_26642_1-p20224 C-genome specific (napus-oleracea) | 0.9832536 | 0.7960457 | 0.9922481 | 0.7300811 | not scorable | not scorable |
| #### Bn-scaff_26642_1-p20375 C-genome specific (napus-oleracea) | 0.9976076 | 0.7262542 | 0.9922481 | 0.664691  | not scorable | not scorable |
| #### Bn-scaff_26642_1-p20605 C-genome specific (napus-oleracea) | 0.9952153 | 0.788909  | 1         | 0.7036011 | not scorable | not scorable |
| #### Bn-scaff_26642_1-p21116 C-genome specific (napus-oleracea) | 0.9928229 | 0.7984042 | 0.9844961 | 0.6869702 | not scorable | not scorable |
| #### Bn-scaff_26642_1-p21201 C-genome specific (napus-oleracea) | 0.9952153 | 0.6858888 | 0.9922481 | 0.6732364 | not scorable | not scorable |
| #### Bn-scaff_26642_1-p24707 C-genome specific (napus-oleracea) | 0.9976076 | 0.8208424 | 0.9922481 | 0.8292759 | not scorable | not scorable |
| #### Bn-scaff_26642_1-p25275 C-genome specific (napus-oleracea) | 0.9976076 | 0.7941719 | 1         | 0.7861444 | not scorable | not scorable |
| #### Bn-scaff_26642_1-p2725 C-genome specific (napus-oleracea)  | 0.9952153 | 0.7672876 | 0.9922481 | 0.6983064 | not scorable | not scorable |
| #### Bn-scaff_26642_1-p28496 C-genome specific (napus-oleracea) | 0.9928229 | 0.8176216 | 0.9844961 | 0.8112457 | not scorable | not scorable |
| #### Bn-scaff_26642_1-p28601 C-genome specific (napus-oleracea) | 0.9976076 | 0.800936  | 1         | 0.7236399 | not scorable | not scorable |
| #### Bn-scaff_26642_1-p36815 C-genome specific (napus-oleracea) | 0.9976076 | 0.7995477 | 1         | 0.8265508 | not scorable | not scorable |
| #### Bn-scaff_26642_1-p44384 C-genome specific (napus-oleracea) | 0.9832536 | 0.6953453 | 1         | 0.6883911 | not scorable | not scorable |

|                                                                 |              |              |              |              |              |              |
|-----------------------------------------------------------------|--------------|--------------|--------------|--------------|--------------|--------------|
| #### Bn-scaff_26642_1-p4440 genome unspecific (all in)          | not scorable | not scorable | not scorable | not scorable | not scorable | not scorable |
| #### Bn-scaff_26642_1-p47097 C-genome specific (napus-oleracea) | 0.9880383    | 0.8755612    | 0.9922481    | 0.7887681    | not scorable | not scorable |
| #### Bn-scaff_26642_1-p50926 C-genome specific (napus-oleracea) | 0.9856459    | 0.8066874    | 0.5271318    | 0.845172     | not scorable | not scorable |
| #### Bn-scaff_26642_1-p51416 C-genome specific (napus-oleracea) | 0.9904306    | 0.6728505    | 0.5348837    | 0.6594497    | not scorable | not scorable |
| #### Bn-scaff_26642_1-p52834 C-genome specific (napus-oleracea) | 0.9832536    | 0.692497     | 0.5271318    | 0.8252531    | not scorable | not scorable |
| #### Bn-scaff_26642_1-p5287 C-genome specific (napus-oleracea)  | 0.9976076    | 0.7783933    | 0.9922481    | 0.8351377    | not scorable | not scorable |
| #### Bn-scaff_26642_1-p52929 C-genome specific (napus-oleracea) | 0.9832536    | 0.7435369    | 0.5348837    | 0.8094355    | not scorable | not scorable |
| #### Bn-scaff_26642_1-p53574 C-genome specific (napus-oleracea) | 0.9832536    | 0.8157113    | 0.5193799    | 0.7130669    | not scorable | not scorable |
| #### Bn-scaff_26642_1-p53677 C-genome specific (napus-oleracea) | 0.9832536    | 0.7767577    | 0.5348837    | 0.793779     | not scorable | not scorable |
| #### Bn-scaff_26642_1-p5516 C-genome specific (napus-oleracea)  | 0.9904306    | 0.7674537    | 1            | 0.7562535    | not scorable | not scorable |
| #### Bn-scaff_26642_1-p55413 C-genome specific (napus-oleracea) | 0.9832536    | 0.7708547    | 0.5271318    | 0.8489324    | not scorable | not scorable |
| #### Bn-scaff_26642_1-p55504 C-genome specific (napus-oleracea) | 0.9856459    | 0.7515612    | 0.5348837    | 0.8229336    | not scorable | not scorable |
| #### Bn-scaff_26642_1-p55613 C-genome specific (napus-oleracea) | 0.9856459    | 0.7697921    | 0.5348837    | 0.8429807    | not scorable | not scorable |
| #### Bn-scaff_26642_1-p55725 C-genome specific (napus-oleracea) | 0.9808612    | 0.7624412    | 0.5426357    | 0.8226578    | not scorable | not scorable |
| #### Bn-scaff_26642_1-p77657 C-genome specific (napus-oleracea) | 0.9904306    | 0.5294244    | 0.9689922    | 0.5454478    | not scorable | not scorable |
| #### Bn-scaff_26642_1-p87262 C-genome specific (napus-oleracea) | 1            | 0.5856029    | 1            | 0.7459044    | not scorable | not scorable |
| #### Bn-scaff_26712_1-p22323 genome unspecific (all in)         | 0.9617225    | 0.3335767    | 0.9844961    | 0.7613186    | 1            | 0.917524     |
| #### Bn-scaff_26712_1-p24371 C-genome specific (napus-oleracea) | 0.9425837    | 0.8158246    | 0.9844961    | 0.7292219    | not scorable | not scorable |
| #### Bn-scaff_26712_1-p24644 C-genome specific (napus-oleracea) | 0.9473684    | 0.7207971    | 0.9844961    | 0.758094     | not scorable | not scorable |
| #### Bn-scaff_26712_1-p25030 C-genome specific (napus-oleracea) | 0.9282297    | 0.69456      | 0.9922481    | 0.6821391    | not scorable | not scorable |
| #### Bn-scaff_26712_1-p25092 C-genome specific (napus-oleracea) | 0.9545454    | 0.7554475    | 0.9844961    | 0.8086624    | not scorable | not scorable |
| #### Bn-scaff_26712_1-p25284 C-genome specific (napus-oleracea) | 0.9354067    | 0.7509636    | 0.9844961    | 0.6884856    | not scorable | not scorable |
| #### Bn-scaff_26712_1-p25842 C-genome specific (napus-oleracea) | 0.9545454    | 0.6985811    | 1            | 0.7603388    | not scorable | not scorable |
| #### Bn-scaff_26712_1-p26029 C-genome specific (napus-oleracea) | 0.9569378    | 0.7734971    | 1            | 0.7220215    | not scorable | not scorable |
| #### Bn-scaff_26712_1-p26624 C-genome specific (napus-oleracea) | 0.5574163    | 0.8061597    | 1            | 0.7145334    | not scorable | not scorable |
| #### Bn-scaff_26712_1-p27219 C-genome specific (napus-oleracea) | 0.9545454    | 0.7744548    | 0.9534883    | 0.8027456    | not scorable | not scorable |
| #### Bn-scaff_26712_1-p30209 genome unspecific (all in)         | 1            | 0.4589593    | 1            | 0.5011974    | 1            | 0.6336445    |
| #### Bn-scaff_26764_1-p779 genome unspecific (all in)           | 1            | 0.273385     | 1            | 0.8751884    | 0.9917355    | 0.7199056    |
| #### Bn-scaff_26787_1-p10259 C-genome specific (oleracea only)  | not scorable | not scorable | 1            | 0.776051     | not scorable | not scorable |
| #### Bn-scaff_26787_1-p10517 genome unspecific (all in)         | 0.9832536    | 0.4050519    | 1            | 0.7764726    | 1            | 0.9175813    |
| #### Bn-scaff_26787_1-p20789 genome unspecific (all in)         | 0.9904306    | 0.8920975    | 0.9922481    | 0.7796087    | 1            | 0.8522106    |
| #### Bn-scaff_26787_1-p23954 C-genome specific (napus-oleracea) | 0.9880383    | 0.7761868    | 1            | 0.795794     | not scorable | not scorable |
| #### Bn-scaff_26787_1-p30400 C-genome specific (napus-oleracea) | 0.9880383    | 0.5748966    | 0.744186     | 0.7193207    | not scorable | not scorable |

|                                                                 |              |              |              |              |              |              |
|-----------------------------------------------------------------|--------------|--------------|--------------|--------------|--------------|--------------|
| #### Bn-scaff_26787_1-p45349 C-genome specific (napus-oleracea) | 0.9928229    | 0.9042242    | 1            | 0.8766996    | not scorable | not scorable |
| #### Bn-scaff_26787_1-p53113 genome unspecific (all in)         | 0.9712918    | 0.5578083    | 1            | 0.6805959    | 1            | 0.7730699    |
| #### Bn-scaff_26787_1-p54295 C-genome specific (napus-oleracea) | 0.9856459    | 0.8320267    | 0.9922481    | 0.7922254    | not scorable | not scorable |
| #### Bn-scaff_26787_1-p54453 C-genome specific (napus-oleracea) | 0.9760765    | 0.687777     | 0.9922481    | 0.5998772    | not scorable | not scorable |
| #### Bn-scaff_26787_1-p54705 C-genome specific (napus-oleracea) | 0.9832536    | 0.7959833    | 0.9922481    | 0.5484413    | not scorable | not scorable |
| #### Bn-scaff_26787_1-p58847 C-genome specific (oleracea only)  | not scorable | not scorable | 1            | 0.6582816    | not scorable | not scorable |
| #### Bn-scaff_26787_1-p6892 genome unspecific (all in)          | 0.9952153    | 0.4633117    | 1            | 0.7588096    | 0.9752066    | 0.9255521    |
| #### Bn-scaff_26846_1-p26261 C-genome specific (napus-oleracea) | 0.9952153    | 0.7127941    | 0.9922481    | 0.6994228    | not scorable | not scorable |
| #### Bn-scaff_26846_1-p29592 genome unspecific (all in)         | 0.9976076    | 0.6728513    | 0.9844961    | 0.6876881    | 0.8429752    | 0.7849486    |
| #### Bn-scaff_26846_1-p29865 C-genome specific (napus-oleracea) | 0.9928229    | 0.7073712    | 0.9844961    | 0.7085282    | not scorable | not scorable |
| #### Bn-scaff_26846_1-p30953 C-genome specific (napus-oleracea) | 0.9952153    | 0.7989463    | 0.9922481    | 0.8390914    | not scorable | not scorable |
| #### Bn-scaff_26846_1-p38699 C-genome specific (napus-oleracea) | 0.9880383    | 0.7112245    | 0.9844961    | 0.7332572    | not scorable | not scorable |
| #### Bn-scaff_26846_1-p40355 C-genome specific (napus-oleracea) | 0.9976076    | 0.7861958    | 0.9922481    | 0.7155664    | not scorable | not scorable |
| #### Bn-scaff_26859_1-p3097 genome unspecific (all in)          | 1            | 0.6933199    | 1            | 0.781678     | 1            | 0.9092497    |
| #### Bn-scaff_26859_1-p8813 C-genome specific (napus-oleracea)  | 0.9952153    | 0.7146152    | 1            | 0.6254632    | not scorable | not scorable |
| #### Bn-scaff_26863_1-p685 C-genome specific (napus-oleracea)   | 1            | 0.479707     | 0.9767442    | 0.3806906    | not scorable | not scorable |
| #### Bn-scaff_26877_1-p31635 genome unspecific (all in)         | 0.9784689    | 0.4968567    | 0.9147287    | 0.8335251    | 1            | 0.9205657    |
| #### Bn-scaff_26877_1-p31852 C-genome specific (napus-oleracea) | 0.8732057    | 0.8037065    | 0.9922481    | 0.8757476    | not scorable | not scorable |
| #### Bn-scaff_26877_1-p40234 A-genome specific (napus-rapa)     | 0.9473684    | 0.3048683    | not scorable | not scorable | 0.9917355    | 0.8600807    |
| #### Bn-scaff_26877_1-p49790 C-genome specific (napus-oleracea) | 0.8564593    | 0.6853049    | 0.9147287    | 0.7028639    | not scorable | not scorable |
| #### Bn-scaff_26877_1-p5835 genome unspecific (all in)          | 0.9832536    | 0.5054206    | 1            | 0.6874049    | 1            | 0.7886995    |
| #### Bn-scaff_26877_1-p5985 genome unspecific (all in)          | 0.9760765    | 0.3578545    | 1            | 0.8633332    | 0.9834711    | 0.7717252    |
| #### Bn-scaff_26877_1-p64540 A-genome specific (rapa only)      | not scorable | not scorable | not scorable | not scorable | 1            | 0.7641606    |
| #### Bn-scaff_26877_1-p81778 C-genome specific (napus-oleracea) | 0.8708134    | 0.686273     | 0.8527132    | 0.7071002    | not scorable | not scorable |
| #### Bn-scaff_26877_1-p82009 C-genome specific (napus-oleracea) | 0.8875598    | 0.7455561    | 0.9922481    | 0.8229404    | not scorable | not scorable |
| #### Bn-scaff_26946_1-p10240 C-genome specific (napus-oleracea) | 0.9784689    | 0.7292314    | 0.9922481    | 0.7801586    | not scorable | not scorable |
| #### Bn-scaff_26946_1-p10570 C-genome specific (napus-oleracea) | 0.9928229    | 0.7919096    | 0.9767442    | 0.7902654    | not scorable | not scorable |
| #### Bn-scaff_26946_1-p12131 C-genome specific (napus-oleracea) | 0.9976076    | 0.6705055    | 0.9922481    | 0.6967005    | not scorable | not scorable |
| #### Bn-scaff_26946_1-p15442 C-genome specific (napus-oleracea) | 0.9976076    | 0.7749739    | 0.9844961    | 0.7740815    | not scorable | not scorable |
| #### Bn-scaff_26946_1-p17547 A-genome specific (napus-rapa)     | 0.9712918    | 0.6975681    | not scorable | not scorable | 0.9917355    | 0.6651957    |
| #### Bn-scaff_26946_1-p19328 C-genome specific (oleracea only)  | not scorable | not scorable | 0.9612403    | 0.4179952    | not scorable | not scorable |
| #### Bn-scaff_26946_1-p37150 genome unspecific (all in)         | 0.9904306    | 0.3936103    | 1            | 0.8024325    | 0.9917355    | 0.7437416    |
| #### Bn-scaff_26946_1-p96772 C-genome specific (napus-oleracea) | 0.9808612    | 0.7800822    | 0.9767442    | 0.8056173    | not scorable | not scorable |

|                                                                  |              |              |              |              |              |              |
|------------------------------------------------------------------|--------------|--------------|--------------|--------------|--------------|--------------|
| ##### Bn-scaff_26946_1-p97285 C-genome specific (napus-oleracea) | 0.9976076    | 0.7769343    | 0.9844961    | 0.8351377    | not scorable | not scorable |
| ##### Bn-scaff_26974_1-p8519 C-genome specific (napus-oleracea)  | 0.9712918    | 0.7587356    | 1            | 0.8686181    | not scorable | not scorable |
| ##### Bn-scaff_26996_1-p1929 C-genome specific (napus-oleracea)  | 0.9832536    | 0.8073556    | 0.875969     | 0.63269      | not scorable | not scorable |
| ##### Bn-scaff_26996_1-p6874 genome unspecific (oleracea-rapa)   | not scorable | not scorable | 0.9922481    | 0.8186417    | 0.9834711    | 0.9153142    |
| ##### Bn-scaff_26997_1-p13152 C-genome specific (oleracea only)  | not scorable | not scorable | 0.9922481    | 0.9073185    | not scorable | not scorable |
| ##### Bn-scaff_26997_1-p25799 genome unspecific (all in)         | 0.9736842    | 0.7531751    | 0.9379845    | 0.2453482    | 1            | 0.6602052    |
| ##### Bn-scaff_26997_1-p86978 genome unspecific (all in)         | 0.9904306    | 0.2668687    | 1            | 0.7857754    | 0.9917355    | 0.7468746    |
| ##### Bn-scaff_27013_1-p190 all not scorable                     | not scorable | not scorable | not scorable | not scorable | not scorable | not scorable |
| ##### Bn-scaff_27039_1-p12956 C-genome specific (napus-oleracea) | 0.9880383    | 0.8656014    | 1            | 0.819558     | not scorable | not scorable |
| ##### Bn-scaff_27039_1-p14062 C-genome specific (napus-oleracea) | 0.9760765    | 0.8394466    | 0.6356589    | 0.7476804    | not scorable | not scorable |
| ##### Bn-scaff_27039_1-p19783 C-genome specific (napus-oleracea) | 0.9976076    | 0.4666125    | 1            | 0.4446907    | not scorable | not scorable |
| ##### Bn-scaff_27039_1-p26952 genome unspecific (oleracea-rapa)  | not scorable | not scorable | 0.9922481    | 0.8021847    | 1            | 0.9207039    |
| ##### Bn-scaff_27039_1-p27397 genome unspecific (all in)         | 1            | 0.7096455    | 1            | 0.7116115    | 1            | 0.8207097    |
| ##### Bn-scaff_27039_1-p31148 C-genome specific (napus-oleracea) | 0.9784689    | 0.7716716    | 0.9922481    | 0.7721094    | not scorable | not scorable |
| ##### Bn-scaff_27039_1-p33745 C-genome specific (napus-oleracea) | 0.9928229    | 0.3157014    | 0.9689922    | 0.7271789    | not scorable | not scorable |
| ##### Bn-scaff_27039_1-p33777 C-genome specific (napus-oleracea) | 0.9641148    | 0.3332736    | 0.9767442    | 0.6986856    | not scorable | not scorable |
| ##### Bn-scaff_27039_1-p33796 genome unspecific (all in)         | 0.9832536    | 0.3297275    | 0.9302326    | 0.1979702    | 1            | 0.8943996    |
| ##### Bn-scaff_27039_1-p39993 C-genome specific (napus-oleracea) | 0.9856459    | 0.8171251    | 0.9767442    | 0.7655068    | not scorable | not scorable |
| ##### Bn-scaff_27039_1-p40076 C-genome specific (napus-oleracea) | 0.9856459    | 0.8184053    | 0.9844961    | 0.7756222    | not scorable | not scorable |
| ##### Bn-scaff_27039_1-p40596 C-genome specific (napus-oleracea) | 0.9856459    | 0.7563141    | 0.9922481    | 0.7994268    | not scorable | not scorable |
| ##### Bn-scaff_27039_1-p41458 genome unspecific (all in)         | 0.9736842    | 0.4699346    | 0.9922481    | 0.5963861    | 0.9586777    | 0.9200076    |
| ##### Bn-scaff_27039_1-p41990 C-genome specific (napus-oleracea) | 0.9736842    | 0.8028288    | 0.9922481    | 0.8229076    | not scorable | not scorable |
| ##### Bn-scaff_27039_1-p42960 C-genome specific (napus-oleracea) | 0.9880383    | 0.8464237    | 0.9844961    | 0.756411     | not scorable | not scorable |
| ##### Bn-scaff_27039_1-p48366 genome unspecific (all in)         | 0.9617225    | 0.2751737    | 1            | 0.8174745    | 1            | 0.7582263    |
| ##### Bn-scaff_27039_1-p48379 C-genome specific (napus-oleracea) | 0.9784689    | 0.7238142    | 0.9922481    | 0.6861082    | not scorable | not scorable |
| ##### Bn-scaff_27039_1-p48569 C-genome specific (napus-oleracea) | 0.9832536    | 0.7897984    | 0.9534883    | 0.6946185    | not scorable | not scorable |
| ##### Bn-scaff_27039_1-p51172 genome unspecific (all in)         | 0.9449761    | 0.5887363    | 1            | 0.7677543    | 0.9834711    | 0.8354596    |
| ##### Bn-scaff_27039_1-p53864 genome unspecific (all in)         | 0.9856459    | 0.4320911    | 0.9922481    | 0.8886092    | 1            | 0.8817205    |
| ##### Bn-scaff_27039_1-p54044 C-genome specific (napus-oleracea) | 1            | 0.5941138    | 1            | 0.2504728    | not scorable | not scorable |
| ##### Bn-scaff_27039_1-p54578 C-genome specific (napus-oleracea) | 0.9688995    | 0.7960223    | 0.7209302    | 0.794443     | not scorable | not scorable |
| ##### Bn-scaff_27039_1-p57771 genome unspecific (all in)         | 0.9904306    | 0.6407089    | 1            | 0.8621204    | 1            | 0.9167631    |
| ##### Bn-scaff_27039_1-p61167 C-genome specific (napus-oleracea) | 0.9736842    | 0.7897474    | 0.7209302    | 0.793036     | not scorable | not scorable |
| ##### Bn-scaff_27039_1-p61358 C-genome specific (napus-oleracea) | 0.9760765    | 0.8811898    | 0.7131783    | 0.8043178    | not scorable | not scorable |



|                                                                 |              |              |              |              |              |              |
|-----------------------------------------------------------------|--------------|--------------|--------------|--------------|--------------|--------------|
| #### Bn-scaff_27039_1-p6476 genome unspecific (all in)          | 1            | 0.6133477    | 1            | 0.6366912    | 0.9834711    | 0.8801323    |
| #### Bn-scaff_27039_1-p6538 genome unspecific (all in)          | 1            | 0.589027     | 1            | 0.5728551    | 1            | 0.8948755    |
| #### Bn-scaff_27039_1-p68527 C-genome specific (napus-oleracea) | 0.9784689    | 0.82548      | 1            | 0.7937816    | not scorable | not scorable |
| #### Bn-scaff_27039_1-p68978 C-genome specific (napus-oleracea) | 0.9856459    | 0.8339107    | 1            | 0.8061357    | not scorable | not scorable |
| #### Bn-scaff_27039_1-p68985 C-genome specific (napus-oleracea) | 0.9856459    | 0.8179559    | 1            | 0.6533186    | not scorable | not scorable |
| #### Bn-scaff_27039_1-p71315 all not scorable                   | not scorable | not scorable | not scorable | not scorable | not scorable | not scorable |
| #### Bn-scaff_27039_1-p7176 genome unspecific (all in)          | 0.9928229    | 0.2483336    | 0.9534883    | 0.6100886    | 1            | 0.8943492    |
| #### Bn-scaff_27039_1-p7343 genome unspecific (all in)          | 0.9880383    | 0.4056681    | 1            | 0.6918443    | 1            | 0.9189743    |
| #### Bn-scaff_27039_1-p7409 genome unspecific (oleracea-rapa)   | not scorable | not scorable | 1            | 0.7531538    | 1            | 0.727613     |
| #### Bn-scaff_27039_1-p88525 C-genome specific (napus-oleracea) | 0.9736842    | 0.8651072    | 0.4263566    | 0.87661      | not scorable | not scorable |
| #### Bn-scaff_27039_1-p88639 C-genome specific (napus-oleracea) | 0.9641148    | 0.8061771    | 0.4263566    | 0.8515791    | not scorable | not scorable |
| #### Bn-scaff_27039_1-p99714 C-genome specific (napus-oleracea) | 0.9593301    | 0.7445928    | 0.4263566    | 0.6577917    | not scorable | not scorable |
| #### Bn-scaff_27050_1-p10134 genome unspecific (all in)         | 0.9449761    | 0.257414     | 1            | 0.7681693    | 0.9834711    | 0.4464929    |
| #### Bn-scaff_27050_1-p14737 genome unspecific (all in)         | 0.9449761    | 0.5623412    | 1            | 0.6350555    | 1            | 0.918771     |
| #### Bn-scaff_27050_1-p15024 genome unspecific (all in)         | 0.9976076    | 0.4137378    | 0.9922481    | 0.81059      | 1            | 0.8894088    |
| #### Bn-scaff_27050_1-p16324 C-genome specific (napus-oleracea) | 1            | 0.9288653    | 1            | 0.8745062    | not scorable | not scorable |
| #### Bn-scaff_27050_1-p17033 C-genome specific (napus-oleracea) | 0.9665072    | 0.5787317    | 1            | 0.5729839    | not scorable | not scorable |
| #### Bn-scaff_27059_1-p12201 A-genome specific (napus-rapa)     | 1            | 0.2959373    | not scorable | not scorable | 1            | 0.681638     |
| #### Bn-scaff_27059_1-p12272 genome unspecific (oleracea-rapa)  | not scorable | not scorable | 1            | 0.5410693    | 1            | 0.7923425    |
| #### Bn-scaff_27059_1-p1228 genome unspecific (all in)          | 0.9976076    | 0.6487591    | 1            | 0.5712574    | 1            | 0.6493671    |
| #### Bn-scaff_27059_1-p23114 genome unspecific (all in)         | 0.9952153    | 0.482521     | 1            | 0.7326353    | 1            | 0.8699991    |
| #### Bn-scaff_27059_1-p23212 genome unspecific (all in)         | 0.9928229    | 0.5168866    | 1            | 0.6100003    | 1            | 0.8207148    |
| #### Bn-scaff_27076_1-p26578 C-genome specific (napus-oleracea) | 0.9856459    | 0.8694518    | 0.8992248    | 0.7725471    | not scorable | not scorable |
| #### Bn-scaff_27076_1-p2668 C-genome specific (napus-oleracea)  | 0.9904306    | 0.7594094    | 0.9224806    | 0.6891317    | not scorable | not scorable |
| #### Bn-scaff_27076_1-p34695 C-genome specific (napus-oleracea) | 0.9880383    | 0.6663384    | 1            | 0.5623417    | not scorable | not scorable |
| #### Bn-scaff_27076_1-p74252 C-genome specific (napus-oleracea) | 0.9880383    | 0.8242144    | 0.8992248    | 0.6767984    | not scorable | not scorable |
| #### Bn-scaff_27076_1-p78402 C-genome specific (napus-oleracea) | 0.9904306    | 0.883461     | 0.9922481    | 0.7275165    | not scorable | not scorable |
| #### Bn-scaff_27076_1-p79989 A-genome specific (napus-rapa)     | 0.9928229    | 0.7542956    | not scorable | not scorable | 1            | 0.7764946    |
| #### Bn-scaff_27076_1-p80568 C-genome specific (napus-oleracea) | 0.9976076    | 0.8429757    | 1            | 0.7429006    | not scorable | not scorable |
| #### Bn-scaff_27129_1-p10321 C-genome specific (napus-oleracea) | 0.9760765    | 0.7116574    | 1            | 0.6626268    | not scorable | not scorable |
| #### Bn-scaff_27129_1-p10525 C-genome specific (napus-oleracea) | 0.9617225    | 0.7425449    | 1            | 0.7680372    | not scorable | not scorable |
| #### Bn-scaff_27129_1-p11086 C-genome specific (napus-oleracea) | 0.9760765    | 0.7971773    | 1            | 0.7368299    | not scorable | not scorable |
| #### Bn-scaff_27129_1-p11225 C-genome specific (napus-oleracea) | 0.9904306    | 0.738911     | 1            | 0.6932197    | not scorable | not scorable |

|                                                                |              |              |              |              |              |              |
|----------------------------------------------------------------|--------------|--------------|--------------|--------------|--------------|--------------|
| #### Bn-scaff_27129_1-p11994genome unspecific (all in)         | 0.9712918    | 0.3610927    | 1            | 0.7868745    | 1            | 0.9072468    |
| #### Bn-scaff_27129_1-p12991genome unspecific (all in)         | 0.9976076    | 0.2789966    | 1            | 0.8404646    | 0.9834711    | 0.6437243    |
| #### Bn-scaff_27129_1-p17961genome unspecific (all in)         | 1            | 0.7868569    | 1            | 0.7919086    | 1            | 0.8515885    |
| #### Bn-scaff_27129_1-p20049genome unspecific (all in)         | 0.9784689    | 0.537572     | 1            | 0.6801245    | 1            | 0.9169765    |
| #### Bn-scaff_27129_1-p70019C-genome specific (napus-oleracea) | 0.9593301    | 0.8056187    | 0.9767442    | 0.6722018    | not scorable | not scorable |
| #### Bn-scaff_27129_1-p98351C-genome specific (napus-oleracea) | 0.9736842    | 0.793625     | 0.9922481    | 0.7742501    | not scorable | not scorable |
| #### Bn-scaff_27145_1-p1140 C-genome specific (napus-oleracea) | 0.9976076    | 0.8731683    | 1            | 0.7902704    | not scorable | not scorable |
| #### Bn-scaff_27173_1-p1097 C-genome specific (napus-oleracea) | 0.9832536    | 0.728994     | 0.9922481    | 0.7648068    | not scorable | not scorable |
| #### Bn-scaff_27173_1-p1225 C-genome specific (napus-oleracea) | 0.9712918    | 0.7561272    | 0.9922481    | 0.7913281    | not scorable | not scorable |
| #### Bn-scaff_27180_1-p4389 genome unspecific (all in)         | 1            | 0.3168183    | 1            | 0.6205606    | 1            | 0.7068782    |
| #### Bn-scaff_27180_1-p44567genome unspecific (all in)         | 0.9832536    | 0.2951375    | 1            | 0.7053436    | 1            | 0.8440055    |
| #### Bn-scaff_27198_1-p10107C-genome specific (oleracea only)  | not scorable | not scorable | 1            | 0.8867063    | not scorable | not scorable |
| #### Bn-scaff_27198_1-p16081C-genome specific (napus-oleracea) | 0.9952153    | 0.7219557    | 0.9922481    | 0.7373989    | not scorable | not scorable |
| #### Bn-scaff_27198_1-p22177C-genome specific (napus-oleracea) | 0.8995215    | 0.80213      | 0.9922481    | 0.8415168    | not scorable | not scorable |
| #### Bn-scaff_27198_1-p25427C-genome specific (napus-oleracea) | 0.8923445    | 0.7703388    | 0.7984496    | 0.7889904    | not scorable | not scorable |
| #### Bn-scaff_27198_1-p25431C-genome specific (napus-oleracea) | 0.8779904    | 0.775112     | 0.8139535    | 0.8253183    | not scorable | not scorable |
| #### Bn-scaff_27198_1-p26300C-genome specific (napus-oleracea) | 0.8779904    | 0.8103251    | 0.9922481    | 0.7110769    | not scorable | not scorable |
| #### Bn-scaff_27198_1-p26627genome unspecific (oleracea-rapa)  | not scorable | not scorable | 1            | 0.737967     | 0.9834711    | 0.7996386    |
| #### Bn-scaff_27198_1-p30070genome unspecific (all in)         | 0.9162679    | 0.3945062    | 1            | 0.6661656    | 1            | 0.8228472    |
| #### Bn-scaff_27198_1-p42156C-genome specific (napus-oleracea) | 0.9449761    | 0.5032458    | 1            | 0.6847168    | not scorable | not scorable |
| #### Bn-scaff_27198_1-p44558A-genome specific (napus-rapa)     | 0.8875598    | 0.8193674    | not scorable | not scorable | 0.9421487    | 0.8499572    |
| #### Bn-scaff_27198_1-p44962C-genome specific (napus-oleracea) | 0.9019139    | 0.7582685    | 1            | 0.7642587    | not scorable | not scorable |
| #### Bn-scaff_27198_1-p57458C-genome specific (napus-oleracea) | 0.9066986    | 0.7481482    | 0.9844961    | 0.6721542    | not scorable | not scorable |
| #### Bn-scaff_27198_1-p57832C-genome specific (napus-oleracea) | 0.8708134    | 0.6926957    | 1            | 0.7524923    | not scorable | not scorable |
| #### Bn-scaff_27204_1-p1544 C-genome specific (oleracea only)  | not scorable | not scorable | 0.9922481    | 0.4779012    | not scorable | not scorable |
| #### Bn-scaff_27215_1-p1398 C-genome specific (napus-oleracea) | 0.9784689    | 0.7002345    | 0.9922481    | 0.6012049    | not scorable | not scorable |
| #### Bn-scaff_27215_1-p1538 C-genome specific (napus-oleracea) | 0.9880383    | 0.7819156    | 0.9922481    | 0.7561868    | not scorable | not scorable |
| #### Bn-scaff_27215_1-p909 C-genome specific (napus-oleracea)  | 0.9880383    | 0.7024454    | 1            | 0.6314372    | not scorable | not scorable |
| #### Bn-scaff_27218_1-p17208genome unspecific (all in)         | 0.9282297    | 0.4081621    | 0.9612403    | 0.4728338    | 0.9917355    | 0.727214     |
| #### Bn-scaff_27218_1-p19546genome unspecific (all in)         | 0.9856459    | 0.239702     | 1            | 0.9407413    | 0.9917355    | 0.7832392    |
| #### Bn-scaff_27218_1-p19974genome unspecific (all in)         | 0.9976076    | 0.2537393    | 1            | 0.886382     | 1            | 0.8334062    |
| #### Bn-scaff_27278_1-p1211 genome unspecific (oleracea-rapa)  | not scorable | not scorable | 0.9689922    | 0.5414754    | 0.9669421    | 0.4763945    |
| #### Bn-scaff_27278_1-p19570genome unspecific (all in)         | 0.9760765    | 0.4356871    | 1            | 0.7374337    | 1            | 0.8033806    |

|                                                                |              |              |              |              |              |              |
|----------------------------------------------------------------|--------------|--------------|--------------|--------------|--------------|--------------|
| #### Bn-scaff_27278_1-p26361genome unspecific (all in)         | 1            | 0.3488048    | 1            | 0.799529     | 0.9917355    | 0.8074242    |
| #### Bn-scaff_27278_1-p2772 C-genome specific (napus-oleracea) | 0.9808612    | 0.7802528    | 0.9767442    | 0.8262665    | not scorable | not scorable |
| #### Bn-scaff_27313_1-p451 C-genome specific (napus-oleracea)  | 0.9784689    | 0.7364488    | 1            | 0.688117     | not scorable | not scorable |
| #### Bn-scaff_27313_1-p653 C-genome specific (napus-oleracea)  | 0.9784689    | 0.7893842    | 0.9922481    | 0.7466822    | not scorable | not scorable |
| #### Bn-scaff_27401_1-p2510 napus specific                     | 0.9736842    | 0.4539504    | not scorable | not scorable | not scorable | not scorable |
| #### Bn-scaff_27401_1-p2581 C-genome specific (napus-oleracea) | 0.9928229    | 0.3077731    | 0.9767442    | 0.3557483    | not scorable | not scorable |
| #### Bn-scaff_27401_1-p2901 C-genome specific (oleracea only)  | not scorable | not scorable | 0.9612403    | 0.5807237    | not scorable | not scorable |
| #### Bn-scaff_27421_1-p10289genome unspecific (all in)         | 0.9760765    | 0.4462586    | 1            | 0.6234978    | 0.9917355    | 0.5814928    |
| #### Bn-scaff_27421_1-p10689C-genome specific (napus-oleracea) | 0.9688995    | 0.6487762    | 1            | 0.6437427    | not scorable | not scorable |
| #### Bn-scaff_27421_1-p10892genome unspecific (all in)         | 0.9712918    | 0.4525201    | 0.9689922    | 0.7139384    | 1            | 0.8931863    |
| #### Bn-scaff_27421_1-p11088C-genome specific (napus-oleracea) | 0.9688995    | 0.6085567    | 0.9689922    | 0.6749648    | not scorable | not scorable |
| #### Bn-scaff_27421_1-p11544genome unspecific (all in)         | 1            | 0.719868     | 1            | 0.8326244    | 1            | 0.7512134    |
| #### Bn-scaff_27421_1-p11862C-genome specific (napus-oleracea) | 0.9545454    | 0.6879162    | 0.9379845    | 0.7915636    | not scorable | not scorable |
| #### Bn-scaff_27421_1-p13172genome unspecific (all in)         | 1            | 0.6075392    | 1            | 0.5987751    | 1            | 0.7849486    |
| #### Bn-scaff_27421_1-p15015genome unspecific (all in)         | 0.9976076    | 0.7051526    | 1            | 0.7125875    | 1            | 0.8171243    |
| #### Bn-scaff_27421_1-p16736C-genome specific (napus-oleracea) | 0.9641148    | 0.7829278    | 0.9922481    | 0.7561727    | not scorable | not scorable |
| #### Bn-scaff_27421_1-p17507C-genome specific (oleracea only)  | not scorable | not scorable | 0.9612403    | 0.774815     | not scorable | not scorable |
| #### Bn-scaff_27421_1-p27395genome unspecific (oleracea-rapa)  | not scorable | not scorable | 0.8139535    | 0.38693      | 1            | 0.7916311    |
| #### Bn-scaff_27421_1-p32784C-genome specific (napus-oleracea) | 0.9593301    | 0.7181665    | 0.9922481    | 0.8202611    | not scorable | not scorable |
| #### Bn-scaff_27421_1-p50410C-genome specific (napus-oleracea) | 0.9736842    | 0.7073253    | 0.9767442    | 0.719955     | not scorable | not scorable |
| #### Bn-scaff_27421_1-p7352 C-genome specific (napus-oleracea) | 0.9665072    | 0.7594824    | 0.8449612    | 0.7874309    | not scorable | not scorable |
| #### Bn-scaff_27421_1-p7441 A-genome specific (napus-rapa)     | 0.9784689    | 0.7353314    | not scorable | not scorable | 0.9917355    | 0.7940054    |
| #### Bn-scaff_27421_1-p7596 C-genome specific (napus-oleracea) | 0.9904306    | 0.749289     | 1            | 0.7538236    | not scorable | not scorable |
| #### Bn-scaff_27421_1-p7687 C-genome specific (napus-oleracea) | 0.9784689    | 0.7951521    | 0.8527132    | 0.8255664    | not scorable | not scorable |
| #### Bn-scaff_27421_1-p8399 C-genome specific (napus-oleracea) | 0.9928229    | 0.6927142    | 1            | 0.6833972    | not scorable | not scorable |
| #### Bn-scaff_27421_1-p88712C-genome specific (napus-oleracea) | 0.9880383    | 0.7733838    | 1            | 0.8678293    | not scorable | not scorable |
| #### Bn-scaff_27421_1-p88842C-genome specific (napus-oleracea) | 0.9832536    | 0.784371     | 1            | 0.824143     | not scorable | not scorable |
| #### Bn-scaff_27421_1-p89824C-genome specific (napus-oleracea) | 0.9545454    | 0.5248312    | 0.9534883    | 0.4365602    | not scorable | not scorable |
| #### Bn-scaff_27421_1-p9012 C-genome specific (napus-oleracea) | 0.9880383    | 0.7177656    | 0.9844961    | 0.7025656    | not scorable | not scorable |
| #### Bn-scaff_27421_1-p9941 C-genome specific (napus-oleracea) | 1            | 0.7824318    | 0.9922481    | 0.7325492    | not scorable | not scorable |
| #### Bn-scaff_27451_1-p10846genome unspecific (all in)         | 0.9832536    | 0.6024555    | 1            | 0.7699351    | 1            | 0.91223      |
| #### Bn-scaff_27451_1-p10905C-genome specific (napus-oleracea) | 0.9952153    | 0.4657498    | 1            | 0.7972638    | not scorable | not scorable |
| #### Bn-scaff_27451_1-p11028C-genome specific (napus-oleracea) | 0.9856459    | 0.798099     | 1            | 0.7992256    | not scorable | not scorable |

|                                                                |           |           |           |           |              |              |
|----------------------------------------------------------------|-----------|-----------|-----------|-----------|--------------|--------------|
| #### Bn-scaff_27451_1-p11121C-genome specific (napus-oleracea) | 0.9952153 | 0.7652438 | 1         | 0.7772946 | not scorable | not scorable |
| #### Bn-scaff_27451_1-p11181C-genome specific (napus-oleracea) | 0.9904306 | 0.8618795 | 1         | 0.6702899 | not scorable | not scorable |
| #### Bn-scaff_27451_1-p11330C-genome specific (napus-oleracea) | 0.9904306 | 0.790795  | 1         | 0.8998013 | not scorable | not scorable |
| #### Bn-scaff_27451_1-p11495C-genome specific (napus-oleracea) | 0.9880383 | 0.799965  | 1         | 0.793566  | not scorable | not scorable |
| #### Bn-scaff_27451_1-p11495C-genome specific (napus-oleracea) | 0.9928229 | 0.8098589 | 1         | 0.7808691 | not scorable | not scorable |
| #### Bn-scaff_27451_1-p1388 C-genome specific (napus-oleracea) | 0.9952153 | 0.7611311 | 0.9689922 | 0.6769311 | not scorable | not scorable |
| #### Bn-scaff_27451_1-p4208 C-genome specific (napus-oleracea) | 0.9856459 | 0.8093744 | 1         | 0.9042724 | not scorable | not scorable |
| #### Bn-scaff_27451_1-p7081 C-genome specific (napus-oleracea) | 1         | 0.7771774 | 0.9922481 | 0.8335554 | not scorable | not scorable |
| #### Bn-scaff_27451_1-p9711 C-genome specific (napus-oleracea) | 0.9904306 | 0.7984841 | 1         | 0.7922049 | not scorable | not scorable |
| #### Bn-scaff_27453_1-p3576 genome unspecific (all in)         | 0.9976076 | 0.3164929 | 0.9767442 | 0.2615289 | 1            | 0.7691762    |
| #### Bn-scaff_27469_1-p10105C-genome specific (napus-oleracea) | 0.9066986 | 0.7350895 | 0.9922481 | 0.7875881 | not scorable | not scorable |
| #### Bn-scaff_27469_1-p23521C-genome specific (napus-oleracea) | 0.930622  | 0.7701003 | 0.9844961 | 0.8474991 | not scorable | not scorable |
| #### Bn-scaff_27469_1-p28443C-genome specific (napus-oleracea) | 0.923445  | 0.7103785 | 0.9922481 | 0.6955214 | not scorable | not scorable |
| #### Bn-scaff_27469_1-p33880C-genome specific (napus-oleracea) | 0.9186603 | 0.7672853 | 0.9767442 | 0.7230631 | not scorable | not scorable |
| #### Bn-scaff_27469_1-p34001C-genome specific (napus-oleracea) | 0.9162679 | 0.7872791 | 0.9844961 | 0.7824321 | not scorable | not scorable |
| #### Bn-scaff_27469_1-p34230C-genome specific (napus-oleracea) | 0.9186603 | 0.7982833 | 0.9844961 | 0.8329149 | not scorable | not scorable |
| #### Bn-scaff_27469_1-p34260C-genome specific (napus-oleracea) | 0.9282297 | 0.7786458 | 1         | 0.8034514 | not scorable | not scorable |
| #### Bn-scaff_27469_1-p34980C-genome specific (napus-oleracea) | 0.9282297 | 0.7778634 | 0.9844961 | 0.8252613 | not scorable | not scorable |
| #### Bn-scaff_27469_1-p35038C-genome specific (napus-oleracea) | 0.9258373 | 0.791391  | 1         | 0.8143882 | not scorable | not scorable |
| #### Bn-scaff_27469_1-p35256C-genome specific (napus-oleracea) | 0.9282297 | 0.7695048 | 1         | 0.8458923 | not scorable | not scorable |
| #### Bn-scaff_27469_1-p35528C-genome specific (napus-oleracea) | 0.9258373 | 0.7879194 | 0.9844961 | 0.8030725 | not scorable | not scorable |
| #### Bn-scaff_27469_1-p36616C-genome specific (napus-oleracea) | 0.9282297 | 0.7835542 | 1         | 0.8191072 | not scorable | not scorable |
| #### Bn-scaff_27469_1-p39202C-genome specific (napus-oleracea) | 0.923445  | 0.7549644 | 0.9922481 | 0.8051868 | not scorable | not scorable |
| #### Bn-scaff_27469_1-p39316C-genome specific (napus-oleracea) | 0.923445  | 0.7350499 | 0.9844961 | 0.6848847 | not scorable | not scorable |
| #### Bn-scaff_27469_1-p39929C-genome specific (napus-oleracea) | 0.923445  | 0.7457753 | 0.9767442 | 0.7291195 | not scorable | not scorable |
| #### Bn-scaff_27469_1-p40108C-genome specific (napus-oleracea) | 0.930622  | 0.7451532 | 0.9767442 | 0.7935227 | not scorable | not scorable |
| #### Bn-scaff_27469_1-p40244C-genome specific (napus-oleracea) | 0.930622  | 0.7888378 | 0.9922481 | 0.8233049 | not scorable | not scorable |
| #### Bn-scaff_27469_1-p40347C-genome specific (napus-oleracea) | 0.9258373 | 0.7819156 | 0.9689922 | 0.8022915 | not scorable | not scorable |
| #### Bn-scaff_27469_1-p44065C-genome specific (napus-oleracea) | 0.9210526 | 0.7237318 | 0.9844961 | 0.8023478 | not scorable | not scorable |
| #### Bn-scaff_27469_1-p44550C-genome specific (napus-oleracea) | 0.923445  | 0.7252792 | 1         | 0.7292317 | not scorable | not scorable |
| #### Bn-scaff_27469_1-p45054C-genome specific (napus-oleracea) | 0.9114832 | 0.8413882 | 0.9767442 | 0.6440528 | not scorable | not scorable |
| #### Bn-scaff_27469_1-p73595C-genome specific (napus-oleracea) | 0.9665072 | 0.6009618 | 1         | 0.7368959 | not scorable | not scorable |
| #### Bn-scaff_27469_1-p73823 genome unspecific (all in)        | 0.9880383 | 0.4411703 | 0.9922481 | 0.5345133 | 0.9917355    | 0.8159313    |

|                                                                 |              |              |           |   |           |              |              |
|-----------------------------------------------------------------|--------------|--------------|-----------|---|-----------|--------------|--------------|
| #### Bn-scaff_27469_1-p75623 C-genome specific (napus-oleracea) | 0.9760765    | 0.4003408    |           | 1 | 0.6656015 | not scorable | not scorable |
| #### Bn-scaff_27469_1-p80430 genome unspecific (oleracea-rapa)  | not scorable | not scorable |           | 1 | 0.6285692 | 0.9834711    | 0.5835149    |
| #### Bn-scaff_27485_1-p7330 C-genome specific (napus-oleracea)  | 0.9784689    | 0.6753186    | 0.9534883 |   | 0.6077929 | not scorable | not scorable |
| #### Bn-scaff_27513_1-p10153 C-genome specific (napus-oleracea) | 0.9401914    | 0.7480859    | 0.9612403 |   | 0.7314339 | not scorable | not scorable |
| #### Bn-scaff_27513_1-p1263 C-genome specific (napus-oleracea)  | 1            | 0.6926664    |           | 1 | 0.6551099 | not scorable | not scorable |
| #### Bn-scaff_27513_1-p18776 C-genome specific (napus-oleracea) | 0.9976076    | 0.8504822    | 0.9844961 |   | 0.7471243 | not scorable | not scorable |
| #### Bn-scaff_27513_1-p18785 C-genome specific (napus-oleracea) | 0.9976076    | 0.8099377    | 0.9922481 |   | 0.7935687 | not scorable | not scorable |
| #### Bn-scaff_27513_1-p55735 C-genome specific (napus-oleracea) | 0.9928229    | 0.7715561    |           | 1 | 0.7158102 | not scorable | not scorable |
| #### Bn-scaff_27513_1-p61573 C-genome specific (napus-oleracea) | 1            | 0.6903681    | 0.9767442 |   | 0.6497499 | not scorable | not scorable |
| #### Bn-scaff_27513_1-p62174 C-genome specific (napus-oleracea) | 0.9952153    | 0.7009391    | 0.9922481 |   | 0.6550958 | not scorable | not scorable |
| #### Bn-scaff_27513_1-p62675 C-genome specific (napus-oleracea) | 0.9928229    | 0.7548091    | 0.9767442 |   | 0.6581514 | not scorable | not scorable |
| #### Bn-scaff_27513_1-p8405 genome unspecific (all in)          | 0.9928229    | 0.8077914    |           | 1 | 0.8089823 | 0.9586777    | 0.9072468    |
| #### Bn-scaff_27513_1-p90965 C-genome specific (napus-oleracea) | 0.9354067    | 0.8251163    | 0.9844961 |   | 0.7343534 | not scorable | not scorable |
| #### Bn-scaff_27513_1-p93022 C-genome specific (napus-oleracea) | 0.9832536    | 0.7987679    | 0.9844961 |   | 0.7401291 | not scorable | not scorable |
| #### Bn-scaff_27513_1-p93081 C-genome specific (napus-oleracea) | 0.9473684    | 0.8828773    |           | 1 | 0.7311875 | not scorable | not scorable |
| #### Bn-scaff_27513_1-p93870 C-genome specific (napus-oleracea) | 0.9880383    | 0.8087332    | 0.9922481 |   | 0.7300061 | not scorable | not scorable |
| #### Bn-scaff_27541_1-p9442 C-genome specific (napus-oleracea)  | 0.9856459    | 0.8082004    |           | 1 | 0.7607086 | not scorable | not scorable |
| #### Bn-scaff_27554_1-p3448 C-genome specific (napus-oleracea)  | 0.9880383    | 0.6926226    | 0.9767442 |   | 0.6504654 | not scorable | not scorable |
| #### Bn-scaff_27554_1-p3917 C-genome specific (napus-oleracea)  | 0.9880383    | 0.7736471    | 0.9844961 |   | 0.8243644 | not scorable | not scorable |
| #### Bn-scaff_27567_1-p347 genome unspecific (all in)           | 0.9976076    | 0.3948508    |           | 1 | 0.6735213 | 0.9917355    | 0.7854174    |
| #### Bn-scaff_27568_1-p91 C-genome specific (napus-oleracea)    | 0.9617225    | 0.7719193    | 0.8217054 |   | 0.7790689 | not scorable | not scorable |
| #### Bn-scaff_27585_1-p898 genome unspecific (all in)           | 0.9976076    | 0.3280707    |           | 1 | 0.823253  | 0.9834711    | 0.7655799    |
| #### Bn-scaff_27609_1-p6012 C-genome specific (napus-oleracea)  | 0.9928229    | 0.826153     | 0.9922481 |   | 0.6773548 | not scorable | not scorable |
| #### Bn-scaff_27619_1-p314 C-genome specific (napus-oleracea)   | 1            | 0.7606305    |           | 1 | 0.8039591 | not scorable | not scorable |
| #### Bn-scaff_27630_1-p584 C-genome specific (napus-oleracea)   | 0.7631579    | 0.7955495    | 0.9379845 |   | 0.7749578 | not scorable | not scorable |
| #### Bn-scaff_27634_1-p10328 C-genome specific (napus-oleracea) | 0.9904306    | 0.7537186    |           | 1 | 0.8573843 | not scorable | not scorable |
| #### Bn-scaff_27634_1-p10781 C-genome specific (napus-oleracea) | 0.9976076    | 0.8028733    |           | 1 | 0.8424019 | not scorable | not scorable |
| #### Bn-scaff_27634_1-p10818 C-genome specific (napus-oleracea) | 0.9904306    | 0.807108     |           | 1 | 0.8547722 | not scorable | not scorable |
| #### Bn-scaff_27634_1-p12059 C-genome specific (napus-oleracea) | 0.9832536    | 0.5992251    |           | 1 | 0.8219516 | not scorable | not scorable |
| #### Bn-scaff_27634_1-p12085 C-genome specific (napus-oleracea) | 0.9904306    | 0.821372     |           | 1 | 0.7263002 | not scorable | not scorable |
| #### Bn-scaff_27634_1-p12586 C-genome specific (napus-oleracea) | 0.9880383    | 0.7784587    |           | 1 | 0.7582499 | not scorable | not scorable |
| #### Bn-scaff_27634_1-p12970 C-genome specific (napus-oleracea) | 0.9928229    | 0.6998034    |           | 1 | 0.5558168 | not scorable | not scorable |
| #### Bn-scaff_27634_1-p13112 C-genome specific (napus-oleracea) | 1            | 0.7920006    |           | 1 | 0.8294824 | not scorable | not scorable |

|                                                                 |              |              |           |           |              |              |
|-----------------------------------------------------------------|--------------|--------------|-----------|-----------|--------------|--------------|
| #### Bn-scaff_27634_1-p13119 C-genome specific (napus-oleracea) | 0.9976076    | 0.7669614    | 1         | 0.8636292 | not scorable | not scorable |
| #### Bn-scaff_27634_1-p13142 C-genome specific (napus-oleracea) | 0.9976076    | 0.8212042    | 1         | 0.7849233 | not scorable | not scorable |
| #### Bn-scaff_27634_1-p13198 C-genome specific (napus-oleracea) | 0.9952153    | 0.7130445    | 1         | 0.7445919 | not scorable | not scorable |
| #### Bn-scaff_27634_1-p13421 C-genome specific (napus-oleracea) | 0.9952153    | 0.7773115    | 1         | 0.7365139 | not scorable | not scorable |
| #### Bn-scaff_27634_1-p13429 C-genome specific (napus-oleracea) | 0.9832536    | 0.7995774    | 1         | 0.7718516 | not scorable | not scorable |
| #### Bn-scaff_27634_1-p13430 C-genome specific (napus-oleracea) | 0.9976076    | 0.8305663    | 1         | 0.6618273 | not scorable | not scorable |
| #### Bn-scaff_27634_1-p13440 C-genome specific (napus-oleracea) | 1            | 0.8111597    | 1         | 0.8368894 | not scorable | not scorable |
| #### Bn-scaff_27634_1-p13451 C-genome specific (napus-oleracea) | 0.9952153    | 0.7972445    | 1         | 0.6914315 | not scorable | not scorable |
| #### Bn-scaff_27634_1-p13464 C-genome specific (napus-oleracea) | 0.9856459    | 0.8294641    | 1         | 0.7709563 | not scorable | not scorable |
| #### Bn-scaff_27634_1-p13545 C-genome specific (napus-oleracea) | 0.9928229    | 0.747279     | 1         | 0.7667328 | not scorable | not scorable |
| #### Bn-scaff_27634_1-p13560 C-genome specific (napus-oleracea) | 0.9928229    | 0.7620221    | 1         | 0.7039412 | not scorable | not scorable |
| #### Bn-scaff_27634_1-p13711 C-genome specific (napus-oleracea) | 0.9880383    | 0.8133568    | 1         | 0.7660711 | not scorable | not scorable |
| #### Bn-scaff_27634_1-p14228 C-genome specific (napus-oleracea) | 1            | 0.6718804    | 1         | 0.8339048 | not scorable | not scorable |
| #### Bn-scaff_27634_1-p23499 genome unspecific (all in)         | 0.9736842    | 0.5960023    | 1         | 0.6468286 | 1            | 0.691387     |
| #### Bn-scaff_27634_1-p24176 C-genome specific (napus-oleracea) | 0.9808612    | 0.8228173    | 0.9922481 | 0.8218637 | not scorable | not scorable |
| #### Bn-scaff_27634_1-p32249 C-genome specific (napus-oleracea) | 0.9880383    | 0.6378781    | 0.9922481 | 0.6797405 | not scorable | not scorable |
| #### Bn-scaff_27634_1-p34344 C-genome specific (napus-oleracea) | 0.9904306    | 0.7971304    | 1         | 0.746467  | not scorable | not scorable |
| #### Bn-scaff_27634_1-p55948 C-genome specific (napus-oleracea) | 0.9808612    | 0.6857575    | 1         | 0.7832311 | not scorable | not scorable |
| #### Bn-scaff_27634_1-p58452 C-genome specific (napus-oleracea) | 0.9880383    | 0.7609219    | 0.9922481 | 0.8507048 | not scorable | not scorable |
| #### Bn-scaff_27634_1-p59279 C-genome specific (napus-oleracea) | 0.9880383    | 0.7429819    | 1         | 0.7370347 | not scorable | not scorable |
| #### Bn-scaff_27634_1-p59390 C-genome specific (napus-oleracea) | 0.9856459    | 0.7598217    | 0.9922481 | 0.6432087 | not scorable | not scorable |
| #### Bn-scaff_27634_1-p84096 C-genome specific (napus-oleracea) | 0.9928229    | 0.7200699    | 1         | 0.8300366 | not scorable | not scorable |
| #### Bn-scaff_27634_1-p84488 C-genome specific (napus-oleracea) | 0.9952153    | 0.8023285    | 1         | 0.7484326 | not scorable | not scorable |
| #### Bn-scaff_27634_1-p84941 C-genome specific (napus-oleracea) | 0.9976076    | 0.7265301    | 1         | 0.8550358 | not scorable | not scorable |
| #### Bn-scaff_27634_1-p85009 C-genome specific (napus-oleracea) | 0.9976076    | 0.7539867    | 1         | 0.8308184 | not scorable | not scorable |
| #### Bn-scaff_27634_1-p85133 C-genome specific (napus-oleracea) | 0.9952153    | 0.80282      | 1         | 0.8255153 | not scorable | not scorable |
| #### Bn-scaff_27634_1-p89324 C-genome specific (napus-oleracea) | 0.9976076    | 0.8038988    | 0.9922481 | 0.7734299 | not scorable | not scorable |
| #### Bn-scaff_27634_1-p90485 C-genome specific (oleracea only)  | not scorable | not scorable | 1         | 0.8004208 | not scorable | not scorable |
| #### Bn-scaff_27650_1-p11659 C-genome specific (oleracea only)  | not scorable | not scorable | 1         | 0.9314576 | not scorable | not scorable |
| #### Bn-scaff_27670_1-p12516 genome unspecific (all in)         | 1            | 0.5302584    | 1         | 0.5080507 | 1            | 0.6980491    |
| #### Bn-scaff_27670_1-p14109 C-genome specific (napus-oleracea) | 0.9186603    | 0.4753681    | 0.9689922 | 0.6899812 | not scorable | not scorable |
| #### Bn-scaff_27670_1-p15869 C-genome specific (napus-oleracea) | 1            | 0.8404303    | 1         | 0.7671751 | not scorable | not scorable |
| #### Bn-scaff_27670_1-p15955 C-genome specific (napus-oleracea) | 1            | 0.8255261    | 1         | 0.8544129 | not scorable | not scorable |

|                                                                 |              |              |              |              |              |              |
|-----------------------------------------------------------------|--------------|--------------|--------------|--------------|--------------|--------------|
| #### Bn-scaff_27670_1-p17203 C-genome specific (oleracea only)  | not scorable | not scorable | 0.9844961    | 0.7940871    | not scorable | not scorable |
| #### Bn-scaff_27670_1-p20749 C-genome specific (napus-oleracea) | 0.8995215    | 0.7411566    | 1            | 0.7799504    | not scorable | not scorable |
| #### Bn-scaff_27670_1-p28633 C-genome specific (napus-oleracea) | 0.9114832    | 0.7870815    | 1            | 0.777872     | not scorable | not scorable |
| #### Bn-scaff_27670_1-p34706 C-genome specific (napus-oleracea) | 0.9784689    | 0.7785823    | 0.9922481    | 0.7944452    | not scorable | not scorable |
| #### Bn-scaff_27670_1-p35944 A-genome specific (napus-rapa)     | 0.9401914    | 0.3938429    | not scorable | not scorable | 1            | 0.9052409    |
| #### Bn-scaff_27670_1-p36671 genome unspecific (all in)         | 1            | 0.5583667    | 1            | 0.729798     | 0.9917355    | 0.4566343    |
| #### Bn-scaff_27676_1-p11040 genome unspecific (all in)         | 0.9712918    | 0.5437804    | 0.9922481    | 0.6723971    | 1            | 0.8841454    |
| #### Bn-scaff_27676_1-p11106 C-genome specific (napus-oleracea) | 0.9688995    | 0.7378935    | 1            | 0.7529763    | not scorable | not scorable |
| #### Bn-scaff_27676_1-p11114 C-genome specific (napus-oleracea) | 0.9856459    | 0.8018239    | 1            | 0.8564256    | not scorable | not scorable |
| #### Bn-scaff_27676_1-p11121 C-genome specific (napus-oleracea) | 0.9784689    | 0.6870108    | 0.9844961    | 0.6732487    | not scorable | not scorable |
| #### Bn-scaff_27676_1-p1282 genome unspecific (all in)          | 1            | 0.4135233    | 1            | 0.5115829    | 0.9834711    | 0.4582287    |
| #### Bn-scaff_27676_1-p14277 C-genome specific (napus-oleracea) | 0.9641148    | 0.7707317    | 0.9767442    | 0.7669243    | not scorable | not scorable |
| #### Bn-scaff_27676_1-p14383 C-genome specific (napus-oleracea) | 0.9784689    | 0.7570737    | 1            | 0.7326967    | not scorable | not scorable |
| #### Bn-scaff_27676_1-p17578 C-genome specific (napus-oleracea) | 0.9784689    | 0.7875342    | 1            | 0.7355382    | not scorable | not scorable |
| #### Bn-scaff_27676_1-p17604 C-genome specific (napus-oleracea) | 0.9856459    | 0.7614085    | 1            | 0.7165939    | not scorable | not scorable |
| #### Bn-scaff_27676_1-p17932 C-genome specific (napus-oleracea) | 0.9880383    | 0.8432207    | 1            | 0.8614628    | not scorable | not scorable |
| #### Bn-scaff_27676_1-p19149 C-genome specific (napus-oleracea) | 0.9832536    | 0.7793696    | 0.9922481    | 0.6621209    | not scorable | not scorable |
| #### Bn-scaff_27676_1-p19177 genome unspecific (oleracea-rapa)  | not scorable | not scorable | 1            | 0.8350664    | 1            | 0.874481     |
| #### Bn-scaff_27676_1-p21431 genome unspecific (oleracea-rapa)  | not scorable | not scorable | 1            | 0.791282     | 1            | 0.9175813    |
| #### Bn-scaff_27676_1-p22341 C-genome specific (napus-oleracea) | 0.9617225    | 0.8143921    | 1            | 0.7114283    | not scorable | not scorable |
| #### Bn-scaff_27676_1-p22345 C-genome specific (napus-oleracea) | 0.9784689    | 0.803743     | 1            | 0.9401598    | not scorable | not scorable |
| #### Bn-scaff_27676_1-p22369 C-genome specific (napus-oleracea) | 0.9521531    | 0.7479835    | 0.9922481    | 0.790215     | not scorable | not scorable |
| #### Bn-scaff_27676_1-p22480 C-genome specific (napus-oleracea) | 0.9593301    | 0.7447921    | 1            | 0.8088131    | not scorable | not scorable |
| #### Bn-scaff_27676_1-p33891 genome unspecific (all in)         | 1            | 0.3382212    | 1            | 0.8725945    | 0.9917355    | 0.8197704    |
| #### Bn-scaff_27676_1-p60301 genome unspecific (all in)         | 0.9688995    | 0.6492685    | 0.9767442    | 0.6755322    | 0.9917355    | 0.9335362    |
| #### Bn-scaff_27676_1-p62035 C-genome specific (napus-oleracea) | 0.9665072    | 0.7673601    | 0.9689922    | 0.7780001    | not scorable | not scorable |
| #### Bn-scaff_27676_1-p81235 C-genome specific (napus-oleracea) | 0.9736842    | 0.7103721    | 0.9922481    | 0.8348557    | not scorable | not scorable |
| #### Bn-scaff_27676_1-p92167 C-genome specific (napus-oleracea) | 0.9760765    | 0.75056      | 0.9922481    | 0.8140952    | not scorable | not scorable |
| #### Bn-scaff_27677_1-p10529 genome unspecific (all in)         | 0.9425837    | 0.4336063    | 1            | 0.6418344    | 1            | 0.793419     |
| #### Bn-scaff_27677_1-p11891 C-genome specific (napus-oleracea) | 1            | 0.626382     | 1            | 0.5759066    | not scorable | not scorable |
| #### Bn-scaff_27677_1-p12594 genome unspecific (all in)         | 0.9712918    | 0.2230296    | 1            | 0.7893451    | 0.9917355    | 0.7638115    |
| #### Bn-scaff_27677_1-p13538 C-genome specific (napus-oleracea) | 0.8492823    | 0.7594367    | 1            | 0.7119895    | not scorable | not scorable |
| #### Bn-scaff_27677_1-p14510 genome unspecific (all in)         | 0.9569378    | 0.2320354    | 0.9612403    | 0.4243761    | 1            | 0.8500507    |

|                                                                |              |              |              |              |              |              |
|----------------------------------------------------------------|--------------|--------------|--------------|--------------|--------------|--------------|
| #### Bn-scaff_27677_1-p19683genome unspecific (all in)         | 1            | 0.5848283    | 1            | 0.8211137    | 1            | 0.4919431    |
| #### Bn-scaff_27677_1-p22874C-genome specific (napus-oleracea) | 0.9976076    | 0.8136061    | 1            | 0.7476579    | not scorable | not scorable |
| #### Bn-scaff_27677_1-p23648genome unspecific (all in)         | 0.9784689    | 0.4044803    | 1            | 0.737586     | 1            | 0.8510376    |
| #### Bn-scaff_27677_1-p24641genome unspecific (all in)         | 0.937799     | 0.4954442    | 1            | 0.8016546    | 1            | 0.6909394    |
| #### Bn-scaff_27677_1-p24647genome unspecific (all in)         | 0.9473684    | 0.3529309    | 1            | 0.5982221    | 1            | 0.7305889    |
| #### Bn-scaff_27677_1-p24758napus specific                     | 0.8803828    | 0.3686064    | not scorable | not scorable | not scorable | not scorable |
| #### Bn-scaff_27677_1-p24780C-genome specific (oleracea only)  | not scorable | not scorable | 0.8604651    | 0.8081348    | not scorable | not scorable |
| #### Bn-scaff_27677_1-p24930C-genome specific (napus-oleracea) | 0.9856459    | 0.7896282    | 1            | 0.6715453    | not scorable | not scorable |
| #### Bn-scaff_27677_1-p25063C-genome specific (napus-oleracea) | 0.8516746    | 0.7483704    | 0.875969     | 0.7125273    | not scorable | not scorable |
| #### Bn-scaff_27677_1-p27292C-genome specific (napus-oleracea) | 0.9928229    | 0.7514754    | 0.9844961    | 0.7923662    | not scorable | not scorable |
| #### Bn-scaff_27677_1-p28653C-genome specific (napus-oleracea) | 0.9976076    | 0.7979862    | 1            | 0.7610632    | not scorable | not scorable |
| #### Bn-scaff_27677_1-p30106genome unspecific (all in)         | 0.9688995    | 0.444035     | 1            | 0.8167108    | 1            | 0.7726262    |
| #### Bn-scaff_27677_1-p30109genome unspecific (all in)         | 1            | 0.3731685    | 1            | 0.5003794    | 1            | 0.868026     |
| #### Bn-scaff_27677_1-p33074genome unspecific (all in)         | 1            | 0.3566743    | 1            | 0.7143303    | 1            | 0.7285315    |
| #### Bn-scaff_27677_1-p36375C-genome specific (oleracea only)  | not scorable | not scorable | 0.9689922    | 0.8109635    | not scorable | not scorable |
| #### Bn-scaff_27677_1-p90409genome unspecific (all in)         | 0.9449761    | 0.4885415    | 1            | 0.7134604    | 1            | 0.776041     |
| #### Bn-scaff_27684_1-p10423C-genome specific (napus-oleracea) | 0.9976076    | 0.8835943    | 0.9844961    | 0.7835721    | not scorable | not scorable |
| #### Bn-scaff_27684_1-p13829C-genome specific (napus-oleracea) | 1            | 0.8380638    | 0.9844961    | 0.796602     | not scorable | not scorable |
| #### Bn-scaff_27684_1-p14175C-genome specific (napus-oleracea) | 0.9976076    | 0.7321074    | 1            | 0.7900799    | not scorable | not scorable |
| #### Bn-scaff_27684_1-p15376C-genome specific (napus-oleracea) | 0.9976076    | 0.7931772    | 0.9844961    | 0.8425367    | not scorable | not scorable |
| #### Bn-scaff_27684_1-p35165C-genome specific (napus-oleracea) | 0.9952153    | 0.7122286    | 0.9844961    | 0.5785433    | not scorable | not scorable |
| #### Bn-scaff_27705_1-p10268genome unspecific (all in)         | 1            | 0.695455     | 1            | 0.7833547    | 1            | 0.7007138    |
| #### Bn-scaff_27705_1-p10407all not scorable                   | not scorable | not scorable | not scorable | not scorable | not scorable | not scorable |
| #### Bn-scaff_27705_1-p11108C-genome specific (napus-oleracea) | 0.9976076    | 0.836035     | 0.9844961    | 0.8103875    | not scorable | not scorable |
| #### Bn-scaff_27705_1-p11127C-genome specific (napus-oleracea) | 0.9880383    | 0.917383     | 1            | 0.8343561    | not scorable | not scorable |
| #### Bn-scaff_27705_1-p12183C-genome specific (napus-oleracea) | 0.9904306    | 0.8689749    | 1            | 0.6406816    | not scorable | not scorable |
| #### Bn-scaff_27705_1-p12987C-genome specific (napus-oleracea) | 0.9880383    | 0.7325948    | 0.9922481    | 0.7298591    | not scorable | not scorable |
| #### Bn-scaff_27705_1-p16118genome unspecific (all in)         | 0.9665072    | 0.4856888    | 1            | 0.8912995    | 1            | 0.7522749    |
| #### Bn-scaff_27705_1-p17929C-genome specific (napus-oleracea) | 0.9736842    | 0.7771013    | 1            | 0.841688     | not scorable | not scorable |
| #### Bn-scaff_27705_1-p19731genome unspecific (all in)         | 1            | 0.7360116    | 1            | 0.720054     | 0.9917355    | 0.9383224    |
| #### Bn-scaff_27705_1-p21795C-genome specific (napus-oleracea) | 0.9473684    | 0.3177632    | 1            | 0.6835711    | not scorable | not scorable |
| #### Bn-scaff_27705_1-p81005C-genome specific (napus-oleracea) | 1            | 0.7120483    | 0.9844961    | 0.7098017    | not scorable | not scorable |
| #### Bn-scaff_27747_1-p20694C-genome specific (napus-oleracea) | 0.5167464    | 0.8181525    | 0.8914729    | 0.7128406    | not scorable | not scorable |



|                                                                 |              |              |           |           |              |              |
|-----------------------------------------------------------------|--------------|--------------|-----------|-----------|--------------|--------------|
| #### Bn-scaff_27747_1-p20714 C-genome specific (napus-oleracea) | 0.9880383    | 0.7792363    | 1         | 0.7218791 | not scorable | not scorable |
| #### Bn-scaff_27747_1-p20852 C-genome specific (napus-oleracea) | 0.9880383    | 0.7883743    | 1         | 0.8302047 | not scorable | not scorable |
| #### Bn-scaff_27747_1-p21917 C-genome specific (napus-oleracea) | 0.9760765    | 0.7698963    | 0.8604651 | 0.7689093 | not scorable | not scorable |
| #### Bn-scaff_27747_1-p27050 C-genome specific (napus-oleracea) | 0.9952153    | 0.7774559    | 1         | 0.7216368 | not scorable | not scorable |
| #### Bn-scaff_27747_1-p4819 C-genome specific (napus-oleracea)  | 0.9928229    | 0.2807169    | 0.9844961 | 0.7133073 | not scorable | not scorable |
| #### Bn-scaff_27754_1-p787 genome unspecific (oleracea-rapa)    | not scorable | not scorable | 0.9069768 | 0.397713  | 1            | 0.8163865    |
| #### Bn-scaff_27761_1-p615 C-genome specific (napus-oleracea)   | 0.9593301    | 0.774795     | 0.9457364 | 0.6389394 | not scorable | not scorable |
| #### Bn-scaff_27765_1-p20939 genome unspecific (all in)         | 0.9880383    | 0.7392532    | 1         | 0.6588631 | 0.9834711    | 0.9359855    |
| #### Bn-scaff_27765_1-p20943 C-genome specific (napus-oleracea) | 0.9904306    | 0.7946332    | 1         | 0.8194487 | not scorable | not scorable |
| #### Bn-scaff_27765_1-p26811 C-genome specific (napus-oleracea) | 0.9928229    | 0.8220317    | 1         | 0.7659105 | not scorable | not scorable |
| #### Bn-scaff_27765_1-p28929 C-genome specific (napus-oleracea) | 0.9760765    | 0.6084584    | 0.9922481 | 0.4222887 | not scorable | not scorable |
| #### Bn-scaff_27765_1-p29415 C-genome specific (napus-oleracea) | 0.9688995    | 0.3256214    | 0.9922481 | 0.7924582 | not scorable | not scorable |
| #### Bn-scaff_27765_1-p33013 C-genome specific (napus-oleracea) | 0.9736842    | 0.5255732    | 1         | 0.8429327 | not scorable | not scorable |
| #### Bn-scaff_27765_1-p33220 genome unspecific (all in)         | 0.9712918    | 0.2398339    | 1         | 0.7107344 | 0.8842975    | 0.7005182    |
| #### Bn-scaff_27765_1-p33897 C-genome specific (napus-oleracea) | 0.9401914    | 0.409742     | 1         | 0.8017694 | not scorable | not scorable |
| #### Bn-scaff_27765_1-p36283 genome unspecific (all in)         | 0.9545454    | 0.2208723    | 0.9379845 | 0.2621296 | 1            | 0.7739488    |
| #### Bn-scaff_27765_1-p40326 C-genome specific (napus-oleracea) | 0.9880383    | 0.6698633    | 0.9689922 | 0.6732758 | not scorable | not scorable |
| #### Bn-scaff_27765_1-p43717 C-genome specific (napus-oleracea) | 0.9976076    | 0.7590374    | 0.9922481 | 0.6726525 | not scorable | not scorable |
| #### Bn-scaff_27765_1-p53066 C-genome specific (napus-oleracea) | 1            | 0.781688     | 0.9922481 | 0.7355621 | not scorable | not scorable |
| #### Bn-scaff_27765_1-p58899 C-genome specific (napus-oleracea) | 1            | 0.9398861    | 1         | 0.8532728 | not scorable | not scorable |
| #### Bn-scaff_27791_1-p296 C-genome specific (napus-oleracea)   | 1            | 0.5918733    | 1         | 0.5634651 | not scorable | not scorable |
| #### Bn-scaff_27815_1-p28401 C-genome specific (napus-oleracea) | 1            | 0.7709031    | 0.9922481 | 0.6520649 | not scorable | not scorable |
| #### Bn-scaff_27815_1-p32082 genome unspecific (all in)         | 1            | 0.7367962    | 1         | 0.5709352 | 1            | 0.8299994    |
| #### Bn-scaff_27815_1-p32115 genome unspecific (all in)         | 1            | 0.6320699    | 1         | 0.5675575 | 0.9669421    | 0.6603905    |
| #### Bn-scaff_27815_1-p33035 C-genome specific (napus-oleracea) | 1            | 0.6678711    | 1         | 0.6969624 | not scorable | not scorable |
| #### Bn-scaff_27815_1-p35807 genome unspecific (all in)         | 1            | 0.3786891    | 1         | 0.6256937 | 0.9669421    | 0.6951373    |
| #### Bn-scaff_27815_1-p36740 genome unspecific (all in)         | 0.9736842    | 0.5605533    | 0.9844961 | 0.6026403 | 0.9669421    | 0.5663823    |
| #### Bn-scaff_27815_1-p68780 genome unspecific (all in)         | 1            | 0.6817572    | 1         | 0.7173807 | 1            | 0.7802337    |
| #### Bn-scaff_27823_1-p6273 C-genome specific (napus-oleracea)  | 0.9521531    | 0.7953886    | 0.8217054 | 0.7401381 | not scorable | not scorable |
| #### Bn-scaff_27870_1-p14433 genome unspecific (all in)         | 1            | 0.5443853    | 1         | 0.4984884 | 0.9834711    | 0.602856     |
| #### Bn-scaff_27870_1-p20867 genome unspecific (all in)         | 0.9952153    | 0.7062932    | 0.9922481 | 0.703651  | 0.8512397    | 0.7809951    |
| #### Bn-scaff_27870_1-p95950 C-genome specific (napus-oleracea) | 0.9856459    | 0.4714238    | 0.9922481 | 0.2777851 | not scorable | not scorable |
| #### Bn-scaff_27872_1-p10205 C-genome specific (napus-oleracea) | 0.9976076    | 0.8938565    | 1         | 0.7426504 | not scorable | not scorable |

|                                                                 |           |           |           |           |              |              |
|-----------------------------------------------------------------|-----------|-----------|-----------|-----------|--------------|--------------|
| #### Bn-scaff_27872_1-p39306 C-genome specific (napus-oleracea) | 0.9976076 | 0.7053873 | 1         | 0.8644673 | not scorable | not scorable |
| #### Bn-scaff_27872_1-p47050 genome unspecific (all in)         | 0.9952153 | 0.5782318 | 1         | 0.5693818 | 1            | 0.8879376    |
| #### Bn-scaff_27872_1-p47322 C-genome specific (napus-oleracea) | 0.9952153 | 0.8214825 | 1         | 0.6693698 | not scorable | not scorable |
| #### Bn-scaff_27872_1-p48296 C-genome specific (napus-oleracea) | 0.9952153 | 0.8051298 | 1         | 0.8763634 | not scorable | not scorable |
| #### Bn-scaff_27872_1-p48334 C-genome specific (napus-oleracea) | 0.9976076 | 0.8248827 | 1         | 0.7996895 | not scorable | not scorable |
| #### Bn-scaff_27872_1-p48519 C-genome specific (napus-oleracea) | 1         | 0.9091303 | 0.9844961 | 0.804515  | not scorable | not scorable |
| #### Bn-scaff_27872_1-p48529 C-genome specific (napus-oleracea) | 0.9952153 | 0.8596807 | 1         | 0.6948434 | not scorable | not scorable |
| #### Bn-scaff_27872_1-p48766 C-genome specific (napus-oleracea) | 0.9904306 | 0.6749174 | 1         | 0.7639859 | not scorable | not scorable |
| #### Bn-scaff_27872_1-p56657 C-genome specific (napus-oleracea) | 0.9928229 | 0.8750127 | 1         | 0.8130237 | not scorable | not scorable |
| #### Bn-scaff_27872_1-p57821 C-genome specific (napus-oleracea) | 0.9904306 | 0.8407106 | 1         | 0.8170289 | not scorable | not scorable |
| #### Bn-scaff_27872_1-p57945 C-genome specific (napus-oleracea) | 0.9904306 | 0.8187779 | 1         | 0.6214157 | not scorable | not scorable |
| #### Bn-scaff_27872_1-p58034 C-genome specific (napus-oleracea) | 0.9904306 | 0.7819193 | 0.9922481 | 0.6556367 | not scorable | not scorable |
| #### Bn-scaff_27872_1-p59624 C-genome specific (napus-oleracea) | 0.9952153 | 0.8810359 | 0.9922481 | 0.9531885 | not scorable | not scorable |
| #### Bn-scaff_27872_1-p59916 C-genome specific (napus-oleracea) | 0.9784689 | 0.8116977 | 0.9922481 | 0.6513934 | not scorable | not scorable |
| #### Bn-scaff_27872_1-p67199 genome unspecific (all in)         | 0.9928229 | 0.6391657 | 1         | 0.7503625 | 1            | 0.9225968    |
| #### Bn-scaff_27881_1-p14038 C-genome specific (napus-oleracea) | 0.722488  | 0.290995  | 0.9922481 | 0.7203072 | not scorable | not scorable |
| #### Bn-scaff_27881_1-p15080 C-genome specific (napus-oleracea) | 0.7344497 | 0.8006734 | 0.9922481 | 0.8434766 | not scorable | not scorable |
| #### Bn-scaff_27881_1-p15401 C-genome specific (napus-oleracea) | 0.7248804 | 0.3490117 | 0.9922481 | 0.7900337 | not scorable | not scorable |
| #### Bn-scaff_27905_1-p617 genome unspecific (all in)           | 1         | 0.6112589 | 1         | 0.592209  | 1            | 0.534196     |
| #### Bn-scaff_27914_1-p15207 C-genome specific (napus-oleracea) | 0.9712918 | 0.7246    | 0.9922481 | 0.826639  | not scorable | not scorable |
| #### Bn-scaff_27914_1-p19775 genome unspecific (all in)         | 0.9593301 | 0.4208175 | 0.9767442 | 0.6467798 | 1            | 0.8011712    |
| #### Bn-scaff_27914_1-p22911 C-genome specific (napus-oleracea) | 0.9736842 | 0.7613492 | 0.9922481 | 0.853522  | not scorable | not scorable |
| #### Bn-scaff_27914_1-p23844 C-genome specific (napus-oleracea) | 0.9712918 | 0.8057169 | 1         | 0.7937279 | not scorable | not scorable |
| #### Bn-scaff_27914_1-p23995 C-genome specific (napus-oleracea) | 0.5885168 | 0.927439  | 1         | 0.6793087 | not scorable | not scorable |
| #### Bn-scaff_27914_1-p30825 C-genome specific (napus-oleracea) | 0.9856459 | 0.8017589 | 1         | 0.7091459 | not scorable | not scorable |
| #### Bn-scaff_27914_1-p32593 C-genome specific (napus-oleracea) | 0.9808612 | 0.7859107 | 0.9767442 | 0.7995872 | not scorable | not scorable |
| #### Bn-scaff_27914_1-p34723 C-genome specific (napus-oleracea) | 0.9593301 | 0.8228533 | 1         | 0.6376554 | not scorable | not scorable |
| #### Bn-scaff_27914_1-p34836 C-genome specific (napus-oleracea) | 0.9784689 | 0.7576046 | 0.9922481 | 0.8030005 | not scorable | not scorable |
| #### Bn-scaff_27914_1-p40505 genome unspecific (all in)         | 0.9904306 | 0.5862412 | 1         | 0.7472603 | 1            | 0.77092      |
| #### Bn-scaff_27914_1-p40676 genome unspecific (all in)         | 0.9688995 | 0.3027223 | 1         | 0.5754553 | 1            | 0.6605194    |
| #### Bn-scaff_27914_1-p54256 C-genome specific (napus-oleracea) | 0.9784689 | 0.7876605 | 0.9922481 | 0.7892655 | not scorable | not scorable |
| #### Bn-scaff_27914_1-p54325 C-genome specific (napus-oleracea) | 0.9784689 | 0.7746714 | 1         | 0.7177916 | not scorable | not scorable |
| #### Bn-scaff_27914_1-p54798 C-genome specific (napus-oleracea) | 0.9712918 | 0.6182495 | 0.8914729 | 0.5358093 | not scorable | not scorable |

|                                                                 |              |              |              |              |              |              |
|-----------------------------------------------------------------|--------------|--------------|--------------|--------------|--------------|--------------|
| #### Bn-scaff_27914_1-p64159 C-genome specific (napus-oleracea) | 0.9880383    | 0.7267039    | 0.9844961    | 0.6840352    | not scorable | not scorable |
| #### Bn-scaff_27914_1-p7446 C-genome specific (napus-oleracea)  | 0.9641148    | 0.7521999    | 0.9844961    | 0.7902322    | not scorable | not scorable |
| #### Bn-scaff_27914_1-p74694 C-genome specific (napus-oleracea) | 0.9712918    | 0.7633366    | 0.9767442    | 0.7501516    | not scorable | not scorable |
| #### Bn-scaff_27914_1-p75461 C-genome specific (napus-oleracea) | 0.9569378    | 0.6634389    | 1            | 0.677716     | not scorable | not scorable |
| #### Bn-scaff_27914_1-p76173 C-genome specific (napus-oleracea) | 0.9688995    | 0.7546542    | 0.9922481    | 0.8056182    | not scorable | not scorable |
| #### Bn-scaff_27914_1-p96300 C-genome specific (napus-oleracea) | 0.9641148    | 0.7602902    | 0.9534883    | 0.7428327    | not scorable | not scorable |
| #### Bn-scaff_27914_1-p9919 napus specific                      | 0.9760765    | 0.8045825    | not scorable | not scorable | not scorable | not scorable |
| #### Bn-scaff_27946_1-p1047 C-genome specific (napus-oleracea)  | 0.9904306    | 0.6611965    | 0.9689922    | 0.6996378    | not scorable | not scorable |
| #### Bn-scaff_27946_1-p19861 genome unspecific (all in)         | 0.9832536    | 0.3415644    | 1            | 0.5574942    | 1            | 0.8696987    |
| #### Bn-scaff_27946_1-p3855 C-genome specific (oleracea only)   | not scorable | not scorable | 0.9844961    | 0.3711188    | not scorable | not scorable |
| #### Bn-scaff_27946_1-p6065 genome unspecific (all in)          | 0.9593301    | 0.3564439    | 0.9922481    | 0.8701585    | 1            | 0.9359844    |
| #### Bn-scaff_27955_1-p76 napus specific                        | 0.9569378    | 0.5855608    | not scorable | not scorable | not scorable | not scorable |
| #### Bn-scaff_28022_1-p11751 all not scorable                   | not scorable | not scorable | not scorable | not scorable | not scorable | not scorable |
| #### Bn-scaff_28053_1-p12340 genome unspecific (all in)         | 0.9952153    | 0.5254956    | 1            | 0.7161461    | 1            | 0.8004208    |
| #### Bn-scaff_28053_1-p15153 C-genome specific (napus-oleracea) | 0.9784689    | 0.507624     | 1            | 0.6217061    | not scorable | not scorable |
| #### Bn-scaff_28053_1-p43195 C-genome specific (napus-oleracea) | 0.9593301    | 0.3932373    | 1            | 0.7844704    | not scorable | not scorable |
| #### Bn-scaff_28053_1-p60542 C-genome specific (napus-oleracea) | 0.9832536    | 0.7314305    | 1            | 0.6757742    | not scorable | not scorable |
| #### Bn-scaff_28133_1-p4687 C-genome specific (napus-oleracea)  | 1            | 0.7651575    | 0.9922481    | 0.8614707    | not scorable | not scorable |
| #### Bn-scaff_28156_1-p13051 genome unspecific (all in)         | 1            | 0.6158749    | 1            | 0.5839204    | 1            | 0.7494321    |
| #### Bn-scaff_28165_1-p22715 C-genome specific (napus-oleracea) | 0.9521531    | 0.734986     | 0.9689922    | 0.657689     | not scorable | not scorable |
| #### Bn-scaff_28165_1-p40330 C-genome specific (napus-oleracea) | 0.9712918    | 0.7206721    | 1            | 0.7377868    | not scorable | not scorable |
| #### Bn-scaff_28179_1-p15387 C-genome specific (napus-oleracea) | 0.9976076    | 0.6850112    | 1            | 0.6514975    | not scorable | not scorable |
| #### Bn-scaff_28179_1-p16904 genome unspecific (oleracea-rapa)  | not scorable | not scorable | 1            | 0.7991624    | 1            | 0.8400544    |
| #### Bn-scaff_28179_1-p21528 genome unspecific (all in)         | 0.9760765    | 0.4562776    | 1            | 0.6958748    | 0.9504132    | 0.7613785    |
| #### Bn-scaff_28179_1-p23683 C-genome specific (napus-oleracea) | 1            | 0.8116869    | 1            | 0.773333     | not scorable | not scorable |
| #### Bn-scaff_28191_1-p507 C-genome specific (napus-oleracea)   | 0.9138756    | 0.2569952    | 0.7054263    | 0.3117078    | not scorable | not scorable |
| #### Bn-scaff_28191_1-p564 C-genome specific (napus-oleracea)   | 0.9976076    | 0.8328643    | 0.9844961    | 0.5728289    | not scorable | not scorable |
| #### Bn-scaff_28265_1-p16036 C-genome specific (napus-oleracea) | 0.9832536    | 0.7807669    | 1            | 0.7731148    | not scorable | not scorable |
| #### Bn-scaff_28265_1-p18789 C-genome specific (napus-oleracea) | 0.9593301    | 0.7076787    | 1            | 0.849866     | not scorable | not scorable |
| #### Bn-scaff_28265_1-p19042 C-genome specific (napus-oleracea) | 0.9760765    | 0.567142     | 1            | 0.5649159    | not scorable | not scorable |
| #### Bn-scaff_28265_1-p19206 C-genome specific (napus-oleracea) | 0.9832536    | 0.7752942    | 1            | 0.7649406    | not scorable | not scorable |
| #### Bn-scaff_28265_1-p20757 C-genome specific (napus-oleracea) | 0.9856459    | 0.7628844    | 1            | 0.7926008    | not scorable | not scorable |
| #### Bn-scaff_28265_1-p6363 C-genome specific (napus-oleracea)  | 1            | 0.7853259    | 1            | 0.8114822    | not scorable | not scorable |

|                              |                                    |              |              |              |              |              |              |
|------------------------------|------------------------------------|--------------|--------------|--------------|--------------|--------------|--------------|
| #### Bn-scaff_28265_1-p6630  | C-genome specific (napus-oleracea) | 0.9832536    | 0.6818753    | 1            | 0.6785764    | not scorable | not scorable |
| #### Bn-scaff_28265_1-p7428  | C-genome specific (napus-oleracea) | 0.9712918    | 0.7723989    | 0.9922481    | 0.8391924    | not scorable | not scorable |
| #### Bn-scaff_28277_1-p5229  | C-genome specific (napus-oleracea) | 0.9928229    | 0.6794595    | 0.9767442    | 0.7239287    | not scorable | not scorable |
| #### Bn-scaff_28330_1-p285   | C-genome specific (napus-oleracea) | 0.9545454    | 0.2932269    | 1            | 0.789278     | not scorable | not scorable |
| #### Bn-scaff_28330_1-p294   | genome unspecific (oleracea-rapa)  | not scorable | not scorable | 1            | 0.6607249    | 1            | 0.8517349    |
| #### Bn-scaff_28330_1-p464   | napus specific                     | 0.9521531    | 0.273423     | not scorable | not scorable | not scorable | not scorable |
| #### Bn-scaff_28366_1-p27528 | C-genome specific (napus-oleracea) | 0.9186603    | 0.1854603    | 1            | 0.6819132    | not scorable | not scorable |
| #### Bn-scaff_28371_1-p431   | C-genome specific (napus-oleracea) | 0.9904306    | 0.6983999    | 1            | 0.8514138    | not scorable | not scorable |
| #### Bn-scaff_28382_1-p10051 | C-genome specific (napus-oleracea) | 0.9904306    | 0.7932429    | 0.9844961    | 0.7412398    | not scorable | not scorable |
| #### Bn-scaff_28382_1-p10214 | C-genome specific (napus-oleracea) | 0.9856459    | 0.7943706    | 0.9922481    | 0.6818452    | not scorable | not scorable |
| #### Bn-scaff_28382_1-p12306 | napus specific                     | 0.9904306    | 0.7671756    | not scorable | not scorable | not scorable | not scorable |
| #### Bn-scaff_28382_1-p13088 | C-genome specific (napus-oleracea) | 0.9808612    | 0.752204     | 0.9922481    | 0.8681164    | not scorable | not scorable |
| #### Bn-scaff_28382_1-p13123 | C-genome specific (napus-oleracea) | 0.9808612    | 0.7117194    | 0.9922481    | 0.6872563    | not scorable | not scorable |
| #### Bn-scaff_28382_1-p13136 | C-genome specific (napus-oleracea) | 0.9784689    | 0.7399957    | 0.9612403    | 0.7040167    | not scorable | not scorable |
| #### Bn-scaff_28382_1-p13143 | C-genome specific (napus-oleracea) | 0.9760765    | 0.7956438    | 0.9922481    | 0.7549448    | not scorable | not scorable |
| #### Bn-scaff_28382_1-p13660 | C-genome specific (oleracea only)  | not scorable | not scorable | 1            | 0.5367113    | not scorable | not scorable |
| #### Bn-scaff_28382_1-p14602 | C-genome specific (napus-oleracea) | 0.9856459    | 0.8164461    | 0.7751938    | 0.7935426    | not scorable | not scorable |
| #### Bn-scaff_28382_1-p28399 | C-genome specific (napus-oleracea) | 0.9593301    | 0.8232754    | 0.9844961    | 0.7431605    | not scorable | not scorable |
| #### Bn-scaff_28382_1-p38738 | C-genome specific (napus-oleracea) | 0.9952153    | 0.7553251    | 0.9922481    | 0.7793687    | not scorable | not scorable |
| #### Bn-scaff_28382_1-p39187 | C-genome specific (napus-oleracea) | 0.9760765    | 0.7358356    | 0.9922481    | 0.84435      | not scorable | not scorable |
| #### Bn-scaff_28382_1-p44654 | genome unspecific (all in)         | 0.9976076    | 0.6460919    | 0.9922481    | 0.6901116    | 0.9917355    | 0.8334557    |
| #### Bn-scaff_28382_1-p90029 | C-genome specific (napus-oleracea) | 0.9952153    | 0.8603146    | 1            | 0.7638096    | not scorable | not scorable |
| #### Bn-scaff_28382_1-p93626 | C-genome specific (napus-oleracea) | 0.9928229    | 0.7373455    | 0.9922481    | 0.691293     | not scorable | not scorable |
| #### Bn-scaff_28382_1-p94229 | C-genome specific (napus-oleracea) | 0.9952153    | 0.7497528    | 0.9844961    | 0.6922315    | not scorable | not scorable |
| #### Bn-scaff_28382_1-p98415 | C-genome specific (oleracea only)  | not scorable | not scorable | 0.9922481    | 0.7463264    | not scorable | not scorable |
| #### Bn-scaff_28382_1-p98797 | all not scorable                   | not scorable | not scorable | not scorable | not scorable | not scorable | not scorable |
| #### Bn-scaff_28396_1-p12362 | C-genome specific (napus-oleracea) | 0.9808612    | 0.8198266    | 0.503876     | 0.8503314    | not scorable | not scorable |
| #### Bn-scaff_28396_1-p14404 | C-genome specific (napus-oleracea) | 1            | 0.556193     | 1            | 0.5079468    | not scorable | not scorable |
| #### Bn-scaff_28396_1-p16515 | napus specific                     | 0.9856459    | 0.6812494    | not scorable | not scorable | not scorable | not scorable |
| #### Bn-scaff_28396_1-p18298 | genome unspecific (all in)         | 1            | 0.2663598    | 0.9224806    | 0.2235834    | 0.9669421    | 0.9095823    |
| #### Bn-scaff_28403_1-p11654 | C-genome specific (napus-oleracea) | 0.9928229    | 0.4460973    | 0.9689922    | 0.3274576    | not scorable | not scorable |
| #### Bn-scaff_28403_1-p12036 | C-genome specific (napus-oleracea) | 1            | 0.3606352    | 1            | 0.7852463    | not scorable | not scorable |
| #### Bn-scaff_28403_1-p12343 | C-genome specific (napus-oleracea) | 0.9976076    | 0.4294831    | 0.9844961    | 0.4761633    | not scorable | not scorable |

|                                                                |              |              |           |           |              |              |
|----------------------------------------------------------------|--------------|--------------|-----------|-----------|--------------|--------------|
| #### Bn-scaff_28403_1-p13561genome unspecific (oleracea-rapa)  | not scorable | not scorable | 0.9767442 | 0.1878163 | 0.9917355    | 0.5615951    |
| #### Bn-scaff_28403_1-p15101genome unspecific (all in)         | 1            | 0.7254306    | 0.9922481 | 0.7784467 | 0.9834711    | 0.9375722    |
| #### Bn-scaff_28403_1-p15443C-genome specific (napus-oleracea) | 1            | 0.5101975    | 1         | 0.8146265 | not scorable | not scorable |
| #### Bn-scaff_28403_1-p15910C-genome specific (oleracea only)  | not scorable | not scorable | 1         | 0.6433131 | not scorable | not scorable |
| #### Bn-scaff_28403_1-p15945C-genome specific (napus-oleracea) | 1            | 0.5885133    | 1         | 0.6466281 | not scorable | not scorable |
| #### Bn-scaff_28403_1-p16412genome unspecific (all in)         | 0.9928229    | 0.3643317    | 0.9922481 | 0.2834356 | 1            | 0.9095823    |
| #### Bn-scaff_28403_1-p20706C-genome specific (napus-oleracea) | 1            | 0.8574859    | 0.9844961 | 0.7471685 | not scorable | not scorable |
| #### Bn-scaff_28403_1-p25606genome unspecific (all in)         | 1            | 0.5754628    | 1         | 0.7537925 | 1            | 0.8522106    |
| #### Bn-scaff_28403_1-p28460genome unspecific (all in)         | 1            | 0.727371     | 1         | 0.7499121 | 1            | 0.9336643    |
| #### Bn-scaff_28403_1-p28467genome unspecific (all in)         | 1            | 0.4995013    | 1         | 0.4606869 | 0.9917355    | 0.7775478    |
| #### Bn-scaff_28403_1-p29443genome unspecific (all in)         | 1            | 0.6379088    | 1         | 0.6083437 | 1            | 0.7884539    |
| #### Bn-scaff_28403_1-p30147genome unspecific (all in)         | 0.9593301    | 0.4224862    | 1         | 0.8457515 | 1            | 0.9507895    |
| #### Bn-scaff_28403_1-p31233C-genome specific (napus-oleracea) | 1            | 0.5135931    | 1         | 0.7769212 | not scorable | not scorable |
| #### Bn-scaff_28403_1-p31539C-genome specific (napus-oleracea) | 0.9976076    | 0.8292398    | 0.9922481 | 0.8067255 | not scorable | not scorable |
| #### Bn-scaff_28403_1-p33479C-genome specific (napus-oleracea) | 1            | 0.7301081    | 1         | 0.6888745 | not scorable | not scorable |
| #### Bn-scaff_28403_1-p37187genome unspecific (oleracea-rapa)  | not scorable | not scorable | 1         | 0.6787264 | 1            | 0.8721346    |
| #### Bn-scaff_28403_1-p37198genome unspecific (all in)         | 1            | 0.6804142    | 1         | 0.6345369 | 1            | 0.789606     |
| #### Bn-scaff_28403_1-p39181genome unspecific (all in)         | 1            | 0.5791867    | 1         | 0.5541744 | 1            | 0.8880857    |
| #### Bn-scaff_28403_1-p96339genome unspecific (all in)         | 1            | 0.4694569    | 1         | 0.4578512 | 1            | 0.5643941    |
| #### Bn-scaff_28413_1-p33081genome unspecific (all in)         | 1            | 0.4482889    | 1         | 0.4036218 | 1            | 0.8004208    |
| #### Bn-scaff_28429_1-p10247genome unspecific (all in)         | 0.9952153    | 0.5119988    | 0.9844961 | 0.7784265 | 0.9917355    | 0.9495258    |
| #### Bn-scaff_28429_1-p10301C-genome specific (napus-oleracea) | 0.9856459    | 0.9137833    | 1         | 0.8282926 | not scorable | not scorable |
| #### Bn-scaff_28429_1-p10303C-genome specific (napus-oleracea) | 0.9856459    | 0.9266107    | 1         | 0.7414947 | not scorable | not scorable |
| #### Bn-scaff_28429_1-p24013genome unspecific (oleracea-rapa)  | not scorable | not scorable | 0.9922481 | 0.3465432 | 0.9917355    | 0.8157788    |
| #### Bn-scaff_28429_1-p32571genome unspecific (all in)         | 0.9976076    | 0.3498591    | 0.9922481 | 0.7746665 | 1            | 0.7242281    |
| #### Bn-scaff_28429_1-p45785genome unspecific (all in)         | 1            | 0.6201955    | 1         | 0.5753367 | 0.9917355    | 0.6362044    |
| #### Bn-scaff_28429_1-p46744C-genome specific (napus-oleracea) | 0.9736842    | 0.2224598    | 0.9379845 | 0.2072417 | not scorable | not scorable |
| #### Bn-scaff_28429_1-p84013C-genome specific (napus-oleracea) | 0.9976076    | 0.4999031    | 1         | 0.4247827 | not scorable | not scorable |
| #### Bn-scaff_28429_1-p90694genome unspecific (oleracea-rapa)  | not scorable | not scorable | 1         | 0.7555088 | 0.9752066    | 0.6120912    |
| #### Bn-scaff_28429_1-p94410C-genome specific (oleracea only)  | not scorable | not scorable | 0.9844961 | 0.3501369 | not scorable | not scorable |
| #### Bn-scaff_28429_1-p99260genome unspecific (all in)         | 0.9473684    | 0.2492198    | 1         | 0.7553873 | 0.9917355    | 0.5990362    |
| #### Bn-scaff_28475_1-p16356genome unspecific (all in)         | 0.9928229    | 0.5995417    | 0.9844961 | 0.8525947 | 1            | 0.9604051    |
| #### Bn-scaff_28498_1-p10690C-genome specific (napus-oleracea) | 0.9760765    | 0.7905769    | 1         | 0.9263565 | not scorable | not scorable |

|                                                                 |           |           |           |           |              |              |
|-----------------------------------------------------------------|-----------|-----------|-----------|-----------|--------------|--------------|
| #### Bn-scaff_28498_1-p10707 C-genome specific (napus-oleracea) | 0.9880383 | 0.8800518 | 1         | 0.8295195 | not scorable | not scorable |
| #### Bn-scaff_28498_1-p10772 C-genome specific (napus-oleracea) | 0.9856459 | 0.8374454 | 1         | 0.8872852 | not scorable | not scorable |
| #### Bn-scaff_28498_1-p10845 C-genome specific (napus-oleracea) | 0.9928229 | 0.8068874 | 1         | 0.6665688 | not scorable | not scorable |
| #### Bn-scaff_28498_1-p10862 C-genome specific (napus-oleracea) | 0.9928229 | 0.769649  | 1         | 0.6859632 | not scorable | not scorable |
| #### Bn-scaff_28498_1-p12170 C-genome specific (napus-oleracea) | 0.9832536 | 0.8041819 | 1         | 0.8443965 | not scorable | not scorable |
| #### Bn-scaff_28498_1-p15968 C-genome specific (napus-oleracea) | 0.9952153 | 0.7429793 | 1         | 0.7795782 | not scorable | not scorable |
| #### Bn-scaff_28498_1-p16017 C-genome specific (napus-oleracea) | 0.9976076 | 0.7777711 | 0.9922481 | 0.7491693 | not scorable | not scorable |
| #### Bn-scaff_28498_1-p16312 C-genome specific (napus-oleracea) | 0.9880383 | 0.7978533 | 1         | 0.7179461 | not scorable | not scorable |
| #### Bn-scaff_28498_1-p16319 C-genome specific (napus-oleracea) | 0.9808612 | 0.8374677 | 1         | 0.7360736 | not scorable | not scorable |
| #### Bn-scaff_28498_1-p16330 C-genome specific (napus-oleracea) | 0.9880383 | 0.6813185 | 1         | 0.7349294 | not scorable | not scorable |
| #### Bn-scaff_28498_1-p16380 C-genome specific (napus-oleracea) | 0.9832536 | 0.8204796 | 1         | 0.6513813 | not scorable | not scorable |
| #### Bn-scaff_28498_1-p16388 C-genome specific (napus-oleracea) | 0.9952153 | 0.7936674 | 1         | 0.6442362 | not scorable | not scorable |
| #### Bn-scaff_28498_1-p16428 C-genome specific (napus-oleracea) | 0.9928229 | 0.8070314 | 1         | 0.8297008 | not scorable | not scorable |
| #### Bn-scaff_28498_1-p16430 C-genome specific (napus-oleracea) | 0.9952153 | 0.7847059 | 1         | 0.6759913 | not scorable | not scorable |
| #### Bn-scaff_28498_1-p16502 C-genome specific (napus-oleracea) | 0.9928229 | 0.7694097 | 1         | 0.6421366 | not scorable | not scorable |
| #### Bn-scaff_28498_1-p16514 C-genome specific (napus-oleracea) | 0.9904306 | 0.7761903 | 1         | 0.627387  | not scorable | not scorable |
| #### Bn-scaff_28498_1-p16526 C-genome specific (napus-oleracea) | 0.9952153 | 0.7105592 | 1         | 0.7686091 | not scorable | not scorable |
| #### Bn-scaff_28498_1-p17264 C-genome specific (napus-oleracea) | 0.9784689 | 0.795297  | 1         | 0.6596385 | not scorable | not scorable |
| #### Bn-scaff_28498_1-p19037 C-genome specific (napus-oleracea) | 0.9856459 | 0.638702  | 1         | 0.7214817 | not scorable | not scorable |
| #### Bn-scaff_28498_1-p19399 C-genome specific (napus-oleracea) | 1         | 0.7715064 | 1         | 0.6203371 | not scorable | not scorable |
| #### Bn-scaff_28498_1-p19598 C-genome specific (napus-oleracea) | 0.9976076 | 0.7535039 | 1         | 0.8917604 | not scorable | not scorable |
| #### Bn-scaff_28498_1-p19607 C-genome specific (napus-oleracea) | 0.9928229 | 0.7922456 | 1         | 0.8599036 | not scorable | not scorable |
| #### Bn-scaff_28498_1-p19649 C-genome specific (napus-oleracea) | 0.9928229 | 0.7789336 | 1         | 0.6890787 | not scorable | not scorable |
| #### Bn-scaff_28498_1-p19737 C-genome specific (napus-oleracea) | 0.9976076 | 0.8392286 | 0.9922481 | 0.8705658 | not scorable | not scorable |
| #### Bn-scaff_28498_1-p21623 C-genome specific (napus-oleracea) | 0.9904306 | 0.8166053 | 1         | 0.78225   | not scorable | not scorable |
| #### Bn-scaff_28498_1-p21634 C-genome specific (napus-oleracea) | 0.9928229 | 0.8172272 | 1         | 0.8422611 | not scorable | not scorable |
| #### Bn-scaff_28498_1-p21635 C-genome specific (napus-oleracea) | 0.9952153 | 0.7519605 | 1         | 0.6708851 | not scorable | not scorable |
| #### Bn-scaff_28498_1-p21701 C-genome specific (napus-oleracea) | 0.9952153 | 0.8495154 | 1         | 0.7050796 | not scorable | not scorable |
| #### Bn-scaff_28498_1-p21769 C-genome specific (napus-oleracea) | 1         | 0.7588905 | 1         | 0.7273982 | not scorable | not scorable |
| #### Bn-scaff_28498_1-p21826 C-genome specific (napus-oleracea) | 0.9928229 | 0.8089651 | 1         | 0.8804982 | not scorable | not scorable |
| #### Bn-scaff_28498_1-p21833 C-genome specific (napus-oleracea) | 0.9952153 | 0.7789707 | 1         | 0.6751245 | not scorable | not scorable |
| #### Bn-scaff_28498_1-p24500 C-genome specific (napus-oleracea) | 0.9952153 | 0.8368981 | 0.9922481 | 0.9265286 | not scorable | not scorable |
| #### Bn-scaff_28498_1-p24551 C-genome specific (napus-oleracea) | 0.9928229 | 0.6487134 | 0.9922481 | 0.6886253 | not scorable | not scorable |

|                                                                 |           |           |           |           |              |              |
|-----------------------------------------------------------------|-----------|-----------|-----------|-----------|--------------|--------------|
| #### Bn-scaff_28498_1-p24683 C-genome specific (napus-oleracea) | 0.9880383 | 0.7803863 | 0.9922481 | 0.7509052 | not scorable | not scorable |
| #### Bn-scaff_28498_1-p24811 C-genome specific (napus-oleracea) | 0.9952153 | 0.8259336 | 0.9922481 | 0.8732719 | not scorable | not scorable |
| #### Bn-scaff_28498_1-p25320 C-genome specific (napus-oleracea) | 0.9856459 | 0.8222045 | 1         | 0.7391759 | not scorable | not scorable |
| #### Bn-scaff_28498_1-p25487 C-genome specific (napus-oleracea) | 0.9856459 | 0.6786445 | 1         | 0.7620202 | not scorable | not scorable |
| #### Bn-scaff_28498_1-p25877 C-genome specific (napus-oleracea) | 0.9904306 | 0.7569193 | 0.9922481 | 0.7223517 | not scorable | not scorable |
| #### Bn-scaff_28498_1-p26361 C-genome specific (napus-oleracea) | 1         | 0.7644905 | 1         | 0.7671112 | not scorable | not scorable |
| #### Bn-scaff_28498_1-p28162 C-genome specific (napus-oleracea) | 0.9928229 | 0.7656379 | 1         | 0.812903  | not scorable | not scorable |
| #### Bn-scaff_28498_1-p28955 C-genome specific (napus-oleracea) | 0.9665072 | 0.8038476 | 0.9922481 | 0.7697536 | not scorable | not scorable |
| #### Bn-scaff_28498_1-p29533 C-genome specific (napus-oleracea) | 0.9904306 | 0.7733597 | 1         | 0.7304497 | not scorable | not scorable |
| #### Bn-scaff_28498_1-p29580 C-genome specific (napus-oleracea) | 0.9928229 | 0.6925502 | 1         | 0.6711787 | not scorable | not scorable |
| #### Bn-scaff_28498_1-p29671 C-genome specific (napus-oleracea) | 0.9928229 | 0.8164868 | 1         | 0.734519  | not scorable | not scorable |
| #### Bn-scaff_28498_1-p29752 C-genome specific (napus-oleracea) | 0.9928229 | 0.7722701 | 1         | 0.7733386 | not scorable | not scorable |
| #### Bn-scaff_28498_1-p29757 C-genome specific (napus-oleracea) | 0.9976076 | 0.7144919 | 1         | 0.6081992 | not scorable | not scorable |
| #### Bn-scaff_28498_1-p29789 C-genome specific (napus-oleracea) | 0.9904306 | 0.7613192 | 1         | 0.7642214 | not scorable | not scorable |
| #### Bn-scaff_28498_1-p29857 C-genome specific (napus-oleracea) | 0.9904306 | 0.787617  | 1         | 0.5838689 | not scorable | not scorable |
| #### Bn-scaff_28498_1-p29878 C-genome specific (napus-oleracea) | 1         | 0.8017138 | 1         | 0.839008  | not scorable | not scorable |
| #### Bn-scaff_28498_1-p29916 C-genome specific (napus-oleracea) | 1         | 0.7040101 | 1         | 0.7402713 | not scorable | not scorable |
| #### Bn-scaff_28498_1-p30026 C-genome specific (napus-oleracea) | 1         | 0.685927  | 1         | 0.739518  | not scorable | not scorable |
| #### Bn-scaff_28498_1-p30029 C-genome specific (napus-oleracea) | 0.9928229 | 0.6664908 | 1         | 0.8108581 | not scorable | not scorable |
| #### Bn-scaff_28498_1-p30053 C-genome specific (napus-oleracea) | 0.9928229 | 0.7877615 | 1         | 0.7148288 | not scorable | not scorable |
| #### Bn-scaff_28498_1-p30131 C-genome specific (napus-oleracea) | 0.9952153 | 0.8957347 | 1         | 0.7501841 | not scorable | not scorable |
| #### Bn-scaff_28498_1-p30214 C-genome specific (napus-oleracea) | 0.9928229 | 0.8691639 | 1         | 0.8296689 | not scorable | not scorable |
| #### Bn-scaff_28498_1-p30220 C-genome specific (napus-oleracea) | 0.9976076 | 0.8933992 | 1         | 0.7953674 | not scorable | not scorable |
| #### Bn-scaff_28498_1-p30288 C-genome specific (napus-oleracea) | 0.9952153 | 0.8234035 | 1         | 0.7608554 | not scorable | not scorable |
| #### Bn-scaff_28498_1-p30488 C-genome specific (napus-oleracea) | 0.9976076 | 0.8236529 | 1         | 0.7939182 | not scorable | not scorable |
| #### Bn-scaff_28498_1-p30526 C-genome specific (napus-oleracea) | 0.9736842 | 0.6265678 | 1         | 0.6339149 | not scorable | not scorable |
| #### Bn-scaff_28498_1-p30608 C-genome specific (napus-oleracea) | 0.9976076 | 0.7866224 | 1         | 0.7510554 | not scorable | not scorable |
| #### Bn-scaff_28498_1-p30960 C-genome specific (napus-oleracea) | 0.9928229 | 0.8016357 | 1         | 0.8635622 | not scorable | not scorable |
| #### Bn-scaff_28498_1-p31097 C-genome specific (napus-oleracea) | 0.9928229 | 0.7907665 | 0.9922481 | 0.6768116 | not scorable | not scorable |
| #### Bn-scaff_28498_1-p31726 C-genome specific (napus-oleracea) | 0.9928229 | 0.8535042 | 1         | 0.8091147 | not scorable | not scorable |
| #### Bn-scaff_28498_1-p32321 genome unspecific (all in)         | 1         | 0.6754791 | 1         | 0.7007138 | 1            | 0.786476     |
| #### Bn-scaff_28498_1-p91470 C-genome specific (napus-oleracea) | 0.9832536 | 0.7112215 | 1         | 0.8201232 | not scorable | not scorable |
| #### Bn-scaff_28505_1-p46377 genome unspecific (all in)         | 1         | 0.5168037 | 0.9922481 | 0.3778512 | 1            | 0.5780199    |

|                                                                 |              |              |           |           |              |              |
|-----------------------------------------------------------------|--------------|--------------|-----------|-----------|--------------|--------------|
| #### Bn-scaff_28509_1-p2213 genome unspecific (all in)          | 0.9641148    | 0.3012074    | 1         | 0.661214  | 1            | 0.7374202    |
| #### Bn-scaff_28509_1-p33423 C-genome specific (napus-oleracea) | 0.9928229    | 0.783886     | 0.9922481 | 0.8192423 | not scorable | not scorable |
| #### Bn-scaff_28509_1-p33495 C-genome specific (napus-oleracea) | 0.9641148    | 0.7404205    | 1         | 0.816483  | not scorable | not scorable |
| #### Bn-scaff_28509_1-p3364 C-genome specific (napus-oleracea)  | 0.9760765    | 0.7027354    | 0.9922481 | 0.7497102 | not scorable | not scorable |
| #### Bn-scaff_28509_1-p3371 C-genome specific (napus-oleracea)  | 0.9784689    | 0.7697844    | 0.9922481 | 0.8379707 | not scorable | not scorable |
| #### Bn-scaff_28509_1-p33929 C-genome specific (napus-oleracea) | 0.5406699    | 0.9175813    | 0.9147287 | 0.8224849 | not scorable | not scorable |
| #### Bn-scaff_28509_1-p34128 C-genome specific (napus-oleracea) | 0.9569378    | 0.6608931    | 0.9844961 | 0.7058187 | not scorable | not scorable |
| #### Bn-scaff_28511_1-p19968 genome unspecific (all in)         | 0.9904306    | 0.3601275    | 1         | 0.6465157 | 1            | 0.8135551    |
| #### Bn-scaff_28522_1-p26738 C-genome specific (napus-oleracea) | 0.9904306    | 0.7840836    | 1         | 0.7554005 | not scorable | not scorable |
| #### Bn-scaff_28522_1-p27206 C-genome specific (napus-oleracea) | 0.9856459    | 0.7641347    | 0.9767442 | 0.6978127 | not scorable | not scorable |
| #### Bn-scaff_28522_1-p34164 C-genome specific (napus-oleracea) | 0.9856459    | 0.7689505    | 0.9844961 | 0.7952927 | not scorable | not scorable |
| #### Bn-scaff_28522_1-p35475 genome unspecific (all in)         | 1            | 0.6095347    | 1         | 0.6890501 | 0.9834711    | 0.5493351    |
| #### Bn-scaff_28554_1-p1828 C-genome specific (napus-oleracea)  | 0.9832536    | 0.6284251    | 1         | 0.6811928 | not scorable | not scorable |
| #### Bn-scaff_28554_1-p2486 C-genome specific (napus-oleracea)  | 0.9856459    | 0.7379315    | 1         | 0.7424204 | not scorable | not scorable |
| #### Bn-scaff_28556_1-p4569 C-genome specific (napus-oleracea)  | 1            | 0.5576342    | 0.9922481 | 0.2752498 | not scorable | not scorable |
| #### Bn-scaff_28562_1-p1094 C-genome specific (napus-oleracea)  | 1            | 0.8118085    | 1         | 0.7837084 | not scorable | not scorable |
| #### Bn-scaff_28562_1-p11758 C-genome specific (napus-oleracea) | 0.9976076    | 0.8845161    | 0.9844961 | 0.7897317 | not scorable | not scorable |
| #### Bn-scaff_28562_1-p1518 C-genome specific (napus-oleracea)  | 0.9258373    | 0.7501642    | 0.9844961 | 0.7277027 | not scorable | not scorable |
| #### Bn-scaff_28562_1-p21632 C-genome specific (napus-oleracea) | 0.9832536    | 0.7518276    | 1         | 0.8035279 | not scorable | not scorable |
| #### Bn-scaff_28562_1-p22961 C-genome specific (napus-oleracea) | 0.9880383    | 0.784013     | 0.9844961 | 0.7593068 | not scorable | not scorable |
| #### Bn-scaff_28562_1-p23696 C-genome specific (napus-oleracea) | 0.9617225    | 0.8243565    | 0.9224806 | 0.7802355 | not scorable | not scorable |
| #### Bn-scaff_28562_1-p24271 C-genome specific (napus-oleracea) | 0.9808612    | 0.7757081    | 0.9379845 | 0.8031754 | not scorable | not scorable |
| #### Bn-scaff_28562_1-p24298 C-genome specific (napus-oleracea) | 0.9736842    | 0.7665607    | 0.9224806 | 0.7690611 | not scorable | not scorable |
| #### Bn-scaff_28562_1-p25864 genome unspecific (all in)         | 1            | 0.626382     | 1         | 0.6322484 | 1            | 0.7739488    |
| #### Bn-scaff_28562_1-p25873 genome unspecific (all in)         | 1            | 0.5656227    | 1         | 0.5867994 | 0.9917355    | 0.5378139    |
| #### Bn-scaff_28562_1-p29545 genome unspecific (all in)         | 1            | 0.5867994    | 1         | 0.5698663 | 0.9834711    | 0.483911     |
| #### Bn-scaff_28562_1-p29599 genome unspecific (all in)         | 1            | 0.6544564    | 1         | 0.6534232 | 1            | 0.7451716    |
| #### Bn-scaff_28562_1-p30677 C-genome specific (napus-oleracea) | 0.9856459    | 0.8096533    | 1         | 0.7677546 | not scorable | not scorable |
| #### Bn-scaff_28562_1-p30733 C-genome specific (napus-oleracea) | 0.9880383    | 0.8086334    | 0.9844961 | 0.7594503 | not scorable | not scorable |
| #### Bn-scaff_28562_1-p33404 C-genome specific (napus-oleracea) | 0.9808612    | 0.6910116    | 0.8992248 | 0.686775  | not scorable | not scorable |
| #### Bn-scaff_28579_1-p336 C-genome specific (oleracea only)    | not scorable | not scorable | 0.8604651 | 0.3556382 | not scorable | not scorable |
| #### Bn-scaff_28590_1-p1342 C-genome specific (napus-oleracea)  | 0.9952153    | 0.404754     | 0.9922481 | 0.8549035 | not scorable | not scorable |
| #### Bn-scaff_28612_1-p31093 genome unspecific (all in)         | 0.9832536    | 0.515968     | 0.8527132 | 0.7022427 | 0.8512397    | 0.8268808    |



|                                                                 |              |              |           |           |              |              |
|-----------------------------------------------------------------|--------------|--------------|-----------|-----------|--------------|--------------|
| #### Bn-scaff_28612_1-p50815 C-genome specific (napus-oleracea) | 1            | 0.6320699    | 1         | 0.6791668 | not scorable | not scorable |
| #### Bn-scaff_28637_1-p15131 genome unspecific (all in)         | 0.9880383    | 0.6932425    | 0.9844961 | 0.7554753 | 0.9917355    | 0.8378905    |
| #### Bn-scaff_28637_1-p38271 genome unspecific (all in)         | 0.9952153    | 0.3631371    | 1         | 0.8335817 | 1            | 0.8417516    |
| #### Bn-scaff_28640_1-p24768 genome unspecific (all in)         | 1            | 0.7770717    | 1         | 0.8689588 | 0.9917355    | 0.8815182    |
| #### Bn-scaff_28640_1-p25433 C-genome specific (napus-oleracea) | 0.9904306    | 0.7906628    | 1         | 0.8500741 | not scorable | not scorable |
| #### Bn-scaff_28640_1-p29149 C-genome specific (napus-oleracea) | 0.9760765    | 0.5983011    | 0.9844961 | 0.4918304 | not scorable | not scorable |
| #### Bn-scaff_28640_1-p43648 genome unspecific (all in)         | 1            | 0.9268773    | 1         | 0.662807  | 1            | 0.7942994    |
| #### Bn-scaff_28666_1-p29889 C-genome specific (napus-oleracea) | 0.9712918    | 0.7504961    | 1         | 0.8752148 | not scorable | not scorable |
| #### Bn-scaff_28666_1-p32984 C-genome specific (napus-oleracea) | 0.9904306    | 0.8628621    | 1         | 0.7791871 | not scorable | not scorable |
| #### Bn-scaff_28678_1-p27291 genome unspecific (all in)         | 1            | 0.7770717    | 1         | 0.7392969 | 1            | 0.7723194    |
| #### Bn-scaff_28678_1-p34404 genome unspecific (oleracea-rapa)  | not scorable | not scorable | 1         | 0.4945174 | 0.9917355    | 0.5961174    |
| #### Bn-scaff_28678_1-p44144 genome unspecific (oleracea-rapa)  | not scorable | not scorable | 1         | 0.5958427 | 1            | 0.8390651    |
| #### Bn-scaff_28678_1-p44292 genome unspecific (oleracea-rapa)  | not scorable | not scorable | 1         | 0.7592272 | 0.9834711    | 0.7242321    |
| #### Bn-scaff_28678_1-p44355 genome unspecific (oleracea-rapa)  | not scorable | not scorable | 1         | 0.7946709 | 0.9834711    | 0.7721309    |
| #### Bn-scaff_28678_1-p49127 C-genome specific (oleracea only)  | not scorable | not scorable | 1         | 0.6591476 | not scorable | not scorable |
| #### Bn-scaff_28678_1-p59133 genome unspecific (all in)         | 0.9976076    | 0.5481173    | 1         | 0.7508476 | 0.9834711    | 0.5197831    |
| #### Bn-scaff_28678_1-p59138 genome unspecific (oleracea-rapa)  | not scorable | not scorable | 1         | 0.6193051 | 0.9752066    | 0.6935779    |
| #### Bn-scaff_28678_1-p59177 C-genome specific (oleracea only)  | not scorable | not scorable | 1         | 0.672401  | not scorable | not scorable |
| #### Bn-scaff_28703_1-p31309 C-genome specific (napus-oleracea) | 0.9856459    | 0.8645889    | 1         | 0.743793  | not scorable | not scorable |
| #### Bn-scaff_28703_1-p34884 genome unspecific (all in)         | 1            | 0.9108447    | 1         | 0.8246619 | 0.9421487    | 0.8023407    |
| #### Bn-scaff_28703_1-p44290 C-genome specific (napus-oleracea) | 0.9928229    | 0.8232076    | 1         | 0.7867201 | not scorable | not scorable |
| #### Bn-scaff_28703_1-p47082 C-genome specific (napus-oleracea) | 0.9832536    | 0.7872965    | 1         | 0.8456232 | not scorable | not scorable |
| #### Bn-scaff_28703_1-p47306 C-genome specific (napus-oleracea) | 0.9808612    | 0.7859449    | 1         | 0.8906979 | not scorable | not scorable |
| #### Bn-scaff_28703_1-p49303 C-genome specific (napus-oleracea) | 0.9880383    | 0.8152784    | 1         | 0.8163805 | not scorable | not scorable |
| #### Bn-scaff_28703_1-p49551 C-genome specific (napus-oleracea) | 0.9928229    | 0.7825863    | 1         | 0.8718688 | not scorable | not scorable |
| #### Bn-scaff_28703_1-p49734 C-genome specific (napus-oleracea) | 0.9928229    | 0.8006418    | 0.9922481 | 0.7902353 | not scorable | not scorable |
| #### Bn-scaff_28703_1-p50575 C-genome specific (napus-oleracea) | 0.9904306    | 0.7857726    | 1         | 0.8997526 | not scorable | not scorable |
| #### Bn-scaff_28703_1-p50822 C-genome specific (napus-oleracea) | 0.9976076    | 0.7289865    | 1         | 0.7688897 | not scorable | not scorable |
| #### Bn-scaff_28703_1-p50848 C-genome specific (napus-oleracea) | 0.9880383    | 0.7801449    | 1         | 0.6260059 | not scorable | not scorable |
| #### Bn-scaff_28703_1-p51095 C-genome specific (napus-oleracea) | 0.9928229    | 0.8081977    | 1         | 0.8184659 | not scorable | not scorable |
| #### Bn-scaff_28703_1-p51257 C-genome specific (napus-oleracea) | 0.9928229    | 0.6949452    | 1         | 0.8047553 | not scorable | not scorable |
| #### Bn-scaff_28703_1-p51978 C-genome specific (napus-oleracea) | 0.9928229    | 0.8311826    | 0.9922481 | 0.7350113 | not scorable | not scorable |
| #### Bn-scaff_28703_1-p53260 C-genome specific (napus-oleracea) | 0.9928229    | 0.7337506    | 1         | 0.6231752 | not scorable | not scorable |

|                                                                 |              |              |              |              |              |              |
|-----------------------------------------------------------------|--------------|--------------|--------------|--------------|--------------|--------------|
| #### Bn-scaff_28703_1-p53619 C-genome specific (napus-oleracea) | 0.9880383    | 0.6923596    | 1            | 0.5855217    | not scorable | not scorable |
| #### Bn-scaff_28703_1-p53700 C-genome specific (napus-oleracea) | 0.9976076    | 0.7006962    | 0.9922481    | 0.6012213    | not scorable | not scorable |
| #### Bn-scaff_28703_1-p53783 C-genome specific (napus-oleracea) | 0.9832536    | 0.7446896    | 1            | 0.8449912    | not scorable | not scorable |
| #### Bn-scaff_28703_1-p57961 C-genome specific (oleracea only)  | not scorable | not scorable | 0.9922481    | 0.7348107    | not scorable | not scorable |
| #### Bn-scaff_28703_1-p58529 C-genome specific (napus-oleracea) | 0.9856459    | 0.609837     | 1            | 0.7854534    | not scorable | not scorable |
| #### Bn-scaff_28703_1-p60085 C-genome specific (napus-oleracea) | 0.9832536    | 0.8019181    | 1            | 0.6236444    | not scorable | not scorable |
| #### Bn-scaff_28703_1-p61169 C-genome specific (napus-oleracea) | 0.9880383    | 0.7899367    | 1            | 0.8809294    | not scorable | not scorable |
| #### Bn-scaff_28703_1-p61511 C-genome specific (napus-oleracea) | 0.9952153    | 0.796284     | 1            | 0.8549033    | not scorable | not scorable |
| #### Bn-scaff_28703_1-p69473 C-genome specific (napus-oleracea) | 0.9976076    | 0.7190414    | 1            | 0.8752052    | not scorable | not scorable |
| #### Bn-scaff_28703_1-p69915 C-genome specific (napus-oleracea) | 0.9928229    | 0.8067088    | 1            | 0.7373143    | not scorable | not scorable |
| #### Bn-scaff_28703_1-p70301 C-genome specific (napus-oleracea) | 0.9880383    | 0.792196     | 1            | 0.58849      | not scorable | not scorable |
| #### Bn-scaff_28725_1-p12048 C-genome specific (napus-oleracea) | 0.9090909    | 0.8037949    | 0.8837209    | 0.8428857    | not scorable | not scorable |
| #### Bn-scaff_28725_1-p15063 C-genome specific (napus-oleracea) | 0.9282297    | 0.7373865    | 0.9922481    | 0.7246544    | not scorable | not scorable |
| #### Bn-scaff_28725_1-p17456 C-genome specific (napus-oleracea) | 0.9808612    | 0.6675227    | 0.9147287    | 0.6340827    | not scorable | not scorable |
| #### Bn-scaff_28725_1-p72570 C-genome specific (napus-oleracea) | 0.9210526    | 0.7269635    | 0.9844961    | 0.7835218    | not scorable | not scorable |
| #### Bn-scaff_28725_1-p97530 genome unspecific (all in)         | 0.9880383    | 0.6086727    | 1            | 0.7468612    | 0.9917355    | 0.8698516    |
| #### Bn-scaff_28752_1-p303 napus specific                       | 0.9904306    | 0.7362101    | not scorable | not scorable | not scorable | not scorable |
| #### Bn-scaff_28774_1-p13523 C-genome specific (napus-oleracea) | 0.7727273    | 0.7548144    | 1            | 0.8502369    | not scorable | not scorable |
| #### Bn-scaff_28774_1-p18799 C-genome specific (napus-oleracea) | 0.7655503    | 0.6261808    | 1            | 0.5813696    | not scorable | not scorable |
| #### Bn-scaff_28774_1-p18859 C-genome specific (napus-oleracea) | 0.7727273    | 0.7368854    | 1            | 0.7544453    | not scorable | not scorable |
| #### Bn-scaff_28774_1-p18994 C-genome specific (napus-oleracea) | 0.7703349    | 0.7699746    | 1            | 0.7759107    | not scorable | not scorable |
| #### Bn-scaff_28774_1-p19273 C-genome specific (napus-oleracea) | 0.7655503    | 0.7593381    | 0.9922481    | 0.8688877    | not scorable | not scorable |
| #### Bn-scaff_28774_1-p19483 C-genome specific (napus-oleracea) | 0.7655503    | 0.7017795    | 1            | 0.6608703    | not scorable | not scorable |
| #### Bn-scaff_28774_1-p19762 C-genome specific (napus-oleracea) | 0.7703349    | 0.7482552    | 0.9922481    | 0.7657913    | not scorable | not scorable |
| #### Bn-scaff_28774_1-p19833 C-genome specific (napus-oleracea) | 0.7751196    | 0.6775557    | 0.9922481    | 0.6691222    | not scorable | not scorable |
| #### Bn-scaff_28774_1-p19911 C-genome specific (napus-oleracea) | 0.7655503    | 0.7448401    | 1            | 0.7285458    | not scorable | not scorable |
| #### Bn-scaff_28774_1-p20162 C-genome specific (napus-oleracea) | 0.7631579    | 0.7430815    | 1            | 0.7952968    | not scorable | not scorable |
| #### Bn-scaff_28774_1-p20343 C-genome specific (napus-oleracea) | 0.7751196    | 0.6827018    | 0.9844961    | 0.6728249    | not scorable | not scorable |
| #### Bn-scaff_28774_1-p20574 C-genome specific (napus-oleracea) | 0.7703349    | 0.7534744    | 1            | 0.8473461    | not scorable | not scorable |
| #### Bn-scaff_28774_1-p20840 C-genome specific (napus-oleracea) | 0.7655503    | 0.7682142    | 0.9922481    | 0.7462447    | not scorable | not scorable |
| #### Bn-scaff_28774_1-p25229 genome unspecific (all in)         | 0.9880383    | 0.340065     | 0.8217054    | 0.7267015    | 1            | 0.9160697    |
| #### Bn-scaff_28774_1-p29882 genome unspecific (all in)         | 0.9784689    | 0.3026375    | 1            | 0.6058624    | 1            | 0.7494321    |
| #### Bn-scaff_28774_1-p31851 C-genome specific (oleracea only)  | not scorable | not scorable | 0.9767442    | 0.6723413    | not scorable | not scorable |

|                                                                |              |              |              |              |              |              |
|----------------------------------------------------------------|--------------|--------------|--------------|--------------|--------------|--------------|
| #### Bn-scaff_28774_1-p3379C-genome specific (napus-oleracea)  | 0.7583732    | 0.7517254    | 1            | 0.7254537    | not scorable | not scorable |
| #### Bn-scaff_28774_1-p3720C-genome specific (napus-oleracea)  | 0.7488039    | 0.8027193    | 0.9922481    | 0.6951118    | not scorable | not scorable |
| #### Bn-scaff_28774_1-p37392C-genome specific (napus-oleracea) | 0.7679426    | 0.7654794    | 1            | 0.7797816    | not scorable | not scorable |
| #### Bn-scaff_28774_1-p3745C-genome specific (napus-oleracea)  | 0.7559808    | 0.7530037    | 1            | 0.7457486    | not scorable | not scorable |
| #### Bn-scaff_28774_1-p37744C-genome specific (napus-oleracea) | 0.7583732    | 0.7450918    | 0.9922481    | 0.7628844    | not scorable | not scorable |
| #### Bn-scaff_28774_1-p3780C-genome specific (napus-oleracea)  | 0.7655503    | 0.7606095    | 1            | 0.7588509    | not scorable | not scorable |
| #### Bn-scaff_28774_1-p4068C-genome specific (napus-oleracea)  | 0.7511961    | 0.7860837    | 0.9844961    | 0.7920969    | not scorable | not scorable |
| #### Bn-scaff_28774_1-p4131C-genome specific (napus-oleracea)  | 0.7631579    | 0.7662799    | 1            | 0.7485909    | not scorable | not scorable |
| #### Bn-scaff_28774_1-p41601C-genome specific (napus-oleracea) | 0.7655503    | 0.7451248    | 1            | 0.8859954    | not scorable | not scorable |
| #### Bn-scaff_28774_1-p4216C-genome specific (napus-oleracea)  | 0.7679426    | 0.7189229    | 1            | 0.7173884    | not scorable | not scorable |
| #### Bn-scaff_28774_1-p42467C-genome specific (napus-oleracea) | 0.7655503    | 0.7509359    | 1            | 0.7602606    | not scorable | not scorable |
| #### Bn-scaff_28774_1-p4457C-genome specific (napus-oleracea)  | 0.7631579    | 0.7454444    | 1            | 0.8096798    | not scorable | not scorable |
| #### Bn-scaff_28777_1-p1958 all not scorable                   | not scorable | not scorable | not scorable | not scorable | not scorable | not scorable |
| #### Bn-scaff_28777_1-p2020 C-genome specific (oleracea only)  | not scorable | not scorable | 0.9147287    | 0.3542679    | not scorable | not scorable |
| #### Bn-scaff_28777_1-p2248 all not scorable                   | not scorable | not scorable | not scorable | not scorable | not scorable | not scorable |
| #### Bn-scaff_28791_1-p5 C-genome specific (oleracea only)     | not scorable | not scorable | 0.8914729    | 0.1507396    | not scorable | not scorable |
| #### Bn-scaff_28795_1-p17561C-genome specific (napus-oleracea) | 0.9880383    | 0.8799702    | 0.9224806    | 0.8138188    | not scorable | not scorable |
| #### Bn-scaff_28795_1-p3187C-genome specific (napus-oleracea)  | 0.9712918    | 0.8320505    | 0.9767442    | 0.7745548    | not scorable | not scorable |
| #### Bn-scaff_28795_1-p5373C-genome specific (napus-oleracea)  | 0.9904306    | 0.7495639    | 0.9224806    | 0.7534347    | not scorable | not scorable |
| #### Bn-scaff_28889_1-p15002C-genome specific (napus-oleracea) | 0.9976076    | 0.8951093    | 1            | 0.8431259    | not scorable | not scorable |
| #### Bn-scaff_28889_1-p1534C-genome specific (napus-oleracea)  | 0.9976076    | 0.8693275    | 0.9844961    | 0.7703761    | not scorable | not scorable |
| #### Bn-scaff_28889_1-p15617C-genome specific (napus-oleracea) | 0.9952153    | 0.7483309    | 1            | 0.7552333    | not scorable | not scorable |
| #### Bn-scaff_28889_1-p1587C-genome specific (napus-oleracea)  | 0.9952153    | 0.7568935    | 1            | 0.7834373    | not scorable | not scorable |
| #### Bn-scaff_28899_1-p4396 genome unspecific (oleracea-rapa)  | not scorable | not scorable | 0.8914729    | 0.185086     | 1            | 0.9187849    |
| #### Bn-scaff_28908_1-p210 A-genome specific (napus-rapa)      | 0.9521531    | 0.686383     | not scorable | not scorable | 0.9504132    | 0.766841     |
| #### Bn-scaff_28977_1-p7912 all not scorable                   | not scorable | not scorable | not scorable | not scorable | not scorable | not scorable |
| #### Bn-scaff_29019_1-p689 genome unspecific (oleracea-rapa)   | not scorable | not scorable | 0.9922481    | 0.6564311    | 1            | 0.7368367    |
| #### Bn-scaff_29028_1-p1199C-genome specific (napus-oleracea)  | 0.9617225    | 0.7733375    | 0.620155     | 0.770726     | not scorable | not scorable |
| #### Bn-scaff_29028_1-p1550C-genome specific (napus-oleracea)  | 0.9665072    | 0.7679108    | 1            | 0.8415254    | not scorable | not scorable |
| #### Bn-scaff_29028_1-p1855C-genome specific (napus-oleracea)  | 0.9688995    | 0.7528377    | 1            | 0.8729286    | not scorable | not scorable |
| #### Bn-scaff_29028_1-p9948 genome unspecific (all in)         | 0.9688995    | 0.3262095    | 1            | 0.8269299    | 1            | 0.8876707    |
| #### Bn-scaff_29032_1-p930 C-genome specific (napus-oleracea)  | 0.9641148    | 0.3687054    | 1            | 0.5418128    | not scorable | not scorable |
| #### Bn-scaff_29055_1-p1050 genome unspecific (all in)         | 1            | 0.558925     | 1            | 0.5732226    | 1            | 0.5652714    |

|                                                                |              |              |              |              |              |              |
|----------------------------------------------------------------|--------------|--------------|--------------|--------------|--------------|--------------|
| #### Bn-scaff_29061_1-p19327 C-genome specific (oleracea only) | not scorable | not scorable | 0.9767442    | 0.6993231    | not scorable | not scorable |
| #### Bn-scaff_29061_1-p30884 napus specific                    | 0.9330143    | 0.706222     | not scorable | not scorable | not scorable | not scorable |
| #### Bn-Scaffold000096-p2342 A-genome specific (napus-rapa)    | 1            | 0.8516162    | not scorable | not scorable | 0.9917355    | 0.7221829    |
| #### Bn-Scaffold000096-p4049 genome unspecific (all in)        | 0.9736842    | 0.7417242    | 0            | 0.7937965    | 1            | 0.5493243    |
| #### Bn-Scaffold000096-p4366 A-genome specific (napus-rapa)    | 0.9928229    | 0.7046303    | not scorable | not scorable | 1            | 0.8206426    |
| #### Bn-Scaffold000096-p4545 A-genome specific (napus-rapa)    | 0.9521531    | 0.6728315    | not scorable | not scorable | 0.9917355    | 0.5611782    |
| #### Bn-Scaffold000096-p4864 all not scorable                  | not scorable | not scorable | not scorable | not scorable | not scorable | not scorable |
| #### Bn-Scaffold000096-p4876 all not scorable                  | not scorable | not scorable | not scorable | not scorable | not scorable | not scorable |
| #### Bn-Scaffold000096-p5032 A-genome specific (napus-rapa)    | 0.9856459    | 0.7774603    | not scorable | not scorable | 1            | 0.8395624    |
| #### Bn-Scaffold000096-p5084 A-genome specific (napus-rapa)    | 0.9856459    | 0.7725002    | not scorable | not scorable | 0.9917355    | 0.7062137    |
| #### Bn-Scaffold000096-p5102 A-genome specific (napus-rapa)    | 0.9712918    | 0.8187729    | not scorable | not scorable | 0.9917355    | 0.8219455    |
| #### Bn-Scaffold000096-p5106 A-genome specific (napus-rapa)    | 0.9904306    | 0.7892465    | not scorable | not scorable | 0.9917355    | 0.7598994    |
| #### Bn-Scaffold000096-p5106 A-genome specific (napus-rapa)    | 0.9808612    | 0.7360518    | not scorable | not scorable | 1            | 0.7939821    |
| #### Bn-Scaffold000096-p5110 A-genome specific (napus-rapa)    | 0.9688995    | 0.6137606    | not scorable | not scorable | 0.9669421    | 0.6562232    |
| #### Bn-Scaffold000096-p5113 A-genome specific (napus-rapa)    | 0.9856459    | 0.7814019    | not scorable | not scorable | 1            | 0.8298277    |
| #### Bn-Scaffold000096-p5132 A-genome specific (napus-rapa)    | 0.9904306    | 0.7450794    | not scorable | not scorable | 1            | 0.7555532    |
| #### Bn-Scaffold000096-p5152 A-genome specific (napus-rapa)    | 0.9090909    | 0.4966223    | not scorable | not scorable | 1            | 0.8476364    |
| #### Bn-Scaffold000096-p5184 A-genome specific (napus-rapa)    | 0.9880383    | 0.7592236    | not scorable | not scorable | 1            | 0.7227326    |
| #### Bn-Scaffold000096-p5188 A-genome specific (napus-rapa)    | 0.9736842    | 0.668263     | not scorable | not scorable | 1            | 0.7685008    |
| #### Bn-Scaffold000096-p5330 A-genome specific (napus-rapa)    | 0.9928229    | 0.8265655    | not scorable | not scorable | 0.9917355    | 0.8874314    |
| #### Bn-Scaffold000096-p5331 A-genome specific (napus-rapa)    | 0.9784689    | 0.7027701    | not scorable | not scorable | 0.9834711    | 0.6350294    |
| #### Bn-Scaffold000096-p5333 A-genome specific (napus-rapa)    | 0.9880383    | 0.7706521    | not scorable | not scorable | 0.9917355    | 0.7781963    |
| #### Bn-Scaffold000096-p5339 A-genome specific (napus-rapa)    | 0.9736842    | 0.6650119    | not scorable | not scorable | 1            | 0.6590557    |
| #### Bn-Scaffold000096-p5356 A-genome specific (napus-rapa)    | 0.9832536    | 0.737579     | not scorable | not scorable | 1            | 0.7125402    |
| #### Bn-Scaffold000096-p5359 A-genome specific (napus-rapa)    | 0.9904306    | 0.7851065    | not scorable | not scorable | 1            | 0.7536532    |
| #### Bn-Scaffold000096-p5362 A-genome specific (napus-rapa)    | 0.9928229    | 0.782249     | not scorable | not scorable | 0.9917355    | 0.8529681    |
| #### Bn-Scaffold000096-p5365 A-genome specific (napus-rapa)    | 0.9880383    | 0.7409453    | not scorable | not scorable | 0.9917355    | 0.7734283    |
| #### Bn-Scaffold000096-p5379 A-genome specific (napus-rapa)    | 0.9832536    | 0.7053204    | not scorable | not scorable | 1            | 0.6514224    |
| #### Bn-Scaffold000096-p5393 A-genome specific (napus-rapa)    | 0.9712918    | 0.6716244    | not scorable | not scorable | 0.9834711    | 0.6723001    |
| #### Bn-Scaffold000096-p5395 A-genome specific (napus-rapa)    | 0.9856459    | 0.663273     | not scorable | not scorable | 1            | 0.7216817    |
| #### Bn-Scaffold000096-p5396 A-genome specific (napus-rapa)    | 0.9832536    | 0.6241567    | not scorable | not scorable | 0.9669421    | 0.6942195    |
| #### Bn-Scaffold000096-p5407 A-genome specific (napus-rapa)    | 0.9952153    | 0.800582     | not scorable | not scorable | 0.9917355    | 0.8141814    |
| #### Bn-Scaffold000096-p5606 A-genome specific (napus-rapa)    | 0.9928229    | 0.7874824    | not scorable | not scorable | 1            | 0.8658676    |

|                                                             |              |              |              |              |              |              |
|-------------------------------------------------------------|--------------|--------------|--------------|--------------|--------------|--------------|
| #### Bn-Scaffold000096-p5618 A-genome specific (napus-rapa) | 0.9593301    | 0.4495421    | not scorable | not scorable | 0.9917355    | 0.7949602    |
| #### Bn-Scaffold000096-p5618 A-genome specific (napus-rapa) | 0.5358852    | 0.8531767    | not scorable | not scorable | 0.9917355    | 0.9186322    |
| #### Bn-Scaffold000096-p5634 all not scorable               | not scorable | not scorable | not scorable | not scorable | not scorable | not scorable |
| #### Bn-Scaffold000096-p5642 A-genome specific (napus-rapa) | 0.9688995    | 0.8032917    | not scorable | not scorable | 0.9752066    | 0.7351026    |
| #### Bn-Scaffold000096-p5642 A-genome specific (napus-rapa) | 0.9856459    | 0.7088412    | not scorable | not scorable | 0.9834711    | 0.6459444    |
| #### Bn-Scaffold000096-p5775 A-genome specific (napus-rapa) | 0.9832536    | 0.7713346    | not scorable | not scorable | 0.9917355    | 0.8285881    |
| #### Bn-Scaffold000096-p5858 A-genome specific (napus-rapa) | 0.9952153    | 0.777251     | not scorable | not scorable | 0.9917355    | 0.7326114    |
| #### Bn-Scaffold000096-p5881 A-genome specific (napus-rapa) | 0.9784689    | 0.6488775    | not scorable | not scorable | 1            | 0.8047311    |
| #### Bn-Scaffold000096-p5906 A-genome specific (napus-rapa) | 0.9856459    | 0.7818289    | not scorable | not scorable | 0.9917355    | 0.7622118    |
| #### Bn-Scaffold000096-p5907 A-genome specific (napus-rapa) | 0.9784689    | 0.7826491    | not scorable | not scorable | 0.9917355    | 0.7675281    |
| #### Bn-Scaffold000096-p5982 A-genome specific (napus-rapa) | 0.9569378    | 0.4180033    | not scorable | not scorable | 1            | 0.6692175    |
| #### Bn-Scaffold000096-p5988 A-genome specific (napus-rapa) | 0.9401914    | 0.4402469    | not scorable | not scorable | 1            | 0.7279344    |
| #### Bn-Scaffold000096-p6038 A-genome specific (napus-rapa) | 0.9617225    | 0.5657559    | not scorable | not scorable | 1            | 0.7300256    |
| #### Bn-Scaffold000096-p6249 A-genome specific (napus-rapa) | 1            | 0.3990285    | not scorable | not scorable | 1            | 0.662355     |
| #### Bn-Scaffold000096-p6250 A-genome specific (napus-rapa) | 1            | 0.5883715    | not scorable | not scorable | 0.9173554    | 0.2740554    |
| #### Bn-Scaffold000096-p6312 A-genome specific (napus-rapa) | 0.9904306    | 0.7349099    | not scorable | not scorable | 1            | 0.75352      |
| #### Bn-Scaffold000096-p6936 genome unspecific (all in)     | 1            | 0.5770498    | 0.9457364    | 0.2972527    | 1            | 0.7473143    |
| #### Bn-Scaffold000096-p7000 A-genome specific (napus-rapa) | 0.9952153    | 0.7881714    | not scorable | not scorable | 0.9917355    | 0.8537922    |
| #### Bn-Scaffold000096-p7063 A-genome specific (napus-rapa) | 0.9736842    | 0.7122595    | not scorable | not scorable | 1            | 0.7696638    |
| #### Bn-Scaffold000096-p7067 A-genome specific (napus-rapa) | 0.9808612    | 0.7991912    | not scorable | not scorable | 1            | 0.8412637    |
| #### Bn-Scaffold000096-p7093 A-genome specific (napus-rapa) | 0.9952153    | 0.3762781    | not scorable | not scorable | 1            | 0.6820455    |
| #### Bn-Scaffold000096-p7165 A-genome specific (napus-rapa) | 0.9808612    | 0.7314607    | not scorable | not scorable | 1            | 0.8525112    |
| #### Bn-Scaffold000096-p7169 A-genome specific (napus-rapa) | 0.9904306    | 0.7206705    | not scorable | not scorable | 1            | 0.8443921    |
| #### Bn-Scaffold000096-p7169 A-genome specific (napus-rapa) | 0.9712918    | 0.6874186    | not scorable | not scorable | 1            | 0.7653593    |
| #### Bn-Scaffold000096-p7178 A-genome specific (napus-rapa) | 0.9760765    | 0.6939263    | not scorable | not scorable | 0.9917355    | 0.6882682    |
| #### Bn-Scaffold000096-p7183 A-genome specific (napus-rapa) | 0.9904306    | 0.7813859    | not scorable | not scorable | 1            | 0.8830892    |
| #### Bn-Scaffold000096-p7216 A-genome specific (napus-rapa) | 0.9880383    | 0.7260429    | not scorable | not scorable | 1            | 0.7755306    |
| #### Bn-Scaffold000096-p7218 A-genome specific (napus-rapa) | 0.9856459    | 0.7824984    | not scorable | not scorable | 0.9917355    | 0.7550186    |
| #### Bn-Scaffold000096-p7254 A-genome specific (napus-rapa) | 0.9665072    | 0.7313488    | not scorable | not scorable | 0.9834711    | 0.6958136    |
| #### Bn-Scaffold000096-p7515 A-genome specific (napus-rapa) | 0.9784689    | 0.7532299    | not scorable | not scorable | 1            | 0.8053541    |
| #### Bn-Scaffold000096-p7607 A-genome specific (napus-rapa) | 0.9976076    | 0.7642548    | not scorable | not scorable | 0.9834711    | 0.7515108    |
| #### Bn-Scaffold000096-p7624 A-genome specific (napus-rapa) | 1            | 0.7067118    | not scorable | not scorable | 1            | 0.80701      |
| #### Bn-Scaffold000096-p7629 A-genome specific (napus-rapa) | 0.9760765    | 0.6465816    | not scorable | not scorable | 1            | 0.7467712    |

|                                                                 |              |              |              |              |              |              |
|-----------------------------------------------------------------|--------------|--------------|--------------|--------------|--------------|--------------|
| #### Bn-Scaffold000096-p7630 A-genome specific (napus-rapa)     | 0.9904306    | 0.7343003    | not scorable | not scorable | 1            | 0.8170457    |
| #### Bn-Scaffold000096-p7633 A-genome specific (napus-rapa)     | 0.9904306    | 0.7777682    | not scorable | not scorable | 1            | 0.7512493    |
| #### Bn-Scaffold000096-p7973 all not scorable                   | not scorable | not scorable | not scorable | not scorable | not scorable | not scorable |
| #### Bn-Scaffold000096-p8148 A-genome specific (napus-rapa)     | 1            | 0.7875468    | not scorable | not scorable | 1            | 0.9095823    |
| #### Bn-Scaffold000096-p8439 A-genome specific (napus-rapa)     | 0.9760765    | 0.6937945    | not scorable | not scorable | 0.9834711    | 0.699387     |
| #### Bn-Scaffold000096-p8572 A-genome specific (napus-rapa)     | 0.9593301    | 0.3546709    | not scorable | not scorable | 1            | 0.7034822    |
| #### Bn-Scaffold000096-p8589 A-genome specific (napus-rapa)     | 0.9521531    | 0.7399234    | not scorable | not scorable | 1            | 0.8162273    |
| #### Bn-Scaffold000096-p8784 A-genome specific (napus-rapa)     | 1            | 0.7062998    | not scorable | not scorable | 0.9917355    | 0.7997645    |
| #### Bn-Scaffold000096-p8869 A-genome specific (napus-rapa)     | 0.9880383    | 0.7920598    | not scorable | not scorable | 1            | 0.8335571    |
| #### Bn-Scaffold000096-p8956 A-genome specific (napus-rapa)     | 0.9952153    | 0.6386546    | not scorable | not scorable | 1            | 0.8869128    |
| #### Bn-Scaffold000096-p9287 A-genome specific (napus-rapa)     | 0.9688995    | 0.846419     | not scorable | not scorable | 1            | 0.7775826    |
| #### Bn-Scaffold000100-p1384 A-genome specific (rapa only)      | not scorable | not scorable | not scorable | not scorable | 1            | 0.9612358    |
| #### Bn-Scaffold000100-p1618 A-genome specific (napus-rapa)     | 0.9832536    | 0.6811635    | not scorable | not scorable | 1            | 0.7724596    |
| #### Bn-Scaffold000100-p1714 A-genome specific (napus-rapa)     | 0.9856459    | 0.6793889    | not scorable | not scorable | 1            | 0.5770498    |
| #### Bn-Scaffold000100-p1912 A-genome specific (napus-rapa)     | 0.9904306    | 0.7701567    | not scorable | not scorable | 0.9752066    | 0.7205092    |
| #### Bn-Scaffold000100-p1934 A-genome specific (napus-rapa)     | 0.9904306    | 0.7719246    | not scorable | not scorable | 1            | 0.7254045    |
| #### Bn-Scaffold000100-p2092 A-genome specific (napus-rapa)     | 0.9952153    | 0.7792453    | not scorable | not scorable | 1            | 0.9272014    |
| #### Bn-Scaffold000100-p2394 all not scorable                   | not scorable | not scorable | not scorable | not scorable | not scorable | not scorable |
| #### Bn-Scaffold000100-p2400 A-genome specific (rapa only)      | not scorable | not scorable | not scorable | not scorable | 1            | 0.8948976    |
| #### Bn-Scaffold000100-p2647 A-genome specific (napus-rapa)     | 1            | 0.4137378    | not scorable | not scorable | 1            | 0.4733973    |
| #### Bn-Scaffold000100-p4727 genome unspecific (oleracea-rapa)  | not scorable | not scorable | 0.9534883    | 0.3793433    | 1            | 0.7325504    |
| #### Bn-Scaffold000100-p4843 A-genome specific (napus-rapa)     | 0.9928229    | 0.7366029    | not scorable | not scorable | 1            | 0.8384755    |
| #### Bn-Scaffold000100-p4949 A-genome specific (rapa only)      | not scorable | not scorable | not scorable | not scorable | 1            | 0.7770717    |
| #### Bn-Scaffold000100-p6226 A-genome specific (napus-rapa)     | 0.9712918    | 0.8071697    | not scorable | not scorable | 1            | 0.9272014    |
| #### Bn-Scaffold000100-p6240 A-genome specific (napus-rapa)     | 0.9784689    | 0.7313274    | not scorable | not scorable | 0.9917355    | 0.7857369    |
| #### Bn-Scaffold000100-p6298 A-genome specific (napus-rapa)     | 0.9856459    | 0.6957522    | not scorable | not scorable | 1            | 0.9272014    |
| #### Bn-Scaffold000100-p6314 A-genome specific (napus-rapa)     | 0.9880383    | 0.4833832    | not scorable | not scorable | 1            | 0.9095823    |
| #### Bn-Scaffold000100-p6735 C-genome specific (napus-oleracea) | 1            | 0.5667164    | 0.9844961    | 0.5372084    | not scorable | not scorable |
| #### Bn-Scaffold000100-p6784 A-genome specific (napus-rapa)     | 0.9832536    | 0.7865589    | not scorable | not scorable | 1            | 0.9175813    |
| #### Bn-Scaffold000100-p6811 A-genome specific (napus-rapa)     | 1            | 0.8102048    | not scorable | not scorable | 0.9917355    | 0.7966691    |
| #### Bn-Scaffold000100-p7887 A-genome specific (napus-rapa)     | 0.9832536    | 0.6990044    | not scorable | not scorable | 1            | 0.7322372    |
| #### Bn-Scaffold000100-p8163 A-genome specific (napus-rapa)     | 0.9856459    | 0.6689774    | not scorable | not scorable | 1            | 0.8754691    |
| #### Bn-Scaffold000100-p8492 A-genome specific (napus-rapa)     | 0.9784689    | 0.4855832    | not scorable | not scorable | 0.9917355    | 0.7283893    |

|                                                             |              |              |              |              |              |              |
|-------------------------------------------------------------|--------------|--------------|--------------|--------------|--------------|--------------|
| #### Bn-Scaffold000100-p8524 A-genome specific (napus-ropa) | 0.9736842    | 0.7711915    | not scorable | not scorable | 0.9421487    | 0.7492745    |
| #### Bn-Scaffold000100-p8735 genome unspecific (all in)     | 0.9976076    | 0.4918934    |              | 1 0.6647925  | 1            | 0.7914145    |
| #### Bn-Scaffold000100-p9450 genome unspecific (all in)     | 0.9832536    | 0.2409512    | 0.9767442    | 0.442557     | 1            | 0.7758878    |
| #### Bn-Scaffold000103-p3014 all not scorable               | not scorable | not scorable | not scorable | not scorable | not scorable | not scorable |
| #### Bn-Scaffold000103-p4949 A-genome specific (napus-ropa) | 0.9808612    | 0.6658241    | not scorable | not scorable | 1            | 0.2770799    |
| #### Bn-Scaffold000103-p5274 A-genome specific (napus-ropa) | 0.9808612    | 0.8110438    | not scorable | not scorable | 0.9752066    | 0.7698238    |
| #### Bn-Scaffold000103-p7089 A-genome specific (napus-ropa) | 1            | 0.7131232    | not scorable | not scorable | 1            | 0.7770717    |
| #### Bn-Scaffold000103-p8552 A-genome specific (napus-ropa) | 0.8516746    | 0.7226692    | not scorable | not scorable | 0.9834711    | 0.8004208    |
| #### Bn-Scaffold000104-p1163 napus specific                 | 0.9880383    | 0.7968443    | not scorable | not scorable | not scorable | not scorable |
| #### Bn-Scaffold000104-p1229 napus specific                 | 0.9928229    | 0.8179718    | not scorable | not scorable | not scorable | not scorable |
| #### Bn-Scaffold000104-p1362 A-genome specific (napus-ropa) | 0.9665072    | 0.7966242    | not scorable | not scorable | 0.9669421    | 0.6953928    |
| #### Bn-Scaffold000104-p1377 A-genome specific (napus-ropa) | 1            | 0.8981851    | not scorable | not scorable | 0.9834711    | 0.7647284    |
| #### Bn-Scaffold000104-p1378 napus specific                 | 0.9952153    | 0.9292629    | not scorable | not scorable | not scorable | not scorable |
| #### Bn-Scaffold000104-p1379 all not scorable               | not scorable | not scorable | not scorable | not scorable | not scorable | not scorable |
| #### Bn-Scaffold000104-p1380 napus specific                 | 1            | 0.9138601    | not scorable | not scorable | not scorable | not scorable |
| #### Bn-Scaffold000104-p1419 napus specific                 | 0.9952153    | 0.9049768    | not scorable | not scorable | not scorable | not scorable |
| #### Bn-Scaffold000104-p1434 napus specific                 | 0.9832536    | 0.8640979    | not scorable | not scorable | not scorable | not scorable |
| #### Bn-Scaffold000104-p1438 A-genome specific (napus-ropa) | 1            | 0.8703493    | not scorable | not scorable | 0.9669421    | 0.7211893    |
| #### Bn-Scaffold000104-p1582 A-genome specific (napus-ropa) | 0.9952153    | 0.7484718    | not scorable | not scorable | 0.9752066    | 0.6913984    |
| #### Bn-Scaffold000104-p1584 napus specific                 | 0.9880383    | 0.8014899    | not scorable | not scorable | not scorable | not scorable |
| #### Bn-Scaffold000104-p1673 A-genome specific (napus-ropa) | 0.9976076    | 0.6214605    | not scorable | not scorable | 0.9834711    | 0.7732632    |
| #### Bn-Scaffold000104-p1737 A-genome specific (napus-ropa) | 0.9976076    | 0.8601324    | not scorable | not scorable | 1            | 0.7552019    |
| #### Bn-Scaffold000104-p1739 A-genome specific (napus-ropa) | 1            | 0.8119286    | not scorable | not scorable | 0.9917355    | 0.7146183    |
| #### Bn-Scaffold000104-p1742 A-genome specific (napus-ropa) | 0.9928229    | 0.7941777    | not scorable | not scorable | 1            | 0.839202     |
| #### Bn-Scaffold000104-p1749 A-genome specific (napus-ropa) | 1            | 0.8176668    | not scorable | not scorable | 1            | 0.7901885    |
| #### Bn-Scaffold000104-p1750 A-genome specific (napus-ropa) | 0.9952153    | 0.8234416    | not scorable | not scorable | 1            | 0.8699914    |
| #### Bn-Scaffold000104-p1767 A-genome specific (napus-ropa) | 0.9904306    | 0.8228866    | not scorable | not scorable | 0.9917355    | 0.9477357    |
| #### Bn-Scaffold000104-p1939 A-genome specific (napus-ropa) | 0.9856459    | 0.8234919    | not scorable | not scorable | 1            | 0.6800622    |
| #### Bn-Scaffold000104-p1990 A-genome specific (napus-ropa) | 0.9856459    | 0.8785859    | not scorable | not scorable | 0.9917355    | 0.7239165    |
| #### Bn-Scaffold000104-p1991 napus specific                 | 0.09808613   | 0.7858343    | not scorable | not scorable | not scorable | not scorable |
| #### Bn-Scaffold000104-p2020 genome unspecific (all in)     | 0.9952153    | 0.5098292    | 0.9844961    | 0.7572086    | 0.9752066    | 0.6910125    |
| #### Bn-Scaffold000104-p3376 genome unspecific (all in)     | 1            | 0.330243     |              | 1 0.6957834  | 1            | 0.7812278    |
| #### Bn-Scaffold000104-p4049 genome unspecific (all in)     | 0.923445     | 0.2653722    | 0.8914729    | 0.5635232    | 1            | 0.6777428    |

|                                                                 |              |              |              |   |              |              |              |
|-----------------------------------------------------------------|--------------|--------------|--------------|---|--------------|--------------|--------------|
| #### Bn-Scaffold000104-p5026 C-genome specific (napus-oleracea) | 0.9641148    | 0.4009536    |              | 1 | 0.7106301    | not scorable | not scorable |
| #### Bn-Scaffold000104-p5046 A-genome specific (napus-rapa)     | 1            | 0.7261082    | not scorable |   | not scorable | 1            | 0.651678     |
| #### Bn-Scaffold000104-p5048 A-genome specific (napus-rapa)     | 0.9688995    | 0.6881973    | not scorable |   | not scorable | 1            | 0.6912019    |
| #### Bn-Scaffold000104-p5052 A-genome specific (napus-rapa)     | 0.9832536    | 0.7878034    | not scorable |   | not scorable | 1            | 0.7189954    |
| #### Bn-Scaffold000104-p5080 A-genome specific (napus-rapa)     | 0.9569378    | 0.6626744    | not scorable |   | not scorable | 0.9752066    | 0.5772233    |
| #### Bn-Scaffold000104-p5141 genome unspecific (oleracea-rapa)  | not scorable | not scorable |              | 1 | 0.7266149    | 1            | 0.5156585    |
| #### Bn-Scaffold000104-p5237 A-genome specific (napus-rapa)     | 0.9665072    | 0.7947808    | not scorable |   | not scorable | 1            | 0.8584651    |
| #### Bn-Scaffold000104-p5238 A-genome specific (napus-rapa)     | 0.9641148    | 0.6331071    | not scorable |   | not scorable | 1            | 0.5927875    |
| #### Bn-Scaffold000104-p5238 A-genome specific (napus-rapa)     | 0.9712918    | 0.6721526    | not scorable |   | not scorable | 1            | 0.6871157    |
| #### Bn-Scaffold000104-p5463 genome unspecific (all in)         | 0.9665072    | 0.4673236    |              | 1 | 0.7195399    | 0.9917355    | 0.7849534    |
| #### Bn-Scaffold000104-p5630 A-genome specific (napus-rapa)     | 0.9880383    | 0.7544408    | not scorable |   | not scorable | 0.9917355    | 0.752816     |
| #### Bn-Scaffold000104-p6135 A-genome specific (napus-rapa)     | 0.9928229    | 0.7362159    | not scorable |   | not scorable | 1            | 0.7014166    |
| #### Bn-Scaffold000104-p6224 A-genome specific (napus-rapa)     | 0.9880383    | 0.7561147    | not scorable |   | not scorable | 0.9917355    | 0.7526091    |
| #### Bn-Scaffold000104-p6282 genome unspecific (all in)         | 0.9354067    | 0.5221992    | 0.9922481    |   | 0.7468982    | 1            | 0.7010086    |
| #### Bn-Scaffold000104-p8897 genome unspecific (all in)         | 1            | 0.6988534    | 0.9844961    |   | 0.672021     | 0.9834711    | 0.6617164    |
| #### Bn-Scaffold000104-p9856 A-genome specific (napus-rapa)     | 0.9688995    | 0.817844     | not scorable |   | not scorable | 0.9834711    | 0.7734912    |
| #### Bn-Scaffold000111-p1250 A-genome specific (napus-rapa)     | 0.9688995    | 0.5150936    | not scorable |   | not scorable | 0.9586777    | 0.7810639    |
| #### Bn-Scaffold000111-p1323 genome unspecific (all in)         | 1            | 0.6882268    | 0.9689922    |   | 0.2995621    | 1            | 0.5634651    |
| #### Bn-Scaffold000111-p2713 A-genome specific (napus-rapa)     | 0.9952153    | 0.8242159    | not scorable |   | not scorable | 1            | 0.8140982    |
| #### Bn-Scaffold000111-p3314 genome unspecific (all in)         | 0.9928229    | 0.7889       | 0.9767442    |   | 0.2281006    | 1            | 0.7622204    |
| #### Bn-Scaffold000111-p4059 genome unspecific (oleracea-rapa)  | not scorable | not scorable |              | 1 | 0.8130233    | 0.9586777    | 0.6986401    |
| #### Bn-Scaffold000111-p5010 A-genome specific (napus-rapa)     | 0.9952153    | 0.8608136    | not scorable |   | not scorable | 1            | 0.8848283    |
| #### Bn-Scaffold000123-p1057 A-genome specific (napus-rapa)     | 1            | 0.8281483    | not scorable |   | not scorable | 1            | 0.7714893    |
| #### Bn-Scaffold000123-p1058 A-genome specific (napus-rapa)     | 0.9904306    | 0.7823623    | not scorable |   | not scorable | 0.9917355    | 0.8509238    |
| #### Bn-Scaffold000123-p1075 A-genome specific (napus-rapa)     | 0.9904306    | 0.7741914    | not scorable |   | not scorable | 1            | 0.7576783    |
| #### Bn-Scaffold000123-p1126 genome unspecific (all in)         | 0.9784689    | 0.6598077    | 0.9844961    |   | 0.6714815    | 1            | 0.8244592    |
| #### Bn-Scaffold000123-p1140 A-genome specific (napus-rapa)     | 0.9928229    | 0.7258993    | not scorable |   | not scorable | 0.9917355    | 0.7583688    |
| #### Bn-Scaffold000123-p1141 A-genome specific (napus-rapa)     | 1            | 0.7740884    | not scorable |   | not scorable | 1            | 0.7487309    |
| #### Bn-Scaffold000123-p1142 A-genome specific (napus-rapa)     | 0.9976076    | 0.7658518    | not scorable |   | not scorable | 1            | 0.7997763    |
| #### Bn-Scaffold000123-p1226 A-genome specific (napus-rapa)     | 0.9976076    | 0.787617     | not scorable |   | not scorable | 0.9917355    | 0.8014797    |
| #### Bn-Scaffold000123-p1294 A-genome specific (napus-rapa)     | 0.9904306    | 0.7096455    | not scorable |   | not scorable | 0.9917355    | 0.7600396    |
| #### Bn-Scaffold000123-p1333 A-genome specific (napus-rapa)     | 0.8875598    | 0.7737154    | not scorable |   | not scorable | 0.9504132    | 0.7067898    |
| #### Bn-Scaffold000123-p1337 A-genome specific (napus-rapa)     | 0.861244     | 0.9314231    | not scorable |   | not scorable | 0.9834711    | 0.6720337    |



|                                                             |           |           |              |              |              |              |
|-------------------------------------------------------------|-----------|-----------|--------------|--------------|--------------|--------------|
| #### Bn-Scaffold000123-p1341 A-genome specific (napus-rapa) | 0.8899522 | 0.8019234 | not scorable | not scorable | 0.9834711    | 0.7094836    |
| #### Bn-Scaffold000123-p1348 A-genome specific (napus-rapa) | 0.8851675 | 0.772038  | not scorable | not scorable | 0.9917355    | 0.7626015    |
| #### Bn-Scaffold000123-p1349 A-genome specific (napus-rapa) | 0.8875598 | 0.7591313 | not scorable | not scorable | 1            | 0.7333506    |
| #### Bn-Scaffold000123-p1523 A-genome specific (napus-rapa) | 1         | 0.8729286 | not scorable | not scorable | 1            | 0.8436936    |
| #### Bn-Scaffold000123-p1524 A-genome specific (napus-rapa) | 1         | 0.8224904 | not scorable | not scorable | 0.9917355    | 0.7756845    |
| #### Bn-Scaffold000123-p1539 A-genome specific (napus-rapa) | 1         | 0.8152066 | not scorable | not scorable | 0.9917355    | 0.7929204    |
| #### Bn-Scaffold000123-p1556 A-genome specific (napus-rapa) | 0.9952153 | 0.7318001 | not scorable | not scorable | 0.9834711    | 0.8136122    |
| #### Bn-Scaffold000123-p1569 A-genome specific (napus-rapa) | 0.9976076 | 0.7898052 | not scorable | not scorable | 0.9834711    | 0.8394054    |
| #### Bn-Scaffold000123-p1669 A-genome specific (napus-rapa) | 0.9904306 | 0.7476723 | not scorable | not scorable | 1            | 0.8078766    |
| #### Bn-Scaffold000123-p1670 A-genome specific (napus-rapa) | 0.9904306 | 0.756163  | not scorable | not scorable | 1            | 0.6614617    |
| #### Bn-Scaffold000123-p1673 A-genome specific (napus-rapa) | 1         | 0.8422567 | not scorable | not scorable | 0.9917355    | 0.8058771    |
| #### Bn-Scaffold000123-p1677 A-genome specific (napus-rapa) | 0.9928229 | 0.7572418 | not scorable | not scorable | 0.9917355    | 0.7631526    |
| #### Bn-Scaffold000123-p1757 A-genome specific (napus-rapa) | 0.9880383 | 0.7803642 | not scorable | not scorable | 0.9834711    | 0.7343488    |
| #### Bn-Scaffold000123-p1829 A-genome specific (napus-rapa) | 0.9928229 | 0.387598  | not scorable | not scorable | 0.9917355    | 0.7227722    |
| #### Bn-Scaffold000123-p1860 A-genome specific (napus-rapa) | 0.9976076 | 0.8513039 | not scorable | not scorable | 0.9834711    | 0.806761     |
| #### Bn-Scaffold000123-p2002 A-genome specific (napus-rapa) | 0.9952153 | 0.7760293 | not scorable | not scorable | 0.9917355    | 0.8715416    |
| #### Bn-Scaffold000123-p2029 genome unspecific (all in)     | 0.9688995 | 0.7470769 | 0.9069768    | 0.7180867    | 1            | 0.6902728    |
| #### Bn-Scaffold000123-p2050 A-genome specific (napus-rapa) | 1         | 0.7956833 | not scorable | not scorable | 0.9917355    | 0.744391     |
| #### Bn-Scaffold000123-p2052 napus specific                 | 0.8851675 | 0.6626899 | not scorable | not scorable | not scorable | not scorable |
| #### Bn-Scaffold000123-p2054 A-genome specific (napus-rapa) | 0.9904306 | 0.7406502 | not scorable | not scorable | 1            | 0.7418739    |
| #### Bn-Scaffold000123-p2056 A-genome specific (napus-rapa) | 0.9904306 | 0.6736308 | not scorable | not scorable | 0.9834711    | 0.7362923    |
| #### Bn-Scaffold000123-p2056 A-genome specific (napus-rapa) | 0.9904306 | 0.7995034 | not scorable | not scorable | 1            | 0.7626317    |
| #### Bn-Scaffold000123-p2067 A-genome specific (napus-rapa) | 1         | 0.8334451 | not scorable | not scorable | 0.9917355    | 0.7969635    |
| #### Bn-Scaffold000123-p2070 A-genome specific (napus-rapa) | 1         | 0.7471638 | not scorable | not scorable | 0.9834711    | 0.6745117    |
| #### Bn-Scaffold000123-p2071 A-genome specific (napus-rapa) | 0.9736842 | 0.744987  | not scorable | not scorable | 0.9917355    | 0.8036829    |
| #### Bn-Scaffold000123-p2073 A-genome specific (napus-rapa) | 0.9904306 | 0.7023045 | not scorable | not scorable | 1            | 0.8224075    |
| #### Bn-Scaffold000123-p2093 A-genome specific (napus-rapa) | 1         | 0.8754983 | not scorable | not scorable | 0.9669421    | 0.7444043    |
| #### Bn-Scaffold000123-p2098 A-genome specific (napus-rapa) | 1         | 0.8660309 | not scorable | not scorable | 0.9917355    | 0.8047678    |
| #### Bn-Scaffold000123-p2109 A-genome specific (napus-rapa) | 1         | 0.8568243 | not scorable | not scorable | 0.9834711    | 0.798973     |
| #### Bn-Scaffold000123-p2118 A-genome specific (napus-rapa) | 0.9928229 | 0.7953948 | not scorable | not scorable | 1            | 0.7469972    |
| #### Bn-Scaffold000123-p2125 A-genome specific (napus-rapa) | 0.9832536 | 0.8012775 | not scorable | not scorable | 1            | 0.8180096    |
| #### Bn-Scaffold000123-p2146 A-genome specific (napus-rapa) | 1         | 0.8385462 | not scorable | not scorable | 0.9834711    | 0.7880636    |
| #### Bn-Scaffold000123-p2193 A-genome specific (napus-rapa) | 0.9928229 | 0.8597986 | not scorable | not scorable | 0.9586777    | 0.7329819    |

|                                                                |              |              |              |              |           |           |
|----------------------------------------------------------------|--------------|--------------|--------------|--------------|-----------|-----------|
| #### Bn-Scaffold000123-p2253 A-genome specific (napus-rapa)    | 0.8803828    | 0.8129083    | not scorable | not scorable | 0.9917355 | 0.7870846 |
| #### Bn-Scaffold000123-p2268 A-genome specific (rapa only)     | not scorable | not scorable | not scorable | not scorable | 0.9917355 | 0.7578821 |
| #### Bn-Scaffold000123-p2383 A-genome specific (napus-rapa)    | 0.9856459    | 0.6973212    | not scorable | not scorable | 1         | 0.8592312 |
| #### Bn-Scaffold000123-p2420 A-genome specific (napus-rapa)    | 0.8803828    | 0.8141424    | not scorable | not scorable | 0.9917355 | 0.8087262 |
| #### Bn-Scaffold000123-p2473 A-genome specific (napus-rapa)    | 1            | 0.8265594    | not scorable | not scorable | 0.9669421 | 0.7608554 |
| #### Bn-Scaffold000123-p2526 A-genome specific (napus-rapa)    | 0.9832536    | 0.7517555    | not scorable | not scorable | 0.9917355 | 0.8628167 |
| #### Bn-Scaffold000123-p2530 A-genome specific (napus-rapa)    | 1            | 0.7473424    | not scorable | not scorable | 0.9752066 | 0.6731386 |
| #### Bn-Scaffold000123-p2531 A-genome specific (napus-rapa)    | 0.9976076    | 0.6672418    | not scorable | not scorable | 0.9834711 | 0.6046469 |
| #### Bn-Scaffold000123-p2533 A-genome specific (napus-rapa)    | 1            | 0.7568132    | not scorable | not scorable | 0.9834711 | 0.7139744 |
| #### Bn-Scaffold000123-p2535 A-genome specific (napus-rapa)    | 1            | 0.7756447    | not scorable | not scorable | 0.9917355 | 0.6714296 |
| #### Bn-Scaffold000123-p2537 A-genome specific (napus-rapa)    | 0.9976076    | 0.7405313    | not scorable | not scorable | 0.9917355 | 0.6850112 |
| #### Bn-Scaffold000123-p2540 A-genome specific (napus-rapa)    | 1            | 0.8275443    | not scorable | not scorable | 1         | 0.7687226 |
| #### Bn-Scaffold000123-p2545 A-genome specific (napus-rapa)    | 1            | 0.6755278    | not scorable | not scorable | 0.9752066 | 0.6639594 |
| #### Bn-Scaffold000123-p2576 A-genome specific (napus-rapa)    | 0.9880383    | 0.7654794    | not scorable | not scorable | 1         | 0.7863019 |
| #### Bn-Scaffold000123-p2629 A-genome specific (napus-rapa)    | 0.9928229    | 0.7188914    | not scorable | not scorable | 0.9421487 | 0.6689491 |
| #### Bn-Scaffold000123-p2633 A-genome specific (napus-rapa)    | 0.9856459    | 0.7992133    | not scorable | not scorable | 1         | 0.8109261 |
| #### Bn-Scaffold000123-p2771 A-genome specific (napus-rapa)    | 0.9736842    | 0.7714059    | not scorable | not scorable | 1         | 0.7735301 |
| #### Bn-Scaffold000123-p2874 genome unspecific (oleracea-rapa) | not scorable | not scorable | 0.9922481    | 0.6450537    | 0.9752066 | 0.7252899 |
| #### Bn-Scaffold000123-p2954 A-genome specific (napus-rapa)    | 1            | 0.7804956    | not scorable | not scorable | 0.9917355 | 0.7509944 |
| #### Bn-Scaffold000123-p2975 A-genome specific (napus-rapa)    | 0.9952153    | 0.8587025    | not scorable | not scorable | 0.9834711 | 0.8134261 |
| #### Bn-Scaffold000123-p3012 A-genome specific (napus-rapa)    | 1            | 0.8214102    | not scorable | not scorable | 0.9917355 | 0.7456536 |
| #### Bn-Scaffold000123-p3013 A-genome specific (napus-rapa)    | 0.9976076    | 0.5194288    | not scorable | not scorable | 0.9669421 | 0.6867138 |
| #### Bn-Scaffold000123-p3033 A-genome specific (napus-rapa)    | 0.9856459    | 0.7864825    | not scorable | not scorable | 1         | 0.7744451 |
| #### Bn-Scaffold000123-p3050 A-genome specific (napus-rapa)    | 0.9976076    | 0.7876649    | not scorable | not scorable | 1         | 0.8369856 |
| #### Bn-Scaffold000123-p3057 A-genome specific (napus-rapa)    | 0.9760765    | 0.6983707    | not scorable | not scorable | 1         | 0.7729509 |
| #### Bn-Scaffold000123-p3090 A-genome specific (napus-rapa)    | 0.9976076    | 0.7571489    | not scorable | not scorable | 0.9669421 | 0.6977757 |
| #### Bn-Scaffold000123-p3181 A-genome specific (napus-rapa)    | 0.9808612    | 0.738867     | not scorable | not scorable | 0.9917355 | 0.7517265 |
| #### Bn-Scaffold000123-p3309 A-genome specific (napus-rapa)    | 1            | 0.8755466    | not scorable | not scorable | 0.9917355 | 0.8395991 |
| #### Bn-Scaffold000123-p3359 A-genome specific (napus-rapa)    | 1            | 0.8709967    | not scorable | not scorable | 0.9834711 | 0.7802339 |
| #### Bn-Scaffold000123-p3366 A-genome specific (napus-rapa)    | 0.9952153    | 0.7888513    | not scorable | not scorable | 1         | 0.6770139 |
| #### Bn-Scaffold000123-p3389 A-genome specific (napus-rapa)    | 0.9856459    | 0.692512     | not scorable | not scorable | 0.9917355 | 0.6637701 |
| #### Bn-Scaffold000123-p3401 A-genome specific (napus-rapa)    | 0.9976076    | 0.8794299    | not scorable | not scorable | 0.9752066 | 0.7315513 |
| #### Bn-Scaffold000123-p3414 A-genome specific (napus-rapa)    | 0.9976076    | 0.8183551    | not scorable | not scorable | 0.9917355 | 0.7295038 |

|                                                             |              |              |              |              |              |              |           |
|-------------------------------------------------------------|--------------|--------------|--------------|--------------|--------------|--------------|-----------|
| #### Bn-Scaffold000123-p3435 A-genome specific (napus-rapa) | 1            | 0.7719779    | not scorable | not scorable | 1            | 0.7774559    |           |
| #### Bn-Scaffold000123-p3442 A-genome specific (napus-rapa) | 0.9976076    | 0.7490933    | not scorable | not scorable | 1            | 0.7697597    |           |
| #### Bn-Scaffold000123-p3448 A-genome specific (napus-rapa) | 0.9976076    | 0.7615884    | not scorable | not scorable | 1            | 0.8091611    |           |
| #### Bn-Scaffold000123-p3558 A-genome specific (napus-rapa) | 1            | 0.788646     | not scorable | not scorable | 0.9917355    | 0.8060756    |           |
| #### Bn-Scaffold000123-p3630 A-genome specific (napus-rapa) | 1            | 0.8227632    | not scorable | not scorable | 1            | 0.8378905    |           |
| #### Bn-Scaffold000123-p3659 napus specific                 | 0.9066986    | 0.8443962    | not scorable | not scorable | not scorable | not scorable |           |
| #### Bn-Scaffold000123-p3737 A-genome specific (napus-rapa) | 1            | 0.8407325    | not scorable | not scorable | 0.9752066    | 0.7367848    |           |
| #### Bn-Scaffold000123-p3783 A-genome specific (napus-rapa) | 0.9952153    | 0.7970756    | not scorable | not scorable | 0.9752066    | 0.7582148    |           |
| #### Bn-Scaffold000123-p3852 A-genome specific (napus-rapa) | 1            | 0.8795602    | not scorable | not scorable | 1            | 0.9175813    |           |
| #### Bn-Scaffold000123-p3877 A-genome specific (rapa only)  | not scorable | not scorable | not scorable | not scorable | 1            | 0.786476     |           |
| #### Bn-Scaffold000123-p4031 A-genome specific (napus-rapa) | 0.9928229    | 0.5758685    | not scorable | not scorable | 0.9834711    | 0.7532995    |           |
| #### Bn-Scaffold000123-p4033 A-genome specific (napus-rapa) | 1            | 0.8451315    | not scorable | not scorable | 1            | 0.8338223    |           |
| #### Bn-Scaffold000123-p4051 A-genome specific (napus-rapa) | 1            | 0.7899991    | not scorable | not scorable | 0.9917355    | 0.765526     |           |
| #### Bn-Scaffold000123-p4052 A-genome specific (napus-rapa) | 1            | 0.7976261    | not scorable | not scorable | 0.9917355    | 0.7664625    |           |
| #### Bn-Scaffold000123-p4054 A-genome specific (napus-rapa) | 0.9976076    | 0.8316491    | not scorable | not scorable | 0.9834711    | 0.81335      |           |
| #### Bn-Scaffold000123-p4056 A-genome specific (napus-rapa) | 1            | 0.8134252    | not scorable | not scorable | 0.9669421    | 0.7815104    |           |
| #### Bn-Scaffold000123-p4061 A-genome specific (napus-rapa) | 0.9832536    | 0.7608589    | not scorable | not scorable | 1            | 0.6865997    |           |
| #### Bn-Scaffold000123-p4072 A-genome specific (napus-rapa) | 1            | 0.8561086    | not scorable | not scorable | 0.9917355    | 0.7993811    |           |
| #### Bn-Scaffold000123-p4186 A-genome specific (napus-rapa) | 0.9976076    | 0.7470607    | not scorable | not scorable | 1            | 0.7923581    |           |
| #### Bn-Scaffold000123-p4242 A-genome specific (napus-rapa) | 1            | 0.7746814    | not scorable | not scorable | 0.9834711    | 0.7043709    |           |
| #### Bn-Scaffold000123-p4242 A-genome specific (napus-rapa) | 1            | 0.7476146    | not scorable | not scorable | 1            | 0.7127202    |           |
| #### Bn-Scaffold000123-p4246 A-genome specific (napus-rapa) | 0.9976076    | 0.8424706    | not scorable | not scorable | 0.9752066    | 0.7736049    |           |
| #### Bn-Scaffold000123-p4247 A-genome specific (napus-rapa) | 0.9976076    | 0.7893864    | not scorable | not scorable | 0.9917355    | 0.7316833    |           |
| #### Bn-Scaffold000123-p4247 A-genome specific (napus-rapa) | 1            | 0.7101038    | not scorable | not scorable | 0.9917355    | 0.6534077    |           |
| #### Bn-Scaffold000123-p4249 A-genome specific (napus-rapa) | 0.9976076    | 0.7646528    | not scorable | not scorable | 0.9752066    | 0.6805297    |           |
| #### Bn-Scaffold000123-p4252 A-genome specific (napus-rapa) | 1            | 0.7877436    | not scorable | not scorable | 0.9917355    | 0.6514717    |           |
| #### Bn-Scaffold000123-p4254 A-genome specific (napus-rapa) | 1            | 0.7278121    | not scorable | not scorable | 0.9917355    | 0.6724114    |           |
| #### Bn-Scaffold000123-p4255 A-genome specific (napus-rapa) | 1            | 0.834133     | not scorable | not scorable | 0.9917355    | 0.8065864    |           |
| #### Bn-Scaffold000123-p4261 A-genome specific (napus-rapa) | 1            | 0.8585076    | not scorable | not scorable | 0.9917355    | 0.8004673    |           |
| #### Bn-Scaffold000123-p4264 A-genome specific (napus-rapa) | 1            | 0.778332     | not scorable | not scorable | 0.9752066    | 0.7960114    |           |
| #### Bn-Scaffold000123-p4303 A-genome specific (napus-rapa) | 0.9976076    | 0.7632949    | not scorable | not scorable | 0.9008265    | 0.6853701    |           |
| #### Bn-Scaffold000123-p4315 all not scorable               | not scorable | not scorable | not scorable | not scorable | not scorable | not scorable |           |
| #### Bn-Scaffold000123-p4390 genome unspecific (all in)     | 1            | 0.6590165    |              | 1            | 0.8730065    | 1            | 0.7841119 |

|                                                             |           |           |              |              |              |              |
|-------------------------------------------------------------|-----------|-----------|--------------|--------------|--------------|--------------|
| #### Bn-Scaffold000123-p4403 A-genome specific (napus-rapa) | 1         | 0.8482987 | not scorable | not scorable | 0.9834711    | 0.8337184    |
| #### Bn-Scaffold000123-p4404 A-genome specific (napus-rapa) | 1         | 0.828534  | not scorable | not scorable | 0.9917355    | 0.8113538    |
| #### Bn-Scaffold000123-p4405 A-genome specific (napus-rapa) | 1         | 0.8381189 | not scorable | not scorable | 0.9752066    | 0.7740898    |
| #### Bn-Scaffold000123-p4440 A-genome specific (napus-rapa) | 0.9952153 | 0.7683113 | not scorable | not scorable | 0.9917355    | 0.6894671    |
| #### Bn-Scaffold000123-p4466 A-genome specific (napus-rapa) | 1         | 0.8084637 | not scorable | not scorable | 0.9834711    | 0.7171257    |
| #### Bn-Scaffold000123-p4477 A-genome specific (napus-rapa) | 1         | 0.881908  | not scorable | not scorable | 1            | 0.7501816    |
| #### Bn-Scaffold000123-p4671 A-genome specific (napus-rapa) | 1         | 0.7768261 | not scorable | not scorable | 0.9834711    | 0.7248943    |
| #### Bn-Scaffold000123-p4683 A-genome specific (napus-rapa) | 1         | 0.8694391 | not scorable | not scorable | 0.9669421    | 0.8136466    |
| #### Bn-Scaffold000123-p4685 A-genome specific (napus-rapa) | 1         | 0.845144  | not scorable | not scorable | 1            | 0.8188089    |
| #### Bn-Scaffold000123-p4686 A-genome specific (napus-rapa) | 1         | 0.8542516 | not scorable | not scorable | 1            | 0.8253718    |
| #### Bn-Scaffold000123-p4687 A-genome specific (napus-rapa) | 0.9952153 | 0.8016517 | not scorable | not scorable | 1            | 0.7476743    |
| #### Bn-Scaffold000123-p4688 A-genome specific (napus-rapa) | 0.9928229 | 0.7705263 | not scorable | not scorable | 0.9421487    | 0.705177     |
| #### Bn-Scaffold000123-p4696 A-genome specific (napus-rapa) | 1         | 0.8609042 | not scorable | not scorable | 0.9917355    | 0.8020387    |
| #### Bn-Scaffold000123-p4709 A-genome specific (napus-rapa) | 1         | 0.8136806 | not scorable | not scorable | 1            | 0.8061729    |
| #### Bn-Scaffold000123-p4718 A-genome specific (napus-rapa) | 1         | 0.8623722 | not scorable | not scorable | 0.9917355    | 0.7764269    |
| #### Bn-Scaffold000123-p4724 A-genome specific (napus-rapa) | 0.9976076 | 0.8502814 | not scorable | not scorable | 1            | 0.7690236    |
| #### Bn-Scaffold000123-p4725 A-genome specific (napus-rapa) | 0.9952153 | 0.7769158 | not scorable | not scorable | 0.9917355    | 0.7683903    |
| #### Bn-Scaffold000123-p4727 A-genome specific (napus-rapa) | 1         | 0.8119851 | not scorable | not scorable | 0.9752066    | 0.7416249    |
| #### Bn-Scaffold000123-p4727 A-genome specific (napus-rapa) | 1         | 0.5803967 | not scorable | not scorable | 0.9834711    | 0.4680606    |
| #### Bn-Scaffold000123-p4736 A-genome specific (napus-rapa) | 1         | 0.8009535 | not scorable | not scorable | 0.9917355    | 0.7483189    |
| #### Bn-Scaffold000123-p4737 A-genome specific (napus-rapa) | 1         | 0.8654323 | not scorable | not scorable | 0.9834711    | 0.7129785    |
| #### Bn-Scaffold000123-p4758 A-genome specific (napus-rapa) | 1         | 0.8791802 | not scorable | not scorable | 0.9669421    | 0.8506505    |
| #### Bn-Scaffold000123-p4760 A-genome specific (napus-rapa) | 1         | 0.6584325 | not scorable | not scorable | 0.9586777    | 0.56067      |
| #### Bn-Scaffold000123-p4814 A-genome specific (napus-rapa) | 1         | 0.7574499 | not scorable | not scorable | 0.9752066    | 0.7413921    |
| #### Bn-Scaffold000123-p4998 A-genome specific (napus-rapa) | 0.9976076 | 0.7226237 | not scorable | not scorable | 0.9834711    | 0.4715799    |
| #### Bn-Scaffold000123-p5052 genome unspecific (all in)     | 0.9976076 | 0.4389346 |              | 1 0.6573632  | 0.9834711    | 0.701187     |
| #### Bn-Scaffold000123-p5061 A-genome specific (napus-rapa) | 1         | 0.8189927 | not scorable | not scorable | 0.9917355    | 0.7143952    |
| #### Bn-Scaffold000123-p5062 A-genome specific (napus-rapa) | 0.9952153 | 0.6838176 | not scorable | not scorable | 1            | 0.6293302    |
| #### Bn-Scaffold000123-p5111 A-genome specific (napus-rapa) | 0.9976076 | 0.7191886 | not scorable | not scorable | 1            | 0.647914     |
| #### Bn-Scaffold000123-p5192 A-genome specific (napus-rapa) | 0.9952153 | 0.7642003 | not scorable | not scorable | 0.9917355    | 0.7806969    |
| #### Bn-Scaffold000123-p5194 napus specific                 | 0.6842105 | 0.817509  | not scorable | not scorable | not scorable | not scorable |
| #### Bn-Scaffold000123-p5216 A-genome specific (napus-rapa) | 0.9641148 | 0.8327107 | not scorable | not scorable | 0.9586777    | 0.7000858    |
| #### Bn-Scaffold000123-p5226 A-genome specific (napus-rapa) | 1         | 0.8870038 | not scorable | not scorable | 1            | 0.758045     |

|                                                                 |              |              |              |              |              |              |
|-----------------------------------------------------------------|--------------|--------------|--------------|--------------|--------------|--------------|
| #### Bn-Scaffold000123-p5227 A-genome specific (napus-rapa)     | 0.9976076    | 0.701055     | not scorable | not scorable | 1            | 0.7629906    |
| #### Bn-Scaffold000123-p5714 genome unspecific (all in)         | 0.9904306    | 0.540019     |              | 1            | 0.7433112    | 0.9917355    |
| #### Bn-Scaffold000123-p5878 A-genome specific (napus-rapa)     | 0.9832536    | 0.6837384    | not scorable | not scorable | 1            | 0.7601305    |
| #### Bn-Scaffold000123-p5964 all not scorable                   | not scorable | not scorable | not scorable | not scorable | not scorable | not scorable |
| #### Bn-Scaffold000123-p6005 napus specific                     | 0.9976076    | 0.9104155    | not scorable | not scorable | not scorable | not scorable |
| #### Bn-Scaffold000123-p6239 A-genome specific (napus-rapa)     | 0.9952153    | 0.8169266    | not scorable | not scorable | 1            | 0.6999747    |
| #### Bn-Scaffold000123-p6550 A-genome specific (napus-rapa)     | 1            | 0.9129047    | not scorable | not scorable | 0.9752066    | 0.7029361    |
| #### Bn-Scaffold000123-p7028 A-genome specific (napus-rapa)     | 0.9976076    | 0.7867963    | not scorable | not scorable | 1            | 0.7442015    |
| #### Bn-Scaffold000123-p7167 A-genome specific (napus-rapa)     | 0.9952153    | 0.8015736    | not scorable | not scorable | 0.9917355    | 0.8192098    |
| #### Bn-Scaffold000123-p8532 genome unspecific (oleracea-rapa)  | not scorable | not scorable |              | 1            | 0.5872382    | 0.8512397    |
| #### Bn-Scaffold000123-p8540 A-genome specific (napus-rapa)     | 0.9784689    | 0.6817737    | not scorable | not scorable | 0.9834711    | 0.6601005    |
| #### Bn-Scaffold000123-p8605 A-genome specific (napus-rapa)     | 0.9880383    | 0.6597728    | not scorable | not scorable | 1            | 0.7027817    |
| #### Bn-Scaffold000123-p8664 A-genome specific (napus-rapa)     | 0.9976076    | 0.8386941    | not scorable | not scorable | 0.9834711    | 0.7384272    |
| #### Bn-Scaffold000123-p8696 A-genome specific (napus-rapa)     | 0.9904306    | 0.8279961    | not scorable | not scorable | 0.9421487    | 0.6747283    |
| #### Bn-Scaffold000123-p8734 A-genome specific (napus-rapa)     | 0.9952153    | 0.7626158    | not scorable | not scorable | 1            | 0.8522878    |
| #### Bn-Scaffold000123-p8903 A-genome specific (napus-rapa)     | 0.9976076    | 0.7733359    | not scorable | not scorable | 0.9834711    | 0.6916021    |
| #### Bn-Scaffold000123-p8980 A-genome specific (napus-rapa)     | 1            | 0.6523141    | not scorable | not scorable | 0.9917355    | 0.574296     |
| #### Bn-Scaffold000123-p9222 A-genome specific (napus-rapa)     | 0.9808612    | 0.8520346    | not scorable | not scorable | 0.9917355    | 0.7817363    |
| #### Bn-Scaffold000123-p9413 A-genome specific (napus-rapa)     | 0.8803828    | 0.7091147    | not scorable | not scorable | 0.9917355    | 0.7201299    |
| #### Bn-Scaffold000123-p9628 A-genome specific (napus-rapa)     | 0.9952153    | 0.814975     | not scorable | not scorable | 0.9834711    | 0.8170379    |
| #### Bn-Scaffold000140-p3107 A-genome specific (napus-rapa)     | 0.9904306    | 0.8042436    | not scorable | not scorable | 0.9917355    | 0.7151737    |
| #### Bn-Scaffold000140-p4437 genome unspecific (all in)         | 1            | 0.6784759    |              | 1            | 0.6963184    | 0.9917355    |
| #### Bn-Scaffold000141-p1325 napus specific                     | 0.9808612    | 0.8502631    | not scorable | not scorable | not scorable | not scorable |
| #### Bn-Scaffold000141-p1985 genome unspecific (all in)         | 0.9665072    | 0.5406125    | 0.9922481    | 0.6674691    | 0.9917355    | 0.7792766    |
| #### Bn-Scaffold000141-p2014 A-genome specific (rapa only)      | not scorable | not scorable | not scorable | not scorable | 0.9917355    | 0.7481557    |
| #### Bn-Scaffold000141-p3971 A-genome specific (napus-rapa)     | 0.9617225    | 0.669276     | not scorable | not scorable | 1            | 0.8016282    |
| #### Bn-Scaffold000149-p1217 genome unspecific (all in)         | 0.8851675    | 0.7711571    | 0.7674419    | 0.823639     | 0.9917355    | 0.8010151    |
| #### Bn-Scaffold000149-p1310 genome unspecific (all in)         | 0.9784689    | 0.673361     | 0.9922481    | 0.7565868    | 1            | 0.8844461    |
| #### Bn-Scaffold000149-p1716 C-genome specific (napus-oleracea) | 0.9976076    | 0.839668     |              | 1            | 0.5883644    | not scorable |
| #### Bn-Scaffold000149-p1886 A-genome specific (napus-rapa)     | 0.9569378    | 0.8010036    | not scorable | not scorable | 1            | 0.832688     |
| #### Bn-Scaffold000149-p2697 A-genome specific (napus-rapa)     | 1            | 0.8410578    | not scorable | not scorable | 0.9917355    | 0.864331     |
| #### Bn-Scaffold000149-p3229 genome unspecific (all in)         | 1            | 0.4029883    |              | 1            | 0.5964914    | 1            |
| #### Bn-Scaffold000149-p3458 A-genome specific (napus-rapa)     | 1            | 0.7453856    | not scorable | not scorable | 1            | 0.8944206    |

|                                                                 |              |              |              |              |              |              |
|-----------------------------------------------------------------|--------------|--------------|--------------|--------------|--------------|--------------|
| #### Bn-Scaffold000149-p3716 A-genome specific (napus-rapa)     | 1            | 0.8694528    | not scorable | not scorable | 1            | 0.7442306    |
| #### Bn-Scaffold000149-p5428 genome unspecific (all in)         | 1            | 0.5915251    |              | 1 0.5838428  | 1            | 0.6180222    |
| #### Bn-Scaffold000155-p1619 genome unspecific (all in)         | 1            | 0.7161461    |              | 1 0.6634675  | 1            | 0.7669629    |
| #### Bn-Scaffold000155-p2643 genome unspecific (all in)         | 1            | 0.6654887    |              | 1 0.6493671  | 1            | 0.7770717    |
| #### Bn-Scaffold000155-p3534 A-genome specific (napus-rapa)     | 0.9856459    | 0.697261     | not scorable | not scorable | 1            | 0.8135551    |
| #### Bn-Scaffold000155-p3665 genome unspecific (all in)         | 1            | 0.5464029    | 0.9379845    | 0.1839335    | 1            | 0.5732226    |
| #### Bn-Scaffold000157-p1145 genome unspecific (all in)         | 1            | 0.7127789    |              | 1 0.7355666  | 1            | 0.8207097    |
| #### Bn-Scaffold000157-p1150 genome unspecific (all in)         | 1            | 0.7269822    | 0.9922481    | 0.6299345    | 1            | 0.9175813    |
| #### Bn-Scaffold000157-p1224 A-genome specific (napus-rapa)     | 0.9545454    | 0.8613522    | not scorable | not scorable | 0.9917355    | 0.7414618    |
| #### Bn-Scaffold000157-p1624 genome unspecific (all in)         | 0.9976076    | 0.6100494    |              | 1 0.6263087  | 1            | 0.6885806    |
| #### Bn-Scaffold000157-p1784 genome unspecific (oleracea-rapa)  | not scorable | not scorable | 0.9767442    | 0.2530375    | 1            | 0.844838     |
| #### Bn-Scaffold000157-p9175 A-genome specific (napus-rapa)     | 0.9904306    | 0.7774039    | not scorable | not scorable | 1            | 0.7315398    |
| #### Bn-Scaffold000162-p1173 genome unspecific (oleracea-rapa)  | not scorable | not scorable |              | 1 0.6695817  | 1            | 0.842876     |
| #### Bn-Scaffold000162-p1693 genome unspecific (all in)         | 0.9976076    | 0.791416     | 0.9302326    | 0.6026212    | 1            | 0.8699284    |
| #### Bn-Scaffold000162-p2499 A-genome specific (napus-rapa)     | 1            | 0.8332126    | not scorable | not scorable | 1            | 0.8848283    |
| #### Bn-Scaffold000162-p3205 genome unspecific (all in)         | 0.9712918    | 0.68144      | 0.9922481    | 0.8264866    | 1            | 0.8136461    |
| #### Bn-Scaffold000162-p3209 A-genome specific (napus-rapa)     | 0.9952153    | 0.7898132    | not scorable | not scorable | 1            | 0.889268     |
| #### Bn-Scaffold000164-p1111 C-genome specific (napus-oleracea) | 0.9354067    | 0.7976701    |              | 0 0.8587047  | not scorable | not scorable |
| #### Bn-Scaffold000164-p1204 A-genome specific (napus-rapa)     | 0.9760765    | 0.6692497    | not scorable | not scorable | 0.9669421    | 0.6484635    |
| #### Bn-Scaffold000164-p1235 genome unspecific (all in)         | 0.9736842    | 0.336082     |              | 1 0.6198273  | 1            | 0.7528113    |
| #### Bn-Scaffold000164-p1339 A-genome specific (napus-rapa)     | 0.9784689    | 0.7041824    | not scorable | not scorable | 0.9834711    | 0.7298581    |
| #### Bn-Scaffold000164-p1585 genome unspecific (all in)         | 0.9880383    | 0.6583862    | 0.7286822    | 0.5867697    | 0.9834711    | 0.6877586    |
| #### Bn-Scaffold000164-p1604 A-genome specific (rapa only)      | not scorable | not scorable | not scorable | not scorable | 0.9834711    | 0.8086471    |
| #### Bn-Scaffold000164-p1745 genome unspecific (all in)         | 0.9425837    | 0.7012526    |              | 1 0.8183283  | 0.9917355    | 0.7880023    |
| #### Bn-Scaffold000164-p1787 genome unspecific (all in)         | 0.9712918    | 0.6897377    |              | 1 0.8175032  | 0.9669421    | 0.6073736    |
| #### Bn-Scaffold000164-p1922 genome unspecific (all in)         | 0.9712918    | 0.5466494    |              | 1 0.8187895  | 1            | 0.6643252    |
| #### Bn-Scaffold000164-p1927 A-genome specific (napus-rapa)     | 0.9665072    | 0.8321344    | not scorable | not scorable | 1            | 0.8364227    |
| #### Bn-Scaffold000164-p1956 A-genome specific (napus-rapa)     | 0.9856459    | 0.6753186    | not scorable | not scorable | 1            | 0.681638     |
| #### Bn-Scaffold000164-p1962 A-genome specific (napus-rapa)     | 0.9521531    | 0.7837605    | not scorable | not scorable | 0.9917355    | 0.8526226    |
| #### Bn-Scaffold000164-p1962 A-genome specific (napus-rapa)     | 0.9354067    | 0.7587707    | not scorable | not scorable | 0.9917355    | 0.781307     |
| #### Bn-Scaffold000164-p1965 A-genome specific (rapa only)      | not scorable | not scorable | not scorable | not scorable | 1            | 0.7045447    |
| #### Bn-Scaffold000164-p2324 genome unspecific (all in)         | 0.9521531    | 0.4625657    |              | 1 0.8234106  | 1            | 0.7590866    |
| #### Bn-Scaffold000164-p2424 genome unspecific (all in)         | 0.9593301    | 0.3718684    |              | 1 0.8737478  | 1            | 0.8453748    |

|                                                             |              |              |              |              |              |              |
|-------------------------------------------------------------|--------------|--------------|--------------|--------------|--------------|--------------|
| #### Bn-Scaffold000164-p2438 A-genome specific (napus-rapa) | 0.9593301    | 0.7924657    | not scorable | not scorable | 1            | 0.8733171    |
| #### Bn-Scaffold000164-p2446 A-genome specific (napus-rapa) | 0.9832536    | 0.871766     | not scorable | not scorable | 1            | 0.8652089    |
| #### Bn-Scaffold000164-p2446 A-genome specific (napus-rapa) | 0.9808612    | 0.8752489    | not scorable | not scorable | 1            | 0.782461     |
| #### Bn-Scaffold000164-p2447 A-genome specific (napus-rapa) | 0.9832536    | 0.9440131    | not scorable | not scorable | 0.9834711    | 0.7257732    |
| #### Bn-Scaffold000164-p2477 A-genome specific (napus-rapa) | 0.9760765    | 0.8705837    | not scorable | not scorable | 0.9917355    | 0.7866898    |
| #### Bn-Scaffold000164-p2613 all not scorable               | not scorable | not scorable | not scorable | not scorable | not scorable | not scorable |
| #### Bn-Scaffold000164-p2628 A-genome specific (napus-rapa) | 0.9856459    | 0.6691793    | not scorable | not scorable | 1            | 0.8098831    |
| #### Bn-Scaffold000164-p2675 A-genome specific (napus-rapa) | 0.9593301    | 0.7856064    | not scorable | not scorable | 0.9917355    | 0.7453191    |
| #### Bn-Scaffold000164-p2710 all not scorable               | not scorable | not scorable | not scorable | not scorable | not scorable | not scorable |
| #### Bn-Scaffold000164-p2830 A-genome specific (napus-rapa) | 0.9569378    | 0.7620645    | not scorable | not scorable | 1            | 0.7844173    |
| #### Bn-Scaffold000164-p2839 A-genome specific (napus-rapa) | 0.9330143    | 0.8995502    | not scorable | not scorable | 0.6280992    | 0.8204865    |
| #### Bn-Scaffold000164-p3001 A-genome specific (napus-rapa) | 0.9760765    | 0.8838637    | not scorable | not scorable | 1            | 0.8190761    |
| #### Bn-Scaffold000164-p3002 A-genome specific (napus-rapa) | 0.9569378    | 0.7517102    | not scorable | not scorable | 0.9834711    | 0.8223111    |
| #### Bn-Scaffold000164-p3008 A-genome specific (napus-rapa) | 0.9952153    | 0.7509954    | not scorable | not scorable | 0.9917355    | 0.7252104    |
| #### Bn-Scaffold000164-p3010 genome unspecific (all in)     | 1            | 0.7550011    | 1            | 0.5376132    | 1            | 0.6465631    |
| #### Bn-Scaffold000164-p3100 genome unspecific (all in)     | 0.9904306    | 0.7963308    | 0.6666667    | 0.9026754    | 0.9917355    | 0.8156895    |
| #### Bn-Scaffold000164-p3105 genome unspecific (all in)     | 0.9928229    | 0.882045     | 0.9379845    | 0.7811546    | 0.9917355    | 0.8185005    |
| #### Bn-Scaffold000164-p3109 A-genome specific (napus-rapa) | 0.9832536    | 0.8733965    | not scorable | not scorable | 1            | 0.8130174    |
| #### Bn-Scaffold000164-p3783 A-genome specific (napus-rapa) | 0.9641148    | 0.8564339    | not scorable | not scorable | 1            | 0.8886375    |
| #### Bn-Scaffold000164-p3987 A-genome specific (napus-rapa) | 0.9784689    | 0.7455623    | not scorable | not scorable | 0.9752066    | 0.6844504    |
| #### Bn-Scaffold000164-p4617 A-genome specific (napus-rapa) | 0.9856459    | 0.881908     | not scorable | not scorable | 0.9917355    | 0.8017709    |
| #### Bn-Scaffold000164-p5574 A-genome specific (napus-rapa) | 0.9808612    | 0.8855786    | not scorable | not scorable | 0.9917355    | 0.8656859    |
| #### Bn-Scaffold000164-p8974 all not scorable               | not scorable | not scorable | not scorable | not scorable | not scorable | not scorable |
| #### Bn-Scaffold000167-p1056 genome unspecific (all in)     | 0.9760765    | 0.321388     | 1            | 0.7372482    | 1            | 0.6463896    |
| #### Bn-Scaffold000167-p1061 A-genome specific (napus-rapa) | 0.9928229    | 0.9166437    | not scorable | not scorable | 1            | 0.7816114    |
| #### Bn-Scaffold000167-p9894 A-genome specific (napus-rapa) | 0.9808612    | 0.7643559    | not scorable | not scorable | 0.9752066    | 0.8085203    |
| #### Bn-Scaffold000169-p2020 A-genome specific (napus-rapa) | 0.9952153    | 0.4968658    | not scorable | not scorable | 1            | 0.8710961    |
| #### Bn-Scaffold000172-p1108 A-genome specific (napus-rapa) | 0.9904306    | 0.7904358    | not scorable | not scorable | 1            | 0.8465479    |
| #### Bn-Scaffold000172-p1161 A-genome specific (napus-rapa) | 0.9760765    | 0.7771608    | not scorable | not scorable | 1            | 0.7392563    |
| #### Bn-Scaffold000172-p1323 A-genome specific (napus-rapa) | 0.9856459    | 0.7961508    | not scorable | not scorable | 0.9752066    | 0.7580987    |
| #### Bn-Scaffold000172-p1325 A-genome specific (napus-rapa) | 0.9808612    | 0.7976837    | not scorable | not scorable | 1            | 0.7597361    |
| #### Bn-Scaffold000172-p1328 A-genome specific (napus-rapa) | 0.9736842    | 0.8026003    | not scorable | not scorable | 0.9917355    | 0.7519936    |
| #### Bn-Scaffold000172-p1353 A-genome specific (napus-rapa) | 0.9784689    | 0.803528     | not scorable | not scorable | 1            | 0.5982801    |

|                                                                 |              |              |              |              |              |              |              |
|-----------------------------------------------------------------|--------------|--------------|--------------|--------------|--------------|--------------|--------------|
| #### Bn-Scaffold000172-p1708 A-genome specific (napus-rapa)     | 0.9760765    | 0.3754816    | not scorable | not scorable | 0.9834711    | 0.7905059    |              |
| #### Bn-Scaffold000172-p2210 genome unspecific (all in)         | 0.9904306    | 0.429171     |              | 1            | 0.900677     | 1            | 0.8418669    |
| #### Bn-Scaffold000172-p2415 genome unspecific (oleracea-rapa)  | not scorable | not scorable |              | 1            | 0.5921538    | 0.9834711    | 0.8669233    |
| #### Bn-Scaffold000172-p2430 A-genome specific (napus-rapa)     | 0.9569378    | 0.7845556    | not scorable | not scorable | 0.9834711    | 0.819884     |              |
| #### Bn-Scaffold000172-p2543 C-genome specific (napus-oleracea) | 0.9832536    | 0.9192803    |              | 0            | 0.7620023    | not scorable | not scorable |
| #### Bn-Scaffold000172-p2666 genome unspecific (oleracea-rapa)  | not scorable | not scorable | 0.9224806    |              | 0.713623     | 0.9834711    | 0.6229227    |
| #### Bn-Scaffold000172-p2687 genome unspecific (oleracea-rapa)  | not scorable | not scorable |              | 0            | 0.7998232    | 0.9917355    | 0.9489022    |
| #### Bn-Scaffold000172-p2767 A-genome specific (napus-rapa)     | 0.9760765    | 0.7177094    | not scorable | not scorable |              | 1            | 0.7983688    |
| #### Bn-Scaffold000172-p8982 A-genome specific (napus-rapa)     | 0.9593301    | 0.3259181    | not scorable | not scorable | 0.9917355    | 0.8442057    |              |
| #### Bn-Scaffold000172-p9507 A-genome specific (napus-rapa)     | 0.9880383    | 0.6440848    | not scorable | not scorable | 0.9669421    | 0.710853     |              |
| #### Bn-Scaffold000172-p9811 genome unspecific (oleracea-rapa)  | not scorable | not scorable |              | 1            | 0.891538     | 1            | 0.9165825    |
| #### Bn-Scaffold000172-p9963 genome unspecific (all in)         | 0.9688995    | 0.5683751    |              | 1            | 0.7634082    | 1            | 0.8347614    |
| #### Bn-Scaffold000178-p1148 genome unspecific (oleracea-rapa)  | not scorable | not scorable | 0.9922481    |              | 0.8107319    | 1            | 0.7298192    |
| #### Bn-Scaffold000178-p1181 A-genome specific (napus-rapa)     | 0.937799     | 0.857896     | not scorable | not scorable |              | 1            | 0.7600434    |
| #### Bn-Scaffold000178-p1252 napus specific                     | 0.5550239    | 0.8901663    | not scorable | not scorable | not scorable | not scorable |              |
| #### Bn-Scaffold000178-p1362 all not scorable                   | not scorable | not scorable | not scorable | not scorable | not scorable | not scorable |              |
| #### Bn-Scaffold000178-p3358 genome unspecific (all in)         | 0.9593301    | 0.4340338    |              | 1            | 0.7845387    | 0.9752066    | 0.7774857    |
| #### Bn-Scaffold000178-p4790 A-genome specific (napus-rapa)     | 0.9545454    | 0.5042732    | not scorable | not scorable | 0.9669421    | 0.7345796    |              |
| #### Bn-Scaffold000178-p7672 genome unspecific (all in)         | 0.9928229    | 0.8971008    | 0.6356589    |              | 0.8323431    | 1            | 0.8135076    |
| #### Bn-Scaffold000180-p1122 genome unspecific (all in)         | 0.9449761    | 0.2052751    |              | 1            | 0.8174118    | 0.9917355    | 0.8650694    |
| #### Bn-Scaffold000180-p1280 A-genome specific (napus-rapa)     | 0.9712918    | 0.8159941    | not scorable | not scorable | 0.9752066    | 0.8536308    |              |
| #### Bn-Scaffold000180-p1341 A-genome specific (napus-rapa)     |              | 1            | 0.7373455    | not scorable | not scorable | 1            | 0.7641606    |
| #### Bn-Scaffold000180-p1352 A-genome specific (napus-rapa)     | 0.9856459    | 0.7695355    | not scorable | not scorable | 0.9834711    | 0.8627238    |              |
| #### Bn-Scaffold000180-p1361 A-genome specific (napus-rapa)     | 0.9808612    | 0.7161283    | not scorable | not scorable | 0.9917355    | 0.7969931    |              |
| #### Bn-Scaffold000180-p1396 A-genome specific (rapa only)      | not scorable | not scorable | not scorable | not scorable |              | 1            | 0.6489695    |
| #### Bn-Scaffold000180-p1402 A-genome specific (napus-rapa)     | 0.9569378    | 0.7316135    | not scorable | not scorable |              | 1            | 0.6922222    |
| #### Bn-Scaffold000180-p1411 A-genome specific (napus-rapa)     | 0.9856459    | 0.6989201    | not scorable | not scorable | 0.9669421    | 0.6988581    |              |
| #### Bn-Scaffold000180-p1413 A-genome specific (napus-rapa)     | 0.9928229    | 0.6903906    | not scorable | not scorable | 0.9834711    | 0.7044981    |              |
| #### Bn-Scaffold000180-p1415 genome unspecific (all in)         | 0.8899522    | 0.5641348    |              | 1            | 0.5667254    | 1            | 0.5996832    |
| #### Bn-Scaffold000180-p1425 A-genome specific (napus-rapa)     | 0.9210526    | 0.6959918    | not scorable | not scorable |              | 1            | 0.6945985    |
| #### Bn-Scaffold000180-p1490 A-genome specific (napus-rapa)     | 0.9856459    | 0.7736461    | not scorable | not scorable |              | 1            | 0.8245425    |
| #### Bn-Scaffold000180-p1633 A-genome specific (napus-rapa)     | 0.9880383    | 0.7750682    | not scorable | not scorable |              | 1            | 0.7531994    |
| #### Bn-Scaffold000180-p1659 A-genome specific (napus-rapa)     | 0.9856459    | 0.772365     | not scorable | not scorable | 0.9834711    | 0.8291969    |              |



|                                                                 |              |              |              |              |              |              |
|-----------------------------------------------------------------|--------------|--------------|--------------|--------------|--------------|--------------|
| #### Bn-Scaffold000180-p2165 A-genome specific (napus-rapa)     | 1            | 0.5867994    | not scorable | not scorable | 0.9917355    | 0.6285366    |
| #### Bn-Scaffold000185-p1040 genome unspecific (all in)         | 0.9808612    | 0.365149     |              | 1 0.7863787  | 1            | 0.7671688    |
| #### Bn-Scaffold000185-p1058 A-genome specific (napus-rapa)     | 0.9832536    | 0.7921106    | not scorable | not scorable | 1            | 0.7378714    |
| #### Bn-Scaffold000185-p1066 C-genome specific (napus-oleracea) | 0.9976076    | 0.2769688    |              | 1 0.7630511  | not scorable | not scorable |
| #### Bn-Scaffold000185-p1162 A-genome specific (rapa only)      | not scorable | not scorable | not scorable | not scorable | 0.9752066    | 0.6296853    |
| #### Bn-Scaffold000185-p1165 A-genome specific (napus-rapa)     | 0.9928229    | 0.8567443    | not scorable | not scorable | 0.9834711    | 0.781224     |
| #### Bn-Scaffold000185-p1165 A-genome specific (napus-rapa)     | 0.9952153    | 0.856944     | not scorable | not scorable | 0.9752066    | 0.7403712    |
| #### Bn-Scaffold000185-p1285 genome unspecific (all in)         | 0.9856459    | 0.5106734    |              | 1 0.5646322  | 0.9669421    | 0.4033935    |
| #### Bn-Scaffold000185-p1303 A-genome specific (napus-rapa)     | 0.9880383    | 0.6499525    | not scorable | not scorable | 0.9917355    | 0.6419206    |
| #### Bn-Scaffold000185-p1317 A-genome specific (napus-rapa)     | 0.9952153    | 0.8437005    | not scorable | not scorable | 1            | 0.7798705    |
| #### Bn-Scaffold000185-p1319 napus specific                     | 0.9832536    | 0.8277735    | not scorable | not scorable | not scorable | not scorable |
| #### Bn-Scaffold000185-p1530 genome unspecific (all in)         | 0.9976076    | 0.5514426    |              | 1 0.7846252  | 0.9917355    | 0.7376443    |
| #### Bn-Scaffold000185-p1557 A-genome specific (napus-rapa)     | 0.9952153    | 0.4008559    | not scorable | not scorable | 0.9917355    | 0.7174574    |
| #### Bn-Scaffold000185-p1563 A-genome specific (napus-rapa)     | 0.9832536    | 0.895559     | not scorable | not scorable | 1            | 0.6869836    |
| #### Bn-Scaffold000185-p1588 A-genome specific (napus-rapa)     | 0.9904306    | 0.8290427    | not scorable | not scorable | 0.9586777    | 0.5972602    |
| #### Bn-Scaffold000185-p1598 napus specific                     | 0.9856459    | 0.8024307    | not scorable | not scorable | not scorable | not scorable |
| #### Bn-Scaffold000185-p1686 A-genome specific (napus-rapa)     | 0.9928229    | 0.7513797    | not scorable | not scorable | 0.9752066    | 0.7186493    |
| #### Bn-Scaffold000185-p1857 A-genome specific (napus-rapa)     | 0.9928229    | 0.6740752    | not scorable | not scorable | 0.9917355    | 0.7495161    |
| #### Bn-Scaffold000185-p1879 napus specific                     | 0.9856459    | 0.8693583    | not scorable | not scorable | not scorable | not scorable |
| #### Bn-Scaffold000185-p2037 A-genome specific (napus-rapa)     | 0.9952153    | 0.7728913    | not scorable | not scorable | 0.9917355    | 0.7358137    |
| #### Bn-Scaffold000185-p2633 A-genome specific (napus-rapa)     | 0.9880383    | 0.8222074    | not scorable | not scorable | 1            | 0.7506546    |
| #### Bn-Scaffold000185-p5451 napus specific                     | 0.9856459    | 0.8609427    | not scorable | not scorable | not scorable | not scorable |
| #### Bn-Scaffold000185-p5470 napus specific                     | 0.9808612    | 0.816991     | not scorable | not scorable | not scorable | not scorable |
| #### Bn-Scaffold000185-p5499 napus specific                     | 0.9856459    | 0.69159      | not scorable | not scorable | not scorable | not scorable |
| #### Bn-Scaffold000185-p5537 napus specific                     | 0.9784689    | 0.9063619    | not scorable | not scorable | not scorable | not scorable |
| #### Bn-Scaffold000185-p5551 napus specific                     | 0.9832536    | 0.6503603    | not scorable | not scorable | not scorable | not scorable |
| #### Bn-Scaffold000185-p5619 napus specific                     | 0.9856459    | 0.8663298    | not scorable | not scorable | not scorable | not scorable |
| #### Bn-Scaffold000185-p5623 napus specific                     | 0.9880383    | 0.880811     | not scorable | not scorable | not scorable | not scorable |
| #### Bn-Scaffold000185-p5775 napus specific                     | 0.9856459    | 0.8313947    | not scorable | not scorable | not scorable | not scorable |
| #### Bn-Scaffold000185-p5781 napus specific                     | 0.9928229    | 0.9242386    | not scorable | not scorable | not scorable | not scorable |
| #### Bn-Scaffold000185-p8219 napus specific                     | 0.9880383    | 0.7522377    | not scorable | not scorable | not scorable | not scorable |
| #### Bn-Scaffold000185-p8336 napus specific                     | 0.9880383    | 0.76002      | not scorable | not scorable | not scorable | not scorable |
| #### Bn-Scaffold000185-p8472 A-genome specific (napus-rapa)     | 0.9808612    | 0.8598629    | not scorable | not scorable | 1            | 0.6603296    |

|                                                                 |              |              |              |              |              |              |           |
|-----------------------------------------------------------------|--------------|--------------|--------------|--------------|--------------|--------------|-----------|
| #### Bn-Scaffold000191-p1107 A-genome specific (rapa only)      | not scorable | not scorable | not scorable | not scorable |              | 1            | 0.6142198 |
| #### Bn-Scaffold000191-p1167 genome unspecific (all in)         | 0.9952153    | 0.5250976    |              | 1            | 0.8136703    | 1            | 0.756402  |
| #### Bn-Scaffold000191-p1394 napus specific                     | 0.9641148    | 0.7992125    | not scorable | not scorable | not scorable | not scorable |           |
| #### Bn-Scaffold000191-p1540 C-genome specific (napus-oleracea) | 0.9043062    | 0.8586859    | 0.8294573    | 0.7811604    | not scorable | not scorable |           |
| #### Bn-Scaffold000191-p1567 genome unspecific (oleracea-rapa)  | not scorable | not scorable |              | 1            | 0.8124056    | 0.9752066    | 0.7813153 |
| #### Bn-Scaffold000191-p1590 A-genome specific (rapa only)      | not scorable | not scorable | not scorable | not scorable |              | 0.9917355    | 0.7552952 |
| #### Bn-Scaffold000191-p4749 genome unspecific (all in)         | 0.9473684    | 0.276736     |              | 1            | 0.4751713    | 0.9834711    | 0.749827  |
| #### Bn-Scaffold000191-p5330 A-genome specific (napus-rapa)     | 0.9760765    | 0.8512101    | not scorable | not scorable |              | 1            | 0.7210552 |
| #### Bn-Scaffold000191-p5498 A-genome specific (napus-rapa)     | 0.9952153    | 0.8670273    | not scorable | not scorable |              | 0.9834711    | 0.8263209 |
| #### Bn-Scaffold000191-p6552 A-genome specific (napus-rapa)     | 0.9736842    | 0.7973562    | not scorable | not scorable |              | 0.9917355    | 0.7453439 |
| #### Bn-Scaffold000191-p7033 napus specific                     | 0.8732057    | 0.5985968    | not scorable | not scorable | not scorable | not scorable |           |
| #### Bn-Scaffold000191-p8904 genome unspecific (oleracea-rapa)  | not scorable | not scorable |              | 1            | 0.8149743    | 1            | 0.7261449 |
| #### Bn-Scaffold000191-p8977 A-genome specific (napus-rapa)     | 0.9593301    | 0.6781849    | not scorable | not scorable |              | 1            | 0.7855795 |
| #### Bn-Scaffold000193-p1015 genome unspecific (all in)         | 1            | 0.7357228    |              | 1            | 0.7494321    | 1            | 0.7641606 |
| #### Bn-Scaffold000193-p1237 genome unspecific (all in)         | 0.9856459    | 0.2690746    | 0.9612403    | 0.3188791    | 0.9917355    | 0.7591171    |           |
| #### Bn-Scaffold000193-p1306 A-genome specific (napus-rapa)     | 1            | 0.7661946    | not scorable | not scorable | 0.9752066    | 0.6095786    |           |
| #### Bn-Scaffold000193-p1387 genome unspecific (all in)         | 0.9904306    | 0.5861388    |              | 1            | 0.7667776    | 0.9586777    | 0.5959644 |
| #### Bn-Scaffold000193-p5168 genome unspecific (all in)         | 0.9856459    | 0.2706511    |              | 1            | 0.7686442    | 0.9752066    | 0.7583197 |
| #### Bn-Scaffold000193-p9365 genome unspecific (oleracea-rapa)  | not scorable | not scorable |              | 1            | 0.6353421    | 0.9917355    | 0.7915975 |
| #### Bn-Scaffold000193-p9462 A-genome specific (napus-rapa)     | 1            | 0.808452     | not scorable | not scorable | 0.9752066    | 0.7584263    |           |
| #### Bn-Scaffold000193-p9467 A-genome specific (napus-rapa)     | 1            | 0.8358084    | not scorable | not scorable | 0.9752066    | 0.8065842    |           |
| #### Bn-Scaffold000193-p9510 A-genome specific (napus-rapa)     | 1            | 0.7595983    | not scorable | not scorable | 0.9917355    | 0.6755754    |           |
| #### Bn-Scaffold000194-p3933 genome unspecific (all in)         | 1            | 0.4340441    | 0.9922481    | 0.5806887    | 0.9917355    | 0.5830583    |           |
| #### Bn-Scaffold000196-p1052 A-genome specific (napus-rapa)     | 1            | 0.8255561    | not scorable | not scorable | 0.9917355    | 0.7644133    |           |
| #### Bn-Scaffold000196-p1100 A-genome specific (napus-rapa)     | 1            | 0.8485625    | not scorable | not scorable | 0.9917355    | 0.7771561    |           |
| #### Bn-Scaffold000196-p1150 A-genome specific (napus-rapa)     | 1            | 0.8674049    | not scorable | not scorable | 0.9834711    | 0.7906551    |           |
| #### Bn-Scaffold000196-p1220 A-genome specific (napus-rapa)     | 0.9976076    | 0.4451372    | not scorable | not scorable | 0.9917355    | 0.7874528    |           |
| #### Bn-Scaffold000196-p1294 A-genome specific (napus-rapa)     | 0.9928229    | 0.5812504    | not scorable | not scorable | 0.9669421    | 0.7385925    |           |
| #### Bn-Scaffold000196-p1321 A-genome specific (napus-rapa)     | 0.9976076    | 0.7481903    | not scorable | not scorable | 0.9421487    | 0.6357273    |           |
| #### Bn-Scaffold000196-p1322 A-genome specific (napus-rapa)     | 0.9952153    | 0.7318245    | not scorable | not scorable | 0.9917355    | 0.6411431    |           |
| #### Bn-Scaffold000196-p1323 A-genome specific (napus-rapa)     | 0.9952153    | 0.8524479    | not scorable | not scorable | 0.9421487    | 0.7468645    |           |
| #### Bn-Scaffold000196-p2131 A-genome specific (napus-rapa)     | 0.9952153    | 0.7550718    | not scorable | not scorable | 0.9752066    | 0.7085331    |           |
| #### Bn-Scaffold000196-p2602 A-genome specific (napus-rapa)     | 0.9880383    | 0.9007409    | not scorable | not scorable | 0.9834711    | 0.7753761    |           |

|                                                             |              |              |              |              |           |           |
|-------------------------------------------------------------|--------------|--------------|--------------|--------------|-----------|-----------|
| #### Bn-Scaffold000196-p4517 A-genome specific (napus-rapa) | 0.9880383    | 0.6816904    | not scorable | not scorable | 0.9917355 | 0.7189067 |
| #### Bn-Scaffold000196-p5281 A-genome specific (napus-rapa) | 0.9976076    | 0.8608925    | not scorable | not scorable | 1         | 0.7686442 |
| #### Bn-Scaffold000196-p6401 A-genome specific (napus-rapa) | 0.9976076    | 0.8019836    | not scorable | not scorable | 0.9586777 | 0.689648  |
| #### Bn-Scaffold000196-p6728 A-genome specific (napus-rapa) | 0.9976076    | 0.7408474    | not scorable | not scorable | 0.9752066 | 0.6892752 |
| #### Bn-Scaffold000196-p6836 A-genome specific (napus-rapa) | 0.9976076    | 0.8441404    | not scorable | not scorable | 0.9669421 | 0.7623271 |
| #### Bn-Scaffold000196-p7542 A-genome specific (napus-rapa) | 0.9976076    | 0.8187081    | not scorable | not scorable | 0.9752066 | 0.7743582 |
| #### Bn-Scaffold000196-p7555 A-genome specific (napus-rapa) | 0.9928229    | 0.7851505    | not scorable | not scorable | 0.9421487 | 0.6567498 |
| #### Bn-Scaffold000196-p7580 A-genome specific (napus-rapa) | 0.9904306    | 0.7792739    | not scorable | not scorable | 0.9586777 | 0.7141998 |
| #### Bn-Scaffold000196-p7592 A-genome specific (napus-rapa) | 0.9952153    | 0.8351873    | not scorable | not scorable | 0.9421487 | 0.674516  |
| #### Bn-Scaffold000196-p9767 A-genome specific (napus-rapa) | 0.9976076    | 0.8733694    | not scorable | not scorable | 0.9834711 | 0.7848645 |
| #### Bn-Scaffold000196-p9772 A-genome specific (napus-rapa) | 1            | 0.8526646    | not scorable | not scorable | 1         | 0.7848645 |
| #### Bn-Scaffold000199-p5150 genome unspecific (all in)     | 1            | 0.6208826    |              | 1 0.549558   | 1         | 0.7015015 |
| #### Bn-Scaffold000199-p9021 genome unspecific (all in)     | 0.9976076    | 0.6657802    |              | 1 0.8004315  | 1         | 0.7888833 |
| #### Bn-Scaffold000201-p1000 genome unspecific (all in)     | 1            | 0.5416871    |              | 1 0.5378139  | 0.9834711 | 0.6054083 |
| #### Bn-Scaffold000201-p1023 genome unspecific (all in)     | 1            | 0.4463749    |              | 1 0.4811479  | 0.9834711 | 0.4105465 |
| #### Bn-Scaffold000201-p1133 A-genome specific (napus-rapa) | 0.9904306    | 0.6749517    | not scorable | not scorable | 0.9917355 | 0.7073446 |
| #### Bn-Scaffold000201-p1471 A-genome specific (rapa only)  | not scorable | not scorable | not scorable | not scorable | 0.9834711 | 0.7252181 |
| #### Bn-Scaffold000201-p3565 A-genome specific (napus-rapa) | 0.9976076    | 0.8293125    | not scorable | not scorable | 0.9917355 | 0.683278  |
| #### Bn-Scaffold000201-p4167 A-genome specific (napus-rapa) | 0.9928229    | 0.8541167    | not scorable | not scorable | 1         | 0.7190257 |
| #### Bn-Scaffold000201-p5047 A-genome specific (napus-rapa) | 0.9904306    | 0.8257665    | not scorable | not scorable | 1         | 0.8013431 |
| #### Bn-Scaffold000201-p9731 A-genome specific (napus-rapa) | 0.9856459    | 0.7978628    | not scorable | not scorable | 0.9917355 | 0.7482478 |
| #### Bn-Scaffold000203-p1476 A-genome specific (napus-rapa) | 0.9641148    | 0.8312328    | not scorable | not scorable | 0.9504132 | 0.7471936 |
| #### Bn-Scaffold000203-p2438 genome unspecific (all in)     | 0.9808612    | 0.3181596    |              | 1 0.7818781  | 1         | 0.7691346 |
| #### Bn-Scaffold000203-p2993 A-genome specific (napus-rapa) | 0.9904306    | 0.800388     | not scorable | not scorable | 0.9752066 | 0.7679985 |
| #### Bn-Scaffold000203-p5046 A-genome specific (napus-rapa) | 0.9641148    | 0.8217288    | not scorable | not scorable | 0.9173554 | 0.8180689 |
| #### Bn-Scaffold000203-p5734 genome unspecific (all in)     | 0.9880383    | 0.4340158    |              | 1 0.7102411  | 1         | 0.9175794 |
| #### Bn-Scaffold000203-p8641 A-genome specific (napus-rapa) | 0.9904306    | 0.8563142    | not scorable | not scorable | 0.9752066 | 0.7135949 |
| #### Bn-Scaffold000203-p9485 A-genome specific (napus-rapa) | 0.9904306    | 0.6944877    | not scorable | not scorable | 1         | 0.7316726 |
| #### Bn-Scaffold000203-p9544 A-genome specific (napus-rapa) | 0.9880383    | 0.8259574    | not scorable | not scorable | 0.9834711 | 0.791052  |
| #### Bn-Scaffold000206-p4837 genome unspecific (all in)     | 0.8827751    | 0.4990879    |              | 1 0.6122772  | 1         | 0.8136836 |
| #### Bn-Scaffold000209-p6205 A-genome specific (napus-rapa) | 1            | 0.7906047    | not scorable | not scorable | 1         | 0.7163983 |
| #### Bn-Scaffold000211-p2590 A-genome specific (napus-rapa) | 1            | 0.8235463    | not scorable | not scorable | 0.9834711 | 0.7861956 |
| #### Bn-Scaffold000211-p2952 A-genome specific (napus-rapa) | 1            | 0.7352715    | not scorable | not scorable | 0.9834711 | 0.713729  |

|                                                                |              |              |              |              |              |              |
|----------------------------------------------------------------|--------------|--------------|--------------|--------------|--------------|--------------|
| #### Bn-Scaffold000211-p3251 A-genome specific (napus-rapa)    | 0.9928229    | 0.5772368    | not scorable | not scorable | 0.9669421    | 0.7784985    |
| #### Bn-Scaffold000211-p6305 A-genome specific (napus-rapa)    | 1            | 0.8313746    | not scorable | not scorable | 0.9917355    | 0.7284561    |
| #### Bn-Scaffold000211-p6563 A-genome specific (napus-rapa)    | 0.9808612    | 0.8006521    | not scorable | not scorable | 0.9669421    | 0.749655     |
| #### Bn-Scaffold000211-p7953 A-genome specific (napus-rapa)    | 0.9952153    | 0.7680583    | not scorable | not scorable | 1            | 0.8315363    |
| #### Bn-Scaffold000211-p8099 A-genome specific (napus-rapa)    | 0.9880383    | 0.7515914    | not scorable | not scorable | 1            | 0.6957003    |
| #### Bn-Scaffold000211-p9020 genome unspecific (all in)        | 0.9976076    | 0.5560093    |              | 1 0.8725104  | 0.9917355    | 0.7834546    |
| #### Bn-Scaffold000212-p3923 genome unspecific (all in)        | 1            | 0.6646448    |              | 1 0.7441981  | 1            | 0.8674821    |
| #### Bn-Scaffold000212-p6618 A-genome specific (napus-rapa)    | 0.9976076    | 0.8131816    | not scorable | not scorable | 0.9917355    | 0.7464397    |
| #### Bn-Scaffold000212-p6977 A-genome specific (rapa only)     | not scorable | not scorable | not scorable | not scorable | 0.9834711    | 0.5160261    |
| #### Bn-Scaffold000212-p7293 A-genome specific (napus-rapa)    | 0.6866029    | 0.7632249    | not scorable | not scorable | 1            | 0.7632179    |
| #### Bn-Scaffold000212-p8106 A-genome specific (napus-rapa)    | 0.9976076    | 0.4975688    | not scorable | not scorable | 1            | 0.7745053    |
| #### Bn-Scaffold000213-p3006 A-genome specific (rapa only)     | not scorable | not scorable | not scorable | not scorable | 1            | 0.4618228    |
| #### Bn-Scaffold000215-p1313 A-genome specific (rapa only)     | not scorable | not scorable | not scorable | not scorable | 1            | 0.8898792    |
| #### Bn-Scaffold000215-p4289 A-genome specific (rapa only)     | not scorable | not scorable | not scorable | not scorable | 0.9752066    | 0.7741971    |
| #### Bn-Scaffold000215-p4493 genome unspecific (all in)        | 0.9928229    | 0.7194567    |              | 1 0.7225404  | 1            | 0.752191     |
| #### Bn-Scaffold000215-p6095 A-genome specific (napus-rapa)    | 0.9736842    | 0.3198937    | not scorable | not scorable | 0.8760331    | 0.5387672    |
| #### Bn-Scaffold000215-p6199 all not scorable                  | not scorable | not scorable | not scorable | not scorable | not scorable | not scorable |
| #### Bn-Scaffold000215-p6257 A-genome specific (rapa only)     | not scorable | not scorable | not scorable | not scorable | 1            | 0.7301956    |
| #### Bn-Scaffold000215-p6787 A-genome specific (napus-rapa)    | 0.9258373    | 0.8397945    | not scorable | not scorable | 0.9834711    | 0.7311931    |
| #### Bn-Scaffold000215-p7816 A-genome specific (napus-rapa)    | 0.923445     | 0.8150275    | not scorable | not scorable | 0.9917355    | 0.7905445    |
| #### Bn-Scaffold000216-p1351 A-genome specific (napus-rapa)    | 0.9736842    | 0.4608323    | not scorable | not scorable | 1            | 0.7523987    |
| #### Bn-Scaffold000217-p2016 A-genome specific (napus-rapa)    | 0.8923445    | 0.8018957    | not scorable | not scorable | 0.9917355    | 0.6973109    |
| #### Bn-Scaffold000217-p2427 A-genome specific (napus-rapa)    | 0.9186603    | 0.6680187    | not scorable | not scorable | 1            | 0.6953403    |
| #### Bn-Scaffold000217-p3229 A-genome specific (rapa only)     | not scorable | not scorable | not scorable | not scorable | 0.9752066    | 0.6762602    |
| #### Bn-Scaffold000217-p3827 genome unspecific (oleracea-rapa) | not scorable | not scorable | 0.9922481    | 0.7878262    | 0.9917355    | 0.695888     |
| #### Bn-Scaffold000217-p3853 A-genome specific (napus-rapa)    | 0.9090909    | 0.8038605    | not scorable | not scorable | 0.9917355    | 0.7781501    |
| #### Bn-Scaffold000217-p3893 A-genome specific (napus-rapa)    | 0.9043062    | 0.6181197    | not scorable | not scorable | 0.9917355    | 0.5141186    |
| #### Bn-Scaffold000217-p3897 A-genome specific (napus-rapa)    | 0.9210526    | 0.7639765    | not scorable | not scorable | 0.9917355    | 0.7894239    |
| #### Bn-Scaffold000217-p6025 A-genome specific (napus-rapa)    | 0.9138756    | 0.7842122    | not scorable | not scorable | 1            | 0.6761094    |
| #### Bn-Scaffold000217-p7091 genome unspecific (oleracea-rapa) | not scorable | not scorable |              | 1 0.6241262  | 1            | 0.7591171    |
| #### Bn-Scaffold000218-p1679 napus specific                    | 0.9545454    | 0.7641267    | not scorable | not scorable | not scorable | not scorable |
| #### Bn-Scaffold000218-p1699 A-genome specific (rapa only)     | not scorable | not scorable | not scorable | not scorable | 1            | 0.8971975    |
| #### Bn-Scaffold000218-p1825 A-genome specific (napus-rapa)    | 0.9665072    | 0.8555826    | not scorable | not scorable | 0.9917355    | 0.5351689    |

|                                                             |              |              |              |              |           |           |
|-------------------------------------------------------------|--------------|--------------|--------------|--------------|-----------|-----------|
| #### Bn-Scaffold000218-p2719 A-genome specific (napus-rapa) | 0.9760765    | 0.82793      | not scorable | not scorable | 0.9669421 | 0.8880448 |
| #### Bn-Scaffold000219-p1209 A-genome specific (napus-rapa) | 0.9425837    | 0.9156932    | not scorable | not scorable | 0.9834711 | 0.7690879 |
| #### Bn-Scaffold000219-p6649 A-genome specific (napus-rapa) | 1            | 0.5171536    | not scorable | not scorable | 0.9834711 | 0.5824231 |
| #### Bn-Scaffold000219-p6746 A-genome specific (napus-rapa) | 0.9856459    | 0.7022214    | not scorable | not scorable | 0.9917355 | 0.6606416 |
| #### Bn-Scaffold000220-p2977 genome unspecific (all in)     | 1            | 0.5354707    |              | 1 0.8843167  | 0.9834711 | 0.8480669 |
| #### Bn-Scaffold000221-p7184 genome unspecific (all in)     | 0.9952153    | 0.7563993    |              | 1 0.8027654  | 1         | 0.8643365 |
| #### Bn-Scaffold000224-p3229 A-genome specific (napus-rapa) | 1            | 0.7939398    | not scorable | not scorable | 1         | 0.7705795 |
| #### Bn-Scaffold000224-p4034 A-genome specific (napus-rapa) | 0.9880383    | 0.8223557    | not scorable | not scorable | 1         | 0.7742743 |
| #### Bn-Scaffold000224-p4131 A-genome specific (napus-rapa) | 0.9976076    | 0.491851     | not scorable | not scorable | 0.9669421 | 0.4051719 |
| #### Bn-Scaffold000224-p4314 A-genome specific (napus-rapa) | 0.9952153    | 0.8479002    | not scorable | not scorable | 0.9834711 | 0.6937831 |
| #### Bn-Scaffold000224-p4637 A-genome specific (napus-rapa) | 0.9976076    | 0.7721354    | not scorable | not scorable | 0.9669421 | 0.7315413 |
| #### Bn-Scaffold000224-p4644 A-genome specific (napus-rapa) | 0.9976076    | 0.716578     | not scorable | not scorable | 0.9752066 | 0.6888929 |
| #### Bn-Scaffold000224-p5744 A-genome specific (napus-rapa) | 0.9976076    | 0.8705972    | not scorable | not scorable | 0.9752066 | 0.737654  |
| #### Bn-Scaffold000224-p5866 A-genome specific (napus-rapa) | 0.9976076    | 0.7514662    | not scorable | not scorable | 0.9752066 | 0.7036847 |
| #### Bn-Scaffold000224-p5916 A-genome specific (napus-rapa) | 1            | 0.791115     | not scorable | not scorable | 0.9834711 | 0.7287913 |
| #### Bn-Scaffold000224-p5932 A-genome specific (napus-rapa) | 1            | 0.8388613    | not scorable | not scorable | 0.9917355 | 0.7902966 |
| #### Bn-Scaffold000224-p5951 A-genome specific (napus-rapa) | 0.9976076    | 0.842319     | not scorable | not scorable | 0.9834711 | 0.8027667 |
| #### Bn-Scaffold000224-p5959 A-genome specific (napus-rapa) | 1            | 0.6723962    | not scorable | not scorable | 0.9917355 | 0.6784315 |
| #### Bn-Scaffold000224-p5993 A-genome specific (napus-rapa) | 0.9952153    | 0.6862206    | not scorable | not scorable | 0.9752066 | 0.7344741 |
| #### Bn-Scaffold000224-p6063 A-genome specific (napus-rapa) | 1            | 0.8347114    | not scorable | not scorable | 0.9917355 | 0.764322  |
| #### Bn-Scaffold000224-p6094 A-genome specific (napus-rapa) | 1            | 0.8385469    | not scorable | not scorable | 0.9752066 | 0.7311617 |
| #### Bn-Scaffold000224-p6099 A-genome specific (napus-rapa) | 1            | 0.8606652    | not scorable | not scorable | 1         | 0.7922694 |
| #### Bn-Scaffold000224-p6132 A-genome specific (napus-rapa) | 1            | 0.8156992    | not scorable | not scorable | 0.9834711 | 0.7044402 |
| #### Bn-Scaffold000224-p6512 A-genome specific (napus-rapa) | 1            | 0.8212768    | not scorable | not scorable | 1         | 0.7806839 |
| #### Bn-Scaffold000224-p6706 A-genome specific (napus-rapa) | 1            | 0.8100396    | not scorable | not scorable | 1         | 0.7379962 |
| #### Bn-Scaffold000224-p6796 A-genome specific (napus-rapa) | 1            | 0.8159263    | not scorable | not scorable | 1         | 0.7526968 |
| #### Bn-Scaffold000228-p3136 genome unspecific (all in)     | 1            | 0.4224113    |              | 1 0.8513666  | 1         | 0.639712  |
| #### Bn-Scaffold000229-p1133 A-genome specific (napus-rapa) | 0.7655503    | 0.8836528    | not scorable | not scorable | 1         | 0.8222771 |
| #### Bn-Scaffold000229-p1231 A-genome specific (napus-rapa) | 0.784689     | 0.7656767    | not scorable | not scorable | 1         | 0.7849216 |
| #### Bn-Scaffold000229-p1255 A-genome specific (napus-rapa) | 0.7822967    | 0.7733867    | not scorable | not scorable | 1         | 0.6638761 |
| #### Bn-Scaffold000229-p1992 A-genome specific (napus-rapa) | 0.7799043    | 0.8331133    | not scorable | not scorable | 1         | 0.7927102 |
| #### Bn-Scaffold000229-p2008 A-genome specific (napus-rapa) | 0.784689     | 0.6704071    | not scorable | not scorable | 1         | 0.5762198 |
| #### Bn-Scaffold000229-p4799 A-genome specific (rapa only)  | not scorable | not scorable | not scorable | not scorable | 0.9752066 | 0.723857  |

|                                                                 |              |              |              |              |              |              |
|-----------------------------------------------------------------|--------------|--------------|--------------|--------------|--------------|--------------|
| #### Bn-Scaffold000232-p2740 A-genome specific (napus-rapa)     | 0.9976076    | 0.8160811    | not scorable | not scorable | 1            | 0.7620253    |
| #### Bn-Scaffold000232-p3831 genome unspecific (all in)         | 0.9736842    | 0.4035726    |              | 1            | 0.8084342    | 0.9752066    |
| #### Bn-Scaffold000232-p4244 A-genome specific (napus-rapa)     | 0.9569378    | 0.6836056    | not scorable | not scorable | 0.9834711    | 0.6277639    |
| #### Bn-Scaffold000232-p5190 A-genome specific (napus-rapa)     | 0.9928229    | 0.8305588    | not scorable | not scorable | 1            | 0.7949221    |
| #### Bn-Scaffold000232-p5746 genome unspecific (all in)         | 0.9976076    | 0.8427514    |              | 1            | 0.8543754    | 0.9669421    |
| #### Bn-Scaffold000232-p5812 genome unspecific (all in)         | 0.7368421    | 0.6861063    | 0.9922481    | 0.7405747    | 0.9752066    | 0.5445745    |
| #### Bn-Scaffold000233-p3667 genome unspecific (all in)         | 1            | 0.6444352    |              | 1            | 0.6741632    | 1            |
| #### Bn-Scaffold000237-p1208 A-genome specific (napus-rapa)     | 0.8875598    | 0.8790489    | not scorable | not scorable | 1            | 0.8587563    |
| #### Bn-Scaffold000237-p2024 A-genome specific (rapa only)      | not scorable | not scorable | not scorable | not scorable | 0.9917355    | 0.9175813    |
| #### Bn-Scaffold000237-p2440 genome unspecific (oleracea-rapa)  | not scorable | not scorable |              | 1            | 0.8519702    | 1            |
| #### Bn-Scaffold000240-p3337 A-genome specific (napus-rapa)     | 1            | 0.8237889    | not scorable | not scorable | 0.9834711    | 0.7766331    |
| #### Bn-Scaffold000240-p4486 genome unspecific (all in)         | 1            | 0.539075     |              | 1            | 0.7259031    | 1            |
| #### Bn-Scaffold000243-p4345 genome unspecific (all in)         | 1            | 0.5788181    |              | 1            | 0.5867994    | 0.9917355    |
| #### Bn-Scaffold000244-p1005 napus specific                     | 0.9138756    | 0.8541599    | not scorable | not scorable | not scorable | not scorable |
| #### Bn-Scaffold000244-p2656 C-genome specific (napus-oleracea) | 0.9952153    | 0.2742781    |              | 1            | 0.642285     | not scorable |
| #### Bn-Scaffold000244-p3524 napus specific                     | 0.9090909    | 0.6763602    | not scorable | not scorable | not scorable | not scorable |
| #### Bn-Scaffold000244-p3603 C-genome specific (napus-oleracea) | 0.9808612    | 0.6330149    |              | 1            | 0.6792569    | not scorable |
| #### Bn-Scaffold000244-p3809 napus specific                     | 0.9114832    | 0.6688153    | not scorable | not scorable | not scorable | not scorable |
| #### Bn-Scaffold000244-p6001 napus specific                     | 0.8899522    | 0.7742743    | not scorable | not scorable | not scorable | not scorable |
| #### Bn-Scaffold000246-p2803 A-genome specific (napus-rapa)     | 0.9545454    | 0.7458807    | not scorable | not scorable | 0.9752066    | 0.8210964    |
| #### Bn-Scaffold000247-p2861 A-genome specific (napus-rapa)     | 1            | 0.7715957    | not scorable | not scorable | 0.9917355    | 0.6445403    |
| #### Bn-Scaffold000247-p3408 C-genome specific (napus-oleracea) | 0.9952153    | 0.6391585    | 0.9844961    | 0.7486226    | not scorable | not scorable |
| #### Bn-Scaffold000249-p5194 A-genome specific (napus-rapa)     | 0.9952153    | 0.8499562    | not scorable | not scorable | 1            | 0.6027094    |
| #### Bn-Scaffold000251-p3333 genome unspecific (oleracea-rapa)  | not scorable | not scorable | 0.9534883    | 0.7968414    | 0.9752066    | 0.7062061    |
| #### Bn-Scaffold000251-p3405 A-genome specific (napus-rapa)     | 0.9688995    | 0.8664871    | not scorable | not scorable | 0.9752066    | 0.802936     |
| #### Bn-Scaffold000252-p4735 C-genome specific (napus-oleracea) | 1            | 0.7094405    |              | 1            | 0.6900873    | not scorable |
| #### Bn-Scaffold000253-p2783 A-genome specific (napus-rapa)     | 0.9665072    | 0.7895221    | not scorable | not scorable | 1            | 0.8782881    |
| #### Bn-Scaffold000254-p3942 napus specific                     | 0.7942584    | 0.8751893    | not scorable | not scorable | not scorable | not scorable |
| #### Bn-Scaffold000256-p2323 A-genome specific (napus-rapa)     | 1            | 0.780965     | not scorable | not scorable | 1            | 0.7888013    |
| #### Bn-Scaffold000257-p3325 C-genome specific (napus-oleracea) | 0.9952153    | 0.2328391    |              | 1            | 0.8273327    | not scorable |
| #### Bn-Scaffold000259-p2927 genome unspecific (all in)         | 0.9641148    | 0.4786707    |              | 1            | 0.8045679    | 0.9752066    |
| #### Bn-Scaffold000259-p3068 A-genome specific (napus-rapa)     | 0.9904306    | 0.7764751    | not scorable | not scorable | 0.9752066    | 0.8089625    |
| #### Bn-Scaffold000259-p3562 A-genome specific (napus-rapa)     | 0.9736842    | 0.7688593    | not scorable | not scorable | 1            | 0.7918426    |

|                                                                |              |              |              |              |              |              |           |
|----------------------------------------------------------------|--------------|--------------|--------------|--------------|--------------|--------------|-----------|
| #### Bn-Scaffold000259-p3714 genome unspecific (all in)        | 0.9593301    | 0.5004888    |              | 1            | 0.7904549    | 1            | 0.7848125 |
| #### Bn-Scaffold000259-p3784 A-genome specific (napus-rapa)    | 0.9856459    | 0.8541604    | not scorable | not scorable | 0.9752066    | 0.8153801    |           |
| #### Bn-Scaffold000261-p2372 A-genome specific (rapa only)     | not scorable | not scorable | not scorable | not scorable | 0.9669421    | 0.7071174    |           |
| #### Bn-Scaffold000262-p2539 A-genome specific (napus-rapa)    | 1            | 0.7994597    | not scorable | not scorable | 0.9917355    | 0.7218056    |           |
| #### Bn-Scaffold000262-p2644 A-genome specific (napus-rapa)    | 0.9976076    | 0.6236973    | not scorable | not scorable | 0.9834711    | 0.6788851    |           |
| #### Bn-Scaffold000262-p2807 napus specific                    | 0.9928229    | 0.8206601    | not scorable | not scorable | not scorable | not scorable |           |
| #### Bn-Scaffold000262-p2866 all not scorable                  | not scorable | not scorable | not scorable | not scorable | not scorable | not scorable |           |
| #### Bn-Scaffold000262-p3392 A-genome specific (napus-rapa)    | 0.9976076    | 0.9062529    | not scorable | not scorable | 0.9917355    | 0.8583652    |           |
| #### Bn-Scaffold000264-p2030 A-genome specific (napus-rapa)    | 1            | 0.5643941    | not scorable | not scorable | 0.9917355    | 0.5093367    |           |
| #### Bn-Scaffold000270-p1152 A-genome specific (napus-rapa)    | 0.9928229    | 0.8495775    | not scorable | not scorable | 0.9917355    | 0.7270513    |           |
| #### Bn-Scaffold000270-p3316 A-genome specific (napus-rapa)    | 0.9976076    | 0.8212823    | not scorable | not scorable | 1            | 0.8162279    |           |
| #### Bn-Scaffold000280-p1140 A-genome specific (napus-rapa)    | 0.9880383    | 0.8075867    | not scorable | not scorable | 0.9834711    | 0.8958296    |           |
| #### Bn-Scaffold000280-p1156 genome unspecific (all in)        | 0.9904306    | 0.3728645    |              | 1            | 0.8166956    | 0.9752066    | 0.7092392 |
| #### Bn-Scaffold000280-p1478 A-genome specific (napus-rapa)    | 0.9928229    | 0.8669229    | not scorable | not scorable | 0.9917355    | 0.6785764    |           |
| #### Bn-Scaffold000280-p4701 A-genome specific (napus-rapa)    | 0.9952153    | 0.756972     | not scorable | not scorable | 0.9834711    | 0.8302953    |           |
| #### Bn-Scaffold000280-p5190 A-genome specific (napus-rapa)    | 0.9736842    | 0.6364716    | not scorable | not scorable | 0.9752066    | 0.6698185    |           |
| #### Bn-Scaffold000280-p5271 A-genome specific (napus-rapa)    | 0.9880383    | 0.7673839    | not scorable | not scorable | 1            | 0.774404     |           |
| #### Bn-Scaffold000280-p9579 A-genome specific (napus-rapa)    | 0.9832536    | 0.7926505    | not scorable | not scorable | 0.9669421    | 0.6899068    |           |
| #### Bn-Scaffold000281-p2562 A-genome specific (napus-rapa)    | 1            | 0.7552642    | not scorable | not scorable | 1            | 0.72626      |           |
| #### Bn-Scaffold000281-p4606 A-genome specific (napus-rapa)    | 0.9952153    | 0.8942465    | not scorable | not scorable | 1            | 0.6862066    |           |
| #### Bn-Scaffold000282-p6257 genome unspecific (all in)        | 0.9665072    | 0.4147535    |              | 1            | 0.8993224    | 0.9834711    | 0.718973  |
| #### Bn-Scaffold000282-p8452 genome unspecific (oleracea-rapa) | not scorable | not scorable |              | 1            | 0.5867819    | 1            | 0.8018759 |
| #### Bn-Scaffold000283-p1502 genome unspecific (all in)        | 0.9641148    | 0.5177764    |              | 1            | 0.7437682    | 1            | 0.6780253 |
| #### Bn-Scaffold000283-p2405 napus specific                    | 0.9641148    | 0.9059768    | not scorable | not scorable | not scorable | not scorable |           |
| #### Bn-Scaffold000285-p1827 A-genome specific (napus-rapa)    | 0.3732058    | 0.5916289    | not scorable | not scorable | 0.9917355    | 0.7995092    |           |
| #### Bn-Scaffold000285-p2915 A-genome specific (napus-rapa)    | 0.9832536    | 0.8336415    | not scorable | not scorable | 1            | 0.7942953    |           |
| #### Bn-Scaffold000285-p2988 A-genome specific (napus-rapa)    | 0.9856459    | 0.7996421    | not scorable | not scorable | 1            | 0.7623614    |           |
| #### Bn-Scaffold000286-p1180 A-genome specific (napus-rapa)    | 1            | 0.8542773    | not scorable | not scorable | 0.9834711    | 0.7977217    |           |
| #### Bn-Scaffold000286-p1755 A-genome specific (napus-rapa)    | 0.8708134    | 0.7769337    | not scorable | not scorable | 1            | 0.7971738    |           |
| #### Bn-Scaffold000286-p1757 napus specific                    | 0.84689      | 0.7842133    | not scorable | not scorable | not scorable | not scorable |           |
| #### Bn-Scaffold000286-p1766 A-genome specific (napus-rapa)    | 0.8732057    | 0.7736812    | not scorable | not scorable | 1            | 0.7380466    |           |
| #### Bn-Scaffold000286-p1903 A-genome specific (napus-rapa)    | 0.8732057    | 0.8359321    | not scorable | not scorable | 0.9669421    | 0.8365365    |           |
| #### Bn-Scaffold000286-p1967 A-genome specific (napus-rapa)    | 0.8684211    | 0.7241612    | not scorable | not scorable | 0.9752066    | 0.6392193    |           |

|                                                             |              |              |              |              |              |              |              |
|-------------------------------------------------------------|--------------|--------------|--------------|--------------|--------------|--------------|--------------|
| #### Bn-Scaffold000286-p2011 A-genome specific (napus-rapa) | 0.8684211    | 0.7675437    | not scorable | not scorable |              | 1            | 0.7449681    |
| #### Bn-Scaffold000286-p2032 A-genome specific (napus-rapa) | 0.8732057    | 0.7082106    | not scorable | not scorable |              | 1            | 0.6796045    |
| #### Bn-Scaffold000286-p2036 A-genome specific (napus-rapa) | 0.8708134    | 0.7320361    | not scorable | not scorable | 0.9917355    |              | 0.668741     |
| #### Bn-Scaffold000286-p2059 A-genome specific (napus-rapa) | 0.8827751    | 0.8332083    | not scorable | not scorable |              | 1            | 0.7263804    |
| #### Bn-Scaffold000286-p2088 napus specific                 | 0.8444976    | 0.760819     | not scorable | not scorable | not scorable | not scorable | not scorable |
| #### Bn-Scaffold000286-p2736 napus specific                 | 0.6770335    | 0.8385026    | not scorable | not scorable | not scorable | not scorable | not scorable |
| #### Bn-Scaffold000286-p3107 napus specific                 | 0.6866029    | 0.8084878    | not scorable | not scorable | not scorable | not scorable | not scorable |
| #### Bn-Scaffold000286-p3116 napus specific                 | 0.6794258    | 0.8050262    | not scorable | not scorable | not scorable | not scorable | not scorable |
| #### Bn-Scaffold000287-p1689 genome unspecific (all in)     | 1            | 0.6681895    |              | 1            | 0.7079132    | 1            | 0.6628417    |
| #### Bn-Scaffold000289-p2554 A-genome specific (napus-rapa) | 1            | 0.695455     | not scorable | not scorable | 0.9917355    |              | 0.6909643    |
| #### Bn-Scaffold000289-p2745 genome unspecific (all in)     | 0.9808612    | 0.5858393    |              | 1            | 0.771352     | 0.9834711    | 0.7809579    |
| #### Bn-Scaffold000289-p3011 A-genome specific (napus-rapa) | 0.9808612    | 0.750956     | not scorable | not scorable | 0.8099173    |              | 0.8585448    |
| #### Bn-Scaffold000291-p1348 A-genome specific (rapa only)  | not scorable | not scorable | not scorable | not scorable |              | 1            | 0.7843882    |
| #### Bn-Scaffold000291-p1358 A-genome specific (rapa only)  | not scorable | not scorable | not scorable | not scorable | 0.9421487    |              | 0.6111382    |
| #### Bn-Scaffold000291-p2417 A-genome specific (napus-rapa) | 0.9952153    | 0.7795064    | not scorable | not scorable | 0.9504132    |              | 0.6954019    |
| #### Bn-Scaffold000291-p3367 genome unspecific (all in)     | 1            | 0.5007244    |              | 1            | 0.3097594    | 1            | 0.5182889    |
| #### Bn-Scaffold000291-p6238 genome unspecific (all in)     | 1            | 0.5544047    |              | 1            | 0.5128075    | 0.9917355    | 0.5266715    |
| #### Bn-Scaffold000291-p6239 genome unspecific (all in)     | 1            | 0.5333502    |              | 1            | 0.504594     | 1            | 0.5959508    |
| #### Bn-Scaffold000293-p1785 genome unspecific (all in)     | 0.3636364    | 0.5038811    |              | 1            | 0.5960813    | 0.9834711    | 0.5104418    |
| #### Bn-Scaffold000293-p2991 genome unspecific (all in)     | 1            | 0.4587017    |              | 1            | 0.4311382    | 0.9917355    | 0.558627     |
| #### Bn-Scaffold000295-p2323 genome unspecific (all in)     | 0.9856459    | 0.3304534    |              | 1            | 0.6628417    | 0.9917355    | 0.7285145    |
| #### Bn-Scaffold000296-p1152 A-genome specific (napus-rapa) | 0.9617225    | 0.389676     | not scorable | not scorable | 0.9669421    |              | 0.4268307    |
| #### Bn-Scaffold000296-p1213 A-genome specific (napus-rapa) | 0.8803828    | 0.6502648    | not scorable | not scorable | 0.9834711    |              | 0.6222027    |
| #### Bn-Scaffold000296-p1377 A-genome specific (napus-rapa) | 0.8827751    | 0.7347276    | not scorable | not scorable | 0.9669421    |              | 0.7243755    |
| #### Bn-Scaffold000296-p1669 A-genome specific (napus-rapa) | 0.9688995    | 0.2905331    | not scorable | not scorable | 0.9669421    |              | 0.5670848    |
| #### Bn-Scaffold000296-p2057 A-genome specific (napus-rapa) | 0.8827751    | 0.8411245    | not scorable | not scorable | 0.9834711    |              | 0.8275465    |
| #### Bn-Scaffold000296-p7135 A-genome specific (napus-rapa) | 0.8827751    | 0.7601275    | not scorable | not scorable | 0.9834711    |              | 0.7394534    |
| #### Bn-Scaffold000296-p7640 A-genome specific (napus-rapa) | 0.8827751    | 0.7958964    | not scorable | not scorable | 0.9752066    |              | 0.8017523    |
| #### Bn-Scaffold000296-p9362 A-genome specific (napus-rapa) | 0.8827751    | 0.8619335    | not scorable | not scorable | 0.9834711    |              | 0.787383     |
| #### Bn-Scaffold000298-p9903 A-genome specific (napus-rapa) | 0.9904306    | 0.6586939    | not scorable | not scorable | 0.9917355    |              | 0.7101412    |
| #### Bn-Scaffold000300-p1552 genome unspecific (all in)     | 0.9904306    | 0.4485862    |              | 1            | 0.773089     | 0.9917355    | 0.5394819    |
| #### Bn-Scaffold000300-p1701 A-genome specific (napus-rapa) | 0.9880383    | 0.7552954    | not scorable | not scorable | 0.9669421    |              | 0.731643     |
| #### Bn-Scaffold000300-p2011 A-genome specific (napus-rapa) | 0.9928229    | 0.8909438    | not scorable | not scorable | 0.9834711    |              | 0.7776042    |



|                                                                |              |              |              |              |              |              |
|----------------------------------------------------------------|--------------|--------------|--------------|--------------|--------------|--------------|
| #### Bn-Scaffold000300-p2953 A-genome specific (napus-rapa)    | 0.9904306    | 0.9165911    | not scorable | not scorable | 0.9834711    | 0.6892272    |
| #### Bn-Scaffold000300-p4564 A-genome specific (napus-rapa)    | 0.9928229    | 0.9085736    | not scorable | not scorable | 1            | 0.639649     |
| #### Bn-Scaffold000303-p7649 genome unspecific (all in)        | 0.9425837    | 0.5993397    | 1            | 0.7862891    | 1            | 0.6877309    |
| #### Bn-Scaffold000305-p2069 genome unspecific (all in)        | 1            | 0.4839559    | 0.9922481    | 0.7181197    | 1            | 0.8419532    |
| #### Bn-Scaffold000306-p2241 genome unspecific (all in)        | 0.9808612    | 0.3045859    | 1            | 0.7836096    | 1            | 0.795274     |
| #### Bn-Scaffold000316-p1579 genome unspecific (all in)        | 0.9760765    | 0.5993081    | 1            | 0.7296177    | 1            | 0.8553243    |
| #### Bn-Scaffold000316-p9840 A-genome specific (napus-rapa)    | 0.9712918    | 0.8600834    | not scorable | not scorable | 0.9834711    | 0.7794156    |
| #### Bn-Scaffold000317-p2324 A-genome specific (napus-rapa)    | 0.9904306    | 0.8291758    | not scorable | not scorable | 1            | 0.848981     |
| #### Bn-Scaffold000318-p1093 genome unspecific (all in)        | 0.9617225    | 0.517725     | 1            | 0.5861257    | 1            | 0.7404419    |
| #### Bn-Scaffold000320-p1148 A-genome specific (napus-rapa)    | 0.9688995    | 0.6587704    | not scorable | not scorable | 0.9834711    | 0.675037     |
| #### Bn-Scaffold000321-p1234 A-genome specific (napus-rapa)    | 0.9712918    | 0.788915     | not scorable | not scorable | 0.9834711    | 0.7539493    |
| #### Bn-Scaffold000321-p2212 all not scorable                  | not scorable | not scorable | not scorable | not scorable | not scorable | not scorable |
| #### Bn-Scaffold000321-p2268 A-genome specific (napus-rapa)    | 0.9880383    | 0.9343498    | not scorable | not scorable | 0.9917355    | 0.7286923    |
| #### Bn-Scaffold000321-p2301 A-genome specific (napus-rapa)    | 0.9784689    | 0.899315     | not scorable | not scorable | 0.9834711    | 0.8004929    |
| #### Bn-Scaffold000321-p2308 napus specific                    | 0.9856459    | 0.8575774    | not scorable | not scorable | not scorable | not scorable |
| #### Bn-Scaffold000321-p2314 A-genome specific (napus-rapa)    | 0.9784689    | 0.8736505    | not scorable | not scorable | 0.9917355    | 0.7792274    |
| #### Bn-Scaffold000321-p2335 napus specific                    | 0.9856459    | 0.7463201    | not scorable | not scorable | not scorable | not scorable |
| #### Bn-Scaffold000324-p1008 A-genome specific (napus-rapa)    | 0.9808612    | 0.8645532    | not scorable | not scorable | 1            | 0.7820514    |
| #### Bn-Scaffold000324-p108 genome unspecific (all in)         | 1            | 0.6674146    | 0.9922481    | 0.5253007    | 0.9834711    | 0.8772691    |
| #### Bn-Scaffold000324-p1163 A-genome specific (napus-rapa)    | 0.9641148    | 0.7469829    | not scorable | not scorable | 1            | 0.8385528    |
| #### Bn-Scaffold000324-p1190 A-genome specific (napus-rapa)    | 0.9712918    | 0.7069435    | not scorable | not scorable | 1            | 0.6814096    |
| #### Bn-Scaffold000324-p1218 A-genome specific (napus-rapa)    | 0.9736842    | 0.8387276    | not scorable | not scorable | 0.9752066    | 0.7333727    |
| #### Bn-Scaffold000324-p1729 A-genome specific (napus-rapa)    | 0.5215311    | 0.8961413    | not scorable | not scorable | 0.9917355    | 0.9325098    |
| #### Bn-Scaffold000324-p3687 A-genome specific (napus-rapa)    | 0.9784689    | 0.8102573    | not scorable | not scorable | 1            | 0.80797      |
| #### Bn-Scaffold000324-p3944 A-genome specific (napus-rapa)    | 0.7703349    | 0.7982365    | not scorable | not scorable | 0.9917355    | 0.8372995    |
| #### Bn-Scaffold000324-p6102 A-genome specific (rapa only)     | not scorable | not scorable | not scorable | not scorable | 0.9586777    | 0.9172415    |
| #### Bn-Scaffold000327-p1598 genome unspecific (oleracea-rapa) | not scorable | not scorable | 0.9922481    | 0.783891     | 0.9917355    | 0.7973484    |
| #### Bn-Scaffold000337-p6012 napus specific                    | 0.8995215    | 0.8042824    | not scorable | not scorable | not scorable | not scorable |
| #### Bn-Scaffold000341-p1156 genome unspecific (all in)        | 1            | 0.5119069    | 1            | 0.6154503    | 0.9917355    | 0.537392     |
| #### Bn-Scaffold000341-p1275 napus specific                    | 0.354067     | 0.8527765    | not scorable | not scorable | not scorable | not scorable |
| #### Bn-Scaffold000341-p1321 napus specific                    | 0.3516746    | 0.6753107    | not scorable | not scorable | not scorable | not scorable |
| #### Bn-Scaffold000344-p1435 A-genome specific (napus-rapa)    | 0.9952153    | 0.73968      | not scorable | not scorable | 1            | 0.6813757    |
| #### Bn-Scaffold000344-p1622 genome unspecific (all in)        | 0.9952153    | 0.5194296    | 1            | 0.7134259    | 0.9752066    | 0.643477     |

|                                                                |              |              |              |              |              |              |              |
|----------------------------------------------------------------|--------------|--------------|--------------|--------------|--------------|--------------|--------------|
| #### Bn-Scaffold000355-p1972 genome unspecific (all in)        | 0.9880383    | 0.3403178    |              | 1            | 0.6149794    | 0.9834711    | 0.5834725    |
| #### Bn-Scaffold000357-p1318 A-genome specific (napus-rapa)    | 0.9976076    | 0.8298263    | not scorable | not scorable |              | 0.9917355    | 0.7866031    |
| #### Bn-Scaffold000357-p2606 napus specific                    | 0.9928229    | 0.7489727    | not scorable | not scorable | not scorable | not scorable | not scorable |
| #### Bn-Scaffold000357-p8914 genome unspecific (all in)        | 0.9904306    | 0.6027871    | 0.9844961    |              | 0.7593859    | 1            | 0.7971813    |
| #### Bn-Scaffold000359-p1226 A-genome specific (napus-rapa)    | 0.9976076    | 0.7737855    | not scorable | not scorable |              | 0.9586777    | 0.6594682    |
| #### Bn-Scaffold000360-p8925 genome unspecific (all in)        | 0.9665072    | 0.52738      |              | 1            | 0.8365182    | 1            | 0.8223478    |
| #### Bn-Scaffold000362-p1519 genome unspecific (all in)        | 0.9880383    | 0.5137978    |              | 1            | 0.8449496    | 0.9586777    | 0.8072287    |
| #### Bn-Scaffold000366-p2717 genome unspecific (all in)        | 0.9832536    | 0.6600481    | 0.9689922    |              | 0.8258035    | 0.9917355    | 0.6842804    |
| #### Bn-Scaffold000366-p4685 genome unspecific (all in)        | 0.9712918    | 0.609265     | 0.9844961    |              | 0.7430391    | 0.9917355    | 0.7421734    |
| #### Bn-Scaffold000366-p4803 A-genome specific (napus-rapa)    | 0.9976076    | 0.7395591    | not scorable | not scorable |              | 1            | 0.7590818    |
| #### Bn-Scaffold000366-p5068 A-genome specific (napus-rapa)    | 0.9880383    | 0.8124186    | not scorable | not scorable |              | 1            | 0.7479047    |
| #### Bn-Scaffold000367-p2871 napus specific                    | 0.9952153    | 0.745256     | not scorable | not scorable | not scorable | not scorable | not scorable |
| #### Bn-Scaffold000367-p4795 A-genome specific (napus-rapa)    | 0.9928229    | 0.8775563    | not scorable | not scorable |              | 1            | 0.7719252    |
| #### Bn-Scaffold000367-p5046 A-genome specific (napus-rapa)    | 0.9928229    | 0.8640286    | not scorable | not scorable |              | 0.9917355    | 0.8087609    |
| #### Bn-Scaffold000367-p6435 A-genome specific (napus-rapa)    | 0.9904306    | 0.8645375    | not scorable | not scorable |              | 0.9917355    | 0.7833784    |
| #### Bn-Scaffold000367-p6861 napus specific                    | 0.9688995    | 0.9735759    | not scorable | not scorable | not scorable | not scorable | not scorable |
| #### Bn-Scaffold000369-p1002 A-genome specific (napus-rapa)    | 1            | 0.8239072    | not scorable | not scorable |              | 0.9669421    | 0.6919895    |
| #### Bn-Scaffold000369-p1016 A-genome specific (napus-rapa)    | 1            | 0.8478454    | not scorable | not scorable |              | 0.9917355    | 0.6773957    |
| #### Bn-Scaffold000369-p1075 A-genome specific (napus-rapa)    | 1            | 0.7007961    | not scorable | not scorable |              | 0.9338843    | 0.6724662    |
| #### Bn-Scaffold000369-p1080 A-genome specific (napus-rapa)    | 1            | 0.7613462    | not scorable | not scorable |              | 0.9752066    | 0.6509639    |
| #### Bn-Scaffold000369-p1086 A-genome specific (napus-rapa)    | 1            | 0.854292     | not scorable | not scorable |              | 1            | 0.6730372    |
| #### Bn-Scaffold000369-p1122 A-genome specific (napus-rapa)    | 0.9976076    | 0.8361573    | not scorable | not scorable |              | 0.9669421    | 0.7623616    |
| #### Bn-Scaffold000369-p1128 A-genome specific (napus-rapa)    | 1            | 0.78624      | not scorable | not scorable |              | 1            | 0.6974743    |
| #### Bn-Scaffold000369-p1902 A-genome specific (napus-rapa)    | 1            | 0.8377294    | not scorable | not scorable |              | 1            | 0.8225489    |
| #### Bn-Scaffold000369-p9410 genome unspecific (all in)        | 0.9952153    | 0.5274712    |              | 1            | 0.7225369    | 0.9669421    | 0.7161155    |
| #### Bn-Scaffold000372-p1594 A-genome specific (napus-rapa)    | 0.9736842    | 0.8443005    | not scorable | not scorable |              | 1            | 0.7472371    |
| #### Bn-Scaffold000375-p1357 genome unspecific (all in)        | 1            | 0.5178796    |              | 1            | 0.824349     | 0.9917355    | 0.75983      |
| #### Bn-Scaffold000376-p3181 A-genome specific (napus-rapa)    | 1            | 0.5671299    | not scorable | not scorable |              | 1            | 0.565666     |
| #### Bn-Scaffold000377-p1217 A-genome specific (napus-rapa)    | 1            | 0.7191204    | not scorable | not scorable |              | 0.9586777    | 0.6147245    |
| #### Bn-Scaffold000379-p1574 genome unspecific (all in)        | 0.9832536    | 0.4986327    |              | 1            | 0.8294707    | 1            | 0.7286226    |
| #### Bn-Scaffold000383-p8310 C-genome specific (oleracea only) | not scorable | not scorable |              | 1            | 0.8013154    | not scorable | not scorable |
| #### Bn-Scaffold000386-p1043 A-genome specific (rapa only)     | not scorable | not scorable | not scorable | not scorable |              | 1            | 0.7556041    |
| #### Bn-Scaffold000386-p1325 A-genome specific (napus-rapa)    | 0.9688995    | 0.8119309    | not scorable | not scorable |              | 0.9834711    | 0.7936549    |

|                                                                 |              |              |              |              |              |              |              |
|-----------------------------------------------------------------|--------------|--------------|--------------|--------------|--------------|--------------|--------------|
| #### Bn-Scaffold000386-p4150 genome unspecific (all in)         | 0.9330143    | 0.4401013    |              | 1            | 0.7478694    | 0.9752066    | 0.6287864    |
| #### Bn-Scaffold000390-p7718 C-genome specific (napus-oleracea) | 0.7894737    | 0.3527341    |              | 1            | 0.8267699    | not scorable | not scorable |
| #### Bn-Scaffold000392-p1395 genome unspecific (oleracea-rapa)  | not scorable | not scorable | 0.9922481    |              | 0.4466663    | 0.9917355    | 0.5073043    |
| #### Bn-Scaffold000392-p1401 C-genome specific (napus-oleracea) | 1            | 0.5865687    |              | 1            | 0.6751245    | not scorable | not scorable |
| #### Bn-Scaffold000392-p1407 C-genome specific (napus-oleracea) | 1            | 0.5568073    |              | 1            | 0.6784627    | not scorable | not scorable |
| #### Bn-Scaffold000392-p1420 C-genome specific (napus-oleracea) | 1            | 0.5948352    |              | 1            | 0.6520397    | not scorable | not scorable |
| #### Bn-Scaffold000397-p6640 genome unspecific (all in)         | 0.9712918    | 0.6330828    |              | 1            | 0.7721094    | 0.9917355    | 0.7034256    |
| #### Bn-Scaffold000397-p6778 A-genome specific (napus-rapa)     | 0.9952153    | 0.8362496    | not scorable | not scorable |              | 1            | 0.7571927    |
| #### Bn-Scaffold000397-p7197 A-genome specific (napus-rapa)     | 0.9976076    | 0.7477932    | not scorable | not scorable |              | 1            | 0.7194184    |
| #### Bn-Scaffold000398-p8508 A-genome specific (napus-rapa)     | 0.9952153    | 0.8327926    | not scorable | not scorable | 0.9917355    |              | 0.8005624    |
| #### Bn-Scaffold000403-p1245 A-genome specific (napus-rapa)     | 0.9736842    | 0.7985544    | not scorable | not scorable | 0.9834711    |              | 0.8779107    |
| #### Bn-Scaffold000403-p1269 A-genome specific (napus-rapa)     | 0.9856459    | 0.7814615    | not scorable | not scorable |              | 1            | 0.7527695    |
| #### Bn-Scaffold000406-p1393 genome unspecific (all in)         | 1            | 0.6054083    |              | 1            | 0.7637064    | 1            | 0.6033546    |
| #### Bn-Scaffold000409-p1127 genome unspecific (all in)         | 0.9952153    | 0.903228     | 0.9534883    |              | 0.7127128    | 1            | 0.8948976    |
| #### Bn-Scaffold000409-p1206 genome unspecific (all in)         | 1            | 0.2770694    |              | 1            | 0.3642456    | 1            | 0.8004208    |
| #### Bn-Scaffold000410-p4788 genome unspecific (all in)         | 1            | 0.6944866    | 0.9767442    |              | 0.8028511    | 1            | 0.8942056    |
| #### Bn-Scaffold000411-p1025 genome unspecific (all in)         | 1            | 0.6185423    |              | 1            | 0.6444352    | 1            | 0.6080307    |
| #### Bn-Scaffold000411-p1030 genome unspecific (all in)         | 0.9976076    | 0.6844433    |              | 1            | 0.6240301    | 1            | 0.6829084    |
| #### Bn-Scaffold000416-p5550 napus specific                     | 0.9545454    | 0.565604     | not scorable | not scorable | not scorable | not scorable | not scorable |
| #### Bn-Scaffold000428-p6186 A-genome specific (napus-rapa)     | 0.9617225    | 0.8423621    | not scorable | not scorable | 0.9586777    |              | 0.8026897    |
| #### Bn-Scaffold000435-p4305 A-genome specific (rapa only)      | not scorable | not scorable | not scorable | not scorable | 0.9752066    |              | 0.7098398    |
| #### Bn-Scaffold000436-p7458 A-genome specific (napus-rapa)     | 0.9760765    | 0.8509076    | not scorable | not scorable |              | 1            | 0.7973625    |
| #### Bn-Scaffold000444-p344 A-genome specific (napus-rapa)      | 0.9784689    | 0.5521904    | not scorable | not scorable | 0.9834711    |              | 0.6539554    |
| #### Bn-Scaffold000444-p5763 A-genome specific (napus-rapa)     | 0.9904306    | 0.8792284    | not scorable | not scorable | 0.9834711    |              | 0.7940717    |
| #### Bn-Scaffold000456-p4751 genome unspecific (all in)         | 1            | 0.7264988    | 0.9689922    |              | 0.2433634    | 1            | 0.7739488    |
| #### Bn-Scaffold000456-p5034 C-genome specific (napus-oleracea) | 1            | 0.4940836    |              | 1            | 0.587085     | not scorable | not scorable |
| #### Bn-Scaffold000457-p5832 all not scorable                   | not scorable | not scorable | not scorable | not scorable | not scorable | not scorable | not scorable |
| #### Bn-Scaffold000460-p4184 A-genome specific (napus-rapa)     | 0.9832536    | 0.7598243    | not scorable | not scorable |              | 1            | 0.7517134    |
| #### Bn-Scaffold000460-p5716 A-genome specific (napus-rapa)     | 0.9832536    | 0.7452986    | not scorable | not scorable | 0.9917355    |              | 0.8052219    |
| #### Bn-Scaffold000464-p5975 napus specific                     | 0.854067     | 0.8032162    | not scorable | not scorable | not scorable | not scorable | not scorable |
| #### Bn-Scaffold000465-p5300 A-genome specific (napus-rapa)     | 0.8492823    | 0.6369402    | not scorable | not scorable | 0.9834711    |              | 0.7477645    |
| #### Bn-Scaffold000465-p5464 genome unspecific (all in)         | 0.9425837    | 0.3876877    |              | 1            | 0.8649622    | 0.9917355    | 0.7732918    |
| #### Bn-Scaffold000465-p8854 A-genome specific (napus-rapa)     | 0.9856459    | 0.7857337    | not scorable | not scorable | 0.9669421    |              | 0.741456     |

|                                                                |              |              |              |              |              |              |
|----------------------------------------------------------------|--------------|--------------|--------------|--------------|--------------|--------------|
| #### Bn-Scaffold000469-p2820 genome unspecific (all in)        | 0.9736842    | 0.2921768    | 0.9224806    | 0.71557      | 1            | 0.598964     |
| #### Bn-Scaffold000477-p7116 A-genome specific (napus-rapa)    | 0.9712918    | 0.3530788    | not scorable | not scorable | 0.9752066    | 0.7904381    |
| #### Bn-Scaffold000480-p5137 A-genome specific (napus-rapa)    | 1            | 0.5790851    | not scorable | not scorable | 1            | 0.5999157    |
| #### Bn-Scaffold000497-p5906 genome unspecific (all in)        | 1            | 0.6252844    | 1            | 0.7262912    | 1            | 0.5643941    |
| #### Bn-Scaffold000499-p5529 A-genome specific (napus-rapa)    | 0.9928229    | 0.9069771    | not scorable | not scorable | 1            | 0.7336677    |
| #### Bn-Scaffold000501-p3606 A-genome specific (napus-rapa)    | 0.9832536    | 0.8656691    | not scorable | not scorable | 0.9669421    | 0.7204044    |
| #### Bn-Scaffold000504-p5010 genome unspecific (all in)        | 0.9904306    | 0.7755595    | 0.9922481    | 0.7533931    | 1            | 0.8135551    |
| #### Bn-Scaffold000508-p6116 A-genome specific (napus-rapa)    | 0.9832536    | 0.8031243    | not scorable | not scorable | 0.9834711    | 0.7978365    |
| #### Bn-Scaffold000512-p1602 napus specific                    | 0.9952153    | 0.5921757    | not scorable | not scorable | not scorable | not scorable |
| #### Bn-Scaffold000516-p949 A-genome specific (napus-rapa)     | 1            | 0.829427     | not scorable | not scorable | 0.9752066    | 0.6908416    |
| #### Bn-Scaffold000519-p5715 genome unspecific (all in)        | 0.9808612    | 0.4531792    | 1            | 0.7252982    | 1            | 0.9205657    |
| #### Bn-Scaffold000520-p2756 A-genome specific (napus-rapa)    | 1            | 0.7927658    | not scorable | not scorable | 0.9586777    | 0.7001475    |
| #### Bn-Scaffold000521-p2857 A-genome specific (napus-rapa)    | 1            | 0.8578495    | not scorable | not scorable | 1            | 0.704993     |
| #### Bn-Scaffold000534-p3951 genome unspecific (oleracea-rapa) | not scorable | not scorable | 1            | 0.9447637    | 1            | 0.7511884    |
| #### Bn-Scaffold000541-p303 A-genome specific (napus-rapa)     | 0.9856459    | 0.346406     | not scorable | not scorable | 1            | 0.3117986    |
| #### Bn-Scaffold000553-p144 genome unspecific (all in)         | 1            | 0.5726597    | 1            | 0.8513622    | 1            | 0.5762428    |
| #### Bn-Scaffold000555-p3863 A-genome specific (napus-rapa)    | 0.9019139    | 0.9184187    | not scorable | not scorable | 0.9504132    | 0.8719519    |
| #### Bn-Scaffold000560-p2014 A-genome specific (napus-rapa)    | 0.6483254    | 0.693244     | not scorable | not scorable | 0.9752066    | 0.8124495    |
| #### Bn-Scaffold000560-p2117 A-genome specific (napus-rapa)    | 0.9928229    | 0.7317113    | not scorable | not scorable | 1            | 0.7405313    |
| #### Bn-Scaffold000560-p2232 A-genome specific (napus-rapa)    | 0.9880383    | 0.7811232    | not scorable | not scorable | 1            | 0.8446657    |
| #### Bn-Scaffold000560-p3677 A-genome specific (napus-rapa)    | 0.9952153    | 0.7910616    | not scorable | not scorable | 1            | 0.8304257    |
| #### Bn-Scaffold000560-p4001 A-genome specific (napus-rapa)    | 0.9880383    | 0.7458125    | not scorable | not scorable | 1            | 0.802225     |
| #### Bn-Scaffold000560-p4073 A-genome specific (napus-rapa)    | 1            | 0.8793284    | not scorable | not scorable | 0.9834711    | 0.7388886    |
| #### Bn-Scaffold000560-p4157 A-genome specific (napus-rapa)    | 0.9976076    | 0.791217     | not scorable | not scorable | 1            | 0.7824756    |
| #### Bn-Scaffold000560-p4391 A-genome specific (napus-rapa)    | 0.9976076    | 0.7829128    | not scorable | not scorable | 1            | 0.7506773    |
| #### Bn-Scaffold000564-p2696 all not scorable                  | not scorable | not scorable | not scorable | not scorable | not scorable | not scorable |
| #### Bn-Scaffold000564-p4733 genome unspecific (all in)        | 0.9976076    | 0.7230238    | 1            | 0.8193942    | 0.9917355    | 0.6064926    |
| #### Bn-Scaffold000565-p1686 A-genome specific (napus-rapa)    | 1            | 0.7760829    | not scorable | not scorable | 0.9752066    | 0.7742809    |
| #### Bn-Scaffold000565-p1945 A-genome specific (napus-rapa)    | 0.9952153    | 0.8129316    | not scorable | not scorable | 1            | 0.8229197    |
| #### Bn-Scaffold000565-p4438 genome unspecific (all in)        | 1            | 0.5149947    | 1            | 0.4566025    | 0.9752066    | 0.6866525    |
| #### Bn-Scaffold000568-p1475 genome unspecific (all in)        | 1            | 0.589027     | 1            | 0.5435127    | 1            | 0.5987751    |
| #### Bn-Scaffold000582-p3247 A-genome specific (napus-rapa)    | 0.9880383    | 0.8442847    | not scorable | not scorable | 1            | 0.8352304    |
| #### Bn-Scaffold000584-p4211 genome unspecific (all in)        | 0.9976076    | 0.6793177    | 1            | 0.8073775    | 0.9917355    | 0.7428803    |

|                                                                 |              |              |              |              |              |              |
|-----------------------------------------------------------------|--------------|--------------|--------------|--------------|--------------|--------------|
| #### Bn-Scaffold000587-p3379 A-genome specific (napus-rapa)     | 0.9545454    | 0.3817779    | not scorable | not scorable | 0.9338843    | 0.8558818    |
| #### Bn-Scaffold000619-p2557 genome unspecific (all in)         | 0.8492823    | 0.6056234    |              | 1 0.727214   | 1            | 0.7554153    |
| #### Bn-Scaffold000632-p2930 A-genome specific (napus-rapa)     | 0.9688995    | 0.8965691    | not scorable | not scorable | 1            | 0.9496523    |
| #### Bn-Scaffold000654-p2388 genome unspecific (all in)         | 0.9712918    | 0.6607506    |              | 1 0.5752002  | 1            | 0.5853774    |
| #### Bn-Scaffold000654-p721 A-genome specific (napus-rapa)      | 0.9688995    | 0.6967307    | not scorable | not scorable | 0.9917355    | 0.7579646    |
| #### Bn-Scaffold000656-p3142 A-genome specific (napus-rapa)     | 0.7799043    | 0.8997134    | not scorable | not scorable | 0.9917355    | 0.770925     |
| #### Bn-Scaffold000664-p1838 napus specific                     | 0.7751196    | 0.8478189    | not scorable | not scorable | not scorable | not scorable |
| #### Bn-Scaffold000673-p1640 C-genome specific (napus-oleracea) | 0.9904306    | 0.4634964    |              | 1 0.7730911  | not scorable | not scorable |
| #### Bn-Scaffold000684-p1606 genome unspecific (all in)         | 0.9736842    | 0.5459707    | 0.9922481    | 0.7297356    | 0.9834711    | 0.6274076    |
| #### Bn-Scaffold000684-p2321 genome unspecific (all in)         | 0.9497608    | 0.4324048    |              | 1 0.6803219  | 1            | 0.7271011    |
| #### Bn-Scaffold000721-p1462 A-genome specific (napus-rapa)     | 0.8492823    | 0.723438     | not scorable | not scorable | 0.9917355    | 0.9246742    |
| #### Bn-Scaffold000783-p133 all not scorable                    | not scorable | not scorable | not scorable | not scorable | not scorable | not scorable |
| #### Bn-Scaffold000788-p1697 genome unspecific (all in)         | 0.9904306    | 0.5837982    |              | 1 0.5677395  | 1            | 0.556953     |
| #### Bn-Scaffold000796-p1119 genome unspecific (all in)         | 1            | 0.4820993    |              | 1 0.7058022  | 1            | 0.7040766    |
| #### Bn-Scaffold000827-p421 genome unspecific (all in)          | 0.9904306    | 0.7160035    | 0.8449612    | 0.7907062    | 0.9834711    | 0.7880506    |
| #### Bn-Scaffold000831-p1394 genome unspecific (all in)         | 0.9712918    | 0.4258299    |              | 1 0.7903793  | 0.9917355    | 0.6711481    |
| #### Bn-Scaffold000856-p200 genome unspecific (all in)          | 0.9808612    | 0.6985893    |              | 1 0.761795   | 1            | 0.8130523    |
| #### Bn-Scaffold000873-p1368 C-genome specific (napus-oleracea) | 0.9569378    | 0.3956424    |              | 1 0.6127741  | not scorable | not scorable |
| #### Bn-Scaffold000879-p1488 A-genome specific (napus-rapa)     | 0.9808612    | 0.8165373    | not scorable | not scorable | 0.9752066    | 0.7084826    |
| #### Bn-Scaffold000892-p1200 all not scorable                   | not scorable | not scorable | not scorable | not scorable | not scorable | not scorable |
| #### Bn-Scaffold000906-p1518 A-genome specific (napus-rapa)     | 0.9210526    | 0.8184071    | not scorable | not scorable | 1            | 0.8611046    |
| #### Bn-Scaffold000906-p828 genome unspecific (oleracea-rapa)   | not scorable | not scorable | 0.9689922    | 0.7685868    | 0.6859504    | 0.7959748    |
| #### Bn-Scaffold000932-p575 genome unspecific (oleracea-rapa)   | not scorable | not scorable | 0.8449612    | 0.2650371    | 0.9752066    | 0.7681131    |
| #### Bn-Scaffold000946-p999 A-genome specific (napus-rapa)      | 0.9904306    | 0.3953399    | not scorable | not scorable | 0.9834711    | 0.8263854    |
| #### Bn-Scaffold000954-p1183 genome unspecific (all in)         | 1            | 0.543762     |              | 1 0.538463   | 1            | 0.4799645    |
| #### Bn-Scaffold000962-p273 A-genome specific (napus-rapa)      | 0.9976076    | 0.5472661    | not scorable | not scorable | 0.9917355    | 0.7267336    |
| #### Bn-Scaffold000993-p187 A-genome specific (napus-rapa)      | 1            | 0.7946354    | not scorable | not scorable | 1            | 0.7518372    |
| #### Bn-Scaffold000996-p195 A-genome specific (napus-rapa)      | 0.9928229    | 0.806685     | not scorable | not scorable | 1            | 0.7522998    |
| #### Bn-Scaffold001041-p1211 napus specific                     | 0.6674641    | 0.7206949    | not scorable | not scorable | not scorable | not scorable |
| #### Bn-Scaffold001041-p911 A-genome specific (napus-rapa)      | 0.6794258    | 0.7623497    | not scorable | not scorable | 0.9669421    | 0.4113089    |
| #### Bn-Scaffold001055-p797 genome unspecific (all in)          | 1            | 0.7390317    |              | 1 0.8103302  | 1            | 0.8004208    |
| #### Bn-Scaffold001080-p1208 A-genome specific (napus-rapa)     | 1            | 0.5016979    | not scorable | not scorable | 1            | 0.7582394    |
| #### Bn-Scaffold001080-p906 A-genome specific (napus-rapa)      | 1            | 0.5206345    | not scorable | not scorable | 0.9752066    | 0.6664248    |

|      |                         |                                   |              |              |              |              |              |              |
|------|-------------------------|-----------------------------------|--------------|--------------|--------------|--------------|--------------|--------------|
| #### | Bn-Scaffold001110-p441  | genome unspecific (all in)        | 0.9784689    | 0.5349526    | 1            | 0.7278739    | 1            | 0.8434396    |
| #### | Bn-Scaffold001128-p1186 | A-genome specific (napus-rapa)    | 0.9952153    | 0.8879691    | not scorable | not scorable | 0.9917355    | 0.7787281    |
| #### | Bn-Scaffold001161-p777  | genome unspecific (all in)        | 0.9904306    | 0.7009967    | 1            | 0.71036      | 1            | 0.7241886    |
| #### | Bn-Scaffold001298-p970  | A-genome specific (napus-rapa)    | 0.9760765    | 0.7989691    | not scorable | not scorable | 1            | 0.8790764    |
| #### | Bn-Scaffold001320-p775  | A-genome specific (napus-rapa)    | 1            | 0.5508217    | not scorable | not scorable | 1            | 0.6885806    |
| #### | Bn-Scaffold001332-p452  | A-genome specific (napus-rapa)    | 0.9904306    | 0.9287075    | not scorable | not scorable | 1            | 0.771754     |
| #### | Bn-Scaffold001356-p370  | A-genome specific (napus-rapa)    | 0.8421053    | 0.7256013    | not scorable | not scorable | 1            | 0.7178787    |
| #### | Bn-Scaffold001367-p715  | genome unspecific (all in)        | 0.9880383    | 0.4885538    | 0.9457364    | 0.4085785    | 0.9752066    | 0.8263288    |
| #### | Bn-Scaffold001532-p334  | genome unspecific (all in)        | 0.9497608    | 0.3484283    | 1            | 0.6339589    | 0.9752066    | 0.5590072    |
| #### | Bn-Scaffold001557-p226  | genome unspecific (oleracea-rapa) | not scorable | not scorable | 1            | 0.8798412    | 0.9917355    | 0.7960036    |
| #### | Bn-Scaffold001563-p-1   | C-genome specific (oleracea only) | not scorable | not scorable | 0.9612403    | 0.8692437    | not scorable | not scorable |
| #### | Bn-Scaffold001576-p312  | A-genome specific (rapa only)     | not scorable | not scorable | not scorable | not scorable | 1            | 0.5951334    |
| #### | Bn-Scaffold001599-p514  | genome unspecific (all in)        | 0.8157895    | 0.7829088    | 1            | 0.7090033    | 0.9917355    | 0.5683218    |
| #### | Bn-Scaffold001630-p45   | genome unspecific (all in)        | 0.9952153    | 0.3090807    | 1            | 0.8612159    | 0.9834711    | 0.641323     |
| #### | Bn-Scaffold001661-p663  | genome unspecific (all in)        | 0.9688995    | 0.6545258    | 0.9767442    | 0.7731757    | 0.8760331    | 0.7040766    |
| #### | Bn-Scaffold001770-p612  | genome unspecific (oleracea-rapa) | not scorable | not scorable | 0.9844961    | 0.736299     | 1            | 0.7049918    |
| #### | Bn-Scaffold001779-p127  | genome unspecific (oleracea-rapa) | not scorable | not scorable | 1            | 0.7490658    | 1            | 0.6760703    |
| #### | Bn-Scaffold001812-p284  | A-genome specific (napus-rapa)    | 0.9904306    | 0.8100616    | not scorable | not scorable | 0.9834711    | 0.7700962    |
| #### | Bn-Scaffold001835-p29   | A-genome specific (rapa only)     | not scorable | not scorable | not scorable | not scorable | 0.9504132    | 0.7153603    |
| #### | Bn-Scaffold001891-p416  | C-genome specific (oleracea only) | not scorable | not scorable | 1            | 0.786147     | not scorable | not scorable |
| #### | Bn-Scaffold001988-p613  | genome unspecific (all in)        | 0.9880383    | 0.5380763    | 1            | 0.736583     | 0.9917355    | 0.6867837    |
| #### | Bn-Scaffold001990-p448  | genome unspecific (all in)        | 1            | 0.6285239    | 1            | 0.6313093    | 1            | 0.7255322    |
| #### | Bn-Scaffold001990-p555  | A-genome specific (napus-rapa)    | 0.9976076    | 0.6799716    | not scorable | not scorable | 1            | 0.7704166    |
| #### | Bn-Scaffold002005-p385  | A-genome specific (napus-rapa)    | 0.2942584    | 0.7484976    | not scorable | not scorable | 0.9338843    | 0.3470687    |
| #### | Bn-Scaffold002031-p167  | A-genome specific (napus-rapa)    | 0.9784689    | 0.4719252    | not scorable | not scorable | 1            | 0.9234645    |
| #### | Bn-Scaffold002041-p220  | A-genome specific (napus-rapa)    | 0.9952153    | 0.6168272    | not scorable | not scorable | 1            | 0.8757944    |
| #### | Bn-Scaffold002082-p84   | A-genome specific (napus-rapa)    | 0.9832536    | 0.9075463    | not scorable | not scorable | 0.9917355    | 0.7879269    |
| #### | Bn-Scaffold002092-p583  | genome unspecific (all in)        | 0.9832536    | 0.3093138    | 1            | 0.6466377    | 0.9917355    | 0.8509708    |
| #### | Bn-Scaffold002192-p580  | A-genome specific (rapa only)     | not scorable | not scorable | not scorable | not scorable | 1            | 0.787395     |
| #### | Bn-Scaffold002217-p471  | A-genome specific (rapa only)     | not scorable | not scorable | not scorable | not scorable | 0.9917355    | 0.8360267    |
| #### | Bn-Scaffold002229-p373  | napus specific                    | 0.2870813    | 0.7870967    | not scorable | not scorable | not scorable | not scorable |
| #### | Bn-Scaffold002315-p80   | genome unspecific (all in)        | 0.9808612    | 0.3347043    | 1            | 0.7005224    | 1            | 0.86349      |
| #### | Bn-Scaffold002454-p605  | A-genome specific (rapa only)     | not scorable | not scorable | not scorable | not scorable | 0.9669421    | 0.9039531    |



|                             |                                    |              |              |              |              |              |              |              |
|-----------------------------|------------------------------------|--------------|--------------|--------------|--------------|--------------|--------------|--------------|
| #### Bn-Scaffold005215-p31  | genome unspecific (all in)         | 1            | 0.6602584    |              | 1            | 0.6319489    | 1            | 0.681638     |
| #### Bn-Scaffold005215-p317 | all not scorable                   | not scorable | not scorable | not scorable | not scorable | not scorable | not scorable | not scorable |
| #### Bn-Scaffold005444-p94  | genome unspecific (all in)         | 1            | 0.6305527    |              | 1            | 0.6653485    | 1            | 0.7395847    |
| #### Bn-Scaffold005540-p56  | A-genome specific (napus-rapa)     | 0.6842105    | 0.7933119    | not scorable | not scorable | 0.6859504    | 0.8497169    |              |
| #### Bn-Scaffold005956-p293 | A-genome specific (napus-rapa)     | 0.9641148    | 0.6833796    | not scorable | not scorable | 0.9917355    | 0.7011052    |              |
| #### Bn-Scaffold006179-p319 | genome unspecific (all in)         | 0.9545454    | 0.6005723    |              | 1            | 0.7394976    | 0.9586777    | 0.392341     |
| #### Bn-Scaffold006479-p207 | A-genome specific (napus-rapa)     | 0.8588517    | 0.8042012    | not scorable | not scorable | 0.9669421    | 0.7672264    |              |
| #### Bn-Scaffold006503-p167 | all not scorable                   | not scorable | not scorable | not scorable | not scorable | not scorable | not scorable | not scorable |
| #### Bn-Scaffold006516-p118 | A-genome specific (rapa only)      | not scorable | not scorable | not scorable | not scorable | 0.9834711    | 0.5892246    |              |
| #### Bn-Scaffold006802-p216 | A-genome specific (napus-rapa)     | 0.9473684    | 0.7204551    | not scorable | not scorable |              | 1            | 0.8004208    |
| #### Bn-Scaffold006810-p-1  | genome unspecific (all in)         | 0.9976076    | 0.3339255    | 0.9844961    | 0.3149463    | 0.9669421    | 0.6271362    |              |
| #### Bn-Scaffold006825-p88  | C-genome specific (napus-oleracea) | 0.9952153    | 0.7891962    |              | 1            | 0.6852731    | not scorable | not scorable |
| #### Bn-Scaffold006833-p103 | genome unspecific (all in)         | 0.9928229    | 0.4811471    |              | 1            | 0.4975551    | 1            | 0.7813892    |
| #### Bn-Scaffold006869-p236 | genome unspecific (all in)         | 0.9425837    | 0.559516     | 0.8527132    | 0.7814524    | 0.9917355    | 0.7933832    |              |
| #### Bn-Scaffold007063-p202 | A-genome specific (napus-rapa)     | 0.9904306    | 0.7947458    | not scorable | not scorable |              | 1            | 0.7015526    |
| #### Bn-Scaffold007411-p208 | A-genome specific (rapa only)      | not scorable | not scorable | not scorable | not scorable |              | 1            | 0.3050063    |
| #### Bn-Scaffold008008-p158 | A-genome specific (napus-rapa)     | 0.9880383    | 0.7930333    | not scorable | not scorable |              | 1            | 0.7236234    |
| #### Bn-Scaffold008242-p94  | A-genome specific (napus-rapa)     | 0.9832536    | 0.8102524    | not scorable | not scorable | 0.9834711    | 0.7976328    |              |
| #### Bn-Scaffold008258-p195 | genome unspecific (all in)         | 1            | 0.7368765    |              | 1            | 0.8337486    | 0.9338843    | 0.819285     |
| #### Bn-Scaffold008419-p59  | genome unspecific (oleracea-rapa)  | not scorable | not scorable | 0.9689922    | 0.2361759    | 0.9834711    | 0.8893148    |              |
| #### Bn-Scaffold009013-p209 | napus specific                     | 0.9976076    | 0.772382     | not scorable | not scorable | not scorable | not scorable |              |
| #### Bn-Scaffold009342-p141 | A-genome specific (napus-rapa)     | 0.9976076    | 0.8893777    | not scorable | not scorable | 0.9834711    | 0.6815999    |              |
| #### Bn-Scaffold009342-p96  | A-genome specific (napus-rapa)     | 1            | 0.7987325    | not scorable | not scorable |              | 1            | 0.6234101    |
| #### Bn-Scaffold009738-p62  | A-genome specific (napus-rapa)     | 0.9928229    | 0.7505167    | not scorable | not scorable |              | 1            | 0.7137888    |
| #### Bn-Scaffold009788-p170 | genome unspecific (all in)         | 0.9688995    | 0.3713591    |              | 1            | 0.8226843    | 0.9917355    | 0.7448924    |
| #### Bn-Scaffold009796-p194 | A-genome specific (rapa only)      | not scorable | not scorable | not scorable | not scorable |              | 1            | 0.8135551    |
| #### Bn-Scaffold010040-p134 | genome unspecific (oleracea-rapa)  | not scorable | not scorable |              | 1            | 0.586687     | 1            | 0.7938833    |
| #### Bn-Scaffold010152-p149 | napus specific                     | 0.9066986    | 0.7592307    | not scorable | not scorable | not scorable | not scorable |              |
| #### Bn-Scaffold010196-p86  | napus specific                     | 0.6842105    | 0.8834132    | not scorable | not scorable | not scorable | not scorable |              |
| #### Bn-Scaffold010197-p119 | napus specific                     | 0.6842105    | 0.8199111    | not scorable | not scorable | not scorable | not scorable |              |
| #### Bn-Scaffold010197-p200 | A-genome specific (napus-rapa)     | 0.6842105    | 0.8315123    | not scorable | not scorable | 0.8099173    | 0.8008999    |              |
| #### Bn-Scaffold010519-p163 | genome unspecific (all in)         | 1            | 0.667827     | 0.9922481    | 0.7598116    | 0.9834711    | 0.7555058    |              |
| #### Bn-Scaffold010559-p213 | genome unspecific (all in)         | 0.9976076    | 0.4951095    |              | 1            | 0.7736278    | 1            | 0.9177714    |



|      |                        |                                    |              |              |              |              |              |              |
|------|------------------------|------------------------------------|--------------|--------------|--------------|--------------|--------------|--------------|
| #### | Bn-Scaffold010592-p46  | C-genome specific (oleracea only)  | not scorable | not scorable | 0.9767442    | 0.7178209    | not scorable | not scorable |
| #### | Bn-Scaffold010693-p54  | A-genome specific (rapa only)      | not scorable | not scorable | not scorable | not scorable | 1            | 0.9256427    |
| #### | Bn-Scaffold010908-p102 | A-genome specific (napus-rapa)     | 0.9617225    | 0.7847167    | not scorable | not scorable | 0.9917355    | 0.6737181    |
| #### | Bn-Scaffold011056-p71  | genome unspecific (oleracea-rapa)  | not scorable | not scorable | 0.9922481    | 0.3659389    | 0.9834711    | 0.840955     |
| #### | Bn-Scaffold011148-p147 | genome unspecific (oleracea-rapa)  | not scorable | not scorable |              | 1            | 0.3391287    | 0.9834711    |
| #### | Bn-Scaffold011296-p78  | all not scorable                   | not scorable | not scorable | not scorable | not scorable | not scorable | not scorable |
| #### | Bn-Scaffold011301-p120 | A-genome specific (napus-rapa)     | 0.9856459    | 0.8023669    | not scorable | not scorable | 0.9504132    | 0.7815589    |
| #### | Bn-Scaffold011309-p72  | A-genome specific (napus-rapa)     | 0.9976076    | 0.7706779    | not scorable | not scorable | 1            | 0.7172806    |
| #### | Bn-Scaffold011425-p94  | genome unspecific (all in)         | 0.9641148    | 0.3867114    |              | 1            | 0.7853642    | 0.9917355    |
| #### | Bn-Scaffold011730-p122 | A-genome specific (napus-rapa)     | 0.7105263    | 0.7339311    | not scorable | not scorable | 0.9338843    | 0.6318454    |
| #### | Bn-Scaffold012150-p185 | genome unspecific (oleracea-rapa)  | not scorable | not scorable | 0.9302326    | 0.3698206    | 1            | 0.7739488    |
| #### | Bn-Scaffold012150-p99  | genome unspecific (oleracea-rapa)  | not scorable | not scorable | 0.8372093    | 0.2615587    | 1            | 0.8324616    |
| #### | Bn-Scaffold012206-p170 | all not scorable                   | not scorable | not scorable | not scorable | not scorable | not scorable | not scorable |
| #### | Bn-Scaffold012474-p89  | all not scorable                   | not scorable | not scorable | not scorable | not scorable | not scorable | not scorable |
| #### | Bn-Scaffold012485-p58  | napus specific                     | 0.6961722    | 0.7955495    | not scorable | not scorable | not scorable | not scorable |
| #### | Bn-Scaffold012538-p144 | all not scorable                   | not scorable | not scorable | not scorable | not scorable | not scorable | not scorable |
| #### | Bn-Scaffold012703-p114 | genome unspecific (all in)         | 0.9784689    | 0.5586233    |              | 1            | 0.9305729    | 1            |
| #### | Bn-Scaffold012966-p76  | A-genome specific (rapa only)      | not scorable | not scorable | not scorable | not scorable | 0.9917355    | 0.8288341    |
| #### | Bn-Scaffold013089-p53  | genome unspecific (all in)         | 0.9976076    | 0.4764197    |              | 1            | 0.7970918    | 1            |
| #### | Bn-Scaffold013153-p127 | napus specific                     | 0.8779904    | 0.7734094    | not scorable | not scorable | not scorable | not scorable |
| #### | Bn-Scaffold013287-p77  | genome unspecific (all in)         | 0.9736842    | 0.4639249    | 0.9767442    | 0.785938     | 0.9917355    | 0.7340815    |
| #### | Bn-Scaffold013964-p106 | A-genome specific (napus-rapa)     | 0.930622     | 0.35355      | not scorable | not scorable | 0.9834711    | 0.6721142    |
| #### | Bn-Scaffold014583-p78  | A-genome specific (napus-rapa)     | 0.9856459    | 0.709097     | not scorable | not scorable | 1            | 0.711467     |
| #### | Bn-Scaffold014586-p83  | genome unspecific (all in)         | 0.9928229    | 0.5012287    |              | 1            | 0.790536     | 0.9834711    |
| #### | Bn-Scaffold014697-p80  | A-genome specific (napus-rapa)     | 0.9641148    | 0.8646677    | not scorable | not scorable | 0.9752066    | 0.7096455    |
| #### | Bn-Scaffold014880-p22  | genome unspecific (oleracea-rapa)  | not scorable | not scorable |              | 1            | 0.6101518    | 0.9917355    |
| #### | Bn-Scaffold014918-p69  | napus specific                     | 0.08133971   | 0.7842133    | not scorable | not scorable | not scorable | not scorable |
| #### | Bn-Scaffold014949-p111 | genome unspecific (all in)         |              | 1            | 0.4346853    |              | 1            | 0.8271875    |
| #### | Bn-Scaffold015028-p146 | all not scorable                   | not scorable | not scorable | not scorable | not scorable | not scorable | not scorable |
| #### | Bn-Scaffold015028-p40  | A-genome specific (rapa only)      | not scorable | not scorable | not scorable | not scorable | 0.7272727    | 0.6594512    |
| #### | Bn-Scaffold015044-p49  | C-genome specific (napus-oleracea) | 0.9545454    | 0.2738466    |              | 1            | 0.5578789    | not scorable |
| #### | Bn-Scaffold015310-p31  | C-genome specific (oleracea only)  | not scorable | not scorable |              | 1            | 0.6121543    | not scorable |
| #### | Bn-Scaffold015689-p116 | genome unspecific (all in)         | 0.9401914    | 0.5361314    | 0.9922481    | 0.8181552    | 0.9917355    | 0.8814059    |

|      |                        |                                    |              |              |              |              |              |              |
|------|------------------------|------------------------------------|--------------|--------------|--------------|--------------|--------------|--------------|
| #### | Bn-Scaffold016308-p77  | genome unspecific (all in)         | 0.9736842    | 0.359147     | 1            | 0.7431233    | 0.9834711    | 0.5356162    |
| #### | Bn-Scaffold016319-p54  | genome unspecific (oleracea-rapa)  | not scorable | not scorable | 0.9922481    | 0.6859744    | 0.9834711    | 0.8497543    |
| #### | Bn-Scaffold016439-p48  | A-genome specific (napus-rapa)     | 0.9688995    | 0.7576311    | not scorable | not scorable | 1            | 0.7178116    |
| #### | Bn-Scaffold016479-p127 | genome unspecific (all in)         | 0.9904306    | 0.5300967    | 1            | 0.6958665    | 0.9917355    | 0.7733704    |
| #### | Bn-Scaffold017342-p9   | genome unspecific (oleracea-rapa)  | not scorable | not scorable | 0.9922481    | 0.214784     | 1            | 0.8135551    |
| #### | Bn-Scaffold017447-p56  | A-genome specific (napus-rapa)     | 1            | 0.8381857    | not scorable | not scorable | 0.9917355    | 0.7788654    |
| #### | Bn-Scaffold017668-p98  | genome unspecific (all in)         | 1            | 0.4642566    | 0.9844961    | 0.5934697    | 0.9917355    | 0.6401719    |
| #### | Bn-Scaffold018404-p-1  | genome unspecific (all in)         | 0.9688995    | 0.2815316    | 1            | 0.7527766    | 0.9504132    | 0.2238064    |
| #### | Bn-Scaffold018996-p33  | genome unspecific (all in)         | 0.9832536    | 0.5231909    | 1            | 0.8343305    | 0.9917355    | 0.6023077    |
| #### | Bn-Scaffold019294-p48  | genome unspecific (oleracea-rapa)  | not scorable | not scorable | 1            | 0.7154919    | 0.9917355    | 0.7171413    |
| #### | Bn-Scaffold019560-p58  | genome unspecific (all in)         | 0.9832536    | 0.4016356    | 0.9922481    | 0.7930586    | 0.9090909    | 0.2614214    |
| #### | Bn-Scaffold019650-p77  | A-genome specific (rapa only)      | not scorable | not scorable | not scorable | not scorable | 1            | 0.7379691    |
| #### | Bn-Scaffold019655-p1   | genome unspecific (oleracea-rapa)  | not scorable | not scorable | 0.9922481    | 0.5622779    | 1            | 0.789732     |
| #### | Bn-Scaffold020953-p21  | genome unspecific (all in)         | 0.9784689    | 0.5407815    | 1            | 0.8883193    | 1            | 0.7486991    |
| #### | Bn-Scaffold022742-p52  | genome unspecific (all in)         | 0.9976076    | 0.3564761    | 1            | 0.7997732    | 1            | 0.8165467    |
| #### | Bn-Scaffold022794-p55  | genome unspecific (all in)         | 0.9688995    | 0.2495354    | 0.8837209    | 0.2766024    | 1            | 0.8371578    |
| #### | Bn-Scaffold023486-p127 | genome unspecific (all in)         | 0.9760765    | 0.3597883    | 0.9224806    | 0.8033919    | 0.9752066    | 0.2824397    |
| #### | Bn-Scaffold024114-p71  | genome unspecific (all in)         | 1            | 0.2295952    | 0.8527132    | 0.1959841    | 1            | 0.7622204    |
| #### | Bn-Scaffold024445-p33  | genome unspecific (all in)         | 0.9952153    | 0.3631757    | 0.9379845    | 0.3542014    | 1            | 0.8804633    |
| #### | Bn-Scaffold025787-p94  | A-genome specific (napus-rapa)     | 0.5023924    | 0.7003761    | not scorable | not scorable | 1            | 0.9205657    |
| #### | Bn-Scaffold026195-p62  | C-genome specific (oleracea only)  | not scorable | not scorable | 0.9224806    | 0.7895885    | not scorable | not scorable |
| #### | Bn-Scaffold026273-p6   | genome unspecific (all in)         | 0.9832536    | 0.4132839    | 1            | 0.7870198    | 1            | 0.7606867    |
| #### | Bn-Scaffold026692-p79  | napus specific                     | 0.8564593    | 0.7744929    | not scorable | not scorable | not scorable | not scorable |
| #### | Bn-Scaffold030677-p51  | A-genome specific (napus-rapa)     | 0.9856459    | 0.7239712    | not scorable | not scorable | 0.9834711    | 0.706338     |
| #### | Bn-Scaffold030702-p88  | A-genome specific (rapa only)      | not scorable | not scorable | not scorable | not scorable | 0.9669421    | 0.7699674    |
| #### | Bn-Scaffold032460-p85  | genome unspecific (all in)         | 0.9090909    | 0.2147041    | 1            | 0.58849      | 1            | 0.6825601    |
| #### | Bn-Scaffold032776-p35  | genome unspecific (all in)         | 1            | 0.5960111    | 1            | 0.6552877    | 1            | 0.6190303    |
| #### | Bn-Scaffold032923-p102 | A-genome specific (napus-rapa)     | 0.9736842    | 0.3185637    | not scorable | not scorable | 0.9586777    | 0.7061671    |
| #### | Bn-Scaffold035376-p42  | genome unspecific (all in)         | 1            | 0.7160041    | 1            | 0.7824872    | 1            | 0.786476     |
| #### | Bn-Scaffold035543-p33  | A-genome specific (napus-rapa)     | 1            | 0.8016498    | not scorable | not scorable | 0.9917355    | 0.7611076    |
| #### | Bn-Scaffold037025-p103 | genome unspecific (oleracea-rapa)  | not scorable | not scorable | 1            | 0.7046539    | 1            | 0.7026687    |
| #### | Bn-Scaffold040234-p71  | napus specific                     | 0.6866029    | 0.7108423    | not scorable | not scorable | not scorable | not scorable |
| #### | Bn-scaffold10046-p339  | C-genome specific (napus-oleracea) | 1            | 0.566473     | 1            | 0.6384038    | not scorable | not scorable |

|      |                       |                                    |              |              |              |              |              |              |
|------|-----------------------|------------------------------------|--------------|--------------|--------------|--------------|--------------|--------------|
| #### | Bn-scaffold10173-p170 | A-genome specific (napus-rapa)     | 1            | 0.6123813    | not scorable | not scorable | 1            | 0.7812527    |
| #### | Bn-scaffold10312-p362 | genome unspecific (oleracea-rapa)  | not scorable | not scorable | 0.9767442    | 0.4817506    | 1            | 0.7425974    |
| #### | Bn-scaffold10367-p969 | C-genome specific (napus-oleracea) | 0.9856459    | 0.7809511    | 1            | 0.7793731    | not scorable | not scorable |
| #### | Bn-scaffold10380-p575 | C-genome specific (napus-oleracea) | 1            | 0.53676      | 1            | 0.5436898    | not scorable | not scorable |
| #### | Bn-scaffold10782-p229 | C-genome specific (napus-oleracea) | 0.9976076    | 0.8559389    | 1            | 0.8214078    | not scorable | not scorable |
| #### | Bn-scaffold10835-p47  | C-genome specific (napus-oleracea) | 1            | 0.469777     | 1            | 0.480633     | not scorable | not scorable |
| #### | Bn-scaffold11635-p281 | genome unspecific (oleracea-rapa)  | not scorable | not scorable | 0.9922481    | 0.675113     | 1            | 0.9513714    |
| #### | Bn-scaffold12556-p316 | genome unspecific (all in)         | 1            | 0.5643941    | 0.9379845    | 0.2069865    | 1            | 0.8450971    |
| #### | Bn-scaffold12606-p486 | genome unspecific (all in)         | 1            | 0.681462     | 0.8682171    | 0.2444658    | 1            | 0.7252899    |
| #### | Bn-scaffold12606-p834 | genome unspecific (all in)         | 0.9808612    | 0.1839857    | 0.9767442    | 0.636499     | 1            | 0.7007138    |
| #### | Bn-scaffold12714-p261 | genome unspecific (oleracea-rapa)  | not scorable | not scorable | 1            | 0.740202     | 1            | 0.8815182    |
| #### | Bn-scaffold12947-p230 | genome unspecific (oleracea-rapa)  | not scorable | not scorable | 0.9689922    | 0.361575     | 1            | 0.9174803    |
| #### | Bn-scaffold13149-p372 | C-genome specific (napus-oleracea) | 0.9976076    | 0.4724458    | 1            | 0.623134     | not scorable | not scorable |
| #### | Bn-scaffold13521-p196 | C-genome specific (oleracea only)  | not scorable | not scorable | 1            | 0.3707692    | not scorable | not scorable |
| #### | Bn-scaffold13646-p3   | genome unspecific (all in)         | 1            | 0.5780199    | 1            | 0.4622107    | 1            | 0.7770717    |
| #### | Bn-scaffold13795-p158 | C-genome specific (napus-oleracea) | 1            | 0.6186296    | 1            | 0.6037343    | not scorable | not scorable |
| #### | Bn-scaffold13873-p248 | C-genome specific (napus-oleracea) | 0.9784689    | 0.4714277    | 1            | 0.7147598    | not scorable | not scorable |
| #### | Bn-scaffold14071-p64  | C-genome specific (napus-oleracea) | 0.9736842    | 0.6689985    | 0.9922481    | 0.6753571    | not scorable | not scorable |
| #### | Bn-scaffold14508-p308 | genome unspecific (all in)         | 1            | 0.4458803    | 1            | 0.50959      | 1            | 0.5709352    |
| #### | Bn-scaffold15009-p89  | genome unspecific (all in)         | 1            | 0.5904691    | 1            | 0.6089343    | 1            | 0.545253     |
| #### | Bn-scaffold15130-p203 | genome unspecific (all in)         | 1            | 0.6829448    | 1            | 0.5267938    | 1            | 0.690158     |
| #### | Bn-scaffold15130-p263 | genome unspecific (all in)         | 1            | 0.7111032    | 1            | 0.7587258    | 1            | 0.6939149    |
| #### | Bn-scaffold15226-p540 | genome unspecific (all in)         | 1            | 0.7322103    | 1            | 0.6169784    | 1            | 0.7770717    |
| #### | Bn-scaffold15638-p135 | genome unspecific (all in)         | 1            | 0.8786232    | 1            | 0.7849486    | 1            | 0.82711      |
| #### | Bn-scaffold15991-p176 | genome unspecific (all in)         | 1            | 0.6673525    | 1            | 0.5980029    | 1            | 0.881123     |
| #### | Bn-scaffold16319-p135 | C-genome specific (napus-oleracea) | 0.8708134    | 0.530576     | 0.875969     | 0.4733223    | not scorable | not scorable |
| #### | Bn-scaffold17178-p245 | C-genome specific (napus-oleracea) | 0.9569378    | 0.9160971    | 1            | 0.7616572    | not scorable | not scorable |
| #### | Bn-scaffold17782-p431 | C-genome specific (napus-oleracea) | 0.9976076    | 0.8977306    | 0.9922481    | 0.8260473    | not scorable | not scorable |
| #### | Bn-scaffold18039-p397 | genome unspecific (oleracea-rapa)  | not scorable | not scorable | 1            | 0.7328466    | 0.9338843    | 0.8154337    |
| #### | Bn-scaffold18185-p90  | C-genome specific (napus-oleracea) | 0.9617225    | 0.6097516    | 0.9922481    | 0.5498683    | not scorable | not scorable |
| #### | Bn-scaffold18260-p26  | C-genome specific (napus-oleracea) | 0.722488     | 0.846419     | 0.7596899    | 0.8560728    | not scorable | not scorable |
| #### | Bn-scaffold19029-p329 | C-genome specific (napus-oleracea) | 0.9665072    | 0.6887033    | 0.9302326    | 0.6474387    | not scorable | not scorable |
| #### | Bn-scaffold19029-p392 | C-genome specific (napus-oleracea) | 0.9736842    | 0.7940576    | 1            | 0.8488321    | not scorable | not scorable |

|                            |                                    |              |              |           |           |              |              |
|----------------------------|------------------------------------|--------------|--------------|-----------|-----------|--------------|--------------|
| #### Bn-scaffold2420-p65   | C-genome specific (napus-oleracea) | 1            | 0.4137378    | 1         | 0.3250555 | not scorable | not scorable |
| #### Bn-scaffold3128-p296  | C-genome specific (napus-oleracea) | 1            | 0.6584362    | 1         | 0.7591171 | not scorable | not scorable |
| #### Bn-scaffold3128-p353  | C-genome specific (napus-oleracea) | 1            | 0.5488765    | 1         | 0.5643941 | not scorable | not scorable |
| #### Bn-scaffold3776-p357  | C-genome specific (napus-oleracea) | 0.9976076    | 0.589027     | 1         | 0.5696363 | not scorable | not scorable |
| #### Bn-scaffold4627-p228  | genome unspecific (oleracea-rapa)  | not scorable | not scorable | 1         | 0.3316456 | 1            | 0.6287634    |
| #### Bn-scaffold4743-p405  | genome unspecific (oleracea-rapa)  | not scorable | not scorable | 1         | 0.4566025 | 0.9338843    | 0.7757468    |
| #### Bn-scaffold5019-p493  | genome unspecific (all in)         | 1            | 0.6946223    | 1         | 0.7364804 | 1            | 0.7395847    |
| #### Bn-scaffold5052-p146  | genome unspecific (all in)         | 0.9760765    | 0.2271541    | 0.9922481 | 0.3067942 | 1            | 0.872824     |
| #### Bn-scaffold5131-p57   | genome unspecific (all in)         | 1            | 0.4992277    | 1         | 0.5205104 | 1            | 0.4091732    |
| #### Bn-scaffold5171-p192  | genome unspecific (all in)         | 1            | 0.8405917    | 1         | 0.7504323 | 1            | 0.8813179    |
| #### Bn-scaffold5213-p158  | C-genome specific (napus-oleracea) | 0.9210526    | 0.2975912    | 0.9147287 | 0.7774748 | not scorable | not scorable |
| #### Bn-scaffold537-p71    | C-genome specific (napus-oleracea) | 1            | 0.6071351    | 1         | 0.5942152 | not scorable | not scorable |
| #### Bn-scaffold5411-p214  | genome unspecific (all in)         | 1            | 0.6470616    | 1         | 0.6020412 | 0.9917355    | 0.6517355    |
| #### Bn-scaffold5422-p409  | genome unspecific (all in)         | 1            | 0.7242321    | 1         | 0.8195457 | 1            | 0.8004208    |
| #### Bn-scaffold5450-p277  | genome unspecific (all in)         | 1            | 0.532066     | 0.9922481 | 0.4272664 | 0.9917355    | 0.6444719    |
| #### Bn-scaffold5527-p309  | genome unspecific (all in)         | 1            | 0.5380938    | 1         | 0.5314127 | 1            | 0.5120054    |
| #### Bn-scaffold5637-p255  | genome unspecific (all in)         | 1            | 0.494966     | 1         | 0.49261   | 1            | 0.5979377    |
| #### Bn-scaffold5814-p487  | genome unspecific (all in)         | 0.9976076    | 0.6803059    | 1         | 0.7092913 | 1            | 0.6710924    |
| #### Bn-scaffold6243-p60   | C-genome specific (napus-oleracea) | 1            | 0.5006427    | 1         | 0.52214   | not scorable | not scorable |
| #### Bn-scaffold6282-p419  | genome unspecific (all in)         | 1            | 0.7641624    | 1         | 0.7486269 | 0.9917355    | 0.8949882    |
| #### Bn-scaffold6335-p129  | genome unspecific (all in)         | 1            | 0.5078604    | 1         | 0.4072714 | 0.9917355    | 0.5406489    |
| #### Bn-scaffold6438-p161  | genome unspecific (all in)         | 1            | 0.6662853    | 1         | 0.6963184 | 1            | 0.8948812    |
| #### Bn-scaffold6617-p322  | C-genome specific (napus-oleracea) | 1            | 0.5142885    | 1         | 0.469484  | not scorable | not scorable |
| #### Bn-scaffold6663-p672  | genome unspecific (all in)         | 1            | 0.4590425    | 1         | 0.4807086 | 1            | 0.568415     |
| #### Bn-scaffold6715-p107  | C-genome specific (napus-oleracea) | 1            | 0.5743468    | 1         | 0.6380648 | not scorable | not scorable |
| #### Bn-scaffold6750-p249  | genome unspecific (all in)         | 1            | 0.5817962    | 1         | 0.5690145 | 1            | 0.5741153    |
| #### Bn-scaffold7116-p1015 | genome unspecific (all in)         | 1            | 0.5761617    | 1         | 0.6510744 | 0.9917355    | 0.8846079    |
| #### Bn-scaffold7263-p395  | genome unspecific (all in)         | 0.9928229    | 0.5207254    | 0.9922481 | 0.9087464 | 0.9752066    | 0.8954933    |
| #### Bn-scaffold733-p492   | genome unspecific (all in)         | 1            | 0.6961709    | 1         | 0.5008383 | 1            | 0.8400722    |
| #### Bn-scaffold7442-p97   | C-genome specific (oleracea only)  | not scorable | not scorable | 0.9689922 | 0.2431094 | not scorable | not scorable |
| #### Bn-scaffold7749-p67   | C-genome specific (napus-oleracea) | 1            | 0.4008043    | 1         | 0.3777065 | not scorable | not scorable |
| #### Bn-scaffold7914-p134  | genome unspecific (all in)         | 1            | 0.727636     | 1         | 0.7705603 | 1            | 0.8288312    |
| #### Bn-scaffold7914-p222  | genome unspecific (oleracea-rapa)  | not scorable | not scorable | 0.9922481 | 0.520063  | 1            | 0.9095823    |

|                           |                                    |              |              |              |              |              |              |
|---------------------------|------------------------------------|--------------|--------------|--------------|--------------|--------------|--------------|
| #### Bn-scaffold7981-p299 | C-genome specific (napus-oleracea) | 1            | 0.4897007    | 1            | 0.4938774    | not scorable | not scorable |
| #### Bn-scaffold8028-p37  | C-genome specific (oleracea only)  | not scorable | not scorable | 1            | 0.4687608    | not scorable | not scorable |
| #### Bn-scaffold8325-p333 | genome unspecific (all in)         | 0.9976076    | 0.751497     | 1            | 0.7410416    | 1            | 0.8206818    |
| #### Bn-scaffold8358-p141 | genome unspecific (all in)         | 1            | 0.6405856    | 1            | 0.5722097    | 1            | 0.7494321    |
| #### Bn-scaffold8442-p424 | genome unspecific (all in)         | 1            | 0.6379088    | 1            | 0.6230366    | 1            | 0.7007138    |
| #### Bn-scaffold8545-p94  | napus specific                     | 1            | 0.5628911    | not scorable | not scorable | not scorable | not scorable |
| #### Bn-scaffold8607-p534 | genome unspecific (all in)         | 1            | 0.6080307    | 0.9922481    | 0.5180401    | 1            | 0.6804142    |
| #### Bn-scaffold8780-p54  | C-genome specific (oleracea only)  | not scorable | not scorable | 0.9922481    | 0.3924138    | not scorable | not scorable |
| #### Bn-scaffold8831-p348 | genome unspecific (all in)         | 1            | 0.6461406    | 1            | 0.4979141    | 1            | 0.681638     |
| #### Bn-scaffold8922-p284 | genome unspecific (all in)         | 1            | 0.6622245    | 1            | 0.6377982    | 1            | 0.8174043    |
| #### Bn-scaffold8954-p202 | genome unspecific (all in)         | 1            | 0.7252899    | 1            | 0.7462659    | 1            | 0.7462659    |
| #### Bn-scaffold9023-p849 | C-genome specific (napus-oleracea) | 0.9712918    | 0.7546248    | 1            | 0.8793074    | not scorable | not scorable |
| #### Bn-scaffold9119-p786 | genome unspecific (all in)         | 1            | 0.6387118    | 1            | 0.6300881    | 1            | 0.6222722    |
| #### Bn-scaffold9512-p788 | genome unspecific (all in)         | 0.9354067    | 0.4797008    | 0.9457364    | 0.3778924    | 1            | 0.9268364    |
| #### Bn-scaffold9654-p438 | genome unspecific (all in)         | 1            | 0.7366818    | 1            | 0.729798     | 1            | 0.8004208    |
| #### Bn-scaffold9702-p250 | napus specific                     | 0.930622     | 0.3693223    | not scorable | not scorable | not scorable | not scorable |
| #### Bn-scaffold9730-p410 | genome unspecific (all in)         | 1            | 0.6112589    | 1            | 0.5909944    | 1            | 0.7417527    |
| #### Bn-scaffold9917-p393 | genome unspecific (all in)         | 1            | 0.6997514    | 1            | 0.7176493    | 1            | 0.7252899    |
| #### Bn-scaffold9986-p592 | C-genome specific (napus-oleracea) | 0.9784689    | 0.739359     | 1            | 0.7117303    | not scorable | not scorable |
| #### Bn-scaffold9986-p660 | C-genome specific (napus-oleracea) | 0.9569378    | 0.3505049    | 0.9844961    | 0.3624155    | not scorable | not scorable |

ire
