# Supplementary material for: A high-density SNP genotyping array for Brassica napus and its ancestral diploid species based on optimised selection of single-locus markers in the allotetraploid genome
Source: PubMed Central journal article supplement (PMC5025514; doi:10.1007/s00122-016-2746-7), 2016-06-30
Supplement: 122_2016_2746_MOESM5_ESM.pdf [file 122_2016_2746_MOESM5_ESM.pdf]

**Table 4: List of SNP loci which fall within annotated *B. napus* (DH12075v3.1) genes**

| SNP_ID           | DH12075v3.1_ID   |      |      |
|------------------|------------------|------|------|
| Bn-A01-p10000230 | Bn-N1-p9549887   | gene |      |
| Bn-A01-p1000115  | Bn-N1-p1030519   | gene | exon |
| Bn-A01-p1001022  | Bn-N1-p1031427   | gene | exon |
| Bn-A01-p10069493 | Bn-N1-p9620973   | gene |      |
| Bn-A01-p10071456 | Bn-N1-p9622923   | gene | exon |
| Bn-A01-p10071903 | Bn-N1-p9623369   | gene |      |
| Bn-A01-p10105499 | Bn-N1-p9656392   | gene | exon |
| Bn-A01-p1012990  | Bn-N1-p1038774   | gene | exon |
| Bn-A01-p10234366 | Bn-N1-p9784407   | gene | exon |
| Bn-A01-p10246312 | Bn-N1-p9794780   | gene |      |
| Bn-A01-p10251052 | Bn-N1-p9799309   | gene |      |
| Bn-A01-p10257919 | Bn-N1-p9805260   | gene | exon |
| Bn-A01-p1026631  | Bn-N1-p1053515   | gene | exon |
| Bn-A01-p10278752 | Bn-N1-p9830448   | gene |      |
| Bn-A01-p10285074 | Bn-N1-p9839493   | gene | exon |
| Bn-A01-p10297732 | Bn-N1-p9847473   | gene | exon |
| Bn-A01-p10299187 | Bn-N1-p9848920   | gene |      |
| Bn-A01-p10340159 | Bn-N1-p9907693   | gene | exon |
| Bn-A01-p10340283 | Bn-N1-p9907816   | gene | exon |
| Bn-A01-p10354645 | Bn-N1-p9922762   | gene |      |
| Bn-A01-p10410665 | Bn-N1-p9970782   | gene | exon |
| Bn-A01-p10426647 | Bn-N1-p9982395   | gene | exon |
| Bn-A01-p10426714 | Bn-N1-p9982461   | gene |      |
| Bn-A01-p10493092 | Bn-N1-p10087131  | gene | exon |
| Bn-A01-p10499882 | Bn-N1-p10100505  | gene | exon |
| Bn-A01-p10513529 | Bn-N7-p7136845   | gene |      |
| Bn-A01-p10559083 | Bn-N7-p7192886   | gene | exon |
| Bn-A01-p1056386  | Bn-N1-p1084599   | gene |      |
| Bn-A01-p10590357 | Bn-N1-p10129316  | gene |      |
| Bn-A01-p10611800 | Bn-N1-p10147556  | gene |      |
| Bn-A01-p10636637 | Bn-N1-p10175252  | gene | exon |
| Bn-A01-p10636994 | Bn-N1-p10175609  | gene |      |
| Bn-A01-p10638747 | Bn-N1-p10177362  | gene |      |
| Bn-A01-p10639421 | Bn-N1-p10178036  | gene |      |
| Bn-A01-p10640881 | Bn-N1-p10179496  | gene | exon |
| Bn-A01-p10641656 | Bn-N1-p10189977  | gene |      |
| Bn-A01-p1067371  | Bn-N1-p1099188   | gene |      |
| Bn-A01-p1073387  | Bn-N1-p1104160   | gene |      |
| Bn-A01-p10835605 | Bn-N1-p10379201  | gene | exon |
| Bn-A01-p10859527 | Bn-N1-p10401833  | gene |      |
| Bn-A01-p10889788 | Bn-N1-p10427892  | gene |      |
| Bn-A01-p1091610  | Bn-N1-p1127323   | gene | exon |
| Bn-A01-p10933947 | Bn-N1-p10489280  | gene |      |
| Bn-A01-p10934377 | Bn-N1-p10489679  | gene |      |
| Bn-A01-p1104187  | Bn-N1-p1140701   | gene |      |
| Bn-A01-p11108443 | Bn-N1-p10623142  | gene |      |
| Bn-A01-p11119985 | Bn-N1-p10628286  | gene |      |
| Bn-A01-p11163785 | Bn-N1-p10671550  | gene | exon |
| Bn-A01-p11174997 | Bn-N11-p16368364 | gene | exon |
| Bn-A01-p11206467 | Bn-N11-p16393184 | gene | exon |

|                  |                        |      |      |
|------------------|------------------------|------|------|
| Bn-A01-p11233207 | Bn-N1-p10742834        | gene |      |
| Bn-A01-p11234159 | Bn-N1-p10743860        | gene |      |
| Bn-A01-p11238778 | Bn-N5-p15435464        | gene | exon |
| Bn-A01-p11249993 | Bn-N1-p10758006        | gene |      |
| Bn-A01-p11253272 | Bn-N1-p10762480        | gene |      |
| Bn-A01-p11306490 | Bn-N1-p10842165        | gene |      |
| Bn-A01-p11309186 | Bn-N1-p10844861        | gene |      |
| Bn-A01-p1132885  | Bn-N1-p1169679         | gene | exon |
| Bn-A01-p11330661 | Bn-N1-p10860453        | gene |      |
| Bn-A01-p11441851 | Bn-N1-p10971971        | gene |      |
| Bn-A01-p11471489 | Bn-N1-p11002226        | gene | exon |
| Bn-A01-p11479565 | Bn-N1-p11009759        | gene | exon |
| Bn-A01-p11480814 | Bn-N1-p11014535        | gene | exon |
| Bn-A01-p11483435 | Bn-N1-p11017255        | gene | exon |
| Bn-A01-p1148760  | Bn-N1-p1196607         | gene |      |
| Bn-A01-p1149351  | Bn-N1-p1197198         | gene |      |
| Bn-A01-p1149698  | Bn-N1-p1197545         | gene | exon |
| Bn-A01-p1151961  | Bn-N1-p1199814         | gene | exon |
| Bn-A01-p1152123  | Bn-N1-p1199976         | gene | exon |
| Bn-A01-p1152359  | Bn-N1-p1200214         | gene | exon |
| Bn-A01-p1152369  | Bn-N1-p1200224         | gene | exon |
| Bn-A01-p11543126 | Bn-N1-p11101231        | gene |      |
| Bn-A01-p11543191 | Bn-N1-p11101339        | gene |      |
| Bn-A01-p11559064 | Bn-N1-p11118034        | gene | exon |
| Bn-A01-p1156081  | Bn-N1-p1203925         | gene | exon |
| Bn-A01-p1156979  | Bn-N1-p1204822         | gene |      |
| Bn-A01-p11652789 | Bn-N4-p4891849         | gene |      |
| Bn-A01-p11653461 | Bn-N4-p4891177         | gene |      |
| Bn-A01-p11702957 | Bn-N1-p11187449        | gene |      |
| Bn-A01-p11741112 | Bn-N8-p556921          | gene |      |
| Bn-A01-p1187868  | Bn-N1-p1237997         | gene | exon |
| Bn-A01-p1188004  | Bn-N1-p1238133         | gene | exon |
| Bn-A01-p1192928  | Bn-N1-p1242752         | gene | exon |
| Bn-A01-p11938379 | Bn-N1-p11446368        | gene |      |
| Bn-A01-p1194009  | Bn-N1-p1243827         | gene | exon |
| Bn-A01-p11947255 | Bn-N1-p11456056        | gene | exon |
| Bn-A01-p120225   | Bn-N1-p131604          | gene | exon |
| Bn-A01-p12066369 | Bn-N1-p11497027        | gene | exon |
| Bn-A01-p1208515  | Bn-N1-p1255249         | gene |      |
| Bn-A01-p12145148 | Bn-N1-p11567265        | gene |      |
| Bn-A01-p12158810 | Bn-N1-p11580929        | gene | exon |
| Bn-A01-p12178646 | Bn-N1-p11606752        | gene | exon |
| Bn-A01-p12179784 | Bn-N1-p11607855        | gene |      |
| Bn-A01-p12192020 | Bn-N1-p11617868        | gene |      |
| Bn-A01-p1220904  | Bn-Scaffold01553-p1629 | gene | exon |
| Bn-A01-p12233209 | Bn-N1-p11635701        | gene | exon |
| Bn-A01-p1226475  | Bn-N1-p1271278         | gene |      |
| Bn-A01-p1227000  | Bn-N1-p1271805         | gene |      |
| Bn-A01-p1227023  | Bn-N1-p1271828         | gene |      |
| Bn-A01-p1232064  | Bn-N1-p1276870         | gene | exon |
| Bn-A01-p1248141  | Bn-N1-p1290257         | gene |      |
| Bn-A01-p12484368 | Bn-N1-p11892376        | gene | exon |

|                  |                  |      |      |
|------------------|------------------|------|------|
| Bn-A01-p1250595  | Bn-N1-p1292716   | gene |      |
| Bn-A01-p12516944 | Bn-N1-p11891352  | gene | exon |
| Bn-A01-p12522369 | Bn-N1-p11939222  | gene |      |
| Bn-A01-p1252553  | Bn-N11-p1604240  | gene | exon |
| Bn-A01-p12577268 | Bn-N1-p11976112  | gene |      |
| Bn-A01-p12580778 | Bn-N1-p11989462  | gene | exon |
| Bn-A01-p12593173 | Bn-N1-p12015522  | gene |      |
| Bn-A01-p12593802 | Bn-N11-p18444093 | gene |      |
| Bn-A01-p12625892 | Bn-N1-p12103289  | gene |      |
| Bn-A01-p12665045 | Bn-N1-p12143466  | gene |      |
| Bn-A01-p12665250 | Bn-N1-p12143671  | gene |      |
| Bn-A01-p12672899 | Bn-N1-p12154035  | gene | exon |
| Bn-A01-p12774270 | Bn-N1-p12261697  | gene |      |
| Bn-A01-p1296503  | Bn-N11-p1708856  | gene | exon |
| Bn-A01-p1314194  | Bn-N1-p1355312   | gene | exon |
| Bn-A01-p1314440  | Bn-N1-p1355558   | gene | exon |
| Bn-A01-p1320368  | Bn-N11-p1735373  | gene |      |
| Bn-A01-p13622238 | Bn-N2-p181357    | gene | exon |
| Bn-A01-p13709801 | Bn-N1-p13197936  | gene | exon |
| Bn-A01-p1372430  | Bn-N1-p1418752   | gene | exon |
| Bn-A01-p1373104  | Bn-N1-p1419426   | gene |      |
| Bn-A01-p1373239  | Bn-N1-p1419561   | gene | exon |
| Bn-A01-p1373827  | Bn-N1-p1420152   | gene |      |
| Bn-A01-p1373838  | Bn-N1-p1420163   | gene |      |
| Bn-A01-p1373965  | Bn-N1-p1420294   | gene | exon |
| Bn-A01-p13775817 | Bn-N1-p13254584  | gene | exon |
| Bn-A01-p1387174  | Bn-N1-p1432886   | gene | exon |
| Bn-A01-p14001039 | Bn-N1-p13554075  | gene | exon |
| Bn-A01-p1409723  | Bn-N1-p1464686   | gene | exon |
| Bn-A01-p1414695  | Bn-N1-p1469639   | gene | exon |
| Bn-A01-p14169412 | Bn-N1-p13748387  | gene | exon |
| Bn-A01-p14181463 | Bn-N14-p49684496 | gene |      |
| Bn-A01-p14181651 | Bn-N14-p49684684 | gene |      |
| Bn-A01-p14181829 | Bn-N14-p49684862 | gene | exon |
| Bn-A01-p14197545 | Bn-N1-p13766078  | gene |      |
| Bn-A01-p14223709 | Bn-N1-p13797566  | gene | exon |
| Bn-A01-p1422384  | Bn-N11-p1861046  | gene | exon |
| Bn-A01-p1423163  | Bn-N1-p1477507   | gene | exon |
| Bn-A01-p14256104 | Bn-N1-p13857145  | gene |      |
| Bn-A01-p14339825 | Bn-N1-p13940499  | gene | exon |
| Bn-A01-p1439621  | Bn-N1-p1495430   | gene | exon |
| Bn-A01-p1440009  | Bn-N1-p1495817   | gene |      |
| Bn-A01-p14402434 | Bn-N17-p12307568 | gene | exon |
| Bn-A01-p14415386 | Bn-N1-p13989587  | gene | exon |
| Bn-A01-p1448811  | Bn-N1-p1504639   | gene | exon |
| Bn-A01-p1449865  | Bn-N1-p1505698   | gene | exon |
| Bn-A01-p14559770 | Bn-N1-p1722929   | gene |      |
| Bn-A01-p1456256  | Bn-N1-p1512420   | gene | exon |
| Bn-A01-p146963   | Bn-N11-p209233   | gene | exon |
| Bn-A01-p1473188  | Bn-N1-p1530325   | gene | exon |
| Bn-A01-p1476216  | Bn-N1-p1533136   | gene | exon |
| Bn-A01-p14901403 | Bn-N1-p14398108  | gene |      |

|                  |                        |      |      |
|------------------|------------------------|------|------|
| Bn-A01-p14948237 | Bn-N1-p14446586        | gene |      |
| Bn-A01-p14948379 | Bn-N1-p14446728        | gene |      |
| Bn-A01-p14948614 | Bn-N1-p14446963        | gene |      |
| Bn-A01-p14948748 | Bn-N1-p14447097        | gene | exon |
| Bn-A01-p14949030 | Bn-N1-p14447379        | gene | exon |
| Bn-A01-p14949121 | Bn-N1-p14447470        | gene | exon |
| Bn-A01-p14949256 | Bn-N1-p14447605        | gene | exon |
| Bn-A01-p14955594 | Bn-N1-p14453956        | gene | exon |
| Bn-A01-p14960233 | Bn-N1-p14459360        | gene | exon |
| Bn-A01-p14965172 | Bn-N1-p14464498        | gene | exon |
| Bn-A01-p14965596 | Bn-N1-p14464922        | gene | exon |
| Bn-A01-p150028   | Bn-N1-p160751          | gene | exon |
| Bn-A01-p15043967 | Bn-N11-p24000093       | gene | exon |
| Bn-A01-p15086787 | Bn-N1-p14616211        | gene | exon |
| Bn-A01-p15087045 | Bn-N1-p14616469        | gene |      |
| Bn-A01-p15087171 | Bn-N1-p14616595        | gene | exon |
| Bn-A01-p15233095 | Bn-N1-p14770954        | gene | exon |
| Bn-A01-p1530160  | Bn-N1-p1571664         | gene | exon |
| Bn-A01-p1531829  | Bn-N1-p1573337         | gene | exon |
| Bn-A01-p15446864 | Bn-N1-p14978764        | gene | exon |
| Bn-A01-p15468033 | Bn-N1-p15006427        | gene | exon |
| Bn-A01-p15476640 | Bn-N1-p15013837        | gene | exon |
| Bn-A01-p15502589 | Bn-N1-p15042884        | gene |      |
| Bn-A01-p15519090 | Bn-N1-p15059254        | gene |      |
| Bn-A01-p1556145  | Bn-N1-p1596831         | gene |      |
| Bn-A01-p15568028 | Bn-N1-p15097995        | gene | exon |
| Bn-A01-p1578682  | Bn-N1-p1627035         | gene |      |
| Bn-A01-p16015382 | Bn-N1-p16585172        | gene | exon |
| Bn-A01-p1606312  | Bn-N1-p1648516         | gene | exon |
| Bn-A01-p16079153 | Bn-N11-p26877557       | gene |      |
| Bn-A01-p16079370 | Bn-N11-p26877781       | gene | exon |
| Bn-A01-p16086381 | Bn-N1-p16669166        | gene |      |
| Bn-A01-p16088721 | Bn-Scaffold05442-p451  | gene | exon |
| Bn-A01-p16106314 | Bn-N1-p16697490        | gene | exon |
| Bn-A01-p16106372 | Bn-N1-p16697548        | gene |      |
| Bn-A01-p16111263 | Bn-N1-p16698816        | gene |      |
| Bn-A01-p16217917 | Bn-N1-p16804153        | gene |      |
| Bn-A01-p16253463 | Bn-Scaffold04479-p1344 | gene | exon |
| Bn-A01-p16257043 | Bn-N1-p16830009        | gene |      |
| Bn-A01-p16276961 | Bn-N1-p16849435        | gene | exon |
| Bn-A01-p16303134 | Bn-N1-p16877802        | gene |      |
| Bn-A01-p16323375 | Bn-N1-p16897385        | gene |      |
| Bn-A01-p16323503 | Bn-N1-p16897513        | gene |      |
| Bn-A01-p16324010 | Bn-N1-p16898020        | gene |      |
| Bn-A01-p1632686  | Bn-N1-p1674784         | gene | exon |
| Bn-A01-p16331424 | Bn-N1-p16906784        | gene | exon |
| Bn-A01-p1637234  | Bn-N1-p1679347         | gene |      |
| Bn-A01-p16374068 | Bn-N1-p16958282        | gene | exon |
| Bn-A01-p16389291 | Bn-N1-p16976972        | gene |      |
| Bn-A01-p16393582 | Bn-N1-p16981289        | gene |      |
| Bn-A01-p16393856 | Bn-N1-p16981543        | gene | exon |
| Bn-A01-p16393939 | Bn-N1-p16981626        | gene |      |

|                  |                  |      |      |
|------------------|------------------|------|------|
| Bn-A01-p16394111 | Bn-N1-p16981800  | gene | exon |
| Bn-A01-p1639922  | Bn-N11-p2083431  | gene |      |
| Bn-A01-p1641033  | Bn-N1-p1683157   | gene | exon |
| Bn-A01-p16432946 | Bn-N1-p17035841  | gene |      |
| Bn-A01-p16476326 | Bn-N1-p17076799  | gene | exon |
| Bn-A01-p16580971 | Bn-N1-p17178201  | gene | exon |
| Bn-A01-p16598652 | Bn-N1-p17196443  | gene |      |
| Bn-A01-p1661180  | Bn-N1-p1703757   | gene |      |
| Bn-A01-p16669142 | Bn-N1-p17236570  | gene |      |
| Bn-A01-p16705936 | Bn-N1-p17291479  | gene |      |
| Bn-A01-p16715637 | Bn-N1-p17302028  | gene | exon |
| Bn-A01-p16730334 | Bn-N1-p17333950  | gene |      |
| Bn-A01-p16749946 | Bn-N1-p17349538  | gene |      |
| Bn-A01-p16749951 | Bn-N1-p17349543  | gene |      |
| Bn-A01-p16774157 | Bn-N1-p17393353  | gene | exon |
| Bn-A01-p16829363 | Bn-N1-p17412271  | gene |      |
| Bn-A01-p16847535 | Bn-N1-p17428973  | gene | exon |
| Bn-A01-p16857183 | Bn-N1-p17446015  | gene | exon |
| Bn-A01-p16857466 | Bn-N1-p17446297  | gene |      |
| Bn-A01-p16869474 | Bn-N1-p17459802  | gene |      |
| Bn-A01-p16893578 | Bn-N1-p17482527  | gene |      |
| Bn-A01-p16997658 | Bn-N1-p17595887  | gene | exon |
| Bn-A01-p17015383 | Bn-N1-p17625591  | gene |      |
| Bn-A01-p17036109 | Bn-N1-p17653794  | gene | exon |
| Bn-A01-p17081120 | Bn-N1-p17714097  | gene |      |
| Bn-A01-p17081703 | Bn-N1-p17714680  | gene |      |
| Bn-A01-p17110860 | Bn-N1-p17742019  | gene |      |
| Bn-A01-p17118647 | Bn-N1-p17745092  | gene | exon |
| Bn-A01-p17129906 | Bn-N1-p17753257  | gene |      |
| Bn-A01-p17160355 | Bn-N1-p17776308  | gene |      |
| Bn-A01-p1719658  | Bn-N1-p1781685   | gene | exon |
| Bn-A01-p17216088 | Bn-N1-p17856909  | gene |      |
| Bn-A01-p17216237 | Bn-N1-p17857059  | gene |      |
| Bn-A01-p17242218 | Bn-N1-p17887632  | gene |      |
| Bn-A01-p17258931 | Bn-N1-p17910900  | gene | exon |
| Bn-A01-p17283208 | Bn-N1-p17936190  | gene | exon |
| Bn-A01-p17315519 | Bn-N1-p17973483  | gene | exon |
| Bn-A01-p17377721 | Bn-N1-p18040148  | gene |      |
| Bn-A01-p1742846  | Bn-N1-p1806273   | gene |      |
| Bn-A01-p1746226  | Bn-N1-p1812677   | gene |      |
| Bn-A01-p17481804 | Bn-N1-p18140345  | gene | exon |
| Bn-A01-p17482037 | Bn-N1-p18140578  | gene |      |
| Bn-A01-p17483006 | Bn-N1-p18141526  | gene |      |
| Bn-A01-p17492348 | Bn-N1-p18150937  | gene | exon |
| Bn-A01-p17518468 | Bn-N1-p18167006  | gene |      |
| Bn-A01-p17535899 | Bn-N1-p18183385  | gene | exon |
| Bn-A01-p17536754 | Bn-N1-p18184240  | gene |      |
| Bn-A01-p17548021 | Bn-N1-p18188383  | gene | exon |
| Bn-A01-p17548227 | Bn-N1-p18188590  | gene |      |
| Bn-A01-p17549137 | Bn-N11-p30196980 | gene | exon |
| Bn-A01-p17550125 | Bn-N1-p18190500  | gene |      |
| Bn-A01-p17550588 | Bn-N1-p18190963  | gene |      |

|                  |                  |      |      |
|------------------|------------------|------|------|
| Bn-A01-p17552389 | Bn-N1-p18192762  | gene | exon |
| Bn-A01-p1768443  | Bn-N1-p1838760   | gene |      |
| Bn-A01-p17696068 | Bn-N1-p18378510  | gene | exon |
| Bn-A01-p17696358 | Bn-N1-p18378797  | gene |      |
| Bn-A01-p17751647 | Bn-N1-p18434525  | gene | exon |
| Bn-A01-p17755236 | Bn-N1-p18438320  | gene | exon |
| Bn-A01-p17771411 | Bn-N1-p18443557  | gene |      |
| Bn-A01-p17899781 | Bn-N1-p18550465  | gene |      |
| Bn-A01-p17905950 | Bn-N1-p18559022  | gene |      |
| Bn-A01-p17906322 | Bn-N1-p18559394  | gene | exon |
| Bn-A01-p1793928  | Bn-N1-p1864630   | gene |      |
| Bn-A01-p17997441 | Bn-N1-p18656229  | gene | exon |
| Bn-A01-p17998573 | Bn-N1-p18657361  | gene |      |
| Bn-A01-p18006188 | Bn-N1-p18659664  | gene |      |
| Bn-A01-p18008659 | Bn-N1-p18662134  | gene |      |
| Bn-A01-p18032386 | Bn-N1-p18688384  | gene |      |
| Bn-A01-p18119989 | Bn-N1-p18779446  | gene |      |
| Bn-A01-p18121827 | Bn-N11-p31100693 | gene | exon |
| Bn-A01-p18178802 | Bn-N1-p18826458  | gene | exon |
| Bn-A01-p18197352 | Bn-N1-p18850715  | gene | exon |
| Bn-A01-p18200921 | Bn-N1-p18852932  | gene |      |
| Bn-A01-p1823705  | Bn-N1-p1897288   | gene | exon |
| Bn-A01-p1831507  | Bn-N1-p1905152   | gene |      |
| Bn-A01-p18327940 | Bn-N1-p18982111  | gene | exon |
| Bn-A01-p18329609 | Bn-N1-p18984031  | gene | exon |
| Bn-A01-p18367467 | Bn-N1-p19021045  | gene |      |
| Bn-A01-p18383994 | Bn-N1-p19034080  | gene |      |
| Bn-A01-p1842079  | Bn-N1-p1914802   | gene |      |
| Bn-A01-p1842658  | Bn-N11-p2404208  | gene | exon |
| Bn-A01-p18435876 | Bn-N1-p19082054  | gene | exon |
| Bn-A01-p18438154 | Bn-N1-p19084332  | gene |      |
| Bn-A01-p1855903  | Bn-N1-p1931677   | gene | exon |
| Bn-A01-p1858279  | Bn-N1-p1934009   | gene |      |
| Bn-A01-p1864705  | Bn-N11-p2433444  | gene |      |
| Bn-A01-p1879401  | Bn-N1-p1955958   | gene | exon |
| Bn-A01-p18813615 | Bn-N10-p5489130  | gene | exon |
| Bn-A01-p18813849 | Bn-N10-p5488896  | gene | exon |
| Bn-A01-p18837660 | Bn-N10-p5469414  | gene | exon |
| Bn-A01-p18850969 | Bn-N10-p5455380  | gene |      |
| Bn-A01-p18881723 | Bn-N10-p5423154  | gene |      |
| Bn-A01-p18882626 | Bn-N10-p5422236  | gene |      |
| Bn-A01-p18917698 | Bn-N10-p5395574  | gene |      |
| Bn-A01-p19097875 | Bn-N10-p5191978  | gene | exon |
| Bn-A01-p19098195 | Bn-N10-p5191658  | gene | exon |
| Bn-A01-p19107773 | Bn-N10-p5182232  | gene |      |
| Bn-A01-p19125668 | Bn-N10-p5164097  | gene |      |
| Bn-A01-p19132144 | Bn-N10-p5157599  | gene |      |
| Bn-A01-p19150923 | Bn-N10-p5131193  | gene |      |
| Bn-A01-p19170760 | Bn-N10-p5108815  | gene | exon |
| Bn-A01-p1917414  | Bn-N11-p2484486  | gene |      |
| Bn-A01-p1929982  | Bn-N1-p1996291   | gene | exon |
| Bn-A01-p1930111  | Bn-N1-p1996420   | gene | exon |

|                  |                       |      |      |
|------------------|-----------------------|------|------|
| Bn-A01-p19355180 | Bn-N1-p19347053       | gene | exon |
| Bn-A01-p19446599 | Bn-N1-p19441811       | gene |      |
| Bn-A01-p19447794 | Bn-N1-p19443005       | gene |      |
| Bn-A01-p19512499 | Bn-N1-p19508482       | gene | exon |
| Bn-A01-p1951988  | Bn-N1-p2007372        | gene | exon |
| Bn-A01-p195253   | Bn-N1-p208162         | gene |      |
| Bn-A01-p19633815 | Bn-N1-p19597950       | gene |      |
| Bn-A01-p1966955  | Bn-N1-p2016917        | gene | exon |
| Bn-A01-p1975231  | Bn-N1-p2025297        | gene |      |
| Bn-A01-p19762477 | Bn-N1-p19691017       | gene |      |
| Bn-A01-p19764240 | Bn-N1-p19692776       | gene |      |
| Bn-A01-p1977270  | Bn-N1-p2027327        | gene | exon |
| Bn-A01-p1980181  | Bn-N1-p2030241        | gene | exon |
| Bn-A01-p19855343 | Bn-N11-p44526660      | gene | exon |
| Bn-A01-p19929280 | Bn-N1-p19844885       | gene |      |
| Bn-A01-p19961176 | Bn-N1-p19884679       | gene | exon |
| Bn-A01-p19993388 | Bn-N1-p19915857       | gene |      |
| Bn-A01-p20133687 | Bn-N1-p20042069       | gene | exon |
| Bn-A01-p20181046 | Bn-N1-p20096054       | gene |      |
| Bn-A01-p20181346 | Bn-N1-p20096357       | gene | exon |
| Bn-A01-p2025400  | Bn-N1-p2079512        | gene |      |
| Bn-A01-p20323059 | Bn-N1-p20216069       | gene |      |
| Bn-A01-p20393111 | Bn-N11-p33747321      | gene | exon |
| Bn-A01-p20433111 | Bn-N11-p33891719      | gene |      |
| Bn-A01-p2046061  | Bn-N1-p2097038        | gene |      |
| Bn-A01-p2069218  | Bn-N1-p2120534        | gene |      |
| Bn-A01-p2069488  | Bn-N1-p2120803        | gene |      |
| Bn-A01-p207098   | Bn-N1-p219745         | gene | exon |
| Bn-A01-p207363   | Bn-N1-p220010         | gene |      |
| Bn-A01-p20782963 | Bn-N18-p19189424      | gene |      |
| Bn-A01-p20784377 | Bn-N13-p54157433      | gene |      |
| Bn-A01-p20899472 | Bn-N1-p20797508       | gene |      |
| Bn-A01-p20909649 | Bn-N1-p20809797       | gene | exon |
| Bn-A01-p20909816 | Bn-N1-p20809964       | gene | exon |
| Bn-A01-p2091322  | Bn-N1-p2141306        | gene |      |
| Bn-A01-p20924050 | Bn-N1-p20816306       | gene | exon |
| Bn-A01-p20933189 | Bn-Scaffold07211-p725 | gene |      |
| Bn-A01-p20990218 | Bn-N1-p20874310       | gene |      |
| Bn-A01-p2100996  | Bn-N1-p2151261        | gene | exon |
| Bn-A01-p21035670 | Bn-N1-p20906257       | gene |      |
| Bn-A01-p21075183 | Bn-N1-p20952653       | gene |      |
| Bn-A01-p2111978  | Bn-N1-p2158333        | gene |      |
| Bn-A01-p2114552  | Bn-N1-p2160898        | gene |      |
| Bn-A01-p2114803  | Bn-N1-p2161149        | gene | exon |
| Bn-A01-p2121224  | Bn-N11-p2744541       | gene |      |
| Bn-A01-p21236322 | Bn-N1-p21104169       | gene | exon |
| Bn-A01-p21277841 | Bn-N11-p35608801      | gene |      |
| Bn-A01-p21444041 | Bn-N1-p21434496       | gene |      |
| Bn-A01-p21473161 | Bn-N1-p21471174       | gene | exon |
| Bn-A01-p2148059  | Bn-N1-p2186745        | gene |      |
| Bn-A01-p21519780 | Bn-N1-p21514264       | gene | exon |
| Bn-A01-p21527187 | Bn-N1-p21522465       | gene |      |

|                  |                  |      |      |
|------------------|------------------|------|------|
| Bn-A01-p2158511  | Bn-N1-p2198901   | gene | exon |
| Bn-A01-p21638516 | Bn-N1-p21622853  | gene |      |
| Bn-A01-p21708353 | Bn-N1-p21688436  | gene | exon |
| Bn-A01-p21715162 | Bn-N1-p21695724  | gene |      |
| Bn-A01-p21724511 | Bn-N1-p21704132  | gene | exon |
| Bn-A01-p21758046 | Bn-N1-p21744520  | gene |      |
| Bn-A01-p21778610 | Bn-N1-p21766939  | gene | exon |
| Bn-A01-p2177864  | Bn-N11-p2795251  | gene | exon |
| Bn-A01-p21846342 | Bn-N1-p21821902  | gene | exon |
| Bn-A01-p21860162 | Bn-N1-p21837377  | gene |      |
| Bn-A01-p2187099  | Bn-N1-p2227901   | gene |      |
| Bn-A01-p21938751 | Bn-N1-p21915672  | gene |      |
| Bn-A01-p21960901 | Bn-N11-p36735444 | gene |      |
| Bn-A01-p21969405 | Bn-N1-p21946464  | gene |      |
| Bn-A01-p2197707  | Bn-N1-p2235975   | gene | exon |
| Bn-A01-p2197976  | Bn-N1-p2236253   | gene |      |
| Bn-A01-p21980567 | Bn-N1-p21959787  | gene | exon |
| Bn-A01-p22014179 | Bn-N1-p22001815  | gene | exon |
| Bn-A01-p22014707 | Bn-N1-p22002341  | gene | exon |
| Bn-A01-p22016353 | Bn-N1-p22003987  | gene | exon |
| Bn-A01-p22018616 | Bn-N1-p22010652  | gene | exon |
| Bn-A01-p22022023 | Bn-N1-p22014059  | gene | exon |
| Bn-A01-p22038749 | Bn-N1-p22027144  | gene |      |
| Bn-A01-p22038776 | Bn-N1-p22027171  | gene |      |
| Bn-A01-p22051021 | Bn-N1-p22039403  | gene | exon |
| Bn-A01-p22051502 | Bn-N1-p22039884  | gene |      |
| Bn-A01-p22051510 | Bn-N1-p22039892  | gene |      |
| Bn-A01-p220693   | Bn-N1-p233449    | gene | exon |
| Bn-A01-p2207452  | Bn-N1-p2246891   | gene |      |
| Bn-A01-p22085117 | Bn-N1-p22087529  | gene | exon |
| Bn-A01-p22086244 | Bn-N1-p22088656  | gene |      |
| Bn-A01-p22087364 | Bn-N1-p22089776  | gene | exon |
| Bn-A01-p22087629 | Bn-N1-p22090041  | gene |      |
| Bn-A01-p22156169 | Bn-N15-p38746904 | gene |      |
| Bn-A01-p22182442 | Bn-N1-p22215004  | gene | exon |
| Bn-A01-p2230371  | Bn-N1-p2270625   | gene | exon |
| Bn-A01-p2245780  | Bn-N1-p2291747   | gene | exon |
| Bn-A01-p2246317  | Bn-N1-p2292283   | gene |      |
| Bn-A01-p2246373  | Bn-N1-p2292339   | gene | exon |
| Bn-A01-p2251106  | Bn-N1-p2297029   | gene | exon |
| Bn-A01-p22602330 | Bn-N3-p34356507  | gene | exon |
| Bn-A01-p2260859  | Bn-N1-p2308181   | gene | exon |
| Bn-A01-p22684301 | Bn-N1-p22245609  | gene | exon |
| Bn-A01-p22741943 | Bn-N1-p22296467  | gene |      |
| Bn-A01-p22743403 | Bn-N11-p37295377 | gene | exon |
| Bn-A01-p22768523 | Bn-N1-p22311096  | gene | exon |
| Bn-A01-p2277290  | Bn-N1-p2319617   | gene | exon |
| Bn-A01-p22841111 | Bn-N1-p22377873  | gene | exon |
| Bn-A01-p22841314 | Bn-N1-p22378076  | gene | exon |
| Bn-A01-p2288902  | Bn-N1-p2331102   | gene | exon |
| Bn-A01-p2292174  | Bn-N1-p2334618   | gene | exon |
| Bn-A01-p22948925 | Bn-N1-p22452695  | gene |      |



|                  |                  |      |      |
|------------------|------------------|------|------|
| Bn-A01-p22949106 | Bn-N1-p22452876  | gene |      |
| Bn-A01-p22982065 | Bn-N11-p37708628 | gene | exon |
| Bn-A01-p2306208  | Bn-N1-p2344506   | gene | exon |
| Bn-A01-p2306938  | Bn-N1-p2345236   | gene |      |
| Bn-A01-p2307144  | Bn-N1-p2345442   | gene |      |
| Bn-A01-p23078554 | Bn-N1-p22579592  | gene |      |
| Bn-A01-p23080525 | Bn-N1-p22581568  | gene | exon |
| Bn-A01-p2311015  | Bn-N1-p2349273   | gene |      |
| Bn-A01-p23169607 | Bn-N1-p22645941  | gene |      |
| Bn-A01-p23175111 | Bn-N1-p22651446  | gene |      |
| Bn-A01-p2318972  | Bn-N1-p2361058   | gene | exon |
| Bn-A01-p23195492 | Bn-N1-p22672365  | gene |      |
| Bn-A01-p23196022 | Bn-N1-p22672895  | gene |      |
| Bn-A01-p23330944 | Bn-N1-p22823086  | gene |      |
| Bn-A01-p2340048  | Bn-N1-p2375360   | gene |      |
| Bn-A01-p2340359  | Bn-N1-p2375614   | gene | exon |
| Bn-A01-p2345255  | Bn-N11-p3025954  | gene | exon |
| Bn-A01-p23472380 | Bn-N1-p22980942  | gene |      |
| Bn-A01-p23472646 | Bn-N1-p22981209  | gene | exon |
| Bn-A01-p23477194 | Bn-N1-p22984780  | gene |      |
| Bn-A01-p23478530 | Bn-N1-p22986116  | gene |      |
| Bn-A01-p23479473 | Bn-N1-p22987059  | gene | exon |
| Bn-A01-p234898   | Bn-N1-p240997    | gene | exon |
| Bn-A01-p235115   | Bn-N1-p241218    | gene | exon |
| Bn-A01-p23536634 | Bn-N1-p23036989  | gene |      |
| Bn-A01-p23538267 | Bn-N1-p23038622  | gene | exon |
| Bn-A01-p23582571 | Bn-N1-p23086314  | gene | exon |
| Bn-A01-p23586266 | Bn-N1-p23089995  | gene |      |
| Bn-A01-p23613283 | Bn-N1-p23130723  | gene | exon |
| Bn-A01-p23627526 | Bn-N1-p23147138  | gene |      |
| Bn-A01-p23634753 | Bn-N1-p23155057  | gene | exon |
| Bn-A01-p23640103 | Bn-N1-p23161915  | gene | exon |
| Bn-A01-p23658023 | Bn-N1-p23176240  | gene |      |
| Bn-A01-p23672301 | Bn-N1-p23189858  | gene | exon |
| Bn-A01-p23685978 | Bn-N1-p23199810  | gene |      |
| Bn-A01-p23718726 | Bn-N11-p38924538 | gene | exon |
| Bn-A01-p23719321 | Bn-N1-p23232558  | gene |      |
| Bn-A01-p23730610 | Bn-N1-p23241673  | gene |      |
| Bn-A01-p23736208 | Bn-N1-p23247097  | gene | exon |
| Bn-A01-p23739022 | Bn-N1-p23249921  | gene | exon |
| Bn-A01-p23785561 | Bn-N1-p23307739  | gene |      |
| Bn-A01-p23810423 | Bn-N1-p23326638  | gene | exon |
| Bn-A01-p23813837 | Bn-N1-p23330051  | gene | exon |
| Bn-A01-p23842865 | Bn-N1-p23361899  | gene | exon |
| Bn-A01-p23843030 | Bn-N1-p23362064  | gene | exon |
| Bn-A01-p23843222 | Bn-N1-p23362256  | gene | exon |
| Bn-A01-p23859890 | Bn-N11-p39959507 | gene | exon |
| Bn-A01-p23905191 | Bn-N1-p23420845  | gene |      |
| Bn-A01-p23938571 | Bn-N1-p23451987  | gene | exon |
| Bn-A01-p23950559 | Bn-N1-p23460955  | gene |      |
| Bn-A01-p23961368 | Bn-N1-p23476953  | gene |      |
| Bn-A01-p23965220 | Bn-N1-p23480933  | gene |      |

|                  |                  |      |      |
|------------------|------------------|------|------|
| Bn-A01-p23966537 | Bn-N1-p23482250  | gene | exon |
| Bn-A01-p23972100 | Bn-N1-p23487811  | gene |      |
| Bn-A01-p2403471  | Bn-N1-p2439812   | gene | exon |
| Bn-A01-p24107515 | Bn-N6-p16491047  | gene | exon |
| Bn-A01-p24145113 | Bn-N17-p7038322  | gene | exon |
| Bn-A01-p24226107 | Bn-N6-p16586359  | gene | exon |
| Bn-A01-p2431503  | Bn-N1-p2465850   | gene | exon |
| Bn-A01-p24360206 | Bn-N1-p23592016  | gene |      |
| Bn-A01-p24390991 | Bn-N1-p23626240  | gene |      |
| Bn-A01-p24394537 | Bn-N1-p23629804  | gene | exon |
| Bn-A01-p24395406 | Bn-N1-p23631005  | gene |      |
| Bn-A01-p24425211 | Bn-N1-p23670004  | gene |      |
| Bn-A01-p24425829 | Bn-N1-p23670623  | gene | exon |
| Bn-A01-p24429653 | Bn-N1-p23674556  | gene | exon |
| Bn-A01-p24435452 | Bn-N1-p23680494  | gene | exon |
| Bn-A01-p2445274  | Bn-N1-p2603063   | gene | exon |
| Bn-A01-p2445468  | Bn-N1-p2602869   | gene | exon |
| Bn-A01-p2445602  | Bn-N1-p2602735   | gene | exon |
| Bn-A01-p24525303 | Bn-N1-p23773086  | gene | exon |
| Bn-A01-p2453633  | Bn-N1-p2599772   | gene | exon |
| Bn-A01-p2453758  | Bn-N1-p2599647   | gene | exon |
| Bn-A01-p24541095 | Bn-N1-p23786611  | gene | exon |
| Bn-A01-p2455219  | Bn-N1-p2598186   | gene | exon |
| Bn-A01-p2457750  | Bn-N1-p2595584   | gene |      |
| Bn-A01-p24646334 | Bn-N1-p23890376  | gene |      |
| Bn-A01-p24664331 | Bn-N1-p23910662  | gene | exon |
| Bn-A01-p24696367 | Bn-N1-p23943419  | gene |      |
| Bn-A01-p24697185 | Bn-N1-p23944238  | gene |      |
| Bn-A01-p24701885 | Bn-N1-p23949100  | gene |      |
| Bn-A01-p24703150 | Bn-N1-p23950352  | gene | exon |
| Bn-A01-p24706378 | Bn-N1-p23953508  | gene |      |
| Bn-A01-p24707425 | Bn-N1-p23954561  | gene | exon |
| Bn-A01-p24707727 | Bn-N1-p23954863  | gene |      |
| Bn-A01-p24737418 | Bn-N1-p23977024  | gene | exon |
| Bn-A01-p24756888 | Bn-N1-p23996711  | gene | exon |
| Bn-A01-p24811222 | Bn-N1-p24028871  | gene |      |
| Bn-A01-p24812396 | Bn-N13-p26104669 | gene | exon |
| Bn-A01-p24848629 | Bn-N1-p24056843  | gene | exon |
| Bn-A01-p24858036 | Bn-N11-p40460287 | gene | exon |
| Bn-A01-p24862401 | Bn-N1-p24070838  | gene |      |
| Bn-A01-p2491976  | Bn-N1-p2562581   | gene |      |
| Bn-A01-p24974533 | Bn-N1-p24186494  | gene | exon |
| Bn-A01-p2501423  | Bn-N1-p2552952   | gene |      |
| Bn-A01-p2504370  | Bn-N1-p2550026   | gene | exon |
| Bn-A01-p25079505 | Bn-N1-p26979908  | gene | exon |
| Bn-A01-p2509163  | Bn-N1-p2543483   | gene | exon |
| Bn-A01-p25171870 | Bn-N4-p21066278  | gene |      |
| Bn-A01-p25175675 | Bn-N4-p21062470  | gene |      |
| Bn-A01-p2517658  | Bn-N1-p2535164   | gene |      |
| Bn-A01-p25183707 | Bn-N4-p21054418  | gene | exon |
| Bn-A01-p25235998 | Bn-N1-p26886005  | gene | exon |
| Bn-A01-p25255567 | Bn-N1-p26866822  | gene | exon |

|                  |                         |      |      |
|------------------|-------------------------|------|------|
| Bn-A01-p25259103 | Bn-N1-p26863282         | gene | exon |
| Bn-A01-p25259292 | Bn-N1-p26863067         | gene |      |
| Bn-A01-p25260327 | Bn-N1-p26862107         | gene | exon |
| Bn-A01-p25260589 | Bn-N1-p26861843         | gene |      |
| Bn-A01-p25267377 | Bn-N1-p26854811         | gene | exon |
| Bn-A01-p25279161 | Bn-N1-p26840028         | gene |      |
| Bn-A01-p25326722 | Bn-N1-p26804360         | gene | exon |
| Bn-A01-p25327241 | Bn-N1-p26803842         | gene | exon |
| Bn-A01-p2533727  | Bn-N1-p2516058          | gene |      |
| Bn-A01-p25377739 | Bn-Scaffold00895-p62181 | gene | exon |
| Bn-A01-p25405698 | Bn-Scaffold00895-p89635 | gene | exon |
| Bn-A01-p25453874 | Bn-N1-p26770166         | gene | exon |
| Bn-A01-p25509783 | Bn-N1-p26711185         | gene |      |
| Bn-A01-p25518745 | Bn-N1-p26696571         | gene | exon |
| Bn-A01-p25555508 | Bn-N1-p26660503         | gene |      |
| Bn-A01-p25561204 | Bn-N1-p26655514         | gene |      |
| Bn-A01-p25570701 | Bn-N1-p26644766         | gene |      |
| Bn-A01-p25572254 | Bn-N1-p26643152         | gene |      |
| Bn-A01-p25577348 | Bn-N1-p26638166         | gene |      |
| Bn-A01-p25580651 | Bn-N1-p26634866         | gene |      |
| Bn-A01-p2574969  | Bn-N1-p2616127          | gene | exon |
| Bn-A01-p25898606 | Bn-N16-p17821360        | gene | exon |
| Bn-A01-p26064479 | Bn-N1-p4486639          | gene |      |
| Bn-A01-p2608660  | Bn-N1-p2657233          | gene | exon |
| Bn-A01-p2624222  | Bn-N1-p2671811          | gene | exon |
| Bn-A01-p2626270  | Bn-N1-p2675493          | gene |      |
| Bn-A01-p2634563  | Bn-N1-p2683740          | gene | exon |
| Bn-A01-p26369426 | Bn-N11-p41476941        | gene | exon |
| Bn-A01-p26369651 | Bn-N1-p24501624         | gene | exon |
| Bn-A01-p2637699  | Bn-N1-p2686959          | gene |      |
| Bn-A01-p26400154 | Bn-N1-p24527640         | gene | exon |
| Bn-A01-p26423587 | Bn-N1-p24541048         | gene |      |
| Bn-A01-p26425810 | Bn-N1-p24543088         | gene |      |
| Bn-A01-p26426004 | Bn-N11-p41571399        | gene | exon |
| Bn-A01-p2647221  | Bn-N1-p2697173          | gene | exon |
| Bn-A01-p26519047 | Bn-N1-p24640051         | gene | exon |
| Bn-A01-p26568738 | Bn-N1-p24698643         | gene | exon |
| Bn-A01-p26571596 | Bn-N5-p22509511         | gene |      |
| Bn-A01-p26572331 | Bn-N1-p24702848         | gene |      |
| Bn-A01-p26575652 | Bn-N1-p24707206         | gene | exon |
| Bn-A01-p26589959 | Bn-N1-p24718839         | gene | exon |
| Bn-A01-p26592021 | Bn-N1-p24721846         | gene |      |
| Bn-A01-p26594603 | Bn-N1-p24724459         | gene |      |
| Bn-A01-p26604864 | Bn-N1-p24735170         | gene |      |
| Bn-A01-p26624315 | Bn-N1-p24754935         | gene |      |
| Bn-A01-p26627091 | Bn-N1-p24757734         | gene |      |
| Bn-A01-p26688333 | Bn-N1-p24829825         | gene |      |
| Bn-A01-p2668951  | Bn-N1-p2721895          | gene | exon |
| Bn-A01-p26715665 | Bn-N1-p24855239         | gene | exon |
| Bn-A01-p26759778 | Bn-N9-p1481062          | gene | exon |
| Bn-A01-p26760158 | Bn-N9-p1480682          | gene | exon |
| Bn-A01-p26829665 | Bn-N19-p1641358         | gene | exon |

|                  |                       |      |      |
|------------------|-----------------------|------|------|
| Bn-A01-p26837207 | Bn-N9-p1407285        | gene |      |
| Bn-A01-p26866541 | Bn-N9-p1378090        | gene |      |
| Bn-A01-p2688662  | Bn-N1-p2742283        | gene | exon |
| Bn-A01-p26910983 | Bn-N9-p1350499        | gene | exon |
| Bn-A01-p26914512 | Bn-N9-p1346927        | gene | exon |
| Bn-A01-p26914851 | Bn-N9-p1346589        | gene |      |
| Bn-A01-p26921219 | Bn-N9-p1339122        | gene | exon |
| Bn-A01-p26921609 | Bn-N9-p1338732        | gene | exon |
| Bn-A01-p26940404 | Bn-N9-p1316930        | gene |      |
| Bn-A01-p2694323  | Bn-N1-p2747936        | gene | exon |
| Bn-A01-p26945726 | Bn-N9-p1310708        | gene |      |
| Bn-A01-p26946254 | Bn-N9-p1310180        | gene | exon |
| Bn-A01-p26965229 | Bn-N9-p1275641        | gene | exon |
| Bn-A01-p26968952 | Bn-N9-p1271915        | gene |      |
| Bn-A01-p26969210 | Bn-N9-p1271660        | gene |      |
| Bn-A01-p26996900 | Bn-N9-p1242431        | gene | exon |
| Bn-A01-p2699907  | Bn-N1-p2753537        | gene | exon |
| Bn-A01-p27017324 | Bn-N9-p1211774        | gene |      |
| Bn-A01-p27017651 | Bn-N9-p1211447        | gene |      |
| Bn-A01-p27019745 | Bn-N9-p1209298        | gene | exon |
| Bn-A01-p27029107 | Bn-N9-p1200086        | gene | exon |
| Bn-A01-p27029254 | Bn-N9-p1199939        | gene | exon |
| Bn-A01-p27037472 | Bn-N9-p1191682        | gene |      |
| Bn-A01-p27050083 | Bn-N9-p1179090        | gene | exon |
| Bn-A01-p27060364 | Bn-N9-p1169123        | gene |      |
| Bn-A01-p27061075 | Bn-N9-p1168411        | gene |      |
| Bn-A01-p27101289 | Bn-N1-p24969557       | gene | exon |
| Bn-A01-p27107081 | Bn-N1-p24973721       | gene | exon |
| Bn-A01-p27115455 | Bn-N1-p24985491       | gene |      |
| Bn-A01-p27117954 | Bn-N1-p24987974       | gene |      |
| Bn-A01-p27119250 | Bn-N1-p24989268       | gene |      |
| Bn-A01-p27125649 | Bn-N11-p42647301      | gene | exon |
| Bn-A01-p2713439  | Bn-N8-p12837754       | gene |      |
| Bn-A01-p2713528  | Bn-N1-p2770797        | gene |      |
| Bn-A01-p2713583  | Bn-N1-p2770852        | gene |      |
| Bn-A01-p27147782 | Bn-N11-p42602531      | gene | exon |
| Bn-A01-p2715156  | Bn-N1-p2772407        | gene |      |
| Bn-A01-p2718126  | Bn-N1-p2775946        | gene |      |
| Bn-A01-p27202461 | Bn-N11-p42336133      | gene | exon |
| Bn-A01-p27225628 | Bn-N11-p42349033      | gene | exon |
| Bn-A01-p27272066 | Bn-N1-p25157507       | gene | exon |
| Bn-A01-p27299339 | Bn-N1-p25185733       | gene |      |
| Bn-A01-p27301637 | Bn-N1-p25190903       | gene |      |
| Bn-A01-p27301980 | Bn-N1-p25191246       | gene |      |
| Bn-A01-p27302144 | Bn-N1-p25191410       | gene |      |
| Bn-A01-p27361855 | Bn-N1-p25237072       | gene | exon |
| Bn-A01-p27381111 | Bn-N1-p25257937       | gene | exon |
| Bn-A01-p27389703 | Bn-N1-p25263989       | gene | exon |
| Bn-A01-p27392534 | Bn-Scaffold03168-p766 | gene | exon |
| Bn-A01-p27417163 | Bn-N1-p25308592       | gene | exon |
| Bn-A01-p2746862  | Bn-N1-p2808336        | gene |      |
| Bn-A01-p27522299 | Bn-N1-p25411408       | gene | exon |

|                  |                         |      |      |
|------------------|-------------------------|------|------|
| Bn-A01-p27573404 | Bn-N1-p25459315         | gene | exon |
| Bn-A01-p27580681 | Bn-N1-p25466344         | gene |      |
| Bn-A01-p27581056 | Bn-N1-p25466719         | gene |      |
| Bn-A01-p27668070 | Bn-N1-p25547775         | gene | exon |
| Bn-A01-p27673018 | Bn-N1-p25558340         | gene |      |
| Bn-A01-p27722989 | Bn-N1-p25619480         | gene |      |
| Bn-A01-p2775635  | Bn-N1-p2829094          | gene | exon |
| Bn-A01-p27774124 | Bn-N1-p25700994         | gene | exon |
| Bn-A01-p27774386 | Bn-N1-p25701256         | gene |      |
| Bn-A01-p27774666 | Bn-N1-p25701534         | gene | exon |
| Bn-A01-p27796877 | Bn-N1-p25722543         | gene |      |
| Bn-A01-p27797076 | Bn-N1-p25722742         | gene | exon |
| Bn-A01-p27822000 | Bn-N1-p25755518         | gene | exon |
| Bn-A01-p27822790 | Bn-N1-p25756308         | gene |      |
| Bn-A01-p27830372 | Bn-N1-p25763891         | gene |      |
| Bn-A01-p27834392 | Bn-N1-p25768895         | gene |      |
| Bn-A01-p27834452 | Bn-N1-p25768956         | gene |      |
| Bn-A01-p27843242 | Bn-N1-p25778161         | gene |      |
| Bn-A01-p27845673 | Bn-N1-p25779974         | gene |      |
| Bn-A01-p27846002 | Bn-N1-p25780303         | gene |      |
| Bn-A01-p27846227 | Bn-N1-p25780528         | gene |      |
| Bn-A01-p27846544 | Bn-N1-p25780845         | gene |      |
| Bn-A01-p27854949 | Bn-N11-p43517628        | gene | exon |
| Bn-A01-p27866419 | Bn-N1-p25801701         | gene |      |
| Bn-A01-p27877194 | Bn-N1-p25814170         | gene | exon |
| Bn-A01-p27907325 | Bn-N1-p25844436         | gene |      |
| Bn-A01-p27907422 | Bn-N1-p25844533         | gene | exon |
| Bn-A01-p27926574 | Bn-N1-p25873087         | gene | exon |
| Bn-A01-p27926866 | Bn-N1-p25873379         | gene | exon |
| Bn-A01-p2792719  | Bn-N1-p2850328          | gene | exon |
| Bn-A01-p27965742 | Bn-N1-p25938114         | gene | exon |
| Bn-A01-p27968584 | Bn-N1-p25940954         | gene | exon |
| Bn-A01-p27988223 | Bn-N1-p25965645         | gene |      |
| Bn-A01-p27989439 | Bn-N11-p43703019        | gene | exon |
| Bn-A01-p28049872 | Bn-N1-p26030653         | gene | exon |
| Bn-A01-p28089456 | Bn-N11-p43830963        | gene |      |
| Bn-A01-p28110393 | Bn-N1-p26103627         | gene |      |
| Bn-A01-p28186318 | Bn-Scaffold01504-p6253  | gene |      |
| Bn-A01-p28193774 | Bn-Scaffold01107-p34210 | gene | exon |
| Bn-A01-p28217427 | Bn-Scaffold01107-p12950 | gene |      |
| Bn-A01-p28220430 | Bn-Scaffold01107-p9803  | gene |      |
| Bn-A01-p28222170 | Bn-Scaffold01107-p8092  | gene |      |
| Bn-A01-p28261145 | Bn-N11-p44124748        | gene | exon |
| Bn-A01-p28285580 | Bn-N11-p44154514        | gene | exon |
| Bn-A01-p28326025 | Bn-N11-p44194806        | gene | exon |
| Bn-A01-p28346931 | Bn-N1-p26178309         | gene | exon |
| Bn-A01-p28360889 | Bn-N1-p26191337         | gene | exon |
| Bn-A01-p28364600 | Bn-N1-p26195825         | gene | exon |
| Bn-A01-p28385501 | Bn-N1-p26215591         | gene |      |
| Bn-A01-p28426820 | Bn-N1-p26248753         | gene | exon |
| Bn-A01-p28462071 | Bn-N1-p26290806         | gene | exon |
| Bn-A01-p2846364  | Bn-N14-p31172883        | gene |      |

|                  |                         |      |      |
|------------------|-------------------------|------|------|
| Bn-A01-p2848253  | Bn-N14-p31171076        | gene |      |
| Bn-A01-p2849034  | Bn-N14-p31170295        | gene |      |
| Bn-A01-p2849540  | Bn-N14-p31169787        | gene |      |
| Bn-A01-p28497362 | Bn-N1-p26332052         | gene |      |
| Bn-A01-p28497900 | Bn-N1-p26332590         | gene |      |
| Bn-A01-p28500378 | Bn-N1-p26335066         | gene |      |
| Bn-A01-p28551714 | Bn-Scaffold00891-p28220 | gene |      |
| Bn-A01-p28571117 | Bn-Scaffold00891-p75320 | gene |      |
| Bn-A01-p28577026 | Bn-Scaffold00891-p81308 | gene |      |
| Bn-A01-p2864193  | Bn-N1-p2918757          | gene | exon |
| Bn-A01-p2867284  | Bn-N1-p2921846          | gene | exon |
| Bn-A01-p2882270  | Bn-N1-p2938627          | gene |      |
| Bn-A01-p2884934  | Bn-N1-p2941286          | gene |      |
| Bn-A01-p2897071  | Bn-N1-p2953448          | gene | exon |
| Bn-A01-p2915231  | Bn-N1-p2981735          | gene | exon |
| Bn-A01-p2928824  | Bn-N1-p2997150          | gene |      |
| Bn-A01-p2934166  | Bn-N1-p3002527          | gene | exon |
| Bn-A01-p2956393  | Bn-N1-p3018205          | gene | exon |
| Bn-A01-p3000989  | Bn-N1-p3061785          | gene | exon |
| Bn-A01-p3005310  | Bn-N1-p3065971          | gene |      |
| Bn-A01-p3005793  | Bn-N1-p3066454          | gene |      |
| Bn-A01-p3061223  | Bn-N1-p3119720          | gene |      |
| Bn-A01-p3069312  | Bn-N1-p3127809          | gene | exon |
| Bn-A01-p3070657  | Bn-N1-p3129154          | gene |      |
| Bn-A01-p3077309  | Bn-N1-p3135680          | gene | exon |
| Bn-A01-p3078457  | Bn-N1-p3136822          | gene | exon |
| Bn-A01-p3097105  | Bn-N1-p3154795          | gene | exon |
| Bn-A01-p3111607  | Bn-N1-p3174757          | gene |      |
| Bn-A01-p3136468  | Bn-N1-p3199609          | gene |      |
| Bn-A01-p3179210  | Bn-Scaffold08692-p250   | gene | exon |
| Bn-A01-p3179292  | Bn-Scaffold08692-p169   | gene | exon |
| Bn-A01-p3223005  | Bn-N1-p3281849          | gene |      |
| Bn-A01-p324562   | Bn-N1-p325704           | gene | exon |
| Bn-A01-p3279678  | Bn-N1-p3328131          | gene |      |
| Bn-A01-p3306526  | Bn-N1-p3356185          | gene |      |
| Bn-A01-p3307173  | Bn-N1-p3356763          | gene | exon |
| Bn-A01-p3378332  | Bn-N1-p3408988          | gene | exon |
| Bn-A01-p3567127  | Bn-N1-p3612730          | gene |      |
| Bn-A01-p3579887  | Bn-N1-p3626398          | gene |      |
| Bn-A01-p3599097  | Bn-N1-p3656214          | gene | exon |
| Bn-A01-p3610530  | Bn-N1-p3665703          | gene | exon |
| Bn-A01-p3619975  | Bn-N1-p3672616          | gene |      |
| Bn-A01-p3626821  | Bn-N1-p3679483          | gene | exon |
| Bn-A01-p3631990  | Bn-N1-p3690151          | gene | exon |
| Bn-A01-p3643352  | Bn-N1-p3700085          | gene | exon |
| Bn-A01-p3664698  | Bn-N1-p3718064          | gene | exon |
| Bn-A01-p3666241  | Bn-N1-p3719607          | gene | exon |
| Bn-A01-p3703676  | Bn-N1-p3749245          | gene | exon |
| Bn-A01-p3707366  | Bn-N1-p3752956          | gene | exon |
| Bn-A01-p3713266  | Bn-N1-p3759089          | gene | exon |
| Bn-A01-p3737522  | Bn-N1-p3782540          | gene | exon |
| Bn-A01-p3744726  | Bn-N1-p3789910          | gene | exon |

|                 |                 |      |      |
|-----------------|-----------------|------|------|
| Bn-A01-p3791028 | Bn-N1-p3835643  | gene |      |
| Bn-A01-p3829226 | Bn-N11-p5311688 | gene | exon |
| Bn-A01-p3829785 | Bn-N1-p3869223  | gene | exon |
| Bn-A01-p3858902 | Bn-N1-p3896021  | gene | exon |
| Bn-A01-p3859106 | Bn-N11-p5352241 | gene | exon |
| Bn-A01-p3859610 | Bn-N1-p3896729  | gene | exon |
| Bn-A01-p3906965 | Bn-N1-p3955040  | gene |      |
| Bn-A01-p3938241 | Bn-N1-p3986378  | gene | exon |
| Bn-A01-p3939508 | Bn-N1-p3987645  | gene | exon |
| Bn-A01-p4070059 | Bn-N1-p4129839  | gene | exon |
| Bn-A01-p4077105 | Bn-N1-p4136147  | gene |      |
| Bn-A01-p4084366 | Bn-N1-p4143665  | gene |      |
| Bn-A01-p4084739 | Bn-N1-p4144038  | gene | exon |
| Bn-A01-p4087533 | Bn-N1-p4147074  | gene |      |
| Bn-A01-p4109157 | Bn-N1-p4164079  | gene | exon |
| Bn-A01-p4113202 | Bn-N1-p4168098  | gene | exon |
| Bn-A01-p4116110 | Bn-N1-p4171006  | gene | exon |
| Bn-A01-p4117153 | Bn-N1-p4172049  | gene | exon |
| Bn-A01-p4167795 | Bn-N1-p4219923  | gene |      |
| Bn-A01-p4173668 | Bn-N1-p4226689  | gene |      |
| Bn-A01-p4220987 | Bn-N11-p5913888 | gene |      |
| Bn-A01-p4227703 | Bn-N1-p4274490  | gene |      |
| Bn-A01-p4230829 | Bn-N1-p4277619  | gene | exon |
| Bn-A01-p4242269 | Bn-N1-p4293684  | gene | exon |
| Bn-A01-p4246586 | Bn-N1-p4297042  | gene |      |
| Bn-A01-p4258195 | Bn-N1-p4304559  | gene | exon |
| Bn-A01-p4293847 | Bn-N1-p4333914  | gene |      |
| Bn-A01-p4293878 | Bn-N1-p4333945  | gene |      |
| Bn-A01-p4322340 | Bn-N1-p4367773  | gene |      |
| Bn-A01-p4325162 | Bn-N1-p4372440  | gene |      |
| Bn-A01-p4335144 | Bn-N1-p4380902  | gene |      |
| Bn-A01-p4353657 | Bn-N1-p4399471  | gene | exon |
| Bn-A01-p436141  | Bn-N1-p435708   | gene | exon |
| Bn-A01-p4390611 | Bn-N1-p4436209  | gene |      |
| Bn-A01-p4394660 | Bn-N11-p6130132 | gene | exon |
| Bn-A01-p442492  | Bn-N1-p442085   | gene | exon |
| Bn-A01-p4452779 | Bn-N1-p4488299  | gene | exon |
| Bn-A01-p4519762 | Bn-N1-p4549496  | gene | exon |
| Bn-A01-p460072  | Bn-N1-p455627   | gene |      |
| Bn-A01-p4612881 | Bn-N1-p4651489  | gene | exon |
| Bn-A01-p4641747 | Bn-N1-p4679669  | gene |      |
| Bn-A01-p4641802 | Bn-N1-p4679724  | gene |      |
| Bn-A01-p4734188 | Bn-N1-p4744328  | gene | exon |
| Bn-A01-p4736924 | Bn-N1-p4747053  | gene |      |
| Bn-A01-p4773772 | Bn-N1-p4785853  | gene |      |
| Bn-A01-p4774065 | Bn-N1-p4786146  | gene |      |
| Bn-A01-p4786653 | Bn-N1-p4802652  | gene | exon |
| Bn-A01-p4786754 | Bn-N1-p4802753  | gene |      |
| Bn-A01-p4786787 | Bn-N1-p4802786  | gene |      |
| Bn-A01-p4787515 | Bn-N1-p4803559  | gene | exon |
| Bn-A01-p4812269 | Bn-N1-p4828077  | gene | exon |
| Bn-A01-p4820187 | Bn-N1-p4830975  | gene |      |

|                 |                         |      |      |
|-----------------|-------------------------|------|------|
| Bn-A01-p4883188 | Bn-N1-p4892640          | gene | exon |
| Bn-A01-p4920622 | Bn-N1-p4922079          | gene |      |
| Bn-A01-p4922557 | Bn-N1-p4924007          | gene |      |
| Bn-A01-p4925004 | Bn-N1-p4926465          | gene | exon |
| Bn-A01-p4940549 | Bn-N1-p4944359          | gene |      |
| Bn-A01-p4947577 | Bn-N1-p4952041          | gene | exon |
| Bn-A01-p4948316 | Bn-N1-p4952735          | gene | exon |
| Bn-A01-p5017444 | Bn-N1-p5004859          | gene | exon |
| Bn-A01-p5017446 | Bn-N1-p5004861          | gene | exon |
| Bn-A01-p5020890 | Bn-N1-p5008304          | gene |      |
| Bn-A01-p5106042 | Bn-N1-p5078759          | gene | exon |
| Bn-A01-p511682  | Bn-N1-p499736           | gene | exon |
| Bn-A01-p5215209 | Bn-N1-p5181745          | gene |      |
| Bn-A01-p5238564 | Bn-N1-p5202234          | gene |      |
| Bn-A01-p5239959 | Bn-N1-p5203630          | gene |      |
| Bn-A01-p5245778 | Bn-N11-p7408118         | gene | exon |
| Bn-A01-p5246582 | Bn-N11-p7408943         | gene |      |
| Bn-A01-p5259856 | Bn-N1-p5226110          | gene | exon |
| Bn-A01-p5268871 | Bn-N1-p5239470          | gene |      |
| Bn-A01-p5269368 | Bn-N1-p5239967          | gene | exon |
| Bn-A01-p5284702 | Bn-N1-p5260212          | gene | exon |
| Bn-A01-p5296564 | Bn-N1-p5270686          | gene |      |
| Bn-A01-p5298283 | Bn-N1-p5272405          | gene |      |
| Bn-A01-p5357589 | Bn-N1-p5336362          | gene | exon |
| Bn-A01-p5378430 | Bn-N1-p5359089          | gene | exon |
| Bn-A01-p5391551 | Bn-N1-p5370787          | gene |      |
| Bn-A01-p5469727 | Bn-N1-p5442893          | gene |      |
| Bn-A01-p5506421 | Bn-N1-p5479028          | gene | exon |
| Bn-A01-p5508840 | Bn-N1-p5481447          | gene | exon |
| Bn-A01-p5508998 | Bn-N1-p5481605          | gene |      |
| Bn-A01-p5512    | Bn-Scaffold01043-p18665 | gene | exon |
| Bn-A01-p5579695 | Bn-N1-p5576501          | gene |      |
| Bn-A01-p5599369 | Bn-N1-p5594557          | gene | exon |
| Bn-A01-p5601232 | Bn-N1-p5596422          | gene |      |
| Bn-A01-p5621392 | Bn-N1-p5613276          | gene | exon |
| Bn-A01-p5647795 | Bn-N1-p5631458          | gene | exon |
| Bn-A01-p5659083 | Bn-N1-p5644004          | gene | exon |
| Bn-A01-p5660238 | Bn-N1-p5645159          | gene | exon |
| Bn-A01-p5661294 | Bn-N1-p5646214          | gene | exon |
| Bn-A01-p5678678 | Bn-N1-p5668444          | gene |      |
| Bn-A01-p5679389 | Bn-N1-p5669155          | gene |      |
| Bn-A01-p5688168 | Bn-N1-p5679756          | gene |      |
| Bn-A01-p5697529 | Bn-N1-p5687445          | gene |      |
| Bn-A01-p5697706 | Bn-N1-p5687622          | gene | exon |
| Bn-A01-p5715141 | Bn-N1-p5703321          | gene |      |
| Bn-A01-p5718049 | Bn-N11-p8176749         | gene | exon |
| Bn-A01-p5730640 | Bn-N1-p5719044          | gene |      |
| Bn-A01-p5731429 | Bn-N1-p5719833          | gene |      |
| Bn-A01-p5731932 | Bn-N1-p5720336          | gene | exon |
| Bn-A01-p5732226 | Bn-N1-p5720630          | gene |      |
| Bn-A01-p5752342 | Bn-N1-p5743225          | gene | exon |
| Bn-A01-p5762190 | Bn-N1-p5759503          | gene |      |



|                 |                 |      |      |
|-----------------|-----------------|------|------|
| Bn-A01-p5795016 | Bn-N1-p5795297  | gene |      |
| Bn-A01-p5796314 | Bn-N1-p5796499  | gene | exon |
| Bn-A01-p5796425 | Bn-N1-p5796610  | gene |      |
| Bn-A01-p5797296 | Bn-N1-p5797482  | gene | exon |
| Bn-A01-p5797810 | Bn-N1-p5797996  | gene |      |
| Bn-A01-p5805154 | Bn-N1-p5805475  | gene | exon |
| Bn-A01-p5806635 | Bn-N1-p5806986  | gene |      |
| Bn-A01-p5821651 | Bn-N1-p5822192  | gene |      |
| Bn-A01-p5822015 | Bn-N1-p5822556  | gene |      |
| Bn-A01-p5835558 | Bn-N1-p5839444  | gene | exon |
| Bn-A01-p5868598 | Bn-N1-p5878881  | gene | exon |
| Bn-A01-p5873504 | Bn-N1-p5883788  | gene |      |
| Bn-A01-p5886182 | Bn-N1-p5896146  | gene | exon |
| Bn-A01-p5899092 | Bn-N1-p5914797  | gene |      |
| Bn-A01-p5917688 | Bn-N1-p5927079  | gene | exon |
| Bn-A01-p5918340 | Bn-N11-p8475688 | gene |      |
| Bn-A01-p5921497 | Bn-N1-p5930921  | gene | exon |
| Bn-A01-p5930704 | Bn-N1-p5940336  | gene | exon |
| Bn-A01-p5943392 | Bn-N1-p5953742  | gene | exon |
| Bn-A01-p5949498 | Bn-N1-p5959596  | gene | exon |
| Bn-A01-p597363  | Bn-N1-p601625   | gene | exon |
| Bn-A01-p598242  | Bn-N1-p602504   | gene |      |
| Bn-A01-p5990203 | Bn-N1-p6006584  | gene | exon |
| Bn-A01-p5994840 | Bn-N1-p6011242  | gene | exon |
| Bn-A01-p5994980 | Bn-N1-p6011382  | gene | exon |
| Bn-A01-p6035491 | Bn-N1-p6057148  | gene |      |
| Bn-A01-p6038249 | Bn-N1-p6059919  | gene | exon |
| Bn-A01-p6040667 | Bn-N1-p6062283  | gene |      |
| Bn-A01-p6083015 | Bn-N1-p6102164  | gene | exon |
| Bn-A01-p6111016 | Bn-N1-p6134186  | gene |      |
| Bn-A01-p6180257 | Bn-N1-p6204502  | gene |      |
| Bn-A01-p6182710 | Bn-N1-p6206809  | gene |      |
| Bn-A01-p6188347 | Bn-N1-p6212733  | gene | exon |
| Bn-A01-p6215196 | Bn-N1-p6237449  | gene | exon |
| Bn-A01-p6216424 | Bn-N11-p8996200 | gene |      |
| Bn-A01-p6217011 | Bn-N1-p6240730  | gene | exon |
| Bn-A01-p6220667 | Bn-N1-p6244388  | gene |      |
| Bn-A01-p622550  | Bn-N1-p627350   | gene |      |
| Bn-A01-p6232061 | Bn-N1-p6255985  | gene | exon |
| Bn-A01-p623568  | Bn-N1-p628366   | gene | exon |
| Bn-A01-p6270054 | Bn-N1-p6282220  | gene | exon |
| Bn-A01-p6271245 | Bn-N1-p6283411  | gene | exon |
| Bn-A01-p6290508 | Bn-N1-p6303043  | gene | exon |
| Bn-A01-p6349933 | Bn-N1-p6348505  | gene |      |
| Bn-A01-p637586  | Bn-N1-p642087   | gene | exon |
| Bn-A01-p644410  | Bn-N1-p648675   | gene |      |
| Bn-A01-p645951  | Bn-N1-p650216   | gene |      |
| Bn-A01-p648196  | Bn-N1-p652446   | gene |      |
| Bn-A01-p6482543 | Bn-N1-p6482538  | gene |      |
| Bn-A01-p6487075 | Bn-N1-p6489048  | gene |      |
| Bn-A01-p6546245 | Bn-N1-p6542526  | gene | exon |
| Bn-A01-p6547052 | Bn-N1-p6543334  | gene |      |

|                 |                  |      |      |
|-----------------|------------------|------|------|
| Bn-A01-p6552596 | Bn-N1-p6548875   | gene | exon |
| Bn-A01-p6558843 | Bn-N1-p6555124   | gene | exon |
| Bn-A01-p6560270 | Bn-N1-p6556551   | gene |      |
| Bn-A01-p657852  | Bn-N1-p657755    | gene |      |
| Bn-A01-p6643749 | Bn-N1-p6624569   | gene |      |
| Bn-A01-p6678914 | Bn-N1-p6660632   | gene | exon |
| Bn-A01-p6679394 | Bn-N1-p6661113   | gene |      |
| Bn-A01-p6747706 | Bn-N1-p6723020   | gene |      |
| Bn-A01-p6776634 | Bn-N1-p6755980   | gene | exon |
| Bn-A01-p6776950 | Bn-N1-p6756296   | gene | exon |
| Bn-A01-p678018  | Bn-N1-p678856    | gene | exon |
| Bn-A01-p6787691 | Bn-N1-p6778779   | gene |      |
| Bn-A01-p6787930 | Bn-N1-p6779018   | gene |      |
| Bn-A01-p6788044 | Bn-N1-p6779131   | gene |      |
| Bn-A01-p6801449 | Bn-N1-p6771861   | gene |      |
| Bn-A01-p6826327 | Bn-N1-p6810755   | gene |      |
| Bn-A01-p6838738 | Bn-N1-p6828366   | gene |      |
| Bn-A01-p6841235 | Bn-N1-p6830489   | gene | exon |
| Bn-A01-p6877281 | Bn-N11-p10119319 | gene | exon |
| Bn-A01-p688355  | Bn-N1-p687818    | gene |      |
| Bn-A01-p6899980 | Bn-N13-p60803183 | gene | exon |
| Bn-A01-p6907522 | Bn-N1-p6896133   | gene |      |
| Bn-A01-p6920456 | Bn-N1-p6908046   | gene |      |
| Bn-A01-p6925167 | Bn-N1-p6911249   | gene | exon |
| Bn-A01-p6925436 | Bn-N1-p6911513   | gene | exon |
| Bn-A01-p6950868 | Bn-N11-p10237431 | gene | exon |
| Bn-A01-p6962542 | Bn-N1-p6949268   | gene |      |
| Bn-A01-p6972779 | Bn-N1-p6961785   | gene | exon |
| Bn-A01-p6976938 | Bn-N1-p6971482   | gene | exon |
| Bn-A01-p6986405 | Bn-N1-p6981704   | gene | exon |
| Bn-A01-p7068752 | Bn-N1-p7060343   | gene |      |
| Bn-A01-p7069263 | Bn-N1-p7060854   | gene | exon |
| Bn-A01-p710239  | Bn-N11-p910546   | gene |      |
| Bn-A01-p71129   | Bn-N1-p68429     | gene | exon |
| Bn-A01-p7121832 | Bn-N1-p7130180   | gene |      |
| Bn-A01-p7122036 | Bn-N1-p7130384   | gene | exon |
| Bn-A01-p7132729 | Bn-N1-p7146539   | gene | exon |
| Bn-A01-p713562  | Bn-N1-p728364    | gene | exon |
| Bn-A01-p7137897 | Bn-N1-p7151712   | gene |      |
| Bn-A01-p7150748 | Bn-N1-p7159741   | gene |      |
| Bn-A01-p7151096 | Bn-N1-p7160087   | gene |      |
| Bn-A01-p733483  | Bn-N11-p967160   | gene |      |
| Bn-A01-p7363480 | Bn-N1-p7373856   | gene |      |
| Bn-A01-p7367598 | Bn-N1-p7377974   | gene | exon |
| Bn-A01-p7372570 | Bn-N1-p7383038   | gene |      |
| Bn-A01-p7372653 | Bn-N1-p7383121   | gene | exon |
| Bn-A01-p7373427 | Bn-N1-p7383894   | gene |      |
| Bn-A01-p7374290 | Bn-N1-p7384740   | gene | exon |
| Bn-A01-p7374589 | Bn-N1-p7385039   | gene | exon |
| Bn-A01-p737560  | Bn-N1-p752694    | gene |      |
| Bn-A01-p7383179 | Bn-N1-p7391780   | gene |      |
| Bn-A01-p739098  | Bn-N1-p754255    | gene | exon |

|                 |                  |      |      |
|-----------------|------------------|------|------|
| Bn-A01-p7455231 | Bn-N1-p7488564   | gene |      |
| Bn-A01-p7455852 | Bn-N1-p7489185   | gene |      |
| Bn-A01-p7479483 | Bn-N1-p7515195   | gene |      |
| Bn-A01-p7493373 | Bn-N1-p7527425   | gene | exon |
| Bn-A01-p7530968 | Bn-N1-p7557701   | gene |      |
| Bn-A01-p7548806 | Bn-N1-p7577062   | gene |      |
| Bn-A01-p7551163 | Bn-N1-p7579411   | gene |      |
| Bn-A01-p7554673 | Bn-N1-p7582871   | gene |      |
| Bn-A01-p7573871 | Bn-N1-p7606082   | gene |      |
| Bn-A01-p7574355 | Bn-N1-p7606566   | gene |      |
| Bn-A01-p7603030 | Bn-N1-p7632937   | gene | exon |
| Bn-A01-p7615707 | Bn-N1-p7645721   | gene |      |
| Bn-A01-p7643514 | Bn-N1-p7681242   | gene |      |
| Bn-A01-p7643571 | Bn-N1-p7681299   | gene | exon |
| Bn-A01-p7702471 | Bn-N1-p7744599   | gene | exon |
| Bn-A01-p7714470 | Bn-N1-p7759078   | gene |      |
| Bn-A01-p7717618 | Bn-N11-p11698999 | gene | exon |
| Bn-A01-p7721497 | Bn-N1-p7767388   | gene | exon |
| Bn-A01-p7724859 | Bn-N1-p7770754   | gene | exon |
| Bn-A01-p7771617 | Bn-N1-p7849593   | gene |      |
| Bn-A01-p7772345 | Bn-N1-p7850321   | gene | exon |
| Bn-A01-p7787153 | Bn-N1-p7857203   | gene | exon |
| Bn-A01-p7825044 | Bn-N1-p7886156   | gene |      |
| Bn-A01-p7827260 | Bn-N1-p7888408   | gene |      |
| Bn-A01-p7831289 | Bn-N1-p7892564   | gene |      |
| Bn-A01-p7834871 | Bn-N1-p7896286   | gene | exon |
| Bn-A01-p7850092 | Bn-N11-p11910851 | gene | exon |
| Bn-A01-p7852440 | Bn-N1-p7911511   | gene | exon |
| Bn-A01-p7861283 | Bn-N1-p7920296   | gene | exon |
| Bn-A01-p7875358 | Bn-N1-p7934380   | gene |      |
| Bn-A01-p7889385 | Bn-N1-p7947519   | gene |      |
| Bn-A01-p7890174 | Bn-N1-p7948308   | gene |      |
| Bn-A01-p7926287 | Bn-N1-p7973148   | gene | exon |
| Bn-A01-p7953001 | Bn-N1-p7998583   | gene |      |
| Bn-A01-p7961620 | Bn-N1-p8008195   | gene | exon |
| Bn-A01-p7973418 | Bn-N1-p8025818   | gene |      |
| Bn-A01-p7974551 | Bn-N1-p8027772   | gene | exon |
| Bn-A01-p7979458 | Bn-N1-p8033912   | gene |      |
| Bn-A01-p7982220 | Bn-N11-p12094492 | gene |      |
| Bn-A01-p7983241 | Bn-N1-p8037687   | gene | exon |
| Bn-A01-p7987687 | Bn-N1-p8044316   | gene |      |
| Bn-A01-p8016433 | Bn-N1-p8071288   | gene |      |
| Bn-A01-p8017380 | Bn-N1-p8072235   | gene |      |
| Bn-A01-p80385   | Bn-N1-p77986     | gene |      |
| Bn-A01-p8043776 | Bn-N1-p8093914   | gene | exon |
| Bn-A01-p8051029 | Bn-N1-p8105843   | gene |      |
| Bn-A01-p8051804 | Bn-N1-p8106618   | gene |      |
| Bn-A01-p8063652 | Bn-N1-p8117459   | gene |      |
| Bn-A01-p8076080 | Bn-N1-p8129897   | gene | exon |
| Bn-A01-p8108178 | Bn-N1-p8150073   | gene |      |
| Bn-A01-p8115849 | Bn-N1-p8154622   | gene |      |
| Bn-A01-p8116314 | Bn-N1-p8155064   | gene |      |

|                 |                        |      |      |
|-----------------|------------------------|------|------|
| Bn-A01-p8121877 | Bn-N1-p8160621         | gene |      |
| Bn-A01-p8122779 | Bn-N1-p8161525         | gene |      |
| Bn-A01-p816488  | Bn-N1-p836147          | gene | exon |
| Bn-A01-p820317  | Bn-N1-p839949          | gene | exon |
| Bn-A01-p821328  | Bn-N1-p840960          | gene |      |
| Bn-A01-p8221245 | Bn-N1-p8246043         | gene |      |
| Bn-A01-p8242690 | Bn-Scaffold01941-p1422 | gene |      |
| Bn-A01-p8246641 | Bn-N1-p8273622         | gene | exon |
| Bn-A01-p830221  | Bn-N1-p849820          | gene | exon |
| Bn-A01-p8335308 | Bn-N1-p8372080         | gene | exon |
| Bn-A01-p8353426 | Bn-N1-p8396150         | gene | exon |
| Bn-A01-p8354196 | Bn-N11-p12707834       | gene |      |
| Bn-A01-p8378967 | Bn-N1-p8419568         | gene |      |
| Bn-A01-p8404588 | Bn-N1-p8448286         | gene | exon |
| Bn-A01-p8417520 | Bn-N1-p8460647         | gene |      |
| Bn-A01-p8418102 | Bn-N1-p8461229         | gene | exon |
| Bn-A01-p8439363 | Bn-N1-p8481766         | gene | exon |
| Bn-A01-p8451192 | Bn-N11-p12860731       | gene |      |
| Bn-A01-p8501753 | Bn-N1-p8547388         | gene |      |
| Bn-A01-p8504134 | Bn-N1-p8549776         | gene | exon |
| Bn-A01-p8543512 | Bn-N1-p8581598         | gene | exon |
| Bn-A01-p857771  | Bn-N1-p882928          | gene |      |
| Bn-A01-p8647625 | Bn-N1-p8687484         | gene | exon |
| Bn-A01-p866260  | Bn-N1-p891435          | gene | exon |
| Bn-A01-p8683487 | Bn-N1-p8727492         | gene |      |
| Bn-A01-p872436  | Bn-N11-p1137301        | gene | exon |
| Bn-A01-p877322  | Bn-N1-p899365          | gene | exon |
| Bn-A01-p878256  | Bn-N1-p900297          | gene | exon |
| Bn-A01-p8795719 | Bn-N9-p18852883        | gene | exon |
| Bn-A01-p879755  | Bn-N1-p902872          | gene |      |
| Bn-A01-p8821722 | Bn-N9-p18882233        | gene |      |
| Bn-A01-p8836783 | Bn-N9-p18897377        | gene |      |
| Bn-A01-p8859217 | Bn-N9-p18918063        | gene | exon |
| Bn-A01-p887815  | Bn-N1-p910193          | gene | exon |
| Bn-A01-p8901327 | Bn-N9-p18985716        | gene |      |
| Bn-A01-p8901490 | Bn-N9-p18985879        | gene | exon |
| Bn-A01-p8960719 | Bn-N9-p3365113         | gene |      |
| Bn-A01-p8982996 | Bn-N9-p3345599         | gene | exon |
| Bn-A01-p89956   | Bn-N1-p88996           | gene |      |
| Bn-A01-p9030262 | Bn-N9-p3301660         | gene |      |
| Bn-A01-p9065564 | Bn-Scaffold06532-p1209 | gene | exon |
| Bn-A01-p9075803 | Bn-N9-p3248371         | gene |      |
| Bn-A01-p9075931 | Bn-N9-p3248243         | gene |      |
| Bn-A01-p9080359 | Bn-N9-p3243748         | gene |      |
| Bn-A01-p9080573 | Bn-N9-p3243534         | gene | exon |
| Bn-A01-p9129693 | Bn-N9-p3184444         | gene | exon |
| Bn-A01-p9130391 | Bn-N9-p3183735         | gene |      |
| Bn-A01-p9138209 | Bn-N9-p3175914         | gene |      |
| Bn-A01-p9145211 | Bn-N9-p3170011         | gene |      |
| Bn-A01-p9145630 | Bn-N9-p3169592         | gene |      |
| Bn-A01-p9146490 | Bn-N9-p3168728         | gene |      |
| Bn-A01-p9147096 | Bn-N9-p3168122         | gene |      |

|                  |                  |      |      |
|------------------|------------------|------|------|
| Bn-A01-p916774   | Bn-N1-p936377    | gene |      |
| Bn-A01-p916852   | Bn-N1-p936455    | gene |      |
| Bn-A01-p9170858  | Bn-N1-p8737520   | gene | exon |
| Bn-A01-p9176104  | Bn-N1-p8743891   | gene | exon |
| Bn-A01-p9180340  | Bn-N1-p8751591   | gene | exon |
| Bn-A01-p9180828  | Bn-N1-p8752082   | gene |      |
| Bn-A01-p9259611  | Bn-N1-p8812569   | gene |      |
| Bn-A01-p9260073  | Bn-N1-p8813031   | gene |      |
| Bn-A01-p9269627  | Bn-N1-p8841697   | gene | exon |
| Bn-A01-p9326695  | Bn-N1-p8879780   | gene | exon |
| Bn-A01-p9331463  | Bn-N1-p8884533   | gene | exon |
| Bn-A01-p933795   | Bn-N11-p1196494  | gene | exon |
| Bn-A01-p9360043  | Bn-N1-p8904052   | gene |      |
| Bn-A01-p9360971  | Bn-N1-p8904980   | gene |      |
| Bn-A01-p9369257  | Bn-N1-p8913447   | gene |      |
| Bn-A01-p9371414  | Bn-N11-p13619579 | gene |      |
| Bn-A01-p938887   | Bn-N1-p958851    | gene | exon |
| Bn-A01-p939202   | Bn-N1-p959173    | gene |      |
| Bn-A01-p9408018  | Bn-N1-p8952049   | gene | exon |
| Bn-A01-p941792   | Bn-N1-p966110    | gene |      |
| Bn-A01-p9469933  | Bn-N1-p9007626   | gene | exon |
| Bn-A01-p9476520  | Bn-N1-p9013686   | gene | exon |
| Bn-A01-p9499100  | Bn-N1-p9029564   | gene | exon |
| Bn-A01-p9523572  | Bn-N1-p9051751   | gene | exon |
| Bn-A01-p9565804  | Bn-N1-p9081251   | gene | exon |
| Bn-A01-p95718    | Bn-N1-p101308    | gene |      |
| Bn-A01-p9599644  | Bn-N1-p9110966   | gene |      |
| Bn-A01-p9614730  | Bn-N1-p9123417   | gene | exon |
| Bn-A01-p9619932  | Bn-N1-p9128645   | gene | exon |
| Bn-A01-p9621623  | Bn-N1-p9130259   | gene | exon |
| Bn-A01-p977861   | Bn-N11-p1264828  | gene |      |
| Bn-A01-p978860   | Bn-N1-p1005541   | gene | exon |
| Bn-A01-p9810552  | Bn-N1-p9320614   | gene | exon |
| Bn-A01-p9853365  | Bn-N1-p9366090   | gene | exon |
| Bn-A01-p9863114  | Bn-N1-p9375414   | gene | exon |
| Bn-A01-p994722   | Bn-N1-p1025240   | gene | exon |
| Bn-A01-p9961425  | Bn-N1-p9496705   | gene | exon |
| Bn-A01-p9961553  | Bn-N1-p9496833   | gene | exon |
| Bn-A01-p9982115  | Bn-N1-p9522795   | gene |      |
| Bn-A01-p9989240  | Bn-N1-p9529910   | gene |      |
| Bn-A01-p9999485  | Bn-N1-p9549138   | gene |      |
| Bn-A02-p10019636 | Bn-N2-p9430743   | gene | exon |
| Bn-A02-p10020231 | Bn-N2-p9431338   | gene | exon |
| Bn-A02-p10096185 | Bn-N2-p9499093   | gene |      |
| Bn-A02-p10126530 | Bn-N2-p9546173   | gene | exon |
| Bn-A02-p10138982 | Bn-N2-p9559614   | gene |      |
| Bn-A02-p10140065 | Bn-N2-p9560595   | gene |      |
| Bn-A02-p10153359 | Bn-N2-p9575002   | gene | exon |
| Bn-A02-p10156025 | Bn-N2-p9577668   | gene |      |
| Bn-A02-p10193709 | Bn-N2-p9620480   | gene | exon |
| Bn-A02-p1020806  | Bn-N7-p13945724  | gene |      |
| Bn-A02-p10231298 | Bn-N2-p9655300   | gene | exon |

|                  |                        |      |      |
|------------------|------------------------|------|------|
| Bn-A02-p10247756 | Bn-N2-p9675879         | gene | exon |
| Bn-A02-p1025518  | Bn-N7-p13950938        | gene |      |
| Bn-A02-p10255955 | Bn-N2-p9684278         | gene | exon |
| Bn-A02-p10259746 | Bn-N2-p9688844         | gene |      |
| Bn-A02-p1028349  | Bn-N7-p13953747        | gene | exon |
| Bn-A02-p10325260 | Bn-N2-p9739682         | gene |      |
| Bn-A02-p10332863 | Bn-N2-p9746334         | gene |      |
| Bn-A02-p10338350 | Bn-N2-p9750165         | gene |      |
| Bn-A02-p10377179 | Bn-N2-p9789893         | gene |      |
| Bn-A02-p10395108 | Bn-N2-p9812760         | gene | exon |
| Bn-A02-p10444138 | Bn-N2-p9877373         | gene | exon |
| Bn-A02-p10510996 | Bn-N2-p9937231         | gene | exon |
| Bn-A02-p10524842 | Bn-N2-p9961771         | gene |      |
| Bn-A02-p10591779 | Bn-Scaffold01435-p4966 | gene | exon |
| Bn-A02-p10616871 | Bn-N2-p10056794        | gene | exon |
| Bn-A02-p10623838 | Bn-N2-p10063922        | gene |      |
| Bn-A02-p10624373 | Bn-N2-p10064457        | gene | exon |
| Bn-A02-p10625720 | Bn-N2-p10065821        | gene |      |
| Bn-A02-p10626782 | Bn-N2-p10066883        | gene |      |
| Bn-A02-p10629886 | Bn-N2-p10069986        | gene | exon |
| Bn-A02-p10711353 | Bn-N2-p10136517        | gene | exon |
| Bn-A02-p10711442 | Bn-N2-p10136606        | gene | exon |
| Bn-A02-p10711565 | Bn-N2-p10136729        | gene | exon |
| Bn-A02-p1075920  | Bn-N2-p1806142         | gene |      |
| Bn-A02-p10775283 | Bn-N12-p15120898       | gene | exon |
| Bn-A02-p10850012 | Bn-N2-p10364056        | gene | exon |
| Bn-A02-p10850323 | Bn-N2-p10364367        | gene |      |
| Bn-A02-p1085455  | Bn-N12-p1811265        | gene |      |
| Bn-A02-p1091779  | Bn-N2-p1790897         | gene |      |
| Bn-A02-p1092146  | Bn-N2-p1790534         | gene |      |
| Bn-A02-p10949322 | Bn-N2-p10473667        | gene |      |
| Bn-A02-p1096082  | Bn-N2-p1786578         | gene |      |
| Bn-A02-p10983922 | Bn-N2-p10505168        | gene | exon |
| Bn-A02-p10996151 | Bn-N2-p10519407        | gene | exon |
| Bn-A02-p11038401 | Bn-N2-p10576393        | gene |      |
| Bn-A02-p11039119 | Bn-N2-p10577070        | gene | exon |
| Bn-A02-p11041638 | Bn-N2-p10579589        | gene | exon |
| Bn-A02-p11041726 | Bn-N2-p10579677        | gene | exon |
| Bn-A02-p11086855 | Bn-N2-p10621790        | gene |      |
| Bn-A02-p11087046 | Bn-N2-p10621981        | gene |      |
| Bn-A02-p11087388 | Bn-N2-p10622333        | gene | exon |
| Bn-A02-p11155686 | Bn-N2-p10688424        | gene |      |
| Bn-A02-p11156474 | Bn-N2-p10689212        | gene | exon |
| Bn-A02-p11159353 | Bn-N2-p10692160        | gene |      |
| Bn-A02-p11160726 | Bn-N2-p10693526        | gene |      |
| Bn-A02-p11161716 | Bn-N2-p10694521        | gene | exon |
| Bn-A02-p11182703 | Bn-N2-p10715981        | gene |      |
| Bn-A02-p11235969 | Bn-N2-p10796763        | gene |      |
| Bn-A02-p11291606 | Bn-N2-p10856085        | gene | exon |
| Bn-A02-p11293986 | Bn-N2-p10858464        | gene | exon |
| Bn-A02-p11346389 | Bn-N2-p10907135        | gene |      |
| Bn-A02-p11355276 | Bn-N2-p10915864        | gene | exon |

|                  |                  |      |      |
|------------------|------------------|------|------|
| Bn-A02-p11356944 | Bn-N2-p10917650  | gene |      |
| Bn-A02-p11365167 | Bn-N2-p10926253  | gene |      |
| Bn-A02-p11449348 | Bn-N2-p11155737  | gene | exon |
| Bn-A02-p11454658 | Bn-N2-p11167023  | gene | exon |
| Bn-A02-p11454746 | Bn-N2-p11167111  | gene | exon |
| Bn-A02-p11455068 | Bn-N2-p11167436  | gene | exon |
| Bn-A02-p11455310 | Bn-N2-p11167691  | gene |      |
| Bn-A02-p11455369 | Bn-N2-p11167750  | gene | exon |
| Bn-A02-p11455659 | Bn-N2-p11168040  | gene |      |
| Bn-A02-p11535570 | Bn-N2-p11254616  | gene | exon |
| Bn-A02-p1155656  | Bn-N2-p1716507   | gene | exon |
| Bn-A02-p1157373  | Bn-N2-p1714788   | gene |      |
| Bn-A02-p11616676 | Bn-N2-p11344990  | gene |      |
| Bn-A02-p11713499 | Bn-N2-p11442395  | gene | exon |
| Bn-A02-p11723698 | Bn-N2-p11453116  | gene |      |
| Bn-A02-p11759281 | Bn-N2-p11485420  | gene | exon |
| Bn-A02-p11772983 | Bn-N12-p16895215 | gene |      |
| Bn-A02-p11786253 | Bn-N12-p16904124 | gene |      |
| Bn-A02-p11786572 | Bn-N2-p11519176  | gene |      |
| Bn-A02-p11842725 | Bn-N2-p11585881  | gene |      |
| Bn-A02-p11859430 | Bn-N2-p11603565  | gene |      |
| Bn-A02-p11918483 | Bn-N2-p11657722  | gene |      |
| Bn-A02-p11929538 | Bn-N2-p11673849  | gene |      |
| Bn-A02-p11936177 | Bn-N2-p11680540  | gene |      |
| Bn-A02-p11937221 | Bn-N2-p11681573  | gene |      |
| Bn-A02-p12044265 | Bn-N2-p11820483  | gene |      |
| Bn-A02-p12061350 | Bn-N2-p11825220  | gene |      |
| Bn-A02-p12105374 | Bn-N12-p17401558 | gene | exon |
| Bn-A02-p12106636 | Bn-N2-p11875156  | gene | exon |
| Bn-A02-p12107746 | Bn-N2-p11876266  | gene | exon |
| Bn-A02-p12107868 | Bn-N2-p11876388  | gene |      |
| Bn-A02-p12145607 | Bn-N2-p11905764  | gene |      |
| Bn-A02-p12150733 | Bn-N2-p11914823  | gene |      |
| Bn-A02-p12157799 | Bn-N2-p11921905  | gene | exon |
| Bn-A02-p12198897 | Bn-N2-p11962322  | gene |      |
| Bn-A02-p12269431 | Bn-N2-p12021186  | gene |      |
| Bn-A02-p12278577 | Bn-N2-p12031940  | gene | exon |
| Bn-A02-p12284078 | Bn-N2-p12037386  | gene |      |
| Bn-A02-p12284671 | Bn-N2-p12037981  | gene | exon |
| Bn-A02-p12284882 | Bn-N2-p12038192  | gene |      |
| Bn-A02-p12295281 | Bn-N2-p12048480  | gene |      |
| Bn-A02-p12295682 | Bn-N2-p12048881  | gene | exon |
| Bn-A02-p1232964  | Bn-N2-p1648567   | gene |      |
| Bn-A02-p12393617 | Bn-N2-p12223294  | gene | exon |
| Bn-A02-p12397326 | Bn-N2-p12226976  | gene |      |
| Bn-A02-p12397585 | Bn-N2-p12227235  | gene |      |
| Bn-A02-p1250673  | Bn-N2-p1628726   | gene |      |
| Bn-A02-p12520861 | Bn-N2-p12364780  | gene |      |
| Bn-A02-p12521545 | Bn-N2-p12365464  | gene | exon |
| Bn-A02-p12589304 | Bn-N2-p12445215  | gene |      |
| Bn-A02-p1259929  | Bn-N2-p1619108   | gene | exon |
| Bn-A02-p126006   | Bn-N7-p13000679  | gene | exon |

|                  |                       |      |      |
|------------------|-----------------------|------|------|
| Bn-A02-p12608089 | Bn-N2-p12466634       | gene | exon |
| Bn-A02-p12680940 | Bn-N2-p12555310       | gene | exon |
| Bn-A02-p12681201 | Bn-N2-p12555566       | gene |      |
| Bn-A02-p12681247 | Bn-N2-p12555614       | gene |      |
| Bn-A02-p12688495 | Bn-N2-p12562841       | gene | exon |
| Bn-A02-p12688906 | Bn-N2-p12563252       | gene | exon |
| Bn-A02-p12693516 | Bn-N2-p12569885       | gene |      |
| Bn-A02-p12739678 | Bn-N2-p12597648       | gene | exon |
| Bn-A02-p12752915 | Bn-N2-p12636981       | gene | exon |
| Bn-A02-p12815817 | Bn-N2-p12709133       | gene | exon |
| Bn-A02-p12819772 | Bn-N12-p18227776      | gene |      |
| Bn-A02-p12821038 | Bn-N2-p12728874       | gene | exon |
| Bn-A02-p12822311 | Bn-N12-p18230297      | gene |      |
| Bn-A02-p12822315 | Bn-N2-p12730149       | gene |      |
| Bn-A02-p1290847  | Bn-N2-p1587146        | gene | exon |
| Bn-A02-p1292023  | Bn-N2-p1585968        | gene |      |
| Bn-A02-p12939509 | Bn-N2-p12812391       | gene |      |
| Bn-A02-p12999856 | Bn-N2-p12861351       | gene |      |
| Bn-A02-p13000494 | Bn-N2-p12861986       | gene | exon |
| Bn-A02-p13019236 | Bn-N2-p12877301       | gene | exon |
| Bn-A02-p13067449 | Bn-N2-p12914411       | gene |      |
| Bn-A02-p13068355 | Bn-N2-p12912891       | gene |      |
| Bn-A02-p13118529 | Bn-N2-p12981704       | gene |      |
| Bn-A02-p13167989 | Bn-N12-p18773573      | gene | exon |
| Bn-A02-p1324368  | Bn-N2-p1553708        | gene | exon |
| Bn-A02-p13252027 | Bn-N1-p22788462       | gene |      |
| Bn-A02-p13252137 | Bn-N1-p22788352       | gene | exon |
| Bn-A02-p13252354 | Bn-N1-p22788137       | gene |      |
| Bn-A02-p13252652 | Bn-N1-p22787838       | gene |      |
| Bn-A02-p1327787  | Bn-N2-p1550342        | gene |      |
| Bn-A02-p13382591 | Bn-N2-p13258690       | gene | exon |
| Bn-A02-p1344870  | Bn-N12-p1467532       | gene | exon |
| Bn-A02-p13572191 | Bn-N2-p13366263       | gene | exon |
| Bn-A02-p13627045 | Bn-N2-p13426522       | gene | exon |
| Bn-A02-p13637436 | Bn-N2-p13438528       | gene |      |
| Bn-A02-p13662225 | Bn-N2-p13470531       | gene |      |
| Bn-A02-p1370581  | Bn-N2-p1508906        | gene | exon |
| Bn-A02-p1372727  | Bn-N2-p1506659        | gene |      |
| Bn-A02-p13874627 | Bn-N2-p13723961       | gene | exon |
| Bn-A02-p13875459 | Bn-N2-p13724898       | gene |      |
| Bn-A02-p14040220 | Bn-N2-p13879570       | gene |      |
| Bn-A02-p14078497 | Bn-N2-p13922267       | gene | exon |
| Bn-A02-p14134708 | Bn-N2-p13977379       | gene |      |
| Bn-A02-p14170476 | Bn-N2-p14009194       | gene |      |
| Bn-A02-p14215327 | Bn-Scaffold21546-p444 | gene | exon |
| Bn-A02-p14287347 | Bn-N2-p14133767       | gene | exon |
| Bn-A02-p14287428 | Bn-N2-p14133848       | gene | exon |
| Bn-A02-p14328410 | Bn-N2-p14160230       | gene |      |
| Bn-A02-p14527781 | Bn-N2-p14409203       | gene | exon |
| Bn-A02-p14529778 | Bn-N2-p14411210       | gene | exon |
| Bn-A02-p14592602 | Bn-N2-p14456030       | gene | exon |
| Bn-A02-p14605944 | Bn-N2-p14466194       | gene | exon |



|                  |                  |      |      |
|------------------|------------------|------|------|
| Bn-A02-p14612382 | Bn-N2-p14473251  | gene | exon |
| Bn-A02-p14615703 | Bn-N2-p14476576  | gene | exon |
| Bn-A02-p14781371 | Bn-N2-p14671951  | gene | exon |
| Bn-A02-p14956864 | Bn-N2-p14875554  | gene |      |
| Bn-A02-p14992706 | Bn-N2-p14911092  | gene |      |
| Bn-A02-p14992781 | Bn-N2-p14911167  | gene |      |
| Bn-A02-p14992802 | Bn-N2-p14911188  | gene |      |
| Bn-A02-p1506579  | Bn-N2-p169311    | gene |      |
| Bn-A02-p1530996  | Bn-N2-p207019    | gene |      |
| Bn-A02-p15457681 | Bn-N18-p23083283 | gene |      |
| Bn-A02-p15569271 | Bn-N2-p15445555  | gene | exon |
| Bn-A02-p15693192 | Bn-N2-p15585036  | gene |      |
| Bn-A02-p15745628 | Bn-N2-p15638511  | gene | exon |
| Bn-A02-p15758928 | Bn-N2-p15651816  | gene | exon |
| Bn-A02-p1576350  | Bn-N2-p249451    | gene |      |
| Bn-A02-p15764198 | Bn-N2-p15655290  | gene | exon |
| Bn-A02-p15766649 | Bn-N2-p15656768  | gene | exon |
| Bn-A02-p15789088 | Bn-N2-p15667274  | gene | exon |
| Bn-A02-p15832342 | Bn-N2-p15718293  | gene | exon |
| Bn-A02-p15870327 | Bn-N2-p15740491  | gene |      |
| Bn-A02-p15912199 | Bn-N2-p15783884  | gene |      |
| Bn-A02-p16058769 | Bn-N2-p15945767  | gene |      |
| Bn-A02-p16083197 | Bn-N2-p15961807  | gene | exon |
| Bn-A02-p16209439 | Bn-N2-p16108396  | gene | exon |
| Bn-A02-p16223740 | Bn-N2-p16125170  | gene |      |
| Bn-A02-p1629448  | Bn-N2-p304853    | gene |      |
| Bn-A02-p16339698 | Bn-N2-p16248137  | gene | exon |
| Bn-A02-p16528486 | Bn-N2-p16440230  | gene |      |
| Bn-A02-p16529092 | Bn-N2-p16440836  | gene |      |
| Bn-A02-p16571709 | Bn-N2-p16481172  | gene |      |
| Bn-A02-p16666866 | Bn-N2-p17563229  | gene |      |
| Bn-A02-p1684625  | Bn-N2-p368153    | gene |      |
| Bn-A02-p1705187  | Bn-N12-p22425    | gene |      |
| Bn-A02-p1707420  | Bn-N2-p392255    | gene |      |
| Bn-A02-p17156661 | Bn-N2-p18059115  | gene | exon |
| Bn-A02-p174249   | Bn-N7-p13043612  | gene |      |
| Bn-A02-p175605   | Bn-N7-p13044968  | gene |      |
| Bn-A02-p17938666 | Bn-N2-p7355591   | gene |      |
| Bn-A02-p179557   | Bn-N7-p13049089  | gene |      |
| Bn-A02-p182447   | Bn-N7-p13051977  | gene | exon |
| Bn-A02-p182618   | Bn-N7-p13052148  | gene | exon |
| Bn-A02-p1890913  | Bn-N2-p590652    | gene |      |
| Bn-A02-p18917772 | Bn-N2-p21457111  | gene | exon |
| Bn-A02-p18966918 | Bn-N2-p21499463  | gene | exon |
| Bn-A02-p18974322 | Bn-N2-p21506168  | gene | exon |
| Bn-A02-p18984484 | Bn-N2-p21515507  | gene |      |
| Bn-A02-p19003944 | Bn-N2-p21534227  | gene |      |
| Bn-A02-p19058136 | Bn-N2-p21596996  | gene | exon |
| Bn-A02-p19207431 | Bn-N2-p21760905  | gene |      |
| Bn-A02-p19212766 | Bn-N2-p21773179  | gene |      |
| Bn-A02-p19316657 | Bn-N2-p21856271  | gene | exon |
| Bn-A02-p19317643 | Bn-N2-p21857257  | gene | exon |

|                  |                  |      |      |
|------------------|------------------|------|------|
| Bn-A02-p19395795 | Bn-N2-p21920826  | gene | exon |
| Bn-A02-p19573867 | Bn-N2-p22285981  | gene |      |
| Bn-A02-p19575587 | Bn-N2-p22287665  | gene | exon |
| Bn-A02-p19587474 | Bn-N2-p22291612  | gene | exon |
| Bn-A02-p19587812 | Bn-N2-p22291950  | gene | exon |
| Bn-A02-p19645773 | Bn-N2-p22331062  | gene | exon |
| Bn-A02-p19682273 | Bn-N2-p22376166  | gene | exon |
| Bn-A02-p19682984 | Bn-N2-p22376878  | gene |      |
| Bn-A02-p19683093 | Bn-N2-p22376987  | gene | exon |
| Bn-A02-p19702955 | Bn-N2-p22414997  | gene |      |
| Bn-A02-p19704677 | Bn-N2-p22416723  | gene | exon |
| Bn-A02-p19731316 | Bn-N2-p24147282  | gene | exon |
| Bn-A02-p19872956 | Bn-N2-p24032897  | gene |      |
| Bn-A02-p19889192 | Bn-N2-p24017850  | gene |      |
| Bn-A02-p19892632 | Bn-N2-p24011891  | gene |      |
| Bn-A02-p19892839 | Bn-N2-p24011684  | gene |      |
| Bn-A02-p19927952 | Bn-N2-p23977051  | gene |      |
| Bn-A02-p1997812  | Bn-N2-p705902    | gene |      |
| Bn-A02-p20200723 | Bn-N2-p23729895  | gene |      |
| Bn-A02-p20242753 | Bn-N2-p23685668  | gene | exon |
| Bn-A02-p202819   | Bn-N7-p13063423  | gene |      |
| Bn-A02-p20371774 | Bn-N2-p23584531  | gene | exon |
| Bn-A02-p20396880 | Bn-N2-p23560271  | gene | exon |
| Bn-A02-p20461477 | Bn-N2-p23499487  | gene | exon |
| Bn-A02-p20536885 | Bn-N2-p23428442  | gene |      |
| Bn-A02-p20561132 | Bn-N2-p23404761  | gene | exon |
| Bn-A02-p20735027 | Bn-N2-p23238672  | gene |      |
| Bn-A02-p2075762  | Bn-N2-p775778    | gene | exon |
| Bn-A02-p21009288 | Bn-N12-p36496167 | gene |      |
| Bn-A02-p21023727 | Bn-N2-p22923264  | gene |      |
| Bn-A02-p2105937  | Bn-N2-p808758    | gene |      |
| Bn-A02-p21073755 | Bn-N2-p22873663  | gene |      |
| Bn-A02-p21207148 | Bn-N2-p22699171  | gene |      |
| Bn-A02-p21211198 | Bn-N2-p22695143  | gene | exon |
| Bn-A02-p2128775  | Bn-N2-p828865    | gene | exon |
| Bn-A02-p212959   | Bn-N7-p13072225  | gene | exon |
| Bn-A02-p21325110 | Bn-N2-p22602967  | gene | exon |
| Bn-A02-p2134112  | Bn-N2-p834279    | gene | exon |
| Bn-A02-p2135053  | Bn-N2-p835204    | gene |      |
| Bn-A02-p21379810 | Bn-N2-p25490754  | gene |      |
| Bn-A02-p2138408  | Bn-N2-p839451    | gene |      |
| Bn-A02-p2146210  | Bn-N2-p847432    | gene | exon |
| Bn-A02-p21467101 | Bn-N2-p25412797  | gene | exon |
| Bn-A02-p21468    | Bn-N7-p12887903  | gene | exon |
| Bn-A02-p21489620 | Bn-N2-p25392820  | gene |      |
| Bn-A02-p21491139 | Bn-N2-p25391305  | gene | exon |
| Bn-A02-p21510968 | Bn-N2-p25366085  | gene |      |
| Bn-A02-p21544735 | Bn-N2-p25325581  | gene | exon |
| Bn-A02-p21570784 | Bn-N12-p41064633 | gene | exon |
| Bn-A02-p21595382 | Bn-N2-p25269719  | gene |      |
| Bn-A02-p21616494 | Bn-N2-p25248893  | gene | exon |
| Bn-A02-p21625125 | Bn-N2-p25238071  | gene | exon |

|                  |                  |      |      |
|------------------|------------------|------|------|
| Bn-A02-p21639869 | Bn-N2-p25226448  | gene | exon |
| Bn-A02-p21648504 | Bn-N2-p25217692  | gene | exon |
| Bn-A02-p21713756 | Bn-N12-p40864854 | gene |      |
| Bn-A02-p21713818 | Bn-N12-p40864792 | gene |      |
| Bn-A02-p21891973 | Bn-N2-p24954183  | gene | exon |
| Bn-A02-p21930156 | Bn-N2-p24931155  | gene |      |
| Bn-A02-p22296426 | Bn-N2-p24561969  | gene |      |
| Bn-A02-p22357265 | Bn-N2-p24503527  | gene |      |
| Bn-A02-p22375400 | Bn-N2-p24489078  | gene |      |
| Bn-A02-p22394632 | Bn-N2-p24463173  | gene | exon |
| Bn-A02-p22395060 | Bn-N2-p24462745  | gene | exon |
| Bn-A02-p22478377 | Bn-N10-p7103511  | gene |      |
| Bn-A02-p22479272 | Bn-N10-p7102617  | gene | exon |
| Bn-A02-p22493338 | Bn-N10-p7087848  | gene |      |
| Bn-A02-p22550542 | Bn-N10-p7034603  | gene | exon |
| Bn-A02-p2258714  | Bn-N2-p952606    | gene |      |
| Bn-A02-p22599833 | Bn-N10-p6996400  | gene |      |
| Bn-A02-p22601555 | Bn-N10-p6994289  | gene |      |
| Bn-A02-p22602317 | Bn-N10-p6993526  | gene |      |
| Bn-A02-p22650896 | Bn-N10-p6960950  | gene |      |
| Bn-A02-p22651355 | Bn-N10-p6960491  | gene |      |
| Bn-A02-p22741797 | Bn-N2-p24315106  | gene |      |
| Bn-A02-p2274901  | Bn-N2-p974551    | gene |      |
| Bn-A02-p22847472 | Bn-N2-p24218337  | gene | exon |
| Bn-A02-p2287712  | Bn-N2-p991484    | gene | exon |
| Bn-A02-p2288207  | Bn-N2-p991976    | gene | exon |
| Bn-A02-p2288216  | Bn-N2-p991985    | gene | exon |
| Bn-A02-p2292871  | Bn-N2-p1000576   | gene |      |
| Bn-A02-p23095572 | Bn-N5-p24533762  | gene |      |
| Bn-A02-p23108517 | Bn-N5-p24518497  | gene |      |
| Bn-A02-p23112746 | Bn-N5-p24514024  | gene | exon |
| Bn-A02-p23277919 | Bn-N5-p24340494  | gene | exon |
| Bn-A02-p23279287 | Bn-N5-p24339131  | gene | exon |
| Bn-A02-p23280472 | Bn-N5-p24337931  | gene | exon |
| Bn-A02-p23280665 | Bn-N5-p24337738  | gene | exon |
| Bn-A02-p23280869 | Bn-N5-p24337534  | gene |      |
| Bn-A02-p23295254 | Bn-N5-p24327677  | gene |      |
| Bn-A02-p23297690 | Bn-N15-p46318587 | gene |      |
| Bn-A02-p23297789 | Bn-N15-p46318493 | gene | exon |
| Bn-A02-p23408870 | Bn-N2-p25826230  | gene |      |
| Bn-A02-p2341934  | Bn-N2-p1046388   | gene | exon |
| Bn-A02-p23454935 | Bn-N2-p25872381  | gene | exon |
| Bn-A02-p23456103 | Bn-N2-p25873549  | gene |      |
| Bn-A02-p23472944 | Bn-N2-p25888075  | gene | exon |
| Bn-A02-p23477774 | Bn-N2-p25895492  | gene | exon |
| Bn-A02-p23477968 | Bn-N2-p25895693  | gene | exon |
| Bn-A02-p23479432 | Bn-N12-p41767720 | gene | exon |
| Bn-A02-p23482499 | Bn-N2-p25900190  | gene |      |
| Bn-A02-p23486694 | Bn-N2-p25904143  | gene |      |
| Bn-A02-p23488731 | Bn-N2-p25906177  | gene |      |
| Bn-A02-p23495061 | Bn-N2-p25912435  | gene |      |
| Bn-A02-p23523709 | Bn-N2-p25944732  | gene | exon |

|                  |                  |      |      |
|------------------|------------------|------|------|
| Bn-A02-p2364069  | Bn-N2-p1068047   | gene |      |
| Bn-A02-p2364479  | Bn-N2-p1068443   | gene | exon |
| Bn-A02-p23685036 | Bn-N2-p26099373  | gene | exon |
| Bn-A02-p23686560 | Bn-N2-p26100891  | gene |      |
| Bn-A02-p23708299 | Bn-N17-p35241902 | gene |      |
| Bn-A02-p23708516 | Bn-N6-p23435721  | gene | exon |
| Bn-A02-p23726200 | Bn-N12-p42159516 | gene |      |
| Bn-A02-p23729046 | Bn-N11-p17266003 | gene | exon |
| Bn-A02-p23743267 | Bn-N2-p26126049  | gene | exon |
| Bn-A02-p23757876 | Bn-N2-p26139876  | gene |      |
| Bn-A02-p23824343 | Bn-N2-p26213639  | gene |      |
| Bn-A02-p23826324 | Bn-N2-p26215628  | gene |      |
| Bn-A02-p23836232 | Bn-N2-p26224099  | gene |      |
| Bn-A02-p23856500 | Bn-N2-p26249411  | gene |      |
| Bn-A02-p23857384 | Bn-N2-p26250302  | gene |      |
| Bn-A02-p23875682 | Bn-N2-p26268225  | gene | exon |
| Bn-A02-p23889188 | Bn-N2-p26279361  | gene |      |
| Bn-A02-p2389418  | Bn-N12-p988560   | gene |      |
| Bn-A02-p23920155 | Bn-N10-p2032226  | gene | exon |
| Bn-A02-p23925334 | Bn-N10-p2027091  | gene | exon |
| Bn-A02-p24216905 | Bn-N2-p26572947  | gene | exon |
| Bn-A02-p24237359 | Bn-N2-p26593264  | gene | exon |
| Bn-A02-p24268496 | Bn-N2-p26620206  | gene |      |
| Bn-A02-p24269435 | Bn-N2-p26621146  | gene |      |
| Bn-A02-p24359370 | Bn-N2-p26707970  | gene |      |
| Bn-A02-p24378297 | Bn-N2-p26731687  | gene |      |
| Bn-A02-p24415454 | Bn-N2-p26761096  | gene | exon |
| Bn-A02-p24438115 | Bn-N2-p26785340  | gene | exon |
| Bn-A02-p24449690 | Bn-N2-p26799071  | gene | exon |
| Bn-A02-p24462762 | Bn-N2-p26817344  | gene | exon |
| Bn-A02-p24522983 | Bn-N2-p26882288  | gene |      |
| Bn-A02-p24584058 | Bn-N2-p26950533  | gene | exon |
| Bn-A02-p2466355  | Bn-N2-p1163220   | gene |      |
| Bn-A02-p24675182 | Bn-N2-p27027234  | gene | exon |
| Bn-A02-p24688870 | Bn-N2-p27041388  | gene |      |
| Bn-A02-p24706646 | Bn-N2-p27057373  | gene |      |
| Bn-A02-p24722684 | Bn-N2-p27070634  | gene |      |
| Bn-A02-p24809526 | Bn-N2-p27155988  | gene | exon |
| Bn-A02-p24810609 | Bn-N2-p27157071  | gene |      |
| Bn-A02-p24844291 | Bn-N2-p27195801  | gene |      |
| Bn-A02-p24851624 | Bn-N2-p27203225  | gene |      |
| Bn-A02-p24878657 | Bn-N2-p27227551  | gene | exon |
| Bn-A02-p2489530  | Bn-N2-p1187700   | gene |      |
| Bn-A02-p2490293  | Bn-N2-p1188463   | gene |      |
| Bn-A02-p24911505 | Bn-N2-p27262414  | gene |      |
| Bn-A02-p24914083 | Bn-N2-p27264991  | gene |      |
| Bn-A02-p24919366 | Bn-N2-p27271338  | gene |      |
| Bn-A02-p24945785 | Bn-N2-p27306231  | gene | exon |
| Bn-A02-p24967958 | Bn-N2-p27323065  | gene | exon |
| Bn-A02-p25022333 | Bn-N12-p44340035 | gene |      |
| Bn-A02-p25022921 | Bn-N2-p27354623  | gene | exon |
| Bn-A02-p25027576 | Bn-N12-p44346012 | gene | exon |

|                  |                  |      |      |
|------------------|------------------|------|------|
| Bn-A02-p2502950  | Bn-N2-p1201098   | gene |      |
| Bn-A02-p25081911 | Bn-N2-p27417291  | gene |      |
| Bn-A02-p25081916 | Bn-N2-p27417296  | gene |      |
| Bn-A02-p25100451 | Bn-N2-p27435756  | gene |      |
| Bn-A02-p25105527 | Bn-N2-p27441225  | gene |      |
| Bn-A02-p25174583 | Bn-N6-p19264943  | gene |      |
| Bn-A02-p25181474 | Bn-N2-p27515640  | gene | exon |
| Bn-A02-p25181726 | Bn-N2-p27515892  | gene | exon |
| Bn-A02-p25190854 | Bn-N2-p27521196  | gene | exon |
| Bn-A02-p25199281 | Bn-N12-p44617912 | gene | exon |
| Bn-A02-p25201372 | Bn-N2-p27529744  | gene |      |
| Bn-A02-p2520421  | Bn-N2-p1218503   | gene | exon |
| Bn-A02-p25205468 | Bn-N2-p27537494  | gene |      |
| Bn-A02-p25260066 | Bn-N2-p27602638  | gene |      |
| Bn-A02-p25334100 | Bn-N2-p27636469  | gene | exon |
| Bn-A02-p25334266 | Bn-N2-p27636635  | gene |      |
| Bn-A02-p25334271 | Bn-N2-p27636640  | gene |      |
| Bn-A02-p2536779  | Bn-N2-p1239345   | gene | exon |
| Bn-A02-p25375825 | Bn-N2-p27670381  | gene | exon |
| Bn-A02-p25400515 | Bn-N2-p27686740  | gene |      |
| Bn-A02-p25400591 | Bn-N2-p27686816  | gene |      |
| Bn-A02-p25401060 | Bn-N2-p27687274  | gene |      |
| Bn-A02-p25402286 | Bn-N2-p27687764  | gene |      |
| Bn-A02-p25402971 | Bn-N2-p27689228  | gene | exon |
| Bn-A02-p25419536 | Bn-N2-p27704681  | gene |      |
| Bn-A02-p2542065  | Bn-N2-p1244624   | gene |      |
| Bn-A02-p25429624 | Bn-N2-p27705618  | gene |      |
| Bn-A02-p25429837 | Bn-N2-p27705832  | gene | exon |
| Bn-A02-p2544070  | Bn-N2-p1244634   | gene |      |
| Bn-A02-p25446521 | Bn-N2-p27724158  | gene |      |
| Bn-A02-p25448092 | Bn-N2-p27725728  | gene |      |
| Bn-A02-p25453070 | Bn-N2-p27730776  | gene |      |
| Bn-A02-p25453447 | Bn-N2-p27731154  | gene |      |
| Bn-A02-p25454242 | Bn-N2-p27732531  | gene |      |
| Bn-A02-p25454499 | Bn-N2-p27732788  | gene |      |
| Bn-A02-p25454882 | Bn-N2-p27733184  | gene |      |
| Bn-A02-p25456985 | Bn-N2-p27735438  | gene |      |
| Bn-A02-p25457045 | Bn-N2-p27735498  | gene |      |
| Bn-A02-p25457843 | Bn-N2-p27735941  | gene |      |
| Bn-A02-p25479893 | Bn-N2-p27760434  | gene |      |
| Bn-A02-p25485627 | Bn-N2-p27765939  | gene |      |
| Bn-A02-p25488435 | Bn-N2-p27768345  | gene | exon |
| Bn-A02-p2549141  | Bn-N2-p1250691   | gene |      |
| Bn-A02-p2551178  | Bn-N2-p1252896   | gene | exon |
| Bn-A02-p25530111 | Bn-N2-p27786711  | gene |      |
| Bn-A02-p25530994 | Bn-N2-p27787594  | gene | exon |
| Bn-A02-p25564792 | Bn-N2-p27816660  | gene | exon |
| Bn-A02-p25572877 | Bn-N2-p27824731  | gene | exon |
| Bn-A02-p25612808 | Bn-N2-p27880540  | gene | exon |
| Bn-A02-p25644999 | Bn-N2-p27912524  | gene | exon |
| Bn-A02-p25670193 | Bn-N2-p27937138  | gene |      |
| Bn-A02-p2568989  | Bn-N2-p1270380   | gene | exon |

|                  |                          |      |      |
|------------------|--------------------------|------|------|
| Bn-A02-p25735700 | Bn-N2-p28014498          | gene |      |
| Bn-A02-p25736307 | Bn-N2-p28015128          | gene |      |
| Bn-A02-p25746504 | Bn-N2-p28033328          | gene |      |
| Bn-A02-p25747937 | Bn-N12-p45461697         | gene | exon |
| Bn-A02-p25762081 | Bn-N2-p28047144          | gene | exon |
| Bn-A02-p25795588 | Bn-N2-p28058120          | gene | exon |
| Bn-A02-p25814719 | Bn-N12-p45535436         | gene | exon |
| Bn-A02-p25820450 | Bn-N2-p28086130          | gene |      |
| Bn-A02-p25821750 | Bn-N2-p28087430          | gene |      |
| Bn-A02-p25826690 | Bn-N2-p28092398          | gene | exon |
| Bn-A02-p25827208 | Bn-N2-p28092916          | gene |      |
| Bn-A02-p25841382 | Bn-N2-p28101760          | gene | exon |
| Bn-A02-p25841722 | Bn-N2-p28102100          | gene |      |
| Bn-A02-p25864853 | Bn-N2-p28124925          | gene | exon |
| Bn-A02-p25865360 | Bn-N2-p28125432          | gene | exon |
| Bn-A02-p25876712 | Bn-N2-p28136615          | gene | exon |
| Bn-A02-p25881408 | Bn-N2-p28144982          | gene | exon |
| Bn-A02-p25883567 | Bn-N2-p28147165          | gene |      |
| Bn-A02-p25966536 | Bn-Scaffold00372b-p49885 | gene | exon |
| Bn-A02-p26013503 | Bn-N2-p28212500          | gene |      |
| Bn-A02-p2608125  | Bn-N2-p1305765           | gene |      |
| Bn-A02-p2615923  | Bn-N2-p1313171           | gene |      |
| Bn-A02-p2617701  | Bn-N2-p1314947           | gene |      |
| Bn-A02-p2617781  | Bn-N2-p1315027           | gene |      |
| Bn-A02-p26193572 | Bn-N2-p28398142          | gene |      |
| Bn-A02-p2620397  | Bn-N2-p1317615           | gene | exon |
| Bn-A02-p2624375  | Bn-N2-p1321568           | gene |      |
| Bn-A02-p26304354 | Bn-N2-p28494437          | gene |      |
| Bn-A02-p26322916 | Bn-N2-p28512399          | gene |      |
| Bn-A02-p26411585 | Bn-N2-p28604732          | gene | exon |
| Bn-A02-p26421790 | Bn-N2-p28617133          | gene |      |
| Bn-A02-p26425347 | Bn-N2-p28620666          | gene |      |
| Bn-A02-p2646929  | Bn-N12-p1289657          | gene | exon |
| Bn-A02-p26514827 | Bn-N2-p28696696          | gene | exon |
| Bn-A02-p2654991  | Bn-N2-p1355422           | gene |      |
| Bn-A02-p26554539 | Bn-N12-p45964408         | gene | exon |
| Bn-A02-p26567426 | Bn-N2-p28741025          | gene |      |
| Bn-A02-p26571107 | Bn-N2-p28744664          | gene |      |
| Bn-A02-p266121   | Bn-N7-p13133586          | gene | exon |
| Bn-A02-p26625153 | Bn-N5-p25377236          | gene | exon |
| Bn-A02-p26625696 | Bn-N5-p25376687          | gene |      |
| Bn-A02-p26641996 | Bn-N5-p25359883          | gene |      |
| Bn-A02-p26644297 | Bn-N5-p25357590          | gene | exon |
| Bn-A02-p26651278 | Bn-N5-p25350622          | gene |      |
| Bn-A02-p26653626 | Bn-N5-p25348367          | gene | exon |
| Bn-A02-p26654006 | Bn-N5-p25347987          | gene | exon |
| Bn-A02-p26656981 | Bn-N5-p25344966          | gene |      |
| Bn-A02-p26668289 | Bn-N5-p25333670          | gene | exon |
| Bn-A02-p26669888 | Bn-N5-p25332080          | gene |      |
| Bn-A02-p26689319 | Bn-N5-p25304193          | gene |      |
| Bn-A02-p26713316 | Bn-N5-p25279974          | gene |      |
| Bn-A02-p26733511 | Bn-N5-p25264790          | gene | exon |

|                  |                         |      |      |
|------------------|-------------------------|------|------|
| Bn-A02-p2673795  | Bn-N2-p1372334          | gene | exon |
| Bn-A02-p26792851 | Bn-Scaffold00893-p90555 | gene | exon |
| Bn-A02-p26803902 | Bn-Scaffold00893-p77934 | gene |      |
| Bn-A02-p26804091 | Bn-Scaffold00893-p77746 | gene |      |
| Bn-A02-p26832454 | Bn-Scaffold00893-p49364 | gene |      |
| Bn-A02-p26845132 | Bn-Scaffold00893-p31826 | gene | exon |
| Bn-A02-p2692116  | Bn-N2-p1390902          | gene | exon |
| Bn-A02-p26921384 | Bn-N5-p25156493         | gene | exon |
| Bn-A02-p26946005 | Bn-N5-p25132913         | gene | exon |
| Bn-A02-p26947254 | Bn-N5-p25131677         | gene | exon |
| Bn-A02-p2695870  | Bn-N2-p1394706          | gene |      |
| Bn-A02-p2698217  | Bn-N2-p1397046          | gene |      |
| Bn-A02-p26982864 | Bn-N2-p28771949         | gene |      |
| Bn-A02-p26986319 | Bn-N12-p46027967        | gene |      |
| Bn-A02-p26987864 | Bn-N2-p28776996         | gene |      |
| Bn-A02-p27024443 | Bn-N2-p28806279         | gene |      |
| Bn-A02-p27051969 | Bn-N2-p28834782         | gene |      |
| Bn-A02-p27052532 | Bn-N2-p28835599         | gene |      |
| Bn-A02-p27052742 | Bn-N2-p28835810         | gene |      |
| Bn-A02-p27121126 | Bn-N2-p28903046         | gene |      |
| Bn-A02-p27124090 | Bn-N2-p28905991         | gene |      |
| Bn-A02-p27134251 | Bn-N2-p28917373         | gene |      |
| Bn-A02-p27172338 | Bn-N2-p28949788         | gene |      |
| Bn-A02-p27203061 | Bn-N2-p28990408         | gene |      |
| Bn-A02-p27220702 | Bn-N12-p46405278        | gene | exon |
| Bn-A02-p27255197 | Bn-N12-p46472742        | gene | exon |
| Bn-A02-p2727560  | Bn-N12-p1375621         | gene | exon |
| Bn-A02-p27286923 | Bn-N2-p29080099         | gene |      |
| Bn-A02-p27288011 | Bn-N2-p29084819         | gene |      |
| Bn-A02-p27288044 | Bn-N2-p29084852         | gene |      |
| Bn-A02-p27288121 | Bn-N2-p29084929         | gene |      |
| Bn-A02-p27321599 | Bn-N2-p29101998         | gene | exon |
| Bn-A02-p27327804 | Bn-N2-p29103428         | gene | exon |
| Bn-A02-p2738923  | Bn-N2-p1452300          | gene |      |
| Bn-A02-p27405658 | Bn-N2-p29191169         | gene | exon |
| Bn-A02-p27420743 | Bn-N2-p29206182         | gene |      |
| Bn-A02-p27420799 | Bn-N2-p29206238         | gene | exon |
| Bn-A02-p27450764 | Bn-N2-p29238960         | gene | exon |
| Bn-A02-p27503846 | Bn-N2-p29291919         | gene |      |
| Bn-A02-p27504018 | Bn-N2-p29292091         | gene | exon |
| Bn-A02-p27613710 | Bn-N2-p29402065         | gene | exon |
| Bn-A02-p276572   | Bn-Scaffold12647-p249   | gene | exon |
| Bn-A02-p27680472 | Bn-N2-p29466488         | gene | exon |
| Bn-A02-p27831174 | Bn-N2-p29609872         | gene |      |
| Bn-A02-p27833071 | Bn-N2-p29611851         | gene |      |
| Bn-A02-p27834072 | Bn-N2-p29612855         | gene |      |
| Bn-A02-p2784335  | Bn-N2-p1858150          | gene |      |
| Bn-A02-p27845279 | Bn-N2-p29621344         | gene |      |
| Bn-A02-p2785185  | Bn-N2-p1859025          | gene | exon |
| Bn-A02-p2788144  | Bn-N2-p1865260          | gene |      |
| Bn-A02-p2799146  | Bn-N2-p1874242          | gene |      |
| Bn-A02-p2800227  | Bn-N2-p1875323          | gene | exon |

|                 |                 |      |      |
|-----------------|-----------------|------|------|
| Bn-A02-p2800579 | Bn-N2-p1875675  | gene |      |
| Bn-A02-p2800698 | Bn-N2-p1875794  | gene | exon |
| Bn-A02-p284968  | Bn-N7-p13154675 | gene |      |
| Bn-A02-p2867545 | Bn-N2-p1943312  | gene | exon |
| Bn-A02-p2877222 | Bn-N2-p1952858  | gene |      |
| Bn-A02-p2923889 | Bn-N2-p1983351  | gene | exon |
| Bn-A02-p293860  | Bn-N7-p13165342 | gene |      |
| Bn-A02-p294984  | Bn-N7-p13166456 | gene | exon |
| Bn-A02-p2962298 | Bn-N2-p2021013  | gene | exon |
| Bn-A02-p300727  | Bn-N7-p13184963 | gene |      |
| Bn-A02-p3011103 | Bn-N2-p2069982  | gene |      |
| Bn-A02-p3033620 | Bn-N2-p2091947  | gene |      |
| Bn-A02-p307342  | Bn-N7-p13196459 | gene | exon |
| Bn-A02-p3078017 | Bn-N2-p2155233  | gene |      |
| Bn-A02-p3080150 | Bn-N2-p2157365  | gene | exon |
| Bn-A02-p3096890 | Bn-N2-p2173479  | gene | exon |
| Bn-A02-p3121742 | Bn-N2-p2196718  | gene | exon |
| Bn-A02-p3142416 | Bn-N2-p2220109  | gene |      |
| Bn-A02-p3145923 | Bn-N2-p2223558  | gene | exon |
| Bn-A02-p3148346 | Bn-N2-p2225846  | gene |      |
| Bn-A02-p3160461 | Bn-N2-p2238075  | gene |      |
| Bn-A02-p3281338 | Bn-N2-p2367290  | gene |      |
| Bn-A02-p3281452 | Bn-N2-p2367418  | gene |      |
| Bn-A02-p3294682 | Bn-N2-p2380926  | gene |      |
| Bn-A02-p3295898 | Bn-N2-p2382134  | gene |      |
| Bn-A02-p3299206 | Bn-N2-p2385418  | gene |      |
| Bn-A02-p3300731 | Bn-N2-p2387091  | gene |      |
| Bn-A02-p3344176 | Bn-N2-p2434012  | gene |      |
| Bn-A02-p3352863 | Bn-N2-p2442666  | gene |      |
| Bn-A02-p3354301 | Bn-N12-p2686843 | gene | exon |
| Bn-A02-p3361391 | Bn-N2-p2445850  | gene |      |
| Bn-A02-p3398506 | Bn-N2-p2482742  | gene | exon |
| Bn-A02-p3398710 | Bn-N2-p2482946  | gene | exon |
| Bn-A02-p3430069 | Bn-N2-p2527335  | gene | exon |
| Bn-A02-p3478450 | Bn-N12-p2849930 | gene |      |
| Bn-A02-p3503647 | Bn-N2-p2580923  | gene | exon |
| Bn-A02-p3507057 | Bn-N12-p2889730 | gene | exon |
| Bn-A02-p3558502 | Bn-N2-p2633436  | gene |      |
| Bn-A02-p3597721 | Bn-N2-p2670223  | gene |      |
| Bn-A02-p3606635 | Bn-N2-p2679040  | gene |      |
| Bn-A02-p3607564 | Bn-N2-p2679970  | gene | exon |
| Bn-A02-p3627856 | Bn-N2-p2699130  | gene |      |
| Bn-A02-p3633790 | Bn-N2-p2708860  | gene |      |
| Bn-A02-p3635114 | Bn-N2-p2712160  | gene | exon |
| Bn-A02-p3640490 | Bn-N2-p2717536  | gene | exon |
| Bn-A02-p3730794 | Bn-N2-p2801052  | gene | exon |
| Bn-A02-p3735101 | Bn-N2-p2805334  | gene |      |
| Bn-A02-p3742509 | Bn-N2-p2812081  | gene |      |
| Bn-A02-p3759462 | Bn-N2-p2826887  | gene |      |
| Bn-A02-p3760177 | Bn-N2-p2827602  | gene |      |
| Bn-A02-p3760247 | Bn-N2-p2827672  | gene |      |
| Bn-A02-p3792136 | Bn-N2-p2859571  | gene |      |



|                 |                        |      |      |
|-----------------|------------------------|------|------|
| Bn-A02-p3801428 | Bn-N2-p2866053         | gene | exon |
| Bn-A02-p3807577 | Bn-N2-p2875058         | gene |      |
| Bn-A02-p3809970 | Bn-N2-p2877458         | gene | exon |
| Bn-A02-p3810028 | Bn-N2-p2877516         | gene | exon |
| Bn-A02-p3810078 | Bn-N2-p2877566         | gene | exon |
| Bn-A02-p3821814 | Bn-N2-p2890915         | gene |      |
| Bn-A02-p3821944 | Bn-N2-p2891045         | gene |      |
| Bn-A02-p3822985 | Bn-N2-p2892084         | gene |      |
| Bn-A02-p3860483 | Bn-N2-p2926014         | gene | exon |
| Bn-A02-p3897213 | Bn-N2-p2960517         | gene |      |
| Bn-A02-p3897546 | Bn-N2-p2960857         | gene |      |
| Bn-A02-p3898766 | Bn-N2-p2962079         | gene | exon |
| Bn-A02-p3914269 | Bn-N2-p2975056         | gene | exon |
| Bn-A02-p3934729 | Bn-Scaffold03677-p1641 | gene |      |
| Bn-A02-p3950581 | Bn-N2-p3016075         | gene | exon |
| Bn-A02-p3965286 | Bn-N2-p3046915         | gene |      |
| Bn-A02-p4035808 | Bn-N2-p3119297         | gene |      |
| Bn-A02-p4037028 | Bn-N2-p3120499         | gene |      |
| Bn-A02-p4038224 | Bn-N2-p3121692         | gene |      |
| Bn-A02-p4065755 | Bn-N2-p3142609         | gene | exon |
| Bn-A02-p4102727 | Bn-N2-p3171759         | gene | exon |
| Bn-A02-p4103096 | Bn-N2-p3172123         | gene | exon |
| Bn-A02-p4103158 | Bn-N2-p3172185         | gene | exon |
| Bn-A02-p4104054 | Bn-N2-p3173081         | gene | exon |
| Bn-A02-p4110181 | Bn-N2-p3178749         | gene |      |
| Bn-A02-p4118946 | Bn-N12-p3809918        | gene |      |
| Bn-A02-p4174594 | Bn-N2-p3240276         | gene | exon |
| Bn-A02-p4183553 | Bn-N2-p3249801         | gene |      |
| Bn-A02-p4199792 | Bn-N2-p3261807         | gene |      |
| Bn-A02-p4210810 | Bn-N2-p3283944         | gene | exon |
| Bn-A02-p4220181 | Bn-N2-p3292631         | gene |      |
| Bn-A02-p4232093 | Bn-N2-p3301771         | gene | exon |
| Bn-A02-p4237047 | Bn-N2-p3309912         | gene |      |
| Bn-A02-p4241100 | Bn-N2-p3314254         | gene |      |
| Bn-A02-p4243717 | Bn-N2-p3316876         | gene | exon |
| Bn-A02-p4262796 | Bn-N2-p3349263         | gene |      |
| Bn-A02-p4262907 | Bn-N2-p3349374         | gene |      |
| Bn-A02-p4277649 | Bn-N2-p3355557         | gene |      |
| Bn-A02-p4295967 | Bn-N2-p3377254         | gene | exon |
| Bn-A02-p4306196 | Bn-N2-p3387309         | gene |      |
| Bn-A02-p4351893 | Bn-N12-p4180934        | gene | exon |
| Bn-A02-p4374253 | Bn-N2-p3456000         | gene |      |
| Bn-A02-p441751  | Bn-N7-p13316291        | gene | exon |
| Bn-A02-p4568023 | Bn-N2-p3649128         | gene |      |
| Bn-A02-p459981  | Bn-N7-p13338835        | gene |      |
| Bn-A02-p4611221 | Bn-N12-p4596088        | gene | exon |
| Bn-A02-p4681731 | Bn-N2-p3759227         | gene | exon |
| Bn-A02-p4698141 | Bn-N2-p3778378         | gene |      |
| Bn-A02-p4721726 | Bn-N12-p4796406        | gene | exon |
| Bn-A02-p4744168 | Bn-N2-p3833121         | gene | exon |
| Bn-A02-p474724  | Bn-N7-p13356720        | gene | exon |
| Bn-A02-p476011  | Bn-N7-p13358348        | gene | exon |

|                 |                        |      |      |
|-----------------|------------------------|------|------|
| Bn-A02-p4761483 | Bn-N2-p3853545         | gene | exon |
| Bn-A02-p4773307 | Bn-N2-p3865572         | gene |      |
| Bn-A02-p4774095 | Bn-N2-p3866360         | gene | exon |
| Bn-A02-p4774099 | Bn-N2-p3866363         | gene | exon |
| Bn-A02-p4777053 | Bn-N2-p3872871         | gene |      |
| Bn-A02-p4779271 | Bn-N2-p3875092         | gene | exon |
| Bn-A02-p4783596 | Bn-N2-p3879029         | gene |      |
| Bn-A02-p4881323 | Bn-N2-p3980652         | gene |      |
| Bn-A02-p488160  | Bn-N7-p13371113        | gene | exon |
| Bn-A02-p490065  | Bn-N7-p13373789        | gene | exon |
| Bn-A02-p4928982 | Bn-N2-p4014476         | gene | exon |
| Bn-A02-p5040691 | Bn-N2-p4122354         | gene | exon |
| Bn-A02-p5063790 | Bn-N12-p5375855        | gene | exon |
| Bn-A02-p5166772 | Bn-N2-p4257512         | gene | exon |
| Bn-A02-p5201568 | Bn-N2-p4286646         | gene | exon |
| Bn-A02-p5242706 | Bn-Scaffold25363-p252  | gene | exon |
| Bn-A02-p5271340 | Bn-N12-p5815167        | gene | exon |
| Bn-A02-p5304300 | Bn-N2-p4438281         | gene |      |
| Bn-A02-p5326222 | Bn-N2-p4461220         | gene | exon |
| Bn-A02-p5327209 | Bn-N2-p4462207         | gene | exon |
| Bn-A02-p5429003 | Bn-N2-p4567982         | gene | exon |
| Bn-A02-p5439746 | Bn-N2-p4582902         | gene |      |
| Bn-A02-p5442618 | Bn-N2-p4585736         | gene | exon |
| Bn-A02-p545783  | Bn-N7-p13444606        | gene |      |
| Bn-A02-p5485978 | Bn-N2-p4642849         | gene | exon |
| Bn-A02-p5500107 | Bn-N2-p4652864         | gene |      |
| Bn-A02-p5501733 | Bn-N2-p4654749         | gene |      |
| Bn-A02-p5570144 | Bn-N2-p4720861         | gene | exon |
| Bn-A02-p5571981 | Bn-N2-p4722669         | gene |      |
| Bn-A02-p5582861 | Bn-N2-p4733516         | gene |      |
| Bn-A02-p5592678 | Bn-N2-p4755097         | gene | exon |
| Bn-A02-p5601991 | Bn-N2-p4769587         | gene | exon |
| Bn-A02-p5602271 | Bn-N2-p4769867         | gene | exon |
| Bn-A02-p5604926 | Bn-N2-p4778603         | gene |      |
| Bn-A02-p5612147 | Bn-N2-p4789072         | gene | exon |
| Bn-A02-p5628094 | Bn-N2-p4807150         | gene |      |
| Bn-A02-p5628473 | Bn-N2-p4807529         | gene |      |
| Bn-A02-p5628535 | Bn-N2-p4807591         | gene |      |
| Bn-A02-p5640408 | Bn-Scaffold01856-p3603 | gene |      |
| Bn-A02-p5664842 | Bn-N2-p4841926         | gene | exon |
| Bn-A02-p5722550 | Bn-N2-p4911936         | gene |      |
| Bn-A02-p5731499 | Bn-N2-p4924739         | gene |      |
| Bn-A02-p5797724 | Bn-N2-p4977779         | gene | exon |
| Bn-A02-p5812506 | Bn-N2-p4989347         | gene | exon |
| Bn-A02-p5826306 | Bn-N2-p5006941         | gene |      |
| Bn-A02-p5826505 | Bn-Scaffold16162-p544  | gene | exon |
| Bn-A02-p5826541 | Bn-Scaffold16162-p508  | gene | exon |
| Bn-A02-p5832870 | Bn-N2-p5019782         | gene | exon |
| Bn-A02-p584200  | Bn-N7-p13489571        | gene |      |
| Bn-A02-p5866325 | Bn-N2-p5045512         | gene | exon |
| Bn-A02-p5882799 | Bn-N2-p5065792         | gene |      |
| Bn-A02-p5924483 | Bn-N2-p5120600         | gene |      |

|                 |                  |      |      |
|-----------------|------------------|------|------|
| Bn-A02-p5938385 | Bn-N2-p5134791   | gene |      |
| Bn-A02-p6097441 | Bn-N2-p5303980   | gene | exon |
| Bn-A02-p6105931 | Bn-N2-p5337505   | gene | exon |
| Bn-A02-p6149358 | Bn-N2-p5357074   | gene | exon |
| Bn-A02-p615312  | Bn-N7-p13513016  | gene | exon |
| Bn-A02-p6156818 | Bn-N2-p5359276   | gene |      |
| Bn-A02-p6164030 | Bn-N12-p7393997  | gene | exon |
| Bn-A02-p6233    | Bn-N7-p12871398  | gene | exon |
| Bn-A02-p6244013 | Bn-N2-p5458662   | gene |      |
| Bn-A02-p624595  | Bn-N7-p13523552  | gene | exon |
| Bn-A02-p6252196 | Bn-N2-p5465834   | gene | exon |
| Bn-A02-p6265274 | Bn-N2-p5483616   | gene |      |
| Bn-A02-p6267188 | Bn-N2-p5485530   | gene |      |
| Bn-A02-p6267300 | Bn-N2-p5485642   | gene |      |
| Bn-A02-p6277812 | Bn-N2-p5496117   | gene |      |
| Bn-A02-p6285260 | Bn-N12-p7645920  | gene | exon |
| Bn-A02-p631297  | Bn-N7-p13530951  | gene |      |
| Bn-A02-p6315194 | Bn-N2-p5530606   | gene |      |
| Bn-A02-p636428  | Bn-N7-p13536098  | gene | exon |
| Bn-A02-p6366262 | Bn-N2-p5578109   | gene | exon |
| Bn-A02-p6373647 | Bn-N2-p5592862   | gene |      |
| Bn-A02-p6375486 | Bn-N2-p5598295   | gene | exon |
| Bn-A02-p6384663 | Bn-N2-p5610536   | gene | exon |
| Bn-A02-p6391751 | Bn-N2-p5618792   | gene |      |
| Bn-A02-p6392450 | Bn-N2-p5619470   | gene |      |
| Bn-A02-p6399820 | Bn-N2-p5627536   | gene |      |
| Bn-A02-p647024  | Bn-N7-p13548076  | gene |      |
| Bn-A02-p6476748 | Bn-N12-p8063604  | gene | exon |
| Bn-A02-p647706  | Bn-N16-p17927716 | gene | exon |
| Bn-A02-p6478309 | Bn-N2-p5711970   | gene |      |
| Bn-A02-p6483805 | Bn-N2-p5717447   | gene | exon |
| Bn-A02-p6500009 | Bn-N12-p8122400  | gene | exon |
| Bn-A02-p6523411 | Bn-N2-p5774235   | gene | exon |
| Bn-A02-p6523609 | Bn-N2-p5774433   | gene | exon |
| Bn-A02-p652623  | Bn-N7-p13551729  | gene | exon |
| Bn-A02-p655765  | Bn-N7-p13556789  | gene |      |
| Bn-A02-p6564856 | Bn-N2-p5818153   | gene | exon |
| Bn-A02-p6564861 | Bn-N2-p5818158   | gene | exon |
| Bn-A02-p6576389 | Bn-N2-p5830462   | gene |      |
| Bn-A02-p6578877 | Bn-N2-p5832950   | gene |      |
| Bn-A02-p6584506 | Bn-N2-p5838571   | gene | exon |
| Bn-A02-p6627382 | Bn-N2-p5881656   | gene |      |
| Bn-A02-p6633    | Bn-N7-p12871798  | gene |      |
| Bn-A02-p6653554 | Bn-N2-p5914507   | gene | exon |
| Bn-A02-p6658392 | Bn-N2-p5919336   | gene |      |
| Bn-A02-p6692347 | Bn-N2-p5948780   | gene |      |
| Bn-A02-p6711579 | Bn-N2-p5970390   | gene | exon |
| Bn-A02-p677501  | Bn-N7-p13572791  | gene | exon |
| Bn-A02-p6794013 | Bn-N2-p6042570   | gene |      |
| Bn-A02-p6813    | Bn-N7-p12871978  | gene | exon |
| Bn-A02-p6859259 | Bn-N2-p6114654   | gene | exon |
| Bn-A02-p6862619 | Bn-N2-p6118405   | gene | exon |

|                 |                       |      |      |
|-----------------|-----------------------|------|------|
| Bn-A02-p6871477 | Bn-N2-p6126225        | gene | exon |
| Bn-A02-p6917044 | Bn-Scaffold10158-p209 | gene | exon |
| Bn-A02-p7029950 | Bn-N2-p6305274        | gene | exon |
| Bn-A02-p7043901 | Bn-N2-p6317407        | gene | exon |
| Bn-A02-p7147282 | Bn-N2-p6425973        | gene | exon |
| Bn-A02-p714791  | Bn-N7-p13615770       | gene | exon |
| Bn-A02-p7245587 | Bn-N2-p6521847        | gene | exon |
| Bn-A02-p7245763 | Bn-N2-p6522023        | gene |      |
| Bn-A02-p7306278 | Bn-N2-p6581856        | gene | exon |
| Bn-A02-p7361744 | Bn-N2-p6641973        | gene |      |
| Bn-A02-p7363071 | Bn-N2-p6643287        | gene |      |
| Bn-A02-p7368167 | Bn-N2-p6648450        | gene |      |
| Bn-A02-p7396400 | Bn-N2-p6679169        | gene | exon |
| Bn-A02-p7409699 | Bn-N12-p9640107       | gene | exon |
| Bn-A02-p7439205 | Bn-N12-p9736465       | gene | exon |
| Bn-A02-p7463965 | Bn-N2-p6762423        | gene |      |
| Bn-A02-p7464840 | Bn-N2-p6763298        | gene |      |
| Bn-A02-p7464997 | Bn-N2-p6763455        | gene |      |
| Bn-A02-p7476709 | Bn-N2-p6775277        | gene | exon |
| Bn-A02-p7498192 | Bn-N2-p6796960        | gene |      |
| Bn-A02-p7514338 | Bn-N2-p6808561        | gene | exon |
| Bn-A02-p7516226 | Bn-N2-p6810596        | gene | exon |
| Bn-A02-p7516732 | Bn-N2-p6811103        | gene | exon |
| Bn-A02-p7520783 | Bn-N2-p6815147        | gene | exon |
| Bn-A02-p7525472 | Bn-N2-p6819958        | gene |      |
| Bn-A02-p7595911 | Bn-N2-p6885350        | gene | exon |
| Bn-A02-p7597314 | Bn-N2-p6886805        | gene | exon |
| Bn-A02-p761524  | Bn-N16-p18500268      | gene |      |
| Bn-A02-p770821  | Bn-N7-p13675563       | gene | exon |
| Bn-A02-p771019  | Bn-N7-p13675761       | gene | exon |
| Bn-A02-p771313  | Bn-N7-p13676055       | gene | exon |
| Bn-A02-p771951  | Bn-N7-p13676693       | gene | exon |
| Bn-A02-p7784914 | Bn-N12-p10410491      | gene |      |
| Bn-A02-p7804291 | Bn-N2-p7107216        | gene |      |
| Bn-A02-p7812681 | Bn-N2-p7115449        | gene |      |
| Bn-A02-p7831145 | Bn-N2-p7134497        | gene | exon |
| Bn-A02-p7840077 | Bn-N2-p7145230        | gene | exon |
| Bn-A02-p7885731 | Bn-N12-p10659504      | gene | exon |
| Bn-A02-p7886882 | Bn-N2-p7192865        | gene |      |
| Bn-A02-p7970283 | Bn-N2-p7269635        | gene |      |
| Bn-A02-p7976278 | Bn-N2-p7275411        | gene | exon |
| Bn-A02-p7978230 | Bn-N2-p7277351        | gene | exon |
| Bn-A02-p799930  | Bn-N7-p13707097       | gene | exon |
| Bn-A02-p806025  | Bn-N7-p13712824       | gene |      |
| Bn-A02-p806949  | Bn-N7-p13713751       | gene |      |
| Bn-A02-p8084362 | Bn-N2-p7416013        | gene | exon |
| Bn-A02-p8084605 | Bn-N2-p7416256        | gene | exon |
| Bn-A02-p808711  | Bn-N7-p13715521       | gene |      |
| Bn-A02-p809627  | Bn-N7-p13718122       | gene |      |
| Bn-A02-p8140997 | Bn-N2-p7467376        | gene | exon |
| Bn-A02-p8141909 | Bn-N2-p7468288        | gene | exon |
| Bn-A02-p8160522 | Bn-N2-p7486923        | gene | exon |

|                 |                       |      |      |
|-----------------|-----------------------|------|------|
| Bn-A02-p8191099 | Bn-N2-p7510888        | gene | exon |
| Bn-A02-p8284992 | Bn-N2-p7603576        | gene |      |
| Bn-A02-p8285151 | Bn-N2-p7603734        | gene | exon |
| Bn-A02-p8289331 | Bn-N2-p7610024        | gene | exon |
| Bn-A02-p8335312 | Bn-N2-p7654564        | gene |      |
| Bn-A02-p839171  | Bn-N7-p13760257       | gene | exon |
| Bn-A02-p8396864 | Bn-N10-p6196801       | gene |      |
| Bn-A02-p8412911 | Bn-N2-p7748607        | gene |      |
| Bn-A02-p8413531 | Bn-N2-p7749409        | gene |      |
| Bn-A02-p8440451 | Bn-N2-p7767730        | gene |      |
| Bn-A02-p8443355 | Bn-N2-p7770939        | gene |      |
| Bn-A02-p8444558 | Bn-N2-p7771866        | gene |      |
| Bn-A02-p8453414 | Bn-N2-p7787059        | gene | exon |
| Bn-A02-p8453695 | Bn-N2-p7787295        | gene |      |
| Bn-A02-p847638  | Bn-N7-p13768733       | gene | exon |
| Bn-A02-p8509407 | Bn-N2-p7872796        | gene |      |
| Bn-A02-p8509694 | Bn-N2-p7873083        | gene |      |
| Bn-A02-p852096  | Bn-N7-p13776977       | gene |      |
| Bn-A02-p8527757 | Bn-N2-p7894091        | gene | exon |
| Bn-A02-p8549867 | Bn-N12-p11843110      | gene |      |
| Bn-A02-p8554870 | Bn-N2-p7927221        | gene | exon |
| Bn-A02-p8567245 | Bn-N2-p7932553        | gene | exon |
| Bn-A02-p8575325 | Bn-N2-p7943615        | gene |      |
| Bn-A02-p859079  | Bn-N7-p13781552       | gene | exon |
| Bn-A02-p8621264 | Bn-N2-p7979682        | gene | exon |
| Bn-A02-p8633119 | Bn-N2-p7991268        | gene |      |
| Bn-A02-p8663297 | Bn-N2-p8017864        | gene |      |
| Bn-A02-p8676211 | Bn-N2-p8031461        | gene | exon |
| Bn-A02-p8682290 | Bn-N2-p8036705        | gene |      |
| Bn-A02-p8724443 | Bn-N2-p8079259        | gene |      |
| Bn-A02-p8735305 | Bn-N2-p8089962        | gene | exon |
| Bn-A02-p8849037 | Bn-N2-p8196394        | gene |      |
| Bn-A02-p8934314 | Bn-N2-p8277914        | gene | exon |
| Bn-A02-p8934537 | Bn-N2-p8278210        | gene |      |
| Bn-A02-p8949465 | Bn-N2-p8293065        | gene | exon |
| Bn-A02-p8950348 | Bn-N2-p8293937        | gene |      |
| Bn-A02-p8954851 | Bn-N2-p8300842        | gene |      |
| Bn-A02-p8955992 | Bn-N2-p8301981        | gene |      |
| Bn-A02-p8967830 | Bn-N14-p3732818       | gene |      |
| Bn-A02-p9051321 | Bn-N2-p8404290        | gene | exon |
| Bn-A02-p9108719 | Bn-Scaffold16068-p488 | gene |      |
| Bn-A02-p9140734 | Bn-N2-p8490773        | gene | exon |
| Bn-A02-p9143216 | Bn-N2-p8493277        | gene | exon |
| Bn-A02-p9195997 | Bn-N2-p8558461        | gene | exon |
| Bn-A02-p9206548 | Bn-N8-p17886683       | gene |      |
| Bn-A02-p9225798 | Bn-N2-p8575828        | gene |      |
| Bn-A02-p9231115 | Bn-N2-p8581134        | gene |      |
| Bn-A02-p9254995 | Bn-N2-p8600433        | gene | exon |
| Bn-A02-p9274719 | Bn-N2-p8622494        | gene |      |
| Bn-A02-p9281731 | Bn-N2-p8629774        | gene |      |
| Bn-A02-p9319210 | Bn-N12-p12993859      | gene | exon |
| Bn-A02-p9341487 | Bn-N2-p8691192        | gene | exon |

|                  |                  |      |      |
|------------------|------------------|------|------|
| Bn-A02-p9351376  | Bn-N12-p4270460  | gene |      |
| Bn-A02-p9353942  | Bn-N2-p8701320   | gene | exon |
| Bn-A02-p9361967  | Bn-N2-p8709878   | gene |      |
| Bn-A02-p9415380  | Bn-N2-p8777642   | gene | exon |
| Bn-A02-p9415636  | Bn-N2-p8777898   | gene | exon |
| Bn-A02-p9415901  | Bn-N2-p8778163   | gene | exon |
| Bn-A02-p9416095  | Bn-N2-p8778357   | gene | exon |
| Bn-A02-p9420837  | Bn-N2-p8785290   | gene |      |
| Bn-A02-p9422112  | Bn-N2-p8786433   | gene | exon |
| Bn-A02-p9425125  | Bn-N2-p8789447   | gene | exon |
| Bn-A02-p9434869  | Bn-N12-p13164607 | gene |      |
| Bn-A02-p9464293  | Bn-N2-p8815383   | gene | exon |
| Bn-A02-p9465668  | Bn-N2-p8816758   | gene | exon |
| Bn-A02-p9480465  | Bn-N2-p8831634   | gene |      |
| Bn-A02-p9513250  | Bn-N2-p8867444   | gene |      |
| Bn-A02-p9526960  | Bn-N2-p8884509   | gene |      |
| Bn-A02-p9607043  | Bn-N2-p8936030   | gene |      |
| Bn-A02-p9622161  | Bn-N2-p8955292   | gene |      |
| Bn-A02-p9643734  | Bn-N2-p8982954   | gene | exon |
| Bn-A02-p9646068  | Bn-N2-p8985287   | gene |      |
| Bn-A02-p9648484  | Bn-N2-p8987694   | gene |      |
| Bn-A02-p9664226  | Bn-N2-p9002188   | gene | exon |
| Bn-A02-p9719196  | Bn-N12-p13555184 | gene | exon |
| Bn-A02-p9722276  | Bn-N2-p9059358   | gene | exon |
| Bn-A02-p9829719  | Bn-N2-p9203173   | gene | exon |
| Bn-A02-p985366   | Bn-N7-p13907779  | gene |      |
| Bn-A02-p9888208  | Bn-N2-p9300950   | gene | exon |
| Bn-A02-p9970625  | Bn-N2-p9391132   | gene |      |
| Bn-A02-p9970848  | Bn-N2-p9391355   | gene |      |
| Bn-A02-p9973775  | Bn-N12-p13996795 | gene | exon |
| Bn-A02-p9973927  | Bn-N12-p13996958 | gene | exon |
| Bn-A02-p99883    | Bn-N7-p12969397  | gene | exon |
| Bn-A02-p9990613  | Bn-N2-p9406491   | gene | exon |
| Bn-A02-p9996703  | Bn-N2-p9413235   | gene |      |
| Bn-A02-p9997237  | Bn-N2-p9413769   | gene | exon |
| Bn-A03-p10008905 | Bn-N13-p14663572 | gene | exon |
| Bn-A03-p10011955 | Bn-N3-p10204804  | gene |      |
| Bn-A03-p10047160 | Bn-N3-p10235963  | gene | exon |
| Bn-A03-p1004918  | Bn-N3-p1022213   | gene | exon |
| Bn-A03-p10062838 | Bn-N3-p10256288  | gene | exon |
| Bn-A03-p10076616 | Bn-N3-p10270934  | gene |      |
| Bn-A03-p10081359 | Bn-N13-p14764453 | gene |      |
| Bn-A03-p1008445  | Bn-N3-p1025736   | gene |      |
| Bn-A03-p10084501 | Bn-N3-p10278812  | gene | exon |
| Bn-A03-p10087723 | Bn-N3-p10282080  | gene |      |
| Bn-A03-p10092390 | Bn-N3-p10286701  | gene |      |
| Bn-A03-p10092885 | Bn-N3-p10287196  | gene |      |
| Bn-A03-p10129836 | Bn-N3-p10327525  | gene | exon |
| Bn-A03-p10130816 | Bn-N3-p10328499  | gene | exon |
| Bn-A03-p1013445  | Bn-N3-p1032818   | gene | exon |
| Bn-A03-p10218040 | Bn-N13-p14933641 | gene | exon |
| Bn-A03-p10321263 | Bn-N3-p10555810  | gene |      |

|                  |                 |      |      |
|------------------|-----------------|------|------|
| Bn-A03-p10321416 | Bn-N3-p10555964 | gene | exon |
| Bn-A03-p10350207 | Bn-N3-p10585533 | gene | exon |
| Bn-A03-p10388827 | Bn-N3-p10628159 | gene |      |
| Bn-A03-p10393461 | Bn-N3-p10632845 | gene | exon |
| Bn-A03-p10400341 | Bn-N3-p10639501 | gene | exon |
| Bn-A03-p10402639 | Bn-N3-p10641727 | gene | exon |
| Bn-A03-p10464551 | Bn-N3-p10704304 | gene | exon |
| Bn-A03-p10466633 | Bn-N3-p10705333 | gene |      |
| Bn-A03-p1050437  | Bn-N3-p1080752  | gene | exon |
| Bn-A03-p1050893  | Bn-N3-p1081207  | gene |      |
| Bn-A03-p1051774  | Bn-N3-p1082089  | gene |      |
| Bn-A03-p10533775 | Bn-N3-p10779956 | gene | exon |
| Bn-A03-p10547280 | Bn-N3-p10795852 | gene | exon |
| Bn-A03-p10562274 | Bn-N3-p10812473 | gene | exon |
| Bn-A03-p10587547 | Bn-N3-p10840760 | gene |      |
| Bn-A03-p10600103 | Bn-N3-p10850182 | gene |      |
| Bn-A03-p10600567 | Bn-N3-p10850644 | gene |      |
| Bn-A03-p10607288 | Bn-N3-p10864571 | gene |      |
| Bn-A03-p10608519 | Bn-N3-p10866539 | gene |      |
| Bn-A03-p10623167 | Bn-N3-p10883047 | gene | exon |
| Bn-A03-p10649410 | Bn-N3-p10913353 | gene |      |
| Bn-A03-p10664726 | Bn-N3-p10936357 | gene |      |
| Bn-A03-p10676505 | Bn-N3-p10945231 | gene |      |
| Bn-A03-p10692514 | Bn-N3-p10961822 | gene |      |
| Bn-A03-p10714724 | Bn-N3-p10980676 | gene |      |
| Bn-A03-p10732934 | Bn-N3-p10999696 | gene |      |
| Bn-A03-p10749391 | Bn-N3-p11020846 | gene |      |
| Bn-A03-p10761386 | Bn-N3-p11032703 | gene | exon |
| Bn-A03-p10761460 | Bn-N3-p11032777 | gene | exon |
| Bn-A03-p10794513 | Bn-N3-p11072359 | gene | exon |
| Bn-A03-p10802728 | Bn-N3-p11080901 | gene |      |
| Bn-A03-p10803927 | Bn-N3-p11082099 | gene | exon |
| Bn-A03-p10823720 | Bn-N3-p11103919 | gene |      |
| Bn-A03-p1084819  | Bn-N3-p1107969  | gene | exon |
| Bn-A03-p10855422 | Bn-N3-p11138274 | gene | exon |
| Bn-A03-p10862251 | Bn-N3-p11145180 | gene |      |
| Bn-A03-p10883930 | Bn-N3-p11171589 | gene |      |
| Bn-A03-p10900301 | Bn-N3-p11185817 | gene |      |
| Bn-A03-p10900813 | Bn-N3-p11186329 | gene |      |
| Bn-A03-p10912453 | Bn-N3-p11195905 | gene |      |
| Bn-A03-p10912815 | Bn-N3-p11197689 | gene |      |
| Bn-A03-p10928669 | Bn-N3-p11206326 | gene |      |
| Bn-A03-p10928990 | Bn-N3-p11206647 | gene |      |
| Bn-A03-p10958194 | Bn-N3-p11239704 | gene |      |
| Bn-A03-p10967268 | Bn-N3-p11247217 | gene |      |
| Bn-A03-p10993904 | Bn-N3-p11276586 | gene |      |
| Bn-A03-p11051970 | Bn-N3-p11346446 | gene | exon |
| Bn-A03-p11053758 | Bn-N3-p11348227 | gene | exon |
| Bn-A03-p11053857 | Bn-N3-p11348345 | gene | exon |
| Bn-A03-p11087692 | Bn-N3-p11376031 | gene | exon |
| Bn-A03-p11138137 | Bn-N3-p16498143 | gene | exon |
| Bn-A03-p11156293 | Bn-N3-p11438941 | gene |      |

|                  |                  |      |      |
|------------------|------------------|------|------|
| Bn-A03-p11171067 | Bn-N3-p11447645  | gene | exon |
| Bn-A03-p11177892 | Bn-N3-p11458348  | gene | exon |
| Bn-A03-p11191805 | Bn-N3-p11472341  | gene |      |
| Bn-A03-p11202719 | Bn-N3-p11485348  | gene | exon |
| Bn-A03-p11217606 | Bn-N3-p11500395  | gene |      |
| Bn-A03-p11218468 | Bn-N3-p11501278  | gene |      |
| Bn-A03-p11232586 | Bn-N3-p11515431  | gene | exon |
| Bn-A03-p11294370 | Bn-N3-p11581195  | gene | exon |
| Bn-A03-p11294858 | Bn-N3-p11581684  | gene | exon |
| Bn-A03-p11399915 | Bn-N3-p11685041  | gene |      |
| Bn-A03-p11402714 | Bn-N3-p11687825  | gene | exon |
| Bn-A03-p11418849 | Bn-N3-p11699513  | gene | exon |
| Bn-A03-p11456115 | Bn-N3-p11746601  | gene |      |
| Bn-A03-p11468741 | Bn-N3-p11761527  | gene | exon |
| Bn-A03-p11505658 | Bn-N3-p11789875  | gene |      |
| Bn-A03-p11517597 | Bn-N3-p11803507  | gene |      |
| Bn-A03-p11520156 | Bn-N3-p11806708  | gene |      |
| Bn-A03-p11578563 | Bn-N3-p11866652  | gene |      |
| Bn-A03-p11613167 | Bn-N3-p11925893  | gene | exon |
| Bn-A03-p11613865 | Bn-N3-p11926590  | gene |      |
| Bn-A03-p11618241 | Bn-N3-p11934741  | gene | exon |
| Bn-A03-p11621375 | Bn-N3-p11937837  | gene |      |
| Bn-A03-p11623083 | Bn-N3-p11939547  | gene |      |
| Bn-A03-p11624578 | Bn-N3-p11941042  | gene |      |
| Bn-A03-p11626015 | Bn-N3-p11942485  | gene | exon |
| Bn-A03-p11626279 | Bn-N3-p11942749  | gene |      |
| Bn-A03-p11633959 | Bn-N7-p9599253   | gene |      |
| Bn-A03-p11683045 | Bn-N13-p17776730 | gene |      |
| Bn-A03-p11704711 | Bn-N3-p12015363  | gene | exon |
| Bn-A03-p11708366 | Bn-N3-p12019703  | gene | exon |
| Bn-A03-p11739768 | Bn-N3-p12055781  | gene | exon |
| Bn-A03-p11744082 | Bn-N3-p12061079  | gene |      |
| Bn-A03-p11751694 | Bn-N3-p12075423  | gene | exon |
| Bn-A03-p11771139 | Bn-N3-p12093780  | gene |      |
| Bn-A03-p11772387 | Bn-N3-p12095031  | gene | exon |
| Bn-A03-p11785159 | Bn-N3-p12115162  | gene | exon |
| Bn-A03-p11792328 | Bn-N3-p12122804  | gene | exon |
| Bn-A03-p11798309 | Bn-N3-p12129486  | gene |      |
| Bn-A03-p11822847 | Bn-N3-p12151785  | gene |      |
| Bn-A03-p1194072  | Bn-N3-p1196191   | gene | exon |
| Bn-A03-p1195712  | Bn-N13-p1532292  | gene | exon |
| Bn-A03-p12008511 | Bn-N3-p12346608  | gene | exon |
| Bn-A03-p12065947 | Bn-N3-p12412283  | gene |      |
| Bn-A03-p12076661 | Bn-N3-p12426160  | gene | exon |
| Bn-A03-p1218291  | Bn-N3-p1220578   | gene |      |
| Bn-A03-p12186958 | Bn-N3-p12537961  | gene |      |
| Bn-A03-p12219523 | Bn-N3-p12575097  | gene |      |
| Bn-A03-p12279241 | Bn-N3-p12629150  | gene |      |
| Bn-A03-p12279706 | Bn-N3-p12629615  | gene |      |
| Bn-A03-p12296442 | Bn-N3-p12643784  | gene | exon |
| Bn-A03-p12319647 | Bn-N3-p12668118  | gene |      |
| Bn-A03-p12359936 | Bn-N3-p12716589  | gene |      |



|                  |                        |      |      |
|------------------|------------------------|------|------|
| Bn-A03-p12393626 | Bn-N3-p12750656        | gene |      |
| Bn-A03-p12393711 | Bn-N3-p12750742        | gene |      |
| Bn-A03-p12402349 | Bn-N3-p12759891        | gene | exon |
| Bn-A03-p12411362 | Bn-N3-p12781741        | gene |      |
| Bn-A03-p12426461 | Bn-N3-p12802514        | gene |      |
| Bn-A03-p12453877 | Bn-N3-p12830096        | gene | exon |
| Bn-A03-p12457385 | Bn-N3-p12833459        | gene | exon |
| Bn-A03-p12457751 | Bn-N3-p12833828        | gene | exon |
| Bn-A03-p12471513 | Bn-N3-p12849878        | gene | exon |
| Bn-A03-p12477334 | Bn-N3-p12856222        | gene |      |
| Bn-A03-p12518314 | Bn-N3-p12898989        | gene |      |
| Bn-A03-p12541037 | Bn-N3-p12920844        | gene |      |
| Bn-A03-p12541207 | Bn-N3-p12921014        | gene |      |
| Bn-A03-p12541337 | Bn-N3-p12921144        | gene |      |
| Bn-A03-p12623286 | Bn-N3-p13010524        | gene |      |
| Bn-A03-p12631124 | Bn-N3-p13019250        | gene | exon |
| Bn-A03-p12737336 | Bn-N13-p20002801       | gene | exon |
| Bn-A03-p12820905 | Bn-N3-p13217701        | gene |      |
| Bn-A03-p12826949 | Bn-Scaffold01631-p5853 | gene |      |
| Bn-A03-p12859516 | Bn-N3-p13257421        | gene | exon |
| Bn-A03-p12863264 | Bn-N3-p13260650        | gene | exon |
| Bn-A03-p12863642 | Bn-N3-p13261028        | gene | exon |
| Bn-A03-p12863684 | Bn-N3-p13261070        | gene | exon |
| Bn-A03-p12869911 | Bn-N3-p13261481        | gene |      |
| Bn-A03-p12932399 | Bn-N3-p13323285        | gene |      |
| Bn-A03-p12932760 | Bn-N3-p13323628        | gene | exon |
| Bn-A03-p12945091 | Bn-N3-p13340397        | gene |      |
| Bn-A03-p12993600 | Bn-N3-p13388486        | gene |      |
| Bn-A03-p12994885 | Bn-N3-p13389764        | gene |      |
| Bn-A03-p13061709 | Bn-N3-p13458036        | gene | exon |
| Bn-A03-p1308820  | Bn-N3-p1322771         | gene |      |
| Bn-A03-p13107268 | Bn-N3-p13501411        | gene | exon |
| Bn-A03-p13145923 | Bn-N3-p13529675        | gene | exon |
| Bn-A03-p13169138 | Bn-N3-p13558157        | gene |      |
| Bn-A03-p13169346 | Bn-N3-p13558365        | gene |      |
| Bn-A03-p13216785 | Bn-N3-p13605162        | gene | exon |
| Bn-A03-p13218451 | Bn-N3-p13606828        | gene |      |
| Bn-A03-p13236840 | Bn-N13-p20803975       | gene |      |
| Bn-A03-p13253155 | Bn-N13-p20830258       | gene | exon |
| Bn-A03-p13254564 | Bn-N13-p20831776       | gene |      |
| Bn-A03-p13286574 | Bn-N3-p13645159        | gene |      |
| Bn-A03-p13287670 | Bn-N3-p13646257        | gene |      |
| Bn-A03-p13288429 | Bn-N3-p13647015        | gene |      |
| Bn-A03-p13291935 | Bn-N3-p13650548        | gene |      |
| Bn-A03-p13302882 | Bn-N13-p20897815       | gene | exon |
| Bn-A03-p13335275 | Bn-N3-p13687875        | gene |      |
| Bn-A03-p13335946 | Bn-N13-p20967497       | gene | exon |
| Bn-A03-p13365712 | Bn-N3-p13707451        | gene | exon |
| Bn-A03-p13469770 | Bn-N3-p13802351        | gene |      |
| Bn-A03-p13492986 | Bn-N3-p13823753        | gene | exon |
| Bn-A03-p13502336 | Bn-N3-p13834517        | gene | exon |
| Bn-A03-p13514947 | Bn-N13-p21438071       | gene | exon |

|                  |                  |      |      |
|------------------|------------------|------|------|
| Bn-A03-p13523343 | Bn-N3-p13853217  | gene | exon |
| Bn-A03-p1352996  | Bn-N3-p1362960   | gene |      |
| Bn-A03-p1353309  | Bn-N3-p1363269   | gene |      |
| Bn-A03-p13546174 | Bn-N3-p13887442  | gene | exon |
| Bn-A03-p13567559 | Bn-N3-p13920556  | gene |      |
| Bn-A03-p13605344 | Bn-N3-p13961114  | gene |      |
| Bn-A03-p13610858 | Bn-N3-p13966548  | gene | exon |
| Bn-A03-p13624310 | Bn-N3-p13985853  | gene |      |
| Bn-A03-p13630048 | Bn-N3-p13991377  | gene |      |
| Bn-A03-p13658460 | Bn-N3-p14017333  | gene | exon |
| Bn-A03-p13678735 | Bn-N13-p21744521 | gene | exon |
| Bn-A03-p13679854 | Bn-N3-p14037826  | gene | exon |
| Bn-A03-p1373885  | Bn-N13-p1752270  | gene |      |
| Bn-A03-p13773583 | Bn-N3-p14130625  | gene |      |
| Bn-A03-p13777203 | Bn-N3-p14134241  | gene | exon |
| Bn-A03-p13778786 | Bn-N3-p14135815  | gene |      |
| Bn-A03-p13783263 | Bn-N3-p14140217  | gene | exon |
| Bn-A03-p13802162 | Bn-N3-p14145741  | gene |      |
| Bn-A03-p13810458 | Bn-N13-p21976769 | gene |      |
| Bn-A03-p13814543 | Bn-N13-p21981294 | gene | exon |
| Bn-A03-p13861679 | Bn-N3-p14182950  | gene |      |
| Bn-A03-p13861749 | Bn-N3-p14183025  | gene |      |
| Bn-A03-p13863828 | Bn-N13-p22045080 | gene |      |
| Bn-A03-p13912476 | Bn-N3-p14236228  | gene | exon |
| Bn-A03-p13996014 | Bn-N3-p14323705  | gene | exon |
| Bn-A03-p14003701 | Bn-N3-p14331357  | gene | exon |
| Bn-A03-p14009871 | Bn-N3-p14338096  | gene | exon |
| Bn-A03-p14015779 | Bn-N3-p14341517  | gene |      |
| Bn-A03-p14023392 | Bn-N3-p14348717  | gene | exon |
| Bn-A03-p14024778 | Bn-N3-p14350104  | gene | exon |
| Bn-A03-p14037892 | Bn-N3-p14366149  | gene | exon |
| Bn-A03-p14041931 | Bn-N3-p14371157  | gene | exon |
| Bn-A03-p14092692 | Bn-N3-p14418412  | gene |      |
| Bn-A03-p14095948 | Bn-N3-p14422444  | gene |      |
| Bn-A03-p14112910 | Bn-N3-p14438774  | gene |      |
| Bn-A03-p14121492 | Bn-N3-p14447394  | gene | exon |
| Bn-A03-p14127649 | Bn-N3-p14453580  | gene | exon |
| Bn-A03-p14128333 | Bn-N3-p14454264  | gene | exon |
| Bn-A03-p141681   | Bn-N3-p152180    | gene | exon |
| Bn-A03-p14201146 | Bn-N3-p14535159  | gene | exon |
| Bn-A03-p14276328 | Bn-N3-p14611514  | gene |      |
| Bn-A03-p14282460 | Bn-N3-p14617650  | gene | exon |
| Bn-A03-p14290741 | Bn-N3-p14626122  | gene |      |
| Bn-A03-p14291952 | Bn-N3-p14627320  | gene | exon |
| Bn-A03-p14306440 | Bn-N3-p14641501  | gene | exon |
| Bn-A03-p14310805 | Bn-N3-p14645865  | gene |      |
| Bn-A03-p14353080 | Bn-N3-p14687684  | gene |      |
| Bn-A03-p14355646 | Bn-N3-p14688286  | gene | exon |
| Bn-A03-p14385006 | Bn-N3-p14711636  | gene |      |
| Bn-A03-p14398744 | Bn-N3-p14728197  | gene |      |
| Bn-A03-p14399972 | Bn-N3-p14729444  | gene |      |
| Bn-A03-p14400020 | Bn-N3-p14729492  | gene |      |

|                  |                         |      |      |
|------------------|-------------------------|------|------|
| Bn-A03-p14413451 | Bn-N3-p14738917         | gene |      |
| Bn-A03-p14418556 | Bn-N13-p22939644        | gene |      |
| Bn-A03-p14418650 | Bn-N3-p14747284         | gene | exon |
| Bn-A03-p14423477 | Bn-N3-p14752111         | gene | exon |
| Bn-A03-p14434665 | Bn-N3-p14764950         | gene |      |
| Bn-A03-p14462570 | Bn-N3-p14794327         | gene | exon |
| Bn-A03-p14472406 | Bn-N3-p14804413         | gene |      |
| Bn-A03-p14473184 | Bn-N3-p14805191         | gene | exon |
| Bn-A03-p14473296 | Bn-N3-p14805303         | gene |      |
| Bn-A03-p14474478 | Bn-N3-p14806463         | gene |      |
| Bn-A03-p14552086 | Bn-N3-p14890862         | gene |      |
| Bn-A03-p14557663 | Bn-N3-p14896577         | gene | exon |
| Bn-A03-p14577690 | Bn-N3-p14922691         | gene | exon |
| Bn-A03-p14585799 | Bn-N3-p14930339         | gene | exon |
| Bn-A03-p14586392 | Bn-N3-p14931181         | gene | exon |
| Bn-A03-p14611641 | Bn-N3-p14954238         | gene |      |
| Bn-A03-p1461633  | Bn-N3-p1475985          | gene |      |
| Bn-A03-p1466010  | Bn-N3-p1480002          | gene |      |
| Bn-A03-p14684924 | Bn-N3-p15060573         | gene | exon |
| Bn-A03-p14685500 | Bn-N3-p15061007         | gene |      |
| Bn-A03-p14710981 | Bn-N3-p15077833         | gene | exon |
| Bn-A03-p14758285 | Bn-N3-p15112267         | gene | exon |
| Bn-A03-p14811204 | Bn-Scaffold01345-p10364 | gene | exon |
| Bn-A03-p14811653 | Bn-N3-p15168702         | gene | exon |
| Bn-A03-p14848117 | Bn-N3-p15196753         | gene | exon |
| Bn-A03-p14852785 | Bn-N3-p15208068         | gene |      |
| Bn-A03-p14870270 | Bn-N3-p15234864         | gene | exon |
| Bn-A03-p14870763 | Bn-N3-p15235357         | gene |      |
| Bn-A03-p14871005 | Bn-N13-p23681566        | gene |      |
| Bn-A03-p1488306  | Bn-N3-p1499294          | gene | exon |
| Bn-A03-p14888403 | Bn-N3-p15253419         | gene | exon |
| Bn-A03-p14903814 | Bn-N3-p15262450         | gene |      |
| Bn-A03-p14949812 | Bn-N3-p15309330         | gene |      |
| Bn-A03-p14962288 | Bn-N3-p15323141         | gene |      |
| Bn-A03-p15002477 | Bn-N3-p15359664         | gene |      |
| Bn-A03-p15004059 | Bn-N3-p15361204         | gene |      |
| Bn-A03-p15015706 | Bn-N3-p15373470         | gene | exon |
| Bn-A03-p1503462  | Bn-N3-p1513506          | gene | exon |
| Bn-A03-p15038774 | Bn-N3-p15403139         | gene |      |
| Bn-A03-p15044158 | Bn-N3-p15409110         | gene | exon |
| Bn-A03-p1507769  | Bn-N3-p1517990          | gene |      |
| Bn-A03-p15103575 | Bn-N3-p15456683         | gene | exon |
| Bn-A03-p15139190 | Bn-N3-p15493124         | gene |      |
| Bn-A03-p15139484 | Bn-N3-p15493418         | gene | exon |
| Bn-A03-p15141821 | Bn-N3-p15495724         | gene | exon |
| Bn-A03-p15237693 | Bn-N3-p15595799         | gene |      |
| Bn-A03-p15240794 | Bn-N3-p15598875         | gene | exon |
| Bn-A03-p15240992 | Bn-N3-p15599073         | gene | exon |
| Bn-A03-p15245600 | Bn-Scaffold01107-p16315 | gene |      |
| Bn-A03-p15300653 | Bn-N3-p15667081         | gene |      |
| Bn-A03-p1532114  | Bn-N3-p1543888          | gene | exon |
| Bn-A03-p15326805 | Bn-N3-p15677762         | gene |      |

|                  |                  |      |      |
|------------------|------------------|------|------|
| Bn-A03-p15327817 | Bn-N3-p15678774  | gene | exon |
| Bn-A03-p15327921 | Bn-N3-p15678878  | gene | exon |
| Bn-A03-p15347967 | Bn-N3-p15694477  | gene | exon |
| Bn-A03-p15349925 | Bn-N3-p15696427  | gene | exon |
| Bn-A03-p15359867 | Bn-N3-p15710902  | gene |      |
| Bn-A03-p15363919 | Bn-N3-p15714953  | gene |      |
| Bn-A03-p1538555  | Bn-N3-p1550326   | gene |      |
| Bn-A03-p15397187 | Bn-N3-p15746620  | gene | exon |
| Bn-A03-p15404736 | Bn-N3-p15754783  | gene |      |
| Bn-A03-p15406047 | Bn-N3-p15759493  | gene | exon |
| Bn-A03-p15416728 | Bn-N3-p15771428  | gene | exon |
| Bn-A03-p15417676 | Bn-N13-p24436448 | gene | exon |
| Bn-A03-p15424536 | Bn-N3-p15779216  | gene |      |
| Bn-A03-p15435114 | Bn-N3-p15791833  | gene | exon |
| Bn-A03-p15435174 | Bn-N3-p15791893  | gene | exon |
| Bn-A03-p15435442 | Bn-N3-p15792170  | gene |      |
| Bn-A03-p15481319 | Bn-N3-p15854768  | gene | exon |
| Bn-A03-p15481682 | Bn-N3-p15855146  | gene |      |
| Bn-A03-p15496608 | Bn-N3-p15876140  | gene |      |
| Bn-A03-p15496962 | Bn-N3-p15876498  | gene |      |
| Bn-A03-p15546590 | Bn-N3-p15918295  | gene |      |
| Bn-A03-p15576074 | Bn-N3-p15954172  | gene | exon |
| Bn-A03-p15577849 | Bn-N3-p15957400  | gene |      |
| Bn-A03-p15593483 | Bn-N3-p15973724  | gene | exon |
| Bn-A03-p15605355 | Bn-N3-p15980808  | gene | exon |
| Bn-A03-p15634432 | Bn-N3-p16009808  | gene | exon |
| Bn-A03-p15675871 | Bn-N13-p24799629 | gene | exon |
| Bn-A03-p15689225 | Bn-N3-p16036365  | gene |      |
| Bn-A03-p15702943 | Bn-N3-p16050732  | gene | exon |
| Bn-A03-p15704793 | Bn-N3-p16052583  | gene |      |
| Bn-A03-p15704830 | Bn-N3-p16052620  | gene |      |
| Bn-A03-p15705021 | Bn-N3-p16052811  | gene | exon |
| Bn-A03-p15744983 | Bn-N3-p16097061  | gene | exon |
| Bn-A03-p15766386 | Bn-N3-p16118711  | gene | exon |
| Bn-A03-p1577561  | Bn-N3-p1585403   | gene | exon |
| Bn-A03-p15776521 | Bn-N3-p16129121  | gene |      |
| Bn-A03-p15776756 | Bn-N3-p16129355  | gene |      |
| Bn-A03-p15818896 | Bn-N3-p16176575  | gene | exon |
| Bn-A03-p15852439 | Bn-N3-p16210478  | gene | exon |
| Bn-A03-p15871284 | Bn-N3-p16228427  | gene |      |
| Bn-A03-p15875404 | Bn-N3-p16232548  | gene |      |
| Bn-A03-p1588735  | Bn-N3-p1596648   | gene | exon |
| Bn-A03-p15892296 | Bn-N3-p16242827  | gene |      |
| Bn-A03-p15900189 | Bn-N3-p16247749  | gene |      |
| Bn-A03-p15906810 | Bn-N3-p16254855  | gene |      |
| Bn-A03-p15916054 | Bn-N3-p16264170  | gene | exon |
| Bn-A03-p15923626 | Bn-N13-p25175440 | gene |      |
| Bn-A03-p15954297 | Bn-N3-p16309095  | gene | exon |
| Bn-A03-p1596091  | Bn-N3-p1607870   | gene | exon |
| Bn-A03-p15979252 | Bn-N3-p16334534  | gene |      |
| Bn-A03-p16000194 | Bn-N13-p25301116 | gene |      |
| Bn-A03-p16017186 | Bn-N3-p16376636  | gene |      |

|                  |                  |      |      |
|------------------|------------------|------|------|
| Bn-A03-p16038553 | Bn-N3-p16401172  | gene | exon |
| Bn-A03-p16051661 | Bn-N3-p16417695  | gene | exon |
| Bn-A03-p16055930 | Bn-N3-p16422048  | gene |      |
| Bn-A03-p16056039 | Bn-N13-p25412548 | gene |      |
| Bn-A03-p16056249 | Bn-N3-p16422373  | gene | exon |
| Bn-A03-p16056460 | Bn-N3-p16422587  | gene | exon |
| Bn-A03-p16056621 | Bn-N3-p16422754  | gene | exon |
| Bn-A03-p16081434 | Bn-N3-p16447196  | gene |      |
| Bn-A03-p16084302 | Bn-N3-p16450065  | gene |      |
| Bn-A03-p16123758 | Bn-N3-p16484258  | gene |      |
| Bn-A03-p16126013 | Bn-N3-p16486504  | gene |      |
| Bn-A03-p16162908 | Bn-N3-p16530314  | gene | exon |
| Bn-A03-p16167780 | Bn-N11-p26752851 | gene |      |
| Bn-A03-p16170389 | Bn-N7-p21285723  | gene | exon |
| Bn-A03-p16185537 | Bn-N3-p16558996  | gene |      |
| Bn-A03-p162225   | Bn-N3-p173341    | gene | exon |
| Bn-A03-p16229294 | Bn-N3-p16606777  | gene | exon |
| Bn-A03-p16269745 | Bn-N3-p16649156  | gene |      |
| Bn-A03-p16275650 | Bn-N3-p16651582  | gene |      |
| Bn-A03-p16278251 | Bn-N3-p16653377  | gene |      |
| Bn-A03-p16284595 | Bn-N3-p16660095  | gene |      |
| Bn-A03-p16303780 | Bn-N3-p16680815  | gene |      |
| Bn-A03-p16342771 | Bn-N3-p16718081  | gene |      |
| Bn-A03-p16371467 | Bn-N3-p16745660  | gene |      |
| Bn-A03-p16378233 | Bn-N3-p16753163  | gene |      |
| Bn-A03-p16379045 | Bn-N3-p16753948  | gene |      |
| Bn-A03-p16380304 | Bn-N3-p16755208  | gene |      |
| Bn-A03-p1638326  | Bn-N3-p1664185   | gene |      |
| Bn-A03-p1639446  | Bn-N3-p1665303   | gene | exon |
| Bn-A03-p16404871 | Bn-N3-p16774587  | gene | exon |
| Bn-A03-p16405269 | Bn-N3-p16774984  | gene |      |
| Bn-A03-p16409353 | Bn-N3-p16781840  | gene |      |
| Bn-A03-p16422604 | Bn-N3-p16798020  | gene | exon |
| Bn-A03-p16423239 | Bn-N3-p16798655  | gene |      |
| Bn-A03-p16431100 | Bn-N3-p16801093  | gene | exon |
| Bn-A03-p16437979 | Bn-N3-p16805278  | gene |      |
| Bn-A03-p16444510 | Bn-N3-p16812048  | gene |      |
| Bn-A03-p16481995 | Bn-N3-p16847571  | gene | exon |
| Bn-A03-p16482731 | Bn-N3-p16848307  | gene | exon |
| Bn-A03-p1652490  | Bn-N3-p1683017   | gene |      |
| Bn-A03-p16530135 | Bn-N3-p16901349  | gene | exon |
| Bn-A03-p16565487 | Bn-N3-p16933963  | gene | exon |
| Bn-A03-p16607714 | Bn-N3-p16961243  | gene | exon |
| Bn-A03-p16610235 | Bn-N3-p16963783  | gene | exon |
| Bn-A03-p16611349 | Bn-N3-p16964899  | gene |      |
| Bn-A03-p16613382 | Bn-N3-p16966918  | gene | exon |
| Bn-A03-p16742011 | Bn-N3-p17112362  | gene |      |
| Bn-A03-p16758311 | Bn-N13-p26698823 | gene | exon |
| Bn-A03-p16759411 | Bn-N3-p17131381  | gene | exon |
| Bn-A03-p16769908 | Bn-N3-p17141747  | gene | exon |
| Bn-A03-p16811562 | Bn-N3-p17184568  | gene |      |
| Bn-A03-p16812953 | Bn-N3-p17185957  | gene | exon |

|                  |                  |      |      |
|------------------|------------------|------|------|
| Bn-A03-p16852209 | Bn-N3-p17230620  | gene |      |
| Bn-A03-p16955732 | Bn-N3-p17352306  | gene | exon |
| Bn-A03-p1698016  | Bn-N3-p1740688   | gene |      |
| Bn-A03-p16981919 | Bn-N3-p17381095  | gene | exon |
| Bn-A03-p16989353 | Bn-N3-p17388681  | gene |      |
| Bn-A03-p16990947 | Bn-N3-p17390270  | gene |      |
| Bn-A03-p17038064 | Bn-N3-p17438283  | gene |      |
| Bn-A03-p1711856  | Bn-N3-p1755477   | gene | exon |
| Bn-A03-p17125715 | Bn-N13-p27358796 | gene |      |
| Bn-A03-p17139931 | Bn-N3-p17542662  | gene | exon |
| Bn-A03-p17182494 | Bn-N3-p17584688  | gene |      |
| Bn-A03-p17194139 | Bn-N3-p17590948  | gene | exon |
| Bn-A03-p17207547 | Bn-N3-p17607592  | gene |      |
| Bn-A03-p17213825 | Bn-N3-p17614336  | gene | exon |
| Bn-A03-p17281617 | Bn-N3-p17683591  | gene |      |
| Bn-A03-p1741556  | Bn-N3-p1787910   | gene | exon |
| Bn-A03-p17532322 | Bn-N3-p17889546  | gene | exon |
| Bn-A03-p1762980  | Bn-N3-p1802282   | gene | exon |
| Bn-A03-p1777701  | Bn-N3-p1824146   | gene | exon |
| Bn-A03-p17782292 | Bn-N3-p18120292  | gene | exon |
| Bn-A03-p17790084 | Bn-N3-p18124358  | gene | exon |
| Bn-A03-p17921239 | Bn-N3-p18249832  | gene | exon |
| Bn-A03-p17926123 | Bn-N3-p18254716  | gene |      |
| Bn-A03-p18014273 | Bn-N13-p28957446 | gene | exon |
| Bn-A03-p18019822 | Bn-N3-p18370833  | gene | exon |
| Bn-A03-p1805828  | Bn-N3-p1857444   | gene |      |
| Bn-A03-p1813564  | Bn-N3-p1869293   | gene | exon |
| Bn-A03-p1817556  | Bn-N3-p1873254   | gene | exon |
| Bn-A03-p18183550 | Bn-N3-p18538515  | gene |      |
| Bn-A03-p18198495 | Bn-N3-p18559964  | gene | exon |
| Bn-A03-p18376493 | Bn-N3-p18740982  | gene | exon |
| Bn-A03-p1839932  | Bn-N13-p2372489  | gene |      |
| Bn-A03-p18405869 | Bn-N3-p18771675  | gene |      |
| Bn-A03-p18461597 | Bn-N3-p18828574  | gene |      |
| Bn-A03-p18461778 | Bn-N3-p18828755  | gene |      |
| Bn-A03-p18462261 | Bn-N3-p18829258  | gene |      |
| Bn-A03-p18468633 | Bn-N3-p18835812  | gene |      |
| Bn-A03-p18471820 | Bn-N3-p18839043  | gene |      |
| Bn-A03-p18570046 | Bn-N3-p18949264  | gene |      |
| Bn-A03-p18594273 | Bn-N3-p18978824  | gene | exon |
| Bn-A03-p18595122 | Bn-N3-p18979675  | gene | exon |
| Bn-A03-p18606297 | Bn-N3-p18990492  | gene |      |
| Bn-A03-p18618117 | Bn-N3-p19000422  | gene | exon |
| Bn-A03-p18618990 | Bn-N3-p19001295  | gene | exon |
| Bn-A03-p18638146 | Bn-N3-p19022428  | gene |      |
| Bn-A03-p18692928 | Bn-N3-p19078178  | gene |      |
| Bn-A03-p187017   | Bn-N3-p198287    | gene | exon |
| Bn-A03-p1871012  | Bn-N3-p1958934   | gene | exon |
| Bn-A03-p18762440 | Bn-N3-p19125889  | gene | exon |
| Bn-A03-p18762453 | Bn-N3-p19125902  | gene | exon |
| Bn-A03-p18762984 | Bn-N3-p19126433  | gene | exon |
| Bn-A03-p18765971 | Bn-N3-p19135030  | gene |      |

|                  |                  |      |      |
|------------------|------------------|------|------|
| Bn-A03-p18766028 | Bn-N3-p19135086  | gene |      |
| Bn-A03-p18768321 | Bn-N3-p19142067  | gene |      |
| Bn-A03-p18770982 | Bn-N3-p19144502  | gene |      |
| Bn-A03-p18775919 | Bn-N3-p19147826  | gene | exon |
| Bn-A03-p18776071 | Bn-N3-p19147979  | gene |      |
| Bn-A03-p187972   | Bn-N3-p199219    | gene |      |
| Bn-A03-p18807150 | Bn-N3-p19184017  | gene |      |
| Bn-A03-p18824580 | Bn-N3-p19198936  | gene |      |
| Bn-A03-p18834464 | Bn-N3-p19214241  | gene | exon |
| Bn-A03-p18836509 | Bn-N3-p19216285  | gene | exon |
| Bn-A03-p18848732 | Bn-N3-p19225129  | gene | exon |
| Bn-A03-p18899251 | Bn-N3-p19265231  | gene |      |
| Bn-A03-p18899284 | Bn-N3-p19265264  | gene |      |
| Bn-A03-p1894119  | Bn-N3-p1980524   | gene |      |
| Bn-A03-p1899032  | Bn-N3-p1989483   | gene |      |
| Bn-A03-p19045801 | Bn-N3-p19315281  | gene |      |
| Bn-A03-p19078721 | Bn-N3-p19349248  | gene |      |
| Bn-A03-p19129006 | Bn-N3-p19402033  | gene | exon |
| Bn-A03-p19132431 | Bn-N3-p19405475  | gene |      |
| Bn-A03-p19147644 | Bn-N3-p19431402  | gene | exon |
| Bn-A03-p19191616 | Bn-N3-p19482961  | gene |      |
| Bn-A03-p1922712  | Bn-N3-p2016565   | gene |      |
| Bn-A03-p1923025  | Bn-N3-p2016876   | gene |      |
| Bn-A03-p19333794 | Bn-N3-p19627079  | gene |      |
| Bn-A03-p19344007 | Bn-N3-p19638274  | gene | exon |
| Bn-A03-p19389076 | Bn-N3-p19683020  | gene |      |
| Bn-A03-p19441544 | Bn-N3-p19736425  | gene |      |
| Bn-A03-p19441620 | Bn-N3-p19736501  | gene |      |
| Bn-A03-p19442945 | Bn-N3-p19737829  | gene |      |
| Bn-A03-p19462036 | Bn-N3-p19752040  | gene | exon |
| Bn-A03-p19501529 | Bn-N3-p19795423  | gene |      |
| Bn-A03-p19510486 | Bn-N3-p19814265  | gene |      |
| Bn-A03-p1951453  | Bn-N3-p2051958   | gene |      |
| Bn-A03-p19526788 | Bn-N3-p19828634  | gene |      |
| Bn-A03-p19527199 | Bn-N3-p19829045  | gene |      |
| Bn-A03-p19573902 | Bn-N3-p19870417  | gene |      |
| Bn-A03-p1960313  | Bn-N3-p2060586   | gene | exon |
| Bn-A03-p1960694  | Bn-N3-p2060923   | gene | exon |
| Bn-A03-p19740654 | Bn-N3-p20028569  | gene | exon |
| Bn-A03-p19751864 | Bn-N13-p32798196 | gene | exon |
| Bn-A03-p19753364 | Bn-N3-p20058074  | gene |      |
| Bn-A03-p19753436 | Bn-N3-p20058146  | gene | exon |
| Bn-A03-p19753470 | Bn-N3-p20058180  | gene | exon |
| Bn-A03-p19768447 | Bn-N3-p20073818  | gene |      |
| Bn-A03-p19772056 | Bn-N3-p20078266  | gene |      |
| Bn-A03-p19793770 | Bn-N3-p20092686  | gene | exon |
| Bn-A03-p19798208 | Bn-N3-p20097172  | gene | exon |
| Bn-A03-p19805933 | Bn-N3-p20104897  | gene | exon |
| Bn-A03-p19806018 | Bn-N3-p20104982  | gene |      |
| Bn-A03-p19832980 | Bn-N3-p20133234  | gene |      |
| Bn-A03-p19850198 | Bn-N3-p20157427  | gene |      |
| Bn-A03-p19868485 | Bn-N3-p20178063  | gene | exon |

|                  |                       |      |      |
|------------------|-----------------------|------|------|
| Bn-A03-p19880918 | Bn-N3-p20192016       | gene | exon |
| Bn-A03-p19896843 | Bn-N13-p33240254      | gene |      |
| Bn-A03-p19897251 | Bn-N3-p20214153       | gene | exon |
| Bn-A03-p1990974  | Bn-N13-p2605446       | gene | exon |
| Bn-A03-p19925593 | Bn-N3-p20240617       | gene |      |
| Bn-A03-p19928269 | Bn-N3-p20244850       | gene |      |
| Bn-A03-p19953514 | Bn-N3-p20259977       | gene | exon |
| Bn-A03-p19956358 | Bn-N3-p20262720       | gene |      |
| Bn-A03-p19973423 | Bn-N3-p20283079       | gene | exon |
| Bn-A03-p19974784 | Bn-N3-p20284442       | gene | exon |
| Bn-A03-p19975539 | Bn-N3-p20285197       | gene | exon |
| Bn-A03-p20000930 | Bn-N3-p20301366       | gene | exon |
| Bn-A03-p20005216 | Bn-N3-p20304899       | gene | exon |
| Bn-A03-p20007146 | Bn-N3-p20306827       | gene | exon |
| Bn-A03-p20008868 | Bn-N3-p20308557       | gene | exon |
| Bn-A03-p2003715  | Bn-N3-p2098853        | gene |      |
| Bn-A03-p20044499 | Bn-N3-p20342349       | gene |      |
| Bn-A03-p2004585  | Bn-N3-p2099723        | gene | exon |
| Bn-A03-p2005352  | Bn-N3-p2100490        | gene | exon |
| Bn-A03-p20080800 | Bn-N3-p20374281       | gene | exon |
| Bn-A03-p20086767 | Bn-N3-p20380413       | gene | exon |
| Bn-A03-p20100490 | Bn-N3-p20394143       | gene | exon |
| Bn-A03-p201146   | Bn-N3-p213799         | gene |      |
| Bn-A03-p20114910 | Bn-N3-p20408835       | gene | exon |
| Bn-A03-p20122616 | Bn-N3-p20417490       | gene |      |
| Bn-A03-p20125361 | Bn-N3-p20420513       | gene |      |
| Bn-A03-p20158806 | Bn-N3-p20453522       | gene | exon |
| Bn-A03-p20180463 | Bn-N3-p20469807       | gene | exon |
| Bn-A03-p20213689 | Bn-N3-p20500455       | gene | exon |
| Bn-A03-p20225335 | Bn-N3-p20518496       | gene | exon |
| Bn-A03-p20262635 | Bn-N3-p20559209       | gene |      |
| Bn-A03-p20286113 | Bn-N3-p20584427       | gene |      |
| Bn-A03-p203000   | Bn-N3-p215656         | gene |      |
| Bn-A03-p2030676  | Bn-Scaffold10148-p525 | gene | exon |
| Bn-A03-p20350690 | Bn-N3-p20662632       | gene | exon |
| Bn-A03-p20375108 | Bn-N13-p34174138      | gene | exon |
| Bn-A03-p20375514 | Bn-N3-p20690914       | gene |      |
| Bn-A03-p20409233 | Bn-N3-p20717493       | gene | exon |
| Bn-A03-p20429794 | Bn-N3-p20746570       | gene | exon |
| Bn-A03-p20495253 | Bn-N3-p20805694       | gene |      |
| Bn-A03-p20495700 | Bn-N3-p20806147       | gene |      |
| Bn-A03-p20523474 | Bn-N3-p20834069       | gene | exon |
| Bn-A03-p20523585 | Bn-N3-p20834180       | gene |      |
| Bn-A03-p20524035 | Bn-N3-p20834644       | gene | exon |
| Bn-A03-p20525474 | Bn-N3-p20836118       | gene | exon |
| Bn-A03-p20525591 | Bn-N3-p20836235       | gene |      |
| Bn-A03-p20560569 | Bn-N3-p20885422       | gene | exon |
| Bn-A03-p20568764 | Bn-N3-p20893626       | gene | exon |
| Bn-A03-p20584351 | Bn-N3-p20899843       | gene |      |
| Bn-A03-p20604949 | Bn-N3-p20913968       | gene | exon |
| Bn-A03-p20609910 | Bn-N3-p20919598       | gene |      |
| Bn-A03-p20664670 | Bn-N3-p20953283       | gene |      |



|                  |                  |      |      |
|------------------|------------------|------|------|
| Bn-A03-p20670561 | Bn-N3-p20960556  | gene |      |
| Bn-A03-p20673486 | Bn-N3-p20963481  | gene |      |
| Bn-A03-p2071494  | Bn-N3-p2173818   | gene | exon |
| Bn-A03-p20730830 | Bn-N3-p21008614  | gene | exon |
| Bn-A03-p2073180  | Bn-N3-p2175513   | gene | exon |
| Bn-A03-p20762376 | Bn-N3-p21035723  | gene | exon |
| Bn-A03-p207748   | Bn-N3-p226168    | gene |      |
| Bn-A03-p20909567 | Bn-N3-p21159284  | gene |      |
| Bn-A03-p20983297 | Bn-N3-p21231831  | gene |      |
| Bn-A03-p20983398 | Bn-N3-p21231932  | gene |      |
| Bn-A03-p2100226  | Bn-N3-p2202584   | gene |      |
| Bn-A03-p21076805 | Bn-N17-p38456629 | gene | exon |
| Bn-A03-p21155851 | Bn-N17-p38567519 | gene |      |
| Bn-A03-p21199018 | Bn-N17-p38615424 | gene | exon |
| Bn-A03-p21205471 | Bn-N3-p21448155  | gene | exon |
| Bn-A03-p21210189 | Bn-N3-p21451794  | gene | exon |
| Bn-A03-p21226758 | Bn-N3-p21486750  | gene |      |
| Bn-A03-p21237671 | Bn-N3-p21499493  | gene | exon |
| Bn-A03-p21238466 | Bn-N3-p21500288  | gene | exon |
| Bn-A03-p21241827 | Bn-N3-p21503657  | gene | exon |
| Bn-A03-p21252366 | Bn-N3-p21524087  | gene |      |
| Bn-A03-p21271941 | Bn-N3-p21543364  | gene | exon |
| Bn-A03-p21292773 | Bn-N3-p21568955  | gene | exon |
| Bn-A03-p2130281  | Bn-N3-p2226318   | gene | exon |
| Bn-A03-p21344477 | Bn-N3-p21637085  | gene | exon |
| Bn-A03-p21353686 | Bn-N3-p21646759  | gene | exon |
| Bn-A03-p21375969 | Bn-N3-p21667099  | gene |      |
| Bn-A03-p2140542  | Bn-N3-p2233968   | gene | exon |
| Bn-A03-p21414316 | Bn-N3-p21705306  | gene | exon |
| Bn-A03-p21436299 | Bn-N3-p21728055  | gene | exon |
| Bn-A03-p21478889 | Bn-N3-p21745571  | gene |      |
| Bn-A03-p21487106 | Bn-N3-p21756700  | gene | exon |
| Bn-A03-p21507834 | Bn-N3-p21776664  | gene |      |
| Bn-A03-p21507915 | Bn-N3-p21776583  | gene |      |
| Bn-A03-p21508594 | Bn-N3-p21775904  | gene |      |
| Bn-A03-p21632587 | Bn-N3-p21900335  | gene | exon |
| Bn-A03-p21685480 | Bn-N3-p21947903  | gene | exon |
| Bn-A03-p21744993 | Bn-N3-p22019268  | gene | exon |
| Bn-A03-p21813117 | Bn-N3-p22063994  | gene |      |
| Bn-A03-p21839200 | Bn-N3-p22091569  | gene |      |
| Bn-A03-p21860400 | Bn-N3-p22117895  | gene |      |
| Bn-A03-p21862988 | Bn-N3-p22120476  | gene |      |
| Bn-A03-p21864294 | Bn-N3-p22121774  | gene | exon |
| Bn-A03-p21904842 | Bn-N3-p22166287  | gene | exon |
| Bn-A03-p21909917 | Bn-N3-p22173162  | gene | exon |
| Bn-A03-p21921653 | Bn-N3-p22190031  | gene | exon |
| Bn-A03-p21927724 | Bn-N3-p22195846  | gene |      |
| Bn-A03-p21937030 | Bn-N3-p22206595  | gene |      |
| Bn-A03-p21979477 | Bn-N3-p22258835  | gene | exon |
| Bn-A03-p21980336 | Bn-N3-p22259691  | gene | exon |
| Bn-A03-p22014622 | Bn-N3-p22297575  | gene |      |
| Bn-A03-p2206256  | Bn-N13-p2851955  | gene | exon |

|                  |                 |      |      |
|------------------|-----------------|------|------|
| Bn-A03-p22065637 | Bn-N3-p22341029 | gene | exon |
| Bn-A03-p22072036 | Bn-N3-p22348081 | gene | exon |
| Bn-A03-p22088201 | Bn-N3-p22360867 | gene | exon |
| Bn-A03-p22090414 | Bn-N3-p22363065 | gene | exon |
| Bn-A03-p22098429 | Bn-N3-p22371208 | gene | exon |
| Bn-A03-p22102124 | Bn-N3-p22374903 | gene |      |
| Bn-A03-p22112518 | Bn-N3-p22385031 | gene |      |
| Bn-A03-p22132164 | Bn-N3-p22403764 | gene |      |
| Bn-A03-p22132555 | Bn-N3-p22404155 | gene |      |
| Bn-A03-p22132662 | Bn-N3-p22404262 | gene |      |
| Bn-A03-p22237846 | Bn-N3-p22526046 | gene |      |
| Bn-A03-p22238801 | Bn-N3-p22527001 | gene |      |
| Bn-A03-p22285105 | Bn-N3-p22561791 | gene | exon |
| Bn-A03-p2228813  | Bn-N3-p2307358  | gene | exon |
| Bn-A03-p22300372 | Bn-N3-p22577562 | gene | exon |
| Bn-A03-p22304555 | Bn-N3-p22580370 | gene |      |
| Bn-A03-p22313737 | Bn-N3-p22591655 | gene | exon |
| Bn-A03-p22378361 | Bn-N3-p22664130 | gene |      |
| Bn-A03-p22382259 | Bn-N3-p22667980 | gene |      |
| Bn-A03-p22382828 | Bn-N3-p22668550 | gene | exon |
| Bn-A03-p22385937 | Bn-N3-p22671584 | gene | exon |
| Bn-A03-p22398141 | Bn-N3-p22691366 | gene | exon |
| Bn-A03-p22588041 | Bn-N3-p22886076 | gene | exon |
| Bn-A03-p22610222 | Bn-N3-p22902373 | gene | exon |
| Bn-A03-p22619997 | Bn-N3-p22908167 | gene |      |
| Bn-A03-p2262214  | Bn-N3-p2332621  | gene |      |
| Bn-A03-p22626240 | Bn-N3-p22918251 | gene |      |
| Bn-A03-p22643433 | Bn-N3-p22936404 | gene |      |
| Bn-A03-p22655575 | Bn-N3-p22944155 | gene |      |
| Bn-A03-p22679507 | Bn-N3-p22977266 | gene | exon |
| Bn-A03-p2271873  | Bn-N3-p2339537  | gene |      |
| Bn-A03-p22739253 | Bn-N3-p23049133 | gene | exon |
| Bn-A03-p22744766 | Bn-N3-p23054682 | gene |      |
| Bn-A03-p22750972 | Bn-N3-p23059076 | gene |      |
| Bn-A03-p22752812 | Bn-N3-p23060917 | gene |      |
| Bn-A03-p22752871 | Bn-N3-p23060976 | gene |      |
| Bn-A03-p22776355 | Bn-N3-p23085025 | gene |      |
| Bn-A03-p22779259 | Bn-N3-p23087925 | gene |      |
| Bn-A03-p22838495 | Bn-N3-p23140811 | gene |      |
| Bn-A03-p22841929 | Bn-N3-p23144235 | gene | exon |
| Bn-A03-p22886478 | Bn-N3-p23187226 | gene | exon |
| Bn-A03-p22974798 | Bn-N3-p23289690 | gene | exon |
| Bn-A03-p22975377 | Bn-N3-p23290269 | gene | exon |
| Bn-A03-p22976259 | Bn-N3-p23291222 | gene | exon |
| Bn-A03-p22976648 | Bn-N3-p23291624 | gene | exon |
| Bn-A03-p23017354 | Bn-N3-p23342059 | gene |      |
| Bn-A03-p23020431 | Bn-N3-p23345136 | gene |      |
| Bn-A03-p23046592 | Bn-N3-p23369171 | gene |      |
| Bn-A03-p23080487 | Bn-N3-p23402061 | gene | exon |
| Bn-A03-p23088716 | Bn-N3-p23411579 | gene | exon |
| Bn-A03-p2313208  | Bn-N3-p2388820  | gene |      |
| Bn-A03-p23143134 | Bn-N3-p23445947 | gene |      |

|                  |                  |      |      |
|------------------|------------------|------|------|
| Bn-A03-p23170401 | Bn-N3-p23473792  | gene | exon |
| Bn-A03-p23185327 | Bn-N17-p41198220 | gene | exon |
| Bn-A03-p23193342 | Bn-N3-p23495929  | gene |      |
| Bn-A03-p23222657 | Bn-N3-p23523310  | gene | exon |
| Bn-A03-p23240923 | Bn-N3-p23545175  | gene |      |
| Bn-A03-p23243420 | Bn-N3-p23547636  | gene |      |
| Bn-A03-p23253636 | Bn-N3-p23557909  | gene |      |
| Bn-A03-p23286977 | Bn-N3-p23594045  | gene |      |
| Bn-A03-p23318910 | Bn-N3-p23628736  | gene |      |
| Bn-A03-p23319135 | Bn-N3-p23628961  | gene |      |
| Bn-A03-p2342965  | Bn-N3-p2425829   | gene | exon |
| Bn-A03-p2344066  | Bn-N13-p3023239  | gene | exon |
| Bn-A03-p235039   | Bn-N3-p253211    | gene |      |
| Bn-A03-p23526967 | Bn-N3-p23815659  | gene | exon |
| Bn-A03-p23528989 | Bn-N3-p23817639  | gene |      |
| Bn-A03-p23529225 | Bn-N3-p23817882  | gene |      |
| Bn-A03-p23550322 | Bn-N3-p23845219  | gene |      |
| Bn-A03-p23552464 | Bn-N3-p23847416  | gene |      |
| Bn-A03-p23552601 | Bn-N3-p23847553  | gene |      |
| Bn-A03-p23562008 | Bn-N3-p23857806  | gene | exon |
| Bn-A03-p23674889 | Bn-N3-p23974210  | gene | exon |
| Bn-A03-p23704255 | Bn-N17-p41798847 | gene |      |
| Bn-A03-p23708487 | Bn-N3-p24009643  | gene |      |
| Bn-A03-p23719771 | Bn-N3-p24019665  | gene |      |
| Bn-A03-p23798235 | Bn-N3-p24090508  | gene |      |
| Bn-A03-p23799968 | Bn-N3-p24092242  | gene |      |
| Bn-A03-p23801324 | Bn-N3-p24093598  | gene |      |
| Bn-A03-p23862018 | Bn-N3-p24127685  | gene |      |
| Bn-A03-p23862683 | Bn-N3-p24128350  | gene | exon |
| Bn-A03-p23899    | Bn-N3-p6712      | gene |      |
| Bn-A03-p23917701 | Bn-N3-p24186212  | gene |      |
| Bn-A03-p23973475 | Bn-N3-p24237586  | gene |      |
| Bn-A03-p23984129 | Bn-N3-p24247463  | gene |      |
| Bn-A03-p23992075 | Bn-N3-p24259165  | gene |      |
| Bn-A03-p24002443 | Bn-N3-p24269601  | gene |      |
| Bn-A03-p24016551 | Bn-N3-p24283710  | gene | exon |
| Bn-A03-p24017311 | Bn-N3-p24284469  | gene |      |
| Bn-A03-p24017859 | Bn-N3-p24285016  | gene | exon |
| Bn-A03-p24059470 | Bn-N3-p24342623  | gene | exon |
| Bn-A03-p24092986 | Bn-N3-p24362517  | gene |      |
| Bn-A03-p24104930 | Bn-N3-p24373519  | gene |      |
| Bn-A03-p24117554 | Bn-N3-p24385535  | gene |      |
| Bn-A03-p2412263  | Bn-N3-p2505310   | gene | exon |
| Bn-A03-p24134454 | Bn-N17-p42241788 | gene | exon |
| Bn-A03-p24249333 | Bn-N3-p24515175  | gene |      |
| Bn-A03-p24294571 | Bn-N3-p24553962  | gene |      |
| Bn-A03-p24298999 | Bn-N3-p24559224  | gene |      |
| Bn-A03-p24349898 | Bn-N3-p24608085  | gene | exon |
| Bn-A03-p24396004 | Bn-N3-p24632888  | gene | exon |
| Bn-A03-p24410521 | Bn-N3-p24637392  | gene | exon |
| Bn-A03-p24420842 | Bn-N3-p24651687  | gene |      |
| Bn-A03-p24422801 | Bn-N4-p19627187  | gene | exon |

|                  |                        |      |      |
|------------------|------------------------|------|------|
| Bn-A03-p24497262 | Bn-N3-p24731628        | gene |      |
| Bn-A03-p24527313 | Bn-N3-p24771219        | gene | exon |
| Bn-A03-p24537588 | Bn-N3-p24774096        | gene |      |
| Bn-A03-p2453901  | Bn-N3-p2552556         | gene | exon |
| Bn-A03-p24565421 | Bn-N3-p24794707        | gene | exon |
| Bn-A03-p2457869  | Bn-N3-p2556456         | gene |      |
| Bn-A03-p2457934  | Bn-N3-p2556520         | gene |      |
| Bn-A03-p24581655 | Bn-N3-p24810883        | gene |      |
| Bn-A03-p24650359 | Bn-N3-p24866051        | gene |      |
| Bn-A03-p2468983  | Bn-N3-p2567726         | gene |      |
| Bn-A03-p24690789 | Bn-N3-p24912822        | gene |      |
| Bn-A03-p24704126 | Bn-N3-p24919591        | gene |      |
| Bn-A03-p24710055 | Bn-N3-p24925103        | gene |      |
| Bn-A03-p24745951 | Bn-N3-p24956620        | gene |      |
| Bn-A03-p24746007 | Bn-N3-p24956676        | gene |      |
| Bn-A03-p24748004 | Bn-N3-p24957877        | gene |      |
| Bn-A03-p24773584 | Bn-N3-p24984578        | gene |      |
| Bn-A03-p24780067 | Bn-N17-p42904503       | gene | exon |
| Bn-A03-p24800655 | Bn-N3-p25012870        | gene | exon |
| Bn-A03-p24809290 | Bn-N3-p25023698        | gene |      |
| Bn-A03-p24811187 | Bn-N3-p25025579        | gene | exon |
| Bn-A03-p24827646 | Bn-N3-p25048900        | gene | exon |
| Bn-A03-p24829281 | Bn-N17-p42963272       | gene |      |
| Bn-A03-p2483644  | Bn-N3-p2583835         | gene |      |
| Bn-A03-p24906226 | Bn-N3-p25124773        | gene | exon |
| Bn-A03-p2491346  | Bn-N3-p2590934         | gene |      |
| Bn-A03-p2493541  | Bn-N13-p3174052        | gene |      |
| Bn-A03-p24990059 | Bn-N3-p25201832        | gene |      |
| Bn-A03-p24998976 | Bn-N17-p43120499       | gene |      |
| Bn-A03-p24999716 | Bn-N17-p43120844       | gene |      |
| Bn-A03-p25008908 | Bn-Scaffold01419-p7069 | gene |      |
| Bn-A03-p25009736 | Bn-N3-p25207170        | gene |      |
| Bn-A03-p25009919 | Bn-N3-p25207353        | gene |      |
| Bn-A03-p25009925 | Bn-N3-p25207359        | gene |      |
| Bn-A03-p25024647 | Bn-N3-p25214769        | gene |      |
| Bn-A03-p25024749 | Bn-N3-p25214871        | gene |      |
| Bn-A03-p25024928 | Bn-N3-p25215047        | gene |      |
| Bn-A03-p25025360 | Bn-N3-p25215488        | gene | exon |
| Bn-A03-p25033468 | Bn-N17-p43145031       | gene |      |
| Bn-A03-p25046120 | Bn-N3-p25230750        | gene |      |
| Bn-A03-p25047750 | Bn-N3-p25232380        | gene | exon |
| Bn-A03-p25071259 | Bn-N3-p25256225        | gene |      |
| Bn-A03-p25073363 | Bn-N3-p25258404        | gene | exon |
| Bn-A03-p25082044 | Bn-N3-p25266974        | gene |      |
| Bn-A03-p2511868  | Bn-N3-p2621627         | gene | exon |
| Bn-A03-p25119771 | Bn-N3-p25323805        | gene | exon |
| Bn-A03-p2520008  | Bn-N3-p2632049         | gene |      |
| Bn-A03-p25265364 | Bn-N3-p25434700        | gene | exon |
| Bn-A03-p25296332 | Bn-N3-p25475054        | gene | exon |
| Bn-A03-p25314490 | Bn-N3-p25499702        | gene |      |
| Bn-A03-p25314570 | Bn-N3-p25499782        | gene |      |
| Bn-A03-p2532699  | Bn-N3-p2645979         | gene | exon |

|                  |                       |      |      |
|------------------|-----------------------|------|------|
| Bn-A03-p25342507 | Bn-N3-p25529747       | gene | exon |
| Bn-A03-p25471848 | Bn-N3-p25668602       | gene | exon |
| Bn-A03-p2548187  | Bn-N3-p2657992        | gene |      |
| Bn-A03-p25489551 | Bn-N3-p25688788       | gene | exon |
| Bn-A03-p25521989 | Bn-N3-p25721078       | gene | exon |
| Bn-A03-p25582691 | Bn-N3-p25795613       | gene | exon |
| Bn-A03-p25584526 | Bn-N3-p25797448       | gene | exon |
| Bn-A03-p25591818 | Bn-N3-p25804790       | gene |      |
| Bn-A03-p25608893 | Bn-N3-p25822853       | gene |      |
| Bn-A03-p25625732 | Bn-N3-p25839627       | gene |      |
| Bn-A03-p25631316 | Bn-N3-p25845246       | gene |      |
| Bn-A03-p25636300 | Bn-N3-p25849712       | gene | exon |
| Bn-A03-p25637279 | Bn-N3-p25850691       | gene |      |
| Bn-A03-p25640844 | Bn-N3-p25855762       | gene |      |
| Bn-A03-p25668597 | Bn-N3-p25885248       | gene |      |
| Bn-A03-p25671744 | Bn-Scaffold04006-p242 | gene | exon |
| Bn-A03-p25679775 | Bn-N3-p25904465       | gene |      |
| Bn-A03-p25683964 | Bn-N17-p43759613      | gene |      |
| Bn-A03-p25704793 | Bn-N3-p25936050       | gene | exon |
| Bn-A03-p25708944 | Bn-N3-p25951642       | gene |      |
| Bn-A03-p25718518 | Bn-N3-p25965615       | gene | exon |
| Bn-A03-p25718716 | Bn-N3-p25965813       | gene | exon |
| Bn-A03-p25751759 | Bn-N3-p26001616       | gene |      |
| Bn-A03-p25756310 | Bn-N3-p26003524       | gene |      |
| Bn-A03-p25779411 | Bn-N3-p26020241       | gene | exon |
| Bn-A03-p25785875 | Bn-N3-p26026651       | gene | exon |
| Bn-A03-p2579866  | Bn-N3-p2679025        | gene | exon |
| Bn-A03-p25801783 | Bn-N3-p26044405       | gene |      |
| Bn-A03-p25810585 | Bn-N3-p26055225       | gene | exon |
| Bn-A03-p25819955 | Bn-N3-p26062430       | gene |      |
| Bn-A03-p25826578 | Bn-N3-p26072457       | gene |      |
| Bn-A03-p25827210 | Bn-N3-p26073088       | gene |      |
| Bn-A03-p25827833 | Bn-N3-p26073710       | gene |      |
| Bn-A03-p25828479 | Bn-N3-p26074364       | gene |      |
| Bn-A03-p25841013 | Bn-N3-p26086965       | gene | exon |
| Bn-A03-p25843937 | Bn-N3-p26089889       | gene | exon |
| Bn-A03-p25849429 | Bn-N3-p26092619       | gene | exon |
| Bn-A03-p25849463 | Bn-N3-p26092653       | gene |      |
| Bn-A03-p25850146 | Bn-N3-p26093336       | gene | exon |
| Bn-A03-p25851789 | Bn-N3-p26094977       | gene |      |
| Bn-A03-p2596410  | Bn-N3-p2695450        | gene |      |
| Bn-A03-p26001258 | Bn-N3-p26239055       | gene | exon |
| Bn-A03-p26013651 | Bn-N17-p44067603      | gene | exon |
| Bn-A03-p26014745 | Bn-N3-p26249043       | gene |      |
| Bn-A03-p26021585 | Bn-N3-p26255287       | gene | exon |
| Bn-A03-p2606192  | Bn-N3-p2705395        | gene |      |
| Bn-A03-p26066930 | Bn-N3-p26287335       | gene |      |
| Bn-A03-p26081548 | Bn-N3-p26301236       | gene |      |
| Bn-A03-p26116027 | Bn-N3-p26344598       | gene | exon |
| Bn-A03-p26117920 | Bn-N3-p26346507       | gene |      |
| Bn-A03-p26131473 | Bn-N3-p26354110       | gene |      |
| Bn-A03-p26132481 | Bn-N3-p26355096       | gene |      |

|                  |                  |      |      |
|------------------|------------------|------|------|
| Bn-A03-p2616068  | Bn-N3-p2715484   | gene | exon |
| Bn-A03-p26167847 | Bn-N3-p26383967  | gene | exon |
| Bn-A03-p26167992 | Bn-N3-p26384112  | gene |      |
| Bn-A03-p26168881 | Bn-N3-p26385056  | gene | exon |
| Bn-A03-p26232681 | Bn-N3-p26447546  | gene | exon |
| Bn-A03-p26272560 | Bn-N3-p26505748  | gene | exon |
| Bn-A03-p2627552  | Bn-N3-p2724321   | gene |      |
| Bn-A03-p262793   | Bn-N3-p288657    | gene | exon |
| Bn-A03-p26284129 | Bn-N3-p26516781  | gene | exon |
| Bn-A03-p26284449 | Bn-N3-p26517101  | gene | exon |
| Bn-A03-p26284882 | Bn-N3-p26517534  | gene |      |
| Bn-A03-p26286301 | Bn-N3-p26518958  | gene |      |
| Bn-A03-p26288769 | Bn-N3-p26521343  | gene | exon |
| Bn-A03-p26319168 | Bn-N3-p26584329  | gene |      |
| Bn-A03-p26359851 | Bn-N3-p26621508  | gene |      |
| Bn-A03-p2638510  | Bn-N3-p2735170   | gene |      |
| Bn-A03-p26405367 | Bn-N3-p26663953  | gene |      |
| Bn-A03-p26406372 | Bn-N3-p26664961  | gene |      |
| Bn-A03-p26437565 | Bn-N3-p26692066  | gene |      |
| Bn-A03-p26437680 | Bn-N3-p26692181  | gene | exon |
| Bn-A03-p26437883 | Bn-N3-p26692384  | gene |      |
| Bn-A03-p26444464 | Bn-N3-p26702481  | gene | exon |
| Bn-A03-p26546744 | Bn-N17-p44634091 | gene | exon |
| Bn-A03-p26567111 | Bn-N3-p26835139  | gene | exon |
| Bn-A03-p26603077 | Bn-N3-p26873097  | gene |      |
| Bn-A03-p26604097 | Bn-N3-p26874117  | gene |      |
| Bn-A03-p26604578 | Bn-N3-p26874599  | gene |      |
| Bn-A03-p2662675  | Bn-N13-p3373305  | gene |      |
| Bn-A03-p2665731  | Bn-N3-p2765209   | gene | exon |
| Bn-A03-p2666271  | Bn-N3-p2765749   | gene | exon |
| Bn-A03-p26740723 | Bn-N3-p27032084  | gene |      |
| Bn-A03-p26756701 | Bn-N17-p44816015 | gene | exon |
| Bn-A03-p26763577 | Bn-N3-p27047775  | gene |      |
| Bn-A03-p26764606 | Bn-N3-p27048805  | gene |      |
| Bn-A03-p26786549 | Bn-N3-p27070755  | gene |      |
| Bn-A03-p26788875 | Bn-N3-p27073110  | gene |      |
| Bn-A03-p26789755 | Bn-N3-p27073988  | gene |      |
| Bn-A03-p26798652 | Bn-N3-p27083185  | gene | exon |
| Bn-A03-p2683534  | Bn-N3-p2782003   | gene |      |
| Bn-A03-p26848326 | Bn-N3-p27158857  | gene | exon |
| Bn-A03-p26852795 | Bn-N3-p27163563  | gene | exon |
| Bn-A03-p26931199 | Bn-N3-p27246627  | gene | exon |
| Bn-A03-p27028300 | Bn-N3-p27340263  | gene |      |
| Bn-A03-p2704795  | Bn-N3-p2807568   | gene |      |
| Bn-A03-p27066000 | Bn-N3-p27367099  | gene | exon |
| Bn-A03-p27101177 | Bn-N3-p27401411  | gene |      |
| Bn-A03-p27104733 | Bn-N3-p27404993  | gene | exon |
| Bn-A03-p27112789 | Bn-N3-p27412155  | gene | exon |
| Bn-A03-p27156983 | Bn-N3-p27503944  | gene | exon |
| Bn-A03-p2719384  | Bn-N3-p2823603   | gene |      |
| Bn-A03-p27253035 | Bn-N3-p27602495  | gene | exon |
| Bn-A03-p27253678 | Bn-N3-p27603138  | gene |      |

|                  |                       |      |      |
|------------------|-----------------------|------|------|
| Bn-A03-p27269401 | Bn-N3-p27642984       | gene |      |
| Bn-A03-p27288521 | Bn-N3-p27649606       | gene | exon |
| Bn-A03-p27298810 | Bn-N3-p27661207       | gene |      |
| Bn-A03-p2731426  | Bn-N3-p2835990        | gene | exon |
| Bn-A03-p27337536 | Bn-N3-p27696860       | gene | exon |
| Bn-A03-p27339890 | Bn-N3-p27699176       | gene |      |
| Bn-A03-p2736960  | Bn-N3-p2839213        | gene | exon |
| Bn-A03-p2737116  | Bn-N3-p2839369        | gene |      |
| Bn-A03-p2737190  | Bn-N3-p2839443        | gene | exon |
| Bn-A03-p2737338  | Bn-N3-p2839591        | gene | exon |
| Bn-A03-p27385155 | Bn-N3-p27755002       | gene | exon |
| Bn-A03-p27423379 | Bn-N3-p27796507       | gene | exon |
| Bn-A03-p27438081 | Bn-N3-p27810899       | gene | exon |
| Bn-A03-p27445819 | Bn-N3-p27818670       | gene | exon |
| Bn-A03-p27454930 | Bn-N3-p27826872       | gene | exon |
| Bn-A03-p27455156 | Bn-N3-p27827095       | gene | exon |
| Bn-A03-p27489686 | Bn-N3-p27861973       | gene |      |
| Bn-A03-p27541115 | Bn-N3-p27914811       | gene | exon |
| Bn-A03-p27546971 | Bn-N3-p27923490       | gene |      |
| Bn-A03-p27547270 | Bn-N3-p27923776       | gene |      |
| Bn-A03-p27564692 | Bn-N3-p27940257       | gene |      |
| Bn-A03-p27581773 | Bn-N3-p27957944       | gene |      |
| Bn-A03-p27582705 | Bn-N3-p27958875       | gene |      |
| Bn-A03-p27629415 | Bn-N3-p28022921       | gene |      |
| Bn-A03-p27650553 | Bn-N3-p28035188       | gene | exon |
| Bn-A03-p27665971 | Bn-Scaffold23998-p141 | gene | exon |
| Bn-A03-p27719757 | Bn-N3-p28143273       | gene |      |
| Bn-A03-p27720045 | Bn-N3-p28143561       | gene |      |
| Bn-A03-p27747178 | Bn-N3-p28164136       | gene | exon |
| Bn-A03-p27747229 | Bn-N3-p28164187       | gene | exon |
| Bn-A03-p27793125 | Bn-N3-p28201195       | gene | exon |
| Bn-A03-p27794041 | Bn-N3-p28202111       | gene | exon |
| Bn-A03-p27825739 | Bn-N3-p28233409       | gene | exon |
| Bn-A03-p27838177 | Bn-N3-p28247743       | gene |      |
| Bn-A03-p27841728 | Bn-N3-p28251286       | gene | exon |
| Bn-A03-p27853312 | Bn-N3-p28262385       | gene |      |
| Bn-A03-p27866782 | Bn-N3-p28280474       | gene |      |
| Bn-A03-p2789113  | Bn-N3-p3541265        | gene | exon |
| Bn-A03-p27917455 | Bn-N3-p28356341       | gene | exon |
| Bn-A03-p2793288  | Bn-N3-p2892489        | gene |      |
| Bn-A03-p27951283 | Bn-N3-p28379354       | gene | exon |
| Bn-A03-p27972408 | Bn-N3-p28386690       | gene | exon |
| Bn-A03-p27972738 | Bn-N3-p28387020       | gene |      |
| Bn-A03-p28036367 | Bn-N3-p28465332       | gene |      |
| Bn-A03-p28043216 | Bn-N3-p28478610       | gene |      |
| Bn-A03-p28046101 | Bn-N3-p28480905       | gene |      |
| Bn-A03-p28117836 | Bn-N3-p28558388       | gene | exon |
| Bn-A03-p28126287 | Bn-N3-p28566839       | gene |      |
| Bn-A03-p28153736 | Bn-N3-p28574150       | gene | exon |
| Bn-A03-p28153797 | Bn-N3-p28574211       | gene | exon |
| Bn-A03-p28154053 | Bn-N3-p28574467       | gene | exon |
| Bn-A03-p28154830 | Bn-N3-p28575244       | gene | exon |

|                  |                       |      |      |
|------------------|-----------------------|------|------|
| Bn-A03-p28154970 | Bn-N17-p46115361      | gene | exon |
| Bn-A03-p28184972 | Bn-N3-p28609414       | gene | exon |
| Bn-A03-p28202050 | Bn-N3-p28631422       | gene |      |
| Bn-A03-p28227026 | Bn-N3-p28656504       | gene |      |
| Bn-A03-p28229360 | Bn-N3-p28658838       | gene |      |
| Bn-A03-p28256169 | Bn-N3-p28692893       | gene | exon |
| Bn-A03-p28265602 | Bn-N3-p28713559       | gene |      |
| Bn-A03-p28297407 | Bn-N3-p28747350       | gene |      |
| Bn-A03-p28302949 | Bn-N3-p28752921       | gene |      |
| Bn-A03-p2834684  | Bn-N3-p2918902        | gene |      |
| Bn-A03-p28360281 | Bn-N3-p28798265       | gene |      |
| Bn-A03-p28389539 | Bn-Scaffold12025-p327 | gene | exon |
| Bn-A03-p28464995 | Bn-N3-p28886686       | gene | exon |
| Bn-A03-p28469194 | Bn-N3-p28890890       | gene | exon |
| Bn-A03-p28498617 | Bn-N3-p28933444       | gene | exon |
| Bn-A03-p28498755 | Bn-N3-p28933582       | gene |      |
| Bn-A03-p28499049 | Bn-N3-p28933876       | gene | exon |
| Bn-A03-p28499141 | Bn-N3-p28933967       | gene |      |
| Bn-A03-p28535638 | Bn-N3-p28971341       | gene |      |
| Bn-A03-p28560125 | Bn-N3-p29014512       | gene | exon |
| Bn-A03-p28560659 | Bn-N17-p46458977      | gene | exon |
| Bn-A03-p28583587 | Bn-N3-p29038514       | gene | exon |
| Bn-A03-p28583685 | Bn-N3-p29038612       | gene |      |
| Bn-A03-p2858882  | Bn-N3-p2940916        | gene |      |
| Bn-A03-p2858972  | Bn-N3-p2941090        | gene |      |
| Bn-A03-p28698732 | Bn-N17-p46544136      | gene | exon |
| Bn-A03-p2879773  | Bn-N3-p2954702        | gene | exon |
| Bn-A03-p28808705 | Bn-N3-p29254604       | gene |      |
| Bn-A03-p28847903 | Bn-N3-p29286039       | gene |      |
| Bn-A03-p28873781 | Bn-N1-p7410314        | gene | exon |
| Bn-A03-p28877626 | Bn-N3-p29314459       | gene |      |
| Bn-A03-p28877719 | Bn-N3-p29314552       | gene |      |
| Bn-A03-p28878501 | Bn-N3-p29315338       | gene |      |
| Bn-A03-p28878698 | Bn-N3-p29315535       | gene |      |
| Bn-A03-p28878703 | Bn-N3-p29315540       | gene |      |
| Bn-A03-p28879610 | Bn-N3-p29316444       | gene | exon |
| Bn-A03-p28882585 | Bn-N3-p29319418       | gene |      |
| Bn-A03-p28883986 | Bn-N3-p29320816       | gene |      |
| Bn-A03-p28924123 | Bn-N3-p29356139       | gene |      |
| Bn-A03-p28926445 | Bn-N3-p29358461       | gene |      |
| Bn-A03-p28928570 | Bn-N3-p29360580       | gene |      |
| Bn-A03-p28948799 | Bn-N3-p29379477       | gene | exon |
| Bn-A03-p28963072 | Bn-N3-p29389977       | gene | exon |
| Bn-A03-p28977058 | Bn-N3-p29404545       | gene | exon |
| Bn-A03-p2898043  | Bn-N3-p2973544        | gene | exon |
| Bn-A03-p28982546 | Bn-N3-p29410176       | gene |      |
| Bn-A03-p28995612 | Bn-N17-p46747013      | gene | exon |
| Bn-A03-p28996082 | Bn-N3-p29425146       | gene |      |
| Bn-A03-p29005979 | Bn-N3-p29441263       | gene |      |
| Bn-A03-p29046284 | Bn-N3-p29475909       | gene |      |
| Bn-A03-p29053385 | Bn-N3-p29480332       | gene |      |
| Bn-A03-p29081614 | Bn-N3-p29513622       | gene | exon |



|                  |                 |      |      |
|------------------|-----------------|------|------|
| Bn-A03-p29198982 | Bn-N3-p29679770 | gene |      |
| Bn-A03-p29269385 | Bn-N3-p29720055 | gene |      |
| Bn-A03-p29271424 | Bn-N3-p29722078 | gene |      |
| Bn-A03-p29271737 | Bn-N3-p29722391 | gene |      |
| Bn-A03-p29274532 | Bn-N3-p29726484 | gene | exon |
| Bn-A03-p29279909 | Bn-N3-p29731867 | gene |      |
| Bn-A03-p2929711  | Bn-N3-p3005203  | gene |      |
| Bn-A03-p29346125 | Bn-N3-p29808039 | gene | exon |
| Bn-A03-p29364596 | Bn-N3-p29824338 | gene | exon |
| Bn-A03-p29391849 | Bn-N3-p29844867 | gene |      |
| Bn-A03-p2946358  | Bn-N3-p3023164  | gene | exon |
| Bn-A03-p2948394  | Bn-N3-p3025293  | gene | exon |
| Bn-A03-p2948695  | Bn-N3-p3025594  | gene | exon |
| Bn-A03-p29564970 | Bn-N3-p30007309 | gene |      |
| Bn-A03-p29565087 | Bn-N3-p30007426 | gene |      |
| Bn-A03-p29566168 | Bn-N3-p30008507 | gene | exon |
| Bn-A03-p29571938 | Bn-N3-p23667615 | gene |      |
| Bn-A03-p29583640 | Bn-N3-p30022628 | gene |      |
| Bn-A03-p29590349 | Bn-N3-p30028438 | gene | exon |
| Bn-A03-p29598801 | Bn-N3-p30037033 | gene |      |
| Bn-A03-p29629982 | Bn-N3-p30096660 | gene |      |
| Bn-A03-p29632526 | Bn-N3-p30099193 | gene |      |
| Bn-A03-p29656801 | Bn-N3-p30118965 | gene |      |
| Bn-A03-p2971192  | Bn-N3-p3047863  | gene | exon |
| Bn-A03-p2976496  | Bn-N3-p3053166  | gene |      |
| Bn-A03-p29776900 | Bn-N3-p30223749 | gene |      |
| Bn-A03-p29780293 | Bn-N3-p30227139 | gene |      |
| Bn-A03-p29781065 | Bn-N3-p30227911 | gene |      |
| Bn-A03-p2978588  | Bn-N3-p3055256  | gene |      |
| Bn-A03-p29899721 | Bn-N3-p30358187 | gene |      |
| Bn-A03-p29926117 | Bn-N3-p30377785 | gene |      |
| Bn-A03-p29938    | Bn-N3-p14251    | gene | exon |
| Bn-A03-p2997270  | Bn-N3-p3074368  | gene |      |
| Bn-A03-p29998247 | Bn-N3-p30445825 | gene |      |
| Bn-A03-p29999738 | Bn-N3-p30447312 | gene |      |
| Bn-A03-p3001467  | Bn-N3-p3078563  | gene |      |
| Bn-A03-p30170124 | Bn-N3-p30585268 | gene | exon |
| Bn-A03-p30243799 | Bn-N3-p30665384 | gene | exon |
| Bn-A03-p30358487 | Bn-N3-p30833534 | gene | exon |
| Bn-A03-p3036102  | Bn-N3-p3110843  | gene |      |
| Bn-A03-p3036446  | Bn-N3-p3111187  | gene | exon |
| Bn-A03-p3052882  | Bn-N3-p3129308  | gene | exon |
| Bn-A03-p3053702  | Bn-N3-p3130128  | gene | exon |
| Bn-A03-p30564852 | Bn-N3-p31074167 | gene |      |
| Bn-A03-p306814   | Bn-N3-p301911   | gene |      |
| Bn-A03-p30693412 | Bn-N3-p31246596 | gene |      |
| Bn-A03-p3073797  | Bn-N3-p3156265  | gene |      |
| Bn-A03-p3084593  | Bn-N3-p3167245  | gene |      |
| Bn-A03-p3084866  | Bn-N3-p3167518  | gene |      |
| Bn-A03-p30873818 | Bn-N3-p31430489 | gene |      |
| Bn-A03-p30873956 | Bn-N3-p31430627 | gene | exon |
| Bn-A03-p30874086 | Bn-N3-p31430757 | gene |      |

|                  |                 |      |      |
|------------------|-----------------|------|------|
| Bn-A03-p30876909 | Bn-N3-p31433263 | gene |      |
| Bn-A03-p30905429 | Bn-N3-p31465405 | gene |      |
| Bn-A03-p30951542 | Bn-N3-p31523807 | gene |      |
| Bn-A03-p3097703  | Bn-N3-p3181533  | gene |      |
| Bn-A03-p3098147  | Bn-N3-p3181977  | gene | exon |
| Bn-A03-p31078490 | Bn-N3-p31716605 | gene | exon |
| Bn-A03-p31093169 | Bn-N3-p31730813 | gene |      |
| Bn-A03-p31095221 | Bn-N3-p31733173 | gene |      |
| Bn-A03-p31147953 | Bn-N3-p32213844 | gene |      |
| Bn-A03-p3116829  | Bn-N3-p3207213  | gene |      |
| Bn-A03-p31179815 | Bn-N3-p31785347 | gene |      |
| Bn-A03-p3131450  | Bn-N3-p3221824  | gene | exon |
| Bn-A03-p31546901 | Bn-N1-p16898334 | gene |      |
| Bn-A03-p3156872  | Bn-N13-p4106390 | gene | exon |
| Bn-A03-p3189093  | Bn-N3-p3292006  | gene |      |
| Bn-A03-p3189333  | Bn-N3-p3292246  | gene |      |
| Bn-A03-p319304   | Bn-N3-p336597   | gene | exon |
| Bn-A03-p3219484  | Bn-N3-p3317486  | gene | exon |
| Bn-A03-p3272346  | Bn-N3-p3357744  | gene |      |
| Bn-A03-p3273629  | Bn-N3-p3359027  | gene |      |
| Bn-A03-p3319357  | Bn-N3-p3406926  | gene |      |
| Bn-A03-p3381122  | Bn-N13-p4396027 | gene |      |
| Bn-A03-p3392103  | Bn-N3-p3477614  | gene |      |
| Bn-A03-p3507222  | Bn-N3-p3596471  | gene | exon |
| Bn-A03-p3517306  | Bn-N3-p3606622  | gene |      |
| Bn-A03-p3544165  | Bn-N3-p3632093  | gene |      |
| Bn-A03-p3544245  | Bn-N3-p3632173  | gene |      |
| Bn-A03-p3561270  | Bn-N3-p3648874  | gene | exon |
| Bn-A03-p3571622  | Bn-N13-p4633364 | gene |      |
| Bn-A03-p3571859  | Bn-N13-p4633600 | gene |      |
| Bn-A03-p360880   | Bn-N3-p447326   | gene | exon |
| Bn-A03-p3698620  | Bn-N3-p3778772  | gene | exon |
| Bn-A03-p3795299  | Bn-N3-p3885826  | gene |      |
| Bn-A03-p3795523  | Bn-N3-p3886050  | gene |      |
| Bn-A03-p3823071  | Bn-N3-p3913548  | gene |      |
| Bn-A03-p3839084  | Bn-N3-p3931501  | gene |      |
| Bn-A03-p3851195  | Bn-N3-p3941404  | gene |      |
| Bn-A03-p3857752  | Bn-N3-p3948397  | gene | exon |
| Bn-A03-p3862928  | Bn-N3-p3954498  | gene |      |
| Bn-A03-p386542   | Bn-N3-p431647   | gene | exon |
| Bn-A03-p3969037  | Bn-N3-p4057117  | gene |      |
| Bn-A03-p3969278  | Bn-N3-p4065533  | gene |      |
| Bn-A03-p3984795  | Bn-N3-p4079139  | gene | exon |
| Bn-A03-p3994857  | Bn-N3-p4088002  | gene | exon |
| Bn-A03-p4008078  | Bn-N3-p4100924  | gene |      |
| Bn-A03-p403559   | Bn-N3-p417823   | gene | exon |
| Bn-A03-p4100027  | Bn-N3-p4188260  | gene |      |
| Bn-A03-p4116886  | Bn-N3-p4210706  | gene |      |
| Bn-A03-p4138735  | Bn-N3-p4244632  | gene |      |
| Bn-A03-p4167644  | Bn-N3-p4287809  | gene |      |
| Bn-A03-p4180932  | Bn-N13-p5989045 | gene |      |
| Bn-A03-p4183056  | Bn-N3-p4303170  | gene | exon |

|                 |                       |      |      |
|-----------------|-----------------------|------|------|
| Bn-A03-p419250  | Bn-N3-p397357         | gene | exon |
| Bn-A03-p4202242 | Bn-N3-p4321291        | gene | exon |
| Bn-A03-p420642  | Bn-N3-p395965         | gene | exon |
| Bn-A03-p4232493 | Bn-N3-p4352276        | gene |      |
| Bn-A03-p4235658 | Bn-N3-p4355441        | gene | exon |
| Bn-A03-p4309562 | Bn-N3-p4421100        | gene |      |
| Bn-A03-p4339301 | Bn-N3-p4448837        | gene |      |
| Bn-A03-p4348997 | Bn-N3-p4458513        | gene |      |
| Bn-A03-p4378124 | Bn-N3-p4480524        | gene | exon |
| Bn-A03-p4382093 | Bn-N3-p4484494        | gene |      |
| Bn-A03-p4399285 | Bn-N3-p4500151        | gene |      |
| Bn-A03-p4407987 | Bn-N3-p4510032        | gene | exon |
| Bn-A03-p4408006 | Bn-N3-p4510051        | gene | exon |
| Bn-A03-p4408895 | Bn-N3-p4510940        | gene |      |
| Bn-A03-p4409606 | Bn-N3-p4511651        | gene |      |
| Bn-A03-p4409970 | Bn-N3-p4512015        | gene | exon |
| Bn-A03-p4416817 | Bn-N3-p4518862        | gene | exon |
| Bn-A03-p4425566 | Bn-N3-p4531826        | gene |      |
| Bn-A03-p4425819 | Bn-N3-p4532079        | gene |      |
| Bn-A03-p4498766 | Bn-N3-p4593459        | gene |      |
| Bn-A03-p4548924 | Bn-Scaffold20404-p489 | gene | exon |
| Bn-A03-p4549344 | Bn-N3-p4647289        | gene | exon |
| Bn-A03-p4550270 | Bn-N3-p4648215        | gene |      |
| Bn-A03-p4560576 | Bn-N3-p4663300        | gene |      |
| Bn-A03-p4567578 | Bn-N3-p4670615        | gene | exon |
| Bn-A03-p4575317 | Bn-N3-p4678354        | gene |      |
| Bn-A03-p4590174 | Bn-N3-p4684505        | gene |      |
| Bn-A03-p4593298 | Bn-N3-p4687569        | gene |      |
| Bn-A03-p4593331 | Bn-N3-p4687602        | gene |      |
| Bn-A03-p4594763 | Bn-N3-p4689034        | gene | exon |
| Bn-A03-p4620459 | Bn-N3-p4715690        | gene | exon |
| Bn-A03-p4659068 | Bn-N3-p4744028        | gene |      |
| Bn-A03-p4682207 | Bn-N13-p6630129       | gene | exon |
| Bn-A03-p4753001 | Bn-N3-p4805875        | gene |      |
| Bn-A03-p4769653 | Bn-N3-p4817421        | gene | exon |
| Bn-A03-p4783485 | Bn-N3-p4831677        | gene |      |
| Bn-A03-p478702  | Bn-N3-p479111         | gene |      |
| Bn-A03-p4798485 | Bn-N3-p4851110        | gene | exon |
| Bn-A03-p4827846 | Bn-N3-p4880681        | gene |      |
| Bn-A03-p4871103 | Bn-N3-p4919913        | gene | exon |
| Bn-A03-p487666  | Bn-N4-p19088456       | gene |      |
| Bn-A03-p4879812 | Bn-N3-p4928778        | gene | exon |
| Bn-A03-p4909313 | Bn-N3-p4959008        | gene |      |
| Bn-A03-p4909522 | Bn-N3-p4959215        | gene |      |
| Bn-A03-p4916224 | Bn-N3-p4964782        | gene |      |
| Bn-A03-p493766  | Bn-N3-p489352         | gene |      |
| Bn-A03-p4944913 | Bn-N3-p4985911        | gene | exon |
| Bn-A03-p4989769 | Bn-N3-p5023410        | gene |      |
| Bn-A03-p4992039 | Bn-N3-p5025754        | gene |      |
| Bn-A03-p4997351 | Bn-N3-p5030697        | gene | exon |
| Bn-A03-p5006544 | Bn-N3-p5040509        | gene | exon |
| Bn-A03-p5025156 | Bn-N3-p5059196        | gene | exon |

|                 |                 |      |      |
|-----------------|-----------------|------|------|
| Bn-A03-p5038403 | Bn-N10-p9907929 | gene |      |
| Bn-A03-p5042719 | Bn-N3-p5076308  | gene | exon |
| Bn-A03-p5072729 | Bn-N3-p5106348  | gene | exon |
| Bn-A03-p5083198 | Bn-N3-p5115640  | gene |      |
| Bn-A03-p5083386 | Bn-N3-p5115828  | gene |      |
| Bn-A03-p5083430 | Bn-N3-p5115872  | gene |      |
| Bn-A03-p5111446 | Bn-N3-p5149867  | gene | exon |
| Bn-A03-p5115321 | Bn-N3-p5153991  | gene |      |
| Bn-A03-p5153735 | Bn-N3-p5185451  | gene | exon |
| Bn-A03-p5159930 | Bn-N3-p5191753  | gene | exon |
| Bn-A03-p5160088 | Bn-N3-p5191911  | gene |      |
| Bn-A03-p5163056 | Bn-N3-p5194879  | gene |      |
| Bn-A03-p5182850 | Bn-N3-p5216734  | gene | exon |
| Bn-A03-p5227700 | Bn-N3-p5261164  | gene | exon |
| Bn-A03-p5230726 | Bn-N3-p5264185  | gene | exon |
| Bn-A03-p5268272 | Bn-N3-p5300453  | gene | exon |
| Bn-A03-p5273046 | Bn-N3-p5306760  | gene | exon |
| Bn-A03-p5333699 | Bn-N3-p5352536  | gene |      |
| Bn-A03-p5357737 | Bn-N3-p5379420  | gene | exon |
| Bn-A03-p5374417 | Bn-N3-p5394308  | gene |      |
| Bn-A03-p5380857 | Bn-N3-p5400514  | gene |      |
| Bn-A03-p5408678 | Bn-N13-p7615820 | gene |      |
| Bn-A03-p5423318 | Bn-N3-p5447066  | gene | exon |
| Bn-A03-p5439400 | Bn-N3-p5461030  | gene | exon |
| Bn-A03-p5455069 | Bn-N3-p5476226  | gene |      |
| Bn-A03-p5471743 | Bn-N3-p5493961  | gene | exon |
| Bn-A03-p5502308 | Bn-N3-p5535586  | gene | exon |
| Bn-A03-p5503857 | Bn-N3-p5537135  | gene |      |
| Bn-A03-p5523239 | Bn-N3-p5558176  | gene | exon |
| Bn-A03-p5523813 | Bn-N3-p5558750  | gene | exon |
| Bn-A03-p5523943 | Bn-N3-p5558880  | gene | exon |
| Bn-A03-p5532043 | Bn-N3-p5567045  | gene | exon |
| Bn-A03-p5564849 | Bn-N3-p5599272  | gene |      |
| Bn-A03-p5578777 | Bn-N3-p5607743  | gene | exon |
| Bn-A03-p5597551 | Bn-N3-p5628250  | gene |      |
| Bn-A03-p5608927 | Bn-N3-p5639957  | gene |      |
| Bn-A03-p5626575 | Bn-N3-p5668974  | gene | exon |
| Bn-A03-p5626694 | Bn-N3-p5669092  | gene | exon |
| Bn-A03-p5627074 | Bn-N3-p5669472  | gene | exon |
| Bn-A03-p5627585 | Bn-N3-p5669983  | gene | exon |
| Bn-A03-p563787  | Bn-N3-p548319   | gene |      |
| Bn-A03-p5649178 | Bn-N3-p5682437  | gene | exon |
| Bn-A03-p565187  | Bn-N3-p549719   | gene |      |
| Bn-A03-p565363  | Bn-N3-p549895   | gene |      |
| Bn-A03-p565637  | Bn-N3-p550169   | gene | exon |
| Bn-A03-p5682911 | Bn-N3-p5710737  | gene | exon |
| Bn-A03-p5694401 | Bn-N3-p5723046  | gene | exon |
| Bn-A03-p5696470 | Bn-N3-p5727160  | gene |      |
| Bn-A03-p5711554 | Bn-N3-p5740667  | gene | exon |
| Bn-A03-p5746114 | Bn-N3-p5784019  | gene | exon |
| Bn-A03-p5762915 | Bn-N3-p5800914  | gene | exon |
| Bn-A03-p5770833 | Bn-N13-p8100180 | gene | exon |

|                 |                |      |      |
|-----------------|----------------|------|------|
| Bn-A03-p5796033 | Bn-N3-p5834914 | gene |      |
| Bn-A03-p5800566 | Bn-N3-p5839462 | gene | exon |
| Bn-A03-p5814447 | Bn-N3-p5854130 | gene | exon |
| Bn-A03-p5866896 | Bn-N3-p5900253 | gene | exon |
| Bn-A03-p5903435 | Bn-N3-p5931743 | gene | exon |
| Bn-A03-p5952923 | Bn-N3-p5980466 | gene | exon |
| Bn-A03-p5984123 | Bn-N3-p6020429 | gene |      |
| Bn-A03-p6036521 | Bn-N3-p6077412 | gene |      |
| Bn-A03-p6039029 | Bn-N3-p6079930 | gene |      |
| Bn-A03-p6057369 | Bn-N3-p6097929 | gene | exon |
| Bn-A03-p6126012 | Bn-N3-p6172559 | gene | exon |
| Bn-A03-p6157864 | Bn-N3-p6205135 | gene |      |
| Bn-A03-p6158211 | Bn-N3-p6205483 | gene | exon |
| Bn-A03-p6204498 | Bn-N3-p6249247 | gene |      |
| Bn-A03-p6274828 | Bn-N3-p6308534 | gene |      |
| Bn-A03-p6276385 | Bn-N3-p6310134 | gene | exon |
| Bn-A03-p630979  | Bn-N3-p624785  | gene |      |
| Bn-A03-p6317002 | Bn-N3-p6356236 | gene |      |
| Bn-A03-p6332797 | Bn-N3-p6374184 | gene | exon |
| Bn-A03-p6404659 | Bn-N3-p6461195 | gene | exon |
| Bn-A03-p6404903 | Bn-N3-p6461439 | gene |      |
| Bn-A03-p641927  | Bn-N3-p643986  | gene |      |
| Bn-A03-p6423795 | Bn-N3-p6478911 | gene |      |
| Bn-A03-p6424980 | Bn-N3-p6480096 | gene | exon |
| Bn-A03-p6425315 | Bn-N3-p6480430 | gene |      |
| Bn-A03-p6425858 | Bn-N3-p6480974 | gene |      |
| Bn-A03-p6427905 | Bn-N3-p6487560 | gene | exon |
| Bn-A03-p6428220 | Bn-N3-p6487875 | gene |      |
| Bn-A03-p6439432 | Bn-N3-p6497920 | gene |      |
| Bn-A03-p6484137 | Bn-N3-p6522588 | gene |      |
| Bn-A03-p6498305 | Bn-N3-p6535515 | gene | exon |
| Bn-A03-p6502463 | Bn-N3-p6539671 | gene | exon |
| Bn-A03-p6514858 | Bn-N3-p6554535 | gene |      |
| Bn-A03-p6522454 | Bn-N3-p6560772 | gene |      |
| Bn-A03-p6528914 | Bn-N3-p6568754 | gene |      |
| Bn-A03-p654363  | Bn-N3-p658962  | gene |      |
| Bn-A03-p6556647 | Bn-N3-p6593693 | gene | exon |
| Bn-A03-p657593  | Bn-N3-p662130  | gene |      |
| Bn-A03-p6576575 | Bn-N3-p6618284 | gene |      |
| Bn-A03-p6577213 | Bn-N3-p6618922 | gene |      |
| Bn-A03-p6585645 | Bn-N3-p6629360 | gene |      |
| Bn-A03-p6586436 | Bn-N3-p6630151 | gene |      |
| Bn-A03-p6590051 | Bn-N3-p6633766 | gene | exon |
| Bn-A03-p6646094 | Bn-N3-p6682601 | gene | exon |
| Bn-A03-p6668218 | Bn-N3-p6704487 | gene | exon |
| Bn-A03-p6668259 | Bn-N3-p6704528 | gene | exon |
| Bn-A03-p6672024 | Bn-N3-p6708373 | gene | exon |
| Bn-A03-p6677819 | Bn-N3-p6710985 | gene | exon |
| Bn-A03-p6681953 | Bn-N3-p6715108 | gene | exon |
| Bn-A03-p6708217 | Bn-N3-p6736061 | gene | exon |
| Bn-A03-p671279  | Bn-N3-p671635  | gene | exon |
| Bn-A03-p6717546 | Bn-N3-p6745534 | gene | exon |

|                 |                  |      |      |
|-----------------|------------------|------|------|
| Bn-A03-p6717785 | Bn-N3-p6745773   | gene | exon |
| Bn-A03-p6771876 | Bn-N3-p6803630   | gene |      |
| Bn-A03-p6772326 | Bn-N3-p6804089   | gene |      |
| Bn-A03-p6781156 | Bn-N3-p6805943   | gene |      |
| Bn-A03-p6783685 | Bn-N3-p6809695   | gene |      |
| Bn-A03-p6804536 | Bn-N3-p6834962   | gene |      |
| Bn-A03-p6804857 | Bn-N3-p6835283   | gene |      |
| Bn-A03-p6845546 | Bn-N3-p6875205   | gene | exon |
| Bn-A03-p6907743 | Bn-N18-p17531568 | gene |      |
| Bn-A03-p6984742 | Bn-N3-p7005668   | gene |      |
| Bn-A03-p7007376 | Bn-N3-p7039005   | gene | exon |
| Bn-A03-p7007377 | Bn-N3-p7039006   | gene | exon |
| Bn-A03-p7011698 | Bn-N3-p7044416   | gene |      |
| Bn-A03-p7011746 | Bn-N3-p7044464   | gene |      |
| Bn-A03-p7012232 | Bn-N3-p7044950   | gene | exon |
| Bn-A03-p7049396 | Bn-N3-p7100631   | gene |      |
| Bn-A03-p7058001 | Bn-N3-p7112725   | gene |      |
| Bn-A03-p7074078 | Bn-N3-p7124947   | gene | exon |
| Bn-A03-p7075595 | Bn-N3-p7126465   | gene |      |
| Bn-A03-p7079712 | Bn-N3-p7130834   | gene | exon |
| Bn-A03-p7088375 | Bn-N3-p7138714   | gene |      |
| Bn-A03-p709332  | Bn-N3-p713087    | gene |      |
| Bn-A03-p711408  | Bn-N3-p715159    | gene |      |
| Bn-A03-p712308  | Bn-N3-p716059    | gene | exon |
| Bn-A03-p7178917 | Bn-N3-p7235721   | gene | exon |
| Bn-A03-p7180288 | Bn-N3-p7237090   | gene |      |
| Bn-A03-p7186958 | Bn-N3-p7242704   | gene | exon |
| Bn-A03-p7224854 | Bn-N3-p7284957   | gene |      |
| Bn-A03-p7235826 | Bn-N3-p7300243   | gene |      |
| Bn-A03-p7236103 | Bn-N3-p7300520   | gene |      |
| Bn-A03-p7239205 | Bn-N3-p7307021   | gene | exon |
| Bn-A03-p7239260 | Bn-N3-p7307076   | gene |      |
| Bn-A03-p726812  | Bn-N13-p892838   | gene | exon |
| Bn-A03-p7281096 | Bn-N3-p7343067   | gene | exon |
| Bn-A03-p7284090 | Bn-N3-p7346059   | gene | exon |
| Bn-A03-p72933   | Bn-N3-p72904     | gene |      |
| Bn-A03-p7295912 | Bn-N3-p7359855   | gene | exon |
| Bn-A03-p731558  | Bn-N3-p738745    | gene | exon |
| Bn-A03-p7366616 | Bn-N3-p7435689   | gene | exon |
| Bn-A03-p7366783 | Bn-N3-p7435856   | gene | exon |
| Bn-A03-p7382887 | Bn-N3-p7452614   | gene | exon |
| Bn-A03-p7428803 | Bn-N13-p10438134 | gene | exon |
| Bn-A03-p7445206 | Bn-N3-p7511807   | gene |      |
| Bn-A03-p7460244 | Bn-N3-p7525249   | gene |      |
| Bn-A03-p7467515 | Bn-N3-p7531661   | gene |      |
| Bn-A03-p7482812 | Bn-N3-p7546148   | gene | exon |
| Bn-A03-p7485450 | Bn-N3-p7548786   | gene | exon |
| Bn-A03-p7491211 | Bn-N3-p7550312   | gene |      |
| Bn-A03-p7493664 | Bn-N3-p7552746   | gene | exon |
| Bn-A03-p7501352 | Bn-N3-p7560441   | gene |      |
| Bn-A03-p7506855 | Bn-N3-p7565998   | gene |      |
| Bn-A03-p7528981 | Bn-N3-p7587681   | gene | exon |

|                 |                  |      |      |
|-----------------|------------------|------|------|
| Bn-A03-p7543362 | Bn-N3-p7601180   | gene | exon |
| Bn-A03-p7551518 | Bn-N3-p7608265   | gene | exon |
| Bn-A03-p7555264 | Bn-N3-p7612737   | gene | exon |
| Bn-A03-p7571364 | Bn-N3-p7630005   | gene | exon |
| Bn-A03-p7575620 | Bn-N3-p7634144   | gene |      |
| Bn-A03-p757592  | Bn-N3-p764664    | gene |      |
| Bn-A03-p7583703 | Bn-N3-p7642964   | gene | exon |
| Bn-A03-p7613494 | Bn-N3-p7669799   | gene | exon |
| Bn-A03-p7614596 | Bn-N3-p7670901   | gene |      |
| Bn-A03-p7628749 | Bn-N3-p7685208   | gene |      |
| Bn-A03-p7628905 | Bn-N3-p7685364   | gene |      |
| Bn-A03-p7629219 | Bn-N13-p10704969 | gene |      |
| Bn-A03-p7630376 | Bn-N13-p10706102 | gene | exon |
| Bn-A03-p7630628 | Bn-N3-p7687041   | gene |      |
| Bn-A03-p7631083 | Bn-N3-p7687496   | gene |      |
| Bn-A03-p7631177 | Bn-N3-p7687592   | gene |      |
| Bn-A03-p764274  | Bn-N3-p771325    | gene |      |
| Bn-A03-p7643795 | Bn-N3-p7699902   | gene | exon |
| Bn-A03-p765077  | Bn-N3-p772129    | gene | exon |
| Bn-A03-p7652326 | Bn-N3-p7708687   | gene |      |
| Bn-A03-p766322  | Bn-N3-p773472    | gene | exon |
| Bn-A03-p7675340 | Bn-N3-p7731832   | gene | exon |
| Bn-A03-p7688578 | Bn-N3-p7746543   | gene | exon |
| Bn-A03-p77099   | Bn-N3-p80627     | gene |      |
| Bn-A03-p7788800 | Bn-N3-p7843561   | gene |      |
| Bn-A03-p7793076 | Bn-N3-p7847636   | gene | exon |
| Bn-A03-p7799483 | Bn-N3-p7854102   | gene | exon |
| Bn-A03-p7814324 | Bn-N3-p7866417   | gene |      |
| Bn-A03-p7818081 | Bn-N3-p7870422   | gene | exon |
| Bn-A03-p7818503 | Bn-N3-p7870844   | gene | exon |
| Bn-A03-p7835836 | Bn-N3-p7891520   | gene |      |
| Bn-A03-p7838070 | Bn-N13-p10974843 | gene |      |
| Bn-A03-p7851577 | Bn-N3-p7907076   | gene | exon |
| Bn-A03-p78559   | Bn-N3-p82106     | gene |      |
| Bn-A03-p7857447 | Bn-N3-p7917659   | gene | exon |
| Bn-A03-p7870307 | Bn-N3-p7929566   | gene | exon |
| Bn-A03-p7870541 | Bn-N3-p7929800   | gene | exon |
| Bn-A03-p7873426 | Bn-N3-p7932668   | gene | exon |
| Bn-A03-p7878888 | Bn-N3-p7939377   | gene |      |
| Bn-A03-p7883846 | Bn-N3-p7944789   | gene | exon |
| Bn-A03-p7897822 | Bn-N3-p7961090   | gene | exon |
| Bn-A03-p7902457 | Bn-N3-p7965564   | gene |      |
| Bn-A03-p7920650 | Bn-N3-p7977117   | gene | exon |
| Bn-A03-p7943450 | Bn-N3-p8003151   | gene |      |
| Bn-A03-p7983071 | Bn-N13-p11170486 | gene | exon |
| Bn-A03-p7985158 | Bn-N3-p8045443   | gene | exon |
| Bn-A03-p8008867 | Bn-N3-p8069505   | gene |      |
| Bn-A03-p8038504 | Bn-N3-p8102537   | gene | exon |
| Bn-A03-p8039401 | Bn-N3-p8103434   | gene | exon |
| Bn-A03-p8043620 | Bn-N3-p8107615   | gene |      |
| Bn-A03-p8070883 | Bn-N3-p8129882   | gene |      |
| Bn-A03-p8080680 | Bn-N3-p8137197   | gene | exon |

|                 |                  |      |      |
|-----------------|------------------|------|------|
| Bn-A03-p8083083 | Bn-N3-p8139630   | gene | exon |
| Bn-A03-p8095796 | Bn-N3-p8156219   | gene | exon |
| Bn-A03-p8109045 | Bn-N13-p11370963 | gene | exon |
| Bn-A03-p8112016 | Bn-N13-p11373962 | gene |      |
| Bn-A03-p8122222 | Bn-N3-p8178415   | gene | exon |
| Bn-A03-p8148926 | Bn-N17-p19243259 | gene | exon |
| Bn-A03-p8158265 | Bn-N3-p8201678   | gene | exon |
| Bn-A03-p8218946 | Bn-N3-p8261863   | gene | exon |
| Bn-A03-p8279849 | Bn-N3-p8324319   | gene | exon |
| Bn-A03-p8285385 | Bn-N3-p8330205   | gene |      |
| Bn-A03-p8298336 | Bn-N3-p8341863   | gene | exon |
| Bn-A03-p830116  | Bn-N3-p837687    | gene | exon |
| Bn-A03-p830487  | Bn-N3-p838058    | gene | exon |
| Bn-A03-p8308938 | Bn-N3-p8353930   | gene |      |
| Bn-A03-p8314005 | Bn-N3-p8359018   | gene |      |
| Bn-A03-p8347370 | Bn-N3-p8402995   | gene | exon |
| Bn-A03-p8359092 | Bn-N3-p8414225   | gene | exon |
| Bn-A03-p8360894 | Bn-N13-p41521362 | gene |      |
| Bn-A03-p8372559 | Bn-N3-p8424764   | gene | exon |
| Bn-A03-p8394184 | Bn-N3-p8446939   | gene |      |
| Bn-A03-p8396525 | Bn-N3-p8454576   | gene |      |
| Bn-A03-p8398790 | Bn-N3-p8456836   | gene |      |
| Bn-A03-p8408815 | Bn-N3-p8465479   | gene | exon |
| Bn-A03-p8467104 | Bn-N3-p8551517   | gene | exon |
| Bn-A03-p8475614 | Bn-N3-p8559885   | gene | exon |
| Bn-A03-p8479803 | Bn-N3-p8564064   | gene | exon |
| Bn-A03-p8480669 | Bn-N3-p8564933   | gene | exon |
| Bn-A03-p8497543 | Bn-N3-p8582113   | gene |      |
| Bn-A03-p8559617 | Bn-N3-p8645677   | gene | exon |
| Bn-A03-p8559794 | Bn-N3-p8645854   | gene | exon |
| Bn-A03-p858910  | Bn-N3-p873123    | gene |      |
| Bn-A03-p8631833 | Bn-N3-p8713343   | gene |      |
| Bn-A03-p8645654 | Bn-N3-p8728661   | gene | exon |
| Bn-A03-p8663803 | Bn-N3-p8747803   | gene |      |
| Bn-A03-p8681690 | Bn-N3-p8762847   | gene |      |
| Bn-A03-p8733974 | Bn-N3-p8831928   | gene | exon |
| Bn-A03-p8735039 | Bn-N3-p8832993   | gene | exon |
| Bn-A03-p8745839 | Bn-N3-p8846748   | gene |      |
| Bn-A03-p8823042 | Bn-N3-p8950062   | gene | exon |
| Bn-A03-p8836751 | Bn-N3-p8965635   | gene | exon |
| Bn-A03-p8842546 | Bn-N3-p8971444   | gene |      |
| Bn-A03-p8881377 | Bn-N3-p9011072   | gene | exon |
| Bn-A03-p8881585 | Bn-N3-p9011283   | gene |      |
| Bn-A03-p8883782 | Bn-N3-p9013572   | gene |      |
| Bn-A03-p8883841 | Bn-N3-p9013631   | gene |      |
| Bn-A03-p8924852 | Bn-N3-p9057017   | gene |      |
| Bn-A03-p8973137 | Bn-N3-p9103360   | gene |      |
| Bn-A03-p898067  | Bn-N3-p910599    | gene | exon |
| Bn-A03-p90436   | Bn-N3-p102637    | gene |      |
| Bn-A03-p9093699 | Bn-N3-p9226323   | gene |      |
| Bn-A03-p9098773 | Bn-N3-p9230818   | gene | exon |
| Bn-A03-p9115020 | Bn-N3-p9247475   | gene |      |



|                 |                  |      |      |
|-----------------|------------------|------|------|
| Bn-A03-p912314  | Bn-N3-p924972    | gene | exon |
| Bn-A03-p9123542 | Bn-N3-p9264008   | gene | exon |
| Bn-A03-p9148822 | Bn-N3-p9302770   | gene | exon |
| Bn-A03-p9191787 | Bn-N13-p13262973 | gene |      |
| Bn-A03-p9203536 | Bn-N3-p9356933   | gene | exon |
| Bn-A03-p9203834 | Bn-N3-p9357231   | gene | exon |
| Bn-A03-p9203992 | Bn-N3-p9357389   | gene | exon |
| Bn-A03-p9203999 | Bn-N3-p9357396   | gene | exon |
| Bn-A03-p9208735 | Bn-N3-p9362802   | gene |      |
| Bn-A03-p9233645 | Bn-N3-p9386412   | gene | exon |
| Bn-A03-p9243701 | Bn-N3-p9397787   | gene |      |
| Bn-A03-p9244195 | Bn-N3-p9398282   | gene |      |
| Bn-A03-p9250832 | Bn-N3-p9405991   | gene | exon |
| Bn-A03-p9255139 | Bn-N3-p9410111   | gene |      |
| Bn-A03-p9265554 | Bn-N3-p9422013   | gene | exon |
| Bn-A03-p927517  | Bn-N3-p937636    | gene | exon |
| Bn-A03-p9304885 | Bn-N13-p13508556 | gene | exon |
| Bn-A03-p9324653 | Bn-N3-p9485997   | gene |      |
| Bn-A03-p9328470 | Bn-N3-p9496324   | gene | exon |
| Bn-A03-p9338698 | Bn-N3-p9507021   | gene |      |
| Bn-A03-p9383602 | Bn-N13-p13601842 | gene | exon |
| Bn-A03-p9439354 | Bn-N3-p9621591   | gene |      |
| Bn-A03-p9439893 | Bn-N3-p9622130   | gene |      |
| Bn-A03-p9448206 | Bn-N3-p9630571   | gene | exon |
| Bn-A03-p9449316 | Bn-N3-p9631681   | gene | exon |
| Bn-A03-p9476053 | Bn-N3-p9659236   | gene | exon |
| Bn-A03-p9485365 | Bn-N3-p9671897   | gene |      |
| Bn-A03-p9497697 | Bn-N3-p9679562   | gene | exon |
| Bn-A03-p9497821 | Bn-N3-p9679686   | gene | exon |
| Bn-A03-p950999  | Bn-N3-p968276    | gene |      |
| Bn-A03-p951365  | Bn-N3-p968642    | gene |      |
| Bn-A03-p952091  | Bn-N3-p969367    | gene |      |
| Bn-A03-p9522072 | Bn-N13-p13808871 | gene | exon |
| Bn-A03-p9537618 | Bn-N3-p9707126   | gene | exon |
| Bn-A03-p9564515 | Bn-N13-p13849965 | gene |      |
| Bn-A03-p9601581 | Bn-N3-p9768372   | gene |      |
| Bn-A03-p9605319 | Bn-N3-p9772136   | gene | exon |
| Bn-A03-p9613933 | Bn-N3-p9778512   | gene | exon |
| Bn-A03-p9615126 | Bn-N3-p9779701   | gene | exon |
| Bn-A03-p9638708 | Bn-N3-p9810417   | gene |      |
| Bn-A03-p9638726 | Bn-N3-p9810435   | gene |      |
| Bn-A03-p9651526 | Bn-N3-p9829080   | gene |      |
| Bn-A03-p9657864 | Bn-N3-p9835434   | gene | exon |
| Bn-A03-p9677969 | Bn-N3-p9845555   | gene |      |
| Bn-A03-p9705481 | Bn-N3-p9870689   | gene | exon |
| Bn-A03-p9706640 | Bn-N3-p9871849   | gene | exon |
| Bn-A03-p9764680 | Bn-N3-p9956468   | gene |      |
| Bn-A03-p9765420 | Bn-N3-p9957200   | gene |      |
| Bn-A03-p9765623 | Bn-N3-p9957420   | gene |      |
| Bn-A03-p9823618 | Bn-N3-p10018687  | gene | exon |
| Bn-A03-p9825032 | Bn-N3-p10020110  | gene | exon |
| Bn-A03-p9833648 | Bn-N3-p10026056  | gene | exon |

|                  |                  |      |      |
|------------------|------------------|------|------|
| Bn-A03-p9839212  | Bn-N3-p10031520  | gene | exon |
| Bn-A03-p9847680  | Bn-N3-p10040187  | gene | exon |
| Bn-A03-p9863138  | Bn-N3-p10056625  | gene |      |
| Bn-A03-p9863553  | Bn-N3-p10057039  | gene | exon |
| Bn-A03-p9863600  | Bn-N3-p10057086  | gene |      |
| Bn-A03-p9873327  | Bn-N3-p10066296  | gene | exon |
| Bn-A03-p9873384  | Bn-N3-p10066353  | gene | exon |
| Bn-A03-p9876378  | Bn-N3-p10069357  | gene | exon |
| Bn-A03-p9883544  | Bn-N3-p10076547  | gene |      |
| Bn-A03-p9920847  | Bn-N3-p10103147  | gene | exon |
| Bn-A04-p1001237  | Bn-N4-p932584    | gene |      |
| Bn-A04-p1007534  | Bn-N4-p942388    | gene |      |
| Bn-A04-p10099096 | Bn-N4-p12112331  | gene | exon |
| Bn-A04-p10129538 | Bn-N4-p12141458  | gene | exon |
| Bn-A04-p10154400 | Bn-N4-p12164658  | gene | exon |
| Bn-A04-p10155907 | Bn-N4-p12166165  | gene | exon |
| Bn-A04-p10176387 | Bn-N4-p12196262  | gene |      |
| Bn-A04-p1018807  | Bn-N4-p954367    | gene |      |
| Bn-A04-p10196289 | Bn-N4-p12216738  | gene | exon |
| Bn-A04-p1021879  | Bn-N4-p957845    | gene | exon |
| Bn-A04-p10261874 | Bn-N4-p12283635  | gene | exon |
| Bn-A04-p1032336  | Bn-N4-p965926    | gene |      |
| Bn-A04-p10383434 | Bn-N4-p12637478  | gene | exon |
| Bn-A04-p1040916  | Bn-N4-p975439    | gene | exon |
| Bn-A04-p1042273  | Bn-N4-p975963    | gene | exon |
| Bn-A04-p1043111  | Bn-N4-p976801    | gene | exon |
| Bn-A04-p10434805 | Bn-N4-p12697821  | gene |      |
| Bn-A04-p10458946 | Bn-N4-p12731491  | gene |      |
| Bn-A04-p10464942 | Bn-N4-p12728711  | gene | exon |
| Bn-A04-p10494765 | Bn-N4-p12772709  | gene | exon |
| Bn-A04-p10541268 | Bn-N4-p12819154  | gene |      |
| Bn-A04-p10566018 | Bn-N4-p12842304  | gene | exon |
| Bn-A04-p10600455 | Bn-N4-p12872786  | gene | exon |
| Bn-A04-p10602815 | Bn-N14-p43786251 | gene | exon |
| Bn-A04-p1065480  | Bn-N4-p1006422   | gene | exon |
| Bn-A04-p10661890 | Bn-N4-p12928183  | gene |      |
| Bn-A04-p10661931 | Bn-N4-p12928224  | gene |      |
| Bn-A04-p10662404 | Bn-N4-p12928696  | gene |      |
| Bn-A04-p10744003 | Bn-N4-p13003736  | gene |      |
| Bn-A04-p10760352 | Bn-N4-p13017710  | gene | exon |
| Bn-A04-p10769811 | Bn-N4-p13027215  | gene |      |
| Bn-A04-p10774641 | Bn-N4-p13032331  | gene | exon |
| Bn-A04-p10786704 | Bn-N4-p13035554  | gene |      |
| Bn-A04-p10808805 | Bn-N4-p13064596  | gene | exon |
| Bn-A04-p10809637 | Bn-N4-p13065428  | gene |      |
| Bn-A04-p10852032 | Bn-N4-p13137303  | gene |      |
| Bn-A04-p10902724 | Bn-N4-p13187409  | gene | exon |
| Bn-A04-p10903353 | Bn-N14-p44379751 | gene |      |
| Bn-A04-p10914108 | Bn-N4-p13200712  | gene |      |
| Bn-A04-p1091727  | Bn-N4-p1036358   | gene |      |
| Bn-A04-p10975832 | Bn-N4-p13271446  | gene |      |
| Bn-A04-p11015443 | Bn-N4-p13326516  | gene |      |

|                  |                 |      |      |
|------------------|-----------------|------|------|
| Bn-A04-p11020444 | Bn-N4-p13331211 | gene |      |
| Bn-A04-p1104385  | Bn-N4-p1053356  | gene |      |
| Bn-A04-p11058870 | Bn-N4-p13372031 | gene |      |
| Bn-A04-p11119216 | Bn-N4-p13412903 | gene |      |
| Bn-A04-p11119582 | Bn-N4-p13413271 | gene |      |
| Bn-A04-p11164883 | Bn-N4-p13449277 | gene |      |
| Bn-A04-p11197346 | Bn-N4-p13491897 | gene |      |
| Bn-A04-p11197707 | Bn-N4-p13492258 | gene | exon |
| Bn-A04-p11209663 | Bn-N4-p13515177 | gene | exon |
| Bn-A04-p11209773 | Bn-N4-p13515286 | gene |      |
| Bn-A04-p11209827 | Bn-N4-p13515340 | gene | exon |
| Bn-A04-p11213108 | Bn-N4-p13518558 | gene |      |
| Bn-A04-p11243983 | Bn-N4-p13553512 | gene |      |
| Bn-A04-p11243994 | Bn-N4-p13553523 | gene |      |
| Bn-A04-p11244643 | Bn-N4-p13554202 | gene | exon |
| Bn-A04-p11244673 | Bn-N4-p13554232 | gene | exon |
| Bn-A04-p11245906 | Bn-N4-p13555465 | gene | exon |
| Bn-A04-p11250035 | Bn-N4-p13559742 | gene | exon |
| Bn-A04-p11250141 | Bn-N4-p13559848 | gene |      |
| Bn-A04-p11274255 | Bn-N4-p13575212 | gene |      |
| Bn-A04-p11291596 | Bn-N4-p13584873 | gene |      |
| Bn-A04-p11319703 | Bn-N4-p13621425 | gene |      |
| Bn-A04-p11320045 | Bn-N4-p13621735 | gene | exon |
| Bn-A04-p11329756 | Bn-N4-p13636377 | gene |      |
| Bn-A04-p11376488 | Bn-N4-p13688766 | gene | exon |
| Bn-A04-p11377702 | Bn-N4-p13690012 | gene | exon |
| Bn-A04-p11377775 | Bn-N4-p13690084 | gene | exon |
| Bn-A04-p11402649 | Bn-N4-p13716359 | gene |      |
| Bn-A04-p11420466 | Bn-N4-p13744208 | gene |      |
| Bn-A04-p11425304 | Bn-N4-p13749037 | gene | exon |
| Bn-A04-p11449464 | Bn-N4-p13775526 | gene | exon |
| Bn-A04-p11450339 | Bn-N4-p13776401 | gene | exon |
| Bn-A04-p11503303 | Bn-N4-p13828317 | gene | exon |
| Bn-A04-p11509775 | Bn-N4-p13835033 | gene |      |
| Bn-A04-p11510797 | Bn-N4-p13836054 | gene |      |
| Bn-A04-p11512379 | Bn-N4-p13837635 | gene | exon |
| Bn-A04-p11513352 | Bn-N4-p13838707 | gene | exon |
| Bn-A04-p11595428 | Bn-N4-p45517823 | gene | exon |
| Bn-A04-p1159662  | Bn-N4-p1093634  | gene | exon |
| Bn-A04-p1161563  | Bn-N4-p1095696  | gene | exon |
| Bn-A04-p11633209 | Bn-N4-p13967615 | gene |      |
| Bn-A04-p11633439 | Bn-N4-p13967845 | gene |      |
| Bn-A04-p11791366 | Bn-N4-p14083506 | gene | exon |
| Bn-A04-p11810574 | Bn-N4-p14106202 | gene | exon |
| Bn-A04-p11818064 | Bn-N4-p14114079 | gene |      |
| Bn-A04-p11818085 | Bn-N4-p14114100 | gene |      |
| Bn-A04-p11865854 | Bn-N4-p14170993 | gene | exon |
| Bn-A04-p11888044 | Bn-N4-p14211428 | gene |      |
| Bn-A04-p11896581 | Bn-N4-p14225042 | gene | exon |
| Bn-A04-p11896696 | Bn-N4-p14225154 | gene | exon |
| Bn-A04-p11897079 | Bn-N4-p14225546 | gene | exon |
| Bn-A04-p11900571 | Bn-N4-p14229076 | gene |      |

|                  |                 |      |      |
|------------------|-----------------|------|------|
| Bn-A04-p11907565 | Bn-N4-p14236714 | gene |      |
| Bn-A04-p11922910 | Bn-N4-p14244731 | gene |      |
| Bn-A04-p11923310 | Bn-N4-p14245131 | gene | exon |
| Bn-A04-p11923511 | Bn-N4-p14245332 | gene |      |
| Bn-A04-p11924219 | Bn-N4-p14246038 | gene |      |
| Bn-A04-p11957518 | Bn-N4-p14285273 | gene | exon |
| Bn-A04-p11958047 | Bn-N4-p14285802 | gene | exon |
| Bn-A04-p11961175 | Bn-N4-p14293805 | gene | exon |
| Bn-A04-p12051277 | Bn-N4-p14385352 | gene |      |
| Bn-A04-p12084855 | Bn-N4-p14424587 | gene | exon |
| Bn-A04-p12087644 | Bn-N4-p14427376 | gene | exon |
| Bn-A04-p1212589  | Bn-N4-p1147464  | gene | exon |
| Bn-A04-p1213196  | Bn-N4-p1148070  | gene |      |
| Bn-A04-p1215863  | Bn-N4-p1150735  | gene | exon |
| Bn-A04-p12163578 | Bn-N4-p14496571 | gene |      |
| Bn-A04-p12163967 | Bn-N4-p14496966 | gene | exon |
| Bn-A04-p12204775 | Bn-N4-p14540890 | gene |      |
| Bn-A04-p12205378 | Bn-N4-p14541493 | gene |      |
| Bn-A04-p12210199 | Bn-N4-p14546314 | gene | exon |
| Bn-A04-p12211993 | Bn-N4-p14548108 | gene |      |
| Bn-A04-p122280   | Bn-N4-p193375   | gene | exon |
| Bn-A04-p12243311 | Bn-N4-p14580040 | gene |      |
| Bn-A04-p12259499 | Bn-N4-p14596496 | gene | exon |
| Bn-A04-p12263920 | Bn-N4-p14600964 | gene | exon |
| Bn-A04-p1231047  | Bn-N4-p1164595  | gene | exon |
| Bn-A04-p1231127  | Bn-N4-p1164675  | gene |      |
| Bn-A04-p12314901 | Bn-N4-p14652564 | gene |      |
| Bn-A04-p12314909 | Bn-N4-p14652572 | gene |      |
| Bn-A04-p12509027 | Bn-N10-p4733803 | gene |      |
| Bn-A04-p12526741 | Bn-N10-p4716216 | gene | exon |
| Bn-A04-p12541660 | Bn-N10-p4688367 | gene |      |
| Bn-A04-p12542184 | Bn-N10-p4687831 | gene |      |
| Bn-A04-p12547910 | Bn-N10-p4676521 | gene |      |
| Bn-A04-p12550756 | Bn-N10-p4673693 | gene |      |
| Bn-A04-p12551118 | Bn-N10-p4673331 | gene |      |
| Bn-A04-p12599627 | Bn-N10-p4608812 | gene |      |
| Bn-A04-p12599843 | Bn-N10-p4608596 | gene |      |
| Bn-A04-p12635986 | Bn-N10-p4575735 | gene |      |
| Bn-A04-p12659254 | Bn-N4-p14726255 | gene |      |
| Bn-A04-p12659402 | Bn-N4-p14726403 | gene | exon |
| Bn-A04-p12671369 | Bn-N4-p14747087 | gene |      |
| Bn-A04-p12675088 | Bn-N4-p14751019 | gene |      |
| Bn-A04-p12677961 | Bn-N4-p14753696 | gene |      |
| Bn-A04-p12680156 | Bn-N4-p14758361 | gene |      |
| Bn-A04-p1276308  | Bn-N4-p1215871  | gene |      |
| Bn-A04-p12793333 | Bn-N4-p14849520 | gene |      |
| Bn-A04-p12793456 | Bn-N4-p14849643 | gene | exon |
| Bn-A04-p12793487 | Bn-N4-p14849674 | gene | exon |
| Bn-A04-p1279752  | Bn-N4-p1219316  | gene |      |
| Bn-A04-p12798976 | Bn-N4-p14855183 | gene |      |
| Bn-A04-p12840183 | Bn-N4-p14892410 | gene |      |
| Bn-A04-p12877134 | Bn-N4-p14930735 | gene |      |

|                  |                 |      |      |
|------------------|-----------------|------|------|
| Bn-A04-p12888388 | Bn-N4-p14942933 | gene | exon |
| Bn-A04-p12917949 | Bn-N4-p14969070 | gene | exon |
| Bn-A04-p12953418 | Bn-N4-p14998960 | gene | exon |
| Bn-A04-p12959668 | Bn-N4-p15005514 | gene |      |
| Bn-A04-p12994676 | Bn-N4-p15036643 | gene | exon |
| Bn-A04-p13009893 | Bn-N4-p15054322 | gene | exon |
| Bn-A04-p13050240 | Bn-N4-p15092086 | gene |      |
| Bn-A04-p13052013 | Bn-N4-p15093867 | gene |      |
| Bn-A04-p13056296 | Bn-N4-p15102871 | gene |      |
| Bn-A04-p13056382 | Bn-N4-p15102956 | gene |      |
| Bn-A04-p13056438 | Bn-N4-p15103012 | gene |      |
| Bn-A04-p13059485 | Bn-N4-p15106045 | gene |      |
| Bn-A04-p13069741 | Bn-N4-p15116045 | gene | exon |
| Bn-A04-p13078078 | Bn-N4-p15122228 | gene |      |
| Bn-A04-p1311487  | Bn-N4-p1247303  | gene |      |
| Bn-A04-p1311567  | Bn-N4-p1247383  | gene |      |
| Bn-A04-p13116453 | Bn-N4-p15199773 | gene | exon |
| Bn-A04-p13122589 | Bn-N4-p15205829 | gene |      |
| Bn-A04-p13129306 | Bn-N4-p15213405 | gene |      |
| Bn-A04-p13129601 | Bn-N4-p15213699 | gene |      |
| Bn-A04-p13129741 | Bn-N4-p15213841 | gene |      |
| Bn-A04-p13145539 | Bn-N4-p15233023 | gene | exon |
| Bn-A04-p1317446  | Bn-N4-p1252454  | gene | exon |
| Bn-A04-p1318613  | Bn-N4-p1253627  | gene |      |
| Bn-A04-p13206432 | Bn-N4-p15287831 | gene |      |
| Bn-A04-p13207715 | Bn-N4-p15289091 | gene | exon |
| Bn-A04-p13208442 | Bn-N4-p15289638 | gene | exon |
| Bn-A04-p13235708 | Bn-N4-p15316208 | gene |      |
| Bn-A04-p13241959 | Bn-N4-p15322956 | gene | exon |
| Bn-A04-p13247108 | Bn-N4-p15329791 | gene |      |
| Bn-A04-p13293545 | Bn-N4-p15352692 | gene | exon |
| Bn-A04-p13293640 | Bn-N4-p15352787 | gene | exon |
| Bn-A04-p13294322 | Bn-N4-p15353469 | gene | exon |
| Bn-A04-p1330321  | Bn-N4-p1271987  | gene | exon |
| Bn-A04-p13306369 | Bn-N4-p15377894 | gene |      |
| Bn-A04-p13336924 | Bn-N4-p15405333 | gene |      |
| Bn-A04-p13370433 | Bn-N4-p15437344 | gene |      |
| Bn-A04-p13384606 | Bn-N4-p15444121 | gene | exon |
| Bn-A04-p13389366 | Bn-N4-p15444250 | gene | exon |
| Bn-A04-p13389622 | Bn-N4-p15444506 | gene | exon |
| Bn-A04-p13394479 | Bn-N4-p15449389 | gene | exon |
| Bn-A04-p13418563 | Bn-N4-p15477342 | gene |      |
| Bn-A04-p1346738  | Bn-N4-p1274801  | gene |      |
| Bn-A04-p13490747 | Bn-N4-p15520771 | gene | exon |
| Bn-A04-p1349255  | Bn-N4-p1277334  | gene | exon |
| Bn-A04-p13497608 | Bn-N4-p15527167 | gene |      |
| Bn-A04-p13521405 | Bn-N4-p15548838 | gene | exon |
| Bn-A04-p1353175  | Bn-N4-p1282151  | gene |      |
| Bn-A04-p1353238  | Bn-N4-p1282214  | gene |      |
| Bn-A04-p13532829 | Bn-N4-p15554194 | gene |      |
| Bn-A04-p13552122 | Bn-N4-p15580400 | gene | exon |
| Bn-A04-p1355502  | Bn-N4-p1284481  | gene | exon |

|                  |                  |      |      |
|------------------|------------------|------|------|
| Bn-A04-p13562332 | Bn-N4-p15592185  | gene |      |
| Bn-A04-p13583325 | Bn-N4-p15605130  | gene | exon |
| Bn-A04-p13589498 | Bn-N4-p15608137  | gene |      |
| Bn-A04-p13600415 | Bn-N4-p15622445  | gene | exon |
| Bn-A04-p13655958 | Bn-N4-p15674600  | gene |      |
| Bn-A04-p13665489 | Bn-N4-p15684044  | gene | exon |
| Bn-A04-p13685561 | Bn-N4-p15701910  | gene |      |
| Bn-A04-p13689816 | Bn-N4-p15707430  | gene |      |
| Bn-A04-p13705410 | Bn-N4-p15714656  | gene |      |
| Bn-A04-p13705548 | Bn-N4-p15714794  | gene |      |
| Bn-A04-p13705636 | Bn-N4-p15714880  | gene |      |
| Bn-A04-p13705760 | Bn-N4-p15715005  | gene |      |
| Bn-A04-p13726056 | Bn-N4-p15738093  | gene | exon |
| Bn-A04-p13856134 | Bn-N4-p15881188  | gene | exon |
| Bn-A04-p1390449  | Bn-N4-p1324713   | gene | exon |
| Bn-A04-p13992889 | Bn-N4-p15997563  | gene |      |
| Bn-A04-p14020738 | Bn-N4-p16025942  | gene |      |
| Bn-A04-p14020855 | Bn-N4-p16026059  | gene |      |
| Bn-A04-p14023419 | Bn-N4-p16028620  | gene | exon |
| Bn-A04-p14026143 | Bn-N4-p16031244  | gene |      |
| Bn-A04-p14060096 | Bn-N4-p16068662  | gene | exon |
| Bn-A04-p14092385 | Bn-N4-p16096135  | gene |      |
| Bn-A04-p14156506 | Bn-N14-p49045771 | gene |      |
| Bn-A04-p14159293 | Bn-N4-p16160739  | gene | exon |
| Bn-A04-p14159494 | Bn-N4-p16160940  | gene | exon |
| Bn-A04-p1416287  | Bn-N4-p1354082   | gene |      |
| Bn-A04-p1417481  | Bn-N4-p1355252   | gene |      |
| Bn-A04-p14289058 | Bn-N4-p16277785  | gene | exon |
| Bn-A04-p1429850  | Bn-N4-p1370880   | gene |      |
| Bn-A04-p14312019 | Bn-N4-p16304417  | gene | exon |
| Bn-A04-p14315336 | Bn-N4-p16307392  | gene |      |
| Bn-A04-p14332759 | Bn-N4-p16322233  | gene | exon |
| Bn-A04-p14353463 | Bn-N4-p16341393  | gene | exon |
| Bn-A04-p14360385 | Bn-N4-p16350269  | gene |      |
| Bn-A04-p14360799 | Bn-N4-p16350682  | gene |      |
| Bn-A04-p14380140 | Bn-N4-p16378096  | gene |      |
| Bn-A04-p14397957 | Bn-N4-p16401198  | gene |      |
| Bn-A04-p14398335 | Bn-N4-p16401576  | gene | exon |
| Bn-A04-p14478925 | Bn-N4-p16451168  | gene |      |
| Bn-A04-p14479867 | Bn-N4-p16452111  | gene | exon |
| Bn-A04-p1451594  | Bn-N4-p1389366   | gene |      |
| Bn-A04-p14532353 | Bn-N4-p16495684  | gene |      |
| Bn-A04-p1454434  | Bn-N4-p1392198   | gene |      |
| Bn-A04-p14563007 | Bn-N14-p49700767 | gene | exon |
| Bn-A04-p14572391 | Bn-N14-p49710064 | gene |      |
| Bn-A04-p14582431 | Bn-N4-p16548395  | gene | exon |
| Bn-A04-p14582584 | Bn-N4-p16548548  | gene | exon |
| Bn-A04-p14588183 | Bn-N4-p16554984  | gene | exon |
| Bn-A04-p14622218 | Bn-N4-p16573987  | gene | exon |
| Bn-A04-p14630533 | Bn-N14-p49822368 | gene | exon |
| Bn-A04-p14630759 | Bn-N14-p49822587 | gene | exon |
| Bn-A04-p14631343 | Bn-N14-p49823213 | gene |      |

|                  |                          |      |      |
|------------------|--------------------------|------|------|
| Bn-A04-p14631586 | Bn-N4-p16585003          | gene |      |
| Bn-A04-p14640007 | Bn-N4-p16594072          | gene | exon |
| Bn-A04-p14642152 | Bn-N4-p16596219          | gene | exon |
| Bn-A04-p14661285 | Bn-N4-p16617010          | gene | exon |
| Bn-A04-p14662924 | Bn-N4-p16618649          | gene |      |
| Bn-A04-p14670992 | Bn-N4-p16626708          | gene | exon |
| Bn-A04-p14673783 | Bn-N4-p16627428          | gene | exon |
| Bn-A04-p14687930 | Bn-N4-p16642399          | gene |      |
| Bn-A04-p1471607  | Bn-N4-p1412969           | gene | exon |
| Bn-A04-p1471982  | Bn-N4-p1413344           | gene | exon |
| Bn-A04-p1472416  | Bn-N4-p1413778           | gene | exon |
| Bn-A04-p1472739  | Bn-N4-p1414101           | gene | exon |
| Bn-A04-p14742779 | Bn-N4-p16697370          | gene |      |
| Bn-A04-p14807002 | Bn-N14-p50171536         | gene |      |
| Bn-A04-p14807150 | Bn-N14-p50171714         | gene | exon |
| Bn-A04-p14807561 | Bn-N4-p16760524          | gene | exon |
| Bn-A04-p14815251 | Bn-N4-p16768147          | gene | exon |
| Bn-A04-p14822521 | Bn-N4-p16777601          | gene | exon |
| Bn-A04-p14829686 | Bn-N4-p16792438          | gene | exon |
| Bn-A04-p14877869 | Bn-N4-p16852137          | gene | exon |
| Bn-A04-p1490485  | Bn-N4-p1439997           | gene |      |
| Bn-A04-p14917114 | Bn-N4-p16884111          | gene |      |
| Bn-A04-p14922562 | Bn-N4-p16889546          | gene | exon |
| Bn-A04-p14923168 | Bn-N4-p16890152          | gene | exon |
| Bn-A04-p14972825 | Bn-N4-p16942573          | gene |      |
| Bn-A04-p149787   | Bn-N14-p25516698         | gene | exon |
| Bn-A04-p14986920 | Bn-N14-p50454869         | gene |      |
| Bn-A04-p14987934 | Bn-N4-p16954493          | gene | exon |
| Bn-A04-p14988304 | Bn-N4-p16954861          | gene | exon |
| Bn-A04-p14999714 | Bn-N4-p16963218          | gene |      |
| Bn-A04-p14999768 | Bn-N4-p16963272          | gene |      |
| Bn-A04-p15001710 | Bn-N4-p16963400          | gene |      |
| Bn-A04-p15030355 | Bn-N4-p16985302          | gene | exon |
| Bn-A04-p15030899 | Bn-N4-p16985846          | gene | exon |
| Bn-A04-p15030963 | Bn-N4-p16985910          | gene | exon |
| Bn-A04-p15048204 | Bn-N4-p17002317          | gene | exon |
| Bn-A04-p15108913 | Bn-N4-p17051397          | gene | exon |
| Bn-A04-p15122412 | Bn-Scaffold00208b-p36326 | gene |      |
| Bn-A04-p15150564 | Bn-Scaffold00208b-p15947 | gene | exon |
| Bn-A04-p15152016 | Bn-N4-p17082281          | gene | exon |
| Bn-A04-p15164920 | Bn-N4-p17088020          | gene |      |
| Bn-A04-p15168889 | Bn-Scaffold03862-p1699   | gene | exon |
| Bn-A04-p15195920 | Bn-N4-p17137351          | gene |      |
| Bn-A04-p15310116 | Bn-Scaffold12290-p631    | gene |      |
| Bn-A04-p15312437 | Bn-N4-p17253809          | gene |      |
| Bn-A04-p15399118 | Bn-N4-p17361369          | gene | exon |
| Bn-A04-p15404568 | Bn-N4-p17369430          | gene |      |
| Bn-A04-p15409836 | Bn-N4-p17378738          | gene |      |
| Bn-A04-p15411699 | Bn-N4-p17380605          | gene |      |
| Bn-A04-p15420126 | Bn-N4-p17387416          | gene |      |
| Bn-A04-p15436139 | Bn-N4-p17402396          | gene | exon |
| Bn-A04-p15456188 | Bn-N14-p50670440         | gene |      |

|                  |                          |      |      |
|------------------|--------------------------|------|------|
| Bn-A04-p15485629 | Bn-N4-p17459433          | gene |      |
| Bn-A04-p15492182 | Bn-N4-p17465788          | gene |      |
| Bn-A04-p15498393 | Bn-N4-p17476425          | gene | exon |
| Bn-A04-p15514869 | Bn-N4-p17499224          | gene |      |
| Bn-A04-p15519877 | Bn-N4-p17504210          | gene | exon |
| Bn-A04-p15530059 | Bn-N4-p17513547          | gene | exon |
| Bn-A04-p15530609 | Bn-N4-p17514102          | gene | exon |
| Bn-A04-p15530625 | Bn-N4-p17514118          | gene | exon |
| Bn-A04-p15555443 | Bn-N4-p17547137          | gene | exon |
| Bn-A04-p15631388 | Bn-N4-p17617446          | gene | exon |
| Bn-A04-p15655213 | Bn-N4-p17648503          | gene | exon |
| Bn-A04-p15707649 | Bn-N4-p17703045          | gene |      |
| Bn-A04-p1576564  | Bn-N4-p1537124           | gene | exon |
| Bn-A04-p1589006  | Bn-N4-p1553265           | gene |      |
| Bn-A04-p15893499 | Bn-Scaffold00305b-p65905 | gene |      |
| Bn-A04-p1590669  | Bn-N4-p1554928           | gene |      |
| Bn-A04-p1590931  | Bn-N4-p1555193           | gene |      |
| Bn-A04-p15951138 | Bn-N5-p4477991           | gene | exon |
| Bn-A04-p16056186 | Bn-N4-p17983696          | gene | exon |
| Bn-A04-p16090875 | Bn-N4-p18045765          | gene | exon |
| Bn-A04-p16107844 | Bn-N14-p51173063         | gene | exon |
| Bn-A04-p16109558 | Bn-N14-p51174766         | gene |      |
| Bn-A04-p16119082 | Bn-N14-p51189070         | gene |      |
| Bn-A04-p16120092 | Bn-N14-p51190072         | gene | exon |
| Bn-A04-p16166839 | Bn-N4-p18132806          | gene |      |
| Bn-A04-p16268792 | Bn-N4-p18239986          | gene |      |
| Bn-A04-p16313477 | Bn-N4-p18286010          | gene |      |
| Bn-A04-p16320671 | Bn-N14-p51452393         | gene | exon |
| Bn-A04-p16365226 | Bn-N4-p18338936          | gene | exon |
| Bn-A04-p16368852 | Bn-N4-p18343289          | gene |      |
| Bn-A04-p16394755 | Bn-N4-p18368736          | gene |      |
| Bn-A04-p16427350 | Bn-N4-p18408150          | gene |      |
| Bn-A04-p16446976 | Bn-N4-p18422343          | gene |      |
| Bn-A04-p16447217 | Bn-N4-p18422584          | gene |      |
| Bn-A04-p16459969 | Bn-N4-p18435319          | gene |      |
| Bn-A04-p16477853 | Bn-N4-p18442566          | gene |      |
| Bn-A04-p16508914 | Bn-N4-p18466378          | gene | exon |
| Bn-A04-p16514488 | Bn-N4-p18470743          | gene |      |
| Bn-A04-p16523010 | Bn-N4-p18477898          | gene | exon |
| Bn-A04-p16523116 | Bn-N4-p18478004          | gene | exon |
| Bn-A04-p16528010 | Bn-N4-p18485408          | gene |      |
| Bn-A04-p16528107 | Bn-N4-p18485498          | gene |      |
| Bn-A04-p1655416  | Bn-N4-p1589334           | gene | exon |
| Bn-A04-p16555982 | Bn-N4-p18508172          | gene |      |
| Bn-A04-p16563543 | Bn-N4-p18512244          | gene | exon |
| Bn-A04-p16584084 | Bn-N14-p51777752         | gene | exon |
| Bn-A04-p16595064 | Bn-N4-p18534997          | gene |      |
| Bn-A04-p16598514 | Bn-N4-p18538501          | gene | exon |
| Bn-A04-p16605277 | Bn-N4-p18544659          | gene | exon |
| Bn-A04-p16607433 | Bn-N4-p18547436          | gene |      |
| Bn-A04-p16608584 | Bn-N4-p18548589          | gene |      |
| Bn-A04-p16621448 | Bn-N4-p18562429          | gene | exon |



|                  |                  |      |      |
|------------------|------------------|------|------|
| Bn-A04-p16627363 | Bn-N4-p18566978  | gene |      |
| Bn-A04-p16743976 | Bn-N4-p19028528  | gene |      |
| Bn-A04-p16744035 | Bn-N4-p19028469  | gene |      |
| Bn-A04-p16745356 | Bn-N4-p19027130  | gene |      |
| Bn-A04-p1674763  | Bn-N4-p1602173   | gene |      |
| Bn-A04-p16748162 | Bn-N4-p19024648  | gene |      |
| Bn-A04-p16791082 | Bn-N4-p18980996  | gene | exon |
| Bn-A04-p16798852 | Bn-N4-p18973231  | gene | exon |
| Bn-A04-p1680506  | Bn-N4-p1607740   | gene |      |
| Bn-A04-p1680518  | Bn-N4-p1607752   | gene |      |
| Bn-A04-p1680673  | Bn-N4-p1607903   | gene |      |
| Bn-A04-p16819445 | Bn-N4-p18957489  | gene |      |
| Bn-A04-p16830389 | Bn-N4-p18946420  | gene | exon |
| Bn-A04-p16832545 | Bn-N4-p18943797  | gene | exon |
| Bn-A04-p16841462 | Bn-N4-p18935470  | gene |      |
| Bn-A04-p16892915 | Bn-N4-p18888967  | gene |      |
| Bn-A04-p16919648 | Bn-N4-p18859650  | gene |      |
| Bn-A04-p16919672 | Bn-N4-p18859626  | gene |      |
| Bn-A04-p16998111 | Bn-N4-p18791320  | gene | exon |
| Bn-A04-p17019529 | Bn-N4-p18775521  | gene |      |
| Bn-A04-p17044228 | Bn-N4-p18752848  | gene |      |
| Bn-A04-p17052071 | Bn-N4-p18743497  | gene |      |
| Bn-A04-p17105440 | Bn-N4-p18698782  | gene | exon |
| Bn-A04-p17106064 | Bn-N4-p18698148  | gene |      |
| Bn-A04-p17107045 | Bn-N4-p18697146  | gene | exon |
| Bn-A04-p17125513 | Bn-N4-p19050827  | gene | exon |
| Bn-A04-p17155901 | Bn-N4-p19083440  | gene |      |
| Bn-A04-p17157304 | Bn-N4-p19084843  | gene |      |
| Bn-A04-p17170974 | Bn-N4-p19106540  | gene | exon |
| Bn-A04-p17171349 | Bn-N4-p19106930  | gene |      |
| Bn-A04-p17179870 | Bn-N4-p19115278  | gene | exon |
| Bn-A04-p1718231  | Bn-N4-p1659171   | gene | exon |
| Bn-A04-p1718248  | Bn-N4-p1659191   | gene | exon |
| Bn-A04-p17212731 | Bn-N4-p19152134  | gene | exon |
| Bn-A04-p17239509 | Bn-N4-p19180742  | gene |      |
| Bn-A04-p17277010 | Bn-N14-p52562849 | gene | exon |
| Bn-A04-p17278229 | Bn-N4-p19217525  | gene |      |
| Bn-A04-p17281577 | Bn-N4-p19221228  | gene |      |
| Bn-A04-p17295665 | Bn-N4-p19237849  | gene | exon |
| Bn-A04-p17300068 | Bn-N4-p19242580  | gene | exon |
| Bn-A04-p17322241 | Bn-N4-p19262174  | gene | exon |
| Bn-A04-p17331915 | Bn-N4-p19271681  | gene | exon |
| Bn-A04-p17372718 | Bn-N4-p19322488  | gene | exon |
| Bn-A04-p17391232 | Bn-N4-p19341607  | gene | exon |
| Bn-A04-p17391802 | Bn-N4-p19342177  | gene | exon |
| Bn-A04-p17394552 | Bn-N4-p19346776  | gene | exon |
| Bn-A04-p17394736 | Bn-N4-p19346960  | gene | exon |
| Bn-A04-p17412823 | Bn-N4-p19364932  | gene | exon |
| Bn-A04-p17416243 | Bn-N4-p19368191  | gene | exon |
| Bn-A04-p17422800 | Bn-N4-p19374651  | gene |      |
| Bn-A04-p17487757 | Bn-N4-p19437505  | gene | exon |
| Bn-A04-p17489063 | Bn-N4-p19438815  | gene |      |

|                  |                 |      |      |
|------------------|-----------------|------|------|
| Bn-A04-p17530621 | Bn-N4-p19479475 | gene | exon |
| Bn-A04-p17541500 | Bn-N4-p19497129 | gene | exon |
| Bn-A04-p17541623 | Bn-N4-p19497252 | gene |      |
| Bn-A04-p17576444 | Bn-N4-p19544316 | gene | exon |
| Bn-A04-p17577700 | Bn-N4-p19545572 | gene |      |
| Bn-A04-p17578444 | Bn-N4-p19546312 | gene |      |
| Bn-A04-p17614504 | Bn-N4-p19580311 | gene |      |
| Bn-A04-p17615088 | Bn-N4-p19580895 | gene | exon |
| Bn-A04-p17623914 | Bn-N4-p19587713 | gene | exon |
| Bn-A04-p17624469 | Bn-N4-p19588268 | gene | exon |
| Bn-A04-p17624526 | Bn-N4-p19588325 | gene | exon |
| Bn-A04-p17632009 | Bn-N4-p19595954 | gene |      |
| Bn-A04-p17634469 | Bn-N4-p19598402 | gene |      |
| Bn-A04-p17685210 | Bn-N4-p19648488 | gene |      |
| Bn-A04-p17686228 | Bn-N4-p19649505 | gene |      |
| Bn-A04-p17689002 | Bn-N4-p19652081 | gene | exon |
| Bn-A04-p17689324 | Bn-N4-p19652403 | gene | exon |
| Bn-A04-p17704458 | Bn-N4-p19668024 | gene |      |
| Bn-A04-p17712184 | Bn-N4-p19675646 | gene |      |
| Bn-A04-p1773333  | Bn-N4-p1721944  | gene |      |
| Bn-A04-p17736387 | Bn-N4-p19701055 | gene |      |
| Bn-A04-p17736770 | Bn-N4-p19701438 | gene |      |
| Bn-A04-p1774031  | Bn-N4-p1722642  | gene | exon |
| Bn-A04-p17740663 | Bn-N4-p19705522 | gene |      |
| Bn-A04-p17742799 | Bn-N4-p19707735 | gene | exon |
| Bn-A04-p1774926  | Bn-N4-p1723549  | gene |      |
| Bn-A04-p1775155  | Bn-N4-p1723774  | gene | exon |
| Bn-A04-p17756059 | Bn-N4-p19720981 | gene | exon |
| Bn-A04-p17760280 | Bn-N4-p19725124 | gene |      |
| Bn-A04-p17766173 | Bn-N4-p19730522 | gene | exon |
| Bn-A04-p17768404 | Bn-N4-p19732754 | gene | exon |
| Bn-A04-p17770281 | Bn-N4-p19734627 | gene | exon |
| Bn-A04-p1780149  | Bn-N4-p1728952  | gene |      |
| Bn-A04-p17811740 | Bn-N4-p19775221 | gene |      |
| Bn-A04-p17816796 | Bn-N4-p19780403 | gene |      |
| Bn-A04-p17816969 | Bn-N4-p19780571 | gene | exon |
| Bn-A04-p17820683 | Bn-N4-p19784349 | gene | exon |
| Bn-A04-p17832455 | Bn-N4-p19794435 | gene | exon |
| Bn-A04-p17858149 | Bn-N4-p19821474 | gene |      |
| Bn-A04-p17864572 | Bn-N4-p19827880 | gene | exon |
| Bn-A04-p17864879 | Bn-N4-p19828476 | gene |      |
| Bn-A04-p17870056 | Bn-N4-p19832166 | gene |      |
| Bn-A04-p17871505 | Bn-N4-p19834650 | gene | exon |
| Bn-A04-p17910578 | Bn-N4-p19885124 | gene | exon |
| Bn-A04-p17969838 | Bn-N4-p19932331 | gene |      |
| Bn-A04-p17976746 | Bn-N4-p19941543 | gene | exon |
| Bn-A04-p18027570 | Bn-N4-p19995455 | gene | exon |
| Bn-A04-p18031439 | Bn-N4-p20005862 | gene |      |
| Bn-A04-p18047327 | Bn-N4-p20021655 | gene | exon |
| Bn-A04-p18047606 | Bn-N4-p20021934 | gene | exon |
| Bn-A04-p18055770 | Bn-N4-p20029924 | gene | exon |
| Bn-A04-p18062365 | Bn-N4-p20036288 | gene |      |

|                  |                  |      |      |
|------------------|------------------|------|------|
| Bn-A04-p18071582 | Bn-N4-p20047890  | gene | exon |
| Bn-A04-p18075680 | Bn-N4-p20051903  | gene |      |
| Bn-A04-p18083568 | Bn-N4-p20063171  | gene | exon |
| Bn-A04-p18097103 | Bn-N4-p20080551  | gene | exon |
| Bn-A04-p18097421 | Bn-N4-p20080869  | gene |      |
| Bn-A04-p18125528 | Bn-N4-p20114547  | gene | exon |
| Bn-A04-p18129552 | Bn-N4-p20119480  | gene |      |
| Bn-A04-p18152854 | Bn-N4-p20141390  | gene | exon |
| Bn-A04-p1815404  | Bn-N4-p1753561   | gene |      |
| Bn-A04-p18156458 | Bn-N4-p20144992  | gene |      |
| Bn-A04-p18167535 | Bn-N4-p20156162  | gene |      |
| Bn-A04-p18167614 | Bn-N4-p20156241  | gene |      |
| Bn-A04-p18168733 | Bn-N14-p53772914 | gene |      |
| Bn-A04-p18180777 | Bn-N4-p20169038  | gene | exon |
| Bn-A04-p1824456  | Bn-N4-p1770094   | gene |      |
| Bn-A04-p1837535  | Bn-N4-p1787089   | gene | exon |
| Bn-A04-p18457550 | Bn-N14-p54136125 | gene |      |
| Bn-A04-p18458146 | Bn-N4-p20450574  | gene |      |
| Bn-A04-p18487715 | Bn-N4-p20483625  | gene |      |
| Bn-A04-p18502854 | Bn-N4-p20498001  | gene |      |
| Bn-A04-p18562244 | Bn-N4-p20563734  | gene | exon |
| Bn-A04-p18572841 | Bn-N4-p20574835  | gene | exon |
| Bn-A04-p18577466 | Bn-N4-p20579460  | gene | exon |
| Bn-A04-p18585603 | Bn-N4-p20585798  | gene |      |
| Bn-A04-p18595858 | Bn-N4-p20602010  | gene |      |
| Bn-A04-p18606660 | Bn-N4-p20612582  | gene |      |
| Bn-A04-p18613344 | Bn-N4-p20621135  | gene | exon |
| Bn-A04-p18620226 | Bn-N4-p20626993  | gene | exon |
| Bn-A04-p18621492 | Bn-N4-p20628250  | gene |      |
| Bn-A04-p18639840 | Bn-N4-p20641939  | gene | exon |
| Bn-A04-p18639922 | Bn-N14-p54400429 | gene | exon |
| Bn-A04-p1865434  | Bn-N4-p1805109   | gene |      |
| Bn-A04-p18693211 | Bn-N4-p20687712  | gene |      |
| Bn-A04-p18702920 | Bn-N4-p20696885  | gene |      |
| Bn-A04-p18731541 | Bn-N4-p20731935  | gene | exon |
| Bn-A04-p18789871 | Bn-N4-p20817952  | gene |      |
| Bn-A04-p1880654  | Bn-N4-p1836032   | gene |      |
| Bn-A04-p18806834 | Bn-N4-p20835363  | gene |      |
| Bn-A04-p1882240  | Bn-N4-p1837609   | gene |      |
| Bn-A04-p18913495 | Bn-N4-p20955081  | gene | exon |
| Bn-A04-p18918997 | Bn-N14-p54728683 | gene | exon |
| Bn-A04-p18946513 | Bn-N4-p20990324  | gene | exon |
| Bn-A04-p18961456 | Bn-N4-p21004100  | gene | exon |
| Bn-A04-p1900422  | Bn-N4-p1855279   | gene | exon |
| Bn-A04-p1948034  | Bn-N4-p2246771   | gene |      |
| Bn-A04-p1962888  | Bn-N4-p2230820   | gene | exon |
| Bn-A04-p1979834  | Bn-N4-p2220145   | gene |      |
| Bn-A04-p1991843  | Bn-N4-p2207545   | gene | exon |
| Bn-A04-p2029030  | Bn-N4-p2172423   | gene |      |
| Bn-A04-p2037077  | Bn-N4-p2161110   | gene |      |
| Bn-A04-p2048587  | Bn-N4-p2149677   | gene |      |
| Bn-A04-p2111647  | Bn-N4-p2089154   | gene |      |

|                 |                  |      |      |
|-----------------|------------------|------|------|
| Bn-A04-p2122324 | Bn-N4-p2075647   | gene | exon |
| Bn-A04-p2124879 | Bn-N4-p2070320   | gene |      |
| Bn-A04-p2146459 | Bn-N4-p2059248   | gene |      |
| Bn-A04-p2149134 | Bn-N4-p2056362   | gene | exon |
| Bn-A04-p2149214 | Bn-N4-p2056282   | gene | exon |
| Bn-A04-p2178146 | Bn-N4-p2030254   | gene |      |
| Bn-A04-p2191612 | Bn-N4-p2016910   | gene | exon |
| Bn-A04-p2192192 | Bn-N4-p2016330   | gene | exon |
| Bn-A04-p2215376 | Bn-N4-p1987197   | gene | exon |
| Bn-A04-p2215559 | Bn-N4-p1987014   | gene | exon |
| Bn-A04-p2222852 | Bn-N4-p1977753   | gene |      |
| Bn-A04-p2288114 | Bn-N4-p1930836   | gene | exon |
| Bn-A04-p2309625 | Bn-N4-p1905792   | gene | exon |
| Bn-A04-p2330084 | Bn-N4-p1892856   | gene |      |
| Bn-A04-p233588  | Bn-N4-p239356    | gene | exon |
| Bn-A04-p2401413 | Bn-N4-p2305853   | gene |      |
| Bn-A04-p24368   | Bn-N4-p133409    | gene | exon |
| Bn-A04-p2439163 | Bn-N4-p2340231   | gene |      |
| Bn-A04-p24411   | Bn-N4-p133366    | gene | exon |
| Bn-A04-p2456200 | Bn-N4-p2354532   | gene | exon |
| Bn-A04-p2498254 | Bn-N4-p2415593   | gene |      |
| Bn-A04-p251383  | Bn-N4-p252312    | gene | exon |
| Bn-A04-p261340  | Bn-N4-p263953    | gene |      |
| Bn-A04-p2650427 | Bn-N4-p2564526   | gene | exon |
| Bn-A04-p2651171 | Bn-N4-p2565270   | gene |      |
| Bn-A04-p2680732 | Bn-N4-p2593065   | gene | exon |
| Bn-A04-p2723787 | Bn-N4-p2632977   | gene |      |
| Bn-A04-p2748876 | Bn-N14-p30998304 | gene |      |
| Bn-A04-p2802411 | Bn-N4-p2705775   | gene | exon |
| Bn-A04-p2825294 | Bn-N4-p2721433   | gene | exon |
| Bn-A04-p2825362 | Bn-N4-p2721501   | gene |      |
| Bn-A04-p2833736 | Bn-N4-p2729937   | gene |      |
| Bn-A04-p2841433 | Bn-N4-p2737553   | gene |      |
| Bn-A04-p2843802 | Bn-N4-p2740497   | gene |      |
| Bn-A04-p2889239 | Bn-N4-p2767110   | gene | exon |
| Bn-A04-p2892557 | Bn-N4-p2770374   | gene |      |
| Bn-A04-p2892722 | Bn-N4-p2770540   | gene | exon |
| Bn-A04-p2892985 | Bn-N4-p2770803   | gene | exon |
| Bn-A04-p2893053 | Bn-N4-p2770871   | gene | exon |
| Bn-A04-p289974  | Bn-N4-p299261    | gene |      |
| Bn-A04-p2903530 | Bn-N4-p2778620   | gene |      |
| Bn-A04-p2941201 | Bn-N4-p2813079   | gene | exon |
| Bn-A04-p2969081 | Bn-N4-p2879542   | gene | exon |
| Bn-A04-p2983187 | Bn-N4-p2887116   | gene | exon |
| Bn-A04-p3002670 | Bn-N4-p2905453   | gene | exon |
| Bn-A04-p3004068 | Bn-N4-p2906851   | gene | exon |
| Bn-A04-p3021710 | Bn-N4-p2914174   | gene | exon |
| Bn-A04-p3022681 | Bn-N4-p2915145   | gene | exon |
| Bn-A04-p3126855 | Bn-N4-p3021601   | gene |      |
| Bn-A04-p3144839 | Bn-N4-p3045094   | gene |      |
| Bn-A04-p3181336 | Bn-N4-p3088237   | gene |      |
| Bn-A04-p3182956 | Bn-N4-p3089856   | gene |      |

|                 |                  |      |      |
|-----------------|------------------|------|------|
| Bn-A04-p320972  | Bn-N4-p334926    | gene | exon |
| Bn-A04-p3220424 | Bn-N4-p3124308   | gene |      |
| Bn-A04-p3220819 | Bn-N4-p3124704   | gene | exon |
| Bn-A04-p3225119 | Bn-N4-p3129508   | gene | exon |
| Bn-A04-p322820  | Bn-N4-p336773    | gene |      |
| Bn-A04-p3235336 | Bn-N4-p3138888   | gene | exon |
| Bn-A04-p324144  | Bn-N4-p338158    | gene |      |
| Bn-A04-p325019  | Bn-N4-p338730    | gene | exon |
| Bn-A04-p326007  | Bn-N4-p339717    | gene |      |
| Bn-A04-p3262432 | Bn-N4-p3170115   | gene |      |
| Bn-A04-p3263085 | Bn-N4-p3170762   | gene | exon |
| Bn-A04-p3267803 | Bn-N4-p3175665   | gene | exon |
| Bn-A04-p3298487 | Bn-N4-p3206903   | gene | exon |
| Bn-A04-p3345530 | Bn-N4-p3261325   | gene | exon |
| Bn-A04-p3357098 | Bn-N4-p3272380   | gene | exon |
| Bn-A04-p3357519 | Bn-N4-p3272801   | gene |      |
| Bn-A04-p3357700 | Bn-N4-p3272981   | gene |      |
| Bn-A04-p3358441 | Bn-N4-p3273734   | gene |      |
| Bn-A04-p3363190 | Bn-N4-p3278771   | gene | exon |
| Bn-A04-p3395103 | Bn-N4-p3317226   | gene |      |
| Bn-A04-p3413548 | Bn-N4-p3332043   | gene | exon |
| Bn-A04-p3414140 | Bn-N4-p3332635   | gene |      |
| Bn-A04-p3414232 | Bn-N4-p3332727   | gene |      |
| Bn-A04-p3414449 | Bn-N4-p3332942   | gene |      |
| Bn-A04-p3528213 | Bn-N4-p3440624   | gene | exon |
| Bn-A04-p354688  | Bn-N4-p367121    | gene |      |
| Bn-A04-p3571259 | Bn-N4-p3486900   | gene |      |
| Bn-A04-p3572717 | Bn-N4-p3488326   | gene |      |
| Bn-A04-p357272  | Bn-N4-p369707    | gene | exon |
| Bn-A04-p3572777 | Bn-N4-p3488386   | gene |      |
| Bn-A04-p3573078 | Bn-N4-p3488718   | gene |      |
| Bn-A04-p3583216 | Bn-N4-p3498786   | gene |      |
| Bn-A04-p3589494 | Bn-N4-p3505048   | gene |      |
| Bn-A04-p3628682 | Bn-N4-p3544790   | gene |      |
| Bn-A04-p3630793 | Bn-N4-p3546895   | gene | exon |
| Bn-A04-p3631563 | Bn-N4-p3547667   | gene |      |
| Bn-A04-p3632226 | Bn-N4-p3548333   | gene |      |
| Bn-A04-p3632611 | Bn-N4-p3548718   | gene |      |
| Bn-A04-p3651589 | Bn-N4-p3565731   | gene | exon |
| Bn-A04-p3702896 | Bn-N4-p3609768   | gene |      |
| Bn-A04-p3721587 | Bn-N4-p3624036   | gene |      |
| Bn-A04-p3724573 | Bn-N4-p3627001   | gene | exon |
| Bn-A04-p3743549 | Bn-N4-p3642885   | gene |      |
| Bn-A04-p3761523 | Bn-N4-p3662467   | gene | exon |
| Bn-A04-p3875034 | Bn-N4-p3744805   | gene | exon |
| Bn-A04-p3915978 | Bn-N4-p3773355   | gene | exon |
| Bn-A04-p3923982 | Bn-N12-p39746008 | gene |      |
| Bn-A04-p397523  | Bn-N4-p397170    | gene |      |
| Bn-A04-p398807  | Bn-N4-p398455    | gene | exon |
| Bn-A04-p4002585 | Bn-N14-p33047165 | gene |      |
| Bn-A04-p404042  | Bn-N1-p3955833   | gene |      |
| Bn-A04-p405060  | Bn-N4-p404783    | gene |      |

|                 |                  |      |      |
|-----------------|------------------|------|------|
| Bn-A04-p4221603 | Bn-N4-p4491938   | gene | exon |
| Bn-A04-p4222491 | Bn-N4-p4492827   | gene | exon |
| Bn-A04-p4223859 | Bn-N4-p4494197   | gene |      |
| Bn-A04-p4224646 | Bn-N4-p4494988   | gene |      |
| Bn-A04-p4224705 | Bn-N4-p4495047   | gene |      |
| Bn-A04-p4249132 | Bn-N4-p4523660   | gene | exon |
| Bn-A04-p4265054 | Bn-N4-p4532069   | gene | exon |
| Bn-A04-p4265606 | Bn-N4-p4532621   | gene | exon |
| Bn-A04-p4276334 | Bn-N4-p4547759   | gene |      |
| Bn-A04-p4286343 | Bn-N4-p4577694   | gene | exon |
| Bn-A04-p4294569 | Bn-N4-p4585331   | gene | exon |
| Bn-A04-p4307559 | Bn-N4-p4600850   | gene | exon |
| Bn-A04-p4319736 | Bn-N4-p4613586   | gene | exon |
| Bn-A04-p4330419 | Bn-N4-p4625457   | gene |      |
| Bn-A04-p4346492 | Bn-N4-p4641714   | gene |      |
| Bn-A04-p461679  | Bn-N14-p23453552 | gene | exon |
| Bn-A04-p4717909 | Bn-N4-p5041861   | gene |      |
| Bn-A04-p4736023 | Bn-N4-p5076254   | gene |      |
| Bn-A04-p4742377 | Bn-N4-p5091187   | gene |      |
| Bn-A04-p4742432 | Bn-N4-p5091242   | gene |      |
| Bn-A04-p4823556 | Bn-N4-p5186650   | gene |      |
| Bn-A04-p4825669 | Bn-N4-p5188763   | gene |      |
| Bn-A04-p4874840 | Bn-N4-p5232333   | gene |      |
| Bn-A04-p4881168 | Bn-N4-p5238741   | gene |      |
| Bn-A04-p4881807 | Bn-N14-p34700808 | gene | exon |
| Bn-A04-p4897489 | Bn-N4-p5314588   | gene |      |
| Bn-A04-p4976932 | Bn-N4-p5380466   | gene | exon |
| Bn-A04-p4977488 | Bn-N4-p5381022   | gene | exon |
| Bn-A04-p4978478 | Bn-N4-p5382012   | gene | exon |
| Bn-A04-p4978492 | Bn-N4-p5382026   | gene | exon |
| Bn-A04-p4978780 | Bn-N4-p5382314   | gene | exon |
| Bn-A04-p5183306 | Bn-N4-p5614929   | gene | exon |
| Bn-A04-p5270881 | Bn-N4-p5713624   | gene | exon |
| Bn-A04-p5273199 | Bn-N4-p5715924   | gene |      |
| Bn-A04-p5378408 | Bn-N4-p5827825   | gene |      |
| Bn-A04-p560622  | Bn-N4-p554487    | gene |      |
| Bn-A04-p570250  | Bn-N4-p564486    | gene | exon |
| Bn-A04-p5715780 | Bn-N4-p6269396   | gene |      |
| Bn-A04-p5788908 | Bn-N4-p7409965   | gene |      |
| Bn-A04-p5852413 | Bn-N4-p7460179   | gene |      |
| Bn-A04-p5853514 | Bn-N4-p7457881   | gene | exon |
| Bn-A04-p5872564 | Bn-N4-p7480361   | gene |      |
| Bn-A04-p5938125 | Bn-N4-p7586749   | gene | exon |
| Bn-A04-p5938245 | Bn-N4-p7586869   | gene | exon |
| Bn-A04-p5982123 | Bn-N4-p7640512   | gene | exon |
| Bn-A04-p5985513 | Bn-N4-p7643273   | gene |      |
| Bn-A04-p5987463 | Bn-N4-p7645250   | gene |      |
| Bn-A04-p6023914 | Bn-N4-p7681393   | gene | exon |
| Bn-A04-p6228211 | Bn-N14-p37289690 | gene | exon |
| Bn-A04-p6240855 | Bn-N4-p7917200   | gene | exon |
| Bn-A04-p6277634 | Bn-N4-p7970235   | gene | exon |
| Bn-A04-p6284377 | Bn-N4-p7977624   | gene | exon |

|                 |                        |      |      |
|-----------------|------------------------|------|------|
| Bn-A04-p6319430 | Bn-N4-p8014387         | gene | exon |
| Bn-A04-p6376472 | Bn-N14-p37577067       | gene | exon |
| Bn-A04-p637683  | Bn-N4-p648894          | gene | exon |
| Bn-A04-p6402808 | Bn-N4-p8099707         | gene | exon |
| Bn-A04-p6445083 | Bn-Scaffold01456-p1233 | gene |      |
| Bn-A04-p646064  | Bn-N4-p657427          | gene | exon |
| Bn-A04-p646105  | Bn-N4-p657447          | gene | exon |
| Bn-A04-p6465442 | Bn-N14-p37632125       | gene |      |
| Bn-A04-p648152  | Bn-N4-p659515          | gene | exon |
| Bn-A04-p6555913 | Bn-N4-p8247861         | gene |      |
| Bn-A04-p6563107 | Bn-N4-p8255950         | gene | exon |
| Bn-A04-p6563200 | Bn-N4-p8256043         | gene | exon |
| Bn-A04-p6588935 | Bn-N4-p8296575         | gene | exon |
| Bn-A04-p6632126 | Bn-N4-p8348683         | gene | exon |
| Bn-A04-p6640990 | Bn-N4-p8360809         | gene | exon |
| Bn-A04-p665754  | Bn-N4-p671632          | gene | exon |
| Bn-A04-p665932  | Bn-N4-p671810          | gene | exon |
| Bn-A04-p665967  | Bn-N4-p671845          | gene | exon |
| Bn-A04-p6673120 | Bn-N4-p8391311         | gene | exon |
| Bn-A04-p6678797 | Bn-N4-p8396236         | gene | exon |
| Bn-A04-p6679263 | Bn-N4-p8396702         | gene | exon |
| Bn-A04-p6679568 | Bn-N4-p8397006         | gene | exon |
| Bn-A04-p669182  | Bn-N4-p675443          | gene | exon |
| Bn-A04-p6719949 | Bn-N4-p8439218         | gene | exon |
| Bn-A04-p6764233 | Bn-N4-p8500149         | gene |      |
| Bn-A04-p6765045 | Bn-N4-p8500961         | gene |      |
| Bn-A04-p6773984 | Bn-N4-p8509867         | gene |      |
| Bn-A04-p6775008 | Bn-N4-p8510915         | gene |      |
| Bn-A04-p6776597 | Bn-N4-p8512504         | gene | exon |
| Bn-A04-p6776786 | Bn-N4-p8512693         | gene |      |
| Bn-A04-p6790373 | Bn-N4-p8525888         | gene | exon |
| Bn-A04-p6929056 | Bn-N4-p8682719         | gene | exon |
| Bn-A04-p6953674 | Bn-N4-p8706711         | gene | exon |
| Bn-A04-p6958157 | Bn-N4-p8711151         | gene | exon |
| Bn-A04-p7003715 | Bn-N4-p8751132         | gene | exon |
| Bn-A04-p7044446 | Bn-N14-p38203369       | gene | exon |
| Bn-A04-p7077586 | Bn-N4-p8807525         | gene | exon |
| Bn-A04-p7093491 | Bn-N4-p8824849         | gene | exon |
| Bn-A04-p7141171 | Bn-N4-p8866013         | gene |      |
| Bn-A04-p7142597 | Bn-N4-p8867424         | gene |      |
| Bn-A04-p7157859 | Bn-N4-p8893629         | gene |      |
| Bn-A04-p7161326 | Bn-N4-p8897087         | gene |      |
| Bn-A04-p7162690 | Bn-N4-p8898451         | gene |      |
| Bn-A04-p7233978 | Bn-N4-p8978598         | gene | exon |
| Bn-A04-p7322000 | Bn-N4-p9083388         | gene | exon |
| Bn-A04-p7322497 | Bn-N4-p9083885         | gene | exon |
| Bn-A04-p7349115 | Bn-N4-p9160821         | gene | exon |
| Bn-A04-p7349794 | Bn-N4-p9161498         | gene | exon |
| Bn-A04-p7350870 | Bn-N4-p9162577         | gene |      |
| Bn-A04-p7389149 | Bn-N4-p9203787         | gene |      |
| Bn-A04-p7407657 | Bn-N4-p9228932         | gene | exon |
| Bn-A04-p741528  | Bn-N4-p745025          | gene |      |

|                 |                  |      |      |
|-----------------|------------------|------|------|
| Bn-A04-p7431245 | Bn-N4-p9252792   | gene |      |
| Bn-A04-p7431816 | Bn-N4-p9253344   | gene |      |
| Bn-A04-p745024  | Bn-N4-p748522    | gene | exon |
| Bn-A04-p7450678 | Bn-N4-p9273747   | gene | exon |
| Bn-A04-p7471870 | Bn-N4-p9311436   | gene |      |
| Bn-A04-p7474589 | Bn-N4-p9314153   | gene |      |
| Bn-A04-p7488675 | Bn-N4-p9348797   | gene |      |
| Bn-A04-p7490390 | Bn-N14-p38833708 | gene |      |
| Bn-A04-p7520330 | Bn-N4-p9383429   | gene | exon |
| Bn-A04-p7541325 | Bn-N4-p9414441   | gene |      |
| Bn-A04-p7541762 | Bn-N4-p9414878   | gene | exon |
| Bn-A04-p7542594 | Bn-N4-p9415709   | gene | exon |
| Bn-A04-p7582986 | Bn-N4-p9451011   | gene | exon |
| Bn-A04-p7584788 | Bn-N4-p9452812   | gene |      |
| Bn-A04-p7586476 | Bn-N4-p9454517   | gene | exon |
| Bn-A04-p7588820 | Bn-N4-p9456872   | gene |      |
| Bn-A04-p761383  | Bn-N4-p759440    | gene | exon |
| Bn-A04-p7625503 | Bn-N4-p9498896   | gene |      |
| Bn-A04-p7629926 | Bn-N4-p9503381   | gene |      |
| Bn-A04-p7635112 | Bn-N4-p9510178   | gene |      |
| Bn-A04-p7666812 | Bn-N4-p9540723   | gene |      |
| Bn-A04-p7666981 | Bn-N4-p9540892   | gene |      |
| Bn-A04-p7694288 | Bn-N4-p9562834   | gene | exon |
| Bn-A04-p7819391 | Bn-N4-p9710288   | gene |      |
| Bn-A04-p7819525 | Bn-N4-p9710410   | gene |      |
| Bn-A04-p783339  | Bn-N4-p781449    | gene | exon |
| Bn-A04-p784708  | Bn-N4-p782818    | gene | exon |
| Bn-A04-p784894  | Bn-N4-p783004    | gene | exon |
| Bn-A04-p785628  | Bn-N4-p783742    | gene | exon |
| Bn-A04-p786588  | Bn-N4-p784701    | gene |      |
| Bn-A04-p792399  | Bn-N4-p790541    | gene | exon |
| Bn-A04-p803315  | Bn-N4-p801225    | gene | exon |
| Bn-A04-p810935  | Bn-N4-p811294    | gene | exon |
| Bn-A04-p813173  | Bn-N4-p813484    | gene | exon |
| Bn-A04-p8178053 | Bn-N14-p39909486 | gene | exon |
| Bn-A04-p8178997 | Bn-N4-p10061305  | gene | exon |
| Bn-A04-p8348750 | Bn-N4-p10238804  | gene | exon |
| Bn-A04-p8348806 | Bn-N4-p10238860  | gene | exon |
| Bn-A04-p8441932 | Bn-N4-p10359241  | gene |      |
| Bn-A04-p8555881 | Bn-N4-p10457792  | gene | exon |
| Bn-A04-p8559580 | Bn-N4-p10461522  | gene | exon |
| Bn-A04-p8564072 | Bn-N4-p10466045  | gene |      |
| Bn-A04-p8595035 | Bn-N7-p13676973  | gene | exon |
| Bn-A04-p860212  | Bn-N4-p855702    | gene | exon |
| Bn-A04-p8609799 | Bn-N14-p40537353 | gene | exon |
| Bn-A04-p8612311 | Bn-N4-p10512694  | gene |      |
| Bn-A04-p8615093 | Bn-N14-p40543502 | gene |      |
| Bn-A04-p8790433 | Bn-N4-p10723288  | gene | exon |
| Bn-A04-p8803630 | Bn-N4-p10744229  | gene | exon |
| Bn-A04-p8817223 | Bn-N4-p10773879  | gene |      |
| Bn-A04-p8828395 | Bn-N4-p10779021  | gene | exon |
| Bn-A04-p8828462 | Bn-N4-p10779088  | gene | exon |



|                 |                 |      |      |
|-----------------|-----------------|------|------|
| Bn-A04-p8892416 | Bn-N4-p10846981 | gene |      |
| Bn-A04-p8906594 | Bn-N4-p10861544 | gene | exon |
| Bn-A04-p8974361 | Bn-N4-p10922129 | gene |      |
| Bn-A04-p9024009 | Bn-N4-p10964749 | gene | exon |
| Bn-A04-p9086923 | Bn-N4-p11036134 | gene |      |
| Bn-A04-p9088043 | Bn-N4-p11037233 | gene | exon |
| Bn-A04-p9088760 | Bn-N4-p11037947 | gene |      |
| Bn-A04-p9097344 | Bn-N4-p11046720 | gene | exon |
| Bn-A04-p9098709 | Bn-N4-p11048084 | gene | exon |
| Bn-A04-p9099209 | Bn-N4-p11048585 | gene | exon |
| Bn-A04-p9107147 | Bn-N4-p11056629 | gene |      |
| Bn-A04-p9119079 | Bn-N4-p11071258 | gene | exon |
| Bn-A04-p9119142 | Bn-N4-p11071321 | gene | exon |
| Bn-A04-p922828  | Bn-N4-p912024   | gene |      |
| Bn-A04-p9231842 | Bn-N4-p11168852 | gene | exon |
| Bn-A04-p9232024 | Bn-N4-p11169034 | gene |      |
| Bn-A04-p9232365 | Bn-N4-p11169375 | gene | exon |
| Bn-A04-p9232828 | Bn-N4-p11169849 | gene |      |
| Bn-A04-p928350  | Bn-N4-p917323   | gene | exon |
| Bn-A04-p9340809 | Bn-N6-p5084813  | gene | exon |
| Bn-A04-p934150  | Bn-N4-p923006   | gene | exon |
| Bn-A04-p9355248 | Bn-N4-p11290169 | gene |      |
| Bn-A04-p9363550 | Bn-N4-p11302129 | gene |      |
| Bn-A04-p9379937 | Bn-N4-p11330582 | gene |      |
| Bn-A04-p9484747 | Bn-N4-p11472813 | gene |      |
| Bn-A04-p9505012 | Bn-N4-p11485501 | gene | exon |
| Bn-A04-p9524800 | Bn-N4-p11513641 | gene |      |
| Bn-A04-p9543062 | Bn-N4-p11529941 | gene |      |
| Bn-A04-p9566708 | Bn-N4-p11552797 | gene | exon |
| Bn-A04-p9606190 | Bn-N4-p11603803 | gene | exon |
| Bn-A04-p9623505 | Bn-N4-p11612168 | gene | exon |
| Bn-A04-p9623913 | Bn-N4-p11612576 | gene | exon |
| Bn-A04-p9639648 | Bn-N4-p11631956 | gene | exon |
| Bn-A04-p9673337 | Bn-N4-p11667162 | gene |      |
| Bn-A04-p9675790 | Bn-N4-p11669634 | gene | exon |
| Bn-A04-p9746407 | Bn-N4-p11733588 | gene | exon |
| Bn-A04-p980952  | Bn-N4-p930085   | gene |      |
| Bn-A04-p9811506 | Bn-N4-p11792965 | gene | exon |
| Bn-A04-p9814236 | Bn-N4-p11795696 | gene | exon |
| Bn-A04-p9814284 | Bn-N4-p11795744 | gene | exon |
| Bn-A04-p9815052 | Bn-N4-p11796512 | gene | exon |
| Bn-A04-p9819724 | Bn-N4-p11801084 | gene | exon |
| Bn-A04-p9819885 | Bn-N4-p11801243 | gene |      |
| Bn-A04-p982068  | Bn-N4-p931248   | gene |      |
| Bn-A04-p9830766 | Bn-N4-p11814273 | gene |      |
| Bn-A04-p9844020 | Bn-N4-p11826893 | gene | exon |
| Bn-A04-p9847875 | Bn-N4-p11830458 | gene |      |
| Bn-A04-p9848849 | Bn-N4-p11831435 | gene |      |
| Bn-A04-p9868258 | Bn-N4-p11856220 | gene |      |
| Bn-A04-p9870167 | Bn-N4-p11858133 | gene |      |
| Bn-A04-p9920827 | Bn-N4-p11910916 | gene |      |
| Bn-A04-p9920873 | Bn-N4-p11910962 | gene |      |

|                  |                  |      |      |
|------------------|------------------|------|------|
| Bn-A04-p9921876  | Bn-N4-p11911966  | gene |      |
| Bn-A04-p9983165  | Bn-N4-p11965185  | gene | exon |
| Bn-A05-p1006754  | Bn-N5-p1117066   | gene | exon |
| Bn-A05-p10179640 | Bn-N5-p9731217   | gene |      |
| Bn-A05-p10181096 | Bn-N5-p9732665   | gene |      |
| Bn-A05-p10241814 | Bn-N5-p9805761   | gene |      |
| Bn-A05-p10278245 | Bn-N5-p9842754   | gene |      |
| Bn-A05-p10305352 | Bn-N5-p9880048   | gene | exon |
| Bn-A05-p10320143 | Bn-N5-p9895872   | gene | exon |
| Bn-A05-p10320501 | Bn-N5-p9896230   | gene | exon |
| Bn-A05-p10321304 | Bn-N5-p9897033   | gene |      |
| Bn-A05-p10321580 | Bn-N5-p9897309   | gene | exon |
| Bn-A05-p1035167  | Bn-N5-p1142967   | gene | exon |
| Bn-A05-p103817   | Bn-N5-p123677    | gene | exon |
| Bn-A05-p10423564 | Bn-N5-p10023951  | gene | exon |
| Bn-A05-p10426347 | Bn-N5-p10026726  | gene | exon |
| Bn-A05-p10426618 | Bn-N5-p10027013  | gene | exon |
| Bn-A05-p10622526 | Bn-N5-p10251993  | gene |      |
| Bn-A05-p10697862 | Bn-N5-p10321363  | gene | exon |
| Bn-A05-p10719967 | Bn-N5-p10361634  | gene | exon |
| Bn-A05-p10760570 | Bn-N5-p10401975  | gene |      |
| Bn-A05-p10783057 | Bn-N5-p10419340  | gene |      |
| Bn-A05-p108510   | Bn-N5-p127460    | gene |      |
| Bn-A05-p10922835 | Bn-N5-p10577272  | gene |      |
| Bn-A05-p10939686 | Bn-N5-p10599417  | gene | exon |
| Bn-A05-p10939740 | Bn-N5-p10599471  | gene | exon |
| Bn-A05-p10940401 | Bn-N5-p10600132  | gene | exon |
| Bn-A05-p109998   | Bn-N5-p128987    | gene |      |
| Bn-A05-p10999977 | Bn-N5-p10656438  | gene | exon |
| Bn-A05-p11000036 | Bn-N5-p10656497  | gene | exon |
| Bn-A05-p11000261 | Bn-N5-p10656719  | gene |      |
| Bn-A05-p11012409 | Bn-N5-p10662213  | gene |      |
| Bn-A05-p11013933 | Bn-N5-p10663727  | gene |      |
| Bn-A05-p11013981 | Bn-N5-p10663775  | gene | exon |
| Bn-A05-p11044537 | Bn-N5-p10674781  | gene |      |
| Bn-A05-p11056573 | Bn-N5-p10686874  | gene | exon |
| Bn-A05-p11057820 | Bn-N5-p10688058  | gene |      |
| Bn-A05-p1107888  | Bn-N5-p1216224   | gene |      |
| Bn-A05-p11084469 | Bn-N5-p10708377  | gene | exon |
| Bn-A05-p11225095 | Bn-N5-p10868110  | gene |      |
| Bn-A05-p11279325 | Bn-N5-p10912453  | gene |      |
| Bn-A05-p11279669 | Bn-N5-p10912797  | gene |      |
| Bn-A05-p1134104  | Bn-N5-p1245455   | gene |      |
| Bn-A05-p11377111 | Bn-N5-p11021231  | gene |      |
| Bn-A05-p11384651 | Bn-N5-p11029410  | gene | exon |
| Bn-A05-p11429310 | Bn-N5-p11076942  | gene |      |
| Bn-A05-p114598   | Bn-N5-p133603    | gene | exon |
| Bn-A05-p11514604 | Bn-N5-p11144951  | gene | exon |
| Bn-A05-p11593933 | Bn-N15-p25890644 | gene | exon |
| Bn-A05-p11606554 | Bn-N5-p11228759  | gene | exon |
| Bn-A05-p11607344 | Bn-N5-p11229549  | gene | exon |
| Bn-A05-p11785796 | Bn-N5-p11394645  | gene |      |

|                  |                        |      |      |
|------------------|------------------------|------|------|
| Bn-A05-p11786537 | Bn-N5-p11395386        | gene |      |
| Bn-A05-p11840240 | Bn-N5-p11445225        | gene |      |
| Bn-A05-p11856345 | Bn-N5-p11464718        | gene |      |
| Bn-A05-p11966222 | Bn-N5-p11902010        | gene |      |
| Bn-A05-p11975840 | Bn-N5-p11911662        | gene |      |
| Bn-A05-p11990369 | Bn-N5-p11929939        | gene |      |
| Bn-A05-p1204987  | Bn-N5-p1293109         | gene | exon |
| Bn-A05-p12056452 | Bn-N5-p11994559        | gene | exon |
| Bn-A05-p12158169 | Bn-N5-p12100389        | gene | exon |
| Bn-A05-p1216828  | Bn-N5-p1309989         | gene | exon |
| Bn-A05-p1220485  | Bn-N5-p1313649         | gene | exon |
| Bn-A05-p12208604 | Bn-N5-p12152813        | gene | exon |
| Bn-A05-p12208728 | Bn-N5-p12152937        | gene | exon |
| Bn-A05-p12208840 | Bn-N5-p12153049        | gene | exon |
| Bn-A05-p12209129 | Bn-N5-p12153338        | gene |      |
| Bn-A05-p12209466 | Bn-N5-p12153675        | gene |      |
| Bn-A05-p1237296  | Bn-N5-p1331338         | gene | exon |
| Bn-A05-p12378382 | Bn-N5-p12329634        | gene |      |
| Bn-A05-p12408504 | Bn-N5-p12360876        | gene |      |
| Bn-A05-p12597194 | Bn-N5-p12521345        | gene | exon |
| Bn-A05-p1279304  | Bn-N5-p1383086         | gene | exon |
| Bn-A05-p12845300 | Bn-N5-p12782155        | gene |      |
| Bn-A05-p12952248 | Bn-N15-p22372553       | gene | exon |
| Bn-A05-p1299570  | Bn-N5-p1401301         | gene | exon |
| Bn-A05-p13013349 | Bn-N5-p12952826        | gene |      |
| Bn-A05-p1308471  | Bn-N5-p1410753         | gene | exon |
| Bn-A05-p13119450 | Bn-N5-p11820809        | gene | exon |
| Bn-A05-p13126937 | Bn-N5-p11813560        | gene | exon |
| Bn-A05-p13165406 | Bn-N5-p11787351        | gene | exon |
| Bn-A05-p13190945 | Bn-N5-p17871658        | gene | exon |
| Bn-A05-p13224690 | Bn-N5-p17912096        | gene | exon |
| Bn-A05-p13227178 | Bn-N5-p17914574        | gene | exon |
| Bn-A05-p1335771  | Bn-N5-p1436231         | gene | exon |
| Bn-A05-p1349520  | Bn-N5-p1453955         | gene |      |
| Bn-A05-p1350976  | Bn-N5-p1455247         | gene | exon |
| Bn-A05-p1353104  | Bn-N14-p2211245        | gene | exon |
| Bn-A05-p1356378  | Bn-N5-p1459257         | gene | exon |
| Bn-A05-p13565564 | Bn-N5-p13247076        | gene |      |
| Bn-A05-p13687507 | Bn-Scaffold03512-p2287 | gene |      |
| Bn-A05-p13688426 | Bn-N5-p13343674        | gene |      |
| Bn-A05-p13688982 | Bn-N5-p13344230        | gene | exon |
| Bn-A05-p13690413 | Bn-N5-p13345661        | gene |      |
| Bn-A05-p1372057  | Bn-N5-p1480737         | gene | exon |
| Bn-A05-p13778123 | Bn-N13-p36788938       | gene |      |
| Bn-A05-p13813146 | Bn-N5-p13489952        | gene |      |
| Bn-A05-p13822414 | Bn-N5-p13499507        | gene | exon |
| Bn-A05-p13822616 | Bn-N5-p13499709        | gene |      |
| Bn-A05-p13823408 | Bn-N5-p13500501        | gene | exon |
| Bn-A05-p13825402 | Bn-N5-p13502511        | gene |      |
| Bn-A05-p1384000  | Bn-N5-p1493281         | gene | exon |
| Bn-A05-p1384677  | Bn-N5-p1493971         | gene |      |
| Bn-A05-p13897888 | Bn-N5-p13579644        | gene |      |

|                  |                  |      |      |
|------------------|------------------|------|------|
| Bn-A05-p13948854 | Bn-N5-p13668111  | gene |      |
| Bn-A05-p1396162  | Bn-N5-p1505543   | gene | exon |
| Bn-A05-p1396567  | Bn-N5-p1505947   | gene | exon |
| Bn-A05-p14040907 | Bn-N5-p13760234  | gene | exon |
| Bn-A05-p14042687 | Bn-N5-p13761427  | gene | exon |
| Bn-A05-p140798   | Bn-N5-p173295    | gene | exon |
| Bn-A05-p14104827 | Bn-N5-p13828339  | gene | exon |
| Bn-A05-p14106384 | Bn-N5-p13829896  | gene | exon |
| Bn-A05-p14146305 | Bn-N5-p13891987  | gene | exon |
| Bn-A05-p14198626 | Bn-N5-p13959974  | gene | exon |
| Bn-A05-p14213049 | Bn-N5-p13982304  | gene | exon |
| Bn-A05-p14325043 | Bn-N5-p14842237  | gene | exon |
| Bn-A05-p1436011  | Bn-N5-p1568006   | gene | exon |
| Bn-A05-p14374199 | Bn-N5-p14911377  | gene |      |
| Bn-A05-p14426042 | Bn-N5-p14948520  | gene |      |
| Bn-A05-p14426121 | Bn-N5-p14948599  | gene |      |
| Bn-A05-p14443915 | Bn-N5-p14967024  | gene | exon |
| Bn-A05-p14444179 | Bn-N5-p14967288  | gene | exon |
| Bn-A05-p14447476 | Bn-N5-p14970698  | gene |      |
| Bn-A05-p14477462 | Bn-N5-p14992271  | gene | exon |
| Bn-A05-p14483962 | Bn-N5-p15020078  | gene |      |
| Bn-A05-p1451750  | Bn-N5-p1577981   | gene | exon |
| Bn-A05-p14521315 | Bn-N5-p15036982  | gene | exon |
| Bn-A05-p1457058  | Bn-N5-p1583214   | gene | exon |
| Bn-A05-p14580151 | Bn-N5-p15080209  | gene |      |
| Bn-A05-p14600386 | Bn-N5-p15107862  | gene | exon |
| Bn-A05-p14612446 | Bn-N5-p15115218  | gene |      |
| Bn-A05-p14662656 | Bn-N5-p15173819  | gene | exon |
| Bn-A05-p14663154 | Bn-N15-p31441363 | gene |      |
| Bn-A05-p14673407 | Bn-N5-p15189140  | gene |      |
| Bn-A05-p1475369  | Bn-N5-p1602173   | gene | exon |
| Bn-A05-p1492327  | Bn-N5-p1619320   | gene | exon |
| Bn-A05-p1496037  | Bn-N5-p1623592   | gene | exon |
| Bn-A05-p1499192  | Bn-N5-p1626797   | gene |      |
| Bn-A05-p15004033 | Bn-N5-p15551040  | gene | exon |
| Bn-A05-p15107406 | Bn-N5-p15642723  | gene |      |
| Bn-A05-p15126127 | Bn-N5-p15684555  | gene |      |
| Bn-A05-p15224458 | Bn-N5-p15731705  | gene | exon |
| Bn-A05-p15290524 | Bn-N5-p15778804  | gene |      |
| Bn-A05-p15297460 | Bn-N5-p15782664  | gene | exon |
| Bn-A05-p15320768 | Bn-N5-p15801621  | gene |      |
| Bn-A05-p15322236 | Bn-N5-p15803039  | gene |      |
| Bn-A05-p15491528 | Bn-N5-p15975442  | gene |      |
| Bn-A05-p1554943  | Bn-N5-p1722333   | gene |      |
| Bn-A05-p15551715 | Bn-N9-p27467116  | gene | exon |
| Bn-A05-p1561518  | Bn-N5-p1728875   | gene | exon |
| Bn-A05-p15663987 | Bn-N9-p27582128  | gene |      |
| Bn-A05-p15702744 | Bn-N9-p27627392  | gene |      |
| Bn-A05-p1578074  | Bn-N5-p1753871   | gene |      |
| Bn-A05-p15780983 | Bn-N9-p27718465  | gene | exon |
| Bn-A05-p1579155  | Bn-N5-p1754900   | gene |      |
| Bn-A05-p1579208  | Bn-N5-p1754953   | gene | exon |

|                  |                  |      |      |
|------------------|------------------|------|------|
| Bn-A05-p1580246  | Bn-N5-p1755984   | gene | exon |
| Bn-A05-p15812933 | Bn-N9-p27767000  | gene | exon |
| Bn-A05-p15859690 | Bn-N5-p16065172  | gene | exon |
| Bn-A05-p15906659 | Bn-N5-p16124527  | gene | exon |
| Bn-A05-p15938967 | Bn-N5-p16147503  | gene |      |
| Bn-A05-p15940232 | Bn-N5-p16148773  | gene |      |
| Bn-A05-p15948690 | Bn-N5-p16159482  | gene |      |
| Bn-A05-p16195531 | Bn-N5-p16479473  | gene |      |
| Bn-A05-p16272686 | Bn-N5-p16556180  | gene | exon |
| Bn-A05-p1630204  | Bn-N5-p1805167   | gene | exon |
| Bn-A05-p16359545 | Bn-N5-p16652852  | gene |      |
| Bn-A05-p16392699 | Bn-N5-p16690718  | gene |      |
| Bn-A05-p16460167 | Bn-N5-p16762643  | gene |      |
| Bn-A05-p16468152 | Bn-N4-p1024552   | gene |      |
| Bn-A05-p16538605 | Bn-N5-p16825020  | gene |      |
| Bn-A05-p16590105 | Bn-N5-p16888750  | gene | exon |
| Bn-A05-p16625783 | Bn-N5-p16955195  | gene | exon |
| Bn-A05-p16664411 | Bn-N5-p17005160  | gene |      |
| Bn-A05-p16735186 | Bn-N5-p17072997  | gene |      |
| Bn-A05-p16738292 | Bn-N5-p17074249  | gene |      |
| Bn-A05-p16738871 | Bn-N5-p17074827  | gene |      |
| Bn-A05-p1679589  | Bn-N5-p1885398   | gene | exon |
| Bn-A05-p16892759 | Bn-N5-p17224711  | gene |      |
| Bn-A05-p1689277  | Bn-N5-p1890245   | gene |      |
| Bn-A05-p16897600 | Bn-N5-p17229653  | gene |      |
| Bn-A05-p16898305 | Bn-N5-p17230322  | gene |      |
| Bn-A05-p16900864 | Bn-N5-p17232898  | gene |      |
| Bn-A05-p1690598  | Bn-N5-p1891553   | gene | exon |
| Bn-A05-p1697401  | Bn-N5-p1896787   | gene | exon |
| Bn-A05-p1701030  | Bn-N5-p1901300   | gene |      |
| Bn-A05-p17108506 | Bn-N5-p17595916  | gene | exon |
| Bn-A05-p17215153 | Bn-N5-p18137448  | gene | exon |
| Bn-A05-p17241091 | Bn-N5-p18160629  | gene |      |
| Bn-A05-p17243214 | Bn-N5-p18167468  | gene |      |
| Bn-A05-p17262653 | Bn-N5-p18175902  | gene | exon |
| Bn-A05-p17292224 | Bn-N5-p18232665  | gene | exon |
| Bn-A05-p17366544 | Bn-N15-p36454254 | gene |      |
| Bn-A05-p17368155 | Bn-N5-p18290404  | gene | exon |
| Bn-A05-p17417422 | Bn-N15-p36517662 | gene | exon |
| Bn-A05-p17419591 | Bn-N5-p18337436  | gene |      |
| Bn-A05-p17420484 | Bn-N5-p18338329  | gene | exon |
| Bn-A05-p17420613 | Bn-N5-p18338458  | gene | exon |
| Bn-A05-p17442162 | Bn-N15-p36557068 | gene |      |
| Bn-A05-p17544675 | Bn-N5-p18437903  | gene | exon |
| Bn-A05-p17566846 | Bn-N5-p18574806  | gene | exon |
| Bn-A05-p17567179 | Bn-N5-p18575139  | gene | exon |
| Bn-A05-p17568606 | Bn-N5-p18576572  | gene |      |
| Bn-A05-p1761473  | Bn-N5-p1949635   | gene |      |
| Bn-A05-p17617527 | Bn-N5-p18610123  | gene |      |
| Bn-A05-p17617724 | Bn-N5-p18740415  | gene | exon |
| Bn-A05-p1762229  | Bn-N5-p1949899   | gene |      |
| Bn-A05-p1764530  | Bn-N5-p1953359   | gene |      |

|                  |                        |      |      |
|------------------|------------------------|------|------|
| Bn-A05-p17675829 | Bn-N5-p18660925        | gene | exon |
| Bn-A05-p17739455 | Bn-N5-p18759377        | gene | exon |
| Bn-A05-p17758084 | Bn-N5-p18779379        | gene | exon |
| Bn-A05-p17774694 | Bn-N5-p18803472        | gene | exon |
| Bn-A05-p17822322 | Bn-N5-p18839244        | gene |      |
| Bn-A05-p17894045 | Bn-N5-p18900369        | gene | exon |
| Bn-A05-p17895197 | Bn-N5-p18901501        | gene | exon |
| Bn-A05-p17928363 | Bn-N5-p18933887        | gene |      |
| Bn-A05-p17931505 | Bn-N5-p18936830        | gene |      |
| Bn-A05-p1806574  | Bn-N5-p1985171         | gene | exon |
| Bn-A05-p18066693 | Bn-N5-p19035144        | gene | exon |
| Bn-A05-p18088421 | Bn-N5-p19057410        | gene |      |
| Bn-A05-p18112139 | Bn-N5-p19080269        | gene |      |
| Bn-A05-p18125663 | Bn-N5-p19101504        | gene |      |
| Bn-A05-p18139526 | Bn-N5-p19115298        | gene |      |
| Bn-A05-p18147040 | Bn-Scaffold01376-p6621 | gene |      |
| Bn-A05-p18161591 | Bn-N5-p19136523        | gene | exon |
| Bn-A05-p18191062 | Bn-N5-p19155169        | gene |      |
| Bn-A05-p18196942 | Bn-N5-p19164488        | gene | exon |
| Bn-A05-p18229790 | Bn-N5-p19205661        | gene |      |
| Bn-A05-p182664   | Bn-N5-p215149          | gene |      |
| Bn-A05-p18309576 | Bn-N5-p19266967        | gene | exon |
| Bn-A05-p18310658 | Bn-N5-p19268047        | gene |      |
| Bn-A05-p18310838 | Bn-N5-p19268227        | gene |      |
| Bn-A05-p18391243 | Bn-N5-p19350612        | gene |      |
| Bn-A05-p18391581 | Bn-N5-p19350950        | gene |      |
| Bn-A05-p18452462 | Bn-N5-p19412722        | gene |      |
| Bn-A05-p18452563 | Bn-N5-p19412824        | gene |      |
| Bn-A05-p18453140 | Bn-N5-p19413401        | gene |      |
| Bn-A05-p18458181 | Bn-N5-p19422118        | gene | exon |
| Bn-A05-p18490530 | Bn-N5-p19458814        | gene |      |
| Bn-A05-p18505935 | Bn-N5-p19477927        | gene | exon |
| Bn-A05-p18543237 | Bn-N5-p19498317        | gene |      |
| Bn-A05-p18543933 | Bn-N5-p19498971        | gene |      |
| Bn-A05-p18547040 | Bn-N5-p19501941        | gene |      |
| Bn-A05-p1857946  | Bn-N5-p2039192         | gene | exon |
| Bn-A05-p18598001 | Bn-N5-p19546408        | gene |      |
| Bn-A05-p18642842 | Bn-N5-p19591839        | gene |      |
| Bn-A05-p18643459 | Bn-N5-p19592456        | gene |      |
| Bn-A05-p18689306 | Bn-N5-p19642096        | gene |      |
| Bn-A05-p18730286 | Bn-N5-p19673681        | gene |      |
| Bn-A05-p18768801 | Bn-N5-p19730837        | gene |      |
| Bn-A05-p18770393 | Bn-N5-p19732402        | gene | exon |
| Bn-A05-p18773930 | Bn-N5-p19736037        | gene |      |
| Bn-A05-p18793322 | Bn-N5-p19752600        | gene | exon |
| Bn-A05-p18807426 | Bn-N5-p19772031        | gene | exon |
| Bn-A05-p18828578 | Bn-N5-p19793031        | gene | exon |
| Bn-A05-p18828589 | Bn-N5-p19793042        | gene | exon |
| Bn-A05-p18905070 | Bn-N5-p19863530        | gene |      |
| Bn-A05-p18922154 | Bn-N5-p19878612        | gene |      |
| Bn-A05-p18958059 | Bn-N5-p19908496        | gene |      |
| Bn-A05-p18958083 | Bn-N5-p19908520        | gene |      |

|                  |                  |      |      |
|------------------|------------------|------|------|
| Bn-A05-p1898273  | Bn-N5-p2075840   | gene |      |
| Bn-A05-p19001293 | Bn-N5-p19946962  | gene |      |
| Bn-A05-p19017469 | Bn-N5-p19964602  | gene | exon |
| Bn-A05-p19031269 | Bn-N5-p19975569  | gene |      |
| Bn-A05-p19041695 | Bn-N5-p19986389  | gene | exon |
| Bn-A05-p19048941 | Bn-N5-p19993850  | gene | exon |
| Bn-A05-p19064234 | Bn-N5-p20005163  | gene |      |
| Bn-A05-p19067421 | Bn-N5-p20008350  | gene |      |
| Bn-A05-p19071118 | Bn-N5-p20016769  | gene |      |
| Bn-A05-p19096242 | Bn-N5-p20037433  | gene | exon |
| Bn-A05-p19128595 | Bn-N5-p20074142  | gene |      |
| Bn-A05-p19130774 | Bn-N5-p20076321  | gene |      |
| Bn-A05-p19187149 | Bn-N5-p20135232  | gene |      |
| Bn-A05-p19195181 | Bn-N5-p20142943  | gene |      |
| Bn-A05-p19209866 | Bn-N5-p20155541  | gene | exon |
| Bn-A05-p19224833 | Bn-N5-p20178234  | gene | exon |
| Bn-A05-p19238078 | Bn-N5-p20191672  | gene |      |
| Bn-A05-p19238134 | Bn-N5-p20191728  | gene |      |
| Bn-A05-p19238534 | Bn-N5-p20192126  | gene |      |
| Bn-A05-p19268141 | Bn-N5-p20211837  | gene | exon |
| Bn-A05-p19278249 | Bn-N5-p20230377  | gene |      |
| Bn-A05-p19278438 | Bn-N5-p20230566  | gene |      |
| Bn-A05-p19359433 | Bn-N5-p20308057  | gene |      |
| Bn-A05-p19359443 | Bn-N5-p20308067  | gene |      |
| Bn-A05-p1942242  | Bn-N5-p2132498   | gene |      |
| Bn-A05-p1943093  | Bn-N5-p2132766   | gene |      |
| Bn-A05-p19473882 | Bn-N5-p20426549  | gene | exon |
| Bn-A05-p19530568 | Bn-N5-p20484395  | gene |      |
| Bn-A05-p19532660 | Bn-N5-p20486481  | gene |      |
| Bn-A05-p19550645 | Bn-N5-p20506085  | gene | exon |
| Bn-A05-p19554281 | Bn-N5-p20509798  | gene | exon |
| Bn-A05-p19571798 | Bn-N5-p20531407  | gene |      |
| Bn-A05-p19583714 | Bn-N5-p20543965  | gene |      |
| Bn-A05-p19622826 | Bn-N5-p20590239  | gene | exon |
| Bn-A05-p19650213 | Bn-N5-p20653161  | gene |      |
| Bn-A05-p19650278 | Bn-N5-p20653226  | gene |      |
| Bn-A05-p19653084 | Bn-N5-p20656318  | gene |      |
| Bn-A05-p19728614 | Bn-N15-p40940767 | gene | exon |
| Bn-A05-p19745674 | Bn-N5-p20746277  | gene |      |
| Bn-A05-p1975785  | Bn-N5-p2163761   | gene |      |
| Bn-A05-p19777231 | Bn-N5-p20764810  | gene |      |
| Bn-A05-p19777547 | Bn-N5-p20765142  | gene |      |
| Bn-A05-p19802577 | Bn-N5-p20796236  | gene | exon |
| Bn-A05-p19857351 | Bn-N5-p20863496  | gene |      |
| Bn-A05-p19857532 | Bn-N15-p41170678 | gene | exon |
| Bn-A05-p19919111 | Bn-N5-p20921026  | gene |      |
| Bn-A05-p19919179 | Bn-N5-p20921094  | gene |      |
| Bn-A05-p19930910 | Bn-N5-p20933033  | gene |      |
| Bn-A05-p19943528 | Bn-N15-p41305004 | gene |      |
| Bn-A05-p19946413 | Bn-N5-p20947845  | gene |      |
| Bn-A05-p19967151 | Bn-N5-p20959304  | gene | exon |
| Bn-A05-p19973413 | Bn-N5-p20966234  | gene | exon |

|                  |                  |      |      |
|------------------|------------------|------|------|
| Bn-A05-p20009925 | Bn-N5-p20990105  | gene | exon |
| Bn-A05-p20019130 | Bn-N5-p20999054  | gene |      |
| Bn-A05-p20075053 | Bn-N5-p21047945  | gene | exon |
| Bn-A05-p20100234 | Bn-N15-p41508343 | gene | exon |
| Bn-A05-p20124425 | Bn-N5-p21103930  | gene |      |
| Bn-A05-p20128796 | Bn-N5-p21111137  | gene | exon |
| Bn-A05-p20139872 | Bn-N5-p21124163  | gene |      |
| Bn-A05-p20161210 | Bn-N5-p21148095  | gene | exon |
| Bn-A05-p20163118 | Bn-N5-p21150003  | gene |      |
| Bn-A05-p20168806 | Bn-N5-p21155697  | gene | exon |
| Bn-A05-p20168909 | Bn-N5-p21155799  | gene | exon |
| Bn-A05-p20174313 | Bn-N5-p21161214  | gene | exon |
| Bn-A05-p20178007 | Bn-N5-p21164918  | gene |      |
| Bn-A05-p20232989 | Bn-N5-p21229250  | gene | exon |
| Bn-A05-p2024975  | Bn-N5-p2214915   | gene |      |
| Bn-A05-p20292751 | Bn-N5-p21285273  | gene | exon |
| Bn-A05-p20302128 | Bn-N5-p21301220  | gene | exon |
| Bn-A05-p20314128 | Bn-N5-p21314748  | gene |      |
| Bn-A05-p20316923 | Bn-N5-p21317537  | gene | exon |
| Bn-A05-p20319622 | Bn-N5-p21320240  | gene |      |
| Bn-A05-p20328249 | Bn-N5-p21328859  | gene | exon |
| Bn-A05-p20328443 | Bn-N6-p12740623  | gene |      |
| Bn-A05-p20337405 | Bn-N15-p41803731 | gene | exon |
| Bn-A05-p20359553 | Bn-N5-p21367608  | gene | exon |
| Bn-A05-p20365953 | Bn-N15-p41914828 | gene | exon |
| Bn-A05-p20372600 | Bn-N5-p21377099  | gene | exon |
| Bn-A05-p20375812 | Bn-N5-p21380281  | gene | exon |
| Bn-A05-p20386700 | Bn-N5-p21394148  | gene |      |
| Bn-A05-p2039690  | Bn-N5-p2230561   | gene |      |
| Bn-A05-p20399452 | Bn-N5-p21409222  | gene | exon |
| Bn-A05-p20422081 | Bn-N15-p42032342 | gene | exon |
| Bn-A05-p20425452 | Bn-N5-p21430652  | gene |      |
| Bn-A05-p20425648 | Bn-N5-p21430848  | gene | exon |
| Bn-A05-p20461416 | Bn-N5-p21457459  | gene |      |
| Bn-A05-p20461727 | Bn-N5-p21457770  | gene |      |
| Bn-A05-p20478486 | Bn-N5-p21473270  | gene | exon |
| Bn-A05-p20492525 | Bn-N5-p21490939  | gene |      |
| Bn-A05-p20550694 | Bn-N5-p21552451  | gene | exon |
| Bn-A05-p20555996 | Bn-N5-p21557718  | gene |      |
| Bn-A05-p20563653 | Bn-N5-p21565316  | gene | exon |
| Bn-A05-p20564729 | Bn-N5-p21566392  | gene | exon |
| Bn-A05-p20594196 | Bn-N5-p21593116  | gene | exon |
| Bn-A05-p20601139 | Bn-N5-p21609623  | gene |      |
| Bn-A05-p20673293 | Bn-N5-p21686601  | gene |      |
| Bn-A05-p20681871 | Bn-N5-p21694862  | gene |      |
| Bn-A05-p20690058 | Bn-N5-p21700221  | gene |      |
| Bn-A05-p20698928 | Bn-N5-p21707505  | gene | exon |
| Bn-A05-p20699671 | Bn-N5-p21707895  | gene |      |
| Bn-A05-p20712388 | Bn-N5-p21721917  | gene |      |
| Bn-A05-p20714207 | Bn-N5-p21723709  | gene | exon |
| Bn-A05-p20714302 | Bn-N5-p21723804  | gene | exon |
| Bn-A05-p20714581 | Bn-N5-p21724083  | gene | exon |



|                  |                  |      |      |
|------------------|------------------|------|------|
| Bn-A05-p20716500 | Bn-N5-p21726006  | gene | exon |
| Bn-A05-p20718776 | Bn-N5-p21728375  | gene | exon |
| Bn-A05-p20728232 | Bn-N5-p21737810  | gene |      |
| Bn-A05-p20728284 | Bn-N15-p42678814 | gene |      |
| Bn-A05-p20811510 | Bn-N5-p21835724  | gene | exon |
| Bn-A05-p20824936 | Bn-N5-p21843939  | gene |      |
| Bn-A05-p20828693 | Bn-N5-p21848115  | gene | exon |
| Bn-A05-p20888695 | Bn-N5-p21899709  | gene |      |
| Bn-A05-p20894465 | Bn-N15-p42927017 | gene |      |
| Bn-A05-p20903214 | Bn-N5-p21916523  | gene |      |
| Bn-A05-p20903608 | Bn-N5-p21916921  | gene |      |
| Bn-A05-p21000614 | Bn-N5-p22021619  | gene |      |
| Bn-A05-p2102634  | Bn-N5-p2295512   | gene | exon |
| Bn-A05-p21036828 | Bn-N5-p22058965  | gene |      |
| Bn-A05-p21064254 | Bn-N5-p22086864  | gene | exon |
| Bn-A05-p21065087 | Bn-N5-p22087896  | gene |      |
| Bn-A05-p21070302 | Bn-N5-p22092218  | gene | exon |
| Bn-A05-p21070991 | Bn-N5-p22092907  | gene | exon |
| Bn-A05-p2107808  | Bn-N5-p2299339   | gene | exon |
| Bn-A05-p21081145 | Bn-N5-p22097194  | gene |      |
| Bn-A05-p2108713  | Bn-N5-p2300244   | gene | exon |
| Bn-A05-p21093954 | Bn-N5-p22109604  | gene | exon |
| Bn-A05-p2109546  | Bn-N5-p2301077   | gene |      |
| Bn-A05-p2110255  | Bn-N5-p2302923   | gene |      |
| Bn-A05-p2110344  | Bn-N5-p2303012   | gene |      |
| Bn-A05-p2111165  | Bn-N5-p2303825   | gene | exon |
| Bn-A05-p21163226 | Bn-N5-p22198721  | gene |      |
| Bn-A05-p21182276 | Bn-N5-p22216406  | gene |      |
| Bn-A05-p21188442 | Bn-N5-p22222880  | gene |      |
| Bn-A05-p21193491 | Bn-N5-p22228410  | gene |      |
| Bn-A05-p21201908 | Bn-N5-p22236093  | gene | exon |
| Bn-A05-p21201956 | Bn-N5-p22236141  | gene | exon |
| Bn-A05-p21210078 | Bn-N5-p22244271  | gene | exon |
| Bn-A05-p21233666 | Bn-N5-p22267180  | gene | exon |
| Bn-A05-p21243931 | Bn-N5-p22284184  | gene | exon |
| Bn-A05-p21248382 | Bn-N5-p22288664  | gene |      |
| Bn-A05-p21248720 | Bn-N5-p22288997  | gene | exon |
| Bn-A05-p21267598 | Bn-N5-p22308940  | gene |      |
| Bn-A05-p21299910 | Bn-N5-p22345549  | gene |      |
| Bn-A05-p21319243 | Bn-N5-p22361875  | gene | exon |
| Bn-A05-p21326091 | Bn-N5-p22365600  | gene |      |
| Bn-A05-p21326775 | Bn-N5-p22366288  | gene | exon |
| Bn-A05-p21345579 | Bn-N15-p43570276 | gene |      |
| Bn-A05-p21347821 | Bn-N5-p22392693  | gene |      |
| Bn-A05-p21370435 | Bn-N5-p22475280  | gene | exon |
| Bn-A05-p21370618 | Bn-N5-p22475463  | gene | exon |
| Bn-A05-p21375513 | Bn-N5-p22477845  | gene |      |
| Bn-A05-p21375514 | Bn-N5-p22477845  | gene |      |
| Bn-A05-p21377682 | Bn-N5-p22480062  | gene | exon |
| Bn-A05-p21381782 | Bn-N5-p22483019  | gene |      |
| Bn-A05-p2138342  | Bn-N5-p2335324   | gene |      |
| Bn-A05-p21385524 | Bn-N5-p22489513  | gene |      |

|                  |                        |      |      |
|------------------|------------------------|------|------|
| Bn-A05-p2139529  | Bn-N5-p2336512         | gene | exon |
| Bn-A05-p2143241  | Bn-N5-p2340764         | gene | exon |
| Bn-A05-p2143292  | Bn-N5-p2340815         | gene | exon |
| Bn-A05-p21463902 | Bn-N15-p43799232       | gene | exon |
| Bn-A05-p21470614 | Bn-N5-p22571580        | gene |      |
| Bn-A05-p21480994 | Bn-N5-p22581296        | gene |      |
| Bn-A05-p21484113 | Bn-N5-p22584410        | gene |      |
| Bn-A05-p21532839 | Bn-N5-p22635384        | gene | exon |
| Bn-A05-p2155466  | Bn-N5-p2357631         | gene | exon |
| Bn-A05-p21633055 | Bn-N5-p22738083        | gene |      |
| Bn-A05-p21668872 | Bn-N5-p22769764        | gene | exon |
| Bn-A05-p21806801 | Bn-N5-p22896160        | gene | exon |
| Bn-A05-p21848003 | Bn-N5-p22904785        | gene | exon |
| Bn-A05-p21852014 | Bn-N5-p22908803        | gene | exon |
| Bn-A05-p21865451 | Bn-N5-p22920042        | gene | exon |
| Bn-A05-p21886422 | Bn-N5-p22949280        | gene | exon |
| Bn-A05-p21915455 | Bn-Scaffold03647-p2401 | gene | exon |
| Bn-A05-p21973951 | Bn-N5-p23033256        | gene |      |
| Bn-A05-p22015412 | Bn-N5-p23079653        | gene |      |
| Bn-A05-p22028401 | Bn-N5-p23094897        | gene |      |
| Bn-A05-p22060825 | Bn-N5-p23110211        | gene |      |
| Bn-A05-p22089650 | Bn-N5-p23135358        | gene |      |
| Bn-A05-p22101592 | Bn-N5-p23143905        | gene |      |
| Bn-A05-p22111286 | Bn-N5-p23146885        | gene | exon |
| Bn-A05-p22111345 | Bn-N5-p23146944        | gene | exon |
| Bn-A05-p22114137 | Bn-N5-p23149741        | gene |      |
| Bn-A05-p22132297 | Bn-N5-p23167931        | gene |      |
| Bn-A05-p22135265 | Bn-N5-p23170850        | gene | exon |
| Bn-A05-p22141046 | Bn-N5-p23176773        | gene | exon |
| Bn-A05-p22142609 | Bn-N5-p23178285        | gene | exon |
| Bn-A05-p22153383 | Bn-N5-p23204638        | gene | exon |
| Bn-A05-p22159613 | Bn-N5-p23215538        | gene |      |
| Bn-A05-p22169560 | Bn-N5-p23229552        | gene |      |
| Bn-A05-p22221563 | Bn-N5-p23283281        | gene |      |
| Bn-A05-p22269511 | Bn-N5-p23332175        | gene | exon |
| Bn-A05-p22320477 | Bn-N5-p23383035        | gene | exon |
| Bn-A05-p22324761 | Bn-N5-p23387315        | gene | exon |
| Bn-A05-p22392750 | Bn-N5-p23463991        | gene |      |
| Bn-A05-p22406985 | Bn-N5-p23484017        | gene |      |
| Bn-A05-p22427412 | Bn-N5-p23503111        | gene | exon |
| Bn-A05-p22459438 | Bn-N5-p23534788        | gene |      |
| Bn-A05-p22463256 | Bn-N5-p23538588        | gene | exon |
| Bn-A05-p22476414 | Bn-N5-p23551706        | gene | exon |
| Bn-A05-p22478538 | Bn-N5-p23553830        | gene | exon |
| Bn-A05-p22506006 | Bn-N5-p23578251        | gene | exon |
| Bn-A05-p22513075 | Bn-N5-p23587400        | gene | exon |
| Bn-A05-p22519751 | Bn-N5-p23601213        | gene |      |
| Bn-A05-p22519836 | Bn-N5-p23601298        | gene |      |
| Bn-A05-p2254100  | Bn-N5-p2449849         | gene |      |
| Bn-A05-p22553631 | Bn-N5-p23621952        | gene | exon |
| Bn-A05-p22563719 | Bn-N5-p23632498        | gene |      |
| Bn-A05-p22589874 | Bn-N5-p23651326        | gene | exon |

|                  |                  |      |      |
|------------------|------------------|------|------|
| Bn-A05-p22591072 | Bn-N5-p23652525  | gene |      |
| Bn-A05-p22591626 | Bn-N5-p23653076  | gene |      |
| Bn-A05-p22599241 | Bn-N5-p23662711  | gene | exon |
| Bn-A05-p22636722 | Bn-N5-p23705220  | gene | exon |
| Bn-A05-p22650582 | Bn-N5-p23716430  | gene |      |
| Bn-A05-p22651145 | Bn-N5-p23716993  | gene | exon |
| Bn-A05-p22660561 | Bn-N5-p23726662  | gene | exon |
| Bn-A05-p22677701 | Bn-N5-p23742924  | gene |      |
| Bn-A05-p22677829 | Bn-N5-p23743052  | gene |      |
| Bn-A05-p22677937 | Bn-N5-p23743160  | gene |      |
| Bn-A05-p22689848 | Bn-N5-p23757583  | gene | exon |
| Bn-A05-p22712783 | Bn-N5-p23775665  | gene | exon |
| Bn-A05-p2272518  | Bn-N5-p2468787   | gene |      |
| Bn-A05-p2273196  | Bn-N5-p2469464   | gene |      |
| Bn-A05-p2274301  | Bn-N5-p2470569   | gene | exon |
| Bn-A05-p22780601 | Bn-N5-p23850449  | gene |      |
| Bn-A05-p22780670 | Bn-N5-p23850516  | gene |      |
| Bn-A05-p22789344 | Bn-N5-p23859137  | gene | exon |
| Bn-A05-p2280549  | Bn-N5-p2476665   | gene |      |
| Bn-A05-p22812957 | Bn-N5-p23882504  | gene | exon |
| Bn-A05-p22813120 | Bn-N5-p23882667  | gene | exon |
| Bn-A05-p22813805 | Bn-N5-p23883352  | gene | exon |
| Bn-A05-p2285903  | Bn-N5-p2481355   | gene |      |
| Bn-A05-p22863641 | Bn-N5-p23926491  | gene |      |
| Bn-A05-p2287815  | Bn-N5-p2483134   | gene |      |
| Bn-A05-p22889788 | Bn-N5-p23989852  | gene |      |
| Bn-A05-p22899595 | Bn-N5-p23997708  | gene |      |
| Bn-A05-p22911906 | Bn-N5-p24009871  | gene |      |
| Bn-A05-p22912544 | Bn-N5-p24010509  | gene |      |
| Bn-A05-p22913147 | Bn-N5-p24011109  | gene |      |
| Bn-A05-p22913571 | Bn-N5-p24011532  | gene |      |
| Bn-A05-p22913874 | Bn-N5-p24011823  | gene |      |
| Bn-A05-p22915357 | Bn-N5-p24013306  | gene |      |
| Bn-A05-p22917436 | Bn-N5-p24015388  | gene |      |
| Bn-A05-p22920228 | Bn-N5-p24018180  | gene |      |
| Bn-A05-p22934224 | Bn-N5-p24027080  | gene | exon |
| Bn-A05-p2293577  | Bn-N5-p2490392   | gene |      |
| Bn-A05-p22938228 | Bn-N5-p24032689  | gene | exon |
| Bn-A05-p22943215 | Bn-N5-p24038161  | gene |      |
| Bn-A05-p22946715 | Bn-N5-p24041620  | gene |      |
| Bn-A05-p22946858 | Bn-N5-p24041763  | gene |      |
| Bn-A05-p22948751 | Bn-N5-p24043719  | gene | exon |
| Bn-A05-p2296307  | Bn-N5-p2493077   | gene | exon |
| Bn-A05-p22969236 | Bn-N15-p45959527 | gene | exon |
| Bn-A05-p22973324 | Bn-N5-p24063948  | gene |      |
| Bn-A05-p22976431 | Bn-N5-p24070006  | gene |      |
| Bn-A05-p22977061 | Bn-N5-p24070632  | gene |      |
| Bn-A05-p23019620 | Bn-N5-p24114691  | gene |      |
| Bn-A05-p23020463 | Bn-N5-p24114724  | gene |      |
| Bn-A05-p23020834 | Bn-N5-p24115095  | gene |      |
| Bn-A05-p23027881 | Bn-N5-p24122493  | gene | exon |
| Bn-A05-p23030143 | Bn-N5-p24126846  | gene | exon |

|                  |                         |      |      |
|------------------|-------------------------|------|------|
| Bn-A05-p2303112  | Bn-N5-p2509507          | gene | exon |
| Bn-A05-p23032803 | Bn-N5-p24129511         | gene |      |
| Bn-A05-p23079485 | Bn-N5-p24168396         | gene | exon |
| Bn-A05-p23102053 | Bn-N5-p24193947         | gene | exon |
| Bn-A05-p23126108 | Bn-N5-p24227096         | gene |      |
| Bn-A05-p23140205 | Bn-N5-p24252004         | gene |      |
| Bn-A05-p23141080 | Bn-N5-p24252879         | gene |      |
| Bn-A05-p23143046 | Bn-N5-p24254846         | gene | exon |
| Bn-A05-p23145678 | Bn-N5-p24257477         | gene | exon |
| Bn-A05-p23146882 | Bn-N5-p24258683         | gene |      |
| Bn-A05-p23188406 | Bn-N5-p24299292         | gene | exon |
| Bn-A05-p23253826 | Bn-N5-p24618267         | gene |      |
| Bn-A05-p23276053 | Bn-N5-p24638929         | gene |      |
| Bn-A05-p23285926 | Bn-N5-p24655514         | gene |      |
| Bn-A05-p23288913 | Bn-N5-p24657940         | gene | exon |
| Bn-A05-p23290863 | Bn-N5-p24659891         | gene |      |
| Bn-A05-p23314738 | Bn-N5-p24678264         | gene | exon |
| Bn-A05-p23340419 | Bn-N5-p24703204         | gene |      |
| Bn-A05-p23358283 | Bn-N5-p24720294         | gene |      |
| Bn-A05-p2337684  | Bn-N5-p2530906          | gene |      |
| Bn-A05-p23377419 | Bn-N5-p24738956         | gene |      |
| Bn-A05-p23424482 | Bn-N5-p24780757         | gene |      |
| Bn-A05-p23445454 | Bn-N5-p24808015         | gene | exon |
| Bn-A05-p2345233  | Bn-N14-p3987756         | gene |      |
| Bn-A05-p2345849  | Bn-N14-p3988373         | gene | exon |
| Bn-A05-p23498540 | Bn-N5-p24861878         | gene |      |
| Bn-A05-p2350131  | Bn-N5-p2546124          | gene |      |
| Bn-A05-p23502993 | Bn-N5-p24865653         | gene | exon |
| Bn-A05-p23512396 | Bn-N5-p24875054         | gene |      |
| Bn-A05-p23512931 | Bn-N5-p24875589         | gene | exon |
| Bn-A05-p2351545  | Bn-N5-p2547531          | gene | exon |
| Bn-A05-p23543751 | Bn-N5-p25412615         | gene | exon |
| Bn-A05-p23547791 | Bn-N5-p25416667         | gene | exon |
| Bn-A05-p23588992 | Bn-N5-p25460397         | gene | exon |
| Bn-A05-p23593836 | Bn-N5-p25465340         | gene |      |
| Bn-A05-p23607588 | Bn-N5-p25483004         | gene | exon |
| Bn-A05-p2367876  | Bn-N5-p2562704          | gene | exon |
| Bn-A05-p23692249 | Bn-N5-p25561438         | gene |      |
| Bn-A05-p23693572 | Bn-N5-p25562767         | gene | exon |
| Bn-A05-p23745136 | Bn-N5-p25622925         | gene | exon |
| Bn-A05-p2376801  | Bn-N5-p2572299          | gene |      |
| Bn-A05-p23776343 | Bn-N5-p25659292         | gene |      |
| Bn-A05-p23776869 | Bn-N5-p25659796         | gene |      |
| Bn-A05-p23802326 | Bn-N5-p25684089         | gene | exon |
| Bn-A05-p23844016 | Bn-Scaffold01069-p22378 | gene |      |
| Bn-A05-p23844225 | Bn-Scaffold01069-p22210 | gene |      |
| Bn-A05-p23855991 | Bn-Scaffold01727-p1531  | gene |      |
| Bn-A05-p2416806  | Bn-N5-p2612057          | gene | exon |
| Bn-A05-p244051   | Bn-N5-p272544           | gene |      |
| Bn-A05-p2460244  | Bn-N5-p2649995          | gene |      |
| Bn-A05-p2472050  | Bn-N5-p2661410          | gene | exon |
| Bn-A05-p2472584  | Bn-N5-p2661943          | gene |      |

|                 |                 |      |      |
|-----------------|-----------------|------|------|
| Bn-A05-p2488952 | Bn-N5-p2675301  | gene |      |
| Bn-A05-p2489101 | Bn-N5-p2675450  | gene |      |
| Bn-A05-p2492451 | Bn-N5-p2676866  | gene |      |
| Bn-A05-p2494204 | Bn-N5-p2678611  | gene | exon |
| Bn-A05-p2495066 | Bn-N5-p2679473  | gene |      |
| Bn-A05-p2495419 | Bn-N5-p2679827  | gene |      |
| Bn-A05-p2495697 | Bn-N5-p2680108  | gene |      |
| Bn-A05-p2497466 | Bn-N5-p2681879  | gene |      |
| Bn-A05-p253584  | Bn-N5-p281613   | gene | exon |
| Bn-A05-p2563320 | Bn-N5-p2745504  | gene |      |
| Bn-A05-p2565185 | Bn-N5-p2748760  | gene | exon |
| Bn-A05-p2565586 | Bn-N5-p2749161  | gene | exon |
| Bn-A05-p2582423 | Bn-N5-p2769101  | gene | exon |
| Bn-A05-p2592847 | Bn-N5-p2778500  | gene | exon |
| Bn-A05-p2604531 | Bn-N5-p2794879  | gene | exon |
| Bn-A05-p2604957 | Bn-N5-p2795396  | gene |      |
| Bn-A05-p2610006 | Bn-N5-p2816986  | gene |      |
| Bn-A05-p262934  | Bn-N5-p291486   | gene | exon |
| Bn-A05-p2645307 | Bn-N5-p2830757  | gene | exon |
| Bn-A05-p2645365 | Bn-N5-p2830821  | gene |      |
| Bn-A05-p2648679 | Bn-N5-p2843690  | gene | exon |
| Bn-A05-p2653139 | Bn-N5-p2848406  | gene | exon |
| Bn-A05-p2656042 | Bn-N5-p2851329  | gene | exon |
| Bn-A05-p2671921 | Bn-N5-p2870666  | gene | exon |
| Bn-A05-p2711007 | Bn-N5-p2902787  | gene |      |
| Bn-A05-p2711208 | Bn-N5-p2902988  | gene | exon |
| Bn-A05-p2718015 | Bn-N5-p2912485  | gene | exon |
| Bn-A05-p2732409 | Bn-N5-p2927711  | gene | exon |
| Bn-A05-p2777824 | Bn-N5-p2974613  | gene |      |
| Bn-A05-p2777912 | Bn-N5-p2974701  | gene |      |
| Bn-A05-p2778040 | Bn-N5-p2974829  | gene | exon |
| Bn-A05-p2778230 | Bn-N5-p2975016  | gene |      |
| Bn-A05-p2778577 | Bn-N5-p2975363  | gene |      |
| Bn-A05-p2778679 | Bn-N5-p2975465  | gene |      |
| Bn-A05-p2778737 | Bn-N5-p2975523  | gene |      |
| Bn-A05-p2779142 | Bn-N5-p2975937  | gene |      |
| Bn-A05-p2804703 | Bn-N5-p2992931  | gene | exon |
| Bn-A05-p2830103 | Bn-N5-p3017274  | gene | exon |
| Bn-A05-p2839985 | Bn-N5-p3028806  | gene |      |
| Bn-A05-p2840537 | Bn-N5-p3029498  | gene |      |
| Bn-A05-p2840734 | Bn-N5-p3029695  | gene |      |
| Bn-A05-p2841024 | Bn-N5-p3029985  | gene | exon |
| Bn-A05-p2843347 | Bn-N5-p3032379  | gene |      |
| Bn-A05-p2844059 | Bn-N5-p3033090  | gene |      |
| Bn-A05-p2898061 | Bn-N14-p4843841 | gene | exon |
| Bn-A05-p2937826 | Bn-N5-p3162058  | gene | exon |
| Bn-A05-p2937829 | Bn-N5-p3162061  | gene | exon |
| Bn-A05-p2984656 | Bn-N5-p3208071  | gene | exon |
| Bn-A05-p3043365 | Bn-N5-p3275694  | gene |      |
| Bn-A05-p3099878 | Bn-N5-p3333556  | gene |      |
| Bn-A05-p3117520 | Bn-N5-p3361502  | gene |      |
| Bn-A05-p3188172 | Bn-N5-p3436050  | gene | exon |

|                 |                 |      |      |
|-----------------|-----------------|------|------|
| Bn-A05-p3191390 | Bn-N5-p3439087  | gene |      |
| Bn-A05-p3198955 | Bn-N5-p3445947  | gene | exon |
| Bn-A05-p3242299 | Bn-N5-p3492083  | gene | exon |
| Bn-A05-p3246311 | Bn-N5-p3496090  | gene |      |
| Bn-A05-p3248878 | Bn-N5-p3498660  | gene |      |
| Bn-A05-p3264129 | Bn-N5-p3515043  | gene |      |
| Bn-A05-p3278023 | Bn-N5-p3523252  | gene |      |
| Bn-A05-p3280592 | Bn-N5-p3525724  | gene |      |
| Bn-A05-p3312679 | Bn-N5-p3558019  | gene | exon |
| Bn-A05-p3312786 | Bn-N5-p3558126  | gene | exon |
| Bn-A05-p3320783 | Bn-N5-p3569934  | gene | exon |
| Bn-A05-p3323878 | Bn-N14-p5658458 | gene | exon |
| Bn-A05-p3361741 | Bn-N5-p3602767  | gene |      |
| Bn-A05-p3369681 | Bn-N5-p3609983  | gene |      |
| Bn-A05-p3394311 | Bn-N5-p3631412  | gene |      |
| Bn-A05-p3406573 | Bn-N5-p3644816  | gene |      |
| Bn-A05-p3467036 | Bn-N5-p3707907  | gene | exon |
| Bn-A05-p346822  | Bn-N5-p384683   | gene | exon |
| Bn-A05-p347486  | Bn-N5-p385347   | gene |      |
| Bn-A05-p3482813 | Bn-N5-p3729580  | gene | exon |
| Bn-A05-p3516602 | Bn-N5-p3752902  | gene | exon |
| Bn-A05-p3548736 | Bn-N5-p3785693  | gene | exon |
| Bn-A05-p3610111 | Bn-N5-p3853841  | gene |      |
| Bn-A05-p3611878 | Bn-N5-p3857996  | gene | exon |
| Bn-A05-p3618356 | Bn-N5-p3873260  | gene |      |
| Bn-A05-p363138  | Bn-N5-p419017   | gene |      |
| Bn-A05-p3681637 | Bn-N5-p3957300  | gene |      |
| Bn-A05-p3719423 | Bn-N5-p3984819  | gene | exon |
| Bn-A05-p3833308 | Bn-N14-p6639070 | gene | exon |
| Bn-A05-p3834445 | Bn-N5-p4104667  | gene |      |
| Bn-A05-p3834639 | Bn-N5-p4104862  | gene |      |
| Bn-A05-p3882826 | Bn-N5-p4150021  | gene | exon |
| Bn-A05-p3901565 | Bn-N5-p4166065  | gene |      |
| Bn-A05-p3939102 | Bn-N5-p4203438  | gene |      |
| Bn-A05-p3966848 | Bn-N5-p4230168  | gene | exon |
| Bn-A05-p3988218 | Bn-N5-p4249789  | gene |      |
| Bn-A05-p3988279 | Bn-N5-p4249850  | gene |      |
| Bn-A05-p3988958 | Bn-N5-p4250529  | gene | exon |
| Bn-A05-p3989555 | Bn-N5-p4251126  | gene |      |
| Bn-A05-p4006770 | Bn-N5-p4268889  | gene | exon |
| Bn-A05-p4016172 | Bn-N5-p4278430  | gene | exon |
| Bn-A05-p4017270 | Bn-N5-p4279532  | gene |      |
| Bn-A05-p4022440 | Bn-N5-p4284420  | gene |      |
| Bn-A05-p4023464 | Bn-N5-p4285459  | gene |      |
| Bn-A05-p4036806 | Bn-N5-p4292309  | gene |      |
| Bn-A05-p4043474 | Bn-N5-p4302708  | gene | exon |
| Bn-A05-p4054823 | Bn-N5-p4314001  | gene |      |
| Bn-A05-p4055656 | Bn-N5-p4314837  | gene |      |
| Bn-A05-p4055839 | Bn-N5-p4315020  | gene |      |
| Bn-A05-p4078496 | Bn-N5-p4338418  | gene |      |
| Bn-A05-p4086144 | Bn-N5-p4346940  | gene |      |
| Bn-A05-p4104070 | Bn-N5-p4366930  | gene | exon |

|                 |                 |      |      |
|-----------------|-----------------|------|------|
| Bn-A05-p4108818 | Bn-N5-p4372981  | gene | exon |
| Bn-A05-p4110015 | Bn-N5-p4374186  | gene | exon |
| Bn-A05-p4121158 | Bn-N5-p4386273  | gene | exon |
| Bn-A05-p4176921 | Bn-N5-p4433574  | gene | exon |
| Bn-A05-p4197697 | Bn-N5-p4451869  | gene |      |
| Bn-A05-p4230422 | Bn-N5-p4488675  | gene |      |
| Bn-A05-p4316943 | Bn-N5-p4565962  | gene |      |
| Bn-A05-p4336667 | Bn-N5-p4597112  | gene | exon |
| Bn-A05-p4353454 | Bn-N5-p4607614  | gene |      |
| Bn-A05-p4354442 | Bn-N5-p4608601  | gene |      |
| Bn-A05-p4373694 | Bn-N5-p4623279  | gene | exon |
| Bn-A05-p4376029 | Bn-N5-p4625600  | gene |      |
| Bn-A05-p4399949 | Bn-N5-p4641889  | gene |      |
| Bn-A05-p4422786 | Bn-N5-p4663810  | gene |      |
| Bn-A05-p44690   | Bn-N5-p49148    | gene |      |
| Bn-A05-p449086  | Bn-N5-p524531   | gene |      |
| Bn-A05-p4498290 | Bn-N5-p4720302  | gene | exon |
| Bn-A05-p4498398 | Bn-N5-p4720410  | gene | exon |
| Bn-A05-p4516526 | Bn-N5-p4775030  | gene | exon |
| Bn-A05-p4516748 | Bn-N14-p7707113 | gene | exon |
| Bn-A05-p4520844 | Bn-N14-p7710650 | gene | exon |
| Bn-A05-p452939  | Bn-N5-p528432   | gene | exon |
| Bn-A05-p4569670 | Bn-N5-p4831145  | gene |      |
| Bn-A05-p458357  | Bn-N5-p533849   | gene |      |
| Bn-A05-p4593001 | Bn-N5-p4848123  | gene | exon |
| Bn-A05-p4625019 | Bn-N5-p4875635  | gene |      |
| Bn-A05-p4644984 | Bn-N5-p4902267  | gene |      |
| Bn-A05-p4679663 | Bn-N5-p4945932  | gene | exon |
| Bn-A05-p472271  | Bn-N5-p547781   | gene | exon |
| Bn-A05-p4820365 | Bn-N5-p5097227  | gene |      |
| Bn-A05-p482473  | Bn-N5-p561498   | gene |      |
| Bn-A05-p484591  | Bn-N5-p564912   | gene | exon |
| Bn-A05-p4919899 | Bn-N5-p5176166  | gene |      |
| Bn-A05-p4924856 | Bn-N5-p5181567  | gene | exon |
| Bn-A05-p4959282 | Bn-N5-p5206299  | gene |      |
| Bn-A05-p4961402 | Bn-N5-p5216947  | gene | exon |
| Bn-A05-p5026139 | Bn-N5-p5284473  | gene | exon |
| Bn-A05-p5037839 | Bn-N5-p5295656  | gene | exon |
| Bn-A05-p5043499 | Bn-N5-p5301311  | gene | exon |
| Bn-A05-p5057096 | Bn-N5-p5316568  | gene | exon |
| Bn-A05-p5057141 | Bn-N5-p5316613  | gene | exon |
| Bn-A05-p5058143 | Bn-N5-p5317614  | gene | exon |
| Bn-A05-p5093548 | Bn-N5-p5361751  | gene |      |
| Bn-A05-p5100352 | Bn-N5-p5368829  | gene | exon |
| Bn-A05-p5104821 | Bn-N5-p5376501  | gene | exon |
| Bn-A05-p5135426 | Bn-N5-p5403580  | gene |      |
| Bn-A05-p518923  | Bn-N5-p593059   | gene | exon |
| Bn-A05-p5251613 | Bn-N5-p5501272  | gene | exon |
| Bn-A05-p5252542 | Bn-N5-p5502201  | gene |      |
| Bn-A05-p5279229 | Bn-N5-p5552874  | gene | exon |
| Bn-A05-p5280016 | Bn-N5-p5553661  | gene |      |
| Bn-A05-p5281478 | Bn-N5-p5555132  | gene |      |

|                 |                 |      |      |
|-----------------|-----------------|------|------|
| Bn-A05-p5283304 | Bn-N14-p9197951 | gene | exon |
| Bn-A05-p5328959 | Bn-N5-p5602569  | gene | exon |
| Bn-A05-p5337620 | Bn-N5-p5611393  | gene | exon |
| Bn-A05-p5391937 | Bn-N5-p5672976  | gene |      |
| Bn-A05-p5437257 | Bn-N5-p5711890  | gene | exon |
| Bn-A05-p5445252 | Bn-N5-p5722369  | gene |      |
| Bn-A05-p5446122 | Bn-N5-p5722728  | gene |      |
| Bn-A05-p5457877 | Bn-N5-p5731679  | gene |      |
| Bn-A05-p547582  | Bn-N5-p622657   | gene |      |
| Bn-A05-p5521242 | Bn-N5-p5789631  | gene | exon |
| Bn-A05-p5522210 | Bn-N5-p5790600  | gene | exon |
| Bn-A05-p5541232 | Bn-N5-p5806607  | gene | exon |
| Bn-A05-p5542434 | Bn-N5-p5807936  | gene | exon |
| Bn-A05-p5552246 | Bn-N5-p5817607  | gene | exon |
| Bn-A05-p5565945 | Bn-N5-p5831310  | gene | exon |
| Bn-A05-p5614651 | Bn-N5-p5885217  | gene |      |
| Bn-A05-p5657708 | Bn-N5-p5929818  | gene |      |
| Bn-A05-p5661136 | Bn-N5-p5933631  | gene | exon |
| Bn-A05-p5662601 | Bn-N5-p5935093  | gene | exon |
| Bn-A05-p5714702 | Bn-N5-p5978793  | gene | exon |
| Bn-A05-p5714756 | Bn-N5-p5978847  | gene |      |
| Bn-A05-p5714836 | Bn-N5-p5978927  | gene |      |
| Bn-A05-p5715403 | Bn-N5-p5979494  | gene | exon |
| Bn-A05-p5778158 | Bn-N5-p6046199  | gene | exon |
| Bn-A05-p5790313 | Bn-N5-p6064158  | gene | exon |
| Bn-A05-p5796678 | Bn-N5-p6070566  | gene |      |
| Bn-A05-p5805445 | Bn-N5-p6077945  | gene | exon |
| Bn-A05-p5808654 | Bn-N5-p6081172  | gene |      |
| Bn-A05-p5808895 | Bn-N5-p6081413  | gene |      |
| Bn-A05-p5809043 | Bn-N5-p6081561  | gene |      |
| Bn-A05-p5817231 | Bn-N5-p6087991  | gene |      |
| Bn-A05-p5831673 | Bn-N5-p6099375  | gene | exon |
| Bn-A05-p5878329 | Bn-N5-p6148874  | gene |      |
| Bn-A05-p58992   | Bn-N5-p78052    | gene |      |
| Bn-A05-p59055   | Bn-N5-p78115    | gene | exon |
| Bn-A05-p59178   | Bn-N5-p78238    | gene |      |
| Bn-A05-p5924319 | Bn-N5-p6195750  | gene |      |
| Bn-A05-p5992612 | Bn-N5-p6282683  | gene | exon |
| Bn-A05-p600196  | Bn-N5-p684459   | gene |      |
| Bn-A05-p6004356 | Bn-N5-p6293193  | gene | exon |
| Bn-A05-p6020205 | Bn-N5-p6308665  | gene | exon |
| Bn-A05-p6021593 | Bn-N5-p6310052  | gene |      |
| Bn-A05-p6074427 | Bn-N5-p6347876  | gene | exon |
| Bn-A05-p6154871 | Bn-N5-p6434195  | gene | exon |
| Bn-A05-p619336  | Bn-N5-p701378   | gene |      |
| Bn-A05-p6236807 | Bn-N5-p6514458  | gene | exon |
| Bn-A05-p6261796 | Bn-N5-p6540668  | gene |      |
| Bn-A05-p6269991 | Bn-N5-p6552395  | gene | exon |
| Bn-A05-p6271443 | Bn-N5-p6553847  | gene |      |
| Bn-A05-p6288330 | Bn-N5-p6575827  | gene |      |
| Bn-A05-p6308471 | Bn-N5-p6599347  | gene |      |
| Bn-A05-p6308543 | Bn-N5-p6599419  | gene |      |



|                 |                       |      |      |
|-----------------|-----------------------|------|------|
| Bn-A05-p6402777 | Bn-N5-p6686533        | gene |      |
| Bn-A05-p6404424 | Bn-N5-p6688182        | gene |      |
| Bn-A05-p6404595 | Bn-N5-p6688353        | gene |      |
| Bn-A05-p6404775 | Bn-N5-p6688533        | gene | exon |
| Bn-A05-p6405021 | Bn-N5-p6688779        | gene | exon |
| Bn-A05-p6405095 | Bn-N5-p6688853        | gene | exon |
| Bn-A05-p6405415 | Bn-N5-p6689173        | gene | exon |
| Bn-A05-p6412530 | Bn-N5-p6696504        | gene |      |
| Bn-A05-p6441813 | Bn-N5-p6721334        | gene | exon |
| Bn-A05-p6473296 | Bn-N5-p6767318        | gene | exon |
| Bn-A05-p6479603 | Bn-N5-p6773398        | gene | exon |
| Bn-A05-p6480168 | Bn-N5-p6773964        | gene |      |
| Bn-A05-p6480907 | Bn-N5-p6774703        | gene | exon |
| Bn-A05-p6480981 | Bn-N5-p6774777        | gene |      |
| Bn-A05-p6494313 | Bn-N5-p6784054        | gene |      |
| Bn-A05-p652475  | Bn-N14-p936241        | gene | exon |
| Bn-A05-p6535233 | Bn-N5-p6831295        | gene | exon |
| Bn-A05-p653606  | Bn-N5-p738760         | gene |      |
| Bn-A05-p6541429 | Bn-N5-p6966977        | gene | exon |
| Bn-A05-p6542040 | Bn-N5-p6966372        | gene |      |
| Bn-A05-p6562415 | Bn-N5-p6940989        | gene |      |
| Bn-A05-p6571327 | Bn-N5-p6932082        | gene |      |
| Bn-A05-p6571330 | Bn-N5-p6932079        | gene |      |
| Bn-A05-p6672638 | Bn-N8-p18042252       | gene |      |
| Bn-A05-p6674758 | Bn-N5-p6976079        | gene | exon |
| Bn-A05-p6682796 | Bn-N5-p6984110        | gene |      |
| Bn-A05-p671910  | Bn-N5-p748023         | gene | exon |
| Bn-A05-p6774249 | Bn-N5-p7074505        | gene | exon |
| Bn-A05-p6775737 | Bn-N5-p7075993        | gene |      |
| Bn-A05-p677619  | Bn-N5-p757125         | gene | exon |
| Bn-A05-p6776954 | Bn-N5-p7077214        | gene |      |
| Bn-A05-p6786862 | Bn-N5-p7081718        | gene |      |
| Bn-A05-p6787164 | Bn-N5-p7082020        | gene |      |
| Bn-A05-p6867531 | Bn-N5-p7163028        | gene | exon |
| Bn-A05-p6877058 | Bn-N5-p7170758        | gene |      |
| Bn-A05-p687790  | Bn-N5-p767412         | gene |      |
| Bn-A05-p6878538 | Bn-N5-p7172426        | gene | exon |
| Bn-A05-p6898696 | Bn-N14-p12382962      | gene |      |
| Bn-A05-p6910402 | Bn-N5-p7201619        | gene | exon |
| Bn-A05-p6951707 | Bn-N5-p7239361        | gene | exon |
| Bn-A05-p6955996 | Bn-Scaffold09921-p280 | gene | exon |
| Bn-A05-p6975353 | Bn-N5-p7267602        | gene | exon |
| Bn-A05-p6984362 | Bn-N5-p7276887        | gene | exon |
| Bn-A05-p7062575 | Bn-N5-p7378703        | gene | exon |
| Bn-A05-p7062784 | Bn-N5-p7378912        | gene |      |
| Bn-A05-p7076442 | Bn-N5-p7398390        | gene |      |
| Bn-A05-p7098949 | Bn-N5-p7418100        | gene |      |
| Bn-A05-p7154689 | Bn-N5-p7457067        | gene | exon |
| Bn-A05-p7222795 | Bn-N5-p7509876        | gene | exon |
| Bn-A05-p7231369 | Bn-N5-p7525358        | gene |      |
| Bn-A05-p726481  | Bn-N5-p802595         | gene |      |
| Bn-A05-p7352554 | Bn-N5-p7638503        | gene | exon |

|                 |                        |      |      |
|-----------------|------------------------|------|------|
| Bn-A05-p7496554 | Bn-N5-p7850202         | gene | exon |
| Bn-A05-p7558647 | Bn-N14-p13675046       | gene | exon |
| Bn-A05-p7589125 | Bn-N5-p7948967         | gene | exon |
| Bn-A05-p7589257 | Bn-N5-p7949099         | gene | exon |
| Bn-A05-p771943  | Bn-N5-p871128          | gene |      |
| Bn-A05-p772777  | Bn-N5-p871952          | gene |      |
| Bn-A05-p7729367 | Bn-N5-p8083716         | gene | exon |
| Bn-A05-p7741244 | Bn-N5-p8094580         | gene | exon |
| Bn-A05-p7781811 | Bn-N5-p8137605         | gene | exon |
| Bn-A05-p780844  | Bn-N5-p880252          | gene | exon |
| Bn-A05-p7809870 | Bn-N5-p8178085         | gene | exon |
| Bn-A05-p784331  | Bn-N5-p883877          | gene | exon |
| Bn-A05-p7844876 | Bn-N5-p8207484         | gene |      |
| Bn-A05-p7855766 | Bn-N5-p8218313         | gene | exon |
| Bn-A05-p7903619 | Bn-N5-p8251744         | gene |      |
| Bn-A05-p7911054 | Bn-N5-p8260953         | gene |      |
| Bn-A05-p802111  | Bn-N5-p903818          | gene |      |
| Bn-A05-p8120795 | Bn-N8-p20095914        | gene | exon |
| Bn-A05-p8120997 | Bn-N8-p20096116        | gene |      |
| Bn-A05-p816963  | Bn-N5-p916761          | gene | exon |
| Bn-A05-p817036  | Bn-N5-p916834          | gene | exon |
| Bn-A05-p8206349 | Bn-N8-p20173578        | gene | exon |
| Bn-A05-p8210067 | Bn-N18-p21801715       | gene | exon |
| Bn-A05-p822087  | Bn-N5-p923155          | gene | exon |
| Bn-A05-p822597  | Bn-N5-p923666          | gene |      |
| Bn-A05-p8245454 | Bn-N8-p20224691        | gene | exon |
| Bn-A05-p8261872 | Bn-N8-p20236998        | gene |      |
| Bn-A05-p8297352 | Bn-N8-p20277216        | gene | exon |
| Bn-A05-p8297563 | Bn-N8-p20277427        | gene | exon |
| Bn-A05-p8320167 | Bn-N8-p20301042        | gene | exon |
| Bn-A05-p8322435 | Bn-N8-p20303309        | gene | exon |
| Bn-A05-p8327216 | Bn-N8-p20308092        | gene | exon |
| Bn-A05-p8542569 | Bn-N2-p17286059        | gene | exon |
| Bn-A05-p8786891 | Bn-N2-p17049997        | gene |      |
| Bn-A05-p8798628 | Bn-N2-p17038049        | gene | exon |
| Bn-A05-p889343  | Bn-N5-p997791          | gene | exon |
| Bn-A05-p894768  | Bn-N14-p1335565        | gene | exon |
| Bn-A05-p895276  | Bn-N5-p1003703         | gene |      |
| Bn-A05-p895522  | Bn-N5-p1003937         | gene | exon |
| Bn-A05-p9058906 | Bn-N2-p16771429        | gene |      |
| Bn-A05-p9063726 | Bn-N2-p16762042        | gene | exon |
| Bn-A05-p907258  | Bn-N5-p1015308         | gene | exon |
| Bn-A05-p9116236 | Bn-N2-p16703689        | gene | exon |
| Bn-A05-p9118240 | Bn-N2-p16701742        | gene | exon |
| Bn-A05-p917769  | Bn-N5-p1025845         | gene |      |
| Bn-A05-p9209378 | Bn-N2-p16611823        | gene | exon |
| Bn-A05-p9225459 | Bn-N2-p16589487        | gene |      |
| Bn-A05-p922813  | Bn-N5-p1030016         | gene |      |
| Bn-A05-p9247748 | Bn-N12-p23584328       | gene |      |
| Bn-A05-p926361  | Bn-N5-p1033381         | gene |      |
| Bn-A05-p9277011 | Bn-Scaffold02521-p2192 | gene |      |
| Bn-A05-p9319851 | Bn-N5-p8702877         | gene |      |

|                  |                  |      |      |
|------------------|------------------|------|------|
| Bn-A05-p9347113  | Bn-N5-p8672485   | gene | exon |
| Bn-A05-p9364170  | Bn-N5-p8656664   | gene | exon |
| Bn-A05-p9376879  | Bn-N5-p8652776   | gene |      |
| Bn-A05-p9409136  | Bn-N5-p8624398   | gene |      |
| Bn-A05-p9455372  | Bn-N5-p8584357   | gene |      |
| Bn-A05-p9472646  | Bn-N5-p8564641   | gene |      |
| Bn-A05-p9472820  | Bn-N5-p8564467   | gene |      |
| Bn-A05-p9495579  | Bn-N5-p8545241   | gene | exon |
| Bn-A05-p9555189  | Bn-N5-p8494946   | gene |      |
| Bn-A05-p9623131  | Bn-N5-p8791583   | gene | exon |
| Bn-A05-p966483   | Bn-N5-p1076071   | gene | exon |
| Bn-A05-p9668222  | Bn-N5-p8856168   | gene |      |
| Bn-A05-p967131   | Bn-N5-p1076788   | gene |      |
| Bn-A05-p967575   | Bn-N5-p1077255   | gene |      |
| Bn-A05-p9758517  | Bn-N5-p8936796   | gene |      |
| Bn-A05-p9849049  | Bn-N5-p9030784   | gene |      |
| Bn-A05-p9937099  | Bn-N5-p9135367   | gene |      |
| Bn-A05-p996188   | Bn-N5-p1105629   | gene |      |
| Bn-A06-p10040506 | Bn-N6-p9798452   | gene |      |
| Bn-A06-p10046575 | Bn-N6-p9804523   | gene | exon |
| Bn-A06-p10046691 | Bn-N6-p9804639   | gene | exon |
| Bn-A06-p10053057 | Bn-N6-p9811002   | gene |      |
| Bn-A06-p10053801 | Bn-N6-p9811745   | gene |      |
| Bn-A06-p10124135 | Bn-N6-p9886369   | gene | exon |
| Bn-A06-p10129250 | Bn-N6-p9894522   | gene |      |
| Bn-A06-p10135140 | Bn-N6-p9900416   | gene | exon |
| Bn-A06-p1015217  | Bn-N6-p1056120   | gene |      |
| Bn-A06-p1016417  | Bn-N6-p1057320   | gene |      |
| Bn-A06-p10240329 | Bn-N6-p10002027  | gene |      |
| Bn-A06-p10251899 | Bn-N6-p10013601  | gene | exon |
| Bn-A06-p10300664 | Bn-N6-p10051722  | gene |      |
| Bn-A06-p10320803 | Bn-N6-p10070686  | gene |      |
| Bn-A06-p10327909 | Bn-N6-p10079243  | gene | exon |
| Bn-A06-p10391346 | Bn-N6-p10140172  | gene |      |
| Bn-A06-p10401376 | Bn-N13-p51376456 | gene |      |
| Bn-A06-p10499003 | Bn-N6-p10265386  | gene | exon |
| Bn-A06-p10594170 | Bn-N6-p10363440  | gene |      |
| Bn-A06-p10609574 | Bn-N6-p10379031  | gene |      |
| Bn-A06-p10609641 | Bn-N6-p10379098  | gene |      |
| Bn-A06-p10642761 | Bn-N6-p10407153  | gene | exon |
| Bn-A06-p1071392  | Bn-N6-p1106111   | gene |      |
| Bn-A06-p10781335 | Bn-N6-p10551637  | gene | exon |
| Bn-A06-p10795156 | Bn-N6-p10567138  | gene | exon |
| Bn-A06-p10833219 | Bn-N6-p10602504  | gene |      |
| Bn-A06-p10836353 | Bn-N6-p10605729  | gene | exon |
| Bn-A06-p10854312 | Bn-N6-p10616850  | gene |      |
| Bn-A06-p10859915 | Bn-N6-p10624189  | gene |      |
| Bn-A06-p10863673 | Bn-N6-p10628123  | gene |      |
| Bn-A06-p10873048 | Bn-N6-p10638902  | gene | exon |
| Bn-A06-p11021085 | Bn-N6-p10764131  | gene |      |
| Bn-A06-p11024576 | Bn-N6-p10767902  | gene |      |
| Bn-A06-p11165324 | Bn-N6-p10948454  | gene |      |

|                  |                  |      |      |
|------------------|------------------|------|------|
| Bn-A06-p11165375 | Bn-N6-p10948505  | gene |      |
| Bn-A06-p1120102  | Bn-N6-p1146457   | gene |      |
| Bn-A06-p1120107  | Bn-N6-p1146462   | gene |      |
| Bn-A06-p112339   | Bn-N6-p100294    | gene | exon |
| Bn-A06-p11301532 | Bn-N6-p11097112  | gene |      |
| Bn-A06-p11362290 | Bn-N6-p11169205  | gene |      |
| Bn-A06-p113900   | Bn-N6-p101855    | gene |      |
| Bn-A06-p11415584 | Bn-N6-p11203715  | gene |      |
| Bn-A06-p1142557  | Bn-N8-p1704686   | gene |      |
| Bn-A06-p114634   | Bn-N6-p102589    | gene |      |
| Bn-A06-p1149034  | Bn-N6-p1179470   | gene |      |
| Bn-A06-p1154840  | Bn-N6-p1187003   | gene | exon |
| Bn-A06-p11588495 | Bn-N6-p11367282  | gene | exon |
| Bn-A06-p1160984  | Bn-N6-p1195652   | gene | exon |
| Bn-A06-p1168447  | Bn-N6-p1204309   | gene |      |
| Bn-A06-p1173126  | Bn-N6-p1205246   | gene |      |
| Bn-A06-p1176062  | Bn-N6-p1209543   | gene | exon |
| Bn-A06-p11776560 | Bn-N6-p14530687  | gene |      |
| Bn-A06-p11819954 | Bn-N6-p14471323  | gene |      |
| Bn-A06-p1184282  | Bn-N6-p1217343   | gene | exon |
| Bn-A06-p1185371  | Bn-N6-p1218432   | gene | exon |
| Bn-A06-p1187915  | Bn-N6-p1220973   | gene | exon |
| Bn-A06-p11919396 | Bn-N6-p14359487  | gene |      |
| Bn-A06-p12078648 | Bn-N11-p43130600 | gene | exon |
| Bn-A06-p12093192 | Bn-N6-p14162119  | gene |      |
| Bn-A06-p12135104 | Bn-N6-p14118028  | gene | exon |
| Bn-A06-p1217543  | Bn-N6-p1239128   | gene |      |
| Bn-A06-p1225010  | Bn-N16-p5520725  | gene |      |
| Bn-A06-p12337022 | Bn-N6-p13901223  | gene |      |
| Bn-A06-p12337596 | Bn-N6-p13900655  | gene |      |
| Bn-A06-p12337598 | Bn-N6-p13900653  | gene |      |
| Bn-A06-p12357497 | Bn-N6-p13872656  | gene |      |
| Bn-A06-p12358748 | Bn-N6-p13871404  | gene |      |
| Bn-A06-p12436092 | Bn-N6-p13777306  | gene |      |
| Bn-A06-p12517420 | Bn-N6-p13700663  | gene |      |
| Bn-A06-p12645785 | Bn-N6-p13596651  | gene | exon |
| Bn-A06-p12658161 | Bn-N6-p13590523  | gene |      |
| Bn-A06-p12696157 | Bn-N6-p13572718  | gene | exon |
| Bn-A06-p12732487 | Bn-N6-p13542781  | gene | exon |
| Bn-A06-p12768136 | Bn-N6-p13500684  | gene |      |
| Bn-A06-p1278419  | Bn-N6-p1290586   | gene |      |
| Bn-A06-p12846574 | Bn-N6-p13448885  | gene |      |
| Bn-A06-p12868864 | Bn-N6-p13424479  | gene | exon |
| Bn-A06-p12884843 | Bn-N6-p13378376  | gene | exon |
| Bn-A06-p12911577 | Bn-N6-p13339902  | gene |      |
| Bn-A06-p1291667  | Bn-N6-p1303631   | gene | exon |
| Bn-A06-p12986192 | Bn-N6-p13275473  | gene |      |
| Bn-A06-p12995133 | Bn-N6-p13252043  | gene |      |
| Bn-A06-p1312619  | Bn-N6-p1327589   | gene | exon |
| Bn-A06-p13162770 | Bn-N6-p13143010  | gene | exon |
| Bn-A06-p13230875 | Bn-N6-p13098469  | gene | exon |
| Bn-A06-p1330567  | Bn-N6-p1345326   | gene |      |

|                  |                        |      |      |
|------------------|------------------------|------|------|
| Bn-A06-p1345642  | Bn-N6-p1360070         | gene |      |
| Bn-A06-p1358955  | Bn-N6-p1373174         | gene | exon |
| Bn-A06-p13610210 | Bn-N6-p12734548        | gene |      |
| Bn-A06-p1366713  | Bn-N6-p1379872         | gene |      |
| Bn-A06-p13726921 | Bn-N13-p47843647       | gene | exon |
| Bn-A06-p13728321 | Bn-N6-p11835582        | gene |      |
| Bn-A06-p1383275  | Bn-N6-p1396905         | gene | exon |
| Bn-A06-p13859891 | Bn-N6-p11668711        | gene | exon |
| Bn-A06-p1386474  | Bn-N6-p1400036         | gene |      |
| Bn-A06-p139033   | Bn-N6-p129567          | gene |      |
| Bn-A06-p1403969  | Bn-N6-p1417507         | gene |      |
| Bn-A06-p1408273  | Bn-N6-p1424022         | gene | exon |
| Bn-A06-p14192915 | Bn-N6-p15617622        | gene |      |
| Bn-A06-p14193381 | Bn-N6-p15618086        | gene |      |
| Bn-A06-p14198240 | Bn-N6-p15623590        | gene | exon |
| Bn-A06-p14232702 | Bn-Scaffold00776-p6669 | gene | exon |
| Bn-A06-p14232703 | Bn-Scaffold00776-p6668 | gene | exon |
| Bn-A06-p14266102 | Bn-N6-p15671764        | gene | exon |
| Bn-A06-p14269763 | Bn-N19-p5165096        | gene | exon |
| Bn-A06-p1427206  | Bn-N6-p1448225         | gene |      |
| Bn-A06-p14316307 | Bn-N6-p15724343        | gene |      |
| Bn-A06-p1432446  | Bn-N6-p1453449         | gene |      |
| Bn-A06-p1433021  | Bn-N6-p1454023         | gene |      |
| Bn-A06-p14369166 | Bn-N6-p15794210        | gene |      |
| Bn-A06-p14373935 | Bn-N6-p15799654        | gene |      |
| Bn-A06-p14389679 | Bn-N6-p15810337        | gene |      |
| Bn-A06-p14417437 | Bn-N6-p15852103        | gene | exon |
| Bn-A06-p14428186 | Bn-N6-p15863068        | gene | exon |
| Bn-A06-p14428293 | Bn-N6-p15863175        | gene | exon |
| Bn-A06-p1443684  | Bn-N6-p1465234         | gene | exon |
| Bn-A06-p14441081 | Bn-N13-p38763344       | gene | exon |
| Bn-A06-p14457099 | Bn-N6-p15895022        | gene | exon |
| Bn-A06-p14474461 | Bn-N6-p15908274        | gene |      |
| Bn-A06-p14495889 | Bn-N6-p15932979        | gene |      |
| Bn-A06-p1450741  | Bn-N6-p1481418         | gene |      |
| Bn-A06-p14546946 | Bn-N6-p15978460        | gene |      |
| Bn-A06-p1456521  | Bn-N6-p1487539         | gene | exon |
| Bn-A06-p14576278 | Bn-N6-p16000536        | gene | exon |
| Bn-A06-p14578177 | Bn-N6-p16002426        | gene |      |
| Bn-A06-p14578303 | Bn-N6-p16002552        | gene |      |
| Bn-A06-p14594965 | Bn-N6-p16625034        | gene | exon |
| Bn-A06-p1460039  | Bn-N6-p1491080         | gene |      |
| Bn-A06-p14621640 | Bn-N2-p11813392        | gene |      |
| Bn-A06-p14664213 | Bn-N6-p16688581        | gene |      |
| Bn-A06-p14676716 | Bn-N6-p16701089        | gene | exon |
| Bn-A06-p14737621 | Bn-N6-p16748548        | gene | exon |
| Bn-A06-p14773179 | Bn-N6-p16779217        | gene | exon |
| Bn-A06-p14809503 | Bn-N6-p16823168        | gene |      |
| Bn-A06-p14816143 | Bn-N6-p16829860        | gene |      |
| Bn-A06-p14819465 | Bn-N6-p16835023        | gene | exon |
| Bn-A06-p14843109 | Bn-N6-p16852047        | gene | exon |
| Bn-A06-p14848662 | Bn-N6-p16857016        | gene |      |

|                  |                 |      |      |
|------------------|-----------------|------|------|
| Bn-A06-p14850300 | Bn-N6-p16859278 | gene | exon |
| Bn-A06-p14852091 | Bn-N6-p16861058 | gene |      |
| Bn-A06-p14852157 | Bn-N6-p16861124 | gene |      |
| Bn-A06-p1485525  | Bn-N6-p1507277  | gene | exon |
| Bn-A06-p14878721 | Bn-N6-p16886918 | gene | exon |
| Bn-A06-p14880259 | Bn-N6-p16888452 | gene | exon |
| Bn-A06-p14880848 | Bn-N6-p16889039 | gene | exon |
| Bn-A06-p1490969  | Bn-N6-p1510313  | gene | exon |
| Bn-A06-p15013369 | Bn-N6-p17022469 | gene | exon |
| Bn-A06-p15048    | Bn-N6-p19860    | gene | exon |
| Bn-A06-p15059166 | Bn-N6-p17060917 | gene | exon |
| Bn-A06-p15065078 | Bn-N6-p17068592 | gene | exon |
| Bn-A06-p1507197  | Bn-N16-p4752677 | gene |      |
| Bn-A06-p15262271 | Bn-N6-p17270352 | gene | exon |
| Bn-A06-p15285770 | Bn-N6-p17291886 | gene |      |
| Bn-A06-p1530126  | Bn-N6-p1556549  | gene | exon |
| Bn-A06-p15375170 | Bn-N6-p17381086 | gene |      |
| Bn-A06-p15375395 | Bn-N6-p17381311 | gene |      |
| Bn-A06-p15406244 | Bn-N6-p17409318 | gene |      |
| Bn-A06-p15415078 | Bn-N6-p17418106 | gene | exon |
| Bn-A06-p15420581 | Bn-N6-p17423599 | gene |      |
| Bn-A06-p15421020 | Bn-N6-p17424038 | gene |      |
| Bn-A06-p15489475 | Bn-N6-p17497852 | gene |      |
| Bn-A06-p15515345 | Bn-N6-p17520327 | gene | exon |
| Bn-A06-p15581849 | Bn-N6-p17585308 | gene |      |
| Bn-A06-p15582577 | Bn-N6-p17586036 | gene | exon |
| Bn-A06-p15582617 | Bn-N6-p17586075 | gene | exon |
| Bn-A06-p15632434 | Bn-N6-p17634501 | gene |      |
| Bn-A06-p15661345 | Bn-N6-p17666374 | gene |      |
| Bn-A06-p15709579 | Bn-N6-p17719839 | gene | exon |
| Bn-A06-p15749428 | Bn-N6-p17759688 | gene |      |
| Bn-A06-p15760165 | Bn-N6-p17772993 | gene | exon |
| Bn-A06-p15775625 | Bn-N6-p17787686 | gene | exon |
| Bn-A06-p15778397 | Bn-N6-p17790463 | gene | exon |
| Bn-A06-p15791244 | Bn-N6-p17805002 | gene |      |
| Bn-A06-p15801373 | Bn-N6-p17814208 | gene |      |
| Bn-A06-p15893221 | Bn-N6-p17911556 | gene | exon |
| Bn-A06-p15966650 | Bn-N6-p17991412 | gene |      |
| Bn-A06-p15967529 | Bn-N6-p17992288 | gene |      |
| Bn-A06-p15967682 | Bn-N6-p17992441 | gene | exon |
| Bn-A06-p16009894 | Bn-N6-p18030366 | gene | exon |
| Bn-A06-p16014870 | Bn-N6-p18041152 | gene |      |
| Bn-A06-p16014941 | Bn-N6-p18041223 | gene |      |
| Bn-A06-p16015026 | Bn-N6-p18041308 | gene |      |
| Bn-A06-p16015727 | Bn-N6-p18041965 | gene |      |
| Bn-A06-p16015795 | Bn-N6-p18042033 | gene |      |
| Bn-A06-p16064239 | Bn-N6-p18087846 | gene | exon |
| Bn-A06-p16106230 | Bn-N6-p18126580 | gene | exon |
| Bn-A06-p1612900  | Bn-N6-p1649426  | gene |      |
| Bn-A06-p16148736 | Bn-N6-p18169290 | gene |      |
| Bn-A06-p16149093 | Bn-N6-p18169647 | gene | exon |
| Bn-A06-p16150365 | Bn-N6-p18170919 | gene |      |

|                  |                 |      |      |
|------------------|-----------------|------|------|
| Bn-A06-p16150919 | Bn-N6-p18171473 | gene | exon |
| Bn-A06-p16181242 | Bn-N6-p18232789 | gene |      |
| Bn-A06-p16188512 | Bn-N6-p18240129 | gene |      |
| Bn-A06-p16237929 | Bn-N6-p18284170 | gene |      |
| Bn-A06-p1626020  | Bn-N6-p1663246  | gene | exon |
| Bn-A06-p16283909 | Bn-N6-p18303343 | gene |      |
| Bn-A06-p16284324 | Bn-N6-p18303758 | gene |      |
| Bn-A06-p16284610 | Bn-N6-p18304044 | gene |      |
| Bn-A06-p16303805 | Bn-N6-p18328984 | gene | exon |
| Bn-A06-p16303860 | Bn-N6-p18329039 | gene | exon |
| Bn-A06-p16330377 | Bn-N6-p18350463 | gene |      |
| Bn-A06-p1636449  | Bn-N16-p4442046 | gene | exon |
| Bn-A06-p16386782 | Bn-N6-p18433771 | gene |      |
| Bn-A06-p16386992 | Bn-N6-p18433981 | gene |      |
| Bn-A06-p16449642 | Bn-N6-p18500196 | gene |      |
| Bn-A06-p16460575 | Bn-N6-p18510588 | gene |      |
| Bn-A06-p16461885 | Bn-N6-p18511901 | gene | exon |
| Bn-A06-p1650453  | Bn-N6-p1687064  | gene |      |
| Bn-A06-p1650457  | Bn-N6-p1687068  | gene |      |
| Bn-A06-p1650529  | Bn-N6-p1687140  | gene |      |
| Bn-A06-p1650786  | Bn-N6-p1687397  | gene |      |
| Bn-A06-p1652088  | Bn-N6-p1688698  | gene |      |
| Bn-A06-p16553412 | Bn-N6-p18592834 | gene |      |
| Bn-A06-p16553640 | Bn-N6-p18593062 | gene |      |
| Bn-A06-p16554297 | Bn-N6-p18593718 | gene |      |
| Bn-A06-p16613538 | Bn-N6-p18656124 | gene |      |
| Bn-A06-p1661477  | Bn-N6-p1702037  | gene |      |
| Bn-A06-p16620858 | Bn-N6-p18662738 | gene | exon |
| Bn-A06-p16620984 | Bn-N6-p18662864 | gene | exon |
| Bn-A06-p16624574 | Bn-N6-p18665999 | gene | exon |
| Bn-A06-p16645035 | Bn-N6-p18693881 | gene |      |
| Bn-A06-p16645140 | Bn-N6-p18693986 | gene | exon |
| Bn-A06-p16656745 | Bn-N6-p18704283 | gene | exon |
| Bn-A06-p16657894 | Bn-N6-p18705429 | gene |      |
| Bn-A06-p16660065 | Bn-N6-p18707593 | gene | exon |
| Bn-A06-p16689717 | Bn-N6-p18733711 | gene |      |
| Bn-A06-p16701773 | Bn-N6-p18742415 | gene |      |
| Bn-A06-p16702471 | Bn-N6-p18743110 | gene |      |
| Bn-A06-p16703929 | Bn-N6-p18744562 | gene | exon |
| Bn-A06-p16718752 | Bn-N6-p18762305 | gene | exon |
| Bn-A06-p16728885 | Bn-N6-p18766418 | gene |      |
| Bn-A06-p16829292 | Bn-N6-p18786178 | gene | exon |
| Bn-A06-p16847178 | Bn-N6-p18799664 | gene | exon |
| Bn-A06-p16847229 | Bn-N6-p18799715 | gene | exon |
| Bn-A06-p16933880 | Bn-N6-p19067826 | gene |      |
| Bn-A06-p16985788 | Bn-N6-p18942604 | gene |      |
| Bn-A06-p16992951 | Bn-N6-p18954240 | gene | exon |
| Bn-A06-p16993923 | Bn-N6-p18955214 | gene |      |
| Bn-A06-p16994210 | Bn-N6-p18955501 | gene | exon |
| Bn-A06-p17003685 | Bn-N6-p18964995 | gene | exon |
| Bn-A06-p17006799 | Bn-N6-p18968109 | gene | exon |
| Bn-A06-p17007775 | Bn-N6-p18969085 | gene |      |

|                  |                       |      |      |
|------------------|-----------------------|------|------|
| Bn-A06-p17010360 | Bn-N6-p18971703       | gene | exon |
| Bn-A06-p17011382 | Bn-N6-p18972716       | gene | exon |
| Bn-A06-p17021956 | Bn-N6-p18982111       | gene |      |
| Bn-A06-p17024179 | Bn-N6-p18984139       | gene |      |
| Bn-A06-p17026294 | Bn-N6-p18986238       | gene |      |
| Bn-A06-p17026843 | Bn-N6-p18986787       | gene | exon |
| Bn-A06-p17037739 | Bn-N6-p18997745       | gene | exon |
| Bn-A06-p17037912 | Bn-N6-p18997918       | gene | exon |
| Bn-A06-p17097734 | Bn-N6-p19055319       | gene |      |
| Bn-A06-p17109583 | Bn-N6-p19069640       | gene |      |
| Bn-A06-p17143376 | Bn-N6-p19092537       | gene |      |
| Bn-A06-p17175388 | Bn-Scaffold08133-p758 | gene | exon |
| Bn-A06-p17176086 | Bn-N6-p19142066       | gene | exon |
| Bn-A06-p17208027 | Bn-N6-p19173275       | gene |      |
| Bn-A06-p17242631 | Bn-N3-p2167500        | gene | exon |
| Bn-A06-p17262265 | Bn-N6-p19212690       | gene |      |
| Bn-A06-p17289947 | Bn-N6-p19234621       | gene | exon |
| Bn-A06-p17291868 | Bn-N6-p19238162       | gene |      |
| Bn-A06-p17301456 | Bn-N6-p19247744       | gene |      |
| Bn-A06-p17313345 | Bn-N6-p19259582       | gene | exon |
| Bn-A06-p17332795 | Bn-N6-p19278754       | gene | exon |
| Bn-A06-p17337842 | Bn-N6-p19283769       | gene | exon |
| Bn-A06-p17375407 | Bn-N6-p19322585       | gene | exon |
| Bn-A06-p17375882 | Bn-N6-p19323060       | gene | exon |
| Bn-A06-p1743446  | Bn-N6-p1781188        | gene |      |
| Bn-A06-p17452087 | Bn-N6-p19399601       | gene | exon |
| Bn-A06-p17548258 | Bn-N6-p19500042       | gene |      |
| Bn-A06-p17548894 | Bn-N6-p19500680       | gene |      |
| Bn-A06-p17549347 | Bn-N6-p19501133       | gene | exon |
| Bn-A06-p17549603 | Bn-N6-p19501390       | gene |      |
| Bn-A06-p17671185 | Bn-N6-p19646596       | gene | exon |
| Bn-A06-p17710201 | Bn-N6-p19685508       | gene |      |
| Bn-A06-p17721678 | Bn-N6-p19697278       | gene |      |
| Bn-A06-p17729064 | Bn-N6-p19704663       | gene |      |
| Bn-A06-p17734402 | Bn-N6-p19710973       | gene |      |
| Bn-A06-p17734904 | Bn-N6-p19711475       | gene | exon |
| Bn-A06-p17741868 | Bn-N6-p19721994       | gene | exon |
| Bn-A06-p17741952 | Bn-N6-p19722078       | gene | exon |
| Bn-A06-p1776668  | Bn-N6-p1815642        | gene | exon |
| Bn-A06-p1777127  | Bn-N6-p1816104        | gene | exon |
| Bn-A06-p17778079 | Bn-N6-p19757990       | gene |      |
| Bn-A06-p17778210 | Bn-N6-p19758120       | gene |      |
| Bn-A06-p17785331 | Bn-N6-p19764946       | gene |      |
| Bn-A06-p17791496 | Bn-N6-p19771178       | gene | exon |
| Bn-A06-p17791746 | Bn-N6-p19771428       | gene | exon |
| Bn-A06-p17823115 | Bn-N6-p19786851       | gene | exon |
| Bn-A06-p17831661 | Bn-N6-p19795172       | gene | exon |
| Bn-A06-p17887060 | Bn-N6-p19840998       | gene | exon |
| Bn-A06-p17888567 | Bn-N6-p19842506       | gene | exon |
| Bn-A06-p17929532 | Bn-N6-p19882884       | gene | exon |
| Bn-A06-p17932959 | Bn-N6-p19886316       | gene | exon |
| Bn-A06-p1793586  | Bn-N6-p1831047        | gene |      |



|                  |                 |      |      |
|------------------|-----------------|------|------|
| Bn-A06-p17938497 | Bn-N6-p19890604 | gene | exon |
| Bn-A06-p17956497 | Bn-N9-p35866953 | gene |      |
| Bn-A06-p18000403 | Bn-N6-p19964006 | gene | exon |
| Bn-A06-p18000461 | Bn-N6-p19964064 | gene |      |
| Bn-A06-p1800467  | Bn-N6-p1837502  | gene |      |
| Bn-A06-p18006686 | Bn-N6-p19974379 | gene |      |
| Bn-A06-p18040363 | Bn-N6-p20017987 | gene |      |
| Bn-A06-p18040423 | Bn-N6-p20018047 | gene |      |
| Bn-A06-p18058671 | Bn-N6-p20031446 | gene |      |
| Bn-A06-p18059278 | Bn-N6-p20032092 | gene |      |
| Bn-A06-p18059565 | Bn-N6-p20032380 | gene | exon |
| Bn-A06-p18059678 | Bn-N6-p20032493 | gene |      |
| Bn-A06-p18102164 | Bn-N6-p20094346 | gene |      |
| Bn-A06-p18115817 | Bn-N6-p20107852 | gene |      |
| Bn-A06-p18129979 | Bn-N6-p20127975 | gene |      |
| Bn-A06-p18141167 | Bn-N6-p20144469 | gene |      |
| Bn-A06-p18144127 | Bn-N6-p20147429 | gene |      |
| Bn-A06-p18220327 | Bn-N6-p20218146 | gene |      |
| Bn-A06-p18246821 | Bn-N6-p20245047 | gene |      |
| Bn-A06-p18248917 | Bn-N6-p20247145 | gene |      |
| Bn-A06-p18249054 | Bn-N6-p20247282 | gene |      |
| Bn-A06-p18252711 | Bn-N6-p20250985 | gene |      |
| Bn-A06-p18254877 | Bn-N6-p20253151 | gene | exon |
| Bn-A06-p18260387 | Bn-N6-p20258633 | gene |      |
| Bn-A06-p18277724 | Bn-N6-p20273817 | gene | exon |
| Bn-A06-p18277802 | Bn-N6-p20273964 | gene | exon |
| Bn-A06-p183811   | Bn-N6-p176405   | gene | exon |
| Bn-A06-p18388041 | Bn-N6-p20381692 | gene |      |
| Bn-A06-p18394892 | Bn-N6-p20388629 | gene |      |
| Bn-A06-p18397592 | Bn-N6-p20391329 | gene |      |
| Bn-A06-p18402713 | Bn-N6-p20396437 | gene | exon |
| Bn-A06-p18403451 | Bn-N6-p20397175 | gene |      |
| Bn-A06-p18408257 | Bn-N6-p20402074 | gene | exon |
| Bn-A06-p18430792 | Bn-N6-p20421348 | gene | exon |
| Bn-A06-p18432812 | Bn-N6-p20423354 | gene |      |
| Bn-A06-p18454864 | Bn-N6-p20445389 | gene | exon |
| Bn-A06-p18455125 | Bn-N6-p20445650 | gene |      |
| Bn-A06-p18500429 | Bn-N6-p20485900 | gene | exon |
| Bn-A06-p18500596 | Bn-N6-p20486067 | gene | exon |
| Bn-A06-p18500625 | Bn-N6-p20486096 | gene | exon |
| Bn-A06-p18563686 | Bn-N6-p20547118 | gene | exon |
| Bn-A06-p18624741 | Bn-N6-p20614321 | gene |      |
| Bn-A06-p18634396 | Bn-N6-p20623983 | gene | exon |
| Bn-A06-p18642085 | Bn-N6-p20631670 | gene |      |
| Bn-A06-p18706102 | Bn-N6-p20685634 | gene |      |
| Bn-A06-p18709596 | Bn-N6-p20689130 | gene |      |
| Bn-A06-p18717323 | Bn-N6-p20697012 | gene | exon |
| Bn-A06-p18718829 | Bn-N6-p20698355 | gene | exon |
| Bn-A06-p1872484  | Bn-N6-p1918225  | gene |      |
| Bn-A06-p1872597  | Bn-N6-p1918338  | gene |      |
| Bn-A06-p18755859 | Bn-N6-p20732196 | gene |      |
| Bn-A06-p18783    | Bn-N6-p23558    | gene |      |

|                  |                         |      |      |
|------------------|-------------------------|------|------|
| Bn-A06-p18794208 | Bn-N6-p20776944         | gene |      |
| Bn-A06-p18813274 | Bn-N6-p14648727         | gene |      |
| Bn-A06-p18872147 | Bn-N6-p14708135         | gene | exon |
| Bn-A06-p18898902 | Bn-N6-p14740468         | gene |      |
| Bn-A06-p1892397  | Bn-N6-p1927804          | gene | exon |
| Bn-A06-p1892464  | Bn-N6-p1927871          | gene | exon |
| Bn-A06-p18998806 | Bn-N6-p14828458         | gene |      |
| Bn-A06-p1903170  | Bn-N6-p1940469          | gene |      |
| Bn-A06-p1903532  | Bn-N6-p1940831          | gene |      |
| Bn-A06-p19151996 | Bn-N6-p14972121         | gene |      |
| Bn-A06-p19153385 | Bn-N6-p14973511         | gene |      |
| Bn-A06-p19153719 | Bn-N6-p14973844         | gene |      |
| Bn-A06-p19163919 | Bn-N6-p14984047         | gene |      |
| Bn-A06-p19184868 | Bn-N6-p15006419         | gene |      |
| Bn-A06-p19185585 | Bn-N6-p15007134         | gene | exon |
| Bn-A06-p19245025 | Bn-N6-p15082715         | gene | exon |
| Bn-A06-p19265815 | Bn-N6-p15104807         | gene |      |
| Bn-A06-p19333055 | Bn-N6-p15166699         | gene |      |
| Bn-A06-p19333117 | Bn-N6-p15166762         | gene |      |
| Bn-A06-p19333349 | Bn-N6-p15166993         | gene |      |
| Bn-A06-p19392651 | Bn-N6-p15226492         | gene | exon |
| Bn-A06-p19405765 | Bn-N6-p15235318         | gene | exon |
| Bn-A06-p19411124 | Bn-N6-p15240234         | gene |      |
| Bn-A06-p19416292 | Bn-N6-p15245415         | gene |      |
| Bn-A06-p19418423 | Bn-N6-p15247555         | gene |      |
| Bn-A06-p19419215 | Bn-N6-p15248345         | gene |      |
| Bn-A06-p19434905 | Bn-N6-p15264691         | gene |      |
| Bn-A06-p19437625 | Bn-N6-p15267450         | gene |      |
| Bn-A06-p1947247  | Bn-N6-p1991978          | gene | exon |
| Bn-A06-p195449   | Bn-N6-p188974           | gene | exon |
| Bn-A06-p19555116 | Bn-N6-p15378380         | gene |      |
| Bn-A06-p19574863 | Bn-N6-p15402830         | gene | exon |
| Bn-A06-p19579765 | Bn-N6-p15404645         | gene | exon |
| Bn-A06-p19593266 | Bn-N6-p15413071         | gene |      |
| Bn-A06-p1961013  | Bn-N6-p2006985          | gene | exon |
| Bn-A06-p19635380 | Bn-N6-p15453006         | gene | exon |
| Bn-A06-p19646183 | Bn-N6-p15467377         | gene | exon |
| Bn-A06-p19656363 | Bn-N6-p15479154         | gene | exon |
| Bn-A06-p19715332 | Bn-Scaffold00926-p20936 | gene |      |
| Bn-A06-p1973105  | Bn-N6-p2022757          | gene |      |
| Bn-A06-p19739501 | Bn-Scaffold00926-p3388  | gene | exon |
| Bn-A06-p197604   | Bn-N6-p191127           | gene |      |
| Bn-A06-p19792160 | Bn-N9-p18529473         | gene |      |
| Bn-A06-p19968113 | Bn-N9-p18718935         | gene | exon |
| Bn-A06-p20320209 | Bn-N5-p14653039         | gene |      |
| Bn-A06-p20320258 | Bn-N5-p14652990         | gene |      |
| Bn-A06-p2060583  | Bn-N6-p2116721          | gene | exon |
| Bn-A06-p21045315 | Bn-N6-p21295598         | gene |      |
| Bn-A06-p21060490 | Bn-N17-p34995753        | gene | exon |
| Bn-A06-p21064129 | Bn-N6-p21276666         | gene |      |
| Bn-A06-p21064168 | Bn-N6-p21276627         | gene |      |
| Bn-A06-p21064290 | Bn-N6-p21276505         | gene | exon |

|                  |                  |      |      |
|------------------|------------------|------|------|
| Bn-A06-p21064341 | Bn-N17-p35005435 | gene |      |
| Bn-A06-p21065019 | Bn-N6-p21275774  | gene |      |
| Bn-A06-p2107176  | Bn-N6-p2171415   | gene | exon |
| Bn-A06-p21072392 | Bn-N6-p21268255  | gene |      |
| Bn-A06-p2107610  | Bn-N6-p2171861   | gene | exon |
| Bn-A06-p21080778 | Bn-N6-p21260524  | gene |      |
| Bn-A06-p21080915 | Bn-N6-p21260159  | gene |      |
| Bn-A06-p21098677 | Bn-N6-p21245347  | gene | exon |
| Bn-A06-p21101957 | Bn-N6-p21242087  | gene | exon |
| Bn-A06-p21105437 | Bn-N6-p21239160  | gene | exon |
| Bn-A06-p21116438 | Bn-N6-p21226214  | gene |      |
| Bn-A06-p21126329 | Bn-N6-p21217733  | gene | exon |
| Bn-A06-p21127138 | Bn-N6-p21217121  | gene |      |
| Bn-A06-p21127779 | Bn-N6-p21216470  | gene | exon |
| Bn-A06-p21127805 | Bn-N6-p21216444  | gene |      |
| Bn-A06-p21127973 | Bn-N6-p21216276  | gene | exon |
| Bn-A06-p21132765 | Bn-N6-p21210684  | gene |      |
| Bn-A06-p21134315 | Bn-N6-p21209138  | gene | exon |
| Bn-A06-p21150459 | Bn-N6-p21195020  | gene |      |
| Bn-A06-p21150622 | Bn-N6-p21194846  | gene |      |
| Bn-A06-p21162770 | Bn-N6-p21186860  | gene |      |
| Bn-A06-p21163950 | Bn-N6-p21185677  | gene |      |
| Bn-A06-p21163993 | Bn-N6-p21185634  | gene |      |
| Bn-A06-p21164043 | Bn-N6-p21185584  | gene | exon |
| Bn-A06-p21164284 | Bn-N6-p21185343  | gene | exon |
| Bn-A06-p21164289 | Bn-N6-p21185338  | gene | exon |
| Bn-A06-p21183207 | Bn-N6-p21165944  | gene | exon |
| Bn-A06-p21187999 | Bn-N6-p21161093  | gene |      |
| Bn-A06-p21191463 | Bn-N6-p21157674  | gene |      |
| Bn-A06-p21194827 | Bn-N6-p21149611  | gene | exon |
| Bn-A06-p21195115 | Bn-N6-p21149323  | gene | exon |
| Bn-A06-p21196739 | Bn-N6-p21147702  | gene | exon |
| Bn-A06-p21221869 | Bn-N6-p21120213  | gene |      |
| Bn-A06-p21247593 | Bn-N6-p21094107  | gene |      |
| Bn-A06-p21252883 | Bn-N6-p21088817  | gene |      |
| Bn-A06-p21268699 | Bn-N17-p35259636 | gene | exon |
| Bn-A06-p21268967 | Bn-N6-p21072654  | gene |      |
| Bn-A06-p21269830 | Bn-N6-p21071791  | gene |      |
| Bn-A06-p21270132 | Bn-N6-p21071489  | gene | exon |
| Bn-A06-p21273211 | Bn-N6-p21068336  | gene | exon |
| Bn-A06-p21278243 | Bn-N6-p21062261  | gene |      |
| Bn-A06-p21301745 | Bn-N9-p5942255   | gene | exon |
| Bn-A06-p21302070 | Bn-N9-p5941930   | gene | exon |
| Bn-A06-p21308348 | Bn-N6-p21038101  | gene | exon |
| Bn-A06-p21310030 | Bn-N6-p21031628  | gene |      |
| Bn-A06-p21315016 | Bn-N6-p21026631  | gene |      |
| Bn-A06-p21318925 | Bn-N17-p35308010 | gene | exon |
| Bn-A06-p21321797 | Bn-N6-p21019844  | gene | exon |
| Bn-A06-p21438687 | Bn-N6-p20903951  | gene | exon |
| Bn-A06-p21462006 | Bn-N6-p20879596  | gene |      |
| Bn-A06-p21463076 | Bn-N6-p20878529  | gene |      |
| Bn-A06-p21475556 | Bn-N6-p20866349  | gene | exon |

|                  |                  |      |      |
|------------------|------------------|------|------|
| Bn-A06-p21490506 | Bn-N6-p20850567  | gene | exon |
| Bn-A06-p21491454 | Bn-N6-p20849620  | gene |      |
| Bn-A06-p21501350 | Bn-N6-p20843710  | gene | exon |
| Bn-A06-p21509934 | Bn-N6-p20833612  | gene | exon |
| Bn-A06-p21525576 | Bn-N6-p20817476  | gene | exon |
| Bn-A06-p21550710 | Bn-N6-p20800759  | gene | exon |
| Bn-A06-p21572310 | Bn-N6-p20783353  | gene | exon |
| Bn-A06-p21573640 | Bn-N6-p20781750  | gene |      |
| Bn-A06-p21574157 | Bn-N6-p20781234  | gene |      |
| Bn-A06-p21589512 | Bn-N6-p21310132  | gene |      |
| Bn-A06-p21591920 | Bn-N6-p21312540  | gene |      |
| Bn-A06-p21600894 | Bn-N6-p21321514  | gene |      |
| Bn-A06-p21602381 | Bn-N6-p21323001  | gene |      |
| Bn-A06-p21613020 | Bn-N6-p21333702  | gene |      |
| Bn-A06-p2165351  | Bn-N6-p2225291   | gene | exon |
| Bn-A06-p21653611 | Bn-N6-p21376133  | gene |      |
| Bn-A06-p21663690 | Bn-N6-p21385957  | gene | exon |
| Bn-A06-p21677028 | Bn-N6-p21389385  | gene |      |
| Bn-A06-p21797963 | Bn-N6-p21515905  | gene |      |
| Bn-A06-p21800812 | Bn-N6-p21518841  | gene | exon |
| Bn-A06-p21800927 | Bn-N6-p21518956  | gene | exon |
| Bn-A06-p21801638 | Bn-N6-p21519667  | gene | exon |
| Bn-A06-p21826106 | Bn-N6-p21564067  | gene |      |
| Bn-A06-p21846491 | Bn-N6-p21580042  | gene | exon |
| Bn-A06-p21848747 | Bn-N6-p21582195  | gene | exon |
| Bn-A06-p2185099  | Bn-N6-p2247063   | gene | exon |
| Bn-A06-p21852261 | Bn-N6-p21585709  | gene |      |
| Bn-A06-p21902421 | Bn-N6-p21647204  | gene |      |
| Bn-A06-p21902773 | Bn-N6-p21647556  | gene |      |
| Bn-A06-p21917612 | Bn-N6-p21657109  | gene |      |
| Bn-A06-p21926982 | Bn-N6-p21665633  | gene | exon |
| Bn-A06-p21930942 | Bn-N6-p21669754  | gene |      |
| Bn-A06-p21933122 | Bn-N6-p21671942  | gene | exon |
| Bn-A06-p21933776 | Bn-N6-p21672596  | gene |      |
| Bn-A06-p21933808 | Bn-N6-p21672628  | gene |      |
| Bn-A06-p21933870 | Bn-N6-p21672690  | gene | exon |
| Bn-A06-p21980483 | Bn-N6-p21729330  | gene | exon |
| Bn-A06-p21980699 | Bn-N17-p34313338 | gene | exon |
| Bn-A06-p22051862 | Bn-N6-p21797366  | gene |      |
| Bn-A06-p22054532 | Bn-N6-p21800071  | gene |      |
| Bn-A06-p22056809 | Bn-N6-p21802385  | gene | exon |
| Bn-A06-p22063657 | Bn-N6-p21810521  | gene |      |
| Bn-A06-p22074841 | Bn-N6-p21821704  | gene |      |
| Bn-A06-p22077748 | Bn-N6-p21824609  | gene |      |
| Bn-A06-p22088550 | Bn-N6-p21834891  | gene | exon |
| Bn-A06-p22096615 | Bn-N6-p21842565  | gene | exon |
| Bn-A06-p22105035 | Bn-N6-p21850966  | gene | exon |
| Bn-A06-p22121666 | Bn-N6-p21868896  | gene | exon |
| Bn-A06-p22160452 | Bn-N6-p21908673  | gene | exon |
| Bn-A06-p22163702 | Bn-N6-p21911923  | gene | exon |
| Bn-A06-p2217578  | Bn-N6-p2284554   | gene | exon |
| Bn-A06-p2218956  | Bn-N6-p2285927   | gene | exon |

|                  |                       |      |      |
|------------------|-----------------------|------|------|
| Bn-A06-p22209347 | Bn-N6-p21961235       | gene | exon |
| Bn-A06-p2222872  | Bn-N6-p2289854        | gene |      |
| Bn-A06-p22262511 | Bn-N6-p22018480       | gene |      |
| Bn-A06-p22267850 | Bn-N6-p22023819       | gene |      |
| Bn-A06-p22268128 | Bn-N6-p22024097       | gene | exon |
| Bn-A06-p22271048 | Bn-N6-p22027017       | gene | exon |
| Bn-A06-p22278468 | Bn-N6-p22032653       | gene | exon |
| Bn-A06-p22279513 | Bn-N6-p22033707       | gene | exon |
| Bn-A06-p22329026 | Bn-N6-p22083891       | gene | exon |
| Bn-A06-p22329819 | Bn-N6-p22084684       | gene | exon |
| Bn-A06-p22330861 | Bn-N6-p22085726       | gene | exon |
| Bn-A06-p22331680 | Bn-N6-p22086545       | gene | exon |
| Bn-A06-p2234696  | Bn-N6-p2310593        | gene |      |
| Bn-A06-p2234718  | Bn-N6-p2310615        | gene |      |
| Bn-A06-p22391357 | Bn-N17-p33472677      | gene | exon |
| Bn-A06-p22397061 | Bn-N6-p22169567       | gene | exon |
| Bn-A06-p22503987 | Bn-N6-p22274288       | gene |      |
| Bn-A06-p22505810 | Bn-N6-p22276050       | gene | exon |
| Bn-A06-p2251910  | Bn-N6-p2323861        | gene | exon |
| Bn-A06-p2252815  | Bn-N6-p2324749        | gene |      |
| Bn-A06-p22554741 | Bn-N6-p22355457       | gene |      |
| Bn-A06-p22555168 | Bn-N6-p22355884       | gene |      |
| Bn-A06-p22557239 | Bn-N6-p22357954       | gene | exon |
| Bn-A06-p22559895 | Bn-N6-p22360620       | gene | exon |
| Bn-A06-p22577587 | Bn-N6-p22382558       | gene | exon |
| Bn-A06-p22582397 | Bn-Scaffold05279-p349 | gene | exon |
| Bn-A06-p22594488 | Bn-N6-p22400553       | gene |      |
| Bn-A06-p22605217 | Bn-N6-p22410943       | gene |      |
| Bn-A06-p22644580 | Bn-N6-p22456205       | gene |      |
| Bn-A06-p22647955 | Bn-N6-p22458486       | gene |      |
| Bn-A06-p2268393  | Bn-N6-p2342201        | gene | exon |
| Bn-A06-p22691250 | Bn-N6-p22488724       | gene |      |
| Bn-A06-p22709184 | Bn-N17-p32930419      | gene | exon |
| Bn-A06-p22709872 | Bn-N6-p22511393       | gene |      |
| Bn-A06-p2274318  | Bn-N6-p2348122        | gene | exon |
| Bn-A06-p2275754  | Bn-N16-p3090573       | gene |      |
| Bn-A06-p22784485 | Bn-N2-p27875310       | gene |      |
| Bn-A06-p22796718 | Bn-N6-p22587749       | gene | exon |
| Bn-A06-p22806976 | Bn-N6-p22597910       | gene |      |
| Bn-A06-p22808095 | Bn-N6-p22599025       | gene | exon |
| Bn-A06-p22835281 | Bn-N6-p22631670       | gene |      |
| Bn-A06-p22847296 | Bn-N6-p22644867       | gene | exon |
| Bn-A06-p22882207 | Bn-N6-p22678173       | gene |      |
| Bn-A06-p22894392 | Bn-N17-p32608696      | gene | exon |
| Bn-A06-p22910339 | Bn-N6-p22705689       | gene | exon |
| Bn-A06-p22917369 | Bn-N6-p22712955       | gene |      |
| Bn-A06-p22938934 | Bn-N17-p32545000      | gene | exon |
| Bn-A06-p2300342  | Bn-N6-p2380085        | gene |      |
| Bn-A06-p23041811 | Bn-N6-p22850310       | gene |      |
| Bn-A06-p23042397 | Bn-N6-p22850896       | gene |      |
| Bn-A06-p23042849 | Bn-N6-p22851348       | gene |      |
| Bn-A06-p23043135 | Bn-N6-p22851631       | gene |      |

|                  |                  |      |      |
|------------------|------------------|------|------|
| Bn-A06-p2306499  | Bn-N6-p2386953   | gene | exon |
| Bn-A06-p23258948 | Bn-N6-p23078241  | gene |      |
| Bn-A06-p23259546 | Bn-N6-p23078841  | gene |      |
| Bn-A06-p23268021 | Bn-N6-p23087867  | gene |      |
| Bn-A06-p23295405 | Bn-N6-p23105851  | gene |      |
| Bn-A06-p23341715 | Bn-N6-p23198691  | gene |      |
| Bn-A06-p23347767 | Bn-N6-p23205777  | gene | exon |
| Bn-A06-p23406582 | Bn-N6-p23286174  | gene | exon |
| Bn-A06-p23442751 | Bn-N17-p31512414 | gene | exon |
| Bn-A06-p23468803 | Bn-N6-p23351373  | gene | exon |
| Bn-A06-p2348428  | Bn-N6-p2430074   | gene | exon |
| Bn-A06-p2357647  | Bn-N6-p2439412   | gene |      |
| Bn-A06-p23585772 | Bn-N6-p23480882  | gene |      |
| Bn-A06-p23586019 | Bn-N6-p23481129  | gene |      |
| Bn-A06-p23612730 | Bn-N6-p23506709  | gene |      |
| Bn-A06-p23661679 | Bn-N6-p23549359  | gene | exon |
| Bn-A06-p23665384 | Bn-N6-p23553077  | gene |      |
| Bn-A06-p23665564 | Bn-N6-p23553257  | gene |      |
| Bn-A06-p23666378 | Bn-N6-p23554072  | gene |      |
| Bn-A06-p23744370 | Bn-N18-p22925019 | gene | exon |
| Bn-A06-p23795599 | Bn-N6-p23686370  | gene |      |
| Bn-A06-p23795763 | Bn-N6-p23686534  | gene |      |
| Bn-A06-p23796020 | Bn-N6-p23686792  | gene |      |
| Bn-A06-p23857345 | Bn-N6-p23753179  | gene |      |
| Bn-A06-p23865356 | Bn-N6-p23761177  | gene |      |
| Bn-A06-p23983648 | Bn-N6-p23877592  | gene | exon |
| Bn-A06-p24032427 | Bn-N6-p23921418  | gene | exon |
| Bn-A06-p24046488 | Bn-N6-p23936898  | gene |      |
| Bn-A06-p2405022  | Bn-N16-p2735237  | gene |      |
| Bn-A06-p2412998  | Bn-N6-p2493840   | gene | exon |
| Bn-A06-p24167592 | Bn-N6-p24064554  | gene | exon |
| Bn-A06-p24168470 | Bn-N6-p24065432  | gene | exon |
| Bn-A06-p24178982 | Bn-N6-p24071269  | gene |      |
| Bn-A06-p24204030 | Bn-N6-p24104375  | gene |      |
| Bn-A06-p24206019 | Bn-N6-p24106364  | gene |      |
| Bn-A06-p24206556 | Bn-N6-p24106901  | gene |      |
| Bn-A06-p24207308 | Bn-N6-p24107654  | gene |      |
| Bn-A06-p24210014 | Bn-N6-p24110360  | gene |      |
| Bn-A06-p24218304 | Bn-N6-p24118837  | gene | exon |
| Bn-A06-p24220121 | Bn-N6-p24120811  | gene |      |
| Bn-A06-p24222064 | Bn-N6-p24122752  | gene |      |
| Bn-A06-p24236385 | Bn-N6-p24137157  | gene |      |
| Bn-A06-p24267492 | Bn-N6-p24168953  | gene |      |
| Bn-A06-p24267499 | Bn-N6-p24168960  | gene |      |
| Bn-A06-p24267745 | Bn-N6-p24169206  | gene |      |
| Bn-A06-p24270718 | Bn-N6-p24172179  | gene |      |
| Bn-A06-p24284014 | Bn-N6-p24185514  | gene | exon |
| Bn-A06-p24297216 | Bn-N6-p24203879  | gene |      |
| Bn-A06-p24307250 | Bn-N6-p24216449  | gene | exon |
| Bn-A06-p24319329 | Bn-N6-p24231951  | gene |      |
| Bn-A06-p24327317 | Bn-N6-p24240336  | gene | exon |
| Bn-A06-p24340685 | Bn-N6-p24253950  | gene |      |

|                  |                  |      |      |
|------------------|------------------|------|------|
| Bn-A06-p24340830 | Bn-N6-p24254096  | gene | exon |
| Bn-A06-p24370009 | Bn-N6-p24290033  | gene |      |
| Bn-A06-p2437284  | Bn-N6-p2519721   | gene | exon |
| Bn-A06-p24386467 | Bn-N6-p24305347  | gene | exon |
| Bn-A06-p24395608 | Bn-N6-p24314023  | gene |      |
| Bn-A06-p24401543 | Bn-N6-p24318789  | gene | exon |
| Bn-A06-p24404374 | Bn-N6-p24321461  | gene |      |
| Bn-A06-p24404996 | Bn-N6-p24322081  | gene |      |
| Bn-A06-p24405065 | Bn-N6-p24322150  | gene |      |
| Bn-A06-p24407165 | Bn-N6-p24324247  | gene |      |
| Bn-A06-p24407535 | Bn-N6-p24324617  | gene |      |
| Bn-A06-p24407609 | Bn-N6-p24324691  | gene |      |
| Bn-A06-p24410007 | Bn-N6-p24327124  | gene |      |
| Bn-A06-p24428073 | Bn-N6-p24343088  | gene |      |
| Bn-A06-p24465494 | Bn-N6-p24388412  | gene |      |
| Bn-A06-p24466136 | Bn-N6-p24389054  | gene |      |
| Bn-A06-p24467652 | Bn-N6-p24390570  | gene |      |
| Bn-A06-p24501315 | Bn-N6-p24426203  | gene |      |
| Bn-A06-p24501540 | Bn-N6-p24426433  | gene |      |
| Bn-A06-p24508464 | Bn-N6-p24434163  | gene | exon |
| Bn-A06-p24557108 | Bn-N6-p24483260  | gene | exon |
| Bn-A06-p24557193 | Bn-N6-p24483345  | gene | exon |
| Bn-A06-p24602106 | Bn-N6-p24528502  | gene | exon |
| Bn-A06-p24607556 | Bn-N6-p24531745  | gene | exon |
| Bn-A06-p24618096 | Bn-N6-p24541836  | gene | exon |
| Bn-A06-p24678077 | Bn-N6-p24609360  | gene | exon |
| Bn-A06-p24695860 | Bn-N6-p24629879  | gene | exon |
| Bn-A06-p24709822 | Bn-N6-p24641624  | gene |      |
| Bn-A06-p24713872 | Bn-N6-p24648594  | gene |      |
| Bn-A06-p24717767 | Bn-N6-p24652460  | gene |      |
| Bn-A06-p24726203 | Bn-N6-p24660985  | gene | exon |
| Bn-A06-p24730935 | Bn-N6-p24666030  | gene | exon |
| Bn-A06-p24744523 | Bn-N6-p24680736  | gene | exon |
| Bn-A06-p24814906 | Bn-N6-p24748982  | gene |      |
| Bn-A06-p24822573 | Bn-N6-p24756372  | gene | exon |
| Bn-A06-p24836495 | Bn-N17-p27245347 | gene | exon |
| Bn-A06-p24886436 | Bn-N6-p24818237  | gene | exon |
| Bn-A06-p24913140 | Bn-N6-p24828591  | gene | exon |
| Bn-A06-p24922072 | Bn-N6-p24838130  | gene |      |
| Bn-A06-p24929938 | Bn-N6-p24845946  | gene | exon |
| Bn-A06-p24934604 | Bn-N6-p24853461  | gene |      |
| Bn-A06-p24973824 | Bn-N6-p24897402  | gene | exon |
| Bn-A06-p24976434 | Bn-N6-p24900064  | gene | exon |
| Bn-A06-p2514723  | Bn-N6-p2549445   | gene | exon |
| Bn-A06-p2521454  | Bn-N6-p2556154   | gene | exon |
| Bn-A06-p2521668  | Bn-N6-p2556368   | gene | exon |
| Bn-A06-p2525037  | Bn-N6-p2559757   | gene | exon |
| Bn-A06-p2526552  | Bn-N6-p2561249   | gene |      |
| Bn-A06-p25329425 | Bn-N6-p25237706  | gene | exon |
| Bn-A06-p25343454 | Bn-N6-p25251925  | gene | exon |
| Bn-A06-p25350033 | Bn-N6-p25259115  | gene |      |
| Bn-A06-p25351980 | Bn-N6-p25261078  | gene | exon |

|                  |                  |      |      |
|------------------|------------------|------|------|
| Bn-A06-p25377321 | Bn-N6-p25287774  | gene |      |
| Bn-A06-p25409852 | Bn-N6-p25304379  | gene | exon |
| Bn-A06-p25471463 | Bn-N6-p25360464  | gene |      |
| Bn-A06-p2563025  | Bn-N6-p2593860   | gene | exon |
| Bn-A06-p2582613  | Bn-N6-p2620055   | gene |      |
| Bn-A06-p25840740 | Bn-N6-p25719735  | gene | exon |
| Bn-A06-p25878721 | Bn-N6-p25758868  | gene | exon |
| Bn-A06-p26023391 | Bn-N6-p25901016  | gene | exon |
| Bn-A06-p26039465 | Bn-N6-p25913173  | gene | exon |
| Bn-A06-p26045429 | Bn-N6-p25920137  | gene | exon |
| Bn-A06-p26066533 | Bn-N17-p48616786 | gene |      |
| Bn-A06-p26080915 | Bn-N6-p25952938  | gene |      |
| Bn-A06-p26096667 | Bn-N6-p25972810  | gene | exon |
| Bn-A06-p26096963 | Bn-N6-p25973106  | gene |      |
| Bn-A06-p26097037 | Bn-N6-p25973180  | gene |      |
| Bn-A06-p26108669 | Bn-N6-p25984695  | gene | exon |
| Bn-A06-p26113448 | Bn-N6-p25989421  | gene | exon |
| Bn-A06-p26144134 | Bn-N6-p26014839  | gene |      |
| Bn-A06-p26144417 | Bn-N6-p26015122  | gene |      |
| Bn-A06-p26144731 | Bn-N6-p26015436  | gene |      |
| Bn-A06-p26152237 | Bn-N6-p26022941  | gene |      |
| Bn-A06-p26154413 | Bn-N6-p26025052  | gene |      |
| Bn-A06-p26155068 | Bn-N6-p26025707  | gene |      |
| Bn-A06-p26173206 | Bn-N6-p26045574  | gene |      |
| Bn-A06-p26186229 | Bn-N6-p26052502  | gene | exon |
| Bn-A06-p2619089  | Bn-N6-p2651143   | gene | exon |
| Bn-A06-p26212942 | Bn-N6-p26083374  | gene |      |
| Bn-A06-p26213014 | Bn-N6-p26083446  | gene |      |
| Bn-A06-p26213205 | Bn-N6-p26083637  | gene | exon |
| Bn-A06-p26213281 | Bn-N6-p26083713  | gene |      |
| Bn-A06-p26219274 | Bn-N6-p26088740  | gene | exon |
| Bn-A06-p26219617 | Bn-N6-p26089080  | gene | exon |
| Bn-A06-p26248182 | Bn-N6-p26119667  | gene | exon |
| Bn-A06-p2630468  | Bn-N6-p2668296   | gene | exon |
| Bn-A06-p2633224  | Bn-N6-p2671059   | gene | exon |
| Bn-A06-p2633764  | Bn-N6-p2671598   | gene | exon |
| Bn-A06-p2646572  | Bn-N6-p2682622   | gene | exon |
| Bn-A06-p2650442  | Bn-N6-p2686460   | gene |      |
| Bn-A06-p2651708  | Bn-N6-p2687756   | gene | exon |
| Bn-A06-p2682929  | Bn-N15-p2990291  | gene | exon |
| Bn-A06-p2698067  | Bn-N6-p2727686   | gene | exon |
| Bn-A06-p2709177  | Bn-N6-p2732304   | gene | exon |
| Bn-A06-p2714610  | Bn-N6-p2737753   | gene |      |
| Bn-A06-p2717967  | Bn-N6-p2741108   | gene | exon |
| Bn-A06-p2718852  | Bn-N6-p2741979   | gene | exon |
| Bn-A06-p2729577  | Bn-N6-p2752302   | gene |      |
| Bn-A06-p2743076  | Bn-N6-p2757743   | gene |      |
| Bn-A06-p2756247  | Bn-N6-p2768293   | gene |      |
| Bn-A06-p2756792  | Bn-N6-p2768838   | gene |      |
| Bn-A06-p2758495  | Bn-N6-p2770541   | gene |      |
| Bn-A06-p2778072  | Bn-N6-p2786608   | gene |      |
| Bn-A06-p2778829  | Bn-N6-p2787365   | gene |      |



|                 |                 |      |      |
|-----------------|-----------------|------|------|
| Bn-A06-p2778837 | Bn-N6-p2787373  | gene |      |
| Bn-A06-p2779243 | Bn-N6-p2787778  | gene |      |
| Bn-A06-p2788585 | Bn-N6-p2797188  | gene | exon |
| Bn-A06-p2801792 | Bn-N6-p2810106  | gene |      |
| Bn-A06-p2807759 | Bn-N6-p2816073  | gene | exon |
| Bn-A06-p2823066 | Bn-N6-p2826199  | gene |      |
| Bn-A06-p2824500 | Bn-N6-p2827633  | gene |      |
| Bn-A06-p2826315 | Bn-N6-p2829463  | gene | exon |
| Bn-A06-p2826630 | Bn-N6-p2829778  | gene |      |
| Bn-A06-p2842757 | Bn-N6-p2842298  | gene |      |
| Bn-A06-p2851834 | Bn-N6-p2851376  | gene |      |
| Bn-A06-p2870413 | Bn-N6-p2866315  | gene | exon |
| Bn-A06-p287053  | Bn-N6-p282831   | gene | exon |
| Bn-A06-p2874216 | Bn-N6-p2870151  | gene | exon |
| Bn-A06-p288377  | Bn-N6-p284723   | gene |      |
| Bn-A06-p2890703 | Bn-N6-p2896493  | gene | exon |
| Bn-A06-p2891175 | Bn-N6-p2897013  | gene |      |
| Bn-A06-p2891290 | Bn-N6-p2897128  | gene |      |
| Bn-A06-p2903017 | Bn-N6-p2903792  | gene | exon |
| Bn-A06-p2929852 | Bn-N6-p2935540  | gene | exon |
| Bn-A06-p2930156 | Bn-N6-p2935844  | gene |      |
| Bn-A06-p2938450 | Bn-N6-p2943858  | gene | exon |
| Bn-A06-p2938890 | Bn-N6-p2944300  | gene | exon |
| Bn-A06-p2949781 | Bn-N6-p2953219  | gene |      |
| Bn-A06-p2949858 | Bn-N6-p2953296  | gene |      |
| Bn-A06-p2954752 | Bn-N6-p2957078  | gene |      |
| Bn-A06-p2956891 | Bn-N6-p2959219  | gene | exon |
| Bn-A06-p2958095 | Bn-N6-p2960373  | gene | exon |
| Bn-A06-p2973074 | Bn-N6-p2973146  | gene |      |
| Bn-A06-p2981395 | Bn-N6-p2981638  | gene | exon |
| Bn-A06-p2984184 | Bn-N15-p3364850 | gene | exon |
| Bn-A06-p2993800 | Bn-N15-p3374204 | gene | exon |
| Bn-A06-p3009854 | Bn-N6-p3006589  | gene |      |
| Bn-A06-p3012876 | Bn-N6-p3010680  | gene |      |
| Bn-A06-p3013547 | Bn-N6-p3011370  | gene |      |
| Bn-A06-p3016186 | Bn-N6-p3013918  | gene |      |
| Bn-A06-p3016356 | Bn-N6-p3014089  | gene |      |
| Bn-A06-p3031327 | Bn-N6-p3030154  | gene | exon |
| Bn-A06-p3049884 | Bn-N6-p3048326  | gene | exon |
| Bn-A06-p3050205 | Bn-N6-p3048647  | gene |      |
| Bn-A06-p3050747 | Bn-N6-p3049189  | gene |      |
| Bn-A06-p3051257 | Bn-N6-p3049699  | gene |      |
| Bn-A06-p3065773 | Bn-N6-p3065004  | gene |      |
| Bn-A06-p3066038 | Bn-N6-p3065269  | gene |      |
| Bn-A06-p3066372 | Bn-N6-p3065603  | gene |      |
| Bn-A06-p307436  | Bn-N6-p302033   | gene | exon |
| Bn-A06-p3088460 | Bn-N6-p3088020  | gene |      |
| Bn-A06-p3090078 | Bn-N6-p3089638  | gene | exon |
| Bn-A06-p3096813 | Bn-N6-p3104738  | gene |      |
| Bn-A06-p3125473 | Bn-N6-p3140846  | gene | exon |
| Bn-A06-p3132058 | Bn-N6-p3147710  | gene |      |
| Bn-A06-p3132860 | Bn-N6-p3148516  | gene |      |

|                 |                  |      |      |
|-----------------|------------------|------|------|
| Bn-A06-p3146367 | Bn-N6-p3162102   | gene |      |
| Bn-A06-p3146720 | Bn-N6-p3162460   | gene |      |
| Bn-A06-p3184395 | Bn-N6-p3195839   | gene |      |
| Bn-A06-p3202098 | Bn-N6-p3213931   | gene | exon |
| Bn-A06-p3202615 | Bn-N6-p3214421   | gene |      |
| Bn-A06-p3206017 | Bn-N6-p3219017   | gene | exon |
| Bn-A06-p3207623 | Bn-N6-p3220626   | gene |      |
| Bn-A06-p3226693 | Bn-N6-p3230970   | gene | exon |
| Bn-A06-p3257163 | Bn-N6-p3249953   | gene | exon |
| Bn-A06-p3278682 | Bn-N6-p3270169   | gene | exon |
| Bn-A06-p3287018 | Bn-N16-p37184565 | gene | exon |
| Bn-A06-p329217  | Bn-N6-p330032    | gene |      |
| Bn-A06-p3295431 | Bn-N6-p3286024   | gene |      |
| Bn-A06-p3302657 | Bn-N6-p3292678   | gene |      |
| Bn-A06-p330826  | Bn-N6-p331683    | gene |      |
| Bn-A06-p3308398 | Bn-N6-p3300591   | gene |      |
| Bn-A06-p3318611 | Bn-N6-p3310703   | gene | exon |
| Bn-A06-p3325502 | Bn-N6-p3317535   | gene | exon |
| Bn-A06-p3325566 | Bn-N6-p3317599   | gene | exon |
| Bn-A06-p3329211 | Bn-N6-p3322607   | gene | exon |
| Bn-A06-p3353405 | Bn-N6-p3347064   | gene |      |
| Bn-A06-p3354754 | Bn-N6-p3349067   | gene | exon |
| Bn-A06-p3363188 | Bn-N6-p3356903   | gene |      |
| Bn-A06-p3380495 | Bn-N6-p3374808   | gene |      |
| Bn-A06-p3399869 | Bn-N6-p3392743   | gene |      |
| Bn-A06-p3399973 | Bn-N6-p3392847   | gene | exon |
| Bn-A06-p3405779 | Bn-N6-p3398917   | gene | exon |
| Bn-A06-p3406041 | Bn-N6-p3399178   | gene |      |
| Bn-A06-p3414128 | Bn-N6-p3407281   | gene |      |
| Bn-A06-p3416803 | Bn-N6-p3409871   | gene |      |
| Bn-A06-p3428214 | Bn-N6-p3424307   | gene | exon |
| Bn-A06-p3444868 | Bn-N6-p3444530   | gene |      |
| Bn-A06-p3446956 | Bn-N6-p3446613   | gene |      |
| Bn-A06-p3452904 | Bn-N6-p3449964   | gene |      |
| Bn-A06-p3468374 | Bn-N6-p3465457   | gene |      |
| Bn-A06-p3483249 | Bn-N6-p3479969   | gene |      |
| Bn-A06-p3483382 | Bn-N6-p3480103   | gene |      |
| Bn-A06-p3496759 | Bn-N6-p3499375   | gene |      |
| Bn-A06-p3528559 | Bn-N6-p3533772   | gene |      |
| Bn-A06-p3528628 | Bn-N6-p3533841   | gene |      |
| Bn-A06-p3584489 | Bn-N6-p3596674   | gene |      |
| Bn-A06-p3586728 | Bn-N6-p3598871   | gene | exon |
| Bn-A06-p3587032 | Bn-N6-p3599168   | gene |      |
| Bn-A06-p3611806 | Bn-N6-p3615094   | gene | exon |
| Bn-A06-p3612397 | Bn-N6-p3615685   | gene |      |
| Bn-A06-p362402  | Bn-N6-p375479    | gene |      |
| Bn-A06-p3625328 | Bn-N6-p3627477   | gene | exon |
| Bn-A06-p3628159 | Bn-N6-p3630437   | gene | exon |
| Bn-A06-p3651074 | Bn-N15-p4343868  | gene |      |
| Bn-A06-p3651473 | Bn-N6-p3658326   | gene | exon |
| Bn-A06-p3661342 | Bn-N6-p3662706   | gene | exon |
| Bn-A06-p3691343 | Bn-N6-p3681470   | gene | exon |

|                 |                 |      |      |
|-----------------|-----------------|------|------|
| Bn-A06-p3712646 | Bn-N6-p3695960  | gene |      |
| Bn-A06-p3731147 | Bn-N6-p3717253  | gene | exon |
| Bn-A06-p3805018 | Bn-N6-p3788444  | gene | exon |
| Bn-A06-p3809199 | Bn-N6-p3792731  | gene |      |
| Bn-A06-p3825492 | Bn-N6-p3807329  | gene | exon |
| Bn-A06-p3839293 | Bn-N6-p3825033  | gene |      |
| Bn-A06-p3867353 | Bn-N6-p3855138  | gene |      |
| Bn-A06-p3871984 | Bn-N6-p3859821  | gene | exon |
| Bn-A06-p3900404 | Bn-N6-p3890089  | gene |      |
| Bn-A06-p3913280 | Bn-N6-p3903064  | gene |      |
| Bn-A06-p393328  | Bn-N6-p408495   | gene |      |
| Bn-A06-p3953661 | Bn-N6-p3951758  | gene | exon |
| Bn-A06-p3970972 | Bn-N6-p3973819  | gene |      |
| Bn-A06-p3976759 | Bn-N6-p3981557  | gene |      |
| Bn-A06-p3986320 | Bn-N6-p3991299  | gene | exon |
| Bn-A06-p3987067 | Bn-N6-p3992372  | gene |      |
| Bn-A06-p3992289 | Bn-N6-p4001869  | gene |      |
| Bn-A06-p3997307 | Bn-N6-p4006737  | gene |      |
| Bn-A06-p3998593 | Bn-N6-p4008023  | gene |      |
| Bn-A06-p3999986 | Bn-N6-p4009416  | gene | exon |
| Bn-A06-p4001378 | Bn-N6-p4010808  | gene | exon |
| Bn-A06-p4013010 | Bn-N6-p4030632  | gene | exon |
| Bn-A06-p4016422 | Bn-N15-p4844920 | gene |      |
| Bn-A06-p4017460 | Bn-N6-p4034974  | gene | exon |
| Bn-A06-p4060202 | Bn-N6-p4091519  | gene | exon |
| Bn-A06-p4060310 | Bn-N6-p4091627  | gene | exon |
| Bn-A06-p4315934 | Bn-N6-p4334089  | gene |      |
| Bn-A06-p4316905 | Bn-N6-p4335061  | gene |      |
| Bn-A06-p4362245 | Bn-N6-p4370566  | gene |      |
| Bn-A06-p4362386 | Bn-N6-p4370707  | gene | exon |
| Bn-A06-p4362700 | Bn-N6-p4371129  | gene | exon |
| Bn-A06-p4409355 | Bn-N6-p4415508  | gene | exon |
| Bn-A06-p4418231 | Bn-N6-p4422646  | gene | exon |
| Bn-A06-p4419571 | Bn-N6-p4424002  | gene |      |
| Bn-A06-p4420263 | Bn-N6-p4424692  | gene | exon |
| Bn-A06-p4421214 | Bn-N6-p4425647  | gene |      |
| Bn-A06-p4436168 | Bn-N6-p4442587  | gene | exon |
| Bn-A06-p4452778 | Bn-N6-p4457051  | gene | exon |
| Bn-A06-p4508774 | Bn-N6-p4499520  | gene | exon |
| Bn-A06-p4517457 | Bn-N6-p4514328  | gene |      |
| Bn-A06-p4597746 | Bn-N6-p4591680  | gene | exon |
| Bn-A06-p4623401 | Bn-N6-p4609266  | gene | exon |
| Bn-A06-p4703366 | Bn-N6-p4654719  | gene |      |
| Bn-A06-p4874556 | Bn-N6-p4876095  | gene |      |
| Bn-A06-p4881785 | Bn-N6-p4883065  | gene | exon |
| Bn-A06-p4896084 | Bn-N6-p4913674  | gene |      |
| Bn-A06-p4901091 | Bn-N6-p4918601  | gene |      |
| Bn-A06-p4927344 | Bn-N15-p6144435 | gene | exon |
| Bn-A06-p4929018 | Bn-N6-p4954842  | gene | exon |
| Bn-A06-p5040441 | Bn-N6-p5030955  | gene |      |
| Bn-A06-p5047871 | Bn-N6-p5038147  | gene |      |
| Bn-A06-p5094790 | Bn-N6-p5100993  | gene |      |

|                 |                  |      |      |
|-----------------|------------------|------|------|
| Bn-A06-p5103824 | Bn-N6-p5109958   | gene | exon |
| Bn-A06-p5114238 | Bn-N6-p5121273   | gene | exon |
| Bn-A06-p5147575 | Bn-N6-p5158557   | gene | exon |
| Bn-A06-p5151254 | Bn-N6-p5162258   | gene |      |
| Bn-A06-p5151337 | Bn-N6-p5162341   | gene |      |
| Bn-A06-p5276150 | Bn-N4-p4098388   | gene | exon |
| Bn-A06-p5276251 | Bn-N4-p4098287   | gene | exon |
| Bn-A06-p5276641 | Bn-N4-p4097897   | gene | exon |
| Bn-A06-p5276713 | Bn-N4-p4097825   | gene | exon |
| Bn-A06-p5276751 | Bn-N4-p4097787   | gene | exon |
| Bn-A06-p5284260 | Bn-N4-p4090036   | gene |      |
| Bn-A06-p5346654 | Bn-N14-p33160018 | gene |      |
| Bn-A06-p5384725 | Bn-N4-p3995321   | gene |      |
| Bn-A06-p5386579 | Bn-N4-p3993216   | gene |      |
| Bn-A06-p5427889 | Bn-N4-p3947979   | gene |      |
| Bn-A06-p54687   | Bn-N6-p49393     | gene | exon |
| Bn-A06-p5535537 | Bn-N6-p5208306   | gene |      |
| Bn-A06-p5546411 | Bn-N6-p5216807   | gene | exon |
| Bn-A06-p5577934 | Bn-N6-p5241155   | gene | exon |
| Bn-A06-p5600636 | Bn-N6-p5269329   | gene |      |
| Bn-A06-p5616164 | Bn-N6-p5281086   | gene |      |
| Bn-A06-p5618302 | Bn-N6-p5283223   | gene |      |
| Bn-A06-p5669960 | Bn-N6-p5336105   | gene |      |
| Bn-A06-p568101  | Bn-N6-p609797    | gene |      |
| Bn-A06-p5693735 | Bn-N6-p5493084   | gene | exon |
| Bn-A06-p569582  | Bn-N6-p611282    | gene | exon |
| Bn-A06-p5747694 | Bn-N6-p5422622   | gene | exon |
| Bn-A06-p5767097 | Bn-N6-p5442981   | gene |      |
| Bn-A06-p576740  | Bn-N6-p618512    | gene |      |
| Bn-A06-p5830298 | Bn-N6-p5501201   | gene |      |
| Bn-A06-p5844403 | Bn-N6-p5509500   | gene |      |
| Bn-A06-p5878990 | Bn-N6-p5546435   | gene |      |
| Bn-A06-p5880980 | Bn-N6-p5548424   | gene |      |
| Bn-A06-p5888779 | Bn-N6-p5556316   | gene | exon |
| Bn-A06-p5922951 | Bn-N6-p5593618   | gene | exon |
| Bn-A06-p5930501 | Bn-N6-p5605488   | gene |      |
| Bn-A06-p5931022 | Bn-N6-p5606794   | gene | exon |
| Bn-A06-p5931130 | Bn-N6-p5606902   | gene | exon |
| Bn-A06-p5945068 | Bn-N6-p5625931   | gene |      |
| Bn-A06-p5945471 | Bn-N6-p5626333   | gene | exon |
| Bn-A06-p5947781 | Bn-N6-p5628643   | gene |      |
| Bn-A06-p5956274 | Bn-N6-p5646319   | gene | exon |
| Bn-A06-p5957378 | Bn-N6-p5647423   | gene | exon |
| Bn-A06-p5995778 | Bn-N6-p5693826   | gene |      |
| Bn-A06-p600029  | Bn-N6-p633463    | gene |      |
| Bn-A06-p6009064 | Bn-N6-p5700145   | gene | exon |
| Bn-A06-p6059527 | Bn-N6-p5744726   | gene | exon |
| Bn-A06-p6066073 | Bn-N6-p5752754   | gene | exon |
| Bn-A06-p608554  | Bn-N6-p641913    | gene |      |
| Bn-A06-p608570  | Bn-N6-p641929    | gene | exon |
| Bn-A06-p6091453 | Bn-N6-p5782313   | gene | exon |
| Bn-A06-p611589  | Bn-N6-p644948    | gene |      |

|                 |                 |      |      |
|-----------------|-----------------|------|------|
| Bn-A06-p6129072 | Bn-N6-p5809181  | gene |      |
| Bn-A06-p613789  | Bn-N6-p647148   | gene |      |
| Bn-A06-p6154470 | Bn-N6-p5820705  | gene | exon |
| Bn-A06-p6182046 | Bn-N6-p5841280  | gene | exon |
| Bn-A06-p6182593 | Bn-N6-p5841830  | gene |      |
| Bn-A06-p6183859 | Bn-N6-p5843097  | gene | exon |
| Bn-A06-p6184455 | Bn-N6-p5843693  | gene | exon |
| Bn-A06-p6198128 | Bn-N6-p5863331  | gene | exon |
| Bn-A06-p6204652 | Bn-N15-p7700309 | gene | exon |
| Bn-A06-p621506  | Bn-N6-p659207   | gene |      |
| Bn-A06-p621695  | Bn-N6-p646998   | gene | exon |
| Bn-A06-p6270772 | Bn-N6-p5935194  | gene |      |
| Bn-A06-p6311231 | Bn-N6-p5979291  | gene |      |
| Bn-A06-p6311289 | Bn-N6-p5979349  | gene |      |
| Bn-A06-p6319212 | Bn-N6-p5989236  | gene |      |
| Bn-A06-p6358974 | Bn-N6-p6030067  | gene |      |
| Bn-A06-p6359207 | Bn-N6-p6030300  | gene |      |
| Bn-A06-p6382773 | Bn-N6-p6055728  | gene |      |
| Bn-A06-p6388760 | Bn-N6-p6062781  | gene | exon |
| Bn-A06-p6389318 | Bn-N6-p6063346  | gene |      |
| Bn-A06-p6403382 | Bn-N6-p6077465  | gene |      |
| Bn-A06-p6437068 | Bn-N6-p6105649  | gene | exon |
| Bn-A06-p6439396 | Bn-N6-p6107952  | gene |      |
| Bn-A06-p6451055 | Bn-N6-p6120744  | gene |      |
| Bn-A06-p6457529 | Bn-N6-p6127519  | gene | exon |
| Bn-A06-p6464476 | Bn-N6-p6134437  | gene | exon |
| Bn-A06-p6477943 | Bn-N6-p6147723  | gene |      |
| Bn-A06-p6482307 | Bn-N6-p6151909  | gene | exon |
| Bn-A06-p6483553 | Bn-N6-p6153153  | gene | exon |
| Bn-A06-p6486764 | Bn-N6-p6155437  | gene |      |
| Bn-A06-p649348  | Bn-N6-p689284   | gene | exon |
| Bn-A06-p650072  | Bn-N16-p7142200 | gene | exon |
| Bn-A06-p650790  | Bn-N16-p7141516 | gene | exon |
| Bn-A06-p6520301 | Bn-N6-p6182653  | gene |      |
| Bn-A06-p6532740 | Bn-N6-p6198691  | gene |      |
| Bn-A06-p6563295 | Bn-N6-p6240258  | gene | exon |
| Bn-A06-p6569468 | Bn-N15-p8359521 | gene | exon |
| Bn-A06-p659391  | Bn-N6-p694734   | gene |      |
| Bn-A06-p6617274 | Bn-N6-p6297113  | gene |      |
| Bn-A06-p6622319 | Bn-N6-p6305165  | gene | exon |
| Bn-A06-p6624071 | Bn-N6-p6306917  | gene |      |
| Bn-A06-p6636202 | Bn-N6-p6319977  | gene |      |
| Bn-A06-p6647323 | Bn-N6-p6327396  | gene | exon |
| Bn-A06-p6655047 | Bn-N15-p8481600 | gene | exon |
| Bn-A06-p6689858 | Bn-N6-p6374095  | gene | exon |
| Bn-A06-p6691628 | Bn-N6-p6375814  | gene | exon |
| Bn-A06-p6692851 | Bn-N6-p6377031  | gene | exon |
| Bn-A06-p6699971 | Bn-N6-p6380905  | gene | exon |
| Bn-A06-p6705911 | Bn-N6-p6386967  | gene | exon |
| Bn-A06-p6706067 | Bn-N6-p6387123  | gene |      |
| Bn-A06-p6723804 | Bn-N6-p6400593  | gene | exon |
| Bn-A06-p6744737 | Bn-N6-p6420813  | gene | exon |

|                 |                 |      |      |
|-----------------|-----------------|------|------|
| Bn-A06-p6747460 | Bn-N6-p6423259  | gene |      |
| Bn-A06-p6847261 | Bn-N6-p6507267  | gene | exon |
| Bn-A06-p6847367 | Bn-N6-p6507373  | gene | exon |
| Bn-A06-p6864079 | Bn-N6-p6524011  | gene |      |
| Bn-A06-p6875144 | Bn-N6-p6536016  | gene |      |
| Bn-A06-p6878792 | Bn-N6-p6539667  | gene | exon |
| Bn-A06-p6879017 | Bn-N6-p6539892  | gene | exon |
| Bn-A06-p6895399 | Bn-N6-p6574346  | gene | exon |
| Bn-A06-p6913483 | Bn-N6-p6629503  | gene |      |
| Bn-A06-p6919765 | Bn-N6-p6633849  | gene |      |
| Bn-A06-p6920925 | Bn-N6-p6635009  | gene | exon |
| Bn-A06-p69515   | Bn-N6-p56922    | gene | exon |
| Bn-A06-p6955437 | Bn-N6-p6668110  | gene |      |
| Bn-A06-p6966525 | Bn-N6-p6678413  | gene |      |
| Bn-A06-p6971737 | Bn-N6-p6683545  | gene |      |
| Bn-A06-p6971900 | Bn-N6-p6683803  | gene |      |
| Bn-A06-p6972345 | Bn-N6-p6684244  | gene |      |
| Bn-A06-p6985717 | Bn-N6-p6701684  | gene |      |
| Bn-A06-p6990496 | Bn-N6-p6706458  | gene |      |
| Bn-A06-p6993862 | Bn-N6-p6709824  | gene |      |
| Bn-A06-p6995492 | Bn-N6-p6711454  | gene |      |
| Bn-A06-p7083415 | Bn-N6-p6792473  | gene | exon |
| Bn-A06-p709547  | Bn-N6-p749143   | gene | exon |
| Bn-A06-p7179419 | Bn-N6-p6921708  | gene |      |
| Bn-A06-p7187455 | Bn-N6-p6929922  | gene | exon |
| Bn-A06-p72383   | Bn-N6-p59864    | gene | exon |
| Bn-A06-p7266200 | Bn-N6-p7005622  | gene |      |
| Bn-A06-p7279909 | Bn-N6-p7023374  | gene |      |
| Bn-A06-p72878   | Bn-N6-p60359    | gene | exon |
| Bn-A06-p7288881 | Bn-N6-p7048578  | gene | exon |
| Bn-A06-p7289388 | Bn-N6-p7049085  | gene |      |
| Bn-A06-p7355866 | Bn-N6-p7112881  | gene | exon |
| Bn-A06-p7384367 | Bn-N15-p9456872 | gene |      |
| Bn-A06-p73924   | Bn-N6-p61405    | gene | exon |
| Bn-A06-p7420466 | Bn-N6-p7191794  | gene | exon |
| Bn-A06-p7444483 | Bn-N6-p7219460  | gene | exon |
| Bn-A06-p7553160 | Bn-N6-p7331811  | gene |      |
| Bn-A06-p7583628 | Bn-N6-p7371216  | gene | exon |
| Bn-A06-p7584691 | Bn-N6-p7372279  | gene |      |
| Bn-A06-p7589883 | Bn-N15-p9848110 | gene | exon |
| Bn-A06-p7658535 | Bn-N6-p7449964  | gene | exon |
| Bn-A06-p7665759 | Bn-N6-p7457260  | gene |      |
| Bn-A06-p7701069 | Bn-N6-p7494036  | gene |      |
| Bn-A06-p7726350 | Bn-N6-p7520076  | gene | exon |
| Bn-A06-p7771695 | Bn-N6-p7563220  | gene | exon |
| Bn-A06-p7927622 | Bn-N6-p7719763  | gene |      |
| Bn-A06-p7927767 | Bn-N6-p7719908  | gene |      |
| Bn-A06-p7931177 | Bn-N6-p7724897  | gene |      |
| Bn-A06-p7959476 | Bn-N6-p7750782  | gene | exon |
| Bn-A06-p7973826 | Bn-N6-p7763966  | gene |      |
| Bn-A06-p798821  | Bn-N6-p838127   | gene |      |
| Bn-A06-p8021875 | Bn-N6-p7800280  | gene |      |

|                 |                       |      |      |
|-----------------|-----------------------|------|------|
| Bn-A06-p8022058 | Bn-N6-p7800462        | gene |      |
| Bn-A06-p8042439 | Bn-N6-p7818608        | gene |      |
| Bn-A06-p8042901 | Bn-N6-p7819062        | gene |      |
| Bn-A06-p8043214 | Bn-N6-p7819375        | gene |      |
| Bn-A06-p8047893 | Bn-N6-p7824149        | gene |      |
| Bn-A06-p8080390 | Bn-N6-p7859729        | gene |      |
| Bn-A06-p8080666 | Bn-N6-p7860005        | gene |      |
| Bn-A06-p8090520 | Bn-N6-p7869882        | gene |      |
| Bn-A06-p8109713 | Bn-N6-p7882207        | gene | exon |
| Bn-A06-p8200169 | Bn-N6-p7967911        | gene |      |
| Bn-A06-p8201495 | Bn-N6-p7969229        | gene |      |
| Bn-A06-p8201581 | Bn-N6-p7969315        | gene | exon |
| Bn-A06-p8263325 | Bn-N6-p8037352        | gene |      |
| Bn-A06-p8356542 | Bn-N6-p8114394        | gene | exon |
| Bn-A06-p836912  | Bn-N6-p876249         | gene | exon |
| Bn-A06-p8416265 | Bn-N6-p8178953        | gene |      |
| Bn-A06-p8430642 | Bn-N6-p8192891        | gene |      |
| Bn-A06-p8434088 | Bn-N6-p8196332        | gene | exon |
| Bn-A06-p8472457 | Bn-N6-p8230082        | gene |      |
| Bn-A06-p8536023 | Bn-N6-p8277780        | gene |      |
| Bn-A06-p853722  | Bn-N6-p892885         | gene | exon |
| Bn-A06-p853974  | Bn-N6-p893137         | gene | exon |
| Bn-A06-p8573607 | Bn-N6-p8331335        | gene | exon |
| Bn-A06-p860631  | Bn-N6-p901756         | gene | exon |
| Bn-A06-p8615815 | Bn-N6-p8374632        | gene | exon |
| Bn-A06-p8633786 | Bn-N6-p8397148        | gene |      |
| Bn-A06-p8634166 | Bn-N6-p8397528        | gene |      |
| Bn-A06-p8634648 | Bn-N6-p8398010        | gene |      |
| Bn-A06-p8643665 | Bn-N14-p25133590      | gene | exon |
| Bn-A06-p8697187 | Bn-N6-p8462318        | gene |      |
| Bn-A06-p8697193 | Bn-N6-p8462324        | gene |      |
| Bn-A06-p8792429 | Bn-N6-p8551424        | gene | exon |
| Bn-A06-p8792843 | Bn-N6-p8551850        | gene |      |
| Bn-A06-p8809314 | Bn-N6-p8575504        | gene | exon |
| Bn-A06-p8837251 | Bn-N6-p8604210        | gene | exon |
| Bn-A06-p8837290 | Bn-N6-p8604249        | gene | exon |
| Bn-A06-p8907559 | Bn-N6-p8674294        | gene |      |
| Bn-A06-p89131   | Bn-Scaffold10358-p220 | gene | exon |
| Bn-A06-p8923160 | Bn-N6-p8689728        | gene | exon |
| Bn-A06-p8948420 | Bn-N6-p8715557        | gene |      |
| Bn-A06-p8968750 | Bn-N6-p8733481        | gene |      |
| Bn-A06-p8972533 | Bn-N6-p8737187        | gene | exon |
| Bn-A06-p8998572 | Bn-N6-p8767207        | gene |      |
| Bn-A06-p9009861 | Bn-N6-p8776269        | gene |      |
| Bn-A06-p9064537 | Bn-N6-p8802966        | gene |      |
| Bn-A06-p9074653 | Bn-N6-p8820097        | gene | exon |
| Bn-A06-p9076011 | Bn-N6-p8821455        | gene |      |
| Bn-A06-p9087487 | Bn-N6-p8833369        | gene | exon |
| Bn-A06-p9135772 | Bn-N6-p8876786        | gene | exon |
| Bn-A06-p918871  | Bn-N6-p965609         | gene |      |
| Bn-A06-p9287101 | Bn-N6-p9033717        | gene |      |
| Bn-A06-p9299877 | Bn-N6-p9047406        | gene | exon |

|                  |                  |      |      |
|------------------|------------------|------|------|
| Bn-A06-p9371495  | Bn-N1-p23082579  | gene | exon |
| Bn-A06-p938677   | Bn-N6-p975926    | gene | exon |
| Bn-A06-p9399854  | Bn-N18-p28491976 | gene | exon |
| Bn-A06-p947740   | Bn-N6-p985341    | gene | exon |
| Bn-A06-p9495829  | Bn-N6-p9270854   | gene |      |
| Bn-A06-p9517147  | Bn-N6-p9281645   | gene |      |
| Bn-A06-p9562200  | Bn-N6-p9345827   | gene |      |
| Bn-A06-p9593892  | Bn-N6-p9366702   | gene | exon |
| Bn-A06-p9630478  | Bn-N6-p9394235   | gene |      |
| Bn-A06-p9684583  | Bn-N6-p9446970   | gene |      |
| Bn-A06-p9721031  | Bn-N6-p9479849   | gene |      |
| Bn-A06-p999044   | Bn-N6-p1041874   | gene | exon |
| Bn-A07-p10003378 | Bn-N7-p11491755  | gene | exon |
| Bn-A07-p10004245 | Bn-N7-p11492622  | gene | exon |
| Bn-A07-p10010327 | Bn-N7-p11498680  | gene | exon |
| Bn-A07-p10033055 | Bn-N7-p11508010  | gene |      |
| Bn-A07-p10037462 | Bn-N7-p11512955  | gene | exon |
| Bn-A07-p10099786 | Bn-N7-p11584293  | gene | exon |
| Bn-A07-p10100811 | Bn-N7-p11585318  | gene | exon |
| Bn-A07-p10101125 | Bn-N7-p11585635  | gene | exon |
| Bn-A07-p10169211 | Bn-N7-p11645303  | gene | exon |
| Bn-A07-p10209077 | Bn-N7-p11678835  | gene | exon |
| Bn-A07-p10209154 | Bn-N7-p11678912  | gene | exon |
| Bn-A07-p10233337 | Bn-N7-p11710832  | gene | exon |
| Bn-A07-p10281077 | Bn-N7-p11760233  | gene | exon |
| Bn-A07-p10282316 | Bn-N7-p11761471  | gene |      |
| Bn-A07-p10282792 | Bn-N7-p11761947  | gene |      |
| Bn-A07-p10284031 | Bn-N7-p11763083  | gene |      |
| Bn-A07-p10285778 | Bn-N7-p11764829  | gene |      |
| Bn-A07-p10289778 | Bn-N7-p11768840  | gene |      |
| Bn-A07-p10291035 | Bn-N7-p11770094  | gene | exon |
| Bn-A07-p10340211 | Bn-N7-p11813359  | gene |      |
| Bn-A07-p10379059 | Bn-N7-p11858814  | gene |      |
| Bn-A07-p10398999 | Bn-N7-p11879724  | gene |      |
| Bn-A07-p10399235 | Bn-N7-p11879960  | gene |      |
| Bn-A07-p10421977 | Bn-N7-p11910872  | gene |      |
| Bn-A07-p10430301 | Bn-N7-p11918244  | gene |      |
| Bn-A07-p10437749 | Bn-N7-p11925680  | gene | exon |
| Bn-A07-p10437970 | Bn-N7-p11925901  | gene |      |
| Bn-A07-p10451411 | Bn-N7-p11937147  | gene |      |
| Bn-A07-p10455192 | Bn-N7-p11940967  | gene | exon |
| Bn-A07-p10471024 | Bn-N7-p11945984  | gene | exon |
| Bn-A07-p10473511 | Bn-N7-p11948511  | gene | exon |
| Bn-A07-p10483339 | Bn-N7-p11958317  | gene | exon |
| Bn-A07-p10486045 | Bn-N7-p11961032  | gene | exon |
| Bn-A07-p10494571 | Bn-N7-p11969210  | gene |      |
| Bn-A07-p10554944 | Bn-N7-p12026837  | gene | exon |
| Bn-A07-p10584018 | Bn-N7-p12061103  | gene | exon |
| Bn-A07-p10650508 | Bn-N7-p12121407  | gene | exon |
| Bn-A07-p10651899 | Bn-N7-p12122798  | gene | exon |
| Bn-A07-p10667459 | Bn-N7-p12151327  | gene |      |
| Bn-A07-p10672691 | Bn-N7-p12171039  | gene | exon |



|                  |                  |      |      |
|------------------|------------------|------|------|
| Bn-A07-p10673477 | Bn-N7-p12171825  | gene | exon |
| Bn-A07-p10673700 | Bn-N7-p12172048  | gene | exon |
| Bn-A07-p10675102 | Bn-N7-p12173458  | gene | exon |
| Bn-A07-p10733528 | Bn-N7-p12222357  | gene |      |
| Bn-A07-p10750190 | Bn-N7-p12236021  | gene |      |
| Bn-A07-p10755129 | Bn-N7-p12240892  | gene |      |
| Bn-A07-p10780571 | Bn-N7-p12269959  | gene |      |
| Bn-A07-p107832   | Bn-N7-p122997    | gene | exon |
| Bn-A07-p10847704 | Bn-N14-p16051073 | gene |      |
| Bn-A07-p10848104 | Bn-N7-p12322177  | gene |      |
| Bn-A07-p10848190 | Bn-N7-p12322263  | gene |      |
| Bn-A07-p10890061 | Bn-N7-p12364144  | gene | exon |
| Bn-A07-p10891272 | Bn-N7-p12365945  | gene | exon |
| Bn-A07-p1093997  | Bn-N7-p1112292   | gene |      |
| Bn-A07-p10968184 | Bn-N7-p12441442  | gene |      |
| Bn-A07-p11021668 | Bn-N7-p12509207  | gene |      |
| Bn-A07-p11068231 | Bn-N7-p12556265  | gene | exon |
| Bn-A07-p11068735 | Bn-N7-p12556769  | gene | exon |
| Bn-A07-p11114150 | Bn-N7-p12596579  | gene |      |
| Bn-A07-p11152131 | Bn-N7-p12641457  | gene |      |
| Bn-A07-p11156840 | Bn-N7-p12646164  | gene | exon |
| Bn-A07-p11178807 | Bn-N7-p12663707  | gene |      |
| Bn-A07-p11196478 | Bn-N7-p12684358  | gene | exon |
| Bn-A07-p11196510 | Bn-N7-p12684390  | gene | exon |
| Bn-A07-p11204177 | Bn-N7-p12692110  | gene | exon |
| Bn-A07-p11255851 | Bn-N7-p12728638  | gene |      |
| Bn-A07-p11323366 | Bn-N7-p12802492  | gene | exon |
| Bn-A07-p11324360 | Bn-N7-p12803486  | gene | exon |
| Bn-A07-p1135440  | Bn-N7-p1164517   | gene |      |
| Bn-A07-p11390804 | Bn-N5-p9409156   | gene | exon |
| Bn-A07-p11477634 | Bn-N7-p13989123  | gene |      |
| Bn-A07-p11542386 | Bn-N7-p14051166  | gene | exon |
| Bn-A07-p11542638 | Bn-N7-p14051418  | gene | exon |
| Bn-A07-p11570097 | Bn-N7-p14083332  | gene | exon |
| Bn-A07-p11572985 | Bn-N7-p14086176  | gene |      |
| Bn-A07-p11599915 | Bn-N7-p14106059  | gene |      |
| Bn-A07-p11698185 | Bn-N16-p19893589 | gene | exon |
| Bn-A07-p11715576 | Bn-N7-p14261264  | gene | exon |
| Bn-A07-p11724009 | Bn-N7-p14269743  | gene |      |
| Bn-A07-p11764922 | Bn-N7-p14316847  | gene |      |
| Bn-A07-p11765027 | Bn-N7-p14316952  | gene |      |
| Bn-A07-p11765232 | Bn-N7-p14317158  | gene |      |
| Bn-A07-p11832389 | Bn-N7-p14389577  | gene | exon |
| Bn-A07-p11846645 | Bn-N7-p14403862  | gene |      |
| Bn-A07-p11861194 | Bn-N7-p14417147  | gene |      |
| Bn-A07-p11864371 | Bn-N7-p14420451  | gene |      |
| Bn-A07-p11870301 | Bn-N7-p14429056  | gene | exon |
| Bn-A07-p11870468 | Bn-N7-p14429223  | gene | exon |
| Bn-A07-p11870852 | Bn-N7-p14429607  | gene | exon |
| Bn-A07-p1196596  | Bn-N7-p1235148   | gene | exon |
| Bn-A07-p12017702 | Bn-N7-p14569170  | gene |      |
| Bn-A07-p12066704 | Bn-N7-p14614851  | gene |      |

|                  |                  |      |      |
|------------------|------------------|------|------|
| Bn-A07-p12115911 | Bn-N7-p14664185  | gene |      |
| Bn-A07-p12131198 | Bn-N7-p14680023  | gene |      |
| Bn-A07-p1217535  | Bn-N7-p1251465   | gene |      |
| Bn-A07-p1217876  | Bn-N7-p1251806   | gene | exon |
| Bn-A07-p12193031 | Bn-N7-p14709044  | gene |      |
| Bn-A07-p1227140  | Bn-N7-p1262567   | gene |      |
| Bn-A07-p12297809 | Bn-N7-p14833511  | gene | exon |
| Bn-A07-p12318667 | Bn-N16-p21611826 | gene | exon |
| Bn-A07-p12328863 | Bn-N7-p14864972  | gene |      |
| Bn-A07-p12333270 | Bn-N7-p14869394  | gene | exon |
| Bn-A07-p12385490 | Bn-N7-p14909637  | gene | exon |
| Bn-A07-p12412116 | Bn-N7-p14957010  | gene | exon |
| Bn-A07-p12415996 | Bn-N7-p14967498  | gene | exon |
| Bn-A07-p12424938 | Bn-N7-p14976509  | gene | exon |
| Bn-A07-p12425115 | Bn-N7-p14976686  | gene |      |
| Bn-A07-p12425319 | Bn-N7-p14976890  | gene |      |
| Bn-A07-p12425566 | Bn-N7-p14977137  | gene |      |
| Bn-A07-p12426500 | Bn-N7-p14978071  | gene |      |
| Bn-A07-p12426652 | Bn-N7-p14978223  | gene |      |
| Bn-A07-p12426907 | Bn-N7-p14978478  | gene |      |
| Bn-A07-p12429159 | Bn-N7-p14980865  | gene |      |
| Bn-A07-p12443929 | Bn-N7-p14998858  | gene |      |
| Bn-A07-p12470367 | Bn-N16-p21977371 | gene | exon |
| Bn-A07-p12487549 | Bn-N7-p15041071  | gene |      |
| Bn-A07-p12487688 | Bn-N7-p15041210  | gene |      |
| Bn-A07-p12487765 | Bn-N7-p15041287  | gene | exon |
| Bn-A07-p1254564  | Bn-N7-p1298977   | gene |      |
| Bn-A07-p12546889 | Bn-N7-p15109085  | gene | exon |
| Bn-A07-p12547012 | Bn-N7-p15109208  | gene | exon |
| Bn-A07-p12547288 | Bn-N7-p15109484  | gene | exon |
| Bn-A07-p1255437  | Bn-N7-p1299849   | gene |      |
| Bn-A07-p12554962 | Bn-N7-p15115102  | gene |      |
| Bn-A07-p12583860 | Bn-N7-p15153157  | gene | exon |
| Bn-A07-p12602102 | Bn-N7-p15181717  | gene | exon |
| Bn-A07-p12605125 | Bn-N7-p15186297  | gene |      |
| Bn-A07-p12609078 | Bn-N7-p15189566  | gene |      |
| Bn-A07-p12609202 | Bn-N7-p15189690  | gene |      |
| Bn-A07-p12631921 | Bn-N16-p22325394 | gene |      |
| Bn-A07-p12685266 | Bn-N7-p15276004  | gene | exon |
| Bn-A07-p12688545 | Bn-N7-p15278966  | gene | exon |
| Bn-A07-p12693030 | Bn-N7-p15282841  | gene | exon |
| Bn-A07-p12705404 | Bn-N7-p15297868  | gene |      |
| Bn-A07-p12708718 | Bn-N7-p15301183  | gene | exon |
| Bn-A07-p12716261 | Bn-N7-p15308770  | gene | exon |
| Bn-A07-p12732142 | Bn-N7-p15319071  | gene |      |
| Bn-A07-p12751218 | Bn-N7-p15329565  | gene |      |
| Bn-A07-p12754144 | Bn-N7-p15332485  | gene | exon |
| Bn-A07-p12787260 | Bn-N7-p15363154  | gene |      |
| Bn-A07-p12827973 | Bn-N7-p15408930  | gene | exon |
| Bn-A07-p12828848 | Bn-N7-p15409806  | gene | exon |
| Bn-A07-p12840368 | Bn-N16-p22717731 | gene |      |
| Bn-A07-p12841026 | Bn-N7-p15425789  | gene | exon |

|                  |                  |      |      |
|------------------|------------------|------|------|
| Bn-A07-p12874349 | Bn-N7-p15458367  | gene | exon |
| Bn-A07-p12876226 | Bn-N16-p22781030 | gene |      |
| Bn-A07-p12878986 | Bn-N7-p15463003  | gene | exon |
| Bn-A07-p12904129 | Bn-N7-p15489905  | gene | exon |
| Bn-A07-p12918175 | Bn-N7-p15507530  | gene |      |
| Bn-A07-p12926496 | Bn-N7-p15515854  | gene |      |
| Bn-A07-p1292866  | Bn-N7-p1320908   | gene |      |
| Bn-A07-p1293366  | Bn-N17-p3287749  | gene | exon |
| Bn-A07-p12935086 | Bn-N16-p22981025 | gene | exon |
| Bn-A07-p12935190 | Bn-N16-p22981129 | gene |      |
| Bn-A07-p12963622 | Bn-N7-p15559143  | gene | exon |
| Bn-A07-p1300457  | Bn-N7-p1329349   | gene |      |
| Bn-A07-p13007323 | Bn-N7-p15598298  | gene |      |
| Bn-A07-p1301127  | Bn-N7-p1330026   | gene | exon |
| Bn-A07-p13017844 | Bn-N7-p15607323  | gene |      |
| Bn-A07-p1303513  | Bn-N7-p1333816   | gene | exon |
| Bn-A07-p13037426 | Bn-N7-p15631631  | gene | exon |
| Bn-A07-p1306286  | Bn-N7-p1336584   | gene |      |
| Bn-A07-p13090054 | Bn-N7-p15689204  | gene |      |
| Bn-A07-p13154645 | Bn-N7-p15762727  | gene |      |
| Bn-A07-p13167740 | Bn-N7-p15781239  | gene |      |
| Bn-A07-p13167844 | Bn-N7-p15781366  | gene |      |
| Bn-A07-p13171850 | Bn-N7-p15785405  | gene |      |
| Bn-A07-p13172047 | Bn-N7-p15785601  | gene | exon |
| Bn-A07-p13184664 | Bn-N7-p15800345  | gene | exon |
| Bn-A07-p13186090 | Bn-N7-p15801770  | gene | exon |
| Bn-A07-p13259825 | Bn-N7-p15876660  | gene | exon |
| Bn-A07-p13273073 | Bn-N7-p15888530  | gene | exon |
| Bn-A07-p1327427  | Bn-N7-p1356597   | gene |      |
| Bn-A07-p13283299 | Bn-N7-p15899977  | gene |      |
| Bn-A07-p13324733 | Bn-N7-p15945033  | gene |      |
| Bn-A07-p13334430 | Bn-N7-p15960245  | gene |      |
| Bn-A07-p13347715 | Bn-N7-p15972076  | gene |      |
| Bn-A07-p13350234 | Bn-N7-p15974592  | gene | exon |
| Bn-A07-p13358954 | Bn-N7-p15983477  | gene | exon |
| Bn-A07-p13359413 | Bn-N7-p15983933  | gene |      |
| Bn-A07-p13391170 | Bn-N7-p16013400  | gene | exon |
| Bn-A07-p13391724 | Bn-N7-p16013955  | gene |      |
| Bn-A07-p13425409 | Bn-N7-p16041939  | gene | exon |
| Bn-A07-p13481981 | Bn-N7-p16102859  | gene | exon |
| Bn-A07-p13482160 | Bn-N7-p16103038  | gene | exon |
| Bn-A07-p13485321 | Bn-N7-p16106200  | gene |      |
| Bn-A07-p13485413 | Bn-N7-p16106292  | gene |      |
| Bn-A07-p13485722 | Bn-N7-p16106600  | gene |      |
| Bn-A07-p13488332 | Bn-N7-p16109178  | gene |      |
| Bn-A07-p13488433 | Bn-N7-p16109279  | gene |      |
| Bn-A07-p13497516 | Bn-N7-p16130688  | gene | exon |
| Bn-A07-p13497654 | Bn-N7-p16130826  | gene | exon |
| Bn-A07-p13512124 | Bn-N7-p16149816  | gene | exon |
| Bn-A07-p13513850 | Bn-N7-p16154516  | gene | exon |
| Bn-A07-p13537021 | Bn-N7-p16184503  | gene | exon |
| Bn-A07-p13543954 | Bn-N7-p16191418  | gene |      |

|                  |                  |      |      |
|------------------|------------------|------|------|
| Bn-A07-p13587753 | Bn-N7-p16230522  | gene |      |
| Bn-A07-p13599579 | Bn-N7-p16236383  | gene |      |
| Bn-A07-p13605650 | Bn-N7-p16242457  | gene | exon |
| Bn-A07-p13605726 | Bn-N7-p16242533  | gene |      |
| Bn-A07-p13615643 | Bn-N7-p16250566  | gene | exon |
| Bn-A07-p13639374 | Bn-N7-p16271735  | gene | exon |
| Bn-A07-p13650653 | Bn-N7-p16283115  | gene |      |
| Bn-A07-p13653958 | Bn-N7-p16286422  | gene |      |
| Bn-A07-p13654191 | Bn-N7-p16286654  | gene |      |
| Bn-A07-p13657646 | Bn-N7-p16290109  | gene |      |
| Bn-A07-p13659939 | Bn-N7-p16292466  | gene |      |
| Bn-A07-p13662635 | Bn-N7-p16295171  | gene | exon |
| Bn-A07-p13665031 | Bn-N7-p16297590  | gene | exon |
| Bn-A07-p13693377 | Bn-N7-p16328594  | gene |      |
| Bn-A07-p13705188 | Bn-N7-p16339498  | gene |      |
| Bn-A07-p13712520 | Bn-N7-p16346921  | gene |      |
| Bn-A07-p13712881 | Bn-N7-p16347282  | gene |      |
| Bn-A07-p13715621 | Bn-N7-p16350064  | gene | exon |
| Bn-A07-p13747722 | Bn-N7-p16379790  | gene |      |
| Bn-A07-p13767766 | Bn-N7-p16391750  | gene | exon |
| Bn-A07-p13828973 | Bn-N7-p16440233  | gene | exon |
| Bn-A07-p13830862 | Bn-N7-p16442121  | gene |      |
| Bn-A07-p13855997 | Bn-N7-p16469862  | gene |      |
| Bn-A07-p13857064 | Bn-N7-p16470929  | gene |      |
| Bn-A07-p13868960 | Bn-N7-p16480181  | gene | exon |
| Bn-A07-p13873942 | Bn-N7-p16485186  | gene |      |
| Bn-A07-p13902763 | Bn-N7-p16514874  | gene | exon |
| Bn-A07-p13926029 | Bn-N7-p16533634  | gene | exon |
| Bn-A07-p13930308 | Bn-N7-p16537885  | gene | exon |
| Bn-A07-p13931176 | Bn-N7-p16538753  | gene |      |
| Bn-A07-p13963849 | Bn-N7-p16570707  | gene | exon |
| Bn-A07-p13971525 | Bn-N7-p16587947  | gene |      |
| Bn-A07-p14002586 | Bn-N7-p16631479  | gene |      |
| Bn-A07-p14002656 | Bn-N7-p16631549  | gene |      |
| Bn-A07-p14005263 | Bn-N7-p16634145  | gene |      |
| Bn-A07-p14016405 | Bn-N7-p16643860  | gene |      |
| Bn-A07-p14024559 | Bn-N7-p16652499  | gene | exon |
| Bn-A07-p14024677 | Bn-N7-p16652617  | gene |      |
| Bn-A07-p14024930 | Bn-N7-p16652870  | gene | exon |
| Bn-A07-p14026612 | Bn-N7-p16654556  | gene | exon |
| Bn-A07-p14029820 | Bn-N7-p16657716  | gene | exon |
| Bn-A07-p14034468 | Bn-N7-p16662443  | gene |      |
| Bn-A07-p14045156 | Bn-N7-p16672532  | gene | exon |
| Bn-A07-p14059112 | Bn-N7-p16686621  | gene | exon |
| Bn-A07-p14092905 | Bn-N7-p16724230  | gene |      |
| Bn-A07-p14103536 | Bn-N7-p16735378  | gene |      |
| Bn-A07-p14124058 | Bn-N7-p16758959  | gene |      |
| Bn-A07-p14129550 | Bn-N7-p16764574  | gene |      |
| Bn-A07-p14129566 | Bn-N7-p16764589  | gene |      |
| Bn-A07-p14144205 | Bn-N7-p16778327  | gene |      |
| Bn-A07-p14146406 | Bn-N16-p25708370 | gene |      |
| Bn-A07-p14162450 | Bn-N7-p16796388  | gene |      |

|                  |                  |      |      |
|------------------|------------------|------|------|
| Bn-A07-p14162566 | Bn-N7-p16796504  | gene |      |
| Bn-A07-p14162622 | Bn-N7-p16796560  | gene |      |
| Bn-A07-p14164068 | Bn-N7-p16798007  | gene |      |
| Bn-A07-p14193108 | Bn-N7-p16833259  | gene | exon |
| Bn-A07-p14199690 | Bn-N7-p16839482  | gene |      |
| Bn-A07-p14225102 | Bn-N7-p16864057  | gene |      |
| Bn-A07-p14225642 | Bn-N7-p16864597  | gene | exon |
| Bn-A07-p14263288 | Bn-N7-p16901581  | gene |      |
| Bn-A07-p14325380 | Bn-N7-p16962092  | gene |      |
| Bn-A07-p1437777  | Bn-N7-p1574926   | gene |      |
| Bn-A07-p14382008 | Bn-N7-p17019859  | gene | exon |
| Bn-A07-p14390667 | Bn-N7-p17028212  | gene |      |
| Bn-A07-p14437313 | Bn-N7-p17070776  | gene |      |
| Bn-A07-p14453848 | Bn-N7-p17091758  | gene |      |
| Bn-A07-p14523713 | Bn-N7-p17164096  | gene | exon |
| Bn-A07-p14540334 | Bn-N7-p17179658  | gene |      |
| Bn-A07-p14562613 | Bn-N7-p17201575  | gene |      |
| Bn-A07-p14585610 | Bn-N11-p43890733 | gene | exon |
| Bn-A07-p14598430 | Bn-N7-p17232223  | gene |      |
| Bn-A07-p14611227 | Bn-N7-p17247704  | gene |      |
| Bn-A07-p14623449 | Bn-N7-p17257181  | gene |      |
| Bn-A07-p14627135 | Bn-N7-p17260873  | gene | exon |
| Bn-A07-p14666868 | Bn-N7-p17294374  | gene |      |
| Bn-A07-p14735920 | Bn-N16-p26969672 | gene |      |
| Bn-A07-p14736696 | Bn-N16-p26970446 | gene | exon |
| Bn-A07-p14759734 | Bn-N7-p17387372  | gene |      |
| Bn-A07-p14759792 | Bn-N7-p17387430  | gene | exon |
| Bn-A07-p14759961 | Bn-N7-p17387599  | gene |      |
| Bn-A07-p14759962 | Bn-N7-p17387599  | gene |      |
| Bn-A07-p14760232 | Bn-N7-p17387872  | gene |      |
| Bn-A07-p14766907 | Bn-N7-p17394595  | gene | exon |
| Bn-A07-p14770619 | Bn-N7-p17398077  | gene |      |
| Bn-A07-p14792267 | Bn-N7-p17416205  | gene |      |
| Bn-A07-p14792772 | Bn-N7-p17416711  | gene |      |
| Bn-A07-p14804953 | Bn-N7-p17428408  | gene | exon |
| Bn-A07-p14812317 | Bn-N7-p17434977  | gene |      |
| Bn-A07-p14814393 | Bn-N7-p17437078  | gene | exon |
| Bn-A07-p14820942 | Bn-N7-p17440792  | gene | exon |
| Bn-A07-p14865976 | Bn-N7-p17490629  | gene | exon |
| Bn-A07-p14895551 | Bn-N7-p17534137  | gene |      |
| Bn-A07-p14895675 | Bn-N16-p27297695 | gene |      |
| Bn-A07-p14920018 | Bn-N7-p17559082  | gene |      |
| Bn-A07-p14922137 | Bn-N7-p17561201  | gene | exon |
| Bn-A07-p14934271 | Bn-N7-p17572824  | gene | exon |
| Bn-A07-p14958606 | Bn-N7-p17595363  | gene |      |
| Bn-A07-p14969298 | Bn-N16-p27408804 | gene | exon |
| Bn-A07-p14970273 | Bn-N7-p17609212  | gene | exon |
| Bn-A07-p14975152 | Bn-N7-p17614051  | gene | exon |
| Bn-A07-p15006983 | Bn-N7-p17648991  | gene | exon |
| Bn-A07-p15015434 | Bn-N7-p17656934  | gene |      |
| Bn-A07-p15033167 | Bn-N7-p17670224  | gene | exon |
| Bn-A07-p15033648 | Bn-N7-p17670705  | gene |      |

|                  |                  |      |      |
|------------------|------------------|------|------|
| Bn-A07-p15035369 | Bn-N7-p17672425  | gene | exon |
| Bn-A07-p15043209 | Bn-N7-p17682010  | gene | exon |
| Bn-A07-p15050270 | Bn-N7-p17688042  | gene | exon |
| Bn-A07-p15054860 | Bn-N7-p17692604  | gene | exon |
| Bn-A07-p15055528 | Bn-N7-p17693272  | gene | exon |
| Bn-A07-p15059054 | Bn-N7-p17696669  | gene | exon |
| Bn-A07-p15064528 | Bn-N7-p17703725  | gene |      |
| Bn-A07-p15107656 | Bn-N7-p17764265  | gene | exon |
| Bn-A07-p15129531 | Bn-N7-p17791210  | gene | exon |
| Bn-A07-p15162548 | Bn-N7-p17830159  | gene |      |
| Bn-A07-p15162767 | Bn-N7-p17830380  | gene | exon |
| Bn-A07-p15162837 | Bn-N7-p17830450  | gene | exon |
| Bn-A07-p15165145 | Bn-N7-p17833148  | gene | exon |
| Bn-A07-p15175027 | Bn-N7-p17842911  | gene | exon |
| Bn-A07-p15175141 | Bn-N7-p17843024  | gene | exon |
| Bn-A07-p15183066 | Bn-N16-p27909405 | gene | exon |
| Bn-A07-p15220175 | Bn-N7-p17895417  | gene | exon |
| Bn-A07-p15233647 | Bn-N7-p17910141  | gene |      |
| Bn-A07-p15239170 | Bn-N7-p17916052  | gene | exon |
| Bn-A07-p15245952 | Bn-N7-p17921873  | gene | exon |
| Bn-A07-p15247793 | Bn-N7-p17923677  | gene |      |
| Bn-A07-p15248927 | Bn-N7-p17924813  | gene | exon |
| Bn-A07-p15262851 | Bn-N7-p17940636  | gene |      |
| Bn-A07-p15273529 | Bn-N7-p17956020  | gene |      |
| Bn-A07-p15298239 | Bn-N7-p17979504  | gene | exon |
| Bn-A07-p15298338 | Bn-N7-p17979603  | gene | exon |
| Bn-A07-p15299046 | Bn-N7-p17980311  | gene | exon |
| Bn-A07-p15303340 | Bn-N7-p17984598  | gene |      |
| Bn-A07-p15331892 | Bn-N7-p18016065  | gene |      |
| Bn-A07-p15332201 | Bn-N7-p18016379  | gene |      |
| Bn-A07-p15352802 | Bn-N7-p18034004  | gene |      |
| Bn-A07-p15354488 | Bn-N7-p18037237  | gene | exon |
| Bn-A07-p15357890 | Bn-N16-p28385249 | gene |      |
| Bn-A07-p15364409 | Bn-N7-p18048568  | gene |      |
| Bn-A07-p15369326 | Bn-N7-p18053484  | gene | exon |
| Bn-A07-p15372787 | Bn-N12-p18557545 | gene | exon |
| Bn-A07-p15404895 | Bn-N7-p18087198  | gene | exon |
| Bn-A07-p15405942 | Bn-N7-p18088245  | gene | exon |
| Bn-A07-p15410837 | Bn-N7-p18093108  | gene |      |
| Bn-A07-p15415388 | Bn-N7-p18097525  | gene | exon |
| Bn-A07-p15417895 | Bn-N7-p18100041  | gene | exon |
| Bn-A07-p15425959 | Bn-N7-p18108303  | gene |      |
| Bn-A07-p15426090 | Bn-N7-p18108434  | gene |      |
| Bn-A07-p15428458 | Bn-N7-p18112046  | gene | exon |
| Bn-A07-p15453076 | Bn-N7-p18139396  | gene | exon |
| Bn-A07-p15459314 | Bn-N7-p18149018  | gene | exon |
| Bn-A07-p15545260 | Bn-N7-p18227733  | gene | exon |
| Bn-A07-p15546893 | Bn-N7-p18229666  | gene | exon |
| Bn-A07-p15549943 | Bn-N7-p18232812  | gene | exon |
| Bn-A07-p1557675  | Bn-N7-p1675377   | gene |      |
| Bn-A07-p15578269 | Bn-N7-p18257843  | gene | exon |
| Bn-A07-p15591535 | Bn-N7-p18267292  | gene |      |

|                  |                  |      |      |
|------------------|------------------|------|------|
| Bn-A07-p15591699 | Bn-N7-p18267456  | gene |      |
| Bn-A07-p15606996 | Bn-N7-p18282644  | gene |      |
| Bn-A07-p15612140 | Bn-N7-p18287694  | gene |      |
| Bn-A07-p15622870 | Bn-N7-p18297859  | gene | exon |
| Bn-A07-p1564369  | Bn-N7-p1682483   | gene | exon |
| Bn-A07-p15648620 | Bn-N7-p18322939  | gene | exon |
| Bn-A07-p15650680 | Bn-N7-p18324891  | gene |      |
| Bn-A07-p15652974 | Bn-N7-p18326907  | gene |      |
| Bn-A07-p15695422 | Bn-N7-p18373032  | gene |      |
| Bn-A07-p15698133 | Bn-N7-p18375871  | gene | exon |
| Bn-A07-p15768026 | Bn-N7-p18449193  | gene | exon |
| Bn-A07-p15771342 | Bn-N7-p18452509  | gene |      |
| Bn-A07-p15791885 | Bn-N7-p18467443  | gene | exon |
| Bn-A07-p15801291 | Bn-N7-p18476233  | gene |      |
| Bn-A07-p15802174 | Bn-N7-p18477116  | gene |      |
| Bn-A07-p15802229 | Bn-N7-p18477171  | gene |      |
| Bn-A07-p15809590 | Bn-N7-p18485768  | gene |      |
| Bn-A07-p15812852 | Bn-N7-p18488979  | gene | exon |
| Bn-A07-p15814161 | Bn-N7-p18490278  | gene | exon |
| Bn-A07-p15816246 | Bn-N7-p18491537  | gene |      |
| Bn-A07-p15821030 | Bn-N7-p18496325  | gene | exon |
| Bn-A07-p15829114 | Bn-N7-p18500972  | gene |      |
| Bn-A07-p15829285 | Bn-N7-p18501143  | gene | exon |
| Bn-A07-p15831043 | Bn-N7-p18502907  | gene | exon |
| Bn-A07-p15833211 | Bn-N7-p18505098  | gene | exon |
| Bn-A07-p15856545 | Bn-N7-p18531264  | gene | exon |
| Bn-A07-p15856978 | Bn-N7-p18531697  | gene |      |
| Bn-A07-p15871261 | Bn-N7-p18541543  | gene |      |
| Bn-A07-p15872578 | Bn-N7-p18542858  | gene |      |
| Bn-A07-p15885711 | Bn-N7-p18559070  | gene |      |
| Bn-A07-p158888   | Bn-N7-p172010    | gene | exon |
| Bn-A07-p15931750 | Bn-N7-p18594936  | gene | exon |
| Bn-A07-p15938534 | Bn-N7-p18601865  | gene |      |
| Bn-A07-p15948472 | Bn-N7-p18606472  | gene |      |
| Bn-A07-p15957061 | Bn-N7-p18631534  | gene |      |
| Bn-A07-p15986673 | Bn-N7-p18657326  | gene |      |
| Bn-A07-p16009799 | Bn-N7-p18688438  | gene | exon |
| Bn-A07-p16013075 | Bn-N7-p18691714  | gene |      |
| Bn-A07-p16020955 | Bn-N7-p18696705  | gene |      |
| Bn-A07-p16021617 | Bn-N7-p18697367  | gene | exon |
| Bn-A07-p16050076 | Bn-N7-p18729717  | gene | exon |
| Bn-A07-p160648   | Bn-N17-p394283   | gene |      |
| Bn-A07-p16146576 | Bn-N7-p18830062  | gene |      |
| Bn-A07-p16146639 | Bn-N7-p18830125  | gene |      |
| Bn-A07-p16183869 | Bn-N7-p18872267  | gene | exon |
| Bn-A07-p16395444 | Bn-N7-p19097039  | gene |      |
| Bn-A07-p16406072 | Bn-N16-p30776587 | gene |      |
| Bn-A07-p16423207 | Bn-N7-p19132231  | gene | exon |
| Bn-A07-p16449661 | Bn-N7-p19159713  | gene | exon |
| Bn-A07-p16449988 | Bn-N7-p19160040  | gene |      |
| Bn-A07-p16469173 | Bn-N7-p19177559  | gene | exon |
| Bn-A07-p16519850 | Bn-N7-p19231704  | gene | exon |

|                  |                  |      |      |
|------------------|------------------|------|------|
| Bn-A07-p16527225 | Bn-N7-p19239077  | gene | exon |
| Bn-A07-p16553147 | Bn-N7-p19263682  | gene |      |
| Bn-A07-p16557893 | Bn-N7-p19268240  | gene | exon |
| Bn-A07-p16559043 | Bn-N7-p19269390  | gene | exon |
| Bn-A07-p16566633 | Bn-N7-p19277009  | gene |      |
| Bn-A07-p16567234 | Bn-N7-p19277609  | gene |      |
| Bn-A07-p16595704 | Bn-N7-p19308425  | gene |      |
| Bn-A07-p16636687 | Bn-N7-p19358087  | gene |      |
| Bn-A07-p16659232 | Bn-N7-p19383325  | gene |      |
| Bn-A07-p16659396 | Bn-N7-p19383489  | gene |      |
| Bn-A07-p16709303 | Bn-N7-p19433945  | gene | exon |
| Bn-A07-p16721483 | Bn-N7-p19450162  | gene | exon |
| Bn-A07-p16722346 | Bn-N7-p19451034  | gene |      |
| Bn-A07-p16722383 | Bn-N7-p19451071  | gene |      |
| Bn-A07-p16722623 | Bn-N7-p19451310  | gene |      |
| Bn-A07-p16745833 | Bn-N7-p19465227  | gene | exon |
| Bn-A07-p16749101 | Bn-N7-p19468523  | gene |      |
| Bn-A07-p16755801 | Bn-N7-p19475138  | gene |      |
| Bn-A07-p16756509 | Bn-N7-p19475846  | gene |      |
| Bn-A07-p16765596 | Bn-N7-p19484933  | gene | exon |
| Bn-A07-p16792991 | Bn-N7-p19499588  | gene | exon |
| Bn-A07-p16831414 | Bn-N7-p19541188  | gene |      |
| Bn-A07-p16833174 | Bn-N7-p19542578  | gene | exon |
| Bn-A07-p16872148 | Bn-N7-p19574677  | gene | exon |
| Bn-A07-p1689072  | Bn-N7-p1805953   | gene | exon |
| Bn-A07-p16895848 | Bn-N7-p19595432  | gene |      |
| Bn-A07-p16896370 | Bn-N7-p19595976  | gene |      |
| Bn-A07-p16898207 | Bn-N7-p19597887  | gene |      |
| Bn-A07-p16909798 | Bn-N7-p19610807  | gene |      |
| Bn-A07-p16912963 | Bn-N7-p19613978  | gene | exon |
| Bn-A07-p16919795 | Bn-N7-p19620923  | gene | exon |
| Bn-A07-p16924814 | Bn-N7-p19626423  | gene | exon |
| Bn-A07-p16925201 | Bn-N7-p19626810  | gene | exon |
| Bn-A07-p16936529 | Bn-N7-p19638052  | gene |      |
| Bn-A07-p16946173 | Bn-N7-p19647643  | gene |      |
| Bn-A07-p16965943 | Bn-N7-p19667355  | gene |      |
| Bn-A07-p16967567 | Bn-N7-p19668971  | gene | exon |
| Bn-A07-p16970000 | Bn-N7-p19671405  | gene |      |
| Bn-A07-p16987468 | Bn-N7-p19689583  | gene | exon |
| Bn-A07-p16996070 | Bn-N7-p19698250  | gene |      |
| Bn-A07-p17001912 | Bn-N7-p19705950  | gene |      |
| Bn-A07-p17026444 | Bn-N7-p19728421  | gene |      |
| Bn-A07-p17047263 | Bn-N7-p19743562  | gene |      |
| Bn-A07-p17053061 | Bn-N7-p19749483  | gene | exon |
| Bn-A07-p17085728 | Bn-N7-p19781419  | gene | exon |
| Bn-A07-p17100649 | Bn-N7-p19800272  | gene |      |
| Bn-A07-p17104148 | Bn-N7-p19803770  | gene | exon |
| Bn-A07-p17123712 | Bn-N7-p19825901  | gene | exon |
| Bn-A07-p17142058 | Bn-N16-p32174578 | gene |      |
| Bn-A07-p17148373 | Bn-N7-p19873366  | gene |      |
| Bn-A07-p17177279 | Bn-N7-p19900751  | gene | exon |
| Bn-A07-p17186393 | Bn-N7-p19913925  | gene | exon |



|                  |                  |      |      |
|------------------|------------------|------|------|
| Bn-A07-p17225853 | Bn-N7-p19950600  | gene |      |
| Bn-A07-p17260356 | Bn-N16-p32479391 | gene | exon |
| Bn-A07-p1729364  | Bn-N7-p1849388   | gene | exon |
| Bn-A07-p17298132 | Bn-N7-p19989191  | gene | exon |
| Bn-A07-p17353806 | Bn-N16-p32765125 | gene |      |
| Bn-A07-p17400106 | Bn-N7-p20100304  | gene | exon |
| Bn-A07-p17409328 | Bn-N7-p20107667  | gene | exon |
| Bn-A07-p17411297 | Bn-N7-p20109636  | gene | exon |
| Bn-A07-p17411599 | Bn-N7-p20109938  | gene |      |
| Bn-A07-p17412755 | Bn-N7-p20111094  | gene | exon |
| Bn-A07-p17418824 | Bn-N7-p20117163  | gene |      |
| Bn-A07-p17419179 | Bn-N7-p20117518  | gene |      |
| Bn-A07-p17421675 | Bn-N7-p20120014  | gene |      |
| Bn-A07-p17435418 | Bn-N7-p20133134  | gene |      |
| Bn-A07-p17450697 | Bn-N7-p20146850  | gene | exon |
| Bn-A07-p17465762 | Bn-N7-p20160318  | gene |      |
| Bn-A07-p17470966 | Bn-N7-p20167404  | gene | exon |
| Bn-A07-p17477080 | Bn-N7-p20173519  | gene |      |
| Bn-A07-p17483655 | Bn-N7-p20180334  | gene | exon |
| Bn-A07-p17520539 | Bn-N7-p20220294  | gene | exon |
| Bn-A07-p17523277 | Bn-N16-p33053742 | gene |      |
| Bn-A07-p17583998 | Bn-N7-p20276166  | gene |      |
| Bn-A07-p17587315 | Bn-N7-p20279530  | gene |      |
| Bn-A07-p17588031 | Bn-N7-p20280260  | gene | exon |
| Bn-A07-p17598687 | Bn-N7-p20294291  | gene | exon |
| Bn-A07-p17605668 | Bn-N7-p20301104  | gene | exon |
| Bn-A07-p17607958 | Bn-N7-p20305544  | gene |      |
| Bn-A07-p17628920 | Bn-N7-p20326009  | gene |      |
| Bn-A07-p17636141 | Bn-N7-p20335931  | gene | exon |
| Bn-A07-p17679589 | Bn-N7-p20396156  | gene | exon |
| Bn-A07-p17814268 | Bn-N7-p20528512  | gene | exon |
| Bn-A07-p17823544 | Bn-N7-p20537658  | gene |      |
| Bn-A07-p17827124 | Bn-N7-p20541231  | gene |      |
| Bn-A07-p178437   | Bn-N7-p195940    | gene |      |
| Bn-A07-p17860745 | Bn-N7-p20582995  | gene |      |
| Bn-A07-p17959118 | Bn-N7-p20681326  | gene |      |
| Bn-A07-p18035698 | Bn-N7-p20760589  | gene | exon |
| Bn-A07-p18103464 | Bn-N7-p20844230  | gene | exon |
| Bn-A07-p18103505 | Bn-N7-p20844271  | gene | exon |
| Bn-A07-p18104828 | Bn-N7-p20845604  | gene |      |
| Bn-A07-p18106007 | Bn-N7-p20846772  | gene |      |
| Bn-A07-p18134446 | Bn-N7-p20874908  | gene | exon |
| Bn-A07-p18157564 | Bn-N7-p20910957  | gene |      |
| Bn-A07-p18167424 | Bn-N7-p20920433  | gene | exon |
| Bn-A07-p18187317 | Bn-N16-p34443093 | gene | exon |
| Bn-A07-p18204966 | Bn-N7-p20966934  | gene | exon |
| Bn-A07-p18210547 | Bn-N7-p20972516  | gene | exon |
| Bn-A07-p18216943 | Bn-N7-p20978354  | gene | exon |
| Bn-A07-p18226326 | Bn-N7-p20987309  | gene |      |
| Bn-A07-p18227328 | Bn-N7-p20988316  | gene |      |
| Bn-A07-p18262143 | Bn-N7-p21028191  | gene |      |
| Bn-A07-p18265668 | Bn-N7-p21031716  | gene | exon |

|                  |                  |      |      |
|------------------|------------------|------|------|
| Bn-A07-p18265772 | Bn-N7-p21031821  | gene |      |
| Bn-A07-p18274656 | Bn-N7-p21042702  | gene | exon |
| Bn-A07-p18308378 | Bn-N7-p21081019  | gene | exon |
| Bn-A07-p1832580  | Bn-N7-p2013193   | gene |      |
| Bn-A07-p18338860 | Bn-N16-p34681807 | gene |      |
| Bn-A07-p18346973 | Bn-N7-p21120187  | gene |      |
| Bn-A07-p18812613 | Bn-N7-p21658703  | gene | exon |
| Bn-A07-p18822708 | Bn-N7-p21671143  | gene | exon |
| Bn-A07-p18832178 | Bn-N7-p21681303  | gene | exon |
| Bn-A07-p18947073 | Bn-N7-p21820922  | gene | exon |
| Bn-A07-p18955989 | Bn-N7-p21829421  | gene |      |
| Bn-A07-p18956207 | Bn-N7-p21829639  | gene |      |
| Bn-A07-p18957162 | Bn-N7-p21830585  | gene |      |
| Bn-A07-p18985169 | Bn-N7-p21860887  | gene | exon |
| Bn-A07-p19001556 | Bn-N7-p21876445  | gene | exon |
| Bn-A07-p19001778 | Bn-N7-p21876667  | gene | exon |
| Bn-A07-p19009397 | Bn-N7-p21885980  | gene |      |
| Bn-A07-p19090612 | Bn-N7-p21968936  | gene | exon |
| Bn-A07-p19093712 | Bn-N7-p21972098  | gene | exon |
| Bn-A07-p19113444 | Bn-N7-p21993479  | gene |      |
| Bn-A07-p19118066 | Bn-N7-p21997596  | gene |      |
| Bn-A07-p19129406 | Bn-N7-p22009465  | gene |      |
| Bn-A07-p19142808 | Bn-N7-p22015948  | gene | exon |
| Bn-A07-p19163856 | Bn-N7-p22035316  | gene |      |
| Bn-A07-p19166676 | Bn-N7-p22038136  | gene |      |
| Bn-A07-p19175358 | Bn-N7-p22048526  | gene | exon |
| Bn-A07-p19176340 | Bn-N16-p36266862 | gene | exon |
| Bn-A07-p19186300 | Bn-N7-p22059448  | gene | exon |
| Bn-A07-p19190510 | Bn-N7-p22063739  | gene |      |
| Bn-A07-p19512603 | Bn-N7-p22378556  | gene |      |
| Bn-A07-p19512916 | Bn-N7-p22378869  | gene | exon |
| Bn-A07-p19824864 | Bn-N7-p22725156  | gene |      |
| Bn-A07-p19825063 | Bn-N7-p22725356  | gene |      |
| Bn-A07-p19865918 | Bn-N7-p22777396  | gene |      |
| Bn-A07-p19865996 | Bn-N7-p22777474  | gene |      |
| Bn-A07-p19871923 | Bn-N7-p22783472  | gene |      |
| Bn-A07-p19900592 | Bn-N7-p22818133  | gene | exon |
| Bn-A07-p19901175 | Bn-N16-p28333077 | gene |      |
| Bn-A07-p19915062 | Bn-N7-p22833926  | gene | exon |
| Bn-A07-p19924753 | Bn-N7-p22846933  | gene |      |
| Bn-A07-p199589   | Bn-N7-p221507    | gene |      |
| Bn-A07-p19965401 | Bn-N7-p22889167  | gene | exon |
| Bn-A07-p19967695 | Bn-N7-p22892309  | gene |      |
| Bn-A07-p19975808 | Bn-N16-p37540850 | gene | exon |
| Bn-A07-p19987483 | Bn-N7-p22914333  | gene | exon |
| Bn-A07-p19987485 | Bn-N7-p22914335  | gene | exon |
| Bn-A07-p19999651 | Bn-N7-p22927363  | gene | exon |
| Bn-A07-p20000340 | Bn-N7-p22928052  | gene | exon |
| Bn-A07-p20003438 | Bn-N7-p22931174  | gene | exon |
| Bn-A07-p20006245 | Bn-N7-p22934417  | gene |      |
| Bn-A07-p20029449 | Bn-N7-p22957030  | gene | exon |
| Bn-A07-p20044413 | Bn-N7-p22973485  | gene | exon |

|                  |                  |      |      |
|------------------|------------------|------|------|
| Bn-A07-p20090726 | Bn-N7-p23020123  | gene |      |
| Bn-A07-p20144687 | Bn-N7-p23083318  | gene | exon |
| Bn-A07-p20190653 | Bn-N7-p23121055  | gene |      |
| Bn-A07-p20193221 | Bn-N7-p23123586  | gene |      |
| Bn-A07-p20209068 | Bn-N7-p23139133  | gene | exon |
| Bn-A07-p20221692 | Bn-N7-p23146689  | gene | exon |
| Bn-A07-p20230189 | Bn-N7-p23153248  | gene | exon |
| Bn-A07-p20231605 | Bn-N7-p23154664  | gene | exon |
| Bn-A07-p20369599 | Bn-N16-p38160484 | gene | exon |
| Bn-A07-p20467347 | Bn-N7-p23418291  | gene | exon |
| Bn-A07-p20471091 | Bn-N7-p23422028  | gene |      |
| Bn-A07-p20471143 | Bn-N7-p23422080  | gene |      |
| Bn-A07-p20511320 | Bn-N7-p23459139  | gene | exon |
| Bn-A07-p20554194 | Bn-N7-p23514296  | gene |      |
| Bn-A07-p20558164 | Bn-N7-p23518260  | gene |      |
| Bn-A07-p20561173 | Bn-N7-p23521267  | gene | exon |
| Bn-A07-p20646388 | Bn-N7-p23615357  | gene | exon |
| Bn-A07-p20661885 | Bn-N7-p23622894  | gene | exon |
| Bn-A07-p20662200 | Bn-N7-p23623208  | gene | exon |
| Bn-A07-p20675049 | Bn-N7-p23636157  | gene | exon |
| Bn-A07-p20771568 | Bn-N7-p23721465  | gene |      |
| Bn-A07-p20797755 | Bn-N7-p23748355  | gene |      |
| Bn-A07-p20871163 | Bn-N7-p23811865  | gene | exon |
| Bn-A07-p20887568 | Bn-N7-p23826853  | gene |      |
| Bn-A07-p20935217 | Bn-N7-p23869260  | gene | exon |
| Bn-A07-p20941237 | Bn-N16-p38817271 | gene |      |
| Bn-A07-p20941338 | Bn-N16-p38817372 | gene |      |
| Bn-A07-p20951340 | Bn-N16-p38850702 | gene |      |
| Bn-A07-p20981410 | Bn-N7-p23882909  | gene | exon |
| Bn-A07-p20986876 | Bn-N7-p23888405  | gene | exon |
| Bn-A07-p20999615 | Bn-N7-p23898726  | gene | exon |
| Bn-A07-p21019499 | Bn-N7-p23918790  | gene | exon |
| Bn-A07-p21160078 | Bn-N7-p24081454  | gene |      |
| Bn-A07-p21173896 | Bn-N7-p24091608  | gene |      |
| Bn-A07-p21280027 | Bn-N7-p24201869  | gene | exon |
| Bn-A07-p21328168 | Bn-N7-p24246510  | gene |      |
| Bn-A07-p21332273 | Bn-N7-p24250622  | gene |      |
| Bn-A07-p21395576 | Bn-N16-p39359806 | gene | exon |
| Bn-A07-p21400508 | Bn-N16-p39365019 | gene |      |
| Bn-A07-p21404492 | Bn-N16-p39369178 | gene | exon |
| Bn-A07-p21410292 | Bn-N16-p39376975 | gene |      |
| Bn-A07-p21413042 | Bn-N16-p39379780 | gene |      |
| Bn-A07-p21449796 | Bn-N16-p39420044 | gene |      |
| Bn-A07-p21496070 | Bn-N7-p24345207  | gene | exon |
| Bn-A07-p21546078 | Bn-N16-p39534992 | gene |      |
| Bn-A07-p21567127 | Bn-N7-p24424123  | gene |      |
| Bn-A07-p21568086 | Bn-N7-p24425050  | gene |      |
| Bn-A07-p21569289 | Bn-N7-p24426258  | gene |      |
| Bn-A07-p21577164 | Bn-N7-p24433733  | gene |      |
| Bn-A07-p21586613 | Bn-N7-p24443471  | gene |      |
| Bn-A07-p21587819 | Bn-N7-p24444677  | gene |      |
| Bn-A07-p21600829 | Bn-N7-p24457796  | gene | exon |

|                  |                  |      |      |
|------------------|------------------|------|------|
| Bn-A07-p216152   | Bn-N7-p231855    | gene |      |
| Bn-A07-p21631043 | Bn-N7-p24486028  | gene |      |
| Bn-A07-p21643815 | Bn-N7-p24498837  | gene |      |
| Bn-A07-p21678440 | Bn-N7-p24535423  | gene | exon |
| Bn-A07-p21679566 | Bn-N7-p24536529  | gene | exon |
| Bn-A07-p21792030 | Bn-N7-p24574746  | gene | exon |
| Bn-A07-p21808739 | Bn-N7-p24590257  | gene | exon |
| Bn-A07-p21820686 | Bn-N7-p24600079  | gene | exon |
| Bn-A07-p21835729 | Bn-N7-p24613096  | gene |      |
| Bn-A07-p21837742 | Bn-N7-p24619288  | gene | exon |
| Bn-A07-p21844673 | Bn-N7-p24626217  | gene | exon |
| Bn-A07-p21875901 | Bn-N7-p24662708  | gene | exon |
| Bn-A07-p21962752 | Bn-N7-p24768075  | gene | exon |
| Bn-A07-p21965076 | Bn-N7-p24770398  | gene | exon |
| Bn-A07-p21979205 | Bn-N7-p24784384  | gene |      |
| Bn-A07-p21993375 | Bn-N7-p24799309  | gene |      |
| Bn-A07-p21994050 | Bn-N7-p24800048  | gene |      |
| Bn-A07-p21995054 | Bn-N7-p24801058  | gene |      |
| Bn-A07-p22005058 | Bn-N7-p24811031  | gene | exon |
| Bn-A07-p22010671 | Bn-N7-p24814522  | gene | exon |
| Bn-A07-p22034462 | Bn-N7-p24839696  | gene | exon |
| Bn-A07-p22050904 | Bn-N7-p24856389  | gene | exon |
| Bn-A07-p22092610 | Bn-N7-p24897405  | gene | exon |
| Bn-A07-p22092775 | Bn-N7-p24897570  | gene | exon |
| Bn-A07-p22095943 | Bn-N7-p24900757  | gene |      |
| Bn-A07-p22103902 | Bn-N7-p24910676  | gene | exon |
| Bn-A07-p22119502 | Bn-N7-p24927237  | gene |      |
| Bn-A07-p22139480 | Bn-N7-p24947975  | gene |      |
| Bn-A07-p22140320 | Bn-N7-p24948807  | gene |      |
| Bn-A07-p22156609 | Bn-N7-p24967569  | gene | exon |
| Bn-A07-p22168947 | Bn-N7-p24983502  | gene | exon |
| Bn-A07-p22169573 | Bn-N7-p24984126  | gene |      |
| Bn-A07-p22176569 | Bn-N7-p24991322  | gene | exon |
| Bn-A07-p22198393 | Bn-N7-p25015613  | gene |      |
| Bn-A07-p22209952 | Bn-N7-p25028678  | gene |      |
| Bn-A07-p22231852 | Bn-N16-p40327922 | gene | exon |
| Bn-A07-p22250567 | Bn-N7-p25075523  | gene | exon |
| Bn-A07-p22251229 | Bn-N7-p25076175  | gene |      |
| Bn-A07-p22251906 | Bn-N7-p25076853  | gene |      |
| Bn-A07-p22253687 | Bn-N7-p25078634  | gene |      |
| Bn-A07-p22282923 | Bn-N16-p40401185 | gene | exon |
| Bn-A07-p22302158 | Bn-N7-p25126505  | gene | exon |
| Bn-A07-p22308030 | Bn-N7-p25133285  | gene |      |
| Bn-A07-p22309060 | Bn-N7-p25134315  | gene |      |
| Bn-A07-p22309183 | Bn-N7-p25134438  | gene | exon |
| Bn-A07-p22310107 | Bn-N7-p25135147  | gene | exon |
| Bn-A07-p22329359 | Bn-N7-p25157288  | gene |      |
| Bn-A07-p22382675 | Bn-N7-p25210618  | gene |      |
| Bn-A07-p22412915 | Bn-N7-p25247687  | gene | exon |
| Bn-A07-p22440144 | Bn-N7-p25284734  | gene |      |
| Bn-A07-p22488507 | Bn-N7-p25334331  | gene |      |
| Bn-A07-p22510199 | Bn-N7-p25356625  | gene |      |

|                  |                  |      |      |
|------------------|------------------|------|------|
| Bn-A07-p22575730 | Bn-N7-p25437729  | gene |      |
| Bn-A07-p2264217  | Bn-N7-p4001170   | gene | exon |
| Bn-A07-p241997   | Bn-N17-p652619   | gene | exon |
| Bn-A07-p244051   | Bn-N7-p269475    | gene |      |
| Bn-A07-p2524777  | Bn-N7-p4182170   | gene |      |
| Bn-A07-p2575548  | Bn-N7-p4236411   | gene |      |
| Bn-A07-p267110   | Bn-N7-p296070    | gene |      |
| Bn-A07-p276584   | Bn-N7-p305580    | gene |      |
| Bn-A07-p3041012  | Bn-N7-p4632441   | gene | exon |
| Bn-A07-p3081602  | Bn-N7-p4691361   | gene | exon |
| Bn-A07-p3093306  | Bn-N7-p4698981   | gene |      |
| Bn-A07-p3102715  | Bn-N19-p36899879 | gene |      |
| Bn-A07-p3132316  | Bn-N7-p4713420   | gene |      |
| Bn-A07-p3202245  | Bn-N7-p4780498   | gene |      |
| Bn-A07-p3262688  | Bn-N7-p4845203   | gene |      |
| Bn-A07-p3262752  | Bn-N7-p4845267   | gene |      |
| Bn-A07-p3262864  | Bn-N7-p4845380   | gene | exon |
| Bn-A07-p3275876  | Bn-N7-p4866520   | gene | exon |
| Bn-A07-p3287486  | Bn-N7-p4875256   | gene | exon |
| Bn-A07-p3309722  | Bn-N7-p4897882   | gene |      |
| Bn-A07-p3467400  | Bn-N17-p12181043 | gene | exon |
| Bn-A07-p3482570  | Bn-N7-p5116632   | gene | exon |
| Bn-A07-p3482967  | Bn-N7-p5117026   | gene |      |
| Bn-A07-p3517211  | Bn-N7-p5153323   | gene | exon |
| Bn-A07-p3646853  | Bn-N7-p5260334   | gene |      |
| Bn-A07-p3648246  | Bn-N7-p5261722   | gene |      |
| Bn-A07-p3649647  | Bn-N7-p5263276   | gene |      |
| Bn-A07-p367569   | Bn-N7-p392915    | gene |      |
| Bn-A07-p3746131  | Bn-N7-p5345350   | gene |      |
| Bn-A07-p3796068  | Bn-N7-p5390231   | gene |      |
| Bn-A07-p3796474  | Bn-N7-p5390636   | gene | exon |
| Bn-A07-p3796859  | Bn-N7-p5391030   | gene | exon |
| Bn-A07-p3826249  | Bn-N7-p5421931   | gene |      |
| Bn-A07-p3862192  | Bn-N7-p5449697   | gene | exon |
| Bn-A07-p3899866  | Bn-N7-p5472422   | gene | exon |
| Bn-A07-p3900934  | Bn-N7-p5473488   | gene | exon |
| Bn-A07-p3916567  | Bn-N7-p5478132   | gene | exon |
| Bn-A07-p3918449  | Bn-N7-p5480005   | gene | exon |
| Bn-A07-p3934301  | Bn-N7-p5499638   | gene |      |
| Bn-A07-p3995605  | Bn-N7-p5563726   | gene |      |
| Bn-A07-p4095559  | Bn-N7-p5649088   | gene |      |
| Bn-A07-p4097388  | Bn-N7-p5650918   | gene |      |
| Bn-A07-p4097690  | Bn-N7-p5651220   | gene |      |
| Bn-A07-p4173116  | Bn-N7-p5732895   | gene | exon |
| Bn-A07-p4173583  | Bn-N7-p5733362   | gene | exon |
| Bn-A07-p4289732  | Bn-N7-p5861096   | gene |      |
| Bn-A07-p4309577  | Bn-N7-p5878177   | gene | exon |
| Bn-A07-p4387388  | Bn-N7-p5955748   | gene | exon |
| Bn-A07-p4414432  | Bn-N7-p5979312   | gene |      |
| Bn-A07-p4477010  | Bn-N7-p6044743   | gene |      |
| Bn-A07-p4483935  | Bn-N7-p6050372   | gene | exon |
| Bn-A07-p4536488  | Bn-N7-p6087716   | gene | exon |

|                 |                       |      |      |
|-----------------|-----------------------|------|------|
| Bn-A07-p4536608 | Bn-N7-p6087836        | gene | exon |
| Bn-A07-p4582463 | Bn-N7-p6132922        | gene |      |
| Bn-A07-p4587108 | Bn-N17-p14444200      | gene |      |
| Bn-A07-p4607332 | Bn-N7-p6164763        | gene |      |
| Bn-A07-p4639103 | Bn-N18-p6352800       | gene |      |
| Bn-A07-p4644371 | Bn-N7-p6189089        | gene |      |
| Bn-A07-p4678510 | Bn-N7-p6243950        | gene | exon |
| Bn-A07-p4704042 | Bn-N7-p6267952        | gene | exon |
| Bn-A07-p4802709 | Bn-N7-p6366961        | gene |      |
| Bn-A07-p4815239 | Bn-N7-p6379719        | gene |      |
| Bn-A07-p4815910 | Bn-N7-p6380390        | gene |      |
| Bn-A07-p4817318 | Bn-N7-p6381799        | gene |      |
| Bn-A07-p4825210 | Bn-N7-p6393903        | gene | exon |
| Bn-A07-p483451  | Bn-N3-p2329168        | gene |      |
| Bn-A07-p483541  | Bn-Scaffold17351-p645 | gene | exon |
| Bn-A07-p4838826 | Bn-N7-p6407686        | gene | exon |
| Bn-A07-p4912587 | Bn-N7-p6483683        | gene | exon |
| Bn-A07-p4912709 | Bn-N7-p6483805        | gene |      |
| Bn-A07-p4937244 | Bn-N7-p6506698        | gene |      |
| Bn-A07-p4947273 | Bn-N7-p6514933        | gene |      |
| Bn-A07-p4954667 | Bn-N7-p6520825        | gene |      |
| Bn-A07-p4958794 | Bn-N7-p6524952        | gene |      |
| Bn-A07-p4958868 | Bn-N7-p6525026        | gene |      |
| Bn-A07-p4959975 | Bn-N7-p6526166        | gene | exon |
| Bn-A07-p5008797 | Bn-N7-p6573394        | gene |      |
| Bn-A07-p5016523 | Bn-N7-p6580894        | gene |      |
| Bn-A07-p5050160 | Bn-N7-p6632110        | gene | exon |
| Bn-A07-p5072420 | Bn-N7-p6659468        | gene | exon |
| Bn-A07-p5118743 | Bn-N7-p6710788        | gene |      |
| Bn-A07-p5119149 | Bn-N7-p6711189        | gene |      |
| Bn-A07-p5126106 | Bn-N7-p6718144        | gene | exon |
| Bn-A07-p5145409 | Bn-N7-p6730359        | gene | exon |
| Bn-A07-p5211320 | Bn-N7-p6774120        | gene | exon |
| Bn-A07-p5228632 | Bn-N7-p6781198        | gene |      |
| Bn-A07-p5229070 | Bn-N7-p6781636        | gene |      |
| Bn-A07-p5234114 | Bn-N7-p6798260        | gene | exon |
| Bn-A07-p5243525 | Bn-N7-p6805566        | gene |      |
| Bn-A07-p5256311 | Bn-N7-p6823370        | gene | exon |
| Bn-A07-p5365136 | Bn-N7-p6921020        | gene | exon |
| Bn-A07-p53742   | Bn-N7-p47215          | gene |      |
| Bn-A07-p5401960 | Bn-N7-p6949695        | gene |      |
| Bn-A07-p5402372 | Bn-N7-p6950841        | gene |      |
| Bn-A07-p5402451 | Bn-N7-p6950920        | gene |      |
| Bn-A07-p5402605 | Bn-N7-p6951074        | gene |      |
| Bn-A07-p5402835 | Bn-N7-p6951305        | gene |      |
| Bn-A07-p5403065 | Bn-N7-p6951535        | gene |      |
| Bn-A07-p5407029 | Bn-N7-p6955556        | gene |      |
| Bn-A07-p5407143 | Bn-N7-p6955670        | gene |      |
| Bn-A07-p5407683 | Bn-N7-p6956210        | gene | exon |
| Bn-A07-p5408025 | Bn-N7-p6963842        | gene |      |
| Bn-A07-p541617  | Bn-N9-p29257429       | gene | exon |
| Bn-A07-p5431144 | Bn-N7-p6985800        | gene |      |

|                 |                  |      |      |
|-----------------|------------------|------|------|
| Bn-A07-p5455024 | Bn-N7-p7010907   | gene | exon |
| Bn-A07-p5482599 | Bn-N7-p7047312   | gene |      |
| Bn-A07-p5539902 | Bn-N17-p15997447 | gene | exon |
| Bn-A07-p5568504 | Bn-N7-p7108520   | gene |      |
| Bn-A07-p5591930 | Bn-N7-p7124905   | gene |      |
| Bn-A07-p5618903 | Bn-N7-p7215114   | gene |      |
| Bn-A07-p5619095 | Bn-N7-p7215306   | gene |      |
| Bn-A07-p5619285 | Bn-N7-p7215496   | gene |      |
| Bn-A07-p5620067 | Bn-N7-p7216278   | gene |      |
| Bn-A07-p5633352 | Bn-N7-p7229050   | gene |      |
| Bn-A07-p5733051 | Bn-N9-p17767212  | gene |      |
| Bn-A07-p5758215 | Bn-N9-p17736080  | gene | exon |
| Bn-A07-p5768726 | Bn-N7-p7332148   | gene | exon |
| Bn-A07-p5810641 | Bn-N7-p7375207   | gene |      |
| Bn-A07-p5871275 | Bn-N7-p7434664   | gene | exon |
| Bn-A07-p5895170 | Bn-N7-p7471626   | gene | exon |
| Bn-A07-p5905223 | Bn-N7-p7479495   | gene |      |
| Bn-A07-p5983825 | Bn-N7-p7565383   | gene |      |
| Bn-A07-p6055505 | Bn-N3-p7073378   | gene | exon |
| Bn-A07-p6197889 | Bn-N7-p7757299   | gene |      |
| Bn-A07-p6207835 | Bn-N7-p7775654   | gene | exon |
| Bn-A07-p6215131 | Bn-N7-p7782954   | gene |      |
| Bn-A07-p6217329 | Bn-N7-p7785152   | gene |      |
| Bn-A07-p6217365 | Bn-N7-p7785188   | gene |      |
| Bn-A07-p6238777 | Bn-N7-p7808729   | gene | exon |
| Bn-A07-p6259787 | Bn-N7-p7826390   | gene | exon |
| Bn-A07-p6262438 | Bn-N7-p7829039   | gene |      |
| Bn-A07-p6276115 | Bn-N7-p7851921   | gene | exon |
| Bn-A07-p6281546 | Bn-N7-p7854896   | gene |      |
| Bn-A07-p6282717 | Bn-N7-p7856070   | gene | exon |
| Bn-A07-p6283126 | Bn-N7-p7856478   | gene |      |
| Bn-A07-p6309969 | Bn-N7-p7879982   | gene |      |
| Bn-A07-p6346472 | Bn-N7-p7931431   | gene | exon |
| Bn-A07-p6428365 | Bn-N7-p8019506   | gene |      |
| Bn-A07-p6432326 | Bn-N7-p8023341   | gene |      |
| Bn-A07-p6432331 | Bn-N7-p8023346   | gene |      |
| Bn-A07-p6460270 | Bn-N7-p8037884   | gene |      |
| Bn-A07-p6494007 | Bn-N7-p8076082   | gene |      |
| Bn-A07-p6501207 | Bn-N17-p17601417 | gene |      |
| Bn-A07-p6516437 | Bn-N7-p8094964   | gene |      |
| Bn-A07-p6518480 | Bn-N7-p8097006   | gene | exon |
| Bn-A07-p6523973 | Bn-N17-p17644049 | gene |      |
| Bn-A07-p6524220 | Bn-N7-p8102738   | gene | exon |
| Bn-A07-p653283  | Bn-N7-p594197    | gene | exon |
| Bn-A07-p6534557 | Bn-N7-p8114866   | gene | exon |
| Bn-A07-p6542254 | Bn-N7-p8122646   | gene |      |
| Bn-A07-p663772  | Bn-N7-p607970    | gene |      |
| Bn-A07-p6641473 | Bn-N7-p8218371   | gene | exon |
| Bn-A07-p6719583 | Bn-N7-p8299963   | gene | exon |
| Bn-A07-p6722244 | Bn-N7-p8302625   | gene |      |
| Bn-A07-p6735264 | Bn-N7-p8323574   | gene |      |
| Bn-A07-p6841662 | Bn-N17-p18288854 | gene | exon |

|                 |                  |      |      |
|-----------------|------------------|------|------|
| Bn-A07-p6850383 | Bn-N7-p8426478   | gene | exon |
| Bn-A07-p6898363 | Bn-N7-p8483939   | gene |      |
| Bn-A07-p6906296 | Bn-N13-p53096085 | gene | exon |
| Bn-A07-p6926020 | Bn-N7-p8510444   | gene |      |
| Bn-A07-p6942882 | Bn-N7-p8523017   | gene | exon |
| Bn-A07-p6943725 | Bn-N7-p8523858   | gene |      |
| Bn-A07-p6947953 | Bn-N7-p8528691   | gene |      |
| Bn-A07-p6952910 | Bn-N7-p8532856   | gene | exon |
| Bn-A07-p6981435 | Bn-N7-p8565060   | gene |      |
| Bn-A07-p7009935 | Bn-N7-p8592644   | gene |      |
| Bn-A07-p7027400 | Bn-N7-p8611224   | gene | exon |
| Bn-A07-p7055420 | Bn-N7-p8632712   | gene | exon |
| Bn-A07-p7069624 | Bn-N7-p8643592   | gene |      |
| Bn-A07-p7078464 | Bn-N7-p8657424   | gene | exon |
| Bn-A07-p7079099 | Bn-N7-p8658089   | gene |      |
| Bn-A07-p7082333 | Bn-N7-p8661352   | gene |      |
| Bn-A07-p7099002 | Bn-N17-p18732130 | gene | exon |
| Bn-A07-p7117228 | Bn-N7-p8706303   | gene |      |
| Bn-A07-p7117229 | Bn-N7-p8706304   | gene |      |
| Bn-A07-p7118584 | Bn-N7-p8708759   | gene | exon |
| Bn-A07-p7119962 | Bn-N7-p8710138   | gene | exon |
| Bn-A07-p7124154 | Bn-N7-p8714434   | gene |      |
| Bn-A07-p7215862 | Bn-N7-p8826403   | gene |      |
| Bn-A07-p7230543 | Bn-N7-p8834828   | gene | exon |
| Bn-A07-p7232691 | Bn-N7-p8840367   | gene | exon |
| Bn-A07-p7237742 | Bn-N7-p8845478   | gene |      |
| Bn-A07-p7261357 | Bn-N7-p8864825   | gene |      |
| Bn-A07-p7261508 | Bn-N7-p8864976   | gene |      |
| Bn-A07-p7268294 | Bn-N7-p8874774   | gene | exon |
| Bn-A07-p7287398 | Bn-N7-p8896085   | gene |      |
| Bn-A07-p7298603 | Bn-N7-p8909681   | gene | exon |
| Bn-A07-p7309287 | Bn-N7-p8916937   | gene | exon |
| Bn-A07-p7312075 | Bn-N7-p8922644   | gene | exon |
| Bn-A07-p73440   | Bn-N7-p72884     | gene | exon |
| Bn-A07-p7352643 | Bn-N7-p8951323   | gene |      |
| Bn-A07-p7367247 | Bn-N7-p8962238   | gene |      |
| Bn-A07-p7380906 | Bn-N7-p8977570   | gene |      |
| Bn-A07-p7391449 | Bn-N7-p8988114   | gene | exon |
| Bn-A07-p7392394 | Bn-N7-p8989059   | gene | exon |
| Bn-A07-p7392454 | Bn-N7-p8989119   | gene | exon |
| Bn-A07-p7392457 | Bn-N7-p8989122   | gene | exon |
| Bn-A07-p7392753 | Bn-N7-p8989418   | gene |      |
| Bn-A07-p7392879 | Bn-N7-p8989544   | gene |      |
| Bn-A07-p7393007 | Bn-N7-p8989673   | gene | exon |
| Bn-A07-p7395038 | Bn-N7-p8991585   | gene | exon |
| Bn-A07-p7400268 | Bn-N7-p8997082   | gene | exon |
| Bn-A07-p7400432 | Bn-N7-p8997246   | gene |      |
| Bn-A07-p7433228 | Bn-N7-p9011407   | gene | exon |
| Bn-A07-p7433707 | Bn-N7-p9011886   | gene |      |
| Bn-A07-p7434126 | Bn-N7-p9012305   | gene |      |
| Bn-A07-p7436573 | Bn-N7-p9014762   | gene |      |
| Bn-A07-p7499400 | Bn-N7-p9095651   | gene | exon |



|                 |                       |      |      |
|-----------------|-----------------------|------|------|
| Bn-A07-p7509139 | Bn-N7-p9105871        | gene |      |
| Bn-A07-p7519375 | Bn-N7-p9116100        | gene | exon |
| Bn-A07-p7528011 | Bn-N7-p9125239        | gene | exon |
| Bn-A07-p7528095 | Bn-N7-p9125323        | gene |      |
| Bn-A07-p7542335 | Bn-N7-p9135461        | gene | exon |
| Bn-A07-p7551371 | Bn-N17-p19834270      | gene |      |
| Bn-A07-p7584364 | Bn-N7-p9184566        | gene |      |
| Bn-A07-p7678712 | Bn-N7-p9258227        | gene | exon |
| Bn-A07-p7679469 | Bn-N7-p9258984        | gene |      |
| Bn-A07-p7717365 | Bn-Scaffold11459-p506 | gene |      |
| Bn-A07-p7738577 | Bn-N7-p9300146        | gene |      |
| Bn-A07-p7740173 | Bn-N7-p9301388        | gene |      |
| Bn-A07-p7773921 | Bn-N7-p9336719        | gene |      |
| Bn-A07-p7796025 | Bn-N7-p9360955        | gene | exon |
| Bn-A07-p7872194 | Bn-N7-p9420763        | gene |      |
| Bn-A07-p7931519 | Bn-N7-p9298824        | gene | exon |
| Bn-A07-p8037081 | Bn-N7-p9618283        | gene |      |
| Bn-A07-p8046121 | Bn-N7-p9627350        | gene | exon |
| Bn-A07-p8084624 | Bn-N7-p9659378        | gene | exon |
| Bn-A07-p8096658 | Bn-N7-p9667551        | gene | exon |
| Bn-A07-p8122640 | Bn-N7-p9685775        | gene | exon |
| Bn-A07-p8134950 | Bn-N7-p9697098        | gene | exon |
| Bn-A07-p8167856 | Bn-N7-p9734603        | gene | exon |
| Bn-A07-p8178839 | Bn-N7-p9744672        | gene | exon |
| Bn-A07-p8181654 | Bn-N7-p9747476        | gene | exon |
| Bn-A07-p8183365 | Bn-N7-p9750272        | gene |      |
| Bn-A07-p8184393 | Bn-N7-p9751304        | gene | exon |
| Bn-A07-p8207791 | Bn-N7-p9764669        | gene | exon |
| Bn-A07-p8258521 | Bn-N7-p9809726        | gene | exon |
| Bn-A07-p8259212 | Bn-N7-p9810415        | gene | exon |
| Bn-A07-p8259218 | Bn-N7-p9810421        | gene | exon |
| Bn-A07-p828139  | Bn-N7-p751984         | gene | exon |
| Bn-A07-p829095  | Bn-N7-p752939         | gene |      |
| Bn-A07-p8314613 | Bn-N7-p9874342        | gene | exon |
| Bn-A07-p8359729 | Bn-N7-p9921479        | gene |      |
| Bn-A07-p8530938 | Bn-N7-p10088538       | gene |      |
| Bn-A07-p8531068 | Bn-N17-p21518315      | gene |      |
| Bn-A07-p8545569 | Bn-N7-p10101866       | gene |      |
| Bn-A07-p8558330 | Bn-N7-p10114125       | gene | exon |
| Bn-A07-p8560948 | Bn-N7-p10116766       | gene |      |
| Bn-A07-p8572785 | Bn-N7-p10129706       | gene |      |
| Bn-A07-p8610828 | Bn-N7-p10167179       | gene |      |
| Bn-A07-p8675164 | Bn-N7-p10229408       | gene |      |
| Bn-A07-p8675574 | Bn-N7-p10229818       | gene | exon |
| Bn-A07-p8701644 | Bn-N7-p10248306       | gene |      |
| Bn-A07-p8745024 | Bn-N7-p10295054       | gene |      |
| Bn-A07-p8775069 | Bn-N7-p10328682       | gene |      |
| Bn-A07-p8790021 | Bn-N7-p10341860       | gene | exon |
| Bn-A07-p8796823 | Bn-N7-p10348699       | gene | exon |
| Bn-A07-p8851644 | Bn-N7-p10432761       | gene | exon |
| Bn-A07-p8852716 | Bn-N17-p21908599      | gene |      |
| Bn-A07-p8857433 | Bn-N7-p10438066       | gene |      |

|                  |                  |      |      |
|------------------|------------------|------|------|
| Bn-A07-p8888056  | Bn-N17-p42441570 | gene |      |
| Bn-A07-p8929154  | Bn-N7-p10527946  | gene |      |
| Bn-A07-p8947431  | Bn-N7-p10546669  | gene |      |
| Bn-A07-p9034194  | Bn-N17-p22687236 | gene | exon |
| Bn-A07-p9044585  | Bn-N13-p41261292 | gene | exon |
| Bn-A07-p9046330  | Bn-N7-p10639867  | gene |      |
| Bn-A07-p9071682  | Bn-N7-p10663266  | gene | exon |
| Bn-A07-p9079474  | Bn-N7-p10670871  | gene | exon |
| Bn-A07-p9089710  | Bn-N7-p10681336  | gene | exon |
| Bn-A07-p9091839  | Bn-N7-p10683458  | gene |      |
| Bn-A07-p9095204  | Bn-N7-p10686823  | gene |      |
| Bn-A07-p9095357  | Bn-N7-p10686976  | gene | exon |
| Bn-A07-p9095557  | Bn-N7-p10687176  | gene |      |
| Bn-A07-p9097136  | Bn-N7-p10688753  | gene |      |
| Bn-A07-p9115370  | Bn-N7-p10704581  | gene |      |
| Bn-A07-p9120043  | Bn-N3-p24974954  | gene |      |
| Bn-A07-p930068   | Bn-N7-p929818    | gene | exon |
| Bn-A07-p9320476  | Bn-N7-p10880110  | gene |      |
| Bn-A07-p9321347  | Bn-N7-p10880981  | gene | exon |
| Bn-A07-p9324529  | Bn-N7-p10884131  | gene |      |
| Bn-A07-p9402974  | Bn-N7-p10952981  | gene | exon |
| Bn-A07-p9462417  | Bn-N7-p10990897  | gene |      |
| Bn-A07-p9493282  | Bn-N7-p11018459  | gene |      |
| Bn-A07-p9509100  | Bn-N7-p11033575  | gene |      |
| Bn-A07-p9512042  | Bn-N7-p11039410  | gene |      |
| Bn-A07-p9512256  | Bn-N7-p11039624  | gene | exon |
| Bn-A07-p9516564  | Bn-N12-p34412387 | gene |      |
| Bn-A07-p9523515  | Bn-N7-p11047560  | gene |      |
| Bn-A07-p9525348  | Bn-N7-p11049392  | gene | exon |
| Bn-A07-p9565657  | Bn-N7-p11072298  | gene | exon |
| Bn-A07-p9583355  | Bn-N7-p11089964  | gene |      |
| Bn-A07-p9583457  | Bn-N7-p11090066  | gene |      |
| Bn-A07-p959523   | Bn-N7-p974049    | gene | exon |
| Bn-A07-p9617534  | Bn-N7-p11120243  | gene | exon |
| Bn-A07-p9637867  | Bn-N7-p11138451  | gene |      |
| Bn-A07-p9661444  | Bn-N7-p11159340  | gene | exon |
| Bn-A07-p9670298  | Bn-N7-p11177134  | gene | exon |
| Bn-A07-p9684829  | Bn-N7-p11191362  | gene |      |
| Bn-A07-p9724274  | Bn-N17-p24104461 | gene | exon |
| Bn-A07-p9831545  | Bn-N7-p11323969  | gene |      |
| Bn-A07-p9841369  | Bn-N7-p11333958  | gene |      |
| Bn-A07-p9849702  | Bn-N7-p11347009  | gene |      |
| Bn-A07-p9897363  | Bn-N7-p11393929  | gene | exon |
| Bn-A07-p9908315  | Bn-N7-p11406142  | gene |      |
| Bn-A07-p9921856  | Bn-N7-p11421553  | gene | exon |
| Bn-A07-p9923514  | Bn-N7-p11423214  | gene |      |
| Bn-A07-p9924604  | Bn-N7-p11424323  | gene |      |
| Bn-A07-p9924929  | Bn-N7-p11424648  | gene |      |
| Bn-A07-p9985625  | Bn-N7-p11476372  | gene |      |
| Bn-A07-p9987682  | Bn-N7-p11478420  | gene |      |
| Bn-A08-p10026421 | Bn-N8-p9593043   | gene | exon |
| Bn-A08-p10067927 | Bn-N8-p9634172   | gene | exon |

|                  |                  |      |      |
|------------------|------------------|------|------|
| Bn-A08-p1007687  | Bn-N8-p1217690   | gene | exon |
| Bn-A08-p10106723 | Bn-N8-p9686586   | gene | exon |
| Bn-A08-p10115835 | Bn-N8-p9694008   | gene | exon |
| Bn-A08-p10118532 | Bn-N18-p17777275 | gene | exon |
| Bn-A08-p10128352 | Bn-N8-p9705188   | gene |      |
| Bn-A08-p10136371 | Bn-N8-p9724412   | gene |      |
| Bn-A08-p10190275 | Bn-N8-p9790118   | gene |      |
| Bn-A08-p10214814 | Bn-N8-p9810999   | gene |      |
| Bn-A08-p10215334 | Bn-N8-p9811598   | gene | exon |
| Bn-A08-p10215623 | Bn-N8-p9811890   | gene | exon |
| Bn-A08-p10281337 | Bn-N8-p9946893   | gene | exon |
| Bn-A08-p10528898 | Bn-N8-p10210186  | gene |      |
| Bn-A08-p10615012 | Bn-N8-p10291520  | gene | exon |
| Bn-A08-p10663544 | Bn-N8-p10331185  | gene | exon |
| Bn-A08-p10716777 | Bn-N8-p10375220  | gene | exon |
| Bn-A08-p1077419  | Bn-N8-p1277816   | gene | exon |
| Bn-A08-p1077573  | Bn-N8-p1277970   | gene | exon |
| Bn-A08-p10795996 | Bn-N8-p10449072  | gene | exon |
| Bn-A08-p10798067 | Bn-N8-p10454779  | gene |      |
| Bn-A08-p10809139 | Bn-N8-p10465446  | gene | exon |
| Bn-A08-p10822662 | Bn-N8-p10475491  | gene | exon |
| Bn-A08-p10824964 | Bn-N8-p10477792  | gene |      |
| Bn-A08-p1084991  | Bn-N3-p34880873  | gene |      |
| Bn-A08-p1088499  | Bn-N8-p1284504   | gene |      |
| Bn-A08-p1088701  | Bn-N8-p1284706   | gene |      |
| Bn-A08-p10887204 | Bn-N8-p10534243  | gene | exon |
| Bn-A08-p1089123  | Bn-N8-p1285128   | gene | exon |
| Bn-A08-p11308315 | Bn-N13-p59642218 | gene |      |
| Bn-A08-p11310535 | Bn-N8-p10992150  | gene |      |
| Bn-A08-p11329864 | Bn-N8-p11010771  | gene |      |
| Bn-A08-p11352069 | Bn-N8-p11022045  | gene | exon |
| Bn-A08-p11458466 | Bn-N8-p11129532  | gene |      |
| Bn-A08-p11459293 | Bn-N8-p11131297  | gene | exon |
| Bn-A08-p11667191 | Bn-N8-p11338956  | gene | exon |
| Bn-A08-p11679083 | Bn-N8-p11352102  | gene |      |
| Bn-A08-p12054745 | Bn-N3-p26994721  | gene | exon |
| Bn-A08-p12058242 | Bn-N3-p26998101  | gene | exon |
| Bn-A08-p12555227 | Bn-N8-p12138124  | gene |      |
| Bn-A08-p12556455 | Bn-N8-p12139346  | gene | exon |
| Bn-A08-p12599446 | Bn-N8-p12191131  | gene |      |
| Bn-A08-p12638473 | Bn-N8-p12235835  | gene | exon |
| Bn-A08-p12752628 | Bn-N8-p12372214  | gene |      |
| Bn-A08-p12761022 | Bn-N8-p12380623  | gene | exon |
| Bn-A08-p12767403 | Bn-N8-p12386789  | gene |      |
| Bn-A08-p12781426 | Bn-N8-p12398027  | gene | exon |
| Bn-A08-p12794893 | Bn-N8-p12401667  | gene | exon |
| Bn-A08-p12812977 | Bn-N8-p12415810  | gene | exon |
| Bn-A08-p12820786 | Bn-N8-p12430957  | gene |      |
| Bn-A08-p12828472 | Bn-N8-p12438569  | gene |      |
| Bn-A08-p12923799 | Bn-N8-p12556531  | gene |      |
| Bn-A08-p13009633 | Bn-N8-p12643613  | gene |      |
| Bn-A08-p13011710 | Bn-N8-p12646066  | gene |      |

|                  |                  |      |      |
|------------------|------------------|------|------|
| Bn-A08-p13019549 | Bn-N13-p63010986 | gene | exon |
| Bn-A08-p13030362 | Bn-N8-p12708538  | gene | exon |
| Bn-A08-p13030439 | Bn-N8-p12708615  | gene |      |
| Bn-A08-p13076304 | Bn-N8-p12763413  | gene |      |
| Bn-A08-p13076305 | Bn-N8-p12763413  | gene |      |
| Bn-A08-p13091365 | Bn-N8-p12779087  | gene | exon |
| Bn-A08-p1319548  | Bn-N5-p9587568   | gene |      |
| Bn-A08-p1319949  | Bn-N5-p9587167   | gene | exon |
| Bn-A08-p13200580 | Bn-N8-p12863686  | gene |      |
| Bn-A08-p13207923 | Bn-N13-p63308773 | gene |      |
| Bn-A08-p13221380 | Bn-N8-p12891668  | gene | exon |
| Bn-A08-p13239621 | Bn-N8-p12910240  | gene | exon |
| Bn-A08-p13239816 | Bn-N8-p12910435  | gene | exon |
| Bn-A08-p13269999 | Bn-N2-p25048579  | gene |      |
| Bn-A08-p13270793 | Bn-N8-p12940453  | gene |      |
| Bn-A08-p13271519 | Bn-N8-p12941278  | gene |      |
| Bn-A08-p13271950 | Bn-N8-p12941709  | gene | exon |
| Bn-A08-p13284369 | Bn-N8-p12952657  | gene |      |
| Bn-A08-p13327070 | Bn-N8-p12999889  | gene | exon |
| Bn-A08-p13328135 | Bn-N8-p13000954  | gene | exon |
| Bn-A08-p13342419 | Bn-N8-p13014295  | gene | exon |
| Bn-A08-p13352430 | Bn-N8-p13023342  | gene |      |
| Bn-A08-p13354792 | Bn-N8-p13027358  | gene |      |
| Bn-A08-p13357594 | Bn-N8-p13030141  | gene |      |
| Bn-A08-p13363830 | Bn-N8-p13038993  | gene | exon |
| Bn-A08-p13376746 | Bn-N8-p13049362  | gene | exon |
| Bn-A08-p13379983 | Bn-N8-p13052563  | gene |      |
| Bn-A08-p13409843 | Bn-N8-p13070885  | gene | exon |
| Bn-A08-p13427247 | Bn-N8-p13081679  | gene | exon |
| Bn-A08-p13427290 | Bn-N8-p13081722  | gene | exon |
| Bn-A08-p13428079 | Bn-N8-p13082114  | gene | exon |
| Bn-A08-p13428547 | Bn-N8-p13082578  | gene | exon |
| Bn-A08-p13484039 | Bn-N8-p13158827  | gene | exon |
| Bn-A08-p13485948 | Bn-N8-p13160734  | gene | exon |
| Bn-A08-p13486650 | Bn-N8-p13161435  | gene |      |
| Bn-A08-p13544679 | Bn-N8-p13225619  | gene | exon |
| Bn-A08-p13559192 | Bn-N8-p13239149  | gene |      |
| Bn-A08-p13573114 | Bn-N8-p13253873  | gene | exon |
| Bn-A08-p13577914 | Bn-N8-p13258045  | gene |      |
| Bn-A08-p13580050 | Bn-N8-p13260187  | gene |      |
| Bn-A08-p1364252  | Bn-N5-p9541711   | gene | exon |
| Bn-A08-p1365508  | Bn-N5-p9540466   | gene | exon |
| Bn-A08-p1365676  | Bn-N5-p9540298   | gene |      |
| Bn-A08-p13670107 | Bn-N8-p13329479  | gene |      |
| Bn-A08-p1369206  | Bn-N5-p9527984   | gene | exon |
| Bn-A08-p13692951 | Bn-N8-p13376528  | gene |      |
| Bn-A08-p13707991 | Bn-N8-p13387562  | gene | exon |
| Bn-A08-p13785392 | Bn-N8-p13468253  | gene | exon |
| Bn-A08-p13785675 | Bn-N8-p13468536  | gene | exon |
| Bn-A08-p1379662  | Bn-N5-p9515624   | gene |      |
| Bn-A08-p1379663  | Bn-N5-p9515623   | gene |      |
| Bn-A08-p1379996  | Bn-N5-p9515292   | gene |      |

|                  |                  |      |      |
|------------------|------------------|------|------|
| Bn-A08-p13856852 | Bn-N8-p13544730  | gene |      |
| Bn-A08-p13860913 | Bn-N8-p13548962  | gene |      |
| Bn-A08-p13876356 | Bn-N8-p13565760  | gene | exon |
| Bn-A08-p13892926 | Bn-N8-p13577434  | gene |      |
| Bn-A08-p13897110 | Bn-N8-p13586404  | gene | exon |
| Bn-A08-p13901348 | Bn-N8-p13590881  | gene |      |
| Bn-A08-p13964091 | Bn-N8-p13664714  | gene |      |
| Bn-A08-p13966241 | Bn-N8-p13668355  | gene | exon |
| Bn-A08-p1400360  | Bn-N5-p9491353   | gene |      |
| Bn-A08-p14011808 | Bn-N8-p13732712  | gene | exon |
| Bn-A08-p14014365 | Bn-N8-p13735227  | gene | exon |
| Bn-A08-p1404321  | Bn-N5-p9487392   | gene | exon |
| Bn-A08-p1404439  | Bn-N5-p9487275   | gene | exon |
| Bn-A08-p14067094 | Bn-N8-p13785515  | gene | exon |
| Bn-A08-p14067361 | Bn-N8-p13785782  | gene | exon |
| Bn-A08-p14086982 | Bn-N8-p13804894  | gene | exon |
| Bn-A08-p14133917 | Bn-N8-p13842510  | gene | exon |
| Bn-A08-p14156050 | Bn-N8-p13860004  | gene |      |
| Bn-A08-p14163751 | Bn-N18-p20069358 | gene |      |
| Bn-A08-p14167389 | Bn-N8-p13866389  | gene | exon |
| Bn-A08-p14218543 | Bn-N8-p13911141  | gene |      |
| Bn-A08-p14218712 | Bn-N8-p13910604  | gene | exon |
| Bn-A08-p14351609 | Bn-N8-p14059113  | gene |      |
| Bn-A08-p14351709 | Bn-N8-p14059213  | gene | exon |
| Bn-A08-p14369220 | Bn-N8-p14071010  | gene |      |
| Bn-A08-p14375712 | Bn-N8-p14071271  | gene |      |
| Bn-A08-p14447288 | Bn-N8-p14161558  | gene | exon |
| Bn-A08-p14493385 | Bn-N8-p14218449  | gene | exon |
| Bn-A08-p14496135 | Bn-N18-p19427490 | gene | exon |
| Bn-A08-p14498301 | Bn-N8-p14223379  | gene | exon |
| Bn-A08-p14538807 | Bn-N8-p14264539  | gene | exon |
| Bn-A08-p14597378 | Bn-N8-p14303241  | gene |      |
| Bn-A08-p14597858 | Bn-N8-p14303721  | gene |      |
| Bn-A08-p14658507 | Bn-N8-p14358001  | gene |      |
| Bn-A08-p14673671 | Bn-N8-p14373101  | gene | exon |
| Bn-A08-p14692156 | Bn-N8-p14400848  | gene |      |
| Bn-A08-p14695487 | Bn-N8-p14404179  | gene |      |
| Bn-A08-p14695762 | Bn-N8-p14404456  | gene |      |
| Bn-A08-p14697337 | Bn-N8-p14406206  | gene |      |
| Bn-A08-p14704782 | Bn-N8-p14413106  | gene | exon |
| Bn-A08-p14713741 | Bn-N8-p14426462  | gene |      |
| Bn-A08-p14715630 | Bn-N8-p14428351  | gene |      |
| Bn-A08-p14718347 | Bn-N8-p14431283  | gene |      |
| Bn-A08-p14739774 | Bn-N8-p14453064  | gene |      |
| Bn-A08-p14740175 | Bn-N8-p14453465  | gene |      |
| Bn-A08-p14740662 | Bn-N8-p14453952  | gene |      |
| Bn-A08-p14759185 | Bn-N8-p14479446  | gene |      |
| Bn-A08-p14766663 | Bn-N8-p14487515  | gene | exon |
| Bn-A08-p14784965 | Bn-N8-p14506665  | gene |      |
| Bn-A08-p14790412 | Bn-N8-p14512675  | gene | exon |
| Bn-A08-p14813540 | Bn-N8-p14537632  | gene | exon |
| Bn-A08-p14846467 | Bn-N8-p14569947  | gene | exon |

|                  |                  |      |      |
|------------------|------------------|------|------|
| Bn-A08-p14906652 | Bn-N8-p14630847  | gene |      |
| Bn-A08-p14955455 | Bn-N8-p14684717  | gene |      |
| Bn-A08-p14970925 | Bn-N8-p14700421  | gene | exon |
| Bn-A08-p14976685 | Bn-N8-p14706183  | gene |      |
| Bn-A08-p14980805 | Bn-N8-p14710303  | gene | exon |
| Bn-A08-p15027690 | Bn-N8-p1516253   | gene |      |
| Bn-A08-p15067659 | Bn-N8-p14800175  | gene | exon |
| Bn-A08-p15067721 | Bn-N8-p14800237  | gene | exon |
| Bn-A08-p15122707 | Bn-N8-p14852936  | gene | exon |
| Bn-A08-p15127926 | Bn-N8-p14858153  | gene | exon |
| Bn-A08-p15213340 | Bn-N13-p57224861 | gene | exon |
| Bn-A08-p15239295 | Bn-N8-p14975889  | gene |      |
| Bn-A08-p15239790 | Bn-N8-p14976383  | gene |      |
| Bn-A08-p15243115 | Bn-N8-p14979752  | gene | exon |
| Bn-A08-p15273100 | Bn-N8-p15008502  | gene | exon |
| Bn-A08-p15322011 | Bn-N8-p15068724  | gene | exon |
| Bn-A08-p15326882 | Bn-N13-p56974805 | gene | exon |
| Bn-A08-p15341166 | Bn-N8-p15080346  | gene | exon |
| Bn-A08-p15342008 | Bn-N8-p15081192  | gene | exon |
| Bn-A08-p15353881 | Bn-N8-p15090232  | gene | exon |
| Bn-A08-p15362382 | Bn-N8-p15099462  | gene |      |
| Bn-A08-p15448484 | Bn-N8-p15181502  | gene | exon |
| Bn-A08-p15489686 | Bn-N8-p15224551  | gene | exon |
| Bn-A08-p15594956 | Bn-N8-p15335573  | gene | exon |
| Bn-A08-p15614498 | Bn-N13-p56349992 | gene | exon |
| Bn-A08-p15615914 | Bn-N8-p15354868  | gene | exon |
| Bn-A08-p15616595 | Bn-N8-p15355549  | gene | exon |
| Bn-A08-p15619709 | Bn-N8-p15358663  | gene | exon |
| Bn-A08-p15620062 | Bn-N8-p15359016  | gene | exon |
| Bn-A08-p15620471 | Bn-N8-p15359431  | gene |      |
| Bn-A08-p15620702 | Bn-N8-p15359662  | gene |      |
| Bn-A08-p15700195 | Bn-N8-p15416748  | gene | exon |
| Bn-A08-p15710460 | Bn-N8-p15426114  | gene | exon |
| Bn-A08-p15710698 | Bn-N8-p15426352  | gene |      |
| Bn-A08-p15740524 | Bn-N8-p15455358  | gene |      |
| Bn-A08-p15767590 | Bn-N8-p15492485  | gene |      |
| Bn-A08-p15782077 | Bn-N8-p15503840  | gene | exon |
| Bn-A08-p15782130 | Bn-N8-p15503893  | gene | exon |
| Bn-A08-p15782229 | Bn-N8-p15503992  | gene | exon |
| Bn-A08-p15782241 | Bn-N8-p15504004  | gene | exon |
| Bn-A08-p15782307 | Bn-N8-p15504070  | gene | exon |
| Bn-A08-p15790373 | Bn-N8-p15512424  | gene |      |
| Bn-A08-p15792069 | Bn-N8-p15514120  | gene |      |
| Bn-A08-p15792369 | Bn-N8-p15514420  | gene |      |
| Bn-A08-p15792684 | Bn-N8-p15514735  | gene |      |
| Bn-A08-p15792942 | Bn-N8-p15514993  | gene |      |
| Bn-A08-p15802943 | Bn-N8-p15526236  | gene |      |
| Bn-A08-p15804301 | Bn-N8-p15527596  | gene |      |
| Bn-A08-p1581891  | Bn-N2-p22571764  | gene |      |
| Bn-A08-p1584454  | Bn-N2-p22574322  | gene | exon |
| Bn-A08-p1584455  | Bn-N2-p22574322  | gene | exon |
| Bn-A08-p15945454 | Bn-N8-p15640322  | gene | exon |

|                  |                  |      |      |
|------------------|------------------|------|------|
| Bn-A08-p15952558 | Bn-N8-p15649647  | gene | exon |
| Bn-A08-p15961655 | Bn-N19-p54773025 | gene |      |
| Bn-A08-p15967287 | Bn-N8-p15659901  | gene |      |
| Bn-A08-p15991441 | Bn-N8-p15686563  | gene | exon |
| Bn-A08-p15994149 | Bn-N8-p15687942  | gene | exon |
| Bn-A08-p16028375 | Bn-N8-p15714872  | gene |      |
| Bn-A08-p16030898 | Bn-N8-p15717300  | gene |      |
| Bn-A08-p16039443 | Bn-N8-p15726713  | gene | exon |
| Bn-A08-p16039755 | Bn-N8-p15727025  | gene |      |
| Bn-A08-p16061843 | Bn-N8-p15748397  | gene |      |
| Bn-A08-p16141425 | Bn-N8-p15834199  | gene | exon |
| Bn-A08-p16171460 | Bn-N8-p15863075  | gene | exon |
| Bn-A08-p16201029 | Bn-N8-p15898446  | gene |      |
| Bn-A08-p16216893 | Bn-N8-p15914242  | gene | exon |
| Bn-A08-p16259976 | Bn-N8-p15960786  | gene |      |
| Bn-A08-p16260215 | Bn-N8-p15961025  | gene | exon |
| Bn-A08-p16267662 | Bn-N8-p15969400  | gene | exon |
| Bn-A08-p16286008 | Bn-N8-p15985095  | gene | exon |
| Bn-A08-p16286082 | Bn-N8-p15985169  | gene |      |
| Bn-A08-p16293275 | Bn-N8-p15992471  | gene | exon |
| Bn-A08-p16299351 | Bn-N8-p15998537  | gene | exon |
| Bn-A08-p16306425 | Bn-N8-p16006346  | gene |      |
| Bn-A08-p16313016 | Bn-N8-p16012975  | gene |      |
| Bn-A08-p16314818 | Bn-N8-p16014776  | gene |      |
| Bn-A08-p16317873 | Bn-N8-p16017715  | gene |      |
| Bn-A08-p16318709 | Bn-N8-p16018551  | gene | exon |
| Bn-A08-p16318890 | Bn-N8-p16018732  | gene |      |
| Bn-A08-p16325858 | Bn-N8-p16025918  | gene |      |
| Bn-A08-p16328281 | Bn-N8-p16028989  | gene |      |
| Bn-A08-p16344396 | Bn-N8-p16042964  | gene |      |
| Bn-A08-p16349875 | Bn-N8-p16048457  | gene | exon |
| Bn-A08-p16392743 | Bn-N8-p16096353  | gene |      |
| Bn-A08-p16392957 | Bn-N8-p16096567  | gene |      |
| Bn-A08-p16403550 | Bn-N8-p16111116  | gene | exon |
| Bn-A08-p16457656 | Bn-N8-p16162924  | gene | exon |
| Bn-A08-p165219   | Bn-N8-p295324    | gene | exon |
| Bn-A08-p16572658 | Bn-N8-p16282351  | gene | exon |
| Bn-A08-p16575548 | Bn-N8-p16284975  | gene | exon |
| Bn-A08-p16575796 | Bn-N8-p16285223  | gene | exon |
| Bn-A08-p16582191 | Bn-N8-p16291688  | gene | exon |
| Bn-A08-p16673732 | Bn-N8-p16382244  | gene | exon |
| Bn-A08-p16676967 | Bn-N8-p16385477  | gene | exon |
| Bn-A08-p16770669 | Bn-N8-p16480922  | gene | exon |
| Bn-A08-p16770923 | Bn-N8-p16481176  | gene |      |
| Bn-A08-p16771030 | Bn-N8-p16481283  | gene |      |
| Bn-A08-p16771161 | Bn-N8-p16481414  | gene |      |
| Bn-A08-p16829757 | Bn-N8-p16534122  | gene | exon |
| Bn-A08-p16842687 | Bn-N8-p16547530  | gene |      |
| Bn-A08-p16842690 | Bn-N8-p16547533  | gene |      |
| Bn-A08-p16870021 | Bn-N13-p53640332 | gene | exon |
| Bn-A08-p16943139 | Bn-N8-p16642216  | gene |      |
| Bn-A08-p16943263 | Bn-N8-p16642340  | gene | exon |

|                  |                  |      |      |
|------------------|------------------|------|------|
| Bn-A08-p16965932 | Bn-N8-p16671094  | gene | exon |
| Bn-A08-p16966023 | Bn-N8-p16671185  | gene | exon |
| Bn-A08-p16980526 | Bn-N8-p16685917  | gene |      |
| Bn-A08-p17062689 | Bn-N8-p16760643  | gene |      |
| Bn-A08-p17070496 | Bn-N8-p16768413  | gene |      |
| Bn-A08-p17088758 | Bn-N8-p16786044  | gene |      |
| Bn-A08-p17094421 | Bn-N8-p16791557  | gene | exon |
| Bn-A08-p17105262 | Bn-N8-p16802291  | gene | exon |
| Bn-A08-p17111194 | Bn-N8-p16814168  | gene | exon |
| Bn-A08-p17130151 | Bn-N8-p16834676  | gene | exon |
| Bn-A08-p17152372 | Bn-N8-p16858120  | gene |      |
| Bn-A08-p17186790 | Bn-N8-p16894646  | gene |      |
| Bn-A08-p17187064 | Bn-N8-p16894920  | gene | exon |
| Bn-A08-p17190098 | Bn-N8-p16897922  | gene |      |
| Bn-A08-p17191196 | Bn-N13-p52891907 | gene | exon |
| Bn-A08-p17191740 | Bn-N8-p16899564  | gene |      |
| Bn-A08-p17193797 | Bn-N8-p16901618  | gene | exon |
| Bn-A08-p17202184 | Bn-N8-p16911036  | gene |      |
| Bn-A08-p17202527 | Bn-N8-p16911379  | gene |      |
| Bn-A08-p17202584 | Bn-N8-p16911436  | gene |      |
| Bn-A08-p17202745 | Bn-N8-p16911597  | gene |      |
| Bn-A08-p1720366  | Bn-N8-p1579503   | gene |      |
| Bn-A08-p17217296 | Bn-N8-p16923386  | gene | exon |
| Bn-A08-p17221534 | Bn-N8-p16927699  | gene |      |
| Bn-A08-p17235030 | Bn-N8-p16945126  | gene |      |
| Bn-A08-p17238995 | Bn-N13-p52787768 | gene |      |
| Bn-A08-p17249190 | Bn-N8-p16959265  | gene |      |
| Bn-A08-p17255997 | Bn-N8-p16968469  | gene |      |
| Bn-A08-p17256848 | Bn-N8-p16969322  | gene | exon |
| Bn-A08-p17291598 | Bn-N8-p17004603  | gene | exon |
| Bn-A08-p17291679 | Bn-N8-p17004684  | gene | exon |
| Bn-A08-p17293594 | Bn-N8-p17006572  | gene |      |
| Bn-A08-p17306802 | Bn-N8-p17019485  | gene | exon |
| Bn-A08-p17307247 | Bn-N8-p17019930  | gene |      |
| Bn-A08-p17363588 | Bn-N8-p17094950  | gene |      |
| Bn-A08-p17366299 | Bn-N8-p17097654  | gene |      |
| Bn-A08-p17381323 | Bn-N13-p52431923 | gene |      |
| Bn-A08-p17382135 | Bn-N8-p17115644  | gene |      |
| Bn-A08-p17382231 | Bn-N8-p17115740  | gene |      |
| Bn-A08-p17402165 | Bn-N8-p17136992  | gene |      |
| Bn-A08-p17403283 | Bn-N8-p17138121  | gene | exon |
| Bn-A08-p17434041 | Bn-N8-p17157955  | gene | exon |
| Bn-A08-p17437898 | Bn-N8-p17161812  | gene |      |
| Bn-A08-p17449031 | Bn-N3-p31715748  | gene | exon |
| Bn-A08-p17449089 | Bn-N3-p31715690  | gene | exon |
| Bn-A08-p17449196 | Bn-N8-p17166986  | gene | exon |
| Bn-A08-p17449410 | Bn-N8-p17167199  | gene | exon |
| Bn-A08-p17472208 | Bn-N8-p17190258  | gene | exon |
| Bn-A08-p17530580 | Bn-N8-p17245366  | gene | exon |
| Bn-A08-p17530617 | Bn-N8-p17245403  | gene |      |
| Bn-A08-p17534858 | Bn-N8-p17249326  | gene | exon |
| Bn-A08-p17559236 | Bn-N8-p17270027  | gene | exon |



|                  |                  |      |      |
|------------------|------------------|------|------|
| Bn-A08-p17565873 | Bn-N8-p17275506  | gene | exon |
| Bn-A08-p17570589 | Bn-N8-p17282600  | gene |      |
| Bn-A08-p17578990 | Bn-N8-p17290924  | gene |      |
| Bn-A08-p17612777 | Bn-N8-p17333121  | gene | exon |
| Bn-A08-p17612865 | Bn-N8-p17333209  | gene |      |
| Bn-A08-p17639419 | Bn-N8-p17373422  | gene | exon |
| Bn-A08-p17648611 | Bn-N8-p17386226  | gene |      |
| Bn-A08-p17649841 | Bn-N8-p17387381  | gene |      |
| Bn-A08-p17654367 | Bn-N8-p17391268  | gene | exon |
| Bn-A08-p17654459 | Bn-N8-p17391360  | gene |      |
| Bn-A08-p17696796 | Bn-N8-p17425347  | gene |      |
| Bn-A08-p17710867 | Bn-N8-p17444751  | gene |      |
| Bn-A08-p17721455 | Bn-N8-p17457023  | gene |      |
| Bn-A08-p17735673 | Bn-N8-p17469786  | gene |      |
| Bn-A08-p17748884 | Bn-N8-p17488093  | gene | exon |
| Bn-A08-p17813465 | Bn-N8-p17543400  | gene |      |
| Bn-A08-p17848907 | Bn-N18-p27148653 | gene | exon |
| Bn-A08-p17849621 | Bn-N8-p17573103  | gene | exon |
| Bn-A08-p17851106 | Bn-N8-p17574579  | gene | exon |
| Bn-A08-p17857870 | Bn-N8-p17579698  | gene |      |
| Bn-A08-p17859330 | Bn-N8-p17581149  | gene | exon |
| Bn-A08-p17938347 | Bn-N5-p24244068  | gene |      |
| Bn-A08-p17981717 | Bn-N8-p17711290  | gene |      |
| Bn-A08-p18000876 | Bn-N8-p17732398  | gene |      |
| Bn-A08-p18045254 | Bn-N8-p17778288  | gene |      |
| Bn-A08-p1809204  | Bn-N8-p1682130   | gene |      |
| Bn-A08-p18112619 | Bn-N18-p26552559 | gene |      |
| Bn-A08-p18144819 | Bn-N8-p17878011  | gene |      |
| Bn-A08-p18153504 | Bn-N8-p17884807  | gene | exon |
| Bn-A08-p18200896 | Bn-N8-p17928683  | gene |      |
| Bn-A08-p18234758 | Bn-N8-p17964906  | gene | exon |
| Bn-A08-p18286374 | Bn-N8-p18021601  | gene |      |
| Bn-A08-p18290748 | Bn-N8-p18030952  | gene | exon |
| Bn-A08-p18291268 | Bn-N8-p18031474  | gene | exon |
| Bn-A08-p18321643 | Bn-N8-p18067482  | gene | exon |
| Bn-A08-p18331012 | Bn-N8-p18076240  | gene | exon |
| Bn-A08-p18353208 | Bn-N8-p18098656  | gene | exon |
| Bn-A08-p18356257 | Bn-N8-p18101702  | gene | exon |
| Bn-A08-p18409864 | Bn-N8-p18146353  | gene |      |
| Bn-A08-p18432711 | Bn-N8-p18182156  | gene | exon |
| Bn-A08-p18432800 | Bn-N8-p18182245  | gene | exon |
| Bn-A08-p18432919 | Bn-N8-p18182364  | gene | exon |
| Bn-A08-p18433093 | Bn-N8-p18182538  | gene | exon |
| Bn-A08-p18433672 | Bn-N8-p18183114  | gene | exon |
| Bn-A08-p18462668 | Bn-N8-p18208682  | gene | exon |
| Bn-A08-p18463273 | Bn-N8-p18209287  | gene |      |
| Bn-A08-p1847328  | Bn-N8-p1726629   | gene |      |
| Bn-A08-p18526873 | Bn-N8-p18279878  | gene | exon |
| Bn-A08-p18538166 | Bn-N8-p18290523  | gene |      |
| Bn-A08-p18592850 | Bn-N8-p18351042  | gene | exon |
| Bn-A08-p18597209 | Bn-N8-p18355625  | gene | exon |
| Bn-A08-p18605816 | Bn-N8-p18359822  | gene | exon |

|                  |                        |      |      |
|------------------|------------------------|------|------|
| Bn-A08-p18630178 | Bn-N18-p25494078       | gene | exon |
| Bn-A08-p18631047 | Bn-N18-p25490266       | gene |      |
| Bn-A08-p18680503 | Bn-N8-p18436703        | gene | exon |
| Bn-A08-p18704383 | Bn-N8-p18453392        | gene | exon |
| Bn-A08-p18750116 | Bn-N8-p18503671        | gene | exon |
| Bn-A08-p18750253 | Bn-N8-p18503808        | gene | exon |
| Bn-A08-p18754717 | Bn-N8-p18507294        | gene |      |
| Bn-A08-p18784592 | Bn-Scaffold02717-p1832 | gene |      |
| Bn-A08-p18789560 | Bn-N8-p18545244        | gene | exon |
| Bn-A08-p18798063 | Bn-N8-p18564132        | gene | exon |
| Bn-A08-p1880862  | Bn-N8-p1772680         | gene | exon |
| Bn-A08-p18827698 | Bn-N8-p18593363        | gene |      |
| Bn-A08-p18953939 | Bn-N8-p18721579        | gene | exon |
| Bn-A08-p18954204 | Bn-N8-p18721844        | gene | exon |
| Bn-A08-p18966828 | Bn-N8-p18734465        | gene | exon |
| Bn-A08-p19005550 | Bn-N8-p18773926        | gene | exon |
| Bn-A08-p19007302 | Bn-N8-p18775647        | gene | exon |
| Bn-A08-p19008575 | Bn-N8-p18776922        | gene | exon |
| Bn-A08-p19008671 | Bn-N8-p18777018        | gene | exon |
| Bn-A08-p19009254 | Bn-N8-p18777760        | gene | exon |
| Bn-A08-p19017689 | Bn-N8-p18786566        | gene | exon |
| Bn-A08-p19035945 | Bn-N8-p18799600        | gene | exon |
| Bn-A08-p19052340 | Bn-N8-p18819257        | gene |      |
| Bn-A08-p19052519 | Bn-N8-p18819436        | gene | exon |
| Bn-A08-p19056545 | Bn-N8-p18823461        | gene | exon |
| Bn-A08-p19084386 | Bn-N8-p18848906        | gene |      |
| Bn-A08-p19122274 | Bn-N8-p18888323        | gene | exon |
| Bn-A08-p19173201 | Bn-N8-p18941616        | gene | exon |
| Bn-A08-p19176979 | Bn-N8-p18945362        | gene | exon |
| Bn-A08-p19191183 | Bn-N8-p18960253        | gene | exon |
| Bn-A08-p19191695 | Bn-N6-p6446926         | gene |      |
| Bn-A08-p19197746 | Bn-N8-p18966855        | gene | exon |
| Bn-A08-p19217869 | Bn-N8-p18989146        | gene |      |
| Bn-A08-p19284258 | Bn-N8-p19053908        | gene | exon |
| Bn-A08-p19287037 | Bn-N8-p19056687        | gene | exon |
| Bn-A08-p19346186 | Bn-N18-p24079296       | gene | exon |
| Bn-A08-p19346369 | Bn-N8-p19133093        | gene |      |
| Bn-A08-p19363491 | Bn-N8-p19150840        | gene | exon |
| Bn-A08-p19365594 | Bn-N8-p19152943        | gene |      |
| Bn-A08-p19407950 | Bn-N8-p19208221        | gene | exon |
| Bn-A08-p19410224 | Bn-N8-p19210493        | gene |      |
| Bn-A08-p19428204 | Bn-N8-p19229698        | gene |      |
| Bn-A08-p19454534 | Bn-N8-p19251282        | gene |      |
| Bn-A08-p19454590 | Bn-N8-p19251339        | gene |      |
| Bn-A08-p19460659 | Bn-N8-p19258338        | gene | exon |
| Bn-A08-p19483726 | Bn-N18-p23810373       | gene | exon |
| Bn-A08-p19487830 | Bn-N8-p19289995        | gene | exon |
| Bn-A08-p19504101 | Bn-N8-p19303607        | gene | exon |
| Bn-A08-p19538361 | Bn-N8-p19341873        | gene |      |
| Bn-A08-p19553756 | Bn-N8-p19357480        | gene |      |
| Bn-A08-p19573947 | Bn-N8-p19378150        | gene | exon |
| Bn-A08-p19578180 | Bn-N18-p23545795       | gene | exon |

|                  |                  |      |      |
|------------------|------------------|------|------|
| Bn-A08-p19599590 | Bn-N8-p19399357  | gene | exon |
| Bn-A08-p19619504 | Bn-N8-p19420061  | gene | exon |
| Bn-A08-p19626269 | Bn-N8-p19426783  | gene |      |
| Bn-A08-p19642040 | Bn-N8-p19441441  | gene |      |
| Bn-A08-p19675091 | Bn-N8-p19477234  | gene |      |
| Bn-A08-p19676653 | Bn-N18-p23318644 | gene | exon |
| Bn-A08-p19676751 | Bn-N18-p23318546 | gene | exon |
| Bn-A08-p19690298 | Bn-N8-p19490115  | gene |      |
| Bn-A08-p19690393 | Bn-N8-p19490210  | gene |      |
| Bn-A08-p19736692 | Bn-N8-p19543607  | gene | exon |
| Bn-A08-p19736774 | Bn-N18-p23160340 | gene |      |
| Bn-A08-p19782306 | Bn-N8-p19586029  | gene | exon |
| Bn-A08-p19782433 | Bn-N8-p19586156  | gene | exon |
| Bn-A08-p19834705 | Bn-N8-p19651757  | gene |      |
| Bn-A08-p19879173 | Bn-N8-p19696516  | gene | exon |
| Bn-A08-p19879285 | Bn-N8-p19696628  | gene |      |
| Bn-A08-p19879343 | Bn-N8-p19696686  | gene |      |
| Bn-A08-p19879488 | Bn-N8-p19696831  | gene | exon |
| Bn-A08-p19879499 | Bn-N8-p19696842  | gene | exon |
| Bn-A08-p19888431 | Bn-N8-p19707140  | gene |      |
| Bn-A08-p19903284 | Bn-N8-p19719543  | gene |      |
| Bn-A08-p19907560 | Bn-N8-p19723958  | gene |      |
| Bn-A08-p19919658 | Bn-N8-p19737576  | gene |      |
| Bn-A08-p19919901 | Bn-N8-p19737820  | gene | exon |
| Bn-A08-p19921292 | Bn-N8-p19739247  | gene | exon |
| Bn-A08-p19924214 | Bn-N8-p19741701  | gene | exon |
| Bn-A08-p19983972 | Bn-N8-p19785184  | gene | exon |
| Bn-A08-p20025646 | Bn-N8-p19824393  | gene |      |
| Bn-A08-p20037426 | Bn-N8-p19835979  | gene | exon |
| Bn-A08-p20042299 | Bn-N8-p19837252  | gene | exon |
| Bn-A08-p20068678 | Bn-N8-p19858500  | gene |      |
| Bn-A08-p20068977 | Bn-N8-p19858799  | gene | exon |
| Bn-A08-p20069265 | Bn-N8-p19859087  | gene | exon |
| Bn-A08-p20072457 | Bn-N8-p19862815  | gene |      |
| Bn-A08-p20075062 | Bn-N8-p19865386  | gene | exon |
| Bn-A08-p20085504 | Bn-N8-p19875990  | gene | exon |
| Bn-A08-p20091818 | Bn-N8-p19882294  | gene |      |
| Bn-A08-p20092115 | Bn-N8-p19882591  | gene |      |
| Bn-A08-p20096558 | Bn-N8-p19886966  | gene | exon |
| Bn-A08-p20106529 | Bn-N8-p19896514  | gene | exon |
| Bn-A08-p20169768 | Bn-N8-p19933880  | gene |      |
| Bn-A08-p20170453 | Bn-N8-p19934563  | gene | exon |
| Bn-A08-p20189027 | Bn-N8-p19957910  | gene |      |
| Bn-A08-p20244218 | Bn-N8-p20001777  | gene |      |
| Bn-A08-p20286379 | Bn-N8-p20051389  | gene |      |
| Bn-A08-p20305036 | Bn-N8-p20348461  | gene |      |
| Bn-A08-p20306059 | Bn-N8-p20351252  | gene |      |
| Bn-A08-p20306463 | Bn-N8-p20351656  | gene | exon |
| Bn-A08-p20306567 | Bn-N8-p20351760  | gene |      |
| Bn-A08-p20319696 | Bn-N8-p20361964  | gene | exon |
| Bn-A08-p20319815 | Bn-N8-p20362083  | gene |      |
| Bn-A08-p20336178 | Bn-N8-p20379990  | gene | exon |

|                  |                  |      |      |
|------------------|------------------|------|------|
| Bn-A08-p20343735 | Bn-N18-p21457522 | gene | exon |
| Bn-A08-p20347040 | Bn-N8-p20392010  | gene |      |
| Bn-A08-p20354609 | Bn-N8-p20398894  | gene |      |
| Bn-A08-p20355213 | Bn-N8-p20399499  | gene |      |
| Bn-A08-p20394042 | Bn-N8-p20432212  | gene | exon |
| Bn-A08-p20395388 | Bn-N8-p20433558  | gene | exon |
| Bn-A08-p20416050 | Bn-N8-p20463692  | gene |      |
| Bn-A08-p20441889 | Bn-N8-p20495674  | gene |      |
| Bn-A08-p20474660 | Bn-N8-p20534215  | gene | exon |
| Bn-A08-p20476359 | Bn-N8-p20535921  | gene |      |
| Bn-A08-p20480348 | Bn-N8-p20539877  | gene | exon |
| Bn-A08-p20485374 | Bn-N8-p20547159  | gene |      |
| Bn-A08-p20490539 | Bn-N8-p20552338  | gene | exon |
| Bn-A08-p20490691 | Bn-N8-p20552490  | gene | exon |
| Bn-A08-p205262   | Bn-N8-p330395    | gene | exon |
| Bn-A08-p20529396 | Bn-N8-p20593300  | gene |      |
| Bn-A08-p20530487 | Bn-N8-p20594384  | gene |      |
| Bn-A08-p20537757 | Bn-N18-p21006384 | gene |      |
| Bn-A08-p20538517 | Bn-N8-p20600222  | gene |      |
| Bn-A08-p20546003 | Bn-N8-p20606125  | gene | exon |
| Bn-A08-p20546044 | Bn-N8-p20606166  | gene | exon |
| Bn-A08-p20546110 | Bn-N8-p20606232  | gene | exon |
| Bn-A08-p20547091 | Bn-N8-p20606688  | gene | exon |
| Bn-A08-p20551301 | Bn-N8-p20610895  | gene | exon |
| Bn-A08-p20554540 | Bn-N8-p20614128  | gene |      |
| Bn-A08-p20555629 | Bn-N8-p20615247  | gene | exon |
| Bn-A08-p20587556 | Bn-N8-p20641784  | gene |      |
| Bn-A08-p20692045 | Bn-N8-p20760472  | gene | exon |
| Bn-A08-p20717142 | Bn-N18-p2025883  | gene | exon |
| Bn-A08-p20778097 | Bn-N8-p20847011  | gene | exon |
| Bn-A08-p20801363 | Bn-N8-p20869624  | gene | exon |
| Bn-A08-p20820768 | Bn-N8-p20879154  | gene | exon |
| Bn-A08-p20838949 | Bn-N8-p20900858  | gene | exon |
| Bn-A08-p20839304 | Bn-N8-p20901235  | gene |      |
| Bn-A08-p20846182 | Bn-N8-p20908110  | gene | exon |
| Bn-A08-p20904948 | Bn-N8-p20968196  | gene |      |
| Bn-A08-p20913891 | Bn-N8-p20977267  | gene |      |
| Bn-A08-p20927339 | Bn-N8-p20989516  | gene | exon |
| Bn-A08-p20931438 | Bn-N8-p20993661  | gene |      |
| Bn-A08-p20931690 | Bn-N8-p20994132  | gene |      |
| Bn-A08-p20934184 | Bn-N8-p20996625  | gene |      |
| Bn-A08-p20950199 | Bn-N8-p21010676  | gene | exon |
| Bn-A08-p20967165 | Bn-N8-p21031047  | gene | exon |
| Bn-A08-p20968239 | Bn-N18-p1551819  | gene | exon |
| Bn-A08-p20971092 | Bn-N8-p21035086  | gene |      |
| Bn-A08-p20993982 | Bn-N8-p21055202  | gene |      |
| Bn-A08-p21036778 | Bn-N8-p21100372  | gene | exon |
| Bn-A08-p21062076 | Bn-N18-p1305030  | gene | exon |
| Bn-A08-p211090   | Bn-N13-p67517978 | gene | exon |
| Bn-A08-p21132027 | Bn-N18-p1122222  | gene | exon |
| Bn-A08-p21149542 | Bn-N8-p21210689  | gene | exon |
| Bn-A08-p21168203 | Bn-N8-p21226954  | gene | exon |

|                  |                  |      |      |
|------------------|------------------|------|------|
| Bn-A08-p21189645 | Bn-N8-p21264787  | gene | exon |
| Bn-A08-p21227076 | Bn-N8-p21302699  | gene |      |
| Bn-A08-p21228678 | Bn-N8-p21304221  | gene | exon |
| Bn-A08-p21282852 | Bn-N8-p21361253  | gene | exon |
| Bn-A08-p21283107 | Bn-N18-p774166   | gene | exon |
| Bn-A08-p21283562 | Bn-N8-p21361961  | gene | exon |
| Bn-A08-p21330967 | Bn-N8-p21408616  | gene |      |
| Bn-A08-p21348310 | Bn-N8-p21425973  | gene | exon |
| Bn-A08-p21352716 | Bn-N8-p21430377  | gene | exon |
| Bn-A08-p21385759 | Bn-N8-p21460702  | gene |      |
| Bn-A08-p21417592 | Bn-N8-p21495935  | gene |      |
| Bn-A08-p21434747 | Bn-N8-p21511255  | gene | exon |
| Bn-A08-p21463036 | Bn-N8-p21536587  | gene | exon |
| Bn-A08-p2275410  | Bn-N8-p2135016   | gene |      |
| Bn-A08-p2371175  | Bn-N8-p2230272   | gene |      |
| Bn-A08-p2397885  | Bn-N8-p2257095   | gene |      |
| Bn-A08-p2406380  | Bn-N8-p2266693   | gene |      |
| Bn-A08-p2425488  | Bn-N8-p2286556   | gene |      |
| Bn-A08-p2461697  | Bn-N8-p2321801   | gene | exon |
| Bn-A08-p2533244  | Bn-N8-p2377256   | gene |      |
| Bn-A08-p2536015  | Bn-N8-p2380024   | gene | exon |
| Bn-A08-p2564131  | Bn-N8-p2407710   | gene | exon |
| Bn-A08-p2574453  | Bn-N8-p2428978   | gene |      |
| Bn-A08-p2589956  | Bn-N8-p2442184   | gene |      |
| Bn-A08-p2590415  | Bn-N8-p2442643   | gene |      |
| Bn-A08-p2660414  | Bn-N8-p2507725   | gene | exon |
| Bn-A08-p2711497  | Bn-N8-p2573766   | gene |      |
| Bn-A08-p2715086  | Bn-N8-p2577309   | gene |      |
| Bn-A08-p2728670  | Bn-N8-p2600395   | gene |      |
| Bn-A08-p2740174  | Bn-N8-p2610879   | gene |      |
| Bn-A08-p2771143  | Bn-N8-p2641528   | gene |      |
| Bn-A08-p2885855  | Bn-N8-p2777219   | gene |      |
| Bn-A08-p2897827  | Bn-N8-p2784310   | gene | exon |
| Bn-A08-p2898446  | Bn-N8-p2784929   | gene |      |
| Bn-A08-p293480   | Bn-N13-p67434994 | gene | exon |
| Bn-A08-p3031902  | Bn-N8-p2911497   | gene |      |
| Bn-A08-p3120976  | Bn-N8-p3000167   | gene |      |
| Bn-A08-p3120986  | Bn-N8-p3000176   | gene |      |
| Bn-A08-p3121492  | Bn-N8-p3000683   | gene | exon |
| Bn-A08-p3182594  | Bn-N8-p3069193   | gene |      |
| Bn-A08-p3182798  | Bn-N8-p3069397   | gene |      |
| Bn-A08-p3184233  | Bn-N8-p3070767   | gene |      |
| Bn-A08-p3193662  | Bn-N8-p3085952   | gene |      |
| Bn-A08-p3195277  | Bn-N18-p3962969  | gene |      |
| Bn-A08-p3223002  | Bn-N8-p3102300   | gene |      |
| Bn-A08-p3269802  | Bn-N8-p3151120   | gene | exon |
| Bn-A08-p3302700  | Bn-N8-p3186724   | gene |      |
| Bn-A08-p3388906  | Bn-N8-p3234254   | gene |      |
| Bn-A08-p345270   | Bn-N8-p513642    | gene |      |
| Bn-A08-p350287   | Bn-N8-p518715    | gene |      |
| Bn-A08-p3546013  | Bn-N8-p3357184   | gene | exon |
| Bn-A08-p355936   | Bn-N8-p523067    | gene |      |

|                 |                  |      |      |
|-----------------|------------------|------|------|
| Bn-A08-p361637  | Bn-N8-p528768    | gene | exon |
| Bn-A08-p361910  | Bn-N8-p529041    | gene | exon |
| Bn-A08-p3628921 | Bn-N8-p3465024   | gene | exon |
| Bn-A08-p3737287 | Bn-N8-p3558110   | gene | exon |
| Bn-A08-p3840267 | Bn-N8-p3739128   | gene | exon |
| Bn-A08-p3846272 | Bn-N8-p3749216   | gene | exon |
| Bn-A08-p3883962 | Bn-N19-p18840612 | gene |      |
| Bn-A08-p4152083 | Bn-N8-p3988274   | gene |      |
| Bn-A08-p4182726 | Bn-N8-p4031637   | gene | exon |
| Bn-A08-p4207231 | Bn-N8-p4052341   | gene |      |
| Bn-A08-p4209834 | Bn-N8-p4054898   | gene | exon |
| Bn-A08-p4253915 | Bn-N8-p4086978   | gene | exon |
| Bn-A08-p4254041 | Bn-N8-p4087104   | gene |      |
| Bn-A08-p4271010 | Bn-N8-p4104241   | gene | exon |
| Bn-A08-p4271262 | Bn-N8-p4104493   | gene | exon |
| Bn-A08-p4273091 | Bn-N8-p4106457   | gene |      |
| Bn-A08-p4293226 | Bn-N8-p4127375   | gene | exon |
| Bn-A08-p4342485 | Bn-N8-p4176136   | gene |      |
| Bn-A08-p4483232 | Bn-N8-p4320169   | gene |      |
| Bn-A08-p4521258 | Bn-N8-p4365967   | gene |      |
| Bn-A08-p4528943 | Bn-N8-p4373662   | gene |      |
| Bn-A08-p4598270 | Bn-N8-p4441754   | gene |      |
| Bn-A08-p4668561 | Bn-N8-p4507005   | gene |      |
| Bn-A08-p4670469 | Bn-N8-p4508913   | gene |      |
| Bn-A08-p482401  | Bn-N8-p658897    | gene |      |
| Bn-A08-p482505  | Bn-N8-p659001    | gene | exon |
| Bn-A08-p4837890 | Bn-N8-p4638527   | gene | exon |
| Bn-A08-p4876592 | Bn-N10-p13185109 | gene | exon |
| Bn-A08-p4902282 | Bn-N10-p13161705 | gene |      |
| Bn-A08-p4936436 | Bn-N10-p13122698 | gene | exon |
| Bn-A08-p5017136 | Bn-N8-p4806558   | gene | exon |
| Bn-A08-p5026482 | Bn-N8-p4815377   | gene | exon |
| Bn-A08-p5096382 | Bn-N8-p4876764   | gene |      |
| Bn-A08-p5146710 | Bn-N8-p4908806   | gene |      |
| Bn-A08-p5174518 | Bn-N8-p4925818   | gene | exon |
| Bn-A08-p5174818 | Bn-N8-p4926118   | gene | exon |
| Bn-A08-p5249573 | Bn-N8-p5021473   | gene | exon |
| Bn-A08-p537474  | Bn-N8-p711266    | gene |      |
| Bn-A08-p5420503 | Bn-N8-p5216482   | gene |      |
| Bn-A08-p5490050 | Bn-N8-p5280916   | gene |      |
| Bn-A08-p5591333 | Bn-N8-p5464803   | gene | exon |
| Bn-A08-p5636755 | Bn-N8-p5499242   | gene |      |
| Bn-A08-p5636764 | Bn-N8-p5499251   | gene |      |
| Bn-A08-p5638757 | Bn-N8-p5501244   | gene |      |
| Bn-A08-p5640946 | Bn-N8-p5503440   | gene |      |
| Bn-A08-p5698262 | Bn-N8-p5571566   | gene | exon |
| Bn-A08-p5698705 | Bn-N8-p5572009   | gene | exon |
| Bn-A08-p5699040 | Bn-N8-p5572344   | gene | exon |
| Bn-A08-p570304  | Bn-N8-p758575    | gene | exon |
| Bn-A08-p5705625 | Bn-N8-p5578918   | gene |      |
| Bn-A08-p5730628 | Bn-N8-p5603234   | gene | exon |
| Bn-A08-p5924891 | Bn-N8-p5785368   | gene |      |

|                 |                  |      |      |
|-----------------|------------------|------|------|
| Bn-A08-p6029041 | Bn-N8-p4690333   | gene |      |
| Bn-A08-p6101880 | Bn-N8-p8407250   | gene | exon |
| Bn-A08-p6114046 | Bn-N8-p8419492   | gene | exon |
| Bn-A08-p6133005 | Bn-N8-p8423399   | gene |      |
| Bn-A08-p6133601 | Bn-N8-p8423995   | gene |      |
| Bn-A08-p6157861 | Bn-N8-p8439711   | gene | exon |
| Bn-A08-p6164968 | Bn-N8-p8454598   | gene |      |
| Bn-A08-p6165340 | Bn-N8-p8454970   | gene |      |
| Bn-A08-p6165665 | Bn-N8-p8455295   | gene |      |
| Bn-A08-p6257665 | Bn-N8-p8545244   | gene | exon |
| Bn-A08-p626649  | Bn-N13-p66924325 | gene |      |
| Bn-A08-p6268593 | Bn-N8-p8553043   | gene | exon |
| Bn-A08-p6332878 | Bn-N8-p8593283   | gene | exon |
| Bn-A08-p6343431 | Bn-N8-p8604736   | gene | exon |
| Bn-A08-p6394232 | Bn-N8-p8651448   | gene | exon |
| Bn-A08-p6400378 | Bn-N8-p8656368   | gene |      |
| Bn-A08-p6523926 | Bn-N8-p8769174   | gene |      |
| Bn-A08-p6523952 | Bn-N8-p8769200   | gene |      |
| Bn-A08-p6828854 | Bn-N8-p9121537   | gene | exon |
| Bn-A08-p6828857 | Bn-N8-p9121540   | gene | exon |
| Bn-A08-p6829643 | Bn-N8-p9122324   | gene | exon |
| Bn-A08-p6887868 | Bn-N8-p9180282   | gene |      |
| Bn-A08-p6889067 | Bn-N8-p9181481   | gene | exon |
| Bn-A08-p6937293 | Bn-N8-p9428077   | gene | exon |
| Bn-A08-p6943246 | Bn-N8-p9427004   | gene | exon |
| Bn-A08-p6971574 | Bn-N8-p9402200   | gene | exon |
| Bn-A08-p7099327 | Bn-N8-p5998133   | gene | exon |
| Bn-A08-p7151447 | Bn-N8-p6036123   | gene |      |
| Bn-A08-p7152271 | Bn-N8-p6036959   | gene |      |
| Bn-A08-p7303995 | Bn-N18-p8810165  | gene |      |
| Bn-A08-p7318043 | Bn-N8-p6317339   | gene | exon |
| Bn-A08-p7355372 | Bn-N18-p8875292  | gene |      |
| Bn-A08-p743985  | Bn-N8-p971806    | gene | exon |
| Bn-A08-p7444336 | Bn-N8-p6413426   | gene | exon |
| Bn-A08-p744725  | Bn-N8-p972494    | gene |      |
| Bn-A08-p744837  | Bn-N8-p972606    | gene | exon |
| Bn-A08-p7458611 | Bn-N8-p6430504   | gene |      |
| Bn-A08-p7563202 | Bn-N8-p6550967   | gene |      |
| Bn-A08-p758590  | Bn-N8-p986604    | gene | exon |
| Bn-A08-p758977  | Bn-N8-p986992    | gene |      |
| Bn-A08-p7596192 | Bn-N18-p9364917  | gene | exon |
| Bn-A08-p7698145 | Bn-N8-p6764076   | gene | exon |
| Bn-A08-p7791369 | Bn-N8-p6895245   | gene | exon |
| Bn-A08-p7814328 | Bn-N8-p6907707   | gene |      |
| Bn-A08-p7814432 | Bn-N8-p6907811   | gene |      |
| Bn-A08-p782784  | Bn-N8-p1011139   | gene | exon |
| Bn-A08-p7835995 | Bn-N8-p6931659   | gene | exon |
| Bn-A08-p7856305 | Bn-N18-p10249395 | gene |      |
| Bn-A08-p7856849 | Bn-N8-p6948450   | gene |      |
| Bn-A08-p797453  | Bn-N8-p1026397   | gene |      |
| Bn-A08-p7984584 | Bn-N8-p7113378   | gene |      |
| Bn-A08-p798867  | Bn-N8-p1027811   | gene |      |

|                 |                  |      |      |
|-----------------|------------------|------|------|
| Bn-A08-p798970  | Bn-N8-p1027914   | gene |      |
| Bn-A08-p8031289 | Bn-N8-p7175077   | gene |      |
| Bn-A08-p8091811 | Bn-N8-p7216514   | gene |      |
| Bn-A08-p813316  | Bn-N8-p1047794   | gene |      |
| Bn-A08-p813510  | Bn-N8-p1047988   | gene | exon |
| Bn-A08-p814234  | Bn-N8-p1048712   | gene | exon |
| Bn-A08-p8161845 | Bn-N8-p7278568   | gene |      |
| Bn-A08-p8162230 | Bn-N8-p7278965   | gene |      |
| Bn-A08-p8179629 | Bn-N8-p7643523   | gene | exon |
| Bn-A08-p8320380 | Bn-N18-p11290982 | gene | exon |
| Bn-A08-p8385137 | Bn-N8-p7351381   | gene |      |
| Bn-A08-p8386874 | Bn-N8-p7349644   | gene |      |
| Bn-A08-p8396508 | Bn-N8-p7336453   | gene |      |
| Bn-A08-p8397266 | Bn-N8-p7335695   | gene | exon |
| Bn-A08-p8434044 | Bn-N8-p7655528   | gene |      |
| Bn-A08-p8479611 | Bn-N8-p7698170   | gene | exon |
| Bn-A08-p8479932 | Bn-N8-p7698491   | gene | exon |
| Bn-A08-p8480536 | Bn-N8-p7699095   | gene | exon |
| Bn-A08-p8480734 | Bn-N8-p7699293   | gene | exon |
| Bn-A08-p8493076 | Bn-N8-p7710546   | gene |      |
| Bn-A08-p8494172 | Bn-N18-p11577952 | gene | exon |
| Bn-A08-p8581123 | Bn-N8-p7834013   | gene | exon |
| Bn-A08-p8581899 | Bn-N8-p7834794   | gene |      |
| Bn-A08-p8644010 | Bn-N8-p7884860   | gene |      |
| Bn-A08-p8644734 | Bn-N8-p7885583   | gene |      |
| Bn-A08-p8672999 | Bn-N8-p7915843   | gene | exon |
| Bn-A08-p8710166 | Bn-N8-p7940018   | gene |      |
| Bn-A08-p8727608 | Bn-N8-p7972048   | gene | exon |
| Bn-A08-p8740002 | Bn-N8-p7987878   | gene | exon |
| Bn-A08-p8755323 | Bn-N8-p8005536   | gene |      |
| Bn-A08-p8783951 | Bn-N8-p8031999   | gene |      |
| Bn-A08-p8784663 | Bn-N8-p8032711   | gene |      |
| Bn-A08-p8869180 | Bn-N8-p8129492   | gene | exon |
| Bn-A08-p8879495 | Bn-N8-p8137151   | gene |      |
| Bn-A08-p9172893 | Bn-N9-p17586800  | gene | exon |
| Bn-A08-p9216064 | Bn-N9-p17530291  | gene | exon |
| Bn-A08-p9216239 | Bn-N9-p17530116  | gene | exon |
| Bn-A08-p9216723 | Bn-N9-p17529632  | gene |      |
| Bn-A08-p9217601 | Bn-N9-p17528742  | gene | exon |
| Bn-A08-p9217703 | Bn-N9-p17528640  | gene | exon |
| Bn-A08-p9218159 | Bn-N9-p17528184  | gene | exon |
| Bn-A08-p9221373 | Bn-N9-p17519787  | gene | exon |
| Bn-A08-p9230750 | Bn-N9-p17504276  | gene |      |
| Bn-A08-p9247445 | Bn-N9-p17499010  | gene | exon |
| Bn-A08-p9341774 | Bn-N9-p17403898  | gene | exon |
| Bn-A08-p9341953 | Bn-N9-p17403719  | gene | exon |
| Bn-A08-p9353221 | Bn-N19-p26431260 | gene |      |
| Bn-A08-p937299  | Bn-N8-p1138446   | gene | exon |
| Bn-A08-p9388258 | Bn-N9-p17363103  | gene |      |
| Bn-A08-p940619  | Bn-N8-p1141887   | gene |      |
| Bn-A08-p9429379 | Bn-N9-p17306796  | gene | exon |
| Bn-A08-p9433046 | Bn-N9-p17303142  | gene | exon |



|                  |                  |      |      |
|------------------|------------------|------|------|
| Bn-A08-p9503231  | Bn-N19-p26682267 | gene | exon |
| Bn-A08-p9505581  | Bn-N9-p17247889  | gene |      |
| Bn-A08-p9555028  | Bn-N9-p17229664  | gene | exon |
| Bn-A08-p9555984  | Bn-N9-p17228714  | gene | exon |
| Bn-A08-p9582412  | Bn-N9-p17196517  | gene | exon |
| Bn-A08-p9715574  | Bn-N9-p17067191  | gene |      |
| Bn-A08-p9795033  | Bn-N9-p16978041  | gene |      |
| Bn-A08-p9795423  | Bn-N9-p16977651  | gene | exon |
| Bn-A08-p980768   | Bn-N8-p1189412   | gene |      |
| Bn-A08-p9917420  | Bn-N7-p4007819   | gene | exon |
| Bn-A08-p9918228  | Bn-N7-p4008627   | gene | exon |
| Bn-A09-p10019827 | Bn-N9-p10788455  | gene | exon |
| Bn-A09-p10023881 | Bn-N9-p10790825  | gene |      |
| Bn-A09-p100554   | Bn-N9-p1037437   | gene | exon |
| Bn-A09-p100631   | Bn-N9-p1037360   | gene | exon |
| Bn-A09-p100643   | Bn-N9-p1037348   | gene | exon |
| Bn-A09-p10092753 | Bn-N9-p10866671  | gene |      |
| Bn-A09-p1011107  | Bn-N9-p147637    | gene |      |
| Bn-A09-p10212596 | Bn-N9-p10978908  | gene |      |
| Bn-A09-p10212674 | Bn-N9-p10978986  | gene |      |
| Bn-A09-p10212726 | Bn-N9-p10979038  | gene |      |
| Bn-A09-p10247512 | Bn-N9-p11010077  | gene |      |
| Bn-A09-p10296510 | Bn-N9-p11060546  | gene |      |
| Bn-A09-p10297982 | Bn-N9-p11062656  | gene |      |
| Bn-A09-p1032996  | Bn-N9-p126850    | gene |      |
| Bn-A09-p10336331 | Bn-N9-p11108405  | gene |      |
| Bn-A09-p10495974 | Bn-N9-p18376183  | gene |      |
| Bn-A09-p10504507 | Bn-N9-p18367623  | gene |      |
| Bn-A09-p10536531 | Bn-N9-p18332961  | gene |      |
| Bn-A09-p10536718 | Bn-N9-p18332777  | gene |      |
| Bn-A09-p10544697 | Bn-N9-p18324503  | gene |      |
| Bn-A09-p10759604 | Bn-N9-p15825988  | gene |      |
| Bn-A09-p10836683 | Bn-N9-p15942153  | gene |      |
| Bn-A09-p10900375 | Bn-N9-p16005270  | gene |      |
| Bn-A09-p10901534 | Bn-N9-p16006426  | gene |      |
| Bn-A09-p109917   | Bn-N19-p1200873  | gene | exon |
| Bn-A09-p11110730 | Bn-N9-p16220290  | gene | exon |
| Bn-A09-p11126016 | Bn-N9-p16227060  | gene |      |
| Bn-A09-p11126583 | Bn-N9-p16227644  | gene |      |
| Bn-A09-p11164079 | Bn-N9-p37292480  | gene | exon |
| Bn-A09-p11180241 | Bn-N9-p16275825  | gene | exon |
| Bn-A09-p11181581 | Bn-N9-p16277162  | gene |      |
| Bn-A09-p11210109 | Bn-N9-p16311666  | gene | exon |
| Bn-A09-p112102   | Bn-N9-p1017201   | gene | exon |
| Bn-A09-p11297498 | Bn-N9-p16373161  | gene |      |
| Bn-A09-p11297772 | Bn-N9-p16373436  | gene |      |
| Bn-A09-p11393003 | Bn-N9-p16502384  | gene |      |
| Bn-A09-p11461510 | Bn-N9-p16556704  | gene |      |
| Bn-A09-p11476056 | Bn-N9-p16585244  | gene |      |
| Bn-A09-p11491871 | Bn-N19-p27886982 | gene |      |
| Bn-A09-p11589729 | Bn-N9-p16716268  | gene |      |
| Bn-A09-p1165212  | Bn-N9-p1534774   | gene |      |

|                  |                  |      |      |
|------------------|------------------|------|------|
| Bn-A09-p11727553 | Bn-N9-p16858337  | gene | exon |
| Bn-A09-p1188091  | Bn-N9-p1554817   | gene |      |
| Bn-A09-p1227639  | Bn-N9-p1605889   | gene | exon |
| Bn-A09-p1243032  | Bn-N9-p1617114   | gene |      |
| Bn-A09-p1252014  | Bn-N9-p1626111   | gene | exon |
| Bn-A09-p1252150  | Bn-N9-p1626247   | gene | exon |
| Bn-A09-p12557952 | Bn-N9-p25202397  | gene | exon |
| Bn-A09-p1272298  | Bn-N9-p1649433   | gene | exon |
| Bn-A09-p12929078 | Bn-N9-p12432502  | gene |      |
| Bn-A09-p13251498 | Bn-N9-p12159209  | gene | exon |
| Bn-A09-p13253434 | Bn-N19-p19760365 | gene | exon |
| Bn-A09-p13384525 | Bn-N19-p18863999 | gene | exon |
| Bn-A09-p13482934 | Bn-N19-p18685776 | gene | exon |
| Bn-A09-p13581136 | Bn-N9-p11894655  | gene |      |
| Bn-A09-p13582084 | Bn-N9-p11893701  | gene |      |
| Bn-A09-p13584189 | Bn-N9-p11891574  | gene |      |
| Bn-A09-p13585262 | Bn-N9-p11890508  | gene |      |
| Bn-A09-p13587429 | Bn-N9-p11888156  | gene |      |
| Bn-A09-p135892   | Bn-N9-p994517    | gene |      |
| Bn-A09-p13616262 | Bn-N19-p18424309 | gene |      |
| Bn-A09-p13641153 | Bn-N9-p11837130  | gene |      |
| Bn-A09-p13666209 | Bn-N9-p11825208  | gene | exon |
| Bn-A09-p13667207 | Bn-N9-p11824216  | gene | exon |
| Bn-A09-p13667337 | Bn-N9-p11824086  | gene | exon |
| Bn-A09-p13682690 | Bn-N9-p11815277  | gene |      |
| Bn-A09-p13692953 | Bn-N9-p11804858  | gene |      |
| Bn-A09-p13693010 | Bn-N9-p11804802  | gene |      |
| Bn-A09-p13693499 | Bn-N9-p11804324  | gene |      |
| Bn-A09-p13696043 | Bn-N19-p18326124 | gene |      |
| Bn-A09-p13737711 | Bn-N9-p11770134  | gene | exon |
| Bn-A09-p13776245 | Bn-N9-p11737276  | gene |      |
| Bn-A09-p13827265 | Bn-N9-p11671670  | gene | exon |
| Bn-A09-p13836909 | Bn-N9-p11668982  | gene |      |
| Bn-A09-p13952461 | Bn-N19-p17992612 | gene |      |
| Bn-A09-p13957074 | Bn-N19-p17988021 | gene |      |
| Bn-A09-p13983057 | Bn-N9-p11513574  | gene |      |
| Bn-A09-p13983626 | Bn-N9-p11513006  | gene |      |
| Bn-A09-p14017321 | Bn-N9-p11479174  | gene |      |
| Bn-A09-p1404415  | Bn-N9-p1774736   | gene |      |
| Bn-A09-p1405207  | Bn-N9-p1775528   | gene |      |
| Bn-A09-p14105923 | Bn-N19-p17836522 | gene | exon |
| Bn-A09-p14106312 | Bn-N9-p11383227  | gene | exon |
| Bn-A09-p14115991 | Bn-N9-p11368203  | gene | exon |
| Bn-A09-p14166446 | Bn-N9-p11284473  | gene | exon |
| Bn-A09-p14167293 | Bn-N19-p17754029 | gene | exon |
| Bn-A09-p14199197 | Bn-N9-p11253207  | gene | exon |
| Bn-A09-p14223034 | Bn-N9-p11225868  | gene | exon |
| Bn-A09-p14282683 | Bn-N9-p11148022  | gene |      |
| Bn-A09-p14285217 | Bn-N9-p11145480  | gene | exon |
| Bn-A09-p14287005 | Bn-N19-p17533617 | gene |      |
| Bn-A09-p14287061 | Bn-N9-p11143635  | gene | exon |
| Bn-A09-p14432426 | Bn-N9-p14596462  | gene | exon |

|                  |                         |      |      |
|------------------|-------------------------|------|------|
| Bn-A09-p14468231 | Bn-N9-p14563728         | gene |      |
| Bn-A09-p14630762 | Bn-N9-p14382789         | gene |      |
| Bn-A09-p14647697 | Bn-N9-p27672263         | gene | exon |
| Bn-A09-p146640   | Bn-N9-p983758           | gene | exon |
| Bn-A09-p149032   | Bn-N19-p1132101         | gene | exon |
| Bn-A09-p149317   | Bn-N9-p979003           | gene | exon |
| Bn-A09-p14987165 | Bn-N9-p14172767         | gene | exon |
| Bn-A09-p15042985 | Bn-N9-p14128345         | gene | exon |
| Bn-A09-p15090180 | Bn-N9-p14086987         | gene | exon |
| Bn-A09-p15105347 | Bn-N9-p14069887         | gene |      |
| Bn-A09-p15112850 | Bn-N5-p13759318         | gene | exon |
| Bn-A09-p15262    | Bn-N9-p1146859          | gene | exon |
| Bn-A09-p15353026 | Bn-N9-p13780787         | gene |      |
| Bn-A09-p1541696  | Bn-N9-p3097254          | gene | exon |
| Bn-A09-p15556325 | Bn-N19-p7430775         | gene | exon |
| Bn-A09-p1558529  | Bn-N9-p3082660          | gene | exon |
| Bn-A09-p15648941 | Bn-N9-p13548099         | gene | exon |
| Bn-A09-p1567071  | Bn-N9-p3070052          | gene | exon |
| Bn-A09-p1570558  | Bn-N9-p3066467          | gene | exon |
| Bn-A09-p15826536 | Bn-N9-p13362920         | gene | exon |
| Bn-A09-p15984968 | Bn-N9-p13173027         | gene | exon |
| Bn-A09-p15986311 | Bn-N9-p13171686         | gene |      |
| Bn-A09-p160775   | Bn-N9-p966527           | gene |      |
| Bn-A09-p1608051  | Bn-N9-p3026742          | gene |      |
| Bn-A09-p1610631  | Bn-N9-p3024118          | gene |      |
| Bn-A09-p16157117 | Bn-N9-p12967181         | gene | exon |
| Bn-A09-p16172780 | Bn-N9-p12956159         | gene | exon |
| Bn-A09-p16187931 | Bn-N9-p12933962         | gene |      |
| Bn-A09-p1623725  | Bn-N9-p3010191          | gene |      |
| Bn-A09-p16322417 | Bn-N16-p14945984        | gene | exon |
| Bn-A09-p16479468 | Bn-N1-p9572063          | gene |      |
| Bn-A09-p16479915 | Bn-Scaffold00929-p45360 | gene | exon |
| Bn-A09-p16519073 | Bn-N9-p12849695         | gene |      |
| Bn-A09-p16540542 | Bn-N9-p12820481         | gene |      |
| Bn-A09-p16600344 | Bn-N9-p12761886         | gene |      |
| Bn-A09-p16620672 | Bn-N9-p12748362         | gene |      |
| Bn-A09-p16639867 | Bn-N9-p12729687         | gene |      |
| Bn-A09-p16640011 | Bn-N9-p12729543         | gene |      |
| Bn-A09-p16722238 | Bn-N9-p12636144         | gene |      |
| Bn-A09-p16722618 | Bn-N9-p12635768         | gene |      |
| Bn-A09-p16722814 | Bn-N9-p12635567         | gene |      |
| Bn-A09-p16766275 | Bn-N9-p12596604         | gene | exon |
| Bn-A09-p16771727 | Bn-N9-p12592843         | gene | exon |
| Bn-A09-p16805527 | Bn-N9-p12554979         | gene |      |
| Bn-A09-p1680594  | Bn-N9-p2954788          | gene |      |
| Bn-A09-p1681240  | Bn-N9-p2954142          | gene | exon |
| Bn-A09-p16833397 | Bn-N9-p12526525         | gene | exon |
| Bn-A09-p16835122 | Bn-N9-p12524782         | gene |      |
| Bn-A09-p16846786 | Bn-N9-p12514031         | gene |      |
| Bn-A09-p1690633  | Bn-N9-p2934202          | gene |      |
| Bn-A09-p1691589  | Bn-N9-p2933246          | gene | exon |
| Bn-A09-p16998291 | Bn-N9-p14761259         | gene | exon |

|                  |                  |      |      |
|------------------|------------------|------|------|
| Bn-A09-p1721492  | Bn-N9-p2894989   | gene | exon |
| Bn-A09-p1721507  | Bn-N9-p2894974   | gene | exon |
| Bn-A09-p17332686 | Bn-N9-p15065639  | gene |      |
| Bn-A09-p17415909 | Bn-N19-p24370712 | gene |      |
| Bn-A09-p174327   | Bn-N9-p954671    | gene |      |
| Bn-A09-p17483853 | Bn-N9-p15217795  | gene | exon |
| Bn-A09-p17484188 | Bn-N9-p15218143  | gene | exon |
| Bn-A09-p175303   | Bn-N9-p948283    | gene |      |
| Bn-A09-p17538848 | Bn-N9-p15271543  | gene |      |
| Bn-A09-p1756759  | Bn-N9-p2853754   | gene |      |
| Bn-A09-p17582590 | Bn-N9-p15315290  | gene | exon |
| Bn-A09-p17600384 | Bn-N13-p41406354 | gene | exon |
| Bn-A09-p17600725 | Bn-N13-p41406016 | gene |      |
| Bn-A09-p17609859 | Bn-N9-p15340926  | gene |      |
| Bn-A09-p1765907  | Bn-N9-p2844896   | gene |      |
| Bn-A09-p17686638 | Bn-N9-p15442766  | gene | exon |
| Bn-A09-p17723940 | Bn-N9-p15490906  | gene | exon |
| Bn-A09-p17739465 | Bn-N9-p15500666  | gene |      |
| Bn-A09-p1786726  | Bn-N9-p2821962   | gene | exon |
| Bn-A09-p17869345 | Bn-N9-p18209625  | gene |      |
| Bn-A09-p17955698 | Bn-N9-p18105082  | gene |      |
| Bn-A09-p1796337  | Bn-N9-p2816747   | gene | exon |
| Bn-A09-p18132317 | Bn-N9-p17941873  | gene |      |
| Bn-A09-p18156994 | Bn-N9-p18110651  | gene | exon |
| Bn-A09-p1821136  | Bn-N9-p2785259   | gene | exon |
| Bn-A09-p18258259 | Bn-N19-p25877131 | gene |      |
| Bn-A09-p18258443 | Bn-N9-p17788208  | gene |      |
| Bn-A09-p18283186 | Bn-N7-p1493424   | gene | exon |
| Bn-A09-p1829952  | Bn-N9-p2777065   | gene |      |
| Bn-A09-p18316084 | Bn-N7-p1458970   | gene | exon |
| Bn-A09-p18324038 | Bn-N7-p1450968   | gene |      |
| Bn-A09-p1841381  | Bn-N9-p2764087   | gene |      |
| Bn-A09-p184319   | Bn-N9-p935677    | gene | exon |
| Bn-A09-p18588652 | Bn-N6-p19223438  | gene | exon |
| Bn-A09-p1860063  | Bn-N9-p2742026   | gene |      |
| Bn-A09-p18922925 | Bn-N9-p20053677  | gene |      |
| Bn-A09-p18923026 | Bn-N9-p20053778  | gene | exon |
| Bn-A09-p19040325 | Bn-N9-p20147639  | gene |      |
| Bn-A09-p19043442 | Bn-N9-p20150756  | gene | exon |
| Bn-A09-p19113008 | Bn-N9-p20239579  | gene |      |
| Bn-A09-p19181075 | Bn-N9-p20293471  | gene | exon |
| Bn-A09-p19198146 | Bn-N9-p20308599  | gene | exon |
| Bn-A09-p19227824 | Bn-N9-p20339917  | gene | exon |
| Bn-A09-p19244125 | Bn-N9-p20364561  | gene | exon |
| Bn-A09-p19244566 | Bn-N9-p20365002  | gene |      |
| Bn-A09-p19267307 | Bn-N9-p20371867  | gene |      |
| Bn-A09-p19268137 | Bn-N9-p20372719  | gene |      |
| Bn-A09-p19268663 | Bn-N9-p20373245  | gene |      |
| Bn-A09-p19282217 | Bn-N9-p20391806  | gene |      |
| Bn-A09-p19283001 | Bn-N9-p20392590  | gene |      |
| Bn-A09-p1929245  | Bn-N9-p2676238   | gene |      |
| Bn-A09-p19297523 | Bn-N9-p20406812  | gene |      |

|                  |                  |      |      |
|------------------|------------------|------|------|
| Bn-A09-p19316704 | Bn-N9-p20419922  | gene |      |
| Bn-A09-p19347448 | Bn-N16-p11601742 | gene |      |
| Bn-A09-p19348447 | Bn-N9-p20470408  | gene |      |
| Bn-A09-p19364150 | Bn-N9-p20491881  | gene |      |
| Bn-A09-p19400882 | Bn-N12-p31281870 | gene |      |
| Bn-A09-p19413084 | Bn-N15-p17860803 | gene |      |
| Bn-A09-p19462041 | Bn-N9-p20578579  | gene | exon |
| Bn-A09-p19489065 | Bn-N9-p20600856  | gene | exon |
| Bn-A09-p19494485 | Bn-N9-p20604964  | gene | exon |
| Bn-A09-p19539215 | Bn-N9-p20667445  | gene |      |
| Bn-A09-p19542797 | Bn-N9-p20669583  | gene | exon |
| Bn-A09-p19545956 | Bn-N9-p20673400  | gene |      |
| Bn-A09-p19583295 | Bn-N9-p20728115  | gene |      |
| Bn-A09-p19589751 | Bn-N9-p20730988  | gene | exon |
| Bn-A09-p19619009 | Bn-N9-p20767013  | gene | exon |
| Bn-A09-p19689884 | Bn-N9-p21012291  | gene |      |
| Bn-A09-p19690311 | Bn-N9-p21012776  | gene |      |
| Bn-A09-p19690392 | Bn-N9-p21012857  | gene |      |
| Bn-A09-p19690521 | Bn-N9-p21012986  | gene |      |
| Bn-A09-p19690574 | Bn-N9-p21013039  | gene |      |
| Bn-A09-p19690777 | Bn-N9-p21013245  | gene |      |
| Bn-A09-p19766078 | Bn-N9-p21072022  | gene | exon |
| Bn-A09-p19766741 | Bn-N9-p21072685  | gene |      |
| Bn-A09-p19766911 | Bn-N9-p21072861  | gene | exon |
| Bn-A09-p19771174 | Bn-N9-p21078816  | gene | exon |
| Bn-A09-p19805361 | Bn-N9-p21109062  | gene |      |
| Bn-A09-p19835714 | Bn-N9-p21139004  | gene |      |
| Bn-A09-p19939967 | Bn-N9-p21252591  | gene | exon |
| Bn-A09-p20061287 | Bn-N9-p21409790  | gene |      |
| Bn-A09-p20113369 | Bn-N9-p21456587  | gene | exon |
| Bn-A09-p20115072 | Bn-N9-p21458259  | gene |      |
| Bn-A09-p20124340 | Bn-N9-p21485661  | gene |      |
| Bn-A09-p20129620 | Bn-N9-p21490082  | gene |      |
| Bn-A09-p20145310 | Bn-N9-p21522397  | gene |      |
| Bn-A09-p20149594 | Bn-N9-p21526611  | gene | exon |
| Bn-A09-p20214059 | Bn-N9-p21590661  | gene |      |
| Bn-A09-p20336623 | Bn-N9-p21743462  | gene |      |
| Bn-A09-p2044817  | Bn-N9-p2550455   | gene | exon |
| Bn-A09-p20523068 | Bn-N9-p21910204  | gene | exon |
| Bn-A09-p20554631 | Bn-N9-p21936966  | gene |      |
| Bn-A09-p20569783 | Bn-N9-p21944496  | gene | exon |
| Bn-A09-p20569958 | Bn-N9-p21944669  | gene |      |
| Bn-A09-p20649745 | Bn-N9-p22007527  | gene |      |
| Bn-A09-p2065608  | Bn-N9-p2532471   | gene |      |
| Bn-A09-p20720084 | Bn-N9-p22091373  | gene | exon |
| Bn-A09-p2081648  | Bn-N9-p2523586   | gene | exon |
| Bn-A09-p2082298  | Bn-N9-p2522938   | gene | exon |
| Bn-A09-p20856553 | Bn-N6-p15584982  | gene |      |
| Bn-A09-p21224256 | Bn-N9-p22646736  | gene |      |
| Bn-A09-p2131637  | Bn-N19-p2220394  | gene | exon |
| Bn-A09-p2131851  | Bn-N9-p1892403   | gene |      |
| Bn-A09-p2160040  | Bn-N9-p1915929   | gene |      |

|                  |                 |      |      |
|------------------|-----------------|------|------|
| Bn-A09-p21795879 | Bn-N9-p23251195 | gene | exon |
| Bn-A09-p21821779 | Bn-N6-p23920971 | gene |      |
| Bn-A09-p21865966 | Bn-N9-p23314517 | gene |      |
| Bn-A09-p219538   | Bn-N9-p915609   | gene | exon |
| Bn-A09-p21969014 | Bn-N9-p23415055 | gene |      |
| Bn-A09-p22003936 | Bn-N9-p23462924 | gene | exon |
| Bn-A09-p2208929  | Bn-N9-p1959990  | gene |      |
| Bn-A09-p2209142  | Bn-N9-p1960203  | gene |      |
| Bn-A09-p22344523 | Bn-N9-p23842926 | gene | exon |
| Bn-A09-p22345800 | Bn-N9-p23844203 | gene | exon |
| Bn-A09-p2241625  | Bn-N9-p1990313  | gene |      |
| Bn-A09-p22462771 | Bn-N9-p23950174 | gene | exon |
| Bn-A09-p22495700 | Bn-N9-p23985383 | gene |      |
| Bn-A09-p22612980 | Bn-N6-p23795660 | gene | exon |
| Bn-A09-p2280336  | Bn-N9-p2040201  | gene | exon |
| Bn-A09-p22965277 | Bn-N9-p25657346 | gene |      |
| Bn-A09-p23089160 | Bn-N9-p25792057 | gene | exon |
| Bn-A09-p23107846 | Bn-N9-p25809995 | gene |      |
| Bn-A09-p23107847 | Bn-N9-p25809995 | gene |      |
| Bn-A09-p23144404 | Bn-N9-p25845832 | gene |      |
| Bn-A09-p23144931 | Bn-N9-p25846359 | gene | exon |
| Bn-A09-p2323366  | Bn-N9-p2122479  | gene | exon |
| Bn-A09-p23250129 | Bn-N9-p25936796 | gene | exon |
| Bn-A09-p23254203 | Bn-N9-p25940347 | gene |      |
| Bn-A09-p23269680 | Bn-N9-p25954329 | gene |      |
| Bn-A09-p23325795 | Bn-N9-p26028979 | gene | exon |
| Bn-A09-p23334889 | Bn-N9-p26038289 | gene |      |
| Bn-A09-p23345719 | Bn-N9-p26047448 | gene | exon |
| Bn-A09-p23382659 | Bn-N9-p26090655 | gene | exon |
| Bn-A09-p23410187 | Bn-N9-p26118153 | gene |      |
| Bn-A09-p23416800 | Bn-N9-p26124779 | gene | exon |
| Bn-A09-p23436500 | Bn-N9-p26147168 | gene |      |
| Bn-A09-p234493   | Bn-N9-p905188   | gene | exon |
| Bn-A09-p23489920 | Bn-N9-p26201599 | gene |      |
| Bn-A09-p23545925 | Bn-N9-p26252968 | gene |      |
| Bn-A09-p23546242 | Bn-N9-p26253285 | gene | exon |
| Bn-A09-p23552530 | Bn-N9-p26259106 | gene |      |
| Bn-A09-p23553955 | Bn-N9-p26260531 | gene |      |
| Bn-A09-p23554212 | Bn-N9-p26260786 | gene |      |
| Bn-A09-p23554351 | Bn-N9-p26260925 | gene |      |
| Bn-A09-p23554402 | Bn-N9-p26260976 | gene |      |
| Bn-A09-p23693948 | Bn-N9-p26406113 | gene | exon |
| Bn-A09-p23707462 | Bn-N9-p26415577 | gene |      |
| Bn-A09-p23708692 | Bn-N9-p26416798 | gene | exon |
| Bn-A09-p23713670 | Bn-N9-p26421777 | gene | exon |
| Bn-A09-p23717291 | Bn-N9-p26425397 | gene | exon |
| Bn-A09-p23722611 | Bn-N9-p26430738 | gene | exon |
| Bn-A09-p23724102 | Bn-N9-p26432203 | gene |      |
| Bn-A09-p23724105 | Bn-N9-p26432206 | gene |      |
| Bn-A09-p23724303 | Bn-N9-p26432401 | gene |      |
| Bn-A09-p23790907 | Bn-N6-p2643129  | gene |      |
| Bn-A09-p23802586 | Bn-N9-p26512622 | gene | exon |

|                  |                       |      |      |
|------------------|-----------------------|------|------|
| Bn-A09-p23802640 | Bn-N9-p26512677       | gene | exon |
| Bn-A09-p23802762 | Bn-N9-p26512799       | gene | exon |
| Bn-A09-p23802813 | Bn-N9-p26512850       | gene | exon |
| Bn-A09-p23808067 | Bn-N15-p14289776      | gene | exon |
| Bn-A09-p23861045 | Bn-N9-p26570880       | gene |      |
| Bn-A09-p23868070 | Bn-N9-p26577901       | gene | exon |
| Bn-A09-p23904657 | Bn-N9-p26611721       | gene |      |
| Bn-A09-p23904905 | Bn-N9-p26611969       | gene |      |
| Bn-A09-p23904964 | Bn-N9-p26612028       | gene |      |
| Bn-A09-p23913406 | Bn-N9-p26621379       | gene |      |
| Bn-A09-p23921036 | Bn-N9-p26636261       | gene | exon |
| Bn-A09-p23940132 | Bn-N9-p26652313       | gene |      |
| Bn-A09-p23948738 | Bn-N9-p26660928       | gene |      |
| Bn-A09-p239851   | Bn-N9-p899826         | gene |      |
| Bn-A09-p23993823 | Bn-N9-p26702498       | gene |      |
| Bn-A09-p24003401 | Bn-N9-p26711518       | gene |      |
| Bn-A09-p24003969 | Bn-N9-p26712086       | gene |      |
| Bn-A09-p24086990 | Bn-N9-p26787014       | gene | exon |
| Bn-A09-p24104666 | Bn-N9-p26823650       | gene |      |
| Bn-A09-p24105838 | Bn-N9-p26824825       | gene | exon |
| Bn-A09-p24106965 | Bn-N9-p26825952       | gene | exon |
| Bn-A09-p24113289 | Bn-N15-p13633484      | gene | exon |
| Bn-A09-p24113399 | Bn-N15-p13633374      | gene | exon |
| Bn-A09-p24216715 | Bn-N9-p26924860       | gene | exon |
| Bn-A09-p2429402  | Bn-N9-p2226143        | gene | exon |
| Bn-A09-p24506395 | Bn-N9-p27218676       | gene | exon |
| Bn-A09-p24556003 | Bn-N15-p12912611      | gene |      |
| Bn-A09-p25004061 | Bn-Scaffold06475-p624 | gene | exon |
| Bn-A09-p25018422 | Bn-N9-p28006407       | gene | exon |
| Bn-A09-p25050662 | Bn-N9-p28033765       | gene |      |
| Bn-A09-p25076813 | Bn-N9-p28059219       | gene | exon |
| Bn-A09-p25133968 | Bn-N9-p28127755       | gene | exon |
| Bn-A09-p25139597 | Bn-N9-p28131332       | gene |      |
| Bn-A09-p25141537 | Bn-N9-p28125648       | gene | exon |
| Bn-A09-p25166951 | Bn-N9-p28152900       | gene |      |
| Bn-A09-p25224568 | Bn-N9-p28210747       | gene |      |
| Bn-A09-p25236454 | Bn-N9-p28226168       | gene |      |
| Bn-A09-p25236781 | Bn-N9-p28226496       | gene |      |
| Bn-A09-p25237569 | Bn-N9-p28227284       | gene | exon |
| Bn-A09-p25238294 | Bn-N9-p28228008       | gene |      |
| Bn-A09-p25372544 | Bn-N9-p28382633       | gene | exon |
| Bn-A09-p25376723 | Bn-N9-p28386821       | gene |      |
| Bn-A09-p25440365 | Bn-N9-p28446824       | gene | exon |
| Bn-A09-p25443253 | Bn-N9-p28448463       | gene |      |
| Bn-A09-p25443581 | Bn-N9-p28448902       | gene |      |
| Bn-A09-p25455888 | Bn-N9-p28461360       | gene |      |
| Bn-A09-p25523186 | Bn-N9-p28537650       | gene |      |
| Bn-A09-p25532977 | Bn-N9-p28547711       | gene | exon |
| Bn-A09-p2555630  | Bn-N9-p2348684        | gene | exon |
| Bn-A09-p2557243  | Bn-N9-p2350301        | gene |      |
| Bn-A09-p25575397 | Bn-N9-p28590392       | gene |      |
| Bn-A09-p25618420 | Bn-N9-p28613017       | gene |      |

|                  |                  |      |      |
|------------------|------------------|------|------|
| Bn-A09-p25635243 | Bn-N9-p28627112  | gene | exon |
| Bn-A09-p25636375 | Bn-N9-p28628244  | gene | exon |
| Bn-A09-p25638579 | Bn-N9-p28630422  | gene |      |
| Bn-A09-p25652958 | Bn-N9-p28650773  | gene |      |
| Bn-A09-p25652968 | Bn-N9-p28650782  | gene |      |
| Bn-A09-p25653162 | Bn-N9-p28650977  | gene |      |
| Bn-A09-p25654791 | Bn-N9-p28652633  | gene | exon |
| Bn-A09-p25670603 | Bn-N9-p28673764  | gene |      |
| Bn-A09-p25736905 | Bn-N9-p28730894  | gene | exon |
| Bn-A09-p25738255 | Bn-N9-p28732244  | gene | exon |
| Bn-A09-p25738298 | Bn-N9-p28732287  | gene | exon |
| Bn-A09-p25739064 | Bn-N9-p28732881  | gene | exon |
| Bn-A09-p25740281 | Bn-N9-p28734131  | gene | exon |
| Bn-A09-p25747213 | Bn-N9-p28741431  | gene |      |
| Bn-A09-p25747305 | Bn-N9-p28741523  | gene |      |
| Bn-A09-p25777776 | Bn-N9-p28779033  | gene |      |
| Bn-A09-p25779397 | Bn-N9-p28781371  | gene | exon |
| Bn-A09-p25793645 | Bn-N9-p28804235  | gene | exon |
| Bn-A09-p25823689 | Bn-N9-p28830751  | gene |      |
| Bn-A09-p25832607 | Bn-N9-p28835826  | gene | exon |
| Bn-A09-p25872184 | Bn-N9-p28879132  | gene | exon |
| Bn-A09-p25886596 | Bn-N9-p28909547  | gene | exon |
| Bn-A09-p25923686 | Bn-N9-p28946507  | gene | exon |
| Bn-A09-p25942252 | Bn-N9-p28963398  | gene |      |
| Bn-A09-p25960397 | Bn-N9-p28977307  | gene |      |
| Bn-A09-p26054532 | Bn-N9-p29069367  | gene | exon |
| Bn-A09-p26062484 | Bn-N9-p29077267  | gene |      |
| Bn-A09-p26101323 | Bn-N9-p29097891  | gene |      |
| Bn-A09-p26133745 | Bn-N9-p29124155  | gene | exon |
| Bn-A09-p26136023 | Bn-N18-p30854660 | gene | exon |
| Bn-A09-p26138669 | Bn-N9-p29129081  | gene | exon |
| Bn-A09-p26142571 | Bn-N9-p29134890  | gene | exon |
| Bn-A09-p26244223 | Bn-N9-p29268040  | gene | exon |
| Bn-A09-p26301343 | Bn-N9-p29304611  | gene | exon |
| Bn-A09-p26323563 | Bn-N9-p29324396  | gene | exon |
| Bn-A09-p26347498 | Bn-N9-p29340919  | gene |      |
| Bn-A09-p26347709 | Bn-N9-p29341135  | gene |      |
| Bn-A09-p26353266 | Bn-N9-p29346686  | gene | exon |
| Bn-A09-p26355161 | Bn-N9-p29348575  | gene |      |
| Bn-A09-p26397574 | Bn-N9-p29391658  | gene | exon |
| Bn-A09-p26400930 | Bn-N9-p29395393  | gene |      |
| Bn-A09-p26451184 | Bn-N9-p29433289  | gene | exon |
| Bn-A09-p26456605 | Bn-N12-p20836411 | gene | exon |
| Bn-A09-p26461272 | Bn-N9-p29443692  | gene |      |
| Bn-A09-p26477673 | Bn-N9-p29458274  | gene | exon |
| Bn-A09-p26481517 | Bn-N9-p29462118  | gene | exon |
| Bn-A09-p26492309 | Bn-N19-p39309662 | gene | exon |
| Bn-A09-p26524436 | Bn-N9-p29491686  | gene |      |
| Bn-A09-p26577478 | Bn-N9-p29538507  | gene | exon |
| Bn-A09-p26606418 | Bn-N9-p29578431  | gene |      |
| Bn-A09-p26625665 | Bn-N9-p29596766  | gene |      |
| Bn-A09-p26637002 | Bn-N9-p29609679  | gene | exon |



|                  |                       |      |      |
|------------------|-----------------------|------|------|
| Bn-A09-p26727566 | Bn-N18-p31610682      | gene |      |
| Bn-A09-p26825500 | Bn-N9-p29793299       | gene |      |
| Bn-A09-p26831710 | Bn-N9-p29799428       | gene | exon |
| Bn-A09-p26873627 | Bn-N9-p29829829       | gene | exon |
| Bn-A09-p26874249 | Bn-N9-p29830527       | gene |      |
| Bn-A09-p26877444 | Bn-N9-p29833881       | gene | exon |
| Bn-A09-p26881902 | Bn-N9-p29850434       | gene |      |
| Bn-A09-p27036273 | Bn-N9-p30042560       | gene | exon |
| Bn-A09-p27103683 | Bn-N9-p30112538       | gene |      |
| Bn-A09-p27108615 | Bn-N9-p30116248       | gene |      |
| Bn-A09-p27109839 | Bn-N9-p30117483       | gene | exon |
| Bn-A09-p2730673  | Bn-N9-p3411364        | gene |      |
| Bn-A09-p27351028 | Bn-N9-p30396553       | gene | exon |
| Bn-A09-p27351047 | Bn-N9-p30396572       | gene | exon |
| Bn-A09-p27370873 | Bn-N9-p30414792       | gene | exon |
| Bn-A09-p27436536 | Bn-N9-p30488192       | gene | exon |
| Bn-A09-p27531548 | Bn-N9-p30562995       | gene | exon |
| Bn-A09-p27642687 | Bn-N9-p30666401       | gene |      |
| Bn-A09-p27642788 | Bn-N9-p30666485       | gene |      |
| Bn-A09-p27642842 | Bn-N9-p30666538       | gene |      |
| Bn-A09-p27673543 | Bn-N9-p30709586       | gene |      |
| Bn-A09-p27678823 | Bn-N9-p30715016       | gene | exon |
| Bn-A09-p27688300 | Bn-N9-p30726093       | gene |      |
| Bn-A09-p27787013 | Bn-N9-p30817307       | gene |      |
| Bn-A09-p27864717 | Bn-N9-p30908247       | gene |      |
| Bn-A09-p27869414 | Bn-N9-p30914287       | gene |      |
| Bn-A09-p27887024 | Bn-N9-p30927905       | gene |      |
| Bn-A09-p27918462 | Bn-N9-p30957622       | gene | exon |
| Bn-A09-p27939579 | Bn-N9-p30975876       | gene | exon |
| Bn-A09-p28003463 | Bn-N9-p31058170       | gene | exon |
| Bn-A09-p28017415 | Bn-N9-p31079966       | gene |      |
| Bn-A09-p28025169 | Bn-N9-p31083527       | gene |      |
| Bn-A09-p28026997 | Bn-N9-p31085355       | gene |      |
| Bn-A09-p28027675 | Bn-N9-p31086038       | gene |      |
| Bn-A09-p28027779 | Bn-N9-p31086142       | gene |      |
| Bn-A09-p28044674 | Bn-N18-p33429704      | gene |      |
| Bn-A09-p28060237 | Bn-N9-p31131118       | gene |      |
| Bn-A09-p28070330 | Bn-N9-p31138236       | gene |      |
| Bn-A09-p28074719 | Bn-N9-p31142638       | gene |      |
| Bn-A09-p28082973 | Bn-N9-p31149111       | gene |      |
| Bn-A09-p28083029 | Bn-N9-p31149167       | gene |      |
| Bn-A09-p28142154 | Bn-N9-p31211549       | gene | exon |
| Bn-A09-p28142685 | Bn-N9-p31212080       | gene | exon |
| Bn-A09-p28149545 | Bn-N9-p31218936       | gene | exon |
| Bn-A09-p281844   | Bn-N9-p867634         | gene | exon |
| Bn-A09-p28191601 | Bn-N9-p31262552       | gene | exon |
| Bn-A09-p28209274 | Bn-Scaffold12533-p573 | gene | exon |
| Bn-A09-p28212233 | Bn-N9-p31286465       | gene | exon |
| Bn-A09-p28225347 | Bn-N9-p31299424       | gene | exon |
| Bn-A09-p28259332 | Bn-N9-p31335679       | gene | exon |
| Bn-A09-p28290848 | Bn-N9-p31372875       | gene |      |
| Bn-A09-p28291555 | Bn-N9-p31373585       | gene |      |

|                  |                  |      |      |
|------------------|------------------|------|------|
| Bn-A09-p28302787 | Bn-N9-p31388617  | gene |      |
| Bn-A09-p28322032 | Bn-N9-p31415979  | gene | exon |
| Bn-A09-p28322383 | Bn-N9-p31416330  | gene | exon |
| Bn-A09-p28466750 | Bn-N9-p31553347  | gene |      |
| Bn-A09-p28510409 | Bn-N9-p31592124  | gene | exon |
| Bn-A09-p28511369 | Bn-N9-p31593084  | gene | exon |
| Bn-A09-p285148   | Bn-N9-p864331    | gene |      |
| Bn-A09-p28518619 | Bn-N9-p31600329  | gene | exon |
| Bn-A09-p28565181 | Bn-N9-p31647170  | gene | exon |
| Bn-A09-p28565331 | Bn-N9-p31647322  | gene | exon |
| Bn-A09-p28566621 | Bn-N9-p31648612  | gene | exon |
| Bn-A09-p28580489 | Bn-N9-p31665586  | gene | exon |
| Bn-A09-p28602135 | Bn-N9-p31688305  | gene |      |
| Bn-A09-p28603202 | Bn-N9-p31689372  | gene |      |
| Bn-A09-p28603388 | Bn-N9-p31689556  | gene | exon |
| Bn-A09-p28654058 | Bn-N9-p31742669  | gene |      |
| Bn-A09-p28695042 | Bn-N9-p31788810  | gene | exon |
| Bn-A09-p28699275 | Bn-N9-p31792823  | gene |      |
| Bn-A09-p28705871 | Bn-N9-p31797994  | gene | exon |
| Bn-A09-p28712265 | Bn-N9-p31804625  | gene | exon |
| Bn-A09-p28717690 | Bn-N9-p31814388  | gene |      |
| Bn-A09-p28721875 | Bn-N18-p34373489 | gene |      |
| Bn-A09-p28722989 | Bn-N9-p31819589  | gene |      |
| Bn-A09-p28723813 | Bn-N9-p31820413  | gene |      |
| Bn-A09-p28726474 | Bn-N9-p31823074  | gene | exon |
| Bn-A09-p28779232 | Bn-N2-p9384090   | gene |      |
| Bn-A09-p28822639 | Bn-N9-p31918034  | gene |      |
| Bn-A09-p28865744 | Bn-N9-p31946357  | gene | exon |
| Bn-A09-p28881091 | Bn-N9-p31961966  | gene | exon |
| Bn-A09-p28885939 | Bn-N9-p31965342  | gene | exon |
| Bn-A09-p28914189 | Bn-N9-p31997772  | gene | exon |
| Bn-A09-p28925363 | Bn-N9-p32008873  | gene |      |
| Bn-A09-p28966938 | Bn-N18-p34658354 | gene |      |
| Bn-A09-p28975119 | Bn-N9-p32055497  | gene |      |
| Bn-A09-p28985128 | Bn-N18-p34672855 | gene | exon |
| Bn-A09-p28987525 | Bn-N18-p34675526 | gene | exon |
| Bn-A09-p28988322 | Bn-N9-p32067950  | gene |      |
| Bn-A09-p28988381 | Bn-N9-p32068018  | gene |      |
| Bn-A09-p28990648 | Bn-N9-p32070470  | gene | exon |
| Bn-A09-p28996871 | Bn-N9-p32076649  | gene |      |
| Bn-A09-p29000054 | Bn-N9-p32079842  | gene |      |
| Bn-A09-p29035265 | Bn-N9-p32117153  | gene |      |
| Bn-A09-p29048790 | Bn-N9-p32123622  | gene |      |
| Bn-A09-p29052515 | Bn-N9-p32127354  | gene |      |
| Bn-A09-p29052616 | Bn-N9-p32127455  | gene |      |
| Bn-A09-p29070287 | Bn-N9-p32150935  | gene | exon |
| Bn-A09-p29084281 | Bn-N9-p32167209  | gene | exon |
| Bn-A09-p29086743 | Bn-N18-p34816481 | gene | exon |
| Bn-A09-p29092594 | Bn-N9-p32175501  | gene | exon |
| Bn-A09-p29106108 | Bn-N9-p32189368  | gene |      |
| Bn-A09-p29134633 | Bn-N9-p32221026  | gene | exon |
| Bn-A09-p29163307 | Bn-N9-p32242477  | gene | exon |

|                  |                  |      |      |
|------------------|------------------|------|------|
| Bn-A09-p29186255 | Bn-N9-p32264891  | gene |      |
| Bn-A09-p29245415 | Bn-N9-p32322014  | gene |      |
| Bn-A09-p29265453 | Bn-N9-p32352864  | gene | exon |
| Bn-A09-p29282189 | Bn-N9-p32368035  | gene | exon |
| Bn-A09-p29310462 | Bn-N9-p32399459  | gene | exon |
| Bn-A09-p29321510 | Bn-N9-p32411874  | gene | exon |
| Bn-A09-p29400976 | Bn-N9-p32512470  | gene |      |
| Bn-A09-p29416708 | Bn-N9-p32528115  | gene |      |
| Bn-A09-p29420099 | Bn-N9-p32531531  | gene |      |
| Bn-A09-p29449180 | Bn-N9-p32557398  | gene |      |
| Bn-A09-p29454619 | Bn-N9-p32558190  | gene | exon |
| Bn-A09-p29494065 | Bn-N9-p32584007  | gene | exon |
| Bn-A09-p29496129 | Bn-N9-p32586060  | gene |      |
| Bn-A09-p29496571 | Bn-N9-p32586503  | gene |      |
| Bn-A09-p29496588 | Bn-N9-p32586520  | gene |      |
| Bn-A09-p29507416 | Bn-N9-p32593460  | gene |      |
| Bn-A09-p29508036 | Bn-N9-p32594074  | gene |      |
| Bn-A09-p29617756 | Bn-N9-p32727243  | gene | exon |
| Bn-A09-p29617813 | Bn-N9-p32727300  | gene |      |
| Bn-A09-p29628819 | Bn-N9-p32738483  | gene | exon |
| Bn-A09-p29629155 | Bn-N9-p32738819  | gene | exon |
| Bn-A09-p29630906 | Bn-N9-p32740570  | gene | exon |
| Bn-A09-p29631122 | Bn-N9-p32740786  | gene | exon |
| Bn-A09-p29676939 | Bn-N9-p32779190  | gene |      |
| Bn-A09-p297029   | Bn-N9-p848747    | gene | exon |
| Bn-A09-p29859019 | Bn-N9-p32953844  | gene |      |
| Bn-A09-p29944855 | Bn-N9-p33051403  | gene | exon |
| Bn-A09-p29951785 | Bn-N18-p35851104 | gene | exon |
| Bn-A09-p29953651 | Bn-N9-p33061844  | gene | exon |
| Bn-A09-p29968210 | Bn-N9-p33074073  | gene |      |
| Bn-A09-p29968302 | Bn-N9-p33074165  | gene | exon |
| Bn-A09-p30007298 | Bn-N9-p33118727  | gene |      |
| Bn-A09-p30010889 | Bn-N9-p33122318  | gene | exon |
| Bn-A09-p30032125 | Bn-N9-p33138568  | gene | exon |
| Bn-A09-p30073403 | Bn-N9-p33178686  | gene | exon |
| Bn-A09-p30102296 | Bn-N9-p33206446  | gene | exon |
| Bn-A09-p30105255 | Bn-N9-p33209402  | gene |      |
| Bn-A09-p30105467 | Bn-N9-p33209842  | gene | exon |
| Bn-A09-p30108245 | Bn-N9-p33212673  | gene |      |
| Bn-A09-p30108430 | Bn-N9-p33212858  | gene | exon |
| Bn-A09-p30112316 | Bn-N9-p33219152  | gene | exon |
| Bn-A09-p30115693 | Bn-N9-p33222528  | gene |      |
| Bn-A09-p30116087 | Bn-N9-p33222921  | gene |      |
| Bn-A09-p30117412 | Bn-N9-p33226477  | gene |      |
| Bn-A09-p30117469 | Bn-N9-p33226533  | gene |      |
| Bn-A09-p30129045 | Bn-N9-p33233059  | gene | exon |
| Bn-A09-p301754   | Bn-N9-p843863    | gene |      |
| Bn-A09-p301830   | Bn-N9-p843787    | gene | exon |
| Bn-A09-p302062   | Bn-N19-p965061   | gene |      |
| Bn-A09-p30280052 | Bn-N9-p33397646  | gene |      |
| Bn-A09-p30280973 | Bn-N9-p33398567  | gene |      |
| Bn-A09-p30282007 | Bn-N9-p33399601  | gene |      |

|                  |                  |      |      |
|------------------|------------------|------|------|
| Bn-A09-p30284632 | Bn-N9-p33402226  | gene |      |
| Bn-A09-p30284813 | Bn-N9-p33402407  | gene | exon |
| Bn-A09-p30292279 | Bn-N9-p33408783  | gene | exon |
| Bn-A09-p30344978 | Bn-N9-p33472614  | gene |      |
| Bn-A09-p30348281 | Bn-N9-p33475898  | gene |      |
| Bn-A09-p30358198 | Bn-N9-p33485793  | gene | exon |
| Bn-A09-p30371768 | Bn-N9-p33502593  | gene | exon |
| Bn-A09-p30373180 | Bn-N9-p33504078  | gene |      |
| Bn-A09-p30391674 | Bn-N9-p33515525  | gene | exon |
| Bn-A09-p30404228 | Bn-N9-p33526161  | gene | exon |
| Bn-A09-p30406985 | Bn-N9-p33528909  | gene | exon |
| Bn-A09-p30424373 | Bn-N9-p33558503  | gene | exon |
| Bn-A09-p30437673 | Bn-N9-p33571425  | gene | exon |
| Bn-A09-p30463234 | Bn-N9-p33607106  | gene |      |
| Bn-A09-p30464712 | Bn-N18-p36549521 | gene |      |
| Bn-A09-p30466030 | Bn-N9-p33610037  | gene |      |
| Bn-A09-p30488258 | Bn-N18-p36861419 | gene |      |
| Bn-A09-p30494224 | Bn-N9-p33637337  | gene | exon |
| Bn-A09-p30495797 | Bn-N9-p33638910  | gene | exon |
| Bn-A09-p30506895 | Bn-N9-p33652890  | gene |      |
| Bn-A09-p30559416 | Bn-N9-p33696438  | gene | exon |
| Bn-A09-p30570466 | Bn-N9-p33705142  | gene | exon |
| Bn-A09-p30587291 | Bn-N9-p33717957  | gene |      |
| Bn-A09-p30687979 | Bn-N9-p33823886  | gene |      |
| Bn-A09-p30697212 | Bn-N18-p36808723 | gene | exon |
| Bn-A09-p30710881 | Bn-N9-p33846656  | gene | exon |
| Bn-A09-p30711004 | Bn-N9-p33846779  | gene | exon |
| Bn-A09-p30718480 | Bn-N9-p33854257  | gene |      |
| Bn-A09-p30733739 | Bn-N9-p33870456  | gene | exon |
| Bn-A09-p30740855 | Bn-N9-p33877684  | gene | exon |
| Bn-A09-p30755882 | Bn-N9-p33901968  | gene |      |
| Bn-A09-p30771886 | Bn-N9-p33916963  | gene |      |
| Bn-A09-p30780421 | Bn-N9-p33929638  | gene | exon |
| Bn-A09-p30780679 | Bn-N9-p33929911  | gene |      |
| Bn-A09-p30780890 | Bn-N9-p33930122  | gene |      |
| Bn-A09-p30788157 | Bn-N9-p33933296  | gene |      |
| Bn-A09-p30805314 | Bn-N9-p33947529  | gene |      |
| Bn-A09-p30805387 | Bn-N9-p33947602  | gene |      |
| Bn-A09-p30835062 | Bn-N9-p33992893  | gene |      |
| Bn-A09-p30846003 | Bn-N9-p34008029  | gene | exon |
| Bn-A09-p30847721 | Bn-N9-p34009664  | gene | exon |
| Bn-A09-p30869609 | Bn-N9-p34032434  | gene |      |
| Bn-A09-p30877022 | Bn-N9-p34039910  | gene | exon |
| Bn-A09-p30877241 | Bn-N9-p34040129  | gene | exon |
| Bn-A09-p30877372 | Bn-N9-p34040260  | gene | exon |
| Bn-A09-p30900431 | Bn-N9-p34067275  | gene | exon |
| Bn-A09-p30901490 | Bn-N18-p37070442 | gene |      |
| Bn-A09-p30908648 | Bn-N9-p34074998  | gene | exon |
| Bn-A09-p30909393 | Bn-N9-p34075742  | gene | exon |
| Bn-A09-p30921980 | Bn-N9-p34083100  | gene |      |
| Bn-A09-p30954374 | Bn-N9-p34116489  | gene | exon |
| Bn-A09-p30965242 | Bn-N9-p34123024  | gene |      |

|                  |                  |      |      |
|------------------|------------------|------|------|
| Bn-A09-p31013896 | Bn-N9-p34181393  | gene |      |
| Bn-A09-p31152287 | Bn-N9-p34320872  | gene |      |
| Bn-A09-p31204477 | Bn-N9-p34366655  | gene | exon |
| Bn-A09-p31204602 | Bn-N9-p34366780  | gene | exon |
| Bn-A09-p31231616 | Bn-N9-p34393086  | gene | exon |
| Bn-A09-p31270539 | Bn-N9-p34427517  | gene | exon |
| Bn-A09-p31388253 | Bn-N9-p34576071  | gene | exon |
| Bn-A09-p31402193 | Bn-N9-p34590601  | gene |      |
| Bn-A09-p31412669 | Bn-N18-p37714208 | gene | exon |
| Bn-A09-p31413712 | Bn-N9-p34601580  | gene | exon |
| Bn-A09-p31416695 | Bn-N9-p34604575  | gene |      |
| Bn-A09-p31492693 | Bn-N9-p34676656  | gene | exon |
| Bn-A09-p31493152 | Bn-N18-p37805730 | gene | exon |
| Bn-A09-p31494058 | Bn-N9-p34677629  | gene | exon |
| Bn-A09-p31576965 | Bn-N9-p34765864  | gene | exon |
| Bn-A09-p31578167 | Bn-N9-p34767066  | gene | exon |
| Bn-A09-p31582088 | Bn-N9-p34770977  | gene |      |
| Bn-A09-p31587667 | Bn-N9-p34780274  | gene | exon |
| Bn-A09-p31610860 | Bn-N9-p34805405  | gene |      |
| Bn-A09-p31611193 | Bn-N9-p34805737  | gene |      |
| Bn-A09-p31611279 | Bn-N9-p34805823  | gene | exon |
| Bn-A09-p31611436 | Bn-N9-p34805980  | gene | exon |
| Bn-A09-p31611521 | Bn-N9-p34806065  | gene | exon |
| Bn-A09-p31611638 | Bn-N9-p34806182  | gene |      |
| Bn-A09-p31612154 | Bn-N9-p34806698  | gene |      |
| Bn-A09-p31613718 | Bn-N9-p34808955  | gene |      |
| Bn-A09-p31614055 | Bn-N9-p34809292  | gene |      |
| Bn-A09-p31614130 | Bn-N9-p34809367  | gene |      |
| Bn-A09-p31614376 | Bn-N9-p34809613  | gene |      |
| Bn-A09-p31615419 | Bn-N9-p34810763  | gene | exon |
| Bn-A09-p31635684 | Bn-N9-p34832111  | gene | exon |
| Bn-A09-p31663954 | Bn-N9-p34891067  | gene |      |
| Bn-A09-p3173488  | Bn-N19-p4919686  | gene | exon |
| Bn-A09-p31741551 | Bn-N9-p34968983  | gene | exon |
| Bn-A09-p31979689 | Bn-N18-p38701686 | gene |      |
| Bn-A09-p31982487 | Bn-N9-p35436621  | gene |      |
| Bn-A09-p32027483 | Bn-N9-p35492302  | gene | exon |
| Bn-A09-p32066349 | Bn-N9-p35530225  | gene |      |
| Bn-A09-p32104929 | Bn-N9-p35573213  | gene | exon |
| Bn-A09-p32104974 | Bn-N9-p35573257  | gene | exon |
| Bn-A09-p32105188 | Bn-N9-p35573472  | gene | exon |
| Bn-A09-p321430   | Bn-N9-p812277    | gene | exon |
| Bn-A09-p32223480 | Bn-N9-p35667486  | gene |      |
| Bn-A09-p32225646 | Bn-N9-p35669625  | gene |      |
| Bn-A09-p3225300  | Bn-N9-p3866498   | gene |      |
| Bn-A09-p32254190 | Bn-N9-p35689490  | gene |      |
| Bn-A09-p32270596 | Bn-N9-p35705227  | gene | exon |
| Bn-A09-p32275168 | Bn-N9-p35708033  | gene | exon |
| Bn-A09-p32321534 | Bn-N9-p35739529  | gene |      |
| Bn-A09-p3233129  | Bn-N19-p5017427  | gene | exon |
| Bn-A09-p3234323  | Bn-N9-p3875594   | gene |      |
| Bn-A09-p3251545  | Bn-N9-p3890593   | gene |      |

|                  |                  |      |      |
|------------------|------------------|------|------|
| Bn-A09-p32553111 | Bn-N9-p35973804  | gene |      |
| Bn-A09-p3257371  | Bn-N9-p3897790   | gene | exon |
| Bn-A09-p32624472 | Bn-N8-p5130068   | gene |      |
| Bn-A09-p32656218 | Bn-N18-p13436786 | gene | exon |
| Bn-A09-p32665710 | Bn-N9-p36061302  | gene |      |
| Bn-A09-p32666778 | Bn-N9-p36062370  | gene | exon |
| Bn-A09-p32713083 | Bn-N9-p36111319  | gene |      |
| Bn-A09-p32717048 | Bn-N9-p36115269  | gene |      |
| Bn-A09-p32787589 | Bn-N9-p36173180  | gene |      |
| Bn-A09-p32811261 | Bn-N9-p36193076  | gene |      |
| Bn-A09-p32849664 | Bn-N18-p39671307 | gene | exon |
| Bn-A09-p32862905 | Bn-N9-p36243125  | gene |      |
| Bn-A09-p32864411 | Bn-N9-p36244647  | gene |      |
| Bn-A09-p32884256 | Bn-N9-p36265098  | gene | exon |
| Bn-A09-p32903518 | Bn-N9-p36284874  | gene |      |
| Bn-A09-p329151   | Bn-N9-p820196    | gene |      |
| Bn-A09-p32937856 | Bn-N9-p36311368  | gene |      |
| Bn-A09-p32944206 | Bn-N9-p36317718  | gene |      |
| Bn-A09-p32945202 | Bn-N9-p36318714  | gene |      |
| Bn-A09-p32980100 | Bn-N9-p36353569  | gene |      |
| Bn-A09-p32980153 | Bn-N9-p36353603  | gene |      |
| Bn-A09-p33009761 | Bn-N9-p36389886  | gene |      |
| Bn-A09-p33025970 | Bn-N9-p36404730  | gene | exon |
| Bn-A09-p33029336 | Bn-N9-p36413463  | gene | exon |
| Bn-A09-p33037403 | Bn-N9-p36422919  | gene |      |
| Bn-A09-p33040441 | Bn-N9-p36426733  | gene |      |
| Bn-A09-p33061472 | Bn-N9-p36435494  | gene | exon |
| Bn-A09-p33105121 | Bn-N9-p36486000  | gene | exon |
| Bn-A09-p33280    | Bn-N9-p1129797   | gene |      |
| Bn-A09-p33349373 | Bn-N9-p36688936  | gene | exon |
| Bn-A09-p33349948 | Bn-N9-p36689515  | gene |      |
| Bn-A09-p33358168 | Bn-N9-p36701856  | gene | exon |
| Bn-A09-p33358298 | Bn-N9-p36701986  | gene | exon |
| Bn-A09-p33358356 | Bn-N9-p36702043  | gene |      |
| Bn-A09-p33398481 | Bn-N9-p36741687  | gene | exon |
| Bn-A09-p33406899 | Bn-N9-p36749552  | gene |      |
| Bn-A09-p33419515 | Bn-N9-p36762500  | gene |      |
| Bn-A09-p33427256 | Bn-N9-p36780736  | gene |      |
| Bn-A09-p33428597 | Bn-N9-p36782086  | gene |      |
| Bn-A09-p33434187 | Bn-N9-p36788333  | gene | exon |
| Bn-A09-p33456655 | Bn-N9-p36822177  | gene | exon |
| Bn-A09-p33458611 | Bn-N9-p36824202  | gene |      |
| Bn-A09-p33459299 | Bn-N9-p36824891  | gene | exon |
| Bn-A09-p33464355 | Bn-N9-p36829929  | gene |      |
| Bn-A09-p33473254 | Bn-N9-p36838946  | gene | exon |
| Bn-A09-p33475518 | Bn-N9-p36840288  | gene |      |
| Bn-A09-p33487356 | Bn-N9-p36847011  | gene | exon |
| Bn-A09-p33491501 | Bn-N9-p36851155  | gene |      |
| Bn-A09-p33499505 | Bn-N9-p36859886  | gene | exon |
| Bn-A09-p33535361 | Bn-N9-p36883548  | gene |      |
| Bn-A09-p33544191 | Bn-N9-p36895783  | gene |      |
| Bn-A09-p33587432 | Bn-N9-p36934279  | gene | exon |

|                  |                  |      |      |
|------------------|------------------|------|------|
| Bn-A09-p33641390 | Bn-N9-p36997498  | gene | exon |
| Bn-A09-p33650317 | Bn-N9-p37009406  | gene | exon |
| Bn-A09-p33660289 | Bn-N9-p37021528  | gene | exon |
| Bn-A09-p33694154 | Bn-N9-p37061860  | gene |      |
| Bn-A09-p33694194 | Bn-N9-p37061900  | gene | exon |
| Bn-A09-p33726811 | Bn-N9-p37089844  | gene |      |
| Bn-A09-p33777546 | Bn-N9-p37125288  | gene |      |
| Bn-A09-p33777987 | Bn-N9-p37125729  | gene |      |
| Bn-A09-p33815163 | Bn-N9-p37157555  | gene | exon |
| Bn-A09-p33822952 | Bn-N9-p37166762  | gene |      |
| Bn-A09-p33894393 | Bn-N18-p40907881 | gene | exon |
| Bn-A09-p33927099 | Bn-N9-p37303753  | gene |      |
| Bn-A09-p33942716 | Bn-N9-p37319590  | gene | exon |
| Bn-A09-p33948825 | Bn-N9-p37325699  | gene | exon |
| Bn-A09-p33973275 | Bn-N9-p37349418  | gene |      |
| Bn-A09-p33975396 | Bn-N9-p37351983  | gene |      |
| Bn-A09-p33975959 | Bn-N9-p37355176  | gene |      |
| Bn-A09-p33976066 | Bn-N9-p37355283  | gene | exon |
| Bn-A09-p33976347 | Bn-N9-p37355564  | gene |      |
| Bn-A09-p33976464 | Bn-N9-p37355681  | gene |      |
| Bn-A09-p33976515 | Bn-N9-p37355732  | gene |      |
| Bn-A09-p33981445 | Bn-N9-p37358958  | gene |      |
| Bn-A09-p33983999 | Bn-N18-p41042789 | gene | exon |
| Bn-A09-p34022183 | Bn-N9-p37399070  | gene | exon |
| Bn-A09-p34028225 | Bn-N9-p37405084  | gene |      |
| Bn-A09-p34029934 | Bn-N9-p37406793  | gene |      |
| Bn-A09-p34044914 | Bn-N9-p37421869  | gene | exon |
| Bn-A09-p34053851 | Bn-N9-p37430821  | gene | exon |
| Bn-A09-p34067269 | Bn-N9-p37445603  | gene | exon |
| Bn-A09-p34331338 | Bn-N18-p41429158 | gene |      |
| Bn-A09-p34373261 | Bn-N9-p37751407  | gene |      |
| Bn-A09-p34390255 | Bn-N9-p37770036  | gene | exon |
| Bn-A09-p34393068 | Bn-N9-p37773158  | gene | exon |
| Bn-A09-p34437367 | Bn-N9-p37816830  | gene | exon |
| Bn-A09-p34469671 | Bn-N9-p37851437  | gene | exon |
| Bn-A09-p34482075 | Bn-N9-p37864555  | gene | exon |
| Bn-A09-p3452203  | Bn-N9-p4101256   | gene | exon |
| Bn-A09-p34591600 | Bn-N18-p41737490 | gene | exon |
| Bn-A09-p34779068 | Bn-N9-p38152140  | gene | exon |
| Bn-A09-p34794738 | Bn-N9-p38177898  | gene | exon |
| Bn-A09-p34830    | Bn-N9-p1128216   | gene | exon |
| Bn-A09-p34995048 | Bn-N9-p38402439  | gene |      |
| Bn-A09-p34995922 | Bn-N9-p38403313  | gene |      |
| Bn-A09-p35278018 | Bn-N18-p42699168 | gene | exon |
| Bn-A09-p35279845 | Bn-N9-p38700381  | gene |      |
| Bn-A09-p35292945 | Bn-N9-p38715294  | gene | exon |
| Bn-A09-p35299111 | Bn-N9-p38723451  | gene | exon |
| Bn-A09-p35303838 | Bn-N9-p38733006  | gene | exon |
| Bn-A09-p35306248 | Bn-N9-p38735420  | gene | exon |
| Bn-A09-p35321301 | Bn-N9-p38752121  | gene | exon |
| Bn-A09-p35368467 | Bn-N9-p38801419  | gene | exon |
| Bn-A09-p35372226 | Bn-N9-p38805268  | gene | exon |

|                  |                        |      |      |
|------------------|------------------------|------|------|
| Bn-A09-p35389045 | Bn-N9-p38828320        | gene | exon |
| Bn-A09-p35404670 | Bn-N9-p38845336        | gene | exon |
| Bn-A09-p35425963 | Bn-N9-p38864755        | gene | exon |
| Bn-A09-p35426888 | Bn-N9-p38865680        | gene |      |
| Bn-A09-p35437924 | Bn-N9-p38876666        | gene | exon |
| Bn-A09-p35466517 | Bn-N9-p38908464        | gene | exon |
| Bn-A09-p35476619 | Bn-N9-p38919112        | gene | exon |
| Bn-A09-p35479723 | Bn-N9-p38922217        | gene |      |
| Bn-A09-p35480425 | Bn-N9-p38922946        | gene |      |
| Bn-A09-p35480484 | Bn-N9-p38923005        | gene |      |
| Bn-A09-p35481880 | Bn-N9-p38924401        | gene | exon |
| Bn-A09-p35484843 | Bn-N9-p38927365        | gene | exon |
| Bn-A09-p35485049 | Bn-N9-p38927571        | gene |      |
| Bn-A09-p35485458 | Bn-N9-p38927980        | gene | exon |
| Bn-A09-p35505057 | Bn-N9-p38945900        | gene |      |
| Bn-A09-p35505120 | Bn-N9-p38945963        | gene |      |
| Bn-A09-p35508720 | Bn-N9-p38949671        | gene | exon |
| Bn-A09-p35508955 | Bn-N9-p38949905        | gene |      |
| Bn-A09-p35509044 | Bn-N9-p38949994        | gene | exon |
| Bn-A09-p35510262 | Bn-N9-p38951200        | gene |      |
| Bn-A09-p35510324 | Bn-N9-p38951262        | gene |      |
| Bn-A09-p35519543 | Bn-N9-p38954628        | gene |      |
| Bn-A09-p35520884 | Bn-N9-p38955969        | gene |      |
| Bn-A09-p35520944 | Bn-N9-p38956029        | gene |      |
| Bn-A09-p35529865 | Bn-N9-p38965296        | gene |      |
| Bn-A09-p35531421 | Bn-N9-p38966852        | gene |      |
| Bn-A09-p35559972 | Bn-N9-p38995774        | gene | exon |
| Bn-A09-p35563022 | Bn-N9-p39002787        | gene | exon |
| Bn-A09-p35571119 | Bn-N9-p39010870        | gene | exon |
| Bn-A09-p35594338 | Bn-N9-p39028751        | gene |      |
| Bn-A09-p35604358 | Bn-N9-p39038217        | gene |      |
| Bn-A09-p35609789 | Bn-N9-p39045025        | gene |      |
| Bn-A09-p35611451 | Bn-N9-p39046687        | gene | exon |
| Bn-A09-p35624679 | Bn-N9-p39061009        | gene |      |
| Bn-A09-p35624767 | Bn-N9-p39061102        | gene |      |
| Bn-A09-p35647477 | Bn-N9-p39081551        | gene | exon |
| Bn-A09-p35661872 | Bn-N9-p39097820        | gene | exon |
| Bn-A09-p35672030 | Bn-Scaffold01321-p9761 | gene |      |
| Bn-A09-p35691478 | Bn-N9-p39121587        | gene | exon |
| Bn-A09-p35703402 | Bn-N9-p39131741        | gene | exon |
| Bn-A09-p35707505 | Bn-N18-p43252029       | gene |      |
| Bn-A09-p35724973 | Bn-N9-p39150989        | gene | exon |
| Bn-A09-p35728172 | Bn-N9-p39154189        | gene | exon |
| Bn-A09-p35790555 | Bn-N9-p39206858        | gene | exon |
| Bn-A09-p35848630 | Bn-N18-p43381931       | gene | exon |
| Bn-A09-p35866195 | Bn-N18-p43399598       | gene |      |
| Bn-A09-p35867904 | Bn-N18-p43401280       | gene |      |
| Bn-A09-p35890304 | Bn-N9-p39286943        | gene |      |
| Bn-A09-p35901593 | Bn-N9-p39300694        | gene |      |
| Bn-A09-p35964883 | Bn-N9-p39360714        | gene |      |
| Bn-A09-p35979119 | Bn-N9-p39375212        | gene | exon |
| Bn-A09-p35981493 | Bn-N9-p39377586        | gene |      |



|                  |                        |      |      |
|------------------|------------------------|------|------|
| Bn-A09-p35981539 | Bn-N9-p39377632        | gene |      |
| Bn-A09-p36019854 | Bn-N9-p39396878        | gene | exon |
| Bn-A09-p36033827 | Bn-N9-p39417090        | gene |      |
| Bn-A09-p36062760 | Bn-N9-p39444862        | gene |      |
| Bn-A09-p36062825 | Bn-N9-p39444927        | gene |      |
| Bn-A09-p36112515 | Bn-N9-p39502154        | gene |      |
| Bn-A09-p36120469 | Bn-N9-p39522329        | gene | exon |
| Bn-A09-p36136583 | Bn-N9-p39538036        | gene |      |
| Bn-A09-p36172635 | Bn-N18-p43731092       | gene |      |
| Bn-A09-p36173579 | Bn-N9-p39576329        | gene |      |
| Bn-A09-p36200543 | Bn-N9-p39608592        | gene |      |
| Bn-A09-p36201113 | Bn-N9-p39609165        | gene | exon |
| Bn-A09-p36204736 | Bn-N9-p39612788        | gene | exon |
| Bn-A09-p36210166 | Bn-N9-p39618274        | gene |      |
| Bn-A09-p36210247 | Bn-N9-p39618355        | gene |      |
| Bn-A09-p36211880 | Bn-N9-p39620502        | gene |      |
| Bn-A09-p36221958 | Bn-N9-p39637035        | gene |      |
| Bn-A09-p36268830 | Bn-N18-p43850890       | gene |      |
| Bn-A09-p36290340 | Bn-N9-p39706035        | gene | exon |
| Bn-A09-p36298053 | Bn-N9-p39714638        | gene |      |
| Bn-A09-p36330477 | Bn-N18-p43997860       | gene | exon |
| Bn-A09-p36363739 | Bn-N9-p39783836        | gene | exon |
| Bn-A09-p36434436 | Bn-N9-p39856164        | gene | exon |
| Bn-A09-p36455112 | Bn-N9-p39876911        | gene |      |
| Bn-A09-p36456115 | Bn-N9-p39877914        | gene |      |
| Bn-A09-p36456505 | Bn-N9-p39878304        | gene |      |
| Bn-A09-p36462450 | Bn-N9-p39883918        | gene | exon |
| Bn-A09-p36467520 | Bn-N9-p39888992        | gene | exon |
| Bn-A09-p36550750 | Bn-N9-p39979652        | gene |      |
| Bn-A09-p36551108 | Bn-N9-p39980235        | gene |      |
| Bn-A09-p36558536 | Bn-N9-p39987599        | gene | exon |
| Bn-A09-p36619537 | Bn-N9-p40049828        | gene | exon |
| Bn-A09-p36727719 | Bn-N18-p44485147       | gene | exon |
| Bn-A09-p36803825 | Bn-N13-p55061222       | gene | exon |
| Bn-A09-p36812148 | Bn-N9-p40297556        | gene | exon |
| Bn-A09-p36815767 | Bn-N9-p40192302        | gene |      |
| Bn-A09-p36915816 | Bn-Scaffold06015-p615  | gene | exon |
| Bn-A09-p36939006 | Bn-N9-p40375145        | gene | exon |
| Bn-A09-p36969978 | Bn-Scaffold03369-p1628 | gene | exon |
| Bn-A09-p36991758 | Bn-N9-p40431805        | gene |      |
| Bn-A09-p37019231 | Bn-N9-p40466380        | gene |      |
| Bn-A09-p37024383 | Bn-N18-p44587258       | gene |      |
| Bn-A09-p37029924 | Bn-N9-p40512392        | gene |      |
| Bn-A09-p37031129 | Bn-N9-p40514752        | gene |      |
| Bn-A09-p37034993 | Bn-N18-p44622559       | gene | exon |
| Bn-A09-p37048611 | Bn-N18-p44637869       | gene | exon |
| Bn-A09-p381059   | Bn-N12-p14270242       | gene | exon |
| Bn-A09-p384043   | Bn-N16-p31486339       | gene |      |
| Bn-A09-p388989   | Bn-N9-p747002          | gene |      |
| Bn-A09-p3955243  | Bn-N9-p5005272         | gene | exon |
| Bn-A09-p403519   | Bn-N19-p849968         | gene |      |
| Bn-A09-p408412   | Bn-N9-p724239          | gene | exon |

|                 |                  |      |      |
|-----------------|------------------|------|------|
| Bn-A09-p4163474 | Bn-N9-p4792753   | gene | exon |
| Bn-A09-p4163989 | Bn-N9-p4792238   | gene | exon |
| Bn-A09-p4164576 | Bn-N9-p4791651   | gene | exon |
| Bn-A09-p4168039 | Bn-N9-p4788032   | gene | exon |
| Bn-A09-p417110  | Bn-N9-p719287    | gene | exon |
| Bn-A09-p4207679 | Bn-N9-p4742916   | gene | exon |
| Bn-A09-p4282686 | Bn-N9-p4664120   | gene | exon |
| Bn-A09-p4288843 | Bn-N9-p4658006   | gene | exon |
| Bn-A09-p4300103 | Bn-N9-p4649474   | gene | exon |
| Bn-A09-p4347835 | Bn-N9-p4608933   | gene | exon |
| Bn-A09-p4356331 | Bn-N9-p4605185   | gene |      |
| Bn-A09-p4384911 | Bn-N9-p4580472   | gene |      |
| Bn-A09-p4416731 | Bn-N9-p4544875   | gene | exon |
| Bn-A09-p4433127 | Bn-N9-p5340674   | gene | exon |
| Bn-A09-p4433252 | Bn-N9-p5340799   | gene | exon |
| Bn-A09-p4459348 | Bn-N9-p5366750   | gene |      |
| Bn-A09-p4465163 | Bn-N9-p5374076   | gene |      |
| Bn-A09-p4509627 | Bn-N9-p5419243   | gene |      |
| Bn-A09-p4652268 | Bn-N19-p7859662  | gene |      |
| Bn-A09-p4655322 | Bn-N9-p5569467   | gene | exon |
| Bn-A09-p4671467 | Bn-N9-p5587113   | gene | exon |
| Bn-A09-p469758  | Bn-N9-p675523    | gene | exon |
| Bn-A09-p4735640 | Bn-N9-p5627772   | gene |      |
| Bn-A09-p4835780 | Bn-N9-p5734320   | gene | exon |
| Bn-A09-p4838767 | Bn-N19-p8115030  | gene | exon |
| Bn-A09-p4850116 | Bn-N9-p5748041   | gene | exon |
| Bn-A09-p4850180 | Bn-N19-p8127893  | gene | exon |
| Bn-A09-p4863472 | Bn-N9-p5761647   | gene | exon |
| Bn-A09-p487360  | Bn-N9-p662145    | gene | exon |
| Bn-A09-p487432  | Bn-N9-p662073    | gene | exon |
| Bn-A09-p4905706 | Bn-N9-p5829540   | gene |      |
| Bn-A09-p4905766 | Bn-N9-p5829600   | gene |      |
| Bn-A09-p4990811 | Bn-N9-p35114498  | gene | exon |
| Bn-A09-p4996710 | Bn-N9-p35120366  | gene | exon |
| Bn-A09-p4997670 | Bn-N9-p35121321  | gene | exon |
| Bn-A09-p5006353 | Bn-N9-p35134896  | gene |      |
| Bn-A09-p5031583 | Bn-N9-p35161613  | gene | exon |
| Bn-A09-p5054103 | Bn-N18-p38400259 | gene |      |
| Bn-A09-p5062101 | Bn-N9-p35194528  | gene | exon |
| Bn-A09-p5118197 | Bn-N9-p35237446  | gene | exon |
| Bn-A09-p5157169 | Bn-N9-p35266060  | gene | exon |
| Bn-A09-p5200256 | Bn-N9-p5953243   | gene | exon |
| Bn-A09-p5215814 | Bn-N9-p5966760   | gene | exon |
| Bn-A09-p5244764 | Bn-N9-p5990474   | gene |      |
| Bn-A09-p5246171 | Bn-N9-p5991884   | gene | exon |
| Bn-A09-p5246229 | Bn-N9-p5991942   | gene | exon |
| Bn-A09-p5255753 | Bn-N9-p6004794   | gene |      |
| Bn-A09-p5285034 | Bn-N9-p6034586   | gene | exon |
| Bn-A09-p5322252 | Bn-N9-p6068414   | gene | exon |
| Bn-A09-p5348717 | Bn-N9-p6095587   | gene | exon |
| Bn-A09-p5406597 | Bn-N9-p6139920   | gene | exon |
| Bn-A09-p5406959 | Bn-N9-p6140282   | gene | exon |

|                 |                  |      |      |
|-----------------|------------------|------|------|
| Bn-A09-p5416801 | Bn-N9-p6149418   | gene | exon |
| Bn-A09-p5418207 | Bn-N9-p6150830   | gene | exon |
| Bn-A09-p5418342 | Bn-N9-p6150965   | gene | exon |
| Bn-A09-p5431352 | Bn-N9-p6163934   | gene | exon |
| Bn-A09-p5442608 | Bn-N9-p6172279   | gene |      |
| Bn-A09-p5455608 | Bn-N9-p6187862   | gene | exon |
| Bn-A09-p5601358 | Bn-N9-p6328235   | gene | exon |
| Bn-A09-p5603209 | Bn-N9-p6330076   | gene | exon |
| Bn-A09-p5678953 | Bn-N9-p6405447   | gene | exon |
| Bn-A09-p5680812 | Bn-N9-p6407307   | gene |      |
| Bn-A09-p574205  | Bn-N9-p567757    | gene | exon |
| Bn-A09-p5781490 | Bn-N9-p6522956   | gene | exon |
| Bn-A09-p584756  | Bn-N9-p558672    | gene |      |
| Bn-A09-p586357  | Bn-N9-p557067    | gene |      |
| Bn-A09-p5958009 | Bn-N9-p6697872   | gene |      |
| Bn-A09-p5958764 | Bn-N9-p6698627   | gene |      |
| Bn-A09-p5966342 | Bn-N1-p1112754   | gene | exon |
| Bn-A09-p5966858 | Bn-N1-p1112176   | gene | exon |
| Bn-A09-p5975583 | Bn-N18-p38563178 | gene | exon |
| Bn-A09-p5977032 | Bn-N9-p35302828  | gene |      |
| Bn-A09-p5992    | Bn-N9-p1160219   | gene | exon |
| Bn-A09-p6021939 | Bn-N9-p8045087   | gene |      |
| Bn-A09-p603278  | Bn-N9-p534104    | gene |      |
| Bn-A09-p6133524 | Bn-N9-p7905525   | gene |      |
| Bn-A09-p6140805 | Bn-N9-p7898169   | gene | exon |
| Bn-A09-p616919  | Bn-N9-p508992    | gene |      |
| Bn-A09-p6459935 | Bn-N9-p7635565   | gene |      |
| Bn-A09-p660753  | Bn-N9-p464464    | gene |      |
| Bn-A09-p660775  | Bn-N9-p464442    | gene |      |
| Bn-A09-p6615722 | Bn-N19-p11198841 | gene | exon |
| Bn-A09-p6616042 | Bn-N9-p7456587   | gene | exon |
| Bn-A09-p6616405 | Bn-N9-p7456223   | gene |      |
| Bn-A09-p6630867 | Bn-N9-p7443977   | gene | exon |
| Bn-A09-p6632506 | Bn-N19-p11176935 | gene | exon |
| Bn-A09-p664845  | Bn-N9-p459340    | gene |      |
| Bn-A09-p6783843 | Bn-N9-p7329180   | gene | exon |
| Bn-A09-p679276  | Bn-N9-p448494    | gene |      |
| Bn-A09-p6922467 | Bn-N9-p7181761   | gene | exon |
| Bn-A09-p694190  | Bn-N19-p417038   | gene | exon |
| Bn-A09-p702173  | Bn-N9-p430601    | gene |      |
| Bn-A09-p704028  | Bn-N9-p428711    | gene |      |
| Bn-A09-p7047022 | Bn-N9-p7063456   | gene | exon |
| Bn-A09-p7086863 | Bn-N9-p6995161   | gene |      |
| Bn-A09-p7087772 | Bn-N9-p6994252   | gene | exon |
| Bn-A09-p7174944 | Bn-N19-p10270316 | gene |      |
| Bn-A09-p7176234 | Bn-N9-p6908092   | gene |      |
| Bn-A09-p7191362 | Bn-N9-p6896173   | gene | exon |
| Bn-A09-p7191369 | Bn-N9-p6896166   | gene | exon |
| Bn-A09-p7199203 | Bn-N9-p6888125   | gene |      |
| Bn-A09-p7287912 | Bn-N9-p6806829   | gene | exon |
| Bn-A09-p7327691 | Bn-N9-p6777654   | gene | exon |
| Bn-A09-p733947  | Bn-N9-p396353    | gene |      |

|                 |                  |      |      |
|-----------------|------------------|------|------|
| Bn-A09-p7397116 | Bn-N9-p6714104   | gene |      |
| Bn-A09-p7490528 | Bn-N9-p8183157   | gene |      |
| Bn-A09-p7490626 | Bn-N9-p8183255   | gene | exon |
| Bn-A09-p7491672 | Bn-N9-p8184301   | gene | exon |
| Bn-A09-p7503009 | Bn-N9-p8204408   | gene | exon |
| Bn-A09-p750455  | Bn-N19-p320463   | gene | exon |
| Bn-A09-p7510345 | Bn-N9-p8210913   | gene |      |
| Bn-A09-p751817  | Bn-N9-p382442    | gene |      |
| Bn-A09-p7560188 | Bn-N9-p8266261   | gene |      |
| Bn-A09-p757653  | Bn-N9-p379694    | gene | exon |
| Bn-A09-p788109  | Bn-N9-p348078    | gene | exon |
| Bn-A09-p788595  | Bn-N9-p347592    | gene | exon |
| Bn-A09-p7892057 | Bn-N7-p9784621   | gene |      |
| Bn-A09-p8044910 | Bn-N9-p8790084   | gene |      |
| Bn-A09-p8239411 | Bn-N9-p8968316   | gene |      |
| Bn-A09-p8598652 | Bn-N9-p9304419   | gene | exon |
| Bn-A09-p8611536 | Bn-N9-p9320169   | gene | exon |
| Bn-A09-p86293   | Bn-N9-p1053679   | gene | exon |
| Bn-A09-p8634971 | Bn-N9-p9339112   | gene | exon |
| Bn-A09-p8635608 | Bn-N9-p9339748   | gene |      |
| Bn-A09-p8635777 | Bn-N19-p14542553 | gene |      |
| Bn-A09-p869372  | Bn-N9-p306757    | gene |      |
| Bn-A09-p8798692 | Bn-N9-p9506415   | gene |      |
| Bn-A09-p8798760 | Bn-N9-p9506483   | gene |      |
| Bn-A09-p8800446 | Bn-N9-p9508156   | gene | exon |
| Bn-A09-p8810292 | Bn-N9-p9528241   | gene |      |
| Bn-A09-p8877444 | Bn-N9-p9612935   | gene | exon |
| Bn-A09-p8891277 | Bn-N9-p9617045   | gene |      |
| Bn-A09-p9040117 | Bn-N9-p9778514   | gene |      |
| Bn-A09-p9083090 | Bn-N9-p9820124   | gene |      |
| Bn-A09-p9083366 | Bn-N9-p9820348   | gene | exon |
| Bn-A09-p9083445 | Bn-N9-p9820428   | gene | exon |
| Bn-A09-p9206874 | Bn-N9-p9964908   | gene |      |
| Bn-A09-p9317714 | Bn-N9-p10088321  | gene |      |
| Bn-A09-p9371106 | Bn-N19-p15847047 | gene |      |
| Bn-A09-p9379347 | Bn-N9-p10155921  | gene |      |
| Bn-A09-p941202  | Bn-N9-p227026    | gene |      |
| Bn-A09-p9421306 | Bn-N9-p10198203  | gene | exon |
| Bn-A09-p9497384 | Bn-N9-p10276370  | gene |      |
| Bn-A09-p951202  | Bn-N9-p216968    | gene |      |
| Bn-A09-p9512316 | Bn-N9-p10292141  | gene |      |
| Bn-A09-p9558015 | Bn-N9-p10331661  | gene |      |
| Bn-A09-p9558692 | Bn-N9-p10332338  | gene |      |
| Bn-A09-p9558834 | Bn-N9-p10333379  | gene |      |
| Bn-A09-p9559997 | Bn-N19-p16199574 | gene |      |
| Bn-A09-p9624934 | Bn-N19-p16287034 | gene |      |
| Bn-A09-p9667631 | Bn-N9-p10471544  | gene | exon |
| Bn-A09-p9671359 | Bn-N9-p10475250  | gene | exon |
| Bn-A09-p9702226 | Bn-N13-p39819389 | gene |      |
| Bn-A09-p972043  | Bn-N9-p197070    | gene | exon |
| Bn-A09-p9728715 | Bn-N3-p19023544  | gene | exon |
| Bn-A09-p9747402 | Bn-N9-p10543852  | gene | exon |

|                  |                       |      |      |
|------------------|-----------------------|------|------|
| Bn-A09-p9789590  | Bn-N9-p10590554       | gene |      |
| Bn-A09-p9789898  | Bn-N9-p10590863       | gene |      |
| Bn-A09-p9789943  | Bn-N9-p10590908       | gene | exon |
| Bn-A09-p9845028  | Bn-N9-p10675202       | gene | exon |
| Bn-A09-p985671   | Bn-N9-p180078         | gene |      |
| Bn-A09-p9862616  | Bn-N9-p10692415       | gene |      |
| Bn-A09-p9863993  | Bn-N9-p10693791       | gene |      |
| Bn-A09-p996577   | Bn-N9-p169841         | gene |      |
| Bn-A09-p9980036  | Bn-N9-p10761224       | gene | exon |
| Bn-A09-p9987709  | Bn-N9-p10768890       | gene | exon |
| Bn-A09-p999098   | Bn-N9-p166061         | gene | exon |
| Bn-A10-p10020060 | Bn-N10-p11657804      | gene |      |
| Bn-A10-p10026077 | Bn-N19-p46930573      | gene |      |
| Bn-A10-p10083397 | Bn-N10-p11698546      | gene |      |
| Bn-A10-p10083483 | Bn-N10-p11698632      | gene | exon |
| Bn-A10-p10108321 | Bn-N19-p47019905      | gene |      |
| Bn-A10-p1010963  | Bn-N10-p2994980       | gene | exon |
| Bn-A10-p10120142 | Bn-N10-p11746996      | gene | exon |
| Bn-A10-p10132309 | Bn-N10-p11760675      | gene | exon |
| Bn-A10-p10133034 | Bn-N10-p11761400      | gene |      |
| Bn-A10-p10134254 | Bn-N10-p11762640      | gene |      |
| Bn-A10-p10134322 | Bn-N10-p11762708      | gene |      |
| Bn-A10-p10141249 | Bn-N10-p11769661      | gene |      |
| Bn-A10-p10149557 | Bn-N10-p11778321      | gene | exon |
| Bn-A10-p10155781 | Bn-N10-p11784531      | gene | exon |
| Bn-A10-p10156893 | Bn-N10-p11785618      | gene |      |
| Bn-A10-p10186330 | Bn-N10-p11818254      | gene |      |
| Bn-A10-p10244709 | Bn-N10-p11868078      | gene |      |
| Bn-A10-p10245283 | Bn-N11-p43901894      | gene |      |
| Bn-A10-p10251191 | Bn-N10-p11873821      | gene |      |
| Bn-A10-p10252741 | Bn-N10-p11875373      | gene |      |
| Bn-A10-p10298013 | Bn-N10-p11912249      | gene | exon |
| Bn-A10-p10361031 | Bn-N10-p11964992      | gene | exon |
| Bn-A10-p10374644 | Bn-N10-p11985610      | gene | exon |
| Bn-A10-p10387954 | Bn-N10-p11999583      | gene |      |
| Bn-A10-p10392191 | Bn-N10-p12003829      | gene |      |
| Bn-A10-p10395508 | Bn-N19-p47520526      | gene | exon |
| Bn-A10-p10395990 | Bn-N10-p12009044      | gene | exon |
| Bn-A10-p10402358 | Bn-Scaffold02259-p694 | gene | exon |
| Bn-A10-p10423500 | Bn-N10-p12039050      | gene |      |
| Bn-A10-p10429303 | Bn-N10-p12045392      | gene |      |
| Bn-A10-p10454385 | Bn-N10-p12068595      | gene |      |
| Bn-A10-p10460400 | Bn-N10-p12074615      | gene | exon |
| Bn-A10-p10469649 | Bn-N10-p12083813      | gene | exon |
| Bn-A10-p10485888 | Bn-N19-p47652419      | gene |      |
| Bn-A10-p10509825 | Bn-N10-p12122863      | gene | exon |
| Bn-A10-p10516377 | Bn-N10-p12127339      | gene | exon |
| Bn-A10-p10540729 | Bn-N10-p12150832      | gene |      |
| Bn-A10-p10555057 | Bn-N10-p12164282      | gene | exon |
| Bn-A10-p10575106 | Bn-N10-p12184538      | gene |      |
| Bn-A10-p10576878 | Bn-N10-p12186310      | gene |      |
| Bn-A10-p10613361 | Bn-Scaffold01263-p707 | gene | exon |

|                  |                  |      |      |
|------------------|------------------|------|------|
| Bn-A10-p10651432 | Bn-N10-p12247935 | gene |      |
| Bn-A10-p10651872 | Bn-N10-p12248375 | gene | exon |
| Bn-A10-p10652964 | Bn-N10-p12249467 | gene | exon |
| Bn-A10-p10654061 | Bn-N10-p12250552 | gene |      |
| Bn-A10-p10660780 | Bn-N10-p12255516 | gene | exon |
| Bn-A10-p10668111 | Bn-N10-p12265600 | gene |      |
| Bn-A10-p10669303 | Bn-N10-p12266804 | gene |      |
| Bn-A10-p10677237 | Bn-N10-p12274787 | gene | exon |
| Bn-A10-p10691761 | Bn-N10-p12290489 | gene |      |
| Bn-A10-p10714593 | Bn-N10-p12315331 | gene |      |
| Bn-A10-p10717595 | Bn-N10-p12318665 | gene |      |
| Bn-A10-p10725779 | Bn-N10-p12326872 | gene |      |
| Bn-A10-p10726590 | Bn-N10-p12327683 | gene |      |
| Bn-A10-p10728078 | Bn-N10-p12328932 | gene | exon |
| Bn-A10-p10748653 | Bn-N10-p12344167 | gene |      |
| Bn-A10-p10751752 | Bn-N10-p12347251 | gene | exon |
| Bn-A10-p10755216 | Bn-N10-p12352772 | gene |      |
| Bn-A10-p10764928 | Bn-N10-p12365473 | gene | exon |
| Bn-A10-p10777142 | Bn-N10-p12385408 | gene |      |
| Bn-A10-p10830979 | Bn-N10-p12432749 | gene |      |
| Bn-A10-p10840792 | Bn-N10-p12439657 | gene | exon |
| Bn-A10-p10882669 | Bn-N10-p12473971 | gene | exon |
| Bn-A10-p10902810 | Bn-N10-p12500338 | gene | exon |
| Bn-A10-p10936233 | Bn-N10-p12537487 | gene | exon |
| Bn-A10-p10936559 | Bn-N10-p12537825 | gene |      |
| Bn-A10-p10949218 | Bn-N10-p12557367 | gene | exon |
| Bn-A10-p10954176 | Bn-N10-p12563640 | gene | exon |
| Bn-A10-p10954641 | Bn-N10-p12564099 | gene | exon |
| Bn-A10-p10982591 | Bn-N10-p12613401 | gene |      |
| Bn-A10-p10997884 | Bn-N10-p12627689 | gene | exon |
| Bn-A10-p11038926 | Bn-N10-p12638872 | gene | exon |
| Bn-A10-p11043549 | Bn-N19-p48776688 | gene | exon |
| Bn-A10-p11043924 | Bn-N10-p12643027 | gene | exon |
| Bn-A10-p11048886 | Bn-N10-p12648161 | gene | exon |
| Bn-A10-p11052814 | Bn-N19-p48788308 | gene |      |
| Bn-A10-p11052877 | Bn-N10-p12653364 | gene |      |
| Bn-A10-p11064857 | Bn-N10-p12663925 | gene | exon |
| Bn-A10-p11075240 | Bn-N10-p12675560 | gene | exon |
| Bn-A10-p11082862 | Bn-N10-p12689085 | gene |      |
| Bn-A10-p1108975  | Bn-N10-p2886382  | gene | exon |
| Bn-A10-p11138874 | Bn-N10-p12755352 | gene | exon |
| Bn-A10-p11169419 | Bn-N10-p12766108 | gene | exon |
| Bn-A10-p11183840 | Bn-N10-p12783717 | gene | exon |
| Bn-A10-p11192168 | Bn-N10-p12791907 | gene | exon |
| Bn-A10-p11201481 | Bn-N10-p12800841 | gene |      |
| Bn-A10-p11221861 | Bn-N19-p49104875 | gene | exon |
| Bn-A10-p1123189  | Bn-N10-p2868701  | gene |      |
| Bn-A10-p11238287 | Bn-N19-p49137317 | gene |      |
| Bn-A10-p1125100  | Bn-N10-p2866782  | gene | exon |
| Bn-A10-p1125156  | Bn-N10-p2866726  | gene |      |
| Bn-A10-p11268601 | Bn-N10-p12875513 | gene |      |
| Bn-A10-p11299415 | Bn-N10-p12912983 | gene | exon |

|                  |                       |      |      |
|------------------|-----------------------|------|------|
| Bn-A10-p11302032 | Bn-N10-p12917622      | gene | exon |
| Bn-A10-p11312705 | Bn-N10-p12928294      | gene | exon |
| Bn-A10-p1131424  | Bn-N10-p2860391       | gene |      |
| Bn-A10-p11321778 | Bn-N10-p12939316      | gene |      |
| Bn-A10-p11330183 | Bn-N10-p12943850      | gene |      |
| Bn-A10-p11332256 | Bn-N10-p12945925      | gene | exon |
| Bn-A10-p11358033 | Bn-N10-p12973917      | gene | exon |
| Bn-A10-p11369880 | Bn-N10-p12987970      | gene | exon |
| Bn-A10-p11394407 | Bn-N10-p13022743      | gene | exon |
| Bn-A10-p113985   | Bn-N10-p4482689       | gene |      |
| Bn-A10-p11411280 | Bn-N10-p13042901      | gene |      |
| Bn-A10-p11420261 | Bn-N10-p13050450      | gene | exon |
| Bn-A10-p11448249 | Bn-N10-p13072679      | gene |      |
| Bn-A10-p114515   | Bn-N10-p4482159       | gene |      |
| Bn-A10-p11464311 | Bn-N7-p2032449        | gene |      |
| Bn-A10-p11466367 | Bn-N7-p2034506        | gene |      |
| Bn-A10-p11466727 | Bn-N7-p2034866        | gene |      |
| Bn-A10-p1149411  | Bn-N10-p2837553       | gene |      |
| Bn-A10-p11527601 | Bn-N7-p2093868        | gene | exon |
| Bn-A10-p11541544 | Bn-N7-p2111403        | gene |      |
| Bn-A10-p11601681 | Bn-N7-p2180386        | gene | exon |
| Bn-A10-p11637678 | Bn-N7-p2213671        | gene | exon |
| Bn-A10-p11637847 | Bn-N7-p2213840        | gene |      |
| Bn-A10-p11639214 | Bn-N7-p2215189        | gene | exon |
| Bn-A10-p11649398 | Bn-N7-p2222212        | gene | exon |
| Bn-A10-p11723249 | Bn-N7-p2294109        | gene | exon |
| Bn-A10-p11723882 | Bn-N7-p2294742        | gene | exon |
| Bn-A10-p11744746 | Bn-N7-p2306631        | gene |      |
| Bn-A10-p11745226 | Bn-N7-p2307111        | gene | exon |
| Bn-A10-p11814912 | Bn-N7-p2337784        | gene |      |
| Bn-A10-p11826776 | Bn-N7-p2357158        | gene |      |
| Bn-A10-p11871893 | Bn-N7-p2388946        | gene |      |
| Bn-A10-p11874688 | Bn-N7-p2391746        | gene | exon |
| Bn-A10-p1187541  | Bn-N10-p2795757       | gene |      |
| Bn-A10-p11888837 | Bn-N7-p2403156        | gene | exon |
| Bn-A10-p1193336  | Bn-N10-p2790114       | gene |      |
| Bn-A10-p1196851  | Bn-N10-p2786588       | gene |      |
| Bn-A10-p12000106 | Bn-N7-p2482675        | gene | exon |
| Bn-A10-p1215039  | Bn-N10-p2759191       | gene |      |
| Bn-A10-p1215054  | Bn-N10-p2759176       | gene |      |
| Bn-A10-p12198293 | Bn-N7-p16086234       | gene |      |
| Bn-A10-p12201411 | Bn-N6-p15273363       | gene |      |
| Bn-A10-p12214779 | Bn-N7-p2722848        | gene | exon |
| Bn-A10-p12231523 | Bn-N7-p2737927        | gene |      |
| Bn-A10-p12297280 | Bn-N7-p2793248        | gene |      |
| Bn-A10-p12307115 | Bn-N7-p2809465        | gene | exon |
| Bn-A10-p12316390 | Bn-N7-p2821655        | gene |      |
| Bn-A10-p12316420 | Bn-N7-p2821685        | gene |      |
| Bn-A10-p12316487 | Bn-N7-p2821752        | gene |      |
| Bn-A10-p12353464 | Bn-N7-p2854426        | gene | exon |
| Bn-A10-p12439754 | Bn-Scaffold15041-p533 | gene |      |
| Bn-A10-p12463322 | Bn-N7-p2970827        | gene | exon |

|                  |                  |      |      |
|------------------|------------------|------|------|
| Bn-A10-p12485323 | Bn-N7-p2992326   | gene |      |
| Bn-A10-p12501815 | Bn-N7-p3009536   | gene |      |
| Bn-A10-p12597952 | Bn-N7-p3080446   | gene |      |
| Bn-A10-p12611994 | Bn-N7-p3093734   | gene | exon |
| Bn-A10-p126180   | Bn-N19-p32582381 | gene |      |
| Bn-A10-p12627247 | Bn-N7-p3114500   | gene |      |
| Bn-A10-p12632289 | Bn-N7-p3119690   | gene | exon |
| Bn-A10-p12633352 | Bn-N7-p3120753   | gene | exon |
| Bn-A10-p1264986  | Bn-N15-p2523137  | gene |      |
| Bn-A10-p1268549  | Bn-N10-p2691862  | gene | exon |
| Bn-A10-p1269116  | Bn-N15-p2518877  | gene | exon |
| Bn-A10-p12727662 | Bn-N7-p3222825   | gene | exon |
| Bn-A10-p1273491  | Bn-N10-p2686920  | gene |      |
| Bn-A10-p12828161 | Bn-N10-p13226976 | gene | exon |
| Bn-A10-p12842513 | Bn-N10-p13241309 | gene |      |
| Bn-A10-p12885978 | Bn-N10-p13286395 | gene |      |
| Bn-A10-p12900258 | Bn-N10-p13307673 | gene | exon |
| Bn-A10-p12901822 | Bn-N19-p49954038 | gene |      |
| Bn-A10-p12928142 | Bn-N10-p13336279 | gene | exon |
| Bn-A10-p12933288 | Bn-N10-p13341433 | gene | exon |
| Bn-A10-p12938355 | Bn-N10-p13346427 | gene | exon |
| Bn-A10-p12968361 | Bn-N10-p13364991 | gene | exon |
| Bn-A10-p12984425 | Bn-N10-p13374408 | gene | exon |
| Bn-A10-p12990499 | Bn-N10-p13380117 | gene |      |
| Bn-A10-p12999930 | Bn-N10-p13392000 | gene | exon |
| Bn-A10-p13008713 | Bn-N19-p50056272 | gene | exon |
| Bn-A10-p13009957 | Bn-N10-p13404021 | gene |      |
| Bn-A10-p13019909 | Bn-N10-p13415737 | gene | exon |
| Bn-A10-p13028260 | Bn-N10-p13424174 | gene |      |
| Bn-A10-p1303093  | Bn-N10-p2679239  | gene | exon |
| Bn-A10-p13038966 | Bn-N10-p13436855 | gene |      |
| Bn-A10-p13049564 | Bn-N10-p13447390 | gene |      |
| Bn-A10-p13094022 | Bn-N10-p13496580 | gene |      |
| Bn-A10-p13130002 | Bn-N10-p13530217 | gene | exon |
| Bn-A10-p1313220  | Bn-N10-p2672199  | gene |      |
| Bn-A10-p13137531 | Bn-N10-p13558959 | gene | exon |
| Bn-A10-p13137658 | Bn-N10-p13559086 | gene |      |
| Bn-A10-p13138159 | Bn-N10-p13559594 | gene |      |
| Bn-A10-p13138769 | Bn-N10-p13560204 | gene | exon |
| Bn-A10-p13139635 | Bn-N10-p13561070 | gene |      |
| Bn-A10-p13142215 | Bn-N10-p13563545 | gene |      |
| Bn-A10-p13142579 | Bn-N10-p13563909 | gene | exon |
| Bn-A10-p13162021 | Bn-N10-p13584582 | gene | exon |
| Bn-A10-p13164379 | Bn-N10-p13586951 | gene |      |
| Bn-A10-p13164536 | Bn-N10-p13587108 | gene |      |
| Bn-A10-p13165001 | Bn-N10-p13587574 | gene |      |
| Bn-A10-p13165101 | Bn-N10-p13587674 | gene |      |
| Bn-A10-p13169213 | Bn-N10-p13591796 | gene |      |
| Bn-A10-p1318385  | Bn-N10-p2667034  | gene |      |
| Bn-A10-p13195966 | Bn-N10-p13628985 | gene | exon |
| Bn-A10-p13205889 | Bn-N10-p13634244 | gene |      |
| Bn-A10-p13207985 | Bn-N10-p13636114 | gene |      |



|                  |                  |      |      |
|------------------|------------------|------|------|
| Bn-A10-p13230002 | Bn-N10-p13654405 | gene |      |
| Bn-A10-p13245203 | Bn-N10-p13669486 | gene |      |
| Bn-A10-p13263227 | Bn-N10-p13696841 | gene | exon |
| Bn-A10-p13267698 | Bn-N19-p50510017 | gene |      |
| Bn-A10-p13283073 | Bn-N10-p13724909 | gene | exon |
| Bn-A10-p13289368 | Bn-N10-p13729447 | gene | exon |
| Bn-A10-p13299250 | Bn-N10-p13739986 | gene | exon |
| Bn-A10-p13327024 | Bn-N10-p13775604 | gene | exon |
| Bn-A10-p13330418 | Bn-N10-p13778955 | gene | exon |
| Bn-A10-p13358856 | Bn-N10-p13806544 | gene | exon |
| Bn-A10-p13364232 | Bn-N10-p13811605 | gene |      |
| Bn-A10-p13375342 | Bn-N10-p13820657 | gene |      |
| Bn-A10-p13384066 | Bn-N10-p13827222 | gene | exon |
| Bn-A10-p13387522 | Bn-N10-p13836637 | gene |      |
| Bn-A10-p13390065 | Bn-N10-p13837385 | gene |      |
| Bn-A10-p13401328 | Bn-N10-p13850989 | gene | exon |
| Bn-A10-p13410287 | Bn-N10-p13860320 | gene | exon |
| Bn-A10-p13410414 | Bn-N10-p13860440 | gene | exon |
| Bn-A10-p13423663 | Bn-N10-p13875193 | gene | exon |
| Bn-A10-p13435288 | Bn-N19-p50796641 | gene | exon |
| Bn-A10-p1345255  | Bn-N10-p2631797  | gene | exon |
| Bn-A10-p13455391 | Bn-N10-p13907941 | gene |      |
| Bn-A10-p13471114 | Bn-N10-p13924651 | gene |      |
| Bn-A10-p13473460 | Bn-N10-p13926768 | gene |      |
| Bn-A10-p13473595 | Bn-N10-p13926902 | gene |      |
| Bn-A10-p13495547 | Bn-N10-p13938984 | gene | exon |
| Bn-A10-p13508529 | Bn-N10-p13951994 | gene | exon |
| Bn-A10-p13508970 | Bn-N10-p13952435 | gene |      |
| Bn-A10-p13509116 | Bn-N10-p13952581 | gene | exon |
| Bn-A10-p135462   | Bn-N10-p4452891  | gene |      |
| Bn-A10-p1354965  | Bn-N15-p2451181  | gene | exon |
| Bn-A10-p13577876 | Bn-N10-p14028553 | gene |      |
| Bn-A10-p13590061 | Bn-N10-p14041793 | gene |      |
| Bn-A10-p13590367 | Bn-N10-p14042099 | gene | exon |
| Bn-A10-p1359047  | Bn-N15-p2448948  | gene |      |
| Bn-A10-p13606837 | Bn-N10-p14062201 | gene | exon |
| Bn-A10-p13608040 | Bn-N10-p14063421 | gene |      |
| Bn-A10-p13618703 | Bn-N10-p14079656 | gene |      |
| Bn-A10-p13638222 | Bn-N10-p14099908 | gene | exon |
| Bn-A10-p13638489 | Bn-N10-p14100175 | gene | exon |
| Bn-A10-p13640346 | Bn-N10-p14102032 | gene | exon |
| Bn-A10-p13659996 | Bn-N10-p14117563 | gene |      |
| Bn-A10-p13669875 | Bn-N10-p14128485 | gene |      |
| Bn-A10-p13680808 | Bn-N10-p14144802 | gene |      |
| Bn-A10-p13685654 | Bn-N10-p14149654 | gene | exon |
| Bn-A10-p13701342 | Bn-N10-p14162042 | gene |      |
| Bn-A10-p1370599  | Bn-N10-p2610745  | gene |      |
| Bn-A10-p13710321 | Bn-N10-p14175760 | gene |      |
| Bn-A10-p13723140 | Bn-N10-p14189516 | gene |      |
| Bn-A10-p13734245 | Bn-N10-p14199560 | gene |      |
| Bn-A10-p13739326 | Bn-N10-p14204498 | gene |      |
| Bn-A10-p13747995 | Bn-N10-p14213173 | gene | exon |

|                  |                  |      |      |
|------------------|------------------|------|------|
| Bn-A10-p13778875 | Bn-N10-p14243624 | gene | exon |
| Bn-A10-p13779014 | Bn-N10-p14243763 | gene | exon |
| Bn-A10-p13786294 | Bn-N10-p14251001 | gene |      |
| Bn-A10-p13786487 | Bn-N19-p51548397 | gene | exon |
| Bn-A10-p13787477 | Bn-N10-p14252185 | gene |      |
| Bn-A10-p13788629 | Bn-N10-p14253316 | gene |      |
| Bn-A10-p13789579 | Bn-N10-p14254267 | gene |      |
| Bn-A10-p13796417 | Bn-N10-p14260941 | gene |      |
| Bn-A10-p13796426 | Bn-N10-p14260950 | gene |      |
| Bn-A10-p13798602 | Bn-N10-p14263300 | gene | exon |
| Bn-A10-p13815263 | Bn-N10-p14280519 | gene | exon |
| Bn-A10-p13827678 | Bn-N10-p14293030 | gene |      |
| Bn-A10-p13841213 | Bn-N10-p14311399 | gene | exon |
| Bn-A10-p13845694 | Bn-N10-p14315829 | gene | exon |
| Bn-A10-p13846108 | Bn-N10-p14316243 | gene | exon |
| Bn-A10-p13849675 | Bn-N10-p14319805 | gene | exon |
| Bn-A10-p13875041 | Bn-N10-p14342649 | gene |      |
| Bn-A10-p13882091 | Bn-N10-p14348550 | gene | exon |
| Bn-A10-p13882718 | Bn-N10-p14349168 | gene |      |
| Bn-A10-p13932541 | Bn-N10-p14390423 | gene | exon |
| Bn-A10-p13938504 | Bn-N10-p14396084 | gene | exon |
| Bn-A10-p13941742 | Bn-N10-p14399277 | gene | exon |
| Bn-A10-p13965313 | Bn-N10-p14423705 | gene | exon |
| Bn-A10-p13973182 | Bn-N10-p14432266 | gene |      |
| Bn-A10-p13973954 | Bn-N10-p14433038 | gene |      |
| Bn-A10-p13985926 | Bn-N10-p14445060 | gene |      |
| Bn-A10-p13995725 | Bn-N10-p14454462 | gene |      |
| Bn-A10-p13997359 | Bn-N10-p14456091 | gene | exon |
| Bn-A10-p14012013 | Bn-N10-p14461495 | gene | exon |
| Bn-A10-p14042374 | Bn-N10-p14488682 | gene |      |
| Bn-A10-p14049684 | Bn-N10-p14497144 | gene | exon |
| Bn-A10-p14058257 | Bn-N10-p14505713 | gene | exon |
| Bn-A10-p1406327  | Bn-N15-p2409529  | gene |      |
| Bn-A10-p14064793 | Bn-N19-p51994809 | gene | exon |
| Bn-A10-p14075685 | Bn-N10-p14522217 | gene |      |
| Bn-A10-p14092948 | Bn-N10-p14543149 | gene |      |
| Bn-A10-p14097282 | Bn-N10-p14549323 | gene | exon |
| Bn-A10-p14142060 | Bn-N10-p14593603 | gene | exon |
| Bn-A10-p14143198 | Bn-N19-p52096410 | gene | exon |
| Bn-A10-p14143770 | Bn-N10-p14595313 | gene | exon |
| Bn-A10-p14150442 | Bn-N10-p14601992 | gene | exon |
| Bn-A10-p14160561 | Bn-N10-p14612957 | gene | exon |
| Bn-A10-p1416938  | Bn-N10-p2567262  | gene | exon |
| Bn-A10-p14198466 | Bn-N10-p14651413 | gene |      |
| Bn-A10-p14254487 | Bn-N10-p14715060 | gene | exon |
| Bn-A10-p14297432 | Bn-N10-p14753438 | gene | exon |
| Bn-A10-p14297749 | Bn-N10-p14753755 | gene | exon |
| Bn-A10-p14299800 | Bn-N10-p14755806 | gene |      |
| Bn-A10-p14300320 | Bn-N10-p14756326 | gene |      |
| Bn-A10-p14307417 | Bn-N10-p14765541 | gene |      |
| Bn-A10-p14313275 | Bn-N10-p14771350 | gene | exon |
| Bn-A10-p14327285 | Bn-N10-p14784956 | gene |      |

|                  |                  |      |      |
|------------------|------------------|------|------|
| Bn-A10-p14334390 | Bn-N10-p14792079 | gene |      |
| Bn-A10-p14353770 | Bn-N10-p14810503 | gene | exon |
| Bn-A10-p14354612 | Bn-N10-p14811340 | gene | exon |
| Bn-A10-p14365581 | Bn-N10-p14823751 | gene |      |
| Bn-A10-p14373433 | Bn-N10-p14831501 | gene |      |
| Bn-A10-p14384277 | Bn-N10-p14842393 | gene | exon |
| Bn-A10-p14385282 | Bn-N10-p14843399 | gene |      |
| Bn-A10-p14394392 | Bn-N10-p14852555 | gene | exon |
| Bn-A10-p14408281 | Bn-N10-p14866420 | gene |      |
| Bn-A10-p14431375 | Bn-N10-p14890034 | gene |      |
| Bn-A10-p14464434 | Bn-N10-p14908626 | gene |      |
| Bn-A10-p14475546 | Bn-N10-p14923063 | gene | exon |
| Bn-A10-p14488358 | Bn-N10-p14935901 | gene | exon |
| Bn-A10-p14490038 | Bn-N10-p14937581 | gene |      |
| Bn-A10-p14528560 | Bn-N10-p14983813 | gene | exon |
| Bn-A10-p14545046 | Bn-N10-p14998321 | gene |      |
| Bn-A10-p14547767 | Bn-N10-p15001063 | gene | exon |
| Bn-A10-p14554456 | Bn-N10-p15007769 | gene | exon |
| Bn-A10-p14574100 | Bn-N10-p15026776 | gene | exon |
| Bn-A10-p14618311 | Bn-N10-p15060399 | gene |      |
| Bn-A10-p14620951 | Bn-N10-p15062988 | gene |      |
| Bn-A10-p14636670 | Bn-N10-p15079362 | gene | exon |
| Bn-A10-p14646222 | Bn-N10-p15090804 | gene | exon |
| Bn-A10-p14653123 | Bn-N10-p15097630 | gene |      |
| Bn-A10-p14658742 | Bn-N10-p15103352 | gene | exon |
| Bn-A10-p14664967 | Bn-N10-p15109709 | gene | exon |
| Bn-A10-p14665064 | Bn-N10-p15109806 | gene | exon |
| Bn-A10-p14681027 | Bn-N10-p15124145 | gene | exon |
| Bn-A10-p14687193 | Bn-N10-p15130797 | gene | exon |
| Bn-A10-p14687699 | Bn-N10-p15131303 | gene | exon |
| Bn-A10-p14693723 | Bn-N10-p15137303 | gene | exon |
| Bn-A10-p14694580 | Bn-N10-p15138161 | gene | exon |
| Bn-A10-p14728923 | Bn-N10-p15186752 | gene | exon |
| Bn-A10-p14734107 | Bn-N10-p15193088 | gene | exon |
| Bn-A10-p1474859  | Bn-N7-p1893662   | gene | exon |
| Bn-A10-p14770174 | Bn-N10-p15226589 | gene | exon |
| Bn-A10-p14772012 | Bn-N10-p15228428 | gene |      |
| Bn-A10-p14809502 | Bn-N10-p15275509 | gene | exon |
| Bn-A10-p14814896 | Bn-N10-p15280900 | gene | exon |
| Bn-A10-p14820463 | Bn-N10-p15286509 | gene |      |
| Bn-A10-p14821861 | Bn-N10-p15287902 | gene | exon |
| Bn-A10-p14823906 | Bn-N10-p15289945 | gene |      |
| Bn-A10-p14834518 | Bn-N10-p15307795 | gene | exon |
| Bn-A10-p14835887 | Bn-N10-p15309164 | gene | exon |
| Bn-A10-p14844217 | Bn-N10-p15322850 | gene | exon |
| Bn-A10-p1486296  | Bn-N10-p2483504  | gene | exon |
| Bn-A10-p14883536 | Bn-N10-p15359194 | gene |      |
| Bn-A10-p14914898 | Bn-N10-p15401933 | gene |      |
| Bn-A10-p14918537 | Bn-N10-p15404656 | gene |      |
| Bn-A10-p14928362 | Bn-N19-p53371026 | gene | exon |
| Bn-A10-p14950115 | Bn-N10-p15438914 | gene | exon |
| Bn-A10-p14958522 | Bn-N10-p15446707 | gene |      |

|                  |                  |      |      |
|------------------|------------------|------|------|
| Bn-A10-p14962307 | Bn-N10-p15449313 | gene |      |
| Bn-A10-p14971063 | Bn-N10-p15457676 | gene |      |
| Bn-A10-p14994086 | Bn-N10-p15482403 | gene | exon |
| Bn-A10-p14994341 | Bn-N10-p15482658 | gene |      |
| Bn-A10-p15020436 | Bn-N10-p15511387 | gene | exon |
| Bn-A10-p15021776 | Bn-N10-p15512727 | gene | exon |
| Bn-A10-p15031810 | Bn-N10-p15522899 | gene | exon |
| Bn-A10-p15069552 | Bn-N19-p53661499 | gene | exon |
| Bn-A10-p15083548 | Bn-N10-p15577790 | gene | exon |
| Bn-A10-p15086931 | Bn-N10-p15581153 | gene |      |
| Bn-A10-p15106056 | Bn-N10-p15599277 | gene |      |
| Bn-A10-p15108947 | Bn-N10-p15602672 | gene |      |
| Bn-A10-p15117055 | Bn-N10-p15610190 | gene | exon |
| Bn-A10-p1513127  | Bn-N10-p2450672  | gene | exon |
| Bn-A10-p15156277 | Bn-N10-p15639341 | gene | exon |
| Bn-A10-p15160966 | Bn-N10-p15644031 | gene | exon |
| Bn-A10-p15227741 | Bn-N10-p16983649 | gene | exon |
| Bn-A10-p15237864 | Bn-N10-p16973367 | gene | exon |
| Bn-A10-p15237975 | Bn-N10-p16973256 | gene | exon |
| Bn-A10-p15265102 | Bn-N10-p16945504 | gene | exon |
| Bn-A10-p15276369 | Bn-N19-p55393882 | gene |      |
| Bn-A10-p15276444 | Bn-N19-p55393806 | gene |      |
| Bn-A10-p15296322 | Bn-N10-p16904775 | gene |      |
| Bn-A10-p15299272 | Bn-N10-p16901840 | gene |      |
| Bn-A10-p15300203 | Bn-N10-p16900889 | gene | exon |
| Bn-A10-p15310323 | Bn-N10-p16891673 | gene | exon |
| Bn-A10-p15312311 | Bn-N10-p16889689 | gene |      |
| Bn-A10-p15327377 | Bn-N10-p16878297 | gene |      |
| Bn-A10-p15327814 | Bn-N10-p16877860 | gene |      |
| Bn-A10-p15327850 | Bn-N10-p16877824 | gene |      |
| Bn-A10-p15328039 | Bn-N19-p55342118 | gene |      |
| Bn-A10-p15355521 | Bn-N10-p16845539 | gene | exon |
| Bn-A10-p15361519 | Bn-N10-p16838219 | gene | exon |
| Bn-A10-p15401999 | Bn-N10-p16794775 | gene | exon |
| Bn-A10-p15405149 | Bn-N10-p16791314 | gene | exon |
| Bn-A10-p15408188 | Bn-N19-p55220975 | gene |      |
| Bn-A10-p15412233 | Bn-N10-p16786323 | gene |      |
| Bn-A10-p15433413 | Bn-N19-p55179397 | gene | exon |
| Bn-A10-p15442975 | Bn-N10-p16749269 | gene |      |
| Bn-A10-p15444223 | Bn-N10-p16748021 | gene |      |
| Bn-A10-p15458720 | Bn-N10-p16732070 | gene |      |
| Bn-A10-p15485139 | Bn-N10-p16703595 | gene |      |
| Bn-A10-p15488923 | Bn-N10-p16700077 | gene |      |
| Bn-A10-p15496817 | Bn-N10-p16692507 | gene |      |
| Bn-A10-p15507350 | Bn-N10-p16681932 | gene | exon |
| Bn-A10-p15591443 | Bn-N10-p16576269 | gene | exon |
| Bn-A10-p15597364 | Bn-N10-p16570303 | gene | exon |
| Bn-A10-p15601027 | Bn-N10-p16566578 | gene | exon |
| Bn-A10-p15606935 | Bn-N10-p16560438 | gene | exon |
| Bn-A10-p15607468 | Bn-N10-p16559905 | gene |      |
| Bn-A10-p15633321 | Bn-N10-p16533851 | gene | exon |
| Bn-A10-p15637848 | Bn-N10-p16529373 | gene | exon |

|                  |                  |      |      |
|------------------|------------------|------|------|
| Bn-A10-p15651383 | Bn-N10-p16515942 | gene |      |
| Bn-A10-p15657263 | Bn-N10-p16510169 | gene |      |
| Bn-A10-p15660472 | Bn-N19-p54843341 | gene | exon |
| Bn-A10-p15668415 | Bn-N10-p16498167 | gene |      |
| Bn-A10-p15672303 | Bn-N10-p16495323 | gene |      |
| Bn-A10-p15711469 | Bn-N10-p16457656 | gene | exon |
| Bn-A10-p15719803 | Bn-N19-p54792481 | gene | exon |
| Bn-A10-p15729205 | Bn-N10-p16437711 | gene | exon |
| Bn-A10-p15737116 | Bn-N10-p16429319 | gene | exon |
| Bn-A10-p15737423 | Bn-N10-p16429012 | gene | exon |
| Bn-A10-p15738808 | Bn-N10-p16427579 | gene |      |
| Bn-A10-p15742689 | Bn-N10-p16423703 | gene | exon |
| Bn-A10-p15746238 | Bn-N10-p16420172 | gene |      |
| Bn-A10-p15760933 | Bn-N10-p16402700 | gene |      |
| Bn-A10-p15786012 | Bn-N10-p16373748 | gene | exon |
| Bn-A10-p15817344 | Bn-N10-p16340492 | gene | exon |
| Bn-A10-p15824883 | Bn-N19-p54662336 | gene | exon |
| Bn-A10-p15838863 | Bn-N10-p16318461 | gene |      |
| Bn-A10-p15838932 | Bn-N10-p16318392 | gene |      |
| Bn-A10-p15863143 | Bn-N10-p16296245 | gene |      |
| Bn-A10-p15863972 | Bn-N10-p16295415 | gene |      |
| Bn-A10-p15864056 | Bn-N10-p16295331 | gene |      |
| Bn-A10-p15868115 | Bn-N10-p16291242 | gene | exon |
| Bn-A10-p15868364 | Bn-N19-p54618907 | gene | exon |
| Bn-A10-p15884544 | Bn-N10-p16282653 | gene |      |
| Bn-A10-p15885356 | Bn-N10-p16281841 | gene | exon |
| Bn-A10-p15894309 | Bn-N10-p16271426 | gene |      |
| Bn-A10-p15894501 | Bn-N10-p16271234 | gene |      |
| Bn-A10-p15908393 | Bn-N10-p16258531 | gene |      |
| Bn-A10-p15924608 | Bn-N10-p16242092 | gene | exon |
| Bn-A10-p15924755 | Bn-N10-p16241945 | gene |      |
| Bn-A10-p15925135 | Bn-N10-p16241644 | gene | exon |
| Bn-A10-p1595235  | Bn-N10-p2354972  | gene |      |
| Bn-A10-p15955591 | Bn-N10-p16204253 | gene |      |
| Bn-A10-p15971312 | Bn-N10-p16187749 | gene | exon |
| Bn-A10-p15997363 | Bn-N10-p16166145 | gene |      |
| Bn-A10-p15997433 | Bn-N10-p16166075 | gene |      |
| Bn-A10-p15997448 | Bn-N10-p16166060 | gene |      |
| Bn-A10-p16005880 | Bn-N10-p16158767 | gene |      |
| Bn-A10-p16017024 | Bn-N10-p16147283 | gene | exon |
| Bn-A10-p16029222 | Bn-N10-p16135174 | gene |      |
| Bn-A10-p16030162 | Bn-N10-p16134232 | gene | exon |
| Bn-A10-p16032125 | Bn-N10-p16132296 | gene |      |
| Bn-A10-p16036488 | Bn-N10-p16126711 | gene |      |
| Bn-A10-p16037268 | Bn-N10-p16125930 | gene |      |
| Bn-A10-p1606279  | Bn-N10-p2343996  | gene |      |
| Bn-A10-p16067573 | Bn-N10-p16090488 | gene | exon |
| Bn-A10-p16071525 | Bn-N10-p16086536 | gene |      |
| Bn-A10-p16074706 | Bn-N10-p16083357 | gene |      |
| Bn-A10-p16109898 | Bn-N10-p16046319 | gene |      |
| Bn-A10-p1611838  | Bn-N10-p2336662  | gene | exon |
| Bn-A10-p1611973  | Bn-N10-p2336527  | gene |      |

|                  |                        |      |      |
|------------------|------------------------|------|------|
| Bn-A10-p16142232 | Bn-N10-p16013752       | gene | exon |
| Bn-A10-p16152327 | Bn-N10-p16003684       | gene | exon |
| Bn-A10-p16158247 | Bn-N10-p16000605       | gene | exon |
| Bn-A10-p16158770 | Bn-N10-p16000082       | gene | exon |
| Bn-A10-p16162575 | Bn-N10-p15996235       | gene |      |
| Bn-A10-p16164252 | Bn-N10-p15994574       | gene |      |
| Bn-A10-p16184233 | Bn-N10-p15975946       | gene |      |
| Bn-A10-p16185535 | Bn-N10-p15974619       | gene |      |
| Bn-A10-p16187017 | Bn-N10-p15973136       | gene |      |
| Bn-A10-p16187357 | Bn-N10-p15972796       | gene |      |
| Bn-A10-p16190708 | Bn-N10-p15969233       | gene | exon |
| Bn-A10-p16207908 | Bn-N10-p15957847       | gene | exon |
| Bn-A10-p16210702 | Bn-N10-p15955037       | gene | exon |
| Bn-A10-p16213045 | Bn-N10-p15952698       | gene |      |
| Bn-A10-p16224024 | Bn-N10-p15939293       | gene |      |
| Bn-A10-p16240958 | Bn-N10-p15927241       | gene |      |
| Bn-A10-p16249484 | Bn-N10-p15918848       | gene |      |
| Bn-A10-p16285282 | Bn-N10-p15878279       | gene | exon |
| Bn-A10-p16287574 | Bn-N10-p15876004       | gene |      |
| Bn-A10-p16296069 | Bn-N10-p15867500       | gene | exon |
| Bn-A10-p16312405 | Bn-N10-p15851140       | gene |      |
| Bn-A10-p16317798 | Bn-N10-p15847683       | gene | exon |
| Bn-A10-p16344917 | Bn-N10-p15825188       | gene |      |
| Bn-A10-p16354622 | Bn-N10-p15813657       | gene | exon |
| Bn-A10-p16357479 | Bn-N10-p15811331       | gene | exon |
| Bn-A10-p16360911 | Bn-N10-p15807897       | gene | exon |
| Bn-A10-p16363196 | Bn-N19-p53976276       | gene | exon |
| Bn-A10-p16396586 | Bn-N10-p15768881       | gene | exon |
| Bn-A10-p16439150 | Bn-N10-p15720562       | gene | exon |
| Bn-A10-p16442531 | Bn-N10-p15717099       | gene | exon |
| Bn-A10-p16451834 | Bn-N10-p15707679       | gene | exon |
| Bn-A10-p16516985 | Bn-Scaffold09297-p138  | gene | exon |
| Bn-A10-p16522658 | Bn-N10-p17075724       | gene |      |
| Bn-A10-p16595840 | Bn-N10-p17146693       | gene |      |
| Bn-A10-p16626615 | Bn-N10-p17179621       | gene |      |
| Bn-A10-p16640315 | Bn-Scaffold02219-p1504 | gene | exon |
| Bn-A10-p16672063 | Bn-N10-p17216045       | gene |      |
| Bn-A10-p16673324 | Bn-N2-p771574          | gene |      |
| Bn-A10-p16673808 | Bn-N10-p17217790       | gene |      |
| Bn-A10-p16674476 | Bn-N10-p17218458       | gene |      |
| Bn-A10-p16694218 | Bn-N10-p17237348       | gene |      |
| Bn-A10-p16694564 | Bn-N10-p17237695       | gene |      |
| Bn-A10-p16695705 | Bn-N10-p17238838       | gene | exon |
| Bn-A10-p16696977 | Bn-N10-p17240110       | gene | exon |
| Bn-A10-p16706289 | Bn-N10-p17257027       | gene |      |
| Bn-A10-p16712853 | Bn-N10-p17263462       | gene |      |
| Bn-A10-p16718558 | Bn-N10-p17268771       | gene |      |
| Bn-A10-p16737974 | Bn-N10-p17296870       | gene | exon |
| Bn-A10-p16752445 | Bn-Scaffold02476-p1343 | gene |      |
| Bn-A10-p16754116 | Bn-Scaffold02476-p3014 | gene |      |
| Bn-A10-p16816027 | Bn-N10-p17374907       | gene |      |
| Bn-A10-p16821888 | Bn-N10-p17382668       | gene |      |

|                  |                  |      |      |
|------------------|------------------|------|------|
| Bn-A10-p16824950 | Bn-N10-p17385723 | gene |      |
| Bn-A10-p16836688 | Bn-N10-p17398551 | gene | exon |
| Bn-A10-p16837056 | Bn-N10-p17398918 | gene | exon |
| Bn-A10-p16871085 | Bn-N10-p17431885 | gene | exon |
| Bn-A10-p16924111 | Bn-N10-p17489488 | gene | exon |
| Bn-A10-p16932737 | Bn-N10-p17498118 | gene | exon |
| Bn-A10-p16935603 | Bn-N12-p352125   | gene |      |
| Bn-A10-p1698746  | Bn-N10-p2222171  | gene |      |
| Bn-A10-p17146557 | Bn-N10-p17715579 | gene |      |
| Bn-A10-p17160136 | Bn-N10-p17729715 | gene | exon |
| Bn-A10-p17169081 | Bn-N10-p17739220 | gene |      |
| Bn-A10-p17262954 | Bn-N10-p17829335 | gene |      |
| Bn-A10-p17302908 | Bn-N10-p17867565 | gene |      |
| Bn-A10-p17367157 | Bn-N19-p55680548 | gene |      |
| Bn-A10-p17434951 | Bn-N19-p55778823 | gene |      |
| Bn-A10-p1746455  | Bn-N10-p2160505  | gene |      |
| Bn-A10-p17470876 | Bn-N19-p55832045 | gene | exon |
| Bn-A10-p17500897 | Bn-N19-p55866113 | gene | exon |
| Bn-A10-p17541781 | Bn-N19-p55895218 | gene |      |
| Bn-A10-p17549759 | Bn-N19-p55902977 | gene | exon |
| Bn-A10-p17565344 | Bn-N19-p55954117 | gene |      |
| Bn-A10-p17565347 | Bn-N19-p55954120 | gene |      |
| Bn-A10-p17566833 | Bn-N19-p55962124 | gene |      |
| Bn-A10-p17568393 | Bn-N19-p55967560 | gene | exon |
| Bn-A10-p17575474 | Bn-N19-p55973742 | gene | exon |
| Bn-A10-p1782825  | Bn-N10-p2132362  | gene |      |
| Bn-A10-p1787348  | Bn-N15-p2061201  | gene |      |
| Bn-A10-p1791974  | Bn-N10-p2123204  | gene | exon |
| Bn-A10-p180934   | Bn-N10-p4362516  | gene |      |
| Bn-A10-p182060   | Bn-N10-p4361353  | gene |      |
| Bn-A10-p2034005  | Bn-N10-p1844715  | gene | exon |
| Bn-A10-p2034006  | Bn-N10-p1844714  | gene | exon |
| Bn-A10-p2035810  | Bn-N15-p1843710  | gene |      |
| Bn-A10-p2048923  | Bn-N10-p1827080  | gene |      |
| Bn-A10-p2056053  | Bn-N10-p1819797  | gene |      |
| Bn-A10-p2059382  | Bn-N10-p1816479  | gene |      |
| Bn-A10-p2074000  | Bn-N10-p1798135  | gene |      |
| Bn-A10-p2084182  | Bn-N10-p1789509  | gene |      |
| Bn-A10-p2096179  | Bn-N10-p1783003  | gene |      |
| Bn-A10-p2096482  | Bn-N10-p1782700  | gene |      |
| Bn-A10-p2104477  | Bn-N10-p1773677  | gene |      |
| Bn-A10-p2106781  | Bn-N10-p1771367  | gene | exon |
| Bn-A10-p2107649  | Bn-N10-p1770499  | gene |      |
| Bn-A10-p2107673  | Bn-N10-p1770475  | gene |      |
| Bn-A10-p2171166  | Bn-N10-p1704397  | gene | exon |
| Bn-A10-p2176252  | Bn-N10-p1699311  | gene | exon |
| Bn-A10-p2196623  | Bn-N10-p1674904  | gene |      |
| Bn-A10-p2240635  | Bn-N10-p1629949  | gene |      |
| Bn-A10-p2247699  | Bn-N10-p1625365  | gene |      |
| Bn-A10-p2260170  | Bn-N15-p1632525  | gene | exon |
| Bn-A10-p2266029  | Bn-N10-p1610466  | gene |      |
| Bn-A10-p2268467  | Bn-N10-p1608071  | gene |      |

|                 |                 |      |      |
|-----------------|-----------------|------|------|
| Bn-A10-p2268881 | Bn-N10-p1607657 | gene |      |
| Bn-A10-p2279962 | Bn-N10-p1603334 | gene | exon |
| Bn-A10-p2292633 | Bn-N10-p1597356 | gene | exon |
| Bn-A10-p2294849 | Bn-N10-p1594492 | gene |      |
| Bn-A10-p2295027 | Bn-N10-p1594314 | gene |      |
| Bn-A10-p2309307 | Bn-N10-p1580565 | gene | exon |
| Bn-A10-p2309584 | Bn-N10-p1580288 | gene | exon |
| Bn-A10-p2315491 | Bn-N10-p5685437 | gene |      |
| Bn-A10-p2315612 | Bn-N10-p5685558 | gene |      |
| Bn-A10-p2337558 | Bn-N10-p1554391 | gene | exon |
| Bn-A10-p2356781 | Bn-N10-p1536384 | gene | exon |
| Bn-A10-p2357401 | Bn-N10-p1535766 | gene | exon |
| Bn-A10-p2369024 | Bn-N10-p1532307 | gene | exon |
| Bn-A10-p2369622 | Bn-N10-p1531709 | gene |      |
| Bn-A10-p2374648 | Bn-N10-p1526705 | gene |      |
| Bn-A10-p2415609 | Bn-N10-p1497520 | gene | exon |
| Bn-A10-p2416648 | Bn-N10-p1496521 | gene | exon |
| Bn-A10-p2425437 | Bn-N15-p1517237 | gene |      |
| Bn-A10-p2449120 | Bn-N10-p1467040 | gene |      |
| Bn-A10-p2500393 | Bn-N10-p1420348 | gene |      |
| Bn-A10-p2500523 | Bn-N10-p1419901 | gene |      |
| Bn-A10-p2523110 | Bn-N10-p1398053 | gene |      |
| Bn-A10-p2523239 | Bn-N10-p1397924 | gene |      |
| Bn-A10-p2529144 | Bn-N10-p1388373 | gene |      |
| Bn-A10-p2535072 | Bn-N10-p1379545 | gene |      |
| Bn-A10-p2580811 | Bn-N10-p1337003 | gene | exon |
| Bn-A10-p2589024 | Bn-N10-p1328701 | gene | exon |
| Bn-A10-p2687844 | Bn-N10-p1233095 | gene |      |
| Bn-A10-p2710961 | Bn-N10-p1213968 | gene |      |
| Bn-A10-p2728481 | Bn-N10-p1200010 | gene |      |
| Bn-A10-p2747164 | Bn-N10-p1181109 | gene |      |
| Bn-A10-p2764779 | Bn-N10-p1168468 | gene | exon |
| Bn-A10-p2805505 | Bn-N10-p1125026 | gene | exon |
| Bn-A10-p2890008 | Bn-N7-p3299226  | gene | exon |
| Bn-A10-p2899850 | Bn-N7-p3305498  | gene | exon |
| Bn-A10-p2937911 | Bn-N7-p3325254  | gene | exon |
| Bn-A10-p2939364 | Bn-N7-p3326707  | gene |      |
| Bn-A10-p2941216 | Bn-N7-p3328567  | gene |      |
| Bn-A10-p2997098 | Bn-N7-p3371486  | gene | exon |
| Bn-A10-p2997237 | Bn-N7-p3371625  | gene |      |
| Bn-A10-p302099  | Bn-N10-p4247550 | gene |      |
| Bn-A10-p3042880 | Bn-N7-p3415813  | gene | exon |
| Bn-A10-p306851  | Bn-N10-p4242768 | gene |      |
| Bn-A10-p3235646 | Bn-N7-p3620878  | gene |      |
| Bn-A10-p353725  | Bn-N10-p4218844 | gene |      |
| Bn-A10-p3605582 | Bn-N10-p4791358 | gene |      |
| Bn-A10-p3605726 | Bn-N10-p4791502 | gene |      |
| Bn-A10-p3605865 | Bn-N10-p4791641 | gene |      |
| Bn-A10-p3652309 | Bn-N10-p4841394 | gene | exon |
| Bn-A10-p3652425 | Bn-N10-p4841510 | gene | exon |
| Bn-A10-p3728041 | Bn-N10-p4933619 | gene | exon |
| Bn-A10-p3745973 | Bn-N10-p4947658 | gene | exon |



|                 |                       |      |      |
|-----------------|-----------------------|------|------|
| Bn-A10-p3782582 | Bn-N10-p1041846       | gene | exon |
| Bn-A10-p3782643 | Bn-N10-p1041785       | gene | exon |
| Bn-A10-p378724  | Bn-N10-p4195288       | gene |      |
| Bn-A10-p3809773 | Bn-N10-p1015618       | gene | exon |
| Bn-A10-p3845546 | Bn-N10-p984144        | gene | exon |
| Bn-A10-p3903845 | Bn-N10-p932923        | gene |      |
| Bn-A10-p3905100 | Bn-N10-p931657        | gene |      |
| Bn-A10-p3905295 | Bn-N10-p931462        | gene |      |
| Bn-A10-p3909275 | Bn-N10-p927565        | gene | exon |
| Bn-A10-p3944803 | Bn-Scaffold03150-p963 | gene | exon |
| Bn-A10-p3955901 | Bn-N10-p912738        | gene | exon |
| Bn-A10-p3966740 | Bn-N10-p898703        | gene |      |
| Bn-A10-p3978242 | Bn-N10-p886752        | gene |      |
| Bn-A10-p3988046 | Bn-N10-p866437        | gene | exon |
| Bn-A10-p4038884 | Bn-N10-p831013        | gene |      |
| Bn-A10-p4040298 | Bn-N10-p829577        | gene | exon |
| Bn-A10-p4076884 | Bn-N10-p795050        | gene |      |
| Bn-A10-p4078158 | Bn-N10-p793644        | gene |      |
| Bn-A10-p4079529 | Bn-N10-p792273        | gene |      |
| Bn-A10-p4080011 | Bn-N10-p791792        | gene |      |
| Bn-A10-p4088438 | Bn-N10-p782670        | gene |      |
| Bn-A10-p4089670 | Bn-N10-p781432        | gene |      |
| Bn-A10-p4112636 | Bn-N10-p763440        | gene |      |
| Bn-A10-p4115062 | Bn-N10-p761222        | gene |      |
| Bn-A10-p4120782 | Bn-N10-p756176        | gene |      |
| Bn-A10-p4127274 | Bn-N10-p749727        | gene | exon |
| Bn-A10-p4134125 | Bn-N15-p791259        | gene | exon |
| Bn-A10-p4138782 | Bn-N10-p738423        | gene |      |
| Bn-A10-p4138801 | Bn-N10-p738404        | gene | exon |
| Bn-A10-p4214836 | Bn-N10-p647918        | gene | exon |
| Bn-A10-p4311291 | Bn-N10-p556861        | gene |      |
| Bn-A10-p4347862 | Bn-N10-p518121        | gene | exon |
| Bn-A10-p4425066 | Bn-N10-p457441        | gene |      |
| Bn-A10-p4425312 | Bn-N10-p457194        | gene |      |
| Bn-A10-p4460099 | Bn-N10-p411194        | gene |      |
| Bn-A10-p4506059 | Bn-N10-p379016        | gene | exon |
| Bn-A10-p4506119 | Bn-N10-p378956        | gene | exon |
| Bn-A10-p4553957 | Bn-N10-p341281        | gene |      |
| Bn-A10-p4558688 | Bn-N10-p334970        | gene | exon |
| Bn-A10-p4574423 | Bn-N10-p322875        | gene | exon |
| Bn-A10-p4575458 | Bn-N10-p321834        | gene |      |
| Bn-A10-p4577455 | Bn-N10-p319837        | gene | exon |
| Bn-A10-p4605721 | Bn-N10-p298208        | gene | exon |
| Bn-A10-p4606815 | Bn-N10-p297188        | gene |      |
| Bn-A10-p4624712 | Bn-N10-p280829        | gene |      |
| Bn-A10-p4625350 | Bn-N10-p280191        | gene |      |
| Bn-A10-p4639202 | Bn-N10-p260628        | gene | exon |
| Bn-A10-p4642637 | Bn-N10-p257232        | gene |      |
| Bn-A10-p466849  | Bn-N10-p4150990       | gene | exon |
| Bn-A10-p4701756 | Bn-N10-p195559        | gene | exon |
| Bn-A10-p4725713 | Bn-N10-p176298        | gene | exon |
| Bn-A10-p4727374 | Bn-N10-p174643        | gene |      |

|                 |                  |      |      |
|-----------------|------------------|------|------|
| Bn-A10-p4731968 | Bn-N10-p172505   | gene | exon |
| Bn-A10-p4742940 | Bn-N10-p165000   | gene | exon |
| Bn-A10-p4755899 | Bn-N10-p146549   | gene | exon |
| Bn-A10-p4757850 | Bn-N10-p144599   | gene |      |
| Bn-A10-p4786596 | Bn-N10-p109572   | gene | exon |
| Bn-A10-p4792793 | Bn-N10-p100701   | gene | exon |
| Bn-A10-p4802341 | Bn-N10-p88239    | gene | exon |
| Bn-A10-p4813171 | Bn-N10-p64218    | gene |      |
| Bn-A10-p4840892 | Bn-N10-p41211    | gene | exon |
| Bn-A10-p4985950 | Bn-N10-p5764268  | gene |      |
| Bn-A10-p4986275 | Bn-N10-p5764593  | gene |      |
| Bn-A10-p510846  | Bn-N10-p6506271  | gene |      |
| Bn-A10-p5128067 | Bn-N19-p36422057 | gene | exon |
| Bn-A10-p5250586 | Bn-N10-p6068974  | gene |      |
| Bn-A10-p5299784 | Bn-N10-p6114631  | gene | exon |
| Bn-A10-p5317804 | Bn-N10-p6132376  | gene |      |
| Bn-A10-p5635816 | Bn-N10-p7187678  | gene |      |
| Bn-A10-p5730775 | Bn-N10-p7287797  | gene | exon |
| Bn-A10-p5799347 | Bn-N10-p7364123  | gene |      |
| Bn-A10-p5819027 | Bn-N10-p7382826  | gene |      |
| Bn-A10-p5869175 | Bn-N10-p7430860  | gene |      |
| Bn-A10-p600021  | Bn-N10-p3397365  | gene |      |
| Bn-A10-p6120400 | Bn-N10-p7704661  | gene | exon |
| Bn-A10-p6126590 | Bn-N10-p7711290  | gene |      |
| Bn-A10-p6137434 | Bn-N10-p7723073  | gene |      |
| Bn-A10-p6159693 | Bn-N10-p7762914  | gene | exon |
| Bn-A10-p6160352 | Bn-N10-p7763571  | gene |      |
| Bn-A10-p6162838 | Bn-N10-p7765879  | gene | exon |
| Bn-A10-p6180693 | Bn-N10-p7783581  | gene | exon |
| Bn-A10-p6192971 | Bn-N10-p7796722  | gene |      |
| Bn-A10-p6204788 | Bn-N10-p7808581  | gene | exon |
| Bn-A10-p6228003 | Bn-N10-p7833539  | gene | exon |
| Bn-A10-p6233556 | Bn-N10-p7839095  | gene |      |
| Bn-A10-p6247519 | Bn-N10-p7856544  | gene | exon |
| Bn-A10-p6271467 | Bn-N10-p7880985  | gene |      |
| Bn-A10-p6271554 | Bn-N10-p7881072  | gene |      |
| Bn-A10-p6271776 | Bn-N10-p7881288  | gene |      |
| Bn-A10-p6280436 | Bn-N10-p7890668  | gene | exon |
| Bn-A10-p6405472 | Bn-N10-p8026286  | gene |      |
| Bn-A10-p6457220 | Bn-N10-p8076350  | gene |      |
| Bn-A10-p6459258 | Bn-N10-p8078561  | gene | exon |
| Bn-A10-p6459782 | Bn-N10-p8079085  | gene | exon |
| Bn-A10-p6600373 | Bn-N10-p8197048  | gene | exon |
| Bn-A10-p6600844 | Bn-N10-p8197519  | gene |      |
| Bn-A10-p6632002 | Bn-N10-p8228294  | gene |      |
| Bn-A10-p6643953 | Bn-N10-p8242779  | gene |      |
| Bn-A10-p6724918 | Bn-N10-p8317394  | gene |      |
| Bn-A10-p6730588 | Bn-N10-p8322916  | gene |      |
| Bn-A10-p6743896 | Bn-N10-p8345249  | gene |      |
| Bn-A10-p6760255 | Bn-N10-p8361662  | gene | exon |
| Bn-A10-p6760664 | Bn-N10-p8362071  | gene | exon |
| Bn-A10-p6765523 | Bn-N10-p8367620  | gene | exon |

|                 |                       |      |      |
|-----------------|-----------------------|------|------|
| Bn-A10-p6792798 | Bn-N19-p39887885      | gene |      |
| Bn-A10-p6796120 | Bn-N10-p8395757       | gene |      |
| Bn-A10-p6838885 | Bn-N10-p8410308       | gene | exon |
| Bn-A10-p6851091 | Bn-N10-p8427566       | gene | exon |
| Bn-A10-p6851375 | Bn-N10-p8427848       | gene | exon |
| Bn-A10-p6880184 | Bn-N10-p8458434       | gene | exon |
| Bn-A10-p6881287 | Bn-N10-p8459537       | gene | exon |
| Bn-A10-p6896063 | Bn-N10-p8472459       | gene | exon |
| Bn-A10-p6915231 | Bn-N10-p8499914       | gene |      |
| Bn-A10-p6967288 | Bn-N19-p40237283      | gene |      |
| Bn-A10-p7065016 | Bn-N10-p8633594       | gene | exon |
| Bn-A10-p7076810 | Bn-N10-p8648033       | gene | exon |
| Bn-A10-p7109137 | Bn-N10-p8674036       | gene | exon |
| Bn-A10-p718048  | Bn-N10-p3290241       | gene | exon |
| Bn-A10-p7186465 | Bn-N19-p40656394      | gene | exon |
| Bn-A10-p7247322 | Bn-N10-p8810546       | gene | exon |
| Bn-A10-p7250703 | Bn-N10-p8818594       | gene | exon |
| Bn-A10-p7252424 | Bn-N10-p8820235       | gene | exon |
| Bn-A10-p7283605 | Bn-N10-p8846180       | gene | exon |
| Bn-A10-p7309029 | Bn-N10-p8869981       | gene | exon |
| Bn-A10-p73255   | Bn-N5-p12497761       | gene |      |
| Bn-A10-p7326339 | Bn-N10-p8881369       | gene |      |
| Bn-A10-p7341107 | Bn-Scaffold17729-p319 | gene | exon |
| Bn-A10-p7349925 | Bn-N10-p8924295       | gene | exon |
| Bn-A10-p7357100 | Bn-N10-p8938488       | gene |      |
| Bn-A10-p7357442 | Bn-N10-p8938830       | gene |      |
| Bn-A10-p7357555 | Bn-N10-p8938943       | gene | exon |
| Bn-A10-p7360229 | Bn-N10-p8940805       | gene | exon |
| Bn-A10-p7365704 | Bn-N19-p41150470      | gene | exon |
| Bn-A10-p7410271 | Bn-N10-p8986806       | gene | exon |
| Bn-A10-p7480918 | Bn-N19-p41478141      | gene |      |
| Bn-A10-p7482568 | Bn-N19-p41479811      | gene | exon |
| Bn-A10-p749870  | Bn-N10-p3250971       | gene | exon |
| Bn-A10-p7502551 | Bn-N10-p9063787       | gene |      |
| Bn-A10-p7502935 | Bn-N10-p9064197       | gene | exon |
| Bn-A10-p7504317 | Bn-N10-p9065708       | gene | exon |
| Bn-A10-p7510542 | Bn-N10-p9071873       | gene |      |
| Bn-A10-p7513409 | Bn-N10-p9074740       | gene |      |
| Bn-A10-p758707  | Bn-N10-p3233916       | gene | exon |
| Bn-A10-p7599250 | Bn-N10-p9167144       | gene | exon |
| Bn-A10-p7600250 | Bn-N10-p9168144       | gene |      |
| Bn-A10-p7636136 | Bn-N10-p9210764       | gene |      |
| Bn-A10-p7704373 | Bn-N10-p9279196       | gene | exon |
| Bn-A10-p7720931 | Bn-N10-p9299579       | gene |      |
| Bn-A10-p7767853 | Bn-N10-p9352782       | gene |      |
| Bn-A10-p7830321 | Bn-N10-p9426238       | gene | exon |
| Bn-A10-p7835472 | Bn-N10-p9431923       | gene | exon |
| Bn-A10-p78356   | Bn-N6-p16371981       | gene |      |
| Bn-A10-p7841942 | Bn-N10-p9438122       | gene | exon |
| Bn-A10-p7850480 | Bn-N10-p9066465       | gene |      |
| Bn-A10-p7866191 | Bn-N10-p9462270       | gene | exon |
| Bn-A10-p7873560 | Bn-N10-p9471356       | gene | exon |

|                 |                       |      |      |
|-----------------|-----------------------|------|------|
| Bn-A10-p788337  | Bn-N10-p3206951       | gene | exon |
| Bn-A10-p7904737 | Bn-N10-p9510368       | gene | exon |
| Bn-A10-p7905059 | Bn-N10-p9510690       | gene | exon |
| Bn-A10-p7906281 | Bn-N10-p9511912       | gene | exon |
| Bn-A10-p7913022 | Bn-N10-p9518968       | gene | exon |
| Bn-A10-p7932013 | Bn-N10-p9533415       | gene |      |
| Bn-A10-p7975206 | Bn-N19-p42508285      | gene | exon |
| Bn-A10-p7979799 | Bn-N10-p9586416       | gene | exon |
| Bn-A10-p8025520 | Bn-Scaffold15780-p179 | gene | exon |
| Bn-A10-p8027866 | Bn-N10-p9656550       | gene |      |
| Bn-A10-p8040898 | Bn-N10-p9674931       | gene | exon |
| Bn-A10-p8213398 | Bn-N10-p9828138       | gene | exon |
| Bn-A10-p8237821 | Bn-N10-p9842422       | gene |      |
| Bn-A10-p8257748 | Bn-N10-p9857551       | gene | exon |
| Bn-A10-p8285049 | Bn-N19-p43117189      | gene | exon |
| Bn-A10-p8290065 | Bn-N10-p9880744       | gene |      |
| Bn-A10-p8290448 | Bn-N10-p9881123       | gene |      |
| Bn-A10-p8292854 | Bn-N10-p9883529       | gene | exon |
| Bn-A10-p8304815 | Bn-N10-p9897698       | gene |      |
| Bn-A10-p8308769 | Bn-N10-p9901618       | gene |      |
| Bn-A10-p8309983 | Bn-N19-p43212085      | gene | exon |
| Bn-A10-p8315549 | Bn-N10-p9908248       | gene | exon |
| Bn-A10-p8320886 | Bn-N10-p9913730       | gene |      |
| Bn-A10-p8322965 | Bn-N10-p9915810       | gene |      |
| Bn-A10-p8328622 | Bn-N10-p9921708       | gene |      |
| Bn-A10-p8329751 | Bn-N10-p9922837       | gene | exon |
| Bn-A10-p8330489 | Bn-N10-p9923575       | gene |      |
| Bn-A10-p8340529 | Bn-N10-p9934261       | gene |      |
| Bn-A10-p8359990 | Bn-N10-p9953103       | gene | exon |
| Bn-A10-p8379385 | Bn-N19-p43408538      | gene | exon |
| Bn-A10-p8383686 | Bn-N10-p9976868       | gene |      |
| Bn-A10-p8383995 | Bn-N10-p9977168       | gene |      |
| Bn-A10-p8387158 | Bn-N10-p9981252       | gene | exon |
| Bn-A10-p8408212 | Bn-Scaffold11791-p859 | gene |      |
| Bn-A10-p8423162 | Bn-N19-p43495014      | gene |      |
| Bn-A10-p8443505 | Bn-N10-p10057518      | gene |      |
| Bn-A10-p8444450 | Bn-N19-p43560319      | gene | exon |
| Bn-A10-p8448368 | Bn-N19-p43567472      | gene | exon |
| Bn-A10-p8456410 | Bn-N10-p10070492      | gene |      |
| Bn-A10-p8456551 | Bn-N10-p10070632      | gene |      |
| Bn-A10-p8470821 | Bn-N10-p10085107      | gene |      |
| Bn-A10-p8487448 | Bn-N19-p43674787      | gene |      |
| Bn-A10-p8503752 | Bn-N10-p10121257      | gene | exon |
| Bn-A10-p8529364 | Bn-N10-p10140677      | gene | exon |
| Bn-A10-p8559413 | Bn-N10-p10187618      | gene | exon |
| Bn-A10-p8560686 | Bn-N10-p10188889      | gene | exon |
| Bn-A10-p8564698 | Bn-N10-p10192915      | gene | exon |
| Bn-A10-p8572267 | Bn-N19-p43940819      | gene | exon |
| Bn-A10-p8577924 | Bn-N10-p10210551      | gene | exon |
| Bn-A10-p8582852 | Bn-N19-p43963228      | gene |      |
| Bn-A10-p8583543 | Bn-N10-p10219233      | gene | exon |
| Bn-A10-p8589353 | Bn-N10-p10224379      | gene | exon |

|                 |                  |      |      |
|-----------------|------------------|------|------|
| Bn-A10-p8608729 | Bn-N10-p10236420 | gene | exon |
| Bn-A10-p8620702 | Bn-N10-p10246201 | gene | exon |
| Bn-A10-p8646816 | Bn-N10-p10277442 | gene | exon |
| Bn-A10-p8655897 | Bn-N10-p10287127 | gene | exon |
| Bn-A10-p8656908 | Bn-N10-p10288138 | gene |      |
| Bn-A10-p8701134 | Bn-N10-p10327963 | gene | exon |
| Bn-A10-p8722713 | Bn-N10-p10343369 | gene |      |
| Bn-A10-p8723171 | Bn-N10-p10343794 | gene |      |
| Bn-A10-p8729146 | Bn-N10-p10349100 | gene |      |
| Bn-A10-p8741886 | Bn-N10-p10371085 | gene |      |
| Bn-A10-p8766754 | Bn-N6-p465259    | gene |      |
| Bn-A10-p8767803 | Bn-N10-p10399961 | gene | exon |
| Bn-A10-p8822075 | Bn-N19-p44525880 | gene | exon |
| Bn-A10-p8826205 | Bn-N10-p10462821 | gene | exon |
| Bn-A10-p8832970 | Bn-N19-p44533303 | gene |      |
| Bn-A10-p8834914 | Bn-N10-p10470766 | gene | exon |
| Bn-A10-p8867175 | Bn-N10-p10502521 | gene |      |
| Bn-A10-p8890067 | Bn-N10-p10520273 | gene |      |
| Bn-A10-p8917543 | Bn-N10-p10553880 | gene | exon |
| Bn-A10-p8937723 | Bn-N10-p10566873 | gene |      |
| Bn-A10-p8951109 | Bn-N19-p44718829 | gene |      |
| Bn-A10-p8957186 | Bn-N19-p44732365 | gene |      |
| Bn-A10-p8961320 | Bn-N12-p21998589 | gene | exon |
| Bn-A10-p8963952 | Bn-N3-p22188985  | gene | exon |
| Bn-A10-p8964484 | Bn-N3-p22188456  | gene | exon |
| Bn-A10-p8965800 | Bn-N19-p44763440 | gene |      |
| Bn-A10-p8981561 | Bn-N10-p10601788 | gene |      |
| Bn-A10-p8984096 | Bn-N10-p10604323 | gene |      |
| Bn-A10-p8996669 | Bn-N10-p10620518 | gene | exon |
| Bn-A10-p902245  | Bn-N10-p3094856  | gene |      |
| Bn-A10-p9039610 | Bn-N10-p10661696 | gene | exon |
| Bn-A10-p9050329 | Bn-N10-p10668987 | gene | exon |
| Bn-A10-p9065520 | Bn-N10-p10687034 | gene |      |
| Bn-A10-p9079327 | Bn-N10-p10702554 | gene | exon |
| Bn-A10-p9084421 | Bn-N10-p10709112 | gene |      |
| Bn-A10-p9118672 | Bn-N10-p10749461 | gene | exon |
| Bn-A10-p9118675 | Bn-N10-p10749464 | gene | exon |
| Bn-A10-p9120500 | Bn-N10-p10751271 | gene |      |
| Bn-A10-p9121306 | Bn-N10-p10752076 | gene | exon |
| Bn-A10-p9124552 | Bn-N10-p10755322 | gene | exon |
| Bn-A10-p9128660 | Bn-N10-p10759514 | gene | exon |
| Bn-A10-p9150150 | Bn-N10-p10771171 | gene |      |
| Bn-A10-p9150359 | Bn-N10-p10771380 | gene |      |
| Bn-A10-p9160244 | Bn-N10-p10780276 | gene |      |
| Bn-A10-p9181902 | Bn-N10-p10810668 | gene | exon |
| Bn-A10-p9184064 | Bn-N10-p10813292 | gene | exon |
| Bn-A10-p9186877 | Bn-N10-p10816121 | gene |      |
| Bn-A10-p9193298 | Bn-N10-p10823160 | gene |      |
| Bn-A10-p9209872 | Bn-N10-p10841185 | gene | exon |
| Bn-A10-p9218381 | Bn-N10-p10844684 | gene | exon |
| Bn-A10-p9241008 | Bn-N10-p10863692 | gene |      |
| Bn-A10-p9255041 | Bn-N10-p10875719 | gene |      |

|                   |                  |      |      |
|-------------------|------------------|------|------|
| Bn-A10-p9259792   | Bn-N10-p10880421 | gene | exon |
| Bn-A10-p926733    | Bn-N10-p3083156  | gene | exon |
| Bn-A10-p9270767   | Bn-N10-p10893055 | gene | exon |
| Bn-A10-p9271334   | Bn-N13-p6453628  | gene |      |
| Bn-A10-p9271807   | Bn-N19-p45447749 | gene | exon |
| Bn-A10-p9272156   | Bn-N10-p10894406 | gene |      |
| Bn-A10-p9287837   | Bn-N10-p10914532 | gene |      |
| Bn-A10-p9318940   | Bn-N10-p10948364 | gene |      |
| Bn-A10-p9327364   | Bn-N10-p10959596 | gene |      |
| Bn-A10-p9327975   | Bn-N10-p10960209 | gene | exon |
| Bn-A10-p9329804   | Bn-N10-p10963914 | gene |      |
| Bn-A10-p9365540   | Bn-N19-p45645175 | gene |      |
| Bn-A10-p9370046   | Bn-N10-p11000973 | gene | exon |
| Bn-A10-p9374169   | Bn-N10-p11004419 | gene | exon |
| Bn-A10-p9378974   | Bn-N10-p11005360 | gene |      |
| Bn-A10-p9381557   | Bn-N10-p11007913 | gene |      |
| Bn-A10-p9436205   | Bn-N19-p45741636 | gene | exon |
| Bn-A10-p9470646   | Bn-N10-p11098941 | gene |      |
| Bn-A10-p9473804   | Bn-N10-p11108265 | gene |      |
| Bn-A10-p9473886   | Bn-N10-p11108347 | gene |      |
| Bn-A10-p9496981   | Bn-N10-p11129479 | gene |      |
| Bn-A10-p9561249   | Bn-N10-p11212698 | gene |      |
| Bn-A10-p9579123   | Bn-N10-p11215987 | gene | exon |
| Bn-A10-p9581812   | Bn-N10-p11226589 | gene | exon |
| Bn-A10-p9605069   | Bn-N10-p11253656 | gene | exon |
| Bn-A10-p9605153   | Bn-N10-p11253740 | gene | exon |
| Bn-A10-p9607076   | Bn-N10-p11255699 | gene | exon |
| Bn-A10-p9607474   | Bn-N10-p11256096 | gene |      |
| Bn-A10-p9615291   | Bn-N10-p11263782 | gene | exon |
| Bn-A10-p9615362   | Bn-N10-p11263853 | gene | exon |
| Bn-A10-p9624125   | Bn-N10-p11279332 | gene | exon |
| Bn-A10-p9630194   | Bn-N10-p11283552 | gene |      |
| Bn-A10-p9631366   | Bn-N10-p11284647 | gene |      |
| Bn-A10-p9648940   | Bn-N10-p11302212 | gene |      |
| Bn-A10-p9694236   | Bn-N19-p46194919 | gene |      |
| Bn-A10-p971793    | Bn-N10-p3037089  | gene |      |
| Bn-A10-p9722784   | Bn-N10-p11356708 | gene |      |
| Bn-A10-p973131    | Bn-N10-p3032751  | gene | exon |
| Bn-A10-p9732666   | Bn-N10-p11368340 | gene |      |
| Bn-A10-p9738703   | Bn-N10-p11375913 | gene | exon |
| Bn-A10-p9746391   | Bn-N10-p11381704 | gene |      |
| Bn-A10-p9774980   | Bn-N10-p11403795 | gene |      |
| Bn-A10-p9845811   | Bn-N10-p11476015 | gene |      |
| Bn-A10-p9846287   | Bn-N10-p11476491 | gene | exon |
| Bn-A10-p9868026   | Bn-N10-p11495432 | gene | exon |
| Bn-A10-p9868333   | Bn-N10-p11495739 | gene |      |
| Bn-A10-p9892016   | Bn-N10-p11519023 | gene | exon |
| Bn-A10-p992281    | Bn-N10-p3016644  | gene | exon |
| Bn-A10-p9979372   | Bn-N10-p11610439 | gene |      |
| Bn-A10-p9981528   | Bn-N10-p11612535 | gene |      |
| Bn-A10-p9981957   | Bn-N10-p11612967 | gene |      |
| Bn-C13488683-p154 | Bn-N14-p1310660  | gene | exon |

|                           |                        |      |      |
|---------------------------|------------------------|------|------|
| Bn-C13706737-p102         | Bn-N8-p20719937        | gene | exon |
| Bn-C13729753-p243         | Bn-N15-p11973629       | gene |      |
| Bn-C13734643-p116         | Bn-N14-p16289078       | gene | exon |
| Bn-C13793433-p23          | Bn-Scaffold01365-p5705 | gene |      |
| Bn-C13803703-p146         | Bn-N17-p4962958        | gene |      |
| Bn-C13824437-p146         | Bn-N4-p15324215        | gene |      |
| Bn-C13873857-p268         | Bn-N14-p50637620       | gene |      |
| Bn-C14160250-p3687        | Bn-N15-p48510589       | gene |      |
| Bn-Scaffold000096-p454538 | Bn-N3-p33815047        | gene | exon |
| Bn-Scaffold000096-p513249 | Bn-N3-p33777294        | gene |      |
| Bn-Scaffold000096-p533173 | Bn-N3-p33767642        | gene | exon |
| Bn-Scaffold000096-p533387 | Bn-N3-p33767428        | gene | exon |
| Bn-Scaffold000096-p533916 | Bn-N3-p33766899        | gene | exon |
| Bn-Scaffold000096-p588135 | Bn-N3-p33731872        | gene | exon |
| Bn-Scaffold000096-p598260 | Bn-N3-p33721988        | gene |      |
| Bn-Scaffold000096-p598820 | Bn-N3-p33721428        | gene |      |
| Bn-Scaffold000096-p603806 | Bn-N3-p33716469        | gene | exon |
| Bn-Scaffold000096-p624954 | Bn-N2-p20210932        | gene | exon |
| Bn-Scaffold000096-p625022 | Bn-N2-p20211000        | gene | exon |
| Bn-Scaffold000096-p693657 | Bn-N9-p21798240        | gene |      |
| Bn-Scaffold000096-p762429 | Bn-N3-p33598434        | gene | exon |
| Bn-Scaffold000096-p762911 | Bn-N3-p33597953        | gene | exon |
| Bn-Scaffold000096-p763000 | Bn-N3-p33597864        | gene | exon |
| Bn-Scaffold000096-p763301 | Bn-N3-p33597563        | gene | exon |
| Bn-Scaffold000100-p138485 | Bn-N10-p10945393       | gene |      |
| Bn-Scaffold000100-p631465 | Bn-N6-p12148629        | gene | exon |
| Bn-Scaffold000100-p873567 | Bn-N6-p11891154        | gene | exon |
| Bn-Scaffold000100-p9450   | Bn-N4-p9962350         | gene | exon |
| Bn-Scaffold000103-p494957 | Bn-N2-p18718259        | gene | exon |
| Bn-Scaffold000103-p527452 | Bn-N12-p29607207       | gene | exon |
| Bn-Scaffold000103-p85526  | Bn-N2-p19133570        | gene | exon |
| Bn-Scaffold000104-p143432 | Bn-N4-p7171316         | gene |      |
| Bn-Scaffold000104-p143849 | Bn-N4-p7170917         | gene |      |
| Bn-Scaffold000104-p158234 | Bn-N4-p7151662         | gene | exon |
| Bn-Scaffold000104-p158481 | Bn-N4-p7151412         | gene |      |
| Bn-Scaffold000104-p193967 | Bn-N4-p7110281         | gene |      |
| Bn-Scaffold000104-p199071 | Bn-N4-p7105171         | gene |      |
| Bn-Scaffold000104-p199126 | Bn-N4-p7105150         | gene |      |
| Bn-Scaffold000104-p33765  | Bn-N4-p7271031         | gene |      |
| Bn-Scaffold000104-p404978 | Bn-N19-p36899078       | gene |      |
| Bn-Scaffold000104-p502698 | Bn-N4-p6799111         | gene | exon |
| Bn-Scaffold000104-p546329 | Bn-N4-p6753284         | gene |      |
| Bn-Scaffold000104-p613533 | Bn-N4-p6682724         | gene |      |
| Bn-Scaffold000104-p622483 | Bn-N4-p6674800         | gene | exon |
| Bn-Scaffold000104-p628225 | Bn-N4-p6665782         | gene |      |
| Bn-Scaffold000111-p125047 | Bn-N2-p19453800        | gene |      |
| Bn-Scaffold000111-p50108  | Bn-N2-p19378006        | gene | exon |
| Bn-Scaffold000123-p155648 | Bn-N10-p3945997        | gene |      |
| Bn-Scaffold000123-p156913 | Bn-N10-p3944731        | gene |      |
| Bn-Scaffold000123-p226882 | Bn-N10-p3872255        | gene | exon |
| Bn-Scaffold000123-p238360 | Bn-N10-p3863424        | gene |      |
| Bn-Scaffold000123-p295468 | Bn-N10-p3809500        | gene |      |

|                           |                         |      |      |
|---------------------------|-------------------------|------|------|
| Bn-Scaffold000123-p387774 | Bn-N10-p3727066         | gene | exon |
| Bn-Scaffold000123-p403102 | Bn-N10-p3710933         | gene | exon |
| Bn-Scaffold000123-p426461 | Bn-N10-p3677827         | gene |      |
| Bn-Scaffold000123-p511169 | Bn-N10-p3619357         | gene | exon |
| Bn-Scaffold000123-p5714   | Bn-N10-p4089175         | gene |      |
| Bn-Scaffold000123-p86645  | Bn-N10-p3999437         | gene |      |
| Bn-Scaffold000123-p86967  | Bn-N10-p3999106         | gene |      |
| Bn-Scaffold000123-p94132  | Bn-N10-p3991789         | gene | exon |
| Bn-Scaffold000140-p310787 | Bn-N1-p15753553         | gene |      |
| Bn-Scaffold000149-p131079 | Bn-N3-p35267553         | gene |      |
| Bn-Scaffold000149-p171606 | Bn-N18-p22315132        | gene |      |
| Bn-Scaffold000149-p188680 | Bn-N3-p35179554         | gene | exon |
| Bn-Scaffold000155-p264365 | Bn-N15-p34145216        | gene |      |
| Bn-Scaffold000162-p117310 | Bn-N3-p261444147        | gene | exon |
| Bn-Scaffold000162-p320522 | Bn-N3-p33233203         | gene |      |
| Bn-Scaffold000164-p11112  | Bn-N1-p24455809         | gene |      |
| Bn-Scaffold000164-p120459 | Bn-N1-p24339405         | gene | exon |
| Bn-Scaffold000164-p123574 | Bn-N7-p14449439         | gene | exon |
| Bn-Scaffold000164-p15854  | Bn-N1-p24449515         | gene | exon |
| Bn-Scaffold000164-p160466 | Bn-N1-p24309879         | gene | exon |
| Bn-Scaffold000164-p174512 | Bn-N1-p24295887         | gene | exon |
| Bn-Scaffold000164-p17878  | Bn-N1-p24447499         | gene | exon |
| Bn-Scaffold000164-p192732 | Bn-N1-p24280824         | gene |      |
| Bn-Scaffold000164-p195645 | Bn-N1-p24277939         | gene | exon |
| Bn-Scaffold000164-p196286 | Bn-N1-p24277298         | gene |      |
| Bn-Scaffold000164-p196290 | Bn-N1-p24277294         | gene |      |
| Bn-Scaffold000164-p196553 | Bn-N1-p24277031         | gene | exon |
| Bn-Scaffold000164-p242428 | Bn-N11-p40943214        | gene |      |
| Bn-Scaffold000164-p261392 | Bn-Scaffold01007-p52117 | gene |      |
| Bn-Scaffold000164-p271091 | Bn-Scaffold01007-p42419 | gene |      |
| Bn-Scaffold000164-p46170  | Bn-N1-p24418714         | gene |      |
| Bn-Scaffold000164-p55747  | Bn-N1-p24408926         | gene |      |
| Bn-Scaffold000167-p105601 | Bn-N3-p11573697         | gene | exon |
| Bn-Scaffold000167-p106164 | Bn-N3-p11574253         | gene |      |
| Bn-Scaffold000172-p110842 | Bn-N5-p11530724         | gene |      |
| Bn-Scaffold000172-p135389 | Bn-N5-p11553008         | gene |      |
| Bn-Scaffold000172-p243096 | Bn-N5-p11683983         | gene |      |
| Bn-Scaffold000172-p98111  | Bn-N15-p24930106        | gene | exon |
| Bn-Scaffold000178-p114893 | Bn-N9-p5200515          | gene |      |
| Bn-Scaffold000178-p33587  | Bn-N9-p5112709          | gene | exon |
| Bn-Scaffold000191-p54987  | Bn-N5-p25032882         | gene |      |
| Bn-Scaffold000191-p65525  | Bn-N5-p25043351         | gene |      |
| Bn-Scaffold000191-p70336  | Bn-N15-p47417549        | gene | exon |
| Bn-Scaffold000191-p89779  | Bn-N5-p25066726         | gene |      |
| Bn-Scaffold000193-p93659  | Bn-N10-p6859125         | gene |      |
| Bn-Scaffold000196-p129412 | Bn-N10-p3513046         | gene | exon |
| Bn-Scaffold000196-p132185 | Bn-N10-p3515829         | gene |      |
| Bn-Scaffold000196-p132202 | Bn-N10-p3515846         | gene |      |
| Bn-Scaffold000196-p132328 | Bn-N10-p3515972         | gene | exon |
| Bn-Scaffold000196-p67283  | Bn-Scaffold00912-p67106 | gene |      |
| Bn-Scaffold000203-p24382  | Bn-N5-p24958325         | gene |      |
| Bn-Scaffold000203-p9485   | Bn-N5-p24969336         | gene | exon |



|                          |                         |      |      |
|--------------------------|-------------------------|------|------|
| Bn-Scaffold000203-p9544  | Bn-N5-p24969277         | gene | exon |
| Bn-Scaffold000212-p66182 | Bn-N10-p4115981         | gene |      |
| Bn-Scaffold000213-p30061 | Bn-N2-p18257798         | gene |      |
| Bn-Scaffold000215-p13136 | Bn-N11-p44225821        | gene |      |
| Bn-Scaffold000215-p42890 | Bn-N11-p44260579        | gene | exon |
| Bn-Scaffold000215-p4493  | Bn-N11-p44217186        | gene | exon |
| Bn-Scaffold000215-p60955 | Bn-N3-p15363807         | gene | exon |
| Bn-Scaffold000215-p6257  | Bn-N11-p44218469        | gene | exon |
| Bn-Scaffold000215-p67874 | Bn-N11-p44278826        | gene |      |
| Bn-Scaffold000216-p13511 | Bn-N3-p34881763         | gene |      |
| Bn-Scaffold000217-p20168 | Bn-Scaffold01003-p20106 | gene |      |
| Bn-Scaffold000217-p6025  | Bn-Scaffold01003-p5965  | gene |      |
| Bn-Scaffold000220-p29775 | Bn-N3-p35607330         | gene |      |
| Bn-Scaffold000224-p32291 | Bn-N10-p3602078         | gene |      |
| Bn-Scaffold000229-p11330 | Bn-Scaffold00900-p16800 | gene |      |
| Bn-Scaffold000229-p12311 | Bn-Scaffold00900-p17779 | gene |      |
| Bn-Scaffold000229-p12556 | Bn-Scaffold00900-p18024 | gene |      |
| Bn-Scaffold000229-p47997 | Bn-Scaffold00900-p52259 | gene |      |
| Bn-Scaffold000232-p38316 | Bn-N7-p825617           | gene |      |
| Bn-Scaffold000237-p12082 | Bn-N1-p27064751         | gene |      |
| Bn-Scaffold000237-p24404 | Bn-N1-p27074965         | gene |      |
| Bn-Scaffold000240-p44866 | Bn-N6-p4820425          | gene | exon |
| Bn-Scaffold000247-p34082 | Bn-N8-p9505869          | gene |      |
| Bn-Scaffold000251-p33332 | Bn-N4-p15152705         | gene |      |
| Bn-Scaffold000251-p34051 | Bn-N4-p15151940         | gene |      |
| Bn-Scaffold000257-p33259 | Bn-Scaffold01089-p5089  | gene | exon |
| Bn-Scaffold000259-p37148 | Bn-N8-p3797614          | gene | exon |
| Bn-Scaffold000264-p20309 | Bn-Scaffold01017-p7354  | gene | exon |
| Bn-Scaffold000270-p33166 | Bn-N2-p24333529         | gene |      |
| Bn-Scaffold000280-p5190  | Bn-Scaffold01040-p31149 | gene | exon |
| Bn-Scaffold000280-p5271  | Bn-Scaffold01040-p31230 | gene | exon |
| Bn-Scaffold000281-p25625 | Bn-N4-p9127651          | gene | exon |
| Bn-Scaffold000281-p4606  | Bn-N4-p9101667          | gene |      |
| Bn-Scaffold000282-p6257  | Bn-N9-p27422574         | gene | exon |
| Bn-Scaffold000283-p1502  | Bn-N8-p3683769          | gene | exon |
| Bn-Scaffold000283-p24053 | Bn-N6-p3216621          | gene |      |
| Bn-Scaffold000285-p18278 | Bn-Scaffold01222-p2349  | gene | exon |
| Bn-Scaffold000286-p11806 | Bn-Scaffold00637-p33390 | gene | exon |
| Bn-Scaffold000289-p27459 | Bn-N6-p18207764         | gene |      |
| Bn-Scaffold000291-p13489 | Bn-N10-p3550653         | gene |      |
| Bn-Scaffold000291-p13580 | Bn-N10-p3550562         | gene |      |
| Bn-Scaffold000295-p23235 | Bn-N9-p17690939         | gene |      |
| Bn-Scaffold000296-p9362  | Bn-N12-p16960102        | gene |      |
| Bn-Scaffold000300-p15526 | Bn-N1-p12057480         | gene | exon |
| Bn-Scaffold000300-p17011 | Bn-N1-p12058978         | gene |      |
| Bn-Scaffold000300-p4564  | Bn-N1-p12046264         | gene |      |
| Bn-Scaffold000303-p7649  | Bn-N1-p21137586         | gene |      |
| Bn-Scaffold000306-p22417 | Bn-N10-p16285653        | gene |      |
| Bn-Scaffold000316-p9840  | Bn-N8-p10128229         | gene |      |
| Bn-Scaffold000317-p23246 | Bn-N7-p12857776         | gene |      |
| Bn-Scaffold000320-p11480 | Bn-N8-p12686182         | gene |      |
| Bn-Scaffold000324-p11634 | Bn-N5-p11834989         | gene |      |

|                          |                         |      |      |
|--------------------------|-------------------------|------|------|
| Bn-Scaffold000324-p11905 | Bn-N5-p11835261         | gene | exon |
| Bn-Scaffold000337-p6012  | Bn-N10-p6470476         | gene |      |
| Bn-Scaffold000344-p1622  | Bn-N9-p17661188         | gene |      |
| Bn-Scaffold000355-p19729 | Bn-N4-p8886866          | gene |      |
| Bn-Scaffold000366-p2717  | Bn-N5-p9963039          | gene | exon |
| Bn-Scaffold000366-p4685  | Bn-N5-p9961073          | gene | exon |
| Bn-Scaffold000366-p4803  | Bn-N5-p9960955          | gene | exon |
| Bn-Scaffold000366-p5068  | Bn-N5-p9960690          | gene | exon |
| Bn-Scaffold000367-p2871  | Bn-N9-p20910355         | gene |      |
| Bn-Scaffold000369-p1902  | Bn-N10-p7139263         | gene |      |
| Bn-Scaffold000379-p15742 | Bn-N3-p26500219         | gene | exon |
| Bn-Scaffold000386-p10437 | Bn-N1-p24881125         | gene |      |
| Bn-Scaffold000397-p6640  | Bn-N5-p7356985          | gene |      |
| Bn-Scaffold000397-p6778  | Bn-N5-p7357123          | gene | exon |
| Bn-Scaffold000397-p7197  | Bn-N5-p7357542          | gene |      |
| Bn-Scaffold000403-p12455 | Bn-N5-p407617           | gene | exon |
| Bn-Scaffold000411-p10252 | Bn-N16-p33563993        | gene |      |
| Bn-Scaffold000512-p1602  | Bn-N8-p5279596          | gene |      |
| Bn-Scaffold000521-p2857  | Bn-N6-p23249963         | gene | exon |
| Bn-Scaffold000565-p4438  | Bn-Scaffold01017-p5337  | gene | exon |
| Bn-Scaffold000684-p2321  | Bn-N7-p11697120         | gene | exon |
| Bn-Scaffold000783-p133   | Bn-N9-p803310           | gene |      |
| Bn-Scaffold000796-p1119  | Bn-N6-p12056354         | gene | exon |
| Bn-Scaffold000892-p1200  | Bn-Scaffold00821-p39712 | gene |      |
| Bn-Scaffold000932-p575   | Bn-N18-p21748724        | gene |      |
| Bn-Scaffold000996-p195   | Bn-N7-p576571           | gene | exon |
| Bn-Scaffold001055-p797   | Bn-N3-p34880837         | gene |      |
| Bn-Scaffold001110-p441   | Bn-N7-p6834202          | gene | exon |
| Bn-Scaffold001128-p1186  | Bn-N3-p11450935         | gene |      |
| Bn-Scaffold001298-p970   | Bn-N6-p18405797         | gene | exon |
| Bn-Scaffold001320-p775   | Bn-N9-p16129231         | gene |      |
| Bn-Scaffold001332-p452   | Bn-N7-p579773           | gene | exon |
| Bn-Scaffold001532-p334   | Bn-N4-p16960038         | gene | exon |
| Bn-Scaffold001557-p226   | Bn-N1-p9922090          | gene |      |
| Bn-Scaffold001770-p612   | Bn-N9-p25011853         | gene |      |
| Bn-Scaffold001988-p613   | Bn-N7-p555405           | gene | exon |
| Bn-Scaffold002092-p583   | Bn-N5-p21310204         | gene | exon |
| Bn-Scaffold002315-p80    | Bn-N2-p1998781          | gene | exon |
| Bn-Scaffold002531-p122   | Bn-N7-p573092           | gene |      |
| Bn-Scaffold002856-p361   | Bn-N7-p578561           | gene | exon |
| Bn-Scaffold003510-p152   | Bn-N8-p20395555         | gene | exon |
| Bn-Scaffold003510-p371   | Bn-N18-p21450319        | gene | exon |
| Bn-Scaffold004298-p436   | Bn-N7-p573280           | gene | exon |
| Bn-Scaffold004542-p45    | Bn-N4-p14466779         | gene | exon |
| Bn-Scaffold004639-p267   | Bn-N7-p22373517         | gene |      |
| Bn-Scaffold005215-p31    | Bn-N9-p32994996         | gene | exon |
| Bn-Scaffold005215-p317   | Bn-N9-p32995282         | gene | exon |
| Bn-Scaffold005444-p94    | Bn-N17-p24943777        | gene | exon |
| Bn-Scaffold006179-p319   | Bn-N1-p3353916          | gene | exon |
| Bn-Scaffold006825-p88    | Bn-N18-p20996128        | gene | exon |
| Bn-Scaffold006833-p103   | Bn-N18-p11804382        | gene |      |
| Bn-Scaffold009013-p209   | Bn-N2-p6071971          | gene |      |

|                          |                  |      |      |
|--------------------------|------------------|------|------|
| Bn-Scaffold009788-p170   | Bn-N6-p4990542   | gene | exon |
| Bn-Scaffold010519-p163   | Bn-N3-p11448216  | gene |      |
| Bn-Scaffold011309-p72    | Bn-N17-p7038114  | gene | exon |
| Bn-Scaffold011425-p94    | Bn-N3-p28889560  | gene | exon |
| Bn-Scaffold012150-p185   | Bn-N2-p8481277   | gene | exon |
| Bn-Scaffold012206-p170   | Bn-N13-p39017405 | gene | exon |
| Bn-Scaffold012485-p58    | Bn-N6-p5794487   | gene |      |
| Bn-Scaffold012703-p114   | Bn-N5-p17840334  | gene |      |
| Bn-Scaffold012966-p76    | Bn-N15-p37168947 | gene | exon |
| Bn-Scaffold013089-p53    | Bn-N6-p2539908   | gene |      |
| Bn-Scaffold014583-p78    | Bn-N3-p6900247   | gene | exon |
| Bn-Scaffold014586-p83    | Bn-N7-p573769    | gene |      |
| Bn-Scaffold014880-p22    | Bn-N1-p1112141   | gene | exon |
| Bn-Scaffold014949-p111   | Bn-N7-p15876337  | gene | exon |
| Bn-Scaffold015028-p146   | Bn-N4-p15823270  | gene |      |
| Bn-Scaffold015689-p116   | Bn-N5-p17839871  | gene | exon |
| Bn-Scaffold016308-p77    | Bn-N1-p22156466  | gene | exon |
| Bn-Scaffold016479-p127   | Bn-N3-p11448016  | gene | exon |
| Bn-Scaffold017668-p98    | Bn-N7-p9298822   | gene | exon |
| Bn-Scaffold018996-p33    | Bn-N16-p16868647 | gene | exon |
| Bn-Scaffold019560-p58    | Bn-N3-p25418964  | gene |      |
| Bn-Scaffold019655-p1     | Bn-N12-p35225741 | gene | exon |
| Bn-Scaffold020953-p21    | Bn-N1-p18623     | gene | exon |
| Bn-Scaffold024114-p71    | Bn-N19-p45102099 | gene | exon |
| Bn-Scaffold026273-p6     | Bn-N5-p17839672  | gene | exon |
| Bn-Scaffold030702-p88    | Bn-N7-p12744107  | gene |      |
| Bn-Scaffold032460-p85    | Bn-N15-p2384036  | gene | exon |
| Bn-Scaffold035376-p42    | Bn-N11-p14135111 | gene | exon |
| Bn-Scaffold037025-p103   | Bn-N3-p3109274   | gene | exon |
| Bn-scaff_15576_1-p111352 | Bn-N19-p48107009 | gene |      |
| Bn-scaff_15576_1-p159597 | Bn-N10-p12364300 | gene | exon |
| Bn-scaff_15576_1-p162267 | Bn-N19-p48155198 | gene | exon |
| Bn-scaff_15576_1-p201715 | Bn-N19-p48188259 | gene | exon |
| Bn-scaff_15576_1-p240863 | Bn-N19-p48227200 | gene |      |
| Bn-scaff_15576_1-p323211 | Bn-N19-p48318735 | gene |      |
| Bn-scaff_15576_1-p335372 | Bn-N19-p48338862 | gene | exon |
| Bn-scaff_15576_1-p335942 | Bn-N19-p48339431 | gene |      |
| Bn-scaff_15576_1-p335950 | Bn-N19-p48339439 | gene |      |
| Bn-scaff_15576_1-p374078 | Bn-N10-p12474103 | gene | exon |
| Bn-scaff_15576_1-p375237 | Bn-N19-p48378629 | gene | exon |
| Bn-scaff_15576_1-p437413 | Bn-N19-p48443932 | gene |      |
| Bn-scaff_15576_1-p455734 | Bn-N19-p48477749 | gene |      |
| Bn-scaff_15576_1-p540624 | Bn-N19-p48552942 | gene |      |
| Bn-scaff_15576_1-p579069 | Bn-N19-p48600957 | gene | exon |
| Bn-scaff_15576_1-p634652 | Bn-N19-p48654996 | gene | exon |
| Bn-scaff_15576_1-p637717 | Bn-N19-p48657054 | gene |      |
| Bn-scaff_15576_1-p639470 | Bn-N16-p25997897 | gene |      |
| Bn-scaff_15576_1-p653601 | Bn-N19-p48730533 | gene |      |
| Bn-scaff_15576_1-p654663 | Bn-N19-p48731604 | gene |      |
| Bn-scaff_15576_1-p663373 | Bn-N10-p12629368 | gene | exon |
| Bn-scaff_15576_1-p663482 | Bn-N19-p48744959 | gene |      |
| Bn-scaff_15576_1-p697886 | Bn-N10-p12639875 | gene | exon |

|                           |                           |      |      |
|---------------------------|---------------------------|------|------|
| Bn-scaff_15576_1-p727242  | Bn-N19-p48788170          | gene |      |
| Bn-scaff_15576_1-p728114  | Bn-N10-p12654041          | gene | exon |
| Bn-scaff_15576_1-p739936  | Bn-N19-p48800264          | gene |      |
| Bn-scaff_15576_1-p761764  | Bn-N19-p48822467          | gene |      |
| Bn-scaff_15576_1-p772503  | Bn-N19-p48833620          | gene |      |
| Bn-scaff_15585_1-p1020764 | Bn-N14-p50517443          | gene | exon |
| Bn-scaff_15585_1-p1028759 | Bn-N14-p50525438          | gene | exon |
| Bn-scaff_15585_1-p1029921 | Bn-N14-p50526600          | gene |      |
| Bn-scaff_15585_1-p1030484 | Bn-N7-p8648385            | gene |      |
| Bn-scaff_15585_1-p1034252 | Bn-N14-p50530931          | gene |      |
| Bn-scaff_15585_1-p1046789 | Bn-N14-p50542537          | gene |      |
| Bn-scaff_15585_1-p1047449 | Bn-N14-p50543198          | gene |      |
| Bn-scaff_15585_1-p1048094 | Bn-N14-p50543842          | gene |      |
| Bn-scaff_15585_1-p1060500 | Bn-N4-p17402347           | gene |      |
| Bn-scaff_15585_1-p1060548 | Bn-N14-p50559020          | gene | exon |
| Bn-scaff_15585_1-p1060700 | Bn-N4-p17402546           | gene |      |
| Bn-scaff_15585_1-p1060833 | Bn-N14-p50559304          | gene |      |
| Bn-scaff_15585_1-p1065032 | Bn-N14-p50561854          | gene |      |
| Bn-scaff_15585_1-p1069334 | Bn-N14-p50566156          | gene | exon |
| Bn-scaff_15585_1-p1102807 | Bn-N14-p50608258          | gene |      |
| Bn-scaff_15585_1-p1109141 | Bn-N14-p50622477          | gene | exon |
| Bn-scaff_15585_1-p121993  | Bn-N4-p16792152           | gene |      |
| Bn-scaff_15585_1-p127973  | Bn-N14-p50225438          | gene |      |
| Bn-scaff_15585_1-p18623   | Bn-N14-p50062743          | gene | exon |
| Bn-scaff_15585_1-p265441  | Bn-N14-p50363030          | gene |      |
| Bn-scaff_15585_1-p266123  | Bn-N14-p50363707          | gene |      |
| Bn-scaff_15585_1-p291968  | Bn-N14-p50390541          | gene | exon |
| Bn-scaff_15585_1-p292538  | Bn-N14-p50391111          | gene | exon |
| Bn-scaff_15585_1-p292549  | Bn-N14-p50391122          | gene | exon |
| Bn-scaff_15585_1-p436385  | Bn-Scaffold00208c-p9658   | gene | exon |
| Bn-scaff_15585_1-p456291  | Bn-Scaffold00208b-p101236 | gene | exon |
| Bn-scaff_15585_1-p456596  | Bn-Scaffold00208b-p100931 | gene | exon |
| Bn-scaff_15585_1-p56427   | Bn-N14-p50108832          | gene |      |
| Bn-scaff_15585_1-p567560  | Bn-Scaffold02372-p1412    | gene | exon |
| Bn-scaff_15585_1-p590757  | Bn-Scaffold00208b-p3454   | gene | exon |
| Bn-scaff_15585_1-p666861  | Bn-N5-p5621542            | gene |      |
| Bn-scaff_15585_1-p763077  | Bn-N5-p5454604            | gene | exon |
| Bn-scaff_15585_1-p82510   | Bn-N4-p16756646           | gene | exon |
| Bn-scaff_15585_1-p904564  | Bn-N4-p17311855           | gene | exon |
| Bn-scaff_15585_1-p929360  | Bn-Scaffold00883b-p18809  | gene | exon |
| Bn-scaff_15585_1-p978062  | Bn-N5-p5224670            | gene | exon |
| Bn-scaff_15585_1-p978781  | Bn-N5-p5223997            | gene | exon |
| Bn-scaff_15585_1-p9965    | Bn-N14-p50058232          | gene |      |
| Bn-scaff_15586_1-p3523    | Bn-N17-p29142426          | gene |      |
| Bn-scaff_15607_1-p13090   | Bn-N14-p14512485          | gene |      |
| Bn-scaff_15611_1-p500444  | Bn-N17-p32319296          | gene | exon |
| Bn-scaff_15611_1-p626686  | Bn-N6-p11105198           | gene | exon |
| Bn-scaff_15626_1-p1072079 | Bn-N7-p6421901            | gene |      |
| Bn-scaff_15626_1-p1084223 | Bn-N17-p14892900          | gene |      |
| Bn-scaff_15626_1-p548743  | Bn-N17-p15440338          | gene |      |
| Bn-scaff_15626_1-p651986  | Bn-N17-p15344777          | gene |      |
| Bn-scaff_15626_1-p673079  | Bn-N17-p15320481          | gene |      |

|                           |                         |      |      |
|---------------------------|-------------------------|------|------|
| Bn-scaff_15626_1-p729257  | Bn-N17-p15265903        | gene |      |
| Bn-scaff_15626_1-p743167  | Bn-N17-p15245657        | gene | exon |
| Bn-scaff_15626_1-p787026  | Bn-N17-p15187885        | gene |      |
| Bn-scaff_15627_1-p14438   | Bn-N17-p936603          | gene |      |
| Bn-scaff_15627_1-p346925  | Bn-N7-p270655           | gene |      |
| Bn-scaff_15627_1-p472369  | Bn-N17-p411358          | gene |      |
| Bn-scaff_15627_1-p481878  | Bn-N17-p400174          | gene | exon |
| Bn-scaff_15627_1-p482235  | Bn-N17-p399808          | gene | exon |
| Bn-scaff_15627_1-p485914  | Bn-N7-p176414           | gene |      |
| Bn-scaff_15648_1-p468518  | Bn-N5-p13423832         | gene |      |
| Bn-scaff_15648_1-p468537  | Bn-N15-p28477108        | gene |      |
| Bn-scaff_15648_1-p538568  | Bn-N5-p13344625         | gene |      |
| Bn-scaff_15648_1-p541272  | Bn-Scaffold03512-p1371  | gene | exon |
| Bn-scaff_15648_1-p541334  | Bn-Scaffold03512-p1309  | gene | exon |
| Bn-scaff_15648_1-p541620  | Bn-Scaffold03512-p1023  | gene | exon |
| Bn-scaff_15650_1-p107513  | Bn-N16-p14480409        | gene |      |
| Bn-scaff_15650_1-p256179  | Bn-Scaffold20455-p294   | gene | exon |
| Bn-scaff_15650_1-p643013  | Bn-N19-p21651158        | gene | exon |
| Bn-scaff_15650_1-p655781  | Bn-N19-p21638623        | gene | exon |
| Bn-scaff_15650_1-p683404  | Bn-N19-p21603035        | gene |      |
| Bn-scaff_15650_1-p707618  | Bn-N2-p22331923         | gene | exon |
| Bn-scaff_15650_1-p714363  | Bn-N19-p21571246        | gene |      |
| Bn-scaff_15650_1-p754414  | Bn-N19-p21528211        | gene |      |
| Bn-scaff_15650_1-p886508  | Bn-N19-p21361546        | gene | exon |
| Bn-scaff_15650_1-p908638  | Bn-N19-p21338800        | gene | exon |
| Bn-scaff_15676_1-p298679  | Bn-N15-p47567740        | gene | exon |
| Bn-scaff_15676_1-p343087  | Bn-N15-p47608607        | gene | exon |
| Bn-scaff_15676_1-p361507  | Bn-N15-p47653500        | gene |      |
| Bn-scaff_15676_1-p471570  | Bn-Scaffold00893-p25886 | gene | exon |
| Bn-scaff_15690_1-p372287  | Bn-N15-p39132084        | gene | exon |
| Bn-scaff_15690_1-p406371  | Bn-N15-p39168145        | gene | exon |
| Bn-scaff_15695_1-p281125  | Bn-N15-p34609173        | gene |      |
| Bn-scaff_15695_1-p288239  | Bn-N15-p34616287        | gene |      |
| Bn-scaff_15695_1-p288827  | Bn-N5-p16921456         | gene | exon |
| Bn-scaff_15695_1-p294894  | Bn-N15-p34623387        | gene |      |
| Bn-scaff_15695_1-p382951  | Bn-N13-p34416175        | gene |      |
| Bn-scaff_15695_1-p383012  | Bn-N13-p34416114        | gene | exon |
| Bn-scaff_15695_1-p611509  | Bn-N13-p34176483        | gene | exon |
| Bn-scaff_15695_2-p265894  | Bn-N15-p34954015        | gene | exon |
| Bn-scaff_15695_2-p288544  | Bn-N15-p34976295        | gene |      |
| Bn-scaff_15695_2-p413042  | Bn-N15-p35097660        | gene |      |
| Bn-scaff_15695_2-p413159  | Bn-N15-p35097777        | gene |      |
| Bn-scaff_15695_2-p413223  | Bn-N15-p35097841        | gene |      |
| Bn-scaff_15695_2-p413633  | Bn-N5-p17072340         | gene |      |
| Bn-scaff_15695_2-p423869  | Bn-N9-p35660900         | gene | exon |
| Bn-scaff_15699_1-p340486  | Bn-N8-p14644251         | gene | exon |
| Bn-scaff_15699_1-p577914  | Bn-N18-p18531864        | gene | exon |
| Bn-scaff_15699_1-p578121  | Bn-N18-p18532072        | gene |      |
| Bn-scaff_15699_1-p696260  | Bn-N8-p14551041         | gene | exon |
| Bn-scaff_15701_1-p1015232 | Bn-N19-p12291662        | gene | exon |
| Bn-scaff_15701_1-p152026  | Bn-N15-p26047661        | gene |      |
| Bn-scaff_15701_1-p703352  | Bn-N19-p12620307        | gene |      |

|                           |                  |      |      |
|---------------------------|------------------|------|------|
| Bn-scaff_15701_1-p994892  | Bn-N19-p12311241 | gene | exon |
| Bn-scaff_15703_1-p186311  | Bn-N13-p58561976 | gene | exon |
| Bn-scaff_15703_1-p186424  | Bn-N8-p10545891  | gene | exon |
| Bn-scaff_15705_1-p1090470 | Bn-N2-p27510258  | gene | exon |
| Bn-scaff_15705_1-p1214538 | Bn-N17-p37614360 | gene |      |
| Bn-scaff_15705_1-p1214955 | Bn-N17-p37614576 | gene |      |
| Bn-scaff_15705_1-p123831  | Bn-N17-p36479753 | gene |      |
| Bn-scaff_15705_1-p1308702 | Bn-N17-p37701535 | gene | exon |
| Bn-scaff_15705_1-p1324812 | Bn-N17-p37722774 | gene | exon |
| Bn-scaff_15705_1-p1350770 | Bn-N17-p37736589 | gene | exon |
| Bn-scaff_15705_1-p1393933 | Bn-N17-p37782798 | gene |      |
| Bn-scaff_15705_1-p1394205 | Bn-N17-p37783067 | gene |      |
| Bn-scaff_15705_1-p1415123 | Bn-N17-p37803986 | gene | exon |
| Bn-scaff_15705_1-p1433099 | Bn-N17-p37815441 | gene | exon |
| Bn-scaff_15705_1-p1433154 | Bn-N17-p37815496 | gene | exon |
| Bn-scaff_15705_1-p1433369 | Bn-N17-p37815711 | gene |      |
| Bn-scaff_15705_1-p1435562 | Bn-N6-p18969658  | gene | exon |
| Bn-scaff_15705_1-p1479071 | Bn-N17-p37851445 | gene |      |
| Bn-scaff_15705_1-p1480198 | Bn-N17-p37852572 | gene |      |
| Bn-scaff_15705_1-p1481509 | Bn-N17-p37853883 | gene |      |
| Bn-scaff_15705_1-p1481530 | Bn-N17-p37853904 | gene |      |
| Bn-scaff_15705_1-p1524031 | Bn-N17-p37900750 | gene |      |
| Bn-scaff_15705_1-p1553993 | Bn-N17-p37934475 | gene | exon |
| Bn-scaff_15705_1-p156530  | Bn-N6-p20103217  | gene |      |
| Bn-scaff_15705_1-p157289  | Bn-N6-p20102454  | gene | exon |
| Bn-scaff_15705_1-p1619245 | Bn-N17-p38013010 | gene | exon |
| Bn-scaff_15705_1-p1673044 | Bn-N17-p38052647 | gene |      |
| Bn-scaff_15705_1-p1710163 | Bn-N17-p38090703 | gene |      |
| Bn-scaff_15705_1-p1719177 | Bn-N17-p38099717 | gene |      |
| Bn-scaff_15705_1-p1719589 | Bn-N17-p38100129 | gene |      |
| Bn-scaff_15705_1-p1719850 | Bn-N17-p38100390 | gene |      |
| Bn-scaff_15705_1-p1723798 | Bn-N17-p38103815 | gene |      |
| Bn-scaff_15705_1-p1724041 | Bn-N17-p38104058 | gene |      |
| Bn-scaff_15705_1-p1730509 | Bn-N17-p38110714 | gene |      |
| Bn-scaff_15705_1-p1812021 | Bn-N17-p38195317 | gene |      |
| Bn-scaff_15705_1-p1818177 | Bn-N17-p38201502 | gene | exon |
| Bn-scaff_15705_1-p2195474 | Bn-N17-p38566411 | gene |      |
| Bn-scaff_15705_1-p2195647 | Bn-N17-p38566585 | gene |      |
| Bn-scaff_15705_1-p2244459 | Bn-N17-p38615911 | gene | exon |
| Bn-scaff_15705_1-p2247844 | Bn-N17-p38619375 | gene | exon |
| Bn-scaff_15705_1-p2248267 | Bn-N17-p38619798 | gene | exon |
| Bn-scaff_15705_1-p2249211 | Bn-N17-p38620761 | gene | exon |
| Bn-scaff_15705_1-p2249214 | Bn-N17-p38620768 | gene | exon |
| Bn-scaff_15705_1-p2274493 | Bn-N17-p38658044 | gene | exon |
| Bn-scaff_15705_1-p2279820 | Bn-N17-p38664474 | gene |      |
| Bn-scaff_15705_1-p2282942 | Bn-N17-p38666703 | gene | exon |
| Bn-scaff_15705_1-p2283255 | Bn-N17-p38667953 | gene |      |
| Bn-scaff_15705_1-p2317575 | Bn-N17-p38706970 | gene |      |
| Bn-scaff_15705_1-p2504173 | Bn-N17-p38887023 | gene |      |
| Bn-scaff_15705_1-p2504492 | Bn-N17-p38887343 | gene |      |
| Bn-scaff_15705_1-p2590289 | Bn-N17-p38967842 | gene |      |
| Bn-scaff_15705_1-p2740790 | Bn-N3-p21862451  | gene |      |

|                            |                  |      |      |
|----------------------------|------------------|------|------|
| Bn-scaff_15705_1-p2758961  | Bn-N17-p39151354 | gene |      |
| Bn-scaff_15705_1-p2971358  | Bn-N18-p1782299  | gene | exon |
| Bn-scaff_15705_1-p329173   | Bn-N17-p36730215 | gene |      |
| Bn-scaff_15705_1-p374398   | Bn-N17-p36777124 | gene | exon |
| Bn-scaff_15705_1-p379864   | Bn-N17-p36785071 | gene |      |
| Bn-scaff_15705_1-p392673   | Bn-N17-p36797874 | gene |      |
| Bn-scaff_15705_1-p394094   | Bn-N17-p36799295 | gene |      |
| Bn-scaff_15705_1-p394867   | Bn-N17-p36800068 | gene |      |
| Bn-scaff_15705_1-p431621   | Bn-N6-p19844476  | gene | exon |
| Bn-scaff_15705_1-p432224   | Bn-N17-p36829930 | gene |      |
| Bn-scaff_15705_1-p459906   | Bn-N17-p36857699 | gene |      |
| Bn-scaff_15705_1-p460083   | Bn-N17-p36857876 | gene | exon |
| Bn-scaff_15705_1-p477053   | Bn-N17-p36868413 | gene |      |
| Bn-scaff_15705_1-p478465   | Bn-N17-p36869841 | gene |      |
| Bn-scaff_15705_1-p480964   | Bn-N17-p36872295 | gene | exon |
| Bn-scaff_15705_1-p523721   | Bn-N6-p19765996  | gene | exon |
| Bn-scaff_15705_1-p562818   | Bn-N17-p36942241 | gene | exon |
| Bn-scaff_15705_1-p605605   | Bn-N17-p36986539 | gene | exon |
| Bn-scaff_15705_1-p773910   | Bn-N17-p37149977 | gene |      |
| Bn-scaff_15705_1-p780228   | Bn-N6-p19551466  | gene | exon |
| Bn-scaff_15705_1-p841235   | Bn-N6-p19500355  | gene |      |
| Bn-scaff_15705_2-p766564   | Bn-N15-p29534218 | gene | exon |
| Bn-scaff_15705_2-p797337   | Bn-N15-p29502817 | gene |      |
| Bn-scaff_15705_2-p798638   | Bn-N15-p29501516 | gene |      |
| Bn-scaff_15705_2-p92026    | Bn-N15-p30229660 | gene | exon |
| Bn-scaff_15705_2-p931546   | Bn-N15-p29271026 | gene | exon |
| Bn-scaff_15705_2-p962347   | Bn-N9-p20372858  | gene | exon |
| Bn-scaff_15705_3-p129321   | Bn-N17-p39419198 | gene |      |
| Bn-scaff_15705_3-p131881   | Bn-N17-p39425879 | gene |      |
| Bn-scaff_15705_3-p234116   | Bn-N17-p39529839 | gene |      |
| Bn-scaff_15705_3-p241821   | Bn-N17-p39537341 | gene | exon |
| Bn-scaff_15705_3-p253023   | Bn-N17-p39542139 | gene |      |
| Bn-scaff_15705_3-p261350   | Bn-N17-p39558857 | gene | exon |
| Bn-scaff_15705_3-p262027   | Bn-N17-p39559532 | gene | exon |
| Bn-scaff_15705_3-p308195   | Bn-N3-p22258665  | gene |      |
| Bn-scaff_15705_3-p351405   | Bn-N17-p39660615 | gene | exon |
| Bn-scaff_15705_3-p436841   | Bn-N17-p39754792 | gene | exon |
| Bn-scaff_15705_3-p440761   | Bn-N17-p39758705 | gene | exon |
| Bn-scaff_15705_3-p450433   | Bn-N17-p39768456 | gene | exon |
| Bn-scaff_15705_3-p455031   | Bn-N17-p39773053 | gene |      |
| Bn-scaff_15705_3-p582863   | Bn-N17-p39875700 | gene | exon |
| Bn-scaff_15705_3-p601831   | Bn-N17-p39899760 | gene |      |
| Bn-scaff_15705_3-p616618   | Bn-N17-p39912815 | gene | exon |
| Bn-scaff_15705_3-p620597   | Bn-N17-p39916125 | gene | exon |
| Bn-scaff_15709_1-p58075    | Bn-N1-p26854340  | gene | exon |
| Bn-scaff_15709_1-p67334    | Bn-N1-p26848911  | gene | exon |
| Bn-scaff_15709_1-p74248    | Bn-N11-p45166914 | gene |      |
| Bn-scaff_15712_1-p816541   | Bn-N6-p25237115  | gene | exon |
| Bn-scaff_15712_1-p841920   | Bn-N17-p26695844 | gene | exon |
| Bn-scaff_15712_10-p103802  | Bn-N15-p5289572  | gene | exon |
| Bn-scaff_15712_10-p1182534 | Bn-N15-p6634826  | gene | exon |
| Bn-scaff_15712_10-p14121   | Bn-N15-p5224172  | gene |      |

|                           |                        |      |      |
|---------------------------|------------------------|------|------|
| Bn-scaff_15712_10-p377155 | Bn-N15-p5531125        | gene |      |
| Bn-scaff_15712_10-p378255 | Bn-N15-p5533141        | gene |      |
| Bn-scaff_15712_10-p443730 | Bn-N15-p5582619        | gene | exon |
| Bn-scaff_15712_10-p528204 | Bn-N15-p5660268        | gene | exon |
| Bn-scaff_15712_10-p598383 | Bn-N15-p5743185        | gene | exon |
| Bn-scaff_15712_10-p669486 | Bn-N15-p5823015        | gene | exon |
| Bn-scaff_15712_10-p717090 | Bn-N6-p4727217         | gene |      |
| Bn-scaff_15712_10-p927257 | Bn-N15-p6076670        | gene |      |
| Bn-scaff_15712_11-p40223  | Bn-N18-p6869024        | gene |      |
| Bn-scaff_15712_11-p46467  | Bn-N18-p6866452        | gene | exon |
| Bn-scaff_15712_11-p60195  | Bn-N18-p6847616        | gene |      |
| Bn-scaff_15712_11-p63788  | Bn-N18-p6844023        | gene |      |
| Bn-scaff_15712_11-p64730  | Bn-N18-p6843081        | gene |      |
| Bn-scaff_15712_11-p64879  | Bn-N18-p6842932        | gene |      |
| Bn-scaff_15712_12-p21418  | Bn-N12-p42499224       | gene |      |
| Bn-scaff_15712_12-p5675   | Bn-N12-p42486098       | gene | exon |
| Bn-scaff_15712_12-p5737   | Bn-N12-p42486160       | gene |      |
| Bn-scaff_15712_12-p5921   | Bn-N12-p42486342       | gene |      |
| Bn-scaff_15712_13-p33062  | Bn-N12-p9756996        | gene | exon |
| Bn-scaff_15712_13-p43168  | Bn-N12-p9767491        | gene |      |
| Bn-scaff_15712_13-p61367  | Bn-N12-p9789812        | gene |      |
| Bn-scaff_15712_13-p63324  | Bn-Scaffold01917-p4110 | gene |      |
| Bn-scaff_15712_2-p14588   | Bn-N17-p21262009       | gene |      |
| Bn-scaff_15712_2-p15006   | Bn-N17-p21261593       | gene |      |
| Bn-scaff_15712_2-p275897  | Bn-N12-p38769161       | gene | exon |
| Bn-scaff_15712_2-p800802  | Bn-N12-p39380771       | gene |      |
| Bn-scaff_15712_2-p800968  | Bn-N12-p39380937       | gene |      |
| Bn-scaff_15712_2-p810721  | Bn-N12-p39391625       | gene |      |
| Bn-scaff_15712_2-p810782  | Bn-N12-p39391686       | gene |      |
| Bn-scaff_15712_2-p811032  | Bn-N12-p39391936       | gene |      |
| Bn-scaff_15712_2-p817397  | Bn-N12-p39396046       | gene |      |
| Bn-scaff_15712_2-p86441   | Bn-N12-p38597827       | gene | exon |
| Bn-scaff_15712_3-p203186  | Bn-N11-p43246088       | gene |      |
| Bn-scaff_15712_3-p205773  | Bn-N11-p43243501       | gene | exon |
| Bn-scaff_15712_3-p205825  | Bn-N11-p43243449       | gene | exon |
| Bn-scaff_15712_3-p251179  | Bn-N11-p43197921       | gene |      |
| Bn-scaff_15712_3-p353404  | Bn-N11-p43073005       | gene |      |
| Bn-scaff_15712_3-p46743   | Bn-N11-p43420313       | gene |      |
| Bn-scaff_15712_3-p480089  | Bn-N11-p42961129       | gene | exon |
| Bn-scaff_15712_3-p489739  | Bn-N11-p42951680       | gene | exon |
| Bn-scaff_15712_3-p493370  | Bn-N11-p42938722       | gene |      |
| Bn-scaff_15712_3-p507666  | Bn-N1-p25411486        | gene | exon |
| Bn-scaff_15712_3-p508068  | Bn-N1-p25411084        | gene | exon |
| Bn-scaff_15712_3-p516388  | Bn-N11-p42921474       | gene |      |
| Bn-scaff_15712_3-p543124  | Bn-N11-p42896042       | gene |      |
| Bn-scaff_15712_3-p562225  | Bn-Scaffold01128-p3952 | gene | exon |
| Bn-scaff_15712_3-p627192  | Bn-N11-p42825633       | gene |      |
| Bn-scaff_15712_3-p627461  | Bn-N11-p42825368       | gene |      |
| Bn-scaff_15712_3-p627936  | Bn-N11-p42824903       | gene |      |
| Bn-scaff_15712_3-p636695  | Bn-N11-p42815944       | gene | exon |
| Bn-scaff_15712_3-p653523  | Bn-N11-p42798163       | gene |      |
| Bn-scaff_15712_3-p703293  | Bn-N11-p42744035       | gene |      |



|                           |                  |      |      |
|---------------------------|------------------|------|------|
| Bn-scaff_15712_3-p804205  | Bn-N11-p42480309 | gene | exon |
| Bn-scaff_15712_3-p804356  | Bn-N11-p42480158 | gene | exon |
| Bn-scaff_15712_3-p807914  | Bn-N11-p42476600 | gene |      |
| Bn-scaff_15712_3-p808416  | Bn-N11-p42476098 | gene |      |
| Bn-scaff_15712_3-p818174  | Bn-N11-p42466501 | gene | exon |
| Bn-scaff_15712_5-p1021105 | Bn-N12-p9934997  | gene |      |
| Bn-scaff_15712_5-p104472  | Bn-N12-p10714800 | gene | exon |
| Bn-scaff_15712_5-p107128  | Bn-N12-p10712144 | gene |      |
| Bn-scaff_15712_5-p107189  | Bn-N12-p10712083 | gene |      |
| Bn-scaff_15712_5-p1123924 | Bn-N15-p8772295  | gene | exon |
| Bn-scaff_15712_5-p1124972 | Bn-N15-p8771247  | gene | exon |
| Bn-scaff_15712_5-p124174  | Bn-N12-p10693196 | gene |      |
| Bn-scaff_15712_5-p17640   | Bn-N12-p10802780 | gene |      |
| Bn-scaff_15712_5-p239953  | Bn-N12-p10583390 | gene | exon |
| Bn-scaff_15712_5-p263761  | Bn-N12-p10556939 | gene |      |
| Bn-scaff_15712_5-p266747  | Bn-N12-p10553953 | gene | exon |
| Bn-scaff_15712_5-p266971  | Bn-N12-p10553729 | gene | exon |
| Bn-scaff_15712_5-p315320  | Bn-N12-p10504926 | gene |      |
| Bn-scaff_15712_5-p355840  | Bn-N2-p7134265   | gene | exon |
| Bn-scaff_15712_5-p384769  | Bn-N12-p10452849 | gene | exon |
| Bn-scaff_15712_5-p389200  | Bn-N12-p10448432 | gene |      |
| Bn-scaff_15712_5-p40206   | Bn-N12-p10776432 | gene |      |
| Bn-scaff_15712_5-p427179  | Bn-N12-p10410784 | gene |      |
| Bn-scaff_15712_5-p442786  | Bn-N12-p10394988 | gene | exon |
| Bn-scaff_15712_5-p442792  | Bn-N12-p10394982 | gene | exon |
| Bn-scaff_15712_5-p443017  | Bn-N12-p10394757 | gene | exon |
| Bn-scaff_15712_5-p50347   | Bn-N12-p10766514 | gene |      |
| Bn-scaff_15712_5-p53061   | Bn-N12-p10763598 | gene |      |
| Bn-scaff_15712_5-p581641  | Bn-N12-p10296647 | gene |      |
| Bn-scaff_15712_5-p581712  | Bn-N12-p10296576 | gene |      |
| Bn-scaff_15712_5-p581943  | Bn-N12-p10296345 | gene |      |
| Bn-scaff_15712_5-p582188  | Bn-N2-p7016815   | gene | exon |
| Bn-scaff_15712_5-p647318  | Bn-N2-p6984095   | gene | exon |
| Bn-scaff_15712_5-p652960  | Bn-N12-p10233924 | gene | exon |
| Bn-scaff_15712_5-p755073  | Bn-N12-p10136477 | gene |      |
| Bn-scaff_15712_5-p795461  | Bn-N12-p10105970 | gene | exon |
| Bn-scaff_15712_5-p823875  | Bn-N12-p10079335 | gene |      |
| Bn-scaff_15712_5-p941560  | Bn-N12-p9983483  | gene |      |
| Bn-scaff_15712_5-p942881  | Bn-N12-p9982019  | gene |      |
| Bn-scaff_15712_6-p1170156 | Bn-N12-p38305459 | gene | exon |
| Bn-scaff_15712_6-p1170308 | Bn-N12-p38305611 | gene | exon |
| Bn-scaff_15712_6-p1182178 | Bn-N12-p38317508 | gene |      |
| Bn-scaff_15712_6-p1227268 | Bn-N12-p38356579 | gene | exon |
| Bn-scaff_15712_6-p1254900 | Bn-N12-p38380144 | gene | exon |
| Bn-scaff_15712_6-p1356799 | Bn-N12-p38486441 | gene |      |
| Bn-scaff_15712_6-p157246  | Bn-N12-p37245848 | gene | exon |
| Bn-scaff_15712_6-p158134  | Bn-N12-p37246723 | gene | exon |
| Bn-scaff_15712_6-p207205  | Bn-N12-p37290118 | gene | exon |
| Bn-scaff_15712_6-p214229  | Bn-N12-p37297028 | gene |      |
| Bn-scaff_15712_6-p357924  | Bn-N12-p37431610 | gene | exon |
| Bn-scaff_15712_6-p470292  | Bn-N2-p23510539  | gene |      |
| Bn-scaff_15712_6-p470462  | Bn-N2-p23510709  | gene |      |

|                           |                        |      |      |
|---------------------------|------------------------|------|------|
| Bn-scaff_15712_6-p561242  | Bn-N2-p23560531        | gene | exon |
| Bn-scaff_15712_6-p561498  | Bn-N12-p37678466       | gene | exon |
| Bn-scaff_15712_6-p585395  | Bn-N12-p37706849       | gene | exon |
| Bn-scaff_15712_6-p590850  | Bn-N12-p37712319       | gene |      |
| Bn-scaff_15712_6-p592438  | Bn-N2-p23587175        | gene |      |
| Bn-scaff_15712_6-p623654  | Bn-N2-p23607818        | gene |      |
| Bn-scaff_15712_6-p648969  | Bn-N12-p37771467       | gene | exon |
| Bn-scaff_15712_6-p801970  | Bn-N12-p37924482       | gene |      |
| Bn-scaff_15712_6-p802708  | Bn-N12-p37925221       | gene |      |
| Bn-scaff_15712_6-p803175  | Bn-N12-p37925687       | gene |      |
| Bn-scaff_15712_6-p803381  | Bn-N12-p37925893       | gene |      |
| Bn-scaff_15712_6-p803807  | Bn-N12-p37926318       | gene | exon |
| Bn-scaff_15712_6-p836450  | Bn-N12-p37983843       | gene |      |
| Bn-scaff_15712_6-p932230  | Bn-N12-p38089110       | gene |      |
| Bn-scaff_15712_8-p359006  | Bn-N14-p32786312       | gene |      |
| Bn-scaff_15712_9-p518410  | Bn-N12-p39747214       | gene |      |
| Bn-scaff_15712_9-p528882  | Bn-N12-p39758584       | gene | exon |
| Bn-scaff_15712_9-p530201  | Bn-N12-p39759903       | gene | exon |
| Bn-scaff_15712_9-p618165  | Bn-N12-p39845573       | gene | exon |
| Bn-scaff_15712_9-p621118  | Bn-N12-p39848526       | gene |      |
| Bn-scaff_15712_9-p621830  | Bn-N12-p39849238       | gene |      |
| Bn-scaff_15712_9-p636935  | Bn-N12-p39869049       | gene |      |
| Bn-scaff_15712_9-p801464  | Bn-N12-p40040212       | gene |      |
| Bn-scaff_15712_9-p822331  | Bn-N12-p40059391       | gene | exon |
| Bn-scaff_15713_1-p3776    | Bn-N11-p33938827       | gene |      |
| Bn-scaff_15714_1-p1026389 | Bn-N12-p3310310        | gene |      |
| Bn-scaff_15714_1-p1063274 | Bn-N12-p3273126        | gene | exon |
| Bn-scaff_15714_1-p1080911 | Bn-N12-p3257054        | gene |      |
| Bn-scaff_15714_1-p1091353 | Bn-N12-p3244236        | gene | exon |
| Bn-scaff_15714_1-p1099018 | Bn-N12-p3231957        | gene | exon |
| Bn-scaff_15714_1-p1210756 | Bn-Scaffold05044-p1458 | gene | exon |
| Bn-scaff_15714_1-p1767499 | Bn-N12-p2566972        | gene | exon |
| Bn-scaff_15714_1-p1787439 | Bn-N12-p2532902        | gene |      |
| Bn-scaff_15714_1-p1890215 | Bn-N12-p2431198        | gene |      |
| Bn-scaff_15714_1-p1892918 | Bn-N12-p2428493        | gene |      |
| Bn-scaff_15714_1-p1934829 | Bn-N2-p2196579         | gene | exon |
| Bn-scaff_15714_1-p1949380 | Bn-N12-p2360318        | gene | exon |
| Bn-scaff_15714_1-p1949467 | Bn-N12-p2360232        | gene | exon |
| Bn-scaff_15714_1-p1949689 | Bn-N12-p2360049        | gene |      |
| Bn-scaff_15714_1-p1983642 | Bn-N12-p2332826        | gene | exon |
| Bn-scaff_15714_1-p2048498 | Bn-N2-p2086382         | gene |      |
| Bn-scaff_15714_1-p2071571 | Bn-N2-p2069493         | gene | exon |
| Bn-scaff_15714_1-p210487  | Bn-N12-p4181914        | gene | exon |
| Bn-scaff_15714_1-p2113009 | Bn-N12-p2196256        | gene |      |
| Bn-scaff_15714_1-p2299285 | Bn-N12-p1985719        | gene | exon |
| Bn-scaff_15714_1-p2368497 | Bn-N2-p1867396         | gene |      |
| Bn-scaff_15714_1-p2383620 | Bn-N12-p1897640        | gene | exon |
| Bn-scaff_15714_1-p2383694 | Bn-N12-p1897566        | gene | exon |
| Bn-scaff_15714_1-p2383776 | Bn-N2-p1848365         | gene | exon |
| Bn-scaff_15714_1-p2481342 | Bn-N12-p1816687        | gene |      |
| Bn-scaff_15714_1-p2489495 | Bn-N12-p1809430        | gene | exon |
| Bn-scaff_15714_1-p2489824 | Bn-N12-p1809100        | gene | exon |

|                           |                  |      |      |
|---------------------------|------------------|------|------|
| Bn-scaff_15714_1-p2492549 | Bn-N2-p1792238   | gene | exon |
| Bn-scaff_15714_1-p2555033 | Bn-N12-p1739717  | gene | exon |
| Bn-scaff_15714_1-p2557722 | Bn-N2-p1730209   | gene | exon |
| Bn-scaff_15714_1-p2567188 | Bn-N2-p1716440   | gene | exon |
| Bn-scaff_15714_1-p2569623 | Bn-N2-p1714008   | gene | exon |
| Bn-scaff_15714_1-p2723978 | Bn-N2-p1586810   | gene | exon |
| Bn-scaff_15714_1-p2794889 | Bn-N12-p1466581  | gene | exon |
| Bn-scaff_15714_1-p2817933 | Bn-N12-p1447634  | gene | exon |
| Bn-scaff_15714_1-p2894962 | Bn-N12-p1375815  | gene | exon |
| Bn-scaff_15714_1-p2895029 | Bn-N12-p1375748  | gene |      |
| Bn-scaff_15714_1-p2895311 | Bn-N2-p1444923   | gene | exon |
| Bn-scaff_15714_1-p2978071 | Bn-N12-p1294128  | gene | exon |
| Bn-scaff_15714_1-p2989937 | Bn-N12-p1282905  | gene | exon |
| Bn-scaff_15714_1-p2995270 | Bn-N12-p1277324  | gene |      |
| Bn-scaff_15714_1-p2995346 | Bn-N12-p1277247  | gene |      |
| Bn-scaff_15714_1-p3001398 | Bn-N12-p1271195  | gene | exon |
| Bn-scaff_15714_1-p3007686 | Bn-N12-p1264901  | gene |      |
| Bn-scaff_15714_1-p3007703 | Bn-N12-p1264884  | gene |      |
| Bn-scaff_15714_1-p3110986 | Bn-N12-p1175456  | gene | exon |
| Bn-scaff_15714_1-p3216292 | Bn-N18-p12134482 | gene |      |
| Bn-scaff_15714_1-p3216346 | Bn-N18-p12134428 | gene |      |
| Bn-scaff_15714_1-p328756  | Bn-N12-p4085502  | gene | exon |
| Bn-scaff_15714_1-p342901  | Bn-N12-p4076106  | gene |      |
| Bn-scaff_15714_1-p483395  | Bn-N2-p3262071   | gene | exon |
| Bn-scaff_15714_1-p517527  | Bn-N12-p3895633  | gene |      |
| Bn-scaff_15714_1-p519285  | Bn-N2-p3246461   | gene |      |
| Bn-scaff_15714_1-p585548  | Bn-N12-p3818883  | gene |      |
| Bn-scaff_15714_1-p585874  | Bn-N12-p3818556  | gene | exon |
| Bn-scaff_15714_1-p592895  | Bn-N2-p3193027   | gene | exon |
| Bn-scaff_15714_1-p593159  | Bn-N2-p3192762   | gene | exon |
| Bn-scaff_15714_1-p594799  | Bn-N12-p3809749  | gene | exon |
| Bn-scaff_15714_1-p615978  | Bn-N2-p3174149   | gene | exon |
| Bn-scaff_15714_1-p633772  | Bn-N12-p3769303  | gene | exon |
| Bn-scaff_15714_1-p633944  | Bn-N12-p3769131  | gene |      |
| Bn-scaff_15714_1-p642855  | Bn-N2-p3150661   | gene | exon |
| Bn-scaff_15714_1-p692582  | Bn-N12-p3709324  | gene |      |
| Bn-scaff_15714_1-p696326  | Bn-N12-p3705521  | gene | exon |
| Bn-scaff_15714_1-p696585  | Bn-N12-p3705261  | gene |      |
| Bn-scaff_15714_1-p696586  | Bn-N12-p3705260  | gene |      |
| Bn-scaff_15714_1-p723481  | Bn-N12-p3677074  | gene |      |
| Bn-scaff_15714_1-p723890  | Bn-N2-p3083954   | gene | exon |
| Bn-scaff_15714_1-p773455  | Bn-N12-p3618105  | gene |      |
| Bn-scaff_15714_1-p835459  | Bn-N12-p3551736  | gene | exon |
| Bn-scaff_15714_1-p865598  | Bn-N12-p3517585  | gene | exon |
| Bn-scaff_15714_1-p881090  | Bn-N12-p3501852  | gene |      |
| Bn-scaff_15714_1-p966029  | Bn-N12-p3371482  | gene |      |
| Bn-scaff_15714_1-p977841  | Bn-N2-p2891505   | gene | exon |
| Bn-scaff_15714_1-p990729  | Bn-N2-p2877737   | gene | exon |
| Bn-scaff_15715_1-p202940  | Bn-N17-p27277424 | gene | exon |
| Bn-scaff_15743_1-p13056   | Bn-N19-p42328064 | gene | exon |
| Bn-scaff_15743_1-p224179  | Bn-N19-p42129008 | gene | exon |
| Bn-scaff_15743_1-p232722  | Bn-N19-p42120466 | gene |      |

|                          |                        |      |      |
|--------------------------|------------------------|------|------|
| Bn-scaff_15743_1-p233012 | Bn-N19-p42120176       | gene | exon |
| Bn-scaff_15743_1-p318571 | Bn-N19-p42029446       | gene |      |
| Bn-scaff_15743_1-p535306 | Bn-N16-p31031744       | gene |      |
| Bn-scaff_15743_1-p536811 | Bn-N16-p31033247       | gene | exon |
| Bn-scaff_15743_1-p538763 | Bn-N16-p31035199       | gene |      |
| Bn-scaff_15743_1-p549066 | Bn-N16-p31055385       | gene | exon |
| Bn-scaff_15743_1-p635780 | Bn-N16-p31117926       | gene |      |
| Bn-scaff_15743_1-p635943 | Bn-N16-p31118089       | gene | exon |
| Bn-scaff_15743_1-p638252 | Bn-N16-p31120415       | gene |      |
| Bn-scaff_15743_1-p638555 | Bn-N16-p31120704       | gene |      |
| Bn-scaff_15743_1-p644117 | Bn-N7-p19267203        | gene | exon |
| Bn-scaff_15743_1-p660655 | Bn-N16-p31149996       | gene | exon |
| Bn-scaff_15743_1-p660665 | Bn-N16-p31150006       | gene |      |
| Bn-scaff_15743_1-p75010  | Bn-N19-p42267640       | gene | exon |
| Bn-scaff_15746_1-p128358 | Bn-N16-p26632870       | gene |      |
| Bn-scaff_15746_1-p152007 | Bn-N16-p26608539       | gene | exon |
| Bn-scaff_15746_1-p241457 | Bn-N16-p26503290       | gene | exon |
| Bn-scaff_15746_1-p403163 | Bn-N7-p17076360        | gene | exon |
| Bn-scaff_15746_1-p428738 | Bn-N7-p17063577        | gene |      |
| Bn-scaff_15747_1-p105633 | Bn-N11-p14577555       | gene |      |
| Bn-scaff_15747_1-p106047 | Bn-N11-p14577969       | gene |      |
| Bn-scaff_15747_1-p339862 | Bn-N11-p14828607       | gene |      |
| Bn-scaff_15747_1-p340806 | Bn-N11-p14829557       | gene | exon |
| Bn-scaff_15747_1-p397042 | Bn-N11-p14876362       | gene | exon |
| Bn-scaff_15747_1-p397566 | Bn-N1-p9805323         | gene | exon |
| Bn-scaff_15747_1-p443186 | Bn-N11-p14918285       | gene |      |
| Bn-scaff_15747_1-p544031 | Bn-N1-p9907465         | gene | exon |
| Bn-scaff_15747_1-p544523 | Bn-N11-p14995262       | gene | exon |
| Bn-scaff_15747_1-p643342 | Bn-N11-p15121104       | gene |      |
| Bn-scaff_15747_1-p649039 | Bn-N1-p9970250         | gene | exon |
| Bn-scaff_15747_1-p649424 | Bn-N1-p9970635         | gene | exon |
| Bn-scaff_15747_1-p750280 | Bn-Scaffold05944-p1025 | gene | exon |
| Bn-scaff_15747_1-p750297 | Bn-Scaffold05944-p1008 | gene | exon |
| Bn-scaff_15747_1-p772985 | Bn-N11-p15265044       | gene |      |
| Bn-scaff_15747_1-p776112 | Bn-N11-p15268172       | gene | exon |
| Bn-scaff_15747_1-p777863 | Bn-N11-p15269922       | gene |      |
| Bn-scaff_15747_1-p784675 | Bn-N11-p15276734       | gene |      |
| Bn-scaff_15747_1-p785543 | Bn-N11-p15277602       | gene |      |
| Bn-scaff_15747_1-p94111  | Bn-N11-p14564335       | gene | exon |
| Bn-scaff_15747_2-p217901 | Bn-N13-p36902929       | gene |      |
| Bn-scaff_15747_2-p259749 | Bn-N13-p36859670       | gene |      |
| Bn-scaff_15747_2-p387345 | Bn-N13-p36718167       | gene | exon |
| Bn-scaff_15747_2-p387704 | Bn-N13-p36717808       | gene |      |
| Bn-scaff_15749_1-p282242 | Bn-N1-p16944932        | gene |      |
| Bn-scaff_15749_1-p332783 | Bn-N11-p27985220       | gene |      |
| Bn-scaff_15749_1-p333180 | Bn-N11-p27984829       | gene |      |
| Bn-scaff_15749_1-p404917 | Bn-N11-p27915576       | gene |      |
| Bn-scaff_15749_1-p405353 | Bn-N11-p27915139       | gene | exon |
| Bn-scaff_15749_1-p406036 | Bn-N11-p27914456       | gene |      |
| Bn-scaff_15749_1-p406268 | Bn-N11-p27914228       | gene |      |
| Bn-scaff_15749_1-p406376 | Bn-N11-p27914120       | gene |      |
| Bn-scaff_15749_1-p409261 | Bn-N11-p27911236       | gene |      |

|                           |                  |      |      |
|---------------------------|------------------|------|------|
| Bn-scaff_15754_1-p1212459 | Bn-N17-p30454636 | gene | exon |
| Bn-scaff_15754_1-p1214097 | Bn-N17-p30456274 | gene |      |
| Bn-scaff_15754_1-p1215465 | Bn-N17-p30457641 | gene |      |
| Bn-scaff_15754_1-p1225357 | Bn-N17-p30467558 | gene |      |
| Bn-scaff_15754_1-p12686   | Bn-N17-p29192826 | gene | exon |
| Bn-scaff_15754_1-p1403758 | Bn-N17-p30654212 | gene | exon |
| Bn-scaff_15754_1-p1425457 | Bn-N17-p30632168 | gene | exon |
| Bn-scaff_15754_1-p1426899 | Bn-N17-p30630717 | gene | exon |
| Bn-scaff_15754_1-p294973  | Bn-N6-p24320035  | gene |      |
| Bn-scaff_15754_1-p44190   | Bn-N17-p29227847 | gene | exon |
| Bn-scaff_15754_1-p465154  | Bn-N17-p29606684 | gene | exon |
| Bn-scaff_15754_1-p477663  | Bn-N17-p29620442 | gene | exon |
| Bn-scaff_15754_1-p478730  | Bn-N17-p29621509 | gene | exon |
| Bn-scaff_15754_1-p478990  | Bn-N17-p29621770 | gene |      |
| Bn-scaff_15754_1-p555074  | Bn-N17-p29713676 | gene |      |
| Bn-scaff_15754_1-p688470  | Bn-N17-p29860763 | gene |      |
| Bn-scaff_15754_1-p691892  | Bn-N17-p29883169 | gene |      |
| Bn-scaff_15754_1-p692148  | Bn-N17-p29883425 | gene |      |
| Bn-scaff_15754_1-p692916  | Bn-N17-p29884193 | gene | exon |
| Bn-scaff_15754_1-p730879  | Bn-N17-p29931236 | gene | exon |
| Bn-scaff_15754_1-p827585  | Bn-N17-p30023704 | gene | exon |
| Bn-scaff_15754_1-p827708  | Bn-N17-p30023827 | gene | exon |
| Bn-scaff_15754_1-p827981  | Bn-N6-p24021965  | gene | exon |
| Bn-scaff_15758_1-p36244   | Bn-N13-p45008685 | gene | exon |
| Bn-scaff_15758_3-p1324936 | Bn-N17-p9145611  | gene | exon |
| Bn-scaff_15758_3-p358181  | Bn-N6-p12992142  | gene |      |
| Bn-scaff_15762_1-p1096634 | Bn-N7-p955943    | gene | exon |
| Bn-scaff_15762_1-p1131894 | Bn-N17-p2252247  | gene | exon |
| Bn-scaff_15762_1-p1132736 | Bn-N7-p1380806   | gene |      |
| Bn-scaff_15762_1-p995371  | Bn-N7-p869488    | gene |      |
| Bn-scaff_15763_1-p1029560 | Bn-N7-p15764803  | gene |      |
| Bn-scaff_15763_1-p1048413 | Bn-N7-p15783785  | gene | exon |
| Bn-scaff_15763_1-p1089975 | Bn-N7-p15800681  | gene | exon |
| Bn-scaff_15763_1-p1090874 | Bn-N7-p15801668  | gene | exon |
| Bn-scaff_15763_1-p1090987 | Bn-N7-p15801781  | gene | exon |
| Bn-scaff_15763_1-p123436  | Bn-N7-p15355618  | gene |      |
| Bn-scaff_15763_1-p1332687 | Bn-N16-p23748643 | gene | exon |
| Bn-scaff_15763_1-p1382176 | Bn-N16-p23767263 | gene | exon |
| Bn-scaff_15763_1-p1403988 | Bn-N16-p23785191 | gene |      |
| Bn-scaff_15763_1-p1411892 | Bn-N16-p23791305 | gene |      |
| Bn-scaff_15763_1-p1413613 | Bn-N16-p23793027 | gene | exon |
| Bn-scaff_15763_1-p1413941 | Bn-N16-p23793355 | gene |      |
| Bn-scaff_15763_1-p1418783 | Bn-N16-p23798819 | gene |      |
| Bn-scaff_15763_1-p1419543 | Bn-N16-p23799596 | gene |      |
| Bn-scaff_15763_1-p1481622 | Bn-N16-p23863227 | gene |      |
| Bn-scaff_15763_1-p1492349 | Bn-N16-p23873923 | gene | exon |
| Bn-scaff_15763_1-p1557780 | Bn-N7-p15983519  | gene | exon |
| Bn-scaff_15763_1-p188023  | Bn-N16-p22690252 | gene |      |
| Bn-scaff_15763_1-p189152  | Bn-N16-p22691369 | gene |      |
| Bn-scaff_15763_1-p221789  | Bn-N16-p22718536 | gene | exon |
| Bn-scaff_15763_1-p233149  | Bn-N16-p22741620 | gene |      |
| Bn-scaff_15763_1-p233999  | Bn-N16-p22742470 | gene | exon |

|                          |                  |      |      |
|--------------------------|------------------|------|------|
| Bn-scaff_15763_1-p241894 | Bn-N16-p22750490 | gene | exon |
| Bn-scaff_15763_1-p255875 | Bn-N16-p22763105 | gene |      |
| Bn-scaff_15763_1-p262418 | Bn-N16-p22770059 | gene |      |
| Bn-scaff_15763_1-p282019 | Bn-N16-p22779031 | gene | exon |
| Bn-scaff_15763_1-p285424 | Bn-N16-p22782141 | gene | exon |
| Bn-scaff_15763_1-p287565 | Bn-N16-p22784281 | gene | exon |
| Bn-scaff_15763_1-p313075 | Bn-N16-p22803057 | gene |      |
| Bn-scaff_15763_1-p313425 | Bn-N16-p22803407 | gene |      |
| Bn-scaff_15763_1-p320413 | Bn-N16-p22810318 | gene | exon |
| Bn-scaff_15763_1-p506136 | Bn-N16-p22981280 | gene |      |
| Bn-scaff_15763_1-p506301 | Bn-N16-p22981445 | gene |      |
| Bn-scaff_15763_1-p514953 | Bn-N16-p22990094 | gene | exon |
| Bn-scaff_15763_1-p522845 | Bn-N16-p22998009 | gene |      |
| Bn-scaff_15763_1-p553985 | Bn-N16-p23025749 | gene | exon |
| Bn-scaff_15763_1-p572494 | Bn-N7-p15556233  | gene |      |
| Bn-scaff_15763_1-p573751 | Bn-N16-p23045027 | gene | exon |
| Bn-scaff_15763_1-p575274 | Bn-N16-p23046550 | gene |      |
| Bn-scaff_15763_1-p637496 | Bn-N7-p15585204  | gene |      |
| Bn-scaff_15763_1-p648473 | Bn-N16-p23094429 | gene |      |
| Bn-scaff_15763_1-p648869 | Bn-N16-p23094825 | gene |      |
| Bn-scaff_15763_1-p648971 | Bn-N16-p23094927 | gene |      |
| Bn-scaff_15763_1-p657663 | Bn-N16-p23097770 | gene |      |
| Bn-scaff_15763_1-p662057 | Bn-N16-p23102163 | gene |      |
| Bn-scaff_15763_1-p675547 | Bn-N16-p23115663 | gene | exon |
| Bn-scaff_15763_1-p677594 | Bn-N16-p23117710 | gene |      |
| Bn-scaff_15763_1-p681318 | Bn-N16-p23121434 | gene | exon |
| Bn-scaff_15763_1-p681523 | Bn-N16-p23121639 | gene | exon |
| Bn-scaff_15763_1-p682251 | Bn-N16-p23122367 | gene |      |
| Bn-scaff_15763_1-p87690  | Bn-N16-p22570082 | gene | exon |
| Bn-scaff_15765_1-p145525 | Bn-N14-p12059033 | gene |      |
| Bn-scaff_15766_1-p103722 | Bn-N17-p10799935 | gene | exon |
| Bn-scaff_15766_1-p103742 | Bn-N17-p10799956 | gene | exon |
| Bn-scaff_15766_1-p103851 | Bn-N17-p10800064 | gene | exon |
| Bn-scaff_15766_1-p117523 | Bn-N17-p10810558 | gene | exon |
| Bn-scaff_15766_1-p117700 | Bn-N17-p10810735 | gene | exon |
| Bn-scaff_15766_1-p141085 | Bn-N17-p10838548 | gene |      |
| Bn-scaff_15766_1-p141160 | Bn-N17-p10838623 | gene |      |
| Bn-scaff_15766_1-p20339  | Bn-N17-p10707305 | gene |      |
| Bn-scaff_15766_1-p20537  | Bn-N17-p10707503 | gene |      |
| Bn-scaff_15766_1-p21067  | Bn-N17-p10708033 | gene |      |
| Bn-scaff_15766_1-p21074  | Bn-N17-p10708040 | gene |      |
| Bn-scaff_15766_1-p21706  | Bn-N17-p10708325 | gene |      |
| Bn-scaff_15766_1-p237467 | Bn-N14-p21562245 | gene | exon |
| Bn-scaff_15766_1-p34395  | Bn-N17-p10717828 | gene |      |
| Bn-scaff_15766_1-p34398  | Bn-N17-p10717831 | gene |      |
| Bn-scaff_15767_1-p104948 | Bn-N12-p28736092 | gene |      |
| Bn-scaff_15767_1-p108658 | Bn-N12-p28739802 | gene |      |
| Bn-scaff_15767_1-p110471 | Bn-N12-p28741615 | gene |      |
| Bn-scaff_15767_1-p113288 | Bn-N12-p28744432 | gene |      |
| Bn-scaff_15767_1-p174572 | Bn-N12-p28799664 | gene | exon |
| Bn-scaff_15767_1-p174671 | Bn-N12-p28799763 | gene | exon |
| Bn-scaff_15779_1-p400004 | Bn-N14-p34636471 | gene |      |

|                           |                  |      |      |
|---------------------------|------------------|------|------|
| Bn-scaff_15779_1-p41353   | Bn-N14-p34336145 | gene |      |
| Bn-scaff_15779_1-p94004   | Bn-N14-p34388709 | gene | exon |
| Bn-scaff_15779_1-p94543   | Bn-N14-p34389254 | gene | exon |
| Bn-scaff_15782_1-p220040  | Bn-N3-p12663515  | gene | exon |
| Bn-scaff_15782_1-p37811   | Bn-N13-p19249996 | gene |      |
| Bn-scaff_15782_1-p71063   | Bn-N13-p19214993 | gene | exon |
| Bn-scaff_15782_1-p72137   | Bn-N3-p12728298  | gene |      |
| Bn-scaff_15783_1-p178333  | Bn-N9-p1128019   | gene |      |
| Bn-scaff_15783_1-p262930  | Bn-N9-p1037793   | gene | exon |
| Bn-scaff_15783_1-p273092  | Bn-N9-p1018784   | gene | exon |
| Bn-scaff_15783_1-p346149  | Bn-N9-p984087    | gene |      |
| Bn-scaff_15783_1-p367803  | Bn-N19-p1110097  | gene |      |
| Bn-scaff_15783_1-p368397  | Bn-N19-p1109503  | gene |      |
| Bn-scaff_15783_1-p379962  | Bn-N19-p945787   | gene | exon |
| Bn-scaff_15783_1-p381165  | Bn-N19-p1087400  | gene | exon |
| Bn-scaff_15783_1-p500695  | Bn-N19-p965542   | gene |      |
| Bn-scaff_15783_1-p501174  | Bn-N19-p965062   | gene |      |
| Bn-scaff_15783_1-p501489  | Bn-N19-p964748   | gene |      |
| Bn-scaff_15783_1-p519816  | Bn-N19-p1087618  | gene | exon |
| Bn-scaff_15783_1-p520465  | Bn-N19-p946120   | gene | exon |
| Bn-scaff_15794_1-p157188  | Bn-N13-p62353372 | gene |      |
| Bn-scaff_15794_1-p236621  | Bn-N13-p62236523 | gene | exon |
| Bn-scaff_15794_1-p236720  | Bn-N13-p62236423 | gene | exon |
| Bn-scaff_15794_1-p240208  | Bn-N13-p62232165 | gene |      |
| Bn-scaff_15794_1-p354725  | Bn-N13-p62097166 | gene |      |
| Bn-scaff_15794_1-p437864  | Bn-N13-p62015568 | gene |      |
| Bn-scaff_15794_1-p84457   | Bn-N13-p62429054 | gene | exon |
| Bn-scaff_15794_2-p214881  | Bn-N11-p36341960 | gene |      |
| Bn-scaff_15794_2-p251230  | Bn-N1-p21706353  | gene | exon |
| Bn-scaff_15794_3-p137832  | Bn-N13-p61741280 | gene | exon |
| Bn-scaff_15794_3-p154541  | Bn-N13-p61712262 | gene | exon |
| Bn-scaff_15794_3-p256042  | Bn-N13-p61643005 | gene | exon |
| Bn-scaff_15794_3-p62430   | Bn-N2-p9008665   | gene | exon |
| Bn-scaff_15798_1-p1057546 | Bn-N4-p12874728  | gene | exon |
| Bn-scaff_15798_1-p1058384 | Bn-N14-p43786578 | gene |      |
| Bn-scaff_15798_1-p135614  | Bn-N14-p42789267 | gene |      |
| Bn-scaff_15798_1-p194900  | Bn-N4-p12011049  | gene | exon |
| Bn-scaff_15798_1-p289396  | Bn-N4-p12111810  | gene | exon |
| Bn-scaff_15798_1-p290204  | Bn-N4-p12112618  | gene | exon |
| Bn-scaff_15798_1-p310424  | Bn-N18-p32082324 | gene |      |
| Bn-scaff_15798_1-p419058  | Bn-N4-p12216719  | gene | exon |
| Bn-scaff_15798_1-p699979  | Bn-N14-p43424560 | gene | exon |
| Bn-scaff_15798_1-p711199  | Bn-N14-p43436831 | gene | exon |
| Bn-scaff_15798_1-p712022  | Bn-N14-p43439216 | gene | exon |
| Bn-scaff_15798_1-p725659  | Bn-N14-p43451574 | gene | exon |
| Bn-scaff_15798_1-p729336  | Bn-N14-p43455251 | gene |      |
| Bn-scaff_15798_1-p731733  | Bn-N14-p43457650 | gene |      |
| Bn-scaff_15798_1-p732529  | Bn-N14-p43458447 | gene |      |
| Bn-scaff_15798_1-p982019  | Bn-N14-p43693473 | gene | exon |
| Bn-scaff_15803_1-p452288  | Bn-N11-p15721007 | gene |      |
| Bn-scaff_15803_1-p452639  | Bn-N11-p15720656 | gene |      |
| Bn-scaff_15803_1-p558476  | Bn-N11-p15612184 | gene |      |

|                          |                  |      |      |
|--------------------------|------------------|------|------|
| Bn-scaff_15803_1-p668267 | Bn-N11-p15505848 | gene |      |
| Bn-scaff_15803_1-p677518 | Bn-N11-p15497251 | gene |      |
| Bn-scaff_15803_1-p729620 | Bn-N11-p15422454 | gene | exon |
| Bn-scaff_15803_1-p802390 | Bn-N11-p15346780 | gene |      |
| Bn-scaff_15803_1-p811739 | Bn-N1-p10087033  | gene | exon |
| Bn-scaff_15803_1-p813514 | Bn-N1-p10085287  | gene | exon |
| Bn-scaff_15803_1-p855436 | Bn-N11-p15294448 | gene |      |
| Bn-scaff_15808_1-p236986 | Bn-N19-p43408065 | gene | exon |
| Bn-scaff_15808_1-p240156 | Bn-N19-p43411238 | gene | exon |
| Bn-scaff_15808_1-p240644 | Bn-N19-p43411724 | gene | exon |
| Bn-scaff_15808_1-p247006 | Bn-N19-p43420231 | gene | exon |
| Bn-scaff_15808_1-p337084 | Bn-N10-p10024667 | gene |      |
| Bn-scaff_15808_1-p337452 | Bn-N19-p43496389 | gene | exon |
| Bn-scaff_15808_1-p388294 | Bn-N19-p43560390 | gene | exon |
| Bn-scaff_15808_1-p393449 | Bn-N19-p43567591 | gene | exon |
| Bn-scaff_15808_1-p405938 | Bn-N19-p43583099 | gene |      |
| Bn-scaff_15808_1-p432946 | Bn-N19-p43614257 | gene | exon |
| Bn-scaff_15808_1-p433123 | Bn-N19-p43614433 | gene | exon |
| Bn-scaff_15808_1-p433195 | Bn-N19-p43614505 | gene | exon |
| Bn-scaff_15808_1-p433496 | Bn-N19-p43614806 | gene |      |
| Bn-scaff_15808_1-p433945 | Bn-N19-p43615255 | gene |      |
| Bn-scaff_15808_1-p434342 | Bn-N19-p43615653 | gene |      |
| Bn-scaff_15808_1-p445999 | Bn-N19-p43635224 | gene |      |
| Bn-scaff_15808_1-p446050 | Bn-N19-p43635275 | gene |      |
| Bn-scaff_15808_1-p446701 | Bn-N19-p43636655 | gene |      |
| Bn-scaff_15808_1-p487486 | Bn-N19-p43674351 | gene | exon |
| Bn-scaff_15808_1-p50319  | Bn-N19-p43213003 | gene | exon |
| Bn-scaff_15808_1-p519223 | Bn-N10-p10121072 | gene |      |
| Bn-scaff_15808_1-p519665 | Bn-N19-p43704435 | gene | exon |
| Bn-scaff_15808_1-p525268 | Bn-N19-p43710040 | gene | exon |
| Bn-scaff_15808_1-p56362  | Bn-N10-p9909941  | gene | exon |
| Bn-scaff_15808_1-p583082 | Bn-N19-p43768862 | gene |      |
| Bn-scaff_15808_1-p644839 | Bn-N19-p43876948 | gene | exon |
| Bn-scaff_15808_1-p645700 | Bn-N19-p43877881 | gene |      |
| Bn-scaff_15808_1-p645707 | Bn-N19-p43877887 | gene |      |
| Bn-scaff_15808_1-p645798 | Bn-N19-p43877978 | gene |      |
| Bn-scaff_15808_1-p646346 | Bn-N19-p43878526 | gene | exon |
| Bn-scaff_15808_1-p646435 | Bn-N19-p43878615 | gene |      |
| Bn-scaff_15808_1-p646761 | Bn-N19-p43878942 | gene |      |
| Bn-scaff_15808_1-p647845 | Bn-N19-p43880025 | gene |      |
| Bn-scaff_15808_1-p647937 | Bn-N19-p43880117 | gene | exon |
| Bn-scaff_15808_1-p680975 | Bn-N10-p10192353 | gene | exon |
| Bn-scaff_15808_1-p742572 | Bn-N19-p43963712 | gene | exon |
| Bn-scaff_15808_1-p742673 | Bn-N19-p43963812 | gene | exon |
| Bn-scaff_15808_1-p743841 | Bn-N19-p43964981 | gene | exon |
| Bn-scaff_15808_1-p784093 | Bn-N19-p43997828 | gene |      |
| Bn-scaff_15808_1-p786011 | Bn-N19-p43999734 | gene |      |
| Bn-scaff_15808_1-p92071  | Bn-N19-p43251404 | gene | exon |
| Bn-scaff_15808_1-p92391  | Bn-N19-p43251724 | gene |      |
| Bn-scaff_15809_1-p110149 | Bn-N14-p19195326 | gene |      |
| Bn-scaff_15809_1-p207828 | Bn-N14-p19287829 | gene |      |
| Bn-scaff_15809_1-p209065 | Bn-N14-p19289078 | gene |      |



|                           |                  |      |      |
|---------------------------|------------------|------|------|
| Bn-scaff_15809_1-p214708  | Bn-N14-p19294587 | gene |      |
| Bn-scaff_15809_1-p219058  | Bn-N15-p3218959  | gene | exon |
| Bn-scaff_15809_1-p81364   | Bn-N14-p19164997 | gene |      |
| Bn-scaff_15818_1-p1579953 | Bn-N7-p16190523  | gene | exon |
| Bn-scaff_15818_1-p1871998 | Bn-N7-p16308315  | gene |      |
| Bn-scaff_15818_1-p2029150 | Bn-N16-p24860781 | gene | exon |
| Bn-scaff_15818_1-p2029912 | Bn-N16-p24861544 | gene |      |
| Bn-scaff_15818_1-p2103793 | Bn-N7-p16405417  | gene | exon |
| Bn-scaff_15818_1-p2165992 | Bn-N7-p16448551  | gene |      |
| Bn-scaff_15818_1-p2331085 | Bn-N7-p16538251  | gene | exon |
| Bn-scaff_15818_1-p2399771 | Bn-N16-p25235002 | gene |      |
| Bn-scaff_15818_1-p2399825 | Bn-N16-p25235044 | gene |      |
| Bn-scaff_15818_1-p2515033 | Bn-N16-p25327888 | gene |      |
| Bn-scaff_15818_1-p2516251 | Bn-N16-p25329106 | gene | exon |
| Bn-scaff_15818_1-p2532249 | Bn-N16-p25345988 | gene |      |
| Bn-scaff_15818_1-p2543219 | Bn-N7-p16672343  | gene | exon |
| Bn-scaff_15818_1-p2633791 | Bn-N7-p16702198  | gene | exon |
| Bn-scaff_15818_1-p277309  | Bn-N16-p17319523 | gene |      |
| Bn-scaff_15818_1-p2876784 | Bn-N16-p25691260 | gene | exon |
| Bn-scaff_15818_1-p2889771 | Bn-N16-p25704426 | gene |      |
| Bn-scaff_15818_1-p2890837 | Bn-N16-p25705492 | gene |      |
| Bn-scaff_15818_1-p2891179 | Bn-N16-p25705835 | gene |      |
| Bn-scaff_15818_1-p2891900 | Bn-N16-p25706555 | gene |      |
| Bn-scaff_15818_1-p2921633 | Bn-N16-p25737438 | gene |      |
| Bn-scaff_15818_1-p292872  | Bn-N16-p17336642 | gene | exon |
| Bn-scaff_15818_1-p297955  | Bn-N16-p17341747 | gene | exon |
| Bn-scaff_15818_1-p3109988 | Bn-N16-p25925645 | gene |      |
| Bn-scaff_15818_1-p3172268 | Bn-N16-p25975890 | gene |      |
| Bn-scaff_15818_1-p3308182 | Bn-N7-p16960659  | gene | exon |
| Bn-scaff_15818_1-p3310016 | Bn-N16-p26110933 | gene |      |
| Bn-scaff_15818_1-p3310794 | Bn-N7-p16963235  | gene | exon |
| Bn-scaff_15818_1-p352205  | Bn-N16-p17406504 | gene | exon |
| Bn-scaff_15818_1-p471106  | Bn-N16-p17484947 | gene |      |
| Bn-scaff_15818_1-p493044  | Bn-N7-p13383887  | gene |      |
| Bn-scaff_15818_1-p832468  | Bn-N7-p13511104  | gene | exon |
| Bn-scaff_15818_1-p858733  | Bn-N7-p13523262  | gene | exon |
| Bn-scaff_15818_1-p858798  | Bn-N7-p13523326  | gene |      |
| Bn-scaff_15818_2-p1142391 | Bn-N16-p19451304 | gene |      |
| Bn-scaff_15818_2-p1144939 | Bn-N16-p19453915 | gene | exon |
| Bn-scaff_15818_2-p1146207 | Bn-N16-p19455199 | gene | exon |
| Bn-scaff_15818_2-p1209251 | Bn-N16-p19534252 | gene |      |
| Bn-scaff_15818_2-p1235556 | Bn-N16-p19559397 | gene |      |
| Bn-scaff_15818_2-p1236404 | Bn-N16-p19560245 | gene |      |
| Bn-scaff_15818_2-p1238506 | Bn-N16-p19562347 | gene | exon |
| Bn-scaff_15818_2-p1430036 | Bn-N16-p19778089 | gene | exon |
| Bn-scaff_15818_2-p1534553 | Bn-N16-p19895770 | gene | exon |
| Bn-scaff_15818_2-p1554832 | Bn-N16-p19917101 | gene |      |
| Bn-scaff_15818_2-p1554957 | Bn-N16-p19917226 | gene |      |
| Bn-scaff_15818_2-p1555112 | Bn-N16-p19917381 | gene |      |
| Bn-scaff_15818_2-p1555114 | Bn-N16-p19917383 | gene |      |
| Bn-scaff_15818_2-p1566134 | Bn-N16-p19923807 | gene | exon |
| Bn-scaff_15818_2-p1567500 | Bn-N16-p19922441 | gene | exon |

|                           |                  |      |      |
|---------------------------|------------------|------|------|
| Bn-scaff_15818_2-p172987  | Bn-N16-p18523560 | gene |      |
| Bn-scaff_15818_2-p175898  | Bn-N16-p18525943 | gene | exon |
| Bn-scaff_15818_2-p175935  | Bn-N16-p18525980 | gene | exon |
| Bn-scaff_15818_2-p176007  | Bn-N16-p18526052 | gene | exon |
| Bn-scaff_15818_2-p1943374 | Bn-N16-p20266466 | gene |      |
| Bn-scaff_15818_2-p1945022 | Bn-N16-p20268414 | gene |      |
| Bn-scaff_15818_2-p1945232 | Bn-N16-p20268603 | gene |      |
| Bn-scaff_15818_2-p1945498 | Bn-N16-p20268871 | gene | exon |
| Bn-scaff_15818_2-p1945612 | Bn-N16-p20268985 | gene | exon |
| Bn-scaff_15818_2-p2060720 | Bn-N16-p20378717 | gene |      |
| Bn-scaff_15818_2-p2080735 | Bn-N16-p20397189 | gene | exon |
| Bn-scaff_15818_2-p485119  | Bn-N16-p18852696 | gene | exon |
| Bn-scaff_15818_2-p502870  | Bn-N16-p18870481 | gene | exon |
| Bn-scaff_15818_2-p503599  | Bn-N16-p18871211 | gene | exon |
| Bn-scaff_15818_2-p504385  | Bn-N7-p13818120  | gene |      |
| Bn-scaff_15818_2-p505807  | Bn-N7-p13819541  | gene | exon |
| Bn-scaff_15818_2-p693286  | Bn-N16-p19061654 | gene | exon |
| Bn-scaff_15832_1-p74342   | Bn-N14-p505347   | gene | exon |
| Bn-scaff_15838_1-p1045102 | Bn-N11-p1646614  | gene | exon |
| Bn-scaff_15838_1-p1065318 | Bn-N11-p1669416  | gene |      |
| Bn-scaff_15838_1-p1126349 | Bn-N11-p1736348  | gene |      |
| Bn-scaff_15838_1-p1218165 | Bn-N11-p1833879  | gene |      |
| Bn-scaff_15838_1-p1347132 | Bn-N1-p1574222   | gene | exon |
| Bn-scaff_15838_1-p1347433 | Bn-N1-p1574535   | gene | exon |
| Bn-scaff_15838_1-p1347959 | Bn-N1-p1575049   | gene | exon |
| Bn-scaff_15838_1-p1372150 | Bn-N11-p1992241  | gene |      |
| Bn-scaff_15838_1-p1403775 | Bn-N11-p2029142  | gene |      |
| Bn-scaff_15838_1-p1430057 | Bn-N11-p2059634  | gene |      |
| Bn-scaff_15838_1-p1451211 | Bn-N11-p2083358  | gene | exon |
| Bn-scaff_15838_1-p1452641 | Bn-N1-p1683410   | gene | exon |
| Bn-scaff_15838_1-p1467858 | Bn-N1-p1697189   | gene | exon |
| Bn-scaff_15838_1-p1476644 | Bn-N11-p2110760  | gene |      |
| Bn-scaff_15838_1-p1572850 | Bn-N1-p1769679   | gene | exon |
| Bn-scaff_15838_1-p1573954 | Bn-N11-p2206997  | gene | exon |
| Bn-scaff_15838_1-p1585380 | Bn-N11-p2221095  | gene |      |
| Bn-scaff_15838_1-p1680792 | Bn-N11-p2325230  | gene |      |
| Bn-scaff_15838_1-p1684617 | Bn-N11-p2329121  | gene | exon |
| Bn-scaff_15838_1-p1810027 | Bn-N11-p2452848  | gene |      |
| Bn-scaff_15838_1-p1917196 | Bn-N11-p2565721  | gene |      |
| Bn-scaff_15838_1-p1942196 | Bn-N11-p2594884  | gene |      |
| Bn-scaff_15838_1-p2018342 | Bn-N11-p2682441  | gene | exon |
| Bn-scaff_15838_1-p2033116 | Bn-N1-p2128324   | gene |      |
| Bn-scaff_15838_1-p2035980 | Bn-N11-p2700993  | gene |      |
| Bn-scaff_15838_1-p2039607 | Bn-N11-p2704674  | gene |      |
| Bn-scaff_15838_1-p2103661 | Bn-N11-p2765238  | gene |      |
| Bn-scaff_15838_1-p2104239 | Bn-N11-p2765816  | gene | exon |
| Bn-scaff_15838_1-p2144986 | Bn-N11-p2803667  | gene | exon |
| Bn-scaff_15838_1-p2212925 | Bn-N11-p2874100  | gene | exon |
| Bn-scaff_15838_1-p2253503 | Bn-N11-p2924028  | gene |      |
| Bn-scaff_15838_1-p2261053 | Bn-N11-p2931702  | gene | exon |
| Bn-scaff_15838_1-p2268600 | Bn-N11-p2939439  | gene | exon |
| Bn-scaff_15838_1-p2363391 | Bn-N11-p3039587  | gene | exon |

|                           |                 |      |      |
|---------------------------|-----------------|------|------|
| Bn-scaff_15838_1-p2366465 | Bn-N1-p2399522  | gene | exon |
| Bn-scaff_15838_1-p3224    | Bn-N14-p382427  | gene | exon |
| Bn-scaff_15838_1-p431092  | Bn-N11-p1100614 | gene | exon |
| Bn-scaff_15838_1-p431266  | Bn-N11-p1100788 | gene | exon |
| Bn-scaff_15838_1-p517875  | Bn-N1-p894187   | gene | exon |
| Bn-scaff_15838_1-p533029  | Bn-N11-p1150870 | gene | exon |
| Bn-scaff_15838_1-p536524  | Bn-N11-p1154327 | gene | exon |
| Bn-scaff_15838_1-p554584  | Bn-N11-p1169242 | gene | exon |
| Bn-scaff_15838_1-p586436  | Bn-N11-p1201469 | gene |      |
| Bn-scaff_15838_1-p614550  | Bn-N11-p1232917 | gene |      |
| Bn-scaff_15838_1-p693814  | Bn-N11-p1327164 | gene | exon |
| Bn-scaff_15838_1-p694016  | Bn-N1-p1048604  | gene |      |
| Bn-scaff_15838_1-p714484  | Bn-N11-p1346032 | gene |      |
| Bn-scaff_15838_1-p740881  | Bn-N11-p1373990 | gene |      |
| Bn-scaff_15838_1-p741071  | Bn-N11-p1374194 | gene |      |
| Bn-scaff_15838_1-p747634  | Bn-N11-p1380587 | gene |      |
| Bn-scaff_15838_1-p767750  | Bn-N11-p1407403 | gene |      |
| Bn-scaff_15838_1-p775566  | Bn-N11-p1418958 | gene | exon |
| Bn-scaff_15838_1-p787184  | Bn-N11-p1430592 | gene |      |
| Bn-scaff_15838_1-p805646  | Bn-N11-p1453637 | gene | exon |
| Bn-scaff_15838_1-p830622  | Bn-N11-p1475601 | gene |      |
| Bn-scaff_15838_1-p842481  | Bn-N11-p1486285 | gene |      |
| Bn-scaff_15838_1-p867997  | Bn-N11-p1513650 | gene | exon |
| Bn-scaff_15838_1-p868199  | Bn-N11-p1513851 | gene |      |
| Bn-scaff_15838_1-p868461  | Bn-N11-p1514103 | gene |      |
| Bn-scaff_15838_1-p868592  | Bn-N11-p1514242 | gene | exon |
| Bn-scaff_15838_1-p943061  | Bn-N11-p1558871 | gene | exon |
| Bn-scaff_15838_2-p107992  | Bn-N15-p4449140 | gene |      |
| Bn-scaff_15838_2-p115812  | Bn-N15-p4436641 | gene | exon |
| Bn-scaff_15838_2-p126220  | Bn-N15-p4430761 | gene |      |
| Bn-scaff_15838_2-p135868  | Bn-N15-p4426226 | gene | exon |
| Bn-scaff_15838_2-p136603  | Bn-N15-p4425491 | gene | exon |
| Bn-scaff_15838_2-p142579  | Bn-N15-p4419019 | gene |      |
| Bn-scaff_15838_2-p143070  | Bn-N15-p4418528 | gene |      |
| Bn-scaff_15838_3-p220348  | Bn-N2-p10883664 | gene | exon |
| Bn-scaff_15838_3-p227340  | Bn-N2-p10876389 | gene | exon |
| Bn-scaff_15838_3-p256125  | Bn-N2-p10854695 | gene |      |
| Bn-scaff_15838_3-p612728  | Bn-N2-p10717080 | gene | exon |
| Bn-scaff_15838_3-p613154  | Bn-N2-p10716672 | gene | exon |
| Bn-scaff_15838_5-p1004507 | Bn-N11-p4210580 | gene | exon |
| Bn-scaff_15838_5-p1092811 | Bn-N11-p4319272 | gene |      |
| Bn-scaff_15838_5-p1093365 | Bn-N11-p4319826 | gene | exon |
| Bn-scaff_15838_5-p1158185 | Bn-N11-p4379087 | gene |      |
| Bn-scaff_15838_5-p1162338 | Bn-N11-p4383249 | gene |      |
| Bn-scaff_15838_5-p1167562 | Bn-N11-p4388971 | gene | exon |
| Bn-scaff_15838_5-p1170066 | Bn-N11-p4391477 | gene | exon |
| Bn-scaff_15838_5-p1182961 | Bn-N11-p4400975 | gene | exon |
| Bn-scaff_15838_5-p1208686 | Bn-N11-p4410676 | gene | exon |
| Bn-scaff_15838_5-p1208759 | Bn-N11-p4410749 | gene | exon |
| Bn-scaff_15838_5-p1208892 | Bn-N11-p4410882 | gene | exon |
| Bn-scaff_15838_5-p1209957 | Bn-N11-p4417387 | gene |      |
| Bn-scaff_15838_5-p1210444 | Bn-N11-p4417868 | gene |      |

|                           |                  |      |      |
|---------------------------|------------------|------|------|
| Bn-scaff_15838_5-p1215697 | Bn-N11-p4422754  | gene | exon |
| Bn-scaff_15838_5-p123944  | Bn-N11-p3245136  | gene | exon |
| Bn-scaff_15838_5-p151738  | Bn-N11-p3280931  | gene |      |
| Bn-scaff_15838_5-p152076  | Bn-N11-p3281268  | gene |      |
| Bn-scaff_15838_5-p164551  | Bn-N11-p3293391  | gene |      |
| Bn-scaff_15838_5-p165094  | Bn-N11-p3293934  | gene |      |
| Bn-scaff_15838_5-p202432  | Bn-N11-p3315863  | gene | exon |
| Bn-scaff_15838_5-p217291  | Bn-N11-p3329956  | gene | exon |
| Bn-scaff_15838_5-p224495  | Bn-N11-p3340342  | gene | exon |
| Bn-scaff_15838_5-p227630  | Bn-N11-p3343538  | gene |      |
| Bn-scaff_15838_5-p236972  | Bn-N11-p3355446  | gene |      |
| Bn-scaff_15838_5-p241183  | Bn-N11-p3359669  | gene |      |
| Bn-scaff_15838_5-p304302  | Bn-N11-p3419694  | gene |      |
| Bn-scaff_15838_5-p329539  | Bn-N11-p3445612  | gene |      |
| Bn-scaff_15838_5-p330543  | Bn-N11-p3446628  | gene |      |
| Bn-scaff_15838_5-p331638  | Bn-N11-p3450237  | gene |      |
| Bn-scaff_15838_5-p335984  | Bn-N11-p3455578  | gene |      |
| Bn-scaff_15838_5-p382969  | Bn-N11-p3496067  | gene | exon |
| Bn-scaff_15838_5-p441651  | Bn-N11-p3563780  | gene | exon |
| Bn-scaff_15838_5-p444851  | Bn-N11-p3567003  | gene |      |
| Bn-scaff_15838_5-p444873  | Bn-N11-p3567025  | gene | exon |
| Bn-scaff_15838_5-p468773  | Bn-N1-p2772283   | gene | exon |
| Bn-scaff_15838_5-p478688  | Bn-N11-p3601869  | gene |      |
| Bn-scaff_15838_5-p479433  | Bn-N11-p3602607  | gene |      |
| Bn-scaff_15838_5-p480491  | Bn-N11-p3603661  | gene |      |
| Bn-scaff_15838_5-p480567  | Bn-N11-p3603737  | gene |      |
| Bn-scaff_15838_5-p480957  | Bn-N11-p3604118  | gene |      |
| Bn-scaff_15838_5-p483184  | Bn-N11-p3607555  | gene | exon |
| Bn-scaff_15838_5-p484014  | Bn-N1-p2788020   | gene |      |
| Bn-scaff_15838_5-p513730  | Bn-N1-p2815315   | gene | exon |
| Bn-scaff_15838_5-p568283  | Bn-N1-p2854509   | gene |      |
| Bn-scaff_15838_5-p603655  | Bn-N11-p3801909  | gene |      |
| Bn-scaff_15838_5-p625786  | Bn-N11-p3819489  | gene |      |
| Bn-scaff_15838_5-p626078  | Bn-N11-p3819781  | gene | exon |
| Bn-scaff_15838_5-p648080  | Bn-N1-p2917518   | gene |      |
| Bn-scaff_15838_5-p672971  | Bn-N1-p2930747   | gene |      |
| Bn-scaff_15838_5-p706717  | Bn-N11-p3882758  | gene |      |
| Bn-scaff_15838_5-p779070  | Bn-N11-p3953787  | gene | exon |
| Bn-scaff_15838_5-p850445  | Bn-N11-p4038071  | gene | exon |
| Bn-scaff_15838_5-p850964  | Bn-N11-p4038590  | gene |      |
| Bn-scaff_15838_5-p884827  | Bn-N11-p4073422  | gene | exon |
| Bn-scaff_15838_5-p885166  | Bn-N11-p4073761  | gene | exon |
| Bn-scaff_15838_5-p886564  | Bn-N11-p4081169  | gene |      |
| Bn-scaff_15838_5-p929569  | Bn-N11-p4135334  | gene | exon |
| Bn-scaff_15838_5-p944359  | Bn-N1-p3140026   | gene | exon |
| Bn-scaff_15838_5-p954588  | Bn-N11-p4161289  | gene |      |
| Bn-scaff_15844_1-p111925  | Bn-N11-p36982647 | gene |      |
| Bn-scaff_15844_1-p119216  | Bn-N11-p36990184 | gene | exon |
| Bn-scaff_15844_1-p163992  | Bn-N1-p22154564  | gene | exon |
| Bn-scaff_15844_1-p184165  | Bn-N11-p37069869 | gene |      |
| Bn-scaff_15844_1-p222290  | Bn-N11-p37108036 | gene |      |
| Bn-scaff_15844_1-p6065    | Bn-N11-p36876178 | gene | exon |

|                           |                  |      |      |
|---------------------------|------------------|------|------|
| Bn-scaff_15844_1-p6285    | Bn-N11-p36876398 | gene | exon |
| Bn-scaff_15844_1-p9633    | Bn-N11-p36879747 | gene |      |
| Bn-scaff_15847_1-p121544  | Bn-N17-p13875407 | gene |      |
| Bn-scaff_15847_1-p264646  | Bn-N19-p17339897 | gene | exon |
| Bn-scaff_15847_1-p265134  | Bn-N19-p17339410 | gene | exon |
| Bn-scaff_15852_1-p234569  | Bn-N14-p44390234 | gene |      |
| Bn-scaff_15852_1-p263989  | Bn-N14-p44370575 | gene | exon |
| Bn-scaff_15852_1-p435102  | Bn-N4-p13065377  | gene | exon |
| Bn-scaff_15852_1-p483817  | Bn-N14-p44114987 | gene | exon |
| Bn-scaff_15852_1-p526799  | Bn-N14-p44070049 | gene | exon |
| Bn-scaff_15852_1-p549809  | Bn-N14-p44047060 | gene | exon |
| Bn-scaff_15852_1-p593067  | Bn-N14-p44002091 | gene |      |
| Bn-scaff_15852_1-p622579  | Bn-N15-p21427152 | gene |      |
| Bn-scaff_15856_1-p119395  | Bn-N15-p48268203 | gene |      |
| Bn-scaff_15856_1-p50968   | Bn-N1-p26927669  | gene |      |
| Bn-scaff_15856_1-p55934   | Bn-N15-p48200037 | gene |      |
| Bn-scaff_15856_1-p78904   | Bn-N5-p25534920  | gene | exon |
| Bn-scaff_15856_1-p79207   | Bn-N5-p25535222  | gene | exon |
| Bn-scaff_15856_1-p80690   | Bn-N5-p25536705  | gene | exon |
| Bn-scaff_15877_1-p1015445 | Bn-N13-p5672849  | gene | exon |
| Bn-scaff_15877_1-p1067997 | Bn-N13-p5725424  | gene | exon |
| Bn-scaff_15877_1-p152569  | Bn-N13-p4209655  | gene | exon |
| Bn-scaff_15877_1-p173651  | Bn-N13-p4239190  | gene | exon |
| Bn-scaff_15877_1-p173818  | Bn-N13-p4239357  | gene | exon |
| Bn-scaff_15877_1-p184815  | Bn-N13-p4250640  | gene | exon |
| Bn-scaff_15877_1-p184866  | Bn-N13-p4250691  | gene | exon |
| Bn-scaff_15877_1-p184927  | Bn-N13-p4250751  | gene | exon |
| Bn-scaff_15877_1-p185777  | Bn-N3-p3351352   | gene | exon |
| Bn-scaff_15877_1-p186528  | Bn-N13-p4252360  | gene |      |
| Bn-scaff_15877_1-p205102  | Bn-N3-p3363208   | gene | exon |
| Bn-scaff_15877_1-p273957  | Bn-N13-p4312899  | gene | exon |
| Bn-scaff_15877_1-p282014  | Bn-N13-p4321147  | gene | exon |
| Bn-scaff_15877_1-p289796  | Bn-N13-p4329042  | gene |      |
| Bn-scaff_15877_1-p292927  | Bn-N13-p4331385  | gene | exon |
| Bn-scaff_15877_1-p293326  | Bn-N13-p4331784  | gene | exon |
| Bn-scaff_15877_1-p293578  | Bn-N13-p4332036  | gene | exon |
| Bn-scaff_15877_1-p293599  | Bn-N13-p4332057  | gene | exon |
| Bn-scaff_15877_1-p294800  | Bn-N13-p4333259  | gene |      |
| Bn-scaff_15877_1-p294806  | Bn-N13-p4333265  | gene |      |
| Bn-scaff_15877_1-p295197  | Bn-N13-p4333652  | gene | exon |
| Bn-scaff_15877_1-p295224  | Bn-N13-p4333679  | gene | exon |
| Bn-scaff_15877_1-p306167  | Bn-N13-p4343820  | gene |      |
| Bn-scaff_15877_1-p349800  | Bn-N13-p4389906  | gene |      |
| Bn-scaff_15877_1-p353421  | Bn-N13-p4393527  | gene |      |
| Bn-scaff_15877_1-p363914  | Bn-N13-p4404019  | gene |      |
| Bn-scaff_15877_1-p364706  | Bn-N13-p4404811  | gene |      |
| Bn-scaff_15877_1-p420181  | Bn-N13-p4453122  | gene |      |
| Bn-scaff_15877_1-p423112  | Bn-N13-p4456065  | gene | exon |
| Bn-scaff_15877_1-p4822    | Bn-N3-p3215603   | gene |      |
| Bn-scaff_15877_1-p555712  | Bn-N13-p4592351  | gene |      |
| Bn-scaff_15877_1-p617921  | Bn-N13-p4662761  | gene |      |
| Bn-scaff_15877_1-p655934  | Bn-N13-p4700688  | gene |      |

|                           |                  |      |      |
|---------------------------|------------------|------|------|
| Bn-scaff_15877_1-p69630   | Bn-N13-p4120535  | gene | exon |
| Bn-scaff_15877_1-p69781   | Bn-N13-p4120686  | gene |      |
| Bn-scaff_15877_1-p715686  | Bn-N3-p3752600   | gene | exon |
| Bn-scaff_15877_1-p717745  | Bn-N19-p48785869 | gene | exon |
| Bn-scaff_15877_1-p718090  | Bn-N13-p5299943  | gene | exon |
| Bn-scaff_15877_1-p719944  | Bn-N13-p5302465  | gene |      |
| Bn-scaff_15877_1-p730349  | Bn-N13-p5313276  | gene |      |
| Bn-scaff_15877_1-p730358  | Bn-N13-p5313285  | gene |      |
| Bn-scaff_15877_1-p730440  | Bn-N13-p5313367  | gene |      |
| Bn-scaff_15877_1-p730579  | Bn-N13-p5313506  | gene |      |
| Bn-scaff_15877_1-p730758  | Bn-N13-p5313735  | gene |      |
| Bn-scaff_15877_1-p730826  | Bn-N13-p5313803  | gene |      |
| Bn-scaff_15877_1-p731133  | Bn-N13-p5314110  | gene |      |
| Bn-scaff_15877_1-p731158  | Bn-N13-p5314135  | gene |      |
| Bn-scaff_15877_1-p731212  | Bn-N13-p5314189  | gene |      |
| Bn-scaff_15877_1-p732473  | Bn-N13-p5315450  | gene | exon |
| Bn-scaff_15877_1-p732865  | Bn-N13-p5315842  | gene |      |
| Bn-scaff_15877_1-p741674  | Bn-N13-p5324207  | gene |      |
| Bn-scaff_15877_1-p742470  | Bn-N13-p5325003  | gene | exon |
| Bn-scaff_15877_1-p743362  | Bn-N13-p5325895  | gene |      |
| Bn-scaff_15877_1-p744228  | Bn-N13-p5326762  | gene | exon |
| Bn-scaff_15877_1-p744483  | Bn-N13-p5327017  | gene |      |
| Bn-scaff_15877_1-p744489  | Bn-N13-p5327023  | gene |      |
| Bn-scaff_15877_1-p744560  | Bn-N13-p5327094  | gene | exon |
| Bn-scaff_15877_1-p746992  | Bn-N13-p5328849  | gene | exon |
| Bn-scaff_15877_1-p754954  | Bn-N13-p5346713  | gene |      |
| Bn-scaff_15877_1-p802484  | Bn-N13-p5403885  | gene |      |
| Bn-scaff_15877_1-p835991  | Bn-N13-p5435371  | gene |      |
| Bn-scaff_15877_1-p901317  | Bn-N3-p3918675   | gene |      |
| Bn-scaff_15877_1-p907858  | Bn-N13-p5563875  | gene |      |
| Bn-scaff_15877_1-p908058  | Bn-N13-p5564075  | gene |      |
| Bn-scaff_15877_1-p921076  | Bn-N13-p5579592  | gene | exon |
| Bn-scaff_15877_1-p922952  | Bn-N13-p5581467  | gene |      |
| Bn-scaff_15877_1-p923112  | Bn-N13-p5581627  | gene |      |
| Bn-scaff_15877_1-p926737  | Bn-N13-p5585256  | gene |      |
| Bn-scaff_15877_1-p92833   | Bn-N13-p4142604  | gene |      |
| Bn-scaff_15877_1-p936945  | Bn-N3-p3948603   | gene | exon |
| Bn-scaff_15877_1-p985222  | Bn-N13-p5650134  | gene | exon |
| Bn-scaff_15879_1-p21018   | Bn-N11-p34818028 | gene |      |
| Bn-scaff_15879_1-p22763   | Bn-N11-p34819773 | gene |      |
| Bn-scaff_15879_1-p29129   | Bn-N11-p34826133 | gene | exon |
| Bn-scaff_15879_1-p29379   | Bn-N11-p34826382 | gene | exon |
| Bn-scaff_15879_1-p467229  | Bn-N11-p35239153 | gene |      |
| Bn-scaff_15879_1-p690531  | Bn-N11-p35454733 | gene | exon |
| Bn-scaff_15879_1-p715384  | Bn-N11-p35480242 | gene |      |
| Bn-scaff_15881_1-p123524  | Bn-N19-p45838088 | gene |      |
| Bn-scaff_15881_1-p181813  | Bn-N19-p45906521 | gene |      |
| Bn-scaff_15881_1-p92161   | Bn-N14-p41903684 | gene | exon |
| Bn-scaff_15892_1-p1113105 | Bn-N16-p30379753 | gene | exon |
| Bn-scaff_15892_1-p1115024 | Bn-N16-p30381666 | gene | exon |
| Bn-scaff_15892_1-p112551  | Bn-N16-p29427599 | gene | exon |
| Bn-scaff_15892_1-p1141154 | Bn-N16-p30409424 | gene | exon |

|                           |                  |      |      |
|---------------------------|------------------|------|------|
| Bn-scaff_15892_1-p114893  | Bn-N16-p29429917 | gene |      |
| Bn-scaff_15892_1-p114985  | Bn-N16-p29430009 | gene |      |
| Bn-scaff_15892_1-p115171  | Bn-N16-p29430172 | gene |      |
| Bn-scaff_15892_1-p1170714 | Bn-N7-p18936843  | gene | exon |
| Bn-scaff_15892_1-p1170828 | Bn-N16-p30437555 | gene | exon |
| Bn-scaff_15892_1-p1298704 | Bn-N16-p30500549 | gene |      |
| Bn-scaff_15892_1-p1300181 | Bn-N16-p30502025 | gene |      |
| Bn-scaff_15892_1-p1481274 | Bn-N7-p19035471  | gene | exon |
| Bn-scaff_15892_1-p1482014 | Bn-N16-p30628435 | gene | exon |
| Bn-scaff_15892_1-p156854  | Bn-N16-p29468217 | gene |      |
| Bn-scaff_15892_1-p1682924 | Bn-N16-p30814307 | gene |      |
| Bn-scaff_15892_1-p169731  | Bn-N7-p18501062  | gene | exon |
| Bn-scaff_15892_1-p191252  | Bn-N7-p18511142  | gene | exon |
| Bn-scaff_15892_1-p446753  | Bn-N16-p29717587 | gene |      |
| Bn-scaff_15892_1-p544810  | Bn-N16-p29821909 | gene | exon |
| Bn-scaff_15892_1-p561526  | Bn-N16-p29838403 | gene | exon |
| Bn-scaff_15892_1-p563981  | Bn-N16-p29840858 | gene | exon |
| Bn-scaff_15892_1-p623966  | Bn-N16-p29896610 | gene | exon |
| Bn-scaff_15892_1-p959005  | Bn-N11-p36604602 | gene |      |
| Bn-scaff_15892_1-p993042  | Bn-N7-p18850477  | gene | exon |
| Bn-scaff_15895_1-p167099  | Bn-N10-p9001680  | gene | exon |
| Bn-scaff_15896_1-p550030  | Bn-N15-p5111205  | gene |      |
| Bn-scaff_15896_1-p613370  | Bn-N8-p4929175   | gene |      |
| Bn-scaff_15896_1-p636698  | Bn-N18-p14465750 | gene |      |
| Bn-scaff_15896_1-p64515   | Bn-N18-p7924734  | gene |      |
| Bn-scaff_15906_1-p269015  | Bn-N1-p15221054  | gene |      |
| Bn-scaff_15906_1-p285153  | Bn-N11-p25958520 | gene | exon |
| Bn-scaff_15908_1-p1128507 | Bn-N14-p7266863  | gene | exon |
| Bn-scaff_15908_1-p1136151 | Bn-N14-p7275265  | gene | exon |
| Bn-scaff_15908_1-p1136503 | Bn-N14-p7275617  | gene |      |
| Bn-scaff_15908_1-p1179977 | Bn-N14-p7319370  | gene |      |
| Bn-scaff_15908_1-p1181021 | Bn-N14-p7320414  | gene |      |
| Bn-scaff_15908_1-p1188324 | Bn-N14-p7327717  | gene | exon |
| Bn-scaff_15908_1-p138105  | Bn-N14-p6198738  | gene | exon |
| Bn-scaff_15908_1-p140050  | Bn-N5-p3870304   | gene | exon |
| Bn-scaff_15908_1-p280031  | Bn-N14-p6337948  | gene | exon |
| Bn-scaff_15908_1-p289000  | Bn-N14-p6347876  | gene |      |
| Bn-scaff_15908_1-p290321  | Bn-N14-p6349194  | gene |      |
| Bn-scaff_15908_1-p432859  | Bn-N5-p4015010   | gene | exon |
| Bn-scaff_15908_1-p472716  | Bn-N14-p6546116  | gene |      |
| Bn-scaff_15908_1-p557100  | Bn-N14-p6639696  | gene |      |
| Bn-scaff_15908_1-p612641  | Bn-N14-p6700088  | gene | exon |
| Bn-scaff_15908_1-p651765  | Bn-N14-p6743480  | gene | exon |
| Bn-scaff_15908_1-p755460  | Bn-N14-p6857602  | gene | exon |
| Bn-scaff_15908_1-p770939  | Bn-N14-p6874479  | gene | exon |
| Bn-scaff_15908_1-p798787  | Bn-N14-p6910887  | gene |      |
| Bn-scaff_15908_1-p833150  | Bn-N14-p6942123  | gene |      |
| Bn-scaff_15908_1-p835545  | Bn-N14-p6944553  | gene |      |
| Bn-scaff_15908_1-p850054  | Bn-N14-p6960431  | gene |      |
| Bn-scaff_15908_1-p854571  | Bn-N14-p6965278  | gene | exon |
| Bn-scaff_15908_1-p875945  | Bn-N14-p6988164  | gene | exon |
| Bn-scaff_15908_1-p923102  | Bn-N14-p7031797  | gene |      |

|                           |                       |      |      |
|---------------------------|-----------------------|------|------|
| Bn-scaff_15908_1-p938821  | Bn-N14-p7043134       | gene | exon |
| Bn-scaff_15911_1-p15553   | Bn-N14-p23691013      | gene |      |
| Bn-scaff_15911_1-p290639  | Bn-N14-p23453649      | gene | exon |
| Bn-scaff_15911_1-p331958  | Bn-N14-p23395562      | gene |      |
| Bn-scaff_15911_1-p360033  | Bn-N14-p23365170      | gene |      |
| Bn-scaff_15911_1-p360381  | Bn-N14-p23364822      | gene |      |
| Bn-scaff_15911_1-p360436  | Bn-N14-p23364767      | gene |      |
| Bn-scaff_15911_1-p510887  | Bn-N14-p24290028      | gene | exon |
| Bn-scaff_15911_1-p516900  | Bn-N14-p24284533      | gene | exon |
| Bn-scaff_15911_1-p539489  | Bn-N3-p33810490       | gene |      |
| Bn-scaff_15911_1-p559862  | Bn-N14-p24242191      | gene |      |
| Bn-scaff_15911_1-p571243  | Bn-N14-p24231232      | gene |      |
| Bn-scaff_15911_1-p571842  | Bn-N14-p24230632      | gene |      |
| Bn-scaff_15911_1-p584543  | Bn-N14-p24216216      | gene | exon |
| Bn-scaff_15911_1-p590682  | Bn-N14-p24210070      | gene |      |
| Bn-scaff_15911_1-p600329  | Bn-N14-p24200383      | gene |      |
| Bn-scaff_15911_1-p611941  | Bn-N14-p24186203      | gene |      |
| Bn-scaff_15911_1-p623766  | Bn-N14-p24174953      | gene |      |
| Bn-scaff_15911_1-p624117  | Bn-N14-p24174602      | gene | exon |
| Bn-scaff_15918_1-p227752  | Bn-N12-p42704138      | gene | exon |
| Bn-scaff_15918_1-p303294  | Bn-N12-p42780913      | gene | exon |
| Bn-scaff_15918_1-p303816  | Bn-N12-p42781436      | gene | exon |
| Bn-scaff_15918_1-p77389   | Bn-N2-p26401841       | gene | exon |
| Bn-scaff_15918_1-p77407   | Bn-N2-p26401822       | gene | exon |
| Bn-scaff_15918_1-p77494   | Bn-N2-p26401735       | gene |      |
| Bn-scaff_15918_1-p77704   | Bn-N12-p42603176      | gene |      |
| Bn-scaff_15918_1-p82985   | Bn-N12-p42618481      | gene | exon |
| Bn-scaff_15918_1-p83785   | Bn-N12-p42619281      | gene | exon |
| Bn-scaff_15923_1-p1096132 | Bn-N8-p18393020       | gene | exon |
| Bn-scaff_15923_1-p1269397 | Bn-Scaffold25034-p422 | gene | exon |
| Bn-scaff_15923_1-p635095  | Bn-N18-p25932440      | gene | exon |
| Bn-scaff_15923_1-p785679  | Bn-N8-p18237372       | gene |      |
| Bn-scaff_15930_1-p104962  | Bn-N10-p7602231       | gene | exon |
| Bn-scaff_15930_1-p105169  | Bn-N10-p7602024       | gene | exon |
| Bn-scaff_15930_1-p202997  | Bn-N19-p38163044      | gene |      |
| Bn-scaff_15930_1-p72371   | Bn-N19-p38305414      | gene |      |
| Bn-scaff_15936_1-p159213  | Bn-N11-p40112374      | gene | exon |
| Bn-scaff_15936_1-p202187  | Bn-N1-p23909704       | gene |      |
| Bn-scaff_15936_1-p245327  | Bn-N11-p40253445      | gene | exon |
| Bn-scaff_15936_1-p264595  | Bn-N11-p40272759      | gene | exon |
| Bn-scaff_15936_1-p358800  | Bn-N11-p40361351      | gene |      |
| Bn-scaff_15936_1-p383132  | Bn-N11-p40389202      | gene |      |
| Bn-scaff_15936_1-p441603  | Bn-N1-p24066438       | gene | exon |
| Bn-scaff_15936_1-p444875  | Bn-N11-p40461971      | gene |      |
| Bn-scaff_15936_1-p444993  | Bn-N11-p40462089      | gene |      |
| Bn-scaff_15959_1-p37450   | Bn-N9-p21111927       | gene | exon |
| Bn-scaff_15959_1-p657425  | Bn-N15-p27479033      | gene | exon |
| Bn-scaff_15969_1-p191154  | Bn-N15-p24967534      | gene |      |
| Bn-scaff_15969_1-p205432  | Bn-N15-p24950944      | gene |      |
| Bn-scaff_15969_1-p276159  | Bn-N15-p24886067      | gene | exon |
| Bn-scaff_15969_1-p276286  | Bn-N15-p24885940      | gene |      |
| Bn-scaff_15983_1-p584698  | Bn-N9-p16551507       | gene | exon |



|                           |                  |      |      |
|---------------------------|------------------|------|------|
| Bn-scaff_15993_1-p3906    | Bn-N14-p14408926 | gene | exon |
| Bn-scaff_16002_1-p1002120 | Bn-N13-p15070603 | gene | exon |
| Bn-scaff_16002_1-p1014503 | Bn-N13-p15083069 | gene | exon |
| Bn-scaff_16002_1-p1224962 | Bn-N13-p14875439 | gene | exon |
| Bn-scaff_16002_1-p1227296 | Bn-N13-p14871228 | gene | exon |
| Bn-scaff_16002_1-p1235661 | Bn-N13-p14863073 | gene |      |
| Bn-scaff_16002_1-p1270726 | Bn-N13-p14834487 | gene |      |
| Bn-scaff_16002_1-p1270822 | Bn-N13-p14834392 | gene | exon |
| Bn-scaff_16002_1-p1274791 | Bn-N13-p14830352 | gene |      |
| Bn-scaff_16002_1-p1334406 | Bn-N3-p10285674  | gene | exon |
| Bn-scaff_16002_1-p1350172 | Bn-N13-p14764021 | gene |      |
| Bn-scaff_16002_1-p1354832 | Bn-N13-p14759341 | gene |      |
| Bn-scaff_16002_1-p1392678 | Bn-N13-p14723568 | gene | exon |
| Bn-scaff_16002_1-p1400264 | Bn-N3-p10236351  | gene | exon |
| Bn-scaff_16002_1-p1400602 | Bn-N13-p14712275 | gene | exon |
| Bn-scaff_16002_1-p1537079 | Bn-N3-p10146687  | gene | exon |
| Bn-scaff_16002_1-p1537435 | Bn-N13-p14580172 | gene |      |
| Bn-scaff_16002_1-p1538744 | Bn-N3-p10144981  | gene | exon |
| Bn-scaff_16002_1-p1554395 | Bn-N13-p14564572 | gene |      |
| Bn-scaff_16002_1-p1569056 | Bn-N13-p14545154 | gene |      |
| Bn-scaff_16002_1-p1569070 | Bn-N13-p14545142 | gene |      |
| Bn-scaff_16002_1-p1595096 | Bn-N13-p14522881 | gene | exon |
| Bn-scaff_16002_1-p1595246 | Bn-N13-p14522731 | gene | exon |
| Bn-scaff_16002_1-p1602193 | Bn-N13-p14506131 | gene | exon |
| Bn-scaff_16002_1-p1603062 | Bn-N13-p14505262 | gene |      |
| Bn-scaff_16002_1-p1627403 | Bn-N13-p14478668 | gene | exon |
| Bn-scaff_16002_1-p1627629 | Bn-N13-p14478442 | gene | exon |
| Bn-scaff_16002_1-p1628134 | Bn-N13-p14477937 | gene |      |
| Bn-scaff_16002_1-p1628209 | Bn-N13-p14477862 | gene | exon |
| Bn-scaff_16002_1-p1660852 | Bn-N13-p14441324 | gene |      |
| Bn-scaff_16002_1-p1666051 | Bn-N13-p14431397 | gene | exon |
| Bn-scaff_16002_1-p1676442 | Bn-N13-p14421104 | gene |      |
| Bn-scaff_16002_1-p1677804 | Bn-N13-p14419738 | gene |      |
| Bn-scaff_16002_1-p1717929 | Bn-N13-p14360891 | gene | exon |
| Bn-scaff_16002_1-p1725846 | Bn-N13-p14352461 | gene | exon |
| Bn-scaff_16002_1-p1731397 | Bn-N13-p14346911 | gene | exon |
| Bn-scaff_16002_1-p1735395 | Bn-N13-p14342920 | gene |      |
| Bn-scaff_16002_1-p1762342 | Bn-N13-p14322905 | gene |      |
| Bn-scaff_16002_1-p1762359 | Bn-N13-p14322888 | gene |      |
| Bn-scaff_16002_1-p1762565 | Bn-N13-p14322682 | gene |      |
| Bn-scaff_16002_1-p1766250 | Bn-N3-p10020562  | gene |      |
| Bn-scaff_16002_1-p178243  | Bn-N13-p15899106 | gene | exon |
| Bn-scaff_16002_1-p1842049 | Bn-N13-p14242856 | gene |      |
| Bn-scaff_16002_1-p1916889 | Bn-N3-p9945268   | gene | exon |
| Bn-scaff_16002_1-p1992812 | Bn-N3-p9882221   | gene |      |
| Bn-scaff_16002_1-p2012656 | Bn-N13-p14082682 | gene |      |
| Bn-scaff_16002_1-p2036813 | Bn-N13-p14055368 | gene | exon |
| Bn-scaff_16002_1-p2037221 | Bn-N13-p14054964 | gene | exon |
| Bn-scaff_16002_1-p2037999 | Bn-N13-p14052434 | gene | exon |
| Bn-scaff_16002_1-p2055593 | Bn-N13-p14029722 | gene | exon |
| Bn-scaff_16002_1-p2066074 | Bn-N13-p14019525 | gene | exon |
| Bn-scaff_16002_1-p2076397 | Bn-N13-p14008475 | gene |      |

|                           |                  |      |      |
|---------------------------|------------------|------|------|
| Bn-scaff_16002_1-p2126973 | Bn-N13-p13958424 | gene | exon |
| Bn-scaff_16002_1-p2131870 | Bn-N13-p13953302 | gene |      |
| Bn-scaff_16002_1-p2144304 | Bn-N13-p13940881 | gene |      |
| Bn-scaff_16002_1-p2172421 | Bn-N13-p13909588 | gene | exon |
| Bn-scaff_16002_1-p2172850 | Bn-N13-p13909159 | gene | exon |
| Bn-scaff_16002_1-p2201513 | Bn-N13-p13865522 | gene |      |
| Bn-scaff_16002_1-p2215859 | Bn-N13-p13851151 | gene |      |
| Bn-scaff_16002_1-p2217361 | Bn-N13-p13849646 | gene |      |
| Bn-scaff_16002_1-p2221754 | Bn-N13-p13845543 | gene |      |
| Bn-scaff_16002_1-p2233131 | Bn-N13-p13837631 | gene |      |
| Bn-scaff_16002_1-p2243475 | Bn-N13-p13827794 | gene |      |
| Bn-scaff_16002_1-p2244145 | Bn-N13-p13827124 | gene |      |
| Bn-scaff_16002_1-p2245949 | Bn-N13-p13822957 | gene |      |
| Bn-scaff_16002_1-p2247639 | Bn-N13-p13821267 | gene |      |
| Bn-scaff_16002_1-p2285097 | Bn-N13-p13783610 | gene | exon |
| Bn-scaff_16002_1-p2291915 | Bn-N13-p13776017 | gene |      |
| Bn-scaff_16002_1-p2292068 | Bn-N13-p13775864 | gene |      |
| Bn-scaff_16002_1-p2299056 | Bn-N13-p13768672 | gene |      |
| Bn-scaff_16002_1-p2307265 | Bn-N13-p13759779 | gene |      |
| Bn-scaff_16002_1-p2307317 | Bn-N13-p13759727 | gene |      |
| Bn-scaff_16002_1-p2307932 | Bn-N13-p13759112 | gene |      |
| Bn-scaff_16002_1-p2320915 | Bn-N13-p13746504 | gene | exon |
| Bn-scaff_16002_1-p2321222 | Bn-N13-p13746205 | gene |      |
| Bn-scaff_16002_1-p2321291 | Bn-N13-p13746136 | gene |      |
| Bn-scaff_16002_1-p2334646 | Bn-N13-p13732920 | gene | exon |
| Bn-scaff_16002_1-p2441323 | Bn-N13-p13602488 | gene |      |
| Bn-scaff_16002_1-p2511119 | Bn-N13-p13531578 | gene |      |
| Bn-scaff_16002_1-p2512925 | Bn-N13-p13529779 | gene |      |
| Bn-scaff_16002_1-p2517762 | Bn-N13-p13524887 | gene | exon |
| Bn-scaff_16002_1-p309640  | Bn-N13-p15781094 | gene | exon |
| Bn-scaff_16002_1-p329748  | Bn-N3-p10981968  | gene | exon |
| Bn-scaff_16002_1-p341408  | Bn-N13-p15751427 | gene | exon |
| Bn-scaff_16002_1-p388314  | Bn-N3-p10944658  | gene |      |
| Bn-scaff_16002_1-p406108  | Bn-N13-p15670842 | gene |      |
| Bn-scaff_16002_1-p482742  | Bn-N13-p15596827 | gene | exon |
| Bn-scaff_16002_1-p580789  | Bn-N3-p10817473  | gene | exon |
| Bn-scaff_16002_1-p602768  | Bn-N13-p15468841 | gene | exon |
| Bn-scaff_16002_1-p650113  | Bn-N13-p15422636 | gene |      |
| Bn-scaff_16002_1-p727475  | Bn-N13-p15345380 | gene |      |
| Bn-scaff_16002_1-p765237  | Bn-N13-p15317849 | gene |      |
| Bn-scaff_16002_1-p778601  | Bn-N13-p15306409 | gene |      |
| Bn-scaff_16002_1-p785360  | Bn-N13-p15299701 | gene |      |
| Bn-scaff_16002_1-p785370  | Bn-N13-p15299691 | gene |      |
| Bn-scaff_16002_1-p785986  | Bn-N3-p10670430  | gene |      |
| Bn-scaff_16002_1-p842967  | Bn-N13-p15237191 | gene | exon |
| Bn-scaff_16002_1-p843894  | Bn-N13-p15236264 | gene |      |
| Bn-scaff_16002_1-p980192  | Bn-N3-p10566907  | gene | exon |
| Bn-scaff_16002_1-p980195  | Bn-N3-p10566904  | gene | exon |
| Bn-scaff_16002_1-p998658  | Bn-N3-p10556684  | gene |      |
| Bn-scaff_16021_1-p115430  | Bn-N18-p44635485 | gene | exon |
| Bn-scaff_16021_1-p167469  | Bn-N18-p44587485 | gene |      |
| Bn-scaff_16021_1-p167771  | Bn-N18-p44587182 | gene | exon |

|                           |                         |      |      |
|---------------------------|-------------------------|------|------|
| Bn-scaff_16021_1-p167843  | Bn-N9-p40471446         | gene | exon |
| Bn-scaff_16021_1-p167885  | Bn-N9-p40471404         | gene | exon |
| Bn-scaff_16021_1-p175579  | Bn-N9-p40465724         | gene |      |
| Bn-scaff_16021_1-p225665  | Bn-N9-p40431754         | gene |      |
| Bn-scaff_16021_1-p225933  | Bn-N9-p40431470         | gene | exon |
| Bn-scaff_16021_1-p231138  | Bn-Scaffold02064-p3633  | gene |      |
| Bn-scaff_16021_1-p585766  | Bn-N18-p44455906        | gene | exon |
| Bn-scaff_16021_1-p588868  | Bn-N18-p44452836        | gene |      |
| Bn-scaff_16021_1-p63795   | Bn-N10-p62209           | gene |      |
| Bn-scaff_16021_1-p64439   | Bn-N15-p66148           | gene |      |
| Bn-scaff_16021_1-p65088   | Bn-N15-p65356           | gene |      |
| Bn-scaff_16021_1-p661548  | Bn-N18-p44373070        | gene |      |
| Bn-scaff_16021_1-p75322   | Bn-N18-p44672210        | gene | exon |
| Bn-scaff_16022_1-p413000  | Bn-N18-p2339914         | gene |      |
| Bn-scaff_16022_1-p449389  | Bn-N18-p2300909         | gene |      |
| Bn-scaff_16022_1-p502304  | Bn-N18-p2180635         | gene |      |
| Bn-scaff_16022_1-p502660  | Bn-N18-p2180278         | gene | exon |
| Bn-scaff_16022_1-p596005  | Bn-N18-p2105542         | gene |      |
| Bn-scaff_16022_1-p849431  | Bn-Scaffold01052-p44529 | gene | exon |
| Bn-scaff_16027_1-p319312  | Bn-N14-p1470020         | gene |      |
| Bn-scaff_16027_1-p319363  | Bn-N14-p1470071         | gene |      |
| Bn-scaff_16027_1-p319454  | Bn-N14-p1470162         | gene |      |
| Bn-scaff_16027_1-p364820  | Bn-N14-p1515985         | gene | exon |
| Bn-scaff_16027_1-p367097  | Bn-N14-p1518262         | gene |      |
| Bn-scaff_16027_1-p397922  | Bn-N14-p1543989         | gene |      |
| Bn-scaff_16027_1-p63045   | Bn-N14-p1234398         | gene | exon |
| Bn-scaff_16027_1-p668374  | Bn-N5-p1310356          | gene | exon |
| Bn-scaff_16027_1-p70704   | Bn-N14-p1242221         | gene |      |
| Bn-scaff_16042_1-p126540  | Bn-N10-p8782272         | gene | exon |
| Bn-scaff_16042_1-p331317  | Bn-N10-p8870416         | gene | exon |
| Bn-scaff_16042_1-p98299   | Bn-N10-p8756392         | gene | exon |
| Bn-scaff_16045_1-p147607  | Bn-N15-p8446814         | gene |      |
| Bn-scaff_16045_1-p326419  | Bn-N6-p6427954          | gene |      |
| Bn-scaff_16055_1-p1055037 | Bn-N11-p32234337        | gene | exon |
| Bn-scaff_16055_1-p1060688 | Bn-N11-p32240182        | gene |      |
| Bn-scaff_16055_1-p1060937 | Bn-N11-p32240431        | gene | exon |
| Bn-scaff_16055_1-p1062293 | Bn-N11-p32241787        | gene |      |
| Bn-scaff_16055_1-p1117736 | Bn-N11-p32293393        | gene |      |
| Bn-scaff_16055_1-p1117843 | Bn-N11-p32293500        | gene | exon |
| Bn-scaff_16055_1-p1187264 | Bn-N11-p32356412        | gene |      |
| Bn-scaff_16055_1-p119822  | Bn-N11-p31319343        | gene | exon |
| Bn-scaff_16055_1-p1261857 | Bn-N11-p32434882        | gene |      |
| Bn-scaff_16055_1-p1317053 | Bn-N11-p32484669        | gene | exon |
| Bn-scaff_16055_1-p1320481 | Bn-N11-p32488252        | gene |      |
| Bn-scaff_16055_1-p1543652 | Bn-N11-p32692534        | gene |      |
| Bn-scaff_16055_1-p16059   | Bn-N11-p31207547        | gene |      |
| Bn-scaff_16055_1-p448968  | Bn-N11-p31684435        | gene |      |
| Bn-scaff_16055_1-p449019  | Bn-N11-p31684486        | gene |      |
| Bn-scaff_16055_1-p451428  | Bn-N11-p31686896        | gene |      |
| Bn-scaff_16055_1-p475420  | Bn-N11-p31708129        | gene |      |
| Bn-scaff_16055_1-p613375  | Bn-N11-p31849159        | gene | exon |
| Bn-scaff_16055_1-p742258  | Bn-N11-p31980537        | gene |      |

|                           |                  |      |      |
|---------------------------|------------------|------|------|
| Bn-scaff_16055_1-p777673  | Bn-N11-p32010330 | gene |      |
| Bn-scaff_16055_1-p777908  | Bn-N11-p32010565 | gene |      |
| Bn-scaff_16062_1-p289885  | Bn-N15-p17650426 | gene |      |
| Bn-scaff_16062_1-p295083  | Bn-N15-p17655644 | gene | exon |
| Bn-scaff_16062_1-p295374  | Bn-N15-p17655934 | gene | exon |
| Bn-scaff_16062_1-p295518  | Bn-N15-p17656078 | gene | exon |
| Bn-scaff_16062_1-p295690  | Bn-N15-p17656250 | gene | exon |
| Bn-scaff_16062_1-p345501  | Bn-N15-p17718171 | gene | exon |
| Bn-scaff_16062_1-p345601  | Bn-N15-p17718271 | gene | exon |
| Bn-scaff_16064_1-p1009773 | Bn-N7-p16343646  | gene |      |
| Bn-scaff_16064_1-p1046468 | Bn-N7-p17637012  | gene | exon |
| Bn-scaff_16064_1-p1047774 | Bn-N16-p27459269 | gene | exon |
| Bn-scaff_16064_1-p1086474 | Bn-N16-p27418279 | gene | exon |
| Bn-scaff_16064_1-p1137134 | Bn-N16-p27349553 | gene | exon |
| Bn-scaff_16064_1-p1146984 | Bn-N7-p17566875  | gene |      |
| Bn-scaff_16064_1-p1154213 | Bn-N16-p27334821 | gene | exon |
| Bn-scaff_16064_1-p13237   | Bn-N7-p18108481  | gene | exon |
| Bn-scaff_16064_1-p1373906 | Bn-N16-p27142786 | gene |      |
| Bn-scaff_16064_1-p1418053 | Bn-N16-p27090910 | gene | exon |
| Bn-scaff_16064_1-p1442092 | Bn-N16-p27073909 | gene | exon |
| Bn-scaff_16064_1-p1442106 | Bn-N16-p27073895 | gene | exon |
| Bn-scaff_16064_1-p144717  | Bn-N16-p28374351 | gene |      |
| Bn-scaff_16064_1-p145597  | Bn-N16-p28373471 | gene |      |
| Bn-scaff_16064_1-p151843  | Bn-N16-p28366853 | gene |      |
| Bn-scaff_16064_1-p152930  | Bn-N7-p18036846  | gene | exon |
| Bn-scaff_16064_1-p158730  | Bn-N7-p18033067  | gene | exon |
| Bn-scaff_16064_1-p249990  | Bn-N16-p28234104 | gene |      |
| Bn-scaff_16064_1-p26703   | Bn-N16-p28510878 | gene | exon |
| Bn-scaff_16064_1-p322157  | Bn-N16-p28191288 | gene |      |
| Bn-scaff_16064_1-p360023  | Bn-N16-p28158935 | gene |      |
| Bn-scaff_16064_1-p375131  | Bn-N16-p28139421 | gene |      |
| Bn-scaff_16064_1-p380045  | Bn-N16-p28133813 | gene |      |
| Bn-scaff_16064_1-p380597  | Bn-N16-p28133263 | gene |      |
| Bn-scaff_16064_1-p380874  | Bn-N16-p28132986 | gene |      |
| Bn-scaff_16064_1-p550807  | Bn-N16-p27965794 | gene | exon |
| Bn-scaff_16064_1-p615620  | Bn-N7-p17842726  | gene | exon |
| Bn-scaff_16064_1-p7157    | Bn-N16-p28530524 | gene | exon |
| Bn-scaff_16064_1-p9281    | Bn-N16-p28528402 | gene |      |
| Bn-scaff_16064_1-p938130  | Bn-N16-p27574086 | gene |      |
| Bn-scaff_16064_1-p938404  | Bn-N16-p27573812 | gene |      |
| Bn-scaff_16064_1-p948906  | Bn-N16-p27563136 | gene | exon |
| Bn-scaff_16069_1-p1050288 | Bn-N17-p41047184 | gene |      |
| Bn-scaff_16069_1-p1101589 | Bn-N17-p41097896 | gene | exon |
| Bn-scaff_16069_1-p1150783 | Bn-N3-p23476924  | gene | exon |
| Bn-scaff_16069_1-p1151520 | Bn-N17-p41187436 | gene | exon |
| Bn-scaff_16069_1-p1152134 | Bn-N17-p41188052 | gene | exon |
| Bn-scaff_16069_1-p1162324 | Bn-N17-p41198251 | gene |      |
| Bn-scaff_16069_1-p1164388 | Bn-N17-p41200308 | gene |      |
| Bn-scaff_16069_1-p1184092 | Bn-N9-p22854028  | gene | exon |
| Bn-scaff_16069_1-p1199961 | Bn-N17-p41245352 | gene |      |
| Bn-scaff_16069_1-p1202176 | Bn-N17-p41247582 | gene | exon |
| Bn-scaff_16069_1-p1202826 | Bn-N17-p41248233 | gene | exon |

|                           |                        |      |      |
|---------------------------|------------------------|------|------|
| Bn-scaff_16069_1-p1204476 | Bn-N17-p41249846       | gene |      |
| Bn-scaff_16069_1-p1204477 | Bn-N17-p41249847       | gene |      |
| Bn-scaff_16069_1-p1268741 | Bn-N17-p41311087       | gene |      |
| Bn-scaff_16069_1-p1269936 | Bn-N17-p41312282       | gene |      |
| Bn-scaff_16069_1-p1456269 | Bn-N17-p41489839       | gene |      |
| Bn-scaff_16069_1-p1464840 | Bn-N17-p41493500       | gene |      |
| Bn-scaff_16069_1-p1469430 | Bn-N17-p41498245       | gene | exon |
| Bn-scaff_16069_1-p1552377 | Bn-N3-p23817221        | gene |      |
| Bn-scaff_16069_1-p1708862 | Bn-N17-p41738273       | gene |      |
| Bn-scaff_16069_1-p17322   | Bn-N17-p39944819       | gene | exon |
| Bn-scaff_16069_1-p1776014 | Bn-N3-p23996914        | gene | exon |
| Bn-scaff_16069_1-p1781070 | Bn-N17-p41795436       | gene |      |
| Bn-scaff_16069_1-p1786996 | Bn-N3-p24008019        | gene |      |
| Bn-scaff_16069_1-p1789002 | Bn-N17-p41803223       | gene |      |
| Bn-scaff_16069_1-p1815891 | Bn-N17-p41847698       | gene | exon |
| Bn-scaff_16069_1-p1916253 | Bn-N17-p41949267       | gene | exon |
| Bn-scaff_16069_1-p1957984 | Bn-N17-p41992633       | gene | exon |
| Bn-scaff_16069_1-p198607  | Bn-N3-p22663303        | gene | exon |
| Bn-scaff_16069_1-p2142538 | Bn-N3-p24244791        | gene | exon |
| Bn-scaff_16069_1-p2174360 | Bn-N17-p42115777       | gene |      |
| Bn-scaff_16069_1-p2193948 | Bn-N3-p24284075        | gene | exon |
| Bn-scaff_16069_1-p2232174 | Bn-Scaffold04490-p191  | gene |      |
| Bn-scaff_16069_1-p2323317 | Bn-N17-p42265894       | gene |      |
| Bn-scaff_16069_1-p2408540 | Bn-N17-p42360747       | gene |      |
| Bn-scaff_16069_1-p2577660 | Bn-N17-p42530127       | gene | exon |
| Bn-scaff_16069_1-p2584610 | Bn-N17-p42537537       | gene |      |
| Bn-scaff_16069_1-p2607295 | Bn-N17-p42621836       | gene |      |
| Bn-scaff_16069_1-p2611780 | Bn-N17-p42622579       | gene |      |
| Bn-scaff_16069_1-p2666161 | Bn-N17-p42680766       | gene |      |
| Bn-scaff_16069_1-p270593  | Bn-N17-p40175403       | gene |      |
| Bn-scaff_16069_1-p2764934 | Bn-N17-p42769944       | gene |      |
| Bn-scaff_16069_1-p2764992 | Bn-N17-p42770003       | gene |      |
| Bn-scaff_16069_1-p2765187 | Bn-N17-p42770197       | gene | exon |
| Bn-scaff_16069_1-p2820796 | Bn-N17-p42839390       | gene |      |
| Bn-scaff_16069_1-p2821021 | Bn-N17-p42839615       | gene | exon |
| Bn-scaff_16069_1-p2821319 | Bn-N17-p42839914       | gene | exon |
| Bn-scaff_16069_1-p2866381 | Bn-N3-p24984422        | gene |      |
| Bn-scaff_16069_1-p2867813 | Bn-N17-p42894320       | gene |      |
| Bn-scaff_16069_1-p2897181 | Bn-N17-p42928058       | gene |      |
| Bn-scaff_16069_1-p2946061 | Bn-N17-p42975451       | gene | exon |
| Bn-scaff_16069_1-p2974287 | Bn-N17-p43021305       | gene |      |
| Bn-scaff_16069_1-p2993184 | Bn-Scaffold03128-p2586 | gene |      |
| Bn-scaff_16069_1-p2996601 | Bn-N17-p43032301       | gene |      |
| Bn-scaff_16069_1-p3024157 | Bn-N17-p43059081       | gene | exon |
| Bn-scaff_16069_1-p306662  | Bn-N17-p40297671       | gene |      |
| Bn-scaff_16069_1-p3093804 | Bn-N17-p43120635       | gene |      |
| Bn-scaff_16069_1-p3098868 | Bn-N11-p10436292       | gene |      |
| Bn-scaff_16069_1-p3099631 | Bn-N17-p43123318       | gene |      |
| Bn-scaff_16069_1-p3117793 | Bn-N17-p43144989       | gene |      |
| Bn-scaff_16069_1-p3131384 | Bn-N17-p43154339       | gene | exon |
| Bn-scaff_16069_1-p3135269 | Bn-N17-p43158306       | gene |      |
| Bn-scaff_16069_1-p3138539 | Bn-N17-p43161574       | gene |      |

|                           |                      |      |      |
|---------------------------|----------------------|------|------|
| Bn-scaff_16069_1-p3154456 | Bn-N17-p43181417     | gene |      |
| Bn-scaff_16069_1-p3210071 | Bn-N17-p43237130     | gene | exon |
| Bn-scaff_16069_1-p3210581 | Bn-N17-p43237640     | gene |      |
| Bn-scaff_16069_1-p3217156 | Bn-N17-p43244196     | gene | exon |
| Bn-scaff_16069_1-p3217193 | Bn-N17-p43244233     | gene | exon |
| Bn-scaff_16069_1-p3263731 | Bn-N17-p43290999     | gene | exon |
| Bn-scaff_16069_1-p3275296 | Bn-N17-p43301300     | gene |      |
| Bn-scaff_16069_1-p3311150 | Bn-N17-p43326846     | gene |      |
| Bn-scaff_16069_1-p3311744 | Bn-N17-p43327165     | gene | exon |
| Bn-scaff_16069_1-p3375579 | Bn-N17-p43386199     | gene | exon |
| Bn-scaff_16069_1-p342150  | Bn-N17-p40329509     | gene |      |
| Bn-scaff_16069_1-p342188  | Bn-N17-p40329547     | gene |      |
| Bn-scaff_16069_1-p3435850 | Bn-N17-p43447093     | gene |      |
| Bn-scaff_16069_1-p3455597 | Bn-N17-p43467262     | gene | exon |
| Bn-scaff_16069_1-p3463763 | Bn-N17-p43475775     | gene |      |
| Bn-scaff_16069_1-p3470600 | Bn-N17-p43478738     | gene | exon |
| Bn-scaff_16069_1-p3486333 | Bn-N17-p43494874     | gene |      |
| Bn-scaff_16069_1-p3583547 | Bn-N3-p25706558      | gene | exon |
| Bn-scaff_16069_1-p3596469 | Bn-N17-p43606800     | gene | exon |
| Bn-scaff_16069_1-p3596576 | Bn-N17-p43606907     | gene | exon |
| Bn-scaff_16069_1-p3602641 | Bn-N17-p43612998     | gene | exon |
| Bn-scaff_16069_1-p3608406 | Bn-N17-p43618094     | gene | exon |
| Bn-scaff_16069_1-p361062  | Bn-N17-p40348972     | gene |      |
| Bn-scaff_16069_1-p3611263 | Bn-N17-p43620938     | gene |      |
| Bn-scaff_16069_1-p3611621 | Bn-N17-p43621296     | gene |      |
| Bn-scaff_16069_1-p3623226 | Bn-N17-p43631978     | gene | exon |
| Bn-scaff_16069_1-p3631187 | Bn-N17-p43639910     | gene | exon |
| Bn-scaff_16069_1-p3636672 | Bn-N17-p43645650     | gene | exon |
| Bn-scaff_16069_1-p3663377 | Bn-N17-p43672300     | gene | exon |
| Bn-scaff_16069_1-p3664108 | Bn-N17-p43673031     | gene | exon |
| Bn-scaff_16069_1-p3674000 | Bn-N17-p43683771     | gene |      |
| Bn-scaff_16069_1-p3675332 | Bn-N17-p43685103     | gene |      |
| Bn-scaff_16069_1-p3675519 | Bn-N17-p43685291     | gene |      |
| Bn-scaff_16069_1-p3676607 | Bn-N17-p43686378     | gene |      |
| Bn-scaff_16069_1-p3689610 | Bn-N17-p43699329     | gene | exon |
| Bn-scaff_16069_1-p3724227 | Bn-N3-p25868620      | gene |      |
| Bn-scaff_16069_1-p3731985 | Bn-N17-p43724035     | gene | exon |
| Bn-scaff_16069_1-p3732050 | Bn-N17-p43724100     | gene | exon |
| Bn-scaff_16069_1-p3732051 | Bn-N17-p43724101     | gene | exon |
| Bn-scaff_16069_1-p3748310 | Bn-N17-p43734683     | gene |      |
| Bn-scaff_16069_1-p3749614 | Bn-N17-p43735984     | gene | exon |
| Bn-scaff_16069_1-p3750766 | Bn-Scaffold04006-p90 | gene | exon |
| Bn-scaff_16069_1-p3780494 | Bn-N17-p43775738     | gene |      |
| Bn-scaff_16069_1-p3861034 | Bn-N17-p43880846     | gene |      |
| Bn-scaff_16069_1-p3864928 | Bn-N17-p43882490     | gene | exon |
| Bn-scaff_16069_1-p3887367 | Bn-N17-p43906140     | gene |      |
| Bn-scaff_16069_1-p3906310 | Bn-N17-p43924735     | gene |      |
| Bn-scaff_16069_1-p3909013 | Bn-N17-p43927473     | gene |      |
| Bn-scaff_16069_1-p3926701 | Bn-N17-p43942226     | gene | exon |
| Bn-scaff_16069_1-p3937772 | Bn-N17-p43953157     | gene | exon |
| Bn-scaff_16069_1-p3940746 | Bn-N17-p43956129     | gene |      |
| Bn-scaff_16069_1-p3942923 | Bn-N17-p43958306     | gene |      |

|                           |                  |      |      |
|---------------------------|------------------|------|------|
| Bn-scaff_16069_1-p3945232 | Bn-N17-p43960610 | gene |      |
| Bn-scaff_16069_1-p4039727 | Bn-N17-p44054980 | gene | exon |
| Bn-scaff_16069_1-p4045434 | Bn-N17-p44060606 | gene |      |
| Bn-scaff_16069_1-p4071609 | Bn-N17-p44086938 | gene | exon |
| Bn-scaff_16069_1-p4074074 | Bn-N17-p44089405 | gene |      |
| Bn-scaff_16069_1-p4240632 | Bn-N17-p44256048 | gene |      |
| Bn-scaff_16069_1-p4246262 | Bn-N17-p44262010 | gene |      |
| Bn-scaff_16069_1-p4252709 | Bn-N17-p44268521 | gene |      |
| Bn-scaff_16069_1-p4306415 | Bn-N17-p44318352 | gene |      |
| Bn-scaff_16069_1-p4306874 | Bn-N17-p44318806 | gene |      |
| Bn-scaff_16069_1-p4327327 | Bn-N17-p44340801 | gene |      |
| Bn-scaff_16069_1-p4332977 | Bn-N17-p44349961 | gene | exon |
| Bn-scaff_16069_1-p4333464 | Bn-N17-p44350448 | gene | exon |
| Bn-scaff_16069_1-p4333601 | Bn-N17-p44350585 | gene | exon |
| Bn-scaff_16069_1-p4341105 | Bn-N17-p44353390 | gene | exon |
| Bn-scaff_16069_1-p4358397 | Bn-N17-p44374440 | gene |      |
| Bn-scaff_16069_1-p4382026 | Bn-N17-p44395570 | gene | exon |
| Bn-scaff_16069_1-p439239  | Bn-N17-p40422106 | gene | exon |
| Bn-scaff_16069_1-p4396361 | Bn-N3-p26623905  | gene |      |
| Bn-scaff_16069_1-p4464312 | Bn-N17-p44505279 | gene |      |
| Bn-scaff_16069_1-p4479258 | Bn-N3-p26685356  | gene | exon |
| Bn-scaff_16069_1-p4482899 | Bn-N17-p44530761 | gene |      |
| Bn-scaff_16069_1-p4484876 | Bn-N17-p44533688 | gene |      |
| Bn-scaff_16069_1-p4489254 | Bn-N17-p44540283 | gene |      |
| Bn-scaff_16069_1-p4510578 | Bn-N17-p44562731 | gene |      |
| Bn-scaff_16069_1-p4528345 | Bn-N17-p44579386 | gene | exon |
| Bn-scaff_16069_1-p4530987 | Bn-N17-p44582055 | gene |      |
| Bn-scaff_16069_1-p4546846 | Bn-N17-p44595392 | gene |      |
| Bn-scaff_16069_1-p4605280 | Bn-N17-p44650324 | gene |      |
| Bn-scaff_16069_1-p4605330 | Bn-N17-p44650374 | gene |      |
| Bn-scaff_16069_1-p4605588 | Bn-N17-p44650632 | gene | exon |
| Bn-scaff_16069_1-p4605776 | Bn-N17-p44650820 | gene |      |
| Bn-scaff_16069_1-p4642584 | Bn-N17-p44686294 | gene |      |
| Bn-scaff_16069_1-p4646214 | Bn-N17-p44689015 | gene |      |
| Bn-scaff_16069_1-p4646255 | Bn-N17-p44689056 | gene |      |
| Bn-scaff_16069_1-p4646457 | Bn-N17-p44689272 | gene |      |
| Bn-scaff_16069_1-p4648828 | Bn-N17-p44691641 | gene |      |
| Bn-scaff_16069_1-p4666209 | Bn-N17-p44710279 | gene |      |
| Bn-scaff_16069_1-p4686169 | Bn-N17-p44732624 | gene |      |
| Bn-scaff_16069_1-p473539  | Bn-N17-p40455696 | gene |      |
| Bn-scaff_16069_1-p4741693 | Bn-N17-p44761961 | gene |      |
| Bn-scaff_16069_1-p4752630 | Bn-N17-p44771875 | gene | exon |
| Bn-scaff_16069_1-p4802994 | Bn-N17-p44822991 | gene |      |
| Bn-scaff_16069_1-p4803141 | Bn-N17-p44823139 | gene | exon |
| Bn-scaff_16069_1-p4803203 | Bn-N17-p44823201 | gene | exon |
| Bn-scaff_16069_1-p4805298 | Bn-N17-p44825295 | gene |      |
| Bn-scaff_16069_1-p4805351 | Bn-N17-p44825348 | gene | exon |
| Bn-scaff_16069_1-p4805385 | Bn-N17-p44825382 | gene |      |
| Bn-scaff_16069_1-p481921  | Bn-N3-p22911707  | gene | exon |
| Bn-scaff_16069_1-p4819823 | Bn-N3-p27098073  | gene | exon |
| Bn-scaff_16069_1-p482315  | Bn-N3-p22906612  | gene |      |
| Bn-scaff_16069_1-p4828119 | Bn-N17-p44849908 | gene | exon |

|                           |                  |      |      |
|---------------------------|------------------|------|------|
| Bn-scaff_16069_1-p4849379 | Bn-N17-p44867058 | gene | exon |
| Bn-scaff_16069_1-p4854537 | Bn-N17-p44876223 | gene | exon |
| Bn-scaff_16069_1-p4896946 | Bn-N17-p44921045 | gene | exon |
| Bn-scaff_16069_1-p496534  | Bn-N17-p40511220 | gene | exon |
| Bn-scaff_16069_1-p541003  | Bn-N3-p22989923  | gene |      |
| Bn-scaff_16069_1-p550328  | Bn-N17-p40541999 | gene | exon |
| Bn-scaff_16069_1-p557756  | Bn-N17-p40549510 | gene |      |
| Bn-scaff_16069_1-p557815  | Bn-N17-p40549569 | gene |      |
| Bn-scaff_16069_1-p557875  | Bn-N17-p40549629 | gene |      |
| Bn-scaff_16069_1-p607537  | Bn-N17-p40599650 | gene |      |
| Bn-scaff_16069_1-p625992  | Bn-N17-p40625710 | gene |      |
| Bn-scaff_16069_1-p628565  | Bn-N17-p40628259 | gene |      |
| Bn-scaff_16069_1-p652895  | Bn-N3-p23060981  | gene |      |
| Bn-scaff_16069_1-p685101  | Bn-N17-p40667082 | gene | exon |
| Bn-scaff_16069_1-p695279  | Bn-N17-p40675312 | gene | exon |
| Bn-scaff_16069_1-p695336  | Bn-N17-p40675369 | gene |      |
| Bn-scaff_16069_1-p695414  | Bn-N17-p40675447 | gene |      |
| Bn-scaff_16069_1-p700577  | Bn-N17-p40679688 | gene | exon |
| Bn-scaff_16069_1-p700623  | Bn-N17-p40679734 | gene | exon |
| Bn-scaff_16069_1-p726538  | Bn-N17-p40699735 | gene |      |
| Bn-scaff_16069_1-p754180  | Bn-N17-p40730683 | gene |      |
| Bn-scaff_16069_1-p7747    | Bn-N17-p39934947 | gene |      |
| Bn-scaff_16069_1-p801743  | Bn-N17-p40787811 | gene |      |
| Bn-scaff_16069_1-p810060  | Bn-N17-p40796148 | gene |      |
| Bn-scaff_16069_1-p812381  | Bn-N17-p40798468 | gene | exon |
| Bn-scaff_16069_1-p850880  | Bn-N17-p40836508 | gene | exon |
| Bn-scaff_16069_1-p942685  | Bn-N17-p40934729 | gene |      |
| Bn-scaff_16069_1-p943494  | Bn-N3-p23289552  | gene | exon |
| Bn-scaff_16069_1-p944313  | Bn-N3-p23290371  | gene | exon |
| Bn-scaff_16069_1-p944589  | Bn-N3-p23290647  | gene | exon |
| Bn-scaff_16082_1-p17710   | Bn-N15-p9413536  | gene |      |
| Bn-scaff_16082_1-p237359  | Bn-N6-p6972790   | gene | exon |
| Bn-scaff_16082_1-p33791   | Bn-N15-p9406635  | gene | exon |
| Bn-scaff_16082_1-p454878  | Bn-N15-p8958496  | gene | exon |
| Bn-scaff_16082_1-p466994  | Bn-N15-p8936192  | gene |      |
| Bn-scaff_16082_1-p503495  | Bn-N6-p6721063   | gene | exon |
| Bn-scaff_16082_1-p518060  | Bn-N15-p8898796  | gene |      |
| Bn-scaff_16082_1-p543841  | Bn-N15-p8869053  | gene | exon |
| Bn-scaff_16082_1-p543947  | Bn-N6-p6685454   | gene | exon |
| Bn-scaff_16082_1-p551611  | Bn-N6-p6678266   | gene |      |
| Bn-scaff_16082_1-p566308  | Bn-N15-p8844240  | gene |      |
| Bn-scaff_16082_1-p579183  | Bn-N15-p8816261  | gene |      |
| Bn-scaff_16092_1-p10969   | Bn-N13-p31101404 | gene |      |
| Bn-scaff_16092_1-p11235   | Bn-N13-p31101670 | gene |      |
| Bn-scaff_16092_1-p129830  | Bn-N13-p31278105 | gene |      |
| Bn-scaff_16092_1-p147262  | Bn-N10-p3712944  | gene |      |
| Bn-scaff_16092_1-p370286  | Bn-N3-p4722127   | gene |      |
| Bn-scaff_16092_1-p476550  | Bn-N13-p31642393 | gene | exon |
| Bn-scaff_16092_1-p671871  | Bn-N3-p19639126  | gene | exon |
| Bn-scaff_16092_1-p671925  | Bn-N3-p19639180  | gene |      |
| Bn-scaff_16092_1-p677092  | Bn-N13-p31843063 | gene | exon |
| Bn-scaff_16092_1-p681859  | Bn-N13-p31848052 | gene |      |



|                           |                  |      |      |
|---------------------------|------------------|------|------|
| Bn-scaff_16092_1-p703657  | Bn-N13-p31867440 | gene | exon |
| Bn-scaff_16092_1-p753442  | Bn-N13-p31917295 | gene |      |
| Bn-scaff_16092_1-p846667  | Bn-N13-p32019774 | gene | exon |
| Bn-scaff_16092_1-p848001  | Bn-N13-p32021111 | gene |      |
| Bn-scaff_16092_1-p866917  | Bn-N3-p19734381  | gene | exon |
| Bn-scaff_16092_1-p870157  | Bn-N13-p32038310 | gene |      |
| Bn-scaff_16092_1-p889505  | Bn-N13-p32057983 | gene |      |
| Bn-scaff_16092_1-p924766  | Bn-N13-p32089397 | gene | exon |
| Bn-scaff_16093_1-p44383   | Bn-N15-p11405952 | gene | exon |
| Bn-scaff_16095_1-p120222  | Bn-N14-p11725431 | gene |      |
| Bn-scaff_16095_1-p22585   | Bn-N14-p11628874 | gene |      |
| Bn-scaff_16095_1-p24601   | Bn-N14-p11630926 | gene |      |
| Bn-scaff_16095_1-p28021   | Bn-N14-p11634346 | gene |      |
| Bn-scaff_16095_1-p43615   | Bn-N14-p11650614 | gene |      |
| Bn-scaff_16095_1-p82767   | Bn-N14-p11690719 | gene | exon |
| Bn-scaff_16100_1-p617160  | Bn-N17-p21604862 | gene |      |
| Bn-scaff_16110_1-p1049197 | Bn-N3-p30805159  | gene | exon |
| Bn-scaff_16110_1-p1076947 | Bn-N3-p30739869  | gene | exon |
| Bn-scaff_16110_1-p111601  | Bn-N17-p48719259 | gene | exon |
| Bn-scaff_16110_1-p111711  | Bn-N6-p26026798  | gene | exon |
| Bn-scaff_16110_1-p1139348 | Bn-N17-p47682165 | gene |      |
| Bn-scaff_16110_1-p1181825 | Bn-N17-p47613654 | gene |      |
| Bn-scaff_16110_1-p1185491 | Bn-N17-p47609993 | gene |      |
| Bn-scaff_16110_1-p1204999 | Bn-N17-p47594347 | gene |      |
| Bn-scaff_16110_1-p1230955 | Bn-N17-p47568578 | gene |      |
| Bn-scaff_16110_1-p1315734 | Bn-N17-p47482705 | gene |      |
| Bn-scaff_16110_1-p1324212 | Bn-N17-p47474221 | gene |      |
| Bn-scaff_16110_1-p1329125 | Bn-N17-p47469311 | gene |      |
| Bn-scaff_16110_1-p1329246 | Bn-N17-p47469190 | gene | exon |
| Bn-scaff_16110_1-p1330898 | Bn-N17-p47467532 | gene |      |
| Bn-scaff_16110_1-p135610  | Bn-N17-p48696724 | gene | exon |
| Bn-scaff_16110_1-p1389044 | Bn-N17-p47408849 | gene | exon |
| Bn-scaff_16110_1-p1389443 | Bn-N17-p47408450 | gene |      |
| Bn-scaff_16110_1-p1451801 | Bn-N17-p47352443 | gene |      |
| Bn-scaff_16110_1-p1533906 | Bn-N15-p45246777 | gene |      |
| Bn-scaff_16110_1-p1582977 | Bn-N17-p47242861 | gene |      |
| Bn-scaff_16110_1-p17868   | Bn-N6-p26083624  | gene | exon |
| Bn-scaff_16110_1-p18020   | Bn-N6-p26083472  | gene | exon |
| Bn-scaff_16110_1-p1891578 | Bn-N17-p46855285 | gene |      |
| Bn-scaff_16110_1-p1939090 | Bn-N17-p46811171 | gene |      |
| Bn-scaff_16110_1-p1948461 | Bn-N17-p46790427 | gene |      |
| Bn-scaff_16110_1-p1986889 | Bn-N17-p46746858 | gene | exon |
| Bn-scaff_16110_1-p1987048 | Bn-N17-p46746699 | gene | exon |
| Bn-scaff_16110_1-p2028032 | Bn-N17-p46702285 | gene |      |
| Bn-scaff_16110_1-p2029853 | Bn-N3-p29361143  | gene |      |
| Bn-scaff_16110_1-p2030050 | Bn-N17-p46700265 | gene |      |
| Bn-scaff_16110_1-p204649  | Bn-N6-p25953086  | gene | exon |
| Bn-scaff_16110_1-p2168026 | Bn-N17-p46544240 | gene | exon |
| Bn-scaff_16110_1-p2168404 | Bn-N17-p46543863 | gene | exon |
| Bn-scaff_16110_1-p2281371 | Bn-N17-p46435741 | gene |      |
| Bn-scaff_16110_1-p2281432 | Bn-N17-p46435680 | gene |      |
| Bn-scaff_16110_1-p2336219 | Bn-N17-p46379593 | gene | exon |

|                           |                  |      |      |
|---------------------------|------------------|------|------|
| Bn-scaff_16110_1-p2403789 | Bn-N17-p46315458 | gene | exon |
| Bn-scaff_16110_1-p2416207 | Bn-N17-p46302881 | gene |      |
| Bn-scaff_16110_1-p2439331 | Bn-N17-p46279913 | gene |      |
| Bn-scaff_16110_1-p2532535 | Bn-N17-p46171749 | gene |      |
| Bn-scaff_16110_1-p2540852 | Bn-N17-p46158475 | gene |      |
| Bn-scaff_16110_1-p2554704 | Bn-N17-p46144687 | gene | exon |
| Bn-scaff_16110_1-p2556157 | Bn-N17-p46143233 | gene | exon |
| Bn-scaff_16110_1-p2557297 | Bn-N3-p28606805  | gene | exon |
| Bn-scaff_16110_1-p2570414 | Bn-N17-p46133260 | gene | exon |
| Bn-scaff_16110_1-p2571584 | Bn-N17-p46132089 | gene |      |
| Bn-scaff_16110_1-p2598394 | Bn-N17-p46100692 | gene | exon |
| Bn-scaff_16110_1-p2721568 | Bn-N3-p28376955  | gene | exon |
| Bn-scaff_16110_1-p2793943 | Bn-N17-p45884797 | gene |      |
| Bn-scaff_16110_1-p2890287 | Bn-N17-p45782916 | gene | exon |
| Bn-scaff_16110_1-p2891118 | Bn-N17-p45782085 | gene | exon |
| Bn-scaff_16110_1-p2971780 | Bn-N3-p28047133  | gene | exon |
| Bn-scaff_16110_1-p2986286 | Bn-N3-p28020434  | gene | exon |
| Bn-scaff_16110_1-p2986510 | Bn-N3-p28020210  | gene | exon |
| Bn-scaff_16110_1-p2986546 | Bn-N17-p45671127 | gene | exon |
| Bn-scaff_16110_1-p2990045 | Bn-N17-p45667629 | gene | exon |
| Bn-scaff_16110_1-p2992015 | Bn-N17-p45664990 | gene |      |
| Bn-scaff_16110_1-p3015887 | Bn-N17-p45639424 | gene | exon |
| Bn-scaff_16110_1-p3016282 | Bn-N17-p45639021 | gene | exon |
| Bn-scaff_16110_1-p3016602 | Bn-N17-p45638701 | gene |      |
| Bn-scaff_16110_1-p3075966 | Bn-N17-p45568368 | gene |      |
| Bn-scaff_16110_1-p3077130 | Bn-N17-p45567203 | gene |      |
| Bn-scaff_16110_1-p3092217 | Bn-N17-p45556463 | gene | exon |
| Bn-scaff_16110_1-p3168173 | Bn-N17-p45472597 | gene |      |
| Bn-scaff_16110_1-p3168236 | Bn-N17-p45472534 | gene |      |
| Bn-scaff_16110_1-p3246958 | Bn-N17-p45461078 | gene |      |
| Bn-scaff_16110_1-p3277472 | Bn-N17-p45361594 | gene |      |
| Bn-scaff_16110_1-p3503616 | Bn-N17-p45160580 | gene |      |
| Bn-scaff_16110_1-p3504170 | Bn-N17-p45160012 | gene |      |
| Bn-scaff_16110_1-p3504222 | Bn-N17-p45159960 | gene |      |
| Bn-scaff_16110_1-p3512482 | Bn-N17-p45144008 | gene |      |
| Bn-scaff_16110_1-p3563652 | Bn-N17-p45080325 | gene | exon |
| Bn-scaff_16110_1-p3660759 | Bn-N17-p44982614 | gene |      |
| Bn-scaff_16110_1-p3660807 | Bn-N17-p44982566 | gene |      |
| Bn-scaff_16110_1-p3665531 | Bn-N17-p44977842 | gene |      |
| Bn-scaff_16110_1-p3665685 | Bn-N17-p44977688 | gene |      |
| Bn-scaff_16110_1-p3665779 | Bn-N17-p44977594 | gene |      |
| Bn-scaff_16110_1-p3674923 | Bn-N17-p44967898 | gene |      |
| Bn-scaff_16110_1-p410525  | Bn-N6-p25783615  | gene | exon |
| Bn-scaff_16110_1-p426547  | Bn-N17-p48428449 | gene |      |
| Bn-scaff_16110_1-p436278  | Bn-N17-p48419347 | gene | exon |
| Bn-scaff_16110_1-p527111  | Bn-N17-p48343837 | gene | exon |
| Bn-scaff_16110_1-p550475  | Bn-N17-p48312502 | gene | exon |
| Bn-scaff_16110_1-p554783  | Bn-N17-p48308176 | gene |      |
| Bn-scaff_16110_1-p594253  | Bn-N17-p48264289 | gene | exon |
| Bn-scaff_16110_1-p931172  | Bn-N17-p47906587 | gene |      |
| Bn-scaff_16110_1-p947765  | Bn-N17-p47889885 | gene | exon |
| Bn-scaff_16116_1-p264169  | Bn-N7-p19427144  | gene | exon |

|                           |                  |      |      |
|---------------------------|------------------|------|------|
| Bn-scaff_16116_1-p265025  | Bn-N16-p31464126 | gene | exon |
| Bn-scaff_16116_1-p367607  | Bn-N7-p19468658  | gene | exon |
| Bn-scaff_16116_1-p373851  | Bn-N7-p19474459  | gene | exon |
| Bn-scaff_16116_1-p409531  | Bn-N16-p31575631 | gene |      |
| Bn-scaff_16116_1-p50186   | Bn-N16-p31292680 | gene |      |
| Bn-scaff_16116_1-p545075  | Bn-N16-p31713864 | gene | exon |
| Bn-scaff_16116_1-p7960    | Bn-N16-p31251374 | gene |      |
| Bn-scaff_16116_1-p840566  | Bn-N7-p19729843  | gene | exon |
| Bn-scaff_16128_1-p115117  | Bn-N14-p31608300 | gene | exon |
| Bn-scaff_16128_1-p471514  | Bn-N11-p9250775  | gene |      |
| Bn-scaff_16128_1-p499556  | Bn-N1-p6377216   | gene | exon |
| Bn-scaff_16128_1-p505089  | Bn-N11-p9215794  | gene | exon |
| Bn-scaff_16128_2-p106250  | Bn-N11-p9588002  | gene |      |
| Bn-scaff_16128_2-p121684  | Bn-N11-p9563586  | gene |      |
| Bn-scaff_16128_2-p123105  | Bn-N11-p9562167  | gene |      |
| Bn-scaff_16128_2-p124279  | Bn-N11-p9560992  | gene |      |
| Bn-scaff_16128_2-p149602  | Bn-N11-p9532277  | gene |      |
| Bn-scaff_16128_2-p150911  | Bn-N11-p9530956  | gene |      |
| Bn-scaff_16130_1-p1042526 | Bn-N17-p31624844 | gene |      |
| Bn-scaff_16130_1-p1050666 | Bn-N17-p31632419 | gene |      |
| Bn-scaff_16130_1-p122971  | Bn-N17-p30760438 | gene | exon |
| Bn-scaff_16130_1-p1313793 | Bn-N6-p23193164  | gene | exon |
| Bn-scaff_16130_1-p1623241 | Bn-N6-p23018378  | gene | exon |
| Bn-scaff_16130_1-p1997926 | Bn-N17-p32310007 | gene | exon |
| Bn-scaff_16130_1-p2006227 | Bn-N17-p32319280 | gene | exon |
| Bn-scaff_16130_1-p2007326 | Bn-N17-p32320379 | gene | exon |
| Bn-scaff_16130_1-p2105546 | Bn-N17-p32422720 | gene | exon |
| Bn-scaff_16130_1-p2106542 | Bn-N17-p32423726 | gene |      |
| Bn-scaff_16130_1-p2106991 | Bn-N17-p32424175 | gene |      |
| Bn-scaff_16130_1-p216749  | Bn-N17-p30833449 | gene |      |
| Bn-scaff_16130_1-p2248228 | Bn-N17-p32567869 | gene |      |
| Bn-scaff_16130_1-p2251656 | Bn-N17-p32571279 | gene |      |
| Bn-scaff_16130_1-p2259290 | Bn-N2-p2975407   | gene |      |
| Bn-scaff_16130_1-p2264713 | Bn-N17-p32593754 | gene |      |
| Bn-scaff_16130_1-p2282903 | Bn-N6-p22690942  | gene |      |
| Bn-scaff_16130_1-p2331239 | Bn-N17-p32657823 | gene |      |
| Bn-scaff_16130_1-p2426412 | Bn-N17-p32756610 | gene | exon |
| Bn-scaff_16130_1-p2433175 | Bn-N17-p32763644 | gene | exon |
| Bn-scaff_16130_1-p2525629 | Bn-N17-p32855427 | gene |      |
| Bn-scaff_16130_1-p258535  | Bn-N17-p30881825 | gene | exon |
| Bn-scaff_16130_1-p260449  | Bn-N17-p30882700 | gene |      |
| Bn-scaff_16130_1-p260865  | Bn-N17-p30883115 | gene | exon |
| Bn-scaff_16130_1-p280712  | Bn-N17-p30900473 | gene |      |
| Bn-scaff_16130_1-p280914  | Bn-N17-p30900678 | gene |      |
| Bn-scaff_16130_1-p280940  | Bn-N17-p30900704 | gene |      |
| Bn-scaff_16130_1-p286182  | Bn-N17-p30910178 | gene |      |
| Bn-scaff_16130_1-p287427  | Bn-N17-p30911424 | gene |      |
| Bn-scaff_16130_1-p293403  | Bn-N17-p30917405 | gene |      |
| Bn-scaff_16130_1-p293649  | Bn-N17-p30917651 | gene |      |
| Bn-scaff_16130_1-p447718  | Bn-N17-p31076973 | gene |      |
| Bn-scaff_16130_1-p542753  | Bn-N17-p31158770 | gene |      |
| Bn-scaff_16130_1-p646330  | Bn-N2-p23542041  | gene | exon |

|                           |                  |      |      |
|---------------------------|------------------|------|------|
| Bn-scaff_16130_1-p659049  | Bn-N17-p31283084 | gene |      |
| Bn-scaff_16130_1-p659599  | Bn-N17-p31283633 | gene | exon |
| Bn-scaff_16130_1-p733651  | Bn-N4-p12541782  | gene | exon |
| Bn-scaff_16130_1-p763633  | Bn-N17-p31307076 | gene | exon |
| Bn-scaff_16130_1-p764056  | Bn-N17-p31307499 | gene |      |
| Bn-scaff_16130_1-p799679  | Bn-N17-p31344011 | gene | exon |
| Bn-scaff_16130_1-p800124  | Bn-N17-p31344456 | gene | exon |
| Bn-scaff_16130_1-p800527  | Bn-N17-p31344859 | gene |      |
| Bn-scaff_16130_2-p374682  | Bn-N13-p33939811 | gene | exon |
| Bn-scaff_16130_2-p374990  | Bn-N3-p20576628  | gene | exon |
| Bn-scaff_16130_2-p375201  | Bn-N13-p33939292 | gene | exon |
| Bn-scaff_16130_2-p403395  | Bn-N13-p33912030 | gene |      |
| Bn-scaff_16130_2-p524217  | Bn-N13-p33781131 | gene | exon |
| Bn-scaff_16130_2-p525577  | Bn-N13-p33779770 | gene | exon |
| Bn-scaff_16130_2-p546231  | Bn-N13-p33766847 | gene |      |
| Bn-scaff_16130_2-p713723  | Bn-N13-p33591961 | gene | exon |
| Bn-scaff_16130_2-p714662  | Bn-N13-p33591022 | gene | exon |
| Bn-scaff_16130_2-p718383  | Bn-N13-p33588319 | gene | exon |
| Bn-scaff_16130_5-p129193  | Bn-N13-p33376773 | gene | exon |
| Bn-scaff_16130_5-p92194   | Bn-N13-p33413151 | gene | exon |
| Bn-scaff_16130_5-p92290   | Bn-N3-p20307270  | gene | exon |
| Bn-scaff_16135_1-p183824  | Bn-N13-p52085239 | gene |      |
| Bn-scaff_16135_1-p184280  | Bn-N13-p52085695 | gene |      |
| Bn-scaff_16135_1-p195975  | Bn-N13-p52098514 | gene | exon |
| Bn-scaff_16135_1-p196922  | Bn-N8-p17275444  | gene | exon |
| Bn-scaff_16135_1-p230416  | Bn-N13-p52124627 | gene |      |
| Bn-scaff_16135_1-p257329  | Bn-N13-p52152019 | gene | exon |
| Bn-scaff_16135_1-p290412  | Bn-N13-p52183172 | gene |      |
| Bn-scaff_16135_1-p309515  | Bn-N13-p52195526 | gene |      |
| Bn-scaff_16135_1-p309577  | Bn-N13-p52195586 | gene |      |
| Bn-scaff_16135_1-p315469  | Bn-N13-p52207197 | gene | exon |
| Bn-scaff_16139_1-p1027358 | Bn-N12-p46309771 | gene | exon |
| Bn-scaff_16139_1-p1072066 | Bn-N12-p46260370 | gene |      |
| Bn-scaff_16139_1-p1074318 | Bn-N2-p28890715  | gene | exon |
| Bn-scaff_16139_1-p1090344 | Bn-N12-p46245892 | gene | exon |
| Bn-scaff_16139_1-p1266852 | Bn-N12-p46067022 | gene | exon |
| Bn-scaff_16139_1-p1275385 | Bn-N12-p46054802 | gene |      |
| Bn-scaff_16139_1-p1275964 | Bn-N12-p46054223 | gene |      |
| Bn-scaff_16139_1-p1276670 | Bn-N12-p46053331 | gene |      |
| Bn-scaff_16139_1-p1277806 | Bn-N12-p46046906 | gene |      |
| Bn-scaff_16139_1-p1279588 | Bn-N12-p46045123 | gene | exon |
| Bn-scaff_16139_1-p1291126 | Bn-N12-p46033601 | gene | exon |
| Bn-scaff_16139_1-p1295124 | Bn-N12-p46029446 | gene | exon |
| Bn-scaff_16139_1-p1337221 | Bn-N2-p28735992  | gene | exon |
| Bn-scaff_16139_1-p1496638 | Bn-N17-p48345883 | gene |      |
| Bn-scaff_16139_1-p259289  | Bn-N12-p46958995 | gene |      |
| Bn-scaff_16139_1-p28203   | Bn-N12-p46774538 | gene | exon |
| Bn-scaff_16139_1-p41217   | Bn-N12-p46786046 | gene |      |
| Bn-scaff_16139_1-p4995    | Bn-N12-p46751624 | gene |      |
| Bn-scaff_16139_1-p660500  | Bn-N12-p46660190 | gene | exon |
| Bn-scaff_16139_1-p662939  | Bn-N12-p46654390 | gene | exon |
| Bn-scaff_16139_1-p721705  | Bn-N12-p46601255 | gene | exon |

|                           |                         |      |      |
|---------------------------|-------------------------|------|------|
| Bn-scaff_16139_1-p921208  | Bn-N12-p46410950        | gene |      |
| Bn-scaff_16139_1-p921558  | Bn-N12-p46410600        | gene | exon |
| Bn-scaff_16139_1-p928671  | Bn-N12-p46401639        | gene |      |
| Bn-scaff_16139_1-p959373  | Bn-N12-p46370308        | gene |      |
| Bn-scaff_16139_1-p978370  | Bn-N12-p46351331        | gene | exon |
| Bn-scaff_16141_1-p131942  | Bn-N17-p13596292        | gene | exon |
| Bn-scaff_16141_1-p55687   | Bn-N3-p19680763         | gene | exon |
| Bn-scaff_16142_1-p166962  | Bn-N18-p11577254        | gene |      |
| Bn-scaff_16142_1-p284811  | Bn-N18-p11464139        | gene | exon |
| Bn-scaff_16142_1-p295868  | Bn-N18-p11452153        | gene |      |
| Bn-scaff_16142_1-p411484  | Bn-N8-p7374438          | gene | exon |
| Bn-scaff_16142_1-p418818  | Bn-N18-p11326372        | gene |      |
| Bn-scaff_16142_1-p711070  | Bn-N2-p10261029         | gene |      |
| Bn-scaff_16142_1-p723944  | Bn-N9-p21096259         | gene | exon |
| Bn-scaff_16142_1-p724998  | Bn-N9-p21097313         | gene | exon |
| Bn-scaff_16142_1-p726414  | Bn-N14-p4044671         | gene |      |
| Bn-scaff_16142_1-p97803   | Bn-N8-p7743305          | gene | exon |
| Bn-scaff_16148_1-p121322  | Bn-N8-p1558964          | gene |      |
| Bn-scaff_16148_1-p121470  | Bn-N8-p1559113          | gene | exon |
| Bn-scaff_16148_1-p21352   | Bn-N13-p65375656        | gene | exon |
| Bn-scaff_16148_1-p23001   | Bn-N13-p65377297        | gene |      |
| Bn-scaff_16148_1-p294989  | Bn-N13-p65737377        | gene |      |
| Bn-scaff_16148_1-p334833  | Bn-N3-p35605083         | gene |      |
| Bn-scaff_16148_1-p365481  | Bn-N13-p65817586        | gene | exon |
| Bn-scaff_16148_1-p61488   | Bn-N13-p65432143        | gene |      |
| Bn-scaff_16148_1-p63709   | Bn-N13-p65434365        | gene | exon |
| Bn-scaff_16148_1-p93513   | Bn-N13-p65507397        | gene |      |
| Bn-scaff_16148_1-p94877   | Bn-N13-p65508748        | gene | exon |
| Bn-scaff_16148_1-p94937   | Bn-N8-p1517049          | gene |      |
| Bn-scaff_16158_1-p284205  | Bn-N18-p6091100         | gene | exon |
| Bn-scaff_16158_1-p284923  | Bn-N18-p6091856         | gene | exon |
| Bn-scaff_16158_1-p377774  | Bn-N18-p6179988         | gene |      |
| Bn-scaff_16166_1-p407410  | Bn-N5-p18901492         | gene | exon |
| Bn-scaff_16166_1-p44558   | Bn-N5-p19038336         | gene | exon |
| Bn-scaff_16174_1-p1033507 | Bn-N6-p9393311          | gene |      |
| Bn-scaff_16174_1-p1163637 | Bn-N18-p28358352        | gene |      |
| Bn-scaff_16174_1-p1340704 | Bn-N18-p28527471        | gene |      |
| Bn-scaff_16174_1-p1342264 | Bn-N18-p28529029        | gene | exon |
| Bn-scaff_16174_1-p1505515 | Bn-N18-p28707191        | gene |      |
| Bn-scaff_16174_1-p19311   | Bn-N7-p9421680          | gene |      |
| Bn-scaff_16174_1-p6960    | Bn-N18-p27176468        | gene | exon |
| Bn-scaff_16181_1-p145919  | Bn-N15-p18514292        | gene |      |
| Bn-scaff_16181_1-p15961   | Bn-N15-p18650058        | gene | exon |
| Bn-scaff_16181_1-p44437   | Bn-N15-p18620814        | gene | exon |
| Bn-scaff_16181_1-p45725   | Bn-N15-p18619526        | gene | exon |
| Bn-scaff_16182_1-p319123  | Bn-N13-p58054641        | gene |      |
| Bn-scaff_16182_1-p481707  | Bn-N5-p13220675         | gene | exon |
| Bn-scaff_16182_1-p542363  | Bn-N13-p57828272        | gene |      |
| Bn-scaff_16182_1-p571563  | Bn-Scaffold01185-p24823 | gene |      |
| Bn-scaff_16182_1-p629084  | Bn-N11-p2301442         | gene |      |
| Bn-scaff_16197_1-p1008308 | Bn-N18-p38416954        | gene |      |
| Bn-scaff_16197_1-p1039642 | Bn-N9-p35171964         | gene | exon |

|                           |                  |      |      |
|---------------------------|------------------|------|------|
| Bn-scaff_16197_1-p1039692 | Bn-N9-p35171914  | gene | exon |
| Bn-scaff_16197_1-p1063639 | Bn-N18-p38376281 | gene |      |
| Bn-scaff_16197_1-p1087526 | Bn-N18-p38347170 | gene |      |
| Bn-scaff_16197_1-p1096399 | Bn-N18-p38336612 | gene |      |
| Bn-scaff_16197_1-p1098469 | Bn-N18-p38334542 | gene | exon |
| Bn-scaff_16197_1-p1098747 | Bn-N18-p38334263 | gene |      |
| Bn-scaff_16197_1-p1120033 | Bn-N18-p38310987 | gene |      |
| Bn-scaff_16197_1-p1156345 | Bn-N18-p38275203 | gene |      |
| Bn-scaff_16197_1-p1160568 | Bn-N18-p38270960 | gene |      |
| Bn-scaff_16197_1-p1192886 | Bn-N18-p38236074 | gene |      |
| Bn-scaff_16197_1-p1193122 | Bn-N18-p38235838 | gene |      |
| Bn-scaff_16197_1-p1193512 | Bn-N18-p38235447 | gene | exon |
| Bn-scaff_16197_1-p1223841 | Bn-N18-p38188114 | gene | exon |
| Bn-scaff_16197_1-p1249438 | Bn-N18-p38170754 | gene | exon |
| Bn-scaff_16197_1-p1257731 | Bn-N9-p35002894  | gene |      |
| Bn-scaff_16197_1-p1333425 | Bn-N18-p38077716 | gene |      |
| Bn-scaff_16197_1-p1348777 | Bn-N18-p38060280 | gene |      |
| Bn-scaff_16197_1-p135078  | Bn-N18-p39334616 | gene | exon |
| Bn-scaff_16197_1-p1382140 | Bn-N18-p38030050 | gene |      |
| Bn-scaff_16197_1-p1388213 | Bn-N9-p34891871  | gene | exon |
| Bn-scaff_16197_1-p1404163 | Bn-N18-p38008950 | gene | exon |
| Bn-scaff_16197_1-p1486027 | Bn-N18-p37922559 | gene | exon |
| Bn-scaff_16197_1-p1635223 | Bn-N18-p37787284 | gene |      |
| Bn-scaff_16197_1-p1725558 | Bn-N18-p37701779 | gene |      |
| Bn-scaff_16197_1-p1745860 | Bn-N18-p37673174 | gene | exon |
| Bn-scaff_16197_1-p1758608 | Bn-N18-p37666699 | gene |      |
| Bn-scaff_16197_1-p1760380 | Bn-N18-p37664925 | gene | exon |
| Bn-scaff_16197_1-p1761489 | Bn-N18-p37663811 | gene | exon |
| Bn-scaff_16197_1-p177403  | Bn-N18-p39279720 | gene | exon |
| Bn-scaff_16197_1-p177710  | Bn-N18-p39279413 | gene |      |
| Bn-scaff_16197_1-p178006  | Bn-N18-p39279119 | gene |      |
| Bn-scaff_16197_1-p1787278 | Bn-N18-p37637096 | gene |      |
| Bn-scaff_16197_1-p1794176 | Bn-N18-p37630210 | gene |      |
| Bn-scaff_16197_1-p1808027 | Bn-N18-p37619057 | gene | exon |
| Bn-scaff_16197_1-p1808165 | Bn-N18-p37618919 | gene | exon |
| Bn-scaff_16197_1-p1822297 | Bn-N18-p37604727 | gene | exon |
| Bn-scaff_16197_1-p1849406 | Bn-N14-p38142057 | gene | exon |
| Bn-scaff_16197_1-p1855471 | Bn-N18-p37570726 | gene | exon |
| Bn-scaff_16197_1-p1888759 | Bn-N18-p37539300 | gene |      |
| Bn-scaff_16197_1-p1901158 | Bn-N18-p37527241 | gene |      |
| Bn-scaff_16197_1-p1906605 | Bn-N18-p37521794 | gene |      |
| Bn-scaff_16197_1-p1944534 | Bn-N18-p37483413 | gene | exon |
| Bn-scaff_16197_1-p1980881 | Bn-N18-p37446103 | gene | exon |
| Bn-scaff_16197_1-p1981260 | Bn-N18-p37445724 | gene | exon |
| Bn-scaff_16197_1-p1981549 | Bn-N18-p37445434 | gene |      |
| Bn-scaff_16197_1-p2042922 | Bn-N18-p37383018 | gene |      |
| Bn-scaff_16197_1-p2048929 | Bn-N18-p37377078 | gene | exon |
| Bn-scaff_16197_1-p2096622 | Bn-N18-p37322645 | gene |      |
| Bn-scaff_16197_1-p2117067 | Bn-N18-p37311186 | gene |      |
| Bn-scaff_16197_1-p2117522 | Bn-N18-p37310731 | gene |      |
| Bn-scaff_16197_1-p2118928 | Bn-N18-p37309705 | gene |      |
| Bn-scaff_16197_1-p2119076 | Bn-N18-p37309556 | gene |      |

|                           |                       |      |      |
|---------------------------|-----------------------|------|------|
| Bn-scaff_16197_1-p2119334 | Bn-N18-p37309297      | gene |      |
| Bn-scaff_16197_1-p2119424 | Bn-N18-p37309207      | gene |      |
| Bn-scaff_16197_1-p2149887 | Bn-N18-p37274397      | gene |      |
| Bn-scaff_16197_1-p2150128 | Bn-N18-p37274170      | gene |      |
| Bn-scaff_16197_1-p222159  | Bn-N18-p39241000      | gene |      |
| Bn-scaff_16197_1-p222284  | Bn-N18-p39240875      | gene | exon |
| Bn-scaff_16197_1-p225455  | Bn-N18-p39237702      | gene |      |
| Bn-scaff_16197_1-p225468  | Bn-N18-p39237690      | gene |      |
| Bn-scaff_16197_1-p2257972 | Bn-N18-p37161528      | gene |      |
| Bn-scaff_16197_1-p225901  | Bn-N18-p39237257      | gene |      |
| Bn-scaff_16197_1-p2313484 | Bn-N18-p37099393      | gene |      |
| Bn-scaff_16197_1-p2329864 | Bn-N18-p37084121      | gene | exon |
| Bn-scaff_16197_1-p2337949 | Bn-N9-p34068690       | gene | exon |
| Bn-scaff_16197_1-p2356427 | Bn-N18-p37044597      | gene | exon |
| Bn-scaff_16197_1-p2356518 | Bn-N18-p37044506      | gene | exon |
| Bn-scaff_16197_1-p2365578 | Bn-N18-p37027751      | gene | exon |
| Bn-scaff_16197_1-p2366422 | Bn-N18-p37026923      | gene |      |
| Bn-scaff_16197_1-p2378207 | Bn-N18-p37637739      | gene |      |
| Bn-scaff_16197_1-p2398598 | Bn-N18-p36985888      | gene | exon |
| Bn-scaff_16197_1-p2433378 | Bn-N18-p36963450      | gene |      |
| Bn-scaff_16197_1-p2476076 | Bn-N18-p36926828      | gene |      |
| Bn-scaff_16197_1-p2481235 | Bn-N18-p36921575      | gene |      |
| Bn-scaff_16197_1-p2488559 | Bn-N18-p36913933      | gene |      |
| Bn-scaff_16197_1-p2491827 | Bn-N18-p36910665      | gene |      |
| Bn-scaff_16197_1-p2493450 | Bn-N18-p36909041      | gene |      |
| Bn-scaff_16197_1-p2495403 | Bn-N18-p36907089      | gene |      |
| Bn-scaff_16197_1-p2520910 | Bn-N18-p36872112      | gene | exon |
| Bn-scaff_16197_1-p2521569 | Bn-N18-p36871452      | gene | exon |
| Bn-scaff_16197_1-p2521682 | Bn-N18-p36871339      | gene |      |
| Bn-scaff_16197_1-p2521968 | Bn-N18-p36871060      | gene | exon |
| Bn-scaff_16197_1-p2522155 | Bn-N18-p36870874      | gene |      |
| Bn-scaff_16197_1-p2522210 | Bn-N18-p36870807      | gene |      |
| Bn-scaff_16197_1-p2523378 | Bn-N18-p36869632      | gene | exon |
| Bn-scaff_16197_1-p2525226 | Bn-N18-p36867777      | gene |      |
| Bn-scaff_16197_1-p2540923 | Bn-N18-p36851565      | gene |      |
| Bn-scaff_16197_1-p2541363 | Bn-N18-p36851124      | gene |      |
| Bn-scaff_16197_1-p2581072 | Bn-N18-p36809130      | gene | exon |
| Bn-scaff_16197_1-p2581685 | Bn-N18-p36808517      | gene |      |
| Bn-scaff_16197_1-p2581920 | Bn-N18-p36808283      | gene |      |
| Bn-scaff_16197_1-p2582618 | Bn-N18-p36807575      | gene | exon |
| Bn-scaff_16197_1-p2593050 | Bn-N18-p36800943      | gene | exon |
| Bn-scaff_16197_1-p2597305 | Bn-N18-p36796541      | gene | exon |
| Bn-scaff_16197_1-p2626407 | Bn-N18-p36767461      | gene |      |
| Bn-scaff_16197_1-p2640097 | Bn-N18-p36753902      | gene | exon |
| Bn-scaff_16197_1-p2836132 | Bn-Scaffold04535-p777 | gene |      |
| Bn-scaff_16197_1-p2852488 | Bn-N18-p36548316      | gene |      |
| Bn-scaff_16197_1-p2853374 | Bn-N18-p36547424      | gene | exon |
| Bn-scaff_16197_1-p2883093 | Bn-N18-p36524368      | gene |      |
| Bn-scaff_16197_1-p2891250 | Bn-N18-p36519429      | gene | exon |
| Bn-scaff_16197_1-p2897439 | Bn-N18-p36513244      | gene | exon |
| Bn-scaff_16197_1-p293459  | Bn-N10-p16607096      | gene |      |
| Bn-scaff_16197_1-p2958011 | Bn-N9-p33529630       | gene | exon |

|                           |                  |      |      |
|---------------------------|------------------|------|------|
| Bn-scaff_16197_1-p2958264 | Bn-N18-p36464614 | gene | exon |
| Bn-scaff_16197_1-p2958549 | Bn-N18-p36464329 | gene |      |
| Bn-scaff_16197_1-p2958698 | Bn-N18-p36464179 | gene | exon |
| Bn-scaff_16197_1-p2962341 | Bn-N18-p36460535 | gene |      |
| Bn-scaff_16197_1-p2963497 | Bn-N18-p36459392 | gene | exon |
| Bn-scaff_16197_1-p2968446 | Bn-N18-p36454184 | gene | exon |
| Bn-scaff_16197_1-p3006933 | Bn-N18-p36431395 | gene | exon |
| Bn-scaff_16197_1-p3019762 | Bn-N18-p36418297 | gene | exon |
| Bn-scaff_16197_1-p3019951 | Bn-N18-p36418108 | gene |      |
| Bn-scaff_16197_1-p3020219 | Bn-N9-p33485812  | gene | exon |
| Bn-scaff_16197_1-p3020399 | Bn-N9-p33485633  | gene | exon |
| Bn-scaff_16197_1-p3020713 | Bn-N9-p33485319  | gene | exon |
| Bn-scaff_16197_1-p3021149 | Bn-N18-p36416695 | gene | exon |
| Bn-scaff_16197_1-p3021158 | Bn-N18-p36416686 | gene | exon |
| Bn-scaff_16197_1-p3023882 | Bn-N18-p36413917 | gene | exon |
| Bn-scaff_16197_1-p3054920 | Bn-N18-p36386183 | gene | exon |
| Bn-scaff_16197_1-p3062579 | Bn-N18-p36378562 | gene | exon |
| Bn-scaff_16197_1-p3070176 | Bn-N18-p36370965 | gene |      |
| Bn-scaff_16197_1-p3111917 | Bn-N18-p36314955 | gene |      |
| Bn-scaff_16197_1-p3112286 | Bn-N18-p36314585 | gene | exon |
| Bn-scaff_16197_1-p3112359 | Bn-N18-p36314513 | gene | exon |
| Bn-scaff_16197_1-p3112707 | Bn-N18-p36314165 | gene | exon |
| Bn-scaff_16197_1-p3148021 | Bn-N9-p33380515  | gene | exon |
| Bn-scaff_16197_1-p325607  | Bn-N18-p39135243 | gene |      |
| Bn-scaff_16197_1-p3294723 | Bn-N18-p36117831 | gene |      |
| Bn-scaff_16197_1-p362815  | Bn-N9-p35795927  | gene | exon |
| Bn-scaff_16197_1-p394169  | Bn-N18-p39075893 | gene | exon |
| Bn-scaff_16197_1-p453838  | Bn-N18-p39000256 | gene | exon |
| Bn-scaff_16197_1-p47391   | Bn-N18-p39441240 | gene | exon |
| Bn-scaff_16197_1-p489638  | Bn-N18-p38965167 | gene | exon |
| Bn-scaff_16197_1-p489972  | Bn-N18-p38964833 | gene | exon |
| Bn-scaff_16197_1-p490092  | Bn-N18-p38964713 | gene |      |
| Bn-scaff_16197_1-p490649  | Bn-N9-p35681679  | gene | exon |
| Bn-scaff_16197_1-p504820  | Bn-N18-p38948144 | gene |      |
| Bn-scaff_16197_1-p506765  | Bn-N18-p38946203 | gene |      |
| Bn-scaff_16197_1-p508785  | Bn-N9-p35661024  | gene | exon |
| Bn-scaff_16197_1-p595290  | Bn-N18-p38868460 | gene |      |
| Bn-scaff_16197_1-p630099  | Bn-N18-p38836466 | gene |      |
| Bn-scaff_16197_1-p634285  | Bn-N18-p38831112 | gene |      |
| Bn-scaff_16197_1-p63640   | Bn-N9-p36100262  | gene | exon |
| Bn-scaff_16197_1-p637120  | Bn-N18-p38827089 | gene |      |
| Bn-scaff_16197_1-p652619  | Bn-N18-p38808093 | gene | exon |
| Bn-scaff_16197_1-p679283  | Bn-N18-p38787368 | gene | exon |
| Bn-scaff_16197_1-p689617  | Bn-N18-p38774778 | gene |      |
| Bn-scaff_16197_1-p697008  | Bn-N18-p38767644 | gene | exon |
| Bn-scaff_16197_1-p732813  | Bn-N18-p38712876 | gene | exon |
| Bn-scaff_16197_1-p739645  | Bn-N18-p38705973 | gene |      |
| Bn-scaff_16197_1-p739973  | Bn-N18-p38705645 | gene |      |
| Bn-scaff_16197_1-p740084  | Bn-N18-p38705533 | gene |      |
| Bn-scaff_16197_1-p74067   | Bn-N18-p39416263 | gene |      |
| Bn-scaff_16197_1-p870393  | Bn-N9-p35302873  | gene |      |
| Bn-scaff_16197_1-p974284  | Bn-N18-p38459102 | gene | exon |



|                          |                  |      |      |
|--------------------------|------------------|------|------|
| Bn-scaff_16200_1-p105426 | Bn-N18-p32473648 | gene | exon |
| Bn-scaff_16200_1-p111092 | Bn-N18-p32467969 | gene |      |
| Bn-scaff_16200_1-p122106 | Bn-N18-p32456956 | gene |      |
| Bn-scaff_16200_1-p280959 | Bn-N17-p12862972 | gene |      |
| Bn-scaff_16200_1-p338436 | Bn-N17-p12905730 | gene |      |
| Bn-scaff_16200_1-p339334 | Bn-N7-p5500554   | gene | exon |
| Bn-scaff_16200_1-p388097 | Bn-N17-p12969459 | gene | exon |
| Bn-scaff_16200_1-p388152 | Bn-N17-p12969514 | gene |      |
| Bn-scaff_16200_1-p388253 | Bn-N17-p12969615 | gene |      |
| Bn-scaff_16200_1-p388352 | Bn-N17-p12969714 | gene | exon |
| Bn-scaff_16200_1-p536263 | Bn-N17-p13143312 | gene | exon |
| Bn-scaff_16200_1-p608563 | Bn-N17-p13223587 | gene |      |
| Bn-scaff_16200_1-p609532 | Bn-N17-p13224555 | gene | exon |
| Bn-scaff_16200_1-p616097 | Bn-N17-p13230415 | gene |      |
| Bn-scaff_16200_1-p616394 | Bn-N17-p13230711 | gene |      |
| Bn-scaff_16200_1-p616552 | Bn-N17-p13230871 | gene |      |
| Bn-scaff_16200_1-p616708 | Bn-N17-p13231027 | gene |      |
| Bn-scaff_16200_1-p616843 | Bn-N17-p13231162 | gene |      |
| Bn-scaff_16200_1-p617013 | Bn-N17-p13231332 | gene |      |
| Bn-scaff_16200_1-p617473 | Bn-N17-p13231792 | gene |      |
| Bn-scaff_16200_1-p618169 | Bn-N17-p13232488 | gene |      |
| Bn-scaff_16200_1-p622179 | Bn-N17-p13236594 | gene |      |
| Bn-scaff_16200_1-p65647  | Bn-N18-p32515926 | gene | exon |
| Bn-scaff_16200_1-p91053  | Bn-N18-p32488398 | gene | exon |
| Bn-scaff_16200_1-p95910  | Bn-N18-p32484549 | gene | exon |
| Bn-scaff_16209_1-p117013 | Bn-N12-p40587598 | gene |      |
| Bn-scaff_16209_1-p117145 | Bn-N12-p40587466 | gene |      |
| Bn-scaff_16214_1-p172721 | Bn-N14-p3043034  | gene |      |
| Bn-scaff_16214_1-p195959 | Bn-N14-p3052920  | gene | exon |
| Bn-scaff_16214_1-p263853 | Bn-N14-p3144754  | gene |      |
| Bn-scaff_16214_1-p265043 | Bn-N14-p3145948  | gene | exon |
| Bn-scaff_16214_1-p265231 | Bn-N5-p2096496   | gene | exon |
| Bn-scaff_16214_1-p300788 | Bn-N14-p3187446  | gene |      |
| Bn-scaff_16214_1-p301269 | Bn-N14-p3187927  | gene | exon |
| Bn-scaff_16214_1-p347223 | Bn-N14-p3226772  | gene |      |
| Bn-scaff_16214_1-p347579 | Bn-N14-p3227127  | gene |      |
| Bn-scaff_16214_1-p347758 | Bn-N14-p3227306  | gene |      |
| Bn-scaff_16214_1-p349072 | Bn-N14-p3228621  | gene |      |
| Bn-scaff_16214_1-p40152  | Bn-N14-p2890268  | gene |      |
| Bn-scaff_16214_1-p40230  | Bn-N14-p2890346  | gene |      |
| Bn-scaff_16214_1-p477058 | Bn-N5-p2179039   | gene | exon |
| Bn-scaff_16214_1-p562727 | Bn-N5-p2211258   | gene |      |
| Bn-scaff_16214_1-p69186  | Bn-N14-p2915439  | gene | exon |
| Bn-scaff_16217_1-p116824 | Bn-N14-p26013556 | gene |      |
| Bn-scaff_16217_1-p121250 | Bn-N14-p26009127 | gene |      |
| Bn-scaff_16217_1-p123037 | Bn-N14-p26007340 | gene | exon |
| Bn-scaff_16217_1-p132134 | Bn-N14-p25998464 | gene | exon |
| Bn-scaff_16217_1-p181427 | Bn-N14-p25948672 | gene |      |
| Bn-scaff_16217_1-p270268 | Bn-N14-p25857550 | gene | exon |
| Bn-scaff_16217_1-p428402 | Bn-N14-p25702349 | gene | exon |
| Bn-scaff_16217_1-p457905 | Bn-N14-p25656254 | gene | exon |
| Bn-scaff_16217_1-p473162 | Bn-N14-p25639298 | gene |      |

|                           |                  |      |      |
|---------------------------|------------------|------|------|
| Bn-scaff_16217_1-p87998   | Bn-N14-p26045300 | gene | exon |
| Bn-scaff_16228_1-p171719  | Bn-N5-p15101132  | gene | exon |
| Bn-scaff_16231_1-p1011395 | Bn-N18-p24196802 | gene | exon |
| Bn-scaff_16231_1-p1014215 | Bn-N18-p24193993 | gene |      |
| Bn-scaff_16231_1-p1015173 | Bn-N18-p24193032 | gene |      |
| Bn-scaff_16231_1-p1024600 | Bn-N18-p24183605 | gene | exon |
| Bn-scaff_16231_1-p1026375 | Bn-N18-p24181807 | gene | exon |
| Bn-scaff_16231_1-p1036610 | Bn-N8-p19062530  | gene | exon |
| Bn-scaff_16231_1-p1093410 | Bn-N18-p24104545 | gene | exon |
| Bn-scaff_16231_1-p1120106 | Bn-N18-p24076764 | gene |      |
| Bn-scaff_16231_1-p1176514 | Bn-N18-p24011698 | gene | exon |
| Bn-scaff_16231_1-p1176794 | Bn-N18-p24011417 | gene | exon |
| Bn-scaff_16231_1-p1176976 | Bn-N18-p24011236 | gene | exon |
| Bn-scaff_16231_1-p1177104 | Bn-N18-p24011108 | gene | exon |
| Bn-scaff_16231_1-p1180991 | Bn-N18-p24007532 | gene |      |
| Bn-scaff_16231_1-p1188910 | Bn-N18-p23995226 | gene |      |
| Bn-scaff_16231_1-p1189052 | Bn-N18-p23995115 | gene |      |
| Bn-scaff_16231_1-p1209255 | Bn-N18-p23972799 | gene |      |
| Bn-scaff_16231_1-p1231804 | Bn-N18-p23952842 | gene |      |
| Bn-scaff_16231_1-p1235878 | Bn-N18-p23948767 | gene | exon |
| Bn-scaff_16231_1-p124584  | Bn-N18-p25136170 | gene |      |
| Bn-scaff_16231_1-p1256187 | Bn-N18-p23928309 | gene |      |
| Bn-scaff_16231_1-p1256308 | Bn-N18-p23928188 | gene |      |
| Bn-scaff_16231_1-p1256858 | Bn-N18-p23927638 | gene | exon |
| Bn-scaff_16231_1-p1484437 | Bn-N18-p23614763 | gene | exon |
| Bn-scaff_16231_1-p1484816 | Bn-N18-p23614384 | gene |      |
| Bn-scaff_16231_1-p1484914 | Bn-N18-p23614287 | gene | exon |
| Bn-scaff_16231_1-p1506772 | Bn-N18-p23594905 | gene |      |
| Bn-scaff_16231_1-p1629494 | Bn-N8-p19416572  | gene | exon |
| Bn-scaff_16231_1-p1643097 | Bn-N18-p23438785 | gene | exon |
| Bn-scaff_16231_1-p1778148 | Bn-N18-p23321376 | gene | exon |
| Bn-scaff_16231_1-p1778471 | Bn-N18-p23321052 | gene | exon |
| Bn-scaff_16231_1-p1841458 | Bn-N8-p19488518  | gene | exon |
| Bn-scaff_16231_1-p203872  | Bn-N18-p25076370 | gene | exon |
| Bn-scaff_16231_1-p2042129 | Bn-N18-p23042268 | gene |      |
| Bn-scaff_16231_1-p204841  | Bn-N18-p25074822 | gene | exon |
| Bn-scaff_16231_1-p205060  | Bn-N18-p25074603 | gene | exon |
| Bn-scaff_16231_1-p2213239 | Bn-N18-p22891395 | gene |      |
| Bn-scaff_16231_1-p2213779 | Bn-N18-p22890855 | gene |      |
| Bn-scaff_16231_1-p2274371 | Bn-N8-p19696722  | gene | exon |
| Bn-scaff_16231_1-p2274454 | Bn-N18-p22796016 | gene | exon |
| Bn-scaff_16231_1-p2287394 | Bn-N8-p19706556  | gene | exon |
| Bn-scaff_16231_1-p296794  | Bn-N18-p24988414 | gene |      |
| Bn-scaff_16231_1-p490553  | Bn-N18-p24772431 | gene |      |
| Bn-scaff_16231_1-p563765  | Bn-N17-p42400764 | gene |      |
| Bn-scaff_16231_1-p576383  | Bn-N18-p24679977 | gene |      |
| Bn-scaff_16231_1-p576632  | Bn-N18-p24679727 | gene | exon |
| Bn-scaff_16231_1-p577104  | Bn-N18-p24679255 | gene | exon |
| Bn-scaff_16231_1-p662722  | Bn-N18-p24582718 | gene |      |
| Bn-scaff_16231_1-p678599  | Bn-N18-p24561072 | gene |      |
| Bn-scaff_16231_1-p715762  | Bn-N18-p24521394 | gene |      |
| Bn-scaff_16231_1-p734971  | Bn-N5-p16486656  | gene |      |

|                          |                  |      |      |
|--------------------------|------------------|------|------|
| Bn-scaff_16231_1-p745514 | Bn-N18-p24483166 | gene |      |
| Bn-scaff_16231_1-p745813 | Bn-N18-p24482874 | gene |      |
| Bn-scaff_16231_1-p746922 | Bn-N18-p24481717 | gene | exon |
| Bn-scaff_16231_1-p747021 | Bn-N18-p24481618 | gene | exon |
| Bn-scaff_16231_1-p780465 | Bn-N18-p24453181 | gene | exon |
| Bn-scaff_16231_1-p780489 | Bn-N18-p24453157 | gene |      |
| Bn-scaff_16231_1-p780750 | Bn-N8-p18940986  | gene |      |
| Bn-scaff_16231_1-p786260 | Bn-N18-p24447388 | gene | exon |
| Bn-scaff_16231_1-p795075 | Bn-N18-p24433888 | gene |      |
| Bn-scaff_16231_1-p795462 | Bn-N18-p24433501 | gene |      |
| Bn-scaff_16231_1-p795518 | Bn-N18-p24433445 | gene |      |
| Bn-scaff_16231_1-p795641 | Bn-N18-p24433335 | gene |      |
| Bn-scaff_16231_1-p801359 | Bn-N8-p18961142  | gene | exon |
| Bn-scaff_16231_1-p847032 | Bn-N18-p24405897 | gene |      |
| Bn-scaff_16231_1-p850157 | Bn-N18-p24402776 | gene | exon |
| Bn-scaff_16231_1-p853799 | Bn-N8-p18989114  | gene |      |
| Bn-scaff_16231_1-p903042 | Bn-N18-p24309959 | gene |      |
| Bn-scaff_16231_1-p905549 | Bn-N18-p24307453 | gene | exon |
| Bn-scaff_16231_1-p905567 | Bn-N18-p24307436 | gene | exon |
| Bn-scaff_16240_1-p13277  | Bn-N14-p49708079 | gene |      |
| Bn-scaff_16240_1-p15203  | Bn-N14-p49706152 | gene | exon |
| Bn-scaff_16240_1-p246238 | Bn-N4-p16394061  | gene |      |
| Bn-scaff_16240_1-p310848 | Bn-N4-p16342115  | gene | exon |
| Bn-scaff_16240_1-p310915 | Bn-N14-p49354622 | gene | exon |
| Bn-scaff_16240_1-p311457 | Bn-N14-p49354082 | gene | exon |
| Bn-scaff_16244_1-p25214  | Bn-N11-p33701989 | gene |      |
| Bn-scaff_16244_1-p28539  | Bn-N11-p33698641 | gene | exon |
| Bn-scaff_16246_2-p21963  | Bn-N19-p36750761 | gene |      |
| Bn-scaff_16246_2-p75351  | Bn-N19-p36790794 | gene |      |
| Bn-scaff_16263_1-p445748 | Bn-N5-p18589874  | gene | exon |
| Bn-scaff_16263_1-p446017 | Bn-N5-p18589605  | gene |      |
| Bn-scaff_16263_1-p446092 | Bn-N5-p18589546  | gene |      |
| Bn-scaff_16263_1-p446224 | Bn-N5-p18589414  | gene | exon |
| Bn-scaff_16263_1-p459593 | Bn-N5-p18574406  | gene | exon |
| Bn-scaff_16263_1-p459656 | Bn-N5-p18574343  | gene | exon |
| Bn-scaff_16263_1-p459932 | Bn-N5-p18574067  | gene | exon |
| Bn-scaff_16268_1-p262996 | Bn-N15-p14301787 | gene |      |
| Bn-scaff_16268_1-p533546 | Bn-N15-p14019003 | gene | exon |
| Bn-scaff_16268_1-p543187 | Bn-N15-p14002109 | gene |      |
| Bn-scaff_16268_1-p564846 | Bn-N15-p13978014 | gene | exon |
| Bn-scaff_16268_1-p600077 | Bn-N15-p13958409 | gene | exon |
| Bn-scaff_16268_1-p600528 | Bn-N15-p13957794 | gene | exon |
| Bn-scaff_16268_1-p601866 | Bn-N15-p13956454 | gene | exon |
| Bn-scaff_16268_1-p87361  | Bn-N9-p26405945  | gene | exon |
| Bn-scaff_16269_1-p192431 | Bn-N12-p8218856  | gene | exon |
| Bn-scaff_16269_1-p197772 | Bn-N2-p5818341   | gene | exon |
| Bn-scaff_16269_1-p242401 | Bn-N2-p5780519   | gene | exon |
| Bn-scaff_16269_1-p296261 | Bn-N2-p5732602   | gene | exon |
| Bn-scaff_16269_1-p301771 | Bn-N12-p8074757  | gene | exon |
| Bn-scaff_16269_1-p304514 | Bn-N2-p5717244   | gene |      |
| Bn-scaff_16269_1-p484840 | Bn-N2-p5627603   | gene |      |
| Bn-scaff_16269_1-p529343 | Bn-N12-p7835866  | gene |      |

|                           |                       |      |      |
|---------------------------|-----------------------|------|------|
| Bn-scaff_16269_1-p529695  | Bn-N19-p43768379      | gene | exon |
| Bn-scaff_16269_1-p533948  | Bn-N12-p7830661       | gene |      |
| Bn-scaff_16269_1-p534639  | Bn-N2-p5568974        | gene | exon |
| Bn-scaff_16269_1-p599575  | Bn-N12-p7763823       | gene |      |
| Bn-scaff_16269_1-p600151  | Bn-N12-p21335454      | gene |      |
| Bn-scaff_16269_1-p609618  | Bn-N12-p7758251       | gene | exon |
| Bn-scaff_16269_1-p98735   | Bn-N12-p8304924       | gene |      |
| Bn-scaff_16273_1-p227959  | Bn-N8-p5959818        | gene | exon |
| Bn-scaff_16273_1-p290254  | Bn-N8-p6002800        | gene |      |
| Bn-scaff_16273_1-p291283  | Bn-N8-p6003831        | gene |      |
| Bn-scaff_16273_1-p291496  | Bn-N18-p8392653       | gene | exon |
| Bn-scaff_16273_1-p340678  | Bn-N18-p8436994       | gene | exon |
| Bn-scaff_16273_1-p340796  | Bn-N18-p8437112       | gene | exon |
| Bn-scaff_16275_1-p819     | Bn-N16-p2003770       | gene |      |
| Bn-scaff_16287_1-p21083   | Bn-N18-p12154172      | gene |      |
| Bn-scaff_16287_1-p248964  | Bn-N18-p12397041      | gene | exon |
| Bn-scaff_16287_1-p28498   | Bn-N18-p12161537      | gene |      |
| Bn-scaff_16287_1-p294064  | Bn-N18-p12421848      | gene | exon |
| Bn-scaff_16287_1-p294080  | Bn-N18-p12421864      | gene | exon |
| Bn-scaff_16287_1-p294213  | Bn-N18-p12421997      | gene | exon |
| Bn-scaff_16287_1-p343693  | Bn-N18-p12442346      | gene | exon |
| Bn-scaff_16287_1-p366585  | Bn-N18-p12462117      | gene |      |
| Bn-scaff_16287_1-p367970  | Bn-N18-p12463502      | gene |      |
| Bn-scaff_16287_1-p368299  | Bn-N18-p12463832      | gene |      |
| Bn-scaff_16287_1-p368373  | Bn-N18-p12463905      | gene |      |
| Bn-scaff_16287_1-p395887  | Bn-N8-p8134585        | gene | exon |
| Bn-scaff_16287_1-p416151  | Bn-N18-p12514226      | gene |      |
| Bn-scaff_16287_1-p441896  | Bn-N18-p12544944      | gene |      |
| Bn-scaff_16287_1-p441940  | Bn-N18-p12544988      | gene |      |
| Bn-scaff_16297_1-p259650  | Bn-N9-p18853705       | gene | exon |
| Bn-scaff_16297_2-p34182   | Bn-N16-p33563951      | gene |      |
| Bn-scaff_16300_1-p1233910 | Bn-N12-p21266657      | gene |      |
| Bn-scaff_16300_1-p1234612 | Bn-N12-p21265955      | gene |      |
| Bn-scaff_16300_1-p186784  | Bn-N2-p15718224       | gene | exon |
| Bn-scaff_16300_1-p214856  | Bn-N12-p22183663      | gene |      |
| Bn-scaff_16300_1-p250259  | Bn-N12-p22151766      | gene | exon |
| Bn-scaff_16300_1-p284543  | Bn-N12-p22118094      | gene | exon |
| Bn-scaff_16300_1-p31299   | Bn-N12-p22383154      | gene | exon |
| Bn-scaff_16300_1-p33977   | Bn-N12-p22382107      | gene | exon |
| Bn-scaff_16300_1-p561129  | Bn-N12-p21903253      | gene |      |
| Bn-scaff_16300_1-p614082  | Bn-N12-p21828760      | gene |      |
| Bn-scaff_16300_1-p625676  | Bn-N12-p21824016      | gene | exon |
| Bn-scaff_16300_1-p625805  | Bn-N12-p21823890      | gene | exon |
| Bn-scaff_16300_1-p831382  | Bn-Scaffold13282-p151 | gene | exon |
| Bn-scaff_16300_1-p831651  | Bn-N10-p5926189       | gene |      |
| Bn-scaff_16300_1-p890245  | Bn-N12-p21536663      | gene |      |
| Bn-scaff_16309_1-p116361  | Bn-N14-p27208002      | gene | exon |
| Bn-scaff_16309_1-p144811  | Bn-N14-p27173265      | gene |      |
| Bn-scaff_16309_1-p164550  | Bn-N14-p27149568      | gene |      |
| Bn-scaff_16309_1-p187260  | Bn-N14-p27120264      | gene | exon |
| Bn-scaff_16309_1-p187425  | Bn-N14-p27120099      | gene |      |
| Bn-scaff_16309_1-p260352  | Bn-N14-p27072112      | gene |      |

|                           |                  |      |      |
|---------------------------|------------------|------|------|
| Bn-scaff_16309_1-p62538   | Bn-N14-p27265481 | gene |      |
| Bn-scaff_16310_1-p239317  | Bn-N3-p18539921  | gene | exon |
| Bn-scaff_16310_1-p239386  | Bn-N3-p18539852  | gene | exon |
| Bn-scaff_16310_1-p279083  | Bn-N13-p29383446 | gene |      |
| Bn-scaff_16312_1-p126580  | Bn-N14-p16873438 | gene | exon |
| Bn-scaff_16312_1-p126687  | Bn-N14-p16873588 | gene | exon |
| Bn-scaff_16312_1-p33849   | Bn-N14-p16727903 | gene |      |
| Bn-scaff_16312_1-p34040   | Bn-N14-p16728085 | gene |      |
| Bn-scaff_16312_1-p34201   | Bn-N14-p16728246 | gene |      |
| Bn-scaff_16312_1-p49769   | Bn-N14-p16740426 | gene |      |
| Bn-scaff_16323_1-p171333  | Bn-N1-p7149541   | gene |      |
| Bn-scaff_16323_1-p226708  | Bn-N11-p10538278 | gene | exon |
| Bn-scaff_16328_1-p184165  | Bn-N12-p26681067 | gene | exon |
| Bn-scaff_16328_1-p200394  | Bn-N12-p26699227 | gene | exon |
| Bn-scaff_16328_1-p25550   | Bn-N12-p26503092 | gene | exon |
| Bn-scaff_16328_1-p334896  | Bn-N12-p26819565 | gene | exon |
| Bn-scaff_16328_1-p751831  | Bn-N12-p27210030 | gene | exon |
| Bn-scaff_16328_1-p971718  | Bn-N15-p48513661 | gene | exon |
| Bn-scaff_16328_1-p971878  | Bn-N15-p48513500 | gene | exon |
| Bn-scaff_16342_1-p104963  | Bn-N11-p44211887 | gene | exon |
| Bn-scaff_16342_1-p28765   | Bn-N11-p44275475 | gene | exon |
| Bn-scaff_16342_1-p37982   | Bn-N11-p44265748 | gene | exon |
| Bn-scaff_16350_1-p172744  | Bn-N13-p41971769 | gene |      |
| Bn-scaff_16352_1-p100761  | Bn-N3-p11926582  | gene |      |
| Bn-scaff_16352_1-p1204075 | Bn-N13-p18806772 | gene |      |
| Bn-scaff_16352_1-p1287850 | Bn-N13-p18896653 | gene |      |
| Bn-scaff_16352_1-p17155   | Bn-N3-p11884861  | gene | exon |
| Bn-scaff_16352_1-p190051  | Bn-N13-p17758501 | gene | exon |
| Bn-scaff_16352_1-p2104    | Bn-N13-p17574621 | gene | exon |
| Bn-scaff_16352_1-p255957  | Bn-N13-p17838976 | gene | exon |
| Bn-scaff_16352_1-p259954  | Bn-N13-p17844117 | gene | exon |
| Bn-scaff_16352_1-p335290  | Bn-N13-p17932153 | gene |      |
| Bn-scaff_16352_1-p359772  | Bn-N13-p17958699 | gene | exon |
| Bn-scaff_16352_1-p367247  | Bn-N13-p17966579 | gene | exon |
| Bn-scaff_16352_1-p377620  | Bn-N3-p12094665  | gene | exon |
| Bn-scaff_16352_1-p46887   | Bn-N3-p11895719  | gene | exon |
| Bn-scaff_16352_1-p496916  | Bn-N3-p12169254  | gene | exon |
| Bn-scaff_16352_1-p5784    | Bn-N13-p17578301 | gene | exon |
| Bn-scaff_16352_1-p5909    | Bn-N3-p11867076  | gene | exon |
| Bn-scaff_16352_1-p720619  | Bn-N13-p18371385 | gene | exon |
| Bn-scaff_16352_1-p83169   | Bn-N13-p17646915 | gene |      |
| Bn-scaff_16352_1-p838453  | Bn-N13-p18473637 | gene | exon |
| Bn-scaff_16353_1-p41335   | Bn-N11-p10916321 | gene |      |
| Bn-scaff_16353_1-p41558   | Bn-N11-p10916098 | gene |      |
| Bn-scaff_16356_1-p17864   | Bn-N14-p2603825  | gene |      |
| Bn-scaff_16356_1-p41349   | Bn-N14-p2626996  | gene |      |
| Bn-scaff_16356_1-p41354   | Bn-N14-p2627001  | gene |      |
| Bn-scaff_16356_1-p42154   | Bn-N14-p2627801  | gene | exon |
| Bn-scaff_16356_1-p42317   | Bn-N14-p2627964  | gene | exon |
| Bn-scaff_16356_1-p42628   | Bn-N14-p2628405  | gene | exon |
| Bn-scaff_16356_1-p42659   | Bn-N14-p2628437  | gene | exon |
| Bn-scaff_16356_1-p60006   | Bn-N14-p2642891  | gene | exon |

|                           |                  |      |      |
|---------------------------|------------------|------|------|
| Bn-scaff_16356_1-p60107   | Bn-N14-p2642991  | gene | exon |
| Bn-scaff_16356_1-p60133   | Bn-N14-p2643017  | gene | exon |
| Bn-scaff_16356_1-p61309   | Bn-N5-p1764461   | gene | exon |
| Bn-scaff_16356_1-p69775   | Bn-N5-p1773582   | gene | exon |
| Bn-scaff_16356_1-p69920   | Bn-N5-p1773727   | gene | exon |
| Bn-scaff_16361_1-p100399  | Bn-N18-p32758741 | gene | exon |
| Bn-scaff_16361_1-p1007904 | Bn-N18-p33709219 | gene | exon |
| Bn-scaff_16361_1-p1052698 | Bn-N9-p31373329  | gene | exon |
| Bn-scaff_16361_1-p1056305 | Bn-N18-p33748571 | gene | exon |
| Bn-scaff_16361_1-p1056657 | Bn-N18-p33748922 | gene |      |
| Bn-scaff_16361_1-p1072715 | Bn-N18-p33767888 | gene | exon |
| Bn-scaff_16361_1-p1127803 | Bn-N18-p33836942 | gene | exon |
| Bn-scaff_16361_1-p1205638 | Bn-N18-p33915303 | gene | exon |
| Bn-scaff_16361_1-p1205826 | Bn-N18-p33915459 | gene | exon |
| Bn-scaff_16361_1-p1227636 | Bn-N9-p31486334  | gene | exon |
| Bn-scaff_16361_1-p1277572 | Bn-N18-p33987884 | gene | exon |
| Bn-scaff_16361_1-p1379846 | Bn-N18-p34090563 | gene |      |
| Bn-scaff_16361_1-p1380155 | Bn-N18-p34090875 | gene |      |
| Bn-scaff_16361_1-p1380357 | Bn-N18-p34091077 | gene | exon |
| Bn-scaff_16361_1-p1387122 | Bn-N18-p34098757 | gene |      |
| Bn-scaff_16361_1-p1389686 | Bn-N18-p34101345 | gene | exon |
| Bn-scaff_16361_1-p1390712 | Bn-N18-p34102368 | gene | exon |
| Bn-scaff_16361_1-p1398166 | Bn-N18-p34107972 | gene |      |
| Bn-scaff_16361_1-p1443077 | Bn-N18-p34139782 | gene |      |
| Bn-scaff_16361_1-p1466598 | Bn-N18-p34167166 | gene | exon |
| Bn-scaff_16361_1-p1467945 | Bn-N18-p34168513 | gene | exon |
| Bn-scaff_16361_1-p1496856 | Bn-N18-p34197768 | gene | exon |
| Bn-scaff_16361_1-p1497208 | Bn-N18-p34198120 | gene | exon |
| Bn-scaff_16361_1-p1497666 | Bn-N18-p34198577 | gene |      |
| Bn-scaff_16361_1-p1500008 | Bn-N9-p31690570  | gene |      |
| Bn-scaff_16361_1-p1500169 | Bn-N9-p31690730  | gene |      |
| Bn-scaff_16361_1-p1505687 | Bn-N18-p34206598 | gene | exon |
| Bn-scaff_16361_1-p1569143 | Bn-N18-p34266593 | gene | exon |
| Bn-scaff_16361_1-p1569363 | Bn-N18-p34266812 | gene | exon |
| Bn-scaff_16361_1-p1569804 | Bn-N18-p34267253 | gene |      |
| Bn-scaff_16361_1-p1570938 | Bn-N18-p34268387 | gene | exon |
| Bn-scaff_16361_1-p1656248 | Bn-N18-p34369176 | gene | exon |
| Bn-scaff_16361_1-p1658395 | Bn-N18-p34371203 | gene |      |
| Bn-scaff_16361_1-p1669677 | Bn-N18-p34378648 | gene |      |
| Bn-scaff_16361_1-p1690357 | Bn-N9-p31836658  | gene | exon |
| Bn-scaff_16361_1-p1713891 | Bn-N18-p34420071 | gene | exon |
| Bn-scaff_16361_1-p1715022 | Bn-N18-p34421191 | gene | exon |
| Bn-scaff_16361_1-p1749058 | Bn-N18-p34457232 | gene | exon |
| Bn-scaff_16361_1-p1974251 | Bn-N18-p34657338 | gene |      |
| Bn-scaff_16361_1-p2016133 | Bn-N18-p34699643 | gene |      |
| Bn-scaff_16361_1-p2037720 | Bn-N18-p34716326 | gene |      |
| Bn-scaff_16361_1-p2038122 | Bn-N18-p34716743 | gene |      |
| Bn-scaff_16361_1-p2052324 | Bn-N18-p34734011 | gene |      |
| Bn-scaff_16361_1-p2064780 | Bn-N18-p34746418 | gene | exon |
| Bn-scaff_16361_1-p2080257 | Bn-N18-p34762202 | gene | exon |
| Bn-scaff_16361_1-p2138712 | Bn-N9-p32168758  | gene |      |
| Bn-scaff_16361_1-p2256702 | Bn-N18-p34936297 | gene | exon |

|                           |                  |      |      |
|---------------------------|------------------|------|------|
| Bn-scaff_16361_1-p2262641 | Bn-N18-p34942236 | gene | exon |
| Bn-scaff_16361_1-p2263072 | Bn-N18-p34942668 | gene | exon |
| Bn-scaff_16361_1-p2273130 | Bn-N18-p34952204 | gene |      |
| Bn-scaff_16361_1-p2291028 | Bn-N18-p34972083 | gene |      |
| Bn-scaff_16361_1-p2291795 | Bn-N18-p34972849 | gene |      |
| Bn-scaff_16361_1-p2342831 | Bn-N9-p32349114  | gene |      |
| Bn-scaff_16361_1-p2350469 | Bn-N18-p35040928 | gene |      |
| Bn-scaff_16361_1-p2357373 | Bn-N18-p35053164 | gene | exon |
| Bn-scaff_16361_1-p2400621 | Bn-N18-p35079769 | gene |      |
| Bn-scaff_16361_1-p2411581 | Bn-N18-p35090882 | gene | exon |
| Bn-scaff_16361_1-p2493469 | Bn-N18-p35146481 | gene |      |
| Bn-scaff_16361_1-p2518617 | Bn-N18-p35166068 | gene |      |
| Bn-scaff_16361_1-p2529346 | Bn-N18-p35178875 | gene | exon |
| Bn-scaff_16361_1-p2532318 | Bn-N18-p35181848 | gene | exon |
| Bn-scaff_16361_1-p2532823 | Bn-N18-p35182353 | gene |      |
| Bn-scaff_16361_1-p2532927 | Bn-N18-p35182456 | gene |      |
| Bn-scaff_16361_1-p2533115 | Bn-N18-p35182645 | gene | exon |
| Bn-scaff_16361_1-p2545402 | Bn-N18-p35190298 | gene |      |
| Bn-scaff_16361_1-p2545776 | Bn-N18-p35190672 | gene |      |
| Bn-scaff_16361_1-p2563720 | Bn-N18-p35208760 | gene | exon |
| Bn-scaff_16361_1-p2730705 | Bn-N18-p35377574 | gene |      |
| Bn-scaff_16361_1-p2750042 | Bn-N18-p35398843 | gene |      |
| Bn-scaff_16361_1-p2750581 | Bn-N18-p35399382 | gene |      |
| Bn-scaff_16361_1-p2793280 | Bn-N18-p35442085 | gene | exon |
| Bn-scaff_16361_1-p2793418 | Bn-N18-p35442223 | gene |      |
| Bn-scaff_16361_1-p2793822 | Bn-N18-p35442628 | gene | exon |
| Bn-scaff_16361_1-p2813910 | Bn-N9-p32741105  | gene | exon |
| Bn-scaff_16361_1-p2818711 | Bn-N9-p32745901  | gene | exon |
| Bn-scaff_16361_1-p2911258 | Bn-N9-p32797763  | gene | exon |
| Bn-scaff_16361_1-p3094172 | Bn-N9-p32919079  | gene | exon |
| Bn-scaff_16361_1-p3120761 | Bn-N18-p35707246 | gene |      |
| Bn-scaff_16361_1-p3250247 | Bn-N18-p35851106 | gene | exon |
| Bn-scaff_16361_1-p3265282 | Bn-N18-p35865354 | gene |      |
| Bn-scaff_16361_1-p330276  | Bn-N18-p32966327 | gene |      |
| Bn-scaff_16361_1-p3325801 | Bn-N18-p35932322 | gene |      |
| Bn-scaff_16361_1-p3328159 | Bn-N9-p33118044  | gene | exon |
| Bn-scaff_16361_1-p3354199 | Bn-N18-p35967462 | gene |      |
| Bn-scaff_16361_1-p3354234 | Bn-N18-p35967497 | gene |      |
| Bn-scaff_16361_1-p3354265 | Bn-N9-p33154616  | gene |      |
| Bn-scaff_16361_1-p3354701 | Bn-N18-p35967970 | gene | exon |
| Bn-scaff_16361_1-p3354942 | Bn-N9-p33155300  | gene | exon |
| Bn-scaff_16361_1-p3355395 | Bn-N18-p35968663 | gene | exon |
| Bn-scaff_16361_1-p3397399 | Bn-N18-p36010220 | gene | exon |
| Bn-scaff_16361_1-p3397563 | Bn-N18-p36010384 | gene |      |
| Bn-scaff_16361_1-p423090  | Bn-N18-p33042017 | gene |      |
| Bn-scaff_16361_1-p456356  | Bn-N18-p33106233 | gene | exon |
| Bn-scaff_16361_1-p457936  | Bn-N18-p33107813 | gene |      |
| Bn-scaff_16361_1-p461213  | Bn-N18-p33111090 | gene | exon |
| Bn-scaff_16361_1-p508319  | Bn-N9-p30870656  | gene |      |
| Bn-scaff_16361_1-p563785  | Bn-N9-p30929785  | gene | exon |
| Bn-scaff_16361_1-p635435  | Bn-N9-p30993981  | gene | exon |
| Bn-scaff_16361_1-p686911  | Bn-N18-p33372017 | gene | exon |

|                          |                  |      |      |
|--------------------------|------------------|------|------|
| Bn-scaff_16361_1-p794887 | Bn-N18-p33471666 | gene |      |
| Bn-scaff_16361_1-p888733 | Bn-N18-p33590255 | gene | exon |
| Bn-scaff_16361_1-p889103 | Bn-N18-p33590625 | gene |      |
| Bn-scaff_16361_1-p889127 | Bn-N18-p33590649 | gene |      |
| Bn-scaff_16361_1-p930064 | Bn-N18-p33631903 | gene |      |
| Bn-scaff_16361_1-p930550 | Bn-N18-p33632414 | gene |      |
| Bn-scaff_16361_1-p930618 | Bn-N18-p33632491 | gene |      |
| Bn-scaff_16361_1-p930719 | Bn-N18-p33632592 | gene |      |
| Bn-scaff_16361_1-p930857 | Bn-N18-p33632730 | gene |      |
| Bn-scaff_16361_1-p933392 | Bn-N18-p33635254 | gene |      |
| Bn-scaff_16361_1-p941757 | Bn-N18-p33643656 | gene |      |
| Bn-scaff_16361_1-p952834 | Bn-N18-p33659461 | gene | exon |
| Bn-scaff_16361_1-p953048 | Bn-N18-p33659675 | gene | exon |
| Bn-scaff_16362_1-p124177 | Bn-N10-p13890645 | gene | exon |
| Bn-scaff_16362_1-p143283 | Bn-N19-p50777916 | gene | exon |
| Bn-scaff_16362_1-p381462 | Bn-N19-p50557941 | gene | exon |
| Bn-scaff_16362_1-p396617 | Bn-N19-p50544180 | gene | exon |
| Bn-scaff_16362_1-p490371 | Bn-N19-p50461247 | gene |      |
| Bn-scaff_16362_1-p568462 | Bn-N19-p50382502 | gene |      |
| Bn-scaff_16362_1-p572387 | Bn-N19-p50378596 | gene | exon |
| Bn-scaff_16362_1-p572972 | Bn-N19-p50378008 | gene |      |
| Bn-scaff_16362_1-p616006 | Bn-N19-p50337104 | gene |      |
| Bn-scaff_16362_1-p616122 | Bn-N19-p50336988 | gene |      |
| Bn-scaff_16362_1-p621813 | Bn-N19-p50334243 | gene |      |
| Bn-scaff_16362_1-p632561 | Bn-N19-p50323780 | gene |      |
| Bn-scaff_16362_1-p633987 | Bn-N19-p50322354 | gene | exon |
| Bn-scaff_16362_1-p650685 | Bn-N19-p50308208 | gene | exon |
| Bn-scaff_16362_1-p655565 | Bn-N19-p50302870 | gene | exon |
| Bn-scaff_16362_1-p713218 | Bn-N19-p50272436 | gene | exon |
| Bn-scaff_16362_1-p815199 | Bn-N19-p50166559 | gene | exon |
| Bn-scaff_16362_1-p815264 | Bn-N19-p50166494 | gene | exon |
| Bn-scaff_16362_1-p842973 | Bn-N19-p50128276 | gene |      |
| Bn-scaff_16362_1-p847467 | Bn-N10-p13420831 | gene |      |
| Bn-scaff_16362_1-p91070  | Bn-N10-p13921386 | gene | exon |
| Bn-scaff_16369_1-p173601 | Bn-N2-p13307559  | gene | exon |
| Bn-scaff_16369_1-p181692 | Bn-N12-p18362814 | gene | exon |
| Bn-scaff_16369_1-p181890 | Bn-N12-p18362617 | gene | exon |
| Bn-scaff_16369_1-p182886 | Bn-N12-p18361610 | gene |      |
| Bn-scaff_16369_1-p185577 | Bn-N12-p18358534 | gene |      |
| Bn-scaff_16369_1-p82394  | Bn-N12-p18444315 | gene |      |
| Bn-scaff_16371_1-p110691 | Bn-N7-p5777093   | gene | exon |
| Bn-scaff_16371_1-p99818  | Bn-N17-p13425846 | gene |      |
| Bn-scaff_16372_1-p106914 | Bn-N13-p54187721 | gene | exon |
| Bn-scaff_16372_1-p78027  | Bn-N13-p54163010 | gene |      |
| Bn-scaff_16372_1-p93422  | Bn-N13-p54178298 | gene |      |
| Bn-scaff_16378_1-p20179  | Bn-N3-p12336721  | gene | exon |
| Bn-scaff_16378_1-p20798  | Bn-N13-p18428451 | gene | exon |
| Bn-scaff_16389_1-p142328 | Bn-N18-p43382239 | gene |      |
| Bn-scaff_16389_1-p152168 | Bn-N18-p43400861 | gene |      |
| Bn-scaff_16389_1-p152360 | Bn-N18-p43401052 | gene |      |
| Bn-scaff_16389_1-p214204 | Bn-N18-p43462116 | gene | exon |
| Bn-scaff_16389_1-p215602 | Bn-N18-p43463516 | gene | exon |



|                           |                  |      |      |
|---------------------------|------------------|------|------|
| Bn-scaff_16389_1-p374339  | Bn-N9-p39481881  | gene | exon |
| Bn-scaff_16389_1-p394420  | Bn-N18-p43652457 | gene |      |
| Bn-scaff_16389_1-p403394  | Bn-N9-p39501393  | gene | exon |
| Bn-scaff_16389_1-p407508  | Bn-N9-p39505465  | gene | exon |
| Bn-scaff_16389_1-p410098  | Bn-N9-p39520346  | gene | exon |
| Bn-scaff_16389_1-p411729  | Bn-N18-p43668549 | gene |      |
| Bn-scaff_16389_1-p425903  | Bn-N18-p43683893 | gene |      |
| Bn-scaff_16389_1-p426263  | Bn-N18-p43684252 | gene |      |
| Bn-scaff_16389_1-p426336  | Bn-N18-p43684324 | gene | exon |
| Bn-scaff_16389_1-p426792  | Bn-N18-p43684781 | gene | exon |
| Bn-scaff_16389_1-p427823  | Bn-N9-p39536234  | gene | exon |
| Bn-scaff_16389_1-p428067  | Bn-N9-p39536479  | gene |      |
| Bn-scaff_16389_1-p436578  | Bn-N18-p43694861 | gene |      |
| Bn-scaff_16389_1-p468392  | Bn-N18-p43725683 | gene |      |
| Bn-scaff_16389_1-p513392  | Bn-N18-p43779352 | gene |      |
| Bn-scaff_16389_1-p539974  | Bn-N18-p43805143 | gene |      |
| Bn-scaff_16389_1-p577783  | Bn-N18-p43829874 | gene | exon |
| Bn-scaff_16389_1-p578073  | Bn-N18-p43830164 | gene | exon |
| Bn-scaff_16389_1-p610756  | Bn-N18-p43882051 | gene |      |
| Bn-scaff_16389_1-p633959  | Bn-N9-p39720791  | gene | exon |
| Bn-scaff_16389_1-p660552  | Bn-N18-p43996802 | gene | exon |
| Bn-scaff_16389_1-p661491  | Bn-N18-p43997776 | gene | exon |
| Bn-scaff_16389_1-p679212  | Bn-N18-p44009357 | gene |      |
| Bn-scaff_16389_1-p688011  | Bn-N18-p44018156 | gene |      |
| Bn-scaff_16389_1-p688405  | Bn-N18-p44018550 | gene |      |
| Bn-scaff_16389_1-p740326  | Bn-N18-p44070544 | gene | exon |
| Bn-scaff_16389_1-p74961   | Bn-N18-p43313169 | gene |      |
| Bn-scaff_16389_1-p751453  | Bn-N18-p44095166 | gene |      |
| Bn-scaff_16389_1-p767175  | Bn-N18-p44094835 | gene |      |
| Bn-scaff_16389_1-p776698  | Bn-N18-p44107160 | gene |      |
| Bn-scaff_16389_1-p820513  | Bn-N18-p44152304 | gene |      |
| Bn-scaff_16389_1-p842667  | Bn-N18-p44181155 | gene | exon |
| Bn-scaff_16391_1-p142     | Bn-N19-p33321646 | gene |      |
| Bn-scaff_16394_1-p1002503 | Bn-N14-p37170308 | gene | exon |
| Bn-scaff_16394_1-p1121499 | Bn-N14-p37319459 | gene |      |
| Bn-scaff_16394_1-p1129497 | Bn-N14-p37323263 | gene | exon |
| Bn-scaff_16394_1-p1195388 | Bn-N4-p8003046   | gene | exon |
| Bn-scaff_16394_1-p1342083 | Bn-N14-p37593537 | gene | exon |
| Bn-scaff_16394_1-p1386812 | Bn-N14-p37638439 | gene |      |
| Bn-scaff_16394_1-p1442938 | Bn-N14-p37691491 | gene |      |
| Bn-scaff_16394_1-p1502876 | Bn-N4-p8253031   | gene | exon |
| Bn-scaff_16394_1-p1511035 | Bn-N14-p37761797 | gene | exon |
| Bn-scaff_16394_1-p1516390 | Bn-N14-p37768183 | gene |      |
| Bn-scaff_16394_1-p1516423 | Bn-N14-p37768216 | gene | exon |
| Bn-scaff_16394_1-p1875336 | Bn-N4-p8682010   | gene | exon |
| Bn-scaff_16394_1-p1945222 | Bn-N14-p38179966 | gene | exon |
| Bn-scaff_16394_1-p2229812 | Bn-N13-p55728682 | gene | exon |
| Bn-scaff_16394_1-p2335614 | Bn-N13-p55630761 | gene | exon |
| Bn-scaff_16394_1-p236787  | Bn-N14-p36325853 | gene |      |
| Bn-scaff_16394_1-p237041  | Bn-N14-p36326107 | gene |      |
| Bn-scaff_16394_1-p237325  | Bn-N14-p36326391 | gene |      |
| Bn-scaff_16394_1-p308897  | Bn-N14-p36402759 | gene |      |

|                           |                        |      |      |
|---------------------------|------------------------|------|------|
| Bn-scaff_16394_1-p363570  | Bn-N14-p16505270       | gene |      |
| Bn-scaff_16394_1-p401584  | Bn-N14-p36500797       | gene | exon |
| Bn-scaff_16394_1-p401893  | Bn-N14-p36501106       | gene | exon |
| Bn-scaff_16394_1-p454360  | Bn-N14-p36578991       | gene |      |
| Bn-scaff_16394_1-p454523  | Bn-N14-p36579154       | gene |      |
| Bn-scaff_16394_1-p474226  | Bn-N14-p36599918       | gene |      |
| Bn-scaff_16394_1-p531248  | Bn-N14-p36649450       | gene | exon |
| Bn-scaff_16394_1-p551690  | Bn-N4-p7421519         | gene |      |
| Bn-scaff_16394_1-p551903  | Bn-N4-p7421732         | gene | exon |
| Bn-scaff_16394_1-p623306  | Bn-N14-p36739167       | gene |      |
| Bn-scaff_16394_1-p722315  | Bn-N4-p7587022         | gene |      |
| Bn-scaff_16394_1-p722580  | Bn-N4-p7587287         | gene | exon |
| Bn-scaff_16394_1-p842382  | Bn-N14-p37008314       | gene |      |
| Bn-scaff_16394_2-p101403  | Bn-N8-p14835049        | gene | exon |
| Bn-scaff_16394_2-p1061499 | Bn-N13-p56363786       | gene | exon |
| Bn-scaff_16394_2-p1061987 | Bn-N13-p56363298       | gene | exon |
| Bn-scaff_16394_2-p1075592 | Bn-N13-p56349432       | gene | exon |
| Bn-scaff_16394_2-p1075976 | Bn-N13-p56349048       | gene | exon |
| Bn-scaff_16394_2-p1084167 | Bn-N13-p56340838       | gene |      |
| Bn-scaff_16394_2-p1084424 | Bn-N8-p15359425        | gene |      |
| Bn-scaff_16394_2-p1085415 | Bn-N8-p15360167        | gene | exon |
| Bn-scaff_16394_2-p1086630 | Bn-N13-p56338358       | gene |      |
| Bn-scaff_16394_2-p1165251 | Bn-N13-p56255970       | gene |      |
| Bn-scaff_16394_2-p1178077 | Bn-N13-p56245794       | gene | exon |
| Bn-scaff_16394_2-p1198592 | Bn-N8-p15443540        | gene | exon |
| Bn-scaff_16394_2-p120638  | Bn-N1-p1239507         | gene | exon |
| Bn-scaff_16394_2-p1263079 | Bn-N13-p56166043       | gene |      |
| Bn-scaff_16394_2-p1263387 | Bn-N8-p15473666        | gene |      |
| Bn-scaff_16394_2-p1364720 | Bn-Scaffold02005-p4060 | gene | exon |
| Bn-scaff_16394_2-p1431681 | Bn-N13-p55961449       | gene | exon |
| Bn-scaff_16394_2-p1498560 | Bn-N13-p55880297       | gene |      |
| Bn-scaff_16394_2-p174513  | Bn-N8-p14896931        | gene | exon |
| Bn-scaff_16394_2-p178524  | Bn-N13-p57284933       | gene |      |
| Bn-scaff_16394_2-p178759  | Bn-N8-p14900658        | gene | exon |
| Bn-scaff_16394_2-p178827  | Bn-N13-p57284630       | gene |      |
| Bn-scaff_16394_2-p203450  | Bn-N13-p57259748       | gene | exon |
| Bn-scaff_16394_2-p207187  | Bn-N13-p57255997       | gene |      |
| Bn-scaff_16394_2-p243183  | Bn-N13-p57227447       | gene |      |
| Bn-scaff_16394_2-p247786  | Bn-N13-p57222895       | gene | exon |
| Bn-scaff_16394_2-p252811  | Bn-N13-p57209345       | gene | exon |
| Bn-scaff_16394_2-p347960  | Bn-N13-p57080525       | gene |      |
| Bn-scaff_16394_2-p348198  | Bn-N13-p57080292       | gene |      |
| Bn-scaff_16394_2-p40571   | Bn-N13-p57436782       | gene | exon |
| Bn-scaff_16394_2-p449512  | Bn-N13-p56980124       | gene | exon |
| Bn-scaff_16394_2-p471655  | Bn-N13-p56956424       | gene | exon |
| Bn-scaff_16394_2-p482093  | Bn-N8-p15081024        | gene | exon |
| Bn-scaff_16394_2-p510062  | Bn-N13-p56913833       | gene | exon |
| Bn-scaff_16394_2-p525073  | Bn-N13-p56899215       | gene |      |
| Bn-scaff_16394_2-p525169  | Bn-N13-p56899119       | gene |      |
| Bn-scaff_16394_2-p526954  | Bn-N13-p56897408       | gene | exon |
| Bn-scaff_16394_2-p527071  | Bn-N13-p56897291       | gene | exon |
| Bn-scaff_16394_2-p527689  | Bn-N13-p56896673       | gene |      |

|                           |                  |      |      |
|---------------------------|------------------|------|------|
| Bn-scaff_16394_2-p527944  | Bn-N13-p56896419 | gene | exon |
| Bn-scaff_16394_2-p553789  | Bn-N13-p56863804 | gene | exon |
| Bn-scaff_16394_2-p553815  | Bn-N13-p56863778 | gene | exon |
| Bn-scaff_16394_2-p672613  | Bn-N13-p56780988 | gene | exon |
| Bn-scaff_16394_2-p672690  | Bn-N13-p56780911 | gene | exon |
| Bn-scaff_16394_2-p673824  | Bn-N13-p56779756 | gene | exon |
| Bn-scaff_16394_2-p776520  | Bn-N13-p56698687 | gene | exon |
| Bn-scaff_16394_2-p781694  | Bn-N13-p56693678 | gene |      |
| Bn-scaff_16397_1-p114405  | Bn-N16-p36419944 | gene | exon |
| Bn-scaff_16397_1-p181125  | Bn-N16-p36342187 | gene |      |
| Bn-scaff_16397_1-p21413   | Bn-N16-p36519805 | gene | exon |
| Bn-scaff_16397_1-p21961   | Bn-N16-p36519257 | gene |      |
| Bn-scaff_16397_1-p22776   | Bn-N16-p36518442 | gene |      |
| Bn-scaff_16397_1-p22778   | Bn-N16-p36518440 | gene |      |
| Bn-scaff_16397_1-p32614   | Bn-N16-p36504309 | gene |      |
| Bn-scaff_16397_1-p360292  | Bn-N16-p36217827 | gene | exon |
| Bn-scaff_16397_1-p360296  | Bn-N16-p36217822 | gene | exon |
| Bn-scaff_16397_1-p360372  | Bn-N16-p36217747 | gene | exon |
| Bn-scaff_16397_1-p424878  | Bn-N16-p36140448 | gene | exon |
| Bn-scaff_16397_1-p561129  | Bn-N16-p36006161 | gene | exon |
| Bn-scaff_16397_1-p568133  | Bn-N16-p35992409 | gene | exon |
| Bn-scaff_16397_1-p568202  | Bn-N16-p35992340 | gene |      |
| Bn-scaff_16397_1-p568238  | Bn-N16-p35992304 | gene |      |
| Bn-scaff_16397_1-p568303  | Bn-N16-p35990400 | gene |      |
| Bn-scaff_16397_1-p568389  | Bn-N16-p35990314 | gene |      |
| Bn-scaff_16397_1-p584351  | Bn-N16-p35951834 | gene |      |
| Bn-scaff_16397_1-p597210  | Bn-N16-p35948853 | gene |      |
| Bn-scaff_16397_1-p597986  | Bn-N16-p35948077 | gene |      |
| Bn-scaff_16397_1-p598096  | Bn-N16-p35947968 | gene |      |
| Bn-scaff_16397_1-p602190  | Bn-N7-p21871184  | gene |      |
| Bn-scaff_16397_1-p716613  | Bn-N7-p21804394  | gene |      |
| Bn-scaff_16397_1-p735665  | Bn-N16-p35787732 | gene | exon |
| Bn-scaff_16397_1-p805714  | Bn-N16-p35707507 | gene |      |
| Bn-scaff_16397_1-p809070  | Bn-N16-p35704582 | gene |      |
| Bn-scaff_16397_1-p809142  | Bn-N16-p35704510 | gene |      |
| Bn-scaff_16397_1-p813786  | Bn-N16-p35699867 | gene |      |
| Bn-scaff_16397_1-p818901  | Bn-N16-p35694768 | gene | exon |
| Bn-scaff_16402_1-p16325   | Bn-N7-p12805206  | gene | exon |
| Bn-scaff_16402_1-p16404   | Bn-N7-p12805127  | gene | exon |
| Bn-scaff_16402_1-p76139   | Bn-N7-p12781998  | gene | exon |
| Bn-scaff_16414_1-p1031719 | Bn-N10-p1014379  | gene | exon |
| Bn-scaff_16414_1-p1047975 | Bn-N15-p1081391  | gene |      |
| Bn-scaff_16414_1-p1072066 | Bn-N10-p936330   | gene | exon |
| Bn-scaff_16414_1-p1086180 | Bn-N15-p1034501  | gene | exon |
| Bn-scaff_16414_1-p1087384 | Bn-N15-p1033299  | gene |      |
| Bn-scaff_16414_1-p1087443 | Bn-N15-p1033240  | gene |      |
| Bn-scaff_16414_1-p1087497 | Bn-N15-p1033186  | gene |      |
| Bn-scaff_16414_1-p1114696 | Bn-N15-p1004798  | gene | exon |
| Bn-scaff_16414_1-p1186210 | Bn-N10-p808551   | gene | exon |
| Bn-scaff_16414_1-p1186599 | Bn-N10-p808106   | gene | exon |
| Bn-scaff_16414_1-p1208159 | Bn-N15-p910820   | gene | exon |
| Bn-scaff_16414_1-p1332150 | Bn-N15-p757030   | gene | exon |

|                           |                  |      |      |
|---------------------------|------------------|------|------|
| Bn-scaff_16414_1-p1421347 | Bn-N15-p663780   | gene | exon |
| Bn-scaff_16414_1-p1469798 | Bn-N15-p631168   | gene | exon |
| Bn-scaff_16414_1-p1496608 | Bn-N15-p600737   | gene | exon |
| Bn-scaff_16414_1-p1499983 | Bn-N10-p484168   | gene | exon |
| Bn-scaff_16414_1-p1602060 | Bn-N15-p492352   | gene |      |
| Bn-scaff_16414_1-p1610723 | Bn-N15-p484356   | gene |      |
| Bn-scaff_16414_1-p1610776 | Bn-N15-p484303   | gene |      |
| Bn-scaff_16414_1-p1627334 | Bn-N15-p464506   | gene |      |
| Bn-scaff_16414_1-p1627393 | Bn-N15-p464447   | gene |      |
| Bn-scaff_16414_1-p1631188 | Bn-N15-p460659   | gene | exon |
| Bn-scaff_16414_1-p1635975 | Bn-N15-p455905   | gene |      |
| Bn-scaff_16414_1-p1636351 | Bn-N15-p455529   | gene |      |
| Bn-scaff_16414_1-p1652972 | Bn-N15-p436739   | gene | exon |
| Bn-scaff_16414_1-p1679802 | Bn-N10-p334540   | gene | exon |
| Bn-scaff_16414_1-p1726455 | Bn-N15-p348225   | gene | exon |
| Bn-scaff_16414_1-p1747803 | Bn-N15-p328893   | gene |      |
| Bn-scaff_16414_1-p175360  | Bn-N15-p1928788  | gene | exon |
| Bn-scaff_16414_1-p309442  | Bn-N15-p1788751  | gene | exon |
| Bn-scaff_16414_1-p309753  | Bn-N15-p1788428  | gene |      |
| Bn-scaff_16414_1-p309830  | Bn-N15-p1788350  | gene | exon |
| Bn-scaff_16414_1-p310240  | Bn-N15-p1787941  | gene |      |
| Bn-scaff_16414_1-p428111  | Bn-N10-p1644361  | gene | exon |
| Bn-scaff_16414_1-p50604   | Bn-N15-p2055863  | gene | exon |
| Bn-scaff_16414_1-p539328  | Bn-N15-p1581612  | gene |      |
| Bn-scaff_16414_1-p539478  | Bn-N15-p1581462  | gene | exon |
| Bn-scaff_16414_1-p620295  | Bn-N15-p1501446  | gene | exon |
| Bn-scaff_16414_1-p623673  | Bn-N15-p1498537  | gene |      |
| Bn-scaff_16414_1-p624848  | Bn-N15-p1497363  | gene |      |
| Bn-scaff_16414_1-p650418  | Bn-N15-p1474088  | gene | exon |
| Bn-scaff_16414_1-p740570  | Bn-N15-p1372661  | gene |      |
| Bn-scaff_16414_1-p772316  | Bn-N15-p1350052  | gene |      |
| Bn-scaff_16414_1-p774881  | Bn-N15-p1344027  | gene |      |
| Bn-scaff_16414_1-p777277  | Bn-N15-p1342122  | gene |      |
| Bn-scaff_16414_1-p798013  | Bn-N15-p1327090  | gene | exon |
| Bn-scaff_16414_1-p834366  | Bn-N15-p1291936  | gene |      |
| Bn-scaff_16414_1-p836176  | Bn-N15-p1290119  | gene | exon |
| Bn-scaff_16414_1-p863592  | Bn-N15-p1261974  | gene |      |
| Bn-scaff_16414_1-p863783  | Bn-N15-p1261783  | gene | exon |
| Bn-scaff_16414_1-p864591  | Bn-N15-p1260975  | gene | exon |
| Bn-scaff_16414_1-p874497  | Bn-N15-p1251075  | gene |      |
| Bn-scaff_16414_1-p879412  | Bn-N10-p1230343  | gene |      |
| Bn-scaff_16414_1-p884592  | Bn-N15-p1240984  | gene |      |
| Bn-scaff_16414_1-p91571   | Bn-N15-p2012720  | gene | exon |
| Bn-scaff_16414_1-p917631  | Bn-N15-p1208899  | gene |      |
| Bn-scaff_16414_1-p932272  | Bn-N15-p1197638  | gene | exon |
| Bn-scaff_16414_1-p932352  | Bn-N15-p1197559  | gene | exon |
| Bn-scaff_16437_1-p36113   | Bn-N12-p18113655 | gene | exon |
| Bn-scaff_16437_1-p53425   | Bn-N12-p18093676 | gene |      |
| Bn-scaff_16445_1-p1076112 | Bn-N18-p41423647 | gene |      |
| Bn-scaff_16445_1-p1291783 | Bn-N18-p41190194 | gene |      |
| Bn-scaff_16445_1-p1325537 | Bn-N18-p41156279 | gene | exon |
| Bn-scaff_16445_1-p1355599 | Bn-N9-p37430430  | gene | exon |

|                           |                  |      |      |
|---------------------------|------------------|------|------|
| Bn-scaff_16445_1-p1369864 | Bn-N18-p41113256 | gene | exon |
| Bn-scaff_16445_1-p1405783 | Bn-N18-p41075300 | gene |      |
| Bn-scaff_16445_1-p1419218 | Bn-N18-p41063612 | gene |      |
| Bn-scaff_16445_1-p1441125 | Bn-N18-p41042904 | gene | exon |
| Bn-scaff_16445_1-p1441308 | Bn-N18-p41042781 | gene | exon |
| Bn-scaff_16445_1-p1445958 | Bn-N18-p41038071 | gene |      |
| Bn-scaff_16445_1-p1447054 | Bn-N18-p41037041 | gene |      |
| Bn-scaff_16445_1-p1459241 | Bn-N18-p41024854 | gene |      |
| Bn-scaff_16445_1-p1460133 | Bn-N18-p41023962 | gene |      |
| Bn-scaff_16445_1-p1460618 | Bn-N18-p41023477 | gene |      |
| Bn-scaff_16445_1-p1530516 | Bn-N18-p40947014 | gene |      |
| Bn-scaff_16445_1-p1548492 | Bn-N18-p40899575 | gene |      |
| Bn-scaff_16445_1-p1548555 | Bn-N18-p40899512 | gene |      |
| Bn-scaff_16445_1-p1602173 | Bn-N18-p40836028 | gene |      |
| Bn-scaff_16445_1-p1603116 | Bn-N18-p40835086 | gene |      |
| Bn-scaff_16445_1-p1603383 | Bn-N18-p40834819 | gene |      |
| Bn-scaff_16445_1-p1607170 | Bn-N18-p40830994 | gene |      |
| Bn-scaff_16445_1-p1607426 | Bn-N18-p40830738 | gene |      |
| Bn-scaff_16445_1-p1607691 | Bn-N18-p40830472 | gene | exon |
| Bn-scaff_16445_1-p1609147 | Bn-N18-p40829021 | gene |      |
| Bn-scaff_16445_1-p1628220 | Bn-N18-p40809911 | gene | exon |
| Bn-scaff_16445_1-p1639969 | Bn-N18-p40797253 | gene |      |
| Bn-scaff_16445_1-p1656512 | Bn-N18-p40780386 | gene |      |
| Bn-scaff_16445_1-p1656718 | Bn-N18-p40780180 | gene | exon |
| Bn-scaff_16445_1-p1673090 | Bn-N18-p40763754 | gene |      |
| Bn-scaff_16445_1-p1673540 | Bn-N18-p40763304 | gene |      |
| Bn-scaff_16445_1-p1673779 | Bn-N18-p40763065 | gene |      |
| Bn-scaff_16445_1-p1674687 | Bn-N18-p40762154 | gene |      |
| Bn-scaff_16445_1-p1679519 | Bn-N18-p40756291 | gene |      |
| Bn-scaff_16445_1-p178795  | Bn-N18-p42326720 | gene | exon |
| Bn-scaff_16445_1-p179795  | Bn-N18-p42325720 | gene |      |
| Bn-scaff_16445_1-p1807153 | Bn-N18-p40638607 | gene |      |
| Bn-scaff_16445_1-p1815534 | Bn-N18-p40629626 | gene | exon |
| Bn-scaff_16445_1-p1823431 | Bn-N18-p40624849 | gene |      |
| Bn-scaff_16445_1-p1834116 | Bn-N18-p40616505 | gene | exon |
| Bn-scaff_16445_1-p1834644 | Bn-N9-p37021234  | gene |      |
| Bn-scaff_16445_1-p1836681 | Bn-N18-p40612335 | gene |      |
| Bn-scaff_16445_1-p1836752 | Bn-N18-p40612264 | gene |      |
| Bn-scaff_16445_1-p1839966 | Bn-N9-p37015753  | gene | exon |
| Bn-scaff_16445_1-p194744  | Bn-N18-p42316717 | gene | exon |
| Bn-scaff_16445_1-p197721  | Bn-N18-p42313740 | gene |      |
| Bn-scaff_16445_1-p2011296 | Bn-N18-p40422126 | gene |      |
| Bn-scaff_16445_1-p2011490 | Bn-N18-p40421931 | gene | exon |
| Bn-scaff_16445_1-p2012444 | Bn-N18-p40420978 | gene | exon |
| Bn-scaff_16445_1-p2013455 | Bn-N18-p40419966 | gene | exon |
| Bn-scaff_16445_1-p2022692 | Bn-N18-p40410730 | gene |      |
| Bn-scaff_16445_1-p202619  | Bn-N18-p42308849 | gene |      |
| Bn-scaff_16445_1-p2106869 | Bn-N9-p36795604  | gene | exon |
| Bn-scaff_16445_1-p2114822 | Bn-N18-p40320031 | gene |      |
| Bn-scaff_16445_1-p2117906 | Bn-N18-p40316962 | gene |      |
| Bn-scaff_16445_1-p2118684 | Bn-N18-p40316184 | gene | exon |
| Bn-scaff_16445_1-p2118822 | Bn-N18-p40316046 | gene | exon |

|                           |                        |      |      |
|---------------------------|------------------------|------|------|
| Bn-scaff_16445_1-p2118895 | Bn-N18-p40315973       | gene | exon |
| Bn-scaff_16445_1-p2119017 | Bn-N18-p40315851       | gene | exon |
| Bn-scaff_16445_1-p2119496 | Bn-N18-p40315371       | gene |      |
| Bn-scaff_16445_1-p2120560 | Bn-N18-p40314313       | gene |      |
| Bn-scaff_16445_1-p2132184 | Bn-N18-p40303413       | gene |      |
| Bn-scaff_16445_1-p2133229 | Bn-N18-p40302377       | gene | exon |
| Bn-scaff_16445_1-p2133282 | Bn-N18-p40302324       | gene | exon |
| Bn-scaff_16445_1-p2133586 | Bn-N18-p40302009       | gene | exon |
| Bn-scaff_16445_1-p214654  | Bn-N18-p42296822       | gene | exon |
| Bn-scaff_16445_1-p2227124 | Bn-N18-p40232028       | gene |      |
| Bn-scaff_16445_1-p2262279 | Bn-N18-p40195326       | gene | exon |
| Bn-scaff_16445_1-p228498  | Bn-N18-p42282987       | gene | exon |
| Bn-scaff_16445_1-p2444795 | Bn-N18-p40019031       | gene | exon |
| Bn-scaff_16445_1-p2549752 | Bn-N9-p36437629        | gene | exon |
| Bn-scaff_16445_1-p2601107 | Bn-N18-p39869059       | gene |      |
| Bn-scaff_16445_1-p2613244 | Bn-N18-p39854595       | gene |      |
| Bn-scaff_16445_1-p2624353 | Bn-N18-p39834588       | gene | exon |
| Bn-scaff_16445_1-p263067  | Bn-N18-p42249036       | gene | exon |
| Bn-scaff_16445_1-p2639425 | Bn-N18-p39815744       | gene |      |
| Bn-scaff_16445_1-p2656698 | Bn-N18-p39796465       | gene | exon |
| Bn-scaff_16445_1-p2665772 | Bn-N18-p39783314       | gene | exon |
| Bn-scaff_16445_1-p268218  | Bn-N6-p3798284         | gene |      |
| Bn-scaff_16445_1-p2929527 | Bn-N18-p39528392       | gene | exon |
| Bn-scaff_16445_1-p311546  | Bn-N18-p42197192       | gene | exon |
| Bn-scaff_16445_1-p31451   | Bn-N18-p42467540       | gene | exon |
| Bn-scaff_16445_1-p351646  | Bn-N18-p42163711       | gene |      |
| Bn-scaff_16445_1-p355779  | Bn-N18-p42159586       | gene |      |
| Bn-scaff_16445_1-p358643  | Bn-N18-p42156783       | gene |      |
| Bn-scaff_16445_1-p364847  | Bn-N18-p42150534       | gene |      |
| Bn-scaff_16445_1-p365999  | Bn-N18-p42149382       | gene | exon |
| Bn-scaff_16445_1-p366238  | Bn-N18-p42149130       | gene | exon |
| Bn-scaff_16445_1-p375092  | Bn-N18-p42140269       | gene |      |
| Bn-scaff_16445_1-p414675  | Bn-N18-p42110361       | gene | exon |
| Bn-scaff_16445_1-p417888  | Bn-N18-p42107125       | gene | exon |
| Bn-scaff_16445_1-p418945  | Bn-N18-p42106103       | gene | exon |
| Bn-scaff_16445_1-p418957  | Bn-N18-p42106091       | gene | exon |
| Bn-scaff_16445_1-p437285  | Bn-N18-p42080488       | gene |      |
| Bn-scaff_16445_1-p460948  | Bn-N18-p42051904       | gene |      |
| Bn-scaff_16445_1-p478398  | Bn-N18-p42033240       | gene |      |
| Bn-scaff_16445_1-p491592  | Bn-N18-p42020425       | gene | exon |
| Bn-scaff_16445_1-p492739  | Bn-N18-p42019313       | gene |      |
| Bn-scaff_16445_1-p566534  | Bn-N18-p41934206       | gene |      |
| Bn-scaff_16445_1-p584652  | Bn-N18-p41915995       | gene |      |
| Bn-scaff_16445_1-p588681  | Bn-N18-p41911762       | gene |      |
| Bn-scaff_16445_1-p591427  | Bn-N18-p41908982       | gene |      |
| Bn-scaff_16445_1-p594145  | Bn-N18-p41906145       | gene | exon |
| Bn-scaff_16445_1-p611520  | Bn-N18-p41892601       | gene |      |
| Bn-scaff_16445_1-p615520  | Bn-N18-p41883614       | gene |      |
| Bn-scaff_16445_1-p621269  | Bn-N18-p41877595       | gene |      |
| Bn-scaff_16445_1-p632372  | Bn-N18-p41866778       | gene | exon |
| Bn-scaff_16445_1-p723609  | Bn-Scaffold01015-p3952 | gene | exon |
| Bn-scaff_16445_1-p724011  | Bn-N18-p41774612       | gene | exon |

|                           |                       |      |      |
|---------------------------|-----------------------|------|------|
| Bn-scaff_16445_1-p727477  | Bn-N18-p41771120      | gene |      |
| Bn-scaff_16445_1-p727690  | Bn-N18-p41770907      | gene |      |
| Bn-scaff_16445_1-p728844  | Bn-N18-p41769724      | gene |      |
| Bn-scaff_16445_1-p728936  | Bn-N18-p41769633      | gene |      |
| Bn-scaff_16445_1-p743559  | Bn-N18-p41757106      | gene | exon |
| Bn-scaff_16445_1-p746383  | Bn-N18-p41755497      | gene |      |
| Bn-scaff_16445_1-p749430  | Bn-N18-p41752394      | gene | exon |
| Bn-scaff_16445_1-p766444  | Bn-N18-p41737747      | gene | exon |
| Bn-scaff_16445_1-p766648  | Bn-N18-p41737543      | gene | exon |
| Bn-scaff_16445_1-p766708  | Bn-N18-p41737484      | gene | exon |
| Bn-scaff_16445_1-p766826  | Bn-N18-p41737365      | gene | exon |
| Bn-scaff_16445_1-p782939  | Bn-N18-p41722181      | gene |      |
| Bn-scaff_16445_1-p783410  | Bn-N18-p41721710      | gene |      |
| Bn-scaff_16445_1-p800267  | Bn-N18-p41704383      | gene |      |
| Bn-scaff_16445_1-p800334  | Bn-N18-p41704316      | gene |      |
| Bn-scaff_16445_1-p809862  | Bn-N18-p41696040      | gene |      |
| Bn-scaff_16445_1-p815008  | Bn-N18-p41689264      | gene | exon |
| Bn-scaff_16445_1-p825012  | Bn-N18-p41682300      | gene | exon |
| Bn-scaff_16445_1-p82664   | Bn-N18-p42401622      | gene | exon |
| Bn-scaff_16445_1-p856678  | Bn-N18-p41663055      | gene | exon |
| Bn-scaff_16445_1-p894350  | Bn-N18-p41612841      | gene | exon |
| Bn-scaff_16445_1-p925530  | Bn-N18-p41563606      | gene | exon |
| Bn-scaff_16445_1-p932699  | Bn-N18-p41557308      | gene |      |
| Bn-scaff_16445_1-p933254  | Bn-N18-p41556749      | gene | exon |
| Bn-scaff_16445_1-p968765  | Bn-N18-p41517888      | gene | exon |
| Bn-scaff_16445_1-p973672  | Bn-N18-p41512750      | gene |      |
| Bn-scaff_16445_1-p992590  | Bn-N9-p37770214       | gene | exon |
| Bn-scaff_16447_1-p393381  | Bn-N5-p6132265        | gene | exon |
| Bn-scaff_16447_1-p403240  | Bn-N14-p10320518      | gene |      |
| Bn-scaff_16447_1-p446856  | Bn-N3-p7909566        | gene | exon |
| Bn-scaff_16449_1-p1020504 | Bn-N12-p33132303      | gene |      |
| Bn-scaff_16449_1-p1020573 | Bn-N12-p33132234      | gene |      |
| Bn-scaff_16449_1-p1020659 | Bn-N12-p33132148      | gene |      |
| Bn-scaff_16449_1-p13856   | Bn-N12-p34212409      | gene |      |
| Bn-scaff_16449_1-p13914   | Bn-N12-p34212351      | gene |      |
| Bn-scaff_16449_1-p14328   | Bn-N12-p34211937      | gene |      |
| Bn-scaff_16449_1-p17755   | Bn-N12-p34208509      | gene |      |
| Bn-scaff_16449_1-p18120   | Bn-N12-p34208144      | gene |      |
| Bn-scaff_16449_1-p248131  | Bn-N12-p33982035      | gene | exon |
| Bn-scaff_16449_1-p251526  | Bn-N12-p33978639      | gene | exon |
| Bn-scaff_16449_1-p350893  | Bn-N12-p33831807      | gene |      |
| Bn-scaff_16449_1-p555329  | Bn-N12-p33626168      | gene | exon |
| Bn-scaff_16449_1-p555639  | Bn-Scaffold29624-p373 | gene | exon |
| Bn-scaff_16449_1-p688961  | Bn-N12-p33459424      | gene | exon |
| Bn-scaff_16449_1-p69605   | Bn-N12-p34152061      | gene |      |
| Bn-scaff_16449_1-p762227  | Bn-N2-p20550310       | gene | exon |
| Bn-scaff_16449_1-p850527  | Bn-N12-p33285521      | gene | exon |
| Bn-scaff_16449_1-p867180  | Bn-N12-p33278545      | gene |      |
| Bn-scaff_16449_1-p875975  | Bn-N12-p33270786      | gene | exon |
| Bn-scaff_16449_1-p878143  | Bn-N12-p33268615      | gene | exon |
| Bn-scaff_16449_1-p92326   | Bn-N12-p34130290      | gene | exon |
| Bn-scaff_16449_1-p92407   | Bn-N12-p34130209      | gene | exon |

|                           |                  |      |      |
|---------------------------|------------------|------|------|
| Bn-scaff_16450_1-p368974  | Bn-N17-p20056001 | gene |      |
| Bn-scaff_16450_1-p406085  | Bn-N17-p20019535 | gene |      |
| Bn-scaff_16454_1-p393468  | Bn-N5-p12252669  | gene | exon |
| Bn-scaff_16454_1-p393741  | Bn-N5-p12252394  | gene | exon |
| Bn-scaff_16454_1-p459442  | Bn-N15-p23537373 | gene | exon |
| Bn-scaff_16454_1-p564668  | Bn-N5-p12144860  | gene | exon |
| Bn-scaff_16454_1-p73573   | Bn-N19-p9093845  | gene |      |
| Bn-scaff_16454_1-p880400  | Bn-N15-p23839011 | gene |      |
| Bn-scaff_16454_1-p943860  | Bn-N15-p23886715 | gene |      |
| Bn-scaff_16456_1-p121347  | Bn-N19-p40347689 | gene | exon |
| Bn-scaff_16456_1-p230098  | Bn-N19-p40250621 | gene |      |
| Bn-scaff_16456_1-p453404  | Bn-N19-p40065238 | gene | exon |
| Bn-scaff_16456_1-p485647  | Bn-N19-p40038051 | gene | exon |
| Bn-scaff_16456_1-p570339  | Bn-N10-p8410591  | gene | exon |
| Bn-scaff_16456_1-p734822  | Bn-N10-p10135868 | gene |      |
| Bn-scaff_16456_1-p735437  | Bn-N10-p10136496 | gene |      |
| Bn-scaff_16456_1-p735749  | Bn-N10-p10136803 | gene | exon |
| Bn-scaff_16456_1-p832346  | Bn-N19-p39701784 | gene | exon |
| Bn-scaff_16468_1-p241032  | Bn-N18-p7124802  | gene | exon |
| Bn-scaff_16468_1-p242072  | Bn-N18-p7125842  | gene |      |
| Bn-scaff_16468_1-p281212  | Bn-N18-p7167100  | gene |      |
| Bn-scaff_16468_1-p290029  | Bn-N18-p7175786  | gene |      |
| Bn-scaff_16468_1-p308201  | Bn-N18-p7192254  | gene | exon |
| Bn-scaff_16468_1-p308268  | Bn-N18-p7192321  | gene | exon |
| Bn-scaff_16468_1-p311691  | Bn-N18-p7195744  | gene |      |
| Bn-scaff_16478_1-p1015336 | Bn-N15-p19697921 | gene | exon |
| Bn-scaff_16478_1-p1051523 | Bn-N9-p23216151  | gene |      |
| Bn-scaff_16478_1-p756672  | Bn-N15-p19443074 | gene | exon |
| Bn-scaff_16485_1-p1400193 | Bn-N2-p18441355  | gene | exon |
| Bn-scaff_16485_1-p1561149 | Bn-N12-p28177914 | gene |      |
| Bn-scaff_16485_1-p1693762 | Bn-N16-p17821692 | gene |      |
| Bn-scaff_16485_1-p46055   | Bn-N16-p3688412  | gene |      |
| Bn-scaff_16485_1-p53130   | Bn-N16-p3696796  | gene |      |
| Bn-scaff_16485_1-p647035  | Bn-N16-p4277496  | gene | exon |
| Bn-scaff_16485_1-p676613  | Bn-N16-p4300629  | gene |      |
| Bn-scaff_16485_1-p682420  | Bn-N16-p4310556  | gene | exon |
| Bn-scaff_16485_1-p691422  | Bn-N6-p1830748   | gene |      |
| Bn-scaff_16485_1-p747170  | Bn-N16-p4375847  | gene | exon |
| Bn-scaff_16486_1-p22444   | Bn-N9-p242192    | gene |      |
| Bn-scaff_16486_1-p39141   | Bn-N19-p137645   | gene |      |
| Bn-scaff_16486_1-p77468   | Bn-N19-p92689    | gene | exon |
| Bn-scaff_16486_1-p88236   | Bn-N19-p80930    | gene | exon |
| Bn-scaff_16486_1-p88463   | Bn-N19-p80703    | gene | exon |
| Bn-scaff_16503_1-p152489  | Bn-N14-p20771166 | gene | exon |
| Bn-scaff_16503_1-p152805  | Bn-N14-p20770850 | gene |      |
| Bn-scaff_16503_1-p154948  | Bn-N14-p20768710 | gene |      |
| Bn-scaff_16503_1-p178769  | Bn-N14-p20753444 | gene | exon |
| Bn-scaff_16503_1-p179067  | Bn-N14-p20753141 | gene |      |
| Bn-scaff_16503_1-p180312  | Bn-N14-p20752643 | gene |      |
| Bn-scaff_16503_1-p182207  | Bn-N14-p20750746 | gene |      |
| Bn-scaff_16503_1-p191084  | Bn-N14-p20749834 | gene | exon |
| Bn-scaff_16503_1-p191126  | Bn-N14-p20749792 | gene | exon |



|                           |                  |      |      |
|---------------------------|------------------|------|------|
| Bn-scaff_16503_1-p201761  | Bn-N14-p20697166 | gene |      |
| Bn-scaff_16503_1-p222903  | Bn-N14-p20670089 | gene | exon |
| Bn-scaff_16503_1-p332592  | Bn-N14-p20579804 | gene |      |
| Bn-scaff_16503_1-p332687  | Bn-N14-p20579709 | gene | exon |
| Bn-scaff_16503_1-p336686  | Bn-N14-p20576539 | gene | exon |
| Bn-scaff_16503_1-p337729  | Bn-N14-p20575544 | gene |      |
| Bn-scaff_16503_1-p337950  | Bn-N14-p20575323 | gene |      |
| Bn-scaff_16503_1-p341200  | Bn-N14-p20572057 | gene |      |
| Bn-scaff_16503_1-p341409  | Bn-N14-p20571848 | gene |      |
| Bn-scaff_16503_1-p345397  | Bn-N14-p20567183 | gene |      |
| Bn-scaff_16503_1-p53371   | Bn-N14-p20864882 | gene | exon |
| Bn-scaff_16503_1-p53448   | Bn-N14-p20864805 | gene | exon |
| Bn-scaff_16503_1-p53669   | Bn-N14-p20864584 | gene |      |
| Bn-scaff_16503_1-p53912   | Bn-N14-p20864341 | gene |      |
| Bn-scaff_16503_1-p53965   | Bn-N14-p20864288 | gene | exon |
| Bn-scaff_16503_1-p54138   | Bn-N14-p20864115 | gene | exon |
| Bn-scaff_16503_1-p54145   | Bn-N14-p20864108 | gene | exon |
| Bn-scaff_16503_1-p54559   | Bn-N14-p20863694 | gene | exon |
| Bn-scaff_16510_1-p234240  | Bn-N16-p15599318 | gene | exon |
| Bn-scaff_16510_1-p279307  | Bn-N16-p15548400 | gene | exon |
| Bn-scaff_16510_1-p279825  | Bn-N16-p15547882 | gene | exon |
| Bn-scaff_16511_1-p1103171 | Bn-N14-p18175785 | gene |      |
| Bn-scaff_16511_1-p1122889 | Bn-N14-p18156005 | gene |      |
| Bn-scaff_16511_1-p1123416 | Bn-N14-p18155478 | gene |      |
| Bn-scaff_16511_1-p1123619 | Bn-N14-p18155275 | gene |      |
| Bn-scaff_16511_1-p1123940 | Bn-N14-p18154954 | gene |      |
| Bn-scaff_16511_1-p1124212 | Bn-N14-p18154702 | gene |      |
| Bn-scaff_16511_1-p1124636 | Bn-N14-p18154278 | gene |      |
| Bn-scaff_16511_1-p1125753 | Bn-N14-p18153160 | gene |      |
| Bn-scaff_16511_1-p1201777 | Bn-N14-p18076008 | gene |      |
| Bn-scaff_16511_1-p1202164 | Bn-N14-p18075690 | gene |      |
| Bn-scaff_16511_1-p1204394 | Bn-N14-p18073458 | gene | exon |
| Bn-scaff_16511_1-p1238622 | Bn-N14-p18039424 | gene | exon |
| Bn-scaff_16511_1-p1238976 | Bn-N14-p18039061 | gene |      |
| Bn-scaff_16511_1-p1239108 | Bn-N14-p18038929 | gene |      |
| Bn-scaff_16511_1-p1239857 | Bn-N14-p18038180 | gene | exon |
| Bn-scaff_16511_1-p1239859 | Bn-N14-p18038178 | gene | exon |
| Bn-scaff_16511_1-p1241573 | Bn-N14-p18036463 | gene |      |
| Bn-scaff_16511_1-p1256064 | Bn-N14-p18016720 | gene |      |
| Bn-scaff_16511_1-p1256652 | Bn-N14-p18016133 | gene |      |
| Bn-scaff_16511_1-p1256780 | Bn-N14-p18016005 | gene |      |
| Bn-scaff_16511_1-p529904  | Bn-N14-p18916942 | gene | exon |
| Bn-scaff_16511_1-p539769  | Bn-N14-p18926841 | gene | exon |
| Bn-scaff_16511_1-p540146  | Bn-N14-p18927220 | gene |      |
| Bn-scaff_16511_1-p540559  | Bn-N14-p18927633 | gene |      |
| Bn-scaff_16511_1-p550592  | Bn-N14-p18939039 | gene | exon |
| Bn-scaff_16511_1-p551625  | Bn-N14-p18940071 | gene |      |
| Bn-scaff_16511_1-p617438  | Bn-N14-p19006672 | gene |      |
| Bn-scaff_16511_1-p617819  | Bn-N14-p19007053 | gene | exon |
| Bn-scaff_16511_1-p623035  | Bn-N14-p19010601 | gene |      |
| Bn-scaff_16511_1-p6787    | Bn-N14-p18545244 | gene |      |
| Bn-scaff_16511_1-p703856  | Bn-N14-p19095010 | gene | exon |

|                          |                  |      |      |
|--------------------------|------------------|------|------|
| Bn-scaff_16511_1-p703878 | Bn-N14-p19095032 | gene | exon |
| Bn-scaff_16511_1-p711537 | Bn-N14-p19102622 | gene | exon |
| Bn-scaff_16511_1-p717330 | Bn-N14-p19108412 | gene | exon |
| Bn-scaff_16511_1-p719704 | Bn-N14-p19109807 | gene | exon |
| Bn-scaff_16511_1-p721075 | Bn-N14-p19111177 | gene |      |
| Bn-scaff_16511_1-p722134 | Bn-N14-p19112400 | gene |      |
| Bn-scaff_16511_1-p722191 | Bn-N14-p19112457 | gene |      |
| Bn-scaff_16511_1-p722442 | Bn-N14-p19112708 | gene |      |
| Bn-scaff_16511_1-p722453 | Bn-N14-p19112719 | gene |      |
| Bn-scaff_16511_1-p722634 | Bn-N14-p19112900 | gene |      |
| Bn-scaff_16511_1-p722642 | Bn-N14-p19112908 | gene |      |
| Bn-scaff_16511_1-p722842 | Bn-N14-p19113108 | gene |      |
| Bn-scaff_16511_1-p729125 | Bn-N14-p19119747 | gene |      |
| Bn-scaff_16511_1-p7404   | Bn-N14-p18545861 | gene |      |
| Bn-scaff_16511_1-p824090 | Bn-N14-p18468156 | gene |      |
| Bn-scaff_16511_1-p836262 | Bn-N14-p18454881 | gene | exon |
| Bn-scaff_16511_1-p836849 | Bn-N14-p18454294 | gene |      |
| Bn-scaff_16511_1-p837471 | Bn-N14-p18453672 | gene |      |
| Bn-scaff_16511_1-p837536 | Bn-N14-p18453607 | gene |      |
| Bn-scaff_16511_1-p84994  | Bn-N14-p18622462 | gene |      |
| Bn-scaff_16511_1-p991704 | Bn-N14-p18287674 | gene |      |
| Bn-scaff_16511_1-p994613 | Bn-N14-p18284764 | gene |      |
| Bn-scaff_16514_1-p159695 | Bn-N17-p33558701 | gene | exon |
| Bn-scaff_16514_1-p159841 | Bn-N17-p33558847 | gene | exon |
| Bn-scaff_16514_1-p161190 | Bn-N17-p33560200 | gene | exon |
| Bn-scaff_16514_1-p41089  | Bn-N17-p33472102 | gene | exon |
| Bn-scaff_16514_1-p50048  | Bn-N17-p33481196 | gene | exon |
| Bn-scaff_16514_1-p65334  | Bn-N17-p33496913 | gene |      |
| Bn-scaff_16514_1-p73994  | Bn-N8-p10784751  | gene |      |
| Bn-scaff_16516_1-p57960  | Bn-N5-p20349142  | gene | exon |
| Bn-scaff_16517_1-p105105 | Bn-N14-p48097987 | gene |      |
| Bn-scaff_16517_1-p133250 | Bn-N14-p48071420 | gene |      |
| Bn-scaff_16517_1-p192158 | Bn-N4-p15657492  | gene | exon |
| Bn-scaff_16517_1-p243867 | Bn-N14-p48147453 | gene | exon |
| Bn-scaff_16517_1-p244040 | Bn-N14-p48147599 | gene | exon |
| Bn-scaff_16517_1-p258949 | Bn-N14-p48167350 | gene |      |
| Bn-scaff_16517_1-p354305 | Bn-N14-p48252486 | gene | exon |
| Bn-scaff_16517_1-p46045  | Bn-N4-p15561036  | gene | exon |
| Bn-scaff_16517_1-p561513 | Bn-N14-p48429850 | gene | exon |
| Bn-scaff_16517_1-p561821 | Bn-N4-p15824941  | gene |      |
| Bn-scaff_16517_1-p561851 | Bn-N14-p48430188 | gene | exon |
| Bn-scaff_16517_1-p584031 | Bn-N14-p48446731 | gene | exon |
| Bn-scaff_16517_1-p630053 | Bn-N14-p48485375 | gene | exon |
| Bn-scaff_16517_1-p630137 | Bn-N14-p48485459 | gene | exon |
| Bn-scaff_16517_1-p634132 | Bn-N4-p15864885  | gene | exon |
| Bn-scaff_16517_1-p656332 | Bn-N12-p2795089  | gene |      |
| Bn-scaff_16517_1-p679954 | Bn-N14-p48531091 | gene | exon |
| Bn-scaff_16517_1-p680544 | Bn-N14-p48531754 | gene |      |
| Bn-scaff_16517_1-p681400 | Bn-N14-p48532610 | gene | exon |
| Bn-scaff_16517_1-p682628 | Bn-N14-p48533839 | gene |      |
| Bn-scaff_16517_1-p682660 | Bn-N14-p48533872 | gene |      |
| Bn-scaff_16517_1-p683951 | Bn-N14-p48535162 | gene | exon |

|                           |                  |      |      |
|---------------------------|------------------|------|------|
| Bn-scaff_16517_1-p91597   | Bn-N4-p15595126  | gene |      |
| Bn-scaff_16526_1-p28769   | Bn-N15-p46465629 | gene |      |
| Bn-scaff_16526_1-p28879   | Bn-N15-p46465519 | gene |      |
| Bn-scaff_16531_1-p228553  | Bn-N14-p24960291 | gene |      |
| Bn-scaff_16531_1-p231683  | Bn-N14-p24972754 | gene |      |
| Bn-scaff_16531_1-p339446  | Bn-N14-p25038773 | gene | exon |
| Bn-scaff_16531_1-p379304  | Bn-N14-p25081438 | gene | exon |
| Bn-scaff_16531_1-p42657   | Bn-N14-p24821016 | gene | exon |
| Bn-scaff_16531_1-p42774   | Bn-N14-p24821133 | gene | exon |
| Bn-scaff_16531_1-p428890  | Bn-N14-p25197413 | gene | exon |
| Bn-scaff_16531_1-p435324  | Bn-N14-p25204224 | gene |      |
| Bn-scaff_16531_1-p521807  | Bn-N14-p25253684 | gene |      |
| Bn-scaff_16531_1-p521908  | Bn-N14-p25253785 | gene | exon |
| Bn-scaff_16531_1-p525553  | Bn-N14-p25257433 | gene |      |
| Bn-scaff_16531_1-p526136  | Bn-N14-p25258016 | gene |      |
| Bn-scaff_16531_1-p526222  | Bn-N14-p25258102 | gene |      |
| Bn-scaff_16531_1-p526677  | Bn-N14-p25258554 | gene |      |
| Bn-scaff_16531_1-p629084  | Bn-N14-p25358389 | gene | exon |
| Bn-scaff_16531_1-p630917  | Bn-N14-p25360897 | gene |      |
| Bn-scaff_16531_1-p630968  | Bn-N14-p25360947 | gene |      |
| Bn-scaff_16531_1-p640411  | Bn-N14-p25369421 | gene | exon |
| Bn-scaff_16531_1-p640933  | Bn-N14-p25369942 | gene | exon |
| Bn-scaff_16531_1-p642247  | Bn-N14-p25371241 | gene |      |
| Bn-scaff_16531_1-p642716  | Bn-N14-p25371710 | gene |      |
| Bn-scaff_16531_1-p643592  | Bn-N14-p25372586 | gene | exon |
| Bn-scaff_16531_1-p684695  | Bn-N14-p25406165 | gene | exon |
| Bn-scaff_16531_1-p88934   | Bn-N14-p24858759 | gene | exon |
| Bn-scaff_16532_1-p4546    | Bn-N11-p26668349 | gene |      |
| Bn-scaff_16534_1-p1112687 | Bn-N14-p4678584  | gene |      |
| Bn-scaff_16534_1-p1146423 | Bn-N14-p4708067  | gene |      |
| Bn-scaff_16534_1-p1161390 | Bn-N14-p4723352  | gene | exon |
| Bn-scaff_16534_1-p1162866 | Bn-N14-p4724824  | gene | exon |
| Bn-scaff_16534_1-p1181744 | Bn-N14-p4742094  | gene | exon |
| Bn-scaff_16534_1-p1255498 | Bn-N14-p4843633  | gene |      |
| Bn-scaff_16534_1-p1263272 | Bn-N14-p4852004  | gene |      |
| Bn-scaff_16534_1-p1267478 | Bn-N14-p4856291  | gene |      |
| Bn-scaff_16534_1-p1280130 | Bn-N14-p4865081  | gene |      |
| Bn-scaff_16534_1-p1339750 | Bn-N14-p4930735  | gene |      |
| Bn-scaff_16534_1-p1340189 | Bn-N14-p4931174  | gene |      |
| Bn-scaff_16534_1-p1340741 | Bn-N14-p4931726  | gene |      |
| Bn-scaff_16534_1-p137258  | Bn-N14-p3583549  | gene | exon |
| Bn-scaff_16534_1-p138772  | Bn-N14-p3585063  | gene |      |
| Bn-scaff_16534_1-p1468318 | Bn-N14-p5059985  | gene |      |
| Bn-scaff_16534_1-p1474844 | Bn-N14-p5066499  | gene | exon |
| Bn-scaff_16534_1-p1500199 | Bn-N14-p5089651  | gene | exon |
| Bn-scaff_16534_1-p1507780 | Bn-N5-p3300147   | gene |      |
| Bn-scaff_16534_1-p154616  | Bn-N5-p2368002   | gene |      |
| Bn-scaff_16534_1-p1770989 | Bn-N14-p5361259  | gene | exon |
| Bn-scaff_16534_1-p1804261 | Bn-N14-p16476636 | gene |      |
| Bn-scaff_16534_1-p1846740 | Bn-N5-p3458338   | gene |      |
| Bn-scaff_16534_1-p1891486 | Bn-N14-p5476708  | gene |      |
| Bn-scaff_16534_1-p1897963 | Bn-N14-p5483009  | gene |      |

|                           |                  |      |      |
|---------------------------|------------------|------|------|
| Bn-scaff_16534_1-p1900588 | Bn-N5-p3498024   | gene |      |
| Bn-scaff_16534_1-p1901223 | Bn-N14-p5486002  | gene |      |
| Bn-scaff_16534_1-p1987292 | Bn-N14-p5573181  | gene | exon |
| Bn-scaff_16534_1-p2007183 | Bn-N14-p5587018  | gene | exon |
| Bn-scaff_16534_1-p2222544 | Bn-N14-p5699850  | gene |      |
| Bn-scaff_16534_1-p2222998 | Bn-N14-p5700304  | gene |      |
| Bn-scaff_16534_1-p22373   | Bn-N14-p3457730  | gene | exon |
| Bn-scaff_16534_1-p2248344 | Bn-N14-p5729690  | gene | exon |
| Bn-scaff_16534_1-p2328268 | Bn-N14-p5817374  | gene |      |
| Bn-scaff_16534_1-p2342844 | Bn-N14-p5835752  | gene |      |
| Bn-scaff_16534_1-p2424886 | Bn-N14-p5913307  | gene | exon |
| Bn-scaff_16534_1-p2424934 | Bn-N14-p5913354  | gene | exon |
| Bn-scaff_16534_1-p2434398 | Bn-N5-p3722780   | gene | exon |
| Bn-scaff_16534_1-p2435936 | Bn-N14-p5925076  | gene |      |
| Bn-scaff_16534_1-p2435960 | Bn-N14-p5925100  | gene |      |
| Bn-scaff_16534_1-p2580555 | Bn-N14-p6047697  | gene | exon |
| Bn-scaff_16534_1-p2581985 | Bn-N14-p6049127  | gene |      |
| Bn-scaff_16534_1-p288565  | Bn-N14-p3771563  | gene |      |
| Bn-scaff_16534_1-p288682  | Bn-N14-p3771680  | gene |      |
| Bn-scaff_16534_1-p332911  | Bn-N14-p3829660  | gene | exon |
| Bn-scaff_16534_1-p334066  | Bn-N14-p3830820  | gene |      |
| Bn-scaff_16534_1-p500718  | Bn-N14-p4071215  | gene | exon |
| Bn-scaff_16534_1-p500900  | Bn-N5-p2594467   | gene | exon |
| Bn-scaff_16534_1-p509606  | Bn-N14-p4080100  | gene |      |
| Bn-scaff_16534_1-p514275  | Bn-N14-p4084770  | gene | exon |
| Bn-scaff_16534_1-p514720  | Bn-N14-p4085214  | gene |      |
| Bn-scaff_16534_1-p584066  | Bn-N14-p4154410  | gene | exon |
| Bn-scaff_16534_1-p648790  | Bn-N5-p2673519   | gene | exon |
| Bn-scaff_16534_1-p650838  | Bn-N5-p2675497   | gene |      |
| Bn-scaff_16534_1-p666334  | Bn-N14-p4231239  | gene | exon |
| Bn-scaff_16534_1-p679107  | Bn-N14-p4244895  | gene |      |
| Bn-scaff_16534_1-p729809  | Bn-N14-p4298504  | gene | exon |
| Bn-scaff_16534_1-p801233  | Bn-N14-p4357824  | gene |      |
| Bn-scaff_16534_1-p808074  | Bn-N14-p4361639  | gene |      |
| Bn-scaff_16534_1-p827888  | Bn-N14-p4381239  | gene | exon |
| Bn-scaff_16534_2-p307964  | Bn-N1-p20777150  | gene | exon |
| Bn-scaff_16534_2-p310612  | Bn-N11-p34774339 | gene | exon |
| Bn-scaff_16534_2-p40563   | Bn-N11-p34481372 | gene |      |
| Bn-scaff_16534_2-p78431   | Bn-N11-p34503137 | gene |      |
| Bn-scaff_16534_2-p79059   | Bn-N11-p34503765 | gene |      |
| Bn-scaff_16534_2-p79383   | Bn-N11-p34504089 | gene |      |
| Bn-scaff_16534_2-p80260   | Bn-N11-p34504966 | gene |      |
| Bn-scaff_16534_2-p80512   | Bn-N11-p34505218 | gene |      |
| Bn-scaff_16534_2-p86956   | Bn-N11-p34511592 | gene | exon |
| Bn-scaff_16534_2-p88292   | Bn-N11-p34512927 | gene | exon |
| Bn-scaff_16534_2-p89468   | Bn-N11-p34513768 | gene |      |
| Bn-scaff_16541_1-p238205  | Bn-N7-p8631232   | gene |      |
| Bn-scaff_16541_1-p526325  | Bn-N17-p18926136 | gene |      |
| Bn-scaff_16541_1-p72003   | Bn-N7-p8532467   | gene | exon |
| Bn-scaff_16545_1-p110342  | Bn-N8-p8342847   | gene |      |
| Bn-scaff_16545_1-p236222  | Bn-N18-p14959257 | gene | exon |
| Bn-scaff_16545_1-p256454  | Bn-N18-p14980417 | gene | exon |

|                           |                  |      |      |
|---------------------------|------------------|------|------|
| Bn-scaff_16545_1-p351117  | Bn-N12-p31927426 | gene |      |
| Bn-scaff_16545_1-p855589  | Bn-N12-p31364551 | gene |      |
| Bn-scaff_16547_1-p179544  | Bn-N16-p32967926 | gene |      |
| Bn-scaff_16547_1-p255118  | Bn-N16-p33050789 | gene |      |
| Bn-scaff_16547_1-p290781  | Bn-N16-p33087104 | gene | exon |
| Bn-scaff_16547_1-p290890  | Bn-N16-p33087213 | gene |      |
| Bn-scaff_16547_1-p292593  | Bn-N16-p33088917 | gene |      |
| Bn-scaff_16547_1-p310844  | Bn-N16-p33178930 | gene | exon |
| Bn-scaff_16547_1-p331785  | Bn-N7-p20104021  | gene | exon |
| Bn-scaff_16547_1-p34318   | Bn-N16-p32823644 | gene |      |
| Bn-scaff_16547_1-p345176  | Bn-N18-p21042421 | gene | exon |
| Bn-scaff_16547_1-p59615   | Bn-N16-p32838815 | gene | exon |
| Bn-scaff_16547_1-p95612   | Bn-N16-p32870419 | gene |      |
| Bn-scaff_16553_1-p15698   | Bn-N16-p3050081  | gene | exon |
| Bn-scaff_16553_1-p33772   | Bn-N16-p3092008  | gene | exon |
| Bn-scaff_16553_1-p34179   | Bn-N16-p3092416  | gene |      |
| Bn-scaff_16553_1-p34303   | Bn-N16-p3092539  | gene |      |
| Bn-scaff_16553_1-p36608   | Bn-N16-p3094849  | gene |      |
| Bn-scaff_16553_1-p78455   | Bn-N16-p3136944  | gene | exon |
| Bn-scaff_16553_1-p88896   | Bn-N16-p3148514  | gene |      |
| Bn-scaff_16554_1-p133285  | Bn-N11-p44831407 | gene | exon |
| Bn-scaff_16554_1-p160009  | Bn-N1-p26464829  | gene |      |
| Bn-scaff_16554_1-p160063  | Bn-N1-p26464883  | gene |      |
| Bn-scaff_16554_1-p160094  | Bn-N11-p44855558 | gene |      |
| Bn-scaff_16554_1-p160189  | Bn-N11-p44855653 | gene |      |
| Bn-scaff_16554_1-p160287  | Bn-N11-p44855751 | gene |      |
| Bn-scaff_16554_1-p160463  | Bn-N11-p44855927 | gene |      |
| Bn-scaff_16554_1-p160955  | Bn-N1-p26465911  | gene |      |
| Bn-scaff_16554_1-p161479  | Bn-N11-p44856889 | gene | exon |
| Bn-scaff_16565_1-p1062007 | Bn-N2-p9500340   | gene | exon |
| Bn-scaff_16565_1-p1065413 | Bn-N2-p9493071   | gene |      |
| Bn-scaff_16565_1-p414573  | Bn-N12-p14618582 | gene | exon |
| Bn-scaff_16565_1-p860022  | Bn-N12-p14328459 | gene | exon |
| Bn-scaff_16565_1-p937414  | Bn-N2-p9561430   | gene |      |
| Bn-scaff_16565_1-p977015  | Bn-N2-p9525819   | gene | exon |
| Bn-scaff_16567_1-p40709   | Bn-N11-p40692838 | gene | exon |
| Bn-scaff_16567_1-p97437   | Bn-N11-p40748415 | gene |      |
| Bn-scaff_16569_1-p411229  | Bn-N19-p26731550 | gene |      |
| Bn-scaff_16569_1-p567777  | Bn-N9-p17314152  | gene | exon |
| Bn-scaff_16569_1-p593723  | Bn-N19-p26573216 | gene | exon |
| Bn-scaff_16576_1-p165518  | Bn-N14-p13522686 | gene |      |
| Bn-scaff_16576_1-p166604  | Bn-N14-p13523772 | gene |      |
| Bn-scaff_16576_1-p262132  | Bn-N14-p13681638 | gene | exon |
| Bn-scaff_16576_1-p262230  | Bn-N14-p13681736 | gene | exon |
| Bn-scaff_16576_1-p262357  | Bn-N14-p13681863 | gene |      |
| Bn-scaff_16576_1-p262623  | Bn-N14-p13682129 | gene | exon |
| Bn-scaff_16576_1-p282069  | Bn-N14-p13723021 | gene |      |
| Bn-scaff_16576_1-p289277  | Bn-N14-p13732022 | gene | exon |
| Bn-scaff_16576_1-p318294  | Bn-N14-p13769400 | gene |      |
| Bn-scaff_16576_1-p385377  | Bn-N5-p7993175   | gene |      |
| Bn-scaff_16576_1-p582535  | Bn-N14-p14026065 | gene | exon |
| Bn-scaff_16576_1-p95164   | Bn-N14-p13455433 | gene |      |

|                           |                       |      |      |
|---------------------------|-----------------------|------|------|
| Bn-scaff_16614_1-p1013432 | Bn-N13-p1238988       | gene | exon |
| Bn-scaff_16614_1-p1059872 | Bn-N13-p1191026       | gene | exon |
| Bn-scaff_16614_1-p1083236 | Bn-N13-p1168401       | gene | exon |
| Bn-scaff_16614_1-p1122477 | Bn-N3-p918098         | gene | exon |
| Bn-scaff_16614_1-p1167537 | Bn-N13-p1101910       | gene |      |
| Bn-scaff_16614_1-p1167942 | Bn-N13-p1101502       | gene |      |
| Bn-scaff_16614_1-p1171440 | Bn-N13-p1097957       | gene | exon |
| Bn-scaff_16614_1-p1189027 | Bn-N3-p869421         | gene | exon |
| Bn-scaff_16614_1-p119144  | Bn-N3-p1792209        | gene |      |
| Bn-scaff_16614_1-p1194872 | Bn-N13-p1072053       | gene |      |
| Bn-scaff_16614_1-p1195406 | Bn-N13-p1071518       | gene | exon |
| Bn-scaff_16614_1-p1203725 | Bn-N13-p1068696       | gene | exon |
| Bn-scaff_16614_1-p1326652 | Bn-N13-p929943        | gene | exon |
| Bn-scaff_16614_1-p1361646 | Bn-N13-p892897        | gene | exon |
| Bn-scaff_16614_1-p1424702 | Bn-N13-p835441        | gene |      |
| Bn-scaff_16614_1-p1480092 | Bn-N13-p755261        | gene |      |
| Bn-scaff_16614_1-p1649933 | Bn-N13-p606295        | gene |      |
| Bn-scaff_16614_1-p174856  | Bn-N13-p2167540       | gene | exon |
| Bn-scaff_16614_1-p1804868 | Bn-Scaffold13202-p324 | gene | exon |
| Bn-scaff_16614_1-p1892380 | Bn-N3-p227875         | gene | exon |
| Bn-scaff_16614_1-p1893345 | Bn-N3-p226267         | gene | exon |
| Bn-scaff_16614_1-p1905215 | Bn-N13-p344707        | gene |      |
| Bn-scaff_16614_1-p1995086 | Bn-N13-p260564        | gene | exon |
| Bn-scaff_16614_1-p1995102 | Bn-N13-p260548        | gene | exon |
| Bn-scaff_16614_1-p1999158 | Bn-N13-p256492        | gene |      |
| Bn-scaff_16614_1-p1999433 | Bn-N13-p256217        | gene | exon |
| Bn-scaff_16614_1-p2013370 | Bn-N13-p233795        | gene |      |
| Bn-scaff_16614_1-p2014049 | Bn-N13-p233116        | gene | exon |
| Bn-scaff_16614_1-p2035305 | Bn-N3-p129577         | gene | exon |
| Bn-scaff_16614_1-p2138906 | Bn-N13-p87066         | gene | exon |
| Bn-scaff_16614_1-p2191153 | Bn-N13-p44229         | gene | exon |
| Bn-scaff_16614_1-p2218769 | Bn-N13-p9834          | gene |      |
| Bn-scaff_16614_1-p226165  | Bn-N3-p1696978        | gene |      |
| Bn-scaff_16614_1-p281452  | Bn-N13-p2043648       | gene | exon |
| Bn-scaff_16614_1-p301846  | Bn-N13-p2022937       | gene |      |
| Bn-scaff_16614_1-p358098  | Bn-N13-p1951861       | gene | exon |
| Bn-scaff_16614_1-p358276  | Bn-N13-p1951683       | gene | exon |
| Bn-scaff_16614_1-p369346  | Bn-N3-p1519413        | gene |      |
| Bn-scaff_16614_1-p373513  | Bn-N3-p1515411        | gene | exon |
| Bn-scaff_16614_1-p400790  | Bn-N13-p1910299       | gene | exon |
| Bn-scaff_16614_1-p432138  | Bn-N13-p1871532       | gene |      |
| Bn-scaff_16614_1-p534173  | Bn-N13-p1766310       | gene |      |
| Bn-scaff_16614_1-p546020  | Bn-N13-p1753320       | gene |      |
| Bn-scaff_16614_1-p56536   | Bn-N13-p2275896       | gene | exon |
| Bn-scaff_16614_1-p571357  | Bn-N13-p1734011       | gene | exon |
| Bn-scaff_16614_1-p578598  | Bn-N13-p1724394       | gene |      |
| Bn-scaff_16614_1-p611916  | Bn-N3-p1335072        | gene | exon |
| Bn-scaff_16614_1-p636297  | Bn-N13-p1662465       | gene |      |
| Bn-scaff_16614_1-p636358  | Bn-N13-p1662457       | gene |      |
| Bn-scaff_16614_1-p636420  | Bn-N13-p1662395       | gene | exon |
| Bn-scaff_16614_1-p636428  | Bn-N13-p1662387       | gene | exon |
| Bn-scaff_16614_1-p642560  | Bn-N13-p1656267       | gene |      |

|                           |                       |      |      |
|---------------------------|-----------------------|------|------|
| Bn-scaff_16614_1-p642888  | Bn-N13-p1655896       | gene | exon |
| Bn-scaff_16614_1-p643298  | Bn-N13-p1655529       | gene |      |
| Bn-scaff_16614_1-p643378  | Bn-N13-p1655449       | gene | exon |
| Bn-scaff_16614_1-p643845  | Bn-N13-p1654982       | gene | exon |
| Bn-scaff_16614_1-p661193  | Bn-N3-p1289877        | gene |      |
| Bn-scaff_16614_1-p677445  | Bn-N3-p1278304        | gene |      |
| Bn-scaff_16614_1-p702187  | Bn-N13-p1588380       | gene |      |
| Bn-scaff_16614_1-p717017  | Bn-N13-p1573556       | gene |      |
| Bn-scaff_16614_1-p722822  | Bn-N13-p1567736       | gene |      |
| Bn-scaff_16614_1-p731075  | Bn-N13-p1561460       | gene |      |
| Bn-scaff_16614_1-p731938  | Bn-N13-p1555052       | gene |      |
| Bn-scaff_16614_1-p750688  | Bn-N3-p1197574        | gene |      |
| Bn-scaff_16614_1-p889881  | Bn-N13-p1354589       | gene | exon |
| Bn-scaff_16619_1-p208263  | Bn-N19-p34952973      | gene |      |
| Bn-scaff_16619_1-p208935  | Bn-N19-p34953645      | gene | exon |
| Bn-scaff_16619_1-p228456  | Bn-N19-p34973447      | gene |      |
| Bn-scaff_16619_1-p229074  | Bn-N19-p34974217      | gene |      |
| Bn-scaff_16625_1-p41761   | Bn-N14-p26758658      | gene | exon |
| Bn-scaff_16625_1-p60807   | Bn-N4-p812278         | gene | exon |
| Bn-scaff_16625_1-p64201   | Bn-N14-p26780967      | gene |      |
| Bn-scaff_16647_1-p162647  | Bn-N16-p6317069       | gene |      |
| Bn-scaff_16647_1-p287095  | Bn-N16-p6126513       | gene |      |
| Bn-scaff_16647_1-p288006  | Bn-N16-p6125602       | gene |      |
| Bn-scaff_16647_1-p294824  | Bn-N16-p6118700       | gene | exon |
| Bn-scaff_16647_1-p296976  | Bn-N16-p6116548       | gene | exon |
| Bn-scaff_16647_1-p297173  | Bn-N16-p6116351       | gene |      |
| Bn-scaff_16647_1-p297315  | Bn-N16-p6116209       | gene |      |
| Bn-scaff_16647_1-p297412  | Bn-N16-p6116112       | gene |      |
| Bn-scaff_16647_1-p297560  | Bn-N16-p6115964       | gene |      |
| Bn-scaff_16647_1-p347369  | Bn-N16-p6081277       | gene |      |
| Bn-scaff_16647_1-p398429  | Bn-N6-p1071631        | gene | exon |
| Bn-scaff_16647_1-p462650  | Bn-N16-p5992011       | gene |      |
| Bn-scaff_16647_1-p464272  | Bn-N16-p5990387       | gene |      |
| Bn-scaff_16647_1-p486000  | Bn-N16-p5973313       | gene |      |
| Bn-scaff_16647_1-p499920  | Bn-N16-p5961851       | gene |      |
| Bn-scaff_16656_1-p171648  | Bn-Scaffold04219-p738 | gene | exon |
| Bn-scaff_16665_1-p127087  | Bn-N8-p16186531       | gene | exon |
| Bn-scaff_16665_1-p127450  | Bn-N8-p16186171       | gene |      |
| Bn-scaff_16665_1-p141052  | Bn-N13-p54488235      | gene | exon |
| Bn-scaff_16665_1-p158336  | Bn-N13-p54498507      | gene | exon |
| Bn-scaff_16665_1-p158462  | Bn-N13-p54498633      | gene | exon |
| Bn-scaff_16670_1-p51961   | Bn-N16-p1965975       | gene |      |
| Bn-scaff_16676_1-p6894    | Bn-N13-p64649039      | gene |      |
| Bn-scaff_16677_1-p101641  | Bn-N6-p1460278        | gene |      |
| Bn-scaff_16677_1-p102715  | Bn-N6-p1459207        | gene |      |
| Bn-scaff_16677_1-p1237    | Bn-N16-p4921864       | gene | exon |
| Bn-scaff_16677_1-p208279  | Bn-N18-p5442895       | gene | exon |
| Bn-scaff_16677_1-p310736  | Bn-N18-p5324199       | gene | exon |
| Bn-scaff_16691_1-p1332173 | Bn-N1-p24998977       | gene | exon |
| Bn-scaff_16691_1-p1350013 | Bn-N11-p42276032      | gene | exon |
| Bn-scaff_16691_1-p1402284 | Bn-N1-p25086811       | gene | exon |
| Bn-scaff_16691_1-p1441263 | Bn-N13-p38449752      | gene |      |

|                           |                  |      |      |
|---------------------------|------------------|------|------|
| Bn-scaff_16691_1-p144715  | Bn-N11-p24368676 | gene |      |
| Bn-scaff_16691_1-p1459639 | Bn-N11-p42394452 | gene | exon |
| Bn-scaff_16691_1-p1479528 | Bn-N17-p47101815 | gene | exon |
| Bn-scaff_16691_1-p278826  | Bn-N11-p24206076 | gene | exon |
| Bn-scaff_16691_1-p483096  | Bn-N11-p24013028 | gene | exon |
| Bn-scaff_16691_1-p50579   | Bn-N1-p14800251  | gene | exon |
| Bn-scaff_16691_1-p565328  | Bn-N11-p23923592 | gene | exon |
| Bn-scaff_16691_1-p61463   | Bn-N11-p24447418 | gene | exon |
| Bn-scaff_16691_1-p637815  | Bn-N11-p23841636 | gene |      |
| Bn-scaff_16691_1-p638223  | Bn-N11-p23841113 | gene |      |
| Bn-scaff_16691_1-p639122  | Bn-N11-p23840213 | gene |      |
| Bn-scaff_16691_1-p639227  | Bn-N11-p23840108 | gene | exon |
| Bn-scaff_16691_1-p640408  | Bn-N11-p23838935 | gene |      |
| Bn-scaff_16691_1-p650869  | Bn-N11-p23828326 | gene |      |
| Bn-scaff_16691_1-p657224  | Bn-N11-p23822039 | gene |      |
| Bn-scaff_16691_1-p658442  | Bn-N11-p23820825 | gene | exon |
| Bn-scaff_16691_1-p658665  | Bn-N11-p23820602 | gene |      |
| Bn-scaff_16691_1-p658917  | Bn-N11-p23820350 | gene |      |
| Bn-scaff_16691_1-p675741  | Bn-N1-p14413420  | gene | exon |
| Bn-scaff_16691_1-p697108  | Bn-N11-p23777494 | gene |      |
| Bn-scaff_16691_1-p697516  | Bn-N11-p23777085 | gene |      |
| Bn-scaff_16691_1-p792721  | Bn-N11-p23679845 | gene | exon |
| Bn-scaff_16691_1-p792979  | Bn-N11-p23679587 | gene |      |
| Bn-scaff_16691_1-p793078  | Bn-N11-p23679488 | gene |      |
| Bn-scaff_16691_1-p793355  | Bn-N11-p23675725 | gene |      |
| Bn-scaff_16691_1-p881093  | Bn-N11-p23587861 | gene |      |
| Bn-scaff_16691_1-p881477  | Bn-N1-p14338784  | gene |      |
| Bn-scaff_16691_1-p913942  | Bn-N11-p23540225 | gene |      |
| Bn-scaff_16691_1-p914035  | Bn-N11-p23540132 | gene |      |
| Bn-scaff_16691_1-p954339  | Bn-N11-p23547890 | gene |      |
| Bn-scaff_16693_1-p128559  | Bn-N2-p396080    | gene | exon |
| Bn-scaff_16693_1-p144993  | Bn-N10-p17802637 | gene | exon |
| Bn-scaff_16693_1-p145372  | Bn-N10-p17802258 | gene |      |
| Bn-scaff_16693_1-p199016  | Bn-N2-p424769    | gene | exon |
| Bn-scaff_16693_1-p300736  | Bn-N10-p17739702 | gene |      |
| Bn-scaff_16693_1-p46449   | Bn-N10-p17858492 | gene |      |
| Bn-scaff_16694_1-p305039  | Bn-N14-p40732336 | gene |      |
| Bn-scaff_16700_1-p126138  | Bn-N14-p44802568 | gene |      |
| Bn-scaff_16700_1-p126438  | Bn-N4-p13452964  | gene |      |
| Bn-scaff_16700_1-p164216  | Bn-N14-p44889927 | gene | exon |
| Bn-scaff_16700_1-p60575   | Bn-N14-p44700201 | gene | exon |
| Bn-scaff_16700_1-p73552   | Bn-N14-p44738247 | gene | exon |
| Bn-scaff_16700_1-p73598   | Bn-N14-p44738292 | gene | exon |
| Bn-scaff_16700_1-p75339   | Bn-N14-p44738624 | gene |      |
| Bn-scaff_16700_1-p75524   | Bn-N14-p44738809 | gene |      |
| Bn-scaff_16700_1-p75804   | Bn-N14-p44739084 | gene |      |
| Bn-scaff_16704_1-p119074  | Bn-N12-p19060123 | gene |      |
| Bn-scaff_16704_1-p121608  | Bn-N12-p19057578 | gene | exon |
| Bn-scaff_16704_1-p141970  | Bn-N12-p19020827 | gene | exon |
| Bn-scaff_16704_1-p173789  | Bn-N12-p18986246 | gene |      |
| Bn-scaff_16704_1-p174270  | Bn-N12-p18985760 | gene |      |
| Bn-scaff_16704_1-p349056  | Bn-N12-p18867322 | gene |      |



|                           |                         |      |      |
|---------------------------|-------------------------|------|------|
| Bn-scaff_16704_1-p454876  | Bn-N12-p18773054        | gene | exon |
| Bn-scaff_16712_1-p333885  | Bn-N11-p3590029         | gene | exon |
| Bn-scaff_16712_1-p33920   | Bn-N13-p63286665        | gene |      |
| Bn-scaff_16712_1-p53301   | Bn-N13-p63305448        | gene | exon |
| Bn-scaff_16714_1-p104848  | Bn-N14-p26493065        | gene |      |
| Bn-scaff_16714_1-p111822  | Bn-N14-p26486327        | gene |      |
| Bn-scaff_16714_1-p112449  | Bn-N4-p671668           | gene |      |
| Bn-scaff_16714_1-p172282  | Bn-N14-p26418743        | gene | exon |
| Bn-scaff_16714_1-p215248  | Bn-N14-p26362564        | gene | exon |
| Bn-scaff_16714_1-p229922  | Bn-N14-p26346285        | gene | exon |
| Bn-scaff_16714_1-p248892  | Bn-N14-p26325586        | gene | exon |
| Bn-scaff_16714_1-p249437  | Bn-N14-p26325040        | gene | exon |
| Bn-scaff_16714_1-p329155  | Bn-N14-p26252074        | gene | exon |
| Bn-scaff_16714_1-p329461  | Bn-N14-p26251768        | gene | exon |
| Bn-scaff_16714_1-p342976  | Bn-N14-p26234058        | gene | exon |
| Bn-scaff_16714_1-p343537  | Bn-N4-p618611           | gene | exon |
| Bn-scaff_16714_1-p346340  | Bn-N14-p26230691        | gene |      |
| Bn-scaff_16714_1-p348941  | Bn-N14-p26228090        | gene |      |
| Bn-scaff_16714_1-p375535  | Bn-N14-p26203507        | gene |      |
| Bn-scaff_16714_1-p406026  | Bn-N14-p26174106        | gene |      |
| Bn-scaff_16714_1-p407589  | Bn-N14-p26172543        | gene | exon |
| Bn-scaff_16714_1-p98921   | Bn-N14-p26498993        | gene |      |
| Bn-scaff_16721_1-p1173038 | Bn-N17-p11827490        | gene |      |
| Bn-scaff_16721_1-p1254647 | Bn-N17-p11900790        | gene | exon |
| Bn-scaff_16721_1-p1263674 | Bn-N17-p11909868        | gene | exon |
| Bn-scaff_16721_1-p1264229 | Bn-N17-p11910515        | gene |      |
| Bn-scaff_16721_1-p1335429 | Bn-N17-p11995124        | gene |      |
| Bn-scaff_16721_1-p1335851 | Bn-N17-p11995546        | gene |      |
| Bn-scaff_16721_1-p1347752 | Bn-N17-p12001901        | gene | exon |
| Bn-scaff_16721_1-p1521206 | Bn-N17-p12177885        | gene | exon |
| Bn-scaff_16721_1-p1532675 | Bn-N7-p5111309          | gene | exon |
| Bn-scaff_16721_1-p158260  | Bn-N17-p11263780        | gene |      |
| Bn-scaff_16721_1-p158546  | Bn-N7-p4580094          | gene |      |
| Bn-scaff_16721_1-p161261  | Bn-N17-p11266824        | gene |      |
| Bn-scaff_16721_1-p169588  | Bn-N17-p11276011        | gene |      |
| Bn-scaff_16721_1-p170488  | Bn-N17-p11276911        | gene | exon |
| Bn-scaff_16721_1-p1775159 | Bn-N17-p12370670        | gene |      |
| Bn-scaff_16721_1-p1783089 | Bn-N17-p12378337        | gene |      |
| Bn-scaff_16721_1-p1805920 | Bn-N7-p5208939          | gene |      |
| Bn-scaff_16721_1-p1901248 | Bn-N17-p12464968        | gene |      |
| Bn-scaff_16721_1-p1901401 | Bn-N17-p12465121        | gene |      |
| Bn-scaff_16721_1-p2118530 | Bn-N17-p12643865        | gene |      |
| Bn-scaff_16721_1-p2136567 | Bn-N7-p5390406          | gene | exon |
| Bn-scaff_16721_1-p2171161 | Bn-N7-p5422323          | gene |      |
| Bn-scaff_16721_1-p24679   | Bn-N17-p11094465        | gene | exon |
| Bn-scaff_16721_1-p25103   | Bn-N17-p11094889        | gene |      |
| Bn-scaff_16721_1-p25525   | Bn-N17-p11095311        | gene | exon |
| Bn-scaff_16721_1-p360637  | Bn-Scaffold00929-p44810 | gene | exon |
| Bn-scaff_16721_1-p360689  | Bn-N17-p11449356        | gene | exon |
| Bn-scaff_16721_1-p361967  | Bn-N19-p3992906         | gene | exon |
| Bn-scaff_16721_1-p377743  | Bn-N17-p11461087        | gene |      |
| Bn-scaff_16721_1-p4674    | Bn-N17-p10621846        | gene |      |

|                           |                  |      |      |
|---------------------------|------------------|------|------|
| Bn-scaff_16721_1-p4809    | Bn-N17-p10621710 | gene | exon |
| Bn-scaff_16721_1-p673     | Bn-N17-p10623387 | gene |      |
| Bn-scaff_16721_1-p744     | Bn-N17-p10623317 | gene |      |
| Bn-scaff_16721_1-p7795    | Bn-N17-p10620061 | gene |      |
| Bn-scaff_16721_1-p825     | Bn-N17-p10623235 | gene |      |
| Bn-scaff_16721_1-p827     | Bn-N17-p10623233 | gene |      |
| Bn-scaff_16755_1-p1008572 | Bn-N13-p66818565 | gene |      |
| Bn-scaff_16755_1-p1112413 | Bn-N8-p987367    | gene | exon |
| Bn-scaff_16755_1-p1112518 | Bn-N8-p987472    | gene | exon |
| Bn-scaff_16755_1-p116429  | Bn-N13-p67667405 | gene | exon |
| Bn-scaff_16755_1-p117421  | Bn-N13-p67666172 | gene | exon |
| Bn-scaff_16755_1-p1191145 | Bn-N13-p66653654 | gene |      |
| Bn-scaff_16755_1-p1201419 | Bn-N13-p66641183 | gene |      |
| Bn-scaff_16755_1-p1208174 | Bn-N13-p66634448 | gene | exon |
| Bn-scaff_16755_1-p12541   | Bn-N13-p67764811 | gene |      |
| Bn-scaff_16755_1-p1290310 | Bn-N13-p66541393 | gene |      |
| Bn-scaff_16755_1-p1426914 | Bn-N2-p10213564  | gene | exon |
| Bn-scaff_16755_1-p1427195 | Bn-N2-p10213284  | gene | exon |
| Bn-scaff_16755_1-p1427621 | Bn-N2-p10212859  | gene | exon |
| Bn-scaff_16755_1-p1428088 | Bn-N2-p10212435  | gene |      |
| Bn-scaff_16755_1-p1494849 | Bn-N13-p66317548 | gene | exon |
| Bn-scaff_16755_1-p1497175 | Bn-N13-p66315241 | gene | exon |
| Bn-scaff_16755_1-p150355  | Bn-N13-p67617970 | gene | exon |
| Bn-scaff_16755_1-p150462  | Bn-N13-p67617863 | gene | exon |
| Bn-scaff_16755_1-p325875  | Bn-N13-p67436102 | gene | exon |
| Bn-scaff_16755_1-p327067  | Bn-N13-p67434911 | gene | exon |
| Bn-scaff_16755_1-p352874  | Bn-N13-p67404934 | gene |      |
| Bn-scaff_16755_1-p411912  | Bn-N13-p67341586 | gene | exon |
| Bn-scaff_16755_1-p436280  | Bn-N13-p67315054 | gene | exon |
| Bn-scaff_16755_1-p439395  | Bn-N13-p67313411 | gene | exon |
| Bn-scaff_16755_1-p502073  | Bn-N8-p1285212   | gene | exon |
| Bn-scaff_16755_1-p515388  | Bn-N9-p9320121   | gene |      |
| Bn-scaff_16755_1-p515807  | Bn-N9-p9319701   | gene | exon |
| Bn-scaff_16755_1-p614641  | Bn-N8-p581805    | gene | exon |
| Bn-scaff_16755_1-p970375  | Bn-N13-p66857529 | gene |      |
| Bn-scaff_16755_1-p970466  | Bn-N13-p66857438 | gene |      |
| Bn-scaff_16755_1-p982092  | Bn-N16-p14474806 | gene | exon |
| Bn-scaff_16766_1-p119819  | Bn-N3-p5799995   | gene |      |
| Bn-scaff_16766_1-p289124  | Bn-N8-p6331205   | gene | exon |
| Bn-scaff_16770_1-p107862  | Bn-N15-p40139455 | gene |      |
| Bn-scaff_16770_1-p1746549 | Bn-N18-p29413393 | gene | exon |
| Bn-scaff_16770_1-p1969319 | Bn-N9-p28210405  | gene |      |
| Bn-scaff_16770_1-p2082683 | Bn-N18-p29793921 | gene |      |
| Bn-scaff_16770_1-p2217095 | Bn-N9-p28364458  | gene |      |
| Bn-scaff_16770_1-p2577945 | Bn-N9-p29140595  | gene | exon |
| Bn-scaff_16770_1-p2803733 | Bn-N9-p28957647  | gene |      |
| Bn-scaff_16770_1-p2818688 | Bn-N18-p30615117 | gene | exon |
| Bn-scaff_16770_1-p2818770 | Bn-N18-p30615036 | gene |      |
| Bn-scaff_16770_1-p2818885 | Bn-N18-p30614921 | gene | exon |
| Bn-scaff_16770_1-p2861442 | Bn-N18-p30588955 | gene | exon |
| Bn-scaff_16770_1-p2909313 | Bn-N18-p30539869 | gene | exon |
| Bn-scaff_16770_1-p2946678 | Bn-N18-p30502022 | gene |      |

|                           |                  |      |      |
|---------------------------|------------------|------|------|
| Bn-scaff_16770_1-p2948588 | Bn-N18-p30500155 | gene |      |
| Bn-scaff_16770_1-p298311  | Bn-N15-p39942722 | gene | exon |
| Bn-scaff_16770_1-p2988236 | Bn-N9-p28657576  | gene | exon |
| Bn-scaff_16770_1-p298928  | Bn-N15-p39942105 | gene | exon |
| Bn-scaff_16770_1-p3013229 | Bn-N18-p30430944 | gene |      |
| Bn-scaff_16770_1-p3013339 | Bn-N18-p30430834 | gene |      |
| Bn-scaff_16770_1-p3050704 | Bn-N9-p28610378  | gene | exon |
| Bn-scaff_16770_1-p3052263 | Bn-N9-p28608755  | gene | exon |
| Bn-scaff_16770_1-p3121600 | Bn-N9-p28545552  | gene | exon |
| Bn-scaff_16770_1-p3142138 | Bn-N9-p28517012  | gene | exon |
| Bn-scaff_16770_1-p317634  | Bn-N15-p39923313 | gene |      |
| Bn-scaff_16770_1-p332122  | Bn-N5-p20136481  | gene | exon |
| Bn-scaff_16770_1-p3930920 | Bn-N18-p31719694 | gene | exon |
| Bn-scaff_16770_1-p3943733 | Bn-N18-p31736733 | gene | exon |
| Bn-scaff_16770_1-p4054911 | Bn-N18-p31864375 | gene | exon |
| Bn-scaff_16770_1-p4054998 | Bn-N18-p31864462 | gene |      |
| Bn-scaff_16770_1-p4068629 | Bn-N18-p31875046 | gene |      |
| Bn-scaff_16770_1-p4071245 | Bn-N18-p31877221 | gene |      |
| Bn-scaff_16770_1-p4204848 | Bn-N18-p31996276 | gene |      |
| Bn-scaff_16770_1-p4219765 | Bn-N18-p32012310 | gene |      |
| Bn-scaff_16770_1-p4231526 | Bn-N18-p32021176 | gene |      |
| Bn-scaff_16770_1-p4235967 | Bn-N18-p32028258 | gene |      |
| Bn-scaff_16770_1-p4246969 | Bn-N18-p32039448 | gene | exon |
| Bn-scaff_16770_1-p4247182 | Bn-N18-p32039661 | gene | exon |
| Bn-scaff_16770_1-p4253992 | Bn-N18-p32046472 | gene |      |
| Bn-scaff_16770_1-p4261177 | Bn-N18-p32053675 | gene |      |
| Bn-scaff_16770_1-p4273193 | Bn-N18-p32059058 | gene |      |
| Bn-scaff_16770_1-p4273299 | Bn-N18-p32059164 | gene |      |
| Bn-scaff_16770_1-p4273315 | Bn-N18-p32059180 | gene |      |
| Bn-scaff_16770_1-p4273479 | Bn-N18-p32059344 | gene |      |
| Bn-scaff_16770_1-p4273654 | Bn-N18-p32059519 | gene |      |
| Bn-scaff_16770_1-p4279495 | Bn-N18-p32066808 | gene |      |
| Bn-scaff_16770_1-p4283902 | Bn-N18-p32071215 | gene |      |
| Bn-scaff_16770_1-p4296535 | Bn-N18-p32083896 | gene |      |
| Bn-scaff_16770_1-p4331835 | Bn-N18-p32115345 | gene |      |
| Bn-scaff_16770_1-p4338179 | Bn-N18-p32130575 | gene | exon |
| Bn-scaff_16770_1-p4352929 | Bn-N18-p32150182 | gene |      |
| Bn-scaff_16770_1-p4353199 | Bn-N18-p32150422 | gene |      |
| Bn-scaff_16770_1-p4353457 | Bn-N18-p32150596 | gene |      |
| Bn-scaff_16770_1-p4374851 | Bn-N18-p32167058 | gene |      |
| Bn-scaff_16770_1-p65546   | Bn-N15-p40190660 | gene |      |
| Bn-scaff_16770_1-p65799   | Bn-N15-p40190406 | gene |      |
| Bn-scaff_16770_1-p677152  | Bn-N5-p19987638  | gene | exon |
| Bn-scaff_16770_1-p684639  | Bn-N15-p39554368 | gene |      |
| Bn-scaff_16770_1-p982799  | Bn-N4-p407412    | gene | exon |
| Bn-scaff_16792_1-p21096   | Bn-N15-p12505820 | gene |      |
| Bn-scaff_16792_1-p21478   | Bn-N15-p12506202 | gene |      |
| Bn-scaff_16792_1-p21595   | Bn-N15-p12506319 | gene |      |
| Bn-scaff_16792_1-p21956   | Bn-N15-p12506680 | gene |      |
| Bn-scaff_16793_1-p821453  | Bn-N19-p29509411 | gene |      |
| Bn-scaff_16804_1-p383275  | Bn-N2-p6234189   | gene |      |
| Bn-scaff_16804_1-p64080   | Bn-N2-p6062784   | gene |      |

|                          |                         |      |      |
|--------------------------|-------------------------|------|------|
| Bn-scaff_16804_1-p653237 | Bn-N12-p9069045         | gene | exon |
| Bn-scaff_16804_1-p670370 | Bn-N14-p47143243        | gene |      |
| Bn-scaff_16804_1-p695166 | Bn-N14-p47179219        | gene |      |
| Bn-scaff_16804_1-p704013 | Bn-N14-p47187128        | gene |      |
| Bn-scaff_16804_1-p704907 | Bn-N14-p47188023        | gene | exon |
| Bn-scaff_16804_1-p755719 | Bn-N14-p47233222        | gene |      |
| Bn-scaff_16804_1-p773033 | Bn-N14-p47250018        | gene | exon |
| Bn-scaff_16804_1-p794568 | Bn-N14-p47276519        | gene |      |
| Bn-scaff_16804_1-p796198 | Bn-N4-p15123163         | gene | exon |
| Bn-scaff_16804_2-p156230 | Bn-N14-p48951207        | gene |      |
| Bn-scaff_16804_2-p157923 | Bn-N4-p16108021         | gene |      |
| Bn-scaff_16804_2-p165752 | Bn-N4-p16097093         | gene | exon |
| Bn-scaff_16804_2-p166441 | Bn-N4-p16096442         | gene |      |
| Bn-scaff_16804_2-p167019 | Bn-N14-p48938815        | gene |      |
| Bn-scaff_16804_2-p195554 | Bn-N14-p48907212        | gene | exon |
| Bn-scaff_16804_2-p210553 | Bn-N14-p48893266        | gene | exon |
| Bn-scaff_16804_2-p211134 | Bn-N14-p48892685        | gene | exon |
| Bn-scaff_16804_2-p255570 | Bn-N14-p48848042        | gene |      |
| Bn-scaff_16804_2-p283580 | Bn-N14-p48818989        | gene |      |
| Bn-scaff_16804_2-p284402 | Bn-N14-p48818167        | gene |      |
| Bn-scaff_16804_2-p298602 | Bn-N14-p48805465        | gene |      |
| Bn-scaff_16804_4-p107537 | Bn-N12-p9136673         | gene | exon |
| Bn-scaff_16804_4-p112136 | Bn-N12-p9141287         | gene |      |
| Bn-scaff_16804_4-p272285 | Bn-N2-p6512012          | gene | exon |
| Bn-scaff_16809_1-p21714  | Bn-Scaffold00952-p74230 | gene | exon |
| Bn-scaff_16809_1-p46229  | Bn-N11-p20128849        | gene |      |
| Bn-scaff_16809_1-p54602  | Bn-N11-p20108993        | gene | exon |
| Bn-scaff_16809_1-p55782  | Bn-N11-p20099934        | gene | exon |
| Bn-scaff_16809_1-p56352  | Bn-N11-p20099362        | gene |      |
| Bn-scaff_16818_1-p222830 | Bn-N15-p33407046        | gene | exon |
| Bn-scaff_16818_3-p10386  | Bn-Scaffold03234-p2275  | gene | exon |
| Bn-scaff_16822_1-p110220 | Bn-N13-p30886079        | gene | exon |
| Bn-scaff_16822_1-p137478 | Bn-N13-p30866763        | gene | exon |
| Bn-scaff_16822_1-p139438 | Bn-N13-p30864833        | gene |      |
| Bn-scaff_16822_1-p56747  | Bn-N13-p31030768        | gene | exon |
| Bn-scaff_16822_1-p96591  | Bn-N13-p30900756        | gene |      |
| Bn-scaff_16822_1-p96861  | Bn-N13-p30900486        | gene |      |
| Bn-scaff_16825_1-p103398 | Bn-N12-p4472399         | gene | exon |
| Bn-scaff_16825_1-p63375  | Bn-N12-p4409413         | gene | exon |
| Bn-scaff_16825_1-p94370  | Bn-N12-p4460737         | gene | exon |
| Bn-scaff_16825_1-p95545  | Bn-N6-p8606002          | gene |      |
| Bn-scaff_16864_1-p113683 | Bn-N14-p2276187         | gene | exon |
| Bn-scaff_16864_1-p22602  | Bn-N14-p2171696         | gene | exon |
| Bn-scaff_16864_1-p22764  | Bn-N14-p2171858         | gene | exon |
| Bn-scaff_16865_1-p221176 | Bn-N4-p21071745         | gene |      |
| Bn-scaff_16865_1-p223681 | Bn-N4-p21076005         | gene | exon |
| Bn-scaff_16865_1-p40832  | Bn-N16-p28602368        | gene | exon |
| Bn-scaff_16874_1-p172441 | Bn-N16-p35142307        | gene |      |
| Bn-scaff_16874_1-p172867 | Bn-N16-p35142733        | gene | exon |
| Bn-scaff_16874_1-p173312 | Bn-N16-p35143178        | gene |      |
| Bn-scaff_16874_1-p173544 | Bn-N16-p35143410        | gene |      |
| Bn-scaff_16874_1-p285169 | Bn-N16-p35261709        | gene | exon |

|                           |                  |      |      |
|---------------------------|------------------|------|------|
| Bn-scaff_16874_1-p325339  | Bn-N16-p35304721 | gene |      |
| Bn-scaff_16874_1-p325632  | Bn-N16-p35305010 | gene |      |
| Bn-scaff_16874_1-p326376  | Bn-N16-p35305774 | gene |      |
| Bn-scaff_16874_1-p327692  | Bn-N16-p35307090 | gene | exon |
| Bn-scaff_16874_1-p342999  | Bn-N16-p35330834 | gene | exon |
| Bn-scaff_16874_1-p425401  | Bn-N16-p35417857 | gene |      |
| Bn-scaff_16874_1-p616918  | Bn-N16-p35599783 | gene | exon |
| Bn-scaff_16874_1-p617228  | Bn-N16-p35600092 | gene | exon |
| Bn-scaff_16874_1-p642411  | Bn-N16-p35628223 | gene |      |
| Bn-scaff_16874_1-p642780  | Bn-N16-p35628592 | gene | exon |
| Bn-scaff_16874_1-p644530  | Bn-N16-p35630340 | gene |      |
| Bn-scaff_16874_1-p644836  | Bn-N16-p35630646 | gene |      |
| Bn-scaff_16874_2-p156435  | Bn-N11-p13331984 | gene | exon |
| Bn-scaff_16874_2-p156587  | Bn-N11-p13331833 | gene | exon |
| Bn-scaff_16874_2-p157688  | Bn-N1-p8750275   | gene | exon |
| Bn-scaff_16874_2-p217681  | Bn-N1-p8711177   | gene |      |
| Bn-scaff_16874_2-p85853   | Bn-N8-p14248847  | gene | exon |
| Bn-scaff_16876_1-p1013994 | Bn-N14-p38900834 | gene | exon |
| Bn-scaff_16876_1-p1016989 | Bn-N14-p38897836 | gene | exon |
| Bn-scaff_16876_1-p1017087 | Bn-N14-p38897738 | gene | exon |
| Bn-scaff_16876_1-p1017291 | Bn-N14-p38897534 | gene | exon |
| Bn-scaff_16876_1-p1038199 | Bn-N14-p38879446 | gene | exon |
| Bn-scaff_16876_1-p1066302 | Bn-N14-p38851491 | gene |      |
| Bn-scaff_16876_1-p1092787 | Bn-N14-p38832572 | gene |      |
| Bn-scaff_16876_1-p1093245 | Bn-N14-p38832113 | gene | exon |
| Bn-scaff_16876_1-p110047  | Bn-N14-p39791703 | gene |      |
| Bn-scaff_16876_1-p1116580 | Bn-N14-p38808273 | gene | exon |
| Bn-scaff_16876_1-p1116894 | Bn-N14-p38807959 | gene |      |
| Bn-scaff_16876_1-p1228854 | Bn-N14-p38679704 | gene | exon |
| Bn-scaff_16876_1-p257162  | Bn-N14-p39665542 | gene |      |
| Bn-scaff_16876_1-p287148  | Bn-N14-p39630648 | gene | exon |
| Bn-scaff_16876_1-p390080  | Bn-N14-p39551702 | gene | exon |
| Bn-scaff_16876_1-p574590  | Bn-N14-p39346902 | gene | exon |
| Bn-scaff_16876_1-p732973  | Bn-N14-p39178511 | gene |      |
| Bn-scaff_16876_1-p733124  | Bn-N14-p39178360 | gene |      |
| Bn-scaff_16876_1-p7359    | Bn-N14-p39911026 | gene |      |
| Bn-scaff_16876_1-p851344  | Bn-N14-p39061279 | gene |      |
| Bn-scaff_16876_1-p863842  | Bn-N4-p9501537   | gene |      |
| Bn-scaff_16876_1-p865850  | Bn-N14-p39045757 | gene |      |
| Bn-scaff_16876_1-p873216  | Bn-N14-p39038391 | gene | exon |
| Bn-scaff_16876_1-p8795    | Bn-N14-p39909613 | gene | exon |
| Bn-scaff_16876_1-p908602  | Bn-N14-p39005334 | gene |      |
| Bn-scaff_16876_1-p93444   | Bn-N14-p39820130 | gene | exon |
| Bn-scaff_16876_1-p948070  | Bn-N14-p38965582 | gene |      |
| Bn-scaff_16876_1-p963956  | Bn-N14-p38949692 | gene | exon |
| Bn-scaff_16876_1-p964636  | Bn-N14-p38949012 | gene | exon |
| Bn-scaff_16888_1-p1023505 | Bn-N4-p18295066  | gene |      |
| Bn-scaff_16888_1-p1031305 | Bn-N4-p18302479  | gene | exon |
| Bn-scaff_16888_1-p1036219 | Bn-N4-p18307337  | gene |      |
| Bn-scaff_16888_1-p1037072 | Bn-N14-p51467109 | gene | exon |
| Bn-scaff_16888_1-p1070420 | Bn-N4-p18345359  | gene | exon |
| Bn-scaff_16888_1-p1085702 | Bn-N14-p51517536 | gene |      |

|                           |                           |      |      |
|---------------------------|---------------------------|------|------|
| Bn-scaff_16888_1-p1140119 | Bn-N14-p51573492          | gene |      |
| Bn-scaff_16888_1-p1193844 | Bn-N14-p51627798          | gene | exon |
| Bn-scaff_16888_1-p1194989 | Bn-N14-p51628944          | gene | exon |
| Bn-scaff_16888_1-p1206146 | Bn-N14-p51640559          | gene |      |
| Bn-scaff_16888_1-p1221383 | Bn-N14-p51655635          | gene |      |
| Bn-scaff_16888_1-p1221973 | Bn-N14-p51656227          | gene |      |
| Bn-scaff_16888_1-p1222121 | Bn-N14-p51656375          | gene |      |
| Bn-scaff_16888_1-p1222131 | Bn-N14-p51656384          | gene |      |
| Bn-scaff_16888_1-p1222789 | Bn-N14-p51657042          | gene | exon |
| Bn-scaff_16888_1-p1273637 | Bn-N4-p18475690           | gene | exon |
| Bn-scaff_16888_1-p1306317 | Bn-N14-p51747316          | gene |      |
| Bn-scaff_16888_1-p1337706 | Bn-N14-p51767998          | gene | exon |
| Bn-scaff_16888_1-p1341139 | Bn-N14-p51771430          | gene |      |
| Bn-scaff_16888_1-p1347380 | Bn-N14-p51776604          | gene |      |
| Bn-scaff_16888_1-p1347381 | Bn-N14-p51776605          | gene |      |
| Bn-scaff_16888_1-p1364784 | Bn-N14-p51797996          | gene |      |
| Bn-scaff_16888_1-p1400424 | Bn-N14-p51834778          | gene | exon |
| Bn-scaff_16888_1-p1419203 | Bn-N14-p51872310          | gene |      |
| Bn-scaff_16888_1-p1426135 | Bn-N14-p51877587          | gene | exon |
| Bn-scaff_16888_1-p1431260 | Bn-N4-p18618578           | gene |      |
| Bn-scaff_16888_1-p1435412 | Bn-N14-p51884510          | gene | exon |
| Bn-scaff_16888_1-p1458728 | Bn-N4-p18652399           | gene | exon |
| Bn-scaff_16888_1-p1484731 | Bn-N14-p51926975          | gene |      |
| Bn-scaff_16888_1-p1538459 | Bn-N14-p51986211          | gene | exon |
| Bn-scaff_16888_1-p1587885 | Bn-N4-p18963932           | gene | exon |
| Bn-scaff_16888_1-p163778  | Bn-N14-p51029968          | gene |      |
| Bn-scaff_16888_1-p173815  | Bn-N14-p51035913          | gene |      |
| Bn-scaff_16888_1-p177029  | Bn-N14-p51039887          | gene | exon |
| Bn-scaff_16888_1-p1786111 | Bn-N14-p52189935          | gene |      |
| Bn-scaff_16888_1-p1786468 | Bn-N14-p52190292          | gene |      |
| Bn-scaff_16888_1-p1786897 | Bn-N14-p52190722          | gene |      |
| Bn-scaff_16888_1-p1790902 | Bn-N14-p52193999          | gene |      |
| Bn-scaff_16888_1-p1796428 | Bn-N14-p52200006          | gene | exon |
| Bn-scaff_16888_1-p1796793 | Bn-N14-p52200371          | gene | exon |
| Bn-scaff_16888_1-p1803946 | Bn-N14-p52207524          | gene | exon |
| Bn-scaff_16888_1-p1804195 | Bn-N14-p52207773          | gene | exon |
| Bn-scaff_16888_1-p1804460 | Bn-N14-p52208038          | gene | exon |
| Bn-scaff_16888_1-p1805449 | Bn-N14-p52209027          | gene |      |
| Bn-scaff_16888_1-p1805506 | Bn-N14-p52209085          | gene |      |
| Bn-scaff_16888_1-p1815678 | Bn-N14-p52216124          | gene | exon |
| Bn-scaff_16888_1-p1816216 | Bn-N14-p52216672          | gene |      |
| Bn-scaff_16888_1-p1817414 | Bn-N14-p52217881          | gene | exon |
| Bn-scaff_16888_1-p1855862 | Bn-N14-p522262832         | gene | exon |
| Bn-scaff_16888_1-p1866577 | Bn-N14-p522267076         | gene | exon |
| Bn-scaff_16888_1-p1867396 | Bn-N14-p522267888         | gene |      |
| Bn-scaff_16888_1-p1867573 | Bn-N14-p522268065         | gene | exon |
| Bn-scaff_16888_1-p189267  | Bn-N14-p51053084          | gene | exon |
| Bn-scaff_16888_1-p189582  | Bn-N14-p51053399          | gene | exon |
| Bn-scaff_16888_1-p193279  | Bn-N14-p51057431          | gene |      |
| Bn-scaff_16888_1-p242818  | Bn-N14-p51118397          | gene |      |
| Bn-scaff_16888_1-p384418  | Bn-Scaffold00305b-p101621 | gene |      |
| Bn-scaff_16888_1-p384581  | Bn-Scaffold00305b-p101449 | gene |      |

|                          |                          |      |      |
|--------------------------|--------------------------|------|------|
| Bn-scaff_16888_1-p469136 | Bn-Scaffold00305b-p38000 | gene | exon |
| Bn-scaff_16888_1-p516727 | Bn-N4-p17893486          | gene | exon |
| Bn-scaff_16888_1-p562258 | Bn-N4-p17923761          | gene |      |
| Bn-scaff_16888_1-p569403 | Bn-N10-p13830859         | gene | exon |
| Bn-scaff_16888_1-p569748 | Bn-N17-p43617607         | gene | exon |
| Bn-scaff_16888_1-p570617 | Bn-N1-p243904            | gene | exon |
| Bn-scaff_16888_1-p59297  | Bn-N14-p50917236         | gene | exon |
| Bn-scaff_16888_1-p637751 | Bn-N4-p17976885          | gene | exon |
| Bn-scaff_16888_1-p746439 | Bn-N14-p51174389         | gene |      |
| Bn-scaff_16888_1-p747827 | Bn-N14-p51175775         | gene | exon |
| Bn-scaff_16888_1-p748045 | Bn-N14-p51175992         | gene |      |
| Bn-scaff_16888_1-p748106 | Bn-N14-p51176053         | gene | exon |
| Bn-scaff_16888_1-p763522 | Bn-N14-p51189659         | gene | exon |
| Bn-scaff_16888_1-p764043 | Bn-N14-p51190178         | gene |      |
| Bn-scaff_16888_1-p80216  | Bn-N14-p50931701         | gene |      |
| Bn-scaff_16888_1-p80455  | Bn-N14-p50931940         | gene |      |
| Bn-scaff_16888_1-p830529 | Bn-N14-p51257595         | gene |      |
| Bn-scaff_16888_1-p830636 | Bn-N14-p51257702         | gene | exon |
| Bn-scaff_16888_1-p830750 | Bn-N14-p51257816         | gene | exon |
| Bn-scaff_16888_1-p88359  | Bn-N14-p50940118         | gene |      |
| Bn-scaff_16888_1-p894418 | Bn-N14-p51329477         | gene | exon |
| Bn-scaff_16888_1-p899785 | Bn-N14-p51334335         | gene | exon |
| Bn-scaff_16903_1-p168859 | Bn-N16-p16868686         | gene | exon |
| Bn-scaff_16903_1-p168943 | Bn-N16-p16868770         | gene | exon |
| Bn-scaff_16903_1-p230137 | Bn-N16-p16931563         | gene | exon |
| Bn-scaff_16903_1-p332611 | Bn-N16-p16669389         | gene | exon |
| Bn-scaff_16903_1-p34282  | Bn-N7-p13206730          | gene | exon |
| Bn-scaff_16903_1-p49977  | Bn-N16-p16732780         | gene | exon |
| Bn-scaff_16903_2-p305070 | Bn-N12-p20074167         | gene | exon |
| Bn-scaff_16903_3-p65171  | Bn-N9-p14231177          | gene |      |
| Bn-scaff_16912_1-p112569 | Bn-N19-p16504495         | gene |      |
| Bn-scaff_16912_1-p182324 | Bn-N19-p16554732         | gene |      |
| Bn-scaff_16912_1-p187495 | Bn-N19-p16569159         | gene |      |
| Bn-scaff_16912_1-p190291 | Bn-N19-p16571976         | gene |      |
| Bn-scaff_16912_1-p201151 | Bn-N19-p16592624         | gene |      |
| Bn-scaff_16925_1-p168760 | Bn-N13-p29946745         | gene |      |
| Bn-scaff_16925_1-p183625 | Bn-N13-p29943421         | gene | exon |
| Bn-scaff_16925_1-p216039 | Bn-N13-p29903419         | gene |      |
| Bn-scaff_16925_1-p227550 | Bn-N13-p29884060         | gene |      |
| Bn-scaff_16925_1-p247087 | Bn-N13-p29864198         | gene |      |
| Bn-scaff_16925_1-p87032  | Bn-N13-p30046234         | gene | exon |
| Bn-scaff_16926_1-p9295   | Bn-N12-p29027779         | gene | exon |
| Bn-scaff_16929_1-p154513 | Bn-N1-p18655777          | gene | exon |
| Bn-scaff_16929_1-p155104 | Bn-N11-p30869026         | gene |      |
| Bn-scaff_16929_1-p175989 | Bn-N11-p30847102         | gene | exon |
| Bn-scaff_16929_1-p378424 | Bn-N1-p18497212          | gene | exon |
| Bn-scaff_16929_1-p383176 | Bn-N1-p18471102          | gene |      |
| Bn-scaff_16929_1-p495739 | Bn-N11-p30574635         | gene |      |
| Bn-scaff_16929_1-p497165 | Bn-N11-p30573208         | gene | exon |
| Bn-scaff_16929_1-p797092 | Bn-N11-p30281752         | gene | exon |
| Bn-scaff_16929_1-p841653 | Bn-N1-p18188897          | gene | exon |
| Bn-scaff_16929_1-p842076 | Bn-N1-p18188474          | gene | exon |

|                          |                        |      |      |
|--------------------------|------------------------|------|------|
| Bn-scaff_16929_1-p886262 | Bn-N11-p30185925       | gene |      |
| Bn-scaff_16929_1-p886405 | Bn-N11-p30185782       | gene | exon |
| Bn-scaff_16929_1-p887518 | Bn-N1-p18183475        | gene |      |
| Bn-scaff_16929_1-p887720 | Bn-N11-p30184416       | gene | exon |
| Bn-scaff_16934_1-p145998 | Bn-N12-p7629494        | gene |      |
| Bn-scaff_16934_1-p146521 | Bn-N12-p7628955        | gene |      |
| Bn-scaff_16934_1-p148328 | Bn-N12-p7627148        | gene |      |
| Bn-scaff_16934_1-p148330 | Bn-N12-p7627148        | gene |      |
| Bn-scaff_16934_1-p167048 | Bn-N12-p7607907        | gene |      |
| Bn-scaff_16934_1-p409102 | Bn-N12-p7388807        | gene |      |
| Bn-scaff_16934_1-p411362 | Bn-N12-p7386557        | gene |      |
| Bn-scaff_16934_1-p425999 | Bn-N12-p7371080        | gene |      |
| Bn-scaff_16934_1-p426000 | Bn-N12-p7371079        | gene |      |
| Bn-scaff_16934_1-p432017 | Bn-N12-p7365092        | gene |      |
| Bn-scaff_16934_1-p98107  | Bn-Scaffold01300-p8957 | gene |      |
| Bn-scaff_16935_1-p102075 | Bn-N14-p677430         | gene |      |
| Bn-scaff_16935_1-p116139 | Bn-N14-p691582         | gene |      |
| Bn-scaff_16935_1-p116701 | Bn-N14-p692149         | gene |      |
| Bn-scaff_16935_1-p220838 | Bn-N14-p785230         | gene |      |
| Bn-scaff_16935_1-p222793 | Bn-N14-p787197         | gene |      |
| Bn-scaff_16935_1-p69744  | Bn-N14-p647832         | gene |      |
| Bn-scaff_16935_1-p93509  | Bn-N14-p666337         | gene |      |
| Bn-scaff_16935_1-p98166  | Bn-N14-p671258         | gene |      |
| Bn-scaff_16935_1-p99442  | Bn-N14-p672526         | gene |      |
| Bn-scaff_16962_1-p359041 | Bn-N18-p22715061       | gene | exon |
| Bn-scaff_16962_1-p376380 | Bn-N18-p22712824       | gene | exon |
| Bn-scaff_16962_1-p449385 | Bn-N18-p22668381       | gene | exon |
| Bn-scaff_16962_1-p454442 | Bn-N18-p22663905       | gene |      |
| Bn-scaff_16962_1-p555042 | Bn-N18-p22570835       | gene |      |
| Bn-scaff_16962_1-p565075 | Bn-N18-p22559135       | gene |      |
| Bn-scaff_16962_1-p578438 | Bn-N18-p22552608       | gene | exon |
| Bn-scaff_16975_1-p129887 | Bn-N17-p9285376        | gene | exon |
| Bn-scaff_16975_1-p177167 | Bn-N17-p9236970        | gene |      |
| Bn-scaff_16975_1-p6371   | Bn-N17-p9391971        | gene |      |
| Bn-scaff_16975_1-p95169  | Bn-N17-p9320151        | gene |      |
| Bn-scaff_16976_1-p12018  | Bn-N14-p47099344       | gene |      |
| Bn-scaff_16984_1-p129923 | Bn-N16-p3382589        | gene |      |
| Bn-scaff_16984_1-p130673 | Bn-N16-p3381841        | gene | exon |
| Bn-scaff_16984_1-p130702 | Bn-N16-p3381812        | gene | exon |
| Bn-scaff_16984_1-p200546 | Bn-N16-p3309877        | gene |      |
| Bn-scaff_16984_1-p204543 | Bn-N16-p3305881        | gene | exon |
| Bn-scaff_16984_1-p21869  | Bn-N16-p3491913        | gene |      |
| Bn-scaff_16984_1-p22326  | Bn-N16-p3491456        | gene |      |
| Bn-scaff_16984_1-p22381  | Bn-N16-p3491401        | gene |      |
| Bn-scaff_16984_1-p22409  | Bn-N16-p3491373        | gene |      |
| Bn-scaff_16984_1-p22475  | Bn-N16-p3491307        | gene |      |
| Bn-scaff_16984_1-p287791 | Bn-N16-p3235572        | gene | exon |
| Bn-scaff_16984_1-p312166 | Bn-N16-p3212298        | gene |      |
| Bn-scaff_16984_1-p324673 | Bn-N16-p3196094        | gene | exon |
| Bn-scaff_16984_1-p353017 | Bn-N16-p3155077        | gene | exon |
| Bn-scaff_16984_1-p353514 | Bn-N16-p3154580        | gene | exon |
| Bn-scaff_16984_1-p353573 | Bn-N6-p2313672         | gene | exon |



|                           |                  |      |      |
|---------------------------|------------------|------|------|
| Bn-scaff_16984_1-p55002   | Bn-N16-p3458189  | gene |      |
| Bn-scaff_16996_1-p283285  | Bn-N13-p62743952 | gene | exon |
| Bn-scaff_16996_1-p335143  | Bn-N8-p12415213  | gene | exon |
| Bn-scaff_17028_1-p134055  | Bn-N19-p49462799 | gene |      |
| Bn-scaff_17028_1-p166275  | Bn-N19-p49511084 | gene | exon |
| Bn-scaff_17028_1-p1940    | Bn-N10-p12975091 | gene | exon |
| Bn-scaff_17028_1-p431988  | Bn-N19-p49750038 | gene |      |
| Bn-scaff_17028_1-p432005  | Bn-N19-p49750055 | gene |      |
| Bn-scaff_17028_1-p432707  | Bn-N19-p49750758 | gene |      |
| Bn-scaff_17028_1-p444352  | Bn-N19-p49761914 | gene | exon |
| Bn-scaff_17028_1-p444459  | Bn-N19-p49762022 | gene | exon |
| Bn-scaff_17036_1-p2905    | Bn-N11-p36045115 | gene | exon |
| Bn-scaff_17036_1-p4953    | Bn-N11-p36043057 | gene | exon |
| Bn-scaff_17036_1-p91726   | Bn-N11-p35955666 | gene |      |
| Bn-scaff_17036_1-p94786   | Bn-N1-p21421992  | gene | exon |
| Bn-scaff_17042_1-p14824   | Bn-N13-p59278951 | gene | exon |
| Bn-scaff_17042_1-p14943   | Bn-N13-p59279070 | gene | exon |
| Bn-scaff_17042_1-p15113   | Bn-N13-p59279240 | gene | exon |
| Bn-scaff_17042_1-p298610  | Bn-N13-p59561211 | gene |      |
| Bn-scaff_17042_1-p319410  | Bn-N13-p59579439 | gene | exon |
| Bn-scaff_17042_1-p359732  | Bn-N8-p10979512  | gene |      |
| Bn-scaff_17042_1-p359779  | Bn-N8-p10979559  | gene | exon |
| Bn-scaff_17042_1-p361073  | Bn-N13-p59625974 | gene | exon |
| Bn-scaff_17042_1-p456580  | Bn-N13-p59729923 | gene | exon |
| Bn-scaff_17042_1-p458609  | Bn-N13-p59732075 | gene |      |
| Bn-scaff_17042_1-p458664  | Bn-N13-p59732130 | gene |      |
| Bn-scaff_17042_1-p516850  | Bn-N13-p59792507 | gene | exon |
| Bn-scaff_17042_1-p517224  | Bn-N13-p59792881 | gene |      |
| Bn-scaff_17042_1-p52695   | Bn-N13-p59312403 | gene | exon |
| Bn-scaff_17042_1-p642311  | Bn-N13-p59908230 | gene |      |
| Bn-scaff_17042_1-p694383  | Bn-N13-p60001509 | gene |      |
| Bn-scaff_17042_1-p701551  | Bn-N13-p60008192 | gene | exon |
| Bn-scaff_17044_1-p310881  | Bn-N9-p20669226  | gene | exon |
| Bn-scaff_17044_1-p521346  | Bn-N6-p17791054  | gene | exon |
| Bn-scaff_17044_1-p522803  | Bn-N13-p36668857 | gene |      |
| Bn-scaff_17044_1-p529538  | Bn-N13-p36662124 | gene |      |
| Bn-scaff_17044_1-p545336  | Bn-N13-p36646684 | gene |      |
| Bn-scaff_17044_1-p612759  | Bn-N13-p36580375 | gene |      |
| Bn-scaff_17044_1-p614454  | Bn-N13-p36578680 | gene |      |
| Bn-scaff_17044_1-p614478  | Bn-N13-p36578656 | gene |      |
| Bn-scaff_17044_1-p614535  | Bn-N13-p36578599 | gene |      |
| Bn-scaff_17044_1-p630648  | Bn-N13-p36558598 | gene | exon |
| Bn-scaff_17044_1-p631059  | Bn-N13-p36558187 | gene | exon |
| Bn-scaff_17048_1-p105215  | Bn-N19-p26296562 | gene |      |
| Bn-scaff_17048_1-p206502  | Bn-N19-p26189233 | gene |      |
| Bn-scaff_17067_1-p1117534 | Bn-N18-p3090365  | gene | exon |
| Bn-scaff_17067_1-p507838  | Bn-N12-p29943968 | gene |      |
| Bn-scaff_17067_1-p716724  | Bn-N12-p30142152 | gene |      |
| Bn-scaff_17077_1-p329966  | Bn-N2-p12363988  | gene |      |
| Bn-scaff_17077_1-p588579  | Bn-N2-p12469235  | gene | exon |
| Bn-scaff_17077_1-p589085  | Bn-N2-p12469741  | gene | exon |
| Bn-scaff_17079_1-p102621  | Bn-N2-p11986827  | gene | exon |

|                           |                  |      |      |
|---------------------------|------------------|------|------|
| Bn-scaff_17079_1-p28593   | Bn-N4-p12479382  | gene |      |
| Bn-scaff_17079_1-p79663   | Bn-N4-p12455274  | gene | exon |
| Bn-scaff_17084_1-p234852  | Bn-N17-p4947848  | gene |      |
| Bn-scaff_17084_1-p256953  | Bn-N17-p4963722  | gene |      |
| Bn-scaff_17084_1-p257435  | Bn-N17-p4964204  | gene |      |
| Bn-scaff_17084_1-p341281  | Bn-N7-p2097330   | gene | exon |
| Bn-scaff_17084_1-p850947  | Bn-N9-p5350421   | gene | exon |
| Bn-scaff_17084_1-p851121  | Bn-N9-p5350247   | gene | exon |
| Bn-scaff_17084_1-p896728  | Bn-N9-p5340759   | gene | exon |
| Bn-scaff_17088_1-p239732  | Bn-N19-p46866964 | gene |      |
| Bn-scaff_17088_1-p240030  | Bn-N10-p11610150 | gene |      |
| Bn-scaff_17088_1-p245502  | Bn-N10-p11615606 | gene | exon |
| Bn-scaff_17088_1-p327069  | Bn-N19-p46949448 | gene |      |
| Bn-scaff_17088_1-p337567  | Bn-N10-p11698760 | gene | exon |
| Bn-scaff_17088_1-p353765  | Bn-N10-p11718757 | gene | exon |
| Bn-scaff_17088_1-p444918  | Bn-N19-p47069927 | gene |      |
| Bn-scaff_17088_1-p445721  | Bn-N10-p11778172 | gene | exon |
| Bn-scaff_17088_1-p455184  | Bn-N19-p47080269 | gene |      |
| Bn-scaff_17088_2-p124580  | Bn-N16-p14103068 | gene |      |
| Bn-scaff_17088_2-p124900  | Bn-N16-p14103387 | gene |      |
| Bn-scaff_17088_2-p126958  | Bn-N16-p14105439 | gene |      |
| Bn-scaff_17088_2-p163374  | Bn-N16-p14136006 | gene |      |
| Bn-scaff_17088_2-p236616  | Bn-N5-p9929814   | gene | exon |
| Bn-scaff_17088_3-p117282  | Bn-N5-p10023837  | gene | exon |
| Bn-scaff_17088_3-p123625  | Bn-N5-p10027591  | gene | exon |
| Bn-scaff_17088_3-p242403  | Bn-N16-p13543105 | gene |      |
| Bn-scaff_17088_3-p275459  | Bn-N16-p13481351 | gene |      |
| Bn-scaff_17088_3-p61230   | Bn-N16-p13710878 | gene | exon |
| Bn-scaff_17092_1-p426203  | Bn-N5-p11876624  | gene | exon |
| Bn-scaff_17109_1-p1044330 | Bn-N12-p41825672 | gene |      |
| Bn-scaff_17109_1-p1044350 | Bn-N12-p41825651 | gene | exon |
| Bn-scaff_17109_1-p1044411 | Bn-N12-p41825591 | gene | exon |
| Bn-scaff_17109_1-p1058256 | Bn-N12-p41811421 | gene |      |
| Bn-scaff_17109_1-p1096035 | Bn-N12-p41767921 | gene | exon |
| Bn-scaff_17109_1-p1659373 | Bn-N10-p14962795 | gene |      |
| Bn-scaff_17109_1-p1694927 | Bn-N19-p52591053 | gene |      |
| Bn-scaff_17109_1-p172384  | Bn-N19-p22829826 | gene |      |
| Bn-scaff_17109_1-p1868715 | Bn-N10-p14816420 | gene | exon |
| Bn-scaff_17109_1-p1959932 | Bn-N19-p52346260 | gene |      |
| Bn-scaff_17109_1-p2172912 | Bn-N15-p25601259 | gene |      |
| Bn-scaff_17109_1-p2174572 | Bn-N10-p14595133 | gene | exon |
| Bn-scaff_17109_1-p280020  | Bn-N19-p22723404 | gene | exon |
| Bn-scaff_17109_1-p387181  | Bn-N9-p14087191  | gene |      |
| Bn-scaff_17109_1-p498072  | Bn-N12-p42405769 | gene | exon |
| Bn-scaff_17109_1-p508730  | Bn-N12-p42395018 | gene |      |
| Bn-scaff_17109_1-p509718  | Bn-N12-p42394030 | gene |      |
| Bn-scaff_17109_1-p548640  | Bn-N12-p42356118 | gene | exon |
| Bn-scaff_17109_1-p548999  | Bn-N12-p42355759 | gene |      |
| Bn-scaff_17109_1-p556641  | Bn-N12-p42348325 | gene |      |
| Bn-scaff_17109_1-p557169  | Bn-N12-p42347797 | gene | exon |
| Bn-scaff_17109_1-p569458  | Bn-N2-p26212825  | gene |      |
| Bn-scaff_17109_1-p626573  | Bn-N12-p42268794 | gene |      |

|                          |                  |      |      |
|--------------------------|------------------|------|------|
| Bn-scaff_17109_1-p687016 | Bn-N12-p42196603 | gene | exon |
| Bn-scaff_17109_1-p690819 | Bn-N12-p42192904 | gene | exon |
| Bn-scaff_17109_1-p691274 | Bn-N12-p42192449 | gene | exon |
| Bn-scaff_17109_1-p715785 | Bn-N12-p42172033 | gene |      |
| Bn-scaff_17109_1-p796852 | Bn-N2-p26113992  | gene | exon |
| Bn-scaff_17109_1-p827316 | Bn-N12-p42070274 | gene |      |
| Bn-scaff_17109_1-p832774 | Bn-N12-p42064838 | gene |      |
| Bn-scaff_17109_1-p833859 | Bn-N12-p42063752 | gene |      |
| Bn-scaff_17109_1-p857649 | Bn-N12-p42038852 | gene |      |
| Bn-scaff_17109_1-p859844 | Bn-N12-p42036627 | gene |      |
| Bn-scaff_17109_1-p868072 | Bn-N12-p42027555 | gene |      |
| Bn-scaff_17109_1-p868668 | Bn-N2-p26054274  | gene | exon |
| Bn-scaff_17109_1-p889768 | Bn-N12-p42005074 | gene |      |
| Bn-scaff_17109_1-p899388 | Bn-N12-p41995560 | gene | exon |
| Bn-scaff_17109_1-p910796 | Bn-N12-p41985546 | gene | exon |
| Bn-scaff_17109_1-p910811 | Bn-N12-p41985531 | gene | exon |
| Bn-scaff_17109_1-p982274 | Bn-N12-p41904103 | gene | exon |
| Bn-scaff_17109_1-p982337 | Bn-N12-p41904040 | gene | exon |
| Bn-scaff_17109_1-p997171 | Bn-N12-p41888813 | gene |      |
| Bn-scaff_17109_2-p150259 | Bn-N10-p15439225 | gene |      |
| Bn-scaff_17109_2-p150298 | Bn-N10-p15439185 | gene | exon |
| Bn-scaff_17109_2-p188015 | Bn-N19-p53374219 | gene | exon |
| Bn-scaff_17109_2-p190946 | Bn-N19-p53371260 | gene | exon |
| Bn-scaff_17109_2-p205003 | Bn-N19-p53357982 | gene | exon |
| Bn-scaff_17109_2-p206902 | Bn-N10-p15400129 | gene | exon |
| Bn-scaff_17109_2-p207004 | Bn-N10-p15400027 | gene |      |
| Bn-scaff_17109_2-p315902 | Bn-N3-p18897762  | gene | exon |
| Bn-scaff_17109_2-p361161 | Bn-N12-p1826636  | gene |      |
| Bn-scaff_17109_2-p364002 | Bn-N19-p53094461 | gene | exon |
| Bn-scaff_17109_2-p370345 | Bn-N19-p53090532 | gene |      |
| Bn-scaff_17109_2-p392938 | Bn-N10-p15256965 | gene | exon |
| Bn-scaff_17109_2-p405700 | Bn-N19-p53059810 | gene | exon |
| Bn-scaff_17109_2-p406679 | Bn-N19-p53058830 | gene | exon |
| Bn-scaff_17109_2-p413792 | Bn-N19-p53051757 | gene |      |
| Bn-scaff_17109_2-p79906  | Bn-N10-p15465109 | gene |      |
| Bn-scaff_17109_4-p114755 | Bn-N12-p41266997 | gene |      |
| Bn-scaff_17109_4-p114822 | Bn-N12-p41266930 | gene |      |
| Bn-scaff_17109_4-p159217 | Bn-N12-p41230648 | gene | exon |
| Bn-scaff_17109_4-p283045 | Bn-N12-p41191535 | gene |      |
| Bn-scaff_17109_4-p95949  | Bn-N12-p41285545 | gene | exon |
| Bn-scaff_17109_4-p96390  | Bn-N12-p41285105 | gene | exon |
| Bn-scaff_17109_4-p97410  | Bn-N12-p41284084 | gene | exon |
| Bn-scaff_17119_1-p114444 | Bn-N8-p12891309  | gene | exon |
| Bn-scaff_17119_1-p114898 | Bn-N8-p12891764  | gene | exon |
| Bn-scaff_17119_1-p115218 | Bn-N8-p12892084  | gene |      |
| Bn-scaff_17119_1-p172528 | Bn-N8-p12909861  | gene | exon |
| Bn-scaff_17119_1-p183714 | Bn-N13-p63388579 | gene |      |
| Bn-scaff_17119_1-p247998 | Bn-N13-p63470097 | gene | exon |
| Bn-scaff_17119_1-p273017 | Bn-N13-p63483753 | gene | exon |
| Bn-scaff_17119_1-p298555 | Bn-N13-p63505621 | gene | exon |
| Bn-scaff_17119_1-p298861 | Bn-N13-p63505927 | gene |      |
| Bn-scaff_17119_1-p299060 | Bn-N13-p63506126 | gene | exon |

|                           |                          |      |      |
|---------------------------|--------------------------|------|------|
| Bn-scaff_17119_1-p300606  | Bn-N13-p63506858         | gene |      |
| Bn-scaff_17119_1-p410578  | Bn-N13-p63620459         | gene |      |
| Bn-scaff_17119_1-p410774  | Bn-N13-p63620655         | gene | exon |
| Bn-scaff_17119_1-p69237   | Bn-N13-p63308406         | gene | exon |
| Bn-scaff_17119_1-p84986   | Bn-N8-p12877341          | gene |      |
| Bn-scaff_17119_1-p85292   | Bn-N8-p12877637          | gene | exon |
| Bn-scaff_17163_1-p221326  | Bn-N11-p44946293         | gene |      |
| Bn-scaff_17163_1-p42534   | Bn-N1-p26793695          | gene |      |
| Bn-scaff_17174_1-p114224  | Bn-N19-p17203746         | gene | exon |
| Bn-scaff_17174_1-p216229  | Bn-N19-p17082722         | gene |      |
| Bn-scaff_17174_1-p291582  | Bn-N19-p17010571         | gene |      |
| Bn-scaff_17174_1-p37586   | Bn-N19-p17272421         | gene | exon |
| Bn-scaff_17174_1-p38610   | Bn-N19-p17271414         | gene | exon |
| Bn-scaff_17174_1-p400192  | Bn-N19-p16959792         | gene |      |
| Bn-scaff_17174_1-p41873   | Bn-N19-p17268150         | gene |      |
| Bn-scaff_17174_1-p88911   | Bn-N19-p17203737         | gene | exon |
| Bn-scaff_17177_1-p105819  | Bn-N2-p28212988          | gene | exon |
| Bn-scaff_17177_1-p131333  | Bn-N2-p28191825          | gene |      |
| Bn-scaff_17177_1-p161160  | Bn-Scaffold00372b-p50350 | gene | exon |
| Bn-scaff_17177_1-p381225  | Bn-N12-p45544093         | gene |      |
| Bn-scaff_17177_1-p385429  | Bn-N12-p45539903         | gene |      |
| Bn-scaff_17177_1-p409992  | Bn-N12-p45515087         | gene | exon |
| Bn-scaff_17177_1-p462784  | Bn-N12-p45461870         | gene | exon |
| Bn-scaff_17177_1-p463843  | Bn-N2-p28033916          | gene |      |
| Bn-scaff_17177_1-p504084  | Bn-N12-p45406485         | gene | exon |
| Bn-scaff_17177_1-p593541  | Bn-N2-p27936056          | gene |      |
| Bn-scaff_17177_1-p667432  | Bn-N12-p45200837         | gene | exon |
| Bn-scaff_17177_1-p667932  | Bn-N2-p27868077          | gene |      |
| Bn-scaff_17177_1-p731457  | Bn-N12-p45137315         | gene | exon |
| Bn-scaff_17180_1-p153332  | Bn-N14-p30536203         | gene | exon |
| Bn-scaff_17180_1-p253719  | Bn-N14-p30628272         | gene | exon |
| Bn-scaff_17180_1-p263031  | Bn-N14-p30637109         | gene |      |
| Bn-scaff_17180_1-p263223  | Bn-N14-p30637301         | gene | exon |
| Bn-scaff_17180_1-p471429  | Bn-N2-p24295289          | gene | exon |
| Bn-scaff_17180_1-p59560   | Bn-N14-p30328864         | gene | exon |
| Bn-scaff_17180_1-p72890   | Bn-N14-p30314792         | gene |      |
| Bn-scaff_17190_1-p1116406 | Bn-N19-p6038475          | gene | exon |
| Bn-scaff_17190_1-p1119408 | Bn-N19-p6041483          | gene |      |
| Bn-scaff_17190_1-p1119825 | Bn-N19-p6041900          | gene |      |
| Bn-scaff_17190_1-p1134270 | Bn-N19-p6044429          | gene |      |
| Bn-scaff_17190_1-p18409   | Bn-N9-p3875259           | gene | exon |
| Bn-scaff_17190_1-p193506  | Bn-N19-p5182418          | gene | exon |
| Bn-scaff_17190_1-p237474  | Bn-N9-p4020145           | gene |      |
| Bn-scaff_17190_1-p237949  | Bn-N9-p4020612           | gene | exon |
| Bn-scaff_17190_1-p238452  | Bn-N9-p4021117           | gene | exon |
| Bn-scaff_17190_1-p495674  | Bn-N12-p46320791         | gene | exon |
| Bn-scaff_17190_1-p660881  | Bn-N19-p5638360          | gene | exon |
| Bn-scaff_17190_1-p9206    | Bn-N19-p5009107          | gene | exon |
| Bn-scaff_17203_1-p315290  | Bn-N11-p16553834         | gene | exon |
| Bn-scaff_17203_1-p318274  | Bn-N11-p16550844         | gene |      |
| Bn-scaff_17203_1-p534613  | Bn-N1-p10670256          | gene | exon |
| Bn-scaff_17203_1-p544482  | Bn-N11-p16328950         | gene |      |

|                           |                  |      |      |
|---------------------------|------------------|------|------|
| Bn-scaff_17227_1-p1101239 | Bn-N8-p20113458  | gene |      |
| Bn-scaff_17227_1-p1380795 | Bn-N18-p22264975 | gene | exon |
| Bn-scaff_17227_1-p253510  | Bn-N18-p21154511 | gene |      |
| Bn-scaff_17227_1-p626934  | Bn-N18-p21530494 | gene |      |
| Bn-scaff_17227_1-p697412  | Bn-N8-p20308029  | gene | exon |
| Bn-scaff_17227_1-p697710  | Bn-N8-p20307730  | gene |      |
| Bn-scaff_17227_1-p699721  | Bn-N8-p20305759  | gene |      |
| Bn-scaff_17227_1-p699815  | Bn-N8-p20305665  | gene |      |
| Bn-scaff_17227_1-p700248  | Bn-N8-p20305257  | gene |      |
| Bn-scaff_17227_1-p701651  | Bn-N6-p3486262   | gene | exon |
| Bn-scaff_17227_1-p895880  | Bn-N8-p20191647  | gene |      |
| Bn-scaff_17227_1-p909256  | Bn-N18-p21792423 | gene |      |
| Bn-scaff_17227_1-p991724  | Bn-N18-p21877741 | gene | exon |
| Bn-scaff_17233_1-p35444   | Bn-N11-p36091941 | gene |      |
| Bn-scaff_17233_1-p9290    | Bn-N11-p36057329 | gene |      |
| Bn-scaff_17249_1-p1042660 | Bn-N6-p15368915  | gene | exon |
| Bn-scaff_17249_1-p1054417 | Bn-N6-p15378213  | gene |      |
| Bn-scaff_17249_1-p1094761 | Bn-N13-p39918456 | gene |      |
| Bn-scaff_17249_1-p1295955 | Bn-N13-p39818348 | gene |      |
| Bn-scaff_17249_1-p749288  | Bn-N13-p40369251 | gene |      |
| Bn-scaff_17249_1-p985993  | Bn-N13-p40093373 | gene | exon |
| Bn-scaff_17257_1-p97933   | Bn-N8-p9121603   | gene | exon |
| Bn-scaff_17257_1-p98421   | Bn-N8-p9122111   | gene | exon |
| Bn-scaff_17257_1-p98652   | Bn-N18-p16582401 | gene | exon |
| Bn-scaff_17275_1-p34341   | Bn-N19-p46571823 | gene | exon |
| Bn-scaff_17289_1-p18657   | Bn-N12-p35641314 | gene | exon |
| Bn-scaff_17289_1-p460845  | Bn-N2-p21761539  | gene | exon |
| Bn-scaff_17289_1-p461538  | Bn-N2-p21760848  | gene |      |
| Bn-scaff_17289_1-p627205  | Bn-N2-p21597671  | gene | exon |
| Bn-scaff_17289_1-p674943  | Bn-N12-p35058761 | gene |      |
| Bn-scaff_17289_1-p807830  | Bn-N12-p34919305 | gene |      |
| Bn-scaff_17289_1-p808294  | Bn-N12-p34918841 | gene | exon |
| Bn-scaff_17289_1-p808429  | Bn-N12-p34918706 | gene | exon |
| Bn-scaff_17289_1-p808558  | Bn-N12-p34918577 | gene |      |
| Bn-scaff_17289_1-p882945  | Bn-N9-p26499791  | gene | exon |
| Bn-scaff_17291_1-p131907  | Bn-N17-p36209498 | gene |      |
| Bn-scaff_17291_1-p188013  | Bn-N17-p36132457 | gene | exon |
| Bn-scaff_17291_1-p216152  | Bn-N17-p36103147 | gene | exon |
| Bn-scaff_17291_1-p22307   | Bn-N6-p20279179  | gene | exon |
| Bn-scaff_17291_1-p226218  | Bn-N17-p36093081 | gene | exon |
| Bn-scaff_17291_1-p239559  | Bn-N13-p6404488  | gene |      |
| Bn-scaff_17291_1-p249622  | Bn-N17-p36064701 | gene |      |
| Bn-scaff_17291_1-p250443  | Bn-N17-p36063881 | gene |      |
| Bn-scaff_17291_1-p305279  | Bn-N17-p36004078 | gene |      |
| Bn-scaff_17291_1-p305613  | Bn-N6-p20470187  | gene | exon |
| Bn-scaff_17291_1-p340775  | Bn-N17-p35959762 | gene | exon |
| Bn-scaff_17291_1-p360274  | Bn-N17-p35939145 | gene |      |
| Bn-scaff_17291_1-p360422  | Bn-N17-p35938997 | gene |      |
| Bn-scaff_17291_1-p398311  | Bn-N17-p35900093 | gene |      |
| Bn-scaff_17291_1-p398501  | Bn-N17-p35899903 | gene |      |
| Bn-scaff_17291_1-p409375  | Bn-N17-p35888579 | gene |      |
| Bn-scaff_17291_1-p409673  | Bn-N17-p35888281 | gene | exon |

|                           |                        |      |      |
|---------------------------|------------------------|------|------|
| Bn-scaff_17291_1-p409933  | Bn-N17-p35888021       | gene |      |
| Bn-scaff_17291_1-p423933  | Bn-N17-p35864789       | gene |      |
| Bn-scaff_17291_1-p467455  | Bn-N17-p35814515       | gene | exon |
| Bn-scaff_17291_1-p467671  | Bn-N17-p35814298       | gene | exon |
| Bn-scaff_17291_1-p475978  | Bn-N6-p20607579        | gene | exon |
| Bn-scaff_17291_1-p476220  | Bn-N17-p35806298       | gene |      |
| Bn-scaff_17291_1-p722344  | Bn-N17-p35630374       | gene |      |
| Bn-scaff_17291_1-p732305  | Bn-N6-p20751653        | gene | exon |
| Bn-scaff_17291_1-p732388  | Bn-N6-p20751736        | gene | exon |
| Bn-scaff_17291_1-p779676  | Bn-N17-p35573134       | gene | exon |
| Bn-scaff_17291_1-p844298  | Bn-N17-p35499700       | gene |      |
| Bn-scaff_17291_1-p867646  | Bn-N17-p35476841       | gene |      |
| Bn-scaff_17297_1-p214513  | Bn-N19-p6321757        | gene | exon |
| Bn-scaff_17298_1-p1055071 | Bn-N13-p26575324       | gene |      |
| Bn-scaff_17298_1-p1058052 | Bn-N13-p26578315       | gene |      |
| Bn-scaff_17298_1-p1064361 | Bn-N13-p26584639       | gene | exon |
| Bn-scaff_17298_1-p1086876 | Bn-N13-p26602110       | gene | exon |
| Bn-scaff_17298_1-p1092986 | Bn-N13-p26608211       | gene |      |
| Bn-scaff_17298_1-p1136461 | Bn-Scaffold01203-p8906 | gene |      |
| Bn-scaff_17298_1-p1170798 | Bn-N13-p26697986       | gene |      |
| Bn-scaff_17298_1-p1173132 | Bn-N13-p26700341       | gene |      |
| Bn-scaff_17298_1-p1173360 | Bn-N3-p17132038        | gene | exon |
| Bn-scaff_17298_1-p1173974 | Bn-N3-p17132683        | gene | exon |
| Bn-scaff_17298_1-p1174018 | Bn-N3-p17132728        | gene | exon |
| Bn-scaff_17298_1-p1174337 | Bn-N13-p26701563       | gene |      |
| Bn-scaff_17298_1-p119718  | Bn-N13-p25591525       | gene | exon |
| Bn-scaff_17298_1-p1249353 | Bn-N13-p26783811       | gene |      |
| Bn-scaff_17298_1-p1249839 | Bn-N13-p26784330       | gene |      |
| Bn-scaff_17298_1-p1251153 | Bn-N13-p26785623       | gene | exon |
| Bn-scaff_17298_1-p1302996 | Bn-N13-p26834187       | gene |      |
| Bn-scaff_17298_1-p1320886 | Bn-N13-p26848042       | gene |      |
| Bn-scaff_17298_1-p1321549 | Bn-N13-p26848688       | gene | exon |
| Bn-scaff_17298_1-p134814  | Bn-N13-p25605150       | gene | exon |
| Bn-scaff_17298_1-p1370828 | Bn-N13-p26902100       | gene | exon |
| Bn-scaff_17298_1-p138775  | Bn-N13-p25609110       | gene |      |
| Bn-scaff_17298_1-p139159  | Bn-N13-p25609494       | gene |      |
| Bn-scaff_17298_1-p140847  | Bn-N13-p25611164       | gene |      |
| Bn-scaff_17298_1-p1471882 | Bn-N13-p26998039       | gene | exon |
| Bn-scaff_17298_1-p1558470 | Bn-N11-p39924400       | gene | exon |
| Bn-scaff_17298_1-p1744778 | Bn-N3-p17471016        | gene |      |
| Bn-scaff_17298_1-p1758734 | Bn-N3-p27246678        | gene | exon |
| Bn-scaff_17298_1-p1964250 | Bn-N13-p27488482       | gene | exon |
| Bn-scaff_17298_1-p1972479 | Bn-N5-p20306526        | gene | exon |
| Bn-scaff_17298_1-p2045159 | Bn-N13-p27509870       | gene |      |
| Bn-scaff_17298_1-p2049303 | Bn-N13-p27515019       | gene | exon |
| Bn-scaff_17298_1-p2096293 | Bn-N13-p27568024       | gene |      |
| Bn-scaff_17298_1-p2097436 | Bn-N13-p27569145       | gene |      |
| Bn-scaff_17298_1-p2114220 | Bn-N5-p20945128        | gene | exon |
| Bn-scaff_17298_1-p2114326 | Bn-N13-p27581498       | gene |      |
| Bn-scaff_17298_1-p220381  | Bn-N13-p25693527       | gene | exon |
| Bn-scaff_17298_1-p233298  | Bn-N13-p25705063       | gene | exon |
| Bn-scaff_17298_1-p250036  | Bn-N13-p25722744       | gene | exon |

|                          |                  |      |      |
|--------------------------|------------------|------|------|
| Bn-scaff_17298_1-p290841 | Bn-N13-p25764799 | gene | exon |
| Bn-scaff_17298_1-p302442 | Bn-N13-p25777742 | gene |      |
| Bn-scaff_17298_1-p302930 | Bn-N13-p25778578 | gene | exon |
| Bn-scaff_17298_1-p307943 | Bn-N13-p25785157 | gene |      |
| Bn-scaff_17298_1-p504210 | Bn-N3-p16676434  | gene |      |
| Bn-scaff_17298_1-p586528 | Bn-N13-p26047571 | gene |      |
| Bn-scaff_17298_1-p61168  | Bn-N13-p25554878 | gene |      |
| Bn-scaff_17298_1-p61238  | Bn-N13-p25554948 | gene | exon |
| Bn-scaff_17298_1-p627166 | Bn-N13-p26100579 | gene |      |
| Bn-scaff_17298_1-p649558 | Bn-N13-p26118165 | gene | exon |
| Bn-scaff_17298_1-p663900 | Bn-N3-p16755441  | gene | exon |
| Bn-scaff_17298_1-p679830 | Bn-N13-p26157491 | gene |      |
| Bn-scaff_17298_1-p685381 | Bn-N13-p26163067 | gene |      |
| Bn-scaff_17298_1-p699493 | Bn-N13-p26177116 | gene |      |
| Bn-scaff_17298_1-p705887 | Bn-N13-p26183664 | gene |      |
| Bn-scaff_17298_1-p720480 | Bn-N12-p36105673 | gene |      |
| Bn-scaff_17298_1-p775436 | Bn-N13-p26283261 | gene | exon |
| Bn-scaff_17298_1-p779577 | Bn-N13-p26287402 | gene | exon |
| Bn-scaff_17298_1-p795098 | Bn-N3-p16864326  | gene |      |
| Bn-scaff_17298_1-p928353 | Bn-N3-p16966820  | gene | exon |
| Bn-scaff_17298_1-p928410 | Bn-N3-p16966877  | gene | exon |
| Bn-scaff_17298_1-p936345 | Bn-N13-p26464329 | gene |      |
| Bn-scaff_17316_1-p35218  | Bn-N14-p20083377 | gene |      |
| Bn-scaff_17316_1-p36051  | Bn-N14-p20084210 | gene |      |
| Bn-scaff_17326_1-p243497 | Bn-N7-p7512911   | gene | exon |
| Bn-scaff_17326_1-p254820 | Bn-N7-p7565160   | gene | exon |
| Bn-scaff_17326_1-p536514 | Bn-N17-p17061241 | gene |      |
| Bn-scaff_17326_1-p718434 | Bn-N7-p7828290   | gene |      |
| Bn-scaff_17326_1-p911613 | Bn-N7-p7940185   | gene | exon |
| Bn-scaff_17339_1-p23654  | Bn-N19-p25945623 | gene | exon |
| Bn-scaff_17339_1-p262780 | Bn-N19-p25727119 | gene |      |
| Bn-scaff_17339_1-p292992 | Bn-N19-p25689081 | gene |      |
| Bn-scaff_17339_1-p393814 | Bn-N19-p25595655 | gene |      |
| Bn-scaff_17346_1-p103209 | Bn-N14-p13211105 | gene |      |
| Bn-scaff_17367_1-p231214 | Bn-N3-p6285935   | gene | exon |
| Bn-scaff_17367_1-p231614 | Bn-N19-p37218201 | gene | exon |
| Bn-scaff_17367_1-p309816 | Bn-N19-p37284711 | gene |      |
| Bn-scaff_17367_1-p310247 | Bn-N19-p37285142 | gene |      |
| Bn-scaff_17367_1-p310274 | Bn-N19-p37285169 | gene |      |
| Bn-scaff_17367_1-p345554 | Bn-N19-p37312410 | gene |      |
| Bn-scaff_17367_1-p345745 | Bn-N19-p37312602 | gene |      |
| Bn-scaff_17367_1-p346946 | Bn-N19-p37313804 | gene |      |
| Bn-scaff_17367_1-p347096 | Bn-N19-p37313953 | gene |      |
| Bn-scaff_17367_1-p575654 | Bn-N19-p37524108 | gene | exon |
| Bn-scaff_17367_1-p576145 | Bn-N19-p37524553 | gene |      |
| Bn-scaff_17367_1-p576489 | Bn-N19-p37524898 | gene | exon |
| Bn-scaff_17367_1-p590827 | Bn-N19-p37538128 | gene | exon |
| Bn-scaff_17367_1-p590933 | Bn-N19-p37538234 | gene | exon |
| Bn-scaff_17367_1-p590982 | Bn-N19-p37538284 | gene | exon |
| Bn-scaff_17367_1-p791787 | Bn-N19-p37728047 | gene | exon |
| Bn-scaff_17367_1-p864352 | Bn-N10-p7361314  | gene | exon |
| Bn-scaff_17367_1-p864566 | Bn-N10-p7361528  | gene | exon |

|                           |                  |      |      |
|---------------------------|------------------|------|------|
| Bn-scaff_17367_1-p866103  | Bn-N10-p7364351  | gene | exon |
| Bn-scaff_17367_1-p9887    | Bn-N19-p36942034 | gene |      |
| Bn-scaff_17369_1-p1016703 | Bn-N11-p12029642 | gene |      |
| Bn-scaff_17369_1-p1017003 | Bn-N11-p12029342 | gene |      |
| Bn-scaff_17369_1-p1017156 | Bn-N11-p12029189 | gene |      |
| Bn-scaff_17369_1-p1041740 | Bn-N11-p12010529 | gene |      |
| Bn-scaff_17369_1-p1041795 | Bn-N11-p12010474 | gene |      |
| Bn-scaff_17369_1-p1062823 | Bn-N11-p11982850 | gene |      |
| Bn-scaff_17369_1-p1111724 | Bn-N11-p11929026 | gene |      |
| Bn-scaff_17369_1-p1112630 | Bn-N11-p11928120 | gene |      |
| Bn-scaff_17369_1-p1150177 | Bn-N11-p11890678 | gene | exon |
| Bn-scaff_17369_1-p1151937 | Bn-N1-p7893974   | gene |      |
| Bn-scaff_17369_1-p1152675 | Bn-N1-p7893243   | gene | exon |
| Bn-scaff_17369_1-p116095  | Bn-N11-p12936658 | gene |      |
| Bn-scaff_17369_1-p1199108 | Bn-N11-p11830343 | gene |      |
| Bn-scaff_17369_1-p1199959 | Bn-N11-p11829490 | gene | exon |
| Bn-scaff_17369_1-p1207575 | Bn-N11-p11823038 | gene |      |
| Bn-scaff_17369_1-p1208179 | Bn-N11-p11822434 | gene | exon |
| Bn-scaff_17369_1-p1235509 | Bn-N11-p11796613 | gene | exon |
| Bn-scaff_17369_1-p1244703 | Bn-N11-p11786232 | gene |      |
| Bn-scaff_17369_1-p1244776 | Bn-N11-p11786159 | gene |      |
| Bn-scaff_17369_1-p318635  | Bn-N11-p12708904 | gene | exon |
| Bn-scaff_17369_1-p319471  | Bn-N11-p12708075 | gene |      |
| Bn-scaff_17369_1-p32803   | Bn-N11-p13056472 | gene | exon |
| Bn-scaff_17369_1-p366584  | Bn-N11-p12678603 | gene |      |
| Bn-scaff_17369_1-p374923  | Bn-N11-p12670266 | gene | exon |
| Bn-scaff_17369_1-p599615  | Bn-N11-p12450690 | gene | exon |
| Bn-scaff_17369_1-p617359  | Bn-N11-p12439574 | gene |      |
| Bn-scaff_17369_1-p617726  | Bn-N13-p22556797 | gene |      |
| Bn-scaff_17369_1-p703501  | Bn-N11-p12354149 | gene |      |
| Bn-scaff_17369_1-p739904  | Bn-N1-p8153722   | gene | exon |
| Bn-scaff_17369_1-p75743   | Bn-N11-p12986471 | gene |      |
| Bn-scaff_17369_1-p794147  | Bn-N11-p12271959 | gene | exon |
| Bn-scaff_17369_1-p802254  | Bn-N11-p12263895 | gene | exon |
| Bn-scaff_17369_1-p805277  | Bn-N11-p12260876 | gene | exon |
| Bn-scaff_17369_1-p83617   | Bn-N11-p12979281 | gene |      |
| Bn-scaff_17369_1-p837839  | Bn-N11-p12227469 | gene |      |
| Bn-scaff_17369_1-p843089  | Bn-N11-p12224260 | gene |      |
| Bn-scaff_17369_1-p850330  | Bn-N11-p12217285 | gene |      |
| Bn-scaff_17369_1-p851091  | Bn-N11-p12216524 | gene |      |
| Bn-scaff_17369_1-p855743  | Bn-N11-p12211408 | gene | exon |
| Bn-scaff_17369_1-p858259  | Bn-N11-p12208866 | gene |      |
| Bn-scaff_17369_1-p884077  | Bn-N11-p12182854 | gene | exon |
| Bn-scaff_17369_1-p917192  | Bn-N11-p12147720 | gene | exon |
| Bn-scaff_17369_1-p965580  | Bn-N11-p12085665 | gene |      |
| Bn-scaff_17369_1-p974691  | Bn-N11-p12076548 | gene |      |
| Bn-scaff_17369_1-p992249  | Bn-N11-p12056702 | gene |      |
| Bn-scaff_17371_1-p462701  | Bn-N9-p16221065  | gene | exon |
| Bn-scaff_17395_1-p20236   | Bn-N13-p30250915 | gene | exon |
| Bn-scaff_17395_1-p32420   | Bn-N13-p30244250 | gene |      |
| Bn-scaff_17413_1-p76511   | Bn-N15-p37167817 | gene | exon |
| Bn-scaff_17423_1-p100318  | Bn-N9-p4692194   | gene |      |



|                           |                  |      |      |
|---------------------------|------------------|------|------|
| Bn-scaff_17423_1-p376558  | Bn-N19-p6771134  | gene |      |
| Bn-scaff_17423_1-p549385  | Bn-N9-p4971024   | gene | exon |
| Bn-scaff_17423_1-p737034  | Bn-N9-p5098325   | gene |      |
| Bn-scaff_17423_1-p99662   | Bn-N9-p4691477   | gene |      |
| Bn-scaff_17436_1-p239369  | Bn-N17-p7028436  | gene | exon |
| Bn-scaff_17436_1-p260772  | Bn-N16-p32308186 | gene |      |
| Bn-scaff_17436_1-p261063  | Bn-N7-p19896215  | gene | exon |
| Bn-scaff_17436_1-p26325   | Bn-N16-p32730713 | gene | exon |
| Bn-scaff_17436_1-p76050   | Bn-N7-p19990324  | gene | exon |
| Bn-scaff_17440_1-p107030  | Bn-N13-p53984842 | gene |      |
| Bn-scaff_17440_1-p25854   | Bn-N13-p54063279 | gene | exon |
| Bn-scaff_17440_1-p268977  | Bn-N13-p53820816 | gene | exon |
| Bn-scaff_17440_1-p306539  | Bn-N13-p53785208 | gene |      |
| Bn-scaff_17440_1-p311228  | Bn-N13-p53780464 | gene |      |
| Bn-scaff_17440_1-p364383  | Bn-N13-p53700581 | gene |      |
| Bn-scaff_17440_1-p364477  | Bn-N13-p53700526 | gene |      |
| Bn-scaff_17440_1-p411613  | Bn-N13-p53651160 | gene | exon |
| Bn-scaff_17440_1-p523867  | Bn-N13-p53527538 | gene | exon |
| Bn-scaff_17440_1-p590665  | Bn-N13-p53445599 | gene |      |
| Bn-scaff_17440_1-p592842  | Bn-N13-p53443386 | gene |      |
| Bn-scaff_17440_1-p593576  | Bn-N13-p53442652 | gene |      |
| Bn-scaff_17440_1-p761980  | Bn-N13-p53270627 | gene | exon |
| Bn-scaff_17440_1-p803525  | Bn-N13-p53229934 | gene | exon |
| Bn-scaff_17440_1-p829293  | Bn-N13-p53204129 | gene |      |
| Bn-scaff_17440_1-p832657  | Bn-N13-p53200707 | gene | exon |
| Bn-scaff_17440_1-p868006  | Bn-N13-p53167783 | gene |      |
| Bn-scaff_17440_1-p871646  | Bn-N8-p16789132  | gene | exon |
| Bn-scaff_17440_1-p958665  | Bn-N13-p53081957 | gene |      |
| Bn-scaff_17441_1-p1037899 | Bn-N15-p44948322 | gene |      |
| Bn-scaff_17441_1-p1039913 | Bn-N15-p44950332 | gene |      |
| Bn-scaff_17441_1-p1045065 | Bn-N15-p44959556 | gene |      |
| Bn-scaff_17441_1-p1140035 | Bn-N15-p45045385 | gene |      |
| Bn-scaff_17441_1-p1142314 | Bn-N15-p45047665 | gene | exon |
| Bn-scaff_17441_1-p1182660 | Bn-N5-p23357519  | gene | exon |
| Bn-scaff_17441_1-p1211653 | Bn-N15-p45110303 | gene |      |
| Bn-scaff_17441_1-p348811  | Bn-N15-p44234543 | gene | exon |
| Bn-scaff_17441_1-p349027  | Bn-N5-p22822682  | gene | exon |
| Bn-scaff_17441_1-p349187  | Bn-N15-p44234955 | gene | exon |
| Bn-scaff_17441_1-p357570  | Bn-N19-p3784583  | gene |      |
| Bn-scaff_17441_1-p369136  | Bn-N5-p22836261  | gene | exon |
| Bn-scaff_17441_1-p369176  | Bn-N5-p22836301  | gene | exon |
| Bn-scaff_17441_1-p388434  | Bn-N15-p44269414 | gene |      |
| Bn-scaff_17441_1-p388678  | Bn-N15-p44269658 | gene |      |
| Bn-scaff_17441_1-p569870  | Bn-N15-p44451287 | gene |      |
| Bn-scaff_17441_1-p575038  | Bn-N15-p44462703 | gene | exon |
| Bn-scaff_17441_1-p671270  | Bn-N5-p23025194  | gene |      |
| Bn-scaff_17441_1-p671782  | Bn-N5-p23025706  | gene |      |
| Bn-scaff_17441_1-p693032  | Bn-N15-p44587703 | gene |      |
| Bn-scaff_17441_1-p693042  | Bn-N15-p44587713 | gene |      |
| Bn-scaff_17441_1-p720235  | Bn-N15-p44613455 | gene | exon |
| Bn-scaff_17441_1-p720405  | Bn-N15-p44613624 | gene | exon |
| Bn-scaff_17441_1-p731079  | Bn-N15-p44623922 | gene |      |

|                           |                  |      |      |
|---------------------------|------------------|------|------|
| Bn-scaff_17441_1-p900689  | Bn-N15-p44796085 | gene |      |
| Bn-scaff_17441_1-p949135  | Bn-N5-p23232599  | gene | exon |
| Bn-scaff_17441_1-p950045  | Bn-N15-p44858437 | gene | exon |
| Bn-scaff_17441_1-p950341  | Bn-N5-p23233877  | gene | exon |
| Bn-scaff_17441_1-p958342  | Bn-N15-p44871455 | gene |      |
| Bn-scaff_17441_1-p958418  | Bn-N15-p44871531 | gene | exon |
| Bn-scaff_17441_1-p974195  | Bn-N15-p44884264 | gene |      |
| Bn-scaff_17441_1-p974705  | Bn-N15-p44884773 | gene |      |
| Bn-scaff_17441_1-p974871  | Bn-N15-p44884939 | gene | exon |
| Bn-scaff_17441_1-p977042  | Bn-N15-p44887111 | gene | exon |
| Bn-scaff_17441_1-p986906  | Bn-N15-p44897065 | gene |      |
| Bn-scaff_17441_1-p986974  | Bn-N15-p44897133 | gene |      |
| Bn-scaff_17441_1-p987771  | Bn-N15-p44898205 | gene |      |
| Bn-scaff_17441_3-p147254  | Bn-N15-p45267488 | gene | exon |
| Bn-scaff_17441_3-p161657  | Bn-N15-p45281868 | gene |      |
| Bn-scaff_17441_3-p165957  | Bn-N15-p45286728 | gene |      |
| Bn-scaff_17441_3-p174529  | Bn-N5-p23545128  | gene |      |
| Bn-scaff_17441_3-p183168  | Bn-N15-p45298286 | gene | exon |
| Bn-scaff_17441_3-p213241  | Bn-N15-p45333439 | gene |      |
| Bn-scaff_17441_3-p56937   | Bn-N15-p45181301 | gene |      |
| Bn-scaff_17454_1-p416530  | Bn-N18-p131583   | gene |      |
| Bn-scaff_17454_1-p87022   | Bn-N16-p11741573 | gene |      |
| Bn-scaff_17457_1-p114659  | Bn-N13-p60507954 | gene | exon |
| Bn-scaff_17457_1-p176662  | Bn-N13-p60460820 | gene |      |
| Bn-scaff_17457_1-p177567  | Bn-N13-p60459918 | gene | exon |
| Bn-scaff_17457_1-p178292  | Bn-N13-p60459171 | gene | exon |
| Bn-scaff_17457_1-p178355  | Bn-N13-p60459108 | gene | exon |
| Bn-scaff_17457_1-p178466  | Bn-N13-p60458997 | gene | exon |
| Bn-scaff_17457_1-p250253  | Bn-N13-p60395711 | gene |      |
| Bn-scaff_17457_1-p253824  | Bn-N13-p60392106 | gene | exon |
| Bn-scaff_17457_1-p290434  | Bn-N13-p60348841 | gene | exon |
| Bn-scaff_17457_1-p505494  | Bn-N13-p60047795 | gene |      |
| Bn-scaff_17457_1-p81967   | Bn-N13-p60541088 | gene |      |
| Bn-scaff_17457_1-p82363   | Bn-N13-p60540692 | gene |      |
| Bn-scaff_17457_1-p82523   | Bn-N13-p60540532 | gene |      |
| Bn-scaff_17457_1-p82664   | Bn-N13-p60540391 | gene |      |
| Bn-scaff_17457_1-p85083   | Bn-N13-p60537972 | gene |      |
| Bn-scaff_17457_1-p85663   | Bn-N13-p60537392 | gene |      |
| Bn-scaff_17461_1-p1039768 | Bn-N17-p6202428  | gene | exon |
| Bn-scaff_17461_1-p1185821 | Bn-N16-p5380133  | gene | exon |
| Bn-scaff_17461_1-p15221   | Bn-N7-p2119589   | gene | exon |
| Bn-scaff_17461_1-p15516   | Bn-N7-p2119884   | gene | exon |
| Bn-scaff_17461_1-p177714  | Bn-N17-p5270230  | gene | exon |
| Bn-scaff_17461_1-p199794  | Bn-N7-p2210827   | gene |      |
| Bn-scaff_17461_1-p209013  | Bn-N17-p5295515  | gene |      |
| Bn-scaff_17461_1-p369095  | Bn-N7-p2298827   | gene |      |
| Bn-scaff_17480_1-p585     | Bn-N9-p36392522  | gene |      |
| Bn-scaff_17482_1-p6632    | Bn-N14-p43890545 | gene |      |
| Bn-scaff_17482_1-p6769    | Bn-N14-p43890408 | gene |      |
| Bn-scaff_17482_1-p7299    | Bn-N14-p43889871 | gene | exon |
| Bn-scaff_17482_1-p9837    | Bn-N6-p4390740   | gene | exon |
| Bn-scaff_17487_1-p1244940 | Bn-N9-p6697596   | gene | exon |

|                           |                  |      |      |
|---------------------------|------------------|------|------|
| Bn-scaff_17487_1-p1371187 | Bn-N9-p6777819   | gene | exon |
| Bn-scaff_17487_1-p1371321 | Bn-N9-p6777951   | gene | exon |
| Bn-scaff_17487_1-p1573204 | Bn-N9-p6876029   | gene | exon |
| Bn-scaff_17487_1-p160800  | Bn-N19-p8685501  | gene |      |
| Bn-scaff_17487_1-p160927  | Bn-N19-p8685628  | gene |      |
| Bn-scaff_17487_1-p160966  | Bn-N9-p6066863   | gene |      |
| Bn-scaff_17487_1-p161463  | Bn-N9-p6067360   | gene | exon |
| Bn-scaff_17487_1-p1782018 | Bn-N19-p10437194 | gene | exon |
| Bn-scaff_17487_1-p1782181 | Bn-N19-p10437358 | gene | exon |
| Bn-scaff_17487_1-p1888000 | Bn-N19-p10533617 | gene | exon |
| Bn-scaff_17487_1-p1890044 | Bn-N19-p10535660 | gene | exon |
| Bn-scaff_17487_1-p1909011 | Bn-N19-p10546168 | gene | exon |
| Bn-scaff_17487_1-p1959291 | Bn-N19-p10615373 | gene | exon |
| Bn-scaff_17487_1-p1959431 | Bn-N19-p10615513 | gene |      |
| Bn-scaff_17487_1-p235174  | Bn-N19-p8760197  | gene | exon |
| Bn-scaff_17487_1-p303109  | Bn-N9-p6139965   | gene | exon |
| Bn-scaff_17487_1-p376857  | Bn-N19-p8926497  | gene |      |
| Bn-scaff_17487_1-p415797  | Bn-N19-p8959048  | gene |      |
| Bn-scaff_17487_1-p416211  | Bn-N19-p8959462  | gene | exon |
| Bn-scaff_17487_1-p441639  | Bn-N19-p9000256  | gene |      |
| Bn-scaff_17487_1-p491031  | Bn-N19-p9114750  | gene |      |
| Bn-scaff_17487_1-p527387  | Bn-N19-p9161418  | gene |      |
| Bn-scaff_17487_1-p545307  | Bn-N19-p9173532  | gene |      |
| Bn-scaff_17487_1-p611346  | Bn-N19-p9233935  | gene | exon |
| Bn-scaff_17487_1-p615064  | Bn-N19-p9237653  | gene | exon |
| Bn-scaff_17487_1-p616916  | Bn-N19-p9239505  | gene |      |
| Bn-scaff_17487_1-p682697  | Bn-N19-p9302556  | gene | exon |
| Bn-scaff_17487_1-p723169  | Bn-N19-p9345211  | gene | exon |
| Bn-scaff_17487_1-p723256  | Bn-N19-p9345298  | gene |      |
| Bn-scaff_17487_1-p74837   | Bn-N12-p21213971 | gene |      |
| Bn-scaff_17487_1-p781216  | Bn-N19-p9400513  | gene |      |
| Bn-scaff_17515_1-p217213  | Bn-N11-p38612367 | gene | exon |
| Bn-scaff_17515_1-p220339  | Bn-N11-p38609240 | gene |      |
| Bn-scaff_17515_1-p243685  | Bn-N11-p38585798 | gene |      |
| Bn-scaff_17515_1-p243778  | Bn-N11-p38585705 | gene |      |
| Bn-scaff_17515_1-p243869  | Bn-N11-p38585614 | gene |      |
| Bn-scaff_17515_1-p244504  | Bn-N11-p38584979 | gene | exon |
| Bn-scaff_17515_1-p247763  | Bn-N1-p23036826  | gene | exon |
| Bn-scaff_17515_1-p257014  | Bn-N1-p23026364  | gene | exon |
| Bn-scaff_17515_1-p27159   | Bn-N11-p38786121 | gene | exon |
| Bn-scaff_17515_1-p301057  | Bn-N11-p38528118 | gene | exon |
| Bn-scaff_17515_1-p302194  | Bn-N11-p38526981 | gene |      |
| Bn-scaff_17515_1-p302518  | Bn-N11-p38526657 | gene |      |
| Bn-scaff_17515_1-p302615  | Bn-N11-p38526560 | gene |      |
| Bn-scaff_17515_1-p304774  | Bn-N11-p38524401 | gene |      |
| Bn-scaff_17515_1-p311556  | Bn-N11-p38517614 | gene |      |
| Bn-scaff_17515_1-p31995   | Bn-N11-p38781306 | gene | exon |
| Bn-scaff_17515_1-p376922  | Bn-N11-p38451601 | gene | exon |
| Bn-scaff_17515_1-p388362  | Bn-N11-p38440232 | gene | exon |
| Bn-scaff_17515_1-p388588  | Bn-N11-p38440006 | gene | exon |
| Bn-scaff_17515_1-p388701  | Bn-N11-p38439893 | gene | exon |
| Bn-scaff_17515_1-p396838  | Bn-N11-p38432867 | gene |      |

|                           |                  |      |      |
|---------------------------|------------------|------|------|
| Bn-scaff_17515_1-p407792  | Bn-N11-p38421917 | gene |      |
| Bn-scaff_17515_1-p51302   | Bn-N1-p23129730  | gene | exon |
| Bn-scaff_17515_1-p533140  | Bn-N11-p38284920 | gene |      |
| Bn-scaff_17515_1-p533532  | Bn-N11-p38284529 | gene |      |
| Bn-scaff_17515_1-p557620  | Bn-N11-p38261768 | gene | exon |
| Bn-scaff_17515_1-p563479  | Bn-N11-p38256652 | gene | exon |
| Bn-scaff_17515_1-p563548  | Bn-N1-p22839689  | gene | exon |
| Bn-scaff_17515_1-p584565  | Bn-N11-p38235846 | gene | exon |
| Bn-scaff_17515_1-p588895  | Bn-N11-p38231512 | gene |      |
| Bn-scaff_17515_1-p749666  | Bn-N11-p38058541 | gene | exon |
| Bn-scaff_17515_1-p780999  | Bn-N9-p38677110  | gene | exon |
| Bn-scaff_17517_1-p11108   | Bn-N11-p33304619 | gene | exon |
| Bn-scaff_17517_1-p321895  | Bn-N11-p33682951 | gene |      |
| Bn-scaff_17517_1-p324434  | Bn-N11-p33686536 | gene |      |
| Bn-scaff_17517_1-p361588  | Bn-N11-p33742799 | gene | exon |
| Bn-scaff_17517_1-p361630  | Bn-N11-p33742840 | gene | exon |
| Bn-scaff_17517_1-p377821  | Bn-N2-p24295397  | gene |      |
| Bn-scaff_17517_1-p377929  | Bn-N11-p33753964 | gene |      |
| Bn-scaff_17517_1-p418933  | Bn-N11-p33794669 | gene | exon |
| Bn-scaff_17517_1-p419997  | Bn-N11-p33795733 | gene |      |
| Bn-scaff_17517_1-p420485  | Bn-N11-p33796222 | gene |      |
| Bn-scaff_17517_1-p420638  | Bn-N1-p20290608  | gene | exon |
| Bn-scaff_17517_1-p564869  | Bn-N11-p33964545 | gene |      |
| Bn-scaff_17517_1-p600097  | Bn-N11-p34003494 | gene |      |
| Bn-scaff_17517_1-p600876  | Bn-N11-p34004273 | gene |      |
| Bn-scaff_17517_1-p642529  | Bn-N11-p34050312 | gene | exon |
| Bn-scaff_17517_1-p78363   | Bn-N11-p33378200 | gene |      |
| Bn-scaff_17517_1-p816801  | Bn-N11-p34233601 | gene |      |
| Bn-scaff_17517_1-p817376  | Bn-N11-p34234201 | gene |      |
| Bn-scaff_17517_1-p859669  | Bn-N11-p34277584 | gene |      |
| Bn-scaff_17517_1-p980938  | Bn-N11-p34407498 | gene | exon |
| Bn-scaff_17521_1-p1050704 | Bn-N13-p24373712 | gene | exon |
| Bn-scaff_17521_1-p1052439 | Bn-N13-p24371985 | gene | exon |
| Bn-scaff_17521_1-p1052808 | Bn-N13-p24371616 | gene | exon |
| Bn-scaff_17521_1-p1054284 | Bn-N3-p15720729  | gene |      |
| Bn-scaff_17521_1-p1166900 | Bn-N3-p15629676  | gene | exon |
| Bn-scaff_17521_1-p1167341 | Bn-N3-p15629235  | gene | exon |
| Bn-scaff_17521_1-p1214522 | Bn-N3-p15599465  | gene | exon |
| Bn-scaff_17521_1-p125175  | Bn-N13-p25295898 | gene | exon |
| Bn-scaff_17521_1-p1327223 | Bn-N3-p15493388  | gene | exon |
| Bn-scaff_17521_1-p1338444 | Bn-N3-p15485935  | gene |      |
| Bn-scaff_17521_1-p1354785 | Bn-N13-p24022685 | gene |      |
| Bn-scaff_17521_1-p1354850 | Bn-N13-p24022620 | gene |      |
| Bn-scaff_17521_1-p1355354 | Bn-N13-p24022116 | gene |      |
| Bn-scaff_17521_1-p1355419 | Bn-N13-p24022051 | gene |      |
| Bn-scaff_17521_1-p137019  | Bn-N13-p25279346 | gene |      |
| Bn-scaff_17521_1-p1385225 | Bn-N13-p23995974 | gene |      |
| Bn-scaff_17521_1-p1385470 | Bn-N13-p23995729 | gene | exon |
| Bn-scaff_17521_1-p1400234 | Bn-N3-p15445011  | gene | exon |
| Bn-scaff_17521_1-p194710  | Bn-N19-p37376956 | gene |      |
| Bn-scaff_17521_1-p246991  | Bn-N3-p16282331  | gene |      |
| Bn-scaff_17521_1-p286106  | Bn-N13-p25151830 | gene |      |

|                           |                  |      |      |
|---------------------------|------------------|------|------|
| Bn-scaff_17521_1-p290063  | Bn-N13-p25148157 | gene |      |
| Bn-scaff_17521_1-p353123  | Bn-N13-p25090001 | gene | exon |
| Bn-scaff_17521_1-p37024   | Bn-N13-p25396034 | gene | exon |
| Bn-scaff_17521_1-p38766   | Bn-N13-p25394329 | gene |      |
| Bn-scaff_17521_1-p403946  | Bn-N13-p25044606 | gene | exon |
| Bn-scaff_17521_1-p404270  | Bn-N13-p25044282 | gene |      |
| Bn-scaff_17521_1-p404658  | Bn-N13-p25043894 | gene |      |
| Bn-scaff_17521_1-p405038  | Bn-N13-p25043514 | gene | exon |
| Bn-scaff_17521_1-p415393  | Bn-N13-p25032997 | gene | exon |
| Bn-scaff_17521_1-p460875  | Bn-N3-p16129428  | gene | exon |
| Bn-scaff_17521_1-p460933  | Bn-N13-p24985969 | gene |      |
| Bn-scaff_17521_1-p464847  | Bn-N3-p16124912  | gene | exon |
| Bn-scaff_17521_1-p508913  | Bn-N13-p24929801 | gene | exon |
| Bn-scaff_17521_1-p511054  | Bn-N13-p24927635 | gene | exon |
| Bn-scaff_17521_1-p550417  | Bn-N3-p16061572  | gene | exon |
| Bn-scaff_17521_1-p561565  | Bn-N13-p24854055 | gene |      |
| Bn-scaff_17521_1-p579834  | Bn-N13-p24839164 | gene |      |
| Bn-scaff_17521_1-p584297  | Bn-N13-p24834701 | gene |      |
| Bn-scaff_17521_1-p585002  | Bn-N13-p24833989 | gene |      |
| Bn-scaff_17521_1-p596578  | Bn-N3-p16034322  | gene | exon |
| Bn-scaff_17521_1-p596662  | Bn-N3-p16034239  | gene |      |
| Bn-scaff_17521_1-p644797  | Bn-N13-p24765862 | gene |      |
| Bn-scaff_17521_1-p647350  | Bn-N13-p24763309 | gene | exon |
| Bn-scaff_17521_1-p663497  | Bn-N13-p24746200 | gene | exon |
| Bn-scaff_17521_1-p682662  | Bn-N13-p24726130 | gene |      |
| Bn-scaff_17521_1-p742161  | Bn-N13-p24665592 | gene | exon |
| Bn-scaff_17521_1-p749297  | Bn-N13-p24658268 | gene |      |
| Bn-scaff_17521_1-p749319  | Bn-N13-p24658246 | gene |      |
| Bn-scaff_17521_1-p759119  | Bn-N13-p24648462 | gene | exon |
| Bn-scaff_17521_1-p807610  | Bn-N13-p24590915 | gene | exon |
| Bn-scaff_17521_1-p837796  | Bn-N13-p24562269 | gene | exon |
| Bn-scaff_17521_1-p842968  | Bn-N13-p24554201 | gene |      |
| Bn-scaff_17521_1-p843450  | Bn-N13-p24553723 | gene | exon |
| Bn-scaff_17521_1-p869381  | Bn-N13-p24528039 | gene |      |
| Bn-scaff_17521_1-p88281   | Bn-N13-p25341694 | gene | exon |
| Bn-scaff_17521_1-p952802  | Bn-N13-p24454079 | gene | exon |
| Bn-scaff_17521_1-p969711  | Bn-N13-p24440833 | gene |      |
| Bn-scaff_17521_1-p988210  | Bn-N13-p24425628 | gene |      |
| Bn-scaff_17521_1-p992171  | Bn-N13-p24421667 | gene | exon |
| Bn-scaff_17521_1-p997498  | Bn-N13-p24416336 | gene | exon |
| Bn-scaff_17522_1-p1234413 | Bn-N2-p4687278   | gene | exon |
| Bn-scaff_17522_1-p1361919 | Bn-N2-p4653612   | gene | exon |
| Bn-scaff_17522_1-p1394030 | Bn-N12-p6138926  | gene | exon |
| Bn-scaff_17522_1-p144926  | Bn-N12-p7245498  | gene |      |
| Bn-scaff_17522_1-p1454520 | Bn-N12-p6081749  | gene |      |
| Bn-scaff_17522_1-p1469252 | Bn-N2-p4585093   | gene | exon |
| Bn-scaff_17522_1-p1469455 | Bn-N2-p4584890   | gene | exon |
| Bn-scaff_17522_1-p1512412 | Bn-N2-p4558829   | gene | exon |
| Bn-scaff_17522_1-p1580565 | Bn-N12-p5956085  | gene | exon |
| Bn-scaff_17522_1-p1607150 | Bn-N12-p5937746  | gene |      |
| Bn-scaff_17522_1-p1702091 | Bn-N12-p5850892  | gene |      |
| Bn-scaff_17522_1-p1724143 | Bn-N12-p5833650  | gene | exon |

|                           |                        |      |      |
|---------------------------|------------------------|------|------|
| Bn-scaff_17522_1-p1818546 | Bn-N2-p4313592         | gene | exon |
| Bn-scaff_17522_1-p1837209 | Bn-N2-p4314105         | gene | exon |
| Bn-scaff_17522_1-p1837786 | Bn-N2-p4313528         | gene | exon |
| Bn-scaff_17522_1-p234775  | Bn-N12-p7195871        | gene |      |
| Bn-scaff_17522_1-p258646  | Bn-N12-p7177286        | gene |      |
| Bn-scaff_17522_1-p275002  | Bn-N15-p13327289       | gene |      |
| Bn-scaff_17522_1-p371170  | Bn-N12-p7082817        | gene |      |
| Bn-scaff_17522_1-p479182  | Bn-N12-p6986605        | gene | exon |
| Bn-scaff_17522_1-p481078  | Bn-N12-p6984710        | gene |      |
| Bn-scaff_17522_1-p490835  | Bn-N12-p6974515        | gene |      |
| Bn-scaff_17522_1-p60662   | Bn-N12-p7328399        | gene |      |
| Bn-scaff_17522_1-p60776   | Bn-N12-p7328285        | gene |      |
| Bn-scaff_17522_1-p61884   | Bn-N12-p7327177        | gene | exon |
| Bn-scaff_17522_1-p62530   | Bn-N12-p7326531        | gene | exon |
| Bn-scaff_17522_1-p653541  | Bn-N12-p6814181        | gene | exon |
| Bn-scaff_17522_1-p67815   | Bn-N12-p7324876        | gene | exon |
| Bn-scaff_17522_1-p71448   | Bn-N2-p5284351         | gene | exon |
| Bn-scaff_17522_1-p774153  | Bn-N12-p6723806        | gene | exon |
| Bn-scaff_17522_1-p88139   | Bn-N12-p7306914        | gene |      |
| Bn-scaff_17522_1-p908204  | Bn-N12-p6599168        | gene |      |
| Bn-scaff_17525_1-p117065  | Bn-N14-p40532786       | gene |      |
| Bn-scaff_17525_1-p125978  | Bn-N4-p10499891        | gene | exon |
| Bn-scaff_17525_1-p126933  | Bn-N4-p10498935        | gene | exon |
| Bn-scaff_17525_1-p267589  | Bn-N14-p40387568       | gene | exon |
| Bn-scaff_17525_1-p272430  | Bn-N4-p10459172        | gene | exon |
| Bn-scaff_17525_1-p272544  | Bn-N4-p10459058        | gene | exon |
| Bn-scaff_17525_1-p302132  | Bn-Scaffold02570-p2976 | gene | exon |
| Bn-scaff_17525_1-p503094  | Bn-N4-p10351731        | gene | exon |
| Bn-scaff_17525_1-p548959  | Bn-N13-p61294947       | gene |      |
| Bn-scaff_17525_1-p665258  | Bn-N14-p40014542       | gene |      |
| Bn-scaff_17525_1-p665421  | Bn-N4-p10195479        | gene | exon |
| Bn-scaff_17525_1-p665586  | Bn-N14-p40014215       | gene |      |
| Bn-scaff_17525_1-p665622  | Bn-N14-p40014178       | gene |      |
| Bn-scaff_17525_1-p666433  | Bn-N14-p40013368       | gene |      |
| Bn-scaff_17525_1-p666500  | Bn-N14-p40013301       | gene |      |
| Bn-scaff_17526_1-p1005324 | Bn-N19-p2736985        | gene | exon |
| Bn-scaff_17526_1-p1063974 | Bn-N19-p2675298        | gene | exon |
| Bn-scaff_17526_1-p1143773 | Bn-N19-p2579440        | gene |      |
| Bn-scaff_17526_1-p1147911 | Bn-N19-p2575296        | gene | exon |
| Bn-scaff_17526_1-p1264483 | Bn-N19-p2462824        | gene |      |
| Bn-scaff_17526_1-p1279502 | Bn-N9-p2049610         | gene | exon |
| Bn-scaff_17526_1-p1348890 | Bn-N19-p2377293        | gene |      |
| Bn-scaff_17526_1-p1348970 | Bn-N19-p2377212        | gene | exon |
| Bn-scaff_17526_1-p1349476 | Bn-N19-p2376706        | gene | exon |
| Bn-scaff_17526_1-p1469380 | Bn-N19-p2267198        | gene |      |
| Bn-scaff_17526_1-p1474906 | Bn-N19-p2260255        | gene | exon |
| Bn-scaff_17526_1-p1504264 | Bn-N9-p1900911         | gene | exon |
| Bn-scaff_17526_1-p1649875 | Bn-N19-p2092209        | gene |      |
| Bn-scaff_17526_1-p1667260 | Bn-N19-p2074812        | gene | exon |
| Bn-scaff_17526_1-p1718326 | Bn-N9-p1727887         | gene |      |
| Bn-scaff_17526_1-p1834362 | Bn-N19-p1924999        | gene |      |
| Bn-scaff_17526_1-p1910152 | Bn-N19-p1840358        | gene | exon |

|                           |                        |      |      |
|---------------------------|------------------------|------|------|
| Bn-scaff_17526_1-p1912248 | Bn-N19-p1838258        | gene | exon |
| Bn-scaff_17526_1-p2177941 | Bn-N19-p1540726        | gene | exon |
| Bn-scaff_17526_1-p2178654 | Bn-N19-p1540012        | gene | exon |
| Bn-scaff_17526_1-p2179198 | Bn-N9-p1338662         | gene | exon |
| Bn-scaff_17526_1-p220057  | Bn-N19-p3578306        | gene |      |
| Bn-scaff_17526_1-p2206429 | Bn-N9-p1310315         | gene | exon |
| Bn-scaff_17526_1-p220813  | Bn-N9-p2890933         | gene | exon |
| Bn-scaff_17526_1-p220816  | Bn-N19-p3577521        | gene | exon |
| Bn-scaff_17526_1-p221576  | Bn-N9-p2890148         | gene |      |
| Bn-scaff_17526_1-p256458  | Bn-N17-p43902457       | gene | exon |
| Bn-scaff_17526_1-p300781  | Bn-N9-p2832960         | gene | exon |
| Bn-scaff_17526_1-p301127  | Bn-N9-p2832606         | gene | exon |
| Bn-scaff_17526_1-p412410  | Bn-N9-p2739289         | gene |      |
| Bn-scaff_17526_1-p463391  | Bn-N19-p3322304        | gene |      |
| Bn-scaff_17526_1-p480659  | Bn-N19-p3301357        | gene | exon |
| Bn-scaff_17526_1-p729024  | Bn-N19-p3014547        | gene | exon |
| Bn-scaff_17526_1-p776163  | Bn-N19-p2966703        | gene |      |
| Bn-scaff_17526_1-p860459  | Bn-N19-p2887140        | gene |      |
| Bn-scaff_17526_1-p860504  | Bn-N19-p2887095        | gene |      |
| Bn-scaff_17526_1-p879036  | Bn-N19-p2867698        | gene | exon |
| Bn-scaff_17526_1-p951929  | Bn-N19-p2784980        | gene |      |
| Bn-scaff_17526_1-p969477  | Bn-N19-p2767307        | gene |      |
| Bn-scaff_17566_1-p21523   | Bn-Scaffold01156-p5994 | gene | exon |
| Bn-scaff_17566_1-p76755   | Bn-N12-p17324877       | gene |      |
| Bn-scaff_17573_1-p41354   | Bn-N13-p41122140       | gene | exon |
| Bn-scaff_17573_1-p95384   | Bn-N13-p41187292       | gene | exon |
| Bn-scaff_17580_1-p160243  | Bn-N7-p7242166         | gene | exon |
| Bn-scaff_17580_1-p194288  | Bn-N7-p7217932         | gene |      |
| Bn-scaff_17580_1-p70475   | Bn-N7-p7306922         | gene | exon |
| Bn-scaff_17584_1-p109173  | Bn-N1-p19081517        | gene | exon |
| Bn-scaff_17584_1-p223738  | Bn-N7-p6203463         | gene |      |
| Bn-scaff_17584_1-p268654  | Bn-N17-p14483219       | gene |      |
| Bn-scaff_17584_1-p682870  | Bn-N17-p14099603       | gene | exon |
| Bn-scaff_17584_1-p683262  | Bn-N17-p14099211       | gene | exon |
| Bn-scaff_17584_1-p683277  | Bn-N17-p14099196       | gene | exon |
| Bn-scaff_17591_1-p578277  | Bn-N18-p9991776        | gene | exon |
| Bn-scaff_17591_1-p75901   | Bn-N18-p10444900       | gene | exon |
| Bn-scaff_17592_1-p267740  | Bn-N1-p7450717         | gene | exon |
| Bn-scaff_17592_1-p295310  | Bn-N11-p11237433       | gene | exon |
| Bn-scaff_17592_1-p485859  | Bn-N11-p11432081       | gene | exon |
| Bn-scaff_17592_1-p535117  | Bn-N11-p11475975       | gene | exon |
| Bn-scaff_17592_1-p535173  | Bn-N11-p11476032       | gene | exon |
| Bn-scaff_17592_1-p546118  | Bn-N11-p11487633       | gene | exon |
| Bn-scaff_17592_1-p603755  | Bn-N1-p7683662         | gene |      |
| Bn-scaff_17592_1-p642504  | Bn-N11-p11600571       | gene | exon |
| Bn-scaff_17592_1-p685168  | Bn-N11-p11641619       | gene | exon |
| Bn-scaff_17592_1-p714613  | Bn-N11-p11674465       | gene | exon |
| Bn-scaff_17592_1-p725692  | Bn-N11-p11700517       | gene | exon |
| Bn-scaff_17592_1-p727914  | Bn-N11-p11702731       | gene | exon |
| Bn-scaff_17592_1-p735049  | Bn-N11-p11709906       | gene |      |
| Bn-scaff_17592_1-p739203  | Bn-N11-p11714060       | gene | exon |
| Bn-scaff_17592_1-p764187  | Bn-N11-p11743002       | gene | exon |

|                           |                  |      |      |
|---------------------------|------------------|------|------|
| Bn-scaff_17592_1-p775877  | Bn-N11-p11757806 | gene |      |
| Bn-scaff_17592_1-p791809  | Bn-N11-p11774220 | gene |      |
| Bn-scaff_17592_1-p793269  | Bn-N11-p11775681 | gene | exon |
| Bn-scaff_17592_1-p794766  | Bn-N11-p11777177 | gene |      |
| Bn-scaff_17592_1-p794801  | Bn-N11-p11777212 | gene |      |
| Bn-scaff_17592_1-p795171  | Bn-N11-p11777582 | gene |      |
| Bn-scaff_17592_1-p795494  | Bn-N11-p11777905 | gene |      |
| Bn-scaff_17592_1-p795582  | Bn-N11-p11777993 | gene |      |
| Bn-scaff_17592_1-p795799  | Bn-N11-p11778210 | gene |      |
| Bn-scaff_17592_1-p795882  | Bn-N11-p11778293 | gene |      |
| Bn-scaff_17592_1-p796290  | Bn-N11-p11778701 | gene |      |
| Bn-scaff_17592_1-p796881  | Bn-N11-p11779292 | gene |      |
| Bn-scaff_17592_1-p798798  | Bn-N11-p11781209 | gene | exon |
| Bn-scaff_17592_1-p799061  | Bn-N11-p11781472 | gene |      |
| Bn-scaff_17592_1-p857899  | Bn-N14-p14732598 | gene |      |
| Bn-scaff_17592_1-p869743  | Bn-N14-p14730135 | gene | exon |
| Bn-scaff_17592_1-p888125  | Bn-N14-p14707497 | gene | exon |
| Bn-scaff_17623_1-p1006646 | Bn-N12-p43041867 | gene |      |
| Bn-scaff_17623_1-p120681  | Bn-N2-p27068249  | gene | exon |
| Bn-scaff_17623_1-p120748  | Bn-N2-p27068181  | gene |      |
| Bn-scaff_17623_1-p172641  | Bn-N12-p43782961 | gene |      |
| Bn-scaff_17623_1-p472440  | Bn-N2-p26947248  | gene |      |
| Bn-scaff_17623_1-p546659  | Bn-N12-p43462429 | gene | exon |
| Bn-scaff_17623_1-p648231  | Bn-N2-p26836930  | gene | exon |
| Bn-scaff_17623_1-p688369  | Bn-N12-p43332654 | gene |      |
| Bn-scaff_17623_1-p706105  | Bn-N12-p43321758 | gene |      |
| Bn-scaff_17623_1-p714325  | Bn-N12-p43314558 | gene |      |
| Bn-scaff_17623_1-p715915  | Bn-N12-p43312968 | gene |      |
| Bn-scaff_17623_1-p73661   | Bn-N12-p43878631 | gene |      |
| Bn-scaff_17623_1-p738869  | Bn-N12-p43289264 | gene |      |
| Bn-scaff_17623_1-p990301  | Bn-N9-p7425252   | gene | exon |
| Bn-scaff_17623_1-p990628  | Bn-N9-p7425592   | gene | exon |
| Bn-scaff_17637_1-p114798  | Bn-N18-p11946344 | gene |      |
| Bn-scaff_17637_1-p84569   | Bn-N18-p11978697 | gene |      |
| Bn-scaff_17637_1-p84671   | Bn-N18-p11978595 | gene |      |
| Bn-scaff_17647_1-p6629    | Bn-N14-p13228686 | gene | exon |
| Bn-scaff_17658_1-p25183   | Bn-N13-p17554706 | gene |      |
| Bn-scaff_17658_1-p25628   | Bn-N13-p17555150 | gene | exon |
| Bn-scaff_17658_1-p25655   | Bn-N13-p17555177 | gene | exon |
| Bn-scaff_17683_1-p280237  | Bn-N9-p7467105   | gene |      |
| Bn-scaff_17683_1-p280296  | Bn-N9-p7467046   | gene |      |
| Bn-scaff_17683_1-p286463  | Bn-N19-p11201336 | gene |      |
| Bn-scaff_17683_1-p28746   | Bn-N19-p11436491 | gene | exon |
| Bn-scaff_17683_1-p311331  | Bn-N19-p11180562 | gene | exon |
| Bn-scaff_17683_1-p313031  | Bn-N19-p11178842 | gene | exon |
| Bn-scaff_17683_1-p313826  | Bn-N19-p11178045 | gene |      |
| Bn-scaff_17685_1-p158320  | Bn-N11-p20962571 | gene | exon |
| Bn-scaff_17685_1-p158870  | Bn-N11-p20963121 | gene |      |
| Bn-scaff_17685_1-p159088  | Bn-N11-p20963340 | gene | exon |
| Bn-scaff_17685_1-p163978  | Bn-N11-p20968243 | gene | exon |
| Bn-scaff_17685_1-p165553  | Bn-N11-p20969818 | gene | exon |
| Bn-scaff_17685_1-p176536  | Bn-N11-p20985598 | gene |      |



|                          |                  |      |      |
|--------------------------|------------------|------|------|
| Bn-scaff_17685_1-p176713 | Bn-N11-p20985775 | gene |      |
| Bn-scaff_17685_1-p176850 | Bn-N11-p20985912 | gene |      |
| Bn-scaff_17686_1-p105094 | Bn-N14-p15460932 | gene | exon |
| Bn-scaff_17708_1-p14790  | Bn-N17-p3124164  | gene |      |
| Bn-scaff_17708_1-p14926  | Bn-N17-p3124300  | gene |      |
| Bn-scaff_17708_1-p15115  | Bn-N17-p3124489  | gene |      |
| Bn-scaff_17708_1-p169681 | Bn-N7-p1321060   | gene | exon |
| Bn-scaff_17708_1-p650212 | Bn-N17-p3741010  | gene | exon |
| Bn-scaff_17721_1-p175463 | Bn-N12-p44711602 | gene |      |
| Bn-scaff_17721_1-p175936 | Bn-N12-p44711129 | gene |      |
| Bn-scaff_17721_1-p212032 | Bn-N12-p44674262 | gene |      |
| Bn-scaff_17721_1-p221548 | Bn-N12-p44664761 | gene | exon |
| Bn-scaff_17721_1-p263958 | Bn-N12-p44620172 | gene | exon |
| Bn-scaff_17721_1-p273764 | Bn-N12-p44609296 | gene |      |
| Bn-scaff_17721_1-p297336 | Bn-N2-p27511161  | gene | exon |
| Bn-scaff_17721_1-p299314 | Bn-N12-p44584944 | gene | exon |
| Bn-scaff_17721_1-p347555 | Bn-N12-p44511427 | gene | exon |
| Bn-scaff_17721_1-p381227 | Bn-N12-p44468918 | gene |      |
| Bn-scaff_17721_1-p39186  | Bn-N2-p27679843  | gene | exon |
| Bn-scaff_17721_1-p404462 | Bn-N12-p44446154 | gene | exon |
| Bn-scaff_17721_1-p644860 | Bn-N12-p44239709 | gene |      |
| Bn-scaff_17721_1-p648583 | Bn-N2-p27323063  | gene | exon |
| Bn-scaff_17721_1-p676081 | Bn-N12-p44212766 | gene |      |
| Bn-scaff_17721_1-p676383 | Bn-N12-p44212464 | gene | exon |
| Bn-scaff_17721_1-p677326 | Bn-N12-p44209216 | gene | exon |
| Bn-scaff_17721_1-p811886 | Bn-N12-p44091960 | gene | exon |
| Bn-scaff_17721_1-p884087 | Bn-N2-p27196717  | gene |      |
| Bn-scaff_17725_1-p115788 | Bn-N12-p11248166 | gene |      |
| Bn-scaff_17725_1-p115992 | Bn-N12-p11248370 | gene |      |
| Bn-scaff_17725_1-p116642 | Bn-N12-p11249029 | gene |      |
| Bn-scaff_17725_1-p199859 | Bn-N12-p11357101 | gene |      |
| Bn-scaff_17725_1-p430981 | Bn-N12-p11555365 | gene |      |
| Bn-scaff_17725_1-p431238 | Bn-N12-p11555622 | gene |      |
| Bn-scaff_17725_1-p431566 | Bn-N12-p11555950 | gene |      |
| Bn-scaff_17725_1-p505212 | Bn-N2-p7776012   | gene |      |
| Bn-scaff_17725_1-p510392 | Bn-N2-p7778581   | gene |      |
| Bn-scaff_17725_1-p514557 | Bn-N12-p11636658 | gene | exon |
| Bn-scaff_17725_1-p514758 | Bn-N2-p7781368   | gene |      |
| Bn-scaff_17726_1-p287320 | Bn-N14-p31908104 | gene |      |
| Bn-scaff_17726_1-p329807 | Bn-N2-p18257173  | gene |      |
| Bn-scaff_17731_1-p154621 | Bn-N11-p6674524  | gene | exon |
| Bn-scaff_17731_1-p155870 | Bn-N1-p4747599   | gene | exon |
| Bn-scaff_17731_1-p166950 | Bn-N11-p6684280  | gene |      |
| Bn-scaff_17731_1-p231809 | Bn-N11-p6752025  | gene |      |
| Bn-scaff_17731_1-p241423 | Bn-N11-p6763064  | gene | exon |
| Bn-scaff_17731_1-p258929 | Bn-N11-p6776210  | gene | exon |
| Bn-scaff_17731_1-p262448 | Bn-N11-p6783414  | gene |      |
| Bn-scaff_17731_1-p262543 | Bn-N11-p6783509  | gene | exon |
| Bn-scaff_17731_1-p275059 | Bn-N11-p6791116  | gene |      |
| Bn-scaff_17731_1-p385358 | Bn-N11-p6934402  | gene | exon |
| Bn-scaff_17731_1-p429660 | Bn-N11-p6981749  | gene |      |
| Bn-scaff_17731_1-p478972 | Bn-N11-p7014690  | gene | exon |

|                           |                  |      |      |
|---------------------------|------------------|------|------|
| Bn-scaff_17731_1-p482821  | Bn-N11-p7017265  | gene | exon |
| Bn-scaff_17731_1-p538617  | Bn-N11-p7067204  | gene |      |
| Bn-scaff_17731_1-p569481  | Bn-N11-p7094237  | gene |      |
| Bn-scaff_17731_1-p569486  | Bn-N11-p7094242  | gene |      |
| Bn-scaff_17731_1-p746793  | Bn-N11-p7290255  | gene |      |
| Bn-scaff_17731_1-p748416  | Bn-N11-p7292145  | gene |      |
| Bn-scaff_17731_1-p748518  | Bn-N11-p7292250  | gene | exon |
| Bn-scaff_17731_1-p748522  | Bn-N11-p7292254  | gene | exon |
| Bn-scaff_17731_1-p824980  | Bn-N11-p7361579  | gene |      |
| Bn-scaff_17731_1-p842133  | Bn-N1-p5198058   | gene | exon |
| Bn-scaff_17731_1-p863967  | Bn-N11-p7408370  | gene | exon |
| Bn-scaff_17731_1-p892885  | Bn-N1-p5239670   | gene | exon |
| Bn-scaff_17731_1-p979512  | Bn-N11-p7536587  | gene |      |
| Bn-scaff_17740_1-p489699  | Bn-N17-p33419128 | gene | exon |
| Bn-scaff_17740_1-p676503  | Bn-N6-p22325909  | gene | exon |
| Bn-scaff_17740_1-p790888  | Bn-N17-p33139902 | gene |      |
| Bn-scaff_17740_1-p793301  | Bn-N17-p33137490 | gene | exon |
| Bn-scaff_17740_1-p799766  | Bn-N17-p33131009 | gene |      |
| Bn-scaff_17740_1-p814634  | Bn-N17-p33097899 | gene |      |
| Bn-scaff_17740_1-p814830  | Bn-N17-p33097703 | gene |      |
| Bn-scaff_17740_1-p815135  | Bn-N17-p33097398 | gene | exon |
| Bn-scaff_17740_1-p816267  | Bn-N17-p33096283 | gene |      |
| Bn-scaff_17740_1-p816319  | Bn-N17-p33096230 | gene |      |
| Bn-scaff_17740_1-p827481  | Bn-N17-p33095122 | gene |      |
| Bn-scaff_17740_1-p828759  | Bn-N17-p33093832 | gene | exon |
| Bn-scaff_17740_1-p829172  | Bn-N17-p33093419 | gene | exon |
| Bn-scaff_17740_1-p830996  | Bn-N17-p33091624 | gene |      |
| Bn-scaff_17740_1-p834125  | Bn-N17-p33088497 | gene |      |
| Bn-scaff_17740_1-p839014  | Bn-N17-p33083608 | gene |      |
| Bn-scaff_17740_1-p839294  | Bn-N17-p33083327 | gene | exon |
| Bn-scaff_17740_1-p845263  | Bn-N17-p33077360 | gene | exon |
| Bn-scaff_17740_1-p85367   | Bn-N19-p35542619 | gene | exon |
| Bn-scaff_17740_1-p955896  | Bn-N17-p32964494 | gene | exon |
| Bn-scaff_17740_1-p987288  | Bn-N17-p32931939 | gene |      |
| Bn-scaff_17740_1-p988132  | Bn-N17-p32931094 | gene | exon |
| Bn-scaff_17750_1-p1105057 | Bn-N19-p54667995 | gene | exon |
| Bn-scaff_17750_1-p1165913 | Bn-N19-p54610662 | gene |      |
| Bn-scaff_17750_1-p1165935 | Bn-N19-p54610640 | gene |      |
| Bn-scaff_17750_1-p1166353 | Bn-N19-p54610222 | gene |      |
| Bn-scaff_17750_1-p1167557 | Bn-N19-p54608921 | gene |      |
| Bn-scaff_17750_1-p1168839 | Bn-N10-p16281841 | gene | exon |
| Bn-scaff_17750_1-p117385  | Bn-N19-p55562109 | gene | exon |
| Bn-scaff_17750_1-p1193301 | Bn-N10-p16263606 | gene | exon |
| Bn-scaff_17750_1-p1243511 | Bn-N19-p54525486 | gene | exon |
| Bn-scaff_17750_1-p1252439 | Bn-N19-p54520183 | gene |      |
| Bn-scaff_17750_1-p1257734 | Bn-N10-p16196927 | gene | exon |
| Bn-scaff_17750_1-p1317267 | Bn-N19-p54454858 | gene |      |
| Bn-scaff_17750_1-p1317272 | Bn-N19-p54454855 | gene |      |
| Bn-scaff_17750_1-p132154  | Bn-N10-p17056039 | gene | exon |
| Bn-scaff_17750_1-p1326856 | Bn-N19-p54445865 | gene |      |
| Bn-scaff_17750_1-p1506896 | Bn-N10-p16002782 | gene | exon |
| Bn-scaff_17750_1-p1576968 | Bn-N19-p46962596 | gene | exon |

|                           |                  |      |      |
|---------------------------|------------------|------|------|
| Bn-scaff_17750_1-p1577506 | Bn-N19-p46963209 | gene |      |
| Bn-scaff_17750_1-p161563  | Bn-N19-p55512276 | gene |      |
| Bn-scaff_17750_1-p1620719 | Bn-N19-p54119207 | gene |      |
| Bn-scaff_17750_1-p1621241 | Bn-N10-p15911145 | gene | exon |
| Bn-scaff_17750_1-p1621294 | Bn-N19-p54118626 | gene | exon |
| Bn-scaff_17750_1-p166173  | Bn-N19-p55507666 | gene | exon |
| Bn-scaff_17750_1-p1692443 | Bn-N19-p54057838 | gene | exon |
| Bn-scaff_17750_1-p1692483 | Bn-N19-p54057799 | gene | exon |
| Bn-scaff_17750_1-p1801981 | Bn-N19-p53945924 | gene |      |
| Bn-scaff_17750_1-p1803210 | Bn-N19-p53944702 | gene |      |
| Bn-scaff_17750_1-p1839429 | Bn-N19-p53910139 | gene |      |
| Bn-scaff_17750_1-p1871862 | Bn-N10-p15708239 | gene | exon |
| Bn-scaff_17750_1-p1905208 | Bn-N19-p53849214 | gene |      |
| Bn-scaff_17750_1-p1981563 | Bn-N10-p15646007 | gene | exon |
| Bn-scaff_17750_1-p2007623 | Bn-N10-p15617354 | gene | exon |
| Bn-scaff_17750_1-p2082478 | Bn-N19-p53678595 | gene |      |
| Bn-scaff_17750_1-p261491  | Bn-N19-p55467168 | gene | exon |
| Bn-scaff_17750_1-p274778  | Bn-N19-p55453837 | gene | exon |
| Bn-scaff_17750_1-p274914  | Bn-N19-p55453701 | gene |      |
| Bn-scaff_17750_1-p409857  | Bn-N10-p16874115 | gene | exon |
| Bn-scaff_17750_1-p413107  | Bn-N19-p55333334 | gene |      |
| Bn-scaff_17750_1-p435403  | Bn-N19-p55310596 | gene |      |
| Bn-scaff_17750_1-p436527  | Bn-N19-p55309293 | gene | exon |
| Bn-scaff_17750_1-p555679  | Bn-N19-p55203164 | gene | exon |
| Bn-scaff_17750_1-p597135  | Bn-N19-p55161212 | gene |      |
| Bn-scaff_17750_1-p602923  | Bn-N19-p55154352 | gene |      |
| Bn-scaff_17750_1-p610438  | Bn-N19-p55147912 | gene |      |
| Bn-scaff_17750_1-p621298  | Bn-N19-p55137923 | gene |      |
| Bn-scaff_17750_1-p666634  | Bn-N19-p55095413 | gene |      |
| Bn-scaff_17750_1-p669492  | Bn-N19-p55092556 | gene |      |
| Bn-scaff_17750_1-p684757  | Bn-N19-p55072003 | gene |      |
| Bn-scaff_17750_1-p770456  | Bn-N19-p54993207 | gene |      |
| Bn-scaff_17750_1-p823170  | Bn-N19-p54939364 | gene | exon |
| Bn-scaff_17750_1-p892716  | Bn-N19-p54879239 | gene |      |
| Bn-scaff_17750_1-p932637  | Bn-N19-p54839328 | gene |      |
| Bn-scaff_17752_1-p73834   | Bn-N12-p398718   | gene |      |
| Bn-scaff_17799_1-p1053450 | Bn-N7-p24106556  | gene | exon |
| Bn-scaff_17799_1-p1070542 | Bn-N16-p39104677 | gene |      |
| Bn-scaff_17799_1-p1178394 | Bn-N16-p39008227 | gene |      |
| Bn-scaff_17799_1-p1179110 | Bn-N16-p39007511 | gene |      |
| Bn-scaff_17799_1-p1214222 | Bn-N16-p38970697 | gene | exon |
| Bn-scaff_17799_1-p122335  | Bn-N16-p25690919 | gene | exon |
| Bn-scaff_17799_1-p123518  | Bn-N7-p16773046  | gene | exon |
| Bn-scaff_17799_1-p1278642 | Bn-N16-p38904676 | gene |      |
| Bn-scaff_17799_1-p1293186 | Bn-N16-p38891493 | gene | exon |
| Bn-scaff_17799_1-p1308909 | Bn-N16-p38875406 | gene |      |
| Bn-scaff_17799_1-p1322660 | Bn-N16-p38860629 | gene |      |
| Bn-scaff_17799_1-p1399131 | Bn-N16-p38744500 | gene | exon |
| Bn-scaff_17799_1-p1428594 | Bn-N16-p38714052 | gene | exon |
| Bn-scaff_17799_1-p150488  | Bn-N7-p24856683  | gene | exon |
| Bn-scaff_17799_1-p1564366 | Bn-N16-p38575084 | gene | exon |
| Bn-scaff_17799_1-p1577464 | Bn-N7-p23674713  | gene | exon |

|                           |                  |      |      |
|---------------------------|------------------|------|------|
| Bn-scaff_17799_1-p1627022 | Bn-N7-p23629541  | gene |      |
| Bn-scaff_17799_1-p1629892 | Bn-N16-p38519009 | gene |      |
| Bn-scaff_17799_1-p1916350 | Bn-N7-p23409205  | gene |      |
| Bn-scaff_17799_1-p1917487 | Bn-N7-p23408003  | gene | exon |
| Bn-scaff_17799_1-p1917543 | Bn-N7-p23407947  | gene | exon |
| Bn-scaff_17799_1-p1951179 | Bn-N16-p38206123 | gene |      |
| Bn-scaff_17799_1-p1952920 | Bn-N16-p38204361 | gene | exon |
| Bn-scaff_17799_1-p1953043 | Bn-N16-p38204239 | gene |      |
| Bn-scaff_17799_1-p1954076 | Bn-N16-p38203205 | gene |      |
| Bn-scaff_17799_1-p1960877 | Bn-N16-p38198398 | gene |      |
| Bn-scaff_17799_1-p1960995 | Bn-N16-p38198281 | gene |      |
| Bn-scaff_17799_1-p1991849 | Bn-N16-p38166649 | gene | exon |
| Bn-scaff_17799_1-p2051989 | Bn-N7-p23264448  | gene | exon |
| Bn-scaff_17799_1-p2054776 | Bn-N16-p38108424 | gene | exon |
| Bn-scaff_17799_1-p2065343 | Bn-N16-p38096354 | gene |      |
| Bn-scaff_17799_1-p2065835 | Bn-N16-p38095925 | gene |      |
| Bn-scaff_17799_1-p2066439 | Bn-N16-p38095321 | gene |      |
| Bn-scaff_17799_1-p2111711 | Bn-N16-p38035827 | gene | exon |
| Bn-scaff_17799_1-p2161244 | Bn-N16-p38002862 | gene |      |
| Bn-scaff_17799_1-p2233442 | Bn-N7-p23154757  | gene | exon |
| Bn-scaff_17799_1-p2273825 | Bn-N16-p37881459 | gene |      |
| Bn-scaff_17799_1-p2278557 | Bn-N16-p37834805 | gene | exon |
| Bn-scaff_17799_1-p2278846 | Bn-N16-p37834516 | gene | exon |
| Bn-scaff_17799_1-p2280106 | Bn-N16-p37833468 | gene |      |
| Bn-scaff_17799_1-p2284083 | Bn-N16-p37831922 | gene | exon |
| Bn-scaff_17799_1-p2284135 | Bn-N16-p37831870 | gene | exon |
| Bn-scaff_17799_1-p2284230 | Bn-N16-p37831775 | gene |      |
| Bn-scaff_17799_1-p2293785 | Bn-N16-p37812451 | gene | exon |
| Bn-scaff_17799_1-p2300742 | Bn-N16-p37806382 | gene |      |
| Bn-scaff_17799_1-p2301106 | Bn-N16-p37806017 | gene |      |
| Bn-scaff_17799_1-p2334952 | Bn-N16-p37783613 | gene | exon |
| Bn-scaff_17799_1-p2391172 | Bn-N16-p37714922 | gene |      |
| Bn-scaff_17799_1-p2391248 | Bn-N16-p37714847 | gene |      |
| Bn-scaff_17799_1-p2426803 | Bn-N16-p37684590 | gene |      |
| Bn-scaff_17799_1-p2426871 | Bn-N16-p37684523 | gene |      |
| Bn-scaff_17799_1-p2495638 | Bn-N16-p37607942 | gene | exon |
| Bn-scaff_17799_1-p2548952 | Bn-N16-p37570921 | gene | exon |
| Bn-scaff_17799_1-p2577368 | Bn-N7-p22898719  | gene | exon |
| Bn-scaff_17799_1-p264732  | Bn-N16-p39955379 | gene |      |
| Bn-scaff_17799_1-p2747856 | Bn-N19-p46387273 | gene |      |
| Bn-scaff_17799_1-p2764738 | Bn-N19-p46367929 | gene |      |
| Bn-scaff_17799_1-p2821394 | Bn-N19-p46315260 | gene |      |
| Bn-scaff_17799_1-p2838665 | Bn-N19-p46297441 | gene |      |
| Bn-scaff_17799_1-p2885267 | Bn-N19-p46247286 | gene | exon |
| Bn-scaff_17799_1-p2937790 | Bn-N19-p46154952 | gene | exon |
| Bn-scaff_17799_1-p2990222 | Bn-N19-p46092475 | gene |      |
| Bn-scaff_17799_1-p2993406 | Bn-N19-p46088549 | gene |      |
| Bn-scaff_17799_1-p2993905 | Bn-N19-p46088051 | gene |      |
| Bn-scaff_17799_1-p2994637 | Bn-N19-p46087319 | gene |      |
| Bn-scaff_17799_1-p2994660 | Bn-N19-p46087296 | gene |      |
| Bn-scaff_17799_1-p300944  | Bn-N16-p39921733 | gene |      |
| Bn-scaff_17799_1-p3010894 | Bn-N19-p46070104 | gene |      |

|                           |                       |      |      |
|---------------------------|-----------------------|------|------|
| Bn-scaff_17799_1-p3014813 | Bn-N19-p46066885      | gene |      |
| Bn-scaff_17799_1-p3015559 | Bn-N10-p11272495      | gene | exon |
| Bn-scaff_17799_1-p3015777 | Bn-N10-p11272265      | gene | exon |
| Bn-scaff_17799_1-p3016075 | Bn-N19-p46065748      | gene | exon |
| Bn-scaff_17799_1-p393729  | Bn-N7-p24627680       | gene |      |
| Bn-scaff_17799_1-p397275  | Bn-N7-p24624123       | gene | exon |
| Bn-scaff_17799_1-p401453  | Bn-N16-p39816758      | gene |      |
| Bn-scaff_17799_1-p462622  | Bn-N16-p39745453      | gene |      |
| Bn-scaff_17799_1-p462623  | Bn-N16-p39745452      | gene |      |
| Bn-scaff_17799_1-p668789  | Bn-N16-p39522760      | gene | exon |
| Bn-scaff_17799_1-p670065  | Bn-N16-p39521484      | gene | exon |
| Bn-scaff_17799_1-p678129  | Bn-N16-p26174419      | gene | exon |
| Bn-scaff_17799_1-p743957  | Bn-N7-p24320722       | gene | exon |
| Bn-scaff_17799_1-p744199  | Bn-N7-p24320481       | gene |      |
| Bn-scaff_17799_1-p836919  | Bn-N16-p39349749      | gene |      |
| Bn-scaff_17799_1-p840352  | Bn-N16-p39346156      | gene |      |
| Bn-scaff_17799_1-p841812  | Bn-N16-p39344538      | gene |      |
| Bn-scaff_17799_1-p925281  | Bn-N16-p39266297      | gene |      |
| Bn-scaff_17799_1-p945289  | Bn-N16-p39244338      | gene |      |
| Bn-scaff_17801_1-p179884  | Bn-N19-p19300295      | gene |      |
| Bn-scaff_17801_1-p180565  | Bn-Scaffold10980-p367 | gene |      |
| Bn-scaff_17801_1-p185077  | Bn-N19-p19294893      | gene |      |
| Bn-scaff_17801_1-p203055  | Bn-N19-p19272234      | gene | exon |
| Bn-scaff_17801_1-p314822  | Bn-N9-p12576733       | gene | exon |
| Bn-scaff_17807_1-p192053  | Bn-N18-p26913742      | gene |      |
| Bn-scaff_17807_1-p364572  | Bn-N18-p4039298       | gene |      |
| Bn-scaff_17807_1-p461276  | Bn-N8-p3085739        | gene |      |
| Bn-scaff_17807_1-p461826  | Bn-N18-p3964246       | gene | exon |
| Bn-scaff_17807_1-p462009  | Bn-N18-p3964064       | gene |      |
| Bn-scaff_17807_1-p462854  | Bn-N18-p3963219       | gene | exon |
| Bn-scaff_17821_1-p119310  | Bn-N8-p12762599       | gene |      |
| Bn-scaff_17821_1-p127254  | Bn-N13-p63142532      | gene | exon |
| Bn-scaff_17821_1-p21053   | Bn-N13-p63041416      | gene | exon |
| Bn-scaff_17827_1-p1028452 | Bn-N11-p8544945       | gene | exon |
| Bn-scaff_17827_1-p111920  | Bn-N11-p7700606       | gene | exon |
| Bn-scaff_17827_1-p197955  | Bn-N7-p16568832       | gene |      |
| Bn-scaff_17827_1-p20213   | Bn-N11-p7616076       | gene |      |
| Bn-scaff_17827_1-p271972  | Bn-N11-p7823186       | gene | exon |
| Bn-scaff_17827_1-p329960  | Bn-N1-p5488275        | gene | exon |
| Bn-scaff_17827_1-p523112  | Bn-N11-p8031171       | gene | exon |
| Bn-scaff_17827_1-p600033  | Bn-N11-p8106740       | gene | exon |
| Bn-scaff_17827_1-p628709  | Bn-N11-p8138086       | gene |      |
| Bn-scaff_17827_1-p629081  | Bn-N11-p8138458       | gene |      |
| Bn-scaff_17827_1-p629351  | Bn-N1-p5680273        | gene | exon |
| Bn-scaff_17827_1-p646146  | Bn-N11-p8148266       | gene |      |
| Bn-scaff_17827_1-p653879  | Bn-N11-p8156000       | gene | exon |
| Bn-scaff_17827_1-p654250  | Bn-N11-p8156369       | gene | exon |
| Bn-scaff_17827_1-p747924  | Bn-N11-p8252973       | gene | exon |
| Bn-scaff_17827_1-p836925  | Bn-N11-p8342276       | gene | exon |
| Bn-scaff_17827_1-p897345  | Bn-N11-p8423772       | gene |      |
| Bn-scaff_17827_1-p936522  | Bn-N11-p8452106       | gene |      |
| Bn-scaff_17827_1-p953712  | Bn-N11-p8479761       | gene | exon |

|                           |                        |      |      |
|---------------------------|------------------------|------|------|
| Bn-scaff_17827_1-p953907  | Bn-N11-p8479956        | gene | exon |
| Bn-scaff_17831_1-p137251  | Bn-N12-p40806307       | gene |      |
| Bn-scaff_17831_1-p138012  | Bn-N12-p40807068       | gene |      |
| Bn-scaff_17831_1-p167412  | Bn-N12-p40838046       | gene | exon |
| Bn-scaff_17831_1-p173520  | Bn-Scaffold01566-p4791 | gene | exon |
| Bn-scaff_17831_1-p198992  | Bn-N12-p40864279       | gene |      |
| Bn-scaff_17831_1-p272649  | Bn-N12-p40946972       | gene |      |
| Bn-scaff_17831_1-p272703  | Bn-N12-p40947026       | gene |      |
| Bn-scaff_17831_1-p273579  | Bn-N12-p40947902       | gene |      |
| Bn-scaff_17831_1-p273961  | Bn-N12-p40948284       | gene |      |
| Bn-scaff_17831_1-p274241  | Bn-N12-p40948564       | gene |      |
| Bn-scaff_17831_1-p274650  | Bn-N12-p40948964       | gene |      |
| Bn-scaff_17831_1-p288494  | Bn-N12-p40963828       | gene | exon |
| Bn-scaff_17831_1-p291371  | Bn-N12-p40966705       | gene | exon |
| Bn-scaff_17831_1-p291865  | Bn-N12-p40967199       | gene | exon |
| Bn-scaff_17831_1-p292580  | Bn-N12-p40967914       | gene | exon |
| Bn-scaff_17867_1-p65627   | Bn-N16-p16361408       | gene |      |
| Bn-scaff_17867_1-p69453   | Bn-N16-p16357628       | gene | exon |
| Bn-scaff_17867_1-p70307   | Bn-N16-p16356805       | gene |      |
| Bn-scaff_17869_1-p1056525 | Bn-N15-p16510311       | gene |      |
| Bn-scaff_17869_1-p1067608 | Bn-N15-p16524114       | gene |      |
| Bn-scaff_17869_1-p115726  | Bn-N14-p10840151       | gene |      |
| Bn-scaff_17869_1-p115797  | Bn-N14-p10840222       | gene |      |
| Bn-scaff_17869_1-p1271417 | Bn-N15-p16735860       | gene | exon |
| Bn-scaff_17869_1-p1272586 | Bn-N15-p16737031       | gene | exon |
| Bn-scaff_17869_1-p1272783 | Bn-N15-p16737228       | gene | exon |
| Bn-scaff_17869_1-p135956  | Bn-N14-p10860683       | gene | exon |
| Bn-scaff_17869_1-p174416  | Bn-N14-p10897686       | gene |      |
| Bn-scaff_17869_1-p174480  | Bn-N14-p10897743       | gene |      |
| Bn-scaff_17869_1-p207523  | Bn-N14-p10930559       | gene |      |
| Bn-scaff_17869_1-p331838  | Bn-N14-p48525363       | gene | exon |
| Bn-scaff_17869_1-p332267  | Bn-N19-p49512320       | gene | exon |
| Bn-scaff_17869_1-p411256  | Bn-N5-p6538816         | gene | exon |
| Bn-scaff_17869_1-p592847  | Bn-N14-p11340141       | gene |      |
| Bn-scaff_17869_1-p593516  | Bn-N5-p6689274         | gene |      |
| Bn-scaff_17869_1-p593823  | Bn-N14-p11339151       | gene | exon |
| Bn-scaff_17869_1-p624110  | Bn-N14-p11302004       | gene |      |
| Bn-scaff_17869_1-p709145  | Bn-N5-p6774794         | gene |      |
| Bn-scaff_17869_1-p814323  | Bn-N14-p11571068       | gene | exon |
| Bn-scaff_17869_1-p814402  | Bn-N14-p11571147       | gene | exon |
| Bn-scaff_17869_1-p815096  | Bn-N14-p11571841       | gene |      |
| Bn-scaff_17869_1-p820117  | Bn-N14-p11576785       | gene |      |
| Bn-scaff_17869_1-p947940  | Bn-N15-p16397450       | gene |      |
| Bn-scaff_17869_1-p972743  | Bn-N15-p16428702       | gene |      |
| Bn-scaff_17869_1-p975256  | Bn-N15-p16431209       | gene |      |
| Bn-scaff_17882_1-p20385   | Bn-N17-p7132913        | gene | exon |
| Bn-scaff_17882_1-p21938   | Bn-N17-p7131360        | gene |      |
| Bn-scaff_17882_1-p22070   | Bn-N17-p7131228        | gene | exon |
| Bn-scaff_17882_1-p74497   | Bn-N7-p3009263         | gene |      |
| Bn-scaff_17882_1-p75280   | Bn-N17-p7072533        | gene | exon |
| Bn-scaff_17882_1-p91047   | Bn-N17-p7049566        | gene |      |
| Bn-scaff_17882_1-p91274   | Bn-N17-p7049339        | gene |      |

|                          |                  |      |      |
|--------------------------|------------------|------|------|
| Bn-scaff_17882_1-p91894  | Bn-N17-p7048719  | gene | exon |
| Bn-scaff_17888_1-p156678 | Bn-N17-p47610693 | gene | exon |
| Bn-scaff_17888_1-p183402 | Bn-N19-p20139547 | gene | exon |
| Bn-scaff_17888_1-p199868 | Bn-N19-p20160224 | gene | exon |
| Bn-scaff_17888_1-p201117 | Bn-N19-p20161470 | gene | exon |
| Bn-scaff_17888_1-p234601 | Bn-N19-p20198436 | gene | exon |
| Bn-scaff_17888_1-p435307 | Bn-N9-p12515313  | gene |      |
| Bn-scaff_17888_1-p65372  | Bn-N19-p20049810 | gene | exon |
| Bn-scaff_17910_1-p126780 | Bn-N19-p38533778 | gene |      |
| Bn-scaff_17910_1-p134686 | Bn-N10-p7711371  | gene |      |
| Bn-scaff_17910_1-p135761 | Bn-N10-p7712561  | gene | exon |
| Bn-scaff_17910_1-p135864 | Bn-N19-p38541697 | gene | exon |
| Bn-scaff_17917_1-p171340 | Bn-N16-p8302589  | gene | exon |
| Bn-scaff_17917_1-p187293 | Bn-N16-p8285149  | gene |      |
| Bn-scaff_17917_1-p190454 | Bn-N16-p8282258  | gene |      |
| Bn-scaff_17917_1-p191484 | Bn-N16-p8281226  | gene |      |
| Bn-scaff_17917_1-p93511  | Bn-N16-p8387232  | gene |      |
| Bn-scaff_17919_1-p174590 | Bn-N19-p39531304 | gene | exon |
| Bn-scaff_17919_1-p175012 | Bn-N19-p39530881 | gene |      |
| Bn-scaff_17919_1-p177730 | Bn-N19-p39528164 | gene |      |
| Bn-scaff_17919_1-p282066 | Bn-N19-p39404555 | gene |      |
| Bn-scaff_17959_1-p284214 | Bn-N11-p21461673 | gene |      |
| Bn-scaff_17959_1-p340854 | Bn-N11-p21403051 | gene | exon |
| Bn-scaff_17959_1-p346956 | Bn-N11-p21396845 | gene |      |
| Bn-scaff_17959_1-p75322  | Bn-N11-p21665069 | gene |      |
| Bn-scaff_17959_1-p75903  | Bn-N11-p21664488 | gene |      |
| Bn-scaff_17959_1-p76427  | Bn-N11-p21663964 | gene |      |
| Bn-scaff_17959_1-p76589  | Bn-N11-p21663802 | gene |      |
| Bn-scaff_17959_1-p95559  | Bn-N11-p21645046 | gene |      |
| Bn-scaff_17959_1-p95580  | Bn-N11-p21645025 | gene |      |
| Bn-scaff_17969_1-p2047   | Bn-N12-p4355401  | gene |      |
| Bn-scaff_17972_1-p113066 | Bn-N1-p26161144  | gene | exon |
| Bn-scaff_17972_1-p146234 | Bn-N17-p34193482 | gene |      |
| Bn-scaff_17972_1-p146235 | Bn-N17-p34193481 | gene |      |
| Bn-scaff_17972_1-p172077 | Bn-N17-p34165706 | gene | exon |
| Bn-scaff_17972_1-p183765 | Bn-N6-p21821758  | gene |      |
| Bn-scaff_17972_1-p279228 | Bn-N17-p34061229 | gene |      |
| Bn-scaff_17972_1-p299054 | Bn-N6-p21873030  | gene | exon |
| Bn-scaff_17972_1-p361917 | Bn-N17-p33939774 | gene | exon |
| Bn-scaff_17972_1-p421559 | Bn-N17-p33882155 | gene |      |
| Bn-scaff_17972_1-p424356 | Bn-N17-p33879357 | gene | exon |
| Bn-scaff_17972_1-p424678 | Bn-N17-p33879035 | gene | exon |
| Bn-scaff_17972_1-p424888 | Bn-N17-p33878826 | gene |      |
| Bn-scaff_17972_1-p425171 | Bn-N17-p33878543 | gene |      |
| Bn-scaff_17972_1-p425274 | Bn-N17-p33878440 | gene |      |
| Bn-scaff_17972_1-p425581 | Bn-N17-p33878132 | gene |      |
| Bn-scaff_17972_1-p425760 | Bn-N17-p33877954 | gene |      |
| Bn-scaff_17972_1-p426067 | Bn-N17-p33877647 | gene |      |
| Bn-scaff_17972_1-p426268 | Bn-N17-p33877446 | gene | exon |
| Bn-scaff_17972_1-p426297 | Bn-N17-p33877417 | gene | exon |
| Bn-scaff_17972_1-p526216 | Bn-N17-p33785592 | gene |      |
| Bn-scaff_17972_1-p581578 | Bn-N17-p33738524 | gene | exon |

|                           |                        |      |      |
|---------------------------|------------------------|------|------|
| Bn-scaff_17972_1-p68614   | Bn-N11-p44025629       | gene |      |
| Bn-scaff_17972_1-p68665   | Bn-N11-p44025578       | gene |      |
| Bn-scaff_17972_1-p69160   | Bn-Scaffold01504-p5604 | gene |      |
| Bn-scaff_17977_1-p146911  | Bn-N13-p50449853       | gene | exon |
| Bn-scaff_17978_1-p22148   | Bn-N11-p4640656        | gene | exon |
| Bn-scaff_17978_1-p225133  | Bn-N11-p4852289        | gene |      |
| Bn-scaff_17978_1-p23608   | Bn-N11-p4655523        | gene | exon |
| Bn-scaff_17978_1-p23955   | Bn-N11-p4655870        | gene |      |
| Bn-scaff_17978_1-p329567  | Bn-N1-p3688925         | gene | exon |
| Bn-scaff_17978_1-p47592   | Bn-N11-p4679189        | gene |      |
| Bn-scaff_17983_1-p52117   | Bn-N14-p7467945        | gene | exon |
| Bn-scaff_17983_1-p52946   | Bn-N14-p7468767        | gene |      |
| Bn-scaff_17984_1-p1228297 | Bn-N9-p19647213        | gene | exon |
| Bn-scaff_17984_1-p222271  | Bn-N16-p10971267       | gene | exon |
| Bn-scaff_17984_1-p222990  | Bn-N16-p10970549       | gene | exon |
| Bn-scaff_17984_1-p317879  | Bn-N16-p10862059       | gene | exon |
| Bn-scaff_17984_1-p792511  | Bn-N18-p8944223        | gene | exon |
| Bn-scaff_17996_1-p229883  | Bn-N19-p20519747       | gene |      |
| Bn-scaff_17996_1-p32471   | Bn-N15-p26047554       | gene |      |
| Bn-scaff_18002_1-p156755  | Bn-N16-p9142685        | gene | exon |
| Bn-scaff_18002_1-p240843  | Bn-N16-p9229439        | gene |      |
| Bn-scaff_18013_1-p194773  | Bn-N13-p48108178       | gene | exon |
| Bn-scaff_18022_1-p991     | Bn-N15-p45592595       | gene | exon |
| Bn-scaff_18034_1-p365     | Bn-N14-p44914645       | gene |      |
| Bn-scaff_18039_1-p166807  | Bn-N11-p36586000       | gene |      |
| Bn-scaff_18039_1-p183225  | Bn-N11-p36602391       | gene |      |
| Bn-scaff_18039_1-p183233  | Bn-N11-p36602399       | gene |      |
| Bn-scaff_18039_1-p189309  | Bn-N11-p36608515       | gene | exon |
| Bn-scaff_18062_1-p121756  | Bn-N14-p35983012       | gene |      |
| Bn-scaff_18062_1-p139457  | Bn-N14-p35972577       | gene | exon |
| Bn-scaff_18062_1-p219340  | Bn-N14-p35882033       | gene | exon |
| Bn-scaff_18062_1-p219780  | Bn-N14-p35881591       | gene |      |
| Bn-scaff_18062_1-p220233  | Bn-N14-p35881138       | gene |      |
| Bn-scaff_18062_1-p220299  | Bn-N14-p35881072       | gene |      |
| Bn-scaff_18062_1-p220320  | Bn-N14-p35881051       | gene |      |
| Bn-scaff_18062_1-p220375  | Bn-N14-p35880996       | gene | exon |
| Bn-scaff_18062_1-p242986  | Bn-N14-p35855606       | gene |      |
| Bn-scaff_18062_1-p281711  | Bn-N14-p35817270       | gene |      |
| Bn-scaff_18062_1-p314727  | Bn-N14-p35792556       | gene |      |
| Bn-scaff_18062_1-p315025  | Bn-N14-p35792258       | gene |      |
| Bn-scaff_18062_1-p323927  | Bn-N14-p35783356       | gene | exon |
| Bn-scaff_18062_1-p45782   | Bn-N14-p36071896       | gene |      |
| Bn-scaff_18062_1-p68600   | Bn-N14-p36048027       | gene |      |
| Bn-scaff_18095_1-p758     | Bn-N4-p3083641         | gene | exon |
| Bn-scaff_18096_1-p30025   | Bn-N11-p39896739       | gene |      |
| Bn-scaff_18100_1-p1123718 | Bn-N19-p18498106       | gene |      |
| Bn-scaff_18100_1-p1124889 | Bn-N9-p11895221        | gene | exon |
| Bn-scaff_18100_1-p1166204 | Bn-N19-p18537507       | gene |      |
| Bn-scaff_18100_1-p1168487 | Bn-N19-p18539789       | gene | exon |
| Bn-scaff_18100_1-p1229515 | Bn-N19-p18601945       | gene |      |
| Bn-scaff_18100_1-p1255808 | Bn-N19-p18634831       | gene | exon |
| Bn-scaff_18100_1-p1255862 | Bn-N19-p18634885       | gene | exon |



|                           |                  |      |      |
|---------------------------|------------------|------|------|
| Bn-scaff_18100_1-p1311597 | Bn-N19-p18685207 | gene | exon |
| Bn-scaff_18100_1-p1312267 | Bn-N19-p18685877 | gene |      |
| Bn-scaff_18100_1-p1335869 | Bn-N19-p18728249 | gene |      |
| Bn-scaff_18100_1-p1335875 | Bn-N19-p18728254 | gene |      |
| Bn-scaff_18100_1-p1335954 | Bn-N19-p18728334 | gene |      |
| Bn-scaff_18100_1-p1345991 | Bn-N19-p18742248 | gene | exon |
| Bn-scaff_18100_1-p1364099 | Bn-N19-p18756344 | gene |      |
| Bn-scaff_18100_1-p1376382 | Bn-N16-p24916897 | gene | exon |
| Bn-scaff_18100_1-p142231  | Bn-N19-p17534089 | gene |      |
| Bn-scaff_18100_1-p232146  | Bn-N19-p17629028 | gene | exon |
| Bn-scaff_18100_1-p232785  | Bn-N19-p17629668 | gene | exon |
| Bn-scaff_18100_1-p234842  | Bn-N19-p17631725 | gene | exon |
| Bn-scaff_18100_1-p275291  | Bn-N19-p17668520 | gene | exon |
| Bn-scaff_18100_1-p275630  | Bn-N19-p17668859 | gene | exon |
| Bn-scaff_18100_1-p31176   | Bn-N19-p17386852 | gene | exon |
| Bn-scaff_18100_1-p446182  | Bn-N9-p11383376  | gene | exon |
| Bn-scaff_18100_1-p54657   | Bn-N19-p17410395 | gene |      |
| Bn-scaff_18100_1-p54706   | Bn-N19-p17410444 | gene | exon |
| Bn-scaff_18100_1-p559555  | Bn-N12-p9480427  | gene | exon |
| Bn-scaff_18100_1-p568863  | Bn-N19-p17949506 | gene | exon |
| Bn-scaff_18100_1-p593993  | Bn-N9-p11525005  | gene | exon |
| Bn-scaff_18100_1-p68477   | Bn-N9-p11074977  | gene | exon |
| Bn-scaff_18100_1-p69205   | Bn-N9-p11075701  | gene | exon |
| Bn-scaff_18100_1-p762388  | Bn-N19-p18177911 | gene | exon |
| Bn-scaff_18100_1-p762611  | Bn-N19-p18178135 | gene | exon |
| Bn-scaff_18100_1-p763088  | Bn-N9-p11667951  | gene |      |
| Bn-scaff_18100_1-p785785  | Bn-N9-p11676105  | gene | exon |
| Bn-scaff_18125_1-p33315   | Bn-N16-p32805298 | gene |      |
| Bn-scaff_18125_1-p37317   | Bn-N7-p20073375  | gene | exon |
| Bn-scaff_18140_1-p183860  | Bn-N16-p2731042  | gene | exon |
| Bn-scaff_18140_1-p536327  | Bn-N10-p3251139  | gene | exon |
| Bn-scaff_18140_1-p771443  | Bn-N16-p2093907  | gene |      |
| Bn-scaff_18140_1-p94701   | Bn-N16-p2772361  | gene |      |
| Bn-scaff_18181_1-p113928  | Bn-N15-p8225544  | gene |      |
| Bn-scaff_18181_1-p1150001 | Bn-N6-p5461586   | gene | exon |
| Bn-scaff_18181_1-p1150890 | Bn-N15-p7101313  | gene | exon |
| Bn-scaff_18181_1-p1175296 | Bn-N19-p54239304 | gene | exon |
| Bn-scaff_18181_1-p1265722 | Bn-N15-p6956802  | gene |      |
| Bn-scaff_18181_1-p1266768 | Bn-N15-p6955756  | gene | exon |
| Bn-scaff_18181_1-p1289692 | Bn-N15-p6935723  | gene |      |
| Bn-scaff_18181_1-p1341113 | Bn-N6-p5375333   | gene | exon |
| Bn-scaff_18181_1-p1342505 | Bn-N6-p5373954   | gene | exon |
| Bn-scaff_18181_1-p140221  | Bn-N15-p8187090  | gene |      |
| Bn-scaff_18181_1-p141261  | Bn-N6-p6152761   | gene | exon |
| Bn-scaff_18181_1-p1481102 | Bn-N17-p32066173 | gene |      |
| Bn-scaff_18181_1-p1590136 | Bn-N15-p6313834  | gene |      |
| Bn-scaff_18181_1-p1603841 | Bn-N15-p6339812  | gene |      |
| Bn-scaff_18181_1-p1664330 | Bn-N15-p6436743  | gene |      |
| Bn-scaff_18181_1-p1691104 | Bn-N15-p6459843  | gene | exon |
| Bn-scaff_18181_1-p1691208 | Bn-N15-p6459947  | gene | exon |
| Bn-scaff_18181_1-p1691801 | Bn-N15-p6460541  | gene | exon |
| Bn-scaff_18181_1-p1707481 | Bn-N15-p6475053  | gene |      |

|                           |                        |      |      |
|---------------------------|------------------------|------|------|
| Bn-scaff_18181_1-p176182  | Bn-N15-p8151214        | gene |      |
| Bn-scaff_18181_1-p1774469 | Bn-N15-p6549784        | gene |      |
| Bn-scaff_18181_1-p1849246 | Bn-N8-p12331547        | gene | exon |
| Bn-scaff_18181_1-p195543  | Bn-N6-p6098271         | gene | exon |
| Bn-scaff_18181_1-p217804  | Bn-N6-p6086604         | gene | exon |
| Bn-scaff_18181_1-p522178  | Bn-N15-p7766993        | gene | exon |
| Bn-scaff_18181_1-p522373  | Bn-N15-p7766798        | gene | exon |
| Bn-scaff_18181_1-p522529  | Bn-N15-p7766642        | gene | exon |
| Bn-scaff_18181_1-p522702  | Bn-N15-p7766469        | gene |      |
| Bn-scaff_18181_1-p529589  | Bn-N15-p7760272        | gene | exon |
| Bn-scaff_18181_1-p616899  | Bn-N15-p7655747        | gene | exon |
| Bn-scaff_18181_1-p620712  | Bn-N15-p7653550        | gene |      |
| Bn-scaff_18181_1-p622258  | Bn-N15-p7652030        | gene |      |
| Bn-scaff_18181_1-p626037  | Bn-N15-p7646696        | gene | exon |
| Bn-scaff_18181_1-p630071  | Bn-N6-p5817465         | gene |      |
| Bn-scaff_18181_1-p674948  | Bn-N15-p7586759        | gene |      |
| Bn-scaff_18181_1-p917633  | Bn-N15-p7348802        | gene | exon |
| Bn-scaff_18181_1-p948888  | Bn-N15-p7317796        | gene |      |
| Bn-scaff_18181_1-p952071  | Bn-N6-p5625803         | gene |      |
| Bn-scaff_18181_1-p953276  | Bn-N15-p7313800        | gene | exon |
| Bn-scaff_18181_1-p960226  | Bn-N15-p7306859        | gene | exon |
| Bn-scaff_18181_1-p962029  | Bn-N15-p7304949        | gene |      |
| Bn-scaff_18189_1-p191178  | Bn-N5-p19212621        | gene | exon |
| Bn-scaff_18189_1-p301812  | Bn-N5-p19133883        | gene | exon |
| Bn-scaff_18199_1-p108926  | Bn-N12-p24332679       | gene |      |
| Bn-scaff_18199_1-p121854  | Bn-N12-p24320819       | gene | exon |
| Bn-scaff_18199_1-p190902  | Bn-N12-p24257615       | gene |      |
| Bn-scaff_18199_1-p234489  | Bn-N12-p24216983       | gene |      |
| Bn-scaff_18199_1-p315029  | Bn-N12-p24148282       | gene |      |
| Bn-scaff_18199_1-p315112  | Bn-N12-p24148199       | gene | exon |
| Bn-scaff_18199_1-p315242  | Bn-N12-p24148069       | gene |      |
| Bn-scaff_18199_1-p524720  | Bn-N2-p16703689        | gene | exon |
| Bn-scaff_18202_1-p1088626 | Bn-N17-p24742496       | gene | exon |
| Bn-scaff_18202_1-p1088668 | Bn-N17-p24742395       | gene | exon |
| Bn-scaff_18202_1-p1481243 | Bn-N17-p24400119       | gene | exon |
| Bn-scaff_18202_1-p149190  | Bn-N17-p25647141       | gene |      |
| Bn-scaff_18202_1-p1503040 | Bn-N17-p24384574       | gene | exon |
| Bn-scaff_18202_1-p1631779 | Bn-N17-p24254633       | gene | exon |
| Bn-scaff_18202_1-p182631  | Bn-N17-p25621099       | gene |      |
| Bn-scaff_18202_1-p276140  | Bn-N17-p25552773       | gene | exon |
| Bn-scaff_18202_1-p280150  | Bn-N17-p25548739       | gene | exon |
| Bn-scaff_18202_1-p356089  | Bn-N17-p25469565       | gene | exon |
| Bn-scaff_18202_1-p407315  | Bn-N17-p25425045       | gene |      |
| Bn-scaff_18202_1-p505132  | Bn-N17-p25327371       | gene | exon |
| Bn-scaff_18206_1-p142860  | Bn-N15-p3458353        | gene |      |
| Bn-scaff_18206_1-p14924   | Bn-N16-p20438919       | gene |      |
| Bn-scaff_18206_1-p457621  | Bn-Scaffold01272-p6939 | gene | exon |
| Bn-scaff_18206_1-p62235   | Bn-N16-p20469204       | gene | exon |
| Bn-scaff_18206_2-p114119  | Bn-N16-p20966774       | gene |      |
| Bn-scaff_18206_2-p114197  | Bn-N16-p20966853       | gene |      |
| Bn-scaff_18206_2-p33548   | Bn-N16-p20866098       | gene |      |
| Bn-scaff_18206_3-p1040029 | Bn-N17-p32657901       | gene |      |

|                           |                  |      |      |
|---------------------------|------------------|------|------|
| Bn-scaff_18206_3-p536950  | Bn-N7-p14869730  | gene | exon |
| Bn-scaff_18206_3-p923334  | Bn-N16-p21979260 | gene | exon |
| Bn-scaff_18206_3-p995621  | Bn-N16-p22055835 | gene |      |
| Bn-scaff_18206_3-p996477  | Bn-N16-p22056691 | gene | exon |
| Bn-scaff_18206_3-p996964  | Bn-N16-p22057178 | gene |      |
| Bn-scaff_18275_1-p1067723 | Bn-N18-p17256451 | gene |      |
| Bn-scaff_18275_1-p1210524 | Bn-N18-p17490884 | gene |      |
| Bn-scaff_18275_1-p1285880 | Bn-N8-p9613284   | gene | exon |
| Bn-scaff_18275_1-p1358799 | Bn-N18-p17666886 | gene | exon |
| Bn-scaff_18275_1-p269456  | Bn-N14-p28502139 | gene | exon |
| Bn-scaff_18275_1-p269623  | Bn-N14-p28501972 | gene | exon |
| Bn-scaff_18275_1-p477077  | Bn-N4-p1294668   | gene |      |
| Bn-scaff_18279_1-p10124   | Bn-N16-p4891006  | gene |      |
| Bn-scaff_18310_1-p1266233 | Bn-N18-p14104849 | gene | exon |
| Bn-scaff_18310_1-p151869  | Bn-N18-p12997662 | gene |      |
| Bn-scaff_18310_1-p151946  | Bn-N18-p12997739 | gene |      |
| Bn-scaff_18310_1-p152041  | Bn-N18-p12997834 | gene |      |
| Bn-scaff_18310_1-p520653  | Bn-N18-p13340272 | gene | exon |
| Bn-scaff_18310_1-p577933  | Bn-N18-p13407331 | gene |      |
| Bn-scaff_18310_1-p868154  | Bn-N18-p13689515 | gene | exon |
| Bn-scaff_18310_1-p868285  | Bn-N18-p13689646 | gene | exon |
| Bn-scaff_18310_1-p961622  | Bn-N18-p13783672 | gene |      |
| Bn-scaff_18310_1-p961688  | Bn-N18-p13783738 | gene |      |
| Bn-scaff_18310_1-p964552  | Bn-N18-p13786603 | gene | exon |
| Bn-scaff_18310_1-p964858  | Bn-N18-p13786909 | gene |      |
| Bn-scaff_18310_1-p98775   | Bn-N18-p12947528 | gene | exon |
| Bn-scaff_18310_1-p99113   | Bn-N18-p12947866 | gene | exon |
| Bn-scaff_18310_1-p9997    | Bn-N18-p12882687 | gene | exon |
| Bn-scaff_18321_1-p116626  | Bn-N12-p208129   | gene |      |
| Bn-scaff_18321_1-p117903  | Bn-N12-p209374   | gene | exon |
| Bn-scaff_18321_1-p122698  | Bn-N12-p213849   | gene |      |
| Bn-scaff_18321_1-p129176  | Bn-N12-p227245   | gene | exon |
| Bn-scaff_18321_1-p169542  | Bn-N2-p574808    | gene | exon |
| Bn-scaff_18321_1-p170290  | Bn-N12-p264829   | gene | exon |
| Bn-scaff_18321_1-p203219  | Bn-N12-p363529   | gene | exon |
| Bn-scaff_18321_1-p29016   | Bn-N2-p461838    | gene | exon |
| Bn-scaff_18321_1-p30360   | Bn-N12-p126030   | gene | exon |
| Bn-scaff_18322_1-p1036896 | Bn-N13-p9312883  | gene |      |
| Bn-scaff_18322_1-p1043643 | Bn-N13-p9304824  | gene |      |
| Bn-scaff_18322_1-p1043993 | Bn-N13-p9304474  | gene |      |
| Bn-scaff_18322_1-p1044275 | Bn-N13-p9304195  | gene |      |
| Bn-scaff_18322_1-p1044730 | Bn-N13-p9303740  | gene |      |
| Bn-scaff_18322_1-p1122025 | Bn-N13-p9209242  | gene |      |
| Bn-scaff_18322_1-p1123656 | Bn-N13-p9207611  | gene |      |
| Bn-scaff_18322_1-p1219747 | Bn-N13-p9121392  | gene |      |
| Bn-scaff_18322_1-p1240715 | Bn-N13-p9105352  | gene | exon |
| Bn-scaff_18322_1-p1315547 | Bn-N13-p9055329  | gene | exon |
| Bn-scaff_18322_1-p1351673 | Bn-N13-p9017502  | gene |      |
| Bn-scaff_18322_1-p1361529 | Bn-N13-p9008505  | gene |      |
| Bn-scaff_18322_1-p1368804 | Bn-N3-p6460568   | gene |      |
| Bn-scaff_18322_1-p1390788 | Bn-N13-p8978895  | gene |      |
| Bn-scaff_18322_1-p1390926 | Bn-N13-p8978757  | gene |      |

|                           |                        |      |      |
|---------------------------|------------------------|------|------|
| Bn-scaff_18322_1-p1391958 | Bn-N3-p6452388         | gene |      |
| Bn-scaff_18322_1-p1417497 | Bn-N13-p8956827        | gene | exon |
| Bn-scaff_18322_1-p1476976 | Bn-N13-p8892370        | gene | exon |
| Bn-scaff_18322_1-p1477883 | Bn-N13-p8891463        | gene |      |
| Bn-scaff_18322_1-p1478173 | Bn-N13-p8891173        | gene |      |
| Bn-scaff_18322_1-p1478389 | Bn-N13-p8890968        | gene |      |
| Bn-scaff_18322_1-p1478526 | Bn-N13-p8890831        | gene |      |
| Bn-scaff_18322_1-p1478842 | Bn-N13-p8890513        | gene |      |
| Bn-scaff_18322_1-p1479449 | Bn-N13-p8889897        | gene |      |
| Bn-scaff_18322_1-p1481186 | Bn-N13-p8888117        | gene |      |
| Bn-scaff_18322_1-p1481418 | Bn-N13-p8887885        | gene |      |
| Bn-scaff_18322_1-p1481509 | Bn-N13-p8887794        | gene |      |
| Bn-scaff_18322_1-p1481654 | Bn-N13-p8887649        | gene | exon |
| Bn-scaff_18322_1-p1482713 | Bn-N13-p8886591        | gene |      |
| Bn-scaff_18322_1-p1486915 | Bn-N13-p8881146        | gene | exon |
| Bn-scaff_18322_1-p1487173 | Bn-N13-p8880888        | gene |      |
| Bn-scaff_18322_1-p1487354 | Bn-N13-p8880707        | gene | exon |
| Bn-scaff_18322_1-p1487593 | Bn-N13-p8880468        | gene |      |
| Bn-scaff_18322_1-p1490180 | Bn-N13-p8877879        | gene |      |
| Bn-scaff_18322_1-p1490792 | Bn-N13-p8877266        | gene | exon |
| Bn-scaff_18322_1-p1490880 | Bn-N13-p8877175        | gene |      |
| Bn-scaff_18322_1-p1490938 | Bn-N13-p8877117        | gene | exon |
| Bn-scaff_18322_1-p1516256 | Bn-N3-p6389292         | gene | exon |
| Bn-scaff_18322_1-p1552078 | Bn-N13-p8824071        | gene |      |
| Bn-scaff_18322_1-p1552930 | Bn-N13-p8823218        | gene |      |
| Bn-scaff_18322_1-p1553314 | Bn-N13-p8822834        | gene |      |
| Bn-scaff_18322_1-p1680489 | Bn-N13-p8698769        | gene |      |
| Bn-scaff_18322_1-p1716237 | Bn-N13-p8663161        | gene |      |
| Bn-scaff_18322_1-p1717349 | Bn-N13-p8662055        | gene |      |
| Bn-scaff_18322_1-p1751672 | Bn-N13-p8630968        | gene |      |
| Bn-scaff_18322_1-p1763220 | Bn-N13-p8619423        | gene | exon |
| Bn-scaff_18322_1-p1794782 | Bn-N13-p8588527        | gene | exon |
| Bn-scaff_18322_1-p1846275 | Bn-N13-p8543566        | gene | exon |
| Bn-scaff_18322_1-p1866564 | Bn-Scaffold03063-p2721 | gene |      |
| Bn-scaff_18322_1-p1910313 | Bn-N3-p6086296         | gene |      |
| Bn-scaff_18322_1-p1914840 | Bn-N13-p8487022        | gene | exon |
| Bn-scaff_18322_1-p1963622 | Bn-N3-p6060430         | gene | exon |
| Bn-scaff_18322_1-p2015929 | Bn-N13-p8377292        | gene |      |
| Bn-scaff_18322_1-p2018782 | Bn-N3-p6006066         | gene | exon |
| Bn-scaff_18322_1-p2061517 | Bn-N13-p8328774        | gene |      |
| Bn-scaff_18322_1-p2083290 | Bn-N3-p5951003         | gene | exon |
| Bn-scaff_18322_1-p2121463 | Bn-N13-p8262154        | gene |      |
| Bn-scaff_18322_1-p2121603 | Bn-N13-p8262014        | gene |      |
| Bn-scaff_18322_1-p2121991 | Bn-N13-p8260435        | gene |      |
| Bn-scaff_18322_1-p2132957 | Bn-N13-p8256260        | gene |      |
| Bn-scaff_18322_1-p2133523 | Bn-N13-p8255695        | gene |      |
| Bn-scaff_18322_1-p2155092 | Bn-N13-p8237432        | gene |      |
| Bn-scaff_18322_1-p2155609 | Bn-N13-p8236915        | gene |      |
| Bn-scaff_18322_1-p2194066 | Bn-N13-p8197899        | gene | exon |
| Bn-scaff_18322_1-p2194125 | Bn-N13-p8197840        | gene | exon |
| Bn-scaff_18322_1-p2205139 | Bn-N13-p8188030        | gene |      |
| Bn-scaff_18322_1-p2206270 | Bn-N13-p8186899        | gene | exon |

|                           |                       |      |      |
|---------------------------|-----------------------|------|------|
| Bn-scaff_18322_1-p2207543 | Bn-N13-p8185626       | gene |      |
| Bn-scaff_18322_1-p2208011 | Bn-N13-p8185158       | gene | exon |
| Bn-scaff_18322_1-p2227308 | Bn-N13-p8165057       | gene | exon |
| Bn-scaff_18322_1-p2250566 | Bn-N13-p8134236       | gene | exon |
| Bn-scaff_18322_1-p2266003 | Bn-N13-p8118293       | gene |      |
| Bn-scaff_18322_1-p2266068 | Bn-N13-p8118228       | gene | exon |
| Bn-scaff_18322_1-p2322027 | Bn-N3-p5768074        | gene | exon |
| Bn-scaff_18322_1-p2327100 | Bn-N13-p8050051       | gene |      |
| Bn-scaff_18322_1-p2357361 | Bn-N13-p8015497       | gene |      |
| Bn-scaff_18322_1-p2378816 | Bn-N13-p7994144       | gene |      |
| Bn-scaff_18322_1-p2382266 | Bn-N13-p7990694       | gene |      |
| Bn-scaff_18322_1-p2382544 | Bn-N13-p7990416       | gene | exon |
| Bn-scaff_18322_1-p2385043 | Bn-N13-p7987917       | gene |      |
| Bn-scaff_18322_1-p243213  | Bn-N3-p8837920        | gene | exon |
| Bn-scaff_18322_1-p2442862 | Bn-N13-p7929180       | gene | exon |
| Bn-scaff_18322_1-p2443171 | Bn-N3-p5669420        | gene | exon |
| Bn-scaff_18322_1-p2487448 | Bn-N13-p7887964       | gene |      |
| Bn-scaff_18322_1-p2518158 | Bn-N13-p7857286       | gene | exon |
| Bn-scaff_18322_1-p2560823 | Bn-Scaffold17879-p117 | gene | exon |
| Bn-scaff_18322_1-p2633571 | Bn-N13-p7746041       | gene |      |
| Bn-scaff_18322_1-p2647238 | Bn-N13-p7732494       | gene |      |
| Bn-scaff_18322_1-p2731053 | Bn-N3-p5455764        | gene |      |
| Bn-scaff_18322_1-p320439  | Bn-N3-p7240873        | gene |      |
| Bn-scaff_18322_1-p475040  | Bn-N13-p9919516       | gene | exon |
| Bn-scaff_18322_1-p476799  | Bn-N13-p9917506       | gene | exon |
| Bn-scaff_18322_1-p47968   | Bn-N13-p10370521      | gene | exon |
| Bn-scaff_18322_1-p483834  | Bn-N13-p9901359       | gene | exon |
| Bn-scaff_18322_1-p511201  | Bn-N3-p7100307        | gene |      |
| Bn-scaff_18322_1-p590148  | Bn-N13-p9799827       | gene | exon |
| Bn-scaff_18322_1-p625299  | Bn-N13-p9752538       | gene | exon |
| Bn-scaff_18322_1-p744117  | Bn-N13-p9606789       | gene |      |
| Bn-scaff_18322_1-p758030  | Bn-N13-p9592168       | gene |      |
| Bn-scaff_18322_1-p802643  | Bn-N13-p9531967       | gene | exon |
| Bn-scaff_18322_1-p804580  | Bn-N13-p9530024       | gene |      |
| Bn-scaff_18322_1-p813458  | Bn-N13-p9520029       | gene |      |
| Bn-scaff_18322_1-p817790  | Bn-N13-p9515353       | gene | exon |
| Bn-scaff_18322_1-p817900  | Bn-N13-p9515244       | gene | exon |
| Bn-scaff_18322_1-p818265  | Bn-N13-p9514879       | gene |      |
| Bn-scaff_18322_1-p881842  | Bn-N13-p9457422       | gene |      |
| Bn-scaff_18322_1-p903761  | Bn-N13-p9432653       | gene | exon |
| Bn-scaff_18322_1-p918037  | Bn-N13-p9417386       | gene | exon |
| Bn-scaff_18322_1-p918195  | Bn-N3-p6774295        | gene | exon |
| Bn-scaff_18322_1-p918715  | Bn-N13-p9416709       | gene |      |
| Bn-scaff_18322_1-p978540  | Bn-N13-p9369107       | gene | exon |
| Bn-scaff_18326_1-p324525  | Bn-N19-p31615611      | gene | exon |
| Bn-scaff_18338_1-p1073237 | Bn-N15-p15145336      | gene | exon |
| Bn-scaff_18338_1-p115595  | Bn-N15-p16144070      | gene |      |
| Bn-scaff_18338_1-p342516  | Bn-N15-p15895383      | gene |      |
| Bn-scaff_18338_1-p807466  | Bn-N9-p25957850       | gene |      |
| Bn-scaff_18338_1-p911753  | Bn-N15-p15311138      | gene |      |
| Bn-scaff_18338_1-p912633  | Bn-N15-p15310259      | gene | exon |
| Bn-scaff_18338_1-p920459  | Bn-N3-p24787485       | gene |      |

|                           |                         |      |      |
|---------------------------|-------------------------|------|------|
| Bn-scaff_18338_1-p984141  | Bn-N15-p15236727        | gene |      |
| Bn-scaff_18338_1-p984735  | Bn-N15-p15236134        | gene | exon |
| Bn-scaff_18344_1-p147881  | Bn-N13-p5206344         | gene |      |
| Bn-scaff_18344_1-p236941  | Bn-N16-p4426311         | gene |      |
| Bn-scaff_18344_1-p237963  | Bn-N6-p1678371          | gene |      |
| Bn-scaff_18344_1-p386545  | Bn-N16-p4571324         | gene |      |
| Bn-scaff_18344_1-p386657  | Bn-N16-p4571436         | gene |      |
| Bn-scaff_18344_1-p386725  | Bn-N16-p4571504         | gene |      |
| Bn-scaff_18344_1-p398871  | Bn-N6-p1605226          | gene | exon |
| Bn-scaff_18344_1-p666462  | Bn-N16-p4853402         | gene |      |
| Bn-scaff_18344_1-p89409   | Bn-N13-p5154425         | gene |      |
| Bn-scaff_18356_1-p116223  | Bn-N13-p38471092        | gene |      |
| Bn-scaff_18356_1-p181684  | Bn-N14-p5350741         | gene | exon |
| Bn-scaff_18356_1-p218731  | Bn-N13-p38364922        | gene | exon |
| Bn-scaff_18356_1-p218924  | Bn-N13-p38364728        | gene | exon |
| Bn-scaff_18356_1-p220316  | Bn-N13-p38363334        | gene |      |
| Bn-scaff_18356_1-p272201  | Bn-N6-p16818614         | gene |      |
| Bn-scaff_18356_1-p309880  | Bn-N6-p16830980         | gene | exon |
| Bn-scaff_18356_1-p311981  | Bn-N13-p38258630        | gene | exon |
| Bn-scaff_18356_1-p349741  | Bn-N13-p38217511        | gene | exon |
| Bn-scaff_18356_1-p39463   | Bn-N13-p38524463        | gene | exon |
| Bn-scaff_18360_1-p151712  | Bn-N12-p35803119        | gene | exon |
| Bn-scaff_18360_1-p151873  | Bn-N12-p35803280        | gene |      |
| Bn-scaff_18360_1-p31167   | Bn-N12-p35696854        | gene | exon |
| Bn-scaff_18360_1-p382074  | Bn-Scaffold11521-p333   | gene | exon |
| Bn-scaff_18360_1-p45199   | Bn-N12-p35708348        | gene |      |
| Bn-scaff_18360_1-p570258  | Bn-N12-p36252747        | gene |      |
| Bn-scaff_18360_1-p723514  | Bn-N12-p36412649        | gene | exon |
| Bn-scaff_18360_1-p873769  | Bn-N12-p36605333        | gene | exon |
| Bn-scaff_18371_1-p300088  | Bn-Scaffold01104-p19398 | gene |      |
| Bn-scaff_18371_1-p777081  | Bn-N15-p22549562        | gene |      |
| Bn-scaff_18371_1-p962353  | Bn-N8-p6729438          | gene |      |
| Bn-scaff_18406_1-p266026  | Bn-N12-p30662796        | gene | exon |
| Bn-scaff_18406_1-p69905   | Bn-N12-p30466433        | gene |      |
| Bn-scaff_18412_1-p280164  | Bn-N18-p594209          | gene |      |
| Bn-scaff_18412_1-p283656  | Bn-N18-p590717          | gene | exon |
| Bn-scaff_18412_1-p29779   | Bn-N18-p831461          | gene |      |
| Bn-scaff_18412_1-p385710  | Bn-N18-p486080          | gene |      |
| Bn-scaff_18412_1-p387438  | Bn-N18-p484351          | gene | exon |
| Bn-scaff_18412_1-p387658  | Bn-N18-p484132          | gene |      |
| Bn-scaff_18424_1-p411190  | Bn-N9-p14748472         | gene |      |
| Bn-scaff_18424_1-p672600  | Bn-N9-p14607669         | gene | exon |
| Bn-scaff_18439_1-p1014445 | Bn-N16-p14895759        | gene | exon |
| Bn-scaff_18439_1-p1062345 | Bn-N5-p5788630          | gene | exon |
| Bn-scaff_18439_1-p1062495 | Bn-N14-p9755975         | gene | exon |
| Bn-scaff_18439_1-p1063837 | Bn-N5-p5790139          | gene | exon |
| Bn-scaff_18439_1-p127216  | Bn-N16-p26903117        | gene | exon |
| Bn-scaff_18439_1-p237947  | Bn-N16-p27004080        | gene | exon |
| Bn-scaff_18439_1-p277248  | Bn-N16-p14152896        | gene |      |
| Bn-scaff_18439_1-p277935  | Bn-N16-p14153586        | gene |      |
| Bn-scaff_18439_1-p376735  | Bn-N16-p14257983        | gene | exon |
| Bn-scaff_18439_1-p515154  | Bn-N16-p14381101        | gene |      |

|                           |                  |      |      |
|---------------------------|------------------|------|------|
| Bn-scaff_18439_1-p633449  | Bn-N16-p14510721 | gene | exon |
| Bn-scaff_18439_1-p639659  | Bn-N16-p14513721 | gene |      |
| Bn-scaff_18439_1-p643793  | Bn-N16-p14518284 | gene |      |
| Bn-scaff_18439_1-p658725  | Bn-N16-p14532832 | gene | exon |
| Bn-scaff_18439_1-p659075  | Bn-N16-p14533182 | gene | exon |
| Bn-scaff_18439_1-p659120  | Bn-N16-p14533185 | gene | exon |
| Bn-scaff_18439_1-p675307  | Bn-N16-p14549236 | gene | exon |
| Bn-scaff_18439_1-p706567  | Bn-N16-p14580422 | gene | exon |
| Bn-scaff_18439_1-p79427   | Bn-N7-p17295637  | gene | exon |
| Bn-scaff_18439_1-p798045  | Bn-N16-p14683521 | gene |      |
| Bn-scaff_18439_1-p798756  | Bn-N16-p14684818 | gene | exon |
| Bn-scaff_18439_1-p799057  | Bn-N16-p14685119 | gene | exon |
| Bn-scaff_18439_1-p952226  | Bn-N16-p14833023 | gene |      |
| Bn-scaff_18439_1-p953290  | Bn-N16-p14834087 | gene |      |
| Bn-scaff_18439_1-p953602  | Bn-N16-p14834399 | gene |      |
| Bn-scaff_18439_1-p954410  | Bn-N16-p14835207 | gene |      |
| Bn-scaff_18439_1-p978904  | Bn-N16-p14859035 | gene | exon |
| Bn-scaff_18461_1-p250715  | Bn-N15-p17769317 | gene |      |
| Bn-scaff_18464_1-p2370    | Bn-N17-p12820981 | gene | exon |
| Bn-scaff_18464_1-p2513    | Bn-N17-p12820838 | gene | exon |
| Bn-scaff_18482_1-p246408  | Bn-N13-p23025757 | gene | exon |
| Bn-scaff_18482_1-p246941  | Bn-N13-p23025187 | gene | exon |
| Bn-scaff_18482_1-p322283  | Bn-N3-p14747648  | gene | exon |
| Bn-scaff_18482_1-p437945  | Bn-N13-p22843364 | gene |      |
| Bn-scaff_18482_1-p438118  | Bn-N13-p22843191 | gene |      |
| Bn-scaff_18482_1-p445207  | Bn-N13-p22836602 | gene |      |
| Bn-scaff_18482_1-p447039  | Bn-N3-p14665052  | gene | exon |
| Bn-scaff_18482_1-p449692  | Bn-N13-p22832555 | gene | exon |
| Bn-scaff_18482_1-p517204  | Bn-N13-p22765153 | gene |      |
| Bn-scaff_18482_1-p517555  | Bn-N13-p22764020 | gene | exon |
| Bn-scaff_18482_1-p646881  | Bn-N13-p22614439 | gene |      |
| Bn-scaff_18482_1-p663209  | Bn-N13-p22585564 | gene |      |
| Bn-scaff_18482_1-p663758  | Bn-N13-p22585007 | gene |      |
| Bn-scaff_18482_1-p663864  | Bn-N13-p22584900 | gene |      |
| Bn-scaff_18482_1-p677287  | Bn-N3-p14484901  | gene | exon |
| Bn-scaff_18482_1-p698896  | Bn-N13-p22539845 | gene | exon |
| Bn-scaff_18482_1-p699135  | Bn-N13-p22539406 | gene |      |
| Bn-scaff_18482_1-p699636  | Bn-N13-p22538911 | gene |      |
| Bn-scaff_18482_1-p710052  | Bn-N13-p22520273 | gene | exon |
| Bn-scaff_18482_1-p739133  | Bn-N13-p22496045 | gene |      |
| Bn-scaff_18482_1-p739195  | Bn-N13-p22495983 | gene |      |
| Bn-scaff_18482_1-p90983   | Bn-N13-p23184583 | gene | exon |
| Bn-scaff_18490_1-p12404   | Bn-N5-p889651    | gene |      |
| Bn-scaff_18501_1-p1007207 | Bn-N17-p23755812 | gene | exon |
| Bn-scaff_18501_1-p114150  | Bn-N17-p22812520 | gene |      |
| Bn-scaff_18501_1-p114412  | Bn-N7-p10680489  | gene | exon |
| Bn-scaff_18501_1-p122257  | Bn-N17-p22820651 | gene | exon |
| Bn-scaff_18501_1-p169867  | Bn-N7-p10704944  | gene | exon |
| Bn-scaff_18501_1-p336612  | Bn-N6-p7830346   | gene | exon |
| Bn-scaff_18501_1-p345881  | Bn-N7-p10825813  | gene |      |
| Bn-scaff_18501_1-p421712  | Bn-N17-p23125248 | gene | exon |
| Bn-scaff_18501_1-p424246  | Bn-N17-p23126818 | gene | exon |

|                           |                  |      |      |
|---------------------------|------------------|------|------|
| Bn-scaff_18501_1-p426392  | Bn-N17-p23128970 | gene |      |
| Bn-scaff_18501_1-p462141  | Bn-N17-p23155131 | gene |      |
| Bn-scaff_18501_1-p465658  | Bn-N17-p23158464 | gene |      |
| Bn-scaff_18501_1-p471519  | Bn-N7-p10890045  | gene | exon |
| Bn-scaff_18501_1-p472321  | Bn-N17-p23165084 | gene |      |
| Bn-scaff_18501_1-p530677  | Bn-N17-p23208449 | gene |      |
| Bn-scaff_18501_1-p604558  | Bn-N17-p23287902 | gene |      |
| Bn-scaff_18501_1-p656400  | Bn-N17-p23335166 | gene |      |
| Bn-scaff_18501_1-p789797  | Bn-N17-p23522278 | gene | exon |
| Bn-scaff_18501_1-p795227  | Bn-N17-p23532357 | gene |      |
| Bn-scaff_18501_1-p837918  | Bn-N17-p23558606 | gene | exon |
| Bn-scaff_18501_1-p837985  | Bn-N17-p23558671 | gene |      |
| Bn-scaff_18501_1-p838299  | Bn-N17-p23558984 | gene | exon |
| Bn-scaff_18501_1-p939596  | Bn-N17-p23681480 | gene |      |
| Bn-scaff_18501_1-p942638  | Bn-N17-p23684490 | gene |      |
| Bn-scaff_18501_1-p942700  | Bn-N17-p23684552 | gene |      |
| Bn-scaff_18501_1-p943346  | Bn-N17-p23685228 | gene |      |
| Bn-scaff_18501_1-p980365  | Bn-N17-p23733382 | gene |      |
| Bn-scaff_18501_1-p982494  | Bn-N17-p23735385 | gene |      |
| Bn-scaff_18501_1-p983179  | Bn-N17-p23736074 | gene | exon |
| Bn-scaff_18503_1-p179825  | Bn-N16-p38852719 | gene | exon |
| Bn-scaff_18505_1-p133117  | Bn-N7-p12122754  | gene | exon |
| Bn-scaff_18505_1-p254578  | Bn-N7-p12171622  | gene | exon |
| Bn-scaff_18505_1-p295538  | Bn-N16-p35615990 | gene | exon |
| Bn-scaff_18505_1-p85179   | Bn-N14-p16638887 | gene |      |
| Bn-scaff_18505_1-p85945   | Bn-N14-p16638121 | gene |      |
| Bn-scaff_18505_1-p90828   | Bn-N14-p16629492 | gene |      |
| Bn-scaff_18505_1-p91467   | Bn-N14-p16628837 | gene |      |
| Bn-scaff_18507_1-p1063809 | Bn-N12-p25582197 | gene |      |
| Bn-scaff_18507_1-p1063865 | Bn-N12-p25582253 | gene |      |
| Bn-scaff_18507_1-p1190632 | Bn-N12-p25692578 | gene | exon |
| Bn-scaff_18507_1-p1280405 | Bn-N12-p25785441 | gene | exon |
| Bn-scaff_18507_1-p1280418 | Bn-N12-p25785454 | gene | exon |
| Bn-scaff_18507_1-p1280533 | Bn-N12-p25785569 | gene | exon |
| Bn-scaff_18507_1-p1280604 | Bn-N12-p25785640 | gene | exon |
| Bn-scaff_18507_1-p1281501 | Bn-N12-p25786537 | gene |      |
| Bn-scaff_18507_1-p265244  | Bn-N12-p24763762 | gene |      |
| Bn-scaff_18507_1-p6970    | Bn-N12-p24521884 | gene |      |
| Bn-scaff_18507_1-p710307  | Bn-N12-p25228733 | gene |      |
| Bn-scaff_18507_1-p783295  | Bn-N12-p25304018 | gene | exon |
| Bn-scaff_18507_1-p9039    | Bn-N12-p24523953 | gene | exon |
| Bn-scaff_18507_1-p9570    | Bn-N12-p24524484 | gene | exon |
| Bn-scaff_18507_1-p960146  | Bn-N12-p25480582 | gene |      |
| Bn-scaff_18507_1-p981369  | Bn-N12-p25502744 | gene |      |
| Bn-scaff_18514_1-p28001   | Bn-N12-p9415333  | gene |      |
| Bn-scaff_18514_1-p74327   | Bn-N12-p9370501  | gene | exon |
| Bn-scaff_18520_1-p1922    | Bn-N17-p34622129 | gene |      |
| Bn-scaff_18520_1-p198684  | Bn-N17-p34819900 | gene | exon |
| Bn-scaff_18520_1-p217435  | Bn-N17-p34854138 | gene | exon |
| Bn-scaff_18520_1-p301248  | Bn-N17-p34948756 | gene | exon |
| Bn-scaff_18520_1-p330575  | Bn-N17-p34977895 | gene |      |
| Bn-scaff_18520_1-p347007  | Bn-N12-p41768062 | gene |      |



|                          |                         |      |      |
|--------------------------|-------------------------|------|------|
| Bn-scaff_18520_1-p347665 | Bn-N17-p34990613        | gene |      |
| Bn-scaff_18520_1-p348211 | Bn-N17-p34991161        | gene |      |
| Bn-scaff_18520_1-p351091 | Bn-N17-p34994041        | gene |      |
| Bn-scaff_18520_1-p362389 | Bn-N17-p35005654        | gene | exon |
| Bn-scaff_18520_1-p362416 | Bn-N17-p35005681        | gene | exon |
| Bn-scaff_18520_1-p363396 | Bn-N17-p35006656        | gene | exon |
| Bn-scaff_18520_1-p404968 | Bn-N17-p35044257        | gene | exon |
| Bn-scaff_18520_1-p405606 | Bn-N17-p35044942        | gene |      |
| Bn-scaff_18520_1-p414565 | Bn-N17-p35053487        | gene |      |
| Bn-scaff_18520_1-p414656 | Bn-N17-p35053579        | gene | exon |
| Bn-scaff_18520_1-p426018 | Bn-N17-p35064276        | gene |      |
| Bn-scaff_18520_1-p486046 | Bn-N6-p21190140         | gene |      |
| Bn-scaff_18520_1-p486331 | Bn-N17-p35120304        | gene |      |
| Bn-scaff_18520_1-p486445 | Bn-N17-p35120418        | gene | exon |
| Bn-scaff_18520_1-p486567 | Bn-N17-p35120540        | gene |      |
| Bn-scaff_18520_1-p488642 | Bn-N6-p21187433         | gene | exon |
| Bn-scaff_18520_1-p489562 | Bn-N6-p21186511         | gene |      |
| Bn-scaff_18520_1-p492814 | Bn-N17-p35128242        | gene |      |
| Bn-scaff_18520_1-p569076 | Bn-N17-p35197236        | gene |      |
| Bn-scaff_18520_1-p603560 | Bn-N17-p35240900        | gene |      |
| Bn-scaff_18520_1-p612557 | Bn-N17-p35250422        | gene |      |
| Bn-scaff_18520_1-p621993 | Bn-N17-p35259821        | gene | exon |
| Bn-scaff_18520_1-p622295 | Bn-N17-p35260123        | gene |      |
| Bn-scaff_18520_1-p630574 | Bn-N17-p35268703        | gene |      |
| Bn-scaff_18520_1-p633499 | Bn-N17-p35271567        | gene |      |
| Bn-scaff_18520_1-p675612 | Bn-N17-p35303312        | gene |      |
| Bn-scaff_18520_1-p675968 | Bn-N17-p35303678        | gene | exon |
| Bn-scaff_18520_1-p688050 | Bn-N17-p35314465        | gene | exon |
| Bn-scaff_18520_1-p705102 | Bn-N17-p35332960        | gene |      |
| Bn-scaff_18520_1-p720465 | Bn-N17-p35348429        | gene |      |
| Bn-scaff_18520_1-p742015 | Bn-N17-p35360870        | gene | exon |
| Bn-scaff_18520_1-p795155 | Bn-N17-p35415361        | gene |      |
| Bn-scaff_18520_1-p807494 | Bn-N17-p35426338        | gene | exon |
| Bn-scaff_18520_1-p813605 | Bn-N6-p20885880         | gene | exon |
| Bn-scaff_18520_1-p814291 | Bn-N17-p35433082        | gene |      |
| Bn-scaff_18520_1-p817342 | Bn-N17-p35435979        | gene | exon |
| Bn-scaff_18520_1-p817618 | Bn-N17-p35436255        | gene | exon |
| Bn-scaff_18549_1-p121747 | Bn-N16-p833785          | gene |      |
| Bn-scaff_18549_1-p14236  | Bn-N16-p941924          | gene | exon |
| Bn-scaff_18549_1-p181754 | Bn-N16-p773735          | gene |      |
| Bn-scaff_18557_1-p42780  | Bn-Scaffold01003-p25069 | gene | exon |
| Bn-scaff_18559_1-p157785 | Bn-N13-p64795790        | gene |      |
| Bn-scaff_18559_1-p161529 | Bn-N13-p64792033        | gene | exon |
| Bn-scaff_18559_1-p166394 | Bn-N13-p64783224        | gene |      |
| Bn-scaff_18559_1-p175628 | Bn-N13-p64764597        | gene |      |
| Bn-scaff_18559_1-p17754  | Bn-N8-p2080560          | gene |      |
| Bn-scaff_18559_1-p23939  | Bn-N13-p64883740        | gene | exon |
| Bn-scaff_18559_1-p77372  | Bn-N8-p2137845          | gene | exon |
| Bn-scaff_18559_1-p77834  | Bn-N13-p64939357        | gene |      |
| Bn-scaff_18559_2-p257147 | Bn-N11-p20548046        | gene | exon |
| Bn-scaff_18559_2-p39127  | Bn-N11-p20763384        | gene | exon |
| Bn-scaff_18589_1-p126670 | Bn-N15-p34071863        | gene |      |

|                           |                         |      |      |
|---------------------------|-------------------------|------|------|
| Bn-scaff_18589_1-p127443  | Bn-N15-p34072637        | gene | exon |
| Bn-scaff_18602_1-p100151  | Bn-N13-p57549964        | gene |      |
| Bn-scaff_18602_1-p24004   | Bn-N13-p57491318        | gene |      |
| Bn-scaff_18602_1-p24122   | Bn-N13-p57491436        | gene |      |
| Bn-scaff_18602_1-p24405   | Bn-N13-p57491719        | gene | exon |
| Bn-scaff_18602_1-p24410   | Bn-N13-p57491725        | gene | exon |
| Bn-scaff_18602_1-p244789  | Bn-N8-p14670111         | gene |      |
| Bn-scaff_18602_1-p244845  | Bn-N8-p14670055         | gene | exon |
| Bn-scaff_18602_1-p276428  | Bn-N8-p14645209         | gene | exon |
| Bn-scaff_18602_1-p277012  | Bn-N8-p14644626         | gene | exon |
| Bn-scaff_18602_1-p278628  | Bn-N13-p57731728        | gene | exon |
| Bn-scaff_18602_1-p279696  | Bn-N8-p14641940         | gene | exon |
| Bn-scaff_18602_1-p280085  | Bn-N8-p14641551         | gene | exon |
| Bn-scaff_18602_1-p280096  | Bn-N8-p14641540         | gene | exon |
| Bn-scaff_18602_1-p289185  | Bn-N13-p57743723        | gene |      |
| Bn-scaff_18602_1-p46083   | Bn-N13-p57494719        | gene |      |
| Bn-scaff_18607_1-p349525  | Bn-N10-p6446837         | gene |      |
| Bn-scaff_18621_1-p137223  | Bn-N11-p44548229        | gene |      |
| Bn-scaff_18621_1-p137565  | Bn-N11-p44547887        | gene |      |
| Bn-scaff_18621_1-p137934  | Bn-N11-p44547518        | gene | exon |
| Bn-scaff_18621_1-p183795  | Bn-N1-p26214722         | gene | exon |
| Bn-scaff_18621_1-p363772  | Bn-N11-p44354501        | gene | exon |
| Bn-scaff_18621_1-p426582  | Bn-Scaffold00900-p79183 | gene | exon |
| Bn-scaff_18621_1-p85309   | Bn-N11-p44625904        | gene |      |
| Bn-scaff_18628_1-p15768   | Bn-N7-p11556504         | gene | exon |
| Bn-scaff_18636_1-p102186  | Bn-N1-p9013677          | gene | exon |
| Bn-scaff_18636_1-p11498   | Bn-N11-p13679240        | gene | exon |
| Bn-scaff_18636_1-p17733   | Bn-N1-p8948927          | gene | exon |
| Bn-scaff_18636_1-p34871   | Bn-N11-p13705436        | gene |      |
| Bn-scaff_18636_1-p41731   | Bn-N11-p13712446        | gene | exon |
| Bn-scaff_18636_1-p51263   | Bn-N11-p13721982        | gene |      |
| Bn-scaff_18645_1-p423     | Bn-Scaffold15270-p437   | gene | exon |
| Bn-scaff_18656_1-p12837   | Bn-N14-p26670292        | gene |      |
| Bn-scaff_18656_1-p22362   | Bn-N14-p26681000        | gene |      |
| Bn-scaff_18656_1-p22363   | Bn-N14-p26681001        | gene |      |
| Bn-scaff_18656_1-p43235   | Bn-N14-p26698670        | gene |      |
| Bn-scaff_18656_1-p44737   | Bn-N14-p26700172        | gene |      |
| Bn-scaff_18656_1-p53047   | Bn-N4-p783164           | gene | exon |
| Bn-scaff_18656_1-p54366   | Bn-N14-p26716452        | gene | exon |
| Bn-scaff_18656_1-p54679   | Bn-N4-p784797           | gene |      |
| Bn-scaff_18656_1-p8003    | Bn-N14-p26665458        | gene |      |
| Bn-scaff_18672_1-p122715  | Bn-N1-p23234168         | gene |      |
| Bn-scaff_18672_1-p139723  | Bn-N11-p38946144        | gene |      |
| Bn-scaff_18672_1-p140782  | Bn-N11-p38947191        | gene |      |
| Bn-scaff_18672_1-p175171  | Bn-N11-p38958552        | gene |      |
| Bn-scaff_18672_1-p178765  | Bn-N11-p38960173        | gene | exon |
| Bn-scaff_18675_1-p1068457 | Bn-N12-p20488873        | gene |      |
| Bn-scaff_18675_1-p109771  | Bn-N15-p48497106        | gene |      |
| Bn-scaff_18675_1-p174256  | Bn-N12-p21062254        | gene |      |
| Bn-scaff_18675_1-p347787  | Bn-N12-p20926413        | gene | exon |
| Bn-scaff_18675_1-p784779  | Bn-N3-p10348866         | gene | exon |
| Bn-scaff_18675_1-p786938  | Bn-N12-p20684960        | gene |      |

|                          |                         |      |      |
|--------------------------|-------------------------|------|------|
| Bn-scaff_18675_1-p82128  | Bn-N12-p21107585        | gene |      |
| Bn-scaff_18675_1-p8309   | Bn-N12-p21178479        | gene | exon |
| Bn-scaff_18675_1-p85245  | Bn-N12-p21105708        | gene |      |
| Bn-scaff_18675_1-p919422 | Bn-N12-p20574863        | gene | exon |
| Bn-scaff_18675_1-p955936 | Bn-N2-p14550513         | gene |      |
| Bn-scaff_18675_1-p958880 | Bn-N12-p20554712        | gene |      |
| Bn-scaff_18675_1-p960242 | Bn-N12-p20553311        | gene |      |
| Bn-scaff_18675_1-p980333 | Bn-N14-p50225427        | gene |      |
| Bn-scaff_18702_1-p217650 | Bn-N2-p11570035         | gene | exon |
| Bn-scaff_18702_1-p224263 | Bn-N7-p21684348         | gene | exon |
| Bn-scaff_18702_1-p233858 | Bn-N12-p17016171        | gene |      |
| Bn-scaff_18702_1-p270197 | Bn-N12-p17053036        | gene | exon |
| Bn-scaff_18702_1-p285210 | Bn-N12-p17068049        | gene | exon |
| Bn-scaff_18702_1-p289625 | Bn-N12-p17072721        | gene | exon |
| Bn-scaff_18702_1-p316851 | Bn-N12-p17083690        | gene | exon |
| Bn-scaff_18702_1-p384439 | Bn-N12-p17143105        | gene | exon |
| Bn-scaff_18702_1-p523869 | Bn-N12-p17276095        | gene |      |
| Bn-scaff_18702_1-p586812 | Bn-Scaffold01129-p10880 | gene |      |
| Bn-scaff_18702_1-p589589 | Bn-Scaffold01129-p13652 | gene |      |
| Bn-scaff_18702_1-p603145 | Bn-N14-p27340796        | gene | exon |
| Bn-scaff_18712_1-p326442 | Bn-N14-p15955010        | gene | exon |
| Bn-scaff_18712_1-p326693 | Bn-N7-p12364284         | gene | exon |
| Bn-scaff_18712_1-p421039 | Bn-N14-p16056265        | gene | exon |
| Bn-scaff_18712_1-p431714 | Bn-N14-p16080257        | gene |      |
| Bn-scaff_18712_1-p433569 | Bn-N14-p16082120        | gene |      |
| Bn-scaff_18712_1-p529145 | Bn-N14-p16171745        | gene |      |
| Bn-scaff_18712_1-p602155 | Bn-N14-p16252731        | gene | exon |
| Bn-scaff_18712_1-p602624 | Bn-N14-p16253201        | gene |      |
| Bn-scaff_18712_1-p95379  | Bn-N7-p12471476         | gene | exon |
| Bn-scaff_18762_1-p73478  | Bn-N18-p22865650        | gene |      |
| Bn-scaff_18776_1-p246454 | Bn-N14-p33837910        | gene |      |
| Bn-scaff_18776_1-p32882  | Bn-N14-p33628609        | gene |      |
| Bn-scaff_18776_1-p33105  | Bn-N14-p33628823        | gene |      |
| Bn-scaff_18776_1-p331403 | Bn-N4-p4526547          | gene |      |
| Bn-scaff_18776_1-p345564 | Bn-N14-p33937585        | gene | exon |
| Bn-scaff_18776_1-p508763 | Bn-N14-p34091444        | gene |      |
| Bn-scaff_18776_1-p62815  | Bn-N14-p33661272        | gene |      |
| Bn-scaff_18776_1-p62883  | Bn-N14-p33661329        | gene |      |
| Bn-scaff_18784_1-p173126 | Bn-N15-p20627958        | gene | exon |
| Bn-scaff_18784_1-p385292 | Bn-N9-p22646408         | gene |      |
| Bn-scaff_18806_1-p248783 | Bn-N16-p22340328        | gene |      |
| Bn-scaff_18806_1-p323783 | Bn-N18-p3042832         | gene | exon |
| Bn-scaff_18806_1-p367722 | Bn-N16-p22447183        | gene |      |
| Bn-scaff_18806_1-p387496 | Bn-N7-p15308589         | gene | exon |
| Bn-scaff_18807_1-p139558 | Bn-N16-p34075492        | gene | exon |
| Bn-scaff_18807_1-p151245 | Bn-N16-p34062427        | gene | exon |
| Bn-scaff_18807_1-p153480 | Bn-N7-p20726888         | gene | exon |
| Bn-scaff_18807_1-p154280 | Bn-N16-p34059395        | gene | exon |
| Bn-scaff_18807_1-p154796 | Bn-N16-p34058706        | gene | exon |
| Bn-scaff_18807_1-p154933 | Bn-N16-p34058570        | gene | exon |
| Bn-scaff_18807_1-p155143 | Bn-N7-p20725214         | gene | exon |
| Bn-scaff_18807_1-p155314 | Bn-N16-p34058189        | gene |      |

|                           |                  |      |      |
|---------------------------|------------------|------|------|
| Bn-scaff_18807_1-p155524  | Bn-N7-p20724840  | gene |      |
| Bn-scaff_18807_1-p169046  | Bn-N16-p34043292 | gene |      |
| Bn-scaff_18807_1-p170611  | Bn-N16-p34041727 | gene |      |
| Bn-scaff_18807_1-p196267  | Bn-N16-p34019647 | gene | exon |
| Bn-scaff_18807_1-p485563  | Bn-N16-p33711799 | gene | exon |
| Bn-scaff_18807_1-p498993  | Bn-N16-p33698689 | gene | exon |
| Bn-scaff_18807_1-p499464  | Bn-N16-p33698235 | gene |      |
| Bn-scaff_18807_1-p504078  | Bn-N16-p33693622 | gene | exon |
| Bn-scaff_18807_1-p519628  | Bn-N16-p33677940 | gene |      |
| Bn-scaff_18807_1-p646353  | Bn-N16-p33534775 | gene | exon |
| Bn-scaff_18807_1-p648317  | Bn-N16-p33532811 | gene | exon |
| Bn-scaff_18807_1-p658855  | Bn-N16-p33515592 | gene | exon |
| Bn-scaff_18807_1-p694694  | Bn-N16-p33467443 | gene | exon |
| Bn-scaff_18807_1-p694943  | Bn-N16-p33467195 | gene | exon |
| Bn-scaff_18807_1-p73328   | Bn-N12-p10539949 | gene | exon |
| Bn-scaff_18807_1-p753863  | Bn-N16-p33447496 | gene |      |
| Bn-scaff_18817_1-p29976   | Bn-N14-p38438650 | gene | exon |
| Bn-scaff_18817_1-p31981   | Bn-N14-p38436648 | gene |      |
| Bn-scaff_18826_1-p1000612 | Bn-N15-p40606936 | gene |      |
| Bn-scaff_18826_1-p1046995 | Bn-N5-p20449834  | gene | exon |
| Bn-scaff_18826_1-p1111648 | Bn-N14-p21562350 | gene |      |
| Bn-scaff_18826_1-p158606  | Bn-N14-p11862559 | gene | exon |
| Bn-scaff_18826_1-p17445   | Bn-N15-p41635680 | gene |      |
| Bn-scaff_18826_1-p232573  | Bn-N15-p41460871 | gene | exon |
| Bn-scaff_18826_1-p324015  | Bn-N15-p41364740 | gene |      |
| Bn-scaff_18826_1-p326874  | Bn-N15-p41361882 | gene |      |
| Bn-scaff_18826_1-p326979  | Bn-N5-p20966706  | gene | exon |
| Bn-scaff_18826_1-p355653  | Bn-N5-p20947193  | gene | exon |
| Bn-scaff_18826_1-p357180  | Bn-N5-p20945637  | gene | exon |
| Bn-scaff_18826_1-p46301   | Bn-N18-p23499040 | gene | exon |
| Bn-scaff_18826_1-p472373  | Bn-N15-p41171006 | gene |      |
| Bn-scaff_18826_1-p472785  | Bn-N15-p41170593 | gene | exon |
| Bn-scaff_18826_1-p548550  | Bn-N16-p2390776  | gene | exon |
| Bn-scaff_18826_1-p632914  | Bn-N5-p20765698  | gene |      |
| Bn-scaff_18826_1-p633463  | Bn-N15-p41008260 | gene | exon |
| Bn-scaff_18826_1-p75232   | Bn-N15-p41597514 | gene |      |
| Bn-scaff_18826_1-p75898   | Bn-N15-p41596839 | gene | exon |
| Bn-scaff_18826_1-p76018   | Bn-N15-p41596718 | gene | exon |
| Bn-scaff_18826_1-p764929  | Bn-N15-p40879239 | gene |      |
| Bn-scaff_18826_1-p776957  | Bn-N15-p40862517 | gene |      |
| Bn-scaff_18826_1-p837020  | Bn-N15-p40769084 | gene | exon |
| Bn-scaff_18826_1-p837750  | Bn-N15-p40768326 | gene | exon |
| Bn-scaff_18826_1-p837907  | Bn-N15-p40768170 | gene | exon |
| Bn-scaff_18826_1-p851258  | Bn-N15-p40756846 | gene | exon |
| Bn-scaff_18826_1-p857151  | Bn-N15-p40755696 | gene | exon |
| Bn-scaff_18826_1-p857416  | Bn-N15-p40755433 | gene | exon |
| Bn-scaff_18826_1-p862439  | Bn-N15-p40754671 | gene | exon |
| Bn-scaff_18826_1-p890208  | Bn-N5-p20567389  | gene | exon |
| Bn-scaff_18826_1-p96686   | Bn-N5-p21156090  | gene | exon |
| Bn-scaff_18826_1-p97796   | Bn-N15-p41579668 | gene | exon |
| Bn-scaff_18839_1-p1075302 | Bn-N9-p10434568  | gene | exon |
| Bn-scaff_18839_1-p1092839 | Bn-N19-p16349214 | gene |      |

|                           |                  |      |      |
|---------------------------|------------------|------|------|
| Bn-scaff_18839_1-p1092979 | Bn-N19-p16349352 | gene |      |
| Bn-scaff_18839_1-p138513  | Bn-N5-p16931011  | gene |      |
| Bn-scaff_18839_1-p138616  | Bn-N5-p16931066  | gene |      |
| Bn-scaff_18839_1-p2517    | Bn-N13-p18473962 | gene |      |
| Bn-scaff_18839_1-p343327  | Bn-N4-p3207023   | gene | exon |
| Bn-scaff_18839_1-p503111  | Bn-N17-p25348314 | gene |      |
| Bn-scaff_18839_1-p974219  | Bn-N9-p10342956  | gene |      |
| Bn-scaff_18849_1-p136795  | Bn-N13-p52904401 | gene |      |
| Bn-scaff_18849_1-p143695  | Bn-N13-p52895056 | gene | exon |
| Bn-scaff_18849_1-p145737  | Bn-N8-p16897915  | gene |      |
| Bn-scaff_18849_1-p206436  | Bn-N11-p14401642 | gene | exon |
| Bn-scaff_18849_1-p209120  | Bn-N2-p14552801  | gene | exon |
| Bn-scaff_18849_1-p229964  | Bn-N13-p52809260 | gene | exon |
| Bn-scaff_18849_1-p230084  | Bn-N8-p16918207  | gene | exon |
| Bn-scaff_18849_1-p230136  | Bn-N13-p52809088 | gene | exon |
| Bn-scaff_18849_1-p230521  | Bn-N13-p52808715 | gene | exon |
| Bn-scaff_18849_1-p230541  | Bn-N13-p52808696 | gene | exon |
| Bn-scaff_18849_1-p233040  | Bn-N15-p16510269 | gene | exon |
| Bn-scaff_18849_1-p350498  | Bn-N13-p52684406 | gene | exon |
| Bn-scaff_18855_1-p184900  | Bn-N13-p35493587 | gene | exon |
| Bn-scaff_18855_1-p185593  | Bn-N13-p35492946 | gene | exon |
| Bn-scaff_18855_1-p309483  | Bn-N13-p35364429 | gene | exon |
| Bn-scaff_18855_1-p309735  | Bn-N3-p21145552  | gene | exon |
| Bn-scaff_18855_1-p404353  | Bn-N13-p35265094 | gene |      |
| Bn-scaff_18855_1-p405082  | Bn-N13-p35264365 | gene |      |
| Bn-scaff_18855_1-p405501  | Bn-N13-p35263945 | gene |      |
| Bn-scaff_18855_1-p480400  | Bn-N13-p35185141 | gene | exon |
| Bn-scaff_18855_1-p481332  | Bn-N3-p21094623  | gene | exon |
| Bn-scaff_18855_1-p831044  | Bn-N3-p20956058  | gene | exon |
| Bn-scaff_18855_1-p840984  | Bn-N17-p7820364  | gene |      |
| Bn-scaff_18901_1-p197391  | Bn-N5-p22489174  | gene | exon |
| Bn-scaff_18901_1-p86336   | Bn-N15-p43799080 | gene | exon |
| Bn-scaff_18903_1-p183876  | Bn-N14-p53710497 | gene |      |
| Bn-scaff_18903_1-p211617  | Bn-N14-p53747519 | gene | exon |
| Bn-scaff_18903_1-p25620   | Bn-N14-p53565662 | gene |      |
| Bn-scaff_18903_1-p265334  | Bn-N14-p53787886 | gene | exon |
| Bn-scaff_18903_1-p329111  | Bn-N14-p53843999 | gene |      |
| Bn-scaff_18903_1-p371596  | Bn-N14-p53883588 | gene | exon |
| Bn-scaff_18903_1-p403008  | Bn-N14-p53905954 | gene |      |
| Bn-scaff_18903_1-p404304  | Bn-N14-p53907248 | gene |      |
| Bn-scaff_18903_1-p432481  | Bn-N14-p53937531 | gene |      |
| Bn-scaff_18903_1-p460375  | Bn-N14-p53958343 | gene |      |
| Bn-scaff_18903_1-p471938  | Bn-N14-p53972936 | gene |      |
| Bn-scaff_18903_1-p489532  | Bn-N14-p53989084 | gene | exon |
| Bn-scaff_18903_1-p489764  | Bn-N14-p53989316 | gene |      |
| Bn-scaff_18903_1-p491280  | Bn-N14-p53990727 | gene |      |
| Bn-scaff_18903_1-p497319  | Bn-N14-p53995031 | gene |      |
| Bn-scaff_18903_1-p497762  | Bn-N14-p53995474 | gene | exon |
| Bn-scaff_18903_1-p497804  | Bn-N14-p53995518 | gene | exon |
| Bn-scaff_18903_1-p535509  | Bn-N4-p20354316  | gene | exon |
| Bn-scaff_18903_1-p557077  | Bn-N14-p54047458 | gene | exon |
| Bn-scaff_18903_1-p690920  | Bn-N14-p54157297 | gene | exon |

|                           |                  |      |      |
|---------------------------|------------------|------|------|
| Bn-scaff_18903_1-p735820  | Bn-N14-p54201442 | gene |      |
| Bn-scaff_18903_1-p748326  | Bn-N14-p54215154 | gene | exon |
| Bn-scaff_18903_1-p757633  | Bn-N14-p54224677 | gene |      |
| Bn-scaff_18903_1-p82359   | Bn-N4-p20009256  | gene | exon |
| Bn-scaff_18903_1-p893924  | Bn-N14-p54384902 | gene |      |
| Bn-scaff_18903_1-p897366  | Bn-N14-p54387897 | gene |      |
| Bn-scaff_18903_1-p897378  | Bn-N14-p54387909 | gene |      |
| Bn-scaff_18903_1-p994149  | Bn-N4-p20732350  | gene | exon |
| Bn-scaff_18903_1-p995626  | Bn-N14-p54503459 | gene | exon |
| Bn-scaff_18903_1-p998892  | Bn-N14-p54505801 | gene | exon |
| Bn-scaff_18917_1-p235384  | Bn-N3-p20151246  | gene | exon |
| Bn-scaff_18917_1-p236042  | Bn-N3-p20150588  | gene | exon |
| Bn-scaff_18917_1-p265790  | Bn-N13-p32913081 | gene |      |
| Bn-scaff_18917_1-p267401  | Bn-N13-p32911267 | gene |      |
| Bn-scaff_18917_1-p286596  | Bn-N13-p32888632 | gene | exon |
| Bn-scaff_18917_1-p286901  | Bn-N3-p20105153  | gene | exon |
| Bn-scaff_18917_1-p299930  | Bn-N13-p32873899 | gene | exon |
| Bn-scaff_18917_1-p320287  | Bn-N13-p32873836 | gene |      |
| Bn-scaff_18917_1-p320503  | Bn-N13-p32853545 | gene | exon |
| Bn-scaff_18917_1-p492674  | Bn-N13-p32657324 | gene |      |
| Bn-scaff_18917_1-p603698  | Bn-N13-p32575299 | gene |      |
| Bn-scaff_18917_1-p603793  | Bn-N13-p32575203 | gene |      |
| Bn-scaff_18917_1-p652748  | Bn-N13-p32536680 | gene | exon |
| Bn-scaff_18917_1-p657551  | Bn-N13-p32527256 | gene | exon |
| Bn-scaff_18917_1-p720029  | Bn-N13-p32469555 | gene |      |
| Bn-scaff_18917_1-p807362  | Bn-N13-p32391714 | gene | exon |
| Bn-scaff_18917_1-p817255  | Bn-N13-p32381614 | gene | exon |
| Bn-scaff_18917_1-p857136  | Bn-N13-p32344580 | gene | exon |
| Bn-scaff_18917_1-p942272  | Bn-N13-p32257752 | gene |      |
| Bn-scaff_18936_1-p102137  | Bn-N13-p3017933  | gene | exon |
| Bn-scaff_18936_1-p102755  | Bn-N13-p3018551  | gene |      |
| Bn-scaff_18936_1-p1066008 | Bn-N13-p4017874  | gene | exon |
| Bn-scaff_18936_1-p1072527 | Bn-N13-p4024367  | gene |      |
| Bn-scaff_18936_1-p1073995 | Bn-N13-p4025845  | gene |      |
| Bn-scaff_18936_1-p1075001 | Bn-N3-p3210426   | gene | exon |
| Bn-scaff_18936_1-p112410  | Bn-N3-p2431297   | gene | exon |
| Bn-scaff_18936_1-p1128294 | Bn-N16-p7497767  | gene |      |
| Bn-scaff_18936_1-p1349441 | Bn-N14-p30536095 | gene | exon |
| Bn-scaff_18936_1-p1403545 | Bn-N6-p658403    | gene |      |
| Bn-scaff_18936_1-p1578780 | Bn-N16-p7031121  | gene |      |
| Bn-scaff_18936_1-p1579348 | Bn-N16-p7030553  | gene | exon |
| Bn-scaff_18936_1-p1675459 | Bn-N16-p6929192  | gene |      |
| Bn-scaff_18936_1-p1687554 | Bn-N16-p6919339  | gene |      |
| Bn-scaff_18936_1-p1759991 | Bn-N16-p6849884  | gene |      |
| Bn-scaff_18936_1-p2020755 | Bn-N16-p6574378  | gene | exon |
| Bn-scaff_18936_1-p2027486 | Bn-N16-p6568241  | gene |      |
| Bn-scaff_18936_1-p240670  | Bn-N13-p3161750  | gene |      |
| Bn-scaff_18936_1-p269153  | Bn-N13-p3186352  | gene |      |
| Bn-scaff_18936_1-p274133  | Bn-N13-p3191332  | gene |      |
| Bn-scaff_18936_1-p277517  | Bn-N13-p3194716  | gene |      |
| Bn-scaff_18936_1-p297756  | Bn-N13-p3202838  | gene | exon |
| Bn-scaff_18936_1-p297918  | Bn-N13-p3203005  | gene | exon |

|                          |                  |      |      |
|--------------------------|------------------|------|------|
| Bn-scaff_18936_1-p298551 | Bn-N13-p3203431  | gene |      |
| Bn-scaff_18936_1-p325272 | Bn-N13-p3231257  | gene |      |
| Bn-scaff_18936_1-p327129 | Bn-N13-p3233114  | gene |      |
| Bn-scaff_18936_1-p333540 | Bn-N13-p3239600  | gene | exon |
| Bn-scaff_18936_1-p358822 | Bn-N3-p2682880   | gene | exon |
| Bn-scaff_18936_1-p384730 | Bn-N13-p3299068  | gene |      |
| Bn-scaff_18936_1-p439378 | Bn-N13-p3341525  | gene |      |
| Bn-scaff_18936_1-p440619 | Bn-N13-p3342907  | gene |      |
| Bn-scaff_18936_1-p472353 | Bn-N13-p3375183  | gene |      |
| Bn-scaff_18936_1-p540327 | Bn-N3-p2810303   | gene |      |
| Bn-scaff_18936_1-p550795 | Bn-N3-p2823504   | gene |      |
| Bn-scaff_18936_1-p559490 | Bn-N13-p3464602  | gene |      |
| Bn-scaff_18936_1-p563025 | Bn-N13-p3468142  | gene | exon |
| Bn-scaff_18936_1-p582850 | Bn-N3-p2852260   | gene | exon |
| Bn-scaff_18936_1-p611810 | Bn-N13-p3523997  | gene |      |
| Bn-scaff_18936_1-p615525 | Bn-N13-p3528228  | gene |      |
| Bn-scaff_18936_1-p618378 | Bn-N13-p3531109  | gene |      |
| Bn-scaff_18936_1-p643990 | Bn-N13-p3557440  | gene | exon |
| Bn-scaff_18936_1-p72585  | Bn-N3-p2389903   | gene |      |
| Bn-scaff_18936_1-p725932 | Bn-N13-p3657864  | gene |      |
| Bn-scaff_18936_1-p744477 | Bn-N13-p3679709  | gene |      |
| Bn-scaff_18936_1-p744540 | Bn-N13-p3679772  | gene |      |
| Bn-scaff_18936_1-p751329 | Bn-N3-p3012458   | gene |      |
| Bn-scaff_18936_1-p757305 | Bn-N13-p3692320  | gene | exon |
| Bn-scaff_18936_1-p758290 | Bn-N13-p3693305  | gene | exon |
| Bn-scaff_18936_1-p808967 | Bn-N13-p3747203  | gene | exon |
| Bn-scaff_18936_1-p861428 | Bn-N13-p3762152  | gene | exon |
| Bn-scaff_18936_1-p86415  | Bn-N13-p3001133  | gene | exon |
| Bn-scaff_18936_1-p867397 | Bn-N13-p3768302  | gene |      |
| Bn-scaff_18936_1-p933467 | Bn-N13-p3840730  | gene |      |
| Bn-scaff_18936_1-p93643  | Bn-N13-p3008135  | gene |      |
| Bn-scaff_18944_1-p358968 | Bn-N9-p15347430  | gene | exon |
| Bn-scaff_18944_1-p394269 | Bn-N9-p15330023  | gene |      |
| Bn-scaff_18944_1-p536342 | Bn-N15-p12641548 | gene | exon |
| Bn-scaff_19026_1-p101219 | Bn-N8-p5615925   | gene |      |
| Bn-scaff_19026_1-p105795 | Bn-N13-p30634252 | gene |      |
| Bn-scaff_19026_1-p184842 | Bn-N13-p30555341 | gene |      |
| Bn-scaff_19026_1-p187828 | Bn-N13-p30552079 | gene |      |
| Bn-scaff_19026_1-p187921 | Bn-N13-p30551986 | gene |      |
| Bn-scaff_19026_1-p188341 | Bn-N13-p30551546 | gene |      |
| Bn-scaff_19026_1-p191325 | Bn-N13-p30548960 | gene | exon |
| Bn-scaff_19026_1-p191536 | Bn-N13-p30548752 | gene |      |
| Bn-scaff_19026_1-p192280 | Bn-N13-p30548002 | gene |      |
| Bn-scaff_19026_1-p192351 | Bn-N13-p30547931 | gene |      |
| Bn-scaff_19026_1-p192416 | Bn-N13-p30547866 | gene |      |
| Bn-scaff_19026_1-p194582 | Bn-N3-p19142981  | gene |      |
| Bn-scaff_19026_1-p200897 | Bn-N13-p30539366 | gene |      |
| Bn-scaff_19026_1-p231124 | Bn-N13-p30516857 | gene |      |
| Bn-scaff_19026_1-p232264 | Bn-N13-p30515717 | gene |      |
| Bn-scaff_19026_1-p292357 | Bn-N13-p30441403 | gene |      |
| Bn-scaff_19026_1-p45302  | Bn-N13-p30703196 | gene |      |
| Bn-scaff_19043_1-p22356  | Bn-N14-p42551050 | gene | exon |

|                           |                  |      |      |
|---------------------------|------------------|------|------|
| Bn-scaff_19043_1-p24351   | Bn-N14-p42548928 | gene |      |
| Bn-scaff_19043_1-p389754  | Bn-N4-p11630934  | gene |      |
| Bn-scaff_19043_1-p50175   | Bn-N14-p42529018 | gene |      |
| Bn-scaff_19043_1-p51461   | Bn-N14-p42527729 | gene |      |
| Bn-scaff_19043_1-p51554   | Bn-N14-p42527636 | gene |      |
| Bn-scaff_19043_1-p52253   | Bn-N14-p42526937 | gene | exon |
| Bn-scaff_19043_1-p53467   | Bn-N14-p42524898 | gene | exon |
| Bn-scaff_19043_1-p53629   | Bn-N14-p42524735 | gene |      |
| Bn-scaff_19043_1-p53637   | Bn-N14-p42524727 | gene |      |
| Bn-scaff_19043_1-p77359   | Bn-N14-p42496178 | gene | exon |
| Bn-scaff_19043_1-p83155   | Bn-N14-p42488705 | gene | exon |
| Bn-scaff_19043_1-p83566   | Bn-N14-p42488296 | gene |      |
| Bn-scaff_19043_1-p97247   | Bn-N14-p42473937 | gene | exon |
| Bn-scaff_19044_1-p9802    | Bn-N15-p32540593 | gene |      |
| Bn-scaff_19047_1-p159375  | Bn-N13-p65157643 | gene |      |
| Bn-scaff_19047_1-p164520  | Bn-N13-p65152308 | gene | exon |
| Bn-scaff_19047_1-p169194  | Bn-N13-p65147608 | gene | exon |
| Bn-scaff_19047_1-p191638  | Bn-N13-p65136153 | gene | exon |
| Bn-scaff_19047_1-p196388  | Bn-N13-p65133374 | gene |      |
| Bn-scaff_19047_1-p292986  | Bn-N13-p65018002 | gene |      |
| Bn-scaff_19047_1-p293516  | Bn-N13-p65017472 | gene |      |
| Bn-scaff_19047_1-p294145  | Bn-N13-p65016841 | gene |      |
| Bn-scaff_19047_1-p294788  | Bn-N13-p65016198 | gene |      |
| Bn-scaff_19047_1-p295106  | Bn-N13-p65015880 | gene |      |
| Bn-scaff_19047_1-p295372  | Bn-N13-p65015398 | gene |      |
| Bn-scaff_19047_1-p297198  | Bn-N13-p65014421 | gene | exon |
| Bn-scaff_19101_1-p10495   | Bn-N13-p60982141 | gene | exon |
| Bn-scaff_19104_1-p304889  | Bn-N8-p8978414   | gene | exon |
| Bn-scaff_19106_1-p307140  | Bn-N16-p16508340 | gene |      |
| Bn-scaff_19106_1-p426627  | Bn-N7-p9721973   | gene | exon |
| Bn-scaff_19106_1-p427702  | Bn-N7-p9720917   | gene | exon |
| Bn-scaff_19106_1-p440312  | Bn-N17-p20634441 | gene |      |
| Bn-scaff_19106_1-p605386  | Bn-N17-p20446675 | gene |      |
| Bn-scaff_19111_1-p138623  | Bn-N13-p12043290 | gene | exon |
| Bn-scaff_19111_1-p140517  | Bn-N3-p8561479   | gene |      |
| Bn-scaff_19111_1-p162577  | Bn-N13-p12017700 | gene | exon |
| Bn-scaff_19111_1-p217082  | Bn-N13-p11967999 | gene |      |
| Bn-scaff_19111_1-p217129  | Bn-N13-p11967954 | gene |      |
| Bn-scaff_19111_1-p258190  | Bn-N13-p11924744 | gene | exon |
| Bn-scaff_19111_1-p258531  | Bn-N13-p11924404 | gene |      |
| Bn-scaff_19111_1-p363367  | Bn-N13-p20932985 | gene | exon |
| Bn-scaff_19168_1-p109723  | Bn-N11-p39761603 | gene |      |
| Bn-scaff_19168_1-p15958   | Bn-N11-p39847702 | gene |      |
| Bn-scaff_19168_1-p29925   | Bn-N11-p39843040 | gene | exon |
| Bn-scaff_19168_1-p30868   | Bn-N11-p39842746 | gene |      |
| Bn-scaff_19168_1-p31612   | Bn-N11-p39841999 | gene |      |
| Bn-scaff_19168_1-p85750   | Bn-N11-p39773153 | gene | exon |
| Bn-scaff_19170_1-p1028423 | Bn-N14-p22453616 | gene |      |
| Bn-scaff_19170_1-p1028779 | Bn-N14-p22453972 | gene |      |
| Bn-scaff_19170_1-p1034998 | Bn-N14-p22460191 | gene |      |
| Bn-scaff_19170_1-p1118815 | Bn-N14-p22544401 | gene |      |
| Bn-scaff_19170_1-p114391  | Bn-N14-p21675001 | gene |      |



|                           |                  |      |      |
|---------------------------|------------------|------|------|
| Bn-scaff_19170_1-p114487  | Bn-N14-p21675097 | gene |      |
| Bn-scaff_19170_1-p391172  | Bn-N14-p21815095 | gene |      |
| Bn-scaff_19170_1-p391864  | Bn-N14-p21815786 | gene |      |
| Bn-scaff_19170_1-p403539  | Bn-N14-p21822614 | gene |      |
| Bn-scaff_19170_1-p405290  | Bn-N14-p21824365 | gene |      |
| Bn-scaff_19170_1-p461594  | Bn-N14-p21886362 | gene |      |
| Bn-scaff_19170_1-p464773  | Bn-N14-p21898643 | gene |      |
| Bn-scaff_19170_1-p472715  | Bn-N14-p21922684 | gene | exon |
| Bn-scaff_19170_1-p473071  | Bn-N14-p21923040 | gene | exon |
| Bn-scaff_19170_1-p474592  | Bn-N14-p21924561 | gene | exon |
| Bn-scaff_19170_1-p51349   | Bn-N14-p21620672 | gene |      |
| Bn-scaff_19170_1-p517947  | Bn-N14-p21976537 | gene |      |
| Bn-scaff_19170_1-p532510  | Bn-N14-p21992330 | gene | exon |
| Bn-scaff_19170_1-p533180  | Bn-N14-p21993000 | gene |      |
| Bn-scaff_19170_1-p550014  | Bn-N14-p22010261 | gene | exon |
| Bn-scaff_19170_1-p574456  | Bn-N14-p22033771 | gene |      |
| Bn-scaff_19170_1-p586404  | Bn-N14-p22051158 | gene | exon |
| Bn-scaff_19170_1-p586539  | Bn-N14-p22051293 | gene | exon |
| Bn-scaff_19170_1-p590810  | Bn-N14-p22055565 | gene |      |
| Bn-scaff_19170_1-p590894  | Bn-N14-p22055649 | gene |      |
| Bn-scaff_19170_1-p829081  | Bn-N14-p22259427 | gene | exon |
| Bn-scaff_19183_1-p164144  | Bn-N11-p23093895 | gene | exon |
| Bn-scaff_19183_1-p164373  | Bn-N11-p23094124 | gene | exon |
| Bn-scaff_19183_1-p164485  | Bn-N11-p23094236 | gene |      |
| Bn-scaff_19183_1-p249410  | Bn-N11-p23186592 | gene |      |
| Bn-scaff_19183_1-p425206  | Bn-N11-p22376276 | gene |      |
| Bn-scaff_19183_1-p465103  | Bn-N11-p22331633 | gene |      |
| Bn-scaff_19183_1-p478485  | Bn-N11-p22321019 | gene |      |
| Bn-scaff_19186_1-p466456  | Bn-N6-p12377071  | gene | exon |
| Bn-scaff_19193_1-p1189479 | Bn-N11-p5310140  | gene |      |
| Bn-scaff_19193_1-p1191929 | Bn-N11-p5307763  | gene |      |
| Bn-scaff_19193_1-p1250152 | Bn-N11-p5243904  | gene |      |
| Bn-scaff_19193_1-p1252982 | Bn-N11-p5241032  | gene | exon |
| Bn-scaff_19193_1-p1288594 | Bn-N11-p5198868  | gene |      |
| Bn-scaff_19193_1-p1290482 | Bn-N11-p5196983  | gene |      |
| Bn-scaff_19193_1-p1347576 | Bn-N1-p3787946   | gene |      |
| Bn-scaff_19193_1-p313981  | Bn-N1-p4467673   | gene | exon |
| Bn-scaff_19193_1-p345684  | Bn-N11-p6135636  | gene | exon |
| Bn-scaff_19193_1-p399060  | Bn-N11-p6078846  | gene | exon |
| Bn-scaff_19193_1-p399528  | Bn-N11-p6078377  | gene |      |
| Bn-scaff_19193_1-p416656  | Bn-N16-p16121031 | gene | exon |
| Bn-scaff_19193_1-p491056  | Bn-N11-p5983097  | gene | exon |
| Bn-scaff_19193_1-p491853  | Bn-N11-p5982300  | gene | exon |
| Bn-scaff_19193_1-p527597  | Bn-N11-p5948182  | gene |      |
| Bn-scaff_19193_1-p561943  | Bn-N11-p5915505  | gene | exon |
| Bn-scaff_19193_1-p565446  | Bn-N11-p5912004  | gene |      |
| Bn-scaff_19193_1-p657373  | Bn-N11-p5819997  | gene | exon |
| Bn-scaff_19193_1-p6789    | Bn-N11-p6552161  | gene |      |
| Bn-scaff_19193_1-p704018  | Bn-N11-p5751693  | gene | exon |
| Bn-scaff_19193_1-p704672  | Bn-N11-p5751039  | gene | exon |
| Bn-scaff_19193_1-p711927  | Bn-N11-p5743795  | gene | exon |
| Bn-scaff_19193_1-p725427  | Bn-N1-p4153029   | gene | exon |

|                          |                  |      |      |
|--------------------------|------------------|------|------|
| Bn-scaff_19193_1-p725739 | Bn-N1-p4152717   | gene |      |
| Bn-scaff_19193_1-p86427  | Bn-N11-p6461074  | gene | exon |
| Bn-scaff_19208_1-p130237 | Bn-N14-p41168253 | gene |      |
| Bn-scaff_19208_1-p242899 | Bn-N4-p10960303  | gene | exon |
| Bn-scaff_19208_1-p309287 | Bn-N14-p41373952 | gene |      |
| Bn-scaff_19208_1-p431737 | Bn-N18-p38964367 | gene | exon |
| Bn-scaff_19224_1-p29613  | Bn-N15-p33944976 | gene |      |
| Bn-scaff_19224_1-p29858  | Bn-N15-p33944731 | gene | exon |
| Bn-scaff_19224_1-p30859  | Bn-N15-p33943730 | gene | exon |
| Bn-scaff_19242_1-p421335 | Bn-N18-p20024510 | gene | exon |
| Bn-scaff_19244_1-p120852 | Bn-N11-p205786   | gene |      |
| Bn-scaff_19244_1-p193513 | Bn-N11-p283543   | gene | exon |
| Bn-scaff_19244_1-p196631 | Bn-N11-p286661   | gene |      |
| Bn-scaff_19244_1-p208209 | Bn-N11-p298051   | gene | exon |
| Bn-scaff_19244_1-p260990 | Bn-N11-p348913   | gene | exon |
| Bn-scaff_19244_1-p270599 | Bn-N11-p358546   | gene | exon |
| Bn-scaff_19244_1-p328817 | Bn-N11-p413606   | gene | exon |
| Bn-scaff_19244_1-p355868 | Bn-N1-p338310    | gene | exon |
| Bn-scaff_19244_1-p380858 | Bn-N11-p462202   | gene |      |
| Bn-scaff_19244_1-p441730 | Bn-N1-p405672    | gene |      |
| Bn-scaff_19244_1-p443382 | Bn-N11-p521263   | gene | exon |
| Bn-scaff_19244_1-p451742 | Bn-N11-p529608   | gene |      |
| Bn-scaff_19244_1-p53159  | Bn-N11-p137862   | gene |      |
| Bn-scaff_19244_1-p551168 | Bn-N11-p614746   | gene |      |
| Bn-scaff_19244_1-p577643 | Bn-N11-p640023   | gene | exon |
| Bn-scaff_19244_1-p656563 | Bn-N1-p6869501   | gene |      |
| Bn-scaff_19244_1-p698816 | Bn-N11-p769136   | gene | exon |
| Bn-scaff_19244_1-p699318 | Bn-N11-p769638   | gene |      |
| Bn-scaff_19244_1-p738519 | Bn-N11-p814744   | gene |      |
| Bn-scaff_19244_1-p755070 | Bn-N11-p830406   | gene |      |
| Bn-scaff_19244_1-p816342 | Bn-N11-p865603   | gene | exon |
| Bn-scaff_19244_1-p843614 | Bn-N3-p7620724   | gene |      |
| Bn-scaff_19248_1-p155179 | Bn-N14-p7698700  | gene | exon |
| Bn-scaff_19248_1-p166341 | Bn-N14-p7707563  | gene | exon |
| Bn-scaff_19248_1-p233324 | Bn-N14-p7770440  | gene | exon |
| Bn-scaff_19248_1-p235858 | Bn-N14-p7770795  | gene | exon |
| Bn-scaff_19248_1-p269648 | Bn-N14-p7800499  | gene |      |
| Bn-scaff_19248_1-p357191 | Bn-N3-p8465382   | gene | exon |
| Bn-scaff_19248_1-p48952  | Bn-N14-p7584354  | gene | exon |
| Bn-scaff_19248_1-p523097 | Bn-N3-p8455128   | gene | exon |
| Bn-scaff_19248_1-p57521  | Bn-N14-p7592933  | gene |      |
| Bn-scaff_19248_1-p57760  | Bn-N14-p7593176  | gene | exon |
| Bn-scaff_19253_1-p112082 | Bn-N14-p17049286 | gene | exon |
| Bn-scaff_19253_1-p112212 | Bn-N14-p17049416 | gene | exon |
| Bn-scaff_19253_1-p112702 | Bn-N14-p17049879 | gene | exon |
| Bn-scaff_19253_1-p112787 | Bn-N14-p17049964 | gene |      |
| Bn-scaff_19253_1-p113020 | Bn-N14-p17050197 | gene |      |
| Bn-scaff_19253_1-p113235 | Bn-N14-p17050412 | gene | exon |
| Bn-scaff_19253_1-p138537 | Bn-N14-p17084705 | gene |      |
| Bn-scaff_19253_1-p167431 | Bn-N14-p17119898 | gene |      |
| Bn-scaff_19253_1-p168128 | Bn-N14-p17120595 | gene |      |
| Bn-scaff_19253_1-p170640 | Bn-N14-p17123122 | gene | exon |

|                          |                  |      |      |
|--------------------------|------------------|------|------|
| Bn-scaff_19253_1-p197419 | Bn-N14-p17150158 | gene | exon |
| Bn-scaff_19253_1-p228274 | Bn-N14-p17188642 | gene | exon |
| Bn-scaff_19253_1-p228569 | Bn-N14-p17188938 | gene |      |
| Bn-scaff_19253_1-p228570 | Bn-N14-p17188938 | gene |      |
| Bn-scaff_19253_1-p237811 | Bn-N14-p17200413 | gene |      |
| Bn-scaff_19253_1-p24802  | Bn-N14-p16965938 | gene |      |
| Bn-scaff_19253_1-p253157 | Bn-N14-p17234620 | gene | exon |
| Bn-scaff_19253_1-p25504  | Bn-N14-p16966640 | gene |      |
| Bn-scaff_19253_1-p25939  | Bn-N14-p16967144 | gene |      |
| Bn-scaff_19253_1-p26030  | Bn-N14-p16967235 | gene | exon |
| Bn-scaff_19253_1-p269230 | Bn-N14-p17251163 | gene |      |
| Bn-scaff_19253_1-p285404 | Bn-N14-p17268712 | gene |      |
| Bn-scaff_19253_1-p30153  | Bn-N14-p16972719 | gene | exon |
| Bn-scaff_19253_1-p30405  | Bn-N14-p16972971 | gene |      |
| Bn-scaff_19253_1-p31161  | Bn-N14-p16973727 | gene |      |
| Bn-scaff_19253_1-p31253  | Bn-N14-p16973819 | gene |      |
| Bn-scaff_19253_1-p31721  | Bn-N14-p16974287 | gene |      |
| Bn-scaff_19253_1-p535009 | Bn-N14-p17610966 | gene |      |
| Bn-scaff_19253_1-p556898 | Bn-N14-p17629542 | gene |      |
| Bn-scaff_19253_1-p600747 | Bn-N14-p17673050 | gene | exon |
| Bn-scaff_19253_1-p614151 | Bn-N14-p17686362 | gene |      |
| Bn-scaff_19253_1-p75285  | Bn-N14-p17004393 | gene |      |
| Bn-scaff_19253_1-p82507  | Bn-N14-p17015415 | gene | exon |
| Bn-scaff_19253_1-p93586  | Bn-N14-p17030446 | gene | exon |
| Bn-scaff_19271_1-p113773 | Bn-N11-p14977117 | gene | exon |
| Bn-scaff_19290_1-p70753  | Bn-N11-p13619178 | gene |      |
| Bn-scaff_19310_1-p116554 | Bn-N13-p38670958 | gene |      |
| Bn-scaff_19310_1-p209197 | Bn-N13-p38756837 | gene |      |
| Bn-scaff_19310_1-p247331 | Bn-N6-p15862828  | gene | exon |
| Bn-scaff_19310_1-p276541 | Bn-N13-p38812341 | gene | exon |
| Bn-scaff_19310_1-p351188 | Bn-N13-p38870659 | gene | exon |
| Bn-scaff_19310_1-p364008 | Bn-N13-p38880526 | gene | exon |
| Bn-scaff_19310_1-p370263 | Bn-N13-p38884692 | gene |      |
| Bn-scaff_19310_1-p37363  | Bn-N13-p38606483 | gene | exon |
| Bn-scaff_19310_1-p429319 | Bn-N13-p38941733 | gene |      |
| Bn-scaff_19310_1-p432715 | Bn-N13-p38945132 | gene |      |
| Bn-scaff_19310_1-p432770 | Bn-N13-p38945187 | gene |      |
| Bn-scaff_19310_1-p432772 | Bn-N13-p38945189 | gene |      |
| Bn-scaff_19310_1-p434081 | Bn-N13-p38946491 | gene | exon |
| Bn-scaff_19310_1-p509653 | Bn-N13-p39442480 | gene |      |
| Bn-scaff_19310_1-p531191 | Bn-N13-p39463755 | gene |      |
| Bn-scaff_19310_1-p531402 | Bn-N13-p39463966 | gene |      |
| Bn-scaff_19310_1-p536472 | Bn-N6-p15668445  | gene |      |
| Bn-scaff_19310_1-p626867 | Bn-N13-p39567939 | gene | exon |
| Bn-scaff_19310_1-p66830  | Bn-N13-p38631850 | gene |      |
| Bn-scaff_19318_1-p167    | Bn-N14-p48027478 | gene |      |
| Bn-scaff_19364_1-p362049 | Bn-N11-p19707635 | gene |      |
| Bn-scaff_19364_1-p362066 | Bn-N11-p19707618 | gene |      |
| Bn-scaff_19364_1-p362185 | Bn-N11-p19707499 | gene |      |
| Bn-scaff_19364_1-p417674 | Bn-N11-p19660358 | gene | exon |
| Bn-scaff_19364_1-p461287 | Bn-N11-p19601746 | gene |      |
| Bn-scaff_19364_1-p462138 | Bn-N11-p19600907 | gene |      |

|                          |                        |      |      |
|--------------------------|------------------------|------|------|
| Bn-scaff_19364_1-p462147 | Bn-N11-p19600898       | gene |      |
| Bn-scaff_19364_1-p462199 | Bn-N11-p19600846       | gene |      |
| Bn-scaff_19364_1-p468188 | Bn-N11-p19594126       | gene | exon |
| Bn-scaff_19364_1-p468644 | Bn-N11-p19593670       | gene | exon |
| Bn-scaff_19372_1-p7611   | Bn-N2-p17327319        | gene | exon |
| Bn-scaff_19458_1-p7894   | Bn-N11-p26297640       | gene |      |
| Bn-scaff_19458_1-p8019   | Bn-N11-p26297515       | gene | exon |
| Bn-scaff_19483_1-p95805  | Bn-N10-p8701886        | gene | exon |
| Bn-scaff_19490_1-p119155 | Bn-Scaffold04186-p1786 | gene |      |
| Bn-scaff_19523_1-p14392  | Bn-N13-p21370240       | gene | exon |
| Bn-scaff_19523_1-p188656 | Bn-N13-p21545093       | gene | exon |
| Bn-scaff_19523_1-p232023 | Bn-N13-p21573788       | gene | exon |
| Bn-scaff_19523_1-p261625 | Bn-N13-p21606213       | gene |      |
| Bn-scaff_19523_1-p341606 | Bn-N19-p1132010        | gene | exon |
| Bn-scaff_19523_1-p366203 | Bn-N13-p21713728       | gene |      |
| Bn-scaff_19523_1-p427343 | Bn-N3-p14065808        | gene |      |
| Bn-scaff_19523_1-p428124 | Bn-N3-p14066557        | gene | exon |
| Bn-scaff_19523_1-p545907 | Bn-N14-p53111005       | gene | exon |
| Bn-scaff_19523_1-p622333 | Bn-N13-p21999599       | gene | exon |
| Bn-scaff_19523_1-p869340 | Bn-N3-p14294755        | gene | exon |
| Bn-scaff_19560_1-p50816  | Bn-N19-p38645485       | gene |      |
| Bn-scaff_19560_1-p51121  | Bn-N19-p38645789       | gene |      |
| Bn-scaff_19564_1-p17934  | Bn-N11-p29100585       | gene |      |
| Bn-scaff_19569_1-p41924  | Bn-N13-p4907742        | gene |      |
| Bn-scaff_19575_1-p165770 | Bn-N14-p20304756       | gene |      |
| Bn-scaff_19575_1-p184301 | Bn-N14-p20290150       | gene |      |
| Bn-scaff_19575_1-p237597 | Bn-N14-p20234881       | gene |      |
| Bn-scaff_19575_1-p386837 | Bn-N14-p20926497       | gene | exon |
| Bn-scaff_19575_1-p540292 | Bn-N14-p21060555       | gene | exon |
| Bn-scaff_19575_1-p634889 | Bn-N14-p21229689       | gene | exon |
| Bn-scaff_19575_1-p723313 | Bn-N14-p21319633       | gene |      |
| Bn-scaff_19575_1-p738860 | Bn-N14-p21335435       | gene |      |
| Bn-scaff_19575_1-p740686 | Bn-N14-p21337262       | gene |      |
| Bn-scaff_19575_1-p88445  | Bn-N14-p20409427       | gene | exon |
| Bn-scaff_19575_1-p88718  | Bn-N14-p20409153       | gene | exon |
| Bn-scaff_19575_1-p89370  | Bn-N14-p20408501       | gene |      |
| Bn-scaff_19575_1-p90626  | Bn-N14-p20407245       | gene |      |
| Bn-scaff_19614_1-p106170 | Bn-N1-p9320598         | gene | exon |
| Bn-scaff_19614_1-p119351 | Bn-N17-p16148810       | gene | exon |
| Bn-scaff_19614_1-p300765 | Bn-N11-p13956787       | gene | exon |
| Bn-scaff_19614_1-p305584 | Bn-N11-p13952157       | gene | exon |
| Bn-scaff_19614_1-p325704 | Bn-N11-p13931879       | gene |      |
| Bn-scaff_19614_1-p36023  | Bn-N11-p14181324       | gene | exon |
| Bn-scaff_19614_1-p53484  | Bn-N11-p14175577       | gene |      |
| Bn-scaff_19614_1-p98680  | Bn-N11-p14150127       | gene | exon |
| Bn-scaff_19619_1-p39510  | Bn-N19-p45660289       | gene | exon |
| Bn-scaff_19641_1-p100329 | Bn-N6-p3895316         | gene |      |
| Bn-scaff_19641_1-p170202 | Bn-N15-p4623425        | gene | exon |
| Bn-scaff_19641_1-p206896 | Bn-N15-p4588751        | gene |      |
| Bn-scaff_19641_1-p222124 | Bn-N15-p4570733        | gene |      |
| Bn-scaff_19646_1-p410    | Bn-N13-p5199414        | gene | exon |
| Bn-scaff_19702_1-p204876 | Bn-N13-p44314137       | gene |      |

|                           |                  |      |      |
|---------------------------|------------------|------|------|
| Bn-scaff_19702_1-p481302  | Bn-N13-p42514966 | gene | exon |
| Bn-scaff_19724_1-p202852  | Bn-N17-p28975035 | gene | exon |
| Bn-scaff_19724_1-p249787  | Bn-N17-p28929164 | gene |      |
| Bn-scaff_19724_1-p462268  | Bn-N17-p26837319 | gene | exon |
| Bn-scaff_19724_1-p467818  | Bn-N6-p24634391  | gene |      |
| Bn-scaff_19724_1-p522227  | Bn-N17-p26909757 | gene |      |
| Bn-scaff_19724_1-p659910  | Bn-N6-p24680432  | gene |      |
| Bn-scaff_19724_1-p749258  | Bn-N6-p24725333  | gene | exon |
| Bn-scaff_19740_1-p109782  | Bn-N13-p51768695 | gene | exon |
| Bn-scaff_19740_1-p114198  | Bn-N13-p51764279 | gene |      |
| Bn-scaff_19740_1-p236040  | Bn-N11-p9467842  | gene |      |
| Bn-scaff_19740_1-p35978   | Bn-N13-p51845472 | gene |      |
| Bn-scaff_19740_1-p36568   | Bn-N13-p51844882 | gene |      |
| Bn-scaff_19740_1-p45553   | Bn-N13-p51835215 | gene | exon |
| Bn-scaff_19740_1-p6264    | Bn-N18-p40830649 | gene | exon |
| Bn-scaff_19740_1-p6315    | Bn-N18-p40830598 | gene | exon |
| Bn-scaff_19740_1-p66841   | Bn-N13-p51813749 | gene |      |
| Bn-scaff_19740_1-p67158   | Bn-N13-p51813432 | gene |      |
| Bn-scaff_19740_1-p67802   | Bn-N13-p51812788 | gene |      |
| Bn-scaff_19757_1-p22787   | Bn-N10-p14515412 | gene | exon |
| Bn-scaff_19757_1-p24032   | Bn-N19-p51996756 | gene |      |
| Bn-scaff_19773_1-p137808  | Bn-N16-p13928755 | gene |      |
| Bn-scaff_19783_1-p1055665 | Bn-N19-p4917290  | gene | exon |
| Bn-scaff_19783_1-p1060183 | Bn-N9-p3825589   | gene |      |
| Bn-scaff_19783_1-p1061297 | Bn-N9-p3819839   | gene | exon |
| Bn-scaff_19783_1-p1061414 | Bn-N19-p4913015  | gene | exon |
| Bn-scaff_19783_1-p1062045 | Bn-N9-p3827438   | gene | exon |
| Bn-scaff_19783_1-p279292  | Bn-N19-p4158931  | gene |      |
| Bn-scaff_19783_1-p379086  | Bn-N19-p4266183  | gene |      |
| Bn-scaff_19783_1-p423234  | Bn-N9-p3411466   | gene | exon |
| Bn-scaff_19783_1-p472902  | Bn-N2-p28015348  | gene |      |
| Bn-scaff_19783_1-p71479   | Bn-N9-p3162962   | gene | exon |
| Bn-scaff_19783_1-p922268  | Bn-N19-p4788413  | gene |      |
| Bn-scaff_19783_1-p925928  | Bn-N19-p4792046  | gene |      |
| Bn-scaff_19821_1-p218002  | Bn-N14-p14246777 | gene | exon |
| Bn-scaff_19821_1-p262184  | Bn-N14-p14291632 | gene | exon |
| Bn-scaff_19821_1-p268090  | Bn-N14-p14297489 | gene |      |
| Bn-scaff_19821_1-p268347  | Bn-N14-p14297746 | gene |      |
| Bn-scaff_19821_1-p388456  | Bn-N14-p14333490 | gene | exon |
| Bn-scaff_19821_1-p54826   | Bn-N5-p8094550   | gene | exon |
| Bn-scaff_19821_1-p96192   | Bn-N14-p14121665 | gene |      |
| Bn-scaff_19892_1-p218532  | Bn-N5-p10734186  | gene | exon |
| Bn-scaff_19892_1-p278146  | Bn-N5-p10690972  | gene | exon |
| Bn-scaff_19899_1-p16013   | Bn-N19-p47957574 | gene |      |
| Bn-scaff_19899_1-p17895   | Bn-N19-p47955692 | gene |      |
| Bn-scaff_19899_1-p203618  | Bn-N19-p47758421 | gene | exon |
| Bn-scaff_19899_1-p303613  | Bn-N19-p47658209 | gene | exon |
| Bn-scaff_19899_1-p34734   | Bn-N19-p47939658 | gene | exon |
| Bn-scaff_19899_1-p356987  | Bn-N10-p12070269 | gene | exon |
| Bn-scaff_19899_1-p357191  | Bn-N19-p47611912 | gene |      |
| Bn-scaff_19899_1-p357670  | Bn-N10-p12069587 | gene | exon |
| Bn-scaff_19899_1-p358095  | Bn-N19-p47611007 | gene | exon |

|                          |                         |      |      |
|--------------------------|-------------------------|------|------|
| Bn-scaff_19899_1-p465507 | Bn-N10-p12009774        | gene | exon |
| Bn-scaff_19899_1-p465611 | Bn-N17-p12155579        | gene | exon |
| Bn-scaff_19899_1-p466993 | Bn-N19-p47520241        | gene | exon |
| Bn-scaff_19899_1-p523832 | Bn-N19-p47461911        | gene | exon |
| Bn-scaff_19899_1-p559187 | Bn-N19-p47451063        | gene |      |
| Bn-scaff_19899_1-p621547 | Bn-N19-p47367335        | gene | exon |
| Bn-scaff_19899_1-p621874 | Bn-N19-p47367007        | gene |      |
| Bn-scaff_19899_1-p623253 | Bn-N19-p47365638        | gene | exon |
| Bn-scaff_19899_1-p639962 | Bn-N19-p47346877        | gene |      |
| Bn-scaff_19899_1-p684603 | Bn-N14-p26646615        | gene | exon |
| Bn-scaff_19899_1-p709156 | Bn-N19-p47288680        | gene | exon |
| Bn-scaff_19899_1-p719729 | Bn-N19-p47275220        | gene |      |
| Bn-scaff_19899_1-p719873 | Bn-N19-p47275076        | gene |      |
| Bn-scaff_19904_1-p103831 | Bn-Scaffold03812-p2020  | gene | exon |
| Bn-scaff_19911_1-p54072  | Bn-N16-p2920805         | gene | exon |
| Bn-scaff_19911_1-p98995  | Bn-N16-p2873079         | gene |      |
| Bn-scaff_19927_1-p24167  | Bn-N17-p35228677        | gene | exon |
| Bn-scaff_19927_1-p24375  | Bn-N18-p26943592        | gene |      |
| Bn-scaff_19929_1-p1877   | Bn-Scaffold02566-p3116  | gene |      |
| Bn-scaff_19937_1-p19550  | Bn-N16-p36848274        | gene |      |
| Bn-scaff_19937_1-p20028  | Bn-N7-p22429034         | gene | exon |
| Bn-scaff_19975_1-p14174  | Bn-Scaffold01814-p2311  | gene | exon |
| Bn-scaff_19995_1-p11896  | Bn-Scaffold01118-p7341  | gene |      |
| Bn-scaff_19995_1-p12647  | Bn-Scaffold01118-p8069  | gene |      |
| Bn-scaff_19995_1-p20624  | Bn-N5-p11922367         | gene | exon |
| Bn-scaff_19995_1-p33414  | Bn-Scaffold01118-p31325 | gene | exon |
| Bn-scaff_20026_1-p359079 | Bn-N11-p29876725        | gene |      |
| Bn-scaff_20042_1-p10474  | Bn-N14-p23278101        | gene |      |
| Bn-scaff_20042_1-p12033  | Bn-N14-p23279656        | gene | exon |
| Bn-scaff_20042_1-p39005  | Bn-N14-p23301810        | gene |      |
| Bn-scaff_20042_1-p74312  | Bn-N14-p23336945        | gene |      |
| Bn-scaff_20042_1-p84111  | Bn-N14-p23345899        | gene | exon |
| Bn-scaff_20063_1-p25913  | Bn-N14-p6398533         | gene |      |
| Bn-scaff_20079_1-p17049  | Bn-N3-p19029227         | gene | exon |
| Bn-scaff_20079_1-p20029  | Bn-N13-p30342481        | gene |      |
| Bn-scaff_20079_1-p289504 | Bn-N14-p46670100        | gene |      |
| Bn-scaff_20079_1-p465897 | Bn-N14-p46494306        | gene | exon |
| Bn-scaff_20079_1-p489358 | Bn-N14-p46467861        | gene | exon |
| Bn-scaff_20079_1-p494342 | Bn-N14-p46461222        | gene | exon |
| Bn-scaff_20079_1-p507355 | Bn-N14-p46431734        | gene |      |
| Bn-scaff_20079_1-p58991  | Bn-N13-p30280082        | gene | exon |
| Bn-scaff_20079_1-p661258 | Bn-N14-p46336661        | gene |      |
| Bn-scaff_20079_1-p721407 | Bn-N4-p14458357         | gene |      |
| Bn-scaff_20084_1-p163373 | Bn-N17-p6705572         | gene | exon |
| Bn-scaff_20084_1-p176376 | Bn-N7-p2807523          | gene | exon |
| Bn-scaff_20084_1-p197706 | Bn-N7-p2826090          | gene | exon |
| Bn-scaff_20084_1-p325311 | Bn-N17-p6840154         | gene | exon |
| Bn-scaff_20084_1-p82863  | Bn-N17-p6619795         | gene | exon |
| Bn-scaff_20103_1-p142562 | Bn-N13-p29131690        | gene | exon |
| Bn-scaff_20103_1-p142790 | Bn-N13-p29131461        | gene | exon |
| Bn-scaff_20103_1-p298039 | Bn-N13-p28955083        | gene | exon |
| Bn-scaff_20103_1-p309490 | Bn-N13-p28938029        | gene | exon |

|                          |                  |      |      |
|--------------------------|------------------|------|------|
| Bn-scaff_20103_1-p379028 | Bn-N13-p28877251 | gene |      |
| Bn-scaff_20103_1-p507458 | Bn-N13-p28669333 | gene | exon |
| Bn-scaff_20103_1-p564754 | Bn-N3-p18519256  | gene | exon |
| Bn-scaff_20125_1-p1071   | Bn-N15-p12333408 | gene | exon |
| Bn-scaff_20125_1-p150744 | Bn-N15-p12176589 | gene |      |
| Bn-scaff_20125_1-p151394 | Bn-N15-p12175939 | gene | exon |
| Bn-scaff_20125_1-p152650 | Bn-N15-p12174673 | gene |      |
| Bn-scaff_20125_1-p177173 | Bn-N15-p12151683 | gene |      |
| Bn-scaff_20125_1-p18276  | Bn-N15-p12315210 | gene |      |
| Bn-scaff_20125_1-p301419 | Bn-N15-p12020198 | gene |      |
| Bn-scaff_20125_1-p378742 | Bn-N15-p11923031 | gene |      |
| Bn-scaff_20125_1-p428266 | Bn-N6-p8767352   | gene | exon |
| Bn-scaff_20125_1-p522233 | Bn-N15-p11761322 | gene | exon |
| Bn-scaff_20125_1-p533196 | Bn-N15-p11755153 | gene |      |
| Bn-scaff_20125_1-p566462 | Bn-N15-p11731057 | gene |      |
| Bn-scaff_20125_1-p567498 | Bn-N15-p11730021 | gene |      |
| Bn-scaff_20125_1-p63386  | Bn-N15-p12258258 | gene |      |
| Bn-scaff_20125_1-p63532  | Bn-N15-p12258112 | gene | exon |
| Bn-scaff_20125_1-p663724 | Bn-N15-p11643360 | gene | exon |
| Bn-scaff_20125_1-p67021  | Bn-N7-p10191283  | gene | exon |
| Bn-scaff_20125_1-p863    | Bn-N15-p12333616 | gene | exon |
| Bn-scaff_20125_1-p86621  | Bn-N15-p12238056 | gene |      |
| Bn-scaff_20125_1-p872243 | Bn-N19-p20858476 | gene |      |
| Bn-scaff_20125_1-p88815  | Bn-N15-p12236213 | gene | exon |
| Bn-scaff_20131_1-p73163  | Bn-N1-p4936980   | gene |      |
| Bn-scaff_20131_1-p76620  | Bn-N4-p5589      | gene |      |
| Bn-scaff_20168_1-p6747   | Bn-N19-p19937519 | gene |      |
| Bn-scaff_20191_1-p143344 | Bn-N4-p5363976   | gene | exon |
| Bn-scaff_20191_1-p146654 | Bn-N14-p34845349 | gene |      |
| Bn-scaff_20191_1-p63120  | Bn-N14-p34935820 | gene |      |
| Bn-scaff_20202_1-p138599 | Bn-N19-p19835397 | gene | exon |
| Bn-scaff_20210_1-p111101 | Bn-N11-p8996544  | gene | exon |
| Bn-scaff_20210_1-p111252 | Bn-N11-p8996393  | gene | exon |
| Bn-scaff_20210_1-p112010 | Bn-N11-p8995634  | gene | exon |
| Bn-scaff_20210_1-p112176 | Bn-N11-p8995469  | gene | exon |
| Bn-scaff_20210_1-p112767 | Bn-N11-p8992465  | gene | exon |
| Bn-scaff_20210_1-p136861 | Bn-N11-p8967302  | gene | exon |
| Bn-scaff_20210_1-p136943 | Bn-N11-p8967220  | gene |      |
| Bn-scaff_20210_1-p161976 | Bn-N11-p8940075  | gene |      |
| Bn-scaff_20210_1-p162115 | Bn-N11-p8939936  | gene |      |
| Bn-scaff_20210_1-p166012 | Bn-N11-p8936002  | gene | exon |
| Bn-scaff_20210_1-p267408 | Bn-N11-p8844681  | gene |      |
| Bn-scaff_20210_1-p346419 | Bn-N11-p8743983  | gene |      |
| Bn-scaff_20210_1-p449263 | Bn-N11-p8662570  | gene | exon |
| Bn-scaff_20210_1-p457153 | Bn-N11-p8445894  | gene | exon |
| Bn-scaff_20210_1-p54473  | Bn-N15-p15894819 | gene | exon |
| Bn-scaff_20219_1-p148469 | Bn-N15-p45711100 | gene |      |
| Bn-scaff_20219_1-p148573 | Bn-N15-p45711204 | gene |      |
| Bn-scaff_20219_1-p148903 | Bn-N15-p45711535 | gene | exon |
| Bn-scaff_20219_1-p150787 | Bn-N15-p45713405 | gene |      |
| Bn-scaff_20219_1-p205790 | Bn-N15-p45768280 | gene |      |
| Bn-scaff_20219_1-p290323 | Bn-N15-p45863364 | gene | exon |

|                           |                  |      |      |
|---------------------------|------------------|------|------|
| Bn-scaff_20219_1-p290966  | Bn-N15-p45864005 | gene |      |
| Bn-scaff_20219_1-p305658  | Bn-N15-p45878877 | gene |      |
| Bn-scaff_20219_1-p308326  | Bn-N5-p24009932  | gene | exon |
| Bn-scaff_20219_1-p312051  | Bn-N5-p24013714  | gene |      |
| Bn-scaff_20219_1-p343155  | Bn-N15-p45916538 | gene |      |
| Bn-scaff_20219_1-p348628  | Bn-N5-p24043483  | gene | exon |
| Bn-scaff_20219_1-p361815  | Bn-N15-p45935030 | gene | exon |
| Bn-scaff_20219_1-p50731   | Bn-N15-p45652782 | gene | exon |
| Bn-scaff_20219_1-p50816   | Bn-N15-p45652867 | gene |      |
| Bn-scaff_20219_1-p52642   | Bn-N15-p45654698 | gene | exon |
| Bn-scaff_20219_1-p53873   | Bn-N15-p45655924 | gene |      |
| Bn-scaff_20221_1-p119381  | Bn-N2-p16942193  | gene | exon |
| Bn-scaff_20221_1-p119890  | Bn-N2-p16941684  | gene |      |
| Bn-scaff_20221_1-p131095  | Bn-N12-p24391258 | gene |      |
| Bn-scaff_20221_1-p132207  | Bn-N12-p24390141 | gene |      |
| Bn-scaff_20221_1-p65440   | Bn-N12-p24458135 | gene | exon |
| Bn-scaff_20221_1-p67938   | Bn-N12-p24455637 | gene | exon |
| Bn-scaff_20221_1-p67945   | Bn-N12-p24455630 | gene |      |
| Bn-scaff_20221_1-p75490   | Bn-N12-p24448351 | gene |      |
| Bn-scaff_20250_1-p190243  | Bn-N11-p18443406 | gene | exon |
| Bn-scaff_20250_1-p190957  | Bn-N11-p18444121 | gene |      |
| Bn-scaff_20250_1-p213668  | Bn-N1-p12057902  | gene | exon |
| Bn-scaff_20250_1-p252517  | Bn-N11-p18512204 | gene | exon |
| Bn-scaff_20250_1-p252691  | Bn-N11-p18512378 | gene |      |
| Bn-scaff_20250_1-p252716  | Bn-N11-p18512403 | gene |      |
| Bn-scaff_20250_1-p320616  | Bn-N11-p18582219 | gene |      |
| Bn-scaff_20250_1-p329601  | Bn-N11-p18590811 | gene |      |
| Bn-scaff_20250_1-p336475  | Bn-N11-p18597683 | gene |      |
| Bn-scaff_20250_1-p395260  | Bn-N11-p18664147 | gene | exon |
| Bn-scaff_20250_1-p402102  | Bn-N11-p18667636 | gene |      |
| Bn-scaff_20250_1-p402157  | Bn-N11-p18667691 | gene |      |
| Bn-scaff_20250_1-p402491  | Bn-N11-p18668026 | gene |      |
| Bn-scaff_20250_1-p436289  | Bn-N11-p18725128 | gene | exon |
| Bn-scaff_20250_2-p12010   | Bn-N11-p19090680 | gene | exon |
| Bn-scaff_20250_2-p12065   | Bn-N11-p19090625 | gene | exon |
| Bn-scaff_20250_2-p12470   | Bn-N11-p19090220 | gene |      |
| Bn-scaff_20250_2-p12556   | Bn-N11-p19090134 | gene |      |
| Bn-scaff_20250_2-p12794   | Bn-N11-p19089896 | gene | exon |
| Bn-scaff_20250_2-p129421  | Bn-N11-p18971342 | gene |      |
| Bn-scaff_20250_2-p255304  | Bn-N11-p18847629 | gene |      |
| Bn-scaff_20250_2-p255760  | Bn-N11-p18847174 | gene |      |
| Bn-scaff_20270_1-p1061064 | Bn-N15-p46530738 | gene |      |
| Bn-scaff_20270_1-p1070285 | Bn-N15-p46540304 | gene |      |
| Bn-scaff_20270_1-p1092399 | Bn-N15-p46560298 | gene | exon |
| Bn-scaff_20270_1-p1095989 | Bn-N15-p46563887 | gene |      |
| Bn-scaff_20270_1-p1172081 | Bn-N15-p46632104 | gene | exon |
| Bn-scaff_20270_1-p1199943 | Bn-N15-p46655991 | gene | exon |
| Bn-scaff_20270_1-p1293568 | Bn-N15-p46749035 | gene | exon |
| Bn-scaff_20270_1-p1299957 | Bn-N15-p46755424 | gene | exon |
| Bn-scaff_20270_1-p1300874 | Bn-N15-p46756341 | gene |      |
| Bn-scaff_20270_1-p1314298 | Bn-N15-p46771301 | gene |      |
| Bn-scaff_20270_1-p1323892 | Bn-N15-p46774545 | gene | exon |



|                           |                  |      |      |
|---------------------------|------------------|------|------|
| Bn-scaff_20270_1-p13443   | Bn-N14-p52418293 | gene | exon |
| Bn-scaff_20270_1-p138318  | Bn-N4-p19184632  | gene | exon |
| Bn-scaff_20270_1-p1440999 | Bn-N15-p46890058 | gene | exon |
| Bn-scaff_20270_1-p1446137 | Bn-N15-p46895185 | gene | exon |
| Bn-scaff_20270_1-p1477447 | Bn-N15-p46926548 | gene | exon |
| Bn-scaff_20270_1-p165323  | Bn-N14-p52555769 | gene | exon |
| Bn-scaff_20270_1-p166898  | Bn-N4-p19211540  | gene | exon |
| Bn-scaff_20270_1-p174459  | Bn-N4-p19215844  | gene | exon |
| Bn-scaff_20270_1-p210772  | Bn-N14-p52591333 | gene | exon |
| Bn-scaff_20270_1-p212224  | Bn-N14-p52592986 | gene |      |
| Bn-scaff_20270_1-p224871  | Bn-N4-p19251899  | gene |      |
| Bn-scaff_20270_1-p235987  | Bn-N14-p52615840 | gene |      |
| Bn-scaff_20270_1-p295928  | Bn-N14-p52676236 | gene | exon |
| Bn-scaff_20270_1-p331696  | Bn-N4-p19341283  | gene | exon |
| Bn-scaff_20270_1-p332105  | Bn-N14-p52713397 | gene |      |
| Bn-scaff_20270_1-p380914  | Bn-N14-p52764451 | gene |      |
| Bn-scaff_20270_1-p456204  | Bn-N14-p52836647 | gene | exon |
| Bn-scaff_20270_1-p48716   | Bn-N4-p19106207  | gene | exon |
| Bn-scaff_20270_1-p48789   | Bn-N14-p52446318 | gene | exon |
| Bn-scaff_20270_1-p546450  | Bn-N14-p52943567 | gene |      |
| Bn-scaff_20270_1-p619866  | Bn-N14-p53025585 | gene | exon |
| Bn-scaff_20270_1-p620404  | Bn-N14-p53026140 | gene |      |
| Bn-scaff_20270_1-p627168  | Bn-N14-p53042397 | gene | exon |
| Bn-scaff_20270_1-p632286  | Bn-N14-p53047526 | gene | exon |
| Bn-scaff_20270_1-p639601  | Bn-N4-p19599693  | gene |      |
| Bn-scaff_20270_1-p715501  | Bn-N14-p53139128 | gene | exon |
| Bn-scaff_20270_1-p721012  | Bn-N14-p53146116 | gene |      |
| Bn-scaff_20270_1-p73558   | Bn-N14-p52480958 | gene | exon |
| Bn-scaff_20270_1-p781490  | Bn-N14-p53217722 | gene | exon |
| Bn-scaff_20270_1-p792475  | Bn-N4-p19707997  | gene | exon |
| Bn-scaff_20270_1-p849122  | Bn-N14-p53269984 | gene | exon |
| Bn-scaff_20270_1-p881395  | Bn-N14-p53302363 | gene |      |
| Bn-scaff_20288_1-p281923  | Bn-N17-p10108964 | gene |      |
| Bn-scaff_20288_1-p283766  | Bn-N17-p10110806 | gene | exon |
| Bn-scaff_20288_1-p483106  | Bn-N17-p10287846 | gene | exon |
| Bn-scaff_20288_1-p514714  | Bn-N7-p4391875   | gene |      |
| Bn-scaff_20294_1-p235008  | Bn-N16-p37281702 | gene | exon |
| Bn-scaff_20294_1-p250512  | Bn-N16-p37266026 | gene | exon |
| Bn-scaff_20294_1-p250681  | Bn-N16-p37265857 | gene | exon |
| Bn-scaff_20294_1-p268948  | Bn-N16-p37247044 | gene | exon |
| Bn-scaff_20294_1-p269011  | Bn-N16-p37246981 | gene |      |
| Bn-scaff_20294_1-p269248  | Bn-N16-p37246743 | gene |      |
| Bn-scaff_20294_1-p269745  | Bn-N7-p22680960  | gene |      |
| Bn-scaff_20294_1-p303417  | Bn-N16-p37209378 | gene | exon |
| Bn-scaff_20294_1-p378164  | Bn-N16-p37150138 | gene |      |
| Bn-scaff_20294_1-p381496  | Bn-N16-p37146640 | gene |      |
| Bn-scaff_20294_1-p421716  | Bn-N16-p37107567 | gene | exon |
| Bn-scaff_20294_1-p421721  | Bn-N16-p37107567 | gene | exon |
| Bn-scaff_20294_1-p422419  | Bn-N16-p37106910 | gene |      |
| Bn-scaff_20294_1-p424857  | Bn-N16-p37104470 | gene |      |
| Bn-scaff_20320_1-p52767   | Bn-N11-p30326    | gene |      |
| Bn-scaff_20320_1-p82662   | Bn-N11-p11522    | gene | exon |

|                           |                         |      |      |
|---------------------------|-------------------------|------|------|
| Bn-scaff_20320_1-p83433   | Bn-N11-p10756           | gene |      |
| Bn-scaff_20354_1-p179456  | Bn-N19-p23209066        | gene | exon |
| Bn-scaff_20354_1-p211850  | Bn-N19-p23188406        | gene | exon |
| Bn-scaff_20354_1-p53124   | Bn-N9-p14374053         | gene | exon |
| Bn-scaff_20376_1-p121796  | Bn-N5-p24782347         | gene |      |
| Bn-scaff_20376_1-p168831  | Bn-N15-p47091056        | gene |      |
| Bn-scaff_20376_1-p218414  | Bn-N15-p47142137        | gene | exon |
| Bn-scaff_20376_1-p281604  | Bn-N15-p47190606        | gene | exon |
| Bn-scaff_20428_1-p133089  | Bn-N9-p7309234          | gene | exon |
| Bn-scaff_20428_1-p282411  | Bn-N3-p20559905         | gene |      |
| Bn-scaff_20428_1-p312666  | Bn-N19-p10751765        | gene |      |
| Bn-scaff_20428_1-p333831  | Bn-N9-p7144154          | gene | exon |
| Bn-scaff_20428_1-p33886   | Bn-N19-p11073861        | gene |      |
| Bn-scaff_20428_1-p360651  | Bn-N19-p10697114        | gene | exon |
| Bn-scaff_20428_1-p430947  | Bn-N19-p10637780        | gene |      |
| Bn-scaff_20428_1-p431113  | Bn-N19-p10637614        | gene |      |
| Bn-scaff_20452_1-p127374  | Bn-N1-p17350625         | gene | exon |
| Bn-scaff_20452_1-p306492  | Bn-N13-p37596567        | gene | exon |
| Bn-scaff_20452_1-p86850   | Bn-N11-p28668831        | gene | exon |
| Bn-scaff_20455_1-p42268   | Bn-N18-p39028943        | gene |      |
| Bn-scaff_20459_1-p120552  | Bn-N5-p18374898         | gene |      |
| Bn-scaff_20461_1-p110039  | Bn-N12-p11144164        | gene |      |
| Bn-scaff_20461_1-p178421  | Bn-N12-p11090200        | gene | exon |
| Bn-scaff_20461_1-p290320  | Bn-N2-p7449577          | gene | exon |
| Bn-scaff_20461_1-p314199  | Bn-N12-p10970256        | gene |      |
| Bn-scaff_20461_1-p321761  | Bn-N12-p10962541        | gene |      |
| Bn-scaff_20461_1-p322463  | Bn-N12-p10961860        | gene |      |
| Bn-scaff_20461_1-p324935  | Bn-N12-p10959356        | gene | exon |
| Bn-scaff_20462_1-p27589   | Bn-Scaffold00938-p9622  | gene | exon |
| Bn-scaff_20478_1-p149392  | Bn-Scaffold09318-p156   | gene | exon |
| Bn-scaff_20478_1-p334940  | Bn-N9-p10494796         | gene | exon |
| Bn-scaff_20478_1-p54432   | Bn-N11-p25522556        | gene | exon |
| Bn-scaff_20497_1-p71596   | Bn-N18-p17173466        | gene | exon |
| Bn-scaff_20497_1-p71756   | Bn-N18-p17173626        | gene |      |
| Bn-scaff_20497_1-p95468   | Bn-N18-p17197659        | gene |      |
| Bn-scaff_20567_1-p320309  | Bn-N14-p21131303        | gene | exon |
| Bn-scaff_20567_1-p336974  | Bn-N14-p24386958        | gene | exon |
| Bn-scaff_20567_1-p347036  | Bn-N14-p24377241        | gene | exon |
| Bn-scaff_20567_1-p64644   | Bn-N14-p24654358        | gene | exon |
| Bn-scaff_20619_1-p210474  | Bn-N19-p36548416        | gene | exon |
| Bn-scaff_20619_1-p210599  | Bn-N10-p6006657         | gene |      |
| Bn-scaff_20619_1-p316049  | Bn-N19-p36422167        | gene |      |
| Bn-scaff_20619_1-p451147  | Bn-Scaffold01071-p27045 | gene | exon |
| Bn-scaff_20619_1-p467200  | Bn-N6-p14520754         | gene | exon |
| Bn-scaff_20619_1-p58311   | Bn-N10-p6068898         | gene | exon |
| Bn-scaff_20619_1-p693773  | Bn-N19-p36134261        | gene | exon |
| Bn-scaff_20638_1-p142399  | Bn-N1-p6663773          | gene | exon |
| Bn-scaff_20646_1-p1065920 | Bn-N13-p19519392        | gene |      |
| Bn-scaff_20646_1-p1066305 | Bn-N13-p19519007        | gene |      |
| Bn-scaff_20646_1-p1111352 | Bn-N3-p12859685         | gene | exon |
| Bn-scaff_20646_1-p207297  | Bn-N13-p20409850        | gene |      |
| Bn-scaff_20646_1-p208091  | Bn-N13-p20409055        | gene |      |

|                          |                       |      |      |
|--------------------------|-----------------------|------|------|
| Bn-scaff_20646_1-p299775 | Bn-N13-p20314379      | gene | exon |
| Bn-scaff_20646_1-p299890 | Bn-N13-p20314264      | gene |      |
| Bn-scaff_20646_1-p300084 | Bn-N13-p20314070      | gene |      |
| Bn-scaff_20646_1-p300270 | Bn-N13-p20313884      | gene |      |
| Bn-scaff_20646_1-p317660 | Bn-N13-p20291245      | gene | exon |
| Bn-scaff_20646_1-p348861 | Bn-N13-p20263967      | gene |      |
| Bn-scaff_20646_1-p397340 | Bn-N13-p20156123      | gene |      |
| Bn-scaff_20646_1-p463899 | Bn-N13-p20094248      | gene |      |
| Bn-scaff_20646_1-p464029 | Bn-N13-p20094118      | gene |      |
| Bn-scaff_20646_1-p495036 | Bn-N13-p20062887      | gene | exon |
| Bn-scaff_20646_1-p498394 | Bn-N13-p20059530      | gene |      |
| Bn-scaff_20646_1-p564345 | Bn-N13-p19998674      | gene |      |
| Bn-scaff_20646_1-p580318 | Bn-N13-p51801267      | gene | exon |
| Bn-scaff_20646_1-p583921 | Bn-N13-p19981444      | gene | exon |
| Bn-scaff_20646_1-p584496 | Bn-N13-p19980881      | gene | exon |
| Bn-scaff_20646_1-p586003 | Bn-N13-p19979374      | gene | exon |
| Bn-scaff_20646_1-p634009 | Bn-N13-p19941602      | gene | exon |
| Bn-scaff_20646_1-p634317 | Bn-N13-p19941294      | gene |      |
| Bn-scaff_20646_1-p634413 | Bn-N13-p19941198      | gene |      |
| Bn-scaff_20646_1-p635083 | Bn-N19-p27002105      | gene |      |
| Bn-scaff_20646_1-p635267 | Bn-N9-p17084790       | gene | exon |
| Bn-scaff_20646_1-p639709 | Bn-N13-p19936061      | gene | exon |
| Bn-scaff_20646_1-p639773 | Bn-N13-p19935997      | gene | exon |
| Bn-scaff_20646_1-p639860 | Bn-N13-p19935910      | gene | exon |
| Bn-scaff_20646_1-p644913 | Bn-N13-p19930875      | gene |      |
| Bn-scaff_20646_1-p675326 | Bn-N13-p19900213      | gene |      |
| Bn-scaff_20646_1-p675506 | Bn-N13-p19900033      | gene | exon |
| Bn-scaff_20646_1-p677020 | Bn-N13-p19898518      | gene | exon |
| Bn-scaff_20646_1-p702004 | Bn-N13-p19879529      | gene | exon |
| Bn-scaff_20646_1-p714994 | Bn-N13-p19867153      | gene |      |
| Bn-scaff_20646_1-p715363 | Bn-N13-p19866786      | gene |      |
| Bn-scaff_20646_1-p730848 | Bn-N13-p19850395      | gene |      |
| Bn-scaff_20646_1-p735337 | Bn-N13-p19845918      | gene | exon |
| Bn-scaff_20646_1-p748599 | Bn-N13-p19832946      | gene | exon |
| Bn-scaff_20646_1-p764847 | Bn-N13-p19816227      | gene |      |
| Bn-scaff_20646_1-p926102 | Bn-N13-p19656997      | gene |      |
| Bn-scaff_20646_1-p930628 | Bn-N17-p7028343       | gene | exon |
| Bn-scaff_20666_1-p54157  | Bn-N19-p34549996      | gene | exon |
| Bn-scaff_20675_1-p149133 | Bn-N11-p10147936      | gene |      |
| Bn-scaff_20675_1-p156163 | Bn-N11-p10139855      | gene |      |
| Bn-scaff_20675_1-p159903 | Bn-N11-p10118131      | gene | exon |
| Bn-scaff_20675_1-p160003 | Bn-N11-p10118032      | gene | exon |
| Bn-scaff_20675_1-p52417  | Bn-N11-p10239767      | gene |      |
| Bn-scaff_20675_1-p61871  | Bn-N11-p10230319      | gene | exon |
| Bn-scaff_20675_1-p93956  | Bn-N1-p6911520        | gene | exon |
| Bn-scaff_20675_1-p94966  | Bn-N1-p6910541        | gene | exon |
| Bn-scaff_20675_1-p95063  | Bn-N11-p10196641      | gene |      |
| Bn-scaff_20675_1-p98663  | Bn-N1-p6907200        | gene | exon |
| Bn-scaff_20676_1-p189015 | Bn-Scaffold04835-p328 | gene | exon |
| Bn-scaff_20676_1-p189097 | Bn-Scaffold04835-p374 | gene |      |
| Bn-scaff_20676_1-p189507 | Bn-Scaffold04835-p373 | gene |      |
| Bn-scaff_20676_1-p435529 | Bn-N14-p29185922      | gene |      |

|                          |                        |      |      |
|--------------------------|------------------------|------|------|
| Bn-scaff_20732_1-p9422   | Bn-N12-p31100503       | gene |      |
| Bn-scaff_20732_1-p9483   | Bn-N12-p31100564       | gene |      |
| Bn-scaff_20735_1-p4627   | Bn-N2-p12708394        | gene | exon |
| Bn-scaff_20741_1-p20543  | Bn-N3-p13800648        | gene |      |
| Bn-scaff_20741_1-p20982  | Bn-N3-p13801088        | gene | exon |
| Bn-scaff_20773_1-p121051 | Bn-N16-p5778184        | gene |      |
| Bn-scaff_20773_1-p123341 | Bn-N16-p5775959        | gene |      |
| Bn-scaff_20773_1-p153100 | Bn-N16-p5750855        | gene |      |
| Bn-scaff_20773_1-p155178 | Bn-N6-p1213095         | gene | exon |
| Bn-scaff_20773_1-p332944 | Bn-N16-p5529879        | gene |      |
| Bn-scaff_20773_1-p339705 | Bn-N16-p5518436        | gene |      |
| Bn-scaff_20773_1-p424697 | Bn-N16-p5440718        | gene |      |
| Bn-scaff_20773_1-p472229 | Bn-N16-p5368962        | gene |      |
| Bn-scaff_20773_1-p566178 | Bn-N6-p1360692         | gene | exon |
| Bn-scaff_20790_1-p102313 | Bn-N13-p52573037       | gene | exon |
| Bn-scaff_20790_1-p102558 | Bn-N13-p52572792       | gene | exon |
| Bn-scaff_20790_1-p103526 | Bn-N13-p52571825       | gene |      |
| Bn-scaff_20790_1-p259929 | Bn-N8-p17093491        | gene |      |
| Bn-scaff_20790_1-p259991 | Bn-N8-p17093554        | gene |      |
| Bn-scaff_20790_1-p261248 | Bn-N13-p52461375       | gene |      |
| Bn-scaff_20790_1-p264415 | Bn-N8-p17098025        | gene |      |
| Bn-scaff_20790_1-p268409 | Bn-N8-p17104166        | gene | exon |
| Bn-scaff_20790_1-p3436   | Bn-N13-p52659189       | gene |      |
| Bn-scaff_20796_1-p137393 | Bn-N6-p23377863        | gene | exon |
| Bn-scaff_20796_1-p148168 | Bn-N18-p1550138        | gene | exon |
| Bn-scaff_20796_1-p34573  | Bn-N18-p1454470        | gene |      |
| Bn-scaff_20796_1-p69576  | Bn-N8-p21071372        | gene |      |
| Bn-scaff_20804_1-p178251 | Bn-N14-p50671270       | gene | exon |
| Bn-scaff_20804_1-p180229 | Bn-N14-p50669290       | gene |      |
| Bn-scaff_20804_1-p180721 | Bn-N14-p50668798       | gene |      |
| Bn-scaff_20804_1-p180953 | Bn-N14-p50668572       | gene |      |
| Bn-scaff_20804_1-p181022 | Bn-N14-p50668503       | gene |      |
| Bn-scaff_20804_1-p60629  | Bn-N14-p50793904       | gene | exon |
| Bn-scaff_20804_1-p84419  | Bn-N14-p50767485       | gene | exon |
| Bn-scaff_20804_1-p84899  | Bn-N14-p50767009       | gene | exon |
| Bn-scaff_20804_1-p85446  | Bn-N14-p50766462       | gene | exon |
| Bn-scaff_20804_1-p9294   | Bn-N14-p50850535       | gene |      |
| Bn-scaff_20807_1-p104549 | Bn-N7-p18188389        | gene | exon |
| Bn-scaff_20809_1-p116777 | Bn-N2-p11021459        | gene |      |
| Bn-scaff_20809_1-p163800 | Bn-N18-p1332183        | gene |      |
| Bn-scaff_20809_1-p164232 | Bn-N18-p1332616        | gene |      |
| Bn-scaff_20809_1-p164254 | Bn-N18-p1332638        | gene |      |
| Bn-scaff_20809_1-p164312 | Bn-N18-p1332696        | gene |      |
| Bn-scaff_20809_1-p47064  | Bn-N2-p10966418        | gene |      |
| Bn-scaff_20809_1-p48762  | Bn-N2-p10968196        | gene | exon |
| Bn-scaff_20809_1-p64287  | Bn-Scaffold01727-p3326 | gene |      |
| Bn-scaff_20809_1-p74433  | Bn-N15-p48526971       | gene | exon |
| Bn-scaff_20814_1-p251867 | Bn-N4-p6139904         | gene | exon |
| Bn-scaff_20817_1-p50242  | Bn-N14-p54860544       | gene | exon |
| Bn-scaff_20817_1-p51382  | Bn-N14-p54861691       | gene | exon |
| Bn-scaff_20817_1-p60579  | Bn-N14-p54875333       | gene |      |
| Bn-scaff_20819_1-p3631   | Bn-N17-p20788038       | gene | exon |

|                           |                         |      |      |
|---------------------------|-------------------------|------|------|
| Bn-scaff_20830_1-p183301  | Bn-N11-p8191138         | gene | exon |
| Bn-scaff_20830_1-p60025   | Bn-N18-p7445903         | gene | exon |
| Bn-scaff_20830_1-p61135   | Bn-N18-p7447048         | gene | exon |
| Bn-scaff_20835_1-p2147    | Bn-N10-p12928517        | gene | exon |
| Bn-scaff_20836_1-p134452  | Bn-N19-p16713395        | gene | exon |
| Bn-scaff_20836_1-p19306   | Bn-N19-p16834690        | gene |      |
| Bn-scaff_20836_1-p30574   | Bn-Scaffold00776-p85614 | gene | exon |
| Bn-scaff_20838_1-p221095  | Bn-N1-p26938766         | gene | exon |
| Bn-scaff_20866_1-p108216  | Bn-N16-p3539235         | gene | exon |
| Bn-scaff_20866_1-p111789  | Bn-N16-p3535662         | gene | exon |
| Bn-scaff_20881_1-p11760   | Bn-N13-p50056419        | gene | exon |
| Bn-scaff_20901_1-p1088726 | Bn-N6-p2850541          | gene | exon |
| Bn-scaff_20901_1-p1103224 | Bn-N15-p3192152         | gene | exon |
| Bn-scaff_20901_1-p1110262 | Bn-N15-p3182631         | gene |      |
| Bn-scaff_20901_1-p1210835 | Bn-N15-p3041443         | gene | exon |
| Bn-scaff_20901_1-p1220930 | Bn-N15-p3037969         | gene |      |
| Bn-scaff_20901_1-p1246467 | Bn-N15-p3018062         | gene |      |
| Bn-scaff_20901_1-p1247459 | Bn-N15-p3017053         | gene |      |
| Bn-scaff_20901_1-p1311264 | Bn-N15-p2960014         | gene |      |
| Bn-scaff_20901_1-p1505546 | Bn-N15-p2779513         | gene | exon |
| Bn-scaff_20901_1-p1506172 | Bn-N15-p2778888         | gene | exon |
| Bn-scaff_20901_1-p1509958 | Bn-N15-p2775101         | gene |      |
| Bn-scaff_20901_1-p1510247 | Bn-N15-p2774812         | gene |      |
| Bn-scaff_20901_1-p1510260 | Bn-N15-p2774798         | gene |      |
| Bn-scaff_20901_1-p1537914 | Bn-N15-p2750972         | gene |      |
| Bn-scaff_20901_1-p1577315 | Bn-N10-p2995296         | gene | exon |
| Bn-scaff_20901_1-p1587058 | Bn-N10-p2984141         | gene | exon |
| Bn-scaff_20901_1-p1613836 | Bn-N15-p2654630         | gene |      |
| Bn-scaff_20901_1-p1621648 | Bn-N15-p2645608         | gene |      |
| Bn-scaff_20901_1-p1641268 | Bn-N15-p2625197         | gene |      |
| Bn-scaff_20901_1-p1674359 | Bn-N15-p2591939         | gene |      |
| Bn-scaff_20901_1-p1681305 | Bn-N15-p2578161         | gene |      |
| Bn-scaff_20901_1-p1705574 | Bn-N15-p2559070         | gene |      |
| Bn-scaff_20901_1-p1719394 | Bn-N15-p2543657         | gene | exon |
| Bn-scaff_20901_1-p1736256 | Bn-N15-p2529890         | gene | exon |
| Bn-scaff_20901_1-p1743515 | Bn-N15-p2522639         | gene | exon |
| Bn-scaff_20901_1-p1761960 | Bn-N15-p2503978         | gene |      |
| Bn-scaff_20901_1-p1765503 | Bn-N15-p2500520         | gene |      |
| Bn-scaff_20901_1-p1783054 | Bn-N15-p2484324         | gene |      |
| Bn-scaff_20901_1-p1783385 | Bn-N15-p2483993         | gene | exon |
| Bn-scaff_20901_1-p1783641 | Bn-N15-p2483737         | gene |      |
| Bn-scaff_20901_1-p2013546 | Bn-N15-p2257895         | gene |      |
| Bn-scaff_20901_1-p2018350 | Bn-N10-p2344219         | gene | exon |
| Bn-scaff_20901_1-p2019548 | Bn-N18-p43666543        | gene | exon |
| Bn-scaff_20901_1-p2029631 | Bn-N15-p2241803         | gene |      |
| Bn-scaff_20901_1-p2081837 | Bn-N15-p2189731         | gene | exon |
| Bn-scaff_20901_1-p2096370 | Bn-N15-p2176308         | gene |      |
| Bn-scaff_20901_1-p2125331 | Bn-N15-p2143706         | gene |      |
| Bn-scaff_20901_1-p276384  | Bn-N15-p4072410         | gene |      |
| Bn-scaff_20901_1-p345310  | Bn-N15-p4007948         | gene |      |
| Bn-scaff_20901_1-p348242  | Bn-N15-p4005029         | gene |      |
| Bn-scaff_20901_1-p365032  | Bn-Scaffold09732-p367   | gene |      |

|                           |                        |      |      |
|---------------------------|------------------------|------|------|
| Bn-scaff_20901_1-p380645  | Bn-N15-p3967277        | gene |      |
| Bn-scaff_20901_1-p403764  | Bn-N15-p3940028        | gene |      |
| Bn-scaff_20901_1-p449219  | Bn-N15-p3895910        | gene | exon |
| Bn-scaff_20901_1-p449884  | Bn-N15-p3830247        | gene | exon |
| Bn-scaff_20901_1-p566912  | Bn-N6-p3241905         | gene |      |
| Bn-scaff_20901_1-p58099   | Bn-N6-p3615757         | gene | exon |
| Bn-scaff_20901_1-p58670   | Bn-N15-p4275661        | gene | exon |
| Bn-scaff_20901_1-p597476  | Bn-N15-p3728694        | gene |      |
| Bn-scaff_20901_1-p653379  | Bn-N15-p3671327        | gene | exon |
| Bn-scaff_20901_1-p653492  | Bn-N15-p3671214        | gene |      |
| Bn-scaff_20901_1-p656470  | Bn-N15-p3668206        | gene |      |
| Bn-scaff_20901_1-p857332  | Bn-N15-p3459894        | gene |      |
| Bn-scaff_20901_1-p870589  | Bn-N18-p42922857       | gene | exon |
| Bn-scaff_20901_1-p875264  | Bn-N15-p3441990        | gene | exon |
| Bn-scaff_20901_1-p879369  | Bn-N15-p3436207        | gene |      |
| Bn-scaff_20901_1-p880825  | Bn-N15-p3434747        | gene |      |
| Bn-scaff_20901_1-p882135  | Bn-N15-p3433436        | gene |      |
| Bn-scaff_20901_1-p884877  | Bn-N6-p3020188         | gene | exon |
| Bn-scaff_20901_1-p890950  | Bn-N15-p3419558        | gene |      |
| Bn-scaff_20901_1-p894349  | Bn-N15-p3416186        | gene |      |
| Bn-scaff_20901_1-p900299  | Bn-N15-p3409513        | gene |      |
| Bn-scaff_20901_1-p948057  | Bn-N15-p3365432        | gene |      |
| Bn-scaff_20901_1-p948373  | Bn-N15-p3365116        | gene |      |
| Bn-scaff_20901_1-p950532  | Bn-N15-p3362946        | gene | exon |
| Bn-scaff_20901_1-p950607  | Bn-N15-p3362870        | gene | exon |
| Bn-scaff_20901_1-p951018  | Bn-N15-p3362460        | gene | exon |
| Bn-scaff_20901_1-p951365  | Bn-N6-p2981706         | gene | exon |
| Bn-scaff_20901_1-p990137  | Bn-N15-p3319836        | gene |      |
| Bn-scaff_20903_1-p264678  | Bn-N19-p21035135       | gene |      |
| Bn-scaff_20903_1-p379070  | Bn-N19-p21159907       | gene |      |
| Bn-scaff_20903_1-p380659  | Bn-N19-p21161317       | gene |      |
| Bn-scaff_20903_1-p38574   | Bn-N19-p20886726       | gene |      |
| Bn-scaff_20903_1-p398892  | Bn-N9-p13270452        | gene | exon |
| Bn-scaff_20903_1-p456556  | Bn-N19-p21260985       | gene |      |
| Bn-scaff_20942_1-p1093417 | Bn-Scaffold01396-p6634 | gene | exon |
| Bn-scaff_20942_1-p149203  | Bn-N2-p8241339         | gene | exon |
| Bn-scaff_20942_1-p21122   | Bn-N12-p12587564       | gene |      |
| Bn-scaff_20942_1-p246578  | Bn-N12-p12397263       | gene | exon |
| Bn-scaff_20942_1-p393532  | Bn-N12-p12257251       | gene | exon |
| Bn-scaff_20942_1-p440106  | Bn-N12-p12209928       | gene | exon |
| Bn-scaff_20942_1-p446103  | Bn-N2-p8093488         | gene |      |
| Bn-scaff_20942_1-p453076  | Bn-N18-p35724879       | gene |      |
| Bn-scaff_20942_1-p460319  | Bn-N12-p12128747       | gene | exon |
| Bn-scaff_20942_1-p526744  | Bn-N2-p8076681         | gene | exon |
| Bn-scaff_20942_1-p604955  | Bn-N12-p12111703       | gene |      |
| Bn-scaff_20942_1-p607399  | Bn-N2-p8034681         | gene | exon |
| Bn-scaff_20942_1-p655677  | Bn-N2-p8013649         | gene |      |
| Bn-scaff_20942_1-p672835  | Bn-N2-p8007110         | gene |      |
| Bn-scaff_20942_1-p694535  | Bn-N12-p12037899       | gene | exon |
| Bn-scaff_20942_1-p695512  | Bn-N2-p7996421         | gene | exon |
| Bn-scaff_20942_1-p734832  | Bn-N12-p12009928       | gene | exon |
| Bn-scaff_20947_1-p127456  | Bn-N18-p42693789       | gene | exon |

|                          |                  |      |      |
|--------------------------|------------------|------|------|
| Bn-scaff_20947_1-p146378 | Bn-N18-p42675828 | gene | exon |
| Bn-scaff_20947_1-p146783 | Bn-N18-p42675423 | gene | exon |
| Bn-scaff_20947_1-p197588 | Bn-N9-p38632400  | gene |      |
| Bn-scaff_20947_1-p327211 | Bn-N16-p37460436 | gene | exon |
| Bn-scaff_20947_1-p89554  | Bn-N18-p42722177 | gene | exon |
| Bn-scaff_20972_1-p21129  | Bn-N19-p37834983 | gene | exon |
| Bn-scaff_20979_1-p456432 | Bn-N12-p16423990 | gene |      |
| Bn-scaff_20979_1-p624297 | Bn-N12-p16334057 | gene | exon |
| Bn-scaff_21003_1-p457127 | Bn-N18-p4698077  | gene | exon |
| Bn-scaff_21003_1-p457723 | Bn-N18-p4697479  | gene | exon |
| Bn-scaff_21003_1-p567379 | Bn-N18-p4826429  | gene | exon |
| Bn-scaff_21003_1-p647095 | Bn-N18-p4552442  | gene |      |
| Bn-scaff_21003_1-p647723 | Bn-N18-p4551814  | gene |      |
| Bn-scaff_21003_1-p655968 | Bn-N18-p4535731  | gene |      |
| Bn-scaff_21003_1-p659725 | Bn-N18-p4531763  | gene |      |
| Bn-scaff_21003_1-p703369 | Bn-N18-p36861249 | gene | exon |
| Bn-scaff_21015_1-p89425  | Bn-N5-p19376008  | gene | exon |
| Bn-scaff_21018_1-p138540 | Bn-N16-p40670655 | gene |      |
| Bn-scaff_21018_1-p24333  | Bn-N16-p40782147 | gene |      |
| Bn-scaff_21034_1-p41433  | Bn-N12-p19884200 | gene |      |
| Bn-scaff_21124_1-p142833 | Bn-N15-p41666095 | gene |      |
| Bn-scaff_21124_1-p174942 | Bn-N15-p41694030 | gene |      |
| Bn-scaff_21124_1-p175003 | Bn-N15-p41694092 | gene | exon |
| Bn-scaff_21124_1-p212889 | Bn-N15-p41721636 | gene | exon |
| Bn-scaff_21124_1-p215984 | Bn-N15-p41724790 | gene | exon |
| Bn-scaff_21124_1-p216517 | Bn-N15-p41725520 | gene | exon |
| Bn-scaff_21124_1-p216889 | Bn-N15-p41725892 | gene |      |
| Bn-scaff_21124_1-p242605 | Bn-N15-p41749822 | gene | exon |
| Bn-scaff_21124_1-p242718 | Bn-N15-p41749935 | gene | exon |
| Bn-scaff_21124_1-p298134 | Bn-N15-p41807557 | gene |      |
| Bn-scaff_21124_1-p324211 | Bn-N15-p41833428 | gene | exon |
| Bn-scaff_21124_1-p375749 | Bn-N15-p41876130 | gene | exon |
| Bn-scaff_21131_1-p149854 | Bn-N12-p32595538 | gene |      |
| Bn-scaff_21131_1-p245633 | Bn-N16-p783965   | gene | exon |
| Bn-scaff_21131_1-p266157 | Bn-N12-p32780832 | gene | exon |
| Bn-scaff_21131_1-p266236 | Bn-N12-p32780911 | gene | exon |
| Bn-scaff_21131_1-p284044 | Bn-N12-p32786130 | gene | exon |
| Bn-scaff_21131_1-p49530  | Bn-N12-p32545937 | gene |      |
| Bn-scaff_21131_1-p95520  | Bn-N2-p20227170  | gene |      |
| Bn-scaff_21138_1-p17277  | Bn-N14-p23067688 | gene | exon |
| Bn-scaff_21163_1-p3558   | Bn-N11-p33872015 | gene | exon |
| Bn-scaff_21163_1-p4255   | Bn-N11-p33871318 | gene | exon |
| Bn-scaff_21182_1-p42780  | Bn-N18-p2799672  | gene | exon |
| Bn-scaff_21186_1-p132310 | Bn-N14-p49841274 | gene | exon |
| Bn-scaff_21186_1-p153195 | Bn-N14-p49823185 | gene |      |
| Bn-scaff_21186_1-p153520 | Bn-N14-p49822860 | gene | exon |
| Bn-scaff_21186_1-p153890 | Bn-N14-p49822458 | gene | exon |
| Bn-scaff_21186_1-p220377 | Bn-N14-p49731821 | gene |      |
| Bn-scaff_21186_1-p220456 | Bn-N14-p49731742 | gene | exon |
| Bn-scaff_21186_1-p54820  | Bn-N14-p49930428 | gene |      |
| Bn-scaff_21188_1-p10781  | Bn-N8-p8747641   | gene | exon |
| Bn-scaff_21188_1-p10848  | Bn-N8-p8747574   | gene |      |

|                           |                  |      |      |
|---------------------------|------------------|------|------|
| Bn-scaff_21198_1-p161305  | Bn-N4-p13975906  | gene | exon |
| Bn-scaff_21198_1-p220051  | Bn-N4-p14007604  | gene | exon |
| Bn-scaff_21198_1-p220428  | Bn-N14-p45632314 | gene | exon |
| Bn-scaff_21198_1-p229395  | Bn-N14-p45639815 | gene | exon |
| Bn-scaff_21198_1-p231017  | Bn-N14-p45640998 | gene |      |
| Bn-scaff_21198_1-p233297  | Bn-N14-p45643592 | gene | exon |
| Bn-scaff_21198_1-p233432  | Bn-N14-p45643728 | gene |      |
| Bn-scaff_21198_1-p238719  | Bn-N14-p45649019 | gene | exon |
| Bn-scaff_21198_1-p238734  | Bn-N14-p45649034 | gene | exon |
| Bn-scaff_21198_1-p24520   | Bn-N16-p15179014 | gene |      |
| Bn-scaff_21198_1-p34568   | Bn-N16-p15166362 | gene |      |
| Bn-scaff_21198_1-p64964   | Bn-N16-p15129517 | gene | exon |
| Bn-scaff_21224_1-p114755  | Bn-N12-p10940245 | gene | exon |
| Bn-scaff_21224_1-p57955   | Bn-N12-p10876408 | gene |      |
| Bn-scaff_21224_1-p61539   | Bn-N12-p10879962 | gene |      |
| Bn-scaff_21225_1-p104810  | Bn-N11-p35702743 | gene |      |
| Bn-scaff_21225_1-p53803   | Bn-N1-p21306157  | gene | exon |
| Bn-scaff_21225_1-p74961   | Bn-N11-p35731746 | gene |      |
| Bn-scaff_21250_1-p212592  | Bn-N2-p6658067   | gene |      |
| Bn-scaff_21250_1-p410732  | Bn-N8-p8618284   | gene |      |
| Bn-scaff_21250_1-p452389  | Bn-N18-p15474566 | gene |      |
| Bn-scaff_21261_1-p117005  | Bn-N13-p31843078 | gene | exon |
| Bn-scaff_21261_1-p98385   | Bn-N12-p8470672  | gene | exon |
| Bn-scaff_21268_1-p121804  | Bn-N17-p27593979 | gene | exon |
| Bn-scaff_21268_1-p122084  | Bn-N17-p27593699 | gene | exon |
| Bn-scaff_21268_1-p193486  | Bn-N6-p24887152  | gene | exon |
| Bn-scaff_21269_1-p118949  | Bn-N9-p38917939  | gene |      |
| Bn-scaff_21269_1-p120803  | Bn-N9-p38919535  | gene |      |
| Bn-scaff_21269_1-p121333  | Bn-N18-p42958167 | gene | exon |
| Bn-scaff_21269_1-p121394  | Bn-N18-p42958228 | gene | exon |
| Bn-scaff_21269_1-p123559  | Bn-N18-p42960383 | gene |      |
| Bn-scaff_21269_1-p140454  | Bn-N18-p42977027 | gene |      |
| Bn-scaff_21269_1-p143806  | Bn-N18-p42980380 | gene |      |
| Bn-scaff_21269_1-p204828  | Bn-N18-p43035968 | gene |      |
| Bn-scaff_21269_1-p285510  | Bn-N9-p39033855  | gene | exon |
| Bn-scaff_21269_1-p295000  | Bn-N18-p43104061 | gene | exon |
| Bn-scaff_21269_1-p295012  | Bn-N18-p43104072 | gene | exon |
| Bn-scaff_21269_1-p295511  | Bn-N9-p39045207  | gene | exon |
| Bn-scaff_21269_1-p306028  | Bn-N18-p43114848 | gene | exon |
| Bn-scaff_21269_1-p309569  | Bn-N18-p43118388 | gene |      |
| Bn-scaff_21269_1-p311160  | Bn-N18-p43120013 | gene |      |
| Bn-scaff_21269_1-p313587  | Bn-N18-p43123724 | gene |      |
| Bn-scaff_21269_1-p355848  | Bn-N9-p39140227  | gene | exon |
| Bn-scaff_21269_1-p83142   | Bn-N18-p42923160 | gene | exon |
| Bn-scaff_21269_1-p83280   | Bn-N18-p42923298 | gene | exon |
| Bn-scaff_21271_1-p17516   | Bn-N8-p9790938   | gene | exon |
| Bn-scaff_21276_1-p302391  | Bn-N19-p42708708 | gene | exon |
| Bn-scaff_21276_1-p303670  | Bn-N19-p42709986 | gene | exon |
| Bn-scaff_21276_1-p378246  | Bn-N19-p42792757 | gene | exon |
| Bn-scaff_21276_1-p574134  | Bn-N10-p9841852  | gene |      |
| Bn-scaff_21312_1-p102482  | Bn-N13-p11712804 | gene |      |
| Bn-scaff_21312_1-p1111796 | Bn-N3-p7744963   | gene |      |



|                           |                  |      |      |
|---------------------------|------------------|------|------|
| Bn-scaff_21312_1-p1156786 | Bn-N3-p7706124   | gene | exon |
| Bn-scaff_21312_1-p1206659 | Bn-N13-p10664194 | gene | exon |
| Bn-scaff_21312_1-p1341908 | Bn-N3-p7567467   | gene | exon |
| Bn-scaff_21312_1-p1343069 | Bn-N3-p7566310   | gene |      |
| Bn-scaff_21312_1-p321858  | Bn-N3-p8201584   | gene | exon |
| Bn-scaff_21312_1-p323300  | Bn-N3-p8199447   | gene | exon |
| Bn-scaff_21312_1-p538444  | Bn-N13-p11345362 | gene |      |
| Bn-scaff_21312_1-p546514  | Bn-N13-p11337265 | gene |      |
| Bn-scaff_21312_1-p662797  | Bn-N3-p8068851   | gene | exon |
| Bn-scaff_21312_1-p694502  | Bn-N13-p11190096 | gene | exon |
| Bn-scaff_21312_1-p895326  | Bn-N13-p11000650 | gene |      |
| Bn-scaff_21312_1-p90644   | Bn-N3-p8359139   | gene | exon |
| Bn-scaff_21312_1-p932709  | Bn-N3-p7886666   | gene |      |
| Bn-scaff_21338_1-p1040635 | Bn-N15-p13723909 | gene | exon |
| Bn-scaff_21338_1-p1135741 | Bn-N15-p13826354 | gene |      |
| Bn-scaff_21338_1-p1153932 | Bn-N15-p13833175 | gene |      |
| Bn-scaff_21338_1-p1154261 | Bn-N15-p13833504 | gene | exon |
| Bn-scaff_21338_1-p1193458 | Bn-N15-p13863790 | gene | exon |
| Bn-scaff_21338_1-p1193513 | Bn-N15-p13863845 | gene | exon |
| Bn-scaff_21338_1-p1193631 | Bn-N15-p13863925 | gene | exon |
| Bn-scaff_21338_1-p1197350 | Bn-N15-p13876547 | gene | exon |
| Bn-scaff_21338_1-p1197474 | Bn-N15-p13876671 | gene |      |
| Bn-scaff_21338_1-p1197568 | Bn-N15-p13876765 | gene | exon |
| Bn-scaff_21338_1-p1205110 | Bn-N15-p13885042 | gene |      |
| Bn-scaff_21338_1-p151286  | Bn-N15-p12739234 | gene |      |
| Bn-scaff_21338_1-p18825   | Bn-N15-p12605534 | gene |      |
| Bn-scaff_21338_1-p215493  | Bn-N15-p12808370 | gene | exon |
| Bn-scaff_21338_1-p22459   | Bn-N15-p12609502 | gene |      |
| Bn-scaff_21338_1-p22879   | Bn-N15-p12609922 | gene |      |
| Bn-scaff_21338_1-p340741  | Bn-N18-p31064837 | gene | exon |
| Bn-scaff_21338_1-p359394  | Bn-N9-p27254675  | gene | exon |
| Bn-scaff_21338_1-p359709  | Bn-N9-p27252711  | gene |      |
| Bn-scaff_21338_1-p363564  | Bn-N15-p12967600 | gene | exon |
| Bn-scaff_21338_1-p513997  | Bn-N15-p13119574 | gene |      |
| Bn-scaff_21338_1-p514119  | Bn-N15-p13119696 | gene |      |
| Bn-scaff_21338_1-p514135  | Bn-N15-p13119712 | gene |      |
| Bn-scaff_21338_1-p514411  | Bn-N15-p13119991 | gene |      |
| Bn-scaff_21338_1-p514512  | Bn-N15-p13120078 | gene |      |
| Bn-scaff_21338_1-p567819  | Bn-N15-p13204443 | gene |      |
| Bn-scaff_21338_1-p607624  | Bn-N15-p13267341 | gene | exon |
| Bn-scaff_21338_1-p669221  | Bn-N15-p13339354 | gene | exon |
| Bn-scaff_21338_1-p687350  | Bn-N15-p13358719 | gene |      |
| Bn-scaff_21338_1-p760251  | Bn-N15-p13420022 | gene |      |
| Bn-scaff_21338_1-p782134  | Bn-N15-p13441585 | gene |      |
| Bn-scaff_21338_1-p832818  | Bn-N15-p13496909 | gene |      |
| Bn-scaff_21338_1-p832899  | Bn-N15-p13496990 | gene | exon |
| Bn-scaff_21338_1-p921370  | Bn-N15-p13603528 | gene |      |
| Bn-scaff_21338_1-p972059  | Bn-N9-p26824762  | gene | exon |
| Bn-scaff_21352_1-p110960  | Bn-N16-p16206277 | gene |      |
| Bn-scaff_21352_1-p170063  | Bn-N1-p13118186  | gene |      |
| Bn-scaff_21369_1-p1167373 | Bn-N15-p42426081 | gene | exon |
| Bn-scaff_21369_1-p1193882 | Bn-N15-p42399398 | gene |      |

|                           |                  |      |      |
|---------------------------|------------------|------|------|
| Bn-scaff_21369_1-p1211715 | Bn-N15-p42382656 | gene |      |
| Bn-scaff_21369_1-p1251615 | Bn-N15-p42330001 | gene | exon |
| Bn-scaff_21369_1-p190637  | Bn-N15-p43392984 | gene |      |
| Bn-scaff_21369_1-p204692  | Bn-N15-p43379026 | gene |      |
| Bn-scaff_21369_1-p205401  | Bn-N15-p43378316 | gene | exon |
| Bn-scaff_21369_1-p239290  | Bn-N5-p22246291  | gene | exon |
| Bn-scaff_21369_1-p260784  | Bn-N15-p43322235 | gene | exon |
| Bn-scaff_21369_1-p406725  | Bn-N15-p43177706 | gene |      |
| Bn-scaff_21369_1-p456007  | Bn-N15-p43126388 | gene |      |
| Bn-scaff_21369_1-p522214  | Bn-N15-p43061512 | gene | exon |
| Bn-scaff_21369_1-p628956  | Bn-N15-p42952898 | gene | exon |
| Bn-scaff_21369_1-p629372  | Bn-N15-p42952482 | gene | exon |
| Bn-scaff_21369_1-p653589  | Bn-N5-p21908814  | gene | exon |
| Bn-scaff_21369_1-p91227   | Bn-N15-p43486391 | gene | exon |
| Bn-scaff_21386_1-p35560   | Bn-N13-p58900103 | gene | exon |
| Bn-scaff_21386_1-p35636   | Bn-N13-p58900027 | gene |      |
| Bn-scaff_21386_1-p35701   | Bn-N13-p58899963 | gene |      |
| Bn-scaff_21386_1-p35918   | Bn-N13-p58899746 | gene | exon |
| Bn-scaff_21386_1-p36155   | Bn-N13-p58899509 | gene | exon |
| Bn-scaff_21386_1-p36891   | Bn-N13-p58892102 | gene |      |
| Bn-scaff_21386_1-p37139   | Bn-N13-p58891853 | gene |      |
| Bn-scaff_21386_1-p39383   | Bn-N13-p58889429 | gene | exon |
| Bn-scaff_21392_1-p175     | Bn-N14-p50635357 | gene |      |
| Bn-scaff_21450_1-p68078   | Bn-N17-p2783666  | gene | exon |
| Bn-scaff_21450_1-p68242   | Bn-N17-p2783830  | gene |      |
| Bn-scaff_21450_1-p77567   | Bn-N7-p1171706   | gene | exon |
| Bn-scaff_21453_1-p128447  | Bn-N12-p13978112 | gene |      |
| Bn-scaff_21453_1-p130266  | Bn-N12-p13979931 | gene |      |
| Bn-scaff_21453_1-p130962  | Bn-N12-p13980627 | gene |      |
| Bn-scaff_21496_1-p140175  | Bn-N15-p4919043  | gene | exon |
| Bn-scaff_21496_1-p165566  | Bn-N15-p4940949  | gene |      |
| Bn-scaff_21496_1-p185845  | Bn-N15-p4962009  | gene | exon |
| Bn-scaff_21496_1-p210320  | Bn-N15-p4986125  | gene | exon |
| Bn-scaff_21496_1-p320793  | Bn-N15-p5078391  | gene |      |
| Bn-scaff_21496_1-p353654  | Bn-N15-p5111592  | gene |      |
| Bn-scaff_21496_1-p359451  | Bn-N15-p5116915  | gene | exon |
| Bn-scaff_21496_1-p382380  | Bn-N6-p4250338   | gene | exon |
| Bn-scaff_21496_1-p419937  | Bn-N15-p5173543  | gene | exon |
| Bn-scaff_21496_1-p440091  | Bn-N15-p5195547  | gene |      |
| Bn-scaff_21496_1-p440186  | Bn-N15-p5195642  | gene |      |
| Bn-scaff_21496_1-p443487  | Bn-N15-p5198529  | gene | exon |
| Bn-scaff_21496_1-p444256  | Bn-N15-p5201367  | gene |      |
| Bn-scaff_21496_1-p457336  | Bn-N15-p5212596  | gene | exon |
| Bn-scaff_21496_1-p91737   | Bn-N15-p4849676  | gene | exon |
| Bn-scaff_21542_1-p12789   | Bn-N5-p11332136  | gene | exon |
| Bn-scaff_21566_1-p109     | Bn-N14-p50050491 | gene |      |
| Bn-scaff_21566_1-p181     | Bn-N14-p50050419 | gene | exon |
| Bn-scaff_21634_1-p62623   | Bn-N15-p47853022 | gene | exon |
| Bn-scaff_21636_1-p118433  | Bn-N10-p17411781 | gene | exon |
| Bn-scaff_21636_1-p118603  | Bn-N10-p17411951 | gene | exon |
| Bn-scaff_21636_1-p119179  | Bn-N10-p17412523 | gene | exon |
| Bn-scaff_21636_1-p124865  | Bn-N10-p17418379 | gene | exon |

|                          |                        |      |      |
|--------------------------|------------------------|------|------|
| Bn-scaff_21636_1-p137260 | Bn-N10-p17428951       | gene | exon |
| Bn-scaff_21636_1-p137344 | Bn-N10-p17429035       | gene | exon |
| Bn-scaff_21636_1-p137408 | Bn-N10-p17429101       | gene |      |
| Bn-scaff_21636_1-p137494 | Bn-N10-p17429187       | gene | exon |
| Bn-scaff_21636_1-p137951 | Bn-N10-p17429638       | gene | exon |
| Bn-scaff_21636_1-p137966 | Bn-N10-p17429653       | gene | exon |
| Bn-scaff_21636_1-p138951 | Bn-N10-p17430622       | gene | exon |
| Bn-scaff_21636_1-p15905  | Bn-N10-p17313543       | gene |      |
| Bn-scaff_21636_1-p15908  | Bn-N10-p17313546       | gene |      |
| Bn-scaff_21636_1-p226446 | Bn-N10-p17483242       | gene | exon |
| Bn-scaff_21636_1-p227057 | Bn-N10-p17483861       | gene | exon |
| Bn-scaff_21636_1-p238954 | Bn-N10-p17493155       | gene | exon |
| Bn-scaff_21636_1-p243640 | Bn-N10-p17490863       | gene | exon |
| Bn-scaff_21636_1-p278203 | Bn-N10-p17522789       | gene | exon |
| Bn-scaff_21636_1-p497038 | Bn-Scaffold02659-p1681 | gene | exon |
| Bn-scaff_21636_1-p7184   | Bn-N5-p17840634        | gene | exon |
| Bn-scaff_21656_1-p109389 | Bn-N19-p11693818       | gene |      |
| Bn-scaff_21656_1-p312658 | Bn-N19-p11475691       | gene | exon |
| Bn-scaff_21705_1-p119297 | Bn-N12-p34729436       | gene | exon |
| Bn-scaff_21705_1-p119663 | Bn-N12-p34729071       | gene | exon |
| Bn-scaff_21705_1-p278164 | Bn-N12-p34574580       | gene | exon |
| Bn-scaff_21705_1-p289975 | Bn-N12-p34554205       | gene | exon |
| Bn-scaff_21705_1-p313590 | Bn-N12-p34533998       | gene |      |
| Bn-scaff_21705_1-p315230 | Bn-N12-p34532358       | gene |      |
| Bn-scaff_21705_1-p366615 | Bn-N12-p34480702       | gene |      |
| Bn-scaff_21705_1-p470585 | Bn-N12-p34378370       | gene |      |
| Bn-scaff_21705_1-p472001 | Bn-N12-p34376948       | gene |      |
| Bn-scaff_21705_1-p488897 | Bn-N12-p34361505       | gene | exon |
| Bn-scaff_21705_1-p490306 | Bn-N12-p34360097       | gene |      |
| Bn-scaff_21705_1-p497937 | Bn-N12-p34352466       | gene |      |
| Bn-scaff_21705_1-p510001 | Bn-N12-p34340413       | gene |      |
| Bn-scaff_21705_1-p51863  | Bn-N12-p34788733       | gene |      |
| Bn-scaff_21705_1-p559758 | Bn-N12-p34289632       | gene | exon |
| Bn-scaff_21705_1-p608640 | Bn-N12-p34242791       | gene | exon |
| Bn-scaff_21705_1-p608952 | Bn-N12-p34242479       | gene |      |
| Bn-scaff_21705_1-p609482 | Bn-N12-p34241949       | gene |      |
| Bn-scaff_21705_1-p609934 | Bn-N12-p34241497       | gene |      |
| Bn-scaff_21705_1-p609955 | Bn-N12-p34241476       | gene |      |
| Bn-scaff_21705_1-p612632 | Bn-N12-p34238796       | gene | exon |
| Bn-scaff_21711_1-p12893  | Bn-N17-p34583222       | gene |      |
| Bn-scaff_21711_1-p13060  | Bn-N17-p34583055       | gene |      |
| Bn-scaff_21711_1-p18343  | Bn-N17-p34577778       | gene | exon |
| Bn-scaff_21711_1-p28431  | Bn-N17-p34562507       | gene | exon |
| Bn-scaff_21711_1-p34999  | Bn-N17-p34556010       | gene |      |
| Bn-scaff_21711_1-p35589  | Bn-N17-p34555421       | gene |      |
| Bn-scaff_21711_1-p39478  | Bn-N17-p34551543       | gene |      |
| Bn-scaff_21711_1-p54607  | Bn-N17-p34535913       | gene | exon |
| Bn-scaff_21711_1-p75853  | Bn-N6-p21595011        | gene |      |
| Bn-scaff_21711_1-p76752  | Bn-N6-p21595897        | gene | exon |
| Bn-scaff_21711_1-p79864  | Bn-N17-p34516742       | gene | exon |
| Bn-scaff_21744_1-p17282  | Bn-N16-p1045794        | gene |      |
| Bn-scaff_21744_1-p25410  | Bn-N14-p49822707       | gene |      |

|                           |                  |      |      |
|---------------------------|------------------|------|------|
| Bn-scaff_21778_1-p160881  | Bn-N13-p5936201  | gene | exon |
| Bn-scaff_21778_1-p163428  | Bn-N13-p5938734  | gene |      |
| Bn-scaff_21778_1-p177121  | Bn-N13-p5950883  | gene |      |
| Bn-scaff_21778_1-p184325  | Bn-N13-p5958068  | gene | exon |
| Bn-scaff_21778_1-p215559  | Bn-N13-p5984689  | gene | exon |
| Bn-scaff_21778_1-p217638  | Bn-N13-p5986297  | gene | exon |
| Bn-scaff_21778_1-p222165  | Bn-N13-p5990681  | gene | exon |
| Bn-scaff_21778_1-p222672  | Bn-N13-p5991187  | gene |      |
| Bn-scaff_21778_1-p222993  | Bn-N13-p5991507  | gene |      |
| Bn-scaff_21778_1-p223740  | Bn-N13-p5992238  | gene |      |
| Bn-scaff_21778_1-p236024  | Bn-N13-p31906538 | gene | exon |
| Bn-scaff_21778_1-p236913  | Bn-N13-p6002364  | gene | exon |
| Bn-scaff_21778_1-p261833  | Bn-N13-p6035825  | gene | exon |
| Bn-scaff_21778_1-p262139  | Bn-N13-p6036131  | gene | exon |
| Bn-scaff_21778_1-p287068  | Bn-N13-p6060543  | gene |      |
| Bn-scaff_21778_1-p287475  | Bn-N13-p6060949  | gene |      |
| Bn-scaff_21778_1-p290583  | Bn-N13-p6064076  | gene |      |
| Bn-scaff_21778_1-p312180  | Bn-N13-p6079614  | gene |      |
| Bn-scaff_21778_1-p319366  | Bn-N13-p6087379  | gene |      |
| Bn-scaff_21778_1-p364556  | Bn-N13-p6133554  | gene |      |
| Bn-scaff_21778_1-p382522  | Bn-N13-p6145467  | gene |      |
| Bn-scaff_21778_1-p43125   | Bn-N13-p5780067  | gene |      |
| Bn-scaff_21778_1-p68265   | Bn-N3-p4145513   | gene | exon |
| Bn-scaff_21778_1-p80189   | Bn-N13-p5828251  | gene |      |
| Bn-scaff_21778_1-p8688    | Bn-N13-p5746094  | gene |      |
| Bn-scaff_21786_1-p127359  | Bn-N18-p22441567 | gene |      |
| Bn-scaff_21786_1-p127974  | Bn-N18-p22442183 | gene | exon |
| Bn-scaff_21786_1-p128237  | Bn-N18-p22442446 | gene |      |
| Bn-scaff_21786_1-p128461  | Bn-N18-p22442670 | gene | exon |
| Bn-scaff_21786_1-p128485  | Bn-N18-p22442694 | gene | exon |
| Bn-scaff_21786_1-p141890  | Bn-N18-p22455980 | gene |      |
| Bn-scaff_21786_1-p149338  | Bn-N18-p22462785 | gene |      |
| Bn-scaff_21786_1-p158103  | Bn-N18-p22471550 | gene |      |
| Bn-scaff_21786_1-p160470  | Bn-N18-p22473927 | gene |      |
| Bn-scaff_21786_1-p52446   | Bn-N8-p19928494  | gene |      |
| Bn-scaff_21786_1-p52917   | Bn-N8-p19928029  | gene |      |
| Bn-scaff_21820_1-p1028375 | Bn-N11-p27840168 | gene |      |
| Bn-scaff_21820_1-p128894  | Bn-N11-p26905119 | gene |      |
| Bn-scaff_21820_1-p129153  | Bn-N11-p26904860 | gene | exon |
| Bn-scaff_21820_1-p137002  | Bn-N11-p26896866 | gene | exon |
| Bn-scaff_21820_1-p137033  | Bn-N11-p26896835 | gene | exon |
| Bn-scaff_21820_1-p138221  | Bn-N11-p26895647 | gene | exon |
| Bn-scaff_21820_1-p143886  | Bn-N1-p16690746  | gene | exon |
| Bn-scaff_21820_1-p144148  | Bn-N1-p16690463  | gene |      |
| Bn-scaff_21820_1-p169248  | Bn-N1-p16639456  | gene | exon |
| Bn-scaff_21820_1-p169785  | Bn-N11-p26861253 | gene | exon |
| Bn-scaff_21820_1-p169937  | Bn-N11-p26861101 | gene |      |
| Bn-scaff_21820_1-p170850  | Bn-N11-p26860189 | gene | exon |
| Bn-scaff_21820_1-p173814  | Bn-N11-p26857219 | gene |      |
| Bn-scaff_21820_1-p174491  | Bn-N11-p26856541 | gene | exon |
| Bn-scaff_21820_1-p209155  | Bn-N11-p26829885 | gene | exon |
| Bn-scaff_21820_1-p251742  | Bn-N11-p26781422 | gene |      |

|                          |                         |      |      |
|--------------------------|-------------------------|------|------|
| Bn-scaff_21820_1-p270823 | Bn-N1-p16546952         | gene | exon |
| Bn-scaff_21820_1-p279193 | Bn-N7-p21285755         | gene | exon |
| Bn-scaff_21820_1-p279894 | Bn-N11-p26754787        | gene | exon |
| Bn-scaff_21820_1-p280779 | Bn-N11-p26753900        | gene | exon |
| Bn-scaff_21820_1-p323086 | Bn-N11-p26707103        | gene | exon |
| Bn-scaff_21820_1-p323485 | Bn-N11-p26706709        | gene |      |
| Bn-scaff_21820_1-p336649 | Bn-N11-p26695904        | gene | exon |
| Bn-scaff_21820_1-p336987 | Bn-N11-p26695566        | gene |      |
| Bn-scaff_21820_1-p338771 | Bn-N11-p26693786        | gene |      |
| Bn-scaff_21820_1-p368142 | Bn-N11-p27265013        | gene | exon |
| Bn-scaff_21820_1-p42624  | Bn-N11-p26968180        | gene |      |
| Bn-scaff_21820_1-p42746  | Bn-N11-p26968058        | gene |      |
| Bn-scaff_21820_1-p490500 | Bn-N11-p27371778        | gene |      |
| Bn-scaff_21820_1-p533341 | Bn-N11-p27414833        | gene | exon |
| Bn-scaff_21820_1-p543774 | Bn-N11-p27432200        | gene |      |
| Bn-scaff_21820_1-p545415 | Bn-N11-p27433853        | gene |      |
| Bn-scaff_21820_1-p611224 | Bn-N1-p16115656         | gene |      |
| Bn-scaff_21820_1-p737794 | Bn-N14-p21563058        | gene |      |
| Bn-scaff_21820_1-p956169 | Bn-N11-p27759629        | gene |      |
| Bn-scaff_21820_1-p965485 | Bn-N11-p27772917        | gene |      |
| Bn-scaff_21821_1-p75538  | Bn-N15-p12400714        | gene |      |
| Bn-scaff_21841_1-p188116 | Bn-N19-p49966534        | gene |      |
| Bn-scaff_21841_1-p230382 | Bn-N19-p50003512        | gene | exon |
| Bn-scaff_21841_1-p26836  | Bn-N19-p49823533        | gene |      |
| Bn-scaff_21841_1-p297252 | Bn-N10-p13396013        | gene | exon |
| Bn-scaff_21841_1-p304850 | Bn-N19-p50058248        | gene |      |
| Bn-scaff_21841_1-p329475 | Bn-N19-p50090437        | gene | exon |
| Bn-scaff_21841_1-p9955   | Bn-N19-p49806198        | gene | exon |
| Bn-scaff_21857_1-p293375 | Bn-N11-p37440199        | gene |      |
| Bn-scaff_21857_1-p298054 | Bn-N11-p37444866        | gene |      |
| Bn-scaff_21861_1-p146849 | Bn-N2-p11905378         | gene | exon |
| Bn-scaff_21861_1-p17903  | Bn-Scaffold01330-p8167  | gene | exon |
| Bn-scaff_21861_1-p20145  | Bn-Scaffold01330-p10090 | gene | exon |
| Bn-scaff_21861_1-p33827  | Bn-Scaffold01376-p3913  | gene |      |
| Bn-scaff_21861_1-p33892  | Bn-Scaffold01376-p3978  | gene |      |
| Bn-scaff_21861_1-p34223  | Bn-Scaffold01376-p4309  | gene |      |
| Bn-scaff_21861_1-p37272  | Bn-Scaffold01376-p7358  | gene | exon |
| Bn-scaff_21861_1-p64738  | Bn-N14-p2289026         | gene |      |
| Bn-scaff_21867_1-p69185  | Bn-N13-p51241578        | gene | exon |
| Bn-scaff_21867_1-p809384 | Bn-N6-p10598107         | gene |      |
| Bn-scaff_21867_1-p872656 | Bn-N6-p10615520         | gene |      |
| Bn-scaff_21867_1-p87764  | Bn-N13-p51208823        | gene | exon |
| Bn-scaff_21867_1-p879485 | Bn-N6-p10624134         | gene |      |
| Bn-scaff_21884_1-p125365 | Bn-N11-p40943706        | gene | exon |
| Bn-scaff_21884_1-p153891 | Bn-N11-p40969873        | gene | exon |
| Bn-scaff_21884_1-p154442 | Bn-N11-p40970424        | gene | exon |
| Bn-scaff_21884_1-p154748 | Bn-N11-p40970730        | gene | exon |
| Bn-scaff_21884_1-p192677 | Bn-N11-p41016725        | gene | exon |
| Bn-scaff_21884_1-p219863 | Bn-N11-p41039106        | gene |      |
| Bn-scaff_21884_1-p227529 | Bn-N11-p41046800        | gene |      |
| Bn-scaff_21884_1-p28771  | Bn-N11-p40846775        | gene | exon |
| Bn-scaff_21884_1-p60083  | Bn-N11-p40879023        | gene |      |

|                          |                  |      |      |
|--------------------------|------------------|------|------|
| Bn-scaff_21884_1-p638903 | Bn-N11-p41575505 | gene |      |
| Bn-scaff_21884_1-p639289 | Bn-N11-p41575868 | gene |      |
| Bn-scaff_21884_1-p650617 | Bn-N11-p41583160 | gene |      |
| Bn-scaff_21884_1-p651359 | Bn-N11-p41583903 | gene |      |
| Bn-scaff_21884_1-p664163 | Bn-N1-p24563000  | gene | exon |
| Bn-scaff_21884_1-p684281 | Bn-N14-p3355676  | gene | exon |
| Bn-scaff_21884_1-p720411 | Bn-N1-p24602074  | gene | exon |
| Bn-scaff_21884_1-p767376 | Bn-N11-p41693934 | gene | exon |
| Bn-scaff_21884_1-p768055 | Bn-N1-p24640108  | gene | exon |
| Bn-scaff_21884_1-p807260 | Bn-N1-p24691988  | gene | exon |
| Bn-scaff_21884_1-p819724 | Bn-N11-p41778226 | gene |      |
| Bn-scaff_21884_1-p819958 | Bn-N11-p41778460 | gene | exon |
| Bn-scaff_21884_1-p819972 | Bn-N11-p41778474 | gene | exon |
| Bn-scaff_21884_1-p866739 | Bn-N1-p24734752  | gene | exon |
| Bn-scaff_21884_1-p914072 | Bn-N6-p9808308   | gene |      |
| Bn-scaff_21884_1-p914724 | Bn-N6-p9807656   | gene |      |
| Bn-scaff_21924_1-p88938  | Bn-N10-p10493335 | gene | exon |
| Bn-scaff_21925_1-p154909 | Bn-N14-p2077247  | gene | exon |
| Bn-scaff_21925_1-p200155 | Bn-N14-p2126261  | gene | exon |
| Bn-scaff_21925_1-p201015 | Bn-N14-p2127122  | gene | exon |
| Bn-scaff_21925_1-p55427  | Bn-N14-p1975434  | gene |      |
| Bn-scaff_21925_1-p61702  | Bn-N12-p46506765 | gene |      |
| Bn-scaff_21925_1-p88165  | Bn-N14-p2008611  | gene |      |
| Bn-scaff_21956_1-p154372 | Bn-N14-p45398869 | gene | exon |
| Bn-scaff_21956_1-p160710 | Bn-N14-p45405207 | gene | exon |
| Bn-scaff_21956_1-p218752 | Bn-N14-p45461565 | gene | exon |
| Bn-scaff_21956_1-p219268 | Bn-N14-p45462081 | gene | exon |
| Bn-scaff_21956_1-p220255 | Bn-N14-p45463066 | gene | exon |
| Bn-scaff_21956_1-p253961 | Bn-N14-p45500201 | gene |      |
| Bn-scaff_21956_1-p257039 | Bn-N14-p45503329 | gene | exon |
| Bn-scaff_21956_1-p262178 | Bn-N14-p45514141 | gene |      |
| Bn-scaff_21956_1-p276706 | Bn-N14-p45526701 | gene | exon |
| Bn-scaff_21956_1-p289981 | Bn-N14-p45540093 | gene |      |
| Bn-scaff_21956_1-p291369 | Bn-N14-p45541481 | gene | exon |
| Bn-scaff_21956_1-p50505  | Bn-N14-p45255554 | gene | exon |
| Bn-scaff_21956_1-p51220  | Bn-N14-p45256273 | gene |      |
| Bn-scaff_21956_1-p95133  | Bn-N4-p13781466  | gene | exon |
| Bn-scaff_22002_1-p78733  | Bn-N8-p4619176   | gene | exon |
| Bn-scaff_22067_1-p139587 | Bn-N13-p23770785 | gene |      |
| Bn-scaff_22067_1-p144570 | Bn-N13-p23775118 | gene |      |
| Bn-scaff_22067_1-p149886 | Bn-N13-p23780562 | gene | exon |
| Bn-scaff_22067_1-p190904 | Bn-N13-p23827143 | gene | exon |
| Bn-scaff_22067_1-p200128 | Bn-N13-p23836470 | gene |      |
| Bn-scaff_22067_1-p219321 | Bn-N13-p23856396 | gene |      |
| Bn-scaff_22067_1-p225959 | Bn-N11-p44285016 | gene | exon |
| Bn-scaff_22067_1-p226242 | Bn-N3-p15359516  | gene | exon |
| Bn-scaff_22067_1-p70907  | Bn-N13-p23680599 | gene |      |
| Bn-scaff_22067_1-p71973  | Bn-N3-p15235704  | gene | exon |
| Bn-scaff_22082_1-p115581 | Bn-N19-p51827918 | gene | exon |
| Bn-scaff_22082_1-p259621 | Bn-N19-p51669549 | gene | exon |
| Bn-scaff_22082_1-p26759  | Bn-N19-p51926614 | gene | exon |
| Bn-scaff_22082_1-p272003 | Bn-N19-p51662834 | gene | exon |

|                          |                  |      |      |
|--------------------------|------------------|------|------|
| Bn-scaff_22082_1-p272234 | Bn-N19-p51662603 | gene | exon |
| Bn-scaff_22082_1-p28114  | Bn-N19-p51925259 | gene |      |
| Bn-scaff_22082_1-p301782 | Bn-N19-p51634525 | gene | exon |
| Bn-scaff_22082_1-p350    | Bn-N15-p46069509 | gene | exon |
| Bn-scaff_22082_1-p370189 | Bn-N19-p51554161 | gene | exon |
| Bn-scaff_22082_1-p372624 | Bn-N19-p51551724 | gene | exon |
| Bn-scaff_22082_1-p372841 | Bn-N19-p51551508 | gene |      |
| Bn-scaff_22082_1-p373269 | Bn-N19-p51551079 | gene |      |
| Bn-scaff_22082_1-p381196 | Bn-N19-p51542741 | gene |      |
| Bn-scaff_22082_1-p381247 | Bn-N19-p51542690 | gene |      |
| Bn-scaff_22082_1-p381255 | Bn-N19-p51542682 | gene |      |
| Bn-scaff_22082_1-p383237 | Bn-N19-p51540700 | gene | exon |
| Bn-scaff_22082_1-p439197 | Bn-N19-p51469262 | gene | exon |
| Bn-scaff_22082_1-p444239 | Bn-N19-p51464186 | gene |      |
| Bn-scaff_22082_1-p906323 | Bn-N19-p50941833 | gene | exon |
| Bn-scaff_22091_1-p59803  | Bn-N13-p29679837 | gene |      |
| Bn-scaff_22091_1-p90799  | Bn-N4-p15441018  | gene | exon |
| Bn-scaff_22093_1-p101912 | Bn-N12-p19770336 | gene | exon |
| Bn-scaff_22093_1-p102888 | Bn-N12-p19769360 | gene |      |
| Bn-scaff_22093_1-p103074 | Bn-N12-p19769174 | gene |      |
| Bn-scaff_22093_1-p103093 | Bn-N12-p19769155 | gene |      |
| Bn-scaff_22093_1-p103725 | Bn-N12-p19768524 | gene |      |
| Bn-scaff_22093_1-p103799 | Bn-N12-p19768450 | gene |      |
| Bn-scaff_22093_1-p53055  | Bn-N12-p19948115 | gene | exon |
| Bn-scaff_22093_1-p97166  | Bn-N12-p19777735 | gene | exon |
| Bn-scaff_22115_1-p120619 | Bn-N11-p39522195 | gene | exon |
| Bn-scaff_22115_1-p155376 | Bn-N11-p39567545 | gene | exon |
| Bn-scaff_22115_1-p182128 | Bn-N11-p39601813 | gene |      |
| Bn-scaff_22115_1-p236953 | Bn-N11-p39665719 | gene |      |
| Bn-scaff_22115_1-p238903 | Bn-N1-p23629342  | gene | exon |
| Bn-scaff_22115_1-p82010  | Bn-N1-p23546207  | gene | exon |
| Bn-scaff_22133_1-p31674  | Bn-N16-p14927161 | gene | exon |
| Bn-scaff_22133_1-p31920  | Bn-N16-p14926915 | gene | exon |
| Bn-scaff_22144_1-p193415 | Bn-N12-p40235382 | gene |      |
| Bn-scaff_22144_1-p207843 | Bn-N12-p40241593 | gene |      |
| Bn-scaff_22148_1-p251521 | Bn-N14-p33416438 | gene |      |
| Bn-scaff_22148_1-p383901 | Bn-N14-p33589085 | gene |      |
| Bn-scaff_22148_1-p5629   | Bn-N14-p33177167 | gene |      |
| Bn-scaff_22183_1-p40909  | Bn-N15-p10245234 | gene | exon |
| Bn-scaff_22183_1-p41540  | Bn-N15-p10244602 | gene | exon |
| Bn-scaff_22183_1-p422126 | Bn-N15-p9841752  | gene | exon |
| Bn-scaff_22183_1-p61318  | Bn-N15-p10225427 | gene |      |
| Bn-scaff_22183_1-p663781 | Bn-N15-p9583241  | gene |      |
| Bn-scaff_22183_1-p670535 | Bn-N15-p9570805  | gene |      |
| Bn-scaff_22183_1-p672707 | Bn-N15-p9568632  | gene |      |
| Bn-scaff_22278_1-p136701 | Bn-N4-p14211003  | gene | exon |
| Bn-scaff_22278_1-p137755 | Bn-N4-p14210018  | gene | exon |
| Bn-scaff_22278_1-p137816 | Bn-N4-p14209958  | gene | exon |
| Bn-scaff_22278_1-p238329 | Bn-N4-p14162714  | gene | exon |
| Bn-scaff_22278_1-p304818 | Bn-N14-p45747235 | gene | exon |
| Bn-scaff_22278_1-p84630  | Bn-N4-p14246038  | gene |      |
| Bn-scaff_22278_1-p95624  | Bn-N17-p39892877 | gene |      |

|                           |                  |      |      |
|---------------------------|------------------|------|------|
| Bn-scaff_22278_1-p95949   | Bn-N17-p39893202 | gene |      |
| Bn-scaff_22278_1-p96314   | Bn-N17-p39893567 | gene |      |
| Bn-scaff_22301_1-p104455  | Bn-N17-p7210457  | gene |      |
| Bn-scaff_22301_1-p105957  | Bn-N17-p7208955  | gene |      |
| Bn-scaff_22301_1-p7514    | Bn-N17-p7316254  | gene |      |
| Bn-scaff_22301_1-p84996   | Bn-N17-p7230640  | gene |      |
| Bn-scaff_22310_1-p321188  | Bn-N17-p8350002  | gene |      |
| Bn-scaff_22310_1-p329937  | Bn-N7-p3705628   | gene | exon |
| Bn-scaff_22310_1-p359751  | Bn-N17-p8312132  | gene |      |
| Bn-scaff_22310_1-p359992  | Bn-N17-p8311891  | gene |      |
| Bn-scaff_22310_1-p424210  | Bn-N17-p8235998  | gene | exon |
| Bn-scaff_22310_1-p436477  | Bn-N17-p8222346  | gene | exon |
| Bn-scaff_22310_1-p470575  | Bn-N17-p8187090  | gene | exon |
| Bn-scaff_22310_1-p557368  | Bn-N7-p3556955   | gene | exon |
| Bn-scaff_22310_1-p563505  | Bn-N17-p8094208  | gene | exon |
| Bn-scaff_22310_1-p568057  | Bn-N17-p8089654  | gene | exon |
| Bn-scaff_22310_1-p589151  | Bn-N17-p8065857  | gene |      |
| Bn-scaff_22310_1-p653167  | Bn-N17-p8000987  | gene | exon |
| Bn-scaff_22310_1-p723646  | Bn-N17-p7942321  | gene | exon |
| Bn-scaff_22310_1-p779359  | Bn-N17-p7884080  | gene |      |
| Bn-scaff_22310_1-p826319  | Bn-N7-p3328802   | gene |      |
| Bn-scaff_22310_1-p835255  | Bn-N17-p7820493  | gene |      |
| Bn-scaff_22310_1-p851873  | Bn-N17-p7798171  | gene | exon |
| Bn-scaff_22310_1-p852906  | Bn-N17-p7797137  | gene | exon |
| Bn-scaff_22310_1-p863593  | Bn-N7-p3298796   | gene | exon |
| Bn-scaff_22310_1-p895435  | Bn-N17-p7755910  | gene | exon |
| Bn-scaff_22321_1-p13103   | Bn-N1-p26143514  | gene |      |
| Bn-scaff_22321_1-p247241  | Bn-N11-p43675538 | gene | exon |
| Bn-scaff_22321_1-p266340  | Bn-N11-p43656394 | gene | exon |
| Bn-scaff_22321_1-p45741   | Bn-N11-p43861680 | gene |      |
| Bn-scaff_22395_1-p700     | Bn-N12-p813067   | gene |      |
| Bn-scaff_22441_1-p108306  | Bn-N17-p9075163  | gene |      |
| Bn-scaff_22441_1-p367333  | Bn-N17-p8831048  | gene |      |
| Bn-scaff_22441_1-p381776  | Bn-N17-p8822313  | gene |      |
| Bn-scaff_22441_1-p381973  | Bn-N17-p8822116  | gene |      |
| Bn-scaff_22441_1-p382588  | Bn-N17-p8821736  | gene |      |
| Bn-scaff_22451_1-p134565  | Bn-N14-p26945363 | gene |      |
| Bn-scaff_22451_1-p193809  | Bn-N12-p22524708 | gene |      |
| Bn-scaff_22451_2-p83262   | Bn-N12-p22879782 | gene | exon |
| Bn-scaff_22451_2-p85639   | Bn-N12-p22882177 | gene |      |
| Bn-scaff_22451_2-p87375   | Bn-N12-p22883992 | gene |      |
| Bn-scaff_22455_1-p12317   | Bn-N11-p8389234  | gene | exon |
| Bn-scaff_22466_1-p1427346 | Bn-N3-p11816633  | gene |      |
| Bn-scaff_22466_1-p170754  | Bn-N13-p16147925 | gene |      |
| Bn-scaff_22466_1-p182130  | Bn-N13-p16159309 | gene | exon |
| Bn-scaff_22466_1-p209190  | Bn-N13-p16188929 | gene |      |
| Bn-scaff_22466_1-p209191  | Bn-N13-p16188929 | gene |      |
| Bn-scaff_22466_1-p286093  | Bn-N13-p16262071 | gene |      |
| Bn-scaff_22466_1-p381085  | Bn-N13-p16365010 | gene |      |
| Bn-scaff_22466_1-p394461  | Bn-N13-p16378372 | gene |      |
| Bn-scaff_22466_1-p618347  | Bn-N3-p11447194  | gene |      |
| Bn-scaff_22466_1-p624476  | Bn-N3-p11453373  | gene | exon |



|                           |                  |      |      |
|---------------------------|------------------|------|------|
| Bn-scaff_22466_1-p667128  | Bn-N13-p16667983 | gene | exon |
| Bn-scaff_22466_1-p733665  | Bn-N13-p16748300 | gene | exon |
| Bn-scaff_22466_1-p746149  | Bn-N13-p16752792 | gene | exon |
| Bn-scaff_22466_1-p754489  | Bn-N13-p16761369 | gene |      |
| Bn-scaff_22466_1-p803725  | Bn-N13-p16811982 | gene | exon |
| Bn-scaff_22466_1-p809447  | Bn-N3-p11555917  | gene | exon |
| Bn-scaff_22466_1-p847646  | Bn-N3-p11581684  | gene | exon |
| Bn-scaff_22466_1-p980721  | Bn-N3-p11640806  | gene | exon |
| Bn-scaff_22466_1-p986888  | Bn-N13-p17003166 | gene | exon |
| Bn-scaff_22466_1-p987521  | Bn-N13-p17003799 | gene | exon |
| Bn-scaff_22481_1-p143945  | Bn-N19-p55806350 | gene |      |
| Bn-scaff_22481_1-p152101  | Bn-N19-p55797728 | gene | exon |
| Bn-scaff_22481_1-p167831  | Bn-N19-p55782005 | gene |      |
| Bn-scaff_22481_1-p176508  | Bn-N19-p55774267 | gene |      |
| Bn-scaff_22481_1-p177318  | Bn-N19-p55773457 | gene |      |
| Bn-scaff_22481_1-p200007  | Bn-N19-p55738631 | gene |      |
| Bn-scaff_22481_1-p200580  | Bn-N19-p55738058 | gene |      |
| Bn-scaff_22481_1-p231024  | Bn-N19-p55707406 | gene | exon |
| Bn-scaff_22486_1-p7889    | Bn-N18-p1570204  | gene | exon |
| Bn-scaff_22527_1-p180660  | Bn-N12-p5092817  | gene | exon |
| Bn-scaff_22527_1-p180772  | Bn-N2-p3983380   | gene | exon |
| Bn-scaff_22527_1-p183208  | Bn-N2-p3980899   | gene |      |
| Bn-scaff_22527_1-p338430  | Bn-N2-p3880106   | gene | exon |
| Bn-scaff_22527_1-p339764  | Bn-N12-p4934944  | gene | exon |
| Bn-scaff_22527_1-p350581  | Bn-N2-p3865462   | gene | exon |
| Bn-scaff_22527_1-p350640  | Bn-N2-p3865403   | gene | exon |
| Bn-scaff_22527_1-p412841  | Bn-N12-p4872231  | gene |      |
| Bn-scaff_22527_1-p413147  | Bn-N2-p3831363   | gene | exon |
| Bn-scaff_22527_1-p613740  | Bn-N19-p51976075 | gene | exon |
| Bn-scaff_22536_1-p164551  | Bn-N7-p8965510   | gene | exon |
| Bn-scaff_22536_1-p319313  | Bn-N17-p19627529 | gene |      |
| Bn-scaff_22536_1-p339132  | Bn-N12-p41264836 | gene |      |
| Bn-scaff_22536_1-p7771    | Bn-N17-p19256845 | gene | exon |
| Bn-scaff_22563_1-p109636  | Bn-N11-p22465175 | gene |      |
| Bn-scaff_22563_1-p111842  | Bn-N11-p22462969 | gene | exon |
| Bn-scaff_22563_1-p111921  | Bn-N11-p22462890 | gene | exon |
| Bn-scaff_22670_1-p170074  | Bn-N12-p9672971  | gene | exon |
| Bn-scaff_22728_1-p1012244 | Bn-N13-p6643610  | gene | exon |
| Bn-scaff_22728_1-p1012688 | Bn-N13-p6643167  | gene |      |
| Bn-scaff_22728_1-p1013354 | Bn-N13-p6642528  | gene | exon |
| Bn-scaff_22728_1-p1018084 | Bn-N13-p6638137  | gene |      |
| Bn-scaff_22728_1-p1024804 | Bn-N13-p6634029  | gene | exon |
| Bn-scaff_22728_1-p1080976 | Bn-N13-p6593204  | gene |      |
| Bn-scaff_22728_1-p109366  | Bn-N13-p7523555  | gene |      |
| Bn-scaff_22728_1-p1141898 | Bn-N13-p6510945  | gene | exon |
| Bn-scaff_22728_1-p1141914 | Bn-N13-p6510928  | gene | exon |
| Bn-scaff_22728_1-p1148454 | Bn-N13-p6503417  | gene | exon |
| Bn-scaff_22728_1-p1181721 | Bn-N13-p6471383  | gene |      |
| Bn-scaff_22728_1-p1185330 | Bn-N13-p6467443  | gene |      |
| Bn-scaff_22728_1-p1197316 | Bn-N13-p6454206  | gene |      |
| Bn-scaff_22728_1-p1197524 | Bn-N13-p6453998  | gene | exon |
| Bn-scaff_22728_1-p1237743 | Bn-N13-p6421333  | gene |      |

|                           |                  |      |      |
|---------------------------|------------------|------|------|
| Bn-scaff_22728_1-p1248875 | Bn-N13-p6410202  | gene |      |
| Bn-scaff_22728_1-p1250616 | Bn-N13-p6408467  | gene |      |
| Bn-scaff_22728_1-p1250818 | Bn-N13-p6408264  | gene | exon |
| Bn-scaff_22728_1-p1256248 | Bn-N13-p6398173  | gene |      |
| Bn-scaff_22728_1-p1256416 | Bn-N13-p6398005  | gene |      |
| Bn-scaff_22728_1-p1258206 | Bn-N13-p6396242  | gene |      |
| Bn-scaff_22728_1-p1258510 | Bn-N13-p6395938  | gene |      |
| Bn-scaff_22728_1-p1258526 | Bn-N13-p6395922  | gene |      |
| Bn-scaff_22728_1-p1259166 | Bn-N13-p6395291  | gene |      |
| Bn-scaff_22728_1-p1259217 | Bn-N13-p6395241  | gene |      |
| Bn-scaff_22728_1-p1261707 | Bn-N13-p6392723  | gene |      |
| Bn-scaff_22728_1-p1264219 | Bn-N13-p6390202  | gene | exon |
| Bn-scaff_22728_1-p1267084 | Bn-N13-p6387284  | gene | exon |
| Bn-scaff_22728_1-p1356495 | Bn-N2-p4758977   | gene | exon |
| Bn-scaff_22728_1-p1363526 | Bn-N13-p6284917  | gene | exon |
| Bn-scaff_22728_1-p1393497 | Bn-N13-p6250100  | gene | exon |
| Bn-scaff_22728_1-p1399313 | Bn-N13-p6244288  | gene | exon |
| Bn-scaff_22728_1-p263173  | Bn-N13-p7371048  | gene | exon |
| Bn-scaff_22728_1-p263319  | Bn-N13-p7370901  | gene | exon |
| Bn-scaff_22728_1-p285715  | Bn-N13-p7347300  | gene | exon |
| Bn-scaff_22728_1-p310071  | Bn-N13-p7316777  | gene |      |
| Bn-scaff_22728_1-p344206  | Bn-N3-p5184596   | gene | exon |
| Bn-scaff_22728_1-p345946  | Bn-N13-p7279510  | gene | exon |
| Bn-scaff_22728_1-p356331  | Bn-N13-p7269121  | gene | exon |
| Bn-scaff_22728_1-p360792  | Bn-N13-p7264894  | gene | exon |
| Bn-scaff_22728_1-p400151  | Bn-N13-p7223981  | gene |      |
| Bn-scaff_22728_1-p402134  | Bn-N13-p7222251  | gene | exon |
| Bn-scaff_22728_1-p458182  | Bn-N13-p7168924  | gene |      |
| Bn-scaff_22728_1-p507391  | Bn-N13-p7121994  | gene | exon |
| Bn-scaff_22728_1-p513362  | Bn-N13-p7116019  | gene | exon |
| Bn-scaff_22728_1-p521385  | Bn-N19-p10628505 | gene |      |
| Bn-scaff_22728_1-p526439  | Bn-N13-p7112873  | gene |      |
| Bn-scaff_22728_1-p577795  | Bn-N13-p7061079  | gene | exon |
| Bn-scaff_22728_1-p600933  | Bn-N13-p7037881  | gene | exon |
| Bn-scaff_22728_1-p646719  | Bn-N13-p6986158  | gene |      |
| Bn-scaff_22728_1-p737182  | Bn-N13-p6898451  | gene | exon |
| Bn-scaff_22728_1-p739263  | Bn-N13-p6896425  | gene |      |
| Bn-scaff_22728_1-p739547  | Bn-N13-p6896141  | gene | exon |
| Bn-scaff_22728_1-p743128  | Bn-N13-p6894078  | gene |      |
| Bn-scaff_22728_1-p749304  | Bn-N13-p6889160  | gene | exon |
| Bn-scaff_22728_1-p922794  | Bn-N13-p6732192  | gene |      |
| Bn-scaff_22728_1-p924452  | Bn-N13-p6730537  | gene |      |
| Bn-scaff_22728_1-p938985  | Bn-N13-p6694313  | gene |      |
| Bn-scaff_22728_1-p967531  | Bn-N13-p6670609  | gene |      |
| Bn-scaff_22728_1-p968340  | Bn-N13-p6669797  | gene | exon |
| Bn-scaff_22728_1-p968837  | Bn-N13-p6669300  | gene |      |
| Bn-scaff_22728_1-p970076  | Bn-N13-p6668303  | gene | exon |
| Bn-scaff_22749_1-p144203  | Bn-N12-p23513386 | gene |      |
| Bn-scaff_22749_1-p202280  | Bn-N9-p843379    | gene | exon |
| Bn-scaff_22749_1-p383075  | Bn-N12-p23670211 | gene |      |
| Bn-scaff_22749_1-p436502  | Bn-N12-p24001083 | gene |      |
| Bn-scaff_22749_1-p441257  | Bn-N12-p23997910 | gene | exon |

|                           |                        |      |      |
|---------------------------|------------------------|------|------|
| Bn-scaff_22749_1-p443829  | Bn-N12-p23995331       | gene | exon |
| Bn-scaff_22749_1-p462312  | Bn-N12-p23969432       | gene |      |
| Bn-scaff_22749_1-p462527  | Bn-N12-p23969217       | gene | exon |
| Bn-scaff_22749_1-p558264  | Bn-N2-p16777070        | gene |      |
| Bn-scaff_22751_1-p137904  | Bn-N3-p15090088        | gene | exon |
| Bn-scaff_22765_1-p148520  | Bn-N16-p1212865        | gene | exon |
| Bn-scaff_22790_1-p1010980 | Bn-N11-p17949280       | gene |      |
| Bn-scaff_22790_1-p1012274 | Bn-N11-p17950577       | gene |      |
| Bn-scaff_22790_1-p1012275 | Bn-N11-p17950577       | gene |      |
| Bn-scaff_22790_1-p10917   | Bn-N11-p16959475       | gene | exon |
| Bn-scaff_22790_1-p1155333 | Bn-N11-p18088246       | gene |      |
| Bn-scaff_22790_1-p1271170 | Bn-N11-p18191532       | gene |      |
| Bn-scaff_22790_1-p1273360 | Bn-N11-p18193779       | gene |      |
| Bn-scaff_22790_1-p1274026 | Bn-N11-p18194445       | gene | exon |
| Bn-scaff_22790_1-p1317315 | Bn-N11-p18234997       | gene | exon |
| Bn-scaff_22790_1-p139306  | Bn-N11-p17089917       | gene |      |
| Bn-scaff_22790_1-p207071  | Bn-N11-p17178678       | gene |      |
| Bn-scaff_22790_1-p263811  | Bn-Scaffold02684-p1834 | gene |      |
| Bn-scaff_22790_1-p323805  | Bn-N11-p17258484       | gene | exon |
| Bn-scaff_22790_1-p332765  | Bn-N11-p17267254       | gene | exon |
| Bn-scaff_22790_1-p370880  | Bn-N11-p17307190       | gene | exon |
| Bn-scaff_22790_1-p373418  | Bn-N11-p17309728       | gene |      |
| Bn-scaff_22790_1-p457131  | Bn-N11-p17395529       | gene |      |
| Bn-scaff_22790_1-p457517  | Bn-N11-p17395915       | gene | exon |
| Bn-scaff_22790_1-p550704  | Bn-N19-p17759767       | gene |      |
| Bn-scaff_22790_1-p669477  | Bn-N11-p17616355       | gene |      |
| Bn-scaff_22790_1-p717222  | Bn-N11-p17650497       | gene | exon |
| Bn-scaff_22790_1-p752821  | Bn-N11-p17686725       | gene |      |
| Bn-scaff_22790_1-p771040  | Bn-N11-p17718242       | gene | exon |
| Bn-scaff_22790_1-p793565  | Bn-N11-p17742121       | gene | exon |
| Bn-scaff_22790_1-p793789  | Bn-N11-p17742345       | gene |      |
| Bn-scaff_22790_1-p98222   | Bn-N11-p17052554       | gene | exon |
| Bn-scaff_22795_1-p195621  | Bn-N1-p14032392        | gene |      |
| Bn-scaff_22814_1-p156349  | Bn-N14-p33147241       | gene | exon |
| Bn-scaff_22814_1-p166991  | Bn-N14-p33159748       | gene |      |
| Bn-scaff_22814_1-p169781  | Bn-N14-p33162535       | gene |      |
| Bn-scaff_22814_1-p58657   | Bn-N14-p33045571       | gene | exon |
| Bn-scaff_22821_1-p13976   | Bn-N17-p25771233       | gene | exon |
| Bn-scaff_22835_1-p534508  | Bn-N19-p14655500       | gene |      |
| Bn-scaff_22835_1-p535692  | Bn-N19-p14656684       | gene |      |
| Bn-scaff_22835_1-p537076  | Bn-N19-p14658066       | gene |      |
| Bn-scaff_22835_1-p547549  | Bn-N19-p14685129       | gene |      |
| Bn-scaff_22835_1-p716171  | Bn-N19-p14457407       | gene |      |
| Bn-scaff_22933_1-p109175  | Bn-N14-p80852          | gene |      |
| Bn-scaff_22933_1-p110027  | Bn-N14-p80000          | gene |      |
| Bn-scaff_22933_1-p62015   | Bn-N14-p121945         | gene |      |
| Bn-scaff_22933_1-p70880   | Bn-N14-p113706         | gene | exon |
| Bn-scaff_22970_1-p195963  | Bn-N12-p689046         | gene |      |
| Bn-scaff_22970_1-p213807  | Bn-N12-p705252         | gene |      |
| Bn-scaff_22970_1-p218555  | Bn-N12-p709793         | gene | exon |
| Bn-scaff_22970_1-p247775  | Bn-N12-p739811         | gene | exon |
| Bn-scaff_22970_1-p264018  | Bn-N12-p756962         | gene |      |

|                          |                        |      |      |
|--------------------------|------------------------|------|------|
| Bn-scaff_22970_1-p270779 | Bn-N12-p763893         | gene |      |
| Bn-scaff_22970_1-p270891 | Bn-N12-p764005         | gene |      |
| Bn-scaff_22970_1-p277300 | Bn-N12-p770697         | gene |      |
| Bn-scaff_22970_1-p32371  | Bn-N12-p523725         | gene |      |
| Bn-scaff_22970_1-p32963  | Bn-N12-p524314         | gene | exon |
| Bn-scaff_22970_1-p370489 | Bn-N2-p974398          | gene |      |
| Bn-scaff_22970_1-p372634 | Bn-N12-p850226         | gene |      |
| Bn-scaff_22970_1-p372788 | Bn-N2-p976858          | gene | exon |
| Bn-scaff_22970_1-p372931 | Bn-N2-p977002          | gene |      |
| Bn-scaff_22970_1-p374054 | Bn-N12-p851647         | gene |      |
| Bn-scaff_22970_1-p384574 | Bn-N2-p991502          | gene | exon |
| Bn-scaff_22970_1-p386413 | Bn-N12-p866795         | gene | exon |
| Bn-scaff_22970_1-p386559 | Bn-N12-p866941         | gene | exon |
| Bn-scaff_22970_1-p386610 | Bn-N2-p993576          | gene | exon |
| Bn-scaff_22970_1-p386682 | Bn-N12-p867064         | gene |      |
| Bn-scaff_22970_1-p387055 | Bn-N2-p994026          | gene | exon |
| Bn-scaff_22970_1-p439123 | Bn-N12-p911544         | gene |      |
| Bn-scaff_22970_1-p491664 | Bn-N12-p956087         | gene |      |
| Bn-scaff_22970_1-p491692 | Bn-N12-p956115         | gene |      |
| Bn-scaff_22970_1-p499830 | Bn-N12-p964230         | gene | exon |
| Bn-scaff_22970_1-p50892  | Bn-N12-p541708         | gene | exon |
| Bn-scaff_22970_1-p51056  | Bn-N2-p771412          | gene |      |
| Bn-scaff_22970_1-p581710 | Bn-N2-p1141057         | gene |      |
| Bn-scaff_22970_1-p72276  | Bn-N12-p559533         | gene |      |
| Bn-scaff_23015_1-p2066   | Bn-N6-p1899416         | gene | exon |
| Bn-scaff_23066_1-p3540   | Bn-N15-p10418325       | gene | exon |
| Bn-scaff_23096_1-p447166 | Bn-N10-p10752753       | gene | exon |
| Bn-scaff_23096_1-p546726 | Bn-N19-p45202855       | gene |      |
| Bn-scaff_23096_1-p548082 | Bn-N19-p45204213       | gene | exon |
| Bn-scaff_23098_1-p304246 | Bn-N8-p1376618         | gene | exon |
| Bn-scaff_23098_1-p319931 | Bn-N8-p1387662         | gene |      |
| Bn-scaff_23098_1-p320181 | Bn-Scaffold02512-p3189 | gene | exon |
| Bn-scaff_23103_1-p2352   | Bn-N19-p25919711       | gene | exon |
| Bn-scaff_23104_1-p232139 | Bn-N12-p32308178       | gene | exon |
| Bn-scaff_23104_1-p29181  | Bn-N12-p32489573       | gene | exon |
| Bn-scaff_23107_1-p115633 | Bn-N10-p111412         | gene | exon |
| Bn-scaff_23107_1-p132163 | Bn-N15-p145114         | gene |      |
| Bn-scaff_23107_1-p158176 | Bn-N15-p170385         | gene |      |
| Bn-scaff_23107_1-p181951 | Bn-N15-p199748         | gene |      |
| Bn-scaff_23108_1-p284977 | Bn-N12-p19136456       | gene | exon |
| Bn-scaff_23108_1-p362932 | Bn-N2-p13429147        | gene | exon |
| Bn-scaff_23140_1-p34812  | Bn-N7-p7126313         | gene | exon |
| Bn-scaff_23140_1-p456    | Bn-N18-p23622812       | gene | exon |
| Bn-scaff_23140_1-p68699  | Bn-N7-p7117612         | gene | exon |
| Bn-scaff_23167_1-p150107 | Bn-N19-p55718471       | gene | exon |
| Bn-scaff_23176_1-p55098  | Bn-N12-p5382551        | gene | exon |
| Bn-scaff_23176_1-p79652  | Bn-N12-p5407807        | gene |      |
| Bn-scaff_23186_1-p102192 | Bn-N15-p46330126       | gene | exon |
| Bn-scaff_23186_1-p102352 | Bn-N15-p46329966       | gene | exon |
| Bn-scaff_23186_1-p18537  | Bn-N15-p46434693       | gene | exon |
| Bn-scaff_23186_1-p256752 | Bn-N15-p46179480       | gene |      |
| Bn-scaff_23186_1-p303048 | Bn-N15-p46131318       | gene | exon |

|                          |                  |      |      |
|--------------------------|------------------|------|------|
| Bn-scaff_23186_1-p303208 | Bn-N15-p46130595 | gene |      |
| Bn-scaff_23186_1-p331289 | Bn-N5-p24167952  | gene |      |
| Bn-scaff_23186_1-p432591 | Bn-N5-p24106491  | gene |      |
| Bn-scaff_23186_1-p52666  | Bn-N15-p46394060 | gene | exon |
| Bn-scaff_23186_1-p72105  | Bn-N15-p46363653 | gene | exon |
| Bn-scaff_23195_1-p9954   | Bn-N15-p18309387 | gene |      |
| Bn-scaff_23200_1-p3350   | Bn-N7-p22025097  | gene | exon |
| Bn-scaff_23207_1-p284979 | Bn-N19-p8223954  | gene | exon |
| Bn-scaff_23207_1-p285998 | Bn-N19-p8222927  | gene | exon |
| Bn-scaff_23207_1-p384863 | Bn-N19-p8114891  | gene | exon |
| Bn-scaff_23207_1-p385010 | Bn-N19-p8114744  | gene |      |
| Bn-scaff_23207_1-p385083 | Bn-N19-p8114671  | gene |      |
| Bn-scaff_23207_1-p477296 | Bn-N9-p5673010   | gene | exon |
| Bn-scaff_23208_1-p22129  | Bn-N19-p44019805 | gene | exon |
| Bn-scaff_23229_1-p41596  | Bn-N14-p3387730  | gene |      |
| Bn-scaff_23229_1-p55001  | Bn-N5-p2219118   | gene |      |
| Bn-scaff_23286_1-p3025   | Bn-N13-p36536860 | gene | exon |
| Bn-scaff_23291_1-p150625 | Bn-N12-p15556889 | gene |      |
| Bn-scaff_23293_1-p107816 | Bn-N19-p22482081 | gene |      |
| Bn-scaff_23293_1-p175881 | Bn-N19-p22425619 | gene |      |
| Bn-scaff_23293_1-p25406  | Bn-N9-p14055857  | gene | exon |
| Bn-scaff_23305_1-p46201  | Bn-N15-p24099905 | gene | exon |
| Bn-scaff_23347_1-p15430  | Bn-N11-p39364344 | gene | exon |
| Bn-scaff_23347_1-p39179  | Bn-N11-p39345740 | gene | exon |
| Bn-scaff_23347_1-p58373  | Bn-N11-p39323391 | gene |      |
| Bn-scaff_23347_1-p58586  | Bn-N11-p39323178 | gene |      |
| Bn-scaff_23347_1-p92439  | Bn-N11-p39280696 | gene |      |
| Bn-scaff_23347_1-p92650  | Bn-N11-p39280485 | gene |      |
| Bn-scaff_23350_1-p770686 | Bn-N2-p26321027  | gene |      |
| Bn-scaff_23400_1-p101355 | Bn-N17-p21558184 | gene |      |
| Bn-scaff_23400_1-p118029 | Bn-N17-p21541510 | gene |      |
| Bn-scaff_23400_1-p249552 | Bn-N17-p21402638 | gene | exon |
| Bn-scaff_23400_1-p264065 | Bn-N17-p21388125 | gene | exon |
| Bn-scaff_23400_1-p265171 | Bn-N17-p21387019 | gene | exon |
| Bn-scaff_23400_1-p508657 | Bn-N17-p21154167 | gene |      |
| Bn-scaff_23400_1-p57185  | Bn-N17-p22576613 | gene |      |
| Bn-scaff_23400_1-p582590 | Bn-N17-p21053844 | gene | exon |
| Bn-scaff_23401_1-p222140 | Bn-N12-p26274755 | gene | exon |
| Bn-scaff_23401_1-p222743 | Bn-N12-p26275358 | gene |      |
| Bn-scaff_23401_1-p222761 | Bn-N12-p26275376 | gene |      |
| Bn-scaff_23401_1-p222826 | Bn-N12-p26275441 | gene |      |
| Bn-scaff_23401_1-p301949 | Bn-N12-p26342631 | gene |      |
| Bn-scaff_23401_1-p303746 | Bn-N2-p17657106  | gene |      |
| Bn-scaff_23401_1-p317800 | Bn-N12-p26358467 | gene |      |
| Bn-scaff_23407_1-p120583 | Bn-N13-p51457114 | gene | exon |
| Bn-scaff_23407_1-p125070 | Bn-N13-p51452471 | gene | exon |
| Bn-scaff_23407_1-p125338 | Bn-N6-p10078134  | gene | exon |
| Bn-scaff_23407_1-p128057 | Bn-N13-p51450003 | gene | exon |
| Bn-scaff_23407_1-p141198 | Bn-N13-p51435797 | gene | exon |
| Bn-scaff_23407_1-p141371 | Bn-N13-p51435624 | gene | exon |
| Bn-scaff_23407_1-p141430 | Bn-N13-p51435565 | gene | exon |
| Bn-scaff_23407_1-p141567 | Bn-N13-p51435428 | gene |      |

|                          |                  |      |      |
|--------------------------|------------------|------|------|
| Bn-scaff_23407_1-p149870 | Bn-N13-p51427052 | gene |      |
| Bn-scaff_23407_1-p26401  | Bn-N6-p10023566  | gene |      |
| Bn-scaff_23407_1-p27013  | Bn-N13-p51554299 | gene |      |
| Bn-scaff_23408_1-p104948 | Bn-N15-p42033158 | gene |      |
| Bn-scaff_23408_1-p202762 | Bn-N15-p42124264 | gene | exon |
| Bn-scaff_23408_1-p243256 | Bn-N15-p42154733 | gene |      |
| Bn-scaff_23408_1-p272922 | Bn-N15-p42180350 | gene | exon |
| Bn-scaff_23408_1-p273674 | Bn-N15-p42181102 | gene |      |
| Bn-scaff_23432_1-p175763 | Bn-N14-p22748412 | gene |      |
| Bn-scaff_23432_1-p175866 | Bn-N14-p22748515 | gene |      |
| Bn-scaff_23432_1-p175867 | Bn-N14-p22748516 | gene |      |
| Bn-scaff_23432_1-p176182 | Bn-N14-p22748856 | gene | exon |
| Bn-scaff_23432_1-p176886 | Bn-N14-p22749536 | gene |      |
| Bn-scaff_23432_1-p176966 | Bn-N14-p22749616 | gene | exon |
| Bn-scaff_23432_1-p213377 | Bn-N14-p22773939 | gene |      |
| Bn-scaff_23432_1-p254884 | Bn-N17-p9131021  | gene | exon |
| Bn-scaff_23472_1-p21637  | Bn-N14-p42609392 | gene |      |
| Bn-scaff_23472_1-p42267  | Bn-N14-p42626788 | gene | exon |
| Bn-scaff_23534_1-p11593  | Bn-N14-p213416   | gene |      |
| Bn-scaff_23534_1-p36688  | Bn-N14-p187301   | gene | exon |
| Bn-scaff_23534_1-p37312  | Bn-N14-p186676   | gene |      |
| Bn-scaff_23534_1-p39080  | Bn-N14-p184907   | gene |      |
| Bn-scaff_23546_1-p29147  | Bn-N12-p13455739 | gene | exon |
| Bn-scaff_23546_1-p29304  | Bn-N12-p13455896 | gene | exon |
| Bn-scaff_23546_1-p35707  | Bn-N12-p13462338 | gene |      |
| Bn-scaff_23546_1-p35786  | Bn-N12-p13462417 | gene |      |
| Bn-scaff_23546_1-p35962  | Bn-N12-p13462593 | gene | exon |
| Bn-scaff_23546_1-p416164 | Bn-N2-p9199425   | gene | exon |
| Bn-scaff_23546_1-p435046 | Bn-N2-p9202142   | gene | exon |
| Bn-scaff_23546_1-p44190  | Bn-N12-p13470821 | gene |      |
| Bn-scaff_23546_1-p82197  | Bn-N12-p13503977 | gene | exon |
| Bn-scaff_23613_1-p26112  | Bn-N5-p7720316   | gene | exon |
| Bn-scaff_23613_1-p35766  | Bn-N14-p13312005 | gene |      |
| Bn-scaff_23613_1-p51738  | Bn-N14-p13299159 | gene |      |
| Bn-scaff_23622_1-p62088  | Bn-N10-p10959317 | gene | exon |
| Bn-scaff_23699_1-p106821 | Bn-N14-p12452253 | gene | exon |
| Bn-scaff_23699_1-p296012 | Bn-N14-p12631929 | gene | exon |
| Bn-scaff_23699_1-p296320 | Bn-N14-p12632236 | gene | exon |
| Bn-scaff_23699_1-p297000 | Bn-N14-p12632916 | gene |      |
| Bn-scaff_23715_1-p109313 | Bn-N8-p20705817  | gene | exon |
| Bn-scaff_23761_1-p249628 | Bn-N13-p64037256 | gene |      |
| Bn-scaff_23761_1-p27239  | Bn-N13-p63750898 | gene |      |
| Bn-scaff_23761_1-p326272 | Bn-N13-p64136202 | gene |      |
| Bn-scaff_23761_1-p326361 | Bn-N8-p13285204  | gene | exon |
| Bn-scaff_23761_1-p35445  | Bn-N8-p13074265  | gene | exon |
| Bn-scaff_23761_1-p392078 | Bn-N13-p64197854 | gene | exon |
| Bn-scaff_23761_1-p408137 | Bn-N13-p64210511 | gene | exon |
| Bn-scaff_23761_1-p434901 | Bn-N13-p64237834 | gene | exon |
| Bn-scaff_23761_1-p530135 | Bn-N13-p64337717 | gene |      |
| Bn-scaff_23761_1-p581335 | Bn-N13-p64389081 | gene | exon |
| Bn-scaff_23761_1-p604319 | Bn-N13-p64412087 | gene |      |
| Bn-scaff_23761_1-p604385 | Bn-N13-p64412153 | gene |      |

|                           |                  |      |      |
|---------------------------|------------------|------|------|
| Bn-scaff_23761_1-p704264  | Bn-N8-p13534677  | gene | exon |
| Bn-scaff_23761_1-p704887  | Bn-N13-p64521312 | gene |      |
| Bn-scaff_23761_1-p727007  | Bn-N13-p64542355 | gene |      |
| Bn-scaff_23761_1-p728473  | Bn-N13-p64543806 | gene |      |
| Bn-scaff_23761_1-p737998  | Bn-N13-p64557277 | gene |      |
| Bn-scaff_23761_1-p738056  | Bn-N13-p64557335 | gene |      |
| Bn-scaff_23761_1-p738582  | Bn-N13-p64557861 | gene | exon |
| Bn-scaff_23761_1-p738585  | Bn-N13-p64557864 | gene | exon |
| Bn-scaff_23761_1-p764152  | Bn-N13-p64582781 | gene | exon |
| Bn-scaff_23771_1-p149473  | Bn-N17-p9505942  | gene |      |
| Bn-scaff_23771_1-p180581  | Bn-N17-p9538692  | gene |      |
| Bn-scaff_23771_1-p195258  | Bn-N17-p12465801 | gene |      |
| Bn-scaff_23795_1-p209345  | Bn-N11-p33025383 | gene | exon |
| Bn-scaff_23795_1-p227140  | Bn-N11-p33007118 | gene |      |
| Bn-scaff_23795_1-p269807  | Bn-N11-p32959163 | gene |      |
| Bn-scaff_23795_1-p82694   | Bn-N11-p14770233 | gene |      |
| Bn-scaff_23795_1-p82795   | Bn-N11-p14770132 | gene |      |
| Bn-scaff_23799_1-p21271   | Bn-N11-p39046393 | gene | exon |
| Bn-scaff_23799_1-p62076   | Bn-N11-p39099716 | gene | exon |
| Bn-scaff_23799_1-p89287   | Bn-N11-p39126052 | gene |      |
| Bn-scaff_23813_1-p241423  | Bn-N12-p12906232 | gene | exon |
| Bn-scaff_23813_1-p396998  | Bn-N2-p8678778   | gene | exon |
| Bn-scaff_23813_1-p397311  | Bn-N2-p8679091   | gene |      |
| Bn-scaff_23813_1-p495084  | Bn-N2-p8744911   | gene | exon |
| Bn-scaff_23813_1-p548372  | Bn-N12-p13147079 | gene |      |
| Bn-scaff_23813_1-p581480  | Bn-N12-p13176839 | gene | exon |
| Bn-scaff_23813_1-p581761  | Bn-N12-p13177120 | gene |      |
| Bn-scaff_23813_1-p582215  | Bn-N12-p13177574 | gene |      |
| Bn-scaff_23813_1-p582286  | Bn-N12-p13177645 | gene |      |
| Bn-scaff_23813_1-p582903  | Bn-N12-p13178262 | gene | exon |
| Bn-scaff_23813_1-p597970  | Bn-N12-p13191805 | gene |      |
| Bn-scaff_23813_1-p603566  | Bn-N12-p13197313 | gene |      |
| Bn-scaff_23813_1-p643415  | Bn-N12-p13245846 | gene |      |
| Bn-scaff_23813_1-p665554  | Bn-N12-p13267502 | gene |      |
| Bn-scaff_23813_1-p807747  | Bn-N12-p13422477 | gene | exon |
| Bn-scaff_23813_1-p807960  | Bn-N12-p13422690 | gene | exon |
| Bn-scaff_23817_1-p83      | Bn-N13-p1472138  | gene | exon |
| Bn-scaff_23821_1-p123235  | Bn-N16-p33429030 | gene |      |
| Bn-scaff_23821_1-p21382   | Bn-N7-p20309626  | gene |      |
| Bn-scaff_23821_1-p21725   | Bn-N16-p33339684 | gene |      |
| Bn-scaff_23821_1-p22581   | Bn-N16-p33340540 | gene |      |
| Bn-scaff_23821_1-p45516   | Bn-N16-p33362757 | gene |      |
| Bn-scaff_23821_1-p45612   | Bn-N16-p33362853 | gene | exon |
| Bn-scaff_23821_1-p45657   | Bn-N16-p33362898 | gene |      |
| Bn-scaff_23821_1-p61146   | Bn-N16-p33374997 | gene | exon |
| Bn-scaff_23821_1-p87496   | Bn-N16-p33399998 | gene | exon |
| Bn-scaff_23825_1-p530     | Bn-N19-p1350584  | gene |      |
| Bn-scaff_23839_1-p144529  | Bn-N17-p28546575 | gene |      |
| Bn-scaff_23839_1-p148899  | Bn-N17-p28550890 | gene |      |
| Bn-scaff_23907_1-p1022401 | Bn-N14-p9582758  | gene |      |
| Bn-scaff_23907_1-p1023804 | Bn-N14-p9584160  | gene | exon |
| Bn-scaff_23907_1-p1137072 | Bn-N14-p9709463  | gene |      |

|                           |                  |      |      |
|---------------------------|------------------|------|------|
| Bn-scaff_23907_1-p195608  | Bn-N14-p8488850  | gene | exon |
| Bn-scaff_23907_1-p261237  | Bn-N5-p5259588   | gene | exon |
| Bn-scaff_23907_1-p29685   | Bn-N5-p7082349   | gene |      |
| Bn-scaff_23907_1-p416774  | Bn-N5-p5296794   | gene | exon |
| Bn-scaff_23907_1-p433016  | Bn-N14-p8919426  | gene |      |
| Bn-scaff_23907_1-p433223  | Bn-N5-p5315855   | gene |      |
| Bn-scaff_23907_1-p434199  | Bn-N5-p5316832   | gene | exon |
| Bn-scaff_23907_1-p497391  | Bn-N5-p5368766   | gene | exon |
| Bn-scaff_23907_1-p542442  | Bn-N14-p9025019  | gene |      |
| Bn-scaff_23907_1-p547717  | Bn-N5-p5414304   | gene | exon |
| Bn-scaff_23907_1-p793109  | Bn-N14-p9289401  | gene |      |
| Bn-scaff_23907_1-p833956  | Bn-N14-p9341108  | gene |      |
| Bn-scaff_23907_1-p930188  | Bn-N14-p9470031  | gene |      |
| Bn-scaff_23907_1-p930514  | Bn-N14-p9470357  | gene |      |
| Bn-scaff_23907_1-p930601  | Bn-N5-p5646532   | gene | exon |
| Bn-scaff_23907_1-p930754  | Bn-N5-p5646685   | gene | exon |
| Bn-scaff_23907_1-p931056  | Bn-N14-p9471008  | gene |      |
| Bn-scaff_23907_1-p931535  | Bn-N14-p9471503  | gene | exon |
| Bn-scaff_23907_1-p931895  | Bn-N14-p9471860  | gene | exon |
| Bn-scaff_23907_1-p985972  | Bn-N5-p5691195   | gene | exon |
| Bn-scaff_23937_1-p26440   | Bn-N18-p32625601 | gene | exon |
| Bn-scaff_23937_1-p36794   | Bn-N15-p15894800 | gene | exon |
| Bn-scaff_23946_1-p35627   | Bn-N14-p965975   | gene | exon |
| Bn-scaff_23946_1-p38726   | Bn-N14-p962885   | gene |      |
| Bn-scaff_23946_1-p65251   | Bn-N14-p936533   | gene |      |
| Bn-scaff_23946_1-p69210   | Bn-N14-p932574   | gene |      |
| Bn-scaff_23946_1-p74762   | Bn-N5-p725211    | gene |      |
| Bn-scaff_23954_1-p1045541 | Bn-N4-p17959348  | gene |      |
| Bn-scaff_23954_1-p1081348 | Bn-N13-p12342526 | gene |      |
| Bn-scaff_23954_1-p1083780 | Bn-N13-p12340049 | gene | exon |
| Bn-scaff_23954_1-p1083875 | Bn-N13-p12339955 | gene |      |
| Bn-scaff_23954_1-p1111123 | Bn-N3-p8707588   | gene | exon |
| Bn-scaff_23954_1-p1112688 | Bn-N13-p12305427 | gene | exon |
| Bn-scaff_23954_1-p119449  | Bn-N14-p51795686 | gene | exon |
| Bn-scaff_23954_1-p132570  | Bn-N13-p13337168 | gene |      |
| Bn-scaff_23954_1-p13556   | Bn-N14-p5582184  | gene | exon |
| Bn-scaff_23954_1-p141044  | Bn-N13-p13328692 | gene |      |
| Bn-scaff_23954_1-p196604  | Bn-N13-p13212624 | gene | exon |
| Bn-scaff_23954_1-p196953  | Bn-N3-p9316350   | gene |      |
| Bn-scaff_23954_1-p209939  | Bn-N13-p13201217 | gene | exon |
| Bn-scaff_23954_1-p228756  | Bn-N13-p13181989 | gene | exon |
| Bn-scaff_23954_1-p239074  | Bn-N3-p9290375   | gene | exon |
| Bn-scaff_23954_1-p254934  | Bn-N3-p9272497   | gene | exon |
| Bn-scaff_23954_1-p269318  | Bn-N13-p13140522 | gene |      |
| Bn-scaff_23954_1-p302686  | Bn-N13-p13109867 | gene |      |
| Bn-scaff_23954_1-p41208   | Bn-N3-p9421464   | gene |      |
| Bn-scaff_23954_1-p47363   | Bn-N13-p13418695 | gene |      |
| Bn-scaff_23954_1-p622637  | Bn-N3-p9069361   | gene |      |
| Bn-scaff_23954_1-p661198  | Bn-N3-p9034675   | gene |      |
| Bn-scaff_23954_1-p768646  | Bn-N13-p12659240 | gene |      |
| Bn-scaff_23954_1-p76992   | Bn-N13-p13399581 | gene |      |
| Bn-scaff_23954_1-p870079  | Bn-N3-p8926762   | gene | exon |



|                          |                  |      |      |
|--------------------------|------------------|------|------|
| Bn-scaff_23954_1-p872722 | Bn-N3-p8924092   | gene | exon |
| Bn-scaff_23954_1-p882621 | Bn-N13-p12563793 | gene |      |
| Bn-scaff_23954_1-p971859 | Bn-N13-p12466319 | gene | exon |
| Bn-scaff_23957_1-p127219 | Bn-N7-p20887115  | gene | exon |
| Bn-scaff_23957_1-p150263 | Bn-N16-p34373829 | gene | exon |
| Bn-scaff_23957_1-p150282 | Bn-N16-p34373848 | gene | exon |
| Bn-scaff_23957_1-p150459 | Bn-N16-p34374025 | gene |      |
| Bn-scaff_23957_1-p150526 | Bn-N16-p34374092 | gene | exon |
| Bn-scaff_23957_1-p151052 | Bn-N16-p34374618 | gene | exon |
| Bn-scaff_23957_1-p163621 | Bn-N16-p34392576 | gene | exon |
| Bn-scaff_23957_1-p174718 | Bn-N16-p34411232 | gene | exon |
| Bn-scaff_23957_1-p175042 | Bn-N16-p34411556 | gene | exon |
| Bn-scaff_23957_1-p250533 | Bn-N16-p34499856 | gene |      |
| Bn-scaff_23957_1-p252406 | Bn-N16-p34501681 | gene | exon |
| Bn-scaff_23957_1-p260266 | Bn-N16-p34508295 | gene |      |
| Bn-scaff_23957_1-p36160  | Bn-N16-p34276393 | gene | exon |
| Bn-scaff_23957_1-p369426 | Bn-N16-p34623151 | gene |      |
| Bn-scaff_23957_1-p37081  | Bn-N16-p34277303 | gene |      |
| Bn-scaff_23957_1-p37633  | Bn-N7-p20846821  | gene | exon |
| Bn-scaff_23957_1-p393528 | Bn-N16-p34642897 | gene |      |
| Bn-scaff_23957_1-p403566 | Bn-N16-p34652877 | gene | exon |
| Bn-scaff_23957_1-p419108 | Bn-N16-p34667402 | gene | exon |
| Bn-scaff_23957_1-p484991 | Bn-N16-p34734914 | gene | exon |
| Bn-scaff_23957_1-p484997 | Bn-N16-p34734919 | gene | exon |
| Bn-scaff_23957_1-p488858 | Bn-N16-p34739912 | gene | exon |
| Bn-scaff_23957_1-p676556 | Bn-N16-p34935673 | gene | exon |
| Bn-scaff_23957_1-p689992 | Bn-N16-p34948994 | gene | exon |
| Bn-scaff_23957_1-p704015 | Bn-N16-p34963159 | gene |      |
| Bn-scaff_23974_1-p14812  | Bn-N14-p989242   | gene | exon |
| Bn-scaff_24047_1-p23400  | Bn-N2-p12038332  | gene | exon |
| Bn-scaff_24104_1-p111316 | Bn-N16-p40524612 | gene |      |
| Bn-scaff_24104_1-p115364 | Bn-N7-p25206725  | gene | exon |
| Bn-scaff_24104_1-p153408 | Bn-N16-p40476497 | gene |      |
| Bn-scaff_24104_1-p170165 | Bn-N16-p40465775 | gene |      |
| Bn-scaff_24104_1-p19325  | Bn-N7-p25309407  | gene | exon |
| Bn-scaff_24104_1-p20590  | Bn-N7-p25308105  | gene | exon |
| Bn-scaff_24104_1-p344071 | Bn-N7-p25024652  | gene |      |
| Bn-scaff_24104_1-p345097 | Bn-N16-p40292325 | gene |      |
| Bn-scaff_24104_1-p359336 | Bn-N16-p40274395 | gene |      |
| Bn-scaff_24104_1-p386708 | Bn-N16-p40250112 | gene | exon |
| Bn-scaff_24108_1-p456844 | Bn-N19-p51918660 | gene |      |
| Bn-scaff_24119_1-p1067   | Bn-N14-p14393284 | gene | exon |
| Bn-scaff_24123_1-p35437  | Bn-N14-p14590283 | gene | exon |
| Bn-scaff_24126_1-p13903  | Bn-N15-p26111409 | gene |      |
| Bn-scaff_24134_1-p25752  | Bn-N18-p11711613 | gene |      |
| Bn-scaff_24208_1-p74641  | Bn-N18-p15662944 | gene | exon |
| Bn-scaff_24236_1-p107377 | Bn-N11-p21904091 | gene |      |
| Bn-scaff_24236_1-p277754 | Bn-N11-p22097234 | gene | exon |
| Bn-scaff_24236_1-p297635 | Bn-N11-p22127937 | gene |      |
| Bn-scaff_24236_1-p343935 | Bn-N11-p22163436 | gene |      |
| Bn-scaff_24236_1-p346915 | Bn-N11-p22166430 | gene |      |
| Bn-scaff_24236_1-p348123 | Bn-N11-p22167637 | gene |      |

|                          |                  |      |      |
|--------------------------|------------------|------|------|
| Bn-scaff_24236_1-p425705 | Bn-N11-p22259474 | gene | exon |
| Bn-scaff_24236_1-p426034 | Bn-N11-p22259806 | gene | exon |
| Bn-scaff_24236_1-p473198 | Bn-N11-p22303177 | gene | exon |
| Bn-scaff_24236_1-p485959 | Bn-N11-p22319804 | gene |      |
| Bn-scaff_24251_1-p56129  | Bn-N15-p48109457 | gene | exon |
| Bn-scaff_24251_1-p57967  | Bn-N15-p48107618 | gene |      |
| Bn-scaff_24451_1-p4603   | Bn-N19-p46257452 | gene | exon |
| Bn-scaff_24457_1-p1741   | Bn-N13-p58946328 | gene | exon |
| Bn-scaff_24459_1-p11374  | Bn-N13-p33973659 | gene | exon |
| Bn-scaff_24459_1-p5391   | Bn-N13-p33968181 | gene |      |
| Bn-scaff_24466_1-p53535  | Bn-N11-p37961653 | gene |      |
| Bn-scaff_24466_1-p65988  | Bn-N1-p22667184  | gene |      |
| Bn-scaff_24559_1-p418    | Bn-N10-p2527567  | gene | exon |
| Bn-scaff_24602_1-p69684  | Bn-N14-p28925360 | gene |      |
| Bn-scaff_24608_1-p276823 | Bn-N11-p29085158 | gene |      |
| Bn-scaff_24631_1-p150378 | Bn-N15-p19696952 | gene | exon |
| Bn-scaff_24631_1-p184986 | Bn-N13-p54890638 | gene | exon |
| Bn-scaff_24631_1-p187311 | Bn-N13-p54892951 | gene |      |
| Bn-scaff_24631_1-p215956 | Bn-N8-p15971865  | gene | exon |
| Bn-scaff_24631_1-p251065 | Bn-N13-p54990282 | gene | exon |
| Bn-scaff_24631_1-p251133 | Bn-N13-p54990350 | gene |      |
| Bn-scaff_24631_1-p276017 | Bn-N13-p55012734 | gene | exon |
| Bn-scaff_24631_1-p316671 | Bn-N13-p55054599 | gene |      |
| Bn-scaff_24631_1-p372982 | Bn-N13-p55109430 | gene |      |
| Bn-scaff_24631_1-p383340 | Bn-N8-p15885084  | gene | exon |
| Bn-scaff_24631_1-p383554 | Bn-N8-p15884213  | gene | exon |
| Bn-scaff_24631_1-p471093 | Bn-N13-p55220190 | gene | exon |
| Bn-scaff_24631_1-p501178 | Bn-N8-p15820613  | gene | exon |
| Bn-scaff_24631_1-p63534  | Bn-N13-p54767699 | gene | exon |
| Bn-scaff_24631_1-p745795 | Bn-N8-p15696130  | gene |      |
| Bn-scaff_24631_1-p801855 | Bn-N8-p15720124  | gene |      |
| Bn-scaff_24680_1-p45025  | Bn-N16-p2986818  | gene |      |
| Bn-scaff_24680_1-p45076  | Bn-N16-p2986768  | gene |      |
| Bn-scaff_24680_1-p46902  | Bn-N16-p2984941  | gene | exon |
| Bn-scaff_24705_1-p95     | Bn-N19-p48555224 | gene | exon |
| Bn-scaff_24721_1-p10525  | Bn-N11-p20406726 | gene | exon |
| Bn-scaff_24721_1-p257717 | Bn-N11-p20169021 | gene | exon |
| Bn-scaff_24721_1-p37669  | Bn-N11-p20382982 | gene |      |
| Bn-scaff_24721_1-p38435  | Bn-N11-p20382216 | gene | exon |
| Bn-scaff_24721_1-p83101  | Bn-N11-p20336263 | gene | exon |
| Bn-scaff_24721_1-p83732  | Bn-N11-p20335632 | gene | exon |
| Bn-scaff_24721_1-p83843  | Bn-N11-p20335521 | gene |      |
| Bn-scaff_24721_1-p83949  | Bn-N11-p20335415 | gene | exon |
| Bn-scaff_24726_1-p33555  | Bn-N13-p54303531 | gene | exon |
| Bn-scaff_24726_1-p33634  | Bn-N13-p54303453 | gene | exon |
| Bn-scaff_24726_1-p33823  | Bn-N13-p54303264 | gene | exon |
| Bn-scaff_24726_1-p39008  | Bn-N8-p16275326  | gene | exon |
| Bn-scaff_24859_1-p45913  | Bn-N14-p1101599  | gene | exon |
| Bn-scaff_24869_1-p119638 | Bn-N11-p10424185 | gene |      |
| Bn-scaff_24869_1-p147699 | Bn-N11-p10396879 | gene |      |
| Bn-scaff_24947_1-p27411  | Bn-N11-p13224806 | gene |      |
| Bn-scaff_24947_1-p7191   | Bn-N11-p13245581 | gene |      |

|                          |                  |      |      |
|--------------------------|------------------|------|------|
| Bn-scaff_24947_1-p79168  | Bn-N11-p13166107 | gene | exon |
| Bn-scaff_24947_1-p9756   | Bn-N11-p13243006 | gene | exon |
| Bn-scaff_24979_1-p13103  | Bn-N14-p44929998 | gene |      |
| Bn-scaff_24979_1-p132892 | Bn-N14-p45097950 | gene |      |
| Bn-scaff_24979_1-p134759 | Bn-N4-p13660105  | gene | exon |
| Bn-scaff_24979_1-p162534 | Bn-N14-p45134860 | gene |      |
| Bn-scaff_24979_1-p163133 | Bn-N14-p45135466 | gene |      |
| Bn-scaff_24979_1-p163668 | Bn-N14-p45135989 | gene |      |
| Bn-scaff_24979_1-p169850 | Bn-N14-p45151016 | gene |      |
| Bn-scaff_24979_1-p40341  | Bn-N14-p44997527 | gene |      |
| Bn-scaff_24979_1-p40600  | Bn-N14-p44997786 | gene |      |
| Bn-scaff_24979_1-p40845  | Bn-N4-p13554052  | gene | exon |
| Bn-scaff_24979_1-p41125  | Bn-N14-p44998344 | gene |      |
| Bn-scaff_24979_1-p46544  | Bn-N14-p45002642 | gene |      |
| Bn-scaff_24979_1-p46937  | Bn-N14-p45003035 | gene |      |
| Bn-scaff_24979_1-p7134   | Bn-N14-p44918337 | gene |      |
| Bn-scaff_24979_1-p73839  | Bn-N14-p45036186 | gene |      |
| Bn-scaff_24979_1-p980    | Bn-N14-p44915896 | gene |      |
| Bn-scaff_24999_1-p32039  | Bn-N19-p14785578 | gene | exon |
| Bn-scaff_25012_1-p10988  | Bn-N14-p8274921  | gene | exon |
| Bn-scaff_25040_1-p24261  | Bn-N5-p4607613   | gene |      |
| Bn-scaff_25071_1-p14638  | Bn-N12-p43936037 | gene | exon |
| Bn-scaff_25094_1-p126581 | Bn-N13-p35903137 | gene | exon |
| Bn-scaff_25094_1-p13129  | Bn-N13-p35717299 | gene |      |
| Bn-scaff_25094_1-p13184  | Bn-N13-p35717355 | gene |      |
| Bn-scaff_25094_1-p131956 | Bn-N13-p35906439 | gene |      |
| Bn-scaff_25094_1-p26060  | Bn-N13-p35724962 | gene |      |
| Bn-scaff_25094_1-p26342  | Bn-N13-p35725238 | gene | exon |
| Bn-scaff_25094_1-p269207 | Bn-N13-p36046561 | gene |      |
| Bn-scaff_25094_1-p336881 | Bn-N6-p18171451  | gene | exon |
| Bn-scaff_25094_1-p339638 | Bn-N13-p36117613 | gene |      |
| Bn-scaff_25094_1-p345039 | Bn-N13-p36122969 | gene |      |
| Bn-scaff_25094_1-p413818 | Bn-N13-p36190936 | gene |      |
| Bn-scaff_25094_1-p497096 | Bn-N13-p36278159 | gene | exon |
| Bn-scaff_25094_1-p9143   | Bn-N13-p35715570 | gene | exon |
| Bn-scaff_25107_1-p22878  | Bn-N16-p3439756  | gene |      |
| Bn-scaff_25107_1-p22897  | Bn-N16-p3439775  | gene |      |
| Bn-scaff_25139_1-p2069   | Bn-N14-p45733861 | gene |      |
| Bn-scaff_25139_1-p5705   | Bn-N14-p45737496 | gene |      |
| Bn-scaff_25149_1-p76377  | Bn-N11-p4592677  | gene |      |
| Bn-scaff_25149_1-p79962  | Bn-N11-p4596273  | gene | exon |
| Bn-scaff_25254_1-p499    | Bn-N3-p10550968  | gene | exon |
| Bn-scaff_25262_1-p114443 | Bn-N12-p19855348 | gene | exon |
| Bn-scaff_25311_1-p1307   | Bn-N18-p30536578 | gene |      |
| Bn-scaff_25323_1-p33026  | Bn-N13-p39756415 | gene |      |
| Bn-scaff_25323_1-p7019   | Bn-N13-p39724930 | gene | exon |
| Bn-scaff_25422_1-p95222  | Bn-N1-p6813440   | gene | exon |
| Bn-scaff_25427_1-p17459  | Bn-N17-p39795270 | gene | exon |
| Bn-scaff_25432_1-p24804  | Bn-N14-p23772711 | gene | exon |
| Bn-scaff_25432_1-p31881  | Bn-N14-p23780006 | gene | exon |
| Bn-scaff_25432_1-p33326  | Bn-N14-p23781451 | gene | exon |
| Bn-scaff_25457_1-p244144 | Bn-N10-p10288025 | gene | exon |

|                          |                         |      |      |
|--------------------------|-------------------------|------|------|
| Bn-scaff_25457_1-p244727 | Bn-N19-p44133882        | gene | exon |
| Bn-scaff_25457_1-p258094 | Bn-N19-p44119976        | gene | exon |
| Bn-scaff_25457_1-p279056 | Bn-N19-p44105020        | gene |      |
| Bn-scaff_25457_1-p279291 | Bn-N19-p44104785        | gene | exon |
| Bn-scaff_25457_1-p279509 | Bn-N19-p44104567        | gene |      |
| Bn-scaff_25457_1-p279510 | Bn-N19-p44104566        | gene |      |
| Bn-scaff_25457_1-p297013 | Bn-N19-p44063701        | gene | exon |
| Bn-scaff_25457_1-p297098 | Bn-N19-p44063615        | gene | exon |
| Bn-scaff_25457_1-p297146 | Bn-N19-p44063568        | gene |      |
| Bn-scaff_25457_1-p297885 | Bn-N19-p44062830        | gene | exon |
| Bn-scaff_25466_1-p11848  | Bn-N16-p36827057        | gene |      |
| Bn-scaff_25466_1-p12042  | Bn-N16-p36826863        | gene |      |
| Bn-scaff_25466_1-p12578  | Bn-N16-p36826327        | gene |      |
| Bn-scaff_25466_1-p12628  | Bn-N16-p36826277        | gene |      |
| Bn-scaff_25466_1-p12702  | Bn-N16-p36826202        | gene |      |
| Bn-scaff_25466_1-p13102  | Bn-N16-p36825796        | gene |      |
| Bn-scaff_25466_1-p13157  | Bn-N16-p36825741        | gene |      |
| Bn-scaff_25466_1-p13426  | Bn-N16-p36825472        | gene |      |
| Bn-scaff_25466_1-p14024  | Bn-N16-p36824874        | gene |      |
| Bn-scaff_25466_1-p14416  | Bn-N16-p36824482        | gene |      |
| Bn-scaff_25466_1-p15088  | Bn-N16-p36823851        | gene |      |
| Bn-scaff_25466_1-p15362  | Bn-N16-p36823577        | gene |      |
| Bn-scaff_25466_1-p15589  | Bn-N16-p36823350        | gene |      |
| Bn-scaff_25466_1-p155973 | Bn-N16-p36690681        | gene | exon |
| Bn-scaff_25466_1-p192846 | Bn-N7-p22299183         | gene | exon |
| Bn-scaff_25466_1-p29121  | Bn-N16-p36816062        | gene |      |
| Bn-scaff_25466_1-p29346  | Bn-N16-p36815838        | gene |      |
| Bn-scaff_25466_1-p8800   | Bn-N16-p36830106        | gene |      |
| Bn-scaff_25466_1-p9410   | Bn-N16-p36829495        | gene | exon |
| Bn-scaff_25491_1-p389    | Bn-Scaffold02892-p2725  | gene | exon |
| Bn-scaff_25491_1-p7540   | Bn-N15-p36409108        | gene | exon |
| Bn-scaff_25491_1-p81630  | Bn-N15-p36486274        | gene |      |
| Bn-scaff_25543_1-p200758 | Bn-N17-p7436496         | gene | exon |
| Bn-scaff_25543_1-p56354  | Bn-N2-p22105856         | gene |      |
| Bn-scaff_25545_1-p10968  | Bn-Scaffold00952-p31257 | gene |      |
| Bn-scaff_25545_1-p11627  | Bn-Scaffold00952-p30598 | gene |      |
| Bn-scaff_25595_1-p241671 | Bn-N5-p15348794         | gene | exon |
| Bn-scaff_25595_1-p331991 | Bn-N5-p15406615         | gene | exon |
| Bn-scaff_25595_1-p414663 | Bn-N15-p31901716        | gene | exon |
| Bn-scaff_25595_1-p414764 | Bn-N15-p31901817        | gene |      |
| Bn-scaff_25628_1-p36781  | Bn-N15-p32224239        | gene | exon |
| Bn-scaff_25628_1-p37066  | Bn-N15-p32224524        | gene | exon |
| Bn-scaff_25628_1-p37260  | Bn-N15-p32224719        | gene | exon |
| Bn-scaff_25686_1-p7882   | Bn-N14-p1921526         | gene | exon |
| Bn-scaff_25686_1-p9156   | Bn-N14-p1922800         | gene | exon |
| Bn-scaff_25690_1-p287    | Bn-Scaffold01365-p5237  | gene |      |
| Bn-scaff_25704_1-p19623  | Bn-N12-p12432867        | gene | exon |
| Bn-scaff_25705_1-p102800 | Bn-N15-p10410031        | gene |      |
| Bn-scaff_25869_1-p1017   | Bn-N16-p2005710         | gene |      |
| Bn-scaff_25869_1-p1568   | Bn-N16-p2005164         | gene |      |
| Bn-scaff_25870_1-p48609  | Bn-N14-p41769456        | gene |      |
| Bn-scaff_25870_1-p80252  | Bn-N14-p41741508        | gene |      |

|                          |                  |      |      |
|--------------------------|------------------|------|------|
| Bn-scaff_25870_1-p81302  | Bn-N14-p41740458 | gene |      |
| Bn-scaff_25960_1-p104315 | Bn-N14-p41952984 | gene |      |
| Bn-scaff_25960_1-p104455 | Bn-N14-p41953124 | gene |      |
| Bn-scaff_25960_1-p55555  | Bn-N14-p41903699 | gene | exon |
| Bn-scaff_25960_1-p76578  | Bn-N4-p11416670  | gene |      |
| Bn-scaff_25960_1-p76841  | Bn-N4-p11416929  | gene |      |
| Bn-scaff_25981_1-p191746 | Bn-N8-p3797452   | gene | exon |
| Bn-scaff_25991_1-p10385  | Bn-N19-p9495974  | gene | exon |
| Bn-scaff_25991_1-p10879  | Bn-N19-p9495480  | gene | exon |
| Bn-scaff_26023_1-p10596  | Bn-N12-p32081113 | gene |      |
| Bn-scaff_26023_1-p19550  | Bn-N12-p32072317 | gene |      |
| Bn-scaff_26033_1-p26555  | Bn-N14-p50973719 | gene |      |
| Bn-scaff_26075_1-p534671 | Bn-N15-p25615011 | gene |      |
| Bn-scaff_26075_1-p577183 | Bn-N6-p8304848   | gene | exon |
| Bn-scaff_26086_1-p11779  | Bn-N12-p45658942 | gene |      |
| Bn-scaff_26139_1-p209686 | Bn-N14-p35183507 | gene | exon |
| Bn-scaff_26139_1-p268705 | Bn-N14-p35134924 | gene | exon |
| Bn-scaff_26139_1-p283121 | Bn-N14-p35124802 | gene |      |
| Bn-scaff_26139_1-p283611 | Bn-N14-p35124312 | gene |      |
| Bn-scaff_26139_1-p304734 | Bn-N14-p35103174 | gene |      |
| Bn-scaff_26139_1-p305170 | Bn-N14-p35102738 | gene | exon |
| Bn-scaff_26139_1-p307625 | Bn-N14-p35100385 | gene |      |
| Bn-scaff_26139_1-p313365 | Bn-N4-p5564578   | gene |      |
| Bn-scaff_26139_1-p313572 | Bn-N4-p5564369   | gene |      |
| Bn-scaff_26139_1-p342322 | Bn-N14-p35058065 | gene |      |
| Bn-scaff_26139_1-p376956 | Bn-N11-p13807196 | gene | exon |
| Bn-scaff_26139_1-p54494  | Bn-N14-p35315830 | gene |      |
| Bn-scaff_26139_1-p95647  | Bn-N4-p5724551   | gene | exon |
| Bn-scaff_26293_1-p117280 | Bn-N18-p1633914  | gene |      |
| Bn-scaff_26293_1-p117439 | Bn-N18-p1633794  | gene | exon |
| Bn-scaff_26293_1-p133260 | Bn-N8-p20993023  | gene |      |
| Bn-scaff_26293_1-p135449 | Bn-N18-p1621343  | gene |      |
| Bn-scaff_26293_1-p141921 | Bn-N18-p1616232  | gene |      |
| Bn-scaff_26293_1-p142747 | Bn-N18-p1615521  | gene |      |
| Bn-scaff_26293_1-p14281  | Bn-N18-p1744846  | gene |      |
| Bn-scaff_26293_1-p158489 | Bn-N8-p21010352  | gene | exon |
| Bn-scaff_26293_1-p89381  | Bn-N18-p1665044  | gene |      |
| Bn-scaff_26293_1-p92022  | Bn-N18-p1659195  | gene |      |
| Bn-scaff_26297_1-p1200   | Bn-N17-p32880785 | gene | exon |
| Bn-scaff_26320_1-p109124 | Bn-N13-p34623036 | gene |      |
| Bn-scaff_26320_1-p156027 | Bn-N13-p34574230 | gene | exon |
| Bn-scaff_26320_1-p163494 | Bn-N13-p34570495 | gene |      |
| Bn-scaff_26320_1-p235535 | Bn-N13-p34500911 | gene |      |
| Bn-scaff_26320_1-p236701 | Bn-N13-p34499745 | gene | exon |
| Bn-scaff_26320_1-p242800 | Bn-N8-p15558094  | gene | exon |
| Bn-scaff_26320_1-p297674 | Bn-N13-p34440251 | gene | exon |
| Bn-scaff_26320_1-p298294 | Bn-N13-p34439630 | gene | exon |
| Bn-scaff_26320_1-p298590 | Bn-N13-p34439334 | gene |      |
| Bn-scaff_26320_1-p35454  | Bn-N13-p34698798 | gene | exon |
| Bn-scaff_26320_1-p35819  | Bn-N13-p34698432 | gene | exon |
| Bn-scaff_26391_1-p10846  | Bn-N14-p30055305 | gene |      |
| Bn-scaff_26391_1-p192467 | Bn-N14-p29865387 | gene | exon |

|                          |                        |      |      |
|--------------------------|------------------------|------|------|
| Bn-scaff_26391_1-p292417 | Bn-N4-p2135748         | gene | exon |
| Bn-scaff_26391_1-p89273  | Bn-N4-p1987134         | gene | exon |
| Bn-scaff_26407_1-p187613 | Bn-N15-p35073887       | gene | exon |
| Bn-scaff_26407_1-p187668 | Bn-N18-p20368116       | gene |      |
| Bn-scaff_26407_1-p209243 | Bn-N12-p19690584       | gene |      |
| Bn-scaff_26505_1-p5590   | Bn-N13-p32203145       | gene | exon |
| Bn-scaff_26506_1-p42166  | Bn-N18-p17060265       | gene |      |
| Bn-scaff_26642_1-p111569 | Bn-N13-p59139337       | gene |      |
| Bn-scaff_26642_1-p111647 | Bn-N13-p59139415       | gene |      |
| Bn-scaff_26642_1-p134911 | Bn-N13-p59182158       | gene |      |
| Bn-scaff_26642_1-p135036 | Bn-N13-p59182283       | gene |      |
| Bn-scaff_26642_1-p50926  | Bn-N13-p59069525       | gene |      |
| Bn-scaff_26642_1-p51416  | Bn-N13-p59070008       | gene | exon |
| Bn-scaff_26642_1-p52834  | Bn-N13-p59071429       | gene |      |
| Bn-scaff_26642_1-p52929  | Bn-N13-p59071522       | gene |      |
| Bn-scaff_26712_1-p25842  | Bn-N12-p41148444       | gene | exon |
| Bn-scaff_26712_1-p26029  | Bn-N12-p41148641       | gene |      |
| Bn-scaff_26712_1-p26624  | Bn-N2-p25339339        | gene |      |
| Bn-scaff_26764_1-p779    | Bn-N6-p22850930        | gene |      |
| Bn-scaff_26787_1-p102596 | Bn-N14-p53518082       | gene |      |
| Bn-scaff_26787_1-p10517  | Bn-N14-p53411349       | gene | exon |
| Bn-scaff_26787_1-p20789  | Bn-N14-p53422501       | gene |      |
| Bn-scaff_26787_1-p23954  | Bn-N14-p53425949       | gene |      |
| Bn-scaff_26787_1-p58847  | Bn-N4-p19897065        | gene | exon |
| Bn-scaff_26846_1-p38699  | Bn-N13-p58699520       | gene | exon |
| Bn-scaff_26846_1-p40355  | Bn-N13-p58701178       | gene | exon |
| Bn-scaff_26859_1-p3097   | Bn-N18-p20939796       | gene | exon |
| Bn-scaff_26863_1-p685    | Bn-N17-p13598060       | gene |      |
| Bn-scaff_26877_1-p31852  | Bn-N14-p35952          | gene |      |
| Bn-scaff_26877_1-p40234  | Bn-N14-p28402          | gene |      |
| Bn-scaff_26877_1-p64540  | Bn-N5-p15900           | gene |      |
| Bn-scaff_26946_1-p175478 | Bn-N4-p2308299         | gene |      |
| Bn-scaff_26946_1-p37150  | Bn-N4-p1917705         | gene | exon |
| Bn-scaff_26974_1-p8519   | Bn-N17-p23580284       | gene | exon |
| Bn-scaff_26997_1-p131520 | Bn-N15-p35988056       | gene |      |
| Bn-scaff_26997_1-p86978  | Bn-N15-p35927460       | gene | exon |
| Bn-scaff_27039_1-p269523 | Bn-N12-p15001910       | gene | exon |
| Bn-scaff_27039_1-p483666 | Bn-N2-p10167349        | gene | exon |
| Bn-scaff_27039_1-p483799 | Bn-Scaffold02199-p3036 | gene |      |
| Bn-scaff_27039_1-p485697 | Bn-Scaffold02199-p1417 | gene | exon |
| Bn-scaff_27039_1-p538644 | Bn-N12-p15148139       | gene | exon |
| Bn-scaff_27039_1-p647665 | Bn-N14-p50493911       | gene |      |
| Bn-scaff_27039_1-p74093  | Bn-N2-p10029465        | gene | exon |
| Bn-scaff_27050_1-p101349 | Bn-N5-p15270249        | gene | exon |
| Bn-scaff_27050_1-p150244 | Bn-N9-p22094465        | gene |      |
| Bn-scaff_27059_1-p12201  | Bn-N17-p48820293       | gene | exon |
| Bn-scaff_27059_1-p12272  | Bn-N17-p48820364       | gene | exon |
| Bn-scaff_27059_1-p12283  | Bn-N6-p26112886        | gene | exon |
| Bn-scaff_27059_1-p23114  | Bn-Scaffold01198-p8135 | gene |      |
| Bn-scaff_27059_1-p23212  | Bn-N6-p26125678        | gene |      |
| Bn-scaff_27076_1-p79989  | Bn-N6-p15604921        | gene |      |
| Bn-scaff_27076_1-p80568  | Bn-N13-p39647544       | gene |      |

|                          |                       |      |      |
|--------------------------|-----------------------|------|------|
| Bn-scaff_27129_1-p119948 | Bn-N1-p9440919        | gene |      |
| Bn-scaff_27129_1-p129919 | Bn-N1-p9458746        | gene | exon |
| Bn-scaff_27129_1-p179619 | Bn-N1-p9512913        | gene | exon |
| Bn-scaff_27129_1-p200492 | Bn-N11-p14427160      | gene |      |
| Bn-scaff_27180_1-p4389   | Bn-N2-p6807343        | gene | exon |
| Bn-scaff_27198_1-p101077 | Bn-N13-p2429962       | gene |      |
| Bn-scaff_27198_1-p221778 | Bn-N13-p2551115       | gene |      |
| Bn-scaff_27198_1-p254278 | Bn-N13-p2601663       | gene |      |
| Bn-scaff_27198_1-p254314 | Bn-N13-p2601699       | gene |      |
| Bn-scaff_27198_1-p263000 | Bn-N13-p2610646       | gene |      |
| Bn-scaff_27198_1-p266270 | Bn-N3-p2099214        | gene |      |
| Bn-scaff_27198_1-p300707 | Bn-Scaffold10098-p454 | gene | exon |
| Bn-scaff_27198_1-p421561 | Bn-N13-p2754152       | gene |      |
| Bn-scaff_27198_1-p445589 | Bn-N6-p15413329       | gene |      |
| Bn-scaff_27198_1-p574582 | Bn-N13-p2896117       | gene |      |
| Bn-scaff_27198_1-p578320 | Bn-N13-p2899855       | gene |      |
| Bn-scaff_27278_1-p1211   | Bn-N1-p23796154       | gene | exon |
| Bn-scaff_27313_1-p451    | Bn-N13-p21632489      | gene |      |
| Bn-scaff_27313_1-p653    | Bn-N13-p21632294      | gene |      |
| Bn-scaff_27421_1-p102892 | Bn-N6-p1414544        | gene | exon |
| Bn-scaff_27421_1-p106897 | Bn-N16-p5090891       | gene |      |
| Bn-scaff_27421_1-p108926 | Bn-N16-p5088862       | gene |      |
| Bn-scaff_27421_1-p11544  | Bn-N11-p30023358      | gene | exon |
| Bn-scaff_27421_1-p27395  | Bn-N16-p5172613       | gene | exon |
| Bn-scaff_27421_1-p7352   | Bn-N16-p5188061       | gene |      |
| Bn-scaff_27421_1-p7596   | Bn-N16-p5187817       | gene |      |
| Bn-scaff_27421_1-p7687   | Bn-N16-p5187726       | gene |      |
| Bn-scaff_27421_1-p8399   | Bn-N16-p5187014       | gene |      |
| Bn-scaff_27421_1-p9012   | Bn-N16-p5186401       | gene |      |
| Bn-scaff_27421_1-p9941   | Bn-N16-p5185472       | gene |      |
| Bn-scaff_27451_1-p7081   | Bn-N14-p19146356      | gene |      |
| Bn-scaff_27469_1-p23521  | Bn-N14-p2551829       | gene |      |
| Bn-scaff_27469_1-p28443  | Bn-N14-p2541002       | gene |      |
| Bn-scaff_27469_1-p73595  | Bn-N14-p2496913       | gene |      |
| Bn-scaff_27469_1-p73823  | Bn-N5-p1644124        | gene |      |
| Bn-scaff_27469_1-p80430  | Bn-N14-p2490076       | gene | exon |
| Bn-scaff_27513_1-p8405   | Bn-N14-p16291446      | gene | exon |
| Bn-scaff_27554_1-p3448   | Bn-N19-p42548736      | gene |      |
| Bn-scaff_27554_1-p3917   | Bn-N19-p42548267      | gene |      |
| Bn-scaff_27567_1-p347    | Bn-N9-p26641275       | gene | exon |
| Bn-scaff_27585_1-p898    | Bn-N1-p14798759       | gene | exon |
| Bn-scaff_27630_1-p584    | Bn-N16-p5213075       | gene | exon |
| Bn-scaff_27634_1-p12586  | Bn-N14-p20001609      | gene | exon |
| Bn-scaff_27634_1-p129708 | Bn-N14-p19865341      | gene |      |
| Bn-scaff_27634_1-p84941  | Bn-N14-p19917307      | gene |      |
| Bn-scaff_27634_1-p85009  | Bn-N14-p19917239      | gene |      |
| Bn-scaff_27634_1-p85133  | Bn-N14-p19917115      | gene |      |
| Bn-scaff_27634_1-p90485  | Bn-N14-p19911824      | gene | exon |
| Bn-scaff_27650_1-p11659  | Bn-N19-p3827541       | gene | exon |
| Bn-scaff_27670_1-p347062 | Bn-N12-p4549883       | gene | exon |
| Bn-scaff_27670_1-p366718 | Bn-N2-p3649033        | gene | exon |
| Bn-scaff_27676_1-p175780 | Bn-N14-p54715295      | gene |      |

|                          |                        |      |      |
|--------------------------|------------------------|------|------|
| Bn-scaff_27676_1-p176043 | Bn-N14-p54715554       | gene | exon |
| Bn-scaff_27676_1-p191497 | Bn-N14-p54729514       | gene |      |
| Bn-scaff_27676_1-p191772 | Bn-N4-p20962060        | gene | exon |
| Bn-scaff_27676_1-p33891  | Bn-N4-p20817866        | gene | exon |
| Bn-scaff_27677_1-p105296 | Bn-N13-p20804689       | gene |      |
| Bn-scaff_27677_1-p118912 | Bn-N13-p20797073       | gene | exon |
| Bn-scaff_27677_1-p125947 | Bn-Scaffold11358-p750  | gene | exon |
| Bn-scaff_27677_1-p145105 | Bn-N15-p36473267       | gene |      |
| Bn-scaff_27677_1-p196839 | Bn-N2-p14964649        | gene |      |
| Bn-scaff_27677_1-p236486 | Bn-N13-p20682700       | gene |      |
| Bn-scaff_27677_1-p246414 | Bn-N3-p13529497        | gene | exon |
| Bn-scaff_27677_1-p246472 | Bn-N3-p13529439        | gene | exon |
| Bn-scaff_27677_1-p247580 | Bn-N3-p13528428        | gene | exon |
| Bn-scaff_27677_1-p247804 | Bn-N3-p13528204        | gene |      |
| Bn-scaff_27677_1-p249301 | Bn-N13-p20673769       | gene |      |
| Bn-scaff_27677_1-p250638 | Bn-N13-p20672417       | gene |      |
| Bn-scaff_27677_1-p301065 | Bn-N3-p13479557        | gene | exon |
| Bn-scaff_27677_1-p301097 | Bn-N3-p13479526        | gene | exon |
| Bn-scaff_27677_1-p330749 | Bn-N3-p13469337        | gene | exon |
| Bn-scaff_27705_1-p102681 | Bn-N3-p3611112         | gene | exon |
| Bn-scaff_27705_1-p111087 | Bn-N19-p49176335       | gene |      |
| Bn-scaff_27705_1-p111279 | Bn-N19-p49176144       | gene |      |
| Bn-scaff_27705_1-p21795  | Bn-N10-p12940659       | gene |      |
| Bn-scaff_27747_1-p20694  | Bn-N13-p52992671       | gene | exon |
| Bn-scaff_27747_1-p20714  | Bn-N13-p52992691       | gene | exon |
| Bn-scaff_27747_1-p20852  | Bn-N13-p52992829       | gene | exon |
| Bn-scaff_27765_1-p332203 | Bn-N8-p2706828         | gene |      |
| Bn-scaff_27765_1-p362839 | Bn-N1-p22454032        | gene | exon |
| Bn-scaff_27765_1-p58899  | Bn-N18-p3783652        | gene |      |
| Bn-scaff_27815_1-p35807  | Bn-N17-p4639605        | gene | exon |
| Bn-scaff_27815_1-p367403 | Bn-N7-p1700315         | gene | exon |
| Bn-scaff_27870_1-p208671 | Bn-N13-p21100276       | gene |      |
| Bn-scaff_27872_1-p39306  | Bn-N13-p4814849        | gene |      |
| Bn-scaff_27872_1-p47050  | Bn-N13-p4807089        | gene | exon |
| Bn-scaff_27881_1-p14038  | Bn-N13-p21009639       | gene | exon |
| Bn-scaff_27881_1-p15080  | Bn-N13-p21008597       | gene | exon |
| Bn-scaff_27881_1-p15401  | Bn-N13-p21008276       | gene | exon |
| Bn-scaff_27914_1-p19775  | Bn-N14-p32687869       | gene | exon |
| Bn-scaff_27914_1-p40505  | Bn-N4-p3625594         | gene | exon |
| Bn-scaff_27914_1-p40676  | Bn-N4-p3625765         | gene | exon |
| Bn-scaff_27914_1-p74694  | Bn-N14-p32736121       | gene |      |
| Bn-scaff_27946_1-p19861  | Bn-N12-p42961199       | gene |      |
| Bn-scaff_27946_1-p6065   | Bn-Scaffold01557-p4225 | gene |      |
| Bn-scaff_27955_1-p76     | Bn-N7-p1087645         | gene |      |
| Bn-scaff_28053_1-p12340  | Bn-N10-p17259635       | gene | exon |
| Bn-scaff_28053_1-p60542  | Bn-N10-p17228691       | gene | exon |
| Bn-scaff_28179_1-p16904  | Bn-N15-p3139942        | gene |      |
| Bn-scaff_28179_1-p21528  | Bn-N15-p3135500        | gene | exon |
| Bn-scaff_28179_1-p23683  | Bn-N15-p3133348        | gene |      |
| Bn-scaff_28277_1-p5229   | Bn-N14-p4000530        | gene |      |
| Bn-scaff_28371_1-p431    | Bn-N11-p5942097        | gene | exon |
| Bn-scaff_28382_1-p38738  | Bn-N14-p2716875        | gene |      |



|                          |                        |      |      |
|--------------------------|------------------------|------|------|
| Bn-scaff_28382_1-p39187  | Bn-N14-p2717323        | gene | exon |
| Bn-scaff_28382_1-p44654  | Bn-N14-p2722831        | gene | exon |
| Bn-scaff_28403_1-p116546 | Bn-N17-p7436681        | gene | exon |
| Bn-scaff_28403_1-p123434 | Bn-N17-p7443564        | gene | exon |
| Bn-scaff_28429_1-p325716 | Bn-N7-p8365999         | gene | exon |
| Bn-scaff_28429_1-p992606 | Bn-N9-p8145546         | gene |      |
| Bn-scaff_28498_1-p107723 | Bn-N14-p19686203       | gene |      |
| Bn-scaff_28498_1-p108458 | Bn-N14-p19686926       | gene | exon |
| Bn-scaff_28498_1-p163192 | Bn-N14-p19699906       | gene |      |
| Bn-scaff_28498_1-p163305 | Bn-N14-p19699793       | gene | exon |
| Bn-scaff_28498_1-p163802 | Bn-N14-p19699296       | gene | exon |
| Bn-scaff_28498_1-p163884 | Bn-N14-p19699214       | gene | exon |
| Bn-scaff_28498_1-p164284 | Bn-N14-p19698813       | gene |      |
| Bn-scaff_28498_1-p164307 | Bn-N14-p19698790       | gene |      |
| Bn-scaff_28498_1-p165023 | Bn-N14-p19698068       | gene |      |
| Bn-scaff_28498_1-p165148 | Bn-N14-p19697945       | gene |      |
| Bn-scaff_28498_1-p165263 | Bn-N14-p19697830       | gene | exon |
| Bn-scaff_28498_1-p172641 | Bn-Scaffold01576-p1116 | gene |      |
| Bn-scaff_28498_1-p245004 | Bn-N14-p19744743       | gene |      |
| Bn-scaff_28498_1-p245518 | Bn-N14-p19745257       | gene |      |
| Bn-scaff_28498_1-p246839 | Bn-N14-p19746586       | gene |      |
| Bn-scaff_28498_1-p91470  | Bn-N14-p19654365       | gene | exon |
| Bn-scaff_28509_1-p33640  | Bn-N13-p21636653       | gene | exon |
| Bn-scaff_28509_1-p33710  | Bn-N13-p21636583       | gene |      |
| Bn-scaff_28509_1-p33929  | Bn-N13-p21636365       | gene |      |
| Bn-scaff_28509_1-p34128  | Bn-N13-p21636166       | gene | exon |
| Bn-scaff_28511_1-p19968  | Bn-N19-p23618646       | gene | exon |
| Bn-scaff_28522_1-p35475  | Bn-N7-p13000790        | gene | exon |
| Bn-scaff_28562_1-p10940  | Bn-N13-p25462781       | gene |      |
| Bn-scaff_28637_1-p15131  | Bn-N18-p32357196       | gene |      |
| Bn-scaff_28640_1-p43648  | Bn-N13-p29314129       | gene |      |
| Bn-scaff_28666_1-p29889  | Bn-N11-p9945397        | gene |      |
| Bn-scaff_28678_1-p272918 | Bn-N9-p582355          | gene | exon |
| Bn-scaff_28678_1-p34404  | Bn-N9-p744727          | gene | exon |
| Bn-scaff_28678_1-p441440 | Bn-N19-p417144         | gene | exon |
| Bn-scaff_28678_1-p442929 | Bn-N19-p414554         | gene | exon |
| Bn-scaff_28678_1-p443552 | Bn-N19-p413534         | gene | exon |
| Bn-scaff_28678_1-p591337 | Bn-N19-p253766         | gene |      |
| Bn-scaff_28678_1-p591388 | Bn-N19-p253766         | gene |      |
| Bn-scaff_28678_1-p591776 | Bn-N19-p253390         | gene | exon |
| Bn-scaff_28703_1-p31309  | Bn-N14-p20494852       | gene | exon |
| Bn-scaff_28703_1-p34884  | Bn-N14-p20444850       | gene |      |
| Bn-scaff_28703_1-p49551  | Bn-N14-p20518427       | gene |      |
| Bn-scaff_28703_1-p49734  | Bn-N14-p20518610       | gene |      |
| Bn-scaff_28703_1-p50575  | Bn-N14-p20519450       | gene | exon |
| Bn-scaff_28703_1-p50822  | Bn-N14-p20519697       | gene | exon |
| Bn-scaff_28703_1-p50848  | Bn-N14-p20519723       | gene | exon |
| Bn-scaff_28703_1-p51095  | Bn-N14-p20519970       | gene |      |
| Bn-scaff_28703_1-p51257  | Bn-N14-p20520131       | gene |      |
| Bn-scaff_28703_1-p51978  | Bn-N14-p20520852       | gene |      |
| Bn-scaff_28703_1-p53260  | Bn-N14-p20522087       | gene |      |
| Bn-scaff_28703_1-p53619  | Bn-N14-p20522446       | gene |      |

|                         |                       |      |      |
|-------------------------|-----------------------|------|------|
| Bn-scaff_28703_1-p53700 | Bn-N14-p20522527      | gene | exon |
| Bn-scaff_28703_1-p53783 | Bn-N14-p20522610      | gene | exon |
| Bn-scaff_28774_1-p13523 | Bn-N13-p9257251       | gene |      |
| Bn-scaff_28774_1-p29882 | Bn-N13-p9283447       | gene | exon |
| Bn-scaff_28791_1-p5     | Bn-N19-p46963129      | gene |      |
| Bn-scaff_28977_1-p7912  | Bn-N2-p21350057       | gene |      |
| Bn-scaff_29028_1-p18552 | Bn-N15-p45584381      | gene | exon |
| Bn-scaff_29028_1-p9948  | Bn-N15-p45574314      | gene | exon |
| Bn-scaff_29061_1-p19327 | Bn-N17-p43330956      | gene |      |
| Bn-scaffold12606-p486   | Bn-N13-p4786482       | gene |      |
| Bn-scaffold12714-p261   | Bn-Scaffold03435-p431 | gene |      |
| Bn-scaffold13646-p3     | Bn-N16-p17821892      | gene | exon |
| Bn-scaffold14071-p64    | Bn-N14-p24388542      | gene | exon |
| Bn-scaffold18039-p397   | Bn-N14-p21035217      | gene | exon |
| Bn-scaffold733-p492     | Bn-Scaffold04835-p328 | gene | exon |
| Bn-scaffold7442-p97     | Bn-N15-p34454042      | gene |      |
| Bn-scaffold8358-p141    | Bn-N2-p25495898       | gene |      |
