# Supplementary material for: A high-density SNP genotyping array for Brassica napus and its ancestral diploid species based on optimised selection of single-locus markers in the allotetraploid genome
Source: PubMed Central journal article supplement (PMC5025514; doi:10.1007/s00122-016-2746-7), 2016-06-30
Supplement: 122_2016_2746_MOESM7_ESM.pdf [file 122_2016_2746_MOESM7_ESM.pdf]

**Table 5: Genetic map for Brassica napus based on SG population compressed in**

| Order | DH12075v4_ID    | New_name_rapa    |
|-------|-----------------|------------------|
| 1     | Bn-N1-p148713   | Bn-A01-p137814   |
| 13    | Bn-N1-p455627   | Bn-A01-p460072   |
| 31    | Bn-N1-p819843   | Bn-C2-p12033716  |
| 35    | Bn-N1-p1001647  | Bn-A01-p974934   |
| 60    | Bn-N1-p1292716  | Bn-A01-p1250595  |
| 65    | Bn-N1-p1418752  | Bn-A01-p1372430  |
| 76    | Bn-N1-p1703757  | Bn-A01-p1661180  |
| 79    | Bn-N1-p1806273  | Bn-A01-p1742846  |
| 82    | Bn-N1-p1840607  | Bn-A01-p1770291  |
| 94    | Bn-N1-p2040832  | Bn-A01-p1990755  |
| 101   | Bn-N1-p2145056  | Bn-A01-p2094793  |
| 104   | Bn-N1-p2211868  | Bn-A01-p2171217  |
| 106   | Bn-N1-p2284563  | Bn-A01-p2242890  |
| 123   | Bn-N1-p2720419  | Bn-A01-p2667471  |
| 130   | Bn-N1-p2879286  | Bn-A01-p2825565  |
| 137   | Bn-N1-p3051730  | Bn-A01-p2990104  |
| 151   | Bn-N1-p3247018  | Bn-A01-p3183888  |
| 152   | Bn-N1-p3356185  | Bn-A01-p3306526  |
| 170   | Bn-N1-p3952570  | Bn-A01-p3904495  |
| 199   | Bn-N1-p4828077  | Bn-A01-p4812269  |
| 215   | Bn-N1-p5078759  | Bn-A01-p5106042  |
| 216   | Bn-N1-p5157847  | Bn-A01-p5193639  |
| 254   | Bn-N1-p5588331  | Bn-A01-p5590998  |
| 286   | Bn-N1-p6206809  | Bn-A01-p6182710  |
| 292   | Bn-N1-p6286302  | Bn-A01-p6274135  |
| 300   | Bn-N1-p6671771  | Bn-A01-p6687707  |
| 309   | Bn-N1-p6894209  | Bn-A01-p6898291  |
| 324   | Bn-N1-p7686806  | Bn-A01-p7648929  |
| 329   | Bn-N1-p7947519  | Bn-A01-p7889385  |
| 335   | Bn-N1-p8033912  | Bn-A01-p7979458  |
| 342   | Bn-N1-p8072235  | Bn-A01-p8017380  |
| 388   | Bn-N1-p8995481  | Bn-A01-p9442471  |
| 400   | Bn-N1-p9398357  | Bn-A01-p9884449  |
| 404   | Bn-N1-p9540618  | Bn-A01-p9996458  |
| 405   | Bn-N1-p9782678  | Bn-A01-p10231780 |
| 423   | Bn-N1-p10024494 | Bn-C4-p24903660  |
| 471   | Bn-N1-p11321978 | Bn-A01-p11825880 |
| 678   | Bn-N1-p19905997 | Bn-A01-p19983739 |
| 711   | Bn-N1-p21381690 | Bn-A01-p21393260 |
| 724   | Bn-N1-p21689831 | Bn-A01-p21709916 |
| 727   | Bn-N1-p21832963 | Bn-A01-p21855770 |
| 746   | Bn-N1-p22039892 | Bn-A01-p22051510 |
| 748   | Bn-N1-p22090041 | Bn-A01-p22087629 |
| 750   | Bn-N1-p22242804 | Bn-A01-p22681496 |
| 781   | Bn-N1-p23075763 | Bn-A01-p23568963 |

|      |                 |                           |
|------|-----------------|---------------------------|
| 783  | Bn-N1-p23129730 | Bn-C1-p37030858           |
| 784  | Bn-N1-p23132864 | Bn-A01-p23614494          |
| 791  | Bn-N1-p23209338 | Bn-A01-p23694782          |
| 805  | Bn-N1-p23749821 | Bn-A01-p24504575          |
| 819  | Bn-N1-p23944238 | Bn-A01-p24697185          |
| 830  | Bn-N1-p24226858 | Bn-Scaffold000164-p244631 |
| 844  | Bn-N1-p24408926 | Bn-Scaffold000164-p55747  |
| 859  | Bn-N1-p24868250 | Bn-Scaffold000386-p1325   |
| 865  | Bn-N1-p25216255 | Bn-A01-p27331467          |
| 870  | Bn-N1-p25466344 | Bn-A01-p27580681          |
| 873  | Bn-N1-p25801701 | Bn-A01-p27866419          |
| 880  | Bn-N1-p26094193 | Bn-A01-p28102080          |
| 888  | Bn-N1-p26290806 | Bn-A01-p28462071          |
| 895  | Bn-N1-p26698258 | Bn-A01-p25517197          |
| 909  | Bn-N1-p27020484 | Bn-A01-p25040577          |
| 922  | Bn-N2-p3922255  | Bn-A02-p1707420           |
| 934  | Bn-N2-p1000576  | Bn-A02-p2292871           |
| 937  | Bn-N2-p1244624  | Bn-A02-p2542065           |
| 938  | Bn-N2-p1274020  | Bn-A02-p2572625           |
| 940  | Bn-N2-p1314947  | Bn-A02-p2617701           |
| 950  | Bn-N2-p1453265  | Bn-A02-p2739888           |
| 957  | Bn-N2-p1786578  | Bn-A02-p1096082           |
| 958  | Bn-N2-p1790534  | Bn-A02-p1092146           |
| 964  | Bn-N2-p1952858  | Bn-A02-p2877222           |
| 965  | Bn-N2-p1983351  | Bn-A02-p2923889           |
| 970  | Bn-N2-p2151215  | Bn-A02-p3074016           |
| 971  | Bn-N2-p2196718  | Bn-A02-p3121742           |
| 975  | Bn-N2-p2256921  | Bn-A02-p3175610           |
| 983  | Bn-N2-p2345136  | Bn-A02-p3260536           |
| 984  | Bn-N2-p2380926  | Bn-A02-p3294682           |
| 988  | Bn-N2-p2434012  | Bn-A02-p3344176           |
| 991  | Bn-N2-p2458886  | Bn-A02-p3374678           |
| 992  | Bn-N2-p2482742  | Bn-A02-p3398506           |
| 997  | Bn-N2-p2616924  | Bn-A02-p3542024           |
| 1009 | Bn-N2-p3119297  | Bn-A02-p4035808           |
| 1020 | Bn-N2-p3355557  | Bn-A02-p4277649           |
| 1029 | Bn-N2-p3865572  | Bn-A02-p4773307           |
| 1032 | Bn-N2-p4461220  | Bn-A02-p5326222           |
| 1033 | Bn-N12-p6060989 | Bn-A02-p5394958           |
| 1034 | Bn-N2-p4567982  | Bn-A02-p5429003           |
| 1042 | Bn-N2-p4725469  | Bn-A02-p5574727           |
| 1051 | Bn-N2-p5035622  | Bn-A02-p5859447           |
| 1052 | Bn-N2-p5101425  | Bn-A02-p5907701           |
| 1057 | Bn-N2-p5291239  | Bn-A02-p6084757           |
| 1083 | Bn-N2-p5711970  | Bn-A02-p6478309           |
| 1090 | Bn-N2-p5919336  | Bn-A02-p6658392           |
| 1117 | Bn-N2-p6595573  | Bn-A02-p7319800           |
| 1185 | Bn-N2-p7984224  | Bn-A02-p8625851           |
| 1194 | Bn-N2-p8138197  | Bn-A02-p8777846           |

|      |                  |                          |
|------|------------------|--------------------------|
| 1195 | Bn-N2-p8215157   | Bn-A02-p8865764          |
| 1232 | Bn-N2-p8688243   | Bn-A02-p9339288          |
| 1295 | Bn-N2-p10579677  | Bn-A02-p11041726         |
| 1356 | Bn-N2-p10907135  | Bn-A02-p11346389         |
| 1389 | Bn-N2-p11561943  | Bn-A02-p11817742         |
| 1407 | Bn-N2-p11905764  | Bn-A02-p12145607         |
| 1416 | Bn-N2-p12045225  | Bn-A02-p12292026         |
| 1489 | Bn-N2-p13922267  | Bn-A02-p14078497         |
| 1497 | Bn-N2-p14075845  | Bn-A02-p14227678         |
| 1503 | Bn-N2-p14254515  | Bn-Scaffold000262-p25395 |
| 1526 | Bn-N2-p15525546  | Bn-A02-p15637932         |
| 1551 | Bn-N2-p16741741  | Bn-A05-p9078281          |
| 1562 | Bn-N2-p18281250  | Bn-A02-p17381818         |
| 1568 | Bn-N2-p21124875  | Bn-A02-p18599005         |
| 1590 | Bn-N2-p21822532  | Bn-A02-p19261853         |
| 1636 | Bn-N2-p22881947  | Bn-A02-p21061002         |
| 1660 | Bn-N2-p24122314  | Bn-A02-p19756499         |
| 1662 | Bn-N2-p24221591  | Bn-A02-p22843446         |
| 1665 | Bn-N2-p24299028  | Bn-A02-p22757902         |
| 1673 | Bn-N2-p24508335  | Bn-A02-p22352518         |
| 1683 | Bn-N2-p25829195  | Bn-A02-p23411852         |
| 1698 | Bn-N2-p25955982  | Bn-Scaffold016439-p48    |
| 1705 | Bn-N2-p26087020  | Bn-A02-p23668607         |
| 1711 | Bn-N12-p40545513 | Bn-C2-p47337384          |
| 1713 | Bn-N2-p26180452  | Bn-A02-p23792703         |
| 1729 | Bn-N2-p26534947  | Bn-A02-p24178094         |
| 1744 | Bn-N2-p26761096  | Bn-A02-p24415454         |
| 1745 | Bn-N2-p26799071  | Bn-A02-p24449690         |
| 1752 | Bn-N2-p26923902  | Bn-A02-p24552542         |
| 1760 | Bn-N2-p27068181  | Bn-C2-p49029761          |
| 1765 | Bn-N2-p27309412  | Bn-A02-p24948938         |
| 1768 | Bn-N2-p27435756  | Bn-A02-p25100451         |
| 1772 | Bn-N2-p27518281  | Bn-A02-p25188041         |
| 1777 | Bn-N2-p27686816  | Bn-A02-p25400591         |
| 1814 | Bn-N2-p27948371  | Bn-A02-p25681480         |
| 1820 | Bn-N2-p28092398  | Bn-A02-p25826690         |
| 1821 | Bn-N2-p28101502  | Bn-A02-p25841130         |
| 1829 | Bn-N2-p28125432  | Bn-A02-p25865360         |
| 1835 | Bn-N2-p28771949  | Bn-A02-p26982864         |
| 1858 | Bn-N2-p29609872  | Bn-A02-p27831174         |
| 1860 | Bn-N3-p330552    | Bn-A03-p312762           |
| 1875 | Bn-N3-p772129    | Bn-A03-p765077           |
| 1879 | Bn-N3-p1010731   | Bn-A03-p991949           |
| 1882 | Bn-N3-p1080752   | Bn-A03-p1050437          |
| 1898 | Bn-N3-p1499294   | Bn-A03-p1488306          |
| 1908 | Bn-N3-p1755477   | Bn-A03-p1711856          |
| 1916 | Bn-N3-p2019723   | Bn-A03-p1926809          |
| 1919 | Bn-N3-p2055094   | Bn-A03-p1954639          |
| 1936 | Bn-N3-p2679025   | Bn-A03-p2579866          |

|      |                  |                       |
|------|------------------|-----------------------|
| 1941 | Bn-N3-p2742051   | Bn-A03-p2645391       |
| 1957 | Bn-N3-p2966999   | Bn-A03-p2891934       |
| 1961 | Bn-N3-p3074368   | Bn-A03-p2997270       |
| 1968 | Bn-N3-p3183725   | Bn-A03-p3099901       |
| 1975 | Bn-N3-p3406926   | Bn-A03-p3319357       |
| 1979 | Bn-N3-p3772359   | Bn-A03-p3692048       |
| 1980 | Bn-N3-p3885826   | Bn-A03-p3795299       |
| 2012 | Bn-N3-p4831677   | Bn-A03-p4783485       |
| 2016 | Bn-N3-p4958930   | Bn-A03-p4909233       |
| 2023 | Bn-N3-p5115640   | Bn-A03-p5083198       |
| 2037 | Bn-N3-p5347595   | Bn-Scaffold01280-p438 |
| 2062 | Bn-N3-p5775835   | Bn-A03-p5741340       |
| 2071 | Bn-N3-p6077412   | Bn-A03-p6036521       |
| 2077 | Bn-N3-p6308534   | Bn-A03-p6274828       |
| 2088 | Bn-N3-p6633766   | Bn-A03-p6590051       |
| 2092 | Bn-N3-p6770990   | Bn-A03-p6744344       |
| 2098 | Bn-N3-p7039006   | Bn-A03-p7007377       |
| 2102 | Bn-N3-p7234314   | Bn-A03-p7177504       |
| 2110 | Bn-N3-p7435856   | Bn-A03-p7366783       |
| 2114 | Bn-N3-p7487460   | Bn-A03-p7420835       |
| 2132 | Bn-N3-p7994167   | Bn-A03-p7939679       |
| 2140 | Bn-N3-p8190537   | Bn-A03-p8133096       |
| 2184 | Bn-N3-p8872358   | Bn-A03-p8764481       |
| 2224 | Bn-N3-p9706667   | Bn-A03-p9537155       |
| 2231 | Bn-N3-p10026056  | Bn-A03-p9833648       |
| 2258 | Bn-N3-p10653298  | Bn-A03-p10414176      |
| 2271 | Bn-N3-p10915390  | Bn-A03-p10651420      |
| 2276 | Bn-N3-p11028842  | Bn-A03-p10757525      |
| 2321 | Bn-N3-p11599250  | Bn-A03-p11319722      |
| 2333 | Bn-N3-p11803507  | Bn-A03-p11517597      |
| 2359 | Bn-N3-p12537961  | Bn-A03-p12186958      |
| 2379 | Bn-N3-p13028750  | Bn-A03-p12639200      |
| 2384 | Bn-N3-p13385371  | Bn-A03-p12990610      |
| 2402 | Bn-N3-p13489967  | Bn-A03-p13104283      |
| 2460 | Bn-N3-p14438774  | Bn-A03-p14112910      |
| 2463 | Bn-N3-p14508983  | Bn-A03-p14175904      |
| 2473 | Bn-N3-p14641501  | Bn-A03-p14306440      |
| 2489 | Bn-N3-p14777622  | Bn-A03-p14447238      |
| 2521 | Bn-N3-p15710902  | Bn-A03-p15359867      |
| 2535 | Bn-N3-p15957400  | Bn-A03-p15577849      |
| 2550 | Bn-N3-p16312745  | Bn-A03-p15957657      |
| 2568 | Bn-N3-p16961243  | Bn-A03-p16607714      |
| 2575 | Bn-N3-p17185957  | Bn-A03-p16812953      |
| 2576 | Bn-N13-p26848688 | Bn-C3-p25537230       |
| 2588 | Bn-N3-p17584688  | Bn-A03-p17182494      |
| 2591 | Bn-N3-p18120292  | Bn-A03-p17782292      |
| 2595 | Bn-N3-p18475063  | Bn-A03-p18120938      |
| 2618 | Bn-N3-p19216285  | Bn-A03-p18836509      |
| 2619 | Bn-N3-p19222659  | Bn-A03-p18846268      |

|      |                 |                           |
|------|-----------------|---------------------------|
| 2655 | Bn-N3-p20192016 | Bn-A03-p19880918          |
| 2669 | Bn-N3-p20329049 | Bn-A03-p20033408          |
| 2670 | Bn-N3-p20371571 | Bn-A03-p20079452          |
| 2674 | Bn-N3-p20445824 | Bn-A03-p20151244          |
| 2675 | Bn-N3-p20469807 | Bn-A03-p20180463          |
| 2677 | Bn-N3-p20532008 | Bn-A03-p20237681          |
| 2698 | Bn-N3-p20834180 | Bn-A03-p20523585          |
| 2714 | Bn-N3-p21231831 | Bn-A03-p20983297          |
| 2719 | Bn-N3-p21543364 | Bn-A03-p21271941          |
| 2726 | Bn-N3-p21713680 | Bn-A03-p21422696          |
| 2733 | Bn-N3-p21900335 | Bn-A03-p21632587          |
| 2734 | Bn-N3-p21947903 | Bn-A03-p21685480          |
| 2751 | Bn-N3-p22166287 | Bn-A03-p21904842          |
| 2801 | Bn-N3-p23119669 | Bn-A03-p22820943          |
| 2807 | Bn-N3-p23181434 | Bn-A03-p22882585          |
| 2811 | Bn-N3-p23342059 | Bn-A03-p23017354          |
| 2818 | Bn-N3-p23667615 | Bn-A03-p29571938          |
| 2819 | Bn-N3-p24031518 | Bn-A03-p23735715          |
| 2835 | Bn-N3-p24362517 | Bn-A03-p24092986          |
| 2836 | Bn-N3-p24431801 | Bn-A03-p24176332          |
| 2848 | Bn-N3-p11952122 | Bn-A03-p24902631          |
| 2937 | Bn-N3-p25600454 | Bn-A03-p25402301          |
| 2943 | Bn-N3-p25724701 | Bn-A03-p25525612          |
| 2945 | Bn-N3-p25828301 | Bn-A03-p25614406          |
| 2946 | Bn-N3-p25845246 | Bn-A03-p25631316          |
| 2963 | Bn-N3-p26231379 | Bn-A03-p25993601          |
| 2967 | Bn-N3-p26287335 | Bn-A03-p26066930          |
| 2973 | Bn-N3-p26517534 | Bn-A03-p26284882          |
| 2974 | Bn-N3-p26521343 | Bn-A03-p26288769          |
| 2990 | Bn-N3-p26736040 | Bn-A03-p26477533          |
| 3001 | Bn-N3-p27060036 | Bn-A03-p26775994          |
| 3011 | Bn-N3-p27367099 | Bn-A03-p27066000          |
| 3047 | Bn-N3-p28068549 | Bn-A03-p27683723          |
| 3089 | Bn-N3-p28971341 | Bn-A03-p28535638          |
| 3149 | Bn-N3-p33346228 | Bn-Scaffold000096-p878406 |
| 3189 | Bn-N3-p28566839 | Bn-A03-p28126287          |
| 3190 | Bn-N4-p193375   | Bn-A04-p122280            |
| 3200 | Bn-N4-p269934   | Bn-A04-p267294            |
| 3254 | Bn-N4-p811294   | Bn-A04-p810935            |
| 3269 | Bn-N4-p1148070  | Bn-A04-p1213196           |
| 3277 | Bn-N4-p1252454  | Bn-A04-p1317446           |
| 3283 | Bn-N4-p1324713  | Bn-A04-p1390449           |
| 3288 | Bn-N4-p1567651  | Bn-A04-p1623151           |
| 3289 | Bn-N4-p1589334  | Bn-A04-p1655416           |
| 3290 | Bn-N4-p1607740  | Bn-A04-p1680506           |
| 3291 | Bn-N4-p1686812  | Bn-A04-p1745832           |
| 3313 | Bn-N4-p1871339  | Bn-A04-p1931502           |
| 3431 | Bn-N4-p3129508  | Bn-A04-p3225119           |
| 3456 | Bn-N4-p3548333  | Bn-A04-p3632226           |

|      |                       |                          |
|------|-----------------------|--------------------------|
| 3459 | Bn-N4-p3642885        | Bn-A04-p3743549          |
| 3492 | Bn-N4-p7608030        | Bn-A04-p5959753          |
| 3662 | Bn-N4-p8850965        | Bn-A04-p7109346          |
| 3754 | Bn-N4-p10191316       | Bn-A04-p8292499          |
| 3789 | Bn-N4-p10512694       | Bn-A04-p8612311          |
| 3826 | Bn-N4-p11037233       | Bn-A04-p9088043          |
| 3977 | Bn-N4-p14285273       | Bn-A04-p11957518         |
| 3985 | Bn-N4-p14573838       | Bn-A04-p12236240         |
| 4002 | Bn-N4-p14726403       | Bn-A04-p12659402         |
| 4075 | Bn-N4-p15678260       | Bn-A04-p13659690         |
| 4086 | Bn-N4-p16108021       | Bn-C4-p46736296          |
| 4088 | Bn-N4-p16162014       | Bn-C4-p46830608          |
| 4089 | Bn-N4-p16255878       | Bn-A04-p14255771         |
| 4101 | Bn-N4-p16711540       | Bn-A04-p14756001         |
| 4110 | Bn-N4-p16965424       | Bn-A04-p15007146         |
| 4114 | Bn-N4-p17271998       | Bn-A04-p15298740         |
| 4118 | Bn-N4-p17369430       | Bn-A04-p15404568         |
| 4126 | Bn-N4-p17499224       | Bn-A04-p15514869         |
| 4136 | Bn-Scaffold31010-p309 | Bn-A04-p15835310         |
| 4137 | Bn-N7-p15002311       | Bn-A04-p15895339         |
| 4142 | Bn-N4-p17983696       | Bn-A04-p16056186         |
| 4143 | Bn-N4-p18198567       | Bn-A04-p16233024         |
| 4155 | Bn-N4-p18420558       | Bn-A04-p16445225         |
| 4168 | Bn-N4-p18620726       | Bn-A04-p16663552         |
| 4173 | Bn-N4-p18743497       | Bn-A04-p17052071         |
| 4203 | Bn-N4-p19262174       | Bn-A04-p17322241         |
| 4218 | Bn-N4-p19649505       | Bn-A04-p17686228         |
| 4228 | Bn-N4-p19775221       | Bn-A04-p17811740         |
| 4230 | Bn-N4-p19780403       | Bn-A04-p17816796         |
| 4231 | Bn-N4-p19827880       | Bn-A04-p17864572         |
| 4241 | Bn-N4-p20125262       | Bn-A04-p18136301         |
| 4243 | Bn-N4-p20169038       | Bn-A04-p18180777         |
| 4244 | Bn-N4-p20260734       | Bn-A04-p18273048         |
| 4247 | Bn-N4-p20419859       | Bn-A04-p18429573         |
| 4248 | Bn-N4-p20483625       | Bn-A04-p18487715         |
| 4257 | Bn-N4-p20625106       | Bn-A04-p18617343         |
| 4268 | Bn-N4-p21066278       | Bn-A01-p25171870         |
| 4278 | Bn-N5-p407617         | Bn-Scaffold000403-p12455 |
| 4295 | Bn-N5-p759307         | Bn-A05-p679803           |
| 4314 | Bn-N5-p1000999        | Bn-A05-p892520           |
| 4324 | Bn-N5-p1080492        | Bn-A05-p970816           |
| 4325 | Bn-N5-p1174032        | Bn-A05-p1071371          |
| 4331 | Bn-N5-p1410753        | Bn-A05-p1308471          |
| 4333 | Bn-N5-p1436231        | Bn-A05-p1335771          |
| 4348 | Bn-N5-p1619320        | Bn-A05-p1492327          |
| 4360 | Bn-N5-p1901300        | Bn-A05-p1701030          |
| 4361 | Bn-N5-p1949635        | Bn-A05-p1761473          |
| 4362 | Bn-N5-p2039192        | Bn-A05-p1857946          |
| 4363 | Bn-N5-p2075840        | Bn-A05-p1898273          |

|      |                 |                  |
|------|-----------------|------------------|
| 4371 | Bn-N5-p2298341  | Bn-A05-p2106680  |
| 4385 | Bn-N5-p2509507  | Bn-A05-p2303112  |
| 4386 | Bn-N14-p3918239 | Bn-A05-p2345233  |
| 4387 | Bn-N5-p2562704  | Bn-A05-p2367876  |
| 4392 | Bn-N5-p2673519  | Bn-C4-p3971988   |
| 4405 | Bn-N5-p2836831  | Bn-A05-p2641800  |
| 4412 | Bn-N5-p2920992  | Bn-A05-p2726301  |
| 4431 | Bn-N5-p3236393  | Bn-A05-p3005109  |
| 4451 | Bn-N5-p3553066  | Bn-A05-p3307736  |
| 4464 | Bn-N5-p3749456  | Bn-A05-p3507831  |
| 4472 | Bn-N5-p4104667  | Bn-A05-p3834445  |
| 4477 | Bn-N5-p4182623  | Bn-A05-p3923814  |
| 4478 | Bn-N5-p4230168  | Bn-A05-p3966848  |
| 4480 | Bn-N5-p4250529  | Bn-A05-p3988958  |
| 4494 | Bn-N5-p4386273  | Bn-A05-p4121158  |
| 4499 | Bn-N5-p4597112  | Bn-A05-p4336667  |
| 4523 | Bn-N5-p5063788  | Bn-C4-p7980371   |
| 4531 | Bn-N5-p5194068  | Bn-A05-p4940713  |
| 4538 | Bn-N5-p5361751  | Bn-A05-p5093548  |
| 4552 | Bn-N5-p5652046  | Bn-A05-p5372015  |
| 4557 | Bn-N5-p5746359  | Bn-A05-p5475992  |
| 4581 | Bn-N5-p6077945  | Bn-A05-p5805445  |
| 4592 | Bn-N5-p6250576  | Bn-A05-p5970916  |
| 4616 | Bn-N5-p6966977  | Bn-A05-p6541429  |
| 4642 | Bn-N5-p7292023  | Bn-A05-p6995896  |
| 4770 | Bn-N5-p10708377 | Bn-A05-p11084469 |
| 4967 | Bn-N5-p16370464 | Bn-A05-p16092993 |
| 5040 | Bn-N5-p19205661 | Bn-A05-p18229790 |
| 5062 | Bn-N5-p19863530 | Bn-A05-p18905070 |
| 5071 | Bn-N5-p20015936 | Bn-A05-p19070284 |
| 5072 | Bn-N5-p20060451 | Bn-A05-p19116891 |
| 5102 | Bn-N5-p20653946 | Bn-A05-p19650965 |
| 5110 | Bn-N5-p20796236 | Bn-A05-p19802577 |
| 5113 | Bn-N5-p20921094 | Bn-A05-p19919179 |
| 5144 | Bn-N5-p21252649 | Bn-A05-p20254809 |
| 5163 | Bn-N5-p21557718 | Bn-A05-p20555996 |
| 5197 | Bn-N5-p21986809 | Bn-A05-p20972649 |
| 5201 | Bn-N5-p22049826 | Bn-A05-p21028051 |
| 5213 | Bn-N5-p22236141 | Bn-A05-p21201956 |
| 5221 | Bn-N5-p22288664 | Bn-A05-p21248382 |
| 5222 | Bn-N5-p22365600 | Bn-A05-p21326091 |
| 5223 | Bn-N5-p22392693 | Bn-A05-p21347821 |
| 5228 | Bn-N5-p22571580 | Bn-A05-p21470614 |
| 5236 | Bn-N5-p22695386 | Bn-A05-p21587317 |
| 5247 | Bn-N5-p22895992 | Bn-A05-p21806633 |
| 5251 | Bn-N5-p22951199 | Bn-A05-p21889289 |
| 5252 | Bn-N5-p22994971 | Bn-A05-p21930978 |
| 5253 | Bn-N5-p23203724 | Bn-A05-p22152482 |
| 5256 | Bn-N5-p23135358 | Bn-A05-p22089650 |

|      |                 |                          |
|------|-----------------|--------------------------|
| 5258 | Bn-N5-p23280486 | Bn-A05-p22218776         |
| 5263 | Bn-N5-p23332175 | Bn-A05-p22269511         |
| 5264 | Bn-N5-p23348012 | Bn-A05-p22282750         |
| 5273 | Bn-N5-p23571097 | Bn-A05-p22498838         |
| 5279 | Bn-N5-p23652525 | Bn-A05-p22591072         |
| 5282 | Bn-N5-p23676910 | Bn-A05-p22613926         |
| 5288 | Bn-N5-p23759203 | Bn-A05-p22691469         |
| 5290 | Bn-N5-p23835201 | Bn-A05-p22767106         |
| 5294 | Bn-N5-p23859503 | Bn-A05-p22789711         |
| 5299 | Bn-N5-p23997708 | Bn-A05-p22899595         |
| 5307 | Bn-N5-p24063948 | Bn-A05-p22973324         |
| 5335 | Bn-N5-p24463861 | Bn-A02-p23161914         |
| 5340 | Bn-N5-p24618267 | Bn-A05-p23253826         |
| 5357 | Bn-N5-p25031207 | Bn-Scaffold000191-p53301 |
| 5358 | Bn-N5-p25180238 | Bn-A02-p26901243         |
| 5375 | Bn-N5-p25336681 | Bn-A02-p26665282         |
| 5389 | Bn-N5-p25659292 | Bn-A05-p23776343         |
| 5403 | Bn-N6-p108297   | Bn-A06-p195449           |
| 5447 | Bn-N6-p1011787  | Bn-A06-p1054104          |
| 5458 | Bn-N6-p1256849  | Bn-A06-p1322724          |
| 5466 | Bn-N6-p1337715  | Bn-A06-p1404859          |
| 5479 | Bn-N16-p4752677 | Bn-A06-p1507197          |
| 5482 | Bn-N6-p1700511  | Bn-A06-p1743446          |
| 5483 | Bn-N6-p1726972  | Bn-A06-p1768254          |
| 5492 | Bn-N6-p1911301  | Bn-A06-p1947247          |
| 5499 | Bn-N6-p2229938  | Bn-A06-p2234718          |
| 5501 | Bn-N6-p2243184  | Bn-A06-p2251910          |
| 5505 | Bn-N6-p2261524  | Bn-A06-p2268393          |
| 5515 | Bn-N6-p2407250  | Bn-A06-p2407080          |
| 5516 | Bn-N6-p2468768  | Bn-A06-p2514723          |
| 5517 | Bn-N6-p2492906  | Bn-A06-p2542722          |
| 5520 | Bn-N6-p2568453  | Bn-A06-p2617079          |
| 5528 | Bn-N6-p2616610  | Bn-A06-p2676314          |
| 5546 | Bn-N6-p2816451  | Bn-A06-p2891290          |
| 5549 | Bn-N6-p2861174  | Bn-A06-p2936438          |
| 5552 | Bn-N6-p2879696  | Bn-A06-p2958095          |
| 5560 | Bn-N6-p2968512  | Bn-A06-p3050747          |
| 5585 | Bn-N6-p3236858  | Bn-A06-p3325502          |
| 5601 | Bn-N6-p3411122  | Bn-A06-p3491241          |
| 5607 | Bn-N6-p3893142  | Bn-A06-p3970972          |
| 5612 | Bn-N6-p3958445  | Bn-A06-p4019827          |
| 5613 | Bn-N6-p3961778  | Bn-A06-p4021930          |
| 5619 | Bn-N6-p4046387  | Bn-A06-p4098800          |
| 5620 | Bn-N6-p4111353  | Bn-A06-p4179318          |
| 5627 | Bn-N6-p4304145  | Bn-A06-p4371627          |
| 5637 | Bn-N6-p4418843  | Bn-A06-p4508774          |
| 5645 | Bn-N6-p4795418  | Bn-A06-p4874556          |
| 5661 | Bn-N6-p5136130  | Bn-A06-p5546411          |
| 5662 | Bn-N6-p5200409  | Bn-A06-p5616164          |



|      |                       |                  |
|------|-----------------------|------------------|
| 5668 | Bn-N6-p5325363        | Bn-A06-p5739682  |
| 5683 | Bn-N6-p5547966        | Bn-A06-p5947781  |
| 5684 | Bn-N6-p5565642        | Bn-A06-p5956274  |
| 5692 | Bn-N6-p5707075        | Bn-A06-p6103844  |
| 5695 | Bn-N6-p5760603        | Bn-A06-p6182046  |
| 5701 | Bn-N6-p5898614        | Bn-A06-p6311231  |
| 5705 | Bn-N6-p5934735        | Bn-A06-p6343931  |
| 5719 | Bn-N6-p6226240        | Bn-A06-p6624071  |
| 5722 | Bn-N6-p6246719        | Bn-A06-p6647323  |
| 5733 | Bn-N6-p6349603        | Bn-A06-p6761232  |
| 5780 | Bn-N6-p7381938        | Bn-A06-p7670696  |
| 5781 | Bn-N6-p7413359        | Bn-A06-p7701069  |
| 5800 | Bn-N6-p7956675        | Bn-A06-p8263325  |
| 5807 | Bn-N6-p8125820        | Bn-A06-p8446816  |
| 5871 | Bn-N6-p10000718       | Bn-A06-p10330066 |
| 6031 | Bn-N6-p17186112       | Bn-A06-p15258692 |
| 6084 | Bn-N6-p18624752       | Bn-A06-p16657894 |
| 6094 | Bn-N6-p18887432       | Bn-A06-p17006799 |
| 6110 | Bn-N6-p19142761       | Bn-A09-p18588652 |
| 6123 | Bn-N6-p19420003       | Bn-A06-p17548894 |
| 6130 | Bn-N6-p19565919       | Bn-A06-p17671185 |
| 6151 | Bn-N6-p19927994       | Bn-A06-p18029021 |
| 6165 | Bn-N6-p20136498       | Bn-A06-p18219362 |
| 6176 | Bn-N6-p20277325       | Bn-A06-p18364834 |
| 6184 | Bn-N6-p20315760       | Bn-A06-p18402713 |
| 6188 | Bn-N6-p20405390       | Bn-A06-p18500596 |
| 6202 | Bn-N6-p20736799       | Bn-A06-p21525576 |
| 6208 | Bn-N6-p20905511       | Bn-A06-p21349507 |
| 6218 | Bn-N6-p21068646       | Bn-A06-p21195115 |
| 6222 | Bn-Scaffold74746-p122 | Bn-A06-p21163037 |
| 6223 | Bn-N6-p21106756       | Bn-C7-p34444146  |
| 6224 | Bn-N6-p21128461       | Bn-A06-p21134315 |
| 6227 | Bn-N6-p21161410       | Bn-A06-p21101957 |
| 6239 | Bn-N6-p21187578       | Bn-A06-p21072392 |
| 6255 | Bn-N6-p21432182       | Bn-A06-p21796008 |
| 6256 | Bn-N6-p21438164       | Bn-A06-p21800812 |
| 6262 | Bn-N6-p21463906       | Bn-A06-p21826671 |
| 6268 | Bn-N6-p21499365       | Bn-A06-p21846491 |
| 6285 | Bn-N6-p21827996       | Bn-A06-p22160452 |
| 6295 | Bn-N6-p22430716       | Bn-A06-p22709872 |
| 6296 | Bn-N6-p22667869       | Bn-A06-p22947499 |
| 6312 | Bn-N6-p23270696       | Bn-A06-p23468803 |
| 6313 | Bn-N6-p23406052       | Bn-A06-p23591616 |
| 6318 | Bn-N6-p23472580       | Bn-A06-p23665564 |
| 6330 | Bn-N6-p23666104       | Bn-A06-p23852270 |
| 6331 | Bn-N6-p23801589       | Bn-A06-p23988702 |
| 6338 | Bn-N6-p23909011       | Bn-A06-p24099288 |
| 6354 | Bn-N6-p24224670       | Bn-A06-p24386467 |
| 6364 | Bn-N6-p24309893       | Bn-A06-p24467652 |

|      |                 |                  |
|------|-----------------|------------------|
| 6366 | Bn-N6-p24345526 | Bn-A06-p24501315 |
| 6367 | Bn-N6-p24347205 | Bn-A06-p24503033 |
| 6379 | Bn-N6-p24557399 | Bn-A06-p24705718 |
| 6392 | Bn-N6-p24806475 | Bn-C7-p27578386  |
| 6393 | Bn-N6-p25085426 | Bn-C7-p26650096  |
| 6394 | Bn-N6-p25171248 | Bn-A06-p25343454 |
| 6401 | Bn-N6-p25570516 | Bn-A06-p25786733 |
| 6413 | Bn-N6-p25934759 | Bn-A06-p26144731 |
| 6498 | Bn-N7-p1320908  | Bn-A07-p1292866  |
| 6558 | Bn-N7-p2187754  | Bn-A10-p11608969 |
| 6579 | Bn-N7-p2492673  | Bn-A10-p12014652 |
| 6632 | Bn-N7-p3119107  | Bn-A10-p12631706 |
| 6432 | Bn-N7-p6487300  | Bn-A07-p4916203  |
| 6417 | Bn-N7-p6968745  | Bn-A07-p5412930  |
| 6787 | Bn-N7-p10074654 | Bn-A07-p8516667  |
| 7005 | Bn-N7-p10832679 | Bn-A07-p9272000  |
| 7023 | Bn-N7-p11159340 | Bn-A07-p9661444  |
| 7028 | Bn-N7-p11291470 | Bn-A07-p9791002  |
| 7091 | Bn-N7-p12236021 | Bn-A07-p10750190 |
| 7195 | Bn-N7-p13676693 | Bn-A02-p771951   |
| 7216 | Bn-N7-p14143467 | Bn-A07-p11629852 |
| 7226 | Bn-N7-p14394583 | Bn-A07-p11838401 |
| 7281 | Bn-N7-p14888341 | Bn-A07-p12362172 |
| 7282 | Bn-N7-p15335414 | Bn-A07-p12757009 |
| 7287 | Bn-N7-p15417889 | Bn-A07-p12833434 |
| 7303 | Bn-N7-p15755571 | Bn-A07-p13147502 |
| 7329 | Bn-N7-p16230522 | Bn-A07-p13587753 |
| 7332 | Bn-N7-p16292466 | Bn-A07-p13659939 |
| 7338 | Bn-N7-p16373144 | Bn-A07-p13739429 |
| 7363 | Bn-N7-p16634145 | Bn-A07-p14005263 |
| 7385 | Bn-N7-p17091758 | Bn-A07-p14453848 |
| 7392 | Bn-N7-p17163479 | Bn-A07-p14523096 |
| 7410 | Bn-N7-p17387599 | Bn-A07-p14759961 |
| 7451 | Bn-N7-p18034004 | Bn-A07-p15352802 |
| 7475 | Bn-N7-p18257843 | Bn-A07-p15578269 |
| 7498 | Bn-N7-p18607472 | Bn-A07-p15949460 |
| 7509 | Bn-N7-p18746325 | Bn-A07-p16074768 |
| 7512 | Bn-N7-p18872267 | Bn-A07-p16183869 |
| 7520 | Bn-N7-p19176714 | Bn-A07-p16468333 |
| 7564 | Bn-N7-p19936860 | Bn-A07-p17212130 |
| 7586 | Bn-N7-p20518723 | Bn-A07-p17804261 |
| 7594 | Bn-N7-p20745840 | Bn-A07-p18020732 |
| 7630 | Bn-N7-p21793439 | Bn-A07-p18922121 |
| 7642 | Bn-N7-p22063739 | Bn-A07-p19190510 |
| 7644 | Bn-N7-p22327509 | Bn-A07-p19458370 |
| 7651 | Bn-N7-p22777474 | Bn-A07-p19865996 |
| 7656 | Bn-N7-p22885432 | Bn-A07-p19961825 |
| 7664 | Bn-N7-p23164955 | Bn-A07-p20248654 |
| 7668 | Bn-N7-p23434792 | Bn-A07-p20481682 |

|      |                 |                  |
|------|-----------------|------------------|
| 7672 | Bn-N7-p23514296 | Bn-A07-p20554194 |
| 7688 | Bn-N7-p23918790 | Bn-A07-p21019499 |
| 7697 | Bn-N7-p24180943 | Bn-A07-p21261518 |
| 7700 | Bn-N7-p24325175 | Bn-A07-p21476982 |
| 7745 | Bn-N7-p25157288 | Bn-A07-p22329359 |
| 7754 | Bn-N8-p1020964  | Bn-A08-p792162   |
| 7849 | Bn-N8-p2854610  | Bn-A08-p2973537  |
| 7818 | Bn-N8-p7792310  | Bn-A08-p8570810  |
| 8153 | Bn-N8-p7859442  | Bn-A08-p8601468  |
| 8219 | Bn-N8-p9634172  | Bn-A08-p10067927 |
| 8224 | Bn-N8-p9946893  | Bn-A08-p10281337 |
| 8226 | Bn-N8-p10085528 | Bn-A08-p10439396 |
| 8239 | Bn-N8-p10979512 | Bn-C3-p57295296  |
| 8248 | Bn-N8-p12138124 | Bn-A08-p12555227 |
| 8295 | Bn-N8-p13023342 | Bn-A08-p13352430 |
| 8299 | Bn-N8-p13038993 | Bn-A08-p13363830 |
| 8308 | Bn-N8-p13128437 | Bn-A08-p13454167 |
| 8322 | Bn-N8-p13290340 | Bn-A08-p13626189 |
| 8327 | Bn-N8-p13391245 | Bn-A08-p13708877 |
| 8363 | Bn-N8-p14223379 | Bn-A08-p14498301 |
| 8366 | Bn-N8-p14328665 | Bn-A08-p14616048 |
| 8379 | Bn-N8-p14537632 | Bn-A08-p14813540 |
| 8380 | Bn-N8-p14670055 | Bn-C3-p55722563  |
| 8399 | Bn-N8-p15090232 | Bn-A08-p15353881 |
| 8404 | Bn-N8-p15416987 | Bn-A08-p15701695 |
| 8423 | Bn-N8-p15696130 | Bn-C3-p53579689  |
| 8433 | Bn-N8-p15876364 | Bn-A08-p16183708 |
| 8436 | Bn-N8-p15914242 | Bn-A08-p16216893 |
| 8437 | Bn-N8-p15952855 | Bn-A08-p16248227 |
| 8442 | Bn-N8-p16006346 | Bn-A08-p16306425 |
| 8479 | Bn-N8-p16552226 | Bn-A08-p16846907 |
| 8484 | Bn-N8-p16663666 | Bn-A08-p16958537 |
| 8485 | Bn-N8-p16685917 | Bn-A08-p16980526 |
| 8503 | Bn-N8-p16911036 | Bn-A08-p17202184 |
| 8510 | Bn-N8-p17004603 | Bn-A08-p17291598 |
| 8515 | Bn-N8-p17014513 | Bn-A08-p17301557 |
| 8531 | Bn-N8-p17227705 | Bn-A08-p17513789 |
| 8532 | Bn-N8-p17245403 | Bn-A08-p17530617 |
| 8560 | Bn-N8-p17556900 | Bn-A08-p17824285 |
| 8565 | Bn-N8-p17612784 | Bn-A08-p17887796 |
| 8566 | Bn-N8-p17732398 | Bn-A08-p18000876 |
| 8569 | Bn-N8-p17798612 | Bn-A08-p18070928 |
| 8576 | Bn-N8-p18042252 | Bn-A05-p6672638  |
| 8579 | Bn-N8-p18304756 | Bn-A08-p18543984 |
| 8581 | Bn-N8-p18359822 | Bn-A08-p18605816 |
| 8586 | Bn-N8-p18503671 | Bn-A08-p18750116 |
| 8594 | Bn-N8-p18776922 | Bn-A08-p19008575 |
| 8604 | Bn-N8-p19062530 | Bn-C8-p21592037  |

|      |                  |                          |
|------|------------------|--------------------------|
| 8606 | Bn-N8-p19229698  | Bn-A08-p19428204         |
| 8611 | Bn-N18-p23614287 | Bn-C8-p21143733          |
| 8620 | Bn-N8-p19448615  | Bn-A08-p19646345         |
| 8621 | Bn-N11-p34110475 | Bn-A08-p19683899         |
| 8631 | Bn-N8-p19651757  | Bn-A08-p19834705         |
| 8634 | Bn-N8-p19762815  | Bn-A08-p19960214         |
| 8636 | Bn-N8-p19858500  | Bn-A08-p20068678         |
| 8653 | Bn-N8-p20113458  | Bn-C8-p19607543          |
| 8659 | Bn-N8-p20348461  | Bn-A08-p20305036         |
| 8684 | Bn-N8-p20879154  | Bn-A08-p20820768         |
| 8690 | Bn-N8-p21005755  | Bn-A08-p20945277         |
| 8700 | Bn-N8-p21495935  | Bn-A08-p21417592         |
| 8701 | Bn-N9-p342104    | Bn-A09-p957959           |
| 8711 | Bn-N9-p560125    | Bn-A09-p704028           |
| 8715 | Bn-N9-p796829    | Bn-A09-p86293            |
| 8717 | Bn-N9-p1015065   | Bn-A01-p26968952         |
| 8730 | Bn-N9-p1150435   | Bn-A01-p26837207         |
| 8732 | Bn-N9-p1297967   | Bn-A09-p1188091          |
| 8734 | Bn-N9-p1613782   | Bn-A09-p2116947          |
| 8736 | Bn-N9-p1655795   | Bn-A09-p2157775          |
| 8753 | Bn-N9-p2419388   | Bn-A09-p1929245          |
| 8755 | Bn-N9-p2488499   | Bn-A09-p1856828          |
| 8775 | Bn-N9-p2809617   | Bn-A09-p1570558          |
| 8776 | Bn-N9-p2829986   | Bn-A09-p1552993          |
| 8777 | Bn-N9-p4609099   | Bn-A09-p4096474          |
| 8788 | Bn-N9-p4868714   | Bn-Scaffold000178-p47905 |
| 8789 | Bn-N9-p5116009   | Bn-A09-p4463675          |
| 8792 | Bn-N9-p5162393   | Bn-A09-p4509627          |
| 8794 | Bn-N9-p5312617   | Bn-A09-p4655322          |
| 8834 | Bn-N9-p5931012   | Bn-A09-p5455608          |
| 8838 | Bn-N9-p6202417   | Bn-A07-p10188190         |
| 8844 | Bn-N19-p10270316 | Bn-A09-p7174944          |
| 8848 | Bn-N9-p6806606   | Bn-A09-p7047022          |
| 8849 | Bn-N9-p6924911   | Bn-A09-p6922467          |
| 8853 | Bn-N9-p7052384   | Bn-C9-p10793169          |
| 8858 | Bn-N9-p7648675   | Bn-A09-p6133524          |
| 8894 | Bn-N9-p9899071   | Bn-A09-p9379347          |
| 8904 | Bn-N9-p10035291  | Bn-A09-p9512316          |
| 8912 | Bn-N9-p10441284  | Bn-A09-p9865556          |
| 8937 | Bn-N9-p10912967  | Bn-A09-p14266174         |
| 8978 | Bn-N9-p12472837  | Bn-A09-p16639867         |
| 8994 | Bn-N9-p13640142  | Bn-C9-p21533473          |
| 8995 | Bn-N9-p14240731  | Bn-A09-p14535292         |
| 9004 | Bn-N9-p14682425  | Bn-A09-p17162263         |
| 9059 | Bn-N9-p10197711  | Bn-A09-p19272189         |
| 9398 | Bn-N9-p23728533  | Bn-A09-p22495700         |
| 9399 | Bn-N13-p16057699 | Bn-C3-p15381003          |
| 9402 | Bn-N9-p25335523  | Bn-A09-p22873685         |
| 9406 | Bn-N9-p25588982  | Bn-A09-p23144404         |

|      |                 |                         |
|------|-----------------|-------------------------|
| 9410 | Bn-N9-p25679946 | Bn-A09-p23250129        |
| 9414 | Bn-N9-p25797589 | Bn-A09-p23354310        |
| 9421 | Bn-N9-p25867929 | Bn-A09-p23416800        |
| 9426 | Bn-N9-p26001801 | Bn-A09-p23552075        |
| 9432 | Bn-N9-p26198959 | Bn-A09-p23756115        |
| 9436 | Bn-N9-p26355119 | Bn-A09-p23904905        |
| 9443 | Bn-N9-p26530164 | Bn-A09-p24086990        |
| 9448 | Bn-N9-p26823882 | Bn-Scaffold003668-p282  |
| 9449 | Bn-N9-p26997825 | Bn-C5-p12386090         |
| 9451 | Bn-N9-p27165724 | Bn-Scaffold000282-p6257 |
| 9452 | Bn-N9-p27491742 | Bn-A05-p15802321        |
| 9453 | Bn-N9-p27495421 | Bn-A05-p15805806        |
| 9477 | Bn-N9-p28204510 | Bn-A09-p25455888        |
| 9516 | Bn-N9-p28841041 | Bn-A09-p26101323        |
| 9532 | Bn-N9-p29283046 | Bn-A09-p26578867        |
| 9541 | Bn-N9-p29855688 | Bn-A09-p27103683        |
| 9546 | Bn-N9-p30306145 | Bn-A09-p27531548        |
| 9584 | Bn-N9-p31054476 | Bn-C8-p30616202         |
| 9596 | Bn-N9-p31562739 | Bn-A09-p28722989        |
| 9620 | Bn-N9-p32008041 | Bn-A09-p29186255        |
| 9624 | Bn-N9-p32102552 | Bn-A09-p29272014        |
| 9628 | Bn-N9-p32161397 | Bn-A09-p29331470        |
| 9638 | Bn-N9-p32326702 | Bn-A09-p29493614        |
| 9646 | Bn-N9-p32470450 | Bn-A09-p29617813        |
| 9649 | Bn-N9-p32550436 | Bn-A09-p29699253        |
| 9660 | Bn-N9-p32817315 | Bn-A09-p29968302        |
| 9691 | Bn-N9-p33307742 | Bn-A09-p30431025        |
| 9708 | Bn-N9-p33603704 | Bn-A09-p30724789        |
| 9723 | Bn-N9-p34324408 | Bn-A09-p31393136        |
| 9738 | Bn-N9-p34420779 | Bn-A09-p31494058        |
| 9787 | Bn-N9-p34992197 | Bn-A09-p5132918         |
| 9815 | Bn-N9-p35716954 | Bn-A09-p32553111        |
| 9828 | Bn-N9-p36096719 | Bn-A09-p32980100        |
| 9832 | Bn-N9-p36169883 | Bn-A09-p33040441        |
| 9837 | Bn-N9-p36445006 | Bn-A09-p33358168        |
| 9855 | Bn-N9-p36573079 | Bn-A09-p33464355        |
| 9861 | Bn-N9-p36603036 | Bn-A09-p33499505        |
| 9889 | Bn-N9-p37159171 | Bn-A09-p34039082        |
| 9894 | Bn-N9-p37607705 | Bn-A09-p34482075        |
| 9895 | Bn-N9-p37895290 | Bn-A09-p34779068        |
| 9898 | Bn-N9-p38146463 | Bn-A09-p34995922        |
| 9899 | Bn-N9-p38325101 | Bn-A09-p35162641        |
| 9902 | Bn-N9-p38427349 | Bn-A09-p35262679        |
| 9909 | Bn-N9-p38608830 | Bn-A09-p35426888        |
| 9912 | Bn-N9-p38663579 | Bn-A09-p35477936        |
| 9927 | Bn-N9-p38804159 | Bn-A09-p35624679        |
| 9935 | Bn-N9-p39021453 | Bn-A09-p35879759        |
| 9942 | Bn-N9-p39188012 | Bn-A09-p36062760        |
| 9946 | Bn-N9-p39351742 | Bn-A09-p36200543        |

|       |                  |                  |
|-------|------------------|------------------|
| 9956  | Bn-N9-p39560080  | Bn-A09-p36402398 |
| 9972  | Bn-N9-p40060791  | Bn-A09-p36886022 |
| 9978  | Bn-N9-p40208874  | Bn-C8-p41583107  |
| 9983  | Bn-N10-p174643   | Bn-A10-p4727374  |
| 9991  | Bn-N10-p334540   | Bn-C5-p335866    |
| 9993  | Bn-N10-p297188   | Bn-A10-p4606815  |
| 10019 | Bn-N10-p912738   | Bn-A10-p3955901  |
| 10022 | Bn-N10-p1004835  | Bn-A10-p3825331  |
| 10030 | Bn-N10-p1108499  | Bn-A10-p2819947  |
| 10034 | Bn-N10-p1361370  | Bn-A10-p2557960  |
| 10041 | Bn-N10-p1398053  | Bn-A10-p2523110  |
| 10090 | Bn-N10-p2123204  | Bn-A10-p1791974  |
| 10091 | Bn-N10-p2222171  | Bn-A10-p1698746  |
| 10096 | Bn-N10-p2525099  | Bn-A10-p1458849  |
| 10101 | Bn-N10-p2631797  | Bn-A10-p1345255  |
| 10123 | Bn-N10-p3240452  | Bn-A10-p754475   |
| 10288 | Bn-N10-p6132376  | Bn-A10-p5317804  |
| 10399 | Bn-N10-p9518968  | Bn-A10-p7913022  |
| 10422 | Bn-N10-p10057518 | Bn-A10-p8443505  |
| 10465 | Bn-N10-p10343794 | Bn-A10-p8723171  |
| 10474 | Bn-N10-p10544389 | Bn-A10-p8904827  |
| 10483 | Bn-N10-p10790201 | Bn-A10-p9166440  |
| 10495 | Bn-N10-p10868858 | Bn-A10-p9245966  |
| 10499 | Bn-N10-p11000973 | Bn-A10-p9370046  |
| 10506 | Bn-N10-p11212698 | Bn-A10-p9561249  |
| 10511 | Bn-N10-p11235601 | Bn-A10-p9594548  |
| 10523 | Bn-N10-p11495739 | Bn-A10-p9868333  |
| 10532 | Bn-N10-p11718757 | Bn-C9-p44593285  |
| 10541 | Bn-N10-p12078376 | Bn-A10-p10464159 |
| 10543 | Bn-N10-p12243716 | Bn-A10-p10647252 |
| 10560 | Bn-N10-p12513083 | Bn-A10-p10914713 |
| 10569 | Bn-N10-p12717224 | Bn-A10-p11105998 |
| 10573 | Bn-N10-p12846026 | Bn-A10-p11230418 |
| 10578 | Bn-N10-p13024539 | Bn-A10-p11396195 |
| 10579 | Bn-N10-p13063530 | Bn-A10-p11427179 |
| 10583 | Bn-N19-p49762022 | Bn-C9-p47439482  |
| 10585 | Bn-N10-p13261881 | Bn-A10-p12857310 |
| 10590 | Bn-N10-p13341433 | Bn-A10-p12933288 |
| 10596 | Bn-N10-p13530217 | Bn-A10-p13130002 |
| 10606 | Bn-N10-p13642700 | Bn-A10-p13218309 |
| 10613 | Bn-N10-p13739986 | Bn-A10-p13299250 |
| 10615 | Bn-N10-p13792515 | Bn-A10-p13343454 |
| 10622 | Bn-N10-p13900036 | Bn-A10-p13446086 |
| 10632 | Bn-N10-p14102032 | Bn-A10-p13640346 |
| 10634 | Bn-N10-p14140344 | Bn-A10-p13677412 |
| 10646 | Bn-N10-p14283825 | Bn-A10-p13818569 |
| 10664 | Bn-N10-p14715060 | Bn-A10-p14254487 |
| 10680 | Bn-N10-p15065815 | Bn-A10-p14623802 |
| 10707 | Bn-N10-p15639341 | Bn-A10-p15156277 |

|       |                  |                        |
|-------|------------------|------------------------|
| 10717 | Bn-N10-p15738014 | Bn-A10-p16421672       |
| 10726 | Bn-N10-p15830303 | Bn-A10-p16336708       |
| 10732 | Bn-N10-p15939293 | Bn-A10-p16224024       |
| 10738 | Bn-N10-p16068992 | Bn-A10-p16087066       |
| 10742 | Bn-N10-p16296245 | Bn-A10-p15863143       |
| 10745 | Bn-N10-p16366292 | Bn-A10-p15793623       |
| 10766 | Bn-N10-p16559905 | Bn-A10-p15607468       |
| 10771 | Bn-N10-p16681932 | Bn-A10-p15507350       |
| 10783 | Bn-N10-p16798686 | Bn-A10-p15398137       |
| 10786 | Bn-N10-p16811029 | Bn-A10-p15387894       |
| 10788 | Bn-N10-p16832459 | Bn-A10-p15367240       |
| 10792 | Bn-N10-p16875078 | Bn-A10-p15330596       |
| 10796 | Bn-N10-p16945504 | Bn-A10-p15265102       |
| 10802 | Bn-N10-p17174060 | Bn-A10-p16620627       |
| 10804 | Bn-N14-p1859330  | Bn-A10-p16862809       |
| 10805 | Bn-N12-p421642   | Bn-A10-p16935603       |
| 10809 | Bn-N18-p44745193 | Bn-A10-p17568393       |
| 10825 | Bn-N11-p1459224  | Bn-C1-p284003          |
| 10828 | Bn-N11-p2038166  | Bn-C1-p903714          |
| 10829 | Bn-N11-p2335230  | Bn-A01-p907721         |
| 10838 | Bn-N11-p2972339  | Bn-C1-p1914447         |
| 10841 | Bn-N1-p1769679   | Bn-C1-p2296948         |
| 10843 | Bn-N11-p3873556  | Bn-C1-p2760078         |
| 10848 | Bn-N11-p4453494  | Bn-C1-p3320931         |
| 10850 | Bn-N11-p5429066  | Bn-C1-p4212311         |
| 10896 | Bn-N11-p7117911  | Bn-Scaffold02362-p1538 |
| 10940 | Bn-N11-p8709150  | Bn-C1-p7446976         |
| 10956 | Bn-N11-p9291289  | Bn-C1-p8141825         |
| 10958 | Bn-N11-p9303916  | Bn-C1-p8150383         |
| 10983 | Bn-N11-p10017244 | Bn-C1-p8817529         |
| 10997 | Bn-N11-p10852512 | Bn-C1-p9647037         |
| 11001 | Bn-N11-p11566204 | Bn-C1-p10298103        |
| 11009 | Bn-N11-p12954035 | Bn-C1-p11604836        |
| 11015 | Bn-N11-p13100683 | Bn-C1-p11741511        |
| 11021 | Bn-N11-p13229265 | Bn-C1-p11861892        |
| 11027 | Bn-N11-p13396823 | Bn-C1-p12011052        |
| 11036 | Bn-N11-p13604090 | Bn-C1-p12228961        |
| 11041 | Bn-N11-p13928723 | Bn-C1-p12582975        |
| 11044 | Bn-N11-p14229035 | Bn-C1-p12821338        |
| 11072 | Bn-N11-p15104442 | Bn-C1-p13594012        |
| 11075 | Bn-N11-p15348140 | Bn-C1-p13866232        |
| 11086 | Bn-N11-p15748495 | Bn-C1-p14268880        |
| 11089 | Bn-N11-p15812621 | Bn-C1-p14332796        |
| 11091 | Bn-N11-p16052156 | Bn-C1-p14565806        |
| 11120 | Bn-N11-p18914484 | Bn-C1-p17234515        |
| 11500 | Bn-N11-p23550723 | Bn-C1-p22108831        |
| 11988 | Bn-N11-p24506672 | Bn-Scaffold01557-p399  |
| 12367 | Bn-N11-p31551362 | Bn-C1-p28860761        |
| 12432 | Bn-N11-p35046298 | Bn-Scaffold01540-p1838 |

|       |                  |                          |
|-------|------------------|--------------------------|
| 12467 | Bn-N11-p35998945 | Bn-C1-p33165496          |
| 12476 | Bn-N11-p36788702 | Bn-Scaffold01385-p6273   |
| 12481 | Bn-N11-p36904309 | Bn-C1-p34090627          |
| 12516 | Bn-N11-p38505222 | Bn-C3-p21365850          |
| 12518 | Bn-N11-p39029778 | Bn-Scaffold00763-p50232  |
| 12538 | Bn-N11-p39434331 | Bn-C1-p36524540          |
| 12597 | Bn-N11-p41026603 | Bn-C1-p38334187          |
| 12613 | Bn-N11-p42177018 | Bn-C1-p39370506          |
| 12622 | Bn-N11-p42748068 | Bn-C1-p39827382          |
| 12639 | Bn-N11-p43536774 | Bn-C1-p40553550          |
| 12643 | Bn-N11-p43652872 | Bn-C1-p40710950          |
| 12647 | Bn-N11-p43970726 | Bn-C1-p40861632          |
| 12648 | Bn-N11-p43984419 | Bn-C1-p40875666          |
| 12702 | Bn-N11-p44592876 | Bn-C1-p41468412          |
| 12703 | Bn-N12-p283366   | Bn-C2-p671385            |
| 12735 | Bn-N12-p936581   | Bn-C2-p1296749           |
| 12742 | Bn-N12-p1537049  | Bn-A02-p1344870          |
| 12743 | Bn-N12-p1640332  | Bn-C2-p2054626           |
| 12747 | Bn-N12-p1886204  | Bn-C2-p2277308           |
| 12755 | Bn-N12-p2411136  | Bn-C2-p2791893           |
| 12758 | Bn-N12-p2498010  | Bn-C2-p2865732           |
| 12764 | Bn-N12-p2959247  | Bn-A02-p3507057          |
| 12766 | Bn-N12-p3440999  | Bn-C2-p3792621           |
| 12797 | Bn-N12-p3912844  | Bn-C2-p4204945           |
| 12802 | Bn-N12-p4121985  | Bn-C2-p4390372           |
| 12811 | Bn-N12-p4336290  | Bn-C2-p4623747           |
| 12833 | Bn-N12-p6117636  | Bn-C2-p6321978           |
| 12887 | Bn-N12-p10151393 | Bn-C2-p11298722          |
| 12961 | Bn-N12-p12139142 | Bn-C2-p13653557          |
| 13002 | Bn-N12-p12889447 | Bn-C2-p14539885          |
| 13063 | Bn-N12-p16538763 | Bn-C2-p19642551          |
| 13070 | Bn-N12-p16729238 | Bn-C2-p19861280          |
| 13126 | Bn-N12-p18195253 | Bn-C2-p22031369          |
| 13176 | Bn-N12-p20496877 | Bn-C2-p25538602          |
| 13257 | Bn-N12-p21583340 | Bn-C2-p26782405          |
| 13638 | Bn-N12-p32987804 | Bn-C2-p40369565          |
| 13657 | Bn-N12-p34013662 | Bn-C2-p41475606          |
| 13734 | Bn-N12-p38135032 | Bn-Scaffold00285-p269525 |
| 13748 | Bn-N12-p39499870 | Bn-Scaffold00992-p24644  |
| 13765 | Bn-N12-p40164030 | Bn-C2-p46969947          |
| 13766 | Bn-N12-p40357683 | Bn-C2-p47138435          |
| 13768 | Bn-N12-p40391461 | Bn-C2-p47170554          |
| 13772 | Bn-N12-p40544490 | Bn-C2-p47336361          |
| 13776 | Bn-N12-p40838951 | Bn-Scaffold00847-p5921   |
| 13779 | Bn-N12-p40971090 | Bn-C2-p47678596          |
| 13796 | Bn-N12-p41334437 | Bn-C2-p48091803          |
| 13797 | Bn-N12-p41775492 | Bn-C2-p48551446          |
| 13798 | Bn-N12-p41815038 | Bn-C2-p48603850          |
| 13799 | Bn-N11-p10640405 | Bn-C3-p49912971          |



|       |                  |                          |
|-------|------------------|--------------------------|
| 13802 | Bn-N12-p42046279 | Bn-C2-p48894790          |
| 13823 | Bn-N12-p42326091 | Bn-C2-p49182188          |
| 13827 | Bn-N12-p42598517 | Bn-C2-p49449909          |
| 13874 | Bn-N12-p43682190 | Bn-C2-p50543794          |
| 13877 | Bn-N12-p44011551 | Bn-C2-p51343986          |
| 13878 | Bn-N12-p44382055 | Bn-C2-p51836264          |
| 13881 | Bn-N12-p44392234 | Bn-C2-p51846290          |
| 13899 | Bn-N12-p44629331 | Bn-C2-p52067557          |
| 13904 | Bn-N12-p44732203 | Bn-C2-p52179807          |
| 13910 | Bn-N12-p44954857 | Bn-Scaffold00615-p131853 |
| 13922 | Bn-N12-p45453768 | Bn-C2-p52680379          |
| 13939 | Bn-N12-p45313388 | Bn-C2-p52559929          |
| 13944 | Bn-N13-p2992378  | Bn-C3-p2915302           |
| 13947 | Bn-N13-p3375183  | Bn-C3-p3310082           |
| 13948 | Bn-N13-p3557440  | Bn-C3-p3481719           |
| 13950 | Bn-N13-p3762152  | Bn-C3-p3699157           |
| 13952 | Bn-N13-p4085409  | Bn-C3-p3953647           |
| 13955 | Bn-N13-p4252360  | Bn-C3-p4100659           |
| 13956 | Bn-N13-p4633364  | Bn-A03-p4682207          |
| 13959 | Bn-N3-p4145513   | Bn-C3-p5068957           |
| 13960 | Bn-N13-p5986297  | Bn-C3-p5218330           |
| 13965 | Bn-N13-p6244288  | Bn-C3-p5482090           |
| 13980 | Bn-N13-p6465866  | Bn-C3-p5694509           |
| 13982 | Bn-N13-p6593204  | Bn-C3-p5800427           |
| 13986 | Bn-N13-p7464782  | Bn-C4-p42681345          |
| 13987 | Bn-N13-p8015497  | Bn-C3-p7275851           |
| 13989 | Bn-N13-p8245744  | Bn-C3-p7486013           |
| 13992 | Bn-N13-p8366065  | Bn-C3-p7604728           |
| 13996 | Bn-N13-p8761234  | Bn-C3-p8017908           |
| 14005 | Bn-N13-p9110162  | Bn-C3-p8403185           |
| 14008 | Bn-N13-p9886904  | Bn-C3-p9135177           |
| 14012 | Bn-N13-p11373962 | Bn-A03-p8359092          |
| 14014 | Bn-N13-p11865252 | Bn-C3-p11172822          |
| 14019 | Bn-N3-p9034675   | Bn-C3-p12070773          |
| 14020 | Bn-N13-p13544313 | Bn-C3-p12808223          |
| 14028 | Bn-N13-p14066106 | Bn-C3-p13279392          |
| 14034 | Bn-N13-p14759341 | Bn-C3-p13950647          |
| 14037 | Bn-N13-p15627092 | Bn-C3-p14859675          |
| 14051 | Bn-N13-p16484575 | Bn-C3-p15798466          |
| 14158 | Bn-N13-p19500387 | Bn-C3-p18354125          |
| 14162 | Bn-N13-p19751255 | Bn-C3-p18596511          |
| 14168 | Bn-N13-p19900213 | Bn-C3-p18754012          |
| 14198 | Bn-N13-p20649361 | Bn-C3-p19981581          |
| 14206 | Bn-N13-p21573788 | Bn-C3-p20568555          |
| 14208 | Bn-N13-p22495983 | Bn-C3-p21443157          |
| 14215 | Bn-N13-p23299576 | Bn-C3-p22202335          |
| 14218 | Bn-N13-p23741532 | Bn-C3-p22562109          |
| 14221 | Bn-N13-p23778608 | Bn-C3-p22606381          |
| 14223 | Bn-N13-p24102290 | Bn-C3-p22945691          |

|       |                  |                         |
|-------|------------------|-------------------------|
| 14224 | Bn-N13-p24436448 | Bn-A03-p15983019        |
| 14233 | Bn-N13-p24927465 | Bn-C3-p23704359         |
| 14245 | Bn-N13-p25244880 | Bn-C3-p24021907         |
| 14252 | Bn-N13-p25461966 | Bn-Scaffold01023-p11758 |
| 14292 | Bn-N13-p25609110 | Bn-C3-p24354456         |
| 14298 | Bn-N13-p26100579 | Bn-C3-p24842847         |
| 14299 | Bn-N13-p26157491 | Bn-C3-p24895511         |
| 14309 | Bn-N13-p26575324 | Bn-C3-p25270752         |
| 14318 | Bn-N13-p26834187 | Bn-C3-p25518677         |
| 14322 | Bn-N13-p26945357 | Bn-C3-p25627940         |
| 14335 | Bn-N13-p28304014 | Bn-C3-p27074199         |
| 14380 | Bn-N13-p30096565 | Bn-C3-p28808057         |
| 14494 | Bn-N13-p32339346 | Bn-C3-p30751017         |
| 14498 | Bn-N13-p32444822 | Bn-C3-p30872016         |
| 14503 | Bn-N13-p32501325 | Bn-C3-p30926907         |
| 14504 | Bn-N13-p32520072 | Bn-C3-p30949166         |
| 14525 | Bn-N13-p32647170 | Bn-C3-p31101837         |
| 14546 | Bn-N13-p33816297 | Bn-C3-p32159218         |
| 14627 | Bn-N13-p36646684 | Bn-C3-p34846496         |
| 14633 | Bn-N13-p37011996 | Bn-C3-p35168382         |
| 14636 | Bn-N13-p38217511 | Bn-C3-p36232123         |
| 14641 | Bn-N13-p38520334 | Bn-C3-p36538236         |
| 14645 | Bn-N13-p35494025 | Bn-C3-p33783470         |
| 14723 | Bn-N13-p51208823 | Bn-C3-p49533128         |
| 14729 | Bn-N13-p51493654 | Bn-C3-p49784531         |
| 14764 | Bn-N13-p52659189 | Bn-C3-p50876390         |
| 14776 | Bn-N13-p52843875 | Bn-C3-p51051765         |
| 14789 | Bn-N13-p53059228 | Bn-C3-p51220360         |
| 14799 | Bn-N13-p53445599 | Bn-C3-p51618353         |
| 14806 | Bn-N13-p53775106 | Bn-C3-p51892437         |
| 14828 | Bn-N13-p54320108 | Bn-C3-p52463498         |
| 14859 | Bn-N13-p54890638 | Bn-C3-p53018880         |
| 14862 | Bn-N13-p55008263 | Bn-C3-p53105434         |
| 14869 | Bn-N13-p55065650 | Bn-C3-p53172050         |
| 14877 | Bn-N13-p55490354 | Bn-C3-p53619703         |
| 14882 | Bn-N13-p55880297 | Bn-C3-p53979059         |
| 14886 | Bn-N13-p56066278 | Bn-C3-p54100388         |
| 14895 | Bn-N13-p56483433 | Bn-C3-p54484753         |
| 14949 | Bn-N13-p56956424 | Bn-C3-p55005964         |
| 14952 | Bn-N13-p57080292 | Bn-C3-p55129421         |
| 14956 | Bn-N13-p57399905 | Bn-C3-p55406195         |
| 14977 | Bn-N13-p57494719 | Bn-C3-p55523801         |
| 14978 | Bn-N13-p57540903 | Bn-C3-p55566792         |
| 14990 | Bn-N13-p57793747 | Bn-C3-p55817169         |
| 15009 | Bn-N13-p58686520 | Bn-Scaffold00889-p26261 |
| 15143 | Bn-N13-p59403363 | Bn-C3-p57082676         |
| 15149 | Bn-N13-p59679488 | Bn-C3-p57354163         |
| 15150 | Bn-N13-p59742276 | Bn-C3-p57404345         |
| 15162 | Bn-N13-p60355266 | Bn-C3-p57896585         |

|       |                  |                         |
|-------|------------------|-------------------------|
| 15215 | Bn-N13-p61395213 | Bn-C3-p58884782         |
| 15228 | Bn-N13-p61720359 | Bn-C3-p59246536         |
| 15236 | Bn-N13-p62353372 | Bn-C3-p59803384         |
| 15241 | Bn-N13-p63051506 | Bn-C3-p60530925         |
| 15247 | Bn-N13-p63388579 | Bn-C3-p60849232         |
| 15262 | Bn-N13-p63750898 | Bn-C3-p61187054         |
| 15288 | Bn-N13-p65014421 | Bn-C3-p62366802         |
| 15294 | Bn-N13-p65681849 | Bn-C3-p62901691         |
| 15297 | Bn-N13-p65434365 | Bn-C3-p62727808         |
| 15333 | Bn-N13-p66466754 | Bn-C3-p63620341         |
| 15345 | Bn-N13-p66892279 | Bn-C3-p64050436         |
| 15351 | Bn-N13-p66937567 | Bn-C3-p64106691         |
| 15365 | Bn-N13-p67764811 | Bn-C3-p64972155         |
| 15366 | Bn-N14-p10483    | Bn-C4-p146560           |
| 15382 | Bn-N14-p115390   | Bn-C4-p264643           |
| 15388 | Bn-N14-p381430   | Bn-Scaffold00802-p78048 |
| 15391 | Bn-N14-p607913   | Bn-C4-p686637           |
| 15397 | Bn-N14-p896458   | Bn-C4-p983004           |
| 15402 | Bn-N14-p1263905  | Bn-C4-p1378830          |
| 15403 | Bn-N14-p1400503  | Bn-C4-p1516144          |
| 15422 | Bn-N14-p1485582  | Bn-C1-p31929709         |
| 15423 | Bn-N14-p1704243  | Bn-C4-p1782015          |
| 15428 | Bn-N14-p2399700  | Bn-C4-p2325430          |
| 15431 | Bn-N14-p2638346  | Bn-C4-p2539802          |
| 15439 | Bn-N14-p2973517  | Bn-C4-p2852349          |
| 15447 | Bn-N14-p3510738  | Bn-C4-p3457408          |
| 15459 | Bn-N14-p3692891  | Bn-C4-p3601694          |
| 15465 | Bn-N14-p3828796  | Bn-C4-p3722891          |
| 15466 | Bn-N14-p3931013  | Bn-Scaffold01730-p5229  |
| 15469 | Bn-N14-p4209836  | Bn-C4-p4030999          |
| 15473 | Bn-N14-p4291107  | Bn-C4-p4130322          |
| 15481 | Bn-N14-p4781873  | Bn-C4-p4585856          |
| 15484 | Bn-N14-p4878672  | Bn-C4-p4681049          |
| 15498 | Bn-N14-p5357044  | Bn-C4-p5169938          |
| 15505 | Bn-N14-p5855559  | Bn-C4-p5759134          |
| 15533 | Bn-N14-p6788085  | Bn-C4-p6677657          |
| 15540 | Bn-N14-p6923580  | Bn-C4-p6808204          |
| 15553 | Bn-N14-p7388271  | Bn-A05-p4304172         |
| 15570 | Bn-N14-p7653870  | Bn-C4-p7497891          |
| 15581 | Bn-N14-p8042737  | Bn-C4-p7925803          |
| 15590 | Bn-N14-p8955502  | Bn-C4-p8618530          |
| 15591 | Bn-N14-p9067753  | Bn-C4-p8723983          |
| 15600 | Bn-N14-p9174618  | Bn-C4-p8822093          |
| 15601 | Bn-N14-p9401986  | Bn-C4-p9007623          |
| 15604 | Bn-N14-p10251001 | Bn-C4-p9777719          |
| 15613 | Bn-N14-p11501551 | Bn-C4-p10995381         |
| 15628 | Bn-N14-p12025135 | Bn-C4-p11427976         |
| 15646 | Bn-N14-p12698070 | Bn-C4-p12096888         |
| 15714 | Bn-N14-p15885493 | Bn-C4-p15358035         |

|       |                       |                         |
|-------|-----------------------|-------------------------|
| 15789 | Bn-N14-p16960929      | Bn-C4-p16825244         |
| 15887 | Bn-N14-p23279842      | Bn-C4-p22906600         |
| 16107 | Bn-N14-p28855843      | Bn-C4-p27836422         |
| 16115 | Bn-N14-p29608726      | Bn-Scaffold00866-p24484 |
| 16135 | Bn-N14-p21949894      | Bn-C4-p21291779         |
| 16209 | Bn-N14-p34266628      | Bn-C4-p32902510         |
| 16212 | Bn-N14-p34552788      | Bn-C4-p33179791         |
| 16224 | Bn-N14-p34993877      | Bn-C4-p33688222         |
| 16318 | Bn-N14-p38673794      | Bn-C4-p37078717         |
| 16323 | Bn-N14-p38738442      | Bn-C4-p37142354         |
| 16364 | Bn-N14-p39683412      | Bn-Scaffold04300-p95    |
| 16366 | Bn-N14-p40463269      | Bn-C4-p38898227         |
| 16379 | Bn-N14-p41195848      | Bn-C4-p39604628         |
| 16397 | Bn-N14-p41883467      | Bn-C4-p40183165         |
| 16526 | Bn-N14-p43994865      | Bn-C4-p42101528         |
| 16531 | Bn-N14-p44301058      | Bn-C4-p42370006         |
| 16534 | Bn-N14-p44414316      | Bn-C4-p42498181         |
| 16551 | Bn-N14-p45065343      | Bn-C4-p42981603         |
| 16572 | Bn-N14-p46311853      | Bn-C4-p44119685         |
| 16575 | Bn-N14-p46389017      | Bn-C4-p44247047         |
| 16581 | Bn-N4-p14969070       | Bn-A04-p12917949        |
| 16583 | Bn-N14-p47057666      | Bn-Scaffold01016-p29132 |
| 16585 | Bn-N14-p48823749      | Bn-C4-p46683666         |
| 16589 | Bn-N14-p49662304      | Bn-C4-p47419520         |
| 16595 | Bn-N14-p50059672      | Bn-Scaffold01527-p4691  |
| 16596 | Bn-N2-p8682855        | Bn-A04-p15287200        |
| 16600 | Bn-N14-p50457083      | Bn-C4-p48686430         |
| 16603 | Bn-Scaffold01385-p601 | Bn-C4-p48865332         |
| 16604 | Bn-N14-p50751772      | Bn-C4-p48943622         |
| 16606 | Bn-N14-p50883109      | Bn-C4-p49082294         |
| 16611 | Bn-N14-p51259960      | Bn-C4-p49871832         |
| 16612 | Bn-N14-p51803213      | Bn-C4-p50397026         |
| 16613 | Bn-N14-p52137515      | Bn-C4-p50780868         |
| 16615 | Bn-N14-p52368863      | Bn-C4-p51022991         |
| 16616 | Bn-N14-p52488607      | Bn-C4-p51151118         |
| 16617 | Bn-N4-p19429574       | Bn-A04-p17475728        |
| 16619 | Bn-N14-p53148205      | Bn-C4-p51764862         |
| 16621 | Bn-N14-p53793394      | Bn-C4-p52507724         |
| 16623 | Bn-N14-p53977786      | Bn-C4-p52713866         |
| 16625 | Bn-N14-p54056004      | Bn-C4-p52800188         |
| 16628 | Bn-N14-p54436284      | Bn-C4-p53155836         |
| 16630 | Bn-N14-p54571000      | Bn-C4-p53316094         |
| 16651 | Bn-N15-p53524         | Bn-C5-p160429           |
| 16643 | Bn-N15-p1174899       | Bn-C5-p1056773          |
| 16658 | Bn-N15-p1342122       | Bn-C5-p1238391          |
| 16662 | Bn-N15-p1473353       | Bn-C5-p1364481          |
| 16665 | Bn-N15-p1578974       | Bn-C5-p1474081          |
| 16670 | Bn-N15-p1788350       | Bn-C5-p1705838          |
| 16672 | Bn-N15-p1999936       | Bn-C5-p1917307          |

|       |                  |                  |
|-------|------------------|------------------|
| 16676 | Bn-N15-p2117649  | Bn-C5-p2069364   |
| 16679 | Bn-N15-p2193139  | Bn-C5-p2151026   |
| 16680 | Bn-N15-p2229669  | Bn-C5-p2189242   |
| 16681 | Bn-N15-p2241803  | Bn-C5-p2199834   |
| 16685 | Bn-N15-p2505335  | Bn-C5-p2468868   |
| 16689 | Bn-N15-p2578161  | Bn-C5-p2548160   |
| 16690 | Bn-N15-p2750972  | Bn-C5-p2691551   |
| 16691 | Bn-N15-p2960014  | Bn-C5-p2918201   |
| 16692 | Bn-N15-p2961100  | Bn-C5-p2919330   |
| 16693 | Bn-N15-p2970279  | Bn-C5-p2928560   |
| 16695 | Bn-N15-p3017053  | Bn-C5-p2982006   |
| 16696 | Bn-N15-p3192152  | Bn-C5-p3126241   |
| 16698 | Bn-N15-p3365432  | Bn-C5-p3281408   |
| 16707 | Bn-N15-p3663901  | Bn-C5-p3568847   |
| 16714 | Bn-N6-p3577649   | Bn-A06-p3651473  |
| 16715 | Bn-N15-p3730704  | Bn-C5-p3633992   |
| 16726 | Bn-N15-p4607710  | Bn-C5-p4463720   |
| 16728 | Bn-N15-p5195547  | Bn-C5-p5091946   |
| 16738 | Bn-N15-p5645612  | Bn-C5-p5640950   |
| 16752 | Bn-N15-p7309887  | Bn-C5-p7266769   |
| 16756 | Bn-N15-p7646696  | Bn-C5-p7597925   |
| 16772 | Bn-N15-p8958496  | Bn-C5-p8762652   |
| 16773 | Bn-N15-p8962076  | Bn-C5-p8767284   |
| 16780 | Bn-N15-p9595787  | Bn-C5-p9370759   |
| 16790 | Bn-N15-p10118146 | Bn-C5-p9849982   |
| 16802 | Bn-N15-p11363353 | Bn-C5-p10853650  |
| 16960 | Bn-N15-p13496909 | Bn-C5-p12859514  |
| 17064 | Bn-N15-p15332549 | Bn-C5-p14153917  |
| 17065 | Bn-N15-p15923332 | Bn-C5-p14722118  |
| 17074 | Bn-N16-p15485278 | Bn-C6-p23268034  |
| 17075 | Bn-N15-p17515855 | Bn-C5-p18008781  |
| 17082 | Bn-N15-p18376044 | Bn-C5-p18812982  |
| 17087 | Bn-N15-p19745473 | Bn-C5-p20180980  |
| 17116 | Bn-N5-p16808652  | Bn-A05-p16509283 |
| 17117 | Bn-N15-p34045905 | Bn-C5-p32349790  |
| 17129 | Bn-N15-p42180350 | Bn-C5-p40472703  |
| 17134 | Bn-N15-p40027801 | Bn-C5-p38043152  |
| 17138 | Bn-N15-p40606936 | Bn-C5-p38756827  |
| 17139 | Bn-N15-p40754671 | Bn-C5-p38895000  |
| 17152 | Bn-N15-p40858129 | Bn-C5-p38976125  |
| 17206 | Bn-N15-p43474159 | Bn-C5-p41676458  |
| 17207 | Bn-N5-p22366288  | Bn-A05-p21326775 |
| 17208 | Bn-N15-p44281647 | Bn-C5-p42447050  |
| 17210 | Bn-N15-p44461286 | Bn-C5-p42619917  |
| 17212 | Bn-N15-p44730765 | Bn-C5-p42877318  |
| 17213 | Bn-N15-p44959556 | Bn-C5-p43091364  |
| 17214 | Bn-N15-p45002883 | Bn-C5-p43140924  |
| 17215 | Bn-N15-p45051720 | Bn-C5-p43192758  |
| 17223 | Bn-N15-p45274243 | Bn-C5-p43418714  |

|       |                  |                          |
|-------|------------------|--------------------------|
| 17228 | Bn-N15-p45401184 | Bn-C5-p43590291          |
| 17242 | Bn-N5-p24193947  | Bn-A05-p23102053         |
| 17245 | Bn-N15-p46329966 | Bn-C5-p44548511          |
| 17252 | Bn-N15-p46540304 | Bn-C5-p44704155          |
| 17269 | Bn-N15-p47239484 | Bn-C5-p45479754          |
| 17271 | Bn-N15-p47395762 | Bn-Scaffold000191-p47497 |
| 17275 | Bn-N15-p47606924 | Bn-C5-p45853238          |
| 17279 | Bn-N15-p48099448 | Bn-C5-p46328665          |
| 17283 | Bn-N15-p48278032 | Bn-C5-p46523272          |
| 17289 | Bn-N16-p37379113 | Bn-C6-p1757213           |
| 17295 | Bn-N16-p37278150 | Bn-C6-p1854873           |
| 17296 | Bn-N16-p37226193 | Bn-C8-p138535            |
| 17301 | Bn-N16-p37117974 | Bn-C6-p1975362           |
| 17303 | Bn-N16-p36961661 | Bn-C6-p2132472           |
| 17306 | Bn-N16-p36892483 | Bn-C6-p2206123           |
| 17308 | Bn-N16-p36841519 | Bn-C6-p2259256           |
| 17311 | Bn-N16-p36426332 | Bn-C6-p2673885           |
| 17329 | Bn-N16-p36396201 | Bn-C6-p2701748           |
| 17332 | Bn-N16-p36110171 | Bn-C6-p2934075           |
| 17350 | Bn-N16-p35980032 | Bn-C6-p3073254           |
| 17373 | Bn-N16-p35139350 | Bn-C6-p3835667           |
| 17394 | Bn-N16-p34266718 | Bn-C6-p4683276           |
| 17426 | Bn-N16-p33058389 | Bn-C6-p5764339           |
| 17466 | Bn-N16-p32870253 | Bn-C6-p5949689           |
| 17479 | Bn-N16-p32047782 | Bn-C6-p6726844           |
| 17505 | Bn-N16-p31856094 | Bn-C6-p6875935           |
| 17516 | Bn-N16-p31714014 | Bn-C6-p7065345           |
| 17528 | Bn-N16-p30681660 | Bn-C6-p7863103           |
| 17534 | Bn-N16-p28249935 | Bn-C6-p10407391          |
| 17562 | Bn-N16-p26901876 | Bn-C6-p11765338          |
| 17597 | Bn-N16-p26712994 | Bn-C2-p41605604          |
| 17598 | Bn-N16-p26506737 | Bn-C6-p12136654          |
| 17607 | Bn-N16-p24349364 | Bn-C6-p14338971          |
| 17664 | Bn-N16-p24223842 | Bn-C6-p14478368          |
| 17671 | Bn-N16-p23582092 | Bn-C6-p15140213          |
| 17696 | Bn-N16-p22247194 | Bn-C6-p16403568          |
| 17706 | Bn-N16-p21115094 | Bn-C6-p17662536          |
| 17749 | Bn-N16-p20370684 | Bn-C6-p18415817          |
| 17752 | Bn-N16-p17911957 | Bn-C6-p20863048          |
| 17833 | Bn-N16-p15871048 | Bn-C6-p22863673          |
| 17858 | Bn-N16-p12557485 | Bn-C6-p26089476          |
| 17963 | Bn-N16-p10094412 | Bn-C6-p28787698          |
| 18003 | Bn-N16-p5360756  | Bn-C6-p34220372          |
| 18107 | Bn-N16-p4535925  | Bn-C6-p35031160          |
| 18143 | Bn-N16-p4260159  | Bn-C6-p35715999          |
| 18156 | Bn-N16-p4216788  | Bn-C6-p35758398          |
| 18158 | Bn-N16-p3367847  | Bn-C6-p36609795          |
| 18189 | Bn-N16-p2735237  | Bn-A06-p2405022          |
| 18229 | Bn-N16-p1977431  | Bn-C6-p38030144          |

|       |                       |                         |
|-------|-----------------------|-------------------------|
| 18269 | Bn-Scaffold27754-p161 | Bn-Scaffold08858-p361   |
| 18271 | Bn-N17-p394283        | Bn-A07-p160648          |
| 18276 | Bn-N17-p1329229       | Bn-C7-p1192208          |
| 18285 | Bn-N17-p4867251       | Bn-C7-p4356314          |
| 18320 | Bn-N17-p10157609      | Bn-C7-p9654338          |
| 18427 | Bn-N17-p11683264      | Bn-C7-p11487715         |
| 18739 | Bn-N17-p14892900      | Bn-C7-p14676153         |
| 18769 | Bn-N17-p16953516      | Bn-C7-p16589778         |
| 18775 | Bn-N13-p53096085      | Bn-A07-p6906296         |
| 18781 | Bn-N17-p20395324      | Bn-C7-p20117250         |
| 18782 | Bn-N17-p20446675      | Bn-C7-p20307138         |
| 18800 | Bn-N17-p20998852      | Bn-C7-p20921325         |
| 18805 | Bn-N17-p21264164      | Bn-C7-p21135074         |
| 18812 | Bn-N17-p21604862      | Bn-C7-p21817897         |
| 18815 | Bn-N17-p21712618      | Bn-C7-p21544993         |
| 18827 | Bn-N17-p23162790      | Bn-C7-p22905190         |
| 18878 | Bn-N17-p24193173      | Bn-C7-p23829640         |
| 18883 | Bn-N17-p24271722      | Bn-C7-p23897491         |
| 18887 | Bn-N17-p24742395      | Bn-C7-p24424315         |
| 18890 | Bn-N17-p24838256      | Bn-C7-p24526764         |
| 18893 | Bn-N17-p24950440      | Bn-C7-p24641573         |
| 18898 | Bn-N17-p25262220      | Bn-C7-p24943849         |
| 18911 | Bn-N17-p25771233      | Bn-Scaffold00928-p13976 |
| 18915 | Bn-N17-p26695844      | Bn-C7-p26355002         |
| 18930 | Bn-N17-p29426444      | Bn-C7-p28973784         |
| 18943 | Bn-N17-p29828465      | Bn-C7-p29385521         |
| 18944 | Bn-N17-p29860763      | Bn-C7-p29422151         |
| 18998 | Bn-N17-p31158770      | Bn-C7-p30740034         |
| 18999 | Bn-N17-p31283084      | Bn-C7-p30856330         |
| 19031 | Bn-N17-p31676667      | Bn-C7-p31288691         |
| 19067 | Bn-N17-p32855427      | Bn-C7-p32722910         |
| 19118 | Bn-N17-p33478895      | Bn-C7-p33351378         |
| 19134 | Bn-N17-p34061229      | Bn-C7-p35151417         |
| 19137 | Bn-N17-p34535913      | Bn-C7-p33900798         |
| 19138 | Bn-N17-p34551543      | Bn-C7-p33915927         |
| 19140 | Bn-N17-p34556010      | Bn-C7-p33920406         |
| 19166 | Bn-N17-p35120304      | Bn-C7-p34441835         |
| 19170 | Bn-N17-p35240900      | Bn-C7-p34559064         |
| 19181 | Bn-N17-p35433082      | Bn-C7-p34769795         |
| 19244 | Bn-N17-p36391568      | Bn-C7-p36225591         |
| 19245 | Bn-N17-p36829930      | Bn-C7-p36618847         |
| 19254 | Bn-N17-p36957581      | Bn-C7-p36763950         |
| 19256 | Bn-N17-p37614576      | Bn-C7-p37401578         |
| 19261 | Bn-N17-p37909489      | Bn-C7-p37720330         |
| 19266 | Bn-N17-p38619798      | Bn-C7-p38434890         |
| 19268 | Bn-N17-p38658044      | Bn-C7-p38461116         |
| 19279 | Bn-N17-p39425879      | Bn-C7-p39218523         |
| 19280 | Bn-N15-p41349137      | Bn-C7-p39332602         |
| 19286 | Bn-N17-p39754792      | Bn-C7-p39523483         |

|       |                  |                        |
|-------|------------------|------------------------|
| 19295 | Bn-N17-p40165190 | Bn-C7-p39971347        |
| 19320 | Bn-N17-p40699585 | Bn-C7-p40436327        |
| 19323 | Bn-N17-p40703416 | Bn-C7-p40440151        |
| 19346 | Bn-N15-p4027205  | Bn-C8-p21229919        |
| 19409 | Bn-N17-p42151468 | Bn-C7-p41915528        |
| 19412 | Bn-N17-p42170025 | Bn-C7-p41932287        |
| 19415 | Bn-N17-p42295766 | Bn-C7-p42054639        |
| 19423 | Bn-N17-p42975451 | Bn-C7-p42655999        |
| 19437 | Bn-N17-p43158306 | Bn-C7-p42845207        |
| 19440 | Bn-N17-p43260732 | Bn-C7-p42942159        |
| 19451 | Bn-N17-p43457031 | Bn-C7-p43156370        |
| 19452 | Bn-N17-p43466400 | Bn-C7-p43164661        |
| 19468 | Bn-N17-p43880846 | Bn-C7-p43570972        |
| 19473 | Bn-N17-p43960610 | Bn-C7-p43655170        |
| 19478 | Bn-N17-p44318806 | Bn-C7-p44016812        |
| 19485 | Bn-N17-p44595392 | Bn-C7-p44256784        |
| 19488 | Bn-N17-p44650324 | Bn-C7-p44315218        |
| 19490 | Bn-N17-p44654596 | Bn-C7-p44319581        |
| 19556 | Bn-N17-p45568856 | Bn-C7-p45252338        |
| 19563 | Bn-N17-p45707681 | Bn-C7-p45377611        |
| 19565 | Bn-N17-p45782916 | Bn-C7-p45437529        |
| 19567 | Bn-N17-p46039061 | Bn-C7-p45671980        |
| 19569 | Bn-N17-p46100692 | Bn-C7-p45729422        |
| 19571 | Bn-N17-p46122548 | Bn-C7-p45751307        |
| 19588 | Bn-N17-p46543863 | Bn-C7-p46159412        |
| 19590 | Bn-N17-p46700265 | Bn-C7-p46297766        |
| 19594 | Bn-N17-p46765619 | Bn-C7-p46356119        |
| 19604 | Bn-N3-p29480332  | Bn-A03-p29053385       |
| 19605 | Bn-N17-p47049196 | Bn-C7-p46637900        |
| 19606 | Bn-N17-p47352443 | Bn-C7-p46876015        |
| 19610 | Bn-N17-p47594347 | Bn-C7-p47122817        |
| 19615 | Bn-N17-p48184736 | Bn-C7-p47656824        |
| 19627 | Bn-N17-p48719259 | Bn-C7-p48216215        |
| 19629 | Bn-N18-p1454470  | Bn-C8-p1210965         |
| 19634 | Bn-N18-p5618557  | Bn-C8-p4368350         |
| 19638 | Bn-N18-p12616173 | Bn-A01-p10059043       |
| 19685 | Bn-N18-p1843932  | Bn-C8-p1650985         |
| 19693 | Bn-N18-p10112858 | Bn-C8-p8635399         |
| 19857 | Bn-N18-p15850482 | Bn-C8-p13822836        |
| 19878 | Bn-N18-p19251163 | Bn-C8-p17004422        |
| 19881 | Bn-N18-p20024510 | Bn-C8-p17859005        |
| 19883 | Bn-N18-p20934069 | Bn-Scaffold01219-p8813 |
| 19886 | Bn-N18-p21210849 | Bn-C8-p18806260        |
| 19889 | Bn-N8-p20305257  | Bn-C8-p19206552        |
| 19891 | Bn-N18-p22264975 | Bn-C8-p19887099        |
| 19892 | Bn-N18-p22441567 | Bn-C8-p20069131        |
| 19894 | Bn-N18-p22462785 | Bn-C8-p20091110        |
| 19916 | Bn-N18-p22891395 | Bn-C8-p20415408        |
| 19917 | Bn-N18-p23909536 | Bn-C8-p21353685        |



|       |                  |                        |
|-------|------------------|------------------------|
| 19921 | Bn-N18-p23952842 | Bn-C8-p21396843        |
| 19922 | Bn-N18-p23995115 | Bn-C8-p21439595        |
| 19941 | Bn-N18-p24433888 | Bn-C8-p21833572        |
| 19946 | Bn-N18-p24521394 | Bn-C8-p21912885        |
| 19949 | Bn-N18-p24988414 | Bn-C8-p22331853        |
| 19952 | Bn-N18-p26041888 | Bn-Scaffold01074-p6212 |
| 19954 | Bn-N18-p26132328 | Bn-C8-p23430903        |
| 19955 | Bn-N18-p26587389 | Bn-C8-p23873394        |
| 19956 | Bn-N18-p26913742 | Bn-C8-p24127988        |
| 19960 | Bn-N18-p28274042 | Bn-C8-p25393055        |
| 19984 | Bn-N18-p28819264 | Bn-C8-p25926212        |
| 19987 | Bn-N18-p30465380 | Bn-C8-p27775136        |
| 19994 | Bn-N18-p30754016 | Bn-C3-p51141028        |
| 19995 | Bn-N18-p31188241 | Bn-C8-p28178287        |
| 19996 | Bn-N18-p31877221 | Bn-C8-p28860028        |
| 20012 | Bn-N18-p32115345 | Bn-C8-p29120618        |
| 20024 | Bn-N18-p32357196 | Bn-C8-p29299889        |
| 20050 | Bn-N18-p33602937 | Bn-C8-p30537649        |
| 20061 | Bn-N18-p33767888 | Bn-C8-p30708636        |
| 20063 | Bn-N18-p34020085 | Bn-C8-p30959960        |
| 20070 | Bn-N18-p34098757 | Bn-C8-p31023043        |
| 20072 | Bn-N18-p34122556 | Bn-C8-p31038829        |
| 20090 | Bn-N18-p34647062 | Bn-C8-p31579687        |
| 20120 | Bn-N18-p35707246 | Bn-C8-p32722330        |
| 20131 | Bn-N18-p36370965 | Bn-C8-p33331256        |
| 20199 | Bn-N18-p37282326 | Bn-C8-p34257170        |
| 20204 | Bn-N18-p37515324 | Bn-C8-p34488468        |
| 20248 | Bn-N18-p39241000 | Bn-C8-p36179273        |
| 20250 | Bn-N18-p39869059 | Bn-C8-p36742396        |
| 20257 | Bn-N9-p36764678  | Bn-A09-p33660289       |
| 20260 | Bn-N18-p41556749 | Bn-C8-p38410249        |
| 20264 | Bn-N18-p41663055 | Bn-C8-p38486825        |
| 20266 | Bn-N18-p41737543 | Bn-C8-p38576855        |
| 20269 | Bn-N18-p41906145 | Bn-C8-p38749358        |
| 20270 | Bn-N18-p42467540 | Bn-C8-p39312052        |
| 20271 | Bn-N18-p43035968 | Bn-C8-p39889339        |
| 20272 | Bn-N18-p43996802 | Bn-C8-p40757738        |
| 20274 | Bn-N18-p44424911 | Bn-C8-p41145335        |
| 20277 | Bn-N4-p5589      | Bn-C9-p7599            |
| 20278 | Bn-N19-p55940966 | Bn-A09-p281844         |
| 20281 | Bn-N9-p1081882   | Bn-A01-p26921609       |
| 20285 | Bn-N19-p2092209  | Bn-C9-p2129884         |
| 20289 | Bn-N19-p2266494  | Bn-C9-p2309674         |
| 20293 | Bn-N19-p2637647  | Bn-C9-p2688672         |
| 20300 | Bn-N17-p11449356 | Bn-C7-p10815743        |
| 20301 | Bn-N19-p4207026  | Bn-C9-p4177835         |
| 20305 | Bn-N19-p5017304  | Bn-A09-p3233005        |
| 20308 | Bn-N9-p3763762   | Bn-C9-p5218392         |
| 20309 | Bn-N19-p5638360  | Bn-C9-p5641324         |

|       |                  |                   |
|-------|------------------|-------------------|
| 20310 | Bn-N19-p6041483  | Bn-C9-p6099851    |
| 20312 | Bn-N19-p6258583  | Bn-C9-p6285792    |
| 20316 | Bn-N19-p6771134  | Bn-C9-p6763573    |
| 20318 | Bn-N19-p7631927  | Bn-C9-p7657260    |
| 20321 | Bn-N19-p10533617 | Bn-C9-p10411803   |
| 20351 | Bn-N19-p10836063 | Bn-C9-p10670207   |
| 20353 | Bn-N19-p11436491 | Bn-C9-p11335462   |
| 20361 | Bn-N19-p13406984 | Bn-C9-p13245838   |
| 20385 | Bn-N19-p15841037 | Bn-C9-p15329223   |
| 20389 | Bn-N19-p16373749 | Bn-C9-p15784039   |
| 20457 | Bn-N19-p17203737 | Bn-C9-p16683551   |
| 20476 | Bn-N19-p17936845 | Bn-C9-p17340499   |
| 20561 | Bn-N19-p19118690 | Bn-C9-p18692647   |
| 20648 | Bn-N19-p25177594 | Bn-C9-p24331999   |
| 20785 | Bn-N19-p37974163 | Bn-C9-p36438578   |
| 20791 | Bn-N19-p38982545 | Bn-C7-p13328709   |
| 20805 | Bn-N19-p42314902 | Bn-C9-p40440348   |
| 20904 | Bn-N19-p45517324 | Bn-C9-p43400331   |
| 20908 | Bn-N19-p45851910 | Bn-C9-p43720221   |
| 20925 | Bn-N19-p46041580 | Bn-C9-p43822424   |
| 20956 | Bn-N19-p46754810 | Bn-C9-p44386081   |
| 20959 | Bn-N19-p47451063 | Bn-C9-p45066216   |
| 20961 | Bn-N19-p47678139 | Bn-C9-p45342222   |
| 20962 | Bn-N19-p47939658 | Bn-C9-p45590669   |
| 20993 | Bn-N19-p48639808 | Bn-C9-p46165884   |
| 21008 | Bn-N19-p48992662 | Bn-C13791383-p286 |
| 21016 | Bn-N19-p49157514 | Bn-C9-p46830604   |
| 21019 | Bn-N19-p49299421 | Bn-C9-p47004610   |
| 21020 | Bn-N19-p49725586 | Bn-C9-p47391900   |
| 21032 | Bn-N19-p50008223 | Bn-A10-p12957851  |
| 21035 | Bn-N19-p50302870 | Bn-C9-p47989399   |
| 21050 | Bn-N19-p50540424 | Bn-C9-p48236162   |
| 21058 | Bn-N2-p2679970   | Bn-A02-p3607564   |
| 21060 | Bn-N19-p51542682 | Bn-C9-p49140588   |
| 21070 | Bn-N19-p51918660 | Bn-C3-p58636673   |
| 21071 | Bn-N19-p52346260 | Bn-C9-p49881005   |
| 21076 | Bn-N19-p52423130 | Bn-C9-p49978999   |
| 21080 | Bn-N19-p53090532 | Bn-C9-p50628723   |
| 21085 | Bn-N19-p53678595 | Bn-C9-p51113926   |
| 21087 | Bn-N19-p53833236 | Bn-C9-p51273237   |
| 21093 | Bn-N19-p53945924 | Bn-C9-p51394423   |
| 21096 | Bn-N19-p54445865 | Bn-C9-p51869548   |
| 21099 | Bn-N19-p54525486 | Bn-C9-p51952893   |
| 21100 | Bn-N19-p54610222 | Bn-C9-p52030051   |
| 21104 | Bn-N19-p54800819 | Bn-C9-p52227361   |
| 21105 | Bn-N19-p54986241 | Bn-C9-p52417079   |
| 21110 | Bn-N10-p17259635 | Bn-C9-p53208843   |

to bins according to recombination events

| locus_name               | LG | Bin | Distance | SG_152 | SG_320 | SG_65 | SG_132 | SG_221 | SG_258 | SG_9 | SG_155 | SG_324 | SG_90 | SG_137 | SG_229 | SG_259 | SG_18 | SG_159 | SG_224 | SG_103 | SG_150 | SG_232 | SG_261 | SG_39 |   |
|--------------------------|----|-----|----------|--------|--------|-------|--------|--------|--------|------|--------|--------|-------|--------|--------|--------|-------|--------|--------|--------|--------|--------|--------|-------|---|
| Bn-A01-p137814           | A1 | 1   | 0        | B      | A      | 0     | A      | B      | B      | A    | 0      | B      | A     | B      | B      | B      | B     | B      | B      | B      | B      | A      | A      | A     | B |
| Bn-A01-p460072           | A1 | 2   | 1.9      | B      | A      | 0     | A      | B      | B      | A    | 0      | B      | A     | B      | B      | B      | B     | B      | B      | B      | B      | A      | A      | A     | B |
| Bn-scaff_20461_1-p169329 | A1 | 3   | 1.9      | B      | A      | 0     | A      | B      | B      | A    | 0      | B      | A     | B      | B      | B      | B     | B      | B      | B      | B      | A      | A      | A     | B |
| Bn-A01-p974934           | A1 | 4   | 3        | B      | A      | 0     | A      | B      | B      | A    | 0      | B      | 0     | B      | B      | B      | B     | B      | B      | B      | B      | A      | A      | A     | B |
| Bn-A01-p1250595          | A1 | 5   | 4.1      | B      | A      | 0     | A      | B      | B      | A    | B      | B      | 0     | B      | B      | B      | B     | B      | B      | B      | B      | A      | A      | A     | B |
| Bn-A01-p1372430          | A1 | 6   | 6.3      | B      | A      | 0     | A      | B      | B      | A    | 0      | B      | 0     | B      | B      | B      | B     | B      | B      | B      | B      | A      | A      | A     | B |
| Bn-A01-p1661180          | A1 | 7   | 8.5      | B      | A      | 0     | A      | B      | B      | A    | 0      | B      | 0     | B      | B      | B      | B     | B      | B      | B      | B      | A      | A      | B     | B |
| Bn-A01-p1742846          | A1 | 8   | 9.6      | B      | A      | 0     | A      | B      | B      | A    | 0      | B      | 0     | B      | B      | B      | B     | B      | B      | B      | B      | A      | A      | B     | B |
| Bn-A01-p1770291          | A1 | 9   | 10.7     | B      | A      | 0     | A      | B      | B      | A    | 0      | B      | 0     | B      | B      | B      | B     | B      | B      | B      | B      | A      | A      | B     | B |
| Bn-A01-p1990755          | A1 | 10  | 11.8     | B      | A      | 0     | A      | B      | B      | A    | 0      | B      | 0     | B      | B      | B      | B     | B      | B      | B      | B      | A      | A      | B     | B |
| Bn-A01-p2094793          | A1 | 11  | 12.9     | B      | A      | 0     | A      | B      | B      | A    | 0      | B      | 0     | B      | B      | B      | B     | B      | B      | B      | B      | A      | A      | B     | B |
| Bn-A01-p2171217          | A1 | 12  | 14       | B      | A      | 0     | A      | B      | B      | A    | 0      | B      | 0     | B      | B      | B      | B     | B      | B      | B      | B      | A      | A      | B     | B |
| Bn-A01-p2242890          | A1 | 13  | 16.2     | B      | A      | 0     | A      | B      | B      | A    | 0      | B      | 0     | B      | B      | B      | B     | B      | B      | B      | B      | A      | A      | B     | B |
| Bn-A01-p2667471          | A1 | 14  | 19       | B      | A      | 0     | A      | B      | B      | A    | 0      | B      | 0     | B      | B      | B      | B     | B      | B      | B      | B      | A      | A      | B     | B |
| Bn-A01-p2825565          | A1 | 15  | 20.4     | B      | A      | 0     | A      | B      | B      | A    | 0      | B      | 0     | B      | B      | B      | B     | B      | B      | B      | B      | A      | A      | B     | B |
| Bn-A01-p2990104          | A1 | 16  | 21.8     | B      | A      | 0     | A      | B      | B      | A    | 0      | B      | 0     | B      | B      | B      | B     | B      | B      | B      | B      | A      | A      | B     | B |
| Bn-A01-p3183888          | A1 | 17  | 23.2     | B      | A      | 0     | A      | B      | B      | A    | 0      | B      | 0     | B      | B      | B      | B     | B      | B      | B      | B      | A      | A      | B     | B |
| Bn-A01-p3306526          | A1 | 18  | 24.4     | B      | A      | 0     | A      | B      | B      | A    | 0      | B      | 0     | B      | B      | B      | B     | B      | B      | B      | B      | A      | A      | B     | B |
| Bn-A01-p3904495          | A1 | 19  | 26.7     | B      | A      | 0     | A      | B      | B      | A    | 0      | B      | 0     | B      | B      | B      | B     | B      | B      | B      | B      | A      | A      | B     | B |
| Bn-A01-p4812269          | A1 | 20  | 26.7     | B      | A      | 0     | A      | B      | B      | A    | 0      | B      | 0     | B      | B      | B      | B     | B      | B      | B      | B      | A      | A      | B     | B |
| Bn-A01-p5106042          | A1 | 21  | 27.6     | B      | A      | 0     | A      | B      | B      | A    | 0      | B      | A     | B      | B      | B      | B     | B      | B      | B      | B      | A      | A      | B     | B |
| Bn-A01-p5193639          | A1 | 22  | 28.5     | B      | A      | 0     | A      | B      | B      | A    | 0      | B      | A     | B      | B      | B      | B     | B      | B      | B      | B      | A      | A      | B     | B |
| Bn-A01-p5590998          | A1 | 23  | 29.5     | B      | A      | A     | A      | B      | B      | A    | A      | B      | B     | B      | B      | B      | B     | B      | B      | B      | B      | A      | A      | B     | B |
| Bn-A01-p6182710          | A1 | 24  | 30.4     | B      | A      | A     | A      | B      | B      | A    | A      | B      | B     | B      | B      | B      | B     | B      | B      | B      | B      | A      | A      | B     | B |
| Bn-A01-p6274135          | A1 | 25  | 32.3     | B      | A      | A     | A      | B      | B      | A    | B      | B      | B     | B      | B      | B      | B     | B      | B      | B      | B      | A      | A      | B     | B |
| Bn-A01-p6687707          | A1 | 26  | 34.2     | B      | A      | A     | A      | B      | B      | A    | B      | B      | B     | B      | B      | B      | B     | B      | B      | B      | B      | A      | A      | B     | B |
| Bn-A01-p6898291          | A1 | 27  | 35.1     | B      | A      | A     | A      | B      | B      | A    | B      | B      | B     | B      | B      | B      | B     | B      | B      | B      | B      | A      | A      | B     | B |
| Bn-A01-p7648929          | A1 | 28  | 36       | B      | A      | A     | A      | B      | B      | A    | B      | B      | B     | B      | B      | B      | B     | B      | B      | B      | B      | A      | A      | B     | B |
| Bn-A01-p7889385          | A1 | 29  | 37.9     | B      | A      | A     | A      | B      | B      | A    | B      | B      | B     | B      | B      | B      | B     | B      | B      | B      | B      | A      | A      | B     | B |
| Bn-A01-p7979458          | A1 | 30  | 38.8     | B      | A      | A     | A      | B      | B      | A    | B      | B      | B     | B      | B      | B      | B     | B      | B      | B      | B      | A      | A      | B     | B |
| Bn-A01-p8017380          | A1 | 31  | 39.7     | B      | A      | A     | A      | B      | B      | A    | B      | B      | B     | B      | A      | B      | B     | B      | B      | B      | B      | A      | A      | B     | B |
| Bn-A01-p9442471          | A1 | 32  | 40.6     | B      | A      | A     | A      | B      | B      | A    | B      | B      | B     | B      | A      | B      | B     | B      | B      | B      | B      | A      | A      | B     | B |
| Bn-A01-p9884449          | A1 | 33  | 41.5     | B      | A      | A     | A      | B      | B      | A    | B      | B      | B     | B      | A      | B      | B     | B      | B      | B      | B      | A      | A      | B     | B |
| Bn-A01-p9996458          | A1 | 34  | 42.4     | B      | A      | A     | A      | B      | B      | A    | B      | B      | B     | B      | A      | B      | B     | B      | B      | B      | B      | A      | A      | B     | B |
| Bn-A01-p10231780         | A1 | 35  | 43.3     | B      | A      | A     | A      | B      | B      | A    | B      | B      | B     | B      | A      | B      | B     | B      | B      | B      | B      | A      | A      | B     | B |
| Bn-scaff_16217_1-p143344 | A1 | 36  | 44.2     | B      | A      | A     | A      | B      | B      | A    | B      | B      | B     | B      | A      | B      | B     | B      | B      | B      | B      | A      | A      | B     | B |
| Bn-A01-p11825880         | A1 | 37  | 45.1     | B      | A      | A     | A      | B      | B      | A    | B      | B      | B     | B      | A      | B      | B     | B      | B      | B      | B      | A      | A      | B     | B |
| Bn-A01-p19983739         | A1 | 38  | 46       | B      | A      | A     | A      | B      | B      | A    | B      | B      | B     | B      | A      | B      | B     | B      | B      | B      | B      | A      | A      | B     | B |
| Bn-A01-p21393260         | A1 | 39  | 46.9     | B      | A      | A     | A      | B      | B      | A    | B      | B      | B     | B      | A      | B      | B     | B      | B      | B      | B      | A      | A      | B     | B |
| Bn-A01-p21709916         | A1 | 40  | 47.7     | B      | A      | A     | A      | B      | B      | A    | B      | B      | B     | B      | A      | B      | B     | B      | B      | B      | B      | A      | A      | B     | B |
| Bn-A01-p21855770         | A1 | 41  | 48.5     | B      | A      | A     | A      | B      | B      | A    | B      | B      | B     | B      | A      | B      | B     | B      | B      | B      | B      | A      | A      | B     | B |
| Bn-A01-p22051510         | A1 | 42  | 49.3     | B      | A      | A     | A      | B      | B      | A    | B      | B      | B     | B      | A      | B      | B     | B      | B      | B      | B      | A      | A      | B     | B |
| Bn-A01-p22087629         | A1 | 43  | 50.1     | B      | A      | A     | A      | B      | B      | A    | B      | B      | B     | B      | A      | B      | B     | B      | B      | B      | B      | A      | A      | B     | B |
| Bn-A01-p22681496         | A1 | 44  | 50.9     | B      | A      | A     | A      | B      | B      | A    | B      | B      | B     | B      | A      | B      | B     | B      | B      | B      | B      | A      | A      | B     | B |
| Bn-A01-p23568963         | A1 | 45  | 55.2     | A      | A      | A     | A      | B      | B      | A    | B      | B      | B     | B      | A      | B      | A     | B      | A      | B      | A      | A      | A      | B     | B |

|                           |    |    |      |   |   |   |   |   |   |   |   |   |   |   |   |   |   |   |   |   |   |   |   |   |
|---------------------------|----|----|------|---|---|---|---|---|---|---|---|---|---|---|---|---|---|---|---|---|---|---|---|---|
| Bn-scaff_17515_1-p51302   | A1 | 46 | 56   | A | A | B | A | B | B | A | B | B | B | B | A | B | A | B | A | A | A | B | B |   |
| Bn-A01-p23614494          | A1 | 47 | 56.8 | A | A | B | A | B | B | A | B | B | B | B | A | B | A | B | A | A | A | B | B |   |
| Bn-A01-p23694782          | A1 | 48 | 57.6 | A | A | B | A | B | B | A | B | B | B | B | A | B | A | B | A | A | A | B | B |   |
| Bn-A01-p24504575          | A1 | 49 | 59.3 | A | A | B | A | B | B | A | B | B | B | B | A | B | A | B | A | A | A | B | B |   |
| Bn-A01-p24697185          | A1 | 50 | 61   | A | A | B | A | B | B | A | B | B | B | A | B | A | B | A | B | A | A | A | B | B |
| Bn-Scaffold000164-p244631 | A1 | 51 | 62.7 | A | A | B | A | B | B | A | B | B | A | B | A | B | A | B | A | A | A | B | B |   |
| Bn-Scaffold000164-p55747  | A1 | 52 | 65.2 | A | A | B | A | B | B | A | B | A | B | A | B | A | B | A | B | A | A | A | B | B |
| Bn-Scaffold000386-p1325   | A1 | 53 | 66   | A | A | B | A | B | B | A | B | A | B | A | B | A | B | A | B | A | A | A | B | B |
| Bn-A01-p27331467          | A1 | 54 | 66.8 | A | A | B | A | B | B | A | B | A | B | A | B | A | B | A | A | A | A | A | B | B |
| Bn-A01-p27580681          | A1 | 55 | 70.2 | A | A | B | A | B | B | A | B | A | B | A | B | A | B | A | A | A | A | A | B | B |
| Bn-A01-p27866419          | A1 | 56 | 71   | A | A | B | A | B | B | A | B | A | B | A | B | A | B | A | A | A | A | A | B | B |
| Bn-A01-p28102080          | A1 | 57 | 71.8 | A | A | B | A | B | B | A | B | A | B | A | B | A | B | A | A | A | A | A | B | B |
| Bn-A01-p28462071          | A1 | 58 | 74.3 | A | A | B | A | B | B | A | B | A | B | A | B | A | B | A | A | A | A | A | B | B |
| Bn-A01-p25517197          | A1 | 59 | 75.1 | A | A | B | A | B | B | A | B | A | B | A | B | A | B | A | A | A | A | A | B | B |
| Bn-A01-p25040577          | A1 | 60 | 75.9 | A | A | B | A | B | B | A | B | A | B | A | B | A | B | A | A | A | A | A | B | B |
| Bn-A02-p1707420           | A2 | 1  | 0    | A | B | B | A | A | B | A | A | A | B | A | A | A | A | A | A | A | A | A | A | A |
| Bn-A02-p2292871           | A2 | 2  | 1.8  | A | B | B | A | A | B | A | B | A | A | B | A | A | A | A | A | A | A | A | A | A |
| Bn-A02-p2542065           | A2 | 3  | 5.3  | A | B | B | A | A | B | A | B | A | A | B | A | A | A | A | A | A | A | A | A | A |
| Bn-A02-p2572625           | A2 | 4  | 6.2  | A | B | B | A | A | B | A | B | A | A | B | A | A | A | A | A | A | A | A | A | A |
| Bn-A02-p2617701           | A2 | 5  | 7.1  | A | B | B | A | A | B | A | B | A | A | B | A | A | A | A | A | A | A | A | B | A |
| Bn-A02-p2739888           | A2 | 6  | 8    | A | B | B | A | A | B | A | B | A | A | B | A | A | A | A | A | A | A | A | B | A |
| Bn-A02-p1096082           | A2 | 7  | 9.8  | A | B | B | A | A | B | A | B | A | A | B | A | A | A | A | A | A | A | A | B | A |
| Bn-A02-p1092146           | A2 | 8  | 10.6 | A | B | B | A | A | B | A | B | A | A | B | A | A | A | A | A | A | A | A | B | A |
| Bn-A02-p2877222           | A2 | 9  | 11.4 | A | B | B | A | A | B | A | B | A | A | B | A | A | A | A | A | A | A | A | B | A |
| Bn-A02-p2923889           | A2 | 10 | 12.2 | A | B | B | A | A | B | A | B | A | A | B | B | A | A | A | A | A | A | A | B | A |
| Bn-A02-p3074016           | A2 | 11 | 17.1 | A | B | B | B | A | B | A | B | A | A | A | B | A | A | A | A | A | B | A | B | A |
| Bn-A02-p3121742           | A2 | 12 | 17.9 | A | B | B | B | A | B | A | B | A | A | A | B | A | B | A | A | A | B | A | B | A |
| Bn-A02-p3175610           | A2 | 13 | 18.7 | A | B | B | B | A | B | A | B | A | A | A | B | A | B | A | A | A | B | A | B | A |
| Bn-A02-p3260536           | A2 | 14 | 19.5 | A | B | B | B | A | B | A | B | A | A | A | B | A | B | A | A | A | B | A | B | A |
| Bn-A02-p3294682           | A2 | 15 | 21.9 | A | B | A | B | A | A | A | B | A | A | A | B | A | B | A | A | A | B | A | B | A |
| Bn-A02-p3344176           | A2 | 16 | 22.7 | A | B | A | B | A | A | A | B | A | A | A | B | A | B | A | A | A | B | A | B | A |
| Bn-A02-p3374678           | A2 | 17 | 23.5 | A | B | A | B | A | A | A | B | B | A | A | B | A | B | A | A | A | B | A | B | A |
| Bn-A02-p3398506           | A2 | 18 | 24.3 | A | B | A | B | A | A | A | B | B | A | A | B | A | B | A | A | A | B | A | B | A |
| Bn-A02-p3542024           | A2 | 19 | 25.1 | A | B | A | B | A | A | A | B | B | A | A | B | A | B | A | A | A | B | A | B | A |
| Bn-A02-p4035808           | A2 | 20 | 25.9 | A | B | A | B | A | A | A | B | B | A | A | B | A | B | A | A | A | B | A | B | A |
| Bn-A02-p4277649           | A2 | 21 | 26.7 | A | B | A | B | A | A | A | B | B | A | A | B | A | B | A | A | A | B | A | B | A |
| Bn-A02-p4773307           | A2 | 22 | 28.3 | A | B | A | B | A | A | A | B | B | A | A | B | A | B | A | A | A | B | A | B | A |
| Bn-A02-p5326222           | A2 | 23 | 32.3 | A | B | A | B | A | A | A | B | B | A | A | B | A | B | A | A | A | B | A | B | A |
| Bn-A02-p5394958           | A2 | 24 | 33.1 | A | B | A | B | A | A | A | B | B | A | A | B | A | B | A | A | A | B | A | B | A |
| Bn-A02-p5429003           | A2 | 25 | 37.1 | B | B | A | B | A | A | A | B | B | A | A | B | A | B | B | A | A | B | A | B | A |
| Bn-A02-p5574727           | A2 | 26 | 37.9 | B | B | A | B | A | A | A | B | B | A | A | B | A | B | B | A | A | B | A | B | A |
| Bn-A02-p5859447           | A2 | 27 | 38.7 | B | B | A | B | A | A | A | B | B | A | A | B | A | B | B | A | A | B | A | B | A |
| Bn-A02-p5907701           | A2 | 28 | 40.3 | B | B | A | B | A | A | A | B | B | A | A | B | A | B | B | A | A | B | A | B | A |
| Bn-A02-p6084757           | A2 | 29 | 42.7 | B | B | A | B | A | A | A | B | B | A | A | B | A | B | B | A | A | B | A | B | A |
| Bn-A02-p6478309           | A2 | 30 | 43.5 | B | B | A | B | A | A | A | B | B | A | A | B | A | B | B | A | A | B | A | B | A |
| Bn-A02-p6658392           | A2 | 31 | 44.3 | B | B | A | B | A | A | A | B | B | A | A | B | A | B | B | A | A | B | A | B | B |
| Bn-A02-p7319800           | A2 | 32 | 45.1 | B | B | A | B | A | A | A | B | B | A | A | B | A | B | B | A | A | B | A | B | B |
| Bn-A02-p8625851           | A2 | 33 | 46.7 | B | B | A | B | A | A | A | B | B | A | A | B | A | B | B | A | A | B | A | B | B |
| Bn-A02-p8777846           | A2 | 34 | 47.5 | B | B | A | B | A | A | A | B | B | A | A | B | A | B | B | A | A | B | A | B | B |

|                          |    |    |      |   |   |   |   |   |   |   |   |   |   |   |   |   |   |   |   |   |   |   |   |   |
|--------------------------|----|----|------|---|---|---|---|---|---|---|---|---|---|---|---|---|---|---|---|---|---|---|---|---|
| Bn-A02-p8865764          | A2 | 35 | 48.3 | B | B | A | B | A | A | A | B | B | A | A | B | A | B | B | A | A | B | A | B | B |
| Bn-A02-p9339288          | A2 | 36 | 49.1 | B | B | A | B | A | A | A | B | B | A | A | B | A | B | B | A | A | B | A | B | B |
| Bn-A02-p11041726         | A2 | 37 | 49.9 | B | B | A | B | B | A | A | B | B | A | A | B | A | B | B | A | A | B | A | B | B |
| Bn-A02-p11346389         | A2 | 38 | 50.7 | B | B | A | B | B | A | B | B | B | A | A | B | A | B | B | A | A | B | A | B | B |
| Bn-A02-p11817742         | A2 | 39 | 51.5 | B | B | A | B | B | A | B | B | B | A | B | A | B | B | A | A | B | A | B | A | B |
| Bn-A02-p12145607         | A2 | 40 | 53.1 | B | B | A | B | B | A | B | B | B | A | A | B | B | B | A | A | B | A | B | A | B |
| Bn-A02-p12292026         | A2 | 41 | 53.9 | B | B | A | B | B | A | B | B | B | A | A | B | B | B | A | A | B | A | B | A | B |
| Bn-A02-p14078497         | A2 | 42 | 54.7 | B | B | A | B | B | A | B | B | B | A | A | B | B | B | A | A | B | A | B | A | B |
| Bn-A02-p14227678         | A2 | 43 | 55.5 | B | B | A | B | B | A | B | B | B | A | A | B | B | B | A | A | B | A | B | A | B |
| Bn-Scaffold000262-p25395 | A2 | 44 | 56.3 | B | B | A | B | B | A | B | B | B | A | A | B | B | B | A | A | B | A | B | A | B |
| Bn-A02-p15637932         | A2 | 45 | 57.9 | B | B | A | B | B | A | B | B | B | A | A | B | B | B | A | A | B | A | B | A | B |
| Bn-A05-p9078281          | A2 | 46 | 58.7 | B | B | A | B | B | A | B | B | B | A | A | B | B | B | A | A | B | A | B | A | B |
| Bn-A02-p17381818         | A2 | 47 | 59.5 | B | B | A | B | B | A | B | B | B | A | A | B | B | B | A | A | B | A | B | A | B |
| Bn-A02-p18599005         | A2 | 48 | 62.7 | B | B | A | A | B | A | B | B | B | A | A | B | B | B | A | A | A | A | B | A | B |
| Bn-A02-p19261853         | A2 | 49 | 63.5 | B | B | A | A | B | A | B | B | B | A | A | B | B | B | A | A | A | A | B | A | B |
| Bn-A02-p21061002         | A2 | 50 | 64.3 | B | B | A | A | B | A | B | B | B | A | A | B | B | B | A | A | A | A | B | A | B |
| Bn-A02-p19756499         | A2 | 51 | 65.1 | B | B | A | A | B | A | B | B | B | A | A | B | B | B | A | A | A | A | B | A | B |
| Bn-A02-p22843446         | A2 | 52 | 67.5 | B | B | A | A | B | A | B | B | B | A | A | B | B | B | A | A | A | A | B | A | B |
| Bn-A02-p22757902         | A2 | 53 | 68.3 | B | B | A | A | B | A | B | B | B | A | A | B | B | B | A | A | A | A | B | A | B |
| Bn-A02-p22352518         | A2 | 54 | 69.1 | B | B | A | A | B | A | B | B | B | A | A | B | B | B | A | A | A | A | B | A | B |
| Bn-A02-p23411852         | A2 | 55 | 70.7 | B | B | A | A | B | A | B | B | B | A | A | B | B | B | A | A | A | A | B | A | B |
| Bn-Scaffold016439-p48    | A2 | 56 | 71.5 | B | B | A | A | B | A | B | B | B | A | A | B | B | B | A | A | A | A | B | A | B |
| Bn-A02-p23668607         | A2 | 57 | 73.1 | B | B | A | A | B | A | B | B | B | B | A | B | B | B | A | A | A | A | B | A | B |
| Bn-scaff_17109_1-p690819 | A2 | 58 | 74.2 | B | B | A | A | B | A | B | B | B | A | B | B | B | B | A | A | A | A | B | A | B |
| Bn-A02-p23792703         | A2 | 59 | 76.4 | B | B | A | A | B | A | B | B | B | B | A | B | B | B | A | A | A | A | B | A | B |
| Bn-A02-p24178094         | A2 | 60 | 77.2 | B | B | A | A | B | A | B | B | B | B | A | B | B | B | A | A | A | A | B | A | B |
| Bn-A02-p24415454         | A2 | 61 | 78.8 | B | B | A | A | B | A | B | B | B | B | A | B | B | B | A | A | A | A | B | A | B |
| Bn-A02-p24449690         | A2 | 62 | 79.6 | B | B | A | A | B | A | B | B | B | B | A | B | B | B | A | A | A | A | B | A | B |
| Bn-A02-p24552542         | A2 | 63 | 80.4 | B | B | A | A | B | A | B | B | B | B | A | B | B | B | A | A | A | A | B | A | B |
| Bn-scaff_17623_1-p120748 | A2 | 64 | 81.2 | B | B | A | A | A | A | B | B | B | B | A | B | B | B | A | A | A | A | B | A | B |
| Bn-A02-p24948938         | A2 | 65 | 83.6 | B | B | A | A | A | A | B | B | B | B | A | B | B | B | A | A | A | A | B | A | B |
| Bn-A02-p25100451         | A2 | 66 | 84.4 | B | B | A | A | A | A | B | B | B | B | A | B | B | B | A | A | A | A | B | A | B |
| Bn-A02-p25188041         | A2 | 67 | 85.2 | B | B | A | A | A | A | B | B | B | B | A | B | B | B | A | A | A | A | B | A | B |
| Bn-A02-p25400591         | A2 | 68 | 86   | B | B | A | A | A | A | B | B | B | B | A | A | B | B | A | A | A | A | B | A | B |
| Bn-A02-p25681480         | A2 | 69 | 87.6 | B | B | A | A | A | A | B | B | B | B | A | A | B | B | A | A | A | A | B | A | B |
| Bn-A02-p25826690         | A2 | 70 | 89.2 | B | B | A | A | A | A | B | B | B | B | A | A | B | B | A | A | A | A | B | A | B |
| Bn-A02-p25841130         | A2 | 71 | 90   | B | B | A | A | A | A | B | B | B | B | A | A | B | B | A | A | A | A | B | A | B |
| Bn-A02-p25865360         | A2 | 72 | 90.8 | B | B | A | A | A | A | B | B | B | B | A | A | B | B | A | A | A | A | B | A | B |
| Bn-A02-p26982864         | A2 | 73 | 97.4 | B | B | A | B | A | A | B | B | A | B | B | A | A | B | B | A | A | B | A | A | B |
| Bn-A02-p27831174         | A2 | 74 | 98.2 | B | B | A | B | A | A | B | B | A | B | B | A | A | B | B | A | A | B | A | A | B |
| Bn-A03-p312762           | A3 | 1  | 0    | B | A | A | B | A | B | A | B | A | B | B | A | B | B | B | B | A | B | A | B | A |
| Bn-A03-p765077           | A3 | 2  | 0.8  | B | A | A | B | A | B | A | B | A | B | B | A | B | B | B | B | A | B | A | B | A |
| Bn-A03-p991949           | A3 | 3  | 1.6  | B | A | A | B | A | B | A | B | A | B | B | A | B | B | B | B | A | B | B | B | A |
| Bn-A03-p1050437          | A3 | 4  | 3.2  | B | A | A | B | A | B | A | B | A | B | B | A | B | B | B | B | A | B | B | B | A |
| Bn-A03-p1488306          | A3 | 5  | 4.8  | B | A | A | B | A | B | A | B | A | B | B | A | B | B | B | B | A | B | B | B | A |
| Bn-A03-p1711856          | A3 | 6  | 5.6  | B | A | A | B | A | B | A | B | A | B | B | A | B | B | B | B | A | B | B | B | A |
| Bn-A03-p1926809          | A3 | 7  | 7.2  | B | B | A | B | A | B | A | B | A | B | B | A | B | B | B | B | A | B | B | B | A |
| Bn-A03-p1954639          | A3 | 8  | 8.8  | B | B | A | B | A | B | A | B | A | B | A | A | B | B | B | B | A | B | B | B | A |
| Bn-A03-p2579866          | A3 | 9  | 9.6  | B | B | A | B | A | B | A | B | A | B | A | A | B | B | B | B | A | B | B | B | A |

|                           |    |    |      |   |   |   |   |   |   |   |   |   |   |   |   |   |   |   |   |   |   |   |   |   |
|---------------------------|----|----|------|---|---|---|---|---|---|---|---|---|---|---|---|---|---|---|---|---|---|---|---|---|
| Bn-A03-p2645391           | A3 | 10 | 10.4 | B | B | A | B | B | B | A | B | A | B | A | A | B | B | B | B | A | B | B | B | A |
| Bn-A03-p2891934           | A3 | 11 | 11.2 | B | B | A | B | B | B | A | B | A | B | A | A | A | B | B | B | A | B | B | B | A |
| Bn-A03-p2997270           | A3 | 12 | 13.6 | B | B | A | B | B | B | A | B | A | B | A | A | A | B | B | B | A | B | B | B | A |
| Bn-A03-p3099901           | A3 | 13 | 14.4 | B | B | A | B | B | B | A | B | A | B | A | A | A | B | B | B | A | B | B | B | A |
| Bn-A03-p3319357           | A3 | 14 | 15.2 | B | B | A | B | B | B | A | B | A | B | A | A | A | B | B | B | A | B | B | B | A |
| Bn-A03-p3692048           | A3 | 15 | 16.8 | B | B | A | B | B | B | A | B | A | B | A | A | A | B | B | B | A | B | B | B | A |
| Bn-A03-p3795299           | A3 | 16 | 17.6 | B | B | A | B | B | B | A | B | A | B | A | A | A | B | B | B | A | B | B | B | A |
| Bn-A03-p4783485           | A3 | 17 | 18.4 | B | B | A | B | B | B | A | B | A | B | A | A | A | B | B | B | A | B | B | B | A |
| Bn-A03-p4909233           | A3 | 18 | 19.2 | B | B | A | B | B | B | A | B | A | B | A | A | A | B | B | B | A | B | B | B | A |
| Bn-A03-p5083198           | A3 | 19 | 20.8 | B | B | A | B | B | B | A | B | A | B | A | A | A | B | B | B | A | B | B | B | A |
| Bn-scaff_18523_1-p438     | A3 | 20 | 24.9 | A | B | A | B | B | B | A | B | A | B | A | A | A | B | A | B | A | B | B | B | A |
| Bn-A03-p5741340           | A3 | 21 | 25.7 | A | B | A | B | B | B | A | B | A | B | A | A | A | B | A | B | A | B | B | B | A |
| Bn-A03-p6036521           | A3 | 22 | 26.5 | A | B | A | B | B | B | A | B | A | B | A | A | A | B | A | 0 | A | B | B | B | A |
| Bn-A03-p6274828           | A3 | 23 | 27.3 | A | B | A | B | B | B | A | B | A | B | A | A | A | B | A | 0 | A | B | B | B | A |
| Bn-A03-p6590051           | A3 | 24 | 28.9 | A | B | A | B | B | B | A | B | A | B | A | A | A | B | A | 0 | A | B | B | B | A |
| Bn-A03-p6744344           | A3 | 25 | 32.1 | A | B | A | A | B | B | A | B | A | B | A | A | A | B | A | 0 | A | A | B | B | A |
| Bn-A03-p7007377           | A3 | 26 | 32.9 | A | B | A | A | B | B | A | B | A | B | A | A | A | B | A | 0 | A | A | B | B | A |
| Bn-A03-p7177504           | A3 | 27 | 33.8 | A | B | A | A | B | B | A | B | A | B | A | A | A | B | A | 0 | A | A | B | B | A |
| Bn-A03-p7366783           | A3 | 28 | 35.5 | A | B | A | A | B | B | A | B | A | B | A | A | A | B | A | 0 | A | A | B | B | A |
| Bn-A03-p7420835           | A3 | 29 | 36.4 | A | B | A | A | B | B | A | B | A | B | A | A | A | B | A | 0 | A | A | B | B | A |
| Bn-A03-p7939679           | A3 | 30 | 37.3 | A | B | A | A | B | B | A | B | A | B | A | A | A | B | A | 0 | A | A | B | B | A |
| Bn-A03-p8133096           | A3 | 31 | 39   | A | B | A | A | B | B | A | B | A | B | A | A | A | B | A | 0 | A | A | B | B | A |
| Bn-A03-p8764481           | A3 | 32 | 41.6 | A | B | A | A | B | B | A | B | A | A | A | A | A | B | A | 0 | A | A | B | B | A |
| Bn-A03-p9537155           | A3 | 33 | 42.5 | A | B | A | A | B | B | A | B | A | A | A | A | A | B | A | 0 | A | A | B | B | A |
| Bn-A03-p9833648           | A3 | 34 | 43.4 | A | B | A | A | B | B | A | B | A | A | A | A | A | B | A | 0 | A | A | B | B | A |
| Bn-A03-p10414176          | A3 | 35 | 44.3 | A | B | A | A | B | B | A | B | A | A | A | A | A | B | A | 0 | A | A | B | B | A |
| Bn-A03-p10651420          | A3 | 36 | 45.2 | A | B | A | A | B | B | A | B | A | A | A | A | A | B | A | 0 | B | A | B | B | A |
| Bn-A03-p10757525          | A3 | 37 | 46.1 | A | B | A | A | B | B | A | B | A | A | A | A | A | B | A | 0 | B | A | B | B | A |
| Bn-A03-p11319722          | A3 | 38 | 47   | A | B | A | A | B | B | A | B | A | A | A | A | A | B | A | 0 | B | A | B | B | A |
| Bn-A03-p11517597          | A3 | 39 | 47.8 | A | B | A | A | B | B | A | B | A | A | A | A | A | B | A | 0 | B | A | B | B | A |
| Bn-A03-p12186958          | A3 | 40 | 49.4 | A | B | B | A | B | B | A | B | A | A | A | A | A | B | A | 0 | B | A | B | B | A |
| Bn-A03-p12639200          | A3 | 41 | 51   | A | B | B | A | B | B | A | B | A | A | A | A | A | B | A | 0 | B | A | B | B | A |
| Bn-A03-p12990610          | A3 | 42 | 51.8 | A | B | B | A | B | B | A | B | A | A | A | A | A | B | A | 0 | B | A | B | B | A |
| Bn-A03-p13104283          | A3 | 43 | 52.6 | A | B | B | A | B | B | A | B | A | A | A | A | A | B | A | 0 | B | A | B | B | B |
| Bn-A03-p14112910          | A3 | 44 | 56.7 | A | B | B | A | B | B | A | B | A | A | A | A | A | B | A | B | B | A | B | B | B |
| Bn-A03-p14175904          | A3 | 45 | 60.7 | A | B | B | B | B | B | A | B | A | A | A | A | A | B | A | B | B | B | B | B | B |
| Bn-A03-p14306440          | A3 | 46 | 62.3 | A | B | B | B | B | B | A | B | A | A | B | A | A | B | A | B | B | B | B | B | B |
| Bn-A03-p14447238          | A3 | 47 | 63.1 | A | B | B | B | B | B | A | B | A | A | B | A | A | B | A | B | B | B | B | B | B |
| Bn-A03-p15359867          | A3 | 48 | 64.7 | A | B | B | B | B | B | A | B | A | A | B | A | A | B | A | B | B | B | B | B | B |
| Bn-A03-p15577849          | A3 | 49 | 65.5 | A | B | B | B | B | B | A | B | A | A | B | A | A | B | A | B | B | B | B | B | B |
| Bn-A03-p15957657          | A3 | 50 | 67.1 | A | B | B | B | B | B | A | B | A | A | B | A | A | B | A | B | B | B | B | B | B |
| Bn-A03-p16607714          | A3 | 51 | 68.7 | A | B | B | B | B | A | A | B | A | A | B | A | A | A | A | B | B | B | B | B | B |
| Bn-A03-p16812953          | A3 | 52 | 69.5 | A | B | B | B | B | A | A | B | A | A | B | A | A | A | A | B | B | B | B | B | B |
| Bn-scaff_17298_1-p1321549 | A3 | 53 | 70.3 | A | B | B | B | B | A | A | B | A | A | B | A | A | A | A | B | B | B | B | B | B |
| Bn-A03-p17182494          | A3 | 54 | 71.1 | A | B | B | B | B | A | A | B | A | A | B | A | A | A | A | B | B | B | B | B | B |
| Bn-A03-p17782292          | A3 | 55 | 71.9 | A | B | B | B | B | A | A | B | A | A | B | A | A | A | A | B | B | B | B | B | B |
| Bn-A03-p18120938          | A3 | 56 | 72.7 | A | B | B | B | B | A | A | B | A | A | B | A | A | A | A | B | B | B | B | B | B |
| Bn-A03-p18836509          | A3 | 57 | 73.5 | A | B | B | B | B | A | A | B | A | A | B | A | A | A | A | B | B | B | B | B | B |
| Bn-A03-p18846268          | A3 | 58 | 74.3 | A | B | B | B | B | A | A | B | A | A | B | A | A | A | A | B | B | B | B | B | B |

|                           |    |    |       |   |   |   |   |   |   |   |   |   |   |   |   |   |   |   |   |   |   |   |   |   |
|---------------------------|----|----|-------|---|---|---|---|---|---|---|---|---|---|---|---|---|---|---|---|---|---|---|---|---|
| Bn-A03-p19880918          | A3 | 59 | 75.1  | A | B | B | B | B | A | A | B | A | A | B | A | A | A | A | B | B | B | B | B |   |
| Bn-A03-p20033408          | A3 | 60 | 75.9  | A | B | B | B | B | A | A | B | A | A | B | B | A | A | A | B | B | B | B | B |   |
| Bn-A03-p20079452          | A3 | 61 | 76.7  | A | B | B | B | B | A | A | B | A | A | B | B | A | A | A | B | B | B | B | B |   |
| Bn-A03-p20151244          | A3 | 62 | 77.5  | A | B | B | B | B | A | A | B | A | A | B | B | A | A | A | B | B | B | B | B |   |
| Bn-A03-p20180463          | A3 | 63 | 79.1  | A | B | B | B | B | A | A | B | A | A | B | B | A | A | A | B | B | B | B | B |   |
| Bn-A03-p20237681          | A3 | 64 | 79.9  | A | B | B | B | B | A | A | B | A | A | B | B | A | A | A | B | B | B | B | B |   |
| Bn-A03-p20523585          | A3 | 65 | 81.5  | A | B | B | B | B | A | A | B | A | A | B | B | A | A | A | B | B | B | B | B |   |
| Bn-A03-p20983297          | A3 | 66 | 83.9  | A | B | B | B | B | A | B | B | A | A | B | B | B | A | A | B | B | B | B | B |   |
| Bn-A03-p21271941          | A3 | 67 | 84.7  | A | B | B | B | B | A | B | B | A | A | B | B | B | A | A | B | B | B | B | B |   |
| Bn-A03-p21422696          | A3 | 68 | 85.5  | A | B | B | B | B | A | B | B | A | A | B | B | B | A | A | B | B | B | B | B |   |
| Bn-A03-p21632587          | A3 | 69 | 86.3  | A | B | B | B | B | A | B | B | A | A | B | B | B | A | A | B | B | B | B | B |   |
| Bn-A03-p21685480          | A3 | 70 | 87.1  | A | B | B | B | B | A | B | B | A | A | B | B | B | A | A | B | B | B | B | B |   |
| Bn-A03-p21904842          | A3 | 71 | 87.9  | A | B | B | B | B | A | B | B | A | A | B | B | B | A | A | B | B | B | B | B |   |
| Bn-A03-p22820943          | A3 | 72 | 88.7  | A | B | B | B | B | A | B | B | A | A | B | B | B | A | A | B | B | B | B | B |   |
| Bn-A03-p22882585          | A3 | 73 | 89.5  | A | B | B | B | B | A | B | B | A | A | B | B | B | A | A | B | B | B | B | B |   |
| Bn-A03-p23017354          | A3 | 74 | 90.3  | A | B | B | B | B | A | B | B | A | A | B | B | B | A | A | B | B | B | B | B |   |
| Bn-A03-p29571938          | A3 | 75 | 92.7  | A | B | B | B | B | A | B | B | B | A | B | B | B | A | A | B | B | B | B | B |   |
| Bn-A03-p23735715          | A3 | 76 | 93.5  | A | B | B | B | B | A | B | B | B | A | B | B | B | A | A | B | B | B | B | A |   |
| Bn-A03-p24092986          | A3 | 77 | 95.1  | A | B | B | B | B | A | B | B | B | A | B | B | B | A | A | B | B | B | B | A |   |
| Bn-A03-p24176332          | A3 | 78 | 95.9  | A | B | B | B | B | A | B | B | B | A | B | B | B | A | A | B | B | B | B | A |   |
| Bn-A03-p24902631          | A3 | 79 | 98.3  | A | B | B | B | B | A | B | B | B | A | B | B | B | A | A | B | B | B | B | A |   |
| Bn-A03-p25402301          | A3 | 80 | 99.1  | A | B | B | B | B | A | B | B | B | A | B | B | B | A | A | B | B | B | B | A |   |
| Bn-A03-p25525612          | A3 | 81 | 99.9  | A | B | B | B | B | A | B | B | B | A | B | B | B | A | A | B | B | B | B | A |   |
| Bn-A03-p25614406          | A3 | 82 | 100.7 | A | B | B | B | B | A | B | B | B | A | B | B | B | A | A | B | B | B | B | A |   |
| Bn-A03-p25631316          | A3 | 83 | 101.5 | A | B | B | B | B | A | B | B | B | A | B | B | B | A | A | B | B | B | B | A |   |
| Bn-A03-p25993601          | A3 | 84 | 102.3 | A | B | B | B | B | A | B | B | B | A | B | B | B | A | A | B | B | B | B | A |   |
| Bn-A03-p26066930          | A3 | 85 | 103.1 | A | B | B | B | B | A | B | B | B | A | B | B | B | A | A | B | B | B | B | A |   |
| Bn-A03-p26284882          | A3 | 86 | 103.9 | A | B | B | B | B | A | B | B | B | A | B | B | B | A | A | B | B | B | B | A |   |
| Bn-A03-p26288769          | A3 | 87 | 104.7 | A | B | B | B | B | A | B | B | B | A | B | B | B | A | A | B | B | B | B | A |   |
| Bn-A03-p26477533          | A3 | 88 | 105.5 | A | B | B | B | B | A | B | B | B | A | B | B | B | A | A | B | B | B | B | A |   |
| Bn-A03-p26775994          | A3 | 89 | 109.5 | A | B | B | B | B | A | B | B | B | A | B | B | B | A | A | B | B | B | B | A |   |
| Bn-A03-p27066000          | A3 | 90 | 110.3 | A | B | B | B | B | A | B | B | B | A | B | B | B | A | A | B | B | B | B | A |   |
| Bn-A03-p27683723          | A3 | 91 | 111.1 | A | B | B | B | B | A | B | B | B | A | B | B | B | A | A | B | B | B | B | A |   |
| Bn-A03-p28535638          | A3 | 92 | 111.9 | A | B | B | B | B | A | B | B | B | A | B | B | B | A | A | B | B | B | B | A |   |
| Bn-Scaffold000096-p878406 | A3 | 93 | 112.7 | A | B | B | B | B | A | B | B | B | A | B | B | B | A | A | B | B | B | B | A |   |
| Bn-A03-p28126287          | A3 | 94 | 114.3 | A | B | B | B | B | A | B | B | B | A | B | B | B | A | A | B | B | B | B | A |   |
| Bn-A04-p122280            | A4 | 1  | 0     | A | B | A | A | A | A | A | B | A | B | A | B | B | B | A | B | A | A | A | B | B |
| Bn-A04-p267294            | A4 | 2  | 0.8   | A | B | A | A | A | A | A | B | A | B | A | B | B | B | A | B | A | A | A | B | B |
| Bn-A04-p810935            | A4 | 3  | 3.2   | A | B | A | A | A | A | A | B | A | B | A | B | B | B | A | B | A | A | A | B | B |
| Bn-A04-p1213196           | A4 | 4  | 4     | A | B | A | A | A | A | A | B | A | B | A | B | B | B | A | B | A | A | A | B | B |
| Bn-A04-p1317446           | A4 | 5  | 4.8   | A | B | A | A | A | A | A | B | A | B | A | B | B | B | A | B | A | A | A | B | B |
| Bn-A04-p1390449           | A4 | 6  | 5.6   | A | B | A | A | A | A | A | B | A | B | A | B | B | B | A | B | A | A | A | B | B |
| Bn-A04-p1623151           | A4 | 7  | 6.4   | A | B | A | A | A | A | A | B | A | B | A | B | B | B | A | B | A | A | A | B | B |
| Bn-A04-p1655416           | A4 | 8  | 7.2   | A | B | A | A | A | A | A | B | A | B | A | B | B | B | A | B | A | A | A | B | B |
| Bn-A04-p1680506           | A4 | 9  | 8.8   | A | B | A | A | A | B | A | B | A | B | A | B | B | B | A | B | A | A | A | B | B |
| Bn-A04-p1745832           | A4 | 10 | 9.6   | A | B | A | A | A | B | A | B | A | B | A | B | B | B | A | B | A | A | A | B | B |
| Bn-A04-p1931502           | A4 | 11 | 10.4  | A | B | A | A | A | B | A | B | A | B | A | B | B | B | A | B | A | A | A | B | B |
| Bn-A04-p3225119           | A4 | 12 | 12    | A | B | A | A | A | B | A | B | A | B | A | B | B | B | A | B | A | A | A | B | B |
| Bn-A04-p3632226           | A4 | 13 | 13.6  | A | B | A | A | A | B | A | B | A | B | A | B | B | B | A | B | A | A | A | B | B |





|                          |    |    |      |   |   |   |   |   |   |   |   |   |   |   |   |   |   |   |   |   |   |   |   |   |   |   |   |   |   |
|--------------------------|----|----|------|---|---|---|---|---|---|---|---|---|---|---|---|---|---|---|---|---|---|---|---|---|---|---|---|---|---|
| Bn-A05-p2106680          | A5 | 13 | 16.8 | A | B | A | A | B | B | B | B | A | B | A | B | A | A | A | A | A | A | A | A | A | A | A | A | A |   |
| Bn-A05-p2303112          | A5 | 14 | 17.6 | A | B | A | A | B | B | B | B | A | B | A | B | A | A | A | A | A | A | A | A | A | A | A | A | A | A |
| Bn-A05-p2345233          | A5 | 15 | 20   | A | B | A | A | B | B | B | B | A | B | A | B | A | A | A | A | A | A | A | A | A | A | A | A | B |   |
| Bn-A05-p2367876          | A5 | 16 | 22.4 | A | B | A | A | B | B | B | B | A | B | A | B | A | A | A | A | A | A | A | A | A | A | A | A | A | A |
| Bn-scaff_16534_1-p648790 | A5 | 17 | 23.2 | A | B | A | A | B | B | B | B | A | B | A | B | A | A | A | A | A | A | A | A | A | A | A | A | A | A |
| Bn-A05-p2641800          | A5 | 18 | 24   | A | B | A | A | B | B | B | B | A | B | A | B | A | A | A | A | A | A | A | A | A | A | A | A | A | A |
| Bn-A05-p2726301          | A5 | 19 | 26.4 | A | B | A | A | B | B | B | B | A | B | A | B | A | A | A | A | A | A | A | A | A | A | A | A | A | A |
| Bn-A05-p3005109          | A5 | 20 | 27.2 | A | B | B | A | B | B | B | B | A | B | A | B | A | A | A | A | A | A | A | A | A | A | A | A | A | A |
| Bn-A05-p3307736          | A5 | 21 | 28.8 | A | B | B | A | B | B | B | B | A | B | A | B | A | A | A | A | A | A | A | A | A | A | A | A | A | A |
| Bn-A05-p3507831          | A5 | 22 | 29.6 | A | B | B | A | B | B | B | B | A | B | A | B | A | A | A | A | A | A | A | A | A | A | A | A | A | A |
| Bn-A05-p3834445          | A5 | 23 | 31.2 | A | B | B | A | B | B | B | B | A | B | A | B | A | A | A | A | A | A | A | A | A | A | A | A | A | A |
| Bn-A05-p3923814          | A5 | 24 | 32   | A | B | B | A | B | B | B | B | A | B | A | B | A | A | A | A | A | A | A | A | A | A | A | A | A | A |
| Bn-A05-p3966848          | A5 | 25 | 32.8 | A | B | B | A | B | A | B | B | A | B | A | B | A | A | A | A | A | A | A | A | A | A | A | A | A | A |
| Bn-A05-p3988958          | A5 | 26 | 33.6 | A | B | B | A | B | A | B | B | A | B | A | B | A | A | A | A | A | A | A | A | A | A | A | A | A | B |
| Bn-A05-p4121158          | A5 | 27 | 34.4 | A | B | B | A | B | A | B | B | A | B | A | B | A | A | A | A | A | A | A | A | A | A | A | A | A | B |
| Bn-A05-p4336667          | A5 | 28 | 38.4 | A | B | B | B | A | B | B | B | A | B | A | B | A | A | A | A | A | A | A | B | A | A | B | A | A | B |
| Bn-scaff_18440_1-p132335 | A5 | 29 | 39.2 | A | B | B | B | A | B | B | B | A | A | B | A | A | A | A | A | A | A | B | A | A | B | A | A | B |   |
| Bn-A05-p4940713          | A5 | 30 | 40   | A | B | B | B | A | B | B | B | A | A | A | B | A | A | A | A | A | A | B | A | A | B | A | A | B |   |
| Bn-A05-p5093548          | A5 | 31 | 41.6 | A | B | B | B | A | B | B | B | A | A | A | A | A | A | A | A | A | A | B | A | A | B | A | A | B |   |
| Bn-A05-p5372015          | A5 | 32 | 43.2 | A | A | B | B | B | A | B | B | A | A | A | A | A | A | A | A | A | A | B | A | A | B | A | A | B |   |
| Bn-A05-p5475992          | A5 | 33 | 44   | A | A | B | B | B | A | B | B | A | A | A | A | A | A | A | A | A | A | B | A | A | B | A | A | B |   |
| Bn-A05-p5805445          | A5 | 34 | 44.8 | A | A | B | B | B | A | B | B | A | A | A | A | A | A | A | A | A | A | B | A | A | B | A | A | B |   |
| Bn-A05-p5970916          | A5 | 35 | 45.6 | A | A | B | B | B | A | B | B | A | A | A | A | A | A | A | A | A | A | B | A | A | B | A | A | B |   |
| Bn-A05-p6541429          | A5 | 36 | 47.2 | A | A | B | B | B | A | B | B | A | A | A | A | A | A | A | A | A | A | B | A | A | B | A | A | B |   |
| Bn-A05-p6995896          | A5 | 37 | 48   | A | A | B | B | B | A | B | B | A | A | A | A | A | A | A | A | A | A | B | A | A | B | A | A | B |   |
| Bn-A05-p11084469         | A5 | 38 | 49.6 | A | A | B | B | B | A | B | B | A | A | B | A | A | A | A | A | A | A | B | A | A | B | A | A | B |   |
| Bn-A05-p16092993         | A5 | 39 | 50.4 | A | A | B | B | B | A | B | B | A | A | B | A | A | A | A | A | A | A | B | A | A | B | A | A | B |   |
| Bn-A05-p18229790         | A5 | 40 | 51.2 | A | A | B | B | B | A | B | B | A | A | B | A | A | A | A | A | A | A | B | A | A | B | A | A | B |   |
| Bn-A05-p18905070         | A5 | 41 | 52   | A | A | B | B | B | A | B | B | A | A | B | A | A | A | A | A | A | A | B | 0 | A | A | B | A | A |   |
| Bn-A05-p19070284         | A5 | 42 | 54.5 | A | A | B | B | B | A | B | B | A | A | A | A | A | A | A | A | A | A | B | 0 | A | A | B | A | A |   |
| Bn-A05-p19116891         | A5 | 43 | 55.3 | A | A | B | B | B | A | B | B | A | A | A | A | A | A | A | A | A | A | B | 0 | A | A | B | A | A |   |
| Bn-A05-p19650965         | A5 | 44 | 56.1 | A | A | B | B | B | A | B | B | A | A | A | A | A | A | A | A | A | A | B | 0 | A | A | B | A | A |   |
| Bn-A05-p19802577         | A5 | 45 | 59.4 | A | A | B | B | B | A | B | B | A | A | A | A | A | A | A | A | A | A | B | 0 | A | A | B | A | A |   |
| Bn-A05-p19919179         | A5 | 46 | 60.2 | A | A | B | B | B | A | B | B | A | A | A | A | A | A | A | A | A | A | B | 0 | A | A | B | A | A |   |
| Bn-A05-p20254809         | A5 | 47 | 61   | A | A | B | B | B | A | B | B | A | A | A | A | A | A | A | A | A | A | B | 0 | A | A | B | A | A |   |
| Bn-A05-p20555996         | A5 | 48 | 62.7 | A | A | B | B | B | A | B | B | A | A | A | A | A | A | A | A | A | A | B | 0 | A | A | B | A | A |   |
| Bn-A05-p20972649         | A5 | 49 | 65.2 | A | A | B | B | A | A | B | B | A | A | A | A | A | A | A | A | A | A | B | 0 | A | A | B | A | A |   |
| Bn-A05-p21028051         | A5 | 50 | 66   | A | A | B | B | A | A | B | B | A | A | A | A | A | A | A | A | A | A | B | 0 | A | A | B | A | A |   |
| Bn-A05-p21201956         | A5 | 51 | 66.8 | A | A | B | B | A | A | B | B | A | A | A | A | A | A | A | A | A | A | B | 0 | A | A | B | A | A |   |
| Bn-A05-p21248382         | A5 | 52 | 67.6 | A | A | B | B | A | A | B | B | A | A | A | A | A | A | A | A | A | A | B | 0 | A | A | B | A | A |   |
| Bn-A05-p21326091         | A5 | 53 | 69.3 | A | A | B | B | A | A | B | B | A | A | A | A | A | A | A | A | A | A | B | 0 | A | A | B | A | A |   |
| Bn-A05-p21347821         | A5 | 54 | 70.1 | A | A | B | B | A | A | B | B | A | A | A | A | A | A | A | A | A | A | B | 0 | A | A | B | A | A |   |
| Bn-A05-p21470614         | A5 | 55 | 73.4 | A | A | B | B | A | A | B | B | A | A | A | A | A | A | A | A | A | A | B | 0 | A | A | B | A | A |   |
| Bn-A05-p21587317         | A5 | 56 | 74.2 | A | A | B | B | A | A | B | B | A | A | A | A | A | A | A | A | A | A | B | 0 | A | A | B | A | A |   |
| Bn-A05-p21806633         | A5 | 57 | 75   | A | A | B | B | A | A | B | B | A | A | A | A | A | A | A | A | A | A | B | 0 | A | A | B | A | A |   |
| Bn-A05-p21889289         | A5 | 58 | 79.2 | A | A | B | B | A | A | B | B | A | A | A | A | A | A | A | A | A | A | B | 0 | A | A | B | A | A |   |
| Bn-A05-p21930978         | A5 | 59 | 80   | A | A | B | B | A | A | B | B | A | A | A | A | A | A | A | A | A | A | B | 0 | A | A | B | A | A |   |
| Bn-A05-p22152482         | A5 | 60 | 83.3 | A | A | B | A | A | A | B | B | A | A | A | A | A | A | A | A | A | A | 0 | A | A | B | A | A | A |   |
| Bn-A05-p22089650         | A5 | 61 | 83.3 | A | A | B | A | A | A | B | B | A | A | A | A | A | A | A | A | A | A | 0 | A | A | B | A | A | A |   |

|                          |    |    |      |   |   |   |   |   |   |   |   |   |   |   |   |   |   |   |   |   |   |   |   |   |   |   |   |   |
|--------------------------|----|----|------|---|---|---|---|---|---|---|---|---|---|---|---|---|---|---|---|---|---|---|---|---|---|---|---|---|
| Bn-A05-p22218776         | A5 | 62 | 85   | A | A | B | A | A | A | B | B | A | A | A | A | A | A | A | A | A | A | A | A | 0 | A | B |   |   |
| Bn-A05-p22269511         | A5 | 63 | 85.8 | A | A | B | A | A | A | B | B | A | A | A | A | A | A | A | A | A | A | A | A | B | A | B |   |   |
| Bn-A05-p22282750         | A5 | 64 | 86.6 | A | A | B | A | A | A | B | B | A | A | A | A | A | A | A | A | A | A | A | A | B | A | B |   |   |
| Bn-A05-p22498838         | A5 | 65 | 87.4 | A | A | B | A | A | A | B | B | A | A | A | A | A | A | A | A | A | A | A | A | B | A | B |   |   |
| Bn-A05-p22591072         | A5 | 66 | 88.2 | A | A | 0 | A | A | A | B | B | A | A | A | A | A | A | A | A | A | A | B | A | B | A | B |   |   |
| Bn-A05-p22613926         | A5 | 67 | 89   | A | A | 0 | A | A | A | B | B | A | A | A | A | A | A | A | A | A | B | A | B | A | B |   |   |   |
| Bn-A05-p22691469         | A5 | 68 | 89.8 | A | A | 0 | A | A | A | B | B | A | A | A | A | A | A | A | A | B | A | B | A | B | A | B |   |   |
| Bn-A05-p22767106         | A5 | 69 | 90.6 | A | A | 0 | A | A | A | B | B | A | A | A | A | A | A | A | A | B | A | B | A | B | A | B |   |   |
| Bn-A05-p22789711         | A5 | 70 | 91.4 | A | A | 0 | A | A | A | B | B | A | A | A | A | A | A | A | A | B | A | B | A | B | A | B |   |   |
| Bn-A05-p22899595         | A5 | 71 | 92.2 | A | A | 0 | A | A | A | B | B | A | A | A | A | A | A | A | A | B | A | B | A | B | A | B |   |   |
| Bn-A05-p22973324         | A5 | 72 | 93   | A | A | 0 | A | A | A | B | B | A | A | A | A | A | A | A | A | B | A | B | A | B | A | B |   |   |
| Bn-A02-p23161914         | A5 | 73 | 93.8 | A | A | 0 | A | A | A | B | B | A | A | A | A | A | A | A | A | B | A | B | B | B | B | B |   |   |
| Bn-A05-p23253826         | A5 | 74 | 94.6 | A | A | 0 | A | A | A | B | B | A | A | A | A | A | A | A | A | B | A | B | B | B | B | B |   |   |
| Bn-Scaffold000191-p53301 | A5 | 75 | 96.3 | A | A | 0 | A | A | A | B | B | A | A | A | A | A | A | A | A | B | A | B | B | B | B | B |   |   |
| Bn-A02-p26901243         | A5 | 76 | 98   | A | A | 0 | A | A | A | B | B | A | A | A | A | A | A | A | A | B | A | B | B | B | B | B |   |   |
| Bn-A02-p26665282         | A5 | 77 | 98.8 | A | A | 0 | A | A | A | B | B | A | A | A | A | A | A | A | A | B | A | B | B | B | B | B |   |   |
| Bn-A05-p23776343         | A5 | 78 | 99.6 | A | A | 0 | A | A | A | B | B | A | A | A | A | A | A | A | A | B | A | B | B | B | B | B |   |   |
| Bn-A06-p195449           | A6 | 1  | 0    | B | B | B | A | B | B | A | B | B | B | A | A | B | B | B | A | A | B | B | A | A | B | B | A |   |
| Bn-A06-p1054104          | A6 | 2  | 0.8  | B | B | B | A | B | B | A | B | B | B | A | A | B | B | B | A | A | A | B | B | A | A | B | B | A |
| Bn-A06-p1322724          | A6 | 3  | 1.6  | B | B | B | A | B | B | A | B | B | B | A | A | B | B | B | A | A | A | B | B | A | A | B | B | A |
| Bn-A06-p1404859          | A6 | 4  | 2.4  | B | B | B | A | B | B | A | B | B | B | A | A | B | B | B | A | A | A | B | B | A | A | B | B | A |
| Bn-A06-p1507197          | A6 | 5  | 3.2  | B | B | B | A | B | B | A | B | B | B | A | A | B | B | B | A | A | A | B | B | A | A | B | B | A |
| Bn-A06-p1743446          | A6 | 6  | 4    | B | B | B | A | B | B | A | B | B | B | A | A | B | B | B | A | A | A | B | B | A | A | B | B | A |
| Bn-A06-p1768254          | A6 | 7  | 4.8  | B | B | B | A | B | B | A | B | A | B | A | A | B | B | B | A | A | A | B | B | A | A | B | B | A |
| Bn-A06-p1947247          | A6 | 8  | 5.6  | B | B | B | A | B | B | A | B | A | B | A | A | B | B | B | A | A | A | B | B | A | A | B | B | A |
| Bn-A06-p2234718          | A6 | 9  | 6.4  | B | B | B | A | B | B | A | B | A | B | A | A | B | B | B | A | A | A | B | B | A | A | B | B | A |
| Bn-A06-p2251910          | A6 | 10 | 7.2  | B | B | B | A | B | B | A | B | A | B | A | A | B | B | B | A | A | A | B | B | A | A | B | B | A |
| Bn-A06-p2268393          | A6 | 11 | 11.2 | B | B | B | A | B | B | A | B | A | B | A | A | B | B | B | A | A | A | B | B | A | A | B | B | A |
| Bn-A06-p2407080          | A6 | 12 | 14.4 | B | B | B | A | B | B | A | B | A | B | A | A | B | B | B | A | A | A | B | B | A | A | B | B | A |
| Bn-A06-p2514723          | A6 | 13 | 16   | B | B | B | A | B | B | A | B | A | B | A | A | B | B | B | A | A | A | B | B | A | A | B | B | A |
| Bn-A06-p2542722          | A6 | 14 | 16.8 | B | B | B | A | B | B | A | B | A | B | A | A | B | B | B | A | A | A | B | B | A | A | B | B | A |
| Bn-A06-p2617079          | A6 | 15 | 18.4 | B | B | B | A | B | B | A | A | A | B | A | A | B | B | B | A | A | A | B | B | A | A | B | B | A |
| Bn-A06-p2676314          | A6 | 16 | 19.2 | B | B | B | A | B | B | A | A | A | B | A | A | B | B | B | A | A | A | B | B | A | A | B | B | A |
| Bn-A06-p2891290          | A6 | 17 | 21.6 | B | B | B | A | B | B | A | A | A | B | A | A | B | B | B | A | A | A | B | B | A | A | B | B | A |
| Bn-A06-p2936438          | A6 | 18 | 22.4 | B | B | B | A | B | B | A | A | A | B | A | A | B | B | B | A | A | A | B | B | A | A | B | B | A |
| Bn-A06-p2958095          | A6 | 19 | 23.2 | B | B | B | A | B | B | A | A | A | B | A | A | B | B | B | A | A | A | B | B | A | A | B | B | A |
| Bn-A06-p3050747          | A6 | 20 | 24.8 | B | B | B | A | B | B | A | A | A | B | A | A | B | B | B | A | A | A | B | B | A | A | B | B | A |
| Bn-A06-p3325502          | A6 | 21 | 25.6 | B | B | B | A | B | B | A | A | A | B | A | A | B | B | B | A | A | A | B | B | A | A | B | B | A |
| Bn-A06-p3491241          | A6 | 22 | 26.4 | B | B | B | A | B | B | A | A | A | B | A | A | B | B | B | A | A | A | B | B | A | A | B | B | A |
| Bn-A06-p3970972          | A6 | 23 | 28   | B | B | B | A | B | B | A | A | A | B | A | A | B | B | B | A | A | A | B | B | A | A | B | B | A |
| Bn-A06-p4019827          | A6 | 24 | 28.8 | B | B | B | A | B | B | A | A | A | B | A | A | B | B | B | A | A | A | B | B | A | A | B | B | A |
| Bn-A06-p4021930          | A6 | 25 | 29.6 | B | B | B | A | B | B | A | A | A | B | A | A | B | B | B | A | A | A | B | B | A | A | B | B | A |
| Bn-A06-p4098800          | A6 | 26 | 30.4 | B | B | B | A | B | B | A | A | A | B | A | A | B | B | B | A | A | A | B | B | A | A | B | B | A |
| Bn-A06-p4179318          | A6 | 27 | 31.2 | B | B | B | A | B | B | A | A | A | B | A | A | B | B | B | A | A | A | B | B | A | A | B | B | A |
| Bn-A06-p4371627          | A6 | 28 | 32.8 | B | B | B | A | B | B | A | A | A | B | A | A | B | B | B | A | A | A | B | B | A | A | B | B | A |
| Bn-A06-p4508774          | A6 | 29 | 33.6 | B | B | B | A | B | B | A | A | A | B | A | A | B | B | B | A | A | A | B | B | A | A | B | B | A |
| Bn-A06-p4874556          | A6 | 30 | 34.4 | B | B | B | A | B | B | A | A | A | B | A | A | B | B | B | A | A | A | B | B | A | A | B | B | A |
| Bn-A06-p5546411          | A6 | 31 | 35.2 | B | B | B | A | B | B | A | A | A | B | A | A | B | B | B | A | A | A | B | B | A | A | B | B | A |
| Bn-A06-p5616164          | A6 | 32 | 36.8 | B | B | B | A | B | B | A | A | A | B | A | A | B | B | B | A | A | A | B | B | A | A | B | B | A |

|                          |    |    |      |   |   |   |   |   |   |   |   |   |   |   |   |   |   |   |   |   |   |   |   |   |
|--------------------------|----|----|------|---|---|---|---|---|---|---|---|---|---|---|---|---|---|---|---|---|---|---|---|---|
| Bn-A06-p5739682          | A6 | 33 | 37.6 | B | B | B | A | B | B | A | A | A | B | A | A | B | B | B | A | B | A | B | B | A |
| Bn-A06-p5947781          | A6 | 34 | 38.4 | B | B | B | A | B | B | A | A | A | B | A | A | B | B | B | A | B | A | B | B | A |
| Bn-A06-p5956274          | A6 | 35 | 39.2 | B | B | B | A | B | B | A | A | A | B | A | A | B | B | B | A | B | A | B | B | A |
| Bn-A06-p6103844          | A6 | 36 | 40   | B | B | B | A | B | B | A | A | A | A | A | B | B | B | A | B | A | B | B | A |   |
| Bn-A06-p6182046          | A6 | 37 | 40.8 | B | B | B | A | B | B | A | A | A | A | A | B | B | B | A | B | A | B | B | A |   |
| Bn-A06-p6311231          | A6 | 38 | 41.6 | B | B | B | A | B | B | A | A | A | A | A | B | B | B | A | B | A | B | B | A |   |
| Bn-A06-p6343931          | A6 | 39 | 42.4 | B | B | B | A | B | B | A | A | A | A | A | B | B | B | A | B | A | B | B | A |   |
| Bn-A06-p6624071          | A6 | 40 | 43.2 | B | B | B | A | B | B | A | A | A | A | A | B | B | B | A | B | A | B | B | A |   |
| Bn-A06-p6647323          | A6 | 41 | 44   | B | B | B | A | B | B | A | A | A | A | B | A | B | B | A | B | A | B | B | A |   |
| Bn-A06-p6761232          | A6 | 42 | 44.8 | B | B | B | A | B | B | A | A | A | A | B | A | B | B | A | B | A | B | B | A |   |
| Bn-A06-p7670696          | A6 | 43 | 45.6 | B | B | B | A | A | B | A | A | A | A | B | A | B | B | A | B | A | B | B | A |   |
| Bn-A06-p7701069          | A6 | 44 | 47.2 | B | B | B | A | A | B | A | A | A | A | B | A | B | B | A | B | A | B | B | A |   |
| Bn-A06-p8263325          | A6 | 45 | 48   | B | B | B | A | A | B | A | A | A | A | B | A | B | B | A | B | A | B | B | A |   |
| Bn-A06-p8446816          | A6 | 46 | 51.2 | B | B | B | B | A | B | A | A | A | A | B | A | B | B | A | B | B | B | B | A |   |
| Bn-A06-p10330066         | A6 | 47 | 52.8 | B | B | B | B | A | B | A | A | A | A | B | A | B | B | A | B | B | B | B | A |   |
| Bn-A06-p15258692         | A6 | 48 | 53.6 | B | B | B | B | A | B | A | A | A | A | B | A | B | B | A | B | B | B | B | A |   |
| Bn-A06-p16657894         | A6 | 49 | 54.4 | B | B | B | B | A | B | A | A | A | A | B | A | B | B | A | B | B | B | B | A |   |
| Bn-A06-p17006799         | A6 | 50 | 55.2 | B | B | B | B | A | B | A | A | A | A | B | A | B | B | A | B | B | B | B | A |   |
| Bn-A09-p18588652         | A6 | 51 | 56   | B | B | B | B | A | B | A | A | A | B | A | B | A | B | A | B | B | B | B | A |   |
| Bn-A06-p17548894         | A6 | 52 | 56.8 | B | B | B | B | A | B | A | A | A | B | A | B | A | B | A | B | B | B | B | A |   |
| Bn-A06-p17671185         | A6 | 53 | 57.6 | B | B | B | B | A | B | A | A | A | B | A | B | A | B | A | B | B | B | B | A |   |
| Bn-A06-p18029021         | A6 | 54 | 58.4 | B | B | B | B | A | B | A | A | A | B | A | B | A | B | B | B | B | B | B | A |   |
| Bn-A06-p18219362         | A6 | 55 | 59.2 | B | B | B | B | A | B | A | A | A | B | A | B | A | B | B | B | B | B | B | A |   |
| Bn-A06-p18364834         | A6 | 56 | 60   | B | B | B | B | A | B | A | A | A | B | A | B | A | B | B | B | B | B | B | A |   |
| Bn-A06-p18402713         | A6 | 57 | 61.6 | B | B | B | B | A | B | A | A | A | B | A | B | A | B | B | B | B | B | B | A |   |
| Bn-A06-p18500596         | A6 | 58 | 62.4 | B | B | B | B | A | B | B | A | A | B | A | B | A | B | B | B | B | B | B | A |   |
| Bn-A06-p21525576         | A6 | 59 | 63.2 | B | B | B | B | A | B | B | A | A | B | A | B | A | B | B | B | B | B | B | A |   |
| Bn-A06-p21349507         | A6 | 60 | 64   | B | B | B | B | A | B | B | A | A | B | A | B | A | B | B | B | B | B | B | A |   |
| Bn-A06-p21195115         | A6 | 61 | 64.8 | B | B | B | B | A | B | B | A | A | B | A | B | A | B | B | B | B | B | B | A |   |
| Bn-A06-p21163037         | A6 | 62 | 65.6 | B | B | B | B | A | B | B | A | A | B | A | B | B | B | B | B | B | B | B | A |   |
| Bn-scaff_18520_1-p488642 | A6 | 63 | 66.4 | B | B | B | B | A | B | B | A | A | B | A | B | B | B | B | B | B | B | B | A |   |
| Bn-A06-p21134315         | A6 | 64 | 67.2 | B | B | B | B | A | B | B | A | A | B | A | B | B | B | B | B | B | B | B | B |   |
| Bn-A06-p21101957         | A6 | 65 | 68   | B | B | B | B | A | B | B | A | A | B | A | B | B | B | B | B | B | B | B | B |   |
| Bn-A06-p21072392         | A6 | 66 | 68.8 | B | B | B | B | A | B | B | A | A | B | A | B | B | B | B | B | B | B | A | B |   |
| Bn-A06-p21796008         | A6 | 67 | 70.4 | B | B | B | B | A | B | B | A | A | B | A | B | B | B | B | B | B | B | A | B |   |
| Bn-A06-p21800812         | A6 | 68 | 71.2 | B | B | B | B | A | B | B | A | A | B | A | B | B | B | B | B | B | B | A | B |   |
| Bn-A06-p21826671         | A6 | 69 | 72   | B | B | B | B | A | B | B | A | A | B | A | B | B | B | B | B | B | A | B | B |   |
| Bn-A06-p21846491         | A6 | 70 | 73.6 | B | B | B | B | A | B | B | A | A | B | A | B | B | B | B | B | B | A | B | B |   |
| Bn-A06-p22160452         | A6 | 71 | 74.4 | B | B | B | B | A | B | B | A | A | B | A | B | B | B | B | B | B | A | B | B |   |
| Bn-A06-p22709872         | A6 | 72 | 76   | B | B | B | B | A | B | B | A | A | B | A | B | B | B | B | B | B | A | B | B |   |
| Bn-A06-p22947499         | A6 | 73 | 76.8 | B | B | B | B | A | B | B | A | A | B | A | B | B | B | B | B | B | A | B | B |   |
| Bn-A06-p23468803         | A6 | 74 | 78.4 | B | B | B | B | A | B | B | A | A | B | A | B | B | B | B | B | B | A | B | B |   |
| Bn-A06-p23591616         | A6 | 75 | 79.2 | B | B | B | B | A | B | B | A | A | B | A | B | B | B | B | B | B | A | B | B |   |
| Bn-A06-p23665564         | A6 | 76 | 80.8 | B | B | B | B | A | B | B | A | A | B | A | B | B | B | B | B | B | A | B | B |   |
| Bn-A06-p23852270         | A6 | 77 | 81.6 | B | B | B | B | A | B | B | A | A | B | A | B | B | B | B | B | B | A | B | B |   |
| Bn-A06-p23988702         | A6 | 78 | 83.2 | B | B | B | B | A | B | B | A | A | B | A | B | B | B | B | A | B | B | A | B |   |
| Bn-A06-p24099288         | A6 | 79 | 84   | B | B | B | B | A | B | B | A | A | B | A | B | B | B | B | A | B | B | A | B |   |
| Bn-A06-p24386467         | A6 | 80 | 84.8 | B | B | B | B | A | B | B | A | A | A | B | B | B | B | A | B | B | A | B | B |   |
| Bn-A06-p24467652         | A6 | 81 | 85.6 | B | B | B | B | A | B | B | A | A | A | B | B | B | B | A | B | B | A | B | B |   |

|                           |    |    |       |   |   |   |   |   |   |   |   |   |   |   |   |   |   |   |   |   |   |   |   |   |
|---------------------------|----|----|-------|---|---|---|---|---|---|---|---|---|---|---|---|---|---|---|---|---|---|---|---|---|
| Bn-A06-p24501315          | A6 | 82 | 87.2  | B | B | A | B | A | B | B | A | A | A | A | B | B | B | B | A | B | B | A | B | B |
| Bn-A06-p24503033          | A6 | 83 | 88    | B | B | A | B | A | B | B | A | A | A | A | B | B | B | B | A | B | B | A | B | B |
| Bn-A06-p24705718          | A6 | 84 | 90.4  | B | B | A | B | A | B | B | A | A | A | A | B | B | B | B | A | B | B | A | B | B |
| Bn-scaff_21268_1-p193486  | A6 | 85 | 91.2  | B | B | A | B | A | B | B | A | A | A | A | B | B | B | B | A | B | B | A | B | B |
| Bn-scaff_15712_1-p1137014 | A6 | 86 | 97.7  | A | B | A | B | A | B | B | A | A | A | A | B | B | A | A | A | B | B | A | B | B |
| Bn-A06-p25343454          | A6 | 87 | 98.5  | A | B | A | B | A | B | B | A | A | A | A | B | B | A | A | A | B | B | A | B | B |
| Bn-A06-p25786733          | A6 | 88 | 99.3  | A | B | A | B | A | B | B | A | A | A | A | B | B | A | A | A | B | B | A | B | B |
| Bn-A06-p26144731          | A6 | 89 | 100.1 | A | B | A | B | A | B | B | A | A | A | A | B | B | A | A | A | B | B | A | B | B |
| Bn-A07-p1292866           | A7 | 1  | 0     | B | B | B | B | A | B | 0 | B | B | B | A | A | A | B | B | B | A | B | B | B | 0 |
| Bn-A10-p11608969          | A7 | 2  | 0.8   | B | B | B | B | A | B | 0 | B | B | B | A | A | A | B | B | B | A | B | B | B | 0 |
| Bn-A10-p12014652          | A7 | 3  | 1.6   | B | B | B | B | A | B | 0 | B | B | B | A | A | A | B | B | B | A | B | B | B | 0 |
| Bn-A10-p12631706          | A7 | 4  | 2.4   | B | B | B | B | A | B | 0 | B | B | B | A | A | A | B | B | B | A | B | A | B | 0 |
| Bn-A07-p4916203           | A7 | 5  | 3.2   | B | B | B | B | A | B | B | B | B | B | A | A | A | B | B | B | A | B | A | B | 0 |
| Bn-A07-p5412930           | A7 | 6  | 4.1   | B | B | B | B | A | B | B | B | B | B | A | A | B | B | B | B | A | B | A | B | 0 |
| Bn-A07-p8516667           | A7 | 7  | 5     | B | B | B | B | A | B | 0 | B | B | B | A | A | B | B | B | B | A | B | A | B | 0 |
| Bn-A07-p9272000           | A7 | 8  | 6.6   | B | B | B | B | A | B | 0 | B | B | B | A | A | B | B | B | B | A | B | A | A | 0 |
| Bn-A07-p9661444           | A7 | 9  | 8.3   | B | B | B | B | A | B | 0 | B | B | B | A | A | B | B | B | B | A | B | A | A | 0 |
| Bn-A07-p9791002           | A7 | 10 | 9.1   | B | B | A | B | A | B | 0 | B | B | B | A | A | B | B | B | B | A | B | A | A | 0 |
| Bn-A07-p10750190          | A7 | 11 | 10    | B | B | A | B | A | B | 0 | B | B | B | A | A | B | B | B | B | A | B | A | A | 0 |
| Bn-A02-p771951            | A7 | 12 | 10.8  | B | B | A | B | A | B | 0 | B | B | B | A | A | B | B | B | B | A | B | A | A | 0 |
| Bn-A07-p11629852          | A7 | 13 | 11.6  | B | B | A | B | A | B | 0 | B | B | B | A | A | B | B | B | B | A | B | A | A | 0 |
| Bn-A07-p11838401          | A7 | 14 | 12.2  | B | B | A | B | A | B | 0 | B | B | B | A | A | B | B | B | B | A | B | A | A | 0 |
| Bn-A07-p12362172          | A7 | 15 | 13.1  | B | B | B | B | A | B | 0 | B | B | B | A | A | B | B | B | B | A | B | A | A | 0 |
| Bn-A07-p12757009          | A7 | 16 | 14    | B | B | B | B | A | B | 0 | B | B | B | A | A | B | B | B | B | A | B | A | A | 0 |
| Bn-A07-p12833434          | A7 | 17 | 17.5  | B | B | B | A | A | B | 0 | B | B | B | A | A | B | B | B | B | A | A | A | A | 0 |
| Bn-A07-p13147502          | A7 | 18 | 19.2  | B | B | B | A | A | B | 0 | B | B | B | A | A | B | B | B | B | A | A | A | A | 0 |
| Bn-A07-p13587753          | A7 | 19 | 20.1  | B | B | B | A | A | B | 0 | B | B | B | A | A | B | B | B | B | A | A | A | A | 0 |
| Bn-A07-p13659939          | A7 | 20 | 21    | B | B | B | A | A | B | 0 | B | B | B | A | A | B | B | B | B | A | A | A | A | 0 |
| Bn-A07-p13739429          | A7 | 21 | 21.9  | B | B | B | A | A | B | 0 | B | B | B | A | A | B | B | B | B | A | A | A | A | 0 |
| Bn-A07-p14005263          | A7 | 22 | 22.8  | B | B | B | A | A | B | 0 | B | B | B | A | A | B | B | B | B | A | A | A | A | 0 |
| Bn-A07-p14453848          | A7 | 23 | 23.7  | B | B | B | A | A | A | 0 | B | B | B | A | A | B | B | B | B | A | A | A | A | 0 |
| Bn-A07-p14523096          | A7 | 24 | 24.7  | B | B | B | A | A | A | 0 | B | B | B | A | A | B | B | B | B | A | A | A | A | 0 |
| Bn-A07-p14759961          | A7 | 25 | 25.6  | B | B | B | A | A | A | 0 | B | B | B | A | A | B | B | B | B | A | B | A | A | 0 |
| Bn-A07-p15352802          | A7 | 26 | 26.5  | B | B | B | A | A | A | 0 | B | B | B | A | A | B | B | B | B | A | B | A | A | B |
| Bn-A07-p15578269          | A7 | 27 | 27.4  | B | B | B | A | A | A | 0 | B | B | B | A | A | B | B | B | B | A | B | A | A | B |
| Bn-A07-p15949460          | A7 | 28 | 29.2  | B | B | B | A | A | A | 0 | B | B | B | A | A | B | B | B | B | A | B | A | A | B |
| Bn-A07-p16074768          | A7 | 29 | 30.1  | B | B | B | A | A | A | 0 | B | B | B | A | A | B | B | B | B | A | B | A | A | B |
| Bn-A07-p16183869          | A7 | 30 | 31    | B | B | B | A | A | A | 0 | B | B | B | A | A | A | B | B | B | A | B | A | A | B |
| Bn-A07-p16468333          | A7 | 31 | 31.9  | B | B | B | A | A | A | 0 | B | B | B | A | A | A | B | B | B | A | B | A | A | B |
| Bn-A07-p17212130          | A7 | 32 | 32.8  | B | B | B | A | A | A | 0 | B | B | B | A | A | A | B | B | B | A | B | A | A | B |
| Bn-A07-p17804261          | A7 | 33 | 33.7  | B | B | B | A | A | A | 0 | B | B | B | A | A | A | B | B | B | A | B | A | A | B |
| Bn-A07-p18020732          | A7 | 34 | 34.6  | B | B | B | A | B | A | B | B | B | B | A | A | A | B | B | B | A | B | A | A | B |
| Bn-A07-p18922121          | A7 | 35 | 35.5  | B | B | B | A | B | A | B | B | B | B | A | A | A | B | B | B | A | B | A | A | B |
| Bn-A07-p19190510          | A7 | 36 | 38.2  | B | B | B | A | B | A | B | B | B | B | A | A | A | B | B | B | A | B | A | A | B |
| Bn-A07-p19458370          | A7 | 37 | 39.1  | B | B | B | A | B | A | B | B | B | B | A | A | A | B | B | B | A | B | A | A | B |
| Bn-A07-p19865996          | A7 | 38 | 40    | B | B | B | A | B | A | B | B | B | B | A | A | A | B | B | B | A | B | A | A | B |
| Bn-A07-p19961825          | A7 | 39 | 42.5  | B | B | B | A | B | A | B | B | B | B | A | A | A | B | B | B | A | 0 | A | A | B |
| Bn-A07-p20248654          | A7 | 40 | 43.6  | B | B | B | A | B | A | B | B | B | B | A | A | A | B | B | A | 0 | A | A | B | A |
| Bn-A07-p20481682          | A7 | 41 | 44.5  | B | B | B | A | B | A | B | B | B | A | B | B | A | B | B | A | 0 | A | A | B | A |

|                           |    |    |      |   |   |   |   |   |   |   |   |   |   |   |   |   |   |   |   |   |   |   |   |   |
|---------------------------|----|----|------|---|---|---|---|---|---|---|---|---|---|---|---|---|---|---|---|---|---|---|---|---|
| Bn-A07-p20554194          | A7 | 42 | 47.7 | B | B | B | A | B | A | B | B | B | A | B | B | A | B | B | A | 0 | A | A | B | A |
| Bn-A07-p21019499          | A7 | 43 | 55   | B | B | B | A | B | A | B | B | B | A | B | B | A | B | B | A | 0 | A | A | B | A |
| Bn-A07-p21261518          | A7 | 44 | 57.7 | B | B | B | A | B | A | B | B | B | A | B | B | A | B | B | A | 0 | A | A | B | A |
| Bn-A07-p21476982          | A7 | 45 | 58.7 | B | B | B | A | B | A | B | B | B | A | B | B | A | B | B | A | 0 | A | A | B | A |
| Bn-A07-p22329359          | A7 | 46 | 60   | B | B | B | A | B | A | B | B | B | A | B | B | A | B | B | A | 0 | A | A | B | A |
| Bn-A08-p792162            | A8 | 1  | 0    | B | A | A | B | B | A | A | A | B | B | B | A | B | B | B | A | A | B | B | B | B |
| Bn-A08-p2973537           | A8 | 2  | 0.8  | B | A | A | B | B | A | A | A | B | B | B | A | B | B | B | A | A | B | B | B | B |
| Bn-A08-p8570810           | A8 | 3  | 1.6  | B | A | A | B | B | A | A | A | B | B | B | A | B | B | B | A | A | B | B | B | B |
| Bn-A08-p8601468           | A8 | 4  | 4    | B | A | A | B | B | A | A | A | B | B | B | A | B | B | B | A | A | B | B | B | B |
| Bn-A08-p10067927          | A8 | 5  | 4.8  | B | A | A | B | B | A | A | A | B | B | B | A | B | B | B | A | A | B | B | B | B |
| Bn-A08-p10281337          | A8 | 6  | 5.6  | B | A | A | B | B | B | A | A | B | B | B | A | B | B | B | A | A | B | B | B | B |
| Bn-A08-p10439396          | A8 | 7  | 6.4  | B | A | A | B | B | B | A | A | B | B | B | A | B | B | B | A | A | B | B | B | B |
| Bn-scaff_17042_1-p359732  | A8 | 8  | 7.2  | B | A | A | B | B | B | A | A | B | B | B | A | B | B | B | A | A | B | B | B | B |
| Bn-A08-p12555227          | A8 | 9  | 9.6  | B | A | A | B | B | B | A | A | B | B | B | A | B | B | B | A | A | B | B | B | B |
| Bn-A08-p13352430          | A8 | 10 | 10.4 | B | A | A | B | B | B | A | A | B | B | B | A | B | B | B | A | A | B | B | B | B |
| Bn-A08-p13363830          | A8 | 11 | 12.8 | B | A | A | B | B | B | A | A | B | B | B | A | B | B | B | A | A | B | B | B | B |
| Bn-A08-p13454167          | A8 | 12 | 13.6 | B | A | A | B | B | B | A | A | B | B | B | A | B | B | B | A | A | B | B | B | B |
| Bn-A08-p13626189          | A8 | 13 | 16.8 | B | A | A | A | B | B | A | A | B | B | B | A | B | B | B | A | A | A | B | B | B |
| Bn-A08-p13708877          | A8 | 14 | 17.6 | B | A | A | A | B | B | A | A | B | B | B | A | B | B | B | A | A | A | B | B | B |
| Bn-A08-p14498301          | A8 | 15 | 18.4 | B | A | A | A | B | B | A | A | B | B | B | A | B | B | B | A | A | A | B | B | B |
| Bn-A08-p14616048          | A8 | 16 | 19.2 | B | A | A | A | B | B | A | A | B | B | B | A | B | B | B | A | A | A | B | B | B |
| Bn-A08-p14813540          | A8 | 17 | 20   | B | A | A | A | B | B | A | A | B | B | B | A | B | B | B | A | A | A | B | B | B |
| Bn-scaff_18602_1-p244845  | A8 | 18 | 20.8 | B | A | A | A | B | B | A | A | B | B | B | A | B | B | B | A | A | A | B | B | B |
| Bn-A08-p15353881          | A8 | 19 | 21.6 | B | A | A | A | B | B | A | A | B | B | B | A | B | B | B | A | A | A | B | B | B |
| Bn-A08-p15701695          | A8 | 20 | 22.4 | B | A | A | A | B | B | A | A | B | B | B | A | B | B | B | A | A | A | B | B | B |
| Bn-scaff_24631_1-p745795  | A8 | 21 | 23.2 | B | A | A | A | B | B | A | A | B | B | B | A | B | B | B | A | A | A | B | B | B |
| Bn-A08-p16183708          | A8 | 22 | 24   | B | A | A | A | A | B | A | A | B | B | B | A | B | B | B | A | A | A | B | B | B |
| Bn-A08-p16216893          | A8 | 23 | 24.8 | B | A | A | A | A | B | A | A | B | B | B | A | B | B | B | A | A | A | B | B | B |
| Bn-A08-p16248227          | A8 | 24 | 25.6 | B | A | A | A | A | B | A | A | B | B | B | A | B | B | B | A | A | A | B | B | B |
| Bn-A08-p16306425          | A8 | 25 | 26.4 | B | A | A | A | A | B | A | A | B | B | B | A | B | B | B | A | A | A | B | B | B |
| Bn-A08-p16846907          | A8 | 26 | 27.2 | B | A | A | A | A | B | A | A | B | B | B | A | B | B | B | A | A | A | B | B | B |
| Bn-A08-p16958537          | A8 | 27 | 28   | B | A | B | A | A | B | A | A | B | B | B | A | B | B | B | A | A | A | B | B | B |
| Bn-A08-p16980526          | A8 | 28 | 28.8 | B | A | B | A | A | B | A | A | B | B | B | A | B | B | B | A | A | A | B | B | B |
| Bn-A08-p17202184          | A8 | 29 | 31.2 | B | A | B | A | A | B | A | A | B | B | B | A | B | B | B | A | A | A | B | B | B |
| Bn-A08-p17291598          | A8 | 30 | 32   | B | A | B | A | A | B | A | A | B | B | B | A | B | B | B | A | A | A | B | B | B |
| Bn-A08-p17301557          | A8 | 31 | 32.8 | B | A | B | A | A | B | A | A | B | B | B | A | B | B | B | A | A | A | B | B | B |
| Bn-A08-p17513789          | A8 | 32 | 35.2 | B | A | B | A | A | B | A | A | B | B | B | A | B | B | B | A | A | A | B | B | B |
| Bn-A08-p17530617          | A8 | 33 | 39.2 | B | A | B | A | A | B | A | A | B | B | B | A | B | B | B | A | A | A | B | B | B |
| Bn-A08-p17824285          | A8 | 34 | 40   | B | A | B | A | A | B | A | A | B | B | B | A | B | B | B | A | A | A | B | B | B |
| Bn-A08-p17887796          | A8 | 35 | 41.6 | B | A | B | A | A | B | A | A | B | B | B | A | B | B | B | A | A | A | B | B | B |
| Bn-A08-p18000876          | A8 | 36 | 43.2 | B | A | B | A | A | B | A | A | B | B | B | A | B | B | B | A | A | A | B | B | B |
| Bn-A08-p18070928          | A8 | 37 | 44   | B | A | B | A | A | B | A | A | B | B | B | A | B | B | B | A | A | A | B | B | B |
| Bn-A05-p6672638           | A8 | 38 | 49.7 | B | A | B | B | A | B | A | A | B | B | B | A | B | B | B | A | A | B | B | B | B |
| Bn-A08-p18543984          | A8 | 39 | 52.9 | B | A | B | B | A | B | A | A | B | B | B | A | B | B | B | A | A | B | B | B | B |
| Bn-A08-p18605816          | A8 | 40 | 53.7 | B | A | B | B | A | B | A | A | B | B | B | A | B | B | B | A | A | B | B | B | B |
| Bn-A08-p18750116          | A8 | 41 | 54.5 | B | A | B | B | A | B | A | A | B | B | B | B | B | B | B | A | A | B | B | B | B |
| Bn-A08-p19008575          | A8 | 42 | 57.7 | B | A | B | B | B | A | B | A | B | B | B | B | B | B | B | A | A | B | B | B | B |
| Bn-scaff_16231_1-p1036610 | A8 | 43 | 60.1 | B | A | B | B | B | A | B | A | B | B | B | B | B | B | B | A | A | B | B | B | B |

|                           |    |    |      |   |   |   |   |   |   |   |   |   |   |   |   |   |   |   |   |   |   |   |   |   |
|---------------------------|----|----|------|---|---|---|---|---|---|---|---|---|---|---|---|---|---|---|---|---|---|---|---|---|
| Bn-A08-p19428204          | A8 | 44 | 62.5 | B | A | B | B | B | A | B | A | B | A | B | B | B | B | B | A | A | B | B | B | B |
| Bn-scaff_16231_1-p1484914 | A8 | 45 | 64.1 | B | A | B | B | B | A | B | A | B | A | B | B | B | B | B | A | A | B | B | B | B |
| Bn-A08-p19646345          | A8 | 46 | 64.9 | B | A | B | B | B | A | B | A | B | A | B | B | B | B | B | A | A | B | B | B | B |
| Bn-A08-p19683899          | A8 | 47 | 68.1 | B | A | B | B | B | A | B | A | B | A | B | B | B | B | B | A | A | B | B | B | B |
| Bn-A08-p19834705          | A8 | 48 | 73   | B | A | B | B | B | A | B | B | A | B | B | B | B | B | A | A | B | B | B | B | B |
| Bn-A08-p19960214          | A8 | 49 | 73.9 | B | A | B | B | B | A | B | B | A | B | B | B | A | B | A | A | B | B | B | B | B |
| Bn-A08-p20068678          | A8 | 50 | 76.2 | B | A | B | B | B | A | B | B | A | B | B | B | A | B | A | A | B | B | B | B | B |
| Bn-scaff_17227_1-p1101239 | A8 | 51 | 77   | B | A | B | B | B | A | B | B | A | B | B | B | A | B | A | A | B | B | B | B | B |
| Bn-A08-p20305036          | A8 | 52 | 77.8 | B | A | B | B | B | A | B | B | A | B | B | B | A | B | A | A | B | B | B | B | B |
| Bn-A08-p20820768          | A8 | 53 | 81.8 | B | A | B | A | B | A | B | B | A | B | B | B | A | B | A | A | A | B | B | B | B |
| Bn-A08-p20945277          | A8 | 54 | 84.2 | B | A | B | A | B | A | B | B | A | B | B | B | A | B | A | A | A | B | B | B | B |
| Bn-A08-p21417592          | A8 | 55 | 85   | B | A | B | A | B | A | B | B | A | B | B | B | A | B | A | A | A | B | B | B | B |
| Bn-A09-p957959            | A9 | 1  | 0    | A | A | A | A | A | B | A | B | A | A | B | A | A | A | A | B | A | A | B | A | A |
| Bn-A09-p704028            | A9 | 2  | 0.8  | A | A | A | A | A | B | A | B | A | A | B | A | A | A | A | B | A | A | B | A | A |
| Bn-A09-p86293             | A9 | 3  | 2.1  | A | A | A | A | A | B | A | B | A | A | B | A | A | A | A | B | A | A | B | A | A |
| Bn-A01-p26968952          | A9 | 4  | 3.4  | A | A | A | A | A | B | A | B | A | A | B | A | A | A | A | B | A | A | B | A | A |
| Bn-A01-p26837207          | A9 | 5  | 4.3  | A | A | A | A | A | B | A | B | A | A | B | A | A | A | A | B | A | A | B | B | A |
| Bn-A09-p1188091           | A9 | 6  | 5.2  | A | A | A | A | A | B | A | B | A | A | B | A | A | A | A | B | A | A | B | B | A |
| Bn-A09-p2116947           | A9 | 7  | 7.9  | A | A | A | A | A | B | A | B | A | A | B | A | A | A | A | B | A | A | B | B | A |
| Bn-A09-p2157775           | A9 | 8  | 8.8  | A | A | A | A | A | B | A | B | A | A | B | A | A | A | A | B | A | A | B | B | A |
| Bn-A09-p1929245           | A9 | 9  | 9.7  | A | A | A | A | A | B | A | B | A | A | B | A | A | A | A | B | A | A | B | B | A |
| Bn-A09-p1856828           | A9 | 10 | 10.6 | A | A | A | A | A | B | A | B | A | A | B | A | A | A | A | B | A | A | B | B | A |
| Bn-A09-p1570558           | A9 | 11 | 12.3 | A | A | A | A | A | B | A | B | A | A | B | A | A | A | A | B | A | A | B | B | A |
| Bn-A09-p1552993           | A9 | 12 | 13.1 | A | A | A | A | A | B | A | B | A | A | B | A | A | A | A | B | A | A | B | B | A |
| Bn-A09-p4096474           | A9 | 13 | 24.6 | A | A | A | A | A | B | A | B | A | A | B | A | A | A | A | B | A | A | B | B | A |
| Bn-Scaffold000178-p47905  | A9 | 14 | 25.4 | A | A | A | A | A | B | A | B | B | A | A | B | A | A | A | B | A | A | B | B | A |
| Bn-A09-p4463675           | A9 | 15 | 26.2 | A | A | A | A | A | B | A | B | B | A | A | B | A | A | A | B | A | A | B | B | A |
| Bn-A09-p4509627           | A9 | 16 | 27   | A | A | A | A | A | B | A | B | B | A | A | B | A | A | A | B | A | A | B | B | A |
| Bn-A09-p4655322           | A9 | 17 | 28.6 | A | A | A | A | A | B | A | B | B | A | A | B | A | A | A | B | A | A | B | B | A |
| Bn-A09-p5455608           | A9 | 18 | 29.4 | A | A | A | A | A | B | A | B | B | A | A | B | A | A | A | B | A | A | B | B | B |
| Bn-A07-p10188190          | A9 | 19 | 30.2 | A | A | A | A | A | B | A | B | B | A | A | B | A | A | A | B | A | A | B | B | B |
| Bn-A09-p7174944           | A9 | 20 | 31   | A | A | A | A | A | B | A | B | B | A | A | B | A | A | A | B | A | A | B | B | B |
| Bn-A09-p7047022           | A9 | 21 | 34.2 | A | A | A | A | A | B | B | B | B | A | A | B | A | A | A | A | A | A | B | B | B |
| Bn-A09-p6922467           | A9 | 22 | 36.6 | A | A | A | A | A | B | B | B | B | A | A | B | A | A | A | A | A | A | B | B | B |
| Bn-scaff_20428_1-p133089  | A9 | 23 | 38.2 | A | A | A | A | A | B | B | B | B | A | A | B | A | A | A | A | A | A | B | B | B |
| Bn-A09-p6133524           | A9 | 24 | 39   | A | A | A | A | A | B | B | B | B | A | A | B | A | A | A | A | A | A | B | B | B |
| Bn-A09-p9379347           | A9 | 25 | 39.8 | A | A | A | A | A | B | B | B | B | A | A | B | A | A | A | A | A | A | B | B | B |
| Bn-A09-p9512316           | A9 | 26 | 40.6 | A | A | A | A | A | B | B | B | B | A | A | B | A | A | A | A | A | A | B | A | B |
| Bn-A09-p9865556           | A9 | 27 | 41.4 | A | A | A | A | A | B | B | B | B | A | A | B | A | A | A | A | A | A | B | A | B |
| Bn-A09-p14266174          | A9 | 28 | 43   | A | A | A | A | A | B | B | B | B | A | A | B | A | A | A | A | A | A | B | A | B |
| Bn-A09-p16639867          | A9 | 29 | 43.8 | A | A | A | A | A | B | B | B | B | A | A | B | A | A | A | A | A | A | B | A | B |
| Bn-scaff_23293_1-p239190  | A9 | 30 | 45.4 | A | A | A | A | A | B | B | B | B | A | A | B | A | A | A | A | A | A | B | A | B |
| Bn-A09-p14535292          | A9 | 31 | 47   | A | A | A | A | A | B | B | B | B | A | A | B | A | A | A | A | A | A | B | A | B |
| Bn-A09-p17162263          | A9 | 32 | 47.8 | A | A | A | A | A | B | B | B | B | A | A | B | A | A | A | A | A | A | B | A | B |
| Bn-A09-p19272189          | A9 | 33 | 49.4 | A | A | A | A | A | B | B | B | B | A | A | B | A | A | A | A | A | A | B | A | B |
| Bn-A09-p22495700          | A9 | 34 | 53.4 | B | A | A | A | A | B | B | B | B | A | A | B | A | A | B | A | A | A | B | A | B |
| Bn-scaff_22466_1-p75425   | A9 | 35 | 54.2 | B | A | A | A | A | B | B | B | B | A | A | B | A | A | B | A | A | A | B | A | B |
| Bn-A09-p22873685          | A9 | 36 | 55   | B | A | A | A | A | B | B | B | B | A | A | B | A | A | B | A | A | A | B | A | B |
| Bn-A09-p23144404          | A9 | 37 | 55.8 | B | A | A | A | A | B | B | B | B | A | A | B | A | A | B | A | A | A | B | A | B |



|                          |    |    |       |   |   |   |   |   |   |   |   |   |   |   |   |   |   |   |   |   |   |   |   |
|--------------------------|----|----|-------|---|---|---|---|---|---|---|---|---|---|---|---|---|---|---|---|---|---|---|---|
| Bn-A09-p23250129         | A9 | 38 | 56.6  | B | A | A | A | B | B | B | A | A | B | A | A | B | A | A | A | B | A | B |   |
| Bn-A09-p23354310         | A9 | 39 | 57.4  | B | A | A | A | A | B | A | B | B | A | A | B | A | A | B | A | A | A | B | A |
| Bn-A09-p23416800         | A9 | 40 | 59    | B | A | A | A | A | B | A | B | B | A | A | B | A | A | B | A | A | A | B | A |
| Bn-A09-p23552075         | A9 | 41 | 59.8  | B | A | A | A | A | B | A | B | B | A | A | B | A | A | B | A | A | A | B | A |
| Bn-A09-p23756115         | A9 | 42 | 61.4  | B | A | A | A | A | B | A | B | B | A | A | B | A | A | B | A | A | A | B | A |
| Bn-A09-p23904905         | A9 | 43 | 64.6  | B | A | A | A | A | B | A | B | B | A | A | B | A | A | B | A | A | A | B | A |
| Bn-A09-p24086990         | A9 | 44 | 65.4  | B | A | A | A | A | B | A | B | B | A | A | B | A | A | B | A | A | A | B | A |
| Bn-Scaffold003668-p282   | A9 | 45 | 67    | B | A | A | A | A | B | A | B | B | A | A | B | A | A | B | A | A | A | B | A |
| Bn-scaff_21338_1-p359394 | A9 | 46 | 69.4  | B | B | A | A | A | B | A | B | B | A | A | B | A | A | B | A | A | A | B | A |
| Bn-Scaffold000282-p6257  | A9 | 47 | 70.2  | B | B | A | A | A | B | A | B | B | A | A | B | A | A | B | A | A | A | B | A |
| Bn-A05-p15802321         | A9 | 48 | 71    | B | B | A | A | A | B | A | B | B | A | A | B | A | A | B | A | A | A | B | A |
| Bn-A05-p15805806         | A9 | 49 | 71.8  | B | B | A | A | A | B | A | B | B | A | A | B | A | A | B | A | A | A | B | A |
| Bn-A09-p25455888         | A9 | 50 | 72.6  | B | B | A | A | A | B | A | B | B | A | A | B | A | A | B | A | A | A | B | A |
| Bn-A09-p26101323         | A9 | 51 | 73.4  | B | B | A | A | A | B | A | B | B | A | A | B | A | B | B | A | A | A | B | A |
| Bn-A09-p26578867         | A9 | 52 | 74.2  | B | B | A | A | A | B | A | B | B | A | A | B | A | B | B | A | A | A | B | A |
| Bn-A09-p27103683         | A9 | 53 | 75.8  | B | B | A | A | A | B | A | B | B | A | A | B | A | B | B | B | A | A | B | A |
| Bn-A09-p27531548         | A9 | 54 | 76.6  | B | B | A | A | A | B | A | B | B | A | A | B | A | B | B | B | A | A | B | A |
| Bn-scaff_16361_1-p980281 | A9 | 55 | 77.4  | B | B | A | A | A | A | B | A | B | B | A | A | B | B | B | A | A | B | A | A |
| Bn-A09-p28722989         | A9 | 56 | 80.6  | B | B | A | A | A | A | B | A | B | B | A | A | B | A | B | B | B | A | B | A |
| Bn-A09-p29186255         | A9 | 57 | 82.2  | B | B | A | A | A | A | A | B | A | A | B | A | B | B | B | A | A | B | A | A |
| Bn-A09-p29272014         | A9 | 58 | 83.8  | B | B | A | A | A | A | A | B | A | A | B | A | B | B | B | A | A | B | A | A |
| Bn-A09-p29331470         | A9 | 59 | 84.6  | B | B | A | A | A | A | A | B | A | A | B | A | B | B | B | A | A | B | A | A |
| Bn-A09-p29493614         | A9 | 60 | 85.4  | B | B | A | A | A | A | A | B | A | A | B | A | B | B | B | A | A | B | A | A |
| Bn-A09-p29617813         | A9 | 61 | 86.2  | B | B | A | A | A | A | A | B | A | A | B | A | B | B | B | A | A | B | A | A |
| Bn-A09-p29699253         | A9 | 62 | 87    | B | B | A | A | A | A | A | B | A | A | B | A | B | B | B | A | A | B | A | A |
| Bn-A09-p29968302         | A9 | 63 | 87.8  | B | B | A | A | A | A | A | B | A | A | B | A | B | B | B | A | A | B | A | A |
| Bn-A09-p30431025         | A9 | 64 | 90.2  | B | B | A | A | A | A | A | A | A | A | B | A | B | B | B | A | A | B | A | A |
| Bn-A09-p30724789         | A9 | 65 | 91    | B | B | A | A | A | A | A | A | A | A | B | A | B | B | B | B | A | B | A | A |
| Bn-A09-p31393136         | A9 | 66 | 91.8  | B | B | A | A | A | A | A | A | A | A | B | A | B | B | B | B | A | B | A | A |
| Bn-A09-p31494058         | A9 | 67 | 92.6  | B | B | A | A | A | A | A | A | A | A | B | A | B | B | B | B | A | B | A | A |
| Bn-A09-p5132918          | A9 | 68 | 93.4  | B | B | A | A | A | A | A | A | A | A | B | A | B | B | B | B | A | B | A | A |
| Bn-A09-p32553111         | A9 | 69 | 95.8  | B | B | A | A | A | A | A | A | A | A | B | A | B | B | B | B | A | B | A | A |
| Bn-A09-p32980100         | A9 | 70 | 96.6  | B | B | A | A | A | A | A | A | A | A | B | A | B | B | B | B | A | B | A | A |
| Bn-A09-p33040441         | A9 | 71 | 97.4  | B | B | A | A | A | A | A | A | A | A | B | A | B | B | B | B | A | B | A | A |
| Bn-A09-p33358168         | A9 | 72 | 99    | B | B | A | A | A | A | A | A | A | A | B | A | B | B | B | B | A | B | A | A |
| Bn-A09-p33464355         | A9 | 73 | 99.8  | B | B | A | A | A | A | A | A | A | A | B | A | B | B | B | B | A | B | A | A |
| Bn-A09-p33499505         | A9 | 74 | 100.6 | B | B | A | A | A | A | A | A | A | A | B | A | B | B | B | B | A | B | A | A |
| Bn-A09-p34039082         | A9 | 75 | 101.4 | B | B | A | A | A | A | A | A | A | A | B | A | B | B | B | B | A | B | A | A |
| Bn-A09-p34482075         | A9 | 76 | 103.8 | B | B | A | A | A | A | A | A | A | A | B | A | A | B | B | B | A | B | A | A |
| Bn-A09-p34779068         | A9 | 77 | 105.4 | B | B | A | A | A | A | A | A | A | A | B | A | A | B | B | B | A | B | A | A |
| Bn-A09-p34995922         | A9 | 78 | 106.2 | B | B | A | A | A | A | A | A | A | A | B | A | A | B | B | B | A | B | A | A |
| Bn-A09-p35162641         | A9 | 79 | 107.8 | B | B | B | A | A | A | A | A | A | A | B | A | A | B | B | B | A | B | A | A |
| Bn-A09-p35262679         | A9 | 80 | 108.6 | B | B | B | A | A | A | A | A | A | A | B | A | A | B | B | B | A | B | A | A |
| Bn-A09-p35426888         | A9 | 81 | 109.4 | B | B | B | A | A | A | A | A | A | A | B | A | A | B | B | B | A | B | A | B |
| Bn-A09-p35477936         | A9 | 82 | 110.2 | B | B | B | A | A | A | A | A | A | A | B | A | A | B | B | B | A | B | A | B |
| Bn-A09-p35624679         | A9 | 83 | 111   | B | B | B | A | A | A | A | A | A | A | B | A | A | B | B | B | A | B | A | B |
| Bn-A09-p35879759         | A9 | 84 | 112.6 | B | B | B | A | A | A | A | A | A | A | B | A | A | B | B | B | A | B | A | B |
| Bn-A09-p36062760         | A9 | 85 | 113.4 | B | B | B | A | A | A | A | A | A | A | B | A | A | B | B | B | A | B | A | B |
| Bn-A09-p36200543         | A9 | 86 | 117.5 | A | B | B | A | A | A | A | A | A | A | B | A | A | A | B | B | A | B | A | B |

|                           |     |    |       |   |   |   |   |   |   |   |   |   |   |   |   |   |   |   |   |   |   |   |   |   |
|---------------------------|-----|----|-------|---|---|---|---|---|---|---|---|---|---|---|---|---|---|---|---|---|---|---|---|---|
| Bn-A09-p36402398          | A9  | 87 | 118.3 | A | B | B | A | A | A | A | A | A | A | A | B | A | A | A | B | B | A | B | A | B |
| Bn-A09-p36886022          | A9  | 88 | 125   | A | B | B | A | A | A | A | A | A | A | A | B | A | A | A | B | B | A | B | A | B |
| Bn-scaff_16021_1-p175579  | A9  | 89 | 127.5 | A | B | B | A | A | A | A | A | A | A | A | B | A | A | A | B | B | A | B | A | B |
| Bn-A10-p4727374           | A10 | 1  | 0     | A | A | A | B | A | B | B | A | A | A | A | B | A | A | B | A | B | B | A | A | A |
| Bn-scaff_16414_1-p1679802 | A10 | 2  | 0.8   | A | A | A | B | A | B | B | A | A | A | A | B | A | A | B | A | B | B | A | A | A |
| Bn-A10-p4606815           | A10 | 3  | 0.8   | A | A | A | B | A | B | B | A | A | A | A | B | A | A | B | A | B | B | A | A | A |
| Bn-A10-p3955901           | A10 | 4  | 1.6   | A | A | A | B | A | B | B | A | A | A | A | B | A | A | B | A | B | B | A | A | A |
| Bn-A10-p3825331           | A10 | 5  | 2.4   | A | A | A | B | A | B | B | A | A | A | A | B | A | A | B | A | B | B | A | A | A |
| Bn-A10-p2819947           | A10 | 6  | 3.2   | A | A | A | B | A | B | B | A | A | A | A | A | A | A | B | A | B | B | A | A | A |
| Bn-A10-p2557960           | A10 | 7  | 4     | A | A | A | B | A | B | B | A | A | A | A | A | A | A | B | A | B | B | A | A | A |
| Bn-A10-p2523110           | A10 | 8  | 4.8   | A | A | A | B | A | B | B | A | A | A | A | A | A | A | B | A | B | B | A | A | A |
| Bn-A10-p1791974           | A10 | 9  | 5.6   | A | A | A | B | A | B | B | A | B | A | A | A | A | A | B | A | B | B | A | A | A |
| Bn-A10-p1698746           | A10 | 10 | 6.4   | A | A | A | B | A | B | B | A | B | A | A | A | A | A | B | A | B | A | A | A | A |
| Bn-A10-p1458849           | A10 | 11 | 7.2   | A | A | A | B | A | B | B | A | B | A | A | A | A | A | B | A | B | A | A | A | A |
| Bn-A10-p1345255           | A10 | 12 | 8     | A | A | A | B | A | B | B | A | B | A | A | A | A | A | B | A | B | A | A | A | A |
| Bn-A10-p754475            | A10 | 13 | 8.8   | A | A | A | B | A | B | B | A | B | A | A | A | A | A | B | A | B | A | A | A | A |
| Bn-A10-p5317804           | A10 | 14 | 9.6   | A | A | A | B | A | B | B | A | B | A | A | A | A | A | B | A | B | A | B | A | A |
| Bn-A10-p7913022           | A10 | 15 | 10.4  | A | A | A | B | A | B | B | A | B | A | A | A | A | A | B | A | B | A | B | A | A |
| Bn-A10-p8443505           | A10 | 16 | 11.2  | A | A | A | B | A | B | B | A | B | A | A | A | A | A | B | A | B | A | B | A | A |
| Bn-A10-p8723171           | A10 | 17 | 12    | A | A | A | B | A | B | B | A | B | A | A | A | A | A | B | A | B | A | B | A | A |
| Bn-A10-p8904827           | A10 | 18 | 13.6  | A | A | A | B | A | B | B | A | B | A | B | A | A | A | B | A | B | A | B | A | A |
| Bn-A10-p9166440           | A10 | 19 | 14.4  | A | A | A | B | A | B | B | A | B | A | B | A | A | A | B | A | B | A | B | A | A |
| Bn-A10-p9245966           | A10 | 20 | 15.2  | A | A | A | B | A | B | B | A | B | A | B | A | A | A | B | A | B | A | B | A | A |
| Bn-A10-p9370046           | A10 | 21 | 16    | A | A | A | B | A | B | B | A | B | A | B | A | A | A | B | A | B | A | B | A | A |
| Bn-A10-p9561249           | A10 | 22 | 17.6  | A | A | A | B | A | B | B | A | B | A | B | A | A | A | B | A | B | A | B | A | A |
| Bn-A10-p9594548           | A10 | 23 | 18.4  | A | A | A | B | A | B | B | A | B | A | B | A | A | A | B | A | B | A | B | A | A |
| Bn-A10-p9868333           | A10 | 24 | 19.2  | A | A | A | B | A | B | B | A | B | A | B | A | A | A | B | A | B | A | B | A | A |
| Bn-scaff_17088_1-p353765  | A10 | 25 | 20.8  | A | A | A | B | A | B | B | A | B | A | B | A | A | A | B | A | B | A | B | A | A |
| Bn-A10-p10464159          | A10 | 26 | 21.6  | A | A | A | B | A | B | B | A | B | A | B | A | A | A | B | A | B | A | B | B | B |
| Bn-A10-p10647252          | A10 | 27 | 26.5  | B | A | A | B | A | B | B | A | B | A | B | A | A | A | B | B | A | B | A | B | B |
| Bn-A10-p10914713          | A10 | 28 | 27.3  | B | A | A | B | A | B | B | A | B | A | B | A | A | A | B | B | A | B | A | B | B |
| Bn-A10-p11105998          | A10 | 29 | 28.1  | B | A | A | B | A | B | B | A | B | A | B | B | A | A | B | B | A | B | A | B | B |
| Bn-A10-p11230418          | A10 | 30 | 29.7  | B | A | A | B | A | B | B | A | B | A | B | B | A | A | B | B | A | B | A | B | B |
| Bn-A10-p11396195          | A10 | 31 | 30.5  | B | A | A | B | A | B | B | A | B | A | B | B | A | A | B | B | A | B | A | B | B |
| Bn-A10-p11427179          | A10 | 32 | 32.1  | B | A | A | B | A | B | B | A | B | A | B | B | A | A | B | B | A | B | A | B | B |
| Bn-scaff_17028_1-p444459  | A10 | 33 | 32.9  | B | A | A | B | A | B | B | A | B | A | B | B | A | A | B | B | A | B | A | B | B |
| Bn-A10-p12857310          | A10 | 34 | 34.5  | B | A | A | B | A | B | B | A | B | A | B | B | A | A | B | B | A | B | A | B | B |
| Bn-A10-p12933288          | A10 | 35 | 35.3  | B | A | A | B | A | B | B | A | B | A | B | B | A | A | B | B | A | B | A | B | B |
| Bn-A10-p13130002          | A10 | 36 | 36.1  | B | A | A | B | A | B | B | A | B | A | B | B | A | A | B | B | A | B | A | B | B |
| Bn-A10-p13218309          | A10 | 37 | 36.9  | B | A | A | B | A | B | B | A | B | A | B | B | A | A | B | B | A | B | A | B | B |
| Bn-A10-p13299250          | A10 | 38 | 37.7  | B | A | A | B | A | B | B | A | B | A | B | B | A | A | B | B | A | B | A | B | B |
| Bn-A10-p13343454          | A10 | 39 | 38.5  | B | A | A | B | A | B | B | A | B | A | B | B | A | A | B | B | A | B | A | B | B |
| Bn-A10-p13446086          | A10 | 40 | 39.3  | B | A | A | B | A | B | B | A | B | A | B | B | A | A | B | B | A | B | A | B | B |
| Bn-A10-p13640346          | A10 | 41 | 40.1  | B | A | A | B | A | B | B | A | B | A | B | B | A | A | B | B | A | B | A | B | B |
| Bn-A10-p13677412          | A10 | 42 | 41.7  | B | A | A | B | A | B | B | A | B | A | B | B | A | A | B | B | A | B | A | B | B |
| Bn-A10-p13818569          | A10 | 43 | 42.5  | B | A | A | B | A | B | B | A | B | A | B | B | A | A | B | B | A | B | A | B | B |
| Bn-A10-p14254487          | A10 | 44 | 43.3  | B | A | A | B | A | B | B | A | B | A | B | B | A | A | B | B | A | B | A | B | B |
| Bn-A10-p14623802          | A10 | 45 | 44.9  | B | A | A | B | A | B | B | A | A | A | B | B | A | A | B | B | A | B | A | B | B |
| Bn-A10-p15156277          | A10 | 46 | 45.8  | B | A | A | B | A | B | B | A | A | A | B | B | A | A | B | B | A | B | A | B | B |



|                           |     |    |      |   |   |   |   |   |   |   |   |   |   |   |   |   |   |   |   |   |   |   |   |   |
|---------------------------|-----|----|------|---|---|---|---|---|---|---|---|---|---|---|---|---|---|---|---|---|---|---|---|---|
| Bn-A10-p16421672          | A10 | 47 | 46.7 | B | A | A | B | A | B | B | A | A | A | B | B | A | A | B | B | A | B | A | B | B |
| Bn-A10-p16336708          | A10 | 48 | 51.8 | B | A | A | B | A | B | B | B | A | A | B | B | A | A | B | B | A | B | A | B | B |
| Bn-A10-p16224024          | A10 | 49 | 52.7 | B | A | A | B | A | A | B | B | A | A | B | B | A | A | B | B | A | B | A | B | B |
| Bn-A10-p16087066          | A10 | 50 | 53.6 | B | A | A | B | A | A | B | B | A | A | B | B | A | A | B | B | A | B | A | B | B |
| Bn-A10-p15863143          | A10 | 51 | 54.5 | B | A | A | B | A | A | B | B | A | A | B | B | A | A | B | B | A | B | A | B | B |
| Bn-A10-p15793623          | A10 | 52 | 56.2 | B | A | A | B | A | A | B | B | A | A | B | B | A | A | B | B | A | B | A | B | B |
| Bn-A10-p15607468          | A10 | 53 | 57.1 | B | A | B | B | A | A | B | B | A | A | B | B | A | A | B | B | A | B | A | B | B |
| Bn-A10-p15507350          | A10 | 54 | 58   | B | A | B | B | A | A | B | B | A | A | B | B | A | A | B | A | A | B | A | B | B |
| Bn-A10-p15398137          | A10 | 55 | 58.9 | B | A | B | B | A | A | B | B | A | A | B | B | A | A | B | A | A | B | A | B | B |
| Bn-A10-p15387894          | A10 | 56 | 59.8 | B | A | B | B | A | A | B | B | A | A | B | B | A | A | B | A | A | B | A | B | B |
| Bn-A10-p15367240          | A10 | 57 | 60.7 | B | A | B | B | A | A | B | B | A | A | B | B | A | A | B | A | A | B | A | B | B |
| Bn-A10-p15330596          | A10 | 58 | 61.6 | B | A | B | B | A | A | B | B | A | A | B | B | A | A | B | A | A | B | A | B | B |
| Bn-A10-p15265102          | A10 | 59 | 62.5 | B | A | B | B | A | A | B | B | A | A | B | B | A | A | B | A | A | B | A | B | B |
| Bn-A10-p16620627          | A10 | 60 | 63.4 | B | A | B | B | A | A | B | B | A | A | B | B | A | A | B | A | A | B | A | B | B |
| Bn-A10-p16862809          | A10 | 61 | 64.2 | B | A | B | B | A | A | B | B | A | A | B | B | A | A | B | A | A | B | A | B | B |
| Bn-A10-p16935603          | A10 | 62 | 73.2 | B | A | B | B | A | A | B | B | A | A | B | B | A | A | B | A | A | B | A | B | B |
| Bn-A10-p17568393          | A10 | 63 | 75.6 | B | A | B | B | A | A | B | B | A | A | B | B | A | A | B | A | B | B | A | B | B |
| Bn-scaff_19244_1-p196631  | C1  | 1  | 0    | B | A | B | A | A | B | A | B | B | A | A | B | A | 0 | A | B | A | A | A | B | A |
| Bn-scaff_19244_1-p816342  | C1  | 2  | 4.3  | B | A | B | A | A | B | A | B | B | A | A | B | A | 0 | B | B | A | A | A | B | A |
| Bn-A01-p907721            | C1  | 3  | 8.6  | B | A | B | A | A | B | A | B | B | B | A | B | A | 0 | B | B | A | A | A | B | A |
| Bn-scaff_15838_1-p1190349 | C1  | 4  | 10.3 | B | A | B | A | A | B | A | B | B | B | A | B | A | 0 | B | B | A | A | A | B | A |
| Bn-scaff_15838_1-p1572850 | C1  | 5  | 14   | B | A | B | A | A | B | A | B | B | B | A | B | A | 0 | B | B | A | A | A | B | A |
| Bn-scaff_15838_1-p2035980 | C1  | 6  | 19.6 | B | A | B | A | A | B | A | B | B | B | A | B | A | A | B | B | A | A | B | B | A |
| Bn-scaff_15838_5-p151738  | C1  | 7  | 21.3 | B | A | B | A | B | B | A | B | B | B | A | B | A | A | B | B | A | A | B | B | A |
| Bn-scaff_15838_5-p1043118 | C1  | 8  | 25.6 | B | A | B | A | B | B | A | B | B | B | A | B | A | A | B | B | A | A | B | B | A |
| Bn-scaff_27215_1-p1538    | C1  | 9  | 27.6 | B | A | B | A | B | B | A | B | B | B | A | B | A | A | B | B | A | A | B | A | A |
| Bn-scaff_17731_1-p979512  | C1  | 10 | 28.6 | B | A | B | A | B | B | A | B | B | B | A | B | A | A | B | B | A | A | B | A | A |
| Bn-scaff_17827_1-p613418  | C1  | 11 | 29.6 | B | A | B | A | B | B | A | B | B | B | A | B | A | A | B | B | A | A | B | A | A |
| Bn-scaff_17827_1-p621976  | C1  | 12 | 30.6 | B | A | B | A | B | B | A | B | B | B | A | B | A | A | B | B | A | A | B | A | A |
| Bn-scaff_20210_1-p267408  | C1  | 13 | 32.1 | B | A | B | A | B | B | A | B | B | B | A | B | A | A | B | B | A | A | B | A | A |
| Bn-scaff_16128_2-p29287   | C1  | 14 | 33.6 | B | A | B | A | B | B | A | B | B | B | A | B | A | A | B | B | A | A | B | A | A |
| Bn-scaff_24869_1-p152736  | C1  | 15 | 34.6 | B | A | B | A | B | B | A | B | B | B | A | B | A | A | B | B | A | A | B | A | A |
| Bn-scaff_17592_1-p799061  | C1  | 16 | 35.6 | B | A | B | A | B | B | A | B | B | B | A | B | A | A | B | B | A | A | B | A | A |
| Bn-scaff_17369_1-p1112630 | C1  | 17 | 36.6 | B | A | B | A | B | B | A | B | B | B | A | B | A | A | B | B | A | A | B | A | A |
| Bn-scaff_17369_1-p992249  | C1  | 18 | 37.6 | B | A | B | A | B | B | A | B | B | B | A | B | A | A | B | B | A | A | B | A | A |
| Bn-scaff_17369_1-p843089  | C1  | 19 | 39.6 | B | A | B | A | B | B | A | B | B | B | A | B | A | A | B | B | A | A | B | A | A |
| Bn-scaff_17369_1-p625180  | C1  | 20 | 40.6 | B | A | B | A | B | B | A | B | B | B | A | B | A | A | B | B | A | A | B | A | A |
| Bn-scaff_17369_1-p271166  | C1  | 21 | 41.6 | B | A | B | A | B | B | A | B | B | B | A | B | A | A | B | B | A | A | B | A | A |
| Bn-scaff_17369_1-p32803   | C1  | 22 | 43.6 | B | A | B | A | B | B | A | B | B | B | A | B | A | A | B | B | A | A | A | A | A |
| Bn-scaff_19614_1-p325704  | C1  | 23 | 46.6 | B | A | B | A | B | B | A | B | B | B | A | B | A | A | B | B | A | A | A | A | A |
| Bn-scaff_19614_1-p53484   | C1  | 24 | 48.6 | B | A | B | A | A | B | A | B | B | B | A | B | A | A | B | B | A | A | A | A | A |
| Bn-scaff_15747_1-p104038  | C1  | 25 | 49.6 | B | A | B | A | A | B | A | B | B | B | A | B | A | A | B | B | A | A | A | A | A |
| Bn-scaff_15747_1-p167954  | C1  | 26 | 50.5 | B | A | B | A | A | B | A | B | B | B | A | B | A | A | B | B | A | A | A | A | A |
| Bn-scaff_15747_1-p400964  | C1  | 27 | 52.4 | B | A | B | A | A | B | A | B | B | B | A | B | A | A | B | B | A | A | A | A | A |
| Bn-scaff_22790_1-p793365  | C1  | 28 | 54.3 | B | A | B | A | A | B | A | B | B | B | A | B | A | A | B | B | A | A | A | A | A |
| Bn-scaff_19183_1-p423384  | C1  | 29 | 54.3 | B | A | B | A | A | B | A | B | B | B | A | B | A | A | B | B | A | A | A | A | A |
| Bn-scaff_25373_1-p399     | C1  | 30 | 54.3 | B | A | B | A | A | B | A | B | B | B | A | B | A | A | B | B | A | A | A | A | A |
| Bn-scaff_16929_1-p719482  | C1  | 31 | 55.2 | B | A | B | A | A | B | A | B | B | B | A | B | A | A | B | B | A | A | A | A | A |
| Bn-scaff_21163_1-p1838    | C1  | 32 | 56.1 | B | A | B | A | A | B | A | B | B | B | A | B | A | A | B | B | A | A | A | A | A |

|                           |    |    |      |   |   |   |   |   |   |   |   |   |   |   |   |   |   |   |   |   |   |   |   |   |
|---------------------------|----|----|------|---|---|---|---|---|---|---|---|---|---|---|---|---|---|---|---|---|---|---|---|---|
| Bn-scaff_15879_1-p29379   | C1 | 33 | 57   | B | A | B | A | A | B | A | 0 | B | B | A | B | A | A | B | B | A | A | A | A | A |
| Bn-scaff_27823_1-p6273    | C1 | 34 | 57.9 | B | A | B | A | A | B | A | 0 | B | B | A | B | A | A | B | B | A | A | A | A | A |
| Bn-scaff_21225_1-p74961   | C1 | 35 | 59.7 | B | A | B | A | A | B | A | 0 | B | B | A | B | A | A | B | B | A | A | A | A | A |
| Bn-scaff_18482_1-p816502  | C1 | 36 | 60.6 | B | A | B | A | A | B | A | 0 | A | B | A | B | A | A | B | B | A | A | A | A | A |
| Bn-scaff_16962_1-p655721  | C1 | 37 | 61.5 | B | A | B | A | A | B | A | 0 | A | B | A | B | A | A | B | B | A | A | B | A | A |
| Bn-scaff_17515_1-p557620  | C1 | 38 | 62.4 | B | A | B | A | A | B | A | 0 | A | B | A | B | A | A | B | B | A | A | B | A | A |
| Bn-scaff_19168_1-p9620    | C1 | 39 | 63.3 | B | A | B | A | A | B | A | 0 | A | B | A | B | A | A | B | B | A | A | B | A | A |
| Bn-scaff_21884_1-p182027  | C1 | 40 | 64.2 | B | A | B | A | A | B | A | 0 | A | B | A | B | A | A | B | B | A | A | B | A | A |
| Bn-scaff_21884_1-p638903  | C1 | 41 | 65.1 | B | A | B | A | A | B | A | 0 | A | B | A | B | A | A | B | B | A | A | B | A | A |
| Bn-scaff_16691_1-p1434829 | C1 | 42 | 67.7 | B | A | A | A | A | B | A | 0 | A | B | A | B | A | A | B | B | A | A | B | A | A |
| Bn-scaff_15712_3-p804205  | C1 | 43 | 68.6 | B | A | A | A | A | B | A | 0 | A | A | A | B | A | A | B | B | A | A | B | A | A |
| Bn-scaff_15712_3-p653523  | C1 | 44 | 69.5 | B | A | A | A | A | B | A | 0 | A | A | A | B | A | A | B | B | A | A | B | A | A |
| Bn-scaff_15712_3-p639489  | C1 | 45 | 70.4 | B | A | A | A | A | B | A | 0 | A | A | A | B | A | A | B | B | A | A | B | A | A |
| Bn-scaff_15712_3-p46743   | C1 | 46 | 71.3 | B | A | A | A | A | B | A | 0 | A | A | A | B | A | A | B | B | A | A | B | A | A |
| Bn-scaff_18321_1-p122698  | C2 | 1  | 0    | A | B | A | A | A | B | A | A | 0 | A | A | B | B | A | A | B | A | A | A | A | A |
| Bn-scaff_22970_1-p386682  | C2 | 2  | 1.7  | A | B | A | A | A | B | A | A | 0 | A | A | B | B | A | A | B | A | A | A | A | A |
| Bn-A02-p1344870           | C2 | 3  | 2.5  | A | B | A | A | A | B | A | A | 0 | A | A | B | B | A | A | B | A | A | A | A | A |
| Bn-scaff_15714_1-p2704024 | C2 | 4  | 6.7  | A | A | A | A | A | B | A | A | 0 | A | A | B | B | A | A | B | A | A | A | A | A |
| Bn-scaff_15714_1-p2481342 | C2 | 5  | 7.5  | A | A | A | A | A | B | A | A | 0 | A | A | B | B | A | A | B | A | A | A | A | A |
| Bn-scaff_15714_1-p1966757 | C2 | 6  | 9.6  | A | A | A | A | A | B | A | A | 0 | A | A | B | B | A | A | B | A | A | A | A | A |
| Bn-scaff_15714_1-p1892918 | C2 | 7  | 11.7 | A | A | A | A | A | B | A | A | 0 | A | A | B | B | A | A | B | A | A | A | A | A |
| Bn-A02-p3507057           | C2 | 8  | 13.4 | A | A | A | A | A | B | A | A | 0 | A | A | A | B | A | A | B | A | A | A | A | A |
| Bn-scaff_15714_1-p966029  | C2 | 9  | 14.2 | A | A | A | A | A | A | A | A | 0 | A | A | A | B | A | A | B | A | A | A | A | A |
| Bn-scaff_15714_1-p553705  | C2 | 10 | 15   | A | A | A | A | A | A | A | A | B | A | A | A | B | A | A | B | A | A | A | A | A |
| Bn-scaff_15714_1-p368278  | C2 | 11 | 15.8 | A | A | A | A | A | A | A | A | B | A | A | A | B | A | A | B | A | A | A | A | A |
| Bn-scaff_15714_1-p134903  | C2 | 12 | 18.3 | A | A | A | A | A | A | A | A | B | A | A | A | B | A | A | B | A | A | A | A | A |
| Bn-scaff_17522_1-p1483337 | C2 | 13 | 19.1 | A | A | A | A | A | A | A | A | B | A | A | A | A | A | A | B | A | A | A | A | A |
| Bn-scaff_15712_5-p445598  | C2 | 14 | 20.8 | A | A | A | A | A | A | A | A | B | A | A | A | A | A | A | B | A | A | A | A | A |
| Bn-scaff_20942_1-p262998  | C2 | 15 | 22.5 | A | A | A | A | A | A | A | A | B | A | A | A | A | A | A | B | A | A | A | A | A |
| Bn-scaff_23813_1-p531505  | C2 | 16 | 23.3 | A | A | A | A | A | A | A | A | B | A | A | A | A | A | A | A | A | A | A | A | A |
| Bn-scaff_15839_1-p183517  | C2 | 17 | 24.1 | A | A | A | A | A | A | A | A | B | A | A | A | A | A | A | A | A | A | A | A | A |
| Bn-scaff_18702_1-p201508  | C2 | 18 | 24.9 | A | A | A | A | A | A | A | A | B | A | A | A | A | A | A | A | A | A | A | A | A |
| Bn-scaff_16369_1-p90302   | C2 | 19 | 25.7 | A | A | A | A | A | A | A | A | B | A | A | A | A | A | A | A | A | A | A | A | A |
| Bn-scaff_18675_1-p549332  | C2 | 20 | 29   | A | A | A | A | A | A | A | A | B | A | A | A | A | A | A | A | A | A | A | A | A |
| Bn-scaff_16300_1-p625676  | C2 | 21 | 29.8 | A | A | A | A | A | A | A | A | B | A | A | A | A | A | A | A | A | A | A | A | A |
| Bn-scaff_21705_1-p216607  | C2 | 22 | 29.8 | A | A | A | A | A | A | A | A | B | A | A | A | A | A | A | A | A | A | A | A | A |
| Bn-scaff_18360_1-p4195    | C2 | 23 | 30.6 | A | A | A | A | A | A | A | A | B | A | A | A | A | A | A | A | A | A | A | A | A |
| Bn-scaff_15712_9-p552692  | C2 | 24 | 33.1 | A | A | A | A | A | A | A | A | B | A | A | A | A | A | A | B | A | A | A | A | A |
| Bn-scaff_26712_1-p24644   | C2 | 25 | 33.9 | A | A | A | A | A | A | A | A | B | A | A | A | A | A | A | B | A | A | A | A | A |
| Bn-scaff_17109_1-p1058256 | C2 | 26 | 35.5 | A | A | A | A | A | A | A | A | B | A | A | A | A | A | A | B | A | A | A | A | A |
| Bn-scaff_17109_1-p889768  | C2 | 27 | 37.1 | A | A | A | A | A | A | A | A | B | A | A | B | A | A | A | B | A | A | A | A | A |
| Bn-scaff_17109_1-p857649  | C2 | 28 | 37.9 | A | A | A | A | A | A | A | A | B | A | A | B | A | A | A | B | A | A | A | B | A |
| Bn-scaff_17109_1-p691842  | C2 | 29 | 38.7 | A | A | A | A | A | A | A | A | B | A | A | B | A | A | A | B | A | A | A | B | A |
| Bn-scaff_15712_12-p5921   | C2 | 30 | 39.5 | A | A | A | A | A | A | A | A | B | A | A | B | A | A | A | B | A | A | A | B | A |
| Bn-scaff_15918_1-p82985   | C2 | 31 | 41.1 | A | A | A | A | A | A | A | A | B | A | A | B | A | A | A | B | A | A | A | B | A |
| Bn-scaff_27946_1-p1047    | C2 | 32 | 42.7 | A | A | A | A | A | A | A | A | B | A | A | B | A | A | A | B | A | A | A | B | A |
| Bn-scaff_17623_1-p599063  | C2 | 33 | 45.2 | A | A | A | A | A | A | A | A | B | A | A | B | A | A | A | B | A | A | A | B | A |
| Bn-scaff_17623_1-p546659  | C2 | 34 | 50.2 | A | A | A | A | A | A | A | A | B | B | A | B | A | A | A | B | A | A | A | B | A |
| Bn-scaff_19740_1-p236040  | C2 | 35 | 51   | A | A | A | A | B | A | A | A | B | B | A | B | A | A | A | B | A | A | A | B | A |



|                           |    |    |       |   |   |   |   |   |   |   |   |   |   |   |   |   |   |   |   |   |   |   |   |   |   |   |
|---------------------------|----|----|-------|---|---|---|---|---|---|---|---|---|---|---|---|---|---|---|---|---|---|---|---|---|---|---|
| Bn-A03-p15417676          | C3 | 38 | 67.6  | B | B | B | B | A | B | B | B | B | B | B | B | A | B | B | B | B | B | B | A | A |   |   |
| Bn-scaff_17521_1-p511223  | C3 | 39 | 68.4  | B | B | B | B | A | B | B | B | B | B | B | B | A | B | B | B | B | B | B | B | A | A |   |
| Bn-scaff_17521_1-p193675  | C3 | 40 | 70    | B | B | B | B | A | B | B | B | B | B | B | B | A | B | B | B | B | B | B | B | A | A |   |
| Bn-scaff_28562_1-p11758   | C3 | 41 | 70.8  | B | B | B | B | A | B | B | B | B | B | B | B | A | B | B | B | B | B | B | B | A | A |   |
| Bn-scaff_17298_1-p138775  | C3 | 42 | 71.6  | B | B | B | B | A | B | B | B | B | B | B | B | A | B | B | B | A | B | B | A | A | A |   |
| Bn-scaff_17298_1-p627166  | C3 | 43 | 72.4  | B | B | B | B | A | B | B | B | B | B | B | B | A | B | B | B | A | B | B | A | A | A |   |
| Bn-scaff_17298_1-p679830  | C3 | 44 | 73.2  | B | B | B | B | A | B | B | B | B | B | B | B | A | B | B | B | A | B | B | A | A | A |   |
| Bn-scaff_17298_1-p1055071 | C3 | 45 | 75.6  | B | B | B | B | A | B | B | B | B | B | B | B | A | B | B | B | A | B | B | A | A | A |   |
| Bn-scaff_17298_1-p1302996 | C3 | 46 | 77.2  | B | B | B | B | A | B | B | B | B | B | B | B | A | B | B | B | A | B | B | A | A | A |   |
| Bn-scaff_17298_1-p1412259 | C3 | 47 | 78    | B | B | B | B | A | B | B | B | B | B | B | B | A | B | B | B | A | B | B | A | A | A |   |
| Bn-scaff_23350_1-p643281  | C3 | 48 | 78.8  | B | B | B | B | A | B | B | B | B | B | B | B | A | B | B | B | A | B | B | A | A | A |   |
| Bn-scaff_17395_1-p191984  | C3 | 49 | 79.6  | B | B | B | B | A | B | B | B | B | B | B | B | A | B | B | B | A | B | B | A | A | A |   |
| Bn-scaff_18917_1-p865354  | C3 | 50 | 81.2  | B | B | B | B | A | B | B | B | B | B | B | B | A | B | B | B | A | B | B | A | A | A |   |
| Bn-scaff_18917_1-p744355  | C3 | 51 | 82    | B | B | B | B | A | B | B | B | B | B | B | B | A | B | B | B | A | B | B | A | A | A |   |
| Bn-scaff_18917_1-p689464  | C3 | 52 | 82.8  | B | B | B | B | A | B | B | B | B | B | B | B | A | A | B | B | A | B | B | A | A | A |   |
| Bn-scaff_18917_1-p667205  | C3 | 53 | 84.4  | B | B | B | B | A | B | B | B | B | B | B | B | A | A | B | B | A | B | B | A | A | A |   |
| Bn-scaff_18917_1-p514534  | C3 | 54 | 85.2  | B | B | B | B | B | B | B | B | B | B | B | B | A | A | B | B | A | B | B | A | A | A |   |
| Bn-scaff_16130_2-p484981  | C3 | 55 | 86    | B | B | B | B | B | B | B | B | B | B | B | B | A | A | B | B | A | B | B | A | A | A |   |
| Bn-scaff_17044_1-p545336  | C3 | 56 | 86.8  | B | B | B | B | B | B | B | B | B | B | B | B | A | A | B | B | A | B | B | A | A | A |   |
| Bn-scaff_15747_2-p127306  | C3 | 57 | 89.2  | B | B | B | B | B | B | B | B | B | B | B | B | A | A | B | B | A | B | B | A | A | A |   |
| Bn-scaff_18356_1-p349741  | C3 | 58 | 92.4  | B | B | B | B | B | B | B | B | B | B | B | B | A | B | B | A | B | B | A | A | A | A |   |
| Bn-scaff_18356_1-p43628   | C3 | 59 | 93.2  | B | B | B | B | B | B | B | B | B | B | B | B | A | B | B | A | B | B | A | A | A | A |   |
| Bn-scaff_18855_1-p179141  | C3 | 60 | 94.8  | B | B | B | B | B | B | B | B | B | B | B | B | A | B | B | A | B | B | A | A | A | A |   |
| Bn-scaff_21867_1-p87764   | C3 | 61 | 95.6  | B | B | B | B | B | B | B | B | B | B | B | B | A | B | B | A | B | B | A | A | A | A |   |
| Bn-scaff_23407_1-p87145   | C3 | 62 | 96.4  | B | B | B | B | B | B | B | B | B | B | B | B | A | B | B | A | B | B | A | A | A | A |   |
| Bn-scaff_20790_1-p3436    | C3 | 63 | 98    | B | B | B | B | B | B | B | B | B | B | B | B | A | B | B | A | B | B | A | A | A | A |   |
| Bn-scaff_18849_1-p191163  | C3 | 64 | 102   | B | B | B | B | B | B | B | B | B | B | B | B | A | B | B | A | B | B | A | A | A | A |   |
| Bn-scaff_18849_1-p22568   | C3 | 65 | 103.6 | B | B | B | B | B | B | B | B | B | B | B | B | A | B | B | A | B | B | B | B | B | A | A |
| Bn-scaff_17440_1-p590665  | C3 | 66 | 104.4 | B | B | B | B | B | B | B | B | B | B | B | B | A | B | B | A | B | B | B | B | B | A | A |
| Bn-scaff_17440_1-p316581  | C3 | 67 | 105.2 | B | B | B | B | B | B | B | B | B | B | B | B | A | B | B | A | B | B | B | B | B | A | A |
| Bn-scaff_24726_1-p16408   | C3 | 68 | 106   | B | B | B | B | B | B | B | B | B | B | B | B | A | B | B | A | B | B | B | B | B | A | A |
| Bn-scaff_24631_1-p184986  | C3 | 69 | 106.8 | B | B | B | B | B | B | B | B | B | B | B | B | A | B | B | A | B | B | B | B | B | A | A |
| Bn-scaff_24631_1-p271540  | C3 | 70 | 108.4 | B | B | B | B | B | B | B | B | B | B | B | B | A | B | B | A | B | B | B | B | B | A | A |
| Bn-scaff_24631_1-p338156  | C3 | 71 | 109.2 | B | B | B | B | B | B | B | B | B | B | B | B | A | B | B | A | B | B | B | B | B | A | A |
| Bn-scaff_24631_1-p785809  | C3 | 72 | 110.8 | B | B | B | B | B | B | B | B | B | B | B | B | A | B | B | A | B | B | B | B | B | A | A |
| Bn-scaff_16394_2-p1498560 | C3 | 73 | 111.6 | B | B | B | B | B | B | B | B | B | B | B | B | A | B | B | A | B | A | B | B | B | A | A |
| Bn-scaff_16394_2-p1377231 | C3 | 74 | 112.4 | B | B | B | B | B | B | B | B | B | B | B | B | A | B | B | A | B | A | B | B | B | A | A |
| Bn-scaff_16394_2-p992866  | C3 | 75 | 113.2 | B | B | B | B | B | B | A | B | B | B | A | B | B | A | B | A | B | A | B | B | B | A | A |
| Bn-scaff_16394_2-p471655  | C3 | 76 | 117.2 | A | B | B | B | B | B | A | B | B | B | A | B | B | A | A | A | B | B | B | B | A | A | A |
| Bn-scaff_16394_2-p348198  | C3 | 77 | 118   | A | B | B | B | B | B | A | B | B | B | A | B | B | A | A | A | B | B | B | B | A | A | A |
| Bn-scaff_16394_2-p71424   | C3 | 78 | 118.8 | A | B | B | B | B | B | A | B | B | B | A | B | B | A | A | A | B | B | B | B | A | A | A |
| Bn-scaff_18602_1-p46083   | C3 | 79 | 119.6 | A | B | B | B | B | B | A | B | B | B | A | B | B | A | A | A | B | B | B | B | A | A | A |
| Bn-scaff_18602_1-p89074   | C3 | 80 | 120.4 | A | B | B | B | B | B | A | B | B | B | A | B | B | A | A | A | B | B | B | B | A | A | A |
| Bn-scaff_16182_1-p632134  | C3 | 81 | 121.2 | A | B | B | B | B | B | A | B | B | B | A | B | B | A | A | A | B | B | B | B | A | A | A |
| Bn-scaff_26846_1-p26261   | C3 | 82 | 122   | A | B | B | B | B | B | A | B | B | B | A | B | B | A | A | A | B | B | B | B | A | A | A |
| Bn-scaff_17042_1-p147112  | C3 | 83 | 122.8 | A | B | B | B | B | B | A | B | B | B | A | B | B | A | A | A | B | B | B | B | A | A | A |
| Bn-scaff_17042_1-p418599  | C3 | 84 | 123.6 | A | B | B | B | B | B | A | B | B | B | A | B | B | A | A | A | B | B | B | B | A | A | A |
| Bn-scaff_17042_1-p468781  | C3 | 85 | 124.4 | A | B | B | B | B | B | A | B | B | B | A | B | B | A | A | A | B | B | B | B | A | A | A |
| Bn-scaff_17457_1-p283145  | C3 | 86 | 127.6 | A | B | B | B | B | B | A | B | B | B | A | B | B | A | A | A | B | B | B | B | A | A | A |

|                           |    |    |       |   |   |   |   |   |   |   |   |   |   |   |   |   |   |   |   |   |   |   |   |   |   |   |   |   |   |
|---------------------------|----|----|-------|---|---|---|---|---|---|---|---|---|---|---|---|---|---|---|---|---|---|---|---|---|---|---|---|---|---|
| Bn-scaff_15794_3-p508122  | C3 | 87 | 129.2 | A | B | B | B | B | A | B | B | B | A | B | B | B | A | B | B | B | A | A | A | B | B | B | B | A |   |
| Bn-scaff_15794_3-p146368  | C3 | 88 | 130   | A | B | B | B | B | B | A | B | B | B | A | B | B | B | A | B | B | B | A | A | A | B | B | B | B | A |
| Bn-scaff_15794_1-p157188  | C3 | 89 | 130.8 | A | B | B | B | B | B | A | B | B | B | A | B | B | B | A | B | B | B | A | A | A | B | B | B | B | A |
| Bn-scaff_17821_1-p30801   | C3 | 90 | 134.8 | A | B | B | B | B | B | A | B | B | B | A | B | B | B | A | B | B | B | A | A | A | B | B | B | B | A |
| Bn-scaff_17119_1-p183714  | C3 | 91 | 136.4 | A | B | B | B | B | B | A | B | B | B | A | B | B | B | A | B | B | B | A | A | A | B | B | B | B | A |
| Bn-scaff_23761_1-p27239   | C3 | 92 | 137.2 | A | B | B | B | B | B | A | B | B | B | A | B | B | B | A | B | B | B | A | A | A | B | B | B | B | A |
| Bn-scaff_19047_1-p297198  | C3 | 93 | 140.4 | A | B | B | B | B | B | A | B | B | B | A | B | B | B | A | B | B | B | A | A | A | A | B | B | B | A |
| Bn-scaff_16148_1-p237592  | C3 | 94 | 141.2 | A | B | B | B | B | B | A | B | B | B | A | B | B | B | A | B | B | B | A | A | A | A | B | B | B | A |
| Bn-scaff_16148_1-p63709   | C3 | 95 | 142   | A | B | B | B | B | B | A | B | B | B | A | B | B | B | A | B | B | B | A | A | A | A | B | B | B | A |
| Bn-scaff_16755_1-p1364355 | C3 | 96 | 142.8 | A | B | B | B | B | B | A | B | B | B | A | B | B | B | A | B | B | B | A | A | A | A | B | B | B | A |
| Bn-scaff_16755_1-p934260  | C3 | 97 | 144.4 | A | B | B | B | B | B | A | B | B | B | A | B | B | B | A | B | B | B | A | A | A | A | B | B | B | A |
| Bn-scaff_16755_1-p878005  | C3 | 98 | 146   | A | B | B | B | B | B | A | A | B | B | A | B | B | B | A | B | B | B | A | A | A | A | B | B | B | A |
| Bn-scaff_16755_1-p12541   | C3 | 99 | 146.8 | A | B | B | B | B | B | A | A | B | B | A | B | B | B | A | B | B | B | A | A | A | A | B | B | B | A |
| Bn-scaff_22933_1-p110027  | C4 | 1  | 0     | B | A | B | B | B | A | 0 | B | B | B | A | A | A | B | B | A | B | B | A | B | B | A | B | B | A | A |
| Bn-scaff_23534_1-p39080   | C4 | 2  | 1.7   | B | A | B | B | B | A | 0 | B | B | B | A | A | A | B | B | A | B | B | A | B | B | A | B | B | A | A |
| Bn-scaff_17712_1-p78048   | C4 | 3  | 2.5   | B | A | B | B | B | A | 0 | B | B | B | A | A | A | B | B | A | B | B | A | B | B | A | B | B | A | A |
| Bn-scaff_16935_1-p102075  | C4 | 4  | 3.3   | B | A | B | B | B | A | 0 | B | B | B | A | A | A | B | B | A | B | B | A | B | B | A | B | B | A | A |
| Bn-scaff_23946_1-p35627   | C4 | 5  | 7.5   | A | A | B | B | B | A | 0 | B | B | B | A | A | A | B | A | A | B | B | A | B | B | A | B | B | A | A |
| Bn-scaff_16027_1-p181998  | C4 | 6  | 9.5   | A | A | B | B | B | A | 0 | B | B | B | A | A | A | B | A | A | B | B | A | B | B | A | B | B | A | A |
| Bn-scaff_16027_1-p319312  | C4 | 7  | 10.5  | A | A | B | B | B | A | 0 | B | B | B | A | A | A | B | A | A | B | B | A | B | B | A | B | B | A | A |
| Bn-scaff_17517_1-p128364  | C4 | 8  | 12.5  | A | A | B | B | B | A | B | B | B | B | B | A | A | B | A | A | B | B | A | B | B | A | B | B | A | A |
| Bn-scaff_16027_1-p585183  | C4 | 9  | 15.8  | A | A | B | B | B | A | B | B | B | B | B | B | A | B | A | A | B | B | A | B | B | A | B | B | A | A |
| Bn-scaff_27469_1-p101056  | C4 | 10 | 17.4  | A | A | B | B | B | A | B | B | B | B | B | B | A | B | A | A | B | B | A | B | B | A | B | B | A | A |
| Bn-scaff_28382_1-p28399   | C4 | 11 | 25.6  | A | B | B | B | B | A | B | B | B | B | B | B | B | B | A | A | B | B | A | B | B | A | B | B | A | B |
| Bn-scaff_16214_1-p172721  | C4 | 12 | 26.4  | A | B | B | B | B | A | B | B | B | B | B | B | B | B | A | A | B | B | A | B | B | A | B | B | A | B |
| Bn-scaff_16534_1-p134210  | C4 | 13 | 27.2  | A | B | B | B | B | A | B | B | B | B | B | B | B | B | A | A | B | B | A | B | B | A | B | B | A | B |
| Bn-scaff_16534_1-p278496  | C4 | 14 | 28    | A | B | B | B | B | A | B | B | B | B | B | B | B | B | A | A | B | B | A | B | B | A | B | B | A | B |
| Bn-scaff_16534_1-p399693  | C4 | 15 | 28.8  | A | B | B | B | B | A | B | B | B | B | B | B | B | B | A | A | B | B | A | B | B | A | B | B | A | B |
| Bn-scaff_28277_1-p5229    | C4 | 16 | 29.6  | A | B | B | B | B | A | B | B | B | B | B | B | B | B | A | A | B | B | A | B | B | A | B | B | A | B |
| Bn-scaff_16534_1-p707801  | C4 | 17 | 30.4  | A | B | B | B | B | A | B | B | B | A | B | B | B | B | A | A | B | B | A | B | B | A | B | B | A | B |
| Bn-scaff_16534_1-p807124  | C4 | 18 | 31.2  | A | B | B | B | B | A | B | B | B | A | B | B | B | B | A | A | B | B | A | B | B | A | B | B | A | B |
| Bn-scaff_16534_1-p1262658 | C4 | 19 | 32    | A | B | B | B | B | A | B | B | B | A | B | B | B | B | A | A | B | B | A | B | B | A | B | B | A | B |
| Bn-scaff_16534_1-p1357851 | C4 | 20 | 32.8  | A | B | A | B | B | A | B | B | B | A | B | B | B | B | A | A | B | B | A | B | B | A | B | B | A | B |
| Bn-scaff_16534_1-p1846740 | C4 | 21 | 33.6  | A | B | A | B | B | A | B | B | B | A | B | B | B | B | A | A | B | B | A | B | B | A | B | B | A | B |
| Bn-scaff_16534_1-p2435936 | C4 | 22 | 34.4  | A | B | A | B | B | A | B | B | B | A | B | B | B | B | A | A | B | B | A | B | B | A | B | B | A | B |
| Bn-scaff_15908_1-p755460  | C4 | 23 | 35.2  | A | B | A | B | B | A | B | B | B | A | B | B | B | B | A | A | B | B | A | B | B | A | B | B | A | B |
| Bn-scaff_15908_1-p886007  | C4 | 24 | 36    | A | B | A | B | B | A | B | B | B | A | B | B | B | B | A | A | B | B | A | B | B | A | B | B | A | B |
| Bn-A05-p4304172           | C4 | 25 | 37.6  | A | B | A | B | B | A | B | B | B | A | B | B | B | B | A | A | B | B | A | B | B | A | B | B | A | B |
| Bn-scaff_19248_1-p187769  | C4 | 26 | 39.2  | A | B | A | B | B | A | B | B | B | A | B | B | B | B | A | A | B | B | A | B | B | A | B | B | A | B |
| Bn-scaff_18440_1-p77767   | C4 | 27 | 40    | A | B | A | B | B | A | B | B | B | A | B | B | B | B | A | A | B | B | A | B | B | A | B | B | A | B |
| Bn-scaff_23907_1-p542442  | C4 | 28 | 44    | A | B | A | B | B | A | B | B | B | A | B | B | B | B | A | A | B | B | A | B | B | A | B | B | A | B |
| Bn-scaff_23907_1-p647895  | C4 | 29 | 44.8  | A | B | A | B | B | A | B | B | B | A | B | B | B | B | A | A | B | B | A | B | B | A | B | B | A | B |
| Bn-scaff_23907_1-p746005  | C4 | 30 | 45.6  | A | B | A | B | B | A | B | B | B | A | B | B | B | B | A | A | B | B | A | B | B | A | B | B | A | B |
| Bn-scaff_23907_1-p931535  | C4 | 31 | 46.4  | A | B | A | B | B | A | B | B | B | A | B | B | B | B | A | A | B | B | A | B | B | A | B | B | A | B |
| Bn-scaff_16447_1-p403240  | C4 | 32 | 48    | A | B | A | B | B | A | B | B | B | A | B | B | B | B | A | A | B | B | A | B | B | A | B | B | A | B |
| Bn-scaff_17869_1-p814323  | C4 | 33 | 48.8  | A | B | A | B | B | A | B | B | B | A | B | A | B | B | A | A | B | B | A | B | B | A | B | B | A | B |
| Bn-scaff_18754_1-p233662  | C4 | 34 | 51.2  | A | B | A | B | A | A | B | B | B | A | B | A | B | B | A | A | B | B | A | B | B | A | B | B | A | B |
| Bn-scaff_23699_1-p435151  | C4 | 35 | 52.8  | A | B | A | B | A | A | B | B | B | A | B | A | B | B | A | A | B | B | A | B | B | A | B | B | A | B |
| Bn-scaff_18712_1-p326442  | C4 | 36 | 54.4  | A | B | A | B | A | A | B | B | B | A | B | A | B | B | A | A | B | B | A | B | B | A | B | B | A | B |

|                           |    |    |       |   |   |   |   |   |   |   |   |   |   |   |   |   |   |   |   |   |   |   |   |   |
|---------------------------|----|----|-------|---|---|---|---|---|---|---|---|---|---|---|---|---|---|---|---|---|---|---|---|---|
| Bn-scaff_19253_1-p93586   | C4 | 37 | 55.2  | A | B | A | B | A | A | A | B | B | A | B | A | B | B | A | A | B | B | A | B | B |
| Bn-scaff_15911_1-p376603  | C4 | 38 | 56    | A | B | A | B | A | A | A | B | B | A | B | A | B | B | A | A | B | B | A | B | B |
| Bn-scaff_24602_1-p69684   | C4 | 39 | 62.5  | A | B | A | B | A | A | A | B | B | A | B | A | A | B | A | B | B | B | A | B | B |
| Bn-scaff_19551_1-p24484   | C4 | 40 | 63.3  | A | B | A | B | B | A | A | B | B | A | B | A | A | B | A | B | B | B | A | B | B |
| Bn-scaff_19170_1-p559165  | C4 | 41 | 64.9  | A | B | A | B | B | A | A | B | B | A | B | A | A | B | A | B | B | B | A | B | B |
| Bn-scaff_15779_1-p41353   | C4 | 42 | 68.1  | A | B | A | B | B | A | A | B | B | A | B | A | A | B | A | B | B | B | B | B | B |
| Bn-scaff_15779_1-p318634  | C4 | 43 | 68.9  | A | B | A | B | B | A | A | B | B | A | B | A | A | B | A | B | B | B | B | B | B |
| Bn-scaff_26139_1-p333824  | C4 | 44 | 69.7  | A | B | A | B | B | A | A | B | B | A | B | A | A | B | A | B | B | B | B | B | B |
| Bn-scaff_16876_1-p1180531 | C4 | 45 | 72.1  | A | B | A | B | B | A | A | B | B | A | B | A | A | B | A | B | B | B | B | B | B |
| Bn-scaff_16876_1-p1116894 | C4 | 46 | 72.9  | A | B | A | B | B | A | A | B | B | A | B | A | A | B | A | B | B | B | B | B | B |
| Bn-scaff_22668_1-p95      | C4 | 47 | 73.7  | A | B | A | B | B | A | A | B | B | A | B | A | A | B | A | B | B | B | B | B | A |
| Bn-scaff_17525_1-p117065  | C4 | 48 | 76.1  | A | B | A | B | B | A | B | B | B | A | B | A | A | B | A | A | B | B | B | B | A |
| Bn-scaff_19208_1-p233040  | C4 | 49 | 76.9  | A | B | A | B | B | A | B | B | B | A | B | A | A | B | A | A | B | B | B | B | A |
| Bn-scaff_25960_1-p104315  | C4 | 50 | 78.5  | A | B | A | B | B | A | A | B | B | A | B | A | A | B | A | A | B | B | B | B | A |
| Bn-scaff_15852_1-p532467  | C4 | 51 | 80.9  | A | B | A | B | B | A | B | B | B | A | B | A | A | B | A | A | B | B | B | B | A |
| Bn-scaff_15852_1-p263989  | C4 | 52 | 83.3  | A | B | A | B | B | A | B | B | B | A | A | A | A | B | A | A | B | B | B | A | A |
| Bn-scaff_15852_1-p135814  | C4 | 53 | 84.1  | A | B | A | B | B | A | B | B | B | A | A | A | A | B | A | A | B | B | B | A | A |
| Bn-scaff_24979_1-p162534  | C4 | 54 | 88.1  | B | B | A | B | B | A | B | B | B | A | A | A | A | B | B | A | B | B | B | A | A |
| Bn-scaff_20079_1-p623803  | C4 | 55 | 89.7  | B | B | A | B | B | A | B | B | B | A | A | A | A | B | B | A | B | B | B | A | A |
| Bn-scaff_20079_1-p496441  | C4 | 56 | 90.5  | B | B | A | B | B | A | B | B | B | A | A | A | A | B | B | A | B | B | B | A | A |
| Bn-A04-p12917949          | C4 | 57 | 93.7  | B | B | A | A | B | A | B | B | B | A | A | A | A | B | B | A | B | A | B | A | A |
| Bn-scaff_16804_3-p29132   | C4 | 58 | 94.5  | B | B | A | A | B | A | B | B | B | A | A | A | A | B | B | A | B | A | B | A | A |
| Bn-scaff_16804_2-p210553  | C4 | 59 | 97.7  | B | B | A | A | B | A | B | B | B | A | A | A | A | B | B | A | B | A | B | A | A |
| Bn-scaff_21186_1-p220377  | C4 | 60 | 100.1 | B | B | A | A | B | A | B | B | B | A | A | A | A | B | B | A | B | A | B | A | A |
| Bn-scaff_17319_1-p4691    | C4 | 61 | 100.9 | B | B | A | A | B | A | B | B | B | A | A | B | A | B | B | A | B | A | B | A | A |
| Bn-A04-p15287200          | C4 | 62 | 101.7 | B | B | A | A | B | A | B | B | B | A | A | B | A | B | B | A | B | A | B | A | A |
| Bn-scaff_15585_1-p1029921 | C4 | 63 | 102.5 | B | B | A | A | B | A | B | B | B | A | A | B | A | B | B | A | B | A | B | A | A |
| Bn-scaff_20804_1-p111983  | C4 | 64 | 103.3 | B | B | A | A | B | A | B | B | B | A | A | B | A | B | B | A | B | A | B | A | A |
| Bn-scaff_20804_1-p33693   | C4 | 65 | 104.1 | B | B | A | A | B | A | B | B | B | A | A | B | A | B | B | A | B | A | B | A | A |
| Bn-scaff_16888_1-p104880  | C4 | 66 | 104.9 | B | B | A | A | B | A | B | B | B | A | A | B | A | B | B | A | B | A | B | A | A |
| Bn-scaff_16888_1-p894418  | C4 | 67 | 109.8 | B | B | A | A | B | A | B | B | B | A | A | B | A | B | B | A | B | A | B | A | A |
| Bn-scaff_16888_1-p1419612 | C4 | 68 | 112.2 | B | B | A | A | B | B | B | B | B | A | A | B | A | B | B | A | B | A | B | A | A |
| Bn-scaff_16888_1-p1803454 | C4 | 69 | 116.2 | B | B | A | A | B | B | B | B | B | A | A | B | A | B | B | A | B | A | B | A | A |
| Bn-scaff_20270_1-p39619   | C4 | 70 | 117.8 | B | B | A | A | B | B | B | B | B | A | A | B | A | B | B | A | B | A | B | A | A |
| Bn-scaff_20270_1-p167746  | C4 | 71 | 118.6 | B | B | A | A | B | B | B | B | B | A | A | B | B | B | B | A | B | A | B | A | A |
| Bn-A04-p17475728          | C4 | 72 | 120.2 | B | B | A | A | B | B | B | B | B | A | A | B | B | B | B | B | A | B | A | A | A |
| Bn-scaff_20270_1-p781490  | C4 | 73 | 122.6 | B | B | A | A | B | B | B | B | B | A | A | B | B | B | B | B | B | A | B | A | A |
| Bn-scaff_18903_1-p350780  | C4 | 74 | 131.6 | B | B | A | A | B | B | B | B | B | B | A | B | B | B | B | B | B | A | B | A | A |
| Bn-scaff_18903_1-p556922  | C4 | 75 | 132.4 | B | B | A | A | B | B | B | B | B | B | A | B | B | B | B | B | B | A | B | A | A |
| Bn-scaff_18903_1-p643244  | C4 | 76 | 133.2 | B | B | B | A | B | B | B | B | B | B | A | B | B | B | B | B | B | A | B | A | A |
| Bn-scaff_18903_1-p998892  | C4 | 77 | 134.8 | B | B | B | A | B | B | B | B | B | B | A | B | B | B | B | B | B | A | B | A | A |
| Bn-scaff_27676_1-p110403  | C4 | 78 | 135.6 | B | B | B | A | B | B | B | B | B | B | A | B | B | B | B | B | B | A | B | A | A |
| Bn-scaff_23107_1-p48188   | C5 | 1  | 0     | B | A | A | A | A | B | B | A | A | A | B | B | A | A | B | A | A | A | A | A | B |
| Bn-scaff_16414_1-p958895  | C5 | 2  | 0.8   | B | A | A | A | A | B | B | A | A | A | B | B | A | A | B | A | A | A | A | A | B |
| Bn-scaff_16414_1-p777277  | C5 | 3  | 2.4   | B | A | A | A | A | B | B | A | A | A | B | B | A | A | B | A | A | A | A | A | B |
| Bn-scaff_16414_1-p651187  | C5 | 4  | 3.2   | B | A | A | A | A | B | B | A | A | A | B | B | A | A | B | A | A | A | A | A | B |
| Bn-scaff_16414_1-p541587  | C5 | 5  | 5.6   | B | A | A | A | A | B | B | A | A | A | B | B | A | A | B | A | A | A | A | A | B |
| Bn-scaff_16414_1-p309830  | C5 | 6  | 10.8  | B | A | A | A | A | B | B | A | A | A | B | B | A | A | B | A | A | A | A | A | B |
| Bn-scaff_16414_1-p98361   | C5 | 7  | 17.8  | B | A | A | A | A | B | B | A | A | A | B | B | A | A | B | A | A | A | A | A | A |



|                           |    |    |      |   |   |   |   |   |   |   |   |   |   |   |   |   |   |   |   |   |   |   |   |
|---------------------------|----|----|------|---|---|---|---|---|---|---|---|---|---|---|---|---|---|---|---|---|---|---|---|
| Bn-scaff_20901_1-p2160101 | C5 | 8  | 18.6 | B | A | A | A | B | B | A | A | A | B | B | A | A | B | A | A | A | A | A | A |
| Bn-scaff_20901_1-p2078439 | C5 | 9  | 20.2 | B | A | A | A | A | B | B | A | A | A | B | B | A | A | B | A | A | A | A | A |
| Bn-scaff_20901_1-p2040223 | C5 | 10 | 21.8 | B | A | A | A | A | B | B | A | A | B | B | B | A | A | B | A | A | A | A | A |
| Bn-scaff_20901_1-p2029631 | C5 | 11 | 22.6 | B | A | A | A | A | B | B | A | A | B | B | B | A | A | B | A | A | A | A | A |
| Bn-scaff_20901_1-p1760597 | C5 | 12 | 23.4 | B | A | A | A | A | B | B | A | A | B | B | B | A | A | B | A | A | A | A | A |
| Bn-scaff_20901_1-p1681305 | C5 | 13 | 24.2 | B | A | A | A | A | B | B | A | A | B | B | B | A | A | B | A | A | A | A | A |
| Bn-scaff_20901_1-p1537914 | C5 | 14 | 29.1 | B | A | A | A | A | B | A | A | A | B | B | B | A | A | B | A | A | A | A | A |
| Bn-scaff_20901_1-p1311264 | C5 | 15 | 33.1 | B | A | A | A | A | B | A | A | A | B | B | B | A | A | B | A | A | A | A | A |
| Bn-scaff_20901_1-p1310135 | C5 | 16 | 33.9 | B | A | A | A | A | A | A | A | A | B | B | B | A | A | B | A | A | A | A | A |
| Bn-scaff_20901_1-p1300905 | C5 | 17 | 34.7 | B | A | A | A | A | A | A | A | A | B | B | B | A | A | B | A | A | A | A | A |
| Bn-scaff_20901_1-p1247459 | C5 | 18 | 36.3 | B | A | A | A | A | A | A | A | A | B | B | B | A | A | B | A | A | A | A | A |
| Bn-scaff_20901_1-p1103224 | C5 | 19 | 38.7 | B | A | A | A | A | A | A | A | A | B | A | B | A | A | B | A | A | A | A | A |
| Bn-scaff_20901_1-p948057  | C5 | 20 | 43.6 | B | A | A | A | A | A | A | A | A | B | A | B | A | A | B | A | A | A | A | A |
| Bn-scaff_20901_1-p660618  | C5 | 21 | 46   | B | A | A | A | A | A | A | A | A | B | A | B | A | A | B | A | A | A | A | A |
| Bn-A06-p3651473           | C5 | 22 | 50   | A | A | A | A | B | A | A | A | A | B | A | B | A | A | B | A | A | A | A | A |
| Bn-scaff_20901_1-p595473  | C5 | 23 | 50.8 | A | A | A | A | B | A | A | A | A | B | A | B | A | A | A | A | A | A | A | A |
| Bn-scaff_19641_1-p188036  | C5 | 24 | 51.6 | A | A | A | A | B | A | A | A | A | B | A | B | A | A | A | A | A | A | A | A |
| Bn-scaff_21496_1-p440091  | C5 | 25 | 55.6 | A | A | A | A | B | A | A | A | A | B | A | B | A | A | A | A | A | A | A | A |
| Bn-scaff_15712_10-p520866 | C5 | 26 | 56.4 | A | A | A | A | B | A | A | A | A | B | A | A | A | A | A | A | A | A | A | A |
| Bn-scaff_18181_1-p957193  | C5 | 27 | 57.2 | A | A | A | A | B | A | A | A | A | B | A | A | A | A | A | A | A | A | A | A |
| Bn-scaff_18181_1-p626037  | C5 | 28 | 58   | A | A | A | A | B | A | A | A | A | B | A | A | A | A | A | A | A | A | A | A |
| Bn-scaff_16082_1-p454878  | C5 | 29 | 58.8 | A | A | A | A | B | A | A | A | A | B | A | A | A | A | A | A | A | A | A | A |
| Bn-scaff_16082_1-p450246  | C5 | 30 | 59.6 | A | A | A | A | B | A | A | A | A | B | A | A | A | A | A | B | A | A | A | A |
| Bn-scaff_22183_1-p644001  | C5 | 31 | 60.4 | A | A | A | A | B | A | A | A | A | B | A | A | A | A | A | B | A | A | A | A |
| Bn-scaff_22183_1-p164778  | C5 | 32 | 62   | A | A | A | A | B | A | A | A | A | B | A | A | A | A | A | B | A | A | A | A |
| Bn-scaff_16093_1-p5778    | C5 | 33 | 64.4 | A | A | A | A | B | A | A | A | A | B | A | A | A | A | A | B | A | A | A | A |
| Bn-scaff_21338_1-p832818  | C5 | 34 | 65.2 | A | A | A | A | B | A | A | A | A | B | A | A | A | A | A | B | A | A | A | A |
| Bn-scaff_18338_1-p891133  | C5 | 35 | 66   | A | A | A | A | B | A | A | A | A | B | A | A | A | A | A | B | A | A | A | A |
| Bn-scaff_18338_1-p322932  | C5 | 36 | 70   | A | A | A | B | B | A | A | A | A | A | A | A | A | A | A | B | A | B | A | A |
| Bn-scaff_15818_1-p74700   | C5 | 37 | 70.8 | A | A | A | B | B | A | B | A | A | A | A | A | A | A | A | B | A | B | A | A |
| Bn-scaff_16062_1-p148000  | C5 | 38 | 71.6 | A | A | A | B | B | A | B | A | A | A | A | A | A | A | A | B | A | B | A | A |
| Bn-scaff_23195_1-p70804   | C5 | 39 | 74   | A | A | A | B | B | A | B | A | A | A | B | A | A | A | A | A | B | A | A | A |
| Bn-scaff_16478_1-p1065763 | C5 | 40 | 74.8 | A | A | A | B | A | A | B | A | A | A | B | A | A | A | A | A | B | A | A | A |
| Bn-A05-p16509283          | C5 | 41 | 75.6 | A | A | A | B | A | A | B | A | A | A | B | A | A | A | A | A | B | A | A | A |
| Bn-scaff_18589_1-p94879   | C5 | 42 | 76.4 | A | A | A | B | A | A | B | A | A | A | B | A | A | A | A | A | B | A | A | A |
| Bn-scaff_23408_1-p272922  | C5 | 43 | 77.2 | A | A | A | B | A | A | B | A | A | A | B | A | A | A | A | B | A | B | A | A |
| Bn-scaff_16770_1-p217669  | C5 | 44 | 78.9 | A | A | A | B | A | A | B | A | A | A | B | A | A | A | A | B | A | B | 0 | A |
| Bn-scaff_18826_1-p1000612 | C5 | 45 | 79.7 | A | A | A | B | A | A | B | A | A | A | B | A | A | A | A | B | A | B | 0 | A |
| Bn-scaff_18826_1-p862439  | C5 | 46 | 80.5 | A | A | A | B | A | A | B | A | A | A | B | A | A | A | A | B | A | B | 0 | A |
| Bn-scaff_18826_1-p781314  | C5 | 47 | 81.4 | A | A | A | B | A | B | B | A | A | A | B | A | A | A | A | B | A | B | 0 | A |
| Bn-scaff_21369_1-p102870  | C5 | 48 | 84   | A | A | A | B | A | B | B | A | A | A | B | A | A | A | A | B | A | B | 0 | A |
| Bn-A05-p21326775          | C5 | 49 | 85.7 | A | A | A | B | A | B | B | A | A | A | B | A | A | A | A | B | A | B | 0 | A |
| Bn-scaff_17441_1-p400751  | C5 | 50 | 90   | A | A | A | B | A | B | B | A | A | A | B | A | A | A | A | B | A | B | 0 | A |
| Bn-scaff_17441_1-p573618  | C5 | 51 | 91.7 | A | A | A | B | A | B | B | A | A | A | B | A | A | A | A | B | A | B | 0 | A |
| Bn-scaff_17441_1-p831019  | C5 | 52 | 93.4 | A | A | A | B | A | B | B | A | A | A | B | A | A | A | A | B | A | B | 0 | A |
| Bn-scaff_17441_1-p1045065 | C5 | 53 | 96   | A | A | A | B | A | B | B | A | A | A | B | A | A | A | A | B | A | B | 0 | A |
| Bn-scaff_17441_1-p1094625 | C5 | 54 | 96.9 | A | A | A | B | A | B | B | A | A | A | B | A | A | A | A | B | A | B | 0 | A |
| Bn-scaff_17441_1-p1146459 | C5 | 55 | 97.8 | A | A | A | B | A | B | B | A | A | A | B | A | A | A | A | B | A | B | B | A |
| Bn-scaff_17441_3-p154031  | C5 | 56 | 99.5 | A | A | A | B | A | B | B | A | A | A | B | A | A | A | A | B | A | B | B | A |

|                           |    |    |       |   |   |   |   |   |   |   |   |   |   |   |   |   |   |   |   |   |   |   |   |   |
|---------------------------|----|----|-------|---|---|---|---|---|---|---|---|---|---|---|---|---|---|---|---|---|---|---|---|---|
| Bn-scaff_17441_3-p325608  | C5 | 57 | 102   | A | A | A | B | A | B | B | A | A | A | B | A | A | A | A | B | A | B | B | A | A |
| Bn-A05-p23102053          | C5 | 58 | 106.1 | A | A | A | B | A | B | A | A | A | A | A | A | A | A | A | B | A | B | B | A | A |
| Bn-scaff_23186_1-p102352  | C5 | 59 | 108.6 | A | A | A | B | A | B | A | A | A | A | A | A | A | A | A | B | A | B | B | A | A |
| Bn-scaff_20270_1-p1070285 | C5 | 60 | 111.9 | A | A | A | A | A | B | A | A | A | A | A | A | A | A | A | B | A | A | B | A | A |
| Bn-scaff_20376_1-p336606  | C5 | 61 | 118.6 | B | A | A | A | A | B | A | A | A | A | A | A | A | A | B | B | A | A | B | A | A |
| Bn-Scaffold000191-p47497  | C5 | 62 | 119.4 | B | A | A | A | A | B | A | A | A | A | A | A | A | A | B | B | A | A | B | A | A |
| Bn-scaff_15676_1-p341508  | C5 | 63 | 121.9 | B | A | A | A | A | B | A | A | A | A | A | A | A | A | B | B | B | A | A | B | A |
| Bn-scaff_24251_1-p65315   | C5 | 64 | 123.6 | B | A | A | A | A | B | A | A | A | A | A | A | A | A | B | B | B | A | A | B | A |
| Bn-scaff_15856_1-p129193  | C5 | 65 | 124.4 | B | A | A | A | A | B | A | A | A | A | A | A | A | A | B | B | B | A | A | B | A |
| Bn-scaff_17799_1-p1180982 | C6 | 1  | 0     | B | A | A | A | A | B | 0 | A | B | A | A | A | B | A | B | B | 0 | A | B | A | 0 |
| Bn-scaff_17799_1-p1278642 | C6 | 2  | 1     | B | A | A | A | A | B | 0 | A | B | A | A | A | B | A | B | B | 0 | A | B | A | 0 |
| Bn-scaff_18503_1-p179825  | C6 | 3  | 2.9   | B | A | A | A | A | B | 0 | A | B | A | A | A | B | A | B | B | 0 | A | B | A | 0 |
| Bn-scaff_17799_1-p1399131 | C6 | 4  | 7.6   | A | A | A | A | A | B | 0 | A | B | A | A | A | B | A | A | B | 0 | A | B | A | 0 |
| Bn-scaff_17799_1-p1556241 | C6 | 5  | 9.5   | A | A | A | A | A | B | 0 | A | B | A | A | A | B | A | A | B | 0 | A | B | A | 0 |
| Bn-scaff_17799_1-p1629892 | C6 | 6  | 10.4  | A | A | A | A | A | B | 0 | A | B | A | A | A | B | A | A | B | 0 | A | B | A | 0 |
| Bn-scaff_17799_1-p1683025 | C6 | 7  | 12.3  | A | A | A | A | A | B | 0 | A | B | A | A | A | B | A | A | B | 0 | A | B | A | 0 |
| Bn-scaff_17799_1-p2097654 | C6 | 8  | 13.2  | A | A | A | A | A | B | 0 | A | B | A | A | A | B | A | A | B | 0 | A | B | A | 0 |
| Bn-scaff_17799_1-p2125517 | C6 | 9  | 14.1  | A | A | A | A | A | B | 0 | A | B | A | A | A | B | A | A | B | 0 | A | B | A | 0 |
| Bn-scaff_17799_1-p2357844 | C6 | 10 | 15    | A | A | A | A | A | B | 0 | A | B | A | A | A | B | A | A | B | 0 | A | B | A | 0 |
| Bn-scaff_17799_1-p2497023 | C6 | 11 | 15.9  | A | A | A | A | A | A | 0 | A | B | A | A | A | B | A | A | B | 0 | A | B | A | 0 |
| Bn-scaff_25466_1-p74820   | C6 | 12 | 18.4  | A | A | A | A | A | A | A | B | A | A | A | B | A | A | B | A | A | B | A | A | A |
| Bn-scaff_16397_1-p636872  | C6 | 13 | 20.4  | A | A | A | A | A | A | A | B | A | A | A | B | A | A | B | A | A | B | A | A | A |
| Bn-scaff_23957_1-p432810  | C6 | 14 | 21.3  | A | A | A | A | A | A | A | B | A | A | A | B | A | A | B | A | A | B | A | A | A |
| Bn-scaff_23957_1-p247460  | C6 | 15 | 22.2  | A | A | A | A | A | A | A | B | A | A | A | B | A | A | B | A | A | B | A | A | A |
| Bn-scaff_18807_1-p529596  | C6 | 16 | 23.1  | A | A | A | A | A | A | A | B | A | A | A | B | A | A | B | A | A | B | A | A | A |
| Bn-scaff_18807_1-p678687  | C6 | 17 | 23.1  | A | A | A | A | A | A | A | B | A | A | A | B | A | A | B | A | A | B | A | A | A |
| Bn-scaff_23821_1-p22581   | C6 | 18 | 23.1  | A | A | A | A | A | A | A | B | A | A | A | B | A | A | B | A | A | B | A | A | A |
| Bn-scaff_17436_1-p260772  | C6 | 19 | 23.1  | A | A | A | A | A | A | A | B | A | A | A | B | A | A | B | A | A | B | A | A | A |
| Bn-scaff_15892_1-p610800  | C6 | 20 | 24.8  | A | A | A | A | A | A | A | B | A | A | A | B | A | A | B | A | A | B | A | A | A |
| Bn-scaff_16064_1-p9281    | C6 | 21 | 25.6  | A | A | A | A | A | A | A | B | A | A | A | B | A | A | B | A | A | B | A | B | A |
| Bn-scaff_18360_1-p134193  | C6 | 22 | 26.4  | A | A | A | A | A | A | A | B | A | A | A | B | A | A | B | A | A | B | A | B | A |
| Bn-scaff_16064_1-p380597  | C6 | 23 | 27.2  | A | A | A | A | A | A | A | B | A | A | A | B | A | A | B | A | A | B | A | B | A |
| Bn-scaff_15818_1-p3172268 | C6 | 24 | 27.2  | A | A | A | A | A | A | A | B | A | A | A | B | A | A | B | A | A | B | A | B | A |
| Bn-scaff_15818_1-p3032871 | C6 | 25 | 28    | A | A | A | A | A | A | A | B | A | A | A | A | A | A | B | A | A | B | B | A | A |
| Bn-scaff_15818_1-p2371026 | C6 | 26 | 28.8  | A | A | A | A | A | A | A | B | A | A | A | A | A | A | B | A | A | B | B | A | A |
| Bn-scaff_15763_1-p1492117 | C6 | 27 | 29.6  | A | A | A | A | A | A | A | B | A | A | A | A | A | A | B | A | A | B | B | A | A |
| Bn-scaff_15763_1-p233149  | C6 | 28 | 30.4  | A | A | A | A | A | A | A | B | A | A | A | A | A | A | B | A | A | B | B | A | A |
| Bn-scaff_18206_3-p934892  | C6 | 29 | 31.2  | A | A | A | A | A | A | A | B | A | A | A | A | A | A | B | A | A | B | B | A | A |
| Bn-scaff_15818_2-p1212586 | C6 | 30 | 32    | A | A | A | A | A | A | A | B | A | A | A | A | A | A | B | A | A | A | B | A | A |
| Bn-scaff_15818_1-p479061  | C6 | 31 | 32.8  | A | A | A | A | A | A | A | B | A | A | A | A | A | A | B | A | A | A | B | A | A |
| Bn-scaff_18439_1-p304224  | C6 | 32 | 33.6  | A | A | A | A | A | A | A | B | A | A | A | A | A | A | B | A | A | A | B | A | A |
| Bn-scaff_17984_1-p1076812 | C6 | 33 | 34.4  | A | A | A | A | A | A | A | B | A | A | A | A | A | A | B | A | A | A | B | A | A |
| Bn-scaff_20773_1-p481244  | C6 | 34 | 35.2  | A | A | A | A | A | A | A | B | A | A | A | A | A | A | B | A | A | A | B | A | A |
| Bn-scaff_18344_1-p341615  | C6 | 35 | 36    | A | A | A | A | A | A | A | B | A | A | A | A | A | A | A | A | A | A | B | A | A |
| Bn-scaff_16485_1-p630261  | C6 | 36 | 36.8  | A | A | A | A | A | A | A | B | A | A | A | A | A | A | A | A | A | A | B | A | A |
| Bn-scaff_16485_1-p587862  | C6 | 37 | 38.5  | A | A | A | A | A | A | A | B | A | A | A | A | A | A | A | A | A | A | B | A | A |
| Bn-scaff_16984_1-p145108  | C6 | 38 | 39.3  | A | A | A | A | A | A | A | B | A | A | A | A | A | A | A | A | A | A | B | A | A |
| Bn-A06-p2405022           | C6 | 39 | 41.8  | A | B | A | A | A | A | A | B | A | A | A | A | A | A | A | A | A | A | B | A | A |
| Bn-scaff_16670_1-p40390   | C6 | 40 | 42.6  | A | B | A | A | A | A | A | B | A | A | A | A | A | A | A | A | A | A | B | A | A |



|                           |    |    |      |   |   |   |   |   |   |   |   |   |   |   |   |   |   |   |   |   |   |   |
|---------------------------|----|----|------|---|---|---|---|---|---|---|---|---|---|---|---|---|---|---|---|---|---|---|
| Bn-scaff_24413_1-p361     | C7 | 1  | 0    | A | B | A | A | A | B | B | A | B | A | A | A | A | A | B | A | A | A | A |
| Bn-A07-p160648            | C7 | 2  | 0.8  | A | B | A | A | A | B | B | A | B | A | A | A | A | A | B | A | A | A | A |
| Bn-scaff_15762_1-p258234  | C7 | 3  | 2.4  | A | B | A | A | A | B | B | A | B | A | A | A | A | A | B | A | A | A | A |
| Bn-scaff_17084_1-p161742  | C7 | 4  | 4    | A | B | A | A | A | B | B | A | B | A | A | A | A | A | B | A | A | A | A |
| Bn-scaff_20288_1-p344108  | C7 | 5  | 4.8  | A | B | A | A | A | B | B | A | B | A | A | A | A | A | B | A | A | A | A |
| Bn-scaff_16721_1-p1032661 | C7 | 6  | 5.6  | A | B | A | A | A | B | B | A | B | A | A | A | A | B | B | A | A | A | A |
| Bn-scaff_15626_1-p1084223 | C7 | 7  | 6.4  | A | B | A | A | A | B | B | A | B | A | A | A | A | B | B | A | A | A | A |
| Bn-scaff_17326_1-p357798  | C7 | 8  | 7.2  | A | B | A | A | A | A | B | A | B | A | A | A | A | B | B | A | A | A | A |
| Bn-A07-p6906296           | C7 | 9  | 8    | A | B | A | A | A | A | B | A | B | A | A | A | A | B | B | A | A | A | A |
| Bn-scaff_16450_1-p15270   | C7 | 10 | 9.6  | A | B | B | A | A | A | B | A | B | A | A | A | A | B | B | A | A | A | A |
| Bn-scaff_19106_1-p605386  | C7 | 11 | 12.8 | A | B | B | B | A | A | A | B | A | B | A | A | A | A | B | B | B | A | A |
| Bn-scaff_23400_1-p613560  | C7 | 12 | 13.6 | A | B | B | B | A | A | A | B | A | B | A | A | A | A | B | B | B | A | A |
| Bn-scaff_23400_1-p399811  | C7 | 13 | 14.4 | A | B | B | B | A | A | A | B | A | B | A | A | A | A | B | B | B | A | A |
| Bn-scaff_16100_1-p617160  | C7 | 14 | 15.2 | A | B | B | B | A | A | A | B | A | B | A | A | A | A | B | B | B | A | A |
| Bn-scaff_16100_1-p890064  | C7 | 15 | 16   | A | B | B | B | A | A | A | B | A | B | A | A | A | A | B | B | B | A | A |
| Bn-scaff_18501_1-p470034  | C7 | 16 | 16.8 | A | B | B | B | A | A | A | B | A | B | A | A | A | A | B | B | B | B | A |
| Bn-scaff_18202_1-p1683343 | C7 | 17 | 20   | A | B | B | B | A | A | A | B | B | B | A | A | A | A | B | B | B | B | A |
| Bn-scaff_18202_1-p1615492 | C7 | 18 | 20.8 | A | B | B | B | A | A | A | B | B | B | A | A | A | A | B | B | B | B | A |
| Bn-scaff_18202_1-p1088668 | C7 | 19 | 24.8 | A | B | B | B | A | A | A | B | B | B | A | A | A | A | B | B | B | B | A |
| Bn-scaff_18202_1-p986219  | C7 | 20 | 25.6 | A | B | B | B | A | A | A | B | B | B | A | A | A | A | B | B | B | B | A |
| Bn-scaff_18202_1-p871410  | C7 | 21 | 26.4 | A | B | B | B | A | A | A | B | B | B | A | A | A | A | B | B | B | B | A |
| Bn-scaff_18202_1-p569134  | C7 | 22 | 28   | A | B | B | B | A | A | A | B | B | B | A | A | A | A | B | B | B | B | A |
| Bn-scaff_22821_1-p13976   | C7 | 23 | 28.8 | A | B | B | B | A | A | A | B | B | B | A | A | A | A | B | B | B | B | A |
| Bn-scaff_15712_1-p841920  | C7 | 24 | 29.6 | A | B | B | B | A | A | A | B | B | B | A | A | A | A | B | B | B | B | A |
| Bn-scaff_15754_1-p240103  | C7 | 25 | 30.4 | A | B | B | B | A | A | A | B | B | B | A | A | A | A | B | B | B | B | A |
| Bn-scaff_15754_1-p651840  | C7 | 26 | 32.8 | A | B | B | B | A | A | A | B | B | B | A | A | A | A | B | B | B | B | A |
| Bn-scaff_15754_1-p688470  | C7 | 27 | 33.6 | A | B | B | B | A | A | A | B | B | B | A | A | A | A | B | B | B | B | A |
| Bn-scaff_16130_1-p542753  | C7 | 28 | 34.4 | A | B | B | B | A | A | A | B | B | B | A | A | A | A | B | B | B | B | A |
| Bn-scaff_16130_1-p659049  | C7 | 29 | 35.2 | A | B | B | B | A | A | A | B | B | B | A | A | A | A | B | B | B | B | A |
| Bn-scaff_16130_1-p1091410 | C7 | 30 | 36   | A | B | B | B | A | A | A | B | B | B | A | A | A | A | B | B | B | B | A |
| Bn-scaff_16130_1-p2525629 | C7 | 31 | 36.8 | A | B | B | B | A | A | A | B | B | B | A | A | A | A | B | B | B | B | A |
| Bn-scaff_16514_1-p47789   | C7 | 32 | 40.8 | A | B | B | A | A | A | A | B | B | B | A | A | A | A | B | B | A | B | A |
| Bn-scaff_17972_1-p279228  | C7 | 33 | 42.4 | A | B | B | A | A | A | A | A | B | B | A | A | A | A | B | B | A | B | A |
| Bn-scaff_21711_1-p54607   | C7 | 34 | 43.2 | A | B | B | A | A | A | A | A | B | B | A | A | A | A | B | B | A | B | A |
| Bn-scaff_21711_1-p39478   | C7 | 35 | 45.6 | A | B | B | A | A | A | A | A | B | B | A | A | A | A | B | B | A | B | A |
| Bn-scaff_21711_1-p34999   | C7 | 36 | 46.4 | A | B | B | A | A | A | A | A | B | B | A | A | A | A | B | B | A | B | A |
| Bn-scaff_18520_1-p486331  | C7 | 37 | 47.2 | A | B | B | A | A | A | A | A | B | B | A | A | A | A | B | B | A | B | A |
| Bn-scaff_18520_1-p603560  | C7 | 38 | 48   | A | B | B | A | A | A | A | A | B | A | A | A | A | A | B | B | A | B | A |
| Bn-scaff_18520_1-p814291  | C7 | 39 | 48.8 | A | B | B | A | A | A | A | A | B | A | A | B | A | A | B | B | A | B | A |
| Bn-scaff_15705_1-p38968   | C7 | 40 | 49.6 | A | B | B | A | A | A | A | A | B | A | A | B | B | A | A | B | B | A | A |
| Bn-scaff_15705_1-p432224  | C7 | 41 | 50.4 | A | B | B | A | A | A | A | A | B | A | A | B | B | A | A | B | B | A | A |
| Bn-scaff_15705_1-p577327  | C7 | 42 | 51.2 | A | B | B | A | A | A | A | A | B | A | A | B | B | A | A | B | B | A | A |
| Bn-scaff_15705_1-p1214955 | C7 | 43 | 52   | A | B | B | A | A | A | B | A | B | A | A | B | B | A | A | B | B | A | A |
| Bn-scaff_15705_1-p1533707 | C7 | 44 | 52.8 | A | B | B | A | A | A | B | A | B | A | A | B | B | A | A | B | B | A | A |
| Bn-scaff_15705_1-p2248267 | C7 | 45 | 54.4 | A | B | B | A | A | A | B | A | B | A | A | B | B | A | A | B | B | A | A |
| Bn-scaff_15705_1-p2274493 | C7 | 46 | 56.8 | A | B | B | A | A | A | B | A | B | A | B | B | B | A | A | B | B | A | A |
| Bn-scaff_15705_3-p131881  | C7 | 47 | 58.4 | A | B | B | A | A | A | B | A | B | A | B | B | B | A | A | B | B | A | A |
| Bn-scaff_15705_3-p245960  | C7 | 48 | 59.2 | A | B | B | A | A | A | B | A | B | A | B | B | B | A | A | B | B | A | A |
| Bn-scaff_15705_3-p436841  | C7 | 49 | 60   | A | B | B | A | A | A | B | A | B | A | B | B | B | A | A | B | B | A | A |

|                           |    |    |       |   |   |   |   |   |   |   |   |   |   |   |   |   |   |   |   |   |   |   |   |   |   |   |
|---------------------------|----|----|-------|---|---|---|---|---|---|---|---|---|---|---|---|---|---|---|---|---|---|---|---|---|---|---|
| Bn-scaff_16069_1-p261409  | C7 | 50 | 60.8  | A | B | B | A | A | A | B | A | B | A | B | B | B | A | A | B | B | A | B | A | A |   |   |
| Bn-scaff_16069_1-p726389  | C7 | 51 | 61.6  | A | B | B | A | A | A | B | A | B | A | B | B | B | A | A | B | B | A | B | A | A |   |   |
| Bn-scaff_16069_1-p730213  | C7 | 52 | 62.4  | A | B | B | A | A | A | B | A | B | A | B | B | B | A | A | B | B | A | B | A | A |   |   |
| Bn-scaff_16231_1-p1398728 | C7 | 53 | 63.2  | A | B | B | A | A | A | B | A | B | A | B | B | B | A | A | B | B | A | B | A | A |   |   |
| Bn-scaff_16069_1-p2205590 | C7 | 54 | 66.4  | A | B | B | A | A | A | B | A | B | A | B | B | B | A | A | B | B | A | B | A | A |   |   |
| Bn-scaff_16069_1-p2222349 | C7 | 55 | 67.2  | A | B | B | A | A | A | B | A | B | A | B | B | B | A | A | B | B | A | B | A | A |   |   |
| Bn-scaff_16069_1-p2344701 | C7 | 56 | 68    | A | B | B | A | A | A | B | A | B | A | B | B | B | A | A | B | B | A | B | A | A |   |   |
| Bn-scaff_16069_1-p2946061 | C7 | 57 | 69.6  | A | B | B | A | A | A | B | A | B | A | B | B | B | A | A | B | B | A | B | A | A |   |   |
| Bn-scaff_16069_1-p3135269 | C7 | 58 | 71.2  | A | B | B | A | A | A | B | B | B | A | B | B | B | A | A | B | B | A | B | A | A |   |   |
| Bn-scaff_16069_1-p3232221 | C7 | 59 | 72    | A | B | B | A | A | A | B | B | B | A | B | B | B | A | A | B | B | A | B | A | A |   |   |
| Bn-scaff_16069_1-p3446432 | C7 | 60 | 72.8  | A | B | B | A | A | A | B | B | B | A | B | B | B | A | A | B | A | B | A | A | A |   |   |
| Bn-scaff_16069_1-p3454723 | C7 | 61 | 73.6  | A | B | B | A | A | A | B | B | B | A | B | B | B | A | A | A | B | A | B | A | A |   |   |
| Bn-scaff_16069_1-p3861034 | C7 | 62 | 76    | A | B | B | A | A | A | B | B | B | A | B | B | B | A | A | A | B | A | B | A | A |   |   |
| Bn-scaff_16069_1-p3945232 | C7 | 63 | 76.8  | A | B | B | A | A | A | B | B | B | A | B | B | B | A | A | A | B | A | B | A | A |   |   |
| Bn-scaff_16069_1-p4306874 | C7 | 64 | 77.6  | A | B | B | A | A | A | B | B | B | A | B | B | B | A | A | A | B | A | B | A | A |   |   |
| Bn-scaff_16069_1-p4546846 | C7 | 65 | 82.5  | A | B | B | B | A | A | B | B | B | A | B | B | B | A | A | A | B | B | B | A | A |   |   |
| Bn-scaff_16069_1-p4605280 | C7 | 66 | 84.1  | A | B | B | B | A | A | B | B | B | A | B | B | B | A | A | A | B | B | B | A | A |   |   |
| Bn-scaff_16069_1-p4609643 | C7 | 67 | 84.9  | A | B | B | B | A | A | B | B | B | B | B | B | B | A | A | A | B | B | B | A | A |   |   |
| Bn-scaff_16110_1-p3075478 | C7 | 68 | 86.5  | A | B | A | B | A | A | B | B | B | B | B | B | B | A | A | A | B | B | B | A | A |   |   |
| Bn-scaff_16110_1-p2950205 | C7 | 69 | 87.3  | A | B | A | B | A | A | B | B | B | B | B | B | B | A | A | A | B | B | B | A | A |   |   |
| Bn-scaff_16110_1-p2890287 | C7 | 70 | 88.1  | A | B | A | B | A | A | B | B | B | B | B | B | B | A | A | A | B | B | B | A | A |   |   |
| Bn-scaff_16110_1-p2655836 | C7 | 71 | 91.3  | A | B | A | B | A | A | B | B | B | B | B | B | B | A | A | A | B | B | B | A | A |   |   |
| Bn-scaff_16110_1-p2598394 | C7 | 72 | 92.1  | A | B | A | B | A | A | B | B | B | B | B | B | B | A | A | A | B | B | B | A | A |   |   |
| Bn-scaff_16110_1-p2576509 | C7 | 73 | 92.9  | A | B | A | B | A | A | B | B | B | B | B | B | B | A | A | A | B | B | B | A | A |   |   |
| Bn-scaff_16110_1-p2168404 | C7 | 74 | 92.9  | A | B | A | B | A | A | B | B | B | B | B | B | B | A | A | A | B | B | B | A | A |   |   |
| Bn-scaff_16110_1-p2030050 | C7 | 75 | 94.5  | A | B | A | B | A | A | A | B | B | B | B | B | B | A | A | A | B | B | B | A | A |   |   |
| Bn-scaff_16110_1-p1971697 | C7 | 76 | 95.3  | A | B | A | B | A | A | A | B | B | B | B | B | B | A | A | A | B | B | B | A | A |   |   |
| Bn-A03-p29053385          | C7 | 77 | 96.1  | A | B | A | B | A | A | A | B | B | B | B | B | B | A | A | A | B | B | B | A | A |   |   |
| Bn-scaff_16110_1-p1689916 | C7 | 78 | 96.9  | A | B | A | B | A | A | A | B | B | B | B | B | B | A | A | A | A | B | B | B | A | A |   |
| Bn-scaff_16110_1-p1451801 | C7 | 79 | 97.7  | A | B | A | B | A | A | A | B | B | B | B | B | B | A | A | A | A | B | B | B | A | A |   |
| Bn-scaff_16110_1-p1204999 | C7 | 80 | 98.5  | A | B | A | B | A | A | A | B | B | B | B | B | B | A | B | A | A | B | B | B | A | A |   |
| Bn-scaff_16110_1-p670992  | C7 | 81 | 100.9 | A | B | A | B | A | A | A | B | B | B | B | B | B | A | B | A | A | B | B | B | A | A |   |
| Bn-scaff_16110_1-p111601  | C7 | 82 | 101.7 | A | B | A | B | A | A | A | B | B | A | B | B | A | B | A | A | B | B | B | A | A |   |   |
| Bn-scaff_20796_1-p34573   | C8 | 1  | 0     | B | B | A | B | A | B | A | A | A | A | B | A | A | A | B | A | A | B | A | A | A | A |   |
| Bn-scaff_25981_1-p240709  | C8 | 2  | 1.6   | B | B | A | B | A | B | A | A | A | A | B | A | A | A | B | A | A | B | A | A | A | A |   |
| Bn-A01-p10059043          | C8 | 3  | 2.4   | B | B | B | B | A | B | A | A | A | A | B | A | A | A | B | A | A | B | A | A | A | A |   |
| Bn-scaff_15705_1-p2909077 | C8 | 4  | 3     | B | B | B | B | A | B | A | A | A | A | B | A | A | A | B | A | A | B | A | A | A | A |   |
| Bn-scaff_17591_1-p461524  | C8 | 5  | 4     | B | B | B | B | A | B | A | A | A | A | B | A | A | A | B | A | A | B | A | A | A | A |   |
| Bn-scaff_19104_1-p662624  | C8 | 6  | 5     | B | B | B | B | A | B | A | A | A | A | B | A | A | A | B | A | A | B | A | A | A | A |   |
| Bn-scaff_15699_1-p1234178 | C8 | 7  | 6     | B | B | B | B | A | B | A | A | A | A | B | A | A | A | B | A | A | B | A | A | A | A |   |
| Bn-scaff_19242_1-p421335  | C8 | 8  | 7     | B | B | B | B | B | B | A | A | A | A | B | A | A | A | B | A | A | B | B | A | A | A |   |
| Bn-scaff_26859_1-p8813    | C8 | 9  | 9     | B | B | B | B | B | B | A | A | A | A | B | A | A | A | B | B | B | B | A | A | A | A |   |
| Bn-scaff_17227_1-p299956  | C8 | 10 | 10    | B | B | B | B | B | B | A | A | A | A | B | A | A | A | B | A | A | B | B | B | A | A | A |
| Bn-scaff_17227_1-p700248  | C8 | 11 | 11    | B | B | B | B | B | B | A | A | A | A | B | A | A | A | B | A | A | B | B | B | A | A | A |
| Bn-scaff_17227_1-p1380795 | C8 | 12 | 15    | B | B | B | B | B | B | A | A | A | A | B | A | A | A | B | A | A | B | B | B | A | A | A |
| Bn-scaff_21786_1-p127359  | C8 | 13 | 16    | B | B | B | B | B | B | A | A | A | A | B | A | A | A | B | A | A | B | B | B | A | A | A |
| Bn-scaff_21786_1-p149338  | C8 | 14 | 18    | B | B | B | B | B | B | A | A | A | A | B | A | A | A | B | A | A | B | B | B | A | A | A |
| Bn-scaff_16231_1-p2213239 | C8 | 15 | 20    | B | B | B | B | B | B | A | A | A | A | B | A | A | A | B | A | A | B | B | B | A | A | A |
| Bn-scaff_16231_1-p1274962 | C8 | 16 | 25    | B | A | B | B | B | B | A | A | A | A | B | A | A | A | B | A | A | B | B | B | A | A | A |



|                           |    |    |      |   |   |   |   |   |   |   |   |   |   |   |   |   |   |   |   |   |   |   |   |   |
|---------------------------|----|----|------|---|---|---|---|---|---|---|---|---|---|---|---|---|---|---|---|---|---|---|---|---|
| Bn-scaff_17190_1-p1119408 | C9 | 12 | 28.5 | A | B | B | B | B | A | A | B | B | B | B | A | B | B | A | B | B | B | B | B | A |
| Bn-scaff_17297_1-p143112  | C9 | 13 | 29.3 | A | B | B | B | B | A | A | B | B | B | B | A | B | B | A | B | B | B | B | B | A |
| Bn-scaff_17423_1-p376558  | C9 | 14 | 30.1 | A | B | B | B | B | A | A | B | B | B | B | A | B | B | A | B | B | B | B | B | A |
| Bn-scaff_17084_1-p760594  | C9 | 15 | 31.7 | A | B | B | B | B | A | A | B | B | B | B | A | B | B | A | B | B | B | B | B | A |
| Bn-scaff_17487_1-p1888000 | C9 | 16 | 37.4 | A | A | B | B | B | A | A | B | B | B | B | A | B | B | A | B | B | B | B | B | A |
| Bn-scaff_20428_1-p256051  | C9 | 17 | 39   | A | A | B | B | B | A | A | B | B | B | B | A | B | B | A | B | B | B | B | B | A |
| Bn-scaff_17683_1-p28746   | C9 | 18 | 39.8 | A | A | B | B | A | A | A | B | B | B | B | A | B | B | A | B | B | B | B | B | A |
| Bn-scaff_28725_1-p72570   | C9 | 19 | 40.6 | A | A | B | B | A | A | A | B | B | B | B | A | B | B | A | B | B | B | B | B | A |
| Bn-scaff_23618_1-p120152  | C9 | 20 | 41   | A | A | B | B | A | A | A | B | B | B | B | A | B | B | A | B | B | B | B | B | A |
| Bn-scaff_16912_1-p13193   | C9 | 21 | 43   | A | A | B | B | A | A | A | B | B | B | B | A | B | B | A | B | B | B | B | B | A |
| Bn-scaff_17174_1-p88911   | C9 | 22 | 44   | A | A | B | B | A | A | A | B | B | B | B | A | B | B | A | B | B | B | B | B | A |
| Bn-scaff_18100_1-p541042  | C9 | 23 | 45   | A | A | B | B | A | A | A | B | B | B | B | A | B | B | A | B | B | B | B | B | A |
| Bn-scaff_17888_1-p378622  | C9 | 24 | 46   | A | A | B | B | A | A | A | B | B | B | B | A | B | B | A | B | B | B | B | B | A |
| Bn-scaff_19691_1-p105535  | C9 | 25 | 49   | A | A | B | B | A | A | A | B | B | B | B | A | B | B | A | B | B | B | B | B | A |
| Bn-scaff_20972_1-p163951  | C9 | 26 | 50   | A | A | B | B | A | A | A | B | B | B | B | A | B | B | A | B | A | B | B | B | A |
| Bn-scaff_15712_7-p58147   | C9 | 27 | 56   | B | A | B | B | A | A | A | B | B | B | B | A | B | B | B | B | A | B | B | B | A |
| Bn-scaff_15743_1-p26884   | C9 | 28 | 57   | B | A | B | B | A | A | A | B | B | B | B | A | B | B | B | B | A | B | B | B | A |
| Bn-scaff_23622_1-p3989    | C9 | 29 | 58   | B | A | B | B | A | A | A | B | B | B | B | A | B | B | B | B | A | B | B | B | A |
| Bn-scaff_15881_1-p139441  | C9 | 30 | 59   | B | A | B | B | A | A | A | B | B | B | B | A | B | B | B | B | A | B | B | B | A |
| Bn-scaff_17799_1-p3029724 | C9 | 31 | 60   | B | A | B | B | A | A | A | B | B | B | B | A | B | B | B | B | A | B | B | B | A |
| Bn-scaff_17088_1-p146561  | C9 | 32 | 63   | B | A | B | A | A | A | A | B | B | B | B | A | B | B | B | B | A | A | B | B | A |
| Bn-scaff_19899_1-p559187  | C9 | 33 | 64   | B | A | B | A | A | A | A | B | B | B | B | A | B | A | B | B | A | A | B | B | A |
| Bn-scaff_19899_1-p283181  | C9 | 34 | 68   | B | A | B | A | A | A | A | B | B | B | B | A | B | A | B | B | A | A | B | B | A |
| Bn-scaff_19899_1-p34734   | C9 | 35 | 69   | B | A | B | A | A | A | A | B | B | B | B | A | B | A | B | B | A | A | B | B | A |
| Bn-scaff_15576_1-p614226  | C9 | 36 | 70   | B | A | B | A | A | A | A | B | B | B | B | A | B | A | B | B | A | A | B | B | A |
| Bn-C13791383-p286         | C9 | 37 | 71   | B | A | B | A | A | A | A | B | B | B | B | A | B | A | B | B | A | A | B | B | A |
| Bn-scaff_27705_1-p129876  | C9 | 38 | 72   | B | A | B | A | A | A | A | B | B | B | B | A | B | A | B | B | A | A | B | B | A |
| Bn-scaff_17028_1-p9587    | C9 | 39 | 73   | B | A | B | A | A | A | A | B | B | B | B | A | B | A | B | B | A | A | B | B | A |
| Bn-scaff_17028_1-p396877  | C9 | 40 | 76   | B | A | B | A | A | A | A | B | B | B | B | A | B | A | B | B | A | A | B | B | A |
| Bn-A10-p12957851          | C9 | 41 | 80   | B | A | B | A | A | A | A | B | B | B | B | A | B | A | B | B | A | A | B | B | A |
| Bn-scaff_16362_1-p655565  | C9 | 42 | 81   | B | A | B | A | A | A | A | B | B | B | B | A | B | A | B | B | A | A | B | B | A |
| Bn-scaff_16362_1-p408802  | C9 | 43 | 82   | B | A | B | A | A | A | A | B | B | B | B | A | B | A | B | B | A | A | B | B | A |
| Bn-A02-p3607564           | C9 | 44 | 85   | B | A | B | A | A | A | A | B | B | B | B | A | B | A | B | B | A | A | B | B | A |
| Bn-scaff_22082_1-p381255  | C9 | 45 | 86   | B | A | A | A | A | A | A | B | B | B | B | A | B | A | B | B | A | A | B | B | A |
| Bn-scaff_24108_1-p456844  | C9 | 46 | 86   | B | A | A | A | A | A | A | B | B | B | B | A | A | A | B | B | A | A | B | B | A |
| Bn-scaff_17109_1-p1959932 | C9 | 47 | 87   | B | A | A | A | A | A | A | B | B | B | B | A | A | A | B | B | A | A | B | B | A |
| Bn-scaff_17109_1-p1861938 | C9 | 48 | 88   | B | A | A | A | A | A | A | B | B | B | B | A | A | A | B | B | A | A | A | A | A |
| Bn-scaff_17109_2-p370345  | C9 | 49 | 90   | B | A | A | A | A | A | A | B | B | B | B | A | A | A | B | B | A | A | A | A | A |
| Bn-scaff_17750_1-p2082478 | C9 | 50 | 90   | B | A | A | A | A | A | A | B | B | A | B | A | A | A | B | B | A | A | A | A | A |
| Bn-scaff_17750_1-p1923167 | C9 | 51 | 93   | B | A | A | A | A | A | A | B | B | A | A | A | A | A | B | B | A | A | A | A | A |
| Bn-scaff_17750_1-p1801981 | C9 | 52 | 94   | B | A | A | A | A | A | A | B | B | A | A | A | A | A | B | B | A | A | A | A | A |
| Bn-scaff_17750_1-p1326856 | C9 | 53 | 95   | B | A | A | A | A | A | A | B | B | A | A | A | A | A | B | B | A | A | A | A | A |
| Bn-scaff_17750_1-p1243511 | C9 | 54 | 95   | B | A | A | A | A | A | A | B | B | A | A | A | A | A | B | B | A | A | A | A | 0 |
| Bn-scaff_17750_1-p1166353 | C9 | 55 | 96   | B | A | A | A | A | A | A | B | B | A | A | A | A | A | B | B | A | A | A | A | 0 |
| Bn-scaff_17750_1-p969043  | C9 | 56 | 97   | B | A | A | A | A | A | A | B | B | A | A | A | A | A | B | B | A | A | A | A | 0 |
| Bn-scaff_17750_1-p779325  | C9 | 57 | 99   | B | A | A | A | A | A | A | B | B | A | A | A | A | A | B | B | A | A | A | A | 0 |
| Bn-scaff_28053_1-p12340   | C9 | 58 | 106  | B | A | A | A | A | A | A | B | A | A | A | A | A | A | B | B | A | A | A | A | 0 |



























































































































B A B B A B A B B B A  
B A B B A B A B B B A  
B A B B A B A B B B A  
B A B B A B A B B B A  
B A B B A B A B B B A  
B A B B A B A B B B A  
B A B B A B A B B B A  
B A B B A B A B B B A  
B A B B A B A B B B A  
B A B B A B A B B B A  
B A B B A B A B B B A  
B A B B B B A B B B A  
B A B B B B A B B B A  
B A B B B B A B B B A  
A A B B B B A B B B A  
A A B B B B A B B B A  
A A B B B B A B B B A  
A A B B B B A B B B A  
A A B B B B A B B B A  
A A B B B B A B B B A  
A A B B A B A B B B A  
A A B B A B A B B B A  
A A B B A B A B B B A  
A A B B A B A B B B A  
A A B B A B A B B B A  
A A B B A B A B B B A  
A A B B A B A B B B A  
A A B B A B A B B B A  
A A B B A B A B B B A  
A A B B A B A B B B A  
A A B B A B A B B B A  
A A B B A B A B B B A  
A A B B A B A B B B A  
A A B B A B A B B B A  
A A B B A B A B B B A  
A A B B A B A B B B A  
A A B A A B A A B B A  
A A B A A B A A B B A  
B B B A A B A B B A A  
B B B A A B A B B A A  
B B B A A B A B B A A  
B B B A A B A B B A A  
B B B A A B B B B A A  
B B B A A B B B B A A  
B B B A A B B B B A A  
B B B A A B B B B A









0 B A A A A A B A A A  
0 B A A A A A B A A A  
0 B A A A A A B A A A  
0 B A A A A A B A A A  
0 B A A A A A B A A A  
0 B A A A A A B A A A  
0 B A A A A A B A A A  
0 B A A A A A B A A A  
0 B A A A A A B A A A  
0 B A A A A A B A A A  
0 B A A A A A B A A A  
0 B A A A A A B A A A  
0 B A A A A A B A A A  
0 B A A A A A B A A A  
0 B A A A A A B A A A  
0 B A A A A A B A A A  
0 B A A A A A B A A B

A A B B A B B B B B  
A A B B A B B B B B  
A A B B A B B B B B  
A B B B A B B B B B  
A B B A A B B B B B  
A B B A A B B B B B  
A B B A A B B B B B  
A B B A A B B B B B  
A B B A A B B B B B  
A B B A A B B B B B  
A B B A A B B B B B  
A B B A A B B B B B  
A B B A A B B B B B  
A B B A A B B A B B B  
A B B A A B B A B B B  
A B B A A B B A B B B  
A B B A A B B A B B B  
A B B A A B B A B B B  
A B B A A B B A B B B  
A B B A A B B A B B B  
A B B A A B B A B B B  
A B B A A B B A B B B  
A B B A A B B A B B B  
A B B A A B B A B B B  
A B B A A B B A B B A  
A B B A A B B A B B A  
A B B A A B B A B B A  
A B B A A B B A B B A









B B B B A B B B B A A  
B B B B A B B B B A A  
B B B B A B B B B A A  
B B B B A B B A B A A  
B B B B A B B B B A A  
B B B B A B B B B A A  
B B B B A B B B B A A  
B B B B A B B B B A A  
B B B B A B B B B A A  
B B B B A B B B B A A  
B B B B A B B B B A A  
B B B B A B B B B A A  
B A A A B A A B A A B  
B A A A B A A B A A B  
B A A A B A A B A A B  
B A A A B A A B A A B  
B A A A B A A B A A B  
B A A A B A A B A A B  
B A A A B A A B A A B  
B A A A B A A B A A B  
B A A A B A A B A A B  
A A A A B A A B A A B  
A A A A B A A B A A B  
A A A A B A A B A A B  
A A A A B A A B A A B  
A A A A B A A B A A B  
A A A A B A A B A A B  
A A A A B A A B A A B  
A A A A B A A B A A B  
A A A A B A A B A A B  
A A A A B A A B A A B  
A A A A B A A B A A B  
A A A A B A A B A A B  
A A A A B A A B A A B  
A A A A B A A B A A B  
A B A A B A B B A A B  
A B A B A B B A A B  
A B A B A B B A A B  
A B A B A B B A A B  
A B B B A B B B B A B  
A B B B A B B B B A B  
A B B B A B B B B A B  
B B B B A B B B B A B



B A A B B A B A A B A  
A A A B B A B A A B A  
A A A B B A B A A B A  
B A A A B A A A A A  
B A A A B A A A A A  
B A A A B A A A A A  
B A A A B A A A A A  
B A A A B A A A A A  
B A A A B A A A A A  
B A A A B A A A A A  
B A A A B A A A A A  
B A A A B A A A A A  
B A A A B A A A A A  
B A A A B A A A A A  
A A A A B A A A A A  
A A A A B A A A A A  
A A A A B A B A A A A  
A A A A B A B A A A A  
A A A A B A B A A A A  
A A A A B A B A A A A  
A A A A B A B A A A A  
A A A A B A B A A A A  
A A A A B A B A A A A  
A A A A B A B A A A A  
A A A A B A B A A A A  
A A A A B A B A A A A  
A A A A B A B A A A A  
A A A A B A B A A A A  
A A A A B A B A A A A  
A A A A B A B A A A A  
A A A A B A B A A A A  
A A B A B B B A B A A  
A A B A B B B B B A A  
A A B A B B B B B A A  
A A B A B B B B B A A  
A A B A B B B B B A A  
A A B A B B B B B A A  
A A B A B B B B B A A  
A A B A B B B B B A A  
A A B A B B B B B A A  
A A B A B B B B B A A  
B A B A B B B B B A A  
B A B A B B B B B A A  
B A B A B B B B B A A  
B A B A B B B B B A A







A B A A A A A A A A  
A B A A A A A A A A  
A B A A A A A A A A  
A B A A A A A A A A  
A B A A A A A A A A  
A B A A A A B A A B B  
A B A A A A B A A B B  
A B A A A A B A A B B  
A B A A A A B A A B B  
A B A A A A B A A B B  
A B A A A A B A A B B  
B B A A B A A A B A  
B B A A B A A A B A  
B B A A B A A A B A  
B B A A B A A A B A  
B B A A B A A A B A  
B B A A B A A A B A  
B B A A B A A A B A  
B B A A B A A A B A  
B B A A B A A A B A  
B B A A B A A A B A  
B B A A B A A A B A  
B B A A B A A A B A  
B B A A B A A A B A  
B B A A B A A A B A  
B B A A B A A A B A  
B B A A B A A A B A  
B B A A B A A A B A  
A B A A B A A A B B  
A B A A B A A A B B  
A B A A B A A A B B  
A B A A B A A A B B  
A B A A B A A A B B  
A A A A B A A A B B  
A A A A B A A A B B  
A A A A B A A A B B  
A B A A B A A A B B  
A B A A B A A A B B  
A B A A B A A A B B  
A B A A B A A A B B  
A B B A B B A A B B B  
A B B A B B A A B B B  
A B B A B B A A B B B  
A B B A B B A A B B B  
A B B A B A A B B B





A B A B B A B B A B B  
A B A B B A B B A B B  
A B A B B A B B A B B  
A B A B B A B B A B B  
A B A B B A B B A B B  
A B A B B A B B A B A  
A B A B B A B B A B A  
A B A B B A B B A B A  
A B A A B A B B A B A  
A B A A B A B B A B A  
A B A A B A B B A B A  
A B A A B A B B A B A  
A B A A A A B B A B A  
A B A A A A B B A B A  
A B A A A A B B A B A  
A B A A A A B B A B A  
A B A A A A B B A B A  
A B B A A B B B B A  
A B B A A B B B B A  
A B B A A B B A B B A  
A B B A A B B A B B A  
A B B A A B B A B B A  
B B B B A B B A B B A  
B B B B A B B A B B A  
B B B B A B B A B B A  
B B B B A B B A B B A  
B B B B A B B A B B A  
B B B B A B B A B B A  
B B B B A B B A B B A  
B B B B A B B A B B A  
B B B B A B B A B B A  
B B B B A B B A B B A  
B B B B A B B A B B A  
B B B B A B A A B B A  
B B B B A B A A B B A  
B B B B A B A A B B A  
B B B B A B A A B B A  
B B B B A B A A B B A  
B B B B B A B B A B  
B B B B B A B B A B  
B B B B B A B B A A  
B B B B B A B B A A  
A B B B B A B B A A  
A B B B B A B B A A  
A B B B B A B B A A

A B B B B B A B B A A  
A B B B B B A B B A A  
A B B B B B A B B A A  
A B B B B B A B B A A  
A B B B B B A B B A A  
A B B B B B A B B A A  
A B B B B B A B B A A  
A B B B B B A A B A A  
A B B B B B A A B A A  
A B B B B B A A B A A  
A B B B B B A A B A A  
A B B B A B A A B A A  
A B B A A B A A B A A  
A B B A A B A A B A A  
A B A A A A A A A A  
A B A A A A A A A A  
A B A A A A A A A A  
A A A A A A A A A A  
A A A A A A A A A A  
A A A A B A A A A A  
A A A A B A A A A A  
A A A A B A A A A A  
A A A A B A A A A A  
A A A A B A A A A A  
A A A A B A A A A A  
A A A A A A A A A A  
A A A A A A A A A A  
A A A A A A A A A A  
A A A A A A A A A A  
A A A A A A A A A A  
A A A A A A A A A A  
A A A A A A A A A A  
A A A A A A A A A A  
A A 0 A A A A A A A  
A A 0 A A A A A A A  
A A 0 A A A A A A A  
A A 0 A A A A A A A  
0 A A A A A A A A A  
0 A A A A A A A A A  
0 A A A A A A A A A  
0 A A A A A A A A A  
0 A A A A A A A A A  
0 A A A A A A A A A  
0 A A A B A A A A A  
0 A A A B A A A A A  
0 A A A B A A A A A  
0 A A A B A A A A A





B A A A B A B A A B A  
B A A A B A B A A B A  
B A A A B A B A A B A  
B A A A B A B A A B A  
B A A A B A A A A B A  
B A A A B A A A A B A  
B A A A B A A A A B A  
B A A A B A A A A B A  
B A A A B A A A A B A  
A A A A B A A A A B A  
A A A A B A A A A B A  
A A A A B A A A A B A  
A A A A B A A A A B A  
A A A A B A A A A B A  
A A A A B A A A A B A  
A A A A B A A A A B A  
A A A A B A A A A B A  
A A A A B A A A A B A  
A A A A B A A A A B A  
A A A A B A A A A B A  
A A A A B A A A A B A  
A A A A B A A A A B A  
A A A A B A A A A B A  
A A A A B A A A A B A  
A A A A B A A A A B A  
A A A A B A A A A B A  
A A A A B A A A A B A  
A A A B B A A A A B A  
A A A B B A A A A B A  
A A A B B A A A A B A  
A A B B A B B B B B  
A A B B A B B B B B  
A A B B A B B B B B  
A A B B A B B B B B  
A A B B A B B B B B  
A A B B A B B B B B  
A A B B A B B B B B  
A A B B A B B B B B  
A A B B A B B B B B  
A A B B A B B B B B  
A A B B A B B B B B  
A A B B A B B B B B  
A B B B B B B B B B  
A B B B B B B B B B  
A B B B B B B B A B
